# Supplementary material
Source: PubMed Central journal article supplement (PMC6564681)
Supplement: NIHMS1527302-supplement-1.pdf [file NIHMS1527302-supplement-1.pdf]

| <u>Subject Number</u> | <u>Baseline</u> | <u>Week 12</u> | <u>Week 24</u> |
|-----------------------|-----------------|----------------|----------------|
| <b>1</b>              | 19              | 18             | 19             |
| <b>2</b>              | 6               | 19.5           | 15             |
| <b>3</b>              | 2               | 3              | 1              |
| <b>4</b>              | 10              | 3              | 0              |
| <b>5</b>              | 1               | 0              | 0              |
| <b>6</b>              | 4               | 2              | 2              |
| <b>7</b>              | 6               | 6              | 1              |
| <b>8</b>              | 6               | 0              |                |
| <b>9</b>              | 7               | 0              | 14             |
| <b>10</b>             | 3               | 2              | 4              |
| <b>11</b>             | 3               | 2              | 2              |
| <b>12</b>             | 11              | 7              | 8              |

Supplementary table 1. Dermatology Life Quality Index (DLQI) scores of individual patients at baseline, week 12 and week 24

Supplementary table 2. RNA sequencing results of AA patients treated with tofaciti

| Gene        | Patient 5 T0 | Patient 5 T36 | Patient 7 T0 | Patient 7 T24 | Patient 9 T0 | Patient 9 T24 |
|-------------|--------------|---------------|--------------|---------------|--------------|---------------|
| SERPINB3    | 68.5684      | 35.8731       | 9.79123      | 18.8551       | 35.02        | 41.1832       |
| INSM2       | 0            | 0             | 0            | 0             | 0.0630056    | 0             |
| C10orf54    | 14.7542      | 21.115        | 13.8349      | 16.1345       | 17.6469      | 16.4335       |
| CD33        | 3.27541      | 4.37599       | 4.10399      | 2.6724        | 9.35302      | 5.75136       |
| TRIM55      | 4.06415      | 2.82379       | 5.5364       | 4.59611       | 5.65901      | 7.75946       |
| UBE2C       | 8.84138      | 15.6203       | 7.27794      | 13.8952       | 10.1561      | 14.5613       |
| SLC25A2     | 0            | 0             | 0            | 0             | 0.146631     | 0.047822      |
| CCDC43      | 12.4258      | 10.107        | 10.8228      | 11.8028       | 11.0307      | 11.6895       |
| RPS23       | 175.063      | 209.294       | 209.13       | 282.746       | 214.236      | 197.404       |
| GLYCTK      | 5.5093       | 8.34608       | 4.47088      | 2.71972       | 4.30959      | 4.26941       |
| RAD23A      | 69.8611      | 87.6622       | 66.2799      | 86.9522       | 67.2946      | 67.1778       |
| ZBTB7B      | 70.3188      | 71.478        | 86.6932      | 90.5851       | 96.087       | 90.226        |
| JOSD1       | 14.0977      | 19.6845       | 18.6978      | 21.9819       | 20.4216      | 19.5522       |
| LOC10013137 | 0.187624     | 0.368634      | 0.647036     | 1.11578       | 1.03566      | 0.818435      |
| LOC400986   | 0.870846     | 0.908052      | 0.953155     | 1.47804       | 1.15715      | 1.03725       |
| NPC1L1      | 0.196597     | 0.292988      | 0.50022      | 0.274886      | 0.544435     | 0.411774      |
| TAGAP       | 2.1353       | 1.91478       | 2.06403      | 0.553894      | 2.24805      | 0.731052      |
| MIR302D     | 0            | 0             | 0            | 0             | 0            | 0             |
| CSAD        | 33.7921      | 53.0875       | 38.9203      | 40.1023       | 47.8389      | 43.4834       |
| FAM149A     | 2.35992      | 4.31672       | 3.89408      | 3.1215        | 2.01033      | 1.36741       |
| PDXDC2P     | 14.4738      | 14.0146       | 15.7131      | 15.3809       | 18.248       | 14.7454       |
| MIR3199-2   | 0            | 0             | 0            | 0             | 0            | 0             |
| CORO1A      | 22.2948      | 28.7851       | 17.0951      | 11.2245       | 36.765       | 16.9323       |
| KCNA10      | 0            | 0.0467692     | 0.0400441    | 0             | 0.0336911    | 0.0329638     |
| CYB561      | 47.7681      | 40.163        | 34.5742      | 37.7006       | 37.8046      | 38.8792       |
| SNORD8      | 0            | 0             | 400.748      | 0             | 0            | 0             |
| CNTROB      | 12.6618      | 16.1674       | 14.0919      | 17.5707       | 17.9059      | 17.2947       |
| TECTA       | 0.132808     | 0.130467      | 0.189902     | 0.0969925     | 0.187969     | 0.119543      |
| MCOLN2      | 3.39181      | 4.26756       | 2.64168      | 1.99053       | 5.02677      | 2.23557       |
| FRG2        | 0.0164537    | 0             | 0            | 0             | 0            | 0             |
| HECTD1      | 23.9609      | 16.7209       | 23.5111      | 17.8748       | 21.0857      | 19.9085       |
| TBCK        | 7.62604      | 5.17706       | 6.88534      | 5.02785       | 7.53708      | 8.54627       |
| CLPTM1      | 56.9402      | 56.2973       | 52.6177      | 58.6966       | 56.5792      | 58.3781       |
| GDPD4       | 0.0796034    | 0             | 0            | 0.0373732     | 0.12675      | 0.0248027     |
| LGALS7      | 1182.59      | 2225.15       | 1846.79      | 3217.37       | 2158.66      | 2679.49       |
| DDIT3       | 31.0273      | 42.2769       | 28.0923      | 38.9189       | 31.5759      | 27.2056       |
| AXIN2       | 8.05826      | 9.41829       | 12.5653      | 11.2744       | 15.9966      | 13.9917       |
| IK          | 28.4271      | 28.2633       | 26.8384      | 24.8291       | 31.2574      | 29.6468       |
| EIF3CL      | 60.7452      | 63.2212       | 74.2372      | 83.1593       | 83.8865      | 85.8979       |
| MIR4693     | 0            | 0             | 0            | 0             | 0            | 0             |
| EIF5AL1     | 34.4888      | 31.1004       | 27.168       | 28.6561       | 25.4515      | 28.0427       |

|             |          |           |           |           |           |           |
|-------------|----------|-----------|-----------|-----------|-----------|-----------|
| SHANK3      | 12.7957  | 21.7787   | 15.0185   | 13.1902   | 16.7318   | 12.1307   |
| LOC339166   | 0.459537 | 0.355507  | 0.043484  | 0.107875  | 0.0731705 | 0         |
| GJB3        | 84.9434  | 101.708   | 98.879    | 111.512   | 100.9     | 103.101   |
| SGPP2       | 36.4259  | 26.9069   | 26.7948   | 21.0144   | 20.8739   | 25.8501   |
| PPFIBP1     | 16.6197  | 15.8845   | 17.8502   | 17.8177   | 19.9621   | 16.8968   |
| FAR1        | 15.0623  | 12.9786   | 14.7429   | 10.0339   | 14.959    | 12.443    |
| LOC729724   | 0        | 0         | 0         | 0         | 0         | 0         |
| H3F3C       | 45.4567  | 46.291    | 51.2433   | 53.0711   | 58.8799   | 52.0801   |
| MAP3K14     | 11.3049  | 17.2284   | 10.3153   | 7.51797   | 14.2903   | 9.39757   |
| CENPE       | 0.824168 | 0.786972  | 0.582307  | 0.660378  | 0.811872  | 0.780652  |
| FXYD2       | 1.52901  | 1.64983   | 8.31E-13  | 0         | 2.10369   | 0.73111   |
| ARL17A      | 2.9814   | 3.21037   | 3.37937   | 3.6174    | 6.27875   | 5.97553   |
| C1orf133    | 5.20132  | 8.22188   | 4.53401   | 5.91995   | 4.21623   | 3.43768   |
| ACSL6       | 0.653262 | 0.643988  | 0.509376  | 0.316407  | 0.376574  | 0.259239  |
| MIR429      | 0        | 0         | 0         | 0         | 0         | 0         |
| PCDHA3      | 0.121069 | 8.25E-14  | 0.123115  | 0.109767  | 0.122581  | 0.0616313 |
| LOC10065291 | 0        | 0         | 0         | 0         | 0         | 0         |
| RAB9A       | 31.0404  | 26.5616   | 29.4345   | 28.3019   | 28.6209   | 29.4539   |
| C9orf37     | 9.99249  | 13.4499   | 9.59659   | 8.12242   | 9.40393   | 8.0392    |
| EIF4EBP2    | 38.3042  | 36.587    | 43.8432   | 33.8945   | 35.2889   | 30.6288   |
| SLC6A17     | 2.02807  | 2.62357   | 1.9529    | 1.79232   | 1.852     | 1.73768   |
| SNORA73A    | 11.8254  | 27.8807   | 26.8556   | 14.8051   | 7.53165   | 17.1945   |
| PRKACA      | 44.9661  | 41.7907   | 38.2913   | 35.0314   | 34.9531   | 33.8312   |
| LRRC4C      | 0.264378 | 0.0637489 | 0.218329  | 0.157975  | 0.122461  | 0.10484   |
| RNF138      | 7.81326  | 9.16724   | 7.37283   | 6.62076   | 7.99584   | 5.69377   |
| SNORD115-4  | 0        | 0         | 0         | 0         | 0         | 0         |
| MIR3689D2   | 0        | 0         | 0         | 0         | 0         | 0         |
| MAPK1       | 34.1243  | 25.9615   | 33.2548   | 26.5329   | 30.1414   | 27.9009   |
| C20orf107   | 0.769845 | 1.87178   | 0.737577  | 1.08431   | 1.2292    | 0.239867  |
| MIR3167     | 0        | 0         | 0         | 0         | 0         | 0         |
| PPP2R3B     | 6.40298  | 4.42311   | 5.15624   | 8.39938   | 6.8212    | 4.9909    |
| ACADL       | 3.40353  | 2.83007   | 5.49038   | 1.78816   | 3.35482   | 2.14619   |
| VIT         | 4.68902  | 3.50077   | 6.94285   | 3.86256   | 5.46387   | 3.79048   |
| LDB2        | 15.1688  | 14.4689   | 12.7209   | 8.99522   | 11.2133   | 8.18322   |
| PRDM8       | 2.74968  | 2.01176   | 2.46369   | 1.98939   | 2.64859   | 2.3035    |
| WNK4        | 0.721754 | 0.988071  | 0.458247  | 1.92384   | 1.06767   | 2.5245    |
| MIR4532     | 0        | 0         | 0         | 0         | 0         | 0         |
| MIPOL1      | 1.25216  | 0.649637  | 0.792724  | 0.557966  | 0.856016  | 0.448145  |
| AQP7P3      | 17.5521  | 26.8968   | 19.0434   | 14.5573   | 11.3646   | 8.20273   |
| CBS         | 2.04056  | 2.11616   | 1.63376   | 1.64229   | 1.70755   | 2.76242   |
| PRDX6       | 169.98   | 160.151   | 155.745   | 141.629   | 129.057   | 138.361   |
| C10orf136   | 0.305402 | 0.180011  | 0.0770636 | 0.0955892 | 0.129675  | 0         |
| TKTL2       | 0        | 0.0315439 | 0         | 0.0335007 | 0         | 0         |

|             |           |           |           |           |           |           |
|-------------|-----------|-----------|-----------|-----------|-----------|-----------|
| FUT1        | 1.7854    | 1.61901   | 1.73276   | 1.61198   | 1.77859   | 1.59755   |
| C14orf176   | 1.26817   | 1.30724   | 1.01272   | 1.5878    | 1.7935    | 1.22913   |
| MTMR14      | 17.5085   | 21.0488   | 18.2204   | 18.3551   | 20.2021   | 16.6717   |
| ST13        | 66.2659   | 57.4149   | 59.7147   | 63.1975   | 52.4971   | 51.5557   |
| MIR4639     | 0         | 0         | 0         | 0         | 0         | 0         |
| ZKSCAN4     | 3.11834   | 3.1509    | 2.96761   | 2.38428   | 4.59637   | 4.02528   |
| MIR520C     | 0         | 0         | 0         | 0         | 0         | 0         |
| TNNI1       | 0.20235   | 0.344049  | 0.424538  | 0.511987  | 0.406461  | 0.64988   |
| TGFBR2      | 46.7285   | 34.3704   | 38.392    | 25.6616   | 29.1775   | 21.5488   |
| QSOX1       | 34.7156   | 26.2136   | 34.7678   | 27.0571   | 36.7653   | 41.0297   |
| C17orf76    | 0.575034  | 0.984758  | 1.79505   | 1.16558   | 0.574936  | 0.49273   |
| GPC5        | 0.0691625 | 0.0305746 | 0.0785346 | 0.0324713 | 0.110125  | 0.129298  |
| MIR3936     | 0         | 0         | 0         | 0         | 283.839   | 555.425   |
| VPS25       | 62.7707   | 68.8432   | 48.5422   | 53.6625   | 52.7971   | 55.7226   |
| CNTN6       | 0         | 0         | 0.273905  | 0.0522693 | 0.0531807 | 0.104066  |
| IGLL5       | 2.08266   | 4.49574   | 4.12729   | 0.746488  | 1.53732   | 4.82429   |
| ACOX3       | 15.6465   | 15.2401   | 11.029    | 12.0256   | 11.1289   | 13.9889   |
| MIR320C2    | 0         | 0         | 0         | 0         | 0         | 0         |
| EEF2K       | 19.0521   | 24.5755   | 39.9774   | 30.8794   | 37.0155   | 28.0432   |
| LOC10062830 | 0         | 0         | 0         | 0         | 0         | 0         |
| SNX2        | 30.8514   | 25.2531   | 28.9297   | 21.2128   | 23.9597   | 21.675    |
| EVI2B       | 5.85662   | 5.59047   | 4.86508   | 2.8713    | 8.08742   | 3.84338   |
| DDN         | 0.104675  | 0.0694368 | 0.118838  | 0.0246562 | 0.0999843 | 0.0489253 |
| SEZ6L2      | 1.68248   | 1.30146   | 0.950532  | 1.20625   | 1.1091    | 0.973679  |
| SULT1A2     | 1.27488   | 1.99714   | 2.07406   | 2.49824   | 1.86033   | 1.8434    |
| NCCRP1      | 112.668   | 65.9299   | 109.046   | 110.82    | 152.408   | 138       |
| BZRAP1      | 3.58476   | 4.8029    | 3.6316    | 4.51577   | 4.26869   | 2.96665   |
| MRPL21      | 59.4399   | 60.0669   | 55.757    | 68.6724   | 53.9905   | 54.243    |
| MAPK7       | 9.46186   | 14.9044   | 10.8665   | 13.8277   | 16.241    | 13.5667   |
| RNPEP       | 32.9918   | 39.115    | 37.4624   | 48.8329   | 44.859    | 45.3555   |
| SLCO6A1     | 0         | 0         | 0         | 0         | 0         | 0         |
| LOC10065274 | 2.09511   | 1.53962   | 3.02783   | 1.96727   | 2.87673   | 2.06858   |
| LOC96610    | 7.03727   | 6.22199   | 7.07713   | 6.70444   | 7.28922   | 7.73035   |
| OR1E2       | 0         | 0         | 0         | 0         | 0         | 0.170812  |
| HPCA        | 0.465125  | 0.34249   | 0.176011  | 0         | 0.0987046 | 0.144805  |
| SLC1A4      | 9.78902   | 12.3539   | 8.44051   | 11.7546   | 10.2255   | 10.9147   |
| PIPOX       | 1.59575   | 1.48511   | 0.635784  | 0.630897  | 1.09658   | 1.88413   |
| GPR174      | 0.35374   | 0.234566  | 0.267783  | 0.083039  | 0.168974  | 0.275545  |
| ATF5        | 24.7113   | 27.2098   | 19.5239   | 21.0464   | 20.1945   | 16.4963   |
| PAPD5       | 2.92673   | 3.13967   | 2.83277   | 2.70959   | 3.31074   | 2.49774   |
| NCAPD2      | 10.6318   | 12.4208   | 11.0912   | 10.738    | 12.3397   | 12.8122   |
| HSFY1       | 0         | 0.111029  | 0         | 0         | 0         | 0         |
| HNRNPUL2    | 48.5603   | 44.694    | 40.7569   | 46.2035   | 43.4122   | 39.1445   |

|             |           |          |           |           |            |           |
|-------------|-----------|----------|-----------|-----------|------------|-----------|
| C10orf91    | 0.528852  | 0.623437 | 0.66724   | 0.662112  | 0.673658   | 0.549264  |
| B4GALNT4    | 1.33884   | 2.2415   | 1.6173    | 2.78177   | 3.50156    | 4.02952   |
| STX12       | 44.9078   | 42.2396  | 38.1412   | 33.2139   | 31.967     | 25.8768   |
| RALGPS2     | 7.19253   | 5.64777  | 8.9752    | 6.16774   | 7.59311    | 6.90732   |
| LOC10050620 | 58.7935   | 63.9877  | 43.3753   | 57.5525   | 57.6264    | 51.3908   |
| OR4K13      | 0         | 0        | 0         | 0         | 0          | 0         |
| CALR3       | 0.0862044 | 0        | 0.130514  | 0         | 0          | 0.0537189 |
| TULP3       | 9.70204   | 13.2499  | 12.2488   | 10.5185   | 16.3831    | 16.1686   |
| PCA3        | 0         | 0        | 0.0198427 | 0         | 0          | 0.0490029 |
| SNORD116-2  | 0         | 0        | 0         | 0         | 0          | 0         |
| SLFNL1      | 0.174315  | 0.445541 | 0.209351  | 0.285783  | 0.656068   | 0.44773   |
| FAM75A2     | 0         | 0        | 0         | 0         | 0.00732563 | 0         |
| KIAA0317    | 8.81714   | 6.6713   | 8.12307   | 7.47497   | 9.29384    | 7.72006   |
| AATK        | 2.20174   | 2.61623  | 1.97651   | 2.10207   | 3.24836    | 1.79659   |
| PAK1        | 21.9638   | 18.0418  | 15.8525   | 16.8871   | 18.2601    | 16.9285   |
| PLD2        | 21.5174   | 28.9122  | 24.9122   | 27.6192   | 33.8221    | 25.1104   |
| MLLT10      | 15.1165   | 16.2921  | 16.6283   | 15.4186   | 17.3063    | 15.2824   |
| C14orf50    | 0.852664  | 1.23361  | 1.99509   | 1.09178   | 0.641806   | 0.869472  |
| CLIP1       | 32.66     | 22.3319  | 29.7776   | 26.3224   | 27.7774    | 28.3361   |
| PARN        | 15.0546   | 13.3641  | 13.6851   | 14.3857   | 13.6737    | 12.4867   |
| CRKL        | 19.4111   | 15.2783  | 19.2325   | 19.5153   | 18.5963    | 19.7252   |
| RAD54L      | 1.46302   | 3.11245  | 1.61586   | 2.6746    | 2.46858    | 2.53708   |
| MIR3182     | 0         | 0        | 0         | 0         | 0          | 0         |
| EED         | 12.1166   | 12.3193  | 11.4649   | 10.262    | 12.7923    | 12.7818   |
| GTSE1       | 1.81534   | 2.33712  | 1.15724   | 1.67468   | 2.21099    | 2.28234   |
| ST8SIA3     | 0         | 0        | 0         | 0         | 0          | 0         |
| MIR519C     | 0         | 0        | 0         | 0         | 0          | 0         |
| DYNC1H1     | 24.8312   | 20.6546  | 28.2678   | 20.7275   | 25.9009    | 24.1653   |
| LOC10028731 | 0         | 0        | 0         | 0.0515621 | 0.0699484  | 0         |
| LOC10050571 | 0         | 0        | 0         | 0         | 0          | 0         |
| OLA1        | 9.77561   | 8.51802  | 11.318    | 10.455    | 9.97278    | 9.11159   |
| FANCL       | 11.1865   | 17.756   | 11.124    | 16.4486   | 14.3969    | 11.1508   |
| GREM2       | 0.999882  | 0.863473 | 1.26739   | 0.742365  | 1.08113    | 0.869419  |
| C12orf52    | 12.4776   | 14.6395  | 11.9077   | 14.8258   | 12.0148    | 13.7822   |
| OR51Q1      | 0         | 0        | 0         | 0         | 0          | 0         |
| PCDHGC5     | 0.359369  | 0.141932 | 0.405635  | 0         | 0.511681   | 0.525217  |
| PTPRU       | 5.16928   | 4.30095  | 7.52454   | 8.03059   | 7.58894    | 5.92488   |
| C9orf100    | 2.12007   | 4.09748  | 1.76941   | 2.72347   | 3.39436    | 2.52685   |
| FAM57A      | 24.9313   | 37.0003  | 35.6119   | 44.2191   | 43.8245    | 41.2756   |
| LOC10012831 | 1.09435   | 0.772958 | 1.02774   | 0.546128  | 0.631697   | 0.585428  |
| FADS1       | 331.48    | 225.005  | 187.867   | 156.218   | 99.4907    | 183.474   |
| OR4C11      | 0         | 0        | 0         | 0         | 0          | 0         |
| LOC10050581 | 0         | 0.168059 | 0         | 0.178485  | 0.242129   | 0         |

|             |           |           |           |           |           |           |
|-------------|-----------|-----------|-----------|-----------|-----------|-----------|
| PRRG4       | 15.2023   | 10.8048   | 11.4295   | 11.9959   | 12.023    | 16.0735   |
| HSPB11      | 31.5183   | 37.5776   | 24.7633   | 30.2678   | 30.8717   | 25.4441   |
| GAS1        | 24.3985   | 24.4437   | 36.2982   | 23.805    | 32.9907   | 27.8119   |
| LOC10063091 | 2.75581   | 6.63274   | 3.94054   | 4.31278   | 4.63176   | 3.53002   |
| C9orf140    | 9.89487   | 16.0989   | 9.4017    | 16.7144   | 11.2398   | 13.1744   |
| KIF18B      | 1.0527    | 1.46257   | 0.512292  | 0.917862  | 1.31699   | 2.48342   |
| ASTE1       | 4.16599   | 4.19829   | 3.60618   | 3.61246   | 4.70796   | 3.55896   |
| FAM151B     | 0.866779  | 0.87583   | 0.56242   | 0.523216  | 0.90695   | 0.733047  |
| LOC10050749 | 5.46842   | 6.04353   | 5.13964   | 6.1444    | 5.97761   | 6.33676   |
| KRTAP21-1   | 0         | 0         | 0         | 0         | 0         | 1.35462   |
| PRG3        | 0         | 0         | 0         | 0         | 0         | 0         |
| SLC35B2     | 25.2754   | 27.2186   | 21.8124   | 28.6698   | 27.2057   | 25.0749   |
| BMPR1A      | 9.63086   | 6.02049   | 9.0568    | 7.87144   | 7.6372    | 7.50616   |
| LPPR3       | 0         | 0         | 0         | 0.0404433 | 0.10973   | 0         |
| CEP170P1    | 2.15881   | 1.3352    | 2.12311   | 0.713235  | 2.26719   | 1.20996   |
| MIR3129     | 0         | 0         | 0         | 0         | 0         | 0         |
| ABHD16B     | 3.36856   | 6.5313    | 3.22108   | 5.82663   | 5.75886   | 6.29744   |
| LOC10013080 | 9.61E-10  | 0.138408  | 2.24E-09  | 2.43E-07  | 1.04E-08  | 6.40E-05  |
| LOC10050735 | 0         | 0         | 0         | 0         | 0         | 0         |
| MIR4656     | 0         | 0         | 0         | 0         | 0         | 0         |
| SYTL4       | 3.90025   | 3.77233   | 4.00265   | 3.51481   | 2.96753   | 3.37648   |
| MED14       | 9.99747   | 9.5114    | 11.3202   | 10.5642   | 11.7304   | 9.15196   |
| OR2G2       | 0         | 0         | 0         | 0         | 0         | 0         |
| LOC255130   | 0.0787176 | 0.417991  | 0.0596523 | 0.666239  | 0.200501  | 0.196377  |
| TSPAN16     | 0         | 0         | 0         | 0         | 0         | 0         |
| C16orf61    | 38.8288   | 37.458    | 24.3465   | 27.8043   | 22.7002   | 23.4696   |
| BCAN        | 1.34868   | 4.21947   | 1.53478   | 2.67546   | 1.91652   | 1.70049   |
| COL28A1     | 2.40451   | 1.1124    | 2.34936   | 2.23154   | 2.65331   | 2.29985   |
| VRTN        | 0         | 0.0254843 | 0         | 0         | 0.0183581 | 0.0538856 |
| CHD6        | 6.63899   | 4.3863    | 7.14042   | 5.93584   | 7.47482   | 5.82704   |
| GADD45A     | 23.2727   | 25.8475   | 21.983    | 17.2488   | 21.5991   | 21.9819   |
| CDK17       | 8.26623   | 7.92451   | 7.70906   | 6.5402    | 7.88448   | 6.79436   |
| CLLU1OS     | 0.195727  | 0         | 0.296333  | 0.183785  | 0.249319  | 0.121969  |
| GSTO2       | 23.7524   | 32.0106   | 21.7932   | 32.55     | 24.0727   | 24.7028   |
| LOC10050733 | 0.786502  | 1.46959   | 0.611231  | 0.461571  | 0.244594  | 0.0287177 |
| MAT2A       | 123.246   | 135.386   | 115.755   | 104.573   | 130.576   | 98.7176   |
| MIR920      | 0         | 0         | 0         | 0         | 0         | 0         |
| LGALS12     | 24.717    | 31.5508   | 31.4135   | 12.4135   | 10.1332   | 8.04736   |
| ABCD4       | 11.7899   | 19.5406   | 14.1959   | 14.9741   | 17.0452   | 15.9374   |
| TAF9        | 61.9182   | 62.6845   | 55.2499   | 49.3486   | 51.2803   | 51.2417   |
| PRKAR2A-AS1 | 0.42558   | 0.47661   | 0.536944  | 0.31969   | 0.433687  | 0.247523  |
| TEX22       | 0.391599  | 0.692454  | 0.266798  | 0.404476  | 0.823058  | 0.512458  |
| ZNF322      | 4.33449   | 3.38038   | 3.54434   | 2.91809   | 3.98468   | 3.18516   |

|             |           |           |           |           |            |           |
|-------------|-----------|-----------|-----------|-----------|------------|-----------|
| SCIN        | 0.62379   | 1.06846   | 3.2851    | 1.97995   | 2.51453    | 2.70547   |
| MIR548AL    | 0         | 0         | 0         | 0         | 0          | 0         |
| RNF13       | 28.745    | 25.9475   | 26.4783   | 22.6841   | 22.7731    | 21.9946   |
| BTBD6       | 53.4241   | 84.0456   | 66.6905   | 78.4175   | 66.6071    | 55.5202   |
| LOC1005073: | 5.90287   | 6.48727   | 4.07469   | 5.63779   | 6.78858    | 6.65391   |
| MXRA5       | 11.2213   | 8.3031    | 18.5203   | 16.2164   | 15.2937    | 14.2373   |
| RBAK        | 6.16041   | 4.50324   | 5.89174   | 4.48645   | 7.04296    | 5.20576   |
| ACSBG2      | 0.0738981 | 0.206108  | 0.0559412 | 0.277556  | 0.122213   | 0.345376  |
| GSTTP1      | 0         | 0.322181  | 0.0689636 | 0         | 0          | 0         |
| GRM5        | 0         | 0         | 0.0365695 | 0         | 0.00769151 | 0         |
| TAF13       | 34.6241   | 19.3576   | 26.0175   | 15.7774   | 17.8365    | 21.2587   |
| MIR3160-1   | 0         | 0         | 0         | 0         | 0          | 0         |
| LOC147670   | 1.70509   | 1.47227   | 0.780354  | 0.881258  | 0.512279   | 0.370603  |
| GBA3        | 0.214884  | 0         | 0.0690637 | 0         | 0.0581066  | 0.169956  |
| ACCN5       | 0         | 0.055221  | 0         | 0         | 0          | 0         |
| CCDC124     | 63.1946   | 83.5448   | 59.866    | 84.5941   | 62.0092    | 85.0877   |
| NR6A1       | 0.446593  | 0.83255   | 1.1294    | 0.473674  | 0.704778   | 0.513781  |
| KIAA0125    | 0.0883667 | 0.0868091 | 0.0297307 | 0.0184389 | 0.0875486  | 0.0611848 |
| PLCL2       | 3.23301   | 1.83346   | 2.78353   | 1.55325   | 2.48323    | 1.4153    |
| BTG1        | 51.6212   | 49.2761   | 58.2565   | 54.0793   | 60.2278    | 57.2537   |
| LOC1005057: | 11.8704   | 13.7876   | 13.567    | 9.17915   | 4.74373    | 9.62209   |
| INTS1       | 14.8532   | 20.4226   | 21.2064   | 20.8819   | 22.7894    | 22.6604   |
| DHFR        | 7.53441   | 7.12071   | 7.64856   | 5.79314   | 6.99481    | 6.6998    |
| HAUS2       | 6.67001   | 6.43506   | 6.98289   | 6.26297   | 5.80954    | 4.90741   |
| ZNF225      | 2.34688   | 1.3617    | 2.02644   | 1.5839    | 2.21876    | 2.42223   |
| TTYH1       | 9.75227   | 7.30372   | 7.4382    | 16.5954   | 8.78007    | 8.64164   |
| RANBP1      | 32.5301   | 37.1701   | 26.3993   | 36.3695   | 30.4634    | 29.2045   |
| ACER3       | 7.34257   | 5.59236   | 6.34524   | 4.96325   | 5.07093    | 4.4791    |
| LOC1005061: | 2.86751   | 5.14352   | 3.76143   | 7.27859   | 2.26163    | 2.48279   |
| C15orf40    | 18.1369   | 22.0037   | 16.7082   | 19.4067   | 18.1981    | 18.6475   |
| MLLT6       | 35.3766   | 40.6286   | 37.059    | 34.9664   | 44.7647    | 33.8479   |
| PPP1R14D    | 1.22479   | 1.50053   | 0.804836  | 1.30446   | 0.433374   | 1.0733    |
| AGT         | 2.29776   | 1.20515   | 1.88682   | 0.987357  | 0.421673   | 0.728067  |
| FOXD4L4     | 0.0106271 | 0.0220801 | 0.204501  | 0.0803322 | 0.0805613  | 0.0609328 |
| LOC283761   | 0         | 0         | 0         | 0         | 0.0515789  | 0         |
| ITSN2       | 10.0228   | 7.20528   | 10.1565   | 6.62069   | 11.3922    | 8.96399   |
| FAM70B      | 1.80836   | 4.49672   | 3.42234   | 3.28991   | 6.91051    | 4.71885   |
| TSPAN13     | 31.0063   | 22.2889   | 29.0191   | 26.0849   | 19.365     | 21.7072   |
| RABGEF1     | 19.0694   | 19.3782   | 20.7694   | 19.9222   | 23.4375    | 20.7916   |
| IL1R1       | 27.2562   | 19.9949   | 25.3671   | 15.9172   | 27.3921    | 20.4775   |
| SESN3       | 5.57068   | 2.89991   | 4.61115   | 3.61755   | 3.51484    | 5.41805   |
| FLJ12334    | 0.494269  | 0.116534  | 0.424053  | 0.0928222 | 0.503685   | 0.369609  |
| CNO         | 8.31675   | 13.3582   | 8.55183   | 9.17592   | 9.00487    | 9.58789   |



|             |          |           |           |             |           |           |
|-------------|----------|-----------|-----------|-------------|-----------|-----------|
| LOC10050674 | 15.4965  | 17.9867   | 19.6257   | 19.7231     | 24.2769   | 18.9474   |
| HOXD3       | 1.28382  | 1.87875   | 2.11129   | 1.87059     | 2.73498   | 1.98627   |
| SELS        | 93.8895  | 85.0521   | 83.778    | 69.9894     | 60.0374   | 65.9422   |
| DYX1C1-CCPC | 0.544549 | 0.341096  | 9.21E-06  | 0.000782197 | 1.11689   | 0.162241  |
| WNT6        | 0.745454 | 2.03217   | 1.31673   | 3.61651     | 2.8487    | 2.47752   |
| LOC10028925 | 1.05224  | 1.05437   | 1.91172   | 2.17368     | 1.87649   | 2.71027   |
| TAS2R43     | 0        | 0         | 0         | 0           | 0         | 0.0353887 |
| TEKT4       | 0        | 0         | 0         | 0           | 0.0473797 | 0.0231785 |
| ERLIN1      | 19.3199  | 17.5754   | 19.8988   | 16.8371     | 20.3514   | 20.1631   |
| C8orf22     | 1.14199  | 1.32035   | 1.66249   | 0.907342    | 1.28684   | 0.492675  |
| MIR567      | 0        | 0         | 0         | 0           | 0         | 0         |
| SYN1        | 0.37519  | 0.66268   | 0.189254  | 0.322754    | 0.477461  | 0.194685  |
| KRTAP4-1    | 7.91765  | 1.71118   | 0.399581  | 57.8243     | 0.672373  | 721.343   |
| MIR367      | 0        | 0         | 0         | 0           | 0         | 0         |
| LOC389247   | 0.162902 | 0.864168  | 0         | 0.152963    | 0.518767  | 0.406056  |
| LINC00176   | 0.384737 | 0.744783  | 0.747317  | 0.961274    | 0.95458   | 0.855366  |
| TMEM120A    | 39.4708  | 42.4297   | 30.5249   | 35.7223     | 31.8126   | 30.2518   |
| AZGP1       | 414.456  | 252.653   | 281.16    | 362.579     | 275.998   | 354.507   |
| ATAD3A      | 13.1552  | 20.0246   | 13.5389   | 22.848      | 14.7342   | 17.908    |
| CDAN1       | 5.80388  | 6.82986   | 6.06436   | 7.38787     | 7.84861   | 7.34808   |
| HDHD2       | 27.6303  | 21.2408   | 20.7745   | 19.7002     | 19.0594   | 19.3776   |
| HYAL1       | 10.2809  | 17.5375   | 11.5915   | 16.5241     | 8.35715   | 8.37604   |
| EBLN2       | 1.51229  | 0.278556  | 1.66951   | 0.887509    | 1.48491   | 1.33506   |
| SP5         | 2.07732  | 1.55407   | 4.55633   | 2.00058     | 4.78335   | 2.62218   |
| LOC10028701 | 1.85108  | 1.93417   | 0.828026  | 1.42211     | 1.84883   | 1.36324   |
| MEG8        | 0.325536 | 0.287818  | 0         | 0           | 0         | 0         |
| ZBTB2       | 5.27039  | 4.43244   | 5.81428   | 5.61268     | 5.89477   | 4.66609   |
| ZNF518B     | 5.93093  | 3.20451   | 3.76224   | 3.37752     | 2.78936   | 2.40405   |
| AIM2        | 1.5992   | 0.771227  | 0.22011   | 0.204767    | 0.231487  | 0.362384  |
| FANCB       | 0.432443 | 0.353399  | 0.302583  | 0.223332    | 0.400993  | 0.324415  |
| RDH10       | 12.7714  | 9.93866   | 10.7423   | 9.98049     | 10.0836   | 9.34574   |
| CIITA       | 5.17573  | 5.67871   | 4.46878   | 2.71297     | 7.40046   | 2.88852   |
| RPL15       | 516.585  | 653.719   | 600.085   | 778.316     | 589.184   | 543.971   |
| LOC10050621 | 0        | 0         | 0         | 0           | 0         | 0         |
| ZCCHC18     | 0.516594 | 0.434282  | 0.328362  | 0.566644    | 1.3478    | 0.275348  |
| CLMP        | 46.3511  | 25.6269   | 34.7974   | 22.7824     | 20.7799   | 23.4799   |
| CD109       | 12.0988  | 9.62806   | 16.4564   | 11.6494     | 14.4654   | 15.3405   |
| C17orf78    | 0        | 0.0495228 | 0.0424019 | 0           | 0.0713495 | 0.0349047 |
| VPS26A      | 43.8494  | 35.143    | 38.9232   | 32.9879     | 36.7174   | 33.7552   |
| LONRF3      | 0.619634 | 0.480068  | 0.760052  | 0.461775    | 0.544965  | 0.381854  |
| JAGN1       | 38.0488  | 34.487    | 29.9147   | 35.3076     | 26.7544   | 28.5639   |
| RNF152      | 3.7713   | 1.59023   | 2.63529   | 2.99639     | 2.03243   | 2.71167   |
| LOC79015    | 0.881209 | 0.692542  | 1.853     | 0.275814    | 0.623608  | 0.244059  |

|             |           |          |           |           |           |           |
|-------------|-----------|----------|-----------|-----------|-----------|-----------|
| ZNF664      | 42.7194   | 32.8657  | 32.8319   | 32.3565   | 28.9909   | 36.2823   |
| DLX1        | 0.853464  | 1.24295  | 0.263084  | 0.922956  | 0.221346  | 0.964963  |
| RFPL2       | 0.36887   | 0.333772 | 0.0564482 | 0.0350075 | 0.421424  | 0.334577  |
| FLJ26850    | 0.151095  | 0.467561 | 0.17157   | 0.35469   | 0.481167  | 0.423703  |
| AKAP7       | 2.40972   | 3.00643  | 1.98073   | 2.34462   | 2.32014   | 1.79763   |
| SPG21       | 61.3864   | 58.023   | 55.9914   | 64.1387   | 55.6814   | 51.3501   |
| FBXL3       | 23.3848   | 17.8126  | 23.5264   | 16.475    | 23.7774   | 19.5391   |
| DUSP6       | 36.7478   | 28.7727  | 39.7767   | 24.0408   | 29.0572   | 29.6743   |
| ZNF672      | 13.0206   | 16.3986  | 13.5786   | 16.8428   | 16.1755   | 14.96     |
| ADAMTS14    | 1.09767   | 1.11401  | 1.03857   | 0.996362  | 1.08345   | 0.991687  |
| TEX101      | 1.1402    | 1.72518  | 0.294604  | 1.46823   | 2.0946    | 2.47859   |
| SPRYD4      | 13.4093   | 12.3299  | 10.0402   | 10.8513   | 10.0001   | 8.69037   |
| UBN1        | 14.4199   | 12.1549  | 13.6084   | 13.7833   | 13.6438   | 12.6901   |
| ANP32B      | 86.9186   | 89.6463  | 77.8517   | 80.6885   | 80.7126   | 75.6492   |
| NUP62       | 18.6494   | 20.4026  | 17.7306   | 18.7512   | 20.4541   | 20.942    |
| PRPSAP2     | 17.955    | 15.4851  | 12.8415   | 13.6013   | 17.8199   | 17.1264   |
| LOC1001308: | 0         | 0        | 0         | 0         | 0         | 0         |
| GABPB2      | 4.14029   | 3.51979  | 5.14334   | 3.23972   | 4.53019   | 4.49856   |
| GPR27       | 1.21392   | 0.985212 | 0.6897    | 0.570075  | 0.644925  | 0.945533  |
| LOC340037   | 0.479569  | 0.264996 | 0.588131  | 0.390883  | 0.404545  | 0.302918  |
| KLRG2       | 1.66585   | 3.00705  | 2.41703   | 2.28114   | 1.81253   | 2.42221   |
| GSR         | 8.98548   | 6.36665  | 7.40036   | 8.90759   | 7.6172    | 6.75043   |
| GALR2       | 0.51102   | 0.677718 | 0.386845  | 1.11963   | 0.867924  | 0.477669  |
| METTL15     | 4.87045   | 4.72094  | 4.57716   | 3.91093   | 4.89706   | 4.62177   |
| ZNF451      | 9.58324   | 9.39086  | 9.12788   | 6.48172   | 10.0652   | 7.31373   |
| ING3        | 9.34675   | 8.02511  | 8.05675   | 6.65189   | 8.07904   | 5.71792   |
| ZNF721      | 7.05535   | 5.14535  | 6.66498   | 4.99873   | 8.3468    | 5.8119    |
| IFFO2       | 58.9365   | 54.6096  | 85.8126   | 79.9043   | 74.9764   | 109.836   |
| SCN3B       | 0.846566  | 0.766959 | 0.743311  | 0.858453  | 1.09941   | 0.833309  |
| NME3        | 47.5553   | 107.359  | 55.747    | 90.4996   | 91.894    | 63.6566   |
| FAM19A2     | 0.888807  | 0.339817 | 0.563724  | 0.496234  | 0.902678  | 0.553867  |
| SMARCE1     | 46.4637   | 41.3879  | 40.9565   | 35.5537   | 42.7543   | 39.863    |
| POLD3       | 7.20332   | 7.56127  | 6.30022   | 6.11706   | 5.86731   | 5.88373   |
| MIR3938     | 0         | 0        | 0         | 0         | 0         | 0         |
| UPK3A       | 0         | 0.392505 | 0         | 0         | 0         | 0         |
| PRAMEF4     | 0         | 0        | 0.0429758 | 0         | 0         | 0         |
| LOC10050730 | 0.892006  | 0.783989 | 0.580159  | 0.475785  | 0.648324  | 0.710449  |
| FGF19       | 0.0480003 | 0        | 0         | 0.0450715 | 0.0611433 | 0.0598235 |
| LOC340113   | 0         | 0        | 0         | 0.14494   | 0         | 0         |
| AKR1D1      | 5.83248   | 0.442721 | 0.174957  | 0         | 0.111478  | 0.174513  |
| TP53I3      | 8.0293    | 17.1044  | 10.7862   | 11.4783   | 12.859    | 15.2027   |
| ERP27       | 6.91324   | 2.22264  | 1.05724   | 1.11469   | 2.80196   | 3.22015   |
| MIR526A1    | 0         | 0        | 0         | 0         | 0         | 0         |

|             |           |           |           |           |           |           |
|-------------|-----------|-----------|-----------|-----------|-----------|-----------|
| SCN10A      | 0         | 0         | 0         | 0         | 0         | 0         |
| LOC344967   | 1.78162   | 1.40017   | 1.19884   | 1.11527   | 1.38688   | 2.59053   |
| MIR4690     | 0         | 0         | 0         | 0         | 0         | 0         |
| ACOT11      | 1.40087   | 2.00812   | 1.93535   | 2.10301   | 1.69854   | 3.24787   |
| RPP25       | 4.35593   | 5.43025   | 3.19854   | 4.04925   | 4.16148   | 3.28446   |
| RPSA        | 446.344   | 639.078   | 437.472   | 713.759   | 538.319   | 496.286   |
| MIR1297     | 0         | 0         | 0         | 0         | 0         | 0         |
| SRRM1       | 34.9569   | 37.1948   | 37.3994   | 36.9008   | 39.8407   | 32.1267   |
| UBE2CBP     | 2.16662   | 2.36928   | 1.81279   | 1.87381   | 2.3241    | 1.70545   |
| PPAPDC1A    | 0.706324  | 0.374692  | 0.908976  | 0.596905  | 0.764765  | 0.836288  |
| SETMAR      | 11.1022   | 15.62     | 12.3911   | 12.0493   | 11.2965   | 9.50715   |
| LOC644189   | 0.0611335 | 0.216201  | 0.27767   | 0.17221   | 0.0389363 | 0.152383  |
| KPNA3       | 13.5619   | 11.3968   | 12.5789   | 10.1916   | 9.87952   | 9.61226   |
| ZNF669      | 3.12319   | 2.65811   | 2.87384   | 1.37885   | 2.18284   | 2.06064   |
| BCL7A       | 8.40503   | 8.1197    | 9.20852   | 10.2496   | 8.14094   | 9.6051    |
| TCP11L2     | 8.88508   | 5.77979   | 9.3398    | 5.44669   | 7.15433   | 12.3072   |
| LCA5        | 1.42181   | 0.900791  | 1.30076   | 0.757575  | 1.29736   | 1.09751   |
| LOC284889   | 2.3792    | 3.14374   | 3.24351   | 3.66849   | 1.17782   | 0.610168  |
| BMP3        | 0.384533  | 0.946031  | 0.329062  | 0.109891  | 0.138428  | 0.156277  |
| GRB10       | 7.14379   | 7.7971    | 6.60376   | 5.8526    | 7.85797   | 6.46001   |
| LOC201617   | 0         | 0         | 0         | 0         | 0.0236467 | 0.0462725 |
| CTNNA1      | 95.3112   | 79.483    | 88.9332   | 74.5675   | 84.1043   | 83.5698   |
| SSX8        | 0         | 0         | 0.0567256 | 0         | 0         | 0         |
| POLM        | 11.8873   | 13.9004   | 10.3341   | 12.3142   | 15.8505   | 13.8118   |
| CD163L1     | 1.22519   | 0.93382   | 1.45517   | 0.75373   | 1.18395   | 0.982895  |
| PATL1       | 13.5745   | 12.5852   | 12.0779   | 10.8871   | 13.9745   | 11.4698   |
| MIR4662A    | 0         | 0         | 0         | 0         | 0         | 0         |
| ANKRD30BL   | 0         | 0.0674012 | 0         | 0         | 0         | 0.0475057 |
| CHEK2       | 5.11047   | 8.26065   | 6.26149   | 4.85308   | 6.33001   | 7.27554   |
| NGFRAP1     | 66.839    | 72.6557   | 71.3658   | 78.4228   | 67.6974   | 74.3733   |
| CAPN1       | 77.9328   | 86.1195   | 76.8913   | 88.6809   | 92.6938   | 85.4103   |
| ALOX12B     | 18.0728   | 12.0198   | 21.1326   | 17.0459   | 26.0532   | 23.4546   |
| SNORD126    | 0         | 0         | 0         | 0         | 0         | 0         |
| OR6B3       | 0         | 0         | 0         | 0         | 0         | 0         |
| IRAK1       | 60.7796   | 51.3834   | 32.9262   | 39.9789   | 33.8277   | 37.1808   |
| 7-Sep       | 61.783    | 56.8716   | 62.7097   | 46.9831   | 54.2023   | 51.3015   |
| CNTN5       | 0         | 0         | 0.0749626 | 0         | 0         | 0         |
| TCEA3       | 36.0647   | 38.2514   | 47.6242   | 49.7222   | 45.3254   | 34.4937   |
| SNORD58C    | 0         | 0         | 0         | 0         | 0         | 0         |
| LOC728208   | 0.214058  | 0.0378513 | 0.0648172 | 0.0401994 | 0.0545339 | 0.266784  |
| OVCA2       | 38.7387   | 60.8671   | 33.6806   | 64.2522   | 49.7736   | 48.084    |
| C17orf97    | 3.74918   | 7.23226   | 4.38623   | 4.96059   | 5.13754   | 5.73462   |
| LOC10050658 | 0.0225761 | 0.0199603 | 0.0512707 | 0.0211986 | 0.0287577 | 0         |

|             |          |           |           |           |           |           |
|-------------|----------|-----------|-----------|-----------|-----------|-----------|
| DTX2P1-UPK3 | 7.16848  | 9.68605   | 6.03162   | 3.63182   | 6.8689    | 6.09662   |
| MMRN2       | 14.8932  | 18.3935   | 14.4804   | 14.5526   | 13.3391   | 10.7455   |
| MIR548A2    | 0        | 0         | 0         | 0         | 0         | 0         |
| FLJ39582    | 2.48528  | 2.7396    | 3.58203   | 3.25268   | 2.15167   | 1.88621   |
| FBXO11      | 22.0483  | 21.1106   | 25.0307   | 17.5334   | 23.4851   | 21.1308   |
| TOX         | 0.989595 | 1.47906   | 1.14153   | 0.707973  | 1.33559   | 0.734136  |
| OR2B3       | 0        | 0         | 0         | 0         | 0         | 0         |
| OR4X1       | 0        | 0         | 0         | 0         | 0         | 0         |
| CCDC147     | 0.387168 | 0.342309  | 0.270543  | 0.22372   | 0.284526  | 0.408297  |
| HLA-DQA1    | 71.531   | 59.7399   | 10.016    | 3.72088   | 32.1433   | 14.1219   |
| PLA2G12A    | 10.9732  | 9.6693    | 11.0061   | 9.73411   | 8.62782   | 8.75085   |
| ZNF431      | 7.14047  | 5.72902   | 9.06026   | 6.156     | 8.98233   | 8.96262   |
| TRAPPC1     | 82.5946  | 105.545   | 82.7525   | 109.585   | 82.1954   | 87.5392   |
| ZNF595      | 3.45331  | 2.899     | 3.06307   | 3.70115   | 4.73211   | 2.93449   |
| FER1L5      | 0        | 0.0651399 | 0.0111547 | 0.0276723 | 0.0281549 | 0         |
| LOC10050701 | 0        | 0         | 0         | 0         | 0         | 0         |
| RAP2B       | 5.63866  | 5.4595    | 6.59994   | 5.98522   | 6.71416   | 5.64305   |
| SNORD103A   | 0        | 0         | 0         | 0         | 0         | 0         |
| PHKA1       | 3.2533   | 2.8618    | 2.82563   | 3.06935   | 2.96396   | 2.4784    |
| SRD5A1      | 90.3068  | 74.2438   | 72.862    | 55.3285   | 55.108    | 58.4452   |
| HK1         | 52.8209  | 48.6518   | 55.8645   | 59.2669   | 53.0567   | 48.3126   |
| GULP1       | 6.87145  | 4.84008   | 6.28093   | 3.96234   | 5.64764   | 5.82778   |
| GPR31       | 0        | 0         | 0         | 0         | 0.157681  | 0.0771386 |
| LOC10050559 | 5.39223  | 3.85731   | 1.41013   | 1.70308   | 0.124885  | 0.183284  |
| LCN8        | 0.131177 | 0         | 0         | 0         | 0         | 0.0817441 |
| POP5        | 33.959   | 42.2531   | 35.1618   | 35.4951   | 36.8003   | 34.7212   |
| C1GALT1C1   | 13.4395  | 9.57965   | 9.02298   | 7.25225   | 7.74639   | 6.8592    |
| CDC7        | 4.16301  | 4.20147   | 3.12676   | 1.99041   | 4.74811   | 3.85187   |
| PMPCB       | 26.2945  | 26.5353   | 23.5968   | 23.6891   | 24.681    | 22.0696   |
| SETD1A      | 6.60355  | 8.86239   | 7.81222   | 7.28505   | 8.10049   | 7.11369   |
| SPAG17      | 0.454019 | 0.330577  | 0.667173  | 0.601859  | 0.399732  | 0.474317  |
| LAIR2       | 1.44622  | 0         | 0.640189  | 0         | 0         | 0         |
| MYC         | 30.2383  | 31.968    | 42.6966   | 35.1996   | 30.8962   | 29.5077   |
| PHTF1       | 2.6196   | 2.36995   | 1.19905   | 1.28709   | 2.15345   | 1.44261   |
| NUP93       | 11.6565  | 11.6017   | 10.4753   | 12.1614   | 10.8973   | 11.1931   |
| ANKRD26P3   | 0.078838 | 0         | 0         | 0         | 0         | 0.0163762 |
| LOC10012908 | 0        | 0.734399  | 4.20E-296 | 3.22E-105 | 1.04E-79  | 3.02E-129 |
| CDY1B       | 0        | 0         | 0         | 0         | 0         | 0         |
| PRPF8       | 43.1519  | 35.4213   | 44.683    | 37.4514   | 41.8108   | 37.3348   |
| SOS2        | 11.6922  | 8.75327   | 11.5502   | 8.03864   | 10.3402   | 8.63953   |
| OR52E2      | 0        | 0         | 0         | 0         | 0         | 0         |
| TAB1        | 12.9768  | 16.4584   | 13.508    | 16.892    | 18.36     | 16.1447   |
| SFRP1       | 164.595  | 58.8047   | 84.4025   | 118.385   | 89.3523   | 87.3559   |

|             |          |          |          |          |          |          |
|-------------|----------|----------|----------|----------|----------|----------|
| XRCC6BP1    | 5.56328  | 8.19784  | 9.16187  | 7.42334  | 11.2516  | 8.63659  |
| OR6P1       | 0        | 0        | 0        | 0        | 0        | 0        |
| SNORD115-3' | 0        | 0        | 0        | 0        | 0        | 0        |
| AJAP1       | 0.18171  | 0.188269 | 0.312079 | 0.292496 | 0.086799 | 0.176222 |
| CALM2       | 394.414  | 335.362  | 346.238  | 358.503  | 323.842  | 285.97   |
| SARM1       | 3.09696  | 3.04825  | 3.77566  | 3.48443  | 4.98857  | 3.49755  |
| CLEC9A      | 0.189814 | 0.391583 | 0.478966 | 0.178232 | 0.402978 | 0.473135 |
| TYRO3       | 10.7351  | 12.1627  | 13.9843  | 13.3555  | 12.3446  | 13.1343  |
| TGM1        | 27.8371  | 17.7345  | 21.9179  | 18.3275  | 29.2665  | 30.9686  |
| AQP7P1      | 7.53571  | 7.62097  | 7.42028  | 3.40893  | 4.92506  | 2.68903  |
| GRSF1       | 24.5616  | 19.8838  | 19.939   | 18.7674  | 19.4829  | 18.5266  |
| SRSF5       | 295.918  | 361.003  | 332.825  | 330.595  | 389.586  | 329.297  |
| GSPT2       | 5.36125  | 4.36831  | 5.33175  | 4.11285  | 4.73136  | 4.60739  |
| WISP1       | 1.63133  | 0.866065 | 1.94222  | 1.38942  | 1.6077   | 1.17975  |
| MIR2117     | 0        | 0        | 0        | 0        | 0        | 0        |
| HIST1H1C    | 66.5163  | 67.1659  | 35.7737  | 41.5269  | 27.3723  | 53.4518  |
| MIR3683     | 0        | 0        | 0        | 0        | 0        | 0        |
| NEK6        | 8.90406  | 6.73441  | 8.66349  | 6.56447  | 6.61542  | 5.74348  |
| LOC727803   | 1.91597  | 1.69398  | 2.73964  | 2.00451  | 2.44058  | 2.38985  |
| CARD16      | 21.628   | 18.7745  | 14.3554  | 11.5121  | 17.6675  | 18.1439  |
| PPTC7       | 11.0731  | 6.6037   | 9.98372  | 9.56367  | 8.61602  | 7.11183  |
| SNORA50     | 0        | 0        | 0        | 77.6076  | 26.3203  | 0        |
| SNORA70G    | 0        | 0        | 0        | 0        | 0        | 0        |
| MIR196A2    | 0        | 0        | 0        | 0        | 0        | 0        |
| C8orf56     | 1.3114   | 0.579727 | 0.992734 | 1.23138  | 0.626427 | 0.612905 |
| CARD6       | 3.89797  | 2.60577  | 2.9328   | 1.85239  | 2.13447  | 1.73292  |
| LOC10050705 | 2.27869  | 2.91009  | 3.06664  | 2.13966  | 2.58011  | 2.6822   |
| TRIM11      | 12.93    | 17.5926  | 11.6216  | 14.9052  | 17.3485  | 13.1427  |
| ATP5J2      | 183.39   | 195.022  | 151.866  | 189.708  | 141.417  | 153.786  |
| SLC25A13    | 9.80953  | 9.86575  | 9.30636  | 11.0289  | 8.63073  | 7.35897  |
| OR8I2       | 0        | 0        | 0        | 0        | 0        | 0        |
| LRP2BP      | 0.765341 | 0.742683 | 0.664153 | 0.858866 | 0.749009 | 0.860797 |
| ADAMTSL4    | 5.72109  | 7.66364  | 8.1726   | 6.69298  | 11.5126  | 10.064   |
| NKD2        | 4.7204   | 10.7686  | 7.54378  | 13.0783  | 10.8752  | 10.3862  |
| SLC6A15     | 0.787593 | 1.36829  | 0.669208 | 0.675309 | 0.671081 | 0.850903 |
| IL6R        | 4.41202  | 5.6515   | 5.42282  | 4.0704   | 6.4061   | 4.79452  |
| LOC10050688 | 2.43388  | 2.03569  | 1.54493  | 1.71881  | 1.32494  | 2.2806   |
| NUPL2       | 15.7446  | 17.684   | 14.8322  | 15.3862  | 15.3017  | 15.8799  |
| GPR1        | 1.45186  | 1.24482  | 1.29853  | 1.19838  | 0.980631 | 1.3153   |
| TNF         | 2.6647   | 2.80471  | 1.72902  | 1.54893  | 6.38456  | 2.09543  |
| MIR765      | 0        | 0        | 0        | 0        | 0        | 156.072  |
| LOC10050710 | 1.37538  | 1.45923  | 1.04117  | 1.29146  | 0.700789 | 0        |
| SFRP2       | 21.7253  | 19.0244  | 40.2106  | 13.0305  | 27.2767  | 25.7811  |

|              |           |           |          |           |           |            |
|--------------|-----------|-----------|----------|-----------|-----------|------------|
| ERCC2        | 6.94786   | 10.1912   | 9.70307  | 11.9076   | 8.1766    | 9.16054    |
| PROCA1       | 1.34066   | 0.948259  | 1.62382  | 1.34278   | 3.70011   | 3.06328    |
| SNORD25      | 0         | 0         | 0        | 0         | 0         | 0          |
| DEFB112      | 0         | 0         | 0        | 0         | 0         | 0          |
| EXOC5        | 7.90305   | 6.23057   | 8.05471  | 5.49945   | 6.30894   | 5.82627    |
| KRT79        | 734.158   | 766.929   | 509.165  | 522.053   | 522.316   | 718.142    |
| C10orf32-AS3 | 1.72E-05  | 4.91E-06  | 7.05E-09 | 3.36E-07  | 1.02E-21  | 0.00346315 |
| LOC10050675  | 0.0825048 | 0.0729456 | 0.124913 | 0         | 0.0525478 | 0.102827   |
| CALCOCO2     | 46.1174   | 37.875    | 43.656   | 34.5185   | 41.6732   | 35.8809    |
| SNORD115-10  | 0         | 0         | 0        | 0         | 0         | 0          |
| SNF8         | 39.3318   | 50.6927   | 36.3443  | 41.7868   | 36.5763   | 39.0854    |
| MIR4678      | 0         | 0         | 0        | 0         | 0         | 0          |
| EDEM1        | 19.0666   | 15.3325   | 16.2333  | 12.6213   | 18.4183   | 14.2733    |
| KCNG1        | 0.552164  | 0.691601  | 0.696653 | 0.432061  | 0.439596  | 0.487454   |
| TMEM87A      | 48.1054   | 38.0762   | 43.0881  | 43.4777   | 40.6743   | 43.3169    |
| TPST2        | 14.5607   | 14.2825   | 16.6377  | 14.1882   | 14.593    | 20.5518    |
| MIR2113      | 0         | 0         | 0        | 0         | 0         | 0          |
| KCNIP1       | 0.654296  | 0.39545   | 0.442421 | 0.419982  | 0.205107  | 0.321087   |
| ARSE         | 0.230069  | 0.325459  | 0.104498 | 0.129618  | 0.146532  | 0.114695   |
| LOC388946    | 0         | 0         | 0        | 0         | 0         | 0          |
| EIF4E1B      | 0         | 0         | 0        | 0         | 0         | 0          |
| HTT          | 10.7794   | 10.4903   | 12.1058  | 9.71658   | 12.4722   | 11.2576    |
| PCIF1        | 17.3966   | 23.0058   | 20.767   | 25.9687   | 23.2728   | 20.1065    |
| SND1         | 46.7073   | 37.2825   | 46.0902  | 38.9727   | 35.3338   | 38.9012    |
| LOC150185    | 0         | 0         | 0        | 0         | 0         | 0          |
| RNU5E-1      | 0         | 0         | 0        | 0         | 0         | 0          |
| MIR34A       | 0         | 0         | 0        | 0         | 0         | 0          |
| CHODL        | 1.19265   | 1.97441   | 2.21504  | 2.51305   | 1.92518   | 1.44046    |
| TMEM184A     | 18.8916   | 24.7391   | 20.3377  | 22.9909   | 28.7032   | 30.5453    |
| PTPRVP       | 0.118902  | 0.294352  | 0.270028 | 0.334941  | 0.484667  | 0.28156    |
| P2RY10       | 0.544726  | 0.597101  | 0.319248 | 0         | 0.852008  | 0.259783   |
| ABCA5        | 12.5074   | 13.4667   | 15.8116  | 13.1898   | 15.3187   | 12.0521    |
| SLC35G3      | 0.0278038 | 0         | 0        | 0         | 0         | 0          |
| GTSF1L       | 0         | 0         | 0        | 0         | 0         | 0          |
| TOMM20L      | 0.233341  | 0.827496  | 0.529922 | 0.438208  | 0.744454  | 0.727042   |
| ORAI1        | 25.8746   | 29.9108   | 32.7177  | 42.0634   | 39.8525   | 35.8658    |
| VN1R1        | 1.84358   | 1.75071   | 1.80911  | 2.11577   | 1.82651   | 1.91473    |
| THY1         | 35.7283   | 27.6261   | 52.9727  | 28.3076   | 32.3963   | 24.5566    |
| FCGBP        | 8.28291   | 6.9451    | 9.36084  | 4.71826   | 19.3538   | 9.77161    |
| MIR151B      | 0         | 0         | 0        | 0         | 0         | 0          |
| MIR609       | 0         | 0         | 0        | 0         | 0         | 0          |
| ZFP92        | 0.0890322 | 0.23615   | 0.134796 | 0.0835998 | 0.0567051 | 0.110962   |
| CCDC94       | 15.9981   | 23.1141   | 18.5499  | 21.8368   | 19.6827   | 18.7715    |

|             |          |          |           |           |           |           |
|-------------|----------|----------|-----------|-----------|-----------|-----------|
| MIR3677     | 0        | 0        | 0         | 0         | 0         | 0         |
| C6orf97     | 0.655434 | 0.563396 | 0.716686  | 0.376103  | 0.660962  | 0.32902   |
| ACSF3       | 14.1729  | 17.5692  | 11.4852   | 14.6267   | 14.3701   | 13.0313   |
| PDK4        | 26.9784  | 31.0856  | 21.3648   | 10.7395   | 17.9415   | 14.7165   |
| MIR362      | 0        | 0        | 0         | 0         | 0         | 0         |
| ZCCHC6      | 13.721   | 9.51396  | 12.6833   | 9.40747   | 12.5111   | 11.8378   |
| MIR376A2    | 0        | 0        | 0         | 0         | 0         | 0         |
| SNORD83A    | 0        | 0        | 0         | 0         | 0         | 0         |
| SH3GL1      | 54.6418  | 60.8404  | 61.9891   | 70.9119   | 71.6155   | 73.3787   |
| LINC00478   | 1.70232  | 1.2273   | 1.99565   | 1.41298   | 1.8735    | 1.46113   |
| CLPS        | 0.284401 | 0        | 0         | 0         | 0         | 0         |
| PPP1CA      | 104.522  | 125.423  | 93.6122   | 123.462   | 102.837   | 110.089   |
| BPIFB3      | 0        | 0        | 0         | 0         | 0         | 0         |
| IGIP        | 15.6666  | 12.6229  | 13.8056   | 11.0575   | 14.4694   | 11.8409   |
| CCL20       | 1.78801  | 2.74186  | 1.45741   | 3.61343   | 4.04932   | 4.32021   |
| PPM1G       | 43.8655  | 43.1857  | 34.817    | 39.5312   | 33.8776   | 38.5061   |
| LOC10050650 | 0        | 0        | 0         | 0         | 0         | 0         |
| IQCK        | 6.70556  | 7.88159  | 6.24067   | 6.81494   | 7.03427   | 5.3093    |
| ZNF557      | 1.61057  | 1.36758  | 1.79208   | 1.39543   | 1.72646   | 1.55008   |
| LOC10050721 | 7.44677  | 8.86789  | 6.34637   | 10.1983   | 9.62683   | 7.99099   |
| ANAPC16     | 54.7729  | 50.535   | 45.0819   | 50.1248   | 40.7513   | 38.8821   |
| LOC399939   | 0        | 0        | 0         | 0         | 0         | 0         |
| ZNF561      | 9.79225  | 10.6382  | 9.04393   | 8.23322   | 12.4871   | 12.5765   |
| CD81        | 372.099  | 464.216  | 472.58    | 458.218   | 407.885   | 357.276   |
| ILKAP       | 22.8356  | 30.5504  | 22.1581   | 30.1179   | 26.122    | 24.7936   |
| USP36       | 9.00827  | 10.1263  | 10.5212   | 10.1849   | 11.6505   | 8.78696   |
| C11orf34    | 0        | 0        | 0         | 0.0653227 | 0         | 0.0433515 |
| ZNF91       | 7.9252   | 5.5426   | 6.57914   | 5.95331   | 5.54669   | 5.57124   |
| NKX3-2      | 0.136611 | 0.281826 | 0.0344717 | 0.0427584 | 0.174016  | 0.141883  |
| GLUD1       | 52.7866  | 46.779   | 48.4486   | 55.2069   | 40.3477   | 37.3787   |
| C12orf50    | 0        | 0        | 0         | 0.0581351 | 0.0394326 | 0         |
| CERKL       | 0.513572 | 0.720601 | 0.284436  | 0.480776  | 0.832925  | 0.589014  |
| ZSCAN22     | 2.02126  | 1.84238  | 1.68788   | 1.40877   | 2.10578   | 1.79195   |
| SSB         | 39.519   | 34.4686  | 35.7278   | 24.3821   | 32.3572   | 28.8902   |
| C11orf1     | 23.551   | 24.2489  | 24.1443   | 25.1954   | 18.9073   | 19.1096   |
| LOC10050773 | 34.4664  | 41.4973  | 30.5437   | 43.7402   | 34.7633   | 32.107    |
| C10orf82    | 0.591936 | 1.25605  | 0.17924   | 0.778146  | 0.754015  | 0.95906   |
| LOC148413   | 15.1054  | 15.2377  | 11.2153   | 11.2184   | 15.4565   | 14.0669   |
| MT1H        | 0        | 0.446894 | 1.53054   | 1.89847   | 0.321929  | 2.20486   |
| THAP2       | 1.41646  | 1.39346  | 1.41963   | 0.824249  | 1.58869   | 1.97776   |
| ZIC4        | 1.93382  | 2.6786   | 3.22472   | 2.77711   | 2.24391   | 0.674066  |
| GRK7        | 0.120511 | 0.106548 | 0.0912271 | 0.0565787 | 0.115131  | 0.150194  |
| TCHP        | 18.7027  | 19.5087  | 21.1728   | 22.1623   | 26.5568   | 25.6158   |

|             |           |           |           |          |           |           |
|-------------|-----------|-----------|-----------|----------|-----------|-----------|
| HAT1        | 29.1015   | 24.1041   | 23.6417   | 18.666   | 23.6835   | 20.7029   |
| HLF         | 13.3505   | 15.5311   | 16.191    | 12.8899  | 13.9279   | 10.669    |
| MRPS27      | 36.4231   | 33.856    | 31.4647   | 36.3614  | 33.4803   | 32.3767   |
| SHCBP1      | 4.73701   | 4.80963   | 8.60626   | 8.66638  | 8.85645   | 6.13234   |
| CPN1        | 0         | 0         | 0         | 0        | 0         | 0         |
| RPA3        | 6.75636   | 7.76318   | 6.98827   | 5.59036  | 5.66654   | 5.75266   |
| HP          | 3.4566    | 7.21799   | 0.746704  | 0.260495 | 0.710809  | 0.444543  |
| IL9R        | 0.293472  | 0.623181  | 0.356935  | 0.422032 | 0.243901  | 0.397303  |
| CHST7       | 1.80467   | 1.94583   | 1.83264   | 1.44658  | 2.71933   | 2.30405   |
| MTERFD3     | 19.2192   | 20.8614   | 17.9296   | 18.3371  | 24.1286   | 19.8664   |
| WDR11       | 19.2082   | 15.3709   | 17.1555   | 11.0434  | 18.1267   | 15.179    |
| FAM74A1     | 0.0146431 | 0         | 0         | 0        | 0         | 0         |
| LOC10050758 | 0.0628503 | 0.0833525 | 0.0475781 | 0        | 0.0400297 | 0         |
| WASH5P      | 13.9772   | 13.6354   | 16.4154   | 13.379   | 21.5903   | 18.427    |
| MIR4524     | 0         | 0         | 0         | 0        | 0         | 0         |
| MIPEPP3     | 1.40842   | 1.91974   | 1.73255   | 1.32248  | 1.34555   | 1.09709   |
| LOC10050567 | 1.35273   | 0.875073  | 1.91394   | 0.980948 | 1.63253   | 1.40053   |
| THRB        | 5.06161   | 3.57564   | 5.15348   | 3.61669  | 4.48109   | 4.58517   |
| SNAP47      | 10.532    | 12.1128   | 10.3649   | 12.3283  | 12.8435   | 12.7909   |
| PRSS45      | 0.504624  | 1.56155   | 0.477504  | 0.592292 | 0.803494  | 0.707535  |
| C1orf112    | 2.13147   | 2.17359   | 1.83156   | 2.19213  | 1.79871   | 1.57499   |
| CD5L        | 0         | 0.0806809 | 0         | 0        | 0         | 0.0568655 |
| MSL1        | 35.8105   | 36.9383   | 42.9706   | 39.5103  | 54.4638   | 42.4496   |
| LOC391767   | 0         | 0         | 0         | 0        | 0         | 0         |
| KHK         | 4.43807   | 4.34427   | 1.61291   | 3.39369  | 3.90497   | 3.51396   |
| MIR4477A    | 0         | 0         | 0         | 0        | 0         | 0         |
| MIR4717     | 0         | 0         | 0         | 0        | 0         | 0         |
| CMPK2       | 4.35707   | 2.85243   | 1.23373   | 0.593383 | 0.889708  | 0.559609  |
| ZNF812      | 1.13007   | 0.410158  | 0.273815  | 0        | 0.230374  | 0.320097  |
| EFCAB9      | 0         | 0         | 0         | 0        | 0         | 0         |
| TRAM1L1     | 2.29111   | 2.52081   | 2.23542   | 1.62544  | 1.5565    | 1.42772   |
| MIR490      | 0         | 0         | 0         | 0        | 0         | 0         |
| SLC2A12     | 2.99915   | 1.66676   | 2.21848   | 1.85062  | 2.46686   | 2.16797   |
| LOC10050557 | 1.19413   | 1.85347   | 1.64722   | 2.19271  | 2.83938   | 1.22368   |
| LINC00347   | 0         | 0         | 0         | 0        | 0         | 0         |
| EP400       | 7.0987    | 7.429     | 8.41561   | 7.86837  | 8.68304   | 7.74488   |
| DNAJB13     | 0         | 0.245676  | 0.0420699 | 0        | 0.0353955 | 0.0692629 |
| SSX2IP      | 3.95911   | 3.82692   | 4.05133   | 3.68625  | 3.57942   | 4.82967   |
| LINC00235   | 0.532684  | 0.235483  | 0.604867  | 0        | 0.169635  | 0.331946  |
| LOC10012819 | 0.580684  | 0.994455  | 0.370164  | 0.362058 | 0.718642  | 0.847057  |
| C12orf57    | 176.429   | 309.491   | 197.643   | 313.829  | 251.756   | 229.573   |
| ACOT8       | 16.8542   | 22.2065   | 17.9795   | 21.8198  | 19.4619   | 23.1917   |
| AHSA2       | 46.556    | 58.0381   | 48.9152   | 46.9544  | 66.4271   | 48.9042   |



|             |           |           |           |           |           |          |
|-------------|-----------|-----------|-----------|-----------|-----------|----------|
| SNORD65     | 0         | 0         | 0         | 0         | 0         | 0        |
| CTNNA3      | 0.124721  | 0         | 0.0236032 | 0         | 0         | 0        |
| PEG3        | 1.18056   | 1.04062   | 1.02835   | 1.11289   | 1.05564   | 1.15647  |
| LOC10050726 | 2.25428   | 2.27535   | 0.64095   | 2.59409   | 1.10655   | 0.115416 |
| NXN         | 23.7725   | 31.2737   | 18.2581   | 30.9888   | 20.319    | 24.4255  |
| LOC284632   | 0.113124  | 0.0500085 | 0         | 0         | 0.0360246 | 0.070494 |
| AOC2        | 1.24754   | 1.0998    | 1.69308   | 1.47227   | 1.48809   | 1.10346  |
| YRDC        | 12.1496   | 11.4808   | 11.4402   | 13.9639   | 10.014    | 10.3382  |
| MIR4325     | 0         | 0         | 0         | 0         | 0         | 0        |
| MIR218-2    | 0         | 0         | 0         | 0         | 0         | 0        |
| LOC10050558 | 0.0996351 | 0.113784  | 0.175167  | 0.0935558 | 0.608914  | 0.343039 |
| METTL18     | 6.37458   | 7.8904    | 7.77772   | 6.19689   | 6.73483   | 6.21559  |
| STAT5A      | 20.1202   | 24.2977   | 26.9921   | 14.779    | 18.9128   | 10.9198  |
| EIF1AY      | 31.0092   | 31.3726   | 0         | 0.0737141 | 0         | 0        |
| SLC7A6      | 14.5108   | 14.8873   | 17.0293   | 13.4771   | 20.1494   | 13.4771  |
| SEC14L4     | 10.859    | 6.47388   | 11.5447   | 7.49732   | 6.61104   | 8.49165  |
| RFX3        | 0.958576  | 0.431699  | 0.958677  | 0.624145  | 0.64402   | 0.816396 |
| WWTR1-AS1   | 0.0621212 | 0.329542  | 0.282156  | 0.349985  | 0.435219  | 0.387113 |
| SIM2        | 0.838378  | 1.09167   | 0.881467  | 0.677887  | 0.830891  | 0.696589 |
| MIR1233-2   | 0         | 0         | 0         | 0         | 0         | 0        |
| LOC10012953 | 1.22526   | 1.40428   | 2.71389   | 2.72712   | 3.46834   | 2.71478  |
| RBBP8       | 11.1896   | 10.2454   | 11.3199   | 8.87567   | 11.6714   | 8.89908  |
| RPTOR       | 5.19112   | 5.62104   | 6.34193   | 6.06909   | 6.17446   | 6.4603   |
| GNA12       | 10.3528   | 10.8549   | 11.7892   | 10.9467   | 10.4261   | 8.53302  |
| LOC10050635 | 1.22684   | 1.55925   | 1.68332   | 1.94397   | 1.17207   | 1.24234  |
| CLIC6       | 12.1736   | 8.87445   | 5.61111   | 7.00831   | 5.47493   | 4.16993  |
| HIST1H4J    | 1.46064   | 2.34366   | 1.47428   | 2.43825   | 2.09315   | 1.61815  |
| NBEA        | 4.64376   | 1.78613   | 3.59706   | 3.84042   | 3.78651   | 2.84483  |
| CXorf22     | 0.0271531 | 0         | 0.0205551 | 0.0254964 | 0         | 0        |
| LOC10050593 | 0         | 0         | 0         | 0         | 0         | 0        |
| SALL2       | 1.55158   | 1.97957   | 2.02202   | 1.9364    | 2.52681   | 2.21525  |
| ZCCHC8      | 10.4771   | 11.5687   | 10.2929   | 10.4062   | 13.4051   | 12.8981  |
| PPP1R2      | 16.5692   | 13.2698   | 17.2681   | 15.3984   | 17.0584   | 21.1632  |
| SNRNP27     | 22.2752   | 17.9523   | 18.1755   | 15.2023   | 15.6407   | 14.0516  |
| RPH3AL      | 3.98302   | 6.6302    | 6.04659   | 6.01533   | 6.71401   | 5.9854   |
| SMG7        | 20.3191   | 16.3408   | 18.955    | 19.2094   | 19.2121   | 19.1798  |
| GADD45GIP1  | 59.8933   | 90.6238   | 53.7994   | 89.0312   | 59.0546   | 62.0237  |
| RHOF        | 2.60787   | 2.02205   | 1.76298   | 0.684274  | 3.5375    | 1.49554  |
| ARSD-AS1    | 3.22442   | 1.08692   | 5.00077   | 3.14419   | 3.01129   | 4.00772  |
| TMEM31      | 0         | 0.788332  | 0.404986  | 0.552576  | 0.383326  | 0.583414 |
| FNTA        | 50.7745   | 48.422    | 47.8063   | 45.0678   | 48.3659   | 47.2961  |
| COX4NB      | 11.0555   | 12.7905   | 11.2499   | 12.1706   | 9.78684   | 10.672   |
| FBXO40      | 0.067021  | 0.162953  | 0.0507353 | 0.0629317 | 0.0533576 | 0.135735 |

|             |           |           |           |           |           |           |
|-------------|-----------|-----------|-----------|-----------|-----------|-----------|
| RGSL1       | 0         | 0         | 0.0197028 | 0         | 0         | 0         |
| CSNK1E      | 33.7509   | 43.0572   | 41.0314   | 42.3477   | 47.0877   | 51.7598   |
| LOC10050567 | 0.133304  | 0.0196432 | 0.117731  | 0         | 0.141503  | 0.0553796 |
| MIB2        | 15.6322   | 30.3742   | 22.7547   | 32.3533   | 33.8819   | 30.3476   |
| MIR4632     | 0         | 0         | 0         | 0         | 0         | 0         |
| PGAP1       | 4.77548   | 3.81044   | 6.33918   | 4.09452   | 5.32806   | 4.64848   |
| HAUS4       | 36.8394   | 44.2555   | 36.5773   | 42.0469   | 33.512    | 28.9237   |
| HAPLN1      | 0.124046  | 0.0731156 | 0.29736   | 0.504734  | 0.408195  | 0.605517  |
| CCR1        | 1.79949   | 0.662916  | 0.851391  | 0.17601   | 1.00284   | 0.210256  |
| SYT6        | 0.510753  | 0.0785349 | 0.0168106 | 0.0417034 | 0.0424306 | 0.0968677 |
| P2RX6       | 0.642428  | 1.39863   | 0.808948  | 1.27348   | 1.24716   | 1.07956   |
| LOC10050734 | 0.801339  | 1.18082   | 3.84192   | 3.00978   | 3.40252   | 3.16262   |
| AVEN        | 8.34141   | 9.54405   | 8.01251   | 9.47793   | 8.52709   | 8.38671   |
| KLHL36      | 6.27951   | 7.63915   | 6.9696    | 5.4087    | 7.03664   | 5.26654   |
| PTP4A2      | 44.75     | 43.0207   | 42.8229   | 34.743    | 31.5635   | 28.0423   |
| TANC1       | 15.9947   | 15.0589   | 21.4286   | 15.5223   | 24.3072   | 17.6962   |
| PTPN2       | 13.5498   | 15.3225   | 14.4397   | 11.5577   | 13.8568   | 11.143    |
| HP11026     | 0         | 0         | 0         | 0         | 0         | 0         |
| MAPK8IP2    | 5.90902   | 6.4133    | 7.29968   | 7.48769   | 7.54779   | 5.62124   |
| CNRIP1      | 8.6012    | 11.742    | 14.4796   | 9.55699   | 8.49783   | 5.80392   |
| SH3BP2      | 18.8237   | 25.6026   | 27.5914   | 20.5244   | 35.2582   | 27.2069   |
| CCDC47      | 61.9999   | 40.584    | 49.2668   | 41.7496   | 38.9012   | 36.1055   |
| ZNF671      | 4.40717   | 5.29342   | 3.43068   | 4.1773    | 5.13725   | 4.56      |
| TH          | 0.0575845 | 0.318208  | 0.441374  | 0.815237  | 0.625946  | 0.505378  |
| PDCL        | 9.38714   | 6.25306   | 8.56627   | 7.0032    | 7.3096    | 7.01159   |
| FLJ42280    | 0.149891  | 0.0331296 | 0.0283658 | 0.0351848 | 0.171844  | 0.124543  |
| MAP9        | 1.08892   | 0.779372  | 1.07946   | 0.62079   | 0.520154  | 0.710881  |
| MIR219-1    | 0         | 0         | 0         | 0         | 0         | 0         |
| GFRA4       | 0         | 0         | 0         | 0         | 0         | 0         |
| COL14A1     | 7.65486   | 5.03023   | 10.6722   | 5.9112    | 5.74133   | 4.98199   |
| SPEN        | 10.724    | 8.35402   | 11.77     | 10.488    | 11.6248   | 9.3587    |
| LOC10050728 | 0         | 0         | 1.09453   | 0.678821  | 0.460439  | 0         |
| MIR31HG     | 0.238636  | 0.337579  | 0.216779  | 0.358521  | 0.243182  | 0.981472  |
| MAD2L2      | 18.0591   | 28.956    | 16.1134   | 25.1001   | 20.924    | 19.8758   |
| LOC10050561 | 0         | 0.0633212 | 0         | 0.268997  | 0         | 0         |
| FTSD1       | 13.4094   | 10.4858   | 11.8013   | 9.0684    | 11.732    | 11.4646   |
| ATP6AP2     | 86.2299   | 65.3157   | 83.3684   | 61.9982   | 74.173    | 70.1424   |
| MIR545      | 0         | 0         | 0         | 0         | 0         | 0         |
| DNAJC1      | 15.9333   | 11.9133   | 12.0989   | 10.713    | 11.6515   | 11.0629   |
| PUSL1       | 14.5845   | 20.5946   | 14.6849   | 22.863    | 15.6601   | 19.8207   |
| POLR2L      | 115.511   | 178.477   | 122.082   | 161.909   | 113.02    | 134.14    |
| NPEPL1      | 24.4193   | 51.1646   | 36.7586   | 50.3193   | 58.2878   | 43.379    |
| PROC        | 0.589466  | 0.573286  | 0.490852  | 1.5498    | 0.638238  | 1.17546   |

|             |           |           |           |          |           |           |
|-------------|-----------|-----------|-----------|----------|-----------|-----------|
| LOC10050821 | 0.467233  | 0         | 0         | 0.438725 | 0         | 0         |
| MYOCD       | 0.728233  | 0.509079  | 0.777992  | 0.553529 | 0.67773   | 0.689314  |
| C11orf41    | 0.744243  | 0.772426  | 0.81445   | 0.706407 | 0.81404   | 0.690609  |
| ATP1B4      | 0         | 0         | 0.0614467 | 0        | 0         | 0.0126423 |
| SSTR5       | 0         | 0         | 0         | 0.141893 | 0.0240594 | 0.0941674 |
| DUS2L       | 7.44069   | 10.1539   | 7.51019   | 8.2524   | 7.86402   | 8.03027   |
| COCH        | 10.0679   | 6.26469   | 13.9804   | 7.35255  | 6.73235   | 6.09561   |
| POU2F1      | 2.3375    | 2.64676   | 3.32678   | 3.24737  | 3.09502   | 2.51709   |
| DGKD        | 6.38266   | 6.19931   | 5.91156   | 4.79747  | 5.64784   | 3.80503   |
| POLR2G      | 59.2988   | 74.9724   | 59.3664   | 72.524   | 64.2996   | 66.6993   |
| LOC10050754 | 3.10659   | 4.28323   | 5.27916   | 5.45239  | 5.12513   | 5.21221   |
| LOC10050601 | 138.093   | 156.367   | 448.69    | 156.303  | 206.89    | 199.298   |
| CCL3L3      | 0.371117  | 0         | 0.0624305 | 0        | 0.105052  | 0.102784  |
| PIK3CA      | 6.06844   | 3.80239   | 7.33017   | 4.58331  | 6.31847   | 5.49153   |
| ZNF229      | 1.04918   | 0.601237  | 1.11782   | 0.94868  | 1.21272   | 1.5982    |
| DEFB113     | 0         | 0         | 0         | 0        | 0         | 0         |
| ADAP1       | 2.6272    | 3.60035   | 2.88377   | 2.4669   | 4.4063    | 4.25662   |
| THAP6       | 4.60919   | 3.39597   | 4.29917   | 2.85954  | 4.8927    | 4.39386   |
| ANKRD13A    | 28.4418   | 23.6893   | 29.6274   | 29.9421  | 33.1759   | 30.1412   |
| C11orf46    | 13.2296   | 10.2281   | 10.5987   | 9.85992  | 12.6201   | 9.24229   |
| LOC10050611 | 0         | 0         | 1.73E-20  | 0        | 0         | 0         |
| TXNDC2      | 0.0539176 | 0         | 0         | 0        | 0         | 0         |
| PI16        | 31.3763   | 19.6285   | 86.7925   | 26.2198  | 60.7985   | 55.7364   |
| FAM54A      | 1.7153    | 2.52817   | 1.19025   | 2.21795  | 1.5935    | 1.56098   |
| KCNJ14      | 1.01778   | 1.44008   | 1.50764   | 1.95946  | 1.8652    | 1.6742    |
| RGPD1       | 0.705624  | 0.682618  | 0.907353  | 0.607233 | 0.68634   | 0.59419   |
| EHF         | 81.0018   | 42.8496   | 50.7421   | 52.8272  | 63.447    | 53.6366   |
| NOV         | 9.28023   | 8.85455   | 5.88359   | 11.2556  | 4.30983   | 4.72282   |
| UNC50       | 42.737    | 38.4884   | 38.7474   | 35.5565  | 34.4358   | 30.1003   |
| MIR29B2     | 0         | 0         | 0         | 0        | 0         | 0         |
| PDE4D       | 1.50962   | 1.59246   | 1.54425   | 1.26155  | 1.61318   | 1.07843   |
| VASH2       | 2.1758    | 3.09118   | 2.945     | 2.02044  | 1.74332   | 1.0664    |
| C4orf36     | 0.798413  | 0.470605  | 1.81321   | 0.249899 | 1.44079   | 1.16092   |
| TMEM65      | 7.80178   | 4.78463   | 6.96429   | 4.99675  | 5.60089   | 5.29733   |
| LOC389607   | 0.351048  | 0.0775937 | 0.755898  | 0.468805 | 0.54102   | 0.109379  |
| RAB43       | 1.89026   | 3.55272   | 4.09317   | 4.88351  | 3.82248   | 2.06231   |
| ATP5G1      | 114.335   | 120.562   | 95.2053   | 120.722  | 97.7715   | 106.501   |
| LOC654780   | 2.43987   | 4.48067   | 3.30523   | 3.6827   | 5.04162   | 5.27929   |
| LOC729420   | 0         | 0.342276  | 0.14653   | 0        | 0.0616413 | 0.241243  |
| HS3ST4      | 1.11162   | 0.573315  | 0.467502  | 1.0148   | 0.688331  | 0.808168  |
| SNORD114-3  | 0         | 0         | 0         | 0        | 0         | 0         |
| FMNL1       | 9.03082   | 9.93416   | 9.21607   | 5.17578  | 12.6484   | 6.25164   |
| TXNL4A      | 43.7337   | 52.6534   | 39.2037   | 48.5541  | 34.304    | 41.3128   |

|             |           |           |           |           |           |           |
|-------------|-----------|-----------|-----------|-----------|-----------|-----------|
| OR2C1       | 0.112334  | 0         | 0.0850377 | 0         | 0         | 0         |
| SIDT1       | 1.71549   | 0.596465  | 0.612838  | 0.597268  | 0.675204  | 0.576549  |
| SLC5A6      | 28.2636   | 32.6832   | 17.753    | 18.4831   | 21.535    | 18.3367   |
| FAM89A      | 21.3538   | 22.1852   | 26.0707   | 20.0508   | 18.9122   | 12.9483   |
| PRSS8       | 83.5901   | 83.7875   | 84.2495   | 100.435   | 93.5685   | 114.211   |
| LOC10052796 | 3.67736   | 5.55275   | 4.06224   | 5.01216   | 5.49461   | 6.19572   |
| LOC10050581 | 0         | 0.0820411 | 0         | 0         | 0         | 0         |
| NANOS1      | 4.28721   | 3.93841   | 4.30615   | 4.08454   | 3.51642   | 3.38838   |
| RN5S6       | 11.918    | 196.353   | 18.0439   | 211.942   | 24.6695   | 32.3889   |
| NSF         | 21.8181   | 12.3622   | 15.6266   | 14.4166   | 12.5447   | 13.764    |
| RPS6        | 2937.31   | 3675.85   | 3287.96   | 4313.57   | 3335.75   | 3243.5    |
| ACE         | 3.77574   | 4.59865   | 6.60517   | 6.72717   | 6.0355    | 4.52069   |
| GPR182      | 0         | 0.120382  | 0.103072  | 0.191776  | 0.476959  | 0.42424   |
| LIMS3L      | 1.09328   | 1.21714   | 1.22117   | 0.922016  | 1.29731   | 0.800708  |
| TRAPPC9     | 6.05492   | 5.4133    | 6.44779   | 6.30068   | 6.6911    | 6.44812   |
| SCN2A       | 0.0999215 | 0.0495215 | 0.226474  | 0.260175  | 0.091754  | 0.0630363 |
| LOC10050551 | 0         | 0         | 0         | 0         | 0         | 0         |
| GZMB        | 4.14465   | 9.16109   | 0.882428  | 0.243235  | 0.989906  | 0.0807115 |
| LOC10050739 | 0.517968  | 0         | 0         | 0.324242  | 0         | 0.107592  |
| EIF4E2      | 34.0325   | 39.5373   | 30.8626   | 37.4092   | 36.8657   | 38.6514   |
| AP4S1       | 6.30414   | 3.27108   | 3.61655   | 3.63278   | 3.90545   | 4.63643   |
| ANKRD33     | 0.0530807 | 0.0521497 | 0.0446511 | 0         | 0         | 0         |
| DUX4        | 0.0168274 | 0         | 0         | 0         | 0         | 0         |
| B3GALTL     | 4.1982    | 3.3039    | 2.28751   | 2.18762   | 2.33595   | 2.11304   |
| GGCT        | 154.557   | 114.554   | 92.6591   | 89.1097   | 96.9083   | 112.958   |
| PRKAR1A     | 98.6456   | 64.2067   | 91.2158   | 71.96     | 68.2693   | 61.1689   |
| DHRS4       | 50.5426   | 54.2367   | 37.9464   | 48.7741   | 32.0738   | 35.0524   |
| KANK3       | 4.77095   | 12.0202   | 6.97887   | 8.21866   | 7.1054    | 6.39318   |
| RBMY1F      | 0         | 0         | 0         | 0         | 0         | 0         |
| TTI1        | 6.75979   | 5.62372   | 5.36267   | 5.41046   | 5.6875    | 5.95334   |
| MIR3173     | 0         | 0         | 0         | 0         | 0         | 0         |
| PRR23B      | 0         | 0         | 0         | 0         | 0         | 0         |
| PRX         | 3.80108   | 4.97313   | 2.82049   | 2.51959   | 2.46947   | 3.8816    |
| HIST1H2BF   | 0         | 0         | 0         | 0         | 0         | 0         |
| LOC10028771 | 1.10423   | 1.38964   | 1.53017   | 1.42389   | 2.3513    | 1.89143   |
| RSPH3       | 2.58621   | 2.45286   | 3.09684   | 2.25179   | 2.9649    | 3.39904   |
| C6orf47     | 15.3086   | 18.9128   | 15.0808   | 17.5944   | 17.8363   | 16.0267   |
| NCAPG2      | 5.38661   | 5.35507   | 4.50989   | 5.08125   | 4.94852   | 4.33123   |
| PPP2R2D     | 17.7212   | 21.1517   | 15.9764   | 22.1571   | 21.3872   | 20.4342   |
| MIR4305     | 0         | 0         | 0         | 0         | 0         | 0         |
| C17orf96    | 2.96642   | 4.08279   | 2.03724   | 2.32597   | 2.76582   | 2.51555   |
| LOC10028761 | 0.0434772 | 0.0384398 | 0         | 0.0816488 | 0.0830727 | 0.0541863 |
| LMNB1       | 10.2867   | 9.97433   | 6.58565   | 8.89063   | 8.77299   | 9.31631   |

|             |           |           |           |           |           |           |
|-------------|-----------|-----------|-----------|-----------|-----------|-----------|
| SCGB3A2     | 0.608163  | 0         | 0.690574  | 0.285528  | 0.387343  | 0.189491  |
| FMO4        | 2.97293   | 3.77313   | 3.15799   | 2.61143   | 3.42047   | 3.91437   |
| MIR1273     | 0         | 0         | 0         | 0         | 0         | 0         |
| KIAA1107    | 1.33908   | 1.07118   | 1.44813   | 0.858209  | 1.39437   | 1.08612   |
| LOC643733   | 8.22008   | 12.1402   | 6.08356   | 6.69813   | 10.6616   | 6.44892   |
| BRPF1       | 6.47908   | 7.65883   | 7.18415   | 5.84028   | 8.07122   | 6.98143   |
| TMC2        | 0.0624674 | 0.193304  | 0.11822   | 0         | 0.139251  | 0.0583906 |
| APOE        | 553.756   | 833.364   | 753.521   | 968.976   | 582.657   | 755.593   |
| CXorf21     | 0.592752  | 0.476431  | 0.856641  | 0.101197  | 1.44147   | 0.638017  |
| FAM85A      | 1.32093   | 1.62205   | 0.612468  | 0.551257  | 0.794566  | 0.868876  |
| LOC10050566 | 0.469819  | 0.158803  | 0.266     | 0.414824  | 0.334824  | 0.109698  |
| DYNLL1      | 412.484   | 446.94    | 422.606   | 464.518   | 407.279   | 513.397   |
| CHORDC1     | 8.26921   | 7.59936   | 6.01304   | 5.59401   | 7.73959   | 7.62797   |
| GNB1        | 114.392   | 97.5959   | 108.247   | 105.766   | 97.2352   | 99.1019   |
| CLDN19      | 0.422231  | 0.339225  | 0.310914  | 0.538509  | 0.30373   | 0.53008   |
| C14orf128   | 4.0668    | 5.04915   | 3.79911   | 3.57492   | 5.07012   | 5.87732   |
| IPPK        | 20.9821   | 21.7298   | 22.3447   | 20.1987   | 25.1195   | 20.0813   |
| AGPAT4-IT1  | 0.669308  | 0.7397    | 1.01334   | 0.837959  | 0.248667  | 0.312813  |
| NR3C1       | 17.4684   | 15.4002   | 20.5431   | 13.6386   | 15.0263   | 12.5523   |
| CYP27A1     | 39.8691   | 52.0502   | 36.9029   | 40.4797   | 52.8216   | 39.5911   |
| GPR143      | 4.17336   | 6.22313   | 3.1121    | 6.78464   | 4.64164   | 6.48224   |
| FAM203A     | 6.40339   | 6.29472   | 4.87929   | 6.3292    | 5.55407   | 6.35301   |
| C7orf16     | 0         | 0         | 0.0437012 | 0.289105  | 0.165457  | 0.143898  |
| CCDC65      | 0.518918  | 0.509771  | 0.872941  | 0.216558  | 0.661003  | 0.682665  |
| MAPK8       | 5.98684   | 4.41132   | 7.97623   | 5.12049   | 7.59295   | 5.31378   |
| TMPRSS11B   | 0         | 0         | 0         | 0         | 0         | 0         |
| IFNGR2      | 51.5916   | 58.0638   | 49.9931   | 47.4244   | 43.6402   | 36.6997   |
| TRIM72      | 0.0476287 | 0.0842205 | 0.216331  | 0         | 0.0910049 | 0.237441  |
| PSPH        | 6.15698   | 6.60082   | 5.84986   | 6.00891   | 5.1256    | 6.25354   |
| PSMB9       | 41.4081   | 57.7545   | 17.517    | 12.4754   | 34.2004   | 18.3524   |
| PRKCB       | 1.82343   | 1.82678   | 2.7151    | 1.80902   | 3.39374   | 2.64678   |
| TTY8B       | 0         | 0         | 0         | 0         | 0         | 0         |
| SLC5A8      | 0.0901318 | 0.026563  | 0.0682303 | 0.282108  | 0.0191352 | 1.59138   |
| LINC00473   | 0         | 0         | 0         | 0.0539037 | 0.0646946 | 0.134845  |
| SERF1A      | 13.3417   | 11.5773   | 12.6566   | 14.9789   | 12.0913   | 12.5551   |
| MIR3976     | 0         | 0         | 0         | 0         | 0         | 0         |
| MXRA8       | 36.1471   | 56.8762   | 63.788    | 58.9312   | 65.5169   | 45.06     |
| LY6G5B      | 32.4933   | 54.103    | 34.5865   | 59.7824   | 54.2066   | 36.0772   |
| CCT7        | 85.1499   | 81.2301   | 78.3789   | 85.8367   | 82.527    | 95.2136   |
| PAK2        | 14.0183   | 12.3253   | 13.7366   | 11.5834   | 11.21     | 9.63831   |
| CELA3A      | 0         | 0         | 0         | 0         | 0         | 0         |
| C17orf89    | 53.6897   | 68.0154   | 39.228    | 63.2054   | 34.5355   | 35.1217   |
| WDR89       | 4.81094   | 4.47887   | 3.76192   | 2.75253   | 4.36272   | 3.73924   |

|             |           |           |           |           |           |           |
|-------------|-----------|-----------|-----------|-----------|-----------|-----------|
| RPL36AL     | 537.577   | 654.618   | 537.617   | 655.901   | 499.384   | 490.096   |
| PARP9       | 28.7182   | 24.6669   | 10.0983   | 4.30312   | 13.3493   | 5.26958   |
| ADRB1       | 1.8822    | 2.00311   | 2.08448   | 1.50553   | 1.26538   | 1.02086   |
| MIR340      | 0         | 0         | 0         | 0         | 0         | 0         |
| APOBEC3A    | 1.42607   | 2.58847   | 0.0568179 | 0         | 1.00388   | 0.654805  |
| RNU7-1      | 0         | 0         | 0         | 0         | 0         | 0         |
| LOC1002894  | 0.341656  | 0.422899  | 0.827633  | 0.449133  | 1.17505   | 0.851621  |
| STX8        | 25.9647   | 27.7036   | 25.7574   | 30.7338   | 27.9254   | 25.1699   |
| C14orf38    | 0         | 2.40E-289 | 6.68E-273 | 0.0380918 | 0.0258065 | 1.10E-303 |
| GNPNAT1     | 11.5055   | 8.23901   | 7.75032   | 7.46677   | 7.88185   | 7.23166   |
| COL4A3      | 0.140482  | 0.238061  | 0.292451  | 0.186874  | 0.119299  | 0.131314  |
| LOC10012996 | 0.852664  | 1.23789   | 1.17358   | 0.873423  | 0.888654  | 0.676256  |
| OR14C36     | 0         | 0         | 0         | 0         | 0         | 0.0793746 |
| OR5H6       | 0         | 0         | 0         | 0         | 0         | 0         |
| S100A10     | 287.772   | 349.174   | 328.804   | 359.288   | 249.856   | 255.478   |
| KRT36       | 0.0645548 | 0.171226  | 0.29321   | 2.6671    | 0.123346  | 4.38483   |
| LOC1001285  | 1.84886   | 2.72441   | 1.3996    | 2.60407   | 2.74761   | 0.768087  |
| TMEM47      | 14.7571   | 7.41612   | 9.73385   | 8.82403   | 7.0568    | 5.76621   |
| SNORD114-1  | 0         | 0         | 0         | 0         | 0         | 0         |
| TTC7B       | 4.04146   | 4.81495   | 6.53107   | 5.19439   | 5.34886   | 5.39416   |
| ATP6V0D2    | 0.0428116 | 0         | 0         | 0         | 0.0272669 | 0.0533567 |
| MIR3919     | 0         | 0         | 0         | 0         | 0         | 0         |
| SNX24       | 6.33604   | 7.93606   | 7.73967   | 8.24809   | 8.56006   | 8.16591   |
| SERTM1      | 0         | 0         | 0.233439  | 0         | 0.176763  | 0.0576491 |
| LOC10050556 | 0         | 0.400947  | 0         | 0.851639  | 0.86649   | 0.282596  |
| C12orf47    | 7.72614   | 9.34053   | 7.75022   | 8.9421    | 10.1524   | 8.57649   |
| NNAT        | 38.4724   | 38.2842   | 36.4323   | 28.5984   | 21.8387   | 22.7034   |
| KCNK13      | 0.0400783 | 0.0708694 | 0.0910185 | 0.0752658 | 0.204209  | 0.124876  |
| SPACA1      | 0         | 0         | 0         | 0         | 0         | 0.044769  |
| HMGA1       | 114.064   | 140.693   | 108.76    | 135.832   | 139.184   | 138.931   |
| PPP6R3      | 21.6604   | 19.864    | 20.9067   | 19.062    | 21.6213   | 19.9868   |
| LOC1001287  | 2.3571    | 2.39118   | 2.65466   | 2.89329   | 1.97027   | 2.77392   |
| CITED2      | 62.8617   | 56.4353   | 58.9701   | 54.8917   | 63.1769   | 61.0429   |
| LOC344595   | 2.9385    | 2.1696    | 2.68397   | 1.98641   | 2.04516   | 1.98525   |
| FAM75A3     | 0         | 0         | 0         | 0         | 0         | 0         |
| TARSL2      | 6.35277   | 6.46452   | 4.1966    | 5.14916   | 6.37454   | 4.72439   |
| ADSSL1      | 6.49744   | 6.30624   | 8.64854   | 5.56915   | 5.59575   | 4.47982   |
| SLC6A7      | 0.0261824 | 0.0694465 | 0         | 0         | 0.0333514 | 0.0163158 |
| SNORA58     | 0         | 0         | 0         | 0         | 0         | 0         |
| ALLC        | 0.224985  | 0.132612  | 0         | 0.0704192 | 0.143294  | 0.0467337 |
| CSRNP2      | 11.2788   | 12.2348   | 9.35905   | 10.1018   | 12.5573   | 10.6238   |
| DEFA10P     | 0         | 0         | 0         | 0         | 0         | 0         |
| IFNA22P     | 0         | 0.123343  | 0         | 0         | 0.177705  | 0.0869345 |

|             |           |           |           |           |           |           |
|-------------|-----------|-----------|-----------|-----------|-----------|-----------|
| ARHGAP39    | 2.75071   | 4.33459   | 3.95212   | 5.49958   | 4.54074   | 4.44273   |
| LOC10050616 | 9.68706   | 35.0336   | 11.1898   | 27.8532   | 19.3719   | 16.9535   |
| MTMR11      | 11.0968   | 12.3612   | 13.2674   | 11.1733   | 18.6242   | 15.507    |
| MSX1        | 5.02717   | 7.89645   | 6.43713   | 5.67457   | 2.52059   | 6.39875   |
| MAP4K3      | 11.788    | 9.79432   | 13.2957   | 10.1796   | 12.6939   | 11.1514   |
| PTTG1       | 9.64587   | 16.5645   | 7.86366   | 12.5415   | 10.7511   | 11.9062   |
| TTY6        | 0         | 0         | 0         | 0         | 0         | 0         |
| C1QTNF4     | 1.00013   | 3.26494   | 1.22302   | 2.45613   | 2.89096   | 2.87649   |
| LOC10013151 | 1.66948   | 0.820026  | 2.24676   | 1.74179   | 0.945155  | 0.462377  |
| TSHR        | 0.137799  | 0.23433   | 0.358177  | 0.0207022 | 0.261675  | 0.186571  |
| MAP3K12     | 4.046     | 5.26563   | 6.12888   | 4.48585   | 10.4641   | 6.75246   |
| LRTM2       | 0         | 0         | 0.0186927 | 0         | 0.0157271 | 0         |
| ASAH1       | 53.5621   | 45.8586   | 81.4741   | 53.5837   | 55.7916   | 49.1456   |
| MX2         | 9.34057   | 7.99098   | 4.1713    | 2.20844   | 6.99763   | 4.41783   |
| RRN3        | 17.686    | 13.1956   | 16.0918   | 13.315    | 14.0353   | 11.6861   |
| GPR39       | 0.475909  | 0.174912  | 0.817785  | 0.624691  | 0.8555    | 0.528077  |
| FAT4        | 1.11463   | 0.893097  | 1.45464   | 0.7141    | 1.21277   | 0.958679  |
| GLT6D1      | 0         | 0         | 0         | 0         | 0         | 0         |
| HYAL3       | 1.86274   | 1.63237   | 1.83853   | 1.59248   | 2.02194   | 3.37262   |
| MIR4290     | 0         | 0         | 0         | 0         | 0         | 0         |
| APOC1P1     | 2.03134   | 1.98352   | 1.00066   | 1.30035   | 0.635051  | 0.552305  |
| FOXL2       | 0.0682924 | 0.0301899 | 0.258489  | 0.0641255 | 0.326219  | 0.148949  |
| LDLR        | 16.1651   | 12.829    | 14.1173   | 14.6112   | 12.8297   | 10.5326   |
| SNORD116-21 | 0         | 0         | 0         | 0         | 0         | 0         |
| MARS        | 34.609    | 31.9789   | 27.3366   | 29.9282   | 29.6158   | 30.0121   |
| MIR4696     | 0         | 0         | 0         | 0         | 0         | 0         |
| NR3C2       | 2.87394   | 1.98854   | 2.61932   | 3.63903   | 2.51255   | 1.97296   |
| CD99L2      | 16.5133   | 21.208    | 18.5152   | 15.7602   | 18.614    | 15.2793   |
| TMPRSS13    | 24.0991   | 22.2476   | 25.4722   | 27.2391   | 30.5154   | 31.9182   |
| RPS8        | 1150.13   | 1725.78   | 1397.11   | 2048.73   | 1468.56   | 1412.32   |
| C9orf3      | 26.1522   | 50.0161   | 27.7826   | 39.7476   | 39.0613   | 33.9551   |
| LOC10050694 | 0         | 0         | 0         | 0         | 0         | 0         |
| OR6A2       | 0         | 0         | 0         | 0         | 0         | 0         |
| INPP1       | 23.2684   | 27.812    | 20.3162   | 18.8766   | 23.1805   | 20.7523   |
| OR10H5      | 0         | 0         | 0         | 0         | 0         | 0         |
| SMCR7L      | 10.7852   | 9.08927   | 10.7246   | 10.6801   | 10.0947   | 8.78639   |
| DHRS7       | 27.4298   | 24.0438   | 23.4935   | 21.0464   | 25.9058   | 20.7559   |
| LOC283177   | 0.25608   | 0         | 0         | 0.0687014 | 0.0931992 | 0.0455937 |
| MRPL2       | 27.0429   | 31.2196   | 21.7758   | 32.105    | 24.5923   | 22.5946   |
| TRPT1       | 34.2016   | 39.7082   | 27.8159   | 43.4592   | 31.6799   | 32.2455   |
| TEX261      | 34.9215   | 28.6497   | 35.0556   | 33.8902   | 34.826    | 31.703    |
| ALDH1A2     | 3.04033   | 2.67983   | 3.75134   | 2.69972   | 2.12108   | 2.17355   |
| SLC24A3     | 6.42907   | 7.26065   | 8.85918   | 6.76782   | 7.24572   | 5.86864   |

|             |          |           |           |           |           |           |
|-------------|----------|-----------|-----------|-----------|-----------|-----------|
| DHRS2       | 173.613  | 1.11961   | 5.784     | 8.00442   | 10.2952   | 7.51306   |
| C20orf132   | 0.658411 | 1.50557   | 0.834552  | 1.17427   | 0.971482  | 0.709776  |
| TC2N        | 17.8071  | 8.55499   | 11.7943   | 12.7329   | 13.0053   | 10.0157   |
| MATN2       | 31.092   | 34.7686   | 26.512    | 26.0541   | 28.2967   | 24.6791   |
| LINC00309   | 0        | 0         | 0         | 0         | 0         | 0         |
| NOLC1       | 28.2183  | 21.0684   | 22.4314   | 22.6548   | 21.3047   | 18.527    |
| LOC10050557 | 9.77742  | 9.30955   | 10.0206   | 11.2995   | 10.4427   | 9.18618   |
| MIR21       | 0        | 0         | 0         | 0         | 0         | 0         |
| MAPK10      | 2.81116  | 3.23299   | 4.79337   | 3.05228   | 2.96837   | 1.4472    |
| SOD3        | 71.8874  | 97.572    | 102.833   | 93.9347   | 119.829   | 78.4826   |
| SIL1        | 23.3644  | 26.8013   | 27.8352   | 28.4759   | 19.4462   | 24.5503   |
| RPS15AP10   | 1.71506  | 0.699852  | 0.898828  | 0.867144  | 1.34441   | 1.3976    |
| PF4V1       | 0        | 0.154971  | 0         | 0         | 0         | 0         |
| RPN1        | 70.6478  | 59.7766   | 61.2664   | 64.9517   | 52.8454   | 55.6258   |
| OR7A10      | 0        | 0         | 0         | 0         | 0         | 0         |
| CALHM3      | 0        | 0.0567576 | 0         | 0         | 0.0408865 | 0.0400039 |
| ZNF189      | 19.4007  | 13.5359   | 13.4618   | 9.71053   | 11.462    | 12.1891   |
| ATRN        | 10.7925  | 8.21198   | 10.9347   | 8.51545   | 9.34648   | 8.16444   |
| CDH11       | 11.1268  | 5.58415   | 10.5186   | 7.92424   | 11.0751   | 8.3406    |
| LOC10050759 | 3.46566  | 4.79116   | 2.38502   | 2.42586   | 3.29088   | 2.98425   |
| LOC647946   | 0.525271 | 0.506631  | 0.867563  | 0.672574  | 0.729923  | 0.357084  |
| TTY7B       | 0        | 0         | 0         | 0         | 0         | 0         |
| SAP130      | 8.61448  | 7.48994   | 8.51983   | 7.77097   | 8.97468   | 8.28577   |
| CCDC74B     | 1.1073   | 2.85747   | 2.16865   | 2.62247   | 2.62034   | 2.1978    |
| LOC10050608 | 0        | 0         | 0         | 0         | 0         | 0         |
| ITCH        | 12.0954  | 8.76163   | 10.9467   | 9.33327   | 10.1825   | 8.90858   |
| IGFALS      | 0.360213 | 0.754915  | 0.530459  | 0.895333  | 0.623194  | 0.321809  |
| GPR123      | 0        | 0.0401071 | 0         | 0.0212976 | 0.028892  | 0         |
| MIR4698     | 0        | 0         | 0         | 0         | 0         | 0         |
| RANBP3L     | 0.636922 | 0.354769  | 0.571778  | 0.413473  | 0.556565  | 0.544552  |
| RNF2        | 4.89541  | 4.10814   | 4.75271   | 3.71373   | 3.5583    | 3.89513   |
| ZNF71       | 2.15009  | 2.71169   | 2.70474   | 3.29556   | 3.06102   | 2.75851   |
| SOD1        | 188.496  | 188.298   | 158.991   | 165.714   | 141.823   | 127.921   |
| KIRREL2     | 0        | 0.132139  | 0         | 0.0367232 | 0.099637  | 0.0243714 |
| SLC12A3     | 0.158422 | 0.0817034 | 0.0524635 | 0         | 0.0689734 | 0.0575862 |
| LOC10028756 | 219.723  | 250.256   | 180.52    | 149.136   | 218.764   | 160.983   |
| PSTPIP1     | 4.89389  | 6.16704   | 2.81047   | 2.27123   | 7.27288   | 3.50536   |
| CBFA2T2     | 9.02815  | 8.69336   | 10.4716   | 9.35461   | 11.5737   | 9.6173    |
| LOC10050761 | 0        | 0.2528    | 0         | 0         | 0.0910549 | 0.0890894 |
| YPEL1       | 2.95665  | 3.45985   | 3.16338   | 2.48581   | 5.0727    | 4.08213   |
| GPC6        | 4.8896   | 2.81888   | 2.9206    | 3.35853   | 2.20128   | 2.88003   |
| FRMPD2P1    | 0.426116 | 0.42531   | 0         | 0         | 0.407864  | 0.331922  |
| LINC00202   | 0.650335 | 1.22184   | 1.39487   | 0.992314  | 1.20809   | 1.16513   |



|             |           |           |           |           |          |           |
|-------------|-----------|-----------|-----------|-----------|----------|-----------|
| TRDN        | 0.368209  | 0.287248  | 2.14791   | 1.505     | 0.151745 | 0.0539888 |
| ST3GAL6     | 19.1382   | 19.8277   | 16.6795   | 20.6891   | 18.5339  | 16.8189   |
| WHSC1L1     | 10.78     | 8.31529   | 10.4538   | 7.56241   | 9.25368  | 8.01394   |
| LOC400464   | 0.0828098 | 0.309501  | 0.972583  | 0.248823  | 0.641846 | 0.361225  |
| USP15       | 17.4422   | 14.0294   | 18.4631   | 12.8303   | 18.5551  | 16.4542   |
| TPO         | 0.516289  | 0.949903  | 0.431029  | 0.318371  | 1.08172  | 1.25078   |
| BBS2        | 16.4716   | 18.8003   | 25.0457   | 21.7666   | 19.5347  | 15.5515   |
| LOC10050650 | 2.63334   | 3.13107   | 3.60884   | 3.96479   | 4.51106  | 4.3854    |
| OMD         | 3.60795   | 1.71765   | 6.51295   | 2.49432   | 3.9898   | 3.75544   |
| ADAM7       | 0         | 0         | 0         | 0.0363235 | 0        | 0.0241061 |
| LOC439990   | 0.0948169 | 0.209578  | 0.215331  | 0.31161   | 0.120779 | 0.0295429 |
| COL6A4P1    | 0         | 0         | 0         | 0         | 0        | 0.0282651 |
| HMGXB4      | 7.0596    | 6.36621   | 6.80487   | 6.98142   | 7.79388  | 6.51758   |
| UXS1        | 15.1045   | 12.9617   | 14.573    | 14.0438   | 14.0844  | 13.7188   |
| KBTBD7      | 2.15957   | 0.969595  | 1.96185   | 1.62239   | 1.50248  | 1.57356   |
| FNBP1L      | 17.309    | 11.0171   | 14.3563   | 13.3297   | 13.9535  | 15.4533   |
| OTUD3       | 5.8439    | 5.69774   | 6.1535    | 6.56004   | 7.85448  | 6.827     |
| FAM122B     | 18.6649   | 22.2514   | 17.9306   | 17.2182   | 22.9879  | 19.1867   |
| CDKN2AIP    | 11.5805   | 7.36733   | 10.675    | 7.78424   | 10.1245  | 10.0125   |
| DTX4        | 19.2811   | 16.3453   | 21.4056   | 20.061    | 18.494   | 18.5689   |
| AP3S1       | 44.6594   | 43.8132   | 45.9651   | 35.1604   | 46.0024  | 38.6942   |
| CSH2        | 0         | 0.0610253 | 0         | 0         | 0        | 0         |
| KATNA1      | 12.1184   | 10.2885   | 9.33544   | 9.03904   | 10.4552  | 10.5482   |
| LOC10050673 | 0         | 0         | 0         | 0         | 0        | 0         |
| URM1        | 39.1884   | 50.0847   | 46.4009   | 57.4788   | 49.6817  | 48.7675   |
| PRNT        | 0         | 0         | 0         | 0         | 0        | 0         |
| MIR4277     | 0         | 0         | 0         | 0         | 0        | 0         |
| MIR4449     | 0         | 0         | 0         | 0         | 0        | 0         |
| SLC37A2     | 24.985    | 18.2445   | 22.6626   | 23.5983   | 30.2652  | 40.8809   |
| SPRY3       | 0.184643  | 0.366043  | 0.298728  | 0.221919  | 0.214867 | 0.348396  |
| IL17RC      | 50.6367   | 63.7086   | 52.9726   | 61.3917   | 57.3038  | 60.2313   |
| RPS15A      | 476.479   | 695.793   | 599.453   | 880.837   | 631.961  | 458.986   |
| ERO1LB      | 5.33904   | 4.78788   | 3.92621   | 3.77786   | 4.29916  | 3.41024   |
| CARS        | 22.6316   | 20.398    | 25.1851   | 24.6424   | 29.0699  | 30.5851   |
| POLR2F      | 13.2283   | 14.9399   | 11.7517   | 15.0855   | 13.89    | 12.7971   |
| RPRD1B      | 17.6612   | 14.8565   | 15.9099   | 14.5936   | 16.6639  | 14.842    |
| ZNF157      | 0.124662  | 0.440873  | 0.0943698 | 0.234111  | 0.158796 | 0.116526  |
| HNRNPA1     | 170.537   | 200.569   | 184.213   | 200.492   | 186.782  | 163.164   |
| NFKBIA      | 93.725    | 107.658   | 76.9287   | 87.0849   | 120.35   | 76.9295   |
| PRR16       | 1.48888   | 1.73762   | 1.17218   | 1.34212   | 1.78276  | 0.890696  |
| GPCPD1      | 14.5691   | 14.9034   | 15.0515   | 11.4331   | 16.2385  | 14.6599   |
| MAST4-AS1   | 1.12718   | 0.249146  | 0.639962  | 0.529203  | 1.43582  | 1.58043   |
| COL8A1      | 1.55097   | 0.823778  | 2.28836   | 2.14732   | 0.794545 | 0.797616  |

|             |           |           |          |           |          |           |
|-------------|-----------|-----------|----------|-----------|----------|-----------|
| SUGT1P3     | 0.332374  | 0.587452  | 0.781761 | 1.04059   | 0.729668 | 0.292988  |
| RPL13AP5    | 4666.31   | 7663.44   | 5646.94  | 8959.34   | 6234.9   | 5754.57   |
| MAGEA3      | 0         | 0         | 0        | 0         | 0        | 0         |
| LINC00472   | 1.0523    | 0.690281  | 0.591025 | 0.541859  | 0.540498 | 0.465371  |
| OR5V1       | 0.110717  | 0         | 0        | 0         | 0        | 0         |
| B3GALT4     | 5.33054   | 9.70308   | 10.4442  | 12.366    | 11.7429  | 11.2158   |
| UFSP2       | 16.1312   | 15.8385   | 11.0766  | 12.7032   | 14.1706  | 13.9779   |
| TAAR8       | 0         | 0         | 0        | 0         | 0        | 0         |
| FAM177A1    | 16.8753   | 16.0129   | 16.218   | 15.6649   | 15.6128  | 14.831    |
| MIR320D2    | 0         | 0         | 0        | 0         | 0        | 0         |
| LOC389641   | 2.78603   | 2.46323   | 1.55194  | 1.23398   | 1.70748  | 1.44132   |
| ATOX1       | 117.337   | 142.98    | 103.163  | 135.75    | 101      | 133.04    |
| CCDC148     | 0.724822  | 0.28194   | 0.271317 | 0.387716  | 0.190337 | 0.304832  |
| HPS5        | 12.5326   | 8.51298   | 8.58705  | 7.4577    | 9.75233  | 7.83588   |
| LOC284661   | 0         | 0         | 0        | 0         | 0        | 0.0309252 |
| NPEPPS      | 41.2673   | 38.3658   | 43.2117  | 36.9433   | 46.8772  | 39.0848   |
| OR52B4      | 0         | 0         | 0        | 0         | 0        | 0         |
| CACNA1G     | 0.883488  | 1.10358   | 1.03893  | 1.11738   | 1.81751  | 1.06902   |
| PMPCA       | 35.2699   | 43.5606   | 32.5412  | 39.1562   | 37.1138  | 35.0283   |
| EPHA1       | 17.3803   | 18.7872   | 16.1301  | 15.6318   | 17.4351  | 18.1547   |
| RBFOX3      | 0.0374438 | 0.132422  | 0.368487 | 0.492228  | 0.310026 | 0.280001  |
| RAD51B      | 2.24855   | 2.10265   | 2.27812  | 2.46779   | 1.92136  | 1.92437   |
| KLRF1       | 0.987933  | 1.90575   | 0.339941 | 0.252996  | 0.858027 | 0.839506  |
| FAM40B      | 0.934426  | 0.649756  | 0.584817 | 0.806108  | 0.943271 | 0.550806  |
| C15orf33    | 0.602446  | 0.26793   | 0.595748 | 0.794255  | 0.486251 | 0.519707  |
| LAMB2P1     | 1.94496   | 2.57941   | 1.68268  | 3.84824   | 3.22961  | 2.42403   |
| ZNF273      | 15.0189   | 17.8241   | 25.237   | 23.6517   | 13.6621  | 11.8632   |
| LOC10050556 | 0.940116  | 1.93885   | 0.709568 | 1.76226   | 2.68014  | 1.59692   |
| MIR891B     | 0         | 0         | 0        | 0         | 0        | 0         |
| LANCL3      | 0         | 0.143395  | 0.188002 | 0.178466  | 0.139452 | 0.136442  |
| LOC10050093 | 0         | 0.139354  | 0        | 0         | 0.200773 | 0         |
| SNORD114-3  | 0         | 0         | 0        | 0         | 0        | 0         |
| PTGDS       | 136.225   | 196.912   | 226.356  | 96.9742   | 379.938  | 194.996   |
| IRGQ        | 5.358     | 6.10669   | 5.82594  | 5.86349   | 6.36594  | 5.94927   |
| CDON        | 5.66695   | 8.4999    | 7.07256  | 5.60881   | 8.90697  | 5.42559   |
| SEPN1       | 29.7603   | 26.7388   | 22.6157  | 23.4776   | 25.0326  | 18.9177   |
| OCIAD1      | 77.6468   | 67.6943   | 68.3814  | 62.6101   | 67.2189  | 62.2898   |
| XCR1        | 0.641031  | 0.354224  | 0.815514 | 0.0835991 | 0.518446 | 0.221924  |
| MYADML      | 0         | 0         | 0        | 0         | 0        | 0         |
| LOC10050591 | 0         | 0         | 0        | 0         | 0        | 0         |
| LOC401134   | 0.119394  | 0.0844487 | 0.361528 | 0.156953  | 0.577926 | 0.446408  |
| GOLGA6L5    | 7.41151   | 7.72809   | 8.21922  | 6.69546   | 10.3585  | 9.01227   |
| MIR588      | 0         | 0         | 0        | 0         | 0        | 0         |

|             |           |           |           |           |           |           |
|-------------|-----------|-----------|-----------|-----------|-----------|-----------|
| PCMT1       | 45.6091   | 40.2173   | 40.978    | 41.7047   | 37.4681   | 39.485    |
| ZNF652      | 10.2206   | 6.13419   | 7.68682   | 7.09069   | 7.6974    | 6.3122    |
| UBP1        | 30.3799   | 29.3792   | 29.6863   | 26.4748   | 32.5588   | 26.1881   |
| LOC1005067: | 9.74664   | 16.7889   | 11.2796   | 16.7703   | 14.0658   | 10.3547   |
| MIR194-2    | 0         | 0         | 0         | 0         | 0         | 0         |
| HSD3BP4     | 0.456909  | 0.625192  | 0.387059  | 0.592471  | 0.291008  | 0.298285  |
| ESRP1       | 51.6106   | 40.4696   | 48.9361   | 48.3135   | 46.0503   | 52.5927   |
| SH2D7       | 0.0550109 | 0.0486372 | 0         | 0.154963  | 0.140147  | 0.102841  |
| EXOSC3      | 12.6659   | 11.4032   | 11.4048   | 10.2977   | 12.9829   | 10.352    |
| BCL2L15     | 0.310281  | 0.394351  | 0.352327  | 0.345977  | 0.419942  | 0.217524  |
| TMEM81      | 2.06447   | 2.84742   | 3.18814   | 3.79946   | 3.68164   | 3.03611   |
| TMCO4       | 9.12936   | 9.54992   | 7.49322   | 8.38392   | 8.64726   | 8.60648   |
| PRAF2       | 14.6102   | 19.2983   | 13.7251   | 14.2972   | 17.0411   | 13.9309   |
| MYH16       | 0         | 0         | 0         | 0         | 0.085864  | 0         |
| FAM171A2    | 0.266981  | 0.606981  | 1.73234   | 1.1102    | 1.23888   | 1.28344   |
| NEAT1       | 973.885   | 973.166   | 1394.13   | 1013.52   | 1054.59   | 1025.17   |
| ENPP1       | 1.65982   | 2.49476   | 2.62896   | 1.51059   | 1.60198   | 1.3128    |
| NOTO        | 0         | 0.0661446 | 0         | 0         | 0         | 0         |
| MYEF2       | 4.8462    | 3.08012   | 2.92804   | 3.36718   | 2.96966   | 2.2924    |
| BAK1        | 20.7555   | 24.6189   | 16.7007   | 22.3796   | 21.4777   | 20.2002   |
| DVL3        | 26.7463   | 31.9956   | 29.5853   | 31.7281   | 35.8642   | 31.377    |
| SLC25A19    | 6.54229   | 5.7369    | 5.03032   | 4.82808   | 3.87728   | 4.49825   |
| OR51G1      | 0         | 0         | 0         | 0         | 0         | 0         |
| OR4X2       | 0         | 0         | 0         | 0         | 0         | 0         |
| PCYT1B      | 0.211572  | 0.21772   | 0.0871543 | 0.231227  | 0.107267  | 0.305512  |
| KIF2C       | 2.97622   | 3.7023    | 2.01723   | 3.93197   | 3.28419   | 3.92497   |
| CHL1-AS2    | 0         | 1.26499   | 0.722063  | 0.447821  | 0.91126   | 0.396262  |
| KCTD19      | 0         | 0.0909066 | 0.0259753 | 0.161179  | 0.196507  | 0.106726  |
| TCTN1       | 7.12338   | 7.5612    | 9.13608   | 7.25457   | 8.28815   | 8.24095   |
| NLRX1       | 18.6596   | 20.9083   | 19.6776   | 21.3877   | 23.3591   | 24.9337   |
| ARL3        | 5.47198   | 6.53239   | 6.74482   | 7.00866   | 5.70149   | 5.62556   |
| UGP2        | 92.3482   | 77.2896   | 93.5133   | 68.261    | 66.3848   | 63.7564   |
| NRTN        | 2.80115   | 4.40285   | 4.55512   | 5.55272   | 3.9646    | 2.32741   |
| LRRC39      | 2.68478   | 3.06491   | 2.52747   | 2.44329   | 2.76196   | 2.25035   |
| WDPCP       | 0.860451  | 1.28546   | 2.42645   | 1.42103   | 2.15418   | 1.47904   |
| IFNA1       | 0         | 0         | 0         | 0.130994  | 0         | 0.0869345 |
| LOC1001322: | 5.75526   | 5.6995    | 5.02379   | 4.68074   | 6.39841   | 4.81984   |
| HES2        | 7.04495   | 11.0867   | 9.458     | 12.6308   | 11.4715   | 12.7157   |
| LOC440700   | 0         | 0         | 0         | 0.0865215 | 0.0586869 | 0         |
| KLHL2       | 13.8836   | 9.05749   | 9.29116   | 8.23529   | 10.7361   | 8.71206   |
| TAF11       | 31.0754   | 38.3039   | 31.4716   | 39.4972   | 41.0552   | 33.496    |
| MIR548F1    | 0         | 0         | 0         | 0         | 0         | 0         |
| KDM5A       | 6.08094   | 4.93069   | 7.08324   | 5.16331   | 6.83357   | 6.21518   |

|             |          |            |           |          |           |           |
|-------------|----------|------------|-----------|----------|-----------|-----------|
| PAIP1       | 13.3059  | 10.7277    | 11.4285   | 7.72942  | 10.9935   | 10.3336   |
| PSRC1       | 2.91062  | 6.64468    | 2.6634    | 5.4804   | 6.02514   | 6.75096   |
| KTI12       | 4.4848   | 5.45212    | 5.37545   | 5.79034  | 5.03836   | 3.84276   |
| WDR45       | 30.6352  | 42.9953    | 29.3355   | 33.273   | 38.3718   | 30.6498   |
| LOC10050705 | 0.307793 | 0.136066   | 0.0873754 | 0.144506 | 0.171531  | 0.215779  |
| LRRC47      | 30.8296  | 37.651     | 31.4046   | 38.0283  | 33.3539   | 32.0431   |
| TIGD7       | 3.10537  | 4.49109    | 3.67151   | 3.18463  | 4.14916   | 4.08134   |
| GYP A       | 0        | 0          | 0         | 0        | 0         | 0.0235147 |
| PTGIS       | 4.17857  | 5.0117     | 7.06534   | 3.56984  | 4.41741   | 2.67861   |
| C1orf192    | 2.31197  | 1.60494    | 3.62245   | 3.72059  | 3.26043   | 1.85306   |
| NTAN1       | 82.0859  | 106.09     | 75.9944   | 93.0721  | 65.051    | 62.4423   |
| LOC10004971 | 6.14609  | 7.03591    | 7.82609   | 7.33895  | 6.65235   | 5.09188   |
| SNORD113-5  | 0        | 0          | 0         | 0        | 0         | 0         |
| CD276       | 13.9755  | 17.7534    | 16.6566   | 18.4583  | 17.4901   | 14.123    |
| RLF         | 5.48891  | 4.1365     | 5.97229   | 4.73766  | 5.53115   | 5.00206   |
| MAGEC1      | 0        | 0          | 0         | 0        | 0         | 0.0140034 |
| ZNF330      | 21.2469  | 22.1431    | 19.7508   | 17.728   | 23.3835   | 18.6597   |
| DNAAF1      | 0.124755 | 0.183781   | 0.0943987 | 0.156072 | 0.15881   | 0.284886  |
| PCDHB9      | 0.301387 | 0.332746   | 0.547388  | 0.420865 | 0.451029  | 0.404593  |
| MIR4270     | 0        | 0          | 0         | 0        | 0         | 0         |
| LOC10050657 | 0        | 0          | 0         | 0        | 0         | 0         |
| LOC10028814 | 15.2304  | 15.7202    | 17.9256   | 15.6982  | 18.0904   | 16.3563   |
| LOC10013030 | 0.41617  | 1.10385    | 0.157521  | 0        | 0.662652  | 0.389009  |
| EDN2        | 1.34587  | 1.50725    | 1.56221   | 4.88651  | 4.68599   | 7.10091   |
| AGL         | 8.01719  | 6.11806    | 8.10523   | 5.91975  | 5.933     | 7.43129   |
| PGBD3       | 1.52014  | 2.15377    | 2.48021   | 1.71264  | 1.91288   | 1.84624   |
| WVOX        | 6.56096  | 6.40434    | 5.98932   | 9.14972  | 5.10708   | 4.17783   |
| CLEC18B     | 0.384392 | 0.490086   | 0.2046    | 0.936074 | 0.578582  | 0.576717  |
| CLASP2      | 9.47507  | 7.94175    | 10.1995   | 9.17257  | 10.2303   | 8.57417   |
| GYG2P1      | 0.618254 | 0.401599   | 0.385242  | 0.142171 | 0.171437  | 0.0786265 |
| CUL9        | 7.93775  | 10.5703    | 10.0395   | 10.1252  | 11.9779   | 9.74835   |
| ARF3        | 59.4189  | 47.124     | 59.7511   | 49.2618  | 55.5734   | 59.0813   |
| SRSF11      | 115.696  | 116.77     | 122.653   | 95.7513  | 145.644   | 109.904   |
| PDE6A       | 5.54103  | 3.61778    | 8.80362   | 6.17839  | 3.54824   | 2.99384   |
| LOC254128   | 4.98948  | 4.78032    | 4.30997   | 4.4772   | 4.31388   | 4.4435    |
| PSG3        | 0        | 0.00963553 | 0         | 0        | 0.0347057 | 0         |
| LOC10065279 | 0.543265 | 0.414916   | 0.915515  | 0.286471 | 1.32427   | 0.520038  |
| HERC2P4     | 1.36541  | 2.22457    | 1.85655   | 2.34993  | 0.810553  | 0.498607  |
| LOC10028907 | 0        | 0          | 0         | 0        | 0         | 0         |
| SREK1       | 35.673   | 33.0047    | 33.0691   | 26.4682  | 38.5181   | 32.3647   |
| OR2AK2      | 0        | 0          | 0         | 0        | 0         | 0         |
| PNMA1       | 17.3275  | 18.2763    | 17.2592   | 15.7707  | 14.7872   | 14.5154   |
| ZNF69       | 3.1285   | 3.16109    | 2.27139   | 2.45774  | 1.78905   | 2.34734   |

|             |           |           |           |           |           |           |
|-------------|-----------|-----------|-----------|-----------|-----------|-----------|
| SNORD4B     | 0         | 0         | 0         | 0         | 0         | 0         |
| HMOX1       | 46.5599   | 30.5478   | 40.4771   | 36.1595   | 49.8226   | 62.4599   |
| CAMK2N2     | 0.16112   | 0.142452  | 0.0609844 | 0.0756447 | 0.256546  | 0.351412  |
| ABI2        | 10.2214   | 8.41204   | 8.44004   | 8.78176   | 9.50241   | 8.47128   |
| MUC6        | 0.261252  | 0.19733   | 0.0878865 | 0.194184  | 0.220597  | 0.129707  |
| FAM20C      | 14.6251   | 15.3752   | 12.2555   | 11.2732   | 10.9368   | 10.3153   |
| DUXA        | 0         | 0         | 0         | 0         | 0         | 0         |
| MIR3124     | 0         | 0         | 0         | 0         | 0         | 0         |
| MIR190      | 0         | 0         | 0         | 0         | 0         | 0         |
| LOC10013138 | 0         | 0         | 0         | 0         | 0         | 0         |
| C14orf149   | 6.17056   | 9.51237   | 6.58752   | 4.7541    | 12.4452   | 7.34538   |
| LINC00256B  | 0.198042  | 0.321184  | 0.225063  | 0.263684  | 0.252383  | 0.174994  |
| GAB1        | 7.61406   | 5.03179   | 7.74011   | 6.33122   | 8.0241    | 7.95971   |
| FGD4        | 5.34456   | 3.65506   | 5.27346   | 4.19277   | 4.64775   | 4.13467   |
| MUC17       | 0         | 0         | 0         | 0         | 0         | 0         |
| LOC10012856 | 0.0652855 | 0.0577214 | 0.0494215 | 0.183906  | 0.207904  | 0.0813664 |
| RBM26       | 15.5176   | 13.4963   | 14.9363   | 11.5888   | 15.342    | 13.2736   |
| SNORD77     | 0         | 0         | 0         | 0         | 0         | 0         |
| KLHL7       | 12.7271   | 9.55961   | 12.0678   | 10.4473   | 10.695    | 10.8554   |
| ZNF594      | 2.65211   | 2.13485   | 2.36725   | 1.61683   | 2.77322   | 2.61469   |
| SCARA5      | 17.7691   | 7.06763   | 23.2647   | 7.5721    | 9.70478   | 8.82333   |
| LOC644242   | 1.14052   | 2.55059   | 1.72675   | 1.88987   | 2.77742   | 1.92313   |
| HEMGN       | 0.213883  | 0         | 0.0359787 | 0         | 0         | 0.0296172 |
| LOC10050551 | 0.224026  | 0.0660233 | 0.141324  | 0         | 0.0951224 | 0.0698019 |
| MGST2       | 79.2725   | 79.6186   | 64.8248   | 65.6305   | 69.0601   | 75.9836   |
| LOC10065296 | 2.95037   | 5.58018   | 6.50688   | 6.851     | 4.98351   | 6.32164   |
| FSCB        | 0         | 0         | 0         | 0         | 0         | 0         |
| PAX5        | 0         | 0         | 0.0203337 | 0         | 0.0684309 | 0.0502153 |
| TADA3       | 29.6331   | 37.8812   | 32.303    | 37.5442   | 34.1252   | 35.67     |
| ZNF107      | 6.96029   | 4.70907   | 9.36002   | 5.81155   | 6.12944   | 6.46637   |
| C15orf24    | 65.9554   | 50.7328   | 54.5054   | 53.0543   | 47.3283   | 51.2387   |
| RAB40AL     | 0.1133    | 0.100172  | 0.192979  | 0.332458  | 0.294658  | 0.141207  |
| LOC10028703 | 0         | 0         | 0         | 0         | 0         | 0         |
| DDX60L      | 5.53155   | 4.21693   | 4.09127   | 2.39827   | 4.8622    | 2.6732    |
| ZNF697      | 1.87765   | 1.6601    | 1.78032   | 1.08634   | 1.4254    | 1.47736   |
| PGBD2       | 6.13615   | 5.41458   | 5.09663   | 4.94683   | 5.3502    | 5.99255   |
| SNTG1       | 0         | 0         | 0         | 0         | 0         | 0.103026  |
| EFCAB1      | 3.70363   | 6.68586   | 3.51846   | 4.83455   | 2.70582   | 3.63277   |
| TWIST1      | 10.2358   | 15.4578   | 12.8982   | 9.37246   | 12.5931   | 9.78567   |
| MIR425      | 0         | 0         | 0         | 0         | 0         | 0         |
| NBPF16      | 19.2355   | 20.1985   | 18.751    | 19.8499   | 21.2565   | 19.0488   |
| RAB44       | 0.709091  | 1.07972   | 1.72964   | 0.924757  | 1.78141   | 1.66931   |
| LOC10050556 | 0         | 0         | 0         | 0         | 0.153361  | 0         |

|             |           |          |           |           |           |           |
|-------------|-----------|----------|-----------|-----------|-----------|-----------|
| MIR3168     | 0         | 0        | 0         | 0         | 0         | 0         |
| OR11G2      | 0         | 0        | 0         | 0         | 0         | 0         |
| KRT8        | 71.4596   | 23.6453  | 27.3863   | 56.9267   | 40.818    | 32.9192   |
| TNFRSF4     | 1.45245   | 4.12767  | 2.51317   | 1.55866   | 5.0879    | 1.87486   |
| FAM90A19    | 0         | 0        | 0.0147941 | 0         | 0.0349701 | 0.0345052 |
| REEP5       | 92.2959   | 63.2122  | 71.4816   | 66.0286   | 62.673    | 61.6175   |
| STXBP2      | 37.1768   | 45.0431  | 35.1475   | 43.2864   | 39.8142   | 43.6225   |
| LINC00460   | 0.263855  | 0        | 0         | 0.123878  | 0.252076  | 0         |
| HOOK1       | 9.28928   | 5.49461  | 7.60153   | 5.3287    | 7.45799   | 8.99896   |
| SAMD4B      | 17.613    | 15.3245  | 20.8891   | 19.7569   | 21.653    | 20.5811   |
| P2RX4       | 4.01995   | 7.46828  | 4.42986   | 5.54255   | 7.22725   | 5.77115   |
| RAP1GAP2    | 7.88273   | 3.98801  | 6.46908   | 5.85917   | 7.97596   | 7.35464   |
| MED15       | 31.3513   | 43.5354  | 28.5507   | 35.1574   | 38.4473   | 37.1986   |
| STK39       | 30.4433   | 12.1869  | 19.2708   | 19.5984   | 12.0448   | 14.6668   |
| LOC10012850 | 0         | 0        | 0         | 0         | 0         | 0         |
| RIBC2       | 0.468632  | 1.24301  | 0.768641  | 0.513378  | 0.497458  | 0.632736  |
| ERCC8       | 5.2458    | 3.70148  | 5.68936   | 5.11517   | 4.78674   | 4.24336   |
| SSFA2       | 55.0325   | 39.0841  | 69.3995   | 43.1341   | 55.5169   | 54.2634   |
| HTN3        | 0         | 0        | 0         | 0         | 0         | 0         |
| MIR4685     | 0         | 0        | 0         | 0         | 0         | 0         |
| CXorf24     | 0.651963  | 1.03368  | 1.06178   | 0.698203  | 0.753657  | 0.660151  |
| NUDT14      | 19.0103   | 31.9843  | 20.5121   | 30.1054   | 25.6307   | 21.777    |
| RNF145      | 22.3257   | 21.1891  | 21.4018   | 26.1328   | 22.2791   | 23.2965   |
| GHITM       | 130.502   | 100.886  | 102.229   | 91.2062   | 80.9867   | 84.3856   |
| FLJ36000    | 0         | 0        | 0         | 0         | 0         | 0         |
| C16orf62    | 10.9597   | 10.6655  | 9.87235   | 8.33642   | 9.52006   | 9.42395   |
| ERO1L       | 15.2334   | 7.32725  | 10.0875   | 7.44589   | 11.449    | 10.7375   |
| LOC10028748 | 0.562356  | 1.29272  | 0.255424  | 0.422435  | 0.358168  | 0.77096   |
| ZC3H12A     | 27.7044   | 34.7684  | 24.882    | 50.1574   | 39.1199   | 33.5399   |
| IFNA10      | 0         | 0        | 0         | 0         | 0         | 0         |
| GRIA2       | 4.96174   | 2.16675  | 2.53023   | 4.04958   | 2.55963   | 2.59082   |
| EIF2A       | 30.8985   | 30.4948  | 30.6851   | 29.6831   | 30.452    | 25.4793   |
| KIR3DL2     | 0         | 0        | 0         | 0         | 0.0707058 | 0         |
| OR2Z1       | 0         | 0        | 0         | 0         | 0         | 0         |
| MIR4700     | 0         | 0        | 0         | 0         | 0         | 0         |
| UPF3A       | 25.658    | 30.4009  | 18.6928   | 18.5492   | 27.6161   | 22.4199   |
| FGGY        | 5.07738   | 3.99042  | 5.04693   | 5.34535   | 5.74653   | 5.38962   |
| LOC727805   | 0         | 0        | 0.011128  | 0.0742053 | 0.0533735 | 0.0166245 |
| LOC644277   | 0         | 0        | 0         | 0         | 0         | 0         |
| LOC10050721 | 0.0678788 | 0.120028 | 0.411077  | 0         | 0.432324  | 0.211496  |
| TUBB2C      | 198.473   | 203.619  | 199.524   | 225.273   | 178.788   | 239.263   |
| FBLN2       | 38.1462   | 36.7745  | 80.4068   | 32.0864   | 44.539    | 43.655    |
| UBE2D4      | 6.15698   | 6.61579  | 6.99936   | 8.41484   | 5.73626   | 4.8404    |

|             |           |           |           |           |           |          |
|-------------|-----------|-----------|-----------|-----------|-----------|----------|
| C10orf35    | 5.03456   | 3.78829   | 4.37882   | 4.72737   | 3.95701   | 5.94089  |
| LOC10012791 | 1.7707    | 5.61988   | 1.58102   | 4.09269   | 0.69401   | 0.339515 |
| ST6GAL2     | 1.71302   | 1.51466   | 1.66875   | 1.26576   | 0.912204  | 1.11123  |
| OR2A2       | 0         | 0         | 0         | 0         | 0         | 0        |
| SMOX        | 8.67629   | 7.33172   | 7.83927   | 10.3883   | 9.24222   | 11.0613  |
| LOC10050630 | 0.153355  | 0         | 0         | 0         | 0         | 0.191129 |
| LINC00469   | 0         | 0         | 0.0523473 | 0         | 0         | 0        |
| ACOT7       | 27.2771   | 31.3302   | 25.0252   | 27.5681   | 27.9716   | 38.946   |
| FNDC7       | 0         | 0         | 0.0245154 | 0         | 0.020626  | 0        |
| INE2        | 1.53016   | 1.49969   | 2.46514   | 0.817845  | 1.45584   | 0.929204 |
| GLP2R       | 0         | 0.0563655 | 0.0965213 | 0.119724  | 0.040604  | 0        |
| LOC283688   | 0         | 0         | 0         | 0         | 0         | 0        |
| ZCCHC13     | 0         | 0         | 0         | 0         | 0         | 0        |
| PCSK4       | 1.20702   | 2.10099   | 1.45624   | 1.9834    | 1.10509   | 1.43381  |
| C2CD4C      | 0.634336  | 1.4021    | 0.888362  | 0.804102  | 1.77765   | 1.30446  |
| GTF2IRD2B   | 7.7418    | 11.7321   | 9.19536   | 11.0167   | 12.0615   | 8.65575  |
| ELAVL3      | 0         | 0         | 0         | 0.0194827 | 0.013215  | 0        |
| LOC10065299 | 1387.7    | 1825.76   | 1490.74   | 2189.92   | 1525.12   | 1450.38  |
| TTR         | 0.129158  | 0         | 0         | 0         | 0         | 0        |
| CBX4        | 13.7217   | 16.5891   | 18.7758   | 17.4047   | 17.841    | 20.5108  |
| MIR3118-1   | 0         | 0         | 0         | 0         | 0         | 0        |
| CTAG1B      | 0         | 0         | 0.0872976 | 2.97804   | 0.0550858 | 0        |
| PKP1        | 215.352   | 201.385   | 334.365   | 322.728   | 366.147   | 424.245  |
| PLAC9       | 43.8784   | 88.8002   | 90.6588   | 71.8184   | 71.7889   | 46.7844  |
| PAFAH1B1    | 48.3829   | 39.1355   | 47.6618   | 45.8159   | 51.7689   | 43.5798  |
| LRIT2       | 1.47315   | 3.31279   | 2.10915   | 2.67632   | 1.87652   | 1.43688  |
| TMEM219     | 131.45    | 190.92    | 123.228   | 179.628   | 122.644   | 135.727  |
| SNORA26     | 218.216   | 96.4663   | 0         | 0         | 0         | 0        |
| MOGS        | 33.6939   | 51.7581   | 41.3625   | 51.7664   | 52.6423   | 44.6449  |
| KLRK1       | 6.17668   | 5.52037   | 3.30196   | 1.25768   | 3.84603   | 1.54686  |
| LOC283174   | 4.87542   | 6.24948   | 6.17407   | 7.07965   | 12.4092   | 6.96856  |
| RANBP10     | 11.4024   | 9.96908   | 11.3488   | 12.4599   | 12.631    | 16.2669  |
| ANKS4B      | 0.0685715 | 0.0303133 | 0         | 0         | 0.0436736 | 0        |
| E2F3        | 4.67702   | 3.06305   | 3.48225   | 3.45187   | 3.72659   | 3.5382   |
| LOC10050754 | 0         | 0         | 0         | 0         | 0         | 0        |
| HTR1A       | 0         | 0         | 0         | 0         | 0         | 0        |
| TMIGD2      | 0.985435  | 0.640373  | 0.878907  | 0.761394  | 0.461311  | 0.5053   |
| GATS        | 9.54934   | 11.6529   | 9.0147    | 10.3678   | 12.0002   | 11.0395  |
| RGN         | 4.8066    | 6.70353   | 2.94112   | 2.35152   | 2.73779   | 2.01998  |
| OR5AC2      | 0         | 0         | 0         | 0         | 0         | 0        |
| HOXC6       | 4.15034   | 4.33355   | 4.7771    | 6.52866   | 7.2379    | 6.90421  |
| PRPF38B     | 28.2461   | 26.5234   | 25.9065   | 21.378    | 30.9883   | 27.062   |
| LOC389676   | 0         | 0         | 0         | 0         | 0         | 0        |

|             |           |           |           |             |           |           |
|-------------|-----------|-----------|-----------|-------------|-----------|-----------|
| SLC25A4     | 10.313    | 9.25394   | 7.29209   | 9.23049     | 5.31065   | 5.42847   |
| ANKRD26P1   | 0.0156181 | 0.0552341 | 0         | 0.102656    | 0.0198945 | 0.0194651 |
| SARS2       | 9.04545   | 17.4099   | 12.1039   | 17.3177     | 16.9106   | 14.7012   |
| OR2Y1       | 0         | 0         | 0         | 0           | 0         | 0         |
| CREB3L2     | 9.35475   | 6.15246   | 9.01119   | 8.31724     | 7.07016   | 7.30671   |
| TMEM160     | 19.2742   | 37.0457   | 18.8727   | 39.934      | 24.8186   | 26.3717   |
| FAM160B1    | 8.8561    | 7.37799   | 9.40072   | 6.59685     | 8.08785   | 6.64921   |
| CMTM3       | 23.8048   | 28.1179   | 27.1358   | 22.8688     | 28.2525   | 22.6013   |
| SCARNA9L    | 0         | 0         | 0         | 1.28954     | 0         | 0         |
| FAM193A     | 7.10709   | 8.324     | 7.99801   | 7.91991     | 9.14412   | 8.42496   |
| SPATA7      | 2.60099   | 4.16753   | 3.99302   | 4.03838     | 5.60303   | 4.25618   |
| MRPL15      | 27.122    | 27.5951   | 26.4497   | 27.7259     | 25.2792   | 23.347    |
| C7orf63     | 1.75277   | 2.44773   | 2.6725    | 3.0288      | 2.9806    | 2.40589   |
| LOC10050691 | 3.59E-06  | 0.261016  | 1.24976   | 0.000113602 | 0.300699  | 1.01151   |
| CAPG        | 73.3741   | 99.7019   | 83.886    | 99.4631     | 119.017   | 122.867   |
| LOC10050621 | 1.36412   | 0.282089  | 0.241536  | 0.559737    | 0.282238  | 0.283587  |
| MAEA        | 34.4446   | 41.1471   | 41.1826   | 44.7463     | 35.2686   | 35.8759   |
| LOC10050710 | 0.425771  | 0.56466   | 0.322311  | 0.199896    | 0.135588  | 0.265322  |
| POLK        | 5.50261   | 5.3024    | 6.05092   | 3.71532     | 5.52895   | 4.11106   |
| OR5AS1      | 0         | 0         | 0         | 0           | 0         | 0         |
| L3MBTL1     | 3.71561   | 4.77126   | 3.8991    | 3.4835      | 4.55508   | 3.87426   |
| WDFY3       | 5.94675   | 4.33228   | 6.71544   | 4.55189     | 6.66253   | 6.24149   |
| FAM90A14    | 0.0156343 | 0.0115191 | 0.0147941 | 0.0122336   | 0.0866253 | 0.109779  |
| ZFR         | 24.1336   | 16.8596   | 20.8459   | 15.4218     | 17.604    | 16.7001   |
| AFF2        | 0.168643  | 0.128877  | 0.364647  | 0.250905    | 0.268096  | 0.166513  |
| PKHD1       | 0.0316251 | 0.107215  | 0.130968  | 0.184062    | 0.0798861 | 0.0840764 |
| C1orf85     | 20.4695   | 26.2538   | 19.2675   | 23.0773     | 29.1192   | 26.3926   |
| RPP40       | 6.83933   | 7.34267   | 5.69515   | 5.59634     | 4.79161   | 5.60146   |
| KRT16       | 374.658   | 426.124   | 205.39    | 501.201     | 165.97    | 1051.78   |
| GUCA1C      | 0         | 0         | 0         | 0           | 0         | 0         |
| FCRL1       | 0         | 0         | 0         | 0.0314225   | 0.0959129 | 0.0208536 |
| PLEKHM2     | 26.3083   | 32.7674   | 29.6766   | 32.4422     | 36.2894   | 33.1171   |
| HES5        | 1.18364   | 1.56975   | 2.49606   | 5.47771     | 1.93852   | 3.10844   |
| ABCE1       | 14.9782   | 12.4434   | 12.8306   | 12.006      | 11.9244   | 10.6489   |
| RBM26-AS1   | 0.939344  | 1.48047   | 1.17484   | 0.42184     | 1.06649   | 0.916215  |
| RAD54L2     | 1.55418   | 0.777458  | 2.24469   | 1.11372     | 1.6411    | 1.47824   |
| MARCO       | 1.93616   | 2.06427   | 2.19853   | 1.76455     | 2.39376   | 1.45494   |
| FAM86DP     | 3.31584   | 3.59737   | 3.35057   | 2.93083     | 3.45501   | 3.78867   |
| LOC10050740 | 0.237937  | 0.584358  | 0.280186  | 0.273068    | 0.252572  | 0.296544  |
| LOC10050665 | 2.50241   | 3.27966   | 3.56581   | 3.62133     | 3.54386   | 2.53172   |
| NDUFB8      | 169.63    | 191.047   | 159.872   | 185.806     | 157.487   | 167.301   |
| LOC10013113 | 0.271175  | 0.527637  | 0.287393  | 0           | 0.276376  | 0.168985  |
| BDH2        | 6.00307   | 7.2677    | 8.62395   | 8.16693     | 10.0364   | 7.52422   |



|             |           |           |           |           |           |           |
|-------------|-----------|-----------|-----------|-----------|-----------|-----------|
| C2orf65     | 0.594462  | 0.525586  | 0.570014  | 0.334914  | 0.631027  | 0.370443  |
| GATA6       | 3.99565   | 3.48295   | 5.47434   | 3.24985   | 5.6632    | 5.69877   |
| NDUFA9      | 57.6385   | 47.1573   | 41.7791   | 46.2302   | 43.4117   | 40.7014   |
| HAGH        | 21.2703   | 25.6428   | 22.714    | 26.1863   | 23.9307   | 28.3176   |
| SLAMF7      | 3.09805   | 3.6744    | 2.97445   | 1.34808   | 3.10412   | 3.67279   |
| TRAPPC2P1   | 15.8268   | 17.7421   | 15.909    | 13.1692   | 14.0126   | 13.8375   |
| TULP2       | 0.0597094 | 0.105583  | 0         | 0         | 0.114088  | 0         |
| LOC440354   | 2.80769   | 2.55148   | 2.9137    | 2.49809   | 3.13502   | 2.55273   |
| LOC10065296 | 0.355363  | 0.172956  | 0         | 0         | 0.101889  | 0.0473545 |
| MIR4667     | 0         | 0         | 0         | 0         | 0         | 0         |
| MRPL40      | 41.0883   | 47.3713   | 42.343    | 47.5321   | 37.1605   | 38.714    |
| MRPL33      | 104.635   | 128.078   | 98.5071   | 109.647   | 75.8766   | 71.0406   |
| LOC10028747 | 0         | 0.04168   | 0.0356868 | 0.0442656 | 0         | 0.0587538 |
| DIAPH3      | 0.744855  | 0.889612  | 0.679247  | 0.737146  | 0.794536  | 1.46099   |
| FUS         | 49.3416   | 60.5039   | 50.8632   | 59.214    | 63.9443   | 55.026    |
| FLJ33534    | 0         | 0         | 0.049178  | 0         | 0         | 0         |
| ATG16L2     | 30.1786   | 57.5621   | 38.0796   | 49.0889   | 59.3778   | 63.9643   |
| SUMF1       | 33.4906   | 31.805    | 36.5568   | 36.4373   | 22.3441   | 24.4911   |
| MIR1283-2   | 0         | 0         | 0         | 0         | 0         | 0         |
| FOXR2       | 0         | 0         | 0         | 0         | 0         | 0         |
| TRAF3IP3    | 3.85163   | 2.96467   | 2.98431   | 1.319     | 5.57003   | 2.25898   |
| RPRM        | 0.367216  | 0.649338  | 0.667163  | 0.68962   | 0.51454   | 0.2746    |
| FAM22D      | 1.52399   | 1.50054   | 1.58633   | 1.15462   | 1.5442    | 1.28426   |
| LOC10050736 | 0         | 0         | 0         | 0         | 0         | 0         |
| AKAP11      | 8.69977   | 6.67462   | 9.00415   | 5.80307   | 8.95027   | 6.96181   |
| ATP5J       | 182.615   | 160.254   | 143.494   | 158.353   | 114.619   | 106.246   |
| EMD         | 49.567    | 62.8338   | 51.6866   | 68.5811   | 55.4035   | 51.9574   |
| CARHSP1     | 18.1168   | 23.3487   | 18.8062   | 22.977    | 22.7924   | 20.3647   |
| METTL12     | 1.73892   | 2.93513   | 1.79506   | 1.78126   | 2.51712   | 3.05385   |
| LOC642924   | 0.0542988 | 0.0480075 | 0.205522  | 0.101971  | 0.207499  | 0.20302   |
| PTPN9       | 9.21931   | 8.87421   | 8.21729   | 7.79576   | 8.4447    | 7.41301   |
| LOC731932   | 0.786609  | 0.287414  | 0.0615215 | 0         | 1.55328   | 0.558348  |
| LOC10065280 | 0.25671   | 0.226967  | 0.388662  | 0         | 0.1635    | 0         |
| SNORA11E    | 0         | 0         | 0         | 0         | 23.388    | 0         |
| PCDH18      | 7.31232   | 5.17494   | 6.46827   | 2.46633   | 4.18224   | 3.67771   |
| PDCD7       | 11.2353   | 12.3783   | 11.4198   | 11.0099   | 13.2639   | 12.3233   |
| SPOP        | 20.1444   | 19.7608   | 20.2401   | 18.0581   | 21.6937   | 19.4632   |
| FLJ32790    | 0         | 0         | 0.0794055 | 0         | 0.0668077 | 0.0653656 |
| CLEC1B      | 0         | 0         | 0         | 0         | 0         | 0         |
| RFX5        | 16.709    | 14.5252   | 13.5538   | 11.3526   | 16.8618   | 10.2769   |
| DCDC2B      | 0.488047  | 1.86984   | 1.23152   | 1.37481   | 1.91685   | 2.12891   |
| PABPC1      | 261.614   | 256.15    | 284.848   | 283.067   | 262.947   | 259.387   |
| PCSK9       | 0.739189  | 0.630204  | 0.479632  | 1.01634   | 0.807075  | 1.5135    |

|             |           |           |           |            |            |           |
|-------------|-----------|-----------|-----------|------------|------------|-----------|
| LOC149351   | 0.28844   | 0.510042  | 0.31193   | 0.232149   | 0.341174   | 0.205422  |
| TAS2R3      | 0         | 0.0920364 | 0         | 0.0977458  | 0.198901   | 0.259476  |
| ZNF791      | 6.353     | 3.68499   | 6.47872   | 4.17955    | 6.75236    | 4.51367   |
| LOC10065280 | 0         | 0         | 0.206815  | 0.116605   | 0.0632739  | 0.0773851 |
| HEATR3      | 8.21017   | 6.20676   | 6.38748   | 5.00968    | 5.98235    | 5.95025   |
| OR52R1      | 0         | 0         | 0         | 0          | 0          | 0         |
| KCNH7       | 0         | 0         | 0         | 0.0215144  | 0          | 0         |
| NCAM1       | 1.33053   | 1.79523   | 1.89793   | 1.61927    | 1.87836    | 1.72254   |
| LOC10028806 | 3.87011   | 2.39919   | 5.21523   | 2.69784    | 2.50765    | 2.03062   |
| MIR3180-2   | 0         | 0         | 0         | 0          | 0          | 0         |
| DHDDS       | 32.2078   | 30.4754   | 36.9878   | 27.4481    | 29.4027    | 26.14     |
| NECAP1      | 15.7716   | 14.4574   | 13.8334   | 14.298     | 16.9945    | 13.6118   |
| RPGRIP1L    | 1.72766   | 1.18441   | 1.6353    | 1.21643    | 1.39847    | 0.92678   |
| C9orf150    | 5.81527   | 5.89954   | 6.77261   | 6.96558    | 7.12266    | 8.7576    |
| SLC31A2     | 73.375    | 62.6762   | 57.8298   | 57.3965    | 61.9337    | 72.3352   |
| FIS1        | 149.38    | 208.609   | 159.166   | 201.945    | 129.096    | 136.067   |
| RXRB        | 26.5689   | 33.3652   | 31.0707   | 34.8813    | 39.779     | 32.6738   |
| TRIM28      | 71.4727   | 96.6157   | 71.4898   | 95.7265    | 92.0635    | 87.2685   |
| UBE2T       | 5.85503   | 7.17672   | 4.43229   | 6.37243    | 5.42415    | 6.13629   |
| SRSF8       | 20.2103   | 18.7404   | 17.7927   | 17.9673    | 17.7098    | 15.7777   |
| C5orf34     | 1.23385   | 1.33723   | 0.873774  | 0.82221    | 1.7745     | 1.26494   |
| LOC388906   | 0.179624  | 0.555843  | 0.475918  | 0.421661   | 0.457614   | 0.279835  |
| MIR152      | 0         | 0         | 0         | 0          | 0          | 0         |
| HCAR3       | 10.6561   | 11.501    | 9.26584   | 5.45375    | 8.62121    | 8.10611   |
| C5orf30     | 6.00786   | 5.48688   | 6.22224   | 4.68041    | 5.15098    | 5.4512    |
| MIR513C     | 0         | 0         | 0         | 0          | 0          | 0         |
| RIMBP3      | 0.0900136 | 0.0586731 | 0.0543214 | 0.0431231  | 0.122957   | 0.171784  |
| SAT1        | 194.538   | 198.06    | 157.129   | 230.406    | 172.849    | 139.016   |
| SNAPC5      | 16.732    | 11.8302   | 11.8645   | 13.1214    | 11.0118    | 8.99214   |
| NICN1       | 12.4331   | 15.6285   | 14.432    | 13.2393    | 20.8627    | 14.8214   |
| NRXN1       | 1.39157   | 0.805736  | 0.637186  | 1.27627    | 1.10596    | 1.02      |
| OMA1        | 12.3622   | 7.84832   | 10.4852   | 9.15337    | 13.3192    | 14.1515   |
| DPPA2       | 0         | 0         | 0         | 0          | 0          | 0         |
| PMF1-BGLAP  | 3.31267   | 4.99127   | 4.36945   | 3.80421    | 2.91835    | 3.04899   |
| BTBD7       | 8.03147   | 7.05646   | 8.15455   | 7.43       | 7.9118     | 7.02077   |
| CD74        | 1031.41   | 1046.58   | 666.536   | 428.798    | 1052.8     | 499.003   |
| RAPGEF2     | 10.8531   | 7.9655    | 9.48473   | 7.83008    | 8.01556    | 7.87735   |
| FDX1        | 9.58275   | 8.5811    | 7.32396   | 7.61373    | 6.31849    | 5.32081   |
| C10orf32    | 24.3348   | 20.6513   | 18.8168   | 13.3272    | 17.3857    | 15.4646   |
| ONECUT2     | 0.011602  | 0.0307732 | 0.0263483 | 0.00544703 | 0.00738936 | 0.0108448 |
| SUCLG1      | 100.785   | 87.1381   | 85.1222   | 87.8015    | 77.2465    | 84.6042   |
| HTRA3       | 12.9537   | 10.192    | 18.2926   | 8.74123    | 14.9615    | 13.034    |
| DALRD3      | 21.9456   | 32.2465   | 25.2296   | 38.3067    | 31.6766    | 31.123    |

|             |           |            |           |            |           |           |
|-------------|-----------|------------|-----------|------------|-----------|-----------|
| HAP1        | 0.331462  | 0.871455   | 0.709746  | 1.28433    | 1.41005   | 2.46155   |
| VSIG7       | 0         | 0          | 0         | 0          | 0         | 0         |
| BPIFB4      | 0         | 0          | 0         | 0          | 0         | 0         |
| KCNN4       | 35.3085   | 26.545     | 28.6601   | 38.2877    | 30.1003   | 34.1256   |
| MAPT        | 3.87801   | 3.84946    | 5.49568   | 4.48803    | 5.02717   | 3.84334   |
| LOC10065300 | 0.410614  | 0.726079   | 0.466256  | 0          | 0.523045  | 0.383816  |
| TBC1D1      | 9.08718   | 7.46788    | 5.99843   | 6.17395    | 5.12193   | 4.94834   |
| PAX1        | 0.281396  | 0.528683   | 0.213018  | 0.165141   | 0.291236  | 0.328788  |
| ZNF510      | 4.68918   | 3.45214    | 4.18614   | 2.26293    | 3.67668   | 3.22478   |
| C9orf38     | 0.0359697 | 0          | 0.0544585 | 0.0337749  | 0.114546  | 0         |
| TMEM9B      | 60.0411   | 47.2511    | 52.9889   | 59.1374    | 55.3933   | 51.8429   |
| TMEM56      | 31.2421   | 18.0125    | 33.9708   | 32.8526    | 16.6356   | 24.1524   |
| CHP2        | 28.3511   | 28.8205    | 53.1515   | 50.4232    | 56.848    | 58.6323   |
| OR10S1      | 0         | 0          | 0         | 0          | 0         | 0         |
| CDC42SE1    | 89.5379   | 78.8384    | 74.7742   | 75.3314    | 92.4992   | 86.6705   |
| FAM90A1     | 0.360861  | 0.177251   | 0.394585  | 0.414142   | 0.434132  | 0.399775  |
| RNF169      | 4.2281    | 2.93026    | 4.11315   | 3.47851    | 3.96725   | 3.1498    |
| SH2D4A      | 5.99068   | 4.07745    | 6.4681    | 7.39615    | 5.16014   | 5.38412   |
| OR7G2       | 0         | 0          | 0         | 0          | 0         | 0         |
| LOC10028717 | 0         | 0.00739837 | 0         | 0.00628586 | 0         | 0.0125148 |
| INHBC       | 0         | 0.0459526  | 0.15738   | 0.195213   | 0.0662057 | 0.0647766 |
| CDKN1B      | 40.9249   | 37.5563    | 40.0679   | 29.954     | 45.1531   | 42.0598   |
| EEF1G       | 532.909   | 695.374    | 614.914   | 862.905    | 668.834   | 661.262   |
| ACTL6B      | 0         | 0          | 0         | 0          | 0         | 0         |
| BARX2       | 34.2376   | 29.4824    | 32.0076   | 52.9111    | 37.4035   | 64.9693   |
| UBR1        | 5.25491   | 3.34646    | 4.49727   | 3.27802    | 4.50152   | 4.57991   |
| GAD1        | 0.141469  | 0.278538   | 0.322925  | 0.198518   | 0.703283  | 0.265828  |
| CADM3       | 6.21899   | 7.64419    | 6.76881   | 4.60189    | 7.72809   | 5.75145   |
| BSN-AS2     | 0         | 0          | 0         | 0          | 0.024607  | 0         |
| GABRE       | 62.431    | 86.6478    | 71.9373   | 78.1394    | 92.5573   | 70.3829   |
| SNORD60     | 0         | 0          | 0         | 0          | 0         | 0         |
| OR4C3       | 0         | 0          | 0         | 0          | 0         | 0         |
| LOC10050597 | 0.765438  | 2.00021    | 0.917247  | 1.35668    | 2.04236   | 2.28561   |
| TMEM176B    | 35.2471   | 25.4573    | 22.9336   | 13.296     | 35.1521   | 20.2686   |
| LOC10050728 | 0         | 0          | 0         | 0          | 0.141804  | 0.138743  |
| LOC10013084 | 0         | 0          | 0         | 0          | 0         | 0         |
| ATP5F1      | 90.0239   | 75.7954    | 71.1153   | 73.64      | 67.8946   | 70.5939   |
| HEPN1       | 1.74426   | 3.35911    | 9.09247   | 4.70732    | 2.59246   | 1.13151   |
| MLL5        | 16.9208   | 12.8143    | 18.4183   | 13.7823    | 18.4892   | 16.2589   |
| C6orf81     | 2.41703   | 1.62411    | 1.53695   | 1.81564    | 1.601     | 0.662723  |
| SNORD56     | 0         | 0          | 0         | 0          | 0         | 0         |
| PPAP2B      | 67.4761   | 41.882     | 65.8256   | 30.279     | 48.9606   | 35.4677   |
| RPL23A      | 494.932   | 607.197    | 544.62    | 734.441    | 520.456   | 515.234   |

|             |          |           |           |          |           |           |
|-------------|----------|-----------|-----------|----------|-----------|-----------|
| PRAMEF19    | 0        | 0         | 0         | 0        | 0         | 0         |
| KRT38       | 1.02045  | 0.622218  | 0.0799122 | 3.20496  | 0.650129  | 87.3156   |
| RN5S13      | 23.8359  | 315.423   | 75.4336   | 287.907  | 38.7663   | 49.0992   |
| SORL1       | 8.80035  | 3.65527   | 4.73996   | 7.29691  | 5.25536   | 5.70315   |
| PNPT1       | 6.36413  | 6.41189   | 5.84203   | 5.36036  | 6.77352   | 4.83544   |
| ANKUB1      | 0        | 0         | 0         | 0        | 0         | 0         |
| ITGA3       | 25.9629  | 36.6531   | 24.1539   | 36.6042  | 27.4418   | 23.9578   |
| LOC10012930 | 0        | 0         | 0         | 0        | 0         | 0         |
| LOC10050553 | 5.84005  | 2.95051   | 6.80685   | 3.65581  | 4.25092   | 4.73683   |
| FOXJ1       | 0.612062 | 0.879552  | 0.92615   | 1.17842  | 0.974737  | 0.741465  |
| CARNS1      | 1.56006  | 1.81698   | 1.27466   | 2.04591  | 2.1918    | 1.62      |
| MTRNR2L5    | 0        | 0         | 0         | 0        | 0.0385531 | 0         |
| MOB1B       | 9.51052  | 7.38021   | 8.24578   | 6.66876  | 8.15775   | 6.21649   |
| LOC10012813 | 0        | 0         | 0.0483687 | 0        | 0.0203475 | 0.0199083 |
| ZNF469      | 0.134989 | 0.182164  | 0.328076  | 0.246834 | 0.316751  | 0.247931  |
| WWTR1       | 22.1447  | 15.7259   | 21.3649   | 16.7095  | 19.3104   | 14.7038   |
| TRIM65      | 12.8548  | 15.3241   | 12.5302   | 16.0306  | 16.4114   | 13.0149   |
| LOC10065283 | 0.508797 | 1.23708   | 1.54065   | 2.03045  | 1.21521   | 1.18898   |
| GAGE2A      | 0        | 0         | 0         | 0        | 0         | 0         |
| TPBG        | 12.9408  | 15.1332   | 10.7352   | 10.6892  | 19.6067   | 14.5467   |
| LOC120824   | 0        | 0         | 0         | 0        | 0         | 0         |
| LYPD1       | 1.23335  | 2.28753   | 0.457045  | 0.400391 | 1.03728   | 0.45844   |
| TMEM222     | 41.1303  | 53.4553   | 36.5246   | 53.4831  | 39.0418   | 37.6667   |
| ZNF148      | 6.31122  | 4.36428   | 5.52647   | 4.2449   | 4.66229   | 3.93905   |
| WDR7        | 3.50928  | 3.1261    | 2.9673    | 2.07661  | 2.0411    | 2.73972   |
| HEATR6      | 5.05983  | 4.51744   | 5.35119   | 4.56478  | 5.1025    | 4.62142   |
| CUZD1       | 0.438862 | 0.77789   | 0.536658  | 0.574487 | 0.912985  | 0.471277  |
| FAM65B      | 5.78268  | 2.657     | 3.275     | 2.39917  | 2.86252   | 1.92587   |
| LOC642643   | 0        | 0         | 0         | 0        | 0         | 0         |
| PYY         | 0        | 0.0973052 | 0         | 0        | 0.0700957 | 0         |
| RNF113B     | 0        | 0         | 0         | 0        | 0.0505154 | 0         |
| BRPF3       | 8.81727  | 7.29001   | 8.73126   | 7.19029  | 10.1792   | 9.10809   |
| HIST1H1B    | 0        | 0.141776  | 0         | 0        | 0         | 0         |
| U2AF1L4     | 17.9926  | 30.8022   | 15.5355   | 24.6015  | 24.7288   | 19.228    |
| PBX1        | 14.2457  | 11.3357   | 14.691    | 13.0315  | 12.3942   | 9.13522   |
| ZSCAN5A     | 2.97244  | 2.81917   | 2.71384   | 2.79107  | 1.9506    | 1.95333   |
| FIP1L1      | 15.2601  | 12.8117   | 11.493    | 11.2525  | 14.4319   | 12.9289   |
| SNORD56B    | 0        | 0         | 0         | 0        | 0         | 0         |
| OR2A20P     | 11.221   | 11.7454   | 13.6366   | 14.7754  | 22.5903   | 18.8878   |
| MIR23B      | 0        | 0         | 0         | 0        | 0         | 0         |
| DEFB104A    | 0        | 0         | 0         | 0        | 0         | 0         |
| MIR4316     | 0        | 0         | 0         | 0        | 0         | 0         |
| ZDHHC13     | 19.3794  | 19.9444   | 15.0876   | 17.3381  | 15.8124   | 14.4546   |

|             |           |           |           |           |           |           |
|-------------|-----------|-----------|-----------|-----------|-----------|-----------|
| LRR52       | 0         | 0         | 0         | 0         | 0         | 0.0633679 |
| GCNT2       | 7.88968   | 2.96565   | 3.85629   | 4.93456   | 3.95038   | 4.71909   |
| UTS2R       | 0.19316   | 0.25617   | 0         | 0         | 0.0615123 | 0         |
| NPR2        | 11.719    | 9.69569   | 13.23     | 9.60106   | 12.7879   | 11.1527   |
| FRG1        | 34.1137   | 32.7414   | 34.599    | 28.309    | 34.0811   | 28.6203   |
| MIR433      | 0         | 0         | 0         | 0         | 0         | 0         |
| KIF21A      | 4.82187   | 2.53865   | 3.92671   | 4.23024   | 4.17851   | 5.58158   |
| COX19       | 4.79503   | 5.91431   | 5.61658   | 6.72589   | 7.99314   | 6.34501   |
| LOC10065285 | 0         | 0         | 0         | 0         | 0         | 0.0455459 |
| C2orf85     | 0.116553  | 0.206098  | 0.0441157 | 0         | 0.0371166 | 0         |
| FAM161A     | 1.94227   | 2.145     | 2.00784   | 1.51885   | 1.84412   | 1.60345   |
| C15orf63    | 29.3337   | 31.7911   | 25.0394   | 27.8289   | 20.689    | 23.7462   |
| SPG200S     | 0.111088  | 0.548     | 0.385432  | 0.0946782 | 0.274058  | 0.265634  |
| TINAGL1     | 50.9508   | 79.6392   | 43.8239   | 56.8583   | 44.5789   | 43.7314   |
| KRTAP1-1    | 8.57826   | 1.54057   | 0         | 109.999   | 1.79379   | 1303.83   |
| C3orf52     | 7.64745   | 5.77296   | 10.5356   | 6.00511   | 10.5102   | 8.10963   |
| UQCR10      | 97.8876   | 115.259   | 83.5695   | 102.111   | 70.1565   | 82.9945   |
| STARD9      | 2.41363   | 3.86982   | 4.09059   | 3.14584   | 5.36891   | 3.25508   |
| MFS9        | 3.4075    | 2.78347   | 3.6169    | 3.9647    | 3.53846   | 3.85445   |
| C18orf55    | 15.1063   | 16.6953   | 15.2474   | 16.0233   | 15.6346   | 14.3819   |
| IFIT5       | 5.9434    | 4.48579   | 3.05433   | 1.54265   | 3.16988   | 2.00239   |
| OR10K2      | 0         | 0         | 0         | 0         | 0         | 0         |
| SNORD104    | 0         | 0         | 0         | 0         | 0         | 0         |
| P2RX5-TAX1E | 0.21315   | 0.128987  | 0.164346  | 0.0756208 | 0.147835  | 0.213713  |
| SLC5A12     | 0.0152819 | 0.0135113 | 0.0462738 | 0.0286988 | 0.0778648 | 0.028569  |
| TCP11       | 0.242205  | 0.253799  | 0.293362  | 0.315871  | 0.137121  | 0.134161  |
| LOC392232   | 0.0842827 | 0.0662377 | 0         | 0.0175867 | 0         | 0.0233429 |
| HOXA10      | 1.22299   | 0.45768   | 0.749187  | 0.224394  | 0.417933  | 0.81859   |
| BOLA3-AS1   | 1.87729   | 2.08772   | 2.06659   | 1.95524   | 2.27097   | 2.74733   |
| DNAJB4      | 7.83621   | 6.72688   | 9.55337   | 5.86079   | 8.58903   | 7.80743   |
| C13orf27    | 11.7012   | 12.0842   | 8.56013   | 7.94036   | 8.76772   | 9.31376   |
| SLC44A5     | 0.529169  | 0.138585  | 4.44202   | 1.46566   | 0.17748   | 0.220101  |
| DHRS7C      | 0         | 0.103445  | 0         | 0         | 0         | 0         |
| LRR1        | 7.08717   | 8.37715   | 4.7717    | 5.69963   | 5.01452   | 3.77055   |
| ANO8        | 10.8978   | 11.7694   | 15.2575   | 13.4017   | 22.2406   | 19.6137   |
| PSMC3       | 69.6079   | 77.8548   | 67.0181   | 73.4198   | 58.5377   | 69.5712   |
| MIR1184-1   | 0         | 0         | 0         | 0         | 0         | 0         |
| SNORD70     | 0         | 0         | 0         | 0         | 0         | 0         |
| ASB8        | 16.7363   | 15.6476   | 17.0091   | 15.0287   | 17.6922   | 15.9437   |
| GORASP2     | 38.3774   | 33.4111   | 36.1009   | 38.6613   | 33.0052   | 31.5388   |
| KRT71       | 63.7255   | 31.394    | 6.60923   | 349.558   | 24.851    | 232.181   |
| SCRG1       | 1.47439   | 1.77758   | 0.608793  | 1.51028   | 1.62199   | 2.17165   |
| DIRAS1      | 2.40592   | 2.46033   | 1.9749    | 3.21176   | 2.60313   | 2.76371   |

|             |           |           |           |           |           |          |
|-------------|-----------|-----------|-----------|-----------|-----------|----------|
| OAS2        | 20.8331   | 13.5861   | 4.22641   | 1.68117   | 4.02751   | 2.37067  |
| LOC10050611 | 0.386963  | 0         | 0         | 0         | 0         | 0.241139 |
| SH3GLB1     | 28.22     | 25.6454   | 31.5438   | 23.0029   | 23.685    | 21.3284  |
| GCLM        | 10.3268   | 7.6752    | 7.06016   | 5.78774   | 4.3163    | 5.55041  |
| FAM165B     | 9.96202   | 11.1883   | 11.9234   | 11.7559   | 10.4605   | 9.47965  |
| SHISA9      | 0.739535  | 0.571883  | 0.816018  | 1.01238   | 0.431258  | 0.750445 |
| GOLGA8G     | 0         | 0         | 0.028966  | 0.0465472 | 0.0167013 | 0        |
| TINF2       | 29.1797   | 30.6233   | 30.0349   | 26.5891   | 30.3376   | 25.5377  |
| RENBP       | 4.33315   | 6.49338   | 4.72574   | 5.24111   | 7.67133   | 4.9428   |
| OR1Q1       | 0         | 0         | 0         | 0.118621  | 0         | 0        |
| SYN2        | 7.85203   | 6.67314   | 5.18047   | 5.41833   | 5.65678   | 5.05092  |
| PAH         | 0         | 0         | 0         | 0.0702612 | 0         | 0        |
| C12orf43    | 6.54704   | 7.65418   | 5.11998   | 5.48708   | 6.16861   | 4.5856   |
| WFDC3       | 3.64197   | 4.05097   | 17.1943   | 36.8745   | 7.63239   | 8.12635  |
| LOC10050751 | 0         | 0         | 0         | 0         | 0         | 0        |
| C9orf78     | 35.393    | 38.721    | 35.2444   | 34.6385   | 37.4601   | 31.81    |
| OR4N5       | 0         | 0         | 0         | 0         | 0         | 0        |
| LOC10013231 | 4.8411    | 5.03236   | 4.85911   | 4.10899   | 6.02056   | 4.73204  |
| ZNF329      | 4.64501   | 4.18335   | 4.17151   | 3.92814   | 3.89558   | 4.74638  |
| C20orf152   | 0.237454  | 0.236185  | 0.183566  | 0.269859  | 0.17014   | 0.166468 |
| FSHR        | 0         | 0         | 0         | 0         | 0         | 0        |
| ESPNL       | 0.247814  | 0.182584  | 0.250129  | 0.193911  | 0.197293  | 0.373199 |
| DNAH9       | 0.438224  | 0.345644  | 0.304794  | 0.369582  | 0.436925  | 0.268138 |
| RNF17       | 0         | 0.0668397 | 0.0643875 | 0.0177413 | 0         | 0        |
| LOC646268   | 0         | 0         | 0         | 0         | 0.0947237 | 0        |
| EPHA2       | 15.8496   | 15.3841   | 14.737    | 17.933    | 19.3273   | 17.8366  |
| HAUS7       | 8.87591   | 18.5069   | 16.1817   | 23.4227   | 23.6015   | 19.6122  |
| MIR3674     | 0         | 0         | 0         | 0         | 0         | 0        |
| CSRP3       | 0         | 0         | 0         | 0         | 0         | 0        |
| MIR4745     | 0         | 0         | 0         | 0         | 0         | 0        |
| FOXH1       | 0.781754  | 1.352     | 0.502931  | 1.11696   | 1.76566   | 0.576879 |
| LOC10050744 | 0         | 0         | 0         | 0         | 0         | 0        |
| LMNB2       | 12.1912   | 15.6328   | 11.0936   | 13.5644   | 13.0563   | 13.581   |
| IGSF1       | 1.12336   | 0.72856   | 1.20311   | 1.58472   | 1.78921   | 1.61388  |
| MIR216B     | 0         | 0         | 0         | 0         | 0         | 0        |
| FMOD        | 27.2362   | 34.5606   | 62.1059   | 38.2052   | 44.0034   | 32.3472  |
| VDAC1       | 107.795   | 88.6844   | 79.3461   | 93.4914   | 73.2854   | 77.2417  |
| KLRAP1      | 3.05519   | 2.82398   | 6.3777    | 5.21595   | 6.95794   | 4.00965  |
| TMPPE       | 0.494043  | 0.35336   | 0.911133  | 0.187764  | 0.636718  | 0.434355 |
| PNMA6B      | 0.0702298 | 0.165581  | 0.390758  | 0.222563  | 0.301926  | 0.238272 |
| NDUFA13     | 353.184   | 440.988   | 326.808   | 448.588   | 297.932   | 342.426  |
| SPINT3      | 0         | 0.312036  | 0.267167  | 0.662785  | 0.224781  | 0.439858 |
| MLL         | 6.85664   | 5.78601   | 7.9751    | 5.56803   | 7.75893   | 6.10837  |

|             |           |           |           |           |           |           |
|-------------|-----------|-----------|-----------|-----------|-----------|-----------|
| ANKRD10-IT1 | 5.75978   | 4.87102   | 9.41547   | 6.0354    | 8.87868   | 4.0054    |
| LDB3        | 3.0228    | 3.92115   | 1.43389   | 2.46662   | 3.74886   | 3.03547   |
| SNORD115-2  | 0         | 0         | 0         | 0         | 0         | 0         |
| NAT10       | 16.8618   | 16.2174   | 16.903    | 16.9847   | 16.7106   | 14.9811   |
| LOC1002886  | 0.590281  | 0.0792208 | 0.666576  | 0.168271  | 0.993274  | 0.778236  |
| RBM11       | 0.684536  | 1.58289   | 0.558059  | 0.494437  | 0.603671  | 0.525014  |
| LOC647086   | 0.856947  | 0.662951  | 0.243268  | 1.30757   | 0.750467  | 0.600765  |
| ANAPC2      | 18.8607   | 29.0514   | 24.9351   | 28.0291   | 28.5888   | 22.9319   |
| KCNU1       | 0.0784804 | 0.0462583 | 0.0990168 | 0.0982558 | 0.0833077 | 0.146717  |
| KNG1        | 0.247006  | 0.0448159 | 0.0383718 | 0.0475961 | 0         | 0.12635   |
| IGLON5      | 1.08734   | 0.65033   | 0.508399  | 0.84082   | 0.916588  | 0.876874  |
| MIR3170     | 0         | 0         | 0         | 0         | 0         | 0         |
| TBL1X       | 7.10511   | 5.82718   | 6.41762   | 6.23782   | 6.6931    | 6.95108   |
| MLEC        | 35.7716   | 26.1341   | 30.7688   | 23.7298   | 23.2526   | 26.7158   |
| KCNT2       | 0.745431  | 0.558771  | 0.77284   | 0.289109  | 1.18692   | 0.838158  |
| TTC34       | 0.0591355 | 0         | 0         | 0.111055  | 0.0753274 | 0.110552  |
| LOC1001327  | 1.07243   | 0.606829  | 2.18409   | 1.78243   | 1.43882   | 1.96006   |
| SNX17       | 56.5241   | 61.978    | 55.0909   | 62.8847   | 52.6508   | 51.7449   |
| LOC1001289  | 0         | 0         | 0         | 0         | 0         | 0         |
| WNT16       | 6.34262   | 5.42376   | 10.9674   | 3.96932   | 10.0447   | 7.2357    |
| C11orf42    | 0.397554  | 0.351492  | 0.601901  | 0.0933242 | 0.316505  | 0.185804  |
| AGXT        | 0.266805  | 0.294865  | 0.353452  | 0.187894  | 0.0424824 | 0.0831308 |
| PEX11A      | 21.0152   | 15.9137   | 20.696    | 13.7034   | 13.5706   | 13.7627   |
| MIR1255A    | 0         | 0         | 0         | 0         | 0         | 355.557   |
| WDR88       | 0.366801  | 0.378353  | 0.462784  | 0.34442   | 0.545108  | 0.609533  |
| CCDC137     | 18.7045   | 28.7681   | 19.2849   | 24.5154   | 27.2386   | 24.7384   |
| LOC283888   | 0.139887  | 0.454288  | 0.510292  | 0.415411  | 0.423851  | 0.44779   |
| ENDOD1      | 28.8883   | 17.4525   | 23.2724   | 26.9128   | 20.9844   | 27.2469   |
| GRPR        | 0         | 0.0661572 | 0.0283222 | 0         | 0.0714865 | 0         |
| UBXN2B      | 6.29331   | 4.75727   | 6.05943   | 4.53466   | 6.22428   | 6.29134   |
| CD79A       | 0.620509  | 0.488679  | 0.400835  | 0.852331  | 0.737343  | 0.679991  |
| ALOX15      | 3.92373   | 4.72455   | 5.06351   | 0.421853  | 5.90239   | 1.18771   |
| NTRK3       | 7.7691    | 7.18402   | 3.11675   | 2.45702   | 3.95755   | 3.00759   |
| ATP2C2      | 11.4968   | 8.36339   | 9.38617   | 10.5493   | 23.4501   | 22.1157   |
| LOC1006530  | 0.227027  | 0.401445  | 0         | 1.06587   | 0.433783  | 0.707367  |
| TSPAN17     | 28.4468   | 32.9163   | 21.6567   | 28.0524   | 23.4539   | 25.8524   |
| ROR1        | 1.03127   | 0.61936   | 0.928931  | 0.61062   | 0.853964  | 0.682236  |
| OXSR1       | 14.7785   | 13.0851   | 15.0624   | 14.7214   | 15.3328   | 14.0942   |
| ADAP2       | 6.4445    | 6.34164   | 5.2644    | 5.12821   | 5.93651   | 6.44366   |
| CREB3L1     | 7.47558   | 5.77911   | 8.9578    | 2.82189   | 5.59864   | 4.47119   |
| MIR1911     | 0         | 0         | 0         | 0         | 0         | 0         |
| NEURL4      | 10.1884   | 14.3775   | 12.196    | 13.8483   | 15.3369   | 12.9001   |
| HOXC8       | 1.37832   | 1.49379   | 1.17802   | 2.54668   | 1.61412   | 2.16112   |

|             |           |             |          |           |            |           |
|-------------|-----------|-------------|----------|-----------|------------|-----------|
| NROB2       | 0         | 0.0772265   | 0        | 0.0820172 | 0          | 0         |
| LOC10013228 | 6.79195   | 11.2394     | 9.92774  | 11.9088   | 9.42323    | 7.69932   |
| PTPN3       | 15.0783   | 15.9667     | 19.7733  | 17.6983   | 20.4165    | 17.709    |
| ZNF251      | 12.3591   | 14.9591     | 14.4091  | 14.0873   | 17.1533    | 13.4882   |
| NAMPT       | 27.2264   | 15.4717     | 16.0162  | 14.208    | 13.7675    | 10.1732   |
| IGF1        | 4.58847   | 4.78525     | 6.31103  | 1.75876   | 2.72988    | 3.73554   |
| RTN3        | 148.759   | 120.279     | 134.923  | 121.9     | 108.357    | 116.756   |
| RPS10-NUDT1 | 1.0845    | 0.000117261 | 3.06269  | 2.55E-10  | 7.33E-16   | 4.60E-23  |
| CLEC4D      | 0.10721   | 0.142182    | 0        | 0         | 0.102424   | 0.0668085 |
| C1orf21     | 11.6749   | 11.8095     | 14.3539  | 13.143    | 15.2501    | 11.6507   |
| PKD1L1      | 0.0937322 | 0.101288    | 0.149796 | 0.0977923 | 0.12603    | 0.0778799 |
| CPA1        | 0.379915  | 0.873333    | 0.402637 | 0.499428  | 0.338758   | 0.331446  |
| HINT1       | 316.204   | 383.829     | 266.584  | 344.16    | 308.233    | 305.821   |
| MIR4797     | 0         | 0           | 0        | 0         | 0          | 0         |
| RUVBL1      | 17.5236   | 16.3861     | 15.4689  | 15.6177   | 14.3389    | 14.6957   |
| STK35       | 9.27335   | 9.64655     | 9.71303  | 9.29455   | 11.1204    | 9.3499    |
| CEACAM3     | 0.197079  | 0.272257    | 0        | 0.092527  | 0.188281   | 0.122811  |
| LOC10050690 | 0         | 0           | 0        | 0         | 0.108946   | 0         |
| AKT2        | 34.0896   | 38.188      | 43.7019  | 38.8406   | 43.936     | 37.0304   |
| PGM3        | 10.4878   | 8.35579     | 8.55604  | 8.05647   | 8.68715    | 8.78691   |
| OR7E24      | 0         | 0           | 0        | 0         | 0          | 0         |
| ANXA2       | 346.379   | 349.447     | 325.237  | 340.617   | 294.797    | 340.793   |
| CPNE9       | 0.150909  | 0.355797    | 0.456955 | 0.0944672 | 0.672802   | 0.501546  |
| C15orf26    | 0.271316  | 0.23988     | 0        | 0         | 0.129602   | 0.0422681 |
| JDP2        | 5.67266   | 8.17153     | 7.5659   | 7.30645   | 6.9672     | 5.55264   |
| NHSL1       | 5.68977   | 6.5424      | 6.33369  | 6.66755   | 7.43823    | 9.66212   |
| CTSO        | 16.5653   | 13.1454     | 13.6707  | 9.59408   | 13.5124    | 8.1863    |
| LOC10050563 | 2.58633   | 1.39248     | 4.44291  | 1.46758   | 4.35387    | 2.71786   |
| LOC10050617 | 0         | 0           | 0        | 0         | 0          | 0         |
| FAM195A     | 24.6796   | 32.9649     | 16.8742  | 29.6109   | 17.9431    | 17.8598   |
| FASTK       | 57.7319   | 86.1139     | 55.0911  | 78.731    | 76.5668    | 75.4755   |
| DHRS1       | 54.6664   | 58.0463     | 34.0961  | 35.5139   | 45.0688    | 50.8514   |
| BRCC3       | 9.85931   | 8.53138     | 9.6336   | 7.45226   | 8.12744    | 8.40951   |
| LRRRC55     | 0.319891  | 0.251402    | 0.443958 | 0.450558  | 0.837599   | 1.04101   |
| KIF9        | 1.60402   | 2.00939     | 1.83869  | 1.79669   | 1.36749    | 1.33089   |
| MIR199A2    | 0         | 0           | 0        | 0         | 0.00068719 | 0         |
| LOC10050654 | 17.5424   | 18.7587     | 20.7864  | 20.1114   | 19.4442    | 16.8915   |
| WBSCR16     | 18.3836   | 23.2302     | 18.0172  | 24.2708   | 17.4678    | 19.1374   |
| KRTAP4-2    | 6.22637   | 0.994454    | 0.636826 | 60.613    | 1.39306    | 770.579   |
| ATHL1       | 10.6983   | 20.6542     | 12.4911  | 10.7834   | 18.7668    | 13.3146   |
| FLJ39080    | 0         | 0           | 0        | 0         | 0          | 0         |
| LOC10050646 | 0.907916  | 0.229349    | 0.687297 | 0.852519  | 0.908689   | 0.727425  |
| CLK1        | 122.218   | 148.46      | 131.814  | 112.74    | 197.945    | 157.882   |



|             |          |           |           |           |           |           |
|-------------|----------|-----------|-----------|-----------|-----------|-----------|
| TSSK6       | 1.12768  | 1.4623    | 1.53658   | 0.917687  | 2.05891   | 1.12435   |
| TOMM7       | 186.543  | 271.34    | 219.062   | 303.499   | 238.953   | 213.713   |
| MIR885      | 0        | 0         | 0         | 0         | 0         | 0         |
| ITIH1       | 0.17069  | 0.0377281 | 0         | 0         | 0.122303  | 0.106367  |
| PHB         | 62.0741  | 60.1475   | 48.9412   | 57.2112   | 46.7203   | 47.389    |
| ARMCX2      | 9.90883  | 10.0875   | 10.4705   | 8.31729   | 10.0428   | 9.96104   |
| DBC1        | 0.185705 | 0.0820944 | 0.04686   | 0.116249  | 0.0788511 | 0.0578618 |
| C17orf85    | 12.5571  | 11.1252   | 14.9832   | 12.8778   | 15.9125   | 13.8031   |
| LOC10013205 | 0.11207  | 0.528455  | 0         | 0         | 0         | 0.104756  |
| FAM187B     | 0        | 0         | 0.0724293 | 0.269522  | 0         | 0         |
| MMACHC      | 4.72873  | 3.1279    | 2.8638    | 3.2234    | 2.63251   | 2.81681   |
| MEAF6       | 36.3392  | 35.633    | 32.9312   | 30.5349   | 34.0529   | 31.5622   |
| DPP9        | 18.659   | 21.3553   | 19.9222   | 21.3962   | 19.6733   | 20.4173   |
| LOC10012854 | 2.37948  | 0         | 1.0293    | 0.957556  | 1.299     | 1.48279   |
| MIR4724     | 0        | 0         | 0         | 0         | 0         | 0         |
| RNASE13     | 0.596431 | 0.468735  | 0.351168  | 0.311133  | 0.675325  | 0.206484  |
| ARHGEF16    | 7.41127  | 9.37378   | 6.72722   | 10.7929   | 6.35923   | 8.8091    |
| MIR1204     | 0        | 0         | 0         | 0         | 0         | 0         |
| COL25A1     | 0        | 0.153457  | 0.238451  | 0.0362159 | 0.0955866 | 0.0240347 |
| MIR4480     | 0        | 0         | 0         | 0         | 0         | 0         |
| ZNF642      | 2.04066  | 2.26577   | 1.93997   | 1.87159   | 2.02513   | 2.12928   |
| RGPD8       | 4.91901  | 4.82382   | 5.39593   | 5.82716   | 5.2092    | 4.93488   |
| SF3A2       | 36.8996  | 64.055    | 44.1383   | 63.0185   | 57.0342   | 53.6933   |
| CASP8       | 11.8436  | 15.4551   | 10.565    | 6.90376   | 11.9463   | 6.61285   |
| BDP1        | 6.01572  | 4.19939   | 5.84679   | 4.33224   | 5.44953   | 4.78653   |
| OLIG1       | 0.893974 | 0.592796  | 0.676743  | 1.13323   | 0.113875  | 0.139272  |
| PCK2        | 42.0182  | 39.4673   | 19.8012   | 19.6801   | 26.4649   | 33.015    |
| OR51M1      | 0        | 0         | 0         | 0         | 0         | 0         |
| KDM1A       | 23.0631  | 27.4734   | 27.1721   | 28.9071   | 27.4361   | 25.9735   |
| C2orf63     | 1.85266  | 1.51575   | 2.71551   | 2.44241   | 2.40948   | 2.43132   |
| MIR4509-1   | 0        | 0         | 0         | 0         | 0         | 0         |
| FAM55C      | 2.74572  | 2.36921   | 2.22832   | 1.73995   | 1.99341   | 1.55932   |
| EFHA1       | 34.1522  | 26.6345   | 26.5851   | 20.9755   | 29.6863   | 27.707    |
| AKR1B10     | 9.68568  | 5.31542   | 1.21359   | 3.82631   | 2.68027   | 2.33103   |
| FAM108A1    | 38.2538  | 66.8534   | 52.6492   | 75.9304   | 65.2706   | 62.499    |
| ZNF562      | 5.13027  | 4.38499   | 5.491     | 4.51884   | 5.5459    | 5.59198   |
| APIP        | 17.0791  | 18.5657   | 9.55776   | 5.32096   | 15.4691   | 14.6229   |
| SYT11       | 2.9512   | 2.64148   | 2.20649   | 1.53952   | 2.1465    | 1.97529   |
| DNAI2       | 0        | 0.0402786 | 0.155196  | 0         | 0.0284688 | 0         |
| LOC10065298 | 20.2708  | 28.8894   | 17.6474   | 18.7898   | 16.2666   | 17.6889   |
| OSBPL3      | 8.58629  | 9.51866   | 9.47799   | 9.27093   | 11.071    | 10.8188   |
| ANXA2P2     | 688.161  | 611.532   | 692.987   | 579.73    | 563.032   | 675.025   |
| SLC6A16     | 1.83102  | 1.52894   | 2.20748   | 3.27941   | 2.15961   | 1.37344   |

|             |           |           |           |           |           |           |
|-------------|-----------|-----------|-----------|-----------|-----------|-----------|
| RPS19       | 858.745   | 1689.22   | 1010      | 2013.25   | 1242.05   | 1162.63   |
| FAM18B1     | 20.572    | 16.2712   | 18.0133   | 13.2448   | 17.4326   | 14.3902   |
| KIAA1549    | 1.01258   | 0.708214  | 0.694902  | 0.901135  | 0.924034  | 0.976998  |
| B3GAT3      | 25.8762   | 42.4389   | 28.9909   | 43.0063   | 39.4713   | 33.1771   |
| ITFG2       | 10.8288   | 11.2079   | 13.8575   | 14.2029   | 12.9636   | 11.5769   |
| LOC10065293 | 0.352778  | 0.571824  | 0.623128  | 0.938551  | 1.12343   | 0.549591  |
| PHTF2       | 5.31131   | 5.73946   | 6.37669   | 4.24241   | 8.23765   | 4.88749   |
| FLJ11235    | 0.702949  | 0.552447  | 1.00515   | 0.806737  | 0.845678  | 0.73008   |
| DKFZp434L19 | 0         | 0         | 0         | 0         | 0         | 0         |
| CHCHD8      | 38.9048   | 48.2102   | 34.5529   | 41.1333   | 33.7536   | 39.0382   |
| IRF2BPL     | 17.8485   | 19.2228   | 20.5956   | 20.9218   | 18.2243   | 17.8017   |
| DCHS2       | 0.444212  | 0.326728  | 0.226191  | 0.160112  | 0.241955  | 0.212212  |
| RNF114      | 31.5453   | 34.1205   | 27.7256   | 29.659    | 29.7196   | 26.1677   |
| PNPO        | 12.6617   | 11.772    | 9.47752   | 10.8762   | 8.10047   | 8.82786   |
| LOC10050553 | 0.0827812 | 0.182975  | 0.21933   | 0.116595  | 0.13181   | 0.309514  |
| CNOT6       | 9.79836   | 7.25346   | 7.19477   | 7.51447   | 8.95181   | 7.27309   |
| LHX3        | 0         | 0.0379194 | 0         | 0.161092  | 0.027316  | 0.142547  |
| BHMT2       | 3.37021   | 6.39488   | 8.34343   | 3.97538   | 3.71681   | 1.88843   |
| TLR7        | 2.1247    | 0.13662   | 0.204707  | 0.0725477 | 0.123021  | 0.168512  |
| C9orf64     | 4.49251   | 3.61091   | 4.26653   | 2.83783   | 4.05785   | 4.32657   |
| LOC10014460 | 0         | 0         | 0.0725798 | 0         | 0         | 0.119494  |
| MIR513A1    | 0         | 0         | 0         | 0         | 0         | 0         |
| CTAGE1      | 1.31294   | 0.530673  | 0.641742  | 0.443759  | 0.597467  | 0.677828  |
| KIAA1715    | 7.39832   | 5.60038   | 7.97924   | 5.18286   | 6.39566   | 6.0504    |
| LOC10013045 | 0         | 0.0315074 | 0         | 0         | 0.0226969 | 0         |
| MAD2L1      | 5.12884   | 4.26786   | 4.05385   | 3.32864   | 3.89108   | 3.76009   |
| CREG1       | 317.773   | 264.831   | 290.11    | 233.283   | 212.904   | 273.067   |
| LOC10012966 | 0         | 0         | 0.561119  | 0         | 0.755355  | 0         |
| MIR3133     | 0         | 0         | 0         | 0         | 0         | 0         |
| LOC10050692 | 2.41513   | 5.51048   | 4.36426   | 5.34024   | 2.13365   | 1.55356   |
| LOC10050686 | 0.197252  | 1.06587   | 0.370181  | 0.110921  | 0.348076  | 0.0819461 |
| GOLGA7B     | 25.2419   | 46.9515   | 25.1827   | 45.7186   | 36.7605   | 47.2766   |
| GDA         | 1.39802   | 0.735316  | 0.356245  | 0.831811  | 0.288238  | 0.338234  |
| SFTA1P      | 0         | 0.170518  | 0.583995  | 0.181096  | 0.122836  | 0.240369  |
| FAM197Y1    | 0         | 0         | 0         | 0         | 0         | 0         |
| ZBTB44      | 16.722    | 12.0672   | 15.544    | 11.5247   | 14.4881   | 12.9909   |
| LILRP2      | 0         | 0.0160843 | 0         | 0         | 0.0115867 | 0         |
| KIAA0196    | 12.5406   | 9.06418   | 11.5263   | 9.38526   | 9.73237   | 9.96857   |
| SIAH3       | 0         | 0.0430487 | 0.0184293 | 0         | 0.0913004 | 0.0758539 |
| LOC644714   | 3.89435   | 2.53768   | 1.68166   | 1.74603   | 1.27202   | 2.49678   |
| CLSTN3      | 49.5106   | 47.5258   | 37.9702   | 40.6043   | 44.773    | 37.2768   |
| IRX3        | 62.8133   | 66.4478   | 44.1131   | 57.6976   | 48.0916   | 48.784    |
| KCTD4       | 1.84125   | 0.385559  | 1.35716   | 1.7744    | 1.75905   | 1.29836   |

|             |          |          |          |          |          |           |
|-------------|----------|----------|----------|----------|----------|-----------|
| C10orf95    | 1.37269  | 1.7459   | 1.80707  | 2.66204  | 2.91584  | 2.76167   |
| ISCA2       | 16.0254  | 20.0482  | 15.7625  | 17.0949  | 16.9417  | 15.8287   |
| DEFB107A    | 0        | 0        | 0        | 0        | 0        | 0         |
| INPP5A      | 13.0788  | 14.7689  | 14.8511  | 14.5079  | 14.3293  | 14.0833   |
| LOC728012   | 0        | 0        | 0        | 0        | 0        | 0         |
| C10orf90    | 0.353872 | 0.312871 | 0.438354 | 0.181244 | 0.61468  | 0.661553  |
| MIR95       | 0        | 0        | 0        | 0        | 0        | 0         |
| AGPAT2      | 87.7046  | 133.164  | 149.429  | 106.147  | 94.6764  | 79.7869   |
| KIFC2       | 51.6636  | 88.7033  | 70.5625  | 91.9945  | 114.509  | 115.805   |
| MIR516B1    | 0        | 0        | 0        | 0        | 0        | 0         |
| SERBP1      | 43.0067  | 39.6228  | 41.822   | 38.9666  | 36.2637  | 40.5789   |
| HIST1H4C    | 0        | 0        | 0        | 0        | 0.334672 | 0         |
| MAX         | 44.6779  | 41.5848  | 46.0716  | 45.6667  | 51.1309  | 51.5495   |
| SNRPD2P2    | 0.167943 | 0        | 0        | 0        | 0        | 0.209309  |
| LOC10050638 | 0        | 0        | 0        | 0        | 0        | 0         |
| PLAC8       | 0.310577 | 0.366126 | 0.530193 | 0        | 0.403865 | 0.489901  |
| ZNF385D     | 6.06541  | 4.74978  | 3.7607   | 3.09175  | 3.86309  | 5.1116    |
| SLX1A       | 14.5402  | 17.0868  | 9.30739  | 11.5384  | 8.02066  | 10.174    |
| IDO1        | 3.08272  | 1.735    | 0.651836 | 0.180771 | 1.06589  | 0.493912  |
| ACTR3B      | 9.02137  | 8.42835  | 6.09002  | 9.16936  | 5.36075  | 6.34605   |
| LOC10012951 | 5.2836   | 5.01523  | 6.38312  | 6.4115   | 5.33897  | 7.37967   |
| LOC151534   | 1.35705  | 1.14801  | 1.27445  | 0.970621 | 1.24049  | 0.779213  |
| H19         | 42.9334  | 43.1034  | 53.4785  | 56.6766  | 38.6024  | 39.225    |
| CRLF2       | 0        | 0        | 0        | 0.564166 | 0        | 0.0736142 |
| ATP10B      | 2.66112  | 1.68691  | 3.58236  | 2.33374  | 3.05399  | 2.33883   |
| DGAT2L7     | 0        | 0        | 0        | 0        | 0        | 0         |
| LOC729658   | 0        | 0        | 0        | 0        | 0        | 0         |
| MORC3       | 14.7867  | 12.5473  | 15.7681  | 10.6391  | 16.8674  | 14.5824   |
| ZNF169      | 1.54651  | 1.66033  | 1.50521  | 1.55588  | 2.14586  | 1.54884   |
| MIR4275     | 0        | 0        | 0        | 0        | 0        | 0         |
| KIAA1147    | 9.9427   | 7.44272  | 10.7524  | 8.27151  | 12.2667  | 8.96492   |
| CCDC90A     | 13.2543  | 10.7563  | 14.2153  | 12.6598  | 12.9812  | 12.836    |
| MIR875      | 0        | 0        | 0        | 0        | 0        | 0         |
| MGC34800    | 0        | 0        | 0        | 0        | 0        | 0         |
| SMEK1       | 30.8728  | 24.9897  | 27.7755  | 25.9277  | 31.1638  | 26.6778   |
| SYT12       | 6.69052  | 7.4498   | 3.75094  | 3.96925  | 4.18991  | 2.66908   |
| POC1B-GALN1 | 2.204    | 2.46346  | 1.5245   | 0.888538 | 1.54663  | 0.896144  |
| FDXACB1     | 2.09725  | 2.87004  | 2.55718  | 2.46815  | 2.62724  | 2.16426   |
| LINC00087   | 1.77925  | 2.04494  | 1.99321  | 2.94011  | 2.33424  | 2.12859   |
| TP53TG1     | 21.4183  | 36.3914  | 26.224   | 37.4831  | 25.5036  | 32.9999   |
| MSX2        | 2.82373  | 2.12822  | 2.76834  | 9.25831  | 2.9188   | 9.34623   |
| PAPOLG      | 3.4485   | 2.37772  | 3.64305  | 2.73062  | 4.04033  | 3.43192   |
| GPER        | 2.94609  | 4.36549  | 5.25692  | 5.04467  | 3.45959  | 2.62437   |

|              |          |           |           |          |           |          |
|--------------|----------|-----------|-----------|----------|-----------|----------|
| SH3YL1       | 58.2496  | 52.5403   | 37.8796   | 36.6882  | 55.6693   | 54.428   |
| NUSAP1       | 8.87983  | 11.7728   | 7.92489   | 9.02551  | 10.3484   | 11.4047  |
| UNK          | 19.3492  | 19.9217   | 25.3259   | 23.2695  | 26.9617   | 26.7504  |
| RPL22        | 173.527  | 197.956   | 195.012   | 224.936  | 190.174   | 172.07   |
| PLVAP        | 42.1674  | 48.3239   | 45.1367   | 33.668   | 36.1225   | 34.4502  |
| LOC339902    | 0        | 0         | 0         | 0        | 0         | 0        |
| MYOM2        | 1.59683  | 0.578335  | 0.611688  | 0.975514 | 0.245068  | 0.3237   |
| RNF217       | 5.76204  | 4.36666   | 7.61113   | 4.85838  | 5.05544   | 4.17689  |
| GUSBP5       | 0.468034 | 0.689677  | 0.27557   | 0.292984 | 0.695551  | 0.356472 |
| TMEM14C      | 96.427   | 113.039   | 89.9613   | 83.4422  | 77.6093   | 68.4556  |
| FAM53C       | 11.3266  | 12.7277   | 13.1874   | 11.9831  | 14.7514   | 12.1903  |
| C20orf166-A5 | 0.454278 | 0.365131  | 0.312628  | 0.465338 | 0.762785  | 0.360292 |
| LPPR2        | 12.9203  | 16.9106   | 17.2532   | 16.5572  | 24.5839   | 17.8409  |
| KL           | 1.07851  | 0.630022  | 0.772697  | 0.614853 | 0.748237  | 0.636075 |
| RBMXL3       | 0        | 0         | 0         | 0        | 0         | 0        |
| LOC648044    | 0.876862 | 0         | 0.663789  | 0        | 1.11696   | 0        |
| ENDOV        | 8.0622   | 13.5513   | 8.78362   | 11.3201  | 13.3157   | 11.2218  |
| XRCC1        | 12.9071  | 16.6852   | 16.2105   | 16.2971  | 18.9322   | 20.3516  |
| LOC10050071  | 0        | 0.0709166 | 0         | 0        | 0         | 0        |
| LOC10012971  | 1.54823  | 1.02664   | 1.31852   | 1.09032  | 1.2326    | 0.763794 |
| OR56A5       | 0        | 0.112152  | 0         | 0        | 0         | 0        |
| BANF2        | 0        | 0         | 0         | 0        | 0         | 0        |
| PANK1        | 9.20297  | 6.08555   | 6.90333   | 6.59804  | 5.52886   | 6.65981  |
| SNORA84      | 0        | 43.5775   | 0         | 0        | 0         | 0        |
| SEC11C       | 97.0814  | 70.3056   | 77.1022   | 69.0174  | 58.9317   | 64.4491  |
| EBNA1BP2     | 49.5072  | 38.2941   | 35.9971   | 37.0359  | 38.0802   | 39.1881  |
| CELA2A       | 0        | 0         | 0         | 0        | 0         | 0        |
| LOC642236    | 4.45348  | 3.52529   | 2.77313   | 2.83369  | 4.60555   | 2.92074  |
| LOC10050601  | 2.30902  | 1.36099   | 1.981     | 0.722712 | 1.27455   | 0.959257 |
| TLE1         | 14.2597  | 12.7143   | 13.196    | 15.3753  | 12.1992   | 16.7366  |
| C10orf31     | 0.532684 | 0.235483  | 0         | 0        | 0.33927   | 0.165973 |
| ANKRD20A5F   | 0.132111 | 0.210248  | 0.0816741 | 0.198481 | 0.0841425 | 0.115257 |
| HERPUD2      | 12.32    | 13.6762   | 13.9894   | 10.8292  | 13.0124   | 13.4566  |
| LOC10065284  | 0.337043 | 0.963708  | 0.209887  | 0.618398 | 0.653937  | 0.532863 |
| RPL27A       | 105.248  | 157.351   | 105.013   | 170.512  | 110.932   | 103.187  |
| BBS9         | 2.8297   | 1.92639   | 2.46443   | 1.88168  | 2.5517    | 1.88179  |
| GAS6         | 104.206  | 151.342   | 143.374   | 138.405  | 156.717   | 117.941  |
| MIR2278      | 0        | 0         | 0         | 0        | 0         | 0        |
| RNF139       | 10.0414  | 8.11633   | 11.2618   | 8.09577  | 9.35083   | 9.23159  |
| RPL26        | 1224.97  | 1674.74   | 1398.38   | 1929.31  | 1458.02   | 1372.56  |
| AMIGO1       | 2.86267  | 2.06095   | 2.78622   | 1.9584   | 2.21395   | 2.29358  |
| POM121C      | 15.4193  | 14.7848   | 14.5439   | 14.6623  | 14.4407   | 14.5791  |
| SLC22A11     | 0        | 0         | 0.0304055 | 0        | 0         | 0        |

|             |            |           |           |           |           |           |
|-------------|------------|-----------|-----------|-----------|-----------|-----------|
| SNORD114-1! | 0          | 0         | 0         | 0         | 0         | 0         |
| MS4A1       | 0.270721   | 0.268249  | 0.403503  | 0.200184  | 0.716472  | 0.295281  |
| EXD3        | 3.49533    | 7.49639   | 6.60186   | 7.53898   | 9.25744   | 7.03045   |
| MFAP3L      | 17.2299    | 10.494    | 16.222    | 12.7201   | 14.2298   | 13.9741   |
| LOC285878   | 0.0327641  | 0         | 0         | 0         | 0         | 0         |
| PSMD6       | 72.914     | 66.4805   | 65.29     | 62.4427   | 55.9529   | 59.373    |
| SCAF8       | 11.5217    | 8.96027   | 11.8141   | 9.67894   | 12.1854   | 10.2775   |
| LOC10050660 | 1.44382    | 0.651233  | 3.49468   | 2.48247   | 3.47334   | 2.33476   |
| DHX15       | 48.3882    | 42.6944   | 45.4572   | 40.7344   | 45.1056   | 37.9946   |
| LOC10028956 | 3.54651    | 6.22393   | 6.92266   | 6.40657   | 5.19944   | 7.33668   |
| CYBASC3     | 28.9362    | 38.6432   | 28.9102   | 34.3197   | 34.0686   | 33.1583   |
| ACOT9       | 15.0518    | 15.059    | 14.7128   | 12.1456   | 12.6682   | 12.0525   |
| ATG14       | 10.5759    | 10.7018   | 14.0839   | 12.399    | 15.9377   | 13.1302   |
| C11orf51    | 29.3393    | 44.0475   | 30.9595   | 43.4445   | 33.7194   | 33.4083   |
| LOC10050729 | 3.75986    | 4.64518   | 4.58389   | 5.82591   | 4.73806   | 2.92098   |
| ARMC4       | 0.109939   | 0.097201  | 0.145643  | 0.0516154 | 0.157546  | 0.0513819 |
| HSD17B12    | 48.5851    | 34.8339   | 67.7435   | 66.3303   | 37.1985   | 39.9489   |
| CD300LB     | 0.221881   | 0.0784694 | 0.0671862 | 0.0833372 | 0.254371  | 0.276534  |
| ADA         | 7.42453    | 10.8992   | 8.53666   | 7.4319    | 12.9817   | 8.94777   |
| LOC10028818 | 0.470016   | 0.640002  | 0.554756  | 0.592563  | 0.489006  | 0.418464  |
| MGC15885    | 0          | 0         | 0.0332572 | 0         | 0         | 0         |
| TSIX        | 0.00221228 | 6.63E-10  | 0.0259249 | 0.0167931 | 0.0114897 | 0.0171084 |
| NAGK        | 57.0282    | 63.7763   | 48.6263   | 58.3859   | 58.4346   | 72.5468   |
| TRMT1       | 23.2549    | 36.0919   | 22.3813   | 35.097    | 31.3207   | 29.2808   |
| RNU5D-1     | 0          | 0         | 0         | 0         | 0         | 0         |
| ABCB8       | 9.34603    | 11.7847   | 9.48152   | 11.8208   | 10.1874   | 13.0947   |
| FRS3        | 2.93179    | 5.47687   | 2.89952   | 2.7085    | 4.78866   | 3.3298    |
| TCL6        | 0          | 0         | 0         | 0         | 0.0190052 | 0.018595  |
| CTSA        | 54.9811    | 53.8339   | 55.858    | 55.958    | 55.7502   | 51.5508   |
| C6orf89     | 18.847     | 16.189    | 20.8291   | 17.5909   | 19.6645   | 17.1727   |
| SCUBE3      | 0.508428   | 0.399573  | 0.441902  | 0.565814  | 0.815548  | 0.586723  |
| BCL2        | 6.57095    | 6.43281   | 7.15533   | 5.81114   | 6.50698   | 4.71764   |
| GALNT6      | 6.90142    | 5.9502    | 5.72738   | 5.61494   | 6.49777   | 5.9969    |
| HAND1       | 0          | 0         | 0         | 0.0568758 | 0         | 0.0377457 |
| RFTN1       | 16.1883    | 16.0981   | 17.367    | 11.6258   | 18.1329   | 12.6047   |
| MTRNR2L8    | 0.860419   | 0.987788  | 0.845753  | 1.53192   | 1.14762   | 0.856398  |
| LOC10050576 | 1.96167    | 2.06468   | 1.76986   | 1.34881   | 1.83631   | 1.03066   |
| C21orf54    | 0          | 0         | 0         | 0         | 0         | 0         |
| CNTN2       | 0.507472   | 0.306412  | 0.796427  | 0.476508  | 0.551825  | 0.424218  |
| TBR1        | 0.031055   | 0         | 0         | 0         | 0         | 0         |
| RABIF       | 9.6633     | 8.35955   | 6.30618   | 6.80526   | 6.60559   | 6.95617   |
| OR1L4       | 0          | 0         | 0         | 0         | 0         | 0         |
| SNX4        | 16.3823    | 12.3646   | 12.5527   | 11.0305   | 12.6226   | 12.209    |

|             |            |            |           |           |           |           |
|-------------|------------|------------|-----------|-----------|-----------|-----------|
| ZNF354A     | 12.6168    | 12.3751    | 11.8194   | 12.0321   | 10.1702   | 10.4667   |
| WT1         | 0          | 0          | 0.126234  | 0         | 0.0265511 | 0.0208908 |
| SNORA48     | 218.804    | 38.6906    | 198.763   | 41.0907   | 167.229   | 163.619   |
| CASP1       | 36.6031    | 42.0578    | 27.536    | 29.9322   | 35.9692   | 37.3964   |
| PHKA1-AS1   | 0          | 0          | 0         | 0         | 0.152868  | 0         |
| THG1L       | 6.76987    | 7.48186    | 5.76543   | 5.1649    | 7.49169   | 5.85344   |
| LOC10050705 | 0.13993    | 0.371151   | 0.105927  | 1.05113   | 0.534731  | 0.348793  |
| LRRC34      | 1.95996    | 1.0953     | 2.34794   | 1.28051   | 1.94885   | 1.74546   |
| RPS16       | 924.589    | 1462.18    | 1055.27   | 1820.12   | 1156.05   | 1107.81   |
| TXNRD3      | 4.60659    | 3.89042    | 3.94721   | 3.26831   | 3.49796   | 3.68246   |
| LOC10029361 | 0          | 0          | 0         | 0         | 0         | 0         |
| TRIM27      | 17.9233    | 19.1641    | 16.7382   | 19.0318   | 18.3715   | 15.5532   |
| SLC13A1     | 0.00429308 | 0.00759135 | 0         | 0         | 0         | 0         |
| LOC644634   | 2.24392    | 3.65845    | 2.08949   | 1.45637   | 2.96458   | 2.36388   |
| KRT73       | 5.61852    | 5.04639    | 4.42196   | 29.2252   | 4.91321   | 18.7007   |
| UNC93B1     | 13.707     | 19.6543    | 13.0701   | 15.8408   | 15.4828   | 11.0603   |
| LOC10065298 | 1.17985    | 2.23251    | 1.53815   | 1.74403   | 1.61272   | 1.84021   |
| UGT1A4      | 1.76E-08   | 1.43E-08   | 1.35E-08  | 1.29E-08  | 0.0740937 | 0.0754603 |
| C1orf61     | 0          | 0.122786   | 0.10513   | 0         | 0.353805  | 0         |
| C10orf107   | 0.355786   | 0.314563   | 0.0673329 | 0.417596  | 0         | 0.110855  |
| HBZ         | 1.23214    | 3.05025    | 1.86547   | 2.77669   | 0.470852  | 0.614252  |
| TMEM108     | 0.698435   | 1.16517    | 0.996533  | 1.47991   | 1.67822   | 1.28791   |
| LOC127841   | 0          | 0          | 0         | 0         | 0         | 0.267346  |
| CDH1        | 91.1463    | 64.5006    | 82.558    | 76.808    | 77.6619   | 86.9228   |
| CRY1        | 5.2151     | 6.54099    | 5.37093   | 6.17806   | 6.23752   | 5.59273   |
| MIR1249     | 0          | 0          | 0         | 0         | 0         | 0         |
| PAQR8       | 2.16241    | 1.58721    | 2.22379   | 1.11101   | 2.13084   | 1.58906   |
| C16orf80    | 16.615     | 19.839     | 20.4225   | 21.5522   | 21.3826   | 18.6261   |
| C7orf13     | 2.09071    | 2.63506    | 2.86229   | 3.13268   | 1.30325   | 1.71864   |
| LOC10050651 | 0          | 0          | 0         | 0.0422579 | 0         | 0.0280445 |
| KIAA1328    | 1.65198    | 1.16064    | 1.70142   | 1.51279   | 2.00155   | 1.78482   |
| ADCY6       | 23.4904    | 19.7858    | 29.9815   | 20.4766   | 22.863    | 18.0138   |
| MIR662      | 0          | 0          | 0         | 0         | 0         | 0         |
| TASP1       | 5.31266    | 6.53014    | 5.98352   | 6.16465   | 6.79483   | 5.1678    |
| CWC25       | 19.2805    | 21.4047    | 17.2372   | 16.6296   | 22.6428   | 16.7718   |
| SSU72       | 107.076    | 123.528    | 92.8656   | 123.867   | 89.4715   | 92.0308   |
| SNORD53     | 0          | 0          | 0         | 0         | 0         | 0         |
| LOC10050641 | 3.44584    | 4.58669    | 4.56274   | 4.09293   | 5.27315   | 4.2266    |
| SESN2       | 7.88146    | 7.36226    | 7.37883   | 7.40056   | 6.42102   | 8.10466   |
| C2orf71     | 0.0945832  | 0.0836245  | 0.163657  | 0.152249  | 0.180722  | 0.261021  |
| MIER1       | 11.9602    | 10.0114    | 11.0728   | 7.81387   | 9.77067   | 8.57675   |
| FBXO38      | 11.3072    | 8.47213    | 9.69646   | 8.00191   | 10.4986   | 9.6052    |
| PDE11A      | 0.364738   | 0.194815   | 0.516947  | 0.526868  | 0.283044  | 0.342262  |

|             |           |           |           |           |           |           |
|-------------|-----------|-----------|-----------|-----------|-----------|-----------|
| SGTB        | 2.25997   | 1.58429   | 2.0782    | 1.1425    | 1.81479   | 1.65691   |
| MIR4454     | 0         | 0         | 0         | 0         | 0         | 0         |
| LOC10065287 | 0.797616  | 1.83352   | 0.850351  | 2.39664   | 0.508006  | 0.503253  |
| RHOXF2B     | 0         | 0.0372726 | 0         | 0         | 0         | 0.0262705 |
| FLOT1       | 52.3239   | 61.2107   | 46.4417   | 52.6177   | 45.0038   | 40.4372   |
| LOC150381   | 2.79344   | 3.10159   | 2.65561   | 2.623     | 1.90329   | 1.45738   |
| MIR1254-2   | 0         | 0         | 0         | 0         | 0         | 0         |
| MIR30E      | 0         | 0         | 0         | 0         | 0         | 0         |
| USP38       | 7.76331   | 5.73351   | 7.32154   | 6.28056   | 6.30158   | 9.45616   |
| MIR4282     | 0         | 0         | 0         | 0         | 0         | 0         |
| FAM173B     | 7.97524   | 7.75132   | 8.13537   | 6.53263   | 6.7366    | 8.35354   |
| LOC730102   | 14.7595   | 14.6141   | 19.4137   | 15.8029   | 11.4634   | 8.36513   |
| HNF1A       | 0.183065  | 0.269757  | 0.184775  | 0.171895  | 0.194325  | 0.24717   |
| CDC42BPA    | 5.62923   | 4.61169   | 5.86713   | 4.59611   | 4.8311    | 3.89711   |
| MIR1250     | 0         | 0         | 0         | 0         | 0         | 0         |
| MIR137      | 0         | 0         | 0         | 0         | 0         | 0         |
| CXCL2       | 0.838504  | 1.15321   | 0.775808  | 0.962307  | 16.3181   | 0.580578  |
| MIR520H     | 0         | 0         | 0         | 0         | 0         | 0         |
| GSDMA       | 67.4531   | 46.4966   | 69.9823   | 66.3154   | 50.4782   | 90.0066   |
| HMG1        | 114.473   | 115.272   | 96.7579   | 104.39    | 102.407   | 97.353    |
| PER2        | 7.46971   | 12.0767   | 10.5226   | 12.9814   | 10.4166   | 7.61098   |
| OR9A4       | 0         | 0.223384  | 0         | 0         | 0         | 0         |
| CUTC        | 14.1019   | 12.7488   | 13.2746   | 12.9303   | 14.1849   | 10.5013   |
| CFHR1       | 10.3153   | 8.14013   | 10.6482   | 5.28342   | 10.0989   | 7.54362   |
| KRTAP5-8    | 3.62077   | 0.505462  | 0.21639   | 33.7301   | 1.15305   | 196.814   |
| MIR3939     | 0         | 0         | 0         | 0         | 0         | 0         |
| C1QTNF9B-A1 | 4.29509   | 6.80026   | 11.4789   | 11.6419   | 8.06575   | 8.01922   |
| ALX1        | 0.170971  | 0.680229  | 0.388279  | 0.561888  | 0.544463  | 0.53271   |
| CCNO        | 3.71095   | 5.35671   | 3.21052   | 4.40899   | 4.2447    | 5.14415   |
| RPLP2       | 8.72485   | 12.2733   | 8.37728   | 14.5528   | 8.64605   | 8.77209   |
| TBP         | 10.5953   | 15.7346   | 11.3496   | 14.0234   | 13.3226   | 11.3919   |
| TUBGCP3     | 8.28522   | 8.90132   | 10.6433   | 8.60481   | 10.17     | 7.86966   |
| EXOC6B      | 5.27427   | 2.67447   | 7.54493   | 3.56868   | 5.70572   | 4.49504   |
| HIST1H2BG   | 11.6116   | 3.18606   | 2.42483   | 1.87984   | 4.33527   | 4.99023   |
| LOC10050558 | 0.0477766 | 0.0844822 | 0.108502  | 0.358892  | 0.517296  | 0.267951  |
| PODNL1      | 2.23804   | 3.67458   | 3.51881   | 5.65823   | 5.02442   | 4.60707   |
| POU3F1      | 13.3991   | 16.9581   | 18.6645   | 31.2302   | 19.0389   | 19.7511   |
| RET         | 3.2277    | 2.48631   | 2.38897   | 0.855189  | 2.57739   | 1.43946   |
| MACF1       | 24.9616   | 19.1463   | 29.0892   | 21.4032   | 29.6786   | 28.4366   |
| ATP1B2      | 3.61128   | 3.03584   | 2.17356   | 3.14078   | 2.80907   | 2.10283   |
| SFTA2       | 0         | 0.340702  | 0.291712  | 0         | 0         | 0         |
| MYO1F       | 4.10288   | 5.1321    | 4.14708   | 2.73618   | 8.86391   | 3.73342   |
| CTNNA2      | 0         | 0.0863708 | 0.0766905 | 0.0917287 | 0.0725892 | 0.0986424 |

|             |           |          |           |           |           |           |
|-------------|-----------|----------|-----------|-----------|-----------|-----------|
| MRPL37      | 49.6872   | 57.6303  | 50.9957   | 62.2984   | 47.3995   | 53.2218   |
| PDZK1       | 45.4829   | 40.7653  | 26.7211   | 23.976    | 18.831    | 22.4352   |
| CCDC59      | 12.5611   | 13.4729  | 13.4679   | 10.6501   | 11.5841   | 9.30822   |
| PI3         | 192.187   | 65.6125  | 5.76184   | 82.1899   | 77.3903   | 57.5945   |
| TNFRSF6B    | 6.79108   | 17.9435  | 4.87827   | 7.88932   | 13.2261   | 5.32408   |
| LPAL2       | 0.280675  | 0.425409 | 0.212473  | 0.395897  | 0.46902   | 0.396815  |
| BIN2        | 5.17677   | 4.29091  | 3.18406   | 1.64923   | 6.82973   | 3.19714   |
| RNF111      | 7.59246   | 5.1955   | 6.29867   | 4.50865   | 6.63526   | 5.44423   |
| AKAP13      | 16.1518   | 14.1564  | 17.0648   | 14.3738   | 19.3045   | 17.1703   |
| C11orf53    | 0         | 0.68195  | 0.250239  | 0         | 0         | 0         |
| MTNR1A      | 0         | 0        | 0         | 0         | 0.0660024 | 0.0645777 |
| LCOR        | 3.77557   | 2.38057  | 3.39172   | 2.72237   | 3.60792   | 2.75489   |
| SNORD41     | 0         | 0        | 0         | 0         | 0         | 0         |
| CD27        | 2.65513   | 3.32523  | 1.46022   | 0.430841  | 2.65427   | 1.66058   |
| FGFR4       | 2.88454   | 1.79983  | 1.25526   | 1.41076   | 1.39385   | 1.22811   |
| FLJ21369    | 0.0498141 | 0        | 0         | 0.0467746 | 0.0317269 | 0.031042  |
| LOC10065296 | 0         | 0        | 0.179639  | 0.0557058 | 0.226709  | 0.258784  |
| OR4F21      | 0         | 0        | 0.0964235 | 0.302745  | 0.0202814 | 0.0198437 |
| MIR4530     | 0         | 0        | 0         | 0         | 0         | 0         |
| MIR378C     | 0         | 0        | 0         | 0         | 0         | 0         |
| PBK         | 3.26459   | 4.18022  | 1.36348   | 2.06121   | 2.58112   | 2.98138   |
| NPPC        | 2.21426   | 2.93656  | 3.35241   | 2.07915   | 2.11541   | 4.48445   |
| USP9X       | 12.0843   | 8.90002  | 13.7166   | 9.76945   | 10.5291   | 10.5934   |
| UTP11L      | 20.4822   | 16.3948  | 16.0228   | 14.8705   | 13.4579   | 13.9312   |
| LTBP4       | 42.5019   | 59.5237  | 55.2068   | 58.3382   | 61.0098   | 51.4883   |
| PEX12       | 4.89719   | 3.96621  | 3.39591   | 2.91348   | 4.47619   | 3.82047   |
| ANKLE2      | 23.7033   | 29.1859  | 24.7258   | 26.1163   | 29.5841   | 25.5035   |
| C1orf50     | 10.54     | 12.4589  | 9.45323   | 11.7257   | 9.33985   | 11.5656   |
| DNAJB8-AS1  | 0.116553  | 0        | 0         | 0         | 0         | 0         |
| MIR622      | 0         | 0        | 0         | 0         | 0         | 0         |
| LOC10050663 | 4.30719   | 4.07526  | 4.26909   | 4.3996    | 5.21932   | 4.41646   |
| CORT        | 0.84856   | 1.13972  | 0.416768  | 0.784694  | 0.763147  | 0.545282  |
| C1orf130    | 1.42643   | 1.01778  | 0.719875  | 0.963423  | 1.05195   | 0.452242  |
| SPNS2       | 29.9073   | 29.3257  | 37.5401   | 39.4637   | 45.2479   | 57.3568   |
| LOC284009   | 1.53174   | 0.902844 | 0.773023  | 0.958852  | 0.650382  | 2.06811   |
| LOC10050753 | 0.0667978 | 0.118117 | 0.202265  | 0.376332  | 0.255263  | 0.124877  |
| LOC10012816 | 0.523549  | 0.743428 | 1.6814    | 1.07259   | 0.646857  | 0.375961  |
| EIF4A3      | 39.9611   | 34.0961  | 35.3079   | 35.5269   | 39.8404   | 35.0824   |
| CD68        | 13.7556   | 14.6629  | 18.4292   | 13.6638   | 18.4889   | 12.4724   |
| PRDM16      | 0.748506  | 0.637288 | 0.418885  | 0.348903  | 0.511259  | 0.428767  |
| PWP1        | 26.2454   | 26.3415  | 24.4297   | 24.168    | 24.8584   | 24.2867   |
| CTBP2       | 13.9566   | 12.0557  | 11.1387   | 13.4282   | 11.6044   | 11.4721   |
| TIMD4       | 0.319728  | 0        | 0.293656  | 0         | 0.247067  | 0         |



|             |           |           |           |           |           |           |
|-------------|-----------|-----------|-----------|-----------|-----------|-----------|
| TMEM189-UI  | 1.19E-22  | 1.11E-78  | 2.43E-31  | 1.83E-31  | 2.94E-36  | 1.84E-15  |
| WRNIP1      | 21.4615   | 22.6158   | 20.6346   | 21.9408   | 20.6161   | 21.7045   |
| OR1B1       | 0         | 0.219773  | 0         | 0         | 0         | 0         |
| LOC10065301 | 755.945   | 1174.52   | 847.082   | 983.479   | 715.811   | 658.667   |
| NBR1        | 38.0662   | 29.9105   | 34.7915   | 27.2589   | 36.6574   | 34.1383   |
| LOC10065302 | 7.08211   | 7.43559   | 7.37164   | 9.97498   | 9.86701   | 5.51659   |
| S100A14     | 467.038   | 566.882   | 426.739   | 657.794   | 565.335   | 758.726   |
| MST4        | 9.75241   | 7.33237   | 6.30647   | 5.17038   | 5.46948   | 7.3618    |
| MRPL10      | 22.7923   | 28.5586   | 22.8268   | 24.9026   | 25.3942   | 22.1019   |
| KLHL5       | 4.99211   | 4.28658   | 5.19484   | 3.59781   | 4.5467    | 3.0379    |
| CUX2        | 5.06671   | 4.39351   | 3.0347    | 2.43106   | 0.85108   | 1.41387   |
| CDNF        | 4.46724   | 5.33935   | 5.32309   | 6.60272   | 5.63774   | 3.55707   |
| FLJ40434    | 0         | 0         | 0         | 0         | 0         | 0         |
| GEMIN8      | 6.8366    | 7.60586   | 7.72041   | 9.48022   | 6.8515    | 7.26397   |
| SIGLEC5     | 0.202059  | 0.285836  | 0.015296  | 0.151784  | 0.231646  | 0.252529  |
| KAZN        | 12.7205   | 12.9461   | 13.3019   | 17.4197   | 13.8893   | 11.1945   |
| OR6N2       | 0         | 0         | 0         | 0         | 0         | 0         |
| GAB3        | 2.59091   | 2.65142   | 3.05576   | 1.89653   | 4.10308   | 2.03407   |
| LOC10013321 | 0.136413  | 0         | 0         | 0         | 0         | 0         |
| SURF2       | 25.8013   | 34.9955   | 24.3037   | 35.5146   | 29.0379   | 28.5938   |
| MIR3158-2   | 0         | 0         | 0         | 0         | 0         | 0         |
| MDS2        | 0.113579  | 0         | 0         | 0.213297  | 0         | 0.0707774 |
| GIMAP2      | 8.18777   | 7.03987   | 5.68641   | 3.45616   | 6.076     | 4.96184   |
| CCDC23      | 17.5921   | 23.529    | 28.6515   | 24.3983   | 20.7809   | 16.3881   |
| PANX2       | 0.572174  | 0.834942  | 0.748418  | 0.712347  | 1.22829   | 1.10162   |
| LOC10012938 | 4.59641   | 5.73161   | 5.17704   | 4.17512   | 3.81786   | 3.08481   |
| FAF2        | 21.7583   | 16.2588   | 19.0052   | 16.8846   | 17.0833   | 16.9151   |
| DKFZP434L18 | 0         | 0.0605027 | 0.0172677 | 0.0214187 | 0.0726406 | 0.0995016 |
| AKR1A1      | 148.211   | 142.795   | 110.732   | 123.457   | 92.5257   | 108.962   |
| CSAG2       | 1.60684   | 3.2297    | 0.490559  | 0         | 0.992872  | 0.395579  |
| SERPINI2    | 0.0759206 | 0.134248  | 0.114945  | 0         | 0.0483542 | 0.141931  |
| SBSN        | 779.171   | 612.583   | 934.778   | 837.115   | 1386.53   | 1486.19   |
| PTPN13      | 13.3736   | 10.3055   | 19.1098   | 11.2548   | 17.3138   | 15.3151   |
| DDX11L10    | 0.225903  | 0.866881  | 0.267599  | 0.543205  | 0.191839  | 0.255477  |
| C2orf48     | 0.179717  | 1.58895   | 0.680235  | 0.675006  | 0.915703  | 0.111992  |
| LOC10050666 | 0.254173  | 0.314824  | 0.076968  | 0.430021  | 0.323676  | 0.444087  |
| FOXN2       | 4.58892   | 3.99506   | 4.11271   | 2.50941   | 3.34824   | 2.5638    |
| ZNF573      | 0.77333   | 0.520362  | 1.75469   | 0.51482   | 0.921775  | 0.451517  |
| MIRLET7D    | 0         | 0         | 0         | 0         | 0         | 0         |
| TERF1       | 8.55637   | 7.01815   | 7.04948   | 6.71142   | 6.7846    | 6.25266   |
| TTPAL       | 6.93277   | 5.67902   | 7.92479   | 6.62575   | 7.03137   | 6.89884   |
| C2orf88     | 6.26634   | 3.05545   | 4.17875   | 3.6293    | 3.34817   | 3.63322   |
| GNL1        | 8.56863   | 10.9253   | 11.3734   | 12.2665   | 11.5183   | 10.2689   |

|             |           |          |           |           |           |            |
|-------------|-----------|----------|-----------|-----------|-----------|------------|
| ESYT1       | 40.642    | 41.6951  | 45.568    | 39.3777   | 36.5754   | 36.5615    |
| ZNF713      | 0.797887  | 0.793621 | 1.28351   | 0.515077  | 0.889313  | 0.745814   |
| XRCC4       | 6.09804   | 5.04753  | 4.63376   | 3.25047   | 3.47825   | 4.31171    |
| TMEM14B     | 55.9186   | 61.6467  | 61.8257   | 54.1348   | 46.3873   | 40.5639    |
| LINC00160   | 0.192461  | 0        | 0         | 0         | 0         | 0          |
| ABCA3       | 10.3101   | 8.19887  | 7.24886   | 6.36836   | 7.08013   | 6.83757    |
| MIR4283-2   | 0         | 0        | 0         | 0         | 0         | 0          |
| LOC10065285 | 1.07434   | 0.569919 | 0.487969  | 1.00879   | 2.18961   | 1.47286    |
| LOC338963   | 0         | 0.213492 | 0.243725  | 0.0755787 | 0         | 0          |
| GPR113      | 0.280193  | 0.294751 | 0.150537  | 0.0861086 | 0.376886  | 0.191912   |
| TRDMT1      | 1.08921   | 0.875463 | 1.53664   | 1.09248   | 1.16672   | 0.833009   |
| PRSS46      | 0         | 0        | 0.0907845 | 0.337825  | 0.152763  | 0.149465   |
| PATL2       | 1.2754    | 1.2216   | 1.16663   | 0.598792  | 1.25231   | 0.894124   |
| SPTA1       | 0.0236538 | 0        | 0.0179061 | 0.0111053 | 0.0150652 | 0.00737002 |
| LOC10050556 | 0.183372  | 1.14026  | 0.534432  | 1.1938    | 0.688231  | 0.609594   |
| TP73-AS1    | 8.85433   | 9.85381  | 7.62      | 8.87667   | 9.77565   | 9.12067    |
| ARMCX5-GPR  | 2.61351   | 1.9519   | 1.8413    | 2.79294   | 1.65781   | 1.76067    |
| ZNF440      | 6.70026   | 10.3669  | 9.16978   | 7.68953   | 8.34224   | 7.30681    |
| TUBE1       | 10.9895   | 11.9885  | 12.3109   | 11.1095   | 13.5187   | 12.5642    |
| USP29       | 0         | 0        | 0         | 0         | 0         | 0          |
| MIR4716     | 0         | 0        | 0         | 0         | 0         | 0          |
| TNFRSF25    | 35.1035   | 80.7579  | 75.0031   | 106.187   | 92.0153   | 75.2368    |
| TTC30A      | 1.82301   | 1.17221  | 2.24255   | 1.10877   | 2.09789   | 1.5104     |
| LOC10012836 | 0         | 0        | 0         | 0         | 0         | 0.134839   |
| NTPCR       | 25.638    | 21.9554  | 26.1146   | 23.3174   | 17.9533   | 18.4859    |
| ZMYND19     | 21.0838   | 27.3966  | 17.7945   | 33.0706   | 22.8893   | 23.938     |
| GNGT2       | 2.27013   | 0.499231 | 0.709301  | 0.380436  | 0.937781  | 0.664412   |
| MIR548F2    | 0         | 0        | 0         | 0         | 0         | 0          |
| FAM18B2     | 5.62602   | 7.42517  | 6.49416   | 6.69464   | 6.94209   | 5.603      |
| SKI         | 27.016    | 27.1687  | 38.2826   | 35.8901   | 33.9746   | 27.6295    |
| PREX1       | 5.13263   | 4.00407  | 4.00515   | 2.49748   | 5.54906   | 3.39554    |
| TMED7-TICAM | 5.45E-06  | 8.03E-07 | 1.08E-06  | 6.65E-07  | 7.60E-07  | 2.75E-06   |
| PKD1        | 11.8478   | 16.7552  | 20.8144   | 18.1478   | 23.0927   | 19.9264    |
| CAMSAP1     | 9.29451   | 7.78859  | 9.21178   | 8.20165   | 8.7726    | 7.99397    |
| PRAMEF18    | 0         | 0        | 0         | 0         | 0         | 0          |
| TFF2        | 0.561003  | 0.496004 | 0         | 0.351182  | 0         | 0          |
| ANKRD7      | 0         | 0        | 0.122182  | 0         | 0.102798  | 0.100579   |
| RPS28       | 147.482   | 257.867  | 170.52    | 295.91    | 159.472   | 142.885    |
| MFAP4       | 111.462   | 92.6235  | 153.909   | 86.0761   | 151.701   | 103.34     |
| MIR1276     | 0         | 0        | 0         | 0         | 0         | 0          |
| PER1        | 32.8507   | 58.4521  | 38.9342   | 60.1503   | 40.1456   | 28.0711    |
| APBB1       | 10.4006   | 13.0961  | 10.6904   | 13.4173   | 12.8027   | 12.7371    |
| TAF5        | 2.27703   | 2.83671  | 2.39059   | 1.53853   | 2.71818   | 2.43283    |

|             |           |           |           |           |           |           |
|-------------|-----------|-----------|-----------|-----------|-----------|-----------|
| PROP1       | 0.0738547 | 0         | 0         | 0         | 0         | 0         |
| RPS6KA5     | 2.51572   | 1.83306   | 2.67038   | 1.84266   | 2.3823    | 2.05359   |
| BIRC6       | 8.61515   | 6.19471   | 8.36638   | 6.13705   | 7.90169   | 6.64577   |
| FAM48B2     | 0         | 0.081971  | 0         | 0         | 0         | 0         |
| MIA         | 15.4698   | 12.4072   | 5.64336   | 19.3405   | 12.3063   | 10.1027   |
| MIR532      | 0         | 0         | 0         | 0         | 0         | 0         |
| VPS41       | 11.4179   | 9.32031   | 12.0309   | 10.4805   | 11.5801   | 11.2408   |
| C12orf32    | 12.3943   | 12.1848   | 11.0788   | 14.3718   | 14.3417   | 12.4978   |
| RIOK2       | 6.07311   | 4.87592   | 4.25262   | 3.21325   | 6.36343   | 4.79508   |
| CDK5        | 15.4674   | 18.6781   | 12.4942   | 13.811    | 12.0736   | 15.2334   |
| LOC10065285 | 29.7362   | 29.0468   | 26.325    | 19.1968   | 26.6256   | 24.716    |
| LOC10028844 | 0         | 0         | 0.535849  | 0         | 0.319064  | 0.309586  |
| C5orf62     | 15.2821   | 18.7852   | 15.2601   | 10.7111   | 9.42823   | 5.96893   |
| TBX4        | 0.0818269 | 0.0723462 | 0.123887  | 0         | 0         | 0.0254955 |
| SNORD59B    | 0         | 0         | 0         | 0         | 0         | 0         |
| LOC10050663 | 0.253188  | 0.223853  | 0         | 0         | 0         | 0.157776  |
| SELO        | 18.4956   | 37.716    | 23.8787   | 37.3743   | 32.4672   | 28.7732   |
| MRM1        | 3.02186   | 4.4361    | 2.07176   | 2.78394   | 3.34089   | 4.29915   |
| GOSR1       | 11.8468   | 10.1585   | 11.4343   | 10.9884   | 11.4789   | 10.4603   |
| PRSS57      | 0         | 0.0973052 | 0.0833135 | 0         | 0.140191  | 0         |
| NPAS3       | 0.34551   | 0.104459  | 0.187308  | 0.293702  | 0.251342  | 0.235711  |
| FAM86C2P    | 2.80603   | 3.07622   | 2.71867   | 4.58426   | 3.73501   | 2.7625    |
| OR51I1      | 0         | 0         | 0         | 0.108655  | 0         | 0         |
| SRGAP3-AS3  | 0         | 0         | 0         | 0         | 0         | 0         |
| IL11RA      | 57.4477   | 94.9562   | 90.3587   | 81.0742   | 121.866   | 79.1793   |
| C3          | 38.0273   | 35.8309   | 37.655    | 12.8382   | 59.898    | 26.9097   |
| LOC10028937 | 0         | 0         | 0         | 0         | 0         | 0         |
| KIAA1841    | 4.43284   | 3.57786   | 4.35998   | 3.60922   | 4.86013   | 4.62746   |
| USP33       | 27.0072   | 22.1042   | 25.9665   | 17.9454   | 24.8118   | 19.4334   |
| GPRIN1      | 0.901192  | 1.38925   | 0.717192  | 0.672625  | 1.04493   | 1.67035   |
| PCDHB3      | 0.499584  | 0.47559   | 0.847983  | 0.358276  | 0.457865  | 0.472396  |
| SNORD115-2  | 0         | 0         | 0         | 0         | 0         | 0         |
| LOC283194   | 0.0772705 | 0         | 0.20473   | 0.108834  | 0.123035  | 0.120379  |
| OR2T4       | 0         | 0         | 0         | 0         | 0         | 0         |
| TMEM232     | 0.216874  | 0.109569  | 0.351804  | 0.232733  | 0.157861  | 0.212374  |
| RPL35A      | 1304.05   | 1936.12   | 1651.42   | 2396.22   | 1647.66   | 1364.41   |
| NDST3       | 0         | 0.028465  | 0.0487439 | 0.0604616 | 0.0205053 | 0.0401254 |
| STAM2       | 10.6467   | 7.10817   | 9.21823   | 7.62808   | 8.89126   | 8.17528   |
| GPRIN3      | 0.571344  | 0.23928   | 0.295928  | 0.0705898 | 0.469229  | 0.224866  |
| S100Z       | 0         | 0         | 0.0749149 | 0         | 0.315148  | 0.185007  |
| EGOT        | 0         | 0         | 0.167725  | 0         | 0.235192  | 0.0920462 |
| ZNF295      | 5.63961   | 4.13912   | 5.80858   | 4.01892   | 5.479     | 4.66714   |
| DECR2       | 17.3638   | 26.9182   | 15.6203   | 19.7552   | 17.7805   | 14.2662   |

|             |           |          |           |          |           |          |
|-------------|-----------|----------|-----------|----------|-----------|----------|
| CDKN3       | 3.44332   | 6.53177  | 2.47575   | 4.31535  | 3.55102   | 4.3243   |
| CLDN7       | 24.2605   | 8.93721  | 9.91439   | 22.1638  | 11.9413   | 7.80306  |
| LOC10050587 | 0         | 0        | 0         | 0        | 0         | 0        |
| MIR4426     | 0         | 0        | 0         | 0        | 0         | 0        |
| NAA60       | 15.685    | 24.0632  | 18.645    | 22.401   | 19.1906   | 17.1545  |
| DTWD2       | 2.11335   | 1.5085   | 2.5098    | 1.52926  | 1.55593   | 1.38944  |
| ATP5G3      | 111.057   | 97.2186  | 83.5696   | 88.0485  | 80.9775   | 83.9344  |
| CSNK2A2     | 44.7191   | 34.1155  | 43.0412   | 46.9094  | 51.1724   | 49.4043  |
| YDJC        | 8.87087   | 17.1386  | 11.0678   | 16.5821  | 18.2576   | 15.0995  |
| MGA         | 4.44048   | 3.37972  | 4.64603   | 3.00928  | 4.06124   | 3.62447  |
| PLCD4       | 3.14469   | 2.91531  | 1.73341   | 2.46546  | 2.21677   | 1.97867  |
| ARIH1       | 21.0705   | 16.2641  | 21.6927   | 18.03    | 20.9584   | 20.643   |
| DSN1        | 12.1098   | 14.5294  | 9.10937   | 12.4821  | 12.7567   | 11.2407  |
| POU5F1P4    | 0         | 0.383604 | 0.967055  | 0.931511 | 0.152267  | 0.265774 |
| ELFN2       | 0.147257  | 0.410617 | 0.222949  | 0.223363 | 0.173149  | 0.211764 |
| ASB16       | 1.73939   | 2.73764  | 2.22264   | 1.98914  | 3.13889   | 2.8679   |
| GUCA1A      | 0.10924   | 0        | 0.0826955 | 0        | 0.0347879 | 0        |
| CDKN1A      | 137.761   | 139.543  | 156.454   | 182.912  | 139.975   | 172.327  |
| IL27RA      | 5.0635    | 5.844    | 3.30519   | 1.90751  | 9.92597   | 4.64801  |
| ADAMDEC1    | 1.60275   | 0.610625 | 0.461131  | 0        | 0.526981  | 0.233123 |
| LEPROT      | 30.8659   | 27.3812  | 30.9858   | 24.1008  | 31.4855   | 25.8708  |
| CXorf48     | 0         | 0        | 0         | 0.208858 | 0         | 0        |
| MSGN1       | 0         | 0        | 0         | 0        | 0         | 0        |
| SYT7        | 6.754     | 4.4597   | 4.99956   | 8.22841  | 6.3572    | 13.3456  |
| SLC7A1      | 12.6733   | 11.5139  | 12.857    | 19.7523  | 12.7548   | 12.3826  |
| SPATA12     | 0.167897  | 0.111333 | 0         | 0.118239 | 0.106935  | 0.156939 |
| SATB2       | 1.44624   | 1.43952  | 1.68146   | 1.3406   | 1.11697   | 0.965648 |
| PDCD5       | 61.1295   | 62.9153  | 58.472    | 43.6806  | 49.2963   | 46.8538  |
| STIM1       | 31.9787   | 29.0418  | 32.722    | 31.5686  | 32.8338   | 26.7258  |
| OR4K15      | 0         | 0        | 0         | 0        | 0         | 0        |
| SLC48A1     | 16.6358   | 21.8604  | 19.6291   | 21.921   | 21.2656   | 20.9694  |
| IGSF8       | 39.1072   | 49.6447  | 44.2146   | 55.5645  | 46.8736   | 45.7178  |
| MIR4441     | 0         | 0        | 0         | 0        | 0         | 0        |
| SAV1        | 19.3636   | 15.4399  | 17.2874   | 15.6286  | 17.1949   | 12.4749  |
| HSPB7       | 21.7474   | 16.9119  | 53.3023   | 21.6179  | 17.7364   | 7.9895   |
| ACP6        | 23.9172   | 31.7447  | 18.4561   | 22.1316  | 22.831    | 25.0448  |
| ZNF585A     | 1.66744   | 1.53653  | 1.58239   | 1.8746   | 1.79487   | 1.3465   |
| MAMSTR      | 1.22157   | 1.42864  | 1.89164   | 2.21703  | 2.23789   | 2.55349  |
| SYT16       | 0.0315757 | 0        | 0         | 0        | 0         | 0        |
| MIR1226     | 0         | 0        | 0         | 0        | 0         | 0        |
| SENP8       | 1.97827   | 1.14802  | 1.49756   | 1.1555   | 1.38999   | 1.82661  |
| POLR2B      | 30.463    | 26.0574  | 29.1903   | 28.373   | 26.972    | 23.9644  |
| DEGS1       | 163.551   | 169.681  | 274.126   | 232.439  | 235.792   | 206.808  |

|             |           |           |           |          |           |           |
|-------------|-----------|-----------|-----------|----------|-----------|-----------|
| CLDND1      | 36.5248   | 37.5214   | 47.6808   | 35.0666  | 58.6259   | 52.3719   |
| FUK         | 6.82258   | 7.57879   | 7.77548   | 8.40093  | 9.27961   | 7.80229   |
| PANK4       | 9.76973   | 9.88135   | 8.69074   | 9.24501  | 9.51518   | 9.68882   |
| AICDA       | 0.0357744 | 0.063259  | 0.0270814 | 0        | 0         | 0.0222931 |
| LOC399708   | 0         | 0         | 0         | 0        | 0         | 0         |
| ZNF177      | 1.77814   | 3.30022   | 2.57718   | 1.95603  | 2.73904   | 2.63586   |
| CT45A6      | 0         | 0         | 0         | 0        | 0         | 0         |
| LOC10050666 | 11.7059   | 11.9987   | 14.0294   | 17.9359  | 20.0789   | 13.9433   |
| MIR1284     | 0         | 0         | 0         | 0        | 0         | 0         |
| LINC00470   | 0.396551  | 0         | 0.358943  | 0        | 0         | 0         |
| ZNF320      | 3.90046   | 3.88415   | 5.85227   | 4.73875  | 5.1699    | 4.81266   |
| GDAP1       | 2.69992   | 2.31841   | 2.54075   | 2.26529  | 2.72211   | 2.30364   |
| LOC10065286 | 0.994311  | 0.972657  | 2.80961   | 0.713302 | 1.84852   | 1.53048   |
| FCGR1C      | 0.292045  | 0.387715  | 0.186536  | 0.038563 | 0.368377  | 0.0511847 |
| C8orf85     | 6.40065   | 3.27083   | 2.44489   | 10.4763  | 4.86201   | 4.31795   |
| C1QTNF6     | 4.57769   | 8.08565   | 8.30667   | 10.6004  | 10.759    | 6.69827   |
| C12orf60    | 0.910181  | 0.804725  | 0.689012  | 0.284882 | 0.772933  | 0.819269  |
| PTPRB       | 3.41788   | 3.69666   | 2.79651   | 2.24656  | 3.13528   | 1.92109   |
| CSGALNACT1  | 7.24118   | 4.41671   | 8.02379   | 6.60983  | 13.7749   | 11.9565   |
| LOC255167   | 0.852929  | 0.898687  | 0.992404  | 0.43312  | 1.106     | 1.4494    |
| ZNF367      | 2.67095   | 2.31472   | 1.82173   | 1.7382   | 1.81904   | 1.77978   |
| NPHP3       | 9.33768   | 10.1731   | 7.30117   | 5.56261  | 12.4556   | 10.0752   |
| C19orf26    | 1.29613   | 0.868146  | 1.66502   | 1.4752   | 2.1013    | 2.5944    |
| KIAA0319L   | 16.5792   | 15.865    | 14.9361   | 16.4534  | 16.9513   | 16.5604   |
| TTY23       | 0         | 0         | 0         | 0        | 0         | 0         |
| HSPA1A      | 114.498   | 103.086   | 105.739   | 110.342  | 96.8727   | 114.543   |
| TAS2R9      | 0         | 0         | 0         | 0        | 0         | 0         |
| ONECUT1     | 0         | 0         | 0         | 0        | 0         | 0         |
| CCNG1       | 48.6704   | 43.562    | 43.1966   | 34.2734  | 36.5625   | 30.5936   |
| ANGPT4      | 0.648532  | 0.764522  | 1.0228    | 0.710455 | 0.550739  | 0.606207  |
| CPSF3       | 15.1403   | 16.3469   | 16.9599   | 12.4893  | 11.6256   | 12.1389   |
| TAF6L       | 11.3561   | 17.163    | 11.8663   | 16.4505  | 13.3219   | 13.9416   |
| SNAR-C3     | 0         | 0         | 0         | 0        | 0         | 0         |
| ATPAF2      | 9.31437   | 13.0543   | 8.56577   | 13.9289  | 10.3707   | 11.7806   |
| P2RX2       | 0         | 0.540662  | 0.0521507 | 0        | 0.0438769 | 0.171721  |
| LOC730091   | 2.42336   | 1.82904   | 0.984366  | 1.0545   | 1.18582   | 0.939232  |
| LOC284950   | 0.191353  | 0.0563941 | 0.120713  | 0        | 0.0812492 | 0.0596216 |
| PMM2        | 16.8936   | 18.9606   | 15.0084   | 18.1642  | 16.7527   | 15.4093   |
| PLEKHM1     | 9.50304   | 11.4336   | 11.9822   | 12.8011  | 14.6675   | 13.4459   |
| GPR161      | 1.94945   | 2.08818   | 2.58255   | 1.97131  | 2.65037   | 3.20057   |
| AP3D1       | 28.8886   | 27.8745   | 29.2187   | 28.5671  | 32.8891   | 30.3792   |
| MIR4728     | 0         | 0         | 0         | 0        | 0         | 0         |
| KRTAP13-1   | 0.517968  | 0.305303  | 0.261403  | 1.13485  | 0.219931  | 24.6385   |

|             |           |           |           |           |           |           |
|-------------|-----------|-----------|-----------|-----------|-----------|-----------|
| ABHD3       | 19.1596   | 13.1018   | 13.7863   | 11.4784   | 10.1797   | 11.7737   |
| RN7SK       | 11.6256   | 45.2287   | 31.0957   | 69.1365   | 47.3897   | 28.0125   |
| ZNF446      | 6.39855   | 11.1289   | 7.74204   | 9.70166   | 12.6267   | 10.1317   |
| MRPL4       | 55.0335   | 77.7144   | 54.3718   | 68.3226   | 55.4641   | 53.989    |
| MIR3942     | 0         | 0         | 0         | 0         | 0         | 0         |
| SETD3       | 37.0917   | 30.3385   | 35.0205   | 30.7798   | 26.2551   | 25.8246   |
| TMEM170B    | 2.16328   | 1.26174   | 2.68364   | 1.22303   | 1.62307   | 1.19985   |
| C18orf25    | 6.88346   | 5.95921   | 7.73924   | 6.53494   | 7.45942   | 7.24272   |
| ZRANB1      | 16.5528   | 12.5294   | 16.9487   | 14.2964   | 16.7214   | 16.2996   |
| LOC10050648 | 3.17697   | 3.07104   | 3.55938   | 4.41502   | 6.04331   | 3.88032   |
| ZMYND8      | 11.6386   | 10.7399   | 12.3806   | 10.9848   | 12.8512   | 12.7724   |
| HTR3D       | 0         | 0         | 0         | 0         | 0         | 0         |
| DIRC1       | 0         | 0.0658244 | 0.0563594 | 0.0699078 | 0.142254  | 0         |
| MYO7A       | 1.20923   | 1.08985   | 0.911977  | 0.64483   | 1.19678   | 0.525088  |
| TPI1P3      | 0.467411  | 0.326523  | 0.561639  | 0.260084  | 0.297697  | 0.34521   |
| LOC10065288 | 0         | 0         | 0         | 0         | 0         | 0.0455459 |
| C7orf62     | 0         | 0         | 0         | 0         | 0         | 0         |
| LOC10050763 | 0.0548474 | 0         | 0         | 0.0515009 | 0.104798  | 0         |
| BRAP        | 7.57801   | 7.34217   | 7.5877    | 7.41117   | 8.20347   | 7.34747   |
| NID2        | 4.29741   | 3.42799   | 4.29417   | 1.84722   | 3.84402   | 2.67796   |
| TMEM53      | 4.32932   | 5.53546   | 3.57984   | 4.12771   | 4.19969   | 3.73548   |
| SRD5A1P1    | 8.13191   | 5.33982   | 6.58789   | 5.76029   | 6.17877   | 6.1047    |
| NGDN        | 23.9699   | 26.4354   | 24.1084   | 24.677    | 25.1942   | 21.0234   |
| FXYD1       | 68.2683   | 111.386   | 89.9795   | 80.7317   | 87.3909   | 66.2494   |
| LOC10050759 | 0         | 0         | 0         | 0         | 1.13E-07  | 0         |
| SLC17A8     | 0.136011  | 0.0225469 | 0.102961  | 0         | 0.0730908 | 0.0635669 |
| C6orf106    | 60.044    | 54.7792   | 52.7065   | 53.4578   | 42.1201   | 50.6302   |
| PIAS3       | 26.5076   | 33.7378   | 32.3871   | 32.8865   | 43.7893   | 32.6374   |
| ZNF345      | 4.94928   | 4.74092   | 5.24953   | 5.37592   | 6.34231   | 4.72483   |
| CYP26A1     | 0.25842   | 0.308447  | 0         | 0.0454968 | 0.123442  | 0.161037  |
| FAM91A1     | 10.495    | 8.68312   | 10.2271   | 8.06909   | 10.0112   | 8.0063    |
| ZMYM6       | 7.3367    | 7.44641   | 8.52924   | 7.20538   | 10.633    | 7.75594   |
| AATK-AS1    | 0         | 0         | 0.102543  | 0         | 0         | 0         |
| NRAP        | 0.106712  | 0.0838642 | 0.013463  | 0.251787  | 0.0113271 | 0.123145  |
| MIR2964A    | 0         | 0         | 0         | 0         | 0         | 0         |
| RFPL3       | 8.65E-23  | 4.78E-25  | 0.205715  | 0.237003  | 0.126876  | 0.13184   |
| BSND        | 0         | 0.0706097 | 0         | 0         | 0.152595  | 0         |
| CDC42EP4    | 52.9096   | 55.0045   | 44.1428   | 47.0996   | 47.8293   | 45.1832   |
| MED11       | 25.1297   | 31.9418   | 28.1321   | 33.0866   | 28.0158   | 25.4699   |
| ARHGAP4     | 7.59518   | 12.8393   | 9.74605   | 7.34071   | 19.356    | 9.06791   |
| MUSTN1      | 21.7797   | 37.3732   | 18.1046   | 27.3721   | 24.2023   | 17.2595   |
| FAM75A4     | 0         | 0         | 0         | 0         | 0         | 0         |
| GIPC1       | 75.3832   | 101.867   | 86.7727   | 121.218   | 100.493   | 121.169   |

|             |           |           |           |          |           |           |
|-------------|-----------|-----------|-----------|----------|-----------|-----------|
| DUOX2       | 2.84448   | 3.27337   | 4.07869   | 4.01344  | 4.65854   | 3.34815   |
| RASSF2      | 7.40716   | 4.89162   | 6.68186   | 3.87925  | 8.44634   | 5.25093   |
| MIR200C     | 0         | 0         | 0         | 0        | 0         | 0         |
| KIAA1267    | 14.7572   | 12.8946   | 15.4535   | 13.813   | 18.5437   | 16.3166   |
| MIR1323     | 0         | 0         | 0         | 0        | 0         | 0         |
| LRP1        | 25.9491   | 24.0755   | 49.7249   | 23.3926  | 33.6744   | 24.9739   |
| WNT10B      | 2.22724   | 2.76443   | 3.14509   | 3.29788  | 6.38343   | 5.55168   |
| SPANXN4     | 0         | 0         | 0         | 0        | 0         | 0         |
| LOC387720   | 0.290909  | 0.257203  | 0.408979  | 0.195113 | 0.0794063 | 0.181282  |
| MIR4284     | 0         | 0         | 0         | 0        | 0         | 0         |
| TMEM98      | 20.8648   | 23.6647   | 23.264    | 24.9875  | 24.5006   | 20.3272   |
| LOC1005062: | 9.41255   | 12.2709   | 9.41966   | 11.9836  | 11.1764   | 10.3384   |
| ZNF3        | 12.4912   | 16.7426   | 14.1995   | 13.0138  | 15.4513   | 14.0845   |
| GRIK4       | 0.069475  | 0.0614254 | 0.105186  | 0.293562 | 0.110622  | 0.0649408 |
| APITD1-CORT | 0.0984466 | 7.25E-05  | 0.294547  | 1.14511  | 2.10E-07  | 0.048372  |
| KRTAP26-1   | 1.75869   | 0.518306  | 0         | 32.7523  | 0.0622287 | 29.8948   |
| SNORD116-1: | 0         | 0         | 0         | 0        | 0         | 0         |
| CARD17      | 10.6419   | 6.48888   | 6.11142   | 7.92513  | 8.64763   | 5.48819   |
| DKK2        | 5.82395   | 2.40771   | 7.06218   | 4.35462  | 8.20855   | 6.36797   |
| CCL13       | 16.6734   | 13.2033   | 18.6584   | 4.22033  | 21.9776   | 3.07187   |
| FAM35B2     | 2.88172   | 3.44863   | 2.7185    | 1.92744  | 3.14275   | 2.24705   |
| MYOC        | 1.05867   | 2.22859   | 0.381628  | 0.378695 | 0.770597  | 0.534057  |
| MIR4478     | 0         | 0         | 0         | 0        | 0         | 0         |
| SLC4A7      | 5.71356   | 2.83407   | 3.09339   | 2.895    | 4.17666   | 3.63669   |
| UBQLN3      | 0         | 0         | 0         | 0        | 0         | 0         |
| MIR523      | 0         | 0         | 0         | 0        | 0         | 0         |
| ANKRD40     | 19.2517   | 19.1462   | 23.4768   | 18.2085  | 16.8391   | 14.3235   |
| SLC38A4     | 0.981182  | 0.525768  | 0.840354  | 1.11501  | 0.822005  | 0.643564  |
| UBA7        | 22.9323   | 36.5745   | 20.5838   | 15.8095  | 35.9451   | 18.6951   |
| LOC1006527: | 0.369317  | 0.601755  | 0.536919  | 1.00923  | 0.468509  | 0.849283  |
| RANGAP1     | 74.1463   | 87.7271   | 69.3048   | 89.0938  | 88.9406   | 104.99    |
| PAXIP1      | 5.23831   | 6.072     | 6.00808   | 6.19087  | 6.50832   | 5.97708   |
| LOC1001342: | 5.45458   | 5.76451   | 4.22592   | 5.48189  | 5.56391   | 5.49692   |
| LOC1005064: | 0.977488  | 1.40438   | 0.554973  | 1.54886  | 1.28405   | 1.02791   |
| 9-Mar       | 4.88603   | 9.03917   | 6.83803   | 11.3734  | 11.8201   | 11.0789   |
| FGF3        | 0         | 0         | 0         | 0        | 0         | 0         |
| ZCCHC12     | 0         | 0         | 0.0704735 | 0        | 0.0296464 | 0         |
| DNAJB3      | 0         | 0.155187  | 0.207614  | 0.164814 | 0.0558962 | 0         |
| LOC1005060: | 3.21839   | 3.73906   | 2.99566   | 4.09791  | 3.66009   | 3.98948   |
| QRICH1      | 30.927    | 31.7415   | 33.9575   | 37.048   | 36.2187   | 30.6196   |
| LOC1005067: | 0.773036  | 10.3034   | 4.39171   | 11.2974  | 9.15751   | 6.20636   |
| LRCH3       | 4.38033   | 2.11607   | 3.76034   | 2.12013  | 3.2788    | 2.95476   |
| SCN3A       | 0.435224  | 0.215175  | 0.223501  | 0.161495 | 0.269009  | 0.170881  |

|             |           |           |           |           |           |           |
|-------------|-----------|-----------|-----------|-----------|-----------|-----------|
| LOC10065289 | 0         | 0         | 0         | 0.131332  | 0         | 0         |
| LOC10050703 | 0.0335016 | 0.0888599 | 0.0760826 | 0.157287  | 0.0853494 | 0.0208768 |
| SATL1       | 0.064763  | 1.39E-07  | 1.31E-08  | 1.34E-08  | 8.21E-08  | 2.51E-08  |
| TADA1       | 6.07795   | 7.45907   | 6.69554   | 5.49414   | 7.30883   | 5.9074    |
| TAS2R20     | 2.33485   | 3.26451   | 1.60307   | 3.41604   | 3.18165   | 3.28216   |
| FHL3        | 15.9842   | 20.4315   | 14.1168   | 18.4412   | 16.5334   | 13.7442   |
| NKX2-1-AS1  | 0         | 0         | 0         | 0         | 0         | 0         |
| SOHLH1      | 0         | 0.138091  | 0.210195  | 0         | 0.388261  | 0.129773  |
| RPS6KA4     | 18.2824   | 26.0281   | 19.0985   | 18.2342   | 22.8123   | 16.8629   |
| SCARNA15    | 73.4426   | 194.8     | 111.193   | 68.9615   | 140.328   | 45.7663   |
| LOC402207   | 0         | 0         | 0         | 0         | 0         | 0         |
| CCDC108     | 0.0161032 | 0.0142375 | 0.0585486 | 0.0151207 | 0         | 0.0200697 |
| NOB1        | 19.7286   | 30.4838   | 21.7738   | 27.9891   | 28.34     | 23.9367   |
| LOC10050751 | 1.08053   | 0         | 0         | 0.732105  | 0.892119  | 0         |
| HDC         | 5.84942   | 10.2762   | 15.0668   | 9.1304    | 18.0712   | 8.40268   |
| RER1        | 55.5797   | 63.3902   | 57.1167   | 64.814    | 61.2005   | 58.8591   |
| GNB3        | 1.89045   | 3.0563    | 2.28972   | 3.19518   | 4.19692   | 5.01511   |
| SCGB1A1     | 0         | 0         | 0         | 0.364885  | 0         | 0         |
| SPRR2E      | 761.844   | 412.718   | 189.837   | 524.57    | 769.703   | 612.492   |
| PET112      | 13.9743   | 12.0318   | 11.5246   | 10.7749   | 9.9       | 12.0794   |
| ADARB1      | 14.2933   | 13.5627   | 13.6618   | 16.8113   | 13.6208   | 13.2749   |
| ARMC3       | 0         | 0         | 0         | 0         | 0         | 0         |
| GPATCH2     | 4.78475   | 5.07645   | 3.98429   | 3.22665   | 4.10018   | 4.49959   |
| LOC643441   | 0.0942841 | 0         | 0         | 0         | 0         | 0         |
| NSFL1C      | 28.4553   | 31.871    | 26.2268   | 33.4867   | 26.8359   | 27.5121   |
| LAPTM5      | 33.7595   | 35.1248   | 33.0746   | 21.8176   | 40.0725   | 23.7914   |
| LOC10030691 | 21.4749   | 25.6601   | 22.8397   | 18.482    | 17.4344   | 24.1695   |
| C15orf55    | 0.0773187 | 0         | 0.0390204 | 0.0968013 | 0.114904  | 0.128485  |
| FRMPD1      | 1.92351   | 1.05857   | 2.61506   | 4.27578   | 4.30034   | 8.9899    |
| DAZ3        | 0.886154  | 0.321262  | 0         | 0         | 0         | 0         |
| IKBKE       | 7.79471   | 8.37995   | 5.69531   | 7.07018   | 9.8513    | 9.09683   |
| NOMO2       | 16.3073   | 14.263    | 12.2438   | 13.1031   | 13.0398   | 12.9273   |
| PNISR       | 77.7198   | 62.0933   | 72.6207   | 55.9416   | 87.2239   | 67.4953   |
| C21orf30    | 2.25569   | 2.55276   | 2.42475   | 2.11806   | 2.35613   | 2.41772   |
| VNN3        | 0.268172  | 0.339386  | 0.0464925 | 0.470976  | 0.667607  | 0.559901  |
| TRIM9       | 0.894651  | 0.792002  | 0.732691  | 1.21267   | 0.753899  | 2.07095   |
| CD5         | 1.78698   | 1.91255   | 1.32902   | 0.942002  | 2.73552   | 1.48476   |
| CCT6P3      | 8.63928   | 9.32671   | 9.50012   | 9.99072   | 10.7441   | 10.2383   |
| NPY1R       | 24.4533   | 10.3193   | 13.3169   | 11.7491   | 11.247    | 13.5195   |
| LINC00112   | 0         | 0         | 0         | 0         | 0         | 0         |
| MIR1287     | 0         | 0         | 0         | 0         | 0         | 0         |
| LY6G5C      | 1.44336   | 3.0308    | 1.22921   | 1.35529   | 1.37893   | 0.899441  |
| LOC10050738 | 0.741943  | 1.08426   | 1.6724    | 1.95939   | 2.03156   | 1.6058    |



|             |           |           |           |           |           |           |
|-------------|-----------|-----------|-----------|-----------|-----------|-----------|
| SRA1        | 15.4378   | 20.9443   | 15.273    | 17.8449   | 15.7658   | 13.999    |
| TRIM4       | 15.1881   | 12.1912   | 16.198    | 13.4129   | 16.636    | 15.2233   |
| ZNF200      | 3.29932   | 3.13622   | 2.80524   | 3.06724   | 2.77396   | 2.90792   |
| FAM159A     | 0.954345  | 0.168754  | 0.433467  | 0         | 0.364697  | 0.118941  |
| MIR4460     | 0         | 0         | 0         | 0         | 0         | 0         |
| FBXO27      | 12.8611   | 20.4213   | 13.8974   | 12.5693   | 19.3823   | 18.7277   |
| LOC10013214 | 0.114528  | 0.0506292 | 0         | 0         | 0         | 0.0713689 |
| LMF2        | 34.1721   | 66.174    | 39.9893   | 51.0317   | 52.772    | 46.3434   |
| FAM90A13    | 0         | 0.0115191 | 0.0542449 | 0.0122336 | 0.0224046 | 0.104958  |
| TMEM217     | 1.52125   | 1.05218   | 0.564378  | 1.4458    | 0.790672  | 1.60388   |
| FAM131A     | 11.8455   | 13.5075   | 15.4629   | 16.7023   | 16.466    | 15.1467   |
| SNORA29     | 0         | 0         | 0         | 31.2663   | 63.6231   | 20.7499   |
| PCDHA7      | 0.048466  | 0.077868  | 0.0209651 | 0.0562397 | 0.0624406 | 0.0641226 |
| MRPL34      | 40.2934   | 57.8228   | 50.2501   | 59.4548   | 45.2419   | 42.8153   |
| C13orf16    | 0.373246  | 0.495     | 0.423824  | 0.525708  | 0.594306  | 0.930364  |
| RBM1D       | 0         | 0         | 0         | 0         | 0         | 0         |
| ORC6        | 2.5479    | 3.57771   | 2.47211   | 3.80175   | 3.49329   | 2.7264    |
| CXCL9       | 18.4521   | 22.8258   | 0.959199  | 0.148723  | 1.21053   | 0.0987001 |
| PLSCR1      | 17.6653   | 17.4993   | 9.48695   | 4.47253   | 11.4279   | 7.86717   |
| FAM41C      | 1.50561   | 1.65084   | 2.139     | 2.52727   | 2.90995   | 1.77377   |
| LOC729444   | 0         | 0.0549138 | 0         | 0         | 0.0197791 | 0.0193522 |
| USP39       | 23.8123   | 23.5759   | 19.3337   | 19.6369   | 20.6276   | 18.5197   |
| CSK         | 31.2172   | 33.656    | 30.2409   | 35.4926   | 36.3165   | 39.806    |
| ZBTB11      | 10.7379   | 8.48104   | 10.9124   | 8.15019   | 10.7075   | 8.81803   |
| UBE2G1      | 20.2191   | 17.6517   | 19.9414   | 21.3721   | 18.5438   | 17.7691   |
| ALDH1A3     | 22.6707   | 14.5031   | 7.68364   | 7.64966   | 6.93853   | 4.96647   |
| SLC2A13     | 1.79434   | 0.88937   | 1.24513   | 0.714788  | 1.02162   | 1.20287   |
| SNAR-A7     | 0         | 0         | 0         | 0         | 0         | 0         |
| PDE6H       | 0         | 0         | 0         | 0         | 0         | 0         |
| BCAT1       | 0.41816   | 0.387723  | 0.493942  | 0.316027  | 0.558295  | 0.298668  |
| WNT7B       | 3.94129   | 7.38809   | 8.25176   | 9.62645   | 8.10234   | 5.70335   |
| IL1RL2      | 3.95602   | 3.31112   | 5.98952   | 4.95285   | 6.51739   | 5.12766   |
| RASSF3      | 19.6932   | 15.2419   | 13.7397   | 12.3411   | 12.198    | 10.4863   |
| C18orf10    | 20.5262   | 25.4841   | 24.5377   | 26.2221   | 19.4378   | 20.4167   |
| OPN1LW      | 0.0603446 | 0         | 0.0685218 | 0.0849939 | 0.160141  | 0.252784  |
| NOTUM       | 1.65898   | 2.36312   | 2.54659   | 8.74072   | 2.17192   | 3.87676   |
| TTC6        | 0.718133  | 0.0604693 | 0.207097  | 0.256882  | 0.0435603 | 0.04262   |
| OR10H3      | 0         | 0         | 0         | 0         | 0         | 0         |
| MUCL1       | 2906.16   | 473.408   | 663.14    | 1061.76   | 391.865   | 698.422   |
| C4orf21     | 1.37485   | 1.44047   | 1.30855   | 1.66319   | 1.77805   | 1.15517   |
| RSPH6A      | 0         | 0.0718999 | 0.0307807 | 0.0381801 | 0.0258973 | 0         |
| C21orf91-OT | 0.850676  | 0         | 0         | 0         | 0         | 0         |
| PRR19       | 1.0647    | 1.34935   | 0.621512  | 1.71861   | 1.45039   | 1.71561   |

|             |           |           |           |          |            |           |
|-------------|-----------|-----------|-----------|----------|------------|-----------|
| LOC1006529: | 7.84845   | 12.0913   | 10.4485   | 13.946   | 17.9665    | 15.3217   |
| WNT4        | 9.37676   | 13.5519   | 11.4897   | 15.504   | 14.556     | 11.7799   |
| CSMD3       | 0         | 0         | 0         | 0        | 0.00473791 | 0.0185429 |
| NLE1        | 6.37519   | 7.91867   | 6.24713   | 6.27938  | 6.55408    | 5.3878    |
| CLEC3A      | 0         | 0         | 0         | 0        | 0          | 0         |
| MIR4770     | 0         | 0         | 0         | 0        | 0          | 0         |
| ATAD2       | 5.17407   | 4.65083   | 4.38682   | 4.04864  | 4.56961    | 4.14855   |
| SLC25A32    | 8.07074   | 8.31391   | 8.29177   | 7.44158  | 6.51293    | 5.61248   |
| LOC10050600 | 0.393568  | 1.39187   | 0         | 0        | 0.250666   | 0.735764  |
| CYP2C19     | 0.516341  | 0.145869  | 0.111017  | 0        | 0.326914   | 0.731865  |
| LINC00083   | 0         | 0.16737   | 0.143303  | 0        | 0          | 0         |
| ATP6V1A     | 34.4376   | 21.0561   | 28.5264   | 24.8361  | 25.5041    | 26.4376   |
| F2R         | 17.1445   | 10.8823   | 19.6309   | 13.0699  | 23.5552    | 16.7552   |
| LOC10050575 | 0.146366  | 0.905853  | 0.664799  | 0        | 0.559328   | 0.182418  |
| FCRLB       | 0.415814  | 0.367636  | 0.449676  | 0.501997 | 0.340501   | 0.333151  |
| MIR4262     | 0         | 0         | 0         | 0        | 0          | 0         |
| C14orf184   | 0.0774976 | 0.0342592 | 0.0293331 | 0.145538 | 0.123397   | 0.0724398 |
| SETDB1      | 9.22254   | 11.2353   | 11.5555   | 11.4028  | 13.0381    | 10.9442   |
| LOC10050576 | 0.5949    | 0.262986  | 1.35103   | 0.279301 | 1.51558    | 1.20483   |
| LOC10050649 | 0         | 0.0441856 | 0.491817  | 0        | 0.636599   | 0.342572  |
| NUP85       | 18.0027   | 21.6895   | 18.1931   | 21.5333  | 19.7548    | 17.8747   |
| C10orf46    | 13.7313   | 11.7527   | 12.1824   | 10.0253  | 12.087     | 10.2487   |
| RILP        | 13.1036   | 17.5849   | 12.9308   | 14.9956  | 11.848     | 9.47797   |
| MICAL2      | 2.67478   | 1.52501   | 3.76579   | 1.40836  | 2.8181     | 2.85073   |
| HSD11B2     | 21.4465   | 30.495    | 30.8384   | 72.8702  | 23.3407    | 30.1391   |
| CDV3        | 70.2736   | 59.7389   | 59.2296   | 54.7459  | 45.6728    | 43.7936   |
| GABBR1      | 26.2303   | 33.1895   | 28.1521   | 27.6988  | 44.3619    | 36.1776   |
| CCDC71      | 10.0512   | 10.9807   | 10.1889   | 14.8078  | 10.1176    | 10.2232   |
| IGSF6       | 1.36127   | 1.40414   | 2.40447   | 0.42607  | 2.023      | 1.34312   |
| WNK3        | 0.311838  | 0.238514  | 0.261545  | 0.166478 | 0.262937   | 0.304475  |
| LOC390660   | 0.0430989 | 0.0857371 | 0.0435015 | 0.053959 | 0.0609999  | 0.0268574 |
| LCE2C       | 67.9156   | 42.6864   | 137.974   | 182.855  | 207.402    | 151.438   |
| MECP2       | 9.23397   | 9.64212   | 9.73528   | 9.1742   | 9.25825    | 8.44052   |
| ADSL        | 25.146    | 25.8533   | 23.4534   | 25.1695  | 26.436     | 21.8442   |
| DRG1        | 28.8309   | 28.5943   | 23.8041   | 24.4067  | 23.4052    | 22.2483   |
| ZNF420      | 3.53193   | 2.38622   | 2.67369   | 2.31524  | 3.07716    | 2.59546   |
| TTC23       | 6.7893    | 6.70234   | 7.76579   | 7.46399  | 8.47409    | 7.51172   |
| C12orf29    | 14.8356   | 12.5781   | 14.8218   | 9.87202  | 14.6981    | 14.3514   |
| MIR936      | 0         | 0         | 0         | 0        | 0          | 0         |
| PROSC       | 24.2998   | 21.9348   | 22.0444   | 20.2042  | 17.923     | 18.4886   |
| IL22RA2     | 0.537808  | 0.412944  | 0.514743  | 0.035857 | 1.04643    | 0.247032  |
| RHOT2       | 46.6034   | 85.7674   | 57.29     | 77.4876  | 82.323     | 71.6466   |
| VCX         | 0         | 0.0271066 | 0.0232089 | 0.352654 | 0.175741   | 0.255002  |

|             |           |           |           |           |           |           |
|-------------|-----------|-----------|-----------|-----------|-----------|-----------|
| C16orf89    | 0.378735  | 1.31769   | 3.71005   | 0.41675   | 1.3133    | 0.486194  |
| ASAP3       | 26.6856   | 24.886    | 34.0433   | 33.6238   | 37.0103   | 32.6857   |
| MPZL3       | 9.00614   | 5.20227   | 9.36297   | 5.86326   | 11.0897   | 12.7959   |
| EHD3        | 2.32481   | 2.34277   | 2.6493    | 4.78842   | 2.42004   | 5.88835   |
| FZD2        | 1.04965   | 0.633781  | 0.60079   | 0.817333  | 1.04356   | 0.893404  |
| PSG7        | 0.0633144 | 0.0559786 | 1.05502   | 1.36806   | 2.25841   | 1.7757    |
| TYW5        | 4.18967   | 3.40757   | 3.74359   | 3.59373   | 5.09961   | 3.66534   |
| SLC9A5      | 1.2844    | 1.41368   | 1.15088   | 1.27986   | 1.28549   | 1.30674   |
| GPRC5D      | 3.13772   | 0.990777  | 0.339325  | 25.5694   | 0.570981  | 184.589   |
| WRN         | 4.17031   | 2.59569   | 4.30623   | 2.75698   | 4.52634   | 2.7653    |
| NT5C3       | 23.8868   | 20.8528   | 19.9502   | 17.2157   | 22.827    | 20.7704   |
| LOC10050569 | 0         | 0         | 0         | 0.0765965 | 0.0259774 | 0.0254167 |
| ZNF816-ZNF3 | 1.44E-06  | 7.12E-115 | 1.20E-38  | 7.60E-40  | 1.50E-117 | 8.09E-85  |
| HS6ST1      | 25.826    | 22.4626   | 24.0362   | 30.278    | 29.7681   | 29.3871   |
| SLAMF8      | 5.63169   | 4.5206    | 4.48323   | 3.44605   | 6.94782   | 3.16978   |
| GFRAL       | 0         | 0         | 0         | 0         | 0         | 0.0338965 |
| ITGA4       | 1.95351   | 0.730475  | 1.57371   | 0.550378  | 1.63603   | 1.15427   |
| C12orf12    | 0         | 0         | 0         | 0         | 0         | 0         |
| LOC10028718 | 0         | 0         | 0         | 0         | 0         | 0         |
| LOC10050720 | 0         | 0         | 0         | 0         | 0         | 0         |
| APOA2       | 0         | 0         | 0         | 0         | 0         | 0         |
| RTN4RL1     | 7.69652   | 7.88358   | 7.4842    | 7.72633   | 6.85477   | 5.92694   |
| LOC10065298 | 10.7202   | 9.51239   | 5.33682   | 7.13474   | 7.39485   | 2.74021   |
| ARHGAP42    | 1.95236   | 1.25866   | 2.07837   | 1.12668   | 1.76158   | 1.71089   |
| NTN3        | 0.0520918 | 0.0460563 | 0.0788676 | 0         | 0.0331776 | 0.0649228 |
| SH3BP1      | 23.4462   | 30.2653   | 24.7893   | 30.7118   | 35.1423   | 29.6353   |
| FGF8        | 0.143854  | 0         | 0         | 0         | 0.366489  | 0         |
| C20orf123   | 0         | 0.0446206 | 0         | 0         | 0.128573  | 0.0314495 |
| LOC10012810 | 0.199149  | 0.484206  | 0.113068  | 0.327246  | 0.190259  | 0         |
| LOC10028930 | 0.106631  | 0.141415  | 0         | 0         | 0         | 0         |
| BMP7        | 13.2502   | 14.3231   | 14.1305   | 18.6399   | 12.1659   | 16.8153   |
| MIR2115     | 0         | 0         | 0         | 0         | 0         | 0         |
| BPIFA1      | 0         | 0         | 0         | 0         | 0         | 0         |
| IZUMO2      | 0         | 0         | 0         | 0         | 0         | 0         |
| ZNF33B      | 7.34253   | 6.49179   | 6.12997   | 5.74794   | 8.22735   | 7.63926   |
| PIGH        | 19.3452   | 24.7117   | 16.0607   | 23.4006   | 18.3612   | 14.6264   |
| NUP107      | 13.4162   | 12.5909   | 15.3663   | 13.9973   | 16.0595   | 11.4832   |
| LOC729173   | 0.148321  | 0.61197   | 0.261987  | 0.278543  | 0.377867  | 0.431329  |
| FGFBP2      | 21.8042   | 5.88574   | 17.3824   | 22.8292   | 37.7291   | 33.7282   |
| PIK3R5      | 1.57607   | 1.94617   | 1.80514   | 0.616941  | 3.26022   | 1.34967   |
| CDKL3       | 0.759171  | 1.29985   | 0.954804  | 1.05146   | 1.37465   | 0.934642  |
| LOC344887   | 4.72628   | 5.9755    | 4.54383   | 4.34914   | 2.73927   | 2.62124   |
| NDUFB6      | 58.8237   | 58.6845   | 47.3632   | 49.8864   | 40.6201   | 40.5053   |

|             |          |           |           |           |           |           |
|-------------|----------|-----------|-----------|-----------|-----------|-----------|
| RNF138P1    | 0.26911  | 0.297608  | 0.471098  | 0.442208  | 0.299946  | 0.377395  |
| UBAP2L      | 30.3669  | 31.1409   | 33.3104   | 32.3303   | 35.1084   | 29.7739   |
| GGCX        | 7.14592  | 5.9416    | 7.14665   | 6.84125   | 6.93611   | 7.37345   |
| LOC10050736 | 0        | 0         | 0         | 0         | 0         | 0         |
| SEL1L3      | 3.55536  | 3.44459   | 2.98152   | 2.07902   | 2.86104   | 2.71969   |
| MIR218-1    | 0        | 0         | 0         | 0         | 0         | 0         |
| CNOT2       | 25.3486  | 25.6417   | 26.6351   | 26.4375   | 27.3491   | 27.0591   |
| KRBOX1-AS1  | 0        | 0         | 0.0362047 | 0.140873  | 0         | 0.0298032 |
| MIR539      | 0        | 0         | 0         | 0         | 0         | 0         |
| LOC729178   | 2.00292  | 1.81588   | 0.939911  | 1.04857   | 1.57837   | 1.51243   |
| MGC2889     | 0        | 0         | 0         | 0.131321  | 0.0593826 | 0.0581008 |
| GALE        | 13.042   | 12.0111   | 8.2418    | 9.29588   | 11.0871   | 14.3732   |
| C19orf63    | 58.404   | 64.34     | 59.5952   | 77.3541   | 59.718    | 60.5619   |
| ZNF658B     | 1.46616  | 1.4298    | 1.71477   | 0.937621  | 1.45195   | 1.22948   |
| DNAJC7      | 53.4654  | 52.7777   | 49.1622   | 51.7508   | 50.6495   | 56.3763   |
| S1PR5       | 11.408   | 18.3829   | 12.2055   | 18.6218   | 16.6883   | 17.0907   |
| C6orf72     | 33.2196  | 26.7255   | 35.6906   | 29.9333   | 30.3567   | 24.7512   |
| TMEM140     | 10.5196  | 11.8675   | 11.7363   | 7.08115   | 9.68124   | 6.77535   |
| AKIRIN2-AS1 | 6.33252  | 3.03269   | 3.2957    | 2.2298    | 4.36932   | 4.11058   |
| SLC25A38    | 14.9814  | 16.2793   | 13.6092   | 14.6572   | 14.6204   | 12.4075   |
| C1orf212    | 7.59935  | 7.41656   | 6.84609   | 7.3144    | 5.76254   | 6.2095    |
| EFNA4       | 28.7944  | 35.091    | 29.8469   | 44.6962   | 34.8944   | 36.7804   |
| CANT1       | 15.5493  | 14.3609   | 14.0217   | 13.7489   | 16.3085   | 17.9851   |
| EPYC        | 0        | 0.0616    | 0         | 0         | 0         | 0.0868339 |
| HLA-DPA1    | 88.3789  | 85.5621   | 96.7008   | 52.28     | 95.4471   | 47.9912   |
| LOC10050690 | 0        | 0         | 0         | 0         | 0         | 0         |
| MIR4792     | 0        | 0         | 0         | 0         | 0         | 0         |
| SERINC1     | 84.8527  | 69.2806   | 95.8833   | 66.3217   | 73.1468   | 65.173    |
| SNORA1      | 0        | 0         | 90.3055   | 0         | 0         | 74.3384   |
| DCAF8L2     | 0        | 0         | 0         | 0         | 0         | 0         |
| DLD         | 55.4584  | 42.1217   | 44.0794   | 38.7598   | 37.1327   | 36.7813   |
| FRMD8       | 26.2688  | 30.8593   | 25.3359   | 30.0793   | 30.0389   | 33.617    |
| FBRSL1      | 14.5016  | 19.3544   | 16.3081   | 23.9343   | 20.7282   | 17.0208   |
| PFKP        | 24.9925  | 21.6602   | 20.5371   | 22.1328   | 24.7359   | 18.9393   |
| MIR325      | 0        | 0         | 0         | 0         | 0         | 0         |
| LOC10050646 | 0        | 0.0435256 | 0.30855   | 0         | 0.0486745 | 0         |
| FLJ32224    | 1.21758  | 1.52505   | 1.92024   | 2.38185   | 1.29267   | 1.0783    |
| OR11L1      | 0        | 0         | 0         | 0         | 0         | 0         |
| LOC284385   | 4.72943  | 3.87919   | 3.4508    | 4.49436   | 3.37512   | 4.65157   |
| C14orf133   | 11.9961  | 12.6469   | 10.6976   | 9.92896   | 11.1556   | 10.869    |
| PKN3        | 5.68999  | 8.43615   | 5.43389   | 6.00039   | 7.65683   | 5.98079   |
| DTX2        | 15.3647  | 23.9105   | 20.0173   | 21.7942   | 25.3442   | 23.3367   |
| TXNRD3NB    | 6.63E-69 | 0.802831  | 0.546264  | 1.06E-175 | 0.482826  | 3.94E-14  |

|             |           |           |           |           |           |           |
|-------------|-----------|-----------|-----------|-----------|-----------|-----------|
| AACS        | 106.692   | 71.7524   | 84.2145   | 77.2356   | 67.9086   | 74.6371   |
| LOC10050736 | 0.542072  | 1.4378    | 0.410351  | 0.254498  | 0.172624  | 0.675592  |
| PHF14       | 9.49785   | 8.82904   | 9.0811    | 7.05165   | 8.15331   | 7.60899   |
| PMS1        | 6.8253    | 6.25209   | 8.15602   | 6.25032   | 7.33938   | 6.41278   |
| MIR1913     | 0         | 0         | 0         | 0         | 0         | 0         |
| NTN5        | 1.99188   | 2.91838   | 2.15409   | 4.00787   | 1.81234   | 1.4895    |
| TMEM200C    | 1.08215   | 1.05245   | 0.696318  | 0.914514  | 1.24061   | 0.708071  |
| ANKRD31     | 0.142664  | 0.0700745 | 0.143996  | 0.0446529 | 0.0706714 | 0.0493899 |
| INO80D      | 4.88497   | 3.91886   | 5.82511   | 4.85017   | 5.72507   | 3.93334   |
| LRRC4B      | 0.706354  | 1.60589   | 0.687489  | 1.64235   | 1.47818   | 0.733616  |
| KRT84       | 0.347573  | 0.263402  | 0.263115  | 0.979096  | 0.252996  | 3.49643   |
| LINC00427   | 0.430262  | 0.38041   | 0         | 0         | 0.548072  | 0.268121  |
| PNPLA3      | 13.5366   | 10.3934   | 12.4046   | 9.63331   | 9.00721   | 9.90051   |
| MIR1302-10  | 0         | 0         | 7.00285   | 0         | 0         | 5.76466   |
| CHMP4C      | 20.9716   | 12.3945   | 19.085    | 20.1697   | 19.8374   | 19.1979   |
| FAM197Y6    | 0         | 0         | 0         | 0         | 0         | 0         |
| MIR4301     | 0         | 0         | 0         | 0         | 0         | 0         |
| EDEM2       | 13.2456   | 15.1011   | 11.2412   | 12.8199   | 12.9314   | 12.2116   |
| NLRP13      | 0.188167  | 0         | 0         | 0         | 0         | 0         |
| SPATA22     | 0.310288  | 0.0769346 | 0.263489  | 0.435774  | 0.221686  | 0.054225  |
| FLJ30403    | 0.808325  | 1.09846   | 1.12838   | 0.874373  | 0.751235  | 0.889761  |
| BAG4        | 5.12428   | 4.66883   | 6.78004   | 4.54017   | 5.7898    | 5.08137   |
| C6orf201    | 0.0643288 | 0         | 0.0974633 | 0         | 0         | 0         |
| HMGB3       | 7.56687   | 7.10523   | 6.68982   | 7.28669   | 7.54567   | 7.43442   |
| ANO5        | 0.673385  | 0.304424  | 0.563939  | 0.309889  | 0.237508  | 0.152275  |
| S100A7      | 3255.24   | 2020.29   | 75.0006   | 233.026   | 1373.84   | 378.977   |
| PSG6        | 0         | 0         | 0         | 0         | 0         | 0         |
| LUM         | 40.0376   | 26.8601   | 40.2646   | 29.4833   | 46.6421   | 30.0909   |
| WDR83       | 13.6743   | 16.153    | 12.6825   | 16.1642   | 17.0143   | 14.1403   |
| RUNX1       | 17.6032   | 13.202    | 12.5391   | 13.286    | 16.6581   | 13.7441   |
| MCFD2       | 31.6083   | 22.1495   | 28.7216   | 21.5201   | 24.1721   | 22.387    |
| SPINK4      | 0         | 0.530178  | 0         | 0.563067  | 0.381924  | 0         |
| GATSL2      | 0.582869  | 0         | 0.634328  | 0.0558685 | 0.589832  | 0.817552  |
| SUDS3       | 16.9082   | 15.4553   | 17.7987   | 18.3723   | 16.7459   | 15.7729   |
| LENEP       | 0.212395  | 0.56336   | 0.643138  | 0.598308  | 0         | 0.264712  |
| NFU1        | 32.6091   | 29.4731   | 27.3268   | 24.3382   | 21.3054   | 21.1633   |
| LOC10065285 | 0         | 0         | 0         | 0         | 0         | 0         |
| LOC10050608 | 0.754867  | 0.71139   | 0.736492  | 0.783974  | 0.700047  | 0.653117  |
| KRTAP5-4    | 2.38702   | 0.732795  | 0.144559  | 23.4897   | 0.972995  | 171.14    |
| LOC10050615 | 0.106344  | 0.0187388 | 0.273985  | 0.0799841 | 0.16216   | 0.184882  |
| SNORD114-1  | 0         | 0         | 0         | 0         | 0         | 0         |
| POM121L12   | 0         | 0         | 0         | 0         | 0         | 0         |
| CABP7       | 0.219248  | 0.0666321 | 0.113199  | 0.241679  | 0.211034  | 0.41107   |

|             |           |           |           |           |           |           |
|-------------|-----------|-----------|-----------|-----------|-----------|-----------|
| CLK3        | 22.6785   | 29.2016   | 27.5267   | 31.8705   | 33.6059   | 33.1374   |
| PCDHGA5     | 0.710038  | 0.258328  | 0.945313  | 0.468946  | 0.980442  | 0.415399  |
| SNORA71A    | 0         | 0         | 0         | 0         | 23.5674   | 0         |
| CLCA1       | 0         | 0         | 0.0480361 | 0.0297918 | 0         | 0         |
| ADAM5P      | 0         | 0         | 0         | 0         | 0         | 0         |
| POT1        | 4.7013    | 4.21928   | 4.37118   | 4.28971   | 4.41626   | 4.29898   |
| GUCY1A2     | 0.168425  | 0.0893465 | 0.229498  | 0.126519  | 0.0858167 | 0.0629732 |
| LOC440157   | 0.339044  | 0.758493  | 0.706407  | 0.508996  | 0.110466  | 0.0703423 |
| ASNSD1      | 15.9083   | 15.1498   | 17.0269   | 15.4368   | 14.1172   | 13.2263   |
| KCNS1       | 0.469454  | 0.490527  | 1.21152   | 0.901656  | 0.84263   | 0.664872  |
| PPP1R2P3    | 2.85699   | 2.43411   | 2.47734   | 2.29272   | 2.08444   | 4.88788   |
| UGT2B15     | 0         | 0         | 0         | 0.0450481 | 0         | 0         |
| KITLG       | 9.03998   | 6.26405   | 7.39827   | 5.05251   | 6.87204   | 5.64461   |
| ADAM33      | 14.27     | 29.5603   | 21.5908   | 17.6575   | 41.2583   | 29.0481   |
| KRT32       | 1.49463   | 1.59487   | 0.429169  | 29.6173   | 0.426732  | 33.498    |
| OR2K2       | 0         | 0         | 0         | 0         | 0         | 0         |
| SCO1        | 19.3613   | 16.9061   | 16.4263   | 14.7466   | 14.0875   | 13.3352   |
| LOC158696   | 0.239822  | 0.0302908 | 0.129676  | 0.0643398 | 0.0654617 | 0.0640487 |
| APOL3       | 38.1885   | 40.0672   | 18.2975   | 10.388    | 26.9172   | 14.3057   |
| LIPI        | 0.0649181 | 0.0573965 | 0.14743   | 0.304785  | 0.165387  | 0.0404542 |
| SNORD13     | 0         | 0         | 0         | 0         | 0         | 0         |
| SMN1        | 14.4213   | 11.4907   | 15.598    | 14.1604   | 14.9896   | 12.9602   |
| LPP-AS2     | 0.830468  | 1.31505   | 1.57157   | 0.617928  | 1.27774   | 0.951726  |
| LOC339803   | 1.22121   | 2.54256   | 1.81911   | 1.1467    | 1.90686   | 1.44837   |
| TMUB2       | 27.9584   | 38.5882   | 31.9933   | 39.2615   | 42.8955   | 36.5309   |
| GSTM3       | 12.2039   | 12.3451   | 15.3729   | 16.8316   | 16.8246   | 11.8023   |
| MIR514-2    | 0         | 0         | 0         | 0         | 0         | 0         |
| C16orf70    | 19.305    | 17.739    | 19.2729   | 19.3927   | 23.9794   | 24.1216   |
| NMUR1       | 0.663559  | 0.93335   | 1.41562   | 1.38775   | 0.768408  | 0.319524  |
| GFPT1       | 9.83408   | 5.6254    | 7.35326   | 5.63503   | 5.13346   | 4.8111    |
| SLC44A3     | 12.878    | 8.86545   | 10.7106   | 10.1031   | 8.25621   | 7.09063   |
| GSTM1       | 128.177   | 91.3281   | 60.9683   | 79.7616   | 105.557   | 77.5116   |
| LOC392196   | 0         | 0.0222284 | 0.0570965 | 0         | 0         | 0         |
| SNHG10      | 8.27021   | 10.7947   | 9.33505   | 8.9356    | 10.8873   | 8.90985   |
| C21orf7     | 3.52038   | 4.66875   | 1.72438   | 3.01392   | 4.81403   | 3.41968   |
| C8orf34     | 0.122525  | 0.488299  | 0.436402  | 0.249454  | 0.336199  | 0.351965  |
| C5orf58     | 0         | 0.276129  | 0         | 0         | 0         | 0.194621  |
| LOC10050574 | 7.71126   | 9.44847   | 3.72393   | 2.83302   | 11.8122   | 4.7495    |
| FMR1-AS1    | 0         | 0         | 0.0514581 | 0.120351  | 0         | 0         |
| DENND1A     | 6.60961   | 5.69408   | 6.3711    | 5.95588   | 6.05044   | 5.71907   |
| GPA33       | 0.0715766 | 0.0316418 | 0.027092  | 0         | 0.0455876 | 0.0223018 |
| SNORA2A     | 87.5216   | 38.6906   | 0         | 123.272   | 55.743    | 54.5398   |
| NMT2        | 7.88023   | 7.73377   | 9.95203   | 7.86979   | 9.1544    | 6.65156   |

|             |           |           |           |           |           |           |
|-------------|-----------|-----------|-----------|-----------|-----------|-----------|
| LOC10050674 | 0.156584  | 0.185472  | 0.276477  | 0.147149  | 0.532922  | 0.391747  |
| LOC642799   | 14.0661   | 24.3496   | 10.7442   | 16.5897   | 25.8043   | 22.8496   |
| PKD2L1      | 0.357864  | 0.0575274 | 0.0246277 | 0.030548  | 0.0621615 | 0.101366  |
| SCGN        | 1.01928   | 0         | 0.110229  | 0         | 0.0463704 | 0         |
| VPS39       | 26.4598   | 28.9776   | 31.7549   | 29.6118   | 36.3905   | 29.5276   |
| PILRB       | 89.6972   | 124.139   | 72.3241   | 91.994    | 96.4115   | 93.8494   |
| C18orf26    | 0         | 0         | 0         | 0         | 0.0324271 | 0.190363  |
| SLC35E4     | 3.21147   | 3.85595   | 3.7517    | 4.57913   | 4.92412   | 4.47194   |
| CENPV       | 4.37356   | 5.8432    | 4.04655   | 4.92805   | 3.89976   | 3.33107   |
| FCRLA       | 0.37745   | 1.41815   | 0.774412  | 0.653286  | 0.528016  | 0.510346  |
| POTEE       | 11.7032   | 10.3068   | 8.715     | 8.1702    | 8.61883   | 9.75917   |
| MEMO1       | 11.034    | 13.1142   | 11.4567   | 12.7952   | 12.2119   | 13.376    |
| IGSF23      | 0         | 0         | 0.0901983 | 0.111881  | 0.0758883 | 0         |
| ATP11A      | 7.35479   | 5.70404   | 7.3221    | 5.23734   | 8.11757   | 6.27922   |
| CIDEA       | 274.372   | 365.048   | 181.828   | 202.518   | 142.348   | 173.8     |
| KCNK1       | 10.9039   | 10.2693   | 9.22333   | 9.17025   | 10.6587   | 11.7581   |
| OTUB2       | 15.7899   | 14.3395   | 9.9863    | 14.4238   | 8.04853   | 15.8282   |
| GBGT1       | 1.7557    | 2.96344   | 2.61788   | 2.14814   | 3.21911   | 2.48654   |
| MRPS17      | 21.3639   | 32.7256   | 22.7544   | 24.4923   | 21.5177   | 22.4464   |
| TANC2       | 5.66518   | 4.07495   | 6.6691    | 5.43222   | 5.48363   | 5.5697    |
| LOC10012849 | 0         | 0         | 0         | 0         | 0         | 0         |
| IL10RA      | 7.10577   | 5.90232   | 6.00787   | 3.14655   | 11.6141   | 4.91258   |
| C16orf47    | 0         | 0         | 0.238849  | 0         | 0         | 0.196618  |
| C20orf79    | 0         | 0         | 0         | 0         | 0         | 0         |
| C9orf128    | 0.270269  | 0.268825  | 0.0511489 | 0.158612  | 0.21517   | 0.147368  |
| MIR574      | 0         | 0         | 0         | 0         | 0         | 0         |
| SPEM1       | 0         | 0         | 0         | 0         | 0         | 0         |
| SOX7        | 21.1523   | 23.0779   | 22.7618   | 24.5673   | 27.3748   | 24.0442   |
| LOC10013067 | 0         | 0.058973  | 0.0504932 | 0         | 0.0849648 | 0.0415654 |
| MIR4663     | 0         | 0         | 0         | 0         | 0         | 0         |
| KCNH4       | 0.0995333 | 0.0660008 | 0.207205  | 0.0467301 | 0.0633933 | 0.0310125 |
| PF4         | 0         | 1.24814   | 0         | 0.662785  | 0.449562  | 0.439858  |
| GNPDA2      | 8.55906   | 6.03475   | 8.36562   | 5.44266   | 8.6255    | 6.00879   |
| ECH1        | 214.477   | 236.516   | 196.675   | 212.108   | 165.237   | 188.155   |
| PNLIPRP1    | 0         | 0         | 0.0552015 | 0         | 0         | 0.0454412 |
| PRKY        | 11.3595   | 13.1659   | 0.0897829 | 0.0748627 | 0.117505  | 0.0905375 |
| HSD17B7     | 14.3841   | 13.3845   | 13.2807   | 12.8199   | 14.1023   | 13.5774   |
| HS6ST2      | 0.39381   | 0.0771048 | 0.103154  | 0.247715  | 0.223171  | 0.231876  |
| DYNC1I1     | 1.90016   | 1.14046   | 1.48977   | 3.05799   | 1.26864   | 2.09285   |
| LOC10050701 | 0.307002  | 0.31667   | 0.477715  | 0.512479  | 0.49969   | 0.382621  |
| STXBP4      | 0.712094  | 0.475689  | 0.503122  | 0.653787  | 0.735738  | 0.680412  |
| CDKN2B-AS   | 0.178319  | 0.0675677 | 0.0964201 | 0.0239198 | 0.146021  | 0.0317487 |
| EMILIN1     | 8.40147   | 8.78657   | 9.94329   | 7.05109   | 9.97579   | 8.1852    |

|             |           |          |           |           |           |            |
|-------------|-----------|----------|-----------|-----------|-----------|------------|
| ELK1        | 13.9799   | 12.1678  | 12.4111   | 11.5114   | 12.8417   | 12.3327    |
| C9orf163    | 0.743407  | 0.795647 | 0.740478  | 0.624569  | 0.64792   | 0.804609   |
| FOSB        | 0.623031  | 0.897989 | 41.4646   | 1.10414   | 7.14562   | 0.48499    |
| HELZ        | 4.76459   | 3.22982  | 4.61242   | 3.62747   | 4.76988   | 3.85602    |
| EIF2B2      | 17.1832   | 18.2676  | 16.5888   | 17.4414   | 15.0647   | 22.9329    |
| NCF2        | 9.39813   | 8.40801  | 9.45843   | 8.29212   | 14.9333   | 8.18324    |
| LOC10029240 | 0.673728  | 2.52E-09 | 0.539574  | 0.468627  | 0.434421  | 0.433944   |
| NLRP12      | 0.152309  | 0        | 0.076419  | 0.0473947 | 0.0729242 | 0.0713501  |
| FLJ40194    | 0         | 0        | 0         | 0         | 0         | 0          |
| SLC34A2     | 10.3148   | 0.395081 | 1.15403   | 1.27643   | 1.51459   | 1.57819    |
| AHCY        | 57.6609   | 58.1869  | 48.0671   | 61.7965   | 49.4085   | 48.5729    |
| LOC440970   | 0         | 0        | 0         | 0         | 0         | 0.00810552 |
| IL27        | 0         | 0.196722 | 0         | 0         | 0         | 0          |
| GDF9        | 0.357776  | 0.858591 | 0.928589  | 0.335946  | 0.748714  | 0.637002   |
| LOC10027080 | 3.51942   | 4.52688  | 4.13909   | 3.41382   | 5.34774   | 4.09846    |
| VSIG10      | 7.24593   | 7.7013   | 5.4998    | 6.18858   | 5.53551   | 5.40402    |
| CDK14       | 3.29118   | 2.39331  | 2.93371   | 2.96236   | 2.90239   | 2.14801    |
| APOA1       | 0         | 1.07593  | 1.53536   | 0.507854  | 1.37789   | 1.17963    |
| SLC17A6     | 0         | 0        | 0         | 0         | 0         | 0          |
| NKX2-2      | 0         | 0        | 0         | 0         | 0         | 0          |
| LOC10050610 | 0.504991  | 0.669722 | 0.191141  | 0         | 0.160816  | 0.472034   |
| AKNA        | 5.95683   | 7.04116  | 5.40538   | 3.1289    | 8.7023    | 4.11291    |
| EGLN1       | 15.2179   | 13.6918  | 14.3214   | 12.5016   | 14.1415   | 12.1902    |
| FLJ45248    | 0         | 0        | 0         | 0         | 0         | 0.103711   |
| SNORA59B    | 19.2134   | 8.49365  | 59.3907   | 9.02055   | 49.9683   | 37.4156    |
| BST2        | 53.2427   | 80.9715  | 30.277    | 19.6149   | 30.7467   | 20.0024    |
| TAS2R19     | 0.134622  | 0.476097 | 0.10191   | 0.505631  | 0.60019   | 0.167781   |
| LOC10050620 | 14.6932   | 15.8381  | 8.53259   | 5.85887   | 10.8965   | 10.4105    |
| ASZ1        | 0         | 0        | 0         | 0         | 0         | 0          |
| MEGF6       | 19.4151   | 36.7255  | 25.353    | 27.0339   | 38.3605   | 30.4643    |
| ZNF641      | 7.91412   | 7.47042  | 7.56006   | 5.1972    | 7.77168   | 6.36762    |
| MITD1       | 26.1392   | 30.5013  | 23.0017   | 15.4492   | 25.1274   | 22.7382    |
| SSTR2       | 0.232235  | 0.293325 | 0.226032  | 0.342673  | 0.295823  | 0.372134   |
| LIMK2       | 42.4949   | 43.8231  | 47.8986   | 51.6992   | 57.5848   | 54.6176    |
| PPIH        | 23.3271   | 33.7237  | 25.2951   | 27.8238   | 24.2935   | 17.4831    |
| ACTR3BP2    | 0         | 0        | 0         | 0         | 0         | 0          |
| TCEA2       | 9.67868   | 15.7817  | 12.6019   | 16.5856   | 16.3486   | 11.6787    |
| HDGFRP2     | 18.5071   | 24.789   | 20.53     | 23.2452   | 25.9665   | 23.7976    |
| MIR3926-2   | 0         | 0        | 0         | 0         | 0         | 0          |
| CYP51A1     | 43.8221   | 27.4262  | 36.8651   | 32.7304   | 25.2587   | 32.4729    |
| EIF2D       | 30.7358   | 32.9967  | 31.2826   | 34.3281   | 33.9274   | 30.9445    |
| C12orf55    | 0.0167583 | 0        | 0.0634306 | 0         | 0.0533673 | 0.0522153  |
| PHF1        | 32.7564   | 46.1173  | 32.1024   | 43.2468   | 42.9177   | 34.2892    |



|             |           |           |           |           |           |           |
|-------------|-----------|-----------|-----------|-----------|-----------|-----------|
| ABI3        | 3.79101   | 4.08976   | 2.61512   | 2.0297    | 4.50204   | 3.27635   |
| LOC10050706 | 0         | 0.131705  | 0         | 0         | 0.104863  | 0         |
| ARHGDIB     | 100.713   | 96.6207   | 76.2404   | 67.6598   | 88.3824   | 54.5491   |
| KLK13       | 16.0952   | 10.5555   | 10.5105   | 6.47704   | 14.9824   | 12.675    |
| MIR548J     | 0         | 0         | 0         | 0         | 0         | 0         |
| LOC10028698 | 0         | 0         | 0.92743   | 6.93E-217 | 5.68E-227 | 4.67E-187 |
| DSP         | 243.871   | 204.566   | 342.264   | 313.48    | 303.97    | 339.545   |
| AXL         | 16.8117   | 12.8857   | 15.4464   | 11.3384   | 12.9869   | 11.6788   |
| LOC284412   | 0.563346  | 1.26434   | 1.22856   | 1.60417   | 0.7528    | 0.891135  |
| FAM22A      | 2.25047   | 3.55486   | 2.31681   | 2.05681   | 2.3506    | 2.16894   |
| LOC10028919 | 0         | 0         | 0         | 0         | 0         | 0         |
| GUSBP10     | 0         | 0         | 0         | 0         | 0         | 0         |
| VSTM2L      | 3.53001   | 3.16759   | 0.797682  | 1.38521   | 1.14092   | 1.08346   |
| TFAP2B      | 7.09268   | 5.52191   | 4.26266   | 6.00484   | 4.32694   | 5.88969   |
| DBH         | 0.616289  | 0.448728  | 0.109773  | 0.0340403 | 0.577232  | 0.211041  |
| IZUMO4      | 2.97252   | 6.72861   | 3.17945   | 2.32801   | 6.91892   | 6.17919   |
| LOC644717   | 0         | 0         | 0         | 0         | 0         | 0         |
| TM6SF1      | 3.5189    | 3.89763   | 4.24509   | 3.1673    | 4.88943   | 2.95209   |
| LOC10050551 | 0.111971  | 0.079719  | 0.0521063 | 0.106413  | 0.0740183 | 0.0279751 |
| FAM71F1     | 0         | 0         | 0         | 0.0576324 | 0.156367  | 0         |
| PRKAR2A     | 7.92253   | 2.86209   | 8.67365   | 4.99941   | 4.88313   | 4.72464   |
| LOC151174   | 0.105796  | 0.385964  | 0.250276  | 0.409907  | 0.408002  | 0.849325  |
| SNAPC2      | 12.4866   | 16.5828   | 13.8814   | 17.2335   | 18.1039   | 15.5381   |
| C19orf45    | 0         | 0.167134  | 0.0954008 | 0.295836  | 0.0802654 | 0         |
| TMC8        | 4.72492   | 6.00199   | 4.47603   | 3.19935   | 10.0955   | 4.76231   |
| ZNF470      | 1.95843   | 1.76686   | 1.50271   | 1.20094   | 1.75645   | 1.66873   |
| TMEM132B    | 0.300768  | 0.4432    | 1.10047   | 0.741343  | 0.622573  | 0.616944  |
| TMEM129     | 24.7836   | 32.228    | 26.5866   | 31.7553   | 32.5637   | 31.5192   |
| SFI1        | 6.04733   | 8.72278   | 8.64917   | 10.2022   | 8.62825   | 7.43551   |
| LINC00115   | 2.59477   | 2.5167    | 2.15434   | 1.57294   | 2.93232   | 2.19071   |
| BACH1       | 8.89952   | 7.08705   | 12.262    | 7.58509   | 11.9995   | 9.82456   |
| FAM19A1     | 0         | 0.0479793 | 0         | 0.101911  | 0         | 0.0338168 |
| APOBEC3F    | 3.51595   | 3.36785   | 2.86469   | 2.83534   | 4.0694    | 2.17429   |
| NOP2        | 19.4914   | 24.6885   | 16.4559   | 23.2499   | 19.344    | 15.8706   |
| EVX1        | 0         | 0         | 0         | 0         | 0         | 0         |
| SSR1        | 18.0379   | 13.8255   | 18.1364   | 15.2041   | 15.0276   | 14.2085   |
| SLC27A4     | 36.9553   | 40.1989   | 31.0447   | 40.8326   | 30.3774   | 40.4454   |
| KCNS2       | 0.0312443 | 0.0552485 | 0.0236521 | 0.0293379 | 0.059699  | 0         |
| C6orf120    | 15.1085   | 13.0135   | 15.2723   | 11.1401   | 13.9724   | 12.7325   |
| SNORD115-3  | 0         | 0         | 0         | 0         | 0         | 0         |
| TMEM19      | 13.7449   | 11.1978   | 15.4031   | 13.0817   | 13.2371   | 13.016    |
| ADCK1       | 15.6464   | 18.9128   | 18.0765   | 21.0638   | 9.6427    | 14.1194   |
| MIR3975     | 0         | 0         | 0         | 0         | 0         | 0         |

|             |          |           |            |          |          |           |
|-------------|----------|-----------|------------|----------|----------|-----------|
| MTL5        | 1.69697  | 1.8263    | 0.990517   | 1.34152  | 1.4519   | 1.32585   |
| GPD2        | 12.6824  | 6.71567   | 9.8375     | 7.89479  | 9.25559  | 7.06913   |
| MIR4515     | 0        | 0         | 0          | 0        | 0        | 0         |
| LOC646762   | 2.9486   | 2.90522   | 2.46979    | 2.19051  | 2.40455  | 2.3843    |
| BTN2A3P     | 1.50512  | 1.65443   | 1.41653    | 1.06951  | 1.91724  | 1.36887   |
| CLEC4C      | 0.091685 | 0         | 0          | 0        | 0.23358  | 0.228538  |
| HENMT1      | 6.416    | 7.37242   | 3.90785    | 3.86176  | 4.32372  | 4.31177   |
| LOC10028794 | 0.520662 | 2.54E-11  | 0          | 0        | 0.343761 | 0.33876   |
| MRPS5       | 32.7274  | 28.7663   | 23.5676    | 26.0182  | 26.3702  | 24.1976   |
| WDR87       | 0.15851  | 0.0840868 | 0.00799954 | 0        | 0        | 0.0131702 |
| CPSF2       | 10.4865  | 8.31415   | 11.8932    | 8.20558  | 8.56646  | 7.90801   |
| LOC10050610 | 0        | 0         | 1.20154    | 4.47113  | 0        | 0         |
| NCSTN       | 33.2484  | 27.5111   | 30.2773    | 32.7711  | 29.7975  | 28.5881   |
| THBS2       | 24.4781  | 24.6316   | 27.4829    | 17.734   | 35.3617  | 39.6453   |
| GAS2        | 1.32807  | 1.66958   | 1.35237    | 1.58179  | 1.62472  | 1.58965   |
| PEX14       | 15.4745  | 17.7813   | 15.6734    | 16.8086  | 15.4877  | 14.9854   |
| CLGN        | 1.06184  | 0.2956    | 0.253096   | 0.517697 | 0.212942 | 0.1861    |
| PSAP        | 373.226  | 346.692   | 401.08     | 355.139  | 330.691  | 296.996   |
| SLC16A3     | 5.48149  | 6.51935   | 2.94758    | 7.16705  | 5.28546  | 3.47877   |
| LINC00308   | 0        | 0         | 0          | 0        | 0        | 0         |
| C3orf33     | 2.68805  | 3.94516   | 2.19766    | 1.61538  | 2.15716  | 1.77558   |
| C1orf146    | 0        | 0.152082  | 0.260428   | 0.323033 | 0        | 0         |
| C1orf35     | 17.933   | 30.8      | 21.4997    | 29.488   | 30.1661  | 26.5207   |
| ZNF765      | 1.69929  | 1.65515   | 1.99368    | 1.33408  | 2.24766  | 1.8534    |
| PTPRO       | 0.624351 | 0.617752  | 0.482109   | 0.248634 | 0.907712 | 0.203504  |
| SLC2A10     | 3.25842  | 1.88678   | 3.36992    | 1.853    | 2.80605  | 2.1306    |
| FLJ36644    | 0.579989 | 0.84244   | 0.250888   | 0.4668   | 0.554097 | 0.361424  |
| SSR2        | 163.392  | 199.602   | 177.123    | 210.841  | 170.014  | 153.709   |
| RBM11       | 0        | 0         | 0          | 0        | 0        | 0         |
| CCDC91      | 16.1017  | 11.8506   | 14.594     | 11.6868  | 11.3917  | 11.417    |
| GUSBP2      | 0.701744 | 0.358239  | 1.03516    | 0.928    | 1.11969  | 0.919143  |
| ZFP62       | 12.7189  | 11.8567   | 12.1896    | 10.5514  | 11.8656  | 10.6191   |
| LOC729678   | 27.0656  | 30.412    | 18.9327    | 22.4224  | 23.3917  | 21.5809   |
| C14orf169   | 7.11415  | 6.75478   | 4.88971    | 7.08158  | 5.91248  | 6.64126   |
| EIF2S1      | 22.8685  | 17.8025   | 19.0268    | 16.867   | 16.1569  | 17.06     |
| TBC1D3G     | 3.20261  | 5.43783   | 3.4181     | 3.76848  | 6.2246   | 5.95469   |
| MIR563      | 0        | 0         | 0          | 0        | 0        | 0         |
| MRPL38      | 37.3059  | 51.2744   | 36.1482    | 49.0415  | 42.0342  | 39.098    |
| BEND5       | 2.23563  | 3.51395   | 3.19672    | 3.42095  | 2.63682  | 2.5283    |
| MIR4799     | 0        | 0         | 0          | 0        | 0        | 0         |
| PTK2        | 18.9317  | 16.9477   | 17.2386    | 17.1961  | 15.8283  | 13.7715   |
| TAF7        | 50.0324  | 43.4511   | 47.8471    | 43.0646  | 46.1603  | 45.4127   |
| SSBP2       | 16.5025  | 15.9554   | 17.6103    | 15.9454  | 17.3254  | 16.4649   |

|             |           |          |           |             |            |           |
|-------------|-----------|----------|-----------|-------------|------------|-----------|
| TMEM132A    | 7.32079   | 8.72431  | 5.1423    | 8.69972     | 6.14089    | 12.9249   |
| HUNK        | 0.74642   | 0.614425 | 0.769629  | 1.293       | 0.844244   | 1.10671   |
| OR1N1       | 0.127905  | 0        | 0         | 0           | 0.0814631  | 0         |
| GJC2        | 1.4482    | 2.25955  | 2.32157   | 2.59969     | 2.55008    | 2.20306   |
| LOC10050619 | 7.55882   | 7.32563  | 5.72207   | 5.91468     | 5.92524    | 4.3782    |
| RNASEH2B    | 14.3333   | 14.6366  | 13.1621   | 9.72235     | 12.0615    | 10.4016   |
| HMGB4       | 0         | 0        | 0         | 0           | 0          | 0         |
| SNIP1       | 6.37967   | 6.61674  | 7.368     | 7.75681     | 8.90789    | 7.03365   |
| SNORD116-10 | 0         | 0        | 0         | 0           | 0          | 0         |
| ATP4B       | 0         | 0        | 0         | 0           | 0.0914422  | 0         |
| SARNP       | 29.2311   | 24.5246  | 21.6728   | 22.4091     | 22.737     | 21.9081   |
| CDSN        | 250.951   | 105.891  | 170.476   | 132.764     | 240.133    | 307.107   |
| LOC285375   | 0         | 0        | 0         | 0           | 0          | 0         |
| RIPK3       | 6.81358   | 9.94461  | 7.28658   | 7.31182     | 13.2255    | 8.96367   |
| MIR371      | 0         | 0        | 0         | 0           | 0          | 0         |
| HIST1H3B    | 0         | 0        | 0         | 0           | 0          | 0         |
| LAMC1       | 23.0263   | 17.084   | 25.1134   | 17.0261     | 17.3459    | 14.9259   |
| LOC10029351 | 5.57047   | 7.90961  | 6.586     | 7.00485     | 6.43745    | 5.94278   |
| GPR107      | 25.227    | 19.8399  | 22.6454   | 20.7225     | 22.2629    | 20.5691   |
| LOC10050681 | 0.269453  | 0        | 0         | 0.759036    | 0          | 0.335823  |
| SNAPC1      | 3.77965   | 3.70932  | 4.52072   | 2.48432     | 3.75536    | 2.9206    |
| ANO9        | 34.5812   | 49.9558  | 48.6366   | 52.3925     | 89.4327    | 76.5293   |
| MGC39584    | 0         | 0        | 0         | 0           | 0          | 0         |
| NTSR2       | 0         | 0.234199 | 0         | 0           | 0.0421775  | 0         |
| SLC2A3      | 4.60965   | 4.55762  | 4.55893   | 3.51395     | 6.56635    | 3.16597   |
| SEPHS1      | 16.4829   | 15.4741  | 14.8955   | 19.046      | 14.6396    | 12.5141   |
| WNT5B       | 4.12376   | 4.97148  | 5.53345   | 9.81128     | 5.37174    | 4.37988   |
| NTRK1       | 0.0783172 | 0.282751 | 0.0296432 | 0           | 0.17468    | 0.152516  |
| ACSF2       | 32.6822   | 31.3539  | 31.5612   | 36.1523     | 29.4572    | 27.1075   |
| SOHLH2      | 0.649651  | 0.5094   | 0.564928  | 0.000165961 | 0.097159   | 0.290651  |
| LOC10013273 | 0.170971  | 0        | 0.0647131 | 0.0802697   | 0.108893   | 0         |
| TTY17A      | 3.83162   | 0        | 0         | 0           | 0          | 0         |
| P2RX1       | 3.55258   | 7.5137   | 5.45775   | 5.16725     | 9.27247    | 6.01204   |
| LOC10050729 | 0.224814  | 0.397533 | 0.680742  | 0.844388    | 1.14548    | 0.980663  |
| LOC729732   | 2.34683   | 4.397    | 3.89152   | 4.40728     | 5.62302    | 4.15521   |
| IQCF3       | 0         | 0        | 0         | 0           | 0          | 0         |
| ABHD2       | 13.1588   | 8.58919  | 10.8467   | 9.23388     | 11.3884    | 9.07057   |
| PPP3R1      | 36.3973   | 31.2757  | 38.3942   | 33.092      | 32.8494    | 30.8037   |
| LOC10065300 | 0.7707    | 0        | 0.291712  | 0.361838    | 0.490863   | 0         |
| C19orf44    | 3.35786   | 3.27653  | 2.60115   | 2.19629     | 4.80905    | 4.03027   |
| DGKH        | 0.603643  | 0.58898  | 0.760601  | 0.592936    | 0.580475   | 0.494183  |
| CORO6       | 4.39732   | 10.2336  | 5.01542   | 7.57202     | 8.40204    | 6.3419    |
| MUC2        | 0.0790166 | 0.029109 | 0.0913856 | 0.0515246   | 0.00698974 | 0.0683886 |

|             |           |           |           |           |           |           |
|-------------|-----------|-----------|-----------|-----------|-----------|-----------|
| SNORD103B   | 0         | 0         | 0         | 0         | 0         | 0         |
| AWAT1       | 114.446   | 130.667   | 82.685    | 86.6143   | 47.5357   | 80.6879   |
| LOC10013331 | 0.53888   | 0.310622  | 0.25778   | 0.0409433 | 0.178541  | 0.15506   |
| SIGLEC14    | 0.194428  | 0.343803  | 0.15025   | 0.36513   | 0.49533   | 0.183254  |
| BPGM        | 11.2881   | 8.62417   | 11.801    | 9.17266   | 9.44347   | 10.0045   |
| CDH23       | 4.10512   | 5.42131   | 3.97991   | 3.75354   | 7.75526   | 3.4214    |
| FAM160A1    | 3.30061   | 2.37571   | 4.66082   | 2.68202   | 3.43626   | 3.98176   |
| DPH3P1      | 1.29747   | 2.48547   | 2.29178   | 2.0305    | 2.96114   | 1.88656   |
| STAMPB      | 8.4169    | 7.04622   | 8.34606   | 7.04629   | 8.28838   | 7.57141   |
| CXCL12      | 239.829   | 193.713   | 335.601   | 150.665   | 266.926   | 170.744   |
| GARS        | 33.7748   | 26.0967   | 27.7994   | 30.1761   | 26.1474   | 34.1107   |
| MIR412      | 0         | 0         | 0         | 0         | 0         | 0         |
| ZNF738      | 0.96237   | 0.943058  | 0.934933  | 0.72292   | 0.960271  | 0.734643  |
| MIR593      | 0         | 0         | 0         | 0         | 0         | 0         |
| RORC        | 11.5857   | 13.3621   | 17.2222   | 19.3872   | 18.7771   | 14.0158   |
| RDH16       | 3.48461   | 5.13478   | 4.16505   | 6.54398   | 9.46151   | 7.69535   |
| C1orf140    | 0         | 0         | 0.0489933 | 0         | 0         | 0.0268871 |
| RAB11FIP1   | 18.2195   | 10.0663   | 15.197    | 13.0787   | 15.4514   | 14.801    |
| TBL2        | 12.2757   | 12.4121   | 11.962    | 11.4654   | 10.0226   | 10.3963   |
| LOC10012817 | 0         | 0         | 0.0747733 | 0         | 0         | 0.0307762 |
| MEIS3       | 1.42614   | 1.51253   | 0.864287  | 1.42628   | 2.00203   | 1.79438   |
| ALDH3B1     | 4.77989   | 4.75023   | 4.71181   | 3.86224   | 5.47495   | 4.96441   |
| LOC643696   | 0.889594  | 1.40491   | 1.07101   | 0.994119  | 1.12973   | 1.33297   |
| SPANXN1     | 0         | 0         | 0         | 0         | 0         | 0         |
| ASAP1       | 9.88115   | 9.22631   | 11.4719   | 8.7727    | 13.6558   | 9.31522   |
| NKIRAS1     | 5.70114   | 4.39906   | 4.27656   | 4.13662   | 3.69711   | 3.97257   |
| TBC1D30     | 0.593904  | 0.278621  | 0.31196   | 0.386952  | 0.185271  | 0.536262  |
| LOC10013098 | 3.19471   | 3.08134   | 3.5177    | 3.13614   | 3.51454   | 3.25769   |
| SHISA7      | 0.11098   | 0.0420519 | 0.108016  | 0.0446606 | 0.0403906 | 0.0197594 |
| SENP1       | 4.15223   | 4.15942   | 3.91746   | 3.53396   | 4.58567   | 4.12979   |
| LOC10050590 | 3.77879   | 3.71214   | 2.58086   | 1.86742   | 2.63886   | 7.64298   |
| LOC10050729 | 0.22762   | 0.217331  | 0.44196   | 3.87E-196 | 0.398389  | 0.161013  |
| HDHD1       | 3.84953   | 3.45023   | 3.95485   | 4.81978   | 4.38164   | 4.12161   |
| TP53AIP1    | 24.4467   | 46.0495   | 28.7835   | 52.7487   | 44.8421   | 54.2879   |
| FABP6       | 5.34494   | 3.60754   | 1.02503   | 1.48996   | 2.09372   | 0.988814  |
| TBX21       | 0.822009  | 0.51912   | 0.53337   | 0.0735098 | 0.598334  | 0.0975697 |
| ZNF182      | 3.94614   | 4.56119   | 4.11873   | 4.65886   | 6.01476   | 4.91877   |
| CEP104      | 5.88248   | 5.4492    | 5.42648   | 4.96842   | 6.04348   | 6.12487   |
| CCNJL       | 0.693721  | 0.506676  | 0.273992  | 0.736357  | 0.633937  | 0.50748   |
| MIR4283-1   | 0         | 0         | 0         | 0         | 0         | 0         |
| PSMD12      | 21.0864   | 16.7046   | 17.0838   | 14.1673   | 14.2792   | 15.2986   |
| VCX3B       | 0.0960771 | 0.509672  | 0.0545482 | 0.596546  | 0.137682  | 0.189731  |
| SEC23IP     | 8.56039   | 7.43828   | 7.85949   | 5.85166   | 7.87202   | 6.37351   |

|             |           |           |           |           |           |           |
|-------------|-----------|-----------|-----------|-----------|-----------|-----------|
| KRTAP12-3   | 0.943998  | 0.417312  | 0         | 25.7056   | 0         | 131.182   |
| BCAP29      | 25.0536   | 18.5965   | 21.0829   | 15.2612   | 16.7482   | 18.0679   |
| LOC10050669 | 0.0683311 | 0         | 0         | 0         | 0         | 0         |
| GFM1        | 22.9459   | 15.1967   | 16.0604   | 13.0766   | 13.5485   | 12.1249   |
| NT5C3L      | 25.8213   | 29.7936   | 27.9264   | 34.5726   | 29.6938   | 28.7214   |
| TXNL4B      | 10.5329   | 9.75907   | 8.05438   | 8.67447   | 10.882    | 9.91993   |
| MPHOSPH6    | 40.3898   | 36.3544   | 24.8227   | 29.226    | 30.8959   | 34.186    |
| KAT6B       | 5.19213   | 4.19904   | 5.6401    | 4.41794   | 5.44334   | 5.09818   |
| MIR4711     | 0         | 0         | 0         | 0         | 0         | 0         |
| ZCCHC5      | 0.49297   | 0.23469   | 0.0861187 | 0.106821  | 0.169064  | 0.189045  |
| PCDHB10     | 0.728782  | 1.10652   | 1.19299   | 1.00148   | 0.964221  | 0.907899  |
| MRRF        | 21.0121   | 25.8471   | 21.8702   | 24.2388   | 22.6164   | 22.8837   |
| SRSF9       | 106.895   | 101.171   | 93.9978   | 111.475   | 91.5399   | 96.1094   |
| AADA4L4     | 2.64533   | 2.33883   | 1.02694   | 0.573212  | 1.38242   | 0.591753  |
| OR10J1      | 0         | 0         | 0         | 0         | 0         | 0         |
| NOG         | 0.220044  | 0.0486372 | 0.249861  | 0.309926  | 0.245257  | 0.342805  |
| LOC10050590 | 1.09788   | 0.754971  | 0.461723  | 1.03089   | 1.78696   | 1.06424   |
| NCOA4       | 102.457   | 71.368    | 81.2447   | 65.8539   | 69.7534   | 62.6778   |
| KIF12       | 2.78622   | 3.33015   | 2.92942   | 5.52313   | 4.56785   | 4.59786   |
| LOC10050650 | 0.245771  | 0         | 0.18605   | 0.230775  | 0.156533  | 0         |
| HOXA9       | 7.54885   | 6.54799   | 4.80464   | 5.40506   | 7.20569   | 6.0159    |
| SNRPC       | 31.9423   | 35.973    | 25.5741   | 35.025    | 30.2499   | 28.2499   |
| BRD3        | 9.59038   | 9.11226   | 10.8751   | 9.62778   | 11.3885   | 9.12072   |
| LOC10027183 | 0         | 0         | 0         | 0.147178  | 0         | 0         |
| INO80       | 8.62554   | 7.789     | 8.91137   | 8.0416    | 9.25711   | 8.06261   |
| CNTN1       | 3.10578   | 1.07839   | 7.34994   | 3.65204   | 5.63814   | 4.4131    |
| TMEM207     | 0         | 0         | 0         | 0         | 0.0476486 | 0         |
| BCCIP       | 46.2315   | 43.1285   | 33.6254   | 34.7      | 33.6736   | 30.7646   |
| LOC10013058 | 0         | 0         | 0         | 0         | 0         | 0         |
| LOC283624   | 8.1885    | 6.9621    | 7.90561   | 9.94231   | 8.66035   | 7.18812   |
| LOC728190   | 10.926    | 14.6828   | 9.34614   | 8.59217   | 5.3213    | 6.22269   |
| CACNB3      | 11.3285   | 14.7845   | 11.5091   | 14.197    | 16.8474   | 17.6231   |
| C5orf15     | 29.5172   | 28.4267   | 30.1873   | 25.7874   | 29.0386   | 24.0707   |
| LOC728485   | 0         | 0.244498  | 0.334945  | 0.155799  | 0.281806  | 0.241258  |
| MIR4682     | 0         | 0         | 0         | 0         | 0         | 0         |
| FAM46D      | 0         | 0.0289772 | 0         | 0         | 0         | 0         |
| EFCAB8      | 0.0946581 | 0.104613  | 0.0537425 | 0.0444412 | 0.0753603 | 0.0884803 |
| LOC10050724 | 1.35181   | 1.73786   | 1.71509   | 0.681527  | 1.25115   | 1.16714   |
| LOC10050812 | 0.895816  | 1.28042   | 0.908439  | 1.42769   | 0.89927   | 0.915959  |
| EMID1       | 6.30038   | 6.67564   | 9.8165    | 11.6441   | 17.3674   | 10.8125   |
| UNC5A       | 0.367179  | 0.162318  | 0.218394  | 0.123134  | 0.150337  | 0.555682  |
| BTBD11      | 6.15733   | 6.73031   | 6.64802   | 8.24928   | 7.33234   | 8.49992   |
| AGMO        | 0.0816459 | 0.46921   | 0.309032  | 0.0766642 | 0.234003  | 0.0763174 |

|             |           |           |           |            |           |           |
|-------------|-----------|-----------|-----------|------------|-----------|-----------|
| NR2C2AP     | 14.2497   | 23.6656   | 14.7588   | 20.786     | 18.14     | 17.8115   |
| PUM1        | 21.15     | 15.9288   | 20.3699   | 20.2031    | 19.701    | 18.6558   |
| LOC10050765 | 0.0406432 | 0.0718683 | 0.399972  | 0.11449    | 0.103543  | 0.101308  |
| OR7A5       | 0.623679  | 0.339334  | 1.01689   | 1.57668    | 0.458336  | 0.358754  |
| COBRA1      | 30.3742   | 39.6232   | 32.8563   | 36.5171    | 39.1409   | 36.0462   |
| MLIP        | 1.67207   | 2.09006   | 1.52765   | 1.29935    | 1.61579   | 1.97613   |
| FOXD2       | 0.22757   | 0.384115  | 0.407188  | 0.505073   | 0.461175  | 0.335192  |
| FLJ43315    | 0         | 0         | 0         | 0          | 0         | 0         |
| MTMR9       | 3.84952   | 3.01418   | 3.09601   | 3.2164     | 3.82168   | 3.25112   |
| MRPL53      | 57.4038   | 81.3154   | 61.0588   | 74.1633    | 63.3807   | 71.8041   |
| CCDC130     | 25.6501   | 46.1811   | 31.2613   | 44.9503    | 44.7114   | 38.4588   |
| SNORD116-1  | 0         | 0         | 0         | 0          | 0         | 0         |
| SLC3A2      | 62.1046   | 77.3856   | 66.27     | 89.5875    | 73.6124   | 80.1269   |
| CD300LF     | 0.119496  | 0.211302  | 0.361837  | 0.112205   | 0.456647  | 0.335092  |
| DAG1        | 30.3441   | 22.9303   | 30.1751   | 27.4493    | 26.6893   | 26.2807   |
| RBM34       | 22.0188   | 23.8092   | 22.0104   | 20.6248    | 21.7539   | 20.1138   |
| SNORD115-1  | 0         | 0         | 0         | 0          | 0         | 0         |
| GPR26       | 0.0182885 | 0.0242543 | 0.0138445 | 0.00858632 | 0.0640643 | 0.0284916 |
| RANGRF      | 23.5517   | 31.9949   | 21.5259   | 25.9295    | 25.7048   | 21.0403   |
| TRIM54      | 0         | 0         | 0.131254  | 0.0527916  | 0.106815  | 0         |
| LOC1002892  | 2.30809   | 0.0774939 | 0.132702  | 0.192036   | 0.297729  | 0.45516   |
| FAM117B     | 3.81835   | 2.96496   | 3.7828    | 3.38272    | 3.29896   | 2.94843   |
| C1orf126    | 0.811578  | 1.78773   | 0.570019  | 0.942233   | 2.8638    | 1.98122   |
| FAM205A     | 0.0451964 | 0         | 0.0684278 | 0.0212193  | 0.0287858 | 0.056329  |
| LOC253573   | 0         | 0         | 0         | 0          | 0         | 0         |
| POC5        | 5.17442   | 5.88404   | 5.35382   | 5.70343    | 6.22063   | 4.44301   |
| CD1D        | 0.542899  | 0.639996  | 0.469688  | 0.218474   | 0.428103  | 0.209431  |
| NKTR        | 37.8219   | 35.0894   | 47.0574   | 37.5918    | 54.9685   | 38.6729   |
| VRK2        | 14.8413   | 11.7804   | 12.6451   | 9.21178    | 10.9234   | 9.48623   |
| FRMD7       | 0.123555  | 0.0273098 | 0.0233829 | 0.319044   | 0.137712  | 0.0962427 |
| XRN2        | 23.1237   | 19.0765   | 19.9559   | 18.5648    | 20.9873   | 15.7489   |
| 5-Sep       | 29.7605   | 34.6473   | 49.512    | 37.0564    | 45.2306   | 41.2869   |
| ERGIC3      | 157.145   | 198.931   | 173.522   | 214.448    | 182.194   | 170.519   |
| H1FX-AS1    | 2.02987   | 3.95881   | 3.56611   | 3.19709    | 5.30367   | 3.22623   |
| TGFBR3      | 25.925    | 19.0779   | 22.4025   | 15.4153    | 15.4088   | 14.6557   |
| PCDHA8      | 2.53E-43  | 8.25E-14  | 7.87E-21  | 7.50E-26   | 0.0306453 | 0.0308157 |
| ZNF699      | 1.12927   | 0.520917  | 1.26371   | 0.875951   | 1.25084   | 0.887287  |
| CARD18      | 59.6594   | 51.8313   | 97.7477   | 60.493     | 94.8616   | 108.606   |
| C6orf105    | 99.722    | 73.7612   | 52.3216   | 50.9443    | 55.3876   | 67.0265   |
| LOC1002878  | 0.106631  | 0         | 0         | 0          | 0         | 0         |
| STRA6       | 4.23437   | 4.40512   | 1.4889    | 4.07521    | 7.76118   | 6.69004   |
| SNORD15A    | 22.7635   | 0         | 0         | 0          | 0         | 14.1852   |
| LOC1001323  | 0.881384  | 1.92218   | 1.8682    | 1.60004    | 2.43255   | 1.79419   |

|            |           |           |           |           |           |           |
|------------|-----------|-----------|-----------|-----------|-----------|-----------|
| CHST5      | 0.182402  | 0.241902  | 0.322184  | 0.342544  | 0.445548  | 0.435716  |
| GCK        | 0.339545  | 0.336089  | 0.257038  | 0.549816  | 0.451936  | 0.287878  |
| WHSC2      | 13.7897   | 21.9891   | 16.5283   | 21.6191   | 20.3188   | 19.0789   |
| AKAP17A    | 19.4165   | 16.2214   | 18.203    | 21.3064   | 18.4579   | 16.8503   |
| KIF6       | 0.0491177 | 0.0868535 | 0.0371823 | 0.0461207 | 0.0782083 | 0.015304  |
| ARHGEF4    | 23.2823   | 38.2285   | 34.4223   | 48.438    | 40.5208   | 45.2049   |
| CIZ1       | 41.4986   | 50.2826   | 49.7086   | 53.0855   | 46.3975   | 43.0643   |
| WDFY2      | 9.47316   | 10.2368   | 12.9238   | 10.1728   | 13.0045   | 11.1826   |
| ACSL5      | 29.4871   | 20.6546   | 18.0887   | 12.8482   | 15.1806   | 12.6278   |
| EPRS       | 22.9714   | 16.2819   | 21.595    | 15.9743   | 16.4181   | 17.034    |
| GCM1       | 0         | 0.0319891 | 0         | 0.101921  | 0.023044  | 0         |
| NMNAT3     | 8.54603   | 10.2381   | 11.126    | 9.37246   | 11.256    | 9.04502   |
| ACSL4      | 16.3313   | 11.0457   | 13.6701   | 8.9736    | 10.3888   | 7.13935   |
| SP140L     | 5.6042    | 4.85506   | 4.75491   | 3.07266   | 6.32416   | 3.21101   |
| LOC1004992 | 0.196032  | 0.433298  | 0.222596  | 0         | 0.124854  | 0.0610795 |
| CDC123     | 33.1115   | 40.1632   | 34.1079   | 32.4445   | 31.1808   | 31.029    |
| PPA1       | 85.5356   | 80.952    | 79.14     | 79.6792   | 66.2601   | 66.4162   |
| LOC1005058 | 0         | 0         | 0.244706  | 0.303532  | 0         | 0         |
| OR1J2      | 0         | 0         | 0         | 0         | 0.161582  | 0         |
| SYTL3      | 4.3621    | 5.93863   | 4.90939   | 3.36502   | 4.25525   | 3.52523   |
| FAM81B     | 0         | 0.0605037 | 0.155411  | 0         | 0         | 0.0852885 |
| LOC1002706 | 0         | 0         | 0         | 0         | 0         | 0         |
| MIR526A2   | 0         | 0         | 0         | 0         | 0         | 0         |
| SNORD3B-1  | 1.29211   | 8.92501   | 6.75218   | 12.3855   | 10.1652   | 1.71102   |
| C15orf29   | 10.4503   | 11.7593   | 11.977    | 11.6311   | 14.5916   | 14.1628   |
| FAM163A    | 0.0342476 | 0.0302796 | 0.0259256 | 0         | 0         | 0.0213416 |
| ODF1       | 0         | 0         | 0         | 0         | 0         | 0         |
| ECI1       | 75.2383   | 93.8301   | 62.8463   | 98.6164   | 69.645    | 63.9345   |
| CN5H6.4    | 0.14159   | 0.312962  | 0         | 0.598278  | 0.721436  | 0.573514  |
| CCDC85C    | 17.8333   | 14.7377   | 12.9044   | 17.0726   | 13.3809   | 15.9947   |
| C10orf58   | 300.074   | 315.471   | 304.654   | 296.611   | 160.223   | 160.24    |
| SNORD108   | 0         | 0         | 0         | 0         | 0         | 0         |
| PPOX       | 8.82442   | 16.0846   | 15.3494   | 16.1545   | 17.9198   | 16.2491   |
| FRMD4A     | 12.2255   | 11.9151   | 14.8522   | 15.0694   | 12.9091   | 11.2342   |
| GMFB       | 14.6307   | 13.8118   | 15.2914   | 10.6359   | 12.7602   | 10.8378   |
| OCA2       | 0.75704   | 1.61754   | 1.79089   | 1.86598   | 1.40631   | 2.10324   |
| SNORD114-1 | 0         | 0         | 0         | 0         | 0         | 0         |
| LOC1005065 | 0.152058  | 0.0672201 | 0.172663  | 0.107085  | 0.0968466 | 0.118445  |
| LOC1001289 | 1.2699    | 0.856602  | 0.860345  | 1.307     | 2.12736   | 1.86886   |
| F5         | 4.92047   | 1.16495   | 1.80007   | 3.52801   | 0.708072  | 0.910887  |
| DSCAM      | 0.107076  | 0.18934   | 0.0202643 | 0.0502713 | 0.025574  | 0.0333626 |
| KRT33B     | 2.3283    | 0.823242  | 0.201391  | 38.4697   | 0.974759  | 522.615   |
| DCDC1      | 0.0604131 | 0         | 0.045733  | 0.113454  | 0         | 0.0376469 |

|             |           |           |           |           |           |           |
|-------------|-----------|-----------|-----------|-----------|-----------|-----------|
| PRPS2       | 18.3247   | 15.7993   | 16.5256   | 13.3164   | 12.831    | 12.7811   |
| GALM        | 4.75944   | 3.70448   | 4.00325   | 2.4446    | 3.60131   | 2.45889   |
| ACVR2B      | 1.62916   | 1.13331   | 1.38353   | 0.885241  | 1.5538    | 1.50995   |
| ERCC6       | 3.01211   | 2.13835   | 3.99119   | 2.72805   | 3.74016   | 3.41319   |
| SNAR-A11    | 0         | 0         | 0         | 0         | 0         | 0         |
| KIF2B       | 0         | 0         | 0         | 0         | 0         | 0         |
| LOC399753   | 3.99045   | 4.72543   | 7.66607   | 9.0846    | 8.80611   | 7.32762   |
| LINC00421   | 0         | 0         | 0         | 0         | 0.0700122 | 0.068501  |
| MIR489      | 0         | 0         | 0         | 0         | 0         | 0         |
| SLFN14      | 0.103783  | 0.15293   | 0.0785641 | 0.0324834 | 0.110166  | 0.0862306 |
| C15orf52    | 9.89129   | 7.73987   | 10.931    | 11.169    | 13.3354   | 11.2591   |
| BRWD1       | 13.0512   | 8.48844   | 13.3095   | 10.2371   | 12.5943   | 10.7722   |
| LOC10050594 | 1.01957   | 1.65722   | 1.04557   | 2.62082   | 2.1297    | 1.49195   |
| LOC10028965 | 0         | 0         | 0         | 0         | 0.0708763 | 0         |
| HM13        | 79.677    | 67.2273   | 54.0253   | 61.1201   | 52.0265   | 58.8248   |
| GNG10       | 27.1235   | 27.4819   | 20.9077   | 20.6367   | 21.0664   | 16.6926   |
| EPB41L5     | 8.07698   | 5.17306   | 5.79948   | 6.58546   | 6.44708   | 6.44949   |
| PCSK7       | 23.765    | 24.6798   | 20.0841   | 21.8379   | 21.6854   | 21.2994   |
| SNORA15     | 0         | 14.5258   | 0         | 0         | 55.8079   | 0         |
| LOC10050648 | 0         | 0         | 0.113094  | 0.280654  | 0         | 0         |
| NR2E3       | 0.155137  | 0.285755  | 0.0391459 | 0.396549  | 0.333476  | 0.23202   |
| CATSPER2    | 4.36282   | 5.46554   | 8.76252   | 11.6483   | 11.0772   | 7.87093   |
| UTP23       | 5.94241   | 4.50335   | 6.04478   | 4.70798   | 6.36988   | 4.59576   |
| PRDM9       | 0         | 0         | 0         | 0.0249243 | 0         | 0         |
| LOC10065288 | 4.32243   | 4.61097   | 4.02218   | 7.54373   | 6.57232   | 5.1911    |
| SLC1A5      | 82.665    | 84.7452   | 55.368    | 76.6959   | 51.781    | 47.9173   |
| DCLK3       | 0.30583   | 0.334018  | 0.258752  | 0.287169  | 0.206243  | 0.168159  |
| CYBRD1      | 74.7223   | 56.4643   | 93.9873   | 55.2639   | 68.9228   | 53.4407   |
| LOC388242   | 0.878839  | 2.03959   | 0.636762  | 1.067     | 0.652219  | 0.478666  |
| LMO7        | 10.3952   | 5.66963   | 7.29426   | 7.06727   | 8.28866   | 7.50966   |
| OR2L13      | 0         | 0.0488702 | 0         | 0         | 0         | 0         |
| RNF5        | 27.5097   | 27.3294   | 24.2327   | 29.4005   | 27.2691   | 25.6208   |
| AVPR2       | 2.00212   | 4.42747   | 3.32341   | 3.08903   | 3.44277   | 2.90578   |
| ASS1        | 51.9099   | 73.5652   | 55.5453   | 70.5548   | 40.3298   | 39.2432   |
| ATRIP       | 5.87211   | 6.04512   | 4.90188   | 5.88951   | 5.30245   | 5.50807   |
| PPP3CA      | 21.7815   | 17.9191   | 20.2562   | 19.3505   | 22.2813   | 20.5588   |
| MIR649      | 0         | 0         | 0         | 0         | 0         | 0         |
| LINC00222   | 0.0599811 | 0.265158  | 0.045406  | 0         | 0.0382023 | 0.0373777 |
| PCCA        | 13.7291   | 10.4764   | 9.88512   | 9.27728   | 7.44429   | 7.63022   |
| ABCC6P1     | 0.673143  | 0.240445  | 0.686389  | 0.345695  | 0.304469  | 0.161103  |
| LOC155060   | 4.552     | 6.96671   | 7.22448   | 7.51679   | 6.71813   | 4.77334   |
| UBA5        | 24.1618   | 19.5052   | 18.726    | 15.9894   | 18.4053   | 18.1932   |
| PNKP        | 17.3352   | 24.1906   | 21.0986   | 22.0293   | 22.9791   | 22.7121   |



|             |          |          |          |          |           |           |
|-------------|----------|----------|----------|----------|-----------|-----------|
| SBNO1       | 7.35554  | 5.3894   | 6.53435  | 6.02159  | 6.61717   | 6.29852   |
| MIR3117     | 0        | 0        | 0        | 0        | 0         | 0         |
| CYP3A5      | 8.97451  | 13.8825  | 23.2451  | 23.542   | 32.02     | 26.4661   |
| OR3A3       | 0        | 0        | 0        | 0        | 0.0391055 | 0.0382614 |
| ZNF41       | 3.86249  | 2.62813  | 3.51079  | 3.13557  | 3.62521   | 3.54945   |
| ANKK1       | 1.58523  | 2.34762  | 2.10005  | 2.75374  | 2.54935   | 3.03764   |
| FBXW9       | 7.69766  | 12.5934  | 8.25898  | 12.0087  | 9.88257   | 11.5578   |
| ACOX1       | 21.47    | 16.7977  | 22.2284  | 19.3     | 21.4158   | 18.3428   |
| VWA2        | 1.35135  | 1.31425  | 2.37842  | 1.80817  | 2.2808    | 1.87368   |
| EIF4EBP1    | 17.1824  | 26.965   | 12.4652  | 23.7976  | 17.1449   | 24.1807   |
| PCDHB18     | 0.18234  | 0.338797 | 0.388282 | 0.418381 | 0.342266  | 0.22588   |
| LCE2D       | 39.535   | 23.1648  | 73.6688  | 96.6501  | 110.205   | 81.1978   |
| LOC10050750 | 1.99683  | 1.51326  | 1.22369  | 1.87499  | 1.45348   | 1.00732   |
| HSPD1       | 112.538  | 83.9989  | 71.8634  | 71.4474  | 64.3174   | 66.5516   |
| ZNF282      | 10.3688  | 14.6431  | 13.0489  | 15.6915  | 14.2471   | 14.2512   |
| LOH12CR2    | 1.18533  | 1.41787  | 1.16184  | 0.458296 | 0.710534  | 1.34694   |
| KAL1        | 1.49777  | 1.47137  | 2.37072  | 1.30694  | 2.3704    | 3.63912   |
| ZNF583      | 1.27222  | 1.3704   | 1.74431  | 0.913498 | 1.11395   | 0.84224   |
| LOC10013333 | 7.52861  | 12.6982  | 12.7586  | 15.8376  | 11.8368   | 9.72493   |
| LOC440742   | 0        | 0        | 0        | 0        | 0         | 0         |
| MAGEA10-M   | 1.12E-05 | 6.83E-06 | 2.70E-07 | 3.99E-07 | 2.71E-07  | 0.220697  |
| PAQR6       | 7.35604  | 12.6394  | 11.1171  | 16.8894  | 12.0889   | 9.99401   |
| PCDHGA2     | 0.425379 | 0.472346 | 0.747154 | 0.534583 | 0.918304  | 0.729043  |
| LOC10050726 | 0        | 0        | 0        | 0        | 0         | 0         |
| NPHP3-AS1   | 0        | 0        | 0        | 0        | 0         | 0         |
| ZNF611      | 1.7061   | 1.18829  | 2.09642  | 1.62947  | 2.13336   | 1.55      |
| IRF3        | 49.5632  | 81.6805  | 51.19    | 66.8003  | 70.7776   | 63.0817   |
| LOC10050679 | 0        | 0        | 0        | 0        | 0         | 0         |
| C20orf118   | 1.00286  | 1.51725  | 1.50807  | 0.8692   | 2.31841   | 1.40792   |
| CDRT15P2    | 0        | 0        | 0        | 0        | 0         | 0         |
| TLL1        | 1.43882  | 1.37618  | 1.3565   | 1.22823  | 1.32454   | 1.003     |
| TNFRSF10B   | 16.6361  | 17.3419  | 14.4338  | 11.8018  | 16.5373   | 9.96879   |
| S100A5      | 0.558739 | 0.658669 | 0.140989 | 0.874411 | 0.593106  | 0.580304  |
| UMOD        | 0        | 0        | 0        | 0        | 0.0288452 | 0         |
| DGUOK       | 31.6915  | 41.6042  | 30.804   | 37.6814  | 34.6218   | 28.896    |
| TMEM114     | 0        | 0        | 0        | 0        | 0         | 0         |
| NALCN       | 0.729047 | 0.255399 | 0.676849 | 0.891224 | 0.332919  | 0.385736  |
| KLF3        | 30.4379  | 19.0645  | 31.9025  | 21.6108  | 26.2641   | 25.9571   |
| CNST        | 7.06186  | 5.77143  | 7.57385  | 6.34838  | 7.86849   | 6.87582   |
| IGFBP7      | 268.916  | 292.783  | 221.275  | 202.713  | 173.432   | 168.663   |
| DCAKD       | 24.8075  | 31.9684  | 21.3304  | 28.154   | 30.0584   | 26.8084   |
| BICD2       | 32.1475  | 28.2068  | 44.7355  | 38.4374  | 43.3693   | 45.2418   |
| PTPRJ       | 5.54535  | 3.74512  | 3.09234  | 3.7191   | 4.14437   | 2.91498   |

|             |          |           |           |           |           |           |
|-------------|----------|-----------|-----------|-----------|-----------|-----------|
| MVD         | 252.68   | 342.273   | 167.972   | 224.397   | 139.377   | 208.701   |
| ATL2        | 63.1936  | 40.2009   | 55.8927   | 51.3721   | 47.924    | 55.8456   |
| CHCHD1      | 45.1523  | 46.5311   | 37.8428   | 37.8547   | 34.1732   | 41.292    |
| LTB         | 5.45018  | 11.0634   | 9.11053   | 3.95765   | 22.3621   | 6.60241   |
| GCFC1       | 19.2964  | 20.6554   | 19.3227   | 19.6491   | 22.373    | 18.4913   |
| LOC285847   | 0.608259 | 0.215138  | 0.184258  | 0         | 0.271255  | 0.151671  |
| SLC35A3     | 7.5847   | 5.60935   | 7.6457    | 5.32757   | 7.67847   | 6.00469   |
| MOSPD3      | 15.8542  | 20.7848   | 24.8738   | 25.325    | 25.218    | 20.7      |
| PSTK        | 1.98121  | 2.0801    | 1.49979   | 1.1627    | 1.65617   | 1.58184   |
| MIR320B1    | 0        | 0         | 0         | 0         | 0         | 0         |
| LOC728716   | 0        | 0         | 0         | 0         | 0         | 0         |
| FCGR2A      | 3.68614  | 2.95187   | 7.70757   | 4.34947   | 4.23457   | 2.10654   |
| ZBPB        | 0        | 0         | 0         | 0         | 0         | 0         |
| ZDHHC14     | 4.2555   | 5.91365   | 3.42754   | 4.1485    | 3.36678   | 3.97853   |
| SYNDIG1     | 1.49475  | 1.02789   | 1.69731   | 0.935701  | 1.53381   | 0.87972   |
| LOC10013239 | 0        | 0         | 0         | 0         | 0         | 0         |
| SERPINB10   | 0        | 0.33319   | 0         | 0.17693   | 0.060005  | 0.11742   |
| LSM10       | 27.4455  | 41.9833   | 24.2941   | 34.0885   | 26.5441   | 24.3422   |
| NDUFA2      | 71.5255  | 85.8681   | 70.8635   | 92.5802   | 65.2109   | 64.8996   |
| POLN        | 0.700901 | 0.638239  | 0.863745  | 0.587012  | 0.532701  | 0.583886  |
| KLRC3       | 0.512367 | 0.629168  | 0.45969   | 0         | 0.654923  | 0.0709521 |
| MRPL43      | 69.6153  | 100.326   | 79.3173   | 94.0732   | 74.194    | 78.5878   |
| ZNF683      | 2.12345  | 1.7071    | 0.878969  | 0.434573  | 2.08893   | 0.564152  |
| INPP5B      | 7.24829  | 8.9488    | 7.1677    | 5.84542   | 10.3697   | 8.07061   |
| KRTAP19-1   | 13.8249  | 11.0008   | 0         | 58.4161   | 2.64155   | 2562.99   |
| LRRC19      | 0        | 0.0480707 | 0.0205793 | 0.0510528 | 0.0346287 | 0.0338812 |
| NCAM2       | 0.424053 | 0.340837  | 1.0068    | 0.325783  | 0.712033  | 0.492469  |
| PISD        | 20.5385  | 23.2938   | 21.1001   | 21.889    | 21.9549   | 19.1198   |
| SYCP3       | 1.43834  | 0.454905  | 1.40094   | 0.289628  | 0.916034  | 1.92048   |
| LOC644704   | 0        | 0         | 0         | 0         | 0         | 0         |
| GLIS3       | 0.743397 | 0.580681  | 0.375186  | 0.290106  | 0.335769  | 0.247954  |
| DCST1       | 0.897488 | 1.7297    | 0.909064  | 0.899447  | 1.34538   | 1.01292   |
| SYNGAP1     | 3.82143  | 4.60343   | 5.26738   | 4.72454   | 5.77373   | 6.18159   |
| PRR20B      | 0        | 0         | 0         | 0         | 0         | 0         |
| TPCN1       | 16.507   | 16.8111   | 18.4113   | 18.7131   | 22.2739   | 20.1167   |
| PLXND1      | 13.1136  | 17.7713   | 18.5835   | 13.3684   | 19.3028   | 13.9202   |
| SNORD68     | 0        | 0         | 0         | 0         | 0         | 0         |
| PUS1        | 16.243   | 24.5378   | 16.8568   | 22.2375   | 19.8852   | 17.8511   |
| CCKBR       | 0.290571 | 0.34254   | 0.843195  | 1.13684   | 0.740266  | 0.513036  |
| MIR4736     | 0        | 0         | 0         | 0         | 0         | 0         |
| FAM120AOS   | 17.1564  | 19.4937   | 18.2695   | 16.4159   | 17.8128   | 17.3739   |
| MSI2        | 5.26483  | 3.29048   | 4.24647   | 4.66783   | 3.08269   | 3.28742   |
| PANK3       | 9.2789   | 4.65483   | 8.69765   | 6.93742   | 5.7801    | 7.83046   |

|             |           |            |           |            |           |            |
|-------------|-----------|------------|-----------|------------|-----------|------------|
| LOC10028736 | 0         | 0.00739837 | 0         | 0          | 0         | 0.00417161 |
| KIAA1755    | 0.69982   | 1.21114    | 0.698843  | 0.671101   | 1.16646   | 0.668066   |
| RTN4        | 562.047   | 449.903    | 444.632   | 361.408    | 298.42    | 323.513    |
| ROCK2       | 7.36864   | 4.93232    | 7.57673   | 4.62203    | 5.91866   | 4.93574    |
| ZNF578      | 0.452454  | 0.412533   | 0.331807  | 0.238977   | 0.279165  | 0.422972   |
| CCL11       | 0         | 0          | 0.0983235 | 0          | 0         | 0.0809387  |
| CNGA1       | 2.08444   | 1.11274    | 1.79546   | 1.85609    | 2.56305   | 3.36266    |
| MYH13       | 0         | 0.0141216  | 0         | 0.00749883 | 0.0050864 | 0          |
| LILRB2      | 1.12727   | 1.16665    | 1.42015   | 0.641816   | 2.22634   | 0.722775   |
| HSPA13      | 4.86777   | 3.56846    | 4.46266   | 3.16968    | 3.50538   | 3.33825    |
| PPP6R1      | 25.1832   | 27.2477    | 25.3912   | 25.4188    | 26.6005   | 26.5304    |
| LOC10065274 | 119.998   | 146.565    | 111.282   | 153.128    | 148.545   | 133.455    |
| C17orf110   | 0         | 0.132994   | 0.341611  | 0.423731   | 0.0958046 | 0          |
| C15orf56    | 0.241509  | 0.298938   | 0.475341  | 0.362837   | 0.184582  | 0.120399   |
| TRPV2       | 3.73604   | 5.06486    | 3.42078   | 2.83988    | 4.57771   | 3.0155     |
| ADAMTS9-AS  | 2.31823   | 1.16619    | 1.95952   | 0.667251   | 0.99579   | 0.762448   |
| CREB1       | 7.31078   | 5.46631    | 6.88367   | 5.71442    | 6.82011   | 5.36985    |
| BSCL2       | 46.2803   | 55.7361    | 33.608    | 56.1944    | 35.7723   | 41.6795    |
| IGSF5       | 0.299046  | 0.220331   | 0.377299  | 1.1232     | 0.190464  | 0.217412   |
| SIGLEC15    | 0.214525  | 0.379338   | 0.108264  | 0.067145   | 0         | 0.0891217  |
| DAP3        | 51.461    | 53.8323    | 44.9285   | 54.7254    | 44.5262   | 43.131     |
| TMEM132C    | 5.14777   | 5.74089    | 8.39898   | 4.35763    | 3.75057   | 2.80689    |
| RBM14       | 12.1678   | 14.3607    | 10.7965   | 11.3956    | 12.2262   | 13.9111    |
| GPR137      | 15.4057   | 23.991     | 14.4929   | 17.2424    | 18.6112   | 16.7805    |
| PINX1       | 12.1935   | 12.2508    | 8.81097   | 13.5312    | 10.5195   | 11.1214    |
| RASL11B     | 3.38936   | 2.0602     | 2.76622   | 5.56948    | 4.45233   | 5.24727    |
| LOC10050554 | 1.17059   | 0.885021   | 0.759413  | 0.941133   | 0.506248  | 0.887281   |
| ANXA9       | 15.1365   | 7.7052     | 11.849    | 12.2209    | 16.1405   | 16.3638    |
| FAM43B      | 0.311823  | 0.275695   | 0.531117  | 0.622194   | 0.42203   | 0.170026   |
| UNC45B      | 0.0168964 | 0.0149387  | 0.057558  | 0.0158654  | 0.0879197 | 0.0421165  |
| ASPH        | 81.3683   | 62.8237    | 89.6444   | 46.243     | 55.2608   | 45.2648    |
| PIGX        | 10.3496   | 9.84653    | 9.7047    | 11.0669    | 9.91869   | 9.39938    |
| XBP1        | 175.365   | 92.337     | 103.208   | 111.45     | 85.4798   | 80.1603    |
| UBTD2       | 11.5659   | 10.8085    | 12.0481   | 8.87999    | 10.4724   | 10.2053    |
| TYMP        | 167.045   | 280.35     | 66.0324   | 72.3426    | 111.476   | 93.5389    |
| SAMD1       | 20.3369   | 25.8048    | 18.2938   | 24.8488    | 23.1956   | 25.9825    |
| TMEM27      | 0.676796  | 0.239352   | 0.66604   | 1.33455    | 0.474161  | 0.674801   |
| MIR4666     | 0         | 0          | 0         | 0          | 0         | 0          |
| LOC151300   | 0         | 0          | 0         | 0          | 0         | 0          |
| ANO7        | 0.589496  | 0.833913   | 1.12456   | 1.01849    | 0.841016  | 0.602453   |
| ARHGAP21    | 13.4587   | 10.538     | 14.6494   | 10.8303    | 11.8941   | 11.3645    |
| NETO2       | 4.27251   | 3.94171    | 2.08184   | 2.5418     | 1.67339   | 2.31263    |
| HSPB6       | 71.4485   | 113.798    | 130.494   | 69.8785    | 53.0745   | 46.2361    |

|             |           |           |           |           |           |          |
|-------------|-----------|-----------|-----------|-----------|-----------|----------|
| MIR4297     | 0         | 0         | 0         | 0         | 0         | 0        |
| CES4A       | 17.8364   | 22.3257   | 26.7493   | 27.2886   | 30.8327   | 27.2217  |
| C9orf7      | 8.72563   | 8.61458   | 5.91139   | 8.60411   | 8.56409   | 9.88537  |
| LOC10050557 | 0         | 0         | 0         | 0         | 0         | 0        |
| GPBP1       | 30.1677   | 23.987    | 22.3614   | 23.6218   | 25.6028   | 25.1748  |
| GJA1        | 297.588   | 232.829   | 302.596   | 311.914   | 292.326   | 475.366  |
| TPTE2P1     | 0.103147  | 0.0521119 | 0.0892373 | 0.138362  | 0.165862  | 0.202012 |
| LOC10050562 | 0         | 0         | 0         | 0         | 0         | 0        |
| MIR122      | 0         | 0         | 0         | 0         | 0         | 0        |
| PTGER2      | 1.30345   | 1.47655   | 2.00428   | 0.61196   | 1.50469   | 1.16762  |
| LOC10013187 | 0.320182  | 0.349487  | 0.419769  | 0.300646  | 0.652692  | 0.357189 |
| MIR193A     | 0         | 0         | 0         | 0         | 0         | 0        |
| SMCR5       | 0.0350942 | 0.124112  | 0.132832  | 0.164764  | 0.0894067 | 0.131215 |
| FUT10       | 2.13092   | 2.00636   | 2.24161   | 1.50717   | 2.15036   | 1.65556  |
| FAM158A     | 13.8413   | 19.8645   | 16.3805   | 20.6246   | 15.2603   | 15.4814  |
| LOC10050571 | 0         | 0         | 0         | 0         | 0         | 0        |
| SYT5        | 0.114599  | 0.354624  | 0.130128  | 0.16141   | 0.145978  | 0.21424  |
| MIR374B     | 0         | 0         | 0         | 0         | 0         | 0        |
| FARSB       | 24.6874   | 24.4139   | 22.8069   | 23.0952   | 22.1003   | 19.8854  |
| ABHD15      | 9.08008   | 7.27702   | 10.2662   | 8.38853   | 6.88382   | 6.86299  |
| LOC10050616 | 136.094   | 149.929   | 168.453   | 162.729   | 195.001   | 144.035  |
| ITIH2       | 0.0310237 | 0.0274292 | 0.164396  | 0.0873923 | 0.0987959 | 0.115996 |
| MIR488      | 0         | 0         | 0         | 0         | 0         | 0        |
| PGLYRP1     | 0.12496   | 0.662891  | 0.378382  | 0.704013  | 0.636702  | 0.467219 |
| NBEAP1      | 0.553451  | 0         | 0.209483  | 0         | 0.528744  | 1.03466  |
| CS          | 150.475   | 131.209   | 115.732   | 116.223   | 104.99    | 97.1849  |
| DLGAP1      | 0.41925   | 0.117825  | 0.280199  | 0.279954  | 0.107782  | 0.245804 |
| CDC37       | 114.425   | 167.884   | 122.624   | 135.761   | 150.06    | 128.304  |
| LOC284933   | 0.0773201 | 0.0683615 | 0.0585317 | 0         | 0.0984912 | 0        |
| TOR1B       | 9.71751   | 9.74141   | 10.0088   | 9.73515   | 11.4119   | 9.70237  |
| RN5S7       | 57.8872   | 233.088   | 47.3653   | 126.947   | 24.6695   | 38.9905  |
| PRRT4       | 2.1947    | 1.53243   | 3.6346    | 1.91382   | 2.48941   | 2.95637  |
| C6orf132    | 11.2107   | 9.86177   | 12.6281   | 15.1063   | 12.7946   | 14.1335  |
| HKDC1       | 0.451506  | 0.0939278 | 0.0603163 | 0.0997546 | 0.202988  | 0.148955 |
| GTF3C6      | 25.8469   | 27.8442   | 20.8009   | 23.0916   | 18.2999   | 17.514   |
| STARD5      | 30.9702   | 41.8789   | 37.4053   | 41.8095   | 48.6407   | 42.0977  |
| CTC1        | 8.04712   | 7.59066   | 7.7216    | 7.4424    | 9.09347   | 7.96638  |
| C11orf85    | 0.293663  | 0         | 0.222305  | 0         | 0.187036  | 0        |
| CHCHD5      | 33.412    | 43.5993   | 29.407    | 45.737    | 29.2283   | 33.3637  |
| RALGDS      | 29.3548   | 49.3052   | 43.1705   | 42.3456   | 48.2708   | 38.8827  |
| DDX46       | 16.2454   | 13.8854   | 15.775    | 14.4296   | 16.0795   | 13.8066  |
| CCNYL2      | 0.0597185 | 0         | 0         | 0         | 0.0760701 | 0.130249 |
| BMP4        | 5.9562    | 6.2303    | 8.04169   | 6.71447   | 8.51276   | 9.49876  |

|             |          |           |           |           |           |           |
|-------------|----------|-----------|-----------|-----------|-----------|-----------|
| LOC10050704 | 0        | 0         | 0         | 0         | 0         | 0         |
| C5orf25     | 3.6004   | 3.93465   | 3.70955   | 2.48869   | 3.18472   | 3.64576   |
| TMPRSS7     | 0.18098  | 0.0355575 | 0.0304447 | 0.0377633 | 0.234195  | 0.253754  |
| LOC10050679 | 0.383701 | 0.277564  | 0.264058  | 0.163768  | 0.288814  | 0.195632  |
| ATP6V1C2    | 63.5677  | 55.0124   | 81.9814   | 84.2747   | 112.961   | 115.334   |
| SLCO3A1     | 8.00178  | 10.4846   | 11.7906   | 11.0484   | 15.4127   | 11.4727   |
| BTN2A2      | 7.38058  | 6.25751   | 5.29484   | 4.00029   | 10.8173   | 5.87241   |
| NKX6-2      | 0.114708 | 0.101418  | 0.0868347 | 0         | 0.0730583 | 0         |
| SPATA18     | 4.85623  | 4.51325   | 5.91611   | 5.85367   | 6.01329   | 4.98267   |
| FLJ42842    | 0        | 0         | 0         | 0         | 0         | 0         |
| GRAP2       | 2.69082  | 3.05007   | 1.51467   | 2.00835   | 2.41689   | 2.02076   |
| KLHL20      | 6.67358  | 5.52374   | 7.48116   | 5.03977   | 7.61461   | 5.36205   |
| LOC10050725 | 1.61146  | 1.33393   | 1.82695   | 0.66125   | 1.85901   | 1.69388   |
| GNGT1       | 0        | 0         | 0         | 0         | 0         | 0         |
| LOC10028816 | 10.2728  | 9.0762    | 10.2891   | 7.49565   | 12.9415   | 11.8308   |
| DNAJC27     | 3.25799  | 3.00427   | 2.98294   | 2.5337    | 4.39181   | 3.41269   |
| ZNF45       | 4.00292  | 3.36217   | 3.56052   | 2.53711   | 4.71654   | 3.47664   |
| SCARNA14    | 0        | 0         | 0         | 0         | 0         | 0         |
| MATL2963    | 1.85428  | 1.85316   | 1.90481   | 0.916121  | 3.24136   | 1.65311   |
| KCNG4       | 0        | 0         | 0         | 0         | 0         | 0         |
| ZNRF1       | 8.77163  | 9.04788   | 7.25676   | 8.07954   | 8.97863   | 8.08204   |
| MLLT3       | 3.23388  | 3.56766   | 3.72625   | 3.81585   | 3.73658   | 3.24574   |
| TMEM92      | 0.335133 | 0.328133  | 0.147992  | 0.247813  | 0.145911  | 0.2538    |
| KHSRP       | 28.569   | 32.9896   | 32.6127   | 34.6655   | 33.2332   | 30.2329   |
| DNAJC17     | 18.8479  | 20.8258   | 18.826    | 22.9991   | 16.1209   | 16.6234   |
| OR14J1      | 0        | 0         | 0         | 0         | 0         | 0         |
| ZNF137P     | 3.45619  | 3.55905   | 3.60134   | 4.23799   | 3.781     | 3.64871   |
| ZNF397      | 9.78091  | 5.72073   | 10.1321   | 5.857     | 10.5864   | 8.53907   |
| RNF207      | 6.46069  | 9.05688   | 6.09953   | 6.46046   | 9.34347   | 5.60276   |
| C19orf76    | 1.75078  | 4.47179   | 1.87758   | 2.3746    | 3.65498   | 2.45477   |
| LAMTOR1     | 116.537  | 140.594   | 106.906   | 132.335   | 107.19    | 96.1121   |
| LOC10050595 | 1.91797  | 0.913094  | 4.69079   | 1.93948   | 3.38279   | 2.20652   |
| GRIA1       | 0.569375 | 0.295849  | 0.455955  | 0.691618  | 0.799349  | 1.39717   |
| RBM15B      | 13.0555  | 14.7898   | 14.427    | 17.3681   | 14.2399   | 12.9966   |
| HSPE1       | 57.0756  | 46.8768   | 41.2819   | 35.0486   | 33.6902   | 35.6456   |
| LOC343052   | 0        | 0         | 0         | 0.0440406 | 0.0896172 | 0.0292276 |
| PPCS        | 101.565  | 95.1153   | 88.9812   | 75.0552   | 80.0708   | 72.2965   |
| LCE1A       | 91.0499  | 57.6423   | 244.216   | 280.97    | 314.722   | 239.422   |
| ADRA2C      | 2.48764  | 5.38154   | 4.88819   | 6.41117   | 4.44977   | 3.33126   |
| UGT1A7      | 2.88665  | 1.12819   | 0.285314  | 3.09E-08  | 0.468387  | 0.398401  |
| KIFC3       | 29.5683  | 40.6102   | 43.871    | 47.9164   | 39.5826   | 36.9553   |
| PDZD3       | 0.045445 | 0.180814  | 0.210665  | 0.167235  | 0.130253  | 0.151042  |
| AXIN1       | 11.2285  | 15.0962   | 12.4667   | 15.8114   | 15.0554   | 12.8984   |

|             |          |           |           |           |           |           |
|-------------|----------|-----------|-----------|-----------|-----------|-----------|
| IL7         | 2.86255  | 2.1373    | 3.83077   | 1.91497   | 3.92591   | 2.98276   |
| FLJ44006    | 0        | 0         | 0.0248114 | 0         | 0         | 0.102122  |
| LOC10050758 | 0.080457 | 0.28454   | 0.380665  | 0.302191  | 1.02772   | 0.80578   |
| SNORD36A    | 0        | 0         | 0         | 0         | 0         | 0         |
| LOC10050641 | 0        | 0         | 0         | 0         | 0         | 0.33309   |
| LOC10050631 | 4.22615  | 3.57636   | 1.5082    | 1.07711   | 3.22999   | 3.34838   |
| FAM58A      | 10.6197  | 15.8979   | 10.589    | 14.7168   | 12.1392   | 10.7313   |
| DIEXF       | 3.35805  | 2.80129   | 2.96433   | 3.32076   | 3.39644   | 3.7333    |
| SNORD96B    | 0        | 0         | 0         | 0         | 0         | 0         |
| TPK1        | 1.46454  | 1.33649   | 1.84795   | 1.29441   | 1.24546   | 1.34477   |
| NUP88       | 14.3324  | 11.5147   | 13.0381   | 12.1162   | 11.2559   | 12.181    |
| MFN2        | 58.9608  | 53.919    | 52.641    | 54.6859   | 53.9861   | 49.9426   |
| FOXQ1       | 9.12061  | 11.902    | 14.4726   | 19.0222   | 16.3657   | 15.9577   |
| FAM156B     | 25.2042  | 42.0981   | 28.7371   | 35.7619   | 44.547    | 38.1243   |
| FSTL5       | 0.107325 | 0.0800622 | 0.0812455 | 0.118098  | 0.0922816 | 0.114654  |
| DIMT1       | 18.3531  | 15.7405   | 16.3912   | 15.0388   | 12.127    | 10.1519   |
| TAS1R3      | 0.551045 | 1.1136    | 0.804492  | 1.10876   | 0.701927  | 0.662248  |
| CECR7       | 4.04174  | 4.93786   | 1.64107   | 1.86306   | 3.25286   | 2.83919   |
| SPTSSB      | 32.5618  | 23.2107   | 40.6816   | 35.7123   | 41.7586   | 48.015    |
| TSKS        | 0.288829 | 0.71502   | 0.787123  | 0.867859  | 0.183957  | 0.0719944 |
| DUPD1       | 0        | 0         | 0         | 0         | 0         | 0         |
| EGFR        | 14.9352  | 10.1865   | 18.1097   | 12.6451   | 14.3093   | 12.2698   |
| LCE1F       | 44.519   | 31.276    | 103.107   | 142.129   | 147.596   | 108.27    |
| PDX1        | 0        | 0         | 0         | 0         | 0         | 0         |
| LRTM1       | 0        | 0         | 0         | 0         | 0         | 0         |
| LRRN1       | 2.71073  | 1.74097   | 1.33576   | 0.888465  | 1.6939    | 1.45017   |
| CAPN10      | 9.15412  | 15.7166   | 11.7348   | 13.2321   | 13.7894   | 13.9651   |
| INA         | 0.978936 | 0.378662  | 0.324214  | 0.0861755 | 0.467617  | 0.190635  |
| SLC22A8     | 0.229054 | 0         | 0         | 0         | 0         | 0         |
| GPR56       | 71.5512  | 70.3505   | 65.283    | 92.7395   | 79.3777   | 94.0986   |
| C16orf5     | 18.2595  | 22.3052   | 18.1916   | 24.9792   | 19.7625   | 15.5355   |
| DUS4L       | 4.05046  | 5.36016   | 4.5181    | 5.09816   | 4.49426   | 3.72041   |
| LOC152024   | 0        | 0         | 0         | 0         | 0         | 0.0567533 |
| ORC2        | 9.4947   | 10.7404   | 11.8831   | 10.8427   | 12.452    | 9.76366   |
| SEC63       | 16.6193  | 12.0847   | 15.2371   | 12.7103   | 12.5704   | 10.9328   |
| ZMAT1       | 8.83187  | 8.58593   | 8.9903    | 6.71806   | 9.59329   | 7.17019   |
| ANKRD36BP2  | 0.121703 | 0.591809  | 0.368518  | 0.228554  | 0.658861  | 0.417119  |
| LOC10050681 | 0        | 0         | 0         | 0         | 0         | 0         |
| LOC338797   | 0        | 0         | 0         | 0         | 0         | 0         |
| CLDN11      | 3.29578  | 3.455     | 2.83454   | 3.3587    | 2.33084   | 2.71591   |
| LOC10050730 | 1.85511  | 1.08011   | 1.23307   | 0.977175  | 1.06626   | 1.24061   |
| ABCB1       | 1.60593  | 2.04812   | 1.98636   | 1.61691   | 2.10208   | 1.2434    |
| TMSB15A     | 1.43078  | 1.98787   | 0.773651  | 1.34348   | 1.82255   | 1.40109   |

|             |           |           |           |           |           |           |
|-------------|-----------|-----------|-----------|-----------|-----------|-----------|
| LOC10012790 | 0         | 0         | 0.0537158 | 0.0666287 | 0.0903875 | 0.221091  |
| KEAP1       | 30.0812   | 37.0895   | 28.9912   | 29.6304   | 29.799    | 29.2079   |
| RMST        | 0         | 0         | 0         | 0         | 0         | 0         |
| SPIN4       | 3.12532   | 1.94681   | 2.59889   | 2.11204   | 2.56357   | 2.77381   |
| VPREB1      | 0         | 0         | 0         | 0         | 0         | 0         |
| EEA1        | 9.15863   | 5.73004   | 9.66871   | 6.15225   | 7.765     | 7.61215   |
| LOC10050580 | 0         | 0.368783  | 1.26302   | 0.78332   | 1.06264   | 0.129963  |
| LOC388942   | 0         | 0         | 0         | 0         | 0         | 0         |
| MYBPC2      | 0.0272735 | 0.0241135 | 0.0206462 | 0         | 0.0694826 | 0.0679828 |
| NEXN        | 6.16856   | 3.74501   | 2.43163   | 2.67043   | 2.24376   | 2.04186   |
| TBX1        | 5.58422   | 12.4045   | 8.42756   | 20.5946   | 16.7432   | 19.6926   |
| HSPA4       | 34.8397   | 22.0279   | 26.9246   | 24.5969   | 20.4285   | 22.7988   |
| BMPR2       | 8.94343   | 7.01946   | 9.16839   | 6.40976   | 7.63449   | 7.4988    |
| SCRN2       | 41.2504   | 69.4874   | 58.5638   | 55.6387   | 44.7833   | 35.9858   |
| PPP2R5B     | 11.9376   | 16.1214   | 11.4889   | 13.1572   | 13.6532   | 14.9915   |
| APOM        | 6.07912   | 6.41987   | 5.11325   | 6.02532   | 4.62468   | 5.26146   |
| ARHGEF37    | 28.2961   | 19.8421   | 28.9459   | 28.7681   | 32.3661   | 33.9427   |
| LRCH2       | 0.645928  | 0.398032  | 0.592692  | 0.422723  | 0.585927  | 0.207356  |
| LOC10050750 | 2.87399   | 0.873468  | 3.19545   | 2.3613    | 2.57408   | 2.46255   |
| ULBP1       | 0         | 0.111478  | 0.0715865 | 0         | 0         | 0.0392861 |
| LOC10050600 | 0.382159  | 0         | 0         | 0.717682  | 0.730197  | 0         |
| UPK1A       | 4.3922    | 6.31037   | 8.17376   | 6.78776   | 0.407957  | 0.684258  |
| BTBD19      | 2.03936   | 2.2839    | 2.88178   | 1.34045   | 3.11732   | 3.13475   |
| STAMBPL1    | 6.00536   | 6.225     | 4.97719   | 4.76393   | 3.98971   | 3.77455   |
| FLJ23152    | 0.0833243 | 0         | 0.189231  | 0.391201  | 0.159209  | 0.207697  |
| NCKAP5L     | 4.17528   | 5.88554   | 6.06797   | 6.639     | 6.30947   | 6.90965   |
| ZNF460      | 0.27929   | 0.314275  | 0.749593  | 0.715223  | 0.614498  | 0.411371  |
| MYO5C       | 6.26526   | 3.64462   | 4.78417   | 5.43438   | 4.33812   | 3.8447    |
| LOC10014460 | 1.11592   | 1.97324   | 1.52056   | 1.46696   | 0.852879  | 1.11263   |
| ZNF346      | 5.55962   | 5.8531    | 4.7682    | 5.31092   | 5.64915   | 5.34698   |
| YME1L1      | 41.2162   | 31.5687   | 38.5671   | 34.0527   | 33.8472   | 34.4887   |
| CPSF4       | 14.8667   | 21.8567   | 17.3983   | 20.6389   | 20.6142   | 17.9019   |
| LOC654841   | 0.129885  | 0         | 0.294971  | 0         | 0.0827244 | 0.0809387 |
| MIR1207     | 0         | 0         | 0         | 0         | 0         | 0         |
| TPSB2       | 136.459   | 227.949   | 182.177   | 160.705   | 240.783   | 208.167   |
| MGAT4C      | 0         | 0         | 0         | 0.0503926 | 0.102543  | 0.100329  |
| CAND1       | 22.7559   | 17.8981   | 22.0237   | 19.1302   | 19.3554   | 19.0184   |
| MMS22L      | 1.62038   | 1.29712   | 1.55816   | 1.38786   | 1.93156   | 1.61014   |
| KIAA1486    | 0.0421802 | 0.0186465 | 0.0159653 | 0         | 0.0134324 | 0         |
| HIST1H2BJ   | 2.07783   | 1.83708   | 1.04862   | 0.975523  | 1.76451   | 1.29481   |
| ZNF621      | 5.65523   | 5.93274   | 6.56926   | 6.0449    | 6.95412   | 5.33619   |
| LOC10013314 | 0         | 0         | 0         | 0         | 0         | 0         |
| EFCAB3      | 0.839235  | 0.620887  | 0.687333  | 0.59544   | 0.447268  | 0.230512  |

|             |            |          |          |           |           |           |
|-------------|------------|----------|----------|-----------|-----------|-----------|
| SYCE2       | 0.770632   | 1.02202  | 0.875059 | 1.32662   | 1.63607   | 1.44067   |
| MED26       | 3.72911    | 5.00052  | 4.09329  | 5.57335   | 5.54188   | 4.97686   |
| SLC17A4     | 0          | 0        | 0        | 0         | 0         | 0         |
| OR4K1       | 0          | 0        | 0        | 0         | 0         | 0         |
| LOC646278   | 3.23038    | 1.77441  | 2.55655  | 1.93043   | 3.24184   | 3.59885   |
| CNIH4       | 59.3952    | 54.8665  | 54.0583  | 59.5563   | 49.3085   | 45.8745   |
| IL31        | 0          | 0        | 0        | 0         | 0         | 0         |
| OR52N1      | 0          | 0        | 0        | 0         | 0         | 0         |
| FAM70A      | 1.93372    | 1.35189  | 1.86481  | 2.16665   | 3.05882   | 1.61252   |
| C20orf96    | 5.11468    | 6.34214  | 5.48044  | 5.11435   | 5.85149   | 4.67696   |
| CD2         | 8.20122    | 9.23418  | 4.35117  | 1.44802   | 7.05383   | 3.14502   |
| MITF        | 5.53773    | 7.05222  | 7.06853  | 7.20527   | 8.34655   | 9.58258   |
| TSC2        | 19.5726    | 24.256   | 24.8084  | 25.9786   | 26.4133   | 24.9967   |
| PPP1R13L    | 52.1594    | 72.3707  | 65.9742  | 92.7477   | 86.0383   | 93.4105   |
| C14orf79    | 8.97748    | 15.5338  | 9.33929  | 12.7221   | 12.5932   | 13.6599   |
| SERPINA6    | 0          | 0        | 0        | 0         | 0         | 0         |
| ATP5C1      | 186        | 145.296  | 140.935  | 127.867   | 119.897   | 120.236   |
| PALM3       | 0.270683   | 0.797737 | 0.512272 | 0.593057  | 0.890732  | 1.0683    |
| UBQLN2      | 15.9585    | 13.9312  | 15.0463  | 12.5504   | 13.8151   | 13.4809   |
| LIMS1       | 14.9166    | 11.7265  | 13.8758  | 11.09     | 12.3132   | 9.29988   |
| MIR4286     | 0          | 0        | 0        | 0         | 0         | 0         |
| TSPYL1      | 28.8482    | 22.449   | 24.4279  | 24.2538   | 22.8437   | 23.8933   |
| BPIFB2      | 0.164542   | 0        | 0.124559 | 0.154503  | 0.0349326 | 0.0341786 |
| OBP2B       | 5.25122    | 2.5824   | 4.41816  | 7.85277   | 2.35528   | 2.30275   |
| SEMA4C      | 16.4514    | 24.1525  | 19.947   | 20.9257   | 28.2642   | 23.8807   |
| LOC255480   | 0.0269548  | 0        | 0        | 0.0759305 | 0.0343354 | 0.0251957 |
| AIFM3       | 0.666811   | 0.53958  | 0.538076 | 1.08148   | 0.801418  | 1.21504   |
| LOC1004988! | 0          | 0.14153  | 0        | 0         | 0         | 0         |
| SPRR4       | 470.709    | 148.833  | 767.001  | 406.793   | 636.896   | 1354.74   |
| VPS33B      | 10.0483    | 10.1964  | 10.6031  | 12.1871   | 14.6419   | 11.3611   |
| WDR18       | 18.4355    | 26.6165  | 22.6324  | 28.2676   | 23.7033   | 23.1916   |
| FAM153B     | 0.230245   | 0.337473 | 0.40569  | 0.230268  | 0.698307  | 0.152818  |
| SCGB1D1     | 0          | 0        | 0        | 0         | 0         | 0         |
| RNU6-1      | 0          | 0        | 0        | 0         | 0         | 0         |
| SARS        | 84.9331    | 87.9171  | 84.1114  | 89.3087   | 87.8053   | 91.2171   |
| ATP5J2-PTCD | 0.00980259 | 1.68E-07 | 1.17E-15 | 3.3734    | 1.3698    | 1.56E-07  |
| TCERG1      | 24.0921    | 23.8723  | 24.5332  | 21.5105   | 25.3378   | 21.118    |
| SNORA59A    | 19.2134    | 8.49365  | 59.3907  | 9.02055   | 49.9683   | 37.4156   |
| FAM120B     | 10.3737    | 8.38946  | 11.5715  | 8.59478   | 11.0377   | 10.0579   |
| LOC1002878: | 2.51684    | 0.934596 | 1.23842  | 1.06347   | 0.849583  | 0.988083  |
| RHBDF2      | 11.3365    | 17.4249  | 12.9681  | 15.0635   | 20.527    | 14.9008   |
| MTMR6       | 8.46873    | 5.93781  | 7.68187  | 5.35331   | 6.94493   | 5.80624   |
| LOC574538   | 0.139023   | 0.279361 | 0.106348 | 0.0669382 | 0.140258  | 0.114639  |



|             |          |           |           |           |           |           |
|-------------|----------|-----------|-----------|-----------|-----------|-----------|
| WDYHV1      | 9.11826  | 5.68644   | 6.47116   | 7.0332    | 5.60006   | 4.71818   |
| GAGE2B      | 0        | 0         | 0         | 0         | 0         | 0         |
| MIR4769     | 0        | 0         | 0         | 0         | 0         | 0         |
| CCDC101     | 11.332   | 22.6228   | 16.2121   | 25.7842   | 19.5603   | 18.565    |
| CHPT1       | 47.0093  | 32.8965   | 31.2295   | 29.0221   | 31.2442   | 30.9515   |
| LINC00281   | 0        | 0         | 0         | 0         | 0         | 0         |
| MUC19       | 0        | 0         | 0         | 0         | 0         | 0         |
| SEH1L       | 17.6744  | 16.6858   | 14.9096   | 17.3673   | 14.4733   | 13.4606   |
| KIAA1908    | 3.96235  | 5.00572   | 4.15347   | 4.27494   | 3.17356   | 3.04164   |
| NCKIPSD     | 13.6876  | 13.1952   | 12.3415   | 15.6303   | 15.6732   | 18.0862   |
| CTSK        | 80.9157  | 53.4381   | 116.903   | 46.38     | 108.892   | 65.8133   |
| FAF1        | 20.3769  | 18.5326   | 20.056    | 23.4505   | 19.2563   | 18.9135   |
| PAGE5       | 0        | 0         | 0         | 0         | 0.18058   | 0         |
| PPARD       | 30.9399  | 29.173    | 21.8345   | 26.8684   | 26.0533   | 27.3336   |
| HOMER3      | 28.2235  | 45.4153   | 28.7412   | 41.2391   | 27.6443   | 35.7656   |
| MFAP5       | 10.4129  | 6.47406   | 18.4626   | 11.5641   | 9.62854   | 10.3046   |
| RWDD3       | 19.0202  | 18.137    | 20.1821   | 18.2562   | 23.635    | 17.0398   |
| TDRD10      | 1.74257  | 2.16885   | 2.54029   | 2.12617   | 2.34315   | 3.87519   |
| LGR5        | 1.66177  | 1.43862   | 2.17524   | 4.09598   | 6.41649   | 7.65871   |
| SNORA68     | 0        | 0         | 37.3114   | 0         | 0         | 0         |
| PSMB5       | 134.71   | 139.409   | 100.672   | 139.359   | 81.1027   | 101.746   |
| TMOD4       | 0.586692 | 0.295857  | 0.253626  | 0.315387  | 0.802089  | 0.885846  |
| ARSH        | 0        | 0.110667  | 0         | 0.235064  | 0.119581  | 0.117     |
| OVOL2       | 3.029    | 4.80832   | 5.15918   | 6.14085   | 3.94606   | 5.83423   |
| SLC9A8      | 6.76762  | 6.95599   | 6.91564   | 6.23993   | 7.08335   | 6.05463   |
| CYMP        | 0        | 0         | 0.0680545 | 0         | 0.0572575 | 0         |
| LOC10050664 | 0.398668 | 1.14669   | 1.37837   | 3.05714   | 1.26488   | 1.89607   |
| LOC10050605 | 0        | 0.0797945 | 0.204962  | 0.0847445 | 0.172445  | 0.112482  |
| LOC10050636 | 18.3428  | 13.1118   | 14.8725   | 8.67842   | 15.6917   | 14.8414   |
| MED21       | 18.2942  | 12.2503   | 12.078    | 10.3631   | 11.6135   | 12.1851   |
| COL22A1     | 0.752503 | 0.838298  | 0.0569649 | 0.0282636 | 0.335492  | 0.0937857 |
| MRPL52      | 29.5256  | 39.841    | 28.3044   | 37.0671   | 28.3084   | 34.2125   |
| GRAPL       | 1.00262  | 0.495423  | 0.992225  | 0.404839  | 1.11971   | 0.878932  |
| E2F7        | 0.634511 | 0.664335  | 0.417127  | 0.454686  | 0.59555   | 0.686748  |
| LOC10028729 | 0        | 0         | 0         | 0         | 0         | 0         |
| GPX1        | 126.995  | 220.293   | 176.061   | 187.982   | 135.798   | 109.74    |
| RPS6KC1     | 6.08884  | 5.30055   | 5.70942   | 4.41998   | 4.89353   | 5.23501   |
| SYCP2L      | 0.253212 | 0.307827  | 0.886534  | 0.475525  | 0.564453  | 0.256411  |
| RLN3        | 0        | 0         | 0         | 0         | 0         | 0         |
| ITGA5       | 15.5496  | 16.7199   | 15.7006   | 11.4874   | 14.768    | 13.2095   |
| APEX2       | 13.7178  | 15.1836   | 12.7229   | 13.7165   | 16.1066   | 15.3022   |
| TREML2      | 0.104168 | 0.138148  | 0.137998  | 0.024453  | 0.215622  | 0.0973697 |
| LOC728606   | 1.85838  | 0.205383  | 0.263776  | 0.109062  | 0.246586  | 0.217137  |

|             |           |           |           |           |            |           |
|-------------|-----------|-----------|-----------|-----------|------------|-----------|
| FAM81A      | 1.67343   | 1.02816   | 0.687077  | 0.958776  | 0.632266   | 0.724667  |
| LOC10013307 | 0         | 0         | 0         | 0         | 0.0195424  | 0         |
| C1orf135    | 0.549736  | 0.972083  | 0.71881   | 0.985459  | 0.3183     | 0.74743   |
| UTP3        | 23.0391   | 19.1405   | 20.5229   | 19.1623   | 20.1448    | 18.1938   |
| LOC10050738 | 0.228715  | 0         | 0         | 0         | 0          | 0         |
| LOC285000   | 0         | 0         | 0         | 0         | 0          | 0.0478618 |
| GABRP       | 38.5754   | 23.4577   | 30.3076   | 54.6685   | 23.4677    | 23.2398   |
| MIR4684     | 0         | 0         | 0         | 0         | 0          | 0         |
| MIR664      | 0         | 0         | 0         | 0         | 0          | 0         |
| SSR4        | 143.665   | 161.953   | 133.075   | 178.415   | 142.191    | 144.166   |
| C20orf195   | 0.514108  | 0.54545   | 0.467019  | 0.675834  | 0.851339   | 0.64074   |
| DKFZp667F07 | 0.275898  | 0.243932  | 0.417713  | 0.259064  | 1.40577    | 0.515784  |
| DPYSL2      | 26.3047   | 25.4449   | 22.6098   | 19.8519   | 24.4986    | 19.4763   |
| LRRK2       | 1.86392   | 1.3401    | 2.7057    | 1.2309    | 1.94378    | 1.97202   |
| PLSCR5      | 0         | 0         | 0         | 0         | 0.0334991  | 0         |
| ICMT        | 26.9989   | 23.1968   | 25.434    | 24.7662   | 22.9168    | 22.3619   |
| SGOL2       | 0.977563  | 0.905376  | 0.935628  | 0.602364  | 0.842272   | 0.852032  |
| ULK2        | 7.11467   | 6.37894   | 6.9171    | 6.68798   | 7.0767     | 6.55139   |
| MIR762      | 0         | 0         | 0         | 0         | 0          | 0         |
| RBM8A       | 17.873    | 15.8709   | 17.3754   | 17.2653   | 18.3799    | 15.4518   |
| C19orf34    | 0.084007  | 0.148547  | 0.190781  | 0.0788813 | 0.0535045  | 0         |
| LOC10013139 | 0.0283459 | 0         | 0.0643739 | 0.21293   | 0.0541609  | 0.0529918 |
| MIR759      | 0         | 0         | 0         | 0         | 0          | 0         |
| FAM75C1     | 0         | 0         | 0         | 0         | 0.00824429 | 0         |
| ITK         | 2.04498   | 1.25777   | 0.992778  | 0.396564  | 2.36425    | 0.817243  |
| CR2         | 0.29551   | 0.0971664 | 0         | 0         | 0.0622183  | 0.0811674 |
| ZFP57       | 5.29549   | 9.70885   | 0.042197  | 0.0523408 | 3.26622    | 3.78623   |
| KIF3B       | 7.71225   | 6.64977   | 8.91357   | 7.5645    | 6.47247    | 5.93394   |
| EFCAB5      | 0.0729423 | 0.0694583 | 0.0396518 | 0.0245431 | 0.0937283  | 0.0749084 |
| WDR5B       | 3.92977   | 3.72116   | 3.67896   | 2.86029   | 4.94654    | 4.40506   |
| ANKRD20A9F  | 0.0578138 | 0.0393166 | 0.0487706 | 0.0295776 | 0.0346164  | 0.0292506 |
| MESTIT1     | 0.182884  | 0.134745  | 0.207666  | 0.0286208 | 0.0388265  | 0.0759769 |
| UVRAG       | 7.41741   | 8.05745   | 8.60593   | 6.73733   | 7.05067    | 6.34103   |
| NUDT22      | 30.192    | 41.8645   | 31.7801   | 42.151    | 32.5214    | 35.5344   |
| TNFRSF21    | 7.88002   | 7.61123   | 8.53925   | 6.03087   | 5.44852    | 3.76695   |
| MYO9B       | 10.027    | 14.0918   | 12.1358   | 11.67     | 15.2462    | 13.0177   |
| NPB         | 0.919701  | 3.25044   | 2.78475   | 3.4492    | 3.07414    | 1.85805   |
| TET2        | 6.17663   | 5.19603   | 8.02336   | 5.86342   | 8.15315    | 7.63427   |
| HCG26       | 16.2485   | 27.6333   | 13.3855   | 13.0134   | 29.281     | 14.9498   |
| EPS8        | 14.6741   | 11.7925   | 15.2988   | 10.5301   | 11.1544    | 9.51599   |
| GLRX2       | 21.589    | 15.4867   | 17.7924   | 13.0143   | 16.0025    | 16.5517   |
| XAGE5       | 0         | 0.621693  | 0.26615   | 0.33013   | 0          | 0         |
| ST6GALNAC2  | 44.3383   | 60.9236   | 47.4704   | 69.317    | 54.4164    | 57.4394   |

|             |           |           |           |           |           |            |
|-------------|-----------|-----------|-----------|-----------|-----------|------------|
| LOC400891   | 0.0936944 | 0.0165677 | 0.0567417 | 0.070382  | 0.0716094 | 0.0706475  |
| MIR1299     | 0         | 0         | 0         | 0         | 0         | 0          |
| AQP12B      | 0         | 0         | 0         | 0         | 0         | 0          |
| ZNF214      | 0.827457  | 0.764839  | 0.996528  | 0.635702  | 0.982158  | 0.890644   |
| FIZ1        | 6.56584   | 8.24057   | 5.99873   | 8.22029   | 6.56113   | 6.56059    |
| PSMG2       | 46.9592   | 57.3759   | 50.1803   | 54.7133   | 49.4726   | 44.0676    |
| NLRP6       | 0.112331  | 0.0993163 | 0.0566903 | 0         | 0.0715445 | 0.0933335  |
| SLC9A7      | 1.06898   | 0.657476  | 0.985138  | 0.65462   | 0.710438  | 0.521327   |
| TNNC2       | 5.71243   | 4.87641   | 3.877     | 6.47365   | 6.64927   | 4.54174    |
| SNAR-A2     | 0         | 0         | 0         | 0         | 0         | 0          |
| PKM2        | 289.24    | 302.449   | 223.728   | 286.714   | 257.252   | 233.685    |
| MIR133A2    | 0         | 0         | 0         | 0         | 0         | 0          |
| TWIST2      | 9.98163   | 11.1163   | 13.078    | 9.01211   | 7.76331   | 7.53593    |
| SLC16A6     | 3.67758   | 2.19037   | 2.22336   | 2.42166   | 3.28561   | 4.91745    |
| LOC10050756 | 0.155947  | 0         | 0         | 0         | 0         | 0          |
| AGAP1       | 3.04124   | 2.39425   | 3.09184   | 2.8349    | 3.196     | 2.42098    |
| MIR3193     | 0         | 0         | 0         | 0         | 0         | 0          |
| HOXA6       | 0.948258  | 0.279346  | 0.598265  | 0.148734  | 1.00712   | 0.788596   |
| USE1        | 22.7292   | 36.6303   | 23.1957   | 40.1183   | 28.3114   | 25.7281    |
| LOC126536   | 0.029506  | 0.0521747 | 0.0446724 | 0.0554113 | 0.0187925 | 0          |
| CCDC73      | 0.717839  | 0.635697  | 0.804737  | 0.723027  | 0.7271    | 0.508792   |
| AASS        | 11.0663   | 10.7673   | 10.0527   | 8.21071   | 14.3845   | 9.61716    |
| CWC15       | 38.6625   | 33.943    | 31.0135   | 28.4695   | 32.1844   | 32.1237    |
| FLJ40292    | 0.120118  | 0         | 0.0909303 | 0         | 0         | 0.0374263  |
| AP4B1       | 12.6383   | 14.4203   | 10.8876   | 13.0589   | 15.6216   | 13.7593    |
| C1orf200    | 0         | 0         | 0         | 0         | 0.109619  | 0          |
| MRGPRF      | 10.1365   | 16.1394   | 12.0192   | 11.371    | 11.3978   | 9.72637    |
| CRTC1       | 2.46836   | 4.15853   | 3.52943   | 4.7899    | 4.55026   | 4.49477    |
| SNORD67     | 0         | 0         | 0         | 0         | 0         | 0          |
| TXN2        | 91.0063   | 98.6011   | 81.7862   | 102.065   | 83.4323   | 86.6735    |
| LOC645202   | 0         | 0         | 0         | 0         | 0.0234626 | 0.00550949 |
| DRG2        | 20.4763   | 26.9119   | 23.2926   | 32.62     | 28.8339   | 28.0168    |
| ZNF705D     | 0         | 0         | 0         | 0         | 0         | 0.0165792  |
| MIR30C2     | 0         | 0         | 0         | 0         | 0         | 0          |
| FKBP14      | 4.54024   | 3.65292   | 5.15549   | 2.98425   | 4.33756   | 3.33856    |
| LOC10050596 | 8.94797   | 9.13451   | 8.51878   | 6.64981   | 8.14409   | 5.98443    |
| C3orf75     | 13.1773   | 17.8354   | 13.2388   | 16.0394   | 16.6818   | 15.3079    |
| TBCEL       | 4.47719   | 3.20662   | 3.78686   | 3.05249   | 4.63529   | 3.63141    |
| NUP153      | 11.4327   | 9.64592   | 12.1395   | 10.9093   | 11.5882   | 9.56223    |
| DQX1        | 1.37305   | 2.83258   | 2.07881   | 2.57854   | 4.34822   | 3.4938     |
| DYDC1       | 0         | 0         | 0         | 0         | 0         | 0          |
| JAKMIP1     | 0.586429  | 0.689695  | 0.590522  | 0.0365223 | 0.3735    | 0.221606   |
| FTH1P3      | 20.5905   | 23.2434   | 23.0501   | 23.6699   | 20.3469   | 12.4424    |

|             |           |           |           |           |           |          |
|-------------|-----------|-----------|-----------|-----------|-----------|----------|
| LOC10061666 | 0.932107  | 1.20891   | 1.03843   | 0.957348  | 1.49296   | 1.16453  |
| MAFIP       | 0         | 0         | 0         | 0         | 0         | 0        |
| C21orf88    | 0.494939  | 0.959492  | 1.13945   | 1.7907    | 0.708872  | 0.658335 |
| MIR1257     | 0         | 0         | 0         | 0         | 0         | 0        |
| FLJ43879    | 0.0563628 | 0         | 0         | 0.0264619 | 0.0358978 | 0        |
| C20orf203   | 0.302325  | 0.320756  | 0.305149  | 0.264953  | 0.462126  | 0.251195 |
| GMNN        | 17.7093   | 15.6574   | 15.4309   | 15.8493   | 18.0936   | 17.9905  |
| ATG4B       | 25.3902   | 37.2551   | 25.552    | 36.2465   | 33.9592   | 40.2694  |
| PIAS4       | 8.48561   | 8.03833   | 9.22253   | 8.99229   | 9.38072   | 10.4624  |
| CLCN7       | 24.719    | 36.7474   | 25.0609   | 32.141    | 35.5952   | 32.0916  |
| KCNH3       | 0.532603  | 0.269082  | 0.441582  | 0.595364  | 0.484597  | 0.410918 |
| GIPC2       | 3.21928   | 3.15906   | 3.21364   | 2.59102   | 1.62228   | 1.87385  |
| NAA25       | 9.48399   | 7.70094   | 8.81225   | 7.88491   | 8.30556   | 6.90528  |
| C1orf185    | 0         | 0         | 0.1003    | 0         | 0         | 0        |
| LOC10012828 | 5.01289   | 5.49749   | 4.30562   | 5.70274   | 5.64869   | 5.70698  |
| LINC00238   | 0         | 0.0983601 | 0.0842168 | 0         | 0         | 0        |
| ALDH6A1     | 16.1741   | 10.6624   | 12.986    | 9.13219   | 11.8861   | 11.3304  |
| R3HDM1      | 6.28732   | 6.2767    | 6.08336   | 5.61045   | 6.33812   | 5.90292  |
| OSGEP       | 16.3126   | 23.6004   | 20.0914   | 23.8563   | 21.7235   | 17.2592  |
| MIR4285     | 0         | 0         | 0         | 0         | 0         | 0        |
| C14orf162   | 0.314551  | 0.41716   | 0.119059  | 0.443038  | 0.20034   | 0.343027 |
| OPTC        | 0.0750561 | 0         | 0.0568179 | 0.281906  | 0.143411  | 0.140315 |
| OR10AD1     | 0.124791  | 0.44133   | 0.188935  | 0.117177  | 0.476881  | 0.388823 |
| TMEM133     | 3.76656   | 4.37394   | 4.76637   | 6.17611   | 5.76463   | 5.39497  |
| KHDRBS3     | 5.50772   | 4.54181   | 5.17162   | 3.58038   | 3.20433   | 3.10216  |
| DOPEY2      | 13.7965   | 8.50361   | 9.84507   | 7.22026   | 8.31463   | 9.59887  |
| USP34       | 16.5371   | 13.0628   | 15.8162   | 13.0685   | 15.8156   | 13.1645  |
| KRTAP4-5    | 4.86068   | 1.59622   | 0         | 36.6869   | 0.199015  | 315.697  |
| LOC10065281 | 150.27    | 110.846   | 79.5415   | 80.4054   | 62.9243   | 70.6535  |
| MAS1L       | 1.70059   | 2.65334   | 1.59027   | 1.03324   | 2.93079   | 2.68051  |
| INTS2       | 4.55945   | 3.0669    | 3.93215   | 2.70667   | 4.19025   | 4.13003  |
| AMMECR1L    | 10.6471   | 10.5334   | 10.6333   | 10.6608   | 11.4668   | 9.59194  |
| C10orf129   | 18.7826   | 16.3341   | 8.39126   | 6.7655    | 15.8065   | 19.8401  |
| PCGEM1      | 0         | 0         | 0         | 0         | 0         | 0        |
| NOX1        | 0.042574  | 0.200755  | 0.425066  | 0.249855  | 0.122021  | 0.165816 |
| LOC10028697 | 0.153052  | 0.160279  | 0.28275   | 0.121462  | 0.137379  | 0.23495  |
| LOC10050691 | 0.0509416 | 0.0900786 | 0.0771261 | 0.0478333 | 0.032445  | 0        |
| TDRD3       | 8.2556    | 10.7726   | 7.99366   | 8.33234   | 8.6037    | 7.9092   |
| OR4M2       | 0         | 0         | 0         | 0         | 0         | 0        |
| LOC10050704 | 0.868152  | 0.460539  | 3.15454   | 2.28251   | 1.10586   | 1.40659  |
| LOC10050623 | 0         | 0         | 0         | 0         | 0         | 0        |
| C16orf48    | 9.62207   | 20.9598   | 12.5622   | 18.5282   | 18.9624   | 18.7268  |
| ERLIN2      | 20.8557   | 16.0777   | 20.0941   | 16.9937   | 18.0593   | 18.4134  |

|             |           |           |           |           |           |           |
|-------------|-----------|-----------|-----------|-----------|-----------|-----------|
| MIR3118-5   | 0         | 0         | 0         | 0         | 0         | 0         |
| UBXN6       | 75.0741   | 114.345   | 86.6096   | 113.055   | 92.3762   | 93.6899   |
| LOC10050744 | 3.31115   | 3.79492   | 3.15641   | 2.76366   | 3.67103   | 2.36905   |
| LOC10012921 | 0         | 0         | 0         | 0         | 0         | 0         |
| DEFB108B    | 0         | 0         | 0         | 0         | 0         | 0         |
| LIMD2       | 5.28141   | 10.635    | 5.36122   | 4.07541   | 13.308    | 5.39174   |
| GJB7        | 0.312739  | 0.118502  | 0.135283  | 0.209755  | 0.398371  | 0.167045  |
| CNN1        | 76.5702   | 87.4885   | 38.6087   | 74.4253   | 48.9394   | 54.997    |
| PGBD1       | 2.25934   | 2.93361   | 2.55962   | 3.01757   | 3.52593   | 2.08191   |
| C4orf45     | 0         | 0         | 0         | 0         | 0         | 0         |
| PTGES       | 18.1334   | 18.6267   | 23.5449   | 21.27     | 17.6042   | 8.77668   |
| LOC10065294 | 0.0548322 | 0         | 0.0415083 | 0.0514865 | 0.0698458 | 0.0341691 |
| LY6G6F      | 0.405048  | 0.358118  | 0.306623  | 0.126778  | 0.687939  | 1.51445   |
| SNAR-A6     | 0         | 0         | 0         | 0         | 0         | 0         |
| DPYSL5      | 0         | 0.0163355 | 0.0139866 | 0         | 0         | 0.0115136 |
| AMPD2       | 10.2474   | 15.4273   | 11.6299   | 11.783    | 14.6421   | 10.6596   |
| ZNF1-AS1    | 195.366   | 256.755   | 183.985   | 271.728   | 152.548   | 151.223   |
| PTOV1       | 43.6485   | 57.0641   | 47.9522   | 63.3895   | 47.186    | 64.6757   |
| INO80B      | 24.3058   | 35.8836   | 30.5534   | 31.292    | 40.7604   | 32.5607   |
| CDKN2D      | 9.71525   | 14.1123   | 13.888    | 16.6607   | 17.3019   | 14.1979   |
| HNRNPA3     | 75.1962   | 70.8304   | 65.9659   | 66.0072   | 76.0003   | 69.1681   |
| C1orf228    | 0.753058  | 2.0529    | 0.665081  | 1.47315   | 1.99845   | 1.40782   |
| SLC1A2      | 0.479769  | 0.215878  | 0.615452  | 0.450495  | 0.657593  | 0.304036  |
| CD302       | 15.8871   | 13.9005   | 17.2258   | 10.1626   | 12.9692   | 9.71877   |
| HIST1H1T    | 0         | 0         | 0         | 0         | 0         | 0.11265   |
| USH1G       | 0.772101  | 0.609503  | 1.73258   | 2.51158   | 1.21183   | 1.8902    |
| TRIOBP      | 26.9377   | 26.6491   | 25.6835   | 27.1909   | 29.4344   | 28.7806   |
| LOC10028711 | 0         | 0.264701  | 0         | 0         | 0.0953414 | 0.0699625 |
| PLXNA3      | 11.2179   | 13.0036   | 11.7327   | 12.9081   | 16.3862   | 17.3267   |
| MIR939      | 0         | 0         | 0         | 0         | 0         | 0         |
| LOC10050590 | 0         | 0         | 0         | 0         | 0         | 0         |
| KRTCAP2     | 96.035    | 123.681   | 94.7608   | 105.813   | 91.571    | 82.33     |
| CYCSP52     | 0         | 0         | 0         | 0         | 1.19207   | 0         |
| LRR6        | 1.07971   | 0.894945  | 1.22657   | 0.823735  | 1.50428   | 1.42976   |
| ZNF767      | 13.786    | 15.563    | 14.5885   | 14.0306   | 19.2894   | 16.0769   |
| MIR4800     | 0         | 0         | 0         | 0         | 0         | 0         |
| MIR4694     | 0         | 0         | 0         | 0         | 0         | 0         |
| METTL14     | 7.74857   | 7.23615   | 9.53181   | 8.41262   | 8.23546   | 7.87662   |
| TMEM97      | 95.6745   | 86.6089   | 65.6842   | 84.192    | 48.856    | 62.8443   |
| SNORD107    | 0         | 0         | 0         | 0         | 0         | 0         |
| GATM        | 49.7687   | 45.3784   | 60.2145   | 33.6514   | 70.4633   | 64.525    |
| BMP8A       | 1.71124   | 1.8745    | 1.84483   | 2.54283   | 2.4451    | 2.93514   |
| LOC10050871 | 0         | 0         | 0         | 0         | 0         | 0         |

|             |          |           |          |          |           |           |
|-------------|----------|-----------|----------|----------|-----------|-----------|
| MAZ         | 60.0542  | 80.12     | 55.5699  | 75.2529  | 66.0208   | 63.4424   |
| TMEM213     | 22.6775  | 3.71576   | 10.2908  | 17.2072  | 7.72657   | 7.88059   |
| NANOS2      | 0        | 0         | 0        | 0        | 0         | 0         |
| DCTN3       | 82.6664  | 99.4556   | 93.2504  | 108.997  | 84.5004   | 90.1036   |
| SPRYD7      | 6.73163  | 5.64971   | 6.49836  | 4.98887  | 4.95035   | 4.85768   |
| TLN2        | 3.48098  | 4.33385   | 5.75871  | 3.21511  | 3.07634   | 3.58307   |
| LOC10050821 | 0        | 0         | 0        | 0        | 0         | 0         |
| SH3BGR      | 8.53818  | 5.09229   | 8.01608  | 7.80654  | 7.40792   | 6.95682   |
| LOC440356   | 0        | 0         | 0.164572 | 0.816537 | 0.623082  | 0.560219  |
| C6orf112    | 0.430214 | 0.32603   | 0.1861   | 0        | 0.0782874 | 0.191494  |
| TMEM62      | 11.7405  | 7.76119   | 6.09827  | 7.02152  | 6.94841   | 5.76289   |
| VEZT        | 17.4423  | 14.4626   | 16.1789  | 11.7027  | 15.9435   | 15.6537   |
| SCRT2       | 0        | 0         | 0        | 0        | 0         | 0         |
| SPNS3       | 0.824672 | 0.583298  | 0.208094 | 0.72273  | 1.40063   | 0.959281  |
| REN         | 0.516569 | 0.717699  | 0.391046 | 0.48505  | 0.752013  | 2.6672    |
| LOC10050671 | 4.67688  | 8.82361   | 2.27438  | 4.94042  | 4.13063   | 2.74821   |
| C10orf47    | 2.21934  | 1.72673   | 1.76965  | 3.05642  | 2.45008   | 2.72911   |
| EBLN1       | 0        | 0         | 0        | 0        | 0         | 0         |
| C19orf21    | 0.490014 | 0.495131  | 0.768383 | 1.47894  | 0.757939  | 0.654334  |
| LEPREL1     | 6.04886  | 8.75404   | 7.55337  | 9.54019  | 7.39723   | 7.39919   |
| PDAP1       | 31.3748  | 38.3565   | 31.2351  | 40.5346  | 33.7652   | 34.4535   |
| LOC10050681 | 1.71168  | 2.27004   | 1.72767  | 2.14299  | 1.99866   | 2.31107   |
| LEMD2       | 27.4736  | 38.2409   | 30.8638  | 37.2826  | 36.84     | 33.5984   |
| STK40       | 27.8758  | 28.9146   | 29.8439  | 30.3744  | 31.3433   | 30.9706   |
| C1orf147    | 0.246604 | 0.222194  | 0.601658 | 0.279993 | 0.693943  | 0.280604  |
| PRIM2       | 2.94619  | 2.60483   | 3.61801  | 2.58199  | 3.1691    | 2.57031   |
| KRTAP10-5   | 2.8859   | 0.115979  | 0        | 41.5094  | 0.167095  | 153.761   |
| MIOS        | 13.3206  | 12.5117   | 11.8804  | 10.6693  | 12.8299   | 13.391    |
| IL28B       | 0        | 0         | 0        | 0        | 0.154476  | 0         |
| HOXD10      | 0.812792 | 0.35931   | 0.659237 | 0.926741 | 0.665578  | 0.795924  |
| SNORA66     | 0        | 0         | 37.3114  | 0        | 0         | 61.4286   |
| APCDD1L     | 0.700659 | 0.140791  | 0.506294 | 0.538288 | 1.05478   | 1.32971   |
| CDC5L       | 14.7092  | 9.92942   | 10.7337  | 8.95892  | 10.0857   | 10.1571   |
| MYO16       | 0.333193 | 0.343508  | 0.545673 | 0.338837 | 0.291526  | 0.190401  |
| CCDC15      | 1.53026  | 0.75411   | 1.50024  | 1.272    | 1.31016   | 0.922329  |
| PDGFD       | 8.98179  | 5.35508   | 10.1498  | 6.19837  | 6.6419    | 5.00709   |
| OCLM        | 0.827036 | 0.243738  | 1.66952  | 1.29429  | 0.702325  | 1.03075   |
| LOC10013149 | 0.226344 | 0.0400238 | 0        | 0        | 0.115328  | 0.0282096 |
| PFAS        | 5.37204  | 5.31768   | 5.29613  | 4.82641  | 5.8995    | 4.67111   |
| RCOR2       | 0.926858 | 0.853613  | 0.90628  | 0.870305 | 0.934675  | 0.79417   |
| ZIM3        | 0        | 0         | 0        | 0        | 0         | 0         |
| DEPDC7      | 2.51743  | 3.07278   | 3.31098  | 3.9382   | 4.3116    | 3.2854    |
| LOC10050651 | 0        | 0         | 0        | 0        | 0         | 0         |

|             |          |          |          |           |           |           |
|-------------|----------|----------|----------|-----------|-----------|-----------|
| SHD         | 0        | 0        | 0        | 0         | 0.0248883 | 0.0243511 |
| SPANXA1     | 0        | 0        | 0        | 0         | 0         | 0         |
| ZNF396      | 0.82473  | 0.538955 | 0.732904 | 0.606059  | 0.959199  | 0.603317  |
| GTF2B       | 20.5786  | 14.9433  | 17.4826  | 16.052    | 17.0098   | 16.4015   |
| ERI1        | 3.96338  | 3.28168  | 3.38129  | 2.79609   | 3.25888   | 3.67205   |
| TUBA8       | 2.61064  | 2.95095  | 3.47586  | 3.08859   | 1.69351   | 1.68707   |
| HACL1       | 40.8329  | 31.3382  | 25.1262  | 20.0935   | 23.8377   | 22.5524   |
| LOC10065279 | 0        | 0        | 0        | 0         | 0         | 0         |
| RELA        | 36.8575  | 41.1826  | 37.6845  | 42.9308   | 42.5977   | 37.4933   |
| TAF5L       | 9.93804  | 8.60249  | 10.1554  | 10.0916   | 7.92129   | 6.60643   |
| RBM28       | 10.144   | 10.9979  | 10.4572  | 11.0848   | 9.59764   | 8.73182   |
| FLT3        | 0.686852 | 0.629763 | 0.712525 | 0.119434  | 1.06935   | 0.44387   |
| ETV4        | 20.4602  | 21.6782  | 14.8267  | 23.7748   | 12.8768   | 15.0333   |
| LOC10013250 | 0.119642 | 0.021156 | 0.163025 | 0.0224684 | 0.182881  | 0.223667  |
| PITPNM3     | 5.91867  | 6.96543  | 10.5364  | 11.3439   | 11.2078   | 10.2734   |
| LOC10050689 | 0        | 0        | 0        | 0         | 0         | 0         |
| SFPQ        | 75.1218  | 61.5372  | 69.0378  | 58.989    | 59.7298   | 52.1639   |
| LOC10012879 | 0        | 0        | 0        | 0.0425484 | 0         | 0         |
| SERPINB1    | 35.2527  | 35.9343  | 37.4389  | 28.2008   | 25.0685   | 17.7557   |
| ACSM4       | 0        | 0        | 0        | 0         | 0         | 0         |
| LOC10050669 | 0.743251 | 0.657135 | 0.562645 | 0         | 0.315587  | 1.08071   |
| LOC10050670 | 1.9028   | 1.86926  | 1.60048  | 1.19113   | 2.69312   | 2.76674   |
| GLDN        | 8.8499   | 6.63493  | 7.86142  | 4.67989   | 6.30038   | 3.88522   |
| HMX2        | 0        | 0        | 0.148265 | 0.245208  | 0.0415807 | 0.0406832 |
| HILS1       | 0.53614  | 0.474021 | 0.602733 | 0.90617   | 0.596188  | 0.445467  |
| ZNF750      | 34.5062  | 29.2199  | 58.5795  | 42.1821   | 46.2449   | 53.6507   |
| OR51G2      | 0        | 0        | 0        | 0         | 0         | 0         |
| LOC10050570 | 0        | 0.136609 | 0.116965 | 0.435249  | 0.147613  | 0.0962845 |
| SNORD85     | 0        | 0        | 0        | 0         | 0         | 0         |
| LOC10050549 | 1.58212  | 2.99742  | 1.77502  | 1.29443   | 2.93138   | 1.64866   |
| CPS1        | 1.35316  | 1.60744  | 1.61893  | 1.42276   | 1.09142   | 1.66083   |
| LOC730101   | 2.58392  | 2.63836  | 1.65879  | 1.21926   | 2.63911   | 2.29984   |
| ALKBH7      | 31.408   | 65.4032  | 39.4182  | 64.1055   | 44.7983   | 45.6855   |
| REEP3       | 16.6974  | 11.8364  | 14.1798  | 10.8865   | 11.8006   | 11.7994   |
| SERPINE2    | 21.006   | 18.4553  | 18.3124  | 17.7479   | 16.0321   | 17.5815   |
| WDR82       | 35.6672  | 30.8944  | 32.8937  | 29.4958   | 32.302    | 29.1649   |
| KRTAP12-1   | 6.17975  | 0.436917 | 0        | 71.9235   | 0.944226  | 220.337   |
| CASP9       | 5.64087  | 9.10852  | 5.91711  | 8.41091   | 6.62758   | 7.22522   |
| CSTF2T      | 9.66504  | 7.77028  | 8.46417  | 7.07341   | 8.78095   | 7.29236   |
| C14orf45    | 2.26535  | 2.50422  | 3.14239  | 2.6233    | 2.9454    | 2.92632   |
| ATF6        | 12.2986  | 7.8233   | 10.0783  | 8.07994   | 8.55691   | 9.71279   |
| FLNA        | 106.814  | 130.661  | 100.089  | 101.882   | 104.49    | 103.153   |
| LOC284454   | 34.794   | 67.4371  | 83.4971  | 59.1745   | 66.2553   | 43.8067   |

|             |          |          |           |           |           |             |
|-------------|----------|----------|-----------|-----------|-----------|-------------|
| TMED3       | 155.31   | 176.598  | 169.44    | 219.082   | 126.565   | 141.719     |
| SNRNP35     | 30.3375  | 35.7207  | 28.384    | 40.3352   | 32.592    | 33.4924     |
| MIR29A      | 0        | 0        | 0         | 0         | 0         | 0           |
| HIST2H2BC   | 2.26009  | 1.33215  | 2.0911    | 1.88639   | 2.07923   | 3.9122      |
| TMEM177     | 4.2315   | 4.8972   | 7.61658   | 7.49649   | 5.13066   | 6.95953     |
| DMGDH       | 1.02944  | 0.796399 | 1.38812   | 0.634352  | 0.61468   | 0.501177    |
| COL6A4P2    | 0.206292 | 0.136792 | 0.288903  | 0.271186  | 0.151096  | 0.719892    |
| NOS1        | 2.84965  | 2.00961  | 3.09649   | 3.79222   | 2.79478   | 2.50041     |
| ZNF138      | 7.52198  | 6.60065  | 8.40588   | 5.84297   | 5.34736   | 5.55541     |
| SLC35D3     | 0        | 0        | 0         | 0         | 0         | 0.0268152   |
| TBC1D22A    | 9.67024  | 12.6993  | 12.2788   | 15.5937   | 13.6813   | 13.4181     |
| PRAMEF20    | 0        | 0        | 0         | 0         | 0         | 0           |
| PLXNA1      | 13.2401  | 16.0474  | 18.4673   | 18.5211   | 20.8427   | 19.964      |
| NMI         | 21.6749  | 19.5505  | 11.712    | 7.81193   | 12.5032   | 8.00397     |
| ERBB4       | 0.538259 | 0.18221  | 0.479341  | 0.349419  | 0.277314  | 0.350211    |
| CEACAM6     | 13.4802  | 6.2124   | 7.7763    | 18.1439   | 4.71844   | 5.3305      |
| LOC10050706 | 2.56718  | 1.60628  | 2.06296   | 1.92843   | 2.7167    | 1.87049     |
| APOOL       | 8.77481  | 5.5188   | 7.47323   | 6.34611   | 6.2218    | 6.5105      |
| CLVS2       | 0        | 0        | 0.0778134 | 0.0482596 | 0.0982023 | 0           |
| CAMLG       | 22.8786  | 27.6992  | 24.9682   | 24.6309   | 28.0414   | 25.3373     |
| LOC10065280 | 76.0782  | 89.2787  | 66.6997   | 68.1999   | 59.3426   | 45.909      |
| ZNF653      | 2.27797  | 4.83369  | 2.96603   | 4.70575   | 3.39499   | 4.48572     |
| RPL4        | 613.504  | 892.395  | 758.551   | 1070.49   | 782.255   | 760.15      |
| PLB1        | 2.02028  | 1.70353  | 3.70986   | 4.28555   | 3.41911   | 9.26876     |
| GCNT1       | 1.28632  | 1.69468  | 1.31387   | 2.58347   | 1.71956   | 1.14196     |
| SNORA28     | 0        | 0        | 0         | 0         | 0         | 0           |
| LOC10050654 | 0.856337 | 0.854084 | 1.01087   | 1.30554   | 1.13664   | 0.967532    |
| PHF20L1     | 9.69818  | 9.42943  | 9.56314   | 7.92428   | 10.3805   | 7.76431     |
| PIP         | 1404.6   | 178.763  | 137.791   | 186.736   | 48.616    | 77.1566     |
| CLEC16A     | 7.83681  | 7.16099  | 7.24038   | 6.77462   | 7.72024   | 8.3546      |
| LOC254312   | 0        | 0        | 0         | 0         | 0         | 0           |
| RNPS1       | 44.7025  | 59.1145  | 42.9086   | 57.1937   | 49.5542   | 48.7027     |
| CHURC1      | 21.9385  | 18.7938  | 21.7377   | 15.0558   | 26.6246   | 22.0129     |
| LOC10028929 | 0        | 0        | 0         | 0         | 0         | 0           |
| C12orf44    | 30.4851  | 32.2656  | 29.0593   | 37.6939   | 28.52     | 30.5185     |
| HLA-DRB6    | 0.542569 | 0.719558 | 0.754712  | 0.0849106 | 1.24818   | 0.1534      |
| ZNF638      | 24.4816  | 20.892   | 22.1706   | 18.12     | 24.098    | 22.3031     |
| TMX2-CTNNC  | 8.07E-06 | 9.43E-11 | 7.55E-29  | 9.42E-22  | 7.09E-33  | 0.000162236 |
| PPP1R3A     | 0        | 0        | 0         | 0         | 0         | 0           |
| L2HGDH      | 3.70394  | 2.60844  | 3.72495   | 2.23092   | 3.0497    | 2.99073     |
| MRS2        | 15.9616  | 14.0602  | 14.6245   | 14.4347   | 15.9431   | 14.0574     |
| MRAP        | 15.4839  | 16.5364  | 17.9166   | 15.7096   | 12.3854   | 10.9968     |
| LOXL1       | 11.3905  | 11.3813  | 14.7227   | 18.4126   | 16.0238   | 15.3483     |



|             |           |           |           |           |           |            |
|-------------|-----------|-----------|-----------|-----------|-----------|------------|
| CBLC        | 17.6033   | 31.1686   | 22.3864   | 28.2564   | 30.2108   | 26.0078    |
| DUX4L3      | 0         | 0.0381147 | 0.0142923 | 0.0103414 | 0.0284588 | 0.00686307 |
| RAG1        | 0.101446  | 0.140945  | 0.241356  | 0.122472  | 0.166144  | 0.135464   |
| HNRNPH3     | 73.0505   | 66.6211   | 70.5602   | 65.7473   | 78.3678   | 69.0469    |
| FRMD6       | 25.7137   | 18.3575   | 30.0088   | 19.6667   | 26.8033   | 23.5898    |
| LOC643988   | 7.23673   | 12.1001   | 7.11799   | 13.1743   | 11.1622   | 9.87822    |
| MIR4712     | 0         | 0         | 0         | 0         | 0         | 0          |
| LOC10065284 | 0.658036  | 2.03628   | 1.99255   | 2.47154   | 3.1433    | 1.02515    |
| DSCR4       | 0         | 0         | 0         | 0         | 0         | 0          |
| CLIC3       | 41.1693   | 46.7601   | 59.2959   | 97.4396   | 94.5722   | 133.752    |
| CHP         | 109.004   | 89.9621   | 79.1498   | 84.6524   | 57.6335   | 74.0862    |
| DVL2        | 15.6133   | 20.357    | 19.6491   | 20.3517   | 24.5459   | 20.5334    |
| MIR521-2    | 0         | 0         | 0         | 0         | 0         | 0          |
| LOC415056   | 1.79459   | 0.854358  | 1.14951   | 0.388868  | 0.615454  | 1.11831    |
| RPS6KB2     | 58.7917   | 80.0416   | 61.7061   | 84.5799   | 79.5496   | 79.533     |
| OR1L8       | 0.257954  | 0         | 0.390546  | 0         | 0.246439  | 0.160746   |
| FAM122C     | 2.21216   | 1.90921   | 1.77741   | 0.972135  | 2.3377    | 1.69819    |
| PQLC3       | 20.5851   | 18.7185   | 21.6653   | 17.0897   | 23.8683   | 16.6651    |
| NPW         | 0.9211    | 1.73055   | 2.52763   | 5.51373   | 2.49328   | 5.23766    |
| TIPIN       | 3.98401   | 2.68009   | 2.95035   | 1.70781   | 2.26163   | 2.10487    |
| SRG7        | 0         | 0         | 0         | 0.540763  | 0         | 0          |
| C10orf140   | 0.46259   | 0.766862  | 0.558104  | 0.705843  | 0.791808  | 0.738683   |
| EML2        | 30.1814   | 35.5286   | 32.578    | 41.5852   | 37.7501   | 38.4448    |
| LOC10065295 | 0         | 0         | 0         | 0         | 0         | 0          |
| LDHC        | 0.654287  | 0.321375  | 0.366887  | 0.341312  | 0.231509  | 0.0566274  |
| RHOBTB3     | 12.2947   | 9.36091   | 14.2153   | 6.67093   | 8.58839   | 7.30696    |
| RABL5       | 5.12422   | 7.33444   | 6.27227   | 7.63368   | 5.5288    | 5.51852    |
| ZNF268      | 4.23278   | 3.84161   | 3.42444   | 3.0557    | 3.84428   | 3.11745    |
| HORMAD2     | 0.109825  | 0         | 0         | 0         | 0         | 0.0342193  |
| C7orf66     | 0         | 0         | 0         | 0         | 0         | 0          |
| FGF16       | 0         | 0.585984  | 1.00345   | 0         | 0         | 0          |
| JUN         | 24.3428   | 26.7455   | 39.1924   | 33.3664   | 35.3001   | 32.9472    |
| SLC38A9     | 5.93046   | 4.78586   | 4.27848   | 4.52216   | 5.09534   | 5.20861    |
| C19orf80    | 6.45634   | 1.61321   | 4.67498   | 1.5815    | 3.30754   | 2.18658    |
| LOC10050716 | 7.29632   | 4.49281   | 10.0602   | 6.2397    | 9.1272    | 7.63151    |
| ZNF285      | 1.34416   | 0.59421   | 0.678357  | 0.350595  | 1.66464   | 2.00099    |
| TOLLIP      | 38.085    | 40.4447   | 38.3867   | 43.1885   | 40.8939   | 43.4214    |
| C10orf108   | 0.0538551 | 0.157429  | 0.257098  | 0.0660565 | 0.225421  | 0.0773987  |
| IL29        | 0.143856  | 0         | 0         | 0.405236  | 0.0916227 | 0.089645   |
| LOC10065275 | 1.1408    | 0.173703  | 2.31E-05  | 0.826656  | 0.382737  | 0.484245   |
| SIGLEC8     | 0.843665  | 1.67085   | 1.4306    | 0.697126  | 2.34278   | 1.7875     |
| MIR3646     | 0         | 0         | 0         | 0         | 0         | 0          |
| IFI27L2     | 70.9085   | 155.763   | 76.9202   | 121.838   | 132.227   | 113.429    |

|            |          |           |           |           |           |            |
|------------|----------|-----------|-----------|-----------|-----------|------------|
| RS1        | 0.131289 | 0.116078  | 0.0745401 | 0.154098  | 0.0627142 | 0.040907   |
| HIST1H2BL  | 1.1609   | 1.8266    | 0         | 0         | 0         | 0          |
| HNRNPD     | 106.703  | 110.371   | 101.38    | 109.062   | 112.312   | 99.7859    |
| TRIB1      | 10.9327  | 10.4536   | 12.4244   | 8.31388   | 8.76833   | 9.01642    |
| FCRL3      | 0.164521 | 0.0872757 | 0.0996349 | 0         | 0.377225  | 0.0615137  |
| SNX21      | 19.3966  | 30.1111   | 33.8821   | 31.6835   | 32.7914   | 28.8922    |
| MOB3C      | 17.6614  | 20.8248   | 12.9812   | 14.7233   | 16.2708   | 14.1138    |
| LOC440910  | 0        | 0         | 0         | 0         | 0         | 0          |
| ESM1       | 0.221533 | 0.313384  | 0         | 0.459396  | 0.213011  | 0.133384   |
| FLJ25328   | 0        | 0         | 0         | 0.0624951 | 0         | 0          |
| CD164      | 184.361  | 124.761   | 168.5     | 143.549   | 133.45    | 121.285    |
| MAF        | 29.2351  | 33.3975   | 35.8963   | 39.0306   | 45.3943   | 42.6031    |
| MIR3925    | 0        | 0         | 0         | 0         | 0         | 0          |
| PARK2      | 2.21796  | 1.96098   | 1.80004   | 2.31122   | 1.36037   | 2.61245    |
| KCTD7      | 6.75237  | 7.46015   | 7.73393   | 6.81499   | 8.65168   | 7.33823    |
| PEX13      | 9.52731  | 6.71599   | 7.03354   | 6.08489   | 6.50533   | 6.3716     |
| LINC00324  | 1.86574  | 2.17049   | 2.04423   | 2.16683   | 2.8144    | 1.28504    |
| MRTO4      | 16.5867  | 18.5888   | 15.3503   | 18.353    | 15.3038   | 14.4427    |
| EEF1A1     | 2511.86  | 2905.15   | 2853.36   | 3253.02   | 2702.57   | 2540.94    |
| PCDH7      | 4.00042  | 4.17431   | 5.0107    | 6.44327   | 3.51457   | 3.25417    |
| MIR1180    | 0        | 0         | 0         | 0         | 0         | 0          |
| PWRN2      | 0        | 0         | 0         | 0         | 0         | 0          |
| ZBTB24     | 3.96042  | 3.8805    | 4.10939   | 4.04009   | 4.2704    | 3.39743    |
| EXD2       | 7.22522  | 6.40769   | 6.76651   | 6.48718   | 7.21971   | 6.84044    |
| LPAR6      | 28.7649  | 29.6226   | 27.5592   | 21.5618   | 35.8863   | 29.5356    |
| MCART6     | 0.076778 | 0.122188  | 0.104619  | 0.043256  | 0.166261  | 0.0669827  |
| MIR135A2   | 0        | 0         | 0         | 0         | 0         | 0          |
| ARPC2      | 277.745  | 296.259   | 252.129   | 293.183   | 265.419   | 246.592    |
| CRX        | 0        | 0         | 0.0142368 | 0         | 0         | 0.00394409 |
| DNMBP-AS1  | 0.121262 | 2.13E-12  | 0.0608437 | 0.036523  | 0.049547  | 3.20E-11   |
| RND3       | 30.4672  | 26.8711   | 37.072    | 26.116    | 26.5476   | 23.9944    |
| CYTH1      | 25.8331  | 32.3082   | 32.9392   | 33.108    | 38.3591   | 30.0212    |
| MIR4254    | 0        | 0         | 0         | 0         | 0         | 0          |
| DACT3      | 2.99439  | 4.39166   | 2.26677   | 2.18319   | 3.32068   | 1.95379    |
| AHCYL1     | 72.6046  | 52.5629   | 51.1007   | 42.0293   | 47.557    | 46.6882    |
| SFRP5      | 3.70561  | 7.53053   | 3.18198   | 2.38892   | 3.4169    | 3.99798    |
| DBX1       | 0        | 0         | 0         | 0         | 0         | 0          |
| FAM13B     | 9.67814  | 8.05148   | 9.70716   | 7.84269   | 10.0322   | 7.67145    |
| CLEC18C    | 0.210266 | 0.436359  | 0.252208  | 1.08837   | 0.426193  | 0.491944   |
| RHOJ       | 7.42395  | 8.39779   | 9.0498    | 5.27948   | 9.45671   | 7.89191    |
| GPR75-ASB3 | 3.18015  | 4.36047   | 2.21481   | 1.3224    | 2.32288   | 2.44781    |
| EBI3       | 0.799413 | 0.795139  | 0.30258   | 0.0938295 | 1.0183    | 0.24908    |
| C5orf4     | 65.8978  | 66.3653   | 58.7975   | 47.739    | 57.6648   | 62.682     |

|             |           |           |           |           |           |            |
|-------------|-----------|-----------|-----------|-----------|-----------|------------|
| C7orf31     | 1.60392   | 1.58633   | 1.44055   | 2.01659   | 1.64486   | 1.35525    |
| ITGB6       | 2.95974   | 0.971959  | 1.56838   | 1.78659   | 1.15797   | 1.71264    |
| ZFP14       | 2.35817   | 2.25309   | 2.20744   | 2.38096   | 2.7051    | 2.25168    |
| ATP6V1E2    | 2.35343   | 2.58939   | 3.20681   | 3.87949   | 2.86459   | 3.55233    |
| CWF19L1     | 10.0732   | 12.4483   | 11.2938   | 12.5398   | 11.3246   | 11.8173    |
| KIAA0556    | 5.38543   | 5.44894   | 6.81283   | 6.23315   | 7.22687   | 7.0619     |
| MAGEA10     | 0         | 0         | 0.178503  | 0.249091  | 0.168956  | 0          |
| ANXA5       | 230.02    | 187.792   | 262.325   | 188.948   | 171.222   | 137.565    |
| LOC10013010 | 0.25529   | 0.225711  | 0.386511  | 0.958852  | 0.325191  | 0          |
| DNAJC9      | 20.3812   | 23.6259   | 18.2859   | 22.2564   | 21.5067   | 22.0772    |
| FAM168A     | 4.10137   | 2.10213   | 5.12961   | 3.7395    | 3.1422    | 2.77805    |
| CCPG1       | 17.327    | 9.29842   | 14.7404   | 9.47839   | 10.9787   | 10.3603    |
| MGC13053    | 0         | 0.0881325 | 0.0754598 | 0.0467999 | 0.031744  | 0.0310588  |
| TRPC4       | 0.136582  | 0.0301888 | 0.0258479 | 0         | 0.115989  | 0.0212777  |
| DEGS2       | 57.9812   | 61.5433   | 71.6473   | 81.2284   | 61.6627   | 70.0408    |
| HBBP1       | 0         | 0         | 0         | 0         | 0         | 0          |
| LOC389602   | 0         | 0         | 0         | 0.0361568 | 0.0245249 | 0.0239955  |
| DSE         | 10.8097   | 10.56     | 12.4206   | 9.32579   | 11.8313   | 9.31558    |
| LACTB       | 11.8482   | 9.7186    | 9.00586   | 7.32995   | 11.0467   | 8.42935    |
| STIM2       | 8.50034   | 7.48243   | 9.2067    | 7.32653   | 9.68552   | 9.84899    |
| CIRBP       | 273.874   | 386.446   | 392.963   | 407.592   | 458.649   | 341.08     |
| TRIM32      | 5.11077   | 4.42546   | 4.4472    | 3.46462   | 3.64248   | 3.7773     |
| SENP3       | 18.9892   | 22.2458   | 19.3293   | 22.5107   | 21.7288   | 20.2025    |
| DTL         | 0.882659  | 1.11115   | 0.867767  | 1.5117    | 1.31923   | 1.12598    |
| NUP214      | 9.16624   | 10.0013   | 10.4913   | 9.72209   | 10.5153   | 9.45479    |
| FAM90A9     | 0         | 0         | 0.0147941 | 0         | 0.0853789 | 0.00974264 |
| USPL1       | 10.5298   | 10.0617   | 9.86452   | 9.93431   | 12.1864   | 8.88407    |
| LOC407835   | 20.7292   | 24.5973   | 19.8215   | 25.8386   | 19.9582   | 21.6047    |
| TAC1        | 1.48615   | 0.603439  | 0.687885  | 0.502599  | 0.302443  | 0.350715   |
| SCN4B       | 8.20244   | 9.76576   | 10.2616   | 9.08569   | 10.7209   | 8.92574    |
| TDGF1       | 0.236693  | 0         | 0.0447944 | 0.0555627 | 0.153892  | 0.22309    |
| FAM55B      | 0         | 0         | 0         | 0.0554207 | 0.0375914 | 0          |
| MIR485      | 0         | 0         | 0         | 0         | 0         | 0          |
| LOC10050551 | 0         | 0         | 0         | 0         | 0.111425  | 0          |
| CETN2       | 59.3892   | 55.0534   | 48.3479   | 60.2708   | 42.7826   | 48.9686    |
| LINC00086   | 1.87902   | 1.5858    | 2.39212   | 1.95138   | 2.62911   | 1.82724    |
| MKRN3       | 0.0738389 | 0.587553  | 0.0558965 | 0.0693336 | 0         | 0.161047   |
| SDCCAG8     | 8.10189   | 8.27836   | 7.58445   | 6.5123    | 8.10755   | 8.65393    |
| NAF1        | 6.33937   | 4.2674    | 5.96267   | 4.60573   | 5.18907   | 4.01422    |
| C14orf159   | 18.2862   | 23.0642   | 20.5719   | 21.7901   | 22.2912   | 18.0535    |
| FBLN5       | 25.9842   | 13.9663   | 30.4729   | 19.2754   | 21.3612   | 22.8023    |
| ACSL3       | 36.7282   | 18.6328   | 21.9292   | 22.0359   | 17.6481   | 18.4309    |
| SNORA20     | 157.298   | 92.7154   | 39.6919   | 0         | 33.3947   | 98.0215    |

|             |           |          |           |           |           |           |
|-------------|-----------|----------|-----------|-----------|-----------|-----------|
| LOC285401   | 0         | 0        | 0         | 0         | 0         | 0         |
| RYR2        | 0.405673  | 0.272792 | 0.173012  | 0.144857  | 0.16012   | 0.153103  |
| LINC00299   | 0.0516834 | 0.182781 | 0.156498  | 0.0485299 | 0.0658349 | 0         |
| GPR172B     | 1.49209   | 3.88443  | 6.55326   | 10.8684   | 12.8786   | 7.68805   |
| SLC22A5     | 8.82769   | 9.25587  | 7.74291   | 9.85913   | 9.9271    | 8.07975   |
| WBP2        | 87.612    | 103.737  | 90.6923   | 99.3508   | 97.8719   | 95.1275   |
| MIR1273D    | 0         | 0        | 0         | 0         | 0         | 0         |
| MGC44328    | 0         | 0        | 0         | 0         | 0         | 0         |
| NDUFAF4     | 9.41079   | 6.79754  | 5.82007   | 7.02198   | 4.95026   | 4.71247   |
| MIR887      | 0         | 0        | 0         | 0         | 0         | 0         |
| MIR4754     | 0         | 0        | 0         | 0         | 0         | 0         |
| MIR4727     | 0         | 0        | 0         | 0         | 0         | 0         |
| ANKRD53     | 1.04062   | 1.71321  | 1.39502   | 1.10892   | 1.08028   | 0.695545  |
| PLD6        | 3.90604   | 4.93847  | 3.87353   | 3.81442   | 4.05508   | 3.72414   |
| LOC10013154 | 0.401882  | 0.888298 | 0.380284  | 0.377361  | 0.191971  | 0.62609   |
| LOC285627   | 0         | 0        | 0.0388634 | 0         | 0         | 0         |
| TDGF1P3     | 0         | 0        | 0.027993  | 0         | 0.0961703 | 0.072011  |
| TM9SF1      | 27.0293   | 22.2128  | 21.8158   | 19.3867   | 22.1008   | 20.6987   |
| CST4        | 0.0589867 | 0.156457 | 0         | 0.373866  | 0         | 0.900571  |
| OTUB1       | 47.1552   | 58.1123  | 49.4038   | 64.9736   | 63.4305   | 61.006    |
| C1orf95     | 3.19076   | 3.49638  | 3.78634   | 2.57963   | 4.66075   | 3.5391    |
| C12orf42    | 0         | 0        | 0         | 0         | 0         | 0         |
| CPA3        | 40.1358   | 41.1411  | 57.9177   | 38.3935   | 77.4071   | 56.3919   |
| G6PD        | 81.7031   | 85.6521  | 57.1756   | 69.0111   | 40.5424   | 67.6048   |
| CHCHD7      | 22.0343   | 18.8166  | 20.398    | 21.1422   | 23.5796   | 19.6832   |
| C20orf144   | 0.519197  | 0        | 0.196518  | 0.731277  | 0.33068   | 0.485313  |
| C16orf72    | 15.1736   | 11.1399  | 14.437    | 12.1762   | 13.2707   | 13.4883   |
| RNF31       | 19.7733   | 25.5153  | 18.2925   | 21.2896   | 22.3556   | 19.2572   |
| MIR3659     | 0         | 0        | 0         | 0         | 0         | 0         |
| NACC1       | 14.3496   | 14.2705  | 13.6723   | 15.3786   | 13.6746   | 15.3427   |
| CCRL1       | 4.1519    | 4.05813  | 4.65531   | 1.62509   | 3.81396   | 2.2935    |
| STON2       | 0.682419  | 0.362011 | 1.34315   | 0.865054  | 1.3691    | 1.33955   |
| MIR548AG2   | 0         | 0        | 0         | 0         | 0         | 0         |
| SCARNA16    | 6.25264   | 11.0564  | 14.1999   | 29.3557   | 27.8764   | 11.6891   |
| MTDH        | 19.6384   | 14.9655  | 18.3908   | 13.4755   | 13.7065   | 12.5542   |
| OAZ2        | 51.3063   | 55.911   | 45.4081   | 52.148    | 52.8846   | 47.3833   |
| PPP2R5D     | 25.6389   | 28.6154  | 27.7889   | 28.2996   | 29.4781   | 26.0629   |
| VCX2        | 0         | 0        | 0         | 0         | 0.0489394 | 0.0957659 |
| RNF144A     | 4.64279   | 4.34111  | 3.59047   | 3.98314   | 3.9356    | 3.6321    |
| DACH1       | 2.69228   | 2.36326  | 3.2544    | 2.33147   | 4.04224   | 5.52944   |
| C6orf218    | 0.65832   | 0.989477 | 0.149506  | 0.309076  | 0.419288  | 0.410237  |
| CLNK        | 0         | 0.111575 | 0.382125  | 0.0592482 | 0.3215    | 0.11796   |
| LOC10050716 | 29.4161   | 44.3907  | 25.8862   | 46.139    | 37.8488   | 30.457    |

|             |           |           |           |             |           |           |
|-------------|-----------|-----------|-----------|-------------|-----------|-----------|
| SPRYD3      | 24.4265   | 22.8275   | 22.4009   | 23.1895     | 18.1499   | 23.0359   |
| LOC10013395 | 0.158267  | 0.895262  | 0.681113  | 1.52475     | 1.00472   | 0.484515  |
| UBXN11      | 15.5163   | 27.3043   | 18.3088   | 22.1641     | 26.6749   | 20.6005   |
| PEAR1       | 5.81274   | 6.47231   | 6.96835   | 5.30904     | 6.8231    | 5.16758   |
| SLC35F4     | 0.0614183 | 0.162907  | 0.418446  | 0.173012    | 0         | 0.11482   |
| ZNF516      | 4.58517   | 4.22849   | 5.4224    | 5.18091     | 6.23189   | 4.72341   |
| CASC4       | 20.9276   | 13.7226   | 18.6505   | 14.4255     | 15.8886   | 13.1927   |
| MIR4766     | 0         | 0         | 0         | 0           | 0         | 0         |
| DLX6        | 2.22296   | 1.22838   | 0.631049  | 1.40895     | 0.955677  | 0.311683  |
| EPHB6       | 47.6203   | 69.1532   | 78.5629   | 97.2602     | 115.802   | 117.258   |
| MIR301B     | 0         | 0         | 0         | 0           | 0         | 0         |
| LOC646862   | 2.97495   | 2.41984   | 4.23386   | 1.89953     | 4.16847   | 3.26279   |
| EGLN3       | 41.6595   | 35.1082   | 64.7166   | 37.9081     | 79.7167   | 53.8931   |
| TMEM170A    | 3.71095   | 2.41249   | 4.46168   | 2.35718     | 2.91965   | 4.14891   |
| PEX5L       | 0.246995  | 0.121321  | 0.145426  | 0.077308    | 0.0873957 | 0.0684073 |
| GFI1B       | 0.256602  | 0.473175  | 0.276947  | 0.271064    | 0.377475  | 0.369332  |
| C19orf53    | 80.1425   | 99.8332   | 71.4158   | 97.9279     | 72.7619   | 79.7078   |
| CREBL2      | 26.2724   | 23.113    | 30.0698   | 24.3015     | 23.4362   | 20.3916   |
| ATRX        | 9.49528   | 6.46358   | 8.32026   | 6.76061     | 7.52018   | 6.27717   |
| PI4KAP2     | 10.4578   | 15.756    | 14.4185   | 14.1504     | 28.2107   | 24.325    |
| LY96        | 5.44556   | 8.21457   | 7.76696   | 5.11329     | 8.12317   | 3.15979   |
| NUP62CL     | 1.25307   | 0.723375  | 0.646187  | 0.711855    | 0.655184  | 1.35693   |
| UNC119      | 25.0301   | 33.046    | 30.0731   | 38.9696     | 39.4005   | 35.5998   |
| ZNF280B     | 0.18394   | 0.177413  | 0.0886098 | 0.0785078   | 0.159754  | 0.0729425 |
| NOSIP       | 26.9483   | 44.5122   | 28.8606   | 42.9908     | 41.6892   | 42.243    |
| LOC645513   | 7.4479    | 5.51538   | 8.63231   | 7.71469     | 7.60175   | 9.13895   |
| CYP4F12     | 21.8274   | 42.6194   | 26.5889   | 26.4436     | 40.919    | 25.6639   |
| SNHG6       | 183.243   | 285.281   | 218.273   | 291.773     | 206.953   | 181.937   |
| PLGLA       | 0.892332  | 0.686241  | 0.599806  | 0.716417    | 0.688724  | 0.834096  |
| HS3ST2      | 0.371778  | 0.469576  | 0.924726  | 0.199482    | 0.541229  | 0.430256  |
| NPHP4       | 3.10911   | 4.20175   | 4.06105   | 4.17414     | 4.7202    | 4.67566   |
| SLC40A1     | 24.2711   | 19.1728   | 25.1799   | 22.597      | 22.3267   | 47.315    |
| VCX3A       | 0         | 0.0784023 | 0.0447525 | 0.222043    | 0.381231  | 0.430308  |
| SNORD59A    | 0         | 0         | 0         | 0           | 0         | 0         |
| RHOXF2      | 0         | 0.0376858 | 0         | 0           | 0         | 0.0265617 |
| MTMR8       | 0.188596  | 0.066698  | 0.199876  | 0.0708356   | 0.360354  | 0.258556  |
| LOC10050680 | 0.67284   | 2.30E-05  | 1.46E-05  | 3.24E-05    | 0.038789  | 1.21E-05  |
| UST         | 4.419     | 3.63351   | 5.2687    | 3.71369     | 5.67119   | 5.60385   |
| TERF2IP     | 38.1818   | 37.0007   | 36.9129   | 37.1767     | 38.6336   | 36.1588   |
| NUDT4P1     | 19.8749   | 17.8006   | 15.2997   | 14.391      | 10.8477   | 12.0148   |
| MTMR2       | 9.14229   | 7.0235    | 8.1931    | 6.76475     | 7.08596   | 6.70065   |
| LOC10065289 | 6.69E-08  | 1.89E-08  | 8.73E-08  | 0.000150211 | 4.15E-09  | 3.47E-08  |
| LOC646743   | 0         | 0         | 0         | 0           | 0         | 0         |

|             |           |           |           |           |           |           |
|-------------|-----------|-----------|-----------|-----------|-----------|-----------|
| LOC10050587 | 1.1586    | 0.307309  | 0.438534  | 0.435164  | 0.221376  | 0.144398  |
| DEFB118     | 0         | 0         | 0         | 0         | 0         | 0         |
| DYX1C1      | 0.681683  | 0.936108  | 1.31644   | 0.934618  | 0.836094  | 1.31944   |
| LILRA4      | 0.0617884 | 0         | 0.187097  | 0         | 0.511594  | 0.115512  |
| DEFB106A    | 0         | 0         | 0         | 0         | 0         | 0         |
| LOC10013303 | 2.49362   | 1.66068   | 2.69669   | 2.03738   | 2.86701   | 2.0988    |
| MYO1E       | 15.4603   | 11.7111   | 14.1249   | 10.3582   | 13.1246   | 12.4324   |
| CASP2       | 15.8236   | 16.8111   | 15.1136   | 18.4656   | 19.5601   | 15.3395   |
| CHKA        | 17.4111   | 15.5926   | 12.8102   | 13.3409   | 12.8488   | 12.188    |
| SMPD3       | 17.2528   | 11.4283   | 18.5334   | 14.8458   | 21.407    | 27.7711   |
| SLC28A3     | 5.01678   | 3.27111   | 8.22684   | 6.11088   | 9.46435   | 9.51543   |
| NFX1        | 18.5126   | 20.1564   | 20.8555   | 19.78     | 23.1211   | 19.8356   |
| ZNF718      | 3.48927   | 3.085     | 1.08057   | 1.09212   | 1.11117   | 1.18602   |
| MDGA2       | 0.0183656 | 0.0162377 | 0.0139029 | 0.017245  | 0.0526379 | 0.0934662 |
| SSX5        | 0         | 0         | 0         | 0         | 0         | 0         |
| SUV39H1     | 4.03531   | 5.44895   | 4.74875   | 6.54479   | 4.74302   | 3.84053   |
| SLA2        | 1.57453   | 1.17378   | 1.03037   | 0.350741  | 1.58476   | 0.53755   |
| LOC440028   | 0.0440164 | 0.11675   | 0.366527  | 0.165323  | 0.0841029 | 0.219433  |
| CCDC8       | 8.19412   | 7.92473   | 7.61378   | 8.08302   | 5.12468   | 5.2537    |
| JAG2        | 23.5808   | 40.8639   | 28.2352   | 42.4648   | 36.2212   | 30.0843   |
| PLEKHA7     | 6.38836   | 5.32848   | 6.84343   | 6.31925   | 9.12277   | 8.95089   |
| LOC645249   | 0         | 0         | 0         | 0         | 0         | 0         |
| ATP6V1E1    | 83.7632   | 80.1314   | 73.7192   | 83.5896   | 74.1701   | 72.7464   |
| FAM155A     | 0.607687  | 0.268639  | 0.40252   | 0.213978  | 0.209646  | 0.236678  |
| KLRB1       | 1.93174   | 2.95005   | 2.12704   | 1.64898   | 3.24362   | 0.766042  |
| STX10       | 62.6147   | 83.0397   | 63.6632   | 76.2164   | 76.759    | 73.4912   |
| RNF187      | 49.8315   | 57.6163   | 42.8929   | 52.8477   | 57.4143   | 59.7611   |
| GPR63       | 0.0494662 | 0         | 0.564581  | 0         | 0.47501   | 0.372991  |
| TBXA2R      | 1.31591   | 1.57281   | 0.937669  | 1.27189   | 1.52732   | 1.66298   |
| LOC10050713 | 1.37001   | 0.795984  | 2.10385   | 1.06589   | 1.69528   | 1.04887   |
| DST         | 60.6794   | 66.6318   | 77.436    | 76.0666   | 77.7537   | 59.1799   |
| PNRC1       | 41.0777   | 50.7351   | 49.2294   | 46.3398   | 63.8135   | 49.0976   |
| LOC10050758 | 0         | 0.0797945 | 0.0683207 | 0.0847445 | 0.116081  | 0.0562408 |
| CKLF        | 12.9074   | 17.401    | 15.8673   | 10.6768   | 16.7895   | 10.2502   |
| PGF         | 8.72949   | 10.1377   | 5.22941   | 7.52965   | 6.78128   | 5.91372   |
| PRDX1       | 287.639   | 255.66    | 207.381   | 244.432   | 181.379   | 182.287   |
| IFNA7       | 0         | 0         | 0         | 0         | 0         | 0         |
| INSL4       | 0.230428  | 0         | 0.174435  | 0         | 0         | 0         |
| MIR4761     | 0         | 0         | 0         | 0         | 0         | 0         |
| LOC10050603 | 0         | 0.295106  | 0         | 0         | 0         | 0         |
| KCNIP3      | 4.45509   | 4.16675   | 4.23645   | 5.33894   | 3.57039   | 3.0974    |
| INSL5       | 0.183287  | 0.162051  | 0.138749  | 0.344207  | 0.116736  | 0         |
| RUSC1-AS1   | 2.98964   | 2.05263   | 1.07501   | 2.34851   | 2.0918    | 2.13942   |

|             |          |           |           |          |           |          |
|-------------|----------|-----------|-----------|----------|-----------|----------|
| FLJ13197    | 1.91436  | 1.97281   | 3.10294   | 4.34899  | 3.32087   | 3.2381   |
| FLJ31306    | 45.2878  | 54.8909   | 47.8715   | 48.3077  | 59.3549   | 47.7062  |
| LOC647589   | 0        | 0         | 0         | 0        | 0         | 0        |
| ENTPD2      | 12.9699  | 19.8185   | 12.1687   | 22.6104  | 13.9029   | 14.67    |
| LOC730257   | 1.24227  | 2.35835   | 1.23991   | 1.23896  | 1.47598   | 0.921141 |
| OR6K6       | 0        | 0         | 0         | 0        | 0         | 0        |
| DDX4        | 0        | 0.0376937 | 0.0322729 | 0        | 0         | 0.119552 |
| SIAH1       | 27.2024  | 32.3487   | 28.0675   | 31.9311  | 36.622    | 32.5839  |
| LOC10013021 | 1.35161  | 1.46485   | 0.957168  | 1.35103  | 1.52732   | 1.14114  |
| CLDN16      | 0.874978 | 0.480166  | 0.890764  | 0.708267 | 0.864742  | 0.88368  |
| LOC10065284 | 135.726  | 121.714   | 125.698   | 134.178  | 101.856   | 105.004  |
| NEIL1       | 8.69181  | 16.8771   | 13.5758   | 16.3744  | 18.114    | 13.9293  |
| RPS12       | 614.196  | 836.61    | 616.3     | 923.753  | 595.334   | 616.97   |
| MIR4670     | 0        | 0         | 0         | 0        | 0         | 0        |
| C2orf54     | 35.1968  | 44.2572   | 32.4675   | 36.6319  | 52.59     | 51.5281  |
| PRKAA2      | 1.32297  | 0.491088  | 0.657468  | 0.692242 | 0.591752  | 0.497167 |
| VIL1        | 0        | 0.0969942 | 0         | 0.103011 | 0         | 0        |
| LOC727982   | 0        | 0         | 0         | 0        | 0         | 0        |
| SNORD31     | 0        | 0         | 0         | 0        | 0         | 0        |
| PIWIL1      | 0        | 0         | 0.0270499 | 0.13048  | 0.0348133 | 0        |
| KRTAP15-1   | 0        | 0         | 0         | 0        | 0         | 0        |
| C9orf62     | 0        | 0         | 0         | 0        | 0         | 0        |
| ZMYM6NB     | 15.0666  | 16.3067   | 17.5999   | 14.3913  | 20.5156   | 14.0833  |
| PRB4        | 0.658696 | 0.465902  | 0.498636  | 0.618505 | 0.167811  | 0.820942 |
| SLU7        | 16.3569  | 14.8032   | 17.1013   | 12.9501  | 16.0922   | 15.0745  |
| POLR2J4     | 3.66515  | 5.78748   | 5.87689   | 6.90658  | 5.4854    | 3.7534   |
| CDC42EP5    | 11.876   | 20.6294   | 6.98062   | 13.7752  | 10.5005   | 7.57475  |
| PLCD3       | 14.221   | 14.8365   | 19.8944   | 20.1901  | 19.2017   | 18.1137  |
| VRK3        | 14.0466  | 13.8853   | 12.6691   | 13.0824  | 11.1907   | 12.3563  |
| RIC3        | 3.95675  | 5.3524    | 3.5031    | 3.82497  | 5.56728   | 4.49019  |
| LOC10065280 | 0.767994 | 0.679011  | 0.581375  | 1.44227  | 0.815232  | 0.478581 |
| TMEM167B    | 32.1006  | 26.1289   | 30.4168   | 29.9369  | 30.0185   | 22.9521  |
| MIR4272     | 0        | 0         | 0         | 0        | 0         | 0        |
| CYLC1       | 0        | 0         | 0         | 0        | 0         | 0        |
| THOC6       | 14.2197  | 22.2377   | 18.5841   | 27.1738  | 26.4725   | 20.5604  |
| TRAPPC5     | 81.3276  | 138.195   | 76.6384   | 127.906  | 90.037    | 103.329  |
| OR4D2       | 0        | 0         | 0         | 0        | 0         | 0        |
| ZFX         | 6.05141  | 4.42142   | 8.63126   | 5.72188  | 8.49341   | 7.46262  |
| FBXW5       | 55.6584  | 87.3137   | 56.1674   | 70.5644  | 72.1949   | 60.6497  |
| DEFB107B    | 0        | 0         | 0         | 0        | 0         | 0        |
| ANKRD26     | 1.92586  | 1.78972   | 2.41562   | 1.58396  | 2.14877   | 1.92719  |
| CFP         | 2.13344  | 1.82718   | 2.32383   | 1.94373  | 3.69647   | 1.70525  |
| MIR3923     | 0        | 0         | 0         | 0        | 0         | 0        |

|             |          |           |           |           |           |           |
|-------------|----------|-----------|-----------|-----------|-----------|-----------|
| BRS3        | 0        | 0         | 0         | 0         | 0.0490401 | 0.0479816 |
| MIR4740     | 0        | 0         | 0         | 0         | 0         | 0         |
| URB2        | 2.06832  | 1.60198   | 1.85041   | 1.94212   | 1.7528    | 1.56584   |
| IGSF21      | 0.800353 | 2.07569   | 0.605872  | 0.350709  | 1.32535   | 0.565246  |
| TMEM38B     | 4.95733  | 2.45445   | 2.32669   | 2.46707   | 3.06263   | 2.84206   |
| SNX25       | 7.29377  | 4.54401   | 6.43001   | 4.797     | 5.27267   | 5.21639   |
| SLC26A6     | 12.7003  | 16.085    | 11.6164   | 13.6641   | 12.3467   | 10.6732   |
| CBX7        | 25.6695  | 27.1779   | 28.2443   | 27.3848   | 33.8894   | 25.4435   |
| NUDT6       | 3.53031  | 4.38773   | 3.62251   | 4.464     | 3.73091   | 3.52317   |
| C3orf38     | 6.00137  | 6.38981   | 6.79937   | 5.31363   | 6.37736   | 6.54965   |
| CYB5R4      | 7.12818  | 5.94101   | 7.28646   | 5.15849   | 5.95692   | 5.29077   |
| TRIM5       | 9.85108  | 7.44355   | 6.56805   | 5.39007   | 6.37369   | 6.10371   |
| ZNF519      | 2.15442  | 1.8868    | 2.50188   | 2.12639   | 2.27831   | 2.69918   |
| MIR320C1    | 0        | 0         | 0         | 0         | 0         | 0         |
| SORBS2      | 18.1996  | 9.85041   | 9.08238   | 8.17514   | 8.15063   | 8.17463   |
| LOC1005057: | 0.146052 | 0.12913   | 0.257979  | 0.228568  | 0.21705   | 0.151689  |
| AMZ2P1      | 3.68834  | 4.82833   | 3.91759   | 3.75861   | 5.35383   | 4.1336    |
| LOC1001292( | 1.38402  | 1.87149   | 1.29423   | 1.22313   | 1.50372   | 1.16686   |
| ATXN3L      | 0        | 0         | 0         | 0         | 0         | 0         |
| PRM2        | 0        | 0         | 0         | 0         | 0         | 0         |
| LOC1002875: | 0        | 0         | 0         | 0         | 0         | 0         |
| CNKS1R1     | 13.8049  | 19.8311   | 12.8459   | 18.0611   | 18.4028   | 17.9872   |
| PTGES2      | 34.3569  | 47.1485   | 34.1669   | 48.8464   | 40.433    | 33.1257   |
| TMEM190     | 0        | 1.07786   | 0.553725  | 0.915782  | 1.8635    | 1.06358   |
| MGC23284    | 1.27305  | 1.73317   | 0.821118  | 0.912255  | 2.30485   | 1.71673   |
| SLMO2       | 27.9137  | 24.6768   | 27.7054   | 24.6583   | 24.4531   | 22.7901   |
| RRN3P2      | 1.28934  | 1.0655    | 1.65917   | 0.939808  | 1.58851   | 1.10199   |
| SMTNL1      | 0.450309 | 0.455011  | 0.146094  | 0.120809  | 0.122916  | 0.280613  |
| ZXDC        | 11.4595  | 14.5459   | 15.2051   | 16.7011   | 15.7676   | 14.262    |
| LOC1005060: | 3.08698  | 2.64661   | 4.10721   | 3.33781   | 5.48129   | 4.95492   |
| LOC139201   | 0.675503 | 0.492066  | 0.781662  | 0.372767  | 0.455121  | 0.568991  |
| GRIK5       | 0.696242 | 1.42813   | 0.864377  | 1.17677   | 1.75602   | 1.05864   |
| C14orf165   | 0.128977 | 0         | 0         | 0         | 0         | 0         |
| ZNF471      | 3.63102  | 2.5751    | 4.31414   | 3.30005   | 4.35725   | 3.60457   |
| FBXO8       | 10.9831  | 7.37604   | 11.1472   | 7.98297   | 8.66381   | 9.71064   |
| HSBP1L1     | 45.496   | 56.0708   | 38.4849   | 51.6201   | 49.5018   | 55.7359   |
| UNC13A      | 0.134245 | 0.0339118 | 0.159696  | 0.072031  | 0.146574  | 0.0896315 |
| LOC1001283( | 0.214193 | 0.252501  | 0.0540483 | 0.0670411 | 0.090947  | 0.0889838 |
| STAB2       | 0.552606 | 0.4784    | 0.664659  | 0.390872  | 1.49445   | 0.882236  |
| LECT2       | 0        | 0         | 0         | 0         | 0         | 0         |
| MIR548I2    | 0        | 0         | 0         | 0         | 0         | 0         |
| STAT6       | 79.4206  | 96.4621   | 78.5273   | 86.6381   | 103.026   | 91.3877   |
| LOC1005072: | 43.7883  | 62.0694   | 38.2347   | 50.5103   | 39.5549   | 38.0262   |



|             |           |             |           |           |           |           |
|-------------|-----------|-------------|-----------|-----------|-----------|-----------|
| PSMC6       | 25.5053   | 26.6341     | 21.9935   | 21.5605   | 21.233    | 22.4016   |
| OTUD4       | 12.7128   | 9.60147     | 12.1009   | 8.68303   | 11.2225   | 9.86831   |
| MMP15       | 6.68583   | 7.92022     | 7.57527   | 7.40626   | 6.10905   | 5.17387   |
| CCDC89      | 0.708726  | 0.368595    | 0.599629  | 0.274022  | 0.531049  | 0.701441  |
| PHKG1       | 1.8206    | 2.95104     | 2.81383   | 2.70673   | 4.05842   | 2.12722   |
| SYS1-DBNDD  | 5.97E-81  | 2.25E-89    | 3.44E-51  | 8.01E-51  | 1.18E-77  | 0.291222  |
| SLC35A1     | 26.3881   | 21.7415     | 21.6806   | 19.0914   | 26.7356   | 24.6219   |
| MAST3       | 5.23272   | 6.09196     | 7.99621   | 6.46987   | 8.15592   | 7.47354   |
| RECQL5      | 12.18     | 17.5165     | 16.6686   | 19.9889   | 21.5006   | 22.2286   |
| DNASE1      | 1.47278   | 1.35829     | 1.55117   | 1.50251   | 1.93636   | 2.23359   |
| RHEBL1      | 0.76702   | 1.94968     | 1.66934   | 1.17036   | 1.83195   | 2.27038   |
| CAB39L      | 12.9542   | 9.0118      | 13.0181   | 12.7462   | 9.4519    | 9.34001   |
| MOG         | 0         | 0.213512    | 0.0812487 | 0         | 0.0384502 | 0         |
| DPT         | 86.1533   | 77.3573     | 136.991   | 84.7324   | 96.695    | 56.2328   |
| EDA         | 5.53518   | 4.54661     | 3.89976   | 4.43481   | 4.561     | 4.30306   |
| LOC728084   | 0.361962  | 0.320024    | 0.0608906 | 0.188821  | 0.128075  | 0.100249  |
| GSN         | 516.502   | 501.999     | 640.909   | 487.555   | 410.298   | 412.109   |
| MIR365-1    | 0         | 0           | 0         | 0         | 0         | 0         |
| ZNF726      | 1.81176   | 0.80092     | 1.71439   | 0.212651  | 0.576959  | 0.423378  |
| AKT1S1      | 36.9436   | 49.2704     | 36.839    | 51.212    | 44.0824   | 45.3616   |
| SNORD28     | 0         | 0           | 0         | 0         | 0         | 0         |
| SMARCA4     | 26.3578   | 25.7762     | 23.9405   | 27.9      | 27.5977   | 30.0398   |
| HNRNPA0     | 52.2669   | 54.5107     | 52.1291   | 54.7128   | 54.1295   | 47.2784   |
| HLA-B       | 1010.24   | 1022.14     | 618.452   | 472.445   | 922.329   | 525.476   |
| MGRN1       | 14.7721   | 18.1394     | 17.4159   | 16.8826   | 16.9322   | 17.2696   |
| LOC10050574 | 0.170525  | 0.141152    | 0.282885  | 0.135015  | 0.679023  | 0.605121  |
| TNFAIP1     | 25.7314   | 26.4781     | 20.8421   | 24.5188   | 25.0844   | 28.0942   |
| STOML1      | 9.01189   | 11.8825     | 7.57134   | 8.16854   | 8.49349   | 9.25151   |
| E2F5        | 2.74789   | 1.21602     | 1.58114   | 2.52015   | 1.6882    | 2.39393   |
| LOC646214   | 2.822     | 1.93054     | 2.73123   | 2.15665   | 4.51758   | 4.33297   |
| LOC10050740 | 0         | 0           | 0         | 0         | 0         | 0         |
| LOC10013104 | 0         | 0           | 0         | 0         | 0         | 0         |
| NECAB1      | 1.35052   | 0.949648    | 1.40812   | 0.896608  | 1.29044   | 1.08566   |
| LOC440993   | 12.732    | 19.5887     | 6.52667   | 8.47218   | 27.5837   | 21.6157   |
| OPN1SW      | 0         | 0.190014    | 0         | 2.69E-165 | 0         | 0         |
| C1QTNF7     | 1.7392    | 1.2833      | 1.75708   | 0.92225   | 1.33316   | 1.41255   |
| HAR1B       | 0.135412  | 0           | 0.102508  | 0.2543    | 0         | 0.0843831 |
| LOC643802   | 0.0817013 | 0.216705    | 0.123697  | 0         | 0         | 0         |
| SERF2-C15OR | 1.91E-10  | 0.000160957 | 3.65E-05  | 1.37598   | 1.99664   | 6.00E-14  |
| MIR98       | 0         | 0           | 0         | 0         | 0         | 0         |
| RNF149      | 25.3029   | 24.6232     | 31.2052   | 26.9688   | 29.5985   | 28.6324   |
| ASCL3       | 0.423815  | 0           | 0         | 0         | 0.134965  | 0         |
| EIF4G1      | 80.071    | 70.1342     | 82.5437   | 71.6992   | 69.6133   | 76.1498   |

|             |          |           |           |           |           |           |
|-------------|----------|-----------|-----------|-----------|-----------|-----------|
| WISP3       | 2.96958  | 1.8319    | 3.85224   | 6.73567   | 3.34729   | 3.11916   |
| CDC16       | 47.812   | 64.0858   | 46.5829   | 51.1738   | 58.1983   | 49.2399   |
| TNFSF11     | 0.655214 | 0.219379  | 0.741452  | 0.528592  | 0.651827  | 0.463898  |
| LRP3        | 15.5975  | 21.8108   | 19.0259   | 21.0809   | 17.842    | 17.8177   |
| HPCAL4      | 0        | 0.0403451 | 0         | 0.149968  | 0.0290634 | 0.355451  |
| ARHGEF40    | 13.3575  | 13.3814   | 17.8698   | 12.7408   | 12.2737   | 8.72962   |
| AIMP2       | 16.3716  | 15.4453   | 13.0721   | 19.2578   | 13.5131   | 12.7228   |
| TCF3        | 16.673   | 22.3649   | 19.3944   | 22.6639   | 23.1256   | 22.9164   |
| WRAP53      | 4.0327   | 6.14768   | 4.59524   | 5.31349   | 4.28878   | 4.39615   |
| ANKDD1B     | 0.707138 | 0.416805  | 0.41635   | 0.516438  | 1.10093   | 0.832355  |
| PTPRM       | 11.9266  | 11.323    | 12.8829   | 8.86509   | 9.01417   | 6.15221   |
| SNX22       | 2.43087  | 2.799     | 1.56032   | 2.26965   | 1.58544   | 1.65968   |
| LOC10013294 | 0        | 0         | 0         | 0         | 0         | 0         |
| CEACAM16    | 0        | 0.055221  | 0.0472807 | 0         | 0         | 0.0389209 |
| TNFRSF10C   | 0.216369 | 0.573899  | 0.545975  | 0.677223  | 0.41342   | 0.0898879 |
| HARS2       | 22.0207  | 24.8835   | 20.2924   | 21.0198   | 28.0503   | 24.3617   |
| REPS1       | 13.6894  | 13.6627   | 14.263    | 16.1411   | 14.8948   | 14.4104   |
| LOC10065278 | 6.34723  | 5.67943   | 6.63422   | 5.32805   | 6.61425   | 6.34758   |
| RAF1        | 43.5391  | 42.9832   | 41.4711   | 42.7794   | 43.3526   | 39.9283   |
| CKS1B       | 23.3907  | 28.6593   | 20.8816   | 26.3467   | 21.7198   | 20.0819   |
| PARD3B      | 2.7854   | 2.19519   | 3.0131    | 2.7831    | 2.60643   | 2.5876    |
| LOC63930    | 0        | 0         | 0         | 0         | 0         | 0         |
| ABCC3       | 17.4452  | 21.7727   | 14.7244   | 13.9531   | 14.6749   | 13.1374   |
| CXCL17      | 5.05862  | 2.04458   | 0.547057  | 0.678566  | 0.828479  | 0.0900662 |
| UCN3        | 0        | 0         | 0         | 0         | 0         | 0         |
| CCDC69      | 22.9215  | 27.5419   | 30.1625   | 17.9856   | 15.9646   | 13.7058   |
| TM4SF19-TC1 | 0.262392 | 2.79E-12  | 0.400526  | 0.0368539 | 0.235981  | 0.886972  |
| OGFOD1      | 12.4992  | 12.0398   | 10.5824   | 10.6555   | 10.4538   | 10.3101   |
| OR10H2      | 0        | 0         | 0         | 0         | 0.0721612 | 0.0706036 |
| SNORD115-8  | 0        | 0         | 0         | 0         | 0         | 0         |
| URB1        | 4.79556  | 4.00921   | 4.58856   | 4.23187   | 5.17912   | 5.04595   |
| MYO18A      | 18.4624  | 16.4827   | 21.7565   | 15.5647   | 21.3331   | 20.4918   |
| SNORA57     | 21.7939  | 115.613   | 0         | 40.9282   | 55.5225   | 40.743    |
| MBLAC2      | 3.22315  | 2.16738   | 4.14103   | 3.32487   | 3.5997    | 3.49371   |
| PM20D1      | 752.016  | 548.689   | 550.433   | 421.237   | 134.228   | 190.574   |
| WDR91       | 8.10813  | 10.892    | 9.38924   | 8.61673   | 13.4285   | 7.41576   |
| ELOVL7      | 19.5362  | 10.4478   | 17.6398   | 13.3731   | 16.5643   | 15.9547   |
| THUMPD1     | 19.7452  | 15.6515   | 18.1395   | 14.457    | 18.0874   | 14.5353   |
| ARRDC1      | 28.1479  | 47.3553   | 33.073    | 49.792    | 51.0213   | 43.8515   |
| SCO2        | 51.4974  | 128.287   | 18.6658   | 32.1907   | 26.7695   | 21.3889   |
| HPGDS       | 6.12792  | 6.75783   | 5.28731   | 3.15543   | 5.87534   | 5.42003   |
| KLKB1       | 0.454024 | 0.521846  | 1.61539   | 1.70529   | 0.347005  | 0.452686  |
| ZNF575      | 1.71971  | 2.98662   | 1.90625   | 2.7682    | 3.44235   | 3.02359   |

|             |           |           |           |          |           |           |
|-------------|-----------|-----------|-----------|----------|-----------|-----------|
| LOC10050563 | 1.26346   | 1.29197   | 2.91416   | 1.93226  | 3.28383   | 1.65086   |
| C14orf166B  | 0         | 0         | 0         | 0        | 0         | 0         |
| PM20D2      | 11.028    | 7.60773   | 9.32764   | 7.36619  | 10.3722   | 7.71679   |
| ITPKB-IT1   | 0.16176   | 0         | 0         | 0        | 0         | 0         |
| RXFP3       | 0         | 0         | 0         | 0        | 0         | 0         |
| LINC00116   | 8.08158   | 12.1992   | 6.01832   | 9.62441  | 8.07651   | 6.79668   |
| TMTC1       | 6.54772   | 4.33465   | 5.81691   | 4.08527  | 2.99531   | 3.86445   |
| LOC10050625 | 1.27495   | 0.927238  | 1.10525   | 1.00407  | 1.47998   | 1.20456   |
| SNORD118    | 36.2435   | 38.983    | 29.7374   | 0        | 138.374   | 98.1767   |
| SFRP4       | 1.17043   | 1.47832   | 2.2024    | 1.22462  | 1.06493   | 0.97943   |
| LOC10050628 | 0         | 0         | 0         | 0        | 0         | 0         |
| SNORD124    | 0         | 0         | 0         | 1603.14  | 0         | 1063.93   |
| TPTE2P6     | 0.0737799 | 0.0652315 | 0.0558518 | 0.17536  | 0.08702   | 0.114941  |
| SLC35C1     | 6.4717    | 5.61806   | 6.18691   | 4.86338  | 4.86575   | 5.39941   |
| OXER1       | 4.23116   | 7.79798   | 2.93233   | 6.88278  | 7.4393    | 3.75077   |
| LOC10065273 | 590.167   | 794.464   | 553.08    | 859.232  | 566.475   | 626.519   |
| LOC10050663 | 0.25044   | 0.885692  | 0.568753  | 0.940636 | 0.159506  | 0.312127  |
| LOC10050760 | 1.11553   | 1.21863   | 0.897423  | 1.97537  | 0.916191  | 0.765095  |
| S100A6      | 856.274   | 1090.92   | 929.137   | 970.678  | 918.352   | 901.148   |
| MAGED4B     | 1.86559   | 3.41325   | 2.41257   | 3.21425  | 4.0343    | 4.30655   |
| LOC10050760 | 1.35397   | 1.79565   | 1.85775   | 1.35082  | 2.96434   | 2.32028   |
| NAGA        | 8.17287   | 8.24826   | 8.91233   | 7.50146  | 10.3605   | 8.66299   |
| DCAF8       | 51.7361   | 55.1572   | 57.4469   | 52.6713  | 60.4751   | 51.247    |
| LHFPL2      | 9.07418   | 5.8271    | 7.10059   | 5.45313  | 5.51172   | 7.40461   |
| KRTAP4-8    | 7.85169   | 2.81265   | 0.0752376 | 75.3749  | 1.58253   | 808.475   |
| CCR10       | 1.70311   | 2.93232   | 1.89997   | 1.8517   | 2.16945   | 1.3406    |
| GDF6        | 0.0264678 | 0.117006  | 0.0200362 | 0        | 0.0337149 | 0.0824679 |
| C4orf47     | 0.607524  | 1.28912   | 0.367919  | 0.798638 | 0.851258  | 0.605733  |
| FURIN       | 51.8703   | 46.992    | 47.6161   | 50.8249  | 55.4165   | 62.022    |
| REG1P       | 0         | 0         | 0         | 0        | 0         | 0         |
| MIRLET7I    | 0         | 0         | 0         | 0        | 0         | 0         |
| MIR4322     | 0         | 0         | 0         | 0        | 0         | 0         |
| TCEA1       | 26.139    | 20.6623   | 27.026    | 23.3655  | 23.9375   | 21.6493   |
| GAGE13      | 0         | 0.0373009 | 0         | 0        | 0         | 0         |
| CFC1        | 0         | 0         | 0         | 0        | 0         | 0         |
| LOC10013283 | 1.1853    | 1.0884    | 0.946063  | 1.56646  | 2.4013    | 1.41329   |
| LOC10050662 | 0.708695  | 1.16366   | 1.53282   | 0.665454 | 2.38582   | 1.32489   |
| EDNRB       | 8.37588   | 7.61546   | 8.64882   | 8.15109  | 7.39871   | 7.37164   |
| RTTN        | 1.6494    | 1.68356   | 1.69526   | 1.68727  | 2.19498   | 1.62114   |
| KRR1        | 14.4372   | 11.4823   | 12.3638   | 8.19937  | 12.0203   | 10.1639   |
| OR2M3       | 0         | 0         | 0         | 0        | 0         | 0         |
| RAB22A      | 8.89268   | 7.05      | 6.07767   | 6.21378  | 7.98366   | 7.09563   |
| HMBOX1      | 1.02963   | 0.69017   | 1.43977   | 0.84987  | 0.913671  | 1.1852    |

|             |           |           |           |            |            |            |
|-------------|-----------|-----------|-----------|------------|------------|------------|
| LRCH4       | 21.5366   | 26.1443   | 23.7416   | 29.1588    | 32.8062    | 23.0675    |
| TAS1R1      | 0.432703  | 0.576151  | 0.337631  | 0.190597   | 0.832872   | 0.445349   |
| ANKZF1      | 29.6352   | 39.3027   | 33.723    | 42.8412    | 52.8933    | 39.3374    |
| SNORD37     | 0         | 0         | 0         | 0          | 0          | 0          |
| IL20RB      | 63.4508   | 76.4908   | 84.1714   | 74.7105    | 105.97     | 100.45     |
| CNTNAP1     | 1.97258   | 2.64718   | 2.3732    | 1.86876    | 3.71295    | 2.00847    |
| LOC10050671 | 0         | 1.07472   | 0.663234  | 0          | 0.660648   | 0.757485   |
| ARSG        | 1.51664   | 1.66018   | 2.48756   | 2.03443    | 1.81692    | 2.22775    |
| MIR4491     | 0         | 0         | 0         | 0          | 0          | 0          |
| SNORD115-3  | 0         | 0         | 0         | 0          | 0          | 0          |
| PIGC        | 38.787    | 31.408    | 32.0377   | 33.2191    | 29.236     | 34.9363    |
| OR51V1      | 0         | 0         | 0         | 0          | 0          | 0          |
| GAGE2D      | 0         | 0         | 0         | 0          | 0          | 0          |
| ZSCAN12     | 2.72229   | 1.76557   | 2.1622    | 2.18253    | 2.56886    | 2.19269    |
| ERC2        | 0.0778927 | 0.0275471 | 0.0589652 | 0          | 0.00992206 | 0.0970789  |
| HRNR        | 0.37298   | 0.454767  | 0.326489  | 0.21226    | 0.0960198  | 0.162449   |
| MYOZ2       | 0.23308   | 0.0686915 | 0.0588143 | 0.218858   | 0.222675   | 0.290491   |
| NOVA1       | 3.46059   | 5.43065   | 6.24671   | 4.48752    | 5.30176    | 3.14107    |
| TBCC        | 15.4819   | 19.4246   | 16.5829   | 18.2771    | 20.212     | 15.8926    |
| CSF2RA      | 2.03491   | 3.23631   | 2.96069   | 3.13641    | 1.38408    | 3.21337    |
| KDELC1      | 2.63706   | 1.7255    | 1.10914   | 0.871325   | 1.61688    | 1.64243    |
| GPR52       | 0         | 0         | 0         | 0          | 0.0467392  | 0.0457303  |
| MIR876      | 0         | 0         | 0         | 0          | 0          | 0          |
| USP4        | 23.5166   | 22.2117   | 23.5987   | 20.8099    | 24.0073    | 23.4723    |
| RPS2        | 947.228   | 1712.01   | 1210.85   | 1956.2     | 1332.77    | 1338.56    |
| NFIX        | 53.0918   | 54.0216   | 73.3762   | 65.6151    | 62.5316    | 53.6704    |
| DHX35       | 5.50341   | 7.33407   | 5.87831   | 5.17351    | 7.44272    | 5.89365    |
| REEP2       | 1.71389   | 2.81415   | 2.63191   | 2.345      | 2.83812    | 2.68531    |
| UTP14C      | 8.90897   | 6.15771   | 7.50224   | 5.78077    | 6.19358    | 5.73134    |
| DUSP11      | 16.8432   | 19.2446   | 20.0573   | 16.1196    | 18.9794    | 17.8835    |
| CTTNBP2NL   | 8.29388   | 5.10865   | 7.93722   | 5.30364    | 7.74272    | 7.7981     |
| LOC10028731 | 0.0167358 | 0.0118374 | 0.0126691 | 0.00628586 | 0          | 0.00880674 |
| KLK7        | 160.355   | 109.954   | 142.48    | 107.846    | 160.577    | 216.053    |
| LOC150051   | 0.153423  | 0.406941  | 0.116142  | 0.144062   | 0          | 0.28682    |
| PARP2       | 16.1571   | 20.029    | 18.837    | 21.1114    | 21.8762    | 13.2015    |
| MBTPS1      | 28.3817   | 26.89     | 28.7032   | 27.8661    | 27.6623    | 24.4074    |
| MALAT1      | 98.5107   | 97.8459   | 120.319   | 297.793    | 160.124    | 144.656    |
| TTC39A      | 5.68356   | 3.85048   | 2.79399   | 3.67354    | 2.77377    | 1.95506    |
| LOC10050581 | 0.466235  | 0.235552  | 0.352942  | 0.125082   | 0.509053   | 0.124516   |
| ZBTB26      | 4.29972   | 2.02107   | 3.33732   | 1.63539    | 3.36248    | 2.47591    |
| SNORD113-1  | 0         | 0         | 0         | 0          | 0          | 0          |
| TMC6        | 19.774    | 27.9517   | 16.8565   | 19.8939    | 23.7123    | 21.3131    |
| SNORD115-4  | 0         | 0         | 0         | 0          | 0          | 0          |

|             |           |           |           |           |           |           |
|-------------|-----------|-----------|-----------|-----------|-----------|-----------|
| AGTRAP      | 54.9148   | 71.4869   | 46.7536   | 63.4526   | 52.8317   | 67.4462   |
| GNG11       | 70.0078   | 80.7633   | 79.7306   | 65.619    | 58.9743   | 46.6587   |
| CHMP4B      | 101.654   | 106.393   | 87.3399   | 104.948   | 89.5668   | 109.07    |
| GPR37       | 3.22905   | 1.78432   | 2.39348   | 3.00044   | 1.73525   | 2.09605   |
| MIR4439     | 0         | 0         | 0         | 0         | 0         | 0         |
| CCDC22      | 11.261    | 15.5784   | 12.7747   | 13.7824   | 15.3829   | 13.7682   |
| UBC         | 248.418   | 200.543   | 256.073   | 200.268   | 228.49    | 222.388   |
| ZBTB6       | 6.14171   | 3.64803   | 5.74432   | 3.40674   | 5.22565   | 4.06369   |
| TALDO1      | 191.233   | 210.539   | 173.405   | 175.83    | 139.38    | 172.211   |
| AOX1        | 6.8826    | 4.71946   | 8.40731   | 2.22154   | 5.35493   | 4.20369   |
| SNORD115-4  | 0         | 0         | 0         | 0         | 0         | 0         |
| LOC400027   | 9.75039   | 9.40065   | 11.9504   | 10.6814   | 10.912    | 10.3003   |
| NLRP2       | 7.37244   | 6.42254   | 1.97202   | 1.07998   | 3.63523   | 1.79626   |
| LOC10050578 | 0.904267  | 0.675574  | 0.123216  | 0.543419  | 0.575933  | 0.36064   |
| OLFM2       | 47.0792   | 48.8096   | 61.9443   | 78.8877   | 60.4697   | 67.7213   |
| TCF21       | 0.0873467 | 0.208963  | 0.131651  | 0.0820172 | 0         | 0         |
| FEN1        | 18.6645   | 17.8738   | 14.5654   | 16.3184   | 14.6264   | 17.4602   |
| MIR1303     | 0         | 0         | 0         | 0         | 0         | 0         |
| MIR9-3      | 0         | 0         | 0         | 0         | 0         | 0         |
| SEPHS2      | 36.5804   | 34.205    | 32.239    | 35.022    | 28.3234   | 33.2153   |
| KLRAQ1      | 11.1771   | 9.18688   | 9.7228    | 9.6847    | 10.6864   | 9.78833   |
| ST3GAL2     | 3.70383   | 5.22024   | 4.37065   | 4.23477   | 4.78736   | 3.65218   |
| FOXD3       | 0.697021  | 1.45262   | 0.339203  | 0.467494  | 0.951293  | 0.744607  |
| GMEB2       | 6.09732   | 8.12714   | 7.16833   | 8.82649   | 7.92865   | 7.91582   |
| CXorf27     | 0         | 0         | 0         | 0         | 0         | 0         |
| SNRPG       | 19.4558   | 22.7862   | 16.2791   | 21.8751   | 13.6964   | 16.3792   |
| TBL1XR1     | 26.3635   | 20.5917   | 25.1396   | 20.4741   | 25.4371   | 23.3359   |
| ARFGEF1     | 13.6359   | 10.5635   | 12.4987   | 11.1693   | 12.372    | 11.7023   |
| DCDC5       | 0         | 0.0897655 | 0.0922296 | 0.0381336 | 0.129329  | 0.0253074 |
| LOC10050594 | 2.71834   | 1.92271   | 0.82312   | 4.08397   | 2.07759   | 3.04912   |
| NECAB3      | 11.6091   | 17.5706   | 12.6412   | 16.3608   | 12.8705   | 15.7664   |
| SMARCD2     | 62.9044   | 69.2487   | 62.7083   | 78.6306   | 72.0096   | 66.5999   |
| UCP2        | 39.9681   | 38.187    | 42.0657   | 47.6986   | 37.4858   | 49.2504   |
| ANKS6       | 3.02163   | 2.84807   | 2.91214   | 2.74977   | 2.76381   | 2.1235    |
| AK3         | 43.0029   | 39.9679   | 36.8385   | 31.7409   | 34.4643   | 31.2374   |
| ANXA10      | 0.0748734 | 0         | 0         | 0         | 0         | 0         |
| CTSF        | 47.589    | 60.7098   | 56.7681   | 61.3942   | 62.111    | 49.3086   |
| IFI44       | 46.2168   | 44.6045   | 12.7097   | 4.52886   | 14.9706   | 5.32635   |
| KIAA1279    | 14.2548   | 12.2881   | 11.3905   | 10.1503   | 12.7358   | 12.6583   |
| LOC647323   | 0         | 0         | 0.0498803 | 0         | 0.0839334 | 0         |
| MIR548S     | 0         | 0         | 0         | 0         | 0         | 0         |
| ZNF592      | 8.07954   | 7.53269   | 8.88495   | 7.83316   | 8.42974   | 6.84467   |
| LOC10050720 | 0         | 0         | 0.0988803 | 0         | 0         | 0         |

|             |           |           |           |           |           |           |
|-------------|-----------|-----------|-----------|-----------|-----------|-----------|
| UCK2        | 11.9627   | 9.84845   | 10.0802   | 11.2328   | 11.1789   | 10.6321   |
| C9orf116    | 2.56094   | 2.64195   | 3.17263   | 2.62311   | 2.32276   | 3.36477   |
| MIPEP       | 17.6268   | 18.4214   | 14.9209   | 13.3428   | 13.1906   | 12.0749   |
| CWH43       | 17.7486   | 16.813    | 17.0579   | 20.5056   | 15.0288   | 19.1387   |
| SLC4A3      | 3.11034   | 4.21062   | 3.12187   | 5.49476   | 5.01057   | 7.93915   |
| LOC10050681 | 1.14805   | 0.85263   | 0.625739  | 0.344961  | 0.877442  | 1.00159   |
| SRRM5       | 1.86078   | 1.23533   | 1.07926   | 0.947414  | 1.23911   | 1.48442   |
| C21orf81    | 0         | 0         | 0         | 0         | 0         | 0         |
| LOC10050696 | 2.21551   | 0.301356  | 1.93518   | 0.640101  | 0.868351  | 0.955808  |
| C12orf45    | 23.3263   | 28.2324   | 24.6872   | 18.926    | 17.453    | 21.5923   |
| CD44        | 188.099   | 192.771   | 192.75    | 196.144   | 202.738   | 177.206   |
| RIF1        | 6.50116   | 4.2035    | 5.96435   | 4.09855   | 5.41425   | 4.38379   |
| LOC10029436 | 0.818368  | 0.738996  | 1.04025   | 0.952842  | 1.03155   | 0.867878  |
| VASH1       | 9.25096   | 11.4339   | 8.26429   | 8.17992   | 15.5941   | 12.0438   |
| LOC646471   | 4.72905   | 4.0287    | 6.93421   | 5.01028   | 9.54778   | 8.22469   |
| OGN         | 7.934     | 5.84038   | 14.1045   | 3.94427   | 9.37487   | 7.53915   |
| TMEM61      | 2.19595   | 2.5887    | 4.11629   | 4.61488   | 2.79723   | 2.4762    |
| SPACA5B     | 0         | 0         | 0         | 0.113871  | 0.0772378 | 0         |
| LOC10050563 | 0.0530197 | 0.0468766 | 0.0401362 | 0.0995692 | 0.0337685 | 0.132158  |
| DIO3OS      | 0.455774  | 0.98223   | 0.495971  | 0.775685  | 1.59657   | 1.29584   |
| LOC646890   | 1.20791   | 0.920655  | 1.28234   | 0.795306  | 0.742798  | 0.692267  |
| LRRC70      | 1.7236    | 2.12543   | 1.85415   | 1.3203    | 1.90665   | 1.15887   |
| CYR61       | 10.9557   | 6.00002   | 25.3506   | 16.4512   | 9.66147   | 5.83206   |
| ZNF763      | 2.32175   | 2.42304   | 2.66039   | 2.64482   | 3.53932   | 3.4866    |
| XCL2        | 1.05321   | 0.523789  | 0.622879  | 0         | 0.838494  | 0.328158  |
| CLIC1       | 171.743   | 193.643   | 186.962   | 200.222   | 195.916   | 187.193   |
| CXCR2P1     | 1.15261   | 0.849218  | 0.0363554 | 0.045095  | 0.45936   | 0.179564  |
| MDM2        | 13.3331   | 10.4664   | 12.6531   | 9.72596   | 12.3022   | 11.298    |
| HEXIM1      | 20.2105   | 24.438    | 21.8411   | 21.3281   | 23.8797   | 20.4327   |
| NUDT16      | 12.8469   | 13.8206   | 13.6914   | 12.453    | 14.3898   | 10.3193   |
| PLEKHG4     | 8.09036   | 12.3537   | 11.8898   | 12.5433   | 15.5236   | 14.3855   |
| NUP98       | 15.1239   | 11.5959   | 12.3732   | 11.7916   | 12.664    | 10.8934   |
| TREX2       | 8.15947   | 8.9392    | 9.19801   | 15.9062   | 15.6469   | 13.209    |
| ZNF326      | 13.5141   | 11.6668   | 12.9501   | 10.5002   | 13.3116   | 13.1241   |
| LOC10050586 | 0         | 0         | 0         | 0         | 0         | 0         |
| IFI35       | 22.7252   | 31.0443   | 11.1989   | 9.37222   | 16.8577   | 10.2184   |
| CLRN2       | 0         | 0         | 0         | 0         | 0         | 0         |
| SPTB        | 1.91131   | 1.69814   | 2.11354   | 2.34888   | 2.6382    | 2.99246   |
| LOC729305   | 0.0532102 | 0.0235226 | 0.0805609 | 0         | 0         | 0.0331584 |
| PTPN20B     | 2.39701   | 1.83056   | 1.74482   | 1.44736   | 1.8675    | 2.07619   |
| HIST1H4H    | 6.35253   | 3.57414   | 0.874345  | 1.08453   | 0.735629  | 5.39813   |
| FOXI1       | 9.59294   | 4.08147   | 6.25121   | 9.39606   | 4.54196   | 6.90416   |
| LOC285359   | 9.24669   | 6.7606    | 10.0605   | 6.76577   | 5.65984   | 8.23129   |

|             |           |          |           |           |           |           |
|-------------|-----------|----------|-----------|-----------|-----------|-----------|
| LOC10028736 | 0.506377  | 0.223853 | 0         | 0.47548   | 0.967542  | 0.946657  |
| RASSF9      | 2.21731   | 1.85723  | 2.03189   | 1.42454   | 1.74669   | 2.7271    |
| LOC10012926 | 9.45405   | 9.83373  | 6.68326   | 5.74407   | 7.61522   | 6.6711    |
| ANXA8       | 60.5133   | 82.6971  | 66.0259   | 79.4963   | 97.3388   | 87.6721   |
| PNMA6C      | 0.254969  | 0.31972  | 0.553212  | 0.44593   | 0.653516  | 0.582298  |
| ADRA1B      | 0.40722   | 0.76008  | 0.753543  | 0.722259  | 0.461085  | 0.281958  |
| DHX58       | 8.02771   | 10.3917  | 8.69392   | 7.39363   | 11.4979   | 7.42002   |
| MIR4438     | 0         | 0        | 0         | 0         | 0         | 0         |
| PNMA6D      | 0.184411  | 0.212957 | 0.463467  | 0.311687  | 0.450102  | 0.325729  |
| RASAL1      | 16.2388   | 16.0433  | 15.7901   | 16.194    | 14.7291   | 22.5259   |
| OPALIN      | 0         | 0        | 0         | 0         | 0         | 0         |
| ANXA2P1     | 21.6701   | 19.7377  | 23.1518   | 16.6622   | 17.2913   | 22.8801   |
| REXO1       | 8.63802   | 15.1874  | 12.9156   | 15.3196   | 16.4482   | 13.7885   |
| CDH17       | 0.190705  | 0.191246 | 0         | 0.0248706 | 0.0674783 | 0         |
| PODXL       | 21.1771   | 16.6526  | 15.7356   | 15.3031   | 13.4774   | 11.4026   |
| ZDBF2       | 1.60744   | 0.961158 | 1.84988   | 1.08186   | 1.49722   | 1.14644   |
| LOC10065286 | 0.163112  | 0.126225 | 0.0788451 | 0.174987  | 0.250895  | 0.199305  |
| FAM131C     | 0.99327   | 1.31728  | 0.986883  | 1.45729   | 2.13509   | 2.12769   |
| LST1        | 16.3464   | 19.3501  | 12.9019   | 12.3525   | 31.3714   | 15.6511   |
| CGREF1      | 4.16067   | 5.67491  | 4.69823   | 4.14326   | 4.04806   | 3.46347   |
| WDR45L      | 37.6122   | 43.2272  | 37.3943   | 44.8862   | 43.7738   | 34.6364   |
| WDR53       | 6.25866   | 6.13498  | 6.74627   | 5.36576   | 8.70892   | 8.81769   |
| C1orf227    | 0         | 0        | 0         | 0         | 0.40329   | 0         |
| DNAJC30     | 8.39454   | 10.0249  | 7.46905   | 6.76163   | 8.23518   | 7.68554   |
| PRKX        | 7.48362   | 6.76944  | 9.9973    | 8.81326   | 11.4352   | 9.66984   |
| EPHX3       | 51.0974   | 48.7544  | 45.5792   | 51.3551   | 69.7764   | 71.0996   |
| NOL9        | 5.76614   | 7.14481  | 6.99905   | 8.48153   | 7.54397   | 6.12439   |
| LOC390705   | 0         | 0        | 0         | 0         | 0         | 0         |
| TCF23       | 0         | 0        | 0         | 0         | 0         | 0         |
| DDX18       | 17.1278   | 14.2931  | 16.5664   | 13.8375   | 15.6763   | 12.4549   |
| GTF2H2      | 4.2337    | 3.85333  | 5.37744   | 2.99417   | 2.76441   | 3.26745   |
| SNORD115-10 | 0         | 0        | 0         | 0         | 0         | 0         |
| CPLX2       | 0.0206817 | 0        | 0.0156562 | 0         | 0         | 0.0687404 |
| FAM133B     | 7.66707   | 7.27033  | 6.3218    | 6.72983   | 7.36559   | 7.17093   |
| MGC39372    | 0.533678  | 1.25825  | 0.740662  | 1.08575   | 1.13301   | 0.609704  |
| SH2D6       | 0         | 0        | 0         | 0.127524  | 0.0864986 | 0.0846315 |
| DKFZp434J02 | 4.93725   | 8.32845  | 4.77026   | 7.93      | 5.79261   | 4.73648   |
| ZNF678      | 0.962811  | 0.704532 | 0.896365  | 0.685911  | 1.1347    | 0.82751   |
| GBAS        | 55.477    | 42.584   | 39.7789   | 34.8635   | 36.46     | 32.2956   |
| MFI2-AS1    | 7.52333   | 9.64811  | 6.35735   | 8.71148   | 8.86464   | 9.06278   |
| STARD6      | 0         | 0        | 0         | 0.38642   | 0         | 0         |
| RPA4        | 0         | 0.121277 | 0         | 0.0644003 | 0.0873644 | 0.213697  |
| TPD52       | 22.5085   | 13.1584  | 18.9628   | 16.3747   | 18.48     | 17.9122   |

|             |           |           |            |            |           |           |
|-------------|-----------|-----------|------------|------------|-----------|-----------|
| VWA5B2      | 0         | 0.0646031 | 0.036815   | 0.114115   | 0.0775673 | 0.0910308 |
| LOC10028815 | 26.7672   | 59.4324   | 19.4404    | 27.7606    | 54.6777   | 38.1594   |
| GTF2F1      | 26.3432   | 31.4621   | 26.6989    | 30.5953    | 32.9777   | 33.6934   |
| LOC283143   | 1.99968   | 2.69216   | 2.88992    | 2.85917    | 1.91041   | 2.12406   |
| SSX2        | 0         | 0         | 0          | 0          | 0         | 0         |
| DUX4L9      | 0         | 0.098133  | 0.00526765 | 0.00762294 | 0.0405205 | 0.0303538 |
| SLC12A5     | 0.0364054 | 0.0148768 | 0.0122703  | 0          | 0.0306082 | 0.0302033 |
| C3orf14     | 17.0063   | 16.6574   | 16.0293    | 17.3777    | 15.1852   | 14.7536   |
| RAPGEF4     | 2.86802   | 2.45191   | 4.3956     | 2.65347    | 4.63387   | 3.11642   |
| LOC339298   | 0         | 0         | 0          | 0          | 0         | 0         |
| TSPAN8      | 15.4224   | 4.2778    | 6.56232    | 8.6131     | 6.80535   | 7.53783   |
| MIR1260B    | 0         | 0         | 0          | 0          | 0         | 0         |
| MIR4330     | 0         | 0         | 0          | 0          | 0         | 0         |
| FNDC1       | 0.393205  | 0.283268  | 0.143317   | 0.615356   | 0.25971   | 0.59896   |
| TMEM115     | 24.8306   | 30.0236   | 26.338     | 30.4577    | 30.9107   | 33.913    |
| ASH2L       | 16.8243   | 16.6853   | 17.0274    | 14.5428    | 17.1805   | 15.7757   |
| EDNRA       | 9.5999    | 7.85741   | 7.60817    | 7.4052     | 10.9057   | 8.99196   |
| IP6K2       | 88.4202   | 101.266   | 96.1124    | 113.28     | 165.364   | 173.882   |
| LOC10012824 | 0         | 0         | 0.158859   | 0          | 0.33414   | 0.261542  |
| MIR938      | 0         | 0         | 0          | 0          | 0         | 0         |
| SLC2A14     | 3.77416   | 2.71893   | 2.53973    | 1.22545    | 2.07745   | 2.00347   |
| VAR52       | 9.1528    | 13.1547   | 11.0013    | 12.2892    | 13.5101   | 12.7455   |
| SNORD114-2  | 0         | 0         | 0          | 0          | 0         | 0         |
| ZNF85       | 3.3685    | 3.80392   | 3.56903    | 3.38988    | 4.59364   | 4.02128   |
| SNORA72     | 209.731   | 324.504   | 39.6919    | 147.7      | 100.184   | 196.043   |
| FLJ45445    | 6.19399   | 11.1061   | 7.24641    | 10.46      | 8.76677   | 7.44249   |
| TBC1D3C     | 4.23564   | 7.55115   | 3.98024    | 5.39811    | 7.69608   | 7.38205   |
| ABCD1       | 4.22676   | 5.77112   | 3.78697    | 4.22006    | 3.83361   | 4.86779   |
| OGDH        | 51.4432   | 42.7452   | 49.4724    | 44.5431    | 43.6738   | 46.3616   |
| NDUFV3      | 33.0854   | 39.2561   | 34.0327    | 38.0802    | 23.1737   | 19.9949   |
| ERCC4       | 2.48239   | 1.72854   | 2.50834    | 1.90853    | 2.06494   | 1.68658   |
| PSME1       | 208.953   | 212.508   | 121.481    | 128.504    | 162.095   | 130.232   |
| RAN         | 118.626   | 108.597   | 89.2295    | 102.586    | 86.4644   | 96.7506   |
| NDFIP1      | 51.3166   | 34.4684   | 45.3111    | 39.2964    | 33.8306   | 31.508    |
| FADD        | 16.2766   | 16.98     | 14.1121    | 18.4036    | 16.357    | 14.7054   |
| FLJ41733    | 0.254585  | 0         | 0          | 0          | 0.162147  | 0         |
| LOC10050645 | 0.898913  | 1.1294    | 1.39678    | 0.710792   | 1.28574   | 0.992672  |
| ZNF554      | 2.75502   | 3.48977   | 3.4091     | 3.90525    | 5.34842   | 3.79679   |
| CRYGB       | 0         | 0         | 0          | 0          | 0         | 0         |
| LOC10013207 | 0.710762  | 0.586516  | 0.860881   | 0.0889858  | 0.633763  | 0.5315    |
| DDTL        | 16.1396   | 21.1187   | 15.0587    | 17.2181    | 16.0475   | 17.0606   |
| FABP12      | 0         | 0         | 0          | 1.24687    | 0         | 0         |
| MIR4720     | 0         | 0         | 0          | 0          | 0         | 0         |



|             |          |           |            |           |           |           |
|-------------|----------|-----------|------------|-----------|-----------|-----------|
| MAP4K4      | 16.8677  | 14.6832   | 16.7204    | 15.3979   | 14.7872   | 13.5592   |
| RBM6        | 84.46    | 108.733   | 59.7309    | 67.0754   | 102.507   | 107.791   |
| CYLD        | 11.2832  | 9.46207   | 10.5107    | 6.76474   | 12.2247   | 8.2913    |
| LOC400548   | 0.154617 | 0.136703  | 0.273107   | 0.290366  | 0.164128  | 0.192702  |
| TTC9        | 4.29808  | 2.57689   | 3.65863    | 3.74137   | 4.66428   | 5.01191   |
| SCARNA1     | 0        | 0         | 0          | 0         | 0         | 0         |
| MYOZ1       | 1.46092  | 0.799593  | 0.315978   | 0.326614  | 0.487387  | 0.346812  |
| RBM39       | 103.941  | 100.856   | 96.6023    | 91.2145   | 114.182   | 101.768   |
| LOC10065273 | 0.33166  | 0.586465  | 1.63194    | 1.55712   | 0.52809   | 0.310014  |
| MRFAP1L1    | 55.6032  | 49.3385   | 52.1838    | 46.2975   | 57.3024   | 51.9326   |
| HIST1H4L    | 0        | 0         | 0          | 0         | 0         | 0         |
| TMEM161B    | 8.60946  | 6.309     | 7.13392    | 6.34846   | 7.60762   | 7.05674   |
| HADHB       | 137.443  | 112.947   | 112.646    | 104.103   | 93.405    | 92.0784   |
| KIAA0247    | 19.9225  | 15.6133   | 20.5582    | 16.1301   | 23.8907   | 18.0893   |
| FAM117A     | 10.8767  | 14.8239   | 12.8876    | 14.2499   | 16.2371   | 15.9134   |
| TMCO5A      | 0        | 0         | 0          | 0         | 0         | 0         |
| MOGAT3      | 0        | 0         | 0          | 0         | 0         | 0         |
| SULT1A3     | 17.7568  | 22.756    | 9.69791    | 14.4389   | 12.0146   | 9.67645   |
| C12orf24    | 3.61666  | 2.07946   | 1.93849    | 2.81369   | 3.26097   | 2.30835   |
| MIR30C1     | 0        | 0         | 0          | 0         | 0         | 0         |
| LOC10028750 | 1.65E-05 | 0.389277  | 0.851649   | 0.284681  | 0.491727  | 0.41329   |
| LOC10028880 | 0.61206  | 0.941818  | 0.60132    | 0.527173  | 0.732615  | 0.472156  |
| LYPD2       | 11.8429  | 9.19386   | 8.52785    | 5.42455   | 12.3261   | 9.90003   |
| NPTXR       | 1.53236  | 1.60247   | 1.47184    | 1.23773   | 1.80502   | 1.51963   |
| ANAPC13     | 54.4742  | 45.4934   | 38.8858    | 44.7757   | 35.468    | 35.2998   |
| IGF2BP1     | 0        | 0.0451173 | 0.00858429 | 0.0479161 | 0         | 0         |
| LOC10050547 | 0        | 0.101166  | 0          | 0         | 0         | 0         |
| MIR1255B1   | 0        | 0         | 0          | 0         | 0         | 0         |
| MIR4468     | 0        | 0         | 0          | 0         | 0         | 0         |
| ARSK        | 1.94553  | 2.16317   | 2.54389    | 1.93754   | 2.0652    | 1.89203   |
| TREH        | 0        | 0.0497949 | 0.127904   | 0.105768  | 0.0358707 | 0.0350964 |
| LOC10050719 | 0.134062 | 0.138618  | 0.13495    | 0.0208316 | 0.185504  | 0.0557874 |
| RETSAT      | 72.5962  | 69.3229   | 85.7874    | 53.5035   | 44.8134   | 54.0167   |
| NLRP10      | 1.27777  | 0.271134  | 0.735133   | 0.191969  | 0.781267  | 1.05105   |
| PROK2       | 0        | 0         | 0.427181   | 0.0648811 | 0.198041  | 0.172236  |
| DUSP19      | 0.737027 | 0.537768  | 0.933511   | 0.467522  | 0.956089  | 1.00964   |
| DGCR11      | 2.03068  | 1.34655   | 1.15293    | 0.736709  | 1.14638   | 1.32295   |
| C1orf9      | 19.2856  | 13.2234   | 14.9577    | 12.5398   | 15.2114   | 15.6014   |
| MIR3615     | 0        | 0         | 0          | 0         | 0         | 0         |
| FXR2        | 17.9068  | 16.5384   | 17.8641    | 17.3143   | 16.7259   | 15.307    |
| FLJ46906    | 3.407    | 5.40129   | 1.7787     | 6.50856   | 5.76156   | 8.05314   |
| C9orf106    | 0        | 0.259639  | 0.111152   | 0.137873  | 0         | 0         |
| ZBP2        | 0        | 0         | 0          | 0         | 0.0297355 | 0.0290936 |

|             |          |           |           |           |           |           |
|-------------|----------|-----------|-----------|-----------|-----------|-----------|
| FAM197Y5    | 0        | 0         | 0         | 0         | 0         | 0         |
| CGB8        | 0        | 0.325573  | 0.500007  | 0.884214  | 0.307717  | 0.319888  |
| ZNF521      | 4.57858  | 3.32767   | 4.31782   | 3.0058    | 3.97877   | 3.68737   |
| LOC10050610 | 0        | 0         | 0         | 0         | 0         | 0         |
| KRT34       | 6.15822  | 2.94015   | 0.559417  | 51.6953   | 1.02017   | 836.188   |
| TRPM7       | 7.83371  | 6.65384   | 8.11712   | 6.45433   | 8.45014   | 6.65934   |
| TOB1        | 78.4858  | 55.2007   | 76.4515   | 80.0797   | 63.0854   | 65.924    |
| SLC12A4     | 15.491   | 21.5388   | 20.5892   | 19.454    | 25.4332   | 16.5609   |
| BMI1        | 8.9658   | 5.01934   | 5.97549   | 3.41928   | 5.99656   | 3.33345   |
| SGCB        | 9.85347  | 9.43445   | 12.2543   | 8.27159   | 8.31462   | 6.86181   |
| RNF126      | 21.4788  | 42.9686   | 32.5331   | 47.9452   | 38.596    | 38.485    |
| C1orf141    | 0        | 0         | 0         | 0         | 0         | 0         |
| HPVC1       | 0.281491 | 0.0829588 | 0         | 0         | 0         | 0         |
| LOC10065274 | 0        | 0         | 0         | 2.86E-254 | 0         | 0         |
| C12orf65    | 9.13524  | 10.2544   | 7.7909    | 11.5068   | 10.264    | 7.46405   |
| MIR3914-1   | 0        | 0         | 0         | 0         | 0         | 0         |
| F2RL2       | 2.68566  | 1.55746   | 2.31725   | 2.25063   | 3.51299   | 2.4654    |
| SYNE1       | 3.2073   | 2.85357   | 5.17664   | 2.76989   | 5.04189   | 4.26094   |
| PROM1       | 7.03647  | 1.38939   | 1.07833   | 2.78345   | 4.14974   | 3.75642   |
| LOC10050665 | 0        | 0.0341017 | 0.0291982 | 0         | 0.0491317 | 0.0721068 |
| CYFIP2      | 2.37922  | 1.93477   | 2.49027   | 3.47503   | 3.87237   | 6.54397   |
| RTP3        | 0        | 0         | 0         | 0.719113  | 0.195108  | 0         |
| OR8G5       | 0        | 0.197436  | 0         | 0         | 0         | 0         |
| TUBA3E      | 0.03481  | 0.0307768 | 0.105405  | 0.266936  | 0         | 0.0976145 |
| LOC644961   | 9.08605  | 9.80737   | 10.8618   | 9.98915   | 9.33147   | 10.3804   |
| C11orf58    | 46.9302  | 38.221    | 41.7969   | 38.406    | 36.274    | 34.2387   |
| HTR1E       | 0        | 0         | 0         | 0         | 0.096167  | 0.0313637 |
| DNAJB7      | 0.281911 | 0.116507  | 0.0340808 | 0.0828736 | 0.161444  | 0.111761  |
| LOC645359   | 0        | 0         | 0         | 0         | 0.0603749 | 0         |
| KHDRBS1     | 54.7593  | 57.4305   | 58.0795   | 53.0315   | 54.321    | 47.3681   |
| SP2         | 9.96847  | 8.92613   | 10.3429   | 11.2742   | 11.1563   | 9.12935   |
| BTBD1       | 22.8159  | 20.9167   | 20.7605   | 18.0807   | 16.7589   | 16.0303   |
| NPY5R       | 1.24666  | 0.450906  | 1.45848   | 1.01096   | 0.72182   | 0.812175  |
| RAB2B       | 13.6977  | 15.202    | 13.9463   | 15.7215   | 17.2967   | 11.442    |
| MIR4287     | 0        | 0         | 0         | 0         | 0         | 0         |
| LOC202781   | 8.39117  | 14.4808   | 10.4284   | 12.514    | 14.547    | 10.5419   |
| DGAT2L6     | 191.75   | 182.972   | 159.173   | 140.578   | 94.212    | 141.245   |
| ZFP3        | 4.88375  | 4.02776   | 4.90988   | 4.187     | 5.22512   | 4.85973   |
| METTL2B     | 8.44244  | 7.83754   | 9.19593   | 8.27964   | 9.2107    | 7.86223   |
| SLC4A5      | 1.62502  | 1.70276   | 2.1658    | 2.10504   | 2.37646   | 1.51737   |
| C20orf108   | 50.5012  | 48.6144   | 46.5049   | 48.4647   | 45.5473   | 46.9096   |
| LOC440173   | 0.614692 | 0.317025  | 0.620434  | 0.913878  | 0.587251  | 0.638417  |
| LOC10050573 | 0        | 0         | 0         | 0         | 0         | 0         |

|             |           |           |           |           |           |           |
|-------------|-----------|-----------|-----------|-----------|-----------|-----------|
| LOC10013016 | 0         | 0         | 0         | 0         | 0         | 0         |
| BMP15       | 0         | 0         | 0         | 0         | 0         | 0         |
| ARSF        | 4.22836   | 2.40379   | 2.32476   | 2.97811   | 3.46231   | 5.52019   |
| NAV3        | 0.986272  | 0.78651   | 1.39075   | 0.871618  | 1.07773   | 1.03639   |
| EMG1        | 24.8529   | 29.4355   | 19.9557   | 20.9087   | 19.7406   | 20.3439   |
| CGN         | 8.94947   | 4.97456   | 9.07594   | 7.49925   | 11.3518   | 10.6832   |
| MDM4        | 13.6051   | 16.0423   | 15.0948   | 18.1292   | 18.5941   | 15.4943   |
| LOC10065301 | 0.220987  | 0.597384  | 0.662302  | 0.225674  | 1.61E-82  | 1.13E-53  |
| MIR591      | 0         | 0         | 0         | 0         | 0         | 0         |
| PARP15      | 1.47534   | 1.16454   | 1.38842   | 0.358243  | 1.84973   | 0.733011  |
| NEURL1B     | 11.6344   | 14.9298   | 13.8642   | 13.2436   | 15.834    | 15.4644   |
| MTAP        | 7.21379   | 5.58073   | 6.35124   | 5.33792   | 5.00651   | 5.11832   |
| FAU         | 485.362   | 745.965   | 531.778   | 801.236   | 603.461   | 579.46    |
| MAP3K15     | 0.0678078 | 0.0585093 | 0.0697195 | 0         | 0         | 0         |
| SLC34A3     | 0         | 0.227878  | 0.332352  | 0.370587  | 0.372435  | 0.299407  |
| C18orf19    | 4.00781   | 4.15344   | 3.55621   | 3.2257    | 3.31104   | 3.49795   |
| FIBP        | 32.6045   | 41.1346   | 33.5343   | 41.8357   | 34.971    | 38.9992   |
| BAZ1A       | 13.7819   | 13.4163   | 12.5854   | 11.8021   | 14.0109   | 11.9136   |
| SNAR-C2     | 0         | 0         | 0         | 0         | 0         | 0         |
| SNRPA       | 35.7512   | 56.1232   | 35.6077   | 44.1063   | 45.1247   | 38.0119   |
| SYT4        | 0         | 0         | 0.0179972 | 0         | 0         | 0         |
| LOC10028771 | 0         | 0         | 0         | 0         | 0         | 0         |
| LOC10012809 | 0.0796135 | 0         | 0         | 3.25E-11  | 0         | 0         |
| FOXD4L3     | 0.127943  | 0.0586412 | 0.101818  | 0.0999599 | 0.0616782 | 0.109141  |
| LIN54       | 3.78142   | 3.54047   | 3.9704    | 2.86024   | 3.56131   | 3.79714   |
| PSMC4       | 59.7316   | 61.8356   | 48.4797   | 55.0222   | 45.7485   | 55.315    |
| SNORD127    | 0         | 0         | 0         | 0         | 0         | 0         |
| F11R        | 42.7659   | 38.3059   | 43.12     | 42.0714   | 46.8863   | 48.0546   |
| LOC286189   | 0         | 0.248638  | 0.211765  | 0         | 0.311088  | 0.601112  |
| ELL         | 7.04352   | 8.92385   | 8.22702   | 10.0911   | 10.6679   | 9.50244   |
| NSUN2       | 47.0655   | 33.2295   | 36.2725   | 39.0685   | 32.7023   | 30.9735   |
| SNORD114-20 | 0         | 0         | 0         | 0         | 0         | 0         |
| ABCC8       | 0.271211  | 0.308299  | 0.102654  | 0.0727609 | 0.123383  | 0.0482878 |
| TRIM10      | 0.56153   | 1.04839   | 0.0943581 | 0.263342  | 0.213101  | 1.00783   |
| ZNF75A      | 7.43242   | 9.10101   | 8.19479   | 9.61211   | 10.5882   | 9.05824   |
| LOC145757   | 0.892732  | 0.986622  | 0.168951  | 0.419131  | 0.42644   | 0.278156  |
| NOS2        | 0.0924763 | 0.0613213 | 0.507537  | 0.499294  | 0.0588987 | 0.0720341 |
| MICA        | 25.9867   | 37.4706   | 32.6344   | 39.6053   | 27.4001   | 20.0248   |
| RMI2        | 10.8388   | 10.9233   | 7.40175   | 10.3198   | 5.5516    | 7.55724   |
| GBP6        | 2.26112   | 1.63088   | 0.645635  | 0.856714  | 0.783225  | 0.741598  |
| MYOD1       | 0         | 0         | 0         | 0         | 0         | 0.0722658 |
| IQGAP1      | 50.7204   | 34.4405   | 50.7581   | 41.3829   | 43.8227   | 42.0465   |
| AAGAB       | 23.2498   | 21.5481   | 17.7595   | 16.3322   | 18.7611   | 18.4654   |

|             |          |           |           |          |           |          |
|-------------|----------|-----------|-----------|----------|-----------|----------|
| ELMOD1      | 11.5701  | 5.00959   | 13.4357   | 10.8004  | 16.0418   | 13.5851  |
| NRG2        | 4.8301   | 4.60467   | 3.45475   | 5.26303  | 2.22008   | 3.83217  |
| EIF3I       | 133.926  | 133.85    | 121.064   | 141.062  | 112.381   | 119.143  |
| LOC10012850 | 0        | 0         | 0         | 0        | 0.0338074 | 0        |
| PHOSPHO1    | 0.609661 | 0.627376  | 0.396319  | 0.711409 | 0.420095  | 0.287067 |
| KRT5        | 1758.01  | 2619.7    | 1818.59   | 2996.81  | 2120.5    | 2751.01  |
| SLC35B1     | 52.2441  | 51.9018   | 43.9354   | 46.559   | 39.264    | 42.1456  |
| FBXO46      | 10.8056  | 12.7872   | 9.58939   | 12.4566  | 12.9385   | 14.5032  |
| ZNF703      | 8.80656  | 12.6994   | 12.8341   | 15.7425  | 15.2071   | 14.38    |
| AGGF1       | 11.1737  | 8.6822    | 9.77613   | 7.76806  | 9.63477   | 9.06526  |
| DCTN4       | 22.1874  | 18.6614   | 21.0733   | 18.2619  | 19.8947   | 19.2127  |
| SPANXB1     | 0        | 0         | 0         | 0        | 0.0769881 | 0        |
| CARTPT      | 0.131739 | 0         | 0         | 0        | 0         | 0        |
| LOC10050656 | 7.80327  | 6.10612   | 7.95189   | 6.48491  | 6.88146   | 5.98633  |
| LOC729296   | 0        | 0         | 0         | 0        | 0.171616  | 0.167912 |
| IFIT2       | 6.46986  | 3.68085   | 3.23675   | 1.47915  | 3.58321   | 1.99834  |
| ARFGAP1     | 29.9443  | 48.451    | 29.1347   | 33.6836  | 37.5818   | 34.8951  |
| TONSL       | 2.91827  | 5.69153   | 3.96347   | 5.41998  | 5.52133   | 5.78993  |
| NOL4        | 0.32824  | 0.0286625 | 0.0981646 | 0.308212 | 0.148663  | 0.107744 |
| CD9         | 295.978  | 260.303   | 258.653   | 316.396  | 246.362   | 273.423  |
| C11orf68    | 23.3636  | 35.8793   | 27.1976   | 34.7184  | 33.5586   | 29.1368  |
| OR2AT4      | 0        | 0         | 0         | 0        | 0         | 0        |
| WDR96       | 0.268749 | 0.269293  | 0.189882  | 0.151411 | 0.319514  | 0.200968 |
| DHX32       | 16.881   | 13.4568   | 15.3285   | 15.2146  | 15.0776   | 17.1436  |
| LOC10050756 | 0        | 0         | 0         | 0        | 0         | 0        |
| MIR378F     | 0        | 0         | 0         | 0        | 0         | 0        |
| PRKCZ       | 10.3679  | 14.7418   | 11.4484   | 18.8531  | 16.7436   | 18.4414  |
| SNORA16B    | 0        | 0         | 37.3114   | 0        | 0         | 0        |
| HIATL2      | 5.97578  | 3.52227   | 5.7459    | 6.67509  | 5.69085   | 6.33942  |
| C19orf68    | 2.84874  | 2.35791   | 2.89064   | 2.50418  | 2.74087   | 2.07738  |
| ERI2        | 8.48142  | 7.42457   | 8.15105   | 5.12837  | 7.53434   | 6.54523  |
| ZNF133      | 16.4106  | 24.6598   | 17.2068   | 19.4707  | 21.0826   | 20.4572  |
| LOC10050920 | 2.76583  | 3.63501   | 3.28209   | 4.00089  | 3.18987   | 2.84152  |
| DIRC2       | 7.71339  | 7.57744   | 7.60647   | 6.46575  | 7.20906   | 10.7551  |
| LNP1        | 1.15492  | 1.06416   | 1.08536   | 0.908688 | 1.03525   | 1.09393  |
| MEI1        | 0.17037  | 0.215784  | 0.221093  | 0.274243 | 0.635557  | 0.182001 |
| UBE2F       | 15.618   | 15.7114   | 13.0211   | 12.2076  | 10.9313   | 13.301   |
| AXDND1      | 0.996165 | 0.975962  | 0.957914  | 0.834261 | 0.58302   | 0.40266  |
| CAV2        | 63.3544  | 53.3437   | 65.4218   | 48.2125  | 41.9155   | 31.5703  |
| RBM23       | 30.3786  | 29.8978   | 23.3019   | 29.4854  | 29.0432   | 27.1503  |
| SKAP1       | 3.66344  | 4.50192   | 1.79737   | 1.65738  | 3.80222   | 2.07507  |
| BCAT2       | 80.0668  | 119.958   | 101.284   | 121.193  | 64.296    | 90.6592  |
| CTNNA1      | 10.3844  | 14.9606   | 12.1204   | 13.1305  | 9.35428   | 7.01251  |

|             |           |           |           |           |           |           |
|-------------|-----------|-----------|-----------|-----------|-----------|-----------|
| NPY         | 0         | 0         | 0.202206  | 0.250815  | 0.170126  | 0         |
| MAFB        | 32.3676   | 28.9544   | 36.332    | 40.3584   | 32.8087   | 30.511    |
| TRIM13      | 9.05667   | 8.01032   | 7.79027   | 7.64263   | 8.83691   | 7.72345   |
| PHF8        | 9.75091   | 8.55165   | 10.5184   | 8.85719   | 11.2418   | 9.01779   |
| ANGPTL2     | 26.5227   | 33.0483   | 38.8449   | 25.3174   | 27.028    | 19.3196   |
| OOEP        | 0.993384  | 0.351315  | 0         | 0.186554  | 0.253077  | 0         |
| PDILT       | 0         | 0         | 0.0365265 | 0         | 0         | 0         |
| GPRIN2      | 6.65501   | 8.06505   | 12.5947   | 8.94246   | 9.82919   | 6.89995   |
| KPNA7       | 0         | 0.166452  | 0         | 0         | 0.0399689 | 0.0782123 |
| RAB3GAP1    | 21.287    | 16.635    | 18.4461   | 16.9485   | 18.9601   | 16.6151   |
| FEM1A       | 16.3228   | 17.2415   | 21.2677   | 23.8975   | 20.8246   | 22.007    |
| SLC6A10P    | 0.0855739 | 0.0703442 | 0.128846  | 0.694175  | 0.0648625 | 0.0926595 |
| LOC1005064  | 0         | 0         | 0         | 0         | 0         | 0         |
| FLYWCH2     | 17.5214   | 27.0359   | 22.0112   | 23.8022   | 21.4849   | 18.8223   |
| ROR2        | 1.73507   | 2.08041   | 1.81725   | 2.3657    | 3.08816   | 2.16245   |
| OSBPL9      | 24.3612   | 22.1998   | 23.6772   | 19.7841   | 24.8685   | 23.9095   |
| PPARG       | 40.7947   | 36.0466   | 50.5362   | 27.7732   | 26.7339   | 22.6038   |
| OR1J4       | 0         | 0         | 0         | 0         | 0         | 0.0790473 |
| ADH4        | 0.209075  | 0.0924257 | 0.435246  | 0.441717  | 0.0665807 | 0.0977152 |
| KLHL13      | 5.46284   | 1.86408   | 1.33002   | 1.74042   | 1.58737   | 1.41217   |
| LOC1005074  | 0.828192  | 0.300404  | 0.369737  | 0.498499  | 0.825033  | 0.820512  |
| LOC728723   | 2.68638   | 1.23155   | 1.50638   | 2.89617   | 1.01391   | 0.558013  |
| HADH        | 96.9535   | 87.8281   | 90.0862   | 74.8598   | 72.1361   | 69.5379   |
| FLJ45139    | 0.127865  | 0.02261   | 0.0193588 | 0.0240126 | 0         | 0         |
| KLHDC4      | 9.06931   | 11.5918   | 11.1386   | 14.7688   | 13.6443   | 12.8228   |
| F10         | 12.9885   | 13.0271   | 11.2068   | 6.81927   | 15.2551   | 9.70396   |
| LOC1001280  | 0.114156  | 0.10093   | 0         | 0.321581  | 0.363572  | 0.497996  |
| MAGEA2B     | 0         | 0         | 0         | 0         | 0         | 0         |
| ZAP70       | 6.34894   | 9.65575   | 5.69113   | 3.53231   | 11.964    | 5.09295   |
| KIAA0391    | 11.7059   | 8.88569   | 10.3481   | 11.1363   | 10.1778   | 10.342    |
| MIR611      | 0         | 0         | 0         | 0         | 0         | 0         |
| ARHGAP19-SI | 1.05E-159 | 0         | 2.98E-129 | 0         | 0         | 0         |
| COQ6        | 17.0973   | 17.307    | 13.2943   | 14.1303   | 15.5147   | 15.2      |
| ZAR1L       | 0         | 0         | 0         | 0.0975258 | 0         | 0         |
| MAP3K4      | 9.28969   | 8.34362   | 9.07402   | 9.51205   | 10.6263   | 9.90018   |
| BRAF        | 1.78988   | 1.28391   | 2.45425   | 2.02949   | 1.76375   | 1.87299   |
| SEPHS1P1    | 0.566351  | 0.292093  | 0.66096   | 0.443162  | 0.526038  | 0.529389  |
| MIR494      | 0         | 0         | 0         | 0         | 0         | 0         |
| CNR2        | 0         | 0         | 0.0447659 | 0         | 0.150655  | 0.0368507 |
| FAM168B     | 31.1598   | 29.1368   | 32.0115   | 31.2948   | 29.9329   | 28.7108   |
| LOC1002873  | 0         | 0         | 0         | 0         | 0         | 0         |
| DGCR8       | 18.1101   | 22.6741   | 17.445    | 20.9846   | 21.8712   | 18.8761   |
| PIK3R6      | 1.69831   | 1.96355   | 2.52181   | 1.74802   | 5.17949   | 3.29705   |

|          |           |           |           |           |           |           |
|----------|-----------|-----------|-----------|-----------|-----------|-----------|
| REST     | 7.97524   | 5.74039   | 7.94889   | 5.43144   | 7.65777   | 7.05117   |
| LGALS13  | 0         | 0         | 0         | 0         | 0         | 0         |
| ST13P4   | 27.1278   | 25.2812   | 27.8521   | 28.6645   | 21.7777   | 20.8923   |
| CDCA7L   | 9.82365   | 14.2244   | 12.521    | 15.1776   | 14.0593   | 11.8196   |
| NDP      | 0.309407  | 0.729489  | 1.09304   | 1.16211   | 1.44513   | 1.79955   |
| PRPF31   | 26.3473   | 36.3174   | 29.3947   | 29.7498   | 33.8826   | 32.2941   |
| BRD7P3   | 0         | 0         | 0         | 0         | 0         | 0.0254504 |
| RBL1     | 1.52488   | 1.06664   | 1.70546   | 1.15417   | 1.56421   | 1.29049   |
| ZNF808   | 2.3544    | 1.3614    | 2.95538   | 1.3248    | 2.02473   | 1.7395    |
| TAC3     | 0.648174  | 0.942195  | 0.65423   | 1.27067   | 1.42127   | 1.25911   |
| DUSP3    | 24.4899   | 22.3623   | 22.1145   | 22.7517   | 21.4337   | 17.6157   |
| TSGA10IP | 0         | 0.107958  | 0.138651  | 0         | 0.233308  | 0.0760908 |
| SBNO2    | 23.7709   | 33.5344   | 23.2272   | 22.616    | 32.0888   | 23.285    |
| MAP2K4   | 13.3641   | 12.0238   | 13.1655   | 13.4081   | 12.8591   | 12.9074   |
| DENND5A  | 12.3545   | 12.3657   | 11.7346   | 9.01056   | 10.5657   | 7.74719   |
| WDR46    | 20.9602   | 30.419    | 22.7925   | 25.5292   | 24.0416   | 22.5694   |
| DISC2    | 0         | 0         | 0.0386553 | 0.0236508 | 0         | 0         |
| NDUFAF2  | 28.3531   | 24.9063   | 24.233    | 21.642    | 16.5437   | 19.7203   |
| GOLGA8IP | 0.387162  | 0.0597964 | 0.185005  | 0.12094   | 0.0844366 | 0.0907318 |
| MIR4706  | 0         | 0         | 0         | 0         | 0         | 0         |
| PTGR1    | 44.5527   | 39.586    | 38.0446   | 31.6405   | 32.086    | 34.8525   |
| CDCP2    | 0         | 0.0325247 | 0.027848  | 0         | 0.0468597 | 0.0229241 |
| ABCG5    | 0.0365394 | 0.193835  | 0.055321  | 0.0343099 | 0.0930885 | 0.0455396 |
| MIR24-1  | 0         | 0         | 0         | 0         | 0         | 0         |
| CT45A5   | 0         | 0         | 0         | 0         | 0         | 0         |
| ARMCX5   | 6.28279   | 6.9962    | 7.68893   | 6.339     | 8.0041    | 6.011     |
| CDK20    | 3.74825   | 5.3455    | 4.34068   | 5.16818   | 6.13016   | 4.76098   |
| C2orf51  | 0         | 0         | 0         | 0         | 0         | 0         |
| KCNJ13   | 0.263529  | 0.595544  | 0.331724  | 0.907733  | 0.801756  | 0.65295   |
| RGS2     | 22.1866   | 16.4544   | 30.5762   | 52.4256   | 33.9035   | 22.3339   |
| RNF112   | 3.39906   | 2.76157   | 2.13267   | 2.09902   | 3.45211   | 2.11815   |
| PDLIM7   | 39.0262   | 60.6124   | 34.6347   | 52.6924   | 49.9592   | 60.9541   |
| HYDIN    | 0.0738621 | 0.181072  | 0.179196  | 0.308495  | 0.246683  | 0.261585  |
| GUSBP1   | 5.84278   | 6.10909   | 5.35877   | 4.32204   | 6.91616   | 5.40768   |
| FAM83B   | 6.68854   | 4.33847   | 8.91986   | 4.84239   | 6.17099   | 5.80406   |
| MSMB     | 10.7371   | 9.64337   | 67.5655   | 22.0011   | 54.411    | 29.5748   |
| DOT1L    | 8.63822   | 10.8686   | 10.157    | 11.4228   | 12.0371   | 10.7978   |
| ARSA     | 14.2554   | 20.7594   | 15.423    | 18.0027   | 21.3132   | 17.5224   |
| BFSP2    | 0         | 0.231213  | 0         | 0         | 0.124919  | 0         |
| KIAA0586 | 2.78049   | 2.01826   | 2.93639   | 2.28851   | 2.98431   | 2.47068   |
| CRISP1   | 0         | 0         | 0         | 0         | 0         | 0         |
| DGCR10   | 0.518081  | 1.25965   | 1.07852   | 0.851322  | 0.577445  | 0.403558  |
| CHSY1    | 9.04599   | 8.50599   | 9.28087   | 8.77384   | 9.35387   | 7.54705   |

|             |           |           |           |           |           |           |
|-------------|-----------|-----------|-----------|-----------|-----------|-----------|
| POLE4       | 54.0486   | 61.3428   | 48.6048   | 53.8103   | 41.2598   | 41.3247   |
| RGS7BP      | 0.383806  | 0.226225  | 0.755413  | 0.360388  | 0.162966  | 0.255117  |
| UBE2V1      | 74.7657   | 80.0082   | 69.8478   | 82.8866   | 63.4047   | 64.3298   |
| TCL1A       | 0.0784172 | 0         | 0.0593623 | 0         | 0.555066  | 0.195491  |
| MIR1285-1   | 0         | 0         | 0         | 0         | 0         | 0         |
| PRKCI       | 9.56491   | 9.19054   | 10.0681   | 10.4101   | 11.6678   | 11.7854   |
| RACGAP1P    | 0.143098  | 0.158148  | 0.270814  | 0.268733  | 0.364939  | 0.28981   |
| PRIM1       | 5.40003   | 4.05494   | 3.47188   | 3.88973   | 5.22964   | 4.28701   |
| ARPC5       | 95.0314   | 97.5373   | 86.7099   | 91.4512   | 82.1383   | 71.4799   |
| CD83        | 8.03168   | 6.99297   | 6.26519   | 8.19238   | 9.48001   | 4.67565   |
| LOC10028836 | 298.922   | 320.86    | 247.646   | 307.222   | 296.722   | 301.955   |
| HELB        | 0.175576  | 0.206978  | 0.575953  | 0.137386  | 0.521852  | 0.164118  |
| PLS1        | 2.00902   | 0.865264  | 1.20079   | 1.76238   | 1.0776    | 1.1696    |
| ESYT2       | 25.331    | 24.1531   | 28.7615   | 28.7447   | 27.245    | 23.3824   |
| CRYGC       | 0         | 0         | 0.168543  | 0         | 0         | 0.138743  |
| OR4N2       | 0         | 0         | 0         | 0         | 0         | 0         |
| GAGE12I     | 0         | 0         | 0         | 0         | 0         | 0         |
| LIN28A      | 0         | 0         | 0         | 0         | 0         | 0.0151348 |
| ATP6V0E2    | 9.80549   | 10.0224   | 12.8427   | 15.5832   | 11.281    | 15.0538   |
| LOC285758   | 0.545714  | 0.67548   | 0.413108  | 0.409933  | 0.532938  | 0.317395  |
| TPRG1L      | 45.1917   | 50.2026   | 49.927    | 59.8152   | 46.1747   | 44.9702   |
| PCDHA12     | 0.0127944 | 1.36E-14  | 1.11E-21  | 0.0516873 | 0.0292631 | 1.72E-22  |
| LINC00479   | 0.0507455 | 0.0897319 | 0.192073  | 0.142948  | 0.323201  | 0.189735  |
| FAM108C1    | 20.9464   | 16.3139   | 16.345    | 17.8106   | 18.217    | 17.4218   |
| LINC00341   | 17.8162   | 22.5341   | 24.9669   | 18.422    | 21.3661   | 14.4726   |
| CMPK1       | 98.9157   | 76.4513   | 85.356    | 67.2688   | 65.8188   | 60.7696   |
| FLNB-AS1    | 1.66379   | 0.641957  | 1.89238   | 1.45439   | 1.23183   | 2.08035   |
| POLH        | 3.72607   | 4.18015   | 3.34048   | 3.4353    | 4.90404   | 4.34222   |
| NPLOC4      | 37.1644   | 42.7864   | 40.8256   | 44.2968   | 37.5789   | 38.1617   |
| NDUFV1      | 115.636   | 148.241   | 110.141   | 147       | 126.842   | 119.653   |
| MADD        | 12.3516   | 13.157    | 14.9447   | 13.5814   | 17.2998   | 13.7396   |
| HSF5        | 0.0474141 | 0.0419206 | 0.0179464 | 0.0222606 | 0.105694  | 0         |
| ZNF25       | 8.80478   | 7.04324   | 8.90686   | 6.76659   | 7.57722   | 6.23793   |
| SEMA3C      | 20.9883   | 15.3815   | 26.4522   | 25.6829   | 20.5135   | 20.1867   |
| C20orf166   | 0         | 0         | 0         | 0         | 0.116907  | 0         |
| FLJ45964    | 0         | 0         | 0         | 0         | 0         | 0         |
| C7orf41     | 25.5934   | 29.4616   | 32.1492   | 28.0397   | 22.3254   | 19.7005   |
| RSBN1L      | 5.96435   | 4.51107   | 5.31418   | 5.12893   | 6.75828   | 4.46662   |
| ABCA12      | 11.5483   | 6.68598   | 10.6678   | 8.52113   | 12.6048   | 13.3922   |
| DIP2A       | 9.40669   | 10.7296   | 11.7649   | 10.8609   | 13.0797   | 12.3548   |
| SNURF       | 50.2328   | 38.758    | 45.7035   | 48.5684   | 41.4935   | 42.476    |
| MACC1       | 3.3633    | 2.07971   | 2.85844   | 2.34435   | 2.60207   | 2.43018   |
| LOC10012925 | 11.4304   | 17.6201   | 11.6072   | 14.105    | 14.3608   | 9.96214   |

|              |           |           |           |           |            |            |
|--------------|-----------|-----------|-----------|-----------|------------|------------|
| LOC1001304!  | 0.0610526 | 0.0539788 | 0.0924343 | 0         | 0.116654   | 0.0380454  |
| RPL17-C18OF  | 7.11E-05  | 2.15E-13  | 3.12E-13  | 2.26E-12  | 1.4588     | 1.12E-15   |
| DLC1         | 7.73254   | 7.23304   | 8.41107   | 5.45769   | 7.26981    | 5.46855    |
| GPR45        | 0         | 0.216058  | 0.0462477 | 0.114731  | 0          | 0          |
| FAM86A       | 8.93603   | 10.9787   | 6.66217   | 8.61093   | 6.94062    | 6.04037    |
| TSPAN19      | 0         | 0         | 0         | 0         | 0          | 0          |
| OR10G4       | 0         | 0         | 0         | 0         | 0          | 0          |
| FAM76A       | 9.27126   | 11.5521   | 8.17275   | 9.1205    | 8.07148    | 7.40505    |
| GALNT12      | 1.72076   | 1.61849   | 2.74382   | 1.4095    | 2.21524    | 1.93927    |
| HCRT         | 0         | 0         | 0         | 0         | 0.324294   | 0          |
| VCAN         | 9.02565   | 6.02486   | 9.90279   | 8.23017   | 10.094     | 9.95973    |
| CDH26        | 1.41782   | 1.34833   | 0.496283  | 1.42045   | 1.50714    | 1.6691     |
| MOCS1        | 16.2379   | 20.0487   | 13.5936   | 11.1086   | 12.8324    | 12.34      |
| HAUS1        | 9.2243    | 11.5604   | 6.69331   | 7.42445   | 7.647      | 7.45332    |
| C17orf106-CI | 4.8953    | 6.74222   | 6.78967   | 5.84697   | 6.82714    | 7.13706    |
| C21orf15     | 0.95576   | 2.9897    | 1.77251   | 2.27998   | 1.4361     | 0.918369   |
| LRRC23       | 3.91834   | 6.92705   | 2.91677   | 3.37277   | 4.24165    | 4.15009    |
| SNORD45C     | 0         | 0         | 0         | 0         | 0          | 0          |
| LOC441728    | 0         | 0         | 0         | 0         | 0.0451385  | 0.00706627 |
| SAMD3        | 1.82103   | 0.740073  | 0.412537  | 0.276322  | 0.657639   | 0.191025   |
| CLC          | 0.444217  | 0.196374  | 0.168137  | 0         | 0          | 0.138409   |
| MIR19A       | 0         | 0         | 0         | 0         | 0          | 0          |
| 2-Sep        | 106.653   | 91.0388   | 105.811   | 85.5105   | 102.729    | 82.7101    |
| ANKRD17      | 15.8477   | 11.8678   | 14.6174   | 11.9236   | 14.1149    | 13.1004    |
| MAMDC4       | 3.18714   | 4.99639   | 3.66972   | 4.27525   | 6.75499    | 6.50904    |
| CSRP2BP      | 6.57699   | 8.3661    | 8.37438   | 9.45316   | 7.63285    | 7.23088    |
| PIP4K2B      | 18.5312   | 20.6132   | 21.3968   | 20.5414   | 22.6678    | 19.3854    |
| ATXN2        | 7.07392   | 6.78157   | 6.58478   | 5.75408   | 6.41761    | 6.34315    |
| PPT2         | 27.7652   | 30.6309   | 25.6632   | 22.9754   | 26.6943    | 28.938     |
| C3orf56      | 0         | 0         | 0         | 0         | 0          | 0          |
| THAP10       | 1.00716   | 1.11308   | 1.29612   | 1.13484   | 1.25085    | 1.28661    |
| SDC3         | 15.6668   | 17.1773   | 15.7751   | 12.9272   | 14.4343    | 12.6577    |
| LOC338758    | 0.563593  | 1.20177   | 0.853286  | 0.435816  | 0.802371   | 0.599118   |
| SMG8         | 7.01588   | 4.89288   | 5.42552   | 4.74208   | 6.24043    | 6.40724    |
| DNAJC2       | 14.8031   | 15.4054   | 12.2982   | 10.2617   | 12.6137    | 13.1447    |
| CDH10        | 0.028645  | 0.151957  | 0.0216844 | 0         | 0.0364883  | 0          |
| CCDC125      | 5.69713   | 4.86917   | 4.66188   | 4.63624   | 5.40824    | 5.78177    |
| MIR518A1     | 0         | 0         | 0         | 0         | 0          | 0          |
| DSG1         | 132.692   | 91.7151   | 200.359   | 112.871   | 158.897    | 163.398    |
| DCAF4        | 6.66313   | 7.49453   | 9.42664   | 11.1724   | 10.1903    | 9.17278    |
| MUC5AC       | 0.0151018 | 0         | 0         | 0         | 0.00961842 | 0          |
| SAR1A        | 48.1277   | 43.1249   | 53.3541   | 41.5827   | 48.2697    | 40.609     |
| LOC10050714  | 0         | 0.0889008 | 0         | 0.0472079 | 0          | 0.0313295  |



|             |          |          |           |           |           |           |
|-------------|----------|----------|-----------|-----------|-----------|-----------|
| LYPLA1      | 55.1452  | 37.6562  | 50.0943   | 37.495    | 43.9153   | 46.0626   |
| LOC10013051 | 0.988932 | 2.88894  | 2.67885   | 1.91147   | 3.24163   | 2.76514   |
| LTF         | 10.0591  | 9.42718  | 3.01493   | 2.98515   | 12.1469   | 3.53549   |
| LOC10050588 | 0.221575 | 0.979515 | 1.29946   | 1.01277   | 1.57944   | 2.07576   |
| LOC10012801 | 0.430262 | 0        | 0         | 1.21203   | 0.274036  | 0         |
| RASEF       | 1.59447  | 0.672827 | 1.9477    | 1.08886   | 1.26941   | 1.60332   |
| RAB10       | 64.4318  | 41.8623  | 50.96     | 42.5663   | 49.5308   | 50.1527   |
| LOC10050604 | 0        | 0        | 0         | 0         | 0         | 0         |
| SNORA81     | 55.7577  | 7.04249  | 42.2089   | 44.8762   | 60.8784   | 44.6732   |
| C4orf49     | 0.984775 | 0.362782 | 0.18637   | 0.385287  | 0.313604  | 0.562531  |
| PRKAB1      | 14.0963  | 16.4931  | 13.8659   | 17.1199   | 14.6229   | 11.9929   |
| CDKL1       | 2.01343  | 2.54307  | 1.95965   | 1.44044   | 1.89301   | 1.73266   |
| RFPL1       | 1.00E-07 | 0        | 0.0261519 | 0.0144725 | 0.10621   | 0.0519401 |
| OAS1        | 60.192   | 47.0116  | 17.0777   | 13.7637   | 22.276    | 23.1776   |
| TMEM229A    | 0        | 0        | 0         | 0.222226  | 0.0251224 | 0.0737403 |
| OSBPL10     | 3.71115  | 3.8987   | 3.39241   | 4.16509   | 3.72561   | 3.35075   |
| NDUFC1      | 80.8614  | 84.604   | 78.2591   | 89.1365   | 61.2468   | 74.1335   |
| MIR1286     | 0        | 0        | 0         | 0         | 0         | 0         |
| ADH5        | 24.4612  | 25.9592  | 26.6833   | 21.8987   | 24.4095   | 18.3676   |
| NPAS2       | 10.4468  | 7.04031  | 9.94218   | 10.3886   | 10.7481   | 11.1737   |
| SPATA6      | 3.56441  | 2.8959   | 3.41296   | 2.80418   | 3.44824   | 2.90555   |
| KCNIP2      | 57.0484  | 85.9314  | 76.647    | 40.7143   | 42.025    | 15.6727   |
| PCDHB4      | 0.927068 | 0.965202 | 0.963819  | 1.27839   | 0.665691  | 1.07124   |
| LOC10050584 | 0.407471 | 0.36026  | 0         | 0         | 0         | 0         |
| ZNF546      | 1.28561  | 1.3789   | 1.21253   | 0.791588  | 1.38259   | 1.22141   |
| FAM166B     | 23.2946  | 24.2826  | 10.4912   | 15.3518   | 4.5174    | 3.91599   |
| TTYH2       | 5.07031  | 5.72033  | 4.4154    | 5.92455   | 6.3375    | 4.15483   |
| CKAP2       | 8.01873  | 7.62902  | 8.65411   | 7.85602   | 9.50182   | 8.92363   |
| NPFF        | 7.08959  | 18.5884  | 11.659    | 19.7415   | 19.1515   | 14.6249   |
| LOC10028779 | 0        | 0        | 0         | 0         | 0         | 0         |
| LOC10050641 | 0.698258 | 0        | 0         | 0         | 0         | 0.725208  |
| FAM71A      | 0        | 0        | 0         | 0         | 0         | 0         |
| MIR4787     | 0        | 0        | 0         | 0         | 0         | 0         |
| C13orf41    | 0        | 0        | 0         | 0         | 0         | 0         |
| HBG2        | 3.58384  | 7.28844  | 2.08543   | 3.92999   | 0.465227  | 0.0780317 |
| RBM18       | 12.0171  | 9.16958  | 9.72441   | 8.0502    | 10.3261   | 9.2738    |
| MIR548U     | 0        | 0        | 0         | 0         | 0         | 0         |
| MAGEB6      | 0        | 0        | 0         | 0         | 0         | 0         |
| CKMT2       | 8.68538  | 4.90676  | 5.68961   | 7.33868   | 4.47185   | 3.68433   |
| EPN3        | 15.3116  | 12.9222  | 18.0262   | 23.5733   | 21.9421   | 29.616    |
| CREB3L4     | 16.9865  | 12.7265  | 10.9923   | 12.5523   | 13.2369   | 12.5381   |
| WDR77       | 25.6206  | 25.1387  | 20.1671   | 19.1194   | 22.1348   | 20.1351   |
| MANF        | 74.7691  | 69.0341  | 59.4933   | 62.9112   | 48.0265   | 59.0547   |

|            |           |           |           |           |           |           |
|------------|-----------|-----------|-----------|-----------|-----------|-----------|
| CBWD5      | 14.361    | 14.1475   | 10.6411   | 11.9483   | 14.3562   | 12.2917   |
| FBN2       | 0.974642  | 0.232897  | 0.0797632 | 0.0989377 | 0.0391467 | 0.103962  |
| LOC147804  | 4.14811   | 4.31565   | 2.83208   | 2.47982   | 5.62001   | 4.71925   |
| SCPEP1     | 51.4596   | 41.2541   | 57.6457   | 59.4859   | 58.3609   | 58.2864   |
| PRR15L     | 16.3986   | 9.54956   | 7.93769   | 11.2524   | 5.92517   | 6.28856   |
| LOC1001297 | 1.67614   | 2.92172   | 1.99831   | 2.91918   | 3.41927   | 1.89969   |
| LOC1002873 | 0         | 0.164844  | 0.141141  | 0.17507   | 0         | 0         |
| GNL3       | 54.0489   | 53.1594   | 51.5831   | 45.6009   | 51.2377   | 44.0643   |
| ZP1        | 3.30793   | 3.52816   | 2.9016    | 2.51446   | 2.10684   | 3.30472   |
| NUDT10     | 2.37639   | 2.1008    | 0.860259  | 1.11556   | 0.98697   | 1.09467   |
| LOC284804  | 0         | 0         | 0         | 0         | 0.0539465 | 0.158346  |
| ANKAR      | 0.417307  | 0.504888  | 0.731566  | 0.618702  | 0.85331   | 0.739084  |
| PABPN1L    | 0.084314  | 0         | 0.0638262 | 0.0791695 | 0.2148    | 0.105082  |
| MRP63      | 12.5298   | 17.7273   | 13.2045   | 15.7749   | 12.6703   | 13.3413   |
| C11orf82   | 1.26694   | 0.998391  | 0.708884  | 0.594817  | 0.947254  | 1.04695   |
| MIR326     | 0         | 0         | 0         | 0         | 0         | 0         |
| SUV420H1   | 20.484    | 15.0291   | 17.3987   | 19.0803   | 17.1983   | 16.9874   |
| PIGO       | 12.8333   | 12.4619   | 11.085    | 10.3925   | 11.9007   | 11.9521   |
| PLTP       | 38.438    | 52.0208   | 48.8563   | 41.1107   | 39.8627   | 28.892    |
| PAX7       | 0.0158053 | 0.0399882 | 0.0239295 | 0.079152  | 0.0100665 | 0.0590953 |
| NECAB2     | 0         | 0.117268  | 0.301217  | 0.186814  | 0.0844763 | 0.330611  |
| LOC1002889 | 1.86E-08  | 0.174979  | 0.115757  | 0.287169  | 0         | 7.95E-09  |
| POR        | 51.3504   | 56.8293   | 51.3606   | 44.3774   | 37.4477   | 49.5383   |
| ROCK1P1    | 5.02046   | 4.17212   | 4.42354   | 3.82534   | 5.29423   | 4.6158    |
| UNC119B    | 15.1574   | 15.2827   | 14.9697   | 15.7595   | 16.1878   | 15.438    |
| CD274      | 2.41897   | 2.30322   | 0.825036  | 0.474244  | 1.65917   | 0.662594  |
| TAP1       | 69.9613   | 75.4171   | 38.3748   | 24.302    | 57.5901   | 33.6808   |
| NEO1       | 13.2658   | 10.9115   | 16.5845   | 15.6818   | 16.445    | 13.917    |
| BMP6       | 3.03188   | 1.90991   | 4.44226   | 5.02039   | 1.92424   | 2.17609   |
| MIR450A2   | 0         | 0         | 0         | 0         | 0         | 0         |
| PAPPA      | 0.531943  | 0.40204   | 0.870317  | 0.507543  | 0.912568  | 0.9998    |
| LOC388436  | 0.160355  | 0.578917  | 0.495674  | 0.150571  | 0.500252  | 0.0999263 |
| CCDC62     | 0.202333  | 0.362396  | 0.163443  | 0.227959  | 0.256339  | 0.269819  |
| MIR7-2     | 0         | 0         | 0         | 0         | 0         | 0         |
| GPD1L      | 21.2501   | 13.5291   | 15.7415   | 15.2241   | 14.6495   | 13.6906   |
| FAM113A    | 22.0295   | 38.7712   | 29.2033   | 34.2327   | 37.0199   | 35.2541   |
| APOH       | 0         | 0         | 0         | 0         | 0         | 0         |
| SPTBN2     | 22.2122   | 19.8198   | 35.5617   | 28.9603   | 34.7302   | 32.5903   |
| GRIK3      | 0.450918  | 0.353369  | 0.512021  | 0.307931  | 0.600493  | 0.280993  |
| LOC1005074 | 0         | 0         | 0         | 0         | 0.460121  | 0         |
| ZG16B      | 226.836   | 115.704   | 95.5371   | 287.572   | 100.307   | 132.637   |
| LOC648740  | 0.468298  | 0.874083  | 0.748397  | 1.07488   | 1.65701   | 1.26457   |
| CD320      | 17.6308   | 28.2598   | 18.2206   | 26.0298   | 15.1374   | 19.7964   |

|             |           |           |           |          |           |           |
|-------------|-----------|-----------|-----------|----------|-----------|-----------|
| RPAP3       | 8.10533   | 5.20313   | 7.00137   | 4.39187  | 5.4613    | 5.01777   |
| ALX4        | 2.37223   | 0.947702  | 2.4742    | 2.52448  | 2.94343   | 1.99293   |
| ZNF394      | 10.5641   | 14.1158   | 11.3262   | 12.8819  | 13.548    | 12.3321   |
| MIR2861     | 0         | 0         | 0         | 0        | 0         | 0         |
| ARL9        | 0.742428  | 1.05025   | 0.899235  | 2.23081  | 0.75657   | 0.555179  |
| RNU105A     | 45.6265   | 67.2334   | 0         | 28.5617  | 19.3732   | 37.91     |
| MYO1B       | 13.2288   | 11.7468   | 10.1807   | 8.68771  | 9.63626   | 10.4179   |
| DLG2        | 2.59232   | 2.91367   | 4.84673   | 3.06587  | 5.46077   | 3.86364   |
| ERH         | 83.2366   | 84.0263   | 72.6587   | 77.4191  | 69.3489   | 66.0871   |
| TAF6        | 21.3622   | 28.2672   | 21.0565   | 25.7101  | 23.6827   | 23.8856   |
| NR2C2       | 14.6852   | 13.1116   | 15.6804   | 13.107   | 16.5221   | 14.2493   |
| BNC1        | 5.20418   | 6.23389   | 6.08412   | 7.21173  | 6.70933   | 6.9568    |
| ARHGAP30    | 12.8212   | 11.4908   | 13.7042   | 16.1342  | 17.9929   | 9.76512   |
| PHOX2B      | 0         | 0.0289782 | 0         | 0        | 0         | 0         |
| C4orf26     | 0.0553387 | 0.048927  | 0.261831  | 0.424372 | 0.187982  | 0         |
| MIR4658     | 0         | 0         | 0         | 0        | 0         | 0         |
| ADAM12      | 1.4544    | 1.4848    | 1.70514   | 0.531073 | 1.10041   | 0.82861   |
| TMEM186     | 10.9975   | 14.155    | 9.40118   | 12.1529  | 12.2933   | 11.4219   |
| HLA-DRB5    | 110.886   | 104.067   | 88.0803   | 48.9198  | 116.362   | 55.2718   |
| SAAL1       | 6.23854   | 5.57769   | 5.41243   | 5.33133  | 5.40198   | 6.15899   |
| FOXB1       | 0         | 0         | 0.056133  | 0        | 0         | 0         |
| CERS5       | 19.5933   | 27.566    | 22.7131   | 27.6719  | 24.7542   | 23.3548   |
| MAP3K10     | 4.86965   | 8.18034   | 5.55122   | 7.18156  | 6.38546   | 5.46221   |
| DDT         | 105.946   | 141.519   | 96.7882   | 118.548  | 76.3148   | 83.1886   |
| EIF2B3      | 22.9353   | 16.831    | 17.4851   | 17.2761  | 13.3442   | 14.8275   |
| LOC10050719 | 0         | 0         | 0         | 0        | 0         | 0         |
| MLL4        | 10.9222   | 13.5806   | 14.0228   | 14.4651  | 17.3162   | 14.33     |
| LAMC2       | 10.0113   | 9.34353   | 9.54363   | 9.68384  | 11.3061   | 10.6292   |
| SCN4A       | 1.90868   | 2.7839    | 1.2056    | 0.77625  | 0.890445  | 0.409097  |
| LOC388499   | 2.11004   | 3.08984   | 2.39596   | 2.78619  | 2.30982   | 2.67086   |
| OSTCP2      | 6.87885   | 4.39948   | 4.05571   | 3.58841  | 4.38118   | 3.57217   |
| LSM1        | 32.5244   | 29.6799   | 31.3451   | 31.2758  | 28.3687   | 26.6168   |
| UGCG        | 8.43342   | 5.67826   | 11.4915   | 6.33508  | 10.6186   | 8.44899   |
| N4BP2L1     | 12.4528   | 13.0392   | 11.3033   | 9.86476  | 17.682    | 12.5742   |
| HTRA4       | 0.048684  | 0.0860867 | 0.110562  | 0        | 0.0930214 | 0.0303378 |
| ZNF317      | 10.3244   | 9.75255   | 10.3081   | 10.1038  | 12.7686   | 11.0821   |
| PSMD11      | 48.4873   | 37.3366   | 36.9096   | 34.1783  | 34.1364   | 40.4413   |
| RYR3        | 0.817881  | 0.834777  | 1.78003   | 1.18585  | 1.06098   | 1.34163   |
| VRK1        | 7.81149   | 9.59226   | 6.61731   | 5.76311  | 6.63358   | 7.03125   |
| KRTAP9-4    | 12.2235   | 3.25279   | 0         | 122.177  | 1.38328   | 1303.48   |
| RXRA        | 55.8285   | 60.843    | 78.2599   | 68.2907  | 80.893    | 69.4282   |
| EXD1        | 0.0677409 | 0         | 0.0256401 | 0        | 0.0674134 | 0.0211066 |
| ICAM5       | 0.827624  | 1.22931   | 1.35327   | 1.39883  | 3.12054   | 2.33115   |

|             |          |           |           |           |           |           |
|-------------|----------|-----------|-----------|-----------|-----------|-----------|
| SCLT1       | 3.5111   | 2.70188   | 2.8548    | 2.0758    | 3.33365   | 2.67418   |
| CMTM6       | 59.5874  | 40.9817   | 56.3684   | 38.685    | 55.9296   | 56.401    |
| KCNE2       | 0.470437 | 0.970505  | 0.593539  | 0.294489  | 0.599248  | 0.586313  |
| CSTT        | 0        | 0         | 0         | 0         | 0         | 0         |
| CX3CL1      | 22.6891  | 21.4474   | 14.9374   | 21.9563   | 22.3103   | 15.5302   |
| ICOS        | 0.379676 | 0.637802  | 0.574834  | 0.035651  | 1.064     | 0.283918  |
| RAB40C      | 23.1304  | 32.406    | 34.188    | 43.6073   | 44.3134   | 49.7504   |
| CPEB2       | 11.84    | 8.98158   | 14.9692   | 13.3118   | 13.7219   | 14.7585   |
| SEC23A      | 14.3515  | 10.7539   | 15.102    | 8.14764   | 11.7985   | 11.2425   |
| RBM5        | 71.2854  | 95.1487   | 82.9151   | 86.1195   | 103.564   | 93.5678   |
| OR1I1       | 0        | 0         | 0         | 0         | 0         | 0         |
| SLC39A13    | 22.0857  | 37.0271   | 26.1825   | 31.6549   | 30.4685   | 23.1891   |
| KLB         | 4.98808  | 2.4068    | 4.49071   | 2.0242    | 1.47322   | 1.35317   |
| RNU6-42     | 0        | 0         | 0         | 0         | 0         | 0         |
| GATA2       | 7.01575  | 11.399    | 12.8474   | 9.50101   | 15.4615   | 10.6632   |
| UNQ6975     | 0.104451 | 0         | 0.0790699 | 0         | 0.0665254 | 0.130179  |
| KCNMA1      | 3.29235  | 1.37182   | 1.29683   | 1.32753   | 1.71106   | 1.08576   |
| CCL17       | 9.67798  | 16.2984   | 10.6406   | 10.8184   | 13.3552   | 12.6362   |
| MS4A5       | 0        | 0         | 0         | 0         | 0         | 0         |
| DBR1        | 7.49276  | 7.119     | 7.39343   | 5.74047   | 6.38665   | 5.22668   |
| TBC1D21     | 0        | 0         | 0.0703859 | 0         | 0         | 0.0579408 |
| POMGNT1     | 26.9713  | 32.2243   | 25.652    | 30.6161   | 27.0286   | 24.149    |
| THOC7       | 69.4301  | 68.8234   | 66.9093   | 59.5153   | 59.7013   | 60.2244   |
| SNORD114-2  | 0        | 0         | 0         | 0         | 0         | 0         |
| LOC10050604 | 0        | 0         | 0         | 0         | 0         | 0         |
| SLC35G6     | 0.211764 | 0         | 0         | 0         | 0.0599438 | 0.1173    |
| CDY1        | 0        | 0         | 0         | 0         | 0         | 0         |
| SCARA3      | 9.34739  | 9.09857   | 10.6014   | 9.08853   | 12.7022   | 10.1093   |
| TRIM16L     | 10.0243  | 11.9094   | 7.99684   | 11.6025   | 10.9069   | 9.38094   |
| PLAU        | 12.5493  | 12.8673   | 12.6859   | 13.4635   | 17.7512   | 13.7294   |
| ZHX1-C8ORF7 | 1.43573  | 1.80673   | 1.59393   | 1.85562   | 2.6459    | 1.78054   |
| WFDC5       | 81.3144  | 75.1425   | 101.201   | 117.513   | 132.156   | 117.089   |
| FBL         | 122.04   | 186.528   | 147.727   | 219.371   | 168.008   | 154.863   |
| PEAK1       | 4.58911  | 3.69174   | 6.18935   | 3.88342   | 5.14155   | 4.46555   |
| LILRA6      | 0.34771  | 0.461135  | 0.244417  | 0.0952275 | 0.427099  | 0.185724  |
| TRH         | 0.154272 | 0.272796  | 0.116785  | 0         | 0.0655047 | 0.0961361 |
| GADD45B     | 27.9111  | 35.5746   | 22.9347   | 26.2827   | 27.0956   | 27.2045   |
| RNF26       | 13.3136  | 15.3246   | 12.6592   | 17.5894   | 15.5877   | 14.7816   |
| MLNR        | 0        | 0.0796387 | 0         | 0         | 0.0573693 | 0.056131  |
| ZNF775      | 1.92578  | 2.57377   | 1.83075   | 3.28012   | 2.59569   | 3.18156   |
| RPS6KA3     | 11.2279  | 9.21949   | 12.1063   | 7.5372    | 11.8715   | 10.2036   |
| NQO1        | 27.6861  | 10.8697   | 27.1659   | 19.0208   | 7.16617   | 7.2835    |
| LOC400238   | 0        | 0         | 0         | 0         | 0         | 0         |

|             |           |          |           |           |           |           |
|-------------|-----------|----------|-----------|-----------|-----------|-----------|
| RPS10P7     | 3.81201   | 4.38024  | 3.8243    | 4.17685   | 4.00433   | 5.38208   |
| ATAD2B      | 4.75494   | 3.96473  | 5.01912   | 3.4104    | 5.72704   | 5.1164    |
| RAB7A       | 140.925   | 126.862  | 130.78    | 123.006   | 122.966   | 126.279   |
| ADCY8       | 8.61895   | 3.86265  | 2.82193   | 7.937     | 1.99617   | 1.99747   |
| RPL13AP3    | 0.146653  | 0        | 0.166526  | 0.0344262 | 0.140106  | 0.102811  |
| RASA4B      | 18.5829   | 25.5619  | 23.0801   | 21.1362   | 19.5612   | 14.9496   |
| CCDC152     | 2.85116   | 2.17821  | 2.17353   | 2.34228   | 3.06294   | 3.01253   |
| FAM99B      | 0         | 0        | 0         | 0         | 0         | 0         |
| MIR361      | 0         | 0        | 0         | 0         | 0         | 0         |
| LOC145216   | 0.0501117 | 0        | 0.0758696 | 0         | 0.0319164 | 0.0312275 |
| TRAF3IP1    | 5.68867   | 5.22467  | 5.67989   | 4.51274   | 4.73192   | 5.28679   |
| SCT         | 0.308143  | 0.272441 | 0.466532  | 0.289342  | 0.981291  | 0.384044  |
| GATA4       | 0         | 0        | 0         | 0         | 0         | 0.0180069 |
| HEY2        | 3.71749   | 2.42358  | 2.92787   | 2.92652   | 3.2765    | 2.50378   |
| HPYR1       | 0         | 0        | 0         | 0         | 0         | 0         |
| SYNJ2BP-COX | 1.30E-07  | 1.32E-07 | 2.83E-07  | 1.58E-07  | 0.11067   | 1.29E-07  |
| ESD         | 86.5705   | 85.3043  | 81.9      | 93.1078   | 78.1862   | 68.831    |
| ATP1A2      | 14.3618   | 15.2053  | 24.432    | 9.81017   | 9.84128   | 5.87517   |
| TEX10       | 7.77877   | 7.49505  | 6.27312   | 7.4532    | 6.9158    | 6.86544   |
| EDEM3       | 8.88644   | 6.50922  | 7.80472   | 5.4683    | 7.40906   | 6.96239   |
| MBNL1       | 43.7484   | 41.5466  | 44.3337   | 31.5751   | 41.1537   | 34.6777   |
| CCDC58      | 6.78161   | 8.75073  | 6.52121   | 7.91676   | 7.35439   | 5.93926   |
| HK2         | 23.6786   | 14.0081  | 24.2214   | 14.6378   | 13.6541   | 17.5227   |
| SPTAN1      | 37.2807   | 35.7941  | 54.2048   | 49.5511   | 48.169    | 51.7365   |
| OR5T1       | 0         | 0        | 0         | 0         | 0         | 0         |
| LOC442132   | 0         | 0        | 0         | 0         | 0         | 0.0309918 |
| POTEF       | 1.17296   | 1.06481  | 1.15906   | 0.983744  | 1.04788   | 1.48418   |
| MIR3929     | 0         | 0        | 0         | 0         | 0         | 0         |
| SMYD5       | 16.5143   | 16.8899  | 14.194    | 19.5583   | 18.188    | 13.8355   |
| LOC1005063  | 6.12245   | 9.13457  | 10.3316   | 11.8571   | 14.0002   | 18.3609   |
| MYCNOS      | 0         | 0        | 0         | 0.155992  | 0         | 0.414097  |
| WWP1        | 13.1777   | 10.4565  | 14.1561   | 10.3485   | 10.0837   | 9.52629   |
| DNAJC4      | 37.1686   | 56.5759  | 41.854    | 62.727    | 47.9666   | 41.2629   |
| OR9G1       | 0         | 0        | 0         | 0         | 0         | 0         |
| MIR1245B    | 0         | 0        | 0         | 0         | 0         | 0         |
| ZNF235      | 1.89181   | 2.13876  | 1.71384   | 2.09671   | 2.72585   | 2.20318   |
| PMP22       | 81.9407   | 83.6579  | 91.6586   | 67.5753   | 75.1371   | 56.6616   |
| SEMG1       | 0         | 0        | 0         | 0         | 0         | 0         |
| HIRIP3      | 8.76012   | 11.9389  | 9.57518   | 10.5127   | 12.6012   | 11.1842   |
| LRP10       | 79.8089   | 72.2542  | 85.3456   | 84.5527   | 82.2154   | 95.6618   |
| LACRT       | 0.94333   | 0        | 0.476071  | 0.590515  | 0         | 0.391895  |
| RASSF10     | 6.09098   | 6.5416   | 6.4779    | 6.63162   | 6.52116   | 5.51881   |
| PRKAA1      | 20.6563   | 16.2824  | 23.115    | 15.4423   | 19.5783   | 13.6958   |

|             |           |          |            |           |           |           |
|-------------|-----------|----------|------------|-----------|-----------|-----------|
| OR2A25      | 0         | 0        | 0.0972287  | 0         | 0         | 0         |
| GTF2A2      | 24.3609   | 23.1493  | 18.7478    | 21.924    | 17.7505   | 18.5448   |
| RPSAP9      | 44.7791   | 60.4958  | 46.1347    | 68.2082   | 52.7716   | 48.7075   |
| LOC729900   | 0.367179  | 0.144283 | 0          | 0.0766167 | 0         | 0.101693  |
| MIR3927     | 0         | 0        | 0          | 0         | 0         | 0         |
| RAET1L      | 1.20677   | 1.76043  | 2.0613     | 1.33206   | 2.63629   | 3.23021   |
| LILRA3      | 0.426674  | 0        | 0.0502752  | 0.0751197 | 0.0509531 | 0.0498532 |
| ADAD2       | 0.865033  | 1.06712  | 1.09615    | 0.650478  | 1.33078   | 1.309     |
| FAM66C      | 0.289414  | 0.393572 | 0.667976   | 0.852885  | 0.812157  | 0.669303  |
| STX17       | 14.9031   | 11.3968  | 11.9184    | 9.46297   | 13.8647   | 13.9004   |
| BLVRA       | 39.4054   | 40.8658  | 33.216     | 34.1007   | 32.423    | 27.6748   |
| EBF2        | 1.01918   | 0.548494 | 0.57026    | 0.58252   | 0.423342  | 0.193295  |
| KC6         | 0         | 0.272236 | 1.49178    | 0.462598  | 0.156888  | 0.460505  |
| C16orf13    | 37.2566   | 72.4649  | 45.5696    | 76.7186   | 61.2055   | 68.4628   |
| C7orf36     | 9.27755   | 14.541   | 12.1309    | 10.1634   | 12.6236   | 10.6868   |
| RHBDD3      | 13.1441   | 17.6727  | 11.983     | 15.0152   | 14.5827   | 14.2301   |
| PPFIA2      | 0.481355  | 0.624772 | 0.872096   | 0.455694  | 0.639853  | 0.434964  |
| ALKBH8      | 3.54508   | 3.43082  | 3.53588    | 2.54156   | 3.90552   | 2.7465    |
| CH25H       | 1.50696   | 1.68298  | 0.720491   | 0.744744  | 1.26288   | 0.69195   |
| AP1S3       | 2.33897   | 1.46481  | 1.62306    | 1.99036   | 1.38108   | 1.42718   |
| BCL6B       | 6.68998   | 5.96415  | 6.16163    | 3.21941   | 4.04784   | 4.25576   |
| C10orf53    | 0         | 0        | 0          | 0         | 0         | 0         |
| VIP         | 0.551466  | 1.61183  | 0.566771   | 0.641998  | 0.691225  | 0.884006  |
| ABCA13      | 0.358904  | 0.125005 | 0.670998   | 0.255307  | 0.408688  | 0.335481  |
| LOC10050628 | 0.0428883 | 8.70347  | 0.00011667 | 4.24045   | 0.981036  | 1.54048   |
| USP44       | 0.446     | 0.290602 | 0.248816   | 0.281238  | 0.28406   | 0.168539  |
| LOC1002885  | 0         | 0        | 0          | 0         | 0         | 0         |
| CBFB        | 21.7      | 20.3785  | 18.5836    | 19.6944   | 19.4733   | 17.519    |
| C1orf129    | 0         | 0        | 0          | 0         | 0         | 0         |
| CRBN        | 19.2211   | 20.3929  | 22.7222    | 15.5325   | 23.3711   | 19.0434   |
| CWC27       | 10.1407   | 7.30384  | 9.81105    | 8.08207   | 7.93946   | 10.4191   |
| LOC285419   | 0.265576  | 0.234805 | 1.80938    | 0.498743  | 1.52232   | 0.661982  |
| SNORD116-2  | 0         | 0        | 0          | 0         | 0         | 0         |
| LOC1001289  | 1.28934   | 1.66424  | 1.69268    | 1.85356   | 2.05263   | 2.90538   |
| PPP5C       | 24.6539   | 27.3782  | 24.8611    | 24.6958   | 27.0054   | 24.4273   |
| XDH         | 1.62674   | 1.49757  | 2.05665    | 2.2361    | 2.01875   | 2.15283   |
| EFCAB4B     | 1.68154   | 0.320125 | 1.38117    | 0.907966  | 1.11651   | 0.936505  |
| VAV3        | 41.432    | 34.3445  | 45.6117    | 41.7174   | 52.6726   | 42.4535   |
| LOC1005068  | 0         | 0        | 0          | 0         | 0         | 0         |
| MCMBP       | 16.3635   | 14.9336  | 16.3255    | 13.5861   | 15.7644   | 13.7103   |
| GLT1D1      | 0.846776  | 1.30203  | 1.89517    | 2.03963   | 1.24277   | 1.58303   |
| C18orf62    | 0         | 0        | 0          | 0         | 0         | 0         |
| EVI5        | 3.70992   | 3.49572  | 3.98428    | 3.44739   | 4.12071   | 3.31981   |

|            |           |           |           |           |           |           |
|------------|-----------|-----------|-----------|-----------|-----------|-----------|
| LOC1005062 | 0.257235  | 0.682494  | 0.779226  | 0.484094  | 0.491333  | 0.323676  |
| MAP2       | 10.5364   | 6.35004   | 9.90616   | 7.9025    | 10.6975   | 10.192    |
| CYP7B1     | 2.58157   | 1.49669   | 2.91537   | 1.07294   | 1.69812   | 1.76696   |
| HMG5       | 3.86212   | 3.63599   | 4.27583   | 2.40254   | 5.0426    | 4.72317   |
| KDM1B      | 8.42001   | 6.86494   | 8.58772   | 7.21981   | 7.67484   | 8.24753   |
| PRAMEF2    | 0         | 0         | 0         | 0         | 0         | 0         |
| MIR943     | 0         | 0         | 0         | 0         | 0         | 0         |
| C19orf40   | 1.77182   | 2.78494   | 1.63934   | 1.01671   | 1.94349   | 1.8402    |
| CLP1       | 7.63698   | 8.21079   | 8.04442   | 9.0171    | 8.52356   | 7.43736   |
| PROSER1    | 12.086    | 10.7205   | 12.3481   | 11.6053   | 14.3219   | 12.7219   |
| LPAR4      | 0.535512  | 0.202914  | 0.347474  | 0.0718339 | 0.341071  | 0.333709  |
| HECW2      | 1.85618   | 1.2278    | 1.34269   | 1.40725   | 1.26102   | 0.942488  |
| METTL21B   | 7.23713   | 7.38248   | 6.5457    | 7.0385    | 7.84761   | 5.95068   |
| CHMP1B     | 35.0894   | 27.8699   | 34.1979   | 35.3845   | 31.9945   | 31.5666   |
| KCNV2      | 0.236921  | 0.041894  | 0.14348   | 0.0889858 | 0.0905376 | 0.0590555 |
| TGM6       | 0.266514  | 0.0785449 | 0.168127  | 1.37639   | 0.226326  | 3.65376   |
| ZNF787     | 11.5789   | 18.7128   | 12.8013   | 20.1265   | 17.2875   | 14.2967   |
| FUZ        | 7.19061   | 11.9951   | 9.56577   | 10.8157   | 10.9627   | 11.4398   |
| LOC1006527 | 0         | 0.760231  | 0         | 0         | 0         | 0         |
| FBXL4      | 4.96962   | 3.50233   | 4.60713   | 2.73897   | 4.24318   | 4.21891   |
| LOC643719  | 263.245   | 182.42    | 212.92    | 202.458   | 133.483   | 113.237   |
| LMOD3      | 0.0712677 | 0.0630104 | 0.125883  | 0.0669192 | 0.0605211 | 0.103626  |
| C17orf105  | 0         | 0         | 0         | 0         | 0         | 0         |
| ZNF614     | 2.70955   | 1.66413   | 2.14509   | 1.8062    | 2.84547   | 1.8947    |
| C9orf170   | 0.173323  | 0.102161  | 0.0218677 | 0.135623  | 0.0367968 | 0.0360025 |
| C20orf72   | 23.3176   | 30.433    | 26.3128   | 29.3291   | 32.7769   | 28.8504   |
| RBBP9      | 12.552    | 10.4936   | 9.57855   | 9.52869   | 9.41279   | 8.43689   |
| LOC1005064 | 134.409   | 134.638   | 139.997   | 128.031   | 148.609   | 131.149   |
| TMEM52     | 4.09595   | 7.79146   | 2.81878   | 3.96258   | 3.87357   | 3.09385   |
| LOC728875  | 4.01416   | 5.36964   | 4.89519   | 5.53923   | 4.55539   | 4.28568   |
| PRKACB     | 11.0188   | 7.22515   | 8.65161   | 5.76948   | 6.48618   | 5.43221   |
| LOC1006529 | 3.09E-07  | 1.18E-06  | 0.649832  | 1.05E-06  | 1.71E-06  | 0.634075  |
| STL        | 0.197851  | 0.302148  | 0.367628  | 0.354669  | 0.229114  | 0.392294  |
| DGCR5      | 0.849769  | 1.39306   | 1.21955   | 1.74545   | 1.05989   | 0.650893  |
| HBM        | 0.312315  | 0.276129  | 0         | 0.879776  | 0.198915  | 0.194621  |
| CDIPT      | 43.9856   | 52.2129   | 47.1046   | 54.4599   | 55.6752   | 53.2606   |
| UCK1       | 19.0585   | 26.3614   | 17.9151   | 22.6774   | 23.8312   | 21.8595   |
| ZNF432     | 5.04734   | 4.28957   | 8.88573   | 5.76807   | 5.9808    | 4.36439   |
| ZBTB32     | 0.528678  | 0.0934847 | 0.240127  | 0.148926  | 0.336718  | 0.164725  |
| NFKB2      | 19.807    | 31.1092   | 17.3629   | 16.7125   | 29.8598   | 18.66     |
| PTCHD3     | 0.558428  | 0.423195  | 0.271757  | 0.224724  | 0.0508095 | 0.149138  |
| LOC1006529 | 0.403351  | 0.662289  | 0.305339  | 0.324634  | 0.183497  | 0.251351  |
| LOC283710  | 0.225492  | 0.199366  | 0.426747  | 0.105867  | 0.287234  | 0.421551  |

|             |          |          |          |          |          |           |
|-------------|----------|----------|----------|----------|----------|-----------|
| TROAP       | 4.08436  | 8.41233  | 3.50942  | 8.07569  | 6.03415  | 7.24379   |
| LOC10065284 | 1.52913  | 2.3352   | 1.64883  | 1.21828  | 1.5643   | 1.09746   |
| POLR2J3     | 48.4337  | 69.9924  | 49.797   | 68.7252  | 21.3561  | 20.5812   |
| RGL2        | 47.3982  | 58.4201  | 51.3045  | 55.3186  | 65.1082  | 69.2574   |
| PCP2        | 6.99231  | 10.3429  | 3.72293  | 8.71941  | 10.5677  | 13.8552   |
| NOL11       | 13.3507  | 13.9169  | 13.7561  | 11.414   | 13.6207  | 11.6834   |
| LOC10050596 | 0        | 0        | 0        | 0        | 0        | 0         |
| PTPRQ       | 0.336809 | 0.496309 | 0.151091 | 0.269405 | 0.572041 | 0.528599  |
| NKPD1       | 6.04538  | 6.56716  | 8.41867  | 10.7331  | 13.1542  | 14.5675   |
| TOX3        | 0.890208 | 0.618915 | 0.673893 | 0.716851 | 0.546788 | 0.534952  |
| LOC10028934 | 1.94861  | 3.54413  | 2.57091  | 2.45705  | 2.34033  | 2.01226   |
| SIAH2       | 18.6824  | 17.5014  | 18.2083  | 18.1548  | 16.5656  | 17.236    |
| SDIM1       | 0        | 0        | 0        | 0        | 0        | 0         |
| FLJ26484    | 0.270023 | 0.477475 | 0.37475  | 0.591611 | 0.171979 | 0.392623  |
| LOC153684   | 0.496253 | 0.717963 | 0.580575 | 0.593057 | 0.890732 | 0.421696  |
| LOC729950   | 0.17523  | 0.271123 | 0.066325 | 0.123404 | 0.167407 | 0.0545979 |
| SYNPO       | 18.3623  | 21.5441  | 22.679   | 14.6629  | 17.6089  | 13.1569   |
| MIR4679-2   | 0        | 0        | 0        | 0        | 0        | 0         |
| SLFN12L     | 0.11888  | 0.105107 | 0.494962 | 0.16744  | 0.530009 | 0.0740812 |
| CDH6        | 0.806126 | 1.08373  | 0.560085 | 0.902106 | 0.632991 | 0.543632  |
| MIR612      | 0        | 0        | 0        | 0        | 0        | 0         |
| WDR90       | 4.41778  | 8.31731  | 7.27873  | 8.29645  | 8.19837  | 6.20769   |
| TOP2A       | 6.41467  | 6.34907  | 4.89378  | 4.99071  | 5.12549  | 6.39576   |
| LOC10050562 | 2.33018  | 2.6941   | 2.53286  | 2.58072  | 2.77793  | 2.23395   |
| GSTA4       | 74.6281  | 83.6055  | 63.7081  | 67.4593  | 96.9752  | 96.1241   |
| STMN1       | 53.2769  | 67.1586  | 43.3952  | 62.1456  | 59.2709  | 70.9216   |
| ISCA1       | 22.9477  | 22.9789  | 19.7528  | 18.7391  | 18.7538  | 20.727    |
| SMTN        | 17.5069  | 24.7653  | 19.9735  | 26.1562  | 23.1283  | 28.4465   |
| TULP4       | 5.58538  | 5.41412  | 6.36676  | 5.76975  | 6.11542  | 5.60735   |
| C14orf135   | 9.97888  | 8.8227   | 9.63989  | 7.52864  | 10.6717  | 9.04919   |
| MAPK8IP1    | 3.20928  | 2.6464   | 2.00898  | 2.66577  | 2.57464  | 2.49984   |
| TNFRSF13C   | 1.2826   | 2.15459  | 1.65059  | 2.76999  | 2.61407  | 1.75838   |
| SNRPB2      | 22.893   | 18.79    | 16.6274  | 14.5371  | 17.1768  | 14.0766   |
| NOTCH1      | 15.9447  | 17.4936  | 20.7172  | 19.7812  | 22.9837  | 23.2159   |
| SAMD5       | 2.91512  | 1.62922  | 1.53216  | 4.02788  | 2.27994  | 4.45204   |
| LOC10050668 | 7.89625  | 18.259   | 12.8746  | 19.3917  | 14.7006  | 8.32719   |
| ORMDL1      | 34.6967  | 38.6579  | 33.3599  | 32.5425  | 49.4954  | 39.2884   |
| SPAG9       | 18.5122  | 15.4494  | 19.1619  | 15.7724  | 15.5404  | 14.3681   |
| CAMKMT      | 5.99811  | 4.93741  | 4.33184  | 5.82634  | 4.34716  | 3.52295   |
| SLCO1B1     | 0.60982  | 0        | 0        | 0        | 0        | 0.0223538 |
| C20orf202   | 0.464892 | 0.176155 | 0.653577 | 0.68597  | 0.549886 | 0.0827718 |
| B4GALNT3    | 8.07288  | 6.37822  | 8.45168  | 11.8006  | 12.763   | 12.7373   |
| C6orf164    | 1.85455  | 1.33604  | 2.02787  | 1.03194  | 2.4061   | 1.92613   |



|             |           |           |           |           |           |           |
|-------------|-----------|-----------|-----------|-----------|-----------|-----------|
| KRT42P      | 0.731415  | 0.985403  | 0.738246  | 0.621378  | 1.10915   | 0.651124  |
| LOC10050593 | 0.904005  | 1.46532   | 1.48273   | 1.83917   | 0.863649  | 1.12668   |
| MED24       | 21.1095   | 25.8361   | 20.672    | 23.491    | 25.7079   | 22.693    |
| ZNF415      | 5.4364    | 5.6956    | 3.93446   | 4.52725   | 5.43014   | 5.04264   |
| ATP8A2      | 0.19259   | 0.0681105 | 0.0874751 | 0.144671  | 0.0858633 | 0.192023  |
| LOC10013007 | 1.31016   | 0.723975  | 0.371924  | 1.53777   | 1.14736   | 1.42876   |
| GHR         | 12.3732   | 13.8277   | 17.5406   | 8.04855   | 8.90405   | 8.49001   |
| RAB40A      | 0.326228  | 0.28843   | 0.373521  | 0.387689  | 0.365773  | 0.35576   |
| KRTAP13-4   | 0         | 0         | 0         | 0         | 0.21892   | 0         |
| MIR4479     | 0         | 0         | 0         | 0         | 0         | 0         |
| LOC286177   | 0         | 0.02962   | 0         | 0         | 0         | 0         |
| LOC10050566 | 0.254968  | 0.25763   | 0.386024  | 0.273612  | 0.185589  | 0.385864  |
| MIR4714     | 0         | 0         | 0         | 0         | 0         | 0         |
| SPIN2A      | 2.00522   | 2.36385   | 2.21369   | 2.51049   | 3.4589    | 2.65533   |
| C6orf208    | 0.0784863 | 0.138785  | 0.161821  | 0.0368487 | 0.0249942 | 0.0661007 |
| COX7A1      | 23.7664   | 30.6995   | 39.5553   | 35.1364   | 15.3517   | 13.8651   |
| C14orf2     | 158.436   | 211.827   | 153.813   | 214.166   | 123.555   | 137.234   |
| C10orf68    | 0.232128  | 0.256374  | 0.436554  | 0.43593   | 0.483568  | 0.34237   |
| TOP1P2      | 0         | 0         | 0         | 0         | 0         | 0         |
| MIR4302     | 0         | 0         | 0         | 0         | 0         | 0         |
| GRAMD3      | 20.0674   | 16.2436   | 19.0032   | 19.8093   | 25.8331   | 24.9853   |
| IQCB1       | 14.7873   | 16.2587   | 12.7745   | 13.9905   | 13.5316   | 13.6679   |
| LOC10050635 | 0.169919  | 0.100154  | 0.150067  | 0.159551  | 0.144296  | 0.176477  |
| THAP8       | 2.69308   | 3.29294   | 3.2532    | 4.51948   | 4.16036   | 4.46333   |
| LOC10065286 | 0         | 0         | 0         | 0         | 0         | 0.0455459 |
| PTHLH       | 1.83042   | 2.8333    | 1.85883   | 1.91413   | 1.52622   | 2.75104   |
| MEF2D       | 12.2452   | 12.1528   | 14.4045   | 12.876    | 16.5016   | 14.0523   |
| PDP1        | 7.00298   | 5.78464   | 6.55167   | 5.51464   | 5.40677   | 5.07332   |
| LOC644192   | 0.707177  | 0.416827  | 1.42756   | 0         | 0.750675  | 0.881365  |
| PMEL        | 14.703    | 44.7385   | 16.5912   | 43.7679   | 31.0317   | 63.2363   |
| RUNX1T1     | 3.00924   | 2.98581   | 4.16098   | 2.18393   | 4.20255   | 2.62827   |
| PPT1        | 45.4874   | 43.4988   | 37.801    | 39.0697   | 40.9123   | 33.0204   |
| EFCAB4A     | 43.4917   | 60.7619   | 39.7257   | 54.3487   | 45.2963   | 43.5187   |
| KIAA0825    | 0.501671  | 0.230534  | 0.59465   | 0.349684  | 0.753268  | 0.540336  |
| FAM75D5     | 0         | 0         | 0         | 0         | 0.0063204 | 0         |
| ZNF709      | 0.768258  | 0.905661  | 0.969293  | 0.943346  | 1.44283   | 1.12935   |
| GPAM        | 81.2801   | 15.0679   | 73.9428   | 22.5894   | 28.4296   | 20.493    |
| IL17F       | 0         | 0         | 0         | 0         | 0         | 0         |
| MIR4273     | 0         | 0         | 0         | 0         | 0         | 0         |
| MVK         | 58.3925   | 60.0835   | 53.9386   | 60.1566   | 47.3103   | 59.5162   |
| CREM        | 9.36487   | 9.12279   | 7.18523   | 8.11627   | 6.66855   | 7.75166   |
| FAM66E      | 0.269054  | 0.327706  | 0.346567  | 0.238822  | 0.337369  | 0.330087  |
| FST         | 12.4614   | 17.6662   | 15.445    | 26.1185   | 17.8504   | 13.5118   |

|             |          |           |          |          |          |           |
|-------------|----------|-----------|----------|----------|----------|-----------|
| PTK6        | 39.0825  | 49.4593   | 48.6021  | 52.4899  | 57.9195  | 55.3467   |
| DOK3        | 4.72073  | 5.93665   | 4.18042  | 4.2931   | 6.35712  | 4.07705   |
| SPTSSA      | 51.2027  | 41.4713   | 46.1394  | 51.889   | 29.6466  | 26.8002   |
| CAMK2N1     | 27.0816  | 18.9412   | 17.5582  | 33.1756  | 14.3324  | 17.8181   |
| PARS2       | 3.39969  | 4.43354   | 2.57359  | 3.51148  | 3.49152  | 3.25726   |
| NOXRED1     | 0.561831 | 0.397389  | 0.46784  | 0.949592 | 0.679884 | 0.490153  |
| CTSL3       | 0        | 0         | 0        | 0        | 0        | 0         |
| NRG1        | 0.588477 | 1.625     | 1.1371   | 1.12783  | 1.17324  | 1.09623   |
| ALOX5       | 6.19278  | 6.06813   | 5.73306  | 2.62968  | 11.9331  | 4.8177    |
| RPL8        | 1401.89  | 2336.33   | 1800.01  | 2871.53  | 2059.09  | 1995.47   |
| ORMDL2      | 24.645   | 28.7462   | 22.8943  | 26.1401  | 21.1792  | 27.3438   |
| SNORA38     | 0        | 0         | 0        | 0        | 0        | 0         |
| ATP7A       | 6.6587   | 3.69799   | 6.71246  | 4.36727  | 6.43604  | 6.22066   |
| PLCL1       | 0.9959   | 0.995361  | 1.18002  | 0.745397 | 0.900881 | 0.656579  |
| LDHB        | 95.1046  | 106.64    | 128.057  | 86.5332  | 85.7232  | 78.6568   |
| UBE4A       | 21.6898  | 17.806    | 23.0463  | 19.4547  | 23.0287  | 21.3882   |
| MIR4778     | 0        | 0         | 0        | 0        | 0        | 0         |
| CNNM1       | 0.465855 | 0.312461  | 0.364816 | 0.331844 | 0.450174 | 0.450468  |
| OR1L3       | 0        | 0         | 0        | 0        | 0        | 0         |
| TFF1        | 0        | 0         | 0        | 0        | 0        | 0         |
| ZWINT       | 9.24393  | 12.5026   | 5.89102  | 8.49963  | 10.586   | 11.0454   |
| LOC284215   | 0.460556 | 0.380048  | 0.3254   | 0.490115 | 0.938657 | 0.478331  |
| TUB         | 4.76849  | 4.13122   | 5.72922  | 3.79092  | 5.44887  | 5.70985   |
| LOC283693   | 0.253606 | 0.840836  | 0.383963 | 0.297666 | 0.323047 | 0.395092  |
| LGALS8      | 26.2059  | 25.424    | 25.4549  | 21.2434  | 25.0633  | 19.7316   |
| ZMPSTE24    | 27.6259  | 20.234    | 20.0575  | 18.4235  | 16.5554  | 20.2671   |
| PAGE1       | 0        | 0         | 0        | 0        | 0        | 0         |
| BET1        | 12.2867  | 9.37268   | 10.6018  | 8.34076  | 8.81657  | 8.38383   |
| C17orf51    | 2.52952  | 2.35303   | 1.81503  | 1.39584  | 1.26747  | 1.16541   |
| WASH7P      | 41.6853  | 74.6657   | 40.2496  | 59.1116  | 60.3894  | 58.1691   |
| LOC10050554 | 0        | 0         | 0        | 0        | 0        | 0         |
| DNASE1L1    | 7.55169  | 9.60722   | 8.79661  | 8.59122  | 8.62788  | 7.67336   |
| MEOX1       | 8.35722  | 12.952    | 9.13003  | 8.62102  | 8.46647  | 5.33239   |
| LOC10065297 | 0        | 0         | 0        | 0        | 0        | 0         |
| KIAA1522    | 105.552  | 109.285   | 99.5517  | 135.919  | 119.229  | 98.4499   |
| KPNA6       | 16.0749  | 14.1441   | 15.0183  | 14.9973  | 16.2317  | 14.6443   |
| RBPM5       | 28.7646  | 37.6748   | 21.6359  | 24.4682  | 22.0263  | 15.5922   |
| KCNQ1DN     | 0        | 0         | 0        | 0        | 0        | 0.0654598 |
| MIR101-1    | 0        | 0         | 0        | 0        | 0        | 0         |
| WDR76       | 3.23997  | 3.08177   | 2.18059  | 1.95485  | 2.20461  | 1.90065   |
| HSF2BP      | 0.328694 | 0.339045  | 0.456175 | 0.514397 | 0.244238 | 0.17069   |
| NCAPD3      | 5.87179  | 5.40341   | 5.85752  | 3.82571  | 5.60421  | 4.92854   |
| PANX3       | 0        | 0.0588879 | 0        | 0        | 0        | 0         |

|             |          |           |           |           |           |           |
|-------------|----------|-----------|-----------|-----------|-----------|-----------|
| LFNG        | 46.0756  | 64.4427   | 55.0676   | 87.8959   | 62.8178   | 53.9499   |
| VTRNA2-1    | 0        | 0         | 0         | 0         | 0         | 0         |
| LOC10050738 | 0        | 0         | 0         | 0         | 0         | 0         |
| AKR1B1      | 20.585   | 20.8886   | 15.701    | 15.7414   | 18.4245   | 14.1396   |
| PKIA        | 3.05572  | 3.19284   | 4.24069   | 3.45975   | 4.46413   | 3.42836   |
| MIR1264     | 0        | 0         | 0         | 0         | 0         | 0         |
| SORCS3      | 0.166494 | 0.279687  | 0.151245  | 0.312671  | 0.127249  | 0.0622514 |
| C12orf74    | 0        | 0         | 0         | 0         | 0.0357615 | 0         |
| ZNF187      | 7.55056  | 7.8932    | 8.44739   | 8.57691   | 11.3415   | 8.48047   |
| LOC10050719 | 0        | 0.271619  | 0         | 0         | 0         | 0         |
| LILRB4      | 1.67893  | 0.873385  | 0.823934  | 0.333677  | 0.959459  | 0.32792   |
| C8orf47     | 0.90457  | 0.761136  | 0.746059  | 0.648825  | 0.826917  | 1.08297   |
| MIR93       | 0        | 0         | 0         | 0         | 0         | 0         |
| DHX33       | 7.16339  | 6.2871    | 6.27783   | 6.21446   | 7.25185   | 5.72538   |
| UGT3A1      | 0        | 0         | 0.0262271 | 0         | 0         | 0.0431801 |
| MIR153-1    | 0        | 0         | 0         | 0         | 0         | 0         |
| LOC10050617 | 0.374194 | 0.147039  | 0.15737   | 0.234241  | 0.105923  | 0.103636  |
| LINC00487   | 0.625957 | 0.468289  | 0.0364502 | 0.0904252 | 0         | 0         |
| SCARNA4     | 0        | 0         | 0         | 0         | 0         | 0         |
| PVRL3-AS1   | 0        | 0.159205  | 0.54525   | 0.169081  | 0.344059  | 0.224421  |
| TDG         | 12.367   | 11.742    | 11.8291   | 11.927    | 12.3193   | 11.37     |
| GALNT3      | 12.2738  | 7.93831   | 11.7782   | 12.1778   | 10.2433   | 10.8511   |
| ZFPL1       | 20.9534  | 28.2064   | 24.0313   | 30.178    | 26.0384   | 25.1819   |
| UNQ6494     | 0        | 0.0824335 | 0         | 0         | 0.0296913 | 0.0581008 |
| DMXL1       | 6.68611  | 4.2065    | 6.5722    | 4.35675   | 4.8752    | 4.73323   |
| FAM84A      | 16.1401  | 13.4728   | 16.3932   | 17.1026   | 20.3871   | 24.8168   |
| DGKK        | 0        | 0         | 0         | 0         | 0         | 0         |
| LOC10050683 | 2.97871  | 1.11421   | 2.94871   | 2.47423   | 1.82419   | 2.21317   |
| AKAP1       | 36.932   | 32.7569   | 31.2501   | 32.4808   | 26.7131   | 25.4164   |
| ID1         | 88.3664  | 129.971   | 124.273   | 134.883   | 89.5162   | 117.293   |
| KDELR2      | 66.1711  | 51.1951   | 59.3075   | 54.9605   | 51.2313   | 48.4082   |
| TMEM203     | 31.0697  | 37.8623   | 31.6895   | 39.5011   | 33.1851   | 31.9548   |
| LOC10050760 | 0        | 0         | 0         | 0         | 0         | 0         |
| TSPAN14     | 30.2581  | 29.5964   | 32.4637   | 34.4428   | 30.7207   | 30.2256   |
| RBM45       | 5.17079  | 6.13021   | 3.91431   | 5.07598   | 5.57616   | 4.94317   |
| TFB2M       | 9.98266  | 8.82604   | 9.15722   | 7.77454   | 8.15322   | 8.41634   |
| ADAMTS3     | 0.181021 | 0.305545  | 0.249152  | 0.0927141 | 0.272511  | 0.338414  |
| ING5        | 8.46228  | 12.5406   | 9.96644   | 11.5973   | 12.7017   | 11.6775   |
| MIR16-2     | 0        | 0         | 0         | 0         | 0         | 0         |
| GREM1       | 1.98788  | 0.944645  | 2.52088   | 0.886571  | 3.5767    | 2.0284    |
| TRIM36      | 2.71459  | 0.328477  | 0.315361  | 0.447867  | 0.79339   | 0.774369  |
| CTDSP2      | 62.6975  | 59.5419   | 68.1627   | 55.9329   | 69.4689   | 60.7417   |
| ATP5EP2     | 469.53   | 575.243   | 441.232   | 583.901   | 367.793   | 410.301   |

|             |           |          |           |           |           |           |
|-------------|-----------|----------|-----------|-----------|-----------|-----------|
| RNF208      | 10.4854   | 12.5815  | 9.9624    | 16.6773   | 9.26774   | 13.3348   |
| MTF1        | 4.64323   | 4.04914  | 4.62015   | 3.50728   | 4.22506   | 3.79534   |
| ZSCAN30     | 7.31316   | 6.96828  | 8.20419   | 7.68856   | 7.85041   | 8.33382   |
| COQ10A      | 9.6804    | 11.2411  | 7.48707   | 7.25335   | 9.99058   | 5.9066    |
| OBFC2B      | 21.2329   | 25.3742  | 18.3696   | 20.8868   | 17.2386   | 17.5935   |
| LOC10050597 | 0         | 0        | 0         | 0         | 0         | 0         |
| TMBIM1      | 144.441   | 133.859  | 141.972   | 146.994   | 133.61    | 129.612   |
| GALNT8      | 0.0480503 | 0.169932 | 0.0363743 | 0.0451184 | 0.0306035 | 0.0598858 |
| ATG9A       | 24.3416   | 27.3218  | 27.4318   | 29.1701   | 27.6216   | 28.5589   |
| CYP4F22     | 61.5073   | 65.0458  | 56.6555   | 64.7988   | 43.5925   | 51.2251   |
| C11orf39    | 0         | 0        | 0.388662  | 0         | 0         | 0         |
| ATPAF1      | 17.7108   | 17.3082  | 16.2346   | 16.1194   | 14.1318   | 13.6451   |
| DMWD        | 6.98029   | 7.85947  | 9.48432   | 7.36667   | 9.15755   | 8.35266   |
| USP19       | 17.7246   | 19.8731  | 21.0672   | 19.3581   | 24.7039   | 20.2622   |
| SRP68       | 46.2906   | 47.5238  | 43.1499   | 48.099    | 45.8975   | 48.0522   |
| TRABD       | 26.6671   | 49.6406  | 31.8272   | 42.7921   | 44.0233   | 35.1611   |
| C8ORFK29    | 0.931482  | 1.29416  | 0.805871  | 0.999597  | 1.01703   | 1.57554   |
| PIK3CB      | 9.20184   | 4.76169  | 10.5536   | 7.05101   | 8.09522   | 6.96158   |
| SHBG        | 0.432795  | 0.53146  | 0.327628  | 0.481645  | 0.309525  | 0.0599324 |
| USP21       | 12.9049   | 16.22    | 15.6492   | 16.0552   | 17.7408   | 17.708    |
| EAF2        | 1.26022   | 1.62067  | 0.953996  | 1.39848   | 0.802643  | 0.928103  |
| MIR4527     | 0         | 0        | 0         | 0         | 0         | 0         |
| RPS4Y1      | 315.454   | 410.287  | 0.614145  | 0.126964  | 0         | 0         |
| LOC10013111 | 0         | 0        | 0.0524652 | 0         | 0         | 0         |
| AIF1        | 25.6397   | 27.9843  | 20.4644   | 10.7661   | 29.2566   | 14.0109   |
| LOC10013110 | 0         | 0        | 0         | 0         | 0         | 0.0354323 |
| KDM2A       | 29.4124   | 28.1864  | 32.719    | 27.9892   | 33.0891   | 27.6473   |
| LOC10028913 | 156.396   | 165.401  | 131.321   | 171.607   | 150.206   | 122.895   |
| MIR345      | 0         | 0        | 0         | 0         | 0         | 0         |
| LTBR        | 48.1761   | 63.2663  | 47.1373   | 52.2876   | 53.5824   | 48.263    |
| HSFY2       | 0         | 0.109583 | 0         | 0         | 0         | 0         |
| GBE1        | 27.7368   | 22.4017  | 25.1382   | 16.1914   | 14.1      | 14.932    |
| SLC10A3     | 27.8564   | 30.3056  | 30.4955   | 32.3374   | 29.9909   | 33.2284   |
| POLQ        | 0.89419   | 0.895363 | 0.717685  | 0.839631  | 1.13903   | 0.980173  |
| C12orf5     | 2.02647   | 1.6797   | 1.51662   | 1.42712   | 1.46667   | 1.24129   |
| SERPINA11   | 1.24853   | 0.324669 | 0.778357  | 0.551696  | 2.3856    | 3.47827   |
| SAMD4A      | 8.1547    | 7.27899  | 7.10639   | 9.01015   | 5.27677   | 4.80891   |
| LOC440600   | 0.0385063 | 0        | 0.116598  | 0.144627  | 0.147149  | 0.119977  |
| HNRNPR      | 58.3534   | 46.6729  | 47.2443   | 44.1476   | 45.1875   | 42.3645   |
| NOP14       | 15.7399   | 14.2515  | 14.5781   | 15.2315   | 15.038    | 12.166    |
| VSIG2       | 2.23961   | 2.88018  | 1.61834   | 3.5368    | 2.46382   | 2.28376   |
| DCAF4L1     | 0.769419  | 0.465449 | 0.398521  | 0.247162  | 0.386879  | 0.492087  |
| SIX1        | 5.5984    | 4.58677  | 5.73545   | 3.0139    | 1.35495   | 0.907057  |

|             |           |          |           |           |           |           |
|-------------|-----------|----------|-----------|-----------|-----------|-----------|
| LOC400553   | 0.453812  | 0.225693 | 1.00914   | 0.239694  | 0.523877  | 0.777691  |
| LOC10050694 | 0         | 0        | 0.262851  | 0.46882   | 0.415195  | 0.103711  |
| TIPARP-AS1  | 0.198656  | 0.224413 | 0.0647869 | 0.194639  | 0.328373  | 0.222807  |
| IFNG        | 0.648894  | 0.737629 | 0.0701738 | 0         | 0.354244  | 0         |
| RASAL2      | 6.47456   | 4.19556  | 5.68957   | 4.26638   | 5.9439    | 7.12494   |
| EPB41L4A-AS | 27.3219   | 44.6475  | 36.5159   | 54.406    | 36.9631   | 30.5878   |
| PPP1R15A    | 21.4051   | 24.1549  | 43.3927   | 27.5313   | 40.0589   | 36.3833   |
| MIR1322     | 0         | 0        | 0         | 0         | 0         | 0         |
| LRIT1       | 0         | 0        | 0         | 0         | 0         | 0         |
| HTR7        | 0.367943  | 0.16802  | 0.122756  | 0.261051  | 0.158161  | 0.208915  |
| LOC10050686 | 0.562276  | 0.248564 | 0.425646  | 0.65996   | 0.268587  | 0.700773  |
| C4orf17     | 0.0649181 | 0        | 0.0491434 | 0         | 0         | 0         |
| TTC9B       | 0         | 0.129819 | 0.111152  | 0         | 0.0935179 | 0         |
| SLCO2B1     | 11.7466   | 10.9346  | 13.7189   | 7.06374   | 16.9173   | 11.0785   |
| C3orf45     | 0.884429  | 0.397086 | 0.193742  | 0.428279  | 0.597337  | 0.927204  |
| MIR933      | 0         | 0        | 0         | 0         | 0         | 0         |
| ACSM3       | 46.4228   | 27.5561  | 18.2319   | 14.2946   | 14.9919   | 18.0197   |
| NR4A3       | 0.47742   | 0.452171 | 0.37428   | 2.60621   | 0.661716  | 0.403501  |
| CD48        | 6.36431   | 8.58344  | 7.26755   | 3.44379   | 11.1298   | 3.89875   |
| OR10A5      | 0         | 0        | 0         | 0         | 0         | 0         |
| AVPR1B      | 0.0592114 | 0        | 0         | 0.0555985 | 0.0377121 | 0.036898  |
| ARL4C       | 12.8406   | 12.944   | 10.4752   | 15.4596   | 12.7166   | 15.5488   |
| SYN3        | 0.359818  | 0.171618 | 0.278958  | 0.136698  | 0.208441  | 0.0926097 |
| ANTXR1      | 23.559    | 20.6652  | 28.3251   | 25.6054   | 27.9046   | 19.7056   |
| PRDX2       | 446.632   | 475.68   | 422.742   | 480.254   | 368.728   | 485.861   |
| PAX9        | 0.255226  | 0.141034 | 0.313962  | 0.17974   | 0.203193  | 0.159046  |
| CCDC64      | 21.5368   | 25.2559  | 28.3504   | 26.3994   | 42.8389   | 46.2809   |
| BTNL8       | 0.730996  | 0.472524 | 0.309623  | 0.253773  | 0.0294799 | 0.11538   |
| SNORD114-1  | 0         | 0        | 0         | 0         | 0         | 0         |
| RNF224      | 0.360215  | 0.529699 | 0.822721  | 1.08371   | 1.3993    | 1.40252   |
| CDY2B       | 0         | 0        | 0         | 0         | 0         | 0         |
| COMMD5      | 20.0339   | 24.5448  | 17.2182   | 20.4062   | 17.9011   | 20.9314   |
| KCNE4       | 1.51196   | 1.33678  | 0.712173  | 1.19886   | 0.791781  | 0.586252  |
| LOC10028750 | 0         | 0        | 0         | 0         | 0         | 0         |
| ZNF484      | 1.4654    | 0.790885 | 1.10931   | 0.572408  | 1.25252   | 1.0689    |
| DRP2        | 0.669348  | 0.542527 | 0.316921  | 0.223368  | 0.515052  | 0.477885  |
| ABLIM3      | 10.1451   | 12.3951  | 9.15481   | 5.9091    | 6.19044   | 4.01928   |
| C4orf11     | 0         | 0        | 0         | 0         | 0         | 0         |
| FKBP9       | 33.7751   | 36.1696  | 47.4496   | 38.5197   | 38.0104   | 32.5676   |
| FAM18B2-CD  | 3.60E-06  | 3.15E-06 | 3.40E-06  | 3.00E-06  | 0.283998  | 3.67E-06  |
| MLF1        | 5.017     | 3.82049  | 3.38446   | 3.16611   | 2.57365   | 2.45935   |
| ZNF256      | 3.88452   | 4.41572  | 4.62095   | 3.95146   | 4.0351    | 3.83273   |
| MIR4773-2   | 0         | 0        | 0         | 0         | 0         | 0         |

|             |           |          |          |           |            |           |
|-------------|-----------|----------|----------|-----------|------------|-----------|
| THEM4       | 5.26782   | 4.98662  | 4.21322  | 4.07246   | 3.12985    | 2.77229   |
| WFDC1       | 4.12432   | 2.5946   | 2.3416   | 5.06426   | 3.38453    | 5.09077   |
| LOC10050667 | 0.156842  | 0.502788 | 0.230818 | 0.462807  | 0.311542   | 0.197649  |
| LOC10065300 | 4.62444   | 4.06747  | 6.17027  | 4.54095   | 5.19789    | 6.10796   |
| MGC16075    | 0         | 0        | 0.143519 | 0         | 0.0603749  | 0         |
| C22orf46    | 6.93963   | 7.71233  | 7.21967  | 5.78814   | 6.55576    | 6.58336   |
| UCN         | 1.613     | 4.27833  | 2.06639  | 4.7601    | 3.36327    | 2.87186   |
| TSPO2       | 0         | 0        | 0.349511 | 0.568682  | 0.0735152  | 0.0719283 |
| LOC647264   | 0.11046   | 0        | 0        | 0         | 0.474882   | 0.103251  |
| MIR4456     | 0         | 0        | 0        | 0         | 0          | 0         |
| HIRA        | 10.5678   | 10.9543  | 11.0895  | 11.0864   | 11.1714    | 9.59803   |
| C17orf69    | 6.79068   | 6.788    | 5.95385  | 7.79998   | 9.57931    | 7.88768   |
| ZNF702P     | 1.22708   | 0.791692 | 0.954016 | 0.592109  | 0.781684   | 0.806136  |
| MYT1L       | 0.0133323 | 0        | 0        | 0.0125188 | 0.00849141 | 0         |
| TCF7L2      | 14.4107   | 12.4986  | 15.2266  | 14.5824   | 14.0446    | 12.916    |
| GCC1        | 8.31519   | 7.03937  | 7.23973  | 6.25954   | 7.89148    | 7.38352   |
| SCP2        | 196.473   | 127.025  | 148.078  | 117.948   | 109.313    | 105.649   |
| OR56A3      | 0         | 0        | 0        | 0         | 0          | 0         |
| TNP1        | 0         | 0        | 0        | 0         | 0          | 0         |
| IYD         | 0.706379  | 0.092701 | 0.583312 | 0.374135  | 0.155846   | 0.280264  |
| PKIB        | 11.9284   | 8.57827  | 9.2753   | 9.42572   | 5.55512    | 8.74273   |
| KRTAP22-2   | 0         | 0        | 0        | 0         | 0          | 0         |
| C18orf32    | 51.0495   | 38.9037  | 39.891   | 34.443    | 32.3445    | 33.898    |
| RNU4ATAC    | 0         | 0        | 0        | 0         | 0          | 0         |
| MTTP        | 0.0952443 | 0.105261 | 0.198276 | 0.0447164 | 0.075827   | 0.0593522 |
| THTPA       | 9.86578   | 10.6253  | 11.478   | 8.50788   | 13.1486    | 11.8635   |
| MLH1        | 16.9859   | 12.9512  | 13.0404  | 14.5911   | 13.5511    | 12.621    |
| C19orf46    | 5.49583   | 5.04359  | 2.73847  | 3.46211   | 2.92432    | 2.9479    |
| METTL11B    | 0         | 0        | 0        | 0         | 0          | 0         |
| MIR3650     | 0         | 0        | 0        | 0         | 0          | 0         |
| GAGE12H     | 0         | 0        | 0        | 0         | 0          | 0         |
| ITGA10      | 2.42082   | 1.90983  | 1.80438  | 1.97585   | 1.82648    | 1.75224   |
| FLJ38717    | 0.914987  | 0.505609 | 1.47188  | 0.680167  | 1.62687    | 0.879029  |
| NUP155      | 4.56083   | 3.39749  | 4.42039  | 3.30445   | 3.36199    | 2.75571   |
| FAM194B     | 0         | 0        | 0        | 0         | 0          | 0         |
| LOC10013277 | 0.557183  | 0.805998 | 1.53911  | 0.409734  | 1.15088    | 1.01477   |
| CLEC1A      | 4.06992   | 4.48492  | 2.72374  | 2.16003   | 3.64404    | 2.13188   |
| C3orf26     | 15.6049   | 13.6153  | 14.4357  | 12.05     | 11.6578    | 9.57358   |
| WFDC11      | 0         | 0.20373  | 0.174435 | 0.432736  | 0          | 0         |
| CENPK       | 1.94724   | 4.30407  | 3.04027  | 1.94271   | 3.91441    | 3.14735   |
| PCGF6       | 4.53466   | 4.91918  | 4.09219  | 4.35401   | 5.08515    | 4.17173   |
| SLC9B1      | 0.252156  | 0.41596  | 0.766617 | 0.168496  | 0.608183   | 0.495324  |
| WSCD2       | 0.438284  | 0.424408 | 0.679366 | 0.548722  | 0.332316   | 0.481212  |

|             |          |          |          |          |          |           |
|-------------|----------|----------|----------|----------|----------|-----------|
| MIR4281     | 0        | 0        | 0        | 0        | 0        | 0         |
| PRKAG2      | 15.3301  | 17.0074  | 15.6998  | 21.6654  | 14.4144  | 14.2966   |
| MIR548AI    | 0        | 0        | 0        | 0        | 0        | 0         |
| B3GNT5      | 7.22467  | 5.21862  | 8.81135  | 4.67775  | 7.29312  | 7.28282   |
| OBFC1       | 5.38794  | 6.03919  | 5.52742  | 5.95768  | 5.55058  | 4.96291   |
| PAX4        | 0        | 0        | 0        | 0        | 0        | 0         |
| KRT27       | 55.7319  | 23.7032  | 8.04796  | 260.313  | 22.7107  | 164.925   |
| LOC10050636 | 0.55508  | 0.327178 | 0.700331 | 0.608079 | 0.294611 | 0.288252  |
| RNF34       | 14.0026  | 14.4222  | 11.4606  | 12.4269  | 13.6906  | 14.2084   |
| CITED1      | 0.810173 | 0.96701  | 0.939125 | 1.027    | 0.604692 | 1.41371   |
| SHROOM1     | 2.40527  | 4.2928   | 2.74153  | 2.7484   | 3.4521   | 3.97072   |
| CT47A4      | 0        | 0        | 0        | 0        | 0        | 0         |
| OR10G8      | 0        | 0        | 0        | 0        | 0        | 0         |
| MDH2        | 207.475  | 191.285  | 171.802  | 187.486  | 164.487  | 181.501   |
| MYL5        | 23.4361  | 46.6381  | 29.6346  | 43.5223  | 38.9496  | 28.8684   |
| SCXA        | 0.736643 | 2.29776  | 1.0796   | 1.33912  | 1.20108  | 1.1804    |
| MIR3912     | 0        | 0        | 0        | 0        | 0        | 0         |
| GABRG2      | 0        | 0        | 0        | 0        | 0        | 0         |
| AFAP1       | 4.27065  | 3.54125  | 3.68111  | 3.38075  | 4.3936   | 3.59019   |
| SEC24C      | 40.7108  | 36.4967  | 37.2501  | 36.0653  | 39.2433  | 38.978    |
| C1orf174    | 19.7723  | 26.756   | 19.2992  | 25.9683  | 26.8058  | 20.8259   |
| CX3CR1      | 2.28366  | 1.18498  | 1.64206  | 1.19864  | 2.31796  | 1.41133   |
| CAPZA2      | 44.6428  | 37.7559  | 39.4055  | 25.6935  | 34.9652  | 30.0483   |
| ZNF442      | 0.813041 | 0.687958 | 0.910038 | 0.73024  | 1.12583  | 0.661041  |
| GOLGA6L2    | 0        | 0        | 0        | 0        | 0        | 0         |
| CYP4X1      | 12.3615  | 6.54993  | 8.44476  | 10.1917  | 9.24472  | 7.91787   |
| CLIC4       | 55.0901  | 35.1334  | 40.8095  | 37.1486  | 36.0065  | 39.4132   |
| C12orf61    | 0.502381 | 0.777303 | 0.475381 | 0.825523 | 0.559946 | 0.70439   |
| IER2        | 53.3423  | 65.7421  | 86.3935  | 66.9408  | 76.3694  | 67.7658   |
| ZNF700      | 21.5164  | 18.9311  | 18.4756  | 19.1574  | 22.3742  | 21.1101   |
| RBBP6       | 21.2079  | 17.2988  | 23.1479  | 18.7091  | 24.9489  | 21.3183   |
| SMU1        | 7.09894  | 7.48663  | 6.69456  | 7.49744  | 7.7863   | 7.52624   |
| RAB23       | 6.50123  | 4.00269  | 5.3905   | 4.65197  | 3.99291  | 5.78887   |
| DIAPH1      | 30.219   | 22.939   | 24.6903  | 23.2688  | 27.0274  | 21.4328   |
| FBXO39      | 0.317663 | 0.3932   | 0.192378 | 0.417593 | 0.242785 | 0.0791816 |
| GTPBP10     | 3.35769  | 3.49625  | 4.29959  | 3.39387  | 3.65756  | 3.44756   |
| MIR302E     | 0        | 0        | 0        | 0        | 0        | 0         |
| KIF5C       | 0        | 0        | 0.406623 | 0.525113 | 0.875693 | 0.345851  |
| C12orf23    | 10.0924  | 7.96612  | 10.386   | 6.48257  | 9.50215  | 7.71108   |
| CLDN2       | 0.248949 | 0.160773 | 0.20157  | 0.261457 | 0.128007 | 0.145189  |
| PRRX2       | 10.0151  | 15.3284  | 14.4621  | 22.127   | 17.6351  | 13.6357   |
| RNU12       | 0        | 0        | 0        | 0        | 0        | 0         |
| LRFN5       | 0.472221 | 0.231949 | 0.476632 | 0.270972 | 0.267342 | 0.163482  |

|             |           |           |           |           |           |           |
|-------------|-----------|-----------|-----------|-----------|-----------|-----------|
| TMEM188     | 12.5982   | 12.222    | 10.3162   | 10.1264   | 13.0817   | 10.7221   |
| LOC220906   | 13.4029   | 12.8669   | 10.6378   | 9.35629   | 10.6923   | 9.53307   |
| C4orf41     | 15.2819   | 10.0294   | 13.6424   | 11.0334   | 13.8908   | 11.1102   |
| TAS2R42     | 0         | 0         | 0         | 0         | 0         | 0         |
| COQ10B      | 17.3075   | 14.143    | 16.9928   | 13.0505   | 13.729    | 12.4195   |
| PCYT2       | 21.612    | 24.6831   | 16.3765   | 21.2982   | 15.428    | 18.6551   |
| TSFM        | 20.6987   | 19.265    | 17.7168   | 13.8172   | 16.3784   | 15.672    |
| POLR3E      | 16.0001   | 16.4983   | 17.7159   | 16.2185   | 17.7291   | 17.0101   |
| DNAJC15     | 19.1657   | 15.9896   | 14.2722   | 12.7192   | 10.4401   | 11.0453   |
| NBPF4       | 0         | 0.0357139 | 0.0305786 | 0         | 0.0578863 | 0         |
| SSTR4       | 0         | 0         | 0         | 0.083039  | 0         | 0         |
| MCU         | 8.43665   | 7.04144   | 9.83535   | 8.68238   | 8.8123    | 8.05428   |
| BOK         | 53.3583   | 81.4599   | 68.9317   | 61.5054   | 59.2979   | 62.3088   |
| USP50       | 0.185445  | 0.282575  | 0         | 0.122035  | 0.0574576 | 0.203962  |
| LOC10049948 | 1.52876   | 2.13784   | 1.57649   | 1.61305   | 1.65804   | 1.35487   |
| GADD45G     | 26.6606   | 46.8558   | 22.8075   | 30.5291   | 29.4049   | 30.2559   |
| LOC10050637 | 0.0746916 | 0         | 0         | 0         | 0         | 0         |
| LOC283038   | 0.593996  | 0.72851   | 0.923395  | 0.490113  | 0.595593  | 0.614834  |
| MIR4803     | 0         | 0         | 0         | 0         | 0         | 0         |
| TRIM39      | 8.67421   | 8.94341   | 7.16986   | 7.30029   | 9.11454   | 7.69181   |
| MIR676      | 0         | 0         | 0         | 0         | 0         | 0         |
| CRELD1      | 15.1178   | 17.7069   | 21.2098   | 22.0633   | 16.6216   | 20.1309   |
| AGBL5       | 11.9384   | 13.0203   | 12.4239   | 12.3989   | 12.1686   | 11.5738   |
| LOC10012993 | 0.100031  | 0.316746  | 0.446544  | 2.50E-26  | 0.147348  | 0.116609  |
| PAK6        | 8.15902   | 12.3342   | 11.9347   | 16.3055   | 13.9302   | 11.202    |
| MIR4315-1   | 0         | 0         | 0         | 0         | 0         | 0         |
| RIOK1       | 12.0998   | 11.7825   | 13.918    | 12.6789   | 13.0188   | 11.8154   |
| TNS3        | 14.0597   | 11.2626   | 18.3238   | 13.9626   | 15.5596   | 13.7247   |
| AP1B1P1     | 0.452003  | 0         | 0         | 0         | 0         | 0         |
| IDH3A       | 77.3113   | 66.2229   | 52.3105   | 60.8899   | 49.6078   | 47.6374   |
| FBXO10      | 2.68766   | 2.00204   | 2.70742   | 2.54354   | 3.05964   | 3.04635   |
| LOC10050578 | 0         | 0         | 0         | 0         | 0         | 0         |
| SUPT5H      | 34.993    | 39.8069   | 36.8532   | 38.2788   | 41.4804   | 42.8478   |
| LOC10065293 | 0         | 0         | 0         | 0         | 0         | 0         |
| RNU1-2      | 48.9911   | 54.6816   | 26.1981   | 59.5068   | 34.2526   | 27.9645   |
| DAOA-AS1    | 0         | 0         | 0         | 0         | 0         | 0         |
| RP1-177G6.2 | 0         | 0         | 0         | 0.0732158 | 0.0496617 | 0.0485897 |
| CDK16       | 31.5933   | 36.2146   | 34.1483   | 40.0564   | 37.8925   | 33.1396   |
| SNORD114-2  | 0         | 0         | 0         | 0         | 0         | 0         |
| OCM2        | 0.123543  | 0.655376  | 0         | 0.232011  | 0.491784  | 0.481169  |
| PCDH20      | 0.727965  | 0.697256  | 0.795995  | 0.930384  | 0.978806  | 1.2853    |
| CD86        | 1.10017   | 0.910498  | 1.61266   | 0.53052   | 1.97834   | 0.81617   |
| INSL6       | 0         | 0.330669  | 0         | 0         | 0.119102  | 0         |



|             |           |           |           |            |           |           |
|-------------|-----------|-----------|-----------|------------|-----------|-----------|
| RPRD1A      | 15.5943   | 12.9824   | 15.7687   | 12.6976    | 14.3254   | 11.7606   |
| COL4A6      | 3.07685   | 4.38903   | 3.28544   | 3.55714    | 6.11214   | 4.45903   |
| PPP1R15B    | 15.6459   | 11.2857   | 14.8809   | 10.5475    | 12.2994   | 14.6134   |
| TRIP10      | 45.2543   | 57.6927   | 49.8377   | 50.0013    | 51.6038   | 43.3411   |
| SLITRK1     | 0.0556852 | 0.0328222 | 0.0140513 | 0.0174292  | 0.0118221 | 0.0231338 |
| ASB10       | 0         | 0         | 0         | 0.227501   | 0         | 0         |
| KIAA1143    | 10.4521   | 8.59516   | 10.6206   | 7.91477    | 8.98333   | 7.17861   |
| LOC400940   | 0         | 0         | 0         | 0          | 0         | 0         |
| MIR3924     | 0         | 0         | 0         | 0          | 0         | 0         |
| MUC12       | 0.0229173 | 0.030393  | 0.0260227 | 0.00537974 | 0.0328413 | 0.0107108 |
| LOC10028918 | 0         | 0         | 0         | 0          | 0         | 0         |
| RHOB        | 66.5791   | 92.6375   | 82.4975   | 91.2188    | 69.6549   | 70.1818   |
| BANK1       | 1.2709    | 1.30624   | 2.24307   | 1.56051    | 1.55976   | 1.00872   |
| CDADC1      | 5.135     | 4.42638   | 4.03391   | 4.0155     | 3.63404   | 3.31334   |
| SLC22A3     | 9.67804   | 8.55167   | 9.68521   | 8.08906    | 13.2442   | 9.71611   |
| C15orf58    | 1.29917   | 1.4358    | 1.90549   | 1.37239    | 1.55147   | 1.41678   |
| TMEM173     | 24.5391   | 35.4986   | 24.7287   | 21.0824    | 39.5124   | 25.5188   |
| TMEM194B    | 1.75258   | 1.83558   | 1.32671   | 2.00009    | 1.85465   | 1.05853   |
| TPTE        | 0         | 0         | 0.0187826 | 0.0232978  | 0.0987721 | 0.0309242 |
| LOC10050658 | 0.156546  | 0.692042  | 0         | 0.293989   | 0.19941   | 0.292659  |
| HAUS6       | 4.56373   | 4.54267   | 4.53009   | 4.22851    | 5.00485   | 4.31297   |
| SKCG-1      | 0         | 0         | 0         | 0          | 0         | 0         |
| OR4F5       | 0         | 0         | 0         | 0          | 0         | 0         |
| ACTL8       | 0         | 0.0559788 | 0         | 0          | 0.0403254 | 0.07891   |
| HBEGF       | 15.0679   | 13.5886   | 15.2196   | 13.0571    | 10.5017   | 12.8773   |
| FAM203B     | 5.73196   | 6.07401   | 4.43484   | 5.97591    | 5.3687    | 5.93568   |
| MAPK11      | 16.4309   | 28.754    | 16.8415   | 18.1393    | 23.0931   | 17.6206   |
| FAM76B      | 8.19938   | 9.47656   | 10.6004   | 7.83821    | 12.4631   | 9.18274   |
| SLC35E2B    | 15.5752   | 16.9044   | 21.445    | 21.84      | 34.5049   | 32.3454   |
| KRTAP4-12   | 10.6994   | 2.08227   | 0.0809952 | 74.3447    | 1.15953   | 721.031   |
| CYSLTR1     | 1.49127   | 1.44406   | 0.860115  | 0.26672    | 1.76391   | 1.10631   |
| LOC283483   | 0         | 0         | 0         | 0          | 0         | 0         |
| WNT9A       | 0         | 0.159122  | 0.885571  | 0.422483   | 0.573134  | 1.00937   |
| LINC00474   | 0         | 0         | 0         | 0          | 0         | 0         |
| NFS1        | 18.363    | 18.7161   | 12.79     | 16.9739    | 15.7724   | 14.5347   |
| MAP1B       | 7.99291   | 5.25677   | 9.08492   | 5.73018    | 6.81928   | 5.36699   |
| NR1D2       | 22.7766   | 23.6762   | 20.4449   | 18.1116    | 16.4731   | 15.7255   |
| ZNF350      | 6.76969   | 6.0237    | 6.20876   | 5.66392    | 6.63331   | 5.65182   |
| NEFM        | 0.160522  | 0.189232  | 0.361768  | 0.259193   | 0.508434  | 0.227654  |
| ZCRB1       | 20.1041   | 18.8263   | 19.3774   | 17.7076    | 17.6377   | 15.3513   |
| LOC645676   | 0.822707  | 1.45538   | 1.38383   | 1.3427     | 1.64444   | 0.698655  |
| MIR4774     | 0         | 0         | 0         | 0          | 0         | 0         |
| RXFP4       | 0         | 0         | 0         | 0.0930236  | 0.0630972 | 0.0617352 |

|             |            |           |           |           |           |           |
|-------------|------------|-----------|-----------|-----------|-----------|-----------|
| SEMA3E      | 1.08309    | 0.631683  | 0.687682  | 0.783497  | 0.746113  | 0.670337  |
| SLC25A47    | 0.0607711  | 0.05373   | 0.0460041 | 0         | 0         | 0         |
| MIR4487     | 0          | 0         | 0         | 0         | 0         | 0         |
| COG5        | 10.4426    | 8.16378   | 10.5317   | 8.03224   | 10.0247   | 9.62557   |
| SAP30L      | 11.9863    | 12.0254   | 11.7002   | 11.3178   | 11.4519   | 9.02912   |
| NEURL2      | 1.95469    | 1.80941   | 1.75261   | 1.92894   | 1.81778   | 2.77677   |
| C17orf77    | 0.0798791  | 0         | 0         | 0         | 0.0254377 | 0         |
| KIAA0226L   | 2.28033    | 1.49583   | 1.89328   | 0.57559   | 3.17019   | 1.71132   |
| ZNF250      | 2.19633    | 2.30095   | 2.60548   | 2.22973   | 3.76527   | 3.07163   |
| ALDOC       | 23.7689    | 23.5708   | 40.8007   | 33.8398   | 43.2062   | 34.5074   |
| IL12A       | 2.25351    | 1.39469   | 0.454913  | 0.634804  | 0.478425  | 0.514908  |
| METTL11A    | 21.5739    | 25.0901   | 19.8498   | 21.0411   | 17.1633   | 22.315    |
| RAD23B      | 80.5076    | 63.4909   | 69.6928   | 59.153    | 60.9425   | 68.3802   |
| TECRL       | 0.0709984  | 0.282475  | 0.188112  | 0.199999  | 1.26614   | 1.06184   |
| WNK1        | 27.7115    | 19.9786   | 32.6429   | 23.1042   | 26.0748   | 23.687    |
| LOC10028721 | 1.52E-08   | 1.09E-06  | 4.56E-06  | 9.74E-10  | 4.61E-08  | 4.99E-05  |
| TEKT1       | 0          | 0.136153  | 0         | 0.0722994 | 0         | 0         |
| LOC728734   | 2.13024    | 1.67859   | 2.1155    | 3.27888   | 2.14673   | 1.70179   |
| SNAR-B1     | 0          | 0         | 0         | 0         | 0         | 0         |
| PCDHB8      | 0.0831686  | 0.174557  | 0.55481   | 0.183608  | 0.21765   | 0.262079  |
| LOC10050647 | 0.106714   | 0.0943496 | 0.0403915 | 0         | 0.0679666 | 0         |
| PON3        | 33.9265    | 21.0555   | 30.8334   | 23.7814   | 25.3999   | 29.6414   |
| ADH1C       | 5.05953    | 10.8052   | 7.99333   | 4.20028   | 4.6702    | 2.37631   |
| KIAA1199    | 2.59412    | 1.84198   | 1.99429   | 2.34749   | 3.51844   | 3.20796   |
| C14orf167   | 5.24657    | 4.33638   | 7.93671   | 7.36224   | 8.30015   | 7.55816   |
| GAGE12F     | 0          | 0         | 0         | 0         | 0         | 0         |
| SNORD116-6  | 0          | 0         | 0         | 0         | 0         | 0         |
| OR6C76      | 0          | 0         | 0         | 0         | 0         | 0         |
| LOC10050674 | 0          | 0.365096  | 0         | 0.387745  | 0         | 0.257327  |
| MIR3611     | 0          | 0         | 0         | 0         | 0         | 0         |
| BPTF        | 8.68594    | 6.47068   | 9.68492   | 8.07812   | 9.84159   | 8.40085   |
| RAP1A       | 71.1177    | 59.3219   | 54.5615   | 45.9178   | 43.3437   | 44.1585   |
| IDH3B       | 73.3482    | 92.8192   | 69.7243   | 84.8258   | 80.5514   | 75.9622   |
| EXOC4       | 16.5842    | 13.2801   | 17.7692   | 15.9643   | 16.9296   | 16.2751   |
| STK32C      | 2.08352    | 4.15547   | 3.26451   | 3.50331   | 3.54897   | 2.86847   |
| CCDC107     | 25.3135    | 37.6578   | 33.5513   | 39.4395   | 28.9601   | 24.014    |
| CYC1        | 157.032    | 173.916   | 129.892   | 169.995   | 139.572   | 131.187   |
| SLC8A2      | 0.301537   | 0.233275  | 0.399464  | 0.54858   | 0.156041  | 0.258369  |
| DDR2        | 3.18292    | 1.766     | 5.22015   | 1.34838   | 1.74903   | 1.38057   |
| GPR158      | 0.0286204  | 0.0885654 | 0.0649975 | 0.0307896 | 0.0546856 | 0.0267526 |
| DCAF5       | 16.1355    | 14.8033   | 17.5775   | 15.6015   | 19.3925   | 16.3929   |
| ANKRD30A    | 0.00550529 | 0         | 0.0166701 | 0         | 0         | 0         |
| OR8K1       | 0          | 0         | 0         | 0         | 0         | 0         |

|             |          |           |           |          |           |           |
|-------------|----------|-----------|-----------|----------|-----------|-----------|
| REEP4       | 42.7256  | 63.7492   | 54.2993   | 79.3002  | 79.531    | 85.8212   |
| PADI3       | 1.98552  | 1.28917   | 0.798494  | 11.3901  | 0.71133   | 17.0321   |
| TEAD1       | 10.139   | 9.29237   | 11.7217   | 7.58054  | 10.3794   | 8.943     |
| LINC00410   | 0        | 0         | 0         | 0        | 0         | 0         |
| SOCS1       | 4.97576  | 13.1978   | 4.60372   | 6.48911  | 5.86869   | 4.53619   |
| CLDN9       | 0.703857 | 0.977909  | 0.228353  | 0.613702 | 0.512332  | 0.438614  |
| FDFT1       | 207.442  | 166.93    | 143.038   | 147.692  | 118.791   | 133.982   |
| LEKR1       | 0.106961 | 0.212779  | 0.464114  | 0.674143 | 0.557237  | 0.371471  |
| ZNF891      | 1.61303  | 0.874083  | 1.06351   | 0.684015 | 0.927925  | 0.843045  |
| TTC14       | 22.4134  | 21.5831   | 23.9297   | 13.4676  | 25.9522   | 21.3358   |
| RBMY1B      | 0        | 0         | 0         | 0        | 0         | 0         |
| PEF1        | 55.7363  | 66.7927   | 51.17     | 61.2986  | 58.377    | 56.3335   |
| MIR511-1    | 0        | 0         | 0         | 0        | 0         | 0         |
| CENPW       | 11.5532  | 12.6466   | 6.87171   | 10.0734  | 8.58466   | 9.94209   |
| FOXC1       | 37.9381  | 28.8551   | 31.9991   | 36.3994  | 32.1326   | 30.4088   |
| LAT         | 13.2935  | 23.2891   | 12.7237   | 14.6471  | 22.8642   | 16.4147   |
| ProSAPiP1   | 3.13558  | 3.24244   | 3.23427   | 4.80379  | 3.66713   | 3.428     |
| KRT85       | 11.7149  | 2.97467   | 0.828522  | 212.923  | 2.7883    | 529.802   |
| PPAPDC1B    | 26.3212  | 21.069    | 17.2893   | 19.4965  | 22.9492   | 22.9298   |
| LCAT        | 18.8393  | 40.5029   | 25.5017   | 43.2298  | 42.2143   | 26.5367   |
| LINC00315   | 0        | 0.397052  | 0         | 0        | 0         | 0.5597    |
| G6PC        | 0.032025 | 0.0849435 | 0.0727293 | 0        | 0         | 0.0199566 |
| SNORD114-2  | 0        | 0         | 0         | 0        | 0         | 0         |
| ITGB7       | 8.91578  | 10.9784   | 5.92955   | 5.18576  | 10.8972   | 6.50067   |
| ATP6V1G1    | 102.028  | 87.636    | 81.4877   | 86.1231  | 78.0291   | 84.0864   |
| ARVCF       | 5.21853  | 7.9581    | 5.90155   | 8.16657  | 7.41621   | 7.20453   |
| GPR55       | 0.459675 | 0.180629  | 0.405973  | 0.167855 | 0.55301   | 0.159139  |
| PLEKHF1     | 12.2194  | 18.3448   | 9.57073   | 11.5875  | 12.5216   | 9.80102   |
| SNHG1       | 87.601   | 137.263   | 76.9072   | 107.128  | 107.25    | 97.5095   |
| LOC10028719 | 0        | 0         | 0         | 0        | 0         | 0         |
| NCR1        | 0        | 0.13542   | 0.463795  | 0.143821 | 0.0662243 | 0         |
| SLC30A4     | 1.35955  | 0.641084  | 1.33795   | 0.787237 | 0.764885  | 0.748375  |
| SUMO1P3     | 24.9362  | 21.9649   | 21.0521   | 19.5848  | 20.1919   | 20.6803   |
| SRPX        | 17.6786  | 15.1787   | 20.3519   | 11.7052  | 17.7731   | 11.2303   |
| SETX        | 10.4654  | 8.85253   | 10.4899   | 7.34006  | 9.82682   | 7.84722   |
| FILIP1      | 0.334991 | 0.203623  | 0.52303   | 0.157276 | 0.226693  | 0.182658  |
| UBE2E2      | 20.7192  | 18.8993   | 23.7754   | 18.2776  | 20.4597   | 18.9019   |
| TRIM29      | 401.402  | 423.153   | 451.291   | 503.898  | 500.965   | 569.718   |
| KCTD8       | 0.232786 | 0.205815  | 0.23496   | 0.255013 | 0.296525  | 0.0967083 |
| ABCA11P     | 6.99423  | 8.84413   | 8.95767   | 8.4226   | 13.128    | 8.64855   |
| NHLRC1      | 3.22105  | 2.72033   | 3.02064   | 2.97937  | 2.14336   | 2.90597   |
| S100A16     | 376.699  | 456.721   | 331.708   | 542.246  | 378.475   | 567.294   |
| LOC10050749 | 0.731694 | 0.161729  | 0.276948  | 0.171762 | 0.23301   | 0         |

|             |           |           |           |           |           |           |
|-------------|-----------|-----------|-----------|-----------|-----------|-----------|
| ERVV-1      | 0.0405539 | 0         | 0.0306995 | 0         | 0.025829  | 0.0126357 |
| LOC10012979 | 2.06605   | 2.27619   | 1.96962   | 1.5046    | 1.87038   | 1.91217   |
| PLAG1       | 1.77337   | 1.43351   | 1.49991   | 1.35315   | 1.72984   | 1.74412   |
| TRAT1       | 0.685641  | 0.991964  | 0.283109  | 0.117056  | 1.46886   | 0.38842   |
| LOC10013106 | 4.05945   | 4.78093   | 7.74486   | 7.63665   | 8.34041   | 9.39778   |
| LOC10013153 | 0.377136  | 0.45848   | 0.570988  | 1.37223   | 0.3603    | 0.499408  |
| CAPN6       | 2.12922   | 0.965396  | 1.07455   | 1.23034   | 1.96462   | 1.47994   |
| FAM22G      | 0.166959  | 0.391531  | 0.540532  | 0.243281  | 0.549895  | 0.356444  |
| LOC730441   | 0         | 0         | 0         | 0         | 0         | 0         |
| LOC10050598 | 0.65682   | 0.464575  | 0.696103  | 0.740092  | 0.585665  | 0.327442  |
| EPC1        | 7.11294   | 5.04919   | 6.67892   | 5.52297   | 7.47059   | 6.15859   |
| MIR3145     | 0         | 0         | 0         | 0         | 0         | 0         |
| HNRNPL      | 61.8744   | 72.4382   | 63.3514   | 71.1277   | 70.9232   | 62.0275   |
| CCDC38      | 0.0530501 | 0         | 0.0401592 | 0.0498132 | 0         | 0.0330586 |
| POPDC3      | 0.706178  | 0.545698  | 0.307913  | 0.433412  | 0.439621  | 0.460851  |
| MUL1        | 17.0288   | 17.0196   | 17.7794   | 18.5002   | 17.4475   | 14.8409   |
| RBM12B      | 3.83122   | 3.12034   | 4.08608   | 2.71138   | 3.77438   | 4.01045   |
| SVIP        | 13.8285   | 11.4621   | 14.8102   | 13.1323   | 10.4088   | 13.3177   |
| MLKL        | 9.92666   | 8.78211   | 4.67137   | 5.01531   | 7.71184   | 6.85106   |
| PWRN1       | 0.0753625 | 0.399785  | 0.1141    | 0         | 0.0479988 | 0         |
| MORF4L1     | 79.2526   | 73.6986   | 75.99     | 75.1136   | 72.0647   | 66.6931   |
| SERPINA10   | 0         | 0.0430886 | 0         | 0.0457616 | 0.124159  | 0.121479  |
| BLOC1S2     | 43.8413   | 41.2069   | 35.8192   | 34.8887   | 35.0912   | 34.7122   |
| ARHGDIG     | 0.761098  | 0.560762  | 1.24834   | 0.476439  | 0.727121  | 0.474284  |
| LGALS9      | 17.2947   | 20.9819   | 9.37041   | 7.90028   | 15.2037   | 8.04658   |
| BCORP1      | 0         | 0.170098  | 0         | 0         | 0         | 0         |
| EIF2S3      | 52.9179   | 59.9894   | 61.4212   | 71.0949   | 66.2503   | 58.2745   |
| CASP10      | 3.93302   | 6.70491   | 4.02093   | 3.92633   | 4.81953   | 3.18366   |
| HPDL        | 0.348559  | 0.975883  | 0.307838  | 0.490936  | 0.850996  | 0.796425  |
| FAM72D      | 0.988442  | 0.917664  | 0.764492  | 0.6364    | 1.12001   | 1.06911   |
| MBD3L1      | 0         | 0         | 0         | 0         | 0         | 0         |
| DPYSL4      | 1.10537   | 1.56368   | 1.00413   | 1.07253   | 0.891756  | 0.826586  |
| MAGEB10     | 0         | 0         | 0         | 0         | 0         | 0         |
| TAS2R38     | 0         | 0         | 0.150475  | 0         | 0         | 0         |
| RPSAP58     | 631.78    | 909.433   | 635.739   | 1020.49   | 743.136   | 721.924   |
| IFNB1       | 0         | 0.130442  | 0.223371  | 0         | 0         | 0         |
| RAB19       | 0.12513   | 0         | 0.378895  | 0.587473  | 0.0796957 | 0.0779754 |
| KCNJ4       | 0.218609  | 0.217441  | 0.201553  | 0.519593  | 0.386761  | 0.181638  |
| OR2AE1      | 0         | 0         | 0         | 0         | 0         | 0         |
| WDR86       | 0.606278  | 1.78678   | 1.30038   | 1.5181    | 1.15843   | 1.07045   |
| APLP1       | 0.705416  | 0.550967  | 0.440652  | 0.354825  | 1.05373   | 0.645054  |
| DDIT4L      | 2.97494   | 2.3942    | 2.22317   | 1.68321   | 1.36034   | 1.78255   |
| SMARCAL1    | 6.84673   | 6.96273   | 6.42423   | 6.45999   | 6.71406   | 6.08948   |

|             |          |           |           |          |           |           |
|-------------|----------|-----------|-----------|----------|-----------|-----------|
| MIR4435-1   | 0        | 0         | 0         | 0        | 0         | 0         |
| THEG        | 0.814793 | 1.55095   | 0.683061  | 1.51148  | 0.855763  | 0.782113  |
| LOC10065294 | 12.2111  | 20.9513   | 11.7217   | 21.3477  | 20.3376   | 19.8169   |
| PIP4K2A     | 9.84386  | 8.18473   | 8.86115   | 7.27964  | 8.59229   | 7.11958   |
| CAMP        | 0        | 0.326697  | 0.419581  | 0.520445 | 0.588356  | 0.690788  |
| VGLL1       | 0.276708 | 0.244647  | 0         | 0.259824 | 0.117491  | 0.114955  |
| COX7A2L     | 67.9975  | 66.5378   | 82.2817   | 99.2773  | 72.1583   | 67.1598   |
| LOC10050751 | 0        | 0         | 0.127133  | 0.315391 | 0         | 0         |
| SNORD99     | 0        | 0         | 0         | 0        | 0         | 0         |
| LOC10013296 | 4.32162  | 6.46221   | 2.34262   | 4.57445  | 5.10567   | 2.62596   |
| HYALP1      | 0        | 0         | 0         | 0        | 0         | 0         |
| ZNF692      | 29.633   | 46.4639   | 27.8102   | 37.4337  | 39.2227   | 45.6979   |
| SCN1B       | 4.16184  | 5.22629   | 4.2364    | 3.79474  | 4.88674   | 2.84402   |
| C17orf102   | 0        | 0         | 0.0554049 | 0        | 0.0155383 | 0.0152029 |
| POM121L1P   | 0.057232 | 0.0997816 | 0.213453  | 0.140614 | 0.112544  | 0.0966291 |
| CD248       | 36.8964  | 27.6777   | 49.8998   | 25.3645  | 27.2865   | 19.4097   |
| PPP6C       | 25.8026  | 22.1862   | 25.448    | 22.3701  | 20.6515   | 18.7359   |
| MIR517B     | 0        | 0         | 0         | 0        | 0         | 0         |
| LOC10065274 | 2.00E-07 | 5.40E-08  | 5.74E-06  | 4.36E-07 | 6.85E-08  | 1.45E-07  |
| UBE2Q2P2    | 0.722567 | 0.601599  | 1.64834   | 0.945732 | 0.985818  | 0.914694  |
| TNXA        | 15.2352  | 28.2415   | 31.911    | 24.4448  | 28.1406   | 19.2232   |
| GLRX        | 94.3259  | 91.2573   | 56.4166   | 40.5386  | 56.5006   | 63.0753   |
| LOC10050585 | 7.81119  | 9.29676   | 4.1695    | 5.17182  | 1.33942   | 4.93001   |
| SAMD14      | 0.224459 | 0.694585  | 0.424792  | 0.263455 | 0.750537  | 0.349684  |
| ENO2        | 12.0756  | 16.5504   | 11.9565   | 14.0068  | 22.461    | 16.8987   |
| LOC654342   | 14.2162  | 16.4108   | 7.5343    | 12.2748  | 8.9041    | 9.25291   |
| OR52N5      | 0        | 0         | 0         | 0        | 0         | 0         |
| MIR18B      | 0        | 0         | 0         | 0        | 0         | 0         |
| LOC10050755 | 4.73565  | 8.07821   | 4.61662   | 10.8467  | 7.17977   | 7.47725   |
| SLC6A12     | 0.440463 | 0.554575  | 0.262002  | 0.278793 | 0.221327  | 0.19733   |
| CCDC85B     | 27.027   | 70.4038   | 38.173    | 68.1288  | 47.1932   | 42.2748   |
| LOC256880   | 0.208485 | 0.276494  | 0.19728   | 0.440469 | 0.531141  | 0.389757  |
| CYB5R3      | 108.072  | 118.113   | 133.127   | 123.737  | 127.577   | 106.583   |
| CACNA1H     | 1.65634  | 2.20146   | 7.47122   | 3.35417  | 1.79457   | 1.00948   |
| SRGN        | 24.236   | 22.5268   | 17.2043   | 9.25356  | 17.0757   | 10.4006   |
| C3orf64     | 10.7485  | 10.7924   | 9.3118    | 10.2252  | 9.58712   | 9.13101   |
| HMGB3P1     | 0        | 0         | 0         | 0        | 0         | 0         |
| CLPX        | 26.9952  | 21.8435   | 27.7269   | 18.7778  | 24.1808   | 26.5388   |
| KLHDC5      | 7.02295  | 6.53536   | 7.34916   | 6.01258  | 6.5027    | 6.53702   |
| GALNTL2     | 3.2313   | 4.5342    | 3.74018   | 1.93793  | 1.38087   | 1.10424   |
| MS4A6A      | 15.8028  | 10.5816   | 9.75933   | 4.6801   | 16.962    | 7.97224   |
| FUNDC1      | 16.2254  | 11.5278   | 12.7215   | 11.1545  | 13.1636   | 13.6017   |
| FLJ35424    | 0        | 0         | 0         | 0        | 0         | 0         |

|             |           |           |           |           |           |          |
|-------------|-----------|-----------|-----------|-----------|-----------|----------|
| SNORD62A    | 0         | 0         | 0         | 0         | 0         | 0        |
| TMEFF1      | 0.314804  | 6.14E-39  | 1.46E-112 | 0.298745  | 0.197568  | 1.65E-44 |
| HDDC2       | 27.0375   | 33.5173   | 27.6337   | 32.6474   | 23.0957   | 26.0873  |
| C5orf47     | 0         | 0.0353579 | 0.0605475 | 0.0375513 | 0.0509416 | 0.074763 |
| ACIN1       | 58.2448   | 72.5463   | 60.5251   | 67.5512   | 75.9628   | 76.749   |
| RASGRP3     | 4.83446   | 3.9181    | 2.01604   | 1.70187   | 2.22556   | 2.03589  |
| ADAT2       | 5.07358   | 6.26922   | 5.6107    | 5.18015   | 6.07346   | 4.77103  |
| CAMTA2      | 19.0642   | 22.7594   | 21.5634   | 23.2701   | 24.1307   | 21.5699  |
| GPR82       | 0.1472    | 0.182203  | 0.111432  | 0.0829313 | 0.168755  | 0.146767 |
| LOC10065273 | 0.260331  | 0         | 0         | 0.244447  | 0.497419  | 0        |
| ITGB1BP2    | 0.0904281 | 0.799509  | 0.479182  | 1.18875   | 0.69113   | 0.845265 |
| IGHMBP2     | 6.09523   | 7.91989   | 6.89316   | 6.44164   | 8.51859   | 9.4419   |
| TJP3        | 5.12958   | 3.48628   | 3.69821   | 4.48894   | 3.64488   | 4.41427  |
| HIST1H1A    | 0         | 0.144028  | 0         | 0         | 0         | 0        |
| BCL2L11     | 5.97264   | 4.77436   | 5.20444   | 4.32216   | 6.01642   | 5.58086  |
| PHC1        | 8.02678   | 8.78888   | 8.1706    | 7.42919   | 9.61763   | 9.95638  |
| C1orf96     | 8.59509   | 6.90083   | 9.36826   | 7.27595   | 10.7089   | 9.49329  |
| MCM3AP-AS1  | 1.00806   | 0.87755   | 1.3382    | 0.842389  | 1.64468   | 1.42743  |
| LRRC37A2    | 0.957521  | 1.20589   | 1.13338   | 1.14489   | 2.1739    | 1.92026  |
| SYT17       | 2.44632   | 3.31642   | 3.33338   | 2.55229   | 3.60089   | 3.28603  |
| C12orf4     | 6.16991   | 5.86248   | 5.87224   | 5.02419   | 6.89727   | 5.24875  |
| GRIA3       | 0.33438   | 0.262789  | 0.576929  | 0.453523  | 0.449929  | 0.717917 |
| ADAM3A      | 0         | 0         | 0         | 0         | 0         | 0        |
| CTAGE11P    | 0.424658  | 0.386873  | 0.382772  | 0.26577   | 0.401738  | 0.358838 |
| PRL         | 0.511104  | 0.100419  | 0         | 0.106648  | 0.289355  | 0        |
| NACA        | 629.399   | 723.473   | 700.098   | 814.63    | 690.6     | 674.874  |
| FXD5        | 54.4996   | 78.2859   | 57.1357   | 63.2706   | 81.0642   | 63.516   |
| ZNF121      | 4.08242   | 2.04713   | 5.02769   | 1.83084   | 3.33746   | 1.82256  |
| RAC3        | 13.0975   | 24.3179   | 16.69     | 24.2892   | 17.935    | 14.4191  |
| DYDC2       | 0         | 0.150394  | 0.171692  | 0         | 0.0361132 | 0.176668 |
| LOC10050731 | 3.43143   | 3.04794   | 3.50679   | 2.7825    | 3.51176   | 3.47985  |
| KLHL22      | 9.22244   | 10.9458   | 9.62039   | 10.6565   | 11.091    | 10.4158  |
| LOC10050667 | 1.20509   | 0.245876  | 1.82452   | 0.435215  | 2.89299   | 1.44415  |
| KLC1        | 30.3588   | 35.6375   | 35.47     | 34.8061   | 33.8148   | 32.4458  |
| C9orf41     | 4.4776    | 2.55673   | 3.1071    | 2.49636   | 2.43592   | 2.93558  |
| LOC10013243 | 0         | 0         | 0.362119  | 0         | 0.152334  | 0        |
| TSNARE1     | 3.42733   | 2.69397   | 7.09172   | 4.02276   | 6.0757    | 5.90901  |
| LOC727924   | 0         | 0         | 0         | 0         | 0         | 0        |
| CLSPN       | 0.402053  | 0.464857  | 0.321237  | 0.45081   | 0.348406  | 0.370288 |
| UEVLD       | 11.4945   | 6.64047   | 9.42688   | 6.82518   | 7.03852   | 7.27699  |
| IL28A       | 0         | 0         | 0         | 0         | 0         | 0        |
| PREX2       | 0.919911  | 0.531475  | 1.24933   | 0.582047  | 0.597843  | 0.410648 |
| LOC10028743 | 0         | 0         | 0.0507869 | 0         | 0.0427295 | 0        |

|             |          |           |           |           |           |            |
|-------------|----------|-----------|-----------|-----------|-----------|------------|
| C9orf142    | 48.4974  | 85.4835   | 57.5245   | 76.7189   | 84.2049   | 74.8158    |
| MDFIC       | 10.1996  | 9.34991   | 14.5724   | 7.22579   | 10.3139   | 7.63723    |
| ZNF101      | 3.21174  | 3.96225   | 3.78831   | 1.89362   | 3.18729   | 2.37378    |
| LRRRC63     | 0        | 0.0827261 | 0.106246  | 0.043929  | 0.0595934 | 0.0291535  |
| C1RL        | 18.9104  | 20.8563   | 17.0081   | 15.2839   | 22.802    | 13.5586    |
| DIO3        | 7.87135  | 0.778064  | 1.29536   | 0.642702  | 2.05514   | 1.06632    |
| KIAA1467    | 12.4367  | 7.16718   | 8.43588   | 6.99514   | 7.92098   | 8.53012    |
| PART1       | 2.44108  | 1.73126   | 1.28054   | 1.59358   | 1.15762   | 1.93088    |
| METAP2      | 31.8487  | 26.4731   | 29.2881   | 29.8001   | 26.82     | 29.5081    |
| TMEM192     | 6.55368  | 4.89851   | 6.00563   | 4.87851   | 4.87433   | 4.00337    |
| DAGLA       | 0.898908 | 0.97137   | 1.17193   | 1.37551   | 1.10263   | 0.726135   |
| MBTD1       | 10.2682  | 10.01     | 13.2074   | 9.30629   | 14.4673   | 12.1853    |
| NCRUPAR     | 0        | 0         | 0         | 0         | 0         | 0          |
| C15orf43    | 2.34947  | 0.769352  | 0.724598  | 0.898786  | 0.387952  | 0.59648    |
| ZMYM3       | 9.77832  | 9.79941   | 10.7356   | 11.1032   | 13.803    | 9.86971    |
| CLDN1       | 137.871  | 117.714   | 177.775   | 130.592   | 198.375   | 203.625    |
| LMAN1       | 34.4713  | 22.655    | 28.2872   | 20.1597   | 23.4559   | 19.1786    |
| FRMD3       | 0.956892 | 0.528765  | 0.784737  | 0.524129  | 0.431694  | 0.546603   |
| LOC10065301 | 0.158934 | 0.126965  | 0.110647  | 0         | 0.0937429 | 0          |
| SAMM50      | 64.6535  | 64.996    | 71.1034   | 69.3652   | 60.2422   | 57.5615    |
| DUX4L5      | 0        | 0.0166926 | 0.0142923 | 0.0103414 | 0.0214443 | 0.00686307 |
| ECT2        | 3.69569  | 3.31165   | 2.91107   | 2.86056   | 3.24443   | 2.72314    |
| LIPH        | 9.96521  | 7.43847   | 8.56398   | 9.54892   | 9.91053   | 10.1547    |
| MIR525      | 0        | 0         | 0         | 0         | 0         | 0          |
| RABGGTB     | 47.959   | 51.3369   | 44.0823   | 41.1109   | 37.8835   | 33.775     |
| ZNF658      | 2.59528  | 2.06273   | 3.01577   | 2.20215   | 2.98199   | 2.28632    |
| PHF5A       | 30.0556  | 32.7129   | 28.2555   | 33.7234   | 27.7809   | 29.3449    |
| GPR65       | 0.578422 | 0.454581  | 0.454086  | 0.201159  | 0.750445  | 0.413848   |
| GLTSCR1     | 4.82737  | 6.01072   | 5.52577   | 5.89737   | 5.98957   | 5.96438    |
| MIR628      | 0        | 0         | 0         | 0         | 0         | 0          |
| MIR573      | 0        | 0         | 0         | 0         | 0         | 0          |
| MAGEB18     | 0        | 0         | 0         | 0         | 0         | 0          |
| PBX4        | 3.25982  | 5.09103   | 2.52773   | 4.4971    | 6.22977   | 4.22325    |
| MIR580      | 0        | 0         | 0         | 0         | 0         | 0          |
| TRIM26      | 22.4312  | 24.3709   | 21.8648   | 22.4291   | 22.2874   | 18.5388    |
| NRADDP      | 1.38858  | 1.43231   | 1.48915   | 1.84713   | 1.32659   | 0.937413   |
| BRE         | 21.1691  | 17.6064   | 18.4833   | 21.7828   | 17.4183   | 19.6761    |
| TMOD3       | 16.217   | 12.6534   | 16.2117   | 11.9603   | 12.8614   | 13.2033    |
| MIR4428     | 0        | 0         | 0         | 0         | 0         | 0          |
| C4A         | 1.99509  | 2.06653   | 1.62638   | 1.21374   | 2.31944   | 1.22113    |
| ALPK2       | 0.325455 | 0.241707  | 0.709549  | 0.305597  | 0.414568  | 0.267709   |
| SNORA54     | 200.447  | 0         | 0         | 0         | 0         | 0          |
| LOC151121   | 0        | 0         | 0         | 0         | 0         | 0          |

|             |           |           |            |           |            |            |
|-------------|-----------|-----------|------------|-----------|------------|------------|
| IQCD        | 0.487618  | 0.790388  | 1.23043    | 0.763109  | 0.362327   | 0.759656   |
| BTG4        | 0         | 0         | 0          | 0         | 0          | 0          |
| ROBO3       | 2.21157   | 7.06926   | 2.81711    | 2.59578   | 5.72904    | 3.92244    |
| CEP135      | 2.38501   | 2.09372   | 2.38168    | 1.55652   | 3.28584    | 2.56139    |
| NSUN5P1     | 33.4413   | 53.8659   | 26.5743    | 33.5448   | 39.9871    | 34.9479    |
| MTVR2       | 0         | 0.136555  | 0          | 0         | 0.19674    | 0.192494   |
| HMGCS2      | 96.7688   | 6.74047   | 14.6138    | 23.2299   | 15.8668    | 13.8207    |
| LOC283070   | 17.881    | 19.9286   | 21.3208    | 20.3372   | 22.9642    | 19.2251    |
| MIR4329     | 0         | 0         | 0          | 0         | 0          | 0          |
| SPOCK3      | 0.142923  | 0.19745   | 0.273878   | 0.472528  | 0.102409   | 0.100199   |
| AK7         | 1.28931   | 0.670543  | 1.26307    | 0.996996  | 1.23175    | 0.945225   |
| SH3GL2      | 0.0734276 | 0.0973801 | 0.0833777  | 0.172368  | 0.093533   | 0.0228785  |
| PPP3CC      | 8.54986   | 8.23705   | 7.20815    | 7.70916   | 8.07895    | 5.73359    |
| UHMK1       | 14.6752   | 9.48034   | 13.5777    | 9.18553   | 10.7681    | 9.03575    |
| PGLYRP4     | 13.2196   | 10.8315   | 8.28197    | 9.25625   | 16.0772    | 12.0373    |
| ZFP2        | 2.56978   | 2.75624   | 2.16857    | 1.97785   | 2.89778    | 2.02141    |
| FGF4        | 0         | 0         | 0          | 0         | 0          | 0          |
| FAM190A     | 0.604505  | 0.270258  | 0.466753   | 0.297364  | 0.275088   | 0.242716   |
| NKAIN1      | 0.272665  | 0.542415  | 0.877238   | 0.736081  | 0.520986   | 0.76461    |
| CCDC168     | 0.0130243 | 0.0115152 | 0.00985945 | 0         | 0.00276508 | 0.00541078 |
| HBS1L       | 7.81364   | 6.10383   | 7.2634     | 6.08553   | 6.8867     | 7.43398    |
| RABAC1      | 65.2608   | 89.3722   | 77.2287    | 87.6039   | 84.3203    | 86.0267    |
| DENND4A     | 3.42309   | 2.21741   | 2.68353    | 1.54926   | 2.29389    | 2.00709    |
| CATSPERB    | 0.571392  | 0.28868   | 0.267767   | 0.204392  | 0.450571   | 0.373023   |
| DARC        | 39.3186   | 82.7976   | 41.4141    | 30.4214   | 47.6457    | 20.9659    |
| C11orf70    | 0.471057  | 1.75717   | 1.6375     | 0.921861  | 0.649237   | 1.32376    |
| SPATA1      | 0         | 0         | 0.127072   | 0.0788095 | 0.374191   | 0.418416   |
| LOC10050575 | 0.201707  | 0         | 0          | 0         | 0          | 0          |
| GUSBP4      | 1.53885   | 1.69521   | 2.59863    | 1.77837   | 3.22915    | 2.02735    |
| XKR7        | 0         | 0         | 0          | 0         | 0          | 0.0213337  |
| TTY2B       | 0.146375  | 0.402625  | 0          | 0         | 0          | 0          |
| C15orf44    | 17.2754   | 21.5556   | 16.5902    | 19.8514   | 20.8983    | 17.0755    |
| LOC10050603 | 0.200665  | 0.35483   | 0.531665   | 0.282631  | 0.415364   | 0.156307   |
| NT5C1A      | 0         | 0         | 0          | 0         | 0          | 0          |
| PRAMEF10    | 0         | 0         | 0          | 0         | 0          | 0          |
| TIGD4       | 0.163509  | 0.32527   | 0.247554   | 0.191915  | 0.390524   | 0.101892   |
| DLEU2L      | 0.895622  | 0.62217   | 0.920803   | 0.961114  | 1.01862    | 0.519079   |
| FAM27E2     | 0         | 1.1449    | 0.183801   | 0.683957  | 0.154641   | 0.151303   |
| LEAP2       | 1.31167   | 2.81639   | 2.41142    | 2.81516   | 2.86425    | 1.63475    |
| ZNF619      | 1.49833   | 1.68779   | 1.73642    | 1.52871   | 2.15422    | 1.99728    |
| CORO2B      | 5.23413   | 3.7129    | 4.76839    | 3.99842   | 4.5579     | 3.55654    |
| ANKMY2      | 12.6957   | 10.8064   | 12.1178    | 11.5138   | 11.8025    | 10.4667    |
| STH         | 0         | 0         | 0          | 0.375968  | 0          | 0          |



|             |           |           |           |           |          |           |
|-------------|-----------|-----------|-----------|-----------|----------|-----------|
| MIR2052     | 0         | 0         | 0         | 0         | 0        | 0         |
| ZNF491      | 1.13205   | 2.15829   | 2.08887   | 1.72734   | 2.23063  | 2.20453   |
| CDY2A       | 0         | 0         | 0         | 0         | 0        | 0         |
| C21orf90    | 0         | 0.107852  | 0.492503  | 0.515444  | 0.414367 | 0.547321  |
| MIR4668     | 0         | 0         | 0         | 0         | 0        | 0         |
| CCDC24      | 5.40639   | 7.3288    | 5.04121   | 7.26788   | 6.03178  | 6.66599   |
| QPCTL       | 5.58433   | 6.86879   | 4.59864   | 7.06782   | 6.53211  | 5.77985   |
| GANAB       | 81.5141   | 66.3385   | 70.1339   | 67.8459   | 66.7536  | 65.3338   |
| HCFC1R1     | 57.3104   | 110.55    | 72.2757   | 102.602   | 69.8004  | 73.6914   |
| ZNF238      | 8.95284   | 7.71377   | 9.02543   | 6.43846   | 8.47977  | 6.66797   |
| PDE10A      | 0.47474   | 0.45041   | 0.298111  | 0.207088  | 0.243452 | 0.223791  |
| FAM50B      | 6.83807   | 9.24309   | 8.76016   | 9.19909   | 7.95663  | 8.15364   |
| LOC10050680 | 0.426244  | 0.602972  | 0.193601  | 0.160094  | 0.217182 | 0.478111  |
| MYO15A      | 0.110908  | 0.217128  | 0.131934  | 0.148772  | 0.22705  | 0.162909  |
| FLJ35024    | 0.137813  | 0.122389  | 0.650226  | 1.86E-221 | 0.701782 | 0.258029  |
| DRD5        | 0.0426928 | 0         | 0.0323187 | 0         | 0        | 0         |
| MUT         | 16.5206   | 10.9757   | 15.4438   | 12.4911   | 11.9127  | 12.138    |
| HRASLS      | 1.19777   | 1.44408   | 2.80258   | 3.06732   | 1.24832  | 1.69636   |
| LOC10050579 | 0         | 0         | 0         | 0         | 0        | 0         |
| SIN3B       | 15.3408   | 23.3748   | 22.6007   | 22.2507   | 27.8649  | 21.2725   |
| MIEN1       | 64.4884   | 67.4519   | 53.2207   | 74.527    | 49.6797  | 59.2666   |
| ZBTB8B      | 0         | 0.0214451 | 0         | 0.0683264 | 0        | 0.0302299 |
| C4orf42     | 4.41776   | 5.04762   | 6.17403   | 5.32884   | 4.43698  | 4.40473   |
| NFE2L3      | 15.0699   | 12.1805   | 9.94951   | 8.22755   | 14.1198  | 16.2326   |
| LOC10013026 | 0.0586097 | 0.051819  | 0.0887357 | 0.165101  | 0        | 0.0365231 |
| ZNF23       | 6.76669   | 5.98268   | 4.86861   | 4.72243   | 6.71699  | 5.67927   |
| SYTL5       | 0.267765  | 0.148376  | 0.343016  | 0.289571  | 0.275542 | 0.999024  |
| TRAK2       | 7.99634   | 7.59977   | 8.22227   | 6.71229   | 6.89917  | 7.65211   |
| NOMO3       | 15.4718   | 13.4074   | 11.681    | 12.0736   | 12.3522  | 12.2305   |
| RGAG4       | 2.48346   | 2.80894   | 2.43891   | 2.45798   | 2.57922  | 1.7149    |
| LOC10065290 | 0         | 0         | 0         | 0         | 0        | 0         |
| MIR4755     | 0         | 0         | 0         | 0         | 0        | 0         |
| ATP1A1      | 329.832   | 181.236   | 185.993   | 260.885   | 188.169  | 194.54    |
| C9orf24     | 1.45974   | 2.1125    | 2.01955   | 2.98597   | 0.900309 | 2.11601   |
| LOC10050629 | 0.311367  | 0.137646  | 0.412487  | 0.0730923 | 0.24789  | 0.485077  |
| JMY         | 6.37659   | 4.45714   | 6.65295   | 5.84171   | 6.71826  | 9.34058   |
| KRT15       | 416.678   | 618.396   | 465.385   | 639.042   | 1002.57  | 801.539   |
| PABPC4      | 33.5988   | 38.6543   | 37.3043   | 40.1762   | 36.2173  | 31.234    |
| CGNL1       | 17.0935   | 8.42612   | 15.8478   | 15.3016   | 14.4849  | 13.2942   |
| MIR3618     | 0         | 0         | 0         | 0         | 0        | 0         |
| NKG7        | 13.8841   | 17.8794   | 5.59789   | 0.99194   | 6.92049  | 1.97491   |
| A1BG-AS1    | 2.1917    | 2.18975   | 1.99935   | 2.2962    | 2.34316  | 2.18705   |
| LOC10065283 | 4.15262   | 6.65482   | 2.89014   | 6.1024    | 6.04914  | 5.48496   |

|             |           |           |           |           |           |           |
|-------------|-----------|-----------|-----------|-----------|-----------|-----------|
| C19orf77    | 0         | 0         | 0.201468  | 0.12495   | 0.593266  | 0.746306  |
| GPR88       | 0.0283895 | 0.0753005 | 0.107455  | 0         | 0.0542442 | 0.0353822 |
| CUL4B       | 18.1792   | 14.4148   | 16.6435   | 13.4433   | 16.7704   | 15.9571   |
| SPRR3       | 0.604035  | 0         | 0         | 0         | 0         | 0         |
| MIR4304     | 0         | 0         | 0         | 0         | 0         | 0         |
| HLCS        | 13.7998   | 10.1216   | 10.1934   | 8.47882   | 6.62242   | 7.84601   |
| SNAR-A8     | 0         | 0         | 0         | 0         | 0         | 0         |
| LOC727869   | 1.81842   | 3.53701   | 1.51421   | 2.21971   | 3.13541   | 2.83291   |
| FGF7        | 7.20336   | 3.50421   | 4.9118    | 2.80567   | 3.82453   | 3.26299   |
| CBLN2       | 0.309954  | 0.304491  | 0.104283  | 6.59694   | 0.329019  | 16.9972   |
| MAPK12      | 2.33774   | 4.02778   | 3.35786   | 4.72792   | 4.2377    | 3.32445   |
| ZFP112      | 3.19008   | 2.15555   | 3.1189    | 2.32157   | 3.12088   | 2.33667   |
| ZCCHC10     | 9.24015   | 9.83769   | 8.38649   | 6.31421   | 9.02793   | 8.29042   |
| IFT81       | 6.31589   | 5.42976   | 5.7618    | 4.51493   | 6.86653   | 6.93667   |
| MRPL48      | 25.4366   | 22.8092   | 17.4304   | 21.0546   | 16.2007   | 18.6807   |
| SRRT        | 46.8387   | 60.0807   | 43.5563   | 56.4132   | 61.2997   | 53.4769   |
| DUSP1       | 33.1486   | 27.9102   | 87.133    | 35.6752   | 100.593   | 27.1717   |
| ZCCHC9      | 19.5432   | 17.5618   | 17.2729   | 15.6776   | 19.4057   | 21.3204   |
| SNORD114-2  | 0         | 0         | 0         | 0         | 0         | 0         |
| FAM13C      | 4.66203   | 4.31328   | 5.58092   | 3.28036   | 4.38019   | 3.1269    |
| IL18RAP     | 0.564175  | 0.498808  | 0.370139  | 0.176584  | 0.598877  | 0.304694  |
| GOLGA2P5    | 7.4656    | 9.88386   | 5.97916   | 6.52039   | 9.74407   | 8.06266   |
| GYS2        | 1.26519   | 0.391511  | 0.861982  | 0.415799  | 0.362614  | 0.394207  |
| KAT6A       | 9.89284   | 6.40763   | 10.8734   | 7.68727   | 9.85782   | 7.77828   |
| TEX264      | 78.1986   | 100.54    | 86.1267   | 104.975   | 83.5325   | 91.4534   |
| MIR516A1    | 0         | 0         | 0         | 0         | 0         | 0         |
| HIBADH      | 50.81     | 40.4856   | 32.784    | 29.102    | 30.5157   | 30.7921   |
| FLJ38723    | 0.170668  | 0.181073  | 0.180875  | 0.0641018 | 0.239138  | 0.0850824 |
| POLR2E      | 50.1469   | 65.2605   | 53.2717   | 58.7543   | 54.8171   | 56.258    |
| FLJ35946    | 0.609952  | 0.898802  | 1.34673   | 0.954559  | 1.06832   | 0.791867  |
| ACTN2       | 0.320898  | 0.132402  | 0.194338  | 0.0803516 | 0.177131  | 0.159976  |
| MIR3691     | 0         | 0         | 0         | 0         | 0         | 0         |
| CDC45       | 2.30701   | 4.02483   | 1.4433    | 3.47599   | 2.73897   | 3.063     |
| LOC10050549 | 0.556344  | 0.245942  | 0         | 0.914196  | 0         | 0.0866724 |
| SKAP2       | 9.48223   | 5.75557   | 7.45704   | 5.72049   | 6.91545   | 6.72025   |
| TMEM204     | 14.5677   | 15.0078   | 15.9184   | 14.2736   | 14.6838   | 12.3145   |
| HSFY1P1     | 0         | 0         | 0         | 0         | 0         | 0         |
| MIR4768     | 0         | 0         | 0         | 0         | 0         | 0         |
| TFCP2       | 13.117    | 13.9397   | 14.6504   | 13.6392   | 14.5418   | 15.7563   |
| KIAA1598    | 17.9526   | 15.4794   | 17.0368   | 16.947    | 20.3404   | 17.4431   |
| EPHA5       | 0.0121767 | 0.109015  | 0.0491659 | 0.0823306 | 0.0484757 | 0.0693829 |
| SEC16A      | 16.9558   | 14.9265   | 17.0851   | 16.785    | 17.415    | 15.087    |
| LOC10013000 | 67.2936   | 80.1396   | 67.5756   | 63.8324   | 57.7302   | 60.763    |

|             |          |           |           |          |           |           |
|-------------|----------|-----------|-----------|----------|-----------|-----------|
| CCNC        | 50.501   | 40.2942   | 41.0488   | 34.6882  | 32.677    | 33.2155   |
| TBCCD1      | 5.35518  | 3.72273   | 4.95095   | 4.12707  | 4.89432   | 4.59173   |
| C10orf137   | 6.67391  | 6.99126   | 6.43364   | 5.84297  | 8.65537   | 6.66672   |
| ABT1        | 12.202   | 16.4013   | 14.4179   | 19.0253  | 16.1739   | 13.3557   |
| BCHE        | 1.7774   | 3.54494   | 4.72491   | 2.63928  | 4.15958   | 3.40008   |
| KCNH8       | 0.513881 | 0.706752  | 0.316971  | 0.696982 | 0.727319  | 0.770921  |
| DMRTC1      | 0.234484 | 0.287938  | 0.0788913 | 0.220176 | 0.207422  | 0.265181  |
| GPR68       | 6.78069  | 10.0741   | 5.40163   | 4.80021  | 10.5973   | 5.55243   |
| MFAP2       | 8.22839  | 14.1696   | 17.219    | 17.9268  | 21.8731   | 23.957    |
| KLHL8       | 4.2104   | 2.41312   | 3.34746   | 1.56948  | 2.6412    | 2.36005   |
| CTPS2       | 6.32398  | 6.52787   | 6.62165   | 6.36978  | 7.21767   | 5.87953   |
| ACOT2       | 95.4808  | 103.25    | 56.0657   | 48.0553  | 33.6556   | 34.7935   |
| OR6C74      | 0        | 0         | 0         | 0        | 0         | 0         |
| LOC10065288 | 0        | 0         | 0         | 0        | 0         | 0         |
| GTF2A1      | 4.10361  | 1.91696   | 4.801     | 2.40373  | 2.4484    | 4.31169   |
| POLA2       | 7.17849  | 7.75316   | 5.55766   | 5.47665  | 6.2346    | 5.84583   |
| DEFA4       | 0        | 0         | 0         | 0        | 0         | 0         |
| AVL9        | 3.58161  | 2.44174   | 4.05061   | 2.5527   | 4.42488   | 4.19491   |
| LOC10050553 | 0.496985 | 3.49E-07  | 0.23497   | 1.21E-07 | 0.05078   | 9.34E-07  |
| CFDP1       | 32.0754  | 28.8189   | 26.9063   | 25.6685  | 27.662    | 32.0349   |
| IPW         | 3.51152  | 2.76182   | 2.91917   | 2.56903  | 3.37534   | 2.69837   |
| LOC645262   | 0        | 0.522604  | 0.111864  | 0        | 0.188234  | 0.0920854 |
| CNTRL       | 4.15587  | 3.64044   | 4.01722   | 2.8937   | 5.16348   | 4.0719    |
| C2orf84     | 0.295867 | 0.837078  | 0.58233   | 0.555629 | 0.452254  | 0.368744  |
| PTPN18      | 17.9339  | 19.917    | 17.6766   | 18.038   | 20.9662   | 16.9735   |
| ZNF555      | 1.12964  | 0.568081  | 0.863589  | 0.790701 | 0.761844  | 0.738677  |
| GIN53       | 6.9305   | 7.80651   | 4.62481   | 5.832    | 6.40398   | 5.61851   |
| PMS2L2      | 3.28527  | 2.6441    | 2.80945   | 3.10318  | 3.77863   | 2.15303   |
| HS1BP3      | 11.2162  | 13.3464   | 13.2148   | 13.3825  | 13.777    | 13.9263   |
| IL22RA1     | 14.0058  | 11.9079   | 17.2893   | 17.9764  | 32.9931   | 26.6857   |
| PSIMCT-1    | 9.75297  | 6.79385   | 7.15932   | 5.55023  | 7.05877   | 6.81432   |
| KRTAP10-9   | 1.06527  | 0.319883  | 0         | 38.2713  | 0.169299  | 148.123   |
| LOC649133   | 0        | 0.0852769 | 0.182537  | 0.090567 | 0.0921463 | 0.0901573 |
| SEZ6L       | 0.376926 | 0.732086  | 0.627091  | 0.834126 | 1.33202   | 1.3508    |
| LOC10028900 | 0        | 0.264701  | 0         | 0        | 0         | 0.0699625 |
| KRTAP10-2   | 2.37164  | 0.955248  | 0         | 67.6825  | 1.87686   | 226.042   |
| NBAS        | 6.69817  | 5.50652   | 6.93865   | 5.81133  | 6.28689   | 6.39528   |
| MIR3977     | 0        | 0         | 0         | 0        | 0         | 0         |
| SLC6A8      | 30.124   | 35.4512   | 28.8534   | 38.5865  | 32.3678   | 29.7071   |
| LOC10013289 | 1.11809  | 0.83475   | 0.807914  | 0.440373 | 1.02075   | 0.593954  |
| PPP1R14A    | 18.512   | 38.7301   | 27.0561   | 27.7086  | 14.0084   | 11.9927   |
| ART1        | 0        | 0         | 0         | 0        | 0.0535533 | 0         |
| LOC10050636 | 8.60156  | 4.39252   | 8.53222   | 7.45009  | 10.2484   | 5.59117   |

|             |           |            |           |            |           |            |
|-------------|-----------|------------|-----------|------------|-----------|------------|
| DEFA1       | 0         | 0          | 0         | 0.203782   | 0.0691119 | 0          |
| MYPOP       | 6.51069   | 8.53695    | 5.8893    | 9.27377    | 7.83655   | 6.94535    |
| SNORD116-5  | 0         | 0          | 0         | 0          | 0         | 0          |
| ELMOD2      | 10.9781   | 8.46126    | 10.5755   | 6.69313    | 9.4301    | 8.85639    |
| GATAD2B     | 9.2362    | 8.51427    | 9.27118   | 10.0207    | 10.7699   | 8.96197    |
| RFX8        | 0.974906  | 1.13131    | 0.507381  | 0.629352   | 0.5045    | 0.41767    |
| TSNAXIP1    | 1.28196   | 0.987178   | 0.876535  | 0.893097   | 1.07987   | 1.62349    |
| GIMAP1-GIM  | 0.274338  | 5.94822    | 2.50827   | 1.37273    | 1.58308   | 1.93479    |
| MAGED1      | 32.5975   | 28.8527    | 35.6481   | 36.8322    | 35.0681   | 32.6525    |
| POLR2J      | 29.6516   | 52.9407    | 33.6228   | 51.2891    | 34.4326   | 37.2894    |
| CSRNP1      | 9.77575   | 7.46325    | 12.5688   | 10.4032    | 8.51907   | 7.79368    |
| ZNF844      | 3.17053   | 1.46389    | 3.25348   | 2.08396    | 3.05143   | 3.20509    |
| LOC10050739 | 0.59619   | 1.05423    | 0.709216  | 0.799733   | 0.542453  | 0.212297   |
| C1QTNF3-AM  | 3.04409   | 1.45539    | 2.55682   | 2.01074    | 1.97813   | 2.31453    |
| LOC10050718 | 0.454053  | 0.80289    | 0.343721  | 0.426349   | 0.289189  | 0.141473   |
| OR1S1       | 0         | 0          | 0         | 0          | 0         | 0          |
| CLEC17A     | 0.225992  | 0.177607   | 0.0380168 | 0.188624   | 0.0319853 | 0          |
| PHLDA1      | 20.4688   | 9.87901    | 8.72818   | 14.3997    | 8.41608   | 9.516      |
| GRB14       | 8.58027   | 6.79748    | 7.20272   | 11.8458    | 4.51799   | 4.04985    |
| ABCA17P     | 0.255462  | 0.123198   | 0.0703222 | 0.0872271  | 0.147914  | 0.159193   |
| ALG10       | 2.15378   | 1.06432    | 1.77437   | 0.981675   | 1.97699   | 1.06591    |
| SLC45A3     | 3.496     | 3.99247    | 3.17579   | 3.99394    | 5.02846   | 4.91992    |
| SLC16A14    | 4.32337   | 4.34901    | 6.06139   | 4.45311    | 5.14189   | 4.59104    |
| MIR526B     | 0         | 0          | 0         | 0          | 0         | 0          |
| PSMC2       | 37.5905   | 33.2555    | 31.3928   | 31.5686    | 28.8738   | 30.8843    |
| NUMA1       | 51.1019   | 54.8114    | 69.63     | 62.3405    | 78.2312   | 70.3095    |
| PSMA3       | 103.099   | 83.6907    | 76.323    | 59.3903    | 58.0629   | 63.1217    |
| GUCA2A      | 0         | 0.226337   | 0         | 0          | 0         | 0          |
| LOC10028720 | 0         | 0.00739837 | 0         | 0.00628586 | 0         | 0.00834323 |
| TSG101      | 53.6318   | 45.4599    | 45.9954   | 47.6952    | 43.326    | 47.4363    |
| PRKDC       | 11.1912   | 8.38939    | 11.9811   | 8.16463    | 9.30699   | 8.98331    |
| SNORD30     | 0         | 0          | 0         | 0          | 0         | 0          |
| URGCP       | 15.0475   | 18.7627    | 15.4652   | 17.6262    | 19.0528   | 15.4132    |
| HSPA2       | 20.8718   | 17.7512    | 21.5679   | 27.4987    | 14.0063   | 38.6143    |
| LOC10013089 | 0.0459074 | 0.162164   | 0.173557  | 0.129168   | 0.408862  | 0.171444   |
| LOC10028790 | 0.0520106 | 0.0229923  | 0.0590585 | 0          | 0.0331259 | 0.0324108  |
| LOC10013366 | 1.51442   | 2.34317    | 2.00625   | 0.711009   | 0.60284   | 0.825758   |
| WWC2        | 3.86536   | 2.76247    | 3.62509   | 2.59109    | 2.62598   | 2.49569    |
| LOC338579   | 0         | 0          | 0.127072  | 0          | 0         | 0.052302   |
| SPANXB2     | 0         | 0          | 0         | 0          | 0.0769881 | 0          |
| SPDYE4      | 0         | 0          | 0.0986011 | 0          | 0.165916  | 0          |
| ZNF890P     | 0.206058  | 0.174896   | 0.598991  | 0.433407   | 0.337473  | 0.698533   |
| MIR150      | 0         | 0          | 0         | 0          | 0         | 0          |

|             |           |           |           |           |           |           |
|-------------|-----------|-----------|-----------|-----------|-----------|-----------|
| CMTM5       | 1.0469    | 1.33056   | 0.489203  | 0.54954   | 1.07724   | 1.11214   |
| ZNF84       | 9.54464   | 7.75806   | 0         | 0         | 0         | 0         |
| ATPAF1-AS1  | 0         | 0         | 0         | 0.271426  | 0.184106  | 0.270199  |
| FAM197Y9    | 0         | 0         | 0         | 0         | 0         | 0         |
| EXOC3L1     | 1.21288   | 1.8945    | 1.34664   | 1.63239   | 1.62224   | 1.13373   |
| CCDC33      | 0         | 0         | 0         | 0         | 0.0311055 | 0         |
| C17orf79    | 47.3869   | 49.3498   | 42.8662   | 42.3367   | 32.2147   | 26.6641   |
| IKZF2       | 2.58464   | 1.85118   | 3.36712   | 1.57096   | 3.52838   | 2.60988   |
| COX8A       | 533.226   | 620.689   | 483.67    | 648.528   | 463.403   | 492.134   |
| LOC10030240 | 0.391676  | 0.423469  | 0.367302  | 0.286224  | 0.405131  | 0.230369  |
| MBD2        | 21.9683   | 23.4749   | 26.2092   | 25.2442   | 22.1513   | 21.3252   |
| C6orf103    | 0.0182781 | 0.0482245 | 0.0412902 | 0         | 0.0754902 | 0.0566493 |
| GLCCI1      | 9.61395   | 7.05936   | 7.81748   | 6.42625   | 10.6118   | 10.4462   |
| FZD9        | 0.216875  | 0.536893  | 0.591033  | 0.407285  | 0.663019  | 0.567619  |
| MIR1182     | 0         | 0         | 0         | 0         | 0         | 0         |
| MIR4681     | 0         | 0         | 0         | 0         | 0         | 0         |
| LOC10050558 | 0.220516  | 1.1698    | 0.83466   | 1.65649   | 1.26403   | 1.51158   |
| SLTM        | 41.414    | 35.635    | 39.3359   | 36.8328   | 41.1741   | 38.1321   |
| MTF2        | 8.07604   | 7.98254   | 9.10614   | 7.20791   | 10.6287   | 8.7395    |
| CACNA1F     | 0.0472784 | 0.153269  | 0.09544   | 0.0739894 | 0.150559  | 0.196413  |
| LOC642366   | 0.0872422 | 0.077134  | 0         | 0         | 0.0277825 | 0.0271828 |
| TNFSF9      | 0.827062  | 0.449992  | 0.57793   | 1.07529   | 0.36468   | 0.436099  |
| LOC10050760 | 0         | 0.0532391 | 0.0455838 | 0.0565418 | 0.0383519 | 0         |
| ATP6V1D     | 52.2432   | 39.8845   | 34.5884   | 31.7418   | 32.4615   | 37.5301   |
| CSF2        | 0.162902  | 0.144028  | 0.369954  | 0         | 0.415014  | 0         |
| TMCO6       | 7.70928   | 10.4407   | 7.60349   | 8.35479   | 10.858    | 9.42062   |
| C11orf31    | 42.8283   | 68.3001   | 43.7461   | 55.948    | 39.8184   | 42.457    |
| LOC728643   | 40.5786   | 50.8677   | 38.1844   | 41.5429   | 42.925    | 41.6472   |
| NPHP3-ACAD  | 6.45641   | 5.77619   | 5.9358    | 4.76139   | 7.85915   | 5.89484   |
| HP1BP3      | 80.3418   | 68.1716   | 70.8269   | 65.9717   | 73.2271   | 88.8676   |
| CYB5R2      | 52.9999   | 64.0145   | 36.7932   | 58.0221   | 54.3413   | 53.2698   |
| ARHGAP36    | 0.096376  | 0         | 0.0729572 | 0.0301652 | 0.0818432 | 0.0800766 |
| PXN         | 36.2785   | 47.0066   | 40.0349   | 42.4289   | 45.7169   | 37.1126   |
| LDLRAD2     | 9.14308   | 27.9962   | 7.37351   | 24.2005   | 14.6954   | 14.4189   |
| MIR4451     | 0         | 0         | 0         | 0         | 0         | 0         |
| ANKRD24     | 0.508429  | 0.513738  | 0.733111  | 0.909346  | 1.2336    | 1.1768    |
| DSTN        | 292.704   | 243.226   | 229.093   | 239.761   | 212.821   | 238.045   |
| ZNF10       | 6.78252   | 6.05509   | 7.38488   | 6.98901   | 8.80796   | 7.82192   |
| LOC10013180 | 0.255538  | 0.22593   | 0.145083  | 0.179959  | 0.203442  | 0.0796201 |
| XKR3        | 0         | 0         | 0.0475058 | 0         | 0         | 0         |
| NME2        | 280.33    | 376.496   | 266.671   | 420.544   | 306.804   | 281.408   |
| UBE2D3      | 150.36    | 127.561   | 116.217   | 112.474   | 114.166   | 108.884   |
| FLJ31356    | 0.0700286 | 0.185745  | 0.238554  | 0.361656  | 0.200707  | 0.283652  |

|             |           |           |           |           |           |           |
|-------------|-----------|-----------|-----------|-----------|-----------|-----------|
| ARL13A      | 0.279112  | 0.0744088 | 0.380397  | 0         | 0         | 0.282663  |
| LRPPRC      | 29.2061   | 21.0408   | 25.7668   | 20.2851   | 21.168    | 18.3347   |
| LOC10013169 | 1.8339    | 1.60025   | 2.04261   | 1.35577   | 2.53578   | 2.56822   |
| RD3         | 0.0227851 | 0         | 0         | 0         | 0.014512  | 0         |
| IZUMO1      | 0         | 0.174026  | 0.0496675 | 0.123214  | 0.167151  | 0.122657  |
| TNPO1       | 13.4934   | 9.14635   | 12.1586   | 8.69453   | 10.2852   | 8.86017   |
| FLJ39534    | 0.260898  | 0.290836  | 0.375304  | 0.272701  | 0.365671  | 0.416097  |
| ASAP1-IT1   | 0         | 0         | 0         | 0.0898408 | 0         | 0         |
| ZBTB9       | 5.76405   | 5.22688   | 5.65007   | 5.65521   | 6.23626   | 6.23979   |
| C1orf220    | 0.859329  | 0.72523   | 1.00534   | 0.440126  | 1.26877   | 1.16836   |
| SLC25A14    | 4.17277   | 6.6633    | 5.70518   | 5.11832   | 6.98671   | 5.66073   |
| LOC10013001 | 1.75945   | 3.90969   | 3.61678   | 3.48837   | 3.752     | 4.13678   |
| SNORD115-2  | 0         | 0         | 0         | 0         | 0         | 0         |
| OR10AG1     | 0         | 0         | 0         | 0         | 0         | 0         |
| PLD5        | 0.0349342 | 0.222387  | 0.165286  | 0.147614  | 0.150943  | 0.0870788 |
| TSHZ1       | 7.66974   | 6.31759   | 7.5846    | 7.52995   | 7.67981   | 6.42505   |
| PYGO1       | 0.882658  | 0.234117  | 0.534541  | 0.580161  | 0.787037  | 0.330021  |
| SNORD116-2  | 0         | 0         | 0         | 0         | 0         | 0         |
| TXNDC3      | 0.0879909 | 0.233388  | 0.299743  | 0.082622  | 0.644482  | 0.164497  |
| TBC1D28     | 0         | 0         | 0.0396127 | 0.110554  | 0.0666562 | 0         |
| PIIB        | 221.711   | 249.373   | 195.541   | 203.55    | 196.252   | 192.553   |
| LOC10050721 | 1.29715   | 1.72029   | 2.27077   | 1.67476   | 1.78142   | 3.66275   |
| MBOAT4      | 0.254832  | 0.16898   | 0.289364  | 0.358925  | 0.121728  | 0.1191    |
| FLJ30430    | 0         | 0         | 0         | 0         | 0         | 0         |
| TACC2       | 32.1715   | 29.1571   | 38.6462   | 42.9149   | 32.4321   | 38.7761   |
| SORBS1      | 44.6662   | 45.6013   | 75.224    | 33.3905   | 33.578    | 27.3089   |
| ERC1        | 6.79682   | 5.54037   | 6.71717   | 5.62      | 6.01146   | 5.68482   |
| SNORD114-2  | 0         | 0         | 0         | 0         | 0         | 0         |
| LOC283116   | 0         | 0         | 0         | 0         | 0         | 0         |
| OR8D1       | 0         | 0         | 0         | 0         | 0         | 0         |
| ZIM2        | 0.0497084 | 0         | 2.36E-217 | 0.0549296 | 0.121683  | 0         |
| ID2B        | 1.34648   | 2.12585   | 2.11205   | 1.53525   | 2.14441   | 2.15761   |
| LOC10013095 | 1.38094   | 1.40384   | 2.33577   | 1.48854   | 2.28224   | 1.73996   |
| CCT3        | 95.4556   | 90.1743   | 73.1319   | 90.266    | 80.1283   | 87.1963   |
| MOSC1       | 28.1595   | 27.3906   | 35.5397   | 17.0865   | 15.0086   | 10.7725   |
| KRT78       | 19.3002   | 12.3153   | 16.0848   | 10.9733   | 17.8935   | 21.3692   |
| ZNF322P1    | 2.04254   | 1.39598   | 2.03771   | 1.82974   | 2.0094    | 1.85038   |
| MIR450A1    | 0         | 0         | 0         | 0         | 0         | 0         |
| MSTN        | 1.06293   | 0.501214  | 0.643716  | 0.83173   | 0.902649  | 0.706532  |
| RRM1        | 34.6302   | 31.6869   | 28.0459   | 29.5479   | 27.8812   | 30.8728   |
| CXADRP2     | 0.653559  | 0.649919  | 1.7607    | 0.868671  | 0.901033  | 0.686553  |
| FSD1L       | 1.27447   | 0.405313  | 0.616807  | 0.659016  | 0.800646  | 0.676752  |
| FRY-AS1     | 7.67E-13  | 0.0375551 | 0.06431   | 0.0398848 | 0.0270536 | 0         |

|             |          |          |           |           |           |           |
|-------------|----------|----------|-----------|-----------|-----------|-----------|
| NDRG1       | 156.585  | 158.328  | 169.721   | 172.033   | 215.06    | 220.165   |
| BDNF        | 0.312183 | 0.605487 | 0.433728  | 0.43023   | 0.604987  | 0.84963   |
| LOC400680   | 0.364382 | 0.253129 | 0.531976  | 1.58855   | 0.116039  | 0.113534  |
| SPEF2       | 2.63962  | 1.85853  | 2.23673   | 1.82721   | 3.25045   | 2.24562   |
| SLC37A1     | 5.35189  | 4.39179  | 4.43957   | 5.14571   | 4.9395    | 3.47486   |
| GFRA3       | 5.21482  | 3.27971  | 4.51741   | 6.86538   | 5.71819   | 6.39884   |
| FAM127A     | 76.5505  | 109.288  | 90.4523   | 100.076   | 95.7982   | 98.0128   |
| TSPEAR      | 0.393465 | 0.587042 | 0.428167  | 0.831279  | 1.42529   | 1.17998   |
| MIR1302-1   | 0        | 0        | 0         | 0         | 0         | 0         |
| MIR627      | 0        | 0        | 0         | 0         | 0         | 0         |
| SPOCK1      | 3.121    | 2.37025  | 2.46863   | 2.38579   | 1.35067   | 2.14435   |
| PAK7        | 0.189318 | 0.276022 | 0.236332  | 0.235263  | 0.198838  | 0.245926  |
| TMPRSS3     | 1.28653  | 0.722298 | 1.71154   | 1.26023   | 1.924     | 1.23578   |
| ALDH5A1     | 14.3586  | 10.4879  | 11.0969   | 9.3851    | 10.3921   | 10.8892   |
| SLC15A1     | 60.1048  | 50.2555  | 57.9319   | 51.5682   | 63.5731   | 75.39     |
| DRAP1       | 92.8081  | 118.283  | 84.661    | 98.9839   | 78.6151   | 90.6674   |
| WISP2       | 26.7651  | 31.0033  | 80.693    | 23.9665   | 52.0794   | 25.3809   |
| VSTM1       | 0        | 0        | 0         | 0         | 0         | 0         |
| PACSIN2     | 34.332   | 27.1055  | 30.8548   | 33.3889   | 33.0672   | 32.1377   |
| CD63        | 374.804  | 374.215  | 363.7     | 316.59    | 311.931   | 256.612   |
| SLC36A2     | 0.230232 | 0.127223 | 0.152501  | 0.0540461 | 0.128307  | 0.125537  |
| LOC10012905 | 0        | 0        | 0         | 0.0338409 | 0.022954  | 0         |
| AKR1C2      | 109.844  | 130.02   | 125.797   | 72.4918   | 56.2915   | 43.7928   |
| MIR3591     | 0        | 0        | 0         | 0         | 0         | 0         |
| NKX3-1      | 1.20372  | 0.691763 | 0.979562  | 0.960731  | 0.517492  | 0.675095  |
| LOC10028771 | 0        | 0        | 0         | 0         | 0         | 0         |
| PEX7        | 14.4884  | 11.7154  | 11.574    | 11.6218   | 7.79023   | 7.30449   |
| MANEA       | 7.12827  | 3.24387  | 5.26917   | 2.5789    | 4.08603   | 4.06316   |
| LOC10050724 | 0        | 0        | 0.329145  | 0         | 0.276926  | 0.135474  |
| HEATR5B     | 10.0873  | 9.03015  | 11.5338   | 8.37837   | 11.1962   | 9.783     |
| SSX1        | 0        | 0        | 0         | 0         | 0         | 0         |
| CLDN17      | 0.357347 | 0        | 0.135257  | 0.838857  | 0         | 1.44744   |
| NBPF7       | 0        | 0        | 0.0139227 | 0         | 0.0316273 | 0.0137532 |
| LOC10019231 | 0.123412 | 0        | 0.0934232 | 0.0579407 | 0.0393008 | 0.0384524 |
| COMMD8      | 15.7091  | 15.8048  | 14.2351   | 9.80953   | 12.9132   | 13.7918   |
| RAD54B      | 2.01898  | 1.88567  | 2.78537   | 1.44027   | 2.58248   | 2.07163   |
| WDR3        | 12.3208  | 8.95519  | 9.42226   | 6.57707   | 8.2965    | 7.59928   |
| LINC00476   | 4.25093  | 6.51654  | 3.8021    | 4.17103   | 3.18584   | 2.74061   |
| NLRC3       | 2.1476   | 1.55594  | 1.41123   | 0.658182  | 2.33668   | 0.780669  |
| IKZF3       | 0.342924 | 0.263187 | 0.615341  | 0.0447209 | 0.487526  | 0.133559  |
| C11orf49    | 13.2569  | 15.8996  | 19.848    | 22.5786   | 22.4939   | 20.0398   |
| MZB1        | 0.301335 | 0.532843 | 0.456225  | 0.848846  | 1.63134   | 2.34724   |
| LOC284861   | 0        | 0        | 0         | 0         | 0.151989  | 0.0148708 |

|             |           |           |           |          |            |            |
|-------------|-----------|-----------|-----------|----------|------------|------------|
| LINS        | 6.94864   | 7.70607   | 6.71962   | 5.69493  | 8.82567    | 6.85807    |
| C6orf162    | 3.56831   | 2.4128    | 3.87678   | 2.60188  | 3.98349    | 3.81904    |
| MMGT1       | 14.9164   | 12.9505   | 13.9977   | 14.3343  | 13.232     | 11.238     |
| SLC4A1      | 0.0778978 | 0.172181  | 0.0737113 | 0.256007 | 0.0620169  | 0.497562   |
| C16orf73    | 0.123804  | 0.175779  | 0.517715  | 0.656987 | 0.28312    | 0.23986    |
| MIR4654     | 0         | 0         | 0         | 0        | 0          | 0          |
| CD2BP2      | 22.5915   | 29.8211   | 23.5643   | 30.3666  | 31.0947    | 29.3162    |
| DNAH14      | 1.1619    | 0.327397  | 0.833651  | 0.634355 | 0.521835   | 1.09035    |
| CTNNB1      | 116.457   | 93.7521   | 104.039   | 113.83   | 103.087    | 135.025    |
| RIN2        | 17.8496   | 15.0531   | 16.9418   | 16.5671  | 18.2037    | 16.8272    |
| OR51A4      | 0         | 0         | 0         | 0        | 0          | 0          |
| LOC10028831 | 0         | 0         | 0         | 0        | 0          | 0          |
| SULT4A1     | 5.74061   | 5.90932   | 3.94221   | 3.0802   | 1.77588    | 1.45647    |
| LOC10014459 | 0         | 0         | 0         | 0        | 0          | 0          |
| NWD1        | 0.583693  | 0.329403  | 0.385451  | 0.384821 | 0.189834   | 0.247648   |
| CDRT15L2    | 0         | 0         | 0         | 0        | 0          | 0          |
| EPB41L3     | 5.45197   | 5.32158   | 5.03513   | 3.93162  | 3.5974     | 2.81307    |
| NRM         | 15.3228   | 24.1145   | 13.6293   | 21.6537  | 19.1768    | 15.6118    |
| RCHY1       | 6.95704   | 5.63107   | 5.70326   | 5.55277  | 6.42804    | 6.03385    |
| LOC10012981 | 0.371859  | 1.20551   | 0.656832  | 0.814729 | 2.13155    | 0.772422   |
| PDE3B       | 11.4005   | 9.01054   | 14.5739   | 3.62727  | 5.22074    | 2.52467    |
| LRRC16A     | 5.75259   | 3.58903   | 4.43082   | 3.63779  | 4.06735    | 4.78927    |
| TMEM93      | 33.7039   | 40.5677   | 31.6213   | 41.8603  | 33.3278    | 36.128     |
| CCDC93      | 10.4999   | 8.66364   | 10.7263   | 8.72361  | 12.8147    | 10.003     |
| BEND4       | 0         | 0.0381027 | 0         | 0        | 0.00686159 | 0.00671348 |
| RGS4        | 0.181642  | 0.275309  | 0.235721  | 0.127918 | 0.116374   | 0.021223   |
| HEYL        | 2.79241   | 2.44795   | 2.63338   | 3.04422  | 2.01966    | 2.94934    |
| STAP2       | 78.7107   | 107.412   | 80.9782   | 107.16   | 85.8247    | 88.9059    |
| ZNF517      | 3.40972   | 6.36007   | 5.83485   | 6.8611   | 8.22961    | 6.44356    |
| SCRN1       | 10.39     | 9.0893    | 10.7776   | 9.75702  | 9.18757    | 8.39015    |
| SLC38A7     | 3.57074   | 3.2208    | 3.52218   | 2.84486  | 3.26202    | 3.30399    |
| LOC158572   | 0.844774  | 0.982758  | 0.572183  | 0.709732 | 0.792903   | 0.609547   |
| MIR4734     | 0         | 0         | 0         | 0        | 0          | 0          |
| VAMP2       | 67.7659   | 65.128    | 76.7148   | 85.4666  | 87.4719    | 71.9224    |
| SNORD89     | 0         | 0         | 0         | 0        | 0          | 0          |
| MIR4732     | 0         | 0         | 0         | 0        | 0          | 0          |
| RIMS3       | 4.55181   | 3.7918    | 3.81422   | 4.26173  | 4.41564    | 5.46804    |
| MIR1305     | 0         | 0         | 0         | 0        | 0          | 0          |
| LOC283887   | 0.447016  | 0.69259   | 0.549889  | 0.118052 | 0.355884   | 0.488152   |
| MIR4267     | 0         | 0         | 0         | 0        | 0          | 0          |
| RPN2        | 92.7408   | 71.2911   | 73.6074   | 68.5201  | 68.3951    | 75.4146    |
| C6orf48     | 166.918   | 221.853   | 161.489   | 206.059  | 175.317    | 152.954    |
| LOC10013029 | 0.618351  | 0.546707  | 0.234048  | 0        | 0.787663   | 0.38533    |



|             |           |           |           |           |           |           |
|-------------|-----------|-----------|-----------|-----------|-----------|-----------|
| LOC10050580 | 4.76781   | 6.96456   | 4.18464   | 6.61802   | 6.51338   | 5.38242   |
| RPLP0       | 978.942   | 1702.73   | 1173.07   | 1896.23   | 1146.45   | 1163.89   |
| CDK9        | 30.6579   | 51.3564   | 35.2765   | 42.3749   | 46.6806   | 40.1199   |
| LSAMP-AS3   | 0         | 0         | 0         | 0         | 0         | 0         |
| SUPT7L      | 14.593    | 14.1734   | 13.491    | 12.5393   | 17.6612   | 18.0524   |
| SMC2        | 3.81122   | 3.5529    | 4.50794   | 3.11266   | 4.06953   | 3.84615   |
| C1orf194    | 0.53602   | 0         | 0         | 0         | 0         | 0         |
| WTH3DI      | 3.60839   | 2.15836   | 3.17667   | 2.50982   | 3.25148   | 2.86486   |
| SCARNA20    | 0         | 0         | 0         | 0         | 0         | 0         |
| TMEM72      | 0         | 0         | 0         | 0         | 0         | 0         |
| VSTM4       | 8.16174   | 6.71159   | 7.30789   | 5.0244    | 7.63336   | 4.76325   |
| MIR3941     | 0         | 0         | 0         | 0         | 0         | 0         |
| KRTCAP3     | 11.4212   | 15.3406   | 12.0081   | 20.0502   | 18.8712   | 16.0684   |
| SFTA3       | 0         | 0         | 0         | 0         | 0         | 0         |
| TRAK1       | 23.3281   | 23.7893   | 26.1944   | 30.8793   | 29.6281   | 28.6533   |
| MRPS12      | 32.6681   | 41.9143   | 25.3725   | 36.1575   | 30.2185   | 27.9844   |
| MCCC2       | 48.4851   | 31.2485   | 31.8236   | 27.8771   | 30.1102   | 30.6516   |
| TRIM44      | 12.2443   | 8.35175   | 12.0141   | 7.62975   | 9.50926   | 7.33718   |
| SSR3        | 42.1934   | 35.4406   | 35.9307   | 32.8755   | 28.2496   | 29.4627   |
| LOC10050711 | 4.91493   | 5.40399   | 7.10736   | 5.73922   | 7.46468   | 5.1439    |
| RANBP2      | 13.915    | 9.52251   | 12.4584   | 9.68775   | 10.9979   | 10.5022   |
| FAM127C     | 13.4983   | 12.9663   | 12.3311   | 14.3424   | 12.12     | 12.1325   |
| CDK18       | 5.17645   | 8.5445    | 3.77882   | 5.20673   | 6.94581   | 6.48256   |
| RBM12       | 10.9552   | 9.46826   | 9.64253   | 9.15492   | 9.02086   | 8.56623   |
| CEP55       | 1.9642    | 2.79946   | 1.45759   | 2.10905   | 2.14483   | 2.39794   |
| BK250D10.8  | 0         | 0.126348  | 0         | 0         | 0.182035  | 0.178105  |
| SIGLEC10    | 1.27519   | 1.2716    | 1.31621   | 1.12761   | 2.04837   | 1.91741   |
| CA9         | 1.37579   | 3.28425   | 2.39541   | 3.68176   | 5.73943   | 5.78701   |
| CNTNAP2     | 0.562475  | 0.0590023 | 0.0360845 | 0.0626625 | 0.133582  | 0.172285  |
| MB21D1      | 1.62763   | 1.33626   | 1.05611   | 0.709577  | 0.629393  | 0.470911  |
| CDH4        | 0.0324302 | 0.143364  | 0.171849  | 0.334966  | 0.268514  | 0.343555  |
| RBMXL1      | 10.7843   | 8.6976    | 10.2577   | 7.96664   | 10.1056   | 9.53353   |
| C2orf16     | 0.416194  | 0.29983   | 0.303392  | 0.173689  | 0.206171  | 0.230537  |
| MIR484      | 0         | 0         | 0         | 0         | 0         | 0         |
| RBM46       | 0.0400088 | 0         | 0.0605738 | 0.0375676 | 0         | 0.0249318 |
| CYP8B1      | 0.172924  | 0.0218412 | 0.0748027 | 0.0927847 | 0.0472013 | 0.0461825 |
| PPIAL4G     | 1.93912   | 3.65058   | 1.97459   | 2.31739   | 2.83908   | 1.64975   |
| LOC10050714 | 0.246938  | 0.0436653 | 0.186933  | 0.0927482 | 0.188731  | 0.123105  |
| BTF3        | 427.433   | 556.259   | 476.817   | 613.387   | 452.377   | 452.024   |
| FLJ39639    | 1.44932   | 2.26991   | 1.91217   | 1.32201   | 2.92748   | 2.58044   |
| PCP4L1      | 31.6633   | 23.0029   | 18.5979   | 14.4      | 24.1999   | 22.3462   |
| MIR140      | 0         | 0         | 0         | 0         | 0         | 0         |
| LOC440518   | 0         | 0.0448659 | 0         | 0         | 0.0323201 | 0         |

|             |          |          |           |          |           |           |
|-------------|----------|----------|-----------|----------|-----------|-----------|
| MIR378G     | 0        | 0        | 0         | 0        | 0         | 0         |
| TRIO        | 6.26716  | 5.36991  | 7.96061   | 5.34821  | 7.28465   | 5.27807   |
| SRR         | 8.9372   | 6.96792  | 4.71068   | 4.89558  | 5.18888   | 5.34054   |
| C19orf23    | 1.77853  | 2.28722  | 2.32553   | 2.65684  | 3.08934   | 2.51888   |
| GNMT        | 4.54114  | 0.76476  | 1.39144   | 1.01525  | 0.826365  | 0.74115   |
| LOC124685   | 15.6685  | 5.40609  | 10.4147   | 7.53566  | 9.97935   | 10.4784   |
| C19orf67    | 0        | 0        | 0         | 0        | 0         | 0         |
| ENPEP       | 2.83759  | 2.23575  | 1.88504   | 2.21132  | 1.67204   | 1.08261   |
| OR2B11      | 0        | 0.110332 | 0         | 0        | 0         | 0         |
| GYPC        | 57.0761  | 72.0246  | 53.7499   | 33.3863  | 42.0817   | 29.9535   |
| LOC10065283 | 0        | 0        | 0         | 0        | 0         | 0         |
| SNORA36B    | 0        | 0        | 0         | 0        | 0         | 0         |
| DOCK4       | 2.96558  | 2.10963  | 2.69223   | 2.26184  | 3.09733   | 2.0392    |
| OR2T2       | 0        | 0        | 0         | 0        | 0         | 0         |
| DCAF4L2     | 0        | 0        | 0         | 0        | 0.0377783 | 0         |
| LOC728888   | 26.9645  | 44.3076  | 19.0096   | 34.4082  | 29.7814   | 27.911    |
| H1FX        | 72.4313  | 112.678  | 84.964    | 137.434  | 102.837   | 93.8334   |
| DEFB123     | 0        | 0        | 0         | 0        | 0         | 0         |
| KAT2A       | 43.9505  | 68.3116  | 56.729    | 58.3246  | 71.5832   | 60.4125   |
| SELP        | 5.49156  | 5.6829   | 2.97613   | 2.16807  | 2.64308   | 1.06941   |
| AKT3        | 5.12049  | 4.82736  | 4.9045    | 4.25868  | 5.40345   | 4.47233   |
| LOC401074   | 4.27099  | 2.88513  | 2.96485   | 2.24882  | 4.19407   | 4.36726   |
| CD97        | 10.1204  | 13.6309  | 11.155    | 7.5712   | 11.7845   | 8.07209   |
| CKMT1B      | 62.7003  | 62.5802  | 58.4338   | 65.0593  | 67.3959   | 76.037    |
| BCAS1       | 3.5378   | 1.37628  | 1.49975   | 2.6044   | 1.0455    | 2.09878   |
| MIR4481     | 0        | 0        | 0         | 0        | 0         | 0         |
| KRT222      | 0.788986 | 0.536593 | 1.19453   | 0.227952 | 0.541164  | 0.983325  |
| GK5         | 35.4698  | 21.8838  | 25.192    | 20.8911  | 21.2555   | 20.4356   |
| UBXN8       | 5.34202  | 6.58569  | 6.32221   | 5.72256  | 5.46294   | 5.20436   |
| KRTAP17-1   | 3.26959  | 1.44538  | 0.371265  | 73.0683  | 1.24945   | 181.029   |
| BST1        | 3.06268  | 3.03019  | 4.02971   | 2.05415  | 2.32219   | 1.81765   |
| MIR7-3HG    | 0        | 0        | 0         | 0.156556 | 0         | 0.103898  |
| PHKG2       | 10.3035  | 14.3713  | 10.6751   | 15.0938  | 13.1066   | 13.3824   |
| LOC341056   | 1.86426  | 1.60371  | 1.06797   | 1.56126  | 1.82917   | 1.94667   |
| DISP1       | 1.68512  | 1.871    | 2.41779   | 1.93187  | 1.92188   | 1.55072   |
| ZNF205      | 9.38432  | 14.7667  | 10.6745   | 15.3963  | 13.1357   | 15.3958   |
| CADPS2      | 3.5676   | 2.00751  | 2.54184   | 2.67807  | 1.76474   | 1.49892   |
| BAG6        | 56.886   | 62.7489  | 57.8944   | 63.9125  | 64.9613   | 65.8532   |
| LOC10050706 | 1.05168  | 0.464913 | 0.398063  | 1.15209  | 0.669819  | 0.546134  |
| MST1        | 7.89169  | 14.4301  | 12.4542   | 14.8205  | 15.4213   | 13.8748   |
| LOC339529   | 0.174719 | 0        | 0.0440878 | 0        | 0.0741864 | 0.0362925 |
| PSMD4       | 54.0891  | 70.2608  | 49.1349   | 58.1809  | 55.5051   | 55.0789   |
| LOC10050750 | 0.26252  | 0        | 0         | 0        | 0.501602  | 0.490775  |

|             |          |          |           |          |           |           |
|-------------|----------|----------|-----------|----------|-----------|-----------|
| TRPC3       | 0.358397 | 0.117845 | 0.0224219 | 0.027812 | 0.172479  | 0.11536   |
| LOC339352   | 0.360715 | 0.318921 | 0.364084  | 0.338705 | 0.306322  | 0.524492  |
| NRGN        | 5.53571  | 10.602   | 4.45644   | 5.37111  | 5.28775   | 4.94373   |
| PGAP2       | 54.4658  | 66.9989  | 44.8229   | 57.851   | 55.6908   | 55.2246   |
| ACYP2       | 13.712   | 13.4973  | 11.7641   | 12.017   | 11.1786   | 9.74102   |
| FAM59B      | 1.81586  | 3.08049  | 1.98609   | 2.22436  | 2.41722   | 1.67581   |
| YARS        | 26.695   | 25.1473  | 20.208    | 23.1253  | 19.5719   | 20.8941   |
| STAG3L1     | 13.7691  | 12.1617  | 14.4946   | 12.1169  | 15.6093   | 14.7758   |
| LOC728769   | 6.05722  | 6.83944  | 4.91682   | 3.08366  | 5.39173   | 4.41128   |
| LOC10050721 | 0.150878 | 1.16E-10 | 6.00E-11  | 0        | 0.0307017 | 0.0314512 |
| PTPRC       | 8.36647  | 6.07593  | 6.23707   | 1.77627  | 8.89338   | 3.97211   |
| LOC10050549 | 4.67172  | 4.17116  | 4.55453   | 3.495    | 4.66841   | 2.44698   |
| MEGF10      | 1.11113  | 0.403872 | 0.523371  | 0.765112 | 0.49538   | 0.569315  |
| FAM19A4     | 0        | 0        | 0         | 0        | 0         | 0         |
| ARHGAP35    | 10.7763  | 9.96037  | 12.5225   | 11.8768  | 10.9762   | 10.4078   |
| ZNF428      | 17.5085  | 25.7065  | 15.3426   | 18.727   | 20.6604   | 22.4879   |
| EFNA3       | 51.277   | 50.593   | 65.0217   | 87.415   | 75.266    | 71.7459   |
| KIAA0913    | 24.8935  | 27.1865  | 28.9826   | 27.7942  | 35.1775   | 37.3772   |
| CENPJ       | 1.45161  | 2.10613  | 2.16958   | 1.79991  | 2.05058   | 1.78597   |
| OR2V2       | 0.125812 | 0        | 0         | 0        | 0         | 0.156801  |
| CYP11A1     | 0.597343 | 0.297074 | 0.29302   | 0.395442 | 0.598722  | 0.262435  |
| MIR4471     | 0        | 0        | 0         | 0        | 0         | 0         |
| CCDC157     | 0.434187 | 1.33181  | 0.867635  | 0.978663 | 1.39192   | 1.27792   |
| C16orf42    | 37.5657  | 54.5074  | 38.2881   | 56.1159  | 47.0931   | 46.6597   |
| DPY19L4     | 8.24759  | 6.49232  | 8.59928   | 5.64273  | 7.3424    | 6.26681   |
| OCRL        | 12.5704  | 10.8983  | 13.9187   | 10.6054  | 13.0221   | 10.99     |
| HIST2H4A    | 6.11025  | 1.83481  | 2.70914   | 4.77215  | 5.18446   | 3.80765   |
| DDX24       | 42.6938  | 41.1896  | 41.298    | 38.0389  | 39.8418   | 35.3845   |
| COX7B2      | 0        | 0        | 0         | 0        | 0         | 0         |
| RTN4RL2     | 0.880132 | 2.80137  | 0.932771  | 2.80986  | 2.24224   | 2.08415   |
| STIP1       | 51.7031  | 42.509   | 36.8186   | 38.9085  | 33.6697   | 39.8615   |
| CHN2        | 1.72744  | 1.9408   | 1.94484   | 1.35236  | 1.48405   | 2.87427   |
| POLR3D      | 7.80444  | 8.80369  | 8.67865   | 8.0358   | 8.91296   | 8.4187    |
| HNRNPA1L2   | 47.5448  | 53.7474  | 49.0978   | 54.5973  | 50.8446   | 44.2279   |
| CASC2       | 0.700707 | 0.529428 | 0.55823   | 0.251358 | 0.534403  | 0.820595  |
| CENPP       | 3.78097  | 6.92761  | 3.88448   | 6.19855  | 4.16321   | 3.66631   |
| PMP2        | 3.2736   | 1.11881  | 1.72845   | 1.23988  | 1.38414   | 1.23427   |
| THPO        | 0.312758 | 0.474055 | 0.401568  | 0.396472 | 0.777964  | 0.228399  |
| LOC10050610 | 0        | 0        | 0         | 0.208056 | 0         | 0         |
| LOC10028691 | 0.113161 | 0        | 0.0753615 | 0        | 0.0978785 | 0.124074  |
| SAP30       | 6.60265  | 5.56401  | 2.96771   | 4.16548  | 4.46809   | 3.98591   |
| ZNF761      | 6.27381  | 6.11645  | 6.52231   | 6.08359  | 7.08708   | 6.77494   |
| GLB1L2      | 6.79745  | 6.14027  | 7.7067    | 11.127   | 8.45282   | 14.5596   |

|             |          |           |          |          |           |          |
|-------------|----------|-----------|----------|----------|-----------|----------|
| ANKRD32     | 2.38489  | 1.9952    | 2.11598  | 1.42068  | 1.95997   | 1.58204  |
| PNPLA7      | 10.9106  | 18.8405   | 18.2267  | 19.7402  | 23.2079   | 20.6123  |
| C17orf57    | 1.24191  | 0.931446  | 1.86256  | 1.08879  | 1.35414   | 1.01541  |
| CHURC1-FNTI | 7.07172  | 11.6959   | 7.95435  | 10.0013  | 9.09273   | 8.33718  |
| ANKRD16     | 3.86474  | 5.81137   | 4.53048  | 5.74612  | 3.02642   | 4.04493  |
| RYR1        | 0.882567 | 1.15699   | 0.907685 | 1.20018  | 1.00401   | 0.713061 |
| BTG3        | 33.5839  | 37.9989   | 36.5199  | 34.1916  | 34.3249   | 41.1262  |
| MMP19       | 8.51729  | 11.7193   | 10.2792  | 7.9252   | 13.3555   | 8.74206  |
| SPRR2B      | 98.9884  | 52.4815   | 9.18514  | 35.1461  | 42.3812   | 30.1143  |
| LOC401164   | 0        | 0         | 0        | 0        | 0         | 0        |
| MIR3614     | 0        | 0         | 0        | 0        | 0         | 0        |
| PCDHB6      | 0.303795 | 0.403249  | 0.834009 | 0.769844 | 0.620245  | 0.399494 |
| ZBTB47      | 8.24719  | 10.7448   | 12.6183  | 9.52853  | 10.0945   | 7.584    |
| NADKD1      | 11.9656  | 10.8539   | 10.067   | 9.85843  | 9.55111   | 8.47189  |
| LOC10050728 | 0.421164 | 0.452159  | 0.387143 | 0.197733 | 0.574803  | 0.524903 |
| KCTD9       | 16.4777  | 14.6326   | 17.7079  | 14.0724  | 16.3491   | 13.1156  |
| HMCN1       | 1.52795  | 0.843187  | 1.83203  | 1.04956  | 1.90386   | 1.60715  |
| GPX3        | 462.648  | 514.435   | 213.268  | 213.773  | 190.125   | 243.52   |
| LOC10050762 | 0        | 0.0534484 | 0.091526 | 0        | 0.115508  | 0.113015 |
| TBC1D2B     | 16.2564  | 17.8719   | 21.2301  | 13.3546  | 22.3545   | 16.006   |
| NDUFA10     | 32.3141  | 33.1292   | 28.5786  | 30.9323  | 27.333    | 25.7847  |
| PRSS22      | 21.0322  | 22.5651   | 15.3252  | 14.1275  | 17.2586   | 22.433   |
| ARMCX4      | 2.93177  | 3.33043   | 3.20126  | 3.3702   | 4.73039   | 3.3771   |
| IL17RD      | 2.33262  | 1.80337   | 2.86635  | 2.08842  | 1.87953   | 1.87276  |
| HTRA1       | 59.8577  | 66.7952   | 92.5682  | 82.3073  | 85.2848   | 75.5974  |
| BEST4       | 1.32425  | 3.16555   | 2.71037  | 4.46721  | 5.31044   | 5.80708  |
| MND1        | 2.41346  | 2.24614   | 1.05774  | 1.78911  | 2.75068   | 2.45384  |
| C1orf151    | 17.6046  | 18.644    | 14.6711  | 14.9424  | 12.3598   | 12.7857  |
| LOC284023   | 22.4061  | 25.0715   | 33.0765  | 32.7773  | 43.1148   | 32.8592  |
| ABHD5       | 87.6553  | 74.0538   | 62.3587  | 50.4195  | 42.2857   | 66.81    |
| B3GNT2      | 13.5808  | 8.98131   | 11.1903  | 14.1197  | 10.2729   | 10.3008  |
| LOC388152   | 7.19542  | 12.4909   | 8.57099  | 14.5255  | 11.6312   | 13.5314  |
| LOC10028862 | 0        | 0         | 0        | 0        | 0         | 0        |
| MIR3910-2   | 0        | 0         | 0        | 0        | 0         | 0        |
| HOGA1       | 1.25414  | 1.40924   | 1.76003  | 1.88976  | 1.44967   | 1.58748  |
| KCNMB3      | 2.64474  | 3.35235   | 2.57405  | 1.40912  | 1.97802   | 1.90618  |
| CXCL13      | 3.64087  | 1.98094   | 0.424024 | 0.262978 | 0.47567   | 0.174526 |
| C19orf69    | 0.504624 | 0         | 0.191001 | 0.236917 | 0.241048  | 0        |
| STYK1       | 1.75898  | 1.05635   | 0.778836 | 0.747919 | 1.5642    | 1.26157  |
| LOC10050582 | 0        | 0.024402  | 0        | 0        | 0.0175785 | 0.034398 |
| ART3        | 0.985687 | 0.928736  | 0.484398 | 1.12161  | 1.6506    | 1.13376  |
| UPRT        | 5.54314  | 3.50154   | 4.55908  | 3.65323  | 3.91416   | 4.02188  |
| TRPC4AP     | 45.9381  | 47.6763   | 47.1522  | 44.7389  | 49.1946   | 43.7811  |

|              |           |           |           |           |           |           |
|--------------|-----------|-----------|-----------|-----------|-----------|-----------|
| MIR4293      | 0         | 0         | 0         | 0         | 0         | 0         |
| OR2T12       | 0         | 0         | 0         | 0         | 0.0588933 | 0.0192074 |
| SEC14L2      | 10.9014   | 10.5035   | 7.20673   | 12.0319   | 11.1905   | 12.9054   |
| PIP4K2C      | 25.3086   | 21.6126   | 18.4961   | 23.0079   | 20.1342   | 19.9669   |
| TTN          | 0.358792  | 0.322942  | 0.380231  | 0.258395  | 0.432605  | 0.322358  |
| SLC23A1      | 2.16253   | 1.60209   | 1.04251   | 1.25983   | 1.70764   | 1.64385   |
| ZNF749       | 1.49579   | 1.1722    | 1.77569   | 1.14916   | 1.42902   | 1.41935   |
| EXOC3L4      | 1.01385   | 1.68934   | 0.826532  | 0.659072  | 1.16728   | 0.777589  |
| AGTR2        | 0         | 0         | 0.0260222 | 0         | 0         | 0         |
| KCNK2        | 2.32286   | 1.17323   | 1.66661   | 1.27512   | 1.97856   | 1.25959   |
| PKDREJ       | 0.0867579 | 0.306823  | 0.318999  | 0.302582  | 0.402584  | 0.355277  |
| ADRA1D       | 0.263496  | 0.532496  | 0.227964  | 0.494838  | 0.239746  | 0.304943  |
| CAPRIN1      | 38.9019   | 32.6674   | 35.9169   | 31.6909   | 31.2236   | 29.4114   |
| CASKIN1      | 0.493561  | 0.625124  | 0.813187  | 0.943983  | 1.03982   | 0.970644  |
| IL25         | 0         | 0         | 0.330038  | 0.0909721 | 0.277677  | 0.241496  |
| ACCSL        | 0.172434  | 0.0508184 | 0.0435111 | 0         | 0         | 0.0358178 |
| OR13C4       | 0         | 0         | 0         | 0         | 0         | 0         |
| PYROXD1      | 7.8324    | 7.14875   | 6.3179    | 5.01696   | 5.99376   | 5.54176   |
| RHPN1        | 5.08785   | 7.76141   | 5.78727   | 9.15876   | 8.66366   | 10.7108   |
| ADRA2A       | 4.66251   | 5.70436   | 6.31502   | 4.96964   | 6.03546   | 5.77954   |
| DBN1         | 22.543    | 21.3056   | 27.4968   | 29.1607   | 19.0463   | 24.4087   |
| TMCO3        | 18.2214   | 12.6344   | 14.8884   | 15.0275   | 14.7778   | 14.9662   |
| FAM84B       | 17.8199   | 12.4245   | 13.6224   | 15.4822   | 11.5281   | 12.2729   |
| CUL5         | 11.392    | 8.9882    | 10.7628   | 8.2964    | 9.66463   | 8.17968   |
| ANXA8L2      | 68.3005   | 91.9501   | 78.3585   | 89.6469   | 107.374   | 100.223   |
| RNY4P8       | 0         | 0         | 0         | 0         | 0         | 0         |
| LOC10050591  | 0         | 0         | 0         | 0         | 0         | 0         |
| TFDP2        | 6.41497   | 6.57273   | 7.82651   | 7.04028   | 8.20212   | 6.46383   |
| COPG         | 44.5023   | 35.2945   | 40.1135   | 36.3628   | 37.5313   | 36.5737   |
| OR8H2        | 0         | 0         | 0         | 0         | 0         | 0         |
| ZNF311       | 1.56061   | 1.83972   | 1.77208   | 1.18626   | 2.03525   | 1.59769   |
| MIR760       | 0         | 0         | 0         | 0         | 0         | 0         |
| RCVRN        | 0.67254   | 1.44407   | 0.581847  | 1.08258   | 1.10146   | 1.43691   |
| PDK2         | 18.17     | 27.0727   | 25.0586   | 24.2722   | 26.4475   | 24.1345   |
| ICK          | 6.61763   | 4.94015   | 6.67549   | 4.26472   | 6.82915   | 6.09807   |
| ACBD3        | 18.4808   | 14.5863   | 18.7437   | 15.7239   | 16.9629   | 15.7386   |
| C19orf29-AS1 | 0.768931  | 0.846341  | 1.35856   | 1.16851   | 0.97558   | 1.19915   |
| ST6GAL1      | 18.9649   | 8.63102   | 8.70245   | 7.86474   | 9.94103   | 8.0023    |
| IMPACT       | 11.4813   | 8.76994   | 11.8053   | 10.6341   | 9.33545   | 8.03073   |
| OR51E1       | 0.989342  | 1.35439   | 0.579822  | 0.209769  | 0.243916  | 0.298314  |
| NUPL1        | 12.3359   | 11.1455   | 11.6638   | 11.4129   | 13.6218   | 10.1227   |
| C9orf30      | 11.2303   | 12.1275   | 11.0542   | 11.5378   | 9.69897   | 7.91435   |
| LOC10050731  | 0.916206  | 0.810051  | 0.351016  | 0.724712  | 1.47373   | 0.570941  |

|             |           |           |           |           |           |           |
|-------------|-----------|-----------|-----------|-----------|-----------|-----------|
| ITGA2       | 6.08807   | 5.85167   | 6.4248    | 6.99576   | 7.05632   | 6.38565   |
| LOC646719   | 1.18627   | 0.947325  | 1.10079   | 0.682705  | 1.5842    | 1.2877    |
| MIR1268     | 0         | 0         | 0         | 0         | 0         | 0         |
| KIR2DL1     | 0         | 0.0147433 | 0.0504932 | 0         | 0.107534  | 0         |
| NUF2        | 3.00442   | 3.45505   | 2.53037   | 2.23609   | 2.38156   | 2.82453   |
| OR6B2       | 0         | 0.112617  | 0         | 0         | 0         | 0         |
| DOCK11      | 5.30102   | 5.2584    | 6.3728    | 2.19877   | 3.16581   | 1.80835   |
| ZNF576      | 5.99025   | 6.43445   | 5.29736   | 6.14158   | 6.48254   | 5.58158   |
| TRAPPC2L    | 55.5127   | 68.9628   | 44.0462   | 62.0909   | 49.0641   | 45.9242   |
| NXF1        | 66.0084   | 76.8938   | 65.1476   | 68.8546   | 77.4655   | 76.1346   |
| LOC10050714 | 0         | 0         | 0         | 0         | 0         | 0         |
| IMP5        | 0         | 0         | 0         | 0         | 0.0298572 | 0         |
| ZNF286B     | 1.40079   | 1.1767    | 1.29432   | 1.54462   | 1.58614   | 1.34518   |
| LOC10050593 | 0.693171  | 1.01526   | 0.876158  | 0.569777  | 1.39964   | 1.30685   |
| C22orf24    | 0.0893771 | 0.0790216 | 0.270636  | 0         | 0         | 0.055696  |
| ZNRF4       | 0         | 0         | 0         | 0         | 0         | 0         |
| BCL2L13     | 18.7633   | 18.2457   | 21.8562   | 17.0138   | 17.9537   | 16.5629   |
| C22orf13    | 25.5419   | 27.2      | 25.6775   | 25.5414   | 25.4844   | 21.968    |
| PSME3       | 43.8241   | 34.9683   | 36.1738   | 35.556    | 32.5488   | 31.588    |
| TSPAN9      | 19.2744   | 24.017    | 19.9276   | 23.4427   | 25.3488   | 21.9306   |
| RPL37A      | 2667.11   | 4048.74   | 3060.31   | 5166.74   | 3153.13   | 3088.24   |
| LOC284080   | 0.557224  | 0.774184  | 1.32573   | 1.75654   | 1.44495   | 0.644871  |
| MMEL1       | 0.262627  | 0.763158  | 0.267144  | 0.324682  | 0.235776  | 0.234412  |
| C3orf72     | 0.0956143 | 0.126804  | 0.217142  | 0.134671  | 0.395832  | 0.342601  |
| OR6M1       | 0         | 0         | 0         | 0         | 0         | 0         |
| FLJ46066    | 0         | 0         | 0         | 0         | 0         | 0.0361329 |
| LOC147646   | 0         | 0         | 0         | 0         | 0         | 0.0521124 |
| MIR548H1    | 0         | 0         | 0         | 0         | 0         | 0         |
| LRIG2       | 3.0594    | 3.06988   | 4.77901   | 4.0127    | 4.91777   | 2.79921   |
| ASXL1       | 13.8457   | 14.733    | 14.5352   | 15.0806   | 16.6223   | 12.4559   |
| SNAPIN      | 39.8148   | 48.6261   | 41.2084   | 45.8342   | 40.6879   | 37.2164   |
| MIR4264     | 0         | 0         | 0         | 0         | 0         | 0         |
| PPPDE1      | 11.8725   | 11.5698   | 11.8513   | 11.863    | 11.0167   | 10.0079   |
| WDR1        | 93.3358   | 85.256    | 80.7478   | 89.2641   | 76.0787   | 82.6532   |
| LOC728763   | 0         | 0.017898  | 0.0153244 | 0.0190083 | 0.128932  | 0.0308856 |
| C14orf93    | 8.43206   | 10.1195   | 7.5234    | 12.123    | 9.12989   | 7.78335   |
| MRPL14      | 71.4566   | 76.4243   | 68.3018   | 80.3922   | 66.5888   | 66.7931   |
| BNC2        | 1.32123   | 1.55967   | 1.69811   | 2.06542   | 2.54762   | 4.13929   |
| SLCO4A1     | 5.39449   | 6.1934    | 6.37981   | 8.62011   | 8.9299    | 9.52764   |
| NHLRC3      | 12.7189   | 12.9385   | 14.9146   | 9.55155   | 15.8178   | 12.2567   |
| LOC729032   | 0         | 0         | 0         | 0         | 0         | 0         |
| CSTL1       | 0         | 0         | 0.13396   | 0         | 0         | 0.110274  |
| LOC10050726 | 0         | 0         | 0         | 0         | 0         | 0         |

|             |          |           |          |           |           |           |
|-------------|----------|-----------|----------|-----------|-----------|-----------|
| PATE3       | 0        | 0         | 0        | 0         | 0         | 0         |
| SCGB2A1     | 6.3232   | 1.33109   | 5.69845  | 16.964    | 0.575326  | 1.87636   |
| MIR4791     | 0        | 0         | 0        | 0         | 0         | 0         |
| DPRXP4      | 1.01301  | 0.895642  | 1.0736   | 1.71217   | 1.16135   | 0.631267  |
| AGAP1-IT1   | 0        | 0.544559  | 0.155419 | 0.38556   | 0.392284  | 0.255878  |
| HOXB8       | 0        | 0         | 0        | 0.215481  | 0.0365398 | 0.071502  |
| LOC10029396 | 0.298042 | 0.26351   | 0.11281  | 0.279857  | 0.284737  | 0.185727  |
| LINC00301   | 0        | 0         | 0        | 0         | 0         | 0         |
| CCDC116     | 0.233326 | 0.330068  | 0.317933 | 0.306725  | 0.386378  | 0.232638  |
| ZNF823      | 4.86689  | 5.31326   | 4.64537  | 4.56993   | 5.6065    | 4.95803   |
| TOX4        | 19.8482  | 20.1024   | 20.2576  | 18.9376   | 18.9123   | 20.5382   |
| FLJ33065    | 0.097163 | 0.730196  | 0.294212 | 0.410555  | 0.216593  | 0.272465  |
| XPO6        | 23.0507  | 24.9951   | 20.5377  | 21.4589   | 20.995    | 17.6034   |
| HABP4       | 11.4534  | 13.194    | 11.1838  | 12.366    | 9.83721   | 8.22996   |
| UQCRHL      | 207.399  | 212.123   | 192.203  | 213.227   | 180.788   | 183.108   |
| DISC1       | 0.863203 | 1.16196   | 1.15554  | 1.04899   | 1.12227   | 1.04101   |
| FGFR3       | 75.7457  | 113.368   | 119.525  | 124.393   | 137.629   | 118.528   |
| SLC7A9      | 0.315187 | 0.998781  | 0.585654 | 1.05847   | 0.560987  | 0.31318   |
| LOC10050628 | 1.54852  | 0.342276  | 1.83162  | 0.545263  | 0.862978  | 0.723729  |
| ZNF630      | 1.24435  | 1.1858    | 1.42719  | 2.40796   | 1.98869   | 2.06981   |
| CD300A      | 3.03102  | 2.77729   | 2.92027  | 2.84608   | 3.82585   | 2.74735   |
| NDUFS4      | 113.382  | 99.774    | 114.088  | 118.419   | 98.6623   | 91.2159   |
| HEATR4      | 4.32673  | 3.50473   | 1.96615  | 2.3228    | 2.83107   | 3.57368   |
| EPB41L1     | 10.7068  | 9.16491   | 12.226   | 10.4914   | 9.99011   | 7.28754   |
| C4orf14     | 15.2941  | 20.3823   | 19.4207  | 21.6888   | 19.5961   | 18.3067   |
| ANO10       | 33.1128  | 24.9716   | 26.5896  | 29.4483   | 23.9847   | 32.4216   |
| HSD3B7      | 19.1209  | 25.23     | 17.4859  | 17.9166   | 16.0845   | 13.3758   |
| EIF5B       | 48.0591  | 41.9631   | 37.4405  | 36.5523   | 36.1148   | 36.9642   |
| ENOX1       | 1.19075  | 2.69419   | 0.67663  | 0.25131   | 0.829351  | 0.487667  |
| ARMC8       | 11.8015  | 10.7469   | 12.0204  | 10.4338   | 11.7224   | 10.3737   |
| LILRA2      | 0.744858 | 0.292139  | 0.293124 | 0.467469  | 0.780066  | 0.620474  |
| PYCARD      | 72.9262  | 104.545   | 65.5064  | 96.3725   | 74.9132   | 91.0181   |
| NRSN1       | 0        | 0         | 0        | 0         | 0.0535891 | 0.0262162 |
| PIK3R3      | 11.6043  | 6.95539   | 5.89012  | 6.67049   | 5.49515   | 5.29565   |
| FAM90A20    | 0.234515 | 0.0691144 | 0.074895 | 0.0999081 | 0.163928  | 0.12527   |
| SNORD64     | 0        | 0         | 0        | 0         | 0         | 0         |
| LRRC68      | 26.934   | 34.9302   | 27.9001  | 36.0842   | 31.8684   | 37.8115   |
| TFE3        | 27.9874  | 32.625    | 30.8568  | 26.0616   | 27.9769   | 27.0654   |
| FAM201A     | 0.365108 | 1.12982   | 1.42801  | 2.28554   | 0.930157  | 0.492959  |
| PRSS44      | 0.237705 | 0.0934062 | 0        | 0.496003  | 0.274755  | 0         |
| SH3KBP1     | 15.6378  | 15.6406   | 18.3276  | 11.8449   | 16.7258   | 14.503    |
| MIR3134     | 0        | 0         | 0        | 0         | 0         | 0         |
| GDF5        | 0.768648 | 0.679591  | 0.806758 | 0.761559  | 0.5706    | 0.399816  |

|             |           |           |           |           |           |            |
|-------------|-----------|-----------|-----------|-----------|-----------|------------|
| TSPYL6      | 0         | 0         | 0.048503  | 0.0601628 | 0         | 0.0399271  |
| NBPF14      | 20.3211   | 18.9019   | 21.1927   | 16.1488   | 21.5622   | 19.6931    |
| OR1D2       | 0         | 0         | 0         | 0         | 0         | 0          |
| ANGPTL3     | 0.0482765 | 0         | 0         | 0         | 0.0922428 | 0          |
| LRRFIP1     | 36.5219   | 32.8617   | 30.3699   | 30.3386   | 31.927    | 30.3797    |
| LOC10012810 | 0         | 0         | 0         | 0.310764  | 0.210617  | 0.412101   |
| MIR4520A    | 0         | 0         | 0         | 0         | 0         | 0          |
| OR10Q1      | 0         | 0         | 0         | 0         | 0         | 0          |
| ADARB2-AS1  | 0.214868  | 0         | 0         | 0         | 0         | 0          |
| CSN2        | 0         | 0         | 0         | 0         | 0         | 0          |
| LOC10017093 | 1.71986   | 1.38282   | 2.43804   | 2.26003   | 2.32949   | 2.42062    |
| LOC10050739 | 0         | 0         | 0         | 0.151463  | 0         | 0.0335061  |
| NOD1        | 6.5306    | 7.48897   | 7.06476   | 7.71069   | 7.1382    | 6.33943    |
| ZFYVE19     | 14.9682   | 21.386    | 13.1151   | 18.5522   | 18.4145   | 19.5008    |
| CD8A        | 5.94081   | 5.40124   | 1.3162    | 0.309892  | 2.32181   | 0.525909   |
| SNRPN       | 5.55E-07  | 1.14E-14  | 4.69E-07  | 9.33E-17  | 3.55E-07  | 4.52E-07   |
| ANGPTL4     | 50.4566   | 80.8173   | 29.3059   | 38.362    | 49.8723   | 47.0544    |
| KLF15       | 9.70531   | 11.547    | 8.61682   | 10.1632   | 5.36736   | 6.17238    |
| ERAP2       | 3.79052   | 4.61411   | 9.30106   | 5.33019   | 3.19558   | 1.56336    |
| MYH1        | 0         | 0.0983239 | 0.0841857 | 0.0447529 | 0.141854  | 0.00990009 |
| TNFRSF18    | 7.77326   | 19.8355   | 14.9834   | 21.1206   | 25.213    | 17.1237    |
| LOC10063091 | 14.486    | 23.2047   | 11.353    | 15.8425   | 13.7851   | 11.4697    |
| LOC10050641 | 4.39889   | 3.38193   | 1.78564   | 2.6938    | 2.96423   | 2.82066    |
| FBXO22-AS1  | 24.9853   | 20.1612   | 11.1459   | 13.9331   | 20.7938   | 14.7105    |
| TMEM223     | 16.7419   | 22.6046   | 16.7274   | 18.23     | 16.2791   | 16.2372    |
| OR1D5       | 0         | 0         | 0         | 0         | 0         | 0          |
| ITGA7       | 42.1191   | 59.0963   | 61.4251   | 44.5934   | 44.0515   | 30.3062    |
| FLJ46836    | 0         | 0.0268073 | 0         | 0.0284703 | 0         | 0.0188944  |
| FLJ39061    | 0.0187541 | 0         | 0.014197  | 0.0176098 | 0.0119446 | 0.0818074  |
| TMC3        | 0.119514  | 0.0528335 | 0.0545928 | 0.0841665 | 0.0269531 | 0.0186191  |
| NBPF11      | 12.989    | 14.8573   | 15.1768   | 15.3167   | 17.5227   | 15.0607    |
| TMCC2       | 1.94788   | 1.98281   | 2.38862   | 3.04789   | 2.61114   | 3.6402     |
| PHOSPHO2    | 4.84574   | 4.93472   | 4.59559   | 4.20492   | 4.16467   | 3.69456    |
| LRRC27      | 5.23976   | 7.53977   | 3.9911    | 4.31538   | 5.21435   | 3.43133    |
| ZNF323      | 4.89934   | 5.48264   | 4.32843   | 4.10007   | 4.78189   | 4.64879    |
| GATAD2A     | 19.7156   | 21.2584   | 20.6208   | 23.6251   | 20.3539   | 20.2202    |
| ECM2        | 14.4571   | 13.7933   | 30.8324   | 11.5668   | 18.4063   | 10.4499    |
| LOC10050651 | 10.183    | 15.8806   | 13.7042   | 17.7956   | 27.5639   | 22.4742    |
| CLEC2D      | 13.1346   | 14.5734   | 10.3428   | 9.83381   | 14.2122   | 10.993     |
| SPINK13     | 0         | 1.10827   | 0.711681  | 0         | 0         | 2.14811    |
| LOC10050624 | 0.21057   | 0.279259  | 0.637611  | 0.494305  | 0.268227  | 0.0656092  |
| LTBP1       | 18.6939   | 10.2569   | 15.1838   | 9.44895   | 16.3197   | 12.2942    |
| ZNF300      | 3.68727   | 4.87675   | 4.22117   | 4.40226   | 5.48574   | 4.8126     |



|             |          |            |           |           |           |            |
|-------------|----------|------------|-----------|-----------|-----------|------------|
| OR5K1       | 0        | 0.110632   | 0         | 0         | 0         | 0.0389877  |
| AANAT       | 0.391182 | 0.547987   | 0.313664  | 0.102031  | 0.527501  | 0.531582   |
| LOC10050617 | 0        | 0          | 0         | 0.204617  | 0.13879   | 0          |
| LOC10012946 | 0        | 0          | 0         | 0         | 0         | 0          |
| ADIPOQ      | 146.895  | 123.842    | 198.69    | 70.2169   | 62.7941   | 44.3855    |
| SPATA5      | 1.28061  | 0.771976   | 0.898923  | 0.907318  | 0.800796  | 0.769001   |
| MIR3688-1   | 0        | 0          | 0         | 0         | 0         | 0          |
| MIR100      | 0        | 0          | 0         | 0         | 0         | 0          |
| BPIFA4P     | 0        | 0          | 0         | 0         | 0         | 0          |
| TCAM1P      | 0.149976 | 0.318237   | 0.0454129 | 0.0281649 | 0.229249  | 0.206076   |
| LOC728393   | 0        | 0.00739837 | 0         | 0         | 0.0085273 | 0.00417161 |
| PLOD2       | 6.74507  | 6.17407    | 8.44764   | 5.02488   | 4.78539   | 4.73798    |
| WNT2B       | 2.62408  | 1.48814    | 3.18547   | 2.41871   | 3.85516   | 3.33229    |
| MYL6        | 938.303  | 1084.57    | 903.491   | 979.266   | 873.258   | 967.779    |
| FLJ33996    | 0.488347 | 0.678489   | 1.18826   | 1.11362   | 0.844227  | 0.760793   |
| MIR3156-3   | 0        | 0          | 0         | 0         | 0         | 0          |
| NDRG4       | 17.1407  | 21.0957    | 10.4491   | 15.161    | 11.2519   | 12.6265    |
| C12orf37    | 0        | 0          | 0         | 0         | 0         | 0          |
| NFKBIE      | 5.03028  | 6.55052    | 4.16218   | 4.17412   | 8.04679   | 4.54404    |
| HLA-H       | 48.6484  | 55.444     | 36.5247   | 26.9987   | 49.0056   | 28.5693    |
| OR5H15      | 0        | 0          | 0         | 0         | 0         | 0          |
| FAM129A     | 19.813   | 10.0777    | 8.84715   | 8.37893   | 8.5732    | 8.82512    |
| BOD1L       | 7.38056  | 5.03232    | 7.23305   | 5.41162   | 7.94645   | 5.71287    |
| SNORA41     | 52.4327  | 92.7154    | 119.076   | 49.2335   | 133.579   | 65.3477    |
| KIAA1245    | 2.82141  | 2.44209    | 2.66096   | 2.10836   | 4.00603   | 2.89729    |
| NPHS1       | 0        | 0          | 0         | 0         | 0.0366608 | 0.0119565  |
| OR6C1       | 0        | 0          | 0         | 0         | 0         | 0          |
| MIR3943     | 0        | 0          | 0         | 0         | 0         | 0          |
| LOC392288   | 0        | 0          | 0         | 0         | 0         | 0          |
| FRMD5       | 0.136476 | 0.0402211  | 0.0688754 | 0.0427162 | 0.376663  | 0.141743   |
| UBE2V2      | 33.3326  | 32.212     | 28.8605   | 22.1672   | 24.9999   | 24.8116    |
| PPP1R12B    | 17.8625  | 16.5482    | 14.4786   | 14.0635   | 14.3254   | 10.5315    |
| ASB2        | 2.69717  | 3.37718    | 1.57917   | 2.33825   | 1.92391   | 1.81517    |
| MIR138-2    | 0        | 0          | 0         | 0         | 0         | 0          |
| SHMT1       | 41.185   | 40.0609    | 38.2289   | 39.0661   | 26.2051   | 26.7269    |
| EIF2AK4     | 7.50779  | 6.23235    | 7.78011   | 5.56129   | 6.37937   | 5.42753    |
| NAPSA       | 1.17556  | 1.73298    | 0.830579  | 1.25216   | 1.3477    | 2.14913    |
| LOC1001327  | 1.28253  | 1.49972    | 0.908247  | 0.971192  | 0.922253  | 0.696095   |
| PORCN       | 4.63028  | 6.03999    | 7.18043   | 7.91247   | 6.65252   | 5.9109     |
| TRIM15      | 0.459221 | 0.730826   | 0.10429   | 0.431201  | 0.263232  | 0.572334   |
| ARFGAP3     | 20.778   | 14.8276    | 17.2457   | 14.6681   | 15.5968   | 14.6152    |
| NLRP11      | 0        | 0.0213218  | 0.529422  | 0.384957  | 0.153596  | 0.0300561  |
| ANGPT2      | 1.32731  | 0.790368   | 1.07171   | 0.665785  | 0.92493   | 0.768975   |

|             |           |          |           |           |          |           |
|-------------|-----------|----------|-----------|-----------|----------|-----------|
| CHRM2       | 0.0412429 | 0        | 0         | 0         | 0        | 0         |
| KBTBD10     | 1.35375   | 1.88602  | 1.36639   | 0.770391  | 1.72442  | 1.53381   |
| DDX26B      | 9.37148   | 11.6538  | 9.78585   | 7.89347   | 12.2934  | 9.1476    |
| CST1        | 0.460529  | 0        | 0         | 5.87751   | 0.107748 | 14.1266   |
| ITGB1BP1    | 33.2224   | 47.2099  | 68.8884   | 50.628    | 33.8495  | 27.5152   |
| CETN1       | 0         | 0        | 0         | 0         | 0        | 0         |
| SLC2A4RG    | 48.8627   | 84.1565  | 69.1469   | 89.0667   | 70.2257  | 60.3057   |
| LOC283404   | 1.10057   | 0.778442 | 1.41633   | 1.34344   | 1.47201  | 1.85173   |
| LRRTM2      | 0.187508  | 0.210996 | 0.129041  | 0.160061  | 0.173709 | 0.106225  |
| LOC282980   | 0         | 0        | 0         | 0         | 0        | 0         |
| CNOT7       | 29.2206   | 25.0413  | 24.7463   | 23.1351   | 23.8456  | 21.8738   |
| INADL       | 10.5371   | 10.1659  | 9.2265    | 9.20785   | 10.6575  | 9.14192   |
| LOC10065287 | 0         | 0        | 0         | 0         | 0        | 0.0455459 |
| DYSF        | 3.64902   | 3.50503  | 2.47712   | 2.13342   | 1.99695  | 2.97351   |
| SOBP        | 2.19293   | 2.2507   | 2.28694   | 1.88633   | 1.5432   | 1.18497   |
| LOC10063137 | 0.122918  | 0.163015 | 0.459154  | 0.0577092 | 0.665443 | 0.191494  |
| MIR4665     | 0         | 0        | 0         | 0         | 0        | 0         |
| NCOA2       | 4.36357   | 2.07316  | 4.34948   | 2.36216   | 3.87701  | 3.44496   |
| IHH         | 0.19872   | 0        | 0         | 0         | 0        | 0.0928754 |
| MIR3670     | 0         | 0        | 0         | 0         | 0        | 0         |
| CCDC159     | 14.6825   | 17.9816  | 13.914    | 19.3013   | 18.5643  | 19.7902   |
| MRPS7       | 42.7881   | 45.8738  | 36.2025   | 46.6519   | 42.0143  | 48.9523   |
| PKD1L3      | 0.0741127 | 0.131052 | 0.0561037 | 0.0869883 | 0.106206 | 0.127006  |
| FAM129C     | 0         | 0.216757 | 0.185589  | 0.0431628 | 0.513949 | 0.173583  |
| ATP12A      | 15.0748   | 8.01557  | 11.0326   | 18.232    | 19.5548  | 33.9298   |
| MIR4742     | 0         | 0        | 0         | 0         | 0        | 0         |
| CASD1       | 10.7188   | 7.05205  | 7.61896   | 7.39502   | 7.05122  | 6.39727   |
| GSC2        | 0         | 0        | 0         | 0         | 0        | 0         |
| MDGA1       | 1.31638   | 1.43605  | 0.530399  | 0.44857   | 4.23938  | 1.91847   |
| RERE        | 25.5325   | 26.7924  | 25.8105   | 24.0593   | 27.9175  | 21.9727   |
| LY6G6C      | 237.399   | 172.173  | 262.361   | 247.957   | 356.747  | 369.67    |
| SNORD87     | 0         | 0        | 0         | 0         | 0        | 0         |
| UNC13B      | 14.7665   | 12.3664  | 17.4995   | 14.9072   | 19.7073  | 17.236    |
| DNAJC27-AS1 | 0.186235  | 0.31102  | 0.266298  | 0.291454  | 0.197926 | 0.348162  |
| PKNOX2      | 1.39122   | 1.46211  | 2.64284   | 1.7007    | 2.24027  | 1.88112   |
| MIR3654     | 0         | 0        | 0         | 0         | 0        | 0         |
| SDR9C7      | 18.0931   | 12.3133  | 18.0218   | 13.5243   | 25.3216  | 27.3341   |
| DTX3        | 16.0709   | 26.4393  | 17.9022   | 27.6497   | 28.5044  | 22.2796   |
| CSNK1A1P1   | 1.00068   | 0.829438 | 1.23096   | 0.587261  | 0.717003 | 1.16921   |
| LOC10050759 | 6.66671   | 1.47357  | 0.630842  | 0.391246  | 0.265379 | 0.778952  |
| MC2R        | 0.134225  | 0.213612 | 0.0406437 | 0.100828  | 0.119684 | 0.100372  |
| TCEAL6      | 0.981945  | 0.309637 | 0.689295  | 0.591921  | 0.580867 | 0.307352  |
| QPRT        | 3.3732    | 3.46929  | 4.48171   | 4.58948   | 5.83141  | 4.46147   |

|             |           |           |            |           |           |           |
|-------------|-----------|-----------|------------|-----------|-----------|-----------|
| YPEL5       | 52.6389   | 54.1911   | 54.227     | 50.9346   | 54.0095   | 53.7499   |
| LOC10050558 | 0         | 0         | 0          | 0         | 0         | 0         |
| LOC391722   | 6.32276   | 3.99299   | 5.16624    | 6.03121   | 4.027     | 4.00262   |
| SSH3        | 22.4161   | 33.8177   | 27.2765    | 33.7468   | 35.4386   | 34.0259   |
| C7orf53     | 4.69914   | 3.84592   | 3.56193    | 7.17687   | 4.21849   | 11.0937   |
| LTV1        | 29.0199   | 25.1474   | 21.9682    | 18.4731   | 19.8425   | 18.1199   |
| GUSBP9      | 0.775369  | 1.25295   | 1.7189     | 2.40291   | 1.64354   | 1.88181   |
| PPP1R11     | 43.0127   | 38.9316   | 35.7883    | 39.9658   | 37.4455   | 39.1331   |
| HIGD1B      | 5.23097   | 4.55136   | 1.2058     | 1.92241   | 3.14857   | 1.98205   |
| FAM63B      | 2.05913   | 1.41229   | 2.35847    | 1.46289   | 2.18027   | 1.93064   |
| EFNA5       | 7.35281   | 5.73608   | 6.22096    | 10.6439   | 7.03605   | 14.2849   |
| EGR3        | 35.5502   | 27.7289   | 58.1885    | 30.7847   | 39.6656   | 47.7266   |
| GPR78       | 0.160349  | 0.0945135 | 0          | 0.0501883 | 0.136169  | 0.0333075 |
| NCOA7       | 12.5895   | 11.6175   | 12.2864    | 5.61282   | 11.3964   | 6.757     |
| CGA         | 2.07382   | 0.666743  | 0          | 0.354052  | 0.720452  | 2.93709   |
| HLA-DOB     | 4.14569   | 4.44073   | 6.15592    | 5.68939   | 5.94094   | 4.07386   |
| RN5S3       | 57.8872   | 271.492   | 29.3214    | 237.869   | 37.4109   | 49.9244   |
| UBE2NL      | 2.74339   | 2.50917   | 2.22059    | 2.576     | 2.7113    | 1.82747   |
| YY1         | 29.3434   | 25.7033   | 27.0318    | 25.3298   | 26.0311   | 26.6301   |
| SPINLW1-WF  | 2.15E-11  | 0.0990457 | 4.75E-11   | 0.089369  | 3.40E-10  | 0.0422668 |
| FAM90A7     | 0.0105918 | 0.146321  | 0.00801802 | 0         | 0.256135  | 0.069386  |
| PARD6A      | 1.94623   | 2.18809   | 2.00692    | 3.15172   | 1.85697   | 1.81586   |
| MIR708      | 0         | 0         | 0          | 0         | 0         | 0         |
| BRIP1       | 0.870396  | 1.24154   | 0.694036   | 0.595735  | 1.24177   | 0.860598  |
| MIR548AN    | 0         | 0         | 0          | 0         | 0         | 0         |
| SART3       | 17.3656   | 15.3339   | 15.348     | 15.4094   | 18.1603   | 15.4435   |
| EVL         | 40.9948   | 55.813    | 36.0553    | 40.5876   | 55.6071   | 41.3286   |
| WHAMMP3     | 2.56146   | 3.13316   | 2.15645    | 1.63293   | 2.65028   | 2.52153   |
| SOX6        | 1.14152   | 1.54661   | 1.73639    | 1.63277   | 1.45399   | 1.15671   |
| LOC10050698 | 0         | 0         | 0.1508     | 0.187051  | 0.0634377 | 0         |
| THSD1P1     | 3.72488   | 3.73291   | 4.11233    | 4.30806   | 5.53944   | 4.26222   |
| MAP7        | 14.8529   | 12.1858   | 13.6597    | 13.8924   | 11.4401   | 19.0164   |
| PRB1        | 2.63647   | 1.13319   | 0.524553   | 1.30937   | 1.09381   | 1.86617   |
| LARS2       | 6.17743   | 4.17298   | 5.16676    | 5.01842   | 4.45019   | 4.23879   |
| DNAJC22     | 0.227223  | 0.25112   | 0.0860044  | 0.320038  | 0.144719  | 0.424787  |
| KLRD1       | 0.517467  | 0.147475  | 0.283597   | 0.0290707 | 0.241029  | 0.103944  |
| ZDHHC17     | 12.4552   | 10.6181   | 12.6788    | 10.6683   | 14.6659   | 11.0807   |
| CDC26       | 14.3636   | 13.8987   | 12.5375    | 12.7838   | 15.3756   | 12.7698   |
| SLITRK3     | 0.184214  | 0.0407176 | 0.156882   | 0.0648653 | 0.219988  | 0.272637  |
| PDK3        | 21.5039   | 7.91571   | 11.3712    | 18.3533   | 8.6474    | 8.68169   |
| STC1        | 0.806267  | 0.779681  | 0.667569   | 0.378536  | 0.36909   | 0.376824  |
| SNX13       | 13.7449   | 9.81995   | 13.1735    | 8.51501   | 10.7208   | 10.8069   |
| SGPL1       | 28.4868   | 23.135    | 28.1256    | 26.982    | 27.0831   | 27.9443   |

|             |           |           |           |           |            |           |
|-------------|-----------|-----------|-----------|-----------|------------|-----------|
| BPHL        | 22.1506   | 27.5655   | 20.0798   | 17.9953   | 24.3193    | 21.1884   |
| SNORD100    | 0         | 0         | 0         | 0         | 0          | 0         |
| KIAA1370    | 19.4819   | 13.5555   | 19.0065   | 13.5521   | 17.2246    | 18.1219   |
| TAAR2       | 0         | 0         | 0         | 0         | 0          | 0         |
| ADCY3       | 17.0946   | 19.2382   | 15.8381   | 13.8209   | 17.0728    | 12.4513   |
| ZNF675      | 12.4922   | 11.5357   | 10.8577   | 8.90611   | 8.0153     | 10.293    |
| ALOX12      | 6.75905   | 4.26308   | 6.02916   | 6.34664   | 9.48718    | 8.96046   |
| LINC00322   | 0.0258741 | 0.0686286 | 0.195868  | 0.121477  | 0.379025   | 0.290225  |
| EXOSC4      | 18.1719   | 25.7782   | 18.4785   | 28.7781   | 16.7561    | 21.0423   |
| NFATC1      | 6.16973   | 8.79649   | 7.527     | 8.92151   | 10.1611    | 9.85932   |
| MNDA        | 9.14869   | 7.41464   | 6.01181   | 1.4914    | 8.09285    | 3.28604   |
| LOC10021654 | 1.90802   | 2.98831   | 2.0015    | 2.04754   | 3.45472    | 3.27823   |
| CYB561D2    | 15.0202   | 16.4825   | 13.1315   | 13.6611   | 14.4761    | 14.5826   |
| COL21A1     | 3.3569    | 4.30766   | 5.40003   | 4.77189   | 6.28046    | 5.46212   |
| GABRR3      | 0         | 0         | 0         | 0         | 0          | 0         |
| RNMTL1      | 6.80546   | 10.7997   | 10.6118   | 13.659    | 10.7064    | 12.3649   |
| LOC10050753 | 0         | 0         | 0         | 0         | 0          | 0         |
| ELAVL2      | 1.04472   | 0.523281  | 0.455382  | 0.536382  | 0.515907   | 0.614222  |
| MIR3132     | 0         | 0         | 0         | 0         | 0          | 0         |
| LOC10050736 | 0.583442  | 0.515843  | 0.687041  | 0.486971  | 0.743195   | 0.807948  |
| CEACAM7     | 1.42346   | 1.57317   | 0.505111  | 1.62899   | 0.821617   | 0.859322  |
| ZNF853      | 2.96305   | 2.9836    | 2.92842   | 3.81273   | 2.93562    | 2.70129   |
| SCARNA27    | 0         | 0         | 119.71    | 0         | 50.359     | 49.272    |
| ALS2CR11    | 0.120989  | 0.0297142 | 0.19854   | 0.0473363 | 0.285206   | 0.0209432 |
| C12orf49    | 9.26226   | 5.76742   | 7.47538   | 7.51268   | 6.67962    | 6.19856   |
| XKR5        | 0.03944   | 0.0348703 | 0.0447844 | 0.148134  | 0.100478   | 0.036866  |
| LOC286367   | 3.37557   | 6.65765   | 3.99679   | 2.38398   | 4.79597    | 2.91255   |
| PDP2        | 3.47867   | 3.19529   | 3.61704   | 3.2537    | 2.40524    | 2.7582    |
| CLTCL1      | 1.70633   | 2.67202   | 1.79775   | 2.27378   | 1.51553    | 0.998224  |
| ELSPBP1     | 0         | 0         | 0         | 0         | 0          | 0.136191  |
| VMA21       | 11.3475   | 10.3395   | 10.3668   | 9.83103   | 11.1528    | 9.04255   |
| MCART2      | 0.465751  | 0.42035   | 0.650083  | 0.267856  | 0.50489    | 0.299975  |
| FAM46B      | 29.1434   | 46.3953   | 36.2304   | 56.215    | 32.4964    | 48.3316   |
| PLXDC2      | 13.9225   | 8.09198   | 10.0403   | 9.24943   | 9.06493    | 13.026    |
| LOC440233   | 0         | 0         | 0         | 0         | 0.00478187 | 0         |
| ARHGEF26    | 6.52172   | 6.91603   | 10.0146   | 9.14208   | 8.20094    | 8.05865   |
| MSMP        | 6.2325    | 5.70908   | 6.33281   | 6.22303   | 3.61027    | 5.46077   |
| WDR24       | 4.4412    | 6.41534   | 5.5639    | 6.49027   | 7.46996    | 7.03586   |
| TTY12       | 0.12071   | 0         | 0         | 0         | 0          | 0         |
| CHRNA10     | 1.11985   | 2.02734   | 1.17068   | 1.25181   | 1.93593    | 1.46214   |
| POLG        | 19.7746   | 18.6999   | 19.0299   | 18.2897   | 20.8265    | 21.1136   |
| GLS2        | 3.79313   | 4.81028   | 3.50951   | 5.32454   | 5.68582    | 5.01394   |
| BRD4        | 18.6789   | 19.8027   | 22.4241   | 21.2709   | 23.3259    | 21.9457   |

|             |           |           |           |           |           |             |
|-------------|-----------|-----------|-----------|-----------|-----------|-------------|
| CBX1        | 30.1537   | 31.2605   | 28.9832   | 32.9211   | 30.4015   | 31.1005     |
| MTMR1       | 10.8134   | 8.23175   | 11.0716   | 10.3945   | 11.4707   | 10.4846     |
| TBC1D19     | 2.04603   | 2.2201    | 1.86567   | 1.74653   | 2.13239   | 2.55        |
| C19orf2     | 38.6525   | 37.8852   | 40.9011   | 32.7707   | 33.1669   | 31.7522     |
| ERBB2IP     | 16.3248   | 11.4443   | 15.7426   | 11.129    | 15.8849   | 15.4904     |
| LOC10050634 | 0.737791  | 0.266073  | 0.211507  | 0.354175  | 0.799977  | 0.303807    |
| BIRC7       | 0.886902  | 1.11072   | 0.606264  | 1.3353    | 1.96514   | 1.74856     |
| FHL1        | 61.8696   | 93.3796   | 198.248   | 123.281   | 77.0512   | 48.0661     |
| ELMO3       | 18.7573   | 26.1722   | 20.2805   | 31.5673   | 28.9073   | 24.2035     |
| DKFZP434H10 | 0         | 0         | 0         | 0         | 0         | 0           |
| STRAP       | 58.7183   | 43.5763   | 51.0702   | 45.3369   | 41.9546   | 42.3304     |
| LOC10050587 | 0.33867   | 0         | 0         | 0.318006  | 0         | 0           |
| DENR        | 25.8378   | 26.2836   | 23.4368   | 25.1136   | 24.9011   | 23.798      |
| EEF1DP3     | 0.255998  | 0.226337  | 0.387584  | 0         | 0.163046  | 0           |
| TUG1        | 38.6769   | 35.6678   | 39.9742   | 37.8889   | 44.0242   | 40.7427     |
| IGFN1       | 0.358119  | 0.40106   | 0.50605   | 0.254069  | 0.283843  | 0.570309    |
| PDE1A       | 2.06772   | 2.55263   | 2.64691   | 1.9926    | 2.86069   | 1.20524     |
| DAAM1       | 12.3984   | 7.2877    | 13.7068   | 8.70459   | 11.8424   | 11.0272     |
| ACOT1       | 197.345   | 219.354   | 74.5615   | 70.3314   | 68.7147   | 86.0204     |
| MRPS11      | 22.1254   | 27.2072   | 18.426    | 24.0882   | 17.4519   | 19.6231     |
| GTPBP3      | 11.2145   | 18.0306   | 14.1055   | 17.5092   | 19.4612   | 17.3569     |
| NDST2       | 14.3733   | 16.6995   | 18.8611   | 15.9023   | 25.1838   | 18.6132     |
| SCGBL       | 8.68617   | 3.45589   | 4.60283   | 3.67028   | 2.76613   | 3.24771     |
| MIR154      | 0         | 0         | 0         | 0         | 0         | 0           |
| ADAM2       | 0.151995  | 0         | 0         | 0         | 0         | 0           |
| ARHGAP44    | 2.37727   | 2.20447   | 2.07805   | 3.13325   | 2.13989   | 2.2938      |
| LOC10050618 | 0         | 0         | 0         | 0         | 0         | 0           |
| SIVA1       | 45.2239   | 82.1787   | 69.6398   | 88.4045   | 62.1881   | 53.6028     |
| IL17A       | 0         | 0         | 0         | 0         | 0         | 0           |
| OPRD1       | 0         | 0         | 0         | 0         | 0         | 0           |
| LRRC71      | 0.0525367 | 0.0464496 | 0.0795411 | 0.0493311 | 0.0669218 | 0.130955    |
| KIAA1239    | 0.0635314 | 0.314555  | 0.0673311 | 0.059655  | 0.105205  | 0.0791802   |
| GALNT5      | 0.411329  | 0.41962   | 0.143713  | 0.14855   | 0.100761  | 0.236606    |
| UBE2N       | 34.8198   | 26.8064   | 27.3151   | 28.9512   | 26.0742   | 24.6995     |
| LOC10050556 | 0         | 0         | 0.600987  | 0.119273  | 0.420032  | 0.494725    |
| DLL4        | 1.55455   | 2.59616   | 1.74341   | 2.18955   | 2.40192   | 2.1348      |
| LOC10065286 | 0.116269  | 3.10E-06  | 2.44E-05  | 0.788662  | 0.276351  | 0.000152954 |
| CCP110      | 5.01409   | 4.22643   | 5.0268    | 3.09714   | 5.15534   | 4.72061     |
| LOC10013233 | 0         | 0         | 0         | 0.0947529 | 0.192811  | 0           |
| EN1         | 9.57228   | 8.10686   | 7.47509   | 16.1157   | 6.67421   | 7.74408     |
| ATXN7L1     | 3.51548   | 3.48934   | 3.40683   | 2.75393   | 4.57122   | 3.09568     |
| TRA2A       | 61.6719   | 75.143    | 60.9881   | 61.6381   | 78.5703   | 75.3069     |
| LOXL3       | 1.32694   | 2.20605   | 1.37692   | 1.55086   | 2.35936   | 0.992558    |

|             |          |           |           |           |           |           |
|-------------|----------|-----------|-----------|-----------|-----------|-----------|
| MIR10A      | 0        | 0         | 0         | 0         | 0         | 0         |
| ACADVL      | 391.62   | 424.965   | 350.205   | 417.111   | 373.669   | 440.444   |
| C10orf125   | 16.7473  | 17.9015   | 14.3144   | 17.2599   | 15.1453   | 11.4482   |
| LOC10050748 | 0        | 0         | 0         | 0         | 0         | 0         |
| LOC643714   | 0        | 0         | 0         | 0         | 0.0747303 | 0         |
| FAM27B      | 0.631467 | 0.845574  | 0.620703  | 0.41637   | 0.684494  | 0.628515  |
| MANBA       | 8.49339  | 6.40269   | 6.81306   | 6.57601   | 8.00984   | 6.46269   |
| MIR330      | 0        | 0         | 0         | 0         | 0         | 0         |
| PRDM13      | 0        | 0         | 0         | 0         | 0         | 0.0192357 |
| TBC1D4      | 27.2403  | 20.2891   | 30.4147   | 22.7033   | 24.9107   | 20.7067   |
| RPL17       | 243.189  | 342.955   | 266.402   | 384.141   | 297.604   | 266.749   |
| MIR3676     | 0        | 0         | 0         | 0         | 0         | 0         |
| OR10G2      | 0        | 0         | 0.0972287 | 0         | 0         | 0         |
| GJA5        | 2.05635  | 1.69242   | 0.879373  | 1.22918   | 1.21917   | 1.14559   |
| CFTR        | 2.38593  | 1.18573   | 1.58187   | 3.86571   | 1.1124    | 1.05923   |
| MYH11       | 95.2511  | 85.1863   | 44.069    | 60.336    | 62.7211   | 61.2378   |
| SLC16A7     | 1.60897  | 0.588641  | 3.087     | 1.14612   | 2.1732    | 1.67683   |
| HTR2C       | 0        | 0.0179848 | 0         | 0         | 0         | 0         |
| CD180       | 0.14756  | 0.163079  | 0.223407  | 0.103917  | 0.281945  | 0.114941  |
| HHATL       | 0.490802 | 0.283386  | 0.242638  | 0.406305  | 0.856264  | 0.676453  |
| MCM2        | 8.48156  | 8.15754   | 6.05184   | 8.52907   | 8.23068   | 9.35649   |
| SDHAF1      | 14.7007  | 19.1401   | 15.397    | 17.2074   | 15.3912   | 14.1805   |
| LPHN1       | 9.66144  | 12.4292   | 12.2758   | 12.991    | 11.554    | 8.96758   |
| NEDD4L      | 8.77671  | 4.9069    | 6.58527   | 7.52828   | 7.17614   | 7.1041    |
| LOC285103   | 1.30E-07 | 1.44E-10  | 1.50E-10  | 4.68E-10  | 2.99E-09  | 5.70E-10  |
| LTBP3       | 26.6115  | 37.8271   | 32.1035   | 36.1728   | 40.5796   | 33.6192   |
| LOC10012881 | 0        | 0         | 0         | 0.0862633 | 0         | 0         |
| GNAS-AS1    | 0.195824 | 0.432839  | 0.29648   | 0.45969   | 0.0623608 | 0.244059  |
| LOC10065281 | 9.67E-08 | 0.135553  | 0.0539686 | 2.75E-09  | 5.12E-09  | 6.36E-09  |
| NANOGNB     | 0        | 0         | 0         | 0         | 0         | 0         |
| C7orf25     | 6.93372  | 7.65009   | 7.80793   | 6.29546   | 5.87582   | 6.07034   |
| UBAC2-AS1   | 1.45427  | 1.53183   | 1.36093   | 0.75731   | 0.706493  | 0.793288  |
| NCKAP5      | 1.76908  | 1.54272   | 1.41747   | 1.3018    | 1.52222   | 2.0942    |
| LOC440300   | 1.07488  | 1.03687   | 1.05328   | 0.635516  | 1.69319   | 1.33094   |
| ABI1        | 32.8718  | 30.242    | 34.2004   | 29.2423   | 36.3514   | 37.2378   |
| C2orf67     | 6.19397  | 5.20192   | 7.01745   | 4.6133    | 6.29718   | 5.3347    |
| LOC729313   | 0        | 0.288837  | 0.247305  | 0         | 0.20807   | 0.203578  |
| UBAC1       | 36.8565  | 49.9655   | 38.8917   | 50.1287   | 48.8688   | 44.2992   |
| GPATCH8     | 15.4737  | 11.9183   | 16.4464   | 14.0457   | 17.2835   | 15.3216   |
| LOC10050601 | 0        | 0.0465818 | 0         | 0         | 0         | 0         |
| CNTNAP5     | 0        | 0         | 0         | 0         | 0         | 0         |
| CHD5        | 0.156265 | 0.112255  | 0.184833  | 0.128389  | 0.130628  | 0.0973777 |
| LOC10028821 | 8.34394  | 4.42631   | 1.89492   | 2.35045   | 0.53143   | 5.71955   |

|             |           |           |          |           |          |          |
|-------------|-----------|-----------|----------|-----------|----------|----------|
| LINC00482   | 0.636299  | 1.09554   | 0.735199 | 0.911935  | 1.17313  | 0.751291 |
| RARB        | 2.48566   | 1.16509   | 1.47302  | 0.947238  | 1.21635  | 1.7965   |
| LOC10050667 | 0         | 0         | 0        | 0         | 0        | 0        |
| LOC10028909 | 2.35505   | 6.7671    | 5.5712   | 9.12183   | 9.74963  | 4.58615  |
| KRTDAP      | 3010.97   | 2513.93   | 2954.67  | 3476.3    | 3748.79  | 3721.72  |
| TPTE2       | 0.0607311 | 0.28637   | 0.245194 | 0         | 0.154719 | 0        |
| PHYHD1      | 14.1766   | 24.962    | 24.2309  | 36.3536   | 31.8471  | 24.0883  |
| OR52D1      | 0         | 0         | 0        | 0         | 0        | 0        |
| MIR155      | 0         | 0         | 0        | 0         | 0        | 0        |
| EAPP        | 34.112    | 36.35     | 36.4234  | 33.3304   | 37.1782  | 31.3531  |
| LOC10013069 | 0         | 0         | 0        | 0         | 0        | 0        |
| MIR411      | 0         | 0         | 0        | 0         | 0        | 0        |
| CFLAR       | 42.3611   | 42.5052   | 42.9172  | 31.2933   | 49.2721  | 37.2226  |
| MIR4263     | 0         | 0         | 0        | 0         | 0        | 0        |
| RGS8        | 0         | 0         | 0        | 0         | 0        | 0        |
| NDUFB7      | 154.88    | 271.246   | 177.027  | 283.628   | 165.609  | 175.392  |
| AKR1C1      | 102.597   | 116.867   | 109.081  | 82.2235   | 44.6845  | 37.3991  |
| FCN2        | 2.52272   | 1.11827   | 0.383575 | 0.475784  | 0        | 0.421006 |
| WDFY3-AS2   | 0.272517  | 0.903535  | 0.72204  | 0.575751  | 0.477312 | 0.551919 |
| ZNF302      | 27.7732   | 23.8387   | 23.3142  | 19.7225   | 29.3578  | 25.6027  |
| DLGAP3      | 0.10945   | 0.241922  | 0.124281 | 0.282622  | 0.209128 | 0.30692  |
| SPRR1A      | 542.708   | 365.691   | 260.341  | 232.509   | 449.191  | 611.551  |
| MIR544      | 0         | 0         | 0        | 0         | 0        | 0        |
| PDE4C       | 0.307721  | 0.356393  | 0.214526 | 0.450252  | 0.561243 | 0.274996 |
| ALDH1L1     | 22.3527   | 22.3418   | 40.5386  | 29.2355   | 20.6985  | 17.861   |
| LPAR2       | 14.4125   | 21.9772   | 13.5165  | 20.1079   | 23.5865  | 28.9194  |
| SNORA76     | 98.5764   | 43.5775   | 74.6229  | 0         | 0        | 61.4286  |
| EEF1D       | 216.107   | 367.395   | 262.533  | 414.371   | 309.862  | 286.835  |
| FAM66B      | 0.711639  | 1.05321   | 0.518194 | 0.0711711 | 0.968178 | 0.472328 |
| ASB12       | 0.17113   | 0.0756511 | 0.323866 | 0.160688  | 0.599464 | 0.159961 |
| CERS6       | 7.83181   | 6.70843   | 11.6957  | 7.55464   | 9.36367  | 9.07593  |
| MYH7B       | 0.454327  | 0.86752   | 0.576646 | 0.42636   | 0.830154 | 0.6753   |
| XPNPEP3     | 7.83071   | 7.8212    | 7.81717  | 7.59709   | 7.47835  | 6.8119   |
| FAT1        | 8.61937   | 5.85431   | 8.0133   | 8.31975   | 6.97223  | 6.72292  |
| DBIL5P      | 0.306039  | 0.795176  | 0.567364 | 0.281501  | 0.740716 | 0.677218 |
| KIAA1324    | 13.4274   | 2.97988   | 3.93469  | 5.85921   | 4.82773  | 5.179    |
| RHOBTB1     | 4.58669   | 5.0443    | 4.02976  | 3.32497   | 3.91845  | 4.09871  |
| BRD9        | 16.1282   | 22.3675   | 15.3824  | 20.1794   | 18.7474  | 17.1169  |
| PI15        | 1.43003   | 0.638431  | 0.900331 | 0.478613  | 0.775528 | 0.899958 |
| BRD8        | 22.6328   | 22.2354   | 19.5717  | 20.2996   | 26.9202  | 26.2643  |
| GFM2        | 14.5892   | 12.3073   | 12.7535  | 10.7277   | 10.3851  | 10.754   |
| MUTYH       | 7.02226   | 11.9992   | 9.2933   | 10.5656   | 13.8852  | 10.0984  |
| ZNF236      | 3.0334    | 2.60973   | 3.42678  | 2.39915   | 3.10604  | 2.55188  |

|              |           |           |           |            |           |            |
|--------------|-----------|-----------|-----------|------------|-----------|------------|
| EVC          | 4.55793   | 3.63604   | 5.29358   | 4.11253    | 4.84144   | 3.74699    |
| GHRH         | 0         | 0         | 0         | 0          | 0         | 0          |
| RBL2         | 31.6034   | 24.2891   | 27.5263   | 20.0748    | 38.4273   | 31.9238    |
| ZNF208       | 0.655164  | 0.652944  | 0.58256   | 0.644483   | 0.649168  | 0.771178   |
| LOC10050700  | 5.44754   | 6.22917   | 3.24407   | 4.50134    | 4.57983   | 4.07361    |
| RAB8A        | 30.094    | 31.3467   | 28.3699   | 31.3927    | 26.175    | 29.097     |
| LHFPL4       | 0.0197792 | 0.0874374 | 0.149729  | 0.0557169  | 0.10078   | 0.0862787  |
| CTSL1        | 31.2095   | 29.187    | 27.8166   | 19.4578    | 23.5123   | 20.2419    |
| ADD3         | 52.6168   | 30.2538   | 39.225    | 24.2026    | 38.5818   | 31.0647    |
| DUSP15       | 1.95666   | 2.3751    | 1.64058   | 2.2081     | 1.8966    | 2.21005    |
| SCTR         | 0         | 0.304342  | 0.60802   | 0.10774    | 0.365398  | 0.286008   |
| HIST1H3G     | 0.365508  | 0         | 0         | 0.343206   | 0.465588  | 0          |
| LOC10032910  | 12.1007   | 10.491    | 13.2513   | 11.6933    | 11.7476   | 13.3243    |
| LOC728400    | 0         | 0         | 0         | 0.00628586 | 0.0085273 | 0.00417161 |
| SNAI2        | 32.2921   | 35.0863   | 24.2244   | 33.1074    | 27.3814   | 27.4571    |
| LDHAL6A      | 0.277197  | 0         | 0.20984   | 0.195213   | 0.27034   | 0.129553   |
| VCAM1        | 7.69665   | 7.37028   | 5.16668   | 1.86131    | 7.86594   | 4.65755    |
| TRIM31       | 0.15274   | 0.135043  | 0.154167  | 0.0956139  | 0.518833  | 0.380725   |
| GSS          | 44.4021   | 51.8916   | 36.0579   | 44.5889    | 43.2394   | 41.5213    |
| C15orf38-AP1 | 8.00198   | 6.36047   | 4.84193   | 4.5433     | 5.32508   | 5.63727    |
| SCARB1       | 28.6825   | 19.8312   | 28.9454   | 22.1691    | 21.0214   | 24.6391    |
| FAM163B      | 0.30207   | 0.178047  | 0         | 0.378185   | 0.12826   | 0.0627456  |
| LOC1002884   | 0.0955038 | 0.0422192 | 0.0722969 | 0.0448383  | 0.0912404 | 0.119028   |
| PTGS2        | 0.237251  | 0.362316  | 1.28985   | 0.243027   | 0.53574   | 0.268808   |
| LRRC43       | 0.0542979 | 0.438925  | 0.428716  | 0.516229   | 0.233733  | 0.384324   |
| MCHR2        | 0         | 0         | 0         | 0          | 0         | 0          |
| EID3         | 2.19268   | 1.27013   | 2.11776   | 1.06494    | 2.26334   | 1.50773    |
| MBD6         | 28.1455   | 40.2671   | 34.7965   | 37.6276    | 49.5865   | 39.978     |
| MIA3         | 10.6299   | 8.61423   | 8.52387   | 7.11072    | 8.24171   | 7.75841    |
| PLAT         | 9.61745   | 12.4077   | 6.68232   | 7.27931    | 6.5403    | 6.50277    |
| MIRLET7A3    | 0         | 0         | 0         | 0          | 0         | 0          |
| LOC1001309   | 1.10514   | 1.05527   | 1.03738   | 0.387413   | 0.910341  | 1.17534    |
| C21orf62     | 0.0246035 | 0.0978911 | 0.0838152 | 0.0231023  | 0.0680151 | 0.110394   |
| LOC1006528   | 8.97648   | 8.59332   | 10.1647   | 9.61435    | 13.0464   | 11.2299    |
| MIR4529      | 0         | 0         | 0         | 0          | 0         | 0          |
| LRRC33       | 2.33725   | 3.84287   | 3.22822   | 1.77111    | 4.30913   | 2.45301    |
| ATOH7        | 0.21963   | 0.0647278 | 0.0554205 | 0.274973   | 0.326396  | 0.456214   |
| VPS11        | 19.6066   | 20.6717   | 18.4658   | 20.3983    | 22.6691   | 19.5985    |
| TDRD7        | 5.38158   | 5.47062   | 4.76271   | 3.63734    | 4.2058    | 4.40664    |
| CASKIN2      | 13.2932   | 16.982    | 13.0088   | 14.747     | 12.3069   | 11.759     |
| SNORD116-9   | 0         | 0         | 0         | 0          | 0         | 0          |
| LOC1005057   | 14.7266   | 22.1665   | 12.8892   | 16.8295    | 19.6528   | 19.4102    |
| VENTX        | 1.80654   | 2.30298   | 2.48069   | 1.10457    | 4.86995   | 1.597      |



|             |           |           |           |           |           |           |
|-------------|-----------|-----------|-----------|-----------|-----------|-----------|
| SLC35F2     | 10.2412   | 10.2417   | 11.7708   | 10.8184   | 13.8408   | 11.8493   |
| ALG13       | 18.4659   | 17.7222   | 18.9577   | 19.398    | 23.4365   | 18.1263   |
| CACNB4      | 3.15775   | 2.7815    | 4.12958   | 2.33242   | 3.93178   | 3.11588   |
| BEAN1       | 4.19387   | 3.11812   | 6.39986   | 5.84879   | 5.86364   | 8.26528   |
| MR1         | 4.43922   | 3.82202   | 4.47941   | 3.65905   | 5.07218   | 4.03234   |
| TMBIM6      | 426.54    | 301.361   | 334.072   | 320.303   | 272.503   | 295.389   |
| PTAR1       | 9.26874   | 5.95536   | 8.3161    | 6.53621   | 8.96849   | 7.55308   |
| LOC10050619 | 0         | 0         | 0         | 0         | 0         | 0.0664431 |
| ZNF416      | 3.61962   | 3.09357   | 2.8923    | 3.43653   | 3.45804   | 3.78439   |
| CT47A7      | 0         | 0         | 0         | 0         | 0         | 0         |
| CPD         | 19.2995   | 12.2323   | 13.5521   | 10.5473   | 10.5985   | 10.9804   |
| IARS        | 35.8023   | 26.7091   | 30.759    | 27.4005   | 27.2218   | 24.1605   |
| RBMS3       | 4.20273   | 3.79504   | 4.44551   | 2.79072   | 3.2732    | 2.55338   |
| LRFN3       | 3.32939   | 5.28436   | 4.16013   | 4.97186   | 3.65341   | 4.7244    |
| COL17A1     | 111.449   | 175.026   | 160.54    | 236.444   | 182.854   | 146.795   |
| MRPS2       | 32.8938   | 40.3995   | 28.0946   | 39.347    | 34.0213   | 33.3315   |
| TNFAIP8L2   | 2.98654   | 3.31574   | 3.42551   | 1.99389   | 5.87899   | 2.51566   |
| MPZL1       | 37.1956   | 29.9299   | 27.8853   | 29.6662   | 26.5511   | 23.1164   |
| PPP1R2P9    | 0         | 0         | 0         | 0         | 0         | 0         |
| GSTA1       | 1.14855   | 0.244105  | 0.535053  | 0.746635  | 0.562708  | 0.275281  |
| MIR182      | 0         | 0         | 0         | 0         | 0         | 0         |
| GLYR1       | 32.0061   | 29.4807   | 30.9215   | 28.9201   | 33.6851   | 30.4132   |
| LOC1001307  | 5.15572   | 11.1496   | 6.92369   | 13.9032   | 10.7688   | 11.9621   |
| ANKRD58     | 1.34178   | 1.36427   | 0.914164  | 0.692952  | 1.36734   | 0.668914  |
| DYRK4       | 5.99924   | 7.05552   | 6.55513   | 6.90864   | 6.23608   | 6.98319   |
| C22orf37    | 0.746644  | 0.371326  | 0.565214  | 0.131454  | 0.505263  | 0.378037  |
| LOC1005061  | 10.2589   | 10.7531   | 12.8026   | 15.7073   | 12.1892   | 9.39048   |
| ATOH8       | 3.1367    | 3.55326   | 2.60948   | 2.94532   | 2.93425   | 2.63676   |
| MIR4424     | 0         | 0         | 0         | 0         | 0         | 0         |
| SYNPO2L     | 0.0196194 | 0.0173462 | 0.0716198 | 0.0222091 | 0.0562306 | 0.0550168 |
| HBA1        | 475.264   | 1167.04   | 458.402   | 1178.71   | 615.478   | 860.834   |
| RBM3AP      | 0         | 0         | 0         | 0         | 0         | 0         |
| ITPA        | 39.1227   | 54.1247   | 35.217    | 55.2935   | 48.8018   | 42.736    |
| DDX25       | 0.0574064 | 0.253776  | 0.130371  | 0.215615  | 0.219375  | 0.21464   |
| FAM138D     | 0         | 0         | 0         | 0         | 0         | 0.0251807 |
| LOC1001285  | 0         | 0         | 0.0289321 | 0.0358872 | 0         | 0         |
| PAPSS2      | 7.32449   | 3.5753    | 3.60025   | 2.36438   | 3.62837   | 2.21885   |
| LOC1005074  | 0         | 0.463253  | 0.396641  | 0.122997  | 0         | 0.435348  |
| NDUFC2      | 47.2771   | 45.5577   | 41.7896   | 41.2405   | 29.6398   | 32.4455   |
| POLR3K      | 16.9578   | 19.5445   | 14.098    | 19.7617   | 13.4042   | 11.4166   |
| QTRTD1      | 7.56492   | 5.97643   | 6.39172   | 5.86598   | 6.82311   | 6.34127   |
| PLCB2       | 4.69411   | 4.46105   | 5.08757   | 2.67957   | 10.352    | 3.99473   |
| VWA5B1      | 0.173275  | 0.0574495 | 0.065585  | 0.0406756 | 0.0275899 | 0.107978  |

|             |          |           |           |           |          |           |
|-------------|----------|-----------|-----------|-----------|----------|-----------|
| RUFY2       | 6.93857  | 5.54359   | 6.83233   | 5.84836   | 7.00591  | 5.93306   |
| YWHAE       | 247.583  | 214.968   | 203.757   | 235.725   | 194.311  | 211.44    |
| KLHL10      | 0.61709  | 0.45466   | 0.467141  | 0.241432  | 0.327523 | 0.192272  |
| CLNS1A      | 50.5816  | 50.7778   | 52.3405   | 41.9604   | 50.8856  | 41.2991   |
| TEF         | 25.5821  | 32.6718   | 30.223    | 32.5679   | 29.0527  | 24.6511   |
| LOC643355   | 1.09953  | 0.686216  | 0.709949  | 1.00208   | 1.21523  | 0.806098  |
| LOC10065276 | 13.7274  | 9.88955   | 12.6204   | 9.69017   | 12.0586  | 8.36792   |
| LOC10065285 | 0        | 0.286807  | 0.245566  | 0         | 0        | 0.202147  |
| TSPAN6      | 31.6476  | 26.8809   | 33.2993   | 34.4825   | 21.1707  | 27.1738   |
| STX16       | 45.5368  | 54.2957   | 53.3056   | 47.4776   | 68.8316  | 63.4156   |
| DDX19A      | 20.4914  | 19.5132   | 17.9286   | 17.0173   | 17.5545  | 16.2345   |
| OAZ3        | 2.82252  | 1.35531   | 1.04352   | 1.70079   | 1.4901   | 2.9272    |
| LOC10050606 | 0        | 0         | 0.317189  | 0         | 0.266866 | 0.391659  |
| ITIH5L      | 0.116478 | 0.0514912 | 0.0293915 | 0.0911424 | 0.111278 | 0.0967788 |
| ARHGAP40    | 12.1821  | 8.05465   | 16.0296   | 14.6645   | 15.3683  | 15.2996   |
| CCT6P1      | 7.91949  | 8.55443   | 8.43043   | 9.30387   | 8.06114  | 6.40745   |
| RAB40B      | 18.1037  | 23.8771   | 22.0268   | 31.193    | 27.3608  | 21.8555   |
| OLFM4       | 0.682419 | 0.724022  | 0.0258297 | 0.0961171 | 0.130391 | 0.0637882 |
| CDC73       | 6.84746  | 5.39882   | 6.26906   | 4.46295   | 5.50022  | 4.83933   |
| OR5K3       | 0        | 0         | 0         | 0         | 0        | 0         |
| FGFBP3      | 1.846    | 2.39608   | 1.99208   | 1.6596    | 1.85114  | 1.90909   |
| DCAF12L1    | 0        | 0.077079  | 0.0219986 | 0         | 0        | 0         |
| IGLL1       | 0        | 0.0715084 | 0.407044  | 0.15189   | 0.463616 | 0.226804  |
| CCDC102A    | 4.04208  | 6.9633    | 4.60559   | 7.04311   | 6.42279  | 4.46642   |
| FAM162B     | 1.01101  | 3.27752   | 2.55113   | 1.47672   | 1.93175  | 0.70002   |
| GMFG        | 22.7325  | 26.1836   | 23.6816   | 20.3663   | 31.9237  | 17.9349   |
| SRRM2       | 118.009  | 111.789   | 147.396   | 119.904   | 179.096  | 145.627   |
| SGIP1       | 0.597413 | 0.783185  | 0.639381  | 0.328839  | 1.60071  | 0.91145   |
| LOC10050708 | 0.264046 | 0.499173  | 0.998238  | 0.657248  | 0.470065 | 0.477907  |
| SAMHD1      | 14.3067  | 6.74861   | 10.2529   | 4.15651   | 10.5505  | 6.01795   |
| GAGE12C     | 0        | 0.0333516 | 0         | 0         | 0        | 0         |
| FOXP2       | 1.02531  | 1.64493   | 1.82786   | 1.28213   | 1.77441  | 1.63527   |
| SCARNA12    | 24.3766  | 34.2301   | 26.0516   | 33.6607   | 34.7043  | 25.0196   |
| LY86        | 2.49978  | 2.45572   | 2.31287   | 1.95604   | 3.98031  | 2.42318   |
| SSH1        | 5.66991  | 5.39584   | 4.84508   | 4.68887   | 5.50967  | 4.67561   |
| SH3BP5L     | 15.8905  | 16.3864   | 20.3625   | 21.812    | 22.638   | 26.5676   |
| MYL2        | 0        | 0         | 0.227     | 0         | 0        | 0         |
| HIST1H2AL   | 0.361216 | 0.319364  | 0         | 0         | 0        | 0         |
| RBM20       | 2.52442  | 1.27871   | 1.22424   | 1.00001   | 0.720169 | 1.13887   |
| LOC339568   | 0        | 0         | 0         | 0         | 0        | 0         |
| MIR4733     | 0        | 0         | 0         | 0         | 0        | 0         |
| FBXO43      | 0.414615 | 0.476842  | 0.385767  | 0.307153  | 0.400367 | 0.410283  |
| PRDM4       | 9.84937  | 8.66711   | 9.09143   | 8.92122   | 10.3714  | 9.58293   |

|             |           |           |            |           |           |             |
|-------------|-----------|-----------|------------|-----------|-----------|-------------|
| AP2A1       | 28.5474   | 32.2155   | 34.7771    | 31.7834   | 34.1724   | 33.1314     |
| RGS17       | 0.366924  | 1.103     | 0.444422   | 0.344536  | 0.701088  | 1.00607     |
| KRTAP20-4   | 0         | 0         | 0          | 0         | 0         | 0           |
| TPD52L2     | 63.1607   | 80.2509   | 66.5589    | 76.1945   | 69.177    | 66.8586     |
| ZNF584      | 6.35795   | 7.3356    | 4.84714    | 5.92767   | 7.43829   | 5.81656     |
| FPR3        | 4.28838   | 3.08282   | 2.91259    | 0.715025  | 4.18628   | 1.42358     |
| ZNF480      | 2.85349   | 2.37871   | 2.45326    | 2.08609   | 2.55734   | 2.38783     |
| FMNL3       | 4.76747   | 4.58465   | 4.08918    | 3.81015   | 5.26596   | 4.58274     |
| PRM3        | 0         | 0         | 0          | 0         | 0         | 0           |
| SEC24B      | 14.7664   | 11.107    | 14.0631    | 12.0074   | 12.4703   | 12.6907     |
| N6AMT1      | 4.45093   | 3.44655   | 3.07675    | 2.18677   | 4.07249   | 3.9514      |
| IFT20       | 12.9119   | 18.5505   | 14.7234    | 17.0286   | 17.4103   | 15.8488     |
| MUC1        | 205.77    | 251.375   | 108.184    | 147.076   | 83.4242   | 194.432     |
| C13orf15    | 36.5618   | 31.5951   | 44.2527    | 37.6282   | 30.9827   | 29.5416     |
| AGXT2       | 0         | 0         | 0.0637525  | 0         | 0         | 0           |
| MAGEA1      | 0         | 0         | 0          | 0         | 0         | 0           |
| ABHD12B     | 25.9487   | 18.7699   | 20.5604    | 22.7551   | 21.5339   | 21.6511     |
| C9          | 0.0372323 | 0.0987553 | 0          | 0         | 0.0474269 | 0.0232016   |
| DDAH2       | 68.767    | 90.7607   | 96.1052    | 104.928   | 99.8618   | 91.371      |
| CEACAM20    | 0         | 0.0637144 | 0          | 0         | 0         | 0           |
| FAM21B      | 9.41838   | 7.9283    | 9.38893    | 8.06629   | 8.33966   | 7.48923     |
| GK          | 12.1754   | 8.56203   | 6.18285    | 6.14347   | 6.1678    | 7.2362      |
| PTTG3P      | 7.01799   | 7.44583   | 4.95848    | 4.83512   | 4.46979   | 5.1022      |
| FAM175B     | 9.83435   | 8.16617   | 10.664     | 9.26549   | 10.136    | 8.5093      |
| SPEF1       | 0.0672358 | 0.535011  | 0.203592   | 0.1894    | 0.128469  | 0.335188    |
| TYSND1      | 15.8347   | 21.8203   | 15.3636    | 19.018    | 18.7184   | 16.3165     |
| MIR613      | 0         | 0         | 0          | 0         | 0         | 0           |
| LOC10050697 | 1.15784   | 1.49166   | 0.676152   | 1.05613   | 1.62236   | 1.09259     |
| CRYL1       | 20.228    | 19.1527   | 18.8422    | 20.745    | 15.6702   | 12.8287     |
| TAF4        | 5.26894   | 6.50707   | 6.75849    | 6.67514   | 7.11114   | 6.37132     |
| FLJ34503    | 0.103021  | 0.182169  | 0          | 0.0483673 | 0.131229  | 0           |
| VSIG8       | 4.91484   | 8.62908   | 5.59863    | 36.0381   | 4.61523   | 86.2501     |
| LOC401589   | 0         | 0         | 0          | 0         | 0         | 0           |
| LOC10050605 | 4.76853   | 5.75479   | 3.45782    | 3.27977   | 4.36152   | 3.40012     |
| ZNF232      | 4.00612   | 4.3027    | 3.39432    | 4.47519   | 5.26896   | 4.21463     |
| MIR143      | 43.3519   | 0         | 0.00055391 | 0         | 0         | 0.000852431 |
| TRIM2       | 18.0257   | 11.2733   | 12.9088    | 13.35     | 12.6755   | 14.9508     |
| LOC10050756 | 0.54232   | 1.27863   | 1.64216    | 1.35795   | 0.921085  | 0.337951    |
| SLC35G5     | 0.0935449 | 0.413532  | 0.141628   | 0         | 0.119159  | 0.0582932   |
| NARS2       | 10.0113   | 7.99313   | 6.41898    | 6.19623   | 6.4638    | 6.82005     |
| ZBTB10      | 2.4308    | 1.28589   | 1.56527    | 1.41067   | 1.55824   | 1.19021     |
| DDX3Y       | 21.3128   | 19.5689   | 0.0163459  | 0.0202754 | 0.0137526 | 0           |
| THOC4       | 37.3662   | 45.5798   | 38.7355    | 45.3306   | 37.4074   | 38.2074     |

|             |          |           |          |           |           |           |
|-------------|----------|-----------|----------|-----------|-----------|-----------|
| GPR146      | 10.7686  | 16.45     | 14.3111  | 11.1227   | 10.1736   | 7.04606   |
| SLC32A1     | 0        | 0         | 0        | 0         | 0         | 0         |
| C14orf19    | 22.7838  | 25.3498   | 20.9295  | 23.557    | 23.8048   | 20.7385   |
| LOC440925   | 0.57841  | 0.383545  | 0.401372 | 0.769417  | 0.460491  | 0.210257  |
| LOC10065276 | 0.303433 | 0         | 0.057425 | 0.0712296 | 0         | 0.0945432 |
| CTDSPL2     | 7.32614  | 4.7617    | 6.22043  | 4.74102   | 6.74687   | 5.33034   |
| PCDHGA6     | 0.580826 | 0.623171  | 1.01724  | 0.582262  | 1.17486   | 0.734979  |
| CCDC40      | 1.01792  | 1.03997   | 0.87331  | 0.658445  | 0.907643  | 0.704802  |
| ATG2A       | 9.29013  | 10.6514   | 11.9102  | 11.3262   | 13.5612   | 15.0893   |
| LOC1005074  | 4.19052  | 4.63564   | 4.84609  | 4.57271   | 11.1252   | 7.45328   |
| LGR4        | 21.7657  | 17.9793   | 23.3479  | 21.4363   | 22.8904   | 26.2128   |
| MGC14436    | 0.458607 | 0.480559  | 0.347169 | 0.382776  | 0.40568   | 0.396923  |
| ATL1        | 8.06804  | 4.99422   | 8.1769   | 5.19499   | 7.43625   | 8.62381   |
| C7orf55     | 11.6249  | 17.4907   | 18.9898  | 17.6182   | 17.5357   | 13.98     |
| PDIA5       | 7.60747  | 6.95045   | 7.96821  | 7.46886   | 6.83161   | 6.16351   |
| SERPINA7    | 0        | 0.0590584 | 0        | 0         | 0         | 0         |
| TRPC1       | 3.08836  | 4.52972   | 4.29523  | 3.4844    | 5.50454   | 3.40151   |
| KDM5B       | 16.8746  | 13.5836   | 19.0481  | 17.1654   | 20.8663   | 20.7515   |
| TTC17       | 19.1317  | 18.8899   | 19.4311  | 18.3128   | 20.9842   | 17.2494   |
| SCARNA18    | 46.407   | 0         | 0        | 0         | 0         | 0         |
| ZNF839      | 9.066    | 12.0891   | 8.68565  | 9.48971   | 11.0183   | 11.1324   |
| GPR32       | 0        | 0         | 0        | 0         | 0         | 0         |
| RBAK-LOC389 | 4.35E-93 | 1.51E-51  | 8.47E-35 | 6.30E-74  | 1.71E-35  | 7.79E-56  |
| LOC10050626 | 2.40537  | 1.20705   | 2.30436  | 2.69356   | 2.45078   | 1.63505   |
| HIST1H2AK   | 0.751862 | 0         | 0.284582 | 0.352993  | 0.478865  | 0.468529  |
| CCNI2       | 0.37993  | 0.521637  | 0.224984 | 0.396836  | 0.614383  | 0.394414  |
| LOC1002873  | 0.310215 | 0.822818  | 0.939338 | 0.873861  | 1.18547   | 1.35319   |
| MIR1909     | 0        | 0         | 0        | 0         | 0         | 0         |
| LOC10028906 | 0        | 0         | 0        | 0         | 0         | 0         |
| LOC386758   | 2.12115  | 1.91291   | 2.17548  | 2.21602   | 1.60176   | 1.26682   |
| LOC10050709 | 2.06687  | 1.82739   | 2.65987  | 1.74668   | 2.23788   | 1.67438   |
| HN1L        | 37.7793  | 33.5667   | 28.3574  | 32.7012   | 32.5908   | 35.496    |
| RAB25       | 147.779  | 146.278   | 136.587  | 175.593   | 161.19    | 177.639   |
| ZBTB25      | 4.06376  | 4.67079   | 5.94749  | 2.86185   | 6.94509   | 4.30502   |
| UCHL5       | 13.7718  | 8.2049    | 10.3418  | 8.41205   | 9.91532   | 8.68105   |
| OR1N2       | 0        | 0         | 0        | 0         | 0         | 0         |
| LOC400654   | 0        | 0         | 0        | 0         | 0.0803837 | 0         |
| RAB21       | 22.0517  | 16.9828   | 23.966   | 21.7118   | 20.4902   | 20.2251   |
| PNLIP       | 0        | 0.0635678 | 0.108855 | 0.135023  | 0.183169  | 0.0448039 |
| NCF1B       | 0.499281 | 1.60003   | 0.683266 | 0.555044  | 1.03917   | 0.648386  |
| ZNF777      | 5.23162  | 6.68124   | 6.3317   | 7.3383    | 6.35558   | 6.29889   |
| LOC10012829 | 10.0228  | 9.1377    | 13.3431  | 15.9867   | 16.3642   | 14.6069   |
| RPL36A      | 13.2731  | 36.1961   | 14.6203  | 52.1832   | 16.5627   | 18.2049   |

|             |           |           |           |           |           |           |
|-------------|-----------|-----------|-----------|-----------|-----------|-----------|
| ANO4        | 0.165397  | 0.125343  | 0.232526  | 0.0887459 | 0.662152  | 0.368102  |
| RNU1-5      | 48.9911   | 52.5215   | 22.6473   | 62.1967   | 31.6046   | 22.9783   |
| TMEM164     | 74.7408   | 39.7332   | 44.0012   | 40.1341   | 34.5549   | 50.4671   |
| GOLGA6B     | 0.0675757 | 0.0843137 | 0.187951  | 0.193342  | 0.181813  | 0.17464   |
| USP54       | 9.58708   | 7.8728    | 10.3069   | 12.2213   | 12.3208   | 11.4136   |
| TMEM79      | 68.3423   | 78.4466   | 65.173    | 89.6047   | 85.6933   | 100.343   |
| MED25       | 14.6105   | 20.5073   | 18.4119   | 18.6856   | 20.0469   | 20.5328   |
| ZNF44       | 9.54051   | 10.5099   | 7.53608   | 8.81569   | 9.47621   | 7.99771   |
| TEX14       | 0.125556  | 0.0799262 | 0.124195  | 0.135816  | 0.104491  | 0.126752  |
| MIR191      | 0         | 0         | 0         | 0         | 0         | 0         |
| PHEX        | 0.0697375 | 0         | 0.0791875 | 0         | 0.0222081 | 0.0217287 |
| LOC10050588 | 1.34725   | 5.55872   | 7.13914   | 6.74692   | 8.86675   | 5.31715   |
| RHOG        | 37.2636   | 44.987    | 36.178    | 42.9136   | 40.0168   | 36.9663   |
| DKFZP564C19 | 0.082338  | 0.036399  | 0.311652  | 0.0773141 | 0.34087   | 0.153929  |
| IQCA1P1     | 0         | 0.232133  | 0         | 0         | 0         | 0         |
| SLC17A7     | 1.43692   | 1.53633   | 2.47907   | 1.53751   | 1.93678   | 1.93662   |
| ABCB10      | 7.65093   | 7.61563   | 7.32605   | 7.30304   | 8.32592   | 7.1516    |
| CABLES1     | 8.9053    | 13.5985   | 10.5451   | 13.1342   | 12.0891   | 10.911    |
| PTRF        | 196.947   | 212.351   | 229.661   | 204.061   | 173.717   | 155.774   |
| HRH2        | 0.399375  | 0.491146  | 0.302329  | 0.148151  | 0.266127  | 0.131094  |
| PRKD3       | 8.69506   | 8.30435   | 10.4136   | 7.20488   | 9.03013   | 7.95573   |
| ZNF622      | 12.8663   | 16.0693   | 14.657    | 15.6      | 15.156    | 14.1283   |
| LRRC10B     | 4.1433    | 5.90189   | 2.788     | 6.26802   | 3.45988   | 5.70893   |
| 2-Mar       | 26.0232   | 37.9157   | 28.8596   | 34.7081   | 31.8898   | 28.3704   |
| FAM138E     | 0.0604799 | 0.0356483 | 0.0190765 | 0         | 0.05778   | 0.0125628 |
| TMEM125     | 12.3315   | 11.7334   | 9.42394   | 12.1856   | 10.7712   | 11.9292   |
| LOC10050697 | 0         | 0         | 0.185556  | 0         | 0         | 0         |
| SLC36A1     | 4.10058   | 3.02367   | 3.73253   | 2.89947   | 4.59952   | 3.71399   |
| ZFP106      | 11.3936   | 9.19756   | 13.5955   | 9.68356   | 10.515    | 9.4854    |
| CTPS        | 10.1417   | 9.90525   | 6.94391   | 10.5972   | 7.96254   | 8.21456   |
| C12orf63    | 0         | 0         | 0.0638982 | 0.198147  | 0         | 0.0789004 |
| B3GNT6      | 0         | 0         | 0         | 0         | 0         | 0.0250186 |
| IFFO1       | 8.47909   | 11.6513   | 9.63463   | 7.82025   | 13.7673   | 8.53285   |
| BMX         | 1.04189   | 0.779979  | 0.667825  | 0.454567  | 0.497674  | 0.583805  |
| CHRNA4      | 0.206582  | 0.146118  | 0.156384  | 0.271569  | 0.0789441 | 0.07724   |
| ABRA        | 0         | 0.0321277 | 0.055016  | 0         | 0.0925753 | 0.0452885 |
| TTC22       | 7.49657   | 7.84765   | 10.6653   | 9.73883   | 11.8614   | 13.9819   |
| CENPM       | 4.8824    | 6.48425   | 5.22566   | 9.77077   | 9.44996   | 9.47674   |
| BIRC8       | 0         | 0         | 0         | 0         | 0         | 0         |
| GUSBP3      | 0.681838  | 0.935756  | 1.26109   | 0.973217  | 0.775948  | 0.907612  |
| ALPL        | 6.53915   | 3.60619   | 2.58929   | 4.74245   | 4.37307   | 3.77596   |
| PPP2R3B-AS1 | 9.97458   | 4.72753   | 3.79175   | 8.01125   | 6.31063   | 3.72944   |
| LOC340515   | 0         | 0         | 0         | 0         | 0         | 0         |

|             |          |          |           |           |           |           |
|-------------|----------|----------|-----------|-----------|-----------|-----------|
| AKR1B15     | 54.6948  | 0.753179 | 0.247633  | 0.554812  | 0.166677  | 0.0815394 |
| GHRLOS      | 0.960128 | 1.45501  | 1.20486   | 0.935298  | 2.07396   | 2.27537   |
| VAMP1       | 16.127   | 16.1339  | 12.2268   | 11.9677   | 21.4918   | 13.0099   |
| TMEM131     | 14.697   | 12.0424  | 15.1674   | 12.8434   | 15.4486   | 15.1957   |
| MIR206      | 0        | 0        | 0         | 0         | 0         | 0         |
| LOC10013328 | 0.337474 | 0.682647 | 0.343931  | 0.307564  | 0.640587  | 0.2822    |
| LOC389705   | 1.17226  | 0.11516  | 0.493006  | 0         | 0.749214  | 0.405836  |
| TLR3        | 3.00363  | 2.16491  | 1.92776   | 1.07296   | 1.97541   | 1.28173   |
| LYG1        | 2.61795  | 4.62926  | 3.24295   | 3.0169    | 2.57687   | 2.15048   |
| ASCC1       | 10.7736  | 10.9397  | 8.65936   | 7.14044   | 8.09407   | 8.56035   |
| C19orf38    | 0.105526 | 0.932993 | 0.399418  | 0.198174  | 1.20978   | 0.591833  |
| CHRNA7      | 0.502222 | 0.238588 | 0.49267   | 0.58235   | 0.451369  | 0.386477  |
| CCDC126     | 5.96543  | 5.67163  | 6.71194   | 4.0668    | 5.07456   | 4.60856   |
| CD93        | 11.751   | 10.6033  | 9.6602    | 6.66582   | 8.85247   | 6.35641   |
| MTPAP       | 5.08728  | 5.62987  | 6.00927   | 6.1875    | 5.93659   | 5.28718   |
| HBP1        | 41.721   | 38.2916  | 47.0463   | 37.6147   | 44.5448   | 44.0935   |
| LOC10027221 | 2.39007  | 2.40899  | 1.55599   | 1.30166   | 1.67447   | 1.93621   |
| ZNF766      | 8.05633  | 7.95046  | 7.81948   | 6.59171   | 8.09057   | 6.83269   |
| LOC10050582 | 0        | 0        | 0         | 0         | 0         | 0         |
| AURKC       | 1.14627  | 1.73137  | 1.01396   | 1.93524   | 2.69293   | 1.67418   |
| DENND2D     | 26.7626  | 23.0368  | 19.1127   | 18.5865   | 20.7116   | 22.247    |
| FLJ26245    | 0        | 0.058973 | 0         | 0         | 0         | 0         |
| TTY4C       | 0        | 0        | 0         | 0         | 0         | 0         |
| CYP4F8      | 239.845  | 412.342  | 181.407   | 219.439   | 119.181   | 145.993   |
| DEF8        | 33.1053  | 37.9551  | 28.0904   | 33.2464   | 37.7815   | 38.3642   |
| KCNQ10T1    | 0.172763 | 0.139949 | 0.168291  | 0.206177  | 0.217928  | 0.154018  |
| ACTL7A      | 0        | 0        | 0         | 0.0711127 | 0.0482352 | 0         |
| LOC10050755 | 4.51838  | 5.87234  | 4.31018   | 4.67225   | 6.20856   | 4.90571   |
| LOC10065286 | 0.848239 | 0.562469 | 0.963182  | 2.19033   | 0.990454  | 0.528586  |
| SNTB2       | 9.03819  | 7.12018  | 9.1884    | 6.30157   | 7.49694   | 5.49382   |
| TPPP        | 2.35168  | 4.10222  | 4.8355    | 4.52082   | 4.22014   | 4.51522   |
| C10orf128   | 4.35105  | 7.21298  | 5.35237   | 6.12835   | 5.88881   | 3.72816   |
| LOC10050626 | 0.129333 | 0.111539 | 0.0979061 | 0.121442  | 0         | 0.0805951 |
| TRIM40      | 0        | 0        | 0         | 0         | 0.0690445 | 0.0337771 |
| C5orf44     | 12.1263  | 10.7315  | 10.2327   | 8.60371   | 10.7887   | 9.76486   |
| ZNF43       | 15.1632  | 10.8294  | 11.5624   | 7.93309   | 5.4397    | 6.14993   |
| LOC10050566 | 8.03007  | 10.8465  | 9.42459   | 10.1182   | 10.488    | 6.69151   |
| SHOX        | 0        | 0        | 0         | 0         | 0.0213985 | 0.0887378 |
| OR8G2       | 0        | 0        | 0         | 0         | 0         | 0         |
| TRIM3       | 6.80616  | 8.84824  | 8.28035   | 8.77105   | 8.32284   | 6.88869   |
| GPM6A       | 0.440483 | 0.626306 | 0.354532  | 0.168505  | 0.407078  | 0.212301  |
| ARL16       | 25.7553  | 42.6104  | 39.205    | 51.5979   | 55.7646   | 48.3033   |
| CNTNAP3B    | 1.86006  | 1.70625  | 3.72581   | 2.87027   | 4.48133   | 2.89925   |

|             |           |           |           |           |           |          |
|-------------|-----------|-----------|-----------|-----------|-----------|----------|
| TMEM220     | 6.12528   | 6.40797   | 5.60794   | 5.93222   | 5.71907   | 4.43653  |
| ZNF852      | 1.89024   | 0.697177  | 1.47095   | 1.47952   | 1.40476   | 1.17815  |
| LOC285299   | 0         | 0         | 0         | 0         | 0         | 0        |
| ALDH1L2     | 1.44897   | 1.14378   | 2.04104   | 1.20679   | 1.34893   | 1.32003  |
| MIR4767     | 0         | 0         | 0         | 0         | 0         | 0        |
| OXA1L       | 100.776   | 135.376   | 98.4827   | 121.754   | 114.28    | 91.4662  |
| C14orf70    | 0         | 0.0577622 | 0         | 0.122691  | 0         | 0        |
| LRRC49      | 1.6114    | 2.04363   | 1.93384   | 2.00598   | 2.11721   | 2.05123  |
| PARP4       | 13.9325   | 10.6827   | 14.4467   | 8.88836   | 14.2576   | 11.4802  |
| SF3A1       | 23.2864   | 19.8053   | 26.0367   | 23.902    | 23.5315   | 23.5978  |
| TRIM21      | 17.5465   | 15.9894   | 8.63791   | 9.29929   | 12.4439   | 9.3243   |
| LSM12       | 11.0598   | 10.9647   | 10.0345   | 11.3395   | 9.58199   | 8.53899  |
| LINC00265   | 2.43764   | 5.11445   | 3.40122   | 5.28498   | 7.17037   | 5.63863  |
| ADRBK2      | 5.5734    | 5.15834   | 6.54196   | 4.45911   | 5.78991   | 4.26008  |
| KIF7        | 2.16704   | 3.3811    | 2.29986   | 2.55349   | 2.36799   | 3.05827  |
| GABPB1      | 6.47584   | 6.45931   | 5.40737   | 4.9748    | 5.90895   | 5.65352  |
| LMO1        | 2.43878   | 5.31354   | 4.7473    | 5.39781   | 8.21017   | 7.4359   |
| PLSCR4      | 17.1976   | 14.0454   | 18.5329   | 9.62161   | 16.3794   | 11.1824  |
| COL5A1      | 6.38773   | 5.78079   | 13.48     | 6.19422   | 10.4622   | 8.4363   |
| SNORD88B    | 0         | 0         | 0         | 0         | 0         | 0        |
| TPR         | 15.8053   | 13.3785   | 16.3646   | 12.19     | 16.2431   | 14.3379  |
| FAM131B     | 0.343063  | 0.363378  | 0.157486  | 0.216328  | 0.362937  | 0.355103 |
| LOC10042273 | 0         | 0         | 0         | 0         | 0         | 0        |
| LOC650226   | 0         | 0         | 0         | 0.0596561 | 0         | 0        |
| PLEKHG1     | 4.87514   | 3.32276   | 4.26746   | 3.23275   | 3.99215   | 5.45363  |
| DIRC3       | 0.799933  | 0.618844  | 0.454166  | 0.328617  | 0.525403  | 0.311553 |
| TSRM        | 0         | 0         | 0         | 0         | 0         | 0        |
| CHRNA9      | 3.13562   | 2.28595   | 2.33204   | 1.54963   | 1.47154   | 1.37122  |
| DIP2C       | 4.06046   | 4.30163   | 5.3655    | 4.67      | 4.75144   | 3.54842  |
| KCNK18      | 0         | 0         | 0         | 0         | 0         | 0        |
| CTRC        | 0.134819  | 0.715189  | 0         | 0.50637   | 0.0858667 | 0.168026 |
| ITGAX       | 3.60004   | 5.50113   | 3.52865   | 1.64134   | 8.21728   | 2.41197  |
| CBX6        | 7.52081   | 6.34958   | 8.37034   | 4.98637   | 8.03426   | 6.27972  |
| MIR1273C    | 0         | 0         | 0         | 0         | 0         | 0        |
| MUM1        | 16.0354   | 22.72     | 19.8369   | 20.4893   | 19.2565   | 19.9559  |
| OPN1MW      | 0.0344942 | 0         | 0.0391685 | 0.0242921 | 0.147684  | 0.114642 |
| RCOR1       | 12.8386   | 10.6436   | 14.3545   | 12.3819   | 12.8527   | 12.4235  |
| PP12613     | 0         | 8.61E-10  | 0         | 9.98E-08  | 0         | 0        |
| LOC730256   | 1.1731    | 1.99507   | 0.893762  | 1.16176   | 1.71228   | 0.984155 |
| LCE6A       | 39.9366   | 14.6964   | 97.8871   | 95.9457   | 84.328    | 91.4758  |
| HBB         | 900.435   | 2233.66   | 630.873   | 1641.71   | 659.623   | 871.228  |
| CSDA        | 162.979   | 176.176   | 179.108   | 180.431   | 186.027   | 167.296  |
| C3orf23     | 9.83712   | 8.53825   | 10.772    | 8.69308   | 8.90515   | 8.64115  |

|             |           |           |           |           |           |           |
|-------------|-----------|-----------|-----------|-----------|-----------|-----------|
| NPS         | 0         | 0         | 0         | 0         | 0         | 0         |
| MIR513A2    | 0         | 0         | 0         | 0         | 0         | 0         |
| LOC10013174 | 0         | 0         | 0         | 0         | 0         | 0         |
| ENO4        | 0.522242  | 0.892684  | 0.606188  | 1.69997   | 0.864809  | 1.0414    |
| KIR2DS2     | 0         | 0         | 0         | 0         | 0         | 0         |
| LMNA        | 190.419   | 236.244   | 270.291   | 236.517   | 223.875   | 224.623   |
| LOC642587   | 166.178   | 346.356   | 111.568   | 187.758   | 210.089   | 172.054   |
| TNFAIP3     | 9.12404   | 8.82136   | 12.5827   | 5.03356   | 14.3816   | 9.01261   |
| C17orf88    | 0         | 0         | 0         | 0         | 0.207874  | 0         |
| CELA3B      | 0         | 0         | 0         | 0         | 0         | 0         |
| SULT6B1     | 0         | 0         | 0         | 0         | 0         | 0         |
| MIR4455     | 0         | 0         | 0         | 0         | 0         | 0         |
| ANKRD36B    | 2.29714   | 3.21841   | 3.34948   | 2.92389   | 3.69489   | 2.77485   |
| CRTAP       | 33.1899   | 37.6851   | 42.6853   | 38.8248   | 35.6575   | 24.8101   |
| MIR4310     | 0         | 0         | 0         | 0         | 0         | 0         |
| HIST1H4A    | 0         | 0         | 0         | 0         | 0         | 0         |
| LY75-CD302  | 4.98E-120 | 2.53E-159 | 3.93E-99  | 6.55E-211 | 2.45E-95  | 0.0208955 |
| CP          | 0.957211  | 0.712501  | 1.55254   | 0.444787  | 2.1301    | 1.10245   |
| WIPF3       | 1.09262   | 1.19212   | 1.17908   | 1.4407    | 0.858764  | 0.883687  |
| APOBEC1     | 0         | 0         | 0         | 0         | 0         | 0         |
| EMX1        | 0.0467598 | 0.20671   | 0.0353974 | 0.175627  | 0.119126  | 0.145694  |
| SNRNP200    | 29.0493   | 26.0913   | 30.5573   | 27.6727   | 30.8445   | 25.5403   |
| CD164L2     | 10.1722   | 15.4616   | 10.7595   | 17.0096   | 14.8212   | 12.3304   |
| TMEM88B     | 0.997726  | 0.294042  | 2.51761   | 0.312283  | 1.48273   | 0.828988  |
| PHLPP1      | 8.66635   | 7.76775   | 8.36715   | 8.8939    | 7.78071   | 8.60734   |
| DENND5B     | 0.804484  | 0.906874  | 1.06575   | 0.65153   | 0.909475  | 0.670516  |
| SYBU        | 9.20337   | 6.78776   | 9.34643   | 9.38146   | 7.93652   | 6.80939   |
| LINC00293   | 0         | 0.400733  | 0.109796  | 0.363173  | 0.0461882 | 0         |
| LOC10050595 | 0         | 0         | 0         | 0         | 0         | 0         |
| FAM65C      | 3.08469   | 3.1083    | 3.82892   | 2.32144   | 5.73506   | 5.93635   |
| REV3L       | 4.34711   | 3.57891   | 5.50907   | 3.31342   | 4.71351   | 3.5589    |
| DAB2        | 15.0132   | 13.2551   | 18.2033   | 8.20524   | 17.166    | 10.1298   |
| KRTAP5-1    | 1.77589   | 0.336457  | 0.192052  | 17.6282   | 0.807912  | 98.9672   |
| C5orf45     | 6.77106   | 7.07767   | 7.88515   | 6.21745   | 8.58332   | 7.28684   |
| FLJ46361    | 0         | 0.0231226 | 0         | 0         | 0         | 0         |
| PCDHGA3     | 0.419072  | 0.150523  | 0.601492  | 0.133891  | 0.428001  | 0.415108  |
| FAM55A      | 0         | 0         | 0         | 0         | 0.0351205 | 0         |
| PIBF1       | 4.87507   | 4.62011   | 5.93191   | 2.7536    | 4.92079   | 4.14875   |
| ARMC6       | 10.8269   | 15.3017   | 10.1868   | 11.8106   | 11.9099   | 13.6208   |
| KCNJ16      | 0.22732   | 0.0219815 | 0.0752847 | 0.124512  | 0.0989711 | 0.111554  |
| TMEM194A    | 7.20977   | 7.83824   | 8.26129   | 7.6058    | 11.8307   | 8.19792   |
| ABHD16A     | 25.5525   | 32.4401   | 24.9723   | 25.5749   | 28.315    | 29.6313   |
| LOC10050758 | 0.933556  | 1.73332   | 0.282683  | 0         | 2.7351    | 1.86161   |



|             |           |           |           |           |           |           |
|-------------|-----------|-----------|-----------|-----------|-----------|-----------|
| METTL9      | 36.4843   | 38.1452   | 34.3217   | 36.262    | 29.8041   | 32.2925   |
| LOC10050648 | 0.166729  | 0.272863  | 0.126215  | 0.313111  | 0.318571  | 0         |
| MAP2K5      | 9.32991   | 13.0287   | 12.5816   | 14.4633   | 12.4469   | 13.203    |
| KIRREL3     | 0.0915908 | 0.160313  | 0.276157  | 0.0972905 | 0.181476  | 0.21131   |
| LINC00174   | 4.80087   | 10.1755   | 5.70865   | 7.1633    | 9.59196   | 9.27563   |
| CCDC12      | 46.0371   | 60.1092   | 39.3212   | 57.2445   | 48.3357   | 46.6259   |
| GPR142      | 0.0785709 | 0         | 0         | 0         | 0.0500423 | 0         |
| LOC10050662 | 0.0477272 | 0.0421974 | 0         | 0         | 0.0607954 | 0.0892247 |
| GIMAP1      | 3.93559   | 3.89476   | 3.80472   | 2.90897   | 3.62271   | 2.75718   |
| LOC729587   | 0         | 0         | 0         | 0         | 0         | 0         |
| SYCP1       | 0.788597  | 0.174307  | 0.0639613 | 0.0528914 | 0.125565  | 0.105304  |
| PVR         | 6.01424   | 5.48299   | 4.95913   | 5.31416   | 5.12978   | 4.51814   |
| C17orf56    | 17.009    | 31.415    | 19.988    | 26.9252   | 30.1739   | 27.941    |
| ARSD        | 10.7999   | 9.0112    | 9.65256   | 10.3881   | 12.4429   | 10.6122   |
| MS4A6E      | 0         | 0         | 0         | 0         | 0         | 0         |
| SRRM4       | 0         | 0.0296233 | 0.0169092 | 0.010487  | 0.028453  | 0.0278388 |
| PSPN        | 0         | 0.318119  | 0         | 0.675707  | 1.60414   | 0         |
| ACBD7       | 0.526395  | 0.646396  | 0.44276   | 0.713955  | 0.335264  | 0.364474  |
| ANAPC4      | 20.8405   | 24.2026   | 18.9885   | 17.8412   | 19.3959   | 15.9587   |
| LOC642441   | 0.987161  | 2.3112    | 1.90883   | 1.45117   | 1.9247    | 1.57469   |
| JMJD1C      | 9.25011   | 6.28186   | 9.79794   | 5.30089   | 9.86128   | 8.06074   |
| ESAM        | 19.5215   | 26.9744   | 19.4223   | 16.8639   | 18.9697   | 15.0498   |
| EIF2B5      | 26.2724   | 30.4949   | 24.7043   | 26.5745   | 31.1007   | 26.6578   |
| HEATR8      | 1.80953   | 4.73789   | 3.40956   | 3.92442   | 4.89925   | 3.73784   |
| DLX3        | 13.412    | 11.1746   | 17.6434   | 34.7688   | 16.3951   | 34.7319   |
| CIRH1A      | 18.0986   | 18.682    | 15.2421   | 17.5467   | 14.6971   | 14.6618   |
| MIR3916     | 0         | 0         | 0         | 0         | 0         | 0         |
| MS4A3       | 0         | 0.072107  | 0.0536329 | 0         | 0.207776  | 0.0508225 |
| MIR553      | 0         | 0         | 0         | 0         | 0         | 0         |
| LIN9        | 2.16362   | 2.01776   | 1.88468   | 1.11321   | 1.52904   | 1.79155   |
| EIF3G       | 148.761   | 216.141   | 157.743   | 215.071   | 177.727   | 171.714   |
| NEUROG3     | 0         | 0         | 0         | 0         | 0         | 0         |
| CCR2        | 2.80138   | 2.53411   | 2.47976   | 0.68663   | 4.46403   | 1.35534   |
| DGCR14      | 4.71176   | 6.21715   | 4.32341   | 5.56382   | 6.80887   | 6.77313   |
| MIR514B     | 0         | 0         | 0         | 0         | 0         | 0         |
| C15orf54    | 0         | 0         | 0         | 0         | 0.0205108 | 0.0200681 |
| CBLN1       | 0.4987    | 1.24927   | 1.2584    | 1.44384   | 0.661719  | 0.569743  |
| CTTNBP2     | 1.37886   | 1.47426   | 1.63853   | 0.677475  | 1.59302   | 1.06906   |
| SLC23A3     | 1.74958   | 1.98476   | 2.14796   | 3.45424   | 4.57353   | 4.30532   |
| SKA2        | 8.06681   | 8.37482   | 6.86607   | 7.22866   | 7.14067   | 7.40441   |
| SRM         | 55.0116   | 64.2852   | 39.9282   | 68.2731   | 35.8146   | 49.2754   |
| CAGE1       | 0.140003  | 0         | 0.105983  | 0.131461  | 0.118892  | 0.0904953 |
| FAM75D4     | 0         | 0         | 0         | 0         | 0.0062412 | 0         |

|             |           |           |           |            |           |           |
|-------------|-----------|-----------|-----------|------------|-----------|-----------|
| SUCLG2      | 34.1378   | 30.8126   | 35.0672   | 28.3095    | 25.4106   | 22.2493   |
| CPEB1       | 1.45143   | 1.59666   | 1.92776   | 1.57467    | 1.64284   | 1.92877   |
| GYPB        | 0         | 0         | 0         | 0          | 0         | 0         |
| GJB4        | 14.3402   | 11.3425   | 16.6294   | 10.495     | 23.7438   | 25.1076   |
| FZD5        | 2.90667   | 1.86317   | 2.98149   | 3.28883    | 2.11971   | 2.66263   |
| ADAMTS20    | 0         | 0         | 0.0126585 | 0          | 0         | 0         |
| OR52I2      | 0         | 0         | 0.0387886 | 0          | 0         | 0.0638605 |
| PP13004     | 0         | 0         | 0         | 0.067988   | 0.0922315 | 0         |
| CT47B1      | 0         | 0         | 0         | 0          | 0         | 0         |
| MTO1        | 10.0472   | 9.18423   | 7.0386    | 6.81187    | 8.0054    | 8.41842   |
| DCLRE1A     | 3.36273   | 2.81966   | 2.84122   | 2.0575     | 2.7359    | 2.7174    |
| ARPC3       | 107.928   | 105.782   | 96.6236   | 102.249    | 95.3406   | 98.6082   |
| RPL13AP17   | 0.0583871 | 0.0516222 | 0         | 0          | 0         | 0.0727688 |
| FXYD6       | 29.9449   | 36.2175   | 27.228    | 34.0086    | 47.2425   | 45.9111   |
| CDC40       | 7.38038   | 6.25618   | 8.02527   | 5.21539    | 7.75355   | 6.49568   |
| ZNF724P     | 0.685026  | 0.701286  | 0.545861  | 0.372395   | 0.22963   | 0.33701   |
| ADM2        | 0.480683  | 0.445227  | 0.346552  | 0.644791   | 0.699771  | 0.399389  |
| ZNF605      | 4.8689    | 4.75821   | 0         | 0          | 0         | 0         |
| U2SURP      | 21.5418   | 18.5845   | 20.8555   | 15.1556    | 22.1895   | 19.4974   |
| BRMS1       | 32.5346   | 51.0183   | 31.9571   | 45.9848    | 39.6478   | 42.2416   |
| AOAH        | 1.21468   | 0.918938  | 1.46426   | 0.412375   | 1.1941    | 0.649936  |
| LOC10065291 | 5.3051    | 8.74754   | 4.33053   | 3.71622    | 6.11391   | 2.56603   |
| GZF1        | 4.52581   | 4.10958   | 3.68842   | 3.92424    | 4.93403   | 4.1161    |
| PDE9A       | 16.4059   | 10.1221   | 8.86835   | 11.233     | 9.60354   | 9.62993   |
| MESP1       | 5.25935   | 6.88887   | 6.85678   | 5.76152    | 3.28768   | 1.82078   |
| ZHX3        | 5.484     | 4.1476    | 5.87343   | 5.10507    | 5.79526   | 5.03492   |
| OR8D4       | 0         | 0         | 0         | 0          | 0         | 0         |
| ZNF441      | 3.57479   | 2.71735   | 4.0757    | 2.66078    | 3.65122   | 3.19207   |
| MIR3605     | 0         | 0         | 0         | 0          | 0         | 0         |
| THBS3       | 12.6263   | 20.3683   | 22.8452   | 24.2876    | 23.046    | 20.5517   |
| HIC2        | 1.41573   | 1.73499   | 1.36881   | 1.47412    | 1.42839   | 1.27526   |
| COPS4       | 27.1397   | 25.2721   | 26.3303   | 26.0488    | 23.6477   | 22.2747   |
| GRRP1       | 3.45306   | 5.35829   | 4.001     | 2.44832    | 3.54577   | 2.54703   |
| OR52L1      | 0         | 0.0927689 | 0         | 0          | 0         | 0         |
| PRKRA       | 37.072    | 39.4608   | 33.4295   | 34.5213    | 30.3929   | 31.4028   |
| CPNE6       | 0.565351  | 0.63617   | 0.311254  | 0.482596   | 1.11296   | 0.51244   |
| TTC21B      | 4.7702    | 4.54863   | 5.84933   | 4.55317    | 5.71225   | 3.82014   |
| VAT1        | 118.82    | 112.334   | 107.552   | 109.083    | 115.491   | 123.172   |
| FUCA1       | 14.852    | 13.0884   | 12.6713   | 12.3559    | 13.8346   | 14.2897   |
| MID1        | 4.27756   | 3.26456   | 3.76698   | 3.45081    | 3.5824    | 4.6195    |
| REXO1L1     | 0         | 0.0119674 | 0         | 0.00635489 | 0         | 0         |
| MRPL11      | 22.1558   | 29.5788   | 19.228    | 25.2713    | 20.2474   | 19.5495   |
| CXCR6       | 3.13176   | 1.73643   | 1.16529   | 0.149526   | 1.72418   | 0.231543  |

|             |          |           |           |           |           |           |
|-------------|----------|-----------|-----------|-----------|-----------|-----------|
| MRGPRD      | 0.122798 | 0         | 0         | 0.115306  | 0.156422  | 0         |
| MIR3180-3   | 0        | 0         | 0         | 0         | 0         | 0         |
| GLOD5       | 0        | 0.156158  | 0         | 0         | 0.337473  | 0.220126  |
| ECHDC1      | 59.2945  | 54.9079   | 65.2297   | 58.153    | 47.6265   | 48.1489   |
| LRP11       | 26.5439  | 19.8247   | 25.3893   | 19.9598   | 24.5732   | 26.3406   |
| PRSS53      | 4.63057  | 12.6421   | 5.08471   | 14.2864   | 7.0652    | 18.9704   |
| AACSP1      | 1.08261  | 1.74788   | 1.95977   | 2.78447   | 0.98931   | 1.75992   |
| VAMP3       | 67.6399  | 74.7639   | 68.7163   | 68.8672   | 64.1036   | 56.6627   |
| HEMK1       | 7.24735  | 7.49454   | 5.3629    | 4.5688    | 8.80859   | 8.65208   |
| C8orf12     | 0        | 0.0809825 | 0         | 0         | 0.0583374 | 0.171234  |
| H2AFZ       | 134.173  | 146.251   | 104.431   | 136.751   | 112.255   | 121.451   |
| PCNT        | 3.97821  | 5.26804   | 5.73946   | 5.41895   | 5.52197   | 5.19897   |
| CIC         | 19.3035  | 27.8864   | 22.1629   | 27.7433   | 34.3501   | 25.5564   |
| ING4        | 30.2974  | 45.0107   | 35.7511   | 39.7371   | 49.7888   | 43.9202   |
| PPIEL       | 8.02427  | 11.8779   | 8.74009   | 9.80759   | 12.152    | 8.2558    |
| OR6Y1       | 0        | 0         | 0         | 0         | 0         | 0         |
| LOC10050550 | 0        | 0         | 0         | 0         | 0.0241427 | 0         |
| FER1L6      | 0        | 0         | 0         | 0         | 0.0103556 | 0.0405284 |
| ARAP3       | 4.47915  | 6.62724   | 4.5948    | 4.32602   | 5.03023   | 3.87352   |
| LOC646498   | 0.378605 | 0         | 0.143303  | 0         | 0.120568  | 0.235931  |
| MOGAT2      | 5.83699  | 3.61249   | 6.09771   | 3.39812   | 9.21967   | 6.18352   |
| GFOD2       | 16.7575  | 15.3768   | 13.9164   | 19.4718   | 18.0861   | 21.0927   |
| LOC145845   | 0        | 0         | 0         | 0         | 0         | 0         |
| HIP1        | 3.74399  | 3.48442   | 4.24636   | 3.14549   | 4.12488   | 2.89795   |
| PRR20C      | 0        | 0         | 0         | 0         | 0         | 0         |
| SNORA32     | 715.077  | 526.855   | 90.2196   | 335.723   | 455.437   | 445.606   |
| NDOR1       | 11.5923  | 17.5103   | 14.0004   | 19.6082   | 19.0648   | 16.4252   |
| TYROBP      | 31.2286  | 35.985    | 35.1049   | 24.7883   | 46.0844   | 23.1048   |
| DNHD1       | 2.14374  | 2.49025   | 3.30907   | 2.26668   | 3.42456   | 2.36403   |
| LOC10050750 | 7.02881  | 9.85898   | 7.84611   | 11.5656   | 13.3948   | 10.0814   |
| TRPM6       | 0.597839 | 0.366091  | 0.426479  | 0.453502  | 0.622258  | 1.36075   |
| LOC10028850 | 0        | 0         | 0         | 0.0219756 | 0         | 0         |
| SCN11A      | 0.322989 | 0.168744  | 0.366757  | 0.289496  | 0.504933  | 0.329356  |
| ASPA        | 6.21186  | 5.73882   | 5.97932   | 5.17855   | 5.57752   | 3.44101   |
| C12orf73    | 7.04816  | 6.783     | 4.53281   | 4.50969   | 5.12463   | 4.23664   |
| SNORD81     | 0        | 0         | 0         | 0         | 0         | 0         |
| C1orf110    | 0.275981 | 0         | 0         | 0.129571  | 0.0439435 | 0         |
| SLX1A-SULT1 | 5.22758  | 12.0449   | 6.41294   | 7.5405    | 7.21208   | 6.91801   |
| CYHR1       | 35.0071  | 63.104    | 42.9494   | 55.4793   | 55.2453   | 59.4035   |
| MIR3907     | 0        | 0         | 0         | 0         | 0         | 0         |
| RBP3        | 0        | 0         | 0.0171996 | 0.14934   | 0.0723544 | 0.0707926 |
| MIR642A     | 0        | 0         | 0         | 0         | 0         | 0         |
| SRPR        | 64.8115  | 52.6663   | 54.5823   | 54.74     | 49.0451   | 48.7008   |

|             |           |           |            |           |           |           |
|-------------|-----------|-----------|------------|-----------|-----------|-----------|
| HIST2H3D    | 0.761165  | 0.168243  | 0.144051   | 0         | 0.242395  | 0.533616  |
| HIF3A       | 2.94689   | 4.68786   | 5.68511    | 5.69463   | 7.60537   | 4.40444   |
| GSG2        | 0.607459  | 0.947783  | 0.67625    | 0.402631  | 1.31999   | 0.890689  |
| DPRX        | 0         | 0.56466   | 0          | 0.399792  | 0.406764  | 0.663306  |
| CRHR2       | 0.258399  | 0.421772  | 0.162335   | 0.158454  | 0.168799  | 0.265137  |
| LOC388820   | 0.441808  | 0.585928  | 0.836127   | 0.829701  | 0.984864  | 1.10126   |
| TMEM127     | 28.1971   | 21.0951   | 26.9731    | 23.4048   | 25.7598   | 25.6103   |
| FCER1A      | 17.0875   | 20.8589   | 30.3539    | 11.5778   | 29.4339   | 15.9118   |
| TSC22D3     | 106.06    | 99.536    | 104.92     | 107.505   | 106.331   | 70.316    |
| ANKRD39     | 7.40421   | 12.7356   | 10.3948    | 14.0313   | 11.4894   | 10.4024   |
| LOC10065288 | 0.735277  | 0.805974  | 0.681562   | 0.380432  | 1.49331   | 0.901693  |
| LOC643650   | 1.59452   | 1.47089   | 2.9648     | 1.62739   | 3.46572   | 2.89419   |
| CA12        | 77.0532   | 71.4837   | 82.812     | 91.1278   | 93.3062   | 86.4905   |
| TTLL11      | 1.28591   | 2.35899   | 1.77326    | 1.71446   | 1.81634   | 2.16311   |
| USP30       | 8.83798   | 7.7633    | 8.62541    | 7.34512   | 8.79843   | 7.91434   |
| DOCK8       | 4.4895    | 4.28735   | 3.53119    | 2.65156   | 4.48848   | 3.04595   |
| CRHBP       | 4.83146   | 3.16606   | 0.946632   | 0.693842  | 0.434426  | 0.0708414 |
| C9orf4      | 0         | 0         | 0          | 0.0889188 | 0         | 0         |
| OR7D4       | 0         | 0         | 0.0865121  | 0         | 0.0727868 | 0         |
| WNT2        | 0.809143  | 0.223486  | 1.37559    | 0.773827  | 0.677442  | 0.577509  |
| RNY5        | 0         | 0         | 0          | 0         | 0         | 0         |
| LOC10012969 | 0.677411  | 0.262029  | 0.336528   | 0.636078  | 0.566274  | 0.369367  |
| PRAMEF11    | 0         | 0         | 0          | 0         | 0         | 0         |
| KLRF2       | 0         | 0.315943  | 1.35257    | 1.00663   | 0.455192  | 0.66805   |
| DUX4L7      | 0         | 0.0200311 | 0.00714616 | 0         | 0.0549707 | 0.0274523 |
| TRPC2       | 2.55681   | 3.43272   | 1.29035    | 0.266756  | 1.50782   | 1.0622    |
| IGFBP6      | 52.1893   | 125.073   | 92.7731    | 69.7599   | 44.1892   | 44.4597   |
| PRAMEF12    | 0.293608  | 0.674932  | 0.444525   | 0.165416  | 0         | 0.0365928 |
| MIR4535     | 0         | 0         | 0          | 0         | 0         | 0         |
| MTFP1       | 8.58671   | 9.97245   | 7.18994    | 9.09367   | 5.84381   | 6.81808   |
| PIR         | 23.7191   | 21.8306   | 19.3875    | 15.6408   | 11.7833   | 13.9344   |
| BUB1        | 1.43157   | 1.91096   | 1.06245    | 1.60779   | 1.6984    | 1.7492    |
| SGSM1       | 0.674414  | 0.712485  | 0.896008   | 1.19939   | 1.57035   | 0.994035  |
| C15orf23    | 26.2685   | 23.6026   | 16.8134    | 15.7833   | 13.3488   | 20.0969   |
| EPS8L1      | 54.7111   | 62.9214   | 63.6339    | 90.2314   | 101.128   | 114.81    |
| SETBP1      | 3.06522   | 2.53696   | 2.95807    | 2.67118   | 3.2654    | 2.74168   |
| LOC10050604 | 5.60162   | 4.9526    | 7.26935    | 7.9381    | 12.7566   | 5.97657   |
| HIST1H2AG   | 0.651072  | 0.575637  | 0.246433   | 0.305673  | 0.207336  | 0.608581  |
| LOC10050625 | 0.471999  | 0.834623  | 4.28767    | 1.7728    | 1.50309   | 0.29413   |
| SPHAR       | 10.2009   | 7.81324   | 7.90244    | 7.91488   | 8.88867   | 7.08798   |
| FLJ35816    | 0.0946224 | 0.167318  | 0.358149   | 0.310971  | 0.0903983 | 0.235859  |
| RFX2        | 2.51067   | 9.79678   | 3.28961    | 5.87116   | 3.07495   | 4.42292   |
| MIR617      | 0         | 0         | 0          | 0         | 0         | 0         |

|            |           |          |           |          |          |           |
|------------|-----------|----------|-----------|----------|----------|-----------|
| CC2D1A     | 20.4737   | 26.0091  | 20.6378   | 28.3055  | 26.011   | 25.0523   |
| MIR548AE2  | 0         | 0        | 0         | 0        | 0        | 0         |
| IER5L      | 6.28637   | 9.61209  | 6.18646   | 8.64587  | 8.78486  | 8.68741   |
| FOLR2      | 9.69847   | 5.16497  | 8.84871   | 4.06779  | 9.04278  | 3.4565    |
| MIR766     | 0         | 0        | 0         | 0        | 0        | 0         |
| NXPH2      | 0         | 0.104355 | 0         | 0        | 0        | 0.0735517 |
| CLK2       | 17.1841   | 25.5058  | 18.0956   | 19.8315  | 26.2305  | 21.686    |
| VAPB       | 14.4551   | 11.3755  | 12.2358   | 13.6179  | 11.238   | 10.803    |
| LOC150577  | 0         | 0        | 0         | 0        | 0        | 0         |
| MIR520A    | 0         | 0        | 0         | 0        | 0        | 0         |
| TUBA1C     | 178.725   | 178.011  | 147.422   | 183.832  | 135.303  | 180.358   |
| LOC1001302 | 0.0755876 | 0.178213 | 0.0190734 | 0.16561  | 0.112332 | 0.062804  |
| SNORD35A   | 0         | 0        | 0         | 0        | 0        | 0         |
| ATP6V0A2   | 6.34399   | 6.09893  | 7.13189   | 6.54575  | 9.44646  | 6.14352   |
| HIVEP1     | 3.44203   | 3.39183  | 3.81568   | 2.79174  | 3.19674  | 2.66289   |
| MIR4788    | 0         | 0        | 0         | 0        | 0        | 0         |
| ZNF32      | 35.8579   | 39.2074  | 34.5409   | 37.6149  | 29.9944  | 29.417    |
| AURKB      | 3.97494   | 11.0226  | 3.89809   | 7.21033  | 6.09901  | 7.54364   |
| RMI1       | 4.13383   | 3.50569  | 3.55509   | 2.71976  | 2.93734  | 3.32956   |
| LYRM5      | 44.8128   | 42.9888  | 44.3965   | 33.7004  | 30.2016  | 30.3619   |
| SLC39A7    | 62.686    | 54.7198  | 52.9799   | 51.269   | 50.6304  | 48.9333   |
| ZNF419     | 7.43241   | 9.76019  | 9.03697   | 8.53226  | 9.36859  | 8.03041   |
| SPI1       | 12.5426   | 19.9314  | 13.1349   | 6.7698   | 23.6232  | 11.7381   |
| FAM164A    | 9.6177    | 10.5057  | 11.845    | 6.93195  | 13.169   | 10.2638   |
| LRRC8C     | 4.07785   | 3.197    | 3.08695   | 2.28007  | 2.85776  | 2.13818   |
| BSPRY      | 21.0642   | 18.7384  | 16.4369   | 18.4387  | 19.8071  | 22.8565   |
| PRR18      | 0.185339  | 0.065546 | 0.112242  | 0        | 0.070826 | 0.0923962 |
| FLJ21408   | 0         | 0.21111  | 0         | 0        | 0.304155 | 0.148795  |
| M1         | 0         | 0        | 0         | 0        | 0.276613 | 0.270642  |
| NYX        | 0         | 0        | 0         | 0        | 0        | 0.0238166 |
| IRF2BP1    | 11.0905   | 15.4188  | 10.7987   | 16.7527  | 13.9993  | 14.248    |
| MSX2P1     | 0.0473841 | 0.125682 | 0.0717401 | 0        | 0.120717 | 0.0295278 |
| LOC1005059 | 2.84776   | 4.54436  | 2.73999   | 3.82673  | 4.29021  | 2.81653   |
| TMEM85     | 93.0828   | 91.9154  | 85.5273   | 92.215   | 79.6237  | 76.3659   |
| SYT8       | 1.90901   | 7.02135  | 16.9369   | 26.8879  | 21.2532  | 20.7469   |
| GNPDA1     | 15.9081   | 15.3578  | 11.0697   | 11.9001  | 12.4462  | 11.7082   |
| ATG10      | 3.47195   | 5.31615  | 3.98015   | 4.01221  | 3.57173  | 3.4669    |
| LOC1005063 | 3.07824   | 2.26799  | 0.291281  | 0.240868 | 0.163379 | 0.159852  |
| SNORD116-1 | 0         | 0        | 0         | 0        | 0        | 0         |
| MIR4651    | 0         | 0        | 0         | 0        | 0        | 0         |
| TIAF1      | 25.0784   | 42.3275  | 20.8508   | 39.5978  | 36.9392  | 33.056    |
| C18orf23   | 0         | 0.208947 | 0         | 0.221909 | 0        | 0.14727   |
| C20orf94   | 1.31554   | 0.957864 | 1.69884   | 1.74392  | 1.18289  | 1.01268   |

|             |          |           |           |           |           |           |
|-------------|----------|-----------|-----------|-----------|-----------|-----------|
| SNORA30     | 0        | 0         | 0         | 0         | 0         | 0         |
| DNAJC8      | 34.2222  | 35.6771   | 30.7273   | 32.8047   | 31.5383   | 30.6721   |
| KCNIP4      | 0.685631 | 0.563475  | 1.62246   | 0.643797  | 0.621864  | 0.578202  |
| FAM92B      | 0        | 0         | 0.0415198 | 0         | 0         | 0         |
| FAM169A     | 1.16004  | 0.769225  | 0.75619   | 0.468986  | 0.790144  | 0.652607  |
| LOC10050588 | 0        | 0         | 0         | 0         | 0.402417  | 0         |
| CALN1       | 0.259884 | 0.361986  | 0.6498    | 0.421903  | 0.34299   | 0.323166  |
| MYOT        | 1.2331   | 0.626611  | 0.709011  | 0.502844  | 0.745748  | 0.583643  |
| STT3B       | 34.3227  | 18.6467   | 27.4927   | 20.2622   | 22.5345   | 23.4182   |
| ERCC1       | 71.3531  | 84.6964   | 61.2518   | 75.5339   | 58.1414   | 53.9519   |
| PTBP2       | 8.15189  | 9.30228   | 8.05009   | 7.36314   | 9.77314   | 7.57592   |
| ORAOV1      | 14.0804  | 17.4568   | 12.4706   | 16.3674   | 18.2914   | 16.0323   |
| CSAG3       | 1.60684  | 3.48827   | 0.490559  | 0         | 1.15546   | 0.414093  |
| PARP11      | 2.37306  | 2.327     | 2.56398   | 2.32955   | 2.32208   | 1.84177   |
| MAP3K9      | 0.822166 | 0.787483  | 1.07621   | 0.739834  | 1.10183   | 1.00333   |
| LOC10050547 | 0        | 0         | 0         | 0.167771  | 0.113798  | 0         |
| NR2C1       | 8.10066  | 8.39811   | 10.3928   | 9.82831   | 11.3519   | 9.12391   |
| ZMAT4       | 0.242863 | 0.161043  | 0.349025  | 0.349193  | 0.322252  | 0.204312  |
| LOC339874   | 0.209313 | 0         | 0.0792254 | 0.147406  | 0.16664   | 0.0652174 |
| ZNF705E     | 0        | 0.118506  | 0         | 0.251714  | 0.256104  | 0         |
| LOC642826   | 0.309938 | 0         | 0         | 0         | 0         | 0.0965701 |
| UXT         | 139.602  | 168.735   | 130.52    | 195.167   | 139.94    | 125.427   |
| TTF1        | 7.04391  | 6.23174   | 5.19127   | 5.90739   | 6.58335   | 7.21623   |
| OR5D13      | 0        | 0         | 0         | 0         | 0         | 0         |
| PPARGC1A    | 6.74312  | 3.58245   | 6.64969   | 12.9757   | 5.54656   | 5.12534   |
| RN5-8S1     | 0        | 0         | 0         | 0         | 0         | 0         |
| UTF1        | 0        | 0         | 0.14824   | 0.0919379 | 0.187082  | 0.0610147 |
| MED19       | 8.44404  | 9.41064   | 8.48719   | 8.19533   | 8.45129   | 7.38444   |
| ZNF664-FAM  | 2.86E-19 | 4.60E-20  | 1.20E-12  | 0.361395  | 0.227012  | 2.51E-18  |
| ZNF730      | 0.424067 | 0.187467  | 0.0687902 | 0.341308  | 0.115753  | 0.528521  |
| OVOS        | 0.472684 | 0.780371  | 0.793363  | 1.08007   | 0.529358  | 0.432031  |
| PPP2CA      | 66.042   | 52.0069   | 57.3293   | 52.343    | 56.1479   | 61.945    |
| RXFP1       | 0        | 0.111384  | 0.0635784 | 0         | 0.0267458 | 0.0523369 |
| IL10RB      | 19.5771  | 20.1067   | 21.0322   | 18.6344   | 20.7358   | 18.9178   |
| C9orf96     | 0.395821 | 0.413589  | 0.326878  | 0.574398  | 0.710465  | 0.493317  |
| LOC10050674 | 1.91974  | 1.74446   | 1.97804   | 2.00289   | 2.10575   | 1.6283    |
| EIF3F       | 100.212  | 123.148   | 105.038   | 154.167   | 104.006   | 105.626   |
| SCXB        | 0.736643 | 2.29776   | 1.0796    | 1.33912   | 1.20108   | 1.1804    |
| PHF10       | 24.4519  | 22.0457   | 23.5251   | 25.1171   | 26.0957   | 23.3117   |
| LOC10050565 | 0.197825 | 0.349809  | 0.599018  | 0.928773  | 0.125996  | 0.123276  |
| KCNK5       | 29.2213  | 18.8166   | 26.5253   | 30.9349   | 12.6326   | 19.2569   |
| RIMBP3B     | 0.112377 | 0.0629233 | 0.0448651 | 0.0462469 | 0.0980278 | 0.107767  |
| TLL2        | 0        | 0         | 0.0262372 | 0.0325444 | 0         | 0.0431963 |

|             |          |           |          |          |           |           |
|-------------|----------|-----------|----------|----------|-----------|-----------|
| XPOT        | 13.9402  | 12.3469   | 13.1723  | 10.3742  | 10.7047   | 9.48788   |
| TFR2        | 1.18906  | 1.66626   | 1.17883  | 1.03972  | 1.17426   | 0.970399  |
| C2orf53     | 0        | 0         | 0        | 0        | 0         | 0         |
| LOC729915   | 0.182533 | 0.0598836 | 0.130868 | 0.160746 | 0.231052  | 0.157221  |
| CHRN1       | 5.56381  | 6.13061   | 6.0663   | 5.38028  | 5.97656   | 6.46853   |
| LOC10050756 | 0        | 0.135873  | 0        | 0        | 0.0978787 | 0.0957659 |
| C2CD4D      | 1.75978  | 2.77323   | 1.57053  | 2.66918  | 1.81386   | 1.85507   |
| AQR         | 8.98994  | 6.69069   | 8.95905  | 6.09064  | 6.523     | 6.41765   |
| RNF38       | 12.0295  | 10.4778   | 12.1335  | 10.083   | 12.6957   | 10.4261   |
| C17orf48    | 3.18578  | 5.06999   | 5.84155  | 5.38451  | 6.76346   | 4.14695   |
| EAF1        | 8.50783  | 6.39568   | 8.28761  | 8.45506  | 9.33829   | 12.6353   |
| CCDC9       | 15.5493  | 17.1336   | 17.9562  | 17.5299  | 21.1736   | 20.8194   |
| RPS6KA6     | 1.37429  | 1.16401   | 1.95829  | 1.17115  | 1.37546   | 1.61924   |
| LOC728758   | 3.68864  | 3.56464   | 3.50664  | 2.497    | 3.03226   | 3.95574   |
| DNAJA1      | 126.551  | 75.0855   | 69.831   | 55.9121  | 64.7918   | 78.7744   |
| PWWP2A      | 9.92203  | 11.1831   | 9.65171  | 9.5158   | 11.0517   | 11.0095   |
| LOC729162   | 1.36649  | 1.29887   | 2.20487  | 1.57557  | 1.54376   | 1.54223   |
| CCDC163P    | 2.17175  | 3.22545   | 0.752486 | 0.809649 | 3.93177   | 3.92469   |
| LOC10050548 | 1.6444   | 0.726939  | 0.933618 | 0        | 0.785498  | 0.512362  |
| TFPI        | 7.35166  | 7.60084   | 8.19662  | 3.48814  | 8.41652   | 6.14059   |
| MIR3157     | 0        | 0         | 0        | 0        | 0         | 0         |
| CEPT1       | 22.0122  | 22.5668   | 23.2016  | 20.1919  | 21.8155   | 21.5063   |
| KIAA0922    | 6.14883  | 6.53658   | 6.16441  | 6.21254  | 5.54371   | 5.54636   |
| C1orf70     | 0.613511 | 1.80809   | 1.00627  | 1.05614  | 1.43275   | 1.08322   |
| ATP2B4      | 40.2487  | 32.0876   | 45.6584  | 35.0336  | 41.3569   | 37.217    |
| LOC10013023 | 0.838701 | 0.526014  | 1.12644  | 0.186033 | 1.37666   | 0.606136  |
| LOC10050675 | 1.15E-08 | 6.31E-10  | 1.62E-08 | 1.54E-09 | 3.28E-10  | 0.018369  |
| CGB         | 0        | 0.431132  | 0.4311   | 0.862289 | 0.425745  | 0.286238  |
| TMEM234     | 8.19141  | 9.12307   | 8.93864  | 9.98867  | 11.0436   | 11.0041   |
| SHMT2       | 28.6092  | 32.141    | 27.9272  | 36.6005  | 33.056    | 32.9505   |
| SNORA52     | 232.035  | 82.0602   | 210.782  | 217.877  | 147.784   | 173.513   |
| FNDC3A      | 15.7492  | 10.1165   | 14.2519  | 8.53376  | 12.57     | 10.3464   |
| LALBA       | 0        | 0         | 0        | 0        | 0         | 0         |
| LOC10012898 | 0        | 0         | 0        | 0        | 0.0751124 | 0         |
| OR5J2       | 0        | 0         | 0        | 0        | 0         | 0         |
| HTR7P1      | 0.928434 | 0.703597  | 1.573    | 0.830271 | 1.73174   | 1.73568   |
| VEGFA       | 44.0114  | 35.4149   | 35.077   | 37.725   | 45.0169   | 37.3354   |
| PCDHGB7     | 1.94524  | 1.53204   | 2.39391  | 1.12791  | 2.25539   | 2.01841   |
| LOC10050607 | 18.4454  | 22.0505   | 18.7325  | 28.5466  | 27.3702   | 21.8135   |
| BAG2        | 1.90735  | 3.10645   | 2.39379  | 2.02663  | 2.30173   | 2.00182   |
| EYA3        | 11.5598  | 9.65884   | 11.0948  | 9.1696   | 10.9122   | 11.5178   |
| C7orf49     | 13.5245  | 15.9703   | 13.1408  | 12.4989  | 12.6372   | 11.9256   |
| LOC648809   | 0.614048 | 0.349774  | 0.366709 | 0.204688 | 0.555354  | 0.181122  |

|             |           |           |           |            |           |           |
|-------------|-----------|-----------|-----------|------------|-----------|-----------|
| PLP2        | 230.9     | 273.663   | 242.237   | 308.257    | 285.155   | 279.734   |
| CTU1        | 2.04797   | 4.91472   | 2.953     | 4.53281    | 3.85098   | 4.40596   |
| C17orf70    | 13.7049   | 21.6211   | 14.4639   | 21.1254    | 19.1705   | 19.3794   |
| CDYL        | 12.0105   | 11.4563   | 11.9374   | 10.7322    | 11.814    | 10.7027   |
| BCL2L2-PABP | 51.0527   | 65.53     | 40.9372   | 58.1121    | 55.9161   | 50.7026   |
| LOC10013070 | 0.668601  | 0.932175  | 1.44054   | 1.27976    | 2.04729   | 1.60248   |
| CNGA3       | 0         | 0.0227916 | 0         | 0          | 0.0656758 | 0         |
| LINGO3      | 0.0481757 | 0.0851878 | 0.109408  | 0.0904724  | 0.429567  | 0.330232  |
| AP3M2       | 9.99831   | 9.03167   | 7.38367   | 8.01065    | 8.40986   | 7.09398   |
| STUB1       | 67.2611   | 96.0789   | 76.631    | 96.507     | 74.959    | 74.9716   |
| RAD21-AS1   | 0.359969  | 0.272806  | 0.390157  | 0.193533   | 0.0654943 | 0.160394  |
| OR2T29      | 0         | 0         | 0         | 0          | 0.0801303 | 0         |
| LOC10013290 | 9.09891   | 8.55277   | 6.30789   | 4.94637    | 11.4683   | 9.48988   |
| SENP7       | 8.56556   | 8.3481    | 11.5169   | 7.65984    | 12.369    | 9.3915    |
| EYS         | 0.204581  | 0.133692  | 0.121202  | 0.116929   | 0.141629  | 0.149658  |
| TRIB2       | 19.6257   | 20.5755   | 11.4215   | 12.5904    | 19.1284   | 14.7417   |
| IL31RA      | 0.418422  | 0.668246  | 0.345641  | 0.569447   | 1.63045   | 1.80333   |
| IL1A        | 1.87043   | 1.05236   | 1.46741   | 1.11765    | 0.671452  | 1.12319   |
| GAS2L1      | 27.3485   | 42.0635   | 33.821    | 46.9239    | 36.2065   | 33.2538   |
| CCNK        | 21.0497   | 22.8017   | 22.1133   | 22.3517    | 24.2252   | 21.7925   |
| BEX2        | 13.4884   | 12.9231   | 10.551    | 17.9875    | 12.7858   | 13.5169   |
| CCT5        | 34.0352   | 27.7888   | 27.3861   | 28.4257    | 21.9537   | 23.8063   |
| PPYR1       | 2.17256   | 2.62358   | 3.57007   | 3.13463    | 4.92737   | 3.00488   |
| LOC10050645 | 0         | 0         | 0         | 0          | 0         | 0         |
| MIR492      | 0         | 0         | 0         | 0          | 0         | 0         |
| FLJ34208    | 0.30473   | 0.449038  | 0.538258  | 0.858409   | 0.388168  | 0.189895  |
| DTX3L       | 15.5432   | 11.8542   | 7.50545   | 2.88687    | 8.47711   | 4.10003   |
| AK1         | 23.1657   | 27.3089   | 19.2391   | 26.1871    | 18.0299   | 18.2481   |
| ENG         | 32.6742   | 39.5055   | 27.4573   | 26.3048    | 29.424    | 23.2999   |
| KRT23       | 68.6195   | 46.6522   | 67.7181   | 79.4534    | 79.2575   | 84.1229   |
| OR51A7      | 0         | 0         | 0         | 0          | 0         | 0         |
| PRAMEL      | 0         | 0         | 0         | 0          | 0         | 0         |
| ABAT        | 4.05235   | 3.12704   | 3.38683   | 3.07015    | 3.02804   | 3.03752   |
| CSNK1A1     | 74.0443   | 56.1752   | 70.3478   | 56.7564    | 65.7669   | 64.3203   |
| CHRNA4      | 0.0350041 | 0.0464226 | 0.0529966 | 0.0657366  | 0.15606   | 0.0763458 |
| DCC         | 0         | 0.0652994 | 0.027955  | 0.00866878 | 0.0940795 | 0.0172591 |
| FAM83C      | 13.2253   | 16.2264   | 23.1711   | 23.8385    | 23.3581   | 21.7629   |
| ARRDC4      | 18.8751   | 18.9754   | 25.7122   | 18.4207    | 29.0931   | 27.0172   |
| SPCS2       | 20.3176   | 17.7345   | 15.7447   | 16.8191    | 14.496    | 14.6674   |
| POP4        | 12.5265   | 13.6467   | 11.8312   | 14.4569    | 11.7326   | 12.2499   |
| TRIM58      | 0.634673  | 0.52813   | 0.452189  | 0.438197   | 0.939233  | 1.04692   |
| UNG         | 54.2202   | 51.8342   | 45.7126   | 53.0917    | 40.4725   | 45.0635   |
| LOC10050695 | 0         | 0         | 0         | 0          | 0         | 0         |



|             |           |           |           |           |           |           |
|-------------|-----------|-----------|-----------|-----------|-----------|-----------|
| GPBP1L1     | 46.9322   | 40.4988   | 46.9476   | 44.462    | 50.1303   | 46.709    |
| FLVCR1-AS1  | 0.892655  | 0.99732   | 1.85741   | 1.22448   | 1.01375   | 1.19693   |
| IFRD2       | 26.8056   | 40.7003   | 27.2109   | 34.9424   | 24.4343   | 27.7941   |
| PPME1       | 26.5896   | 25.3677   | 26.3074   | 27.5994   | 30.877    | 35.4767   |
| PRPF18      | 12.0111   | 12.1339   | 11.6233   | 9.12721   | 9.71363   | 10.2627   |
| HOXC4       | 2.96654   | 3.34694   | 3.61795   | 5.75254   | 5.68316   | 4.96622   |
| GJA3        | 0.443696  | 0.24518   | 0.489826  | 0.902685  | 0.447438  | 0.979245  |
| LOC10012894 | 0.0485619 | 0.0644031 | 0.0735233 | 0.205195  | 0.216506  | 0.423664  |
| ASTN1       | 0.012998  | 0.0459837 | 0.0491979 | 0.0236069 | 0.0919835 | 0.0156668 |
| GML         | 0         | 0         | 0.137385  | 0         | 0         | 0         |
| CYP4V2      | 5.15919   | 4.08893   | 8.20007   | 6.96744   | 4.80451   | 3.39431   |
| CDR2        | 6.56627   | 6.55987   | 6.90843   | 7.97699   | 6.71025   | 4.04559   |
| CLK2P       | 15.3079   | 17.8755   | 13.075    | 16.7606   | 22.9946   | 16.9187   |
| LOC10013017 | 0         | 0.0594304 | 0.102019  | 0         | 0         | 0         |
| TMEM236     | 0.176276  | 0.202046  | 0.106933  | 0.0998622 | 0.16794   | 0.131701  |
| LOC345051   | 0.540248  | 1.37325   | 1.73813   | 1.83891   | 1.54839   | 0.50499   |
| FBXO47      | 0.0442062 | 0         | 0         | 0         | 0         | 0         |
| MIR4640     | 0         | 0         | 0         | 0         | 0         | 0         |
| MIR3620     | 0         | 0         | 0         | 0         | 0         | 0         |
| NDUFB2      | 202.929   | 234.965   | 214.673   | 257.92    | 153.74    | 192.072   |
| LOC10050605 | 4.52076   | 9.40532   | 6.47621   | 8.26002   | 8.90191   | 7.34893   |
| C14orf37    | 1.06198   | 0.682865  | 1.09627   | 0.423049  | 0.512412  | 0.501351  |
| HOXA10-HOX  | 6.11E-06  | 1.68E-06  | 4.36E-06  | 1.58E-06  | 1.36E-06  | 1.99E-06  |
| LOC644093   | 0         | 0.108139  | 0         | 0         | 0         | 0.0762184 |
| CGRRF1      | 6.16044   | 6.0355    | 5.79785   | 4.50793   | 5.14312   | 3.8908    |
| RALA        | 24.1767   | 20.2438   | 25.4611   | 19.8972   | 23.4823   | 21.5796   |
| LMBR1       | 8.17106   | 5.37462   | 8.63584   | 6.35668   | 6.27268   | 6.44476   |
| ALK         | 0.0305031 | 0.0269689 | 0.127001  | 0.0286419 | 0.097138  | 0.0665288 |
| HSPA1B      | 109.298   | 99.9374   | 113.201   | 108.73    | 106.433   | 128.953   |
| PRND        | 0.122533  | 0.0866689 | 0.0371033 | 0.276136  | 0.124867  | 0.397059  |
| AHDC1       | 13.4567   | 14.0277   | 19.2281   | 19.4362   | 20.3693   | 16.7712   |
| JPH4        | 0.546021  | 0.824672  | 0.654689  | 0.36302   | 1.11989   | 0.878397  |
| LOC10028807 | 0         | 0.0361954 | 0.071943  | 0         | 0.0260741 | 0         |
| ALKBH4      | 4.82865   | 7.0137    | 6.13808   | 7.89155   | 6.8027    | 6.66415   |
| KHNYN       | 21.1956   | 24.7134   | 27.1361   | 24.3298   | 31.9766   | 24.8611   |
| SLC29A4     | 7.34396   | 8.36188   | 15.8604   | 7.83469   | 9.91471   | 7.56285   |
| LOC10028947 | 0.519913  | 0         | 0.918347  | 0.65092   | 0.331136  | 1.94393   |
| BEST2       | 0.707132  | 0.721387  | 0.86472   | 0.459683  | 2.07866   | 1.52534   |
| FAM136A     | 31.0597   | 32.3794   | 26.5391   | 29.0739   | 25.7364   | 25.4577   |
| ZDHHC23     | 5.67119   | 4.0296    | 4.84201   | 4.52274   | 5.36029   | 4.95412   |
| FAM125A     | 25.9352   | 38.6062   | 31.1273   | 37.5475   | 35.6194   | 34.3216   |
| SNORD121B   | 0         | 0         | 0         | 0         | 0         | 0         |
| GTF2H1      | 19.2137   | 16.0091   | 17.4899   | 16.6147   | 15.9998   | 13.2002   |

|             |           |          |           |           |           |           |
|-------------|-----------|----------|-----------|-----------|-----------|-----------|
| CCND3       | 43.2697   | 45.2307  | 33.4317   | 37.3022   | 41.3289   | 34.4415   |
| EGFL7       | 35.6814   | 79.4902  | 43.5369   | 49.9524   | 52.613    | 41.7437   |
| TMEM63C     | 11.1002   | 7.5336   | 7.70269   | 5.59565   | 3.37628   | 4.63363   |
| FERD3L      | 0.216888  | 0        | 0         | 0         | 0.276275  | 0.405467  |
| LOC10050584 | 0         | 0        | 0         | 0         | 0         | 0         |
| GYS1        | 25.7901   | 27.4036  | 25.3489   | 25.2781   | 24.2889   | 25.3612   |
| LOC10013109 | 1.90532   | 1.95632  | 2.18683   | 2.5657    | 2.49983   | 2.47781   |
| HMHA1       | 10.394    | 14.9522  | 10.4021   | 10.1661   | 16.0667   | 9.45752   |
| CPOX        | 14.1685   | 11.8073  | 12.6299   | 9.93458   | 17.4354   | 17.474    |
| LAMA1       | 0.908867  | 0.648035 | 0.932153  | 0.991059  | 0.510395  | 0.657717  |
| BTBD16      | 1.12985   | 2.14773  | 1.19743   | 2.12183   | 1.83501   | 1.61938   |
| LOC731779   | 0.4761    | 0.280625 | 0.840958  | 0.447051  | 0         | 0.395581  |
| NMT1        | 26.1737   | 25.6561  | 24.539    | 26.042    | 25.7287   | 25.7273   |
| PCDHB17     | 0.0434245 | 0.119292 | 0.122007  | 0.233849  | 0.133053  | 0.170855  |
| AMDHD1      | 0.720379  | 0.636914 | 0.618042  | 0.856804  | 1.31527   | 1.13724   |
| PCDHB13     | 0.957959  | 0.43181  | 1.28997   | 0.7325    | 0.755816  | 0.537386  |
| ZNF98       | 0.0902278 | 0.147729 | 0.106723  | 0.0423612 | 0.0897915 | 0.114795  |
| LOC10050720 | 0         | 0.158579 | 0.0452589 | 0.112278  | 0.0380786 | 0.0372566 |
| OXNAD1      | 3.1223    | 2.67359  | 3.0522    | 2.42392   | 2.74021   | 2.77298   |
| PYGL        | 32.6291   | 30.6865  | 29.0682   | 22.7085   | 19.9124   | 21.253    |
| APBA3       | 6.22009   | 10.2012  | 6.32612   | 8.51564   | 9.91915   | 9.64586   |
| FAM83A      | 14.9854   | 14.2765  | 13.7277   | 17.0711   | 23.1597   | 28.912    |
| SEC22A      | 5.9647    | 5.6048   | 7.3292    | 7.44062   | 8.24023   | 7.16455   |
| MASP1       | 3.84942   | 3.30309  | 7.52932   | 2.94061   | 8.26106   | 5.94099   |
| DEFB114     | 0         | 0        | 0         | 0         | 0         | 0         |
| RFESD       | 1.35083   | 1.25131  | 2.01017   | 2.00088   | 1.30512   | 1.57213   |
| GMEB1       | 3.43296   | 3.04523  | 3.69237   | 3.00581   | 2.76439   | 3.58786   |
| KLHL25      | 4.76232   | 5.01031  | 6.00179   | 5.32112   | 6.7102    | 6.63167   |
| C9orf30-TME | 0.53426   | 0.589754 | 0.494246  | 0.231608  | 0.702923  | 0.833465  |
| LOC10013273 | 0.840587  | 0.603845 | 0.477247  | 0.493311  | 0.936906  | 0.556557  |
| MIR26A2     | 0         | 0        | 0         | 0         | 0         | 0         |
| MIR1200     | 0         | 0        | 0         | 0         | 0         | 0         |
| HAMP        | 0.434308  | 0.383988 | 0.657548  | 0.407809  | 0.276613  | 0.270643  |
| PPP1R3B     | 10.0702   | 8.14584  | 10.294    | 9.15321   | 12.3629   | 10.2212   |
| CCDC76      | 11.6826   | 10.859   | 11.3402   | 9.07774   | 11.9347   | 10.3861   |
| PPP1R1B     | 102.612   | 57.4332  | 89.5785   | 91.368    | 51.5327   | 42.7693   |
| CMBL        | 3.32279   | 2.85269  | 4.48395   | 3.14266   | 2.44859   | 2.28069   |
| SNAR-A10    | 0         | 0        | 0         | 0         | 0         | 0         |
| SYDE2       | 0.738812  | 0.326605 | 0.68357   | 0.501029  | 0.588192  | 0.473185  |
| LOC653562   | 0.244255  | 0.38486  | 0.454793  | 0.68176   | 0.275093  | 0.310774  |
| FAM57B      | 0.0541395 | 0.299166 | 0.122952  | 0.152508  | 0.172409  | 0.101212  |
| WFIKKN1     | 1.33084   | 3.85941  | 1.37014   | 1.69951   | 8.03546   | 6.03749   |
| MIR483      | 0         | 0        | 0         | 0         | 0         | 0         |

|             |           |           |            |           |           |           |
|-------------|-----------|-----------|------------|-----------|-----------|-----------|
| MIR4509-2   | 0         | 0         | 0          | 0         | 0         | 0         |
| C15orf53    | 0         | 0.178482  | 0.0382045  | 0.0947772 | 0.0642866 | 0.0314495 |
| LOC440292   | 0.25306   | 0.4972    | 0.170283   | 0.330027  | 0.0716335 | 0.424028  |
| MIR517C     | 0         | 0         | 0          | 0         | 0         | 0         |
| PHGR1       | 1.25001   | 0         | 0          | 0.391246  | 0         | 0         |
| ST7L        | 3.52579   | 4.73626   | 5.94354    | 6.47055   | 7.24609   | 6.80519   |
| SNORD15B    | 0         | 44.0216   | 18.8458    | 0         | 15.8559   | 15.5137   |
| RHCG        | 17.5186   | 13.2311   | 7.05668    | 42.2058   | 13.2505   | 18.6288   |
| TTY13       | 0         | 0         | 0          | 0         | 0         | 0         |
| WWC1        | 18.748    | 9.01789   | 13.5193    | 13.0095   | 10.4938   | 11.5615   |
| MIR548AJ1   | 0         | 0         | 0          | 0         | 0         | 0         |
| LOC10028819 | 1.77313   | 1.09687   | 1.34371    | 0.976417  | 1.02444   | 1.27491   |
| COMMD4      | 41.823    | 67.6384   | 47.5231    | 66.2242   | 57.8243   | 58.8425   |
| SLC24A2     | 0         | 0.0409073 | 0.00656613 | 0         | 0.0294684 | 0.0337882 |
| TUBA1B      | 94.5054   | 99.2501   | 94.6644    | 98.6105   | 104.895   | 96.5319   |
| NAPG        | 13.4182   | 13.2853   | 13.3107    | 12.847    | 15.9002   | 14.4235   |
| LOC286442   | 0         | 0         | 0          | 0         | 0         | 0.073796  |
| LOC642781   | 0         | 0         | 0          | 0         | 0.0437256 | 0         |
| GGA3        | 18.2922   | 23.3764   | 19.0003    | 19.3834   | 25.2695   | 20.5323   |
| PPM1E       | 0.0730937 | 0.0837536 | 0.132848   | 0.0455236 | 0.0731059 | 0.0287654 |
| AGPAT3      | 82.8722   | 65.9543   | 60.3914    | 61.604    | 60.0221   | 72.317    |
| LOC10028691 | 0.590281  | 0.0792208 | 0.770581   | 0.196316  | 0.993274  | 0.540497  |
| ZNF773      | 3.88279   | 2.99521   | 3.37252    | 3.13759   | 3.6355    | 3.73054   |
| ADPRH       | 3.83486   | 3.89659   | 2.70803    | 2.4185    | 2.51535   | 1.97955   |
| TMEM184B    | 18.9453   | 22.3421   | 18.6157    | 19.8479   | 19.0566   | 19.3057   |
| PSMB3       | 111.528   | 128.854   | 87.2763    | 93.6406   | 85.3049   | 95.2956   |
| LOC10050621 | 0.475283  | 0.140072  | 0.119931   | 0.595044  | 0.403614  | 0.197451  |
| LOC10050719 | 3.33515   | 2.77527   | 3.08165    | 2.07242   | 4.99806   | 4.12608   |
| PTPLB       | 32.0734   | 10.8227   | 32.1814    | 14.1672   | 15.9554   | 13.6005   |
| SLC5A3      | 6.34191   | 2.98982   | 3.69148    | 3.84369   | 3.92225   | 3.15792   |
| PAPLN       | 7.67776   | 9.3272    | 8.54522    | 9.11693   | 16.0085   | 14.7159   |
| LOC10065273 | 3.81576   | 2.30661   | 4.46766    | 2.99666   | 4.26221   | 4.89959   |
| TATDN2      | 15.398    | 15.3526   | 15.8991    | 16.3789   | 15.318    | 12.7938   |
| UBE2S       | 11.3094   | 17.3236   | 10.1586    | 16.0911   | 10.5532   | 12.5831   |
| PIEZO1      | 18.5183   | 22.5085   | 25.9099    | 23.1706   | 27.8353   | 26.7134   |
| LOC401321   | 2.18993   | 2.21284   | 1.98935    | 2.0759    | 2.13425   | 1.46868   |
| MIR449A     | 0         | 0         | 0          | 0         | 0         | 0         |
| RPL13AP20   | 137.134   | 207.997   | 143.119    | 229.912   | 153.837   | 147.16    |
| FAM90A15    | 0.0156343 | 0.0115191 | 0.0805455  | 0.0122336 | 0.0569007 | 0.05818   |
| C4orf29     | 4.88011   | 3.65721   | 4.53867    | 3.40403   | 4.38104   | 2.95419   |
| RNASE11     | 0         | 0         | 0          | 0         | 0         | 0         |
| FXN         | 3.5186    | 2.56706   | 2.7273     | 2.09524   | 2.41336   | 2.56318   |
| MIR1263     | 0         | 0         | 0          | 0         | 0         | 0         |

|            |          |           |          |            |           |            |
|------------|----------|-----------|----------|------------|-----------|------------|
| STAR       | 1.82291  | 3.51943   | 3.12602  | 2.13087    | 3.10396   | 1.41416    |
| NRN1       | 17.9803  | 19.1296   | 21.9523  | 19.9401    | 19.4903   | 16.8225    |
| ZNF439     | 4.54388  | 5.17023   | 10.3491  | 7.71704    | 9.71385   | 9.8735     |
| HCG9       | 0        | 0.186074  | 0.159318 | 0.197617   | 0         | 0          |
| LOC285943  | 1.17561  | 2.20999   | 0.849624 | 1.00401    | 2.57125   | 2.77772    |
| RAB34      | 31.612   | 48.0908   | 35.6622  | 48.2611    | 43.4835   | 34.0238    |
| TSC1       | 10.662   | 11.4539   | 11.3672  | 10.8303    | 15.1227   | 13.2597    |
| LOC1002885 | 0        | 0         | 0        | 0.00591269 | 0         | 0.00392396 |
| MIR4777    | 0        | 0         | 0        | 0          | 0         | 0          |
| HERC2P7    | 6.19375  | 8.00356   | 12.8038  | 15.5462    | 18.3966   | 14.214     |
| MIR653     | 0        | 0         | 0        | 0          | 0         | 0          |
| ID4        | 46.7144  | 28.3903   | 71.0869  | 60.9946    | 59.2293   | 70.9938    |
| SLC6A20    | 0.147579 | 0.189212  | 0.125072 | 0.61136    | 0.428377  | 0.439486   |
| TREML4     | 0        | 0.131914  | 0        | 0.046699   | 0         | 0          |
| HOXA3      | 1.81186  | 2.24259   | 1.32539  | 1.67327    | 1.536     | 1.90038    |
| LOC1005058 | 0        | 0         | 0        | 0          | 0         | 0          |
| FAM206A    | 16.9068  | 16.2457   | 15.5558  | 15.0585    | 17.035    | 16.5995    |
| C20orf177  | 4.8302   | 4.1799    | 3.96807  | 3.29566    | 4.80902   | 4.13948    |
| GCNT7      | 0.149685 | 0.0512082 | 0.317274 | 0.093701   | 0.262171  | 0.0792232  |
| LOC1001305 | 1.60858  | 1.16098   | 2.09854  | 1.50701    | 1.02219   | 1.45625    |
| SNORD32A   | 0        | 0         | 0        | 0          | 0         | 0          |
| PRAMEF23   | 0        | 0         | 0        | 0          | 0         | 0          |
| PRM1       | 0        | 0         | 0        | 0          | 0         | 0          |
| SELENBP1   | 63.3987  | 79.9925   | 75.3174  | 72.6689    | 58.9123   | 77.7287    |
| SOAT1      | 144.553  | 114.508   | 117.032  | 91.2156    | 68.5276   | 98.1332    |
| INTS4L2    | 0.92946  | 0.693381  | 0.899441 | 1.07676    | 1.11796   | 0.862649   |
| ACAT2      | 185.317  | 149.562   | 133.119  | 125.553    | 98.3688   | 126.886    |
| TK1        | 13.5698  | 24.3497   | 9.10853  | 19.709     | 17.4982   | 17.8703    |
| SERAC1     | 7.76679  | 4.43307   | 5.93538  | 7.5006     | 5.00933   | 4.8093     |
| LOC1005061 | 6.06832  | 7.56627   | 8.74326  | 13.3858    | 12.3475   | 11.3566    |
| CDCA7      | 11.3619  | 16.7508   | 12.3734  | 14.446     | 16.5277   | 12.2241    |
| TMTC2      | 4.40899  | 3.10441   | 4.03234  | 2.47275    | 4.52348   | 3.58045    |
| MIR4463    | 0        | 0         | 0        | 0          | 0         | 0          |
| PLEK       | 6.47273  | 5.44437   | 5.11178  | 2.49682    | 8.53473   | 3.27043    |
| CPSF3L     | 45.404   | 68.05     | 47.3386  | 64.6286    | 56.5073   | 58.7841    |
| RAB15      | 18.9121  | 19.3664   | 12.3813  | 12.2479    | 15.6532   | 12.4731    |
| LOC643750  | 0        | 0         | 0        | 0          | 0         | 0          |
| CBLN4      | 0        | 0         | 0        | 0.151122   | 0.0256263 | 0.0501462  |
| LOC388780  | 2.01952  | 2.14264   | 0.305757 | 1.8963     | 0         | 0.755087   |
| CLTA       | 121.36   | 123.648   | 96.7244  | 128.652    | 109.917   | 114.907    |
| AP2A2      | 14.3818  | 17.8639   | 17.1052  | 14.3879    | 18.7206   | 15.6767    |
| ISPD       | 0.948051 | 0.696153  | 0.684421 | 0.605021   | 0.808947  | 0.909897   |
| WNT7A      | 0.676953 | 0.924984  | 0.838566 | 1.04015    | 0.587939  | 0.805347   |

|             |           |           |          |          |           |           |
|-------------|-----------|-----------|----------|----------|-----------|-----------|
| MIR500A     | 0         | 0         | 0        | 0        | 0         | 0         |
| LOC10050700 | 2.5044    | 4.20704   | 3.41252  | 4.23286  | 3.98766   | 2.49702   |
| KIF25       | 0.0809839 | 0.515528  | 0.4414   | 0.356725 | 0.326653  | 0.362509  |
| RHBDL1      | 1.23545   | 4.30854   | 2.33811  | 6.57372  | 4.7649    | 3.55      |
| DLL1        | 12.0735   | 16.2623   | 19.1369  | 19.3425  | 21.1703   | 17.2951   |
| LMBRD2      | 2.41195   | 1.40367   | 2.98147  | 1.00338  | 1.73064   | 1.59815   |
| MIR3064     | 0         | 0         | 0        | 0        | 0         | 0         |
| HSPB8       | 33.505    | 22.7307   | 28.06    | 47.8454  | 35.3138   | 34.2941   |
| SRRD        | 12.3462   | 10.9134   | 7.78515  | 10.0623  | 10.0183   | 11.2633   |
| PBLD        | 2.35049   | 2.26442   | 2.23817  | 2.46919  | 2.51563   | 1.55912   |
| KCNAB2      | 7.24471   | 11.5854   | 6.96907  | 9.77342  | 12.9593   | 8.33568   |
| LINC00226   | 0         | 0         | 0        | 0        | 0         | 0         |
| LOC10050609 | 0         | 0         | 0        | 0        | 0         | 0         |
| SNORD61     | 0         | 0         | 0        | 0        | 0         | 0         |
| HOXA7       | 7.02746   | 7.27871   | 5.55093  | 5.68138  | 4.25903   | 4.01643   |
| C4orf6      | 0.420426  | 0         | 0        | 0.263182 | 0.0892572 | 0.174661  |
| COL6A2      | 205.606   | 268.847   | 321.514  | 212.417  | 308.045   | 241.175   |
| SLC9A2      | 3.03627   | 1.77925   | 2.51228  | 3.38143  | 1.21426   | 1.65006   |
| CCND1       | 70.028    | 72.0465   | 92.0502  | 99.377   | 83.5479   | 91.1016   |
| AQP1        | 179.642   | 193.94    | 183.328  | 164.916  | 171.431   | 134.218   |
| FAM190B     | 11.2049   | 8.01497   | 11.1317  | 8.77928  | 8.55428   | 9.14032   |
| SPRED2      | 9.88206   | 7.18036   | 5.96615  | 7.50702  | 6.38503   | 6.14547   |
| PHF16       | 4.19041   | 3.3764    | 2.62527  | 2.82945  | 2.62946   | 2.37976   |
| LOC10050724 | 0.376269  | 0.498808  | 0.740278 | 0.565225 | 0.479262  | 0.515636  |
| UBE2D2      | 35.6586   | 37.5993   | 32.7371  | 35.3639  | 32.3727   | 30.6823   |
| MLXIPL      | 14.6227   | 25.1409   | 34.3411  | 22.7407  | 15.233    | 9.40431   |
| NCAN        | 0         | 0.0395321 | 0        | 0        | 0.0189852 | 0.0185754 |
| GALC        | 9.2294    | 6.90229   | 7.56825  | 5.70475  | 8.06602   | 6.50186   |
| MIR4461     | 0         | 0         | 0        | 0        | 0         | 0         |
| ZNF804A     | 0.0619257 | 0.0365006 | 0.015626 | 0        | 0.0920287 | 0.0257263 |
| RPAP2       | 3.78993   | 3.06924   | 3.97802  | 4.01765  | 3.20961   | 3.21512   |
| JAM2        | 10.9227   | 10.8712   | 10.2058  | 8.84975  | 8.62633   | 6.30092   |
| C20orf30    | 51.4935   | 47.4981   | 56.0516  | 45.0023  | 41.8708   | 35.6484   |
| NPC1        | 15.2943   | 10.1714   | 12.5605  | 10.5128  | 12.0917   | 18.3672   |
| SPAG8       | 1.25908   | 1.37434   | 1.79453  | 0.871665 | 2.45469   | 1.92305   |
| DNM2        | 51.4301   | 54.7354   | 53.8054  | 54.514   | 66.9746   | 54.6913   |
| FLJ44881    | 0         | 0         | 0        | 0        | 0         | 0         |
| SPTLC3      | 23.232    | 14.2478   | 18.9337  | 14.177   | 16.2536   | 24.2976   |
| CENPBD1     | 4.81586   | 4.19422   | 4.49939  | 4.42894  | 4.45948   | 3.88165   |
| FLJ39051    | 1.02824   | 1.21214   | 1.16757  | 1.28733  | 1.20063   | 1.3883    |
| PRC1        | 7.31757   | 10.6316   | 7.62265  | 8.88168  | 9.52571   | 8.46239   |
| MGAT1       | 81.001    | 90.7676   | 77.5451  | 84.8413  | 79.0715   | 81.4553   |
| GOS2        | 239.43    | 280.036   | 379.206  | 236.166  | 201.18    | 56.2392   |

|             |           |           |           |           |           |           |
|-------------|-----------|-----------|-----------|-----------|-----------|-----------|
| MGC70870    | 0         | 0         | 0         | 0         | 0         | 0         |
| SLC35E2     | 11.3913   | 13.8175   | 15.7762   | 17.7763   | 21.9665   | 19.6154   |
| HS2ST1      | 6.80529   | 5.87915   | 7.02067   | 5.90187   | 5.85887   | 5.30725   |
| SEMA3F      | 27.1124   | 33.4524   | 36.3088   | 49.4989   | 41.4967   | 46.4243   |
| FNIP2       | 3.98877   | 2.39985   | 5.13694   | 2.89063   | 3.39432   | 2.8363    |
| LOC10050561 | 0         | 0         | 0         | 0         | 0         | 0         |
| C3orf51     | 0         | 0         | 0         | 0         | 0         | 0         |
| KCNE1L      | 0.516569  | 0.717699  | 0.335182  | 0.277172  | 0.141002  | 0.275918  |
| SLMO2-ATP5  | 6.58E-18  | 5.01E-14  | 3.26E-26  | 3.38E-15  | 1.14E-10  | 1.18E-11  |
| DYNC2LI1    | 17.6275   | 18.0173   | 18.1561   | 15.5043   | 19.6366   | 17.0671   |
| MIR4688     | 0         | 0         | 0         | 0         | 0         | 0         |
| SPHKAP      | 0.0628068 | 0         | 0.1593    | 0.145619  | 0.142867  | 0.0880632 |
| MIR3661     | 0         | 0         | 0         | 0         | 0         | 0         |
| S100A8      | 1794.92   | 1468.99   | 183.659   | 471.069   | 1064.18   | 691.988   |
| UBR7        | 14.8885   | 13.4073   | 13.1712   | 12.8935   | 14.3813   | 11.8986   |
| O3FAR1      | 1.82397   | 0.96318   | 2.22538   | 1.48273   | 1.35234   | 0.797525  |
| ZNF850      | 0.504024  | 0.434757  | 0.623507  | 0.646418  | 0.665544  | 0.482621  |
| MIR4484     | 0         | 0         | 0         | 0         | 0         | 0         |
| LOC283089   | 0         | 0.0357296 | 0.0305999 | 0         | 0         | 0.0503557 |
| USP1        | 19.784    | 17.0823   | 16.9406   | 13.4033   | 17.3191   | 14.475    |
| C20orf201   | 0         | 0.124853  | 0.2138    | 0         | 0.0899402 | 0         |
| ZNF257      | 0.390603  | 0.345346  | 0.887065  | 0.681144  | 0.764101  | 0.64329   |
| LYZL2       | 0.164941  | 0         | 0         | 0         | 0         | 0         |
| TNFSF15     | 0.86611   | 0.633824  | 0.550482  | 0.36188   | 1.04596   | 0.604602  |
| ENOX2       | 4.01887   | 3.59542   | 3.38445   | 2.76903   | 2.90808   | 3.51215   |
| C8orf76     | 14.5266   | 13.9961   | 11.3577   | 13.2076   | 11.9746   | 10.7802   |
| CHAT        | 0         | 0         | 0         | 0         | 0         | 0.0302679 |
| SH3PXD2A    | 18.552    | 19.4272   | 21.8765   | 19.8784   | 20.6752   | 19.9891   |
| LOC339760   | 0         | 0         | 0         | 0         | 0         | 0         |
| TMEM185B    | 10.0285   | 9.6648    | 9.89837   | 8.43252   | 9.25217   | 7.64586   |
| ACTA2       | 329.903   | 311.468   | 156.296   | 217.095   | 155.103   | 149.142   |
| LOC10065291 | 0.597657  | 0.229123  | 0.69241   | 0.596451  | 0.863604  | 0.665033  |
| LOC646324   | 0.159309  | 0.0704256 | 0.0401993 | 0.0249315 | 0.152197  | 0.0992748 |
| ZFYVE27     | 19.4572   | 27.3794   | 19.3495   | 25.3964   | 31.3097   | 27.0466   |
| SNORA60     | 0         | 0         | 31.2835   | 0         | 52.6406   | 154.513   |
| KRTAP25-1   | 0         | 0         | 0         | 0         | 0         | 0         |
| SLC2A2      | 0         | 0         | 0         | 0         | 0         | 0         |
| LOC10013031 | 0.66332   | 2.05263   | 0.878739  | 1.71283   | 2.00674   | 1.44673   |
| KRTAP6-3    | 0         | 0         | 0         | 0         | 0         | 0         |
| MIF         | 329.736   | 516.368   | 352.473   | 670.064   | 497.602   | 618.419   |
| SLC25A5     | 375.399   | 336.64    | 304.241   | 411.799   | 298.488   | 311.922   |
| EIF4A2      | 212.943   | 203.065   | 203.423   | 184.755   | 217.017   | 191.351   |
| SNAR-A12    | 0         | 0         | 0         | 0         | 0         | 0         |

|            |           |           |           |           |           |           |
|------------|-----------|-----------|-----------|-----------|-----------|-----------|
| C8orf38    | 6.20488   | 6.93493   | 5.93783   | 6.59576   | 6.18872   | 5.58094   |
| TRIM25     | 27.7031   | 26.0131   | 25.1909   | 19.3215   | 29.9739   | 22.38     |
| MBL1P      | 1.30214   | 1.33284   | 1.32842   | 0.573135  | 1.02048   | 1.00095   |
| ENOPH1     | 28.1021   | 19.3147   | 22.0111   | 20.0314   | 19.9887   | 19.749    |
| GBP1P1     | 3.80226   | 2.96164   | 0.548174  | 0.424969  | 1.09616   | 0.282031  |
| LOC151171  | 0         | 0.0369932 | 0.0633478 | 0.0785761 | 0.133244  | 0         |
| IGFL3      | 15.2606   | 17.6866   | 12.6452   | 13.7486   | 18.914    | 20.3475   |
| CIAPIN1    | 18.4903   | 18.5398   | 18.1404   | 20.9811   | 16.4734   | 17.841    |
| CABIN1     | 10.9313   | 15.0029   | 10.8591   | 11.8518   | 15.1335   | 12.4605   |
| LOC728175  | 0.166422  | 0.098093  | 0.125982  | 0.104178  | 0.0353316 | 0.034569  |
| DIDO1      | 29.1598   | 32.715    | 31.0252   | 31.2303   | 36.2469   | 31.7262   |
| ABCF1      | 25.632    | 27.9169   | 22.7226   | 24.3999   | 24.4499   | 25.187    |
| LOC1002890 | 0         | 0         | 0         | 0         | 0         | 0         |
| MIR217     | 0         | 0         | 0         | 0         | 0         | 0         |
| GANC       | 4.41186   | 3.6394    | 5.43317   | 3.68678   | 4.98798   | 4.03842   |
| GALNTL6    | 0.0700286 | 0.12383   | 0.053012  | 0.131511  | 0.0446016 | 0.0436388 |
| MKRN7P     | 0.195166  | 0.0575179 | 0.295484  | 0.183258  | 0.0828683 | 0.243239  |
| SPAG16     | 19.2251   | 21.5107   | 23.5448   | 21.04     | 25.8826   | 22.214    |
| OBSCN      | 3.35707   | 4.55502   | 2.67579   | 4.57464   | 6.38199   | 6.41771   |
| AKAP10     | 8.5707    | 6.43045   | 8.55597   | 6.5408    | 8.06847   | 8.21349   |
| ZFAND2A    | 19.895    | 24.0079   | 21.5734   | 21.0794   | 18.75     | 16.7537   |
| TGIF2LY    | 0         | 0         | 0         | 0         | 0         | 0         |
| TMEM134    | 99.5162   | 158.533   | 109.941   | 162.809   | 110.489   | 125.527   |
| IFNA17     | 0         | 0         | 0         | 0         | 0         | 0         |
| LOC1006528 | 1.79733   | 1.26806   | 1.00004   | 3.19769   | 1.62953   | 0.823217  |
| AKIP1      | 9.91177   | 11.2462   | 7.73027   | 9.55915   | 8.54458   | 9.51611   |
| TYMS       | 11.3367   | 16.0519   | 6.84813   | 8.70233   | 9.6665    | 8.65557   |
| LOC729454  | 0         | 0         | 0.181223  | 0         | 0         | 0         |
| STK11      | 20.2153   | 32.1662   | 24.2476   | 32.3786   | 29.4684   | 26.5032   |
| MS4A4E     | 0.249762  | 0.220824  | 0         | 0.234522  | 0.159075  | 0.155641  |
| PCDH15     | 0.113634  | 0.0565094 | 0.193499  | 0         | 0.191553  | 0.177076  |
| PCNX       | 5.6728    | 4.90636   | 6.86765   | 4.78104   | 6.81897   | 4.77526   |
| NUDT7      | 12.2548   | 14.216    | 11.6283   | 7.85365   | 10.7507   | 10.6956   |
| LOC441402  | 0.664926  | 0.396932  | 1.14714   | 0.656655  | 1.54131   | 0.723867  |
| PTMA       | 681.653   | 811.556   | 662.464   | 736.293   | 669.852   | 596.244   |
| SPINK8     | 8.59483   | 1.44743   | 1.54913   | 0.768611  | 0         | 0         |
| C17orf62   | 29.4147   | 46.6006   | 33.6674   | 36.1036   | 47.9287   | 34.8052   |
| CSF3R      | 0.954206  | 1.66052   | 1.37802   | 0.95018   | 2.76195   | 1.38272   |
| SLC7A6OS   | 9.4076    | 7.25042   | 9.58135   | 8.85479   | 11.1106   | 8.04598   |
| CHAD       | 6.54475   | 3.69231   | 5.04878   | 6.67217   | 7.34431   | 9.47745   |
| LOC1001313 | 0.324275  | 0.328578  | 0.176265  | 0.248314  | 0.526228  | 0.322461  |
| C12orf26   | 4.77448   | 4.07382   | 4.88098   | 4.08372   | 4.58676   | 3.52537   |
| TAOK1      | 11.536    | 7.34249   | 11.1426   | 7.97248   | 9.82739   | 8.45243   |

|             |           |           |           |           |           |            |
|-------------|-----------|-----------|-----------|-----------|-----------|------------|
| EIF3D       | 116.515   | 130.956   | 118.409   | 135.783   | 111.257   | 113.696    |
| GNAS        | 504.322   | 470.248   | 416.856   | 473.674   | 399.9     | 373.345    |
| FLJ32955    | 0.0570515 | 0         | 0         | 0         | 0         | 0          |
| SLC2A4      | 13.7107   | 12.2612   | 14.7354   | 10.9548   | 10.0343   | 6.23159    |
| GNB2L1      | 1285.42   | 1858.93   | 1419.32   | 2089.62   | 1548.33   | 1462.5     |
| GYLTL1B     | 21.0607   | 28.695    | 21.0461   | 36.1056   | 26.3447   | 27.8888    |
| TMX2        | 81.8711   | 69.66     | 58.6674   | 67.4383   | 54.7856   | 54.9811    |
| GABRR2      | 0         | 0         | 0.246584  | 0.0611723 | 0.124478  | 0.162388   |
| SCAMP3      | 46.9985   | 58.326    | 43.693    | 55.1391   | 47.6541   | 46.242     |
| FLVCR1      | 2.94998   | 2.76496   | 2.8555    | 3.19381   | 3.67558   | 2.7022     |
| NACAP1      | 82.6819   | 89.3595   | 81.897    | 104.068   | 87.1126   | 84.0942    |
| MCM9        | 7.3208    | 5.81289   | 5.04863   | 4.95845   | 6.44205   | 6.19488    |
| PI4K2B      | 11.8807   | 10.3837   | 11.9436   | 9.69736   | 9.25035   | 8.76201    |
| CYGB        | 13.6562   | 22.8794   | 18.0341   | 17.0487   | 15.454    | 9.97879    |
| CAP2        | 7.64489   | 5.88886   | 8.3952    | 6.53145   | 3.25998   | 3.70077    |
| HAVCR2      | 4.47048   | 2.71251   | 4.71131   | 1.89309   | 3.74054   | 1.66603    |
| SMC1A       | 10.8478   | 7.88381   | 10.7606   | 9.69395   | 11.0433   | 10.1217    |
| BHLHE40     | 68.9033   | 66.821    | 67.1197   | 85.7125   | 63.8686   | 51.7453    |
| LOC1005072! | 0.719542  | 0.381704  | 0.708107  | 0.945895  | 1.05405   | 0.851938   |
| LOC440981   | 0         | 0         | 0.142427  | 0.176665  | 0         | 0.117244   |
| TBC1D10A    | 22.7791   | 29.2799   | 23.8279   | 33.2504   | 33.2219   | 32.6483    |
| C9orf47     | 0.617923  | 0.265708  | 0.091699  | 0.131367  | 0.193049  | 0.281578   |
| FSHB        | 0         | 0         | 0         | 0         | 0         | 0          |
| GPSM2       | 9.25486   | 14.1607   | 15.895    | 18.4579   | 10.4657   | 12.5964    |
| TRIM47      | 25.2268   | 40.9038   | 19.8811   | 22.334    | 29.4946   | 21.8119    |
| LOC1002874! | 0         | 0         | 0.158256  | 0.403825  | 0         | 0          |
| FBXL13      | 0.183272  | 0.096512  | 0.130413  | 0.170947  | 0.137703  | 0.203113   |
| FOLH1B      | 0.262236  | 0.464992  | 0.31904   | 0.246235  | 0.202093  | 0.0980485  |
| PGCP        | 16.1896   | 15.0417   | 23.0987   | 15.2018   | 20.0283   | 14.1583    |
| USP17L6P    | 0.0234814 | 0.0166086 | 0.0177756 | 0         | 0         | 0.00650339 |
| DEFB119     | 0         | 0         | 0         | 0         | 0         | 0          |
| C9orf91     | 11.074    | 7.22993   | 8.16381   | 6.6951    | 6.74089   | 6.24826    |
| HIST1H1E    | 0.32352   | 0.286036  | 0.244907  | 1.67079   | 0         | 0.302406   |
| SI          | 0         | 0         | 0         | 0         | 0         | 0          |
| FBXO32      | 18.5336   | 12.68     | 12.6233   | 14.1813   | 15.1235   | 15.6074    |
| MIR3146     | 0         | 0         | 0         | 0         | 0         | 0          |
| DVL1        | 30.2435   | 45.5292   | 35.6566   | 51.7755   | 43.5859   | 41.5768    |
| OR4Q3       | 0         | 0         | 0         | 0         | 0         | 0          |
| TAF2        | 7.46994   | 6.55351   | 8.08241   | 5.69787   | 7.64403   | 6.29435    |
| HOXA13      | 0.120392  | 0.141924  | 0.0911372 | 0.075364  | 0.0255594 | 0.0500154  |
| EHMT1       | 14.0112   | 15.2855   | 14.9563   | 14.2599   | 16.3916   | 14.5363    |
| LOC148145   | 0.14287   | 0.0757901 | 0.0865229 | 0         | 0.0545969 | 0.124643   |
| SNORD116-1! | 0         | 0         | 0         | 0         | 0         | 0          |



|             |           |           |           |           |            |           |
|-------------|-----------|-----------|-----------|-----------|------------|-----------|
| ZNF343      | 6.66953   | 7.01884   | 6.47973   | 6.54149   | 7.79062    | 6.47824   |
| MIR4747     | 0         | 0         | 0         | 0         | 0          | 0         |
| TMIE        | 0.728606  | 0.891952  | 0.551559  | 0.894658  | 0.785321   | 0.349259  |
| DCTD        | 41.741    | 45.106    | 32.6165   | 34.5838   | 30.9599    | 25.7622   |
| PHF15       | 8.58036   | 6.9203    | 7.35622   | 8.90272   | 8.07034    | 6.63533   |
| ORM1        | 0.0738861 | 0.130651  | 0         | 0.277512  | 0.211763   | 0.207192  |
| FAM182A     | 0.866918  | 1.41636   | 0.770461  | 0.743237  | 0.960252   | 0.739923  |
| MOSC2       | 15.8152   | 13.1837   | 10.3644   | 9.80109   | 8.41793    | 6.88464   |
| SVIL        | 23.0745   | 24.3992   | 24.056    | 18.1208   | 26.3689    | 22.4519   |
| CHD7        | 3.25553   | 2.97883   | 3.84111   | 2.53089   | 3.43337    | 3.66786   |
| LMBR1L      | 17.8165   | 26.5005   | 18.4055   | 22.9385   | 29.3065    | 24.1033   |
| AMZ2        | 40.3858   | 42.2961   | 41.3784   | 44.721    | 45.9473    | 46.3489   |
| SLC22A31    | 17.8337   | 26.5931   | 13.9107   | 17.4301   | 14.9302    | 23.9388   |
| OR2A42      | 0.65022   | 0.0567787 | 0.649992  | 0.271354  | 0.49082    | 0.400187  |
| GRM1        | 0.0555921 | 0.0655359 | 0.106527  | 0.0587258 | 0.00885137 | 0.0346426 |
| SSBP4       | 8.10812   | 16.6297   | 8.30769   | 14.0282   | 14.027     | 9.33767   |
| PI4KB       | 28.8572   | 35.6181   | 32.7937   | 34.8913   | 38.6422    | 30.8829   |
| AKAP5       | 1.633     | 1.01456   | 1.44779   | 0.704519  | 1.24621    | 1.32932   |
| PRAMEF7     | 0         | 0         | 0         | 0         | 0          | 0         |
| USO1        | 42.8926   | 31.9009   | 41.7854   | 30.583    | 35.1238    | 34.4919   |
| ADORA2A     | 3.2057    | 3.08978   | 2.07084   | 2.66323   | 3.14924    | 2.17945   |
| LOXL4       | 2.06407   | 2.06192   | 3.59174   | 1.76193   | 5.05359    | 3.4077    |
| RNPC3       | 14.6225   | 10.0058   | 17.5736   | 11.8505   | 22.978     | 13.2126   |
| MIR4540     | 0         | 0         | 0         | 0         | 0          | 0         |
| KCTD6       | 11.396    | 9.23256   | 8.6435    | 8.31716   | 10.6371    | 11.7091   |
| MIR146A     | 0         | 0         | 0         | 0         | 0          | 0         |
| COX16       | 28.1002   | 27.1944   | 25.0589   | 24.7434   | 24.6011    | 23.5839   |
| MIR4319     | 0         | 0         | 0         | 0         | 0          | 0         |
| OC90        | 0.353228  | 0.208201  | 0.22283   | 0.0552793 | 0          | 0.0733723 |
| CDCA4       | 9.35807   | 11.627    | 9.64305   | 13.5095   | 10.4762    | 11.2262   |
| RAB11A      | 54.4733   | 37.813    | 52.9274   | 43.8285   | 47.5681    | 45.1549   |
| CERS1       | 0.636566  | 0.918962  | 0.891299  | 0.898636  | 1.41115    | 1.26357   |
| MIR3144     | 0         | 0         | 0         | 0         | 0          | 0         |
| LOC10013160 | 21.3048   | 18.1077   | 11.5475   | 22.3602   | 16.098     | 13.2009   |
| ANP32A      | 25.8918   | 26.188    | 24.7173   | 28.0434   | 22.6746    | 25.6571   |
| FAM120C     | 3.90981   | 3.66617   | 3.37944   | 3.50958   | 4.29121    | 3.51341   |
| CD40        | 17.3174   | 19.5024   | 14.3554   | 13.9667   | 19.8781    | 11.7762   |
| HEPH        | 4.54442   | 3.45504   | 4.93587   | 5.66403   | 4.59954    | 6.3285    |
| DENND2A     | 2.13118   | 3.31628   | 2.94698   | 1.25405   | 2.53373    | 1.9124    |
| HOXB2       | 5.0474    | 7.75082   | 6.78715   | 6.42318   | 6.93703    | 4.51106   |
| FLJ41649    | 0         | 0         | 0.0480526 | 0.0298021 | 0.0202145  | 0.0395563 |
| GPD1        | 206.43    | 238.406   | 254.055   | 149.997   | 115.45     | 98.4228   |
| FBXO48      | 0.810607  | 0.879571  | 1.14359   | 0.761147  | 1.33763    | 1.01027   |

|             |           |           |           |           |           |           |
|-------------|-----------|-----------|-----------|-----------|-----------|-----------|
| C15orf59    | 6.4544    | 7.58469   | 7.48365   | 6.1373    | 8.06558   | 12.4227   |
| FONG        | 2.25233   | 2.87642   | 1.70503   | 2.58488   | 1.51422   | 1.24761   |
| MIR892A     | 0         | 0         | 0         | 0         | 0         | 0         |
| LYG2        | 0.563134  | 0.622359  | 0.426295  | 15.3344   | 0.806992  | 16.9319   |
| PDPR        | 6.17607   | 4.66395   | 8.6776    | 6.41143   | 9.09025   | 7.37229   |
| ZCCHC11     | 7.95672   | 8.09275   | 11.2295   | 9.31765   | 11.5221   | 10.1021   |
| C9orf173    | 0.481388  | 1.4286    | 0.910778  | 1.80225   | 1.01367   | 0.954508  |
| ATOH1       | 0         | 0         | 0.082138  | 0         | 0.0691067 | 0         |
| MIR4725     | 0         | 0         | 0         | 0         | 0         | 0         |
| SPATA19     | 0         | 0.125236  | 0         | 0.133005  | 0         | 0         |
| POLR2D      | 8.65744   | 9.27801   | 7.87771   | 7.59546   | 8.74438   | 7.52023   |
| COX6B1      | 321.468   | 366.794   | 265.679   | 360.701   | 271.584   | 298.497   |
| MTHFSD      | 8.06195   | 9.18873   | 8.74106   | 9.92824   | 10.7521   | 10.2396   |
| GAL3ST1     | 0.409747  | 0.362273  | 0.753296  | 0.604601  | 0.857474  | 0.838964  |
| SLITRK6     | 2.72198   | 1.56326   | 2.83546   | 1.74762   | 2.51897   | 2.33412   |
| TMEM161A    | 16.8695   | 24.8236   | 15.7173   | 22.1541   | 20.061    | 20.2161   |
| ART5        | 0.815582  | 0.551273  | 0.339594  | 0.920066  | 0.285717  | 0.296471  |
| HPN         | 7.89404   | 1.91138   | 0.972155  | 2.31258   | 1.15381   | 1.36917   |
| MAP1S       | 5.69685   | 8.12819   | 6.91379   | 7.30216   | 8.73494   | 8.00168   |
| PIGS        | 22.7359   | 24.5517   | 24.3585   | 25.5206   | 26.1757   | 22.6689   |
| SH3D21      | 32.4366   | 28.8582   | 48.615    | 42.9795   | 46.8639   | 45.0626   |
| LOC10050638 | 2.72091   | 2.68832   | 1.40661   | 2.20886   | 2.27205   | 2.11279   |
| FAM132B     | 0.09148   | 0.0404404 | 0.103876  | 0.0429491 | 0.203925  | 0         |
| OR2A14      | 0.128439  | 0         | 0         | 0         | 0         | 0.0800375 |
| LINC00471   | 0.25934   | 0.611445  | 0.392644  | 0.162344  | 0.385408  | 0.16161   |
| KRTAP10-12  | 2.10463   | 0.247809  | 0         | 36.736    | 0.714058  | 87.2869   |
| KCNQ1       | 1.48621   | 1.75986   | 1.8533    | 1.0537    | 2.8379    | 1.52717   |
| LOC389458   | 0.761413  | 0.224512  | 0.384067  | 0.953931  | 1.29178   | 0.789582  |
| ELP2        | 27.8792   | 28.2196   | 28.8579   | 27.8428   | 26.3016   | 24.6395   |
| OR8J1       | 0         | 0         | 0         | 0         | 0         | 0         |
| SLC26A7     | 2.19357   | 1.306     | 2.35581   | 3.51425   | 1.91378   | 2.24941   |
| LOC10012831 | 0.103367  | 0         | 0.234748  | 0.14559   | 0.164587  | 0         |
| BOLL        | 0.0360384 | 0.0318629 | 0.109127  | 0         | 0         | 0         |
| IGF2BP2     | 3.89803   | 4.36354   | 2.66598   | 3.82767   | 3.14367   | 4.14685   |
| ZNF233      | 0.581937  | 0.610151  | 0.522417  | 0.681891  | 0.738754  | 0.925713  |
| TTC24       | 0.154617  | 0.0455676 | 0.0780307 | 0.0483944 | 0.0328255 | 0.0642339 |
| MICALCL     | 3.16352   | 1.55708   | 4.3452    | 2.48051   | 4.29975   | 5.40602   |
| CDC42       | 135.9     | 117.895   | 121.019   | 116.354   | 109.734   | 103.833   |
| LOC10050760 | 8.14041   | 13.1488   | 11.0211   | 14.5525   | 17.3487   | 9.65775   |
| LOC284998   | 0.0830419 | 0.146841  | 0         | 0.15595   | 0.0793348 | 0.0517482 |
| FAM150A     | 0.192958  | 0         | 0         | 0         | 0         | 0.120243  |
| LOC10065271 | 0         | 0.581923  | 0         | 0         | 0         | 0.205076  |
| MIR106B     | 0         | 0         | 0         | 0         | 0         | 0         |

|             |           |           |           |           |           |           |
|-------------|-----------|-----------|-----------|-----------|-----------|-----------|
| KIN         | 5.34645   | 6.60814   | 5.82322   | 5.02023   | 6.01119   | 5.47347   |
| LOC115110   | 1.29549   | 2.74076   | 1.68119   | 0.825444  | 2.9468    | 1.61459   |
| LOC283856   | 0.037459  | 0.0331189 | 0.0567133 | 0         | 0.0477157 | 0.0233429 |
| C10orf11    | 2.70824   | 1.43667   | 2.6652    | 1.7801    | 2.41485   | 1.94081   |
| TSC22D4     | 27.5756   | 32.1814   | 29.5727   | 35.9626   | 36.5987   | 40.9179   |
| LOC10012837 | 0.100578  | 0         | 0.0507586 | 0         | 0         | 0.0417839 |
| C4orf34     | 19.873    | 12.2993   | 12.7631   | 8.84864   | 10.6157   | 10.3466   |
| DCD         | 12563.2   | 3502.65   | 2109.67   | 2998.12   | 1788.06   | 1760.3    |
| FZD10       | 3.39939   | 4.49499   | 4.85067   | 9.18046   | 4.75171   | 3.63683   |
| MIR548V     | 0         | 0         | 0         | 0         | 0         | 0         |
| TMEM146     | 0.0401481 | 0         | 0.0303923 | 0.0376984 | 0.0255705 | 0         |
| HRG         | 0.159334  | 0.140873  | 0.120616  | 0.0498706 | 0.135307  | 0.165483  |
| DOCK5       | 2.0994    | 1.64498   | 2.39816   | 2.07754   | 2.94647   | 2.16999   |
| SULF2       | 15.9282   | 13.9844   | 16.573    | 18.5917   | 23.1789   | 30.747    |
| ZBTB7A      | 17.7726   | 16.5241   | 19.2718   | 18.8613   | 18.7174   | 18.4902   |
| DGKE        | 2.79764   | 2.23587   | 2.47851   | 2.21397   | 2.69998   | 2.42093   |
| LHX4        | 1.20168   | 0.871204  | 1.42576   | 1.23493   | 1.50637   | 0.892847  |
| MIR1184-2   | 0         | 0         | 0         | 0         | 0         | 0         |
| JPH1        | 1.39801   | 1.05946   | 1.00791   | 0.791793  | 0.7632    | 1.0786    |
| STK32A      | 3.95497   | 1.26728   | 1.51353   | 3.77512   | 2.57052   | 2.68431   |
| APP         | 185.398   | 115.998   | 153.946   | 156.951   | 141.458   | 157.185   |
| SGK2        | 49.9177   | 38.5573   | 39.9109   | 30.931    | 26.6625   | 29.4325   |
| ARMC10      | 23.9159   | 25.9902   | 21.6009   | 22.1061   | 20.3113   | 20.9822   |
| CST7        | 9.54431   | 9.57881   | 2.92909   | 1.45329   | 12.5684   | 5.14388   |
| LOC283738   | 0.113065  | 0         | 0         | 0         | 0         | 0         |
| LOC10050616 | 2.24688   | 1.22977   | 0.728956  | 0.904192  | 0.954032  | 1.53351   |
| TBC1D16     | 7.15325   | 6.19046   | 8.46677   | 5.94834   | 5.79147   | 5.87422   |
| C3orf21     | 6.66376   | 6.34739   | 9.83818   | 8.84991   | 9.73115   | 10.37     |
| PPP1R12A    | 18.6977   | 14.1107   | 15.8861   | 11.35     | 17.6687   | 14.3686   |
| OR5R1       | 0         | 0         | 0         | 0         | 0         | 0         |
| MIR20B      | 0         | 0         | 0         | 0         | 0         | 0         |
| TAX1BP3     | 98.087    | 131.705   | 99.5327   | 125.331   | 116.38    | 102.15    |
| LOC389043   | 0         | 0         | 0         | 0         | 0         | 0         |
| NOL8        | 10.5056   | 9.99664   | 10.9289   | 9.1513    | 12.3414   | 10.2878   |
| LOC729970   | 5.38057   | 3.98274   | 3.5995    | 1.87991   | 1.833     | 2.65116   |
| POLA1       | 3.17871   | 2.60744   | 3.22177   | 3.36614   | 2.90183   | 3.05929   |
| MUC21       | 0.214511  | 0.189657  | 0.568351  | 0.755333  | 0.307402  | 0.484568  |
| C5orf64     | 0.167447  | 0         | 0.0507033 | 0         | 0.0639888 | 0.0208692 |
| CUL4A       | 37.2202   | 34.8836   | 34.3848   | 30.236    | 33.1822   | 27.2734   |
| CETN3       | 18.3965   | 13.2884   | 15.9287   | 6.4354    | 13.8611   | 16.2592   |
| MED12L      | 0.196615  | 0.105837  | 0.176678  | 0.112935  | 0.0801739 | 0.132054  |
| C8orf80     | 0.15202   | 0.0888637 | 0.171193  | 0.0707823 | 0.240055  | 0.109608  |
| KCNB2       | 0         | 0         | 0.103721  | 0         | 0         | 0.0512293 |

|             |          |           |           |           |           |           |
|-------------|----------|-----------|-----------|-----------|-----------|-----------|
| MAML3       | 2.55941  | 2.74862   | 3.81411   | 3.09528   | 3.87469   | 3.79941   |
| HOOK3       | 5.84469  | 3.88853   | 5.68158   | 4.76323   | 5.18921   | 4.70126   |
| DCAF8L1     | 0        | 0         | 0         | 0         | 0         | 0         |
| SHOX2       | 3.37268  | 3.7695    | 5.0214    | 2.86994   | 4.37676   | 3.4675    |
| CALHM2      | 12.5166  | 13.8388   | 12.2509   | 9.99773   | 17.3845   | 14.7516   |
| CHAF1A      | 6.16478  | 7.64114   | 5.9172    | 5.51166   | 7.36432   | 6.70907   |
| SERP2       | 1.94453  | 5.5875    | 2.45337   | 2.89098   | 1.75452   | 1.81762   |
| GABRA6      | 0        | 0         | 0         | 0         | 0         | 0         |
| LOC389834   | 0        | 0         | 0         | 0         | 0         | 0         |
| LOC10050621 | 0        | 0         | 0         | 0         | 0         | 0         |
| BMS1P4      | 2.53793  | 1.63633   | 3.45537   | 2.33317   | 2.49183   | 2.37215   |
| FUBP1       | 23.9559  | 17.3904   | 23.3597   | 15.9374   | 23.1029   | 18.935    |
| POLR3F      | 7.08935  | 8.32923   | 8.03201   | 8.04176   | 8.96989   | 7.91643   |
| ERP44       | 11.3972  | 9.74314   | 10.9726   | 7.86787   | 9.81349   | 9.09435   |
| KRT9        | 9.38144  | 8.0193    | 3.60139   | 2.46319   | 1.84067   | 2.38278   |
| EGFLAM-AS2  | 0        | 0         | 0         | 0         | 0         | 0         |
| IFT80       | 10.9865  | 10.0763   | 11.5773   | 9.58062   | 13.4021   | 11.974    |
| GOLGA6C     | 0.129068 | 0.182563  | 0.728206  | 0.914411  | 1.27081   | 0.777595  |
| LOC10050631 | 1.47387  | 1.15781   | 1.36308   | 2.38242   | 0.93831   | 1.22407   |
| PDC         | 0        | 0         | 0.381927  | 0         | 0         | 0.0589478 |
| NIPSNAP3A   | 29.1448  | 26.4582   | 28.8097   | 21.991    | 25.192    | 22.378    |
| TPD52L3     | 0        | 0.286656  | 0         | 0.342494  | 0.0887496 | 0         |
| LOC10063091 | 5.30012  | 6.6802    | 4.51658   | 4.66829   | 11.2412   | 5.89283   |
| MYO19       | 25.5601  | 32.6723   | 25.0069   | 30.7425   | 29.7062   | 27.74     |
| ABHD11      | 25.4557  | 27.3213   | 20.2583   | 25.9147   | 23.115    | 19.4764   |
| OR7G1       | 0        | 0         | 0         | 0         | 0         | 0         |
| GATA1       | 0.729209 | 0.64472   | 0.441612  | 0.616244  | 0.650212  | 0.7725    |
| ZNF746      | 6.1273   | 6.78106   | 5.65014   | 6.28341   | 6.9706    | 6.30543   |
| LINC00159   | 0        | 0         | 0         | 0         | 0         | 0         |
| CYB5R1      | 95.5219  | 119.257   | 88.318    | 101.906   | 108.95    | 96.8559   |
| FAM18A      | 1.06324  | 0.940046  | 0.715444  | 0.831968  | 1.12863   | 0.680968  |
| HYDIN2      | 0        | 0         | 0         | 0         | 0         | 0         |
| MIR517A     | 0        | 0         | 0         | 0         | 0         | 0         |
| RNASEK-C17C | 0.428837 | 0.561338  | 1.47475   | 0.79721   | 1.47855   | 1.73891   |
| LHPP        | 16.5048  | 17.6441   | 15.606    | 18.3261   | 14.8286   | 13.1007   |
| DNAAF2      | 4.24391  | 4.35302   | 3.88226   | 3.05838   | 3.79154   | 3.17964   |
| NAP1L6      | 0.252202 | 0.0445962 | 0         | 0.0947254 | 0         | 0.0314323 |
| ZZZ3        | 11.702   | 8.7178    | 9.57261   | 7.80338   | 9.25555   | 8.31395   |
| MDM1        | 5.49023  | 5.12825   | 6.59421   | 4.80183   | 6.10319   | 5.33107   |
| TNFSF8      | 0.313791 | 0.138717  | 0.277132  | 0.0491075 | 0.466329  | 0.0977706 |
| SLC22A12    | 0.12339  | 0.0299348 | 0.0256305 | 0.0289652 | 0.11501   | 0         |
| HNRNPC      | 84.0814  | 71.5478   | 68.4645   | 67.1077   | 68.5035   | 70.3151   |
| RANBP17     | 0.508954 | 0.468734  | 0.401334  | 0.497812  | 0.432207  | 0.370018  |

|             |           |           |           |           |           |           |
|-------------|-----------|-----------|-----------|-----------|-----------|-----------|
| ZNF780A     | 6.55828   | 6.30191   | 4.68467   | 3.40541   | 8.05719   | 7.00734   |
| HOXC5       | 1.64969   | 1.66216   | 1.04071   | 0.694778  | 1.89212   | 1.07461   |
| RN7SL2      | 250.437   | 140.363   | 182.627   | 151.35    | 164.359   | 135.972   |
| MTIF2       | 16.5215   | 15.0664   | 15.4227   | 15.7034   | 15.8388   | 14.7493   |
| PLEKHM3     | 2.7513    | 1.97324   | 2.90566   | 2.07758   | 2.72039   | 2.59572   |
| FLJ16126    | 0.206225  | 0.364662  | 0.93668   | 0         | 0.262692  | 0.257021  |
| OIT3        | 0         | 0.03801   | 0         | 0.0807359 | 0.164288  | 0.133951  |
| DISP2       | 0.306481  | 0.372586  | 0.029001  | 0.125904  | 0.1098    | 0.167113  |
| KIR2DL5A    | 0         | 0         | 0         | 0         | 0         | 0         |
| IRX5        | 12.7731   | 14.5576   | 14.4662   | 14.5237   | 15.4443   | 13.8361   |
| HADHA       | 93.9311   | 94.0613   | 90.1225   | 95.3221   | 80.4403   | 82.6361   |
| OR5AN1      | 0         | 0         | 0         | 0         | 0         | 0         |
| STOML3      | 0.0542977 | 0.0480066 | 0.164416  | 0         | 0.0345825 | 0.033836  |
| LOC10050581 | 357.545   | 446.758   | 918.782   | 464.919   | 395.185   | 354.643   |
| HIPK1       | 17.9233   | 12.048    | 18.4135   | 13.693    | 17.2781   | 13.6998   |
| PGRMC2      | 45.1298   | 42.1294   | 47.3706   | 38.1652   | 39.4356   | 40.1457   |
| SYNGR1      | 33.5774   | 43.3585   | 43.381    | 51.2665   | 50.5657   | 49.3717   |
| PACRGL      | 5.68275   | 4.96113   | 5.31253   | 5.31551   | 6.57171   | 5.60065   |
| CSTF3       | 32.5827   | 38.16     | 27.847    | 30.1809   | 35.6762   | 29.6968   |
| TELO2       | 14.6119   | 28.5993   | 18.2939   | 25.1307   | 23.7892   | 20.4827   |
| SLC22A23    | 11.5741   | 11.9517   | 12.2644   | 13.6548   | 13.7812   | 17.7575   |
| C8orf75     | 0.0779076 | 0         | 0         | 0         | 0         | 0.0485487 |
| MIR378H     | 0         | 0         | 0         | 0         | 0         | 0         |
| ANKRD55     | 0.323011  | 0.0356983 | 0.183391  | 0.151651  | 0.308592  | 0.0754826 |
| OR2D3       | 0         | 0         | 0         | 0         | 0         | 0         |
| MAP2K7      | 14.6128   | 20.3615   | 18.4514   | 21.0758   | 23.919    | 22.7106   |
| LOC10050804 | 0         | 0         | 0         | 0         | 0         | 0         |
| DCBLD2      | 7.34657   | 6.81459   | 8.31833   | 7.29629   | 6.33874   | 5.97693   |
| CFHR5       | 0         | 0         | 0         | 0         | 0         | 0         |
| RBM22       | 22.4261   | 22.9665   | 21.27     | 22.3586   | 23.5206   | 20.1531   |
| PLK2        | 34.8092   | 29.3483   | 34.2559   | 39.6604   | 39.8149   | 35.9141   |
| KIAA1462    | 4.06271   | 3.82547   | 3.86743   | 2.92787   | 2.96276   | 3.67098   |
| HYI         | 20.9804   | 43.4616   | 29.5481   | 42.4153   | 39.7919   | 31.4914   |
| C13orf26    | 0         | 0         | 0.0891622 | 0         | 0         | 0         |
| LINC00326   | 0         | 0         | 0         | 0         | 0.0588043 | 0         |
| LOC10018958 | 0.191526  | 0.253976  | 0.217393  | 0.179725  | 0.426594  | 0.119308  |
| C2CD2       | 28.4941   | 25.9321   | 25.5422   | 23.4168   | 19.4526   | 24.5154   |
| MIR4783     | 0         | 0         | 0         | 0         | 0         | 0         |
| NACA2       | 174.38    | 246.318   | 189.353   | 241.892   | 219.658   | 207.808   |
| RBBP7       | 64.0235   | 61.8823   | 53.3297   | 53.5899   | 59.3202   | 55.484    |
| MIR382      | 0         | 0         | 0         | 0         | 0         | 0         |
| C22orf26    | 0.455286  | 0.352218  | 0.516981  | 0.267192  | 0.507455  | 0.177322  |
| GK3P        | 4.39104   | 2.38599   | 2.52766   | 1.41732   | 1.57313   | 2.70781   |

|             |           |           |           |           |            |           |
|-------------|-----------|-----------|-----------|-----------|------------|-----------|
| LYZL4       | 0         | 0.124093  | 0         | 0         | 0          | 0         |
| MIR4785     | 0         | 0         | 0         | 0         | 0          | 0         |
| GRINL1A     | 11.5079   | 11.8252   | 9.96756   | 9.81669   | 12.3633    | 9.07276   |
| LOC10050740 | 0.702354  | 0.27599   | 0.886143  | 0.439666  | 0.994074   | 0.923985  |
| MIR16-1     | 0         | 0         | 0         | 0         | 0          | 0         |
| RSF1        | 4.87706   | 2.96864   | 4.77115   | 3.24086   | 3.77526    | 3.07425   |
| PTX3        | 1.33857   | 0.994119  | 0.729577  | 0.452481  | 1.46637    | 1.16779   |
| NNMT        | 19.0859   | 21.3624   | 20.9548   | 10.8674   | 24.1392    | 11.7248   |
| LINC00114   | 0         | 0         | 0         | 0.202227  | 0          | 0         |
| GLIPR1L2    | 0.487453  | 0.538719  | 0.41513   | 1.37313   | 0.620923   | 0.3797    |
| RGAG1       | 0.0531207 | 0.0626213 | 0.0670212 | 0.0166265 | 0.0676658  | 0.0441368 |
| PRICKLE3    | 7.5363    | 9.74194   | 8.77393   | 9.71184   | 9.96395    | 10.1051   |
| RBM17       | 24.0422   | 30.9167   | 27.1657   | 27.1662   | 30.8574    | 24.9802   |
| LOC647286   | 0         | 0         | 0         | 0         | 0          | 0         |
| LHFPL3      | 0.0934166 | 0.110124  | 0.0471446 | 0.233911  | 0.178493   | 0.0776177 |
| AMOTL1      | 15.7257   | 12.4269   | 16.8109   | 12.3988   | 15.5823    | 15.9333   |
| DEFB4A      | 13.5191   | 5.33604   | 0         | 1.58678   | 1.95328    | 1.46259   |
| AQP11       | 1.28531   | 1.30474   | 0.900914  | 1.60918   | 1.27341    | 1.15693   |
| CDCA2       | 1.10562   | 0.744777  | 0.956527  | 0.444926  | 0.754474   | 0.803805  |
| LTB4R       | 42.6838   | 81.4406   | 67.4466   | 77.4589   | 81.0024    | 54.641    |
| RBM10       | 21.1054   | 27.4146   | 20.4267   | 26.2548   | 27.4524    | 28.7062   |
| PTPRZ1      | 8.41042   | 9.29158   | 14.0452   | 8.49249   | 11.3448    | 10.9471   |
| GIGYF1      | 24.3131   | 35.0129   | 31.5206   | 34.5065   | 40.9669    | 31.4899   |
| KIR3DL1     | 0         | 0.0120944 | 0         | 0         | 0.00871244 | 0.0340975 |
| LOC10050670 | 0.245771  | 0         | 0         | 0.46155   | 0.313065   | 0.459462  |
| FAM157C     | 0.0242976 | 0.0859295 | 0.25904   | 0         | 0.193441   | 0.164871  |
| GAS2L3      | 1.08898   | 0.885785  | 0.956265  | 1.22705   | 2.16397    | 1.08577   |
| LOC10028770 | 5.54E-07  | 0.269789  | 1.60469   | 2.1179    | 1.13256    | 0.391006  |
| CPLX4       | 0         | 0         | 0         | 0         | 0.0335564  | 0         |
| LOC10013069 | 0.998317  | 1.30763   | 1.94531   | 1.14572   | 1.28344    | 2.20042   |
| ANP32A-IT1  | 0.0300929 | 0.0532125 | 0.0911221 | 0.0847704 | 0.172497   | 0.0750106 |
| C10orf99    | 6.46814   | 6.51668   | 3.98546   | 2.11866   | 4.88603    | 2.8121    |
| MIR4686     | 0         | 0         | 0         | 0         | 0          | 0         |
| CHRD        | 3.79557   | 5.10774   | 5.36626   | 3.69501   | 7.60777    | 4.05221   |
| OR51D1      | 0         | 0         | 0         | 0         | 0          | 0         |
| KLC2        | 10.8094   | 13.2596   | 11.2957   | 15.9082   | 11.0364    | 13.3815   |
| ZMAT3       | 4.95003   | 4.50659   | 4.47118   | 4.41115   | 4.05566    | 3.83124   |
| PKNOX1      | 4.92261   | 4.21519   | 4.46      | 4.73144   | 4.6288     | 4.23904   |
| SNORD115-2  | 0         | 0         | 0         | 0         | 0          | 0         |
| MYLIP       | 29.4521   | 21.7283   | 22.5643   | 19.8922   | 19.0462    | 16.7031   |
| INTS6       | 8.66155   | 6.0888    | 6.39222   | 4.87966   | 5.91126    | 6.00919   |
| SLC25A35    | 10.7737   | 10.3418   | 9.63398   | 11.3152   | 11.2568    | 9.93905   |
| STEAP1B     | 1.3688    | 0.688348  | 0.652681  | 1.12629   | 0.87171    | 1.16827   |

|             |           |           |           |          |            |           |
|-------------|-----------|-----------|-----------|----------|------------|-----------|
| N4BP3       | 5.89886   | 5.90796   | 6.65584   | 5.92921  | 6.24133    | 6.93344   |
| USP7        | 29.1708   | 26.4817   | 29.9451   | 27.8577  | 30.4864    | 26.8005   |
| TRUB1       | 7.50361   | 5.07773   | 5.94244   | 4.14616  | 5.58786    | 5.34135   |
| LINC00475   | 0         | 0.502647  | 0.156498  | 0.389972 | 0.296257   | 0.161034  |
| GBA         | 19.8926   | 18.9791   | 22.8137   | 23.7712  | 22.9046    | 27.7003   |
| MARCKSL1    | 69.5835   | 50.798    | 36.3059   | 47.7668  | 44.3181    | 60.2051   |
| KAAG1       | 0         | 0         | 0.0385121 | 0        | 0          | 0         |
| LOC10028948 | 1.72961   | 1.74767   | 2.61865   | 3.24815  | 2.51794    | 1.23179   |
| LOC149086   | 0         | 0         | 0         | 0        | 0          | 0         |
| CLEC12A     | 1.90445   | 1.5496    | 0.810735  | 0.285617 | 1.92113    | 0.903168  |
| RSC1A1      | 6.58431   | 3.5822    | 6.00172   | 4.72174  | 5.48839    | 5.85827   |
| GABARAPL3   | 1.54306   | 0.877037  | 1.3767    | 1.29367  | 0.73709    | 0.75593   |
| C19orf59    | 0         | 0         | 0         | 0.079242 | 0.0537492  | 0         |
| CHPF        | 16.3456   | 16.1681   | 17.5628   | 19.4073  | 15.9041    | 23.4114   |
| PYHIN1      | 2.06084   | 0.687194  | 0.34683   | 0.227158 | 0.857503   | 0.431774  |
| TRIM33      | 11.5134   | 9.77899   | 13.0921   | 12.7103  | 11.3197    | 8.98097   |
| ZNF828      | 8.38822   | 7.92453   | 7.91745   | 5.93117  | 9.01958    | 6.51799   |
| RNASE12     | 0.174286  | 0         | 0         | 0        | 0          | 0         |
| CCBL1       | 6.2265    | 5.53481   | 6.34918   | 7.65314  | 8.04074    | 7.59819   |
| UBQLNL      | 0.609543  | 0.654402  | 0.296632  | 0.613233 | 0.443681   | 0.596893  |
| KIAA1430    | 11.5733   | 7.5737    | 10.3785   | 6.85465  | 7.9381     | 6.53393   |
| C8orf44     | 2.64918   | 2.5935    | 2.78794   | 2.69385  | 3.55128    | 2.99601   |
| ARFGEF2     | 16.3467   | 9.79292   | 14.735    | 11.5736  | 12.5377    | 10.095    |
| FANCF       | 5.12915   | 5.19401   | 5.75647   | 4.9842   | 5.9068     | 5.8908    |
| C10orf120   | 0         | 0         | 0         | 0        | 0          | 0         |
| DYNLL2      | 59.0036   | 46.9879   | 45.1469   | 41.8176  | 45.4163    | 40.6829   |
| PJA2        | 30.2543   | 21.4027   | 29.1311   | 19.6029  | 24.4463    | 21.1759   |
| MIR363      | 0         | 0         | 0         | 0        | 0          | 0         |
| FAM173A     | 9.46499   | 17.2439   | 12.9188   | 21.8102  | 16.8062    | 17.6945   |
| CPEB3       | 4.65197   | 2.23352   | 3.53419   | 2.40516  | 2.75431    | 2.6357    |
| MIR339      | 0         | 0         | 0         | 0        | 0          | 0         |
| MIR3667     | 0         | 0         | 0         | 0        | 0          | 0         |
| TMEM209     | 7.09313   | 5.60987   | 6.29242   | 4.83915  | 6.0353     | 5.49064   |
| KIAA1210    | 0.0363806 | 0.0107218 | 0.0183602 | 0        | 0.00772367 | 0.0151139 |
| CLEC3B      | 115.662   | 132.978   | 190.127   | 136.062  | 117.368    | 105.753   |
| KRTAP11-1   | 10.8491   | 2.10558   | 1.10172   | 89.8205  | 2.19092    | 1294.42   |
| TMEM87B     | 12.8702   | 8.96282   | 11.4482   | 8.72126  | 9.97295    | 11.0694   |
| LDHA        | 296.371   | 253.029   | 264.254   | 257.896  | 249.316    | 213.654   |
| RINT1       | 11.087    | 10.779    | 11.0723   | 10.6999  | 12.77      | 10.2245   |
| YTHDF2      | 36.1467   | 35.3877   | 34.191    | 35.2447  | 35.515     | 33.2963   |
| APBA2       | 1.00841   | 1.2044    | 1.25791   | 1.45805  | 1.35314    | 1.23909   |
| SIGLEC6     | 2.27707   | 0.885202  | 1.89337   | 0.718468 | 2.85784    | 2.02034   |
| CCDC160     | 2.38256   | 0.451395  | 0.579733  | 0.319598 | 0.867124   | 0.424203  |

|             |           |           |           |           |           |           |
|-------------|-----------|-----------|-----------|-----------|-----------|-----------|
| MED27       | 7.81198   | 10.0461   | 7.46673   | 9.78032   | 8.14151   | 8.55589   |
| GGT2        | 2.57359   | 3.24137   | 6.722     | 9.40121   | 6.50672   | 8.32955   |
| LOC645166   | 10.3563   | 13.1128   | 11.5526   | 9.18942   | 7.20512   | 7.64122   |
| XKR9        | 0.296436  | 0.30325   | 0.0236042 | 0         | 0.0198593 | 0.0388613 |
| C9orf153    | 0         | 0         | 0         | 0.890941  | 0         | 0.295637  |
| PGGT1B      | 7.97007   | 5.19567   | 7.47918   | 5.7594    | 5.661     | 5.30992   |
| LOC728989   | 1.1783    | 0.662951  | 0.732337  | 1.00862   | 1.09159   | 0.735937  |
| MIR1827     | 0         | 0         | 0         | 0         | 0         | 0         |
| HTR1F       | 0         | 0.055062  | 0.0707169 | 0.0584778 | 0.0198325 | 0.0388088 |
| NOP58       | 32.333    | 24.9357   | 28.0546   | 19.9486   | 29.5801   | 24.671    |
| LOC728648   | 1.42706   | 1.34706   | 1.39249   | 1.26937   | 1.76272   | 1.43962   |
| PAWR        | 15.9957   | 15.129    | 15.9038   | 14.9199   | 17.0247   | 16.9552   |
| C6orf27     | 0.854604  | 1.51117   | 1.19037   | 1.31603   | 1.41518   | 1.70417   |
| DEFB109P1   | 0         | 0         | 0         | 0         | 0         | 0         |
| C6orf168    | 0.628375  | 0.384625  | 0.380547  | 0.526492  | 0.289387  | 0.343383  |
| HMP19       | 0         | 0         | 0.0988306 | 0.0408629 | 0         | 0.0542374 |
| MIR3186     | 0         | 0         | 0         | 0         | 0         | 0         |
| DEPTOR      | 8.01939   | 4.32167   | 4.91439   | 5.91649   | 4.52387   | 5.06873   |
| CHST3       | 9.13442   | 6.72403   | 5.75717   | 6.43601   | 6.1917    | 6.57706   |
| MIR518E     | 0         | 0         | 0         | 0         | 0         | 0         |
| PPWD1       | 21.1165   | 21.962    | 21.3261   | 19.276    | 34.5124   | 27.6307   |
| ZNF263      | 12.9189   | 16.2565   | 13.3277   | 13.8515   | 15.3847   | 17.8297   |
| ZNF879      | 2.58748   | 2.62913   | 2.5142    | 1.81313   | 1.89395   | 2.28625   |
| PCDHA13     | 0.0672607 | 0.0755503 | 0.164154  | 7.50E-26  | 0.0612905 | 0.0616313 |
| S1PR4       | 1.13639   | 1.59573   | 0.556632  | 0.75321   | 2.17131   | 1.74954   |
| KDM6B       | 9.51305   | 11.3905   | 12.2069   | 11.8834   | 14.8258   | 12.9639   |
| PGBD4       | 0.921269  | 1.2024    | 1.52765   | 1.1946    | 1.06176   | 1.64027   |
| SPATA3      | 0         | 0.124472  | 0         | 0         | 0         | 0         |
| PGS1        | 12.4077   | 15.9935   | 15.6518   | 14.2961   | 12.9354   | 13.9468   |
| FKSG29      | 0         | 0         | 0         | 0         | 0         | 0         |
| LOC10028776 | 0.727573  | 0.68616   | 0.47734   | 0.774271  | 0.71054   | 0.725429  |
| SETD4       | 14.089    | 19.1547   | 13.0496   | 16.7457   | 19.2534   | 15.4073   |
| ANGPT1      | 2.64091   | 2.33578   | 3.79486   | 2.01895   | 1.59763   | 1.074     |
| SMG6        | 11.0505   | 11.7978   | 11.8816   | 11.5856   | 13.1774   | 11.6059   |
| GALNTL5     | 0         | 0.241467  | 0.510484  | 0.227952  | 0.0386543 | 0.03782   |
| FREM3       | 0         | 0         | 0         | 0         | 0         | 0         |
| AMY2A       | 3.24535   | 4.29825   | 5.15024   | 4.50583   | 6.33444   | 4.28406   |
| RAB4B       | 22.8948   | 39.5377   | 25.9658   | 31.1049   | 31.271    | 29.3212   |
| ACVRL1      | 10.9592   | 10.5747   | 10.75     | 7.13252   | 10.2922   | 8.15829   |
| HOTAIRM1    | 16.6523   | 22.1191   | 20.0856   | 21.0818   | 20.9046   | 15.9221   |
| SHQ1        | 5.08093   | 6.19619   | 6.10101   | 6.18573   | 5.6687    | 5.37165   |
| TRAF7       | 30.4888   | 36.062    | 33.6728   | 37.2271   | 38.6099   | 33.4868   |
| HSPA1L      | 1.29809   | 1.05389   | 0.902347  | 1.19388   | 0.961639  | 1.3618    |



|             |           |           |            |           |            |           |
|-------------|-----------|-----------|------------|-----------|------------|-----------|
| GPRC6A      | 0         | 0         | 0          | 0         | 0          | 0         |
| ASF1B       | 2.79916   | 5.9719    | 2.99421    | 5.14245   | 4.57327    | 4.96751   |
| ZNF35       | 3.60099   | 2.71458   | 2.69728    | 2.91858   | 2.96947    | 3.1652    |
| KIF19       | 0.322986  | 0.428346  | 0.448254   | 0.278006  | 0.857132   | 0.31868   |
| PAAF1       | 13.9381   | 17.5025   | 13.6096    | 15.6167   | 12.4368    | 10.364    |
| MIR499      | 0         | 96.4663   | 0          | 0         | 0          | 67.9914   |
| HSD17B3     | 1.3047    | 1.5972    | 1.06364    | 0.753902  | 1.27841    | 1.25082   |
| CNIH        | 59.5611   | 52.7277   | 50.4061    | 37.2846   | 37.108     | 43.0164   |
| OR4D10      | 0         | 0         | 0          | 0         | 0          | 0         |
| GTPBP6      | 31.6794   | 19.4982   | 24.7292    | 31.6895   | 27.1661    | 21.5616   |
| LOC284440   | 2.65186   | 3.25219   | 3.30261    | 3.25313   | 3.67762    | 3.19844   |
| PSMB11      | 0         | 0         | 0          | 0.154779  | 0          | 0.0342396 |
| ER13        | 24.6324   | 34.2512   | 25.9137    | 35.4878   | 28.0702    | 27.2761   |
| LY6D        | 466.682   | 658.567   | 398.467    | 561.956   | 456.804    | 372.192   |
| LOC10013128 | 0         | 0         | 4.80614    | 0         | 2.03413    | 0         |
| EPB42       | 0.25788   | 0.333534  | 0.43989    | 0.0387425 | 0.266078   | 0.185127  |
| LYPLA2      | 32.8664   | 42.6035   | 26.3669    | 38.2381   | 35.0269    | 34.3525   |
| CRYAB       | 222.337   | 256.165   | 371.221    | 352.437   | 286.299    | 274.929   |
| NCK1        | 25.341    | 21.924    | 23.0969    | 19.953    | 31.4328    | 26.6133   |
| LOC10013047 | 0.349232  | 0         | 0.132185   | 0         | 0.222428   | 0.108813  |
| ZNF142      | 4.46162   | 5.44538   | 5.06621    | 4.78137   | 5.68326    | 5.75198   |
| PTK2B       | 14.3667   | 17.5173   | 19.2148    | 19.1696   | 22.8991    | 23.8527   |
| KLHDC7A     | 0.114031  | 0.0336064 | 0.359676   | 0.107073  | 0.351031   | 0.532945  |
| ABCD3       | 38.4839   | 28.2154   | 35.1998    | 27.5506   | 34.4761    | 33.8621   |
| ATG13       | 17.5864   | 16.772    | 17.4494    | 18.8789   | 16.9756    | 16.1514   |
| CHMP7       | 13.8037   | 13.481    | 12.7886    | 13.1513   | 13.6657    | 13.5327   |
| TLR5        | 4.03048   | 2.91925   | 3.08557    | 2.77962   | 3.91582    | 3.91643   |
| LOC10012835 | 0         | 0         | 0          | 0         | 0          | 0         |
| LOC10013223 | 0.0570515 | 0.0504414 | 0.0863766  | 0.107141  | 0.0726729  | 0.17776   |
| GNA13       | 9.32407   | 7.66829   | 8.99484    | 7.12067   | 9.29345    | 8.80987   |
| LRRC41      | 28.4235   | 32.5614   | 30.6913    | 32.6797   | 33.3465    | 32.2695   |
| LOC285326   | 0         | 0         | 0          | 0         | 0          | 0         |
| HGC6.3      | 0         | 0.101797  | 0.0871597  | 0         | 0.513322   | 0.0717488 |
| MIR1301     | 0         | 0         | 0          | 0         | 0          | 0         |
| ATAD1       | 18.7866   | 12.3272   | 14.618     | 11.8012   | 13.3619    | 12.5636   |
| STK33       | 0.148093  | 0.491003  | 0.280267   | 0.625755  | 0.282963   | 0.207641  |
| ZBTB1       | 21.0925   | 17.8396   | 21.3531    | 15.8564   | 21.6679    | 21.8313   |
| MIR1253     | 0         | 0         | 0          | 0         | 0          | 0         |
| ZAN         | 0.0109161 | 0.043431  | 0.00853907 | 0         | 0.00718434 | 0.0281175 |
| HYAL4       | 0.757604  | 0.558188  | 0.76468    | 0.434731  | 0.375295   | 0.157369  |
| ZNF865      | 5.27757   | 8.52295   | 6.98783    | 9.36253   | 8.0622     | 7.43915   |
| ZNF846      | 5.77204   | 3.95504   | 5.9352     | 4.69721   | 6.12708    | 5.24547   |
| LOC10012834 | 0.105133  | 0.139428  | 0.0795864  | 0.197437  | 0.13392    | 0.262058  |

|             |           |           |           |           |           |           |
|-------------|-----------|-----------|-----------|-----------|-----------|-----------|
| MIR504      | 0         | 0         | 0         | 0         | 0         | 0         |
| XAGE1D      | 0.068236  | 0.0603299 | 0         | 0         | 0         | 0.0425217 |
| SNORA37     | 0         | 0         | 0         | 0         | 0         | 0         |
| ADAM30      | 0         | 0         | 0         | 0         | 0         | 0         |
| EPSTI1      | 15.0242   | 10.9126   | 3.33714   | 1.27674   | 4.8169    | 2.04606   |
| RGS1        | 4.89166   | 6.31572   | 1.82212   | 0.801985  | 6.52776   | 1.35479   |
| HUS1B       | 0.113719  | 0         | 0.0860856 | 0         | 0         | 0.0708646 |
| CLDN6       | 0.0798629 | 0         | 0         | 0.07499   | 0         | 0.0497672 |
| GLIPR1L1    | 0.493822  | 0.109152  | 0.747652  | 0.115923  | 0.393147  | 0.230797  |
| MAG         | 0.423824  | 0.197378  | 0.0316826 | 0         | 0.106634  | 0.139116  |
| SASH1       | 12.7932   | 8.01234   | 14.6246   | 10.868    | 12.1319   | 10.4275   |
| ALG5        | 28.0681   | 22.9385   | 22.2262   | 20.547    | 21.4049   | 17.8936   |
| IVL         | 98.5992   | 58.4567   | 64.7463   | 78.822    | 98.7269   | 145.253   |
| PIGR        | 2.11354   | 0.904188  | 0.344077  | 1.28037   | 1.3606    | 2.08586   |
| DDX12P      | 4.28793   | 7.13303   | 5.73234   | 7.00873   | 7.37409   | 6.01328   |
| GEMIN4      | 9.78666   | 13.9971   | 13.0937   | 15.2585   | 16.1496   | 13.7464   |
| ATXN7L2     | 4.92502   | 5.78083   | 3.66398   | 5.42184   | 5.6516    | 5.21211   |
| CDHR5       | 0         | 0.0250492 | 0.259312  | 0.0321817 | 0.0873146 | 0.0176552 |
| EPHB4       | 23.1564   | 27.3768   | 24.8588   | 29.1589   | 30.1362   | 26.9556   |
| SYTL2       | 10.1221   | 8.51295   | 10.2075   | 9.60011   | 8.7369    | 11.8169   |
| SDC2        | 28.1594   | 25.9196   | 29.5403   | 23.2089   | 20.0554   | 22.6292   |
| PAMR1       | 7.79541   | 11.1633   | 11.9407   | 15.0517   | 12.3538   | 10.7536   |
| CXorf23     | 4.52617   | 4.48248   | 4.28292   | 3.07711   | 5.50342   | 4.22162   |
| FAM124A     | 1.06838   | 1.26519   | 0.717282  | 0.530517  | 0.398297  | 0.515158  |
| FAM181B     | 1.12093   | 1.09016   | 1.56982   | 1.68406   | 1.57064   | 1.53674   |
| PHF3        | 9.52606   | 7.31956   | 10.6561   | 7.77363   | 9.86466   | 8.40469   |
| SNORD101    | 0         | 0         | 0         | 0         | 0         | 0         |
| LOC10050713 | 0         | 0         | 0.781673  | 0         | 0.32883   | 0         |
| SLC47A1     | 5.2697    | 7.90722   | 7.52248   | 7.37983   | 9.24421   | 7.22448   |
| TSSK1B      | 0         | 0         | 0.0925868 | 0.0382813 | 0.0778978 | 0.101622  |
| PKD1L2      | 0.5946    | 1.65001   | 2.3228    | 1.65525   | 0.79086   | 0.271905  |
| SMTNL2      | 0.42837   | 0.991762  | 0.253472  | 1.55896   | 0.514446  | 1.5031    |
| OR2D2       | 0         | 0         | 0         | 0         | 0         | 0         |
| RARG        | 62.3691   | 65.1571   | 76.937    | 80.5712   | 98.2936   | 96.6126   |
| C20orf61    | 0         | 0         | 0         | 0         | 0         | 0         |
| IFNA4       | 0         | 0         | 0         | 0         | 0         | 0         |
| LOC10050607 | 0.479164  | 2.27E-24  | 0.695805  | 0.198435  | 0.294281  | 0.111434  |
| MCCC1       | 42.4716   | 29.0772   | 29.201    | 23.4128   | 32.2933   | 34.285    |
| NIM1        | 0.659617  | 0.855348  | 0.366178  | 0.412913  | 0.280076  | 0.493254  |
| PLG         | 0.138829  | 0.147293  | 0.214793  | 0.182502  | 0.271851  | 0.173506  |
| CRISP3      | 9.8981    | 1.99529   | 3.06721   | 2.98336   | 0.880672  | 1.23428   |
| SLC25A21    | 0.450371  | 0.289274  | 0.788939  | 0.491914  | 0.229062  | 0.635895  |
| RRAD        | 3.98002   | 4.62597   | 4.96457   | 6.57306   | 5.11535   | 4.81606   |

|             |           |           |           |            |           |            |
|-------------|-----------|-----------|-----------|------------|-----------|------------|
| C8orf59     | 40.3842   | 54.3835   | 43.2529   | 40.2704    | 41.6582   | 35.0232    |
| POU3F2      | 0         | 0.0421371 | 0.0541172 | 0.0447511  | 0.0758857 | 0.0593982  |
| SLC39A12    | 0         | 0         | 0.028139  | 0          | 0.0236747 | 0          |
| SMARCA5-AS  | 9.38E-11  | 5.81E-09  | 3.12E-09  | 7.39E-09   | 5.08E-09  | 9.06E-10   |
| KRTAP5-10   | 1.85987   | 1.06401   | 0.165639  | 24.5522    | 0.836163  | 139.011    |
| MAPK9       | 10.0159   | 9.98275   | 9.37806   | 8.9799     | 8.79251   | 6.4499     |
| MIR4804     | 0         | 0         | 0         | 0          | 0         | 0          |
| SNORD2      | 0         | 0         | 0         | 0          | 0         | 0          |
| HSP90AB3P   | 95.9129   | 70.5606   | 83.1032   | 73.2738    | 72.66     | 73.895     |
| LOC728755   | 0         | 0         | 0         | 0          | 0         | 0          |
| LOC10065297 | 0         | 0         | 0         | 0          | 0         | 0          |
| AMH         | 0.307005  | 0.542869  | 0.271139  | 1.057      | 0.847311  | 0.70148    |
| CCL8        | 0.802064  | 0.866719  | 0.269852  | 0          | 0.737878  | 0.111069   |
| FAM150B     | 4.44448   | 3.24014   | 3.71866   | 2.56255    | 1.6885    | 1.45769    |
| MIR4303     | 0         | 0         | 0         | 0          | 0         | 0          |
| WBSCR28     | 0         | 0         | 0         | 0          | 0         | 0          |
| NT5C2       | 21.1118   | 16.243    | 15.7627   | 17.815     | 21.8981   | 19.8726    |
| LOC10027170 | 0.172688  | 0         | 0.0653631 | 0.121614   | 0.109986  | 0.0807091  |
| SPATA9      | 0.363852  | 0.321695  | 0.482016  | 0.256238   | 0.695218  | 0.623527   |
| CSPP1       | 3.15556   | 3.58708   | 3.53663   | 3.59796    | 3.98044   | 2.75808    |
| C3P1        | 0         | 0         | 0         | 0          | 0         | 0          |
| MIR4466     | 0         | 0         | 0         | 0          | 0         | 0          |
| OR4C12      | 0         | 0         | 0         | 0          | 0         | 0          |
| C14orf23    | 0.0108112 | 0.0139395 | 0.205346  | 0.00493476 | 0.0313801 | 0.00654992 |
| ZNF496      | 3.37687   | 4.97603   | 4.41832   | 3.13168    | 4.93876   | 4.36452    |
| TNFRSF19    | 23.3584   | 36.4297   | 45.8907   | 39.8551    | 46.3347   | 35.237     |
| C14orf80    | 6.89428   | 16.7115   | 8.93797   | 12.074     | 10.0223   | 9.42381    |
| METTL19     | 12.7646   | 12.2158   | 10.6716   | 11.7882    | 10.7877   | 13.1771    |
| NDUFAF1     | 14.7056   | 11.0318   | 13.2687   | 12.832     | 10.1702   | 10.2747    |
| CHML        | 2.65291   | 2.19075   | 1.98788   | 1.70706    | 2.05846   | 2.20704    |
| FAM72A      | 1.60106   | 1.35787   | 1.23299   | 0.874295   | 1.59472   | 1.79254    |
| SNORD46     | 0         | 0         | 0         | 0          | 0         | 0          |
| LINC00346   | 0.302184  | 0.374041  | 0.228755  | 0.21281    | 0.202086  | 0.188308   |
| LOC440563   | 0.0490081 | 0.0433298 | 0         | 0          | 0.140461  | 0.0305397  |
| LOC402269   | 0         | 0         | 0         | 0          | 0         | 0          |
| IFNAR1      | 11.9577   | 11.6267   | 11.2497   | 9.07674    | 10.6443   | 9.2606     |
| DEK         | 49.6293   | 40.9246   | 39.361    | 32.3563    | 44.7913   | 37.1386    |
| MED10       | 34.8258   | 44.0298   | 35.2942   | 35.6833    | 37.7145   | 33.4366    |
| SYNGR3      | 0.904466  | 1.19951   | 0.7988    | 0.66055    | 1.08811   | 0.782812   |
| YOD1        | 8.22059   | 4.22064   | 10.3332   | 7.16048    | 10.2383   | 10.3975    |
| LEF1        | 3.46021   | 4.0127    | 2.47108   | 5.5189     | 4.80497   | 8.89531    |
| C14orf43    | 11.458    | 11.9729   | 16.1995   | 12.4589    | 15.4031   | 12.1708    |
| FLJ45340    | 11.794    | 13.4026   | 14.0961   | 11.5612    | 31.7073   | 23.6207    |

|             |           |           |          |           |           |           |
|-------------|-----------|-----------|----------|-----------|-----------|-----------|
| AKAP2       | 20.4762   | 16.1572   | 19.0178  | 14.3232   | 12.6984   | 10.2742   |
| IMPG2       | 0.18144   | 0.100261  | 0.171689 | 0.0745367 | 0.108338  | 0.148399  |
| SNTN        | 0         | 0         | 0        | 0         | 0         | 0.0419291 |
| PGM5        | 11.4925   | 12.9559   | 9.37085  | 9.07135   | 11.591    | 9.22363   |
| SLC35F3     | 0.792992  | 0.487731  | 0.495899 | 0.938852  | 0.900326  | 1.11723   |
| INHBB       | 14.2349   | 9.28224   | 14.7029  | 19.4262   | 14.7893   | 13.2001   |
| UFC1        | 92.2992   | 97.0691   | 90.604   | 103.568   | 89.2691   | 96.3615   |
| KLHL1       | 0         | 0         | 0        | 0         | 0         | 0         |
| CCRN4L      | 2.59946   | 2.39208   | 2.97178  | 2.09216   | 3.00713   | 2.94222   |
| LOC10028915 | 0         | 0         | 0        | 0         | 0         | 0         |
| HECW1       | 0.1393    | 0.110844  | 0.210902 | 0.334621  | 0.19921   | 0.234376  |
| FRS2        | 6.80721   | 4.9622    | 6.07857  | 5.10048   | 5.15844   | 4.22465   |
| ANXA2P3     | 3.7384    | 3.0897    | 4.24521  | 4.12079   | 3.51975   | 3.89957   |
| MIR20A      | 0         | 0         | 0        | 0         | 0         | 0         |
| LOC286083   | 0         | 0         | 0        | 0         | 0         | 0         |
| LOC90834    | 2.80224   | 3.25392   | 4.46399  | 3.88785   | 4.34178   | 3.82241   |
| COMT        | 75.4396   | 68.563    | 54.2562  | 71.0973   | 48.9348   | 54.8983   |
| SNORD75     | 0         | 0         | 0        | 0         | 0         | 0         |
| FSIP1       | 0.390641  | 0.0627965 | 0.107534 | 0.100038  | 0.180947  | 0.221301  |
| ZFYVE28     | 3.17396   | 3.67669   | 4.1488   | 3.56309   | 5.33854   | 4.15847   |
| C2orf69     | 7.53787   | 5.08546   | 6.64068  | 3.92123   | 5.2693    | 5.12282   |
| TTY4B       | 0         | 0         | 0        | 0         | 0         | 0         |
| MAPKAPK2    | 42.6124   | 40.521    | 35.6989  | 42.3213   | 40.8535   | 36.7961   |
| CCDC39      | 1.29311   | 1.1657    | 2.38005  | 1.11898   | 2.58381   | 1.62742   |
| SNORA2B     | 0         | 0         | 29.5829  | 36.6945   | 0         | 0         |
| HMGCR       | 130.893   | 97.488    | 98.5735  | 71.1975   | 63.2262   | 73.2454   |
| HR          | 51.3312   | 71.4105   | 70.7528  | 96.3134   | 108.981   | 112.589   |
| EGFLAM      | 6.37875   | 8.50664   | 4.62565  | 5.71371   | 5.31281   | 4.12987   |
| HRH4        | 0.0289315 | 0.102319  | 0.18494  | 0.112906  | 0.332841  | 0.267609  |
| MOS         | 0         | 0         | 0        | 0         | 0         | 0         |
| NARG2       | 6.55996   | 5.55062   | 6.74852  | 5.21343   | 6.03604   | 5.6375    |
| KIF1C       | 28.4296   | 27.3283   | 36.8031  | 31.9709   | 29.1504   | 30.0644   |
| MIR4488     | 0         | 0         | 0        | 0         | 0         | 0         |
| ARR3        | 0.337256  | 0.894542  | 0.51061  | 0.237509  | 0.966602  | 1.62877   |
| SLC25A36    | 23.2022   | 21.1745   | 27.7603  | 20.6173   | 29.4363   | 20.9767   |
| TOM1L1      | 18.3457   | 13.272    | 14.688   | 13.7873   | 11.4217   | 13.666    |
| TRAPPC6A    | 32.6429   | 60.017    | 41.3983  | 67.223    | 52.8531   | 45.8344   |
| GIPC3       | 1.23714   | 3.12232   | 1.46438  | 1.07717   | 1.6905    | 1.86426   |
| LOC285819   | 0.054692  | 0.0542343 | 0.162854 | 5.08E-206 | 0.0338594 | 0.0296829 |
| LOC10050719 | 0.496479  | 0.109739  | 0.281878 | 0.233093  | 0.0790525 | 0.0773461 |
| IL37        | 6.75896   | 5.89386   | 26.6227  | 26.9339   | 23.405    | 18.9536   |
| FKSG43      | 3.02684   | 1.44086   | 2.99624  | 1.36629   | 2.11298   | 2.46634   |
| C21orf67    | 2.95771   | 3.09413   | 4.00886  | 3.70927   | 3.97796   | 3.27356   |

|             |           |           |          |           |           |            |
|-------------|-----------|-----------|----------|-----------|-----------|------------|
| OR52E6      | 0         | 0         | 0        | 0         | 0         | 0          |
| C11orf91    | 0.402106  | 0.711033  | 0.507327 | 0.251714  | 1.10978   | 1.3364     |
| MEX3C       | 9.56279   | 7.41614   | 9.65804  | 6.61866   | 8.35025   | 7.65755    |
| KNDC1       | 0.717581  | 0.945439  | 1.16098  | 1.04372   | 1.04848   | 0.587453   |
| LOC10012981 | 0.460763  | 0.452642  | 0.310045 | 0.432649  | 0.391284  | 0.223322   |
| AP2S1       | 115.212   | 164.27    | 119.586  | 171.638   | 111.755   | 134.292    |
| LINC00239   | 3.45398   | 3.05379   | 2.45126  | 1.82432   | 1.23742   | 1.07619    |
| LOC727983   | 0.0167494 | 0         | 0.162807 | 0.0369594 | 0.0802305 | 0.00782812 |
| LOC400620   | 0         | 0         | 0        | 0         | 0         | 0          |
| FLJ45831    | 0         | 0.0587494 | 0        | 0.031197  | 0.0423213 | 0.0621117  |
| HARS        | 50.3733   | 58.8073   | 44.2421  | 49.0827   | 46.8424   | 46.7954    |
| LOC10050611 | 0         | 0         | 0        | 0         | 0         | 0          |
| AFF1        | 17.2408   | 15.2462   | 19.7971  | 12.1799   | 18.727    | 15.0587    |
| SNORA78     | 0         | 64.9333   | 55.5965  | 137.923   | 0         | 0          |
| SNX7        | 14.5461   | 15.4042   | 12.1282  | 11.3906   | 13.5514   | 9.88911    |
| CALB1       | 0.0398361 | 0.0704411 | 0.150781 | 0.0374055 | 0.126859  | 0.0992966  |
| TTC27       | 6.68356   | 5.31204   | 6.88007  | 6.59452   | 6.45729   | 4.89017    |
| MIR3944     | 0         | 0         | 0        | 0         | 0         | 0          |
| CT47A10     | 0         | 0         | 0        | 0         | 0         | 0          |
| DDIT4       | 129.824   | 143.172   | 87.7815  | 113.336   | 85.5141   | 107.643    |
| RSPO2       | 0         | 0         | 0        | 0         | 0         | 0          |
| SULT2B1     | 119.11    | 113.726   | 91.6554  | 92.3186   | 97.9519   | 135.849    |
| ADAM22      | 0.665773  | 0.624841  | 0.969046 | 0.653989  | 0.860957  | 0.49782    |
| ABHD12      | 40.239    | 44.8724   | 36.1225  | 43.2248   | 40.8243   | 41.0874    |
| OR52J3      | 0         | 0         | 0        | 0         | 0         | 0          |
| MAGI2-AS3   | 9.79477   | 11.3055   | 10.3679  | 8.14258   | 9.29259   | 6.16095    |
| IQGAP2      | 12.6927   | 2.98178   | 4.98029  | 4.80474   | 4.19016   | 4.04795    |
| MIR3143     | 0         | 0         | 0        | 0         | 0         | 0          |
| LRRIQ3      | 0.174081  | 0.184693  | 0.105424 | 0.163459  | 0.199571  | 0.151872   |
| PRELID1     | 61.2486   | 80.2061   | 54.3945  | 72.5738   | 61.5292   | 65.9097    |
| RCC1        | 13.4228   | 13.7217   | 9.22785  | 12.3269   | 9.51707   | 11.569     |
| MMP17       | 3.36559   | 5.0214    | 5        | 5.21439   | 4.4211    | 4.77135    |
| TTBK2       | 1.10739   | 0.903769  | 1.58632  | 0.783865  | 1.3021    | 0.881176   |
| LOC10050630 | 1.64727   | 0.910255  | 2.33811  | 2.25569   | 2.6666    | 3.80663    |
| TCFL5       | 9.51004   | 11.4922   | 9.50538  | 8.38858   | 9.55106   | 8.64566    |
| ANKRD27     | 11.8874   | 10.3176   | 11.3721  | 10.3035   | 10.7189   | 10.3247    |
| PMS2        | 5.17835   | 4.98492   | 6.58197  | 5.53051   | 7.71246   | 6.38338    |
| B3GALT2     | 0.193778  | 0.269227  | 0.209559 | 0.129968  | 0.229206  | 0.155256   |
| BPY2C       | 8.53242   | 8.58588   | 0        | 0         | 0         | 0          |
| LOC10028859 | 3.17737   | 2.55385   | 4.15459  | 2.44105   | 6.25503   | 3.96001    |
| F11         | 0         | 1.89E-08  | 0        | 0.113138  | 0         | 0          |
| KCNC3       | 0.685518  | 0.303046  | 0.91994  | 0.614431  | 0.416764  | 0.601943   |
| ARHGAP17    | 17.5238   | 20.9039   | 21.4289  | 21.4665   | 22.1738   | 20.0456    |

|             |           |           |           |           |           |           |
|-------------|-----------|-----------|-----------|-----------|-----------|-----------|
| PRINS       | 0.186378  | 0.329568  | 0.493813  | 0.131255  | 0.207734  | 0.406501  |
| CORO1C      | 32.8061   | 32.2001   | 36.6307   | 37.7113   | 33.1208   | 33.3642   |
| LRRC7       | 0.107115  | 0.108233  | 0.0695028 | 0.0287369 | 0.116952  | 0.0858208 |
| NDUFA1      | 264.462   | 291.108   | 248.062   | 293.012   | 216.068   | 234.705   |
| FABP1       | 0.259599  | 0.229521  | 0.196518  | 0.243759  | 0.66136   | 0         |
| C11orf92    | 0.419095  | 0.231586  | 0.264381  | 0.290401  | 0.308652  | 0.244718  |
| ADORA3      | 1.00879   | 1.01279   | 0.577225  | 0.457091  | 0.845774  | 0.527445  |
| OR10G3      | 0         | 0         | 0         | 0         | 0         | 0         |
| PCID2       | 24.8638   | 24.644    | 22.4371   | 23.2123   | 25.1579   | 23.1444   |
| SPRY4       | 5.11533   | 3.40066   | 3.96101   | 3.35497   | 4.2652    | 4.0393    |
| DEXI        | 29.2171   | 36.9152   | 24.7269   | 31.9727   | 29.416    | 28.3098   |
| ALG14       | 15.2252   | 17.4318   | 15.0911   | 15.7362   | 10.3947   | 12.4228   |
| RC3H2       | 3.65167   | 2.17458   | 3.59192   | 2.60213   | 2.93827   | 2.70355   |
| ATP1B3      | 134.38    | 173.037   | 129.61    | 220.42    | 149.222   | 135.472   |
| UTP18       | 17.9979   | 16.7912   | 15.5888   | 15.2927   | 17.1593   | 15.1375   |
| LOC649201   | 0         | 0         | 0         | 0         | 0         | 0         |
| MRPL30      | 15.1184   | 11.6298   | 12.621    | 12.4315   | 12.349    | 11.7897   |
| SYT13       | 0.29873   | 0.082537  | 0.127204  | 0.0876572 | 0.0475657 | 0         |
| OR8B4       | 0         | 0         | 0         | 0         | 0         | 0         |
| MAGEB16     | 0         | 0         | 0         | 0         | 0         | 0         |
| FARS2       | 7.65934   | 7.42401   | 7.12959   | 7.61819   | 5.45644   | 5.83364   |
| TAS2R13     | 0         | 0         | 0         | 0.121828  | 0.0413176 | 0         |
| GRHL1       | 74.1124   | 53.9749   | 72.1125   | 61.6934   | 75.5103   | 88.1782   |
| LOC10050688 | 0         | 0         | 0         | 0.141883  | 0.0117843 | 0         |
| TSTD1       | 106.236   | 128.171   | 95.0651   | 144.502   | 114.115   | 141.653   |
| FAM21A      | 11.765    | 9.63863   | 9.30269   | 7.76416   | 10.6942   | 9.69443   |
| CGGBP1      | 27.9694   | 22.3187   | 25.1778   | 16.8069   | 26.0012   | 21.7856   |
| KRT10       | 4301.32   | 3707.7    | 5633.78   | 4780      | 5470.79   | 5079.39   |
| LOC10050721 | 0         | 0.445263  | 0         | 0         | 0.160377  | 0         |
| CLPP        | 37.6421   | 46.5233   | 37.7452   | 42.1      | 30.6899   | 35.7381   |
| TNR         | 0.0556404 | 0.0819896 | 0.01404   | 0         | 0.0708754 | 0.0231152 |
| KGFLP2      | 1.48701   | 1.37546   | 1.70382   | 1.32466   | 2.08289   | 1.9132    |
| PTGS1       | 34.8925   | 33.4378   | 41.0221   | 31.8956   | 54.7264   | 35.3108   |
| P2RY11      | 6.72482   | 14.5912   | 9.00728   | 13.7572   | 15.5355   | 10.8977   |
| LOC390877   | 0         | 0         | 0         | 0         | 0         | 0         |
| HSP90B3P    | 7.96175   | 4.8352    | 6.75761   | 4.83282   | 5.17332   | 6.26427   |
| SNORD44     | 0         | 0         | 0         | 0         | 0         | 0         |
| PLRG1       | 19.5216   | 17.8049   | 18.7702   | 15.2433   | 15.1819   | 15.684    |
| CACHD1      | 8.51756   | 9.53027   | 10.1481   | 7.12442   | 10.722    | 8.05828   |
| HIST1H2AI   | 0         | 0         | 0         | 0.170254  | 0.115482  | 0.225979  |
| ALOXE3      | 11.1587   | 6.27093   | 14.418    | 14.8698   | 18.4197   | 15.1835   |
| FUT9        | 0.278667  | 0.142641  | 0.205401  | 0.254778  | 0.121437  | 0.164514  |
| PIWIL4      | 1.20587   | 1.3942    | 1.05329   | 0.870995  | 1.55574   | 0.90559   |

|             |          |          |          |          |           |          |
|-------------|----------|----------|----------|----------|-----------|----------|
| FAM153A     | 0.159043 | 0.091831 | 0.226153 | 0.123433 | 0.23584   | 0.109222 |
| GNB4        | 16.2623  | 13.3408  | 17.7971  | 10.2358  | 17.2626   | 15.2612  |
| SRL         | 1.38437  | 2.06035  | 1.04798  | 0.758276 | 1.46952   | 0.79079  |
| MC3R        | 0        | 0        | 0        | 0        | 0         | 0        |
| C17orf46    | 0.17257  | 0        | 0.195955 | 0        | 0.0549554 | 0        |
| LOC10065286 | 3.61547  | 2.71708  | 5.47386  | 5.0923   | 6.793     | 5.85782  |
| TXNDC11     | 16.1266  | 15.4391  | 13.1698  | 15.3568  | 13.0516   | 13.9474  |
| ETV7        | 9.34354  | 11.3848  | 5.07014  | 5.11091  | 9.68904   | 6.55664  |
| GPSM3       | 12.9027  | 15.7257  | 9.97262  | 8.30563  | 19.5083   | 10.8166  |
| RPS21       | 1037.97  | 1732.21  | 1317.18  | 2253.41  | 1436.54   | 1246.13  |
| ERBB3       | 43.9727  | 37.2194  | 44.2365  | 50.943   | 54.7359   | 57.798   |
| ZMYM2       | 13.1664  | 12.4805  | 15.6031  | 14.3317  | 16.2486   | 12.0373  |
| DDX49       | 28.6268  | 38.5049  | 31.5276  | 44.5755  | 32.9382   | 34.2697  |
| TMEM180     | 2.43074  | 4.23593  | 3.60017  | 4.10176  | 6.14774   | 5.51013  |
| PPFIA1      | 14.5239  | 14.5351  | 18.0489  | 18.5401  | 14.8458   | 18.551   |
| TIMM17A     | 37.1807  | 36.9396  | 33.8042  | 36.1119  | 29.3363   | 28.2253  |
| N4BP2L2     | 43.5478  | 40.954   | 44.9231  | 42.6816  | 48.195    | 40.6632  |
| MIR124-1    | 0        | 0        | 0        | 0        | 0         | 0        |
| INPP4A      | 5.58018  | 5.45675  | 5.18963  | 4.38615  | 5.84141   | 4.28563  |
| SDF2L1      | 17.2113  | 24.3722  | 16.2069  | 17.8693  | 16.2202   | 15.4341  |
| OR4D1       | 0        | 0        | 0        | 0        | 0         | 0        |
| MED29       | 14.7538  | 13.9205  | 14.5443  | 16.2702  | 16.532    | 15.1803  |
| XRCC3       | 12.4706  | 16.7359  | 16.2159  | 22.5298  | 23.1731   | 21.0962  |
| LRFN4       | 9.93205  | 24.4395  | 14.9768  | 19.6259  | 17.9866   | 13.5467  |
| COL18A1     | 33.1213  | 54.7433  | 44.0924  | 45.77    | 63.9995   | 50.4379  |
| P2RY12      | 0.741837 | 0.466407 | 0.872008 | 0.309585 | 0.642906  | 0.285358 |
| BCS1L       | 22.687   | 33.6703  | 22.0988  | 28.7399  | 34.1216   | 32.2678  |
| MIR1912     | 0        | 0        | 0        | 0        | 0         | 0        |
| AK5         | 1.48398  | 0.997465 | 0.921365 | 1.17069  | 1.03959   | 0.813884 |
| MIR138-1    | 0        | 0        | 0        | 0        | 0         | 0        |
| QDPR        | 33.5724  | 28.8507  | 28.6196  | 31.9254  | 28.1649   | 25.145   |
| MTHFS       | 6.08419  | 8.12669  | 5.61726  | 6.20032  | 4.27802   | 4.55895  |
| SNX16       | 7.54655  | 6.45601  | 6.67669  | 4.2235   | 8.36548   | 7.66325  |
| SNORD115-3  | 0        | 0        | 0        | 0        | 0         | 0        |
| LOC388276   | 0        | 0        | 0        | 0        | 0         | 0        |
| HOMER2      | 23.9933  | 13.1423  | 25.3772  | 25.9389  | 22.4116   | 28.2519  |
| RNU1-4      | 48.9911  | 54.6816  | 26.1981  | 59.5068  | 31.1737   | 27.9645  |
| C9orf85     | 8.03541  | 7.40042  | 6.71648  | 7.9381   | 6.23732   | 9.64954  |
| SNORD114-10 | 0        | 0        | 0        | 0        | 0         | 0        |
| SNORD52     | 0        | 0        | 0        | 0        | 0         | 0        |
| LOC646808   | 0.426252 | 1.50746  | 0.860467 | 0.933903 | 0.995435  | 1.41665  |
| DGKZ        | 11.9144  | 18.2617  | 11.9299  | 19.2487  | 15.6841   | 14.8993  |
| LOC1001308  | 0.54321  | 0.411396 | 0.587512 | 0.80072  | 0.518438  | 0.495188 |

|             |           |           |           |           |           |           |
|-------------|-----------|-----------|-----------|-----------|-----------|-----------|
| SSR4P1      | 1.1295    | 1.59782   | 1.40227   | 1.73936   | 1.87041   | 1.49218   |
| HDX         | 0.402293  | 0.299261  | 0.351246  | 0.104437  | 0.433048  | 0.279527  |
| INGX        | 0.0910527 | 0         | 0         | 0.0854971 | 0         | 0.0567402 |
| CXCL16      | 23.4807   | 22.0442   | 22.1068   | 22.334    | 26.2001   | 21.6013   |
| KLHL11      | 1.1363    | 0.540961  | 1.12485   | 0.28726   | 0.946395  | 0.544686  |
| MIR1183     | 0         | 0         | 0         | 0         | 0         | 0         |
| SUN1        | 66.4186   | 79.2448   | 81.1708   | 76.097    | 92.031    | 69.6559   |
| SNRNP25     | 19.9072   | 26.2137   | 19.2381   | 24.4594   | 16.7705   | 15.5726   |
| SNORD98     | 0         | 0         | 0         | 0         | 0         | 0         |
| SCGB1D2     | 1055.89   | 322.015   | 249.454   | 391.234   | 172.005   | 174.982   |
| LINC00094   | 3.70636   | 4.42685   | 4.33082   | 5.20578   | 4.29117   | 4.1075    |
| CD37        | 8.83249   | 12.7192   | 9.20737   | 6.494     | 18.7053   | 10.2876   |
| LOC10050735 | 0.183756  | 0.446779  | 0.399924  | 0.323519  | 0.731468  | 0.715679  |
| PRKAR2B     | 53.3089   | 49.5944   | 61.3334   | 18.6297   | 23.0729   | 13.1645   |
| FAT2        | 11.5595   | 11.2741   | 14.3307   | 13.9942   | 15.5782   | 14.0936   |
| VTRNA1-3    | 0         | 0         | 0         | 0         | 0         | 0         |
| SYT14       | 0.0195971 | 0.0173266 | 0.0148352 | 0         | 0.0124815 | 0.0549571 |
| CBL         | 4.39086   | 3.41538   | 5.07466   | 3.58004   | 4.46703   | 3.94242   |
| CEBPD       | 64.7264   | 93.5154   | 53.7835   | 68.8027   | 77.2324   | 64.58     |
| C3orf30     | 0         | 0         | 0         | 0         | 0         | 0         |
| CCBE1       | 1.48062   | 1.26859   | 1.3635    | 0.487315  | 1.19579   | 0.741934  |
| HMG20A      | 11.7408   | 8.89121   | 9.99171   | 10.1746   | 11.577    | 9.72906   |
| DKFZP434K02 | 0         | 0         | 0         | 0         | 0         | 0         |
| GPHN        | 6.36237   | 6.25975   | 5.69206   | 5.70251   | 5.33459   | 5.04637   |
| MIR421      | 0         | 0         | 0         | 0         | 0         | 0         |
| CAMK1       | 12.7109   | 17.3746   | 15.788    | 10.1315   | 10.3897   | 8.1066    |
| TMEM33      | 13.8004   | 9.29789   | 11.2198   | 9.41271   | 9.33009   | 9.70354   |
| MEX3B       | 1.3334    | 1.51208   | 1.90907   | 1.22482   | 2.99084   | 2.13149   |
| LRRTM1      | 0.46198   | 0.653526  | 0.454638  | 0.390413  | 0.264814  | 0.287886  |
| RIMKLA      | 0.303008  | 0.110312  | 0.1889    | 0.200837  | 0.181635  | 0.199929  |
| KIAA0513    | 9.63275   | 8.42534   | 11.3193   | 9.00863   | 12.4759   | 14.0734   |
| B3GALT6     | 7.22924   | 10.9164   | 9.02162   | 11.8288   | 10.827    | 9.99119   |
| RBMXL2      | 0         | 0.163136  | 0         | 0         | 0         | 0         |
| LOC10050606 | 1.26627   | 0.857802  | 2.02311   | 1.71689   | 2.08046   | 1.38273   |
| MIR3657     | 0         | 0         | 0         | 0         | 0         | 110.045   |
| FLJ10661    | 1.92004   | 3.48714   | 1.85342   | 2.52923   | 2.48167   | 2.2414    |
| SLC25A18    | 7.09661   | 7.14582   | 4.73796   | 3.19298   | 3.98628   | 4.20733   |
| BAHCC1      | 2.63218   | 3.37609   | 3.82378   | 2.61952   | 4.22064   | 2.71452   |
| TBK1        | 14.5849   | 10.6512   | 11.2354   | 8.02394   | 11.0488   | 8.22787   |
| OR51I2      | 0         | 0         | 0         | 0         | 0         | 0         |
| HEPHL1      | 2.49339   | 1.5787    | 0.0974198 | 4.51635   | 1.21922   | 20.9409   |
| APOL5       | 0.150848  | 0         | 0         | 0.0708221 | 0.0480381 | 0         |
| PDF         | 13.6601   | 13.3411   | 10.391    | 12.7001   | 10.0659   | 12.5244   |



|             |          |          |           |           |           |           |
|-------------|----------|----------|-----------|-----------|-----------|-----------|
| RPE         | 14.6273  | 12.0097  | 12.6508   | 9.5878    | 10.9372   | 12.3626   |
| LRRC31      | 1.06046  | 0.396673 | 0         | 0.0382982 | 0.155864  | 0.635416  |
| PKD2L2      | 0        | 0        | 0         | 0.0495128 | 0         | 0.03164   |
| LOC10013431 | 0.96509  | 2.13318  | 1.82645   | 3.17172   | 1.53668   | 0.751754  |
| YEATS4      | 10.0126  | 10.1072  | 9.25069   | 7.55095   | 12.2018   | 9.97327   |
| SLC35B4     | 3.7183   | 2.85492  | 3.01583   | 2.59888   | 2.9469    | 2.52615   |
| PDGFRA      | 10.6652  | 5.786    | 12.5114   | 5.6953    | 11.5708   | 8.40032   |
| IGFBP5      | 166.301  | 103.127  | 176.585   | 85.7069   | 113.04    | 91.0702   |
| CHD9        | 8.27827  | 5.3896   | 9.03671   | 6.05521   | 7.55599   | 6.50329   |
| LOC10012837 | 0        | 0.287818 | 0         | 0.305673  | 0.414671  | 0         |
| HIST1H2AM   | 2.37075  | 0.598876 | 0.769144  | 1.90808   | 0.862825  | 1.05525   |
| LOC401324   | 0        | 0        | 0         | 0         | 0         | 0         |
| PNCK        | 1.29062  | 2.33925  | 1.30062   | 2.28326   | 3.2761    | 2.6711    |
| CYorf15B    | 21.5186  | 20.078   | 0.0225307 | 0.0558938 | 0         | 0         |
| ZNF813      | 0.959933 | 0.523643 | 1.04621   | 0.396165  | 1.04042   | 0.884245  |
| LOC10013274 | 0.244421 | 0.300141 | 0.328939  | 0         | 0.282518  | 0.211546  |
| ZNF816      | 4.07424  | 3.10416  | 3.71399   | 2.51777   | 2.53212   | 2.47746   |
| MIR212      | 0        | 0        | 0         | 0         | 0         | 0         |
| ATP6V0A1    | 29.1304  | 29.6706  | 28.7499   | 27.4449   | 29.0947   | 30.2525   |
| LOC646168   | 0.187143 | 0.264736 | 0.085001  | 0.0351449 | 0.214546  | 0.0932957 |
| LOC10050570 | 0.589666 | 0.312808 | 0.624933  | 0.332212  | 0.300449  | 0.293964  |
| SIGLECP3    | 2.79152  | 2.83223  | 3.36033   | 1.93367   | 6.41223   | 3.59319   |
| LOC646329   | 0.366647 | 0.547841 | 0.24286   | 0.215172  | 0.467039  | 0.485518  |
| CHST13      | 0.242128 | 0.160556 | 0         | 0.0568385 | 0         | 0.0754419 |
| TRMT1L      | 4.93528  | 4.40823  | 5.07623   | 3.36722   | 4.9678    | 4.61775   |
| ZBTB37      | 0.491651 | 0.357685 | 0.845947  | 0.339315  | 0.285345  | 0.415729  |
| LOC440131   | 0        | 0        | 0         | 0         | 0.12207   | 0         |
| MIR1292     | 0        | 0        | 0         | 0         | 0         | 0         |
| PAM         | 29.642   | 18.5122  | 32.3089   | 20.7903   | 25.4279   | 21.1472   |
| SOD2        | 145.372  | 83.0192  | 67.9862   | 49.0071   | 93.5007   | 55.2297   |
| 1-Mar       | 2.44332  | 1.84491  | 3.13208   | 2.32773   | 4.17988   | 2.53384   |
| MCM3AP      | 18.3365  | 20.3388  | 19.8582   | 17.196    | 23.4281   | 20.6668   |
| LOC10013038 | 0        | 0        | 0.029544  | 0         | 0.0497135 | 0         |
| PTCH2       | 3.94317  | 4.9327   | 4.71699   | 8.38821   | 6.96581   | 8.6975    |
| HBE1        | 0        | 0.137531 | 0.116142  | 0         | 0.114002  | 0         |
| MIR579      | 0        | 0        | 0         | 0         | 0         | 0         |
| KRTAP10-8   | 0.837038 | 0.246686 | 0         | 23.972    | 0.266557  | 102.757   |
| IRX2        | 25.2223  | 25.067   | 21.4272   | 25.8806   | 30.4028   | 30.1834   |
| STBD1       | 14.717   | 14.2875  | 20.3157   | 8.98045   | 9.50464   | 5.98558   |
| FLJ90757    | 4.12423  | 4.17007  | 4.30115   | 5.21152   | 4.93214   | 4.55226   |
| NUP37       | 9.66012  | 9.19786  | 12.1645   | 8.80904   | 9.76131   | 10.4768   |
| ZRANB3      | 0.768226 | 0.608953 | 0.641712  | 0.572107  | 0.523032  | 0.775866  |
| TAGLN2      | 243.292  | 297.583  | 254       | 317.935   | 281.533   | 285.698   |

|             |           |           |           |           |           |           |
|-------------|-----------|-----------|-----------|-----------|-----------|-----------|
| CYP21A1P    | 0.373033  | 0.819955  | 0.579123  | 0.459166  | 0.894771  | 0.269702  |
| CST3        | 638.334   | 853.477   | 679.278   | 480.807   | 641.769   | 482.326   |
| ZNRF2P2     | 0.143317  | 0.254739  | 2.36E-07  | 0.122482  | 0.0271916 | 0.223966  |
| LOC729041   | 1.91201   | 2.28712   | 1.10684   | 4.01313   | 5.65905   | 3.92489   |
| FLJ41757    | 2.24934   | 2.08985   | 2.16453   | 1.64672   | 1.91825   | 1.54424   |
| ZNF532      | 12.0933   | 10.6138   | 14.8889   | 12.7419   | 16.7776   | 15.3941   |
| EXOC6       | 6.69285   | 4.64417   | 4.65662   | 4.03458   | 4.88302   | 5.04894   |
| SNORD35B    | 0         | 0         | 0         | 0         | 0         | 0         |
| MIR4534     | 0         | 0         | 0         | 0         | 0         | 0         |
| FLRT2       | 5.60474   | 4.36962   | 5.46652   | 4.78998   | 6.20265   | 6.37427   |
| TACSTD2     | 244.128   | 211.23    | 257.615   | 253.443   | 295.658   | 298.192   |
| OR2M1P      | 0         | 0         | 0         | 0         | 0         | 0         |
| DENND1C     | 7.49581   | 6.12108   | 7.10828   | 5.08528   | 10.9469   | 7.16504   |
| LOC1001292: | 0.055877  | 0.0988058 | 0.253795  | 0.104935  | 0.0355884 | 0.0696403 |
| CPLX1       | 1.91702   | 8.05081   | 3.91823   | 4.50013   | 7.60048   | 3.40463   |
| CSPG4P1Y    | 0         | 0         | 0         | 0         | 0         | 0         |
| HSD17B4     | 72.9298   | 52.8689   | 64.8606   | 52.5813   | 60.5396   | 59.652    |
| MESDC1      | 6.66928   | 9.0318    | 6.62486   | 6.44564   | 7.39722   | 5.77787   |
| MIR556      | 0         | 0         | 0         | 0         | 0         | 0         |
| CYP2D7P1    | 2.95988   | 6.62523   | 4.24258   | 7.11515   | 6.88491   | 5.21894   |
| ADCY7       | 10.4844   | 9.39357   | 12.4535   | 6.08525   | 16.3119   | 9.03805   |
| MYO5A       | 6.12662   | 6.1707    | 6.27753   | 5.57639   | 7.33116   | 5.95782   |
| FAM75A7     | 0         | 0         | 0         | 0         | 0         | 0         |
| DBIL5P2     | 0         | 0         | 0.0472807 | 0.117293  | 0         | 0.116763  |
| MGC45922    | 0         | 0.678511  | 0.290473  | 0.1201    | 0.0814631 | 0.318819  |
| KLHDC7B     | 11.0676   | 32.3238   | 0.855437  | 0.873829  | 1.77813   | 0.62134   |
| LY6G6E      | 1.61794   | 0.228877  | 1.22479   | 0         | 1.03048   | 3.69469   |
| HCG4B       | 0.109145  | 0.192999  | 0.743614  | 0.102486  | 0.278062  | 0.0680148 |
| NAA15       | 9.6436    | 5.95922   | 7.60116   | 6.65345   | 6.81351   | 6.72028   |
| PTGDR       | 0.575165  | 0.867483  | 1.02448   | 0.254151  | 1.5084    | 0.716837  |
| ZNF433      | 4.94505   | 4.55278   | 4.82687   | 6.36264   | 5.42462   | 5.91047   |
| HCRTR1      | 0.0516544 | 0.137009  | 0         | 0.0970054 | 0.032899  | 0.0321889 |
| OR2T34      | 0         | 0         | 0         | 0         | 0         | 0         |
| LOC1002886: | 0         | 0         | 0         | 0         | 0         | 0         |
| SLK         | 22.5415   | 15.9347   | 23.7022   | 18.225    | 22.0021   | 18.8074   |
| HMSD        | 1.79414   | 0.396567  | 0.679088  | 0.210584  | 1.28554   | 0.419263  |
| LOC1002876: | 0         | 0         | 0         | 0         | 0         | 0         |
| ITPRIP      | 9.02894   | 7.82552   | 12.34     | 11.8609   | 11.0196   | 10.5046   |
| RNU5A-1     | 0         | 0         | 0         | 0         | 0         | 0         |
| TIMM23B     | 13.5807   | 11.2829   | 12.3675   | 12.1696   | 10.6262   | 10.7377   |
| OR9I1       | 0         | 0         | 0         | 0         | 0         | 0         |
| RBP2        | 0         | 0         | 0         | 0         | 0.124133  | 0.607268  |
| LOC1005070: | 0         | 0         | 0         | 0         | 0         | 0         |

|             |           |           |           |           |           |           |
|-------------|-----------|-----------|-----------|-----------|-----------|-----------|
| EHD4        | 14.8433   | 14.92     | 16.4246   | 13.8083   | 14.6742   | 13.5205   |
| KRTAP13-3   | 0         | 0         | 0         | 0         | 0         | 0         |
| ST7         | 11.0031   | 8.42642   | 9.76391   | 9.34948   | 7.80576   | 7.81561   |
| SMAP1       | 17.1791   | 16.1688   | 16.6731   | 15.5756   | 14.0664   | 17.0795   |
| LOC400643   | 0.0600592 | 0.318603  | 0.227326  | 0.394762  | 0.344268  | 0.187132  |
| PIM1        | 29.3728   | 26.7546   | 47.5232   | 37.7931   | 45.6148   | 46.1516   |
| C11orf75    | 30.7812   | 28.7148   | 19.3568   | 28.486    | 23.3867   | 33.832    |
| SLC39A4     | 2.42062   | 3.7714    | 5.7804    | 9.73227   | 7.29326   | 7.22892   |
| MCF2        | 0.260508  | 0.12132   | 0.194605  | 0.120104  | 0.149824  | 0.115439  |
| MIR4737     | 0         | 0         | 0         | 0         | 0         | 0         |
| C14orf166   | 109.989   | 115.29    | 93.6178   | 111.151   | 84.6673   | 91.2268   |
| FAM53B      | 13.8115   | 14.3818   | 14.7412   | 15.5719   | 17.1784   | 14.4868   |
| FOXO3B      | 3.14884   | 2.58568   | 2.90806   | 2.51966   | 3.08696   | 3.18672   |
| LOC10050910 | 6.68225   | 11.45     | 1.66384   | 1.44908   | 3.36528   | 1.96805   |
| ARL6IP4     | 71.7171   | 113.282   | 107.497   | 146.887   | 135.365   | 117.522   |
| RTL1        | 0         | 0         | 0         | 0.0217794 | 0         | 0.0144539 |
| FBLIM1      | 18.8472   | 20.1199   | 11.815    | 18.3997   | 13.7334   | 19.596    |
| LOC283663   | 2.40574   | 3.04871   | 4.00655   | 4.8944    | 5.0819    | 4.29758   |
| C17orf107   | 1.78371   | 2.45782   | 2.30475   | 2.95207   | 2.30972   | 2.87682   |
| FAM179B     | 4.48576   | 3.79006   | 3.96363   | 2.76012   | 4.40739   | 3.68259   |
| MIR596      | 0         | 0         | 0         | 0         | 0         | 0         |
| ANKHD1      | 19.692    | 17.479    | 21.4742   | 19.5895   | 22.0606   | 16.7723   |
| VMAC        | 4.1211    | 5.82979   | 7.00732   | 5.77471   | 7.87426   | 5.92638   |
| SYT14L      | 0         | 0.033805  | 0.115777  | 0         | 0.0243521 | 0.0476529 |
| FAM26E      | 7.85538   | 4.07388   | 9.14048   | 6.51597   | 5.79869   | 9.34055   |
| CSHL1       | 0         | 0         | 0         | 0         | 0         | 0         |
| DHX40       | 17.8116   | 14.8634   | 15.5002   | 14.3063   | 15.0853   | 13.2514   |
| PNMA5       | 0.127303  | 0.202598  | 0.146235  | 0.0298833 | 0.160767  | 0.0892463 |
| FLJ37396    | 0.0650554 | 0.115036  | 0.984946  | 0.61086   | 0.580078  | 0.810796  |
| NAV2        | 8.11706   | 5.9253    | 7.35346   | 9.47348   | 8.67526   | 8.33774   |
| TMPRSS5     | 3.32959   | 3.67977   | 3.60574   | 3.38697   | 2.62134   | 2.44949   |
| SP1         | 33.0189   | 28.5088   | 31.9207   | 25.3956   | 30.1528   | 25.0079   |
| FAM9C       | 0         | 0         | 0         | 0.166557  | 0         | 0.0552678 |
| MIR346      | 0         | 0         | 0         | 0         | 0         | 0         |
| LOC642778   | 13.5356   | 23.2388   | 9.92243   | 14.4381   | 24.0373   | 21.2173   |
| UGDH        | 7.90744   | 6.87475   | 8.32456   | 6.61387   | 5.63983   | 5.61455   |
| MT1F        | 6.51953   | 7.92572   | 5.86069   | 9.94782   | 7.00705   | 4.57053   |
| C2orf18     | 19.2172   | 21.4185   | 19.9697   | 18.5836   | 17.7235   | 17.6468   |
| TNFRSF14    | 44.2674   | 91.4314   | 49.0489   | 59.5815   | 81.8085   | 53.0184   |
| SNRNP40     | 19.3139   | 20.6072   | 18.7344   | 18.4429   | 18.2223   | 17.0539   |
| EPS8L3      | 0         | 0.0387595 | 0         | 0         | 0         | 0         |
| LATS1       | 2.98758   | 1.76095   | 4.27707   | 2.04195   | 2.84774   | 2.41899   |
| BEND2       | 0         | 0         | 0.0364502 | 0         | 0         | 0         |

|             |           |           |           |          |           |           |
|-------------|-----------|-----------|-----------|----------|-----------|-----------|
| IL36G       | 8.02868   | 6.2534    | 4.41361   | 5.8336   | 7.12239   | 7.2069    |
| NAIF1       | 2.49288   | 3.74175   | 2.67708   | 2.91236  | 3.37854   | 3.05272   |
| MTRNR2L2    | 1.79922   | 3.17901   | 1.70187   | 3.16531  | 1.78866   | 1.75078   |
| CCNF        | 13.2783   | 14.9252   | 9.57147   | 10.9788  | 9.53942   | 10.4772   |
| MIR4650-2   | 0         | 0         | 0         | 0        | 0         | 0         |
| TDO2        | 0.312076  | 0.110367  | 0.330741  | 0        | 0.0397527 | 0.0777891 |
| VGLL2       | 0.246389  | 0         | 0.249295  | 0.231918 | 0.157308  | 0         |
| ZNF566      | 2.09301   | 2.08531   | 2.58033   | 2.40004  | 2.72468   | 1.60433   |
| FAM189A2    | 20.4147   | 18.1932   | 18.1241   | 22.1147  | 21.0246   | 25.585    |
| MFSD7       | 10.9862   | 10.7592   | 10.5155   | 8.59147  | 14.1803   | 13.5055   |
| PDE8A       | 11.9819   | 12.6986   | 14.4099   | 14.1666  | 13.7957   | 11.724    |
| GIT1        | 19.6703   | 28.568    | 23.666    | 30.2011  | 28.7311   | 22.6359   |
| MIR1469     | 0         | 0         | 0         | 0        | 0         | 0         |
| TUBB2A      | 41.3565   | 35.3119   | 47.5649   | 51.4626  | 36.606    | 66.7009   |
| OR5M8       | 0         | 0         | 0         | 0        | 0         | 0         |
| QRICH2      | 2.45744   | 3.09255   | 1.91461   | 2.17275  | 2.27348   | 3.11864   |
| RPL38       | 1950.12   | 2821.45   | 2310.56   | 3421.06  | 2227.3    | 2222.99   |
| CMA1        | 12.4774   | 15.9029   | 51.8887   | 42.1475  | 37.1545   | 33.0202   |
| ESRG        | 0.284084  | 0.251169  | 0.334527  | 0.56314  | 0.100519  | 0.0590098 |
| IPO7        | 24.4998   | 19.5592   | 23.151    | 18.4822  | 17.5312   | 17.5472   |
| TTC18       | 2.05188   | 2.92754   | 3.50103   | 3.0267   | 3.74791   | 3.20802   |
| CPB2        | 0.485741  | 0.235042  | 0.411673  | 0.332831 | 0.190482  | 0.302693  |
| CCNDBP1     | 39.756    | 38.4438   | 35.4817   | 29.7983  | 29.5331   | 32.4505   |
| MIR145      | 0         | 0         | 0         | 0        | 0         | 0         |
| EVI2A       | 1.70416   | 1.93686   | 2.34245   | 0.68721  | 2.59071   | 1.62504   |
| ZNF17       | 3.52114   | 2.9807    | 2.49539   | 2.81387  | 3.57868   | 2.9412    |
| SERHL       | 62.903    | 3.1126    | 2.12935   | 4.9092   | 2.34916   | 1.23213   |
| ZNF587      | 6.93212   | 5.2694    | 6.72597   | 6.51177  | 7.79035   | 6.51823   |
| MIR29B1     | 0         | 0         | 0         | 0        | 0         | 0         |
| WDR61       | 70.2472   | 64.5312   | 70.2515   | 66.2863  | 60.0088   | 52.5104   |
| SDHAP3      | 8.16164   | 9.60987   | 9.13873   | 9.0058   | 9.80338   | 9.20756   |
| DLG4        | 2.43516   | 4.73624   | 5.06047   | 4.93733  | 6.87569   | 4.59298   |
| LOC10013001 | 2.85538   | 4.2985    | 3.71258   | 4.18843  | 4.72576   | 3.8146    |
| ERVFRD-1    | 0.358427  | 0.660205  | 0.768771  | 0.504836 | 1.0463    | 0.912039  |
| LRP12       | 4.62093   | 2.27267   | 4.32389   | 3.50809  | 3.56182   | 3.54426   |
| LOC10050614 | 16.3677   | 22.3537   | 17.7292   | 21.2416  | 19.3236   | 16.6676   |
| NEK10       | 0.228369  | 0.0336516 | 0.0576256 | 0.142957 | 0.0484832 | 0.0474367 |
| TAOK2       | 16.9925   | 22.8803   | 21.1679   | 20.5392  | 25.2703   | 22.517    |
| IL34        | 26.6225   | 33.2388   | 34.1125   | 32.7467  | 51.8392   | 51.4549   |
| ST18        | 0.0150894 | 0.0266823 | 0.0342684 | 0        | 0.0480528 | 0.0376124 |
| NAA11       | 0         | 0         | 0         | 0        | 0         | 0         |
| KCNA3       | 0         | 0.312648  | 0.156154  | 0        | 0.300296  | 0.128544  |
| SMPD1       | 22.2782   | 23.6002   | 19.8044   | 22.8764  | 22.9628   | 22.2124   |

|             |            |           |           |           |            |           |
|-------------|------------|-----------|-----------|-----------|------------|-----------|
| SNORD115-2l | 0          | 0         | 0         | 0         | 0          | 0         |
| NXPH1       | 0          | 0         | 0         | 0         | 0.0217158  | 0         |
| CNN2        | 71.8569    | 91.9348   | 69.2566   | 80.2729   | 69.1464    | 70.4762   |
| TMEM181     | 17.4143    | 12.7203   | 20.5019   | 18.2076   | 14.6409    | 14.2139   |
| BMP8B       | 1.00355    | 0.621027  | 0.767781  | 1.17066   | 1.11928    | 0.971565  |
| RBM4B       | 16.0888    | 19.2006   | 16.6713   | 18.3238   | 20.8837    | 17.3451   |
| GOLGA8E     | 0.00608564 | 0         | 0.0264472 | 0.0142858 | 0.00232559 | 0         |
| SCAPER      | 4.78291    | 3.48466   | 4.75503   | 4.35615   | 5.62178    | 4.06778   |
| HLA-F-AS1   | 3.75045    | 6.63225   | 4.02686   | 5.99842   | 8.50292    | 4.95193   |
| YEATS2      | 9.19641    | 8.50696   | 7.30594   | 6.22512   | 9.61261    | 8.63735   |
| NFKBIZ      | 31.8894    | 27.5546   | 29.2048   | 25.6335   | 36.7832    | 28.2277   |
| BBOX1       | 14.4094    | 15.3757   | 18.6815   | 21.2025   | 21.9062    | 20.9517   |
| CCDC54      | 0.0854856  | 0         | 0.129426  | 0         | 0          | 0.106542  |
| RRN3P3      | 2.26408    | 3.16698   | 2.57635   | 2.79502   | 3.18873    | 2.86279   |
| SLC28A1     | 0          | 0.0322038 | 0.110293  | 0         | 0          | 0.0680937 |
| LONRF2      | 1.07117    | 0.684983  | 1.01998   | 0.999489  | 0.746598   | 0.906806  |
| PAK1IP1     | 17.6288    | 10.4969   | 10.0224   | 9.52651   | 10.9071    | 9.05745   |
| AIM1L       | 10.6762    | 10.088    | 11.5397   | 12.0803   | 11.0214    | 13.6946   |
| LHX5        | 0.0987222  | 0         | 0         | 0         | 0          | 0         |
| TPPP2       | 0.947313   | 0.977147  | 0.23904   | 0.148252  | 0.402233   | 0.39355   |
| KRTAP2-4    | 7.16599    | 2.03055   | 0.127133  | 64.1821   | 1.58795    | 1271.92   |
| ZNF525      | 2.56267    | 2.43453   | 3.61665   | 2.89002   | 4.71999    | 3.93142   |
| FLJ41423    | 0.0774651  | 0.102735  | 0         | 0.0727385 | 0          | 0         |
| SKP1        | 93.1236    | 89.8196   | 97.569    | 106.331   | 89.4738    | 92.0514   |
| ZYG11A      | 0.318481   | 0.261468  | 0.275533  | 0.0640818 | 0.289774   | 0.226816  |
| RRAGC       | 16.9903    | 13.8918   | 18.6097   | 14.683    | 16.3755    | 14.1481   |
| SLC9A1      | 16.4123    | 14.6231   | 13.0174   | 18.2346   | 13.0832    | 13.9358   |
| SOS1        | 10.3172    | 8.05455   | 10.1463   | 7.03584   | 9.53746    | 8.3736    |
| MFS10       | 29.9637    | 48.0268   | 30.162    | 50.0213   | 48.5436    | 43.8619   |
| GSTM2P1     | 37.9544    | 15.4061   | 15.1618   | 11.9422   | 20.5378    | 13.6667   |
| MORN5       | 0          | 0         | 0.142427  | 0         | 0          | 0.117244  |
| PATZ1       | 8.82816    | 9.80559   | 9.21513   | 9.1266    | 12.4757    | 9.41788   |
| FXD6-FXD2   | 4.68E-49   | 0.201842  | 0.210326  | 3.06E-52  | 1.58E-60   | 0.24381   |
| TRPV5       | 0          | 0.0359183 | 0.0307536 | 0         | 0.0258745  | 0.025316  |
| GFER        | 8.11949    | 12.0514   | 8.24841   | 11.6929   | 11.3877    | 10.303    |
| C14orf126   | 6.24804    | 5.39186   | 6.769     | 5.23452   | 4.78959    | 4.61626   |
| GNA15       | 21.6565    | 26.6785   | 18.8349   | 20.9677   | 32.6131    | 31.9691   |
| SERPINE3    | 0.0822022  | 0         | 0.229763  | 0         | 0.198686   | 0.158023  |
| CCL4        | 5.09865    | 6.31107   | 2.11129   | 0.766008  | 2.2082     | 0.635452  |
| MIR26A1     | 0          | 0         | 0         | 0         | 0          | 0         |
| FADS2       | 2126.42    | 1961.98   | 1493.94   | 1455.04   | 1010.53    | 1567.03   |
| TNFRSF12A   | 21.0835    | 37.2814   | 19.2036   | 47.7459   | 17.5213    | 22.272    |
| MRGPRX4     | 0          | 0         | 0         | 0         | 0          | 0         |

|             |           |           |           |           |           |           |
|-------------|-----------|-----------|-----------|-----------|-----------|-----------|
| VPS29       | 83.3303   | 77.9984   | 82.9193   | 73.3575   | 69.8313   | 66.4169   |
| FAM176A     | 3.48856   | 3.38268   | 4.59935   | 4.82973   | 4.12696   | 5.90578   |
| CDRT15      | 1.06905   | 0.723357  | 0.19819   | 0.122917  | 0.521085  | 0.326296  |
| ABCB4       | 0.631382  | 0.949347  | 0.500899  | 0.361734  | 0.986999  | 0.691013  |
| OR2B6       | 0.380549  | 0.112152  | 0.0960259 | 0         | 0.0807912 | 0.158095  |
| STAP1       | 0.498241  | 0.377583  | 0.107763  | 0.0668343 | 0.725331  | 0.0887093 |
| IL36A       | 0         | 0         | 0         | 0         | 0         | 0         |
| STX2        | 3.84901   | 5.15748   | 4.4377    | 3.83708   | 8.92088   | 6.92499   |
| PRPF39      | 28.8827   | 29.8796   | 26.5244   | 28.6315   | 34.38     | 30.1621   |
| MIR3135     | 0         | 0         | 0         | 0         | 0         | 0         |
| DDR1        | 55.1294   | 55.4136   | 42.607    | 47.5144   | 45.4028   | 51.3932   |
| ESR2        | 0.632729  | 0.652833  | 0.942389  | 0.429172  | 0.623564  | 1.01563   |
| FN1         | 18.8293   | 9.67043   | 17.5433   | 9.6835    | 11.4718   | 10.4742   |
| SF1         | 97.7935   | 111.793   | 99.5522   | 121.917   | 104.969   | 94.6703   |
| ARPC1A      | 65.8726   | 83.845    | 61.1534   | 78.5922   | 60.0617   | 72.4758   |
| TRAF6       | 4.04365   | 3.44822   | 3.30559   | 3.77446   | 3.84788   | 3.16842   |
| EIF3H       | 205.448   | 224.266   | 210.068   | 244.225   | 213.318   | 201.665   |
| C16orf92    | 0         | 2.20E-06  | 0         | 0         | 0         | 0         |
| NR1H4       | 1.01604   | 0.198923  | 0.16394   | 0.237676  | 0.143298  | 0.157734  |
| LOC10050682 | 0         | 0         | 0         | 0         | 0.231177  | 0         |
| C1QL4       | 0.0498679 | 0.396811  | 0.188752  | 0.374602  | 0.127045  | 0.27968   |
| GDPD3       | 17.4476   | 23.577    | 17.5539   | 21.9597   | 20.2191   | 28.2895   |
| ZNF180      | 3.86945   | 3.22483   | 3.98563   | 2.76969   | 3.55531   | 2.88563   |
| TRIM43B     | 0         | 0         | 0         | 0         | 0         | 0         |
| WDR38       | 0.177942  | 0.0786511 | 0         | 0         | 0.056656  | 0         |
| CCDC70      | 0         | 0         | 0         | 0         | 0         | 0         |
| MIR503      | 0         | 0         | 0         | 0         | 0         | 0         |
| MBL2        | 0         | 0         | 0         | 0         | 0         | 0.0171426 |
| MIR195      | 0         | 0         | 0         | 0         | 0         | 0         |
| TMEM231     | 3.40716   | 4.98201   | 5.52246   | 5.14708   | 5.8036    | 5.25892   |
| ATP6V1B2    | 53.5515   | 45.7032   | 47.4763   | 45.7823   | 55.3983   | 58.6939   |
| TRPM4       | 12.819    | 19.2943   | 23.4493   | 30.6179   | 29.3394   | 25.1739   |
| GNAO1       | 0.924986  | 1.55893   | 1.22409   | 1.2613    | 1.4298    | 1.30039   |
| PRAMEF22    | 0         | 0         | 0         | 0         | 0         | 0         |
| PARL        | 27.9265   | 35.6279   | 27.3598   | 31.4105   | 32.8791   | 26.1873   |
| LOC441455   | 1.28924   | 0.455646  | 0.829022  | 0.846846  | 0.738526  | 0.762728  |
| GIPR        | 2.14191   | 4.28346   | 2.12331   | 3.39992   | 4.54732   | 2.57416   |
| PRSS37      | 0         | 0         | 0         | 0         | 0         | 0         |
| MIR3934     | 0         | 0         | 0         | 0         | 0         | 0         |
| CHST6       | 0.249011  | 0.171236  | 0.178031  | 0.324747  | 0.229172  | 0.456899  |
| RSRC2       | 46.5861   | 39.3729   | 41.4989   | 35.1984   | 46.9401   | 44.4174   |
| ZNF385B     | 0.9986    | 0.717815  | 0.784925  | 0.605849  | 0.73256   | 0.431244  |
| MSRB3       | 20.5415   | 14.9359   | 19.0074   | 13.1118   | 15.3198   | 14.1209   |

|             |           |           |           |           |           |           |
|-------------|-----------|-----------|-----------|-----------|-----------|-----------|
| CNKS3       | 10.8096   | 8.39301   | 7.90478   | 8.94242   | 9.12761   | 11.2587   |
| LIMA1       | 53.3734   | 59.4899   | 60.2871   | 39.1529   | 45.6604   | 33.3061   |
| NAB2        | 24.4458   | 29.2992   | 22.9278   | 31.0211   | 31.041    | 35.1869   |
| MSH6        | 11.2553   | 9.19935   | 10.0783   | 8.96391   | 9.71005   | 8.4614    |
| UGT8        | 1.51015   | 0.640066  | 0.946353  | 1.08417   | 1.05176   | 0.906175  |
| TFRC        | 34.1748   | 32.1927   | 35.7519   | 32.929    | 27.9712   | 32.707    |
| OTOS        | 0         | 0         | 0         | 0         | 0         | 0         |
| GRIN2B      | 0.0161145 | 0.0284948 | 0         | 0         | 0.0307902 | 0.0100419 |
| PHKB        | 17.1144   | 12.128    | 14.4159   | 13.6086   | 11.9761   | 12.2725   |
| LOC10050617 | 1.15E-08  | 0.239898  | 2.49E-09  | 0         | 2.35E-09  | 1.86E-09  |
| FAM183B     | 0.386518  | 0.0569557 | 0.390128  | 0.302445  | 0.164117  | 0.0401436 |
| PRKRIP1     | 17.3236   | 24.3269   | 17.7152   | 24.0122   | 20.7344   | 21.6404   |
| PVRIG       | 5.99558   | 5.48161   | 6.29206   | 4.41433   | 6.72582   | 6.11364   |
| SNORA5C     | 0         | 69.1022   | 29.5829   | 36.6945   | 24.8896   | 24.3523   |
| PHACTR2     | 3.86395   | 2.74675   | 3.79437   | 2.91295   | 3.07619   | 2.71154   |
| SNORD14E    | 0         | 0         | 0         | 0         | 0         | 0         |
| LOC10050625 | 13.1275   | 17.2357   | 11.5115   | 13.4936   | 16.2551   | 14.9526   |
| EIF2C1      | 7.67354   | 7.42472   | 8.07862   | 8.32669   | 8.01877   | 6.79273   |
| B4GALT1     | 34.948    | 25.5545   | 28.0161   | 41.5795   | 29.5158   | 27.3778   |
| PRH1-PRR4   | 1.30571   | 0.339665  | 0.516691  | 0.458058  | 1.14005   | 0.216675  |
| PLEKHB2     | 30.9515   | 25.9104   | 26.8445   | 29.2959   | 25.083    | 24.9419   |
| CLUAP1      | 8.96537   | 8.25921   | 8.01927   | 8.61088   | 7.57001   | 7.42385   |
| BAG1        | 30.5792   | 32.8196   | 35.4326   | 39.2371   | 31.8193   | 34.5957   |
| DHRS9       | 28.474    | 21.9706   | 21.4051   | 19.6899   | 15.3079   | 19.4218   |
| TSEN2       | 5.99914   | 6.39007   | 6.79748   | 4.79011   | 4.85394   | 5.37954   |
| OSTCP1      | 1.59999   | 0.915339  | 0.926215  | 0.972121  | 1.73837   | 1.6422    |
| ARGFXP2     | 0.184472  | 0.163098  | 0.139646  | 0.259824  | 0.411219  | 0.287387  |
| LOC10065289 | 27.6279   | 29.6744   | 160.201   | 61.9447   | 47.1146   | 48.3176   |
| FLJ46257    | 0         | 0         | 0.0175938 | 0         | 0.0296051 | 0.014483  |
| C9orf133    | 0.494174  | 1.09229   | 0.748185  | 0.232011  | 1.57371   | 0.461922  |
| CACNA2D2    | 1.3677    | 1.31894   | 1.49903   | 1.62028   | 1.93841   | 1.37951   |
| CD99P1      | 5.06531   | 9.11503   | 7.90805   | 9.55884   | 10.8721   | 3.41781   |
| BAIAP2L2    | 2.10326   | 3.16972   | 1.8093    | 3.68055   | 3.40984   | 3.06814   |
| MSTO2P      | 8.88165   | 13.0908   | 10.4187   | 11.7606   | 13.697    | 9.55227   |
| CXCL14      | 401.726   | 453.755   | 620.717   | 854.984   | 485.683   | 380.8     |
| C10orf122   | 0         | 0         | 0         | 0         | 0         | 0         |
| LOC10012788 | 1.81128   | 0.960853  | 0.137115  | 0.531489  | 0.922893  | 0.564357  |
| C1orf222    | 0.289791  | 0.288241  | 0.137108  | 0         | 0.0922846 | 0.0451463 |
| FOXA3       | 0         | 0.0459784 | 0         | 0.0488307 | 0         | 0         |
| LOC644366   | 0.962574  | 1.06381   | 5.10071   | 5.42305   | 4.90455   | 2.39934   |
| COX15       | 7.83031   | 7.45329   | 8.56485   | 7.96513   | 8.94708   | 8.3483    |
| AAA1        | 0         | 0.0181523 | 0         | 0         | 0         | 0         |
| LOC10050607 | 0         | 0.219767  | 0.0627221 | 0.1945    | 0.158313  | 0.103264  |

|             |           |           |           |           |            |            |
|-------------|-----------|-----------|-----------|-----------|------------|------------|
| LOC388387   | 0.453051  | 0.550769  | 0.257222  | 0.478584  | 0.396757   | 0.211742   |
| MIR548W     | 0         | 0         | 0         | 0         | 0          | 0          |
| RABEPK      | 16.6731   | 18.8259   | 16.0056   | 20.4613   | 16.2464    | 14.4671    |
| ZNF37BP     | 5.5517    | 5.63172   | 6.143     | 5.2232    | 7.29412    | 6.91918    |
| LGALS9B     | 0.28039   | 0.323927  | 0.679221  | 0.842501  | 0.400023   | 0.335476   |
| LOC10050717 | 0.801609  | 0.0638281 | 1.08172   | 0.973341  | 1.00118    | 1.06057    |
| LOC254559   | 0.231655  | 0.0819259 | 0.140291  | 0.369785  | 0.236068   | 0.245408   |
| GPR137B     | 21.4101   | 17.4562   | 17.2652   | 19.2503   | 16.6915    | 20.4324    |
| HMGA1P7     | 0         | 0         | 0         | 0         | 0          | 0          |
| CCNA1       | 1.19441   | 0.409625  | 0.350724  | 0.750244  | 0.437215   | 0.955509   |
| SCNN1A      | 30.6862   | 24.6469   | 27.4472   | 28.7586   | 34.7228    | 37.1317    |
| CYP2A13     | 0         | 0.0532391 | 0.0227919 | 0.226167  | 0          | 0          |
| POU1F1      | 0         | 0         | 0         | 0.0827208 | 0.0561089  | 0          |
| DOK1        | 6.23078   | 6.98865   | 7.92431   | 6.19517   | 7.94891    | 4.14457    |
| C15orf2     | 0.0235452 | 0.0208172 | 0         | 0.0110543 | 0.00749802 | 0.00733617 |
| LOC10050743 | 0.525726  | 0.6324    | 0.541466  | 0.435216  | 0.256253   | 0.407364   |
| FHL5        | 3.27202   | 1.9812    | 1.27836   | 0.620578  | 1.00846    | 0.750515   |
| LOC10050757 | 0         | 0         | 0         | 0         | 0.0982058  | 0.096086   |
| TOP1MT      | 17.2533   | 23.5311   | 17.9638   | 22.4355   | 18.8923    | 18.5184    |
| ZNF680      | 6.89749   | 4.93069   | 6.48303   | 4.37889   | 5.7047     | 5.69763    |
| LOC286002   | 0.527529  | 0.0444198 | 0.15213   | 0.192475  | 0.243912   | 0.381155   |
| WNT3A       | 1.33861   | 2.39661   | 1.95066   | 2.54528   | 1.89696    | 1.2721     |
| UIMC1       | 9.65898   | 13.3279   | 9.59197   | 12.8206   | 11.3297    | 9.4142     |
| IQCJ-SCHIP1 | 2.37479   | 1.73452   | 1.70205   | 1.70231   | 0.882654   | 1.20885    |
| TRMT2B      | 8.29353   | 6.93411   | 7.86971   | 8.68035   | 9.27698    | 8.26341    |
| DNAJA3      | 39.063    | 40.9355   | 30.6028   | 34.85     | 34.7155    | 33.5482    |
| LOC10050634 | 0         | 0         | 0         | 0         | 0          | 0          |
| WDR92       | 6.8659    | 6.1106    | 7.40045   | 4.65378   | 6.1974     | 5.58194    |
| FGFR1       | 23.292    | 25.4879   | 26.6934   | 24.3397   | 26.5043    | 29.0188    |
| LCN10       | 1.68947   | 2.08215   | 1.58898   | 1.05759   | 1.59774    | 1.85038    |
| EIF3J       | 34.7134   | 24.7947   | 26.7232   | 24.5345   | 24.8411    | 28.8711    |
| SNORA42     | 0         | 0         | 0         | 0         | 0          | 0          |
| CDK7        | 12.4695   | 12.9666   | 12.7111   | 13.1722   | 13.5373    | 14.6579    |
| GPR19       | 0.181121  | 0.160135  | 0.319922  | 0.283449  | 0.34607    | 0.413845   |
| KIF15       | 1.11794   | 0.882508  | 0.785835  | 0.749803  | 0.979027   | 1.38086    |
| LOC10050639 | 0.512076  | 0.867762  | 0.355341  | 0.56097   | 0.896896   | 0.452064   |
| MIR4509-3   | 0         | 0         | 0         | 0         | 0          | 0          |
| SLC13A4     | 0.894754  | 0.882364  | 0.963898  | 0.84016   | 0.723301   | 1.02937    |
| PCDHGC3     | 48.3648   | 51.0385   | 50.378    | 55.7331   | 54.6347    | 47.7891    |
| RAP1GDS1    | 14.2709   | 12.7291   | 12.4186   | 12.9484   | 12.3947    | 12.6371    |
| DYTN        | 0         | 0         | 0         | 0         | 0          | 0          |
| PRSS35      | 0.368671  | 0.502091  | 0.369353  | 0.4207    | 0.209738   | 0.113075   |
| KIAA0415    | 8.33291   | 13.1353   | 12.4449   | 13.068    | 12.62      | 11.3069    |



|            |           |           |           |          |           |            |
|------------|-----------|-----------|-----------|----------|-----------|------------|
| NKX2-6     | 0         | 0         | 0         | 0        | 0         | 0          |
| SCARNA11   | 0         | 0         | 0         | 36.6945  | 0         | 0          |
| SERPINE1   | 1.18294   | 1.70586   | 1.05266   | 0.653984 | 1.01084   | 0.591203   |
| MIR4521    | 0         | 0         | 0         | 0        | 0         | 0          |
| C9orf146   | 0         | 0         | 0         | 0        | 0         | 0          |
| CDC42BPB   | 22.0794   | 22.3261   | 26.2847   | 22.3752  | 24.1835   | 21.2235    |
| SNORD115-1 | 0         | 0         | 0         | 0        | 0         | 0          |
| DNAJC5B    | 0.158355  | 0.0700039 | 0.0599379 | 0        | 0.0504287 | 0          |
| KCNK6      | 13.2449   | 15.4135   | 12.8259   | 13.4643  | 18.65     | 20.6459    |
| TMEM11     | 24.1208   | 28.9967   | 20.276    | 23.463   | 21.1028   | 19.5675    |
| ARL6IP1    | 115.266   | 91.5209   | 91.8586   | 77.1584  | 73.9585   | 79.0119    |
| CTXN3      | 0         | 0.063866  | 0         | 0        | 0.0400234 | 0.045014   |
| GPX7       | 4.54815   | 4.82542   | 7.23024   | 7.43091  | 8.80609   | 8.16253    |
| GBF1       | 18.8109   | 17.2325   | 20.0515   | 18.4293  | 20.9254   | 19.3722    |
| TUBA4A     | 138.247   | 143.855   | 156.903   | 186.734  | 168.689   | 199.115    |
| KRT14      | 2304.67   | 3633.67   | 2345.29   | 4481.62  | 2510.38   | 3790.6     |
| MPZL2      | 45.8381   | 39.0013   | 32.1426   | 30.5422  | 32.3127   | 34.9672    |
| SLC35D2    | 13.141    | 15.4334   | 10.4922   | 10.1906  | 11.1178   | 11.3667    |
| RIOK3      | 31.2068   | 28.0182   | 31.9432   | 29.7789  | 34.4442   | 30.5699    |
| MIR410     | 0         | 0         | 0         | 0        | 0         | 0          |
| MIR4278    | 0         | 0         | 0         | 0        | 0         | 0          |
| C12orf34   | 1.86106   | 2.11954   | 2.10131   | 2.96187  | 2.04919   | 2.28015    |
| FADS3      | 25.1863   | 37.1309   | 39.7398   | 28.8557  | 22.4027   | 16.7243    |
| WDR64      | 0.0222013 | 0         | 0         | 0        | 0         | 0.0138349  |
| C14orf21   | 7.35224   | 5.65444   | 9.49216   | 4.53938  | 8.37109   | 6.96655    |
| SPRY1      | 21.4985   | 16.1045   | 20.5318   | 16.0509  | 19.4534   | 16.1183    |
| LRRC66     | 0.147766  | 0.313549  | 0.357951  | 0.1665   | 0.43292   | 0.313077   |
| CXorf41    | 0         | 0         | 0         | 0        | 0         | 0          |
| LPA        | 0.0147071 | 0.0130031 | 0.0222667 | 0        | 0.018734  | 0.00916482 |
| MRPL42     | 12.5555   | 9.5133    | 10.4607   | 10.2492  | 9.82436   | 9.90369    |
| MMP20      | 0         | 0         | 0         | 0        | 0         | 0.0330206  |
| PLEKHA8    | 3.29844   | 2.52145   | 2.7037    | 2.52331  | 2.4388    | 3.12444    |
| NBPF24     | 2.86469   | 2.46764   | 3.41504   | 2.4534   | 3.49485   | 2.85887    |
| LOC643955  | 0         | 0         | 0         | 0        | 0         | 0          |
| NAGS       | 0.69552   | 1.36164   | 0.676945  | 0.74638  | 1.58207   | 1.33121    |
| TMEM42     | 16.0598   | 21.0834   | 17.7755   | 16.565   | 18.055    | 15.6941    |
| MLL2       | 7.17271   | 6.11043   | 9.29444   | 7.00341  | 9.21815   | 7.07612    |
| NAPSB      | 4.38452   | 4.90077   | 3.5696    | 2.64168  | 8.58833   | 5.36151    |
| RSBN1      | 4.7742    | 3.93964   | 4.66547   | 4.14328  | 5.418     | 3.78646    |
| ATP6V1G3   | 0         | 0         | 0         | 0        | 0         | 0          |
| MIR626     | 0         | 0         | 0         | 0        | 0         | 0          |
| CSRP2      | 45.3016   | 38.27     | 30.5283   | 26.7594  | 21.7467   | 17.0051    |
| ZNF649     | 5.45273   | 3.43776   | 4.68427   | 3.33654  | 4.5459    | 4.58139    |

|             |          |          |           |          |          |           |
|-------------|----------|----------|-----------|----------|----------|-----------|
| HIST2H3A    | 0        | 0.139481 | 0.238849  | 0.6666   | 0.200955 | 0.0983089 |
| RNASE3      | 0.184018 | 0        | 0.139302  | 0        | 0        | 0         |
| CD200       | 11.8493  | 11.4955  | 10.1905   | 10.9099  | 11.8048  | 9.13658   |
| ARSJ        | 0.86832  | 0.621483 | 0.84513   | 0.970641 | 1.19825  | 1.12085   |
| SUZ12       | 11.3658  | 9.70442  | 10.9148   | 8.65984  | 10.6034  | 8.97142   |
| MIR4251     | 0        | 0        | 0         | 0        | 0        | 0         |
| SMARCD1     | 20.8339  | 21.6548  | 19.2543   | 20.5134  | 21.9912  | 18.4765   |
| HEXB        | 44.4657  | 32.2489  | 37.7864   | 30.6025  | 33.7108  | 40.82     |
| PROS1       | 19.7968  | 15.4667  | 22.8738   | 14.9329  | 18.6336  | 15.8393   |
| MIR527      | 0        | 0        | 0         | 0        | 0        | 0         |
| SNORD55     | 0        | 0        | 0         | 0        | 0        | 0         |
| GPR108      | 30.0414  | 31.4258  | 30.3595   | 35.051   | 32.0471  | 29.9343   |
| MRPS18A     | 37.5949  | 44.8736  | 29.6469   | 51.1285  | 35.3487  | 38.7113   |
| MIR4462     | 0        | 0        | 0         | 0        | 0        | 0         |
| SPANXA2-OT  | 0        | 0        | 0         | 0        | 0        | 0         |
| C8B         | 0        | 0        | 0         | 0        | 0        | 0.031553  |
| CIB4        | 0        | 0        | 0         | 0        | 0        | 0         |
| PRB3        | 1.72081  | 0.464902 | 1.5126    | 0.987484 | 0.803763 | 0.458741  |
| WFDC2       | 41.746   | 40.3911  | 18.6829   | 29.3375  | 20.9027  | 12.4345   |
| BARD1       | 1.38854  | 2.42122  | 2.16067   | 1.59356  | 2.87421  | 1.92285   |
| ZNF204P     | 9.75984  | 10.8257  | 8.89689   | 8.45839  | 10.2341  | 10.7465   |
| CYP4Z2P     | 4.66518  | 0.443847 | 0.119176  | 0.18101  | 0.122778 | 0.144153  |
| DPY19L1     | 4.48451  | 4.80704  | 4.58149   | 3.22337  | 4.27168  | 3.49939   |
| BRF2        | 7.95924  | 9.55029  | 7.43367   | 9.12362  | 8.75604  | 8.69586   |
| MIR328      | 0        | 0        | 0         | 0        | 0        | 0         |
| CBWD3       | 12.5624  | 12.9533  | 9.62705   | 10.646   | 12.4275  | 11.3202   |
| PIGM        | 4.85269  | 3.35687  | 4.09869   | 3.2065   | 4.33557  | 3.21999   |
| CYP2B7P1    | 19.6508  | 2.78469  | 2.38427   | 1.89661  | 0.327066 | 0.405341  |
| ZNF75D      | 8.92497  | 7.95184  | 8.93829   | 6.47473  | 9.82206  | 9.05012   |
| OR4E2       | 0        | 0        | 0         | 0        | 0        | 0         |
| SERPINB11   | 0.791067 | 1.02222  | 0.0921295 | 0.228554 | 0        | 0         |
| RAP1GAP     | 7.23023  | 7.16341  | 8.73488   | 12.7579  | 7.25525  | 6.89885   |
| CDKN2A      | 2.09478  | 3.8979   | 1.91738   | 1.46173  | 1.13361  | 1.0908    |
| LOC10050560 | 0.229283 | 0        | 0         | 0        | 0.146032 | 0         |
| DHTKD1      | 10.0403  | 8.07443  | 6.89938   | 6.94028  | 7.03181  | 6.32593   |
| NUAK2       | 3.61996  | 3.85346  | 6.54028   | 3.94294  | 5.92688  | 5.45905   |
| ATG4A       | 9.73371  | 9.46009  | 8.36439   | 9.0513   | 7.61241  | 10.3607   |
| SPRN        | 2.59421  | 3.97117  | 2.77701   | 3.73752  | 4.10447  | 4.76288   |
| VAT1L       | 0.337783 | 0.275674 | 0.137687  | 0.170786 | 0.231685 | 0.0809586 |
| MIR210      | 1336.96  | 2364.11  | 1686.81   | 2092.31  | 2270.72  | 2499.41   |
| TBC1D24     | 6.91827  | 4.96262  | 5.91789   | 4.15375  | 5.01596  | 4.52809   |
| G6PC2       | 0        | 0        | 0.135454  | 0.141763 | 0        | 0         |
| SIDT2       | 28.223   | 28.0049  | 33.11     | 29.1581  | 31.8715  | 27.5803   |

|             |           |           |           |           |           |           |
|-------------|-----------|-----------|-----------|-----------|-----------|-----------|
| LOC10050765 | 0.171336  | 0.146751  | 0.126663  | 0         | 0.347836  | 0.105071  |
| DDO         | 5.17381   | 5.07229   | 3.81924   | 3.73901   | 2.75347   | 2.86242   |
| SLC6A3      | 0.0992389 | 0.0658056 | 0.0187811 | 0.0931838 | 0.0948088 | 0.0154604 |
| LOC10050686 | 0.05819   | 0         | 0         | 0         | 0.0729178 | 0.0545757 |
| PGPEP1L     | 0.497894  | 0.353013  | 0.075563  | 0.374912  | 0.2543    | 0         |
| DCAF10      | 7.03435   | 5.61541   | 6.25942   | 5.31112   | 6.22041   | 5.67541   |
| KLKP1       | 0         | 0         | 0         | 0.285508  | 0         | 0.126318  |
| NIPA1       | 3.94719   | 3.75455   | 4.33504   | 3.21526   | 6.72282   | 5.91659   |
| CEBPB       | 87.3611   | 94.2358   | 80.5994   | 101.096   | 76.1076   | 78.2217   |
| LOC10028860 | 0.171448  | 0.381141  | 0.256807  | 0.154795  | 0.289276  | 0.55246   |
| KLK12       | 1.147     | 1.33332   | 1.71108   | 1.2273    | 0.879825  | 7.65889   |
| HMGCS1      | 541.376   | 366.215   | 368.994   | 324.679   | 239.438   | 371.039   |
| HLA-DMB     | 25.9091   | 23.5281   | 19.7315   | 13.996    | 38.189    | 15.5132   |
| KCNQ2       | 0.0762342 | 0.0674014 | 0         | 0         | 0.048554  | 0.0475059 |
| MIR3121     | 0         | 0         | 0         | 0         | 0         | 0         |
| DEFB103B    | 5.51293   | 3.48156   | 1.34142   | 3.69754   | 1.50481   | 4.43231   |
| NKX2-4      | 0         | 0         | 0         | 0         | 0         | 0         |
| CAMK2G      | 18.4595   | 20.5576   | 18.4245   | 18.9819   | 21.417    | 16.2668   |
| LOC10050731 | 3.8044    | 6.30677   | 3.13195   | 5.62633   | 3.51342   | 3.94136   |
| CALCR       | 0         | 0.0242616 | 0.020773  | 0         | 0.069913  | 0         |
| INO80E      | 31.2809   | 46.3766   | 36.8081   | 49.5406   | 42.9191   | 45.0318   |
| MIR4483     | 0         | 0         | 0         | 0         | 0         | 0         |
| SLC39A2     | 18.6483   | 12.6101   | 20.4247   | 18.9087   | 32.8995   | 31.8232   |
| GSG1        | 0.0423972 | 0         | 0.0320949 | 0.0398103 | 0.027003  | 0.0264201 |
| TTC13       | 10.4857   | 11.4527   | 10.0206   | 10.4896   | 12.7727   | 9.53053   |
| SMPDL3A     | 48.6758   | 35.2912   | 53.8609   | 38.5305   | 52.3886   | 56.8133   |
| C20orf27    | 26.6159   | 36.8084   | 19.0658   | 24.9919   | 28.2867   | 24.1609   |
| LHFPL5      | 0.0955038 | 0         | 0         | 0         | 0.0304135 | 0.029757  |
| MIR3606     | 0         | 0         | 0         | 0         | 0         | 0         |
| PPIL2       | 21.5509   | 26.5621   | 20.7156   | 26.8045   | 26.9109   | 23.7262   |
| MMP25       | 1.23978   | 1.73386   | 1.22859   | 0.510247  | 3.8022    | 2.27198   |
| CTAGE5      | 8.14157   | 5.44304   | 5.5594    | 4.9399    | 6.01532   | 5.21281   |
| LOC10050606 | 2.21194   | 0.86918   | 2.41865   | 1.8462    | 1.09573   | 0.765769  |
| TPH2        | 0         | 0         | 0         | 0         | 0         | 0.0268027 |
| OR5H1       | 0         | 0         | 0         | 0         | 0         | 0         |
| MIR4320     | 0         | 0         | 0         | 0         | 0         | 0         |
| LOC10012885 | 0         | 0         | 0         | 0         | 0.0476873 | 0         |
| TST         | 73.0378   | 86.9044   | 69.8199   | 87.5844   | 55.1398   | 64.8403   |
| PLGLB1      | 1.3981    | 1.03144   | 1.09335   | 0.946649  | 1.5638    | 1.70628   |
| RGP1        | 7.53628   | 2.90955   | 6.88062   | 4.02104   | 5.18452   | 6.27654   |
| KRTAP22-1   | 0         | 0         | 0         | 0         | 0         | 0         |
| LOC154449   | 0         | 0         | 0.0626246 | 0         | 0         | 0         |
| SCG2        | 0.0391433 | 0.069216  | 0.118527  | 0.0735098 | 0.0498611 | 0.121962  |

|             |           |           |           |           |           |           |
|-------------|-----------|-----------|-----------|-----------|-----------|-----------|
| VDAC2       | 84.3935   | 82.0035   | 76.8819   | 93.8099   | 73.845    | 74.1838   |
| XRRA1       | 1.31856   | 1.83646   | 1.26986   | 2.16438   | 1.55232   | 2.36972   |
| LOC642424   | 0         | 0         | 0.177088  | 0         | 0         | 0         |
| C1orf127    | 0.289904  | 0.224276  | 0.246892  | 0.136108  | 0.369283  | 0.248402  |
| LOC401980   | 0         | 0.0491944 | 0.0421206 | 0.0522461 | 0.0354381 | 0         |
| LAPTM4B     | 47.0637   | 39.998    | 45.3284   | 49.1594   | 45.8922   | 41.0366   |
| ODZ2        | 2.36802   | 1.86871   | 1.80742   | 3.23423   | 3.0725    | 6.02455   |
| KDELC2      | 9.79902   | 8.02635   | 11.34     | 7.82624   | 13.5438   | 12.3811   |
| RYK         | 27.5811   | 31.1732   | 28.8928   | 24.9409   | 25.8498   | 23.5502   |
| NGB         | 0         | 0.0491055 | 0         | 0         | 0         | 0.242274  |
| LOC10050573 | 1.8229    | 1.61169   | 1.55244   | 0         | 0.290253  | 1.13595   |
| MIR4516     | 0         | 0         | 0         | 0         | 0         | 0         |
| GDE1        | 45.9282   | 40.1873   | 39.5661   | 40.1978   | 33.8934   | 37.5974   |
| CHID1       | 20.3748   | 22.5541   | 22.7923   | 24.6073   | 19.5541   | 22.2115   |
| OR52E4      | 0         | 0         | 0         | 0         | 0         | 0         |
| MEPCE       | 32.8913   | 46.7811   | 33.3157   | 40.5871   | 42.0926   | 34.2681   |
| TPRG1       | 6.6479    | 4.28974   | 8.60395   | 5.43682   | 11.2511   | 10.6073   |
| AMY1A       | 2.25517   | 2.13701   | 2.19136   | 2.36874   | 2.49537   | 1.90215   |
| IL21R       | 0.632743  | 0.640824  | 0.416744  | 0.213342  | 1.23078   | 0.366898  |
| LOC554201   | 0         | 0         | 0         | 0         | 0         | 0         |
| ACSBG1      | 330.079   | 336.578   | 245.211   | 213.73    | 205.086   | 216.592   |
| ZMYND11     | 30.9697   | 24.0402   | 29.3745   | 25.2948   | 27.1789   | 22.8602   |
| CA11        | 12.3144   | 18.0326   | 13.2313   | 21.613    | 21.4087   | 20.9174   |
| TAS2R8      | 0         | 0         | 0         | 0         | 0         | 0         |
| TRAIP       | 2.3969    | 3.2915    | 2.39355   | 2.96894   | 3.2156    | 3.46399   |
| RPS17       | 1107.48   | 1489.81   | 1130.09   | 1572.67   | 1139.19   | 1100.93   |
| DLK1        | 0         | 0.118632  | 0         | 0         | 0.170918  | 0.0418071 |
| USF1        | 33.1378   | 43.6545   | 32.5899   | 39.9436   | 43.2491   | 32.3302   |
| CT47A2      | 0         | 0         | 0         | 0         | 0         | 0         |
| IQCF2       | 0         | 0         | 0         | 0         | 0         | 0         |
| LOC10050690 | 0         | 0.120963  | 0         | 0.128467  | 0.087138  | 0         |
| PDE6D       | 12.5631   | 15.9839   | 10.6701   | 18.2223   | 12.0998   | 15.0847   |
| TIPRL       | 15.2955   | 12.1044   | 14.8201   | 10.9135   | 14.7074   | 12.8787   |
| LOC10050603 | 3.69965   | 3.57346   | 6.28207   | 3.89029   | 5.35073   | 4.01559   |
| MAPK14      | 28.1845   | 22.6501   | 28.6505   | 22.4868   | 26.3156   | 24.1219   |
| CCDC37      | 0.0986167 | 0.0435953 | 0.0373267 | 0.0925995 | 0.0942143 | 0.0307269 |
| LSMD1       | 23.3022   | 35.1485   | 25.7415   | 33.5719   | 23.4014   | 23.5802   |
| SNORD115-6  | 0         | 0         | 0         | 0         | 0         | 0         |
| FBLL1       | 0.437617  | 0         | 1.07666   | 2.46549   | 0.348401  | 0.477233  |
| RRM2        | 3.53825   | 5.08018   | 2.65573   | 3.66327   | 2.65799   | 4.29664   |
| RNASEH2A    | 12.238    | 12.2275   | 10.394    | 14.948    | 10.4559   | 13.3923   |
| PTS         | 20.1089   | 22.1954   | 21.8482   | 17.7995   | 21.5361   | 14.9523   |
| MIIP        | 15.3858   | 23.5233   | 10.6299   | 13.1853   | 19.2563   | 15.3656   |

|             |          |          |         |           |           |           |
|-------------|----------|----------|---------|-----------|-----------|-----------|
| MIR1976     | 0        | 0        | 0       | 0         | 0         | 0         |
| MIR4458     | 0        | 0        | 0       | 0         | 0         | 0         |
| CERK        | 14.4838  | 11.6678  | 15.9676 | 15.0133   | 17.3799   | 21.0826   |
| AQP3        | 274.75   | 391.191  | 306.613 | 385.597   | 215.317   | 236.811   |
| LOC10065273 | 6.91949  | 12.7532  | 7.00501 | 17.4607   | 13.4153   | 7.91125   |
| LOC388588   | 3.06235  | 4.43051  | 2.73971 | 3.65972   | 4.07816   | 2.60226   |
| RN18S1      | 0        | 0        | 0       | 0         | 0         | 0         |
| GPRASP1     | 5.06117  | 5.78623  | 6.21488 | 5.30967   | 7.78539   | 5.45468   |
| MRPS14      | 18.4515  | 15.6731  | 15.0181 | 14.6322   | 16.3038   | 14.4742   |
| APOBEC3D    | 2.21798  | 2.85223  | 1.0686  | 0.719399  | 2.54254   | 1.3319    |
| SULT1A1     | 15.4328  | 16.9693  | 12.5092 | 15.6331   | 17.429    | 15.5345   |
| RPL7        | 571.443  | 654.458  | 632.344 | 803.1     | 630.312   | 603.635   |
| SNORD27     | 0        | 0        | 0       | 0         | 0         | 0         |
| GRP         | 0.150613 | 0.686905 | 0       | 2.6366    | 0.688666  | 0.76673   |
| LOC10012798 | 3.07335  | 2.30437  | 4.39238 | 2.69167   | 4.33619   | 3.08733   |
| TRIM42      | 0        | 0        | 0       | 0         | 0         | 0         |
| PNPLA5      | 46.7541  | 53.9898  | 33.0067 | 37.6378   | 30.7085   | 59.7029   |
| L3MBTL4     | 5.63667  | 5.32228  | 6.46262 | 4.98443   | 7.52859   | 6.15546   |
| KIF13A      | 8.02304  | 7.65202  | 9.71341 | 6.99028   | 8.97948   | 6.70614   |
| ODZ3        | 0.801255 | 1.10113  | 1.54276 | 0.997702  | 0.926348  | 0.862935  |
| MIR3194     | 0        | 0        | 0       | 0         | 0         | 0         |
| FLJ39653    | 34.5809  | 49.9929  | 40.9357 | 69.1223   | 43.6379   | 39.8992   |
| LOC152742   | 0        | 0        | 0       | 0         | 0.0332151 | 0.0324981 |
| FBXO31      | 14.2362  | 19.4827  | 18.2811 | 20.4678   | 20.1881   | 17.6351   |
| NSDHL       | 77.8618  | 61.8881  | 63.0903 | 54.7966   | 38.9283   | 67.1005   |
| IL7R        | 1.1604   | 0.820763 | 0.87843 | 0.21792   | 1.62594   | 0.614646  |
| OR2G3       | 0        | 0        | 0       | 0         | 0         | 0         |
| RFC3        | 5.78443  | 6.39265  | 5.08741 | 5.6019    | 5.66057   | 4.57765   |
| CXorf66     | 0        | 0        | 0       | 0         | 0         | 0         |
| CCDC153     | 2.00437  | 5.46408  | 3.03463 | 3.76414   | 2.34042   | 1.76947   |
| MKRN2       | 14.4977  | 14.4361  | 14.7813 | 13.6131   | 17.3043   | 14.823    |
| NAPRT1      | 26.4283  | 44.1975  | 49.7329 | 64.4001   | 64.0873   | 66.9378   |
| LOC10028701 | 0        | 0        | 0       | 0         | 0         | 0         |
| ECM1        | 14.561   | 20.8055  | 32.5998 | 27.5367   | 26.5425   | 22.0185   |
| MED4        | 32.1132  | 28.8589  | 28.5741 | 28.8754   | 27.7477   | 30.0014   |
| IDUA        | 11.0158  | 20.5929  | 15.0352 | 19.6374   | 19.5566   | 17.3124   |
| LOC10013089 | 16.9384  | 18.3758  | 20.1347 | 20.7193   | 18.3398   | 15.7188   |
| MFSD5       | 38.1497  | 36.5036  | 37.8528 | 39.6352   | 40.0114   | 43.2038   |
| CRTC3       | 12.6266  | 11.7201  | 13.9825 | 11.6448   | 12.8562   | 9.84144   |
| SUPT6H      | 24.7871  | 25.7911  | 28.4112 | 28.2786   | 32.6328   | 26.3024   |
| RXFP2       | 0        | 0        | 0       | 0.0344314 | 0         | 0         |
| TIGD6       | 2.23949  | 1.60346  | 1.59601 | 1.22041   | 1.82646   | 1.98545   |
| RRP7B       | 18.654   | 11.6987  | 11.6137 | 16.5317   | 16.5154   | 12.4305   |

|             |            |           |            |           |            |            |
|-------------|------------|-----------|------------|-----------|------------|------------|
| LOC1006530: | 9.75151    | 15.2055   | 9.66364    | 17.3141   | 9.25972    | 12.3744    |
| C21orf91    | 7.44457    | 5.6284    | 9.70505    | 5.46401   | 9.06633    | 7.7136     |
| MIR515-2    | 0          | 0         | 0          | 0         | 0          | 0          |
| CCDC30      | 0.864075   | 0.99032   | 0.734887   | 0.360601  | 0.489186   | 0.578341   |
| MS4A13      | 0          | 0         | 0          | 0         | 0          | 0          |
| ANKRD34B    | 0          | 0         | 0          | 0.0698691 | 0.0315944  | 0.0309124  |
| MAGI1       | 7.80214    | 5.72517   | 7.73156    | 6.89493   | 7.59359    | 6.46387    |
| STS         | 2.53067    | 2.03887   | 4.20553    | 2.5028    | 2.81349    | 2.31418    |
| KIF5B       | 38.6714    | 25.679    | 36.9808    | 30.0817   | 28.1412    | 25.4462    |
| EPHA10      | 0.276256   | 0.215657  | 0.250593   | 0.621668  | 0.310706   | 0.466856   |
| MZT1        | 7.09687    | 6.01471   | 8.2334     | 5.36263   | 5.77709    | 5.57388    |
| PCDH11Y     | 0.0104572  | 0.0297463 | 0.00706563 | 0.0512772 | 0.00667269 | 0.020364   |
| SERP1       | 52.9488    | 46.1632   | 39.4006    | 35.527    | 37.5392    | 38.0757    |
| PRKAR1B     | 7.13025    | 10.3955   | 8.48922    | 10.7767   | 8.42082    | 8.95218    |
| MIR761      | 0          | 0         | 0          | 0         | 0          | 0          |
| LOC1002874: | 0          | 0         | 0          | 0         | 0          | 0.00834323 |
| C19orf39    | 2.29507    | 2.08552   | 2.65434    | 1.91559   | 2.84228    | 2.97957    |
| FOXR1       | 0          | 0         | 0          | 0         | 0.0626266  | 0          |
| PES1        | 26.238     | 34.0752   | 29.4203    | 32.3844   | 28.0181    | 28.5681    |
| IL22        | 0          | 0         | 0          | 0         | 0          | 0          |
| LOC1005063: | 0          | 0.180011  | 0.0770636  | 0.477946  | 0.583537   | 0.190314   |
| LPHN2       | 12.5526    | 10.088    | 14.1964    | 9.98795   | 11.3769    | 13.5537    |
| DENND1B     | 3.65633    | 2.48228   | 2.7745     | 2.05641   | 2.27951    | 2.06651    |
| FAM153C     | 1.0356     | 0.821159  | 0.795957   | 0.508608  | 1.04502    | 0.333371   |
| NCR3        | 0.547189   | 0.858235  | 0.619973   | 0         | 1.11081    | 0.178715   |
| C16orf3     | 0.473549   | 0.523352  | 0.537719   | 0.555818  | 0.52781    | 0.221322   |
| DKFZP686I15 | 3.72077    | 4.07005   | 2.86161    | 2.92014   | 4.86754    | 3.15856    |
| ASRGL1      | 2.73334    | 2.03327   | 1.41271    | 2.20012   | 1.04987    | 1.22947    |
| LOC1005069: | 0.00109731 | 1.02442   | 7.48E-05   | 2.07E-06  | 4.47E-05   | 2.68697    |
| C17orf98    | 0          | 0.232133  | 0          | 0         | 0          | 0.163612   |
| PANK2       | 16.6863    | 17.9655   | 16.488     | 16.3596   | 16.1178    | 15.6539    |
| TAAR5       | 0          | 0         | 0          | 0         | 0          | 0          |
| SAMD13      | 1.24577    | 1.03328   | 1.11836    | 1.02506   | 1.48049    | 0.920617   |
| HOXA2       | 2.00675    | 1.61769   | 1.25104    | 1.44094   | 1.61643    | 1.39764    |
| MOCS3       | 3.12606    | 3.41846   | 4.35923    | 3.86226   | 3.95581    | 3.71663    |
| DKFZp686K16 | 0          | 0         | 0          | 0         | 0          | 0          |
| ZFP82       | 1.57547    | 1.66472   | 1.22173    | 1.01028   | 1.39501    | 1.36489    |
| KCNK12      | 0.533639   | 0.876219  | 0.115419   | 0.429496  | 0.436986   | 0.475059   |
| TOPORS      | 6.7395     | 4.69914   | 7.58889    | 6.28172   | 6.42964    | 6.10959    |
| LOC1006530: | 11.5678    | 9.57752   | 8.80145    | 7.87081   | 10.2301    | 8.48576    |
| ANKRD52     | 11.1612    | 11.1631   | 11.362     | 11.3732   | 13.6742    | 10.8926    |
| ZNF185      | 38.2273    | 29.8114   | 32.0463    | 22.1808   | 36.7282    | 47.2858    |
| LOC1005065: | 0          | 0         | 0          | 0         | 0          | 0          |

|             |          |           |           |           |           |           |
|-------------|----------|-----------|-----------|-----------|-----------|-----------|
| HS3ST6      | 30.0176  | 40.5788   | 44.3767   | 56.7807   | 45.3716   | 50.2886   |
| CNPY4       | 6.48148  | 9.36853   | 7.57799   | 8.01776   | 10.5451   | 13.2069   |
| CCL25       | 0.117598 | 0         | 0.0890224 | 0.110423  | 0         | 0.0732821 |
| FGG         | 0        | 0         | 0         | 0.239614  | 0         | 0.286236  |
| KRT81       | 10.5407  | 2.16544   | 1.15402   | 78.8054   | 2.98127   | 806.614   |
| LOC1001317: | 2.24959  | 0.951235  | 1.11062   | 0.918405  | 1.30819   | 2.0723    |
| XYLT1       | 3.99609  | 3.12164   | 4.21977   | 2.81182   | 3.73071   | 3.46105   |
| SNORA51     | 104.865  | 0         | 79.3837   | 49.2335   | 33.3947   | 0         |
| DLGAP5      | 1.9933   | 1.79171   | 1.33301   | 1.31058   | 1.37528   | 1.88361   |
| DPYSL3      | 27.2774  | 20.7951   | 28.3588   | 19.1818   | 26.2964   | 22.2178   |
| VPS16       | 21.2967  | 27.8583   | 18.4273   | 21.2295   | 23.9457   | 21.0651   |
| MIR665      | 0        | 0         | 0         | 0         | 0         | 0         |
| TM4SF18     | 6.17872  | 3.23232   | 3.36953   | 2.97963   | 1.81632   | 1.49533   |
| LOC1005071: | 0.112502 | 0.0165778 | 0.0141941 | 0.0176062 | 0.0477687 | 0.0233688 |
| RNF220      | 21.0935  | 24.7883   | 20.3743   | 26.7083   | 23.239    | 20.31     |
| FSTL3       | 12.296   | 22.2401   | 25.4605   | 24.7894   | 22.2657   | 16.4515   |
| SEC11A      | 78.9744  | 80.0884   | 78.7555   | 77.9376   | 68.8596   | 63.9611   |
| IFT46       | 12.5862  | 13.4572   | 14.2591   | 15.9014   | 13.776    | 13.7654   |
| SNORA25     | 0        | 123.09    | 140.521   | 43.5754   | 532.023   | 260.27    |
| FAM58BP     | 0.238611 | 0.210965  | 0         | 0.336078  | 0.303945  | 0.371731  |
| DGCR6L      | 46.7623  | 78.6193   | 48.4999   | 76.3223   | 54.7589   | 59.9441   |
| ANO3        | 0.113022 | 0.128514  | 0.220143  | 0.166811  | 0.143942  | 0.0603492 |
| WAS         | 3.42521  | 4.54253   | 4.53758   | 3.48424   | 5.41748   | 2.7392    |
| C6orf57     | 20.8058  | 17.0812   | 16.4251   | 14.7918   | 18.3626   | 14.6323   |
| LOC1005058: | 1.7379   | 1.02436   | 1.57872   | 0.326373  | 1.91859   | 1.51618   |
| AK4         | 16.0612  | 10.8926   | 15.9987   | 12.6375   | 13.7075   | 12.217    |
| C10orf114   | 1.19609  | 2.02305   | 1.73215   | 2.63686   | 1.6892    | 1.58792   |
| HGD         | 15.1103  | 8.2702    | 3.89067   | 2.70254   | 2.16045   | 5.06035   |
| LSAMP-AS1   | 0        | 0         | 0         | 0         | 0         | 0         |
| COX8C       | 0.583181 | 0         | 0         | 0         | 0         | 0         |
| MIR497      | 0        | 0         | 0         | 0         | 0         | 0         |
| KCND1       | 0.757818 | 1.08651   | 0.976793  | 1.09622   | 1.42189   | 1.23803   |
| GABARAPL2   | 134.879  | 117.594   | 138.741   | 130.501   | 126.507   | 138.162   |
| NIP7        | 12.7239  | 12.1665   | 11.2185   | 12.4525   | 10.7183   | 9.20016   |
| PSMB4       | 191.71   | 254.591   | 190.256   | 227.455   | 183.152   | 176.392   |
| MIR3116-1   | 0        | 0         | 0         | 0         | 0         | 0         |
| KHDRBS2     | 0        | 0         | 0         | 0         | 0         | 0.0275738 |
| CES3        | 2.53731  | 2.51038   | 2.77685   | 4.99925   | 3.90426   | 2.59613   |
| TNFRSF17    | 0        | 0.209341  | 0.268859  | 0         | 0.0754015 | 0.221322  |
| HLX         | 4.06758  | 5.45373   | 3.21453   | 2.81208   | 5.80764   | 2.89685   |
| C15orf17    | 49.2455  | 50.7311   | 51.3181   | 50.7089   | 61.3491   | 54.0712   |
| C5orf39     | 2.10629  | 4.11247   | 2.52458   | 1.73055   | 3.01839   | 1.96883   |
| SESTD1      | 5.23008  | 5.10246   | 7.27673   | 3.98804   | 4.72092   | 3.21983   |

|              |           |           |           |           |           |           |
|--------------|-----------|-----------|-----------|-----------|-----------|-----------|
| SH3RF3       | 0.561785  | 0.528827  | 3.25029   | 4.46066   | 3.80769   | 3.36572   |
| FAM3B        | 0         | 0.358024  | 0.430077  | 0.337985  | 1.00792   | 0.61632   |
| SULT2A1      | 0         | 0         | 0         | 0         | 0         | 0         |
| KRTAP21-2    | 1.81872   | 1.608     | 0         | 0         | 0         | 27.2003   |
| DUSP22       | 36.7474   | 48.4018   | 28.7924   | 36.2157   | 31.8816   | 32.4951   |
| CYP26C1      | 0         | 0         | 0         | 0         | 0         | 0         |
| ZNF254       | 11.0839   | 7.98249   | 9.07586   | 6.93837   | 7.10612   | 7.9438    |
| MIR4680      | 0         | 0         | 0         | 0         | 0         | 0         |
| SNORA24      | 167.619   | 98.7987   | 296.073   | 314.783   | 142.343   | 278.541   |
| C12orf75     | 14.3451   | 17.2178   | 10.556    | 15.5016   | 13.6282   | 13.8334   |
| ARPP19       | 37.2973   | 30.9036   | 31.4771   | 27.3564   | 27.9285   | 24.9778   |
| ROPN1B       | 11.7333   | 5.08374   | 5.8626    | 11.5683   | 4.70801   | 6.94633   |
| ACCN4        | 0.0350925 | 0.253394  | 0.138682  | 0.333646  | 0.160931  | 0.221425  |
| JMJD4        | 11.2696   | 13.738    | 10.6396   | 15.2183   | 12.1231   | 14.1829   |
| LINC00314    | 0         | 0         | 0         | 0         | 0         | 0         |
| UBLCP1       | 19.791    | 16.9734   | 17.1313   | 15.0816   | 15.4121   | 15.8981   |
| HEATR7B1     | 0.0182497 | 0.0161352 | 0.0828907 | 0.0171362 | 0.0581167 | 0.0113724 |
| PPP1R10      | 16.743    | 15.0875   | 14.3624   | 13.2052   | 18.4055   | 17.9949   |
| LOC1001292:  | 0.30805   | 0.170224  | 0.349793  | 0.542352  | 0.515022  | 0.26395   |
| LOC10050670  | 0.218428  | 0.193121  | 0         | 0.205101  | 0         | 0         |
| C17orf61-PLS | 10.9121   | 18.3696   | 14.5963   | 6.94849   | 24.7007   | 16.5864   |
| ZNF524       | 22.3871   | 35.938    | 28.3494   | 38.5549   | 30.9481   | 34.266    |
| ATRNL1       | 0.151677  | 0.210734  | 0.106619  | 0.122076  | 0.138006  | 0.10127   |
| LAMA5        | 17.1447   | 28.4026   | 29.9449   | 33.0473   | 42.2471   | 31.9524   |
| VCP          | 98.2174   | 78.6665   | 84.2033   | 81.9061   | 73.2472   | 85.5197   |
| NUP43        | 13.0032   | 14.1687   | 13.1888   | 13.7599   | 16.7416   | 13.6739   |
| DRD3         | 0         | 0         | 0         | 0         | 0         | 0         |
| YY1AP1       | 31.6394   | 36.8141   | 30.9985   | 42.7216   | 37.641    | 33.6451   |
| PROZ         | 0.0726339 | 0.0642183 | 0.164953  | 0.0682021 | 0.185044  | 0.271574  |
| SEMA3A       | 1.11864   | 0.719297  | 0.936633  | 0.350129  | 1.03632   | 0.855521  |
| NUDT11       | 1.18483   | 1.45861   | 1.31292   | 1.23133   | 1.45487   | 1.02823   |
| LIMS3-LOC44  | 0.0645923 | 6.51E-15  | 0.149308  | 0.101757  | 0.0790884 | 0.080715  |
| LOC1001311:  | 1.25526   | 0         | 0         | 0         | 0         | 0.391114  |
| ST6GALNAC1   | 1.1488    | 0.595408  | 0.779684  | 0.557951  | 0.908288  | 0.641826  |
| LOC1001321:  | 0         | 0         | 0         | 0         | 0         | 0         |
| LOC441454    | 0.821374  | 0.607152  | 0.881535  | 0.670867  | 1.22702   | 0.591574  |
| GZMA         | 7.44767   | 7.42282   | 2.25517   | 0.38145   | 3.96726   | 0.337532  |
| ARVP6125     | 0         | 0         | 0         | 0         | 0         | 0         |
| ZIC1         | 2.94323   | 3.65938   | 4.55357   | 3.64456   | 3.53824   | 1.29533   |
| PLEKHA5      | 8.78565   | 8.25035   | 9.97815   | 8.68709   | 9.69615   | 9.59072   |
| SART1        | 17.4396   | 22.9598   | 19.2046   | 20.9555   | 21.8676   | 20.2239   |
| LOC10065290  | 12.5444   | 12.3501   | 6.19525   | 9.34381   | 9.95699   | 9.06495   |
| DCAF12       | 14.8972   | 12.5575   | 15.6022   | 14.0384   | 14.8103   | 14.108    |



|             |          |           |           |          |          |          |
|-------------|----------|-----------|-----------|----------|----------|----------|
| DHX36       | 13.3945  | 10.4733   | 12.5871   | 9.56678  | 11.8361  | 8.79265  |
| CEP70       | 6.36935  | 5.79799   | 4.45074   | 3.60967  | 4.65678  | 4.39186  |
| MIR1268B    | 0        | 0         | 0         | 0        | 0        | 0        |
| WDR65       | 0.196786 | 0.0297267 | 2.01E-134 | 0        | 0.133113 | 0.188474 |
| LOC10065290 | 0.444908 | 0         | 0.56133   | 0.208881 | 0.567803 | 0.23104  |
| PYY2        | 0.107744 | 0.0952602 | 0.163125  | 0.303509 | 0.411735 | 0.335707 |
| MIR3675     | 0        | 0         | 0         | 0        | 0        | 0        |
| RAD1        | 6.35727  | 5.77749   | 6.33868   | 6.20668  | 5.91976  | 5.19447  |
| PCBP3       | 0.820105 | 1.24326   | 2.62481   | 1.38109  | 1.52427  | 1.18631  |
| UBQLN1      | 78.5467  | 57.0211   | 58.3627   | 49.8607  | 45.5247  | 46.32    |
| CYP4F35P    | 0.72855  | 1.44095   | 0.44661   | 0.781714 | 0.419576 | 0.280881 |
| PTPRK       | 16.1224  | 11.1979   | 13.734    | 12.8222  | 12.5951  | 10.8302  |
| SH3RF2      | 13.7678  | 14.6533   | 16.1521   | 16.0524  | 19.6986  | 21.2658  |
| U2AF2       | 43.3946  | 49.8737   | 43.5823   | 50.8786  | 50.1414  | 51.9774  |
| ZNF365      | 0.901817 | 0.671859  | 0.662204  | 0.981183 | 1.66104  | 2.5072   |
| LOC389831   | 0        | 0         | 0         | 0        | 0        | 0        |
| MIR642B     | 0        | 0         | 0         | 0        | 0        | 0        |
| ACSL1       | 800.058  | 539.512   | 412.679   | 331.723  | 290.859  | 366.176  |
| MIR1262     | 0        | 0         | 0         | 0        | 0        | 0        |
| AMHR2       | 0.299246 | 0.54992   | 0.368884  | 0.285975 | 0.326747 | 0.387595 |
| SCN9A       | 0.357616 | 0.375999  | 0.512167  | 0.4084   | 0.63407  | 0.36138  |
| ELK4        | 9.89928  | 8.79133   | 9.39122   | 7.86914  | 10.6299  | 7.58601  |
| SPTLC2      | 11.6198  | 7.14321   | 8.58536   | 6.62715  | 8.15484  | 7.68946  |
| FABP4       | 1036.46  | 1520.47   | 1073.72   | 545.351  | 460.216  | 253.641  |
| VIPR2       | 0.742296 | 1.02819   | 0.412076  | 0.766705 | 0.945545 | 1.09474  |
| COX5A       | 214.97   | 208.864   | 170.531   | 212.461  | 160.194  | 168.848  |
| LOC338862   | 0        | 0         | 0         | 0        | 0        | 0        |
| ABCC10      | 4.53035  | 6.74971   | 5.47637   | 4.86187  | 8.38424  | 6.71006  |
| TMEM2       | 7.40183  | 5.18578   | 6.19805   | 6.17331  | 6.99293  | 5.78273  |
| DDX56       | 39.3426  | 48.6907   | 31.044    | 43.3153  | 37.9487  | 40.3714  |
| HIST2H4B    | 6.11025  | 1.83481   | 2.70914   | 4.77215  | 5.18446  | 3.80765  |
| LOC10050643 | 0        | 0         | 0         | 0        | 0        | 0        |
| TRERF1      | 2.76882  | 3.26771   | 4.16357   | 2.96457  | 5.07499  | 3.83338  |
| NT5C        | 40.3937  | 73.1777   | 41.1147   | 59.279   | 47.1661  | 42.7324  |
| PDIA3       | 61.4831  | 56.3888   | 55.4891   | 51.6028  | 47.9445  | 48.6962  |
| PCDHGA10    | 0.576874 | 0.886567  | 1.47997   | 1.10121  | 0.907173 | 0.682349 |
| LHX2        | 2.59886  | 3.52074   | 2.95102   | 8.65908  | 8.75668  | 14.1053  |
| FLJ33630    | 6.16436  | 4.3482    | 5.58444   | 3.57416  | 3.79739  | 3.73641  |
| UCA1        | 0.384987 | 0.204229  | 0.116575  | 0.144599 | 0.343281 | 0.383853 |
| OR2H2       | 0        | 0.384633  | 0.164663  | 0        | 0.207809 | 0.203323 |
| PDLIM5      | 24.4323  | 14.8402   | 15.7318   | 16.9849  | 13.3432  | 15.698   |
| LEPR        | 4.27472  | 3.30673   | 5.4009    | 3.06089  | 4.69566  | 3.29146  |
| LOC283788   | 0        | 0         | 0         | 0        | 0        | 0        |

|             |           |           |           |           |           |           |
|-------------|-----------|-----------|-----------|-----------|-----------|-----------|
| CEACAM18    | 0         | 0         | 0         | 0         | 0         | 0         |
| ZNF140      | 10.6433   | 9.89641   | 9.23257   | 9.29527   | 11.456    | 10.5434   |
| SPAG1       | 6.50108   | 5.74784   | 7.23373   | 4.21677   | 6.51843   | 6.55669   |
| STT3A       | 33.6536   | 26.9492   | 26.1237   | 27.282    | 27.4512   | 25.7923   |
| PLEKHN1     | 16.014    | 23.3124   | 23.5653   | 26.1226   | 36.6428   | 35.8298   |
| MRPL23-AS1  | 0.710062  | 0.965834  | 1.57122   | 2.41051   | 2.43515   | 2.17837   |
| TRPS1       | 7.47637   | 4.4151    | 6.4743    | 6.84291   | 6.07843   | 7.0002    |
| OXTR        | 0.534116  | 0.177087  | 0.185317  | 0.0626908 | 0.0850454 | 0.388312  |
| SGTA        | 33.5206   | 44.5134   | 34.6208   | 50.3687   | 37.7183   | 40.4631   |
| NPBWR2      | 0         | 0         | 0         | 0         | 0         | 0         |
| TAS2R1      | 0         | 0         | 0         | 0         | 0         | 0         |
| LOC643486   | 0         | 0         | 0         | 0         | 0         | 0         |
| COPS8       | 16.6183   | 16.5288   | 14.3914   | 15.6891   | 13.6034   | 12.2694   |
| IVD         | 24.3218   | 20.3322   | 15.9945   | 14.963    | 15.6888   | 16.0501   |
| ACTBL2      | 0         | 0.0316295 | 0.0270814 | 0.671833  | 0         | 0.535035  |
| CDC14A      | 4.36629   | 3.86273   | 5.10891   | 2.79909   | 4.08225   | 4.2369    |
| MIR4419A    | 0         | 0         | 0         | 0         | 0         | 0         |
| CXorf58     | 0.0695508 | 0         | 0.0526504 | 0         | 0         | 0         |
| FAM72B      | 1.25352   | 0.938506  | 0.836804  | 0.561749  | 1.56522   | 1.10514   |
| NPC2        | 168.792   | 184.82    | 167.662   | 184.478   | 174.045   | 164.081   |
| RASGEF1C    | 0.783796  | 0.815274  | 0.62824   | 1.77499   | 1.02777   | 0.948126  |
| RERGL       | 12.8462   | 14.1086   | 6.30585   | 9.14106   | 7.86224   | 3.56483   |
| LOC286135   | 0         | 0         | 0         | 0         | 0         | 0         |
| RAX         | 0.309405  | 0.328268  | 0.187377  | 0         | 0.335005  | 0.192808  |
| LOC1005076: | 0         | 0         | 0.053133  | 0         | 0.067055  | 0.0437384 |
| UBXN4       | 58.0468   | 45.3517   | 52.6014   | 41.7111   | 52.8103   | 45.0716   |
| SLC26A5     | 0.736372  | 0.313621  | 0.773716  | 0.523741  | 0.590342  | 0.571535  |
| FLJ40448    | 0.0475305 | 0.210118  | 0.107943  | 0.0892608 | 0.181635  | 0.0888571 |
| RAPGEF3     | 5.91465   | 11.6714   | 10.7283   | 11.3989   | 11.0365   | 7.83118   |
| PTER        | 7.73125   | 5.18648   | 5.71754   | 4.10698   | 4.11984   | 3.93327   |
| C12orf71    | 0.245597  | 0.325712  | 0.557754  | 0.345917  | 0.547477  | 0.459136  |
| AUH         | 18.8123   | 13.9002   | 13.7325   | 12.8067   | 13.9929   | 13.663    |
| LOC1005058: | 2.26626   | 2.89421   | 2.85928   | 2.36442   | 1.60377   | 1.41224   |
| FAM138A     | 0.0856799 | 0.117862  | 0.0572295 | 0         | 0.231762  | 0.0376885 |
| LOC284865   | 0         | 0         | 0.0694229 | 0.0861117 | 0.0292045 | 0.0285741 |
| LOC1005055( | 0         | 0         | 0         | 0         | 0         | 0         |
| ALDH16A1    | 16.6912   | 27.2542   | 14.7372   | 17.7153   | 24.5843   | 19.8726   |
| C20orf54    | 1.97172   | 1.31568   | 1.23914   | 1.64182   | 1.30319   | 1.66917   |
| PDIA2       | 0.366315  | 0.755704  | 0.600823  | 1.03189   | 0.583271  | 0.304363  |
| LOC387646   | 0.118317  | 0.0920768 | 0.145545  | 0.180533  | 0.574593  | 0.460812  |
| OR5H14      | 0         | 0         | 0         | 0         | 0         | 0         |
| CBY1        | 32.8218   | 35.638    | 33.1685   | 40.2391   | 35.6578   | 32.9764   |
| LOC1005075: | 0.615345  | 0         | 0         | 0.577799  | 0         | 0         |

|             |          |          |          |           |           |            |
|-------------|----------|----------|----------|-----------|-----------|------------|
| CCDC138     | 1.95598  | 1.27643  | 1.51594  | 0.568483  | 1.42374   | 1.68322    |
| CPS1-IT1    | 0        | 0        | 0        | 0         | 0         | 0          |
| IGFL4       | 9.00992  | 7.5108   | 6.62568  | 4.83438   | 14.2642   | 7.70002    |
| SMUG1       | 18.3133  | 23.294   | 23.9644  | 28.4467   | 19.4253   | 21.8484    |
| CCL24       | 0        | 0        | 3.3481   | 0.59328   | 4.42659   | 1.18119    |
| ANKFY1      | 14.4416  | 12.3832  | 14.8245  | 12.4191   | 15.4521   | 13.5436    |
| CT45A2      | 0        | 0        | 0        | 0         | 0         | 0          |
| CCDC121     | 2.62619  | 2.63053  | 1.97321  | 1.20001   | 2.82555   | 2.09312    |
| TAZ         | 27.5732  | 43.0934  | 30.0021  | 38.3894   | 40.0725   | 35.9624    |
| LOC10050667 | 2.83304  | 4.77572  | 3.97071  | 4.52892   | 2.2595    | 1.9348     |
| ABCB11      | 0.343987 | 0.339912 | 0.19913  | 0.227999  | 0.128875  | 0.163921   |
| LOC374443   | 2.38639  | 1.83765  | 1.68996  | 1.40953   | 1.78957   | 1.19927    |
| LOC10050607 | 0.602081 | 0        | 0.10518  | 0         | 0.0589952 | 0          |
| HIGD1C      | 0        | 0        | 0.828103 | 1.02717   | 0         | 1.36337    |
| NOP10       | 135.913  | 144.861  | 105.72   | 123.564   | 107.471   | 121.301    |
| LOC10050585 | 3.54518  | 4.43348  | 3.7381   | 4.52551   | 3.81289   | 3.83331    |
| SKIL        | 6.28356  | 3.90873  | 6.43231  | 4.69583   | 4.06931   | 4.80695    |
| LOC10050590 | 0        | 0        | 0.954883 | 0.39481   | 0.535593  | 0          |
| POLR1D      | 94.9879  | 134.872  | 102.034  | 133.367   | 123.889   | 118.424    |
| SV2A        | 0.768723 | 1.51466  | 0.764819 | 1.01055   | 1.03516   | 0.58853    |
| MIR3914-2   | 0        | 0        | 0        | 0         | 0         | 0          |
| XRN1        | 7.18464  | 5.48147  | 7.7748   | 5.22263   | 6.91766   | 5.60522    |
| CHRNA2      | 1.1258   | 0.381203 | 0.19946  | 0.224917  | 0.152559  | 0.164193   |
| VANGL2      | 19.3989  | 21.6138  | 26.8139  | 28.7734   | 33.405    | 30.0088    |
| MIR1208     | 0        | 0        | 0        | 0         | 0         | 0          |
| PIGY        | 126.933  | 117.242  | 106.152  | 103.814   | 87.0392   | 83.2915    |
| KRTAP10-11  | 1.08302  | 0.478767 | 0        | 32.6832   | 0.287408  | 92.3755    |
| KRTAP9-3    | 8.42754  | 2.48408  | 0.359401 | 123.375   | 2.47114   | 1460.94    |
| MAP7D3      | 3.28846  | 5.45117  | 4.62803  | 3.04677   | 3.93819   | 3.33775    |
| PIK3AP1     | 4.03529  | 1.704    | 2.614    | 2.60145   | 2.1865    | 2.50211    |
| EPCAM       | 29.7067  | 8.7911   | 11.2905  | 14.581    | 11.1411   | 12.4305    |
| THSD4       | 4.28822  | 3.38939  | 3.11323  | 4.80277   | 5.13332   | 4.51382    |
| FLJ33360    | 0.33488  | 0.51814  | 0.665453 | 0.47167   | 0.719843  | 0.67822    |
| EME2        | 3.45902  | 2.11165  | 3.05491  | 2.47464   | 4.45875   | 3.79799    |
| LOC554249   | 1.90397  | 3.09927  | 1.53609  | 1.95747   | 4.29878   | 4.00368    |
| DAB1        | 0.117033 | 0.137964 | 0.177189 | 0.0732612 | 0.149078  | 0.12155    |
| C6orf25     | 5.17019  | 4.40832  | 6.14842  | 5.1388    | 7.44319   | 8.1192     |
| LOC202181   | 2.37479  | 2.00702  | 2.64365  | 2.06582   | 2.8247    | 2.17616    |
| BOK-AS1     | 0.462931 | 0.832335 | 0.580606 | 0.144598  | 0.691578  | 0.388417   |
| PPT2-EGFL8  | 9.77934  | 13.2538  | 11.5726  | 10.8759   | 15.0046   | 16.4956    |
| SLC7A14     | 0        | 0        | 0.007043 | 0.0174722 | 0.0177768 | 0.00579771 |
| RNFT2       | 0.621134 | 0.488631 | 0.314986 | 0.391077  | 0.351995  | 0.313362   |
| KCNK3       | 1.39762  | 0.628684 | 0.111369 | 0.299307  | 0.249868  | 0.183355   |

|             |          |           |           |           |           |           |
|-------------|----------|-----------|-----------|-----------|-----------|-----------|
| RCCD1       | 8.87918  | 10.7924   | 10.404    | 11.6327   | 12.7962   | 13.9179   |
| BOD1        | 23.882   | 29.9022   | 27.0778   | 29.9685   | 27.5832   | 26.5713   |
| SLIT2       | 4.11171  | 1.53338   | 4.95654   | 2.47023   | 3.32621   | 2.33152   |
| LOC727751   | 2.45396  | 2.21767   | 4.47773   | 4.25689   | 3.67443   | 4.7572    |
| CPT2        | 22.0485  | 20.5423   | 15.5991   | 14.3538   | 15.9472   | 17.574    |
| FYB         | 4.70068  | 2.80732   | 4.21417   | 1.77097   | 4.89809   | 2.71097   |
| NPAS1       | 1.4131   | 2.36489   | 2.40688   | 3.17504   | 5.14293   | 5.09482   |
| FLJ44790    | 0.400481 | 1.035     | 0.443089  | 0.433898  | 0.686723  | 0.422337  |
| OR10A4      | 0        | 0         | 0         | 0         | 0         | 0         |
| LOH12CR1    | 6.06817  | 5.80128   | 4.59364   | 6.20749   | 4.96461   | 6.33312   |
| TBXAS1      | 2.33927  | 1.49322   | 1.10342   | 0.817295  | 1.36577   | 1.45943   |
| FLJ32063    | 0        | 0.0265542 | 0         | 0         | 0         | 0         |
| RAG2        | 0.216888 | 0         | 0.195702  | 0.446402  | 0         | 0.405467  |
| S100A7A     | 13.8039  | 6.1023    | 0.120309  | 0.234504  | 3.71629   | 0.170098  |
| PBRM1       | 11.4028  | 8.87525   | 12.2069   | 8.49948   | 10.0735   | 8.89693   |
| LPPR4       | 1.35399  | 1.42588   | 1.98904   | 1.29743   | 2.11712   | 1.69942   |
| TMEM132E    | 0.022212 | 0.314215  | 0.134517  | 0.0834268 | 0.0990286 | 0.17994   |
| AMBN        | 0        | 0         | 0         | 0         | 0         | 0.0326272 |
| SIX2        | 0.713693 | 0.631003  | 0.936468  | 0.536117  | 0.393948  | 0.177897  |
| ACSM1       | 54.5862  | 1.15508   | 0.380381  | 0.613368  | 0.608063  | 0.814125  |
| PURB        | 13.6525  | 11.0018   | 12.8359   | 11.2146   | 12.3527   | 11.034    |
| FBXO36      | 2.6969   | 1.88244   | 2.82059   | 2.26578   | 2.59911   | 2.47667   |
| C1QL1       | 0.287145 | 1.20591   | 0.597769  | 1.14591   | 0.685817  | 0.357874  |
| EPOR        | 2.19496  | 3.04041   | 3.26218   | 2.76371   | 2.50479   | 2.17612   |
| LOC286186   | 0        | 0         | 0         | 0         | 0         | 0         |
| NSUN5       | 13.253   | 22.9134   | 14.1585   | 19.9301   | 19.5485   | 17.666    |
| CCDC114     | 0.153519 | 0.298609  | 0.650801  | 0.922569  | 1.17332   | 1.47326   |
| C17orf53    | 1.50981  | 1.79016   | 1.19862   | 1.62488   | 1.89887   | 1.62857   |
| NTNG2       | 0.545371 | 0.425456  | 0.388564  | 0.481972  | 0.817294  | 0.199913  |
| SUCNR1      | 0.835705 | 0.397857  | 1.50859   | 0.0603626 | 0.859813  | 0.280418  |
| MIR520D     | 0        | 0         | 0         | 0         | 0         | 0         |
| LOC645638   | 40.2594  | 33.6553   | 48.2359   | 31.8341   | 63.2554   | 55.5994   |
| OR52I1      | 0        | 0         | 0.0459294 | 0         | 0         | 0         |
| LOC10050684 | 2.85712  | 7.57827   | 4.75829   | 5.54444   | 6.06573   | 3.32349   |
| RHOV        | 63.0272  | 80.1384   | 63.9753   | 112.898   | 78.3526   | 84.6862   |
| FOXRED2     | 5.10247  | 4.49413   | 4.30318   | 4.5361    | 4.81904   | 4.37626   |
| PCDHGA8     | 0.397891 | 0.181094  | 0.63927   | 0.558424  | 0.30653   | 0.315909  |
| GABRA4      | 1.79627  | 1.2023    | 1.31434   | 0.899126  | 0.838948  | 1.03231   |
| GMPPA       | 23.6575  | 28.7129   | 20.8545   | 24.2528   | 25.958    | 23.4017   |
| MGP         | 166.551  | 130.249   | 199.942   | 143.796   | 178.931   | 163.472   |
| HECW1-IT1   | 0        | 0         | 0         | 0         | 0         | 0         |
| L3MBTL2     | 15.1894  | 15.5464   | 15.2618   | 17.4311   | 15.2287   | 14.7753   |
| TGFA        | 9.3004   | 6.30628   | 8.52666   | 9.37216   | 8.4035    | 8.60551   |

|             |           |           |           |           |           |           |
|-------------|-----------|-----------|-----------|-----------|-----------|-----------|
| GDF15       | 0.347031  | 0.276917  | 0.404395  | 0.803897  | 0.662992  | 0.616497  |
| GALNT2      | 15.6318   | 15.1277   | 15.3718   | 14.2085   | 16.4502   | 16.19     |
| AAMP        | 62.5534   | 71.3806   | 63.595    | 66.9708   | 65.3461   | 63.6805   |
| MIR4257     | 0         | 0         | 0         | 0         | 0         | 0         |
| MRPS26      | 68.6104   | 106.775   | 63.3768   | 85.0229   | 58.3119   | 64.586    |
| TMEM139     | 8.12126   | 7.6837    | 5.57194   | 6.76556   | 5.24961   | 5.77054   |
| SPATS2      | 7.85854   | 9.68167   | 9.67437   | 10.4516   | 10.437    | 9.89055   |
| LOC10050548 | 4.65422   | 7.94132   | 5.70597   | 6.62498   | 5.00407   | 4.79637   |
| DSG3        | 33.0759   | 28.0677   | 24.1996   | 32.6771   | 23.3573   | 28.4191   |
| DPP6        | 0.119097  | 0.190868  | 1.4321    | 1.03141   | 2.66071   | 1.03994   |
| SERPING1    | 171.991   | 167.121   | 155.708   | 103.489   | 152.84    | 97.861    |
| PVRL1       | 72.4273   | 62.4556   | 86.7819   | 87.8835   | 103.242   | 115.425   |
| CDA         | 37.2598   | 45.4194   | 25.9569   | 40.3331   | 27.5942   | 42.8119   |
| DDC         | 1.47012   | 0.567833  | 0.298738  | 0.237151  | 0.328422  | 0.283298  |
| MRPS24      | 101.674   | 126.327   | 85.376    | 132.102   | 81.269    | 90.4018   |
| SLFN12      | 2.33085   | 2.58535   | 3.07979   | 2.26822   | 2.10533   | 1.29403   |
| LOC10050640 | 0.889288  | 0.909523  | 0.2931    | 0.566771  | 0.267438  | 0.400558  |
| NIPSNAP3B   | 3.36113   | 5.625     | 3.54397   | 2.25432   | 2.6759    | 1.53348   |
| OR9Q2       | 0         | 0         | 0         | 0         | 0         | 0         |
| ZNF782      | 2.44214   | 2.05386   | 2.41234   | 2.06941   | 2.40899   | 2.11572   |
| SLC4A10     | 0.0774648 | 0.0152193 | 0         | 0.0646556 | 0.0493378 | 0.0482728 |
| HELLS       | 1.34365   | 1.92338   | 1.42886   | 2.07274   | 1.18179   | 2.13314   |
| SCYL3       | 7.8375    | 6.50294   | 7.28364   | 5.67433   | 7.80712   | 7.71373   |
| ARNTL2      | 6.34749   | 2.71091   | 5.37518   | 1.61632   | 4.3511    | 3.31859   |
| CPZ         | 8.94506   | 6.03047   | 16.7222   | 3.6283    | 6.92645   | 6.03477   |
| LOC10013120 | 0         | 0.0297604 | 0.0254811 | 0.0316066 | 0         | 0         |
| MTHFD1      | 14.6404   | 13.2721   | 18.3202   | 12.434    | 13.0871   | 12.0043   |
| F8A3        | 3.8229    | 5.28016   | 4.5984    | 4.22925   | 4.0858    | 3.74245   |
| PSIP1       | 21.3839   | 19.4046   | 20.3155   | 18.2974   | 23.2333   | 17.0836   |
| ZNF540      | 4.35347   | 4.70375   | 4.53866   | 3.34876   | 5.50039   | 4.28767   |
| COPS7B      | 27.5402   | 32.6355   | 29.1715   | 30.9236   | 38.3157   | 33.4755   |
| TRMT61B     | 10.0318   | 6.61289   | 8.49093   | 8.36603   | 8.86902   | 6.683     |
| CNOT8       | 35.7162   | 31.7578   | 33.2578   | 29.0679   | 33.6036   | 29.6335   |
| EMP1        | 92.7256   | 84.6603   | 124.957   | 102.427   | 94.4193   | 92.0925   |
| C20orf29    | 6.83234   | 7.25513   | 6.77635   | 7.75364   | 6.05757   | 6.71249   |
| MED20       | 8.19454   | 8.29041   | 8.24022   | 7.84767   | 8.20523   | 9.14595   |
| LOC10050756 | 0.307477  | 0.407777  | 0.523714  | 0.72179   | 0.244792  | 0.431115  |
| ARID1A      | 14.6188   | 12.1847   | 14.1152   | 13.0975   | 16.1547   | 14.5992   |
| LOC10050570 | 1.41813   | 0.38879   | 0.943507  | 0.383956  | 0.613621  | 0.648205  |
| ZBTB17      | 9.85936   | 15.0171   | 10.6858   | 15.9135   | 14.5439   | 13.2517   |
| LOC10065296 | 2.37398   | 4.30583   | 1.67219   | 6.86512   | 2.54387   | 1.71464   |
| FAM75C2     | 0.05204   | 0         | 0         | 0.0488647 | 0.0838971 | 0         |
| SNORA70D    | 0         | 0         | 0         | 0         | 0         | 0         |

|             |            |          |           |           |            |           |
|-------------|------------|----------|-----------|-----------|------------|-----------|
| TRAF5       | 9.43954    | 10.1023  | 7.68425   | 6.99947   | 8.19848    | 5.50083   |
| NDUFS8      | 114.592    | 156.678  | 96.1087   | 146.113   | 95.4512    | 112.771   |
| USP17L2     | 0.0669432  | 0        | 0.0791818 | 0         | 0.00710608 | 0.0185405 |
| NCF1C       | 1.51313    | 1.84072  | 0.901236  | 0.6553    | 1.67277    | 0.818617  |
| MIR1244-2   | 0          | 0        | 0         | 0         | 0          | 0         |
| SORCS2      | 1.01154    | 0.936264 | 0.873426  | 1.35053   | 1.07712    | 2.39336   |
| LOC10013215 | 0          | 0        | 0         | 0         | 0.514007   | 0         |
| PYCR2       | 26.152     | 33.7172  | 28.7272   | 29.4207   | 33.2332    | 30.2989   |
| LOC10012974 | 0          | 0        | 1.66E-07  | 0         | 0          | 0         |
| GCM2        | 0          | 0        | 0         | 0         | 0          | 0         |
| CEP72       | 1.55093    | 1.48242  | 1.77696   | 1.81053   | 1.70862    | 1.41053   |
| ZSCAN5D     | 0.429715   | 0.633212 | 0.1506    | 0.0672493 | 0.124173   | 0.0892601 |
| TAF10       | 66.6734    | 105.678  | 63.7141   | 104.533   | 69.096     | 66.2707   |
| KRT18       | 61.0645    | 16.6996  | 23.4114   | 46.4214   | 32.1912    | 28.1906   |
| CRYBG3      | 4.84175    | 2.51851  | 6.61824   | 3.65828   | 5.07146    | 4.95006   |
| POMT1       | 14.407     | 20.1228  | 17.6147   | 22.8949   | 23.9978    | 25.5652   |
| ISLR        | 25.1184    | 29.4347  | 38.6724   | 30.2107   | 35.2826    | 24.5954   |
| DCT         | 7.50605    | 15.736   | 15.9138   | 15.3852   | 12.6578    | 11.0085   |
| PRPSAP1     | 23.452     | 17.3868  | 22.6721   | 24.2838   | 18.7463    | 18.4221   |
| VN1R4       | 0          | 0        | 0         | 0         | 0          | 0         |
| MYOZ3       | 0.367093   | 0.326774 | 0.343488  | 0.347046  | 0.504183   | 0.300265  |
| EIF2C2      | 1.37687    | 1.61544  | 2.57288   | 1.53012   | 1.50288    | 1.71544   |
| PAX3        | 1.38238    | 2.27273  | 1.38977   | 2.01026   | 1.51031    | 1.63669   |
| MIR4294     | 0          | 0        | 0         | 0         | 0          | 0         |
| CPM         | 14.1134    | 12.0428  | 13.4328   | 10.8034   | 8.6814     | 9.41922   |
| ABHD14A-AC  | 0.00011398 | 1.38E-06 | 1.24E-15  | 0.643799  | 0.00106242 | 9.54E-06  |
| MPV17L2     | 9.26441    | 10.7552  | 7.92798   | 10.212    | 8.3634     | 7.78125   |
| VASN        | 13.4245    | 12.0265  | 19.5162   | 13.9094   | 13.9252    | 17.3525   |
| LOC10065275 | 0          | 0        | 0         | 0         | 0          | 0.0366161 |
| LOC729862   | 10.4557    | 12.0887  | 22.223    | 20.0131   | 16.6483    | 13.7829   |
| DGCR2       | 41.4806    | 46.3967  | 48.3082   | 55.295    | 57.9544    | 56.5558   |
| FAM174B     | 12.8363    | 6.58652  | 6.62272   | 7.7843    | 6.25331    | 5.40413   |
| MIR548A1    | 0          | 0        | 0         | 0         | 0          | 0         |
| STX6        | 15.6309    | 14.2918  | 14.9525   | 15.0982   | 13.7362    | 16.1676   |
| TRAPPC6B    | 16.123     | 13.6842  | 15.9914   | 11.3192   | 17.9325    | 14.367    |
| MIR4674     | 0          | 0        | 0         | 0         | 0          | 0         |
| TMEM169     | 0.732558   | 0.854303 | 0.731462  | 0.550849  | 0.410797   | 0.292943  |
| MIR1302-7   | 0          | 0        | 0         | 0         | 0          | 0         |
| MIF4GD      | 15.0828    | 19.1449  | 19.6589   | 23.3419   | 22.2351    | 16.4073   |
| B4GALNT2    | 0.530127   | 0.205049 | 0.854652  | 1.41785   | 0.81389    | 2.52983   |
| E2F4        | 40.671     | 48.6373  | 32.122    | 39.7979   | 40.149     | 38.5199   |
| C6orf127    | 2.10949    | 0.310847 | 0         | 0         | 0          | 0         |
| BAI3        | 0.527555   | 0.210646 | 0.450893  | 0.35155   | 0.35768    | 0.212097  |

|             |           |           |           |           |           |           |
|-------------|-----------|-----------|-----------|-----------|-----------|-----------|
| ST6GALNAC5  | 0.761601  | 0.628469  | 0.345922  | 0.953508  | 0.388054  | 0.253119  |
| C6orf211    | 10.8818   | 8.96348   | 10.4896   | 5.69701   | 9.12459   | 6.90306   |
| LOC84989    | 0.164913  | 0.072929  | 0.189314  | 5.06E-133 | 0.21785   | 4.41E-134 |
| SIPA1L3     | 5.79604   | 5.60754   | 7.14789   | 7.39407   | 7.17882   | 7.57156   |
| UBE2L3      | 37.7781   | 38.3029   | 29.7289   | 38.3096   | 28.1128   | 29.7216   |
| FRAS1       | 0.742618  | 0.524222  | 0.870417  | 1.03468   | 1.09802   | 1.02343   |
| SFT2D2      | 6.04195   | 5.21472   | 7.18739   | 5.80838   | 5.86385   | 6.54408   |
| KCNK17      | 0.273323  | 0.0604135 | 0         | 0.0641613 | 0.0435201 | 0.0425807 |
| SQSTM1      | 127.566   | 153.262   | 114.671   | 123.357   | 120.333   | 112.044   |
| RHBDL3      | 0.24904   | 0.532115  | 0.235656  | 0.389741  | 0.806293  | 0.814754  |
| RILPL2      | 8.39266   | 13.5035   | 11.9053   | 9.58448   | 11.0278   | 8.481     |
| GAGE12J     | 0         | 0.0333516 | 0         | 0         | 0         | 0         |
| C16orf87    | 3.86974   | 2.86279   | 4.1251    | 2.52129   | 3.37005   | 4.28157   |
| GPC1        | 73.9249   | 133.61    | 113.2     | 143.912   | 177.481   | 138.677   |
| SMCR7       | 7.45099   | 8.50083   | 9.24514   | 10.1806   | 9.07488   | 10.6837   |
| LOC10050566 | 5.41206   | 11.55     | 12.856    | 23.1315   | 25.7929   | 19.0725   |
| ITLN1       | 4.96033   | 0         | 0         | 0         | 0         | 0         |
| LOC10050585 | 0.779696  | 0.886317  | 0.590234  | 0.313767  | 0.78036   | 0.277642  |
| PCDHA11     | 0.112126  | 4.78E-20  | 0.111945  | 0.28719   | 0.0218284 | 0.0332767 |
| LOC440288   | 1.41418   | 2.14373   | 2.18182   | 3.54168   | 1.60553   | 1.76596   |
| ZNF474      | 0.158876  | 0.32776   | 0.200451  | 0.248637  | 0.134919  | 0.264013  |
| MIR1915     | 0         | 0         | 0         | 0         | 0         | 0         |
| PTPRN       | 0.0276322 | 0.0977238 | 0.0209177 | 0         | 0.0703973 | 0.0774877 |
| FAM135A     | 9.28806   | 7.40781   | 10.7094   | 6.25647   | 8.95218   | 8.31199   |
| C19orf10    | 74.5762   | 79.1032   | 74.7439   | 86.7037   | 58.6699   | 70.8091   |
| SNORD51     | 0         | 0         | 0         | 0         | 0         | 0         |
| MGC11082    | 0.867192  | 1.91679   | 1.09411   | 0.949992  | 1.28874   | 0.540397  |
| EIF4A1      | 167.369   | 182.389   | 146.581   | 172.102   | 148.616   | 147.983   |
| PIH1D1      | 45.9844   | 59.3237   | 38.8739   | 44.6907   | 55.7834   | 49.5618   |
| ETAA1       | 7.57848   | 6.16863   | 7.19395   | 5.08291   | 9.09809   | 6.48418   |
| ARHGEF10L   | 18.0386   | 18.0478   | 24.4651   | 25.1752   | 24.738    | 28.3141   |
| TACC1       | 17.6568   | 17.5818   | 22.0824   | 13.7291   | 18.3074   | 12.469    |
| MIR4729     | 0         | 0         | 0         | 0         | 0         | 0         |
| ACAT1       | 46.9679   | 38.0903   | 42.4916   | 31.6688   | 35.2919   | 30.6237   |
| FAM71E1     | 1.06481   | 2.80049   | 1.83651   | 1.55229   | 2.33309   | 2.07135   |
| ZNF76       | 12.5639   | 15.9931   | 15.3264   | 16.1324   | 17.9322   | 15.4228   |
| SLMAP       | 17.2908   | 16.529    | 15.3317   | 17.0187   | 15.2471   | 12.8533   |
| LOC10050673 | 0.201732  | 0.0668845 | 0.171801  | 0.0473558 | 0.128484  | 0.0942832 |
| RAB3B       | 1.16906   | 0.400525  | 0.75777   | 0.731828  | 0.714663  | 1.18156   |
| KRTAP19-8   | 0         | 0         | 0         | 0         | 0         | 0         |
| AGMAT       | 0.188359  | 0.444093  | 0.095059  | 0.0884329 | 0.259928  | 0.293443  |
| H2AFY       | 90.1099   | 89.359    | 75.0409   | 82.8381   | 80.7028   | 84.2277   |
| LOC340073   | 0         | 0         | 0         | 0         | 0         | 0         |

|             |          |           |          |          |          |          |
|-------------|----------|-----------|----------|----------|----------|----------|
| KLHDC3      | 56.048   | 73.8968   | 60.9293  | 70.1138  | 63.8434  | 66.1527  |
| LOC10050611 | 2.64817  | 4.16239   | 4.51053  | 5.31854  | 4.07603  | 2.10862  |
| KLF14       | 0.216538 | 0.510532  | 0.382481 | 0.338876 | 0.137914 | 0.359833 |
| IGFLR1      | 6.29944  | 10.8066   | 6.69043  | 7.59248  | 16.348   | 6.62069  |
| MGC27382    | 0        | 0         | 0        | 0        | 0        | 0        |
| GNAT1       | 0        | 0.0362534 | 0        | 0        | 0        | 0        |
| CCL2        | 28.8335  | 59.992    | 29.0157  | 15.2394  | 38.5979  | 11.9427  |
| PPP2R4      | 107.877  | 118.421   | 77.7942  | 96.8394  | 80.3529  | 89.2438  |
| ABCA10      | 6.87133  | 6.17947   | 7.28276  | 4.69991  | 9.47864  | 6.21133  |
| BCAR1       | 12.7587  | 17.2485   | 15.0117  | 19.4519  | 14.953   | 13.5106  |
| ERCC5       | 17.8534  | 19.3542   | 21.076   | 18.416   | 21.6588  | 18.4248  |
| ATP10D      | 8.24405  | 5.62763   | 9.09656  | 6.40071  | 9.03563  | 8.7589   |
| CBX2        | 2.23064  | 2.71103   | 2.06062  | 2.73221  | 3.00251  | 3.69117  |
| EPO         | 0.165453 | 0.511992  | 0.438372 | 0.621433 | 0.474202 | 0.515518 |
| SOX13       | 14.1583  | 12.391    | 9.46867  | 11.3406  | 11.6679  | 10.343   |
| P2RY14      | 2.43607  | 1.47227   | 3.10369  | 0.95448  | 3.46432  | 1.03769  |
| KCTD3       | 19.3176  | 15.5866   | 17.3678  | 12.147   | 14.6123  | 12.6259  |
| COX7B       | 503.303  | 429.446   | 404.436  | 437.427  | 338.081  | 378.015  |
| SLCO4C1     | 6.39893  | 4.43041   | 6.24946  | 4.19747  | 3.50149  | 3.26865  |
| SNORA39     | 0        | 36.5372   | 31.2835  | 0        | 0        | 0        |
| ZNRF2       | 8.52996  | 6.30985   | 7.72715  | 6.16731  | 7.47912  | 8.23904  |
| LOC728316   | 0        | 0         | 0        | 0        | 0        | 0        |
| PIGG        | 12.2438  | 13.7701   | 13.1879  | 13.6703  | 14.091   | 11.4776  |
| FAM96A      | 29.4259  | 26.9756   | 28.2862  | 20.534   | 24.6031  | 24.3882  |
| LOC10050704 | 0.37618  | 0         | 0        | 0.355498 | 0.239969 | 0        |
| MCF2L-AS1   | 1.27556  | 1.82179   | 1.63411  | 2.85614  | 3.06218  | 3.17951  |
| MIR92A2     | 0        | 0         | 0        | 0        | 0        | 0        |
| PDCD2L      | 5.37946  | 6.22627   | 5.1829   | 6.42883  | 5.04587  | 5.18075  |
| MTHFD2      | 12.2045  | 12.1134   | 10.0176  | 9.92312  | 9.02879  | 9.29535  |
| CTDP1       | 8.27552  | 10.977    | 11.5209  | 15.1133  | 13.655   | 11.6841  |
| SOCS3       | 6.04335  | 9.97388   | 9.64878  | 3.02646  | 7.72142  | 3.08124  |
| KIAA1383    | 0.598704 | 0.435924  | 0.599852 | 0.363759 | 0.594407 | 0.38406  |
| CYP39A1     | 8.61135  | 7.09811   | 6.28117  | 5.47484  | 8.22692  | 11.8504  |
| PAPOLA      | 44.351   | 35.3937   | 36.3013  | 34.3207  | 36.5136  | 34.489   |
| MASTL       | 5.57484  | 5.40979   | 5.63368  | 4.66193  | 6.12008  | 5.10815  |
| USP25       | 11.609   | 10.2468   | 11.3304  | 8.47625  | 9.84194  | 8.71009  |
| GREB1L      | 0.363585 | 0.167718  | 0.29917  | 0.222653 | 0.201365 | 0.157615 |
| C16orf71    | 0.334893 | 0.295993  | 0.534239 | 0.244065 | 0.118176 | 0.416299 |
| MIR518A2    | 0        | 0         | 0        | 0        | 0        | 0        |
| OR51S1      | 0        | 0         | 0        | 0        | 0        | 0        |
| DKFZP434I07 | 4.30673  | 2.81187   | 2.78373  | 2.58191  | 4.11448  | 3.46826  |
| NSMCE2      | 11.3793  | 11.2058   | 10.575   | 10.4242  | 13.0218  | 11.9913  |
| C16orf45    | 11.8062  | 12.6167   | 11.8133  | 9.95479  | 15.2647  | 9.54815  |



|             |           |          |           |           |           |           |
|-------------|-----------|----------|-----------|-----------|-----------|-----------|
| OR56A4      | 0         | 0        | 0         | 0         | 0         | 0         |
| RLN2        | 1.15858   | 0.569079 | 0.552382  | 0.513878  | 0.711642  | 1.01528   |
| ATP5A1      | 484.729   | 381.284  | 397.629   | 413.366   | 340.753   | 352.206   |
| TMCO1       | 20.7828   | 15.3863  | 16.8058   | 15.7879   | 14.2229   | 13.8207   |
| S100A7L2    | 0         | 0        | 0         | 0         | 0         | 0         |
| TAGLN       | 375.964   | 399.42   | 230.225   | 308.266   | 265.244   | 267.057   |
| LOC90784    | 5.09908   | 5.69467  | 5.79004   | 6.50154   | 6.71747   | 7.42538   |
| ZSCAN5B     | 0         | 0.173409 | 0.0673635 | 0         | 0.0138799 | 0.0814817 |
| ZC3H11A     | 51.9349   | 49.7555  | 52.2601   | 46.3357   | 58.6511   | 49.4338   |
| LOC401320   | 3.65939   | 5.64522  | 9.15115   | 8.76801   | 6.93315   | 5.66163   |
| ZFHX4       | 0.423007  | 0.439297 | 0.833584  | 0.315235  | 0.401985  | 0.292889  |
| FAM101B     | 5.25379   | 6.12958  | 5.90422   | 6.6624    | 5.6057    | 5.82221   |
| MIR1-1      | 0         | 0        | 0         | 0         | 0         | 0         |
| MRPL13      | 32.3581   | 26.6667  | 19.6589   | 15.7082   | 22.972    | 24.765    |
| CALCRL      | 5.01467   | 5.62735  | 5.18319   | 2.68034   | 3.16931   | 3.11291   |
| CGB2        | 0         | 0.734473 | 0.668311  | 1.31582   | 0.574989  | 0.550145  |
| MLYCD       | 9.03934   | 10.5874  | 8.60645   | 8.96907   | 9.58545   | 9.11723   |
| ZNF366      | 0.974981  | 0.415045 | 1.01142   | 0.576421  | 0.528975  | 0.495055  |
| MANEAL      | 8.84653   | 7.3467   | 6.23829   | 7.73949   | 8.66245   | 8.18603   |
| ABCB9       | 2.13788   | 2.09949  | 2.61083   | 2.90792   | 2.98693   | 3.27246   |
| P4HA2       | 16.1855   | 15.2067  | 16.133    | 16.5179   | 15.882    | 15.293    |
| ADAMTSL3    | 0.699725  | 0.595739 | 0.980918  | 0.717867  | 0.726258  | 0.710582  |
| MIR4781     | 0         | 0        | 0         | 0         | 0         | 0         |
| KIAA1432    | 8.49952   | 6.98378  | 11.256    | 7.35062   | 9.87704   | 8.7559    |
| HRH3        | 0.0748572 | 0.16546  | 0.0283337 | 0.0702897 | 0.166869  | 0.11662   |
| LOC1005068: | 0.257873  | 0.364792 | 0.136648  | 0.0726416 | 0.147817  | 0.128556  |
| WDR78       | 0.86429   | 0.943647 | 1.3897    | 0.76391   | 1.02315   | 0.464925  |
| DNAJB1      | 91.2976   | 91.0267  | 93.1425   | 91.3505   | 72.6485   | 85.097    |
| SLC29A2     | 9.06562   | 10.285   | 6.71086   | 8.58776   | 6.87249   | 7.0741    |
| MYEOV       | 9.61765   | 11.9676  | 17.1566   | 20.9883   | 12.3078   | 13.9012   |
| DMRTC1B     | 0.234484  | 0.287938 | 0.0788913 | 0.220176  | 0.207422  | 0.265181  |
| LSM14A      | 36.7145   | 34.5245  | 35.3252   | 32.7355   | 34.8788   | 32.7006   |
| LOC1005059: | 0.132686  | 0        | 0.301333  | 0         | 0         | 0.330738  |
| LOC1001286: | 0         | 0        | 0.0225525 | 0         | 0         | 0.0371299 |
| STIL        | 1.84517   | 1.97124  | 1.30952   | 1.55219   | 1.40778   | 1.41244   |
| USP20       | 10.881    | 14.4893  | 13.4992   | 12.9263   | 16.388    | 14.1513   |
| SH2B2       | 1.03717   | 1.01353  | 1.28102   | 1.17891   | 1.46023   | 1.97298   |
| PLXNB1      | 32.804    | 48.339   | 41.6441   | 49.4407   | 50.6587   | 51.1458   |
| FLJ41350    | 0         | 0        | 0         | 0         | 0.106044  | 0.155632  |
| TCEAL4      | 85.588    | 84.941   | 80.7803   | 80.4394   | 77.5482   | 77.9112   |
| OR1K1       | 0         | 0        | 0         | 0.117654  | 0         | 0.0780813 |
| SGK494      | 3.57262   | 4.32603  | 3.84117   | 3.67065   | 3.77589   | 3.87184   |
| SH2B3       | 5.01259   | 5.51619  | 5.11323   | 2.95423   | 6.29452   | 4.13161   |

|             |          |           |           |           |           |           |
|-------------|----------|-----------|-----------|-----------|-----------|-----------|
| GSTM4       | 20.7641  | 28.7104   | 27.5782   | 31.0047   | 36.2507   | 28.2121   |
| KCNJ6       | 0        | 0         | 0         | 0         | 0         | 0.0253271 |
| HERC4       | 13.9331  | 12.7383   | 11.7175   | 10.0654   | 12.9771   | 15.4565   |
| LYST        | 10.2343  | 7.98436   | 11.4763   | 7.69572   | 8.67185   | 9.27084   |
| LOC10050662 | 1.00332  | 1.33061   | 1.29119   | 0.98921   | 1.5017    | 1.09415   |
| ATP5L2      | 0.631542 | 0.977147  | 1.43424   | 1.48252   | 1.60893   | 0.7871    |
| MYO1D       | 31.376   | 24.85     | 30.8956   | 26.4264   | 27.118    | 28.8826   |
| SNORA9      | 0        | 43.5775   | 0         | 0         | 62.7839   | 0         |
| SH3RF1      | 5.60931  | 5.46019   | 5.50495   | 4.92393   | 6.09786   | 5.47664   |
| PDGFB       | 12.0517  | 9.89859   | 9.41021   | 10.5498   | 8.89223   | 8.57539   |
| ARL8B       | 61.0537  | 46.7649   | 57.5393   | 56.5466   | 54.0536   | 55.7511   |
| EPN2        | 27.8934  | 31.3752   | 36.8574   | 36.9225   | 40.3071   | 39.9306   |
| FAM48B1     | 0        | 0.0166541 | 0.0285187 | 0         | 0.0239942 | 0.0469525 |
| C20orf85    | 0        | 0         | 0         | 0         | 0         | 0         |
| DDX42       | 50.1658  | 51.1205   | 50.2336   | 50.7216   | 52.0283   | 47.245    |
| PRMT7       | 12.66    | 17.0685   | 18.3451   | 17.2343   | 21.2863   | 15.9861   |
| ACTB        | 1011.7   | 1023.44   | 883.593   | 833.504   | 846.499   | 944.135   |
| C12orf40    | 0        | 0         | 0         | 0         | 0         | 0         |
| PRAMEF15    | 0        | 0         | 0         | 0         | 0         | 0         |
| KIAA1967    | 31.5952  | 34.3078   | 34.1632   | 37.4458   | 37.5941   | 33.2071   |
| SERPINB9    | 4.08515  | 4.71201   | 4.57949   | 2.7594    | 4.43665   | 3.47326   |
| LOC730974   | 0        | 0.0688229 | 0         | 0         | 0.0495779 | 0         |
| HNMT        | 12.9122  | 10.5575   | 14.7141   | 12.6456   | 11.1217   | 8.57838   |
| OR52K1      | 0        | 0         | 0         | 0         | 0         | 0         |
| NSUN5P2     | 14.5246  | 21.2032   | 22.4726   | 27.7546   | 34.6921   | 27.6969   |
| RPL14       | 502.866  | 751.921   | 534.591   | 874.432   | 425.577   | 397.912   |
| LYPD5       | 23.9331  | 10.6336   | 21.785    | 20.0472   | 34.4958   | 40.6674   |
| SP8         | 0        | 0.0954648 | 0         | 0.0253463 | 0.06877   | 0         |
| ZNF2        | 2.00726  | 2.29772   | 1.66279   | 1.58332   | 2.77243   | 2.13765   |
| REXO2       | 62.5939  | 43.4457   | 48.491    | 45.2254   | 50.9197   | 51.7648   |
| MIR133B     | 0        | 0         | 0         | 0         | 0         | 0         |
| HOMER1      | 2.67645  | 1.57076   | 2.847     | 2.55647   | 2.60105   | 3.62326   |
| WDR70       | 10.4012  | 10.7787   | 10.8036   | 10.7659   | 10.9075   | 10.0691   |
| GABRG1      | 0        | 0.0124476 | 0         | 0         | 0         | 0         |
| ANXA6       | 62.0208  | 61.8629   | 67.6479   | 39.4807   | 47.6264   | 35.5516   |
| KRTAP10-3   | 3.17311  | 0.935155  | 0.266896  | 57.1072   | 0.561381  | 208.757   |
| CYP2B6      | 0.162608 | 0.201275  | 0.172333  | 0.641283  | 0.393551  | 1.45916   |
| ARL5C       | 0        | 0         | 0         | 0         | 0         | 0         |
| BMS1P5      | 1.06117  | 0.84219   | 1.90091   | 1.14944   | 1.69341   | 1.43512   |
| METTL7B     | 11.0159  | 9.85995   | 6.60128   | 6.44426   | 3.50647   | 5.25758   |
| SNORA11     | 0        | 0         | 0         | 52.4638   | 35.5858   | 34.8177   |
| SDR16C5     | 14.7452  | 13.7016   | 18.9832   | 17.4681   | 20.2819   | 21.637    |
| PDE6C       | 0        | 0.0296092 | 0.177462  | 0.0943381 | 0.149307  | 0.0208692 |

|             |           |           |            |           |            |           |
|-------------|-----------|-----------|------------|-----------|------------|-----------|
| ZCCHC7      | 7.95294   | 7.52666   | 9.01649    | 5.46929   | 8.22809    | 7.74801   |
| C11orf44    | 0         | 0         | 0          | 0         | 0.0176471  | 0         |
| FLJ27243    | 0.370556  | 0.208794  | 0.279057   | 0.347152  | 0.320627   | 0.439744  |
| LOC285768   | 0.0457165 | 0.0404196 | 0.155736   | 0.17171   | 0.0291171  | 0.113955  |
| KLF12       | 1.94145   | 1.51053   | 2.22086    | 1.62854   | 1.80807    | 1.80668   |
| C8orf74     | 0.898674  | 0.0993189 | 0.170075   | 0         | 0.0715463  | 0.560016  |
| MIR607      | 0         | 0         | 0          | 0         | 0          | 0         |
| CCND2       | 16.1517   | 20.4891   | 15.9592    | 18.7241   | 13.9863    | 14.3773   |
| CLDN15      | 6.08969   | 14.4558   | 8.28863    | 9.55367   | 14.5452    | 12.296    |
| LOC10050675 | 0         | 0.465237  | 0.0995851  | 0.123525  | 0          | 0.163954  |
| LOC653061   | 3.02492   | 3.0998    | 2.62654    | 2.31807   | 2.91745    | 2.27462   |
| LOC646508   | 0         | 0         | 0          | 0         | 0          | 0         |
| LOC10029374 | 7.99E-07  | 0.455128  | 1.85599    | 1.80E-06  | 1.58319    | 1.4895    |
| FGD6        | 4.89187   | 4.35206   | 5.82037    | 3.51427   | 5.75198    | 4.14482   |
| TMED4       | 51.884    | 35.8695   | 50.0905    | 48.9329   | 46.0013    | 41.0202   |
| CFI         | 2.98673   | 4.5688    | 3.33763    | 1.95869   | 5.25388    | 2.33389   |
| SPATS1      | 0.309846  | 0         | 0.0781849  | 0.09698   | 0          | 0         |
| OR5T3       | 0         | 0         | 0          | 0         | 0          | 0         |
| POM121L10F  | 0.0641422 | 0.0819849 | 0.251821   | 0.187551  | 0.10418    | 0.102887  |
| SH3BGRL     | 64.6838   | 57.2695   | 58.0408    | 54.1709   | 66.2659    | 53.8169   |
| ZNF347      | 2.36631   | 2.41707   | 2.29595    | 1.8771    | 2.64842    | 2.41968   |
| HIST2H2AC   | 5.80715   | 4.76758   | 1.47407    | 3.27046   | 3.69861    | 5.69957   |
| SOX2-OT     | 0.242365  | 0.107142  | 0.0917357  | 0.151718  | 0.205818   | 0.0503438 |
| LOC643623   | 0.0671494 | 0         | 0.0508325  | 0         | 0.0213839  | 0         |
| LOC729911   | 0         | 0         | 0          | 0         | 0          | 0         |
| LOC10028945 | 0.0860683 | 1.05E-09  | 0.923282   | 0.103452  | 0.222965   | 0.300104  |
| ANP32D      | 0         | 0.29956   | 0          | 0         | 0          | 0         |
| ZKSCAN3     | 3.19076   | 3.0231    | 2.39563    | 2.35499   | 3.74444    | 2.97142   |
| KLHL33      | 0.167936  | 0.148478  | 0.169505   | 0.105126  | 0.178266   | 0.174418  |
| HCN4        | 0         | 0.0116329 | 0.00996023 | 0.0123546 | 0.00838002 | 0         |
| ZNF549      | 3.22132   | 3.29108   | 3.50566    | 3.51764   | 4.04727    | 3.22625   |
| C8orf49     | 0         | 0         | 0          | 0         | 0          | 0         |
| NAIP        | 5.30928   | 5.41577   | 12.9835    | 12.8318   | 16.5681    | 16.1994   |
| EPB41       | 19.7789   | 18.3389   | 22.492     | 18.6196   | 20.2187    | 18.4216   |
| CLDN3       | 21.8619   | 4.00441   | 4.15389    | 9.65062   | 6.49047    | 5.8076    |
| LOC10013425 | 0.463496  | 0.327835  | 0.631564   | 0.957473  | 0.826568   | 0.75096   |
| MIR4504     | 0         | 0         | 0          | 0         | 0          | 0         |
| JAKMIP2     | 0.241274  | 0.39382   | 0.359434   | 0.0277411 | 0.1129     | 0.0552313 |
| MAGEA8      | 0         | 0.171992  | 0.233542   | 0.240918  | 0          | 0.14212   |
| ISLR2       | 0.615639  | 0.907608  | 1.08752    | 0.963756  | 0.784603   | 0.810285  |
| SNORD113-9  | 0         | 0         | 0          | 0         | 0          | 0         |
| ASNS        | 18.0644   | 22.3088   | 15.5331    | 19.2308   | 22.4071    | 19.1734   |
| MIR4269     | 0         | 0         | 0          | 0         | 0          | 0         |

|             |          |           |           |           |           |          |
|-------------|----------|-----------|-----------|-----------|-----------|----------|
| MIR4526     | 0        | 0         | 0         | 0         | 0         | 0        |
| C1orf226    | 3.53895  | 2.77434   | 3.44692   | 4.06097   | 3.81662   | 4.00769  |
| TESK2       | 7.89195  | 8.06963   | 9.19296   | 9.72133   | 10.3439   | 9.15383  |
| ASCC3       | 8.42616  | 5.95099   | 6.18985   | 3.63405   | 5.54169   | 5.47897  |
| CDH5        | 11.8607  | 16.0737   | 11.7811   | 10.7827   | 9.59659   | 8.06699  |
| SULT1B1     | 0        | 0         | 0         | 0         | 0.0537001 | 0        |
| RAB42       | 0.739693 | 0.561889  | 0.876707  | 0.497729  | 0.875833  | 0.396031 |
| GLYCAM1     | 0        | 0         | 0         | 0         | 0         | 0        |
| GABBR2      | 0.132455 | 0.0731926 | 0.0501345 | 0.0466398 | 0.073816  | 0.113493 |
| TMPRSS9     | 1.5135   | 0.678808  | 0.741423  | 0.90453   | 1.13249   | 0.605473 |
| TES         | 22.01    | 18.2051   | 19.2504   | 22.8336   | 17.861    | 15.8471  |
| FYCO1       | 10.2737  | 7.11511   | 11.4088   | 7.99546   | 10.0596   | 9.92571  |
| LOC84931    | 0        | 0.0453145 | 0         | 0         | 0         | 0        |
| DEFT1P2     | 0        | 0         | 0         | 0         | 0         | 0        |
| SNAR-F      | 0        | 0         | 0         | 0         | 0         | 0        |
| CARD8       | 9.54336  | 10.9818   | 12.861    | 11.9435   | 15.7931   | 9.97233  |
| C2orf81     | 2.2446   | 2.95655   | 2.67013   | 3.6131    | 2.65497   | 2.34075  |
| PPP1CB      | 96.634   | 61.4076   | 76.1836   | 70.0359   | 70.1196   | 74.9757  |
| PDLIM4      | 32.8371  | 35.0198   | 30.3102   | 49.826    | 37.0074   | 41.8472  |
| RAB5C       | 73.3509  | 76.6898   | 73.4702   | 72.4243   | 70.2331   | 63.885   |
| CASK        | 9.51144  | 6.79262   | 8.76019   | 6.59751   | 7.87053   | 7.47648  |
| GGNBP2      | 29.5857  | 29.9389   | 32.613    | 28.6692   | 32.8865   | 27.8078  |
| C12orf33    | 0.277466 | 0.245318  | 0.175036  | 0.260536  | 0.17672   | 0.11527  |
| KIAA0284    | 24.4719  | 33.5566   | 30.1865   | 30.5513   | 38.4633   | 34.7754  |
| KIF24       | 0.845178 | 0.720036  | 0.50038   | 0.807993  | 0.792478  | 0.966744 |
| SLC17A3     | 0        | 0         | 0         | 0         | 0         | 0        |
| VSNL1       | 14.3279  | 17.2245   | 15.0599   | 26.0846   | 16.7738   | 24.2483  |
| VTN         | 0.37833  | 0.668991  | 0.286398  | 0.414454  | 0.883522  | 0.746571 |
| SPAM1       | 0        | 0         | 0.0381411 | 0         | 0         | 0        |
| KIAA0408    | 2.27579  | 2.23135   | 2.00499   | 0.617348  | 1.37299   | 0.744102 |
| GABRD       | 0.917143 | 1.28787   | 0.367561  | 0.759867  | 0.652855  | 0.36981  |
| RPAIN       | 27.4603  | 30.7487   | 24.1213   | 28.7233   | 30.0557   | 24.8862  |
| ISG20L2     | 12.964   | 11.8174   | 12.7047   | 10.616    | 12.6093   | 11.0846  |
| EPHB3       | 29.5581  | 26.9278   | 27.224    | 34.7419   | 31.3713   | 41.6338  |
| MRPL42P5    | 2.44735  | 1.80316   | 2.31582   | 2.29802   | 2.46799   | 1.77927  |
| NAGPA       | 7.07893  | 11.413    | 6.75978   | 9.384     | 8.89887   | 8.27477  |
| PDE4B       | 7.98988  | 4.25611   | 4.83514   | 4.90171   | 7.84378   | 4.80988  |
| PCDHB5      | 0.589954 | 0.540063  | 0.702795  | 0.414329  | 0.935394  | 0.657481 |
| POPDC2      | 2.84041  | 4.68017   | 2.98097   | 3.57634   | 3.16588   | 2.61481  |
| ANXA3       | 41.3572  | 17.9049   | 17.7194   | 21.2999   | 16.2483   | 20.0358  |
| CYP4A11     | 0        | 0.104712  | 0.0896556 | 0.222416  | 0.176007  | 0.100455 |
| CEP57L1     | 2.24513  | 1.55997   | 1.57826   | 1.31829   | 1.93927   | 1.49894  |
| LOC10050948 | 1.59794  | 0.815075  | 1.3027    | 0.923347  | 1.5266    | 1.53195  |

|             |          |           |          |          |           |           |
|-------------|----------|-----------|----------|----------|-----------|-----------|
| EBAG9       | 24.2532  | 18.3807   | 17.9043  | 14.771   | 18.3834   | 16.6076   |
| OR5M1       | 0        | 0         | 0        | 0        | 0         | 0         |
| PPP1R3E     | 6.4833   | 7.80101   | 8.62944  | 9.01063  | 10.5419   | 7.75917   |
| GPAT2       | 1.90961  | 3.54008   | 0.805537 | 1.0651   | 0.588062  | 0.553056  |
| ATP6AP1     | 67.2333  | 64.9419   | 67.6142  | 73.0628  | 74.1342   | 77.5486   |
| DHX8        | 8.86793  | 8.7412    | 9.23705  | 8.21814  | 9.80664   | 8.26754   |
| CES2        | 21.6709  | 25.8837   | 23.2455  | 25.0232  | 24.0676   | 21.3616   |
| LOC390940   | 13.3138  | 11.5138   | 9.22133  | 11.0974  | 12.2504   | 19.3722   |
| PRRC2C      | 18.4507  | 15.8129   | 18.4048  | 16.2315  | 18.3052   | 16.4191   |
| IFT74       | 7.22102  | 6.80489   | 6.61041  | 5.60419  | 6.73043   | 6.06955   |
| 8-Sep       | 29.8809  | 27.9958   | 34.9471  | 28.8455  | 38.0845   | 31.8453   |
| C14orf64    | 1.55843  | 1.5747    | 2.35948  | 1.81176  | 1.89062   | 2.17352   |
| BDH1        | 51.58    | 49.7804   | 24.3929  | 30.6112  | 32.7752   | 37.1218   |
| MIR4295     | 0        | 0         | 0        | 0        | 0         | 0         |
| DCP1B       | 5.30828  | 5.86656   | 6.99499  | 6.13819  | 6.44871   | 5.81945   |
| VMP1        | 43.094   | 36.77     | 33.2279  | 28.2722  | 32.9901   | 32.3367   |
| TLR9        | 0.504882 | 0.60262   | 0.458638 | 0.49778  | 0.610968  | 0.660704  |
| MIR921      | 0        | 0         | 0        | 0        | 0         | 0         |
| EXTL3       | 11.8341  | 11.2025   | 11.6085  | 12.2756  | 10.2502   | 9.81658   |
| CHAF1B      | 3.263    | 3.83342   | 2.80848  | 3.02194  | 4.21339   | 3.20325   |
| F8A1        | 23.6571  | 22.3971   | 15.3726  | 15.6116  | 15.3175   | 12.3581   |
| ZNF565      | 1.0581   | 2.2324    | 1.33321  | 2.09352  | 1.97975   | 1.46295   |
| ENTPD5      | 4.60777  | 1.81554   | 4.05682  | 1.83411  | 3.3813    | 2.77774   |
| MIR4645     | 0        | 0         | 0        | 0        | 0         | 0         |
| LOC1002895; | 0.188529 | 0         | 0        | 0        | 0.0400251 | 0.183568  |
| FAS         | 7.97896  | 10.1281   | 6.80377  | 5.22152  | 8.73303   | 5.44703   |
| FAM71F2     | 2.49183  | 1.74623   | 1.79792  | 2.49167  | 1.98893   | 2.15159   |
| LOC1005074; | 11.0766  | 11.0458   | 17.355   | 13.9079  | 19.0313   | 19.985    |
| SYNPO2      | 8.99692  | 9.20846   | 8.96537  | 6.27019  | 6.91515   | 5.91802   |
| CSH1        | 0        | 0.0579893 | 0        | 0        | 0         | 0         |
| ZNF571      | 1.81351  | 2.4399    | 1.73239  | 1.45215  | 2.03764   | 1.86646   |
| CLDN8       | 19.254   | 7.30771   | 9.15029  | 11.978   | 8.91576   | 10.7776   |
| LOC1001325; | 0.350153 | 0.232188  | 0.242979 | 0        | 0.0371691 | 0.0727335 |
| NT5DC3      | 1.89846  | 2.20302   | 1.97607  | 2.89676  | 2.27553   | 2.01281   |
| PPPDE2      | 20.8045  | 22.6184   | 21.2721  | 22.9483  | 21.1319   | 17.5912   |
| KRTAP24-1   | 0.64285  | 0.227347  | 0        | 11.5293  | 0.0409435 | 10.8962   |
| C1QC        | 24.2095  | 16.1106   | 13.994   | 5.43823  | 17.8989   | 7.87204   |
| FNTB        | 7.1057   | 2.81784   | 5.13666  | 2.44155  | 5.10078   | 3.82489   |
| SPTBN5      | 4.7986   | 5.88645   | 6.29143  | 7.72712  | 5.24067   | 6.81019   |
| PADI2       | 27.516   | 7.5914    | 13.8921  | 19.195   | 9.77551   | 14.3606   |
| PRPS1L1     | 0.421621 | 0.279578  | 0.31917  | 0.197948 | 0.0671333 | 0.197052  |
| LOC729164   | 0        | 0         | 0        | 0        | 0         | 0         |
| ZNF259      | 13.8702  | 16.0203   | 14.0295  | 14.2431  | 13.7209   | 13.6822   |

|             |           |           |           |           |           |           |
|-------------|-----------|-----------|-----------|-----------|-----------|-----------|
| GCLC        | 17.669    | 19.83     | 15.8602   | 15.5077   | 14.5562   | 16.37     |
| PBX2        | 39.1463   | 45.0864   | 38.6267   | 42.8551   | 51.0018   | 45.5859   |
| WNT8A       | 0         | 0.0635678 | 0.0544273 | 0         | 0         | 0         |
| 7-Mar       | 34.7734   | 25.077    | 34.8692   | 25.887    | 31.5049   | 32.2211   |
| COMMD3-BN   | 9.34384   | 10.5564   | 12.2106   | 11.4265   | 10.6982   | 11.3016   |
| ZNF134      | 6.35322   | 4.97516   | 7.00801   | 5.07073   | 6.0696    | 5.00538   |
| ACRBP       | 0.607292  | 0.8298    | 1.00303   | 0.725757  | 1.47683   | 1.27293   |
| C6orf228    | 6.42877   | 4.29937   | 5.98968   | 5.22391   | 5.51186   | 5.22596   |
| CRYBB2P1    | 10.7213   | 14.3324   | 14.1393   | 18.4965   | 7.77177   | 9.12826   |
| LOC613126   | 0.0862714 | 0.15318   | 0.0881273 | 0.0818399 | 0.11147   | 0.0905508 |
| AMPH        | 1.27462   | 1.02192   | 1.60778   | 0.759358  | 0.83858   | 0.652865  |
| WDR4        | 5.08167   | 4.93884   | 4.91685   | 3.84457   | 4.5007    | 5.1521    |
| LPGAT1      | 8.1701    | 6.39332   | 8.46488   | 6.05712   | 6.21323   | 4.24018   |
| USP28       | 6.55933   | 5.48536   | 6.29379   | 5.15874   | 7.19783   | 6.2484    |
| B3GNT3      | 4.3829    | 5.21019   | 1.08737   | 1.17585   | 0.492616  | 0.436079  |
| PIAS2       | 5.84134   | 5.21008   | 5.32124   | 4.28071   | 6.29774   | 3.72888   |
| PXDN        | 7.40303   | 10.4107   | 11.0497   | 5.61352   | 7.02807   | 6.91118   |
| DPP7        | 58.3405   | 112.043   | 70.9282   | 96.2578   | 94.5419   | 79.8724   |
| RAC1        | 120.587   | 126.301   | 134.517   | 152.468   | 127.948   | 116.463   |
| MMD2        | 0         | 0         | 0         | 0         | 0         | 0         |
| UBE2QL1     | 3.27647   | 3.7797    | 4.09841   | 4.67344   | 3.42832   | 3.85017   |
| IPO5        | 25.8553   | 22.0101   | 24.452    | 19.6606   | 18.7819   | 19.2363   |
| PEX1        | 11.9128   | 9.51451   | 11.9514   | 8.94041   | 11.9874   | 9.80146   |
| C18orf56    | 0.881988  | 1.58211   | 0.111259  | 0.699991  | 0.666356  | 1.1897    |
| MCEE        | 31.6294   | 28.8775   | 23.4462   | 19.829    | 22.1474   | 25.705    |
| PCDHA4      | 0.0513784 | 0.0705933 | 1.30E-21  | 5.40E-27  | 0.146844  | 0.0564566 |
| FLJ23867    | 29.5527   | 18.6938   | 23.6506   | 27.2313   | 30.1423   | 34.9855   |
| TGM3        | 19.2243   | 13.021    | 30.7795   | 21.6756   | 23.3902   | 23.726    |
| HCG11       | 5.42872   | 4.76992   | 5.92186   | 3.95766   | 4.87496   | 3.95026   |
| LOC10013329 | 0         | 0.0512011 | 0.0438388 | 0         | 0.0368837 | 0.0360876 |
| VN1R2       | 0.168321  | 0         | 0         | 0         | 0         | 0         |
| SNORD116-3  | 0         | 0         | 0         | 0         | 0         | 0         |
| KCNN1       | 0.188905  | 0.167018  | 0.0572009 | 0.248331  | 0.192504  | 0.164805  |
| CALCA       | 0         | 0.116309  | 0         | 0         | 0         | 0.0819772 |
| GRIK1       | 0.505843  | 0.456647  | 0.469801  | 0.663573  | 1.00672   | 0.544     |
| SCEL        | 82.0644   | 55.6984   | 136.235   | 68.6104   | 130.549   | 118.452   |
| OR10R2      | 0         | 0         | 0         | 0         | 0         | 0         |
| BHLHA9      | 0         | 0         | 0         | 0         | 0         | 0         |
| SPA17       | 2.76296   | 3.26662   | 4.62764   | 2.75384   | 2.59478   | 3.42336   |
| SLC25A24    | 10.5234   | 8.07218   | 10.0868   | 6.29076   | 9.6853    | 7.33385   |
| MAT1A       | 0.983702  | 0.716246  | 1.59885   | 1.30402   | 0.571244  | 0.955561  |
| INF2        | 25.646    | 37.4627   | 38.1598   | 39.0786   | 39.1417   | 39.9041   |
| LINC00338   | 7.35074   | 10.8752   | 7.643     | 10.2778   | 11.2946   | 8.70107   |

|             |           |           |            |          |          |          |
|-------------|-----------|-----------|------------|----------|----------|----------|
| PPAP2C      | 31.3435   | 42.4658   | 32.9535    | 54.7808  | 41.6795  | 40.3005  |
| HTN1        | 0         | 0         | 0          | 0        | 0        | 0        |
| RBFOX1      | 0.246362  | 0.196685  | 0.150422   | 0.186582 | 0.357172 | 0.258778 |
| LOC10050750 | 1.32636   | 2.21508   | 1.85938    | 1.98347  | 2.0337   | 1.74491  |
| ATP6V1F     | 97.5356   | 106.849   | 104.816    | 118.157  | 110.865  | 109.041  |
| KCTD1       | 47.4805   | 47.6129   | 45.5812    | 50.0267  | 43.0195  | 42.4146  |
| DTNA        | 7.38141   | 4.93196   | 2.85895    | 2.53796  | 3.3655   | 2.53602  |
| OR52A1      | 0         | 0         | 0          | 0        | 0        | 0        |
| PRH2        | 0.338712  | 0.328742  | 0.308018   | 0.410045 | 0.472538 | 0.322587 |
| ABCB7       | 13.1677   | 12.919    | 11.3507    | 10.6891  | 10.5779  | 10.1379  |
| MIR4661     | 0         | 0         | 0          | 0        | 0        | 0        |
| C15orf38    | 11.7142   | 10.2604   | 13.1146    | 9.97391  | 9.94884  | 10.3325  |
| LOC728728   | 2.66067   | 3.86914   | 3.46401    | 3.66756  | 3.08723  | 3.21481  |
| UBAC2       | 34.7714   | 34.2714   | 36.5333    | 41.6298  | 38.8568  | 36.1797  |
| TCHHL1      | 1.3889    | 0.0240779 | 0          | 0.588147 | 0.03469  | 6.43186  |
| NXT2        | 9.39684   | 7.27058   | 9.68677    | 6.52874  | 8.03343  | 7.80638  |
| FAM90A25P   | 0.353469  | 0.1823    | 0.156087   | 0.189658 | 0.432269 | 0.314667 |
| USP9Y       | 6.35826   | 5.54684   | 0.00710966 | 0        | 0        | 0        |
| OBP2A       | 2.52836   | 2.5824    | 5.00692    | 9.86162  | 4.95565  | 3.27234  |
| ZNF768      | 19.55     | 29.8698   | 20.4199    | 27.2676  | 24.875   | 29.3481  |
| CNTN3       | 1.36996   | 0.682386  | 1.70898    | 0.960252 | 1.16748  | 0.985968 |
| SERPINB2    | 10.2446   | 10.3102   | 25.2864    | 14.2833  | 23.367   | 19.5612  |
| LOC644246   | 6.30264   | 8.75662   | 7.2703     | 10.7089  | 6.69031  | 7.294    |
| SAP25       | 7.5606    | 16.3838   | 13.8035    | 25.3347  | 22.5662  | 15.7048  |
| COMTD1      | 30.943    | 57.2191   | 29.6093    | 47.1338  | 34.624   | 38.3884  |
| SUSD5       | 1.46399   | 1.10703   | 1.89569    | 1.28423  | 1.84031  | 1.41646  |
| BUD31       | 51.809    | 64.8137   | 47.7074    | 59.2871  | 49.8097  | 55.7426  |
| LOC10050637 | 1.01328   | 1.12602   | 0.50817    | 0.913101 | 1.26067  | 1.34901  |
| SKIV2L2     | 16.1851   | 11.2023   | 15.7296    | 11.6416  | 13.6367  | 12.751   |
| MPPE1       | 16.4405   | 18.4793   | 19.9853    | 21.4218  | 19.5734  | 17.2457  |
| METRN       | 10.3062   | 9.85592   | 9.71249    | 19.3547  | 10.5159  | 14.221   |
| CSRP1       | 357.764   | 313.166   | 174.143    | 293.568  | 203.916  | 224.795  |
| PRAMEF9     | 0         | 0         | 0          | 0        | 0        | 0        |
| CHIC1       | 2.27442   | 2.13277   | 2.40001    | 1.9415   | 2.70404  | 2.08733  |
| MAN1B1      | 24.1656   | 34.8529   | 30.0357    | 36.1542  | 34.3168  | 34.4825  |
| GGA2        | 21.217    | 22.3291   | 20.8531    | 23.5488  | 25.3628  | 21.3801  |
| SLC22A9     | 0.262098  | 0.231731  | 0.19841    | 0.205088 | 0.111288 | 0.3811   |
| RN5S15      | 40.8616   | 129.438   | 27.0659    | 224.09   | 45.0015  | 39.8157  |
| RBM43       | 4.71439   | 2.84494   | 4.49407    | 2.59983  | 3.70164  | 3.17097  |
| MIR2392     | 0         | 0         | 0          | 0        | 0        | 0        |
| OPN4        | 0.0427493 | 0.0377962 | 0.145633   | 0.214095 | 0.356451 | 0.191815 |
| SEPSECS     | 4.70701   | 4.70251   | 6.50902    | 4.40386  | 7.90066  | 5.65464  |
| CA14        | 0.907979  | 1.28444   | 0.45823    | 1.30729  | 1.2337   | 1.32023  |

|             |           |           |          |           |           |           |
|-------------|-----------|-----------|----------|-----------|-----------|-----------|
| PDCD6       | 81.0936   | 97.137    | 81.5735  | 79.7274   | 85.7547   | 80.2027   |
| MIR219-2    | 0         | 0         | 0        | 0         | 0         | 0         |
| TMEM179B    | 50.1892   | 59.0058   | 44.0989  | 53.1312   | 49.8643   | 44.7004   |
| RAX2        | 0         | 0.0420452 | 0        | 0         | 0         | 0         |
| LOC10013344 | 4.32078   | 4.1555    | 5.41993  | 4.83304   | 10.0546   | 6.09218   |
| SAA3P       | 0.215874  | 0         | 0        | 0         | 0         | 0         |
| LOC10026816 | 0.611608  | 0.738181  | 1.11321  | 1.18547   | 0.38345   | 0.411286  |
| TTC4        | 14.6957   | 15.7401   | 10.1193  | 14.3312   | 13.8711   | 12.7054   |
| MTRNR2L4    | 0         | 0         | 0.068724 | 0.0852447 | 0.289104  | 0         |
| ZBTB49      | 2.6042    | 3.22944   | 2.45784  | 2.28652   | 3.98502   | 3.0349    |
| EP300       | 13.5614   | 10.7396   | 13.9442  | 11.4869   | 14.6478   | 12.959    |
| LOC10037921 | 1.31813   | 0.362227  | 1.24216  | 0.703088  | 0.60902   | 0.995986  |
| MIR4721     | 0         | 0         | 0        | 0         | 0         | 0         |
| ISM2        | 0         | 0         | 0.181151 | 0.160429  | 0.193538  | 0.147874  |
| MIR3686     | 0         | 0         | 0        | 0         | 0         | 0         |
| TCEAL1      | 15.8702   | 20.079    | 19.3233  | 16.8372   | 18.473    | 16.4847   |
| EPPK1       | 3.22916   | 2.40423   | 14.7197  | 4.28426   | 7.50226   | 5.62134   |
| DCLRE1B     | 2.16916   | 2.37447   | 2.20897  | 2.15805   | 2.08878   | 1.67357   |
| ZNF167      | 0.85296   | 1.68232   | 1.24491  | 1.07435   | 1.51936   | 1.84573   |
| FLJ45983    | 1.4323    | 2.04108   | 2.99696  | 1.64796   | 2.67521   | 3.34127   |
| SLC39A14    | 8.28513   | 6.54166   | 6.3811   | 6.03792   | 7.44668   | 6.03626   |
| SNORA6      | 87.1754   | 38.5375   | 32.9961  | 61.3923   | 13.8806   | 54.324    |
| LILRB5      | 3.36346   | 1.66071   | 3.38088  | 0.974389  | 3.33109   | 1.70603   |
| LOC10050759 | 91.4805   | 162.373   | 65.7802  | 153.36    | 63.5253   | 39.3992   |
| CGB7        | 1.66401   | 6.18034   | 2.15226  | 5.25177   | 6.79192   | 3.04172   |
| PSG4        | 0.317337  | 0         | 0.319734 | 0.506599  | 0.0191009 | 0.0373775 |
| GALNT9      | 0.0468106 | 0.3254    | 0        | 0         | 0         | 0         |
| C15orf34    | 0.562341  | 0.862666  | 0.653185 | 0.633636  | 0.525573  | 0.771373  |
| SLC24A4     | 0.128069  | 0.139011  | 0.185468 | 0.129371  | 0.180927  | 0.353701  |
| PTDSS2      | 12.2461   | 18.7282   | 12.0264  | 15.8887   | 13.623    | 13.9992   |
| PLA2G7      | 19.1818   | 15.4003   | 12.9676  | 12.4359   | 9.73396   | 10.2334   |
| RUNX3       | 10.6712   | 9.73923   | 8.52604  | 15.5227   | 8.76024   | 7.17813   |
| FLJ37644    | 2.81571   | 3.27105   | 2.47856  | 3.59695   | 3.23222   | 3.06041   |
| SERHL2      | 169.077   | 8.56937   | 5.43055  | 18.7633   | 7.84775   | 4.05583   |
| WDR63       | 0.198274  | 0.701206  | 0.550347 | 0.465441  | 0.231517  | 0.288297  |
| SPINK7      | 18.7051   | 6.32332   | 3.74821  | 4.90754   | 0.175197  | 10.4563   |
| PPP1R9B     | 20.5334   | 27.689    | 21.5027  | 19.4387   | 26.3856   | 20.6708   |
| TRRAP       | 5.28759   | 4.82661   | 6.85377  | 5.063     | 6.70214   | 6.11132   |
| SLC25A46    | 19.3608   | 16.3834   | 18.9571  | 13.5833   | 17.0908   | 12.664    |
| DKFZp566F09 | 0.29159   | 0         | 0.441471 | 0         | 0.185716  | 0.363414  |
| SNORD115-4L | 0         | 0         | 0        | 0         | 0         | 0         |
| MIER2       | 16.1196   | 19.5043   | 16.2336  | 20.7483   | 18.0186   | 19.0969   |
| MIR4647     | 0         | 0         | 0        | 0         | 0         | 0         |



|             |          |           |           |          |           |           |
|-------------|----------|-----------|-----------|----------|-----------|-----------|
| LOC645722   | 4.8794   | 11.463    | 5.61886   | 4.65914  | 4.80114   | 6.24869   |
| MTCH2       | 52.1653  | 42.9323   | 39.0456   | 38.7264  | 31.9013   | 33.4523   |
| LOC399744   | 1.92527  | 3.39102   | 1.49421   | 1.58927  | 2.5262    | 2.26842   |
| GBX2        | 0        | 0         | 0         | 0        | 0.104908  | 0.0513217 |
| RAB1A       | 98.1053  | 79.2833   | 75.2178   | 67.9921  | 65.5532   | 68.1966   |
| GLOD4       | 44.1924  | 45.1568   | 38.233    | 38.75    | 41.4046   | 34.3392   |
| LOC1005067: | 0.219259 | 0.775421  | 0.165981  | 0.874994 | 0.418942  | 1.12722   |
| CBX5        | 13.0849  | 11.8842   | 13.2699   | 12.9932  | 15.1634   | 11.3869   |
| SPON2       | 25.5451  | 33.9087   | 37.6028   | 47.8546  | 32.1881   | 30.6085   |
| PARVA       | 16.5581  | 13.805    | 15.8695   | 12.7255  | 11.8866   | 11.0148   |
| TOR2A       | 13.3503  | 18.3757   | 12.4635   | 15.6159  | 16.2241   | 15.6299   |
| LOC1006527: | 0.289418 | 0.992636  | 0.424754  | 0.7329   | 0.379111  | 0.269438  |
| LAMB2       | 33.9191  | 43.0438   | 45.3593   | 41.0977  | 45.5497   | 38.7991   |
| ZNF695      | 0.204587 | 0.112796  | 0.189432  | 0.240745 | 0.245472  | 0.315246  |
| ST3GAL5     | 14.1959  | 15.2157   | 17.2427   | 15.0876  | 18.3748   | 13.6241   |
| C10orf93    | 0        | 0.0594457 | 0.152694  | 0        | 0.0428229 | 0.0418985 |
| GAPDH       | 788.543  | 951.222   | 657.958   | 1026.05  | 806.805   | 796.948   |
| FTL         | 707.484  | 1130.6    | 1228.09   | 1037.06  | 853.034   | 574.283   |
| HNRPLL      | 9.35324  | 9.09615   | 9.10708   | 8.00569  | 7.66217   | 7.1061    |
| TIMM13      | 34.5153  | 49.4418   | 33.4755   | 46.7231  | 34.3181   | 36.2163   |
| LOC1002875: | 0.76127  | 1.34935   | 0.670352  | 0.354614 | 0.480586  | 0.471601  |
| CDX1        | 0.355496 | 0.157154  | 0.269113  | 0.111268 | 0.415099  | 0.22153   |
| FAM185A     | 3.6516   | 4.08408   | 3.57654   | 2.53558  | 3.35267   | 3.28145   |
| DSCR10      | 0        | 0         | 0         | 0        | 0         | 0         |
| KLHL17      | 4.04549  | 7.60496   | 6.00598   | 7.78169  | 8.55531   | 7.7832    |
| LOC728503   | 0.135857 | 0         | 0.0514224 | 0        | 0.173057  | 0.0423303 |
| MIR4657     | 0        | 0         | 0         | 0        | 0         | 0         |
| HPSE2       | 1.33609  | 1.52493   | 1.9861    | 0.843936 | 2.04181   | 1.42321   |
| SERPINB13   | 22.436   | 15.572    | 11.8018   | 14.5804  | 15.6175   | 25.8486   |
| TOP1P1      | 8.07687  | 4.38034   | 5.38935   | 3.90941  | 5.43592   | 4.92939   |
| SUMO1P1     | 0        | 0         | 0         | 0        | 0         | 0         |
| LOC1005055: | 1.42558  | 1.66554   | 1.81146   | 1.91228  | 1.81592   | 1.39599   |
| SNX32       | 0.185738 | 0.87583   | 0.187473  | 0.581351 | 1.30128   | 0.578721  |
| DPP8        | 5.14988  | 3.13589   | 5.63584   | 3.46031  | 3.93919   | 3.5598    |
| UBXN7       | 3.14022  | 1.24396   | 3.39595   | 2.08701  | 3.1429    | 2.17287   |
| LOC1001295: | 0        | 0         | 0         | 0        | 0.0424742 | 0.0207787 |
| ELTD1       | 10.3542  | 8.89093   | 7.44834   | 4.93757  | 4.50577   | 3.3275    |
| RPP21       | 29.4558  | 59.9334   | 37.9792   | 55.9497  | 47.6189   | 45.2088   |
| LOC1005072: | 14.3949  | 20.8684   | 17.5768   | 22.0092  | 21.4157   | 13.9911   |
| LOC1002890: | 0        | 0         | 0         | 0        | 0         | 0         |
| IL1RN       | 44.0517  | 41.4616   | 48.6965   | 54.4013  | 67.8489   | 60.1839   |
| LOC1005056: | 2.95829  | 7.19272   | 2.7993    | 2.08334  | 6.59453   | 4.14783   |
| ATAD5       | 1.65263  | 1.71821   | 1.67965   | 1.49432  | 1.65682   | 1.42081   |

|             |           |           |          |           |           |           |
|-------------|-----------|-----------|----------|-----------|-----------|-----------|
| C17orf59    | 11.1312   | 14.5463   | 10.2761  | 13.7151   | 12.692    | 11.6398   |
| PHAX        | 10.4224   | 8.66717   | 10.1324  | 7.28294   | 9.10806   | 8.76042   |
| PLA2G2F     | 25.2393   | 19.1551   | 18.4648  | 26.5709   | 26.7918   | 42.5233   |
| PCOLCE2     | 10.42     | 17.0323   | 26.1651  | 11.6933   | 8.51423   | 5.47972   |
| RPS25       | 1107.85   | 1787.21   | 1828.2   | 2291.27   | 1629.93   | 1605.92   |
| ZNF780B     | 3.45112   | 3.02231   | 3.54674  | 2.35864   | 4.21523   | 4.25355   |
| ZNF674      | 2.0813    | 1.69219   | 1.44857  | 1.39314   | 2.17654   | 2.1612    |
| LOC1005066: | 0.927924  | 1.26057   | 1.07931  | 0.796622  | 4.47199   | 2.58296   |
| UBA3        | 42.2442   | 40.6739   | 46.138   | 38.7594   | 42.134    | 37.7494   |
| LPO         | 0         | 0         | 0.231034 | 0.450933  | 0.0233643 | 0.25997   |
| EFEMP2      | 22.3208   | 32.1914   | 37.355   | 27.037    | 37.5363   | 27.0101   |
| ABCG4       | 0.597626  | 0.625368  | 0.371385 | 0.486073  | 1.10742   | 0.677471  |
| LOC400590   | 845.922   | 1361.31   | 958.845  | 1572.87   | 1010.08   | 959.816   |
| PPP1R14C    | 33.3717   | 35.4988   | 52.7994  | 47.4372   | 55.6093   | 60.8897   |
| C5orf50     | 0         | 0         | 0        | 0         | 0         | 0.0637897 |
| NIT1        | 24.6692   | 26.3953   | 27.1227  | 29.1799   | 30.8683   | 31.0304   |
| IGSF10      | 4.24709   | 3.00029   | 7.88544  | 2.51935   | 5.84262   | 3.8455    |
| CLIP3       | 6.2359    | 6.8734    | 4.91162  | 4.47328   | 6.67044   | 4.49848   |
| LOC10065298 | 0         | 1.05797   | 1.35876  | 0         | 0.571596  | 1.11852   |
| LOC284600   | 0.142605  | 0.605197  | 0.496584 | 1.04445   | 1.2534    | 0.835337  |
| CDK12       | 7.38295   | 4.97081   | 6.98669  | 5.77268   | 6.2417    | 5.28788   |
| CD40LG      | 1.93855   | 1.0082    | 0.388455 | 0.642449  | 1.70676   | 0.568482  |
| C17orf82    | 0.0701492 | 0.248086  | 0.106207 | 0.131738  | 0.134035  | 0.43714   |
| HSD17B6     | 0.355612  | 0.880347  | 0.861441 | 0.400697  | 0.860667  | 0.709127  |
| LOC1002873: | 1.45684   | 0.805031  | 0.896056 | 1.45345   | 1.10185   | 0.851103  |
| MYF6        | 0         | 0.0726209 | 0.186536 | 0         | 0         | 0.0511847 |
| TTY3        | 0         | 0         | 0        | 0         | 0         | 0         |
| KLHL15      | 2.07045   | 1.4806    | 2.20119  | 1.48668   | 1.88106   | 1.16689   |
| LOC282997   | 1.33257   | 1.99384   | 1.55195  | 2.69503   | 2.08916   | 1.59693   |
| PLEKHG5     | 18.0739   | 32.2348   | 58.439   | 41.7278   | 53.3146   | 39.3577   |
| PIGU        | 9.52761   | 10.8953   | 9.71737  | 11.0891   | 10.3195   | 11.3767   |
| LRR1Q1      | 0.123522  | 0.0156015 | 0.106865 | 0.0828464 | 0.0674329 | 0.0549811 |
| CXorf69     | 6.35459   | 5.74181   | 5.76198  | 4.58989   | 5.02574   | 3.39421   |
| MIR1293     | 0         | 0         | 0        | 0         | 0         | 0         |
| PGRMC1      | 160.031   | 105.497   | 126.993  | 99.4392   | 91.6486   | 105.737   |
| LINC00029   | 0         | 0         | 0        | 0         | 0         | 0         |
| LOC730755   | 4.57736   | 2.00293   | 0.246176 | 39.3568   | 0.824187  | 847.928   |
| LINC00442   | 0         | 0         | 0        | 0         | 0         | 0         |
| USP27X      | 1.78212   | 2.39628   | 1.91119  | 2.12659   | 1.91538   | 2.03599   |
| LOC400657   | 3.93524   | 4.60568   | 4.28633  | 3.93438   | 4.34559   | 3.7578    |
| C9orf117    | 0.489717  | 0.38042   | 0.556077 | 1.14959   | 0.428867  | 0.572195  |
| MIR3147     | 0         | 0         | 0        | 0         | 0         | 0         |
| KIAA1191    | 53.1219   | 51.0907   | 48.227   | 51.8122   | 43.4727   | 49.1279   |

|             |          |           |           |           |           |           |
|-------------|----------|-----------|-----------|-----------|-----------|-----------|
| LOC10065276 | 1.40881  | 0.830389  | 1.42197   | 0.440951  | 1.49547   | 1.46319   |
| PRKCSH      | 86.7833  | 108.355   | 89.0123   | 109.985   | 94.9981   | 93.7677   |
| 8-Mar       | 5.10471  | 3.45126   | 7.37207   | 3.47344   | 4.93941   | 5.45284   |
| LOC10065291 | 3.13271  | 3.92626   | 4.2417    | 4.70376   | 2.36682   | 2.73347   |
| IL15        | 3.58057  | 3.89016   | 2.8119    | 2.08408   | 4.05497   | 1.73784   |
| PICALM      | 85.0751  | 67.6338   | 65.7527   | 51.555    | 59.7061   | 54.5779   |
| LOC81691    | 1.48052  | 1.98087   | 2.73569   | 1.83668   | 2.1657    | 1.93812   |
| RTKN2       | 0.847194 | 0.482429  | 0.47828   | 1.07865   | 1.44498   | 1.22588   |
| CAMK2D      | 11.0158  | 9.44673   | 10.3198   | 7.46803   | 9.46212   | 8.77922   |
| EPHX1       | 93.6383  | 94.6031   | 93.3825   | 87.6166   | 66.5192   | 59.6855   |
| NAV1        | 5.06935  | 4.38924   | 5.11167   | 3.67994   | 4.36856   | 3.96726   |
| CXCL6       | 0        | 0.0564826 | 0.0967217 | 0.0599865 | 0         | 0.0398101 |
| CDHR1       | 48.3731  | 93.7905   | 123.879   | 126.91    | 90.9078   | 69.8334   |
| KCND2       | 0        | 0.0637591 | 0.150126  | 0.101572  | 0.126308  | 0.0898775 |
| LOC255411   | 0        | 0         | 0         | 0         | 0         | 0.160416  |
| LOC10050563 | 6.79501  | 9.45332   | 8.62353   | 9.19529   | 13.8744   | 11.0841   |
| WARS2       | 7.90531  | 7.41862   | 6.17244   | 5.48372   | 4.24118   | 4.43809   |
| LOC147093   | 0        | 0         | 0         | 0         | 0.0610164 | 0.0298496 |
| GRK5        | 8.07231  | 7.69406   | 6.73677   | 7.80162   | 6.1194    | 5.03032   |
| CARKD       | 30.1527  | 35.7233   | 27.7643   | 34.1645   | 37.2816   | 33.2981   |
| MIR548H5    | 0        | 0         | 0         | 0         | 0         | 0         |
| ZNF467      | 3.97626  | 6.0041    | 5.71571   | 4.99217   | 8.93489   | 8.01816   |
| C3orf24     | 3.41E-26 | 0.102433  | 4.80E-46  | 1.60E-18  | 0.194847  | 3.61E-24  |
| LGALS7B     | 2251.1   | 3936.56   | 1810.86   | 3136.76   | 2993.06   | 3661.89   |
| CLCN5       | 3.22814  | 2.7487    | 3.16544   | 2.65807   | 3.35273   | 2.97098   |
| MAGED2      | 54.9615  | 54.8544   | 59.2412   | 61.5986   | 60.9282   | 50.9857   |
| SNORA75     | 39.0789  | 0         | 0         | 0         | 49.7791   | 97.4093   |
| MIR2114     | 0        | 0         | 0         | 0         | 0         | 0         |
| GAST        | 0        | 0         | 0         | 0         | 0         | 0.782484  |
| MIR519D     | 0        | 0         | 0         | 0         | 0         | 0         |
| LOC653653   | 2.63524  | 2.76138   | 3.25093   | 2.47533   | 3.66761   | 2.25038   |
| PIRT        | 0        | 0         | 0         | 0.213192  | 0.162683  | 1.76857   |
| TAS2R30     | 0        | 0         | 0         | 0         | 0.0788404 | 0         |
| LOC10028891 | 0.283193 | 0.352099  | 0.171717  | 0.268219  | 0.361618  | 0.49657   |
| MGLL        | 35.6433  | 37.0483   | 57.3096   | 35.2143   | 28.8523   | 27.7451   |
| LOC643837   | 6.02067  | 6.38772   | 6.5905    | 5.67471   | 6.5774    | 5.54098   |
| CDK5RAP2    | 12.4663  | 10.1306   | 10.6703   | 10.3099   | 9.53506   | 8.67367   |
| CAPN13      | 3.32845  | 0.859695  | 1.44385   | 2.80931   | 1.0004    | 0.396185  |
| HIST1H3E    | 2.23736  | 0.659377  | 0.846846  | 1.05042   | 0.94999   | 4.18268   |
| KRT4        | 28.2214  | 16.9299   | 12.0736   | 13.7654   | 13.8077   | 12.1706   |
| C5orf42     | 1.84819  | 1.65634   | 2.3085    | 1.63287   | 2.04391   | 1.85845   |
| ZNF654      | 5.95757  | 4.68516   | 6.07148   | 3.82184   | 6.50873   | 5.65286   |
| LOC10050701 | 1.16089  | 0.946081  | 1.4717    | 0.518993  | 1.57926   | 0.935899  |

|            |           |           |           |          |           |           |
|------------|-----------|-----------|-----------|----------|-----------|-----------|
| DPH5       | 15.5797   | 15.5384   | 13.7179   | 13.6979  | 13.3418   | 14.035    |
| ZFP42      | 0.075904  | 0         | 0.0574597 | 0        | 0.0483437 | 0.0236501 |
| STAM       | 6.59885   | 5.2274    | 6.85712   | 4.38679  | 5.98491   | 5.08258   |
| SNORD50A   | 0         | 0         | 0         | 0        | 0         | 0         |
| CRLF3      | 9.30755   | 9.12687   | 8.99309   | 7.62732  | 9.59263   | 8.3521    |
| P2RX7      | 3.62664   | 4.28594   | 5.07574   | 3.63063  | 6.11498   | 6.17227   |
| AGPAT9     | 5.33113   | 4.88932   | 4.0357    | 1.49428  | 4.07958   | 2.65275   |
| OGT        | 92.0803   | 88.8707   | 102.053   | 93.9703  | 124.256   | 101.239   |
| SHANK2     | 2.60716   | 1.10527   | 1.3588    | 2.53851  | 1.42239   | 1.85779   |
| STOML2     | 68.1761   | 78.7763   | 64.0171   | 76.7049  | 63.1892   | 62.6401   |
| SAMD9L     | 9.05655   | 6.04965   | 5.35141   | 2.1166   | 6.35433   | 3.29975   |
| BTF3P11    | 0         | 0         | 0         | 0        | 0         | 0         |
| TOMM22     | 43.9398   | 49.5778   | 43.7098   | 54.7387  | 42.0288   | 42.9503   |
| RTN1       | 2.96215   | 3.49834   | 4.39979   | 1.75532  | 5.30206   | 3.03809   |
| SNORD115-4 | 0         | 0         | 0         | 0        | 0         | 0         |
| LOC1006527 | 7.48482   | 13.3856   | 10.817    | 14.5355  | 11.5928   | 10.2825   |
| TMED10P1   | 1.03916   | 0.662361  | 0.969591  | 1.15729  | 0.831156  | 0.798156  |
| AP2M1      | 126.923   | 125.565   | 116.398   | 132.626  | 123.892   | 125.378   |
| LOC729234  | 11.4359   | 17.7614   | 14.8935   | 24.3206  | 16.0019   | 9.46322   |
| MIR552     | 0         | 0         | 0         | 0        | 0         | 0         |
| GIP        | 0         | 0         | 0         | 0        | 0         | 0         |
| KLF9       | 14.9318   | 12.8586   | 12.8703   | 9.42234  | 11.4287   | 7.57747   |
| LOC386597  | 0.0865061 | 0.114725  | 0.196457  | 0.162456 | 0.0826443 | 0.107814  |
| PA2G4P4    | 19.8276   | 18.4953   | 17.6535   | 19.0961  | 18.8845   | 21.1521   |
| SCD        | 170.614   | 86.5314   | 196.953   | 70.9807  | 67.5457   | 107.37    |
| MLH3       | 5.24856   | 4.73711   | 4.5424    | 4.50907  | 4.51039   | 4.14399   |
| MIR3160-2  | 0         | 0         | 0         | 0        | 0         | 0         |
| MORC1-AS1  | 0         | 0         | 0         | 0        | 0         | 0         |
| LOC1005068 | 0         | 0.246139  | 0         | 0        | 0         | 0         |
| NSRP1      | 18.0562   | 17.5712   | 17.0628   | 16.8786  | 16.5426   | 17.5448   |
| ITGAL      | 4.80459   | 3.56083   | 2.61853   | 0.67654  | 5.79071   | 2.12986   |
| LOC1006529 | 50.5352   | 123.526   | 46.1269   | 111.521  | 82.6205   | 79.736    |
| PADI4      | 3.87033   | 2.38738   | 4.53107   | 4.77515  | 1.80578   | 2.41183   |
| CAMKK2     | 18.3395   | 17.9992   | 17.7639   | 18.6384  | 18.4962   | 15.3344   |
| GNG2       | 8.56061   | 8.97949   | 11.5421   | 5.63631  | 7.74291   | 4.87691   |
| WDR17      | 0.452836  | 0.263416  | 0.46015   | 0.291869 | 0.403606  | 0.346585  |
| SSH2       | 2.95856   | 2.9621    | 3.9097    | 3.04914  | 3.99192   | 3.03208   |
| LOC388948  | 0         | 0.295439  | 0.168638  | 0.627533 | 0.283767  | 0.277642  |
| MUC22      | 0.0318727 | 0.0281799 | 0         | 0        | 0.0710497 | 0.0297926 |
| LOC1005076 | 3.64145   | 5.75605   | 6.18166   | 5.83708  | 6.6019    | 4.05712   |
| MBD3L2     | 0         | 0         | 0         | 0        | 0         | 0         |
| FAM74A4    | 0.0327137 | 0.049583  | 0         | 0        | 0         | 0         |
| MS4A12     | 0         | 0         | 0         | 0        | 0         | 0         |

|            |          |           |           |           |           |           |
|------------|----------|-----------|-----------|-----------|-----------|-----------|
| PRSS48     | 0        | 0.105619  | 0         | 0         | 0         | 0         |
| PROKR2     | 0        | 0         | 0         | 0         | 0         | 0         |
| KCTD15     | 27.6562  | 35.4882   | 34.5951   | 36.3214   | 47.3436   | 43.2598   |
| ZP4        | 0        | 0         | 0         | 0         | 0         | 0         |
| ALPI       | 0        | 0         | 0         | 0.0371011 | 0         | 0.0492444 |
| GPS1       | 46.6272  | 68.7681   | 52.6599   | 63.2058   | 57.0847   | 57.7813   |
| OR1A2      | 0        | 0         | 0         | 0         | 0         | 0         |
| C11orf16   | 0        | 0         | 0         | 0.0515388 | 0         | 0.0340146 |
| KCNJ10     | 0.217491 | 0.176267  | 0.0960411 | 0.0170184 | 0.242412  | 0.0338828 |
| ZMYND10    | 0.41448  | 0.837615  | 0.67235   | 2.05715   | 1.69704   | 1.40212   |
| MEOX2      | 11.0831  | 11.161    | 10.204    | 8.07633   | 7.6312    | 6.7465    |
| TRIM71     | 0        | 0         | 0         | 0.029639  | 0         | 0         |
| TPRN       | 8.13395  | 12.256    | 10.2046   | 14.0561   | 13.8391   | 13.4452   |
| SNHG5      | 257.884  | 392.499   | 471.886   | 649.417   | 416.849   | 400.183   |
| PPFIA4     | 3.2285   | 3.20913   | 1.86553   | 3.01357   | 5.56039   | 4.42848   |
| C7orf72    | 0        | 0         | 0         | 0         | 0         | 0         |
| MAP3K3     | 11.2271  | 11.2597   | 12.3747   | 11.437    | 13.3446   | 10.2321   |
| KRTAP3-3   | 10.5576  | 3.83377   | 1.56989   | 167.113   | 3.60226   | 2673.92   |
| RNF115     | 13.9006  | 10.9493   | 14.0623   | 9.84866   | 11.7508   | 11.4184   |
| MTHFR      | 7.33129  | 7.09523   | 9.77255   | 8.1419    | 11.3607   | 8.28804   |
| TTY6B      | 0        | 0         | 0         | 0         | 0         | 0         |
| LIMK1      | 15.7087  | 11.4111   | 11.8792   | 13.1481   | 10.3142   | 13.1754   |
| FAM123C    | 0        | 0         | 0         | 0         | 0         | 0         |
| MS4A8B     | 0        | 0.0716641 | 0         | 0         | 0.0516247 | 0.0505103 |
| FOXC2      | 0.628403 | 0.388916  | 0.380564  | 0.118012  | 0.36021   | 0.195797  |
| TMEM141    | 88.9135  | 123.496   | 75.9568   | 126.041   | 96.5443   | 101.699   |
| LOC1001305 | 0.474946 | 1.0078    | 0.934796  | 0.802741  | 0.786489  | 0.295966  |
| TBC1D15    | 10.7756  | 8.84035   | 9.21693   | 6.53483   | 9.50149   | 7.84719   |
| C6orf115   | 58.5464  | 47.0612   | 48.9735   | 45.3079   | 38.7491   | 43.8715   |
| CNTD2      | 0.230342 | 0.305481  | 0.435926  | 0         | 0.220059  | 0.0717698 |
| COTL1      | 30.2738  | 38.1001   | 25.6468   | 16.4971   | 37.4332   | 17.4745   |
| NPM1       | 162.118  | 188.072   | 156.952   | 172.355   | 167.772   | 158.032   |
| MIR190B    | 0        | 0         | 0         | 0         | 0         | 0         |
| TLX1       | 0        | 0         | 0         | 0         | 0         | 0.0303834 |
| NUDT4      | 23.1522  | 19.7596   | 17.2375   | 18.4022   | 12.8914   | 13.514    |
| HCN3       | 5.40462  | 7.48525   | 6.36504   | 6.62457   | 7.7161    | 7.63544   |
| MIR141     | 0        | 0         | 0         | 0         | 0         | 0         |
| ECSIT      | 28.037   | 40.8063   | 25.8274   | 38.4735   | 29.1284   | 27.8673   |
| CCDC7      | 0.792349 | 0.390977  | 0.901249  | 0.42089   | 0.450277  | 0.442948  |
| POLD4      | 75.9758  | 107.057   | 67.9196   | 88.0017   | 79.1898   | 91.1856   |
| CDKN2AIPNL | 12.9612  | 15.6194   | 14.7175   | 18.0054   | 12.3826   | 13.4983   |
| UAP1L1     | 12.7707  | 23.2036   | 17.0955   | 24.368    | 26.7891   | 19.5121   |
| TSPAN4     | 30.835   | 48.8544   | 49.0895   | 52.13     | 47.6898   | 39.4156   |

|             |           |           |           |           |           |           |
|-------------|-----------|-----------|-----------|-----------|-----------|-----------|
| LELP1       | 0         | 0         | 0         | 0         | 0.381064  | 0         |
| AMY2B       | 23.4203   | 30.9889   | 32.5679   | 28.9972   | 38.4453   | 25.6323   |
| ARF4        | 86.141    | 62.95     | 72.3834   | 61.175    | 56.9827   | 60.3893   |
| AKAP3       | 0.394711  | 0.203571  | 0.373498  | 0.308856  | 0.188545  | 0.163978  |
| TADA2A      | 6.51396   | 5.40489   | 6.35645   | 5.34614   | 7.29779   | 8.13472   |
| CROCC       | 5.88789   | 11.032    | 8.55646   | 9.90492   | 11.3961   | 10.9626   |
| LPCAT2      | 7.81259   | 5.51961   | 7.21044   | 7.16842   | 7.92961   | 8.48093   |
| XPNPEP2     | 2.63361   | 1.15116   | 3.20329   | 2.05614   | 2.95894   | 2.17591   |
| FLJ39632    | 0.427227  | 1.13257   | 1.31262   | 0.674439  | 0.292949  | 0.30237   |
| KCNT1       | 0.121594  | 0.197094  | 0.0920473 | 0.114175  | 1.4069    | 1.52807   |
| SPATA16     | 0         | 0         | 0         | 0         | 0         | 0.0303859 |
| CPA5        | 0.469638  | 0.326987  | 0.207385  | 0.209615  | 0.174482  | 0.185482  |
| DNAJB8      | 0         | 0         | 0         | 0         | 0         | 0         |
| SHROOM3     | 5.08986   | 1.43461   | 2.63119   | 3.25569   | 3.0677    | 3.50173   |
| APOL6       | 15.6488   | 13.8603   | 8.76323   | 3.56217   | 6.4787    | 2.75225   |
| MOK         | 5.04472   | 7.54441   | 6.58147   | 11.3383   | 9.5137    | 8.69521   |
| BCMO1       | 0.250252  | 0.110628  | 0.094721  | 0.195819  | 0.212516  | 0.0519821 |
| MIR571      | 0         | 0         | 0         | 0         | 0         | 0         |
| GPT         | 56.2573   | 79.4167   | 62.7314   | 59.7713   | 66.3751   | 67.4653   |
| LOC1005074: | 2.37689   | 2.31165   | 1.70935   | 1.5623    | 4.2388    | 1.99959   |
| RN5S11      | 45.9693   | 135.343   | 36.0878   | 223.211   | 0         | 30.5323   |
| IRAK4       | 11.8182   | 11.8383   | 11.5352   | 9.6697    | 11.2454   | 8.72435   |
| IKZF5       | 7.09608   | 6.04782   | 9.09814   | 4.44207   | 10.5456   | 8.40574   |
| SLC39A5     | 0.0527352 | 0.0466198 | 0.157052  | 0.346612  | 0.0335715 | 0.361376  |
| MIR877      | 0         | 0         | 0         | 0         | 0         | 0         |
| BNIP2       | 23.5558   | 19.8702   | 25.5449   | 18.0936   | 20.3355   | 17.475    |
| LAMB1       | 29.8886   | 30.7865   | 43.3414   | 34.5888   | 33.5848   | 30.3887   |
| CHI3L2      | 52.3168   | 44.5944   | 34.9984   | 34.2679   | 53.7034   | 39.5455   |
| TRAPPC8     | 15.4474   | 10.9333   | 13.9107   | 9.66513   | 11.415    | 12.8571   |
| MSR1        | 1.6966    | 0.498236  | 0.622182  | 0.350242  | 0.840874  | 0.375131  |
| EMP3        | 48.0567   | 65.6363   | 56.0469   | 56.9696   | 52.0648   | 35.5308   |
| SPRR2G      | 662.212   | 348.294   | 84.0576   | 139.683   | 312.175   | 91.2479   |
| GOLGA6A     | 0.0909912 | 0.0843707 | 0.16515   | 0.200781  | 0.338704  | 0.171943  |
| DPAGT1      | 18.1928   | 16.7199   | 14.3882   | 15.2396   | 15.1547   | 16.6176   |
| CXCR3       | 3.48727   | 2.28828   | 1.43913   | 0.0614761 | 1.84571   | 0.574581  |
| TACR2       | 0.544922  | 1.37123   | 0.698091  | 1.10206   | 0.85431   | 0.966474  |
| TSPAN15     | 22.876    | 27.7002   | 27.5758   | 19.4372   | 15.2033   | 9.21949   |
| DNAH17      | 4.48887   | 4.32056   | 4.40555   | 3.60322   | 4.67618   | 2.84672   |
| MIR181A1    | 0         | 0         | 0         | 0         | 0         | 0         |
| EEF1E1      | 19.805    | 17.5775   | 11.5387   | 9.07307   | 13.5836   | 14.6041   |
| PVRL4       | 42.9002   | 38.0207   | 51.8974   | 53.5315   | 64.9683   | 72.6268   |
| CDCA5       | 3.43877   | 7.08263   | 2.30736   | 4.36643   | 4.18124   | 4.3345    |
| MIR610      | 0         | 0         | 0         | 0         | 0         | 0         |

|             |           |           |           |           |           |           |
|-------------|-----------|-----------|-----------|-----------|-----------|-----------|
| ABCC12      | 1.13638   | 0.0494122 | 0.0846143 | 0.0874625 | 0.0474601 | 0.0116089 |
| SORBS3      | 67.7321   | 105.457   | 75.5542   | 97.6097   | 87.0017   | 84.4538   |
| FFAR1       | 0         | 0         | 0         | 0         | 0.0829579 | 0         |
| PISRT1      | 0         | 0         | 0         | 0         | 0         | 0         |
| C20orf20    | 11.1659   | 15.0953   | 10.1235   | 13.7763   | 13.1896   | 12.2576   |
| STX4        | 53.565    | 66.9524   | 48.5396   | 57.2495   | 61.2581   | 48.6457   |
| C1orf158    | 5.16187   | 7.20066   | 7.46778   | 8.40131   | 3.87209   | 4.86072   |
| CCDC120     | 13.077    | 15.7635   | 16.3022   | 19.9159   | 22.9501   | 23.3488   |
| SCAMP5      | 3.92148   | 3.19835   | 2.32421   | 2.62649   | 4.61129   | 3.44531   |
| ENTPD7      | 2.19609   | 1.30045   | 1.5098    | 1.6912    | 1.64727   | 1.66464   |
| PTPRA       | 39.2471   | 34.4446   | 39.068    | 34.8511   | 36.818    | 35.1027   |
| UBE2D1      | 10.5875   | 7.75614   | 7.25993   | 5.92953   | 8.43763   | 10.8461   |
| ESPNP       | 0.461275  | 0.090629  | 0.155195  | 0.144377  | 0.0326432 | 0.0319386 |
| TMEM44      | 4.49882   | 8.52406   | 5.26933   | 7.02209   | 9.40781   | 6.43867   |
| LOC10050640 | 0         | 0         | 0         | 0         | 0         | 0         |
| LRRC1       | 17.3015   | 15.7371   | 17.95     | 17.8237   | 18.1742   | 17.3746   |
| GOLGA8H     | 0.320097  | 0.24042   | 0.34773   | 0.257722  | 0.49599   | 0.268559  |
| PNMA6A      | 0.0547339 | 0.129046  | 0.344438  | 0.173456  | 0.271459  | 0.222754  |
| CDK5RAP3    | 61.7969   | 89.1882   | 65.5263   | 91.7625   | 100.509   | 83.6777   |
| KIAA1751    | 0.0615814 | 0.0725951 | 0.0621566 | 0.0963732 | 0.078443  | 0.0383749 |
| FP2234      | 0.753593  | 0.791206  | 0.695265  | 0.862402  | 1.09493   | 1.04194   |
| MIA2        | 0         | 0         | 0         | 0         | 0         | 0         |
| ZNF264      | 3.79976   | 3.61898   | 4.20942   | 3.36486   | 4.6385    | 3.80203   |
| REEP6       | 114.068   | 145.572   | 45.8884   | 80.0315   | 25.316    | 36.9309   |
| KRTAP21-3   | 0         | 0         | 0         | 0         | 0         | 0         |
| LOC285463   | 1.72498   | 2.35143   | 3.00946   | 2.91978   | 3.31021   | 2.71285   |
| ABHD1       | 0.674407  | 1.39172   | 0.624308  | 0.492534  | 0.381861  | 0.560858  |
| TUBA3D      | 0.488031  | 0.492398  | 0.317414  | 0.265733  | 0.220708  | 0.218643  |
| LINC00305   | 0         | 0         | 0         | 0         | 0.0898028 | 0         |
| MIR1271     | 0         | 0         | 0         | 0         | 0         | 0         |
| MAP4K1      | 4.45252   | 5.49125   | 3.42722   | 1.93285   | 8.18729   | 3.24088   |
| DTX1        | 7.17583   | 8.09643   | 11.387    | 7.47099   | 7.70645   | 7.1659    |
| IER3        | 54.8922   | 69.6159   | 102.999   | 116.014   | 76.7426   | 106.769   |
| LOC728978   | 9.17524   | 19.6201   | 16.1528   | 22.4401   | 7.20278   | 11.8341   |
| LINC00371   | 0         | 0         | 0         | 0         | 0         | 0         |
| CETP        | 1.10553   | 2.17209   | 1.5343    | 0.346025  | 0.547647  | 0.497553  |
| LPCAT1      | 7.96304   | 10.4294   | 8.66769   | 7.22174   | 8.31634   | 7.10431   |
| SLC3A1      | 0.932038  | 0.828416  | 0.499722  | 1.05556   | 0.392793  | 0.308752  |
| ITGB1       | 80.4842   | 60.9617   | 86.7172   | 57.399    | 55.9741   | 47.0052   |
| LOC391636   | 0.895404  | 1.28645   | 1.1862    | 1.15606   | 1.35443   | 0.697473  |
| ATP2C1      | 36.3736   | 28.6565   | 34.1989   | 27.4496   | 31.6099   | 31.8264   |
| ASPDH       | 0.593338  | 0.643973  | 0.689219  | 0.378032  | 0.991735  | 0.842272  |
| G6PC3       | 30.1654   | 29.0224   | 26.4737   | 30.282    | 21.8506   | 22.4875   |

|             |           |           |          |           |           |           |
|-------------|-----------|-----------|----------|-----------|-----------|-----------|
| ASB15       | 0         | 0.0654933 | 0        | 0         | 0.0471794 | 0         |
| MIR3945     | 0         | 0         | 0        | 0         | 0         | 0         |
| SNORD6      | 0         | 0         | 0        | 0         | 0         | 0         |
| CEBPZ       | 19.5964   | 13.4732   | 16.2789  | 10.5246   | 12.7843   | 11.9718   |
| LOC10050575 | 0         | 0         | 0.202793 | 0         | 0         | 0         |
| BTD         | 12.9505   | 10.5711   | 11.7539  | 10.0363   | 8.13701   | 9.19245   |
| CALM1       | 89.0167   | 76.0791   | 90.2022  | 81.0842   | 69.4872   | 65.2557   |
| ALOX12P2    | 1.59319   | 3.96168   | 2.41211  | 2.61797   | 2.98072   | 3.10253   |
| HSPA12B     | 6.38599   | 10.1795   | 7.83467  | 5.46468   | 8.69538   | 6.97868   |
| MIR378D1    | 0         | 0         | 0        | 0         | 0         | 0         |
| LINC00304   | 0.045492  | 0.160885  | 0.103313 | 0.0427162 | 0.289741  | 0.226789  |
| SAG         | 0         | 0         | 0        | 0         | 0         | 0         |
| C7orf45     | 0         | 0         | 0        | 0         | 0         | 0         |
| GNAT2       | 0.08021   | 0         | 0.182158 | 0.225948  | 0.102172  | 0.14995   |
| OR1C1       | 0         | 0         | 0        | 0         | 0         | 0         |
| ZNF786      | 5.34913   | 6.78677   | 4.96442  | 4.93761   | 7.75693   | 7.19401   |
| C7orf42     | 33.9441   | 26.564    | 29.0641  | 29.0948   | 29.1713   | 24.9257   |
| TATDN3      | 7.66914   | 7.76386   | 7.17071  | 7.17459   | 8.0248    | 6.78074   |
| DPY19L1P1   | 1.63958   | 1.06362   | 1.57243  | 0.975039  | 1.63619   | 1.53276   |
| LOC10050703 | 0         | 0         | 0        | 0         | 0         | 0         |
| SPARCL1     | 106.094   | 88.0019   | 79.4588  | 57.3585   | 70.7174   | 51.2676   |
| FLJ42627    | 1.91653   | 1.71801   | 2.16616  | 1.93708   | 1.87336   | 1.96562   |
| MTX2        | 27.0777   | 28.5842   | 25.7044  | 23.8198   | 23.8488   | 26.0456   |
| LOC283104   | 2.58802   | 1.55788   | 2.30196  | 1.81405   | 2.69297   | 2.72756   |
| KIF22       | 21.8746   | 27.2757   | 22.277   | 29.4744   | 29.3636   | 26.7126   |
| NAP1L2      | 3.12616   | 2.69485   | 3.31313  | 2.20156   | 2.16529   | 2.55687   |
| NGFR        | 15.8873   | 12.7763   | 16.318   | 12.9462   | 15.2524   | 14.0542   |
| DNAJB6      | 86.7442   | 78.3662   | 71.2633  | 79.5874   | 72.9977   | 77.2881   |
| ZBTB41      | 3.39644   | 2.36085   | 3.05321  | 2.14013   | 3.24482   | 2.53425   |
| XRCC2       | 1.12989   | 0.913354  | 0.757583 | 0.606259  | 0.80188   | 0.683985  |
| ZNF418      | 2.91731   | 3.07172   | 3.75432  | 4.00935   | 4.25663   | 4.03253   |
| MIR142      | 0         | 0         | 0        | 0         | 0         | 0         |
| EXT2        | 19.5626   | 18.1017   | 18.128   | 13.8237   | 16.377    | 16.662    |
| EZR         | 90.1401   | 90.1682   | 99.972   | 104.499   | 95.6797   | 109.303   |
| C6          | 0.329229  | 0.458489  | 0.659805 | 0.309141  | 1.50788   | 0.475408  |
| LRRC37B     | 4.49506   | 5.04759   | 6.17636  | 4.99101   | 8.3032    | 6.99602   |
| LOC10065273 | 1.36903   | 9.72E-07  | 2.04382  | 2.87812   | 2.06145   | 1.9996    |
| KDM2B       | 10.4227   | 11.4631   | 11.94    | 12.2699   | 14.5429   | 13.539    |
| FLII        | 43.2688   | 43.9438   | 41.3503  | 41.5236   | 47.1571   | 43.6341   |
| C3orf80     | 5.03666   | 5.38514   | 1.38915  | 1.68643   | 0.422744  | 0.413619  |
| GNRHR       | 0.0167758 | 0.0593299 | 0.057149 | 0.0692761 | 0.0569866 | 0.0557565 |
| DNTTIP2     | 21.9706   | 18.3513   | 20.8943  | 17.6237   | 17.8607   | 17.7045   |
| UBE2W       | 6.54717   | 4.62661   | 6.70655  | 4.63938   | 5.75106   | 5.26292   |



|             |          |          |           |           |           |           |
|-------------|----------|----------|-----------|-----------|-----------|-----------|
| SLC22A15    | 2.00719  | 2.11869  | 3.45754   | 2.75016   | 2.84377   | 3.01212   |
| PTGIR       | 2.21888  | 2.70291  | 2.0903    | 1.52789   | 4.74212   | 2.12015   |
| DPM2        | 25.9205  | 37.6849  | 18.4153   | 29.2198   | 27.765    | 32.1468   |
| KLK15       | 0        | 0        | 0.0832137 | 0         | 0.280048  | 0.274003  |
| WIPF2       | 10.8431  | 8.63428  | 10.997    | 9.93678   | 10.9789   | 10.482    |
| MIR25       | 0        | 0        | 0         | 0         | 0         | 0         |
| LCN9        | 0        | 0        | 0         | 0         | 0         | 0         |
| CCR5        | 3.70694  | 2.13433  | 1.69694   | 0.40679   | 2.03158   | 0.859874  |
| PLEKHJ1     | 52.8511  | 86.0343  | 52.1113   | 69.5174   | 61.3891   | 55.8106   |
| TSPAN2      | 2.73901  | 3.1019   | 1.93366   | 1.67606   | 1.21526   | 0.958896  |
| LOC388692   | 2.13615  | 2.74835  | 2.17929   | 2.30057   | 2.56013   | 1.57926   |
| DLST        | 50.9954  | 51.5716  | 44.4209   | 48.7943   | 47.5616   | 41.7191   |
| GEMIN7      | 12.1478  | 13.9952  | 10.0024   | 14.2865   | 12.0876   | 16.036    |
| LOC255512   | 1.76224  | 3.32387  | 2.40125   | 2.64755   | 2.91819   | 1.61063   |
| LOC727721   | 0.590646 | 0.522212 | 0.447123  | 0         | 0.188093  | 1.28823   |
| BVES        | 1.6258   | 0.906375 | 0.735931  | 0.846168  | 0.619175  | 0.962321  |
| CXCL11      | 4.70856  | 10.4955  | 0         | 0.0622713 | 0.0422381 | 0         |
| HNRNPKP3    | 0        | 0        | 0         | 0         | 0         | 0         |
| MRS2P2      | 0.148989 | 0.362249 | 0.140982  | 0.45467   | 0.284676  | 0.0464219 |
| TTY1        | 0        | 0        | 0         | 0         | 0         | 0         |
| ZNF691      | 8.50347  | 12.2585  | 7.91454   | 8.16856   | 10.6469   | 8.68944   |
| LOC10050637 | 0        | 0.142519 | 0.122026  | 0         | 0         | 0.10045   |
| NR4A1       | 10.805   | 8.32135  | 22.9552   | 57.717    | 19.2135   | 7.49228   |
| ENY2        | 15.279   | 15.0974  | 15.2666   | 14.2803   | 15.1918   | 12.3002   |
| LOC10013486 | 0.75725  | 1.46075  | 1.56339   | 1.48673   | 0.701522  | 1.02957   |
| TTLL4       | 13.3523  | 15.6551  | 10.4145   | 12.8275   | 13.1741   | 13.6352   |
| PDE4DIP     | 10.1096  | 8.26017  | 12.9675   | 7.81532   | 10.9494   | 8.74649   |
| ERICH1      | 7.44999  | 8.54227  | 7.13772   | 6.39425   | 9.48988   | 8.8498    |
| LOC729159   | 0        | 0        | 0         | 0         | 0.017438  | 0         |
| SNORD114-1  | 0        | 0        | 0         | 0         | 0         | 0         |
| VWDE        | 0.360971 | 0.471122 | 0.299281  | 0.193683  | 0.372226  | 0.235653  |
| DYNC1I2     | 21.2969  | 17.7017  | 19.7501   | 18.945    | 17.6506   | 19.052    |
| PDCD11      | 9.85069  | 10.8143  | 10.2393   | 10.3115   | 9.86584   | 9.36543   |
| LARP4B      | 18.7944  | 17.6845  | 21.0386   | 19.7558   | 20.9398   | 18.9298   |
| MIR618      | 0        | 0        | 0         | 0         | 0         | 0         |
| MIR4470     | 0        | 0        | 0         | 0         | 0         | 0         |
| C7orf46     | 5.93984  | 7.14458  | 7.61851   | 6.86549   | 6.07236   | 5.99103   |
| PHACTR4     | 13.2746  | 11.544   | 13.0586   | 12.6365   | 14.3702   | 12.785    |
| THOC1       | 19.5167  | 23.2927  | 18.9902   | 18.6897   | 22.6089   | 19.9481   |
| NAG20       | 0        | 0        | 0         | 0         | 0         | 0         |
| TMEM184C    | 9.09262  | 7.89134  | 9.59088   | 7.1881    | 8.40993   | 9.08248   |
| DCK         | 10.3755  | 7.63879  | 10.307    | 6.98992   | 10.0474   | 7.78753   |
| ITGB5       | 49.5764  | 51.8598  | 68.7613   | 64.078    | 63.5667   | 62.6317   |

|             |           |           |           |           |           |           |
|-------------|-----------|-----------|-----------|-----------|-----------|-----------|
| SLC10A2     | 0.0258886 | 0.022889  | 0         | 0.024309  | 0.0824429 | 0.0806633 |
| FO XK1      | 7.46877   | 6.79136   | 7.93608   | 7.80719   | 9.13506   | 6.9258    |
| URGCP-MRPS  | 0         | 1.97E-163 | 3.88E-144 | 6.73E-74  | 1.47E-63  | 2.52E-116 |
| C3orf65     | 0         | 0         | 0         | 0         | 0.0335948 | 0         |
| PRTFDC1     | 5.49964   | 4.0997    | 3.91836   | 3.69586   | 4.42995   | 2.28476   |
| BEND7       | 2.08791   | 3.02342   | 2.1895    | 3.58451   | 2.11889   | 2.06022   |
| C18orf45    | 5.17924   | 5.13687   | 4.17204   | 4.645     | 3.9119    | 3.66195   |
| GOT2        | 45.6338   | 34.7916   | 34.0131   | 38.58     | 33.9875   | 34.0524   |
| METTL2A     | 8.12884   | 7.11624   | 6.39611   | 6.58004   | 5.04978   | 6.66257   |
| RNF128      | 13.2536   | 7.73789   | 12.4016   | 11.8009   | 8.86481   | 7.95383   |
| MIR4495     | 0         | 0         | 0         | 0         | 0         | 0         |
| LOC10050566 | 4.27594   | 5.90291   | 4.06033   | 5.81124   | 6.34258   | 7.3276    |
| LOC729156   | 2.49E-06  | 0.812613  | 4.34E-07  | 0.20885   | 0.368507  | 2.56E-06  |
| NT5DC1      | 14.9763   | 11.4215   | 11.6727   | 9.98944   | 9.51833   | 9.35233   |
| MSH4        | 0         | 0.0546014 | 0.187001  | 0.0289943 | 0.098333  | 0.192421  |
| SNAP25      | 0.607341  | 0.890023  | 0.799931  | 0.471308  | 0.83118   | 0.378469  |
| TAS2R16     | 0         | 0         | 0         | 0         | 0         | 0         |
| MIR24-2     | 0         | 0         | 0         | 0         | 0         | 0         |
| EXPH5       | 6.172     | 6.34865   | 11.9363   | 8.86255   | 11.1506   | 11.671    |
| STAG3L4     | 4.03622   | 5.26789   | 4.94691   | 4.96303   | 3.12156   | 2.9344    |
| AFG3L2      | 33.6824   | 32.0413   | 32.4729   | 34.3183   | 30.4418   | 28.9973   |
| FOX D4L1    | 0.0498141 | 0.0688164 | 0.25517   | 0.176867  | 0.0971636 | 0.132036  |
| ZNF792      | 1.78355   | 1.15491   | 1.06491   | 0.731218  | 0.847964  | 0.907931  |
| MYH4        | 0         | 0         | 0         | 0         | 0         | 0         |
| ABCB6       | 15.4047   | 17.9561   | 13.7296   | 15.732    | 13.6618   | 14.5429   |
| MIR202      | 0         | 0         | 0         | 0         | 283.839   | 0         |
| GLCE        | 7.35791   | 5.52536   | 7.00226   | 5.99376   | 7.10856   | 6.4311    |
| MIR454      | 0         | 0         | 0         | 0         | 0         | 138.034   |
| SPSB2       | 6.7141    | 8.98387   | 6.56175   | 8.13775   | 7.53793   | 7.02318   |
| POLR2A      | 32.4927   | 31.6045   | 36.023    | 32.0774   | 43.1824   | 39.3061   |
| IRGM        | 0         | 0         | 0         | 0         | 0         | 0         |
| PIP5K1B     | 6.65764   | 2.44146   | 2.34812   | 4.51097   | 1.83103   | 2.80513   |
| ZAR1        | 0         | 0         | 0         | 0         | 0.0480381 | 0.84602   |
| PCDHA6      | 0.17734   | 0.181448  | 1.03E-13  | 0.104114  | 0.0479725 | 0.129357  |
| PIGQ        | 15.0704   | 23.3177   | 17.6287   | 24.653    | 25.4518   | 23.1701   |
| LOC10050733 | 0.105807  | 0         | 0         | 0         | 0         | 0.0659521 |
| UBXN10      | 1.27167   | 1.15392   | 1.24133   | 0.848427  | 0.916507  | 1.60576   |
| HGFAC       | 0         | 0.134229  | 0.153237  | 0.190074  | 0.257852  | 0.189214  |
| FBXO18      | 28.7204   | 29.1485   | 27.5467   | 27.437    | 28.2261   | 26.6824   |
| DNER        | 46.9021   | 11.7412   | 16.1989   | 27.5748   | 15.7435   | 15.4977   |
| MIR196A1    | 0         | 0         | 0         | 0         | 0         | 0         |
| PVRL3       | 1.2857    | 1.36408   | 1.94656   | 0.543263  | 0.900756  | 0.721074  |
| FLNC        | 3.82628   | 5.0946    | 3.91075   | 2.18953   | 3.92548   | 3.98148   |

|             |           |           |           |           |          |           |
|-------------|-----------|-----------|-----------|-----------|----------|-----------|
| FAM3C       | 70.471    | 46.3994   | 68.9212   | 50.302    | 46.8624  | 47.2832   |
| ATF6B       | 46.3698   | 48.3049   | 51.6496   | 52.916    | 63.9816  | 59.4085   |
| VPS8        | 9.92299   | 7.86044   | 8.94463   | 7.82745   | 10.4481  | 10.9136   |
| SOSTDC1     | 24.6528   | 18.5418   | 16.7201   | 22.363    | 22.0958  | 36.7034   |
| PANX1       | 4.55169   | 5.46158   | 5.03175   | 3.79908   | 5.19979  | 5.85294   |
| HMOX2       | 39.7721   | 44.4463   | 30.6323   | 36.6977   | 27.4323  | 34.2636   |
| INSM1       | 0.352955  | 0.0624122 | 0.0801567 | 0.132568  | 0.224799 | 0.065984  |
| C12orf41    | 16.1412   | 17.4631   | 14.5984   | 16.3528   | 15.0147  | 12.0966   |
| C3orf49     | 0.0858835 | 0         | 0.0650143 | 0.161286  | 0.164099 | 0         |
| TRAF2       | 12.5278   | 17.2869   | 11.6174   | 12.0995   | 15.4451  | 13.7176   |
| COL4A4      | 0.355394  | 0.314217  | 0.255238  | 0.0684531 | 0.261176 | 0.147644  |
| ARHGAP11B   | 0.229988  | 0.415154  | 1.13348   | 1.19045   | 1.17185  | 1.14655   |
| C6orf126    | 5.21859   | 11.7446   | 1.07741   | 1.33641   | 0.906477 | 0.295637  |
| TFAP2A      | 36.8041   | 41.5017   | 46.65     | 53.6947   | 56.1721  | 52.4969   |
| PLAUR       | 4.61951   | 5.85877   | 3.79419   | 3.1212    | 4.92289  | 2.42505   |
| ZNF860      | 1.2401    | 0.438544  | 0.60998   | 0.203786  | 0.60244  | 0.887536  |
| LOC10065290 | 3076.95   | 4096.16   | 3297.31   | 4898.38   | 3395.17  | 3238.16   |
| LOC10012867 | 0.408698  | 1.02E-53  | 0.16002   | 0.123003  | 0.150379 | 0.344592  |
| NTHL1       | 7.14445   | 14.4518   | 10.7348   | 14.9417   | 10.6175  | 12.6818   |
| KISS1       | 0         | 0         | 0.13986   | 0         | 0        | 0.460525  |
| KCNC4       | 3.14532   | 3.30023   | 2.10965   | 2.52423   | 2.80049  | 2.47867   |
| DEFB133     | 0         | 0         | 0         | 0         | 0        | 0         |
| OR8U1       | 0         | 0         | 0         | 0         | 0        | 0         |
| POU2F3      | 23.4517   | 26.1332   | 39.993    | 32.2488   | 46.1058  | 41.1452   |
| XKR8        | 6.74247   | 5.41545   | 5.0322    | 6.42024   | 6.95553  | 6.39116   |
| OR13C9      | 0         | 0         | 0         | 0         | 0        | 0         |
| SLC30A6     | 9.79269   | 7.37222   | 8.86989   | 7.70451   | 8.33655  | 7.14269   |
| SNAR-A1     | 0         | 0         | 0         | 0         | 0        | 0         |
| CDH9        | 0         | 0         | 0         | 0         | 0        | 0         |
| LOC10030370 | 1.50141   | 1.32825   | 1.51623   | 1.41451   | 1.35527  | 1.44968   |
| LOC10050729 | 0         | 0         | 0         | 0         | 0        | 0         |
| ADPRHL2     | 23.6249   | 31.221    | 24.9811   | 27.5827   | 24.9587  | 29.5999   |
| LOC10010126 | 1.24166   | 1.48987   | 1.81275   | 1.33245   | 1.24272  | 2.04491   |
| CHST9-AS1   | 0.254274  | 0.0374689 | 0.160406  | 0.159173  | 0        | 0         |
| HSPA5       | 95.7813   | 70.3019   | 73.251    | 63.4959   | 52.8813  | 65.6433   |
| NUDCD2      | 35.1437   | 36.6705   | 33.6199   | 31.424    | 29.8085  | 29.7923   |
| OR5B12      | 0         | 0         | 0         | 0         | 0        | 0         |
| METTL6      | 4.16059   | 4.32138   | 3.97521   | 2.92056   | 3.62754  | 3.54924   |
| LOC641367   | 0.188412  | 0.230336  | 0.140868  | 0.139786  | 0.213335 | 0.0927689 |
| FAM69A      | 6.26941   | 5.23507   | 6.0936    | 5.19644   | 4.16556  | 3.68978   |
| LAS1L       | 15.2607   | 14.9913   | 15.9916   | 18.7964   | 18.4485  | 15.4214   |
| CRB3        | 16.7908   | 15.5395   | 18.4771   | 25.7418   | 23.6573  | 23.1892   |
| LMTK2       | 5.90782   | 4.49449   | 6.9844    | 7.26415   | 7.28313  | 6.96127   |

|             |           |          |           |           |           |           |
|-------------|-----------|----------|-----------|-----------|-----------|-----------|
| ZNF662      | 11.61     | 9.99078  | 10.3532   | 10.4743   | 11.229    | 11.6758   |
| BZW2        | 46.8191   | 46.1916  | 39.8383   | 45.1816   | 38.0924   | 40.5521   |
| ETS2        | 37.7393   | 48.7522  | 52.1069   | 37.5919   | 37.4315   | 24.9756   |
| MALT1       | 9.5342    | 9.16298  | 9.70058   | 7.99173   | 10.0302   | 8.2056    |
| PIP5K1A     | 16.3623   | 15.7429  | 17.0401   | 17.8418   | 18.7942   | 16.4554   |
| YIPF7       | 0         | 0        | 0         | 0         | 0         | 0         |
| SPRR1B      | 1063.4    | 782.251  | 577.025   | 580.773   | 877.815   | 910.191   |
| LRRC58      | 9.6602    | 6.56948  | 8.31737   | 6.13742   | 7.15704   | 6.01777   |
| LZTS2       | 30.0483   | 48.0578  | 40.6412   | 48.6897   | 45.0681   | 47.0843   |
| LOC10028901 | 6.71589   | 8.7492   | 6.66307   | 8.88588   | 11.0175   | 7.26044   |
| PPP2CB      | 60.1888   | 56.7008  | 62.6743   | 64.9074   | 53.3336   | 54.4099   |
| OFCC1       | 0         | 0        | 0         | 0.0649669 | 0         | 0         |
| LOC285484   | 0         | 0        | 0         | 0         | 0.0462609 | 0         |
| FAM149B1    | 7.17997   | 6.29215  | 8.28461   | 6.53398   | 7.41345   | 7.54907   |
| BCL9L       | 19.6059   | 22.1808  | 24.441    | 23.2211   | 26.3271   | 23.7109   |
| KNTC1       | 4.55212   | 5.64425  | 4.04618   | 4.23586   | 4.78858   | 4.57448   |
| PPP1R3D     | 6.512     | 5.28006  | 5.17683   | 4.61714   | 4.83029   | 5.52529   |
| LOC10050688 | 0.303237  | 0.495876 | 0.0868347 | 0         | 1.24199   | 1.57616   |
| MIR543      | 0         | 0        | 0         | 0         | 0         | 0         |
| DNAJC14     | 13.7984   | 12.2826  | 13.5081   | 12.8623   | 12.9326   | 14.6019   |
| SRGAP3-AS2  | 0         | 0        | 0         | 0         | 0         | 0         |
| CCNB3       | 0.33557   | 0.191415 | 0.30394   | 0.263887  | 0.254486  | 0.364333  |
| ZNF577      | 12.0341   | 15.4392  | 17.4846   | 16.3948   | 21.0269   | 17.2835   |
| FABP5P3     | 0.255744  | 0.127188 | 0.1089    | 0         | 0.0305409 | 0         |
| LOC10028743 | 0.189199  | 0.501835 | 0.143225  | 0.532966  | 0.602511  | 0.648456  |
| LOC10013128 | 2.25633   | 3.45783  | 2.39127   | 3.53109   | 4.98184   | 4.78056   |
| LOC10050621 | 0.424559  | 0.482617 | 1.05601   | 0.284753  | 1.00436   | 0.793702  |
| LOC10050715 | 0.34253   | 0.605687 | 0.340327  | 0.502547  | 0.354509  | 0.506944  |
| GOT1        | 56.5022   | 30.8864  | 28.1619   | 37.8768   | 26.6749   | 28.5046   |
| OR11A1      | 0         | 0        | 0         | 0         | 0         | 0         |
| ACTRT1      | 0         | 0        | 0         | 0         | 0         | 0         |
| LOC10050646 | 11.0553   | 14.1067  | 10.5395   | 13.5094   | 13.2897   | 11.2851   |
| CYTH3       | 13.3393   | 13.8073  | 16.1731   | 15.6007   | 17.793    | 15.1787   |
| SLC10A4     | 0.0969588 | 0.17145  | 0.220195  | 0.0910428 | 0.185261  | 0.211472  |
| PRY         | 0         | 0        | 0         | 0         | 0         | 0         |
| LOC10012644 | 0         | 0.186499 | 0         | 0         | 0         | 0.131448  |
| SNORD54     | 0         | 0        | 0         | 0         | 0         | 0         |
| FBXW11      | 14.0952   | 11.2382  | 13.6211   | 12.3548   | 12.4761   | 11.788    |
| GTPBP1      | 14.1308   | 14.1481  | 14.7735   | 16.1016   | 15.4337   | 14.0177   |
| CECR6       | 0.616844  | 0.480185 | 0.318221  | 0.508702  | 0.47055   | 0.505917  |
| MIP         | 0         | 0        | 0.058372  | 0.108606  | 0.0245556 | 0.0720766 |
| MIR548F5    | 0         | 0        | 0         | 0         | 0         | 0         |
| KIRREL-IT1  | 0.0902513 | 0        | 0.204962  | 0         | 0         | 0.112482  |

|             |           |          |           |          |          |           |
|-------------|-----------|----------|-----------|----------|----------|-----------|
| SPANXC      | 0         | 0        | 0         | 0        | 0.103367 | 0         |
| VSTM2B      | 0         | 0.079329 | 0.135844  | 0.1685   | 0        | 0         |
| ENHO        | 10.5802   | 11.1496  | 8.65645   | 10.5367  | 9.46121  | 7.45886   |
| CAMSAP2     | 10.0715   | 7.76154  | 10.8931   | 8.18233  | 9.96367  | 8.79791   |
| C2orf77     | 0.188858  | 0.083488 | 0.178708  | 0        | 0.240569 | 0.14711   |
| LOC10050666 | 0         | 0        | 0         | 0        | 0        | 0         |
| FAM102B     | 4.96911   | 3.23136  | 5.21996   | 4.02351  | 3.7038   | 3.19751   |
| AGXT2L2     | 17.1888   | 23.6503  | 19.9258   | 19.5607  | 24.8909  | 20.9004   |
| UTP15       | 5.36433   | 5.69136  | 5.60394   | 3.87851  | 5.07361  | 4.42924   |
| SMG9        | 16.0525   | 18.6564  | 10.9759   | 16.8559  | 14.7587  | 16.3763   |
| LOC10029056 | 4.72637   | 6.62971  | 5.83396   | 6.12138  | 6.3884   | 7.81046   |
| MAMLD1      | 3.08289   | 2.81795  | 3.11232   | 4.04579  | 3.90408  | 2.9814    |
| ROS1        | 7.90764   | 4.20855  | 2.77334   | 1.7079   | 2.48945  | 4.67851   |
| FOLH1       | 1.45554   | 0.87526  | 1.16984   | 0.423105 | 0.824816 | 0.537144  |
| MIR135A1    | 0         | 0        | 0         | 0        | 0        | 0         |
| AQP9        | 6.31312   | 3.80832  | 8.91097   | 7.10115  | 12.1254  | 12.1915   |
| ADCK2       | 22.2383   | 25.3932  | 22.0994   | 25.2754  | 26.386   | 25.4152   |
| PSMC1       | 44.6771   | 43.4865  | 39.8312   | 41.6984  | 35.1404  | 35.9751   |
| IGFBP2      | 17.7654   | 9.73301  | 12.1841   | 18.7488  | 11.5567  | 13.8147   |
| SPHK2       | 5.07905   | 6.10907  | 5.47074   | 5.80167  | 5.40275  | 6.14809   |
| LOC10028836 | 0.517986  | 0.602776 | 0.822443  | 0.798005 | 1.61715  | 0.912912  |
| LCN6        | 2.04458   | 2.13636  | 1.40705   | 1.13917  | 0.753408 | 0.694962  |
| PTPN11      | 25.2729   | 18.0873  | 23.7247   | 15.9015  | 16.5904  | 15.3858   |
| KCNE3       | 1.61583   | 2.14292  | 1.90818   | 1.1531   | 1.99651  | 1.93328   |
| SLC41A3     | 18.6964   | 23.0908  | 19.6772   | 25.332   | 19.6538  | 18.2044   |
| LOC10028757 | 0.0607311 | 0.107389 | 0.0459738 | 0        | 0        | 0.0378451 |
| GPR15       | 0.106255  | 0.281832 | 0         | 0        | 0.135349 | 0         |
| SNORA22     | 0         | 0        | 0         | 0        | 0        | 0         |
| HMGNA4      | 37.8695   | 38.5041  | 37.626    | 32.003   | 40.4669  | 35.988    |
| ELF2        | 15.1942   | 14.5092  | 15.414    | 13.8881  | 18.0644  | 15.018    |
| IKZF4       | 3.68308   | 2.77335  | 3.24168   | 2.81301  | 4.06301  | 3.0309    |
| DRD4        | 0.401748  | 1.98912  | 1.76393   | 3.99869  | 2.50758  | 1.05148   |
| MIR1302-2   | 0         | 0        | 7.00285   | 0        | 0        | 5.76466   |
| RNF40       | 14.8406   | 15.493   | 16.0927   | 17.4186  | 17.2732  | 16.3086   |
| AKAP8       | 15.9137   | 19.6586  | 17.0753   | 18.4311  | 21.2128  | 16.6027   |
| MRPS6       | 62.9712   | 59.3021  | 43.2945   | 58.9984  | 46.0644  | 42.9408   |
| C15orf60    | 0         | 0.114755 | 0         | 0        | 0        | 0.161728  |
| MMP12       | 3.05474   | 1.91512  | 0.336357  | 0        | 4.81088  | 0         |
| SNORD73A    | 0         | 0        | 0         | 0        | 0        | 0         |
| MIR764      | 0         | 0        | 0         | 0        | 0        | 0         |
| LINC00312   | 1.31239   | 1.46116  | 2.53891   | 3.14925  | 2.16707  | 2.18087   |
| ZNF423      | 2.98679   | 3.01291  | 2.89835   | 2.07047  | 2.41299  | 2.07359   |
| RMND5A      | 19.5274   | 14.2849  | 19.8736   | 16.9615  | 17.4592  | 23.0462   |

|             |           |           |           |           |           |           |
|-------------|-----------|-----------|-----------|-----------|-----------|-----------|
| MIR4518     | 0         | 0         | 0         | 0         | 0         | 0         |
| ASPHD1      | 0.292145  | 0.839463  | 0.387022  | 0.41148   | 0.790793  | 0.864749  |
| PLA2G10     | 0         | 0.208538  | 0.0892762 | 0.221475  | 0         | 0.0367455 |
| LONP2       | 23.7882   | 13.0857   | 17.5339   | 12.7428   | 15.4641   | 14.5451   |
| TRIM64B     | 0         | 0.0309402 | 0         | 0.182553  | 0         | 0         |
| FMNL2       | 15.6654   | 11.0194   | 12.8492   | 12.2203   | 13.9245   | 15.2545   |
| CCDC83      | 0         | 0         | 0         | 0         | 0         | 0         |
| SLC4A1AP    | 9.32332   | 7.25284   | 8.99141   | 8.64864   | 8.6207    | 9.35891   |
| FGR         | 8.07503   | 8.47687   | 5.24142   | 4.30837   | 7.69596   | 5.85772   |
| NHP2L1      | 72.2138   | 76.0266   | 73.6299   | 87.8855   | 77.8036   | 72.8501   |
| NDUFS6      | 161.655   | 213.403   | 135.44    | 206.861   | 147.996   | 167.932   |
| PLA2G6      | 8.35612   | 11.7935   | 14.6788   | 17.0239   | 19.8991   | 18.6974   |
| PASK        | 4.51188   | 6.23892   | 4.09538   | 4.43737   | 4.8348    | 4.26406   |
| ECEL1P2     | 0         | 0         | 0         | 0         | 0         | 0         |
| SOX18       | 13.9304   | 20.582    | 13.9668   | 20.5217   | 14.3535   | 12.6933   |
| MIR27B      | 0         | 0         | 0         | 0         | 0         | 0         |
| INMT-FAM18  | 1.70E-11  | 4.47E-51  | 6.50E-26  | 2.65E-19  | 1.41E-153 | 7.89E-13  |
| IL1F10      | 1.0292    | 0.504992  | 2.34509   | 5.50194   | 1.38505   | 6.92582   |
| COBL        | 15.7557   | 6.72493   | 11.8312   | 12.7027   | 10.8154   | 11.6127   |
| PVRL2       | 30.6091   | 32.727    | 28.6397   | 40.9925   | 31.7309   | 33.4536   |
| LSM14B      | 21.7951   | 22.8358   | 24.8073   | 29.1321   | 27.1701   | 25.9714   |
| NAE1        | 29.2526   | 29.0832   | 26.3694   | 25.4099   | 26.7546   | 23.3603   |
| RNF167      | 121.229   | 114.485   | 94.0317   | 106.096   | 104.077   | 110.57    |
| UBR5        | 15.8822   | 11.2153   | 16.1259   | 11.7513   | 15.0309   | 13.4094   |
| CPEB4       | 14.7437   | 8.2187    | 12.5666   | 8.99235   | 9.04025   | 9.25615   |
| HOXA11      | 0         | 0.167292  | 0.0286474 | 0.106602  | 0.0723073 | 0.0235822 |
| MIR507      | 0         | 0         | 0         | 0         | 0         | 0         |
| ITM2C       | 20.9439   | 22.9      | 21.612    | 19.7333   | 29.1628   | 20.9852   |
| LRRC37A4    | 5.9714    | 3.33131   | 6.88333   | 4.45214   | 5.72776   | 4.80105   |
| NPNT        | 8.30224   | 4.69685   | 5.58863   | 5.57377   | 7.65273   | 8.78341   |
| LOC10050654 | 0         | 0         | 0         | 0         | 0         | 0         |
| SNORD62B    | 0         | 0         | 0         | 0         | 0         | 0         |
| LOC93622    | 16.3166   | 20.2078   | 18.0711   | 19.7922   | 21.7144   | 16.8541   |
| MS4A10      | 0         | 0         | 0         | 0         | 0         | 0         |
| CRCP        | 14.4362   | 15.0485   | 14.5108   | 15.686    | 17.4934   | 15.8167   |
| LGSN        | 0         | 0         | 0         | 0         | 0         | 0.0106107 |
| TMEM82      | 0         | 0         | 0         | 0         | 0         | 0         |
| LOC90499    | 0         | 0         | 0.0661189 | 0.0555575 | 0         | 0.0302867 |
| ZNF774      | 1.02313   | 1.10561   | 0.98966   | 1.28094   | 0.941256  | 0.885518  |
| PAM16       | 22.2909   | 31.7697   | 26.8995   | 37.0464   | 25.1188   | 23.8174   |
| PAEP        | 5.11039   | 1.25059   | 3.68923   | 4.11988   | 3.55016   | 7.41646   |
| FAM86B1     | 2.46896   | 2.69166   | 1.96431   | 2.90287   | 1.87077   | 2.14491   |
| NXF5        | 0.0659856 | 0         | 0.0333009 | 0         | 0         | 0         |

|             |           |           |           |           |           |           |
|-------------|-----------|-----------|-----------|-----------|-----------|-----------|
| PIAS1       | 7.60663   | 5.54543   | 8.99097   | 6.18182   | 7.0829    | 7.81706   |
| C5orf46     | 47.6235   | 24.9146   | 61.863    | 59.5354   | 49.3562   | 72.1729   |
| DUSP10      | 4.90374   | 4.49645   | 3.67607   | 4.45172   | 4.22691   | 3.26901   |
| C11orf20    | 0.174286  | 0.616372  | 0.263871  | 0.654608  | 0.444016  | 0.217216  |
| GPR179      | 0.0356498 | 0.0105064 | 0.0179914 | 0.0111582 | 0.0378425 | 0.0370257 |
| ACTR3C      | 4.28471   | 3.20904   | 1.90925   | 2.30867   | 1.5975    | 2.58325   |
| LOC653501   | 1.45606   | 1.35514   | 1.60285   | 0.844495  | 1.35643   | 1.12352   |
| GIN1        | 2.54603   | 2.34891   | 1.92736   | 1.16936   | 1.95648   | 2.69029   |
| FSTL4       | 0.915151  | 1.15269   | 0.862603  | 1.57111   | 1.12356   | 1.40852   |
| LOC339442   | 0         | 0.0394433 | 0.135087  | 0.251341  | 0.255724  | 0.111202  |
| ZNF287      | 1.38527   | 1.68657   | 1.92541   | 1.66326   | 2.3142    | 1.79725   |
| MIR96       | 0         | 0         | 0         | 0         | 0         | 0         |
| RELL2       | 3.56768   | 4.66175   | 3.29642   | 3.20495   | 5.1919    | 4.53351   |
| CCDC102B    | 0.630848  | 0.525231  | 0.833032  | 0.501984  | 0.588114  | 0.255936  |
| PIGW        | 9.36146   | 8.27681   | 7.42903   | 7.55878   | 5.24227   | 5.35457   |
| MIR548F3    | 0         | 0         | 0         | 0         | 0         | 0         |
| LOC254099   | 0.0656571 | 0.0580499 | 0         | 0.123302  | 0.125452  | 0.0818295 |
| TMEM30A     | 43.9633   | 30.6983   | 39.7295   | 27.734    | 35.0272   | 30.5053   |
| VWF         | 12.6808   | 13.6508   | 16.4214   | 9.85274   | 10.2837   | 7.25271   |
| LOC10050676 | 0         | 0         | 0         | 0         | 0         | 0         |
| PBXIP1      | 36.2998   | 39.8213   | 40.8286   | 37.8012   | 43.8759   | 36.8402   |
| RB1         | 10.4074   | 8.25277   | 8.35362   | 6.33114   | 6.51247   | 6.3719    |
| ZNF580      | 25.9247   | 44.9063   | 26.455    | 46.7018   | 32.4573   | 34.1777   |
| LOC10050721 | 0.160942  | 0.142295  | 0.152293  | 0.226683  | 0.128131  | 0.100292  |
| PRRC2B      | 30.5655   | 29.4485   | 34.2555   | 33.014    | 36.0992   | 33.8074   |
| CRIM1       | 32.2333   | 28.544    | 33.3844   | 27.4727   | 24.3087   | 21.7594   |
| SIK3        | 8.85833   | 7.98527   | 7.18309   | 7.97742   | 8.38257   | 7.49442   |
| LOC401442   | 0         | 0         | 0         | 0         | 0         | 0         |
| PLAA        | 6.47092   | 5.01745   | 8.05147   | 7.228     | 7.40945   | 7.41813   |
| DUOXA2      | 5.2292    | 10.3807   | 6.16508   | 8.41207   | 7.52102   | 6.5101    |
| SNED1       | 7.71203   | 6.71893   | 11.0022   | 5.55572   | 15.4352   | 9.53422   |
| ALDH4A1     | 17.3966   | 17.6983   | 15.2454   | 18.0237   | 11.895    | 17.1245   |
| LOC10050596 | 0.542693  | 0.639754  | 0.376587  | 0.636975  | 0.7777    | 0.422729  |
| SNPH        | 1.46736   | 1.65583   | 1.6662    | 2.48372   | 2.72993   | 2.37021   |
| MIR4459     | 0         | 0         | 0         | 0         | 0         | 0         |
| DEFB109P1B  | 0         | 1.0255    | 0         | 0         | 0         | 0         |
| LINC00184   | 0.0448944 | 0         | 0.135941  | 0.210776  | 0.0857805 | 0.0559526 |
| GENE        | 8.80441   | 4.24329   | 4.80763   | 4.195     | 4.68252   | 3.68726   |
| C9orf66     | 0.251935  | 0.477168  | 0.29766   | 0.338493  | 0.0915945 | 0.269052  |
| PODXL2      | 9.76339   | 10.1334   | 8.92625   | 12.1793   | 8.20102   | 9.49359   |
| KRTAP5-11   | 1.71635   | 0.202332  | 0         | 24.8191   | 0.364385  | 143.535   |
| MIR1-2      | 0         | 0         | 0         | 0         | 0         | 0         |
| DMPK        | 18.4815   | 32.6473   | 24.6012   | 31.7037   | 31.1613   | 27.3526   |

|             |           |           |           |           |           |          |
|-------------|-----------|-----------|-----------|-----------|-----------|----------|
| CDK11A      | 22.3219   | 26.9517   | 22.9455   | 28.8988   | 30.0629   | 24.5406  |
| FCN3        | 1.65666   | 2.29327   | 0.556551  | 0.902047  | 1.29864   | 1.20055  |
| GLE1        | 16.9137   | 18.2875   | 15.7024   | 17.6504   | 18.9884   | 17.4499  |
| OSGIN1      | 4.38608   | 4.96529   | 2.43775   | 3.72532   | 3.16815   | 3.39967  |
| SNORD78     | 0         | 0         | 0         | 0         | 0         | 0        |
| LOC1006529: | 1.19781   | 0.994921  | 1.02074   | 0.735753  | 1.35613   | 0.927385 |
| LOC200772   | 0.134422  | 0.237694  | 0.0678386 | 0.0420733 | 0.114152  | 0.186924 |
| LOC1002407: | 0.267294  | 0         | 0.101172  | 0.250985  | 0.425603  | 0.24985  |
| G3BP1       | 34.8355   | 24.9562   | 27.7946   | 24.3548   | 21.7695   | 23.584   |
| RTN2        | 9.48238   | 9.07202   | 6.92399   | 12.5834   | 9.69719   | 8.64069  |
| MIR3166     | 0         | 0         | 0         | 0         | 0         | 0        |
| EFHC2       | 1.24559   | 1.4236    | 1.65586   | 1.08401   | 2.16713   | 1.41988  |
| TEX12       | 0.0992816 | 0.438892  | 0.751567  | 0.279671  | 0.63233   | 0.371208 |
| NDST1       | 28.2075   | 22.3295   | 30.345    | 24.5905   | 28.7493   | 27.312   |
| FPGT        | 7.23421   | 6.46083   | 6.34325   | 4.48747   | 6.45533   | 6.75998  |
| CPXCR1      | 0         | 0         | 0         | 0         | 0         | 0        |
| LOC646903   | 0.210988  | 0.233177  | 0.239578  | 0.099057  | 0.235164  | 0.295827 |
| ZNF219      | 25.5307   | 46.711    | 37.4365   | 46.0014   | 40.9969   | 35.8806  |
| HDGFRP3     | 8.60622   | 7.14511   | 7.30946   | 5.86373   | 7.15249   | 5.49384  |
| TLR4        | 2.9756    | 2.15128   | 2.00097   | 0.756487  | 1.75016   | 1.15628  |
| LOC1006528: | 0.124544  | 0.0917615 | 0.299133  | 0         | 0.467536  | 0.283389 |
| LOC339975   | 0         | 0         | 0         | 0         | 0.0958156 | 0.020746 |
| SEC1        | 0.153344  | 0.270431  | 0.216526  | 0.232634  | 0.193734  | 0.214624 |
| HMG3        | 125.336   | 133.165   | 106.566   | 108.213   | 112.464   | 90.6251  |
| SPDYE7P     | 0.164057  | 0.149996  | 0.164188  | 0.182044  | 0.158815  | 0.127938 |
| F13A1       | 22.5357   | 18.8736   | 22.593    | 8.71599   | 31.1386   | 13.1134  |
| SPINT4      | 0         | 0         | 0         | 0         | 0.354671  | 0.347016 |
| WDR75       | 17.3342   | 19.207    | 17.1553   | 17.0516   | 22.0327   | 17.8396  |
| DEM1        | 4.28569   | 7.25232   | 3.62802   | 4.7598    | 4.40254   | 3.99163  |
| AKAP6       | 0.644073  | 0.537367  | 0.549371  | 0.57922   | 0.514211  | 0.486153 |
| GRIP1       | 2.55281   | 2.32854   | 3.66712   | 2.36469   | 3.75396   | 2.71927  |
| AIRE        | 0.281478  | 0.564612  | 0.349464  | 0.501763  | 0.391973  | 0.372937 |
| ARHGAP23    | 25.8931   | 24.2262   | 28.0333   | 28.0431   | 31.2308   | 27.7445  |
| UNQ9370     | 0         | 0         | 0.0790014 | 0.0489964 | 0.0997016 | 0        |
| MIR3685     | 0         | 0         | 0         | 0         | 0         | 0        |
| S100B       | 63.8942   | 81.5754   | 93.4225   | 50.08     | 35.5013   | 25.5514  |
| SSX4B       | 0         | 0         | 0         | 0         | 0         | 0        |
| ARFIP1      | 15.0642   | 10.7284   | 15.5597   | 12.05     | 14.7172   | 13.2964  |
| ZNF493      | 9.83762   | 9.23305   | 11.4913   | 9.5424    | 10.8222   | 10.422   |
| NPFFR1      | 0         | 0         | 0.0637098 | 0.0790251 | 0.0536021 | 0        |
| LOC10013330 | 0         | 0         | 0.236424  | 0         | 0.198915  | 0        |
| DIAPH2      | 3.87127   | 2.35941   | 3.98623   | 2.8247    | 2.98841   | 3.11937  |
| RPS6KA2     | 8.20763   | 7.19723   | 8.73065   | 6.91357   | 9.02793   | 7.41631  |



|             |          |           |           |          |           |           |
|-------------|----------|-----------|-----------|----------|-----------|-----------|
| LOC10050689 | 0        | 0         | 0         | 0        | 0         | 0         |
| RGS13       | 4.09168  | 3.44985   | 5.87311   | 1.79063  | 6.21251   | 3.67639   |
| PSME2       | 23.8782  | 29.4765   | 21.1454   | 19.4599  | 25.8251   | 19.2783   |
| ZNF567      | 2.79694  | 1.81344   | 3.19006   | 2.45119  | 3.84779   | 3.04432   |
| LOC613038   | 0.952519 | 2.2962    | 0.693245  | 1.13453  | 0.746302  | 0.524226  |
| LOC10050582 | 2679.76  | 2962.45   | 1791.92   | 2263.58  | 2036.88   | 2075.21   |
| LOC10065289 | 23.0936  | 21.0548   | 22.5183   | 25.3333  | 24.4533   | 19.6217   |
| FLJ36777    | 0.43133  | 0.338982  | 0.362799  | 0.540015 | 0.30524   | 0.537573  |
| AREGB       | 5.44507  | 3.31054   | 4.6376    | 4.15488  | 4.47979   | 4.66557   |
| NCF4        | 9.82013  | 11.0926   | 5.88593   | 3.75552  | 11.7035   | 7.18859   |
| EIF1AD      | 12.9745  | 14.3736   | 14.5078   | 13.0293  | 16.1887   | 15.2706   |
| TMEM126B    | 35.9168  | 33.3387   | 30.5059   | 29.6888  | 35.3473   | 29.0526   |
| SNORD113-2  | 0        | 0         | 0         | 0        | 0         | 0         |
| F8A2        | 3.8229   | 5.28016   | 4.5984    | 4.13313  | 4.0858    | 3.74245   |
| HIST1H2BD   | 13.3942  | 5.44757   | 5.74456   | 8.74844  | 8.14573   | 14.398    |
| SNORD116-10 | 0        | 0         | 0         | 0        | 0         | 0         |
| SNORA17     | 84.4571  | 103.291   | 48.6927   | 179.933  | 310.762   | 192.176   |
| PTPN23      | 14.9702  | 17.1304   | 17.1302   | 18.4334  | 19.5349   | 19.1474   |
| CCDC151     | 0.236921 | 0.293258  | 0.46631   | 0.711887 | 0.241434  | 0.295278  |
| COPE        | 108.229  | 131.225   | 103.283   | 136.041  | 106.325   | 122.694   |
| FLJ45079    | 0        | 0.0726922 | 0         | 0        | 0         | 0         |
| PHLDB3      | 10.7921  | 12.9494   | 10.9031   | 15.0861  | 16.5637   | 17.0404   |
| IFITM1      | 170.49   | 240.637   | 122.203   | 83.2914  | 143.17    | 85.2607   |
| NEK4        | 5.37301  | 4.37471   | 4.88547   | 4.05883  | 5.03425   | 4.46507   |
| LOC10050629 | 8.39251  | 7.14724   | 6.6202    | 7.33522  | 8.42845   | 8.58086   |
| BEX5        | 4.73777  | 3.38021   | 2.77883   | 3.3038   | 2.72621   | 2.95238   |
| MYH15       | 0.121075 | 0.118941  | 0.13239   | 0.138952 | 0.0599771 | 0.167664  |
| TIMM17B     | 28.7343  | 39.8518   | 26.5996   | 34.8951  | 29.2406   | 30.3744   |
| POLDIP2     | 53.5784  | 52.7031   | 50.3693   | 55.6756  | 44.6375   | 49.9631   |
| TCEAL2      | 4.47619  | 4.69385   | 1.73365   | 3.6166   | 5.10512   | 4.15162   |
| CTAGE4      | 4.51195  | 4.26077   | 4.94585   | 4.69033  | 11.0415   | 11.4208   |
| CRIP3       | 0.248909 | 1.98063   | 0.565276  | 1.05175  | 1.81967   | 1.78376   |
| SNORD80     | 0        | 0         | 0         | 0        | 0         | 0         |
| SLC22A17    | 13.0569  | 18.7596   | 13.6246   | 20.6395  | 20.9717   | 16.3041   |
| MGC27345    | 5.57475  | 6.38421   | 6.61263   | 8.67625  | 8.17754   | 5.94948   |
| CCDC63      | 0.053326 | 0.0471475 | 0.0403681 | 0.100145 | 0         | 0.0332305 |
| LOC10050757 | 0        | 0         | 0         | 0        | 0.0441084 | 0         |
| IL3         | 0        | 0         | 0         | 0        | 0         | 0         |
| TRAF3IP2    | 22.3364  | 29.4944   | 24.9226   | 32.7495  | 34.4123   | 27.2      |
| TXNRD2      | 11.4519  | 13.02     | 9.47346   | 9.76175  | 10.3925   | 9.76797   |
| PILRA       | 4.10823  | 3.80238   | 3.61532   | 4.17467  | 5.33775   | 3.14536   |
| MIR1179     | 0        | 0         | 0         | 0        | 0         | 0         |
| ZDHHC5      | 34.5929  | 29.2143   | 33.3407   | 33.1801  | 29.1602   | 32.0111   |

|             |           |           |           |           |           |           |
|-------------|-----------|-----------|-----------|-----------|-----------|-----------|
| CETN4P      | 0         | 0.787393  | 0.674173  | 0.418119  | 0.425411  | 0         |
| LOC10028716 | 0         | 0         | 0         | 0         | 0         | 0         |
| UNC45A      | 28.5524   | 34.2605   | 29.4672   | 34.8288   | 33.2361   | 34.3242   |
| SNORD114-3l | 0         | 0         | 0         | 0         | 0         | 0         |
| SAP18       | 56.6111   | 52.9455   | 49.8858   | 52.0356   | 44.253    | 43.5182   |
| PPP4R2      | 10.8742   | 5.36299   | 9.18367   | 4.86217   | 8.81035   | 5.65481   |
| C7orf73     | 20.408    | 21.3663   | 25.8502   | 29.1425   | 24.3229   | 25.334    |
| ACAD9       | 61.138    | 56.2105   | 58.5716   | 56.063    | 60.6171   | 65.0928   |
| FMO9P       | 0         | 0         | 0.0607722 | 0         | 0.102261  | 0.0500269 |
| UHRF1BP1L   | 7.24246   | 4.63825   | 5.65305   | 4.26222   | 3.77964   | 4.08468   |
| MAS1        | 0         | 0         | 0         | 0         | 0         | 0         |
| RRN3P1      | 4.26836   | 6.40664   | 4.86773   | 4.08103   | 5.90092   | 5.40243   |
| LOC10050957 | 0         | 0         | 0         | 0         | 0         | 0         |
| LIFR        | 11.6895   | 8.86472   | 8.60158   | 6.94034   | 7.01077   | 4.57096   |
| LONRF1      | 18.8969   | 26.3929   | 32.3281   | 26.8473   | 26.0945   | 23.3126   |
| RPIA        | 12.7638   | 13.1489   | 12.2935   | 11.9315   | 12.8835   | 13.4931   |
| MIR302A     | 0         | 0         | 0         | 0         | 0         | 0         |
| CXorf59     | 0.0529892 | 0         | 0.0401131 | 0         | 0         | 0         |
| LOC10050742 | 2.17335   | 1.5823    | 1.98895   | 2.7966    | 2.95059   | 1.81002   |
| LRRC4       | 0.449179  | 0.420497  | 0.420038  | 0.396962  | 0.521684  | 0.905589  |
| FNDC4       | 20.6126   | 26.5522   | 17.1226   | 15.23     | 9.68475   | 11.0945   |
| CDC42EP2    | 7.26126   | 9.46827   | 8.34408   | 7.40683   | 5.9556    | 4.91555   |
| C14orf132   | 4.48752   | 5.2789    | 8.56947   | 5.74922   | 6.70126   | 6.41442   |
| NHEG1       | 0.16112   | 0.142452  | 0.304922  | 0         | 0.205237  | 0         |
| STON1-GTF2I | 0.0744787 | 0         | 4.63E-62  | 0.0568359 | 4.45E-115 | 9.16E-54  |
| LOC285095   | 1.59805   | 6.59352   | 1.61298   | 0.750273  | 3.05343   | 1.32779   |
| SSNA1       | 60.0825   | 87.8591   | 63.7985   | 93.6299   | 71.5987   | 76.9792   |
| AUTS2       | 14.3633   | 10.0523   | 16.9111   | 14.3857   | 13.3019   | 12.0601   |
| C3orf27     | 0         | 0         | 0         | 0         | 0         | 0         |
| CELSR3      | 0.36134   | 0.604223  | 0.434091  | 0.47206   | 0.585355  | 0.259437  |
| GPR77       | 0.94648   | 0.456446  | 0.781626  | 0.807936  | 0.383612  | 0.697044  |
| GINS2       | 6.59499   | 9.88714   | 4.12419   | 8.34654   | 5.05264   | 5.59875   |
| C9orf25     | 12.8012   | 16.0674   | 14.7345   | 13.9737   | 16.8906   | 15.3659   |
| IP6K3       | 0.340271  | 0.300846  | 0.0281731 | 0.0349458 | 0.240001  | 0.166983  |
| FAM159B     | 0         | 0         | 0         | 0         | 0.0781701 | 0         |
| MIR144      | 0         | 0         | 0         | 0         | 0         | 0         |
| ACTR6       | 28.1545   | 21.3969   | 23.127    | 16.1432   | 18.1988   | 17.3581   |
| ACPT        | 0.0814849 | 0         | 0.493476  | 0.382565  | 0.57088   | 0.355445  |
| MIR211      | 0         | 0         | 0         | 0         | 0         | 0         |
| SNORA71C    | 0         | 0         | 0         | 0         | 23.5674   | 23.0587   |
| FRMPD4      | 0.0447388 | 0.0988881 | 0.0169338 | 0.0210045 | 0.035618  | 0.0139397 |
| LRRC26      | 25.7252   | 13.6923   | 12.0032   | 26.1845   | 10.0354   | 12.1645   |
| AVPI1       | 28.0567   | 31.8736   | 33.3023   | 50.9971   | 35.0402   | 35.1629   |

|             |           |           |           |          |           |           |
|-------------|-----------|-----------|-----------|----------|-----------|-----------|
| WDR43       | 14.1796   | 12.9091   | 14.6238   | 12.2071  | 13.7344   | 9.83349   |
| C9orf114    | 17.1968   | 19.4584   | 15.929    | 19.3525  | 18.7538   | 17.7622   |
| ICAM1       | 9.25387   | 9.7965    | 6.54436   | 3.28705  | 10.4887   | 4.5526    |
| MIR4292     | 0         | 0         | 0         | 0        | 0         | 0         |
| NFE2L1      | 62.2922   | 66.6022   | 69.219    | 63.0226  | 70.3927   | 64.3604   |
| SEC62       | 19.4717   | 15.8624   | 17.577    | 14.309   | 15.3087   | 12.916    |
| FAM208B     | 8.66679   | 5.84882   | 7.74009   | 4.74887  | 6.6868    | 5.84514   |
| LOC728558   | 0.0686908 | 0.0205535 | 0         | 0        | 0.0891387 | 0.0599431 |
| LOC153910   | 0         | 0         | 0.0336336 | 0        | 0         | 0         |
| CRYGA       | 0         | 0         | 0         | 0        | 0         | 0         |
| SNORA7A     | 4.82E-30  | 0         | 4.06E-113 | 82.4393  | 147.291   | 83.0039   |
| ITFG1       | 26.8685   | 17.049    | 23.1069   | 20.8526  | 18.8007   | 18.4518   |
| SNORD1A     | 0         | 0         | 0         | 0        | 0         | 0         |
| LOC10050568 | 23.0753   | 16.9032   | 28.6931   | 17.0523  | 28.359    | 21.3617   |
| LOC10012921 | 0         | 0         | 0         | 0        | 0         | 0         |
| TMEM51      | 8.07078   | 10.3294   | 5.78183   | 8.34428  | 10.5474   | 9.44509   |
| C1orf63     | 99.5503   | 111.439   | 87.9853   | 72.7575  | 112.238   | 112.804   |
| LSM3        | 46.6708   | 60.6214   | 51.9046   | 62.218   | 46.6057   | 46.4374   |
| MOB1A       | 23.8467   | 17.2037   | 27.8303   | 16.716   | 19.1433   | 19.9684   |
| LINGO2      | 0.0358022 | 0.031654  | 0         | 0.100853 | 0.114013  | 0.0446208 |
| IDH1        | 134.286   | 77.4792   | 93.9243   | 72.7375  | 77.9112   | 85.5032   |
| CYB5A       | 468.893   | 451.032   | 351.15    | 335.216  | 246.134   | 270.335   |
| C15orf42    | 0.500315  | 0.631924  | 0.616807  | 0.684548 | 0.491636  | 0.730444  |
| ERGIC2      | 22.1476   | 16.3439   | 18.0624   | 10.2594  | 15.7985   | 14.2062   |
| SNORD102    | 0         | 0         | 0         | 0        | 0         | 0         |
| C4orf37     | 0         | 0.0566788 | 0.0485289 | 0        | 0.163319  | 0.0399484 |
| LOC10050581 | 16.443    | 15.1422   | 16.1153   | 15.7476  | 16.3259   | 15.5468   |
| DHX57       | 4.95837   | 4.68439   | 4.93405   | 3.97998  | 5.15724   | 4.90887   |
| MYL7        | 0.482545  | 0         | 0         | 0.226551 | 0.153668  | 0.150351  |
| OAS3        | 15.7433   | 10.802    | 4.47733   | 2.24308  | 6.4433    | 3.90987   |
| LOC10028863 | 1.71419   | 1.89326   | 1.79112   | 1.6443   | 1.68734   | 1.82737   |
| MAP1LC3B2   | 44.6848   | 36.865    | 34.7317   | 28.6272  | 24.1768   | 47.2166   |
| ST8SIA1     | 1.14627   | 0.824507  | 0.830962  | 0.574649 | 0.853803  | 0.502435  |
| LOC10050766 | 0.347916  | 0.153802  | 0.658435  | 0.816718 | 0.443179  | 0.542016  |
| IQCA1       | 0.341376  | 0.219507  | 0.211437  | 0.466249 | 0.256956  | 0.212731  |
| INPP5E      | 9.27027   | 15.6449   | 11.012    | 14.0424  | 16.8588   | 13.1523   |
| AP2B1       | 24.4844   | 20.6696   | 22.3406   | 19.8274  | 21.7001   | 16.448    |
| FPGT-TNNI3K | 0.872322  | 0.73704   | 1.30132   | 0.57591  | 1.03389   | 2.82E-05  |
| HOXB7       | 0.240212  | 0         | 0.424298  | 0.827037 | 0.101995  | 0.199587  |
| PLXNB2      | 39.5925   | 48.3488   | 46.3234   | 51.4896  | 63.7459   | 60.97     |
| POLG2       | 5.48536   | 7.33386   | 5.82356   | 6.2813   | 7.29987   | 5.79434   |
| APOC1       | 542.015   | 740.505   | 809.563   | 1192.5   | 239.415   | 347.482   |
| POU3F4      | 0.0713975 | 0         | 0         | 0        | 0         | 0         |

|             |           |           |           |           |           |           |
|-------------|-----------|-----------|-----------|-----------|-----------|-----------|
| GPR172A     | 23.0234   | 31.9539   | 22.9412   | 26.9478   | 20.6315   | 24.4236   |
| LOC10065295 | 0         | 0         | 0         | 0         | 0         | 0         |
| MYCL1       | 6.87992   | 7.17482   | 14.6069   | 13.4414   | 17.1652   | 14.8072   |
| IL2RB       | 2.57772   | 2.34295   | 5.16103   | 3.61934   | 6.82788   | 4.09837   |
| GDF3        | 0         | 0         | 0.0692005 | 0         | 0         | 0         |
| LOC10050633 | 0.113611  | 0.351568  | 0.258013  | 0.320038  | 0.289439  | 0.353989  |
| NPRL3       | 15.6104   | 19.7872   | 13.5049   | 17.5735   | 19.2844   | 19.6027   |
| LOC10013017 | 0.783722  | 0.808403  | 0         | 0.490601  | 0.249578  | 0.325588  |
| CYP2C18     | 1.32788   | 0.910997  | 2.09869   | 1.7799    | 1.76477   | 1.75322   |
| PHF19       | 6.92941   | 10.477    | 7.97945   | 10.5359   | 10.7167   | 8.08579   |
| GRM4        | 0.0503642 | 0.0222644 | 0.095315  | 0.0945824 | 0.0641545 | 0.172617  |
| MNAT1       | 13.3471   | 10.8232   | 12.9136   | 11.4205   | 11.4684   | 10.9749   |
| OR2B2       | 0         | 0         | 0         | 0         | 0         | 0         |
| ACVR2A      | 11.1929   | 9.09867   | 12.0975   | 12.7416   | 13.6598   | 11.4229   |
| LOC441617   | 0.24984   | 0.473341  | 0.324223  | 0.268109  | 0.409177  | 0.177931  |
| ARIH2       | 26.9822   | 28.1072   | 24.6839   | 26.2756   | 28.1334   | 27.2067   |
| LOC257358   | 0.0927675 | 0.369086  | 0.280902  | 0.0435536 | 0         | 0.0289044 |
| RGL4        | 7.74748   | 8.10415   | 8.03977   | 6.67497   | 7.88942   | 6.41321   |
| C2orf68     | 13.396    | 15.9329   | 14.6766   | 16.3864   | 16.2804   | 14.6229   |
| IBA57       | 2.34014   | 2.51463   | 2.46193   | 2.63682   | 3.08026   | 2.49776   |
| CNKS2       | 0.74089   | 0.619472  | 0.923287  | 0.445481  | 0.608647  | 0.415223  |
| ZDHHC15     | 0.823583  | 0.35056   | 0.715066  | 0.999103  | 0.728629  | 0.582275  |
| KDSR        | 25.7942   | 23.2968   | 24.4605   | 22.9163   | 20.6978   | 19.3279   |
| LAT2        | 4.12754   | 5.43048   | 5.23933   | 4.07152   | 6.42544   | 4.02109   |
| XIRP2       | 0.0344391 | 0         | 0         | 0         | 0         | 0         |
| LIPC        | 1.06261   | 1.46796   | 0.703852  | 0.436527  | 0.634484  | 0.331087  |
| PFDN6       | 66.6069   | 73.0553   | 51.1891   | 61.7841   | 54.665    | 59.9297   |
| RFT1        | 3.90991   | 3.3066    | 4.26101   | 4.22116   | 3.89778   | 3.31928   |
| DHRS12      | 9.53839   | 15.0482   | 12.0141   | 12.1079   | 12.8212   | 9.87692   |
| RIMBP3C     | 0.0717583 | 0.0397922 | 0.0445001 | 0.0103496 | 0.112437  | 0.100487  |
| LOC653075   | 3.3076    | 2.15975   | 2.14601   | 1.79807   | 2.3263    | 1.5756    |
| SLC7A11     | 0.430412  | 0.26811   | 0.459239  | 0.514373  | 0.292823  | 0.835122  |
| MIR548P     | 0         | 0         | 0         | 0         | 0         | 0         |
| MIR4758     | 0         | 0         | 0         | 0         | 0         | 0         |
| NXNL2       | 0.222097  | 0.13091   | 0.174349  | 0.146746  | 0.197215  | 0.25704   |
| OSBPL7      | 2.49369   | 4.74142   | 2.63877   | 2.99616   | 4.93551   | 3.99351   |
| FZD1        | 35.033    | 14.2638   | 22.9222   | 26.5259   | 22.2843   | 22.9713   |
| ANKS1B      | 0.669301  | 1.29937   | 0.988686  | 1.21302   | 1.5939    | 1.20237   |
| SACS-AS1    | 0         | 0         | 0.172956  | 0.12872   | 0.0873097 | 0.05695   |
| CRYZL1      | 13.6128   | 11.6666   | 14.3777   | 13.0771   | 16.119    | 11.0164   |
| FEZ1        | 6.87338   | 9.39745   | 8.13718   | 6.58905   | 6.39439   | 5.11023   |
| PGA5        | 0         | 0.137878  | 0.848062  | 0.246086  | 0.0882875 | 0.0971794 |
| BET3L       | 0         | 0         | 0.0777498 | 0         | 0         | 0.0640027 |

|             |           |          |           |          |           |           |
|-------------|-----------|----------|-----------|----------|-----------|-----------|
| CXXC1       | 22.0301   | 33.8623  | 26.7854   | 32.6419  | 37.7808   | 31.7544   |
| RRAS2       | 9.39692   | 11.3917  | 8.56608   | 9.96753  | 7.04539   | 8.0088    |
| CNIH2       | 1.73726   | 2.85253  | 1.56561   | 3.88395  | 1.68605   | 2.42293   |
| MIR129-2    | 0         | 0        | 0         | 0        | 0         | 0         |
| ZNF770      | 33.6428   | 22.9478  | 27.6702   | 21.2421  | 26.1552   | 27.942    |
| TBC1D5      | 10.6553   | 8.4502   | 12.37     | 10.676   | 10.3054   | 8.73789   |
| ACBD4       | 10.4411   | 13.3464  | 11.4089   | 12.5193  | 16.124    | 13.8887   |
| KRT16P2     | 2.11402   | 2.24898  | 1.66887   | 2.51671  | 0.72201   | 9.53852   |
| MAP3K11     | 24.7838   | 36.6824  | 24.8143   | 31.089   | 31.5699   | 29.844    |
| LOC389033   | 0.494679  | 0.437364 | 0.74895   | 1.85798  | 0.630128  | 1.23305   |
| GOLGA2P3Y   | 0         | 0.192544 | 0.0412144 | 0        | 0.0693513 | 0.152672  |
| LOC728855   | 5.55034   | 6.9578   | 6.03419   | 7.17139  | 5.74955   | 4.6904    |
| TRIM6       | 1.73168   | 1.15658  | 1.95604   | 1.26557  | 1.93878   | 1.68883   |
| B3GNT4      | 0.644073  | 1.32871  | 1.13766   | 1.74713  | 1.95991   | 2.18518   |
| LOC283683   | 0.224985  | 0.929558 | 0.624488  | 0.281677 | 0.717325  | 0.74774   |
| TCN1        | 6.48186   | 2.95591  | 0.309903  | 0.768804 | 0.0434561 | 0.127554  |
| FUT8        | 4.39644   | 3.30773  | 3.62339   | 2.83481  | 3.3104    | 2.93654   |
| L1TD1       | 0.304786  | 0.100216 | 0.193065  | 0.170294 | 0.146678  | 0.128189  |
| LOC10012889 | 1.34888   | 1.55556  | 1.24309   | 0.991233 | 1.79292   | 1.53494   |
| RGMA        | 11.7795   | 14.2025  | 13.8759   | 18.6174  | 18.488    | 22.8958   |
| PPAT        | 3.5711    | 3.67187  | 3.58443   | 3.89965  | 3.4875    | 3.56057   |
| CCDC141     | 0.0724775 | 0.100697 | 0.0862178 | 0        | 0.0791337 | 0.0387128 |
| MIR4429     | 0         | 0        | 0         | 0        | 0         | 0         |
| SMR3B       | 0         | 0        | 0         | 0        | 0         | 0         |
| ADNP        | 25.3985   | 19.7764  | 23.9123   | 23.5076  | 25.7217   | 23.5043   |
| SLC22A6     | 0         | 0        | 0         | 0        | 0         | 0         |
| CCDC88C     | 4.41974   | 4.23051  | 3.82237   | 3.28695  | 4.95625   | 3.17007   |
| C7orf29     | 3.6794    | 3.8362   | 3.73129   | 4.79123  | 4.2226    | 3.4609    |
| IQSEC2      | 9.46554   | 13.7092  | 11.0846   | 15.7357  | 13.4592   | 10.3525   |
| WDR13       | 48.5364   | 68.8734  | 47.6682   | 63.053   | 60.9847   | 61.2373   |
| GATSL3      | 7.67097   | 10.3762  | 9.52938   | 11.9433  | 9.52082   | 12.4204   |
| ORAI3       | 8.13621   | 12.2373  | 9.87589   | 12.8647  | 13.9378   | 10.1111   |
| CYP4F2      | 11.398    | 8.48023  | 14.0007   | 10.864   | 3.56128   | 4.63691   |
| SYNM        | 29.2892   | 18.6986  | 20.4735   | 29.1219  | 25.8479   | 15.5691   |
| ZNF806      | 0         | 0        | 0         | 0        | 0         | 0         |
| AS3MT       | 6.07916   | 8.34853  | 7.89594   | 11.5768  | 5.06795   | 3.83877   |
| LOC729570   | 4.74822   | 6.31953  | 4.97998   | 5.11412  | 8.29438   | 6.83458   |
| LOC1002869  | 0.923987  | 1.28375  | 0.759417  | 0.570143 | 2.06871   | 1.59576   |
| MIR4485     | 0         | 0        | 0         | 0        | 0         | 0         |
| LOC128322   | 0         | 0.489427 | 0         | 2.59894  | 1.0577    | 0         |
| ANKRD60     | 0         | 0        | 0         | 0        | 0         | 0         |
| HERC2P3     | 3.63645   | 2.22495  | 6.19876   | 3.20388  | 8.45586   | 8.32008   |
| OR4A47      | 0         | 0        | 0         | 0        | 0         | 0         |

|             |           |           |           |           |           |           |
|-------------|-----------|-----------|-----------|-----------|-----------|-----------|
| HSPA7       | 10.2062   | 9.48911   | 7.1436    | 4.8298    | 11.2466   | 6.30957   |
| FGA         | 0         | 0.0408863 | 0         | 0         | 0         | 0         |
| ZNF710      | 8.58878   | 7.00803   | 7.63831   | 8.14766   | 10.7999   | 10.4704   |
| CITED4      | 34.8039   | 42.2917   | 33.8744   | 83.7936   | 38.3278   | 47.8639   |
| IRS4        | 0.0503367 | 0         | 0.0381052 | 0.0472654 | 0.112209  | 0.0470516 |
| EIF3M       | 116.076   | 129.066   | 117.657   | 129.474   | 107.024   | 106.582   |
| MIR640      | 0         | 0         | 0         | 0         | 0         | 0         |
| SIRT6       | 9.86799   | 16.5878   | 9.92722   | 15.3614   | 15.2571   | 15.3727   |
| GRTP1       | 14.638    | 18.2149   | 17.6478   | 17.5993   | 18.4489   | 18.292    |
| ASH1L       | 9.63869   | 6.76721   | 11.5264   | 7.00784   | 8.9844    | 7.89849   |
| APBB2       | 8.71146   | 9.45866   | 9.85082   | 8.30444   | 9.08823   | 5.77425   |
| CHCHD4      | 15.1358   | 13.8651   | 10.8461   | 11.9144   | 9.92239   | 9.22749   |
| OPN3        | 5.98477   | 4.74742   | 4.36183   | 4.92372   | 4.12842   | 4.7705    |
| FCHSD2      | 6.64768   | 7.46132   | 7.98964   | 5.49221   | 8.028     | 5.25889   |
| SKOR2       | 0         | 0         | 0         | 0         | 0         | 0         |
| LOC10050553 | 0.221967  | 0.490622  | 0.16803   | 0.416846  | 0.212058  | 0.20748   |
| HTR1B       | 0         | 0.0851226 | 0         | 0.0904032 | 0.0613198 | 0         |
| ARHGAP24    | 4.14748   | 3.95371   | 4.06962   | 4.35303   | 4.13248   | 4.30306   |
| GPC4        | 9.46663   | 6.5746    | 4.3916    | 6.58629   | 3.99717   | 4.73251   |
| KHDC1       | 0.401445  | 1.41973   | 0.37987   | 1.31933   | 0.511365  | 0.437786  |
| SMPX        | 0         | 0.243012  | 0         | 0.129043  | 0.175058  | 0         |
| CLEC14A     | 12.4306   | 13.668    | 10.6419   | 10.5262   | 9.93241   | 8.64762   |
| DEPDC1B     | 2.14784   | 1.7113    | 1.03838   | 1.13675   | 1.13015   | 1.70833   |
| WDR26       | 35.0856   | 28.3071   | 38.9241   | 35.7743   | 39.395    | 39.4785   |
| PLOD1       | 23.6229   | 20.77     | 22.9672   | 22.5507   | 23.7056   | 23.0714   |
| PIK3R4      | 7.44052   | 6.20639   | 8.55737   | 5.47787   | 6.1886    | 6.36492   |
| SEMA4F      | 3.02407   | 3.15617   | 2.2376    | 2.19906   | 2.34602   | 2.2954    |
| PFKFB1      | 4.49706   | 3.49245   | 4.5544    | 2.39665   | 2.94162   | 1.59054   |
| SLC22A4     | 3.51589   | 3.10138   | 2.2745    | 2.12874   | 3.3547    | 3.96364   |
| CHRD12      | 0.37833   | 0.278746  | 0.429597  | 0.473661  | 0.401601  | 1.29668   |
| PCDHB1      | 0.0397846 | 0         | 0         | 0         | 0         | 0.0495841 |
| NIN         | 7.52414   | 6.09736   | 8.1421    | 6.01703   | 9.34375   | 7.55629   |
| TIPARP      | 10.3961   | 8.03907   | 19.2605   | 11.0599   | 11.4129   | 10.3031   |
| OR52H1      | 0         | 0         | 0         | 0         | 0         | 0         |
| PRPF3       | 24.5972   | 28.0126   | 24.9788   | 24.4066   | 27.8382   | 24.7395   |
| PRICKLE2    | 5.93715   | 5.46435   | 6.32192   | 5.94625   | 5.77508   | 5.68767   |
| LOC10030374 | 0.166428  | 0         | 0         | 0         | 0.105999  | 0.207422  |
| LOC10050562 | 2.75898   | 5.12256   | 3.3417    | 4.66315   | 5.97451   | 6.18941   |
| MMP23B      | 4.94971   | 9.07013   | 6.94849   | 2.78905   | 7.81391   | 6.33661   |
| ADCY5       | 5.95844   | 5.96607   | 6.54606   | 3.74205   | 4.57339   | 3.11581   |
| FAM132A     | 20.7818   | 46.5806   | 21.7696   | 47.0794   | 43.381    | 38.2911   |
| C7orf65     | 0         | 0.0302571 | 0.0518128 | 0.0642682 | 0.0871852 | 0.0213258 |
| RSPO4       | 3.33805   | 3.06848   | 4.27526   | 3.48745   | 7.91643   | 5.36538   |

|             |           |           |           |           |           |           |
|-------------|-----------|-----------|-----------|-----------|-----------|-----------|
| BBC3        | 6.70886   | 10.6155   | 6.41926   | 10.0679   | 11.3137   | 9.77133   |
| CDC23       | 15.2205   | 13.6512   | 14.0877   | 13.0836   | 15.7902   | 12.3791   |
| LOC728024   | 6.92941   | 3.89307   | 5.79186   | 4.87982   | 5.83847   | 4.36309   |
| SNORA69     | 0         | 92.7154   | 0         | 0         | 0         | 0         |
| PTGFR       | 6.10111   | 2.94933   | 6.66592   | 2.66079   | 5.44845   | 3.72155   |
| ETV3        | 5.91838   | 3.51459   | 7.48845   | 3.18279   | 5.56601   | 5.33675   |
| MIR422A     | 0         | 0         | 0         | 0         | 0         | 0         |
| CEBPG       | 23.6891   | 23.4929   | 25.4708   | 20.6443   | 24.3339   | 21.9144   |
| SNORD21     | 0         | 0         | 0         | 0         | 0         | 0         |
| NDUFAF3     | 43.3172   | 45.6301   | 37.5651   | 46.4327   | 36.0676   | 34.5878   |
| NRXN2       | 1.21122   | 1.30947   | 1.25303   | 1.46695   | 1.26593   | 1.14338   |
| TAS2R41     | 0         | 0         | 0         | 0         | 0         | 0         |
| NCLN        | 23.3421   | 27.4781   | 19.7349   | 25.0947   | 21.3368   | 23.0445   |
| MIR3660     | 0         | 0         | 0         | 0         | 0         | 0         |
| PSPC1       | 17.7418   | 15.434    | 16.931    | 15.4935   | 17.1105   | 14.245    |
| LOC10050576 | 1.42398   | 0.489607  | 0.898298  | 0.891394  | 1.36041   | 0.591574  |
| SNORD3C     | 1.29211   | 11.424    | 6.26006   | 12.1327   | 6.95394   | 1.20778   |
| NBPF1       | 7.1936    | 5.69298   | 6.36364   | 3.51841   | 5.24187   | 5.05712   |
| FIGLA       | 0         | 0.160773  | 0.412966  | 0.51224   | 0.231632  | 0.339949  |
| KIAA0664    | 41.1339   | 46.0097   | 39.6588   | 48.7601   | 40.641    | 37.973    |
| TBC1D13     | 15.0589   | 17.2549   | 16.1146   | 16.5283   | 16.0065   | 15.1275   |
| PHF2        | 14.1982   | 13.2047   | 15.6098   | 13.2475   | 14.6175   | 13.406    |
| MTRNR2L6    | 0         | 0         | 0         | 0         | 0         | 0         |
| LOC730268   | 5.62347   | 5.83934   | 8.66071   | 8.30316   | 8.88967   | 8.15016   |
| MED13L      | 15.468    | 12.7232   | 18.738    | 13.5219   | 17.4649   | 13.9251   |
| TRMT6       | 14.5254   | 12.57     | 16.2938   | 14.1351   | 14.4096   | 13.9066   |
| MIR3648     | 37.6582   | 0         | 0         | 0         | 0         | 0         |
| ZNF528      | 5.90924   | 5.00779   | 5.16011   | 3.96006   | 7.74589   | 7.16614   |
| C15orf50    | 0         | 0.0731418 | 0         | 0         | 0         | 0         |
| C10orf76    | 11.5394   | 9.65662   | 10.1913   | 10.055    | 11.7804   | 11.245    |
| BHMT        | 0.284317  | 0.428379  | 0.336217  | 0.191934  | 0.155582  | 0.327091  |
| KIR2DL4     | 0         | 0.163841  | 0.0554198 | 0         | 0.0728555 | 0         |
| ADAR        | 55.3018   | 43.486    | 39.0671   | 32.2573   | 42.4855   | 31.6569   |
| XIRP1       | 0         | 0         | 0         | 0         | 0         | 0         |
| ZDHHC7      | 23.1768   | 26.7481   | 23.0319   | 23.4319   | 27.6762   | 25.502    |
| TRPA1       | 0.0192211 | 0.016808  | 0.044234  | 5.82E-106 | 0.0372823 | 0.0254135 |
| CT47A3      | 0         | 0         | 0         | 0         | 0         | 0         |
| KIAA2026    | 5.96757   | 4.72752   | 6.59632   | 5.70263   | 6.84476   | 5.94833   |
| PEX3        | 32.088    | 22.1862   | 21.8345   | 17.5364   | 18.6459   | 19.5391   |
| ZNF543      | 1.77988   | 1.2331    | 1.75157   | 1.28686   | 2.13234   | 1.83559   |
| OR8A1       | 0         | 0         | 0         | 0         | 0         | 0         |
| PAQR5       | 2.9741    | 2.34696   | 2.82427   | 3.78597   | 2.9093    | 2.81251   |
| GUCY2E      | 0.0714105 | 0.220978  | 0.108116  | 0.0670533 | 0.0454817 | 0.0889999 |

|             |           |           |           |           |          |          |
|-------------|-----------|-----------|-----------|-----------|----------|----------|
| MTUS2       | 0.199555  | 0.0863734 | 0.205529  | 0.254937  | 0.310393 | 0.214735 |
| EIF2AK1     | 30.8916   | 26.4315   | 28.4839   | 29.0911   | 27.6585  | 28.1001  |
| KRTAP2-1    | 8.49194   | 3.58872   | 0.124416  | 124.386   | 2.9169   | 1982.83  |
| SNORD115-7  | 0         | 0         | 0         | 0         | 0        | 0        |
| OR4C15      | 0         | 0         | 0         | 0         | 0        | 0        |
| PP14571     | 0.153588  | 0.452642  | 0.310045  | 0.336505  | 0.586925 | 0.60616  |
| CCDC154     | 1.49404   | 3.5913    | 1.37841   | 1.9728    | 2.79522  | 2.0948   |
| C9orf79     | 0.0218026 | 0         | 0         | 0         | 0        | 0        |
| ZSWIM5      | 1.39482   | 1.10264   | 1.04346   | 1.07859   | 1.30642  | 1.23732  |
| TWF2        | 31.2729   | 40.8958   | 30.0627   | 32.1906   | 32.627   | 27.0303  |
| SOX3        | 0         | 0.0438767 | 0         | 0         | 0        | 0        |
| TANK        | 46.9896   | 31.615    | 37.3718   | 25.7423   | 32.5532  | 33.3268  |
| ANKRD34A    | 0.4889    | 0.40824   | 0.493467  | 0.229535  | 0.397879 | 0.287736 |
| PRKD1       | 4.68791   | 2.89662   | 2.5406    | 2.60111   | 2.37503  | 2.19098  |
| LOC10050562 | 0.158902  | 0         | 0.358307  | 0.145991  | 0.202079 | 0.19347  |
| C11orf86    | 0         | 0         | 0         | 0         | 0        | 0        |
| VLDLR       | 6.46996   | 2.74226   | 7.54673   | 4.49017   | 4.59348  | 2.92859  |
| SLC25A37    | 13.0831   | 15.7196   | 14.6021   | 19.6348   | 15.2054  | 15.4695  |
| MIR4713     | 0         | 0         | 0         | 0         | 0        | 0        |
| LOC158435   | 0.0836062 | 0         | 0.158226  | 0.15701   | 0.186372 | 0        |
| HECTD2      | 4.37368   | 4.05042   | 4.70204   | 3.35156   | 4.42419  | 4.01774  |
| CCDC19      | 1.16774   | 2.47787   | 1.85637   | 2.19298   | 1.07843  | 1.45538  |
| GPC2        | 3.74298   | 8.94216   | 5.42576   | 6.73008   | 9.8654   | 7.5681   |
| ZNF382      | 0.923334  | 0.753557  | 1.18287   | 0.83365   | 1.44757  | 1.01798  |
| MIR942      | 0         | 0         | 0         | 0         | 0        | 0        |
| HSPA8       | 422.195   | 288.879   | 249.116   | 229.951   | 183.774  | 244.914  |
| LOC10065289 | 0         | 0         | 4.13E-17  | 0         | 3.00E-08 | 0.225798 |
| AGAP10      | 7.41831   | 8.43246   | 7.69943   | 7.96401   | 9.19523  | 6.74036  |
| PCNA        | 54.88     | 64.1034   | 43.7658   | 42.0307   | 47.2471  | 44.2924  |
| CDR1        | 1.70183   | 2.10651   | 2.25452   | 4.47438   | 1.35488  | 1.27261  |
| TMEM25      | 9.02517   | 10.6075   | 11.7221   | 11.3187   | 9.6077   | 9.43567  |
| SYT10       | 0.0300439 | 0         | 0         | 0         | 0        | 0        |
| DNMT1       | 10.9748   | 13.1494   | 12.1424   | 11.1147   | 13.4078  | 11.8647  |
| MIR4256     | 0         | 0         | 0         | 0         | 0        | 0        |
| MIR497HG    | 3.39416   | 9.01365   | 6.95312   | 8.06567   | 9.05628  | 7.84664  |
| TRIM43      | 0         | 0         | 0         | 0         | 0        | 0        |
| C8A         | 0         | 0         | 0         | 0         | 0        | 0        |
| DDI1        | 0         | 0         | 0         | 0.0360965 | 0        | 0        |
| PRG2        | 3.15991   | 10.4132   | 4.6754    | 9.17104   | 6.76953  | 3.84873  |
| DYSFIP1     | 0.157886  | 1.53552   | 0.597601  | 1.18602   | 1.2067   | 0.7871   |
| SUGT1       | 13.4883   | 15.7668   | 13.4934   | 11.9206   | 13.2647  | 13.2512  |
| DPY19L2P1   | 0.0779496 | 0.049621  | 0.0443218 | 0.0156146 | 0.132446 | 0.119417 |
| C5AR1       | 1.99525   | 2.26262   | 1.90444   | 2.19934   | 1.29841  | 0.837914 |



|             |          |           |           |          |           |          |
|-------------|----------|-----------|-----------|----------|-----------|----------|
| LMAN1L      | 0.727816 | 0.160872  | 0.321394  | 0.341704 | 0.0772583 | 0.491339 |
| AQPEP       | 3.1622   | 3.12909   | 4.56566   | 1.80908  | 4.33482   | 2.1141   |
| KRT86       | 10.2126  | 3.60877   | 0.707835  | 90.6751  | 3.25747   | 1089.31  |
| SPRY2       | 14.9381  | 11.5726   | 13.813    | 13.2499  | 14.1008   | 13.6751  |
| MGC24103    | 0        | 0.0544108 | 0.046587  | 0.115572 | 0.0391959 | 0.11505  |
| TMEM199     | 22.9489  | 20.356    | 17.1461   | 15.8632  | 16.7587   | 18.4     |
| ANPEP       | 18.1847  | 13.0142   | 14.5996   | 11.602   | 14.7469   | 11.4993  |
| TRPM2       | 1.35234  | 1.41238   | 1.03661   | 0.597274 | 2.0337    | 0.985316 |
| KIAA0090    | 10.5751  | 9.60547   | 11.2662   | 9.3971   | 10.0599   | 9.84615  |
| C2orf56     | 10.7686  | 10.2194   | 8.70367   | 7.7659   | 10.8335   | 10.7276  |
| MIR451      | 0        | 0         | 0         | 0        | 0         | 0        |
| KRTAP16-1   | 3.10015  | 0.365461  | 0.0521518 | 30.5978  | 0.482657  | 88.6091  |
| LOC10050743 | 0        | 0         | 0         | 0        | 0         | 0        |
| CXCL1       | 0.825331 | 1.18577   | 1.48385   | 0.678101 | 17.2153   | 1.41436  |
| PSMC3IP     | 5.07685  | 10.6562   | 4.90516   | 6.87029  | 4.58509   | 4.6992   |
| IAPP        | 0        | 0         | 0         | 0        | 0         | 0        |
| ATP10A      | 3.54745  | 2.95767   | 4.0212    | 3.31374  | 3.27787   | 2.89786  |
| SAMD7       | 0        | 0         | 0         | 0        | 0         | 0        |
| SIRPD       | 0        | 0.136555  | 0         | 0        | 0.0983702 | 0        |
| MIR1290     | 0        | 0         | 0         | 0        | 0         | 0        |
| PZP         | 0.167953 | 0.186132  | 0.158927  | 0.216845 | 0.147418  | 0.105128 |
| RNF182      | 0.424639 | 0.401926  | 0.253612  | 0.539596 | 0.270455  | 0.93938  |
| TOM1L2      | 23.207   | 27.6373   | 34.7316   | 38.2813  | 37.4747   | 38.1446  |
| HIST2H2AA3  | 23.9756  | 25.5385   | 13.2681   | 15.2793  | 20.4213   | 25.7413  |
| GAMT        | 19.4498  | 38.924    | 28.7512   | 48.0956  | 30.4263   | 29.1495  |
| LOC10050549 | 1.35977  | 2.10388   | 1.95148   | 1.2502   | 2.02077   | 1.53582  |
| ABHD10      | 11.243   | 11.2837   | 10.7538   | 10.664   | 12.4829   | 10.675   |
| LZTS1       | 4.25811  | 6.70499   | 4.76852   | 6.39397  | 3.84389   | 5.06572  |
| KLHDC2      | 33.6885  | 39.2693   | 41.3042   | 36.2064  | 40.66     | 37.3614  |
| MBNL2       | 22.4202  | 18.3552   | 20.7725   | 17.1828  | 17.2303   | 18.5111  |
| MSN         | 73.2734  | 70.6495   | 68.0613   | 52.8825  | 63.8989   | 51.0967  |
| NAGLU       | 12.431   | 15.5966   | 13.4899   | 13.393   | 13.2032   | 10.3883  |
| GC          | 0        | 0         | 0         | 0        | 0         | 0        |
| ADC         | 2.53273  | 2.8613    | 1.91729   | 2.33415  | 3.34571   | 2.80585  |
| LOC10050620 | 0        | 0         | 0         | 0        | 0         | 0        |
| LOC10050668 | 0        | 0.109152  | 0         | 0        | 0         | 0        |
| C14orf118   | 4.8991   | 3.03227   | 4.69749   | 2.33891  | 3.40625   | 3.53843  |
| MAP3K2      | 9.68216  | 7.8253    | 11.1777   | 8.52217  | 10.7337   | 7.78204  |
| ZNF224      | 9.56196  | 10.5752   | 10.8412   | 10.9424  | 14.9078   | 11.1919  |
| VPS18       | 9.77833  | 9.19957   | 9.79374   | 10.0292  | 9.00646   | 8.51519  |
| SPON1       | 10.889   | 9.13808   | 13.0132   | 6.82197  | 10.346    | 7.89793  |
| RNF219      | 5.86566  | 5.60388   | 5.61882   | 4.09819  | 5.17002   | 4.79857  |
| FGL2        | 23.1069  | 17.8131   | 26.3846   | 8.44368  | 20.8357   | 12.2997  |

|             |           |           |           |           |           |           |
|-------------|-----------|-----------|-----------|-----------|-----------|-----------|
| HDAC10      | 13.1062   | 24.8338   | 18.124    | 23.7244   | 26.3392   | 21.8869   |
| ZNF708      | 3.19088   | 2.15362   | 2.72898   | 1.62389   | 2.96313   | 2.17057   |
| FAM167A     | 11.587    | 12.9371   | 20.1905   | 16.5546   | 19.1694   | 17.2136   |
| ZNF563      | 2.29669   | 1.74503   | 1.79294   | 1.44893   | 1.9656    | 2.1468    |
| LOC645206   | 0.320532  | 0.283394  | 0.727933  | 0.300974  | 0.326637  | 0.559277  |
| MIR205      | 2228.27   | 4728.23   | 1687.59   | 2093.02   | 2271.49   | 2777.13   |
| IGSF9B      | 0.468258  | 0.230003  | 1.13235   | 0.232057  | 1.38349   | 0.737603  |
| RBMY1E      | 0         | 0         | 0         | 0         | 0         | 0         |
| NKAPL       | 0.777377  | 1.31734   | 0.833678  | 1.45989   | 1.15527   | 1.13033   |
| MTERFD2     | 15.5785   | 16.294    | 20.5482   | 16.7371   | 20.4664   | 18.1139   |
| NR1I2       | 0         | 0.0897327 | 0.0276277 | 0.277237  | 0         | 0.0632454 |
| DNMT3B      | 2.63153   | 2.48482   | 2.73888   | 2.708     | 3.72363   | 3.38275   |
| MIR377      | 0         | 0         | 0         | 0         | 0         | 0         |
| LOC10050637 | 0         | 0         | 0.498248  | 0         | 0         | 0         |
| FUT4        | 0.71185   | 0.951053  | 1.12565   | 0.742685  | 0.896688  | 0.630891  |
| NOL10       | 8.43895   | 7.58554   | 9.45473   | 8.47872   | 8.22347   | 8.06349   |
| NLGN2       | 11.2966   | 15.3686   | 12.3698   | 12.1534   | 21.7306   | 14.4038   |
| ST3GAL4     | 16.1801   | 14.946    | 17.093    | 19.6147   | 21.2256   | 17.9834   |
| B4GALNT1    | 0.814999  | 0.887326  | 0.493829  | 0.436889  | 0.846836  | 0.405588  |
| FNDC9       | 0         | 0         | 0         | 0.0453309 | 0.0614952 | 0         |
| GUF1        | 10.6543   | 9.19559   | 12.6392   | 11.7582   | 11.06     | 10.0165   |
| TNFAIP8     | 23.9307   | 21.9241   | 20.2165   | 13.8525   | 23.0123   | 18.6677   |
| LOC153469   | 3.62E-09  | 3.45E-10  | 1.58E-10  | 0         | 0         | 0         |
| ST20        | 3.70747   | 6.88138   | 8.2523    | 14.8579   | 9.06511   | 8.68638   |
| CEP85       | 6.00234   | 6.77616   | 6.30876   | 6.40466   | 7.85122   | 6.46071   |
| GPR44       | 1.512     | 1.4057    | 1.16413   | 0.56742   | 1.45291   | 0.694041  |
| MIR130B     | 0         | 0         | 0         | 0         | 0         | 0         |
| SRD5A3      | 13.9106   | 12.5098   | 9.88013   | 9.76834   | 8.63177   | 10.6014   |
| UTP6        | 21.7424   | 24.6904   | 21.5554   | 19.9007   | 21.6929   | 19.5155   |
| OR2AG2      | 0         | 0.332346  | 0         | 0         | 0         | 0         |
| NEDD8-MDP   | 4.73608   | 6.86E-05  | 4.48E-05  | 3.22E-05  | 4.19781   | 0.488551  |
| HCN2        | 0.60682   | 0.740897  | 0.940606  | 2.06211   | 1.12265   | 1.53058   |
| SPECC1      | 4.3464    | 3.85653   | 4.18953   | 4.5887    | 4.81999   | 7.22884   |
| ECRP        | 0         | 0.208947  | 0         | 0         | 0         | 0         |
| ASB11       | 0.163905  | 0.201271  | 0.306367  | 0.182406  | 0.280702  | 0.185365  |
| LOC10050557 | 0         | 0         | 0         | 0         | 0         | 0         |
| ADAMTS5     | 2.6858    | 2.07239   | 3.26786   | 1.56818   | 2.22067   | 2.33706   |
| C3orf74     | 0.559373  | 0.436378  | 0.921623  | 0.525242  | 0.859234  | 0.656146  |
| OTUD7B      | 5.29991   | 4.15935   | 5.81524   | 5.61957   | 5.35725   | 4.85197   |
| ABTB1       | 16.9144   | 37.8427   | 28.8155   | 38.5636   | 31.4173   | 28.9333   |
| FLJ13224    | 0.130387  | 0         | 0.148055  | 0.0612155 | 0.0830439 | 0.121877  |
| LOC340107   | 0         | 0         | 0         | 0         | 0         | 0         |
| ANKRD20A8F  | 0.0267052 | 0.0897811 | 0.0229788 | 0.0140424 | 0.0430533 | 0.0688961 |

|            |          |           |           |           |           |           |
|------------|----------|-----------|-----------|-----------|-----------|-----------|
| GP9        | 0.143409 | 0.126793  | 0         | 0         | 0.0913379 | 0         |
| HAS1       | 0.197128 | 0.261432  | 1.15651   | 2.0361    | 1.66356   | 0.798472  |
| LOC1005058 | 1.95727  | 1.21135   | 2.07433   | 0.183785  | 1.62058   | 1.58559   |
| CDC42SE2   | 14.6279  | 14.6029   | 14.9997   | 12.9418   | 15.8696   | 11.2239   |
| SQLE       | 30.1669  | 16.35     | 21.4517   | 17.2393   | 24.1704   | 25.3275   |
| AKR1C3     | 101.256  | 103.695   | 77.9429   | 54.9064   | 28.8392   | 29.5839   |
| DCST2      | 5.2325   | 8.69734   | 7.66856   | 9.15827   | 9.89118   | 8.21691   |
| LOC1005056 | 18.8131  | 30.1242   | 19.7794   | 29.2451   | 24.4963   | 24.8793   |
| KIAA1257   | 0.123    | 0.108749  | 0         | 0.0577477 | 0.313358  | 0.26827   |
| SHANK2-AS3 | 0        | 0         | 0         | 0         | 0         | 0         |
| IRX4       | 16.2041  | 34.9288   | 13.1602   | 27.4222   | 25.6596   | 29.1754   |
| FAM19A5    | 3.55945  | 2.98319   | 2.86037   | 3.48587   | 2.83423   | 1.92799   |
| AP1G1      | 26.849   | 19.3673   | 24.2359   | 20.8172   | 23.8854   | 21.3218   |
| CAHM       | 3.57315  | 2.67313   | 2.18472   | 4.00035   | 3.85128   | 2.14099   |
| OLIG2      | 0        | 0         | 0         | 0         | 0         | 0         |
| OR8B12     | 0        | 0         | 0         | 0         | 0         | 0         |
| DLG3       | 12.3459  | 7.0814    | 9.23984   | 9.29226   | 10.2407   | 10.2098   |
| ATP2A1     | 1.03043  | 1.23006   | 0.64018   | 1.27992   | 1.184     | 1.12644   |
| RPS19BP1   | 75.7693  | 100.543   | 77.1634   | 106.05    | 77.2952   | 84.1014   |
| SP140      | 1.43897  | 1.81214   | 1.06106   | 0.514236  | 1.64361   | 0.985475  |
| KIF3A      | 4.06228  | 3.26756   | 4.28905   | 3.628     | 4.24082   | 3.73055   |
| AQP12A     | 0        | 0         | 0         | 0         | 0         | 0         |
| FLJ38109   | 0.313732 | 0.126083  | 0.410222  | 0.214247  | 0.4178    | 0.28437   |
| ALKBH2     | 16.3518  | 24.817    | 18.4594   | 21.8356   | 18.7215   | 17.1739   |
| ARMC5      | 5.69308  | 9.16851   | 5.80654   | 8.26152   | 8.49814   | 7.89626   |
| IDE        | 27.4859  | 16.3493   | 30.8092   | 23.4583   | 31.4465   | 35.1823   |
| TSSC1      | 13.0474  | 11.4273   | 10.4797   | 14.2069   | 12.0162   | 13.6655   |
| CYP2A6     | 2.2635   | 0.789825  | 0.676255  | 0.335529  | 0.456035  | 0.0371123 |
| MYBL1      | 1.00144  | 0.680912  | 0.976253  | 0.615162  | 1.32873   | 0.696005  |
| LOC441493  | 0        | 0         | 0         | 0         | 0         | 0         |
| BAALC      | 2.52249  | 2.69468   | 1.86728   | 1.41509   | 1.82964   | 2.4449    |
| H2AFV      | 48.3411  | 46.6791   | 39.3335   | 44.3987   | 45.1778   | 39.0851   |
| LOC1006528 | 0        | 0         | 0         | 0         | 0         | 0         |
| KIF2A      | 11.1252  | 7.07834   | 8.01922   | 5.23085   | 6.90206   | 7.51998   |
| COMMD6     | 35.9931  | 46.7156   | 46.9485   | 44.334    | 37.2618   | 33.0961   |
| CBWD1      | 24.7333  | 22.5986   | 23.051    | 23.1892   | 18.8354   | 19.0824   |
| MKRN9P     | 3.5484   | 3.49125   | 4.93874   | 3.70802   | 4.51969   | 4.35088   |
| RNGTT      | 5.32153  | 3.8984    | 3.60092   | 3.60996   | 3.72133   | 4.03353   |
| DCP2       | 5.56144  | 4.4798    | 5.33335   | 4.02386   | 6.98811   | 5.40684   |
| CT45A3     | 0        | 0         | 0         | 0         | 0         | 0         |
| LOC1005061 | 2.8743   | 1.63368   | 4.19631   | 4.04839   | 3.92284   | 4.22198   |
| AIDA       | 13.5977  | 14.2435   | 15.6989   | 12.0748   | 12.4152   | 10.9181   |
| C3orf43    | 0        | 0.0511369 | 0.0437838 | 0.108618  | 0.0368375 | 0.0720846 |

|            |           |           |           |           |           |           |
|------------|-----------|-----------|-----------|-----------|-----------|-----------|
| RRH        | 0.0686872 | 0.242915  | 0.519966  | 0.386977  | 0.306231  | 0.256818  |
| MIR4643    | 0         | 0         | 0         | 0         | 0         | 0         |
| ZNF544     | 9.99058   | 11.2331   | 9.70257   | 12.0613   | 10.106    | 9.81814   |
| GOLGA6L7P  | 0.3063    | 0.0866597 | 0         | 0.0460178 | 0.0312135 | 0         |
| GTF3C5     | 26.5247   | 36.3269   | 29.3589   | 34.4981   | 34.3268   | 33.0124   |
| EMB        | 23.6418   | 20.9425   | 25.6541   | 15.9564   | 33.0291   | 23.192    |
| WFDC13     | 0.334085  | 0.146849  | 0.387978  | 0.537123  | 0.0529849 | 0.203456  |
| SNAR-C5    | 0         | 0         | 0         | 0         | 0         | 0         |
| BEND3      | 0.801745  | 0.518981  | 0.736981  | 0.631836  | 0.574466  | 0.544222  |
| DHODH      | 3.28951   | 5.59642   | 5.28219   | 4.16519   | 4.41242   | 4.41035   |
| USP47      | 17.2174   | 14.4673   | 16.359    | 12.5806   | 17.1443   | 14.8124   |
| AKAP9      | 8.4606    | 6.40046   | 9.05102   | 7.64785   | 9.75373   | 7.31406   |
| GSDMD      | 24.8661   | 45.0781   | 24.1962   | 27.885    | 35.3204   | 28.427    |
| ACTL6A     | 27.0172   | 24.6915   | 22.4716   | 23.7441   | 22.5399   | 20.351    |
| MRPL55     | 43.5149   | 73.9126   | 36.5853   | 61.6738   | 55.2111   | 42.1859   |
| TOE1       | 6.1206    | 6.76883   | 4.38127   | 4.3515    | 5.64806   | 4.60021   |
| SNORD11B   | 0         | 0         | 0         | 0         | 0         | 0         |
| CD69       | 1.79003   | 1.95559   | 1.53698   | 0.484192  | 3.42917   | 0.515088  |
| PTTG2      | 3.06348   | 3.83709   | 2.12581   | 3.83541   | 2.60153   | 2.54537   |
| CT45A1     | 0         | 0         | 0         | 0         | 0         | 0         |
| IMMP1L     | 4.81156   | 3.30613   | 4.43365   | 1.56491   | 2.76782   | 2.1791    |
| ABP1       | 2.83491   | 2.43273   | 1.54641   | 3.95375   | 2.1773    | 2.3901    |
| C5orf38    | 7.78705   | 18.6414   | 12.7207   | 17.8311   | 11.6596   | 16.0335   |
| C12orf35   | 11.2444   | 7.43248   | 8.01275   | 5.17114   | 9.89733   | 6.76807   |
| STOM       | 101.309   | 89.1441   | 81.9907   | 67.1575   | 74.9174   | 55.7605   |
| FMO6P      | 0.386414  | 0.128116  | 0.0731294 | 0         | 0.276873  | 0.300996  |
| C12orf11   | 7.85291   | 6.70669   | 6.98186   | 7.18549   | 8.02379   | 7.1634    |
| OPLAH      | 15.7263   | 22.178    | 16.9834   | 20.0618   | 18.4998   | 16.4494   |
| GZMK       | 4.88914   | 4.51916   | 1.93467   | 0.208674  | 3.39701   | 1.31562   |
| HYMAI      | 0.0775171 | 0.138677  | 0.073705  | 0.0744193 | 0.124467  | 0.170378  |
| LOC1005060 | 0.0386352 | 0.136635  | 0.380212  | 0.253945  | 0.615175  | 0.433365  |
| LOC1001909 | 0         | 0         | 0.0210824 | 0.0523008 | 0         | 0         |
| RDH12      | 27.1822   | 18.981    | 28.5979   | 29.1178   | 27.3113   | 34.1196   |
| SERF2      | 99.7231   | 113.169   | 105.719   | 129.734   | 115.578   | 112.467   |
| COX7C      | 600.119   | 624.105   | 513.56    | 619.313   | 479.606   | 482.695   |
| LOC642846  | 5.79242   | 7.58047   | 5.48374   | 6.81957   | 6.92566   | 5.45377   |
| FANCD2     | 3.94184   | 4.48584   | 3.25684   | 4.30341   | 5.38976   | 3.84361   |
| CYP2C8     | 0.419325  | 0.674075  | 0.235134  | 0.499987  | 0.741518  | 0.652907  |
| RPL23P8    | 284.195   | 396.473   | 338.105   | 447.614   | 346.578   | 320.641   |
| EMR1       | 0         | 0.0561033 | 0         | 0.0297918 | 0.0808302 | 0.0197714 |
| OR1E1      | 0         | 0.111692  | 0         | 0         | 0.0804594 | 0.177126  |
| LOC1005060 | 0.0682983 | 0.0603851 | 0.0775533 | 0.160328  | 0.0761243 | 0.127682  |
| CXCL3      | 0.390819  | 0.691075  | 0         | 0.183486  | 3.29812   | 0.487084  |

|             |           |          |           |           |            |           |
|-------------|-----------|----------|-----------|-----------|------------|-----------|
| KRT28       | 8.55668   | 3.64459  | 1.4657    | 40.2316   | 0.755812   | 15.8797   |
| POTEB       | 0         | 0        | 0         | 0         | 0          | 0         |
| RSPH4A      | 0.39053   | 0.494115 | 0.534014  | 0.628684  | 1.03833    | 0.440241  |
| CCDC74A     | 3.41645   | 7.81433  | 5.22893   | 8.08973   | 7.33203    | 6.52582   |
| PPAN-P2RY11 | 2.10137   | 2.55733  | 0.0001452 | 2.97E-05  | 0.00716787 | 5.00E-05  |
| FRYL        | 6.70524   | 4.94857  | 6.13363   | 4.90116   | 6.30105    | 5.71468   |
| ZNF341      | 2.94558   | 3.47239  | 3.31095   | 3.15698   | 2.76671    | 4.28298   |
| GINS4       | 1.29774   | 1.61984  | 1.02093   | 1.14688   | 1.31274    | 1.3954    |
| ZNF430      | 6.10796   | 4.93014  | 5.77495   | 4.54145   | 5.39859    | 5.06457   |
| BCAM        | 53.485    | 88.3281  | 56.9724   | 83.7198   | 70.8873    | 73.4572   |
| RNU1-6      | 44.1589   | 56.5787  | 23.4432   | 64.9374   | 28.65      | 25.2188   |
| PRR15       | 1.19805   | 0.891988 | 0.811461  | 0.828907  | 0.441761   | 0.667985  |
| ORC4        | 5.65521   | 4.80242  | 6.51503   | 4.4661    | 6.08874    | 4.99741   |
| GHRHR       | 0         | 0        | 0         | 0         | 0          | 0         |
| RPL10       | 280.435   | 443.189  | 321.699   | 494.487   | 360.319    | 326.148   |
| TIGD2       | 4.58813   | 3.31502  | 2.801     | 2.73315   | 2.60799    | 3.1973    |
| LOC10050639 | 0         | 0        | 0.224279  | 0.556388  | 0          | 0         |
| GALP        | 0         | 0        | 0         | 0         | 0          | 0         |
| LOC10050630 | 0.152915  | 0        | 0         | 0         | 0.0973921  | 0.0476449 |
| FBXO33      | 3.83369   | 3.53831  | 4.06297   | 3.07297   | 3.83525    | 3.70585   |
| LINC00294   | 6.36002   | 6.96951  | 6.2612    | 7.90656   | 8.99528    | 7.10788   |
| VPS35       | 34.1711   | 27.2093  | 32.8977   | 27.7402   | 28.2527    | 28.8789   |
| MMP21       | 0.108279  | 0.191467 | 0.245903  | 0.203344  | 0.103445   | 0.0674749 |
| S100A9      | 2051.58   | 1897.3   | 112.769   | 449.131   | 1416.54    | 935.775   |
| ZNF711      | 6.42048   | 6.31649  | 10.0388   | 8.28676   | 12.5949    | 10.257    |
| C17orf108   | 11.5853   | 15.9764  | 12.3002   | 15.6676   | 18.238     | 12.0324   |
| OR9G4       | 0         | 0        | 0         | 0         | 0          | 0         |
| LOC731424   | 0.0581199 | 0.154158 | 0.175988  | 0.0272869 | 0.0925423  | 0.0362179 |
| LRRC25      | 1.18065   | 0.335525 | 1.53216   | 0.712678  | 0.966808   | 0.762007  |
| MIR3681     | 0         | 0        | 0         | 0         | 0          | 0         |
| FAM100B     | 26.5195   | 35.4968  | 32.0698   | 40.0944   | 31.8566    | 33.6932   |
| ELF1        | 23.2203   | 17.4077  | 23.7629   | 18.3538   | 23.0707    | 20.0317   |
| TAL2        | 0.627083  | 0.184809 | 0.474705  | 0.588821  | 0.399393   | 0         |
| TMEM64      | 9.82023   | 8.01574  | 12.5619   | 10.3813   | 8.54947    | 8.09079   |
| SELL        | 2.22519   | 2.00704  | 1.61214   | 0.824483  | 1.26873    | 0.838455  |
| DNAH7       | 0.0151532 | 0        | 0.0458843 | 0.0711431 | 0.0337791  | 0.0472142 |
| IKBKAP      | 12.0286   | 10.1509  | 11.6752   | 10.6044   | 12.1044    | 11.5117   |
| LOC10065288 | 118.158   | 214.138  | 113.26    | 198.044   | 167.85     | 107.841   |
| LPHN3       | 3.88757   | 3.598    | 8.62935   | 3.83429   | 8.82858    | 7.82785   |
| KLK2        | 0.0352122 | 0        | 0         | 0.0330637 | 0.0897106  | 0         |
| DAPK2       | 25.8469   | 29.3991  | 27.796    | 29.7628   | 31.9906    | 28.1708   |
| LOC10012986 | 0         | 0        | 0         | 0         | 0          | 0         |
| MAPK8IP3    | 21.0695   | 30.3713  | 28.5358   | 32.3678   | 39.8399    | 38.4182   |

|             |           |            |          |            |           |            |
|-------------|-----------|------------|----------|------------|-----------|------------|
| MIR4790     | 0         | 0          | 0        | 0          | 0         | 0          |
| MIRLET7C    | 0         | 0          | 0        | 0          | 0         | 0          |
| CT62        | 0         | 0          | 0.043215 | 0          | 0.181795  | 0.0355741  |
| SNRNP70     | 144.196   | 227.153    | 175.368  | 207.653    | 230.406   | 215.01     |
| CNTNAP3     | 1.51524   | 2.06637    | 3.55238  | 2.75328    | 3.94792   | 2.66052    |
| ZSCAN10     | 0.0410408 | 0          | 0        | 0.0770734  | 0         | 0.0767247  |
| ACTC1       | 1.69783   | 6.02792    | 2.40988  | 2.31663    | 1.97686   | 3.65347    |
| BPI         | 0         | 0          | 0.042844 | 0          | 0         | 0.0352686  |
| UFM1        | 37.4302   | 32.3755    | 39.9557  | 29.1555    | 42.8521   | 34.1441    |
| RANBP6      | 10.6745   | 9.21319    | 10.8999  | 8.28564    | 10.2956   | 8.86612    |
| ZNF506      | 7.90065   | 5.63157    | 6.44411  | 6.35471    | 8.48359   | 7.67119    |
| SNORD115-2  | 0         | 0          | 0        | 0          | 0         | 0          |
| RAMP1       | 8.35923   | 16.4238    | 8.53776  | 14.2033    | 13.1833   | 14.8005    |
| FAM125B     | 3.66845   | 4.58817    | 4.42358  | 3.97047    | 4.65887   | 3.28123    |
| TM2D3       | 29.6418   | 32.9417    | 30.1962  | 27.8925    | 33.282    | 31.4206    |
| PLD4        | 0.966009  | 0.711737   | 0.406264 | 0.554319   | 1.40142   | 0.802635   |
| KBTBD12     | 0.219126  | 0.387651   | 0.276466 | 0.445805   | 0.430319  | 0.375513   |
| PRTN3       | 0         | 0          | 0        | 0          | 0         | 0          |
| LOC10050745 | 4.10533   | 2.72226    | 3.49623  | 4.65794    | 2.61471   | 2.13189    |
| HOXD11      | 0.147828  | 0.2614     | 0.111906 | 0          | 0.0941522 | 0.0921199  |
| C14orf28    | 3.87429   | 4.3348     | 4.51608  | 4.28177    | 4.47654   | 4.42264    |
| LOC10050694 | 4.83885   | 5.29337    | 5.44282  | 6.10948    | 6.16378   | 4.29306    |
| NDUFB3      | 90.4917   | 79.8562    | 71.734   | 64.7699    | 59.3022   | 69.5839    |
| MAP3K13     | 15.9574   | 16.9615    | 14.542   | 14.4197    | 15.9014   | 13.8622    |
| UBE2Q2      | 16.7545   | 16.5474    | 16.3215  | 13.1726    | 16.1935   | 14.2436    |
| KIAA0895    | 3.14878   | 3.26538    | 3.46492  | 2.40644    | 3.80487   | 3.68317    |
| RPS7        | 298.151   | 469.216    | 369.095  | 570.38     | 385.053   | 356.994    |
| CFHR3       | 0.297082  | 0.295494   | 0        | 0          | 0.189213  | 0.104135   |
| LOC10013182 | 1.99598   | 2.66544    | 3.49547  | 0.911108   | 3.2872    | 1.89771    |
| LOC728369   | 0         | 0.00739837 | 0        | 0.00628586 | 0         | 0.00417161 |
| LOC10065300 | 1.55904   | 1.61254    | 1.5068   | 1.05097    | 1.50627   | 1.24038    |
| MIR4752     | 0         | 0          | 0        | 0          | 0         | 0          |
| TMEM40      | 33.897    | 37.0983    | 34.7534  | 37.14      | 33.0519   | 39.6701    |
| PGP         | 13.0452   | 15.4156    | 11.9556  | 19.1006    | 12.3522   | 14.8413    |
| MPL         | 0.564897  | 0.332964   | 0.407266 | 0.68198    | 0.342653  | 0.301731   |
| IGSF11      | 1.14762   | 0.609545   | 0.868757 | 1.64272    | 1.05947   | 0.80443    |
| ARL11       | 0.182191  | 0.345176   | 0.256137 | 0.171075   | 0.580193  | 0.308163   |
| SV2C        | 0.0429711 | 0.113977   | 0.162647 | 0          | 0.0273685 | 0          |
| SLC25A25    | 10.0126   | 10.4952    | 14.0907  | 10.1008    | 9.93769   | 7.89721    |
| LOC643037   | 0         | 0          | 0        | 0.222479   | 0         | 0          |
| PINK1       | 79.0919   | 86.7429    | 64.4721  | 75.6125    | 64.8422   | 71.6492    |
| IL17RB      | 2.7803    | 2.32408    | 1.60723  | 2.56319    | 3.09083   | 3.84314    |
| CKM         | 0.832226  | 1.5848     | 0.678461 | 0.961781   | 1.42706   | 2.47336    |

|             |           |           |           |           |          |           |
|-------------|-----------|-----------|-----------|-----------|----------|-----------|
| PPP1R14B    | 57.2213   | 79.5311   | 49.3758   | 91.7559   | 52.7267  | 57.5936   |
| WBP11P1     | 1.00424   | 0.562578  | 0.886665  | 0.754157  | 0.831251 | 0.959402  |
| SNORD91B    | 0         | 0         | 0         | 0         | 0        | 0         |
| DOK7        | 0.177411  | 0.250979  | 1.04554   | 0.521383  | 0.503622 | 0.811584  |
| TPSG1       | 0.10437   | 0.828372  | 1.72787   | 1.06327   | 1.52763  | 1.04004   |
| UCN2        | 5.44754   | 12.9079   | 8.19265   | 15.6865   | 11.8891  | 12.8092   |
| LOC149950   | 0         | 0         | 0         | 0         | 0        | 0         |
| CMTM8       | 17.0946   | 16.2241   | 12.6483   | 15.3261   | 10.9492  | 14.0832   |
| THUMPD3     | 12.8247   | 10.087    | 10.2105   | 10.1909   | 11.2874  | 9.70065   |
| CDCA3       | 5.21532   | 5.63573   | 3.58247   | 4.53435   | 4.61342  | 5.77771   |
| LOC400927   | 5.94352   | 2.91938   | 4.25322   | 4.34068   | 7.99295  | 5.76139   |
| MIR4718     | 0         | 0         | 0         | 0         | 0        | 0         |
| LOC10013106 | 0.634857  | 0.471016  | 0.403288  | 0.694772  | 0.291126 | 0.295095  |
| SEC22B      | 57.3273   | 37.633    | 43.8319   | 33.8187   | 33.9145  | 31.1779   |
| CCDC140     | 0.124326  | 0.164882  | 0.0941155 | 0         | 0.039592 | 0         |
| LOC442421   | 0.290812  | 0.16362   | 0.220146  | 0.347541  | 0.336763 | 0.280327  |
| C21orf128   | 0         | 0.0988183 | 0         | 0.0599706 | 0.137287 | 0.0970113 |
| ZXDA        | 1.49808   | 1.22645   | 1.5401    | 0.851039  | 1.48423  | 1.08336   |
| ACRV1       | 0         | 0.406369  | 0         | 0         | 0.260209 | 0.239485  |
| SLAIN1      | 2.93209   | 1.67907   | 1.9213    | 3.00801   | 1.93731  | 1.69966   |
| FAM106CP    | 0.0597481 | 0.0264127 | 0.497526  | 0.336615  | 0.342485 | 0.186162  |
| NUDC        | 44.71     | 54.1975   | 42.3856   | 51.8738   | 45.065   | 49.1063   |
| TRIM45      | 4.38683   | 5.38034   | 5.3952    | 6.58921   | 7.6468   | 6.37145   |
| PET117      | 6.01834   | 7.43825   | 5.93275   | 6.53013   | 7.31411  | 6.03743   |
| LOC10050627 | 0         | 0.0466088 | 0         | 0         | 0        | 0         |
| ZNF625      | 1.39843   | 0.55558   | 1.00766   | 0.888733  | 2.16824  | 1.25791   |
| CKAP5       | 13.0374   | 11.3004   | 12.9078   | 10.8253   | 10.6515  | 12.2841   |
| LOC10030264 | 0         | 0.451333  | 0.359647  | 0.892208  | 0        | 0.296057  |
| LOC10050551 | 0.505315  | 0.335075  | 1.33884   | 0.948965  | 0.321838 | 0.393613  |
| LRMP        | 1.98149   | 1.86523   | 2.41246   | 1.17433   | 3.66887  | 2.89014   |
| ARRDC3      | 37.4123   | 22.6582   | 30.2861   | 32.0777   | 29.5468  | 29.929    |
| MIR498      | 0         | 0         | 0         | 0         | 0        | 0         |
| OR4C46      | 0         | 0         | 0         | 0         | 0        | 0         |
| LRRC15      | 9.08391   | 3.05142   | 7.80494   | 11.7244   | 6.76022  | 26.4975   |
| CHODL-AS1   | 0         | 0         | 0.566855  | 0         | 0        | 0         |
| DAPP1       | 9.75828   | 8.74748   | 9.82378   | 7.34938   | 16.4873  | 13.2176   |
| KDM5C       | 19.8889   | 17.8706   | 28.1683   | 27.4363   | 33.7602  | 32.0733   |
| NRBP1       | 61.5978   | 67.727    | 57.4609   | 56.0073   | 58.0195  | 60.5883   |
| AARS        | 29.2217   | 24.4282   | 23.438    | 22.3719   | 22.0108  | 21.8848   |
| DNAH3       | 0.068431  | 0.121005  | 0.16692   | 0.0928137 | 0.140438 | 0.0947629 |
| MT1A        | 1.01645   | 0         | 0.769458  | 0.477215  | 1.61846  | 0.316704  |
| MIR4642     | 0         | 0         | 0         | 0         | 0        | 0         |
| HSPB1       | 790.414   | 909.039   | 896.345   | 1350      | 1042.72  | 1537.68   |

|             |           |           |             |           |           |            |
|-------------|-----------|-----------|-------------|-----------|-----------|------------|
| C1orf180    | 0         | 0         | 0           | 0         | 0         | 0          |
| NUDT1       | 18.4128   | 36.2087   | 29.8629     | 38.097    | 33.5475   | 27.7294    |
| SLC46A2     | 8.26993   | 5.24306   | 10.5968     | 7.15926   | 9.85774   | 7.94388    |
| FAM25G      | 15.3157   | 9.35261   | 16.38       | 14.9849   | 25.6344   | 33.1624    |
| LOC390806   | 0         | 1.60379   | 1.37318     | 2.98074   | 2.31064   | 1.41298    |
| FOXP1-IT1   | 0.0279171 | 0         | 0           | 0.0262137 | 0.0355611 | 0.0347935  |
| TRAPPC4     | 33.523    | 35.2687   | 34.6632     | 38.9513   | 34.77     | 30.8684    |
| TRY6        | 0         | 0         | 0           | 0         | 0         | 0          |
| WDR6        | 30.85     | 40.3905   | 30.9258     | 41.0149   | 41.7397   | 41.1732    |
| DUSP9       | 0.0852278 | 0.150706  | 0.193554    | 0.360124  | 0.108564  | 0.238997   |
| KCNRG       | 0.667296  | 0.475062  | 0.76917     | 0.507859  | 0.830187  | 0.562329   |
| SLC17A9     | 1.51375   | 3.08852   | 3.05577     | 2.40542   | 3.88117   | 3.09597    |
| TIGD3       | 0.105253  | 0.139587  | 0.0398386   | 0.148247  | 0.201109  | 0.393536   |
| FAM78B      | 0.21859   | 1.03074   | 0.882527    | 0.889427  | 0.696106  | 0.317837   |
| LOC10065291 | 0.548898  | 0.121325  | 0.207759    | 0.128852  | 0.524394  | 0.427562   |
| LOC10013224 | 78.5932   | 120.486   | 77.3481     | 118.222   | 116.718   | 105.674    |
| CTDSPL      | 36.32     | 37.295    | 33.7373     | 37.0442   | 34.684    | 30.5841    |
| RBM44       | 0.249497  | 0.421125  | 0.480761    | 0.255571  | 0.43338   | 0.282683   |
| FBXL2       | 2.78324   | 2.94119   | 3.46104     | 3.1111    | 3.24953   | 3.63354    |
| ZDHHC18     | 17.1654   | 18.4686   | 13.2332     | 17.2736   | 18.7706   | 16.3794    |
| TAAR1       | 0         | 0         | 0           | 0         | 0         | 0.0713925  |
| SNORA53     | 5.61412   | 3.3091    | 0           | 7.02876   | 1.19189   | 3.49848    |
| TATDN1      | 10.6637   | 9.71565   | 7.96435     | 7.12503   | 8.09233   | 6.62959    |
| LOC10028721 | 0.0357883 | 0.379701  | 0.189644    | 0.268837  | 0.189783  | 0.119481   |
| EML3        | 24.7658   | 36.01     | 27.3171     | 30.559    | 34.2716   | 27.6876    |
| SPPL3       | 31.4946   | 33.8065   | 33.5496     | 37.1433   | 33.3918   | 31.4664    |
| MSC         | 4.63613   | 6.82148   | 3.28591     | 2.19712   | 4.38403   | 2.64172    |
| OR2T6       | 0         | 0         | 0           | 0         | 0         | 0          |
| KLK8        | 44.9056   | 47.8709   | 53.5457     | 64.6106   | 50.1002   | 51.8595    |
| MECOM       | 2.60939   | 2.1128    | 2.09184     | 1.34894   | 1.75168   | 1.32624    |
| SMC1B       | 0.02285   | 0.121215  | 0.103785    | 0.193102  | 0.0436599 | 0.0996741  |
| DNAJC25-GN1 | 8.85E-180 | 1.91E-163 | 4.795599999 | 1.48E-179 | 3.38E-207 | 1.95E-224  |
| RBPM52      | 6.57853   | 8.56419   | 6.86218     | 5.93394   | 4.25588   | 3.64755    |
| ZNHIT1      | 47.4262   | 67.8172   | 47.9442     | 66.6891   | 49.4566   | 55.4611    |
| NXF2        | 0         | 0         | 0.0220978   | 0         | 0         | 0.00791315 |
| LRRN4       | 0.0745548 | 0.0329583 | 0.112877    | 0         | 0         | 0.0696891  |
| LOC1720     | 0         | 0         | 0           | 0         | 0         | 0          |
| SNORA44     | 52.4327   | 231.789   | 119.076     | 246.167   | 66.7894   | 228.717    |
| PRPH2       | 0.45935   | 0.66721   | 0.47192     | 0.338896  | 0.982174  | 0.879188   |
| MIR638      | 0         | 0         | 0           | 0         | 0         | 0          |
| POTEI       | 1.41086   | 1.44785   | 1.26107     | 0.895205  | 1.2678    | 1.30525    |
| RPS4X       | 741.998   | 999.556   | 1296.84     | 1839.16   | 1372.41   | 1317.42    |
| LPPR1       | 0.273666  | 0.476709  | 0.176782    | 0.296027  | 0.23984   | 0.234663   |



|             |           |           |          |          |            |           |
|-------------|-----------|-----------|----------|----------|------------|-----------|
| SPAG11B     | 0         | 0         | 0        | 0        | 0          | 0         |
| LOC10050659 | 6.96182   | 4.55194   | 6.7903   | 10.1658  | 9.37819    | 12.245    |
| USH1C       | 0         | 0.161362  | 0.138159 | 0        | 0.13077    | 0.177705  |
| PABPC3      | 103.047   | 90.8748   | 109.213  | 94.674   | 97.9609    | 101.505   |
| LOC10050560 | 0         | 0.483156  | 0.483341 | 1.04126  | 0.391549   | 0.170265  |
| MIR520F     | 0         | 0         | 0        | 0        | 0          | 0         |
| ZNF639      | 9.13403   | 7.11364   | 8.13766  | 7.67879  | 7.8967     | 5.56865   |
| CORO7-PAM1  | 1.30E-54  | 5.71E-53  | 2.14E-28 | 2.06E-57 | 0.0825201  | 0.086351  |
| TSPAN5      | 11.9754   | 9.12659   | 16.0675  | 14.8659  | 16.4363    | 19.2436   |
| CAPZB       | 121.614   | 124.603   | 112.752  | 115.836  | 118.728    | 118.465   |
| DUSP4       | 11.9686   | 7.25865   | 11.6843  | 11.1594  | 9.34914    | 7.15459   |
| GSTO1       | 61.45     | 71.308    | 43.0037  | 52.0872  | 45.1891    | 41.5914   |
| TMEM183A    | 16.4269   | 16.7205   | 15.8488  | 18.0602  | 16.3237    | 16.4014   |
| ZNF500      | 5.04312   | 5.26462   | 5.7725   | 5.44857  | 5.88227    | 4.50574   |
| EMID2       | 2.11644   | 0.906373  | 1.30175  | 2.9499   | 1.32691    | 1.54556   |
| CIDEC       | 149.719   | 188.205   | 203.044  | 100.787  | 85.6528    | 53.7127   |
| SLC6A14     | 11.3506   | 4.03297   | 3.75822  | 6.0761   | 6.45907    | 12.7054   |
| SALL4       | 0.0282072 | 0.024939  | 0.170824 | 0.132431 | 0.359307   | 0.246086  |
| RIPK1       | 20.0262   | 21.1264   | 18.7585  | 19.5166  | 20.3078    | 13.9134   |
| THADA       | 7.80535   | 6.72121   | 6.42206  | 6.46254  | 6.66521    | 6.89141   |
| GRXCR1      | 0         | 0         | 0        | 0        | 0          | 0         |
| MAST1       | 0.313576  | 0.381211  | 0.697301 | 0.88333  | 0.649085   | 0.732778  |
| HUWE1       | 19.7467   | 15.5988   | 21.3953  | 16.3576  | 19.8872    | 19.9688   |
| RIMS1       | 0.810588  | 0.454377  | 0.357746 | 0.53281  | 0.343032   | 0.201319  |
| TTBK1       | 0.0400432 | 0.0354036 | 0        | 0        | 0.00850124 | 0.0249532 |
| LOC10050597 | 0         | 0         | 0        | 0        | 0          | 0         |
| LOC10050630 | 0         | 0         | 0        | 0        | 0          | 0         |
| PSMD3       | 73.2514   | 78.2744   | 69.9111  | 81.516   | 65.9465    | 76.892    |
| LOC10050678 | 1.33215   | 1.27067   | 1.85447  | 1.33246  | 1.34404    | 1.11168   |
| ELOVL4      | 173.988   | 125.3     | 116.677  | 82.5233  | 83.7559    | 109.574   |
| LIPE        | 41.6756   | 110.575   | 79.8442  | 38.0229  | 27.2144    | 17.3724   |
| EID2        | 11.8239   | 12.3925   | 10.7291  | 9.70549  | 11.321     | 10.8327   |
| HMG2        | 80.3851   | 99.562    | 84.8212  | 102.503  | 89.3141    | 77.6517   |
| DPYD        | 12.2713   | 7.53511   | 10.0912  | 6.70963  | 7.24924    | 5.57389   |
| PPM1H       | 3.15999   | 2.03066   | 1.63365  | 1.98295  | 2.01262    | 2.63197   |
| DBF4        | 2.58553   | 2.27585   | 2.14567  | 2.21609  | 2.32389    | 2.21143   |
| INS         | 0         | 0         | 0        | 0        | 0          | 0         |
| HRASLS5     | 8.33219   | 7.79423   | 11.3529  | 4.10841  | 3.99164    | 2.78669   |
| MIR4467     | 0         | 0         | 0        | 0        | 0          | 0         |
| LRRC18      | 0.196971  | 0.29025   | 0.546731 | 0.431557 | 1.12907    | 0.327318  |
| ISCU        | 128.897   | 125.642   | 119.098  | 125.848  | 99.4316    | 89.5003   |
| DNASE2B     | 0.72595   | 0         | 0        | 0        | 0.0739776  | 0         |
| UHRF1       | 1.55246   | 2.85592   | 1.31946  | 2.06902  | 1.48004    | 1.51366   |

|             |          |           |           |           |           |           |
|-------------|----------|-----------|-----------|-----------|-----------|-----------|
| RFX4        | 0        | 0.103227  | 0.0220958 | 0         | 0.0185903 | 0.0970085 |
| POLDIP3     | 35.7369  | 37.9446   | 32.2488   | 35.9282   | 34.2435   | 35.9757   |
| KDELR1      | 80.7675  | 97.7248   | 90.9577   | 107.014   | 91.1934   | 88.5396   |
| WIPI2       | 27.5157  | 28.5146   | 31.4708   | 34.8786   | 30.3624   | 34.1839   |
| LOC10050616 | 0.928714 | 0.785791  | 0.799368  | 0.408032  | 1.07268   | 0.665592  |
| HSP90AB2P   | 0.852316 | 0.574739  | 0.874246  | 0.688945  | 0.714769  | 0.723937  |
| FAM25C      | 15.3157  | 9.35261   | 16.38     | 14.9849   | 25.25     | 33.0673   |
| LOC10050658 | 0.855834 | 0.577431  | 0.310755  | 0.397809  | 0.477199  | 0.592269  |
| PCLO        | 0.67016  | 0.305835  | 0.613744  | 0.537746  | 0.508606  | 0.509863  |
| FER1L6-AS1  | 0        | 0         | 0         | 0         | 0         | 0         |
| MIR3690     | 0        | 0         | 0         | 0         | 0         | 0         |
| TAOK3       | 9.93731  | 8.88378   | 11.1247   | 8.64518   | 9.17653   | 7.86131   |
| MFGE8       | 57.7762  | 71.2666   | 59.2495   | 66.7347   | 68.2557   | 68.0787   |
| MIR331      | 0        | 0         | 0         | 0         | 0         | 0         |
| ALDH18A1    | 16.8738  | 14.302    | 17.0099   | 18.9383   | 14.1007   | 14.6082   |
| UROS        | 28.8304  | 33.5333   | 33.105    | 41.1647   | 27.6638   | 26.3937   |
| ATP4A       | 0        | 0.0243947 | 0.0208869 | 0.025908  | 0.0175732 | 0.0171939 |
| C6orf141    | 3.30131  | 2.80867   | 2.92349   | 2.86593   | 3.68951   | 5.1625    |
| MIR518C     | 0        | 0         | 0         | 0         | 0         | 0         |
| CYTH2       | 20.224   | 22.3602   | 18.0469   | 22.4971   | 25.3643   | 26.6509   |
| LOC439994   | 5.38548  | 5.21411   | 5.86616   | 5.85043   | 5.32349   | 4.49792   |
| NAP1L5      | 3.33449  | 3.04174   | 3.32557   | 2.68374   | 4.14638   | 3.33126   |
| MIR4675     | 0        | 0         | 0         | 0         | 0         | 0         |
| CROT        | 23.8369  | 23.5189   | 20.5871   | 17.6855   | 22.6863   | 20.4349   |
| GRM7        | 0        | 0         | 0.111023  | 0.0220332 | 0.0149449 | 0.0658025 |
| LOC10013326 | 0        | 0         | 0         | 0         | 0         | 0         |
| PML         | 35.9157  | 45.6425   | 30.438    | 31.9596   | 35.7679   | 25.6263   |
| UNC5B       | 11.7869  | 9.2444    | 14.4283   | 10.5424   | 8.13379   | 19.6191   |
| CCDC36      | 0.857078 | 0.659399  | 0.78931   | 0.630711  | 0.498627  | 0.580346  |
| LOC286359   | 0        | 0         | 0         | 0         | 0         | 0         |
| CD300E      | 0.445999 | 0.295743  | 0.654145  | 0.261741  | 0.390581  | 0.555855  |
| SDF2        | 33.7815  | 33.2809   | 25.8975   | 32.0224   | 26.2969   | 27.7341   |
| NMS         | 0        | 0         | 0         | 0         | 0         | 0         |
| GALT        | 36.2374  | 53.228    | 44.4521   | 35.6503   | 55.7761   | 46.8397   |
| C21orf119   | 6.61856  | 9.97452   | 7.6293    | 5.93224   | 7.47276   | 5.71793   |
| TMEM75      | 0        | 0         | 0         | 0.0444245 | 0.0602656 | 0         |
| ALG1L       | 1.11163  | 0.332114  | 0.815926  | 0.335634  | 0.383724  | 0.596543  |
| TNFSF14     | 0.897956 | 1.39678   | 0.49068   | 0.134783  | 1.37105   | 0.426202  |
| PITRM1      | 27.6772  | 28.8459   | 26.2613   | 26.1841   | 26.0364   | 24.3814   |
| CIDEB       | 18.8346  | 22.7811   | 18.4387   | 23.7366   | 26.6233   | 22.2021   |
| PNPLA6      | 11.3431  | 14.9485   | 14.5043   | 13.9548   | 14.9845   | 13.9968   |
| C5orf27     | 21.627   | 18.5462   | 20.8853   | 24.0738   | 15.6386   | 17.429    |
| KRT6B       | 508.491  | 404.029   | 358.767   | 470.613   | 283.224   | 949.703   |

|             |           |           |           |           |           |           |
|-------------|-----------|-----------|-----------|-----------|-----------|-----------|
| LOC10050610 | 0         | 0         | 0         | 0         | 0         | 0         |
| FKBP6       | 0.272316  | 0.38112   | 0.487998  | 0.199766  | 0.17344   | 0.228495  |
| ART4        | 0.0797938 | 0.0705487 | 0.302022  | 0         | 0.203285  | 0         |
| ITGB1BP3    | 0.202484  | 0         | 0         | 0.0950648 | 0         | 0.441629  |
| CSN1S2AP    | 0         | 0         | 0         | 0         | 0         | 0         |
| SNX5        | 35.7262   | 32.8731   | 31.3419   | 31.4799   | 30.4008   | 26.2204   |
| KRTAP4-11   | 4.61702   | 1.36054   | 0.0728067 | 33.4596   | 0.310108  | 383.429   |
| LOC441698   | 0.309176  | 0         | 0.234048  | 0         | 0.196916  | 0.192665  |
| GSTA3       | 5.53304   | 7.105     | 3.291     | 2.35032   | 4.6148    | 5.82869   |
| ODZ4        | 2.78218   | 2.29462   | 3.23254   | 2.44346   | 2.99299   | 3.4071    |
| VPS33A      | 8.92474   | 8.64219   | 8.15994   | 8.77924   | 8.48941   | 7.2709    |
| TTC33       | 3.81919   | 2.9758    | 4.01328   | 3.0294    | 3.55428   | 3.07547   |
| FLNB        | 38.9789   | 34.1787   | 44.3215   | 45.8863   | 43.2374   | 51.3343   |
| HAND2       | 0.0428514 | 0.0378865 | 0.0648774 | 0         | 0         | 0.133516  |
| RNF122      | 3.01371   | 4.3422    | 3.0841    | 4.50675   | 3.87444   | 5.35582   |
| CD300C      | 0.495946  | 0.438484  | 0.3218    | 0.133053  | 0.406119  | 0.485653  |
| SLC6A5      | 0         | 0         | 0         | 0         | 0         | 0         |
| JPH3        | 0.0496643 | 0.0435181 | 0.0932294 | 0.115324  | 0.0780544 | 0.0917184 |
| SNORD115-1! | 0         | 0         | 0         | 0         | 0         | 0         |
| LRP1B       | 0.164012  | 0.210013  | 0.316816  | 0.228351  | 0.133277  | 0.123351  |
| OXSM        | 14.4083   | 14.353    | 8.69144   | 9.98711   | 8.51037   | 10.3142   |
| TBC1D29     | 0         | 0.358257  | 0.153371  | 0         | 0.129039  | 0.126253  |
| MIR4676     | 0         | 0         | 0         | 0         | 0         | 0         |
| DLG1        | 21.2157   | 18.2777   | 22.0916   | 17.098    | 19.0691   | 19.6834   |
| FAM115C     | 4.13095   | 3.93121   | 2.05377   | 1.73021   | 4.29852   | 3.1142    |
| WIPI1       | 13.8732   | 11.693    | 16.4273   | 20.8833   | 16.606    | 18.3331   |
| ZNF829      | 1.22625   | 0.942545  | 1.20296   | 0.917672  | 0.938072  | 0.84769   |
| VAV2        | 7.00347   | 7.81673   | 5.95084   | 5.17659   | 6.87936   | 5.58574   |
| SLC35D1     | 6.98874   | 5.51277   | 7.86307   | 5.20268   | 7.31196   | 6.18736   |
| LOC10065276 | 0         | 0         | 0.212177  | 0.131591  | 0         | 0         |
| LOC10065289 | 2.09608   | 4.38233   | 2.49352   | 0.810524  | 3.795     | 4.34072   |
| ZNF534      | 0.226607  | 0.044521  | 0.0381193 | 0         | 0         | 0         |
| FAM71B      | 0         | 0         | 0         | 0         | 0         | 0         |
| MIR1282     | 0         | 12185.1   | 2324.12   | 17795.1   | 2798.81   | 16343.8   |
| HLA-C       | 430.791   | 426.63    | 367.244   | 295.481   | 483.919   | 272.466   |
| HARBI1      | 2.18793   | 2.05923   | 2.03027   | 2.65088   | 1.66322   | 2.41898   |
| SNX10       | 4.14384   | 4.66601   | 5.20159   | 1.64023   | 3.13853   | 2.03667   |
| SKP2        | 5.61875   | 4.10165   | 6.7964    | 6.5685    | 6.2049    | 4.36915   |
| DRAM1       | 4.9349    | 4.75532   | 2.60243   | 2.2388    | 3.28433   | 2.45327   |
| BAGE2       | 0         | 0         | 0.103301  | 0.0320335 | 0.1358    | 0         |
| GORAB       | 6.57611   | 5.66872   | 5.44101   | 4.685     | 6.7983    | 4.8264    |
| RBM1A3P     | 0         | 0         | 0         | 0         | 0         | 0         |
| RASSF7      | 34.7327   | 51.1898   | 36.3618   | 60.0132   | 53.9209   | 57.2513   |

|             |           |          |           |          |           |           |
|-------------|-----------|----------|-----------|----------|-----------|-----------|
| TGM5        | 18.9573   | 14.5711  | 24.7415   | 27.1184  | 24.6724   | 24.7857   |
| TMEM30C     | 0         | 0        | 0         | 0        | 0         | 0         |
| RRP9        | 13.4758   | 17.1961  | 12.4097   | 17.0888  | 13.1396   | 12.4664   |
| FLJ30375    | 0.213266  | 0.188557 | 0.129155  | 0.240305 | 0.190163  | 0.0531594 |
| LOC729770   | 0.903931  | 1.2223   | 0.684281  | 1.14835  | 1.11757   | 0.960909  |
| SPACA4      | 1.82738   | 1.50795  | 0.737781  | 0.571962 | 1.31905   | 1.06283   |
| OR14A16     | 0         | 0        | 0         | 0        | 0         | 0         |
| WRAP73      | 7.70822   | 10.4975  | 9.6469    | 9.92292  | 15.3221   | 13.9455   |
| MOV10L1     | 0.273852  | 0.389266 | 0.319844  | 0.425118 | 0.537515  | 0.477987  |
| ZNF227      | 4.46964   | 4.03831  | 4.98887   | 4.41136  | 5.27789   | 5.69256   |
| FAM53A      | 0.644158  | 1.60872  | 1.02665   | 1.23999  | 1.15885   | 1.40048   |
| MEF2A       | 24.3283   | 26.4345  | 28.2137   | 22.9303  | 28.8541   | 21.7353   |
| MIR3713     | 0         | 0        | 0         | 0        | 0         | 0         |
| SELM        | 59.845    | 112.672  | 78.5838   | 87.8364  | 82.6455   | 58.172    |
| TNFSF4      | 0.309617  | 0.273744 | 0.426149  | 0.211437 | 0.448174  | 0.24556   |
| LIG1        | 11.4847   | 17.0847  | 11.9898   | 14.4693  | 17.9555   | 14.7279   |
| STXBP3      | 26.3716   | 20.1431  | 24.6338   | 15.2967  | 26.8893   | 22.3638   |
| UTY         | 4.73329   | 3.98596  | 0.0443004 | 0        | 0         | 0         |
| IGFL2       | 94.5094   | 57.4914  | 98.029    | 73.2155  | 125.766   | 111.292   |
| LOC10050569 | 0         | 0        | 0.350162  | 0        | 0         | 0         |
| ARFGAP2     | 48.0375   | 59.7414  | 53.2324   | 62.4815  | 61.8176   | 58.2645   |
| C6orf99     | 0.217913  | 0.770658 | 0.164961  | 0.204617 | 0.27758   | 0.814764  |
| SIN3A       | 11.3805   | 11.4666  | 12.1572   | 10.9166  | 11.6634   | 9.95391   |
| PRRT1       | 2.68912   | 5.8711   | 4.44526   | 7.369    | 6.25666   | 5.36923   |
| PCNAP1      | 0         | 0        | 0         | 0        | 0         | 0         |
| FABP3       | 7.84269   | 6.93402  | 3.56218   | 1.37464  | 1.86482   | 1.7594    |
| SLC44A1     | 22.6779   | 18.2396  | 24.3055   | 22.8767  | 23.0039   | 26.9078   |
| HLA-L       | 0.90029   | 0.808368 | 0.507181  | 0.334211 | 1.02013   | 0.521881  |
| GIMAP6      | 12.8243   | 11.2118  | 10.1008   | 5.88255  | 9.65932   | 6.32491   |
| FOXD1       | 1.48152   | 1.23048  | 1.35941   | 1.72836  | 1.48686   | 0.895241  |
| FATE1       | 0         | 0        | 0         | 0.10117  | 0.27449   | 0         |
| ARRB2       | 16.0796   | 19.6136  | 17.7051   | 13.7197  | 20.9994   | 16.3965   |
| LOC10050551 | 0.835185  | 0.492279 | 0         | 0        | 0.886557  | 0.346968  |
| LOC441242   | 0.0528966 | 0.165373 | 0.240938  | 0.199158 | 0.220081  | 0.115826  |
| GNG4        | 0.123937  | 0.173345 | 0.0800607 | 0.299253 | 0.177871  | 0.556332  |
| STC2        | 0.305889  | 0.461352 | 0.749164  | 0.506868 | 0.550087  | 0.347596  |
| SEC24D      | 8.12858   | 6.19038  | 7.33323   | 4.4805   | 6.84177   | 5.24469   |
| FLOT2       | 51.5701   | 58.9709  | 46.4555   | 48.8894  | 47.4567   | 39.8433   |
| TMEM39B     | 7.13616   | 11.9572  | 8.62595   | 11.348   | 10.1531   | 7.92561   |
| CLCN2       | 1.79686   | 2.86084  | 2.27764   | 2.07524  | 2.88345   | 2.75142   |
| DAZAP1      | 55.1185   | 82.5699  | 59.0095   | 81.4776  | 67.6056   | 71.5025   |
| TNFSF18     | 0         | 0        | 0         | 0        | 0.110172  | 0         |
| LOC643723   | 0.391436  | 0.230722 | 0.0493866 | 0.183776 | 0.0415513 | 0.0406544 |

|             |           |          |           |          |           |           |
|-------------|-----------|----------|-----------|----------|-----------|-----------|
| MIR4299     | 0         | 0        | 0         | 0        | 0         | 0         |
| LOC10013019 | 0         | 0        | 0.244796  | 0        | 0         | 0         |
| DDHD1       | 4.58404   | 4.09083  | 4.92932   | 3.68076  | 4.14236   | 3.97842   |
| TUSC1       | 9.53284   | 14.9033  | 10.4994   | 13.2539  | 9.69358   | 9.1529    |
| LOC391322   | 9.26847   | 14.9844  | 5.2121    | 7.45967  | 0.0562204 | 0         |
| NSL1        | 1.93553   | 1.86914  | 1.69769   | 1.62966  | 1.63759   | 1.44647   |
| FBXO42      | 12.832    | 12.143   | 11.6617   | 14.0258  | 14.9834   | 17.3879   |
| MIR654      | 0         | 0        | 0         | 0        | 0         | 0         |
| HAVCR1      | 0         | 0        | 0.0429493 | 0        | 0.0513536 | 0.200981  |
| B4GALT5     | 12.9418   | 8.33322  | 12.3198   | 7.54472  | 10.4043   | 7.47874   |
| CACNG8      | 0.0540499 | 0.057345 | 0.0409161 | 0.101504 | 0.0688493 | 0.0740995 |
| SEMA3G      | 34.6859   | 29.3029  | 34.5582   | 23.6061  | 20.9648   | 19.9097   |
| TTY14       | 2.31137   | 3.21132  | 0         | 0        | 0         | 0         |
| FLJ39739    | 2.60527   | 2.4952   | 2.23249   | 2.15826  | 3.26004   | 1.97212   |
| NOBOX       | 0         | 0        | 0         | 0        | 0.063147  | 0         |
| ARCN1       | 41.158    | 29.6566  | 37.968    | 29.6334  | 31.2012   | 29.1502   |
| LOC10012941 | 0.0616671 | 0        | 0         | 0        | 0         | 3.13E-101 |
| LOC10028929 | 0.935331  | 4.39675  | 1.40278   | 3.50196  | 1.3604    | 3.10224   |
| GPR83       | 0.0453742 | 0.040117 | 0.0171743 | 0.170423 | 0.158945  | 0.0848258 |
| MYH8        | 0         | 0        | 0.0119956 | 0        | 0.0100924 | 0         |
| TOMM20      | 82.4629   | 78.3606  | 85.5672   | 89.4216  | 77.4941   | 67.0846   |
| OR10T2      | 0         | 0        | 0         | 0        | 0         | 0         |
| TMEM145     | 0.176953  | 0.312901 | 0.401863  | 0.553853 | 0.450809  | 0.367565  |
| KIF16B      | 6.97366   | 5.93633  | 6.136     | 4.82808  | 5.33785   | 4.96507   |
| RUNDC2A     | 0.771462  | 0.561711 | 1.51153   | 0.468723 | 0.751474  | 1.23092   |
| TM4SF4      | 0.13254   | 0.117184 | 0.150501  | 0        | 0.0422078 | 0         |
| DNAJB12     | 21.1936   | 23.2072  | 21.0703   | 22.5804  | 22.1632   | 22.0058   |
| LOC10050557 | 0.655284  | 0.386044 | 0.578602  | 0.615407 | 0.48703   | 0.612642  |
| RPS18       | 364.644   | 662.977  | 484.025   | 718.129  | 536.876   | 480.684   |
| RNU6-21     | 0         | 0        | 0         | 0        | 0         | 0         |
| TREM2       | 0.992879  | 2.53598  | 2.83943   | 1.76101  | 2.52948   | 1.09995   |
| COLQ        | 2.33455   | 3.30812  | 2.49469   | 2.38545  | 2.99484   | 1.83973   |
| UROD        | 39.5925   | 49.3267  | 38.1444   | 45.0862  | 39.2177   | 36.3126   |
| ZHX1        | 17.3813   | 14.9106  | 20.1486   | 15.3679  | 17.8826   | 15.8053   |
| RFPL4B      | 0         | 0        | 0         | 0        | 0         | 0         |
| C10orf10    | 25.8517   | 57.5258  | 45.7869   | 22.2084  | 30.7624   | 36.0788   |
| FGD3        | 4.10344   | 5.04292  | 4.20686   | 4.5547   | 7.83389   | 4.94665   |
| MIR423      | 0         | 0        | 0         | 0        | 0         | 0         |
| OR2T5       | 0         | 0        | 0         | 0        | 0.0801303 | 0         |
| LOC10050561 | 0.532031  | 0.37631  | 0.845775  | 0.94918  | 1.08433   | 0.464155  |
| SPDYA       | 0.917336  | 1.86506  | 0.591566  | 1.51238  | 1.6329    | 1.57944   |
| DKK3        | 40.6072   | 40.6645  | 41.5094   | 40.1423  | 40.6065   | 33.7711   |
| TPTE2P2     | 0         | 0        | 0.0950501 | 0.117899 | 0.319881  | 0         |

|             |          |          |           |           |           |           |
|-------------|----------|----------|-----------|-----------|-----------|-----------|
| CALCB       | 0        | 0.199854 | 0         | 0.955135  | 0.215953  | 0.563445  |
| MIR3688-2   | 0        | 0        | 0         | 0         | 0         | 0         |
| PCDHGA12    | 0.931319 | 0.612063 | 1.01619   | 0.792164  | 0.689505  | 0.813345  |
| C22orf33    | 0        | 0        | 0         | 0         | 0         | 0         |
| PLA2G15     | 9.45426  | 13.6279  | 11.4177   | 16.0277   | 13.1207   | 12.975    |
| ETHE1       | 49.5628  | 58.7905  | 38.4526   | 50.1662   | 43.5025   | 49.4782   |
| SALL3       | 0        | 0        | 0.0153177 | 0         | 0         | 0.0126093 |
| OPN5        | 0        | 0        | 0         | 0         | 0.0179782 | 0.0175901 |
| KBTBD11     | 2.08613  | 2.09537  | 2.57831   | 2.17205   | 1.70829   | 1.20271   |
| TNPO2       | 29.5519  | 34.1082  | 37.825    | 36.7294   | 43.0462   | 34.6918   |
| BTRC        | 7.28834  | 7.21819  | 6.45721   | 5.84289   | 6.60846   | 8.0724    |
| LOC10012794 | 0.169485 | 0        | 0         | 0.159144  | 0         | 0         |
| LOC10050699 | 0.55081  | 0.730487 | 0.387183  | 0.184715  | 0.751744  | 0.465827  |
| KDM4DL      | 0.130309 | 0.230422 | 0.131526  | 0         | 0.248983  | 0.243609  |
| LIN52       | 4.95351  | 5.41007  | 4.19099   | 2.68132   | 3.93436   | 4.28522   |
| LOC10012788 | 2.08206  | 1.72565  | 3.00984   | 4.81664   | 3.10365   | 4.64443   |
| EREG        | 2.75992  | 1.42342  | 5.2865    | 1.74732   | 4.24804   | 3.50488   |
| C12orf54    | 0.136818 | 0.120965 | 0.310715  | 0.770817  | 0.17428   | 0.341035  |
| LOC731282   | 0.448246 | 0.198155 | 0.339325  | 0.631344  | 0         | 0.418992  |
| LOC10013298 | 0        | 0        | 0         | 0         | 0         | 0         |
| LGALS8-AS1  | 0.301464 | 0.399628 | 0.119828  | 0.451863  | 0.403013  | 0.141344  |
| MIR1184-3   | 0        | 0        | 0         | 0         | 0         | 0         |
| CKAP2L      | 1.05601  | 1.17374  | 0.708043  | 0.679937  | 0.749443  | 0.733266  |
| GPR139      | 0        | 0        | 0         | 0         | 0         | 0         |
| MIR3937     | 0        | 0        | 0         | 0         | 0         | 0         |
| CTNND1      | 103.153  | 84.9787  | 92.6289   | 97.0144   | 107.86    | 98.7378   |
| MIR3960     | 0        | 0        | 0         | 0         | 0         | 0         |
| NDNF        | 1.04212  | 1.01352  | 2.15631   | 1.07639   | 0.862855  | 1.03905   |
| LOC728047   | 1.10093  | 0.793219 | 1.26533   | 0.679457  | 1.09036   | 0.908283  |
| DOLK        | 7.74609  | 7.79182  | 7.30346   | 7.2299    | 5.67208   | 6.99486   |
| LOC389332   | 0        | 0.110144 | 0         | 0         | 0         | 0         |
| CNGB3       | 0        | 0        | 0         | 0         | 0         | 0         |
| BTNL9       | 27.0759  | 46.5615  | 26.5563   | 18.3822   | 22.0926   | 12.8644   |
| MCM5        | 13.0613  | 21.1363  | 12.2845   | 17.356    | 15.9318   | 15.4153   |
| C2orf83     | 0        | 0.0459   | 0         | 0.0487474 | 0         | 0.310944  |
| ANXA1       | 225.698  | 243.77   | 310.216   | 208.172   | 190.077   | 173.723   |
| FAP         | 3.81278  | 3.11661  | 6.3989    | 3.10729   | 5.58986   | 4.14673   |
| PRPF40B     | 10.4027  | 15.4805  | 11.3258   | 13.4719   | 13.9645   | 12.938    |
| LINC00290   | 0        | 0        | 0         | 0         | 0         | 0         |
| LOC10027183 | 29.181   | 39.4112  | 14.8414   | 42.3647   | 33.2437   | 33.6235   |
| PDGFRL      | 14.6295  | 13.8515  | 28.0172   | 9.38005   | 14.2894   | 9.25258   |
| MIR143HG    | 21.7264  | 24.9033  | 15.8557   | 16.8787   | 15.3047   | 11.6756   |
| NFAT5       | 14.7636  | 10.3332  | 14.5207   | 12.066    | 13.6094   | 12.2846   |

|             |            |           |           |          |           |           |
|-------------|------------|-----------|-----------|----------|-----------|-----------|
| SOX21       | 7.22351    | 8.9412    | 11.6656   | 12.6988  | 15.9235   | 15.7298   |
| C7orf50     | 31.391     | 47.5638   | 31.7685   | 46.9563  | 39.818    | 42.5566   |
| PRR7        | 2.02922    | 5.59534   | 2.30111   | 4.756    | 3.1188    | 4.94136   |
| METTL8      | 4.33376    | 4.23403   | 4.62607   | 4.07573  | 4.85513   | 3.54644   |
| SIGLEC12    | 0.272931   | 0.227646  | 0.19491   | 0.256278 | 0.173831  | 0.0377952 |
| FAM123B     | 2.00741    | 1.35839   | 1.74035   | 1.74804  | 1.69281   | 1.67723   |
| PPIG        | 21.5561    | 15.5219   | 20.1032   | 12.8331  | 18.4472   | 15.764    |
| PDE1B       | 7.07773    | 11.4042   | 8.90885   | 7.16482  | 9.62522   | 6.89371   |
| TM4SF19     | 0.163168   | 0.438685  | 3.38E-07  | 0.324131 | 0.356814  | 0.859511  |
| IFT52       | 15.4802    | 17.0385   | 16.4061   | 16.6122  | 15.6946   | 11.4184   |
| FGF22       | 3.40093    | 5.46707   | 5.85363   | 12.7754  | 10.8961   | 23.6978   |
| ABCA4       | 1.42737    | 1.28494   | 2.16105   | 3.22885  | 2.47936   | 5.35303   |
| ZNF530      | 1.64456    | 2.19586   | 2.41366   | 1.85936  | 2.75752   | 2.34245   |
| PNRC2       | 51.1156    | 44.6005   | 50.7472   | 41.5053  | 52.116    | 47.6751   |
| KIAA0907    | 33.6947    | 33.3465   | 30.4533   | 30.3482  | 37.5179   | 32.496    |
| RASSF6      | 2.91416    | 2.25806   | 2.72301   | 2.36218  | 2.30582   | 2.36892   |
| TP53TG5     | 0          | 0         | 0.151713  | 0.536822 | 0.426042  | 0         |
| CC2D1B      | 9.39846    | 11.3693   | 9.63179   | 9.14359  | 10.6537   | 11.4809   |
| LRP5        | 12.339     | 13.1842   | 16.0939   | 13.0675  | 12.5717   | 10.7788   |
| MICB        | 1.83056    | 1.5825    | 0.862238  | 0.458363 | 1.32147   | 0.912761  |
| TGIF1       | 26.3605    | 30.0384   | 30.894    | 32.6776  | 31.0283   | 30.4397   |
| HLA-E       | 390.3      | 465.226   | 346.925   | 314.488  | 404.805   | 250.068   |
| CCDC144A    | 0.160336   | 0.0872052 | 0.987253  | 1.27097  | 0.553338  | 0.386055  |
| CCDC82      | 12.1059    | 12.552    | 14.1074   | 8.95603  | 16.2384   | 11.2244   |
| SERPINF1    | 141.939    | 184.878   | 226.818   | 118.754  | 130.001   | 82.3879   |
| GBAP1       | 9.29077    | 10.0498   | 11.5974   | 14.5158  | 11.2326   | 13.4237   |
| ELAVL4      | 0.250372   | 0         | 0         | 0        | 0.0354326 | 0.0346678 |
| LOC10065278 | 0.00064124 | 0.90611   | 5.18E-07  | 2.04E-06 | 5.28E-05  | 0.237142  |
| OR4D9       | 0          | 0         | 0         | 0.237241 | 0.160919  | 0         |
| DNLZ        | 13.9469    | 19.8576   | 11.3806   | 22.9603  | 14.6509   | 11.7386   |
| TBC1D2      | 10.3211    | 10.4138   | 7.9257    | 9.16068  | 9.75614   | 8.91536   |
| TLX3        | 0          | 0         | 0.0546402 | 0        | 0.0459714 | 0         |
| MIR548AG1   | 0          | 0         | 0         | 0        | 0         | 0         |
| SNCG        | 20.2225    | 37.36     | 33.7016   | 29.7582  | 22.5877   | 18.3384   |
| TMEM179     | 0          | 0         | 0         | 0.123039 | 0         | 0         |
| RPP14       | 9.72323    | 7.11903   | 10.2614   | 9.70512  | 9.06121   | 8.18358   |
| PUM2        | 34.195     | 29.2553   | 33.0414   | 31.1534  | 34.9261   | 34.3965   |
| LOC10050675 | 0.387685   | 0.0761703 | 0.652176  | 0.525821 | 0.507555  | 0.214745  |
| ISYNA1      | 19.1579    | 30.8161   | 17.8952   | 28.6324  | 20.21     | 21.1454   |
| SMA5        | 1.18521    | 2.14105   | 1.98935   | 1.64447  | 1.80597   | 1.78353   |
| C4orf52     | 31.0495    | 32.6566   | 27.6988   | 29.5885  | 22.9367   | 25.6784   |
| LOC10050676 | 13.7073    | 11.1886   | 14.0946   | 11.3415  | 14.3482   | 13.9604   |
| RECK        | 6.55137    | 4.45113   | 10.9007   | 4.54147  | 8.86328   | 6.1101    |

|             |           |           |          |           |           |           |
|-------------|-----------|-----------|----------|-----------|-----------|-----------|
| LOC643072   | 1.92026   | 1.34415   | 2.02634  | 2.39915   | 2.11902   | 2.18266   |
| ACSM2B      | 0         | 0.0371763 | 0.143244 | 0         | 0.0267807 | 0         |
| ENGASE      | 18.2595   | 26.3913   | 21.3057  | 24.9547   | 31.9104   | 44.4966   |
| MIR4447     | 0         | 0         | 0        | 0         | 0         | 0         |
| BOLA1       | 16.0868   | 34.6684   | 20.3326  | 29.9408   | 27.7185   | 23.3609   |
| CXorf64     | 0         | 0         | 0        | 0         | 0         | 0         |
| LDHD        | 47.5269   | 60.1616   | 30.498   | 31.3012   | 23.6279   | 31.7484   |
| WASF1       | 3.80842   | 3.63255   | 4.04566  | 3.38692   | 5.1633    | 5.01611   |
| LOC10013436 | 0.748318  | 0.360881  | 0.257491 | 0.383268  | 0.389952  | 0.296749  |
| GPS2        | 41.4168   | 55.1436   | 42.6931  | 50.4739   | 50.1381   | 46.7576   |
| HDLBP       | 82.3434   | 75.439    | 88.0133  | 80.3538   | 76.3442   | 75.9669   |
| LOC10050570 | 0         | 0.3039    | 0        | 0         | 0.21892   | 0         |
| C19orf50    | 49.0537   | 61.0473   | 43.7073  | 59.4551   | 57.4533   | 53.191    |
| DAP         | 47.4523   | 40.9572   | 39.5664  | 43.946    | 32.8195   | 31.7326   |
| TNFAIP6     | 1.44965   | 0.674572  | 1.96375  | 0.573135  | 0.631723  | 1.04599   |
| RPUSD3      | 23.0595   | 27.076    | 20.6299  | 24.3055   | 22.5233   | 23.5138   |
| LOC284801   | 0         | 0         | 0        | 0         | 0         | 0         |
| MIR32       | 0         | 0         | 0        | 0         | 0         | 0         |
| DEFB4B      | 10.503    | 3.79183   | 0        | 0.493109  | 1.50512   | 2.04533   |
| THOC5       | 10.9361   | 11.4499   | 9.72814  | 12.3564   | 10.3773   | 10.5356   |
| LEP         | 7.06642   | 6.0699    | 38.7717  | 19.1236   | 11.6541   | 3.93808   |
| SGMS1       | 11.3182   | 11.0675   | 13.4639  | 9.55016   | 12.8227   | 12.2209   |
| SPHK1       | 15.6838   | 25.8523   | 17.2585  | 21.4208   | 21.3752   | 19.1645   |
| C16orf57    | 17.1684   | 16.9775   | 12.6205  | 15.1853   | 11.6788   | 14.0716   |
| BNIP1       | 62.6827   | 79.9558   | 88.1812  | 104.858   | 142.166   | 147.412   |
| MIR3175     | 0         | 0         | 0        | 0         | 0         | 0         |
| PCBP2       | 105.76    | 119.822   | 114.497  | 129.559   | 112.122   | 102.193   |
| TMEM8B      | 8.40701   | 10.6791   | 8.90355  | 12.1548   | 14.3412   | 10.6126   |
| LOC729711   | 0         | 0         | 0        | 0         | 0         | 0         |
| SNORD105B   | 0         | 0         | 0        | 0         | 0         | 0         |
| CCDC75      | 2.92115   | 1.95659   | 3.01545  | 1.41302   | 2.25515   | 2.20647   |
| MOB2        | 45.0569   | 65.2998   | 49.7872  | 68.211    | 55.6952   | 53.3924   |
| LOC643770   | 0         | 0.0506606 | 0.130128 | 0.0538033 | 0.0729888 | 0.178533  |
| MIR4500HG   | 0.0631846 | 0.111728  | 0.191324 | 0.237317  | 0.241456  | 0.118122  |
| GBA2        | 38.7982   | 39.2329   | 38.2844  | 43.4816   | 41.8142   | 40.5498   |
| LOC401296   | 0         | 0         | 0        | 0         | 0         | 0.0475845 |
| SH2D3A      | 9.29907   | 18.3084   | 14.0789  | 18.9186   | 15.4647   | 16.821    |
| PER3        | 19.2926   | 26.0901   | 20.1455  | 19.6347   | 17.5972   | 14.1925   |
| RALYL       | 0.0342858 | 0.121254  | 0        | 0         | 0.304024  | 0.130139  |
| C17orf64    | 0         | 0.437778  | 0.281122 | 0.116234  | 0.0788404 | 0         |
| AGBL4       | 0.232904  | 0.323588  | 0.377807 | 0.0937258 | 0.296676  | 0.311006  |
| SLC6A11     | 1.19474   | 1.42373   | 1.8875   | 1.31694   | 0.992526  | 1.26243   |
| CDC20       | 5.05496   | 6.8155    | 3.68299  | 5.7551    | 4.58766   | 6.26052   |



|             |           |           |           |           |           |           |
|-------------|-----------|-----------|-----------|-----------|-----------|-----------|
| REM2        | 0.336689  | 0.644971  | 1.06198   | 1.31727   | 1.00072   | 0.664399  |
| MRPS31      | 16.495    | 14.6564   | 13.5429   | 11.0963   | 15.4712   | 17.4385   |
| KIAA0430    | 14.7735   | 13.3047   | 16.0718   | 12.299    | 16.289    | 12.773    |
| FGF11       | 10.7762   | 16.4123   | 16.0917   | 14.6928   | 22.5411   | 17.5241   |
| LOC650293   | 0         | 0         | 0.160048  | 0         | 0         | 0.131749  |
| MYLK2       | 0.107365  | 0.0632835 | 0.0541839 | 0.168023  | 0.0227938 | 0.089207  |
| CT47A6      | 0         | 0         | 0         | 0         | 0         | 0         |
| RPL13       | 840.289   | 1663.7    | 1237.9    | 2218.04   | 1433.55   | 1327.95   |
| COL8A2      | 7.10766   | 5.14683   | 6.18927   | 8.02516   | 7.49856   | 8.16548   |
| LCN1        | 0         | 0         | 0         | 0         | 0         | 0         |
| MIR130A     | 0         | 0         | 0         | 0         | 0         | 0         |
| KRTAP5-7    | 4.86057   | 0.798027  | 0.306623  | 34.2301   | 1.28989   | 214.267   |
| RHAG        | 0.0537923 | 0.0475598 | 0.122163  | 0         | 0.0342606 | 0.0670422 |
| SLC25A22    | 14.1884   | 17.8439   | 12.442    | 13.8645   | 13.5121   | 12.8226   |
| LOC10050695 | 2.44452   | 1.92114   | 1.26794   | 1.36021   | 1.58576   | 1.32585   |
| MAN2C1      | 42.3323   | 74.7066   | 57.9475   | 64.114    | 63.6175   | 44.8953   |
| MIR3915     | 0         | 0         | 0         | 0         | 0         | 0         |
| RBM14-RBM4  | 3.43348   | 5.29889   | 9.10012   | 4.2621    | 5.92409   | 3.98185   |
| IGANRP      | 0.0296482 | 0.0262131 | 0         | 0.0278392 | 0.0188831 | 0         |
| MIR890      | 0         | 0         | 0         | 0         | 0         | 0         |
| SP100       | 25.6776   | 23.2183   | 20.4003   | 16.8811   | 20.6908   | 14.0402   |
| CLASRP      | 31.735    | 43.7334   | 32.9423   | 46.2533   | 46.2014   | 40.0169   |
| C19orf71    | 7.88419   | 10.3667   | 10.1003   | 10.6301   | 17.3821   | 17.2588   |
| C11orf63    | 1.85382   | 1.7252    | 2.70334   | 1.53853   | 1.65447   | 1.83427   |
| ECHDC2      | 82.5883   | 120.533   | 74.239    | 93.4314   | 81.7725   | 82.1612   |
| STK19       | 24.3215   | 28.4317   | 21.2125   | 26.7638   | 28.6545   | 23.9971   |
| RPS27A      | 426.763   | 581.443   | 421.357   | 621.697   | 473.501   | 436.728   |
| RSPH9       | 0.771594  | 1.42889   | 0.0934565 | 0.463688  | 0.419357  | 0.410305  |
| PPIP5K2     | 10.9282   | 8.92128   | 10.7132   | 8.61959   | 12.25     | 10.3398   |
| PRLR        | 2.22063   | 0.804794  | 1.88064   | 1.40618   | 2.08498   | 1.58719   |
| SNORA67     | 508.026   | 552.818   | 414.161   | 513.723   | 497.791   | 487.046   |
| ZBED5       | 31.6399   | 35.15     | 30.4638   | 26.7752   | 38.5549   | 34.5805   |
| FAM170B     | 0         | 0         | 0.116575  | 0         | 0.0490401 | 0.0959631 |
| RIN3        | 5.43345   | 7.29567   | 5.80454   | 6.34165   | 6.37138   | 6.72433   |
| PRPF19      | 53.333    | 56.6304   | 47.0749   | 54.1264   | 49.6669   | 51.0016   |
| FAM46C      | 5.71562   | 3.88266   | 3.71771   | 3.36807   | 2.63682   | 2.46501   |
| FLRT3       | 3.55557   | 2.32454   | 4.53976   | 4.43296   | 4.61943   | 7.34988   |
| LOC10013108 | 2.12753   | 3.10249   | 1.60544   | 3.16221   | 3.79043   | 4.32668   |
| LOC10012921 | 0         | 0         | 0         | 0         | 0.0305872 | 0         |
| ANKRD36BP1  | 6.09059   | 1.97612   | 5.92188   | 2.62338   | 4.73325   | 2.95971   |
| LRWD1       | 5.58289   | 6.71501   | 5.67653   | 6.21118   | 6.43406   | 5.42346   |
| WSB2        | 29.4093   | 27.9105   | 24.7278   | 25.3884   | 21.3907   | 23.6416   |
| NUP35       | 8.91259   | 7.24725   | 7.45291   | 8.79638   | 9.07408   | 7.05392   |

|             |           |           |           |           |          |           |
|-------------|-----------|-----------|-----------|-----------|----------|-----------|
| C9orf171    | 0.0586097 | 0.051819  | 0         | 0.110067  | 0        | 0.0365231 |
| SLC43A2     | 8.34544   | 10.1015   | 10.7047   | 8.76913   | 12.6132  | 13.1664   |
| LPAR3       | 3.67531   | 1.62474   | 2.3649    | 2.35822   | 2.18477  | 2.17578   |
| CD1A        | 9.66212   | 10.2338   | 12.0667   | 5.71066   | 20.2421  | 8.86343   |
| LOC10050743 | 1.08525   | 0.995003  | 1.03189   | 0.958499  | 1.67981  | 1.82257   |
| SLC39A8     | 29.369    | 17.8602   | 18.0234   | 24.7226   | 14.8207  | 19.7626   |
| C11orf9     | 0.401212  | 0.50204   | 0.631816  | 0.533184  | 0.627055 | 0.405793  |
| GSX2        | 0         | 0.0817944 | 0.140066  | 0.0868685 | 0.117844 | 0.0576503 |
| BFSP1       | 1.39973   | 1.72257   | 0.793538  | 1.59819   | 1.17734  | 1.81947   |
| ZNF676      | 0.74652   | 0.480019  | 0.539433  | 0.573522  | 0.345791 | 0.253745  |
| PPIL6       | 0.468846  | 0.495203  | 0.359687  | 0.436243  | 0.358622 | 0.367863  |
| LOC728431   | 10.0463   | 12.3814   | 10.4282   | 16.4369   | 8.67682  | 8.63181   |
| VIM         | 719.515   | 934.14    | 891.669   | 776.716   | 739.883  | 500.552   |
| DAZ1        | 0.70474   | 0.252264  | 0         | 0         | 0        | 0         |
| PRRG2       | 11.7456   | 14.2617   | 11.7961   | 15.2935   | 12.518   | 13.2237   |
| PPIL4       | 12.1343   | 9.4269    | 10.4808   | 6.46277   | 11.5039  | 8.77639   |
| HIST1H3A    | 1.08791   | 0.320619  | 0.274517  | 0.340509  | 0.230964 | 0.677937  |
| NXT1        | 12.168    | 14.2839   | 10.1401   | 17.0903   | 10.8107  | 10.2588   |
| SNORD32B    | 0         | 0         | 0         | 0         | 0        | 0         |
| RPRML       | 0.420182  | 0.557247  | 0.47712   | 0.591816  | 0.869752 | 1.17828   |
| PPFIBP2     | 21.8394   | 20.5524   | 19.6846   | 24.1146   | 25.3137  | 34.0579   |
| ATP5S       | 9.22726   | 8.54671   | 9.42999   | 7.35285   | 8.125    | 6.7671    |
| IL32        | 55.9758   | 61.6339   | 32.7689   | 18.4067   | 64.3322  | 29.0372   |
| ADRA2B      | 0.665299  | 1.2299    | 1.46512   | 2.24326   | 4.25659  | 1.73372   |
| LOC728613   | 2.07108   | 1.53205   | 1.77489   | 1.35788   | 2.87878  | 2.39464   |
| PPCDC       | 5.93873   | 6.67524   | 4.3214    | 5.27378   | 5.3071   | 5.73762   |
| MIR103A2    | 0         | 0         | 0         | 0         | 0        | 0         |
| B3GNT8      | 2.05748   | 4.3265    | 2.6941    | 5.32589   | 3.54168  | 6.79185   |
| LOC10012821 | 0.10876   | 0.37053   | 0.329326  | 0.612741  | 0.312795 | 0.636326  |
| TBC1D3H     | 3.58844   | 6.50328   | 3.5567    | 4.70067   | 7.03914  | 6.7759    |
| SNX3        | 127.252   | 116.295   | 120.676   | 97.5732   | 105.554  | 95.2678   |
| PHC3        | 6.83715   | 5.46209   | 7.60382   | 5.63399   | 8.22329  | 5.54388   |
| THYN1       | 42.7309   | 46.3754   | 36.4998   | 35.692    | 37.942   | 37.0849   |
| ZNF593      | 25.0627   | 43.5665   | 22.5098   | 30.3143   | 22.9969  | 23.2946   |
| KCNMB2      | 0.215432  | 0.190472  | 0.191114  | 0.148851  | 0.134619 | 0.100685  |
| RNY3        | 0         | 0         | 0         | 0         | 0        | 0         |
| PPP2R5C     | 27.6391   | 23.9325   | 27.9604   | 23.9294   | 24.9195  | 22.4385   |
| STXBP1      | 13.3592   | 15.554    | 13.6447   | 12.7113   | 12.3389  | 12.6102   |
| NDST4       | 0         | 0         | 0.0223576 | 0         | 0        | 0         |
| GLP1R       | 0.285549  | 0.0280516 | 0.168126  | 0.0893754 | 0.343528 | 0.158171  |
| KIAA0494    | 37.909    | 28.0506   | 34.0317   | 26.7477   | 29.6275  | 27.0202   |
| BEND6       | 0.371274  | 0.492386  | 0.64643   | 0.418345  | 0.803987 | 0.300771  |
| GUCY1A3     | 5.88149   | 3.22117   | 3.20896   | 2.9329    | 1.86595  | 2.71515   |

|             |           |           |           |           |           |           |
|-------------|-----------|-----------|-----------|-----------|-----------|-----------|
| MIR4517     | 0         | 0         | 0         | 0         | 0         | 0         |
| C12orf56    | 1.33803   | 1.4834    | 1.22208   | 0.940126  | 0.857587  | 1.08163   |
| ZNF32-AS3   | 0         | 0         | 0.0407686 | 0         | 0.0343006 | 0         |
| STYX        | 7.64925   | 7.70428   | 8.74037   | 7.35999   | 7.77843   | 6.05939   |
| MAP2K1      | 27.7664   | 25.6405   | 24.5113   | 21.1414   | 18.3509   | 20.1535   |
| RNF133      | 0         | 0         | 0         | 0         | 0.0478425 | 0         |
| ZNF589      | 28.8805   | 31.3611   | 23.0379   | 26.6783   | 17.7226   | 20.954    |
| LOC10013109 | 5.2831    | 5.57705   | 5.3559    | 5.91844   | 9.79373   | 8.98174   |
| PTTG1IP     | 94.9127   | 85.6966   | 81.399    | 96.9852   | 91.1032   | 87.4852   |
| LOC387895   | 0.227027  | 0.200723  | 0.343721  | 0.426349  | 0         | 0         |
| PRAMEF25    | 0         | 0         | 0         | 0         | 0         | 0         |
| LOC10050699 | 0         | 0         | 0         | 0         | 0         | 0.109227  |
| IFT27       | 21.9045   | 22.3489   | 20.6409   | 25.7041   | 17.5923   | 19.139    |
| NANS        | 32.7554   | 25.0617   | 21.3899   | 26.1939   | 20.5755   | 20.8043   |
| C19orf70    | 58.8298   | 79.8653   | 51.0569   | 75.0863   | 55.2175   | 50.7539   |
| CCNT1       | 2.47022   | 1.10934   | 3.44312   | 1.43588   | 2.44735   | 1.68594   |
| C12orf69    | 0.146516  | 0.0863601 | 0.258798  | 0         | 0.155528  | 0.213039  |
| DCAF12L2    | 0.3096    | 0.239513  | 0.322258  | 0.363387  | 0.271131  | 0.144697  |
| PTPMT1      | 20.2241   | 24.8318   | 20.9025   | 21.9955   | 16.9597   | 16.1715   |
| ASB9        | 1.90872   | 1.61488   | 1.44373   | 1.19754   | 1.72986   | 0.891602  |
| POU4F2      | 0         | 0         | 0         | 0         | 0         | 0         |
| ASB6        | 11.1182   | 12.7823   | 11.5263   | 15.0117   | 15.9179   | 13.3022   |
| FHIT        | 4.05933   | 5.79307   | 5.01142   | 9.13875   | 5.42539   | 5.35768   |
| GLDC        | 26.7508   | 24.7408   | 21.6303   | 18.176    | 10.4646   | 14.8622   |
| SEC13       | 55.0447   | 52.3896   | 50.5777   | 52.5787   | 50.019    | 52.8103   |
| REG1A       | 0         | 0         | 0         | 0         | 0         | 0         |
| FOXD4L6     | 0.102105  | 0.0467983 | 0.105216  | 0.0847149 | 0.0786876 | 0.0735023 |
| MBD3L3      | 0         | 0         | 0         | 0         | 0         | 0         |
| USH2A       | 0.0197722 | 0.013111  | 0.0112257 | 0.0278486 | 0.0349806 | 0.0215621 |
| ATP13A2     | 13.276    | 15.3699   | 13.0579   | 17.2238   | 14.7131   | 18.9332   |
| C11orf35    | 3.76343   | 8.22301   | 5.42799   | 7.61273   | 8.66179   | 7.13414   |
| MRPS36      | 15.8978   | 13.4702   | 12.9122   | 12.6731   | 11.0219   | 11.7128   |
| SNRPB       | 95.5338   | 121.223   | 102.705   | 138.106   | 110.095   | 106.45    |
| BTF3L4      | 21.1607   | 18.7367   | 19.0394   | 16.8187   | 21.7885   | 17.7493   |
| ANKRD56     | 2.31851   | 1.2661    | 2.45201   | 1.79286   | 2.08471   | 2.27343   |
| AMOTL2      | 13.6015   | 13.5823   | 22.7166   | 18.8032   | 15.3295   | 12.744    |
| NEK11       | 2.70598   | 2.5622    | 3.54813   | 3.00213   | 3.01926   | 2.9338    |
| ZNF579      | 6.09377   | 9.43897   | 4.68454   | 8.29462   | 8.63483   | 7.59476   |
| LOC10028949 | 0.299813  | 0.397613  | 0.813273  | 0.680338  | 0.509206  | 0.404799  |
| RPL18       | 1458.83   | 2560.58   | 1861.43   | 3399.36   | 2118.42   | 2017.28   |
| MIR4772     | 0         | 0         | 0         | 0         | 0         | 0         |
| FAM64A      | 1.19989   | 2.82436   | 1.52487   | 2.73899   | 2.11191   | 2.50789   |
| FOS         | 9.25916   | 12.0905   | 129       | 8.07004   | 110.199   | 13.0486   |

|             |           |           |           |           |           |           |
|-------------|-----------|-----------|-----------|-----------|-----------|-----------|
| TMEM151B    | 0.0419025 | 0.0370475 | 0.237903  | 0.157383  | 0.120096  | 0.0913914 |
| RGS14       | 9.08138   | 16.8154   | 11.0292   | 14.0364   | 16.9317   | 14.021    |
| LOC653160   | 1.87596   | 3.12208   | 2.42255   | 3.10853   | 4.07641   | 2.64749   |
| LOC10050664 | 1.14466   | 4.04814   | 0.216628  | 0.268704  | 0.9113    | 1.78326   |
| GGT6        | 58.4831   | 61.4475   | 64.4823   | 71.3902   | 70.957    | 74.1453   |
| PEBP1       | 330.955   | 358.955   | 287.912   | 341.783   | 248.405   | 240.475   |
| DCUN1D4     | 11.5722   | 11.3611   | 13.7502   | 11.4201   | 13.8194   | 11.0461   |
| SF3B14      | 78.1059   | 74.9209   | 73.3119   | 67.2674   | 65.5888   | 68.4099   |
| COL20A1     | 0.116588  | 0.164928  | 0         | 0.0875798 | 0.0742558 | 0.0435918 |
| LOC283914   | 0.0356363 | 0.0705487 | 0.0873812 | 0.0749251 | 0         | 0.022207  |
| LOC285141   | 0         | 0.42222   | 1.80754   | 0.896825  | 1.3687    | 1.19036   |
| LOC10050693 | 0.774845  | 0.411041  | 0.469249  | 0.145513  | 0.394802  | 0.28971   |
| LOC10050647 | 1.67896   | 2.12062   | 6.53648   | 5.85564   | 3.89545   | 2.69038   |
| CDT1        | 3.90048   | 8.15718   | 3.35017   | 6.93761   | 5.99562   | 6.1934    |
| LRP8        | 2.32216   | 2.08577   | 1.95899   | 1.69979   | 2.3732    | 1.70306   |
| STMN4       | 0.167861  | 0         | 0         | 0.315238  | 0.0534559 | 0         |
| MNS1        | 2.85746   | 2.12036   | 2.16311   | 1.77277   | 2.43741   | 2.67097   |
| PCDHA1      | 0.0538086 | 5.20E-07  | 1.93E-13  | 4.63E-15  | 0.0549723 | 2.44E-06  |
| KRTAP10-1   | 2.31721   | 0.204873  | 0         | 37.3879   | 0.619619  | 149.308   |
| VN1R5       | 0         | 0.0949277 | 0         | 0         | 0.068383  | 0         |
| TUFT1       | 29.1299   | 32.2597   | 51.1885   | 60.3263   | 58.266    | 62.4429   |
| ASB14       | 0.977167  | 0.822474  | 0.80965   | 0.786294  | 0.977527  | 1.01503   |
| HSDL1       | 9.23054   | 10.6417   | 10.4922   | 10.9857   | 11.0088   | 9.72107   |
| NR2F6       | 53.7604   | 62.1092   | 47.0695   | 73.9212   | 46.7753   | 60.5626   |
| MXRA7       | 95.3904   | 107.738   | 54.6283   | 60.6476   | 41.8099   | 34.1177   |
| C11orf21    | 2.72811   | 1.91233   | 1.46034   | 0.403682  | 4.8818    | 1.52429   |
| SPATA13     | 9.67059   | 6.06981   | 8.10749   | 5.75059   | 7.7558    | 6.43477   |
| ATP1B1      | 153.797   | 59.6438   | 85.8239   | 134.468   | 90.4431   | 90.6963   |
| MIR1285-2   | 0         | 0         | 0         | 0         | 0         | 0         |
| LOC10028960 | 0         | 0         | 0         | 0         | 0         | 0         |
| MIR15B      | 0         | 0         | 0         | 0         | 0         | 0         |
| MTMR4       | 18.6712   | 13.6307   | 16.1042   | 13.5811   | 16.5292   | 14.1035   |
| GPX2        | 27.1107   | 30.5638   | 14.6976   | 24.1225   | 23.9777   | 15.9352   |
| FLJ46010    | 0         | 0         | 0.0638398 | 0         | 0         | 0.0262761 |
| LOC727710   | 0         | 0         | 0         | 0         | 0         | 0         |
| MRPL45      | 35.7237   | 31.6576   | 31.1206   | 36.3926   | 29.1933   | 27.7401   |
| MIR3162     | 0         | 0         | 0         | 0         | 0         | 0         |
| B3GNT1      | 13.627    | 13.1034   | 14.57     | 14.5701   | 12.6069   | 13.0166   |
| OR7E156P    | 0         | 0         | 0         | 0         | 0         | 0         |
| OR1J1       | 0         | 0         | 0         | 0         | 0         | 0         |
| PHACTR1     | 1.00757   | 0.857943  | 1.46737   | 1.36551   | 1.44809   | 1.48647   |
| TMEM5       | 12.0156   | 14.1866   | 11.4687   | 12.1935   | 10.6474   | 9.99905   |
| C5orf41     | 5.71765   | 4.12927   | 5.76266   | 4.17449   | 5.6639    | 4.92632   |

|              |           |           |           |           |          |           |
|--------------|-----------|-----------|-----------|-----------|----------|-----------|
| TEX2         | 15.2364   | 10.1912   | 12.3078   | 10.8589   | 9.9332   | 10.91     |
| ANKS3        | 8.37483   | 17.4553   | 10.9271   | 15.7523   | 13.6911  | 12.627    |
| PSMB2        | 24.4612   | 21.6871   | 20.6168   | 21.923    | 16.6215  | 18.5186   |
| CDYL2        | 0.319547  | 0.443965  | 0.138228  | 0.257185  | 0.174447 | 0.142234  |
| ZNF14        | 3.52534   | 2.96846   | 3.48203   | 3.46787   | 4.14848  | 3.91248   |
| LOC100506191 | 0.252496  | 0.446481  | 0.382281  | 0.474179  | 1.28653  | 0.472034  |
| LIMD1        | 7.95145   | 7.04556   | 7.39819   | 7.25196   | 7.47427  | 5.95419   |
| HES4         | 20.5322   | 43.5531   | 19.915    | 60.7626   | 31.6698  | 36.3299   |
| FAM189B      | 10.914    | 14.3305   | 10.5092   | 12.4837   | 13.1775  | 12.6289   |
| NEDD1        | 7.02843   | 6.49442   | 5.52058   | 4.19255   | 6.42086  | 5.33937   |
| MIR3150B     | 0         | 0         | 0         | 0         | 0        | 0         |
| CD3EAP       | 1.43493   | 2.20594   | 2.12882   | 2.7112    | 1.83385  | 2.06814   |
| FLJ37786     | 0.112503  | 0.149202  | 0.383245  | 0         | 0        | 0.105161  |
| SPPL2B       | 18.0474   | 29.7835   | 23.0827   | 31.5751   | 27.4551  | 26.8755   |
| PPP1R8       | 23.0435   | 19.6233   | 19.9412   | 20.963    | 21.175   | 19.452    |
| MIR298       | 0         | 0         | 0         | 0         | 0        | 0         |
| HOXD13       | 0         | 0         | 0         | 0         | 0        | 0         |
| VPS13A       | 8.38296   | 6.22546   | 10.1715   | 6.60134   | 11.2396  | 10.7115   |
| SSX2B        | 0         | 0         | 0         | 0         | 0        | 0         |
| GTF2I        | 46.7389   | 38.9282   | 48.6899   | 43.2642   | 48.0921  | 47.419    |
| MIR616       | 0         | 0         | 0         | 0         | 0        | 0         |
| KLHL14       | 0.159634  | 0.181463  | 0.362531  | 0.12848   | 0.116196 | 0.028422  |
| OSTBETA      | 0.508797  | 0.224923  | 0.288872  | 0.597191  | 0.162028 | 0.713387  |
| C20orf151    | 2.50215   | 2.64846   | 2.90791   | 4.10332   | 4.60134  | 5.97341   |
| DERL2        | 32.6654   | 33.0834   | 29.7041   | 34.7556   | 26.795   | 26.6788   |
| UGGT2        | 3.95219   | 2.88883   | 4.44331   | 4.33567   | 3.04054  | 2.46284   |
| C8G          | 0.696479  | 2.46313   | 1.58172   | 2.61593   | 2.57283  | 2.34369   |
| F9           | 0         | 0.0315317 | 0.188984  | 0.100463  | 0.045429 | 0.133345  |
| ZNF706       | 24.8683   | 24.1998   | 26.2873   | 26.5091   | 23.1054  | 25.5083   |
| LNX1         | 6.93794   | 4.58428   | 7.36718   | 7.55983   | 6.56352  | 6.22014   |
| RPS3         | 1063.8    | 1616.66   | 1252.64   | 2093.64   | 1406.87  | 1291.93   |
| SNORD115-3'  | 0         | 0         | 0         | 0         | 0        | 0         |
| COMMD9       | 14.0118   | 17.7398   | 12.9866   | 18.1495   | 13.7377  | 13.2559   |
| MIR602       | 0         | 0         | 0         | 0         | 0        | 0         |
| CACNA1I      | 0.0964956 | 0.0606684 | 0.0659619 | 0.0730827 | 0.10964  | 0.0895416 |
| SPO11        | 0         | 0         | 0.0469307 | 0         | 0        | 0         |
| HBA2         | 454.304   | 1103.24   | 469.798   | 1235.41   | 623.251  | 861.012   |
| C14orf49     | 2.14079   | 1.99938   | 2.60207   | 0.65118   | 1.68995  | 1.2401    |
| FAM60A       | 16.1053   | 16.2776   | 13.9363   | 18.7117   | 15.9225  | 14.019    |
| GGTA1P       | 14.5565   | 15.6769   | 15.554    | 11.6996   | 14.1165  | 8.3244    |
| MIR146B      | 0         | 0         | 0         | 0         | 0        | 0         |
| FAM5C        | 0.82964   | 0.122253  | 0.575705  | 0.551805  | 0.264201 | 0.344664  |
| MT4          | 4.37568   | 4.83587   | 19.0464   | 68.8206   | 0.696723 | 216.776   |

|             |           |           |           |           |           |          |
|-------------|-----------|-----------|-----------|-----------|-----------|----------|
| CMTM1       | 0.459973  | 1.44261   | 1.49032   | 2.41102   | 1.98094   | 2.46499  |
| KRBOX1      | 6.57109   | 7.00587   | 3.365     | 6.33182   | 7.1394    | 7.3466   |
| C11orf2     | 49.6074   | 87.293    | 68.5938   | 98.7479   | 77.0337   | 71.847   |
| NDUFB1      | 137.869   | 182.644   | 166.24    | 169.938   | 137.864   | 136.847  |
| LOC10050737 | 1.4119    | 0.996043  | 1.93668   | 0.815557  | 2.09286   | 1.62506  |
| ENC1        | 14.4793   | 11.263    | 13.4772   | 14.5436   | 16.5596   | 23.4899  |
| NKAPP1      | 1.0859    | 1.29242   | 1.1382    | 0.588254  | 1.67583   | 1.61363  |
| LOC10013278 | 0.335827  | 0.169667  | 0.14527   | 0.0900962 | 0.183335  | 0.149481 |
| CERS3       | 37.6944   | 33.9701   | 31.3067   | 26.069    | 30.6686   | 34.8827  |
| ZFP37       | 1.60013   | 0.964591  | 1.4866    | 1.46835   | 2.0151    | 1.9716   |
| IL8         | 0.185738  | 0.218958  | 0.0468683 | 0.0581351 | 1.02525   | 0.154326 |
| TRMT2A      | 16.8636   | 26.5958   | 19.2043   | 25.1444   | 24.5352   | 20.0906  |
| PRY2        | 0         | 0         | 0         | 0         | 0         | 0        |
| EPB41L2     | 25.8435   | 24.0538   | 27.8684   | 18.6579   | 22.9319   | 17.714   |
| TXNIP       | 339.531   | 404.596   | 377.808   | 291.954   | 522.123   | 379.074  |
| SNORA34     | 0         | 0         | 0         | 73.3889   | 0         | 0        |
| LZTFL1      | 6.69598   | 5.86891   | 8.86508   | 5.60697   | 7.21862   | 6.99055  |
| MYO10       | 8.64745   | 7.51459   | 7.64239   | 7.37042   | 7.53039   | 9.2239   |
| GGTLC1      | 0.496143  | 0.438659  | 0.0919789 | 0.456362  | 0.483668  | 0.170361 |
| ADH7        | 0.220006  | 0.437661  | 0.266474  | 0.419723  | 0.140123  | 0.137098 |
| BBS10       | 7.45143   | 5.3286    | 6.59473   | 4.0643    | 6.82217   | 5.85548  |
| SFXN3       | 41.6017   | 45.7666   | 41.4288   | 36.3111   | 48.8912   | 46.4293  |
| C20orf4     | 17.0334   | 18.6152   | 17.0011   | 17.9889   | 18.1697   | 15.9572  |
| MRPL12      | 74.9329   | 101.415   | 57.7718   | 95.9072   | 68.1369   | 77.0108  |
| CYP27B1     | 1.17761   | 1.57971   | 0.829981  | 2.24965   | 1.65524   | 1.49298  |
| GCGR        | 0.351737  | 1.51049   | 1.21722   | 3.68021   | 2.01621   | 1.503    |
| C8orf33     | 20.8183   | 21.0211   | 20.2374   | 22.9743   | 21.3567   | 18.957   |
| MIR9-2      | 0         | 0         | 0         | 0         | 0         | 0        |
| OR5L1       | 0         | 0         | 0         | 0         | 0         | 0        |
| CHRM5       | 0.0980139 | 0.0577718 | 0.222591  | 0.184067  | 0.166468  | 0.244312 |
| ARMC2       | 1.58681   | 0.918297  | 0.960976  | 1.35453   | 0.99227   | 0.845    |
| UBE2E1      | 54.0199   | 53.3836   | 50.1306   | 50.9248   | 49.6199   | 47.5228  |
| SBF2        | 7.60094   | 6.40764   | 8.3817    | 7.54166   | 7.67767   | 5.70494  |
| ECE2        | 9.40238   | 9.28936   | 3.88639   | 8.2701    | 6.08447   | 6.9547   |
| WFIKKN2     | 0.599643  | 0.691522  | 0.434197  | 1.02819   | 0.332101  | 0.373672 |
| LOC285740   | 0         | 0.0627849 | 0         | 0         | 0.0452285 | 0        |
| ARNT        | 16.4985   | 14.3872   | 19.2712   | 16.5277   | 21.3617   | 16.0997  |
| ALDH1A1     | 38.7625   | 36.5056   | 23.0856   | 18.621    | 16.095    | 11.477   |
| BBS1        | 13.4231   | 13.5485   | 12.9507   | 15.0205   | 16.8749   | 13.9594  |
| RNF130      | 34.8208   | 42.1813   | 40.1242   | 35.5624   | 30.1701   | 23.2136  |
| LTC4S       | 5.91443   | 15.6875   | 9.72646   | 13.0221   | 14.0286   | 10.4214  |
| EMR4P       | 1.1653    | 0.949128  | 1.19318   | 0.516284  | 4.03111   | 1.43906  |
| SH2D1A      | 1.444     | 1.20589   | 0.487599  | 0         | 0.970701  | 0.252873 |

|             |           |           |           |           |           |           |
|-------------|-----------|-----------|-----------|-----------|-----------|-----------|
| ZNF498      | 4.62012   | 5.50563   | 5.11947   | 4.73642   | 5.75723   | 5.32697   |
| CHMP4A      | 46.4844   | 58.4672   | 45.8374   | 49.5691   | 48.4511   | 49.6219   |
| MIR4314     | 0         | 0         | 0         | 0         | 0         | 0         |
| OR1G1       | 0         | 0         | 0         | 0         | 0         | 0         |
| GH2         | 0         | 0.0726535 | 0         | 0         | 0         | 0.0512078 |
| LOC442459   | 0.376559  | 0.166465  | 0.428396  | 0.353583  | 0.480165  | 0.351984  |
| HTR1D       | 0.0352147 | 0.0622692 | 0         | 0         | 0.0672853 | 0.15361   |
| UCHL1       | 7.60986   | 10.2268   | 8.83325   | 5.71643   | 6.61342   | 10.6856   |
| FAM89B      | 39.4445   | 54.3209   | 35.2691   | 51.0244   | 41.374    | 46.0402   |
| LOC642361   | 3.22813   | 4.08024   | 3.58752   | 2.68141   | 3.9012    | 3.28825   |
| SKIV2L      | 13.3276   | 17.259    | 16.3547   | 16.4238   | 21.9585   | 19.9856   |
| MIR4321     | 0         | 0         | 0         | 0         | 0         | 0         |
| DPH1        | 19.4      | 22.2175   | 24.7135   | 25.0784   | 29.6597   | 27.8063   |
| ESPL1       | 1.41116   | 2.52077   | 1.66778   | 2.14983   | 2.48538   | 2.71888   |
| PROKR1      | 0         | 0.168661  | 0.0722047 | 0.0895622 | 0.0607493 | 0.059438  |
| GJD2        | 0         | 0         | 0         | 0         | 0         | 0         |
| RQCD1       | 13.8661   | 10.5932   | 14.7769   | 11.2503   | 14.3188   | 12.7514   |
| SERPINB7    | 20.3077   | 16.4693   | 35.906    | 24.3834   | 29.0717   | 36.2609   |
| LOC283481   | 3.33368   | 4.64443   | 4.43544   | 2.56113   | 3.60307   | 2.64397   |
| BAIAP2L1    | 16.7736   | 18.4813   | 15.5206   | 21.2842   | 18.0061   | 21.5166   |
| TTC23L      | 0.483783  | 0.213865  | 0.183113  | 0.378554  | 0.667602  | 0.45221   |
| POLE2       | 1.54128   | 2.2359    | 1.71715   | 2.87379   | 2.17811   | 1.81686   |
| SIX6        | 0         | 0         | 0         | 0         | 0         | 0         |
| MED30       | 10.5988   | 11.3096   | 9.68338   | 8.46503   | 9.23338   | 7.81941   |
| SNORD3A     | 22.052    | 71.4299   | 16.4337   | 130.445   | 40.613    | 17.7206   |
| EFCAB2      | 3.00929   | 2.07621   | 3.11281   | 1.75648   | 2.99296   | 2.07593   |
| LRRC42      | 14.0314   | 16.1056   | 15.6066   | 19.2428   | 15.012    | 16.6822   |
| RPUSD1      | 9.20041   | 18.6247   | 10.1998   | 18.1278   | 14.7616   | 15.5081   |
| LOC10050604 | 2.30954   | 3.5767    | 2.0402    | 1.98859   | 2.3298    | 1.9201    |
| HIGD2A      | 122.893   | 184.178   | 130.913   | 198.663   | 136.086   | 114.873   |
| MIR937      | 0         | 0         | 0         | 0         | 0         | 0         |
| LOC10065278 | 37.206    | 23.8026   | 35.9689   | 28.5841   | 27.3616   | 24.0317   |
| MPRIP       | 18.4442   | 17.7968   | 24.1029   | 20.8488   | 20.2191   | 18.5803   |
| OR4A16      | 0         | 0         | 0         | 0         | 0         | 0         |
| TMEM216     | 7.77924   | 8.74376   | 7.79121   | 9.61513   | 9.6358    | 10.3687   |
| HMG2P46     | 0.0538866 | 0.381145  | 0.0815849 | 0.303592  | 0.308886  | 0.335798  |
| GPR6        | 0         | 0         | 0         | 0         | 0         | 0         |
| MIR4649     | 0         | 0         | 0         | 0         | 0         | 0         |
| PEX11G      | 7.51327   | 8.66446   | 5.35787   | 6.44137   | 7.00448   | 6.51402   |
| ING1        | 5.45246   | 7.71846   | 5.88084   | 4.80531   | 7.51814   | 5.27326   |
| SNORD114-1  | 0         | 0         | 0         | 0         | 0         | 0         |
| TMEM45A     | 475.595   | 397.678   | 489.614   | 421.192   | 562.643   | 627.045   |
| LOC10012815 | 0         | 0         | 0.0788004 | 0         | 0         | 0.0216225 |

|             |            |           |           |          |            |           |
|-------------|------------|-----------|-----------|----------|------------|-----------|
| SLC25A11    | 77.3933    | 82.329    | 63.3238   | 76.5508  | 61.7341    | 68.3759   |
| BRD2        | 84.4415    | 83.301    | 82.8867   | 78.1568  | 96.09      | 80.8666   |
| MUC5B       | 0.182457   | 0.235063  | 0.323648  | 0.37698  | 0.332057   | 0.276167  |
| PITPNM2     | 4.59876    | 5.42959   | 4.39178   | 4.80977  | 4.92068    | 4.35595   |
| BOD1P       | 0          | 0         | 0         | 0        | 0          | 0         |
| MIR636      | 0          | 0         | 0         | 0        | 0          | 0         |
| IPO8        | 15.9507    | 11.759    | 13.6453   | 12.8747  | 13.8907    | 12.5405   |
| USP3        | 24.2269    | 19.1383   | 22.166    | 19.7536  | 21.1914    | 21.6737   |
| SCARNA23    | 0          | 0         | 0         | 0        | 0          | 0         |
| VPS13B      | 4.25818    | 3.10878   | 5.33393   | 3.27652  | 5.07499    | 3.7722    |
| KATNAL2     | 1.6916     | 2.30572   | 2.85456   | 2.61421  | 2.17722    | 1.5812    |
| GUSB        | 128.277    | 25.9639   | 23.079    | 25.2616  | 21.6064    | 17.4818   |
| NET1        | 55.0107    | 53.5873   | 47.5341   | 44.5653  | 51.2452    | 54.5822   |
| LRRIQ4      | 0.114599   | 0         | 0.043376  | 0        | 0          | 0         |
| MIR1302-5   | 0          | 0         | 0         | 0        | 0          | 0         |
| SETD1B      | 10.1524    | 10.0189   | 10.4515   | 9.35923  | 10.3546    | 8.82691   |
| GOLGA8C     | 0.00607003 | 0.0080501 | 0.019303  | 0        | 0.00231962 | 0         |
| SLC39A6     | 47.6913    | 30.8576   | 39.8652   | 39.2816  | 30.4644    | 35.2745   |
| FAM46A      | 9.72804    | 6.27308   | 9.95264   | 5.57058  | 9.90899    | 7.64954   |
| USP12       | 14.331     | 12.8608   | 15.9146   | 12.4867  | 16.0896    | 13.4493   |
| VENTXP7     | 0          | 0         | 0         | 0        | 0          | 0         |
| KAT8        | 24.7229    | 32.2905   | 23.2579   | 30.4754  | 29.3811    | 27.4687   |
| FOXD4       | 0.393432   | 0.30679   | 0.602314  | 0.68212  | 0.12985    | 0.10814   |
| PDGFC       | 11.5447    | 9.40457   | 9.07654   | 9.6778   | 7.44334    | 6.6363    |
| LOC10028717 | 0.900339   | 0.955228  | 0.408937  | 1.01449  | 1.14686    | 1.45874   |
| UBL7        | 35.0254    | 35.6139   | 30.0247   | 38.848   | 36.3862    | 39.7183   |
| OGG1        | 10.3637    | 11.5826   | 8.37531   | 9.19813  | 10.9803    | 10.5634   |
| EPG5        | 6.32764    | 4.62069   | 5.89804   | 3.93558  | 5.84742    | 6.40295   |
| NAV2-AS4    | 0          | 0         | 0         | 0        | 0          | 0         |
| LOC10029436 | 3.22E-07   | 0.140078  | 0.129215  | 0.317687 | 0.14924    | 0.0401048 |
| MIR3118-2   | 0          | 0         | 0         | 0        | 0          | 0         |
| ADORA1      | 12.0139    | 5.4075    | 8.21771   | 7.33959  | 4.79515    | 5.84056   |
| MPV17       | 44.0166    | 55.3889   | 42.1943   | 51.1714  | 48.9486    | 45.062    |
| ZNF526      | 3.3314     | 3.71996   | 3.55555   | 2.95823  | 3.4944     | 3.88544   |
| MAT2B       | 45.5391    | 37.3589   | 36.8232   | 31.394   | 37.1155    | 30.6382   |
| IGFL1       | 2.66285    | 1.76574   | 0.881909  | 0.781367 | 0.953991   | 0.933398  |
| NACC2       | 5.48058    | 5.48027   | 6.63604   | 5.13322  | 5.381      | 4.03466   |
| VAMP8       | 277.592    | 288.732   | 196.992   | 265.953  | 229.278    | 262.907   |
| BCAR3       | 7.67842    | 4.60694   | 7.205     | 6.53571  | 7.2524     | 5.69896   |
| LOC10050597 | 1.61672    | 2.38233   | 2.24375   | 1.26506  | 1.88778    | 1.51121   |
| FAM90A18    | 0.0156343  | 0         | 0.0320538 | 0        | 0.0225231  | 0.0130482 |
| ZMAT2       | 74.7496    | 65.9631   | 63.6389   | 64.2451  | 69.3063    | 66.7466   |
| TMEM191B    | 1.48376    | 3.57152   | 1.68732   | 2.29654  | 4.9001     | 7.00328   |



|             |           |           |           |           |           |           |
|-------------|-----------|-----------|-----------|-----------|-----------|-----------|
| LINC00320   | 0         | 0         | 0         | 0         | 0         | 0         |
| LOC10028759 | 0.0821748 | 4.50E-210 | 0.0295879 | 2.65E-111 | 0.0246598 | 7.88E-101 |
| RHOC        | 115.597   | 142.832   | 100.37    | 130.074   | 118.771   | 106.824   |
| PRKAG3      | 0.221349  | 0.273984  | 0.40215   | 0.374118  | 0.817675  | 0.303458  |
| TTC32       | 14.5831   | 13.9679   | 12.0745   | 11.1258   | 10.8361   | 8.99293   |
| CBY3        | 0.464907  | 0.411041  | 0.703874  | 0.291027  | 0.493503  | 0.0965701 |
| PFDN1       | 53.176    | 49.5641   | 38.2607   | 43.9698   | 43.8096   | 44.2115   |
| ANKH        | 20.6323   | 17.9661   | 19.4295   | 19.3661   | 20.5899   | 17.0661   |
| C17orf100   | 4.80453   | 6.00769   | 4.41642   | 5.60699   | 7.4315    | 7.65603   |
| LOC10050629 | 0.181635  | 0.339618  | 0.235747  | 0.503822  | 0.340269  | 0.264411  |
| MIR147B     | 0         | 0         | 0         | 0         | 0         | 0         |
| GLRA1       | 0         | 0         | 0.0441406 | 0.0547516 | 0.0371376 | 0         |
| ENO1        | 434.308   | 407.21    | 324.068   | 409.297   | 337.643   | 335.524   |
| ST8SIA2     | 0         | 0.0301535 | 0.0516353 | 0.0480361 | 0.0217217 | 0.0212528 |
| MIR379      | 0         | 0         | 0         | 0         | 0         | 0         |
| HSFX1       | 0.478834  | 0.657174  | 0.923588  | 0.548875  | 0.77706   | 0.759911  |
| MAP3K5      | 6.1143    | 6.74916   | 5.73661   | 5.16711   | 5.56993   | 5.04559   |
| DRAM2       | 25.8096   | 25.6863   | 24.9185   | 22.4716   | 23.1794   | 20.6479   |
| ZNF781      | 1.63913   | 1.14265   | 1.33628   | 1.00635   | 0.823132  | 1.35537   |
| C16orf93    | 1.15699   | 0.568213  | 0.348732  | 1.11255   | 1.07304   | 0.903121  |
| HPRT1       | 21.6002   | 14.4081   | 15.1877   | 13.8584   | 14.9323   | 12.6939   |
| MMP24       | 5.62394   | 7.0524    | 6.12313   | 6.60625   | 5.77959   | 5.51521   |
| IFI30       | 50.6849   | 55.8907   | 30.7634   | 29.361    | 40.4058   | 24.5502   |
| CRYGS       | 6.61796   | 14.0428   | 4.34185   | 10.0807   | 10.397    | 8.15642   |
| LOC10050675 | 0.936945  | 0.828387  | 0.709272  | 1.75955   | 0.39783   | 0.389243  |
| NBEAL1      | 0.876516  | 0.470511  | 1.08218   | 0.480103  | 0.664592  | 0.5267    |
| USP2        | 13.2746   | 10.4967   | 11.912    | 14.7093   | 10.0181   | 14.5409   |
| PPP3R2      | 0         | 0         | 0         | 0         | 0.018526  | 0         |
| ARHGAP18    | 11.2382   | 6.95529   | 9.08165   | 6.41066   | 6.60297   | 6.68805   |
| RPS3A       | 803.753   | 1076.1    | 1002.68   | 1307.63   | 985.781   | 959.173   |
| LOC10013247 | 0         | 0.794103  | 0         | 0.421683  | 0.0953414 | 0         |
| PKMYT1      | 2.65911   | 7.32326   | 2.97707   | 6.43148   | 4.02511   | 5.12318   |
| KPNA5       | 2.42156   | 1.88911   | 2.98334   | 1.20378   | 2.60075   | 1.65696   |
| EXOC7       | 36.4224   | 42.3431   | 40.6559   | 41.055    | 42.1557   | 41.6607   |
| LOC283547   | 0.315756  | 0.199408  | 0.273176  | 0.127067  | 0.100553  | 0.0702735 |
| LRRC37A3    | 1.8133    | 1.97642   | 1.89429   | 2.27864   | 3.11561   | 2.98716   |
| COX4I1      | 557.633   | 683.471   | 530.954   | 765.282   | 521.748   | 524.584   |
| NRD1        | 50.7692   | 41.4187   | 51.7591   | 43.9612   | 52.3336   | 52.2149   |
| LOC285626   | 0         | 0.0597504 | 0         | 0         | 0         | 0         |
| TAS2R7      | 0         | 0         | 0         | 0         | 0         | 0         |
| RAB12       | 31.2319   | 31.6853   | 33.2306   | 34.4167   | 33.2752   | 28.7302   |
| TRIM53P     | 0         | 0         | 0         | 0         | 0         | 0         |
| NLRP9       | 0.366918  | 0.424223  | 0.363223  | 0.238521  | 0.34155   | 0.263824  |

|             |          |           |           |           |           |           |
|-------------|----------|-----------|-----------|-----------|-----------|-----------|
| PIEZO2      | 0.456612 | 0.249096  | 0.610417  | 0.291916  | 0.482635  | 0.441947  |
| PKD1        | 7.70143  | 8.36175   | 8.56886   | 6.63552   | 8.39525   | 6.6055    |
| OR6S1       | 0        | 0         | 0         | 0         | 0         | 0         |
| CDK4        | 53.6336  | 57.3152   | 48.5051   | 60.7296   | 55.0087   | 56.1718   |
| LOC10013304 | 0        | 0         | 0         | 0         | 0         | 0         |
| C9orf57     | 0        | 0         | 0         | 0         | 0         | 0         |
| C2orf76     | 6.77537  | 6.54502   | 7.69349   | 6.00852   | 6.28656   | 7.42781   |
| MGC57346    | 6.3124   | 7.379     | 7.37905   | 5.82935   | 8.31241   | 8.96895   |
| C1orf177    | 0.234439 | 0.219397  | 0.383529  | 0.762576  | 0.67434   | 0.467776  |
| SLCO1B7     | 5.5093   | 0         | 0         | 0         | 0         | 0         |
| VWA3A       | 0.189378 | 0.27906   | 0.207076  | 0.158065  | 0.214428  | 0.1049    |
| LOC440900   | 0        | 0.127986  | 0.219166  | 0.407778  | 0.0921976 | 0.270622  |
| TTY22       | 0        | 0         | 0         | 0         | 0         | 0         |
| CLSTN1      | 44.5297  | 51.0297   | 55.0232   | 68.0345   | 57.9152   | 52.8144   |
| POLR2C      | 43.8907  | 37.5222   | 39.0708   | 45.1377   | 39.6388   | 33.5081   |
| ANUBL1      | 2.23279  | 2.50898   | 2.05641   | 2.2683    | 2.28813   | 1.78659   |
| LOC387647   | 5.35774  | 5.50391   | 4.7125    | 4.07258   | 3.44487   | 4.92858   |
| MIR222      | 0        | 0         | 0         | 0         | 0         | 0         |
| PKIG        | 22.7136  | 32.4483   | 25.7217   | 28.9445   | 24.0758   | 21.1811   |
| PCBP1-AS1   | 1.74234  | 1.61561   | 1.55495   | 1.51632   | 1.34437   | 1.31091   |
| ZBTB46      | 2.38755  | 4.14869   | 2.80455   | 2.65752   | 3.25862   | 2.5128    |
| CHCHD2      | 168.124  | 187.505   | 157.751   | 193.797   | 154.159   | 158.11    |
| HIST1H2BC   | 5.78117  | 3.65096   | 4.06378   | 4.65294   | 2.89305   | 4.63189   |
| LOC10012831 | 29.8882  | 31.9238   | 29.2165   | 31.2591   | 31.7809   | 38.4127   |
| TLR8        | 0.299797 | 0.203893  | 0.401523  | 0.151579  | 0.514075  | 0.17245   |
| KIAA1429    | 9.41239  | 8.53068   | 10.1019   | 7.96016   | 9.08858   | 7.18962   |
| CCR6        | 1.16915  | 1.16951   | 1.95804   | 0.69236   | 2.77989   | 1.0924    |
| MIR3192     | 0        | 0         | 0         | 0         | 0         | 0         |
| COL2A1      | 0        | 0.0699492 | 0.0149726 | 0.151673  | 0.0787338 | 0.0493016 |
| GABRA1      | 0        | 0         | 0         | 0.0228857 | 0         | 0         |
| LOC10050586 | 3.35552  | 3.73079   | 5.97615   | 4.93993   | 7.18746   | 5.02055   |
| METTL21D    | 9.13044  | 11.0257   | 11.1544   | 12.2566   | 13.6254   | 11.8525   |
| PLEKHF2     | 12.8833  | 12.3992   | 15.2895   | 11.9397   | 15.8981   | 12.9833   |
| DHX34       | 7.05833  | 10.028    | 7.3483    | 8.29499   | 8.59985   | 9.3686    |
| C2CD4A      | 0        | 0.0757667 | 0.0432481 | 0.0536446 | 0.0363867 | 0.195807  |
| RNF165      | 1.47677  | 1.37014   | 2.04262   | 1.26682   | 2.04369   | 1.07931   |
| MIR572      | 0        | 0         | 0         | 0         | 0         | 0         |
| CSE1L       | 27.4923  | 20.7962   | 24.5484   | 25.4783   | 21.6724   | 21.8404   |
| MS4A2       | 10.8849  | 10.3841   | 11.5359   | 5.09776   | 17.6483   | 11.5563   |
| LOC10050700 | 0        | 0         | 0         | 0         | 0         | 0         |
| MIR1321     | 0        | 0         | 0         | 0         | 0         | 0         |
| TRNT1       | 13.1158  | 8.94446   | 8.33605   | 6.3469    | 7.78331   | 8.56372   |
| TSC22D2     | 5.28171  | 4.84684   | 6.42379   | 6.27572   | 5.66505   | 7.6434    |

|             |           |          |           |           |           |           |
|-------------|-----------|----------|-----------|-----------|-----------|-----------|
| MID1IP1     | 16.1303   | 13.8706  | 14.6415   | 12.4728   | 13.794    | 14.7804   |
| MIR1256     | 0         | 0        | 0         | 0         | 0         | 0         |
| TGS1        | 7.61591   | 5.58388  | 7.05666   | 5.30735   | 5.73421   | 5.91999   |
| TNFRSF9     | 0.255511  | 0.197669 | 0.12089   | 0.0599803 | 0.0915393 | 0.0796119 |
| MAL2        | 75.9996   | 57.1698  | 95.5382   | 64.9415   | 78.8915   | 74.495    |
| TMEM120B    | 6.55524   | 6.84383  | 9.46953   | 6.43102   | 7.28556   | 6.09493   |
| MIR384      | 0         | 0        | 0         | 0         | 0         | 0         |
| SLC9A4      | 0.353216  | 0.409764 | 0.231831  | 0.507948  | 0.173111  | 0.29313   |
| CCDC97      | 12.6208   | 15.5168  | 13.2182   | 15.3919   | 17.0789   | 14.6006   |
| LOC10012809 | 1.88617   | 0.238233 | 0.611932  | 0         | 0         | 0         |
| B3GALNT1    | 4.95999   | 4.69488  | 4.35972   | 3.92558   | 4.29894   | 3.6442    |
| ANGEL1      | 5.11547   | 4.39714  | 5.05569   | 4.46978   | 6.36531   | 5.99178   |
| VPS13C      | 7.60915   | 5.54743  | 7.18184   | 4.4833    | 6.9759    | 5.19323   |
| C1orf64     | 2.62728   | 0.232288 | 0         | 0         | 0.0836665 | 0.491163  |
| LOC728537   | 4.63606   | 6.57239  | 3.57029   | 4.5033    | 5.29456   | 4.98103   |
| MIR924      | 0         | 0        | 0         | 0         | 0         | 0         |
| SLAMF9      | 0         | 0        | 0.131192  | 0         | 0.496703  | 0         |
| PROX2       | 0.471874  | 0.521502 | 0.31256   | 0.276927  | 0.601079  | 0.441078  |
| LOC10065275 | 0.0201701 | 4.03E-10 | 0.147451  | 0.0361945 | 0.171497  | 0.046661  |
| SLC29A3     | 2.27514   | 2.43441  | 2.07853   | 3.11911   | 3.06011   | 4.07496   |
| MIR3191     | 0         | 0        | 0         | 0         | 0         | 0         |
| LOC541472   | 0.0805601 | 0.142452 | 0         | 0         | 0.0513092 | 0         |
| CRYZ        | 12.147    | 9.15486  | 18.0592   | 11.0238   | 15.2578   | 14.1546   |
| TMEM171     | 2.11028   | 1.78835  | 1.66853   | 1.49271   | 1.23429   | 1.59257   |
| SYF2        | 38.2023   | 40.1481  | 39.5122   | 35.6737   | 39.8604   | 34.6322   |
| LOC286059   | 0.114326  | 0.10108  | 0.0288485 | 0         | 0.0485433 | 0.0237477 |
| C17orf49    | 53.4896   | 77.4255  | 48.7416   | 67.0319   | 56.494    | 46.7329   |
| SUOX        | 23.5719   | 20.3645  | 22.5044   | 21.3097   | 18.3649   | 18.5678   |
| FKBP4       | 51.0501   | 34.0364  | 30.0728   | 36.86     | 28.1      | 35.251    |
| CDKL5       | 0.433062  | 0.114242 | 0.414418  | 0.107823  | 0.167253  | 0.181224  |
| AMIGO2      | 6.17734   | 4.88256  | 5.93203   | 6.24169   | 4.90434   | 2.49146   |
| ERV3-1      | 74.4061   | 48.2534  | 57.7331   | 46.1684   | 61.6987   | 75.6574   |
| HSP90AA1    | 267.27    | 176.107  | 170.997   | 158.685   | 155.105   | 185.053   |
| SNORD43     | 0         | 0        | 0         | 0         | 0         | 0         |
| MGC39545    | 0         | 0        | 0.185556  | 0         | 0         | 0         |
| KCTD10      | 22.6307   | 19.4873  | 22.7677   | 20.3039   | 22.7186   | 17.9918   |
| TNFSF13B    | 4.13262   | 3.84214  | 3.55136   | 2.11703   | 4.90493   | 2.36459   |
| C16orf95    | 1.69893   | 3.66841  | 2.70746   | 2.29118   | 2.94674   | 1.82304   |
| GRIPAP1     | 27.2169   | 29.5668  | 28.5965   | 29.7352   | 32.5877   | 30.0561   |
| LOC10028761 | 3.83663   | 3.4746   | 6.67133   | 5.86374   | 4.33702   | 4.69656   |
| LOC10050615 | 0.357031  | 0.450949 | 0.482633  | 0.359193  | 0.341093  | 0.190703  |
| CALD1       | 92.3661   | 58.2811  | 66.5872   | 60.525    | 62.2458   | 68.9969   |
| ANXA4       | 50.2696   | 42.5404  | 51.1619   | 41.6729   | 50.2819   | 43.4684   |

|             |           |           |           |           |           |           |
|-------------|-----------|-----------|-----------|-----------|-----------|-----------|
| MAP2K2      | 48.7469   | 73.5617   | 50.6785   | 79.0375   | 59.3093   | 60.8297   |
| C19orf33    | 93.6916   | 212.483   | 149.846   | 298.389   | 181.284   | 134.439   |
| XAGE1E      | 0.068236  | 0.0603299 | 0         | 0         | 0         | 0.0425217 |
| CENPT       | 55.3553   | 67.5149   | 51.4567   | 60.3966   | 79.4227   | 81.5501   |
| CRNDE       | 34.2202   | 44.6095   | 35.377    | 34.498    | 37.6041   | 31.9891   |
| RNF146      | 27.7079   | 23.6449   | 24.9003   | 21.3667   | 28.0211   | 22.9404   |
| EGFEM1P     | 0.0253481 | 0.0448224 | 0.0959433 | 0.0714044 | 0.0161444 | 0.110571  |
| SNORD91A    | 0         | 0         | 0         | 0         | 0         | 0         |
| ZBTB33      | 10.9564   | 8.1678    | 11.2033   | 9.02146   | 11.5586   | 9.51015   |
| ABO         | 2.0289    | 1.0165    | 2.25264   | 1.39708   | 6.76261   | 4.97301   |
| FLJ45513    | 0.730871  | 1.20862   | 0.740991  | 1.51655   | 1.33767   | 1.46394   |
| DIO2        | 11.4477   | 5.63299   | 9.13691   | 3.92778   | 13.7343   | 9.99204   |
| OR52B6      | 0         | 0         | 0         | 0         | 0.0740711 | 0         |
| C12orf48    | 1.47156   | 1.48157   | 1.63316   | 1.29949   | 1.35555   | 1.27026   |
| GLI2        | 1.54867   | 1.43147   | 2.94153   | 2.24736   | 3.65848   | 3.483     |
| C11orf66    | 2.7888    | 4.00498   | 2.38862   | 2.87951   | 3.39373   | 3.55189   |
| KRT6C       | 81.7231   | 70.9238   | 65.8945   | 63.475    | 50.638    | 226.914   |
| LOC10050699 | 2.91651   | 3.52029   | 1.58267   | 1.4973    | 1.75188   | 1.67766   |
| LOC10065296 | 0         | 0         | 0         | 0         | 0         | 0         |
| SETD6       | 12.3489   | 15.3056   | 15.7879   | 14.7912   | 17.9775   | 15.9449   |
| GPM6B       | 13.1333   | 9.07436   | 11.3172   | 13.0125   | 14.0727   | 12.6128   |
| CRMP1       | 2.86482   | 2.84169   | 2.82918   | 2.35834   | 3.87699   | 3.47025   |
| C3orf58     | 20.3514   | 11.2883   | 15.8504   | 11.771    | 13.8647   | 16.5308   |
| RHO         | 0         | 0.0639031 | 0.0273572 | 0.0339337 | 0.0230169 | 0.0225201 |
| ZNF385A     | 60.3963   | 84.5519   | 80.001    | 103.291   | 97.6412   | 97.8773   |
| NRIP1       | 6.19679   | 4.21191   | 5.22386   | 3.35194   | 4.30702   | 3.93991   |
| C2orf49     | 5.48898   | 8.25011   | 8.93365   | 7.60224   | 7.34152   | 7.78163   |
| VAR5        | 19.069    | 21.6995   | 18.4765   | 21.4313   | 18.7724   | 19.1283   |
| CD82        | 90.4891   | 66.8281   | 61.3742   | 77.9324   | 73.4031   | 100.25    |
| LOC729815   | 0         | 0         | 0         | 0         | 0         | 0         |
| MPZ         | 30.8574   | 26.8603   | 13.847    | 9.11059   | 16.2089   | 11.3987   |
| C14orf82    | 0.812693  | 0.695278  | 0.827793  | 1.01092   | 0.967963  | 0.686379  |
| LOC1002874  | 4.94E-07  | 1.23E-06  | 0.835977  | 1.42E-07  | 6.70E-07  | 1.38E-06  |
| RPL35       | 906.119   | 1691.9    | 1200.37   | 2123.25   | 1222.78   | 1124.94   |
| RECQL4      | 5.48172   | 8.78729   | 5.37133   | 8.41839   | 6.75427   | 8.4282    |
| LOC729739   | 0.0295532 | 0.0261291 | 0         | 0         | 0.0188226 | 0.0184163 |
| WDHD1       | 2.1436    | 1.69615   | 1.6475    | 1.52894   | 1.81731   | 1.72008   |
| LOC10013319 | 9.86747   | 16.5579   | 16.2112   | 16.7913   | 20.9046   | 16.2082   |
| MARK1       | 3.81042   | 4.22325   | 3.33996   | 2.92739   | 3.12359   | 2.55627   |
| P2RY8       | 0.211317  | 0.734474  | 0.342052  | 0.507536  | 0.189067  | 0.278     |
| ZNF536      | 0.312779  | 0.241972  | 0.221977  | 0.146847  | 0.336168  | 0.219275  |
| FKBPL       | 10.5395   | 10.763    | 9.40095   | 10.0498   | 9.05427   | 10.5899   |
| ATP6V0A4    | 24.3613   | 8.45025   | 16.2773   | 21.2696   | 13.72     | 19.4355   |

|             |           |           |           |           |           |           |
|-------------|-----------|-----------|-----------|-----------|-----------|-----------|
| OR1M1       | 0         | 0         | 0         | 0         | 0         | 0         |
| KRT20       | 0         | 0.0512977 | 0.087843  | 0         | 0.0739066 | 0.0361556 |
| ZFAND5      | 30.5342   | 32.1461   | 28.5429   | 26.4507   | 30.3513   | 27.0076   |
| STK17A      | 7.76754   | 6.93339   | 6.01157   | 7.29359   | 5.97456   | 7.59309   |
| HLA-J       | 1.24099   | 1.40198   | 0.678481  | 0.906319  | 1.2295    | 0.687405  |
| PCDHGB3     | 0.291975  | 0.0737086 | 0.534957  | 0.507342  | 0.344016  | 0.388911  |
| ZNF80       | 0.270072  | 0.0596951 | 0.0511114 | 0         | 0.322519  | 0.0841486 |
| ZNF623      | 5.66175   | 3.89099   | 4.96409   | 4.1788    | 4.83381   | 4.93431   |
| CASP7       | 25.9241   | 23.0859   | 18.2845   | 15.1431   | 18.939    | 14.1695   |
| AHI1        | 4.48962   | 4.28735   | 5.48366   | 5.42213   | 4.72785   | 4.39254   |
| CEP78       | 3.78116   | 2.19786   | 3.66843   | 3.14897   | 3.02329   | 3.43696   |
| TUBGCP6     | 17.3181   | 23.7592   | 25.8949   | 27.6315   | 27.2139   | 23.9417   |
| GAPVD1      | 10.2033   | 10.1702   | 12.4651   | 10.0871   | 11.5266   | 10.4593   |
| LOC10050723 | 0         | 0         | 0         | 0         | 0         | 0.212611  |
| VBP1        | 25.1349   | 22.7422   | 23.5246   | 21.0879   | 22.9526   | 22.7419   |
| LOC10050594 | 0         | 0         | 0         | 0         | 0         | 0         |
| LOC10050711 | 0.605678  | 0.779884  | 0.25827   | 0.598906  | 0.507829  | 0.522886  |
| LOC10012904 | 5.07E-11  | 0.125022  | 0.210986  | 0.0643047 | 0.313349  | 0.170703  |
| NR2E1       | 0.484966  | 0.241187  | 0.298287  | 0.313071  | 0.173744  | 0.169993  |
| GRIN2C      | 0.205091  | 0.382805  | 0.396764  | 0.577733  | 0.420899  | 0.198807  |
| FAM160B2    | 35.5827   | 47.4954   | 34.1388   | 43.7742   | 45.4315   | 43.9277   |
| RNF44       | 23.4302   | 25.9151   | 28.5562   | 28.1167   | 34.6806   | 27.3179   |
| DPF3        | 0.403853  | 0.198368  | 0.339688  | 0.421346  | 0.428694  | 0.41944   |
| MIR3978     | 0         | 0         | 0         | 0         | 0         | 0         |
| ITPKC       | 23.0873   | 28.0138   | 22.2722   | 30.114    | 25.3004   | 27.4937   |
| LRRC32      | 10.1237   | 9.21637   | 10.0102   | 8.85973   | 6.28906   | 5.74692   |
| MIR1234     | 0         | 0         | 0         | 0         | 0         | 0         |
| GPR173      | 0.982794  | 1.89951   | 1.45336   | 1.69543   | 2.76581   | 1.73761   |
| ARHGAP12    | 16.3224   | 13.5654   | 13.274    | 10.422    | 14.0641   | 11.7407   |
| ACBD5       | 11.6775   | 9.02734   | 13.0401   | 8.87422   | 10.4637   | 10.3005   |
| OCM         | 0.0958309 | 1.18619   | 0.290178  | 0.359935  | 1.46762   | 0.487695  |
| GCHFR       | 39.2466   | 48.7755   | 36.1563   | 49.7153   | 39.2631   | 38.9924   |
| CEACAM8     | 0         | 0         | 0         | 0         | 0         | 0         |
| PRSS1       | 0         | 0         | 0         | 0         | 0         | 0         |
| SERINC5     | 16.3615   | 12.0402   | 17.699    | 15.6426   | 15.3803   | 14.5851   |
| C20orf181   | 0         | 0         | 0         | 0         | 0         | 0         |
| KLK14       | 3.91835   | 9.94893   | 6.1606    | 11.5095   | 8.06278   | 7.76352   |
| PRIC285     | 6.23726   | 7.65454   | 3.94826   | 2.81714   | 5.31209   | 3.46064   |
| GRAMD2      | 7.10653   | 5.32875   | 2.22451   | 2.61849   | 2.48272   | 2.5973    |
| TBC1D17     | 28.1669   | 39.9166   | 37.7858   | 45.6663   | 49.2972   | 51.1929   |
| ATF7IP      | 7.40894   | 4.18352   | 7.46243   | 4.77433   | 6.30494   | 5.70327   |
| FAIM        | 14.4191   | 18.6134   | 13.7069   | 13.5233   | 12.0861   | 11.5081   |
| SFTPC       | 0.484719  | 0.875003  | 0.525304  | 1.37688   | 0.621534  | 0.402752  |

|             |           |           |           |           |           |            |
|-------------|-----------|-----------|-----------|-----------|-----------|------------|
| ARPC5L      | 87.1021   | 101.573   | 75.2455   | 94.7238   | 75.5631   | 80.5306    |
| LYPLAL1     | 19.5839   | 20.9788   | 18.9062   | 16.0645   | 20.2629   | 19.2656    |
| MIR1537     | 0         | 0         | 0         | 0         | 0         | 0          |
| TUBGCP5     | 8.93602   | 7.81853   | 8.93669   | 8.5481    | 11.814    | 9.35444    |
| B3GNT9      | 5.4296    | 5.79672   | 6.63      | 6.40787   | 6.59365   | 6.402      |
| CHRN2       | 0.117351  | 0.163042  | 0.279196  | 0.220381  | 0.437771  | 0.282065   |
| CACNA1B     | 0.019274  | 0         | 0.0145906 | 0.0542941 | 0.049103  | 0.00600539 |
| TPTE2P3     | 0         | 0         | 0.0145626 | 0.112896  | 0.0245044 | 0.0239755  |
| TCEANC      | 1.37851   | 0.937533  | 1.04354   | 1.19483   | 1.45205   | 1.38766    |
| SGSM3       | 32.2142   | 43.1642   | 33.7597   | 40.184    | 48.0019   | 42.7226    |
| GYG1        | 23.1161   | 23.2217   | 16.1629   | 17.6336   | 14.7971   | 15.5123    |
| POU5F1P3    | 1.27601   | 2.25206   | 1.52652   | 2.02869   | 2.50107   | 1.30109    |
| LOC10012834 | 0.186489  | 0.109921  | 0.42352   | 0.0583701 | 0.316736  | 0.271162   |
| WHAMMP2     | 1.41227   | 1.60265   | 1.28078   | 1.2659    | 1.95154   | 1.50372    |
| PAK3        | 0.924287  | 0.420581  | 0.496864  | 0.278653  | 0.502877  | 0.544492   |
| CACNA1E     | 0.0335086 | 0.0249965 | 0.0297264 | 0.0539401 | 0.0250103 | 0.086335   |
| LOC440896   | 0         | 0.0549878 | 0.0706215 | 0.058399  | 0.198058  | 0.0387565  |
| LOC10050616 | 0.418132  | 0         | 0.0633056 | 0         | 0         | 0.104225   |
| LOC10050598 | 0         | 0         | 0         | 0         | 0         | 0          |
| NOC3L       | 8.79402   | 8.78816   | 8.47862   | 8.04227   | 8.79369   | 8.28257    |
| LENG8       | 94.3137   | 132.89    | 127.56    | 135.136   | 164.67    | 130.778    |
| ACTN1       | 98.8033   | 76.645    | 70.7866   | 77.9489   | 75.0271   | 106.772    |
| PAGE3       | 0         | 0         | 0         | 0         | 0         | 0.139078   |
| NAPEPLD     | 7.23421   | 6.35925   | 7.59028   | 5.12947   | 7.31232   | 7.64445    |
| PRR4        | 45.3303   | 26.0063   | 14.814    | 15.288    | 7.41431   | 7.91349    |
| SSX7        | 0         | 0         | 0         | 0         | 0         | 0          |
| SLC25A31    | 0.0577658 | 0         | 0         | 0.108482  | 0.0367914 | 0          |
| SNORD88C    | 0         | 0         | 0         | 0         | 0         | 0          |
| LOC91450    | 0.355618  | 1.57207   | 1.16655   | 0.890452  | 0.830482  | 0.886424   |
| PCDHA5      | 1.33E-42  | 1.77E-13  | 1.81E-20  | 2.53E-25  | 1.47E-47  | 4.08E-20   |
| LOC641518   | 0.379301  | 0.296881  | 0.209265  | 0.274647  | 0.229984  | 0.354219   |
| CCDC13      | 0.17641   | 0.0935824 | 0.293796  | 0.132517  | 0.359541  | 0.219863   |
| TARS2       | 10.6535   | 11.1146   | 9.7422    | 10.0835   | 13.3534   | 12.3216    |
| MSH2        | 10.9269   | 8.40799   | 10.6078   | 8.42703   | 10.1282   | 10.1843    |
| MTMR12      | 16.4053   | 12.0761   | 14.0485   | 13.6443   | 13.3208   | 12.7904    |
| GRASP       | 7.19978   | 12.7312   | 8.09406   | 12.9155   | 11.0875   | 7.43302    |
| MIR2681     | 0         | 0         | 0         | 0         | 0         | 0          |
| LOC10028939 | 0.928588  | 0.577742  | 0.354098  | 0.208988  | 0.429139  | 0.141596   |
| FRK         | 1.29602   | 0.588414  | 0.87503   | 0.427574  | 0.468494  | 0.785797   |
| GORASP1     | 22.7575   | 25.2586   | 24.2562   | 26.0939   | 27.4794   | 26.6637    |
| DDAH1       | 13.8847   | 8.38807   | 9.63156   | 9.48863   | 7.87467   | 7.44067    |
| CUX1        | 16.2709   | 17.0328   | 19.1338   | 20.3863   | 18.6694   | 17.206     |
| BMPR1B      | 0.258946  | 0.289995  | 0.496592  | 0.259356  | 0.296863  | 0.172121   |

|             |           |          |          |           |          |           |
|-------------|-----------|----------|----------|-----------|----------|-----------|
| FKBP10      | 13.0717   | 13.1165  | 20.1572  | 13.2158   | 18.3689  | 13.7271   |
| CALCOCO1    | 82.0424   | 86.666   | 100.042  | 90.4658   | 124.805  | 115.683   |
| SELPLG      | 4.42167   | 4.28986  | 4.26536  | 2.16826   | 7.55084  | 4.02319   |
| MDFI        | 16.9758   | 23.2696  | 25.3529  | 18.5349   | 14.2483  | 15.3349   |
| OR1F2P      | 0         | 0.105893 | 0        | 0         | 0        | 0         |
| RDH5        | 18.703    | 24.9441  | 38.5381  | 18.5957   | 14.8732  | 9.07548   |
| DUSP16      | 17.8732   | 12.203   | 16.3828  | 15.2479   | 17.3115  | 15.9947   |
| PPIL1       | 16.7894   | 13.0221  | 10.0943  | 11.0981   | 10.7705  | 12.0488   |
| EME1        | 1.41667   | 2.27235  | 1.49971  | 2.61688   | 1.88869  | 1.64529   |
| ANGPTL7     | 2.23462   | 0.927372 | 0.759501 | 11.8616   | 2.14938  | 36.717    |
| ATP5H       | 171.891   | 170.415  | 156.713  | 165.411   | 139.768  | 149.57    |
| NT5C1B-RDH  | 0.112823  | 0.166446 | 0.115879 | 0.0282632 | 2.19E-09 | 0.13825   |
| LOC10050761 | 0         | 0        | 0        | 0         | 0        | 0.210278  |
| SS18L2      | 30.8894   | 35.7346  | 25.1285  | 30.7363   | 27.9933  | 24.7076   |
| CYB5D1      | 11.434    | 10.2433  | 9.53299  | 10.6583   | 10.6511  | 11.5231   |
| CAPN7       | 12.7305   | 9.70373  | 13.5054  | 8.38642   | 11.858   | 9.98218   |
| HCK         | 6.23008   | 5.64279  | 4.7882   | 2.46055   | 7.63591  | 3.91195   |
| CHD4        | 34.2012   | 29.9275  | 36.2155  | 33.7258   | 36.3013  | 34.7902   |
| ELP4        | 5.73133   | 7.41994  | 7.64437  | 5.89416   | 7.56137  | 6.63282   |
| C6orf191    | 0         | 0        | 0        | 0         | 0        | 0         |
| PCDH19      | 0.677658  | 0.659901 | 1.05555  | 0.922086  | 0.450363 | 0.636416  |
| MAP7D1      | 49.5306   | 54.086   | 62.8884  | 55.0911   | 57.1639  | 54.5676   |
| ITPK1       | 24.0419   | 29.0847  | 27.6309  | 24.4753   | 20.3311  | 16.3766   |
| PTPN12      | 27.3487   | 24.9249  | 34.691   | 29.0792   | 39.0325  | 35.9362   |
| PJA1        | 16.6346   | 17.9264  | 19.4848  | 17.7791   | 15.6439  | 17.0855   |
| TOMM5       | 92.6888   | 103.158  | 78.027   | 92.5034   | 63.6539  | 77.3891   |
| KLRG1       | 0.760959  | 0.414026 | 0.398804 | 0.659565  | 0.894755 | 0.21886   |
| TRAPPC2     | 6.59711   | 7.91781  | 7.1685   | 9.58579   | 9.71763  | 9.1863    |
| LYPD6       | 0.61959   | 0.547803 | 0.540971 | 1.20683   | 0.636827 | 3.05434   |
| IGFBPL1     | 0         | 0        | 0.07952  | 0.197272  | 0.133808 | 0.261839  |
| LOC10029414 | 3.06121   | 2.53705  | 3.18592  | 2.56651   | 3.70743  | 3.44162   |
| SH3TC2      | 0.496999  | 0.495116 | 0.532553 | 0.617851  | 0.550604 | 0.621599  |
| LIME1       | 12.2795   | 27.2657  | 15.3269  | 22.0919   | 25.3129  | 22.7221   |
| EIF2AK2     | 4.30244   | 2.75898  | 2.22797  | 1.78395   | 2.01312  | 1.39816   |
| BLMH        | 59.0038   | 38.1156  | 44.7263  | 52.2324   | 48.8411  | 71.7216   |
| APOBR       | 3.61933   | 4.08114  | 3.21635  | 2.1179    | 8.25185  | 4.00418   |
| SRGAP3      | 1.47835   | 1.64811  | 1.93814  | 2.21291   | 2.517    | 2.29074   |
| CCDC155     | 0.0425549 | 0.150498 | 0        | 0         | 0        | 0.0795553 |
| TET1        | 0.443201  | 0.252526 | 0.402607 | 0.258943  | 0.263459 | 0.35597   |
| LOC10050579 | 0         | 0        | 0        | 0         | 0        | 0         |
| LOC10065292 | 8.01E-08  | 4.18E-07 | 9.68E-07 | 1.11E-06  | 6.92E-07 | 1.98E-07  |
| LOC10050686 | 0         | 0        | 0        | 0.311423  | 0.281913 | 0.275829  |
| PPAPDC3     | 0.883303  | 1.25821  | 2.08029  | 1.52058   | 1.53147  | 1.28435   |

|             |           |           |          |           |          |           |
|-------------|-----------|-----------|----------|-----------|----------|-----------|
| MN1         | 2.35051   | 2.23376   | 3.85367  | 2.59658   | 2.2816   | 1.95037   |
| OLAH        | 21.522    | 16.2286   | 11.6718  | 11.9255   | 4.76186  | 15.4547   |
| FLJ20464    | 0.760331  | 0         | 0.287787 | 0.535454  | 0.242129 | 0.473806  |
| LOC730081   | 0.10787   | 0.858344  | 0.839214 | 0.108186  | 0.499678 | 0.201659  |
| MATN3       | 3.11692   | 1.51568   | 2.33003  | 1.68287   | 1.38963  | 1.84521   |
| C12orf77    | 0         | 0         | 0        | 0.0665775 | 0        | 0         |
| DFNB31      | 5.47769   | 6.7335    | 5.53068  | 8.74278   | 8.41246  | 8.33874   |
| MIR1281     | 0         | 0         | 0        | 0         | 0        | 0         |
| RPS20       | 960.01    | 1498.65   | 1138.25  | 1626.03   | 997.983  | 903.642   |
| NUDT21      | 27.6894   | 22.3211   | 24.81    | 18.2496   | 23.8739  | 19.9295   |
| FLJ45872    | 0         | 0         | 0        | 0         | 0        | 0.0292534 |
| PHYHIPL     | 0.824186  | 1.44353   | 0.555907 | 1.60498   | 0.731728 | 1.27522   |
| CSDC2       | 1.8731    | 2.8541    | 0.512876 | 2.95631   | 1.16761  | 7.82299   |
| MIR449C     | 0         | 0         | 0        | 0         | 0        | 0         |
| LOC644083   | 0         | 0         | 0.065856 | 0         | 0        | 0         |
| IFNA2       | 0         | 0         | 0        | 0         | 0        | 0         |
| RETN        | 0         | 0         | 0        | 0         | 0.230957 | 0.225972  |
| LCE2B       | 101.689   | 82.5177   | 250.271  | 277.08    | 346.998  | 253.763   |
| CYP17A1     | 0.167226  | 0.0492835 | 0.464167 | 0.157022  | 0.284019 | 0.17368   |
| TAF12       | 21.4583   | 29.0498   | 18.0295  | 21.586    | 19.8807  | 19.5172   |
| NMRAL1      | 28.5773   | 41.7456   | 25.4705  | 37.7139   | 32.3689  | 33.1466   |
| C17orf87    | 0.285489  | 5.59E-08  | 0.528143 | 0         | 0.552798 | 1.04762   |
| IMPA1       | 6.87435   | 6.64073   | 5.40153  | 4.35784   | 5.93007  | 5.44057   |
| ERGIC1      | 52.0824   | 37.9536   | 44.9454  | 40.1488   | 42.6738  | 38.8156   |
| TBCB        | 24.2892   | 32.9099   | 24.9533  | 29.5366   | 29.5705  | 28.9428   |
| DACT1       | 3.18313   | 1.86898   | 1.89623  | 1.93593   | 2.02736  | 1.77253   |
| CISD2       | 6.92065   | 5.48645   | 5.24967  | 4.89802   | 5.09772  | 4.91976   |
| IQSEC3      | 0.94112   | 1.55402   | 1.41446  | 0.319866  | 0.66572  | 0.34576   |
| APBA1       | 3.08588   | 2.08789   | 3.20245  | 3.53697   | 3.8847   | 3.52097   |
| SLC26A1     | 1.87965   | 2.45526   | 1.48655  | 1.07751   | 1.6664   | 1.30176   |
| AQP8        | 0.168782  | 0.596907  | 0.447192 | 0.158484  | 0.483743 | 0.052589  |
| FAM182B     | 1.01077   | 1.13112   | 1.12817  | 1.1355    | 1.08572  | 0.644266  |
| ANKRD9      | 14.2524   | 24.971    | 13.3627  | 31.247    | 17.4887  | 19.8408   |
| ZNF266      | 23.0534   | 26.9989   | 23.5923  | 25.6055   | 46.022   | 34.6246   |
| ARSB        | 1.57283   | 1.66144   | 1.16807  | 0.813329  | 1.0616   | 1.04982   |
| GYG2        | 16.6187   | 24.8574   | 49.7508  | 23.0737   | 23.6347  | 13.2712   |
| ZNF154      | 2.36849   | 1.77191   | 1.59987  | 2.4977    | 1.81021  | 1.74843   |
| OR2L3       | 0         | 0         | 0        | 0         | 0        | 0         |
| C7orf68     | 114.209   | 95.7916   | 84.2426  | 86.9959   | 59.8087  | 78.3835   |
| LOC1005064! | 0         | 0         | 0        | 0         | 0        | 0         |
| PI4K2A      | 11.7369   | 10.7058   | 12.4388  | 14.5998   | 13.7368  | 13.4547   |
| MIR1283-1   | 0         | 0         | 0        | 0         | 0        | 0         |
| FLJ20444    | 0.0841244 | 0.768774  | 3.05815  | 2.36974   | 0.437564 | 0.629073  |



|             |          |          |           |          |          |           |
|-------------|----------|----------|-----------|----------|----------|-----------|
| LOC10012877 | 2.96583  | 2.23533  | 4.30175   | 2.34077  | 3.93832  | 4.13999   |
| ADCY4       | 11.1254  | 20.3163  | 13.009    | 12.235   | 20.4773  | 14.5486   |
| ABCC4       | 2.70528  | 1.46419  | 2.01068   | 1.01629  | 2.21537  | 1.52236   |
| SNORD34     | 0        | 0        | 0         | 0        | 0        | 0         |
| SERTAD1     | 16.3974  | 27.5124  | 22.2868   | 22.9204  | 20.3532  | 23.7456   |
| ANXA13      | 0        | 0.259941 | 0         | 0.276066 | 0        | 0.206114  |
| SRRM3       | 2.41521  | 2.78318  | 2.44461   | 4.48472  | 2.74812  | 4.17695   |
| C6orf147    | 0.750561 | 0.663598 | 0.79545   | 0.775241 | 1.05168  | 0.748348  |
| LOC10050751 | 0.635894 | 1.82721  | 0.481375  | 0        | 0.202502 | 0.0990655 |
| ANKRD6      | 2.43864  | 2.07058  | 2.96709   | 2.32395  | 2.53176  | 2.03368   |
| C6orf130    | 22.5055  | 26.2755  | 23.8807   | 22.3966  | 24.5023  | 23.7337   |
| SLC27A3     | 17.7551  | 30.1341  | 22.1788   | 26.2097  | 28.4802  | 21.3699   |
| MUC4        | 0.212965 | 0.13669  | 0.183795  | 0.371612 | 0.237535 | 0.246621  |
| IBTK        | 14.3883  | 9.59597  | 12.2363   | 7.33957  | 10.8763  | 9.41089   |
| LSAMP-AS4   | 0        | 0        | 0         | 0        | 0        | 0         |
| SNTB1       | 12.154   | 4.7645   | 7.21967   | 5.4241   | 5.494    | 5.27877   |
| ZSCAN2      | 2.2491   | 3.96627  | 3.51019   | 2.8456   | 4.33578  | 2.2964    |
| PRAMEF3     | 0        | 0        | 0         | 0        | 0        | 0         |
| MIR1255B2   | 0        | 0        | 0         | 0        | 0        | 0         |
| DENND2C     | 4.98279  | 3.90633  | 6.46629   | 4.63266  | 6.22207  | 5.88891   |
| C11orf73    | 20.0875  | 22.3033  | 19.152    | 23.0892  | 18.8512  | 20.9668   |
| NEURL       | 0.810162 | 1.07444  | 0.613297  | 1.01431  | 0.558997 | 0.392668  |
| EPHX2       | 35.5803  | 34.9577  | 23.0917   | 27.9431  | 32.8549  | 31.633    |
| NFE4        | 0        | 0        | 0.0934565 | 0        | 0.157259 | 0         |
| MSRA        | 15.4105  | 15.984   | 13.7021   | 15.0088  | 10.6738  | 11.6418   |
| KRTAP3-2    | 16.3592  | 2.89276  | 0.582777  | 164.454  | 3.43223  | 2629.07   |
| FLJ38379    | 0.570581 | 0.892526 | 0.797414  | 0.783043 | 1.03431  | 0.519667  |
| C18orf12    | 0        | 0        | 0         | 0        | 0        | 0         |
| TP53I13     | 26.1532  | 40.4488  | 31.3047   | 40.2295  | 37.6012  | 33.9417   |
| PDE6B       | 0.498391 | 0.919424 | 0.623517  | 1.11479  | 0.95732  | 1.09458   |
| CELF4       | 0.27485  | 0.243005 | 0.468957  | 0.419542 | 0.426011 | 0.416815  |
| LOC10050661 | 0        | 0        | 0         | 0        | 0        | 0         |
| YPEL2       | 7.37501  | 5.64245  | 10.1913   | 6.73506  | 8.12929  | 7.64438   |
| SNX20       | 1.62397  | 2.17803  | 1.64064   | 0.732792 | 3.10014  | 1.48444   |
| CCNL2       | 121.274  | 165.713  | 151.641   | 156.081  | 202.624  | 161.984   |
| SUV39H2     | 3.81464  | 2.02905  | 2.9634    | 2.14884  | 2.58894  | 3.13047   |
| DNAJC21     | 8.18362  | 7.04016  | 7.93817   | 5.93452  | 7.22759  | 7.52022   |
| TNNT1       | 6.58392  | 12.9415  | 12.8603   | 23.4982  | 20.2378  | 16.5255   |
| KRTAP20-1   | 9.79794  | 0        | 0         | 0        | 0        | 299.177   |
| CEND1       | 0.128929 | 0.284978 | 0.1952    | 0.242125 | 0.451637 | 0.441888  |
| LOC10013331 | 0.716405 | 1.50432  | 1.15244   | 0.588606 | 1.53995  | 0.613846  |
| MIR486      | 0        | 0        | 0         | 0        | 0        | 0         |
| TCP11L1     | 2.63134  | 2.7667   | 4.12974   | 2.44293  | 3.50149  | 3.78965   |

|              |           |           |           |           |           |           |
|--------------|-----------|-----------|-----------|-----------|-----------|-----------|
| SERPINA12    | 26.987    | 17.9394   | 92.159    | 50.1176   | 60.774    | 52.1644   |
| LOC10012797  | 1.32904   | 0.528105  | 0.597858  | 0.774133  | 0.621554  | 0.612281  |
| TMBIM4       | 57.6215   | 49.1113   | 47.8073   | 41.6073   | 44.492    | 39.2467   |
| MLC1         | 0.329912  | 0.531546  | 0.434528  | 0.614235  | 0.3987    | 0.391594  |
| LOC10013316  | 6.30227   | 10.4077   | 8.73905   | 10.4784   | 8.10973   | 6.38636   |
| CD52         | 44.5874   | 49.8708   | 33.3567   | 23.0724   | 73.7606   | 28.1817   |
| FYTTD1       | 30.4373   | 25.6918   | 31.5694   | 27.2894   | 29.8283   | 27.3355   |
| PRSS43       | 0.2268    | 0.0891209 | 0.076306  | 0.0946494 | 0.38841   | 0         |
| OPCML        | 0.0857399 | 0.121081  | 0.0826488 | 0.0861435 | 0.0872231 | 0.0590585 |
| MLL3         | 8.09851   | 6.14571   | 9.2204    | 6.17476   | 8.65784   | 7.26772   |
| KAT7         | 15.016    | 13.2966   | 13.8369   | 15.0404   | 15.2851   | 14.7203   |
| METTL13      | 9.93806   | 9.70786   | 8.99011   | 9.12099   | 9.72671   | 10.2124   |
| TEX15        | 0         | 0         | 0         | 0.0175092 | 0.0118764 | 0.02324   |
| C9orf5       | 15.4145   | 10.9972   | 15.2323   | 11.5792   | 11.2978   | 11.5268   |
| EDC3         | 12.1897   | 13.0063   | 12.7888   | 13.6667   | 14.3354   | 14.0746   |
| SPRR2D       | 243.725   | 129.473   | 53.672    | 196.51    | 164.827   | 152.946   |
| LOC388553    | 0         | 0         | 0.0731115 | 0         | 0         | 0.0601845 |
| CNDP1        | 0.977006  | 0.740406  | 1.19745   | 0.393168  | 0.948206  | 0.811771  |
| ADIPOR1      | 90.7198   | 79.6992   | 83.9211   | 89.3332   | 84.8499   | 89.9117   |
| TAS2R31      | 0.457695  | 0.404665  | 0.259858  | 0.214884  | 0.218631  | 0.431389  |
| FKBP11       | 19.1826   | 31.1774   | 19.2721   | 18.8115   | 32.7872   | 23.3172   |
| SNORD50B     | 0         | 0         | 0         | 0         | 0         | 0         |
| TREML2P1     | 0         | 0         | 0         | 0         | 0         | 0         |
| TRAF3IP2-AS1 | 4.20191   | 6.42682   | 5.97188   | 4.74842   | 5.41769   | 4.70428   |
| LOC10050647  | 0         | 0         | 0         | 0         | 0         | 0         |
| BNIP3        | 35.1781   | 26.8976   | 37.3244   | 28.5661   | 35.0999   | 34.6037   |
| TEKT5        | 0.13235   | 0.643586  | 0.250474  | 0.683511  | 0.126442  | 0.288663  |
| PRRG3        | 0.69236   | 0.832845  | 1.33416   | 0.424565  | 1.48146   | 0.779502  |
| RNASE1       | 126.487   | 111.083   | 114.237   | 74.9587   | 103.746   | 64.3493   |
| SF3A3        | 24.4769   | 27.5533   | 19.0433   | 21.6748   | 22.0639   | 19.3326   |
| LOC10012853  | 1.21665   | 1.39839   | 1.38152   | 1.48514   | 1.08485   | 1.51633   |
| LOC643669    | 3.16396   | 5.76428   | 3.33867   | 3.87118   | 5.19052   | 5.49687   |
| DMP1         | 0         | 0         | 0         | 0         | 0         | 0         |
| MAGOHB       | 3.6984    | 3.84864   | 3.87342   | 3.41128   | 3.71749   | 3.10011   |
| ZC3H13       | 7.58258   | 4.3596    | 7.88271   | 4.43421   | 6.34747   | 6.72103   |
| PABPC1L      | 8.86896   | 10.8245   | 7.52884   | 8.91625   | 13.2008   | 12.3451   |
| OR5B17       | 0         | 0         | 0         | 0         | 0         | 0         |
| RASSF1       | 32.1527   | 49.7649   | 32.06     | 41.2967   | 47.1196   | 34.3603   |
| SLC8A3       | 0.909167  | 0.492307  | 0.710354  | 0.793594  | 1.15633   | 0.910918  |
| LOC338651    | 0.493313  | 0.146462  | 0.158642  | 0.505803  | 0.701444  | 3.48658   |
| RAB39        | 0.353228  | 0.156151  | 0.356528  | 0.0552793 | 0         | 0         |
| GAL3ST4      | 9.52366   | 13.1917   | 13.8482   | 14.718    | 19.5112   | 18.5461   |
| UNC13C       | 0.0815035 | 0.0411773 | 0.0352563 | 0.0874634 | 0.05191   | 0.0870677 |

|            |           |           |           |           |           |           |
|------------|-----------|-----------|-----------|-----------|-----------|-----------|
| MIR3662    | 0         | 0         | 0         | 0         | 0         | 0         |
| SPC24      | 1.46985   | 1.29955   | 1.11269   | 0.591501  | 1.73858   | 1.17765   |
| OR11H1     | 0         | 0         | 0         | 0         | 0         | 0         |
| LOC339807  | 0         | 0.0524182 | 0.0448809 | 0         | 0.0377605 | 0.0369454 |
| LOC1002160 | 0         | 0         | 0.118453  | 0.0734641 | 0.0498301 | 0.146264  |
| MIR4260    | 0         | 0         | 0         | 0         | 0         | 0         |
| MIR4490    | 0         | 0         | 0         | 0         | 0         | 0         |
| EEF1A2     | 2.94664   | 2.60523   | 6.3058    | 6.06578   | 6.71292   | 5.79116   |
| MIR4794    | 0         | 0         | 0         | 0         | 0         | 0         |
| PRAMEF17   | 0         | 0         | 0         | 0         | 0         | 0         |
| ZNF550     | 3.86367   | 2.80288   | 4.64971   | 2.41861   | 4.79539   | 3.88932   |
| LOC399829  | 0         | 0         | 0.0269585 | 0         | 0.0340222 | 0         |
| APLF       | 2.7929    | 2.60399   | 2.0758    | 1.59733   | 2.16692   | 2.10432   |
| LOC1002883 | 0         | 0         | 0         | 0         | 0.118593  | 0         |
| DTWD1      | 9.31443   | 10.3024   | 10.1654   | 9.04588   | 9.4671    | 8.07348   |
| SLC25A16   | 8.35816   | 8.63477   | 10.041    | 7.25104   | 8.0429    | 7.95421   |
| BABAM1     | 47.6358   | 65.5758   | 45.2039   | 57.5697   | 54.9005   | 50.1152   |
| LOC1005075 | 2.56093   | 2.10248   | 0.138474  | 0.171762  | 1.39806   | 0.683941  |
| FGF21      | 0         | 0         | 0         | 0         | 0         | 0         |
| KHDC1L     | 0.219467  | 0.388079  | 0.166138  | 0.206076  | 0         | 0         |
| GRM6       | 0.249047  | 0.233953  | 0.718769  | 0.716168  | 0.317238  | 0.455886  |
| FLJ43390   | 0.158074  | 0         | 0.0435139 | 0.0674679 | 0.192204  | 0.16119   |
| ISL1       | 0         | 0.0325897 | 0.0279036 | 0         | 0.0704299 | 0.114849  |
| OCIAD2     | 33.7387   | 39.9024   | 34.4648   | 41.8666   | 34.0582   | 34.8694   |
| KDR        | 5.95658   | 5.60169   | 5.27464   | 3.76832   | 4.53844   | 3.93834   |
| LINC00483  | 0         | 0.100916  | 0.0864051 | 0         | 0.0726968 | 0         |
| FAM167B    | 2.738     | 4.7315    | 1.69583   | 1.75291   | 3.0121    | 2.71442   |
| SYTL1      | 70.3813   | 106.047   | 79.8423   | 127.078   | 116.905   | 141.484   |
| IGF2BP3    | 0.140367  | 0.0620519 | 0.106259  | 0.0659013 | 0.0447003 | 0.0728924 |
| COX4I2     | 7.86243   | 12.1651   | 5.50551   | 6.45986   | 4.50687   | 3.91963   |
| SLCO2A1    | 13.2601   | 15.2246   | 7.78989   | 6.61461   | 11.0846   | 7.57454   |
| PRDM6      | 0.0984321 | 0.232073  | 0.223541  | 0.277278  | 0.397049  | 0.388478  |
| AP1B1      | 52.9022   | 45.6942   | 40.3075   | 43.3276   | 40.6971   | 48.2701   |
| MIR3122    | 0         | 0         | 0         | 0         | 0         | 0         |
| SLC2A5     | 1.44009   | 1.47779   | 1.53963   | 1.85818   | 2.40936   | 1.92477   |
| ADCY1      | 0.465734  | 0.332075  | 0.528845  | 0.317408  | 0.521493  | 0.26214   |
| OVGP1      | 3.14049   | 5.99591   | 4.82365   | 6.32512   | 8.17472   | 4.2544    |
| UNC79      | 0.0223531 | 0.0494081 | 0.0423036 | 0.0209892 | 0.0213553 | 0.0557181 |
| LYSMD2     | 9.36532   | 7.15678   | 6.05235   | 4.85833   | 5.36209   | 3.623     |
| MIR508     | 0         | 0         | 0         | 0         | 0         | 0         |
| RNY4       | 0         | 0         | 0         | 0         | 0         | 0         |
| C5orf13    | 15.8318   | 22.3886   | 15.0343   | 18.9575   | 20.6598   | 20.0221   |
| HMX1       | 0         | 0.0970429 | 0.083089  | 0.154594  | 0.139814  | 0.170995  |

|             |           |          |           |           |           |            |
|-------------|-----------|----------|-----------|-----------|-----------|------------|
| TSEN54      | 16.8901   | 27.8815  | 17.7627   | 23.5885   | 23.2509   | 19.0852    |
| TMEM22      | 4.00259   | 6.95297  | 3.56066   | 3.04844   | 3.57005   | 2.85004    |
| MIR148A     | 0         | 0        | 0         | 0         | 0         | 0          |
| ERMP1       | 16.0565   | 11.2678  | 16.1065   | 14.0119   | 12.978    | 12.6417    |
| HERC2P2     | 9.67409   | 9.3326   | 15.8484   | 12.5996   | 34.153    | 34.079     |
| RAMP3       | 26.3429   | 41.1734  | 17.8426   | 13.8611   | 20.3621   | 16.7207    |
| DNAJC13     | 8.54521   | 7.82218  | 10.1652   | 7.06663   | 9.30594   | 7.67774    |
| LOC10050548 | 12.7124   | 11.8962  | 12.9321   | 12.366    | 13.1002   | 11.5623    |
| KIF20A      | 1.67189   | 2.20474  | 1.65176   | 2.42134   | 1.82286   | 2.40156    |
| TRIM16      | 19.0984   | 19.7707  | 19.2074   | 21.6637   | 22.7963   | 21.1198    |
| UNKL        | 10.8688   | 13.9451  | 12.475    | 13.7404   | 18.8969   | 14.32      |
| MIMT1       | 0.0859635 | 0        | 0         | 0         | 0.0547506 | 0          |
| CAPNS1      | 168.817   | 170.656  | 152.342   | 176.535   | 130.298   | 130.839    |
| GTF2IRD2    | 7.89263   | 11.705   | 8.56885   | 10.5259   | 10.6935   | 7.78568    |
| PCDHGB2     | 0.527909  | 0.252627 | 0.631911  | 0.431028  | 0.518115  | 0.636811   |
| WDR27       | 3.4119    | 4.05938  | 4.13797   | 4.10494   | 6.13152   | 5.37544    |
| LOC10028751 | 0         | 0        | 0         | 0         | 0         | 0.00834323 |
| MORC2-AS1   | 4.95176   | 5.27064  | 3.05704   | 5.01076   | 3.24566   | 3.26733    |
| MIR4635     | 0         | 0        | 0         | 0         | 0         | 0          |
| OR4C6       | 0         | 0        | 0         | 0         | 0         | 0          |
| MIR1275     | 0         | 0        | 0         | 0         | 0         | 0          |
| TRPM3       | 0         | 0        | 0.0490562 | 0.0608489 | 0.120096  | 0.106945   |
| VTI1B       | 46.1112   | 50.1698  | 51.3379   | 50.7022   | 35.4831   | 35.1405    |
| LOC10050640 | 18.3385   | 21.2216  | 17.039    | 19.7085   | 16.8784   | 16.9193    |
| LMOD1       | 22.7964   | 26.3734  | 18.8579   | 21.8903   | 18.607    | 15.3397    |
| SNORD17     | 0         | 2.01519  | 5.17627   | 0         | 1.45168   | 1.42035    |
| ST3GAL3     | 7.90576   | 9.76407  | 7.96094   | 9.70133   | 6.86802   | 6.36107    |
| CPA4        | 59.6764   | 45.325   | 59.2584   | 61.9509   | 69.7289   | 90.8393    |
| LOC401177   | 0         | 0        | 0         | 0         | 0         | 0          |
| LARGE       | 5.45668   | 7.94362  | 5.63815   | 4.68206   | 4.50855   | 5.21776    |
| LOC644554   | 0.437617  | 0.386914 | 1.00883   | 1.23275   | 0.766482  | 0.613585   |
| PDIA4       | 36.1704   | 31.6816  | 27.3047   | 24.4676   | 23.531    | 25.7539    |
| WASF3       | 6.65946   | 6.48572  | 6.57689   | 3.44403   | 3.40621   | 2.8347     |
| ESX1        | 0         | 0        | 0         | 0         | 0         | 0          |
| LOC10012830 | 2.45509   | 4.54319  | 3.47931   | 3.83321   | 3.05462   | 5.21236    |
| PDPK1       | 14.4368   | 10.6024  | 14.5266   | 12.9956   | 14.2133   | 13.3352    |
| LOC10065290 | 0         | 0        | 0         | 0         | 0         | 0          |
| OR10J3      | 0         | 0        | 0         | 0         | 0         | 0          |
| PFN3        | 0         | 0        | 0         | 0         | 0         | 0          |
| MIR548AB    | 0         | 0        | 0         | 0         | 0         | 0          |
| LOC145663   | 0.305189  | 0.337413 | 0.3562    | 0.143284  | 0.44555   | 0.332879   |
| CCDC81      | 0.506375  | 0.390832 | 0.275651  | 0.201233  | 0.4599    | 0.450641   |
| MPND        | 16.4973   | 23.3211  | 16.4234   | 22.7373   | 19.2664   | 16.9679    |

|             |          |           |           |           |           |           |
|-------------|----------|-----------|-----------|-----------|-----------|-----------|
| C10orf131   | 0        | 0.084857  | 0         | 0.180242  | 0.305642  | 0.179427  |
| SPG20       | 18.905   | 15.4045   | 15.0682   | 11.2267   | 12.7169   | 12.7419   |
| SPDYE8P     | 0.982368 | 0.951414  | 0.74322   | 0.984616  | 1.15166   | 1.06375   |
| SEC31B      | 8.22596  | 9.36939   | 9.29298   | 8.98511   | 12.3673   | 8.93139   |
| LOC10050921 | 2.98556  | 1.9017    | 2.05662   | 1.20722   | 2.33932   | 1.21137   |
| COPA        | 32.1123  | 27.4914   | 32.3929   | 28.7243   | 30.9219   | 29.5292   |
| GRXCR2      | 0        | 0.153225  | 0.262385  | 0.16273   | 0.331136  | 0.107996  |
| LRRC45      | 8.08831  | 12.4205   | 7.44122   | 8.21255   | 11.141    | 10.177    |
| SH2B1       | 32.8554  | 46.4494   | 35.5102   | 39.5629   | 48.5484   | 44.9795   |
| LOC10050609 | 1.56303  | 1.75334   | 1.91045   | 1.46664   | 2.14283   | 1.6849    |
| MAB21L2     | 0.108374 | 0.0638781 | 0.0273465 | 0.0339204 | 0.0920317 | 0.112556  |
| LINC00337   | 0.175691 | 0.388338  | 0.398998  | 0.164971  | 0.111899  | 0.109483  |
| UBL3        | 19.1193  | 15.2848   | 22.8937   | 18.1834   | 21.9076   | 18.3308   |
| DSCR8       | 0        | 0         | 0         | 0         | 0         | 0         |
| AOC4        | 1.63895  | 1.53651   | 2.5937    | 1.7717    | 1.23356   | 0.773545  |
| EVPL        | 43.6309  | 53.6449   | 66.9676   | 77.3008   | 90.2374   | 90.3832   |
| LOC10013089 | 1.36364  | 1.7461    | 1.24585   | 1.19213   | 1.64717   | 1.25999   |
| C17orf47    | 0.241256 | 0.170643  | 0.182632  | 0.135922  | 0.122926  | 0.0902044 |
| LOC10013309 | 4.81294  | 5.61445   | 1.29292   | 2.08036   | 1.8938    | 2.53092   |
| AKAP4       | 0        | 0         | 0         | 0         | 0         | 0         |
| NDUFS1      | 37.0944  | 24.2012   | 29.9279   | 22.7745   | 22.9089   | 25.0752   |
| GEMIN2      | 5.53505  | 6.5837    | 6.49366   | 4.08984   | 6.64467   | 6.64078   |
| LOC10065296 | 1.1941   | 1.12173   | 2.09036   | 1.47163   | 2.32912   | 2.23233   |
| TLK1        | 13.3527  | 9.68039   | 11.863    | 9.26176   | 12.0961   | 10.5968   |
| EMILIN2     | 3.69654  | 4.17132   | 4.1054    | 2.42056   | 4.95652   | 3.54622   |
| LOC10013088 | 0.626497 | 0.553909  | 1.42279   | 0.352963  | 0.558627  | 0.936976  |
| LCK         | 4.2205   | 4.67374   | 2.4607    | 1.10503   | 6.17877   | 2.32783   |
| VENTXP1     | 0        | 0         | 0         | 0         | 0         | 0         |
| CWF19L2     | 4.57562  | 5.18992   | 6.38063   | 6.38812   | 6.442     | 5.38376   |
| HP09025     | 0        | 0         | 0.0356819 | 0.0221298 | 0         | 0         |
| CES1P2      | 0.133692 | 0.2992    | 0.709414  | 0.379743  | 0.340598  | 0.29159   |
| HS3ST1      | 1.95052  | 1.072     | 1.1573    | 0.544502  | 1.41018   | 1.05123   |
| SLC6A2      | 1.88971  | 2.32298   | 1.3499    | 1.70434   | 3.43973   | 2.49876   |
| MYL6B       | 18.3275  | 27.7087   | 25.2954   | 40.8884   | 35.8305   | 36.4118   |
| C7orf74     | 4.38436  | 4.07019   | 3.68407   | 3.16997   | 3.44864   | 2.32232   |
| ACVR1B      | 21.7011  | 18.918    | 25.3536   | 26.4223   | 30.661    | 27.1657   |
| DSCAM-AS1   | 0        | 0         | 0         | 0         | 0         | 0         |
| NCALD       | 59.9564  | 27.0507   | 43.2911   | 61.2519   | 24.4743   | 26.3642   |
| DHRS11      | 28.4147  | 27.3045   | 26.2565   | 31.6289   | 25.4045   | 24.8423   |
| C19orf47    | 6.22767  | 6.87197   | 6.10311   | 8.88485   | 7.10269   | 7.06971   |
| ISL2        | 0        | 0         | 0         | 0         | 0         | 0.0363155 |
| MIR1280     | 0        | 0         | 0         | 0         | 0         | 0         |
| IL23R       | 0        | 0         | 0.0267496 | 0         | 0         | 0.0220199 |

|              |           |          |            |           |          |            |
|--------------|-----------|----------|------------|-----------|----------|------------|
| DCP1A        | 6.07196   | 5.70573  | 6.77444    | 5.88058   | 7.23847  | 6.02237    |
| ADCY9        | 4.55716   | 5.07174  | 4.51914    | 3.95615   | 4.49063  | 4.31715    |
| MKI67        | 3.35254   | 4.0784   | 2.60646    | 3.06299   | 3.46255  | 4.24551    |
| PAIP2        | 74.7854   | 65.8633  | 64.9287    | 47.2703   | 61.2071  | 61.8352    |
| MAPKAP1      | 27.2858   | 30.0161  | 29.4403    | 27.6756   | 25.0188  | 23.3587    |
| POTEKP       | 0.0488811 | 0.126201 | 0.00513935 | 0.0127496 | 0        | 0.00423065 |
| C17orf75     | 4.75287   | 4.93057  | 4.54142    | 5.59347   | 5.87936  | 4.0412     |
| LOC10050685  | 0         | 0.374558 | 0          | 0         | 0.17988  | 0          |
| 1-Sep        | 6.09288   | 11.6157  | 6.56816    | 8.38058   | 12.7774  | 5.80489    |
| FUNDC2P2     | 4.38593   | 5.25374  | 4.01633    | 3.52049   | 3.46925  | 3.83519    |
| RPP38        | 17.8652   | 17.4743  | 16.5738    | 16.6715   | 16.0697  | 14.796     |
| LIPA         | 27.7108   | 23.9737  | 20.0336    | 19.5632   | 19.3677  | 15.4032    |
| LOC10050638  | 0.314212  | 0.387619 | 0.418734   | 0.230503  | 0.375232 | 0.558319   |
| PITPNB       | 24.2285   | 20.985   | 20.22      | 21.3745   | 21.4912  | 18.8971    |
| LOC647012    | 0         | 0        | 0          | 0         | 0        | 0          |
| ZNF705G      | 0         | 0        | 0          | 0         | 0        | 0          |
| FBXL12       | 10.5947   | 14.7483  | 11.6891    | 13.4408   | 13.9981  | 12.1508    |
| MIR4473      | 0         | 0        | 0          | 0         | 0        | 0          |
| EHMT2        | 16.8049   | 21.5158  | 16.8716    | 20.2645   | 22.5772  | 18.4104    |
| C13orf44-AS1 | 0.282064  | 0.498767 | 0.213524   | 0.0882846 | 0.179648 | 0.175771   |
| RMND5B       | 27.913    | 30.311   | 27.1801    | 27.9499   | 30.3184  | 31.7571    |
| RAB37        | 2.49926   | 3.43598  | 3.50499    | 1.86158   | 5.02842  | 3.85415    |
| LOC10013170  | 52.9162   | 46.0436  | 78.9467    | 143.072   | 42.2798  | 34.537     |
| PRAMEF21     | 0         | 0        | 0          | 0         | 0        | 0          |
| OR2F1        | 0         | 0        | 0          | 0         | 0.13442  | 0          |
| GNRH2        | 0         | 0.442064 | 0.378485   | 0         | 0.318444 | 0          |
| LOC10028870  | 0         | 0        | 0          | 0         | 0        | 0          |
| RBFOX2       | 22.2817   | 18.6675  | 24.2557    | 19.4277   | 23.8674  | 20.4496    |
| DNASE1L2     | 98.3563   | 125.865  | 90.2316    | 126.293   | 81.9268  | 193.36     |
| MORC1        | 0         | 0        | 0          | 0         | 0        | 0          |
| IGF2         | 10.4958   | 14.1332  | 8.35279    | 8.05685   | 7.86655  | 7.79605    |
| ITGAM        | 2.93516   | 2.43285  | 2.39159    | 1.2634    | 3.46609  | 1.89252    |
| LOC441035    | 0         | 0        | 0          | 0         | 0        | 0          |
| IRS1         | 5.23041   | 3.5425   | 5.21368    | 3.71142   | 3.57267  | 3.67776    |
| NT5C1B       | 0.0753652 | 2.04E-12 | 0.0719063  | 0.0536918 | 0.143296 | 0.094959   |
| TAF1C        | 23.5093   | 42.404   | 29.6125    | 36.1487   | 37.333   | 31.4235    |
| DNAJC24      | 7.61091   | 7.13166  | 8.30507    | 8.16631   | 8.24301  | 6.8748     |
| HAS2         | 1.44096   | 1.43956  | 2.19195    | 0.86933   | 1.43956  | 1.31526    |
| NLGN3        | 1.03707   | 1.00626  | 0.88014    | 1.09241   | 1.34633  | 1.28652    |
| FUT7         | 1.43281   | 1.52521  | 0.916607   | 0.472743  | 1.43733  | 0.362313   |
| CTDSP1       | 65.6216   | 85.0194  | 83.1797    | 81.8449   | 80.7684  | 70.4448    |
| UPK3B        | 8.66507   | 21.5382  | 3.88571    | 5.73428   | 4.7328   | 2.75224    |
| CCL26        | 5.31151   | 15.2623  | 3.61876    | 0.249371  | 4.05952  | 0.496486   |

|             |           |          |           |           |          |           |
|-------------|-----------|----------|-----------|-----------|----------|-----------|
| ADAM19      | 2.47394   | 2.30448  | 1.58295   | 1.09236   | 3.08568  | 1.65177   |
| GPR84       | 0.998021  | 1.38661  | 0.701543  | 0.736313  | 0.544839 | 0.710771  |
| TSEN15      | 14.967    | 15.0678  | 16.0304   | 13.7041   | 15.402   | 12.1991   |
| C15orf61    | 8.72856   | 12.71    | 9.07083   | 9.34073   | 9.63073  | 9.7443    |
| ENTPD8      | 0.0983972 | 0.476369 | 0.111684  | 0.0460733 | 0.310861 | 0.719826  |
| HNRNPAB     | 90.1892   | 91.3869  | 84.3907   | 101.166   | 75.2873  | 79.3041   |
| SCNN1G      | 1.96669   | 1.58978  | 2.08431   | 2.74366   | 2.29046  | 3.53661   |
| LOC10050725 | 0         | 0.107744 | 0.276754  | 0.0572138 | 0.155231 | 0.15188   |
| AK2         | 53.3107   | 47.1032  | 43.7297   | 42.2086   | 44.5147  | 42.3442   |
| LRRCC1      | 5.24217   | 4.54566  | 4.65518   | 3.17111   | 5.07236  | 4.22472   |
| ZNRD1       | 21.9038   | 35.9841  | 22.3445   | 33.9284   | 25.7482  | 31.3854   |
| ITSN1       | 9.22965   | 9.74238  | 11.3705   | 7.67221   | 9.07822  | 7.79803   |
| PXMP4       | 38.4847   | 26.4364  | 23.96     | 26.5123   | 19.7434  | 26.6313   |
| SNRPE       | 11.9118   | 9.55201  | 9.48907   | 10.9898   | 7.80719  | 7.89766   |
| FLJ37453    | 3.92214   | 4.11588  | 3.05304   | 3.54515   | 3.73611  | 3.26643   |
| COX17       | 58.87     | 54.3972  | 35.853    | 36.9905   | 34.1117  | 37.7886   |
| MXD1        | 8.7967    | 5.7556   | 8.21079   | 7.20141   | 9.84552  | 10.6973   |
| PEX11B      | 28.5003   | 28.7673  | 28.4668   | 31.1832   | 34.8265  | 28.0654   |
| LOC10012962 | 0         | 0        | 0.0449818 | 0         | 0        | 0         |
| MIR378I     | 0         | 0        | 0         | 0         | 0        | 0         |
| LOC10050763 | 0.654294  | 0.934477 | 0.419104  | 0.472594  | 0.288501 | 0.282273  |
| COL9A3      | 7.07191   | 13.6288  | 5.44578   | 8.85388   | 9.02756  | 14.7404   |
| THUMPD2     | 6.66607   | 10.1034  | 7.04675   | 6.6469    | 8.309    | 6.90984   |
| ITGBL1      | 7.32737   | 2.97076  | 14.2196   | 8.89495   | 6.60062  | 8.27449   |
| NR1I3       | 0.816117  | 1.15713  | 1.76108   | 1.33226   | 1.67904  | 1.66519   |
| LOC284688   | 0.061093  | 0.432117 | 0.554973  | 0         | 0.116731 | 0.152282  |
| CXorf26     | 29.9293   | 23.9652  | 22.7991   | 20.768    | 20.4409  | 24.5743   |
| MREG        | 19.0192   | 16.9516  | 17.7058   | 16.9918   | 13.8775  | 31.3559   |
| GFAP        | 1.63717   | 0.876961 | 0.925122  | 0.395027  | 0.678045 | 0.588595  |
| SNORD115-2  | 0         | 0        | 0         | 0         | 0        | 0         |
| UFL1        | 13.4322   | 9.62744  | 12.8284   | 8.70508   | 13.0755  | 10.3009   |
| MIRPRE      | 0.0853276 | 0        | 0         | 0         | 0.108691 | 0.0531725 |
| LOC10050736 | 39.8878   | 23.4378  | 30.0077   | 33.7319   | 34.399   | 29.9512   |
| PRICKLE4    | 7.2845    | 11.0001  | 10.8336   | 10.2903   | 13.5902  | 10.8865   |
| MAP2K3      | 34.9636   | 39.2858  | 34.1717   | 43.8763   | 43.5132  | 45.3287   |
| CDX4        | 0.144081  | 0        | 0.10907   | 0         | 0        | 0.0897849 |
| LOC10050668 | 0         | 0.313234 | 0.536386  | 0.332665  | 0.225644 | 0.66232   |
| PDDC1       | 24.1349   | 30.3263  | 25.6288   | 31.2677   | 31.735   | 30.1351   |
| MIR2110     | 0         | 0        | 0         | 0         | 0        | 0         |
| F12         | 1.75868   | 3.59852  | 1.40741   | 2.54784   | 1.72818  | 2.53631   |
| TIMM44      | 17.6758   | 23.4416  | 21.4012   | 29.7973   | 22.7789  | 21.8363   |
| USP43       | 3.37565   | 2.47653  | 2.06606   | 3.10224   | 1.92125  | 2.10356   |
| ZSCAN12P1   | 0.950114  | 0.350013 | 1.21872   | 0.817797  | 0.521087 | 0.953892  |

|             |           |           |           |           |           |           |
|-------------|-----------|-----------|-----------|-----------|-----------|-----------|
| DEFB1       | 209.465   | 182.897   | 181.62    | 246.204   | 123.869   | 128.91    |
| BTN3A3      | 16.26     | 14.2721   | 10.2715   | 5.85803   | 21.6901   | 11.1583   |
| PRR22       | 3.76179   | 10.3936   | 6.82261   | 10.1553   | 9.03457   | 5.81164   |
| NUAK1       | 5.09831   | 4.26061   | 8.23702   | 7.8432    | 10.5777   | 9.40059   |
| LOC1005062: | 1.98141   | 1.83299   | 1.75454   | 0.836761  | 2.07527   | 2.37516   |
| CCDC129     | 0.947251  | 0.495663  | 0.819513  | 1.57923   | 0.541747  | 0.602333  |
| NPHP1       | 1.52055   | 2.27439   | 1.82136   | 1.36893   | 3.33959   | 2.10232   |
| ZNF814      | 4.60248   | 4.61146   | 3.73733   | 4.30735   | 4.18714   | 5.24019   |
| RAD21       | 36.0026   | 25.0928   | 32.9053   | 25.1478   | 30.689    | 28.1306   |
| AZIN1       | 30.3136   | 21.5335   | 28.3056   | 21.4164   | 25.8065   | 21.7403   |
| PLXNA2      | 2.81041   | 3.07329   | 4.8273    | 3.83494   | 3.95153   | 5.3564    |
| BEST1       | 1.43504   | 1.62481   | 1.85637   | 1.26274   | 2.33962   | 1.87837   |
| ZNF771      | 1.88272   | 3.97357   | 2.02896   | 4.23669   | 3.73539   | 3.65476   |
| SEMA4A      | 21.1899   | 23.7822   | 23.4692   | 28.2062   | 30.0359   | 34.3374   |
| SNORA11D    | 0         | 0         | 0         | 0         | 23.388    | 0         |
| ZNF507      | 4.37146   | 3.99694   | 4.25187   | 3.47325   | 4.02151   | 3.60874   |
| ISM1        | 12.8086   | 13.6238   | 12.7226   | 14.5418   | 20.2958   | 20.5591   |
| OR6Q1       | 0         | 0         | 0         | 0         | 0         | 0         |
| ARMS2       | 0         | 0.137475  | 0.353123  | 0.292007  | 0.396133  | 0.0968955 |
| RHOH        | 2.17192   | 1.00586   | 1.37013   | 0.776913  | 1.54799   | 0.998973  |
| SLBP        | 35.3728   | 34.6233   | 33.2984   | 30.2889   | 30.5836   | 27.5377   |
| CLN3        | 28.3172   | 31.233    | 27.9894   | 33.1362   | 28.7788   | 27.0853   |
| MRGPRX1     | 0         | 0         | 0         | 0         | 0         | 0         |
| TAS2R40     | 0         | 0         | 0.0922227 | 0         | 0         | 0         |
| OR2W1       | 0         | 0         | 0         | 0         | 0         | 0         |
| C17orf58    | 8.44358   | 7.88443   | 6.9692    | 6.01312   | 5.54339   | 5.32743   |
| SNORD16     | 0         | 0         | 0         | 0         | 0         | 0         |
| LOC1002872: | 0.0167358 | 0.0118374 | 0.0126691 | 0         | 0         | 0.0129784 |
| ARHGAP6     | 1.90749   | 1.63971   | 3.45962   | 2.0063    | 2.34265   | 1.91942   |
| PCDHAC1     | 0.35662   | 1.79E-15  | 0.0367316 | 1.72E-28  | 6.11E-52  | 2.29E-24  |
| CLEC10A     | 6.814     | 7.62255   | 11.6899   | 5.10543   | 20.5116   | 8.33973   |
| LOC1005058: | 0         | 0         | 0         | 0         | 0         | 0         |
| SLC22A10    | 0         | 0.0345787 | 0         | 0.0734475 | 0.0498189 | 0.0487435 |
| YWHAB       | 137.164   | 116.134   | 124.333   | 110.517   | 98.4778   | 104.66    |
| ANP32C      | 7.527     | 5.87768   | 5.84038   | 4.59506   | 6.35102   | 6.6829    |
| SLC12A9     | 12.5257   | 19.844    | 12.8167   | 16.0947   | 19.5244   | 15.611    |
| LOC1005070( | 0         | 0         | 0         | 0         | 0         | 0         |
| LOC1005060( | 0.989644  | 0.729151  | 1.99778   | 0.309753  | 2.73134   | 1.74733   |
| MIR604      | 0         | 0         | 0         | 0         | 0         | 0         |
| APEX1       | 89.9759   | 113.299   | 95.5018   | 102.365   | 101.446   | 84.6756   |
| SNORA70E    | 0         | 0         | 0         | 0         | 0         | 0         |
| MKLN1       | 10.6678   | 7.84746   | 10.2028   | 7.86819   | 9.2271    | 7.5757    |
| MIR1245     | 0         | 0         | 0         | 0         | 0         | 0         |



|             |           |           |          |          |           |           |
|-------------|-----------|-----------|----------|----------|-----------|-----------|
| LOC10050640 | 0         | 0         | 0        | 0        | 0         | 0         |
| ZNF202      | 5.98299   | 6.69189   | 5.09303  | 5.73074  | 6.58055   | 5.83958   |
| LOC10029440 | 97.5108   | 124.22    | 75.398   | 67.7991  | 197.864   | 263.781   |
| ZSCAN21     | 5.39122   | 4.78236   | 5.8818   | 6.8524   | 7.67127   | 6.97032   |
| ZNF728      | 0.0378275 | 0.133779  | 0.114543 | 0.106558 | 0.0481851 | 0.0235725 |
| MIR599      | 0         | 0         | 0        | 0        | 0         | 0         |
| FAM106A     | 0.312588  | 0.0197408 | 0.473912 | 0.293515 | 0.255972  | 0.111309  |
| CPSF7       | 42.9185   | 46.7676   | 42.2497  | 41.758   | 51.3474   | 45.1359   |
| PARP14      | 25.8483   | 27.4263   | 7.79337  | 5.30751  | 13.6943   | 6.02404   |
| C5orf35     | 3.91872   | 3.35647   | 1.66145  | 1.32477  | 2.53483   | 2.0641    |
| LOC10050730 | 2.15862   | 3.70477   | 2.59532  | 3.21921  | 4.20539   | 2.13643   |
| GSDMC       | 14.6201   | 20.2706   | 15.4368  | 14.4214  | 23.0831   | 15.9206   |
| C22orf15    | 0         | 0.251243  | 0.107558 | 0        | 0.0904941 | 0.265622  |
| ZSWIM7      | 12.6187   | 17.6947   | 14.5018  | 16.2448  | 16.0279   | 16.0774   |
| USP48       | 19.4398   | 17.5243   | 20.6253  | 15.6541  | 18.9365   | 17.8492   |
| ALS2        | 6.07993   | 5.75695   | 7.86345  | 7.26595  | 7.80198   | 7.15766   |
| LOC152217   | 14.9815   | 21.4983   | 15.6163  | 21.5799  | 16.4859   | 15.3968   |
| GPR119      | 0         | 0         | 0        | 0        | 0         | 0         |
| KIAA1614    | 0.866477  | 1.11807   | 1.73732  | 0.857587 | 1.13356   | 1.2988    |
| OSM         | 0.168858  | 0.099529  | 0.170435 | 0.211406 | 0.143395  | 0.07015   |
| LOC283050   | 3.25797   | 3.85281   | 2.21166  | 2.96925  | 4.17596   | 2.32666   |
| LOC10012801 | 1.18773   | 0.63007   | 1.07894  | 0.669156 | 0.605178  | 0.740143  |
| C12orf51    | 5.96216   | 5.98357   | 7.59469  | 6.22296  | 8.63242   | 7.85665   |
| CCDC134     | 2.08252   | 1.22749   | 2.9559   | 1.71102  | 2.76327   | 2.37919   |
| HEATR5A     | 4.16125   | 2.90907   | 4.26727  | 2.58976  | 3.44388   | 3.09063   |
| LINC00092   | 0.612552  | 1.73306   | 0.602817 | 0.287588 | 0.624221  | 0.610746  |
| SESN1       | 24.1714   | 21.1069   | 24.5414  | 19.5768  | 29.7237   | 26.7717   |
| SUPV3L1     | 13.9676   | 16.3935   | 12.7996  | 16.0683  | 14.2025   | 11.3254   |
| ZNF92       | 3.66156   | 3.20685   | 3.14973  | 1.56331  | 3.64598   | 2.86244   |
| PPIAL4D     | 0.660521  | 0.929332  | 0.40318  | 0.421917 | 0.455732  | 0.548812  |
| CADM2       | 1.08645   | 0.827189  | 0.846416 | 0.392711 | 0.544535  | 0.578533  |
| IFITM2      | 85.5716   | 103.989   | 107.467  | 84.7208  | 111.51    | 73.7396   |
| FGF13       | 4.32821   | 2.30774   | 2.70739  | 1.77743  | 2.21079   | 1.82216   |
| LOC10012941 | 0         | 0         | 0        | 0        | 0         | 0         |
| CMTM2       | 0.13384   | 0.692341  | 0.808665 | 0.125674 | 0.432984  | 0.521275  |
| MAK         | 0.137878  | 0.401713  | 0.230411 | 0.379604 | 0.28101   | 0.210895  |
| MIR584      | 0         | 0         | 0        | 0        | 0         | 0         |
| SLC5A2      | 7.17E-09  | 0.0631017 | 0.111274 | 0.345942 | 0.135106  | 0.173094  |
| IFNGR1      | 67.4125   | 63.327    | 63.423   | 40.6534  | 72.8545   | 50.0965   |
| HIST2H2BF   | 1.24109   | 1.07688   | 1.1877   | 0.424768 | 1.5382    | 1.58943   |
| WDR67       | 1.79529   | 1.76081   | 1.3166   | 1.10665  | 1.72662   | 1.53047   |
| TMEM100     | 5.22069   | 6.93852   | 5.18853  | 2.65604  | 4.1658    | 1.69677   |
| SCAMP4      | 37.9261   | 42.6385   | 42.6424  | 57.654   | 45.2087   | 51.0991   |

|             |           |           |          |           |           |           |
|-------------|-----------|-----------|----------|-----------|-----------|-----------|
| ESRP2       | 46.0292   | 48.0729   | 37.5269  | 45.0288   | 43.93     | 56.0603   |
| PRKAG1      | 43.4831   | 45.7418   | 41.8091  | 40.2881   | 43.224    | 39.7474   |
| LOC401286   | 0.0428461 | 0.0189409 | 0        | 0.0201159 | 0.0272889 | 0.0133499 |
| LOC10050655 | 7.14215   | 6.54566   | 12.3298  | 9.73241   | 10.4846   | 6.7303    |
| TMEM80      | 29.1238   | 43.8354   | 29.7377  | 34.7429   | 36.9555   | 36.7128   |
| LOC284100   | 0         | 0         | 0        | 0         | 0         | 0         |
| THAP5       | 10.7599   | 9.21534   | 9.88689  | 6.25785   | 9.62421   | 7.33527   |
| OR51B5      | 0         | 0         | 0        | 0         | 0         | 0         |
| VAPA        | 20.412    | 18.5361   | 18.9577  | 20.1297   | 18.7766   | 16.1193   |
| FAM7A1      | 1.00771   | 0.769008  | 1.09649  | 0.534893  | 1.03751   | 0.408109  |
| WDR35       | 3.53894   | 2.66628   | 4.09664  | 3.01269   | 3.96414   | 3.5954    |
| TAF1D       | 24.9728   | 22.1537   | 29.6617  | 19.9751   | 28.1155   | 23.8408   |
| LOC10050756 | 4.69797   | 7.66693   | 4.30695  | 7.15732   | 7.86902   | 5.38744   |
| FAM78A      | 2.97557   | 2.8062    | 2.5904   | 1.76954   | 3.50604   | 2.28691   |
| DAPK1       | 5.28832   | 5.45961   | 5.44349  | 4.64772   | 7.07519   | 6.92247   |
| PMCHL2      | 0         | 0         | 0        | 0         | 0         | 0         |
| RLTPR       | 0.672415  | 1.51558   | 0.92016  | 0.387313  | 2.30584   | 0.729032  |
| IFITM10     | 5.33425   | 7.09766   | 4.45788  | 5.80224   | 7.08075   | 5.79245   |
| DEDD        | 23.2985   | 24.5168   | 21.5574  | 24.9535   | 23.8784   | 21.944    |
| PMFBP1      | 2.30807   | 1.0125    | 2.44978  | 2.0246    | 2.72799   | 2.29505   |
| INPP5K      | 24.1875   | 30.5467   | 29.1691  | 29.5034   | 26.6706   | 29.6215   |
| TM9SF3      | 52.0459   | 35.4825   | 45.8359  | 37.8738   | 39.2384   | 35.4412   |
| C2orf62     | 0.0832492 | 0.147207  | 0.12604  | 0         | 0.212087  | 0         |
| IRAK3       | 5.01636   | 5.26687   | 3.9996   | 3.00942   | 5.77609   | 4.04507   |
| MYO15B      | 8.82388   | 14.7776   | 13.1163  | 12.2916   | 17.1072   | 11.8669   |
| OR52M1      | 0         | 0         | 0        | 0         | 0         | 0         |
| DOK4        | 22.3467   | 25.3244   | 33.2546  | 38.9248   | 31.9657   | 33.562    |
| LAMA2       | 3.96745   | 2.33565   | 5.60088  | 3.13042   | 5.87328   | 4.75029   |
| XG          | 12.4698   | 11.0863   | 21.9424  | 15.2807   | 22.5913   | 23.1399   |
| KLHDC1      | 3.4654    | 3.9534    | 5.35948  | 4.72348   | 4.88892   | 4.3422    |
| FSCN1       | 35.7317   | 53.2935   | 36.1141  | 51.5352   | 39.2543   | 43.9408   |
| CHD1L       | 17.8255   | 17.1611   | 15.893   | 18.1637   | 17.7446   | 18.0815   |
| POU4F1      | 0.0768465 | 0.135886  | 0.116346 | 0.120263  | 0.146832  | 0.303287  |
| LOC10050654 | 0         | 0         | 0        | 0         | 0         | 0         |
| DLX5        | 8.85048   | 6.54335   | 7.97052  | 9.52837   | 10.4477   | 9.3664    |
| CISD1       | 12.7472   | 14.2961   | 9.72478  | 11.0845   | 11.5305   | 10.8798   |
| YIF1A       | 42.4509   | 51.5733   | 43.1043  | 58.2138   | 39.9398   | 45.3581   |
| LOC10013217 | 0         | 0         | 0        | 0         | 0.226514  | 0         |
| RFPL3-AS1   | 1.23999   | 1.3607    | 2.56211  | 3.20391   | 1.74396   | 2.53267   |
| MAP3K6      | 27.294    | 45.1096   | 46.9162  | 54.789    | 42.1304   | 30.8668   |
| LOC645591   | 0         | 0         | 0        | 0         | 0.313841  | 0.309384  |
| MIR643      | 0         | 0         | 0        | 0         | 0         | 0         |
| LOC10050605 | 0         | 0         | 0        | 0         | 0         | 0         |

|             |           |           |           |           |           |           |
|-------------|-----------|-----------|-----------|-----------|-----------|-----------|
| ZNF114      | 0.231686  | 0.24581   | 0.456008  | 0.348079  | 0.708298  | 0.548632  |
| ZNF729      | 0         | 0         | 0         | 0         | 0         | 0         |
| MIR652      | 0         | 0         | 0         | 0         | 0         | 0         |
| C21orf58    | 2.88218   | 6.31135   | 4.33829   | 5.09796   | 5.14419   | 5.51347   |
| MIR548AM    | 0         | 0         | 0         | 0         | 0         | 0         |
| PRRC2A      | 37.0698   | 38.2782   | 38.4079   | 37.965    | 40.3028   | 44.2719   |
| KCNA6       | 1.10476   | 0.622861  | 1.23628   | 0.240546  | 0.673036  | 0.858085  |
| CYYR1       | 9.11686   | 8.06055   | 9.04757   | 6.89687   | 7.40698   | 5.80169   |
| CNIH3       | 0.556035  | 0.869773  | 0.777086  | 0.481946  | 0.544833  | 0.613034  |
| FBXL18      | 3.08577   | 3.43066   | 3.34702   | 3.36238   | 3.73268   | 3.53731   |
| NCRNA00185  | 2.5944    | 5.60708   | 0         | 0.0676694 | 0         | 0         |
| CTTN        | 91.6275   | 108.688   | 92.1646   | 106.098   | 101.873   | 101.268   |
| MIR635      | 0         | 0         | 0         | 0         | 0         | 0         |
| CCL27       | 110.033   | 155.795   | 153.312   | 121.287   | 213.542   | 181.356   |
| PRMT10      | 5.04533   | 4.21121   | 5.28832   | 3.18041   | 4.98863   | 4.70506   |
| LOC10065280 | 416.741   | 392.044   | 378.122   | 356.915   | 364.406   | 352.437   |
| LOC10050720 | 0.0901837 | 0.0797347 | 0.0682696 | 0         | 0.0287192 | 0         |
| ISG15       | 35.0787   | 49.5869   | 14.8213   | 19.9162   | 16.7564   | 9.02343   |
| LOC400084   | 0.296484  | 0         | 0         | 0         | 0         | 0         |
| LOC10050739 | 0         | 0         | 0         | 0         | 0         | 0         |
| FAM50A      | 45.7514   | 59.3467   | 46.0546   | 55.355    | 45.8674   | 47.6705   |
| MCC         | 9.87844   | 8.17355   | 10.2194   | 10.727    | 9.72141   | 8.53947   |
| CD59        | 130.68    | 91.6646   | 93.7273   | 109.957   | 105.585   | 102.265   |
| TMEM229B    | 3.30469   | 1.99021   | 2.21162   | 2.20361   | 2.16578   | 1.62658   |
| ACHE        | 2.14819   | 2.16738   | 1.11767   | 2.10363   | 2.52147   | 1.72793   |
| KRT13       | 1.8472    | 0.834254  | 0.714295  | 0.886006  | 2.43216   | 2.14687   |
| MIR4637     | 0         | 0         | 0         | 0         | 0         | 0         |
| RPL21P44    | 0.291567  | 0.051557  | 0.264861  | 0.82133   | 0.408541  | 0.363384  |
| OR2T33      | 0.123291  | 0         | 0         | 0         | 0.122694  | 0.194475  |
| MIR548O2    | 0         | 0         | 0         | 0         | 0         | 0         |
| CELF1       | 27.6738   | 28.5015   | 27.9258   | 29.3142   | 30.0747   | 25.9935   |
| C6orf163    | 1.01641   | 1.27308   | 1.53886   | 2.46552   | 1.72629   | 1.53068   |
| ZNF93       | 2.36111   | 1.77125   | 1.67905   | 1.44464   | 1.83421   | 2.00638   |
| APRT        | 200.346   | 293.238   | 174.321   | 255.398   | 196.803   | 209.129   |
| OCLN        | 6.7004    | 4.5853    | 7.74369   | 7.17989   | 10.2482   | 9.68566   |
| C3orf32     | 1.52588   | 0.981156  | 0.735065  | 0.846643  | 1.23689   | 1.25341   |
| SLC41A2     | 2.7993    | 1.29874   | 1.61554   | 1.11906   | 1.72993   | 1.38171   |
| OR12D2      | 0.112746  | 0         | 0         | 0         | 0         | 0         |
| LOC10050682 | 28.7059   | 32.0589   | 28.4022   | 31.2104   | 30.1509   | 27.9309   |
| GPANK1      | 6.25828   | 9.41795   | 6.64063   | 7.84198   | 9.12867   | 8.69265   |
| OTUD6B      | 5.2073    | 4.65689   | 6.2301    | 3.82174   | 5.6229    | 4.69961   |
| LOC401022   | 1.46456   | 2.31713   | 1.56846   | 1.03743   | 1.94059   | 0.944672  |
| MRGPRX3     | 0         | 0         | 0.0245199 | 0         | 0.0412596 | 0.0201845 |

|             |           |           |            |            |           |           |
|-------------|-----------|-----------|------------|------------|-----------|-----------|
| SEMA3D      | 3.32704   | 2.07798   | 2.85363    | 1.20376    | 2.72166   | 1.91159   |
| LOC10028738 | 0.666701  | 1.27715   | 0.757045   | 0.626022   | 1.55696   | 0.83092   |
| MAGEB3      | 0         | 0         | 0          | 0          | 0         | 0         |
| TSSC4       | 19.6847   | 34.9428   | 23.7383    | 35.6776    | 29.1079   | 31.7126   |
| CCDC88B     | 4.92237   | 6.69283   | 4.46854    | 3.5724     | 8.96808   | 5.45046   |
| LOC146481   | 0.057478  | 0.0508184 | 0          | 0          | 0.036608  | 0         |
| BCL2L12     | 7.31313   | 11.7126   | 9.81908    | 10.7927    | 12.3861   | 10.6781   |
| ST8SIA6     | 0.857707  | 0.482574  | 0.885394   | 0.219647   | 0.446955  | 0.0971794 |
| SLIT3       | 12.1301   | 7.5341    | 20.8128    | 9.79635    | 11.5715   | 10.754    |
| G3BP2       | 32.2806   | 22.2423   | 26.4937    | 23.1819    | 22.5452   | 19.8699   |
| FBXO2       | 12.021    | 15.1994   | 9.36676    | 20.3436    | 14.2777   | 16.4282   |
| FIBCD1      | 0.290481  | 0         | 0.219895   | 0.390538   | 0.426064  | 0.27883   |
| SUPT3H      | 3.26971   | 3.93395   | 3.21013    | 4.0637     | 4.61099   | 3.91498   |
| KIAA1875    | 0.654891  | 1.27619   | 0.617165   | 0.865925   | 0.868256  | 0.982772  |
| FAM135B     | 0.0820566 | 0.0967323 | 0.082823   | 0.0898915  | 0.121945  | 0.102268  |
| LOC10050926 | 0.0655049 | 0.0289577 | 0.123969   | 0.0615081  | 0.187742  | 0.244919  |
| DAK         | 9.05678   | 10.8439   | 9.44129    | 11.9448    | 12.3117   | 10.7321   |
| CLCN1       | 0.160292  | 0.085032  | 0.14561    | 0          | 0.0204182 | 0.0399548 |
| CSPG4       | 10.65     | 12.8612   | 12.0673    | 13.1441    | 12.7656   | 12.8247   |
| LRRK1       | 1.6813    | 1.37855   | 4.00995    | 2.74999    | 4.62433   | 3.23377   |
| AP1S1       | 43.4769   | 53.0616   | 41.4307    | 45.787     | 37.4638   | 41.1706   |
| ITGB8       | 10.6369   | 7.06971   | 8.93321    | 7.98379    | 9.69183   | 9.0663    |
| SNORD45B    | 0         | 0         | 0          | 0          | 0         | 0         |
| SOX10       | 17.7066   | 14.2991   | 12.375     | 19.67      | 14.785    | 15.7257   |
| MIR4659A    | 0         | 0         | 0          | 0          | 0         | 0         |
| LOC10050665 | 0.24269   | 0         | 0.0918589  | 0          | 0.154571  | 0         |
| OR6C65      | 0         | 0         | 0          | 0          | 0         | 0         |
| OR7E91P     | 0.998624  | 1.52504   | 2.81768    | 3.66552    | 2.60194   | 4.01666   |
| C8orf55     | 21.1621   | 23.5669   | 20.5531    | 26.5087    | 19.902    | 18.322    |
| FOXE3       | 0         | 0.230933  | 0.0395454  | 0.0981037  | 0.133086  | 0.0651066 |
| LCE3A       | 15.7731   | 6.3389    | 2.17097    | 0          | 1.82654   | 1.78711   |
| B3GNTL1     | 2.68513   | 3.42138   | 3.28812    | 2.15051    | 4.57723   | 4.18315   |
| DRD1        | 0.204515  | 0.129156  | 0.486573   | 0.384072   | 0.204689  | 0.0364128 |
| HIST1H2AA   | 0         | 0         | 0          | 0          | 0         | 0         |
| PUS3        | 8.49471   | 8.96251   | 6.21619    | 7.49781    | 7.14163   | 6.1758    |
| LOC10050744 | 0         | 0         | 0          | 0          | 0         | 0         |
| GOLGA3      | 14.1316   | 13.9376   | 15.2861    | 14.2841    | 14.7533   | 14.8918   |
| KRT80       | 95.0616   | 62.6778   | 117.263    | 103.357    | 162.36    | 174.791   |
| SNORA71D    | 0         | 0         | 0          | 0          | 0         | 0         |
| COL18A1-AS1 | 0.0287432 | 0         | 0.0987455  | 0          | 0.138078  | 0.0270422 |
| NOTCH4      | 8.89398   | 12.9687   | 10.3878    | 8.34579    | 10.4391   | 8.6953    |
| LOC285556   | 0         | 0.0163658 | 0.00700626 | 0.00869052 | 0         | 0.0115349 |
| RFXANK      | 28.2357   | 40.0104   | 28.2279    | 38.8003    | 35.2753   | 34.844    |

|             |           |           |           |           |           |           |
|-------------|-----------|-----------|-----------|-----------|-----------|-----------|
| UBE2F-SCLY  | 2.77E-06  | 7.03E-06  | 0.239717  | 2.06E-06  | 0.299886  | 6.25E-06  |
| LOC10028826 | 0         | 0.0587409 | 0.201178  | 0.12477   | 0.190418  | 0.0414017 |
| C4BPA       | 0.045492  | 0         | 0         | 0         | 0.0289741 | 0         |
| DGCR9       | 1.46776   | 1.59432   | 1.23809   | 2.087     | 0.908117  | 1.48957   |
| STX3        | 8.87348   | 9.91817   | 9.99779   | 9.72994   | 11.4909   | 9.91172   |
| CNTF        | 0.934768  | 0.632025  | 0.749116  | 0.361445  | 0.490189  | 0.548175  |
| LOC10065296 | 8.30727   | 8.19633   | 5.37725   | 6.2177    | 7.66803   | 5.70191   |
| C6orf15     | 1.70244   | 2.3906    | 1.44037   | 2.16276   | 4.84743   | 4.99241   |
| NF1         | 5.83039   | 4.5845    | 6.98934   | 4.89982   | 5.60149   | 4.54297   |
| HTR5A       | 0         | 0         | 0         | 0         | 0         | 0         |
| FOXM1       | 6.36173   | 9.49975   | 3.6414    | 6.99729   | 7.27155   | 8.0192    |
| VMO1        | 1.43129   | 3.05191   | 0.952904  | 2.54529   | 3.1056    | 3.16073   |
| FMO3        | 0.454701  | 0.706676  | 0.830147  | 0.472822  | 0.320711  | 0.165285  |
| PLXNC1      | 3.76019   | 4.85811   | 4.40616   | 4.19213   | 5.27616   | 5.51972   |
| SRF         | 17.1359   | 18.789    | 17.0406   | 19.5111   | 17.0727   | 14.1117   |
| LOC442075   | 1.92573   | 2.67552   | 2.29081   | 2.45402   | 2.56252   | 2.31435   |
| ACTG2       | 93.6038   | 86.8125   | 34.6163   | 56.3223   | 45.9278   | 56.8299   |
| MRPS18B     | 60.4252   | 62.6373   | 48.6011   | 55.0309   | 48.9676   | 49.1163   |
| FLJ41309    | 0.898627  | 0.832343  | 0.161968  | 0.241085  | 0.408814  | 0.453322  |
| PAR-SN      | 0.34988   | 0.360899  | 0.706297  | 0.438043  | 0.519961  | 0.363384  |
| LINC00163   | 0         | 0.210226  | 0.107998  | 0.357227  | 0.121152  | 0.296343  |
| LOC400604   | 1.53738   | 1.49518   | 1.10562   | 0.938327  | 1.66459   | 1.48495   |
| HOXC12      | 1.89076   | 1.5431    | 0.330304  | 1.77539   | 1.01897   | 1.72205   |
| SLC4A4      | 1.97575   | 1.03295   | 0.771539  | 0.209279  | 0.318698  | 0.156239  |
| KIR2DL2     | 0         | 0         | 0         | 0         | 0         | 0         |
| CAMK2A      | 0.555646  | 0.403821  | 0.330789  | 0.317577  | 0.404317  | 0.309269  |
| NCDN        | 7.2611    | 7.09518   | 7.1171    | 7.83812   | 8.0016    | 7.2994    |
| CLIP2       | 6.21244   | 8.94691   | 7.26075   | 9.78711   | 7.95827   | 6.1852    |
| TTY21       | 0         | 0         | 0         | 0         | 0         | 0         |
| S100A3      | 17.6284   | 27.8988   | 11.0762   | 190.854   | 13.6977   | 425.24    |
| KIAA1033    | 14.254    | 9.46643   | 12.7636   | 7.77649   | 12.735    | 11.0825   |
| LOC653786   | 0.303101  | 0.168829  | 0.0892303 | 0.106253  | 0.216963  | 0.0705152 |
| CHST1       | 4.71814   | 2.8353    | 1.17195   | 2.49202   | 3.16935   | 2.48075   |
| LOC10013015 | 0         | 0         | 0.611515  | 0.758518  | 0.514497  | 0         |
| LOC10050655 | 0         | 0         | 0         | 0         | 0         | 0         |
| C4orf19     | 2.43323   | 2.07556   | 1.10807   | 1.217     | 1.00913   | 1.31243   |
| PHOX2A      | 0         | 0         | 0         | 0         | 0         | 0         |
| LOC10028839 | 0.81974   | 0.937066  | 0.51057   | 0.36189   | 0.879712  | 0.570817  |
| CT45A4      | 0         | 0         | 0         | 0         | 0         | 0         |
| ELMOD3      | 29.0627   | 30.5679   | 36.9296   | 27.837    | 27.5827   | 21.2381   |
| LOC10065297 | 2.42E-08  | 0.11878   | 0.0809248 | 3.28E-10  | 0.0893989 | 0.112342  |
| TIE1        | 7.77491   | 8.89854   | 6.97135   | 5.10327   | 6.45828   | 5.01747   |
| A1CF        | 0.0101876 | 0         | 0         | 0.0382711 | 0.0292059 | 0         |

|             |           |           |          |          |          |          |
|-------------|-----------|-----------|----------|----------|----------|----------|
| PPP1R1C     | 0.577128  | 0.204104  | 0.436889 | 0.541914 | 0.882182 | 2.66135  |
| CCDC103     | 0.797443  | 0.783387  | 0.536594 | 0.249595 | 0.620762 | 0.93865  |
| C19orf43    | 122.071   | 205.728   | 139.885  | 199.718  | 161.242  | 148.419  |
| CEP63       | 10.2071   | 8.42661   | 8.55095  | 6.08152  | 7.1792   | 6.83637  |
| CHD3        | 26.9613   | 31.2643   | 29.8458  | 30.8663  | 38.5611  | 33.4259  |
| ECT2L       | 0.448279  | 0.376642  | 0.188005 | 0.253955 | 0.299706 | 0.321024 |
| RAD51AP1    | 2.39602   | 2.8105    | 2.40637  | 2.14371  | 2.34723  | 1.83742  |
| OR2A12      | 0         | 0         | 0        | 0        | 0        | 0        |
| SLC35G4     | 0         | 0         | 0        | 0        | 0        | 0        |
| VPS45       | 22.0905   | 21.945    | 19.5411  | 19.7105  | 22.1771  | 20.5052  |
| AQP2        | 0.209489  | 0.123478  | 0.140964 | 0.131138 | 0.1186   | 0.159554 |
| LINC00254   | 0.206225  | 0         | 0        | 0        | 0        | 0        |
| LRFN1       | 1.20193   | 1.78977   | 1.05353  | 1.2474   | 1.9138   | 1.20233  |
| C1orf43     | 125.172   | 126.491   | 119.361  | 123.66   | 97.4321  | 96.5057  |
| INTS3       | 25.6675   | 31.3542   | 29.2848  | 30.1318  | 37.4057  | 37.1777  |
| LOC10050746 | 0.261389  | 0.490992  | 0.307677 | 0.242862 | 0.470661 | 0.322351 |
| CABP5       | 0         | 0.101133  | 0        | 0        | 0        | 0        |
| SLC26A9     | 5.67634   | 5.77562   | 7.03972  | 7.06883  | 6.80748  | 7.31275  |
| LOC647979   | 92.3606   | 71.9073   | 100.674  | 75.5064  | 83.3611  | 72.9615  |
| FBXW4       | 38.2519   | 52.8947   | 41.0223  | 48.5847  | 49.1181  | 44.6224  |
| MIR4513     | 0         | 0         | 0        | 0        | 0        | 0        |
| LGR6        | 6.55772   | 8.68324   | 8.24938  | 11.4923  | 9.43365  | 8.83962  |
| HCAR2       | 16.5063   | 16.8865   | 15.0246  | 10.1143  | 17.3416  | 13.8287  |
| MTERFD1     | 15.3351   | 15.6811   | 15.3611  | 13.0176  | 15.7357  | 14.3825  |
| MIR3180-4   | 0         | 0         | 0        | 0        | 0        | 0        |
| TPRA1       | 27.2901   | 34.8113   | 28.6996  | 33.655   | 33.0081  | 40.7966  |
| COG2        | 11.3271   | 9.59957   | 10.3558  | 10.9527  | 11.9255  | 9.67765  |
| JMJD7       | 22.9444   | 25.4937   | 29.9242  | 33.8977  | 36.2773  | 37.8732  |
| C1orf201    | 3.70758   | 3.32052   | 3.50136  | 3.53356  | 3.6012   | 3.31957  |
| OSGIN2      | 11.8093   | 8.01869   | 10.4429  | 8.79299  | 8.29069  | 7.61805  |
| LOC10050750 | 0.10789   | 0.0633363 | 0.165003 | 0.16822  | 0.114642 | 0.157017 |
| SLAIN2      | 15.3149   | 13.1323   | 17.4866  | 15.2923  | 14.3169  | 15.2182  |
| AGBL3       | 0.139039  | 0.245858  | 0.252607 | 0.287221 | 0.265663 | 0.173286 |
| MIR647      | 0         | 0         | 0        | 0        | 0        | 0        |
| MIR1243     | 0         | 0         | 0        | 0        | 0        | 0        |
| NAT1        | 1.22251   | 1.39234   | 1.68341  | 1.73738  | 1.40549  | 1.30484  |
| TRMT5       | 6.01924   | 6.23827   | 4.95581  | 4.8665   | 4.78342  | 4.38553  |
| RAPSN       | 0.0721224 | 0.573759  | 0.393101 | 0.609303 | 0.448369 | 0.202247 |
| RBM7        | 16.0441   | 12.2204   | 14.4022  | 8.75408  | 13.5213  | 11.1464  |
| PAFAH1B2    | 27.0945   | 22.7632   | 25.1168  | 23.255   | 22.8926  | 21.5511  |
| RAD51       | 1.8162    | 2.62324   | 1.60933  | 2.5364   | 2.17144  | 2.29007  |
| LOC10050744 | 0.446366  | 0         | 1.35161  | 0.628696 | 0.995026 | 0.834469 |
| PHYHIP      | 11.3845   | 14.3981   | 28.3105  | 37.5009  | 29.9892  | 26.4136  |

|             |           |           |          |           |          |          |
|-------------|-----------|-----------|----------|-----------|----------|----------|
| CELSR2      | 18.4103   | 17.5494   | 20.6885  | 25.0409   | 24.0034  | 29.7673  |
| C17orf109   | 8.71446   | 7.5345    | 9.83993  | 14.7314   | 13.4247  | 12.9325  |
| WDR31       | 1.12959   | 0.643362  | 1.64535  | 0.720964  | 1.3861   | 1.53187  |
| MMS19       | 29.2935   | 32.8326   | 32.4782  | 35.5766   | 37.0604  | 32.572   |
| MCM8        | 3.6295    | 3.28103   | 2.72768  | 2.09094   | 2.10916  | 2.57595  |
| RHOBTB2     | 4.77725   | 5.13569   | 4.38636  | 3.97527   | 2.91803  | 3.03775  |
| C7orf70     | 11.0303   | 9.38503   | 8.28011  | 9.01385   | 10.582   | 10.9     |
| KCNN3       | 0.324344  | 0.324964  | 0.354559 | 0.203172  | 0.265341 | 0.242502 |
| OR5E1P      | 0.60221   | 0.266218  | 0.455876 | 0.565466  | 0.575326 | 0.187636 |
| COPS5       | 42.1072   | 40.107    | 41.113   | 33.9674   | 36.2185  | 40.1406  |
| REPIN1      | 38.3292   | 44.9894   | 38.7629  | 43.2649   | 42.9993  | 40.6069  |
| LILRA1      | 0.12246   | 0.0962416 | 0        | 0.153318  | 0.138659 | 0        |
| LOC10050717 | 0.351582  | 0         | 0        | 0         | 0.447849 | 0        |
| PRRX1       | 34.5809   | 26.9187   | 32.6451  | 20.399    | 29.8176  | 18.3003  |
| RNFT1       | 17.4675   | 11.7752   | 12.0597  | 10.1489   | 11.9408  | 12.3853  |
| ZNF564      | 5.16512   | 6.62615   | 4.37003  | 4.84997   | 4.88079  | 5.80625  |
| PFKL        | 78.8958   | 103.391   | 82.9906  | 88.1834   | 101.569  | 94.2549  |
| EIF3E       | 175.502   | 172.388   | 192.533  | 187.57    | 181.344  | 170.139  |
| CPA2        | 0.0827267 | 0.365709  | 0.250498 | 0.0776791 | 0.105378 | 0.103104 |
| MID2        | 5.46507   | 3.60108   | 4.96998  | 3.81809   | 3.93187  | 3.91234  |
| HIST1H3J    | 0         | 0         | 0        | 0         | 0.446149 | 0.436519 |
| ST5         | 16.8805   | 23.7327   | 16.5224  | 22.7609   | 20.9296  | 18.1114  |
| MIR302F     | 0         | 0         | 0        | 0         | 0        | 0        |
| TTY9A       | 1.23258   | 0.599372  | 0        | 0         | 0        | 0        |
| FAHD2B      | 21.3759   | 24.4136   | 17.1569  | 24.3883   | 21.9334  | 21.6449  |
| LOC10050679 | 1.93714   | 0         | 0        | 0         | 0        | 0        |
| PCCB        | 47.2647   | 34.0315   | 32.6277  | 30.8403   | 31.0111  | 34.0401  |
| LOC10049948 | 0.994252  | 0.993139  | 0.576056 | 0.61516   | 1.15706  | 1.25592  |
| LOC391766   | 0         | 0         | 0        | 0         | 0        | 0        |
| LOC10050730 | 0         | 7.11E-07  | 0        | 0         | 0        | 0        |
| PSMA1       | 135.992   | 132.274   | 118.33   | 107.291   | 104.324  | 103.172  |
| KCTD2       | 20.0004   | 17.8236   | 21.0361  | 23.1828   | 21.5793  | 19.4297  |
| OR2T35      | 0         | 0         | 0        | 0         | 0        | 0        |
| BCKDHB      | 32.2407   | 19.911    | 21.6707  | 17.5399   | 16.4702  | 18.5838  |
| LOC10050620 | 0         | 0         | 0        | 0         | 0        | 0        |
| HDHD3       | 24.0733   | 32.9281   | 28.0542  | 35.3159   | 30.0796  | 30.7282  |
| RAB3IL1     | 7.00074   | 10.1715   | 8.74265  | 6.78293   | 9.74122  | 6.89118  |
| KRTAP4-9    | 8.23332   | 3.40983   | 0.236674 | 100.547   | 1.92547  | 1007.23  |
| DNAJC10     | 24.8878   | 18.9282   | 21.0701  | 15.8118   | 21.5978  | 17.5037  |
| SMR3A       | 0         | 0         | 0        | 0         | 0        | 0        |
| TXNDC12     | 32.7696   | 28.2073   | 31.5127  | 25.7669   | 26.4283  | 23.16    |
| ACER2       | 2.2742    | 2.38191   | 2.91345  | 1.77406   | 2.6295   | 2.94339  |
| FUCA2       | 11.0728   | 10.7689   | 11.2262  | 9.09757   | 7.90871  | 6.45655  |

|             |           |           |           |           |           |           |
|-------------|-----------|-----------|-----------|-----------|-----------|-----------|
| C1orf168    | 0         | 0         | 0.0645723 | 0.16019   | 0.072437  | 0.460677  |
| LYVE1       | 4.44141   | 2.1419    | 4.40139   | 1.59234   | 4.29457   | 2.81802   |
| GLI3        | 4.98278   | 5.18049   | 6.36523   | 4.97117   | 6.03123   | 6.33949   |
| RRP8        | 9.61063   | 11.7394   | 9.85995   | 12.5864   | 9.30241   | 9.86343   |
| CGB1        | 0         | 0.539766  | 0.475296  | 0.977938  | 0.532397  | 0.415706  |
| LOC10050714 | 0         | 0         | 4.81319   | 2.98679   | 8.1003    | 0         |
| CXADRP3     | 0.197957  | 0.233362  | 0.399613  | 0.248699  | 0.448752  | 0.164478  |
| WDR93       | 0.168203  | 0.223072  | 0.190996  | 0.118455  | 0.107129  | 0.104817  |
| TWSG1       | 12.6636   | 10.1366   | 12.4465   | 7.73152   | 10.754    | 8.63832   |
| GRM3        | 0.0912419 | 0         | 0.051803  | 0.0214187 | 0.0290562 | 0.028429  |
| GGT7        | 10.1582   | 14.0606   | 11.4052   | 14.0397   | 18.0283   | 14.3911   |
| MIR663B     | 0         | 0         | 0         | 0         | 0         | 0         |
| BLOC1S3     | 9.20675   | 10.842    | 9.95651   | 11.2603   | 10.2001   | 11.4745   |
| LOC10050550 | 1.00275   | 1.1399    | 1.20168   | 0.719297  | 1.18669   | 0.994505  |
| HOXB5       | 0.124458  | 0         | 0.626682  | 0.0647248 | 0.152704  | 0.16108   |
| ATP6V0CP3   | 0         | 0.40343   | 0         | 0         | 0         | 0         |
| STXBP5L     | 0.0907616 | 0.0713295 | 0.0839753 | 0.151509  | 0.0963443 | 0.0502745 |
| NPPA        | 0.144458  | 0.255333  | 0.765996  | 2.17432   | 0.918628  | 1.26058   |
| LOC730198   | 0         | 0         | 0         | 0         | 0         | 0.0803731 |
| PTMS        | 203.636   | 248.012   | 154.228   | 226.933   | 176.419   | 187.549   |
| DPEP2       | 1.11145   | 1.5286    | 1.21531   | 0.637775  | 3.22482   | 1.73152   |
| LOC340094   | 0         | 0         | 0         | 0         | 0         | 0         |
| TAS2R39     | 0         | 0         | 0         | 0         | 0         | 0         |
| ZNF253      | 3.27313   | 2.73955   | 3.23763   | 2.3358    | 4.14155   | 3.48105   |
| C21orf59    | 22.6045   | 26.6471   | 26.1571   | 28.0858   | 24.1401   | 24.4253   |
| IFNAR2      | 7.82475   | 8.19508   | 7.57105   | 3.96882   | 7.2293    | 4.72276   |
| TMEM106A    | 1.71651   | 1.67571   | 1.32648   | 0.470101  | 1.526     | 0.913663  |
| FLJ33581    | 0         | 0         | 0         | 0         | 0         | 0         |
| RRBP1       | 42.372    | 39.1418   | 34.8122   | 35.7163   | 31.4143   | 33.8083   |
| CUL2        | 11.0178   | 9.98943   | 9.22548   | 7.65839   | 9.73047   | 8.57207   |
| CRAMP1L     | 9.41538   | 8.95894   | 9.97475   | 9.99102   | 12.4662   | 10.5318   |
| LOC10029268 | 0.0454696 | 0.201007  | 0.240945  | 0.298866  | 0.173759  | 0.198343  |
| FAM7A3      | 0.422661  | 0.458523  | 0.999496  | 0.3709    | 0.702363  | 0.359393  |
| FAM21C      | 11.2208   | 10.6692   | 10.6522   | 8.54507   | 10.1028   | 8.60096   |
| CLPTM1L     | 42.1908   | 46.9657   | 40.2124   | 49.2966   | 39.5474   | 36.4037   |
| AGTR1       | 5.30976   | 4.2236    | 5.19477   | 2.32215   | 3.51382   | 2.45985   |
| PMS2P3      | 3.59552   | 3.24498   | 3.55491   | 3.74047   | 4.93447   | 3.65837   |
| NME6        | 12.2089   | 12.1436   | 8.73677   | 9.04578   | 10.773    | 12.7792   |
| CYP11B2     | 0         | 0         | 0         | 0         | 0         | 0         |
| BET1L       | 27.0778   | 31.1387   | 29.3714   | 29.2534   | 33.2271   | 27.4197   |
| PYGM        | 4.08725   | 5.82233   | 1.84856   | 1.73849   | 3.20246   | 2.69335   |
| CST8        | 0         | 0         | 0         | 0         | 0         | 0         |
| FAM172A     | 7.75649   | 5.81202   | 7.41726   | 6.00329   | 6.2771    | 6.62387   |



|             |           |           |           |           |           |           |
|-------------|-----------|-----------|-----------|-----------|-----------|-----------|
| FAR2        | 115.569   | 79.7313   | 85.4969   | 77.2673   | 66.7548   | 88.7108   |
| SLAMF6      | 2.05318   | 1.33575   | 0.730638  | 0.214138  | 1.78786   | 0.785631  |
| SPTBN4      | 1.06355   | 1.0229    | 1.04118   | 0.827045  | 0.928003  | 0.93898   |
| FES         | 6.22062   | 10.3227   | 7.5214    | 6.40314   | 11.5703   | 8.45208   |
| LOC10013117 | 0         | 0.750084  | 0.547204  | 1.44571   | 1.09783   | 0.626578  |
| PDZD2       | 8.08327   | 6.11862   | 11.8225   | 7.12753   | 8.69704   | 7.91049   |
| KEL         | 0.27694   | 0.279832  | 0.269543  | 0.33434   | 0.302373  | 0.0986155 |
| TCTE1       | 0.439882  | 0.333357  | 0.523275  | 0.354036  | 0.48028   | 0.234957  |
| CAD         | 9.37051   | 10.936    | 9.8296    | 9.82947   | 12.0386   | 10.0658   |
| GNN         | 0.15017   | 0.0569019 | 0.0811999 | 0.241727  | 0.122971  | 0.106948  |
| ZNF234      | 4.22955   | 4.01433   | 3.60346   | 3.00498   | 3.96601   | 3.6656    |
| GPR171      | 1.10936   | 0.4646    | 0.839789  | 0.274123  | 1.89654   | 0.509382  |
| MKNK1       | 24.8183   | 29.2027   | 24.3745   | 21.2251   | 28.9918   | 27.1804   |
| MANSC4      | 0.31442   | 0         | 0.158679  | 0.49206   | 0         | 0         |
| SSPN        | 9.86487   | 7.32578   | 10.5331   | 7.96161   | 8.3444    | 6.64784   |
| ARG2        | 12.3865   | 9.53571   | 5.51635   | 6.50932   | 6.71933   | 4.77675   |
| LOC646851   | 0.931238  | 0.766838  | 1.52049   | 1.49165   | 1.12807   | 1.63852   |
| C1GALT1     | 4.40344   | 4.64193   | 5.83931   | 5.69612   | 4.21666   | 3.61713   |
| LAG3        | 2.85538   | 3.07536   | 0.668112  | 0.926218  | 1.58715   | 1.09996   |
| RTF1        | 18.143    | 17.8572   | 18.763    | 19.2173   | 18.5375   | 17.0606   |
| GUCY2D      | 0.270735  | 0.550543  | 0.307421  | 0.254215  | 0.137946  | 0.404905  |
| C17orf42    | 6.97549   | 7.90864   | 6.95782   | 6.47282   | 8.51959   | 7.97771   |
| VPS54       | 16.9922   | 13.8614   | 14.3685   | 11.8974   | 13.3673   | 12.6693   |
| CLCA3P      | 0.02886   | 0.0765486 | 0         | 0         | 0.0183811 | 0         |
| EYA2        | 4.52621   | 3.50984   | 2.92091   | 4.63319   | 2.71739   | 2.82054   |
| 1-Dec       | 0         | 0         | 0         | 0         | 0         | 0         |
| DUSP26      | 0.12866   | 0.0568763 | 0.146094  | 0         | 0.122916  | 0.120263  |
| VWC2        | 1.21096   | 1.75198   | 2.3751    | 2.06741   | 2.03334   | 1.33774   |
| SNORD76     | 0         | 0         | 0         | 0         | 0         | 0         |
| ATXN1L      | 9.26565   | 8.60092   | 10.9388   | 8.65638   | 10.31     | 8.32843   |
| MIR624      | 0         | 0         | 0         | 0         | 0         | 0         |
| MYCBP       | 18.9063   | 16.8139   | 15.2912   | 16.0856   | 12.7428   | 14.4878   |
| KIF26A      | 2.89145   | 3.99053   | 3.9933    | 5.00624   | 3.90774   | 5.52853   |
| OSCP1       | 6.44561   | 7.29502   | 6.35695   | 5.2583    | 5.04531   | 4.65177   |
| CACNG1      | 0         | 0.0738034 | 0         | 0         | 0.0531657 | 0.0520181 |
| UPB1        | 27.0491   | 32.2391   | 9.38968   | 12.255    | 13.1984   | 15.997    |
| GPKOW       | 8.0229    | 6.91601   | 8.09784   | 7.81588   | 7.85637   | 7.41597   |
| GPAA1       | 57.2862   | 80.1573   | 63.4652   | 87.6557   | 67.4513   | 71.0656   |
| MC4R        | 0         | 0         | 0         | 0         | 0         | 0         |
| LOC400685   | 0         | 0.131207  | 0.11234   | 0.0928974 | 0.0630116 | 0.154129  |
| LOC653550   | 0.0760523 | 0.189941  | 0.118116  | 0.147168  | 0.111205  | 0.0809789 |
| CD300LD     | 0         | 0         | 0         | 0         | 0         | 0         |
| LOC400499   | 0.0552988 | 0.0733376 | 0.251169  | 0.0519247 | 0.193711  | 0.12061   |

|             |           |           |           |          |            |           |
|-------------|-----------|-----------|-----------|----------|------------|-----------|
| DUSP14      | 24.1851   | 26.7444   | 32.674    | 49.1032  | 30.9889    | 72.6436   |
| C5orf32     | 57.8512   | 55.137    | 54.8425   | 70.3935  | 37.6063    | 41.673    |
| TMEM123     | 114.41    | 61.9252   | 88.6786   | 75.2903  | 85.2876    | 76.4234   |
| LSR         | 22.1839   | 27.826    | 24.579    | 28.0746  | 25.9246    | 32.9067   |
| INS-IGF2    | 1.62E-06  | 1.07E-06  | 1.06E-06  | 6.82E-07 | 9.36E-07   | 1.11E-06  |
| BIRC5       | 9.05061   | 6.74096   | 3.00674   | 6.49041  | 5.86167    | 5.40026   |
| IMPA2       | 127.903   | 170.89    | 161.953   | 228.753  | 221.099    | 186.584   |
| GRAMD1A     | 13.9497   | 20.2062   | 16.0886   | 15.9511  | 21.358     | 14.7944   |
| LOC200726   | 0.0794503 | 0         | 0.180433  | 0        | 0.0506024  | 0.0495101 |
| SUZ12P      | 3.77406   | 7.78584   | 6.80235   | 6.91882  | 12.5912    | 10.4901   |
| VPS28       | 115.387   | 153.635   | 121.244   | 185.304  | 147.207    | 141.244   |
| LOC10050559 | 2.03239   | 1.90922   | 1.63469   | 2.38547  | 1.13263    | 1.34565   |
| HBCBP       | 0         | 0.433436  | 0.185556  | 0.460324 | 0.780585   | 0.458241  |
| LOC554206   | 2.35615   | 3.07514   | 1.61375   | 2.21239  | 2.57254    | 2.72676   |
| TBX2        | 5.07241   | 9.81996   | 5.27427   | 6.78852  | 5.57008    | 4.10555   |
| CACNA1S     | 0         | 0         | 0.0117336 | 0        | 0.00987206 | 0         |
| AP1AR       | 12.7449   | 8.96618   | 10.6335   | 8.91118  | 10.7395    | 9.56466   |
| LOC374890   | 0         | 0         | 0         | 0        | 0          | 0.064074  |
| KLF8        | 16.6428   | 15.6882   | 22.1438   | 17.0358  | 24.2883    | 21.891    |
| FAM120A     | 43.5955   | 32.2156   | 34.1581   | 30.7278  | 32.5729    | 31.2078   |
| ZMYND15     | 3.75791   | 4.64403   | 3.02169   | 4.22142  | 5.0574     | 3.30598   |
| IMP4        | 38.3728   | 43.4106   | 33.9037   | 44.8575  | 35.9202    | 35.5583   |
| CYP27C1     | 2.20868   | 4.32532   | 3.92214   | 4.9619   | 7.88817    | 4.41207   |
| SNORD116-2  | 0         | 0         | 0         | 0        | 0          | 0         |
| ZNF160      | 11.4758   | 11.4298   | 9.17941   | 6.63204  | 13.3262    | 11.2595   |
| ZNF383      | 2.99391   | 4.19112   | 3.63569   | 3.86545  | 5.2438     | 3.07059   |
| PSORS1C3    | 0.487645  | 0         | 2.2149    | 1.60262  | 1.08704    | 0         |
| SLC12A1     | 0         | 0.0181528 | 0         | 0        | 0          | 0         |
| MIR19B2     | 0         | 0         | 0         | 0        | 0          | 0         |
| FOLR3       | 0         | 0         | 0.1108    | 0.137435 | 0.186443   | 0.456045  |
| CAPN5       | 3.26849   | 3.046     | 3.84515   | 3.4838   | 4.14938    | 2.76618   |
| ANKRD13D    | 24.1268   | 36.4576   | 25.0837   | 37.8259  | 36.509     | 36.8395   |
| CIB2        | 14.0586   | 17.2057   | 11.4813   | 23.4103  | 11.5564    | 12.0838   |
| LOC10065296 | 0         | 0         | 0         | 0        | 0          | 0         |
| FAM110B     | 1.533     | 1.21788   | 1.24458   | 1.33515  | 1.20278    | 1.43987   |
| FAM83H      | 29.5055   | 34.8482   | 31.7192   | 39.151   | 32.3213    | 38.1727   |
| DNM1        | 8.85456   | 12.2865   | 12.9868   | 11.0851  | 12.9433    | 9.21537   |
| TCEAL3      | 22.4424   | 23.4814   | 23.5265   | 23.5999  | 21.0316    | 18.2562   |
| RPS26       | 202.212   | 302.763   | 141.151   | 208.187  | 237.552    | 231.583   |
| RSPRY1      | 8.14752   | 5.44657   | 7.74726   | 6.67077  | 8.35335    | 7.6777    |
| BCAS3       | 6.7224    | 5.79886   | 8.48835   | 8.83007  | 7.17672    | 8.37812   |
| KBTBD2      | 14.5462   | 16.2452   | 14.8686   | 13.3116  | 15.5866    | 12.3877   |
| SYNCRIP     | 35.2993   | 29.2837   | 32.6782   | 29.8097  | 28.9247    | 26.3081   |

|             |           |          |           |           |           |          |
|-------------|-----------|----------|-----------|-----------|-----------|----------|
| LBX2        | 0.327377  | 0.245084 | 0.0800315 | 0.150373  | 0.335089  | 0.180476 |
| SLC43A1     | 11.3785   | 11.8634  | 9.23293   | 7.21707   | 9.50234   | 5.32458  |
| TOR1A       | 16.8803   | 17.8145  | 16.4347   | 15.1174   | 15.4431   | 15.3834  |
| PHIP        | 7.65624   | 6.32483  | 8.75614   | 5.64067   | 8.37223   | 7.03178  |
| OR51F1      | 0         | 0        | 0         | 0         | 0         | 0        |
| IRF6        | 56.2251   | 48.5153  | 53.6602   | 60.9254   | 56.9935   | 48.9932  |
| MIRLET7G    | 0         | 0        | 0         | 0         | 0         | 0        |
| EBF4        | 4.03822   | 6.11193  | 3.47146   | 5.8484    | 5.97219   | 4.09456  |
| IRG1        | 0         | 0        | 0         | 0         | 0         | 0        |
| CYP3A43     | 0.0516539 | 0.167324 | 0.175962  | 0         | 0.131595  | 0.128755 |
| IRF1        | 18.8896   | 28.0063  | 8.99773   | 4.10629   | 14.8915   | 4.97609  |
| MIRLET7A2   | 0         | 0        | 0         | 0         | 0         | 0        |
| MORC4       | 12.3927   | 10.334   | 11.588    | 9.38412   | 11.5002   | 10.801   |
| SNORA74A    | 0         | 0        | 0         | 0         | 0         | 0        |
| MIR9-1      | 0         | 0        | 0         | 0         | 0         | 0        |
| BACE1-AS    | 5.00923   | 4.06917  | 6.18228   | 4.26869   | 5.40118   | 4.84311  |
| CPSF1       | 15.9332   | 22.2296  | 31.3788   | 33.7168   | 41.9239   | 35.9453  |
| ACSS2       | 137.733   | 129.351  | 108.536   | 106.107   | 86.8584   | 126.266  |
| LOC254100   | 2.63798   | 1.74925  | 3.06676   | 3.00781   | 3.42029   | 2.58323  |
| KRT25       | 67.5227   | 27.8036  | 4.1756    | 343.208   | 11.8316   | 130.222  |
| MYNN        | 5.37265   | 4.76098  | 5.23025   | 4.15749   | 5.27605   | 4.62583  |
| PPP1R7      | 60.9222   | 59.7139  | 52.7253   | 57.1783   | 54.0426   | 55.3644  |
| SNORD115-3l | 0         | 0        | 0         | 0         | 0         | 0        |
| BDAG1       | 0.193584  | 0.740527 | 0.0955854 | 0.0702702 | 0.414838  | 0.386264 |
| KRTAP12-2   | 4.0488    | 0.311124 | 0.266387  | 49.5638   | 0.224124  | 143.962  |
| LARP4       | 16.4325   | 9.84801  | 10.3729   | 8.78542   | 10.0855   | 9.16193  |
| EXT1        | 14.8891   | 15.6257  | 14.4661   | 13.3477   | 13.7577   | 11.0864  |
| TERC        | 0         | 0        | 0         | 0         | 0.248545  | 0.729541 |
| VGLL3       | 2.79154   | 1.58664  | 5.12522   | 2.18718   | 2.83432   | 1.95419  |
| C1orf131    | 14.2939   | 12.3002  | 9.84474   | 8.94552   | 10.0218   | 9.80027  |
| MRPS15      | 86.1963   | 94.1474  | 73.7217   | 81.2449   | 64.4273   | 66.97    |
| MIR512-1    | 0         | 0        | 0         | 0         | 0         | 0        |
| OR5AU1      | 0         | 0        | 0         | 0.0990871 | 0         | 0        |
| OR5P3       | 0         | 0        | 0.0968244 | 0.360301  | 0.0814631 | 0        |
| CUL1        | 27.1418   | 23.2431  | 23.9897   | 24.9644   | 21.375    | 20.7328  |
| LOC10050579 | 0         | 0        | 0.911488  | 0         | 0         | 0        |
| TMCC1       | 6.14168   | 4.16272  | 5.51134   | 5.11127   | 5.15146   | 5.12599  |
| LOC154872   | 0         | 0        | 0         | 0         | 0         | 0        |
| UFSP1       | 1.53509   | 5.11573  | 1.34086   | 2.21758   | 3.15876   | 2.35472  |
| CDH13       | 11.0789   | 15.0442  | 10.7454   | 13.4855   | 12.4092   | 9.81765  |
| PCGF2       | 9.89456   | 12.5984  | 9.88425   | 11.6089   | 15.3773   | 12.8084  |
| CTSC        | 60.488    | 53.2989  | 36.5507   | 32.4317   | 36.7633   | 27.0959  |
| SPG7        | 37.6251   | 57.9059  | 46.2426   | 56.6697   | 54.001    | 45.0461  |

|             |          |           |          |           |           |           |
|-------------|----------|-----------|----------|-----------|-----------|-----------|
| TRIM48      | 0        | 0         | 0        | 0         | 0         | 0         |
| CSF2RB      | 6.4527   | 8.62804   | 6.31699  | 3.1978    | 9.50066   | 4.62917   |
| IRF2BP2     | 41.7804  | 43.5647   | 53.6907  | 52.6699   | 49.6894   | 43.6056   |
| WASH3P      | 27.3291  | 51.1706   | 33.9822  | 51.1677   | 47.2041   | 44.444    |
| ZNF620      | 1.22406  | 1.17484   | 0.6977   | 0.67477   | 0.846322  | 0.635583  |
| SLC39A11    | 24.7896  | 18.2071   | 18.7898  | 20.0659   | 15.5384   | 18.4642   |
| HDAC11      | 14.9847  | 17.0207   | 14.3925  | 13.9423   | 16.7322   | 18.1013   |
| SNORD5      | 0        | 0         | 0        | 0         | 0         | 0         |
| TICAM2      | 4.06283  | 2.71123   | 2.58765  | 1.88308   | 2.91176   | 2.08021   |
| LOC10050578 | 0        | 0.0838742 | 0.107721 | 0.356309  | 0.120841  | 2.42377   |
| C9orf129    | 8.77524  | 6.77384   | 7.28715  | 7.19436   | 6.44382   | 7.14148   |
| MIR922      | 0        | 0         | 0        | 0         | 0         | 0         |
| PIK3CD      | 3.1444   | 4.11538   | 3.50903  | 2.16814   | 6.71907   | 3.97312   |
| OR10G7      | 0        | 0         | 0        | 0         | 0         | 0         |
| DEFB131     | 0        | 0         | 0        | 0         | 0         | 0         |
| WAPAL       | 13.8855  | 8.88586   | 13.3573  | 10.5758   | 11.9333   | 10.9389   |
| LOC10028786 | 2.65811  | 1.22616   | 3.14954  | 1.41074   | 2.72347   | 2.52064   |
| MSL2        | 10.5761  | 9.15252   | 9.14484  | 9.53237   | 11.6454   | 9.46428   |
| DDX27       | 21.2425  | 17.1696   | 16.7847  | 18.9683   | 22.0357   | 19.01     |
| PAN2        | 15.8903  | 19.9645   | 19.9399  | 17.9939   | 23.4642   | 19.5676   |
| MIR3668     | 0        | 0         | 0        | 0         | 0         | 0         |
| YSK4        | 0        | 0         | 0        | 0.057902  | 0.157098  | 0.0384267 |
| CR1L        | 0        | 0.100572  | 0        | 0.0534054 | 0.0362245 | 0         |
| FBXL14      | 2.18963  | 2.9254    | 3.13094  | 2.55861   | 2.6962    | 2.39542   |
| PIK3R1      | 36.9781  | 22.8055   | 37.0506  | 28.174    | 31.7427   | 24.4798   |
| LOC643699   | 1.02123  | 0.734121  | 1.10605  | 0.679458  | 1.09169   | 0.999288  |
| SCML2       | 0.996691 | 0.942613  | 1.14015  | 0.566459  | 0.974014  | 0.779809  |
| TRAPPC10    | 12.3212  | 9.78255   | 12.6776  | 11.3514   | 12.5107   | 10.1126   |
| ALS2CL      | 35.9339  | 71.8812   | 53.5847  | 71.762    | 82.2505   | 70.1311   |
| HTR3A       | 0.232966 | 0.183088  | 0.209015 | 0.194446  | 0.148377  | 0.326643  |
| SEMA7A      | 7.10071  | 6.76575   | 6.9753   | 6.49605   | 9.06017   | 9.51811   |
| psiTPTE22   | 3.11274  | 2.61784   | 2.75867  | 2.56638   | 2.75619   | 2.46015   |
| TTY9B       | 1.23258  | 0.599372  | 0        | 0         | 0         | 0         |
| LRRC8A      | 17.3868  | 18.2042   | 18.9288  | 25.1547   | 19.5824   | 22.7956   |
| HERC5       | 3.63692  | 3.6855    | 1.90604  | 1.76004   | 2.56583   | 1.25522   |
| KRT24       | 0        | 0.0489582 | 0        | 0         | 0         | 0.0345067 |
| FAM207A     | 14.6767  | 16.7712   | 11.8441  | 21.7121   | 14.3743   | 15.9622   |
| SMCP        | 0        | 0.293761  | 0        | 0         | 0         | 0         |
| LOC10013283 | 0.261344 | 0.184851  | 0.197839 | 0.147239  | 0.233032  | 0.130287  |
| LOC10013304 | 0        | 0         | 0        | 0         | 0         | 0         |
| C5orf60     | 0        | 0         | 0.142495 | 0.176749  | 0         | 0         |
| BATF        | 6.98633  | 8.87224   | 3.65401  | 2.2662    | 5.90588   | 3.2454    |
| LOC10050684 | 0        | 0         | 0        | 0         | 0         | 0         |

|             |           |           |           |           |           |           |
|-------------|-----------|-----------|-----------|-----------|-----------|-----------|
| BTBD8       | 0.150234  | 0         | 0.227456  | 0         | 0.239213  | 0.0936197 |
| ACTRT2      | 0         | 0         | 0         | 0         | 0         | 0         |
| C1orf162    | 13.1364   | 12.6597   | 8.2541    | 5.67404   | 17.6536   | 8.02233   |
| LOC10065295 | 4.63E-08  | 3.71E-09  | 1.28E-08  | 0.286213  | 5.62E-09  | 0.23112   |
| XK          | 0.359986  | 0.217769  | 0.200798  | 0.338021  | 0.21721   | 0.306975  |
| LOC651337   | 0.814941  | 0         | 0.308458  | 0         | 0.519041  | 0         |
| KRTAP9-9    | 6.02037   | 1.81124   | 0.18228   | 73.4066   | 0.153361  | 871.667   |
| SNORA8      | 210.485   | 341.179   | 212.451   | 362.344   | 290.461   | 218.609   |
| SYCP2       | 3.50506   | 1.81289   | 2.26862   | 2.02409   | 2.02032   | 2.06408   |
| ANKRD20A3   | 0.138823  | 0.0704551 | 0.0751457 | 0.0452947 | 0.0489845 | 0.0644524 |
| LSM11       | 0.668555  | 0.452013  | 1.0122    | 0.516981  | 1.07704   | 0.514642  |
| APOBEC3G    | 9.00301   | 9.37057   | 3.2784    | 2.408     | 5.22605   | 2.27266   |
| AKR1C4      | 0.513989  | 0.408839  | 0.214398  | 0.0886459 | 0.0601278 | 0.240222  |
| DYNLRB2     | 2.28682   | 4.04372   | 3.46227   | 3.06755   | 2.0807    | 2.44294   |
| TTC12       | 6.23843   | 6.83627   | 5.99747   | 4.74398   | 4.48635   | 4.59932   |
| RHBDF1      | 19.0042   | 30.9316   | 26.4168   | 34.8262   | 33.984    | 29.1373   |
| SHISA2      | 1.38015   | 1.98289   | 0.783585  | 3.33704   | 2.63707   | 7.41793   |
| TMC1        | 0.0926971 | 0.054638  | 0.116954  | 0         | 0.0196798 | 0.0577649 |
| EML4        | 23.2448   | 23.5722   | 29.1432   | 24.0776   | 29.2043   | 25.5099   |
| ERAL1       | 29.6811   | 31.7642   | 24.8978   | 30.9369   | 29.4145   | 26.9942   |
| RCN3        | 12.2703   | 16.472    | 23.307    | 14.2699   | 19.5018   | 17.0465   |
| MIR4268     | 0         | 0         | 0         | 0         | 0         | 0         |
| TUBD1       | 6.11151   | 5.97559   | 6.04028   | 6.72821   | 7.47454   | 6.84078   |
| MIR3199-1   | 0         | 0         | 0         | 0         | 0         | 0         |
| PMAIP1      | 6.70061   | 6.77734   | 7.14193   | 4.93274   | 8.09147   | 6.74766   |
| CD177       | 2.79052   | 1.21462   | 0.324991  | 0.322493  | 0.109372  | 0.133764  |
| MIR658      | 0         | 0         | 0         | 0         | 0         | 0         |
| OR51A2      | 0         | 0         | 0         | 0         | 0         | 0         |
| CRHR1       | 0.30544   | 0.405757  | 0.597378  | 1.8409    | 0.817335  | 1.85439   |
| LOC10065294 | 0.0826329 | 0.0365294 | 0.0312768 | 0.0387955 | 0.0526294 | 0         |
| OTC         | 0.0644196 | 0.0569557 | 0.048766  | 0         | 0.0410292 | 0         |
| IL21        | 0         | 0.203222  | 0         | 0         | 0         | 0         |
| LOC10050760 | 0         | 0         | 0         | 0         | 0.0355668 | 0.0347991 |
| SNORA49     | 0         | 0         | 0         | 0         | 0         | 0         |
| ZDHHC22     | 0.0577924 | 0         | 0.0218746 | 0.0271331 | 0         | 0.0360137 |
| NUDT2       | 29.4146   | 37.2428   | 26.4743   | 36.6948   | 45.1751   | 46.3197   |
| PLCB1       | 3.79619   | 1.49395   | 2.06664   | 1.83576   | 1.44891   | 1.63844   |
| TRPV1       | 4.70371   | 7.52522   | 5.77514   | 6.14802   | 9.48778   | 7.66711   |
| MIR505      | 0         | 0         | 0         | 0         | 0         | 0         |
| OR1D4       | 0         | 0         | 0         | 0         | 0         | 0         |
| PEX10       | 15.8334   | 16.4615   | 14.4714   | 20.9331   | 13.9679   | 14.8859   |
| SYNGR4      | 0         | 0.203849  | 0         | 0         | 0.0734233 | 0         |
| MIR1181     | 0         | 0         | 0         | 0         | 0         | 0         |

|             |           |          |            |            |            |            |
|-------------|-----------|----------|------------|------------|------------|------------|
| TRIM62      | 8.29539   | 8.9541   | 7.49321    | 8.74497    | 10.8747    | 9.60925    |
| GDF7        | 0.0518576 | 0        | 0.0392565  | 0.097387   | 0.132114   | 0.0323155  |
| KLRC4       | 0.264415  | 0.233716 | 0.302909   | 0.255039   | 0.172499   | 0.165553   |
| CALML6      | 1.45736   | 3.31331  | 1.41844    | 2.63914    | 3.44761    | 2.91911    |
| LOC1002873: | 0.175357  | 0.23256  | 0.132747   | 0.246987   | 0.390901   | 0.109275   |
| LOC1001303: | 0.882855  | 1.13182  | 0.735159   | 0.746088   | 0.534181   | 0.385111   |
| COPG2       | 14.7605   | 12.1414  | 14.6342    | 18.9628    | 10.8658    | 9.58047    |
| TTC9C       | 15.3721   | 11.5612  | 12.4679    | 12.2784    | 16.0209    | 13.3736    |
| MRPS18C     | 15.7559   | 11.825   | 15.9793    | 13.9692    | 12.1887    | 10.4574    |
| MT1B        | 0         | 0        | 0          | 0          | 0          | 0          |
| C4orf7      | 0         | 0        | 0          | 0          | 0.362273   | 0          |
| CYP4Z1      | 1.52716   | 0.433855 | 0.86728    | 0.511966   | 0.590346   | 0.40772    |
| GNS         | 32.5472   | 23.2135  | 28.4913    | 22.0965    | 22.7749    | 21.1364    |
| FP588       | 1.74268   | 1.63808  | 1.33311    | 1.79137    | 1.81093    | 1.86329    |
| LOC1002869: | 0         | 0        | 0          | 0          | 0          | 0          |
| FAM175A     | 3.50797   | 4.92625  | 4.40603    | 3.71312    | 5.51633    | 4.71755    |
| GIT2        | 13.0744   | 11.8243  | 12.3091    | 11.6857    | 14.477     | 11.7376    |
| PDCL3       | 13.5135   | 14.4122  | 13.6389    | 14.5009    | 11.2019    | 13.1654    |
| C6orf94     | 2.96729   | 2.30867  | 1.34775    | 2.34044    | 0.982741   | 1.40531    |
| RASA1       | 15.3144   | 14.603   | 16.9929    | 13.84      | 15.7124    | 13.7274    |
| KIF20B      | 2.55848   | 1.63296  | 2.06285    | 1.37888    | 2.27553    | 1.87736    |
| DEFB136     | 0         | 0        | 0          | 0          | 0          | 0          |
| PCDHGA7     | 0.519649  | 0.229573 | 0.504053   | 0.486205   | 0.871307   | 0.692197   |
| POTEM       | 0.0286071 | 0        | 0.00541394 | 0          | 0.00911002 | 0          |
| SNORD7      | 0         | 0        | 0          | 0          | 0          | 0          |
| LOC1005068: | 0         | 0.368393 | 0.315421   | 2.34747    | 0.265379   | 0          |
| LOC1005075: | 0.0732683 | 0.518233 | 0.0554645  | 0.137595   | 0.18666    | 0.0456577  |
| HSD52       | 0.111385  | 0        | 0.0843192  | 0          | 0.141884   | 0.0694105  |
| NME1-NME2   | 0.65858   | 5.99744  | 6.11187    | 9.77E-40   | 1.41569    | 0.488719   |
| LOC1005076: | 0.99075   | 1.1616   | 0.945656   | 0.930298   | 1.12485    | 1.10057    |
| FSTL1       | 64.4215   | 52.0291  | 88.8193    | 46.7961    | 59.803     | 47.6471    |
| C20orf141   | 0         | 0        | 0.136312   | 0          | 0          | 0          |
| PFN4        | 0.493939  | 1.60127  | 1.37102    | 0.463801   | 0.943778   | 2.15461    |
| SDR39U1     | 44.4974   | 68.1358  | 60.0603    | 82.9208    | 58.9921    | 51.3927    |
| TMEM130     | 0.196197  | 0.146361 | 0.309422   | 0.349742   | 0.35325    | 0.343727   |
| LOC1001329: | 2.05454   | 1.76187  | 4.02761    | 1.22488    | 4.79447    | 3.38945    |
| MIR1260     | 0         | 0        | 0          | 0          | 0          | 0          |
| COL6A3      | 31.3501   | 24.3938  | 32.8152    | 20.6648    | 34.2232    | 25.5178    |
| C20orf173   | 0.0484031 | 0        | 0.0827215  | 0          | 0          | 0.0301628  |
| CYP3A4      | 0.983848  | 1.30118  | 3.25253    | 1.85255    | 1.18619    | 1.87651    |
| MIR550B2    | 0         | 0        | 0          | 0          | 0          | 0          |
| LOC147727   | 14.1259   | 20.0736  | 13.4931    | 16.9297    | 15.8345    | 12.8679    |
| LOC1002874: | 0         | 0        | 0          | 0.00628586 | 0          | 0.00417161 |

|             |          |           |           |           |           |            |
|-------------|----------|-----------|-----------|-----------|-----------|------------|
| BHLHB9      | 1.73471  | 1.31472   | 1.93189   | 1.95275   | 2.08495   | 1.48237    |
| SLC22A18    | 19.642   | 28.4541   | 22.9329   | 32.0537   | 21.491    | 23.43      |
| GLG1        | 20.0217  | 20.5496   | 21.9759   | 20.1358   | 20.7572   | 19.6546    |
| MUSK        | 0        | 0         | 0         | 0         | 0.213183  | 0.183892   |
| LINC00339   | 11.7533  | 15.8338   | 19.2337   | 21.0198   | 15.6832   | 14.4589    |
| CCDC110     | 0.827084 | 0.321119  | 0.212594  | 0.275077  | 0.265013  | 0.259293   |
| KERA        | 0        | 0.0351902 | 0.0602602 | 0         | 0         | 0          |
| MIR520B     | 0        | 0         | 0         | 0         | 0         | 0          |
| CER1        | 0.186146 | 0.246868  | 0         | 0         | 0         | 0.115998   |
| UQCRFS1     | 121.671  | 106.281   | 89.1303   | 102.402   | 89.6615   | 86.6438    |
| SELV        | 0        | 0         | 0         | 0         | 0.0789181 | 0.0772147  |
| GP5         | 0.028147 | 0.0497716 | 0.0639223 | 0.0264296 | 0.107562  | 0.0701601  |
| C20orf160   | 3.5837   | 7.18189   | 3.64732   | 4.03805   | 3.42377   | 3.4987     |
| RRP15       | 4.09099  | 3.56305   | 3.48517   | 2.64883   | 3.47671   | 2.67112    |
| MIR4318     | 0        | 0         | 0         | 0         | 0         | 0          |
| IL3RA       | 3.21931  | 2.65335   | 2.83539   | 4.47362   | 2.07824   | 3.17639    |
| EIF4B       | 118.523  | 112.45    | 117.035   | 115.949   | 100.686   | 86.6456    |
| SFXN4       | 35.5443  | 42.8979   | 21.4901   | 24.3671   | 21.9873   | 18.4744    |
| TBC1D10B    | 18.7352  | 24.5017   | 18.3875   | 23.1178   | 21.2071   | 22.0964    |
| PCDH17      | 0.438044 | 0.219814  | 0.304995  | 0.1334    | 0.150807  | 0.162307   |
| RUNDC2B     | 0.369682 | 0.333659  | 0.349815  | 0.271192  | 0.531608  | 0.348435   |
| SNORD115-9  | 0        | 0         | 0         | 0         | 0         | 0          |
| TMEM191C    | 1.26703  | 2.91307   | 1.66518   | 2.75124   | 3.98127   | 5.42175    |
| TAF4B       | 2.01382  | 2.55384   | 2.433     | 2.02465   | 2.17655   | 2.34506    |
| TNFAIP2     | 39.0276  | 53.8289   | 48.7168   | 27.2823   | 60.5617   | 26.4257    |
| FASTKD1     | 10.703   | 10.6896   | 8.30226   | 7.01013   | 7.91083   | 8.02828    |
| RNF43       | 5.89669  | 6.07719   | 7.00492   | 6.43075   | 9.61478   | 8.49945    |
| ERG         | 5.21991  | 4.66935   | 3.56794   | 3.22845   | 4.25892   | 3.16338    |
| LOC145783   | 5.1038   | 4.65802   | 3.63927   | 3.89575   | 3.52328   | 4.51422    |
| FNDC5       | 3.48756  | 3.59799   | 3.65659   | 3.32802   | 2.28578   | 1.94872    |
| LOC145474   | 0.056286 | 0.199058  | 0         | 0         | 0         | 0.105225   |
| MIR4641     | 0        | 0         | 0         | 0         | 0         | 0          |
| CD3G        | 1.17824  | 0.818501  | 0.318549  | 0.237075  | 1.39366   | 0.472006   |
| AGRP        | 0        | 0         | 0.127133  | 0         | 0.213927  | 0.104655   |
| KIF21B      | 0.867457 | 0.674242  | 0.512347  | 0.447543  | 1.00176   | 0.409877   |
| SLC17A1     | 0        | 0.0500699 | 0         | 0         | 0         | 0          |
| LOC10028714 | 0        | 0         | 0         | 0         | 0         | 0.00417161 |
| MAML2       | 3.45152  | 1.87792   | 3.21578   | 2.34344   | 2.79578   | 2.5038     |
| SGCG        | 3.58746  | 3.00189   | 6.49835   | 2.88735   | 4.52895   | 2.79444    |
| MOSPD2      | 6.53325  | 5.01341   | 8.51488   | 5.17974   | 7.51727   | 6.89412    |
| SEPT7L      | 0.100858 | 0.837232  | 1.58545   | 0.927753  | 0.524605  | 0.636364   |
| TLR10       | 0.313605 | 0.106157  | 0.405954  | 0.165639  | 0.648868  | 0.31304    |
| LOC10050685 | 0        | 0.167027  | 0.42903   | 0         | 0.601606  | 0.117724   |

|             |          |           |           |           |           |          |
|-------------|----------|-----------|-----------|-----------|-----------|----------|
| LENG1       | 8.74336  | 14.0112   | 10.3418   | 13.341    | 11.7465   | 9.62143  |
| FHAD1       | 0.151418 | 0.100405  | 0.128952  | 0.0888618 | 0.144658  | 0.141536 |
| APLNR       | 9.49891  | 9.91313   | 11.4354   | 9.22688   | 6.90041   | 8.32155  |
| LAP3        | 49.7253  | 42.9687   | 30.5288   | 35.6618   | 29.2389   | 43.0032  |
| SLC2A6      | 2.05894  | 2.79761   | 1.72412   | 1.30193   | 2.39509   | 1.75153  |
| LOC10028789 | 3.77812  | 2.60873   | 2.89774   | 2.09922   | 3.46923   | 3.49147  |
| CBR4        | 14.6244  | 13.8731   | 12.9974   | 12.1507   | 15.8994   | 14.5708  |
| A2ML1       | 19.1774  | 11.5605   | 25.9694   | 30.2327   | 33.2051   | 36.2215  |
| LOC10050659 | 0.400399 | 0         | 0.606208  | 0         | 0         | 0.249511 |
| ZNF175      | 4.23859  | 2.99343   | 3.65863   | 2.93644   | 4.69135   | 3.78481  |
| HACE1       | 4.14693  | 3.8161    | 4.61277   | 2.50322   | 4.64905   | 4.00813  |
| DDX41       | 36.2383  | 46.5481   | 34.2845   | 46.6842   | 40.8416   | 36.0746  |
| H2AFX       | 14.7837  | 33.1798   | 19.395    | 32.9768   | 21.8567   | 27.0542  |
| MTERF       | 6.10941  | 6.36462   | 4.30219   | 4.98065   | 6.33438   | 6.13862  |
| IFNA21      | 0        | 0         | 0         | 0         | 0         | 0.142079 |
| ISOC1       | 54.5939  | 40.4756   | 42.4601   | 36.1147   | 35.6217   | 37.3494  |
| DLL3        | 0        | 0.0445473 | 0.0381418 | 0         | 0.0320905 | 0.031398 |
| ATP13A5     | 3.13631  | 1.70642   | 3.02356   | 4.8579    | 1.39998   | 1.40317  |
| FARP2       | 8.96178  | 10.5007   | 12.784    | 14.0928   | 15.6811   | 14.6871  |
| CELA1       | 0        | 0.110632  | 0         | 0.117495  | 0         | 0        |
| DSC3        | 131.023  | 119.855   | 154.202   | 115.262   | 145.16    | 141.855  |
| TNP2        | 0        | 0         | 0         | 0         | 0         | 0        |
| ADCK3       | 22.8188  | 42.9396   | 34.4964   | 27.4068   | 32.1471   | 22.1998  |
| VSX2        | 0.132753 | 0.117372  | 0.100495  | 0         | 0         | 0        |
| HCP5        | 27.9084  | 27.6232   | 18.9931   | 13.2705   | 35.4994   | 18.9499  |
| LOC10050608 | 0.609066 | 1.24918   | 1.18728   | 0.487028  | 0.573368  | 0.796187 |
| SNORD116-2  | 0        | 0         | 0         | 0         | 0         | 0        |
| MEIG1       | 0.224814 | 0.397533  | 0         | 0.211097  | 0.286371  | 0        |
| DDX3X       | 68.0913  | 53.9834   | 89.8765   | 68.1673   | 84.0313   | 73.4037  |
| FKBP8       | 103.017  | 145.561   | 124.105   | 164.96    | 146.301   | 141.228  |
| LOC10050582 | 1.22991  | 2.48271   | 1.47804   | 3.85412   | 2.10962   | 1.52918  |
| RTP2        | 0        | 0         | 0         | 0         | 0         | 0        |
| MMRN1       | 3.74592  | 1.88761   | 3.76132   | 1.1846    | 3.39945   | 1.94726  |
| NFIL3       | 18.5499  | 14.6559   | 13.893    | 15.6114   | 18.9472   | 24.072   |
| EPHA7       | 1.29173  | 0.469515  | 0.717085  | 0.525594  | 0.475342  | 0.411418 |
| PRSS42      | 0        | 0         | 0.104658  | 0         | 0         | 0.086153 |
| ZNF518A     | 8.10821  | 6.15908   | 5.95641   | 4.804     | 8.85181   | 7.20898  |
| TREX1       | 21.6784  | 34.4318   | 23.8613   | 31.4866   | 30.5487   | 26.5167  |
| RAB8B       | 6.88757  | 5.40711   | 6.877     | 4.6089    | 8.08016   | 5.10605  |
| NFATC2      | 1.30628  | 0.389305  | 1.67012   | 1.25818   | 1.16843   | 0.785982 |
| WDR47       | 9.72347  | 9.32719   | 12.1888   | 9.27625   | 12.0855   | 10.1445  |
| MIR194-1    | 0        | 0         | 0         | 0         | 0         | 0        |
| C5          | 2.75934  | 2.89026   | 3.45921   | 2.83852   | 2.99996   | 3.01187  |



|             |          |           |           |           |           |           |
|-------------|----------|-----------|-----------|-----------|-----------|-----------|
| CCRL2       | 0.870098 | 0.865801  | 0.603826  | 0.467248  | 0.681773  | 0.500638  |
| MED22       | 11.5536  | 17.9407   | 13.3888   | 16.6001   | 15.5731   | 15.5218   |
| LOC728377   | 8.58387  | 6.08069   | 9.91774   | 5.91825   | 13.4429   | 12.7551   |
| BAZ2A       | 21.3837  | 18.5684   | 23.5494   | 17.2425   | 25.8206   | 21.3203   |
| FLJ42351    | 0.308143 | 2.45197   | 0.699798  | 1.44671   | 2.3551    | 1.92022   |
| HNRNPU-AS1  | 37.0877  | 33.4088   | 37.36     | 33.2538   | 47.4428   | 34.9182   |
| EPAS1       | 34.9838  | 30.4554   | 35.3987   | 21.6569   | 22.8015   | 19.5917   |
| LOC10019093 | 5.20711  | 12.4422   | 8.68224   | 10.6373   | 11.5174   | 9.25184   |
| TNFRSF11A   | 2.85255  | 1.87752   | 2.1354    | 2.02376   | 2.52334   | 1.9356    |
| OR5M9       | 0        | 0         | 0         | 0         | 0         | 0         |
| KIAA1644    | 0.692821 | 0.500039  | 0.374621  | 0.411571  | 0.486288  | 0.317194  |
| LIMCH1      | 9.8151   | 5.42347   | 10.3885   | 6.66185   | 6.30639   | 4.86097   |
| TRIM77P     | 0        | 0         | 0         | 0         | 0         | 0         |
| LOC10050596 | 0.405121 | 0.307014  | 0.262868  | 0.434746  | 0.331745  | 0.360649  |
| LOC10050732 | 5.25121  | 6.00165   | 6.63826   | 6.65458   | 7.5429    | 5.64011   |
| ZC3H12D     | 1.27825  | 1.51266   | 1.16117   | 0.590894  | 2.39227   | 0.894587  |
| AGBL1       | 0        | 0         | 0         | 0         | 0         | 0         |
| CDS2        | 7.13231  | 6.13575   | 6.97908   | 6.65908   | 7.32367   | 5.90924   |
| ATP6V1B1    | 38.9564  | 25.1224   | 35.1614   | 66.6269   | 25.5387   | 35.8138   |
| DPY19L2P4   | 0.513097 | 0.633348  | 0.813901  | 1.10505   | 1.01053   | 0.70148   |
| LOC10050762 | 2.41105  | 0.852679  | 2.64651   | 0.679181  | 2.30342   | 2.85468   |
| TLN1        | 40.2334  | 36.3358   | 45.1812   | 32.4721   | 37.213    | 32.9029   |
| SLC22A20    | 0.398627 | 1.05927   | 0.703668  | 0.596073  | 0.923993  | 0.678089  |
| USP11       | 14.3423  | 16.6333   | 15.7861   | 19.4683   | 19.2249   | 15.5752   |
| FAM90A3     | 0        | 0.0115191 | 0.0438891 | 0.0999081 | 0.0154105 | 0.0325335 |
| SP4         | 1.45101  | 1.76398   | 1.64764   | 1.00638   | 1.7433    | 1.37687   |
| GCOM1       | 15.6686  | 8.16776   | 21.3886   | 10.7472   | 14.678    | 10.4777   |
| NUDT16P1    | 1.17673  | 1.23726   | 1.05529   | 0.901036  | 1.23496   | 1.19126   |
| EFCAB11     | 5.56976  | 3.22635   | 3.78017   | 5.22992   | 2.44649   | 4.30863   |
| GBP5        | 4.87416  | 4.22191   | 1.44252   | 0.21242   | 3.27797   | 0.802092  |
| MIR4442     | 0        | 0         | 0         | 0         | 0         | 0         |
| C11orf24    | 14.8627  | 16.8581   | 15.3223   | 17.0775   | 15.2579   | 13.649    |
| MIR3911     | 0        | 1406.17   | 0         | 498.021   | 0         | 990.913   |
| TYRP1       | 29.2634  | 73.6333   | 22.625    | 34.1194   | 18.5276   | 41.1599   |
| BREA2       | 0.468738 | 1.13968   | 0.798384  | 1.21038   | 1.34344   | 1.67956   |
| MIR3118-6   | 0        | 0         | 0         | 0         | 0         | 0         |
| LOC10050725 | 0.684543 | 1.31133   | 0.978828  | 1.35697   | 2.30106   | 1.30343   |
| DUSP7       | 34.2174  | 44.1638   | 42.2076   | 40.0185   | 39.2084   | 38.4382   |
| ACADS       | 21.302   | 34.4087   | 23.4293   | 27.4838   | 23.3025   | 22.1578   |
| CDRT4       | 8.28844  | 11.3692   | 15.4236   | 21.3263   | 18.9957   | 15.6839   |
| C20orf24    | 112.755  | 111.715   | 70.3881   | 91.9552   | 60.1635   | 73.8716   |
| LOC10050716 | 1.03808  | 2.01918   | 2.35751   | 0.389898  | 1.32232   | 0.776268  |
| SIKE1       | 13.5007  | 8.21448   | 12.8827   | 8.7571    | 12.811    | 10.512    |

|             |           |           |            |            |           |           |
|-------------|-----------|-----------|------------|------------|-----------|-----------|
| SCLY        | 2.80487   | 4.56919   | 2.67846    | 2.93914    | 2.606     | 2.59539   |
| AP3M1       | 14.0194   | 10.2805   | 12.8479    | 12.5446    | 11.8956   | 11.0745   |
| SLC35A5     | 11.4779   | 9.07035   | 9.07328    | 6.67636    | 11.1919   | 9.28352   |
| LOC10050681 | 0.25887   | 0.457754  | 0          | 0.729226   | 0.164876  | 0.645268  |
| OR5I1       | 0         | 0         | 0          | 0          | 0         | 0         |
| MIR3672     | 0         | 0         | 0          | 0          | 0         | 0         |
| SNHG4       | 5.14067   | 5.05188   | 5.37564    | 4.54182    | 5.18446   | 4.36197   |
| TTLL7       | 3.0639    | 2.11485   | 2.23801    | 1.00946    | 2.05412   | 1.77531   |
| ESRRA       | 53.5793   | 70.2235   | 48.7762    | 70.3045    | 50.2354   | 45.0527   |
| MESP2       | 0.593448  | 0.233195  | 0.299496   | 0.185746   | 0.25198   | 0.369812  |
| MIR4425     | 0         | 0         | 0          | 0          | 0         | 0         |
| C9orf29     | 0         | 0         | 0          | 0          | 0         | 0         |
| PSCA        | 5.48123   | 9.79582   | 4.19434    | 7.61106    | 1.74803   | 1.66208   |
| TLR8-AS1    | 0         | 0         | 0          | 0          | 0         | 0         |
| LOC10050547 | 0         | 4.23E-276 | 1.10E-194  | 0.207308   | 0.119152  | 0.119744  |
| ACPP        | 15.7131   | 11.6556   | 17.4677    | 15.2073    | 20.2754   | 26.1161   |
| SCARF1      | 5.83455   | 10.2231   | 8.34101    | 7.33568    | 10.5979   | 7.2549    |
| LOC10050634 | 1.46386   | 1.59293   | 1.7219     | 1.77634    | 2.58187   | 1.86654   |
| C19orf48    | 30.4948   | 57.9019   | 35.1582    | 61.0853    | 38.8147   | 36.7823   |
| GLTPD1      | 27.332    | 35.3406   | 25.7513    | 37.2702    | 28.2012   | 31.9135   |
| MIR4655     | 0         | 0         | 0          | 0          | 0         | 0         |
| SUPT16H     | 24.59     | 22.2399   | 23.1942    | 19.7939    | 24.0906   | 19.595    |
| FLJ44054    | 0         | 0.0300675 | 0          | 0          | 0         | 0.0211922 |
| FGF1        | 3.7826    | 2.51972   | 2.68778    | 2.71093    | 2.55048   | 3.04514   |
| OR4F29      | 0         | 0         | 0.267843   | 0.18688    | 0.0473234 | 0.0198437 |
| MYH3        | 1.82578   | 2.14762   | 1.40614    | 2.14669    | 2.356     | 1.82036   |
| LRP2        | 0         | 0         | 0.00900176 | 0.00558286 | 0.0151472 | 0         |
| TMEM165     | 53.8238   | 46.0185   | 42.6339    | 37.0427    | 42.6746   | 35.4461   |
| LOC729609   | 0         | 0         | 0          | 0          | 0         | 0         |
| TJAP1       | 12.8842   | 18.9212   | 13.3691    | 16.5087    | 20.706    | 17.0619   |
| IGFBP4      | 88.5352   | 105.542   | 98.9568    | 71.117     | 113.05    | 79.404    |
| OTOGL       | 0.539474  | 0.259222  | 0.221948   | 0.198218   | 0.283839  | 0.518883  |
| FAM22F      | 0.0393268 | 0.0782331 | 0.0669838  | 0.110782   | 0.102277  | 0.0980271 |
| UBAP1       | 28.0623   | 26.2648   | 25.4586    | 27.8713    | 25.1597   | 27.0874   |
| PRSS41      | 0         | 0         | 0.0940859  | 0          | 0.079159  | 0.0774503 |
| LOC10028704 | 0.3907    | 0.690766  | 0          | 0.366762   | 0.248771  | 0.489545  |
| CADM1       | 8.42576   | 6.47255   | 7.84181    | 7.45771    | 6.61235   | 5.72398   |
| RPRD2       | 7.86338   | 5.93306   | 7.58775    | 5.17307    | 7.18001   | 6.09491   |
| KIDINS220   | 13.3903   | 9.90948   | 14.0074    | 9.42087    | 13.3806   | 12.7457   |
| EHBP1L1     | 18.2682   | 25.0736   | 21.5949    | 21.2718    | 29.1529   | 23.7408   |
| MBOAT2      | 34.4234   | 25.4799   | 25.4943    | 21.9912    | 19.1136   | 24.2441   |
| PRSS33      | 0         | 0         | 0          | 0          | 0.158903  | 0.0777366 |
| TMEM182     | 0.738567  | 0.38696   | 0.786881   | 0.667818   | 0.418131  | 0.426152  |

|             |           |           |          |           |           |          |
|-------------|-----------|-----------|----------|-----------|-----------|----------|
| SEPT7P2     | 5.06469   | 6.65624   | 6.95403  | 7.48327   | 7.35219   | 6.31208  |
| GHDC        | 8.46447   | 10.1298   | 10.4824  | 11.2543   | 11.1142   | 8.13006  |
| AMMECR1     | 5.43711   | 3.55723   | 4.30779  | 3.84623   | 3.94774   | 4.75467  |
| PGCP1       | 0         | 0         | 0        | 0         | 0         | 0        |
| INTU        | 3.40717   | 3.89213   | 4.31396  | 3.05772   | 5.60755   | 4.81009  |
| LOC10050691 | 68.2548   | 86.7809   | 58.8719  | 76.6784   | 70.7355   | 61.0442  |
| GSTA2       | 0.337256  | 0.0372726 | 0        | 0         | 0         | 0        |
| HTR3E       | 0         | 0         | 0        | 0         | 0         | 0        |
| SIRT1       | 7.80057   | 7.13174   | 8.42384  | 7.2242    | 9.45847   | 8.06914  |
| LOC441167   | 0         | 0         | 0        | 0         | 0         | 0        |
| ZNF321P     | 2.33733   | 2.28651   | 2.64959  | 3.00557   | 1.84108   | 1.80134  |
| MPHOSPH10   | 22.0692   | 17.0328   | 17.6911  | 14.4639   | 18.8449   | 16.4373  |
| RABL2A      | 9.75281   | 13.4278   | 13.4917  | 15.2588   | 18.4192   | 16.323   |
| SLC25A48    | 0.562409  | 0.580121  | 0.354789 | 0.0880156 | 0.597003  | 0.233647 |
| CAMK1G      | 0.0818269 | 0.0361731 | 0        | 0         | 0.052116  | 0        |
| PEMT        | 27.4585   | 40.1647   | 33.6826  | 42.2796   | 29.1362   | 26.9871  |
| MIR4324     | 0         | 0         | 0        | 0         | 0         | 0        |
| MIR4533     | 0         | 0         | 0        | 0         | 0         | 0        |
| PTPRS       | 13.2221   | 21.0331   | 24.7447  | 21.2348   | 24.9033   | 17.7031  |
| STAU2       | 10.3674   | 7.02288   | 9.13155  | 6.62918   | 8.33258   | 7.24017  |
| SERPINB4    | 58.0245   | 37.0933   | 1.02206  | 4.31956   | 16.5638   | 8.33248  |
| LOC729264   | 0.643314  | 0.673199  | 0.474049 | 0.734102  | 0.361451  | 0.343948 |
| SERTAD4     | 7.3275    | 5.84865   | 7.04926  | 5.35142   | 5.34752   | 3.99541  |
| ADAM8       | 4.45023   | 5.92131   | 3.41773  | 3.00296   | 9.72129   | 4.84703  |
| PIGL        | 12.5996   | 16.2745   | 13.7853  | 11.9232   | 15.6733   | 12.8814  |
| ZNF740      | 13.6085   | 13.6872   | 13.1191  | 12.0921   | 16.6657   | 12.82    |
| SNORD115-2  | 0         | 0         | 0        | 0         | 0         | 0        |
| POFUT1      | 13.4768   | 12.6365   | 15.5986  | 13.5398   | 13.5529   | 12.3962  |
| MMP27       | 1.35281   | 1.19607   | 3.36485  | 1.02831   | 3.11822   | 1.92689  |
| C3orf36     | 0.380933  | 0.617461  | 0.144184 | 0.298075  | 0.161746  | 0.276945 |
| CHRNE       | 1.44607   | 2.74257   | 1.07459  | 1.95365   | 3.06647   | 2.37158  |
| PRDM7       | 0         | 0         | 0        | 0.0388999 | 0         | 0.116172 |
| AMELY       | 0.314158  | 0         | 0        | 0         | 0         | 0        |
| BAI1        | 5.97425   | 7.1707    | 5.3245   | 12.7578   | 8.57608   | 28.3113  |
| TTY11       | 0         | 0         | 0        | 0         | 0         | 0        |
| UQCRB       | 35.9286   | 35.802    | 33.0299  | 35.9072   | 29.8306   | 30.0045  |
| MCPH1       | 4.17187   | 4.13384   | 5.00872  | 3.82137   | 4.40062   | 3.48949  |
| SLC7A5      | 23.7491   | 22.4535   | 19.1909  | 27.0769   | 22.7011   | 24.7778  |
| LOC10013251 | 0.677091  | 0.370589  | 0.211534 | 0         | 0.0889869 | 0        |
| OR8K3       | 0         | 0         | 0        | 0         | 0         | 0        |
| DPM1        | 42.7881   | 39.0066   | 46.6562  | 36.118    | 42.7842   | 35.6438  |
| TCEB2       | 170.304   | 220.146   | 167.533  | 254.903   | 175.542   | 200.016  |
| ATMIN       | 17.5771   | 14.4706   | 17.8113  | 15.7967   | 17.0451   | 16.2074  |

|             |           |           |           |           |          |          |
|-------------|-----------|-----------|-----------|-----------|----------|----------|
| HMX3        | 0         | 0         | 0         | 0         | 0        | 0        |
| PPP1R1A     | 60.8938   | 103.705   | 73.0275   | 44.7296   | 30.9204  | 15.2685  |
| LOC10012994 | 0.0206882 | 0.0548736 | 0.0156611 | 0.0777035 | 0.210823 | 0.206272 |
| MARCKS      | 55.3022   | 45.5323   | 44.0061   | 35.0933   | 51.1826  | 45.1547  |
| C9orf82     | 11.7103   | 9.53742   | 10.9678   | 10.0291   | 10.2626  | 9.8618   |
| SRFBP1      | 3.44973   | 1.92961   | 3.17106   | 2.18153   | 2.35409  | 2.28134  |
| UBXN1       | 77.9822   | 110.862   | 91.3667   | 103.304   | 96.162   | 88.9663  |
| SLITRK4     | 1.69266   | 1.18357   | 2.32972   | 1.45435   | 1.40209  | 1.56486  |
| ANKRD62     | 0         | 0         | 0         | 0.0119434 | 0        | 0        |
| CMIP        | 21.1449   | 19.4341   | 22.4796   | 20.0757   | 21.0071  | 21.7431  |
| OR4F4       | 0         | 0         | 0         | 0         | 0        | 0        |
| LOC10012878 | 0         | 0         | 0         | 0         | 0        | 0        |
| PHOSPHO2-K  | 2.5881    | 1.48882   | 2.23E-05  | 1.62567   | 0.632663 | 0.377507 |
| NR1H2       | 34.7702   | 43.2057   | 40.5755   | 51.4989   | 46.6702  | 39.6407  |
| CYP2C9      | 0.673834  | 1.18981   | 0.72127   | 0.368388  | 1.64204  | 1.18775  |
| GLYATL2     | 7.83859   | 1.40008   | 0.419565  | 5.27861   | 5.29501  | 3.05909  |
| LYRM7       | 6.0612    | 4.76047   | 5.83445   | 3.92907   | 5.20602  | 4.25003  |
| OR6C75      | 0         | 0         | 0         | 0         | 0        | 0        |
| PHF21B      | 0.149794  | 0.22704   | 0.113395  | 0.105489  | 0.251932 | 0.10939  |
| SYT15       | 4.00815   | 4.53903   | 4.84393   | 3.84691   | 4.4687   | 2.94019  |
| DCTN2       | 94.2586   | 99.5137   | 85.6805   | 101.135   | 88.1711  | 90.2115  |
| SCG3        | 0.136484  | 0.143017  | 0.1435    | 0         | 0.157759 | 0.266182 |
| MIR4741     | 0         | 0         | 0         | 0         | 0        | 0        |
| LOC440335   | 17.2256   | 9.74833   | 6.28916   | 17.7519   | 7.78425  | 11.2925  |
| HCFC2       | 5.10017   | 4.40575   | 5.74698   | 4.17661   | 4.78196  | 3.43872  |
| AGA         | 17.4448   | 14.3094   | 19.3277   | 17.2521   | 16.2362  | 16.0021  |
| CDH22       | 2.54658   | 5.19035   | 4.99194   | 6.04091   | 7.27307  | 5.3287   |
| FAM49B      | 18.7216   | 18.0759   | 19.0374   | 17.3169   | 15.6612  | 13.1756  |
| CNTFR       | 20.0801   | 22.6593   | 21.8178   | 13.6804   | 11.9681  | 12.0566  |
| PDE12       | 8.76762   | 5.33339   | 7.5985    | 6.16876   | 6.50187  | 5.95062  |
| SLC12A2     | 102.993   | 25.6838   | 52.9268   | 59.4436   | 39.8544  | 41.9217  |
| ATAD3C      | 1.44337   | 1.56714   | 1.2268    | 1.67235   | 1.84382  | 1.04138  |
| NGF         | 0.331753  | 1.07549   | 0.418564  | 1.03837   | 0.563454 | 0.689114 |
| CMTM7       | 18.5135   | 19.9579   | 13.3387   | 18.9088   | 13.7242  | 17.5007  |
| SLC19A2     | 12.1566   | 10.629    | 11.6716   | 9.51662   | 10.541   | 9.99428  |
| EPX         | 0.110626  | 0.0652055 | 0.307062  | 0.277002  | 0.46972  | 0.413623 |
| INMT        | 4.54114   | 4.44005   | 6.45724   | 5.16105   | 5.24335  | 4.86343  |
| GPLD1       | 2.48029   | 1.47894   | 4.44643   | 2.30249   | 3.97229  | 4.17587  |
| LOC10012951 | 4.34676   | 4.81826   | 5.97942   | 5.80249   | 7.04516  | 4.9424   |
| UPF3B       | 10.3752   | 10.1996   | 9.21384   | 8.42696   | 12.3621  | 10.5024  |
| MRPS23      | 17.77     | 19.2238   | 16.2955   | 18.3137   | 17.2988  | 16.7903  |
| DNAJC5      | 28.11     | 29.1157   | 26.5477   | 31.94     | 29.4417  | 29.9951  |
| TSPAN7      | 20.8161   | 24.7612   | 24.1416   | 18.6749   | 17.9849  | 20.6319  |

|             |            |           |           |            |            |            |
|-------------|------------|-----------|-----------|------------|------------|------------|
| NDUFA8      | 58.6394    | 66.8806   | 49.6062   | 60.017     | 45.9689    | 52.8939    |
| LOC1002718: | 3.78015    | 2.01433   | 4.32745   | 3.18217    | 3.52019    | 2.82888    |
| COL19A1     | 0.043372   | 0.0095867 | 0.0328328 | 0.0101814  | 0.0621537  | 0.0135138  |
| PHLDA3      | 69.1312    | 109.078   | 68.8645   | 80.692     | 80.6239    | 83.1547    |
| CLDN10      | 40.5413    | 9.75374   | 17.737    | 31.9472    | 19.9231    | 18.3032    |
| ZNF830      | 11.2592    | 11.1425   | 12.785    | 10.5723    | 13.9347    | 12.0792    |
| NEUROD2     | 0.0655049  | 0.0289577 | 0.0743814 | 0.0615081  | 0.187742   | 0.265329   |
| ZSCAN16     | 7.21563    | 6.45647   | 6.51524   | 6.53047    | 7.91785    | 6.71762    |
| RIN1        | 11.2478    | 26.3646   | 18.7265   | 33.7897    | 23.8951    | 20.6315    |
| LOC1001288: | 0.0793138  | 0         | 0         | 0.0744744  | 0.101031   | 0.049425   |
| GSK3A       | 35.4654    | 35.2187   | 30.7235   | 38.5062    | 33.957     | 35.3609    |
| MIR1197     | 0          | 0         | 0         | 0          | 0          | 0          |
| ZNF26       | 6.97494    | 6.79782   | 6.48343   | 7.1586     | 7.70701    | 6.14573    |
| TNFSF10     | 74.366     | 67.9883   | 49.1275   | 31.1806    | 67.9453    | 49.7493    |
| PPP6R2      | 21.6289    | 28.3024   | 25.8522   | 26.769     | 31.5486    | 29.2485    |
| BACH2       | 1.54593    | 1.10081   | 1.19384   | 1.41263    | 1.7511     | 1.36418    |
| CYB561D1    | 19.3172    | 18.1103   | 16.2809   | 15.1756    | 20.8076    | 21.7203    |
| ZNF438      | 3.86341    | 4.84913   | 4.29586   | 3.62972    | 3.88644    | 3.79365    |
| MAPK13      | 57.6422    | 57.529    | 53.9738   | 57.5252    | 56.263     | 67.3618    |
| MS4A15      | 0.395716   | 0         | 0         | 0          | 0.161301   | 0.0394548  |
| FUT5        | 0.277799   | 0.340773  | 0.199409  | 0.180956   | 0.155575   | 0.264803   |
| ATXN7       | 8.33119    | 5.98159   | 8.28816   | 6.6182     | 9.33229    | 7.06816    |
| SNORD113-6  | 0          | 0         | 0         | 0          | 0          | 0          |
| LOC1005067: | 0.369902   | 0         | 0.280018  | 0.347332   | 1.96589    | 0.922031   |
| SMARCC1     | 22.9263    | 16.3985   | 20.2416   | 18.8697    | 21.9435    | 21.0756    |
| DHH         | 0.375234   | 0.47394   | 0.243475  | 0.151002   | 0.238989   | 0.167021   |
| SHC3        | 1.00456    | 1.21269   | 1.3893    | 1.16094    | 0.996625   | 0.836671   |
| C14orf129   | 19.0937    | 16.2958   | 17.4125   | 12.2686    | 17.7192    | 17.0581    |
| LOC1002895: | 0.0708106  | 0.127404  | 0.167217  | 1.24E-270  | 0.09411    | 0.179193   |
| LINC00051   | 0          | 0         | 0         | 0          | 0.0706859  | 0          |
| 14-Sep      | 0.00516902 | 0         | 0.0669608 | 0.00808937 | 0.00603565 | 0.00322111 |
| IKBIP       | 7.73337    | 5.58068   | 5.45176   | 3.23547    | 4.65728    | 4.8151     |
| CCNI        | 124.47     | 100.108   | 114.234   | 115.285    | 107.249    | 98.353     |
| SLC25A26    | 0          | 0         | 10.1951   | 13.1022    | 13.3005    | 11.4358    |
| CFL1        | 462.954    | 447.554   | 370.304   | 414.484    | 410.777    | 438.433    |
| CDRT7       | 0          | 0         | 0         | 0          | 0          | 0          |
| AKR7A3      | 1.9483     | 2.38519   | 3.17693   | 2.28       | 3.0639     | 1.42869    |
| ARL6IP6     | 11.1744    | 12.8908   | 14.8432   | 10.4333    | 16.3654    | 11.4656    |
| ECEL1       | 0.523427   | 0.833006  | 0.396237  | 0.0655319  | 1.08902    | 0.239197   |
| FAM73A      | 5.3233     | 2.83041   | 4.50061   | 2.95443    | 3.13413    | 2.77008    |
| SLA         | 5.16045    | 5.34831   | 3.71785   | 2.15805    | 7.74393    | 3.21527    |
| INTS12      | 12.8005    | 12.1048   | 10.7567   | 11.3413    | 10.077     | 9.60884    |
| FOXO1       | 9.40588    | 6.61742   | 11.4709   | 8.65941    | 8.81042    | 8.80764    |

|             |           |           |           |           |           |            |
|-------------|-----------|-----------|-----------|-----------|-----------|------------|
| LMAN2L      | 11.2839   | 10.4308   | 9.11902   | 11.7757   | 11.2399   | 11.8341    |
| PNOC        | 0         | 0         | 0.142349  | 0.176569  | 0.179648  | 0.0585902  |
| STYXL1      | 12.7497   | 12.0194   | 13.7796   | 16.8279   | 15.0178   | 19.5117    |
| LOC10019220 | 0         | 0.198283  | 0.169772  | 0         | 0.285675  | 0          |
| SPDYE5      | 0.591235  | 0.654549  | 0.682675  | 0.797435  | 0.739633  | 0.710591   |
| MIR4692     | 0         | 0         | 0         | 0         | 0         | 0          |
| GABRB2      | 0.0938359 | 0         | 0.0526177 | 0.0652667 | 0.0677887 | 0.00812104 |
| TMEM121     | 0.778148  | 1.81379   | 1.12457   | 1.85988   | 1.66704   | 1.89555    |
| IER5        | 29.3649   | 26.883    | 26.3338   | 31.2795   | 31.521    | 33.0841    |
| ADD2        | 0.161441  | 0.261358  | 0.470182  | 0.60672   | 0.584087  | 0.45539    |
| PIK3C2G     | 6.75727   | 4.52923   | 7.87666   | 5.7086    | 6.08111   | 6.35975    |
| C17orf65    | 5.83038   | 10.7087   | 8.59784   | 11.8577   | 11.1698   | 11.6852    |
| KCNK9       | 0.0847788 | 0.0749561 | 0         | 0         | 0         | 0          |
| LOC375295   | 3.39153   | 4.44951   | 4.96918   | 4.31461   | 3.69305   | 3.20428    |
| WDR12       | 7.90019   | 6.98485   | 5.87912   | 7.04096   | 6.36777   | 5.78529    |
| PSENE1      | 67.1913   | 78.0614   | 63.8904   | 70.0162   | 60.0167   | 75.1887    |
| PDHB        | 76.6672   | 67.2167   | 67.5129   | 62.1518   | 53.8207   | 57.0874    |
| MIR3177     | 0         | 0         | 0         | 0         | 0         | 0          |
| SLC16A10    | 3.82419   | 3.0765    | 3.75559   | 2.5233    | 3.68639   | 3.1989     |
| LYZL6       | 0         | 0         | 0         | 0         | 0         | 0          |
| LOC10050647 | 1.79036   | 1.92704   | 2.71063   | 2.48514   | 2.67721   | 1.40672    |
| LOC400768   | 0         | 0.0529971 | 0.0453765 | 0         | 0.0381775 | 0.0373534  |
| MMP3        | 0.57193   | 0.809063  | 0.129886  | 0.32222   | 0.364265  | 0.142561   |
| UTS2        | 1.08243   | 0.229519  | 1.04085   | 1.88862   | 0         | 0          |
| EIF2S2      | 23.2108   | 22.7521   | 18.8635   | 21.7216   | 19.0351   | 23.4616    |
| ITGB4       | 39.1345   | 57.6492   | 45.3773   | 62.1401   | 59.2135   | 47.9805    |
| MGAT5B      | 0.127982  | 0.404361  | 0.210068  | 0.184016  | 0.337006  | 0.434214   |
| ABCC11      | 15.4452   | 0.617914  | 0.736275  | 0.33906   | 0.337474  | 0.475035   |
| HIST1H4K    | 1.48091   | 2.37619   | 1.49474   | 2.47209   | 2.1222    | 2.05076    |
| C3orf78     | 42.5053   | 50.4553   | 30.3892   | 38.0641   | 27.5732   | 25.0166    |
| PROCR       | 9.48583   | 11.5566   | 10.6299   | 15.149    | 9.37158   | 11.962     |
| NSUN4       | 6.25181   | 6.12658   | 5.4773    | 6.46559   | 6.65491   | 5.24443    |
| MIR934      | 0         | 0         | 0         | 0         | 0         | 0          |
| PQLC2       | 14.7576   | 19.0128   | 12.0998   | 20.5272   | 14.578    | 17.1371    |
| MIR4465     | 0         | 0         | 0         | 0         | 0         | 0          |
| LOC284408   | 1.76767   | 5.79262   | 5.31045   | 3.71118   | 5.14195   | 4.86592    |
| UBE2O       | 9.0296    | 10.38     | 8.91463   | 10.6868   | 11.1361   | 10.1798    |
| C9orf86     | 39.9433   | 55.3425   | 40.5328   | 53.0412   | 46.1456   | 49.4436    |
| APOBEC4     | 0         | 0         | 0         | 0         | 0         | 0          |
| SLC44A4     | 3.13812   | 0.500996  | 0.550247  | 0.79538   | 0.566302  | 0.60397    |
| TMPRSS15    | 0         | 0         | 0.0561922 | 0         | 0.0157591 | 0          |
| LOC10065297 | 25.9209   | 33.1911   | 21.6522   | 38.1876   | 35.8648   | 34.5336    |
| PLEKHA1     | 28.2396   | 26.4969   | 35.3343   | 33.0399   | 34.7861   | 30.857     |

|             |           |           |           |           |           |           |
|-------------|-----------|-----------|-----------|-----------|-----------|-----------|
| CATSPER2P1  | 1.15888   | 0.797363  | 1.70479   | 1.57052   | 1.27013   | 1.40336   |
| SP3         | 18.4942   | 15.2548   | 19.842    | 14.505    | 17.2371   | 15.6631   |
| LINC00173   | 2.15405   | 3.79783   | 6.28768   | 8.11258   | 20.2598   | 10.3631   |
| TRIM74      | 0.682407  | 2.15817   | 2.0922    | 2.59457   | 2.15761   | 1.67164   |
| ABL1        | 14.3613   | 15.2691   | 15.9347   | 13.2641   | 16.8294   | 13.5112   |
| LRIG3       | 15.8485   | 14.0127   | 21.9336   | 14.0264   | 23.939    | 18.1008   |
| LOC10050640 | 0         | 0.0966131 | 0         | 0         | 0         | 0         |
| CAST        | 105.788   | 80.2271   | 109.314   | 94.8038   | 79.2642   | 88.1924   |
| ADAMTS7     | 0.997128  | 1.77856   | 1.60224   | 1.08404   | 1.6377    | 1.16636   |
| CTNNB1      | 20.5131   | 24.0842   | 20.2454   | 19.2096   | 23.8117   | 22.1637   |
| MIR1298     | 0         | 0         | 0         | 0         | 0         | 0         |
| MYB         | 2.75567   | 2.12111   | 2.5753    | 1.82285   | 4.24949   | 3.94767   |
| ZNF568      | 2.56091   | 1.7569    | 2.37556   | 1.70945   | 2.09317   | 1.87613   |
| IFT57       | 8.24452   | 7.808     | 9.27991   | 6.84265   | 8.10264   | 6.75397   |
| BTBD18      | 0.13027   | 0.201559  | 0.123269  | 0.0611608 | 0.145197  | 0.0608841 |
| NFE2        | 2.64101   | 1.76635   | 2.34019   | 2.29866   | 2.54272   | 1.60568   |
| WDTC1       | 21.8454   | 21.4307   | 22.5063   | 23.4024   | 25.1236   | 23.8794   |
| SRCAP       | 13.06     | 12.3421   | 14.5642   | 12.4997   | 15.4731   | 13.5137   |
| ING2        | 9.82707   | 11.6751   | 11.7012   | 10.0925   | 10.4315   | 10.1426   |
| ZNF324B     | 2.25693   | 2.72898   | 2.86416   | 2.43084   | 3.44546   | 3.20564   |
| NPHS2       | 0.111417  | 0         | 0.0421715 | 0         | 0         | 0.0694301 |
| PLA2G2A     | 28.7327   | 29.8357   | 50.6309   | 32.4229   | 23.6667   | 6.53901   |
| LOC10050740 | 1.87756   | 3.21461   | 3.35891   | 3.16217   | 3.76971   | 3.67669   |
| CBX3        | 60.1257   | 60.0525   | 51.5409   | 43.2513   | 50.179    | 43.7079   |
| SHARPIN     | 30.1573   | 45.8244   | 31.5878   | 43.5557   | 40.1255   | 37.9876   |
| C1S         | 111.72    | 90.7944   | 88.799    | 35.025    | 104.53    | 53.4351   |
| RUSC2       | 8.67957   | 10.0244   | 11.8407   | 11.4232   | 12.3885   | 10.0075   |
| ZFP41       | 2.92695   | 3.21247   | 4.09526   | 3.41176   | 4.5512    | 3.74853   |
| LCT         | 0.121831  | 0.0673222 | 0.0922269 | 0.200196  | 0.135791  | 0.15184   |
| S100A2      | 305.637   | 499.828   | 164.793   | 429.73    | 190.553   | 554.478   |
| UQCRC2      | 203.615   | 167.539   | 169.502   | 161.783   | 155       | 161.412   |
| ST7-AS1     | 1.6461    | 2.98528   | 1.90113   | 1.60633   | 2.5776    | 1.23135   |
| PTN         | 15.974    | 16.9564   | 33.3148   | 19.6175   | 33.1708   | 32.3896   |
| LOC10050640 | 0.0632814 | 0.167848  | 0.287426  | 0.0891303 | 0.141065  | 0.216888  |
| GABRB1      | 0.0917529 | 0.121683  | 0         | 0.0861545 | 0.0584379 | 0.0285883 |
| CHPF2       | 11.6339   | 15.4529   | 10.8258   | 12.0553   | 14.0639   | 12.6338   |
| HIST1H4E    | 0.567004  | 0.501309  | 0.429225  | 1.06482   | 0         | 1.06      |
| PRKG1       | 1.0744    | 0.500681  | 0.778901  | 0.365173  | 0.637435  | 0.432813  |
| TCERG1L     | 0.11523   | 0.272891  | 0.17446   | 0.577665  | 0.0489272 | 0.0718066 |
| SDHB        | 82.6296   | 69.0277   | 62.3277   | 63.1536   | 47.5753   | 63.9095   |
| MIR548F4    | 0         | 0         | 0         | 0         | 0         | 0         |
| SPIN3       | 5.50324   | 5.50379   | 6.77557   | 5.42047   | 7.43077   | 5.69499   |
| POLR2K      | 63.1891   | 52.8479   | 54.7603   | 45.8174   | 45.6841   | 44.2925   |

|             |           |           |           |           |           |           |
|-------------|-----------|-----------|-----------|-----------|-----------|-----------|
| SNW1        | 28.8543   | 26.4923   | 26.4817   | 24.6471   | 25.9681   | 24.5657   |
| C16orf7     | 10.9797   | 18.0448   | 12.8311   | 19.5181   | 16.9873   | 16.6057   |
| LRG1        | 33.9532   | 47.0615   | 26.7291   | 71.5675   | 26.4306   | 49.4059   |
| CELF3       | 0.0191429 | 0.0677002 | 0.0652114 | 0.129421  | 0.087785  | 0.0745574 |
| C1orf106    | 15.339    | 16.3984   | 21.208    | 22.2313   | 26.1763   | 24.5897   |
| ACPL2       | 4.46142   | 4.73332   | 3.96195   | 4.87181   | 4.46206   | 3.72739   |
| GAB4        | 0.0764067 | 0.033777  | 0         | 0         | 0.0243319 | 0.0238067 |
| SGK196      | 0.724807  | 0.0582572 | 0.897845  | 0.0618711 | 0.461634  | 0.123182  |
| LOC10013156 | 6.42829   | 6.55951   | 11.6168   | 10.3022   | 16.9104   | 11.2645   |
| GPHA2       | 0.173304  | 0.30645   | 0         | 0.32546   | 0.220757  | 0.323988  |
| KRTAP9-6    | 1.3749    | 0.3039    | 0         | 2.25926   | 0         | 31.3445   |
| CILP2       | 0.324236  | 0.286669  | 0.911664  | 0.173973  | 0.958785  | 0.793767  |
| ZNF805      | 1.97098   | 2.1679    | 2.14999   | 1.94519   | 2.89742   | 2.3037    |
| ADAM21P1    | 0.150909  | 0         | 0         | 0         | 0.0160191 | 0.0313466 |
| CDK11B      | 26.1135   | 34.2673   | 26.6677   | 28.5856   | 31.8808   | 28.286    |
| ZNF785      | 3.29733   | 3.26299   | 4.0533    | 2.8405    | 4.25798   | 4.14722   |
| SNORA55     | 39.0789   | 0         | 29.5829   | 0         | 0         | 0         |
| FBXW4P1     | 2.09677   | 2.13593   | 2.07034   | 2.48244   | 2.03219   | 2.21557   |
| ARHGEF15    | 6.67629   | 10.3921   | 6.82903   | 6.22478   | 7.5444    | 5.12381   |
| TCEB1       | 13.6299   | 14.5764   | 12.8377   | 15.2117   | 12.2056   | 12.4359   |
| ESR1        | 1.52818   | 1.41799   | 1.67218   | 0.708733  | 1.5416    | 0.820323  |
| TMC5        | 1.61756   | 0.632459  | 0.740981  | 0.324294  | 1.19943   | 0.643583  |
| PCP4        | 25.4028   | 33.9282   | 17.1843   | 34.2567   | 21.687    | 19.8716   |
| LINC00204B  | 1.11075   | 2.62155   | 1.68488   | 1.74313   | 2.59536   | 2.07822   |
| KRTAP1-5    | 15.4363   | 3.13645   | 0.217739  | 131.98    | 1.83247   | 1005.36   |
| STOX1       | 1.38956   | 1.55855   | 1.60733   | 1.83858   | 0.724703  | 1.38118   |
| INSIG2      | 16.7145   | 12.7799   | 15.9563   | 12.9142   | 17.3455   | 15.4173   |
| LOC643797   | 0         | 0         | 0.133126  | 0.165129  | 0.224011  | 0.0547938 |
| FAM138C     | 0.0856799 | 0.117862  | 0.0572295 | 0         | 0.225422  | 0.0376885 |
| RB1CC1      | 11.2637   | 8.30133   | 12.6097   | 7.95753   | 11.1302   | 14.0746   |
| DDX39B      | 126.097   | 168.672   | 135.635   | 160.822   | 161.057   | 138.826   |
| LOC144438   | 12.8734   | 11.6632   | 12.8763   | 11.6053   | 13.686    | 11.0419   |
| MYO1G       | 2.98114   | 4.71238   | 2.9634    | 1.61169   | 5.83038   | 1.97031   |
| PRG1        | 0         | 0.585973  | 0         | 0.622323  | 0.422117  | 0.206503  |
| SNORA7B     | 0         | 0         | 0         | 0         | 0         | 0         |
| CEP152      | 2.05931   | 1.53715   | 1.36568   | 1.59812   | 1.97272   | 1.70807   |
| KIAA1609    | 5.42202   | 4.50584   | 4.64113   | 4.73145   | 5.85723   | 5.42039   |
| CDK5R1      | 1.69879   | 2.39866   | 2.14972   | 2.23795   | 1.82481   | 1.72222   |
| CTAG2       | 0         | 0         | 0.45203   | 11.3727   | 0         | 0         |
| HAUS3       | 4.72259   | 4.81755   | 4.732     | 4.1642    | 5.62765   | 4.81291   |
| MIR431      | 0         | 0         | 0         | 0         | 0         | 0         |
| SNRPD1      | 15.3192   | 16.8419   | 13.2102   | 12.0079   | 13.4475   | 12.1611   |
| MORN2       | 24.5391   | 19.5264   | 17.9128   | 17.7751   | 16.5222   | 15.9471   |



|             |          |           |          |          |           |           |
|-------------|----------|-----------|----------|----------|-----------|-----------|
| KRTAP19-4   | 0        | 0         | 0        | 1.63755  | 0         | 43.4706   |
| HCG4        | 1.1864   | 0.814548  | 0.70876  | 0.483375 | 1.44644   | 1.31063   |
| RNF126P1    | 1.2544   | 1.84843   | 1.26611  | 1.17786  | 1.22503   | 1.19859   |
| ZNFX1       | 12.7016  | 11.0799   | 9.80695  | 6.29935  | 9.3663    | 7.1405    |
| LOC400879   | 0.220516 | 0.779867  | 0.391827 | 0.207061 | 0.11704   | 0         |
| DNTTIP1     | 14.844   | 17.9035   | 20.0707  | 21.1089  | 16.7772   | 18.6607   |
| LOC649395   | 18.0158  | 12.0854   | 15.1967  | 14.1777  | 11.7658   | 14.0066   |
| LOC10049940 | 2.16938  | 2.42481   | 1.05374  | 0.999288 | 1.38169   | 1.19896   |
| CRYBB1      | 0.391861 | 0         | 0.197761 | 0.490601 | 0         | 0.732573  |
| LRRC37BP1   | 6.0853   | 6.68341   | 6.23246  | 6.12916  | 5.75329   | 4.67125   |
| S100P       | 52.7812  | 31.4787   | 57.2146  | 107.919  | 34.0145   | 41.0651   |
| ELF5        | 24.7998  | 8.9499    | 10.8168  | 18.4301  | 8.08063   | 9.86206   |
| FAM86B2     | 0.96355  | 1.08574   | 0.795723 | 0.480367 | 0.55945   | 0.492978  |
| LOC400456   | 0.395888 | 0.140008  | 0.539441 | 0.148693 | 0.151286  | 0.444061  |
| SAMD9       | 4.21955  | 2.49529   | 1.75174  | 1.0571   | 2.09397   | 2.3215    |
| ZBTB20-AS1  | 0        | 0         | 0.159196 | 0.131644 | 0.127851  | 0         |
| C1QTNF8     | 0        | 0         | 0        | 0        | 0         | 0         |
| EIF2C3      | 1.66827  | 1.43929   | 1.64969  | 1.4907   | 1.37083   | 1.34124   |
| MON2        | 11.2211  | 9.21467   | 12.0957  | 9.99941  | 12.0925   | 11.0602   |
| CBX8        | 2.84156  | 4.04423   | 3.25284  | 3.4491   | 4.06102   | 6.04642   |
| SLC44A2     | 59.4508  | 52.5642   | 71.7582  | 77.9889  | 71.5634   | 73.2857   |
| PITHD1      | 50.8022  | 60.0935   | 40.7984  | 57.0609  | 52.3543   | 63.4141   |
| OR2L2       | 0        | 0         | 0        | 0        | 0         | 0         |
| LEUTX       | 0        | 0         | 0        | 0        | 0         | 0         |
| PRKG2       | 0.503857 | 0.602707  | 0.650662 | 0.194812 | 0.69845   | 0.480208  |
| LRRC3B      | 0.187246 | 0.110367  | 0        | 0        | 0.0397527 | 0.0777891 |
| SRY         | 1.75778  | 0.836832  | 0        | 0        | 0         | 0         |
| OR9A2       | 0        | 0         | 0        | 0        | 0         | 0         |
| CYP2W1      | 0.971605 | 3.35803   | 5.34917  | 8.70853  | 6.16008   | 4.26576   |
| SNORA31     | 119.301  | 316.429   | 406.388  | 336.056  | 113.975   | 185.853   |
| LOC402160   | 0        | 0.0429301 | 0        | 0        | 0         | 0.030258  |
| LRIG1       | 39.7762  | 30.0613   | 37.2721  | 31.697   | 36.8268   | 32.5648   |
| CXorf61     | 0        | 0         | 0        | 0        | 0         | 0         |
| ATP6V1C1    | 10.8426  | 9.5566    | 10.1931  | 10.1179  | 9.66797   | 8.62125   |
| LOC10028710 | 13.4151  | 11.7692   | 12.1452  | 10.6511  | 12.4616   | 10.7845   |
| MMP9        | 4.01815  | 4.5434    | 2.82922  | 1.33861  | 4.69134   | 2.59371   |
| CLDN24      | 0        | 0.40933   | 0.486766 | 0.19321  | 0.294869  | 0.064112  |
| LOC10050650 | 0        | 0         | 0.117116 | 0        | 0.0985351 | 0.192816  |
| MERTK       | 9.33213  | 5.2136    | 5.30347  | 3.80988  | 5.11674   | 5.62997   |
| LOC10028730 | 0        | 0         | 0        | 0        | 0         | 0         |
| LOC10013130 | 0.893323 | 5.27E-11  | 0.135986 | 0.497534 | 1.14474   | 1.3287    |
| LOC10050620 | 0.142868 | 0.108904  | 0.189657 | 0.108651 | 0.209142  | 0.0767012 |
| FOXN1       | 10.3711  | 9.79389   | 14.098   | 16.9285  | 18.9165   | 24.9942   |

|             |           |           |          |           |           |           |
|-------------|-----------|-----------|----------|-----------|-----------|-----------|
| NEK2        | 1.16207   | 1.69338   | 1.12418  | 1.6746    | 1.3174    | 1.95526   |
| DSG4        | 0.277619  | 0.129291  | 0.149446 | 2.90957   | 0.125736  | 3.87873   |
| ASB1        | 4.74998   | 4.40608   | 5.67926  | 4.99774   | 5.99746   | 5.10598   |
| MIR3202-2   | 0         | 0         | 0        | 0         | 0         | 0         |
| PRMT2       | 53.4981   | 62.0672   | 55.1452  | 54.7107   | 60.9551   | 49.1613   |
| NPM2        | 0.312645  | 0.460702  | 0.394457 | 0.0978562 | 1.062     | 1.81839   |
| HDAC1       | 50.7506   | 44.6096   | 39.3864  | 41.0046   | 43.5676   | 45.3546   |
| LOC10050626 | 2.79934   | 7.59001   | 3.67314  | 3.85519   | 4.75445   | 3.83775   |
| ANAPC10     | 7.74235   | 5.6013    | 6.71239  | 5.7562    | 5.87427   | 4.56081   |
| DCXR        | 147.913   | 161.103   | 119.233  | 147.676   | 104.225   | 134.61    |
| ATP8B2      | 6.6668    | 5.59487   | 8.63135  | 4.85184   | 8.27402   | 5.68578   |
| ALMS1       | 1.26355   | 0.898859  | 1.5722   | 1.01599   | 1.35515   | 1.05891   |
| LOC10050689 | 0         | 0.16737   | 0        | 0         | 0         | 0         |
| NMBR        | 0         | 0.0716012 | 0        | 0.076043  | 0.154738  | 0         |
| PDGFA       | 11.7155   | 14.5991   | 8.99064  | 14.1534   | 11.532    | 9.87422   |
| SRGAP1      | 1.63099   | 1.12596   | 1.94503  | 1.69931   | 2.03488   | 1.6777    |
| MIR4780     | 0         | 0         | 0        | 0         | 0         | 0         |
| ABCC9       | 3.22446   | 2.97327   | 3.70075  | 2.04843   | 2.89935   | 1.62578   |
| NEK9        | 23.9163   | 19.9204   | 23.2439  | 18.0014   | 23.2843   | 20.9147   |
| FKBP1B      | 4.25326   | 5.4661    | 6.43345  | 8.2533    | 6.29172   | 6.09674   |
| NEXN-AS1    | 0.0895385 | 0.0793474 | 0.105295 | 0.126838  | 0.0289813 | 0.0560393 |
| SNORD42B    | 0         | 0         | 0        | 0         | 0         | 0         |
| RRS1        | 14.2304   | 14.4415   | 13.4422  | 14.4078   | 11.4278   | 11.3353   |
| FLVCR2      | 4.46784   | 2.86509   | 3.49016  | 4.15925   | 5.05007   | 5.23354   |
| TBC1D8      | 17.1942   | 18.5829   | 15.7625  | 26.8241   | 20.7024   | 14.9511   |
| CD96        | 1.29101   | 0.986759  | 0.9773   | 0.416694  | 1.27958   | 0.306748  |
| NOSTRIN     | 14.0621   | 13.3861   | 8.26613  | 10.1761   | 8.05538   | 7.19528   |
| ZDHHC20     | 17.0138   | 13.7372   | 20.1984  | 13.0003   | 17.6131   | 16.9075   |
| SEMA3B      | 5.8922    | 15.8088   | 20.3574  | 14.7962   | 14.5631   | 9.88433   |
| CYP2E1      | 6.16266   | 6.34738   | 4.90564  | 5.60767   | 8.21424   | 5.38435   |
| GRIK1-AS1   | 0         | 0.464373  | 0.31808  | 0.197272  | 0.267616  | 0.19638   |
| CCDC68      | 1.74216   | 1.34762   | 1.09912  | 0.620174  | 1.55302   | 1.16693   |
| HMG20B      | 69.7415   | 103.364   | 77.8403  | 120.301   | 89.281    | 90.2792   |
| C9orf152    | 8.03421   | 2.46783   | 1.45624  | 2.23132   | 1.44142   | 3.10267   |
| OR4N3P      | 0.255455  | 0         | 0        | 0         | 0         | 0         |
| C5orf65     | 1.27639   | 1.23598   | 0.828201 | 0.856079  | 1.20005   | 0.871144  |
| MGC23270    | 0.320487  | 0.460451  | 0.33359  | 0.376166  | 0.20412   | 0.524249  |
| HEXDC       | 11.8714   | 20.4964   | 12.2392  | 15.0966   | 18.5743   | 15.4247   |
| DDX11L9     | 0.26787   | 0.719407  | 0.32843  | 1.02998   | 0.340929  | 0.400164  |
| MEX3D       | 8.66453   | 12.6238   | 8.66987  | 13.0888   | 9.50215   | 10.1655   |
| LOC10050631 | 0.669334  | 0.147946  | 0.126672 | 0.157123  | 0.532878  | 0.625651  |
| MIR192      | 0         | 0         | 0        | 0         | 283.839   | 0         |
| TRAF3       | 6.95772   | 7.18595   | 6.07532  | 5.54389   | 7.5567    | 5.88305   |

|            |          |           |          |           |           |           |
|------------|----------|-----------|----------|-----------|-----------|-----------|
| FAM126A    | 12.5444  | 9.99146   | 11.0377  | 6.37844   | 6.39562   | 6.15101   |
| B4GALT4    | 10.4124  | 8.13245   | 10.8139  | 7.87557   | 10.8537   | 10.4334   |
| MIR3200    | 0        | 0         | 0        | 0         | 0         | 0         |
| OTOL1      | 0        | 0         | 0        | 0         | 0         | 0         |
| FGFRL1     | 10.5335  | 9.11434   | 12.2517  | 9.83051   | 10.1451   | 9.24567   |
| MIR3131    | 0        | 0         | 0        | 0         | 0         | 0         |
| SLC6A4     | 1.8582   | 1.96393   | 1.6977   | 1.72476   | 1.10187   | 0.55901   |
| TPSD1      | 2.64524  | 3.82271   | 13.6701  | 10.1486   | 4.80321   | 3.05549   |
| FFAR2      | 1.25484  | 1.33134   | 0.607947 | 0.282785  | 1.31071   | 0.844517  |
| GABRQ      | 0        | 0.0456952 | 0        | 0.291179  | 0.0329174 | 0.161034  |
| MT1L       | 3.49088  | 5.01543   | 4.29425  | 7.78497   | 3.89088   | 5.43842   |
| DDX6       | 29.1918  | 24.8732   | 28.5815  | 25.8254   | 25.8065   | 24.9147   |
| PPP2R1B    | 14.8488  | 16.5126   | 24.6285  | 20.5654   | 13.857    | 24.5017   |
| JMJD5      | 2.04562  | 2.38693   | 1.70327  | 2.11273   | 2.08405   | 1.91167   |
| GALNT1     | 28.7778  | 20.9627   | 31.8099  | 23.1479   | 28.8556   | 30.0419   |
| MIR302B    | 0        | 0         | 0        | 0         | 0         | 0         |
| ITGB3BP    | 14.9845  | 16.0378   | 9.49702  | 8.61754   | 12.9465   | 14.3318   |
| LOC388813  | 0        | 0         | 0        | 0         | 0         | 0         |
| LOC1005073 | 0        | 0         | 0        | 0         | 0         | 0         |
| PEG10      | 4.08558  | 3.56098   | 1.78773  | 2.30044   | 1.47782   | 1.35428   |
| FOXK2      | 14.8817  | 17.2955   | 14.8916  | 17.5959   | 15.1606   | 14.3662   |
| PLA2G4F    | 32.3375  | 42.1087   | 48.3826  | 42.5529   | 65.1377   | 55.6624   |
| OR10X1     | 0        | 0         | 0        | 0         | 0         | 0         |
| LOC1006529 | 1.67104  | 1.0439    | 1.65001  | 0.460491  | 1.46921   | 0.543298  |
| DCTN5      | 10.4673  | 9.19179   | 10.2018  | 10.1818   | 10.0482   | 9.17391   |
| PXMP2      | 52.3248  | 68.606    | 41.3037  | 57.4181   | 40.0545   | 49.5682   |
| PFDN4      | 7.09545  | 8.86922   | 7.53216  | 3.13981   | 7.53189   | 6.09874   |
| SNORD117   | 0        | 0         | 0        | 0         | 0         | 0         |
| BAG3       | 35.6747  | 35.7999   | 35.8103  | 35.7777   | 31.1016   | 28.6001   |
| ABTB2      | 7.16429  | 5.35065   | 6.54087  | 6.81474   | 4.58805   | 7.29771   |
| ST8SIA5    | 0.114943 | 0.101626  | 0        | 0.0719532 | 0.0976106 | 0.0238759 |
| MOB3A      | 17.0554  | 18.535    | 17.0354  | 17.0991   | 20.707    | 15.887    |
| CCNB2      | 5.18628  | 6.41954   | 3.19318  | 5.8438    | 4.66848   | 6.07592   |
| HIVEP2     | 4.85195  | 3.97235   | 4.8483   | 4.45568   | 4.50557   | 3.56172   |
| SCNN1D     | 4.41459  | 8.95973   | 5.52037  | 8.33517   | 11.3308   | 9.95651   |
| C1orf216   | 8.21172  | 9.54038   | 8.60524  | 9.43124   | 7.60741   | 7.80267   |
| CHRM3      | 1.01987  | 0.161019  | 0.551463 | 1.09445   | 0.742357  | 0.605374  |
| SPDYC      | 0        | 0         | 0        | 0         | 0         | 0         |
| KIR2DS1    | 0        | 0         | 0        | 0         | 0         | 0         |
| LOC1005069 | 0        | 0         | 0        | 0         | 0         | 0         |
| SFSWAP     | 19.671   | 26.5185   | 21.8294  | 24.6467   | 25.6001   | 23.1184   |
| HS3ST3A1   | 0.400158 | 0.24697   | 0.332291 | 0.449642  | 0.304989  | 0.423129  |
| HTR4       | 0.133427 | 0.117968  | 0.206273 | 0.0313041 | 0.0849805 | 0         |

|             |           |           |           |           |           |           |
|-------------|-----------|-----------|-----------|-----------|-----------|-----------|
| PEX26       | 11.1997   | 8.47741   | 10.9219   | 10.4703   | 9.13218   | 8.83711   |
| LRRc48      | 1.29017   | 1.45301   | 1.7331    | 1.90836   | 2.05716   | 1.62199   |
| EPB41L4B    | 17.8419   | 15.4158   | 18.844    | 24.0698   | 14.0194   | 19.0934   |
| LRRc2       | 1.03717   | 0.716926  | 1.42753   | 0.35414   | 0.840735  | 0.9401    |
| OR13G1      | 0         | 0         | 0         | 0         | 0         | 0         |
| ZC3H8       | 11.2238   | 8.74904   | 8.24513   | 6.73498   | 9.81335   | 9.72569   |
| PLA2G5      | 1.97803   | 3.93492   | 1.33101   | 1.85734   | 2.58963   | 1.33535   |
| TMEM68      | 8.6026    | 8.14915   | 8.79531   | 7.748     | 7.45598   | 8.20527   |
| CXorf65     | 1.44081   | 1.89691   | 0.574524  | 0.835122  | 2.38097   | 0.399043  |
| TAAR9       | 0         | 0         | 0         | 0         | 0         | 0         |
| LOC10065279 | 6.53E-129 | 0         | 5.08E-168 | 0         | 3.15E-280 | 3.11E-178 |
| FAM118B     | 6.7424    | 6.18203   | 4.97563   | 5.63945   | 5.17175   | 4.81569   |
| PLAC2       | 39.2093   | 44.752    | 43.6858   | 52.3857   | 55.1493   | 59.3316   |
| MIR629      | 0         | 0         | 0         | 0         | 0         | 0         |
| OAZ1        | 635.623   | 826.82    | 553.515   | 777.957   | 520.152   | 604.059   |
| POM121L9P   | 0.69391   | 1.06472   | 1.55531   | 0.79739   | 1.31523   | 0.737026  |
| JMJD7-PLA2G | 6.34E-06  | 3.43E-06  | 1.08E-05  | 0.375202  | 4.45E-06  | 6.31E-06  |
| LUC7L       | 42.5394   | 64.7451   | 41.8527   | 63.4002   | 61.3129   | 60.9541   |
| SAA2        | 28.5343   | 22.4557   | 4.38954   | 4.72426   | 66.3466   | 40.441    |
| LOC10050658 | 420.941   | 445.798   | 436.629   | 426.434   | 434.579   | 450.647   |
| ODF3B       | 30.4149   | 62.3135   | 20.0653   | 20.301    | 36.9535   | 20.6786   |
| NRP2        | 2.58153   | 2.45889   | 1.83751   | 2.26908   | 2.55721   | 2.56047   |
| ANO1-AS2    | 0.349777  | 0.618501  | 0.441305  | 0.218957  | 0.148516  | 0.0726553 |
| OTOP2       | 0.0955038 | 0.0422192 | 0.0361485 | 0.358706  | 0.0304135 | 0.267813  |
| LOC441177   | 0         | 0         | 0         | 0         | 3.03E-09  | 0         |
| MIR3115     | 0         | 0         | 0         | 0         | 0         | 0         |
| ETNK2       | 3.73667   | 3.23561   | 2.77035   | 4.66617   | 3.38584   | 5.71331   |
| DPF2        | 17.0971   | 18.6045   | 15.9595   | 18.4489   | 21.9561   | 19.9921   |
| OGDHL       | 0.266026  | 0.160783  | 0.137664  | 0.249794  | 0.205909  | 0.3251    |
| ZFAT        | 2.43236   | 1.73527   | 1.8741    | 1.57112   | 1.91173   | 2.25317   |
| ACYP1       | 22.6734   | 29.3804   | 23.1391   | 24.7716   | 24.9055   | 25.117    |
| FBXO7       | 59.0785   | 66.2422   | 67.5678   | 78.1554   | 61.409    | 55.5361   |
| GHRLOS2     | 1.24313   | 2.05165   | 2.63496   | 3.42402   | 2.16413   | 1.54933   |
| YY2         | 0.913123  | 0.678557  | 1.05068   | 0.720651  | 0.977043  | 1.22919   |
| PPM1J       | 7.50802   | 12.7321   | 9.59698   | 11.3839   | 14.9728   | 11.505    |
| MPV17L      | 6.38879   | 1.73476   | 2.17441   | 3.25503   | 2.14889   | 1.1659    |
| SUPT4H1     | 41.5267   | 45.226    | 38.9674   | 40.6432   | 42.7922   | 39.2554   |
| FRG2C       | 0.0884629 | 0         | 0.113007  | 0.0467242 | 0.0316927 | 0         |
| SMEK2       | 24.5774   | 19.4453   | 23.3719   | 18.6375   | 22.0949   | 17.7398   |
| FLJ35390    | 2.48265   | 2.94169   | 3.11127   | 2.63612   | 3.67984   | 3.66201   |
| MAGEA5      | 0.249818  | 0.248487  | 0.236403  | 0.513158  | 0.348071  | 2.60E-06  |
| ATP6V1G2-DI | 1.19059   | 1.13081   | 2.30902   | 6.88E-11  | 1.83283   | 2.82063   |
| LOC1005060  | 6.00848   | 5.40634   | 5.03148   | 6.39079   | 3.72524   | 5.16903   |

|             |          |           |           |           |           |           |
|-------------|----------|-----------|-----------|-----------|-----------|-----------|
| CNGB1       | 0.186921 | 0.0901439 | 0.0878383 | 0.092998  | 0.0108228 | 0.0317676 |
| STK3        | 12.297   | 10.4036   | 10.2986   | 9.92082   | 10.2851   | 11.1201   |
| RTCD1       | 18.1485  | 19.0069   | 17.4826   | 16.1269   | 16.7098   | 16.9155   |
| ZNF30       | 2.68776  | 3.78789   | 3.39428   | 2.59688   | 2.77835   | 3.34819   |
| PABPC4L     | 0.312184 | 0.293264  | 0.295406  | 0.054963  | 0.298248  | 0.19454   |
| LOC10050563 | 2.08854  | 2.07738   | 2.76681   | 2.69652   | 0.997652  | 2.60298   |
| SNORD114-5  | 0        | 0         | 0         | 0         | 0         | 0         |
| FTH1        | 539.862  | 757.851   | 601.477   | 689.412   | 526.269   | 413.79    |
| TMSB15B     | 3.47476  | 4.87932   | 5.26083   | 4.79816   | 7.16001   | 3.69379   |
| CSNK1G1     | 5.11986  | 3.91079   | 4.47339   | 2.77983   | 4.64359   | 3.96459   |
| CLCA2       | 73.7899  | 55.3055   | 68.2339   | 59.2139   | 63.7478   | 66.0087   |
| LOC10050597 | 6.23458  | 4.94199   | 3.17353   | 3.93642   | 5.06624   | 2.6794    |
| KCNE1       | 0.504528 | 0.422103  | 0.125549  | 0.634229  | 0.24193   | 0.625903  |
| NRK         | 0.38805  | 0.332692  | 0.0623118 | 0.176665  | 0.247151  | 0.175866  |
| CACNG5      | 0        | 0         | 0         | 0         | 0         | 0         |
| RRM2B       | 6.41611  | 3.91659   | 7.07441   | 4.22477   | 4.86959   | 3.86975   |
| RNF150      | 0.601847 | 0.422022  | 1.33538   | 0.701534  | 0.396537  | 0.387978  |
| FXC1        | 21.1246  | 18.9861   | 16.4153   | 16.9636   | 15.3537   | 13.4029   |
| SLC7A2      | 7.64317  | 6.54678   | 9.62462   | 6.45862   | 7.69479   | 4.80983   |
| BYSL        | 7.1205   | 9.8798    | 6.01978   | 9.66304   | 6.58746   | 7.09304   |
| SIRPA       | 29.2396  | 28.4273   | 26.7622   | 25.3451   | 30.8706   | 31.7047   |
| LOC10050571 | 1.97669  | 0.873834  | 0.748185  | 0.928043  | 0.629484  | 0.615896  |
| WDR34       | 19.2291  | 29.8497   | 19.9799   | 36.3011   | 25.3863   | 30.4      |
| JTB         | 83.4846  | 96.12     | 72.7018   | 91.0803   | 71.0534   | 73.4962   |
| ZP2         | 0.629747 | 0         | 0.0340516 | 0.0844747 | 0         | 0         |
| SLC24A5     | 1.35027  | 3.26513   | 2.168     | 3.2979    | 1.54394   | 3.16389   |
| TSGA14      | 2.39652  | 2.29132   | 2.10951   | 1.33448   | 1.6151    | 1.96227   |
| LOC145837   | 0.185738 | 0.0547394 | 0.234342  | 0.0581351 | 0.118298  | 0.308651  |
| GAS7        | 21.4809  | 14.5545   | 22.5216   | 17.9512   | 25.1148   | 21.1483   |
| GBP1        | 31.6008  | 28.5149   | 9.48501   | 4.73662   | 11.3796   | 6.71281   |
| DPY19L2     | 1.77723  | 2.54797   | 3.32695   | 2.57078   | 4.83342   | 3.41213   |
| LINC00102   | 0        | 0         | 0.102097  | 0.163543  | 0         | 0         |
| CLEC4F      | 1.9595   | 1.66028   | 2.03961   | 2.98991   | 4.91407   | 4.57905   |
| LYRM2       | 8.27336  | 7.41839   | 6.98819   | 5.96349   | 6.96953   | 7.01705   |
| CCL14-CCL15 | 0.204009 | 1.16E-06  | 1.39E-15  | 4.11E-17  | 1.43E-06  | 2.09E-06  |
| EIF3K       | 280.878  | 385.106   | 293.419   | 408.335   | 311.519   | 298.022   |
| ACSM5       | 3.16842  | 5.6395    | 6.375     | 2.54449   | 2.57559   | 0.961235  |
| ZDHHC11     | 3.54998  | 7.75577   | 8.17894   | 8.98566   | 3.07202   | 2.88553   |
| LOC10013081 | 0        | 0         | 0         | 0.0592077 | 0         | 0.0392932 |
| MZT2A       | 49.9518  | 101.344   | 67.4028   | 119.342   | 61.1313   | 67.5838   |
| LOC10050721 | 0        | 0         | 0         | 0         | 0         | 0         |
| RPL5        | 488.708  | 601.061   | 566.739   | 657.875   | 562.006   | 524.708   |
| C8orf84     | 4.40348  | 2.9598    | 3.25548   | 3.04669   | 3.34584   | 3.51432   |

|             |          |          |           |          |          |          |
|-------------|----------|----------|-----------|----------|----------|----------|
| MIR514-3    | 0        | 0        | 0         | 0        | 0        | 0        |
| MIR1244-3   | 0        | 0        | 0         | 0        | 0        | 0        |
| MIR570      | 0        | 0        | 0         | 0        | 0        | 0        |
| KCNJ2       | 2.47934  | 2.36555  | 1.94439   | 1.70836  | 2.65835  | 2.02297  |
| C17orf99    | 0.105405 | 0.559157 | 0         | 0.692818 | 0.4028   | 0.525473 |
| LOC440313   | 0.178436 | 0.210349 | 0.0450256 | 0.279247 | 0.265175 | 0.074129 |
| USP32       | 7.2299   | 5.85721  | 8.01989   | 5.87285  | 6.80505  | 7.07182  |
| LAIR1       | 9.86923  | 6.96675  | 10.9647   | 4.67985  | 8.44202  | 5.19923  |
| DPM3        | 73.3522  | 100.675  | 71.6384   | 93.0729  | 64.3156  | 67.4521  |
| HNRNPF      | 77.4     | 73.2376  | 73.4868   | 65.6377  | 68.3887  | 62.4538  |
| MIR124-3    | 0        | 0        | 0         | 0        | 0        | 0        |
| REXO4       | 13.7206  | 16.428   | 13.8053   | 16.9221  | 16.2721  | 15.7868  |
| PDE6G       | 0.688115 | 0.726597 | 0.92374   | 0.143584 | 0.664807 | 0.428804 |
| CNOT3       | 17.6101  | 18.7752  | 18.0621   | 21.9177  | 24.1693  | 21.5026  |
| LOC401010   | 5.09113  | 7.3185   | 6.29392   | 6.90137  | 6.87391  | 6.92332  |
| LHX6        | 2.57523  | 4.86541  | 2.02705   | 2.24207  | 2.36496  | 1.6421   |
| LOC10050761 | 1.48335  | 3.3724   | 2.40623   | 3.5816   | 2.56434  | 7.1308   |
| SNORD18C    | 0        | 0        | 0         | 0        | 0        | 0        |
| SLC1A7      | 1.27412  | 2.58432  | 2.46803   | 1.54826  | 2.29128  | 1.37779  |
| MED28       | 25.5257  | 24.4042  | 31.0479   | 22.9662  | 24.1382  | 23.0779  |
| VSIG1       | 0.414631 | 0.589547 | 0.19581   | 0.655782 | 0.605907 | 0.514697 |
| MKI67IP     | 18.3722  | 18.7774  | 17.5692   | 18.5886  | 16.277   | 16.6487  |
| KRTAP5-5    | 3.23266  | 0.419289 | 0         | 23.145   | 1.60851  | 185.771  |
| CFHR2       | 0        | 0        | 0         | 0        | 0        | 0        |
| METTL1      | 12.6708  | 13.5338  | 9.66581   | 14.6538  | 10.9083  | 9.69332  |
| LOC10013050 | 0        | 0        | 0         | 0        | 0        | 0        |
| VIPR1       | 20.0648  | 27.9089  | 25.1254   | 34.2157  | 32.595   | 27.7683  |
| PPP4R4      | 0.682974 | 0.75927  | 0.307292  | 0.636331 | 0.724285 | 0.492878 |
| TCF7        | 6.6846   | 6.6425   | 5.71726   | 5.59861  | 7.66172  | 14.1407  |
| OR4S1       | 0        | 0        | 0         | 0        | 0        | 0        |
| ARFRP1      | 19.2743  | 31.7397  | 18.5273   | 25.825   | 23.8008  | 23.6517  |
| ELN         | 32.8923  | 28.7535  | 53.4153   | 28.6157  | 37.7581  | 41.6964  |
| SRP19       | 28.847   | 25.9181  | 23.5627   | 22.03    | 22.8968  | 21.4669  |
| SLC35G1     | 2.4075   | 1.71808  | 3.32452   | 1.86429  | 1.90715  | 1.97375  |
| DCAF15      | 16.6182  | 29.0661  | 20.4426   | 26.2756  | 30.5734  | 24.6512  |
| RGS10       | 29.0949  | 34.3172  | 25.9379   | 27.4966  | 32.5698  | 25.6887  |
| ZC4H2       | 3.68098  | 2.66608  | 3.62996   | 3.54254  | 3.98396  | 3.2759   |
| KCNIP4-IT1  | 0        | 0        | 0         | 0        | 0        | 0        |
| LRP5L       | 5.96683  | 8.11139  | 3.90585   | 5.8009   | 7.19922  | 5.53671  |
| DUSP8       | 3.0554   | 2.72055  | 2.59183   | 7.46748  | 4.15424  | 4.02405  |
| CPNE7       | 0.682425 | 2.20821  | 1.19797   | 1.99364  | 3.84335  | 2.20457  |
| FTX         | 5.51579  | 7.696    | 6.55672   | 8.60499  | 7.52001  | 6.39096  |
| SLURP1      | 133.353  | 99.9386  | 190.85    | 131.934  | 162.029  | 119.835  |

|             |           |           |           |           |           |           |
|-------------|-----------|-----------|-----------|-----------|-----------|-----------|
| KCNA4       | 0.0232765 | 0.0411593 | 0.0352409 | 0.109281  | 0.0592998 | 0.0435148 |
| DMRT1       | 0         | 0         | 0         | 0         | 0.0292772 | 0         |
| ACTR1B      | 41.8615   | 50.8257   | 41.0561   | 49.1871   | 51.6267   | 45.3908   |
| CALHM1      | 0         | 0         | 0.0737531 | 0.0304943 | 0.020684  | 0.0202376 |
| MIR4307     | 0         | 0         | 0         | 0         | 0         | 0         |
| LOC10013050 | 0.0507799 | 0.0224482 | 0.134542  | 0.0715223 | 0.177881  | 0.56959   |
| RCOR3       | 20.1572   | 19.3436   | 24.1837   | 19.0765   | 25.6848   | 21.8464   |
| XPO4        | 5.62045   | 3.83872   | 5.15766   | 4.17541   | 5.15379   | 4.23383   |
| NAA38       | 3.39706   | 3.65322   | 4.04188   | 3.16162   | 4.48005   | 3.53752   |
| LOC729013   | 12.2221   | 14.9832   | 11.0405   | 14.6589   | 12.4288   | 11.4565   |
| ZNF146      | 25.9778   | 23.7051   | 23.4461   | 21.8846   | 23.858    | 22.4518   |
| MYBPC3      | 0.115278  | 0.224227  | 0.174532  | 0.151541  | 0.279     | 0.0862034 |
| RAD51L3-RFF | 3.3396    | 5.17745   | 1.09525   | 3.9609    | 2.94919   | 1.3694    |
| EDAR        | 2.19192   | 1.46877   | 1.46717   | 2.29649   | 0.984579  | 1.179     |
| H6PD        | 17.5178   | 18.3658   | 28.4681   | 23.885    | 30.4611   | 22.9502   |
| C1orf191    | 1.14424   | 1.11283   | 1.03943   | 1.50419   | 1.23891   | 0.71304   |
| OSBPL6      | 2.74129   | 3.28537   | 3.70361   | 3.47055   | 3.13558   | 2.63213   |
| HS3ST5      | 0         | 0.0322547 | 0.110467  | 0.0342556 | 0.0232353 | 0.0454676 |
| SMC6        | 10.821    | 9.18329   | 8.14463   | 6.03007   | 8.91531   | 8.24729   |
| POLR2J2     | 11.1725   | 11.8811   | 13.7594   | 13.8039   | 7.36226   | 7.79871   |
| FCGR2C      | 2.94431   | 3.40116   | 6.03988   | 2.27412   | 3.55386   | 1.81994   |
| SPNS1       | 16.8964   | 30.2339   | 25.5669   | 30.2346   | 28.771    | 28.8885   |
| DEFB129     | 0         | 0         | 0         | 0         | 0         | 0         |
| KIAA1024    | 0.311015  | 0.112492  | 0.363862  | 0.252215  | 0.29713   | 0.308336  |
| AMACR       | 9.00479   | 7.25469   | 6.48161   | 8.03916   | 12.833    | 11.0702   |
| MIR378D2    | 0         | 0         | 0         | 0         | 0         | 0         |
| KRTAP10-7   | 1.62667   | 0.236405  | 0         | 37.127    | 0.331334  | 134.77    |
| NDUFS7      | 91.127    | 125.541   | 82.5114   | 110.534   | 97.7034   | 103.041   |
| MIR541      | 0         | 0         | 0         | 0         | 0         | 0         |
| ACVR1       | 12.6779   | 9.88492   | 12.1284   | 11.8717   | 9.25034   | 12.9574   |
| AMN1        | 3.89535   | 5.30765   | 5.49151   | 3.52055   | 5.61247   | 4.58122   |
| TSTD2       | 7.80982   | 6.51818   | 8.38314   | 6.55908   | 8.72376   | 6.85566   |
| SLC30A9     | 29.715    | 20.9159   | 24.8333   | 20.5353   | 22.3018   | 20.8011   |
| NCBP2       | 43.8961   | 47.886    | 41.0337   | 38.9924   | 40.5696   | 38.427    |
| CTSL1P8     | 0         | 0         | 0         | 0         | 0         | 0         |
| KIAA1539    | 9.21653   | 13.0785   | 13.5567   | 12.9659   | 13.2651   | 11.6093   |
| BFAR        | 10.0485   | 11.5669   | 11.262    | 10.477    | 9.49605   | 8.8438    |
| BLM         | 0.641797  | 0.62418   | 0.615402  | 0.622725  | 0.803903  | 0.666568  |
| CCT8        | 47.3348   | 41.9475   | 38.9088   | 41.456    | 48.1245   | 51.6369   |
| LOC10012829 | 0.626298  | 1.16575   | 0.598877  | 0.680939  | 1.36463   | 0.780565  |
| CD99        | 106.693   | 74.5927   | 85.5162   | 97.3552   | 83.93     | 94.3645   |
| ZNF239      | 2.48501   | 2.94021   | 1.64798   | 0.915005  | 1.66656   | 1.62965   |
| C11orf96    | 12.7628   | 20.0768   | 10.5398   | 18.9877   | 11.2957   | 9.76079   |

|             |          |           |           |          |           |           |
|-------------|----------|-----------|-----------|----------|-----------|-----------|
| TTYH3       | 13.4189  | 12.7141   | 12.0533   | 14.744   | 16.3915   | 23.2016   |
| MIR200A     | 0        | 0         | 0         | 0        | 0         | 0         |
| LUC7L3      | 115.918  | 128.289   | 116.606   | 113.691  | 159.722   | 120.699   |
| LOC10050636 | 0        | 0         | 0         | 0        | 0         | 0.159086  |
| BOLA2B      | 13.7052  | 17.8114   | 10.5362   | 15.4968  | 11.2521   | 11.2793   |
| MPP2        | 1.29708  | 1.43836   | 1.88059   | 2.58038  | 1.12016   | 1.47958   |
| SLC4A8      | 0.296406 | 0.416362  | 0.220858  | 0.200354 | 0.221925  | 0.224338  |
| HTR3B       | 0.115171 | 0         | 0         | 0        | 0         | 0         |
| DNAH1       | 2.09669  | 2.69522   | 3.51568   | 2.681    | 4.04263   | 2.66664   |
| GOLGA6D     | 0.145885 | 0.0638491 | 0.249584  | 0.22008  | 0.264264  | 0.219311  |
| H3F3AP4     | 226.96   | 244.233   | 254.383   | 278.404  | 253.048   | 253.898   |
| PAQR3       | 11.7559  | 8.26413   | 12.5858   | 8.65387  | 8.68805   | 7.7663    |
| FAM199X     | 10.0555  | 7.87438   | 9.63564   | 7.0492   | 8.32174   | 7.64393   |
| LOC10050731 | 4.02068  | 5.19231   | 3.88633   | 4.15176  | 7.20363   | 7.76398   |
| FGFR2       | 32.1899  | 29.4021   | 39.1368   | 42.0926  | 39.3426   | 31.2835   |
| LINC00273   | 0        | 0         | 0         | 0        | 0         | 0         |
| FOXO4       | 10.7492  | 10.9879   | 11.8602   | 9.60104  | 12.4544   | 12.3568   |
| KLHL21      | 28.4453  | 36.1488   | 29.5121   | 36.9514  | 33.4276   | 30.1757   |
| DNAJB5      | 5.33493  | 7.31262   | 3.47648   | 4.11638  | 3.63488   | 2.71304   |
| LOC10065295 | 96.3639  | 109.298   | 74.4777   | 112.478  | 101.021   | 89.5879   |
| LPP         | 8.9905   | 5.75012   | 7.7105    | 5.64213  | 7.62315   | 5.86242   |
| LOC400752   | 1.54264  | 2.07314   | 1.72833   | 1.8541   | 1.65063   | 1.80726   |
| ZNF395      | 24.4     | 26.9796   | 27.9273   | 27.0666  | 32.0547   | 25.4086   |
| MIR4274     | 0        | 0         | 0         | 0        | 0         | 0         |
| CHAC1       | 1.30715  | 1.1557    | 0.527631  | 13.8464  | 0.486171  | 103.301   |
| LOC10050721 | 0        | 0         | 0.0662307 | 0        | 0         | 0.0272601 |
| TH1L        | 42.1381  | 43.9666   | 39.1381   | 44.9547  | 40.8324   | 40.3921   |
| KIAA0889    | 3.45628  | 4.62165   | 5.2317    | 4.5433   | 4.92282   | 3.90425   |
| LOC10050654 | 0        | 0         | 0         | 0        | 0         | 0         |
| LOC441179   | 0.266081 | 0.290662  | 0.438289  | 0.177729 | 0.333971  | 0.393799  |
| MLLT1       | 19.4001  | 23.7319   | 23.0873   | 23.7702  | 25.0546   | 25.7692   |
| SDCBP       | 64.7878  | 62.0457   | 58.4922   | 47.5773  | 50.9533   | 42.2      |
| HMGXB3      | 13.6737  | 15.7283   | 13.7352   | 17.0714  | 14.0271   | 13.1221   |
| HTR6        | 0        | 0.0461084 | 0         | 0        | 0.0332151 | 0.0649962 |
| CIT         | 1.35657  | 2.12571   | 1.95373   | 2.52681  | 2.59192   | 2.30925   |
| ZBBX        | 0        | 0         | 0         | 0        | 0         | 0         |
| C17orf81    | 20.9216  | 23.0916   | 20.1162   | 17.4943  | 20.3085   | 17.8169   |
| PRRT2       | 2.15746  | 4.09243   | 5.40443   | 6.18795  | 7.17028   | 4.54664   |
| COA5        | 26.5209  | 26.8488   | 25.3368   | 23.8251  | 27.5295   | 23.1214   |
| DOLPP1      | 13.3008  | 13.2607   | 11.5153   | 11.1324  | 11.7917   | 12.5093   |
| DIS3        | 7.99116  | 6.86417   | 7.79551   | 5.77019  | 7.44169   | 6.04656   |
| TTY17C      | 3.83162  | 0         | 0         | 0        | 0         | 0         |
| PI4KA       | 23.0039  | 22.9892   | 24.7762   | 26.915   | 26.6082   | 28.061    |



|             |           |           |           |           |           |           |
|-------------|-----------|-----------|-----------|-----------|-----------|-----------|
| MIR548E     | 0         | 0         | 0         | 0         | 0         | 0         |
| FAM197Y4    | 0         | 0         | 0         | 0         | 0         | 0         |
| NUDT9       | 19.2208   | 15.8557   | 13.879    | 14.2379   | 13.7416   | 17.4012   |
| LOC150568   | 0.143016  | 0.189669  | 0.0541321 | 0         | 0.045544  | 0.0891217 |
| HOXA5       | 3.64646   | 3.56334   | 2.9541    | 3.3639    | 4.40043   | 3.7872    |
| SRPRB       | 25.8914   | 22.673    | 17.8084   | 19.4692   | 15.793    | 18.7538   |
| MIR376A1    | 0         | 0         | 0         | 0         | 0         | 0         |
| ESF1        | 9.13115   | 6.71407   | 7.0287    | 5.57166   | 7.14722   | 7.14621   |
| TOR3A       | 20.0557   | 24.483    | 19.426    | 20.7379   | 23.0541   | 17.8584   |
| ZNF485      | 2.20611   | 2.88143   | 1.51822   | 1.93026   | 2.49083   | 2.34333   |
| COG8        | 5.79994   | 6.39534   | 6.60707   | 5.76418   | 6.40315   | 6.24509   |
| FAM195B     | 44.3052   | 88.0462   | 54.4128   | 74.08     | 61.1732   | 65.7034   |
| PFN1P2      | 1.30823   | 1.33568   | 2.70401   | 0.959549  | 1.75374   | 0.939125  |
| FAM75D1     | 0.0799218 | 0.0529963 | 0.0756265 | 0.0187613 | 0.0127257 | 0.0498039 |
| PRPF38A     | 18.2576   | 15.4723   | 16.416    | 16.3304   | 18.5686   | 16.4589   |
| LOC10050733 | 0.030231  | 0.0801849 | 0.068655  | 0.0851592 | 0.115526  | 0.0188386 |
| C8orf42     | 2.9278    | 1.95364   | 3.05272   | 3.47534   | 4.18684   | 3.51126   |
| HECA        | 16.7098   | 14.6832   | 19.9109   | 17.5013   | 19.5458   | 21.2937   |
| TUBB2B      | 16.4839   | 14.8635   | 16.982    | 22.1047   | 16.1552   | 26.6861   |
| POLR3G      | 1.74312   | 1.67401   | 1.77464   | 1.63676   | 1.32076   | 2.69686   |
| LOC10028763 | 0         | 0         | 0         | 0         | 0         | 0         |
| PRAMEF8     | 0         | 0         | 0         | 0         | 0         | 0         |
| KRT74       | 7.81705   | 2.63147   | 1.62868   | 39.3602   | 2.32948   | 21.4289   |
| LOC285629   | 1.05038   | 0.464341  | 0.728883  | 1.02739   | 0.501746  | 0.381823  |
| C7orf26     | 14.5606   | 19.1183   | 15.7934   | 19.1819   | 19.0666   | 15.4386   |
| FAM172BP    | 0         | 0         | 0         | 0         | 0         | 0         |
| TARBP2      | 15.9155   | 21.2087   | 12.3297   | 19.4463   | 18.4032   | 17.6368   |
| UBE2Z       | 43.8025   | 43.3231   | 36.8057   | 36.0407   | 41.08     | 36.7763   |
| NAT9        | 24.8972   | 38.0306   | 26.9668   | 33.4147   | 36.3039   | 30.5449   |
| GNAT3       | 0         | 0.0959322 | 0         | 0         | 0         | 0         |
| RNASE9      | 0         | 0         | 0         | 0         | 0         | 0         |
| AHNAK2      | 27.2313   | 30.8232   | 53.2606   | 42.2749   | 50.9665   | 46.7247   |
| ZC3H6       | 2.94981   | 2.72331   | 3.84302   | 2.96876   | 4.27649   | 2.91471   |
| UBA1        | 78.4377   | 78.2459   | 86.0683   | 95.1973   | 89.2108   | 91.4394   |
| GTF3C1      | 17.9404   | 18.2411   | 36.4491   | 33.0001   | 23.4837   | 26.2251   |
| LINC00311   | 0.0586842 | 0.10377   | 0         | 0.165311  | 0.0747526 | 0.109709  |
| TSPY2       | 0         | 0         | 0         | 0         | 0         | 0         |
| B4GALT6     | 1.86586   | 1.89801   | 2.59711   | 1.50711   | 2.10841   | 1.48779   |
| KIAA1530    | 4.08473   | 5.60968   | 8.35041   | 6.44442   | 7.77835   | 5.55602   |
| EIF1AX      | 27.7726   | 21.5362   | 34.5429   | 24.845    | 33.6904   | 30.1537   |
| BRIX1       | 24.0621   | 20.6576   | 17.0272   | 16.9455   | 16.6024   | 15.7551   |
| ZNF732      | 0.466417  | 0.494851  | 0.318875  | 0.178833  | 0.297063  | 0.581684  |
| CRLF1       | 3.19311   | 5.54363   | 3.25224   | 13.3197   | 6.06415   | 14.8331   |

|             |           |           |           |           |           |           |
|-------------|-----------|-----------|-----------|-----------|-----------|-----------|
| SDPR        | 19.7841   | 13.4883   | 17.8063   | 7.07692   | 9.32946   | 7.91605   |
| MAP4        | 61.4717   | 55.0074   | 74.2712   | 58.8132   | 69.2943   | 68.7906   |
| RBM25       | 46.4954   | 44.3011   | 51.0873   | 42.0053   | 59.1257   | 45.3316   |
| LRRRC69     | 0.499495  | 0.294415  | 1.07134   | 0.469018  | 0.265109  | 0.518773  |
| LOC10012896 | 0         | 0.10218   | 0         | 0         | 0         | 0         |
| LOC641364   | 0         | 0         | 1.90E-11  | 0         | 0         | 0         |
| TNFRSF1B    | 12.48     | 13.9576   | 9.12443   | 5.85925   | 12.2456   | 6.38113   |
| ADIG        | 0         | 0         | 0         | 0         | 0         | 0         |
| ZNF490      | 1.21556   | 1.40062   | 1.60289   | 1.73784   | 1.82808   | 1.80166   |
| LOC10012903 | 14.3334   | 8.82839   | 12.7895   | 9.57722   | 12.5733   | 10.1451   |
| MIR4440     | 0         | 0         | 0         | 0         | 0         | 0         |
| SULT1C2     | 0.2235    | 0.126464  | 0.462009  | 0.307001  | 0.142351  | 0.118848  |
| FCRL5       | 0.0714363 | 0.0157795 | 0.0973611 | 0.0670776 | 0.104021  | 0.134696  |
| CRYM-AS1    | 0         | 0.117141  | 0.100297  | 0.248815  | 0.140641  | 0.0550421 |
| ATP11C      | 5.53037   | 3.82685   | 4.87522   | 2.31928   | 4.22141   | 3.24317   |
| LOC10050604 | 2.73672   | 3.5077    | 6.34E-07  | 0.0207025 | 0.686614  | 2.53037   |
| SERPINB12   | 12.2307   | 2.92699   | 9.53716   | 3.45396   | 12.9439   | 13.0084   |
| ALAS1       | 48.5372   | 44.558    | 37.9003   | 40.0648   | 32.1415   | 38.6167   |
| ITGA1       | 3.78666   | 1.77244   | 5.76919   | 1.72107   | 2.48871   | 2.18396   |
| MYF5        | 0         | 0         | 0         | 0         | 0         | 0         |
| LOC392364   | 0         | 0         | 0         | 0         | 0         | 0.0719283 |
| C3orf54     | 12.4087   | 25.1048   | 15.148    | 28.5516   | 20.5767   | 19.5752   |
| LOC10065294 | 4.94094   | 3.83804   | 5.77969   | 4.49781   | 7.62737   | 7.92883   |
| NAPB        | 7.14213   | 6.60469   | 7.10695   | 7.29878   | 8.21367   | 7.10849   |
| SAMD15      | 0.458727  | 0.450642  | 0.385843  | 0.0478597 | 0.324629  | 0.158811  |
| LOC10065282 | 0         | 0         | 0.0587648 | 0.0364457 | 0.0247208 | 0         |
| LOC150776   | 13.6089   | 21.804    | 11.7356   | 15.85     | 26.858    | 22.3036   |
| NBLA00301   | 0         | 0         | 0         | 0         | 0         | 0         |
| GCG         | 0         | 0         | 0         | 0         | 0         | 0         |
| CCR3        | 0.0614169 | 0.0543009 | 0.209221  | 0.307576  | 0.244484  | 0.425258  |
| CLDN12      | 12.4487   | 8.05697   | 9.30054   | 6.95241   | 8.395     | 9.56383   |
| ZNF880      | 2.38637   | 1.95064   | 3.85158   | 3.00178   | 2.23682   | 2.04825   |
| CXXC4       | 0.168864  | 0.298599  | 0.383494  | 0         | 0.107551  | 0         |
| EI24        | 126.708   | 112.372   | 102.968   | 105.215   | 90.634    | 97.2925   |
| LOC10050756 | 0.965982  | 1.13435   | 0.57927   | 1.79038   | 0.993278  | 0.689584  |
| CSNK1D      | 38.4259   | 47.5481   | 41.7726   | 48.2725   | 45.7329   | 41.6102   |
| MIR372      | 0         | 0         | 0         | 0         | 0         | 0         |
| ZNF81       | 1.27956   | 0.619018  | 1.39813   | 0.804771  | 1.3839    | 1.08322   |
| GBP7        | 0.123617  | 0.327884  | 0         | 0         | 0.0524884 | 0.0256777 |
| DAB2IP      | 22.1834   | 19.1238   | 20.3908   | 21.8572   | 21.1827   | 19.8051   |
| MIR4739     | 0         | 0         | 0         | 0         | 0         | 0         |
| NDUFA7      | 60.2792   | 79.9426   | 50.5343   | 54.964    | 48.5455   | 52.4647   |
| FBF1        | 4.45271   | 6.21836   | 8.29276   | 8.67087   | 9.44244   | 9.5697    |

|             |             |            |           |           |           |           |
|-------------|-------------|------------|-----------|-----------|-----------|-----------|
| LOC10050720 | 1.76036     | 1.91557    | 2.35768   | 0.890049  | 1.46616   | 1.0126    |
| DMAP1       | 20.6978     | 35.804     | 27.2295   | 36.9179   | 33.0736   | 32.2999   |
| APOD        | 1372.59     | 525.457    | 517.253   | 383.141   | 603.351   | 415.202   |
| BTBD2       | 35.3158     | 51.8039    | 46.6848   | 63.5322   | 59.5066   | 51.7641   |
| ZCCHC16     | 0           | 0          | 0         | 0         | 0         | 0.0209605 |
| QARS        | 122.929     | 151.503    | 121.856   | 144.931   | 132.138   | 120.92    |
| CMTM4       | 20.4776     | 14.6224    | 16.8924   | 21.2651   | 16.4018   | 14.9707   |
| PION        | 7.87107     | 8.06074    | 6.32654   | 4.65136   | 9.85206   | 6.4957    |
| TRAF1       | 7.77074     | 8.78027    | 6.77908   | 4.64081   | 10.0137   | 7.71468   |
| MAP3K8      | 7.14158     | 6.99368    | 9.43057   | 7.2471    | 14.0535   | 8.1423    |
| CARD11      | 1.37947     | 1.21964    | 0.757934  | 0.292487  | 1.47377   | 0.651652  |
| CCDC109B    | 16.2005     | 17.2497    | 13.4507   | 14.5577   | 16.0875   | 14.6004   |
| CCDC14      | 27.2019     | 25.837     | 27.0281   | 27.687    | 33.0374   | 34.3992   |
| SOAT2       | 0.198613    | 0.175601   | 0.0751756 | 0.279742  | 0.28462   | 0.309418  |
| OR6C3       | 0           | 0          | 0         | 0         | 0         | 0         |
| LOC10050670 | 24.4645     | 21.728     | 28.6443   | 20.5142   | 30.7252   | 23.7455   |
| RARS2       | 21.6796     | 22.6146    | 21.2056   | 19.0175   | 20.7844   | 18.6767   |
| LINC00466   | 0.175383    | 0          | 0         | 0         | 0         | 0         |
| PIPSL       | 10.9861     | 12.905     | 10.984    | 11.9782   | 12.1513   | 11.1624   |
| PNKD        | 51.4572     | 59.219     | 51.4791   | 55.6414   | 49.4644   | 52.6533   |
| DPPA4       | 0.0709165   | 0.1254     | 0.0805263 | 0.0332948 | 0.0677507 | 0.0220961 |
| KPNA4       | 12.6843     | 10.0978    | 11.1081   | 9.72594   | 8.92342   | 8.63897   |
| ADPRHL1     | 2.21775     | 3.0035     | 3.44335   | 4.25583   | 1.98052   | 1.94351   |
| CASP6       | 11.4021     | 10.8386    | 7.53419   | 8.44772   | 9.59163   | 9.9181    |
| PLA2G16     | 78.6005     | 129.27     | 107.386   | 67.0814   | 48.3066   | 25.8847   |
| TIMP1       | 99.4528     | 123.094    | 107.751   | 83.5026   | 105.821   | 74.5992   |
| LOC642373   | 1.17788     | 1.33317    | 1.96389   | 1.10601   | 2.95114   | 1.92072   |
| FLJ37505    | 0           | 0.090378   | 0         | 0         | 0         | 0         |
| SHPRH       | 3.27491     | 1.87255    | 3.41831   | 2.53455   | 2.73882   | 2.52118   |
| P2RY2       | 2.92335     | 3.28298    | 2.76414   | 2.93077   | 2.77175   | 3.01043   |
| METTL16     | 7.39102     | 7.21169    | 6.77958   | 6.68996   | 7.28372   | 6.60783   |
| PFN2        | 22.4936     | 18.15      | 17.8471   | 21.5622   | 19.0955   | 21.5648   |
| LOC643401   | 0           | 0          | 0.0783603 | 0         | 0         | 0         |
| FLJ20021    | 4.30712     | 9.30866    | 6.03799   | 9.28696   | 12.9033   | 11.1337   |
| LOC10050710 | 2.938820049 | 1.99435    | 1.09053   | 0.928891  | 0.309229  | 0.439724  |
| PHF23       | 20.2536     | 17.2355    | 17.0186   | 14.7388   | 15.8988   | 16.8809   |
| EFHA2       | 3.37564     | 2.29247    | 2.96276   | 1.69968   | 2.30576   | 1.98161   |
| ADIPOR2     | 45.248      | 33.0442    | 42.7836   | 35.972    | 34.0684   | 31.5085   |
| C17orf67    | 1.8534      | 2.86766    | 2.57223   | 2.17539   | 2.55762   | 1.05871   |
| STK4        | 8.32801     | 6.89624    | 8.14312   | 7.29571   | 9.58976   | 6.75973   |
| LOC728419   | 0           | 0.00739837 | 0         | 0         | 0         | 0.0125148 |
| GPR155      | 4.86728     | 5.18689    | 5.07967   | 5.11875   | 6.29912   | 5.38676   |
| TCF19       | 11.7771     | 13.4435    | 7.91021   | 10.8698   | 11.9004   | 11.2558   |

|             |          |          |           |           |           |           |
|-------------|----------|----------|-----------|-----------|-----------|-----------|
| B3GAT1      | 4.3221   | 0.494423 | 0.36024   | 0.420782  | 0.710829  | 0.973361  |
| LIN7A       | 0.363494 | 0.401723 | 0.275167  | 0.511972  | 0.115756  | 0.0566284 |
| AMY1C       | 2.15343  | 1.89716  | 2.13178   | 2.06299   | 2.34708   | 1.71298   |
| LOC10050649 | 0.251514 | 0.489221 | 0.571193  | 0.377869  | 0.35242   | 0.18808   |
| TMEM185A    | 8.17422  | 9.43089  | 9.10156   | 9.85162   | 10.7123   | 9.27992   |
| SPOCK2      | 2.4096   | 1.99416  | 2.25785   | 0.77971   | 3.41342   | 1.47953   |
| MVP         | 46.107   | 64.3748  | 46.3342   | 37.1647   | 55.5626   | 36.7681   |
| MAGEA4      | 0        | 0        | 0         | 0         | 0         | 0         |
| LOC10013087 | 0        | 0        | 0.105127  | 0         | 0.120388  | 0.0288464 |
| PLSCR2      | 0        | 0.326196 | 0         | 0         | 0.0587454 | 0         |
| FAM116B     | 7.05691  | 8.92626  | 5.88803   | 9.09306   | 10.7279   | 10.4001   |
| GZMH        | 4.29537  | 2.96818  | 0.711291  | 0         | 1.19689   | 0.334587  |
| LOC10050637 | 0        | 0        | 2.11E-241 | 2.98E-289 | 0.249259  | 0.238972  |
| KIAA0753    | 5.99338  | 5.90473  | 6.31735   | 7.03996   | 7.85831   | 6.59131   |
| IRF5        | 7.62119  | 8.78407  | 7.94018   | 10.4021   | 15.593    | 14.6506   |
| KIF27       | 1.33069  | 1.23158  | 1.62112   | 0.917542  | 1.46983   | 1.17902   |
| HSD17B14    | 3.24905  | 6.14417  | 3.41604   | 2.96606   | 3.79378   | 3.3182    |
| NCK2        | 26.9685  | 27.3283  | 26.889    | 33.2925   | 31.3857   | 39.4217   |
| HSD3B2      | 0.98832  | 0.822541 | 0.489778  | 0.35054   | 0.276742  | 0.500682  |
| PPP2R5A     | 54.537   | 46.9377  | 51.1954   | 43.0498   | 37.0925   | 35.3365   |
| HPCAL1      | 15.6016  | 20.8979  | 11.2847   | 16.0216   | 13.8549   | 13.9668   |
| LMX1A       | 0.297416 | 0.469102 | 0.512501  | 0.279269  | 0.207875  | 0.476691  |
| MRPS30      | 12.5535  | 10.5945  | 11.1829   | 9.8825    | 10.6202   | 9.16613   |
| METTL22     | 6.80791  | 8.00543  | 6.64818   | 6.77607   | 9.55365   | 8.23026   |
| GLYATL1     | 4.83211  | 4.20487  | 2.71984   | 2.25681   | 1.99144   | 1.92501   |
| PCDHB7      | 0.632686 | 0.44388  | 0.343694  | 0.486962  | 0.35821   | 0.359923  |
| FDPSL2A     | 2.64496  | 1.60555  | 1.42221   | 1.28593   | 1.37906   | 1.81891   |
| NKX2-1      | 0        | 0        | 0         | 0         | 0         | 0         |
| ANK1        | 0.724555 | 0.571672 | 0.319148  | 0.16506   | 0.381542  | 0.433325  |
| BAZ1B       | 13.3403  | 10.8821  | 12.9637   | 10.2942   | 11.1461   | 9.28768   |
| LOC641298   | 3.48016  | 1.92281  | 4.20625   | 3.04884   | 3.43631   | 2.69656   |
| COL1A1      | 116.987  | 114.516  | 415.354   | 125.563   | 195.133   | 224.653   |
| ZNF443      | 2.93862  | 3.80836  | 3.27972   | 2.2641    | 4.17499   | 3.92054   |
| MAFA        | 0.256513 | 0.188994 | 0.161818  | 0.602153  | 0.108916  | 0.346337  |
| LOC10065287 | 13.0358  | 18.9459  | 10.4458   | 16.2511   | 11.3802   | 8.46401   |
| RPL39       | 321.468  | 606.238  | 250.086   | 714.672   | 373.029   | 322.676   |
| FAM192A     | 25.1593  | 30.3923  | 23.1308   | 27.77     | 31.9367   | 27.3168   |
| OPA3        | 5.10304  | 5.30908  | 5.0416    | 5.90996   | 4.97111   | 5.21284   |
| RCSD1       | 3.72245  | 3.7907   | 3.89979   | 1.84128   | 3.0694    | 2.25754   |
| EP400NL     | 2.85657  | 2.7104   | 2.68987   | 2.15891   | 2.97311   | 2.90894   |
| BASP1P1     | 0        | 0        | 0         | 0         | 0         | 0         |
| GLTSCR2     | 214.205  | 402.05   | 294.764   | 446.673   | 341.454   | 306.448   |
| UBA6        | 13.0294  | 11.5591  | 11.3204   | 8.89777   | 12.8721   | 10.3061   |

|             |           |           |           |           |           |           |
|-------------|-----------|-----------|-----------|-----------|-----------|-----------|
| PER4        | 0         | 0         | 0         | 0         | 0         | 0         |
| CCT6B       | 3.98804   | 4.65777   | 3.34698   | 5.14425   | 2.84549   | 2.31371   |
| SMCHD1      | 9.31795   | 7.21579   | 8.58178   | 6.60816   | 8.00553   | 7.18      |
| ETV5        | 6.12429   | 5.70853   | 5.69632   | 7.95724   | 5.97184   | 6.61213   |
| ZNF20       | 2.68641   | 2.41248   | 2.47859   | 2.07126   | 2.57684   | 2.78058   |
| RPL23AP7    | 5.69031   | 8.03336   | 8.38628   | 7.13644   | 7.19374   | 6.75539   |
| DIABLO      | 16.7695   | 19.8201   | 16.5523   | 19.2338   | 16.6795   | 14.7839   |
| SERPINH1    | 47.5577   | 52.8985   | 57.4127   | 46.1694   | 39.9336   | 41.4741   |
| FBXL8       | 6.48636   | 12.4793   | 10.3045   | 10.0102   | 12.7483   | 11.0847   |
| ZFP91-CNTF  | 0         | 0         | 2.79E-196 | 5.65E-232 | 3.53E-259 | 0         |
| LOC1005065: | 3.31232   | 4.88091   | 12.6765   | 16.415    | 16.1741   | 13.1873   |
| RPE65       | 0.192773  | 0.579487  | 0.087558  | 0.0724042 | 0.171889  | 0.168179  |
| RNASE4      | 62.9323   | 54.5951   | 75.0417   | 50.4269   | 63.3389   | 45.6849   |
| LOC728743   | 5.64591   | 7.44884   | 5.20408   | 6.26282   | 6.93098   | 5.76052   |
| RPL30       | 1743.91   | 2564.65   | 2214.12   | 2937.91   | 2139.06   | 1943.98   |
| CABLES2     | 3.33401   | 3.9303    | 3.20864   | 4.46533   | 3.95061   | 3.84923   |
| ZBTB43      | 7.97276   | 7.83094   | 7.42342   | 7.68645   | 7.88278   | 7.42703   |
| LOC284344   | 0         | 0         | 0.0463705 | 0         | 0         | 0         |
| ITPK1-AS1   | 0.0411366 | 0.0181852 | 0         | 0         | 0         | 0.0128173 |
| MARS2       | 4.33692   | 3.94804   | 4.47471   | 3.3785    | 3.29419   | 2.94282   |
| CIR1        | 23.7352   | 26.5158   | 23.4554   | 21.244    | 27.0693   | 22.7326   |
| PPFIA3      | 8.57988   | 8.63584   | 11.2229   | 14.19     | 12.9637   | 11.9948   |
| CAPN14      | 0.3837    | 0.361859  | 0.716475  | 1.48919   | 0.521345  | 1.11583   |
| RAP2C       | 14.4928   | 13.9326   | 16.8888   | 16.0785   | 16.106    | 15.6037   |
| SLC5A7      | 0.0749251 | 0         | 0.0283594 | 0.0351767 | 0.0238601 | 0         |
| C7orf10     | 1.28533   | 0.934938  | 1.85734   | 1.05443   | 1.36475   | 0.494737  |
| C6orf58     | 0.18728   | 0.0827904 | 0.0708858 | 0.0879263 | 0.119279  | 0.0583524 |
| SH3BGRL3    | 290.118   | 377.915   | 263.219   | 354.978   | 330.916   | 300.528   |
| PAIP2B      | 6.2475    | 4.8533    | 7.4729    | 6.33618   | 7.0696    | 7.38948   |
| POLR3A      | 4.9873    | 4.68902   | 5.57064   | 4.54804   | 5.30017   | 4.6036    |
| PSMB6       | 157.403   | 155.444   | 126.695   | 143.831   | 124.473   | 144.826   |
| LOR         | 369.037   | 225.749   | 578.488   | 748.558   | 860.39    | 840.288   |
| DNAJB2      | 74.1314   | 87.1207   | 95.5909   | 105.595   | 105.939   | 116.614   |
| TSPY4       | 0         | 0         | 0         | 0         | 0         | 0         |
| LOC1005062: | 0         | 0         | 0         | 0         | 0         | 0         |
| GATSL1      | 0.485908  | 0         | 0.45604   | 0.0558685 | 0.458532  | 0.669707  |
| ZNF736      | 1.46983   | 0.823034  | 2.48496   | 1.61017   | 2.49637   | 2.44249   |
| KRT17       | 1295.47   | 1323.43   | 1190.94   | 1507.19   | 1015.92   | 2109.97   |
| MIR3908     | 0         | 0         | 0         | 0         | 0         | 0         |
| LOC1005071( | 0.284668  | 0.335581  | 0.383103  | 0.207899  | 0.221597  | 0.394207  |
| KIAA1211    | 0.27147   | 0.156011  | 0.154128  | 0.114708  | 0.216126  | 0.211461  |
| UMPS        | 5.87623   | 6.01577   | 5.72549   | 5.52867   | 5.91603   | 4.969     |
| NAP1L4      | 50.8774   | 55.75     | 48.138    | 54.8073   | 57.851    | 54.1641   |

|             |           |           |           |          |           |           |
|-------------|-----------|-----------|-----------|----------|-----------|-----------|
| EMILIN3     | 15.6746   | 21.3249   | 17.978    | 22.4129  | 11.5453   | 12.1579   |
| COBLL1      | 13.5426   | 8.47328   | 16.9578   | 11.4833  | 10.2106   | 9.22079   |
| OR4F15      | 0         | 0         | 0         | 0        | 0         | 0         |
| GATC        | 13.1392   | 13.8698   | 12.2679   | 14.6462  | 13.9556   | 11.9767   |
| LOC645212   | 7.2226    | 9.86151   | 8.4846    | 8.85267  | 11.0757   | 8.27257   |
| PDE4A       | 4.53706   | 4.93898   | 5.45924   | 3.70362  | 6.46285   | 3.48104   |
| TEX11       | 0         | 0.155211  | 0         | 0        | 0.0209639 | 0.0205114 |
| ADAM18      | 0         | 0         | 0         | 0        | 0         | 0         |
| IRF8        | 6.40966   | 7.46713   | 6.59321   | 3.78816  | 9.26933   | 5.02803   |
| MIR519A2    | 0         | 0         | 0         | 0        | 0         | 0         |
| LOC388796   | 14.3293   | 23.1775   | 15.5084   | 23.8254  | 18.2476   | 14.7073   |
| OVCH1       | 0         | 0         | 0.0217927 | 0        | 0.0183352 | 0.0358789 |
| MIR3189     | 0         | 0         | 0         | 0        | 0         | 0         |
| POLR1B      | 6.16824   | 4.96671   | 4.1411    | 3.96467  | 3.54273   | 3.70653   |
| FAM196A     | 0.0440213 | 0.0389209 | 0.0166622 | 0.103338 | 0.0420562 | 0.356619  |
| LOC10065284 | 0.0996351 | 0.113784  | 0.309781  | 0.116945 | 0.734237  | 0.536727  |
| VTA1        | 16.7533   | 13.708    | 17.2018   | 13.9291  | 14.8219   | 15.2992   |
| SLC5A5      | 0         | 0.072814  | 0.229114  | 0.025777 | 0.0699373 | 0.0513208 |
| AKAP12      | 7.65888   | 5.90339   | 7.67695   | 3.64294  | 4.60463   | 2.99943   |
| RNASEH2C    | 16.5412   | 24.8198   | 16.3969   | 22.6297  | 22.0311   | 21.5052   |
| MCM6        | 8.8979    | 9.59723   | 8.77032   | 8.35499  | 8.95771   | 8.09768   |
| RAD50       | 11.5087   | 8.27063   | 11.6892   | 8.00985  | 11.4922   | 9.53231   |
| ZSCAN29     | 5.86961   | 5.53753   | 6.14035   | 4.72412  | 6.93182   | 5.86511   |
| CC2D2A      | 2.59171   | 2.99283   | 2.70145   | 2.51197  | 3.02203   | 2.43124   |
| LOC151658   | 0         | 0         | 0         | 0        | 0         | 0         |
| RSU1        | 27.4482   | 24.2934   | 20.5699   | 16.7805  | 19.1602   | 16.6633   |
| PLA2R1      | 24.053    | 11.9487   | 26.993    | 23.5405  | 18.3458   | 20.6815   |
| ARHGAP8     | 10.2895   | 9.54912   | 5.54943   | 9.14222  | 5.87217   | 11.3683   |
| DBI         | 1117.06   | 939.746   | 665.068   | 697.067  | 645.812   | 812.98    |
| APOL2       | 27.9554   | 34.799    | 16.5163   | 12.4928  | 23.4036   | 16.5076   |
| DNAL4       | 12.4734   | 15.1317   | 13.2304   | 16.0023  | 15.0574   | 14.3256   |
| LOC10028891 | 7.54473   | 16.9205   | 7.94024   | 13.3048  | 10.8998   | 9.17377   |
| MIR4709     | 0         | 0         | 0         | 0        | 0         | 0         |
| RNF166      | 14.5326   | 18.7247   | 13.9815   | 15.0521  | 22.0135   | 14.5484   |
| MIR625      | 0         | 0         | 0         | 0        | 0         | 0         |
| CSDAP1      | 32.2849   | 32.8259   | 39.1037   | 36.0973  | 37.5074   | 35.1702   |
| MGEA5       | 73.7636   | 81.17     | 84.6781   | 74.9169  | 93.1283   | 72.5356   |
| GRIN3A      | 0.232027  | 0.21594   | 0.258846  | 0.183469 | 0.451115  | 0.235909  |
| SDR16C6P    | 0         | 0         | 0         | 0        | 0         | 0         |
| FBXO6       | 12.3595   | 14.0409   | 8.88572   | 7.97458  | 9.45497   | 6.49717   |
| PTRH1       | 15.3679   | 15.6217   | 15.8216   | 20.4908  | 14.3882   | 23.4627   |
| LGALS3      | 391.477   | 410.748   | 452.203   | 516.766  | 399.848   | 442.155   |
| POU2F2      | 0.75313   | 0.805316  | 0.946083  | 0.959125 | 1.41495   | 0.767474  |

|             |          |          |           |           |          |          |
|-------------|----------|----------|-----------|-----------|----------|----------|
| FAM63A      | 17.4363  | 17.1082  | 18.4008   | 15.4384   | 19.9343  | 21.5483  |
| HSPA4L      | 8.98154  | 4.83941  | 6.50147   | 6.81497   | 6.35599  | 7.19872  |
| NPL         | 17.1741  | 11.9502  | 8.13237   | 6.6888    | 7.84072  | 7.92257  |
| NUDT12      | 9.55641  | 8.62364  | 7.70373   | 4.71165   | 8.16923  | 7.32536  |
| CRIP2       | 96.1445  | 154.704  | 124.356   | 186.849   | 148.73   | 198.879  |
| ETV6        | 18.857   | 19.3426  | 16.1862   | 15.3356   | 15.491   | 11.2928  |
| CCDC28A     | 12.0928  | 15.1509  | 13.1375   | 14.8757   | 14.6306  | 11.6672  |
| CAT         | 86.86    | 83.3686  | 116.568   | 82.2665   | 82.461   | 72.3538  |
| ZNF670      | 1.30855  | 1.04295  | 1.27923   | 1.21582   | 0.943349 | 1.03879  |
| B3GNT7      | 0.811727 | 1.05259  | 1.12655   | 0.406506  | 1.32695  | 0.623862 |
| SNORA27     | 158.136  | 0        | 299.275   | 445.463   | 201.436  | 147.816  |
| NUCB1       | 91.5192  | 100.308  | 111.41    | 104.515   | 100.048  | 86.6773  |
| AKTIP       | 17.191   | 16.4651  | 17.5562   | 15.1846   | 16.7326  | 17.8347  |
| LOC10050724 | 0        | 0.087518 | 0.0374668 | 0.139421  | 0.094568 | 0.123369 |
| BCL2L10     | 4.66563  | 2.9118   | 3.53191   | 1.93277   | 4.10775  | 2.7364   |
| LOC441204   | 0.781216 | 0.978494 | 0.887077  | 0.427904  | 1.57561  | 1.13591  |
| CENPA       | 2.88472  | 3.48895  | 1.83952   | 1.64167   | 3.18953  | 3.73263  |
| TEX19       | 0        | 0        | 0         | 0.0503341 | 0        | 0        |
| PRDM5       | 1.09979  | 0.720269 | 1.54175   | 0.535465  | 0.933948 | 1.06609  |
| SLC35E1     | 18.7642  | 16.4229  | 17.7128   | 16.8023   | 16.0833  | 14.6517  |
| CT47A11     | 0        | 0        | 0         | 0         | 0        | 0        |
| MIR4759     | 0        | 0        | 0         | 0         | 0        | 0        |
| CYP1B1-AS1  | 0.179477 | 1.00499  | 0.769901  | 1.29203   | 1.56223  | 3.0943   |
| TTC5        | 5.27636  | 3.73202  | 4.96126   | 4.27645   | 6.08435  | 6.2299   |
| FAM98A      | 20.0934  | 17.1527  | 16.2598   | 15.0323   | 13.4247  | 15.1802  |
| FAM105B     | 5.71828  | 5.21507  | 5.33821   | 5.06481   | 5.50892  | 5.03067  |
| SNORD84     | 0        | 0        | 0         | 0         | 0        | 0        |
| STARD7      | 69.039   | 53.4742  | 55.7001   | 57.1195   | 55.4461  | 49.2433  |
| NDC80       | 2.16853  | 2.95928  | 1.78434   | 1.37223   | 2.19183  | 1.76262  |
| MIR4472-1   | 0        | 0        | 0         | 0         | 0        | 0        |
| LOC10013160 | 0.11586  | 0        | 0.0877069 | 0         | 0        | 0        |
| GPR160      | 5.99991  | 2.6297   | 2.09629   | 2.26316   | 1.73105  | 1.27825  |
| TRIM68      | 7.65635  | 6.05532  | 6.47511   | 4.409     | 7.54315  | 5.96389  |
| GSTA5       | 0        | 0        | 0         | 0         | 0        | 0        |
| PPID        | 24.9007  | 22.0157  | 21.9989   | 21.4552   | 22.2105  | 26.2761  |
| SNORA21     | 49.2882  | 87.155   | 111.934   | 92.5617   | 251.135  | 30.7143  |
| ARHGEF9     | 9.36782  | 7.89464  | 9.51507   | 10.3282   | 10.9838  | 9.91449  |
| LOC10028829 | 0        | 0        | 0         | 0         | 0        | 0        |
| SNUPN       | 16.0528  | 19.3739  | 17.2387   | 14.9296   | 14.9132  | 13.5665  |
| CDH20       | 0.69896  | 0.77247  | 1.05823   | 1.11573   | 0.957118 | 0.217781 |
| CHCHD6      | 13.1202  | 18.404   | 16.4261   | 19.3087   | 15.2664  | 15.9589  |
| LARP1B      | 7.96116  | 7.24493  | 7.92509   | 6.57444   | 6.73791  | 7.09015  |
| ADH1A       | 3.47978  | 8.97818  | 3.93707   | 1.41553   | 3.44527  | 1.99352  |

|             |          |           |           |           |           |           |
|-------------|----------|-----------|-----------|-----------|-----------|-----------|
| CNNM3       | 7.61557  | 7.3059    | 7.8749    | 9.14137   | 10.4008   | 9.38133   |
| GTPBP4      | 20.2796  | 16.6543   | 14.836    | 15.1661   | 15.1625   | 13.6364   |
| SEC31A      | 39.82    | 32.5783   | 39.3597   | 34.3034   | 34.9428   | 33.3162   |
| SNORD113-7  | 0        | 0         | 0         | 0         | 0         | 0         |
| MAPRE2      | 16.9864  | 17.2602   | 18.3296   | 17.9331   | 17.1173   | 12.888    |
| REL         | 1.43612  | 0.892239  | 2.02739   | 1.02048   | 2.17543   | 1.81404   |
| LOC10013011 | 0        | 0.0352206 | 0.0603123 | 0         | 0.0253718 | 0.0496483 |
| GTF3C3      | 10.4947  | 8.90508   | 11.9011   | 9.92371   | 10.3438   | 9.26108   |
| C6orf10     | 0        | 0.0421974 | 0.108389  | 0.0448151 | 0         | 0         |
| LOC143666   | 2.62456  | 4.42203   | 2.24922   | 3.58039   | 5.0148    | 4.5671    |
| NAALAD2     | 3.15699  | 4.15945   | 2.81165   | 1.59843   | 2.85835   | 2.14089   |
| LOC10012978 | 32.6305  | 34.2751   | 17.1283   | 25.3862   | 11.5116   | 11.545    |
| SLC30A1     | 11.4104  | 9.09306   | 10.4969   | 7.97555   | 7.72357   | 9.98014   |
| ASGR1       | 0.719587 | 1.8816    | 1.96806   | 1.92007   | 2.00642   | 1.42414   |
| RNF212      | 1.21903  | 1.57911   | 2.07058   | 2.25048   | 0.6829    | 1.40106   |
| LOC220729   | 22.2506  | 18.9639   | 21.4922   | 19.4319   | 24.1397   | 21.8778   |
| FAM181A     | 0.331282 | 0.0650874 | 0.284951  | 0.432042  | 0.52098   | 0.286725  |
| SLC19A1     | 1.87753  | 3.39068   | 2.92947   | 2.53859   | 2.41614   | 2.65106   |
| CCDC169-SO  | 6.42E-07 | 0.191273  | 7.74E-17  | 0.395174  | 0.162533  | 3.98E-17  |
| NFATC2IP    | 20.7614  | 20.8954   | 19.8173   | 18.2407   | 24.2797   | 20.7567   |
| MIR3689E    | 0        | 0         | 0         | 0         | 0         | 0         |
| LOC10050573 | 0.135474 | 0         | 0.13674   | 0.127208  | 0         | 0.0562812 |
| FAHD2A      | 19.362   | 18.6247   | 17.5155   | 19.2204   | 18.318    | 17.0759   |
| NADSYN1     | 48.7919  | 53.4852   | 42.95     | 47.0517   | 43.6598   | 58.6155   |
| SETD7       | 18.6256  | 13.995    | 21.8586   | 13.5375   | 16.1772   | 12.6895   |
| LOC10050594 | 0.277558 | 0.245399  | 0         | 0         | 0         | 0         |
| HIST2H3C    | 0        | 0.139481  | 0.238849  | 0.6666    | 0.200955  | 0.0983089 |
| KY          | 4.06807  | 5.29105   | 5.09016   | 6.47165   | 6.71298   | 4.74536   |
| MRPL49      | 57.4247  | 48.6044   | 45.3982   | 49.7204   | 44.1633   | 47.094    |
| LOC10065286 | 0.11824  | 0.159765  | 0.8524    | 0.354317  | 0.724117  | 0.62372   |
| ZNF318      | 5.83889  | 5.81161   | 6.51804   | 4.75977   | 6.65315   | 5.06297   |
| RN5S5       | 28.9436  | 161.314   | 75.4336   | 404.324   | 18.4343   | 41.6724   |
| KRTAP4-6    | 10.1011  | 3.94793   | 0.166231  | 104.745   | 1.39858   | 1002.28   |
| LOC93463    | 0        | 0         | 0         | 0         | 0         | 0         |
| PLA2G4D     | 18.267   | 11.6226   | 16.627    | 16.8696   | 25.0479   | 45.0949   |
| CNNM4       | 5.83603  | 4.67945   | 6.80967   | 7.35067   | 8.40811   | 7.23591   |
| SLC43A3     | 15.2365  | 24.1742   | 17.5893   | 18.5484   | 22.0467   | 16.5734   |
| MIR595      | 0        | 0         | 0         | 0         | 0         | 0         |
| LPAR5       | 5.31785  | 4.90008   | 5.2369    | 6.56453   | 7.50973   | 7.65042   |
| C1orf27     | 13.1177  | 11.005    | 10.9865   | 8.48129   | 11.3754   | 11.2736   |
| MAU2        | 19.2975  | 21.2478   | 20.8883   | 23.4626   | 27.9011   | 21.9556   |
| ZNF638-IT1  | 0.717807 | 0.373317  | 1.18266   | 0.872247  | 1.07571   | 0.420994  |
| MIR4764     | 0        | 0         | 0         | 0         | 0         | 0         |



|             |           |           |          |           |           |           |
|-------------|-----------|-----------|----------|-----------|-----------|-----------|
| PAOX        | 3.03867   | 4.7743    | 4.42474  | 5.04016   | 5.55457   | 4.99881   |
| OR7D2       | 0.0306629 | 0.0542204 | 0.023212 | 0         | 0.0781175 | 0.0191078 |
| IQCC        | 3.9738    | 4.79602   | 4.44128  | 5.07343   | 5.1644    | 4.47424   |
| MSRB2       | 11.5604   | 11.192    | 9.80144  | 10.1495   | 8.06236   | 7.45609   |
| SHOC2       | 17.2103   | 12.1339   | 17.5148  | 13.7729   | 13.0139   | 13.4006   |
| KRTAP9-1    | 0         | 0         | 0        | 0.160917  | 0         | 2.67093   |
| CATSPER3    | 0.400354  | 0.637142  | 0.30307  | 1.12778   | 0.917956  | 0.548864  |
| SHKBP1      | 18.1085   | 22.0427   | 19.3605  | 22.8058   | 23.7227   | 23.0235   |
| LOC10050910 | 45.536    | 41.6516   | 34.3487  | 27.6208   | 24.8602   | 18.9272   |
| C16orf53    | 8.92531   | 13.776    | 9.9527   | 14.3358   | 12.6405   | 11.1434   |
| CASP5       | 0.114141  | 0.100917  | 0.450057 | 0.496219  | 0.378655  | 0.0823288 |
| LRGUK       | 0.482656  | 0.590863  | 0.477796 | 0.662379  | 0.331053  | 0.485861  |
| C2orf89     | 1.05111   | 2.95197   | 1.35736  | 0.464458  | 1.49643   | 1.0403    |
| MIR1302-8   | 0         | 0         | 0        | 0         | 0         | 0         |
| LOC728586   | 0.603831  | 0.711825  | 0.761839 | 1.88996   | 1.02556   | 0.752564  |
| ARHGAP19    | 6.05839   | 5.02535   | 6.13632  | 5.73844   | 6.90043   | 6.78574   |
| LOC441239   | 4.71416   | 4.63981   | 8.34928  | 5.51227   | 6.79805   | 5.48733   |
| MAN1A2      | 6.20727   | 3.56409   | 6.60281  | 3.95268   | 3.8512    | 4.65729   |
| OR4D5       | 0         | 0         | 0        | 0         | 0         | 0         |
| HPD         | 0.762715  | 0.270052  | 0.416197 | 0.322655  | 0         | 0.21413   |
| DHRX        | 3.20515   | 3.53187   | 3.59917  | 3.67324   | 3.96823   | 2.767     |
| GRHPR       | 66.1934   | 73.3149   | 68.3405  | 82.8727   | 77.061    | 70.1006   |
| CCL5        | 25.2386   | 18.5597   | 7.56708  | 2.55986   | 12.9646   | 4.07725   |
| XRCC6       | 85.3301   | 74.3378   | 74.0261  | 80.0332   | 70.4308   | 70.7089   |
| LINC00052   | 0         | 0.0519179 | 0        | 0.0551386 | 0         | 0.0365928 |
| LOC1005062  | 0         | 0         | 0        | 0         | 0.102309  | 0.2002    |
| NOP56       | 57.3421   | 71.1238   | 46.4839  | 63.6323   | 46.3216   | 44.6701   |
| ZSCAN4      | 0.545098  | 0.602426  | 0.412642 | 0.682451  | 0.925802  | 0.679363  |
| NHLH2       | 0.568377  | 1.00048   | 0.887134 | 0.609047  | 0.977493  | 0.830752  |
| PLEKHM1P    | 9.08317   | 8.46773   | 11.0945  | 8.54494   | 14.3054   | 12.0426   |
| PLD3        | 63.3769   | 79.9448   | 99.9607  | 108.649   | 104.256   | 120.672   |
| TP63        | 61.2665   | 63.5737   | 66.6211  | 56.8037   | 78.0769   | 70.5691   |
| RPL19P12    | 55.4998   | 70.1879   | 57.9682  | 87.1699   | 65.0073   | 56.4119   |
| LOC10065276 | 65.8722   | 34.5799   | 46.5084  | 49.2061   | 27.0837   | 29.4348   |
| TMEM187     | 8.44983   | 10.8411   | 7.64703  | 8.41151   | 6.95985   | 8.31407   |
| DHX37       | 5.55402   | 6.20869   | 5.31594  | 5.81458   | 5.97699   | 5.2247    |
| MIR214      | 1785.26   | 495.912   | 0        | 0         | 559.849   | 0         |
| RAB4A       | 33.3523   | 33.5174   | 31.5389  | 37.5662   | 28.1729   | 26.3436   |
| LAMB4       | 2.7961    | 6.15866   | 6.95652  | 8.45993   | 7.5504    | 4.78909   |
| NPAT        | 4.46605   | 3.32138   | 3.58831  | 2.52824   | 3.77891   | 2.73282   |
| STMN2       | 12.7729   | 11.821    | 35.7197  | 24.9791   | 39.5776   | 22.3608   |
| ZNF513      | 18.3365   | 24.3561   | 15.8454  | 23.7101   | 25.1425   | 23.9168   |
| ATG4D       | 23.0974   | 37.1889   | 29.4924  | 40.2322   | 35.1171   | 32.3349   |

|             |           |           |           |           |           |           |
|-------------|-----------|-----------|-----------|-----------|-----------|-----------|
| MIR548AK    | 0         | 0         | 0         | 0         | 0         | 0         |
| RCE1        | 17.6054   | 25.384    | 18.2344   | 24.7868   | 26.4084   | 26.696    |
| EPT1        | 13.1277   | 10.1225   | 14.4486   | 10.9262   | 11.5843   | 10.3462   |
| UROC1       | 0         | 0         | 0.0228996 | 0         | 0.0192665 | 0.0188507 |
| RPGR        | 2.91823   | 3.01843   | 3.24094   | 2.61453   | 3.37081   | 2.56852   |
| HIST1H4F    | 1.19931   | 0         | 0         | 0         | 0         | 0         |
| GPR156      | 0.258489  | 0.0822625 | 0.300565  | 0.19972   | 0.164142  | 0.20417   |
| TSNAX-DISC1 | 0.265718  | 3.85E-13  | 1.67E-25  | 8.53E-13  | 0.120242  | 1.10E-13  |
| LOC285501   | 0         | 0         | 0.0852452 | 0         | 0         | 0         |
| CLTC-IT1    | 0         | 0.0521169 | 0.0892458 | 0         | 0.0750868 | 0.110199  |
| FGF6        | 0         | 0         | 0         | 0         | 0         | 0         |
| MIR633      | 0         | 0         | 0         | 0         | 0         | 0         |
| LOC10013054 | 0.414386  | 1.30714   | 0.61857   | 1.10884   | 2.21708   | 1.26643   |
| MIR335      | 0         | 0         | 0         | 0         | 0         | 0         |
| LOC10050645 | 1.63805   | 0.79654   | 1.05248   | 0.734333  | 0.650843  | 0.636799  |
| SRGAP2      | 15.0982   | 15.1895   | 21.248    | 15.2817   | 23.8335   | 19.0105   |
| LOC10013233 | 0         | 0         | 0         | 0         | 0         | 0         |
| EYA1        | 0.282421  | 0.271919  | 0.443471  | 0.149164  | 0.220228  | 0.159364  |
| CRTAM       | 0.292622  | 0.739193  | 0.316452  | 0.15701   | 0.372745  | 0.1042    |
| RCAN3       | 4.47272   | 3.29542   | 5.92529   | 4.37481   | 3.24436   | 4.60664   |
| ZNF569      | 1.17615   | 1.67654   | 1.45364   | 0.788847  | 1.63578   | 1.18166   |
| ANKRD1      | 0.0524471 | 0.0463704 | 0.0794055 | 0.196988  | 0         | 0.0326828 |
| JOSD2       | 23.9656   | 47.3807   | 28.599    | 37.0368   | 31.2697   | 36.1951   |
| LOC10028803 | 0.584711  | 1.16317   | 0.885259  | 2.24189   | 1.11722   | 1.48783   |
| TYRO3P      | 0         | 0.376865  | 0         | 0         | 0         | 0.265622  |
| YIF1B       | 9.99835   | 13.2736   | 10.8065   | 15.1529   | 12.1381   | 12.7123   |
| DNM1P41     | 0.504269  | 0.572512  | 0.52358   | 0.647674  | 0.716682  | 0.623375  |
| PABPN1      | 24.8233   | 40.483    | 32.9626   | 33.993    | 43.3968   | 38.9323   |
| NOXO1       | 0.722341  | 1.26369   | 0.653503  | 0.644965  | 0.937629  | 1.50238   |
| JAG1        | 30.6613   | 32.6634   | 32.9283   | 39.478    | 34.2408   | 34.717    |
| SMS         | 15.9711   | 16.8225   | 13.4869   | 11.64     | 12.7427   | 11.5334   |
| INPPL1      | 28.8713   | 33.7511   | 35.0923   | 32.1507   | 36.2981   | 38.3663   |
| FOPNL       | 19.857    | 19.0393   | 20.0424   | 17.2832   | 21.5692   | 17.77     |
| OR12D3      | 0         | 0         | 0         | 0         | 0         | 0         |
| FGF9        | 0.1283    | 0.0567173 | 0.372308  | 0.220865  | 0.204287  | 0.239853  |
| CASC3       | 38.606    | 34.5033   | 37.3459   | 37.3721   | 33.1699   | 27.6684   |
| ERF         | 20.305    | 31.9408   | 25.3285   | 34.5485   | 32.4017   | 22.9512   |
| LGALS1      | 593.757   | 1030.37   | 841.262   | 875.312   | 705.057   | 911.729   |
| HLA-DPB2    | 0.468844  | 0         | 0.354917  | 0.0733728 | 0         | 0.219123  |
| LOC10050716 | 0.0413165 | 0         | 0.0625536 | 0.116387  | 0.0526294 | 0         |
| SNORA11C    | 0         | 0         | 0         | 0         | 0         | 0         |
| LOC340544   | 0.626248  | 1.62945   | 0.815787  | 1.14371   | 1.06376   | 1.45351   |
| VCPIP1      | 3.69743   | 2.63368   | 3.05343   | 2.52497   | 2.9012    | 2.70856   |

|            |          |           |           |           |           |           |
|------------|----------|-----------|-----------|-----------|-----------|-----------|
| WNT11      | 6.73582  | 11.7678   | 7.66898   | 16.2928   | 8.58016   | 12.8611   |
| IFIT3      | 19.3093  | 18.6997   | 6.43532   | 3.79218   | 7.97763   | 4.42286   |
| LOC728730  | 1.16227  | 1.20478   | 1.06188   | 1.27952   | 1.35288   | 1.02398   |
| FOLR4      | 0        | 0         | 0         | 0         | 0         | 0         |
| PAPD7      | 32.0187  | 34.6767   | 33.3948   | 34.8014   | 33.2279   | 27.8987   |
| AHRR       | 1.06281  | 1.8625    | 1.34897   | 0.820403  | 3.15306   | 2.1456    |
| SMC5       | 11.6663  | 8.96678   | 10.6779   | 11.0449   | 11.7639   | 9.54995   |
| MFAP1      | 24.1123  | 18.0965   | 19.5002   | 16.3597   | 17.4875   | 19.5366   |
| LIN7C      | 10.6059  | 9.16599   | 10.2581   | 9.34222   | 10.5444   | 8.89076   |
| CECR5-AS1  | 3.83203  | 5.16605   | 1.45847   | 1.52888   | 1.3937    | 1.30267   |
| PPP1R16A   | 19.931   | 37.3239   | 25.4666   | 36.5705   | 30.8271   | 32.2464   |
| LOC154860  | 0        | 0         | 0         | 0.035534  | 0.0241024 | 0.0943285 |
| INHBE      | 0.124563 | 0.220261  | 0.220021  | 0.272913  | 0.0793348 | 0.258741  |
| AGER       | 16.5871  | 27.8599   | 12.8831   | 23.0464   | 27.5823   | 20.6861   |
| BTBD9      | 3.16807  | 2.52509   | 3.55531   | 3.18451   | 3.79424   | 3.23957   |
| LOC1001280 | 4.95235  | 17.3458   | 10.3817   | 18.4219   | 16.0135   | 13.65     |
| GCA        | 6.74136  | 6.23121   | 6.68061   | 5.0928    | 6.92832   | 4.7165    |
| LOC1005069 | 0        | 0         | 0         | 0         | 0.243399  | 0         |
| LOC1006528 | 0        | 0         | 0         | 0         | 0         | 0         |
| UGT1A5     | 3.44E-08 | 2.87E-08  | 2.44E-08  | 2.39E-08  | 2.44E-08  | 2.13E-08  |
| C20orf43   | 72.1137  | 76.328    | 68.2746   | 74.1165   | 67.9316   | 67.3873   |
| MCART3P    | 0.117983 | 0.0586761 | 0.0334927 | 0.0415441 | 0.0422685 | 0.0275708 |
| LBH        | 39.8463  | 37.0869   | 29.0609   | 35.6334   | 31.8308   | 23.3947   |
| MYO3B      | 0.188722 | 0.354261  | 0.378217  | 0.419513  | 0.417467  | 0.515317  |
| USF2       | 97.4898  | 130.804   | 96.6442   | 127.045   | 113.913   | 114.401   |
| MCF2L      | 9.73937  | 12.6805   | 15.0391   | 12.7965   | 20.8346   | 14.7889   |
| C6orf146   | 0        | 0         | 0         | 0.0422305 | 0         | 0         |
| CHIT1      | 0.926112 | 0.116973  | 0.200306  | 0.0414097 | 0.561758  | 0.0274816 |
| SNORD116-1 | 0        | 0         | 0         | 0         | 0         | 0         |
| ZSWIM4     | 4.56421  | 3.3826    | 3.04864   | 3.80252   | 4.7452    | 4.71248   |
| RUNDC1     | 7.52507  | 6.14893   | 6.18114   | 6.46649   | 6.40841   | 6.58308   |
| KIAA1797   | 6.99375  | 5.10425   | 6.85513   | 6.83032   | 6.15626   | 6.07477   |
| NUP50      | 15.099   | 14.983    | 14.8181   | 13.8608   | 16.6035   | 14.4075   |
| CC2D2B     | 0.462489 | 0.7549    | 0.42832   | 0.590844  | 0.791186  | 0.602287  |
| DHX9       | 27.6253  | 21.3793   | 23.8592   | 21.3233   | 23.0677   | 21.9664   |
| MIR1254    | 0        | 0         | 0         | 0         | 0         | 0         |
| LOC729995  | 0        | 0         | 0         | 0         | 0         | 0         |
| UBR3       | 9.65652  | 6.65096   | 10.1258   | 7.43296   | 8.63319   | 7.42163   |
| TBC1D22B   | 8.13531  | 9.08769   | 9.13772   | 9.48272   | 9.89626   | 9.5079    |
| MIR4505    | 0        | 0         | 0         | 0         | 0         | 0         |
| ARID2      | 5.20026  | 3.95504   | 5.64672   | 4.78845   | 5.29931   | 4.84345   |
| WHAMM      | 5.84568  | 6.3378    | 6.04218   | 6.33836   | 7.17511   | 6.43758   |
| NEUROD1    | 0        | 0.0298803 | 0         | 0         | 0         | 0         |

|             |          |           |           |           |          |          |
|-------------|----------|-----------|-----------|-----------|----------|----------|
| XRCC5       | 82.5368  | 65.6663   | 77.3624   | 72.9197   | 68.3423  | 65.186   |
| ITIH4       | 4.02731  | 7.28116   | 4.57318   | 4.28579   | 6.29665  | 4.61384  |
| MIR4312     | 0        | 0         | 0         | 0         | 0        | 0        |
| ADAMTS10    | 6.28581  | 10.8513   | 11.2361   | 8.7457    | 16.6324  | 8.62036  |
| GNB1L       | 3.2734   | 4.4116    | 3.37372   | 6.04462   | 4.19013  | 5.39205  |
| GPR20       | 0.281024 | 0.745391  | 0.585026  | 0.0659693 | 0.76069  | 0.218903 |
| HPSE        | 2.76887  | 1.41323   | 2.21731   | 1.58014   | 3.03622  | 2.59673  |
| LOC10028861 | 7.49447  | 6.00235   | 11.3201   | 8.10476   | 7.38416  | 5.47375  |
| MLANA       | 7.96318  | 22.43     | 9.54905   | 20.5129   | 14.228   | 29.6861  |
| LOC10065294 | 221.022  | 186.866   | 12.3879   | 91.9012   | 136.614  | 96.2485  |
| LOC10028915 | 0        | 0         | 0         | 0         | 0        | 0        |
| C9orf21     | 8.21907  | 7.58976   | 6.70581   | 4.11604   | 5.23477  | 4.26815  |
| VTRNA1-1    | 0        | 0         | 0         | 0         | 0        | 0        |
| SSBP3       | 8.5868   | 9.57603   | 10.5627   | 10.5365   | 9.78802  | 10.2152  |
| LEMD1       | 0        | 0.677819  | 0         | 0.719868  | 0.12207  | 0.119435 |
| FN3KRP      | 30.4072  | 29.9218   | 30.7345   | 34.0364   | 30.1621  | 26.8704  |
| COG3        | 14.1742  | 9.19877   | 11.4952   | 8.89926   | 12.9043  | 10.0402  |
| MIR3612     | 0        | 0         | 0         | 0         | 0        | 0        |
| TIMM8B      | 55.2291  | 61.7103   | 44.8534   | 52.6434   | 38.2957  | 48.5875  |
| LOC389634   | 0.206225 | 1.27632   | 1.24891   | 2.51734   | 2.49557  | 1.67064  |
| SPP1        | 2.77824  | 1.47258   | 0.635782  | 1.37211   | 1.46158  | 2.67839  |
| MIR1247     | 165.301  | 73.0744   | 31.2835   | 77.6076   | 26.3203  | 51.5043  |
| SNORD123    | 0        | 0         | 0         | 0         | 0        | 0        |
| NTM         | 2.05664  | 3.35001   | 4.35523   | 3.08078   | 4.35855  | 3.38079  |
| CNFN        | 171.035  | 166.401   | 160.079   | 227.309   | 273.865  | 300.362  |
| LIF         | 3.31306  | 5.83637   | 6.43029   | 7.4615    | 7.40916  | 4.85869  |
| TOP3A       | 5.25083  | 6.08538   | 4.83435   | 4.64173   | 5.54368  | 6.38206  |
| LOC284294   | 0        | 0         | 0         | 0         | 0        | 0        |
| OSMR        | 9.17192  | 9.26598   | 7.81875   | 5.71787   | 10.8556  | 6.14683  |
| TBC1D7      | 14.3712  | 15.4302   | 12.0631   | 15.6839   | 12.5025  | 14.5923  |
| FLJ45256    | 0        | 0         | 0         | 0         | 0        | 0        |
| PCDHB11     | 0.227759 | 0.366168  | 0.435226  | 0.358544  | 0.398641 | 0.280801 |
| RAB3A       | 2.86922  | 2.02943   | 2.76932   | 4.17594   | 2.64976  | 2.14557  |
| SNORD38B    | 0        | 0         | 0         | 0         | 0        | 0        |
| ZNF487P     | 1.59043  | 1.66183   | 1.14924   | 0.610933  | 0.92087  | 0.900992 |
| SERPINA3    | 24.1521  | 14.4731   | 11.7318   | 28.915    | 18.9292  | 74.5143  |
| TMEM74      | 0.443538 | 0.348576  | 0.0746135 | 0.416475  | 0.502208 | 0.337815 |
| MIXL1       | 0        | 0         | 0.144191  | 0         | 0        | 0        |
| KRT12       | 0        | 0.0459008 | 0.0393007 | 0.0974966 | 0.165328 | 0.129407 |
| CENPI       | 0.314346 | 0.277925  | 0.446178  | 0.147583  | 0.375392 | 0.489718 |
| EXOC1       | 25.3439  | 22.6817   | 24.8078   | 19.6304   | 25.1051  | 22.3996  |
| GRWD1       | 14.4503  | 20.5291   | 14.336    | 16.3519   | 15.68    | 15.1876  |
| COX6C       | 165.888  | 165.03    | 141.135   | 137.246   | 124.789  | 123.588  |

|             |          |           |           |           |           |           |
|-------------|----------|-----------|-----------|-----------|-----------|-----------|
| ITGA11      | 3.23349  | 1.54854   | 2.56433   | 1.80726   | 1.66716   | 2.7586    |
| LOC730376   | 1.80147  | 4.34385   | 0.619873  | 0.922663  | 0         | 0.204109  |
| LOC340017   | 0        | 0.0691144 | 0.118353  | 0.0734019 | 0.0497879 | 0.0487132 |
| MPPED1      | 0.563298 | 1.31623   | 1.6143    | 2.04015   | 2.12698   | 0.777266  |
| GP6         | 1.57724  | 1.07641   | 0.513894  | 0.595399  | 2.17986   | 2.30112   |
| SLC9B2      | 1.93564  | 2.35961   | 1.6651    | 1.92768   | 2.09205   | 1.31586   |
| FFAR3       | 0        | 0.503119  | 0.526502  | 0.17811   | 0.362432  | 0.0394009 |
| C14orf178   | 0        | 0         | 0         | 0         | 0.140947  | 0.13791   |
| LOC10050631 | 0.978453 | 1.00927   | 1.08018   | 0.88047   | 1.01267   | 0.812974  |
| DKFZp761E19 | 7.62552  | 9.90112   | 9.79686   | 7.85581   | 9.42207   | 8.79781   |
| LOC399491   | 20.7052  | 31.5877   | 19.4093   | 29.3392   | 28.4846   | 26.4788   |
| OR8S1       | 0        | 0         | 0         | 0.100118  | 0         | 0         |
| TBC1D14     | 36.5268  | 34.7852   | 40.94     | 39.9308   | 43.5702   | 38.2973   |
| C10orf116   | 366.741  | 644.004   | 544.574   | 428.468   | 314.047   | 237.308   |
| KNCN        | 0        | 0         | 0         | 0         | 0         | 0         |
| CORO1B      | 42.181   | 44.0609   | 38.4714   | 46.6993   | 42.6865   | 43.7255   |
| OR1A1       | 0        | 0         | 0         | 0         | 0         | 0         |
| FAM86HP     | 2.02223  | 3.01928   | 3.85412   | 4.9314    | 4.35428   | 3.09377   |
| COQ5        | 23.2396  | 24.3287   | 21.1542   | 22.3571   | 21.8541   | 21.412    |
| CLN6        | 20.3905  | 31.5892   | 20.4661   | 25.8561   | 24.3213   | 24.1933   |
| LOC146513   | 0        | 0         | 0         | 0         | 0         | 0         |
| FBXO16      | 0.513866 | 0.757213  | 0.648332  | 0.804187  | 0.654568  | 1.0674    |
| CCL3L1      | 0.365241 | 0         | 0.0614421 | 0         | 0.103388  | 0.101157  |
| FLJ43663    | 2.89913  | 3.009     | 2.98882   | 1.61202   | 2.84713   | 2.44915   |
| PARP3       | 14.6075  | 17.9928   | 12.1292   | 13.0668   | 14.9098   | 11.4716   |
| AZI2        | 29.8134  | 23.6717   | 23.3587   | 17.803    | 22.0019   | 19.7502   |
| NAA10       | 68.2967  | 80.43     | 60.2829   | 83.7318   | 58.8199   | 72.7419   |
| PRPF4       | 12.7043  | 10.7468   | 11.2525   | 13.098    | 11.5426   | 12.206    |
| CHEK1       | 3.0799   | 3.61727   | 2.58232   | 2.4246    | 3.56135   | 2.988     |
| KATNAL1     | 2.52618  | 2.58229   | 3.53135   | 2.37204   | 2.41741   | 2.24658   |
| ZNF843      | 0.205239 | 0.499014  | 0.271893  | 0.289074  | 0.261436  | 0.255793  |
| SS18        | 45.4461  | 42.3012   | 46.5212   | 38.5475   | 53.3129   | 47.538    |
| FAM188B     | 2.00245  | 2.9291    | 2.42114   | 2.69603   | 1.75438   | 2.57396   |
| NTSR1       | 0.141335 | 0.0416531 | 0.0534956 | 0.309659  | 0.270051  | 0.14679   |
| BCL2A1      | 1.52471  | 1.34806   | 0.599338  | 1.5591    | 0.971099  | 1.45941   |
| PEX2        | 9.90189  | 8.64459   | 10.4539   | 10.6189   | 10.4423   | 9.0627    |
| LOC10065279 | 21.1958  | 50.7982   | 30.2992   | 63.6667   | 35.0574   | 35.8136   |
| PSMD10      | 29.534   | 28.9996   | 28.4515   | 25.2601   | 26.3251   | 22.8788   |
| TOPBP1      | 8.93753  | 8.23589   | 9.21614   | 7.00757   | 9.11695   | 8.4719    |
| TMEM101     | 29.2625  | 27.7816   | 23.2594   | 32.1873   | 28.4443   | 26.7883   |
| FBXL22      | 2.18126  | 0.995371  | 1.49143   | 1.12319   | 1.16518   | 1.09618   |
| FAM114A1    | 18.7299  | 15.8536   | 19.0649   | 18.044    | 14.1634   | 13.858    |
| LOC10050764 | 102.787  | 72.968    | 113.938   | 697.805   | 135.38    | 131.016   |

|             |           |          |           |           |           |           |
|-------------|-----------|----------|-----------|-----------|-----------|-----------|
| LOC150935   | 0         | 0        | 0         | 0         | 0         | 0.0714812 |
| CXorf36     | 7.02094   | 10.0579  | 10.6483   | 7.05619   | 7.91171   | 6.55976   |
| LOC253044   | 0         | 0.054194 | 0         | 0         | 0         | 0.038197  |
| CHD2        | 17.5911   | 15.0703  | 18.4939   | 15.7689   | 20.1491   | 16.3221   |
| ITGA2B      | 0.295817  | 0.889244 | 0.179148  | 0.694418  | 0.433337  | 0.368681  |
| PPP4R1L     | 1.26788   | 0.82205  | 1.75962   | 1.34925   | 1.64195   | 1.21147   |
| LYL1        | 2.93235   | 6.01482  | 3.72927   | 2.80849   | 4.85583   | 4.16627   |
| ISX         | 0.145621  | 0.154499 | 0.198424  | 0.136736  | 0.129845  | 0.018149  |
| GDPD5       | 10.7262   | 8.54615  | 11.1648   | 8.25651   | 10.7439   | 8.62721   |
| LOC284578   | 2.57706   | 3        | 2.24348   | 6.45286   | 1.9149    | 2.24828   |
| PRDX5       | 174.96    | 214.061  | 150.681   | 221.809   | 145.096   | 159.345   |
| ALPK3       | 4.52666   | 4.31474  | 4.96057   | 1.61923   | 2.35587   | 1.50981   |
| ERLEC1      | 26.0271   | 20.1625  | 23.2176   | 17.4478   | 18.6506   | 18.0442   |
| VSTM5       | 0         | 0.63007  | 0.179824  | 0.223052  | 0         | 0.444086  |
| LOC441495   | 0         | 0        | 0         | 0         | 0         | 0.0264153 |
| ZNF230      | 1.57824   | 1.77026  | 1.83668   | 0.906859  | 2.1154    | 1.57065   |
| PP7080      | 25.055    | 33.842   | 21.2519   | 27.7213   | 31.5693   | 22.009    |
| C15orf27    | 0.549162  | 1.90479  | 1.43903   | 0.713983  | 2.26002   | 1.42151   |
| CCL28       | 14.2683   | 4.3407   | 9.29137   | 7.77934   | 9.47845   | 7.96726   |
| HNRNPA3P1   | 1.78526   | 1.51997  | 1.1763    | 1.24182   | 1.49487   | 1.25669   |
| ODAM        | 0         | 0        | 0         | 0         | 0         | 0         |
| MIR3118-4   | 0         | 0        | 0         | 0         | 0         | 0         |
| SLC15A5     | 0.0681411 | 0        | 0.232124  | 0.0639834 | 0.0216997 | 0         |
| LOC10050753 | 0.812194  | 0.718091 | 2.45934   | 0.381319  | 1.6812    | 1.51837   |
| CHST10      | 2.44729   | 2.90559  | 2.69952   | 2.33079   | 2.51617   | 1.78648   |
| ANGPTL1     | 5.34595   | 4.50614  | 6.50022   | 2.15876   | 3.66949   | 3.15876   |
| ASB9P1      | 0.0327122 | 0.173532 | 0.202234  | 0.0614325 | 0.375022  | 0.122309  |
| FLJ16341    | 0.0619128 | 0.109479 | 0.0937366 | 0.0581351 | 0.0394326 | 0.154326  |
| ZC3H3       | 7.97501   | 10.7363  | 7.32973   | 8.57301   | 10.2546   | 9.23212   |
| AKNAD1      | 0.0976336 | 0.172643 | 0.0492728 | 0.213912  | 0.0414556 | 0.0405608 |
| PLIN2       | 211.649   | 200.142  | 159.895   | 168.123   | 118.748   | 166.603   |
| TFEB        | 10.801    | 15.0073  | 11.4326   | 16.1139   | 10.7214   | 9.52846   |
| PDLIM2      | 50.2557   | 63.2978  | 64.0803   | 71.2188   | 77.9698   | 68.5888   |
| LOC728637   | 0         | 0        | 0         | 0         | 0         | 0         |
| FAM184B     | 1.3181    | 1.90495  | 1.89968   | 2.30874   | 2.38937   | 1.57959   |
| PGAM5       | 22.7097   | 19.8446  | 16.5061   | 21.8059   | 16.2322   | 16.244    |
| LOC10012950 | 29.9559   | 27.9497  | 25.1848   | 23.5913   | 26.4645   | 24.5169   |
| IFNA5       | 0.190083  | 0        | 0         | 0         | 0         | 0         |
| CXCR7       | 15.4412   | 17.5404  | 22.3424   | 11.746    | 13.2269   | 11.4189   |
| USP24       | 10.4068   | 8.72322  | 10.8273   | 8.71603   | 9.45367   | 7.18026   |
| LOC10050673 | 1.99857   | 2.45721  | 2.11109   | 2.41754   | 3.47342   | 1.8646    |
| LOC10050731 | 1.3073    | 0        | 0         | 0.613765  | 0.416312  | 0.814652  |
| SPTBN1      | 55.0853   | 49.0879  | 70.2076   | 47.2606   | 50.1878   | 39.25     |

|             |           |           |          |          |           |          |
|-------------|-----------|-----------|----------|----------|-----------|----------|
| PGK2        | 0         | 0         | 0        | 0        | 0         | 0        |
| LOC283875   | 0.0306935 | 0.108549  | 0.278822 | 0.115283 | 0.293233  | 0.172142 |
| FMO5        | 22.4039   | 8.33331   | 11.7459  | 14.1328  | 9.60683   | 9.46415  |
| RAB11FIP4   | 5.63957   | 5.96592   | 6.2875   | 6.46995  | 6.99507   | 5.62705  |
| OR10H4      | 0         | 0         | 0        | 0        | 0         | 0        |
| RGNEF       | 6.31219   | 5.40507   | 8.24443  | 8.06805  | 9.24199   | 7.7864   |
| RSAD1       | 19.1872   | 28.2854   | 21.3744  | 25.261   | 24.9297   | 21.522   |
| MOSPD1      | 12.9154   | 11.1906   | 11.4717  | 12.5316  | 9.81621   | 12.6895  |
| HEY1        | 5.68325   | 6.07537   | 4.067    | 3.96087  | 3.53487   | 3.29257  |
| RNASE10     | 0         | 0         | 0        | 0        | 0.134656  | 0.131749 |
| PLAC8L1     | 0.903867  | 1.91794   | 1.23162  | 1.69743  | 1.38163   | 1.5771   |
| PSMA2       | 86.5668   | 80.5137   | 69.3459  | 65.6372  | 60.4417   | 60.3317  |
| C3orf19     | 8.70535   | 9.95522   | 9.82139  | 8.42667  | 10.1685   | 8.35713  |
| MIR562      | 0         | 0         | 0        | 0        | 0         | 0        |
| TTY20       | 0         | 0         | 0        | 0        | 0         | 0        |
| RAD51AP2    | 0.109385  | 0.145067  | 0.227714 | 0.231099 | 0.313506  | 0.17041  |
| KDM4A       | 13.5759   | 12.8347   | 15.0472  | 15.0836  | 17.4135   | 15.5999  |
| LOC10065297 | 1.84274   | 0.842708  | 1.92409  | 0.984484 | 1.67954   | 1.4057   |
| MIR34B      | 0         | 0         | 0        | 0        | 0         | 0        |
| ABHD11-AS1  | 0.357023  | 0.315657  | 0.540537 | 1.34096  | 0.68217   | 0        |
| PPBP        | 0.337874  | 0.821498  | 0        | 0.71383  | 0.537984  | 0.210549 |
| LOC10050647 | 3.20184   | 2.89826   | 2.3661   | 2.21906  | 3.44733   | 2.23278  |
| RNF148      | 0         | 0         | 0.064237 | 0        | 0         | 0        |
| PACRG       | 1.72212   | 1.14374   | 1.11889  | 0.813714 | 1.00291   | 0.80613  |
| MRGPRX2     | 2.48243   | 2.41877   | 4.60216  | 1.99797  | 5.19496   | 3.63059  |
| TMPRSS11D   | 1.61674   | 0.794124  | 0.244777 | 0        | 0.389003  | 0.335829 |
| RTEL1       | 3.54026   | 6.79179   | 5.15626  | 5.32537  | 7.63304   | 6.5368   |
| IGF2R       | 13.9929   | 10.7356   | 13.717   | 10.8939  | 13.2689   | 11.7128  |
| ABR         | 28.8065   | 29.4173   | 29.6746  | 29.183   | 39.4331   | 32.8457  |
| BSPH1       | 0         | 0         | 0        | 0        | 0         | 0        |
| MRPL39      | 28.9351   | 21.9146   | 20.2935  | 15.4831  | 16.4865   | 19.4895  |
| GRID2IP     | 0.208896  | 0.221631  | 0.189762 | 0.35307  | 0.492273  | 0.429577 |
| FGF2        | 6.67624   | 7.21134   | 5.61125  | 3.79372  | 3.67113   | 2.36279  |
| NCL         | 198.536   | 175.044   | 173.602  | 174.557  | 165.796   | 147.985  |
| LOC10050708 | 0.434762  | 0.384419  | 0.234967 | 0.116802 | 0.0793544 | 0.116324 |
| DNMBP       | 7.90392   | 7.96688   | 10.0612  | 8.5868   | 9.45378   | 9.13865  |
| SLC9A7P1    | 0.238797  | 0.0527822 | 0.158174 | 0.169571 | 0.28517   | 0.167409 |
| MAGT1       | 25.72     | 20.164    | 24.3832  | 21.9155  | 21.9268   | 20.4495  |
| SLC25A40    | 7.33023   | 6.01983   | 7.14876  | 6.94279  | 8.25143   | 6.0697   |
| LOC151760   | 0         | 0.117821  | 0        | 0        | 0         | 0        |
| KIAA1524    | 0.826017  | 0.704646  | 0.79294  | 0.684213 | 1.05872   | 0.709498 |
| YTHDF1      | 21.2288   | 22.0182   | 20.3695  | 22.7282  | 21.1999   | 18.6983  |
| ZDHHC16     | 16.6349   | 15.6099   | 12.2932  | 16.173   | 16.1413   | 17.5938  |

|             |           |          |           |           |          |           |
|-------------|-----------|----------|-----------|-----------|----------|-----------|
| HTA         | 0         | 0        | 0         | 0         | 0        | 0         |
| RRAS        | 53.0762   | 85.2535  | 64.7226   | 69.006    | 60.9807  | 49.5374   |
| SPERT       | 0.0659858 | 0.116681 | 0.0999032 | 0.123919  | 0        | 0         |
| FDPS        | 461.964   | 351.336  | 250.804   | 306.791   | 273.164  | 352.989   |
| KLHL28      | 3.21846   | 2.56229  | 3.75932   | 2.01016   | 3.77507  | 3.26705   |
| CREB3L3     | 0         | 0        | 0         | 0         | 0        | 0         |
| PPIL3       | 23.6323   | 23.8385  | 16.0057   | 15.209    | 23.4315  | 22.3542   |
| FANCE       | 7.33353   | 8.26168  | 8.14821   | 10.181    | 10.4213  | 10.6141   |
| FBXO21      | 13.8893   | 11.1058  | 13.9603   | 13.3524   | 12.8849  | 10.3809   |
| PKD2        | 10.111    | 10.2477  | 10.239    | 9.74346   | 9.87108  | 10.19     |
| NTNG1       | 0.545749  | 0.632069 | 0.592466  | 0.2604    | 0.520052 | 0.235122  |
| OR2T27      | 0         | 0        | 0         | 0         | 0        | 0         |
| GIMAP5      | 13.3621   | 12.0316  | 8.97766   | 7.53214   | 9.47045  | 6.6296    |
| KLK3        | 0         | 0        | 0         | 0.0512268 | 0        | 0.0513213 |
| MIR651      | 0         | 0        | 0         | 0         | 0        | 0         |
| KCNAB1      | 5.33306   | 3.91413  | 2.68915   | 2.0702    | 2.30094  | 1.99526   |
| NFKBIB      | 14.5375   | 16.4135  | 15.2197   | 14.9092   | 15.5709  | 16.7902   |
| ANGPTL6     | 0.277273  | 0.222887 | 0.319463  | 0.30635   | 0.139952 | 0.47551   |
| MIR548Q     | 0         | 0        | 0         | 0         | 0        | 0         |
| LOC388849   | 1.56607   | 1.97803  | 2.54041   | 1.05037   | 2.56484  | 0.697077  |
| H1F0        | 154.855   | 129.007  | 129.939   | 142.293   | 144.052  | 148.364   |
| MIR548O     | 0         | 0        | 0         | 0         | 0        | 0         |
| OR51B4      | 0         | 0        | 0.0972287 | 0         | 0        | 0         |
| TMED8       | 0.362605  | 0.53432  | 1.64696   | 0.453973  | 1.46265  | 0.45192   |
| CEP19       | 1.47042   | 2.09686  | 1.18493   | 1.02439   | 1.7824   | 2.15774   |
| UGGT1       | 6.92543   | 5.55165  | 6.28806   | 5.41223   | 5.8014   | 5.71427   |
| SCOC        | 51.6055   | 37.9582  | 39.6741   | 23.8333   | 31.5103  | 33.8574   |
| USP17L5     | 0         | 0        | 0         | 0         | 0        | 0         |
| WDR73       | 14.4004   | 17.6556  | 15.4576   | 13.4162   | 19.7048  | 20.039    |
| MTHFD1L     | 3.0903    | 1.82578  | 2.37107   | 1.74515   | 2.51348  | 2.24751   |
| NUBPL       | 9.08217   | 7.79629  | 9.36425   | 8.16678   | 7.57712  | 6.60972   |
| SPANXN3     | 0         | 0        | 0         | 0         | 0        | 0         |
| LOC10050739 | 4.63418   | 7.77065  | 5.56457   | 7.9526    | 5.90307  | 5.47691   |
| SIX4        | 1.40083   | 0.807733 | 1.01433   | 0.557596  | 0.329724 | 0.313193  |
| GDI2        | 98.7878   | 94.7422  | 88.978    | 88.7069   | 92.1684  | 81.3662   |
| HSPC072     | 0.162561  | 2.81E-09 | 0.0628486 | 2.72E-10  | 1.13E-10 | 0.108724  |
| KRTAP13-2   | 0.581773  | 1.02873  | 0         | 4.3702    | 0.555801 | 36.4349   |
| PIM3        | 55.6368   | 76.4433  | 55.3819   | 63.4111   | 63.7023  | 54.0382   |
| P4HB        | 316.099   | 314.893  | 314.008   | 361.117   | 284.656  | 306.686   |
| KIFC1       | 3.59269   | 5.04299  | 3.44867   | 4.48638   | 4.69435  | 6.00093   |
| MIR3917     | 0         | 0        | 0         | 0         | 0        | 0         |
| AP4M1       | 10.9225   | 14.1924  | 12.0027   | 14.5162   | 15.5116  | 15.986    |
| LINC00200   | 0.0415771 | 0        | 0         | 0         | 0        | 0         |



|             |           |          |           |           |           |           |
|-------------|-----------|----------|-----------|-----------|-----------|-----------|
| MAPKAPK5    | 13.9901   | 13.8604  | 14.0129   | 12.8147   | 12.5002   | 10.6202   |
| C5orf63     | 2.51019   | 2.29934  | 4.08712   | 2.72998   | 2.17482   | 3.26679   |
| TLR2        | 5.0937    | 3.68471  | 5.56485   | 4.75573   | 6.96767   | 4.4186    |
| UBE2M       | 21.5641   | 27.913   | 21.4987   | 31.4973   | 20.4218   | 21.1228   |
| C1orf38     | 6.82207   | 7.95976  | 5.02536   | 4.03656   | 8.18972   | 4.98834   |
| SMURF1      | 11.3893   | 12.0108  | 14.3178   | 14.4986   | 14.7667   | 12.3381   |
| CHST15      | 6.22172   | 5.76142  | 6.69384   | 4.42166   | 7.82997   | 5.91578   |
| CT47A8      | 0         | 0        | 0         | 0         | 0         | 0         |
| TDRD9       | 0.324536  | 0.233134 | 0.276385  | 0.0380917 | 0.400478  | 0.442393  |
| TBC1D20     | 23.3228   | 24.7947  | 24.5234   | 25.005    | 24.9422   | 21.8911   |
| FAM95B1     | 2.36173   | 4.85175  | 0.736171  | 0.978366  | 4.5126    | 2.85689   |
| CST6        | 1203.12   | 1083.58  | 2164.73   | 1806.11   | 2223.72   | 4245.47   |
| LOC10050625 | 0         | 0        | 0.269227  | 0.333947  | 0.453027  | 0.221624  |
| TCTE3       | 0.346609  | 0.459674 | 0.393577  | 0.48819   | 0.441514  | 0.755972  |
| LOC646999   | 0.27056   | 0.205039 | 0.585187  | 0.435517  | 0.418494  | 0.168601  |
| CHMP6       | 19.1629   | 27.7499  | 19.3258   | 26.841    | 20.6389   | 23.6053   |
| DNAH6       | 0.0366755 | 0.084308 | 0.0888434 | 0.0482128 | 0.0934353 | 0.0548511 |
| PCDHAC2     | 0.0856117 | 1.65E-19 | 5.04E-27  | 6.75E-35  | 8.33E-61  | 5.73E-33  |
| RDX         | 16.5329   | 12.4991  | 14.2474   | 10.6601   | 10.4749   | 9.37454   |
| LOC10050567 | 1.47378   | 1.03868  | 0.745355  | 0.86568   | 3.19E-08  | 3.40E-06  |
| OPRK1       | 0.0583494 | 0        | 0.235578  | 0.109578  | 0.123877  | 0.109083  |
| FAM24B      | 2.20044   | 4.27335  | 3.02621   | 4.21193   | 4.55752   | 3.76262   |
| LRRC24      | 0.435551  | 0.502663 | 0.828643  | 1.17411   | 1.21007   | 2.07167   |
| IL18        | 43.6369   | 55.9425  | 75.3011   | 90.3299   | 88.4942   | 114.766   |
| MESDC2      | 12.0718   | 11.6655  | 10.8031   | 10.1738   | 10.2418   | 10.3776   |
| GTDC1       | 8.20969   | 7.19302  | 7.87006   | 6.15989   | 6.23054   | 5.69142   |
| DAZ2        | 0.949226  | 0.375194 | 0         | 0         | 0         | 0         |
| VPS36       | 35.0613   | 33.5386  | 41.5801   | 35.0632   | 42.8599   | 37.3436   |
| FGF23       | 0         | 0        | 0         | 0         | 0         | 0.0205119 |
| 61E3.4      | 37.3328   | 52.7848  | 34.6744   | 50.4145   | 50.8908   | 47.4367   |
| ZNF660      | 0.556326  | 0.245934 | 0.421142  | 0.174127  | 0.177163  | 0.260009  |
| MOAP1       | 14.79     | 14.0395  | 18.047    | 15.0678   | 16.8917   | 13.9161   |
| ADPGK       | 23.9437   | 31.0064  | 26.1873   | 26.544    | 32.9682   | 27.0983   |
| KIAA1586    | 1.96158   | 2.3124   | 2.37067   | 2.1004    | 2.69594   | 2.12307   |
| SLC30A8     | 0.183146  | 0.52828  | 0         | 0.205517  | 0.334529  | 0.399316  |
| LOC170425   | 0         | 0        | 0.0282763 | 0.0701475 | 0.0237902 | 0.0232767 |
| RSL24D1     | 51.8418   | 71.573   | 62.3361   | 62.2426   | 64.0752   | 49.2124   |
| SORT1       | 25.0244   | 20.0334  | 23.7105   | 22.6735   | 17.5448   | 21.4166   |
| OR6F1       | 0         | 0        | 0         | 0         | 0         | 0         |
| LOC440461   | 1.4858    | 1.54211  | 1.41817   | 2.54765   | 1.27547   | 1.52973   |
| TMEM110     | 9.20017   | 8.52525  | 10.2129   | 8.88513   | 8.88364   | 7.51941   |
| FLJ41484    | 0.0285918 | 0.227511 | 0.216441  | 0.268472  | 1.03798   | 0.605784  |
| MIER3       | 6.99523   | 5.12122  | 6.75237   | 5.03925   | 7.18977   | 6.28499   |

|             |           |           |           |            |           |           |
|-------------|-----------|-----------|-----------|------------|-----------|-----------|
| CERS2       | 42.1951   | 35.0571   | 33.256    | 34.0429    | 30.8724   | 25.5522   |
| DAPK3       | 18.1095   | 31.5911   | 21.1363   | 31.4883    | 24.9646   | 26.7983   |
| NF2         | 8.47967   | 10.6271   | 8.35964   | 10.753     | 8.88259   | 10.2684   |
| CLRN1-AS1   | 0         | 0         | 0         | 0          | 0.0321082 | 0         |
| OR2T3       | 0         | 0         | 0         | 0          | 0         | 0         |
| MIR4653     | 0         | 0         | 0         | 0          | 0         | 0         |
| PFN1        | 710.392   | 868.246   | 583.754   | 749.678    | 646.489   | 627.293   |
| MIR720      | 0         | 0         | 0         | 0          | 0         | 0         |
| GSG1L       | 0.0960465 | 0.0188706 | 0.100983  | 0.125259   | 0.084962  | 0.0532018 |
| RAB31       | 14.8449   | 14.9598   | 9.33389   | 8.09292    | 10.6211   | 6.83151   |
| BTBD17      | 0         | 0         | 0.047733  | 0          | 0.0401601 | 0.0392932 |
| LOC10050624 | 0         | 0         | 0         | 0          | 0         | 0         |
| CA6         | 70.2747   | 52.821    | 69.6403   | 98.4793    | 35.0192   | 74.0666   |
| ZXDB        | 3.48546   | 2.23984   | 3.44938   | 2.41071    | 3.66015   | 2.41567   |
| KRTAP4-7    | 14.7959   | 5.18816   | 0.482784  | 146.916    | 1.54352   | 1488.77   |
| FLJ41200    | 3.18735   | 0.810674  | 0.628     | 1.63993    | 1.22359   | 1.38777   |
| LOC10028816 | 0         | 0         | 0.360986  | 0          | 0.303715  | 0         |
| MIR4327     | 0         | 0         | 0         | 0          | 0         | 0         |
| PCDHGC4     | 0.120721  | 0.0357604 | 0.27402   | 0.113621   | 0.128081  | 0.100825  |
| TMEM144     | 3.95464   | 2.60262   | 3.30881   | 4.10423    | 3.21944   | 2.57554   |
| C1orf187    | 0.177634  | 0         | 0.0896467 | 0.0555985  | 0.0754241 | 0.110694  |
| POTEA       | 0         | 0         | 0         | 0          | 0         | 0         |
| SAMD12      | 0.971169  | 0.499768  | 0.573137  | 0.710915   | 0.77153   | 0.471799  |
| METTL23     | 24.6993   | 26.2337   | 25.8332   | 27.8896    | 24.7377   | 25.4048   |
| RP11-165H2C | 0         | 0         | 0.0269873 | 0          | 0         | 0         |
| MIR577      | 0         | 0         | 0         | 0          | 0         | 0         |
| SLC30A5     | 20.125    | 18.337    | 19.5935   | 14.4874    | 15.3971   | 15.6714   |
| WT1-AS      | 0         | 0         | 0         | 0          | 0         | 0.0268779 |
| LOC10050569 | 1.33129   | 1.28405   | 0.732943  | 1.02278    | 1.23332   | 0.452512  |
| AP1M1       | 19.3572   | 22.1077   | 21.1154   | 22.7505    | 20.2091   | 18.4565   |
| CHN1        | 4.30868   | 6.17469   | 4.36077   | 3.36244    | 4.5111    | 3.19298   |
| ZNF570      | 1.72529   | 0.842982  | 0.893617  | 0.895276   | 1.21452   | 0.707322  |
| DDX20       | 5.05303   | 5.28177   | 5.07008   | 4.50773    | 5.48418   | 4.45548   |
| SMO         | 11.0521   | 16.3246   | 16.8123   | 18.8373    | 21.6012   | 17.9198   |
| DUSP12      | 13.2022   | 15.1428   | 12.4927   | 12.8155    | 14.2605   | 11.0065   |
| LOC10050649 | 3.68298   | 2.80274   | 3.14092   | 2.97661    | 3.80055   | 3.65083   |
| ARHGDI1A    | 142.483   | 187.328   | 139.272   | 179.982    | 148.689   | 148.889   |
| LINC00028   | 0.4955    | 0.219045  | 0         | 0          | 0         | 0         |
| H2BFWT      | 0         | 0         | 0.103265  | 0          | 0         | 0         |
| LOC10065300 | 1.83967   | 4.74396   | 0         | 0.00146031 | 0         | 0         |
| GNG13       | 0         | 0.106031  | 0         | 0          | 0.0763814 | 0         |
| MIR941-2    | 0         | 156.132   | 0         | 0          | 0         | 0         |
| PDGFRB      | 29.6328   | 27.9204   | 37.9798   | 22.1684    | 30.9603   | 22.2407   |

|             |           |           |          |           |           |           |
|-------------|-----------|-----------|----------|-----------|-----------|-----------|
| MT1JP       | 0         | 0.42161   | 0        | 0         | 0.60743   | 0         |
| RALY        | 88.206    | 111.088   | 84.9375  | 110.738   | 92.2397   | 94.7007   |
| KLHDC8B     | 46.2316   | 57.1882   | 51.2534  | 59.5123   | 44.4499   | 43.5878   |
| DPYS        | 0.0967048 | 0.0427501 | 0.036603 | 0.136206  | 0.0307959 | 0         |
| FAM108A4    | 2.67328   | 4.24155   | 3.54553  | 5.22355   | 5.18003   | 4.59823   |
| NECAP2      | 33.2487   | 38.8364   | 30.5191  | 32.774    | 38.2039   | 33.5322   |
| TNMD        | 3.745     | 2.37535   | 6.9642   | 6.49787   | 5.65191   | 4.81965   |
| UBE2G2      | 47.4433   | 55.6615   | 44.7117  | 52.4667   | 45.991    | 45.4233   |
| LOC10050649 | 0.0345424 | 0.0610805 | 0.287637 | 0.324348  | 0.176002  | 0.344406  |
| EPN1        | 48.541    | 62.6989   | 49.6302  | 62.8534   | 58.2286   | 64.6538   |
| SLC16A8     | 1.59152   | 1.50417   | 1.24633  | 1.49441   | 1.85253   | 1.50475   |
| IL18BP      | 10.5986   | 12.2953   | 9.61276  | 6.70982   | 11.0051   | 5.90811   |
| APOC2       | 1.63993   | 0.991161  | 1.3748   | 0.740644  | 2.86098   | 1.78839   |
| PSMA7       | 177.49    | 180.57    | 150.975  | 141.849   | 130.841   | 144.309   |
| C1orf159    | 9.8654    | 19.431    | 10.241   | 18.0683   | 21.9294   | 17.9562   |
| NXP4        | 16.8364   | 18.6841   | 27.0287  | 35.5432   | 26.771    | 36.9019   |
| MARK4       | 13.1655   | 13.5032   | 12.6909  | 16.7798   | 14.2524   | 16.8459   |
| SNORA23     | 0         | 0         | 0        | 0         | 0         | 0         |
| LOC10050561 | 0         | 0.292707  | 0        | 0.155432  | 0.527143  | 0.206306  |
| CXorf49B    | 0.0187964 | 0.155799  | 0.151776 | 0.0941307 | 0.0997627 | 0.095657  |
| YAF2        | 3.88686   | 3.8079    | 3.56598  | 3.21435   | 3.18653   | 2.71682   |
| LOC10065291 | 0         | 0         | 0        | 0         | 0         | 0.0342396 |
| C16orf54    | 1.50993   | 0.787301  | 1.26026  | 0.36354   | 1.70144   | 0.627285  |
| MIRLET7BHG  | 8.23907   | 17.3957   | 10.4416  | 14.1304   | 13.9281   | 12.7981   |
| CCDC142     | 3.07079   | 3.14923   | 2.78156  | 3.3036    | 3.10899   | 3.12629   |
| LOC619207   | 1.22107   | 1.18407   | 1.75926  | 1.64588   | 1.96936   | 1.36229   |
| ZFP90       | 8.52085   | 7.69014   | 8.41056  | 8.27111   | 9.50074   | 8.06819   |
| MFSD2A      | 13.1256   | 27.5003   | 37.6994  | 25.2448   | 20.8237   | 19.3407   |
| STAC3       | 2.3256    | 2.51307   | 2.24952  | 2.12304   | 3.74411   | 3.42176   |
| SELRC1      | 6.26701   | 4.12346   | 3.82475  | 5.61092   | 3.92961   | 3.17876   |
| DHX38       | 19.8682   | 23.154    | 24.1669  | 22.8366   | 27.9487   | 23.3848   |
| KLHL26      | 3.23734   | 3.53572   | 3.91629  | 4.3213    | 3.53754   | 3.22384   |
| GLIS1       | 0.461135  | 0.78405   | 0.88613  | 0.999227  | 1.85256   | 0.862079  |
| FOXJ3       | 17.1737   | 16.0935   | 19.1108  | 18.5202   | 17.8873   | 14.3687   |
| CLCF1       | 1.67069   | 2.1644    | 2.2578   | 1.7055    | 1.91471   | 1.66147   |
| SEC61A1     | 84.4449   | 84.3661   | 79.6054  | 83.5217   | 79.3153   | 81.48     |
| LOC10050691 | 1.03899   | 1.14071   | 0.762622 | 0.857748  | 0.74672   | 0.986494  |
| MIR181D     | 0         | 0         | 0        | 0         | 0         | 0         |
| NCAPH2      | 30.0742   | 45.6039   | 27.26    | 30.1519   | 34.0559   | 31.2791   |
| LOC646543   | 2.00761   | 3.66834   | 4.35669  | 3.64456   | 5.54086   | 4.83743   |
| LOC286238   | 0         | 0         | 0        | 0         | 0         | 0         |
| MIR657      | 0         | 0         | 0        | 0         | 0         | 0         |
| ZNF135      | 5.64847   | 4.801     | 6.11102  | 4.6287    | 6.61586   | 7.90319   |

|             |          |           |           |           |           |           |
|-------------|----------|-----------|-----------|-----------|-----------|-----------|
| PPP1R3G     | 1.33433  | 1.71597   | 1.60697   | 1.48072   | 2.08597   | 1.32284   |
| USP14       | 18.9173  | 16.7145   | 17.936    | 17.4683   | 13.0177   | 11.8334   |
| TCIRG1      | 23.3722  | 42.7994   | 23.6979   | 29.0006   | 37.5778   | 27.1315   |
| LOC10065284 | 16.9691  | 12.8979   | 12.5533   | 12.6482   | 11.7192   | 12.1699   |
| HERC2P9     | 21.6114  | 26.5103   | 19.749    | 19.6872   | 28.5007   | 26.9176   |
| MEA1        | 73.1162  | 88.3321   | 73.5545   | 79.9438   | 65.3501   | 71.2353   |
| PIWIL2      | 0.379836 | 0.549586  | 0.552072  | 0.432212  | 0.721894  | 0.38736   |
| LBP         | 2.06535  | 0.152171  | 0.30401   | 0.0538702 | 0         | 0.071502  |
| CHST2       | 4.37176  | 6.20168   | 6.02616   | 13.0503   | 7.9584    | 26.3484   |
| SLC7A13     | 0        | 0         | 0         | 0.0524994 | 0         | 0         |
| BOLA2       | 13.3121  | 17.6413   | 10.3644   | 15.2584   | 11.0295   | 11.0924   |
| LY6H        | 0.129882 | 0.516759  | 0.393291  | 0.121957  | 0.0827228 | 0.0809372 |
| CHRND       | 0        | 0.0534484 | 0         | 0         | 0.0770052 | 0         |
| S100G       | 0        | 0         | 0.292936  | 0         | 0         | 0         |
| UTRN        | 10.273   | 7.94738   | 11.2991   | 7.90134   | 9.63156   | 7.8044    |
| HSBP1       | 50.9705  | 47.7902   | 41.5017   | 45.2762   | 41.9991   | 44.0424   |
| SNORD29     | 0        | 0         | 0         | 0         | 0         | 0         |
| LOX         | 10.3533  | 4.13802   | 18.9177   | 4.64299   | 8.98317   | 7.07127   |
| UBA52       | 103.85   | 161.804   | 114.221   | 179.539   | 119.449   | 113.277   |
| LOC10050611 | 0        | 0.0755802 | 0         | 0         | 0         | 0.0532705 |
| ROD1        | 19.1721  | 15.6146   | 18.5819   | 14.1467   | 17.1989   | 16.5328   |
| ZFAND1      | 29.9596  | 25.9711   | 23.3893   | 24.1527   | 26.0168   | 20.7878   |
| FAM55D      | 0        | 0.0418725 | 0         | 0.0583699 | 0         | 0         |
| RAD51D      | 2.8973   | 4.00167   | 4.02523   | 5.16463   | 3.85459   | 2.95899   |
| LOC10050551 | 0.119642 | 0.0423119 | 0.126797  | 0         | 0.152401  | 0.0596446 |
| C4orf48     | 4.69321  | 9.72525   | 4.43315   | 12.7049   | 6.20031   | 6.59182   |
| HSD11B1     | 87.9471  | 53.3886   | 60.9676   | 51.4131   | 36.1      | 38.7374   |
| LOC10050581 | 6.68442  | 5.7746    | 7.26188   | 7.09108   | 7.83221   | 6.9954    |
| CASC5       | 0.300154 | 0.298427  | 0.189516  | 0.398886  | 0.413579  | 0.46686   |
| LOC404266   | 1.87E-08 | 2.12E-07  | 1.52E-06  | 0.463217  | 1.09287   | 0.287435  |
| RPL36A-HNRI | 52.3764  | 42.9833   | 47.4412   | 39.4453   | 43.2666   | 42.2054   |
| LOC541471   | 7.58802  | 9.19743   | 6.25018   | 11.6051   | 5.53112   | 3.22468   |
| NANOG       | 0.489942 | 0.303223  | 0.0370889 | 0.0920096 | 0.156023  | 0.519029  |
| WDR16       | 0.208014 | 0.0459781 | 0.0393668 | 0         | 0.132485  | 0         |
| MFSD11      | 14.2606  | 13.2675   | 11.04     | 12.1303   | 11.0062   | 10.109    |
| PLAGL2      | 6.64772  | 6.73213   | 6.43167   | 7.2453    | 8.05751   | 8.0421    |
| LOC10050651 | 0.101913 | 0.36042   | 0.462893  | 0.669863  | 0.584181  | 0.762095  |
| PLK5        | 0.269276 | 0.333307  | 0.366918  | 0.606829  | 0.308706  | 0.234922  |
| LOC285577   | 0        | 0         | 0         | 0         | 0         | 0         |
| MIR4748     | 0        | 0         | 0         | 0         | 0         | 0         |
| KCNK4       | 0.115676 | 0.255684  | 0.131352  | 0.0543092 | 0.073675  | 0.216254  |
| LOC145820   | 0.545482 | 0.414362  | 0.183254  | 0.404102  | 0.177616  | 0.220676  |
| LOC10050691 | 1.05647  | 1.5879    | 1.03968   | 2.77762   | 0.471009  | 0.592511  |

|             |          |           |           |           |           |           |
|-------------|----------|-----------|-----------|-----------|-----------|-----------|
| C16orf90    | 0        | 0.118334  | 0         | 0         | 0.085244  | 0         |
| DERL3       | 0.644046 | 1.32316   | 0.732623  | 0.605268  | 2.17812   | 0.882404  |
| EFNA1       | 54.8294  | 81.6798   | 55.9273   | 84.3746   | 87.3245   | 86.1204   |
| ZBTB4       | 25.1705  | 25.6969   | 29.8939   | 27.9985   | 27.4461   | 23.2752   |
| LOC10050582 | 0        | 0         | 0         | 0         | 0         | 0         |
| TFF3        | 8.90397  | 4.47071   | 4.32714   | 3.61264   | 7.35128   | 5.20607   |
| ABCG2       | 0.56902  | 0.503092  | 0.530155  | 0.472651  | 0.696946  | 0.422779  |
| CNN3        | 96.3427  | 53.849    | 69.2721   | 70.4807   | 69.7416   | 59.695    |
| MAGEE1      | 1.61453  | 0.982847  | 1.42257   | 1.16808   | 1.56774   | 1.41845   |
| STK38       | 28.1383  | 26.747    | 28.512    | 32.6079   | 33.9371   | 31.9215   |
| OR2M4       | 0        | 0         | 0         | 0         | 0         | 0         |
| HMHB1       | 0        | 0.480865  | 0         | 0         | 0         | 0         |
| LOC10050663 | 0.197825 | 0         | 0         | 0         | 0         | 0         |
| NUDT18      | 6.21565  | 8.55548   | 7.75303   | 11.7391   | 7.91757   | 9.41924   |
| RRP36       | 43.7717  | 41.9828   | 34.3928   | 44.4955   | 30.5543   | 32.452    |
| LOC10050692 | 0.259599 | 0.459042  | 0.589553  | 1.70631   | 0.992039  | 0         |
| MIR514-1    | 0        | 0         | 0         | 0         | 0         | 0         |
| C1orf51     | 17.7614  | 32.4219   | 16.9365   | 26.7184   | 17.4303   | 17.6564   |
| ARAP1-AS2   | 0.322476 | 0.13707   | 0.205356  | 0.0996734 | 0.440687  | 0.260419  |
| THBS1       | 29.4937  | 14.4723   | 12.2034   | 31.6882   | 21.7468   | 17.7295   |
| ATP5SL      | 29.8298  | 34.4601   | 27.1298   | 35.4832   | 27.952    | 31.2277   |
| SNORA70F    | 0        | 0         | 0         | 41.0907   | 0         | 0         |
| TAS1R2      | 0        | 0.141493  | 0.0302869 | 0         | 0.0254818 | 0         |
| TBX19       | 3.00817  | 3.25414   | 2.25041   | 2.82463   | 3.65152   | 3.2419    |
| ZBTB3       | 2.47462  | 2.12877   | 2.22771   | 2.85744   | 3.2161    | 2.50067   |
| SPIN1       | 26.3138  | 18.4685   | 25.8535   | 23.2442   | 25.0574   | 23.0259   |
| SNHG12      | 37.1311  | 56.1207   | 26.9587   | 27.3278   | 39.6958   | 33.1359   |
| ZNF502      | 3.83938  | 4.27757   | 4.0916    | 4.39639   | 5.32756   | 3.96797   |
| OR9K2       | 0        | 0         | 0         | 0         | 0         | 0         |
| TMLHE       | 5.42838  | 4.10744   | 5.90378   | 5.49692   | 5.01608   | 4.74871   |
| PTPRG       | 2.2797   | 1.34357   | 2.33253   | 1.15768   | 1.65862   | 0.946545  |
| PRODH       | 34.2838  | 44.6648   | 38.5682   | 37.8155   | 53.9266   | 37.4276   |
| DDX43       | 1.07843  | 1.44666   | 0.197057  | 0.20951   | 0.0947391 | 0.231735  |
| SLC22A14    | 0.104716 | 0         | 0.0396352 | 0.0491632 | 0.100041  | 0.0652544 |
| LOC10013208 | 2.31993  | 2.0493    | 5.26792   | 3.04762   | 8.86341   | 4.04445   |
| HCG22       | 0        | 0.0448654 | 0.089633  | 0         | 0.0646394 | 0.0210814 |
| LPCAT3      | 94.5625  | 74.9087   | 49.7132   | 61.7055   | 53.2564   | 62.8485   |
| RNF19B      | 14.6182  | 17.5283   | 11.6683   | 12.4488   | 13.6247   | 15.6079   |
| APOL4       | 1.56339  | 1.84237   | 4.41383   | 2.67562   | 5.11212   | 3.63348   |
| PARP10      | 25.6993  | 39.6641   | 21.2942   | 21.2197   | 32.1015   | 22.3103   |
| PSMB8       | 94.5061  | 119.94    | 56.3585   | 50.0667   | 81.9622   | 50.6489   |
| SLC15A2     | 2.12364  | 0.735583  | 0.977946  | 0.947285  | 1.14953   | 1.76592   |
| LOC10013028 | 0.191265 | 0.338208  | 0         | 0.179594  | 0.121817  | 0.238376  |

|             |           |          |           |           |           |           |
|-------------|-----------|----------|-----------|-----------|-----------|-----------|
| QTRT1       | 41.298    | 82.5735  | 48.1942   | 71.0546   | 59.3785   | 56.6927   |
| TMEM189     | 52.6891   | 58.1322  | 47.3067   | 58.9492   | 43.4655   | 51.48     |
| TICAM1      | 5.7849    | 9.31127  | 7.38288   | 9.36659   | 9.73068   | 8.0417    |
| DERA        | 20.9076   | 19.6743  | 18.6502   | 21.4689   | 17.2877   | 20.0384   |
| OTOP1       | 0.223103  | 0.197253 | 0.548892  | 0.680842  | 0.177619  | 0.382327  |
| LOC10050628 | 0.394436  | 0.412142 | 0.570036  | 0.471379  | 0.59379   | 0.469247  |
| CES5A       | 0.20399   | 0.187367 | 0.277961  | 0.255392  | 0.233862  | 0.290557  |
| C3orf70     | 2.90478   | 2.29562  | 2.00238   | 2.89516   | 2.33584   | 1.85059   |
| MIR4793     | 0         | 0        | 0         | 0         | 0         | 0         |
| TMED6       | 0.890395  | 0.787231 | 0.770325  | 1.91101   | 0.729126  | 0.15853   |
| RHBDD1      | 6.23844   | 5.30469  | 5.64013   | 6.43647   | 4.9361    | 5.22772   |
| LOC148824   | 0.0543307 | 0        | 0         | 0         | 0.138414  | 0.152355  |
| NHP2        | 70.6109   | 92.887   | 72.6427   | 85.28     | 75.3781   | 77.3546   |
| SCRT1       | 0.0276494 | 0        | 0.0209308 | 0.0778871 | 0.0704403 | 0.0172299 |
| TAS2R14     | 2.12145   | 2.09632  | 2.36169   | 2.10918   | 4.13297   | 3.26611   |
| FLJ44313    | 0.0495466 | 0        | 0.112521  | 0         | 0.0631131 | 0.123501  |
| PROX1       | 0.354861  | 0        | 0.293053  | 0.0908752 | 0.36984   | 0.0402063 |
| SH3GL1P1    | 0.89147   | 0.954198 | 1.52051   | 1.19006   | 1.58795   | 1.8308    |
| THOC3       | 9.89438   | 11.428   | 9.56833   | 11.2778   | 10.2723   | 10.6208   |
| FABP2       | 0         | 0        | 0         | 0         | 0         | 0.0282651 |
| ZFP30       | 3.3583    | 2.52381  | 3.22548   | 2.46358   | 3.30195   | 2.81213   |
| BIVM-ERCC5  | 3.21185   | 4.26     | 2.90351   | 0.79066   | 4.35695   | 2.42334   |
| ZSWIM2      | 0.0413535 | 0        | 0.0313048 | 0         | 0         | 0         |
| BMP5        | 0.282852  | 0.33344  | 0.142747  | 0.354125  | 0.06005   | 0.0881308 |
| FMR1        | 15.7375   | 16.2609  | 16.7456   | 12.2886   | 16.9813   | 13.7748   |
| CADM4       | 15.6663   | 14.5583  | 14.5305   | 21.1158   | 18.3978   | 18.6163   |
| JARID2      | 10.208    | 8.14184  | 10.7781   | 9.63201   | 10.1076   | 10.3979   |
| ZNRF2P1     | 0.253588  | 0.448413 | 0.345541  | 0.428607  | 0.16353   | 0.284445  |
| RAPGEF1     | 14.6027   | 15.8436  | 15.4719   | 12.9151   | 13.6359   | 11.8721   |
| CLCNKB      | 0.56119   | 0.706415 | 0.537472  | 0.784132  | 0.428841  | 0.420433  |
| ZNF19       | 1.09488   | 1.16163  | 0.966969  | 0.993806  | 1.2552    | 1.18262   |
| SLC12A8     | 9.87142   | 6.81025  | 2.95899   | 4.28643   | 6.087     | 4.99585   |
| SUN3        | 0         | 0.286655 | 0         | 0         | 0         | 0         |
| RAB27B      | 13.8382   | 9.84316  | 12.2558   | 8.64128   | 11.2464   | 11.1985   |
| LOC10050705 | 1.17145   | 1.08317  | 1.43262   | 0.9209    | 0.811434  | 0.791243  |
| MIR4520B    | 0         | 0        | 0         | 0         | 0         | 0         |
| C9orf84     | 0.985173  | 0.66845  | 0.366122  | 0.355531  | 0.841571  | 0.575678  |
| OR51T1      | 0         | 0        | 0         | 0         | 0         | 0         |
| ZBTB34      | 4.11294   | 3.48221  | 4.55475   | 3.32977   | 4.45231   | 4.17508   |
| OR4C13      | 0         | 0        | 0         | 0         | 0         | 0         |
| MIR4763     | 0         | 0        | 0         | 0         | 0         | 0         |
| DDB1        | 62.4547   | 52.1524  | 60.3484   | 54.7882   | 56.1671   | 53.3538   |
| ID3         | 31.8065   | 37.8497  | 43.1446   | 48.8346   | 29.7296   | 40.8194   |

|             |           |           |           |           |           |           |
|-------------|-----------|-----------|-----------|-----------|-----------|-----------|
| RNY1        | 0         | 0         | 0         | 267.88    | 0         | 0         |
| CLPB        | 3.11682   | 3.43056   | 2.35945   | 2.03073   | 2.28896   | 2.67557   |
| LOC10050728 | 1.33624   | 0.886067  | 0.395135  | 0.313678  | 0.643615  | 0.104086  |
| PAFAH2      | 16.2962   | 12.2567   | 14.0252   | 12.8283   | 10.357    | 13.5837   |
| KCTD18      | 9.24325   | 8.771     | 8.25309   | 6.70815   | 8.7767    | 8.54505   |
| LOC10050600 | 0         | 0         | 0         | 0         | 0         | 0         |
| MIR3127     | 0         | 0         | 0         | 0         | 0         | 0         |
| RNU105C     | 0         | 0         | 0         | 0         | 0         | 0         |
| AGPAT1      | 185.749   | 172.314   | 110.315   | 117.45    | 109.287   | 126.962   |
| SHH         | 0.0677791 | 0         | 0.0513091 | 0.19093   | 0.0431689 | 0.126711  |
| PP2672      | 0         | 0         | 0         | 0         | 0.0528661 | 0.0258625 |
| MIR188      | 0         | 0         | 0         | 0         | 0         | 0         |
| RPS9        | 1011.77   | 1783.03   | 1258.61   | 2177.33   | 1289.63   | 1210.15   |
| ADAM9       | 15.869    | 9.61831   | 13.775    | 8.96725   | 12.0495   | 10.5847   |
| WDFY4       | 0.57448   | 0.84098   | 1.03374   | 0.371409  | 1.44556   | 0.715983  |
| MSL3        | 16.2603   | 21.0264   | 17.7394   | 14.2049   | 22.2545   | 18.7187   |
| CHDH        | 6.29031   | 3.92576   | 2.74103   | 3.99557   | 3.65283   | 4.34807   |
| ABLIM1      | 58.5303   | 44.7966   | 72.8899   | 57.5362   | 72.1211   | 72.0675   |
| NRN1L       | 1.76413   | 6.62887   | 4.50717   | 6.4189    | 5.05613   | 3.57283   |
| LOC10050692 | 0         | 0         | 0         | 0         | 0         | 0         |
| FAM134B     | 15.9734   | 15.1232   | 16.1895   | 13.3517   | 7.95103   | 9.65191   |
| FBXO44      | 17.7598   | 30.9489   | 21.4335   | 28.0021   | 30.5604   | 25.1238   |
| BHLHA15     | 0.751048  | 0.664029  | 0.568548  | 0         | 0.239173  | 0.117005  |
| KCTD20      | 18.039    | 15.1507   | 20.7234   | 15.8921   | 17.2276   | 16.5206   |
| OR5H2       | 0         | 0         | 0         | 0         | 0         | 0         |
| KCNH6       | 0.0329277 | 0.0291125 | 0.0997057 | 0.0309185 | 0.0838873 | 0.0956473 |
| TLE2        | 20.464    | 25.1316   | 24.5196   | 33.6116   | 28.4182   | 26.0434   |
| LOC10050629 | 0.129019  | 0         | 0.0976684 | 0.43678   | 0         | 0.351623  |
| MEF2BNB     | 15.315    | 17.3284   | 11.8767   | 16.3264   | 12.2972   | 12.7389   |
| DNAI1       | 0.0800176 | 0.0353733 | 0.121148  | 0         | 0.0764455 | 0         |
| C5orf20     | 1.45348   | 1.08952   | 0.932855  | 0.593388  | 2.65644   | 0.886056  |
| KIAA0754    | 0.368327  | 0.120612  | 0.557651  | 0.294615  | 0.28672   | 0.263529  |
| FAM171B     | 0.690201  | 0.537004  | 1.10767   | 0.4407    | 1.60012   | 1.39354   |
| KCNF1       | 0         | 0.0786585 | 0.033674  | 0         | 0         | 0         |
| C6orf26     | 5.74371   | 16.8008   | 15.1475   | 20.2507   | 15.9797   | 14.4729   |
| HTR2A       | 0.251889  | 0.0312658 | 0.10708   | 0.0332053 | 0.140769  | 0.077257  |
| CYP7A1      | 0         | 0.0919995 | 0.0787708 | 0.0977067 | 0.0662737 | 0.0432288 |
| HLTF        | 8.08152   | 5.35171   | 6.64051   | 4.75676   | 7.331     | 5.0744    |
| ZGLP1       | 1.93395   | 4.20537   | 1.78055   | 3.14129   | 3.76181   | 3.35489   |
| LOC10030692 | 0.0982403 | 0         | 0         | 0.0409983 | 0.0625698 | 0.0850267 |
| HSD17B13    | 4.48641   | 6.33588   | 3.6523    | 2.79995   | 2.34534   | 3.17399   |
| LOC10050762 | 0.901631  | 2.15235   | 1.02381   | 1.35459   | 0.976231  | 0.786601  |
| CDC42EP1    | 44.022    | 65.8736   | 43.7165   | 59.0704   | 47.6644   | 44.3937   |

|             |          |          |           |           |           |           |
|-------------|----------|----------|-----------|-----------|-----------|-----------|
| ARHGAP22    | 1.78407  | 2.38214  | 2.34279   | 2.94017   | 2.45809   | 2.49578   |
| C11orf61    | 10.1437  | 14.2034  | 9.5899    | 12.4124   | 12.5704   | 11.3838   |
| SPIRE1      | 13.0329  | 8.51695  | 10.5237   | 11.7233   | 10.009    | 9.54579   |
| MEGF11      | 0.161908 | 0.186094 | 0.232874  | 0.349667  | 0.371233  | 0.494382  |
| BHLHE23     | 0        | 0        | 0         | 0         | 0         | 0.136514  |
| MIR3617     | 0        | 0        | 0         | 0         | 0         | 0         |
| PA2G4       | 32.6033  | 37.8592  | 30.88     | 37.4769   | 31.2697   | 34.8393   |
| IPO4        | 14.9033  | 17.3432  | 13.9659   | 16.3763   | 16.0887   | 16.1336   |
| CYCS        | 35.7088  | 24.6288  | 25.8377   | 25.7498   | 20.9104   | 22.5439   |
| PKN1        | 14.1144  | 22.8095  | 18.2798   | 15.6644   | 18.5175   | 13.1531   |
| ZNF831      | 0.311297 | 0.21308  | 0.129229  | 0.0660038 | 0.409324  | 0.137668  |
| GDPD2       | 5.48107  | 15.5262  | 10.4657   | 21.279    | 12.4018   | 10.6331   |
| VAC14       | 13.6747  | 16.8754  | 14.158    | 14.6145   | 13.7475   | 14.9475   |
| CYFIP1      | 40.5896  | 32.1836  | 36.0617   | 33.0306   | 49.3108   | 51.1214   |
| 6-Mar       | 23.592   | 20.1534  | 27.5675   | 20.3591   | 26.028    | 22.1962   |
| VHLL        | 0        | 0        | 0         | 0         | 0         | 0         |
| GJD4        | 0        | 0        | 0.0511588 | 0.126914  | 0.0430424 | 0.210567  |
| MIR4507     | 0        | 0        | 0         | 0         | 0         | 0         |
| KIAA1324L   | 2.03163  | 1.49893  | 2.04653   | 1.60184   | 1.67181   | 1.40466   |
| OR5A2       | 0        | 0        | 0         | 0         | 0         | 0         |
| MGC12916    | 0.412082 | 0.500964 | 0.623897  | 0.193469  | 0.164036  | 0.353089  |
| SRSF6       | 89.1125  | 91.6775  | 85.0311   | 78.9921   | 95.8924   | 91.4322   |
| GDI1        | 51.7486  | 66.7754  | 60.8415   | 67.4006   | 75.0545   | 68.4277   |
| CRSP8P      | 5.06676  | 5.47486  | 5.41833   | 3.70052   | 5.01954   | 5.01154   |
| MIR15A      | 0        | 0        | 0         | 0         | 0         | 0         |
| ACOXL       | 0        | 0        | 0.129454  | 0         | 0.0544581 | 0.133206  |
| GPR126      | 6.14985  | 5.03549  | 7.87284   | 5.42331   | 7.13646   | 6.8875    |
| SENP5       | 9.67697  | 8.99761  | 9.19416   | 9.3567    | 10.195    | 9.05957   |
| STEAP2      | 3.96997  | 3.04167  | 4.98988   | 4.01704   | 4.21708   | 3.45749   |
| PTGFRN      | 18.4078  | 15.6712  | 16.4257   | 17.955    | 15.4903   | 17.5353   |
| C9orf148    | 0        | 0        | 0         | 0         | 0         | 0.0666742 |
| CSTB        | 1064.56  | 1093.92  | 752.533   | 851.047   | 645.335   | 731.381   |
| SOX9        | 57.5431  | 33.6834  | 39.7677   | 51.9127   | 37.9923   | 62.0104   |
| RPH3A       | 0        | 0        | 0         | 0         | 0         | 0         |
| RPL7L1      | 15.3441  | 10.4376  | 14.0967   | 9.45095   | 14.2435   | 12.2911   |
| LOC1005057: | 2.69671  | 2.0759   | 1.47168   | 1.74463   | 1.63002   | 1.71223   |
| GPR34       | 3.55528  | 1.52528  | 5.37315   | 1.64222   | 3.15604   | 1.91354   |
| RP1L1       | 0.522998 | 0.294256 | 0.305932  | 0.290188  | 0.302818  | 0.296282  |
| MBTPS2      | 5.07372  | 3.40699  | 4.06772   | 2.57304   | 3.17694   | 2.88158   |
| CKAP4       | 41.3404  | 39.4712  | 39.3167   | 42.8718   | 34.5789   | 40.7824   |
| PSMD5       | 21.7574  | 15.3275  | 17.4393   | 17.0158   | 16.3028   | 14.1202   |
| AZGP1P1     | 3.24634  | 1.51952  | 2.81937   | 3.22821   | 5.10822   | 4.22468   |
| LOC1005055: | 461.91   | 748.717  | 641.058   | 1024.07   | 682.364   | 551.698   |



|             |           |           |           |           |           |           |
|-------------|-----------|-----------|-----------|-----------|-----------|-----------|
| PP12719     | 0.862002  | 0.508085  | 1.16007   | 0.539604  | 1.46404   | 1.37275   |
| BTN3A2      | 28.9858   | 26.7448   | 17.3476   | 11.0515   | 28.9593   | 17.1196   |
| PGAM2       | 5.21908   | 2.54289   | 7.25832   | 2.98255   | 5.0703    | 3.15435   |
| SMAP2       | 21.2618   | 18.1171   | 19.0999   | 20.2318   | 27.6514   | 19.2144   |
| NME4        | 50.3043   | 72.9597   | 64.5549   | 78.1054   | 58.9608   | 51.3993   |
| ALG11       | 3.45182   | 2.04443   | 3.39785   | 2.6707    | 2.49942   | 2.23177   |
| LOC10050587 | 0.290419  | 0.08559   | 0.183207  | 0.136349  | 0.277454  | 0.301628  |
| F13B        | 0         | 0         | 0         | 0         | 0         | 0         |
| GSK3B       | 11.5535   | 8.17257   | 11.3578   | 9.04483   | 9.42394   | 9.98007   |
| DPH3        | 6.58878   | 5.54627   | 6.5008    | 5.44222   | 4.56733   | 5.35112   |
| VEGFC       | 4.45441   | 4.33214   | 3.93402   | 3.43905   | 2.96313   | 3.08422   |
| SPRED3      | 0.166498  | 0.660083  | 0.419508  | 0.0781696 | 0.356939  | 0.700274  |
| TRIM64      | 0         | 0.0309402 | 0         | 0.182553  | 0         | 0         |
| SLC5A4      | 0.562219  | 0.497079  | 0.65775   | 0         | 0.325528  | 0.286651  |
| MORN4       | 4.18216   | 4.27369   | 3.60783   | 3.37618   | 5.19195   | 5.26223   |
| DEFA6       | 0.728132  | 0         | 0         | 0         | 0.927502  | 1.36122   |
| BRI3        | 82.1034   | 113.968   | 95.6418   | 113.214   | 94.0061   | 75.5184   |
| TLX1NB      | 0         | 0         | 0         | 0.0519641 | 0         | 0         |
| LOC10050687 | 0.65395   | 1.31572   | 1.66352   | 1.53459   | 1.68397   | 1.26712   |
| LOC10050700 | 1.888     | 3.7558    | 0.714611  | 0         | 1.50309   | 0.882389  |
| MOBP        | 0.0967127 | 0.15592   | 0.101443  | 0.217948  | 0.0923953 | 0.0803564 |
| RPL32P3     | 4.81119   | 6.22714   | 5.74475   | 5.86826   | 6.98153   | 5.53267   |
| SCN1A       | 0.082939  | 0         | 0.0356632 | 0.058984  | 0.0337567 | 0         |
| SWI5        | 20.106    | 25.1213   | 17.8635   | 24.0796   | 13.3424   | 18.3812   |
| RUFY1       | 28.9777   | 28.3934   | 27.4673   | 27.9946   | 28.5143   | 28.5598   |
| CLCN3       | 19.0096   | 9.43917   | 16.0385   | 10.5127   | 12.9697   | 15.535    |
| LOC10065287 | 14.0058   | 19.5191   | 13.6687   | 13.1549   | 17.092    | 10.893    |
| RAB20       | 5.70298   | 4.47496   | 4.04736   | 3.61463   | 3.90468   | 2.62097   |
| MIR4421     | 0         | 0         | 0         | 0         | 0         | 0         |
| KRT35       | 3.04153   | 1.00831   | 0.143887  | 75.0594   | 1.04918   | 169.852   |
| RRP7A       | 12.4994   | 12.0555   | 9.90093   | 12.3742   | 11.5201   | 11.0596   |
| CXorf51A    | 0         | 0         | 0         | 0         | 0         | 0         |
| NEUROG1     | 0         | 0         | 0         | 0         | 0         | 0         |
| GLIPR2      | 12.0315   | 13.2288   | 11.0729   | 6.19119   | 8.58913   | 6.71646   |
| LOC255187   | 0.160403  | 0.0567274 | 0.097141  | 0         | 0.102162  | 0.0399826 |
| MAST4       | 8.53061   | 7.86158   | 10.1149   | 8.40932   | 9.85527   | 9.99809   |
| EIF5A       | 194.184   | 229.238   | 158.974   | 210.28    | 168.618   | 187.378   |
| TBX22       | 0.326736  | 0.604919  | 0.137411  | 0.266319  | 0.236039  | 0.230944  |
| PCDHGA9     | 0.896921  | 0.6848    | 0.306859  | 0.612619  | 0.722892  | 0.66371   |
| AREG        | 5.31962   | 3.18917   | 4.30027   | 3.89491   | 4.53679   | 4.49486   |
| MORF4L2     | 99.7475   | 85.7405   | 85.8057   | 86.4397   | 84.4671   | 84.4165   |
| OR4F17      | 0         | 0         | 0         | 0         | 0         | 0         |
| FOXA2       | 0.168112  | 0         | 0         | 0         | 0         | 0         |

|             |          |          |            |             |          |           |
|-------------|----------|----------|------------|-------------|----------|-----------|
| HERC6       | 12.9248  | 8.94827  | 3.30798    | 3.10968     | 4.82774  | 3.30515   |
| SLC1A6      | 2.94416  | 1.95228  | 2.69307    | 6.62333     | 4.25816  | 12.7281   |
| LOC10049918 | 0.237079 | 0.314415 | 0.17947    | 0.222613    | 0.150997 | 0.221606  |
| INTS8       | 11.737   | 9.85251  | 10.4938    | 8.8718      | 11.3917  | 11.7779   |
| ABCC2       | 0.915832 | 0.455468 | 0.375532   | 0.322482    | 0.449626 | 0.249685  |
| TEX9        | 3.61586  | 1.90455  | 2.44603    | 2.09494     | 1.71497  | 2.3012    |
| UGT2B10     | 0.368511 | 0        | 0          | 0           | 0        | 0         |
| CBLN3       | 3.93972  | 4.5933   | 1.93364    | 1.42282     | 7.72071  | 4.37056   |
| DEFB127     | 0        | 0        | 0          | 0           | 0        | 0         |
| OR56B4      | 0        | 0.109444 | 0          | 0           | 0        | 0.0771386 |
| NAALADL1    | 1.04503  | 2.67286  | 1.38442    | 2.2429      | 2.59104  | 2.25601   |
| MIR3161     | 0        | 0        | 0          | 0           | 0        | 0         |
| UGT1A8      | 1.06E-08 | 8.45E-09 | 8.70E-09   | 8.10E-09    | 9.09E-09 | 7.41E-09  |
| FAM86C1     | 4.59391  | 5.68432  | 3.42959    | 4.77217     | 4.29137  | 3.97805   |
| LOC10050571 | 0.765058 | 1.18373  | 1.44788    | 1.79594     | 2.19271  | 2.0262    |
| MAN1C1      | 5.59273  | 4.7535   | 6.24533    | 3.88784     | 5.4513   | 3.50441   |
| MIA-RAB4B   | 6.77E-05 | 1.66E-05 | 0.00044519 | 0.000139589 | 9.62E-05 | 3.28E-05  |
| DDX31       | 4.57454  | 4.9047   | 5.29003    | 5.94239     | 5.69516  | 5.58554   |
| ASL         | 15.4949  | 17.6971  | 11.8571    | 14.7833     | 15.2553  | 17.1283   |
| CTHRC1      | 15.7857  | 10.7921  | 31.9589    | 9.30715     | 10.4632  | 10.3517   |
| DEFB106B    | 0        | 0        | 0          | 0           | 0        | 0         |
| LOC729852   | 6.05191  | 5.06317  | 4.20804    | 3.83053     | 5.5105   | 5.02839   |
| LRRC8D      | 6.99755  | 4.90749  | 4.97495    | 5.98514     | 4.04491  | 3.65203   |
| TAF1L       | 1.6914   | 0.883699 | 2.15336    | 0.996214    | 1.94884  | 1.43411   |
| LOC10028780 | 1185.21  | 1442.18  | 1164.71    | 1484.64     | 1156.73  | 1094.33   |
| MACROD1     | 20.4481  | 31.4881  | 23.9226    | 38.4008     | 32.2674  | 28.0774   |
| LOC440944   | 12.8425  | 16.0153  | 13.8398    | 11.5323     | 14.573   | 12.4761   |
| SNORD12B    | 0        | 0        | 0          | 0           | 0        | 0         |
| HIST2H2AB   | 0        | 0        | 0.299209   | 0           | 0.251739 | 0         |
| MT1M        | 7.367    | 13.7506  | 4.02773    | 12.6821     | 9.90551  | 6.8862    |
| DERL1       | 25.2741  | 22.678   | 26.0791    | 22.3792     | 20.9275  | 20.5508   |
| C16orf46    | 1.95981  | 1.60274  | 1.41389    | 1.02435     | 1.22633  | 1.49225   |
| PRRG1       | 1.96295  | 1.37047  | 1.66555    | 1.08979     | 1.25021  | 1.26796   |
| EIF4H       | 201.55   | 189.689  | 189.676    | 179.754     | 172.264  | 167.437   |
| LOC645177   | 0        | 0        | 0.0372272  | 0           | 0.187927 | 0.091935  |
| ARMC9       | 1.61209  | 1.22169  | 0.80195    | 1.08123     | 0.850734 | 1.69344   |
| NFATC4      | 8.99803  | 14.34    | 11.2226    | 10.7558     | 18.7628  | 12.3911   |
| MIR3188     | 0        | 0        | 0          | 0           | 0        | 0         |
| LOC642838   | 0        | 0        | 0          | 0           | 0        | 0         |
| TESC        | 26.3805  | 15.4051  | 18.3179    | 25.5142     | 12.4817  | 12.802    |
| PIF1        | 1.24626  | 2.47086  | 1.08637    | 1.84399     | 2.02046  | 2.09452   |
| TSSK4       | 3.33216  | 1.81906  | 2.90036    | 1.61134     | 3.34125  | 1.45456   |
| PUS10       | 3.3365   | 2.70031  | 3.01147    | 2.81963     | 3.51448  | 3.32666   |

|             |           |          |           |          |           |           |
|-------------|-----------|----------|-----------|----------|-----------|-----------|
| TTC3P1      | 17.2468   | 11.3459  | 14.6266   | 10.0766  | 12.4745   | 12.5099   |
| ARPC1B      | 60.9466   | 79.0364  | 43.779    | 43.2724  | 54.9155   | 45.7564   |
| RAB3GAP2    | 6.5761    | 5.52748  | 6.77499   | 5.66333  | 6.09666   | 5.40735   |
| C19orf81    | 0.167637  | 0.444643 | 0.634512  | 0.944453 | 0.854154  | 0.522323  |
| LOC1005055† | 1.79574   | 1.47008  | 1.81251   | 1.81107  | 1.22844   | 1.65782   |
| OR8J3       | 0         | 0        | 0         | 0        | 0         | 0         |
| NAT6        | 10.2823   | 18.2145  | 10.0407   | 16.5988  | 17.2157   | 14.057    |
| DSEL        | 1.79134   | 0.989867 | 2.3423    | 1.41444  | 1.09554   | 0.995819  |
| PLEKHH2     | 10.2556   | 12.1664  | 13.3918   | 9.41124  | 21.9065   | 12.8585   |
| MAGEB2      | 0         | 0        | 0         | 0        | 0         | 0.041149  |
| SNORA63     | 525.13    | 425.596  | 198.763   | 205.454  | 362.33    | 136.349   |
| ESP33       | 0         | 0.316086 | 0.202977  | 0.167847 | 0.341549  | 0         |
| CCR7        | 4.16796   | 2.77414  | 1.63076   | 0.219868 | 3.4301    | 1.34242   |
| DEFB110     | 0         | 0        | 0         | 0        | 0         | 0         |
| TMPRSS6     | 0.558051  | 1.89134  | 1.85408   | 3.58068  | 5.41038   | 4.6174    |
| IPO13       | 11.9087   | 11.3421  | 10.0593   | 10.5911  | 11.3308   | 11.78     |
| CA5A        | 0         | 0        | 0         | 0        | 0         | 0         |
| MIR4782     | 0         | 0        | 0         | 0        | 0         | 0         |
| SAR1B       | 18.361    | 13.4144  | 15.2898   | 14.1272  | 13.8805   | 12.88     |
| EDC4        | 14.2535   | 18.7313  | 18.1897   | 18.7028  | 21.5427   | 19.8798   |
| YKT6        | 52.6592   | 54.8399  | 43.8332   | 49.9895  | 43.7665   | 46.2926   |
| MIR555      | 0         | 0        | 0         | 0        | 0         | 0         |
| TUBB8       | 0         | 0.031636 | 0.121892  | 0.209991 | 0.0911586 | 0         |
| DBNL        | 60.7528   | 64.9947  | 51.4027   | 55.1684  | 57.1641   | 67.4224   |
| RNASE2      | 0.3546    | 0        | 0.671086  | 0        | 0.225847  | 0.110486  |
| MIR3658     | 0         | 0        | 0         | 0        | 0         | 0         |
| SRBD1       | 3.68642   | 3.61102  | 3.37286   | 2.31596  | 2.70262   | 3.17314   |
| DICER1      | 13.463    | 9.34488  | 13.6295   | 9.13186  | 13.9974   | 10.8764   |
| FASTKD2     | 7.93497   | 6.78479  | 7.25636   | 7.18367  | 6.65691   | 5.64395   |
| SPTLC1      | 39.0687   | 29.4686  | 44.1501   | 37.3499  | 41.2372   | 35.3136   |
| MIR376B     | 0         | 0        | 0         | 0        | 0         | 0         |
| MARVELD2    | 2.32421   | 1.84523  | 3.30343   | 2.58324  | 2.41682   | 2.24642   |
| MAGEB1      | 0         | 0        | 0         | 0        | 0         | 0.0770064 |
| PCDHB15     | 1.0017    | 2.04021  | 2.59261   | 1.64734  | 2.81233   | 1.23819   |
| PRIMA1      | 4.70062   | 3.01606  | 2.60271   | 3.4806   | 3.23336   | 3.93353   |
| ANTXRL      | 0.0964017 | 0        | 0.0729766 | 0        | 0.0920982 | 0.0300367 |
| RBM19       | 12.447    | 16.6771  | 12.3619   | 13.5066  | 14.094    | 13.4607   |
| CDH7        | 0.146854  | 0.129839 | 0.111169  | 0        | 0         | 0         |
| UBE4B       | 17.9267   | 17.5898  | 20.8834   | 17.2068  | 21.1142   | 22.9013   |
| GOLT1B      | 16.9016   | 12.0081  | 15.2622   | 10.1457  | 12.9562   | 10.9274   |
| TSNAX       | 19.6619   | 20.2251  | 21.9932   | 16.2846  | 20.2069   | 16.9702   |
| LOC1005064† | 2.18201   | 1.71484  | 3.90007   | 5.06528  | 2.70226   | 2.37954   |
| SMARCA1     | 7.96373   | 5.97745  | 8.97909   | 6.98108  | 7.00287   | 6.41197   |

|            |          |           |           |          |           |           |
|------------|----------|-----------|-----------|----------|-----------|-----------|
| SAMSN1     | 5.62452  | 4.04653   | 2.67156   | 1.24267  | 5.4788    | 2.13047   |
| ODF3L1     | 0        | 0.833827  | 1.42786   | 0.354221 | 0.480531  | 0.470158  |
| TRIM69     | 1.57997  | 1.73589   | 0.973965  | 1.2081   | 1.30501   | 1.0402    |
| TAGLN3     | 3.84163  | 4.00559   | 3.19151   | 2.64093  | 1.91046   | 4.37723   |
| PDSS2      | 7.32709  | 5.28031   | 5.21176   | 5.11458  | 4.49057   | 5.13452   |
| LOC339666  | 0.343436 | 0.182187  | 0.15599   | 0.257985 | 0.349978  | 0.513635  |
| BRCA2      | 0.569957 | 0.547739  | 0.43146   | 0.325762 | 0.499794  | 0.324288  |
| NIPAL3     | 10.1461  | 5.80813   | 9.89232   | 10.0424  | 9.1236    | 9.66596   |
| CHMP2B     | 25.1586  | 20.283    | 21.5923   | 14.8635  | 23.5241   | 21.3008   |
| SOX1       | 0        | 0.0419098 | 0.0179418 | 0        | 0.0603812 | 0.0147694 |
| TCP1       | 75.3163  | 63.7554   | 66.1216   | 68.3683  | 55.9926   | 57.6483   |
| RGS20      | 3.03811  | 1.70878   | 1.36092   | 1.86226  | 1.93304   | 1.11848   |
| GPR111     | 0.432135 | 0.531571  | 1.08095   | 0.917388 | 1.36418   | 1.69769   |
| EIF2C4     | 11.3622  | 12.5006   | 13.8253   | 12.1624  | 15.3833   | 12.6491   |
| LOC150197  | 0.185349 | 0.450653  | 0.28062   | 0.565628 | 0.354149  | 0.548632  |
| MIR1272    | 0        | 0         | 0         | 0        | 0         | 0         |
| NT5M       | 3.22497  | 3.08892   | 2.89907   | 3.40672  | 2.39633   | 2.67955   |
| TRHR       | 0        | 0         | 0         | 0        | 0         | 0         |
| C7orf47    | 17.7988  | 37.7451   | 24.7997   | 31.488   | 34.0907   | 29.2558   |
| PPP3CB     | 25.5486  | 24.7921   | 26.9242   | 22.4382  | 22.1364   | 18.8888   |
| SDHA       | 68.4909  | 58.8627   | 59.8147   | 60.6423  | 54.5512   | 47.8598   |
| BUD13      | 12.0015  | 12.6992   | 9.92893   | 13.9393  | 12.5467   | 10.9439   |
| LOC440132  | 0        | 0         | 0.322703  | 0        | 1.08602   | 0         |
| LOXL2      | 6.62066  | 6.39762   | 8.08175   | 5.18137  | 5.81727   | 4.9415    |
| GLB1       | 13.8301  | 13.1237   | 12.2694   | 10.9198  | 13.0117   | 11.526    |
| HOXB13-AS1 | 0        | 0.233461  | 0         | 0        | 0         | 0         |
| GRM2       | 0.679904 | 0.986644  | 1.28151   | 2.31007  | 0.984403  | 0.427182  |
| SLC9A3R1   | 55.3323  | 50.1979   | 40.7548   | 53.6025  | 44.9304   | 44.3247   |
| SLC16A9    | 0.342457 | 0.237897  | 0.685138  | 1.05656  | 0.685496  | 1.99686   |
| TRIML1     | 0        | 0         | 0         | 0        | 0.0410866 | 0         |
| STATH      | 0        | 0         | 0         | 0        | 0         | 0         |
| INPP5J     | 2.14659  | 2.09978   | 3.4574    | 5.14625  | 4.24697   | 2.6184    |
| FBXO5      | 3.74068  | 4.51745   | 3.36934   | 3.18077  | 3.28369   | 3.84025   |
| HSPA14     | 12.4665  | 12.5088   | 10.5345   | 10.7802  | 11.6699   | 10.4424   |
| GABARAPL1  | 75.8648  | 62.6394   | 66.4321   | 69.5609  | 56.2002   | 57.0018   |
| DOCK9      | 18.5067  | 14.6272   | 21.9587   | 16.4374  | 19.4532   | 17.503    |
| KRT26      | 2.8619   | 0.161509  | 0.0460952 | 9.54841  | 0.0387821 | 10.359    |
| NFKBID     | 3.3049   | 5.64246   | 4.01155   | 4.70838  | 7.62123   | 4.61606   |
| TEC        | 1.95101  | 1.17393   | 2.66667   | 1.39942  | 1.89843   | 1.87433   |
| DUS3L      | 11.7631  | 20.6186   | 16.2638   | 23.7738  | 20.8658   | 17.6289   |
| SLC26A2    | 29.126   | 8.54228   | 12.1041   | 12.3241  | 9.59304   | 9.03482   |
| RPS26P11   | 68.3163  | 115.672   | 43.3483   | 71.479   | 77        | 80.5846   |
| WBP5       | 42.0049  | 33.2035   | 40.3232   | 26.5423  | 31.3246   | 33.3434   |

|             |           |           |          |          |          |           |
|-------------|-----------|-----------|----------|----------|----------|-----------|
| IQCF5       | 0         | 0         | 0.234834 | 0        | 0        | 0         |
| HAGHL       | 2.10929   | 6.31199   | 3.19349  | 7.46531  | 4.75364  | 4.70159   |
| XAGE3       | 0.339923  | 0         | 0        | 1.27674  | 0.216499 | 0         |
| SPDYE6      | 1.54167   | 1.81033   | 1.66312  | 1.93929  | 1.21455  | 1.14766   |
| KIAA1468    | 17.5418   | 13.8588   | 18.4923  | 13.6932  | 18.7218  | 16.7482   |
| LMO2        | 15.1782   | 17.247    | 15.331   | 11.8536  | 17.8305  | 12.4978   |
| RG9MTD3     | 7.76958   | 8.16474   | 7.999    | 7.29551  | 9.24661  | 8.05101   |
| QKI         | 12.7938   | 11.1936   | 13.5881  | 9.36723  | 11.2448  | 8.64142   |
| RPS10       | 350.389   | 555.867   | 423.245  | 683.163  | 390.096  | 354.095   |
| EML1        | 4.71124   | 3.45519   | 6.83693  | 4.62763  | 4.72902  | 4.11285   |
| C7orf30     | 25.9523   | 25.6626   | 28.0907  | 25.8117  | 23.0539  | 23.301    |
| OSTalpha    | 1.5622    | 2.49931   | 1.63311  | 1.18748  | 1.89519  | 0.880783  |
| TOP2B       | 37.0269   | 25.9358   | 35.2803  | 29.6814  | 35.9332  | 32.2059   |
| INSRR       | 0.0463892 | 0         | 0        | 0        | 0        | 0         |
| C3orf35     | 1.30645   | 1.95878   | 1.69311  | 2.83848  | 1.66129  | 1.21961   |
| TFPI2       | 1.06238   | 0.426949  | 0.95045  | 0.453435 | 0.615123 | 0.180554  |
| CASZ1       | 23.1735   | 22.9668   | 29.9811  | 29.6989  | 35.0296  | 35.7384   |
| VILL        | 4.84269   | 7.51659   | 6.54439  | 7.51132  | 8.31629  | 7.75676   |
| OR2L1P      | 0         | 0         | 0        | 0        | 0        | 0         |
| NRL         | 0.629365  | 0.417334  | 0.794055 | 1.03419  | 0.400846 | 0.620974  |
| MIR4636     | 0         | 0         | 0        | 0        | 0        | 0         |
| OR5AR1      | 0         | 0         | 0        | 0        | 0        | 0         |
| MRPL27      | 84.6972   | 96.2075   | 67.9297  | 100.757  | 70.0269  | 80.8764   |
| BDKRB2      | 2.57202   | 3.831     | 2.21014  | 2.02345  | 2.25796  | 2.44026   |
| ZNF260      | 6.17422   | 3.75598   | 5.25401  | 3.57017  | 5.99744  | 5.18235   |
| C1orf210    | 17.1002   | 15.589    | 14.6518  | 14.9384  | 12.1494  | 15.8408   |
| GIMAP7      | 21.1034   | 22.3578   | 14.5293  | 8.19963  | 17.7281  | 10.8834   |
| LYRM4       | 18.2935   | 20.5257   | 17.0141  | 21.3282  | 17.8712  | 16.4151   |
| KIAA0101    | 4.79586   | 5.37889   | 3.12414  | 5.38359  | 3.72718  | 5.88669   |
| LINC00246A  | 0.306326  | 0.317854  | 0.23189  | 0.239696 | 0.488332 | 0.381779  |
| PTENP1      | 7.20296   | 6.30229   | 6.88033  | 5.05503  | 5.49241  | 6.08829   |
| XPO1        | 50.61     | 39.3076   | 44.5124  | 32.7598  | 44.9083  | 47.7722   |
| DZIP1       | 3.2416    | 2.15406   | 2.3264   | 2.86365  | 2.87752  | 2.90545   |
| CTRL        | 1.23997   | 2.95158   | 1.15528  | 1.61212  | 2.24772  | 1.4434    |
| LOC10050618 | 0.0951591 | 0.0420668 | 0        | 0        | 0        | 0.0889487 |
| SLC20A1     | 11.052    | 11.5505   | 8.30021  | 10.8158  | 8.35776  | 9.57659   |
| LOC10050678 | 0         | 0.119024  | 0.203819 | 0        | 0        | 0         |
| LOC10050580 | 0         | 0         | 0        | 0        | 0        | 0         |
| C10orf113   | 0         | 0         | 0        | 0        | 0.588513 | 0.157774  |
| SYNDIG1L    | 0.231424  | 0.170509  | 0.233585 | 0.108652 | 0.29479  | 0.120178  |
| MIR4683     | 0         | 0         | 0        | 0        | 0        | 0         |
| MGST3       | 65.5059   | 74.1152   | 75.2215  | 78.3144  | 56.5442  | 50.3424   |
| ANXA8L1     | 62.832    | 88.9211   | 70.7209  | 88.2004  | 95.9369  | 87.2289   |

|             |          |          |          |          |          |           |
|-------------|----------|----------|----------|----------|----------|-----------|
| RAPGEF5     | 7.02807  | 6.48118  | 7.54435  | 5.49036  | 8.75064  | 6.30016   |
| PCDHB12     | 0.47462  | 0.394336 | 0.450503 | 0.363666 | 0.488993 | 0.344278  |
| C1orf116    | 25.2019  | 16.392   | 22.0197  | 23.9307  | 28.0448  | 27.7443   |
| CD226       | 0.495004 | 0.269324 | 0.317072 | 0.143016 | 0.291019 | 0.189825  |
| GLB1L       | 3.22306  | 3.56204  | 2.53137  | 2.91291  | 3.79766  | 2.81187   |
| ARHGEF2     | 14.5119  | 18.6083  | 16.2732  | 12.8321  | 15.0814  | 12.2982   |
| NID1        | 9.16528  | 9.0821   | 10.8571  | 7.71946  | 8.55394  | 7.46643   |
| MIR4496     | 0        | 0        | 0        | 0        | 0        | 0         |
| GLMN        | 7.0575   | 7.45184  | 6.18815  | 5.91115  | 5.9427   | 5.41041   |
| MYBBP1A     | 16.3556  | 18.9918  | 23.4445  | 24.1502  | 20.6336  | 19.2426   |
| VAX2        | 1.28651  | 1.57493  | 1.79796  | 3.06649  | 1.38665  | 1.60339   |
| TTY7        | 0        | 0        | 0        | 0        | 0        | 0         |
| FCER1G      | 40.1993  | 31.2803  | 24.8644  | 15.1907  | 32.6284  | 22.403    |
| SEMA6D      | 1.87468  | 1.77983  | 1.799    | 1.45989  | 1.62367  | 1.59729   |
| EVI5L       | 6.75394  | 9.49406  | 8.36686  | 9.60106  | 9.32605  | 9.8599    |
| FAM3A       | 18.3567  | 25.04    | 20.7319  | 27.8164  | 26.2808  | 25.1356   |
| BNIP1       | 8.40774  | 12.6529  | 7.35132  | 9.42998  | 7.42435  | 8.39004   |
| HIST1H2BO   | 0        | 0        | 0        | 0        | 0        | 0         |
| AVPR1A      | 0.585606 | 0.124261 | 0.549701 | 0.30793  | 0.283461 | 0.233552  |
| PCDHGA4     | 0.162434 | 0.216537 | 0.921783 | 0.229334 | 0.255024 | 0.228948  |
| CSN3        | 0        | 0        | 0        | 0        | 0        | 0         |
| LOC10012961 | 0.324076 | 0        | 0.327103 | 0.202868 | 0.240807 | 0.302926  |
| FAM82B      | 18.0706  | 20.6726  | 21.1077  | 17.3025  | 19.6772  | 15.4584   |
| C9orf16     | 241.218  | 403.134  | 186.387  | 379.47   | 232.985  | 291.059   |
| MIR4659B    | 0        | 0        | 0        | 0        | 0        | 0         |
| ABL2        | 2.51965  | 2.54368  | 2.47406  | 2.71882  | 2.44407  | 1.71702   |
| C7orf64     | 7.86154  | 8.79695  | 8.92685  | 8.82363  | 9.81853  | 8.26703   |
| HOXD8       | 6.3123   | 7.24686  | 5.99081  | 4.27694  | 4.83699  | 3.6249    |
| LOC10013041 | 0.899599 | 0.397684 | 1.362    | 0.563139 | 0.381973 | 1.12118   |
| PHF7        | 3.81802  | 6.07107  | 5.79498  | 6.99277  | 6.04305  | 3.10368   |
| KIAA0664L3  | 3.75102  | 3.10914  | 4.48115  | 2.42148  | 3.58357  | 3.28707   |
| PRODH2      | 0        | 0        | 0        | 0        | 0        | 0         |
| MRPL22      | 7.06772  | 7.03459  | 5.90068  | 6.54984  | 6.41397  | 6.03062   |
| MIR337      | 0        | 0        | 0        | 0        | 0        | 0         |
| C18orf1     | 4.6494   | 2.00006  | 3.64556  | 3.9066   | 2.95912  | 3.06342   |
| NF1P2       | 0        | 0        | 0        | 0        | 0        | 0         |
| OR2T11      | 0        | 0        | 0        | 0        | 0        | 0         |
| C13orf35    | 0        | 0        | 0        | 0        | 0        | 0.0283767 |
| THAP11      | 19.3781  | 20.9891  | 20.6458  | 23.2242  | 21.4491  | 19.094    |
| MIR323B     | 0        | 0        | 0        | 0        | 0        | 0         |
| MEF2BNB-MI  | 0.960986 | 1.60496  | 1.66164  | 3.89597  | 1.80404  | 1.98219   |
| SCAMP2      | 43.5477  | 42.3675  | 51.9148  | 45.3178  | 56.3452  | 50.6951   |
| HDAC2       | 12.0623  | 10.2214  | 10.6278  | 9.6045   | 9.41614  | 10.0431   |

|             |           |           |           |           |           |           |
|-------------|-----------|-----------|-----------|-----------|-----------|-----------|
| TNFAIP8L2-S | 5.77E-06  | 8.12E-05  | 7.64E-06  | 0.799251  | 4.63E-06  | 0.573353  |
| ZNF616      | 2.57374   | 2.18913   | 2.81152   | 2.14138   | 3.38221   | 2.90317   |
| SRSF2       | 162.263   | 195.327   | 153.722   | 165.703   | 181.277   | 141.696   |
| ADAM32      | 0.183642  | 0.487094  | 0.528269  | 0.172437  | 0.257318  | 0.320426  |
| NR1D1       | 28.4424   | 49.1285   | 32.6042   | 36.1067   | 31.0548   | 30.9023   |
| BCR         | 14.4045   | 16.3755   | 13.7449   | 14.002    | 15.531    | 17.3038   |
| TAAR6       | 0         | 0         | 0         | 0         | 0         | 0         |
| RIMS4       | 0.268923  | 0.239453  | 0.198155  | 0.217736  | 0.486939  | 0.576824  |
| FAM90A5     | 0         | 0.0115191 | 0.140646  | 0.0122336 | 0.0569007 | 0.0401884 |
| OR52B2      | 0         | 0         | 0.0922227 | 0         | 0         | 0         |
| CRY2        | 20.3047   | 26.8091   | 28.3558   | 28.2654   | 27.3343   | 24.0414   |
| SLC9A3R2    | 32.9679   | 61.3118   | 31.7074   | 35.0303   | 28.7083   | 26.7619   |
| PRH1        | 0.303534  | 1.34931   | 0.597768  | 2.83035   | 0.572389  | 1.03316   |
| CDH24       | 3.75766   | 6.09766   | 3.53074   | 5.64329   | 6.64371   | 6.27653   |
| CD244       | 0.926527  | 0.807721  | 0.553185  | 0.392289  | 0.814667  | 0.303116  |
| FLJ42709    | 1.70694   | 1.60774   | 2.33702   | 1.23997   | 2.02572   | 1.00091   |
| ARL2BP      | 19.3632   | 22.2496   | 22.8715   | 22.3808   | 20.0574   | 17.8542   |
| GABARAP     | 385.047   | 418.839   | 376.837   | 449.419   | 364.263   | 386.912   |
| NEURL3      | 1.51643   | 1.45246   | 0.382648  | 0.237317  | 1.04631   | 0.866227  |
| NCOR1P1     | 0         | 0.39899   | 0.341619  | 0         | 0         | 0         |
| ECE1        | 28.9049   | 35.7169   | 30.2756   | 25.1177   | 28.2001   | 25.1635   |
| FOXP1       | 8.15655   | 7.89057   | 7.34478   | 8.38006   | 6.81899   | 7.22698   |
| EML5        | 0.663261  | 0.562957  | 0.411715  | 0.5356    | 0.473126  | 0.31412   |
| LOC144481   | 2.31039   | 0.6809    | 0.194331  | 0.72314   | 0.654     | 0.319942  |
| PROM2       | 53.7417   | 51.3869   | 54.505    | 59.2727   | 65.2185   | 62.4952   |
| LOC1002876  | 0.340489  | 0.0792208 | 0.723817  | 0.168271  | 0.86245   | 0.41716   |
| LMF1        | 22.2343   | 29.6574   | 24.7097   | 40.0694   | 23.3518   | 25.8958   |
| HIST1H3C    | 0         | 0.333734  | 0         | 0         | 0         | 0.235223  |
| ADAMTS9     | 2.7399    | 2.38882   | 2.15283   | 1.25528   | 2.26755   | 1.70012   |
| ZNF492      | 0.137372  | 0.297053  | 0.139274  | 0.12899   | 0.160769  | 0.200018  |
| C11orf10    | 212.261   | 235.415   | 186.278   | 230.617   | 160.912   | 159.487   |
| CDC25B      | 17.04     | 26.6979   | 20.8732   | 22.4833   | 29.4392   | 20.8771   |
| ZDHHC24     | 9.62576   | 13.6908   | 11.7222   | 14.2257   | 10.1823   | 10.5363   |
| PLDN        | 14.6102   | 14.253    | 15.9714   | 11.6959   | 14.652    | 12.5148   |
| FCAMR       | 0.0548138 | 0.031765  | 0         | 0.101206  | 0.0349112 | 0.0341575 |
| PTGER1      | 0.0764869 | 0.0676249 | 0.057901  | 0.21546   | 0.29229   | 0.0953268 |
| TCF24       | 0         | 0         | 0         | 0         | 0         | 0         |
| MRPL24      | 64.0691   | 66.4152   | 53.7282   | 58.1932   | 50.0521   | 49.6445   |
| PICK1       | 23.7223   | 31.5943   | 23.3296   | 29.575    | 26.7689   | 27.5988   |
| LOC729177   | 0         | 0.156863  | 0.100731  | 0         | 0.0847497 | 0.0829203 |
| MIR378      | 0         | 0         | 0         | 0         | 0         | 0         |
| MIR320D1    | 0         | 0         | 0         | 0         | 0         | 0         |
| APOBEC2     | 0.195029  | 0.229909  | 0.344488  | 0.488344  | 0.33124   | 0.445623  |

|             |          |          |          |          |          |          |
|-------------|----------|----------|----------|----------|----------|----------|
| FH          | 44.4511  | 39.844   | 34.1993  | 36.0759  | 32.5081  | 35.0775  |
| ATG12       | 10.5835  | 11.2444  | 12.9168  | 9.19963  | 12.6665  | 10.926   |
| C2orf27A    | 1.74678  | 2.68104  | 1.11272  | 1.20934  | 2.34046  | 2.17545  |
| SLC1A1      | 0.811654 | 0.578721 | 0.673887 | 0.76213  | 0.850461 | 0.929998 |
| OXT         | 0.930645 | 2.19418  | 1.17417  | 0.873861 | 1.58062  | 0.773251 |
| IPO9        | 6.87883  | 6.87574  | 6.94724  | 6.6757   | 7.5398   | 6.36059  |
| CLIP4       | 25.1228  | 20.6455  | 30.8485  | 27.6638  | 32.6383  | 27.6778  |
| H2AFB3      | 0        | 1.07895  | 0.410582 | 0.143236 | 0.528959 | 0.675972 |
| NAP1L1      | 48.2149  | 45.5912  | 46.1229  | 39.9588  | 47.3652  | 39.3589  |
| C11orf36    | 0        | 0        | 0        | 0        | 0        | 0        |
| AHR         | 22.3031  | 18.1637  | 25.7654  | 15.1106  | 21.8141  | 15.9764  |
| MMP7        | 36.6272  | 14.8838  | 33.8285  | 32.668   | 33.79    | 26.3849  |
| LRRC28      | 7.39446  | 6.40564  | 8.3682   | 9.11744  | 7.08815  | 7.26096  |
| UBE2L6      | 74.1931  | 69.1762  | 29.5385  | 23.0211  | 38.9168  | 22.7906  |
| LOC10065282 | 0        | 0        | 0.226718 | 0.355919 | 0        | 0        |
| LOC10050604 | 2.81643  | 2.1581   | 1.98992  | 1.23414  | 1.55463  | 1.28706  |
| UHRF2       | 12.7749  | 12.0127  | 11.303   | 10.4452  | 14.0491  | 10.4907  |
| KCNK7       | 18.5824  | 28.7822  | 34.2114  | 41.2048  | 43.2825  | 50.6947  |
| LOC10028761 | 6.52915  | 5.32861  | 5.70301  | 4.48018  | 1.11958  | 0.782441 |
| RNU1-7      | 44.7492  | 54.6816  | 26.1981  | 59.5068  | 34.2526  | 27.9645  |
| LOC728026   | 27.5704  | 16.7115  | 16.6988  | 12.5716  | 21.0703  | 16.6901  |
| ASIP        | 9.99048  | 8.3913   | 12.4787  | 8.20829  | 13.9986  | 9.33846  |
| MPST        | 48.6139  | 81.8693  | 62.1026  | 89.7495  | 64.6599  | 74.7959  |
| DNAH2       | 0.270787 | 0.313078 | 0.26806  | 0.241225 | 0.168043 | 0.190376 |
| AGFG1       | 10.4938  | 8.22583  | 9.70148  | 8.22904  | 8.88858  | 7.34611  |
| GALNTL4     | 7.58139  | 7.69602  | 7.95586  | 9.94372  | 11.0369  | 8.52391  |
| LOC10065294 | 0        | 0        | 0        | 0        | 0        | 0        |
| TBPL1       | 10.6109  | 12.7795  | 10.183   | 10.2773  | 11.2281  | 11.0899  |
| PRPF40A     | 17.0843  | 14.0934  | 15.9799  | 11.8123  | 16.0002  | 13.8779  |
| SNAR-I      | 0        | 0        | 0        | 0        | 0        | 0        |
| MIR134      | 0        | 0        | 0        | 0        | 0        | 0        |
| SNORD115-3  | 0        | 0        | 0        | 0        | 0        | 0        |
| FAM178B     | 4.66643  | 5.57807  | 3.63319  | 6.59745  | 3.41026  | 5.64626  |
| KIT         | 27.3365  | 16.6052  | 17.2     | 13.8077  | 21.9172  | 19.1792  |
| ACTL9       | 0        | 0        | 0        | 0        | 0        | 0        |
| SRCRB4D     | 2.30476  | 2.4408   | 1.40328  | 0.9068   | 1.35029  | 1.22346  |
| MGC15705    | 1.06797  | 0.94423  | 1.10244  | 0.729313 | 1.5459   | 1.02852  |
| PRR14L      | 6.43334  | 5.21139  | 5.98887  | 5.50203  | 6.80506  | 5.87262  |
| FCGRT       | 65.8593  | 86.2941  | 80.6619  | 81.4083  | 94.8925  | 68.1547  |
| CHRNA9      | 0        | 0.041363 | 0        | 0.087858 | 0.119187 | 0.058307 |
| PELO        | 6.27593  | 6.52806  | 6.75536  | 6.30936  | 6.38679  | 7.26917  |
| IQCG        | 6.15839  | 7.07984  | 6.44248  | 4.85242  | 7.66238  | 5.10852  |
| NAA50       | 37.8814  | 26.8215  | 28.1926  | 25.1625  | 26.4602  | 24.4901  |



|             |          |          |           |           |           |           |
|-------------|----------|----------|-----------|-----------|-----------|-----------|
| SCAI        | 2.15856  | 2.03354  | 2.84052   | 2.02685   | 2.57218   | 1.95741   |
| PGM5P2      | 0.786749 | 0.741084 | 1.00471   | 0.639484  | 1.10134   | 0.856059  |
| DEFB130     | 0        | 0        | 0         | 0         | 0         | 0         |
| MIR3169     | 0        | 0        | 0         | 0         | 0         | 0         |
| LOC10050587 | 0.392416 | 0        | 0.0990204 | 0.491297  | 0.249932  | 0         |
| TCL1B       | 0        | 0        | 0         | 0         | 0.0617709 | 0         |
| DHX16       | 18.3012  | 21.3746  | 19.7524   | 17.9135   | 23.066    | 22.0984   |
| ROGDI       | 14.4711  | 21.5866  | 11.7974   | 19.2325   | 19.1898   | 19.7004   |
| GAK         | 24.0471  | 27.029   | 25.9827   | 27.8225   | 28.1715   | 27.8165   |
| MOV10       | 28.0479  | 35.1368  | 27.8446   | 27.9354   | 38.4122   | 30.3885   |
| DDX55       | 13.4923  | 15.5552  | 12.2739   | 13.4608   | 14.5256   | 14.5067   |
| MIR3180-1   | 0        | 0        | 0         | 0         | 0         | 0         |
| PID1        | 12.2451  | 9.58147  | 14.5898   | 8.06312   | 14.669    | 11.0674   |
| GSTT1       | 82.0411  | 107.308  | 41.3945   | 51.9946   | 0         | 0         |
| HNF1A-AS1   | 0        | 0        | 0         | 0         | 0         | 0         |
| MIR578      | 0        | 0        | 0         | 0         | 0         | 0         |
| MELK        | 1.70083  | 2.38402  | 1.72718   | 2.41505   | 1.84948   | 3.30891   |
| IFNK        | 0        | 0        | 0         | 0         | 0         | 0.0621355 |
| SBDSP1      | 24.1257  | 24.1643  | 26.8721   | 23.5249   | 21.1783   | 18.7651   |
| PPP2R2C     | 10.9237  | 10.4155  | 15.0612   | 12.7823   | 11.6259   | 10.7372   |
| LOC283867   | 0        | 0        | 0         | 0.0560662 | 0         | 0.0744168 |
| MLXIP       | 1.07003  | 2.78932  | 10.5211   | 7.08789   | 5.67873   | 10.8035   |
| TSTA3       | 66.1749  | 95.3246  | 65.1231   | 77.8987   | 78.3834   | 67.6896   |
| HLA-G       | 7.76101  | 9.19539  | 3.22794   | 1.7794    | 6.38681   | 4.07015   |
| BRAT1       | 16.0587  | 27.0843  | 19.096    | 25.6063   | 26.3013   | 24.7199   |
| WAC         | 48.6446  | 44.4008  | 47.8774   | 43.1029   | 47.159    | 41.2512   |
| LRAT        | 0.276434 | 0.314236 | 0.239157  | 0.333729  | 0.0880312 | 1.04588   |
| FAM49A      | 3.52301  | 2.89233  | 3.07967   | 4.0366    | 3.1921    | 5.56688   |
| MADCAM1     | 0        | 0        | 0.380321  | 0.471747  | 0.278029  | 0.33859   |
| PKDCC       | 13.3588  | 18.8048  | 12.8318   | 8.18559   | 8.73961   | 5.28147   |
| MRPL47      | 27.5094  | 26.5643  | 22.6071   | 24.0926   | 18.601    | 21.1671   |
| SNORD12     | 0        | 0        | 0         | 0         | 0         | 0         |
| SFTPB       | 0        | 0        | 0.0202336 | 0         | 0         | 0         |
| LOC375196   | 0.413099 | 0.496818 | 0.558795  | 0.102729  | 0.634293  | 0.577628  |
| PDXDC1      | 42.5365  | 32.9662  | 34.9297   | 33.3831   | 30.0331   | 30.748    |
| MIR300      | 0        | 0        | 0         | 0         | 0         | 0         |
| FLG         | 117.62   | 47.5561  | 160.376   | 98.6778   | 185.291   | 176.398   |
| KCNJ11      | 1.80669  | 1.05758  | 0.604275  | 0.712231  | 0.806842  | 1.12824   |
| C3orf25     | 0        | 0.210334 | 0.288144  | 0.223382  | 0.363644  | 0.237196  |
| PNP         | 17.7325  | 18.858   | 12.3472   | 14.2944   | 14.5969   | 16.9141   |
| LOC10050607 | 2.92515  | 5.68971  | 6.42162   | 7.96533   | 9.87413   | 9.11414   |
| ATP6V1H     | 28.4749  | 20.8306  | 26.9526   | 24.9015   | 21.2703   | 26.1111   |
| LOC10012805 | 0.140493 | 0.041405 | 0         | 0         | 0.0298269 | 0         |

|             |          |           |           |           |           |           |
|-------------|----------|-----------|-----------|-----------|-----------|-----------|
| C4BPB       | 0.501789 | 0.693277  | 0.379857  | 0.5301    | 0.756234  | 0.351802  |
| MC5R        | 8.10441  | 7.60863   | 7.21031   | 6.74694   | 3.88461   | 5.41478   |
| ZNF547      | 2.85506  | 3.00921   | 2.48616   | 1.9742    | 2.99742   | 2.48046   |
| RUNX2       | 2.34522  | 1.72513   | 2.51675   | 2.29047   | 3.17703   | 2.38165   |
| C1orf144    | 42.3803  | 43.4421   | 41.3303   | 46.8893   | 45.0572   | 39.25     |
| LOC10028753 | 0        | 0         | 0         | 0         | 0         | 0         |
| CHRFAM7A    | 0.215309 | 0.344665  | 0.316223  | 0.352173  | 0.20983   | 0.182059  |
| LOC644145   | 2.65734  | 0.469891  | 0.804649  | 1.99616   | 0.338495  | 0.331189  |
| LOC10050661 | 0        | 0         | 0         | 0         | 0.223075  | 0         |
| MIR329-1    | 0        | 0         | 0         | 0         | 0         | 0         |
| LETM2       | 0.394626 | 0.29773   | 0.768187  | 0.658763  | 0.474212  | 0.941625  |
| CDH2        | 0.711126 | 0.648381  | 0.504681  | 0.667736  | 0.283075  | 0.484688  |
| USP51       | 0.837204 | 0.99343   | 0.850584  | 0.620622  | 1.1787    | 0.87867   |
| DR1         | 21.4791  | 18.1186   | 20.9021   | 13.9762   | 20.0983   | 18.9347   |
| FNDC8       | 0.809133 | 0.93      | 1.04128   | 0.683787  | 1.80369   | 1.21012   |
| ZNF847P     | 0        | 0         | 0         | 0         | 0         | 0         |
| SCAMP1      | 12.2131  | 8.9984    | 10.2997   | 8.85244   | 8.53892   | 8.10664   |
| FCGR1A      | 0.239506 | 0.60514   | 0.281944  | 0.184733  | 0.307791  | 0.0896168 |
| FAM160A2    | 13.658   | 17.2115   | 21.8332   | 20.9802   | 23.2163   | 22.6694   |
| SLC10A7     | 3.10337  | 2.60663   | 3.04845   | 1.9914    | 2.45416   | 3.00537   |
| LOC10065283 | 1.65E-07 | 1.12E-07  | 2.16E-07  | 1.19E-07  | 2.82E-07  | 1.27E-07  |
| PCYOX1      | 37.5017  | 26.6928   | 36.0749   | 26.1668   | 24.3974   | 23.7482   |
| POGZ        | 26.2583  | 26.9689   | 26.6005   | 26.775    | 34.0993   | 28.2964   |
| ARL2-SNX15  | 3.31E-14 | 0.317384  | 1.24E-12  | 0.348643  | 0.247482  | 0.229773  |
| LOC10065293 | 6820.96  | 10815.8   | 6523.08   | 10793     | 6549.83   | 5257.72   |
| KLRC1       | 0.354775 | 0.31367   | 0.356562  | 0         | 0.353584  | 0.221081  |
| HMGB2       | 46.655   | 58.9196   | 38.6039   | 38.4222   | 49.5363   | 51.0094   |
| NBR2        | 7.74     | 10.2296   | 4.65114   | 6.29371   | 10.8757   | 8.40338   |
| SNAR-E      | 0        | 0         | 0         | 0         | 0         | 0         |
| CXCL5       | 0.123397 | 0         | 0.0311374 | 0.0772452 | 0.235777  | 0.179423  |
| ATP5G2      | 290.691  | 340.677   | 252.054   | 347.116   | 257.235   | 250.645   |
| LOC10050708 | 5.4957   | 3.40127   | 3.60557   | 2.66619   | 5.25036   | 4.10962   |
| C5orf24     | 16.616   | 13.1754   | 15.1598   | 11.271    | 14.2983   | 12.7004   |
| DCLK2       | 2.03329  | 2.09552   | 2.1042    | 1.80437   | 2.46174   | 2.12698   |
| LRRC38      | 0.762876 | 0.481776  | 0.577501  | 0.869828  | 0.555291  | 0.645175  |
| FRG1B       | 15.762   | 13.5483   | 11.1103   | 6.98905   | 18.9732   | 13.0242   |
| LOC286190   | 1.17E-11 | 3.67E-13  | 9.32E-13  | 0.0521251 | 0.034289  | 0.0169156 |
| DOCK10      | 3.28633  | 3.02993   | 3.3493    | 1.12866   | 3.86039   | 2.07978   |
| ECD         | 14.6008  | 11.1504   | 12.2584   | 10.8929   | 12.8737   | 12.2708   |
| KDELR3      | 4.70563  | 5.14562   | 7.43734   | 4.46514   | 3.67741   | 3.81985   |
| C8orf86     | 0        | 0         | 0         | 0         | 0         | 0         |
| LOC10013191 | 0        | 0.0398284 | 0.0341014 | 0.0845984 | 0.0286912 | 0.0280719 |
| HERC2       | 7.31524  | 6.5461    | 7.12674   | 6.01196   | 7.6095    | 7.39123   |

|             |           |           |           |           |           |           |
|-------------|-----------|-----------|-----------|-----------|-----------|-----------|
| SLC6A6      | 11.3845   | 13.9349   | 9.7049    | 12.0943   | 14.7763   | 10.5393   |
| ACCS        | 9.14574   | 20.979    | 13.2201   | 12.5525   | 18.9643   | 14.2939   |
| NKAP        | 9.89809   | 10.2396   | 9.68471   | 8.40899   | 9.0917    | 7.97234   |
| CAPS2       | 1.20126   | 0.722211  | 0.982107  | 0.812132  | 1.28535   | 0.92823   |
| CTSZ        | 84.8754   | 84.5406   | 69.5043   | 64.2381   | 72.788    | 60.3017   |
| TPP2        | 12.1288   | 11.3647   | 13.7491   | 12.1981   | 15.1841   | 12.6353   |
| SCN8A       | 0.219599  | 0.158148  | 0.341455  | 0.372551  | 0.287468  | 0.204742  |
| LOC10050710 | 0.335777  | 0.79166   | 0.593098  | 0.84077   | 0.784146  | 0.76722   |
| TRAF4       | 18.2328   | 22.2527   | 14.8681   | 19.6674   | 14.9367   | 13.9724   |
| PDCD1       | 0.632225  | 1.54793   | 0.294522  | 0.0456653 | 0.991182  | 0.151529  |
| RCL1        | 16.0057   | 16.4054   | 15.9407   | 15.0291   | 12.5096   | 11.8571   |
| SDC1        | 294.317   | 276.814   | 265.557   | 376.556   | 315.209   | 527.406   |
| OR2M5       | 0         | 0         | 0         | 0         | 0         | 0         |
| CHI3L1      | 387.362   | 368.126   | 915.32    | 802.202   | 286.511   | 375.336   |
| ZNF776      | 5.59766   | 4.98123   | 5.79211   | 4.5735    | 6.44742   | 5.76463   |
| TSPAN12     | 3.80983   | 3.05588   | 2.97326   | 2.10216   | 2.50155   | 2.81468   |
| LOC10050621 | 0         | 0         | 0         | 0         | 0         | 0         |
| TRPM5       | 0.0248431 | 0.0219647 | 0.0752256 | 0.466546  | 0.126582  | 0.696653  |
| RHCE        | 0.452822  | 0.536117  | 0.198059  | 0.36514   | 0.251478  | 0.275613  |
| LOC10028841 | 6.52743   | 5.45053   | 3.56872   | 5.78865   | 2.30964   | 2.93773   |
| SLC7A10     | 6.7796    | 6.11451   | 12.3151   | 5.47979   | 2.6989    | 1.11751   |
| OR56A1      | 0         | 0         | 0         | 0         | 0         | 0         |
| F7          | 0.553668  | 0.603847  | 0.321491  | 0.308428  | 0.538078  | 0.405447  |
| LOC10065300 | 1.9945    | 2.306     | 1.74213   | 2.59311   | 2.93148   | 2.19895   |
| IDH2        | 173.137   | 159.847   | 66.2459   | 70.7013   | 108.104   | 97.8939   |
| ZNF48       | 2.99379   | 4.17527   | 3.42986   | 4.58634   | 4.10683   | 3.91232   |
| PRNP        | 101.983   | 78.1364   | 91.2385   | 82.6987   | 82.0344   | 78.1777   |
| GARNL3      | 5.29035   | 4.97841   | 4.0643    | 4.08224   | 5.02081   | 3.91689   |
| NPAS4       | 0.328771  | 0.317104  | 0.20363   | 0.477098  | 0.209396  | 0.111751  |
| SLC25A15    | 4.6746    | 4.23375   | 4.22073   | 3.78182   | 3.65298   | 3.49293   |
| GDPD1       | 3.14576   | 3.17513   | 2.63611   | 1.85631   | 1.58858   | 1.63285   |
| PDCD4       | 156.423   | 91.758    | 119.977   | 125.533   | 114.794   | 131.26    |
| TMEM198     | 1.01331   | 1.87326   | 1.63877   | 1.90297   | 1.58412   | 2.411     |
| DKFZP434F14 | 0.522514  | 0         | 1.58218   | 0         | 0.332792  | 0.325609  |
| TLE6        | 1.18587   | 0.912376  | 1.05321   | 1.06337   | 0.689908  | 1.82819   |
| FANCG       | 8.09576   | 12.2222   | 6.53325   | 10.1118   | 10.1179   | 9.94709   |
| SLC7A7      | 3.75638   | 2.93693   | 2.14737   | 1.08716   | 3.77117   | 2.12607   |
| PRR20D      | 0         | 0         | 0         | 0         | 0         | 0         |
| RHD         | 0.496319  | 0.90906   | 0.390299  | 0.267701  | 0.656755  | 0.321289  |
| RGS7        | 0         | 0         | 0         | 0         | 0.0264093 | 0.0516785 |
| MIR1178     | 0         | 0         | 0         | 0         | 0         | 0         |
| NEB         | 0.454164  | 0.311707  | 0.918713  | 0.585479  | 0.554327  | 0.598345  |
| RNF181      | 61.5233   | 76.3592   | 60.736    | 65.5449   | 62.4686   | 59.4766   |

|             |           |           |           |          |          |           |
|-------------|-----------|-----------|-----------|----------|----------|-----------|
| KRTAP20-3   | 0         | 0         | 0         | 0        | 0        | 0         |
| SDSL        | 3.90197   | 4.00185   | 4.13533   | 3.44405  | 1.98815  | 2.23702   |
| ATP6V0D1    | 74.2433   | 72.5361   | 58.7463   | 70.6063  | 56.6139  | 66.1779   |
| NENF        | 65.1974   | 104.379   | 74.9533   | 106.789  | 67.4112  | 65.2716   |
| C1orf109    | 7.50142   | 9.37667   | 9.26855   | 8.46055  | 9.2259   | 7.76408   |
| IL16        | 11.0024   | 12.1684   | 9.7464    | 8.26425  | 12.7247  | 9.46048   |
| NCOR1       | 14.1595   | 11.8691   | 13.1307   | 11.3619  | 12.6596  | 11.0682   |
| SNORD114-2  | 0         | 0         | 0         | 0        | 0        | 0         |
| LOC285205   | 0.0928858 | 0         | 0.070315  | 0.436091 | 0        | 0.46306   |
| LOC10050654 | 0         | 0         | 0         | 0        | 0        | 0.0174973 |
| RNU4-1      | 0         | 0         | 0         | 0        | 17.4017  | 0         |
| PPY2        | 0         | 0         | 0.157877  | 0        | 0        | 0         |
| TAS2R46     | 0.257954  | 0         | 0.195273  | 0        | 0        | 0.0803731 |
| SNORD114-7  | 0         | 0         | 0         | 0        | 0        | 0         |
| HOXC9       | 2.15497   | 2.51989   | 2.68379   | 2.74149  | 3.05494  | 3.29223   |
| USP8        | 11.3304   | 8.27609   | 9.42473   | 7.28492  | 9.53185  | 8.68964   |
| LOC653566   | 40.461    | 34.8469   | 33.9498   | 30.7995  | 27.9798  | 30.6398   |
| LINC00310   | 0.525074  | 1.26612   | 1.34905   | 1.11557  | 1.14684  | 1.0345    |
| ZNF362      | 16.7231   | 21.2189   | 17.4671   | 21.6661  | 20.7735  | 17.2624   |
| CACNA2D4    | 0.665759  | 0.843161  | 0.844512  | 0.726511 | 1.07725  | 0.426086  |
| SNHG7       | 60.7224   | 121.764   | 66.537    | 100.034  | 66.4654  | 61.1195   |
| MKX         | 0.91781   | 1.31193   | 1.4907    | 0.634193 | 0.73904  | 0.622316  |
| MINA        | 16.8023   | 16.1301   | 15.5435   | 14.2641  | 13.4407  | 13.8396   |
| GSTT2B      | 28.2251   | 20.4092   | 19.3546   | 20.9035  | 32.4338  | 30.8184   |
| FKRP        | 4.63319   | 5.97772   | 4.9658    | 5.48358  | 5.96071  | 5.84438   |
| CRIPAK      | 11.61     | 15.8603   | 11.8781   | 13.2172  | 16.5819  | 12.3074   |
| PLEKHA4     | 13.1031   | 17.0087   | 12.6334   | 9.95149  | 15.3851  | 11.3246   |
| CCDC85A     | 2.26276   | 1.62849   | 2.31425   | 2.50123  | 1.47528  | 1.30162   |
| CACNG3      | 0         | 0         | 0         | 0        | 0        | 0         |
| SYK         | 8.1557    | 7.73826   | 9.26124   | 7.47968  | 9.10276  | 8.53946   |
| SAMD12-AS1  | 0         | 0         | 0         | 0        | 0        | 0         |
| EGR4        | 0         | 0.0377987 | 0.0970907 | 0        | 0.027229 | 0         |
| GALNT10     | 6.46109   | 5.28619   | 5.19526   | 4.61806  | 5.36397  | 4.15648   |
| RNF20       | 14.8123   | 10.9499   | 12.9568   | 10.6989  | 13.0152  | 12.8423   |
| FLJ31813    | 0.583229  | 0.680271  | 0.541972  | 0.593451 | 0.6437   | 0.65705   |
| PPAN        | 12.5677   | 24.5455   | 17.1829   | 22.1753  | 20.122   | 18.1339   |
| SNORD121A   | 0         | 0         | 0         | 0        | 0        | 0         |
| ACBD6       | 17.9097   | 17.7946   | 19.4893   | 22.3195  | 17.0263  | 14.8124   |
| GGH         | 23.5305   | 18.2515   | 12.8404   | 11.7251  | 12.4123  | 15.2929   |
| NUBP1       | 15.5088   | 20.3674   | 14.3492   | 16.4361  | 14.1522  | 13.5076   |
| ZNF211      | 10.1332   | 11.3434   | 8.31931   | 8.74763  | 12.4388  | 12.043    |
| PDZK1P1     | 10.6093   | 8.79617   | 6.3825    | 5.73969  | 4.80311  | 5.46011   |
| GSTA7P      | 0         | 0         | 0         | 0        | 0        | 0         |

|            |          |           |           |           |           |           |
|------------|----------|-----------|-----------|-----------|-----------|-----------|
| LOC644656  | 4.07493  | 5.44813   | 3.68664   | 2.98637   | 6.0136    | 4.39736   |
| SHANK1     | 0.057419 | 0.0888409 | 0.347732  | 0.377409  | 0.374847  | 0.313084  |
| PPM1F      | 13.6456  | 16.4637   | 14.4758   | 12.935    | 19.6755   | 15.0978   |
| TMEM67     | 1.94339  | 2.49782   | 2.27626   | 2.03767   | 2.53143   | 2.23067   |
| FAM20A     | 2.87503  | 3.00988   | 4.20165   | 3.7342    | 5.33721   | 3.54838   |
| GAA        | 16.2958  | 22.528    | 20.431    | 23.4264   | 21.1851   | 17.9606   |
| RAB14      | 54.1644  | 44.9977   | 48.5803   | 43.9878   | 47.3758   | 43.7056   |
| LOC1005063 | 0        | 0         | 0         | 0         | 0         | 0         |
| REG3A      | 0        | 0         | 0         | 0         | 0         | 0         |
| FLJ37035   | 0.763731 | 0.628763  | 0.731852  | 0.87785   | 1.25238   | 1.23434   |
| PCDHGA1    | 0.178579 | 0.0971027 | 0.062177  | 0.0963988 | 0.0344686 | 0.136626  |
| TMEM43     | 56.9171  | 57.7834   | 69.6442   | 67.4817   | 80.1125   | 68.5463   |
| CPA6       | 0        | 0         | 0.0413478 | 0         | 0         | 0.102111  |
| LOC1005073 | 1.38892  | 1.80588   | 2.47393   | 2.53164   | 2.6018    | 1.37465   |
| MRPL1      | 19.6738  | 15.0419   | 14.1608   | 11.4323   | 14.944    | 13.516    |
| BLNK       | 14.6727  | 14.5681   | 11.379    | 11.8458   | 14.2979   | 14.9158   |
| GMPR       | 6.17337  | 9.09685   | 5.103     | 7.92882   | 7.63774   | 6.89804   |
| IDI2-AS1   | 7.68291  | 2.63375   | 5.30735   | 5.79413   | 5.83341   | 4.76379   |
| CDKAL1     | 4.22541  | 3.60242   | 4.06687   | 4.56273   | 5.03637   | 4.64554   |
| FAM73B     | 31.7405  | 34.6674   | 25.8919   | 29.0159   | 31.5783   | 34.8866   |
| EPHA3      | 1.48471  | 0.860686  | 1.38612   | 0.774735  | 0.746047  | 0.678561  |
| RDH14      | 15.7461  | 12.7409   | 14.7668   | 9.98104   | 14.2525   | 13.7337   |
| KIAA0146   | 17.1685  | 15.0158   | 0         | 0         | 0         | 0         |
| HSPB2      | 12.0125  | 34.5371   | 32.1002   | 31.5291   | 23.4482   | 17.8041   |
| TNFRSF13B  | 0.080701 | 0         | 0         | 0.075777  | 0         | 0         |
| CCL21      | 50.9054  | 44.1466   | 38.9568   | 20.7653   | 93.4567   | 38.6559   |
| MIR4432    | 0        | 0         | 0         | 0         | 0         | 0         |
| REP15      | 1.49728  | 1.41205   | 0.377816  | 0.562368  | 0.699325  | 1.36846   |
| LILRB3     | 0.814724 | 0.846078  | 0.430537  | 0.280757  | 1.12748   | 0.566663  |
| BCKDK      | 38.9436  | 44.0275   | 39.2225   | 43.0463   | 39.6152   | 45.3564   |
| MTSS1L     | 16.7605  | 21.5854   | 17.8509   | 24.9804   | 24.0153   | 23.7022   |
| STAC       | 0.872942 | 0.979593  | 0.81332   | 1.00884   | 0.98366   | 0.648592  |
| CR1        | 0.187114 | 0.117504  | 0.23396   | 0.223785  | 0.183186  | 0.230564  |
| C19orf18   | 4.74261  | 6.28967   | 4.58745   | 6.80355   | 3.52403   | 3.28377   |
| RAD21L1    | 0        | 0         | 0.0438388 | 0         | 0         | 0.0360876 |
| BHLHE22    | 1.94274  | 1.66637   | 1.66821   | 1.55193   | 1.6621    | 2.47547   |
| KIAA1671   | 15.5123  | 10.0719   | 14.0602   | 14.6922   | 14.0708   | 13.0958   |
| SNAR-A14   | 0        | 0         | 0         | 0         | 0         | 0         |
| LOC1005071 | 0        | 0         | 0         | 0         | 0         | 0         |
| LOC284395  | 0        | 0         | 0         | 0         | 0         | 0         |
| OR7A17     | 0        | 0         | 0         | 0         | 0         | 0         |
| BCLAF1     | 26.0403  | 21.2264   | 23.5901   | 18.2044   | 25.8883   | 21.7074   |
| CTBS       | 13.8428  | 9.33705   | 9.6079    | 7.4747    | 9.14239   | 6.99931   |

|             |           |           |           |           |           |           |
|-------------|-----------|-----------|-----------|-----------|-----------|-----------|
| SEMA4G      | 4.83416   | 4.63638   | 6.41617   | 7.03945   | 8.18119   | 8.75452   |
| CLEC19A     | 0         | 0         | 0.158235  | 0         | 0         | 0         |
| OXCT1       | 28.759    | 22.0838   | 27.6835   | 20.7326   | 24.1176   | 27.398    |
| GBP3        | 15.8726   | 11.2038   | 3.23879   | 1.38001   | 11.0246   | 7.85593   |
| LOC10050683 | 0         | 0         | 0         | 0         | 0.186897  | 0         |
| MIR644      | 0         | 0         | 0         | 0         | 0         | 0         |
| LOC10028961 | 10.6718   | 18.6785   | 18.1185   | 21.8055   | 14.8533   | 13.6521   |
| FAM27A      | 0.631467  | 1.17615   | 0.918441  | 0.492746  | 0.924372  | 0.74613   |
| CYP4A22     | 0.126978  | 0         | 0.0961228 | 0         | 0.0404364 | 0.0197818 |
| SLC23A2     | 7.63708   | 8.99915   | 9.50045   | 9.46614   | 10.7367   | 9.98577   |
| FRMPD3      | 0.165936  | 0.0451415 | 0.0386505 | 0.0359564 | 0.0812965 | 0.047725  |
| C1orf167    | 0         | 0.0347851 | 0         | 0         | 0.0250581 | 0         |
| LOC10050611 | 1.67311   | 0.277361  | 1.58319   | 0.687322  | 0.999011  | 0.781958  |
| ZNF274      | 11.7188   | 13.5895   | 13.7717   | 13.8757   | 16.0899   | 13.6625   |
| NIPAL2      | 21.3459   | 17.6732   | 28.05     | 13.7587   | 27.786    | 24.0956   |
| RAB24       | 51.8366   | 75.7767   | 50.62     | 67.6367   | 71.8669   | 74.3915   |
| THNSL2      | 12.8877   | 17.3282   | 17.1191   | 19.0881   | 21.1865   | 17.7289   |
| CHMP5       | 30.1884   | 24.7015   | 27.5212   | 18.4426   | 25.3194   | 24.7832   |
| THEMIS      | 0.759055  | 0.475075  | 0.326499  | 0.0958595 | 0.309818  | 0.239798  |
| TTY17B      | 3.83162   | 0         | 0         | 0         | 0         | 0         |
| RND2        | 1.92176   | 1.16036   | 0.851582  | 1.12231   | 1.77627   | 2.20526   |
| C12orf39    | 12.7724   | 17.271    | 8.72088   | 2.82191   | 3.03062   | 4.99403   |
| HERPUD1     | 65.8789   | 49.5848   | 54.9967   | 45.9919   | 43.4218   | 46.9734   |
| IFNA6       | 0         | 0         | 0         | 0         | 0         | 0         |
| LCP2        | 9.82373   | 8.13113   | 5.09487   | 1.6486    | 10.7031   | 4.01169   |
| NRXN3       | 0.612352  | 0.69154   | 0.664864  | 0.634477  | 1.32629   | 0.68817   |
| C2orf61     | 0         | 0.239443  | 0         | 0         | 0.0868822 | 0         |
| CECR3       | 0         | 0         | 0         | 0         | 0         | 0         |
| LOC10050730 | 0.0538866 | 0         | 0.203962  | 0.0505986 | 0.137283  | 0.0671596 |
| LOC10013220 | 0         | 0         | 0         | 0         | 0         | 0         |
| SNAR-G2     | 0         | 0         | 0         | 0         | 0         | 0         |
| TTLL9       | 0.13254   | 0.117184  | 0.200667  | 0         | 0.168831  | 0.0412967 |
| LOC10050629 | 1.83328   | 2.34632   | 3.36287   | 4.03216   | 2.62314   | 2.43333   |
| FCHO2       | 10.7354   | 7.91825   | 10.5213   | 6.83112   | 9.43076   | 8.38996   |
| SOCS2       | 8.00026   | 7.64574   | 5.14606   | 4.95018   | 5.4783    | 5.01424   |
| SGMS2       | 4.51692   | 3.16935   | 4.51437   | 3.27525   | 3.70594   | 3.06511   |
| LOC10012841 | 3.1314    | 2.78635   | 1.20238   | 1.22671   | 1.21719   | 1.46651   |
| SET         | 87.4932   | 84.9019   | 78.0705   | 90.5115   | 78.3691   | 70.6273   |
| MED23       | 10.8885   | 8.1883    | 10.655    | 9.40005   | 11.3733   | 9.86472   |
| LOC643085   | 2.97583   | 3.16798   | 2.89635   | 2.96533   | 3.40384   | 3.8602    |
| PSMF1       | 28.9792   | 29.716    | 26.8347   | 29.3271   | 26.9509   | 26.0057   |
| SIPA1L2     | 7.63297   | 5.86438   | 7.69313   | 7.70581   | 8.34601   | 8.71574   |
| MFSD2B      | 0         | 0.126153  | 0.0540065 | 0.0669893 | 0.27263   | 0.266745  |

|             |           |           |          |           |           |          |
|-------------|-----------|-----------|----------|-----------|-----------|----------|
| GLYAT       | 2.19766   | 3.36047   | 10.5951  | 5.83005   | 5.84087   | 2.96181  |
| PLD1        | 10.4646   | 9.22748   | 13.2561  | 9.65952   | 12.1841   | 10.5432  |
| ERP29       | 116.909   | 120.257   | 122.016  | 134.414   | 116.65    | 114.504  |
| LOC10028785 | 0.4137    | 0         | 0        | 0         | 0.526976  | 0        |
| CROCCP3     | 2.2025    | 2.20058   | 2.64324  | 2.65658   | 3.46699   | 2.93467  |
| FAM134A     | 28.3792   | 32.5461   | 28.4855  | 32.3396   | 31.581    | 29.2524  |
| ERBB2       | 68.4786   | 58.0138   | 65.8085  | 74.2129   | 80.9868   | 91.6571  |
| MIR542      | 0         | 0         | 0        | 0         | 0         | 0        |
| C8orf83     | 6.6026    | 4.2147    | 5.16912  | 4.6502    | 3.77189   | 4.09717  |
| FANK1       | 2.81581   | 3.62118   | 2.19618  | 4.48679   | 4.78241   | 6.00849  |
| FAM75A5     | 0         | 0         | 0        | 0         | 0         | 0        |
| BMS1P1      | 1.26821   | 1.02528   | 2.01148  | 1.21456   | 1.6743    | 1.34958  |
| SULT1A4     | 20.0507   | 25.938    | 11.8509  | 18.2929   | 14.5187   | 12.3349  |
| PCBP1       | 201.799   | 209.004   | 187.044  | 201.442   | 169.916   | 171.525  |
| C8orf51     | 0.513098  | 0.317554  | 0.349576 | 0.0963582 | 0.522872  | 0.54356  |
| LOC10030265 | 0.643636  | 1.36988   | 0.631695 | 1.3284    | 0.820247  | 1.00602  |
| ITPR1       | 7.73138   | 4.81806   | 4.92049  | 5.03769   | 3.5365    | 3.64898  |
| FAM82A2     | 44.8601   | 37.7395   | 42.2148  | 42.5343   | 30.3899   | 32.6517  |
| TMEFF2      | 0.750486  | 1.02082   | 0.742928 | 0.271036  | 1.47073   | 0.935342 |
| FAM45A      | 11.2566   | 11.5697   | 11.3617  | 11.0102   | 10.2761   | 9.06058  |
| PITPNM1     | 7.80043   | 10.6182   | 5.17202  | 6.95733   | 6.74027   | 7.0253   |
| IGSF3       | 17.4768   | 14.0708   | 18.1505  | 18.3658   | 18.0236   | 18.7739  |
| NRBP2       | 47.0539   | 72.0421   | 62.1145  | 72.1399   | 86.749    | 67.1287  |
| NCEH1       | 3.57157   | 1.05905   | 1.37777  | 1.66327   | 1.11118   | 1.00116  |
| SEZ6        | 0.023032  | 0.0916526 | 0.108995 | 0         | 0.0586852 | 0        |
| SERINC3     | 54.72     | 38.0339   | 59.9613  | 39.6827   | 44.0868   | 41.7482  |
| C22orf23    | 12.0737   | 10.9331   | 12.8079  | 11.7785   | 13.6393   | 13.714   |
| CSNK1A1L    | 3.28608   | 1.82527   | 2.90206  | 2.68988   | 2.52214   | 2.86154  |
| FLJ35282    | 0.201277  | 0.177956  | 0.304736 | 0         | 0         | 0        |
| LOC10028909 | 3.79631   | 5.63163   | 5.95005  | 5.93664   | 3.577     | 2.83693  |
| NLGN1       | 0.156955  | 0.520386  | 0.297039 | 0.0736891 | 0.112461  | 0.134485 |
| ATF3        | 11.9016   | 12.0903   | 23.3515  | 12.8075   | 14.2119   | 7.18151  |
| OR52E8      | 0         | 0         | 0        | 0         | 0         | 0        |
| SEC14L6     | 135.37    | 92.8817   | 56.7408  | 40.8762   | 54.9838   | 116.972  |
| MYO1A       | 0.108612  | 0.0720212 | 0.267216 | 0.407942  | 0.34588   | 0.287651 |
| TMEM39A     | 9.95986   | 8.74638   | 8.58401  | 7.33006   | 9.32236   | 7.98885  |
| SPC25       | 0.815569  | 1.81714   | 1.13614  | 2.52716   | 1.94799   | 1.26074  |
| DLGAP2      | 0.0933954 | 0.0990892 | 0.162612 | 0.114006  | 0.41044   | 0.19788  |
| PHLPP2      | 2.04812   | 1.62021   | 2.50247  | 2.17058   | 2.31904   | 1.88833  |
| LGI3        | 1.96566   | 4.94636   | 2.56396  | 4.28775   | 3.77507   | 3.56167  |
| OTUD6A      | 0         | 0         | 0        | 0         | 0         | 0        |
| PECAM1      | 21.0732   | 24.4504   | 19.3509  | 14.9582   | 19.2927   | 14.6665  |
| TOMM40      | 29.1619   | 35.7437   | 25.6392  | 32.806    | 20.3788   | 25.4243  |

|             |          |          |           |          |           |           |
|-------------|----------|----------|-----------|----------|-----------|-----------|
| CFL1P1      | 0.290571 | 0.214087 | 0.0366607 | 0.136421 | 0.215911  | 0.0905358 |
| STAC2       | 90.8788  | 34.6023  | 51.7185   | 54.4371  | 46.4624   | 47.3559   |
| METTL21A    | 2.83686  | 2.2983   | 2.29213   | 2.2108   | 1.98567   | 2.14589   |
| CENPB       | 43.7588  | 57.6137  | 48.1852   | 61.6168  | 52.0021   | 43.2137   |
| SNORD22     | 711.614  | 1468.05  | 837.971   | 1187.9   | 1510.77   | 936.168   |
| PTH         | 0        | 0        | 0         | 0        | 0         | 0         |
| PLEKHD1     | 3.06159  | 1.1236   | 1.44306   | 1.68148  | 1.47165   | 1.04392   |
| COLEC10     | 0        | 0        | 0         | 0        | 0         | 0         |
| NRARP       | 16.5272  | 21.3252  | 22.6421   | 21.4239  | 15.4597   | 18.567    |
| FAM202A     | 0.152879 | 0.120148 | 0.334332  | 0.606105 | 0.313746  | 0.201121  |
| CYP17A1-AS1 | 1.81209  | 3.89091  | 2.15563   | 1.45845  | 2.96777   | 0.967903  |
| MIR4306     | 0        | 0        | 0         | 0        | 0         | 0         |
| GKN2        | 0        | 0        | 0.238632  | 0        | 0         | 0         |
| PLEKHG4B    | 0.587948 | 0.678663 | 0.531623  | 0.958462 | 0.837351  | 1.31797   |
| GRID1       | 0.786124 | 1.02808  | 1.1902    | 0.876563 | 1.03267   | 0.836877  |
| DNM3        | 0.883467 | 0.693132 | 0.697043  | 0.619351 | 0.847895  | 0.659061  |
| GLUL        | 135.049  | 153.043  | 117.813   | 99.0409  | 131.384   | 107.744   |
| CEP290      | 3.66522  | 2.61399  | 2.87638   | 2.14934  | 3.18079   | 2.83994   |
| COX11       | 22.0489  | 18.3111  | 20.613    | 22.7652  | 19.4827   | 18.6272   |
| POLR3B      | 5.38649  | 2.92482  | 4.56075   | 3.74931  | 4.21541   | 3.68084   |
| MIR452      | 0        | 0        | 0         | 0        | 0         | 0         |
| UTP20       | 4.10224  | 3.20024  | 3.43899   | 3.01456  | 3.43465   | 3.11207   |
| NUTF2       | 53.0475  | 63.7906  | 53.2656   | 54.8435  | 49.3664   | 52.069    |
| SNORA36C    | 0        | 0        | 0         | 0        | 0         | 0         |
| LOC10050673 | 0.503613 | 0.222631 | 0.190619  | 0.236442 | 0.641508  | 0.941491  |
| LGALS1      | 39.4664  | 32.7255  | 76.5568   | 37.9458  | 62.5562   | 51.1296   |
| UCHL3       | 47.7915  | 41.0875  | 43.5026   | 44.7374  | 36.8498   | 43.9109   |
| CNOT10      | 9.8252   | 10.3338  | 9.67735   | 9.84304  | 9.58432   | 9.4002    |
| SEMA4B      | 29.8173  | 32.7011  | 25.5227   | 31.1847  | 37.4435   | 36.8508   |
| 3-Mar       | 4.8946   | 3.45368  | 5.23722   | 6.36363  | 6.44463   | 7.15603   |
| TMEM135     | 6.20367  | 4.20571  | 4.63318   | 3.23513  | 3.81582   | 3.23483   |
| CD58        | 19.6693  | 16.9051  | 19.7089   | 16.2775  | 17.477    | 15.036    |
| CCR9        | 0        | 0        | 0.0303249 | 0.150463 | 0.0255138 | 0         |
| EFHB        | 0.174608 | 0.432256 | 0.0793074 | 0.163954 | 0.733977  | 0.326424  |
| DLEC1       | 0.513259 | 0.605015 | 1.15307   | 1.01266  | 0.958868  | 0.437173  |
| SELE        | 1.46216  | 2.56321  | 1.1832    | 0.8285   | 1.99096   | 1.08396   |
| SLAMF1      | 2.16949  | 2.28348  | 1.01667   | 0.242514 | 2.13844   | 0.257511  |
| OAF         | 34.1117  | 29.7632  | 36.8896   | 31.294   | 29.8598   | 31.1699   |
| LOC10050743 | 1.24393  | 1.92466  | 1.05937   | 0.438011 | 1.28743   | 0.775164  |
| NOX3        | 0        | 0        | 0         | 0        | 0         | 0         |
| OR6X1       | 0        | 0        | 0         | 0        | 0         | 0         |
| MIR3545     | 0        | 0        | 0         | 0        | 0         | 0         |
| SCNM1       | 11.2376  | 12.9533  | 10.3861   | 11.9387  | 12.0255   | 11.5034   |



|             |           |           |           |          |           |            |
|-------------|-----------|-----------|-----------|----------|-----------|------------|
| TBCA        | 55.2323   | 49.7112   | 41.2095   | 38.0573  | 35.937    | 43.3325    |
| UHRF1BP1    | 4.13462   | 3.10983   | 2.633     | 2.11597  | 2.45239   | 2.12471    |
| SEC14L3     | 0.740417  | 0.087284  | 0.186833  | 0.602541 | 0.37726   | 0.953552   |
| C8orf40     | 65.4818   | 66.0227   | 58.9677   | 62.2379  | 56.1675   | 52.3418    |
| KIAA1161    | 2.77707   | 1.71872   | 3.32858   | 3.0205   | 1.96034   | 2.32183    |
| OR4K5       | 0         | 0         | 0         | 0        | 0         | 0          |
| TTC19       | 23.9676   | 24.3536   | 22.4621   | 25.7898  | 23.6068   | 23.155     |
| LOC10050568 | 0.308143  | 2.72441   | 1.86613   | 1.44671  | 1.96258   | 1.15213    |
| LOC10050697 | 0.0508779 | 0.0224915 | 0         | 0        | 0.0324044 | 0          |
| CASP12      | 0.125254  | 0.332226  | 0.284454  | 0.176418 | 0.438763  | 0.11708    |
| C14orf48    | 0         | 0.0473665 | 0         | 0        | 0.0341214 | 0          |
| SNORD114-1  | 0         | 0         | 0         | 0        | 0         | 0          |
| SFXN5       | 7.19338   | 9.18657   | 8.61303   | 8.03473  | 9.3277    | 10.1225    |
| LCE3C       | 1.75372   | 0         | 0         | 6.1752   | 0.279239  | 10.6553    |
| CCDC34      | 10.9324   | 10.8606   | 7.64455   | 8.454    | 10.5681   | 14.0418    |
| ATP7B       | 0.937232  | 1.08186   | 1.33504   | 1.32738  | 1.62929   | 1.31668    |
| LOC442028   | 0         | 0.0261878 | 0         | 0        | 0         | 0          |
| BCAS2       | 28.9114   | 22.3164   | 25.1988   | 20.6786  | 21.7405   | 23.013     |
| C7orf52     | 0         | 0         | 0         | 0        | 0         | 0.105688   |
| HNRNPUL1    | 57.3797   | 63.0572   | 64.1943   | 64.146   | 65.0334   | 57.3454    |
| SNAP23      | 31.8313   | 25.6676   | 25.5071   | 22.7052  | 24.4154   | 23.0116    |
| LOC10050731 | 14.1972   | 20.4923   | 19.6556   | 24.1174  | 21.524    | 19.6528    |
| MST1P9      | 4.24084   | 7.14131   | 3.97605   | 4.96639  | 5.24275   | 4.47176    |
| OMG         | 0.0549127 | 0.194201  | 0.166277  | 0.103124 | 0.0699484 | 0.0684385  |
| CD19        | 0.211999  | 0.0937533 | 0.180613  | 0        | 0.475573  | 0.148678   |
| CWC22       | 8.31107   | 6.36305   | 7.75043   | 5.03299  | 7.84417   | 7.07436    |
| ALDH1B1     | 5.38478   | 5.31245   | 4.6977    | 3.51469  | 4.83071   | 4.23538    |
| TDRD12      | 1.05276   | 0         | 0         | 0        | 0.880044  | 1.10706    |
| ICA1L       | 1.45863   | 2.03411   | 1.85832   | 1.84852  | 1.69475   | 1.12332    |
| LOC10050698 | 12.5438   | 17.1031   | 16.4524   | 21.683   | 23.0096   | 16.3164    |
| FLJ41941    | 1.02321   | 0.565409  | 0.0645477 | 0.320258 | 0.705993  | 0.876726   |
| MRPL46      | 27.0211   | 29.0839   | 23.1231   | 20.0772  | 27.1617   | 26.2093    |
| FLJ12825    | 0.272321  | 0.481539  | 0.543483  | 0.441673 | 0.488794  | 0.246835   |
| GOLGA6L6    | 0         | 0         | 0         | 0        | 0.0126346 | 0.00296684 |
| ENTPD3      | 3.33075   | 2.99028   | 2.45405   | 4.23879  | 2.13156   | 2.19748    |
| INPP4B      | 2.51883   | 1.71318   | 2.20006   | 1.20564  | 1.11075   | 2.03742    |
| IGF1R       | 10.4852   | 9.91406   | 9.84413   | 9.38973  | 11.8959   | 9.50109    |
| C10orf67    | 0.0338208 | 0.209316  | 0.20482   | 0.444601 | 0.129244  | 0.379363   |
| PCBD1       | 60.7446   | 59.5823   | 47.3079   | 51.8927  | 34.1588   | 39.0886    |
| LOC10050629 | 20.4131   | 26.9029   | 23.4035   | 23.6758  | 17.5028   | 13.0945    |
| VPS72       | 23.3719   | 25.0027   | 23.2964   | 29.8339  | 21.8253   | 23.6347    |
| GNAI3       | 28.3246   | 23.0191   | 25.9592   | 23.6604  | 24.3268   | 23.9927    |
| KLF5        | 84.6721   | 71.9734   | 101.972   | 99.4859  | 101.446   | 96.0464    |

|             |           |           |           |           |           |           |
|-------------|-----------|-----------|-----------|-----------|-----------|-----------|
| SNORD36C    | 0         | 0         | 0         | 0         | 0         | 0         |
| KIF1B       | 11.6021   | 9.6695    | 12.156    | 9.94463   | 12.58     | 11.8459   |
| MRPL20      | 119.424   | 127.086   | 107.761   | 129.097   | 104.939   | 96.7022   |
| SEC61G      | 176.451   | 129.221   | 135.426   | 127.805   | 99.7715   | 111.012   |
| ALDH2       | 177.35    | 241.321   | 367.574   | 289.137   | 284.548   | 250.139   |
| CYP2R1      | 26.2817   | 31.5242   | 25.6649   | 27.6188   | 29.307    | 21.3318   |
| MIR3935     | 0         | 0         | 0         | 0         | 0         | 0         |
| PBX3        | 11.7984   | 9.59596   | 11.6516   | 12.0026   | 11.78     | 10.1766   |
| C9orf11     | 0         | 0.443126  | 0.426835  | 0         | 0.359117  | 0         |
| NSMAF       | 16.5476   | 16.6598   | 17.0116   | 15.716    | 18.1207   | 18.4402   |
| LOC728739   | 2.49116   | 1.80207   | 1.20007   | 1.91386   | 1.15392   | 1.69351   |
| UBE2I       | 70.3879   | 77.0966   | 76.6759   | 82.5125   | 73.3405   | 68.0486   |
| C4orf22     | 0         | 0         | 0         | 0         | 0         | 0         |
| CHIA        | 0.429654  | 0         | 0         | 0         | 0         | 0.0502014 |
| LOC285286   | 0.0890523 | 0.236203  | 0.0337065 | 0.0418093 | 0.113436  | 0.194228  |
| RPS2P32     | 1.00489   | 1.38205   | 0.845232  | 0.733894  | 0.640021  | 0.695785  |
| LOC285548   | 0         | 0.265849  | 0.0455244 | 0         | 0         | 0.0374751 |
| GRINA       | 104.556   | 132.09    | 94.1848   | 104.856   | 96.0737   | 80.357    |
| ZBED3       | 3.14117   | 2.57401   | 2.72587   | 1.6546    | 1.26869   | 1.28905   |
| MIR4726     | 0         | 0         | 0         | 0         | 0         | 0         |
| MIR3074     | 0         | 0         | 0         | 0         | 0         | 0         |
| LEPROTL1    | 17.8023   | 16.4157   | 18.3414   | 13.2898   | 16.8452   | 17.0939   |
| RND1        | 1.20878   | 1.06873   | 0.288965  | 0.597383  | 1.33716   | 0.911844  |
| ASPSCR1     | 13.9399   | 20.4912   | 14.0272   | 23.7843   | 15.6635   | 15.5373   |
| LLGL1       | 10.6442   | 14.2434   | 13.5994   | 15.282    | 14.911    | 15.1485   |
| NAB1        | 30.1924   | 28.19     | 33.2985   | 27.3726   | 32.3258   | 29.7627   |
| C1orf87     | 0         | 0.134969  | 0.0385205 | 0.0955611 | 0.226864  | 0.0317096 |
| LINC00167   | 0         | 0.0927905 | 0.0793941 | 0.0328484 | 0.0223283 | 0.0435463 |
| DMRT3       | 0.140564  | 0.289982  | 0.212816  | 0.351967  | 0.14921   | 0.0583958 |
| LAYN        | 2.64157   | 2.73211   | 2.71655   | 2.90159   | 2.31731   | 2.98164   |
| LIPG        | 5.89895   | 5.34015   | 4.39437   | 3.8398    | 3.30802   | 2.91442   |
| LOC10028963 | 0.171448  | 0.381141  | 0.256807  | 0.154795  | 0.289276  | 0.438315  |
| PAICS       | 22.152    | 20.8247   | 19.2902   | 19.4323   | 19.3356   | 17.1703   |
| BAAT        | 0         | 0.116093  | 0.174811  | 0.0273982 | 0.151773  | 0         |
| MIS18BP1    | 6.14861   | 4.91762   | 6.20094   | 3.3995    | 6.58262   | 5.21797   |
| SULT1E1     | 4.53889   | 8.026     | 4.95314   | 6.19919   | 11.0378   | 8.15473   |
| GTF2E2      | 17.0387   | 20.9916   | 18.8189   | 18.0317   | 17.0341   | 18.4941   |
| TRPM1       | 1.98241   | 3.25506   | 1.79548   | 2.77556   | 3.05507   | 4.85318   |
| LOC10050554 | 0         | 0.252992  | 0.0722047 | 0         | 0.242997  | 0         |
| ZMYND12     | 0.926231  | 0.944367  | 0.509402  | 0.998084  | 1.10233   | 0.706828  |
| SNORA12     | 0         | 0         | 36.0266   | 67.0308   | 0         | 0         |
| LINC00458   | 0         | 0         | 0         | 0         | 0         | 0         |
| SLC22A18AS  | 1.80649   | 2.63813   | 1.1559    | 1.49858   | 0.927502  | 1.25227   |

|             |           |           |           |             |           |           |
|-------------|-----------|-----------|-----------|-------------|-----------|-----------|
| CERS4       | 101.178   | 103.694   | 69.9516   | 83.6673     | 70.7736   | 103.265   |
| DOPEY1      | 8.73998   | 6.04925   | 9.87784   | 5.72897     | 8.91146   | 7.01898   |
| HDAC8       | 10.5283   | 10.1616   | 8.33356   | 10.3263     | 9.02403   | 10.0511   |
| DAZ4        | 0.960479  | 0.363906  | 0         | 0           | 0         | 0         |
| LOC10029110 | 0.140175  | 0.187018  | 0.0537885 | 0.202019    | 0.180505  | 0.177719  |
| SAA4        | 1.43223   | 5.58E-05  | 0.511743  | 0.000106846 | 1.95927   | 1.28185   |
| MIR5096     | 0         | 0         | 0         | 0           | 0         | 0         |
| VPS37B      | 16.2751   | 15.838    | 18.136    | 24.1026     | 18.7603   | 16.3133   |
| ZNF449      | 4.05652   | 3.31063   | 3.87031   | 3.53854     | 4.90735   | 2.25861   |
| LIPJ        | 0         | 0.0642689 | 0.110055  | 0.0682558   | 0.0462974 | 0.045298  |
| TDRKH       | 2.64711   | 1.81814   | 1.95159   | 1.50639     | 1.82776   | 1.49155   |
| ECHS1       | 147.634   | 162.667   | 143.602   | 129.763     | 107.16    | 115.683   |
| AKR1CL1     | 0         | 0.0426607 | 0.0365265 | 0           | 0.0307315 | 0.0300681 |
| SNORD116-1  | 0         | 0         | 0         | 0           | 0         | 0         |
| ARHGAP31    | 5.84336   | 5.07297   | 5.22288   | 2.9858      | 5.06685   | 3.15875   |
| ATP8B3      | 0.266558  | 0.385685  | 0.145071  | 0.0947859   | 0.313928  | 0.177827  |
| USMG5       | 206.833   | 207.608   | 182.331   | 187.816     | 130.234   | 149.597   |
| DSTNP2      | 5.38875   | 8.52093   | 4.23621   | 5.15726     | 4.09215   | 3.93924   |
| TBL3        | 19.7397   | 27.7047   | 21.6366   | 26.4374     | 24.8236   | 27.365    |
| NFIC        | 18.2003   | 12.9175   | 26.5468   | 15.1696     | 17.6848   | 15.0385   |
| CCDC106     | 7.10849   | 11.6981   | 9.81965   | 10.0852     | 10.0793   | 9.73243   |
| MIR4280     | 0         | 0         | 0         | 0           | 0         | 0         |
| GIF         | 0         | 0         | 0         | 0           | 0         | 0         |
| APOF        | 0         | 0.0553334 | 0         | 0           | 0         | 0         |
| BRI3BP      | 16.6674   | 15.6621   | 19.6197   | 17.617      | 10.6712   | 15.2262   |
| PIGP        | 28.8141   | 20.8074   | 20.7252   | 16.6395     | 18.2971   | 20.5033   |
| MIR4253     | 0         | 0         | 0         | 0           | 0         | 0         |
| ITGA8       | 1.42365   | 0.830209  | 1.10064   | 1.02392     | 0.578766  | 0.717279  |
| LOC10013285 | 1.83718   | 1.0723    | 0.195575  | 0.86254     | 0.914147  | 0.876526  |
| JAK2        | 6.53355   | 6.14664   | 8.5555    | 4.42602     | 7.99796   | 5.08079   |
| BUB1B       | 1.86599   | 2.53756   | 1.55503   | 2.10616     | 2.13886   | 2.21907   |
| STARD4      | 5.74075   | 2.31659   | 2.7654    | 2.28758     | 2.53242   | 3.06907   |
| CACNG6      | 0         | 0.358475  | 0         | 0           | 0         | 0         |
| CLEC4G      | 0.0805601 | 0.213678  | 0.487876  | 0.226934    | 1.79582   | 0.401613  |
| DPY30       | 34.0979   | 35.0245   | 37.346    | 34.7797     | 31.1534   | 37.258    |
| DOCK2       | 3.01193   | 2.10817   | 2.85006   | 1.11948     | 3.55687   | 1.57386   |
| SNORD115-2  | 0         | 0         | 0         | 0           | 0         | 0         |
| FAM166A     | 1.16718   | 1.44567   | 0.575643  | 1.91054     | 0.803281  | 0.540431  |
| POLR2H      | 51.8859   | 78.4751   | 45.6516   | 60.4357     | 59.3091   | 54.6471   |
| LOC10050765 | 4.32289   | 3.82173   | 9.01477   | 9.31252     | 9.25835   | 7.61914   |
| GDNF        | 0.457755  | 0.475597  | 0.165816  | 0.230263    | 0.376676  | 0.38522   |
| LOC10050555 | 0.511996  | 1.8107    | 0.775167  | 2.1634      | 1.14133   | 0.638108  |
| LGALS16     | 0         | 0         | 0         | 0           | 0         | 0         |

|             |           |           |           |           |           |           |
|-------------|-----------|-----------|-----------|-----------|-----------|-----------|
| NEUROG2     | 0         | 0         | 0         | 0         | 0.0567179 | 0         |
| PC          | 26.1158   | 28.1662   | 27.5834   | 18.7206   | 15.2716   | 19.1147   |
| UCP1        | 0         | 0.103871  | 0         | 0         | 0.0748255 | 0         |
| CDS1        | 15.1541   | 10.4922   | 12.5866   | 12.7464   | 10.5761   | 15.7478   |
| ANKRD20A1   | 0.192098  | 0.0693135 | 0.0854722 | 0.0515191 | 0.0873295 | 0.09228   |
| ADCK4       | 11.6464   | 19.5422   | 15.1176   | 19.8261   | 19.0549   | 19.5899   |
| ZC3HC1      | 8.09052   | 10.0816   | 6.53561   | 8.10672   | 8.47292   | 7.91779   |
| NSD1        | 8.45571   | 6.72859   | 9.59745   | 7.0716    | 8.22263   | 7.66843   |
| MIR4503     | 0         | 0         | 0         | 0         | 0         | 0         |
| LOC10050744 | 0         | 0.0344037 | 0.147284  | 0.18269   | 0.123917  | 0         |
| DDX52       | 8.92742   | 6.62655   | 7.61013   | 6.14892   | 8.11344   | 9.34106   |
| PKI55       | 4.98811   | 4.1989    | 3.86647   | 4.26306   | 5.04127   | 4.37406   |
| UBAP2       | 11.9729   | 12.0893   | 13.807    | 12.307    | 13.8647   | 13.0991   |
| CMC1        | 18.1657   | 25.5786   | 18.1656   | 17.0573   | 22.7112   | 18.7271   |
| HELT        | 0.599629  | 1.16634   | 0.453922  | 2.13956   | 0.229144  | 0.298931  |
| C16orf55    | 1.96192   | 2.10631   | 1.30838   | 1.84222   | 1.42807   | 1.92121   |
| MGC16275    | 1.41256   | 2.31937   | 0.977658  | 1.59164   | 1.1053    | 1.55929   |
| NSUN6       | 6.34258   | 6.27178   | 6.85458   | 5.9164    | 6.48466   | 6.5007    |
| PLGLB2      | 1.49411   | 1.04917   | 1.45458   | 1.02034   | 1.71272   | 1.50145   |
| ATG16L1     | 18.0298   | 15.9807   | 13.5466   | 13.5187   | 19.7225   | 15.1357   |
| KLLN        | 0.249865  | 0.401664  | 0.361103  | 0.191961  | 0.332748  | 0.495426  |
| THRA        | 21.7146   | 24.3176   | 26.7026   | 24.0229   | 27.965    | 23.8733   |
| SIPA1       | 10.5608   | 13.5079   | 10.6124   | 10.9416   | 13.0012   | 11.6569   |
| TEDDM1      | 0.0403764 | 0.142793  | 0.122261  | 0.0758256 | 0.231444  | 0.125804  |
| CALR        | 309.615   | 250.465   | 269.71    | 243.155   | 210.845   | 244.36    |
| FPR1        | 1.92914   | 2.3706    | 0.955318  | 0.641858  | 1.65446   | 0.234718  |
| TTY16       | 0         | 4.88158   | 0         | 0         | 0         | 0         |
| TTC3        | 33.6556   | 27.3893   | 27.804    | 22.1809   | 24.8202   | 26.3592   |
| MIR4671     | 0         | 0         | 0         | 0         | 0         | 0         |
| PNMT        | 1.27286   | 0.519406  | 0.88944   | 0.827441  | 1.18485   | 1.03725   |
| OR4D6       | 0         | 0         | 0         | 0         | 0         | 0         |
| POLD1       | 6.70867   | 10.2979   | 6.65608   | 10.3739   | 10.2547   | 8.7347    |
| ZNF512      | 17.8727   | 15.5987   | 14.0953   | 13.9222   | 17.4774   | 16.3481   |
| EPHX4       | 1.12676   | 0.531311  | 0.568641  | 1.55174   | 1.05254   | 0.936197  |
| KIAA1737    | 16.2748   | 14.4879   | 15.5818   | 15.5962   | 15.4843   | 15.0944   |
| LOC388630   | 1.65208   | 1.14938   | 1.19938   | 1.10624   | 1.12984   | 1.5527    |
| LOC285692   | 0         | 0         | 0         | 0         | 0         | 0         |
| RASL12      | 11.8303   | 10.5977   | 8.15758   | 8.54215   | 6.81363   | 6.90986   |
| SLC25A41    | 0.759516  | 1.15989   | 0.104538  | 0.064834  | 2.11087   | 1.54898   |
| SNORD66     | 0         | 0         | 0         | 0         | 0         | 0         |
| FLJ43826    | 0.164516  | 0.0969699 | 0.18681   | 0.128732  | 0.24449   | 0.0683464 |
| SLC22A7     | 0         | 0         | 0         | 0         | 0.0524405 | 0.0256959 |
| RN5S12      | 28.9436   | 107.979   | 55.1342   | 234.257   | 35.5132   | 57.3511   |

|             |          |          |           |           |           |           |
|-------------|----------|----------|-----------|-----------|-----------|-----------|
| MBLAC1      | 2.07857  | 2.72492  | 2.22459   | 2.08635   | 2.32815   | 3.12653   |
| MTMR10      | 14.5824  | 12.6109  | 15.8929   | 10.8745   | 14.7384   | 11.9599   |
| IPO11       | 7.16227  | 6.35197  | 6.40918   | 5.50063   | 5.50499   | 5.57901   |
| LOC10065294 | 0        | 0        | 0         | 0         | 0         | 0         |
| FAM83D      | 6.50067  | 7.03698  | 4.5425    | 4.34325   | 4.3261    | 5.21948   |
| IL13RA2     | 0.716905 | 0.563415 | 0.482401  | 1.12194   | 0.456601  | 0.446745  |
| ADRA1A      | 0.751994 | 0.723861 | 0.754305  | 0.728413  | 0.527802  | 0.667811  |
| PLK4        | 2.0451   | 1.60646  | 1.64634   | 1.63865   | 2.26422   | 2.45956   |
| OTOG        | 0        | 0        | 0         | 0         | 0         | 0         |
| ZNF197      | 5.69332  | 5.32289  | 6.43873   | 5.0465    | 6.57152   | 6.9161    |
| PSKH1       | 15.0292  | 15.1112  | 15.7185   | 17.1362   | 14.5562   | 18.0748   |
| GTF2IRD2P1  | 3.29025  | 5.15613  | 4.04669   | 4.68299   | 4.8952    | 3.94828   |
| PDE3A       | 0.849743 | 0.584336 | 0.357367  | 0.398948  | 0.360804  | 0.29418   |
| ARHGAP11A   | 2.1869   | 2.41677  | 2.03046   | 1.72008   | 3.14101   | 2.54073   |
| ZNF559-ZNF1 | 0.581975 | 0.50063  | 1.21E-85  | 5.47E-28  | 0.352124  | 0.135534  |
| PBOV1       | 0        | 0        | 0.0304985 | 0         | 0.0513197 | 0         |
| ELL2        | 24.7809  | 19.6292  | 23.5389   | 20.9657   | 20.4999   | 23.203    |
| AKR7A2      | 24.126   | 31.5693  | 45.821    | 51.4997   | 35.9563   | 42.3966   |
| JUB         | 17.6305  | 22.7586  | 23.0305   | 29.9728   | 28.7477   | 24.793    |
| MED17       | 9.67077  | 8.32658  | 8.83181   | 8.0512    | 10.3492   | 8.79436   |
| LOC10050695 | 0        | 0.259445 | 0         | 0         | 0         | 0         |
| FLCN        | 9.91773  | 12.167   | 14.0438   | 14.9901   | 21.3108   | 20.1261   |
| SEC22C      | 18.9998  | 21.0043  | 24.1399   | 21.5434   | 21.7579   | 18.6946   |
| RIT2        | 0.105045 | 0        | 0         | 0         | 0         | 0         |
| HSD17B11    | 15.4682  | 15.447   | 15.2898   | 11.1284   | 14.317    | 9.91653   |
| HIPK2       | 5.35849  | 10.3951  | 3.95016   | 1.40611   | 1.37175   | 1.86608   |
| ANKHD1-EIF4 | 6.67879  | 4.56735  | 4.77977   | 3.52231   | 4.0352    | 6.87575   |
| GTF2H2B     | 7.09195  | 7.49943  | 8.06691   | 7.52719   | 5.98639   | 5.18896   |
| SULF1       | 5.27224  | 3.01362  | 2.80517   | 1.51107   | 2.16849   | 1.40171   |
| PDLIM1      | 91.1256  | 103.775  | 71.5228   | 94.038    | 70.8619   | 64.6854   |
| LINC00263   | 10.6182  | 6.32895  | 4.78669   | 5.93738   | 3.26741   | 5.05554   |
| CBR3        | 28.55    | 43.0072  | 28.1846   | 33.0765   | 31.0039   | 28.5141   |
| LOC10050713 | 0.226216 | 0.228578 | 0.195711  | 0.364137  | 0.246991  | 0.342352  |
| STK36       | 6.29246  | 8.54079  | 5.26797   | 5.87171   | 7.62837   | 7.28048   |
| GPR75       | 1.04717  | 0.684908 | 1.36118   | 0.626312  | 1.45312   | 1.71946   |
| VCY1B       | 0        | 0        | 0.0528461 | 0.0655499 | 0         | 0.0435022 |
| UQCR11      | 69.9216  | 108.568  | 69.8266   | 107.492   | 60.427    | 66.8209   |
| SCGB2A2     | 2750.38  | 509.729  | 648.496   | 998.102   | 586.365   | 440.949   |
| FLJ34747    | 0        | 0.026323 | 0.022538  | 0         | 0         | 0.018553  |
| EIF4ENIF1   | 9.83166  | 10.8749  | 10.0149   | 10.235    | 11.3838   | 9.80547   |
| ZCCHC2      | 13.0579  | 6.2165   | 8.96718   | 10.3911   | 6.37534   | 5.69813   |
| CNNM2       | 2.49527  | 1.80959  | 2.23058   | 2.16436   | 2.03929   | 1.93624   |
| PRB2        | 2.82384  | 1.49715  | 1.91895   | 3.07045   | 2.46783   | 3.52283   |

|             |           |          |          |          |          |          |
|-------------|-----------|----------|----------|----------|----------|----------|
| LOC10050741 | 0.235125  | 0.207883 | 0        | 0.662336 | 0        | 0.43956  |
| MRPL3       | 36.3287   | 29.4868  | 27.9068  | 29.1351  | 23.7069  | 24.2344  |
| OR4K2       | 0         | 0        | 0        | 0        | 0        | 0        |
| YIPF5       | 18.6447   | 14.5162  | 17.0867  | 15.5038  | 16.1876  | 15.5961  |
| FBXO4       | 7.69986   | 9.74416  | 9.09161  | 7.98155  | 7.43849  | 6.08801  |
| ZFPM2       | 1.23314   | 0.841605 | 1.4248   | 1.09695  | 1.11608  | 0.822364 |
| FRG2B       | 0.0455383 | 0        | 0        | 0        | 0        | 0        |
| LYZ         | 37.8391   | 32.4727  | 26.0322  | 12.9826  | 43.1419  | 22.7402  |
| LOC643395   | 0.368943  | 0.244647 | 0.279292 | 0.259824 | 0.52871  | 0.91964  |
| RASSF4      | 12.8274   | 11.842   | 14.1521  | 8.89105  | 20.5406  | 11.4229  |
| ALDH8A1     | 1.78759   | 1.26941  | 0.448514 | 0.674184 | 1.68672  | 2.04442  |
| TPST1       | 6.02977   | 7.50803  | 7.91192  | 4.85976  | 8.32086  | 4.79081  |
| XKRX        | 8.08523   | 5.44644  | 7.52485  | 5.71858  | 8.02524  | 8.28823  |
| AEBP1       | 43.6279   | 44.8612  | 63.6503  | 37.2683  | 60.6052  | 46.5859  |
| RIC8B       | 4.11678   | 3.21268  | 3.27737  | 2.6678   | 2.83042  | 2.67279  |
| ZNF337      | 13.5829   | 16.8511  | 15.9739  | 17.4025  | 21.795   | 17.0057  |
| TMEM159     | 47.8715   | 54.3283  | 63.1775  | 76.5559  | 69.383   | 64.8841  |
| INPP5F      | 9.70386   | 10.3724  | 11.0288  | 11.6443  | 11.9482  | 12.4789  |
| OR5T2       | 0         | 0        | 0        | 0        | 0        | 0        |
| CYSLTR2     | 0.632734  | 0.839135 | 0.329301 | 0.185665 | 0.554114 | 0.271076 |
| NR4A2       | 2.78245   | 1.52524  | 2.86461  | 6.7407   | 2.99495  | 2.32343  |
| IL36B       | 0.913049  | 0.518953 | 4.01961  | 3.92335  | 1.33514  | 1.95446  |
| UBIAD1      | 44.7801   | 47.5304  | 39.0115  | 42.1444  | 25.3139  | 31.7822  |
| LOC10013081 | 3.22038   | 3.23467  | 3.9268   | 3.37573  | 3.40136  | 3.53506  |
| LOC347411   | 0         | 0.228877 | 0        | 0        | 0        | 0        |
| MIR2682     | 0         | 0        | 0        | 0        | 0        | 0        |
| LOC93432    | 0.134081  | 0        | 0        | 0        | 0        | 0        |
| BAHD1       | 12.478    | 10.8998  | 12.735   | 13.7264  | 12.8548  | 12.3239  |
| LOC10050620 | 0.190567  | 0.973962 | 1.74939  | 1.17124  | 1.24063  | 1.09774  |
| RILPL1      | 8.31078   | 11.7837  | 8.69768  | 10.8964  | 8.63496  | 8.25764  |
| RBX1        | 71.1309   | 67.7271  | 57.3823  | 73.9335  | 63.0115  | 63.0928  |
| LOC10050761 | 0.09148   | 0.121321 | 0.103876 | 0.214746 | 0.174792 | 0.171019 |
| LOC10050724 | 0.353243  | 0.156158 | 0        | 0        | 0.112491 | 0        |
| ZNF184      | 3.51543   | 3.22114  | 3.29021  | 3.12088  | 4.03019  | 3.44532  |
| OTUD5       | 36.2783   | 43.4987  | 36.6689  | 43.6723  | 47.5675  | 42.1289  |
| C9orf103    | 7.10562   | 10.5045  | 9.6794   | 10.1859  | 9.91869  | 7.75017  |
| CACNG2      | 0         | 0        | 0        | 0        | 0        | 0        |
| MIR329-2    | 0         | 0        | 0        | 0        | 0        | 0        |
| KRTAP5-9    | 0.473971  | 1.34098  | 0.861116 | 1.86921  | 0.905623 | 7.97467  |
| PRAMEF13    | 0         | 0        | 0        | 0        | 0        | 0        |
| E2F6        | 4.40078   | 5.09189  | 4.30935  | 4.96709  | 4.85016  | 4.08437  |
| CEP192      | 5.88448   | 5.45494  | 3.68966  | 2.72365  | 8.57844  | 7.41541  |
| LOC390937   | 0.542519  | 0.479661 | 0.492828 | 0.407533 | 0.20732  | 0.338075 |

|             |          |           |           |           |          |           |
|-------------|----------|-----------|-----------|-----------|----------|-----------|
| DGKA        | 42.6334  | 59.3638   | 50.0646   | 62.717    | 69.3494  | 59.9592   |
| SNORA38B    | 0        | 46.3577   | 0         | 0         | 0        | 0         |
| ZNF192      | 5.09129  | 3.1066    | 5.74049   | 3.08048   | 6.22273  | 3.51899   |
| NBPF10      | 4.07136  | 2.78301   | 5.61679   | 3.39592   | 4.49841  | 4.21374   |
| AP3B2       | 1.18968  | 1.84657   | 1.16077   | 1.0178    | 0.825069 | 0.889633  |
| MOXD1       | 18.786   | 20.3646   | 15.9524   | 12.2711   | 22.2027  | 13.8647   |
| 3-Sep       | 1.90392  | 2.04674   | 1.1641    | 1.93823   | 2.22802  | 2.15342   |
| COMP        | 9.23834  | 7.98564   | 2.74744   | 20.8347   | 3.91388  | 31.0978   |
| IL17D       | 3.25071  | 2.27943   | 3.81849   | 3.26287   | 3.17698  | 2.54959   |
| GPR132      | 0.943971 | 1.3592    | 2.04169   | 1.89937   | 2.6969   | 0.806733  |
| ABCG1       | 7.15379  | 6.50987   | 7.16892   | 6.71841   | 8.1194   | 7.71398   |
| LOC10050711 | 113.164  | 113.795   | 97.7557   | 97.9186   | 48.5756  | 65.0902   |
| LOC727787   | 0        | 0         | 0         | 0         | 0        | 0         |
| DNAJC18     | 2.26569  | 2.77106   | 3.03008   | 2.74795   | 2.98226  | 2.42373   |
| JKAMP       | 18.9304  | 17.598    | 19.4623   | 19.5636   | 18.4883  | 17.2992   |
| CCDC162P    | 0        | 0.163022  | 2.09371   | 1.03881   | 1.17436  | 0.804309  |
| OR6C68      | 0        | 0         | 0         | 0         | 0        | 0         |
| LHX1        | 0        | 0         | 0         | 0         | 0        | 0.0178781 |
| DOK6        | 0.680205 | 0.357078  | 0.563192  | 0.419148  | 0.365535 | 0.231807  |
| ANP32E      | 17.4086  | 14.953    | 17.8512   | 12.8091   | 17.9631  | 14.7124   |
| SSSCA1      | 23.9376  | 37.13     | 27.3403   | 42.1937   | 31.9631  | 34.021    |
| TM7SF3      | 20.7647  | 19.886    | 21.2254   | 17.6381   | 20.4992  | 20.7573   |
| GJA8        | 0        | 0         | 0         | 0         | 0        | 0         |
| LOC10065271 | 64.5015  | 21.3014   | 83.329    | 18.5788   | 23.8592  | 24.8421   |
| SNORD115-41 | 0        | 0         | 0         | 0         | 0        | 0         |
| CARD9       | 2.3703   | 3.71939   | 3.58749   | 3.2696    | 7.91458  | 4.24871   |
| MIR4677     | 0        | 0         | 0         | 0         | 0        | 0         |
| MIR4326     | 0        | 0         | 0         | 0         | 0        | 0         |
| PTK7        | 25.9866  | 27.3724   | 22.7427   | 32.5739   | 31.4225  | 33.488    |
| C6orf226    | 14.4926  | 27.561    | 14.283    | 24.1355   | 17.0676  | 13.4616   |
| TAS2R50     | 0        | 0.103871  | 0         | 0.110315  | 0.224476 | 0.0732103 |
| MIR1229     | 0        | 0         | 0         | 0         | 0        | 0         |
| FAM109A     | 10.8951  | 12.0995   | 10.7581   | 11.7646   | 15.8668  | 14.4079   |
| CSTF1       | 11.4438  | 13.0292   | 11.4904   | 11.4259   | 13.2195  | 12.1929   |
| SNORD115-31 | 0        | 0         | 0         | 0         | 0        | 0         |
| MRI1        | 19.5405  | 27.0499   | 23.397    | 24.4669   | 23.5001  | 19.6043   |
| GPR98       | 0.22795  | 0.115894  | 0.176228  | 0.191295  | 0.105073 | 0.114878  |
| OR10H1      | 0        | 0         | 0.0771488 | 0         | 0        | 0.0635079 |
| SNORD18B    | 0        | 0         | 0         | 0         | 0        | 0         |
| LOC400550   | 0.463529 | 0.0848551 | 0.157724  | 0.0703468 | 0.16997  | 0.105043  |
| LOC10050681 | 0        | 0         | 0         | 0         | 0        | 0         |
| OR10W1      | 0        | 0         | 0         | 0         | 0        | 0         |
| CDO1        | 35.4091  | 28.8579   | 28.9512   | 17.2744   | 13.7329  | 6.77988   |

|             |           |           |           |           |           |          |
|-------------|-----------|-----------|-----------|-----------|-----------|----------|
| LOC10016975 | 0         | 0         | 0         | 0         | 0         | 0        |
| CPT1A       | 10.8147   | 11.5876   | 11.9789   | 17.2329   | 13.1878   | 12.169   |
| ZNF280D     | 13.7145   | 11.0182   | 12.9754   | 10.6828   | 15.3866   | 13.5327  |
| RCN2        | 27.8896   | 23.5968   | 24.7479   | 20.4647   | 22.0274   | 25.0911  |
| EXOSC5      | 16.3374   | 23.4462   | 15.1457   | 19.5648   | 21.791    | 21.7633  |
| LOC10050895 | 3.85969   | 5.23764   | 5.74205   | 4.54188   | 5.47541   | 5.71881  |
| MRAP2       | 2.35374   | 1.95862   | 1.88661   | 2.25346   | 3.02762   | 2.24327  |
| DROSHA      | 10.0599   | 9.49369   | 9.90806   | 8.40808   | 10.7792   | 10.0971  |
| PLCH1       | 0.531054  | 0.0993371 | 0.178103  | 0.177298  | 0.139972  | 0.13695  |
| DPCD        | 16.8937   | 15.9135   | 19.2428   | 22.9791   | 18.9049   | 21.0549  |
| PSG9        | 0.0618713 | 0         | 0         | 0         | 0         | 0        |
| CTSS        | 8.72427   | 6.12048   | 6.04799   | 2.71598   | 8.09318   | 4.10702  |
| CRIP1       | 10.0759   | 10.3932   | 10.088    | 8.44375   | 9.10852   | 10.2622  |
| MGC4294     | 0         | 0.108282  | 0         | 0.115     | 0.23401   | 0.152639 |
| TOR1AIP2    | 12.804    | 11.462    | 11.1759   | 10.6103   | 11.778    | 12.3909  |
| LOC10050737 | 0         | 0         | 0         | 0         | 0         | 0        |
| LOC10050767 | 0.601191  | 0.74415   | 0.182042  | 0.451607  | 0.382902  | 0.149855 |
| EFS         | 40.6139   | 52.0081   | 45.6473   | 56.6913   | 64.7088   | 63.2023  |
| DEFB105B    | 0         | 0         | 0         | 0         | 0         | 0        |
| C10orf81    | 5.00661   | 1.77554   | 0.728334  | 0.826257  | 1.71938   | 0.987426 |
| SLC7A8      | 14.7908   | 12.0046   | 8.56933   | 19.6239   | 9.88274   | 20.7434  |
| DCTN6       | 34.8273   | 35.8048   | 34.8716   | 32.7974   | 31.0157   | 27.2548  |
| ABCA7       | 6.30147   | 8.72146   | 7.32989   | 6.95343   | 10.1537   | 8.9681   |
| C14orf101   | 6.81359   | 6.32636   | 6.88299   | 5.52056   | 7.43105   | 7.28484  |
| MIR509-3    | 0         | 0         | 0         | 0         | 0         | 0        |
| NMNAT2      | 1.85158   | 1.8397    | 2.04231   | 1.62297   | 0.84242   | 0.747337 |
| MIR4798     | 0         | 0         | 0         | 0         | 0         | 0        |
| ZNF414      | 13.9182   | 21.5645   | 14.429    | 23.6238   | 21.6068   | 20.2469  |
| DZIP1L      | 3.00741   | 5.61221   | 4.53747   | 5.24016   | 6.00433   | 4.13706  |
| LOC10012907 | 0         | 0.0241993 | 0         | 0.0257005 | 0         | 0        |
| PSD4        | 15.0723   | 14.0024   | 12.5682   | 12.3746   | 12.8036   | 12.8013  |
| CSF3        | 0.0731994 | 0         | 0.0554124 | 0         | 0         | 0.182473 |
| PIDD        | 9.33352   | 18.7996   | 13.8406   | 20.2872   | 26.7806   | 20.5995  |
| BSDC1       | 44.3448   | 43.0482   | 44.2014   | 43.2785   | 46.9003   | 45.2698  |
| ZNF28       | 4.23155   | 2.83941   | 3.1376    | 2.44517   | 3.57948   | 3.48884  |
| PCDHA10     | 0.272865  | 5.55E-07  | 0.0724225 | 0.165266  | 2.68E-33  | 2.80E-06 |
| IMPAD1      | 21.7918   | 14.6363   | 20.6206   | 14.9512   | 13.4519   | 12.2021  |
| MYPN        | 0.0332989 | 0.0147204 | 0.0126037 | 0.109435  | 0.0212082 | 0.653639 |
| USHBP1      | 2.73205   | 6.39181   | 4.10454   | 3.8283    | 4.25645   | 3.14308  |
| STAG1       | 8.8338    | 6.26141   | 9.18436   | 6.10735   | 7.62042   | 6.80557  |
| C16orf96    | 0.114937  | 0.0762149 | 0.130512  | 0.134905  | 0.256214  | 0.340213 |
| BBS5        | 5.17458   | 7.97171   | 6.31269   | 6.75528   | 6.55818   | 5.31569  |
| TBC1D3      | 5.36755   | 9.01971   | 4.38653   | 5.90764   | 9.00922   | 7.96057  |



|             |           |           |           |           |           |          |
|-------------|-----------|-----------|-----------|-----------|-----------|----------|
| SMAD4       | 11.0746   | 10.5828   | 12.2202   | 11.4317   | 11.9229   | 10.2544  |
| CLRN3       | 0         | 0.087873  | 0         | 0         | 0         | 0        |
| SUSD2       | 9.76113   | 10.8015   | 16.2375   | 21.9798   | 16.9678   | 16.8147  |
| PRR14       | 22.9308   | 35.1329   | 24.4784   | 34.7328   | 36.5993   | 32.3553  |
| ICT1        | 27.0809   | 30.6965   | 28.9108   | 33.3831   | 24.3241   | 27.4338  |
| FAM138B     | 0.0856799 | 0.205981  | 0.038153  | 0         | 0.225422  | 0.212312 |
| LOC10012903 | 1.17558   | 0.346459  | 1.08768   | 0.367951  | 0.249578  | 0.895367 |
| GABRB3      | 0.709986  | 0.230849  | 1.08828   | 0.618384  | 0.551728  | 1.08995  |
| SYCE1L      | 3.4824    | 8.86727   | 6.11597   | 11.6201   | 4.87951   | 5.295    |
| AHSG        | 0.135857  | 0         | 0.0514224 | 0.063784  | 0         | 0.211652 |
| LOC10065273 | 6.15118   | 4.55269   | 6.33152   | 2.83096   | 7.84414   | 4.8113   |
| SNORD115-1  | 0         | 0         | 0         | 0         | 0         | 0        |
| MIR4430     | 0         | 0         | 0         | 0         | 0         | 0        |
| STX1B       | 3.38895   | 4.73001   | 3.66263   | 3.42234   | 5.4572    | 4.31668  |
| DOC2B       | 2.35934   | 2.1808    | 2.59787   | 0.201399  | 2.11741   | 0.935609 |
| CSN1S1      | 0         | 0         | 0         | 0         | 0         | 0.311054 |
| RNU5F-1     | 0         | 0         | 0         | 0         | 0         | 0        |
| ZCWPW2      | 1.46833   | 0.395105  | 0.918221  | 0.299725  | 0.731884  | 0.63652  |
| FER1L4      | 2.65333   | 2.30745   | 2.90861   | 2.70927   | 2.76113   | 3.06294  |
| SPINK9      | 0         | 0         | 0         | 0.363355  | 0.246461  | 0        |
| GLT8D1      | 23.5101   | 25.4307   | 23.1063   | 24.5709   | 23.9778   | 23.2583  |
| PAN3        | 17.2848   | 18.5335   | 18.3655   | 17.0287   | 20.9853   | 17.4284  |
| ONECUT3     | 0         | 0         | 0         | 0         | 0         | 0        |
| LY6G6D      | 5.4126    | 3.91539   | 2.9799    | 78.0832   | 0.940176  | 296.815  |
| TAF8        | 4.94135   | 5.04401   | 5.10086   | 4.80857   | 5.82227   | 5.12274  |
| MED13       | 8.14719   | 5.68299   | 8.09608   | 6.29758   | 7.08111   | 6.72069  |
| CCNG2       | 19.949    | 17.6377   | 22.1144   | 13.7564   | 23.858    | 20.1504  |
| PLEKHA3     | 8.10087   | 5.28127   | 5.48199   | 3.64962   | 4.66438   | 4.07929  |
| MIR589      | 0         | 0         | 0         | 0         | 0         | 0        |
| MSMO1       | 673.943   | 495.549   | 420.677   | 452.381   | 294.658   | 413.436  |
| LOC494127   | 0         | 0.0724919 | 0.0620682 | 0.0769889 | 0.208884  | 0.153281 |
| KLF13       | 29.062    | 30.3406   | 38.6539   | 29.236    | 33.5478   | 25.5586  |
| SNORD72     | 0         | 0         | 0         | 0         | 0         | 0        |
| SMAD5       | 17.4904   | 13.8982   | 16.7965   | 10.8416   | 18.6165   | 14.4413  |
| PATE2       | 0         | 0         | 0         | 0         | 0         | 0        |
| NARFL       | 21.7132   | 30.403    | 17.5897   | 27.2612   | 21.7763   | 21.5205  |
| LOC10065303 | 52.1303   | 53.9957   | 32.1198   | 49.3359   | 40.3361   | 27.6693  |
| TFB1M       | 5.24339   | 5.05381   | 4.03791   | 5.07484   | 5.63962   | 4.81244  |
| PRKCDBP     | 24.4591   | 43.052    | 36.182    | 42.7729   | 32.514    | 26.918   |
| MINPP1      | 9.34358   | 6.17781   | 9.11609   | 6.56651   | 12.2617   | 11.8576  |
| PLA2G4A     | 9.96428   | 8.47907   | 6.77069   | 5.7479    | 5.95643   | 7.41729  |
| PSMA8       | 0         | 0         | 0         | 0.0584481 | 0.0396449 | 0        |
| CRP         | 0         | 0         | 0         | 0         | 0         | 0        |

|             |            |           |           |           |          |           |
|-------------|------------|-----------|-----------|-----------|----------|-----------|
| TMEM205     | 64.8968    | 84.4436   | 60.5239   | 78.8324   | 68.3871  | 52.9472   |
| MYCN        | 1.2739     | 1.33108   | 1.63647   | 5.14715   | 1.86857  | 4.28191   |
| NR2F2       | 16.2696    | 15.1862   | 12.3282   | 11.69     | 11.692   | 8.69755   |
| MIR1227     | 0          | 0         | 0         | 0         | 0        | 0         |
| TRIP13      | 1.69784    | 2.13837   | 1.54201   | 1.9127    | 2.08061  | 2.14319   |
| ZNF426      | 2.6322     | 1.31876   | 2.3911    | 1.89489   | 2.3191   | 1.94099   |
| LOC388789   | 86.4905    | 108.405   | 77.0132   | 96.4601   | 69.2272  | 68.3524   |
| BUTR1       | 0          | 0.154093  | 0.131936  | 0.327304  | 0        | 0.434431  |
| KREMEN1     | 24.7848    | 26.8456   | 31.2136   | 27.0387   | 35.2951  | 33.1436   |
| ASCC2       | 31.4853    | 37.9027   | 29.033    | 34.6731   | 35.5764  | 38.1736   |
| ABLIM2      | 2.41285    | 3.13677   | 2.72966   | 3.17009   | 3.74749  | 3.01536   |
| LOC10013224 | 0          | 0.141285  | 0.120969  | 0.750245  | 0.407108 | 0.597481  |
| MIR1267     | 0          | 0         | 0         | 0         | 0        | 0         |
| JAZF1       | 6.49097    | 6.44944   | 7.69813   | 6.32711   | 6.53587  | 5.08502   |
| ZNF141      | 2.26258    | 0.800173  | 3.13196   | 1.39612   | 1.72926  | 1.16824   |
| FAM25A      | 115.283    | 68.8547   | 137.347   | 153.679   | 146.332  | 213.847   |
| DYNC1LI2    | 55.0118    | 50.6572   | 57.5596   | 49.8262   | 55.7574  | 44.95     |
| GIMAP8      | 6.83096    | 6.19268   | 7.32569   | 3.88103   | 5.95853  | 3.68611   |
| OR4F6       | 0          | 0         | 0         | 0         | 0        | 0         |
| LHFP        | 30.4357    | 31.1494   | 31.1993   | 21.9356   | 28.3664  | 20.2977   |
| TNNI3K      | 0.00015449 | 0.222417  | 0.136595  | 3.24E-12  | 0.228225 | 0.575461  |
| TLL2        | 0.0422235  | 0.0248876 | 0.0532724 | 0.0660787 | 0.116534 | 0.0526238 |
| F2          | 0          | 0.0454407 | 0.0389067 | 0.0482596 | 0        | 0         |
| PLAC4       | 0          | 0.0416497 | 0.0142643 | 0.0530801 | 0.066007 | 0.0821955 |
| MYRIP       | 1.11001    | 0.858727  | 1.29044   | 1.28424   | 1.17408  | 0.963457  |
| PCDH1       | 23.5046    | 16.718    | 24.8575   | 21.129    | 23.477   | 26.8274   |
| LOC10050579 | 2.3222     | 1.89321   | 1.69802   | 1.25884   | 1.23624  | 1.49792   |
| DEFB128     | 0          | 0         | 0         | 0         | 0        | 0         |
| LOC10050637 | 0          | 0.218303  | 0         | 0         | 0        | 0         |
| TUBG1       | 22.3854    | 24.026    | 20.2037   | 20.6188   | 19.0142  | 18.9649   |
| CCNE2       | 1.58946    | 2.22715   | 1.6553    | 1.22819   | 2.15548  | 2.05443   |
| PON2        | 59.8393    | 63.4407   | 61.945    | 62.3777   | 67.8406  | 68.0555   |
| KIFAP3      | 12.8455    | 11.2037   | 12.6012   | 10.0666   | 10.4644  | 11.7569   |
| OSGEPL1     | 4.25943    | 4.65887   | 3.92248   | 3.38106   | 4.97823  | 4.24141   |
| SLC25A43    | 16.807     | 14.8247   | 18.5007   | 15.4844   | 17.8828  | 16.6342   |
| UPK3BL      | 72.235     | 124.172   | 71.8847   | 117.914   | 23.9515  | 22.3286   |
| HSP90AA6P   | 0          | 0         | 0         | 0.912212  | 0.618746 | 0         |
| MIR324      | 0          | 0         | 0         | 0         | 0        | 0         |
| PSAPL1      | 108.533    | 104.783   | 105.093   | 100.727   | 120.587  | 154.93    |
| RACGAP1     | 6.50895    | 6.79117   | 5.60449   | 7.12556   | 7.38724  | 8.61185   |
| KIAA1683    | 1.39599    | 3.23707   | 1.99972   | 3.07827   | 3.30291  | 2.56624   |
| ACCN2       | 1.94254    | 2.03796   | 2.09774   | 2.31026   | 2.21309  | 1.63896   |
| SLC22A1     | 0.606176   | 0.347289  | 0.0412989 | 0.320168  | 0.376996 | 0.512566  |

|             |           |           |           |           |           |           |
|-------------|-----------|-----------|-----------|-----------|-----------|-----------|
| LSG1        | 17.2879   | 18.2981   | 14.4394   | 16.4911   | 17.6102   | 14.8494   |
| TRPV4       | 9.61213   | 7.72606   | 8.0275    | 12.1908   | 9.46969   | 11.4081   |
| ZNF143      | 4.89684   | 5.40438   | 5.80327   | 5.39082   | 4.88257   | 4.44046   |
| EID1        | 83.7976   | 75.0016   | 74.9757   | 69.1722   | 72.5396   | 55.4675   |
| LPIN3       | 30.6016   | 36.8319   | 34.8392   | 43.7284   | 43.2583   | 54.3961   |
| NBPF22P     | 0         | 0         | 0         | 0         | 0.0121509 | 0         |
| MIR718      | 0         | 0         | 0         | 0         | 0         | 0         |
| C14orf86    | 0         | 0         | 0         | 0         | 0         | 0.0262881 |
| SNORD114-8  | 0         | 0         | 0         | 0         | 0         | 0         |
| KLHL34      | 0.105443  | 0.093226  | 0.0798209 | 0.0660062 | 0.0223857 | 0.0657076 |
| AGK         | 11.7116   | 11.9801   | 11.5719   | 13.7143   | 14.9184   | 12.3051   |
| LOC654433   | 5.20168   | 6.76452   | 0.403069  | 0.680594  | 1.71294   | 1.6675    |
| LOC10050643 | 0.32352   | 0.429055  | 0.122453  | 0.303781  | 0.618156  | 0.403208  |
| SGSM2       | 24.8445   | 29.6426   | 33.1809   | 39.7125   | 42.8026   | 39.5038   |
| PPEF1       | 0.973253  | 0.198067  | 0.195364  | 0.297998  | 0.287628  | 0.197766  |
| EXOSC2      | 12.9598   | 14.9205   | 12.5986   | 13.2634   | 13.5986   | 12.114    |
| SNORD1C     | 0         | 0         | 0         | 0         | 0         | 0         |
| LINC00256A  | 0.280761  | 0.408987  | 0.287693  | 0.248381  | 0.284107  | 0.277974  |
| OR13J1      | 0         | 0.112617  | 0.0964235 | 0.598015  | 0.324503  | 0.476248  |
| NAA30       | 8.7937    | 6.31945   | 7.77183   | 6.42674   | 7.06302   | 7.04554   |
| IMPG1       | 0.392874  | 0.187037  | 0.228775  | 0.113508  | 0.153984  | 0.15066   |
| KLK4        | 0.407424  | 0.144088  | 0.123369  | 0.535591  | 0.622778  | 0.761669  |
| ZBTB20      | 0.17338   | 0.164354  | 0.12866   | 0.170613  | 0.165142  | 0.205942  |
| EXTL2       | 7.95423   | 8.08469   | 9.57336   | 8.80804   | 8.24822   | 9.74963   |
| PRADC1      | 31.0264   | 47.1598   | 31.0481   | 45.2964   | 26.3253   | 27.7435   |
| GP1BB       | 4.15721   | 17.8392   | 5.55897   | 16.6785   | 4.06302   | 2.81328   |
| CELF6       | 2.6199    | 3.70553   | 2.83793   | 2.91259   | 4.39989   | 4.01641   |
| FAM154A     | 0         | 0         | 0         | 0         | 0.0683619 | 0.0334431 |
| SFN         | 599.307   | 955.352   | 631.291   | 940.131   | 689.702   | 1015.51   |
| LMBRD1      | 31.6932   | 24.5915   | 29.8647   | 28.4349   | 27.7937   | 25.7471   |
| MIR511-2    | 0         | 0         | 0         | 0         | 0         | 0         |
| CCR8        | 0.0725197 | 0.0641174 | 0.164693  | 0         | 0.692823  | 0.135574  |
| HFE2        | 0.228877  | 0         | 0.333537  | 0         | 0.0468493 | 0.0458381 |
| C19orf28    | 43.5791   | 60.5743   | 40.8358   | 49.6179   | 44.3154   | 49.8144   |
| FOXD4L2     | 0.0265676 | 0.0220801 | 0.204501  | 0.0803322 | 0.100524  | 0.0609328 |
| CCNB1       | 7.41782   | 9.46837   | 5.20626   | 8.3029    | 6.16369   | 7.77554   |
| ATP1A3      | 0.248919  | 0.0978128 | 0.125622  | 0.103881  | 0.105692  | 0.0861755 |
| SLC7A3      | 0.181871  | 0.251254  | 0         | 0.26684   | 0.115834  | 0.127503  |
| DDX21       | 23.4536   | 14.7287   | 21.0536   | 15.8844   | 16.1913   | 14.1043   |
| BPIFA2      | 0         | 0         | 0         | 0         | 0         | 0         |
| MIR181B1    | 0         | 0         | 0         | 0         | 0         | 0         |
| LOC10050594 | 0         | 0         | 0.201622  | 0         | 0         | 0.165973  |
| HIGD1A      | 48.0202   | 35.5887   | 42.2824   | 36.3228   | 33.8717   | 34.2206   |

|             |           |           |           |           |           |           |
|-------------|-----------|-----------|-----------|-----------|-----------|-----------|
| GLUD2       | 32.1745   | 22.1622   | 28.3644   | 25.6211   | 21.6193   | 19.2543   |
| HIST1H2BA   | 0         | 0         | 0         | 0         | 0         | 0         |
| SNORD95     | 0         | 0         | 0         | 0         | 0         | 0         |
| ZFHX2       | 0.288132  | 0.24565   | 0.272647  | 0.164263  | 0.268715  | 0.27574   |
| SH2D1B      | 0.198837  | 0.0351598 | 0.150521  | 0.186705  | 0.12664   | 0.148688  |
| RNU1-8      | 48.9911   | 54.6816   | 23.1387   | 70.2567   | 31.6046   | 27.9645   |
| CHMP3       | 59.5191   | 52.6802   | 53.7523   | 51.6229   | 50.846    | 44.4294   |
| HERC3       | 11.6742   | 6.6951    | 10.181    | 8.23995   | 10.412    | 8.90928   |
| OR2C3       | 0.109531  | 0         | 0.0276386 | 0         | 0         | 1.07E-09  |
| RNASEL      | 5.15657   | 4.11334   | 3.73006   | 2.41021   | 4.77311   | 3.7989    |
| NDE1        | 9.66184   | 10.4367   | 9.03383   | 10.0358   | 12.7803   | 11.5692   |
| VSIG4       | 3.79422   | 2.62086   | 4.5071    | 2.67269   | 4.01225   | 1.86438   |
| NFIA        | 11.5035   | 10.3021   | 11.1894   | 8.81886   | 9.26657   | 7.71676   |
| MS4A4A      | 3.73632   | 2.4316    | 2.12899   | 0.800667  | 2.24046   | 1.01212   |
| XAGE-4      | 0         | 0         | 0         | 0         | 0         | 0         |
| BANP        | 6.00852   | 5.87078   | 5.61116   | 5.23441   | 5.99576   | 5.56677   |
| MGC16703    | 0.238946  | 0.0795162 | 0.0709618 | 0.274163  | 0.0970732 | 0.180452  |
| LOC10050731 | 5.72416   | 9.73967   | 6.61643   | 7.02623   | 7.29462   | 6.51498   |
| WDR49       | 0         | 0.034288  | 0         | 0         | 0.0741002 | 0         |
| LOC253962   | 0.227201  | 0.200877  | 0.114662  | 0.0711127 | 0.241176  | 0.094388  |
| MPDU1       | 42.5065   | 40.3251   | 34.5534   | 40.824    | 37.3735   | 43.6668   |
| NLGN4X      | 0.556287  | 0.405425  | 0.488186  | 0.462378  | 0.766904  | 0.549735  |
| XPC         | 16.284    | 21.3213   | 21.7837   | 18.3751   | 23.4521   | 18.9888   |
| C20orf112   | 4.5578    | 3.2125    | 4.33095   | 3.23222   | 4.46598   | 3.81345   |
| MIR888      | 0         | 0         | 0         | 0         | 0         | 0         |
| ARID1B      | 10.0888   | 8.85905   | 12.0291   | 9.41785   | 11.6676   | 10.9991   |
| ASB13       | 14.1411   | 15.9926   | 14.1162   | 15.6785   | 13.8087   | 13.6929   |
| HMMR        | 1.94753   | 2.32704   | 1.6547    | 1.15536   | 2.02365   | 1.77822   |
| LRRC36      | 0.300941  | 0.469353  | 0.622084  | 1.98891   | 1.31944   | 0.599792  |
| MIR7-1      | 445.654   | 394.019   | 0         | 418.462   | 283.839   | 0         |
| MTCH1       | 136.423   | 147.07    | 132.756   | 168.101   | 157.119   | 137.785   |
| LOC643201   | 0.0678944 | 0.120056  | 0         | 0         | 0.0432423 | 0.0423089 |
| SNORD58A    | 0         | 0         | 0         | 0         | 0         | 0         |
| RAB9BP1     | 0         | 0         | 0         | 0         | 0         | 0         |
| RASGRP1     | 4.66155   | 3.32907   | 4.57502   | 2.52188   | 6.83215   | 4.27723   |
| CXADR       | 24.6885   | 25.7735   | 31.7868   | 24.5357   | 28.914    | 22.6966   |
| STEAP3      | 8.43082   | 8.30499   | 7.28043   | 7.67944   | 10.6473   | 9.1729    |
| LOC10050668 | 7.63609   | 7.24535   | 5.3576    | 3.49764   | 4.74485   | 6.4994    |
| TDP2        | 34.8514   | 31.4335   | 30.916    | 25.2276   | 33.3987   | 32.7786   |
| LOC10028936 | 2.03323   | 2.19714   | 1.19713   | 2.96983   | 1.15109   | 2.39327   |
| PCDH11X     | 0.0519013 | 0.0616951 | 0.0355506 | 0.102802  | 0.0528913 | 0.121423  |
| EIF5        | 59.2944   | 47.3411   | 51.534    | 44.8273   | 48.0027   | 54.2516   |
| ZNF221      | 0.208637  | 0.0737856 | 0.252704  | 0.313452  | 0.212612  | 0.260028  |

|             |           |           |           |           |           |           |
|-------------|-----------|-----------|-----------|-----------|-----------|-----------|
| RNF180      | 2.38057   | 1.62177   | 2.73259   | 1.35601   | 2.11266   | 1.44699   |
| RAB32       | 12.0429   | 17.4983   | 13.5688   | 15.954    | 13.9133   | 16.1727   |
| FKBP5       | 104.791   | 63.9585   | 58.4563   | 47.2468   | 31.5303   | 26.2974   |
| SNORA40     | 587.541   | 649.333   | 277.982   | 275.846   | 374.208   | 137.299   |
| ZBTB48      | 7.95259   | 17.0977   | 12.6653   | 15.914    | 16.496    | 15.6525   |
| LINC00207   | 0         | 0         | 0.138472  | 0         | 0         | 0         |
| EIF4E3      | 11.2383   | 9.87398   | 10.9625   | 8.94343   | 8.41743   | 7.23675   |
| SLC7A5P2    | 0.750086  | 0.59337   | 0.814389  | 0.741388  | 0.666879  | 0.68906   |
| ATIC        | 22.9529   | 22.6938   | 18.0855   | 19.6521   | 17.857    | 16.7948   |
| SNCAIP      | 1.70558   | 2.11601   | 2.04082   | 2.3506    | 2.75077   | 2.62282   |
| C3orf18     | 5.71368   | 5.69356   | 3.8826    | 3.38678   | 5.39746   | 3.66447   |
| ANKRD10     | 42.0026   | 48.8469   | 34.5225   | 35.4502   | 49.7836   | 36.4876   |
| ZNF267      | 6.01793   | 4.09077   | 4.02908   | 2.41363   | 4.98849   | 3.56167   |
| ITIH3       | 0.523111  | 0.231251  | 0.148499  | 0.0306996 | 0.499759  | 0.183364  |
| MIR4510     | 0         | 0         | 0         | 0         | 0         | 0         |
| MIR2467     | 0         | 0         | 0         | 0         | 0         | 0         |
| PRHOXNB     | 0         | 0         | 0.227197  | 0         | 0         | 0         |
| GNPTAB      | 15.9834   | 11.5403   | 16.4724   | 13.8402   | 14.4668   | 12.3281   |
| LOC10013131 | 0.299422  | 0.468529  | 0.563783  | 0.594819  | 0.285554  | 0.581653  |
| TAS2R60     | 0         | 0         | 0         | 0         | 0         | 0         |
| FAM170A     | 0         | 0         | 0.0685212 | 0         | 0.230602  | 0.0564058 |
| LRRC46      | 0.703604  | 0.621491  | 0.450391  | 0.304799  | 0.37896   | 0.235995  |
| LOC493754   | 7.31643   | 7.68824   | 8.46678   | 8.92538   | 7.84923   | 5.88597   |
| KRTAP19-3   | 7.2643    | 0.875814  | 0         | 8.06125   | 0.63091   | 780.462   |
| GMPS        | 16.9541   | 11.024    | 15.233    | 13.1762   | 12.2921   | 11.078    |
| PLAC1L      | 0         | 0         | 0         | 0         | 0         | 0         |
| MIR1205     | 0         | 0         | 0         | 0         | 0         | 0         |
| NYNRIN      | 6.44779   | 6.17045   | 9.02164   | 8.73008   | 11.2971   | 9.53331   |
| LOC10012469 | 0.0832976 | 0.0736465 | 0.0840757 | 0.104287  | 0.141474  | 0.0865126 |
| STGC3       | 0.634863  | 0.320746  | 1.23582   | 0.596127  | 0.519876  | 0.39562   |
| GOLGA8J     | 0.194469  | 0.208939  | 0.306888  | 0.110505  | 0.297082  | 0.224567  |
| CHST8       | 0.285916  | 0.346583  | 0.227102  | 0.324514  | 0.137571  | 0.332352  |
| CLCN6       | 6.18229   | 6.82197   | 7.66358   | 6.15573   | 9.64735   | 6.98983   |
| C2orf47     | 15.4679   | 12.0402   | 13.5512   | 9.00212   | 9.52718   | 9.79929   |
| PMVK        | 244.298   | 296.968   | 182.358   | 241.217   | 154.077   | 188.682   |
| CKLF-CMTM1  | 4.46E-121 | 7.16E-07  | 3.34E-57  | 7.77E-41  | 7.17E-08  | 6.48E-17  |
| GLRA2       | 0.175551  | 0         | 0         | 0.0309071 | 0.0943393 | 0.227909  |
| FAM3D       | 5.7386    | 4.10373   | 3.19455   | 4.59603   | 5.48242   | 4.25971   |
| LOC10050649 | 0         | 0         | 0.145613  | 0         | 0.0612558 | 0         |
| GPR141      | 0.131177  | 0.463915  | 0.297906  | 0.123173  | 0.584833  | 0.326977  |
| CSTA        | 214.502   | 166.109   | 224.97    | 210.453   | 287.797   | 287.584   |
| CXCL10      | 30.8682   | 68.6773   | 1.88334   | 0.0865215 | 2.34747   | 0.0574201 |
| OSBPL1A     | 30.4556   | 23.5137   | 25.8141   | 21.2078   | 20.2242   | 20.3834   |

|             |           |           |           |           |           |           |
|-------------|-----------|-----------|-----------|-----------|-----------|-----------|
| XAB2        | 21.7797   | 32.2943   | 26.0478   | 32.913    | 32.1745   | 27.2622   |
| ANKFN1      | 0.208637  | 0.184464  | 0.979226  | 0.705266  | 0.770718  | 0.910098  |
| RFXAP       | 3.07542   | 3.68796   | 4.25482   | 2.58903   | 4.66047   | 2.84166   |
| MIR155HG    | 1.53863   | 1.74904   | 0.610109  | 0.206393  | 1.35328   | 0.365261  |
| CRTAC1      | 0.851821  | 0.817454  | 0.84053   | 1.81124   | 0.637115  | 0.738963  |
| RPS24       | 1399.65   | 1698.76   | 1773.51   | 2069.71   | 1820.05   | 1779.77   |
| LINC00230B  | 0.372893  | 2.63751   | 0         | 0         | 0         | 0         |
| NKAIN3      | 0         | 0         | 0.103378  | 0         | 0         | 0.0425496 |
| RGR         | 0         | 0         | 0         | 0.0763774 | 0.0518062 | 0.202753  |
| OR5L2       | 0         | 0         | 0         | 0         | 0         | 0         |
| KDM3A       | 23.643    | 19.5337   | 26.0932   | 20.4502   | 31.3302   | 27.626    |
| PARP16      | 7.51934   | 7.14052   | 7.46905   | 8.03177   | 8.26052   | 8.1566    |
| C1orf186    | 9.18282   | 11.2415   | 11.8404   | 7.86449   | 18.0599   | 13.5198   |
| CCDC105     | 0         | 0.0531005 | 0         | 0         | 0.038252  | 0.0374263 |
| C4B         | 1.90619   | 1.86266   | 1.4028    | 0.980776  | 1.83415   | 1.01129   |
| SLC6A1      | 0.646896  | 0.591009  | 0.571321  | 0.850395  | 0.961361  | 0.362806  |
| LOC10050673 | 3.08209   | 3.26282   | 4.88122   | 4.60761   | 4.31344   | 3.79072   |
| SMPD4       | 22.1239   | 28.057    | 23.5095   | 26.956    | 26.8851   | 26.1072   |
| CYS1        | 1.6949    | 2.28037   | 2.37086   | 2.45643   | 1.64271   | 1.63021   |
| MIR1273G    | 0         | 0         | 0         | 0         | 0         | 0         |
| GPR151      | 0.176532  | 0         | 0         | 0         | 0         | 0         |
| LOC144571   | 1.38147   | 1.7431    | 1.44288   | 1.52623   | 1.92633   | 1.51432   |
| UBE2E3      | 39.0861   | 47.1995   | 45.45     | 45.6978   | 39.3318   | 35.7494   |
| LINC00230A  | 0.375931  | 2.99137   | 0         | 0         | 0         | 0         |
| SNORD116-1  | 0         | 0         | 0         | 0         | 0         | 0         |
| MIR4501     | 0         | 0         | 0         | 0         | 0         | 0         |
| D2HGDH      | 26.6549   | 52.1216   | 40.179    | 51.2627   | 63.9742   | 49.5557   |
| RALBP1      | 25.3911   | 23.2179   | 29.8191   | 24.428    | 29.1063   | 25.2135   |
| LINC00342   | 23.4714   | 20.7025   | 19.7328   | 21.8817   | 27.8161   | 21.9521   |
| TMEM215     | 0.0714169 | 0.0473568 | 0.0270315 | 0         | 0         | 0.011126  |
| FIGF        | 1.29746   | 2.42813   | 1.99907   | 0.769634  | 1.27261   | 1.27E-05  |
| PPP2R3A     | 7.48135   | 6.07102   | 8.72976   | 9.35313   | 8.24875   | 6.78758   |
| ETFDH       | 44.3136   | 28.2855   | 28.1129   | 22.7737   | 22.1108   | 22.0107   |
| C9orf46     | 25.3233   | 24.5761   | 23.093    | 22.1192   | 19.9544   | 19.0099   |
| LOC10028833 | 0         | 0         | 0         | 0.0485027 | 0.065798  | 0.0321889 |
| C9orf50     | 0.131314  | 0.1161    | 0.0994057 | 0.061651  | 0.250904  | 0.0818295 |
| LOC10012836 | 0.18507   | 0.0409068 | 0         | 0.0434444 | 0.117872  | 0.0288319 |
| SNORD47     | 0         | 0         | 0         | 0         | 0         | 0         |
| ZNF609      | 6.03958   | 5.22331   | 6.70837   | 4.49562   | 6.74212   | 6.54184   |
| RPS17L      | 992.501   | 1498.66   | 1130.09   | 1572.35   | 1154.91   | 1091.79   |
| ARID3C      | 0.3603    | 0.159277  | 0.545499  | 0.592053  | 0.286847  | 0.56131   |
| LOC10028951 | 0.670336  | 1.17387   | 1.77042   | 0.617976  | 2.00625   | 1.67585   |
| DEFA1B      | 0         | 0         | 0         | 0.203782  | 0.0691119 | 0         |

|             |           |          |           |          |           |           |
|-------------|-----------|----------|-----------|----------|-----------|-----------|
| SLC29A1     | 59.8611   | 62.1527  | 74.2217   | 66.2637  | 63.5099   | 52.0027   |
| PKHD1L1     | 0.280799  | 0.271909 | 0.369461  | 0.19461  | 0.740919  | 0.358297  |
| MAPK15      | 3.74968   | 6.58171  | 5.88578   | 8.33623  | 8.745     | 7.18174   |
| CSF1R       | 11.5885   | 8.06261  | 11.0489   | 5.05043  | 16.7235   | 8.77541   |
| TAS2R4      | 0.538488  | 1.42829  | 1.32482   | 1.13767  | 2.65799   | 1.42614   |
| LAMTOR3     | 15.7638   | 13.2964  | 14.105    | 10.6141  | 14.1098   | 13.1512   |
| ERVW-1      | 0.130454  | 0        | 0.123349  | 0.269268 | 0.160905  | 0.385474  |
| ZBTB40      | 6.32626   | 6.69847  | 7.88312   | 7.03236  | 8.12168   | 6.1369    |
| IMMT        | 39.185    | 36.4702  | 30.8729   | 31.0439  | 28.5324   | 25.9636   |
| SNORD11     | 0         | 0        | 0         | 0        | 0         | 0         |
| C6orf52     | 1.9012    | 0.251448 | 1.87993   | 1.08623  | 1.1321    | 2.33654   |
| HIST3H2BB   | 1.16579   | 0.343572 | 0.882507  | 0        | 3.46498   | 2.66372   |
| MAGED4      | 1.61886   | 3.07678  | 2.26678   | 2.77384  | 3.89163   | 4.05978   |
| TRIM35      | 9.24522   | 10.5124  | 9.78423   | 9.26418  | 11.3079   | 9.04313   |
| LINC00189   | 0.205307  | 0.18152  | 0.466256  | 0        | 0.130761  | 0.255878  |
| CSPG5       | 1.04697   | 0.8001   | 0.756712  | 0.699552 | 0.537122  | 0.888712  |
| TNNI3       | 0.88099   | 0.908735 | 1.44498   | 1.24085  | 1.68332   | 1.64699   |
| ZMYM5       | 8.79516   | 6.74894  | 5.8983    | 6.3865   | 8.20516   | 6.75576   |
| MIB1        | 8.63581   | 6.45989  | 9.38736   | 7.10838  | 7.80756   | 6.02016   |
| SEC24A      | 9.50826   | 4.69237  | 6.8017    | 4.57636  | 5.65595   | 5.0401    |
| MCF2L2      | 0.141735  | 0.125313 | 0.168605  | 0.171112 | 0.219232  | 0.126176  |
| GPR87       | 37.5765   | 31.037   | 40.5831   | 34.4215  | 40.5775   | 49.8251   |
| ADAMTS19    | 0.0757244 | 0.167377 | 0.0573238 | 0.017776 | 0.0723439 | 0.0471882 |
| OR52W1      | 0         | 0        | 0         | 0        | 0         | 0         |
| GTF3C2      | 18.2333   | 19.4418  | 21.3668   | 24.055   | 25.4702   | 21.3893   |
| CLOCK       | 1.94916   | 0.847058 | 2.50089   | 1.24083  | 1.56757   | 1.36904   |
| LOC10050751 | 0         | 2.64E-11 | 0.897627  | 0        | 0         | 1.16E-10  |
| LOC10065274 | 124.931   | 127.321  | 137.661   | 89.4007  | 112.412   | 82.8645   |
| PI4KAP1     | 11.6561   | 15.6548  | 9.67565   | 10.8102  | 37.5729   | 32.4313   |
| PCK1        | 17.5932   | 6.67106  | 6.447     | 2.77082  | 5.37659   | 3.7941    |
| LIN7B       | 8.02474   | 15.5485  | 13.8298   | 19.5592  | 22.4014   | 26.3866   |
| CD1C        | 5.51159   | 5.11322  | 8.47197   | 2.18674  | 14.0662   | 3.72483   |
| C1orf183    | 5.74673   | 5.88552  | 5.05383   | 4.95649  | 6.28639   | 5.06362   |
| LOC729706   | 0         | 0        | 0         | 0        | 0         | 0         |
| C21orf49    | 0.590633  | 0.445609 | 0.654066  | 0.554595 | 0.602019  | 0.712571  |
| MIR2053     | 0         | 0        | 0         | 0        | 0         | 0         |
| PRLHR       | 0         | 0        | 0         | 0        | 0         | 0         |
| TTC30B      | 2.5818    | 1.24204  | 2.78794   | 1.6756   | 1.9588    | 2.03474   |
| DMRTB1      | 0.0545233 | 0        | 0         | 0        | 0.0347262 | 0         |
| TMEM50A     | 56.362    | 43.3749  | 46.3058   | 41.6195  | 43.631    | 41.3562   |
| RNF125      | 4.39155   | 5.06193  | 5.40528   | 4.50541  | 4.11263   | 3.45626   |
| PTEN        | 18.828    | 19.2781  | 20.1173   | 17.5329  | 18.2851   | 18.3756   |
| DHRS13      | 10.7611   | 11.9048  | 7.12284   | 11.3739  | 8.67921   | 6.47      |

|             |           |           |           |          |            |           |
|-------------|-----------|-----------|-----------|----------|------------|-----------|
| RAMP2       | 50.3789   | 80.7282   | 53.4528   | 46.3481  | 37.4361    | 33.8122   |
| EDIL3       | 3.04312   | 1.41918   | 6.22747   | 2.54344  | 3.34389    | 2.06305   |
| LOC10012909 | 0.21083   | 0.298244  | 0.0957598 | 0        | 0.134279   | 0.13138   |
| LOC10050747 | 0.0579472 | 0.1537    | 0         | 0.217646 | 0.0369069  | 0         |
| ATP5I       | 519.025   | 695.422   | 483.066   | 648.738  | 515.693    | 528.48    |
| MCM3        | 25.105    | 27.7735   | 19.2699   | 20.4022  | 22.0769    | 19.0393   |
| MIR4506     | 0         | 0         | 0         | 0        | 0          | 0         |
| MICALL2     | 12.9886   | 24.41     | 14.119    | 15.14    | 26.8823    | 18.7198   |
| SGCZ        | 0.0939959 | 0         | 0         | 0        | 0.0299333  | 0         |
| MIR4436A    | 0         | 0         | 0         | 0        | 0          | 0         |
| LOC10050614 | 1.15E-09  | 1.34E-09  | 6.44E-09  | 1.83E-10 | 3.67E-11   | 0.217573  |
| SNORD113-3  | 0         | 0         | 0         | 0        | 0          | 0         |
| JSRP1       | 0.396699  | 0.0876841 | 0.0750759 | 0.279371 | 0.063165   | 0.185405  |
| HPS1        | 21.3664   | 27.623    | 18.5098   | 23.8065  | 23.8752    | 20.3327   |
| PRCC        | 28.6246   | 34.9696   | 27.9281   | 35.0505  | 28.1167    | 31.8185   |
| SPDYE1      | 0.53795   | 0.710368  | 0.543125  | 0.599974 | 0.815214   | 0.768023  |
| BEX1        | 1.42919   | 1.38926   | 0.546196  | 1.07539  | 0.910258   | 0.710514  |
| MBD4        | 18.2202   | 17.978    | 17.8191   | 15.0979  | 20.2731    | 15.9602   |
| LOC10028920 | 0         | 0         | 0.0647271 | 0        | 0          | 0         |
| ALKBH3      | 15.806    | 16.5648   | 11.4495   | 15.4173  | 13.7119    | 14.6046   |
| PRSS23      | 14.6969   | 8.35985   | 12.351    | 11.3152  | 9.60603    | 13.0973   |
| GPR22       | 0         | 0         | 0         | 0        | 0          | 0.0208995 |
| LOC285547   | 0         | 0         | 0         | 0        | 0          | 0         |
| C12orf68    | 0.30334   | 0.229881  | 0.196826  | 0.610353 | 0.331198   | 0.216033  |
| LOC151009   | 13.7424   | 14.5553   | 9.47994   | 13.0801  | 11.7996    | 11.3988   |
| POU6F1      | 6.20018   | 9.01577   | 7.00571   | 9.64891  | 9.73827    | 7.05577   |
| MAPRE3      | 20.7917   | 25.4468   | 24.6993   | 26.4844  | 29.4433    | 29.0972   |
| TBKBP1      | 4.49686   | 6.22396   | 4.9369    | 5.5047   | 6.56788    | 6.17669   |
| SMG1        | 20.8057   | 17.9652   | 22.7024   | 15.0882  | 23.4324    | 19.92     |
| MIR558      | 0         | 0         | 0         | 0        | 0          | 0         |
| MLLT11      | 3.32371   | 2.7707    | 2.80362   | 3.83427  | 2.7822     | 6.89413   |
| NLGN4Y      | 1.5456    | 1.51857   | 0.0143602 | 0        | 0.00604088 | 0.0118211 |
| LYSMD1      | 5.65036   | 5.19728   | 4.83555   | 4.02094  | 6.7862     | 5.9252    |
| LOC10065287 | 0.974803  | 1.51952   | 1.15647   | 0.627584 | 1.29284    | 0.892493  |
| SNORD42A    | 0         | 0         | 0         | 0        | 0          | 0         |
| RNH1        | 104.473   | 137.162   | 157.764   | 182.311  | 148.098    | 155.611   |
| MIR3179-1   | 0         | 0         | 0         | 0        | 0          | 0         |
| LOC10050610 | 0         | 0         | 0         | 0        | 0          | 0         |
| KIAA1826    | 6.10035   | 3.79234   | 4.96074   | 3.31158  | 4.47726    | 3.41539   |
| HAUS8       | 4.24843   | 4.99549   | 2.98334   | 3.35169  | 3.03062    | 3.79879   |
| FANCM       | 1.1479    | 1.21552   | 0.980117  | 1.02773  | 1.13917    | 0.923268  |
| UGT1A10     | 1.17E-08  | 9.05E-09  | 0.0885751 | 8.26E-09 | 9.23E-09   | 7.27E-09  |
| TMEM183B    | 24.5629   | 23.8504   | 22.1539   | 26.7242  | 22.5009    | 23.1719   |



|             |          |           |           |           |           |           |
|-------------|----------|-----------|-----------|-----------|-----------|-----------|
| TERF2       | 9.42421  | 9.60734   | 8.70827   | 10.7702   | 9.48411   | 8.23441   |
| CALU        | 25.8318  | 17.307    | 21.5754   | 18.4245   | 17.8181   | 16.129    |
| BBX         | 5.28279  | 3.72128   | 5.54349   | 3.7891    | 4.47228   | 3.73202   |
| DLEU1       | 6.43676  | 7.91788   | 6.88528   | 9.06602   | 6.32765   | 6.88865   |
| GPR35       | 1.89723  | 3.80667   | 2.34527   | 4.08111   | 3.32502   | 2.97302   |
| RNF7        | 27.098   | 34.5368   | 30.6145   | 36.881    | 33.1534   | 28.3844   |
| MIR148B     | 0        | 0         | 0         | 0         | 0         | 0         |
| ZC3H15      | 37.5949  | 30.3062   | 33.8821   | 28.8457   | 28.5679   | 30.8273   |
| NDUFA11     | 97.5239  | 149.872   | 112.084   | 157.079   | 121.819   | 112.645   |
| PARD6B      | 3.04069  | 2.85525   | 2.95268   | 3.4065    | 3.47258   | 3.56751   |
| MIR630      | 0        | 0         | 0         | 0         | 0         | 0         |
| GCN1L1      | 17.3675  | 17.1601   | 18.0559   | 17.2201   | 17.3118   | 16.4415   |
| WFDC9       | 0        | 0         | 0         | 0         | 0         | 0         |
| FGB         | 0        | 0         | 0         | 0         | 0         | 0         |
| LOC10050750 | 0.134226 | 0.158232  | 0.10161   | 0.21006   | 0.0569929 | 0.083644  |
| MIR3621     | 0        | 0         | 0         | 0         | 0         | 0         |
| CD160       | 0.823633 | 1.57778   | 1.14307   | 0.902275  | 1.66116   | 0.898193  |
| OR13D1      | 0        | 0.098718  | 0         | 0         | 0         | 0         |
| NDNL2       | 11.9994  | 11.1704   | 11.2944   | 11.2076   | 11.5244   | 11.513    |
| GNAI1       | 21.7357  | 19.2699   | 30.3195   | 18.12     | 25.6419   | 22.8093   |
| ACE2        | 1.12109  | 0.594719  | 0.721372  | 0.210538  | 0.606925  | 0.646221  |
| GM2A        | 76.7606  | 63.6723   | 66.2284   | 65.3405   | 61.3694   | 65.4221   |
| RN5S16      | 40.8616  | 221.907   | 28.0683   | 297.386   | 0         | 34.2456   |
| BMP1        | 12.6447  | 17.8678   | 15.9713   | 16.6432   | 18.1305   | 17.8402   |
| LOC10050567 | 1.30283  | 0.383959  | 0.219166  | 0.135926  | 0.553186  | 0.451037  |
| IGDCC3      | 0.021639 | 0.0382638 | 0.0491426 | 0.0609562 | 0.013782  | 0.0809072 |
| ROPN1L      | 0        | 0         | 0.377359  | 0         | 0         | 0.0776591 |
| HCG18       | 4.01212  | 3.70454   | 4.10369   | 4.39078   | 4.43554   | 3.88942   |
| NPM3        | 25.0732  | 31.8566   | 22.9876   | 30.0832   | 24.3975   | 22.8293   |
| ALDH3A2     | 91.7051  | 89.35     | 118.675   | 109.905   | 145.609   | 145.368   |
| MPP7        | 11.7926  | 8.77569   | 14.7058   | 7.74071   | 12.667    | 10.8502   |
| TMC7        | 0.926323 | 0.935863  | 0.484514  | 1.07667   | 0.800467  | 1.70335   |
| LOC10050717 | 0.041898 | 0.0740871 | 0.031717  | 0         | 0.0266851 | 0.0261091 |
| SYNE2       | 56.4844  | 65.7609   | 54.1196   | 59.0321   | 72.8191   | 62.5803   |
| LOC10050978 | 0        | 0.570051  | 2.92849   | 0         | 1.23194   | 2.4107    |
| LOC10050695 | 0        | 0         | 0.118506  | 0         | 0         | 0.195106  |
| LOC401180   | 0        | 0.113181  | 0         | 0         | 0.159656  | 0         |
| LOC10050638 | 0        | 0         | 0.116187  | 0.0720589 | 0         | 0         |
| GEMIN6      | 12.729   | 11.0837   | 6.86194   | 9.59808   | 8.23      | 10.5762   |
| HAPLN4      | 0.114438 | 0         | 0.0649726 | 0.214911  | 0.127551  | 0.142626  |
| CHERP       | 13.5323  | 15.5637   | 14.9487   | 17.5203   | 16.2935   | 15.2713   |
| LOC152225   | 0.100496 | 0.177705  | 0.0760762 | 0.0943643 | 0.128013  | 0.187875  |
| LOC10028716 | 0        | 0         | 0.215449  | 0         | 0         | 0.177355  |

|             |           |          |           |           |           |           |
|-------------|-----------|----------|-----------|-----------|-----------|-----------|
| EXOSC9      | 13.6623   | 13.1673  | 13.2315   | 12.0879   | 13.9962   | 12.4155   |
| MIR1261     | 0         | 0        | 0         | 0         | 0         | 0         |
| LOC10065276 | 0         | 0        | 0.442629  | 0         | 0         | 0         |
| MTX3        | 7.12309   | 6.24432  | 7.47679   | 6.21191   | 8.86548   | 8.24456   |
| SPRED1      | 7.87727   | 5.91005  | 6.67753   | 5.95669   | 6.59483   | 5.97058   |
| COL6A1      | 146.004   | 182.026  | 171.782   | 108.547   | 194.036   | 143.118   |
| MIR4289     | 0         | 0        | 0         | 0         | 0         | 0         |
| LINC00208   | 0         | 0        | 0         | 0         | 0         | 0         |
| LOC285540   | 1.52701   | 0.540034 | 0.770636  | 0.764714  | 0.518699  | 0.951568  |
| IVNS1ABP    | 62.7627   | 52.4399  | 52.9934   | 68.6249   | 55.8799   | 47.6309   |
| EMBP1       | 1.47041   | 1.05639  | 1.20598   | 0.798213  | 1.60966   | 1.32674   |
| LY86-AS1    | 0.561287  | 0.270684 | 0.193135  | 0.431214  | 0.162494  | 0.0953919 |
| DHRS4L1     | 4.54987   | 5.91516  | 2.45358   | 4.07658   | 3.95818   | 4.03951   |
| MPP3        | 4.01173   | 5.30444  | 2.82193   | 2.63375   | 3.52725   | 2.72114   |
| VPS53       | 5.27631   | 6.49262  | 6.12097   | 6.65462   | 7.61082   | 6.99315   |
| BRDT        | 0         | 0        | 0         | 0         | 0.0209864 | 0.0205334 |
| MTMR3       | 10.5132   | 10.1165  | 13.3268   | 11.3511   | 12.5165   | 11.7749   |
| LOC10013248 | 0         | 0        | 0         | 0         | 0         | 0         |
| DNM3OS      | 5.41068   | 5.52353  | 8.51579   | 3.40138   | 9.04384   | 4.80992   |
| MIR4508     | 0         | 0        | 0         | 0         | 0         | 0         |
| NSUN7       | 2.64906   | 1.92055  | 1.76471   | 2.3133    | 1.48473   | 1.53522   |
| RTP4        | 9.34947   | 9.59289  | 2.00969   | 2.27604   | 4.3374    | 2.01399   |
| MIR4687     | 0         | 0        | 0         | 0         | 0         | 0         |
| FLJ45832    | 0.0296387 | 0        | 0.0224366 | 0         | 0.0566311 | 0         |
| FOXN4       | 0.0882358 | 0        | 0.08906   | 0.193321  | 0.0187326 | 0.0733131 |
| GPR85       | 0.165683  | 0.181614 | 0.093577  | 0.15345   | 0.154214  | 0.079015  |
| RAB33B      | 5.95924   | 4.15252  | 4.62587   | 3.05075   | 4.43877   | 4.23283   |
| DNAL1       | 1.65656   | 1.45576  | 1.70661   | 1.40152   | 1.28069   | 1.30106   |
| GBX1        | 0         | 0        | 0.0629633 | 0         | 0.158922  | 0         |
| SCMH1       | 15.2044   | 18.1246  | 13.4013   | 14.9874   | 16.0636   | 12.8639   |
| TTC16       | 0.347254  | 0.275839 | 0.0262643 | 0.163493  | 0.243268  | 0.151145  |
| ITLN2       | 0.694624  | 0        | 0         | 0.185252  | 0.188482  | 0.368827  |
| CYP1A2      | 0.253473  | 0.196092 | 0.0959403 | 0.0595018 | 0.0807192 | 0.0789768 |
| MICU1       | 19.7341   | 17.4675  | 21.4529   | 22.7667   | 23.1289   | 21.2431   |
| TGIF2-C20OR | 2.93E-37  | 1.23E-48 | 6.83E-14  | 1.14E-42  | 1.25E-73  | 1.73E-47  |
| ZNF280A     | 0.0954544 | 0.16879  | 0.0722595 | 0         | 0         | 0.0297416 |
| RPL31P11    | 0.96162   | 0.972674 | 0.675955  | 0.83845   | 1.05041   | 0.684847  |
| LOC10050550 | 1.13231   | 0.66741  | 0.380961  | 1.06322   | 0.480782  | 0.235202  |
| SNORA18     | 367.029   | 370.862  | 119.076   | 196.934   | 400.736   | 359.412   |
| RPL23AP82   | 5.42786   | 5.16114  | 5.68772   | 5.59241   | 4.69717   | 5.61155   |
| C1orf172    | 11.9091   | 13.611   | 9.93876   | 14.7281   | 12.1729   | 12.9238   |
| LOC10065280 | 453.622   | 420.489  | 391.957   | 457.523   | 469.28    | 523.115   |
| PRTG        | 0.180501  | 0.124895 | 0.124759  | 0.0810594 | 0.189938  | 0.161385  |

|             |           |           |           |          |          |          |
|-------------|-----------|-----------|-----------|----------|----------|----------|
| PKP4        | 23.6305   | 22.3575   | 19.1421   | 20.6011  | 22.7774  | 20.3764  |
| USP46       | 4.41668   | 3.30501   | 4.95658   | 4.21277  | 4.71718  | 4.34726  |
| VAMP5       | 44.8625   | 59.7685   | 32.4624   | 41.1634  | 36.4014  | 28.2117  |
| CD8B        | 3.51914   | 3.62932   | 0.988535  | 0.887096 | 2.00229  | 0.823488 |
| MANBAL      | 49.849    | 61.9691   | 55.3936   | 73.0809  | 58.6712  | 52.4849  |
| FLG2        | 96.2419   | 39.5596   | 202.592   | 118.161  | 208.482  | 181.11   |
| MIR3156-2   | 0         | 0         | 0         | 0        | 0        | 0        |
| CACYBP      | 16.4682   | 15.0987   | 14.0904   | 13.0927  | 11.8319  | 12.1585  |
| VHL         | 18.0293   | 19.5918   | 17.2248   | 17.8391  | 18.5594  | 16.7976  |
| KIAA0930    | 41.9224   | 47.4774   | 39.5048   | 41.8926  | 43.9467  | 44.7695  |
| RP2         | 3.13851   | 2.52671   | 3.20646   | 1.79696  | 2.81151  | 2.48051  |
| MIR548AE1   | 0         | 0         | 0         | 0        | 0        | 0        |
| RORA        | 25.1042   | 19.8708   | 37.9412   | 21.9222  | 30.9258  | 28.7182  |
| TRIM23      | 5.18312   | 4.69327   | 5.0988    | 2.65694  | 6.04404  | 5.25826  |
| SCARNA22    | 0         | 0         | 0         | 0        | 0        | 0        |
| C8orf37     | 1.19787   | 1.03325   | 1.3049    | 0.905313 | 1.52586  | 1.03777  |
| TYK2        | 21.2769   | 29.3098   | 24.8355   | 22.9862  | 29.1427  | 24.1891  |
| SUN2        | 63.4874   | 57.5786   | 72.6857   | 70.7853  | 65.2584  | 72.6083  |
| ITPKB       | 12.366    | 10.8098   | 14.7875   | 13.7968  | 16.4931  | 19.3761  |
| MT3         | 0.251121  | 0.888102  | 0.1901    | 0        | 0.319881 | 0.312976 |
| MIR4750     | 0         | 0         | 0         | 0        | 0        | 0        |
| STX16-NPEPL | 0.85641   | 0.501815  | 2.64821   | 0.750174 | 4.05737  | 1.29821  |
| GLRX3       | 28.1136   | 25.247    | 20.6611   | 22.8895  | 18.2001  | 19.8035  |
| LOC10050573 | 0         | 0         | 0         | 0        | 0        | 0.466628 |
| PRRC1       | 17.2129   | 11.6827   | 16.9627   | 12.7946  | 15.6633  | 15.094   |
| MTCP1NB     | 14.7452   | 22.6157   | 17.9941   | 18.84    | 17.6175  | 10.4757  |
| RPL34       | 175.166   | 257.591   | 184.85    | 246.268  | 200.412  | 170.598  |
| SPINK2      | 0         | 1.08359   | 0         | 0.230162 | 2.02952  | 1.52747  |
| RNF5P1      | 14.0996   | 14.9029   | 13.5625   | 15.5286  | 13.3012  | 14.93    |
| LOC10065295 | 31.3306   | 13.8219   | 30.6937   | 19.7166  | 21.3848  | 18.0402  |
| KRT19P2     | 0         | 0         | 0         | 0        | 0        | 0        |
| COL4A5      | 9.7887    | 12.5287   | 13.617    | 12.9852  | 18.2619  | 13.5975  |
| PAPPA2      | 0.0550309 | 0.0729819 | 0.0520731 | 0        | 0.026287 | 0        |
| MIR501      | 0         | 0         | 0         | 0        | 0        | 0        |
| PPM1A       | 16.395    | 12.5963   | 16.4261   | 12.3233  | 14.9249  | 14.8066  |
| ZNF334      | 2.79584   | 4.08028   | 3.82934   | 4.49046  | 7.24768  | 6.30939  |
| HSCB        | 11.9108   | 13.7925   | 11.2507   | 13.8564  | 14.098   | 13.2682  |
| LOC10065294 | 0.484397  | 2.06E-06  | 2.41334   | 1.20791  | 1.9474   | 0.722603 |
| ARGFX       | 0         | 0.033641  | 0         | 0        | 0        | 0        |
| ACTR3       | 70.5357   | 49.5247   | 62.822    | 46.6989  | 53.9142  | 61.5921  |
| ERMN        | 0.556257  | 0.19078   | 0.38121   | 0.342736 | 1.10623  | 0.27564  |
| TMEM71      | 1.32914   | 0.752179  | 0.887552  | 0.554756 | 1.81563  | 0.63151  |
| CACNB1      | 7.30777   | 10.5883   | 10.2317   | 9.2651   | 15.345   | 11.0334  |

|             |           |           |           |           |           |           |
|-------------|-----------|-----------|-----------|-----------|-----------|-----------|
| PARK7       | 195.151   | 197.637   | 150.461   | 159.442   | 141.212   | 140.23    |
| MIR4431     | 0         | 0         | 0         | 0         | 0         | 0         |
| PCNXL2      | 1.77501   | 2.16249   | 2.42288   | 1.92918   | 3.05327   | 2.71737   |
| LOC729799   | 1.40084   | 0.860093  | 1.44338   | 0.949986  | 1.1896    | 1.35791   |
| HRSP12      | 28.2699   | 26.6335   | 24.8211   | 12.6198   | 18.2266   | 25.8473   |
| C10orf85    | 0.271334  | 0.0959586 | 0.123241  | 0.0509557 | 0.207377  | 0.0676336 |
| LOC645949   | 0         | 0.0426607 | 0         | 0         | 0         | 0         |
| 1/2-SBSRNA4 | 0.746791  | 1.09978   | 1.2245    | 2.33783   | 1.66411   | 1.62812   |
| LINC00426   | 0.872794  | 1.36526   | 0.66071   | 0.567374  | 1.58214   | 0.585726  |
| SNX27       | 7.33347   | 6.57879   | 7.92051   | 8.87866   | 8.98216   | 7.73369   |
| TMEM235     | 0         | 0         | 0         | 0         | 0.0285653 | 0         |
| LOC440041   | 0         | 0         | 0         | 0         | 0         | 0         |
| TLCD1       | 50.8054   | 49.5684   | 37.4018   | 41.4805   | 31.0501   | 43.3587   |
| LOC10050548 | 0.265576  | 1.17403   | 0.603127  | 0.748114  | 0.845733  | 0.661982  |
| AEBP2       | 9.63183   | 7.44978   | 8.27891   | 6.81891   | 9.30458   | 7.57271   |
| ADAT3       | 4.18999   | 11.4721   | 7.92962   | 11.2319   | 9.85671   | 10.6126   |
| SIGIRR      | 13.6489   | 22.3294   | 14.6064   | 18.2829   | 20.2715   | 16.8743   |
| SLITRK2     | 2.06075   | 1.92324   | 5.93652   | 3.87256   | 4.3545    | 4.25752   |
| MTIF3       | 66.1745   | 63.8721   | 53.2388   | 50.2658   | 54.1182   | 49.1925   |
| ORMDL3      | 64.6371   | 87.4603   | 69.5968   | 60.4231   | 58.209    | 56.1458   |
| OVOL3       | 0         | 0.68003   | 0.291327  | 0.180504  | 0.612765  | 0.838323  |
| C3orf71     | 1.60969   | 2.3882    | 1.56113   | 1.90235   | 2.0333    | 1.67308   |
| MIR4511     | 0         | 0         | 0         | 0         | 0         | 0         |
| ZNF689      | 2.87053   | 1.78957   | 2.08943   | 1.31314   | 2.62519   | 1.74293   |
| GLIPR1      | 6.05677   | 3.154     | 3.85585   | 2.12692   | 6.32384   | 3.35713   |
| TTLL12      | 29.2213   | 30.7967   | 29.918    | 34.1839   | 31.639    | 30.3269   |
| POU6F2      | 0         | 0         | 0.0349016 | 0         | 0         | 0.0287306 |
| FAM26D      | 0.589122  | 0.0744092 | 0.0637098 | 2.68685   | 0.0536021 | 20.3487   |
| MIR1825     | 0         | 0         | 0         | 0         | 0         | 0         |
| YTHDC1      | 15.4771   | 16.6704   | 16.4458   | 15.3677   | 18.7668   | 17.1943   |
| SPDYE2L     | 1.81109   | 1.8858    | 1.73256   | 1.59662   | 1.08432   | 0.909817  |
| EMCN        | 9.80139   | 11.5686   | 7.60246   | 6.30185   | 6.25794   | 4.30257   |
| GEMIN8P4    | 0.744452  | 0.932446  | 0.65748   | 1.04854   | 0.276585  | 0.773185  |
| TP53BP1     | 6.3196    | 5.84569   | 5.99451   | 4.76454   | 6.54181   | 6.94676   |
| LOC339240   | 0.0314038 | 0.0624718 | 0.0237728 | 0.0294877 | 0         | 0.0195695 |
| LIX1        | 0         | 0         | 0.0744638 | 0.115455  | 0.140962  | 0.122595  |
| SMG5        | 31.6406   | 36.6053   | 31.6952   | 35.0303   | 36.3034   | 34.8983   |
| TAPBP       | 75.2286   | 103.63    | 56.9824   | 60.3937   | 78.5474   | 54.2451   |
| IQCJ        | 0.452503  | 0.223099  | 0.415035  | 0.139325  | 0.0923795 | 0.6035    |
| EPS15       | 25.1659   | 21.6326   | 31.4753   | 26.263    | 23.4736   | 18.4914   |
| MIR4744     | 0         | 0         | 0         | 0         | 0         | 0         |
| FAM115A     | 15.9638   | 10.9755   | 15.873    | 10.9086   | 12.0177   | 11.513    |
| FAM41AY1    | 0         | 0         | 0         | 0         | 0         | 0         |

|             |          |          |           |          |          |           |
|-------------|----------|----------|-----------|----------|----------|-----------|
| MIR3141     | 0        | 0        | 0         | 0        | 0        | 0         |
| RBCK1       | 35.0725  | 47.1792  | 29.2035   | 35.7823  | 40.0328  | 35.8518   |
| LOC10028833 | 20.8292  | 31.755   | 26.6175   | 38.4136  | 39.0903  | 33.3825   |
| FAM86EP     | 1.85609  | 1.80775  | 1.35556   | 1.82411  | 1.58703  | 1.30906   |
| KLHL29      | 4.33967  | 4.80865  | 5.06402   | 3.719    | 4.7796   | 4.889     |
| TREML1      | 0.602762 | 0.852679 | 0.547553  | 0.226394 | 1.15171  | 0.375616  |
| GLYATL3     | 0        | 0        | 0         | 0        | 0        | 0         |
| LOC10052671 | 0        | 0        | 0         | 0        | 0        | 0         |
| FAM155B     | 0.654897 | 0.193006 | 0.0550845 | 0.296081 | 0.154484 | 0.211609  |
| EHHADH      | 4.23911  | 3.63566  | 4.74068   | 3.38463  | 3.47589  | 3.80199   |
| MIR597      | 0        | 0        | 0         | 0        | 0        | 0         |
| LCNL1       | 0.512197 | 1.05666  | 0.990881  | 1.33596  | 2.28355  | 0.815681  |
| TIFAB       | 1.13336  | 1.15621  | 0.857961  | 0.573036 | 1.16606  | 1.03223   |
| TXNDC15     | 16.3605  | 13.69    | 14.496    | 12.5441  | 16.645   | 16.2361   |
| ADCYAP1     | 0.167141 | 0.124685 | 0.334116  | 0.132419 | 1.6809   | 1.04504   |
| KCNJ15      | 6.08459  | 4.79667  | 6.07686   | 5.91857  | 6.53589  | 5.43606   |
| TNNT2       | 4.37027  | 10.3281  | 12.4573   | 22.7959  | 17.3384  | 15.6982   |
| MIR3664     | 0        | 0        | 0         | 0        | 0        | 0         |
| SNORD115-5  | 0        | 0        | 0         | 0        | 0        | 0         |
| CDK15       | 0.349683 | 0.432834 | 0.423539  | 0.328346 | 0.979945 | 0.87163   |
| LOC253039   | 13.4422  | 14.0704  | 4.1327    | 4.20733  | 5.7076   | 4.30063   |
| AGXT2L1     | 0.206033 | 0.182161 | 0         | 0        | 0.174968 | 0.0320963 |
| RBM33       | 12.9057  | 13.5327  | 18.2128   | 15.6063  | 20.2354  | 14.3214   |
| TMEM63B     | 25.0141  | 28.3214  | 30.6      | 30.4268  | 33.5962  | 32.3508   |
| C6orf1      | 27.452   | 46.3778  | 29.634    | 40.7937  | 39.9312  | 35.6433   |
| CREB5       | 3.12582  | 2.3858   | 2.36692   | 3.66881  | 3.82615  | 5.44326   |
| LOC10065295 | 214.116  | 438.359  | 239.196   | 240.305  | 323.562  | 241.711   |
| TP53BP2     | 8.91124  | 6.33608  | 7.95664   | 6.9827   | 8.24219  | 7.11936   |
| LOC613037   | 37.3937  | 55.624   | 33.696    | 54.6563  | 51.4495  | 47.0618   |
| LUZP6       | 47.9568  | 35.5301  | 45.5746   | 38.7496  | 37.8316  | 37.9082   |
| ILF2        | 92.5783  | 86.756   | 83.6788   | 86.9915  | 84.0715  | 97.1527   |
| VNN1        | 2.26282  | 4.24856  | 2.34811   | 3.72428  | 4.92276  | 3.20044   |
| PGLS        | 64.412   | 114.794  | 75.6125   | 127.837  | 96.0344  | 102.242   |
| LOC10065295 | 6.13924  | 11.0524  | 8.38147   | 14.7898  | 14.7362  | 12.2595   |
| PRKCE       | 3.42646  | 1.8146   | 2.08035   | 2.43346  | 1.70598  | 1.61497   |
| LOC10050701 | 10.6744  | 4.28984  | 3.37916   | 1.45791  | 2.71944  | 4.71677   |
| KCNK10      | 0.134117 | 0.130127 | 0.0100272 | 0.162824 | 0.152385 | 0.297403  |
| NCOA5       | 18.0893  | 19.9713  | 17.8928   | 17.1302  | 20.2553  | 17.6865   |
| DYNC2H1     | 1.64499  | 1.32715  | 1.86789   | 1.73126  | 2.16959  | 1.66575   |
| NOP16       | 49.7927  | 59.4571  | 39.2098   | 43.2614  | 34.0826  | 37.1516   |
| MIR33B      | 0        | 0        | 0         | 0        | 0        | 0         |
| HEPACAM     | 0.307301 | 0.393177 | 2.95776   | 1.12062  | 0.502558 | 0.468517  |
| UBTFL1      | 0        | 0        | 0         | 0        | 0        | 0         |

|             |           |           |           |          |            |          |
|-------------|-----------|-----------|-----------|----------|------------|----------|
| OST4        | 245.723   | 306.718   | 254.947   | 324.654  | 249.744    | 262.689  |
| ACADSB      | 10.8773   | 7.83607   | 8.31954   | 7.17221  | 10.13      | 7.79248  |
| DOCK6       | 12.7375   | 18.3201   | 15.0407   | 14.4169  | 17.8724    | 15.0551  |
| LOC10050548 | 0         | 0.376346  | 0         | 0        | 0.541888   | 0.127588 |
| MT1IP       | 0         | 0         | 0.0195077 | 0        | 0.0328255  | 0        |
| STAT1       | 91.9281   | 60.3194   | 28.2088   | 15.9186  | 29.7597    | 16.9472  |
| LSP1        | 40.3674   | 59.2415   | 74.5224   | 71.8502  | 60.1629    | 46.0905  |
| MARK3       | 20.4254   | 24.3639   | 19.367    | 19.34    | 19.9322    | 21.2278  |
| TMX1        | 12.8354   | 11.3483   | 13.3444   | 8.88882  | 12.1944    | 11.8425  |
| DPEP3       | 0         | 0         | 0.183718  | 0.227883 | 0.173912   | 0        |
| MIR4652     | 0         | 0         | 0         | 0        | 0          | 0        |
| LOC10050703 | 0         | 0         | 0         | 0        | 0          | 0        |
| MIR4722     | 0         | 0         | 0         | 0        | 0          | 0        |
| CEBPA       | 118.316   | 146.766   | 147.709   | 144.131  | 108.076    | 118.108  |
| ANKRD64     | 1.60096   | 2.50811   | 1.97737   | 1.8725   | 1.82466    | 2.03031  |
| OR6W1P      | 0.0716748 | 0         | 0         | 0        | 0          | 0        |
| EDDM3A      | 0         | 0         | 0         | 0        | 0          | 0        |
| SNORD19     | 0         | 0         | 0         | 0        | 0          | 0        |
| RNF222      | 3.07331   | 1.88776   | 3.37956   | 3.94897  | 6.03705    | 7.80173  |
| KRT75       | 21.2045   | 20.584    | 5.88692   | 72.6883  | 24.5802    | 80.8777  |
| JUND        | 50.4465   | 91.3716   | 66.5868   | 86.9381  | 64.1528    | 58.7734  |
| PCSK2       | 2.91138   | 5.39722   | 2.80435   | 4.3523   | 2.45943    | 2.87246  |
| CEP250      | 5.50752   | 5.72456   | 6.82236   | 6.54982  | 7.47213    | 6.24719  |
| KIAA1984    | 1.28572   | 2.19363   | 2.33998   | 2.43204  | 2.99461    | 2.06374  |
| LYPD4       | 0         | 0         | 0         | 0        | 0          | 0        |
| UNC13D      | 6.3824    | 8.70844   | 6.46988   | 7.34088  | 11.6183    | 9.39949  |
| POLL        | 10.9045   | 14.8089   | 12.6827   | 13.5554  | 17.3053    | 15.2133  |
| LOC10050743 | 6.93962   | 14.8115   | 6.48095   | 11.8177  | 13.2218    | 11.0265  |
| TNRC6C      | 3.41647   | 4.15495   | 3.58871   | 3.42582  | 4.44532    | 4.10416  |
| LOC10050638 | 1.85735   | 2.66091   | 0.97206   | 0.488298 | 5.66872    | 3.09853  |
| C12orf76    | 3.57078   | 5.89004   | 4.31689   | 5.25456  | 5.53288    | 5.38024  |
| GCH1        | 9.04918   | 9.53603   | 6.93971   | 6.90719  | 8.36755    | 5.67801  |
| YARS2       | 5.70127   | 3.8326    | 7.27639   | 8.76012  | 7.41239    | 7.95708  |
| FGF20       | 0         | 0.101797  | 0.0871597 | 0.108112 | 0          | 0        |
| USP49       | 0.49839   | 0.550806  | 0.448025  | 0.175493 | 0.555498   | 0.543507 |
| COPZ1       | 85.3426   | 76.1819   | 75.5245   | 85.7489  | 76.3977    | 76.0132  |
| C4orf33     | 7.80964   | 9.26227   | 9.2018    | 7.58715  | 8.9964     | 8.00584  |
| ULBP2       | 0.462741  | 0.337609  | 0.882708  | 0.386664 | 0.537894   | 0.30413  |
| ADAM17      | 9.39977   | 7.75178   | 9.63321   | 7.51004  | 8.50751    | 8.28961  |
| TRIM14      | 15.7808   | 12.5986   | 8.79898   | 7.3813   | 12.2574    | 7.97847  |
| SLCO1A2     | 0.0131873 | 0.0116594 | 0         | 0        | 0.00839906 | 0        |
| LOC10050683 | 0.576918  | 0.510075  | 0.119108  | 0.541717 | 0.200423   | 0.294145 |
| PCSK1N      | 2.7983    | 4.94815   | 3.77614   | 6.96873  | 3.64199    | 3.18429  |

|             |           |           |           |           |           |           |
|-------------|-----------|-----------|-----------|-----------|-----------|-----------|
| AFTPH       | 20.6631   | 15.1275   | 18.4777   | 17.9428   | 18.5867   | 17.0434   |
| GOLM1       | 18.5269   | 10.3848   | 11.9455   | 15.5925   | 13.833    | 12.3075   |
| SMAGP       | 36.5006   | 38.6647   | 32.9022   | 50.6984   | 36.8114   | 43.4913   |
| EXTL1       | 5.87599   | 3.84272   | 3.52912   | 6.04185   | 3.27851   | 3.60115   |
| CNDP2       | 32.9736   | 31.1871   | 31.5959   | 33.2413   | 28.9887   | 33.4096   |
| MKRN1       | 41.9568   | 39.5748   | 40.5816   | 43.0676   | 44.5873   | 44.5113   |
| LOC10028704 | 0         | 0         | 0.0118353 | 0         | 0         | 0         |
| NUDT13      | 5.03038   | 4.9657    | 3.40134   | 3.89799   | 6.43886   | 5.20424   |
| KRT37       | 0.24551   | 0.325596  | 0.278778  | 0.46106   | 0.626118  | 58.2132   |
| RANBP3      | 19.342    | 24.5474   | 19.1853   | 24.9072   | 24.3835   | 20.351    |
| C3orf20     | 0.0353352 | 0.0312412 | 0         | 0.132718  | 0.0900218 | 0.0220194 |
| GIGYF2      | 10.9283   | 8.78165   | 10.6185   | 8.27697   | 10.147    | 8.80629   |
| FBXL6       | 17.3651   | 32.5717   | 19.9463   | 30.0631   | 24.7421   | 23.2202   |
| HK3         | 0.291053  | 0.7434    | 0.440658  | 0.425125  | 1.07105   | 0.382897  |
| TBRG1       | 13.594    | 14.0312   | 15.1117   | 14.9519   | 18.9663   | 13.545    |
| TM2D2       | 8.4266    | 8.63243   | 9.01595   | 8.60471   | 8.50112   | 9.10338   |
| WNT8B       | 0.0517994 | 0         | 0.0392125 | 0.0486388 | 0.164957  | 0.129117  |
| LOC10050760 | 0.025801  | 0         | 0         | 0         | 0         | 0         |
| FCGR3A      | 4.89864   | 2.77941   | 1.94712   | 1.03072   | 1.54768   | 1.66262   |
| LOC10013330 | 0         | 0.0500699 | 0.0857405 | 0         | 0.108207  | 0         |
| SCARNA9     | 3.97665   | 4.10189   | 7.02415   | 6.84569   | 3.377     | 2.8911    |
| GALNTL1     | 4.4512    | 4.45377   | 7.22591   | 4.21601   | 5.88012   | 4.34129   |
| LINC00162   | 2.86432   | 4.43179   | 5.01421   | 6.05149   | 5.13084   | 4.79698   |
| MPEG1       | 7.129     | 4.55639   | 6.25821   | 2.52034   | 8.01425   | 3.90725   |
| DPP3        | 18.3103   | 18.7989   | 12.6163   | 14.2457   | 13.4945   | 14.3274   |
| STRA8       | 0.237079  | 0         | 0.269205  | 0         | 0.0754983 | 0.0738686 |
| MIR1304     | 0         | 0         | 0         | 0         | 0         | 0         |
| C7orf44     | 29.4446   | 33.2292   | 24.247    | 29.1317   | 26.6512   | 26.6729   |
| LINC00477   | 0         | 0         | 0         | 0         | 0         | 0         |
| C9orf102    | 0.745427  | 0.361108  | 0.838814  | 0.678072  | 0.643524  | 0.438307  |
| LOC729966   | 0         | 0         | 0.443559  | 0.183396  | 0.248792  | 0.121711  |
| P2RX3       | 0.0742707 | 0         | 0.0562234 | 0         | 0         | 0.0462824 |
| MIR4705     | 0         | 0         | 0         | 0         | 0         | 0         |
| ADO         | 10.5703   | 9.48509   | 8.91741   | 7.53043   | 10.1654   | 9.32335   |
| LOC10050720 | 0         | 0         | 0         | 0         | 0         | 0         |
| AQP7        | 38.5727   | 53.1137   | 55.7164   | 31.9483   | 23.5701   | 13.7854   |
| CEBPE       | 0.18709   | 0.165413  | 0.141628  | 0.0878372 | 0.238317  | 0         |
| CCDC64B     | 37.1387   | 50.4412   | 38.9307   | 60.6853   | 52.102    | 77.0488   |
| MIR3116-2   | 0         | 0         | 0         | 0         | 0         | 0         |
| R3HDM2      | 19.563    | 22.1359   | 22.8983   | 22.7024   | 25.9982   | 23.1427   |
| ZFR2        | 0.507358  | 0.125044  | 0         | 0.553948  | 0.195371  | 0         |
| C5orf56     | 11.2508   | 16.3813   | 8.57429   | 7.57328   | 13.694    | 10.0812   |
| PRR24       | 32.9138   | 59.5741   | 33.3644   | 63.4044   | 62.1916   | 55.4421   |

|             |           |           |          |           |            |           |
|-------------|-----------|-----------|----------|-----------|------------|-----------|
| UBA2        | 34.3062   | 34.3267   | 38.285   | 30.7632   | 29.261     | 27.104    |
| OR4K14      | 0         | 0         | 0        | 0         | 0          | 0         |
| PRDM12      | 0.0405183 | 0         | 0        | 0         | 0.0774189  | 0.0252493 |
| SVEP1       | 3.23333   | 2.3206    | 5.22357  | 2.02879   | 4.83094    | 2.48896   |
| LOC10013121 | 0         | 0.003922  | 0        | 0         | 0.00565058 | 0.0165858 |
| CLTB        | 266.237   | 323.993   | 285.853  | 403.116   | 324.576    | 395.723   |
| TCTN2       | 4.72738   | 6.47946   | 6.73826  | 8.93936   | 10.1173    | 7.4712    |
| CTXN1       | 3.87258   | 6.4587    | 4.39735  | 9.9998    | 5.66167    | 9.37868   |
| SFT2D3      | 7.92547   | 9.83521   | 7.1834   | 8.81013   | 8.64686    | 7.48574   |
| LOC10065274 | 1.24003   | 2.07698   | 1.42906  | 2.00824   | 1.34701    | 1.56231   |
| FLJ40288    | 0         | 0         | 0        | 0         | 0          | 0         |
| RRP1        | 21.3246   | 30.4325   | 20.2225  | 31.2866   | 28.406     | 25.9633   |
| LSM6        | 24.6628   | 30.9265   | 27.6998  | 20.1308   | 28.6438    | 20.1904   |
| CSF1        | 13.0419   | 12.0866   | 12.6212  | 5.42274   | 11.8216    | 5.96247   |
| RICTOR      | 6.50615   | 5.43713   | 7.6764   | 4.93755   | 7.59381    | 5.68967   |
| TRAFD1      | 22.9801   | 26.5566   | 21.6183  | 21.1884   | 26.5682    | 21.7416   |
| DARS        | 48.338    | 36.4294   | 40.8031  | 34.2077   | 38.6478    | 37.0524   |
| PURA        | 7.97534   | 5.66995   | 6.73876  | 6.03874   | 7.63666    | 6.36237   |
| LOC10050709 | 0.76847   | 1.23498   | 0.71101  | 0.841844  | 1.2461     | 1.03757   |
| ATR         | 5.54606   | 3.64462   | 4.59825  | 3.461     | 4.2929     | 4.21455   |
| APOO        | 12.2342   | 9.96258   | 8.37628  | 10.2472   | 9.02566    | 7.11016   |
| CCL7        | 0.312562  | 0.276348  | 0        | 0         | 0          | 0         |
| MIR3922     | 0         | 0         | 0        | 0         | 0          | 0         |
| LPL         | 160.344   | 109.662   | 181.419  | 61.2003   | 46.0705    | 35.4715   |
| TAAR3       | 0         | 0         | 0        | 0         | 0          | 0         |
| RNF141      | 25.6604   | 21.7596   | 30.4736  | 25.7966   | 27.8413    | 25.6056   |
| C9orf40     | 3.71658   | 4.02047   | 2.87967  | 3.16135   | 3.53674    | 2.77922   |
| PACSIN1     | 0.506204  | 0.320119  | 0.451472 | 0.458376  | 0.379845   | 0.337924  |
| PRAME       | 0.193299  | 0.0427238 | 0.146329 | 0.136215  | 0.138505   | 0.0301126 |
| AMD1        | 31.1702   | 24.7643   | 23.9569  | 24.5902   | 23.3291    | 19.7119   |
| CXorf40A    | 10.8668   | 13.4486   | 10.9764  | 13.4814   | 15.9829    | 11.0974   |
| PPP2R3C     | 10.8264   | 12.5948   | 10.1799  | 9.52377   | 9.68985    | 8.87705   |
| DCPS        | 9.41423   | 8.32347   | 7.67908  | 8.90834   | 8.92424    | 9.41377   |
| EFNB3       | 2.67211   | 4.29054   | 5.02213  | 5.8545    | 6.6706     | 6.83284   |
| BMS1        | 8.45261   | 7.43092   | 8.17268  | 7.48115   | 8.06027    | 7.29657   |
| POLR1A      | 3.95124   | 3.20126   | 3.92652  | 2.38799   | 3.81603    | 4.09181   |
| REG1B       | 0         | 0         | 0        | 0         | 0          | 0         |
| MIR374A     | 0         | 0         | 0        | 0         | 0          | 0         |
| LOC284576   | 0         | 0.0317897 | 0        | 0.0675236 | 0.0458007  | 0.022406  |
| LOC10050569 | 0         | 0         | 0.824308 | 0.170411  | 0.231177   | 0.226187  |
| FAM40A      | 12.7784   | 15.3404   | 12.8366  | 12.3115   | 15.6408    | 15.5674   |
| ZNF668      | 3.93451   | 5.77578   | 5.36436  | 6.34664   | 4.82268    | 5.43559   |
| C5orf54     | 3.20355   | 3.77651   | 2.91013  | 2.50674   | 4.35277    | 3.26065   |



|           |           |           |           |           |           |           |
|-----------|-----------|-----------|-----------|-----------|-----------|-----------|
| ELOVL2    | 0.334737  | 0.253674  | 0.452496  | 0.202058  | 0.319794  | 0.119196  |
| AVIL      | 3.5604    | 2.84365   | 3.1265    | 2.6255    | 5.08049   | 5.10834   |
| NEDD8     | 198.476   | 203.764   | 176.912   | 199.021   | 168.95    | 181.267   |
| MIR645    | 0         | 0         | 0         | 0         | 0         | 0         |
| SIX3      | 0.0399741 | 0         | 0.0605213 | 0.0750702 | 0.0254598 | 0         |
| ALMS1P    | 0.200248  | 0.177047  | 0.303178  | 0.438737  | 0.0425131 | 0.166382  |
| COX7A2    | 217.065   | 212.797   | 197.91    | 231.459   | 153.632   | 163.67    |
| GTF2E1    | 4.71468   | 3.24211   | 4.26306   | 3.351     | 4.25398   | 3.55007   |
| ZNF804B   | 0         | 0         | 0.0159726 | 0.0198123 | 0         | 0         |
| SNORD125  | 0         | 0         | 0         | 0         | 0         | 0         |
| MRPS10    | 17.1574   | 16.1864   | 18.2488   | 18.7206   | 18.7519   | 17.2919   |
| CCKAR     | 0         | 0         | 0         | 0         | 0         | 0         |
| COMMD7    | 34.432    | 35.2074   | 28.2887   | 34.1787   | 29.8322   | 28.719    |
| MKNK2     | 71.1051   | 71.3293   | 81.0107   | 81.3907   | 88.4893   | 87.4579   |
| C20orf11  | 28.018    | 26.4374   | 25.2726   | 26.5553   | 31.4621   | 32.9125   |
| NEGR1     | 7.25785   | 3.47023   | 7.27441   | 2.85944   | 6.45435   | 4.44898   |
| ZNF462    | 2.38354   | 1.86538   | 3.10797   | 1.79905   | 2.48414   | 2.25285   |
| RHOT1     | 23.2835   | 19.0026   | 24.6566   | 17.8441   | 24.6516   | 20.066    |
| CASP4     | 45.6188   | 46.3167   | 40.6055   | 36.5591   | 44.8061   | 39.7779   |
| MIR3159   | 0         | 0         | 0         | 0         | 0         | 0         |
| OTP       | 0         | 0         | 0         | 0         | 0         | 0         |
| LOC731789 | 0.250696  | 0.110825  | 0.0830279 | 0.0147125 | 0.129939  | 0.146459  |
| RALGAPA1  | 4.10619   | 4.05877   | 4.63965   | 4.50393   | 6.00964   | 5.14775   |
| NEDD9     | 7.95451   | 6.70229   | 7.9468    | 9.67589   | 7.89002   | 5.61743   |
| KCTD16    | 0.0185729 | 0.049263  | 0.0421794 | 0         | 0         | 0.0115739 |
| GNA14     | 1.54037   | 2.04285   | 1.25813   | 1.82701   | 0.98107   | 0.75781   |
| SPSB3     | 53.7931   | 108.131   | 79.7094   | 98.8276   | 110.785   | 94.6823   |
| NELF      | 17.0203   | 26.8525   | 17.5205   | 22.4932   | 26.4078   | 22.6907   |
| ARSI      | 2.06282   | 2.12779   | 1.37229   | 2.58261   | 1.53279   | 2.99941   |
| ANO2      | 0.368856  | 0.349413  | 0.37895   | 0.321611  | 0.402731  | 0.262692  |
| SIGLEC7   | 0.329445  | 0         | 0.221681  | 0         | 0.209826  | 0         |
| MIR29C    | 0         | 0         | 0         | 0         | 0         | 0         |
| KRTAP23-1 | 0         | 0         | 0         | 0         | 0         | 2.40591   |
| RASGEF1A  | 2.32189   | 1.99885   | 1.04074   | 1.46304   | 1.63449   | 1.38979   |
| ZC3H12C   | 3.68366   | 2.68714   | 4.2438    | 3.20679   | 4.27504   | 3.29267   |
| FDXR      | 17.4774   | 24.8308   | 17.1661   | 26.0705   | 21.7637   | 24.8151   |
| GGPS1     | 29.3068   | 24.5643   | 16.3523   | 16.8881   | 17.1312   | 18.0556   |
| TPM1      | 206.077   | 205.544   | 153.06    | 193.366   | 195.449   | 294.153   |
| SPECC1L   | 9.75687   | 8.071     | 9.14982   | 8.04837   | 8.86609   | 8.7857    |
| IL6ST     | 28.2659   | 21.2328   | 29.9595   | 16.4748   | 22.3027   | 14.8334   |
| ZNF648    | 0.0268685 | 0.0237554 | 0         | 0         | 0.18824   | 0.0502299 |
| SRSF4     | 52.965    | 65.0922   | 54.8777   | 64.8516   | 62.8732   | 54.4381   |
| GABPA     | 11.0858   | 8.9845    | 10.5847   | 7.24812   | 9.93218   | 8.07117   |

|             |           |          |           |           |           |           |
|-------------|-----------|----------|-----------|-----------|-----------|-----------|
| ZKSCAN2     | 0.894556  | 0.708277 | 0.899543  | 0.338497  | 0.739822  | 0.58241   |
| CEP97       | 2.04504   | 1.01098  | 1.71457   | 0.908511  | 1.54059   | 1.50733   |
| ANK3        | 11.0544   | 7.39377  | 10.8147   | 11.341    | 11.6806   | 13.9558   |
| OASL        | 4.59898   | 5.37089  | 1.73973   | 0.493448  | 1.94094   | 1.1474    |
| LPIN2       | 5.86096   | 5.19546  | 5.43564   | 3.47201   | 5.33548   | 4.44587   |
| OR8B2       | 0         | 0        | 0         | 0         | 0         | 0         |
| SPATA20     | 14.6183   | 23.8371  | 17.4897   | 22.1287   | 28.6766   | 22.0406   |
| PIK3IP1     | 28.8057   | 36.1612  | 29.5194   | 32.9182   | 53.8579   | 39.2043   |
| PAFAH1B3    | 15.3845   | 23.27    | 13.1585   | 25.036    | 18.0184   | 19.4379   |
| DDX28       | 6.32136   | 8.53772  | 6.42934   | 7.42868   | 6.32322   | 5.84839   |
| WFDC8       | 0         | 0        | 0         | 0         | 0         | 0         |
| ZNF878      | 0.0596323 | 0.421785 | 0.0902839 | 0.391956  | 0.15192   | 0.185801  |
| FTHL17      | 0         | 0        | 0         | 0         | 0         | 0.096086  |
| SLC25A3     | 350.113   | 372.689  | 312.555   | 356.8     | 286.488   | 278.528   |
| NOC4L       | 11.5229   | 19.5699  | 9.56072   | 14.4876   | 13.4756   | 11.7648   |
| SPACA5      | 0         | 0        | 0         | 0.0830814 | 0.0563534 | 0         |
| NDUFB9      | 216.277   | 222.378  | 174.431   | 232.051   | 154.253   | 169.161   |
| STEAP4      | 15.4556   | 13.5614  | 15.8522   | 8.65852   | 12.2998   | 6.17973   |
| RAET1G      | 2.41638   | 0.95252  | 1.94271   | 2.75959   | 2.58302   | 1.91909   |
| NOL7        | 55.552    | 50.6002  | 47.5614   | 47.4327   | 46.6999   | 43.5119   |
| LOC10028810 | 1.46569   | 1.12771  | 1.55455   | 0.523977  | 0.918388  | 0.918245  |
| MIR4255     | 0         | 0        | 0         | 0         | 0         | 0         |
| MIR151      | 0         | 0        | 0         | 0         | 0         | 0         |
| LCN12       | 0.583468  | 1.03173  | 0.588918  | 1.09574   | 0.619357  | 0.727186  |
| ADCYAP1R1   | 2.68808   | 2.57369  | 2.32728   | 1.65961   | 1.92968   | 1.49925   |
| LOC10050653 | 2.21316   | 0.391347 | 0         | 0         | 0.281915  | 0.275829  |
| LOC645561   | 0         | 0        | 0         | 0         | 0         | 0         |
| ATPIF1      | 153.521   | 198.129  | 160.928   | 181.32    | 171.076   | 168.339   |
| RDH8        | 0         | 0        | 0         | 0.0577862 | 0         | 0         |
| SMCR8       | 5.27191   | 4.51177  | 5.50922   | 4.71052   | 6.20166   | 4.9681    |
| GDF10       | 2.76594   | 3.88596  | 5.01947   | 2.38371   | 2.60627   | 2.36112   |
| SPOCD1      | 0.0251204 | 0.155469 | 0.209179  | 0.141526  | 0.127995  | 0.125232  |
| RAB6B       | 1.9331    | 2.07536  | 2.50863   | 1.78274   | 1.95673   | 1.73165   |
| TSPAN3      | 51.5976   | 53.3085  | 60.077    | 47.7589   | 43.1657   | 34.5235   |
| LOC10028889 | 0.696469  | 0.359202 | 0.301275  | 0.0934248 | 0.887171  | 0.520615  |
| AMBP        | 0.378358  | 0.066904 | 0         | 0.142109  | 0.144587  | 0.0943106 |
| ARHGAP5     | 10.8009   | 6.96009  | 9.084     | 7.25405   | 8.27527   | 6.93949   |
| CDK8        | 5.4021    | 4.25134  | 6.06672   | 3.01005   | 4.46147   | 5.28999   |
| MATR3       | 55.3553   | 48.1824  | 48.1599   | 41.0048   | 50.3186   | 42.3169   |
| NRF1        | 6.77097   | 7.8163   | 6.74243   | 7.67073   | 6.78881   | 5.85776   |
| VDR         | 24.223    | 23.713   | 25.3539   | 25.0872   | 24.8296   | 24.0717   |
| LOC10065283 | 0         | 0        | 0         | 0         | 0         | 0         |
| PRCP        | 50.4543   | 44.126   | 53.9497   | 41.6513   | 47.9212   | 39.3699   |

|             |           |           |           |           |          |           |
|-------------|-----------|-----------|-----------|-----------|----------|-----------|
| DYNLT3      | 17.9351   | 13.0852   | 15.6362   | 10.5201   | 12.8031  | 14.7391   |
| ACADM       | 162.963   | 123.951   | 87.833    | 72.1204   | 67.5708  | 84.9235   |
| SNORA3      | 59.6465   | 0         | 45.1527   | 0         | 37.9892  | 0         |
| MAGI3       | 2.59848   | 1.62614   | 1.80097   | 1.69978   | 1.63656  | 1.77139   |
| SNORD69     | 0         | 0         | 0         | 0         | 0        | 0         |
| MS4A14      | 0.688851  | 0.241601  | 0.724771  | 0.175402  | 0.609785 | 0.458858  |
| STAU1       | 33.0183   | 29.0644   | 30.0934   | 30.2386   | 29.0602  | 27.4538   |
| SYPL2       | 9.86355   | 8.53762   | 5.3306    | 4.44854   | 2.11054  | 2.96841   |
| MIR126      | 0         | 0         | 0         | 0         | 0        | 0         |
| FAM194A     | 0.0501934 | 0         | 0.0379967 | 0.0942617 | 0.063937 | 0.0625568 |
| LOC10013123 | 0         | 0         | 0         | 0         | 0        | 0.147649  |
| ATF4        | 261.898   | 325.847   | 271.226   | 332.172   | 257.607  | 247.625   |
| KIF13B      | 10.8126   | 7.3082    | 11.1668   | 8.48098   | 11.6426  | 10.6785   |
| RNF186      | 0.267355  | 0.236378  | 0         | 0.0836806 | 0.227039 | 0.0555347 |
| LOC401127   | 1.09208   | 1.07915   | 1.70206   | 0.965129  | 1.75934  | 0.880699  |
| MUC15       | 27.0847   | 19.1281   | 26.0849   | 20.8494   | 20.9028  | 24.4305   |
| POU3F3      | 1.00267   | 0.633212  | 0.162648  | 0.268997  | 0.775449 | 0.4463    |
| NUDT17      | 2.20735   | 3.06665   | 2.62519   | 3.74817   | 3.41321  | 3.60181   |
| SECISBP2L   | 18.9583   | 10.7802   | 18.4194   | 12.44     | 16.6245  | 12.609    |
| MICAL3      | 8.11252   | 9.38043   | 9.219     | 9.64469   | 10.5803  | 10.4238   |
| SCUBE1      | 0.176805  | 0.468961  | 0.172083  | 0.142301  | 0.337825 | 0.173136  |
| ZNF727      | 0.441084  | 0.278556  | 0.333903  | 0.473338  | 0.441459 | 0.43193   |
| AMT         | 17.9345   | 31.1869   | 19.0916   | 23.5983   | 38.3122  | 27.4206   |
| DCUN1D3     | 4.80932   | 3.91235   | 5.93163   | 3.27898   | 4.77125  | 4.23803   |
| FAM36A      | 1.90582   | 1.05311   | 2.57684   | 1.4856    | 0.948295 | 1.98287   |
| PMS2P4      | 1.61071   | 2.57805   | 1.829     | 2.21633   | 1.97615  | 1.42206   |
| WDR44       | 5.04529   | 4.27154   | 5.27592   | 3.67984   | 4.7378   | 4.37232   |
| ODF2        | 12.1438   | 15.416    | 10.9373   | 11.7949   | 12.7001  | 11.6275   |
| CEACAM1     | 17.8408   | 9.45505   | 7.20117   | 9.16631   | 6.71866  | 6.57968   |
| RFNG        | 27.853    | 42.5264   | 29.311    | 40.2238   | 38.6485  | 38.8122   |
| MSLNL       | 0.156539  | 0.0830414 | 0.0474005 | 0.205783  | 0        | 0.175588  |
| OR10A3      | 0.126329  | 0         | 0         | 0         | 0        | 0         |
| OR51B6      | 0         | 0         | 0         | 0         | 0        | 0         |
| LOC10050740 | 1.11648   | 0.930555  | 2.37491   | 0.959969  | 3.0036   | 1.56428   |
| TBCE        | 10.7983   | 11.4773   | 11.2513   | 10.5686   | 10.8361  | 10.429    |
| ABCC6       | 5.20538   | 4.65302   | 5.13894   | 2.1505    | 2.06642  | 1.22289   |
| FKBP1A      | 178.43    | 176.288   | 153.718   | 180.05    | 146.753  | 156.811   |
| TAP2        | 25.2724   | 25.1771   | 12.3549   | 7.8086    | 18.7103  | 12.1108   |
| SLC13A3     | 1.28996   | 1.34178   | 1.68934   | 1.6147    | 2.44167  | 1.73428   |
| LOC10028783 | 0         | 0         | 0         | 0         | 0        | 0         |
| ZNF826P     | 0         | 0.387158  | 0.994463  | 0.82235   | 0.418345 | 0.272877  |
| LINC00085   | 1.95164   | 5.22317   | 3.47388   | 4.16039   | 4.56889  | 3.3527    |
| CD207       | 32.8481   | 32.5371   | 34.2647   | 21.0679   | 64.0399  | 32.4043   |

|             |          |           |          |          |           |           |
|-------------|----------|-----------|----------|----------|-----------|-----------|
| MPP1        | 12.7842  | 14.0289   | 11.9255  | 12.8817  | 11.6501   | 12.5478   |
| AIM1        | 31.6379  | 23.8921   | 34.6813  | 30.0027  | 32.7484   | 38.0125   |
| ANGEL2      | 11.0498  | 10.1927   | 11.5469  | 10.0239  | 12.2994   | 9.11622   |
| RBM38       | 16.6436  | 19.835    | 11.9391  | 15.922   | 11.5412   | 10.1419   |
| LOC10050752 | 0        | 0         | 0        | 0        | 0         | 0         |
| GAGE10      | 0        | 0.243932  | 0        | 0.259064 | 0         | 0         |
| C12orf36    | 0        | 0         | 0        | 0        | 0         | 0         |
| C22orf41    | 1.62272  | 4.66279   | 0.921304 | 1.52371  | 0.516759  | 0.758406  |
| NRCAM       | 0.816799 | 0.629894  | 0.51606  | 0.355856 | 0.654519  | 0.52821   |
| LOC10050642 | 0.856082 | 0.578801  | 0.800543 | 0.472852 | 0.930121  | 0.815902  |
| OR5D16      | 0        | 0         | 0        | 0        | 0         | 0         |
| DMRTA1      | 1.06095  | 0.508096  | 1.03739  | 0.788669 | 0.506793  | 0.165285  |
| MIR1538     | 0        | 0         | 0        | 0        | 0         | 0         |
| LOC10050628 | 4.42E-09 | 2.04E-09  | 0.437785 | 0.306067 | 0.379126  | 3.33E-10  |
| C11orf65    | 0.676476 | 0.299049  | 0.597446 | 0.423467 | 0.0718086 | 0.140517  |
| PATE4       | 0        | 0         | 0        | 0        | 0         | 0         |
| OR7G3       | 0        | 0         | 0        | 0        | 0         | 0         |
| KRI1        | 21.6978  | 30.8233   | 20.939   | 29.5799  | 29.4936   | 27.0886   |
| ULK1        | 20.8977  | 24.6352   | 33.0204  | 31.1123  | 41.5375   | 39.1136   |
| SNX6        | 29.3839  | 24.8897   | 30.6509  | 25.7421  | 25.2577   | 25.0856   |
| RIBC1       | 1.62698  | 1.75227   | 1.80901  | 1.58185  | 1.2136    | 1.64926   |
| FBXO15      | 0.245014 | 0.288839  | 0.693086 | 0.414124 | 0.356695  | 0.499699  |
| CATSPER1    | 0.191891 | 0.169658  | 0.261472 | 0.180182 | 0.488865  | 0.334819  |
| MIR3652     | 352.659  | 157.622   | 627.641  | 90.7506  | 548.987   | 209.975   |
| ARAF        | 29.4212  | 39.1271   | 29.5218  | 38.57    | 35.4272   | 29.6348   |
| LOC10050746 | 0        | 0.461974  | 0        | 0        | 0         | 0         |
| MIR3155B    | 0        | 0         | 0        | 0        | 0         | 0         |
| FLJ46300    | 0.34938  | 0.128708  | 0.264482 | 0.246047 | 0.185435  | 0.0725729 |
| PRR21       | 0        | 0         | 0        | 0        | 0         | 0         |
| HIST1H2AC   | 20.8796  | 17.2298   | 14.963   | 10.7177  | 16.8446   | 23.9408   |
| RELL1       | 7.78513  | 12.7023   | 9.90987  | 13.4402  | 9.41476   | 8.54705   |
| D4S234E     | 19.1445  | 23.2511   | 33.3507  | 40.1071  | 29.8113   | 32.9558   |
| EEFSEC      | 9.26724  | 12.2291   | 9.59812  | 14.5463  | 11.6579   | 12.2969   |
| LOC152586   | 0        | 0         | 0        | 0        | 0         | 0         |
| MIR7-3      | 0        | 0         | 0        | 0        | 0         | 0         |
| MIR1471     | 0        | 0         | 0        | 0        | 0         | 0         |
| TMSB4X      | 407.359  | 529.651   | 455.458  | 418.291  | 452.013   | 401.874   |
| OSR2        | 8.68993  | 11.0173   | 20.1952  | 9.39636  | 21.1871   | 13.8772   |
| MCM10       | 0.852503 | 0.753238  | 0.46816  | 0.460914 | 0.542964  | 0.6639    |
| COQ3        | 13.9675  | 11.6501   | 12.2359  | 9.07342  | 10.6863   | 10.7841   |
| HIP1R       | 32.0059  | 32.4551   | 36.1379  | 42.9804  | 44.275    | 49.2474   |
| ZNF436      | 18.6708  | 16.3566   | 16.926   | 12.5363  | 17.5073   | 15.3237   |
| GJA9        | 3.38E-50 | 2.07E-137 | 0.15161  | 0.375548 | 5.07E-202 | 0.141027  |

|             |           |           |           |           |           |           |
|-------------|-----------|-----------|-----------|-----------|-----------|-----------|
| LOC646778   | 0.656571  | 0.754649  | 0.894651  | 1.23302   | 0.836348  | 0.818295  |
| TCTB        | 0         | 0         | 0         | 0         | 0         | 0         |
| TBC1D3F     | 7.65806   | 11.0622   | 5.66977   | 7.3709    | 10.0234   | 9.29704   |
| ZFAND6      | 56.4694   | 50.6513   | 54.1387   | 40.2839   | 46.5918   | 51.9276   |
| LOC440905   | 0.0856325 | 0.0378554 | 0.0661748 | 0.0603057 | 0.0556761 | 0.0726323 |
| CBWD6       | 12.2049   | 12.4631   | 8.56681   | 10.8693   | 11.9142   | 11.4548   |
| LOC442497   | 0.0908049 | 0.080284  | 0.0343699 | 0         | 0         | 0.0282929 |
| C1orf27     | 0.0674324 | 0.536575  | 0.102093  | 0.126636  | 0.21474   | 0.210105  |
| OR4N4       | 0.0817737 | 0         | 0         | 0         | 0         | 0         |
| MIR587      | 0         | 0         | 0         | 0         | 0         | 0         |
| ASAH2       | 0.309653  | 0.121497  | 0.271859  | 0.220219  | 0.308783  | 0.304478  |
| AMELX       | 0         | 0         | 0         | 0         | 0         | 0         |
| SLC2A7      | 0         | 0         | 0         | 0         | 0.0443748 | 0         |
| ZNF598      | 18.4096   | 30.6109   | 22.1808   | 32.8585   | 29.0863   | 26.8646   |
| FAM13A      | 14.4111   | 16.3972   | 18.5644   | 13.9609   | 16.1851   | 12.4134   |
| GOLGA6L1    | 0         | 0         | 0         | 0         | 0.0135767 | 0         |
| C1orf93     | 12.3582   | 18.3786   | 10.8848   | 14.299    | 15.8258   | 12.6263   |
| TMF1        | 10.6064   | 6.62299   | 9.84243   | 5.53867   | 9.19807   | 7.73114   |
| LOC10012936 | 14.0586   | 13.6498   | 11.2637   | 11.5809   | 10.6293   | 10.9567   |
| LOC10013361 | 0.318667  | 0.0939152 | 0.160822  | 0.548576  | 0.0676536 | 0.430256  |
| CREBBP      | 10.9127   | 10.7723   | 13.2306   | 11.5197   | 13.8709   | 12.4351   |
| LOC10028825 | 0         | 0         | 0         | 0         | 0         | 0         |
| MIR4523     | 0         | 0         | 0         | 0         | 0         | 0         |
| GNA11       | 18.1461   | 14.5268   | 20.3803   | 14.1268   | 17.5251   | 13.2405   |
| MIR518D     | 0         | 0         | 0         | 0         | 0         | 0         |
| LSM2        | 40.2979   | 52.9995   | 35.4996   | 52.7862   | 44.2381   | 42.8959   |
| XYLT2       | 12.4691   | 16.4271   | 12.6481   | 16.3865   | 17.7241   | 13.5679   |
| GUSBP11     | 9.47428   | 14.4555   | 11.6334   | 13.031    | 10.9294   | 8.55631   |
| HSD17B8     | 27.7623   | 36.7658   | 29.7054   | 38.5246   | 36.1228   | 34.0808   |
| PCDHGB4     | 0.825575  | 0.617228  | 1.13389   | 0.772441  | 1.04755   | 1.02636   |
| COL24A1     | 0.308308  | 0.350468  | 0.444554  | 0.303282  | 0.74805   | 0.439142  |
| PRAMEF1     | 0         | 0         | 0         | 0         | 0         | 0         |
| LOC10012941 | 2.25E-09  | 2.16E-10  | 3.81E-10  | 4.10E-11  | 5.54E-10  | 1.94E-11  |
| SCN2B       | 0.352848  | 0.329298  | 0.46002   | 0.423352  | 0.786559  | 0.684072  |
| LOC10065286 | 1.96617   | 1.74612   | 2.9768    | 1.38465   | 2.50452   | 2.29731   |
| LOC728622   | 22.4684   | 16.4401   | 19.0614   | 18.2914   | 18.3636   | 17.2775   |
| LOC10013270 | 3.39875   | 4.12434   | 3.60163   | 2.33912   | 4.58346   | 2.885     |
| CHGB        | 0.113576  | 0.100416  | 0         | 0         | 0.0482247 | 0.0707755 |
| CPNE4       | 0.312616  | 0.55279   | 0.502885  | 0.256849  | 0.248883  | 0.389618  |
| RPL21       | 319.079   | 397.232   | 306.414   | 473.656   | 339.24    | 289.792   |
| HAUS5       | 7.16692   | 9.22584   | 7.55802   | 8.93051   | 10.9954   | 8.56709   |
| MRPS35      | 45.9757   | 36.9853   | 32.617    | 29.9938   | 30.7058   | 31.2189   |
| DET1        | 2.82266   | 2.57578   | 3.65632   | 2.49249   | 2.60579   | 2.32169   |

|             |           |           |           |           |           |           |
|-------------|-----------|-----------|-----------|-----------|-----------|-----------|
| GOLGA8A     | 97.4452   | 103.004   | 91.155    | 77.1803   | 121.362   | 96.5563   |
| LOC550643   | 42.5339   | 42.2002   | 37.0063   | 41.7459   | 39.961    | 42.8163   |
| NUDCD3      | 24.2154   | 24.7236   | 21.837    | 23.3828   | 24.4217   | 22.8307   |
| FAM183A     | 2.13561   | 5.39477   | 3.69524   | 5.44296   | 7.77246   | 8.80888   |
| CUTA        | 100.395   | 128.973   | 109.675   | 141.693   | 109.403   | 107.953   |
| LGI2        | 0.783498  | 0.666076  | 0.501864  | 0.212219  | 0.470225  | 0.309846  |
| SLC38A5     | 9.15266   | 20.9662   | 9.64495   | 18.9951   | 18.0843   | 15.0366   |
| TDP1        | 5.1028    | 5.62035   | 4.96016   | 3.74347   | 5.30915   | 4.60439   |
| DMRTC2      | 0.0574422 | 0         | 0         | 0         | 0         | 0         |
| SNORD57     | 0         | 0         | 0         | 0         | 0         | 0         |
| C16orf91    | 7.21883   | 7.62081   | 6.52501   | 7.9924    | 6.17622   | 6.71413   |
| HIST1H4I    | 0         | 0         | 0.448218  | 1.11193   | 0.377108  | 0.368967  |
| LOC1005063: | 2.21E-09  | 0.155986  | 0.441435  | 0.0563325 | 0.506246  | 0.210808  |
| CST5        | 0         | 0         | 0         | 0         | 0         | 0         |
| IFNA14      | 0         | 0         | 0         | 0         | 0         | 0         |
| AFF4        | 17.6371   | 11.6473   | 15.7755   | 13.147    | 14.465    | 12.3415   |
| MIR554      | 0         | 0         | 0         | 0         | 0         | 0         |
| CCNT2       | 13.4026   | 11.0381   | 12.5356   | 9.75042   | 15.7565   | 13.1948   |
| AKR1E2      | 1.32255   | 1.52011   | 1.30153   | 1.17976   | 1.2214    | 0.947783  |
| MAP2K6      | 2.17525   | 1.38077   | 1.3089    | 0.837959  | 1.56305   | 1.25125   |
| TLR6        | 0.747795  | 0.632407  | 0.947577  | 0.671639  | 0.652289  | 0.567297  |
| MORC2       | 8.89704   | 9.93828   | 9.41273   | 10.0861   | 10.8356   | 10.4792   |
| MIR4784     | 0         | 0         | 0         | 0         | 0         | 0         |
| ANKRD20A2   | 0.108928  | 0.0693135 | 0.149045  | 0.0515191 | 0.0660337 | 0.106138  |
| ZNF720      | 4.0741    | 3.06016   | 3.1387    | 2.91145   | 3.23778   | 3.05555   |
| MGC16142    | 0.257172  | 0.985291  | 0.648935  | 0.563454  | 0.982764  | 0.587614  |
| RUFY3       | 24.8006   | 24.5229   | 30.4671   | 27.9196   | 34.5598   | 32.4872   |
| MLK7-AS1    | 3.17E-14  | 0         | 0.0913055 | 0.0746952 | 0.101755  | 0.0748738 |
| MAGIX       | 1.00672   | 1.96069   | 1.93003   | 1.77747   | 1.67153   | 1.42588   |
| FTCD        | 1.27632   | 1.7104    | 0.54974   | 0.526203  | 0.530598  | 0.350011  |
| TYW1B       | 2.44544   | 1.71898   | 1.87517   | 1.94299   | 2.09676   | 1.93429   |
| CUL3        | 16.4627   | 11.7734   | 15.4929   | 13.2292   | 13.1601   | 15.931    |
| IARS2       | 52.8856   | 38.0965   | 45.0416   | 35.4012   | 37.9838   | 37.9055   |
| LINC00403   | 0         | 0.30645   | 0.131192  | 0.16273   | 0.441514  | 0         |
| DNAH5       | 0.138192  | 0.0106244 | 0.100064  | 0.107193  | 0.061228  | 0.0673947 |
| DCAF11      | 30.6169   | 29.49     | 23.3984   | 25.061    | 27.5222   | 27.0211   |
| ZFYVE1      | 10.188    | 10.4686   | 10.3403   | 10.331    | 12.7355   | 11.198    |
| C1orf98     | 0.230224  | 0.0678499 | 0         | 0.0720589 | 0         | 0         |
| LOC10012946 | 0.719615  | 0         | 0         | 0.337853  | 0         | 0.448433  |
| SNORA80B    | 0         | 0         | 0         | 0         | 0         | 77.2565   |
| MSTO1       | 12.6027   | 18.0909   | 15.9771   | 16.7551   | 17.3668   | 13.8722   |
| H2AFJ       | 30.4561   | 37.9949   | 30.3299   | 32.9808   | 28.1454   | 33.2935   |
| SYNJ2BP     | 8.92648   | 6.63924   | 7.6552    | 6.78603   | 7.57168   | 6.56169   |

|             |         |           |           |          |           |           |
|-------------|---------|-----------|-----------|----------|-----------|-----------|
| FEZF2       | 0       | 0         | 0.0373267 | 0        | 0         | 0         |
| C10orf57    | 134.252 | 111.887   | 108.297   | 102.729  | 114.429   | 134.401   |
| NDUFS3      | 83.4074 | 101.996   | 76.4255   | 101.532  | 80.8839   | 69.8213   |
| RN5S8       | 28.9436 | 86.6384   | 57.3897   | 206.478  | 46.357    | 49.0992   |
| PLCG2       | 4.8128  | 3.9715    | 5.70786   | 4.45459  | 4.70013   | 4.1131    |
| LOC645321   | 0       | 0         | 0         | 0        | 0.171616  | 0         |
| LOC10050616 | 3.89537 | 3.97162   | 3.31069   | 3.57386  | 7.5458    | 7.46116   |
| HMBS        | 16.7529 | 20.7773   | 9.66001   | 13.5291  | 13.5303   | 14.1711   |
| MIR941-3    | 0       | 0         | 0         | 0        | 0         | 0         |
| NFAM1       | 1.9002  | 1.6649    | 1.38663   | 0.610827 | 2.47501   | 0.896094  |
| MRPL41      | 123.918 | 247.61    | 151.023   | 243.17   | 175.353   | 165.662   |
| GATA3       | 31.7098 | 36.1787   | 49.4277   | 53.5104  | 62.7071   | 59.1975   |
| LOC10050656 | 2.49178 | 4.09142   | 3.90731   | 2.33974  | 3.17405   | 3.21645   |
| GPN1        | 26.6135 | 24.406    | 23.8898   | 25.3029  | 24.1505   | 21.9143   |
| PFKFB2      | 9.59986 | 6.84524   | 7.44342   | 7.13673  | 7.55922   | 7.3673    |
| MMADHC      | 66.8805 | 57.5965   | 65.7718   | 60.9568  | 59.1832   | 60.7751   |
| LOC400655   | 0       | 0         | 0         | 0        | 0         | 0         |
| OR5AP2      | 0       | 0         | 0         | 0        | 0         | 0         |
| NFASC       | 4.34661 | 3.55217   | 3.23393   | 3.25399  | 3.60468   | 3.61467   |
| ZNF556      | 0       | 0         | 0         | 0        | 0         | 0         |
| MIR518B     | 0       | 0         | 0         | 0        | 0         | 0         |
| ABCB5       | 0       | 0.0540504 | 0.112988  | 0.126918 | 0.202485  | 0.144671  |
| KRTAP5-3    | 5.25793 | 1.43038   | 0.306175  | 34.8131  | 0.686934  | 212.946   |
| MIR550A1    | 0       | 0         | 0         | 0        | 0         | 0         |
| MIR4638     | 0       | 0         | 0         | 0        | 0         | 0         |
| KIAA2013    | 27.9122 | 29.0884   | 27.8784   | 30.1289  | 26.9478   | 28.7911   |
| FGL1        | 0       | 0         | 0         | 0        | 0         | 0         |
| ZNF560      | 0       | 0         | 0         | 0        | 0         | 0         |
| CXXC1P1     | 0       | 0         | 0         | 0        | 0.0349326 | 0.0341786 |
| FBXO34      | 8.18747 | 6.23823   | 8.01409   | 7.86833  | 8.20576   | 8.40133   |
| FAM66D      | 1.18787 | 0.666821  | 0.407813  | 0.688515 | 0.154401  | 0.151068  |
| LINC00317   | 0       | 0         | 0         | 0        | 0         | 0         |
| SNX12       | 27.4159 | 20.0405   | 26.9639   | 21.8918  | 20.7612   | 22.1963   |
| TUBBP5      | 2.30182 | 1.60141   | 1.42841   | 1.94878  | 1.85058   | 1.6226    |
| LMX1B       | 2.85402 | 1.11512   | 2.18563   | 2.54928  | 1.6698    | 1.90258   |
| LOC10050746 | 23.4055 | 38.3694   | 14.7863   | 9.75983  | 25.8416   | 11.96     |
| MIR601      | 0       | 0         | 0         | 0        | 0         | 0         |
| CREB3       | 21.4454 | 23.4873   | 18.3434   | 22.4133  | 20.0153   | 19.5465   |
| HES3        | 0       | 0         | 0         | 0        | 0         | 0         |
| NLRC5       | 21.7588 | 28.5686   | 15.1113   | 7.14698  | 24.4759   | 10.5915   |
| TMEM196     | 0       | 0         | 0         | 0        | 0         | 0         |
| GCC2        | 8.37707 | 5.68258   | 7.30375   | 5.52846  | 7.76725   | 6.71416   |
| C17orf66    | 0.15779 | 0.0465026 | 0.0398159 | 0        | 0.100497  | 0.032776  |

|             |          |          |          |           |           |           |
|-------------|----------|----------|----------|-----------|-----------|-----------|
| HNRPD1      | 68.6769  | 71.6047  | 78.1683  | 72.6491   | 94.4219   | 71.7652   |
| AGFG2       | 14.7158  | 11.1292  | 14.1491  | 12.404    | 15.5101   | 14.3246   |
| CRISPLD2    | 18.0151  | 14.3984  | 15.1386  | 10.4387   | 14.0132   | 12.9088   |
| LOC10050765 | 0        | 0        | 0        | 0         | 0         | 0         |
| MIR4789     | 0        | 0        | 0        | 0         | 0         | 0         |
| C20orf7     | 6.20823  | 7.36976  | 6.89324  | 6.70108   | 6.12973   | 5.64028   |
| LOC10050671 | 1.09009  | 0.667236 | 0.486657 | 0.131227  | 1.38856   | 0.40061   |
| MIR496      | 0        | 0        | 0        | 0         | 0         | 0         |
| ZNF117      | 48.5818  | 26.749   | 48.8702  | 31.122    | 33.1078   | 34.9817   |
| THBS4       | 8.61914  | 10.3053  | 3.08822  | 1.64169   | 1.85591   | 1.26154   |
| SEL1L       | 17.8194  | 12.5372  | 16.7492  | 12.0896   | 14.2582   | 11.7548   |
| NINL        | 3.56824  | 4.16641  | 4.03708  | 4.07889   | 4.06356   | 4.37464   |
| SNTA1       | 10.7237  | 19.0392  | 16.0715  | 15.5729   | 12.8304   | 9.30689   |
| XPO7        | 17.3105  | 16.3404  | 18.5893  | 17.2049   | 16.9803   | 15.488    |
| RNF175      | 0.613164 | 0.662592 | 0.876763 | 0.127945  | 0.737663  | 0.764196  |
| LCE4A       | 0.531469 | 0.469891 | 3.62092  | 0         | 0.676991  | 0.993566  |
| OR10P1      | 0        | 0        | 0        | 0         | 0         | 0         |
| LOC10050755 | 0.961982 | 1.33278  | 0.992762 | 1.24778   | 2.0995    | 1.64266   |
| RNF223      | 1.7287   | 0.899065 | 1.61655  | 3.24645   | 2.20204   | 2.47135   |
| ADRB3       | 0        | 0        | 0.028718 | 0         | 0.0724857 | 0.0472807 |
| CFC1B       | 0        | 0        | 0        | 0         | 0         | 0         |
| ZBTB38      | 9.31659  | 6.56974  | 8.60858  | 6.52133   | 8.02679   | 7.06536   |
| C2orf29     | 25.0381  | 22.2788  | 20.5613  | 25.5416   | 21.9684   | 20.1711   |
| RPGRIP1     | 0.17311  | 0.481023 | 0.243369 | 0.0928841 | 0.220509  | 0.215749  |
| LOC10012839 | 3.32513  | 3.5544   | 3.7541   | 5.05225   | 4.34809   | 3.89407   |
| C8orf73     | 9.17786  | 13.8376  | 11.7559  | 15.4665   | 14.6329   | 17.6123   |
| PFKM        | 19.828   | 18.9436  | 17.5334  | 19.7885   | 18.6058   | 17.5983   |
| PNMA3       | 0.417497 | 1.56878  | 1.91604  | 1.29858   | 1.8281    | 0.82928   |
| TPSAB1      | 142.733  | 237.315  | 217.942  | 196.363   | 190.396   | 166.207   |
| LOC10050738 | 0        | 0        | 0        | 0         | 0         | 0         |
| OR2T1       | 0        | 0        | 0        | 0         | 0         | 0         |
| SMN2        | 12.141   | 9.5142   | 15.9149  | 14.8552   | 15.1789   | 13.7399   |
| HIAT1       | 28.6748  | 24.0747  | 24.3268  | 23.8541   | 24.5607   | 20.9734   |
| NFKBIL1     | 17.229   | 27.8439  | 18.059   | 24.0647   | 25.5023   | 26.6451   |
| TTC38       | 28.7762  | 33.1054  | 29.2394  | 28.2141   | 23.6028   | 22.085    |
| PRPF4B      | 20.8875  | 17.5805  | 20.147   | 16.1435   | 22.1588   | 17.6793   |
| PDCD6IP     | 50.2744  | 38.6919  | 50.4802  | 38.1916   | 46.5957   | 45.3475   |
| OAT         | 69.201   | 57.087   | 62.9798  | 54.9025   | 54.7885   | 49.0797   |
| FAM9A       | 0        | 0        | 0        | 0         | 0         | 0         |
| LOC730098   | 1.19372  | 1.87629  | 2.20893  | 1.36997   | 2.53429   | 1.61173   |
| MRPL32      | 61.2962  | 56.1126  | 47.8388  | 51.1893   | 46.5542   | 44.2817   |
| ZNF581      | 17.9729  | 31.6196  | 20.0285  | 31.7821   | 24.1143   | 28.3693   |
| MKS1        | 6.4242   | 8.89325  | 8.57425  | 8.73064   | 9.36729   | 9.19143   |



|             |          |          |           |           |           |           |
|-------------|----------|----------|-----------|-----------|-----------|-----------|
| ARL15       | 9.30319  | 7.57876  | 7.93442   | 9.42218   | 8.02108   | 9.21501   |
| TUSC5       | 29.7457  | 53.3706  | 68.4      | 30.2113   | 26.2626   | 11.768    |
| RNU86       | 0        | 0        | 0         | 0         | 0         | 0         |
| GPNMB       | 175.432  | 206.426  | 195.429   | 195.793   | 193.455   | 200.887   |
| LOC10050608 | 0        | 0        | 0.0168308 | 0         | 0         | 0.0277098 |
| GPR144      | 0        | 0.182831 | 0.182632  | 0.0647242 | 0.109755  | 0.0214771 |
| LCE1C       | 158.642  | 109.866  | 360.861   | 416.41    | 462.876   | 397.471   |
| AP3S2       | 6.05981  | 6.4036   | 6.45661   | 6.99189   | 7.32921   | 7.57461   |
| KIAA1804    | 1.31958  | 1.10835  | 1.69817   | 2.19933   | 1.65988   | 1.06899   |
| JMJD8       | 44.2185  | 53.4738  | 41.5751   | 59.9954   | 47.4511   | 45.451    |
| STAT5B      | 24.1881  | 23.392   | 28.6325   | 21.4692   | 25.3306   | 19.2566   |
| FERMT2      | 27.443   | 20.7337  | 28.2739   | 17.466    | 18.458    | 13.5816   |
| TMEM237     | 13.1192  | 14.2761  | 15.8663   | 14.508    | 16.3678   | 12.915    |
| RNF103-VPS2 | 0.720661 | 2.34E-17 | 3.39E-15  | 4.32E-27  | 0.206283  | 1.73224   |
| APPL2       | 40.0579  | 35.7954  | 39.1965   | 35.4586   | 38.4353   | 37.3959   |
| TMEM191A    | 1.07628  | 2.88584  | 1.82983   | 3.34673   | 3.23064   | 3.44121   |
| KLHL12      | 9.7199   | 9.92588  | 10.6009   | 9.68165   | 9.89753   | 11.0831   |
| PLEKHH1     | 23.9618  | 15.3544  | 24.9221   | 21.9391   | 20.5321   | 17.1437   |
| MIR193B     | 0        | 0        | 0         | 0         | 0         | 0         |
| LOC10050596 | 0.137384 | 0        | 0         | 0         | 0         | 0.107015  |
| KIF4A       | 0.688896 | 0.989845 | 0.668169  | 1.01082   | 0.754121  | 0.965904  |
| CYB5RL      | 1.46586  | 1.29602  | 2.17745   | 0.882985  | 1.832     | 1.58563   |
| STK25       | 49.6729  | 64.8813  | 51.7808   | 59.146    | 57.9045   | 56.7442   |
| PGAM4       | 21.3757  | 20.8688  | 16.993    | 19.4399   | 16.5192   | 18.1011   |
| ANKRD33B    | 2.67168  | 2.8453   | 4.29777   | 2.41364   | 4.18312   | 3.04597   |
| LRRN3       | 1.12535  | 0.71261  | 1.35518   | 0.99115   | 0.955001  | 0.882515  |
| GPR25       | 0        | 0        | 0         | 0         | 0         | 0         |
| PGA4        | 0.175886 | 0.215982 | 1.38198   | 0.359533  | 0.0414899 | 0         |
| PLA2G2E     | 0.677357 | 0        | 0         | 0.954041  | 0         | 15.4067   |
| TUBGCP4     | 4.3048   | 2.86872  | 4.81517   | 4.22313   | 5.27889   | 4.36418   |
| NPFFR2      | 0.541176 | 0.212654 | 0.529679  | 0.0501875 | 0.578952  | 0.272011  |
| UGT2B28     | 31.8251  | 0.389113 | 0         | 0.240919  | 0         | 0         |
| DGKQ        | 8.97439  | 13.1382  | 11.2016   | 13.6789   | 16.4696   | 13.2138   |
| TDRD1       | 0.515589 | 0.208932 | 0.406566  | 0.10086   | 0.150508  | 0.174034  |
| RING1       | 37.615   | 52.6432  | 36.6825   | 47.7757   | 52.7367   | 48.2768   |
| TBC1D9B     | 40.0555  | 44.1059  | 44.4666   | 38.8841   | 41.4528   | 36.213    |
| SMAD7       | 9.97069  | 10.2025  | 13.6017   | 16.4772   | 9.84555   | 11.1009   |
| RGS19       | 8.70709  | 11.3035  | 10.2607   | 10.5056   | 12.5279   | 9.26321   |
| DOC2A       | 0.765744 | 1.11748  | 0.464576  | 1.55114   | 1.35384   | 1.11892   |
| WWC3        | 12.8817  | 9.4801   | 10.6696   | 10.096    | 11.2281   | 10.9304   |
| MAP7D2      | 0.855924 | 0.738262 | 0.421948  | 0.499711  | 0.692242  | 0.953207  |
| PTP4A1      | 17.29    | 12.5043  | 19.4894   | 14.6507   | 13.0165   | 15.3937   |
| BPIFB6      | 0        | 0        | 0         | 0         | 0         | 0         |

|             |           |           |           |          |          |           |
|-------------|-----------|-----------|-----------|----------|----------|-----------|
| MIR509-1    | 0         | 0         | 0         | 0        | 0        | 0         |
| CA2         | 49.1445   | 43.9564   | 38.0208   | 18.2673  | 31.2194  | 36.0128   |
| ZNF714      | 2.21286   | 1.60506   | 3.01418   | 1.53316  | 2.53825  | 1.92786   |
| GON4L       | 8.52082   | 8.17018   | 10.1877   | 7.90242  | 10.9151  | 9.21676   |
| BMP10       | 0         | 0.0595759 | 0.255047  | 0        | 0        | 0.0419903 |
| PCYOX1L     | 8.80741   | 8.55517   | 8.84981   | 8.75212  | 13.6087  | 10.3123   |
| GCNT3       | 0.459679  | 0.243851  | 0.0695959 | 0        | 0.20494  | 0.286452  |
| MIR128-2    | 0         | 0         | 0         | 0        | 0        | 0         |
| C8orf45     | 0.436156  | 0.61951   | 0.632171  | 0.355448 | 0.337895 | 0.401394  |
| ICAM3       | 12.0251   | 14.28     | 10.4418   | 9.74159  | 11.6385  | 8.0078    |
| ACO2        | 53.205    | 46.913    | 49.0258   | 52.7709  | 41.8679  | 47.7167   |
| C9orf69     | 23.2937   | 30.6751   | 26.9282   | 35.4768  | 28.0183  | 28.8345   |
| PAX6        | 0.609469  | 0.245475  | 0.534697  | 0.494335 | 0.441053 | 0.379795  |
| GXYLT2      | 1.80061   | 2.14306   | 2.77857   | 1.43063  | 2.24953  | 1.51047   |
| LOC10050639 | 2.19016   | 1.79472   | 1.81972   | 1.3543   | 1.76918  | 1.23166   |
| RGS9        | 1.33899   | 1.0298    | 1.34319   | 0.642816 | 0.964851 | 0.800725  |
| ME3         | 12.4596   | 17.6364   | 15.098    | 14.4881  | 11.1023  | 8.6221    |
| HCRTR2      | 0         | 0         | 0.0436198 | 0        | 0        | 0.107722  |
| PAR4        | 0         | 0         | 0         | 0        | 0        | 0         |
| KRCC1       | 38.088    | 30.7052   | 36.0524   | 20.5573  | 32.8922  | 28.7808   |
| MIR4662B    | 0         | 0         | 0         | 0        | 0        | 0         |
| BAI2        | 0.816241  | 1.0825    | 1.45072   | 1.64951  | 1.32227  | 1.4596    |
| TCF15       | 1.914     | 3.46505   | 0.827946  | 0.684652 | 0.174148 | 0.45437   |
| LOC10050731 | 0         | 0         | 0         | 0        | 0        | 0         |
| SEPX1       | 130.996   | 158.507   | 79.7681   | 101.726  | 75.3744  | 104.633   |
| EIF1B       | 39.806    | 38.9793   | 42.2217   | 45.7436  | 40.1663  | 28.7714   |
| ARHGEF1     | 31.124    | 47.2189   | 38.3795   | 40.2519  | 58.7571  | 52.8108   |
| MIR4452     | 0         | 0         | 0         | 0        | 0        | 0         |
| DCUN1D1     | 9.70707   | 6.66596   | 9.1081    | 6.66648  | 8.18331  | 9.12251   |
| MYO3A       | 0.0828437 | 0.249033  | 0.28848   | 0.186693 | 0.158291 | 0.320073  |
| SHISA5      | 52.8668   | 63.1443   | 48.0389   | 49.1527  | 52.9764  | 45.3795   |
| SCML4       | 0.277597  | 0.471988  | 0.484944  | 0.260659 | 1.12882  | 0.35928   |
| DPH2        | 13.1802   | 19.2446   | 12.5847   | 18.3648  | 16.7188  | 13.375    |
| LOC10012951 | 0         | 0         | 0         | 0        | 0.281569 | 0.137746  |
| MIR608      | 0         | 0         | 0         | 0        | 0        | 0         |
| LOC10050609 | 1.52478   | 1.29194   | 1.53902   | 1.67037  | 1.17346  | 1.42527   |
| SNORD114-1  | 0         | 0         | 0         | 0        | 0        | 0         |
| MIR499A     | 0         | 0         | 0         | 0        | 0        | 0         |
| ZNF681      | 2.48233   | 2.07784   | 2.51293   | 1.84814  | 1.9365   | 1.94047   |
| CDK2AP2     | 23.7149   | 31.9766   | 18.8531   | 20.1828  | 18.6402  | 24.5148   |
| LOC10050557 | 0         | 0         | 0         | 0        | 0        | 0         |
| GABRA5      | 0.0361947 | 0.144007  | 0.0273996 | 0        | 0        | 0         |
| WIPF1       | 12.1275   | 9.29636   | 10.0537   | 5.5315   | 11.3896  | 6.86804   |

|             |          |           |          |           |           |           |
|-------------|----------|-----------|----------|-----------|-----------|-----------|
| ZFP1        | 2.88234  | 2.76075   | 2.52288  | 2.87563   | 2.6963    | 2.61939   |
| MIR550A3    | 0        | 0         | 0        | 0         | 0         | 0         |
| C1orf150    | 1.30107  | 1.28566   | 2.11467  | 0.610842  | 1.51108   | 1.16846   |
| CCL15       | 4.75E-31 | 0.472386  | 0        | 0         | 0.88459   | 1.13356   |
| RASL11A     | 6.94627  | 8.72087   | 6.04712  | 6.97901   | 7.521     | 6.57951   |
| CHST4       | 0        | 0         | 0        | 0         | 0.138507  | 0         |
| BCL3        | 22.4898  | 27.9959   | 18.0413  | 15.3916   | 27.7926   | 15.6881   |
| TNFSF13     | 16.0169  | 12.9476   | 10.2093  | 13.012    | 13.2806   | 12.3259   |
| PREP        | 19.7176  | 13.9644   | 17.0001  | 17.9746   | 19.164    | 23.5615   |
| SGSH        | 12.9377  | 19.2029   | 19.4783  | 18.6296   | 22.4415   | 17.1378   |
| LOC729603   | 1.48711  | 1.09101   | 2.37126  | 1.33695   | 2.33765   | 1.83369   |
| PRMT3       | 8.72147  | 6.7853    | 6.0369   | 5.81885   | 7.25475   | 6.38317   |
| DYRK1A      | 20.0506  | 15.9363   | 17.1923  | 14.7399   | 17.5374   | 16.3481   |
| TACR3       | 0        | 0         | 0        | 0         | 0.0382023 | 0         |
| FASLG       | 1.17769  | 1.43791   | 0.509441 | 0         | 1.00011   | 0.314524  |
| ACLY        | 85.0853  | 52.9487   | 58.2369  | 45.8796   | 37.9368   | 56.599    |
| APPL1       | 16.0359  | 11.4566   | 14.9113  | 9.87017   | 13.2794   | 11.8026   |
| POU4F3      | 0        | 0         | 0        | 0.0895622 | 0.0607493 | 0         |
| GDAP2       | 2.96446  | 2.32831   | 2.53299  | 2.66624   | 2.45758   | 2.58024   |
| CALM3       | 84.4494  | 92.6227   | 86.6846  | 90.4431   | 92.8539   | 88.2901   |
| GAN         | 3.26107  | 1.31913   | 4.11441  | 2.86195   | 3.92321   | 5.04719   |
| WDR33       | 20.6917  | 23.7625   | 22.9463  | 24.9107   | 26.5787   | 23.7786   |
| GRHL3       | 17.6606  | 14.467    | 18.9084  | 19.5183   | 22.4093   | 25.9231   |
| LOC285733   | 0        | 0.141986  | 0        | 0         | 0         | 0         |
| SNORA70     | 2231.8   | 2747.03   | 1722.61  | 2629.81   | 1923.13   | 1527.11   |
| AGBL2       | 0.191197 | 0.410536  | 0.351505 | 0.359062  | 0.434909  | 0.476584  |
| TRIM39-RPP2 | 1.07E-37 | 2.74E-33  | 3.12E-28 | 2.57E-56  | 2.18E-39  | 5.09E-38  |
| LOC648691   | 0        | 0         | 0        | 0         | 0         | 0         |
| MIR181A2HG  | 0.458566 | 1.01359   | 1.38855  | 1.07647   | 2.04444   | 1.57167   |
| LIPK        | 10.1131  | 5.96091   | 11.4126  | 5.62728   | 13.2997   | 19.6064   |
| MORN1       | 1.55257  | 2.34501   | 4.2121   | 3.28014   | 5.47984   | 3.50718   |
| TP53TG3B    | 0.270048 | 0.171362  | 0.197463 | 0.301267  | 0.195398  | 0.123775  |
| PSG1        | 0        | 0.0663575 | 0        | 0.0244695 | 0.114041  | 0.0162392 |
| BARX1       | 0        | 0.257481  | 0        | 0.20509   | 0.139111  | 0.136108  |
| MIR4437     | 0        | 0         | 0        | 0         | 0         | 0         |
| PPRC1       | 9.74398  | 11.6619   | 9.06692  | 11.9399   | 10.4389   | 9.02387   |
| TNK1        | 8.39534  | 11.6943   | 8.08202  | 8.17876   | 10.8217   | 8.67155   |
| VWA3B       | 0        | 0         | 0        | 0         | 0.0129671 | 0.0126872 |
| LOC10028784 | 0.392025 | 0.173302  | 0.33916  | 0.184053  | 0.35669   | 0.209394  |
| RNF6        | 17.4485  | 12.5105   | 15.6356  | 10.1661   | 14.5794   | 13.7819   |
| SNORA80     | 0        | 0         | 0        | 0         | 0         | 0         |
| MYCBP2      | 12.8559  | 8.89114   | 14.0855  | 7.33067   | 12.7304   | 10.4328   |
| GTF2H4      | 11.8002  | 16.3558   | 14.2366  | 14.5427   | 14.5615   | 14.362    |

|             |           |           |           |           |           |           |
|-------------|-----------|-----------|-----------|-----------|-----------|-----------|
| LOC10028910 | 66.6108   | 85.4889   | 78.5545   | 94.2946   | 99.5193   | 105.954   |
| SNORD115-3  | 0         | 0         | 0         | 0         | 0         | 0         |
| USP26       | 0         | 0         | 0         | 0         | 0.0227849 | 0.0222931 |
| MIR3918     | 0         | 0         | 0         | 0         | 0         | 0         |
| CD6         | 4.112     | 3.34367   | 2.54478   | 1.40916   | 5.2188    | 3.98392   |
| LOC10013034 | 0         | 0         | 0         | 0         | 0         | 0.253918  |
| PRSS12      | 7.77025   | 7.50642   | 7.66119   | 7.69375   | 7.093     | 7.69193   |
| ESRRB       | 0.131852  | 0         | 0.0499064 | 0.0619036 | 0.0209944 | 0.0616235 |
| CCL1        | 0.281796  | 0         | 0.426642  | 0         | 0.179477  | 0.175603  |
| PGC         | 0.159038  | 0         | 0         | 0.167095  | 0.250773  | 0.198211  |
| SLN         | 0.8951    | 0.474834  | 0.542076  | 3.69813   | 0.342056  | 3.34673   |
| MAFK        | 15.0219   | 26.1256   | 20.6365   | 30.058    | 29.1117   | 24.403    |
| MGC16121    | 0.322954  | 0.856607  | 0.122239  | 0.758122  | 0.925611  | 0.905632  |
| HOXB6       | 0.752434  | 0.565234  | 1.03329   | 0.284586  | 0.671417  | 0.573343  |
| LOC339685   | 0.044499  | 0         | 0         | 0         | 0.0141708 | 0         |
| KIAA0182    | 21.2162   | 16.1551   | 23.0467   | 18.3724   | 21.0302   | 20.4035   |
| CASP8AP2    | 4.61655   | 3.31389   | 4.57914   | 2.92165   | 4.19302   | 3.6524    |
| CNGA2       | 0         | 0         | 0         | 0         | 0         | 0.0187282 |
| C2orf3      | 9.82904   | 9.60924   | 8.81122   | 6.40848   | 8.98516   | 7.86532   |
| NPR3        | 3.20282   | 3.41375   | 6.86439   | 7.65848   | 3.79339   | 1.75631   |
| MIR296      | 0         | 0         | 0         | 0         | 0         | 0         |
| LOC51145    | 0         | 0         | 0         | 0         | 0         | 0.029407  |
| ZNF181      | 7.15272   | 5.88009   | 6.71772   | 3.92866   | 5.32981   | 4.83748   |
| KLHL35      | 1.23148   | 1.51485   | 1.05383   | 1.55855   | 1.12535   | 0.834138  |
| LOC348761   | 0         | 0.0247649 | 0         | 0         | 0.0178399 | 0.0174548 |
| ADD1        | 62.4997   | 63.4667   | 64.4116   | 60.3106   | 70.0907   | 63.1591   |
| SOX2        | 0.602221  | 0.567942  | 0.425492  | 0.527777  | 0.741545  | 0.52539   |
| MIR3165     | 0         | 0         | 0         | 0         | 0         | 0         |
| ARHGEF25    | 17.7587   | 26.8613   | 16.8564   | 18.6094   | 23.7695   | 20.4569   |
| MIR487A     | 0         | 0         | 0         | 0         | 0         | 0         |
| ALKBH6      | 11.1358   | 21.0883   | 14.2347   | 15.8405   | 16.8038   | 16.1269   |
| PLEKHA2     | 6.1378    | 6.02795   | 6.75716   | 5.93891   | 7.49354   | 7.06691   |
| CISD3       | 12.9109   | 17.6226   | 13.5272   | 15.7042   | 12.5199   | 12.0823   |
| BECN1       | 35.0811   | 37.464    | 36.1982   | 31.8983   | 35.1767   | 31.3446   |
| LAMC3       | 4.4387    | 2.77344   | 6.63713   | 7.52573   | 7.75187   | 7.72137   |
| UBE3B       | 12.6629   | 13.2336   | 14.6433   | 14.1474   | 14.7655   | 15.3069   |
| LOC10013095 | 0         | 0         | 0         | 0         | 0         | 0         |
| MIR4775     | 0         | 0         | 0         | 0         | 0         | 0         |
| DKFZP434A06 | 0.0404071 | 0.0178627 | 0.0305884 | 0.0569124 | 0.051471  | 0.01259   |
| IL17REL     | 0.161871  | 0.214674  | 0.122537  | 0.0253324 | 0.257741  | 0.0504355 |
| SYT3        | 0         | 0.192071  | 0.106264  | 0.0382473 | 0.162144  | 0.135376  |
| PPP1R3C     | 15.429    | 10.4561   | 11.8281   | 13.5683   | 6.98352   | 11.1765   |
| DNAJA1P5    | 0         | 0         | 0         | 0         | 0         | 0         |

|             |           |           |           |          |           |           |
|-------------|-----------|-----------|-----------|----------|-----------|-----------|
| HSFX2       | 0.475827  | 0.653047  | 0.917788  | 0.545428 | 0.772179  | 0.755138  |
| C6orf136    | 18.0758   | 23.5798   | 14.9334   | 21.6175  | 19.278    | 15.6342   |
| LOC10028884 | 0.647815  | 0.878647  | 1.21661   | 0.67359  | 0.744436  | 0.657461  |
| TMX3        | 20.4093   | 14.8571   | 16.0975   | 10.6722  | 15.9436   | 12.7436   |
| KRTAP19-2   | 0         | 0         | 0         | 0        | 0         | 9.13475   |
| CRYBB2      | 1.68249   | 2.08257   | 2.41994   | 2.52773  | 1.07456   | 0.946886  |
| MIR135B     | 0         | 0         | 0         | 0        | 0         | 0         |
| HSP90AB4P   | 1.06193   | 0.815006  | 0.911068  | 0.799215 | 0.901795  | 0.705863  |
| LOC10013031 | 0         | 0         | 0         | 0        | 0.0201798 | 0         |
| C16orf74    | 6.88581   | 12.6535   | 10.6296   | 13.3117  | 14.6187   | 12.368    |
| ERMAP       | 10.7606   | 12.0103   | 11.7242   | 10.9308  | 8.85611   | 7.76831   |
| LOC10028884 | 0.25044   | 0.221423  | 1.51667   | 0.470318 | 0.638026  | 0.936381  |
| CDX2        | 0         | 0         | 0         | 0        | 0.0626756 | 0         |
| LANCL2      | 5.32919   | 6.4466    | 6.34673   | 8.1865   | 6.81679   | 5.34961   |
| SLC25A44    | 14.2571   | 14.0616   | 11.9987   | 12.6773  | 13.3283   | 11.7954   |
| TOP1        | 29.194    | 19.2946   | 23.6871   | 19.4329  | 20.1543   | 22.3894   |
| TGM4        | 0.0331406 | 0.0293009 | 0.0501753 | 0.186711 | 0.0211075 | 0.0413037 |
| S100A1      | 79.6932   | 79.6618   | 82.1001   | 91.8715  | 69.1434   | 70.9132   |
| DAD1        | 187.248   | 184.831   | 177.51    | 180.313  | 148.374   | 157.686   |
| MIR3689A    | 0         | 0         | 0         | 0        | 0         | 0         |
| LOC10050640 | 0         | 0         | 0.0498799 | 0        | 0         | 0         |
| B3GALT1     | 0.188954  | 0.125296  | 0.0715197 | 0        | 0         | 0.0883112 |
| BBS7        | 4.80185   | 5.15817   | 5.42245   | 4.11085  | 4.85473   | 4.40236   |
| PTPRCAP     | 12.7931   | 24.6246   | 10.9959   | 10.5109  | 23.3405   | 13.702    |
| PPP4R1      | 24.9665   | 28.5665   | 22.8523   | 22.0575  | 23.7609   | 19.2203   |
| TNRC6B      | 4.47945   | 3.04757   | 4.69666   | 3.56961  | 4.75847   | 3.9037    |
| CYP4F43P    | 0         | 0         | 0         | 0        | 0         | 0         |
| SDAD1       | 13.0677   | 10.9716   | 10.1415   | 9.85953  | 11.3837   | 9.37392   |
| ERAP1       | 22.672    | 21.5488   | 21.3158   | 13.3783  | 21.5676   | 14.4697   |
| LOC10050581 | 0         | 0         | 0         | 0        | 0         | 0         |
| N4BP2       | 1.61097   | 1.48474   | 2.12861   | 1.50351  | 2.33812   | 1.9591    |
| CA7         | 0         | 0         | 0.0782856 | 0        | 0         | 0.171851  |
| DNAJB11     | 32.7943   | 30.046    | 29.0894   | 24.1528  | 24.9925   | 24.6871   |
| ARHGEF5     | 12.3075   | 10.6958   | 15.1806   | 12.0166  | 17.2841   | 16.9056   |
| MIR5047     | 0         | 0         | 0         | 0        | 0         | 0         |
| SPANXN2     | 0         | 0         | 0         | 0        | 0         | 0         |
| LOC10028809 | 0.903045  | 0.723501  | 1.20601   | 1.07634  | 0.867469  | 1.19184   |
| SLC35E3     | 4.80334   | 4.59115   | 4.02925   | 3.49444  | 4.54757   | 3.58649   |
| ANTXR2      | 6.54197   | 5.48085   | 5.18511   | 3.36551  | 4.52996   | 3.75407   |
| MIR3185     | 0         | 0         | 0         | 0        | 0         | 0         |
| SOX30       | 0         | 0.0267458 | 0.0273143 | 0        | 0         | 0         |
| SNAR-A13    | 0         | 0         | 0         | 0        | 0         | 0         |
| C19orf52    | 10.4573   | 11.7986   | 12.8786   | 13.3365  | 12.9727   | 14.6379   |

|             |           |           |           |           |           |           |
|-------------|-----------|-----------|-----------|-----------|-----------|-----------|
| PHF6        | 10.5432   | 5.70574   | 7.66014   | 4.73483   | 7.39791   | 7.02707   |
| ATP13A4     | 5.79661   | 2.71323   | 6.52187   | 3.73534   | 4.37236   | 4.46213   |
| FAM59A      | 5.73722   | 3.43293   | 5.51888   | 4.496     | 4.4024    | 5.21825   |
| ABCA6       | 6.10173   | 4.78464   | 6.44742   | 2.76243   | 6.75463   | 5.16032   |
| LOC10013398 | 0.826747  | 0.365479  | 1.09524   | 1.16445   | 0.78984   | 0.386395  |
| IL26        | 0.6651    | 0.29402   | 0.335656  | 0.208173  | 0.141202  | 0         |
| MIR10B      | 0         | 0         | 0         | 0         | 0         | 0         |
| NUP210L     | 0.0708001 | 0.0156492 | 0.0535961 | 0.0664802 | 0.0507297 | 0         |
| LZTR1       | 19.3539   | 24.0556   | 20.0344   | 20.6242   | 24.6245   | 25.3832   |
| MDC1        | 7.28844   | 7.93807   | 8.12473   | 7.71585   | 9.72777   | 7.16246   |
| FOXRED1     | 13.7812   | 18.3901   | 12.9914   | 14.3277   | 16.479    | 15.4417   |
| C3orf79     | 0         | 0.669722  | 0         | 0         | 0         | 0.157345  |
| ADAM20      | 0.0358022 | 0.126616  | 0.189717  | 0.168088  | 0.182421  | 0.0446208 |
| LOC10050665 | 0.102633  | 0.460458  | 0.539484  | 0.582094  | 0.847245  | 0.570925  |
| MRPL28      | 47.3626   | 68.8513   | 43.4774   | 68.0666   | 46.4866   | 55.3627   |
| SLC14A1     | 15.731    | 9.82436   | 12.6575   | 4.91307   | 6.6386    | 7.62344   |
| MGAT5       | 2.21657   | 0.665576  | 2.75438   | 1.49227   | 1.41175   | 2.00675   |
| CEP57       | 12.2894   | 13.2492   | 16.85     | 14.2772   | 14.8423   | 12.0734   |
| KRTAP3-1    | 31.127    | 13.7603   | 1.47271   | 316.026   | 6.81484   | 4453.29   |
| AKAP8L      | 35.3188   | 51.7151   | 36.0532   | 49.51     | 48.6921   | 42.6257   |
| TPRKB       | 38.8024   | 36.5836   | 27.0342   | 23.0539   | 31.4206   | 28.8876   |
| DBH-AS1     | 1.30053   | 1.92768   | 0.608079  | 0.754256  | 1.94898   | 1.08877   |
| CFH         | 73.0353   | 38.7401   | 72.12     | 32.2764   | 64.7008   | 41.7592   |
| MIR606      | 0         | 0         | 0         | 0         | 0         | 0         |
| TTC28-AS1   | 6.40741   | 7.6519    | 4.93423   | 6.34848   | 7.25978   | 6.21336   |
| IL1RAPL1    | 0         | 0.0331054 | 0         | 0         | 0.0476963 | 0.0233334 |
| TMED10      | 84.7062   | 58.24     | 74.4162   | 64.1242   | 61.558    | 60.0585   |
| TGIF2LX     | 0         | 0         | 0         | 0         | 0         | 0         |
| VWC2L       | 0         | 0         | 0         | 0         | 0         | 0         |
| MIR451B     | 0         | 0         | 0         | 0         | 0         | 0         |
| MIR1470     | 0         | 0         | 0         | 0         | 0         | 0         |
| ZNF155      | 3.35934   | 4.65812   | 4.38672   | 4.93277   | 4.51687   | 3.53578   |
| TP53TG3     | 0.207097  | 0.247188  | 0.156773  | 0.314907  | 0.175868  | 0.105643  |
| C5orf43     | 18.7975   | 14.119    | 15.5092   | 13.1488   | 14.2129   | 13.4333   |
| ARHGAP26    | 4.66644   | 2.22306   | 2.45607   | 2.44297   | 3.41584   | 2.738     |
| ZNF165      | 1.58317   | 1.84691   | 2.50032   | 1.49459   | 1.22199   | 2.24444   |
| SEC61A2     | 4.8481    | 6.75453   | 5.99762   | 6.83364   | 6.64118   | 6.05955   |
| LOC10013134 | 8.14E-14  | 0.158845  | 0.203676  | 0.297331  | 0.491194  | 0.251061  |
| TPPA        | 0.267092  | 0.202411  | 0.60657   | 0.286623  | 0.121509  | 0.142663  |
| RTDR1       | 0.266839  | 0.707767  | 0.0673329 | 1.00223   | 0.396553  | 0.110855  |
| LOC10050664 | 4.28191   | 5.19797   | 4.25654   | 4.513     | 5.84117   | 5.73122   |
| ABCF3       | 21.6071   | 25.6445   | 23.014    | 25.949    | 26.7256   | 23.2704   |
| KIR3DS1     | 0         | 0         | 0         | 0         | 0         | 0         |

|             |           |          |           |           |           |          |
|-------------|-----------|----------|-----------|-----------|-----------|----------|
| PNN         | 75.6415   | 78.9057  | 70.0315   | 75.1906   | 94.3947   | 70.524   |
| JAK1        | 35.396    | 29.8953  | 44.9586   | 28.5995   | 36.6962   | 31.4116  |
| LOC10050746 | 0.221258  | 0.521618 | 0.0557551 | 0         | 0.093803  | 0.183767 |
| MACROD2-AS1 | 0         | 0        | 0         | 0         | 0         | 0        |
| C10orf112   | 0.0553818 | 0.29379  | 0.188659  | 0.182009  | 0.176365  | 0.362372 |
| MIR208B     | 0         | 0        | 0         | 0         | 0         | 0        |
| MIR181A2    | 0         | 0        | 0         | 0         | 0         | 0        |
| SLC6A9      | 13.3834   | 17.7593  | 19.5905   | 17.7817   | 17.1296   | 15.8642  |
| C21orf63    | 15.841    | 18.8957  | 13.4958   | 21.0764   | 16.0174   | 11.8123  |
| ACAN        | 0.377943  | 0.274658 | 0.165737  | 0.241553  | 0.36127   | 0.676182 |
| TCP10       | 0         | 0        | 0         | 0         | 0         | 0        |
| C9orf147    | 0         | 0.146091 | 0         | 0.155154  | 0         | 3.89E-06 |
| NEUROD6     | 0         | 0        | 0         | 0         | 0         | 0        |
| IFI44L      | 17.8542   | 14.2719  | 3.75232   | 0.903312  | 2.887     | 1.36154  |
| MLF2        | 165.964   | 173.943  | 130.564   | 154.461   | 127.085   | 129.151  |
| LOC283299   | 0.483882  | 0.499121 | 0.457877  | 0.416494  | 0.410916  | 0.376918 |
| NEK1        | 3.93183   | 2.45983  | 3.29357   | 2.32818   | 3.10365   | 2.87068  |
| NFIB        | 29.8054   | 27.7459  | 26.9442   | 30.4286   | 28.1873   | 27.8912  |
| CTNNBIP1    | 95.8118   | 101.599  | 128.591   | 136.998   | 128.138   | 120.865  |
| LOC10050690 | 0.552955  | 0.249184 | 0.80988   | 0.318301  | 1.13108   | 0.438916 |
| RPUSD2      | 6.07821   | 5.67531  | 5.33228   | 7.78759   | 5.9335    | 5.73462  |
| ZNF789      | 9.69227   | 15.5067  | 12.5991   | 16.3267   | 18.6324   | 14.5422  |
| STARD3NL    | 9.47485   | 8.95881  | 7.32194   | 5.25155   | 8.63281   | 6.72437  |
| SMYD3       | 5.53413   | 5.26291  | 5.82238   | 4.97119   | 5.2831    | 4.1608   |
| NEK3        | 6.67447   | 9.02785  | 8.39687   | 7.21643   | 9.20021   | 7.34069  |
| LOC401317   | 0.296251  | 1.04771  | 0.672791  | 0.92725   | 0.251579  | 1.59996  |
| THSD7A      | 0.551691  | 0.574311 | 0.478258  | 0.292436  | 0.464722  | 0.415876 |
| KRT19       | 152.174   | 46.3844  | 40.5857   | 55.5144   | 63.8965   | 75.7439  |
| YES1        | 18.9837   | 13.1767  | 14.8395   | 11.5842   | 11.6219   | 10.8115  |
| TLR1        | 2.10006   | 2.07336  | 1.69574   | 1.21602   | 1.87256   | 0.937879 |
| AOX2P       | 0         | 0        | 0.0198258 | 0.0491837 | 0.0166804 | 0        |
| SDC4        | 103.611   | 88.4427  | 107.21    | 142.483   | 144.747   | 93.6481  |
| GRIN2A      | 0.41509   | 0.579078 | 0.407469  | 0.39585   | 0.479092  | 0.262706 |
| EOMES       | 0.581407  | 0.514043 | 0.385112  | 0         | 0.78689   | 0.15851  |
| LOC10065276 | 6.18827   | 9.8505   | 7.79152   | 12.2123   | 11.981    | 9.4761   |
| MIAT        | 3.79756   | 3.34077  | 1.70857   | 0.76604   | 3.80755   | 1.66005  |
| SDCCAG3     | 15.1443   | 26.0563  | 13.3928   | 21.3161   | 20.5172   | 17.5644  |
| CLN8        | 9.04948   | 7.71551  | 10.7479   | 10.1918   | 8.97509   | 10.7576  |
| NR1H3       | 34.2833   | 45.6759  | 31.4076   | 33.0086   | 28.0874   | 23.9299  |
| STAG3L3     | 5.49799   | 4.14073  | 6.56192   | 5.44969   | 6.83045   | 5.58179  |
| SMOC2       | 21.3016   | 19.7049  | 18.6525   | 11.8519   | 15.4705   | 12.9572  |
| LOC652276   | 1.5137    | 1.33832  | 1.20177   | 1.10934   | 1.74013   | 1.304    |
| PMS2P5      | 3.53172   | 5.88612  | 4.0677    | 5.23851   | 5.77444   | 3.97341  |

|             |           |           |           |           |           |           |
|-------------|-----------|-----------|-----------|-----------|-----------|-----------|
| ZNF8        | 1.61855   | 1.83988   | 2.52052   | 1.82375   | 2.29735   | 2.36303   |
| SIM1        | 0.219685  | 0.215813  | 0.443474  | 0.0916802 | 0.124372  | 0.136898  |
| TISP43      | 0         | 0         | 0         | 0         | 0         | 0         |
| KARS        | 60.6505   | 61.4888   | 55.1488   | 56.2322   | 47.88     | 48.7906   |
| MTFR1       | 11.7975   | 10.4144   | 10.3804   | 10.3697   | 9.60291   | 10.3523   |
| ALG2        | 14.2409   | 14.1357   | 12.6253   | 12.3891   | 14.0679   | 12.0912   |
| TRIM49L1    | 0         | 0         | 0         | 0         | 0         | 0         |
| TFAMP1      | 0.09189   | 0.0406217 | 0         | 0.172566  | 0.204838  | 0.114524  |
| IRF2        | 17.73     | 14.5335   | 14.4671   | 12.1724   | 16.4278   | 14.1299   |
| ESCO2       | 0.704315  | 0.648657  | 0.48874   | 0.440894  | 0.635492  | 0.621774  |
| VPS4B       | 29.8223   | 25.3876   | 30.0126   | 24.7179   | 29.1501   | 28.2665   |
| FABP5       | 199.102   | 167.977   | 104.238   | 151.33    | 107.274   | 254.193   |
| MIR3684     | 0         | 0         | 0         | 0         | 0         | 0         |
| AHNAK       | 163.348   | 158.776   | 247.893   | 175.783   | 200.002   | 177.758   |
| TTY2        | 0.146375  | 0.402625  | 0         | 0         | 0         | 0         |
| LOC10012959 | 0         | 0.144283  | 0.123536  | 0.153233  | 0.103937  | 0         |
| BBS4        | 8.54935   | 9.77986   | 10.3673   | 9.62564   | 11.8967   | 9.31698   |
| LOC10013034 | 0.0743905 | 0.0657714 | 0.337884  | 0.279406  | 0.142139  | 0.231785  |
| LOC646626   | 0.17298   | 0.152938  | 0.261893  | 0.336024  | 0.110172  | 0.442948  |
| ANKRD49     | 13.647    | 11.9693   | 10.4548   | 8.86748   | 15.3672   | 12.7223   |
| UBTF        | 32.6371   | 33.6758   | 38.4124   | 34.2261   | 36.6971   | 32.7171   |
| PASD1       | 0         | 0         | 0         | 0         | 0         | 0         |
| CREBZF      | 26.939    | 28.333    | 30.385    | 25.0127   | 35.7455   | 30.3459   |
| NKAIN2      | 0.30135   | 0.257268  | 0.363242  | 0.159382  | 0.145946  | 0.181328  |
| HCAR1       | 0.835114  | 0.91556   | 1.89656   | 0.721426  | 0.446787  | 0.249796  |
| LTB4R2      | 16.9066   | 23.8945   | 35.6023   | 22.1764   | 36.3204   | 24.8596   |
| WSCD1       | 0.378566  | 0.916798  | 0.859729  | 0.618204  | 0.628984  | 0.57438   |
| SKA1        | 0.973251  | 0.983088  | 0.51248   | 0.913867  | 0.541299  | 1.03838   |
| GCAT        | 8.46516   | 7.24668   | 6.81347   | 10.5633   | 7.87222   | 11.6271   |
| LOC441461   | 4.90747   | 7.95461   | 3.30221   | 4.35204   | 3.1256    | 4.92699   |
| FAM138F     | 0.0856799 | 0.117862  | 0.0572295 | 0         | 0.231762  | 0.0376885 |
| LOC10050638 | 0         | 0         | 0         | 0         | 0         | 0         |
| CDKL4       | 0.0682301 | 0.0603247 | 0.0516506 | 0         | 0.0869123 | 0.0425181 |
| ZFP36L1     | 128.157   | 116.883   | 161.062   | 130.738   | 169.863   | 127.832   |
| RAB26       | 1.70224   | 4.51504   | 2.87458   | 5.34842   | 5.12894   | 3.18229   |
| ICAM2       | 13.0107   | 19.4857   | 11.0284   | 14.0518   | 11.2457   | 7.68462   |
| ZNF444      | 11.1029   | 19.9454   | 13.0277   | 17.7233   | 18.7717   | 18.5657   |
| NCOA1       | 13.7605   | 10.9942   | 13.0066   | 12.3272   | 12.3579   | 11.1524   |
| ELOVL3      | 705.911   | 633.035   | 190.018   | 281.606   | 217.014   | 362.347   |
| LOC10013009 | 0         | 0.154671  | 0.264861  | 0.328532  | 0.259981  | 0.181692  |
| XPR1        | 4.04489   | 2.83528   | 3.09574   | 2.6682    | 2.63298   | 3.15942   |
| LGI4        | 8.90528   | 14.3737   | 9.69395   | 10.3066   | 13.0804   | 9.11277   |
| NEFH        | 0.421069  | 0.39555   | 0.239064  | 0.345955  | 0.703975  | 0.705179  |



|             |          |           |           |           |           |           |
|-------------|----------|-----------|-----------|-----------|-----------|-----------|
| LOC10050606 | 0.635382 | 1.12353   | 1.02609   | 0.974453  | 1.21403   | 1.54415   |
| LOC10013054 | 0.167212 | 0.221758  | 0.348097  | 0.235515  | 0.239622  | 0.1563    |
| FAM162A     | 105.975  | 103.118   | 94.453    | 105.207   | 88.5176   | 90.3884   |
| ABHD8       | 9.79144  | 11.0931   | 11.9936   | 17.233    | 13.1619   | 15.3613   |
| TRMT12      | 5.84374  | 5.57349   | 4.49341   | 5.66      | 4.86486   | 4.30107   |
| HES1        | 60.1883  | 61.0039   | 84.1205   | 81.2633   | 57.9965   | 66.0637   |
| CLMN        | 5.77136  | 3.62524   | 4.39682   | 3.20729   | 3.08975   | 2.36248   |
| C15orf41    | 6.70888  | 5.37461   | 4.71981   | 4.75065   | 4.59081   | 5.62904   |
| SNAR-A5     | 0        | 0         | 0         | 0         | 0         | 0         |
| RAB30       | 1.92876  | 1.64648   | 3.72572   | 1.49882   | 3.04991   | 2.56962   |
| EXOSC1      | 17.4601  | 24.5075   | 16.1297   | 17.1358   | 16.9006   | 19.302    |
| LRBA        | 11.0998  | 5.95747   | 9.91222   | 7.90223   | 8.33385   | 7.86358   |
| RBMX        | 86.6975  | 88.2291   | 88.0379   | 85.5449   | 101.791   | 85.5215   |
| LOC10013103 | 1.67E-42 | 4.56E-43  | 9.07E-92  | 1.76E-129 | 0         | 3.64E-106 |
| ARHGEF19    | 17.4757  | 24.2924   | 25.1677   | 30.3866   | 35.1452   | 40.4343   |
| C5orf28     | 6.63156  | 5.31854   | 6.0077    | 6.46512   | 6.02394   | 5.71325   |
| ARL6        | 2.10896  | 1.79314   | 1.96382   | 1.2978    | 1.60074   | 1.46438   |
| GNAZ        | 2.09622  | 2.28943   | 1.70353   | 1.67886   | 1.59033   | 1.45996   |
| NKIRAS2     | 22.7565  | 24.4912   | 20.1843   | 25.5382   | 22.8332   | 24.2091   |
| CDK3        | 11.005   | 23.5208   | 12.8739   | 21.7491   | 19.9178   | 13.0646   |
| MTRF1L      | 9.62873  | 7.85353   | 8.25593   | 7.04224   | 7.80457   | 7.09395   |
| ASGR2       | 1.4938   | 1.41009   | 1.51951   | 0.788433  | 2.25381   | 1.62707   |
| SCNN1B      | 14.6796  | 13.8692   | 17.8563   | 31.3503   | 24.0769   | 29.4465   |
| LOC10021647 | 0.29793  | 0.296337  | 0.352398  | 0         | 0.480313  | 0.41601   |
| SLIT2-IT1   | 0        | 0         | 0         | 0         | 0         | 0         |
| SNORA70B    | 0        | 0         | 0         | 0         | 0         | 0         |
| LOC10013109 | 1.61977  | 0.875171  | 0.885571  | 1.01396   | 1.54746   | 0.953296  |
| LOC729974   | 0        | 0         | 0         | 0         | 0.0904941 | 0         |
| CXorf40B    | 25.8274  | 39.1698   | 28.1169   | 37.4423   | 30.1315   | 22.4302   |
| SLC9A6      | 6.83093  | 5.94656   | 6.64035   | 5.54577   | 5.91053   | 6.22136   |
| FAM107A     | 15.7484  | 12.7545   | 9.99649   | 7.55873   | 7.05114   | 7.36944   |
| CPB1        | 0.739731 | 0.261609  | 0.503982  | 0.208379  | 0.282683  | 0.184387  |
| UBOX5       | 4.25367  | 4.93673   | 3.85325   | 5.66721   | 4.628     | 4.26233   |
| LOC10013136 | 0.274749 | 0.425102  | 0.0519966 | 0.257985  | 0.0874945 | 0.171212  |
| LOC10050594 | 0.28035  | 0.660982  | 0.141485  | 0.614237  | 0.0595189 | 0         |
| LOC10012678 | 0.428264 | 0.0784864 | 0.2905    | 0.327026  | 0.426309  | 0.478544  |
| DPCR1       | 0        | 0.0160875 | 0         | 0         | 0.011589  | 0.0226776 |
| LOC401847   | 0        | 0         | 0         | 0         | 0         | 0         |
| ZNF333      | 4.31202  | 4.89184   | 5.56491   | 4.56113   | 6.07175   | 5.11514   |
| ADI1        | 84.2305  | 78.8257   | 64.3366   | 76.4824   | 57.9097   | 53.3545   |
| ICA1        | 15.5966  | 16.2747   | 15.2631   | 16.6643   | 14.3016   | 11.3205   |
| RPF1        | 17.6248  | 16.3595   | 15.3227   | 13.5935   | 15.0642   | 13.9896   |
| ZNF827      | 2.06225  | 1.02433   | 2.56096   | 1.39248   | 1.60862   | 1.3573    |

|             |          |           |          |           |           |           |
|-------------|----------|-----------|----------|-----------|-----------|-----------|
| ROBO4       | 7.5658   | 10.4054   | 9.06349  | 6.24306   | 8.01494   | 6.95297   |
| HNRNPM      | 82.2636  | 84.2989   | 78.5993  | 92.7919   | 85.8457   | 81.8956   |
| C11orf84    | 6.49901  | 7.47449   | 4.95979  | 8.3847    | 6.36032   | 6.28888   |
| MIR590      | 0        | 0         | 0        | 0         | 0         | 0         |
| LOC10013311 | 0        | 0         | 0        | 0         | 0         | 0         |
| PRDM1       | 7.92537  | 4.93945   | 7.91017  | 5.80936   | 8.67553   | 9.47773   |
| 11-Sep      | 42.3859  | 30.9668   | 40.327   | 29.8214   | 24.5636   | 27.4898   |
| MIR376C     | 0        | 0         | 0        | 0         | 0         | 0         |
| TCP10L2     | 0        | 0         | 0        | 0         | 0         | 0         |
| GGT5        | 13.0987  | 17.8942   | 14.2895  | 11.5013   | 14.8125   | 9.87302   |
| ZP3         | 7.25347  | 10.8598   | 9.10408  | 15.7352   | 5.70827   | 7.83339   |
| SNORD82     | 0        | 0         | 0        | 0         | 0         | 0         |
| FBXO28      | 13.2867  | 9.77998   | 13.6141  | 12.5018   | 14.0438   | 14.6592   |
| ITGA6       | 38.4813  | 31.3901   | 32.4635  | 33.3758   | 28.2821   | 28.0736   |
| CRCT1       | 114.276  | 68.7722   | 183.483  | 195.13    | 200.245   | 225.844   |
| PRSS27      | 5.47401  | 6.34402   | 3.47188  | 4.30649   | 5.51232   | 5.62382   |
| NAALADL2    | 1.86622  | 0.920523  | 1.39787  | 0.996073  | 1.35126   | 1.12622   |
| GNG7        | 5.46895  | 6.66151   | 4.86853  | 6.656     | 5.02299   | 4.24174   |
| HTR2B       | 0.365377 | 0.161522  | 0.207444 | 0.171542  | 0.261799  | 0.256148  |
| ARRB1       | 12.2896  | 10.7322   | 12.6793  | 9.57004   | 12.2329   | 8.78606   |
| STX7        | 16.7016  | 17.2209   | 20.3256  | 13.5246   | 19.1443   | 15.2146   |
| SNX9        | 24.6357  | 17.3186   | 24.5445  | 20.5236   | 20.3506   | 18.2665   |
| FAT3        | 0.17639  | 0.155953  | 0.17062  | 0.0552093 | 0.112344  | 0.112972  |
| TFG         | 74.0519  | 62.7369   | 60.8049  | 60.5981   | 54.6066   | 59.6602   |
| ISOC2       | 66.4177  | 83.7795   | 53.7112  | 70.5419   | 44.4579   | 48.0081   |
| PLK1        | 4.76865  | 7.09648   | 4.0388   | 6.16237   | 5.77365   | 6.23747   |
| TTC15       | 17.581   | 23.0687   | 20.9918  | 22.8865   | 22.8615   | 25.1401   |
| MMP14       | 43.287   | 46.25     | 53.1358  | 50.5009   | 60.993    | 51.6653   |
| ADAMTS4     | 0.649936 | 0.871856  | 0.492005 | 0.378794  | 0.699429  | 0.502774  |
| SLC16A11    | 4.64745  | 7.96115   | 6.11277  | 7.90953   | 8.32496   | 6.1904    |
| LOC10065280 | 0        | 0         | 0        | 0         | 0         | 0         |
| OR7E5P      | 0        | 0         | 0        | 0         | 0         | 0         |
| SNORD49B    | 0        | 0         | 0        | 0         | 0         | 0         |
| MATK        | 3.03319  | 4.55582   | 4.67857  | 7.08079   | 6.96297   | 6.28501   |
| LCMT2       | 5.32824  | 4.21501   | 4.77652  | 4.31191   | 4.24198   | 4.28148   |
| KRT7        | 201.343  | 62.5836   | 45.8357  | 104.155   | 77.6413   | 61.2749   |
| MAFG        | 7.28902  | 8.98137   | 8.46384  | 8.1916    | 9.19978   | 8.67934   |
| PROL1       | 0.22277  | 0.0984797 | 1.60206  | 2.30096   | 0         | 0.0694105 |
| MIR493      | 0        | 0         | 0        | 0         | 0         | 0         |
| CHRNA3      | 0.495569 | 0.192388  | 0.189075 | 0.205726  | 0.0984769 | 0.216561  |
| TMEM212     | 0        | 0         | 0        | 0         | 0         | 0         |
| CYP4B1      | 7.70135  | 6.55439   | 9.05799  | 4.32517   | 11.1656   | 10.7458   |
| ADORA2B     | 5.5247   | 7.37531   | 3.89339  | 5.75813   | 7.17762   | 6.53685   |

|             |           |          |          |          |            |           |
|-------------|-----------|----------|----------|----------|------------|-----------|
| PQLC1       | 44.103    | 65.6991  | 44.2567  | 64.9804  | 50.3754    | 59.4821   |
| GAD2        | 0         | 0        | 0        | 0        | 0          | 0         |
| MON1B       | 8.6694    | 7.32252  | 8.97591  | 7.03528  | 10.2463    | 9.07827   |
| C22orf39    | 16.6634   | 20.489   | 19.5922  | 19.7526  | 19.7133    | 15.8692   |
| NGLY1       | 14.9271   | 13.5815  | 11.7814  | 14.0781  | 13.1777    | 11.4628   |
| LOC10065295 | 0.138342  | 0.23891  | 0.330897 | 0.12925  | 0.273674   | 0.175827  |
| LOC388882   | 0.0676796 | 0        | 0        | 0        | 0.129317   | 0.337401  |
| OR2W5       | 0         | 0        | 0        | 0        | 0          | 0         |
| SCARNA8     | 111.746   | 0        | 0        | 0        | 35.5858    | 0         |
| MIR3529     | 0         | 0        | 0        | 0        | 0          | 0         |
| TRIM49      | 0         | 0        | 0        | 0        | 0          | 0         |
| LOC10050619 | 0         | 0        | 0        | 0.220779 | 0          | 0         |
| NOD2        | 9.27011   | 9.9346   | 7.75363  | 7.56823  | 11.8221    | 8.57758   |
| SMAD9       | 2.17252   | 1.7817   | 2.16211  | 1.69495  | 2.3991     | 1.91355   |
| MIR4308     | 0         | 0        | 0        | 0        | 0          | 0         |
| HTRA2       | 9.96725   | 15.1688  | 11.2092  | 13.1631  | 11.9036    | 11.2434   |
| LRTOMT      | 4.91966   | 5.99823  | 4.84141  | 4.17145  | 4.02284    | 4.75141   |
| TMEM233     | 0.135857  | 0.180175 | 0        | 0        | 0.0865284  | 0.126991  |
| LOC440243   | 0         | 0        | 0        | 0        | 0.00448211 | 0         |
| S100A13     | 106.592   | 154.765  | 104.216  | 116.48   | 94.7443    | 84.0003   |
| RELT        | 1.97387   | 2.32667  | 1.81893  | 3.84053  | 3.51576    | 3.1369    |
| PGBD5       | 2.40337   | 2.23529  | 2.66998  | 2.13949  | 3.12108    | 4.27908   |
| CRYAA       | 0         | 0        | 0        | 0        | 0          | 0         |
| CEACAM4     | 0         | 0.247117 | 0.070528 | 0        | 0.474709   | 0.0580578 |
| C1orf115    | 29.3489   | 28.6409  | 25.384   | 21.3992  | 17.9891    | 16.8918   |
| HRASLS2     | 5.07347   | 0.309354 | 0.132436 | 0.492818 | 0          | 0.10902   |
| LMTK3       | 1.92027   | 1.90357  | 1.82074  | 2.36771  | 2.34723    | 3.15475   |
| C19orf42    | 47.475    | 55.5199  | 44.803   | 44.1296  | 45.2711    | 43.6817   |
| ARHGAP28    | 2.16843   | 2.14725  | 3.16483  | 1.62889  | 3.40299    | 3.87004   |
| FAM47A      | 0         | 0        | 0        | 0        | 0          | 0         |
| LINC00161   | 0         | 0.272441 | 0.106574 | 0        | 0          | 0         |
| LOC10012865 | 0         | 0        | 0        | 0        | 0          | 0         |
| PNLDC1      | 29.0017   | 28.0016  | 19.415   | 21.1862  | 13.44      | 15.8923   |
| CPNE5       | 0.797426  | 1.27951  | 1.76625  | 1.7194   | 2.74634    | 2.61344   |
| DHCR7       | 180.155   | 164.215  | 116.68   | 129.713  | 80.8724    | 119.236   |
| MIR744      | 0         | 0        | 0        | 0        | 0          | 0         |
| SLC11A2     | 42.842    | 29.309   | 33.0536  | 35.0897  | 38.5833    | 38.1414   |
| UBE2Q2P1    | 2.18877   | 1.69751  | 3.90927  | 2.52309  | 3.48325    | 3.34778   |
| XAGE2       | 0.416532  | 0        | 1.4053   | 0.543218 | 0.265291   | 0.360507  |
| NCBP1       | 9.41991   | 7.65819  | 8.99708  | 7.47099  | 9.10614    | 8.85418   |
| EXOC3L2     | 1.90144   | 2.98265  | 1.95015  | 1.61264  | 3.35965    | 2.79024   |
| PRLH        | 0         | 0        | 0        | 0        | 0          | 0         |
| KRTAP5-2    | 4.80627   | 1.29872  | 0.196653 | 32.5155  | 1.01186    | 231.49    |

|             |           |           |           |           |           |           |
|-------------|-----------|-----------|-----------|-----------|-----------|-----------|
| TSKU        | 86.604    | 72.6792   | 76.8969   | 74.7572   | 75.6958   | 72.3567   |
| ARID4A      | 6.21013   | 5.15296   | 7.30302   | 5.16079   | 7.6038    | 5.57717   |
| LOC1001323: | 0.330195  | 0         | 0         | 0         | 0         | 0.411528  |
| ACACB       | 27.9018   | 26.4028   | 29.4871   | 14.7204   | 18.5774   | 14.0905   |
| RLN1        | 0         | 0         | 0.185671  | 0         | 0         | 0.076421  |
| CRYGD       | 0         | 0         | 0         | 0         | 0         | 0.467071  |
| RBKS        | 3.12598   | 3.68512   | 2.14001   | 3.82127   | 2.52942   | 3.0618    |
| PRF1        | 3.46074   | 2.95306   | 1.3409    | 0.236124  | 1.92232   | 1.04189   |
| PRR20E      | 0         | 0         | 0         | 0         | 0         | 0         |
| LOC400236   | 5.4567    | 7.09481   | 3.88777   | 3.91817   | 4.08871   | 4.6672    |
| LOC1001278: | 1.66535   | 3.19019   | 3.57192   | 2.86684   | 2.29811   | 2.42147   |
| LINC00111   | 0         | 0         | 0         | 0         | 0         | 0         |
| OLFM3       | 0.142078  | 0         | 0         | 0.0800456 | 0.0361962 | 0.0531223 |
| MIR656      | 0         | 0         | 0         | 0         | 0         | 0         |
| MIR3926-1   | 0         | 0         | 0         | 0         | 0         | 0         |
| C22orf32    | 41.0895   | 49.8617   | 39.1902   | 51.9967   | 36.1789   | 39.6372   |
| MPPED2      | 3.76867   | 3.17112   | 1.40111   | 2.19333   | 1.68586   | 1.58704   |
| C15orf39    | 7.66716   | 8.98677   | 9.05437   | 10.0379   | 9.13866   | 7.60361   |
| RAI2        | 14.857    | 14.1313   | 10.8338   | 8.82658   | 10.8815   | 8.63815   |
| EPS8L2      | 56.8952   | 72.3741   | 59.4689   | 79.7951   | 79.9515   | 90.343    |
| ADAM10      | 9.59461   | 6.90064   | 10.5937   | 6.97862   | 9.53041   | 8.10102   |
| ZMAT5       | 12.6939   | 16.7875   | 16.0614   | 18.297    | 14.6265   | 15.7947   |
| APOA5       | 0.0544873 | 0         | 0.0412472 | 0.0511627 | 0.385616  | 0.244484  |
| NKX6-1      | 0         | 0         | 0         | 0         | 0         | 0         |
| LOC151484   | 0         | 0         | 0         | 0         | 0         | 0         |
| CD36        | 222.951   | 197.583   | 187.713   | 82.9658   | 72.8143   | 52.0798   |
| ARL5B       | 2.65259   | 1.40231   | 3.10519   | 1.33524   | 2.90863   | 2.30054   |
| LTK         | 0.621936  | 0.361693  | 0.77648   | 0.757432  | 1.22725   | 1.0476    |
| TM7SF4      | 0.106222  | 0         | 0         | 0.0498706 | 0.0676536 | 0         |
| MIRLET7B    | 0         | 0         | 0         | 0         | 0         | 0         |
| FAM108B1    | 10.1239   | 6.01442   | 8.99353   | 8.45664   | 8.47614   | 9.40821   |
| SNORD105    | 0         | 0         | 0         | 0         | 0         | 0         |
| FAM90A10    | 0         | 0.0115191 | 0.0192323 | 0         | 0         | 0.0365349 |
| PYGO2       | 22.4982   | 24.1834   | 22.0252   | 24.0182   | 25.1703   | 22.1643   |
| SEMA6B      | 1.63393   | 2.91112   | 2.62371   | 2.2781    | 2.27053   | 1.9284    |
| MST1R       | 9.27352   | 18.6538   | 14.592    | 16.5408   | 16.3908   | 11.3811   |
| FIGNL2      | 0.267806  | 0.710331  | 0.608191  | 0.406213  | 0.826594  | 0.654703  |
| TSPAN31     | 41.4372   | 39.7917   | 34.6195   | 38.1137   | 33.0266   | 34.492    |
| PRO0611     | 0         | 0.688562  | 0.196518  | 0.731277  | 0.66136   | 0         |
| TBC1D3B     | 2.98943   | 5.04746   | 2.54108   | 3.51694   | 5.37085   | 5.08918   |
| MEFV        | 0.174123  | 0.115462  | 0.222438  | 0.122624  | 0.341046  | 0.16615   |
| CXorf38     | 5.05361   | 6.28766   | 5.81631   | 5.30352   | 7.31119   | 5.48615   |
| FAM92A3     | 0.0411874 | 0         | 0         | 0         | 0.0262325 | 0         |

|             |           |           |           |           |           |          |
|-------------|-----------|-----------|-----------|-----------|-----------|----------|
| DNALI1      | 1.4783    | 1.47459   | 1.37733   | 1.60166   | 1.47266   | 1.60622  |
| SCML1       | 10.9664   | 13.0261   | 13.8528   | 9.57836   | 14.0798   | 10.1187  |
| TMEM116     | 12.1571   | 8.67502   | 13.343    | 12.2016   | 12.9021   | 11.4016  |
| DYNLRB1     | 151.03    | 168.908   | 156.202   | 185.649   | 159.82    | 163.052  |
| NMUR2       | 0         | 0         | 0         | 0         | 0.0317783 | 0        |
| SNORD116-21 | 0         | 0         | 0         | 0         | 0         | 0        |
| C21orf96    | 0         | 0         | 0         | 0         | 0.0456501 | 0        |
| ARX         | 0         | 0         | 0         | 0         | 0         | 0        |
| LOC10050761 | 0.0427719 | 0.189081  | 0.129514  | 0.0401621 | 0.272417  | 0.159922 |
| POMT2       | 6.06022   | 6.8289    | 5.86195   | 6.86201   | 7.30332   | 7.77508  |
| TMEM156     | 0.166422  | 0.098093  | 0.0839881 | 0.260445  | 0.600638  | 0.103707 |
| MIR548AH    | 0         | 0         | 0         | 0         | 0         | 0        |
| ZNF836      | 1.86424   | 2.06685   | 2.50887   | 1.75049   | 2.63855   | 2.19435  |
| HDDC3       | 15.1121   | 18.1749   | 11.6082   | 12.1031   | 12.3849   | 14.4719  |
| NRG3        | 0.881184  | 0.237717  | 0.469335  | 0.721238  | 0.423606  | 0.167787 |
| OR10K1      | 0         | 0         | 0         | 0         | 0         | 0        |
| MXI1        | 23.4937   | 22.7179   | 26.0352   | 25.593    | 26.3933   | 25.905   |
| TTY19       | 0         | 0         | 0         | 0         | 0         | 0        |
| MAOB        | 20.2741   | 20.29     | 25.3544   | 16.3799   | 16.6409   | 10.5323  |
| INSC        | 0.249451  | 0.25016   | 0.291414  | 0.425876  | 0.332692  | 0.218598 |
| DIS3L2      | 6.2596    | 6.89933   | 8.54214   | 9.59403   | 8.99258   | 8.06381  |
| FBXO3       | 27.014    | 22.9149   | 26.7225   | 19.6836   | 23.2107   | 24.7679  |
| FKBP15      | 12.8294   | 11.6201   | 12.8136   | 11.1005   | 16.114    | 14.2314  |
| LOC10050561 | 0.168556  | 0         | 0.255196  | 0         | 0.214709  | 0        |
| DFFB        | 2.39433   | 3.94384   | 2.905     | 2.67941   | 3.55128   | 3.00453  |
| CCL4L2      | 1.2457    | 0.749544  | 0.528256  | 0         | 0.793394  | 0        |
| MIR548I3    | 0         | 0         | 0         | 0         | 0         | 0        |
| SNORD97     | 120.4     | 26.6126   | 159.502   | 113.054   | 153.367   | 37.5142  |
| ZNF410      | 30.4242   | 29.1449   | 25.3701   | 27.4629   | 26.5435   | 28.8121  |
| LOC10050561 | 0.0996351 | 0.113784  | 0.177038  | 0.0935558 | 0.482014  | 0.467635 |
| LOC645752   | 0.0953799 | 0.114781  | 0.288812  | 0.17912   | 0.0675681 | 0.060675 |
| ULBP3       | 0         | 0.156758  | 0.402651  | 0.166482  | 0.451694  | 0.773401 |
| SGPP1       | 6.08341   | 5.72132   | 5.39528   | 3.64014   | 5.1091    | 3.67943  |
| GAS5        | 114.059   | 208.133   | 115.18    | 197.525   | 136.936   | 111.573  |
| ZNF223      | 3.31446   | 2.44821   | 3.14427   | 2.08795   | 4.00822   | 4.26158  |
| ACP2        | 13.1578   | 15.7085   | 13.7373   | 15.6997   | 14.5412   | 13.8831  |
| VGF         | 0.0789226 | 0.0348892 | 0.0896173 | 0.259375  | 0.0753994 | 4.03286  |
| LOC10065291 | 1.24891   | 2.83842   | 2.02525   | 1.34033   | 3.74915   | 1.88966  |
| RCC2        | 47.9614   | 51.2254   | 46.3465   | 54.9361   | 57.3182   | 59.6709  |
| ZFP36L2     | 106.751   | 119.433   | 128.728   | 111.372   | 129.763   | 97.8336  |
| ALG8        | 19.2373   | 14.3141   | 16.5333   | 17.7059   | 11.1606   | 13.8078  |
| LOC648987   | 1.11924   | 0.959046  | 0.890394  | 0.91568   | 0.834791  | 0.940527 |
| PTPRE       | 11.0556   | 10.1819   | 8.86499   | 7.67215   | 12.6477   | 10.4447  |

|             |          |           |           |           |           |           |
|-------------|----------|-----------|-----------|-----------|-----------|-----------|
| UPP2        | 0        | 0         | 0         | 0         | 0.0267641 | 0         |
| RLIM        | 12.9516  | 13.4528   | 14.069    | 13.601    | 13.285    | 12.6257   |
| ZZEF1       | 9.82178  | 9.87325   | 10.8278   | 9.54799   | 10.8464   | 8.71273   |
| PP13        | 0        | 1.75795   | 0         | 0.622336  | 0         | 1.23904   |
| MT2A        | 83.9374  | 162.788   | 79.5971   | 155.513   | 103.759   | 113.893   |
| MIR3201     | 0        | 0         | 0         | 0         | 0         | 0         |
| LOC10050761 | 18.8131  | 30.1242   | 19.7794   | 29.2451   | 24.7625   | 24.8793   |
| LOC10050566 | 0        | 0         | 0         | 0         | 0         | 0         |
| FBXW2       | 18.5042  | 14.1231   | 16.4138   | 15.4918   | 17.0263   | 15.5179   |
| KCNC1       | 0        | 0         | 0.0106221 | 0.0296795 | 0.11165   | 0.105802  |
| BTBD10      | 11.7086  | 9.78278   | 11.026    | 9.5207    | 11.5831   | 11.1325   |
| ERRF1       | 18.0476  | 12.9332   | 19.1989   | 13.676    | 17.2822   | 14.6599   |
| MIR548L     | 0        | 0         | 0         | 0         | 0         | 0         |
| RNU105B     | 0        | 0         | 0         | 0         | 0         | 0         |
| CRB2        | 0.561177 | 1.09756   | 0.399068  | 0.191613  | 0.855634  | 0.286119  |
| RECQL       | 10.4704  | 8.77629   | 10.8873   | 6.11155   | 11.7988   | 9.90394   |
| LSM4        | 71.2753  | 103.135   | 65.4055   | 91.6176   | 65.7323   | 73.3076   |
| PITX2       | 1.52192  | 1.28426   | 1.88435   | 1.71146   | 1.66283   | 1.28183   |
| LOC10065287 | 0        | 0         | 0         | 0         | 0         | 0.0455459 |
| GDF5OS      | 2.20E-07 | 1.64E-08  | 3.67E-07  | 1.90E-06  | 5.26E-09  | 6.53E-08  |
| MBIP        | 16.2227  | 15.9995   | 16.0396   | 14.5137   | 17.0331   | 14.525    |
| GRAMD1C     | 10.9696  | 8.66149   | 10.007    | 7.8559    | 13.9876   | 14.6521   |
| FAM71C      | 0        | 0         | 0.0441994 | 0         | 0         | 0         |
| NUP133      | 13.9044  | 13.4278   | 14.7642   | 12.4645   | 13.4917   | 13.1568   |
| TMEM200B    | 5.89578  | 8.97545   | 9.34074   | 8.64495   | 8.42114   | 6.94936   |
| LOC10050668 | 0        | 0         | 0.0664196 | 0         | 0.083823  | 0.0820137 |
| METTL21C    | 0        | 0         | 0.0802508 | 0         | 0         | 0         |
| VKORC1      | 57.8017  | 75.6642   | 69.0335   | 70.1466   | 63.1443   | 65.1365   |
| LOC116437   | 0        | 0.0361251 | 0         | 0         | 0         | 0         |
| AMOT        | 2.68367  | 2.12357   | 3.3902    | 2.77007   | 2.64177   | 2.66928   |
| CDK10       | 44.0582  | 73.9151   | 34.4175   | 46.2942   | 71.4979   | 68.279    |
| NADK        | 44.0687  | 47.1647   | 40.3147   | 42.7544   | 40.0461   | 44.9771   |
| EPHB2       | 3.17432  | 2.49076   | 1.66714   | 2.32862   | 2.1354    | 3.46114   |
| FKBP1AP1    | 0.31876  | 0.0563655 | 0.289564  | 0.0598621 | 0.081208  | 0.0397276 |
| LOC10013143 | 5.41688  | 5.51721   | 5.54398   | 5.65594   | 8.19718   | 4.99576   |
| FLJ42392    | 0        | 0.0349191 | 0         | 0         | 0.0251546 | 0         |
| LOC286467   | 0        | 0.0300675 | 0.0772322 | 0.0957983 | 0.0216597 | 0.0211922 |
| CD101       | 0.94149  | 0.709994  | 0.649827  | 0.806041  | 1.3051    | 1.00084   |
| ACCN3       | 2.98809  | 4.71042   | 3.67456   | 5.04938   | 4.37137   | 4.40151   |
| PCSK6       | 2.71836  | 2.20191   | 4.01108   | 2.73658   | 3.72378   | 3.44626   |
| OSTN        | 0        | 0         | 1.86244   | 1.38609   | 0.313392  | 2.14639   |
| GCET2       | 2.80878  | 2.70528   | 3.22448   | 2.73229   | 4.3746    | 3.10291   |
| NOXA1       | 5.85426  | 13.9925   | 7.69829   | 12.2379   | 15.3848   | 12.2111   |

|             |          |           |          |          |           |           |
|-------------|----------|-----------|----------|----------|-----------|-----------|
| LOC10050667 | 30.0147  | 45.5574   | 21.9557  | 43.8538  | 24.7118   | 31.4981   |
| MLLT4       | 33.7939  | 23.1417   | 29.3753  | 26.6517  | 27.0869   | 37.1398   |
| ACER1       | 66.4518  | 65.6645   | 48.0651  | 42.7555  | 46.5626   | 53.7868   |
| LOC10050693 | 6.56537  | 7.15099   | 8.32761  | 11.7573  | 9.04889   | 8.44693   |
| TSC22D1     | 82.0911  | 67.2478   | 69.8452  | 80.3972  | 73.3487   | 57.9522   |
| NKAIN4      | 0.379603 | 0.469869  | 0.287361 | 0.213865 | 0.773668  | 0.283863  |
| TNFRSF1A    | 65.8786  | 83.5558   | 67.9641  | 66.6549  | 71.3235   | 55.7566   |
| DCLK1       | 6.25762  | 3.84524   | 5.7949   | 2.46928  | 4.05648   | 2.72863   |
| LOC10050753 | 1.47873  | 0.408562  | 0.559703 | 0.867815 | 0.882948  | 0.287963  |
| LOC10050608 | 0        | 0         | 0.282282 | 1.05042  | 0         | 0         |
| METTL3      | 34.4495  | 39.5257   | 37.7798  | 35.5698  | 49.1988   | 38.5848   |
| CECR2       | 0.783257 | 0.888214  | 1.83035  | 1.03924  | 1.95206   | 2.01603   |
| MIR4646     | 0        | 0         | 0        | 0        | 0         | 0         |
| LOC10013216 | 2.28298  | 2.59956   | 2.04181  | 3.44238  | 3.01807   | 2.94155   |
| RAB28       | 13.1292  | 15.3584   | 13.2853  | 12.4875  | 13.5693   | 12.6028   |
| KIF26B      | 0.613239 | 0.50758   | 0.55312  | 1.02913  | 0.963973  | 0.813074  |
| ARL2BPP2    | 0        | 0         | 0        | 0        | 0         | 0         |
| PLA2G1B     | 0        | 0         | 0.199321 | 0        | 0         | 0         |
| GOLGA8B     | 66.1578  | 67.9521   | 57.4748  | 49.7251  | 72.8633   | 55.6705   |
| MED1        | 7.86297  | 5.59446   | 7.50203  | 6.05073  | 7.17858   | 6.05235   |
| PALLD       | 58.5842  | 40.7831   | 44.3301  | 43.9332  | 49.7859   | 70.4551   |
| SYCE1       | 1.2712   | 1.61816   | 0.871246 | 0.464492 | 0.239915  | 0.611947  |
| HIST1H2AD   | 1.70272  | 0.670292  | 8.93E-08 | 0.624904 | 8.51E-08  | 0.0214391 |
| SPRR2C      | 0.199106 | 0.176037  | 0        | 0        | 0.126811  | 0         |
| NBPF6       | 0        | 0.0424821 | 0        | 0        | 0.0306028 | 0         |
| PRSS21      | 3.516    | 3.8526    | 0.553635 | 1.20099  | 5.32131   | 4.56313   |
| PPP2R1A     | 88.9623  | 95.6633   | 85.399   | 97.1535  | 87.9879   | 83.6326   |
| NOTCH2NL    | 10.9822  | 11.1018   | 13.184   | 12.6422  | 9.223     | 8.05491   |
| ANKRD35     | 21.7181  | 26.5871   | 23.8291  | 20.9709  | 46.4315   | 33.2105   |
| CCL14       | 128.961  | 210.702   | 158.204  | 164.629  | 198.147   | 107.938   |
| LOC10027173 | 4.82732  | 5.49579   | 4.95584  | 5.65045  | 5.26463   | 5.60428   |
| NUDT16L1    | 24.4162  | 28.0484   | 22.4933  | 30.5296  | 27.2518   | 28.9271   |
| RNF123      | 10.0401  | 10.4933   | 10.8684  | 11.7375  | 11.0064   | 11.0109   |
| SNAR-C1     | 0        | 0         | 0        | 0        | 0         | 0         |
| C20orf197   | 0.146622 | 0.194451  | 0.69371  | 0.688378 | 0.700383  | 0.365474  |
| RDBP        | 43.6373  | 52.6716   | 42.8676  | 52.7215  | 44.8361   | 40.9686   |
| B7H6        | 0.448867 | 0.158744  | 0.588977 | 0.182641 | 0.362122  | 0.251743  |
| LOC10028923 | 2.94365  | 7.0712    | 5.21353  | 5.21518  | 6.68571   | 5.39925   |
| WRB         | 14.3878  | 13.0243   | 17.3297  | 16.2593  | 13.9846   | 13.8032   |
| ALG12       | 15.7182  | 15.6342   | 13.6124  | 14.4383  | 13.9375   | 16.9282   |
| NBEAL2      | 17.5291  | 19.401    | 29.1455  | 27.788   | 39.1526   | 34.0988   |
| LOC653513   | 2.11175  | 1.99362   | 3.48178  | 2.90825  | 2.15295   | 3.68467   |
| CSMD1       | 0.17013  | 0.260339  | 0.108976 | 0.147461 | 0.258389  | 0.17126   |

|             |          |           |           |          |           |          |
|-------------|----------|-----------|-----------|----------|-----------|----------|
| OR2F2       | 0        | 0         | 0         | 0        | 0         | 0        |
| MCART1      | 7.48237  | 5.87627   | 6.89823   | 5.40093  | 6.27343   | 4.89451  |
| HES6        | 1.76098  | 4.2378    | 1.46128   | 3.01723  | 3.37541   | 5.12651  |
| C7orf11     | 22.4833  | 25.8306   | 27.0204   | 23.974   | 20.6301   | 23.9843  |
| NFYA        | 6.78537  | 6.26423   | 6.48081   | 4.2133   | 6.00518   | 5.78255  |
| HFM1        | 0.254349 | 0.328669  | 0.162921  | 0.110229 | 0.0996899 | 0.134115 |
| LOC10050646 | 0        | 0         | 0.189071  | 0        | 0.31815   | 0        |
| LOC10012878 | 0.478822 | 1.5746    | 0.944769  | 1.10074  | 0.738684  | 0.725714 |
| MURC        | 0.267202 | 0.134996  | 0.144481  | 0.322584 | 0.0972472 | 0.23787  |
| GNRH1       | 8.20088  | 8.9368    | 8.51797   | 9.31212  | 12.8587   | 10.1612  |
| MIR600      | 0        | 0         | 0         | 0        | 0         | 0        |
| LOC10050648 | 0        | 0         | 0         | 0        | 0         | 0        |
| HS3ST3B1    | 0.458547 | 0.0448906 | 0.845586  | 0.238377 | 0.614419  | 0.443566 |
| AES         | 327.452  | 443.148   | 307.395   | 409.717  | 338.869   | 305.198  |
| LOC10050598 | 0.190366 | 0         | 0         | 0        | 0.0202076 | 0        |
| KIAA0355    | 6.37689  | 6.77322   | 6.55525   | 6.68437  | 7.73225   | 7.2542   |
| HDGF        | 138.379  | 141.484   | 121.606   | 143.288  | 129.656   | 129.504  |
| WDR36       | 9.01452  | 7.35601   | 8.57661   | 6.18193  | 7.96239   | 6.26668  |
| MIR4323     | 0        | 0         | 0         | 0        | 0         | 0        |
| SERPINF2    | 3.53737  | 6.19162   | 3.15869   | 3.13794  | 5.78985   | 4.1341   |
| ASB7        | 3.94342  | 3.10976   | 3.48874   | 2.73859  | 3.84862   | 2.95314  |
| AIPL1       | 0        | 0         | 0         | 0        | 0         | 0        |
| RBP1        | 28.9486  | 39.8509   | 35.1776   | 46.732   | 45.5505   | 45.9453  |
| KRT8P41     | 0.728055 | 0.252832  | 0.0216477 | 0        | 0.267272  | 0.238262 |
| STXBP5      | 6.59132  | 5.8177    | 8.73828   | 5.48636  | 7.2841    | 6.10948  |
| C18orf42    | 0        | 0         | 0.0334643 | 0        | 0.0281552 | 0        |
| SLC46A3     | 26.6019  | 19.0428   | 17.8908   | 15.7455  | 15.1886   | 14.9734  |
| LOC10050706 | 0        | 0         | 0         | 0        | 0         | 0        |
| FCF1        | 18.6285  | 16.3214   | 17.8899   | 15.2412  | 16.3105   | 16.0108  |
| LOC692247   | 3.73759  | 6.95117   | 7.34451   | 9.10367  | 15.8658   | 12.6822  |
| KRT31       | 17.3674  | 6.61467   | 8.09061   | 229.375  | 9.78509   | 965.283  |
| LOC10014771 | 0.155978 | 0.310288  | 0.118076  | 0.146461 | 0.248358  | 0.170098 |
| DDX51       | 8.66756  | 13.5331   | 9.24488   | 13.6992  | 12.5547   | 11.1473  |
| GPR180      | 3.39901  | 2.81678   | 2.87958   | 1.99101  | 3.25745   | 2.71571  |
| EFEMP1      | 32.991   | 29.7408   | 43.8633   | 35.9186  | 32.6587   | 28.7034  |
| RG9MTD2     | 2.44718  | 1.86885   | 2.04589   | 1.64541  | 2.03667   | 2.13155  |
| ASCL2       | 5.30706  | 11.0815   | 4.44487   | 13.4124  | 7.40745   | 8.02157  |
| FBXL19      | 9.14682  | 13.3721   | 9.44031   | 11.4436  | 12.9313   | 12.1545  |
| MIR1278     | 0        | 0         | 0         | 0        | 0         | 0        |
| ZG16        | 0        | 0         | 0         | 0        | 0         | 0        |
| OR5C1       | 0        | 0         | 0         | 0        | 0         | 0        |
| LOC257396   | 0.863442 | 0.954649  | 0.980446  | 0.729683 | 0.852393  | 0.941606 |
| ACOT6       | 1.16888  | 0.413379  | 0.884846  | 0.109756 | 0.297785  | 0.437036 |



|             |          |          |          |           |           |           |
|-------------|----------|----------|----------|-----------|-----------|-----------|
| ACR         | 0.718766 | 1.34158  | 0.423197 | 1.27483   | 1.1699    | 0.497672  |
| ACCN1       | 0.198732 | 0.13178  | 0.112831 | 0.0349887 | 0.0237325 | 0.0928812 |
| RIMKLB      | 5.47219  | 4.48947  | 6.91657  | 4.30508   | 6.21697   | 4.41359   |
| PLA2G4B     | 39.9554  | 56.1308  | 44.9063  | 65.754    | 87.1058   | 92.8981   |
| GPR183      | 2.11532  | 1.92218  | 2.57989  | 0.827606  | 2.84422   | 1.1351    |
| HNRNPK      | 122.75   | 123.248  | 119.88   | 115.124   | 116.654   | 100.577   |
| LATS2       | 4.08707  | 4.05758  | 4.44426  | 4.45563   | 3.83844   | 3.57212   |
| METTL4      | 4.61466  | 4.03282  | 3.51352  | 3.15589   | 4.12834   | 3.85638   |
| LOC10050691 | 0        | 0        | 0.127886 | 0         | 0.161395  | 0         |
| CAMK2B      | 2.38136  | 4.16549  | 4.67384  | 6.03027   | 2.49558   | 1.90037   |
| TSGA13      | 0        | 0        | 0        | 0         | 0         | 0         |
| RABGGTA     | 25.4705  | 29.7066  | 25.695   | 31.6487   | 26.7191   | 26.7725   |
| MIR874      | 0        | 0        | 0        | 0         | 0         | 0         |
| LOC10050573 | 3.58526  | 1.50957  | 2.76668  | 4.4092    | 1.95399   | 3.12313   |
| BRF1        | 12.6691  | 21.2635  | 15.8424  | 21.2352   | 19.2574   | 18.7656   |
| KIAA1310    | 20.2812  | 23.0138  | 20.2477  | 24.4077   | 23.8449   | 20.6425   |
| TRIM41      | 14.9345  | 19.4721  | 16.5551  | 17.9345   | 22.2046   | 20.5331   |
| FAM204A     | 13.3877  | 12.5658  | 13.8446  | 13.0592   | 12.5455   | 11.9493   |
| FBXW8       | 4.65286  | 4.90231  | 5.46159  | 4.91279   | 4.75772   | 3.40259   |
| CRNKL1      | 7.5731   | 5.97578  | 6.46639  | 4.89941   | 6.95489   | 6.11872   |
| ATP8B1      | 8.07083  | 5.95611  | 7.45474  | 5.44715   | 6.95994   | 6.70876   |
| FUT11       | 3.40759  | 2.52542  | 4.59011  | 2.16449   | 3.00014   | 2.2796    |
| PHF13       | 9.34683  | 12.9153  | 11.4625  | 12.0364   | 11.634    | 11.0334   |
| MIR1224     | 0        | 0        | 0        | 0         | 0         | 0         |
| PLCD1       | 18.2344  | 17.7725  | 20.3192  | 25.7814   | 23.3833   | 30.0884   |
| TSPY1       | 0        | 0        | 0        | 0         | 0         | 0         |
| LOC388282   | 0.514822 | 0.758621 | 0.389723 | 0.644546  | 0.819732  | 0.213877  |
| THAP9       | 2.10727  | 1.96652  | 1.64729  | 1.20256   | 1.7085    | 1.52253   |
| IRX6        | 25.2249  | 26.9711  | 30.6804  | 36.6078   | 30.0749   | 26.9781   |
| LOC10050645 | 0.236936 | 0        | 0.179362 | 0         | 0         | 0.442946  |
| NDUFB5      | 129.593  | 116.805  | 107.781  | 112.264   | 87.8484   | 89.6794   |
| CHCHD3      | 18.9175  | 17.3166  | 14.6242  | 14.8131   | 12.4318   | 14.038    |
| CACNA1A     | 0.241871 | 0.475448 | 0.257709 | 0.206543  | 0.181939  | 0.164375  |
| WFDC6       | 2.50964  | 3.02573  | 0.921121 | 0.600013  | 0.653893  | 1.40754   |
| OR10C1      | 0        | 0        | 0        | 0         | 0         | 0         |
| C5orf49     | 0.305602 | 0.404926 | 0.348085 | 0.43503   | 0.458489  | 0.715269  |
| SLC27A5     | 1.97391  | 1.82109  | 2.46878  | 2.98167   | 1.91312   | 1.41724   |
| MIR519A1    | 0        | 0        | 0        | 0         | 0         | 0         |
| ZBTB5       | 6.57432  | 7.15538  | 8.88263  | 8.69324   | 9.63325   | 8.07699   |
| SLC27A6     | 4.49367  | 4.07364  | 3.40254  | 4.68972   | 2.59328   | 7.01505   |
| MIRLET7E    | 0        | 0        | 0        | 0         | 0         | 0         |
| OR1L6       | 0        | 0        | 0        | 0         | 0         | 0         |
| LOC10050666 | 0        | 0        | 0        | 0         | 0         | 0         |

|             |           |          |           |           |           |           |
|-------------|-----------|----------|-----------|-----------|-----------|-----------|
| NME5        | 1.00356   | 1.04861  | 0.621573  | 0.856661  | 0.581067  | 0.397967  |
| SUGP1       | 18.3024   | 25.7418  | 19.0741   | 22.6347   | 22.3029   | 20.1524   |
| CCDC167     | 15.8919   | 17.6636  | 9.9679    | 13.8563   | 13.3027   | 17.1183   |
| LOC388210   | 0.682723  | 1.47552  | 1.6079    | 1.63828   | 1.20786   | 1.08725   |
| RFK         | 9.25579   | 7.88878  | 7.84748   | 5.90991   | 5.98938   | 5.42175   |
| ASPG        | 2.15278   | 2.36758  | 2.74261   | 3.81306   | 2.70879   | 2.58531   |
| EARS2       | 12.066    | 10.4285  | 8.75465   | 9.29506   | 9.33421   | 10.8358   |
| CYP2F1      | 0.0572639 | 0        | 0.130047  | 0.10754   | 0         | 0         |
| GCKR        | 0.327153  | 0.661138 | 0.919868  | 0.263307  | 0.357198  | 0.43686   |
| ZFYVE9      | 7.28349   | 5.67588  | 7.096     | 6.59943   | 6.0643    | 5.83553   |
| ARL4D       | 7.87807   | 13.5139  | 20.083    | 14.9212   | 14.6668   | 14.0565   |
| RAD51C      | 15.8439   | 8.81217  | 10.2553   | 7.52887   | 8.71528   | 9.10206   |
| SHC1        | 47.9898   | 54.1781  | 45.9697   | 43.67     | 44.3843   | 36.5873   |
| SH2D4B      | 0.126893  | 0.112191 | 0.0213464 | 0.0264779 | 0.0718392 | 0.109826  |
| ADAMTS6     | 0.287821  | 0.462679 | 0.415957  | 0.393105  | 0.724927  | 0.3098    |
| FRRS1       | 3.48369   | 2.71575  | 4.79228   | 2.46214   | 4.93857   | 4.4118    |
| MMP26       | 0         | 0        | 0         | 0         | 0         | 0         |
| LOC10028811 | 2.06941   | 2.37507  | 3.28138   | 4.20548   | 4.19958   | 3.52748   |
| MIR1289-1   | 0         | 0        | 0         | 0         | 0         | 0         |
| BTN2A1      | 15.254    | 17.899   | 13.5792   | 11.7951   | 21.1423   | 15.1292   |
| RCBTB2      | 8.82123   | 8.57082  | 7.45639   | 5.50248   | 7.86163   | 6.09916   |
| SULT1C2P1   | 0.666889  | 0        | 0.16828   | 0         | 0         | 0         |
| LOC152578   | 0         | 0        | 0         | 0         | 0         | 0.112211  |
| UACA        | 16.838    | 12.7125  | 15.4721   | 11.3097   | 15.582    | 15.0563   |
| CTAGE9      | 2.63296   | 2.47301  | 2.78145   | 3.22892   | 6.60589   | 6.69616   |
| DDX60       | 9.27758   | 5.40344  | 4.11374   | 1.68609   | 3.82225   | 2.29685   |
| BBIP1       | 5.91971   | 6.08734  | 5.34086   | 6.0181    | 5.20054   | 4.3775    |
| GGN         | 0.285477  | 0.378602 | 0.648324  | 0.491441  | 0.818199  | 0.65229   |
| LOC10065299 | 0.97763   | 0.555659 | 0.422898  | 0.524559  | 1.06741   | 0.783279  |
| MPHOSPH9    | 2.09202   | 1.53736  | 1.87161   | 1.60722   | 2.52641   | 1.86237   |
| LGALS9C     | 0.306683  | 0.81345  | 0.742915  | 1.72782   | 0.469676  | 0.305779  |
| BGLAP       | 1.86332   | 5.44722  | 1.7619    | 5.89588   | 7.39286   | 3.28529   |
| OR4C16      | 0         | 0        | 0         | 0         | 0         | 0         |
| CCDC42B     | 0.859884  | 4.38427  | 2.27206   | 4.94687   | 4.5982    | 2.37169   |
| KRTAP8-1    | 11.8907   | 3.8229   | 0.40915   | 21.0615   | 1.72119   | 3495.55   |
| TROVE2      | 4.96418   | 4.39546  | 5.08881   | 3.39237   | 4.51874   | 3.63792   |
| RASAL3      | 4.41072   | 4.50983  | 2.65752   | 1.69045   | 6.53571   | 2.76727   |
| GRN         | 104.618   | 128.793  | 121.535   | 125.301   | 137.847   | 119.604   |
| PPIAL4E     | 0.10784   | 0.123949 | 0.0174933 | 0.0506301 | 0.224508  | 0.0672014 |
| OLFM1       | 8.50844   | 9.76039  | 9.4929    | 6.9553    | 10.2655   | 8.09915   |
| LOC10028938 | 0.295641  | 0.29604  | 0.656876  | 1.42E-09  | 0.616192  | 0.195414  |
| SPG11       | 12.6528   | 10.1459  | 11.8296   | 9.83301   | 11.854    | 10.7091   |
| MSL3P1      | 2.95091   | 3.616    | 1.76379   | 2.81947   | 2.83566   | 2.54873   |

|             |          |           |           |           |          |           |
|-------------|----------|-----------|-----------|-----------|----------|-----------|
| CA13        | 7.57909  | 5.51316   | 7.48358   | 6.21219   | 8.50808  | 6.68165   |
| LOC728671   | 0        | 0         | 0         | 0         | 0        | 0         |
| THAP1       | 5.48292  | 4.27284   | 4.71337   | 3.28466   | 3.67603  | 4.12351   |
| GFI1        | 0.59812  | 0.758373  | 0.508876  | 0.319496  | 0.972458 | 0.557659  |
| MIR495      | 0        | 0         | 0         | 0         | 0        | 0         |
| KDM5D       | 16.9357  | 17.4125   | 0.0730159 | 0.0164301 | 0        | 0         |
| TNC         | 15.5496  | 13.678    | 11.2383   | 11.2645   | 11.835   | 15.6133   |
| EDDM3B      | 0        | 0         | 0         | 0         | 0        | 0         |
| LOC10050625 | 0.338678 | 0         | 0         | 0.636027  | 0        | 0         |
| C17orf63    | 6.84774  | 5.76506   | 6.12143   | 5.24491   | 5.47773  | 6.14592   |
| HOOK2       | 37.1773  | 51.7973   | 56.8312   | 58.3829   | 53.862   | 46.479    |
| SNORD92     | 0        | 0         | 0         | 0         | 0        | 0         |
| LOC653712   | 0.82997  | 1.1028    | 1.57509   | 0.87979   | 0.837582 | 1.07795   |
| UBASH3B     | 2.5524   | 1.59796   | 2.04706   | 1.50277   | 2.02985  | 1.83987   |
| ETF1        | 58.5099  | 49.8052   | 54.4254   | 57.7579   | 47.9898  | 50.8268   |
| LOC10065298 | 0.869219 | 0.0853899 | 0.438669  | 0.272061  | 0.307561 | 0         |
| TMEM56-RW   | 2.47848  | 0.793017  | 2.99342   | 1.87307   | 1.88066  | 3.58105   |
| ETNK1       | 15.5441  | 13.4181   | 14.8975   | 11.2739   | 16.5079  | 13.6946   |
| LOC10050685 | 0        | 0         | 0         | 0         | 0        | 0         |
| MFSD1       | 48.8671  | 40.51     | 43.1519   | 39.0191   | 41.3096  | 39.0173   |
| FAM184A     | 1.56679  | 1.21286   | 1.47895   | 1.23642   | 0.859807 | 0.610765  |
| GPR135      | 0.172434 | 0.30491   | 0.217556  | 0.269854  | 0.292864 | 0.32236   |
| XKRY        | 0        | 0         | 0         | 0         | 0        | 0         |
| SARDH       | 0.554585 | 0.517376  | 0.442981  | 0.463344  | 0.567829 | 0.517363  |
| TNKS1BP1    | 59.182   | 55.367    | 69.4802   | 67.082    | 69.1063  | 66.6674   |
| SLC35B3     | 14.8623  | 16.4784   | 16.288    | 12.2635   | 18.0034  | 13.7164   |
| MIR133A1    | 0        | 0         | 0         | 0         | 0        | 0         |
| PDZD7       | 0.959842 | 0.699332  | 0.963826  | 0.96624   | 1.9055   | 1.2698    |
| OR13A1      | 0        | 0.0437825 | 0.112461  | 0         | 0        | 0.0617176 |
| MCL1        | 101.69   | 82.5617   | 102.424   | 72.1661   | 101.578  | 73.0391   |
| LOC10050766 | 0        | 0         | 0         | 0         | 0        | 0         |
| FXYD3       | 182.687  | 216.507   | 170.513   | 270.064   | 191.714  | 173.107   |
| TRPC7       | 0        | 0         | 0         | 0         | 0        | 0         |
| SLC10A6     | 3.15369  | 2.15459   | 5.04602   | 1.68254   | 4.61066  | 4.60046   |
| CD200R1L    | 0        | 0         | 0.201853  | 0.180271  | 0.217381 | 0.0265854 |
| MAGOH       | 27.3428  | 30.3656   | 29.0676   | 20.866    | 25.9816  | 22.1669   |
| SEMA5A      | 4.99065  | 3.38496   | 6.2544    | 5.72501   | 6.41291  | 5.51063   |
| COPB1       | 36.8691  | 27.7769   | 33.7879   | 27.942    | 30.9144  | 28.1054   |
| ANKRD30B    | 0.146725 | 0.111193  | 0.0317348 | 0.0196818 | 0        | 0.0391855 |
| GEN1        | 5.00431  | 6.43313   | 4.24148   | 3.77649   | 5.21095  | 4.1707    |
| ZNF597      | 1.36186  | 0.837615  | 1.16541   | 1.27877   | 1.28221  | 1.07004   |
| SLCO1C1     | 0.49381  | 1.25417   | 0.475343  | 0.410242  | 0.452965 | 0.328179  |
| FAM83G      | 11.4838  | 9.52827   | 20.8633   | 15.3566   | 21.3737  | 25.0923   |

|           |           |           |           |           |           |           |
|-----------|-----------|-----------|-----------|-----------|-----------|-----------|
| HS6ST3    | 0.145983  | 0.0537787 | 0.21181   | 0.399804  | 0.0774811 | 0.0758086 |
| ELOF1     | 50.5863   | 60.5464   | 44.2857   | 60.9634   | 47.1956   | 53.5395   |
| DSTYK     | 5.54232   | 5.16934   | 6.12632   | 5.81153   | 6.6432    | 6.10799   |
| HCCS      | 10.6683   | 10.4226   | 10.755    | 10.8677   | 10.1252   | 9.22485   |
| C20orf196 | 2.06272   | 2.51848   | 2.00763   | 2.21356   | 1.93936   | 2.5708    |
| DONSON    | 7.83358   | 10.9313   | 8.00201   | 8.41907   | 9.46756   | 7.70462   |
| NOM1      | 5.71385   | 5.78942   | 5.86255   | 5.66082   | 6.52647   | 5.11044   |
| FAM26F    | 5.05515   | 4.10459   | 1.24956   | 1.16246   | 2.62829   | 1.86438   |
| FAM48A    | 13.8654   | 12.1488   | 14.8055   | 12.1261   | 16.2473   | 14.0049   |
| RDH13     | 14.751    | 16.0364   | 27.8206   | 27.4976   | 31.2021   | 32.5198   |
| LOC401588 | 3.81889   | 3.42466   | 3.6343    | 4.40551   | 4.76031   | 3.26369   |
| NUBP2     | 33.0396   | 62.9654   | 38.8331   | 57.891    | 45.4759   | 49.1736   |
| ARID4B    | 10.9433   | 8.89318   | 9.50553   | 6.11931   | 11.1704   | 9.14839   |
| CACNG7    | 0         | 0         | 0         | 0         | 0         | 0.0269914 |
| LAMP1     | 183.198   | 176.591   | 194.355   | 207.256   | 174.186   | 184.265   |
| PLS3      | 73.6067   | 62.4194   | 73.3108   | 59.8262   | 72.6882   | 68.8256   |
| SFXN2     | 4.95306   | 4.90052   | 4.13635   | 3.87571   | 3.83063   | 3.57647   |
| C3orf77   | 0         | 0         | 0         | 0         | 0         | 0         |
| KCTD21    | 5.03645   | 4.79227   | 3.60761   | 3.58835   | 3.57139   | 4.18578   |
| HDAC7     | 29.3042   | 36.8294   | 39.9739   | 37.5608   | 48.2752   | 37.1483   |
| RGS12     | 11.8843   | 19.725    | 14.4322   | 18.1348   | 21.0562   | 18.8605   |
| THSD7B    | 0.131091  | 0.231804  | 0.384541  | 0.138478  | 0.344406  | 0.102113  |
| SURF1     | 61.9331   | 80.8465   | 43.1466   | 51.5171   | 59.4542   | 58.1009   |
| YPEL3     | 87.8804   | 140.547   | 85.2052   | 114.579   | 115.931   | 128.955   |
| PLCXD1    | 7.33361   | 7.68521   | 9.49456   | 7.87122   | 8.6321    | 8.20693   |
| SNAP91    | 0.417545  | 0.104852  | 0.161596  | 0.125276  | 0.154212  | 0.0985359 |
| MUS81     | 15.7268   | 23.7419   | 17.7676   | 18.086    | 22.1842   | 20.0027   |
| GCFC1-AS1 | 1.30127   | 1.30722   | 0.878066  | 0.713773  | 1.32746   | 0.775381  |
| ARV1      | 19.2737   | 16.3113   | 16.1232   | 14.3655   | 17.4341   | 16.2166   |
| GPR149    | 0         | 0         | 0         | 0         | 0.0278748 | 0         |
| NUMB      | 33.2875   | 32.2505   | 31.3203   | 28.8543   | 34.0264   | 33.7189   |
| CLN5      | 14.3123   | 11.7704   | 15.2115   | 12.8693   | 15.0941   | 11.9659   |
| ITPRIPL1  | 1.96338   | 1.17564   | 1.05017   | 0.753564  | 1.47078   | 0.860575  |
| MDH1B     | 0.435799  | 0.963265  | 0.857746  | 0.736575  | 1.11025   | 0.624614  |
| DIRAS2    | 0.355606  | 0.104801  | 0.376874  | 1.31337   | 0.452975  | 0.531837  |
| FLI1      | 6.44706   | 6.50197   | 7.64536   | 4.76473   | 7.43162   | 5.19374   |
| COPB2     | 44.0454   | 31.7052   | 36.9878   | 30.1549   | 31.2139   | 30.6768   |
| PRSS50    | 0.32594   | 0.648394  | 0.801899  | 1.60677   | 1.60884   | 1.11711   |
| SCARNA7   | 0.787561  | 2.08894   | 1.19238   | 2.95803   | 0         | 0         |
| SNORD112  | 0         | 0         | 0         | 0         | 0         | 0         |
| MIR3119-2 | 0         | 0         | 0         | 0         | 0         | 0         |
| ENKUR     | 0.0892025 | 0.105156  | 0.0675268 | 0.0837597 | 0.0568136 | 0.0555872 |
| PALMD     | 53.2559   | 50.503    | 65.8813   | 49.8964   | 42.8961   | 49.3666   |

|             |           |           |           |          |           |          |
|-------------|-----------|-----------|-----------|----------|-----------|----------|
| PLEKHA8P1   | 4.55062   | 4.81783   | 3.9529    | 2.62435  | 3.16593   | 3.42987  |
| TTC25       | 0.39616   | 0.612955  | 0.524817  | 1.16246  | 0.599252  | 0.432023 |
| CCBL2       | 24.9022   | 23.6186   | 19.7638   | 20.0938  | 20.4714   | 18.8401  |
| HECTD3      | 37.6311   | 39.3181   | 36.9184   | 36.8326  | 37.5696   | 34.1475  |
| SERPINB6    | 45.6575   | 52.6416   | 40.6822   | 36.2417  | 36.5607   | 27.5349  |
| LOC10012857 | 0         | 0.788364  | 0.450003  | 0        | 1.32513   | 0.370437 |
| RREB1       | 13.3888   | 12.3774   | 15.0949   | 12.2621  | 12.8006   | 11.0361  |
| AMBRA1      | 7.50366   | 7.73714   | 7.59796   | 7.42423  | 8.55597   | 8.64634  |
| ETV3L       | 0.336254  | 0.144661  | 0.356717  | 0.153635 | 0.367651  | 0.262183 |
| TTY10       | 0.261142  | 0.346328  | 0         | 0        | 0         | 0        |
| KRTAP1-3    | 16.6901   | 5.17011   | 0.368891  | 169.644  | 2.7157    | 1918.11  |
| SH3TC1      | 3.0566    | 4.15452   | 3.5744    | 3.83394  | 5.24465   | 4.70501  |
| SMC3        | 13.543    | 10.2992   | 13.6576   | 9.4486   | 14.1298   | 11.7444  |
| EPDR1       | 4.2957    | 4.14015   | 6.38656   | 9.88413  | 3.96837   | 2.79748  |
| RASGRP2     | 4.22816   | 6.87366   | 3.51044   | 3.11697  | 6.45816   | 4.5904   |
| CTXN2       | 0         | 0         | 0         | 0        | 0         | 0        |
| ZNF354C     | 1.79227   | 1.09413   | 2.22896   | 0.961663 | 1.33176   | 1.19664  |
| FLJ44511    | 0.168215  | 0.570113  | 0.275903  | 0.342228 | 0.357123  | 0.489181 |
| KIAA1009    | 2.8114    | 2.88337   | 3.0363    | 2.53427  | 3.37826   | 3.03671  |
| CD55        | 23.1588   | 15.7479   | 35.9656   | 24.8499  | 34.4921   | 27.5996  |
| MEP1A       | 0.0679905 | 0.0601129 | 0.0514692 | 0.031921 | 0.0433035 | 0        |
| LOC10050666 | 4.33295   | 4.70378   | 5.23149   | 3.19305  | 3.77272   | 5.60529  |
| AHCYL2      | 14.7286   | 13.6571   | 14.7999   | 18.1339  | 15.0199   | 13.5642  |
| PLA1A       | 1.14963   | 0.902174  | 0.511492  | 0.285975 | 0.436443  | 0.337552 |
| SURF4       | 84.5245   | 82.0473   | 82.0424   | 79.6817  | 69.453    | 66.3672  |
| ARFIP2      | 16.8674   | 18.18     | 16.3704   | 19.6065  | 17.7763   | 14.8448  |
| SERF1B      | 13.6766   | 11.851    | 13.2176   | 15.3827  | 12.6015   | 12.9762  |
| LOC644649   | 2.18291   | 1.15799   | 1.07411   | 1.4348   | 0.834185  | 1.3603   |
| HIST1H2BH   | 0.438431  | 0         | 0.331895  | 0.41168  | 1.11696   | 1.63927  |
| UGT2B4      | 0.0488645 | 0.172812  | 0.0739814 | 0        | 0.0622441 | 0        |
| PRUNE2      | 1.9395    | 1.51033   | 2.04421   | 1.75812  | 1.88143   | 2.11508  |
| FAM164C     | 1.64065   | 1.59312   | 1.76557   | 1.46693  | 1.3248    | 1.53236  |
| ID2         | 52.1819   | 47.9814   | 61.9877   | 58.6468  | 54.5053   | 51.1776  |
| LOC10050607 | 0.472041  | 0.695582  | 0.833788  | 0.443239 | 0.20043   | 0.196104 |
| FITM1       | 1.17036   | 1.65561   | 1.15176   | 2.1979   | 1.93806   | 1.82329  |
| WDR19       | 5.63687   | 6.3671    | 8.35582   | 6.07782  | 7.30317   | 7.26573  |
| RGS21       | 0         | 0         | 0         | 0        | 0         | 0        |
| GP1BA       | 2.01794   | 2.21233   | 3.51346   | 2.27377  | 3.88141   | 1.73534  |
| LOC10012910 | 0.695675  | 1.16864   | 1.52723   | 0.587905 | 1.37355   | 0.953733 |
| SPATA8      | 0         | 0         | 0         | 0        | 0.072428  | 0        |
| SNORD115-3  | 0         | 0         | 0         | 0        | 0         | 0        |
| LOC728145   | 0         | 0         | 0         | 0        | 0         | 0        |
| IKZF1       | 0.686115  | 0.894331  | 1.77878   | 2.77217  | 0.930179  | 2.41605  |

|            |           |           |           |           |           |           |
|------------|-----------|-----------|-----------|-----------|-----------|-----------|
| ALG10B     | 2.20883   | 1.81224   | 2.69236   | 1.40615   | 2.87324   | 2.02385   |
| PAPSS1     | 44.2866   | 32.3549   | 38.9877   | 35.1066   | 35.2012   | 36.3191   |
| C16orf86   | 2.97542   | 5.18399   | 3.44486   | 3.77995   | 4.79339   | 3.38111   |
| LOC729020  | 2.21635   | 1.06485   | 1.93287   | 1.08567   | 1.56485   | 1.98139   |
| PLK1S1     | 8.82312   | 9.83369   | 12.3246   | 10.3896   | 10.5415   | 9.08656   |
| TXLNG2P    | 9.93059   | 8.27829   | 0         | 0         | 0         | 0         |
| ENAM       | 0         | 0         | 0         | 0         | 0         | 0         |
| FBXL15     | 7.04726   | 12.6514   | 8.81545   | 11.3381   | 11.3579   | 9.69355   |
| ELMO2      | 16.9308   | 14.7187   | 17.5037   | 18.1038   | 19.162    | 19.4433   |
| ASB4       | 0.184078  | 0.158226  | 0.116121  | 0.263176  | 0.158172  | 0.177018  |
| TMPRSS2    | 10.0013   | 4.28495   | 6.02885   | 9.50704   | 4.79717   | 5.73229   |
| LOC284561  | 0.0437189 | 0.0193268 | 0.0496432 | 0.0205257 | 0.0417672 | 0.0817313 |
| SORD       | 118.862   | 89.8617   | 44.2889   | 48.5094   | 45.1462   | 46.5839   |
| TUBG2      | 15.0205   | 24.0162   | 19.2123   | 17.4003   | 19.8663   | 18.6844   |
| LOC1005058 | 0         | 0         | 0         | 0         | 0         | 0         |
| MIR600HG   | 6.31778   | 4.59589   | 5.8723    | 5.39163   | 6.53999   | 6.14965   |
| ZDHHC2     | 8.62655   | 6.08016   | 9.05051   | 8.57936   | 5.68002   | 5.31513   |
| CKS2       | 14.5898   | 22.1133   | 15.9533   | 17.3963   | 19.7647   | 18.3278   |
| RGPD2      | 0.692664  | 0.67176   | 1.01135   | 0.629685  | 0.669571  | 0.577164  |
| TSPY3      | 0         | 0         | 0         | 0         | 0         | 0         |
| TBX20      | 0         | 0         | 0         | 0.0747311 | 0         | 0         |
| STK17B     | 7.86438   | 6.24826   | 7.10564   | 5.2066    | 7.5133    | 5.32984   |
| HCST       | 17.0441   | 17.628    | 9.33102   | 5.08353   | 23.1692   | 8.27687   |
| MIR373     | 0         | 0         | 0         | 0         | 0         | 0         |
| PCDHB16    | 1.26314   | 0.709074  | 1.44194   | 0.866021  | 0.755553  | 0.587298  |
| SETD5      | 22.6076   | 19.9759   | 24.8154   | 21.2806   | 27.0202   | 23.4628   |
| ATG7       | 8.23448   | 8.55892   | 7.14335   | 7.31707   | 9.09019   | 9.13748   |
| TRIP4      | 15.3255   | 14.6196   | 17.6694   | 16.7572   | 14.4808   | 13.1629   |
| MIR4422    | 0         | 0         | 0         | 0         | 0         | 0         |
| C22orf45   | 2.09624   | 2.36302   | 1.65333   | 1.46748   | 1.43514   | 1.46659   |
| RPL13A     | 577.999   | 941.498   | 672.884   | 1035.93   | 680.052   | 691.505   |
| NDUFB10    | 136.945   | 166.568   | 111.921   | 143.316   | 107.443   | 121.413   |
| LDOC1L     | 6.57398   | 5.17359   | 5.15428   | 4.98578   | 5.63636   | 5.52595   |
| AHCTF1     | 7.19074   | 5.19462   | 6.29812   | 5.56834   | 5.63402   | 4.37167   |
| CDKN2B     | 15.6046   | 12.373    | 16.9214   | 19.5435   | 13.8653   | 23.6778   |
| MIR3190    | 0         | 0         | 0         | 0         | 0         | 0         |
| CCDC17     | 0.829878  | 1.46357   | 1.33938   | 1.40616   | 2.51702   | 1.26044   |
| C1orf54    | 16.2441   | 19.3227   | 16.0964   | 15.3443   | 18.0574   | 7.5465    |
| ODF3       | 0         | 0         | 0         | 0         | 0         | 0.107538  |
| ZDHHC19    | 0         | 0.145371  | 0         | 0.154389  | 0         | 0.102461  |
| MIR557     | 0         | 0         | 0         | 0         | 0         | 0         |
| TARDBP     | 58.2152   | 51.6333   | 56.6704   | 51.4158   | 62.9365   | 54.1501   |
| 15-Sep     | 76.2771   | 54.7293   | 67.501    | 56.3773   | 56.9593   | 50.6423   |

|             |          |           |           |          |           |          |
|-------------|----------|-----------|-----------|----------|-----------|----------|
| COL11A2     | 1.00467  | 1.37877   | 0.640728  | 1.16202  | 1.34664   | 1.30804  |
| CCT6A       | 58.6955  | 51.2613   | 54.6531   | 53.7144  | 48.9722   | 47.7368  |
| HNRNPU      | 57.5133  | 48.8283   | 48.0784   | 42.1421  | 44.4634   | 45.5498  |
| MIR520E     | 0        | 0         | 0         | 0        | 0         | 0        |
| EFCAB7      | 2.96639  | 2.2806    | 3.12427   | 2.62392  | 3.47742   | 3.40236  |
| SERPINA5    | 1.45185  | 3.30633   | 3.26387   | 0.991464 | 1.09282   | 1.0144   |
| RABGAP1L    | 5.79019  | 3.78916   | 4.96309   | 3.16305  | 4.08235   | 3.55336  |
| LGALS3BP    | 92.0775  | 122.094   | 78.5825   | 61.805   | 66.69     | 44.756   |
| ZNF625-ZNF2 | 3.93E-96 | 3.73E-112 | 2.63E-29  | 1.19E-61 | 3.29E-69  | 2.35E-63 |
| SAFB2       | 20.9329  | 23.6865   | 21.1359   | 24.2531  | 26.4941   | 24.1866  |
| LOC10028917 | 0.325363 | 0.249063  | 0.424704  | 0.566871 | 0.512193  | 0.236844 |
| CDK5R2      | 0        | 0         | 0.030835  | 0        | 0         | 0        |
| SPATC1      | 0.227979 | 0.0485209 | 0.350641  | 0.274834 | 0.15729   | 0.213743 |
| PDSS1       | 4.38516  | 3.83509   | 3.71046   | 4.37265  | 3.73693   | 3.56583  |
| KRT40       | 0.267713 | 0         | 0.0405321 | 5.07784  | 0.306914  | 6.30608  |
| MUTED-TXN1  | 1.14E-05 | 0.048595  | 2.72059   | 2.05573  | 0.624356  | 1.42533  |
| PRCD        | 0.261298 | 0.598452  | 1.58949   | 1.27973  | 1.03323   | 0.781645 |
| SRSF1       | 61.6836  | 58.9385   | 53.872    | 53.7004  | 63.3094   | 54.5602  |
| MYH14       | 23.5945  | 19.7066   | 36.4818   | 39.4464  | 33.2531   | 41.3518  |
| HNRNPH1     | 262.365  | 285.851   | 253.355   | 280.996  | 302.955   | 254.762  |
| TIMM22      | 13.5091  | 16.7546   | 11.9782   | 15.9148  | 13.5035   | 14.6931  |
| HLA-DRB1    | 192.517  | 195.765   | 151.194   | 93.8003  | 227.111   | 102.039  |
| HNF4A       | 0.12326  | 0         | 0         | 0        | 0.0196252 | 0        |
| GPR3        | 0.437925 | 0.559268  | 0.515685  | 1.00517  | 0.340899  | 0.33354  |
| GUCA2B      | 0        | 0         | 0         | 0        | 0         | 0.150351 |
| CA3         | 13.1958  | 22.0611   | 28.515    | 7.6597   | 12.2247   | 11.3628  |
| ADNP2       | 7.09912  | 7.31743   | 8.45268   | 8.72604  | 8.1909    | 6.48019  |
| POLD2       | 55.6177  | 64.9544   | 49.0293   | 65.3119  | 52.1712   | 60.0623  |
| KRT6A       | 638.505  | 572.938   | 430.853   | 471.926  | 448.615   | 876.715  |
| ISG20       | 11.4498  | 10.7834   | 5.37013   | 5.60932  | 7.29245   | 8.9188   |
| CST2        | 0.523922 | 0.340324  | 0.437083  | 1.27256  | 0.12258   | 1.55914  |
| LOC10050559 | 0        | 0         | 0         | 0        | 0         | 0        |
| SNORD116-2  | 0        | 0         | 0         | 0        | 0         | 0        |
| RNASEH1     | 6.43747  | 4.55328   | 6.67628   | 5.50066  | 4.14106   | 5.53595  |
| ARF6        | 47.7442  | 38.5103   | 46.871    | 40.8528  | 44.1373   | 44.25    |
| CYP4F30P    | 0        | 0         | 0         | 0        | 0         | 0        |
| SLC4A9      | 0.21134  | 0.266933  | 0.0914202 | 0.141746 | 0.153833  | 0.112884 |
| WDR48       | 13.6662  | 12.3643   | 14.1822   | 11.6612  | 14.6533   | 12.6668  |
| C2orf70     | 0        | 0         | 0.145391  | 0.360684 | 0.122325  | 0.119684 |
| EIF3IP1     | 0        | 0         | 0.0904319 | 0        | 0.152169  | 0        |
| CPSF6       | 21.0319  | 17.6647   | 18.8458   | 16.3918  | 22.5582   | 16.915   |
| PPL         | 87.2469  | 74.6189   | 94.5409   | 79.1615  | 101.213   | 103.878  |
| SNORD114-2  | 0        | 0         | 0         | 0        | 0         | 0        |

|             |           |          |          |           |           |           |
|-------------|-----------|----------|----------|-----------|-----------|-----------|
| EPS15L1     | 11.1407   | 8.09667  | 10.9172  | 7.78645   | 8.45038   | 9.93055   |
| OR5AK2      | 0         | 0        | 0        | 0         | 0.0821463 | 0         |
| MMP28       | 21.0683   | 37.6066  | 25.8167  | 25.2592   | 29.6456   | 18.8312   |
| C1orf31     | 37.5448   | 37.0904  | 26.3925  | 23.9262   | 20.9541   | 21.8824   |
| GPR17       | 1.00415   | 1.68161  | 2.48136  | 1.57837   | 1.32366   | 1.10294   |
| ZNF215      | 1.12553   | 1.32683  | 0.527448 | 0.654242  | 0.477903  | 0.601184  |
| ZBED6       | 4.50312   | 1.67637  | 7.89426  | 3.14742   | 4.55008   | 3.08044   |
| FTSD2       | 18.1279   | 19.617   | 16.4389  | 15.1379   | 20.4756   | 16.327    |
| LOC1005065: | 3.23267   | 2.25991  | 2.50406  | 1.6236    | 2.05891   | 2.48294   |
| MIR4261     | 0         | 0        | 0        | 0         | 0         | 0         |
| CHAC2       | 2.17543   | 3.15434  | 1.77856  | 1.47074   | 1.82892   | 1.35564   |
| SEMA6C      | 5.64102   | 8.79215  | 6.95175  | 8.17341   | 9.32475   | 7.62896   |
| CXorf28     | 0.200839  | 0.355138 | 0.152036 | 0.377169  | 0.255831  | 0         |
| PSEN1       | 16.7055   | 12.9683  | 15.7832  | 14.2517   | 15.7327   | 14.7366   |
| LOC1005068: | 0.217913  | 0        | 0        | 0         | 0         | 0         |
| UBE2H       | 26.6182   | 23.6757  | 28.0835  | 29.4939   | 26.6823   | 28.7099   |
| DDX54       | 15.9473   | 17.8084  | 16.3312  | 17.0755   | 17.5569   | 16.6822   |
| RPL7A       | 481.727   | 666.137  | 530.536  | 862.742   | 577.375   | 576.249   |
| CHRNA5      | 0.253814  | 0.400395 | 0.279753 | 0.347874  | 0.376592  | 0.107553  |
| MIR769      | 0         | 0        | 0        | 0         | 0         | 0         |
| RNPEPL1     | 35.0556   | 53.5482  | 38.4977  | 46.4851   | 42.8932   | 41.099    |
| TFAP2C      | 51.3344   | 53.4485  | 58.8571  | 55.3263   | 54.5954   | 52.2458   |
| ZNF679      | 0         | 0        | 0        | 0         | 0         | 0         |
| MPDZ        | 5.31435   | 3.86281  | 4.25509  | 3.19078   | 3.27083   | 2.90568   |
| PDE1C       | 0.299617  | 0.296141 | 0.392074 | 0.248628  | 0.30698   | 0.255834  |
| LOC644684   | 2.12619   | 2.70305  | 3.70297  | 4.11044   | 3.28508   | 2.5028    |
| CCDC144C    | 0.154633  | 0.111343 | 0.233505 | 0.441656  | 0.169502  | 0.0706021 |
| LOC1005057: | 0.0817864 | 0.149255 | 0.139632 | 0.0776603 | 0.222748  | 0.106201  |
| PSMD2       | 56.1349   | 46.5272  | 45.668   | 48.4853   | 43.676    | 44.6589   |
| IFNW1       | 0         | 0        | 0        | 0         | 0         | 0         |
| WDR74       | 24.9821   | 35.8215  | 24.2456  | 29.9237   | 27.7937   | 24.6989   |
| LOC1001301: | 0.314359  | 0.361317 | 0.571131 | 0.678909  | 0.900976  | 0.685633  |
| YIPF2       | 25.0768   | 30.6995  | 25.2548  | 30.9779   | 28.4961   | 29.2065   |
| GEM         | 4.66827   | 3.63474  | 5.42967  | 2.4733    | 5.34199   | 4.51794   |
| HOTAIR      | 4.48661   | 2.88843  | 2.7369   | 3.72204   | 3.44015   | 4.09879   |
| YIPF3       | 67.0335   | 75.5666  | 65.1455  | 73.8264   | 69.3724   | 72.3098   |
| CSN1S2BP    | 0         | 0        | 0        | 0         | 0         | 0         |
| DNMT3A      | 6.00377   | 4.831    | 5.89793  | 4.99499   | 6.17194   | 5.67936   |
| SLC34A1     | 0.186358  | 0.254402 | 0.199795 | 0         | 0.0495668 | 0.293802  |
| STRN4       | 29.1459   | 33.5692  | 29.4852  | 33.2546   | 33.0854   | 29.4921   |
| LOC284798   | 0.0412418 | 0        | 0.029796 | 0         | 0.10507   | 0.0781186 |
| COL27A1     | 7.58038   | 10.1063  | 8.9741   | 7.32768   | 15.878    | 10.8615   |
| RAB3IP      | 2.54637   | 1.54853  | 1.92058  | 2.40044   | 2.13398   | 2.22396   |



|             |           |           |           |          |           |           |
|-------------|-----------|-----------|-----------|----------|-----------|-----------|
| LOC10050696 | 0         | 0         | 0         | 0        | 0         | 0         |
| MIR106A     | 0         | 0         | 0         | 0        | 0         | 0         |
| FZD3        | 1.54182   | 0.94701   | 1.31693   | 1.33885  | 1.24269   | 2.02785   |
| MIR3179-3   | 0         | 0         | 0         | 0        | 0         | 0         |
| ZCCHC3      | 8.5126    | 11.1453   | 8.50071   | 8.97959  | 9.50531   | 6.86224   |
| ZNF606      | 3.59732   | 2.35332   | 3.4756    | 2.65476  | 3.20177   | 3.14037   |
| WBP1        | 50.4653   | 80.0194   | 54.6253   | 67.4093  | 81.552    | 59.3288   |
| LINC00467   | 8.48983   | 11.5595   | 8.61198   | 6.69633  | 4.75835   | 5.60793   |
| CTSE        | 0.197232  | 0.232508  | 0.149306  | 0.208348 | 0.0314044 | 0.122907  |
| SF3B1       | 109.857   | 98.423    | 125.514   | 84.4793  | 133.999   | 110.506   |
| SCRIB       | 20.5519   | 27.4265   | 26.9887   | 29.9531  | 32.4999   | 42.2003   |
| OR2W3       | 0.126329  | 0.446767  | 0.382526  | 0.355862 | 1.04597   | 0.944672  |
| VPS52       | 31.2602   | 34.138    | 32.0203   | 36.2874  | 39.655    | 36.2493   |
| LOC10050621 | 0         | 0         | 0         | 0        | 0         | 0         |
| ENDOU       | 25.5708   | 17.8888   | 37.036    | 34.1673  | 23.2153   | 36.4431   |
| C16orf82    | 0.0449163 | 0         | 0.0340019 | 0        | 0         | 0         |
| CELF5       | 0.343584  | 0.273546  | 0.234211  | 0.326566 | 0.30706   | 0.300432  |
| HMGA2       | 0.141047  | 0.0831364 | 0.0177955 | 0.223493 | 0         | 0.0585962 |
| GPR18       | 0.331021  | 0.594627  | 0.250585  | 0        | 0.655536  | 0.206278  |
| BCL7C       | 36.7127   | 67.0735   | 53.7379   | 67.1498  | 59.8263   | 48.4068   |
| ALDH3A1     | 34.2812   | 55.1076   | 18.3781   | 23.8778  | 32.1945   | 21.7291   |
| AIF1L       | 22.4145   | 18.5087   | 19.7824   | 20.0593  | 17.8503   | 18.6078   |
| MIR221      | 0         | 0         | 0         | 0        | 567.679   | 0         |
| C5orf52     | 0         | 0         | 0         | 0        | 0         | 0         |
| DCAF17      | 6.68051   | 5.49622   | 6.17057   | 4.67003  | 6.22925   | 5.72011   |
| ZNF222      | 2.1862    | 1.87615   | 2.43252   | 2.79081  | 3.30647   | 2.76279   |
| ENTPD3-AS1  | 1.10974   | 1.18523   | 0.782112  | 1.27611  | 0.821248  | 0.802908  |
| DEAF1       | 15.1057   | 19.1154   | 15.1809   | 20.6884  | 15.6099   | 17.7601   |
| D21S2088E   | 0         | 0         | 0         | 0        | 0         | 0         |
| MAP3K7      | 13.69     | 11.1246   | 13.6479   | 11.2381  | 15.3815   | 13.2958   |
| MTRNR2L9    | 0.88597   | 2.34996   | 0.894245  | 3.05034  | 0.940465  | 2.57646   |
| EEPD1       | 5.07564   | 6.09287   | 10.1524   | 8.69882  | 6.04489   | 5.42583   |
| LOC400794   | 0         | 0         | 0.0454356 | 0        | 0         | 0.037402  |
| LOC10027221 | 0.329239  | 0.133622  | 0.377674  | 0.206576 | 0.939255  | 0.475176  |
| KLHL3       | 3.16395   | 3.39149   | 3.49731   | 2.78686  | 4.33343   | 2.78298   |
| ATG3        | 44.2773   | 40.0207   | 38.1414   | 32.8895  | 35.4651   | 33.7481   |
| ODF4        | 0         | 0         | 0         | 0.18545  | 0.0628946 | 0         |
| LOC10065296 | 5.94E-08  | 5.23E-08  | 1.28E-08  | 3.09E-09 | 1.77E-08  | 2.08E-09  |
| OPA1        | 16.348    | 10.8514   | 14.3321   | 11.0271  | 12.1145   | 11.5573   |
| STK32B      | 0.858561  | 0.921747  | 1.53199   | 1.84269  | 1.58188   | 1.37576   |
| PIK3R2      | 14.7459   | 18.3181   | 18.6484   | 24.5276  | 20.3778   | 20.046    |
| USP6NL      | 6.31212   | 4.76463   | 6.27397   | 5.98799  | 7.04304   | 9.27195   |
| MIR4486     | 0         | 0         | 0         | 0        | 0         | 0         |

|             |           |           |           |           |           |            |
|-------------|-----------|-----------|-----------|-----------|-----------|------------|
| MRV11       | 6.9695    | 8.31684   | 5.60372   | 5.2449    | 6.49911   | 4.75754    |
| MRE11A      | 5.2988    | 4.99955   | 10.3181   | 6.94107   | 8.21982   | 5.55615    |
| ZC3H7A      | 16.2191   | 15.5179   | 14.7607   | 12.0056   | 15.6827   | 13.013     |
| MIR4443     | 0         | 0         | 0         | 0         | 0         | 0          |
| ZNF599      | 1.49532   | 1.26581   | 1.49323   | 0.926093  | 1.86422   | 0.931817   |
| LOC10050550 | 1.66071   | 1.06022   | 0.93049   | 0.646656  | 1.33754   | 0.898882   |
| SNORD58B    | 0         | 0         | 0         | 0         | 0         | 0          |
| UCMA        | 0         | 0         | 0         | 0         | 0         | 0          |
| RAB6A       | 48.5456   | 35.0606   | 38.893    | 35.7343   | 36.1273   | 37.5624    |
| SGK1        | 105.164   | 70.0909   | 42.7285   | 110.786   | 72.7089   | 53.7587    |
| C14orf33    | 0.568979  | 1.57205   | 1.45368   | 1.66957   | 0.860667  | 0.886409   |
| WDR37       | 9.19334   | 9.2045    | 9.77177   | 10.0908   | 11.5101   | 13.0012    |
| PNPLA4      | 8.64559   | 6.84953   | 11.7676   | 10.962    | 8.95286   | 10.944     |
| FAM186A     | 0.0523534 | 0.0115719 | 0.0594477 | 0.0122898 | 0.0500163 | 0.0326244  |
| LOC10050564 | 48.8578   | 42.3959   | 52.7232   | 40.1686   | 48.2945   | 38.942     |
| FBXL17      | 9.8286    | 6.79148   | 9.21981   | 5.90927   | 6.8847    | 5.49037    |
| IL1B        | 5.24857   | 1.5892    | 4.73518   | 5.46841   | 3.34284   | 3.04667    |
| KIF14       | 0.731702  | 0.854865  | 0.336298  | 0.65025   | 0.682394  | 0.626953   |
| RHOQ        | 31.0722   | 31.5079   | 36.5971   | 27.3212   | 26.252    | 21.6455    |
| SMNDC1      | 21.5127   | 17.1766   | 17.3247   | 16.1887   | 17.3941   | 16.575     |
| PNPLA8      | 24.6878   | 17.5702   | 22.397    | 14.557    | 19.1037   | 19.8765    |
| ENPP7       | 0         | 0         | 0         | 0         | 0         | 0          |
| RAB36       | 1.45806   | 1.58314   | 1.58786   | 2.13771   | 1.48258   | 1.14771    |
| SDK1        | 1.24164   | 1.39425   | 1.11196   | 0.944642  | 1.59888   | 1.1149     |
| ATP1A4      | 0.45192   | 0.892112  | 0.250403  | 0.0883478 | 1.22664   | 0.580719   |
| PTP4A3      | 15.1124   | 35.7025   | 16.5533   | 20.9361   | 20.5605   | 12.3505    |
| LOC10065288 | 0         | 0         | 0         | 0         | 0.0380006 | 0          |
| ILDR1       | 2.28791   | 1.22152   | 1.64256   | 1.61904   | 1.13366   | 1.45594    |
| ZNF799      | 3.0716    | 3.495     | 3.20808   | 2.19058   | 3.83823   | 3.41619    |
| LEPREL2     | 5.94257   | 8.31881   | 11.3328   | 8.7991    | 9.63187   | 10.6109    |
| DKK1        | 1.79862   | 1.28244   | 0.614901  | 0.435839  | 0.406486  | 0.614646   |
| CLCN4       | 1.01059   | 0.744583  | 1.44504   | 0.5799    | 0.795623  | 0.559784   |
| FAM35B      | 2.26539   | 2.78991   | 1.94983   | 1.73274   | 2.30599   | 1.70773    |
| MBD3L5      | 0         | 0         | 0         | 0         | 0         | 0          |
| TAB2        | 20.4404   | 16.6279   | 20.7706   | 16.851    | 19.4154   | 17.2494    |
| LOC201477   | 0         | 0.0781886 | 0.133891  | 0.083039  | 0         | 0          |
| DEFB103A    | 1.24439   | 1.46695   | 0.157002  | 1.16846   | 0.528373  | 1.56383    |
| SUB1        | 40.0791   | 35.0389   | 36.8536   | 29.6332   | 33.0417   | 28.8704    |
| CXXC5       | 14.7501   | 11.7833   | 19.9512   | 17.5762   | 17.0244   | 18.3366    |
| IDAS        | 0.244193  | 0         | 0.0369711 | 0.0917174 | 0.0622112 | 0.121737   |
| RP1         | 0.013402  | 0         | 0.0304362 | 0         | 0.0170716 | 0.00835156 |
| RPL39L      | 12.8462   | 18.874    | 11.8698   | 15.6102   | 12.8744   | 10.3597    |
| TOX2        | 1.71733   | 2.11024   | 1.42671   | 1.37138   | 1.25649   | 0.835601   |

|             |           |           |           |           |           |           |
|-------------|-----------|-----------|-----------|-----------|-----------|-----------|
| LOC10050564 | 0         | 0         | 0         | 0         | 0         | 0         |
| C1orf101    | 0.556998  | 0.440087  | 0.250149  | 0.463003  | 0.562065  | 0.306631  |
| HIC1        | 4.54758   | 6.20564   | 4.93815   | 5.12408   | 4.44949   | 4.02597   |
| C18orf8     | 11.2935   | 9.7726    | 9.5943    | 11.1918   | 10.9952   | 8.07176   |
| IRF7        | 18.8367   | 29.3207   | 9.79997   | 10.4787   | 18.6585   | 13.6765   |
| AADACL3     | 159.373   | 129.105   | 81.6354   | 75.6961   | 64.3773   | 123.018   |
| NPIP        | 35.2592   | 58.2242   | 15.5454   | 24.2471   | 33.0472   | 28.3275   |
| CTBP1       | 49.6651   | 62.6546   | 58.5218   | 67.9565   | 59.3976   | 58.706    |
| LOC10050751 | 0         | 0         | 0         | 0         | 0         | 0         |
| NOS1AP      | 0.762676  | 0.319836  | 0.56343   | 0.408095  | 0.429228  | 0.476364  |
| OR11H4      | 0         | 0.107286  | 0.0918589 | 0         | 0         | 0.0756171 |
| MYEOV2      | 142.887   | 209.87    | 135.026   | 186.05    | 137.238   | 156.182   |
| SOS1-IT1    | 1.83709   | 0.649694  | 0.927123  | 0.919997  | 1.17005   | 0.686876  |
| EGR2        | 31.9831   | 30.5263   | 55.5055   | 29.5292   | 44.5302   | 45.658    |
| NTS         | 0.54045   | 2.38916   | 1.43193   | 0.592053  | 0.573693  | 0.336786  |
| PPAP2A      | 43.765    | 38.2325   | 45.3554   | 41.2104   | 39.8591   | 34.7483   |
| INHBA       | 1.22382   | 0.208081  | 1.60345   | 0.928156  | 0.839414  | 0.791963  |
| DHRS7B      | 35.3859   | 38.7383   | 29.9978   | 30.9121   | 28.3111   | 30.8218   |
| IFNA16      | 0         | 0         | 0         | 0         | 0         | 0         |
| CBLB        | 4.44042   | 4.42482   | 4.45714   | 2.99466   | 4.96876   | 4.15827   |
| THAP4       | 41.7303   | 59.6083   | 43.4601   | 69.7174   | 48.9141   | 46.8484   |
| APITD1      | 8.9425    | 8.76599   | 4.61264   | 5.27618   | 6.02919   | 6.36104   |
| SLC22A13    | 0         | 0.0347851 | 0.0595666 | 0         | 0.0501162 | 0.0490345 |
| ZNF296      | 5.51736   | 7.85255   | 6.06127   | 7.13927   | 6.72809   | 8.59546   |
| NSA2        | 73.4524   | 77.4167   | 72.5678   | 63.3205   | 50.6808   | 47.2594   |
| JAM3        | 11.7132   | 11.9132   | 10.923    | 11.2088   | 11.0744   | 7.66498   |
| ACAD11      | 17.5806   | 20.6929   | 20.5301   | 16.7794   | 20.6744   | 20.0968   |
| LOC10050615 | 0         | 0.107711  | 0         | 0         | 0.232774  | 0.379583  |
| ALOX15B     | 986.892   | 849.945   | 421.541   | 445.031   | 275.014   | 505.833   |
| C8orf48     | 1.49868   | 1.59005   | 1.13451   | 1.12579   | 0.71589   | 1.35418   |
| LINC00422   | 0         | 0         | 0         | 0         | 0.130761  | 0.127939  |
| IMP3        | 63.1426   | 78.5237   | 53.527    | 69.7777   | 60.4673   | 60.6776   |
| LOC440337   | 0         | 0         | 0         | 0         | 0         | 0         |
| YTHDC2      | 12.1909   | 9.94825   | 12.4499   | 9.37092   | 12.5581   | 9.49367   |
| LOC728752   | 1.07855   | 1.13413   | 0.844724  | 0.724398  | 0.979985  | 1.63001   |
| LOC401242   | 0.717994  | 0         | 0         | 0         | 0         | 0         |
| LOC10050710 | 0         | 0         | 0         | 0         | 0         | 0         |
| SYT9        | 0.0986027 | 0.0217946 | 0.335893  | 0.0462932 | 0.0785008 | 0         |
| LOC10050660 | 0.0501661 | 0         | 0.0379761 | 0.0471052 | 0.0639022 | 0.156307  |
| DDX58       | 10.1596   | 8.4076    | 7.2448    | 4.55998   | 7.32484   | 5.4067    |
| PTPLAD1     | 34.0636   | 18.9423   | 21.5858   | 21.6805   | 19.2214   | 17.0392   |
| FAM43A      | 10.2341   | 8.71425   | 11.4183   | 12.1229   | 14.1795   | 20.6433   |
| TPM2        | 169.879   | 223.035   | 112.952   | 172.268   | 145.304   | 149.545   |

|             |           |           |           |          |          |          |
|-------------|-----------|-----------|-----------|----------|----------|----------|
| LY6K        | 3.70191   | 5.41671   | 3.63575   | 5.80386  | 3.79348  | 4.3476   |
| ANKS1A      | 13.6994   | 12.6972   | 13.9792   | 12.5106  | 14.1941  | 14.2626  |
| SNRNP48     | 5.45496   | 5.97714   | 5.9118    | 5.27535  | 7.91367  | 6.81313  |
| CLIC5       | 3.16762   | 2.07821   | 1.47438   | 0.898857 | 1.25116  | 1.02539  |
| MRPS33      | 81.4837   | 73.294    | 52.5441   | 61.9966  | 48.7903  | 65.5428  |
| SOX5        | 1.02998   | 0.907977  | 1.70138   | 1.05448  | 1.53564  | 1.01934  |
| PALM2-AKAP  | 1.5577    | 0.400969  | 2.33997   | 8.39E-18 | 0.229151 | 1.52E-12 |
| GAGE12D     | 0         | 0.0314611 | 0         | 0        | 0        | 0        |
| C7orf43     | 18.8614   | 26.6817   | 18.7135   | 24.7194  | 31.5914  | 26.3331  |
| LOC10050711 | 0.637249  | 0.633842  | 0.964802  | 0.448775 | 0.659534 | 0.694936 |
| MIR1539     | 0         | 0         | 0         | 0        | 0        | 0        |
| ATP9A       | 14.9466   | 12.7939   | 17.0811   | 11.9994  | 11.1714  | 10.8209  |
| ATPBD4      | 5.47231   | 4.6933    | 4.99061   | 3.7194   | 4.27046  | 3.54264  |
| MIR4482     | 0         | 0         | 0         | 0        | 0        | 0        |
| LOC219347   | 2.13222   | 3.1653    | 5.93747   | 6.72137  | 7.65412  | 6.92019  |
| ILVBL       | 47.9606   | 52.2386   | 40.1068   | 49.1832  | 39.7524  | 46.9099  |
| AMIGO3      | 2.37602   | 3.69847   | 3.85066   | 3.9279   | 4.39071  | 3.37836  |
| FAM75D3     | 0         | 0         | 0         | 0        | 0        | 0        |
| PTPRT       | 1.14402   | 0.518934  | 0.354361  | 0.837075 | 0.529935 | 0.953608 |
| PTPN1       | 17.4231   | 17.193    | 18.8141   | 18.5378  | 21.1524  | 17.1013  |
| LIPF        | 0.0815558 | 0.384572  | 0.0617382 | 0.344611 | 0        | 0        |
| PNMAL1      | 2.17381   | 1.78138   | 1.32473   | 1.16336  | 9.35252  | 7.64754  |
| RNF144B     | 14.2013   | 10.9652   | 12.5036   | 10.4594  | 14.2012  | 13.3699  |
| ZCWPW1      | 3.34072   | 4.68301   | 3.77695   | 2.50587  | 4.13122  | 3.4806   |
| DUSP5P      | 0.450949  | 0.362711  | 0.281394  | 0.46278  | 0.62642  | 0.204491 |
| ARAP1       | 24.7337   | 29.7645   | 24.7795   | 24.2161  | 28.9824  | 24.5943  |
| FUT6        | 0.803573  | 0.158955  | 0.176026  | 0.176396 | 0.119648 | 0.208351 |
| IL18R1      | 4.21293   | 3.92215   | 4.96334   | 2.77697  | 7.23231  | 3.72065  |
| NFATC3      | 20.5451   | 20.4064   | 18.8361   | 19.5786  | 21.4365  | 18.3319  |
| GEMIN5      | 3.91204   | 3.50594   | 4.77868   | 3.75682  | 4.00921  | 2.80349  |
| ADAT1       | 4.23943   | 3.13584   | 3.91282   | 2.99218  | 3.81185  | 3.29793  |
| TAPBPL      | 15.733    | 20.8593   | 15.2674   | 12.5607  | 16.5551  | 13.4789  |
| MINK1       | 50.5467   | 61.2873   | 62.3751   | 62.5435  | 75.5513  | 64.2061  |
| SNORA79     | 0         | 0         | 0         | 0        | 0        | 0        |
| LOC10050721 | 0.936359  | 1.22002   | 0.783442  | 0.879226 | 0.564984 | 0.737051 |
| TTC35       | 43.5488   | 32.046    | 35.6968   | 25.7372  | 33.3067  | 31.1831  |
| CPPED1      | 5.54133   | 4.51396   | 4.30087   | 4.38475  | 3.72758  | 3.10394  |
| LOC10050681 | 0.944352  | 1.77424   | 0.71488   | 0.997573 | 0.977378 | 1.21374  |
| LOC550112   | 7.77707   | 6.48308   | 5.31537   | 6.55142  | 6.84965  | 6.6741   |
| ARL2        | 69.5757   | 95.0106   | 78.007    | 89.7993  | 69.643   | 69.0237  |
| CEACAM21    | 0.0808038 | 0.0714416 | 0.558059  | 0.303575 | 0.521326 | 0.362694 |
| TSHZ3       | 3.20136   | 2.36159   | 3.01816   | 2.23147  | 3.35241  | 2.66809  |
| HNF1B       | 0         | 0         | 0.0274639 | 0        | 0        | 0        |

|             |           |           |           |           |           |           |
|-------------|-----------|-----------|-----------|-----------|-----------|-----------|
| TP73        | 7.53181   | 10.5105   | 8.75075   | 13.501    | 9.80707   | 8.63834   |
| MIR18A      | 0         | 0         | 0         | 0         | 0         | 0         |
| FGFR1OP2    | 22.1421   | 19.4417   | 21.2398   | 16.6372   | 20.3734   | 19.0682   |
| RBMS1       | 20.6253   | 16.3678   | 22.1821   | 16.3167   | 20.5291   | 17.3116   |
| MIR623      | 0         | 0         | 0         | 0         | 0         | 0         |
| 11-Mar      | 0         | 0.31058   | 0.159553  | 0.395816  | 0.0894929 | 0.131342  |
| SLC22A25    | 0.193664  | 0.285376  | 0.0977367 | 0.0606159 | 0         | 0.120683  |
| NAT2        | 1.25553   | 0.51803   | 0         | 0         | 0.0533104 | 0.104319  |
| CEP112      | 3.11161   | 2.92753   | 3.3946    | 1.44127   | 2.90955   | 2.47564   |
| PGK1        | 91.2342   | 64.1501   | 75.8245   | 67.5896   | 75.0356   | 67.5274   |
| FAM154B     | 0.316407  | 0.41962   | 0.646709  | 0.713042  | 0.624716  | 0.650665  |
| SNORA10     | 246.441   | 130.733   | 261.18    | 277.685   | 219.744   | 245.715   |
| OTUD7A      | 0.653162  | 0.981078  | 0.741396  | 0.704841  | 0.956177  | 0.772835  |
| RHBDD2      | 41.8705   | 54.7493   | 44.4505   | 54.7007   | 47.7161   | 40.7101   |
| NOX5        | 0.835213  | 0.673349  | 0.875555  | 0.505223  | 0.568554  | 0.544381  |
| RARS        | 37.9091   | 39.4066   | 35.2278   | 36.451    | 38.094    | 35.2409   |
| PLCZ1       | 0.1488    | 0.0438531 | 0.413021  | 0.186294  | 0.284314  | 0.21636   |
| C20orf165   | 1.09754   | 1.45556   | 1.38474   | 1.71762   | 2.79612   | 1.25389   |
| MAGI2       | 1.48718   | 1.77908   | 1.87027   | 1.58975   | 1.54715   | 1.30753   |
| RPL9        | 43.1224   | 53.0126   | 159.458   | 202.892   | 158.033   | 147.573   |
| ALOX5AP     | 11.7455   | 8.733     | 6.66925   | 4.1393    | 11.4753   | 7.06984   |
| LITAF       | 115.537   | 93.8276   | 84.4933   | 92.9282   | 81.8641   | 77.7078   |
| EVC2        | 2.2437    | 1.7893    | 2.09807   | 2.00355   | 2.08739   | 2.11086   |
| CPVL        | 12.6253   | 11.6045   | 13.7803   | 6.80813   | 15.4848   | 7.04967   |
| GPR97       | 0.0751621 | 0.232587  | 0.341389  | 0.35288   | 0.670196  | 0.234189  |
| LOC503519   | 0         | 0         | 0         | 0         | 0         | 0         |
| GPR50       | 0         | 0         | 0         | 0         | 0.0325528 | 0.0318501 |
| SLC10A5     | 0.837022  | 0.296017  | 0.253452  | 0.785951  | 0.479794  | 0.521597  |
| LOC10065275 | 0.814958  | 0.633066  | 1.04493   | 0.374768  | 0.308078  | 0.301428  |
| LOC10028754 | 0.14876   | 0.244765  | 0.728241  | 0.695308  | 0.0955957 | 0.197876  |
| OLR1        | 0.432263  | 0.150978  | 0.172362  | 0.18039   | 0.10876   | 0.0266019 |
| MIR661      | 0         | 0         | 0         | 0         | 0         | 0         |
| CXorf57     | 1.45111   | 2.03954   | 2.58885   | 2.06553   | 2.24835   | 1.81013   |
| TMEM55B     | 27.2593   | 33.469    | 28.7828   | 35.8507   | 35.6695   | 27.3016   |
| EXO1        | 0.756545  | 0.795126  | 0.563763  | 0.786374  | 0.828985  | 0.964912  |
| RIPK4       | 11.4798   | 12.6258   | 11.0777   | 13.8828   | 15.2176   | 15.6438   |
| OBSL1       | 18.7453   | 35.6231   | 26.7606   | 34.7863   | 39.4629   | 34.0633   |
| DUSP21      | 0         | 0         | 0         | 0         | 0         | 0         |
| GLO1        | 72.8173   | 56.6335   | 78.072    | 63.7404   | 73.4261   | 69.9479   |
| HRK         | 0         | 0         | 0         | 0         | 0         | 0         |
| SPOPL       | 8.91113   | 6.54831   | 8.25187   | 6.70335   | 8.1779    | 8.00138   |
| C9orf174    | 0.916151  | 0.704087  | 0.773954  | 0.650898  | 1.17754   | 0.844682  |
| AKIRIN2     | 17.0323   | 19.3343   | 16.9609   | 16.8507   | 16.8708   | 18.5825   |

|             |           |           |           |           |           |            |
|-------------|-----------|-----------|-----------|-----------|-----------|------------|
| FUT3        | 6.04783   | 4.67963   | 2.92909   | 3.44416   | 3.18556   | 4.31945    |
| RPL23AP32   | 0.227586  | 3.62192   | 0.861421  | 1.9233    | 1.88436   | 1.56004    |
| HVCN1       | 4.27699   | 4.94558   | 3.18481   | 3.56599   | 4.49167   | 3.17938    |
| MIR873      | 0         | 0         | 0         | 0         | 0         | 0          |
| SPDYE2      | 1.95073   | 1.91642   | 1.83778   | 1.62833   | 1.12382   | 0.958936   |
| BACE2       | 9.70139   | 12.6854   | 11.4816   | 13.813    | 12.8627   | 9.60319    |
| LOC10012914 | 2.75124   | 3.97935   | 1.69773   | 5.85346   | 5.41293   | 4.12291    |
| HAPLN2      | 0.0592875 | 0.471764  | 0.0897619 | 0.50103   | 0.490887  | 0.184727   |
| MIR1237     | 0         | 0         | 0         | 0         | 0         | 0          |
| TTC8        | 16.2927   | 15.5385   | 15.2771   | 14.7891   | 14.9042   | 14.4016    |
| LOC10050724 | 0.27434   | 0.181916  | 0.259596  | 0.257601  | 0.131047  | 0.213697   |
| SPN         | 1.53893   | 1.43416   | 1.61621   | 0.690164  | 2.41048   | 1.0281     |
| FLYWCH1     | 10.4317   | 15.4034   | 19.3221   | 20.2892   | 20.1599   | 15.8406    |
| LOC10050559 | 0.0996351 | 0.113784  | 0.26333   | 0.0935558 | 0.654429  | 0.444827   |
| LOC10012879 | 1.46244   | 2.88315   | 0.511806  | 1.05651   | 0.787937  | 0.421396   |
| LOC284648   | 0.0723491 | 0.383799  | 0.164306  | 0.135869  | 0.184318  | 0.0450849  |
| CDKN2C      | 35.8958   | 29.2488   | 35.0698   | 21.402    | 19.8731   | 16.3609    |
| C19orf54    | 5.85681   | 7.71949   | 5.12279   | 5.70491   | 7.39018   | 6.21044    |
| USP17       | 0         | 0         | 0         | 0         | 0.0426365 | 0.00834323 |
| LOC10050619 | 0.399395  | 0.211872  | 0.241876  | 0.225016  | 0.356128  | 0.149332   |
| LOC10050663 | 2.21947   | 1.77835   | 2.41521   | 1.75841   | 3.18073   | 2.42039    |
| IPMK        | 3.80438   | 3.0741    | 3.81237   | 2.34246   | 3.38628   | 3.20631    |
| PCSK1       | 0.0957382 | 0.0211614 | 0.147969  | 0.0349991 | 0.0952754 | 0.0746108  |
| CRYM        | 1.26837   | 2.56486   | 2.19929   | 1.45341   | 3.34595   | 2.36359    |
| LOC730811   | 0         | 0         | 0         | 0         | 0         | 0          |
| FCRL4       | 0         | 0         | 0         | 0         | 0         | 0          |
| MPG         | 19.4989   | 34.4196   | 42.3057   | 45.9425   | 41.5868   | 37.1236    |
| COG7        | 9.21954   | 11.2381   | 9.36552   | 11.6488   | 10.7941   | 10.9413    |
| LOC10028729 | 0         | 0         | 0         | 0         | 0         | 0          |
| C4orf50     | 0         | 0         | 0         | 0         | 0         | 0          |
| ZNF12       | 10.3108   | 8.15089   | 10.9183   | 7.5213    | 11.3833   | 8.91437    |
| ZNF788      | 1.27247   | 1.28575   | 3.69579   | 2.73103   | 1.76978   | 2.34651    |
| ZFAT-AS1    | 0         | 0         | 2.86E-128 | 0         | 1.60E-188 | 0          |
| NXF3        | 0.05488   | 0.0970429 | 0         | 0.0515315 | 0         | 0          |
| ATG5        | 12.702    | 9.02196   | 10.7684   | 8.86659   | 8.03178   | 8.88342    |
| KCNQ4       | 1.66064   | 1.79703   | 1.40725   | 2.53743   | 1.65797   | 2.25526    |
| EXOC2       | 8.18566   | 6.85126   | 7.73335   | 5.90301   | 7.57695   | 6.46121    |
| MRPS9       | 23.4507   | 25.6546   | 24.8869   | 22.2289   | 23.097    | 23.3076    |
| RBP4        | 129.545   | 156.559   | 222.434   | 92.8982   | 68.8527   | 51.9937    |
| MIR2116     | 0         | 0         | 0         | 0         | 0         | 0          |
| WDR5        | 20.3704   | 27.1707   | 22.9226   | 27.9131   | 26.3436   | 23.4209    |
| C22orf43    | 0.170026  | 0.450979  | 0.450488  | 0.478956  | 0.0541453 | 0.105953   |
| OR3A2       | 0         | 0.0937281 | 0         | 0         | 0.210997  | 0.0330307  |

|             |          |           |          |          |           |           |
|-------------|----------|-----------|----------|----------|-----------|-----------|
| TTC21A      | 1.89443  | 1.31949   | 1.34447  | 1.33465  | 1.74956   | 1.44614   |
| TMEM150A    | 12.5954  | 16.263    | 10.4509  | 11.7257  | 11.9389   | 10.7758   |
| LOC389906   | 2.49766  | 2.89842   | 6.49906  | 6.79723  | 7.6304    | 7.28808   |
| TAF3        | 3.04555  | 2.69268   | 2.87509  | 2.456    | 2.37331   | 2.21045   |
| GAB2        | 6.31569  | 5.89131   | 8.10397  | 5.17422  | 7.33072   | 6.18882   |
| RPL41       | 611.202  | 830.149   | 641.202  | 977.473  | 668.551   | 637.076   |
| LOC10050728 | 3.07315  | 1.75811   | 1.23162  | 0.678973 | 1.38163   | 1.01385   |
| ANAPC7      | 34.6939  | 37.2697   | 27.7833  | 39.0691  | 29.8123   | 28.7859   |
| ADRB2       | 4.69609  | 5.7592    | 6.30719  | 5.5475   | 6.01409   | 4.49974   |
| CXCR1       | 0.609379 | 0.682947  | 0.399796 | 0.152586 | 0.543364  | 0.329107  |
| SOX12       | 4.4097   | 6.81824   | 5.22083  | 8.41864  | 7.02806   | 5.54797   |
| YPEL4       | 1.40794  | 1.73191   | 1.66823  | 1.43699  | 2.37826   | 2.36507   |
| CHMP1A      | 49.7985  | 68.5686   | 50.921   | 64.7048  | 58.2516   | 57.0801   |
| NEK7        | 18.27    | 16.0282   | 23.33    | 11.96    | 16.5846   | 13.6591   |
| HAS3        | 11.4739  | 17.5468   | 11.5014  | 11.4577  | 8.94768   | 7.63159   |
| TMEM178     | 3.16809  | 5.51969   | 4.69734  | 5.32381  | 4.6023    | 3.08141   |
| KANK2       | 27.7367  | 27.3441   | 30.3168  | 25.0834  | 25.2894   | 18.984    |
| DNAJC16     | 6.20967  | 5.56041   | 5.5303   | 5.44306  | 5.60372   | 5.51245   |
| PRSS38      | 0        | 0         | 0        | 0        | 0         | 0         |
| SRD5A2      | 0.248232 | 0.475521  | 0.313189 | 0.116543 | 0.289851  | 0.232032  |
| ZBED2       | 1.82456  | 3.26768   | 3.29363  | 5.4472   | 3.81398   | 3.87742   |
| ADHFE1      | 11.0375  | 16.2644   | 15.2975  | 14.5405  | 14.1646   | 11.7372   |
| ZNF613      | 4.6916   | 2.54781   | 3.1857   | 3.609    | 3.67104   | 2.62585   |
| MAD2L1BP    | 15.9661  | 18.1692   | 16.3313  | 15.7774  | 15.5214   | 13.8708   |
| CTRB2       | 0        | 0         | 0        | 0        | 0         | 0         |
| OR51E2      | 0.143599 | 0.0952207 | 0.108705 | 0.168546 | 0.137188  | 0.0223712 |
| AKIRIN1     | 27.6585  | 23.7338   | 24.0876  | 24.3234  | 19.6345   | 18.8086   |
| CTSD        | 407.659  | 428.185   | 333.893  | 408.074  | 377.435   | 442.034   |
| ZC3HAV1L    | 2.2193   | 2.12126   | 4.99466  | 2.3655   | 4.31686   | 3.10235   |
| MIR1302-6   | 0        | 0         | 0        | 0        | 0         | 0         |
| RP9         | 11.0963  | 16.0211   | 10.712   | 12.8091  | 14.9127   | 14.5907   |
| OR4A15      | 0        | 0         | 0        | 0        | 0         | 0         |
| TGFBI       | 42.3692  | 73.7194   | 62.1049  | 69.5061  | 77.9142   | 53.659    |
| GPRC5A      | 4.30512  | 1.85674   | 2.06668  | 4.73262  | 1.71651   | 2.02844   |
| DLK2        | 9.26655  | 16.607    | 11.761   | 15.5367  | 12.8009   | 11.1653   |
| ARHGEF38    | 2.04228  | 0.451983  | 0.674042 | 0.893011 | 0.773744  | 0.658309  |
| CCDC28B     | 4.68063  | 5.74949   | 4.44179  | 4.3705   | 6.97271   | 5.17698   |
| PCDHA9      | 7.04E-55 | 3.75E-19  | 0.018247 | 2.49E-34 | 0.0228352 | 3.31E-32  |
| LOC10050550 | 7.69E-08 | 1.24E-08  | 1.89E-07 | 1.41E-08 | 5.98E-08  | 4.62E-08  |
| GKAP1       | 4.43929  | 4.47725   | 3.66177  | 2.35229  | 1.67553   | 3.00428   |
| MRC1        | 1.60114  | 0.938337  | 1.6772   | 0.472012 | 1.36368   | 0.580094  |
| TIMM9       | 28       | 34.1094   | 26.212   | 31.6101  | 24.3218   | 23.1092   |
| SPANXD      | 0        | 0         | 0        | 0        | 0         | 0         |

|             |           |            |           |            |          |           |
|-------------|-----------|------------|-----------|------------|----------|-----------|
| HSPH1       | 27.4421   | 20.0574    | 16.8497   | 15.3302    | 16.3718  | 17.6003   |
| CLIC2       | 5.89936   | 6.10716    | 8.4512    | 3.82149    | 6.49211  | 4.09504   |
| TMPRSS11E   | 20.891    | 13.6724    | 23.0857   | 15.7381    | 16.1808  | 22.6849   |
| ZMYND17     | 3.55166   | 3.39875    | 3.32124   | 3.45265    | 4.33785  | 3.56722   |
| CRH         | 0         | 0.066904   | 0         | 0.0710544  | 0        | 0         |
| ROCK1       | 12.9052   | 8.81527    | 11.4518   | 8.45553    | 9.82676  | 8.20283   |
| SNORD14B    | 0         | 0          | 0         | 0          | 0        | 0         |
| SHISA4      | 7.72053   | 7.54691    | 6.19817   | 6.4977     | 7.22659  | 6.17892   |
| IL20        | 0.0905168 | 0.320117   | 0.205565  | 0.339976   | 0        | 0.0564063 |
| RPS27       | 1096.38   | 1331.26    | 955.219   | 1447.4     | 976.836  | 859.135   |
| MYO9A       | 1.65494   | 0.943376   | 2.45615   | 1.11436    | 1.56719  | 1.9201    |
| OBFC2A      | 9.64773   | 7.84437    | 8.32144   | 5.35714    | 10.0889  | 9.64163   |
| SRPK2       | 16.1156   | 15.0793    | 16.5028   | 15.5407    | 15.8795  | 13.5679   |
| C17orf80    | 7.84336   | 7.01628    | 7.13332   | 5.77469    | 10.2431  | 8.82164   |
| MIR3663     | 0         | 0          | 0         | 0          | 0        | 0         |
| CIB3        | 0         | 0          | 0         | 0          | 0        | 0         |
| C6orf154    | 0.580838  | 0.813105   | 0.476339  | 0.999895   | 0.308282 | 0.392116  |
| FAM197Y3    | 0         | 0          | 0         | 0          | 0        | 0         |
| IL9         | 0         | 0          | 0         | 0          | 0        | 0         |
| HGS         | 41.0282   | 56.3351    | 44.9666   | 55.9962    | 59.8074  | 54.2205   |
| CXorf30     | 0         | 0.0308055  | 0.0791277 | 0.0981494  | 0        | 0.195411  |
| N4BP1       | 13.3234   | 14.183     | 15.0122   | 13.7803    | 16.7327  | 14.6025   |
| CDK19       | 5.57618   | 4.24154    | 5.9309    | 5.04581    | 5.13876  | 4.94048   |
| RGS18       | 0.764822  | 0.591681   | 0.434231  | 0.359078   | 1.37002  | 0.387241  |
| TMEM154     | 16.971    | 14.8144    | 23.7161   | 14.6942    | 25.1621  | 24.1783   |
| DDX47       | 35.6456   | 32.5407    | 32.0842   | 31.1455    | 31.9454  | 27.8467   |
| SPINK6      | 1.2572    | 0.208413   | 0.713782  | 0          | 0.800719 | 0.146894  |
| OR6B1       | 0         | 0          | 0         | 0          | 0        | 0         |
| KRT77       | 88.7118   | 75.0278    | 172.646   | 198.028    | 144.99   | 150.307   |
| LOC1000936: | 45.1992   | 41.4496    | 46.5881   | 46.9981    | 49.5318  | 50.8471   |
| TCF12       | 25.8503   | 20.3574    | 23.1962   | 18.0298    | 23.6006  | 27.6978   |
| MIR4265     | 0         | 0          | 0         | 0          | 0        | 0         |
| PAGE2       | 0         | 0.922002   | 0.592069  | 0          | 0.442788 | 0         |
| FTSJ3       | 20.4817   | 21.8406    | 18.9721   | 18.091     | 20.3571  | 17.6287   |
| IL10        | 0.456676  | 0.288403   | 0.14816   | 0          | 0.415513 | 0         |
| LOC1005063: | 0         | 0          | 0.14723   | 0          | 0        | 0.121198  |
| C1D         | 16.6413   | 15.6471    | 17.7809   | 13.0305    | 13.3039  | 12.5124   |
| CSNK2A1     | 19.9623   | 14.2198    | 18.8985   | 18.8709    | 18.2723  | 17.4118   |
| LOC728373   | 0         | 0.00739837 | 0         | 0.00628586 | 0        | 0         |
| MGC16025    | 0         | 0.0426607  | 0.073053  | 0.0906144  | 0.061463 | 0.0601363 |
| C1orf68     | 77.7123   | 48.237     | 151.403   | 166.183    | 221.627  | 164.685   |
| MYLPF       | 0.419004  | 1.48183    | 0         | 0.983596   | 0.667166 | 1.04442   |
| MIR101-2    | 0         | 0          | 0         | 0          | 0        | 0         |



|             |          |           |           |           |           |           |
|-------------|----------|-----------|-----------|-----------|-----------|-----------|
| LDLRAD3     | 6.96833  | 6.04248   | 6.49238   | 5.00173   | 6.29452   | 5.26094   |
| SPSB1       | 11.1238  | 11.7177   | 13.6898   | 16.6226   | 14.2709   | 11.4277   |
| EIF2B4      | 26.6231  | 34.7041   | 28.9272   | 32.0376   | 31.8931   | 37.8973   |
| MIR1587     | 0        | 0         | 0         | 0         | 0         | 0         |
| FAM25B      | 15.3157  | 9.35261   | 16.38     | 14.9849   | 25.25     | 33.1624   |
| MIR1908     | 0        | 0         | 0         | 0         | 0         | 0         |
| ZC3H18      | 11.5596  | 12.2179   | 11.4753   | 11.471    | 12.4157   | 13.0645   |
| GRIN2D      | 0.416143 | 0.234135  | 0.486853  | 0.177614  | 0.301186  | 0.341834  |
| PDZD8       | 3.56637  | 2.50001   | 3.72181   | 2.84645   | 2.54726   | 3.17487   |
| WLS         | 26.9624  | 32.4803   | 31.2145   | 34.2056   | 29.0731   | 32.0972   |
| KPTN        | 5.69907  | 6.92137   | 5.30981   | 7.64476   | 6.50167   | 7.29797   |
| LOC727677   | 0        | 0         | 0.0583362 | 0.0723598 | 0         | 0         |
| LOC1005064: | 0        | 0         | 0         | 0.0761589 | 0.051658  | 0         |
| LOC285972   | 0.100936 | 0.223103  | 0.0382045 | 0.0473886 | 0.514293  | 0.251596  |
| LRRC59      | 36.5209  | 28.6507   | 24.9085   | 28.9925   | 20.8173   | 25.4233   |
| PSD2        | 0.128897 | 0.303901  | 0.146364  | 0.181549  | 0.273651  | 0.174034  |
| UBFD1       | 10.937   | 10.8288   | 11.2416   | 10.435    | 11.3148   | 10.7901   |
| FICD        | 1.60601  | 1.07915   | 1.65343   | 0.965129  | 1.26836   | 1.56124   |
| DUSP27      | 0        | 0         | 0.0548682 | 0.045372  | 0.0461633 | 0.105389  |
| GNRHR2      | 1.64498  | 1.56196   | 1.63367   | 1.72273   | 1.86133   | 1.58068   |
| EFTUD1      | 8.04205  | 5.16409   | 5.57918   | 5.01391   | 5.65079   | 6.42975   |
| C1QTNF1     | 27.2111  | 36.7093   | 25.8731   | 18.1193   | 26.5501   | 14.2853   |
| LOC10050714 | 0.623881 | 0.551596  | 1.1807    | 0.292907  | 0.927157  | 0.712756  |
| TRIP6       | 41.774   | 70.3125   | 55.8403   | 73.5471   | 58.6022   | 52.2257   |
| LOC10050590 | 1.4512   | 0.466568  | 0.0998698 | 0.123878  | 0.252076  | 1.89087   |
| MAGEA12     | 0        | 0         | 0         | 0         | 0         | 0         |
| LOC1002886: | 0.110417 | 0.146435  | 0.167172  | 0.10368   | 0.105488  | 0.068807  |
| LOC1005059: | 0        | 0         | 0         | 0         | 0         | 0         |
| LINC00221   | 0        | 0         | 0         | 0         | 0         | 0         |
| NUMBL       | 7.16951  | 8.2161    | 9.79012   | 9.63202   | 11.0645   | 9.07294   |
| MAL         | 12.3298  | 19.1948   | 18.9607   | 33.2105   | 14.2008   | 15.7891   |
| MTRNR2L1    | 0        | 0         | 0         | 0         | 0         | 0         |
| KCNG2       | 0.233329 | 0.0687648 | 0.176631  | 0         | 0.148608  | 0.0484669 |
| EIF2AK3     | 8.45056  | 4.85828   | 6.85406   | 5.94143   | 6.07155   | 6.03129   |
| PDE5A       | 6.77842  | 3.91898   | 4.44535   | 3.85138   | 3.83779   | 3.28435   |
| FLAD1       | 35.6089  | 42.8278   | 31.2364   | 42.4451   | 29.0184   | 33.0561   |
| LOC10050698 | 1.04486  | 0         | 0.703008  | 1.84536   | 0.882092  | 0         |
| GOLGA7      | 47.2522  | 37.5335   | 49.631    | 42.1071   | 43.4501   | 42.8941   |
| CALML3      | 1618.05  | 2162.9    | 1064.34   | 1719.64   | 1227.6    | 2849.92   |
| CRYBA4      | 0        | 0         | 0         | 0         | 0         | 0.192816  |
| ZBTB22      | 12.4863  | 14.3279   | 15.9173   | 16.6422   | 16.8214   | 16.5787   |
| H3F3AP5     | 0        | 0         | 0         | 0         | 0         | 0         |
| LOC646513   | 0        | 0.501309  | 0         | 0         | 0         | 0.706666  |

|             |           |           |           |           |           |          |
|-------------|-----------|-----------|-----------|-----------|-----------|----------|
| APTX        | 25.4822   | 28.4543   | 18.8684   | 20.3006   | 24.4955   | 27.644   |
| DMRTA2      | 0.0321701 | 0         | 0         | 0         | 0.0204893 | 0        |
| MIR3692     | 0         | 0         | 0         | 0         | 0         | 0        |
| MGC4473     | 0         | 0         | 0         | 0         | 0         | 0        |
| SCAF4       | 11.7965   | 11.5907   | 11.2185   | 10.5813   | 13.4134   | 11.0644  |
| ATCAY       | 0         | 0         | 0         | 0         | 0         | 0        |
| FAM127B     | 61.9042   | 79.712    | 55.6707   | 75.4879   | 59.4632   | 65.2444  |
| HIF1A       | 46.7103   | 20.0501   | 27.2375   | 29.8494   | 27.0502   | 33.5654  |
| LCORL       | 2.10393   | 2.32719   | 2.17661   | 1.40628   | 2.1368    | 2.1205   |
| DCBLD1      | 3.28672   | 1.65152   | 3.58988   | 1.51502   | 1.77766   | 1.60048  |
| TM7SF2      | 114.855   | 136.091   | 112.566   | 127.749   | 101.364   | 155.333  |
| PMS2P1      | 3.76614   | 3.4584    | 3.93262   | 2.88396   | 2.85507   | 2.72155  |
| HBQ1        | 0         | 0         | 0.159318  | 0         | 0.268084  | 0.131148 |
| PLCXD3      | 0.38018   | 0.325288  | 0.324933  | 0.0690934 | 0.289004  | 0.145204 |
| ZNF79       | 3.10643   | 3.26965   | 2.83683   | 2.63909   | 3.48593   | 2.70397  |
| TRIM17      | 3.337     | 4.45563   | 1.97294   | 1.27582   | 5.10481   | 3.18965  |
| LOC389300   | 0         | 0         | 0         | 0         | 0         | 0        |
| PSEN2       | 7.08968   | 6.26758   | 5.70076   | 6.28172   | 6.15108   | 6.73826  |
| KCND3       | 1.86239   | 1.64661   | 1.83248   | 1.43228   | 1.2381    | 0.859121 |
| RBBP4       | 16.5143   | 14.6237   | 15.0839   | 15.892    | 16.2475   | 14.2977  |
| KCNJ9       | 0.0655748 | 0.0579771 | 0.0744607 | 0.0923605 | 0.0835298 | 0        |
| MIR30B      | 0         | 0         | 0         | 0         | 0         | 0        |
| CASS4       | 0.549991  | 0.495133  | 0.539799  | 0.309312  | 0.705874  | 0.473936 |
| FLJ40852    | 0.495768  | 1.23666   | 1.34885   | 1.48119   | 1.7749    | 1.70423  |
| PPARA       | 12.9752   | 10.1498   | 11.377    | 8.86884   | 6.99818   | 7.02994  |
| C7orf69     | 0         | 0         | 0         | 0         | 0         | 0        |
| PFDN2       | 51.6825   | 56.7658   | 44.2111   | 55.2148   | 45.6927   | 41.6116  |
| LOC10050673 | 177.701   | 171.556   | 123.91    | 148.728   | 136.725   | 127.306  |
| MIR2276     | 0         | 0         | 0         | 0         | 0         | 0        |
| SCFD1       | 32.063    | 25.092    | 27.1799   | 22.7847   | 27.7728   | 23.8702  |
| NEU1        | 18.0436   | 18.8096   | 17.1209   | 17.3627   | 14.4679   | 15.7664  |
| OR2J2       | 0         | 0         | 0         | 0         | 0         | 0        |
| GLRA3       | 0         | 0         | 0.0206813 | 0         | 0.0174002 | 0        |
| PDZD9       | 0         | 0.502771  | 0.363215  | 0.40047   | 0.271635  | 0        |
| KRTAP10-4   | 1.76537   | 0.209652  | 0         | 21.1154   | 0.354494  | 74.8439  |
| FAM129B     | 110.647   | 111.877   | 101.281   | 112.67    | 117.765   | 127.473  |
| MAGEF1      | 19.2422   | 17.2908   | 20.6121   | 19.4853   | 20.3457   | 19.5539  |
| PSMB1       | 201.644   | 210.801   | 176.81    | 195.754   | 170.429   | 175.673  |
| KIAA1377    | 2.37844   | 2.533     | 2.84396   | 2.1318    | 2.8059    | 2.33269  |
| IREB2       | 12.1639   | 9.87937   | 12.3987   | 8.2107    | 11.8168   | 10.7953  |
| LOC10050700 | 4.37724   | 1.93504   | 0.552266  | 1.82674   | 1.23906   | 0.454618 |
| DYRK1B      | 7.57244   | 12.02     | 11.1801   | 11.976    | 14.5313   | 13.0648  |
| TP53INP2    | 16.8768   | 14.9423   | 15.8492   | 24.092    | 19.4985   | 23.402   |

|             |           |          |           |           |          |          |
|-------------|-----------|----------|-----------|-----------|----------|----------|
| FAM7A2      | 1.00771   | 0.769008 | 1.09649   | 0.534893  | 0.954615 | 0.408109 |
| MIR4288     | 0         | 0        | 0         | 0         | 0        | 0        |
| MYOG        | 0.0603341 | 0        | 0         | 0         | 0        | 0        |
| LOC10050641 | 14.4108   | 16.5225  | 10.2013   | 15.3592   | 14.5773  | 15.7643  |
| SNORA14A    | 0         | 0        | 0         | 0         | 0        | 0        |
| CEL         | 1.10769   | 1.39172  | 1.06258   | 1.43784   | 1.65255  | 2.01447  |
| FAM113B     | 4.71199   | 8.28824  | 4.46814   | 4.89022   | 6.6024   | 3.55448  |
| TCOF1       | 10.775    | 12.9581  | 10.848    | 11.22     | 10.2236  | 10.9503  |
| EDARADD     | 42.6131   | 36.3037  | 31.2194   | 36.6927   | 32.4096  | 30.9836  |
| SNORA64     | 46.407    | 369.271  | 35.1303   | 305.028   | 177.341  | 173.513  |
| KRAS        | 9.27475   | 6.59769  | 10.5151   | 8.78236   | 8.96096  | 8.60212  |
| ADAL        | 3.75227   | 3.42985  | 3.27911   | 3.22635   | 4.84539  | 3.61709  |
| PNMAL2      | 2.57953   | 2.89608  | 3.42501   | 2.6336    | 3.4423   | 3.24042  |
| TRPV3       | 2.99395   | 1.83258  | 6.21091   | 3.62222   | 5.79394  | 8.32391  |
| DBNDD2      | 44.7589   | 52.1947  | 46.3216   | 55.0608   | 49.174   | 50.0154  |
| INTS7       | 4.96869   | 5.43352  | 5.10467   | 5.01668   | 4.63369  | 4.70737  |
| LOC283335   | 3.70691   | 5.38075  | 4.68613   | 3.05386   | 4.22803  | 3.06516  |
| GALK1       | 11.7515   | 15.5849  | 11.2114   | 13.6042   | 15.6357  | 14.7966  |
| LOC401357   | 0         | 0        | 0         | 0         | 0        | 0        |
| CALB2       | 35.7555   | 45.6779  | 42.9979   | 28.2275   | 17.6161  | 16.2274  |
| LOC10050761 | 0.221575  | 0        | 0         | 0         | 0        | 0        |
| C9orf123    | 17.1769   | 20.5721  | 17.1222   | 18.226    | 16.2162  | 17.0807  |
| COL5A3      | 12.7747   | 15.6755  | 24.0219   | 18.5574   | 22.9952  | 20.3696  |
| AADAT       | 2.72433   | 3.44476  | 2.17297   | 1.40689   | 2.91509  | 1.94061  |
| NDRG3       | 18.3042   | 15.793   | 16.0257   | 16.7725   | 17.324   | 15.2482  |
| PDYN        | 0.146969  | 0.225781 | 0.123721  | 0.0344997 | 0.162646 | 0.114577 |
| BCAR4       | 0         | 0        | 0         | 0         | 0        | 0        |
| KIAA0748    | 1.44105   | 2.1291   | 2.57567   | 0.394122  | 3.16147  | 1.6319   |
| PARD6G      | 18.7871   | 17.2149  | 22.8035   | 23.6732   | 23.1137  | 22.8879  |
| PTPN6       | 18.6914   | 23.3794  | 18.6358   | 18.9138   | 27.1913  | 19.5922  |
| LOC10050681 | 3.95984   | 4.33039  | 3.14943   | 4.07237   | 3.60962  | 3.12625  |
| RNF170      | 15.9251   | 13.2404  | 13.8017   | 11.7045   | 14.3391  | 13.0366  |
| RWDD4       | 16.9546   | 13.2407  | 13.5983   | 13.2607   | 12.034   | 9.67083  |
| RUSC1       | 30.9245   | 37.7354  | 26.2483   | 33.4748   | 34.273   | 32.9301  |
| RDH11       | 140.332   | 111.35   | 100.721   | 102.389   | 86.781   | 101.857  |
| CSMD2       | 0.12167   | 0.120228 | 0.0487612 | 0.0940848 | 0.123076 | 0.102579 |
| LCE2A       | 26.8915   | 21.1821  | 43.6751   | 71.8498   | 62.2813  | 47.5308  |
| MIR561      | 0         | 0        | 0         | 0         | 0        | 0        |
| MIR4309     | 0         | 0        | 0         | 0         | 0        | 0        |
| LOC10050621 | 2.25911   | 2.04719  | 1.66356   | 1.54601   | 2.59478  | 2.12837  |
| TRNAU1AP    | 10.4713   | 16.8703  | 12.299    | 12.1258   | 13.0023  | 11.3989  |
| NBPF3       | 5.46522   | 6.4095   | 3.64455   | 3.64575   | 6.34709  | 5.24121  |
| SLFN5       | 4.96787   | 2.75666  | 3.63482   | 1.40528   | 3.94515  | 2.16315  |

|               |           |           |           |           |           |            |
|---------------|-----------|-----------|-----------|-----------|-----------|------------|
| GRAMD4        | 25.6939   | 28.1674   | 32.5025   | 27.9922   | 32.1273   | 30.0364    |
| LOC10050680   | 2.28157   | 10.7557   | 3.39541   | 9.70838   | 6.54713   | 6.25071    |
| MIR1225       | 0         | 0         | 0         | 0         | 0         | 0          |
| PIGN          | 8.35343   | 6.58408   | 9.20139   | 7.90043   | 8.11493   | 8.76731    |
| XAGE1B        | 0.068236  | 0.0603299 | 0         | 0         | 0         | 0.0425217  |
| FCAR          | 0.0816629 | 0.0720415 | 0         | 0         | 0.186717  | 0          |
| RBP5          | 7.25036   | 3.48631   | 4.81453   | 2.14989   | 7.61531   | 3.80473    |
| SLC39A1       | 42.5011   | 40.2319   | 36.3097   | 39.2029   | 38.8904   | 31.4752    |
| ALDH9A1       | 126.015   | 97.9918   | 115.322   | 94.6683   | 79.3595   | 92.9443    |
| STMN3         | 17.7732   | 26.4698   | 23.9304   | 27.2201   | 38.1937   | 27.4774    |
| IGBP1         | 38.8518   | 55.1636   | 44.3339   | 52.2359   | 44.289    | 46.0893    |
| AFP           | 0         | 0         | 0         | 0         | 0         | 0          |
| FNBP4         | 36.6278   | 42.0761   | 36.2231   | 37.5276   | 45.5862   | 35.0611    |
| BCOR          | 5.90855   | 4.88979   | 6.81505   | 5.85764   | 6.39096   | 5.26741    |
| POU5F1B       | 1.06645   | 0.943869  | 1.11005   | 1.64921   | 1.27392   | 0.706101   |
| TMOD1         | 6.81575   | 9.572     | 7.0839    | 8.57754   | 6.83133   | 5.15607    |
| C3orf15       | 1.88752   | 1.93425   | 0.911082  | 1.12518   | 1.71789   | 1.4178     |
| LOC10050578   | 5.63848   | 5.51442   | 6.08902   | 6.70333   | 5.31236   | 4.7789     |
| RPF2          | 13.9461   | 16.1071   | 11.5084   | 9.90986   | 8.80233   | 9.63015    |
| LOC10050561   | 0.0639287 | 0.169565  | 0         | 0         | 0.162866  | 0.0796753  |
| MYH10         | 9.74576   | 9.44299   | 11.2645   | 7.73515   | 7.65969   | 8.06905    |
| ZNHIT2        | 9.21538   | 13.504    | 8.72011   | 12.8194   | 9.40179   | 12.5487    |
| CTSL2         | 33.0055   | 19.8774   | 29.6186   | 21.3061   | 30.5394   | 74.9039    |
| UGT2A2        | 2.15282   | 0.816958  | 7.28437   | 2.67712   | 0.796105  | 1.44094    |
| LOC10065299   | 23.9823   | 29.2629   | 7.96136   | 10.1584   | 6.73676   | 18.8248    |
| KRT39         | 0.498311  | 0.0550719 | 0.141459  | 3.62627   | 0.238033  | 28.6849    |
| SSX4          | 0         | 0         | 0         | 0         | 0         | 0          |
| RPUSD4        | 16.9499   | 19.141    | 16.0238   | 18.0655   | 16.5258   | 15.4182    |
| AFAP1-AS1     | 0         | 0         | 0.0757877 | 0.0401054 | 0.018116  | 0.00893168 |
| ACP1          | 52.5141   | 52.8496   | 46.5107   | 47.8492   | 45.8453   | 41.0356    |
| MIR3913-1     | 0         | 0         | 0         | 0         | 0         | 0          |
| KLK6          | 101.956   | 54.4347   | 30.894    | 29.6656   | 44.3666   | 106.556    |
| WWP2          | 20.719    | 22.2804   | 19.6447   | 23.55     | 20.161    | 20.4739    |
| DLX6-AS1      | 1.14344   | 0.137858  | 0.668864  | 0.488032  | 0.430337  | 0.323883   |
| OVOS2         | 0.558045  | 0.356208  | 0.586476  | 0.538966  | 0.363024  | 0.227619   |
| SLC10A1       | 0.260589  | 0         | 0         | 0.367034  | 0.124478  | 0.121791   |
| CHRD1         | 20.632    | 16.1497   | 31.5059   | 9.9179    | 13.2932   | 10.3766    |
| MIR3164       | 0         | 0         | 0         | 0         | 0         | 0          |
| TSPO          | 264.705   | 417.78    | 303.659   | 435.715   | 283.138   | 315.881    |
| MYL12B        | 472.938   | 427.826   | 400.23    | 427.251   | 373.647   | 401.519    |
| NDUFC2-KCTD11 | 4.92391   | 3.98988   | 3.13302   | 3.99423   | 2.13375   | 2.35195    |
| ASMT          | 0.390688  | 0.123983  | 0.0922883 | 0.350189  | 0.0929065 | 0.342939   |
| SZT2          | 7.48117   | 8.89667   | 9.62616   | 8.90618   | 11.7024   | 9.21593    |

|             |           |           |           |           |           |           |
|-------------|-----------|-----------|-----------|-----------|-----------|-----------|
| LOC283585   | 0         | 0         | 0         | 0         | 0         | 0         |
| AQP10       | 0         | 0.207013  | 0.0886231 | 0.329782  | 0.149126  | 0.10943   |
| KIAA1704    | 7.20399   | 4.84622   | 9.30654   | 4.63216   | 8.47831   | 7.66095   |
| RIPPLY1     | 0.135365  | 0         | 0.0821799 | 0         | 0.125246  | 0.19388   |
| EIF3L       | 219.034   | 264.701   | 258.022   | 338.273   | 240.619   | 233.893   |
| CPNE2       | 11.2187   | 11.451    | 13.1877   | 13.446    | 11.5892   | 9.69078   |
| GJA4        | 7.8021    | 13.5064   | 6.65071   | 9.60389   | 4.67689   | 6.04678   |
| CACNG4      | 2.35327   | 0.279107  | 0.108625  | 1.99411   | 0.493512  | 0.858416  |
| PPEF2       | 0.057684  | 0.102001  | 0.0436671 | 0.0270822 | 0.0551089 | 0.0179731 |
| PPP2R5E     | 8.25732   | 5.51432   | 7.04882   | 4.64664   | 5.61349   | 5.71128   |
| LOC644339   | 0         | 0         | 0         | 0         | 0         | 0         |
| KIAA1109    | 8.61485   | 6.36319   | 8.68167   | 5.67485   | 8.32592   | 7.04931   |
| LOC10050654 | 0.2031    | 0.924075  | 0.538653  | 0.912364  | 0.610242  | 0.327557  |
| CELP        | 0.718621  | 0.850927  | 1.45067   | 1.7994    | 0.991669  | 1.0449    |
| ZNF384      | 21.5115   | 25.9403   | 22.6642   | 22.5325   | 26.7285   | 22.7104   |
| MIR569      | 0         | 0         | 0         | 0         | 0         | 0         |
| RFX6        | 0         | 0         | 0         | 0         | 0         | 0.0174654 |
| RGS5        | 29.0114   | 21.5656   | 19.8093   | 19.3446   | 12.9812   | 13.4926   |
| IL12RB1     | 1.34675   | 1.33083   | 0.548599  | 0.183824  | 1.11648   | 0.560584  |
| SLC4A11     | 19.6533   | 23.4217   | 14.9044   | 26.6757   | 14.241    | 16.6803   |
| FAM54B      | 45.6186   | 46.9517   | 38.9934   | 43.0143   | 49.5885   | 44.3122   |
| PIK3CG      | 0.55391   | 0.394945  | 0.60868   | 0.23489   | 0.84214   | 0.233827  |
| DIS3L       | 10.0773   | 9.84998   | 9.88319   | 10.3612   | 8.68725   | 8.83977   |
| SNRPD2      | 149.169   | 206.394   | 160.375   | 242.05    | 152.73    | 144.818   |
| KLHDC9      | 3.37628   | 3.47286   | 3.51349   | 2.90649   | 3.01874   | 2.73212   |
| MIR3622A    | 0         | 0         | 0         | 0         | 0         | 0         |
| TOMM70A     | 28.7588   | 20.5251   | 26.1679   | 20.1913   | 18.8666   | 19.3912   |
| CTAGE6P     | 1.65601   | 1.60677   | 2.16546   | 2.4656    | 3.89911   | 4.00684   |
| SPAST       | 6.381     | 4.32999   | 6.52603   | 5.09026   | 5.50271   | 5.38388   |
| SLC25A34    | 9.88888   | 9.77173   | 5.43097   | 6.15999   | 7.348     | 6.44427   |
| LCN15       | 0.337112  | 0.149027  | 0         | 0         | 0.107354  | 0         |
| HLA-DPB1    | 35.3576   | 38.9636   | 35.3416   | 25.5822   | 31.3336   | 13.5079   |
| NFXL1       | 5.25287   | 4.13339   | 4.35422   | 3.87191   | 4.3158    | 4.69728   |
| VNN2        | 0.882266  | 0.872401  | 0.998932  | 0.419017  | 0.736695  | 0.640357  |
| LOC10013261 | 3.63221   | 2.2649    | 3.88952   | 2.26028   | 5.31876   | 3.33068   |
| AMY1B       | 2.16401   | 2.16247   | 2.27907   | 2.33894   | 2.55255   | 1.90567   |
| HOXA4       | 2.43888   | 2.80319   | 1.75393   | 2.40457   | 3.1455    | 2.77364   |
| CDC20B      | 0.0349075 | 0.0308631 | 0.0264252 | 0         | 0         | 0         |
| PDZRN4      | 1.97976   | 1.56116   | 0.669779  | 0.261589  | 0.482922  | 0.321607  |
| SLC7A5P1    | 0.518463  | 0         | 1.57537   | 0.676151  | 0.599274  | 0.586338  |
| TBL1Y       | 1.75149   | 1.32226   | 0         | 0         | 0         | 0         |
| GLB1L3      | 2.70467   | 2.03272   | 1.71484   | 2.44451   | 2.99309   | 2.02253   |
| GUCY1B2     | 0         | 0.0581216 | 0.0746463 | 0.123454  | 1.54916   | 0.860271  |

|             |           |           |           |           |           |           |
|-------------|-----------|-----------|-----------|-----------|-----------|-----------|
| F8          | 5.32264   | 4.67087   | 4.72894   | 2.57025   | 2.97257   | 2.01874   |
| TSSK3       | 8.53763   | 16.5029   | 12.6726   | 15.6404   | 16.9527   | 13.0399   |
| TBC1D3P2    | 0.40486   | 0.838435  | 0.347448  | 0.536085  | 0.691072  | 0.601445  |
| FOXP4       | 11.5911   | 11.6926   | 11.4586   | 11.183    | 9.68347   | 8.40214   |
| HSD17B1     | 4.52105   | 7.43166   | 5.17441   | 7.40218   | 6.01543   | 6.00432   |
| SOST        | 0         | 0.0391218 | 0.0334964 | 0         | 0.0563643 | 0.0275738 |
| BTK         | 3.81212   | 4.39178   | 4.95541   | 3.61568   | 8.43655   | 5.18302   |
| ITPR2       | 13.767    | 6.63743   | 11.4848   | 10.465    | 8.94431   | 8.81176   |
| LOC645781   | 0.17721   | 0.235016  | 0.335371  | 0.748786  | 0.902926  | 1.10429   |
| MIR641      | 0         | 0         | 0         | 0         | 0         | 0         |
| MAB21L3     | 1.49999   | 1.08261   | 1.64532   | 0.718606  | 1.16982   | 1.33533   |
| B9D1        | 5.82024   | 9.14825   | 6.7558    | 6.43669   | 5.68398   | 8.38223   |
| SNORA36A    | 0         | 0         | 0         | 0         | 33.3947   | 0         |
| ADAM23      | 0.811896  | 0.545548  | 0.368766  | 0.518403  | 0.475733  | 0.708315  |
| MFSD6       | 23.6615   | 17.2523   | 21.7381   | 20.1945   | 19.123    | 21.1572   |
| LOC10013119 | 1.27916   | 1.26409   | 2.56434   | 1.59092   | 2.77434   | 2.0953    |
| PRKACG      | 0.334231  | 0.236405  | 0.354221  | 0.188303  | 0.170299  | 0.166623  |
| PVALB       | 0.516293  | 1.36942   | 0         | 0         | 0.657659  | 0         |
| C10orf111   | 0.432997  | 0.713518  | 0.281161  | 0.350255  | 0.197172  | 0.269481  |
| TSN         | 28.7806   | 28.6651   | 27.037    | 28.9238   | 25.5633   | 25.7498   |
| KCNJ8       | 3.53532   | 4.85803   | 4.96559   | 4.11952   | 4.23205   | 2.84009   |
| SEMA4D      | 11.1487   | 10.0511   | 11.363    | 8.11314   | 14.1181   | 11.536    |
| JHDM1D      | 7.4227    | 5.56144   | 8.49479   | 7.41448   | 7.2651    | 6.56939   |
| SNORA4      | 156.316   | 276.409   | 88.7488   | 220.167   | 149.337   | 243.523   |
| SPIB        | 0.146886  | 0.194802  | 0.111194  | 0.068962  | 1.12263   | 0.2746    |
| FLJ34690    | 0         | 0         | 0         | 0.033947  | 0         | 0         |
| LUC7L2      | 66.1352   | 65.1037   | 66.2348   | 70.0387   | 75.3767   | 62.8706   |
| TMEM111     | 82.5264   | 69.0053   | 64.0065   | 65.9775   | 53.7839   | 53.0216   |
| SLC25A23    | 38.1858   | 34.8173   | 35.7802   | 44.2124   | 37.957    | 38.626    |
| ABHD6       | 33.7747   | 24.8305   | 19.8171   | 15.8304   | 23.7955   | 21.8565   |
| LOC728054   | 13.2665   | 20.4608   | 17.8229   | 17.2734   | 4.4712    | 3.25574   |
| DACH2       | 0         | 0         | 0.175241  | 0.0393296 | 0.166499  | 0         |
| MIR583      | 0         | 0         | 0         | 0         | 0         | 0         |
| LINC00336   | 0.0487612 | 0         | 0         | 0.137358  | 0.0310563 | 0.0303859 |
| SLC39A10    | 4.80601   | 3.73801   | 4.77337   | 7.02358   | 5.00569   | 7.46448   |
| ENPP6       | 0.0743892 | 0.0876937 | 0.0750841 | 0.0232834 | 0.142137  | 0.0463562 |
| PPAPDC2     | 10.6509   | 9.68424   | 8.97847   | 8.32896   | 9.80097   | 9.50566   |
| C8orf58     | 7.54262   | 11.4696   | 10.6646   | 17.1476   | 12.7125   | 10.8199   |
| MYH6        | 0.0161145 | 0.0142474 | 0.0121987 | 0.0151312 | 0.0410536 | 0.100419  |
| FBN3        | 0.0316296 | 0.0652514 | 0.143663  | 0.356396  | 0.201451  | 0.0788409 |
| PSAT1       | 34.1962   | 27.9554   | 27.3149   | 31.4757   | 27.3669   | 28.2034   |
| EZH2        | 10.9623   | 13.3853   | 9.62871   | 10.4258   | 14.2117   | 13.4744   |
| HIATL1      | 36.6007   | 28.8233   | 37.4259   | 33.8805   | 34.4173   | 32.7667   |

|             |           |           |           |           |           |           |
|-------------|-----------|-----------|-----------|-----------|-----------|-----------|
| FLJ30679    | 0.104538  | 0.0462128 | 0         | 0         | 0.0332903 | 0.0651435 |
| GABRA3      | 0.287198  | 0.190441  | 0.271763  | 0.202255  | 0.160053  | 0.0894847 |
| LOC10013048 | 0.476318  | 0         | 0         | 0         | 0         | 0         |
| LOC728095   | 0         | 0         | 0.195418  | 0         | 0         | 0.160866  |
| MIR3910-1   | 0         | 0         | 0         | 0         | 0         | 0         |
| PDE8B       | 2.96771   | 3.44525   | 4.60721   | 2.86663   | 2.50338   | 2.40336   |
| PDLIM3      | 9.04783   | 7.34731   | 4.07742   | 12.5321   | 5.41268   | 3.56719   |
| DDX50       | 13.3843   | 14.5374   | 14.3411   | 12.4931   | 13.1789   | 11.5992   |
| LOC728640   | 0.440288  | 0.424663  | 0.273647  | 0.366574  | 0.468036  | 0.433031  |
| TGFB3       | 7.36748   | 6.89865   | 5.95374   | 6.30496   | 8.27603   | 6.14084   |
| LOC647107   | 0         | 0         | 0         | 0         | 0         | 0         |
| LOC729513   | 3.52369   | 4.00686   | 2.84762   | 4.42812   | 4.94313   | 3.78454   |
| NLRP14      | 0         | 0.02261   | 0.0193588 | 0         | 0.0325751 | 0.015936  |
| MEN1        | 17.9859   | 25.1162   | 21.2101   | 23.0996   | 25.3121   | 25.1913   |
| POLE3       | 35.7256   | 34.4864   | 30.3097   | 39.7484   | 34.918    | 31.5316   |
| SLC18A3     | 0         | 0         | 0         | 0         | 0         | 0         |
| ERCC6L      | 0.369812  | 0.408706  | 0.27995   | 0.412357  | 0.235536  | 0.331274  |
| COL7A1      | 38.013    | 82.2785   | 65.8168   | 82.1121   | 105.578   | 79.6185   |
| LOC729175   | 0         | 0.117651  | 0         | 0         | 0         | 0         |
| BCRP3       | 2.64869   | 2.45061   | 1.86176   | 2.17383   | 3.47011   | 3.30406   |
| MGMT        | 23.6305   | 34.2514   | 18.9524   | 20.374    | 25.6248   | 25.0169   |
| FREM1       | 2.69426   | 2.31502   | 2.65803   | 2.18462   | 4.68875   | 3.46016   |
| SNORA45     | 55.873    | 148.198   | 0         | 52.4638   | 177.929   | 34.8177   |
| RUNDC3A     | 3.91448   | 2.59921   | 3.78383   | 6.19662   | 7.04645   | 9.17774   |
| ATP2B3      | 0.0929405 | 0.0801829 | 0.143797  | 0.168955  | 0.0865931 | 0.0756778 |
| BTC         | 2.91372   | 1.25126   | 4.53745   | 2.97045   | 2.22692   | 5.08398   |
| MAP4K5      | 22.0878   | 17.6766   | 24.0581   | 18.8835   | 25.8814   | 23.6949   |
| HCN1        | 0.125319  | 0.0158285 | 0.0542098 | 0         | 0.0228047 | 0.0111562 |
| TESK1       | 23.456    | 34.3157   | 24.2214   | 31.6254   | 26.1756   | 22.4124   |
| LOC10050664 | 0         | 0         | 0.0464086 | 0.0287824 | 0         | 0         |
| DNTT        | 0         | 0         | 0         | 0         | 0.128943  | 0         |
| CDC25A      | 1.04084   | 1.23466   | 0.974285  | 1.08006   | 0.610664  | 0.648608  |
| KIAA0649    | 4.1274    | 4.96358   | 5.61219   | 4.66537   | 5.3572    | 5.22937   |
| IL6         | 0.19037   | 0.168314  | 0.216167  | 0         | 0.060624  | 0.118631  |
| C1orf86     | 25.477    | 58.6076   | 32.0702   | 63.3554   | 40.8223   | 49.4424   |
| DEPDC5      | 4.25103   | 3.59175   | 3.65529   | 3.49012   | 3.75218   | 3.54444   |
| MRAS        | 27.2594   | 17.8931   | 31.4859   | 20.2581   | 17.5808   | 14.4893   |
| SNORD116-8  | 0         | 0         | 0         | 0         | 0         | 0         |
| ALS2CR12    | 0.284568  | 0.212287  | 0.252445  | 0.0501013 | 0.135932  | 0.303997  |
| ZNRF3       | 4.18955   | 3.53458   | 5.1254    | 3.43526   | 4.23721   | 3.52081   |
| LOC10065297 | 0         | 0         | 0         | 0         | 0         | 0         |
| CEP95       | 19.0038   | 22.8309   | 21.72     | 23.3025   | 28.7402   | 21.5252   |
| CYP26B1     | 14.7399   | 11.7459   | 15.1907   | 13.2982   | 15.3968   | 16.1576   |

|             |           |           |            |           |           |           |
|-------------|-----------|-----------|------------|-----------|-----------|-----------|
| CHRM4       | 0.515333  | 0.0650892 | 0.83595    | 0.276508  | 0.515772  | 0.550515  |
| SNORD4A     | 0         | 0         | 0          | 0         | 0         | 0         |
| LOC10065291 | 0         | 0         | 0          | 0         | 0         | 0         |
| LOC10028761 | 5.64872   | 7.03231   | 3.69293    | 7.46855   | 2.20797   | 2.98068   |
| SERGEF      | 16.0834   | 18.9387   | 14.5776    | 21.6711   | 16.4909   | 17.663    |
| TIMM10      | 43.9837   | 52.738    | 48.8036    | 67.5133   | 52.5732   | 48.2263   |
| KCNH1       | 0.0531649 | 0.105764  | 0.00894299 | 0.0905989 | 0.135918  | 0.132984  |
| TRIM37      | 5.64031   | 5.41023   | 5.52695    | 4.90129   | 4.55381   | 4.38595   |
| MMP16       | 0.437236  | 0.106642  | 0.376644   | 0.297301  | 0.268876  | 0.197304  |
| MUC7        | 26.5787   | 4.41903   | 9.99903    | 15.2003   | 4.63772   | 2.47201   |
| LOC646021   | 0.962941  | 0.282809  | 0.565001   | 1.60188   | 0.882816  | 1.32886   |
| WDR60       | 5.94015   | 7.24717   | 8.30618    | 6.33277   | 8.54137   | 7.53262   |
| LRRC17      | 3.15335   | 3.9066    | 4.05852    | 3.9309    | 5.18851   | 3.38193   |
| MEG3        | 22.7089   | 42.4752   | 30.0006    | 22.2968   | 50.4281   | 39.0716   |
| UQCRC1      | 162.783   | 174.774   | 138.42     | 170.418   | 138.46    | 150.437   |
| MIR1202     | 0         | 0         | 0          | 0         | 0         | 0         |
| MARVELD3    | 4.52578   | 3.26883   | 3.7474     | 6.1881    | 5.11805   | 5.82448   |
| LOC10065280 | 0.285125  | 0.168223  | 0.441288   | 0.124551  | 0.731026  | 0.291377  |
| CG030       | 2.88158   | 3.36787   | 3.76511    | 4.0401    | 4.95278   | 3.66515   |
| MTCP1       | 1.65583   | 2.19179   | 2.36539    | 1.62658   | 3.02758   | 2.34383   |
| LINC00303   | 0         | 0         | 0          | 0.06668   | 0.180914  | 0         |
| DDX11       | 12.5739   | 19.2425   | 8.87747    | 11.7068   | 18.4619   | 16.6927   |
| TNNC1       | 3.44991   | 3.0502    | 2.75669    | 3.41938   | 3.41797   | 3.10532   |
| MARK2P9     | 0.206734  | 0.274171  | 0.156498   | 0.291179  | 1.02044   | 0.676345  |
| IL4         | 0         | 0.495615  | 0.106087   | 0         | 0         | 0         |
| M6PR        | 60.6767   | 56.914    | 46.4128    | 50.2318   | 53.2479   | 45.7559   |
| TAX1BP1     | 47.9872   | 33.285    | 41.8406    | 32.217    | 35.3772   | 35.6394   |
| WDR62       | 1.73732   | 3.34969   | 1.77333    | 3.95912   | 3.52866   | 2.90671   |
| LOC10050701 | 0         | 0         | 0          | 0         | 0         | 0         |
| ACTL7B      | 0         | 0         | 0          | 0         | 0         | 0         |
| LOC10012884 | 0         | 0         | 0          | 0         | 0         | 0         |
| A2LD1       | 2.75169   | 3.34098   | 2.93652    | 2.17954   | 3.47669   | 3.83745   |
| FCHSD1      | 14.7593   | 15.8578   | 19.4536    | 25.6041   | 30.0846   | 36.6773   |
| PRKCA       | 2.72885   | 2.61294   | 2.84143    | 3.04848   | 3.3936    | 2.98428   |
| CA5BP1      | 5.91936   | 9.42034   | 6.54224    | 9.11577   | 6.71094   | 9.36943   |
| TMEM210     | 0.361215  | 0         | 0.273442   | 0.339175  | 0         | 0.225094  |
| LOC10050651 | 0         | 0         | 0          | 0         | 0         | 0         |
| CA4         | 10.1064   | 11.1042   | 5.86793    | 2.67187   | 2.56223   | 1.71204   |
| LANCL1      | 29.2302   | 24.0001   | 34.3963    | 26.8816   | 30.5178   | 26.8669   |
| FAM90A8     | 0         | 0         | 0.0488204  | 0         | 0.0154105 | 0.0130482 |
| IMPDH1      | 18.0421   | 24.7108   | 19.0632    | 22.9308   | 21.4613   | 21.1728   |
| CECR1       | 12.4429   | 9.36805   | 6.89151    | 3.3359    | 9.67415   | 4.4103    |
| TRMT11      | 7.9621    | 6.61721   | 7.91592    | 5.68198   | 7.30239   | 6.45013   |



|             |           |           |           |           |           |           |
|-------------|-----------|-----------|-----------|-----------|-----------|-----------|
| CCDC92      | 21.3383   | 26.7742   | 23.7209   | 23.8789   | 19.2129   | 19.6725   |
| LOC10028856 | 0         | 0         | 0         | 0         | 0         | 0         |
| LY6E        | 357.003   | 468.847   | 275.24    | 352.825   | 241.281   | 212.343   |
| CCDC99      | 3.98684   | 4.42276   | 4.32778   | 4.48523   | 4.52751   | 2.74225   |
| LOC729080   | 0.242707  | 0.381486  | 0.0816579 | 0.316525  | 0.122138  | 0.268879  |
| PIP5K1C     | 11.299    | 12.8433   | 11.7083   | 13.2773   | 12.1186   | 11.7228   |
| COL16A1     | 31.96     | 52.3507   | 49.0686   | 52.3332   | 61.6554   | 64.6883   |
| LOC10013151 | 0.626298  | 0.174863  | 0.249532  | 0.0928554 | 0.0839774 | 0.267035  |
| STRN        | 5.7577    | 3.85758   | 6.31923   | 4.67057   | 6.21759   | 5.35917   |
| UGT1A6      | 13.1742   | 10.4323   | 11.7426   | 8.2844    | 9.0212    | 9.71621   |
| IGFBP3      | 59.0963   | 91.8103   | 56.9105   | 60.3315   | 68.2448   | 54.2325   |
| SNORA5B     | 0         | 46.3577   | 0         | 0         | 0         | 0         |
| LOC650368   | 0.657847  | 1.16325   | 1.54931   | 1.78449   | 1.90872   | 1.41202   |
| CCDC6       | 19.911    | 14.8857   | 19.205    | 19.7923   | 18.4095   | 15.9732   |
| KIAA0528    | 14.5456   | 11.0509   | 12.7102   | 10.0008   | 16.5241   | 14.2339   |
| BAG5        | 19.0915   | 15.5388   | 18.7012   | 17.2833   | 16.7869   | 14.7563   |
| SUV420H2    | 6.12412   | 13.7507   | 9.00517   | 13.1557   | 14.1428   | 14.5239   |
| HEPACAM2    | 0.221149  | 0.397306  | 0.167411  | 0.332271  | 0.166957  | 0.0306145 |
| LPPR5       | 0.0243705 | 0.0215469 | 0.0553537 | 0.143054  | 0.0620957 | 0.0683528 |
| WDR81       | 10.1355   | 16.2791   | 11.9296   | 12.2152   | 17.3644   | 13.8888   |
| LOC285074   | 6.24045   | 6.0924    | 7.73652   | 7.18269   | 9.39877   | 8.8099    |
| TGIF2       | 4.87766   | 8.98093   | 5.95616   | 8.16967   | 7.96575   | 5.0851    |
| TTY3B       | 0         | 0         | 0         | 0         | 0         | 0         |
| GTPBP8      | 9.5973    | 6.71466   | 8.01042   | 6.38429   | 8.43721   | 6.92265   |
| HIST4H4     | 0.934467  | 1.65239   | 1.41479   | 0.87745   | 0.892751  | 0.87348   |
| B4GALT3     | 17.2674   | 17.8817   | 19.6033   | 19.4006   | 19.5385   | 19.7276   |
| C20orf134   | 1.37391   | 1.79959   | 1.04005   | 1.19451   | 1.19914   | 1.87087   |
| LOC10028729 | 2.9615    | 2.89891   | 1.28107   | 0.397257  | 1.48201   | 2.04321   |
| TMED1       | 21.2429   | 28.8509   | 18.2824   | 26.7729   | 19.3944   | 20.7374   |
| SHROOM2     | 2.68013   | 2.59528   | 3.11094   | 2.94802   | 3.40585   | 3.03807   |
| ZNF618      | 2.21923   | 1.83374   | 2.15098   | 2.03513   | 2.1796    | 2.2618    |
| SLC47A2     | 1.81568   | 2.7704    | 1.68334   | 2.1325    | 3.46918   | 2.31909   |
| CST9        | 0         | 0         | 0         | 0         | 0.0398605 | 0.0390001 |
| C9orf95     | 42.2144   | 42.5581   | 44.386    | 41.6129   | 34.7817   | 30.0923   |
| LINC00340   | 0.382794  | 0.193396  | 0.455365  | 0.30809   | 0.626924  | 0.477082  |
| LOC391764   | 0         | 0         | 0         | 0         | 0         | 0         |
| HYAL2       | 23.8273   | 29.4299   | 24.1345   | 27.1797   | 23.8099   | 23.9358   |
| MTG1        | 26.76     | 33.172    | 20.9842   | 27.6383   | 31.682    | 32.8431   |
| LOC730184   | 0         | 0.197803  | 0.508081  | 0         | 0.284982  | 0.278831  |
| CCT2        | 56.7286   | 50.7966   | 49.2433   | 49.614    | 46.4584   | 43.6043   |
| ROBO2       | 0.407472  | 0.380039  | 0.898576  | 0.573651  | 1.22445   | 0.824549  |
| RASSF5      | 14.38     | 11.7533   | 14.1433   | 13.3786   | 16.3217   | 12.4853   |
| TMEM138     | 24.0812   | 26.9729   | 20.2162   | 24.32     | 20.7257   | 18.1652   |

|             |           |           |           |           |            |           |
|-------------|-----------|-----------|-----------|-----------|------------|-----------|
| TTY18       | 0         | 0         | 0         | 0         | 0          | 0         |
| ANKRD30BP2  | 0         | 0         | 0         | 0         | 0.00917048 | 0         |
| ZNF551      | 2.56003   | 2.00674   | 2.95688   | 2.55252   | 2.48777    | 2.31894   |
| TEK         | 3.33028   | 3.39323   | 3.48942   | 2.0022    | 2.40558    | 2.3157    |
| ZNF655      | 42.3309   | 47.0639   | 42.7946   | 41.4897   | 52.1673    | 42.2975   |
| IQCH        | 0.351207  | 0.553382  | 0.368897  | 0.547182  | 0.432278   | 0.320948  |
| SEN3-EIF4A  | 0.22355   | 0.0868416 | 0.318635  | 0.0998491 | 0.153085   | 0.395919  |
| LRRC20      | 3.62523   | 3.23004   | 2.75401   | 2.36145   | 3.35957    | 2.89042   |
| RTKL1-TNFRS | 3.00313   | 3.65531   | 2.73462   | 2.76525   | 3.75545    | 2.57132   |
| MIR342      | 0         | 0         | 0         | 0         | 0          | 0         |
| MIR767      | 0         | 0         | 0         | 0         | 0          | 0         |
| C2orf66     | 0.472633  | 0.905389  | 0.894464  | 1.03552   | 0.903067   | 0.736312  |
| EFNA2       | 0         | 0.0423068 | 0         | 0.0449313 | 0.0609531  | 0.0298187 |
| HIST1H2BB   | 0         | 0         | 0         | 0         | 0          | 0         |
| APLP2       | 159.948   | 115.423   | 112.768   | 118.674   | 101.909    | 101.157   |
| ALB         | 0.317817  | 0.521846  | 0.343699  | 0.255793  | 0.549424   | 0.19805   |
| CATSPER4    | 0.0766139 | 0         | 0.0579972 | 0         | 0          | 0.0477426 |
| NSMCE1      | 34.6264   | 41.9745   | 35.6092   | 46.0098   | 36.0627    | 39.2877   |
| INO80B-WBP  | 6.70452   | 5.833     | 5.91638   | 11.3037   | 10.1883    | 12.9102   |
| LOC1001302  | 0.0508127 | 0         | 0.0384764 | 0.0476729 | 0.0323474  | 0.0316442 |
| DSC2        | 25.9991   | 17.0444   | 16.5285   | 17.8938   | 16.7818    | 31.3389   |
| DFNB59      | 4.99198   | 5.59469   | 4.68377   | 4.62137   | 6.09015    | 4.03088   |
| ACOT13      | 10.1202   | 8.22156   | 8.58402   | 6.51256   | 7.17902    | 7.37685   |
| FAM205B     | 0.0155996 | 0         | 0         | 0         | 0.00993548 | 0.0291631 |
| AFG3L1P     | 13.8742   | 20.1612   | 13.9885   | 18.4956   | 19.6378    | 17.0276   |
| ATG9B       | 17.6386   | 16.2453   | 37.7569   | 35.6451   | 44.5469    | 71.5388   |
| ZNF292      | 6.42235   | 4.54754   | 8.02049   | 4.5141    | 7.33067    | 6.03229   |
| LOC1002888  | 0         | 0.189532  | 0.162279  | 0.603868  | 0.273066   | 0         |
| TMEM8C      | 0         | 0         | 0         | 0         | 0          | 0         |
| C14orf182   | 0.186689  | 0.19807   | 0.423973  | 0.105179  | 0.642077   | 0.488613  |
| QRSL1       | 6.71384   | 4.61917   | 4.2592    | 4.41737   | 4.98374    | 4.86143   |
| TNPO3       | 16.7962   | 14.4601   | 15.6195   | 14.8011   | 16.2047    | 15.1138   |
| LOC729176   | 4.46774   | 4.49651   | 5.28919   | 4.5523    | 4.97929    | 5.12409   |
| BLVRB       | 127.6     | 158.35    | 98.881    | 121.301   | 98.7693    | 99.8645   |
| LOC1005071  | 0         | 0.13888   | 0.0594549 | 0.58998   | 0.300134   | 0.391541  |
| SDHC        | 38.4552   | 30.4624   | 31.7812   | 33.6299   | 31.0975    | 31.9124   |
| TECR        | 166.037   | 175.136   | 174.6     | 179.561   | 154.048    | 175.038   |
| TCF25       | 58.8874   | 72.4434   | 60.7966   | 67.4862   | 65.0744    | 61.9352   |
| ARNT2       | 1.75992   | 2.10897   | 1.12307   | 1.17453   | 1.6582     | 1.43207   |
| ATP5E       | 497.472   | 621.451   | 437.641   | 597.092   | 422.199    | 448.13    |
| PARP6       | 26.2255   | 34.7578   | 27.4521   | 30.9613   | 35.2911    | 31.2465   |
| DIO1        | 0         | 0.299373  | 0.300382  | 0         | 0.39633    | 0.211005  |
| NPTX2       | 1.03416   | 0.653099  | 1.34205   | 1.14446   | 1.24675    | 1.56508   |

|             |           |           |          |           |           |           |
|-------------|-----------|-----------|----------|-----------|-----------|-----------|
| IQCF6       | 0         | 0         | 0        | 0         | 0         | 0         |
| LOC10050624 | 0.322377  | 1.1401    | 0.244041 | 0.605414  | 0.205324  | 0.904013  |
| COL12A1     | 30.2645   | 19.7422   | 35.6745  | 17.4558   | 33.3711   | 24.4401   |
| BCL11B      | 9.79154   | 7.85114   | 10.761   | 8.97158   | 8.74207   | 9.33261   |
| ZYX         | 72.646    | 96.8766   | 53.8315  | 76.1167   | 64.6359   | 50.8067   |
| FEM1B       | 9.01351   | 4.69799   | 9.14737  | 6.94824   | 8.49833   | 8.11866   |
| SLC25A10    | 21.4889   | 33.6026   | 23.8781  | 31.1225   | 21.2157   | 17.6596   |
| ATP8B5P     | 3.02946   | 2.29391   | 2.18014  | 2.21091   | 2.08223   | 2.31148   |
| OR8H1       | 0         | 0         | 0        | 0         | 0         | 0         |
| NVL         | 13.008    | 11.5011   | 12.4893  | 11.8569   | 13.8305   | 15.8646   |
| AURKAIP1    | 108.58    | 149.261   | 101.066  | 140.403   | 96.6839   | 121.296   |
| LOC10013221 | 5.24215   | 5.76521   | 5.90411  | 5.40252   | 7.45118   | 8.5651    |
| CTDNEP1     | 43.7501   | 55.4988   | 42.2177  | 53.8741   | 49.0944   | 46.845    |
| H2AFB2      | 0         | 2.47903   | 0.173271 | 0.322386  | 1.19055   | 1.00438   |
| PRKCG       | 0.0316733 | 0         | 0        | 0.0297407 | 0.0201729 | 0         |
| MEX3A       | 0.812004  | 0.552248  | 0.673796 | 0.630494  | 0.934883  | 0.895242  |
| MT1X        | 160.672   | 273.781   | 254.317  | 377.629   | 164.973   | 145.635   |
| PPBPL2      | 0         | 0         | 0        | 0         | 0         | 0         |
| MIR3678     | 0         | 0         | 0        | 0         | 0         | 0         |
| FAM116A     | 9.05456   | 9.19895   | 8.89808  | 7.68308   | 9.2191    | 7.00126   |
| ANKRD44     | 4.04253   | 3.60536   | 3.72443  | 2.45707   | 5.29958   | 3.46436   |
| MIR17       | 0         | 0         | 0        | 0         | 0         | 0         |
| LOC10050721 | 0         | 0         | 0        | 0         | 0         | 0         |
| RUNDC3B     | 0.97562   | 1.19442   | 0.908991 | 0.729053  | 1.22715   | 1.48125   |
| ALG1L2      | 3.24E-11  | 4.05E-07  | 5.69E-07 | 0.262721  | 1.31E-08  | 3.94E-08  |
| SRPK1       | 25.5424   | 18.1569   | 22.637   | 22.3126   | 24.558    | 26.7732   |
| BRK1        | 166.712   | 183.631   | 154.974  | 184.928   | 146.158   | 150.24    |
| MIR4703     | 0         | 0         | 0        | 0         | 0         | 0         |
| HEXA        | 23.75     | 23.1754   | 29.6186  | 24.6791   | 24.8051   | 22.1995   |
| LOC10065290 | 58.4456   | 82.0495   | 87.6002  | 84.4866   | 106.952   | 92.4121   |
| RPL23AP53   | 4.63197   | 3.95715   | 3.27941  | 2.83435   | 4.09415   | 4.04578   |
| KIAA1045    | 0.704487  | 1.83962   | 1.12861  | 1.38454   | 2.38954   | 1.71519   |
| CREG2       | 0         | 0.0249238 | 0        | 0         | 0.0359087 | 0.0175668 |
| LDHAL6B     | 0.126542  | 0.0559404 | 0.191587 | 0.118821  | 0.161191  | 0.157712  |
| DOCK1       | 21.1909   | 16.5778   | 24.0842  | 20.0462   | 25.3381   | 20.9262   |
| OR51B2      | 0         | 0         | 0        | 0         | 0         | 0         |
| FOXI2       | 0.342527  | 0.412965  | 0.589307 | 0.467822  | 0.515645  | 0.426897  |
| XPNPEP1     | 27.265    | 25.5587   | 24.5495  | 25.518    | 26.4757   | 25.2799   |
| LOC10050559 | 0         | 0         | 1.25039  | 0         | 0.789013  | 0.257327  |
| EIF2B1      | 44.4821   | 47.9036   | 40.3403  | 44.4373   | 42.8158   | 42.6211   |
| TPX2        | 4.87163   | 5.56148   | 3.91074  | 4.77545   | 4.05746   | 6.00486   |
| LOC10013309 | 0.0843075 | 0.0239591 | 0.159996 | 0.0989543 | 0.146187  | 0.319658  |
| C1orf111    | 0         | 0         | 0.218648 | 0         | 0         | 0         |

|            |           |           |           |          |          |           |
|------------|-----------|-----------|-----------|----------|----------|-----------|
| RCBTB1     | 13.0016   | 10.7687   | 10.7387   | 7.51104  | 10.0816  | 9.48751   |
| C19orf24   | 49.3624   | 87.2065   | 36.8544   | 62.395   | 47.5907  | 48.8733   |
| PAGE2B     | 0         | 0.585973  | 0.783929  | 1.24465  | 2.11059  | 0.413005  |
| STX18      | 12.4883   | 16.1772   | 12.305    | 12.6128  | 12.3647  | 10.7763   |
| CTNND2     | 0.247422  | 0.343758  | 0.28095   | 0.331893 | 0.787922 | 1.87222   |
| TTY15      | 1.26649   | 1.15221   | 0         | 0        | 0        | 0         |
| LOC401431  | 0.553257  | 0.974708  | 1.12347   | 1.00384  | 0.53923  | 0.913631  |
| SWAP70     | 19.617    | 15.1372   | 18.167    | 14.6987  | 15.382   | 14.8928   |
| PITPNA     | 45.433    | 40.0317   | 46.5032   | 45.0529  | 52.801   | 42.3642   |
| TOB2       | 18.8356   | 19.2225   | 22.6244   | 20.1561  | 20.7237  | 19.8666   |
| HDGFL1     | 0         | 0         | 0         | 0        | 0        | 0         |
| RAPGEFL1   | 81.145    | 95.0486   | 111.021   | 128.599  | 154.024  | 139.594   |
| LOC1005071 | 2.05762   | 1.89003   | 3.65839   | 4.93184  | 3.09683  | 4.00785   |
| SLC45A2    | 0.226844  | 0.710865  | 0.334969  | 0.743241 | 0.256851 | 2.96576   |
| TSPAN1     | 1.76146   | 1.96114   | 3.55583   | 5.6358   | 2.11912  | 1.13832   |
| ARHGAP25   | 8.80645   | 9.32921   | 6.92472   | 4.94286  | 10.0943  | 6.48989   |
| CCDC11     | 0.458681  | 0.658997  | 0.607642  | 0.430694 | 0.511239 | 0.60739   |
| KRTAP20-2  | 9.59139   | 16.9602   | 0         | 0        | 0        | 95.6312   |
| CNOT6L     | 8.60464   | 6.89446   | 9.22511   | 7.28176  | 9.49469  | 7.45324   |
| ARID3B     | 2.52099   | 2.49232   | 3.0708    | 2.58237  | 3.47401  | 3.28477   |
| SLC35F1    | 0.55716   | 0.439827  | 0.331393  | 0.523165 | 0.354858 | 0.347199  |
| MNT        | 7.87692   | 9.89104   | 8.24235   | 11.2723  | 10.1226  | 9.29521   |
| LOC1005064 | 0         | 0         | 0         | 0        | 0        | 0         |
| LEFTY2     | 0.355209  | 0.378177  | 0.225947  | 0.78824  | 0.440506 | 0.355229  |
| PSTPIP2    | 10.215    | 10.0188   | 8.97606   | 8.91323  | 11.4012  | 5.87435   |
| ASAP2      | 7.08277   | 8.31432   | 10.1136   | 8.86227  | 9.11221  | 7.43127   |
| LOC1002880 | 0         | 0         | 0         | 0        | 0        | 0         |
| POU5F1     | 1.82101   | 2.34288   | 2.25343   | 3.04177  | 1.55899  | 0.897518  |
| TIGD1      | 3.88375   | 5.62553   | 4.25364   | 5.04342  | 6.89445  | 5.17508   |
| CNOT1      | 25.0729   | 19.433    | 24.2132   | 20.7521  | 22.7424  | 20.1894   |
| HLA-F      | 78.7785   | 123.044   | 62.1506   | 43.2628  | 90.7468  | 44.0904   |
| NNT        | 21.2023   | 12.9298   | 16.6696   | 12.31    | 12.6327  | 11.777    |
| SNORD115-1 | 0         | 0         | 0         | 0        | 0        | 0         |
| PDE7A      | 15.1612   | 11.366    | 10.1136   | 11.0333  | 14.0007  | 11.5542   |
| LIPT1      | 7.4902    | 8.28391   | 7.41786   | 8.39001  | 9.13674  | 6.78511   |
| PALM       | 16.8981   | 27.1544   | 35.7908   | 27.6282  | 28.5786  | 27.2436   |
| A4GALT     | 14.3029   | 16.4264   | 15.1062   | 16.0147  | 14.8696  | 12.7722   |
| CDC42BPG   | 17.751    | 18.405    | 27.0624   | 23.5991  | 32.8972  | 31.5056   |
| SOX17      | 2.37669   | 3.51493   | 2.159     | 2.79974  | 2.0917   | 1.69648   |
| RSPH10B2   | 0.0319142 | 0.0846497 | 0.0120796 | 0.119868 | 0.101632 | 0.0596628 |
| NR5A2      | 0.551268  | 0.695783  | 1.10159   | 0.517632 | 0.78911  | 0.478159  |
| ANLN       | 2.74468   | 3.12563   | 2.61389   | 3.14976  | 2.99923  | 4.05901   |
| C10orf2    | 7.51972   | 9.212     | 5.0588    | 8.39061  | 6.77043  | 8.16339   |

|             |           |          |          |           |          |           |
|-------------|-----------|----------|----------|-----------|----------|-----------|
| C16orf79    | 7.12622   | 12.2228  | 6.99042  | 11.9121   | 8.21504  | 11.0659   |
| TSPAN33     | 11.834    | 9.0954   | 8.6589   | 12.159    | 8.8888   | 7.97966   |
| EPM2AIP1    | 10.2696   | 8.65058  | 10.5106  | 7.53208   | 11.0884  | 8.79543   |
| COPZ2       | 18.4969   | 37.5666  | 52.2885  | 51.5595   | 41.0336  | 36.3892   |
| PAG1        | 2.81321   | 2.83594  | 3.11812  | 3.0777    | 3.58908  | 3.10747   |
| MBP         | 27.0446   | 22.1554  | 18.1829  | 16.5138   | 21.7625  | 16.403    |
| JUP         | 300.665   | 305.686  | 349.647  | 405.503   | 417.25   | 467.735   |
| RNF24       | 6.33684   | 4.43855  | 5.86262  | 4.39806   | 4.83474  | 4.33037   |
| LOC10050594 | 0.180068  | 0        | 0        | 0         | 0.114686 | 0.112211  |
| ZNF300P1    | 3.30544   | 3.8103   | 3.10404  | 3.41806   | 5.75614  | 4.87575   |
| DLG5        | 19.4099   | 22.5331  | 25.6749  | 18.2852   | 31.2292  | 22.0456   |
| LOC284379   | 0         | 0        | 0        | 0         | 0        | 0.114043  |
| IFT122      | 7.6478    | 9.29994  | 10.3598  | 10.4354   | 11.0051  | 11.0117   |
| DNAJC6      | 0.266728  | 0.515865 | 0.391209 | 0.923547  | 0.435319 | 1.04922   |
| GOLPH3L     | 12.8908   | 8.7204   | 10.2073  | 8.26489   | 10.5361  | 9.45288   |
| IFNE        | 0.439261  | 0.258911 | 0.221682 | 1.03115   | 0.186512 | 0.6387    |
| COL6A5      | 1.96617   | 1.85606  | 1.56603  | 0.510299  | 1.05661  | 0.465921  |
| CELF2       | 9.32094   | 6.92525  | 9.41081  | 5.52195   | 8.02086  | 5.62515   |
| LOC10065294 | 11.1825   | 5.55098  | 7.95934  | 2.51442   | 5.21017  | 1.96983   |
| MIR4313     | 0         | 0        | 0        | 0         | 0        | 0         |
| HPS6        | 8.52395   | 8.79793  | 8.6699   | 9.34371   | 8.58588  | 8.61114   |
| LOC283731   | 0.0784863 | 0.104089 | 0.237658 | 0.147395  | 0.149965 | 0.0489093 |
| MIR3178     | 0         | 0        | 0        | 0         | 0        | 0         |
| CPNE3       | 28.8777   | 23.1278  | 26.2177  | 20.9658   | 24.6749  | 21.4831   |
| SPINK1      | 1.62988   | 2.88208  | 1.54229  | 3.06087   | 4.41185  | 4.82445   |
| CMYA5       | 2.67139   | 2.04653  | 3.84614  | 3.07568   | 3.13395  | 3.68773   |
| TEAD4       | 4.8375    | 5.31761  | 5.92728  | 6.10211   | 5.68073  | 5.29236   |
| RFWD2       | 14.3498   | 15.866   | 16.5764  | 13.9789   | 14.859   | 15.2935   |
| VASP        | 32.3526   | 39.3307  | 30.2438  | 38.1819   | 34.5785  | 29.9088   |
| SNORA56     | 0         | 0        | 0        | 179.713   | 0        | 39.7557   |
| PRAMEF6     | 0         | 0        | 0        | 0         | 0        | 0         |
| GRK4        | 0.569255  | 1.19611  | 1.44923  | 2.0769    | 1.64072  | 1.1674    |
| C1orf189    | 0         | 0        | 0        | 0         | 0.340439 | 0         |
| PCM1        | 14.7328   | 12.8544  | 13.941   | 11.8619   | 14.4684  | 13.221    |
| PLBD1       | 23.3187   | 17.4816  | 19.7267  | 17.5571   | 16.9393  | 14.3973   |
| CCBP2       | 1.91585   | 1.09953  | 0.534324 | 0.347166  | 0.685033 | 0.670246  |
| SLC30A10    | 1.15372   | 0.710942 | 0.741043 | 1.08332   | 0.534408 | 0.762522  |
| CCDC66      | 8.53659   | 6.98887  | 6.27068  | 4.24224   | 8.0407   | 7.40454   |
| MEGF8       | 6.83201   | 6.50333  | 7.06259  | 6.47156   | 7.42899  | 7.24724   |
| ZNF417      | 3.639     | 2.92651  | 4.76241  | 3.10809   | 4.13778  | 2.98511   |
| HCG27       | 1.4711    | 2.60131  | 1.80965  | 1.66912   | 3.47453  | 2.48281   |
| GPR152      | 0         | 0        | 0        | 0.0713469 | 0.048394 | 0.0473494 |
| TTK         | 1.35427   | 1.60576  | 1.24997  | 1.86029   | 1.451    | 1.74697   |

|            |          |          |          |          |          |          |
|------------|----------|----------|----------|----------|----------|----------|
| METTL7A    | 72.7662  | 59.171   | 64.9838  | 59.7855  | 44.4943  | 49.8539  |
| NOTCH2     | 27.2126  | 18.0121  | 31.0339  | 22.8543  | 27.069   | 25.9016  |
| TMEM38A    | 2.52647  | 1.31734  | 1.37312  | 1.03409  | 1.23779  | 0.847749 |
| SERPINA13  | 0        | 0        | 0        | 0        | 0        | 0        |
| GPT2       | 75.6323  | 82.8508  | 72.014   | 57.8637  | 59.4882  | 55.8744  |
| ACP5       | 39.9526  | 45.3087  | 34.7857  | 46.4359  | 41.9085  | 51.4786  |
| LOC286094  | 0        | 0        | 0        | 0        | 0        | 0        |
| R3HCC1     | 20.5147  | 27.1467  | 18.9522  | 21.8607  | 21.1029  | 20.353   |
| MYO1C      | 71.2571  | 76.3696  | 81.8275  | 71.1712  | 64.8472  | 57.3938  |
| MED31      | 7.4386   | 8.70535  | 8.17358  | 8.43003  | 7.57686  | 6.42648  |
| MIR4749    | 0        | 0        | 0        | 0        | 0        | 0        |
| ALS2CR8    | 5.19675  | 3.25264  | 5.27194  | 3.40261  | 6.08267  | 4.3815   |
| GSTT2      | 30.8118  | 20.1157  | 20.6732  | 20.5495  | 36.021   | 33.7812  |
| ZBED4      | 3.91443  | 3.90114  | 4.08362  | 4.41589  | 3.99075  | 4.22353  |
| LOC1005065 | 0        | 0        | 0        | 0        | 0        | 0        |
| EWSR1      | 72.3281  | 86.9158  | 71.1599  | 78.5223  | 89.4295  | 74.5853  |
| GPX5       | 0        | 0        | 0        | 0        | 0        | 0        |
| APH1B      | 5.14558  | 3.87266  | 5.25004  | 3.73093  | 5.35689  | 3.64244  |
| ARL10      | 1.01106  | 0.931163 | 2.13668  | 1.1076   | 1.90502  | 1.47012  |
| KRT2       | 642.585  | 347.238  | 1499.63  | 1092.71  | 649.02   | 600.221  |
| PITPNC1    | 4.9218   | 3.51188  | 3.32079  | 2.79072  | 2.70011  | 2.09597  |
| MIR663     | 0        | 0        | 0        | 0        | 0        | 0        |
| EIF5A2     | 1.68175  | 1.41025  | 1.10247  | 0.895387 | 1.23675  | 0.961563 |
| MIR770     | 0        | 0        | 0        | 0        | 0        | 0        |
| CROCCP2    | 37.7932  | 55.7783  | 30.9525  | 38.505   | 35.1015  | 29.9303  |
| LOC1005064 | 0        | 0.11431  | 0        | 0        | 0        | 0        |
| PDE2A      | 6.78389  | 9.80164  | 8.77273  | 6.87892  | 9.31487  | 7.30531  |
| TULP1      | 0.441886 | 0.217049 | 0.408846 | 0.322719 | 0.156355 | 0.489537 |
| MAGEA9     | 0        | 0        | 0        | 0        | 0        | 0        |
| ZNF358     | 23.6209  | 48.3854  | 35.5212  | 46.652   | 37.4586  | 30.7622  |
| CBLL1      | 9.28778  | 6.07907  | 7.00232  | 5.72814  | 7.6872   | 7.16646  |
| KIF4B      | 0.175291 | 0.213583 | 0.16587  | 0.370642 | 0.293065 | 0.218468 |
| LOC338817  | 8.19139  | 0.542583 | 0.78774  | 0.776675 | 0.798716 | 0.665085 |
| LOC728065  | 0        | 0        | 0        | 0        | 0        | 0        |
| SLC25A30   | 8.22283  | 5.94827  | 6.54809  | 5.56521  | 7.56668  | 5.68977  |
| ABCF2      | 14.9839  | 15.6549  | 14.7472  | 15.8725  | 13.7741  | 13.4471  |
| LOC1005074 | 7.86761  | 9.56155  | 7.59172  | 7.19285  | 11.7693  | 12.74    |
| LOC400692  | 0.306788 | 0.189461 | 0.183712 | 0.115604 | 0.216529 | 0.180318 |
| ZFP36      | 48.6273  | 55.2279  | 85.5057  | 44.7283  | 80.3967  | 56.7809  |
| MIR4475    | 0        | 0        | 0        | 0        | 0        | 0        |
| SLC16A4    | 1.1654   | 1.14961  | 0.982283 | 1.08598  | 0.844111 | 0.786014 |
| KPNB1      | 45.185   | 36.0817  | 40.7239  | 35.5595  | 37.477   | 33.8264  |
| RSPH1      | 1.28113  | 1.91143  | 1.63658  | 3.23296  | 2.39688  | 2.64453  |

|              |           |           |           |           |            |             |
|--------------|-----------|-----------|-----------|-----------|------------|-------------|
| KLK11        | 67.2707   | 85.8337   | 118.06    | 112.879   | 145.429    | 136.898     |
| VCL          | 47.1826   | 36.1619   | 37.2873   | 31.3757   | 30.8672    | 27.3571     |
| MIR1343      | 0         | 0         | 0         | 0         | 0          | 0           |
| MIR4494      | 0         | 0         | 0         | 0         | 0          | 0           |
| PODN         | 36.1075   | 38.8828   | 40.5367   | 14.9116   | 35.1907    | 24.1074     |
| HIST2H2BA    | 0.959743  | 0.814602  | 1.32261   | 0.144189  | 1.18341    | 1.47031     |
| SCG5         | 0.910197  | 0.649082  | 0.42531   | 0.527551  | 1.54822    | 1.17938     |
| MED6         | 18.7913   | 17.3364   | 16.9464   | 17.3379   | 16.1832    | 17.0558     |
| PSMD13       | 78.5909   | 79.341    | 69.5818   | 77.8717   | 65.4969    | 69.9139     |
| NT5DC4       | 0         | 0.0730588 | 0         | 0         | 0.0526294  | 0           |
| MIR3909      | 0         | 0         | 0         | 0         | 0          | 0           |
| ENPP4        | 6.86079   | 3.56279   | 4.44277   | 2.65837   | 2.73763    | 2.02178     |
| LOC10050734  | 0         | 0         | 0         | 0         | 0          | 0           |
| OR11H12      | 0         | 0         | 0         | 0         | 0          | 0           |
| GSDMB        | 14.707    | 22.8976   | 16.2481   | 22.8581   | 23.6484    | 23.4624     |
| MTOR         | 19.3873   | 15.5017   | 13.6667   | 12.4111   | 12.5067    | 12.3381     |
| ENDOG        | 10.2254   | 13.4608   | 16.5945   | 19.4059   | 10.4998    | 12.2353     |
| LOC10012826  | 0         | 0         | 0         | 0         | 0          | 0           |
| LRSAM1       | 14.4824   | 18.5322   | 17.1636   | 20.6697   | 24.6443    | 24.3082     |
| EEF1E1-MUTL1 | 0.729321  | 2.15E-31  | 3.37E-35  | 1.75E-38  | 0.00038499 | 0.000139064 |
| DCDC2C       | 0         | 0         | 0         | 0         | 0.0425439  | 0           |
| TRIM49L2     | 0         | 0         | 0         | 0         | 0          | 0           |
| ANKRD12      | 8.62665   | 7.59015   | 9.02197   | 6.89026   | 8.39343    | 6.78012     |
| APC2         | 0.0373491 | 0.172871  | 0.127013  | 0.218006  | 0.213474   | 0.174111    |
| EIF4G2       | 212.645   | 183.938   | 216.311   | 185.052   | 187.385    | 193.74      |
| LOC678655    | 7.47849   | 10.8917   | 7.40658   | 7.55861   | 16.7361    | 12.0676     |
| ABCD2        | 2.55607   | 0.954895  | 1.93496   | 0.456359  | 0.710807   | 0.3926      |
| GSTCD        | 3.17951   | 2.09765   | 2.27681   | 1.53035   | 3.48067    | 2.71562     |
| ZNF429       | 4.55706   | 3.83901   | 4.32842   | 4.84416   | 2.51908    | 2.49149     |
| GJA10        | 0         | 0         | 0         | 0         | 0          | 0           |
| MAN2B1       | 29.324    | 39.6351   | 30.6244   | 37.5256   | 39.0978    | 33.3814     |
| CAMTA1       | 30.4636   | 44.113    | 27.7951   | 34.4243   | 29.6411    | 25.7887     |
| TCAP         | 1.72607   | 2.28912   | 1.58664   | 2.77843   | 2.74836    | 2.45854     |
| RASA4        | 22.388    | 30.2391   | 29.5255   | 26.0343   | 24.0832    | 18.2406     |
| BRP44        | 58.128    | 52.1664   | 38.0629   | 40.0045   | 30.7986    | 33.8329     |
| LOC220594    | 3.33873   | 4.27576   | 8.36345   | 6.82731   | 5.19796    | 3.99298     |
| LOC158376    | 0.970287  | 1.22552   | 0.839443  | 0.52062   | 0.529698   | 0.604642    |
| MYO1H        | 0.273861  | 0.282486  | 0.0691048 | 0.085717  | 0.2471     | 0.270209    |
| LGALS14      | 0         | 0         | 0         | 0         | 0          | 0           |
| NSMCE4A      | 30.6701   | 37.6936   | 30.8067   | 32.2517   | 37.3975    | 34.5615     |
| C22orf42     | 0         | 0         | 0         | 0         | 0          | 0           |
| C7orf54      | 0         | 0         | 0.0890083 | 0.0368017 | 0.074887   | 0.048847    |
| MBOAT1       | 9.31697   | 9.18117   | 10.0203   | 10.9002   | 12.9467    | 9.01268     |

|             |           |          |           |           |           |            |
|-------------|-----------|----------|-----------|-----------|-----------|------------|
| KIRREL      | 2.11732   | 1.272    | 3.1851    | 1.55482   | 3.00827   | 2.01297    |
| OTOA        | 0.15136   | 0.147478 | 0.087689  | 0.250603  | 0.189712  | 0.123195   |
| XKR6        | 0.36428   | 0.345078 | 0.334854  | 0.586376  | 0.36459   | 0.405364   |
| LOC10050731 | 5.8912    | 9.97008  | 6.11169   | 11.2288   | 13.3562   | 8.53263    |
| B4GALT7     | 12.6738   | 16.7542  | 13.0074   | 15.505    | 13.6215   | 12.3782    |
| VPS37D      | 1.26094   | 2.05366  | 1.8086    | 2.92886   | 2.11343   | 1.77831    |
| VKORC1L1    | 25.0643   | 17.2552  | 28.4982   | 16.8374   | 16.5315   | 17.5328    |
| ZNF408      | 5.86158   | 7.801    | 6.00407   | 9.32484   | 7.35329   | 7.99745    |
| B9D2        | 3.064     | 6.21283  | 3.09589   | 3.50492   | 4.22452   | 3.67272    |
| DUSP18      | 2.01999   | 2.442    | 3.5888    | 2.12899   | 3.59706   | 3.13408    |
| LOC494558   | 0         | 0        | 0         | 0         | 0         | 0          |
| ATP8B4      | 1.13185   | 1.83712  | 0.869605  | 0.840714  | 1.24809   | 0.663212   |
| TPRXL       | 3.37859   | 3.34559  | 2.48941   | 6.34488   | 3.2708    | 2.8914     |
| WDR72       | 1.70394   | 1.47202  | 1.05358   | 2.68698   | 1.22608   | 1.11856    |
| TMEM214     | 34.6378   | 33.625   | 32.6599   | 32.7629   | 32.4728   | 31.2639    |
| LOC732275   | 0         | 0        | 0         | 0.0721029 | 0.0244534 | 0.334958   |
| SNORD113-4  | 0         | 0        | 0         | 0         | 0         | 0          |
| C12orf62    | 107.21    | 139.051  | 102.488   | 111.431   | 90.334    | 75.4389    |
| OR5D18      | 0         | 0        | 0         | 0         | 0         | 0          |
| KIAA0226    | 6.79032   | 7.88769  | 6.21756   | 5.33939   | 6.60115   | 6.50557    |
| DMKN        | 1605.89   | 1782.1   | 2477.91   | 2436.7    | 2920.07   | 2669.2     |
| TMEM8A      | 11.2082   | 12.6359  | 7.10438   | 10.4488   | 9.18791   | 8.88932    |
| ACY1        | 36.3635   | 40.9945  | 30.8329   | 30.7528   | 19.413    | 26.4277    |
| ADAMTS16    | 0.038777  | 0.102853 | 0.0587089 | 0         | 0.0987892 | 0.0483284  |
| DTHD1       | 0.235972  | 0.14836  | 0.127027  | 0.0218834 | 0.059374  | 0.0145229  |
| C1QTNF9B    | 0.838053  | 1.54211  | 2.78296   | 2.95286   | 4.38688   | 4.05905    |
| BARHL2      | 0         | 0        | 0         | 0         | 0         | 0          |
| CYP21A2     | 0.328656  | 0.201013 | 0.205924  | 0.391614  | 0.431872  | 0.0761339  |
| LOC10050749 | 0         | 0        | 0         | 0         | 0         | 0          |
| MIR3714     | 0         | 0        | 0         | 0         | 0         | 0          |
| IGF2-AS     | 0         | 0.133371 | 0.0761703 | 0.0945323 | 0.192221  | 0.188067   |
| RHBDL2      | 10.7495   | 9.75547  | 13.3902   | 8.75848   | 10.3964   | 11.7669    |
| NXF2B       | 0         | 0        | 0.0124371 | 0         | 0         | 0.00767858 |
| PLEKHG3     | 14.8159   | 21.3448  | 17.3076   | 23.0002   | 22.6781   | 23.3839    |
| AEN         | 6.17002   | 6.35496  | 4.76705   | 5.31574   | 4.23357   | 4.39983    |
| REEP1       | 2.46387   | 2.60975  | 2.5159    | 2.44092   | 2.55006   | 2.31213    |
| KLHL18      | 7.35794   | 6.93803  | 8.29489   | 8.27104   | 9.28583   | 8.80419    |
| CCDC149     | 6.15747   | 6.07589  | 5.05307   | 5.18079   | 5.03576   | 3.96009    |
| LINC00488   | 0         | 0        | 0         | 0         | 0.0508975 | 0          |
| SGK110      | 0.175025  | 0.154746 | 0         | 0.0821728 | 0         | 0          |
| IDS         | 31.8764   | 28.181   | 36.8927   | 31.8737   | 38.878    | 35.7238    |
| FBLN7       | 1.81623   | 3.52142  | 4.8792    | 2.71331   | 4.55677   | 3.51352    |
| ALPPL2      | 0.0202413 | 0        | 0         | 0         | 0         | 0          |



|             |           |           |           |           |           |           |
|-------------|-----------|-----------|-----------|-----------|-----------|-----------|
| TPRX1       | 0         | 0         | 0         | 0         | 0         | 0         |
| PIKFYVE     | 7.63576   | 5.5363    | 7.45252   | 4.6158    | 7.73315   | 5.35822   |
| HIST3H2A    | 12.1304   | 17.9715   | 10.1755   | 13.2373   | 15.6607   | 15.3226   |
| MIR4433     | 0         | 0         | 0         | 0         | 0         | 0         |
| MAP6D1      | 4.84551   | 4.24168   | 3.12331   | 4.09938   | 4.06392   | 3.9164    |
| NELL2       | 4.49661   | 2.06842   | 3.86765   | 3.6133    | 3.96177   | 7.63882   |
| C4orf44     | 0.0634016 | 0.39239   | 0.575944  | 0.476265  | 0.605713  | 0.316074  |
| ARNTL       | 8.96772   | 5.13184   | 8.76407   | 7.23668   | 9.75234   | 9.07095   |
| EVX2        | 0         | 0         | 0         | 0         | 0         | 0         |
| ATG2B       | 8.35087   | 6.60376   | 10.1596   | 8.10404   | 10.416    | 8.63796   |
| LOC10013233 | 0.0583871 | 0.0516222 | 0.0441994 | 0.109649  | 0.148748  | 0         |
| OR9Q1       | 0         | 0         | 0         | 0         | 0         | 0         |
| TTY4        | 0         | 0         | 0         | 0         | 0         | 0         |
| PHKA2       | 13.0957   | 14.808    | 15.4378   | 16.1588   | 15.8646   | 20.453    |
| LOC10050576 | 0.354419  | 0.0783387 | 0.134149  | 0         | 0.0564329 | 0.110429  |
| PLBD2       | 9.23697   | 7.66745   | 10.7554   | 8.37544   | 9.54307   | 7.6015    |
| CCNA2       | 4.7476    | 5.4487    | 4.35077   | 4.21595   | 4.83963   | 5.03895   |
| WASF2       | 48.377    | 45.4819   | 57.1313   | 56.0453   | 59.0319   | 51.9174   |
| UBQLN4      | 21.8052   | 21.3108   | 17.1008   | 20.8169   | 21.7065   | 20.0852   |
| NBPF9       | 1.81845   | 5.45679   | 4.4491    | 3.48222   | 2.639     | 4.94711   |
| LOC643387   | 3.43396   | 3.36963   | 3.45641   | 3.36607   | 3.96556   | 3.48021   |
| LOC10050618 | 0         | 0         | 0         | 0         | 0.0441084 | 0         |
| FTMT        | 0         | 0.491144  | 0.10513   | 0         | 0.176903  | 0.259626  |
| IFI27L1     | 13.2014   | 21.0106   | 16.7976   | 22.5435   | 14.9501   | 14.0764   |
| NUP188      | 13.8053   | 15.6335   | 14.3681   | 14.6882   | 15.6636   | 15.1784   |
| UPK2        | 0.25652   | 1.47419   | 0.194187  | 0.963473  | 0.653517  | 0.319705  |
| BTN3A1      | 29.0456   | 29.5683   | 16.0076   | 8.88002   | 31.9458   | 17.0804   |
| AFM         | 0         | 0         | 0.0391905 | 0.0972231 | 0         | 0.0645222 |
| LBR         | 14.1562   | 14.0189   | 12.2422   | 11.7748   | 12.6579   | 12.0476   |
| CFHR4       | 0         | 0.0665763 | 0         | 0         | 0         | 0         |
| CDH18       | 0.132847  | 0.176598  | 0.0251412 | 0.124741  | 0.0211525 | 0.0827847 |
| STAT2       | 50.6142   | 60.3006   | 36.7837   | 29.1181   | 50.1901   | 31.8919   |
| CHRAC1      | 11.7497   | 13.3743   | 11.3092   | 12.4734   | 11.7987   | 9.4354    |
| MNX1        | 0         | 0         | 0.265082  | 0.0616509 | 0         | 0.218212  |
| DSG2        | 19.0517   | 8.37004   | 12.4712   | 14.2717   | 11.1734   | 11.6825   |
| LOC10050576 | 4.99604   | 9.32516   | 6.51349   | 8.86116   | 8.13179   | 4.49702   |
| IQCE        | 5.11803   | 5.98801   | 5.12658   | 5.13459   | 5.64355   | 5.35599   |
| CENPO       | 3.43623   | 8.73751   | 5.35962   | 5.78149   | 6.00584   | 4.35448   |
| C11orf40    | 0         | 0         | 0         | 0         | 0         | 0         |
| MFSD3       | 25.4027   | 37.2116   | 28.4762   | 41.3025   | 32.7878   | 34.7884   |
| SPICE1      | 3.01515   | 1.94869   | 3.35032   | 3.34444   | 2.66156   | 2.86782   |
| MIR3610     | 0         | 0         | 0         | 0         | 0         | 0         |
| CLINT1      | 47.7032   | 35.2768   | 42.1143   | 31.7198   | 36.9366   | 36.4848   |

|             |           |          |           |          |           |           |
|-------------|-----------|----------|-----------|----------|-----------|-----------|
| LOC200261   | 0.0543948 | 0        | 0.0823543 | 0        | 0.0692887 | 0.0677931 |
| LOC10050620 | 4.4407    | 4.04638  | 6.00292   | 5.23346  | 6.20496   | 4.80034   |
| STX1A       | 1.28889   | 2.94734  | 1.61094   | 3.02152  | 3.81395   | 2.07735   |
| LOC10050746 | 0.290672  | 0.256994 | 0         | 0        | 0.370261  | 0.181134  |
| ULK4        | 4.34179   | 4.84271  | 3.9104    | 3.80508  | 3.06311   | 3.49649   |
| LOC441025   | 0         | 0        | 0         | 0        | 0         | 0         |
| GOLT1A      | 0.966319  | 0.732307 | 0.522506  | 1.03698  | 0.703376  | 1.11831   |
| ALKBH5      | 9.84368   | 10.6968  | 12.5944   | 11.7956  | 11.3891   | 9.88721   |
| SLC5A10     | 1.84154   | 2.46773  | 2.9002    | 4.46414  | 3.50274   | 5.28611   |
| KMO         | 1.00381   | 0.175626 | 0.117264  | 0.119795 | 0.369668  | 0.0773154 |
| LOC10065277 | 0         | 0        | 0         | 0        | 0         | 0         |
| LOC10050714 | 0         | 0        | 0.0505074 | 0        | 0.0424943 | 0.0194026 |
| SRSF12      | 0.381716  | 0.674979 | 0.536642  | 0.409629 | 0.729352  | 0.696617  |
| GPBAR1      | 2.1373    | 1.85005  | 2.9122    | 2.00268  | 1.93877   | 1.17658   |
| CLDND2      | 0.486019  | 1.28912  | 1.19574   | 0.912729 | 1.47035   | 0.68145   |
| CNPY1       | 0         | 0        | 0         | 0        | 0.0582064 | 0         |
| SSX6        | 0         | 0        | 0         | 0        | 0         | 0         |
| LINC00277   | 0.119715  | 0.317533 | 0.18125   | 0.149881 | 0.127079  | 0.223804  |
| FLJ22184    | 0.407511  | 0.511998 | 0.324724  | 0.886128 | 0.614714  | 0.521252  |
| NUB1        | 30.9142   | 29.0248  | 27.9184   | 24.175   | 28.5283   | 21.8688   |
| LOC283332   | 0         | 0        | 0         | 0        | 0         | 0         |
| C14orf55    | 0.490069  | 0.375517 | 0.321521  | 0.398812 | 0.603447  | 0.508984  |
| TMCC3       | 9.18139   | 6.60097  | 5.87442   | 4.80148  | 4.60947   | 5.30405   |
| NELL1       | 1.65747   | 0.699949 | 0.773099  | 0.481112 | 0.465571  | 0.663625  |
| TRIML2      | 0         | 0        | 0.0643554 | 0.079826 | 0         | 0         |
| LOC10065292 | 0         | 0.137383 | 0.0882214 | 0        | 0.074225  | 0.0968304 |
| LOC10050649 | 0.218726  | 0.193384 | 0.165577  | 0.246456 | 0.250754  | 0.381642  |
| ZNF704      | 4.25208   | 3.3449   | 4.88989   | 4.21275  | 4.5786    | 3.46532   |
| LOC10012906 | 2.94764   | 4.5655   | 4.03324   | 4.44526  | 4.74206   | 4.07253   |
| SLC2A1      | 62.597    | 67.386   | 63.6197   | 77.5594  | 74.5207   | 66.8982   |
| ACTR5       | 5.70512   | 7.71028  | 5.95378   | 8.72429  | 6.61841   | 6.12003   |
| TLE4        | 8.69353   | 8.15429  | 8.92372   | 8.22044  | 10.7108   | 10.0229   |
| LOC286437   | 3.362     | 1.81437  | 2.97474   | 2.04991  | 3.89323   | 3.10177   |
| HLA-DOA     | 7.56185   | 5.76268  | 7.77488   | 4.66298  | 7.88919   | 3.28801   |
| RPLP2       | 2238.37   | 3649.05  | 2705.41   | 3865.35  | 2846.97   | 2627.06   |
| SNORD12C    | 0         | 0        | 0         | 0        | 0         | 0         |
| CHIC2       | 13.4855   | 10.4435  | 15.7227   | 14.234   | 18.1811   | 17.2366   |
| DCLRE1C     | 3.92693   | 5.50746  | 3.84708   | 4.19131  | 5.10759   | 4.22419   |
| CCL22       | 6.48538   | 7.27308  | 6.87325   | 4.32687  | 9.34814   | 4.4881    |
| RBMX2       | 16.6507   | 18.0136  | 14.2002   | 20.0547  | 14.4084   | 14.5789   |
| CYP11B1     | 0         | 0        | 0         | 0        | 0         | 0         |
| SEPP1       | 308.955   | 235.787  | 317.428   | 235.315  | 244.337   | 225.32    |
| SLX4        | 1.77297   | 2.18996  | 2.29942   | 1.76272  | 2.38298   | 2.39653   |

|             |           |           |          |          |           |           |
|-------------|-----------|-----------|----------|----------|-----------|-----------|
| SLC11A1     | 0.405904  | 0.583172  | 0.499317 | 0.381138 | 0.581676  | 0.316178  |
| LOC10050740 | 0.316615  | 0.331208  | 0.330195 | 0.422335 | 0.356946  | 0.698815  |
| PGA3        | 0.175737  | 0.2158    | 1.38081  | 0.271629 | 0.0414548 | 0         |
| MIR2909     | 0         | 0         | 0        | 0        | 0         | 0         |
| SUMO1       | 55.3849   | 60.5246   | 49.8594  | 53.4655  | 50.5245   | 50.817    |
| CHFR        | 11.8154   | 16.8736   | 14.9615  | 16.9192  | 16.4025   | 15.2666   |
| ACTA1       | 2.38192   | 5.74348   | 4.15265  | 3.99874  | 4.91894   | 8.4111    |
| NBPF15      | 21.8893   | 23.206    | 20.8225  | 21.9758  | 21.1374   | 19.4725   |
| LOC10050670 | 0.0814298 | 0.0719951 | 0.154107 | 0.267615 | 0.0518631 | 0.355205  |
| ACTN3       | 0.139686  | 0.154377  | 0.158615 | 0.262326 | 0.200175  | 0.108808  |
| LOC399715   | 0.100797  | 0.386181  | 0.254348 | 0.252393 | 0.556387  | 0.355939  |
| DPF1        | 0.276151  | 0.371212  | 0.2839   | 0.666784 | 0.26741   | 0.488391  |
| LOC10050656 | 0         | 0         | 0        | 0        | 0         | 0         |
| LOC10050617 | 0         | 0         | 0        | 0        | 0         | 0         |
| BTAF1       | 27.7156   | 26.0822   | 38.7754  | 25.796   | 40.3246   | 29.4958   |
| HEBP2       | 110.219   | 118.009   | 109.089  | 112.342  | 92.1493   | 106.716   |
| PENK        | 0.0933549 | 0.388003  | 0.577144 | 0.631147 | 0.485579  | 0.261788  |
| COMMD2      | 11.2327   | 9.18347   | 11.1842  | 8.71084  | 11.2278   | 9.27259   |
| HIST1H2BI   | 0         | 0         | 0        | 0        | 0         | 0         |
| RHOXF1      | 1.19517   | 3.17009   | 4.00676  | 3.04611  | 2.39238   | 2.12795   |
| LOC10050589 | 4.41929   | 1.94757   | 2.36971  | 2.75152  | 1.93001   | 2.19227   |
| ASF1A       | 13.2317   | 10.0274   | 11.6301  | 8.04375  | 11.1426   | 10.5011   |
| TM4SF1      | 86.3748   | 72.6648   | 65.4493  | 118.018  | 68.9449   | 91.5001   |
| COL23A1     | 5.31295   | 9.88167   | 6.64599  | 7.544    | 7.88188   | 5.43052   |
| CHD1        | 8.01209   | 6.70476   | 7.48638  | 6.48219  | 8.48294   | 6.43905   |
| TCP10L      | 0.631929  | 0.755904  | 0.140698 | 0.453754 | 0.520855  | 0.393791  |
| MATN4       | 1.39674   | 0.989263  | 5.21175  | 0.441968 | 0.883554  | 1.08928   |
| SLC35F5     | 13.3155   | 8.48877   | 16.234   | 10.3315  | 16.0911   | 16.3115   |
| CCDC25      | 14.9781   | 14.0763   | 12.5077  | 12.0153  | 12.5423   | 11.1468   |
| NFYC        | 31.0848   | 31.4911   | 29.9308  | 36.87    | 32.0645   | 33.6949   |
| WBSCR22     | 41.5802   | 46.3081   | 44.7715  | 45.3961  | 39.4996   | 39.3166   |
| OR52N2      | 0         | 0.217141  | 0.185918 | 0.230611 | 0.078211  | 0         |
| PADI1       | 8.53573   | 6.10927   | 6.84621  | 10.0186  | 6.37489   | 15.6565   |
| FAS-AS1     | 0.206677  | 0.0609102 | 0.104304 | 0.129378 | 0.351023  | 0.257585  |
| ZNF596      | 3.61017   | 2.93006   | 3.97648  | 2.71442  | 4.93087   | 3.76921   |
| LOC10065275 | 2.19268   | 2.47342   | 1.48816  | 1.98789  | 2.79306   | 2.07313   |
| FAM69C      | 0.90892   | 1.38399   | 0.688058 | 1.84917  | 1.64021   | 1.9824    |
| SOX15       | 13.4734   | 24.2221   | 18.1414  | 26.326   | 20.1993   | 18.881    |
| MYO18B      | 0.28732   | 0.185637  | 0.317888 | 0.228283 | 0.436374  | 0.420068  |
| SPINK5      | 193.632   | 125.774   | 179.354  | 142.733  | 189.626   | 214.496   |
| ATXN10      | 26.0653   | 21.5002   | 21.7496  | 21.7771  | 22.6379   | 23.146    |
| XAGE1A      | 0.068236  | 0.0603299 | 0        | 0        | 0         | 0.0425217 |
| LOC10050669 | 7.31108   | 16.7661   | 11.9368  | 18.0635  | 14.6714   | 14.3004   |

|             |          |          |          |           |          |           |
|-------------|----------|----------|----------|-----------|----------|-----------|
| FAIM2       | 1.34462  | 0.864603 | 0.663168 | 0.650419  | 0.544979 | 0.83791   |
| MSLN        | 0.63799  | 0.907132 | 0.957446 | 1.85005   | 0.406339 | 0.367473  |
| MIR4476     | 0        | 0        | 0        | 0         | 0        | 0         |
| DPPA3       | 0        | 0        | 0        | 0         | 0        | 0         |
| LOC441528   | 1.04778  | 1.20422  | 2.04215  | 1.82017   | 2.40203  | 2.4481    |
| DNM1L       | 18.9503  | 17.4534  | 16.3885  | 15.0407   | 18.1274  | 15.7213   |
| LOC10012836 | 3.46042  | 5.14591  | 4.82134  | 5.16014   | 4.50834  | 4.58889   |
| LUZP1       | 8.84957  | 7.02888  | 8.74212  | 7.51771   | 8.05702  | 7.70092   |
| GNAQ        | 5.86203  | 3.98996  | 4.86022  | 2.49007   | 4.53361  | 4.00087   |
| YBEY        | 10.1109  | 12.8621  | 10.1071  | 10.792    | 10.4809  | 8.96277   |
| MIS18A      | 9.04784  | 9.68364  | 7.67324  | 8.30415   | 7.88569  | 9.66554   |
| OR6T1       | 0        | 0        | 0        | 0         | 0        | 0         |
| LOC10028878 | 9.44E-07 | 1.30E-07 | 6.35E-08 | 8.35E-08  | 1.04E-07 | 4.06E-07  |
| ECSCR       | 35.4798  | 20.7705  | 46.6307  | 41.361    | 19.2144  | 43.801    |
| MIR3921     | 0        | 0        | 0        | 0         | 0        | 0         |
| CPNE8       | 4.17839  | 4.4482   | 6.92862  | 4.5907    | 5.46731  | 4.32195   |
| ARHGEF10    | 8.56459  | 11.1384  | 11.6719  | 11.9905   | 10.6254  | 8.9308    |
| ESCO1       | 6.67679  | 5.38905  | 6.00002  | 4.9953    | 5.69284  | 5.64154   |
| SNORA13     | 0        | 261.465  | 0        | 0         | 31.3919  | 30.7143   |
| SIRT7       | 20.3243  | 29.1601  | 19.1169  | 28.6263   | 26.5095  | 27.1886   |
| LOC10065280 | 215.861  | 182.758  | 173.637  | 177.412   | 187.986  | 180.155   |
| LOC10050743 | 0.201717 | 0.178345 | 0        | 0.568227  | 0.128475 | 0         |
| LOC10050711 | 0        | 0        | 0.266806 | 0         | 0.149651 | 0.366052  |
| ZNF677      | 0.675528 | 0.398173 | 0.596608 | 0.475732  | 0.806714 | 0.666521  |
| C17orf28    | 9.23537  | 6.52183  | 8.8228   | 10.1126   | 8.88886  | 7.09734   |
| SLMO1       | 2.26819  | 3.03385  | 2.04141  | 3.27955   | 3.70673  | 3.32235   |
| FEM1C       | 6.51075  | 4.882    | 6.5882   | 4.99913   | 5.31202  | 5.91635   |
| KRTAP7-1    | 3.45709  | 0.679232 | 0.436173 | 4.68889   | 0.489298 | 1786.64   |
| FLJ46446    | 0.244421 | 0.300141 | 0.246704 | 0         | 0.282518 | 0.211546  |
| RRP1B       | 11.0792  | 10.8505  | 10.7526  | 9.85195   | 10.3494  | 7.87187   |
| ASPEN       | 6.7471   | 8.54196  | 6.10488  | 4.4139    | 6.5602   | 4.55281   |
| LOC91948    | 0.302329 | 0        | 0        | 0.0766479 | 0        | 0.0508674 |
| LOC644075   | 0.136182 | 0.240806 | 0.592769 | 0.255745  | 0.281888 | 0.297019  |
| OR6C6       | 0        | 0        | 0        | 0         | 0        | 0         |
| NHEJ1       | 7.91605  | 7.99254  | 7.47212  | 8.44247   | 7.59378  | 7.33852   |
| RNASE8      | 0        | 0        | 0        | 0         | 0        | 0.229588  |
| CXorf68     | 0        | 0        | 0        | 0         | 0        | 0.0717488 |
| MIR1307     | 0        | 29.7676  | 29.1224  | 0         | 59.0318  | 102.226   |
| SREBF2      | 50.7014  | 38.1269  | 47.7888  | 40.7886   | 50.2624  | 52.7895   |
| NUDT19      | 11.03    | 9.72241  | 10.1263  | 9.41261   | 10.4629  | 10.6131   |
| ABCA2       | 11.402   | 13.8115  | 15.0643  | 12.7704   | 17.2386  | 13.6312   |
| ANKRD22     | 27.207   | 28.5121  | 24.9152  | 25.3013   | 17.422   | 22.0192   |
| SLFN11      | 6.93597  | 6.88189  | 7.62364  | 3.7812    | 7.3134   | 5.36996   |

|             |           |           |           |           |           |           |
|-------------|-----------|-----------|-----------|-----------|-----------|-----------|
| BTBD9-AS1   | 0         | 0         | 0         | 0.198068  | 0         | 0         |
| C1QB        | 28.9252   | 19.6722   | 13.7275   | 4.80529   | 13.8878   | 5.26884   |
| NCOR2       | 18.7619   | 22.4757   | 23.7591   | 25.6016   | 25.208    | 25.0558   |
| NAT8B       | 0         | 0         | 0         | 0.140329  | 0         | 0         |
| TMEM18      | 14.2082   | 18.1166   | 17.5968   | 19.4219   | 16.8365   | 15.8407   |
| DDX23       | 30.3216   | 29.0804   | 28.858    | 27.7903   | 32.3857   | 28.8043   |
| USP10       | 20.5002   | 17.8414   | 17.2406   | 19.441    | 18.7771   | 17.6994   |
| ELP3        | 9.42604   | 9.20259   | 9.85498   | 9.1392    | 9.99931   | 8.76303   |
| SFT2D1      | 60.6197   | 50.8564   | 51.7539   | 43.8273   | 44.5299   | 44.0514   |
| LOC644662   | 3.33031   | 1.23977   | 1.45956   | 0.658339  | 0.223273  | 0.873814  |
| CCDC122     | 2.53961   | 1.69755   | 1.8304    | 1.70039   | 1.65928   | 2.24414   |
| FAM193B     | 33.4536   | 57.4321   | 43.8488   | 54.885    | 64.4817   | 52.8567   |
| CABP4       | 0.897215  | 0.83614   | 0.49563   | 0.45539   | 0.772218  | 0.347553  |
| 4-Mar       | 0.0217872 | 0         | 0.0494791 | 0.0204578 | 0.0277528 | 0.095038  |
| MIR3120     | 0         | 0         | 0         | 0         | 0         | 0         |
| GPI         | 89.5899   | 87.9436   | 78.016    | 82.4142   | 75.1942   | 70.8472   |
| ACTR10      | 28.9994   | 27.0313   | 30.2948   | 25.5573   | 25.5588   | 23.0279   |
| TOP3B       | 7.94393   | 9.73135   | 8.16301   | 8.14823   | 13.1127   | 11.1001   |
| EGF         | 2.55143   | 0.576266  | 0.719289  | 1.15722   | 0.583172  | 1.10797   |
| NTN4        | 19.7016   | 11.8285   | 11.7095   | 12.6133   | 9.9209    | 10.789    |
| NDUFA4      | 38.1937   | 39.1679   | 31.2244   | 35.6753   | 26.5256   | 26.6393   |
| MIR566      | 0         | 0         | 0         | 0         | 0         | 0         |
| ANKRD13B    | 4.52277   | 7.50797   | 5.83943   | 7.06667   | 6.59552   | 7.35321   |
| DEFB132     | 1.88772   | 0.984285  | 1.942     | 0.272699  | 0.554908  | 0.211139  |
| PGM1        | 79.8805   | 65.0443   | 73.9493   | 58.003    | 43.2779   | 43.1767   |
| C11orf67    | 28.0534   | 37.8631   | 48.8285   | 42.008    | 42.5031   | 38.4072   |
| MGAT4B      | 44.7682   | 60.8788   | 48.0988   | 66.824    | 57.2972   | 61.4949   |
| CABS1       | 0         | 0         | 0         | 0         | 0         | 0         |
| tAKR        | 0         | 0.0689975 | 0         | 0         | 0.0497037 | 0         |
| AK8         | 0.780592  | 0.862687  | 1.14489   | 0.916204  | 0.963254  | 1.85452   |
| LOC1005068: | 0         | 0         | 0         | 0         | 0         | 0         |
| ELAC2       | 20.5902   | 22.5003   | 18.662    | 21.6342   | 22.2028   | 21.974    |
| FSD2        | 0         | 0.035808  | 0.0613182 | 0.0380293 | 0.025795  | 0.0252382 |
| GLTPD2      | 1.1083    | 1.06634   | 1.21637   | 0.439622  | 1.49766   | 0.251633  |
| MIR500B     | 0         | 0         | 0         | 0         | 0         | 0         |
| MMAB        | 16.81     | 18.461    | 14.2127   | 18.5333   | 14.3133   | 14.5833   |
| LOC1001280: | 0.0513383 | 0.0453901 | 0.0777268 | 0         | 0.0326977 | 0.0319919 |
| DPY19L2P3   | 0.502806  | 0.6751    | 0.597928  | 0.347466  | 0.830836  | 0.513357  |
| FHDC1       | 7.6292    | 6.90152   | 7.69303   | 8.87856   | 9.69002   | 15.7678   |
| MAN2B2      | 11.8915   | 11.4051   | 16.3735   | 13.4465   | 14.3887   | 13.5784   |
| MIR26B      | 0         | 0         | 0         | 0         | 0         | 0         |
| ATP6AP1L    | 6.28248   | 10.2084   | 5.52709   | 3.34816   | 6.70495   | 6.3486    |
| TMEM200A    | 0.921165  | 0.407218  | 1.00241   | 0.66674   | 0.660032  | 0.621867  |

|             |          |           |           |            |           |           |
|-------------|----------|-----------|-----------|------------|-----------|-----------|
| MIR4756     | 0        | 0         | 0         | 0          | 0         | 0         |
| HSPE1-PHOCL | 6.58E-09 | 0.799475  | 9.28E-09  | 0.00617591 | 5.76E-05  | 2.36E-05  |
| C1QTNF2     | 2.10062  | 1.89438   | 1.43116   | 2.24859    | 1.17735   | 1.54464   |
| FOLR1       | 3.03762  | 2.1287    | 1.44182   | 4.39234    | 1.25864   | 0.874693  |
| HOXA11-AS1  | 0        | 0.122277  | 0.157042  | 0.194793   | 0.132127  | 0.0861832 |
| INTS5       | 8.8358   | 9.48607   | 8.66807   | 9.22793    | 9.8961    | 9.51393   |
| IPP         | 4.96997  | 2.32126   | 3.9299    | 3.07056    | 3.71692   | 3.32548   |
| SEPT5-GP1BE | 14.2449  | 12.9884   | 15.6852   | 17.6353    | 23.9316   | 18.9423   |
| SSRP1       | 52.4025  | 51.8757   | 48.4128   | 49.2717    | 49.7811   | 48.1546   |
| SIGLEC16    | 0.2647   | 0.351047  | 0.752318  | 0.375931   | 0.547915  | 0.288663  |
| ZFYVE20     | 7.60965  | 7.27075   | 8.28957   | 8.35187    | 8.87487   | 8.39861   |
| SMAD2       | 10.3595  | 9.05538   | 10.6282   | 9.5694     | 8.29677   | 8.22684   |
| PLEKHG2     | 3.7823   | 5.31961   | 4.26176   | 4.16102    | 5.27111   | 4.72172   |
| ORAI2       | 1.40817  | 1.50887   | 1.47916   | 1.1976     | 1.49307   | 1.24261   |
| SYMPK       | 23.0148  | 30.1425   | 23.6458   | 26.1682    | 29.8342   | 28.5969   |
| ADAM15      | 117.45   | 143.972   | 111.18    | 142.392    | 136.926   | 136.941   |
| TMEM155     | 0.219558 | 0.24265   | 0.0997242 | 0.164929   | 0.195773  | 0.0273639 |
| CHM         | 5.02088  | 3.88153   | 6.00313   | 3.19989    | 4.9634    | 4.0394    |
| T           | 0        | 0         | 0         | 0          | 0         | 0.0249643 |
| CYP24A1     | 0.77617  | 0.829176  | 0.223826  | 0.488025   | 0.742099  | 0.886128  |
| RNU6-2      | 0        | 0         | 0         | 0          | 0         | 0         |
| FXD7        | 0.185125 | 0.491028  | 1.12113   | 0.869149   | 2.82978   | 1.26898   |
| TMEM102     | 5.24769  | 7.60908   | 4.25061   | 7.63763    | 5.18054   | 6.57298   |
| UNC5CL      | 1.45697  | 2.49231   | 1.48656   | 2.31977    | 2.94524   | 2.46718   |
| LOC644100   | 0.215874 | 0.190862  | 0         | 0          | 0         | 0         |
| CASP3       | 11.2371  | 11.8197   | 11.8578   | 9.87445    | 12.5845   | 10.9478   |
| C19orf6     | 83.4905  | 160.588   | 114.723   | 149.384    | 156.917   | 126.718   |
| SCD5        | 4.984    | 4.86588   | 6.69915   | 6.56972    | 6.52449   | 6.9409    |
| DNAJB14     | 5.78678  | 4.70056   | 6.89944   | 3.36215    | 5.7818    | 4.5977    |
| SCRN3       | 9.33613  | 6.81232   | 8.82178   | 5.99147    | 8.53391   | 8.55952   |
| MIR506      | 0        | 0         | 0         | 0          | 0         | 0         |
| MAN2A2      | 20.8656  | 20.6311   | 21.0336   | 19.3205    | 20.9874   | 15.6239   |
| LOC10012943 | 1.34858  | 1.07306   | 1.00421   | 1.09224    | 0.678085  | 0.650308  |
| SUSD3       | 3.68939  | 2.92737   | 2.36321   | 1.5989     | 4.94059   | 3.06543   |
| TMIGD1      | 0        | 0         | 0         | 0          | 0         | 0         |
| CEACAM22P   | 0.065879 | 0.0582461 | 0.0498708 | 0          | 0.0419587 | 0         |
| SOCS4       | 6.11539  | 4.28157   | 5.53372   | 3.59878    | 5.34014   | 4.26768   |
| HEATR1      | 7.08889  | 5.01474   | 7.07349   | 5.28254    | 6.61065   | 5.81364   |
| HBXIP       | 77.254   | 84.2234   | 71.1601   | 76.6309    | 64.7415   | 62.801    |
| MIR646      | 0        | 0         | 0         | 0          | 0         | 0         |
| MIR4660     | 0        | 0         | 0         | 0          | 0         | 0         |
| XAF1        | 45.0214  | 49.6805   | 25.745    | 14.6461    | 24.441    | 13.8336   |
| CLEC2B      | 20.3437  | 24.6086   | 23.5347   | 19.245     | 29.2339   | 22.8319   |

|             |           |           |           |          |          |           |
|-------------|-----------|-----------|-----------|----------|----------|-----------|
| TFAM        | 14.7413   | 12.4646   | 12.9448   | 10.5198  | 12.9737  | 10.5557   |
| LYRM1       | 25.7215   | 27.0283   | 28.4645   | 27.8747  | 23.3616  | 23.7466   |
| ENTPD4      | 7.34627   | 7.08047   | 8.51672   | 6.75636  | 9.21931  | 6.85082   |
| THRSP       | 927.769   | 853.881   | 553.643   | 531.007  | 341.621  | 464.261   |
| TSR1        | 15.0569   | 14.3866   | 15.7293   | 14.0139  | 14.7107  | 13.1218   |
| OXGR1       | 7.35391   | 2.36431   | 4.75721   | 3.34798  | 1.78834  | 4.77706   |
| ST14        | 37.4144   | 41.3295   | 40.1185   | 53.947   | 45.6398  | 50.6248   |
| SLC30A3     | 0.343872  | 0.0434329 | 0.0743752 | 0.322891 | 0.312877 | 0.367349  |
| RAB5B       | 90.3784   | 73.6319   | 91.0186   | 84.0484  | 94.2209  | 93.5867   |
| CCDC166     | 1.0017    | 1.54987   | 0.315955  | 1.25411  | 0.159497 | 0.208073  |
| LOC113230   | 4.42068   | 6.16339   | 5.72763   | 10.0581  | 8.66325  | 7.20481   |
| TRIM38      | 9.70575   | 8.31471   | 8.94455   | 6.22665  | 10.8275  | 9.18502   |
| TREML3      | 0         | 0.0884446 | 0         | 0        | 0        | 0         |
| ZNF193      | 7.21314   | 8.45912   | 6.4246    | 7.58369  | 8.42885  | 7.27572   |
| FLJ31104    | 0.0444832 | 0.0786585 | 0.101022  | 0.041769 | 0.226653 | 0.0831602 |
| MYBPC1      | 9.54315   | 1.00875   | 0.623757  | 1.06331  | 2.03151  | 2.26024   |
| MAPKBP1     | 10.9276   | 15.0445   | 13.2296   | 15.4715  | 17.0157  | 13.9634   |
| FAM45B      | 8.20806   | 8.78676   | 10.2341   | 10.2385  | 8.48229  | 8.19893   |
| LCN2        | 86.8912   | 30.4877   | 41.8582   | 132.084  | 174.055  | 192.733   |
| FAM104B     | 18.6064   | 15.5631   | 14.9043   | 14.7712  | 15.1694  | 14.1886   |
| ST6GALNAC3  | 0.789333  | 0.297762  | 0.900865  | 0.485734 | 0.347487 | 0.548456  |
| SCARNA5     | 0         | 0         | 0         | 0        | 0        | 0.812091  |
| SNORA70C    | 0         | 0         | 0         | 0        | 0        | 0         |
| NEU3        | 2.07617   | 0.869502  | 2.261     | 1.26546  | 2.22707  | 1.79313   |
| APOA4       | 0         | 0         | 0         | 0        | 0        | 0         |
| MIR711      | 0         | 0         | 0         | 0        | 0        | 0         |
| DHPS        | 35.7201   | 36.7744   | 42.6795   | 48.2101  | 45.8483  | 39.4165   |
| SNORD116-7  | 0         | 0         | 0         | 0        | 0        | 0         |
| ADAMTSL2    | 1.02869   | 1.15692   | 0         | 0        | 0        | 0         |
| TTI2        | 5.22503   | 4.63774   | 5.25281   | 4.63214  | 4.84708  | 5.64128   |
| LOC646670   | 0         | 0         | 0.0662474 | 0        | 0        | 0         |
| C7orf28B    | 27.1465   | 26.3661   | 22.5318   | 20.7341  | 26.1339  | 23.9385   |
| PTPDC1      | 2.75701   | 2.63273   | 2.98524   | 2.69252  | 3.45572  | 2.58404   |
| SCARF2      | 3.32057   | 6.1699    | 5.35734   | 6.22801  | 5.76111  | 4.33113   |
| C2CD4B      | 0.203337  | 0.89889   | 0.667019  | 0.763722 | 1.42457  | 1.56277   |
| ZNF800      | 6.74684   | 5.13042   | 7.37348   | 5.14598  | 6.58498  | 5.32359   |
| GPR133      | 2.26617   | 1.70385   | 2.97174   | 2.89863  | 2.13659  | 1.62345   |
| GTF3A       | 76.8261   | 90.0389   | 70.9697   | 79.9425  | 62.2441  | 64.7808   |
| LOC10050684 | 9.92883   | 14.2274   | 10.0076   | 11.1767  | 12.9879  | 9.39522   |
| IKBKG       | 19.0209   | 25.0896   | 17.9201   | 22.8999  | 22.3184  | 18.5621   |
| MTRNR2L3    | 0         | 0         | 0.059784  | 0        | 0        | 0         |
| KCTD17      | 11.1875   | 12.4884   | 9.55717   | 10.4462  | 18.8285  | 14.2936   |
| LOC554223   | 0.821037  | 1.12627   | 0.293389  | 0.233984 | 0.330555 | 0.340989  |

|             |          |           |           |          |           |           |
|-------------|----------|-----------|-----------|----------|-----------|-----------|
| CFD         | 315.694  | 518.567   | 723.531   | 509.874  | 512       | 444.331   |
| ZNF541      | 0.584908 | 0.7203    | 0.553473  | 0.745369 | 0.266094  | 0.36449   |
| NEBL        | 21.5214  | 15.5817   | 24.3498   | 19.9161  | 22.4957   | 21.3724   |
| HYLS1       | 3.88019  | 3.42127   | 3.05739   | 3.7381   | 3.05414   | 3.02181   |
| OFD1        | 12.0838  | 12.2744   | 12.3593   | 13.2376  | 14.2523   | 14.9933   |
| MIR632      | 0        | 0         | 0         | 0        | 0         | 0         |
| FEZF1       | 0        | 0         | 0         | 0        | 0         | 1.91E-07  |
| TET3        | 7.22398  | 5.13687   | 9.37381   | 8.22353  | 9.52946   | 8.73101   |
| UOX         | 0.138094 | 0.183141  | 0.0522689 | 0        | 0.219882  | 0.0430271 |
| ZNF784      | 6.06053  | 7.64823   | 6.58769   | 8.56044  | 8.47878   | 6.84319   |
| WIBG        | 35.8924  | 45.4923   | 29.403    | 34.6041  | 30.3907   | 35.6303   |
| LOC10050701 | 1.53559  | 1.08614   | 2.09241   | 2.30703  | 3.71649   | 1.72244   |
| EIF6        | 125.379  | 149.583   | 111.657   | 137.684  | 124.057   | 134.544   |
| HIST1H2BE   | 0.837117 | 0         | 0         | 0        | 0         | 0         |
| PLP1        | 14.6867  | 13.148    | 12.4569   | 12.294   | 15.1039   | 11.7121   |
| TMEM168     | 18.0534  | 18.7348   | 24.1735   | 20.9869  | 24.4752   | 21.346    |
| FKBP7       | 3.70594  | 2.0633    | 4.00096   | 2.64301  | 2.68893   | 2.63087   |
| C6orf225    | 2.70473  | 2.45778   | 2.24656   | 1.41095  | 2.63184   | 2.17707   |
| ARHGAP33    | 7.29905  | 12.7576   | 8.25397   | 12.2122  | 15.9178   | 12.7972   |
| ETS1        | 21.294   | 17.8461   | 16.354    | 11.3494  | 13.8936   | 9.48598   |
| POU2AF1     | 0.294772 | 0.318534  | 0.272732  | 0.215278 | 0.312903  | 0.224509  |
| SSTR1       | 0.814932 | 0.440313  | 0.274181  | 0.637674 | 0.519035  | 0.846385  |
| LOC10050639 | 0        | 0         | 0.140423  | 0        | 0         | 0         |
| TMOD2       | 3.50876  | 2.72453   | 3.31814   | 2.71758  | 3.54771   | 3.04463   |
| MORN3       | 1.56493  | 0.691808  | 1.62891   | 1.19393  | 2.61638   | 1.27995   |
| RAD9B       | 0.441931 | 0.439569  | 0.418181  | 0.414967 | 0.457386  | 0.344241  |
| FBXL20      | 3.82242  | 3.39732   | 4.78579   | 3.81442  | 5.37453   | 4.74226   |
| ERN1        | 1.48505  | 0.860973  | 2.37738   | 1.60017  | 2.40335   | 2.24528   |
| POSTN       | 34.7779  | 42.9273   | 66.5205   | 73.98    | 84.3367   | 76.7287   |
| LOC553103   | 1.30338  | 1.54606   | 1.40176   | 2.21869  | 1.4209    | 1.19544   |
| MANSC1      | 27.8725  | 19.2757   | 21.7034   | 23.1344  | 20.9131   | 24.6313   |
| LOC401176   | 0        | 0         | 0         | 0        | 0         | 0         |
| MIR637      | 0        | 0         | 0         | 0        | 0         | 0         |
| LOC10019093 | 2.81029  | 3.52837   | 3.61833   | 1.54408  | 2.56184   | 1.56374   |
| RPS13       | 573.88   | 769.775   | 876.858   | 1154.61  | 732.76    | 670.008   |
| GJB1        | 3.52374  | 1.00285   | 0.559014  | 1.56766  | 1.06007   | 2.07819   |
| MIR223      | 0        | 0         | 0         | 418.462  | 0         | 0         |
| TEAD3       | 24.0297  | 28.1805   | 26.896    | 34.2666  | 35.8167   | 31.3777   |
| OR6K3       | 0        | 0         | 0         | 0        | 0         | 0         |
| MIR99B      | 0        | 0         | 0         | 0        | 0         | 0         |
| MIR103A1    | 0        | 0         | 0         | 0        | 0         | 0         |
| FOXS1       | 2.25791  | 3.10536   | 2.15239   | 3.53357  | 2.07722   | 3.02252   |
| LOC723809   | 0.171155 | 0.0504414 | 0.25913   | 0.107141 | 0.0726729 | 0.0355521 |



|             |          |           |           |          |           |           |
|-------------|----------|-----------|-----------|----------|-----------|-----------|
| LOC10050737 | 4.42965  | 1.58612   | 8.16051   | 10.0793  | 2.82127   | 3.02972   |
| TTC39C      | 18.8617  | 22.2711   | 18.6821   | 20.338   | 18.7484   | 15.7899   |
| PFDN5       | 530.584  | 705.199   | 537.674   | 748.647  | 568.379   | 500.145   |
| RSL1D1      | 34.681   | 36.9942   | 34.3427   | 36.2615  | 33.3      | 30.2564   |
| LOC10050720 | 0.590281 | 0         | 0.458528  | 0.280451 | 0.535808  | 0.525111  |
| TBC1D10C    | 6.87232  | 9.41517   | 5.71793   | 2.55795  | 13.1311   | 5.47856   |
| DGAT2       | 823.986  | 723.266   | 546.261   | 472.924  | 458.554   | 506.311   |
| PELI2       | 3.03025  | 3.14057   | 4.84271   | 3.22474  | 5.46829   | 5.97969   |
| PSG5        | 0.271913 | 0.0120193 | 0.205839  | 0.287238 | 0.0432952 | 0.0423607 |
| KLRC2       | 0.091686 | 0.243189  | 0.0694068 | 0        | 0.116791  | 0         |
| LOC10023320 | 0.685799 | 0.356671  | 0.610769  | 0.113639 | 0.822191  | 0.251389  |
| ITGAV       | 26.5526  | 22.1436   | 32.7494   | 16.0049  | 27.5192   | 21.8243   |
| CDKL2       | 1.33278  | 1.25087   | 1.64532   | 1.50175  | 2.15479   | 1.83995   |
| ZCCHC4      | 4.28795  | 4.17024   | 5.27475   | 4.05987  | 5.18893   | 3.34008   |
| KRTAP4-4    | 6.61873  | 1.76232   | 0.161616  | 61.4098  | 0.5439    | 786       |
| GPR116      | 6.77702  | 7.19591   | 7.22164   | 4.93379  | 5.56221   | 3.88412   |
| DBT         | 7.49516  | 5.64929   | 6.64918   | 5.37034  | 7.12453   | 6.94904   |
| HN1         | 22.5467  | 26.1675   | 21.851    | 24.1687  | 22.2814   | 21.4689   |
| COMMD3      | 46.0789  | 53.3367   | 52.9328   | 52.3636  | 52.4292   | 48.2908   |
| SMAD1       | 19.9735  | 19.9242   | 24.1096   | 18.4612  | 30.4923   | 21.9604   |
| EIF4E       | 19.6328  | 14.2902   | 14.8622   | 13.4662  | 13.4619   | 15.5313   |
| KRTAP27-1   | 0        | 0         | 0         | 0        | 0         | 0         |
| POP7        | 37.0419  | 48.5566   | 34.9538   | 48.0664  | 38.3373   | 38.0708   |
| LAX1        | 1.01826  | 0.86999   | 1.56519   | 0.433889 | 1.54669   | 1.53195   |
| HHEX        | 6.27355  | 5.54668   | 5.06572   | 4.5443   | 7.26829   | 3.72325   |
| PRUNE       | 10.2218  | 9.30327   | 8.14255   | 7.87295  | 8.74425   | 7.57713   |
| IFNA13      | 0        | 0         | 0         | 0        | 0         | 0         |
| AHSA1       | 59.6788  | 54.3701   | 44.9022   | 54.0152  | 46.8015   | 50.7391   |
| SNORA61     | 715.758  | 1001.98   | 812.749   | 728.093  | 493.86    | 669.045   |
| IL23A       | 0.669119 | 1.08459   | 0.675369  | 0.942437 | 0.781303  | 0.694944  |
| DKKL1       | 0.127549 | 0.451087  | 0         | 0        | 0.32495   | 0.317935  |
| C20orf111   | 26.7361  | 28.7037   | 24.301    | 26.5564  | 28.4096   | 27.513    |
| MED7        | 13.8903  | 12.6239   | 12.0796   | 9.49308  | 10.3549   | 9.3326    |
| LOC10012805 | 0.157134 | 4.92E-50  | 5.07E-45  | 0        | 0.0497332 | 4.24E-57  |
| CARS2       | 19.6044  | 24.7944   | 28.4517   | 29.8739  | 29.2533   | 31.7982   |
| CORO2A      | 6.04888  | 4.63685   | 6.60384   | 5.33508  | 6.53712   | 5.56693   |
| FAM174A     | 25.1144  | 21.4857   | 30.4325   | 29.52    | 30.1498   | 25.6146   |
| LOC10050596 | 0        | 0.049142  | 0         | 0        | 0         | 0         |
| LOC10050625 | 1.55869  | 0.876967  | 1.66263   | 1.19748  | 1.21836   | 1.01546   |
| C17orf101   | 7.10469  | 8.44166   | 8.7584    | 10.9627  | 8.91601   | 7.62554   |
| IBSP        | 0        | 0         | 0.1015    | 0.31475  | 0.170794  | 0.0835535 |
| CD2AP       | 17.435   | 9.77955   | 14.1124   | 10.3195  | 11.896    | 11.4622   |
| TMED9       | 110.038  | 107.87    | 95.3005   | 110.913  | 97.306    | 100.726   |

|             |           |           |           |           |           |           |
|-------------|-----------|-----------|-----------|-----------|-----------|-----------|
| EID2B       | 0.950484  | 2.37278   | 1.43904   | 1.10249   | 2.27903   | 1.39365   |
| LOC730159   | 0         | 0         | 0         | 0         | 0         | 0         |
| PIGF        | 16.1224   | 13.4655   | 13.7982   | 11.0302   | 12.1126   | 11.919    |
| LOC10028763 | 0         | 0.163676  | 0         | 0         | 0         | 0         |
| SERPINB5    | 123.168   | 93.8511   | 142.053   | 126.616   | 101.703   | 143.519   |
| DSCR9       | 0         | 0         | 0         | 0         | 0.241399  | 0.472377  |
| CLEC4E      | 0.0949633 | 0.293862  | 0.0718877 | 0         | 0.151207  | 0         |
| MIR3187     | 0         | 0         | 0         | 0         | 0         | 0         |
| ASCL1       | 0         | 0.03595   | 0         | 0.0381801 | 0         | 0.0253383 |
| ATP2B1      | 8.43443   | 8.89891   | 8.14075   | 7.11462   | 9.49935   | 7.25324   |
| PRR9        | 49.6658   | 8.04237   | 1.79035   | 157.33    | 2.14359   | 200.606   |
| RALB        | 37.0655   | 31.0567   | 30.5165   | 27.2673   | 31.2753   | 31.1341   |
| LOC10049946 | 7.81617   | 8.18882   | 6.01949   | 6.19382   | 5.95653   | 6.27842   |
| EFCAB6      | 0.360176  | 0.506401  | 0.657057  | 0.498105  | 0.391131  | 0.409648  |
| ZKSCAN1     | 13.0917   | 7.3096    | 15.2296   | 8.5016    | 13.4256   | 11.4476   |
| SLC25A29    | 21.2346   | 33.1577   | 26.5751   | 33.6469   | 32.0114   | 27.7455   |
| PPDPF       | 415.238   | 636.683   | 493.675   | 804.966   | 545.549   | 711.35    |
| NHS         | 2.27972   | 2.12767   | 2.43185   | 2.05425   | 2.5456    | 2.26735   |
| GRIK2       | 0.471635  | 0.453101  | 0.357029  | 0.33782   | 1.22527   | 1.07132   |
| MRPL51      | 135.884   | 146.956   | 107.85    | 141.645   | 103.321   | 131.927   |
| LOC10065293 | 22.8742   | 5.93423   | 14.7287   | 10.4109   | 11.9634   | 8.15304   |
| ADAMTS15    | 10.442    | 11.4879   | 13.8011   | 10.852    | 16.7017   | 17.7521   |
| ARID5B      | 7.6795    | 7.02204   | 9.34849   | 7.3455    | 9.1813    | 7.1076    |
| CD34        | 52.3828   | 57.5419   | 64.0048   | 51.9952   | 53.2747   | 40.9069   |
| TM4SF5      | 0         | 0         | 0         | 0         | 0         | 0         |
| LOC340074   | 0.0504956 | 0         | 0.0382254 | 0.284487  | 0.0321609 | 0         |
| CRIP1       | 180.757   | 336.838   | 360.768   | 441.292   | 222.944   | 211.2     |
| UBB         | 636.689   | 605.127   | 553.329   | 613.572   | 578.587   | 571.951   |
| FADS6       | 18.5817   | 15.9403   | 19.541    | 19.6643   | 11.0031   | 11.9236   |
| PIK3C3      | 8.30828   | 7.03125   | 8.51647   | 5.98001   | 9.22425   | 8.98484   |
| LOC10013235 | 0         | 0         | 0.0337881 | 0.0419105 | 0.0284275 | 0         |
| ANKRD23     | 2.6505    | 4.10096   | 3.65881   | 3.84296   | 5.36226   | 4.08062   |
| C1orf173    | 0.0664407 | 0.0352456 | 0         | 0         | 0.0338531 | 0.0082806 |
| APOB        | 0.112807  | 0.041068  | 0.140651  | 0.130847  | 0.0972051 | 0.0702964 |
| MIR3679     | 0         | 0         | 0         | 0         | 0         | 0         |
| MIR4493     | 0         | 0         | 0         | 0         | 0         | 0         |
| PTCD1       | 4.11156   | 5.59739   | 4.13198   | 1.38238   | 3.72891   | 4.32275   |
| PTH1R       | 6.12998   | 10.9767   | 10.46     | 9.46275   | 11.6788   | 8.06028   |
| PSORS1C1    | 4.65741   | 6.47081   | 0.302202  | 0.999597  | 1.9493    | 3.39984   |
| LOC10050716 | 0         | 0         | 0         | 0         | 0         | 0         |
| PRICKLE1    | 6.42393   | 3.61897   | 5.22661   | 4.12262   | 3.96156   | 5.37163   |
| CALY        | 0.240164  | 0.424675  | 0.0909026 | 0.112755  | 0         | 0.22449   |
| CD38        | 0.361462  | 0.127833  | 0.0547258 | 0         | 0.0460435 | 0.360397  |

|             |           |           |           |           |           |           |
|-------------|-----------|-----------|-----------|-----------|-----------|-----------|
| SNAR-A3     | 0         | 0         | 0         | 0         | 0         | 0         |
| DNAJC25     | 8.21833   | 7.41246   | 6.67114   | 5.4166    | 6.75543   | 5.74837   |
| OTX2        | 0         | 0         | 0         | 0         | 0         | 0.124033  |
| CKB         | 82.382    | 96.4452   | 104.724   | 147.445   | 97.2087   | 103.903   |
| MDK         | 36.0252   | 44.4332   | 26.6275   | 37.862    | 35.8067   | 33.1672   |
| LOC10013346 | 0         | 0         | 0         | 0         | 0         | 0         |
| NMB         | 15.7408   | 22.3384   | 15.5255   | 14.7965   | 11.0358   | 8.26185   |
| ZACN        | 1.34E-129 | 6.26E-219 | 1.94E-31  | 1.16E-38  | 0.214441  | 2.25E-26  |
| SOX4        | 12.879    | 11.4568   | 10.2886   | 14.6195   | 14.2004   | 13.7089   |
| PARP12      | 16.8743   | 21.9682   | 12.0317   | 10.8539   | 14.8666   | 8.69849   |
| LOC10050579 | 0.0486071 | 0.128926  | 0.0367958 | 0         | 0.154791  | 0.0302899 |
| POMZP3      | 17.6512   | 19.9838   | 16.8735   | 21.0767   | 13.5272   | 21.4814   |
| GFRA1       | 12.3114   | 9.45978   | 13.9955   | 8.15788   | 12.5131   | 10.5431   |
| C10orf103   | 0.417955  | 0.499647  | 0.711029  | 0.569221  | 0.763105  | 0.933166  |
| MIR107      | 0         | 0         | 0         | 0         | 0         | 0         |
| RALGAPB     | 13.1929   | 9.31987   | 12.4673   | 10.7109   | 11.8293   | 11.0482   |
| PGLYRP2     | 0.166022  | 0.587146  | 0.293253  | 0.467677  | 0.634444  | 0.413833  |
| ENO1-AS1    | 1.19099   | 1.05521   | 1.20211   | 1.11932   | 1.26466   | 0.494772  |
| TRADD       | 19.4238   | 32.3527   | 20.927    | 28.4168   | 28.4027   | 27.0189   |
| C9orf80     | 8.10412   | 4.79754   | 7.04176   | 7.41113   | 7.54037   | 5.88452   |
| SLC36A4     | 4.30546   | 3.44408   | 4.28359   | 4.7358    | 4.20466   | 3.34734   |
| PKP2        | 3.83338   | 3.34936   | 3.26033   | 2.60441   | 3.47549   | 2.24829   |
| LOC10065282 | 2019.06   | 2540.74   | 2212.24   | 3036.03   | 2003.12   | 1877.78   |
| PSG10P      | 0         | 0         | 0         | 0         | 0         | 0.0376469 |
| LOC10050568 | 0         | 0.0334721 | 0.114637  | 0.142194  | 0.072337  | 0.141551  |
| LOC348840   | 0         | 0.030415  | 0         | 0         | 0.0657302 | 0         |
| SNORA65     | 82.6505   | 36.5372   | 62.5669   | 116.411   | 26.3203   | 103.009   |
| MIR3622B    | 0         | 0         | 0         | 0         | 0         | 0         |
| MPP5        | 8.54158   | 5.98125   | 8.81607   | 6.95889   | 6.96023   | 6.97773   |
| ATE1        | 4.67348   | 2.61869   | 4.37838   | 2.86801   | 3.47748   | 2.82553   |
| XKRY2       | 0         | 0         | 0         | 0         | 0         | 0         |
| C9orf135    | 0         | 0.128188  | 0         | 0         | 0         | 0         |
| STRN3       | 12.3637   | 8.66775   | 10.568    | 9.02295   | 10.391    | 9.75029   |
| LOC10050581 | 1.06E-283 | 0         | 0         | 0         | 0         | 2.19E-240 |
| MGC45800    | 0.233693  | 0.602633  | 0.545464  | 0.347438  | 0.322488  | 0.327662  |
| FLJ42393    | 0         | 0         | 0         | 0.0422373 | 0.0286493 | 0         |
| LOC10013320 | 0         | 0         | 0         | 0         | 0         | 0         |
| ZNF624      | 1.14505   | 1.45783   | 1.24821   | 0.989171  | 1.60444   | 1.46991   |
| PARVB       | 23.3327   | 30.551    | 22.9456   | 21.4497   | 20.3516   | 19.7086   |
| CD80        | 0.108885  | 0.385078  | 0.0549511 | 0         | 0.323631  | 0.0904702 |
| FZR1        | 13.9454   | 18.9084   | 16.1878   | 22.2961   | 21.0699   | 19.1567   |
| HABP2       | 0.100173  | 2.24E-124 | 0         | 2.98E-119 | 0         | 9.40E-180 |
| LOC10065274 | 0         | 0         | 0         | 0         | 0         | 0         |

|             |           |           |           |           |          |           |
|-------------|-----------|-----------|-----------|-----------|----------|-----------|
| GPRC5C      | 14.1786   | 19.9588   | 17.1043   | 27.1828   | 12.2557  | 10.5962   |
| FLJ10038    | 3.84321   | 4.96119   | 4.86406   | 4.44688   | 5.54887  | 4.01982   |
| RN7SL1      | 266.032   | 131.169   | 151.139   | 180.636   | 159.062  | 137.916   |
| CELSR1      | 5.73107   | 8.08976   | 9.64586   | 10.786    | 9.96691  | 10.3641   |
| PKN2        | 13.8353   | 10.7916   | 14.8145   | 9.76907   | 14.1208  | 12.0389   |
| RGS11       | 4.54899   | 10.8698   | 5.45735   | 5.5607    | 9.59303  | 7.00609   |
| LASP1       | 44.1436   | 41.4591   | 47.2824   | 36.6888   | 43.3124  | 36.1906   |
| LOC10050748 | 0         | 0         | 0         | 0         | 0        | 0         |
| LOC10050762 | 0         | 0         | 0         | 0         | 0        | 0         |
| IL2         | 0         | 0.279185  | 0         | 0         | 0        | 0.0983876 |
| LOC220980   | 0.0308577 | 0.245542  | 0.233595  | 0.144875  | 0.412723 | 0.192292  |
| LOC146336   | 0.0339327 | 0         | 0         | 0         | 0        | 0.0211454 |
| FAM27L      | 0         | 0         | 0         | 0         | 0        | 0         |
| MIR892B     | 0         | 0         | 0         | 0         | 0        | 0         |
| LRRD1       | 0.0754954 | 0.0333849 | 0.0857763 | 0.0709022 | 0.192506 | 0.0706043 |
| PTCD2       | 2.883     | 3.06741   | 3.32916   | 2.47768   | 3.64128  | 3.16683   |
| PCBP4       | 21.6581   | 34.6472   | 21.674    | 24.9387   | 29.4129  | 22.8536   |
| GPR89A      | 9.92355   | 11.1553   | 8.84611   | 9.8539    | 9.88327  | 8.11463   |
| OR2A4       | 3.2123    | 1.47861   | 4.27806   | 3.25625   | 5.72652  | 4.88229   |
| APBB3       | 13.3696   | 22.3185   | 17.1592   | 18.097    | 23.7106  | 19.6041   |
| LOC79999    | 0.299     | 1.14858   | 0.464895  | 0.139838  | 0.390458 | 0.870473  |
| SLC45A4     | 5.69179   | 4.15489   | 5.87753   | 4.24819   | 4.51747  | 4.0198    |
| MDP1        | 9.64146   | 21.1936   | 16.8477   | 18.4658   | 17.2188  | 14.2396   |
| LOC10028842 | 0         | 0         | 0.362854  | 0         | 0        | 0         |
| CACNB2      | 1.00376   | 1.20362   | 1.19267   | 0.971177  | 1.75548  | 1.24246   |
| MIR4448     | 0         | 0         | 0         | 0         | 0        | 0         |
| INCENP      | 3.76714   | 4.24655   | 3.76069   | 2.98463   | 4.07874  | 3.31582   |
| SLC2A9      | 4.04599   | 3.32889   | 2.93369   | 3.32444   | 3.5787   | 4.30664   |
| SNHG11      | 11.846    | 23.3783   | 12.8107   | 17.9759   | 20.7706  | 15.2473   |
| USP42       | 4.21377   | 4.34093   | 4.3718    | 4.15096   | 4.6966   | 3.80981   |
| HSF4        | 14.3065   | 25.9937   | 21.0281   | 27.9535   | 33.945   | 25.8834   |
| LINC00271   | 0         | 0.286982  | 0.14743   | 0.304785  | 0.206734 | 0.121363  |
| TPI1P2      | 0.153588  | 0.362114  | 0.426312  | 0.336505  | 0.423891 | 0.478547  |
| HINT3       | 23.9336   | 17.9646   | 20.4792   | 18.9969   | 17.1373  | 17.1852   |
| ACTR2       | 64.642    | 46.9332   | 50.6126   | 40.816    | 43.9949  | 39.2266   |
| SEC14L1     | 12.9297   | 11.6565   | 11.3173   | 10.2916   | 9.9685   | 9.76217   |
| HRC         | 1.65811   | 2.70646   | 0.965539  | 1.15773   | 1.05606  | 1.11275   |
| MIR3150A    | 0         | 0         | 0         | 0         | 0        | 0         |
| AZU1        | 0         | 0.116976  | 0.100156  | 0.496932  | 0        | 0.329789  |
| C10orf118   | 6.92572   | 4.10462   | 7.06339   | 5.43119   | 6.95101  | 6.52589   |
| KRT83       | 4.39053   | 1.32665   | 0         | 35.9542   | 0.955677 | 433.655   |
| SPCS1       | 118.695   | 106.942   | 94.1707   | 110.522   | 85.0863  | 82.4087   |
| MIR4317     | 0         | 0         | 0         | 0         | 0        | 0         |

|             |           |           |           |           |           |           |
|-------------|-----------|-----------|-----------|-----------|-----------|-----------|
| SNORA77     | 0         | 75.4493   | 129.201   | 0         | 0         | 0         |
| ABHD14A     | 11.1872   | 14.9149   | 13.2996   | 13.6101   | 13.2604   | 11.7412   |
| LOC10050671 | 4.29916   | 10.2235   | 8.08011   | 16.2866   | 10.2917   | 7.66764   |
| MT1E        | 28.1775   | 39.4685   | 15.5785   | 27.0528   | 42.5471   | 36.8937   |
| C6orf124    | 1.40853   | 1.20641   | 1.09958   | 0.702622  | 1.68206   | 1.92004   |
| C6orf192    | 12.3569   | 12.8445   | 12.5777   | 14.0333   | 16.538    | 11.6025   |
| MB21D2      | 3.71636   | 2.92356   | 3.34496   | 3.54456   | 3.50387   | 3.06353   |
| MST1P2      | 6.92311   | 15.1115   | 8.24107   | 11.904    | 16.9942   | 15.0877   |
| LOC339593   | 0         | 0.158463  | 0.0339193 | 0.12622   | 0.114152  | 0.251298  |
| CT47A1      | 0         | 0         | 0         | 0         | 0         | 0         |
| ZFY         | 6.12778   | 4.07301   | 0         | 0.0191043 | 0         | 0.0126786 |
| LOC10050641 | 0.277586  | 0.276102  | 0.0788004 | 0.228068  | 0.265194  | 0.216225  |
| DMBT1       | 0.118911  | 0.0584073 | 0.0833049 | 0.196153  | 0.0961712 | 0.547557  |
| YWHAG       | 72.8312   | 57.8334   | 77.7368   | 50.7018   | 45.2219   | 41.0063   |
| DDX19B      | 17.6265   | 18.6777   | 19.5915   | 18.2724   | 18.9781   | 16.6591   |
| MIR524      | 0         | 0         | 0         | 0         | 0         | 0         |
| AARS2       | 10.5867   | 10.4854   | 9.4977    | 10.415    | 11.9799   | 13.0055   |
| S100A12     | 2.20177   | 0.324444  | 0.833375  | 0         | 0.701159  | 0.228675  |
| LOC400099   | 1.91964   | 2.80869   | 2.2146    | 2.84121   | 2.18128   | 1.8287    |
| MRPL17      | 12.5242   | 13.2979   | 9.8056    | 11.8003   | 10.4353   | 10.9317   |
| DUS1L       | 86.1176   | 134.094   | 82.4846   | 115.709   | 96.0625   | 81.2875   |
| C2orf42     | 3.71599   | 5.6877    | 3.7507    | 4.80241   | 4.73346   | 4.0835    |
| COMMD10     | 15.4883   | 11.1304   | 12.8221   | 8.66867   | 10.302    | 11.1731   |
| MIR4746     | 0         | 0         | 0         | 0         | 0         | 0         |
| NKRF        | 6.40569   | 6.27439   | 5.4524    | 4.59312   | 5.23726   | 5.09366   |
| HPX         | 0.786208  | 2.49083   | 2.13267   | 2.39927   | 2.46197   | 1.22483   |
| WEE2        | 0.0324188 | 1.48E-11  | 0.134697  | 0.0304407 | 0.14831   | 0.188584  |
| JPH2        | 4.39465   | 4.94416   | 3.38414   | 4.71499   | 3.94512   | 2.92651   |
| LIAS        | 11.2203   | 13.5668   | 12.2153   | 11.7783   | 13.3024   | 12.3701   |
| GPR128      | 0.18926   | 0.0557773 | 0.047757  | 0.0888561 | 0.100451  | 0.0589694 |
| CYP2J2      | 5.95541   | 3.17911   | 6.0394    | 5.27551   | 6.29787   | 5.91685   |
| FSIP2       | 0.163839  | 0.0391504 | 0.231294  | 0.237001  | 0.186138  | 0.171083  |
| LOC10065276 | 4.91291   | 8.30126   | 14.1739   | 11.0716   | 17.1751   | 15.0014   |
| BRWD3       | 2.86114   | 2.48424   | 4.22073   | 2.76234   | 4.21928   | 3.35102   |
| NCAPG       | 1.89987   | 2.51666   | 1.47586   | 2.15135   | 2.40342   | 2.4509    |
| SLC9A11     | 0         | 0         | 0.0331662 | 0.0205695 | 0.0139522 | 0.013651  |
| FXD4        | 0         | 0         | 0         | 0.311423  | 0.211236  | 0.103338  |
| GSTM5       | 247.467   | 19.1409   | 20.4599   | 14.8306   | 24.1515   | 18.0302   |
| IL12B       | 0.173093  | 0.0765191 | 0.0655163 | 0         | 0.192927  | 0.0269661 |
| SLC13A5     | 0.0314889 | 0.174006  | 0.171631  | 0.270337  | 0.183367  | 0.104655  |
| SBF1        | 18.1608   | 22.3505   | 23.3461   | 22.4351   | 29.5761   | 27.4989   |
| OR13C2      | 0         | 0         | 0         | 0         | 0         | 0         |
| DOC2GP      | 2.10233   | 0.371749  | 0.636589  | 1.97405   | 1.07119   | 1.5721    |

|             |           |           |           |           |           |           |
|-------------|-----------|-----------|-----------|-----------|-----------|-----------|
| PRDM15      | 3.65435   | 3.98711   | 3.87279   | 3.49857   | 4.19844   | 3.10567   |
| LEMD3       | 9.42229   | 7.06678   | 9.29691   | 6.79108   | 8.29639   | 7.87893   |
| HSPB2-C11or | 5.33E-07  | 0.499456  | 0.629348  | 0.258123  | 0.175804  | 3.60E-07  |
| P2RX6P      | 0         | 0         | 0         | 0         | 0         | 57.5475   |
| C21orf2     | 14.0809   | 22.366    | 15.5391   | 19.9615   | 19.6059   | 16.3813   |
| MIR544B     | 0         | 0         | 0         | 0         | 0         | 0         |
| FAM35A      | 10.3916   | 10.5433   | 12.882    | 9.44968   | 10.0306   | 8.25753   |
| ZSCAN18     | 20.6417   | 28.0596   | 28.3011   | 35.1491   | 36.914    | 33.9891   |
| UBASH3A     | 1.02562   | 0.456307  | 0.454733  | 0.288365  | 1.30456   | 0.639121  |
| H2AFB1      | 0         | 1.10143   | 0.410582  | 0         | 0.0647705 | 0.258771  |
| AMN         | 1.99341   | 2.55251   | 1.14478   | 2.71086   | 3.10837   | 2.99844   |
| SNCB        | 0.456346  | 0.691667  | 0.0647727 | 0.321375  | 0         | 0.239941  |
| MIR1289-2   | 0         | 0         | 0         | 0         | 0         | 0         |
| NGEF        | 5.40027   | 7.03605   | 9.85212   | 15.8122   | 12.0753   | 11.735    |
| HEATR7A     | 7.81478   | 9.43528   | 9.21968   | 9.06286   | 9.53299   | 9.98724   |
| SECTM1      | 8.79286   | 13.1804   | 5.91291   | 6.07702   | 9.83593   | 6.11906   |
| FLJ43860    | 0.0466944 | 0.0825684 | 0.0530219 | 0.0438453 | 0.1487    | 0.029098  |
| HLA-DQB1    | 93.6989   | 104.422   | 26.0194   | 15.2788   | 66.5863   | 27.3432   |
| GAL         | 811.752   | 1110.65   | 623.997   | 653.707   | 263.824   | 415.484   |
| TYW3        | 10.2766   | 8.71507   | 9.97854   | 6.72454   | 9.2369    | 8.05864   |
| ZNF217      | 9.9251    | 6.87863   | 9.614     | 6.64994   | 11.3849   | 8.86891   |
| ADH1B       | 136.092   | 333.451   | 271.896   | 130.176   | 126.48    | 70.8472   |
| DRGX        | 0.467261  | 0.137708  | 0         | 0         | 0.595202  | 0         |
| CES1P1      | 0.541631  | 0.0399064 | 0.410018  | 0.254292  | 0.0898354 | 0.0878963 |
| LOC730668   | 0.093507  | 0.082673  | 0.0176963 | 0.131702  | 0.11911   | 0.0437022 |
| CYP2S1      | 2.68424   | 5.42453   | 3.62854   | 4.50081   | 5.20209   | 3.24982   |
| NME7        | 3.92545   | 6.18468   | 5.91751   | 5.70931   | 5.3894    | 6.04572   |
| TMEM106B    | 13.0307   | 7.8441    | 11.3614   | 7.30888   | 9.76107   | 8.69887   |
| LOC10050666 | 1.40033   | 0.742852  | 2.04945   | 1.57787   | 1.78376   | 1.39621   |
| MIR449B     | 0         | 0         | 0         | 0         | 0         | 0         |
| FAM75B      | 0         | 0         | 0         | 0         | 0         | 0         |
| OR11H2      | 0         | 0         | 0         | 0         | 0         | 0         |
| KIAA2022    | 0.304857  | 0.23407   | 0.242924  | 0.286255  | 0.204384  | 0.154979  |
| MRPL35      | 18.793    | 15.7821   | 16.1363   | 13.7503   | 14.6903   | 15.104    |
| NUDT8       | 30.27     | 40.7616   | 13.7486   | 21.2807   | 14.5334   | 16.7347   |
| LINC00272   | 0         | 0.623437  | 0         | 0.331056  | 0.112276  | 0         |
| SNORD45A    | 0         | 0         | 0         | 0         | 0         | 0         |
| CCDC48      | 2.273     | 2.56971   | 1.94634   | 1.71445   | 2.91911   | 1.92729   |
| DDX11L2     | 1.06718   | 1.048     | 2.45148   | 4.7166    | 1.6746    | 2.37814   |
| SGK3        | 6.0054    | 5.57142   | 5.82193   | 5.02807   | 6.8062    | 7.70346   |
| RIT1        | 11.8709   | 9.4536    | 9.26922   | 9.23037   | 12.8879   | 11.2484   |
| MIR3689F    | 0         | 0         | 0         | 0         | 0         | 0         |
| FAM82A1     | 3.64274   | 3.42054   | 3.27346   | 1.84069   | 3.12723   | 2.79546   |

|             |           |            |           |            |           |            |
|-------------|-----------|------------|-----------|------------|-----------|------------|
| LOC10065298 | 584.716   | 398.945    | 363.111   | 349.806    | 331.15    | 420.061    |
| MIR3974     | 0         | 0          | 0         | 0          | 0         | 0          |
| ZDHHC21     | 6.93396   | 4.06275    | 8.74321   | 6.13358    | 7.69731   | 7.38349    |
| GOLGA4      | 28.5041   | 19.3167    | 32.198    | 21.8624    | 23.856    | 21.2823    |
| UNC93A      | 11.9702   | 7.18471    | 7.34593   | 6.07705    | 11.1568   | 10.5171    |
| RHOU        | 8.47204   | 5.98154    | 5.54217   | 4.81593    | 5.90977   | 4.38669    |
| SSC5D       | 2.88909   | 3.57949    | 5.74266   | 3.78309    | 3.83023   | 3.25769    |
| LOC10028770 | 0         | 0          | 0         | 0          | 0         | 0          |
| MIR1306     | 0         | 0          | 0         | 0          | 0         | 0          |
| KLHL32      | 0.0513736 | 0.068132   | 0.0194451 | 0.096478   | 0.0163601 | 0.0640277  |
| GALK2       | 5.36791   | 3.79273    | 3.8906    | 3.60935    | 4.73636   | 5.29672    |
| KTN1        | 60.9482   | 45.9668    | 57.175    | 37.4065    | 48.1801   | 42.8034    |
| SCGB1D4     | 0         | 0          | 0         | 0          | 0         | 0          |
| SLC13A2     | 34.4525   | 11.6585    | 15.1571   | 20.5488    | 7.05607   | 11.3271    |
| COX6B2      | 0.700788  | 3.71756    | 2.02555   | 2.33301    | 5.51833   | 3.17601    |
| BAIAP3      | 2.83242   | 3.3798     | 4.6481    | 6.49074    | 2.80709   | 2.11394    |
| LOC10050729 | 0.117184  | 0.103607   | 0.266128  | 0.110034   | 0.0746354 | 0          |
| ASB3        | 5.41589   | 5.22998    | 5.69001   | 6.5282     | 7.3718    | 5.50255    |
| MYLK-AS1    | 4.44418   | 4.26273    | 2.89875   | 1.88959    | 2.07029   | 2.93579    |
| LIMS3       | 1.05217   | 1.21596    | 1.16791   | 0.865735   | 1.31233   | 0.773023   |
| GPR153      | 13.0039   | 12.2145    | 14.1429   | 14.8318    | 15.4703   | 13.3521    |
| LOC10050547 | 0         | 0          | 0         | 0          | 0.158421  | 0          |
| LOC10012865 | 1.08442   | 1.29066    | 1.73655   | 1.01826    | 1.96577   | 1.40352    |
| TRIM73      | 1.08377   | 2.01256    | 0.984345  | 1.83229    | 1.07162   | 1.01354    |
| TRPC5       | 0         | 0.0145032  | 0.0124178 | 0          | 0.0104477 | 0.0204443  |
| SFR1        | 4.32174   | 5.26857    | 3.44366   | 3.06209    | 3.12189   | 3.1181     |
| LOC728379   | 0         | 0.00739837 | 0         | 0.00628586 | 0.0085273 | 0.00834323 |
| ATF7        | 21.6139   | 13.23      | 19.8901   | 15.4011    | 20.4369   | 16.2665    |
| LOC10050618 | 0         | 0          | 0         | 0          | 0         | 0          |
| CD47        | 28.9565   | 21.3254    | 23.5076   | 18.995     | 26.1604   | 17.3353    |
| CCDC60      | 0         | 0          | 0         | 0          | 0         | 0.0514473  |
| FBXL16      | 4.82401   | 4.85337    | 7.61841   | 8.26968    | 8.89359   | 10.3371    |
| NDUFA6      | 69.9611   | 74.6471    | 63.409    | 70.9657    | 59.3509   | 62.2218    |
| CCDC127     | 10.2579   | 12.1601    | 9.2139    | 9.41636    | 9.9137    | 9.47715    |
| SCAND1      | 37.3021   | 71.7532    | 44.695    | 72.6944    | 48.3864   | 59.5414    |
| LOC10050683 | 0         | 0          | 0         | 0          | 0         | 0          |
| NUP210      | 4.24593   | 3.74228    | 3.97518   | 3.96202    | 4.70085   | 5.50607    |
| LOC10050745 | 4.10839   | 2.62393    | 2.13133   | 2.88604    | 2.37386   | 1.63796    |
| MIR1233-1   | 0         | 0          | 0         | 0          | 0         | 0          |
| GFOD1       | 1.82834   | 1.93173    | 1.98344   | 2.56438    | 2.06903   | 2.2604     |
| RFX7        | 5.49935   | 4.23103    | 6.4347    | 4.25766    | 5.91059   | 3.86357    |
| KDM4D       | 0.234086  | 0.443495   | 0.253149  | 0.408206   | 0.596363  | 0.270906   |
| CATSPERG    | 0.788829  | 1.09264    | 1.07487   | 1.03698    | 1.94265   | 1.1306     |

|            |           |           |           |           |           |           |
|------------|-----------|-----------|-----------|-----------|-----------|-----------|
| DYM        | 12.8087   | 9.97247   | 12.967    | 11.6323   | 10.8367   | 10.293    |
| TMED7      | 27.7486   | 16.7922   | 22.0245   | 16.7698   | 18.2825   | 17.3923   |
| RELB       | 11.8005   | 14.3062   | 7.24115   | 7.89062   | 15.2593   | 7.46496   |
| SNORD115-1 | 0         | 0         | 0         | 0         | 0         | 0         |
| SCARNA3    | 0         | 0         | 0         | 0         | 0         | 0         |
| TRAM1      | 58.0649   | 44.9166   | 61.4408   | 42.416    | 44.9284   | 42.1444   |
| ADARB2     | 0.202281  | 0.089422  | 0.0425355 | 0.0844171 | 0.164621  | 0.0980411 |
| MRPS28     | 39.9123   | 33.6313   | 32.9564   | 32.5505   | 26.1364   | 33.0454   |
| LOC1005069 | 0         | 0         | 0         | 0         | 0         | 0         |
| ORC5       | 13.7278   | 11.746    | 12.4132   | 12.0829   | 11.2969   | 11.4806   |
| PWP2       | 10.2112   | 12.2429   | 10.4595   | 10.2995   | 11.7528   | 10.1774   |
| FAM118A    | 41.254    | 60.9749   | 10.386    | 13.9038   | 12.6183   | 9.52097   |
| SLC27A2    | 20.1394   | 14.6314   | 6.09916   | 6.22447   | 2.88968   | 3.75197   |
| RPL11      | 2091.67   | 3113      | 2665.77   | 3731.44   | 2714.46   | 2449.87   |
| LOC144742  | 0         | 0         | 0         | 0         | 0         | 0.0276934 |
| INSR       | 8.98857   | 9.31795   | 9.01079   | 10.0829   | 9.10832   | 9.14016   |
| MYD88      | 24.9699   | 26.6809   | 19.2312   | 17.6231   | 24.0831   | 19.6417   |
| C2orf15    | 2.04986   | 1.40961   | 1.89659   | 1.2119    | 2.07923   | 1.89242   |
| DDX53      | 0         | 0         | 0         | 0         | 0         | 0         |
| ST8SIA4    | 1.73826   | 1.14938   | 1.0466    | 0.55387   | 1.80155   | 0.980273  |
| FRMPD2     | 0.365032  | 0.264519  | 0         | 0         | 0.275652  | 0.193471  |
| MYO7B      | 0.383285  | 0.263571  | 0.677014  | 0.399888  | 1.00359   | 0.583849  |
| CLU        | 139.221   | 124.24    | 171.278   | 108.822   | 114.623   | 83.4702   |
| SYNC       | 9.30675   | 8.8456    | 10.6929   | 8.41587   | 5.46683   | 5.61738   |
| FUBP3      | 24.8066   | 23.2357   | 25.7822   | 21.6145   | 25.387    | 21.8685   |
| LOC256374  | 0         | 0.433436  | 0         | 0         | 0.156117  | 0.152747  |
| EFHC1      | 6.2951    | 7.9607    | 7.61581   | 7.9336    | 7.60341   | 7.6393    |
| LOC339894  | 0.0512243 | 0         | 0         | 0         | 0.0652501 | 0.0957625 |
| OR6K2      | 0         | 0         | 0         | 0         | 0         | 0         |
| COQ4       | 57.578    | 88.2906   | 60.2772   | 81.7675   | 71.0056   | 64.0224   |
| PADI6      | 0         | 0.0382596 | 0         | 0         | 0         | 0.0808983 |
| PHPT1      | 57.1874   | 97.847    | 61.7791   | 88.1307   | 73.1058   | 62.8569   |
| UBL4B      | 0.642081  | 0.567687  | 0.108013  | 0.133979  | 0.136315  | 0.133373  |
| LOC1001286 | 0.469055  | 0.207354  | 1.06523   | 0.440435  | 1.49372   | 0.58459   |
| FAM188A    | 14.9494   | 13.5194   | 15.0998   | 14.4784   | 15.8598   | 15.8103   |
| UBR2       | 11.1383   | 9.37117   | 11.8463   | 9.01787   | 10.8437   | 8.94822   |
| TFAP2E     | 3.78563   | 5.99157   | 4.59934   | 6.88987   | 4.10778   | 3.32013   |
| GMPR2      | 35.8742   | 40.9126   | 31.6247   | 32.974    | 35.021    | 33.3175   |
| C22orf31   | 1.40231   | 1.04909   | 1.71482   | 2.32962   | 1.44276   | 1.20996   |
| STOX2      | 0.852228  | 0.349177  | 1.33749   | 0.370838  | 1.03262   | 0.919662  |
| RN5S10     | 28.9436   | 186.547   | 57.3897   | 325.228   | 35.5132   | 57.3511   |
| LOC1001297 | 0.806822  | 0.60634   | 0.488615  | 0.530315  | 0.668031  | 0.377083  |
| C10orf25   | 0.773341  | 0.353844  | 0.586643  | 0.433609  | 0.509796  | 0.443886  |



|             |           |          |           |           |           |           |
|-------------|-----------|----------|-----------|-----------|-----------|-----------|
| GS52        | 0.920575  | 0.597875 | 1.09825   | 1.22457   | 1.3536    | 0.481594  |
| IFT172      | 5.8141    | 7.91208  | 7.39664   | 7.62412   | 9.08439   | 8.06656   |
| FLJ16779    | 0.17403   | 0.285752 | 0.131742  | 0.151739  | 0.205847  | 0.123941  |
| GLI1        | 2.1786    | 2.45448  | 2.9691    | 3.57771   | 4.88306   | 2.39825   |
| TTLL10      | 0.593467  | 0.756039 | 0.646974  | 0.721657  | 0.714307  | 0.447987  |
| CAPN3       | 30.5113   | 57.0103  | 36.0125   | 62.7624   | 59.7764   | 52.9193   |
| TAF1        | 7.05645   | 6.42645  | 7.55786   | 5.58613   | 8.29144   | 6.36208   |
| QRFPR       | 0.0865467 | 0.191298 | 0.0327582 | 0.040633  | 0.110244  | 0.107864  |
| SLX1B       | 15.178    | 18.5298  | 10.1341   | 13.5893   | 9.1605    | 11.6712   |
| MIR675      | 0         | 0        | 0         | 0         | 0         | 0         |
| MIR4786     | 0         | 0        | 0         | 0         | 0         | 0         |
| C2orf43     | 5.7293    | 5.09637  | 4.7338    | 3.50994   | 4.71703   | 4.52813   |
| GTF2H2C     | 5.00913   | 4.22762  | 5.10905   | 3.20671   | 3.56319   | 3.66853   |
| FAM109B     | 7.5829    | 8.9391   | 8.04961   | 8.10232   | 8.96528   | 7.30527   |
| GSPT1       | 20.5873   | 17.7499  | 18.8164   | 19.5805   | 17.7515   | 16.5783   |
| PTPRD       | 0.712911  | 0.346401 | 1.60036   | 1.03879   | 0.675244  | 0.501842  |
| SPACA3      | 0         | 0        | 0         | 0         | 0.194462  | 0.190264  |
| MIR634      | 0         | 0        | 0         | 0         | 0         | 0         |
| C19orf55    | 2.96062   | 3.63085  | 3.21721   | 3.00416   | 4.59243   | 4.40403   |
| TMEM14A     | 17.0616   | 17.9387  | 16.3192   | 14.3969   | 13.8036   | 12.1407   |
| ANKRD43     | 0.56919   | 0.377431 | 0.64632   | 0.374122  | 0.36252   | 0.33696   |
| NAAA        | 9.9691    | 6.43449  | 11.7055   | 10.2181   | 13.4731   | 10.3714   |
| ARHGEF3     | 9.20764   | 7.81462  | 8.13925   | 6.92512   | 9.00319   | 7.08515   |
| TMPO        | 21.0557   | 19.6677  | 18.658    | 18.0076   | 20.5503   | 20.6333   |
| EPB49       | 12.11     | 15.708   | 13.9864   | 11.3111   | 15.1426   | 14.0268   |
| AGAP11      | 9.07536   | 13.0739  | 14.4759   | 10.6271   | 10.3879   | 7.76449   |
| LOC10013200 | 0         | 0        | 0         | 0         | 0.514007  | 0         |
| KCNN2       | 0.652054  | 0.524773 | 0.730468  | 0.606746  | 0.330721  | 0.597402  |
| SVOP        | 0         | 0        | 0         | 0         | 0.0202424 | 0.0396108 |
| CYP2A7      | 0.150706  | 0.227404 | 0.114085  | 0.0452829 | 0.0691092 | 0         |
| ACAA1       | 106.89    | 123.975  | 87.9222   | 94.8286   | 84.5821   | 86.764    |
| PLIN1       | 145.626   | 174.264  | 242.908   | 118.067   | 102.964   | 52.9347   |
| GET4        | 55.7575   | 81.2621  | 51.5802   | 67.803    | 53.0906   | 50.3383   |
| MEIS2       | 7.58986   | 5.15965  | 9.17827   | 7.68441   | 9.70658   | 8.18213   |
| LOC1005070  | 0.229611  | 0.162406 | 0.0695266 | 0.215601  | 0.350977  | 0.0286167 |
| JUNB        | 63.787    | 97.2546  | 140.194   | 74.72     | 113.255   | 98.7091   |
| TMEM208     | 58.6032   | 63.4994  | 44.1219   | 58.6162   | 45.946    | 45.3511   |
| GTF2IRD1    | 7.84382   | 9.23421  | 9.72703   | 12.1716   | 13.2928   | 14.025    |
| RPP30       | 9.96118   | 12.1175  | 11.528    | 9.22679   | 10.6023   | 10.1702   |
| LINC00158   | 0.0731521 | 0.258706 | 0.276883  | 0.274755  | 0.186364  | 0.0911706 |
| PFKFB4      | 8.53635   | 8.84255  | 9.38386   | 9.84081   | 9.04347   | 9.98941   |
| LOC283553   | 3.6151    | 7.4579   | 4.56108   | 8.29772   | 6.52369   | 5.50679   |
| RAB2A       | 48.5575   | 36.5133  | 42.8565   | 35.5027   | 34.1015   | 34.4417   |

|             |          |           |          |          |          |          |
|-------------|----------|-----------|----------|----------|----------|----------|
| MIR548I4    | 0        | 0         | 0        | 0        | 0        | 0        |
| RAB5A       | 43.3847  | 34.8423   | 40.9695  | 36.8182  | 37.9385  | 36.7005  |
| C16orf11    | 0        | 0.0407434 | 0        | 0        | 0        | 0        |
| DLAT        | 18.6302  | 11.3727   | 13.802   | 11.1833  | 10.6642  | 10.2734  |
| ARF1        | 197.922  | 195.734   | 191.16   | 204.765  | 184.418  | 188.651  |
| NEIL3       | 0.464038 | 1.04433   | 0.670625 | 0.673393 | 0.994118 | 0.630914 |
| BROX        | 10.0476  | 4.94143   | 10.2682  | 4.65831  | 7.87929  | 7.70916  |
| CDC6        | 1.82057  | 2.52942   | 1.59967  | 1.92317  | 1.408    | 2.32978  |
| C2orf78     | 0.032602 | 0         | 0        | 0        | 0        | 0        |
| LOC10050564 | 3.33255  | 2.42647   | 4.45192  | 2.48496  | 4.74445  | 2.80966  |
| LIPM        | 6.69078  | 3.21321   | 10.3551  | 7.8314   | 11.2979  | 9.46065  |
| C2orf82     | 61.5272  | 65.4736   | 57.1747  | 150.833  | 72.5077  | 92.0647  |
| SCARNA2     | 0.898168 | 0.794103  | 1.01988  | 2.10841  | 1.1441   | 0.83955  |
| NEIL2       | 12.9066  | 15.3205   | 16.8201  | 17.5132  | 15.6997  | 13.6316  |
| MIR4669     | 0        | 0         | 0        | 0        | 0        | 0        |
| HERC1       | 6.31311  | 5.44007   | 7.59055  | 5.11246  | 7.24931  | 5.72646  |
| CNPY3       | 20.0572  | 22.2061   | 16.0845  | 19.6717  | 23.2747  | 19.0634  |
| ZNF18       | 4.88064  | 6.45674   | 4.87149  | 6.44992  | 6.00978  | 5.09154  |
| WASH2P      | 23.6628  | 42.2327   | 28.7784  | 39.6515  | 42.2012  | 40.1027  |
| LOC10050631 | 0        | 0         | 0        | 0.250091 | 0        | 0        |
| MIR27A      | 0        | 0         | 0        | 0        | 0        | 0        |
| RPL26L1     | 15.4584  | 19.1014   | 15.0859  | 17.1385  | 12.6925  | 13.463   |
| LOC10050628 | 0.285382 | 0.360453  | 0.27776  | 0.459376 | 0.467387 | 0.304865 |
| FMR1NB      | 0        | 0         | 0        | 0        | 0        | 0        |
| LOC10050591 | 0.540063 | 0.47749   | 0.408831 | 0.253556 | 0.429962 | 0.420681 |
| GLTP        | 163.934  | 132.419   | 124.686  | 136.587  | 161.451  | 165.807  |
| B2M         | 4135.05  | 3423.16   | 2434.93  | 1482.83  | 2798.23  | 1499.72  |
| HSPB9       | 0.459708 | 1.01611   | 0.522002 | 0.431659 | 0.292791 | 0.572941 |
| DPP10       | 0.421002 | 0.336971  | 0.303607 | 0.190119 | 0.154112 | 0.349406 |
| GPX8        | 5.14188  | 3.89998   | 5.74974  | 3.45568  | 5.15339  | 3.65962  |
| SCYL1       | 29.7033  | 35.8947   | 32.0363  | 34.4143  | 32.5986  | 34.011   |
| CCDC77      | 5.01451  | 4.66805   | 4.21436  | 4.14248  | 6.14971  | 4.31329  |
| LOC10065278 | 76.6409  | 50.5479   | 67.9187  | 63.6625  | 54.6788  | 53.5268  |
| ANKRA2      | 9.95615  | 8.51467   | 9.65     | 7.33914  | 12.0601  | 10.3211  |
| C20orf106   | 0.796422 | 1.75162   | 0.39565  | 0.373914 | 1.11158  | 0.577194 |
| NASP        | 32.5393  | 40.5165   | 26.9607  | 32.6943  | 33.6923  | 32.8784  |
| GPATCH4     | 18.3862  | 16.779    | 12.6844  | 14.3788  | 13.0824  | 12.1205  |
| SELT        | 24.9329  | 17.0624   | 18.4691  | 16.0839  | 16.8847  | 15.0807  |
| CYP1B1      | 8.35253  | 6.42658   | 15.0222  | 7.6148   | 17.0899  | 18.2464  |
| PDIA6       | 105.252  | 68.2039   | 75.5838  | 65.9419  | 59.4874  | 64.3794  |
| MIR34C      | 0        | 0         | 0        | 0        | 0        | 0        |
| LOC647859   | 5.58547  | 3.14688   | 4.03604  | 5.00925  | 9.54034  | 7.12036  |
| SH2D3C      | 8.10183  | 11.3992   | 8.20353  | 7.02249  | 9.88936  | 6.68115  |

|             |           |           |          |           |           |           |
|-------------|-----------|-----------|----------|-----------|-----------|-----------|
| LOC728715   | 13.1334   | 27.9346   | 19.124   | 33.047    | 19.5717   | 14.5799   |
| NISCH       | 35.1524   | 49.239    | 46.8859  | 49.2181   | 59.2783   | 51.0327   |
| LOC10050695 | 1.01894   | 9.89E-170 | 0.418526 | 0.236527  | 0.17733   | 0.340559  |
| IL20RA      | 22.3281   | 18.2823   | 22.0599  | 21.8404   | 22.0856   | 22.7035   |
| LOC338799   | 11.6544   | 26.9154   | 13.4742  | 18.9684   | 24.7124   | 19.8068   |
| TBC1D12     | 4.5352    | 3.98025   | 4.07689  | 3.05295   | 3.93982   | 3.58463   |
| LOC10050685 | 0         | 0         | 0        | 0         | 0.256127  | 0         |
| PPP1CC      | 70.6417   | 65.69     | 62.8756  | 59.9549   | 59.0085   | 54.6965   |
| COL5A2      | 10.4708   | 9.91371   | 16.4147  | 9.85776   | 14.852    | 12.9643   |
| ASB18       | 0         | 0         | 0        | 0         | 0         | 0         |
| MFHAS1      | 2.92922   | 2.44415   | 3.20142  | 2.88802   | 2.75181   | 3.49101   |
| GALR1       | 0.107615  | 0.0634311 | 0.217241 | 0.168415  | 0.0685408 | 0.0447076 |
| BCL6        | 51.8293   | 51.8091   | 48.5578  | 44.6395   | 62.0363   | 47.1136   |
| CCDC56      | 63.0654   | 68.7889   | 48.5192  | 73.2171   | 52.0639   | 60.8718   |
| BIN3        | 14.8443   | 18.8667   | 16.0232  | 19.2481   | 17.9431   | 16.7855   |
| LOC10050605 | 0         | 0         | 0        | 0         | 0         | 0         |
| LOC255654   | 0         | 0         | 0        | 0         | 0         | 0         |
| MIR185      | 0         | 0         | 0        | 0         | 0         | 0         |
| LOC10050711 | 0.341183  | 0         | 0.774832 | 0.320365  | 0.217301  | 0.637832  |
| ANK2        | 5.88793   | 7.19572   | 7.0482   | 3.81207   | 7.54226   | 5.21509   |
| WHSC1       | 9.31763   | 10.0821   | 8.99755  | 7.91079   | 9.43349   | 8.74486   |
| MAGI1-IT1   | 0.392098  | 0.485336  | 0.415549 | 0.404991  | 0.349621  | 0.488678  |
| LOC10028704 | 0.156932  | 0.679259  | 0.68873  | 1.03754   | 0.654332  | 0.365215  |
| IL33        | 14.9132   | 15.4711   | 18.7845  | 10.6054   | 19.896    | 17.397    |
| CLDN4       | 85.3677   | 67.5131   | 89.6829  | 101.222   | 106.952   | 106.896   |
| LOC10050552 | 0         | 0         | 0        | 0         | 0         | 0         |
| LOC10050734 | 8.287     | 9.32508   | 9.88521  | 7.78136   | 9.11661   | 9.70227   |
| TP53        | 30.2443   | 34.026    | 26.9844  | 31.2447   | 31.7678   | 30.7934   |
| MYO5B       | 6.60449   | 2.58646   | 5.49259  | 4.5906    | 4.90119   | 6.21053   |
| BCKDHA      | 38.5274   | 43.4303   | 40.2718  | 46.6765   | 40.1019   | 42.7025   |
| FAM111A     | 25.6585   | 24.1253   | 19.9999  | 18.7995   | 30.7602   | 22.6339   |
| C11orf45    | 1.02849   | 1.96223   | 2.15132  | 2.38892   | 1.93068   | 2.39498   |
| SLC22A16    | 0.262683  | 0.371597  | 0.159082 | 0.0986622 | 0.167305  | 0.130955  |
| ATP5O       | 280.05    | 295.56    | 254.793  | 325.273   | 237.722   | 235.228   |
| C2orf57     | 0.0765504 | 0         | 0        | 0         | 0.0975107 | 0         |
| LOC10065283 | 1.95E-07  | 5.41E-12  | 2.10E-06 | 1.47E-08  | 9.59E-07  | 3.61E-07  |
| LOC10050625 | 12.1784   | 0.978853  | 2.09526  | 0         | 2.11541   | 0.344958  |
| RTN4R       | 2.59987   | 3.49494   | 4.59057  | 6.45659   | 4.44842   | 5.87051   |
| LOC338739   | 0         | 0         | 0        | 0.0469012 | 0.0636255 | 0         |
| RGS22       | 0.720663  | 0.575504  | 1.07349  | 0.436575  | 1.24373   | 0.622927  |
| LOC643962   | 0         | 0         | 0        | 0         | 0         | 0         |
| ZNF501      | 1.55501   | 1.57534   | 2.06001  | 1.61223   | 2.41408   | 1.69578   |
| LOC10050716 | 0         | 0         | 0        | 0         | 0         | 0         |

|             |          |           |          |          |          |           |
|-------------|----------|-----------|----------|----------|----------|-----------|
| MIR323      | 0        | 0         | 0        | 0        | 0        | 0         |
| TTC7A       | 16.8264  | 17.7801   | 17.4013  | 15.3452  | 17.1896  | 16.9857   |
| C10orf96    | 0.310815 | 0.274803  | 0.235289 | 0.350221 | 0.19796  | 0.193687  |
| FIGN        | 1.60189  | 1.26522   | 1.63302  | 0.86238  | 0.884221 | 0.851824  |
| DZIP3       | 3.49423  | 2.74129   | 4.39264  | 2.521    | 3.66265  | 2.95754   |
| ZADH2       | 10.2924  | 9.48622   | 10.3033  | 10.1454  | 9.66793  | 9.90662   |
| PLA2G4E     | 40.2921  | 41.2542   | 48.5604  | 38.3842  | 44.8607  | 37.694    |
| MYLK4       | 0.682258 | 0.809183  | 0.554264 | 0.453128 | 0.900863 | 0.508111  |
| MIR455      | 0        | 0         | 0        | 0        | 0        | 0         |
| C1QBP       | 93.7988  | 84.9294   | 73.9424  | 87.3776  | 65.0959  | 65.5089   |
| LOC10013091 | 0        | 0         | 0.1901   | 0        | 0.159941 | 0.156488  |
| MYH9        | 123.267  | 109.97    | 109.248  | 103.417  | 111.492  | 105.163   |
| PRAM1       | 1.66563  | 3.0271    | 1.50606  | 1.86811  | 2.9468   | 1.67225   |
| MEIS1       | 4.85275  | 4.318     | 4.9452   | 4.35219  | 6.47867  | 5.66036   |
| C20orf194   | 6.72589  | 6.11862   | 6.97456  | 5.36296  | 8.06302  | 6.07044   |
| MPHOSPH8    | 20.3978  | 19.0811   | 21.4386  | 17.4859  | 23.4311  | 20.3292   |
| ZNF503      | 7.32023  | 10.6178   | 10.1174  | 9.45117  | 8.10187  | 8.86545   |
| SAE1        | 31.6118  | 32.5093   | 26.9573  | 32.4394  | 28.3928  | 27.2764   |
| RAB11B      | 63.7319  | 81.2212   | 71.9669  | 85.1069  | 80.1064  | 78.0708   |
| TTC39B      | 21.264   | 15.7968   | 19.4938  | 14.4291  | 14.0698  | 13.381    |
| MEP1B       | 0        | 0         | 0        | 0        | 0        | 0         |
| ITPKA       | 0.338749 | 0.648917  | 0.47013  | 0.424106 | 0.215751 | 0.211094  |
| DMD         | 13.6758  | 12.3359   | 15.3392  | 10.9866  | 14.6633  | 12.2348   |
| MAGEA11     | 1.05347  | 0.882607  | 0.713695 | 0.525349 | 0.35634  | 1.06891   |
| MPP6        | 1.96491  | 2.2336    | 1.66452  | 1.6693   | 1.07268  | 1.07868   |
| SFXN1       | 11.6659  | 11.5484   | 11.5484  | 9.30004  | 10.0338  | 9.11299   |
| LOC10050541 | 0.287951 | 0         | 0        | 0        | 0        | 0         |
| TCEAL7      | 2.37963  | 1.85145   | 2.37784  | 1.69817  | 2.84933  | 2.43193   |
| RGL1        | 7.10206  | 6.09598   | 6.68828  | 4.776    | 7.83485  | 6.91442   |
| CALML4      | 5.90795  | 8.22318   | 6.98587  | 6.38993  | 7.89592  | 6.0733    |
| PCSK5       | 1.57553  | 0.886901  | 0.908571 | 0.533196 | 0.742859 | 0.766779  |
| LOC10050734 | 0        | 0.0472114 | 0.17545  | 0        | 0        | 0.0692316 |
| LOC10012948 | 1.40639  | 2.92728   | 2.06276  | 2.61365  | 2.29533  | 2.62922   |
| C11orf80    | 16.08    | 24.2626   | 18.6767  | 24.6977  | 25.8588  | 27.3126   |
| HNRNPH2     | 8.10039  | 5.62389   | 4.77353  | 8.22458  | 6.44157  | 4.77942   |
| SPATA5L1    | 5.57883  | 5.44096   | 5.70635  | 5.91641  | 7.05512  | 6.04157   |
| RAD52       | 5.4426   | 5.24342   | 5.76811  | 6.09737  | 6.90894  | 6.99371   |
| CASC1       | 0.335127 | 0.519379  | 0.403078 | 0.127101 | 0.4529   | 0.46084   |
| RAB11FIP5   | 11.5811  | 10.6939   | 12.1011  | 13.4356  | 11.4343  | 10.6859   |
| NDUFA4L2    | 70.104   | 133.218   | 95.9915  | 177.031  | 181.575  | 186.686   |
| C17orf103   | 8.16855  | 8.54874   | 10.0242  | 8.58625  | 10.3752  | 11.8746   |
| ACMSD       | 0        | 2.80E-10  | 0        | 0        | 0        | 0.0554276 |
| TXLNA       | 40.1829  | 38.2696   | 35.8925  | 37.3339  | 40.4095  | 36.2237   |

|             |           |           |           |          |           |           |
|-------------|-----------|-----------|-----------|----------|-----------|-----------|
| ZNF701      | 1.86517   | 1.46538   | 2.06721   | 1.1946   | 1.63201   | 1.73249   |
| TSGA10      | 1.30347   | 0.734028  | 2.09554   | 1.59832  | 1.22244   | 1.49397   |
| BPIFC       | 24.3573   | 17.8382   | 23.8198   | 24.9325  | 25.1009   | 31.5295   |
| TSPYL5      | 4.73508   | 3.57193   | 4.01199   | 4.18102  | 4.59287   | 6.26685   |
| PITX3       | 0.0786379 | 0         | 0         | 0        | 0.0500849 | 0         |
| ZNF682      | 4.97371   | 5.42573   | 5.2585    | 5.61777  | 8.3091    | 7.52504   |
| C20orf3     | 258.882   | 233.075   | 272.87    | 230.649  | 178.709   | 171.212   |
| CCNL1       | 55.8161   | 63.4294   | 57.7285   | 53.8483  | 70.5546   | 57.3819   |
| PRKCD       | 27.2213   | 23.1577   | 32.8127   | 27.1151  | 27.2684   | 23.6896   |
| ZNF705A     | 0         | 0         | 0         | 0        | 0         | 0.0178393 |
| ZDHHC8      | 11.6913   | 18.6725   | 14.2894   | 16.1107  | 16.4712   | 14.7992   |
| PCOLCE      | 49.7608   | 64.3632   | 82.437    | 44.313   | 66.9984   | 48.7556   |
| GPN2        | 10.115    | 10.9583   | 12.7798   | 11.7719  | 12.6124   | 13.0503   |
| MBNL3       | 3.72403   | 2.61342   | 4.20315   | 2.85388  | 3.07917   | 2.52882   |
| LOC10027074 | 2.03239   | 1.5723    | 1.05774   | 1.07346  | 2.75068   | 1.50397   |
| PRSS54      | 1.35E-177 | 1.59E-129 | 2.99E-256 | 0        | 0.0425984 | 2.04E-152 |
| LRRC14B     | 0         | 0         | 0         | 0        | 0         | 0.0423303 |
| TM9SF2      | 73.4593   | 43.7115   | 60.4922   | 49.0929  | 53.3096   | 51.1716   |
| TEN1        | 29.8652   | 47.174    | 34.6805   | 50.2587  | 36.2968   | 28.6245   |
| MGC34034    | 0         | 0         | 0         | 0        | 0         | 0         |
| LOC10050696 | 6.67692   | 6.35209   | 4.62579   | 7.19995  | 7.22173   | 7.0608    |
| ACTR1A      | 57.6556   | 51.8654   | 49.1111   | 53.9421  | 53.9432   | 55.6917   |
| CCDC51      | 9.71758   | 12.8243   | 8.2758    | 7.78279  | 9.46581   | 9.39512   |
| LOC10050554 | 2.4795    | 1.23312   | 2.93281   | 1.16411  | 3.65192   | 3.28338   |
| LOC10065275 | 9.22E-07  | 2.76E-07  | 6.76E-07  | 1.41E-07 | 2.06E-07  | 2.06E-07  |
| MRO         | 0.221395  | 0.349293  | 0.321942  | 0.224339 | 0.25162   | 0.112497  |
| LENG9       | 3.2517    | 5.36424   | 2.6634    | 3.40792  | 4.54976   | 4.05554   |
| HELQ        | 3.71579   | 4.25152   | 4.19862   | 3.05293  | 4.97683   | 3.66056   |
| ZNF281      | 2.93041   | 1.23375   | 2.32397   | 1.23167  | 2.18635   | 1.58262   |
| SMEK3P      | 0         | 0         | 0         | 0        | 0         | 0         |
| HLA-DQA2    | 9.35126   | 9.05127   | 14.8286   | 7.48698  | 21.6919   | 9.75308   |
| MIR380      | 0         | 0         | 0         | 0        | 0         | 0         |
| ELANE       | 2.86149   | 2.75995   | 9.05852   | 4.51887  | 2.56807   | 1.62106   |
| MAK16       | 8.21965   | 7.99059   | 6.73117   | 6.28052  | 6.82692   | 6.75386   |
| ODC1        | 20.6789   | 18.018    | 27.5268   | 18.995   | 16.479    | 38.5652   |
| DCX         | 0.0747003 | 0.129193  | 0.0872697 | 0.156577 | 0.125947  | 0.0654632 |
| MIR4796     | 0         | 0         | 0         | 0        | 0         | 0         |
| HMGB1       | 76.1461   | 85.3118   | 79.751    | 69.6125  | 83.87     | 66.6045   |
| ZFAND3      | 21.5946   | 20.0341   | 18.9225   | 18.9715  | 18.6146   | 18.4893   |
| AMDHD2      | 13.2185   | 20.2313   | 14.9723   | 12.4443  | 20.3858   | 18.4564   |
| LOC10065301 | 1.06234   | 0.137962  | 0.619826  | 7.61E-07 | 0.299469  | 0.669608  |
| IRAK1BP1    | 1.37077   | 1.73135   | 1.92712   | 0.735503 | 1.06013   | 1.95247   |
| CNP         | 28.6038   | 30.4471   | 19.1634   | 23.5727  | 23.2982   | 23.0523   |

|             |           |           |          |           |          |           |
|-------------|-----------|-----------|----------|-----------|----------|-----------|
| ZFYVE21     | 55.7701   | 67.2991   | 65.3605  | 75.8685   | 64.5244  | 58.6439   |
| SH3BGRL2    | 21.5732   | 11.6357   | 13.9192  | 14.5474   | 12.5199  | 13.6511   |
| SPIRE2      | 5.87887   | 8.8873    | 6.57174  | 9.61024   | 4.75311  | 8.16212   |
| CIB1        | 81.7335   | 93.3077   | 58.3606  | 68.4884   | 69.657   | 59.5054   |
| RGL3        | 2.22006   | 2.73351   | 2.0705   | 1.67543   | 2.65056  | 1.67972   |
| ZFYVE26     | 5.30627   | 5.0278    | 5.85548  | 4.90007   | 6.40507  | 5.98721   |
| WFDC12      | 39.4208   | 24.062    | 9.86402  | 9.13772   | 19.8548  | 9.76448   |
| LOC400706   | 0.321828  | 0.71135   | 0.365438 | 0.453287  | 1.12736  | 0.501374  |
| FAM200B     | 5.9521    | 5.86893   | 6.29803  | 5.5266    | 7.22954  | 5.70843   |
| MGC3771     | 0.399976  | 0.260641  | 0.621743 | 1.11488   | 0.565487 | 0.36959   |
| GTF2A1L     | 5.43E-18  | 0         | 0.154275 | 0.198544  | 0.216081 | 0.254476  |
| OVOL1       | 20.4587   | 19.7914   | 43.6462  | 30.2502   | 24.7067  | 39.4474   |
| CTSH        | 63.0221   | 58.1176   | 103.737  | 102.121   | 89.1448  | 72.5556   |
| TMEM59L     | 0.131408  | 0.290456  | 0.248691 | 0.678644  | 0.376625 | 1.06454   |
| RUNDC2C     | 0.0837003 | 0.207492  | 0.316808 | 0.220363  | 0.426542 | 0.167081  |
| CHTF8       | 37.6725   | 44.0136   | 36.8026  | 35.9558   | 37.198   | 36.2671   |
| KLF10       | 35.7396   | 37.9106   | 59.81    | 41.7218   | 49.1173  | 38.7202   |
| CLEC4A      | 5.6261    | 6.67869   | 3.47301  | 3.96306   | 7.2326   | 3.63458   |
| ARHGAP29    | 7.48393   | 6.25024   | 8.74916  | 6.63797   | 7.96847  | 6.78234   |
| FETUB       | 4.89988   | 4.2744    | 2.37391  | 3.25131   | 3.12076  | 5.29256   |
| SNRPF       | 32.3832   | 35.9653   | 28.1371  | 36.6985   | 28.5499  | 31.8106   |
| VPREB3      | 1.24544   | 0.440455  | 0.565682 | 1.87112   | 1.11052  | 0.310442  |
| LAMA4       | 17.4671   | 19.2941   | 22.2217  | 14.127    | 14.7146  | 11.612    |
| HSPA6       | 3.2938    | 2.74472   | 2.98062  | 2.63072   | 2.72475  | 2.2177    |
| SNORD33     | 0         | 0         | 0        | 0         | 0        | 0         |
| LOC10050597 | 1.67351   | 1.75879   | 1.93614  | 1.69      | 1.62897  | 1.69219   |
| HPS4        | 13.5224   | 19.0901   | 17.1747  | 20.5646   | 24.6396  | 21.5976   |
| TRIM50      | 0.0251789 | 0.139135  | 0.317808 | 0.23161   | 0.150566 | 0.28691   |
| OR5B21      | 0         | 0         | 0        | 0         | 0        | 0         |
| RPS6KB1     | 9.32829   | 8.43929   | 9.77124  | 8.33474   | 9.31485  | 8.79835   |
| CAPN12      | 4.58      | 7.20358   | 4.38432  | 16.5253   | 5.4539   | 43.0725   |
| FAM176B     | 28.6906   | 52.5794   | 48.5139  | 61.0021   | 60.6306  | 62.8154   |
| PDZD11      | 19.861    | 19.3      | 20.1819  | 21.3374   | 17.8347  | 20.4045   |
| NPSR1       | 0         | 0         | 0        | 0         | 0        | 0         |
| LRPAP1      | 10.219    | 12.3391   | 10.5649  | 12.0552   | 10.671   | 10.749    |
| TMCO2       | 0         | 0.154971  | 0        | 0         | 0        | 0         |
| WDR54       | 5.30534   | 6.85556   | 5.17468  | 10.3465   | 8.51248  | 6.03992   |
| SENP6       | 19.6297   | 16.2674   | 18.0959  | 15.3844   | 19.3429  | 16.5596   |
| LOC10050717 | 0         | 0         | 0        | 0         | 0        | 0         |
| CDHR2       | 0.0225706 | 0.0399109 | 0.139536 | 0.0222031 | 0.117398 | 0.0632926 |
| SHCBP1L     | 0         | 0         | 0.032484 | 0         | 0        | 0         |
| NEK8        | 3.97955   | 5.43202   | 3.67318  | 3.44173   | 4.23179  | 3.28844   |
| TMEM66      | 185.855   | 150.223   | 155.922  | 139.282   | 137.278  | 137.144   |

|             |           |           |           |           |          |           |
|-------------|-----------|-----------|-----------|-----------|----------|-----------|
| CDC25C      | 0.932691  | 0.903792  | 0.82848   | 1.27836   | 0.677366 | 1.60811   |
| PCDP1       | 0.201082  | 0.148154  | 0.12685   | 0.220282  | 0.149416 | 0.0417687 |
| FAM27E3     | 0.943623  | 1.84868   | 0.968445  | 1.77209   | 1.92086  | 1.71804   |
| CHST14      | 6.32727   | 8.59693   | 7.92427   | 6.90229   | 8.91906  | 6.52316   |
| CCDC164     | 0.0810721 | 0.107518  | 0         | 0.0761254 | 0.129088 | 0.101041  |
| LOC642131   | 0         | 0         | 0         | 0         | 0        | 0.161771  |
| KRTAP6-1    | 6.22167   | 0         | 0         | 2.92102   | 0        | 616.456   |
| MAP4K2      | 6.70087   | 8.78253   | 7.34127   | 7.20894   | 8.44986  | 7.28124   |
| WDR59       | 17.7415   | 23.5407   | 20.6622   | 21.1064   | 24.5877  | 24.3126   |
| SPAG7       | 44.9743   | 55.9708   | 46.9172   | 46.8273   | 58.2315  | 59.4106   |
| HDAC3       | 40.1012   | 46.5975   | 39.5339   | 43.6798   | 42.0131  | 33.9173   |
| LOC10050738 | 0         | 0         | 0         | 0         | 0        | 0         |
| RFTN2       | 2.57881   | 3.09633   | 3.56694   | 2.69051   | 2.79826  | 2.12283   |
| ANKRD50     | 4.71145   | 3.81968   | 5.15416   | 4.42461   | 5.68817  | 5.38438   |
| SLC4A2      | 18.4151   | 25.4283   | 20.8171   | 25.2216   | 26.4456  | 24.7206   |
| CDK6        | 6.55004   | 4.86054   | 6.14737   | 5.13915   | 5.57931  | 4.71735   |
| ARL14       | 0.343534  | 0.0759327 | 0.130029  | 0.0806432 | 0.273498 | 0         |
| WNT3        | 3.52576   | 4.51684   | 8.00706   | 8.2428    | 8.43236  | 11.2994   |
| NEFL        | 0.164029  | 0.169195  | 0.227646  | 0.10268   | 0.139295 | 0.0851799 |
| ELOVL6      | 11.7885   | 4.28408   | 8.99982   | 5.73817   | 9.44375  | 13.0485   |
| XYLB        | 3.27243   | 2.06999   | 2.17514   | 1.6488    | 2.01645  | 2.0724    |
| RASGEF1B    | 9.70191   | 10.6031   | 15.7769   | 12.1044   | 16.5923  | 16.1502   |
| OR52K2      | 0         | 0         | 0         | 0         | 0        | 0         |
| LOC10050731 | 0         | 0         | 0         | 0         | 0        | 0         |
| MIR3128     | 0         | 0         | 0         | 0         | 0        | 0         |
| FLJ23865    | 0.100387  | 0.0887557 | 0.0759934 | 0         | 0.191811 | 0.0312784 |
| LOC10028961 | 0         | 0         | 0         | 0         | 0        | 0         |
| DOCK3       | 0.831978  | 0.840666  | 1.31688   | 1.10587   | 1.19054  | 1.37357   |
| LTA4H       | 41.2025   | 40.5401   | 43.4169   | 45.027    | 43.5033  | 44.1534   |
| RN5S1       | 0         | 358.315   | 36.0878   | 361.782   | 18.4343  | 59.2078   |
| FXR1        | 9.76431   | 10.1463   | 9.73349   | 8.36417   | 9.80628  | 8.4721    |
| LOC10050751 | 0         | 0         | 0         | 0         | 0        | 0         |
| MIR4779     | 0         | 0         | 0         | 0         | 0        | 0         |
| LOC572558   | 2.5835    | 5.07592   | 2.39033   | 3.50402   | 6.03329  | 5.5453    |
| C16orf52    | 5.69318   | 4.20427   | 5.68031   | 3.62532   | 5.7794   | 4.5944    |
| ELFN1       | 0.549363  | 1.01768   | 0.851545  | 1.35102   | 0.98303  | 2.00513   |
| RPL10A      | 893.581   | 1309.36   | 1008.28   | 1547.63   | 1041.09  | 983.051   |
| LOC10050581 | 0.610295  | 0.380883  | 0.570702  | 0.404511  | 0.548753 | 0.223712  |
| LOC727944   | 0         | 0         | 0         | 0         | 0        | 0.563123  |
| CPT1C       | 1.79517   | 2.30333   | 1.33221   | 2.19163   | 2.3451   | 2.50543   |
| ATP8A1      | 5.40543   | 3.40185   | 2.9999    | 1.89302   | 2.9495   | 2.77816   |
| NCR2        | 0         | 0         | 0         | 0         | 0        | 0         |
| ANKRD42     | 1.92619   | 1.32071   | 2.23184   | 1.66102   | 1.60235  | 1.9842    |

|             |           |           |           |           |           |           |
|-------------|-----------|-----------|-----------|-----------|-----------|-----------|
| TACR1       | 1.73927   | 2.09192   | 2.57577   | 1.89894   | 2.2111    | 1.00365   |
| ARHGAP32    | 11.8207   | 8.65566   | 14.6597   | 11.9439   | 12.5493   | 13.072    |
| LOC285965   | 0.0960546 | 0.0693557 | 0.101799  | 0.0736582 | 0.0734132 | 0.0606054 |
| STARD13     | 5.84698   | 4.54503   | 4.52552   | 4.56489   | 5.5501    | 4.69024   |
| CEP76       | 3.23302   | 2.79696   | 3.21059   | 3.26425   | 2.65694   | 3.05452   |
| FCRL6       | 0.587265  | 0.755233  | 0.808296  | 0.100261  | 0.91808   | 0.266152  |
| C1orf88     | 1.03905   | 1.26316   | 1.24539   | 1.74804   | 1.15811   | 1.24102   |
| FAM9B       | 0         | 0         | 0         | 0         | 0         | 0         |
| ZNF696      | 3.11623   | 3.19308   | 2.99953   | 3.2749    | 3.71975   | 3.60088   |
| OSBPL5      | 16.726    | 20.4612   | 19.6416   | 19.8919   | 22.9642   | 20.0984   |
| CEP44       | 6.00893   | 5.88292   | 8.48049   | 5.16515   | 9.77451   | 8.63417   |
| MIR1270-2   | 0         | 0         | 0         | 0         | 0         | 0         |
| SHC4        | 2.2318    | 0.939628  | 0.901059  | 1.63658   | 1.1507    | 1.11261   |
| LOC10021654 | 4.49141   | 3.99761   | 4.43976   | 3.62429   | 4.61017   | 4.60436   |
| IL2RG       | 10.3506   | 10.2025   | 7.83547   | 3.2178    | 13.452    | 6.53722   |
| NOL12       | 12.0908   | 15.8795   | 11.8135   | 13.1022   | 15.4685   | 15.1127   |
| ZNF124      | 1.77038   | 1.67706   | 1.53164   | 0.831179  | 2.01351   | 1.22143   |
| LOC10065287 | 3.15593   | 9.27E-08  | 20.2496   | 5.89E-07  | 0.0004322 | 3.30E-06  |
| INPP5D      | 1.12981   | 0.772046  | 7.06769   | 7.00151   | 4.95347   | 7.4247    |
| LOC10050765 | 0         | 0.0168413 | 0.0288394 | 0         | 0         | 0         |
| DND1        | 5.81078   | 7.07975   | 6.29607   | 7.76371   | 7.81478   | 5.69154   |
| CTR9        | 15.7537   | 12.1948   | 15.5938   | 11.597    | 13.2777   | 13.4545   |
| LOC641365   | 0         | 0         | 0         | 0         | 0         | 0         |
| OSTM1       | 10.0906   | 9.01736   | 9.11704   | 6.54071   | 7.90557   | 9.03309   |
| LOC10012993 | 0         | 0         | 0         | 0         | 0         | 0         |
| LOC10050669 | 3.07974   | 1.39383   | 2.87151   | 1.8724    | 2.664     | 2.43655   |
| A1BG        | 1.04859   | 2.88069   | 2.54516   | 4.82695   | 4.46237   | 3.86416   |
| CDCA8       | 3.04877   | 3.7503    | 2.47518   | 4.19039   | 4.13683   | 4.46055   |
| MIR3138     | 0         | 0         | 0         | 0         | 0         | 0         |
| DSC1        | 37.6157   | 20.1945   | 68.0026   | 29.1967   | 54.4581   | 53.0663   |
| THEG5       | 0         | 0         | 0         | 0         | 0         | 0         |
| FAM197Y8    | 0         | 0         | 0         | 0         | 0         | 0         |
| C4orf32     | 12.015    | 12.4096   | 10.8755   | 7.17624   | 11.1393   | 9.59372   |
| TDRD6       | 0.624592  | 0.767573  | 1.30373   | 1.03702   | 1.01899   | 0.915441  |
| LOC10050660 | 0.402106  | 1.18506   | 0.507327  | 0.503428  | 0.597575  | 1.0023    |
| DNAJC3      | 13.9539   | 10.1065   | 12.681    | 11.0719   | 9.34646   | 9.1661    |
| HHIPL1      | 0.513259  | 0.55397   | 0.689064  | 0.481941  | 0.741695  | 0.371808  |
| CYB5B       | 18.9704   | 14.2877   | 15.2529   | 16.8553   | 14.0023   | 13.1492   |
| SLC15A3     | 9.00986   | 9.68357   | 4.7221    | 4.27948   | 6.86807   | 4.43124   |
| ZNF615      | 3.76037   | 3.2826    | 3.74333   | 2.5707    | 3.62324   | 3.39556   |
| MZF1        | 12.388    | 23.5929   | 16.5869   | 26.2213   | 21.736    | 25.7071   |
| LOC653720   | 0.29998   | 0.225162  | 0.510894  | 0.199263  | 0.287964  | 0.261901  |
| MIR516A2    | 0         | 0         | 0         | 0         | 0         | 0         |



|             |          |           |           |           |           |           |
|-------------|----------|-----------|-----------|-----------|-----------|-----------|
| SPIC        | 0        | 0         | 0         | 0         | 0         | 0         |
| LIN37       | 8.68074  | 13.751    | 9.03563   | 11.8561   | 10.178    | 9.22069   |
| CDHR4       | 0.489659 | 0.50508   | 0.494233  | 0.996194  | 0.9356    | 0.508558  |
| ANKRD46     | 12.4144  | 8.23996   | 10.5691   | 9.12279   | 9.09853   | 8.22944   |
| SALL1       | 0        | 0.0662157 | 0.0141733 | 0.0175804 | 0.0119247 | 0.0525043 |
| LOC10013436 | 16.945   | 22.5144   | 12.667    | 17.7558   | 15.9678   | 12.4127   |
| ST7-OT3     | 4.72E-18 | 3.59E-08  | 0.142727  | 0.318173  | 0.0886593 | 0.259976  |
| TAF1B       | 5.09103  | 5.32312   | 5.19444   | 4.32314   | 4.5677    | 4.46911   |
| FAM198A     | 1.66296  | 1.95193   | 1.8449    | 1.37304   | 2.46526   | 1.60803   |
| GNL2        | 26.1127  | 24.0196   | 23.0248   | 24.1629   | 22.7035   | 21.8717   |
| LOC10065285 | 36.1185  | 49.9781   | 35.3898   | 45.6305   | 38.1616   | 34.1083   |
| MTNR1B      | 0        | 0         | 0         | 0.0598621 | 0         | 0.198638  |
| SNRK        | 12.0123  | 10.793    | 13.5689   | 11.5246   | 10.9703   | 9.38316   |
| C17orf39    | 7.57992  | 6.31583   | 7.18124   | 6.81547   | 8.80688   | 8.87442   |
| SYCN        | 0        | 0         | 0.261174  | 0.647917  | 0         | 0.214995  |
| MIR4525     | 0        | 0         | 0         | 0         | 0         | 0         |
| LOC285796   | 0        | 0.127449  | 0.145497  | 0.0451184 | 0.153017  | 0.0299429 |
| EPM2A       | 3.15149  | 3.81539   | 3.65359   | 3.6789    | 3.45364   | 2.75993   |
| PCDHGB1     | 0.209682 | 0.148215  | 0.126553  | 0.117712  | 0.172938  | 0.182474  |
| ZNF74       | 3.85384  | 4.80277   | 4.19049   | 4.12688   | 4.87633   | 5.14145   |
| SIGMAR1     | 58.1682  | 63.6628   | 50.532    | 54.4386   | 56.8056   | 49.9807   |
| FAM124B     | 0.657829 | 0.850166  | 0.806913  | 0.809139  | 1.27796   | 0.790677  |
| CPAMD8      | 1.18276  | 1.85122   | 1.17365   | 0.915491  | 0.834747  | 1.02589   |
| SUN5        | 0        | 0         | 0         | 0         | 0         | 0         |
| MIR548X2    | 0        | 0         | 0         | 0         | 0         | 0         |
| LOC10065295 | 5.43953  | 16.031    | 4.11775   | 9.53424   | 8.77665   | 6.10143   |
| LOC10012934 | 0        | 0         | 0         | 0         | 0         | 0.0790184 |
| ADAMTS2     | 4.77417  | 3.55323   | 7.60858   | 3.9222    | 4.77974   | 3.96702   |
| DKC1        | 25.8581  | 23.6218   | 22.0585   | 24.427    | 23.0176   | 21.0305   |
| TDRD5       | 1.21593  | 1.32452   | 0.455341  | 0.748818  | 1.28544   | 1.04008   |
| IQGAP3      | 1.26464  | 1.88683   | 1.43601   | 1.95934   | 2.82918   | 2.85676   |
| MPI         | 13.7547  | 15.5158   | 14.0926   | 12.8041   | 16.1237   | 15.8496   |
| LGALS2      | 9.71457  | 15.3561   | 10.4739   | 5.8048    | 10.6871   | 6.60405   |
| UTS2D       | 0.294489 | 0.706716  | 0.159236  | 0.0888817 | 0.133973  | 0.0524324 |
| FAAH2       | 9.85696  | 8.39717   | 8.3945    | 8.33962   | 10.6921   | 9.22437   |
| HIST1H2BK   | 52.7548  | 38.9777   | 32.5525   | 37.4641   | 32.5645   | 46.9636   |
| C9orf68     | 1.38492  | 1.87134   | 1.46379   | 1.52124   | 1.84734   | 1.62834   |
| VTI1A       | 4.68414  | 3.73118   | 3.78008   | 2.67634   | 3.6729    | 3.71754   |
| KLF6        | 32.9697  | 30.8278   | 45.729    | 28.8155   | 40.7815   | 30.1164   |
| KIAA0947    | 7.42691  | 6.10041   | 7.77135   | 6.24263   | 7.03433   | 5.36715   |
| BDNF-AS1    | 3.27928  | 3.6652    | 3.96359   | 3.62267   | 4.83078   | 3.57107   |
| COLEC12     | 5.87912  | 3.7727    | 6.62793   | 4.74873   | 8.87795   | 6.49997   |
| MS4A18      | 0.575863 | 0.254571  | 0         | 0         | 0         | 0.0598089 |

|             |           |           |           |           |           |           |
|-------------|-----------|-----------|-----------|-----------|-----------|-----------|
| C19orf79    | 82.0793   | 88.284    | 56.6511   | 88.7892   | 65.9384   | 71.5329   |
| LOC10050649 | 2.37665   | 2.00789   | 2.21893   | 2.4548    | 2.43874   | 2.66584   |
| CLDN23      | 4.2489    | 3.4279    | 7.15657   | 5.9346    | 5.88587   | 5.32856   |
| ZNF385C     | 1.16322   | 1.30298   | 0.998559  | 2.5861    | 2.07393   | 2.054     |
| ZC3H12B     | 0.458678  | 0.359187  | 0.595237  | 0.676801  | 0.692776  | 0.334828  |
| MYH7        | 0.0158788 | 0         | 0.0120203 | 0.0298198 | 0.0101133 | 0         |
| SNORD115-4  | 0         | 0         | 0         | 0         | 0         | 0         |
| FAM208A     | 11.8472   | 9.82013   | 11.8973   | 9.69424   | 11.3528   | 10.4382   |
| METTL20     | 1.41439   | 1.74123   | 2.38441   | 1.38768   | 1.52081   | 1.51833   |
| NODAL       | 0.493084  | 0.610335  | 0.671881  | 0.648197  | 0.816524  | 0.276542  |
| STEAP1      | 6.55255   | 6.31327   | 7.24969   | 3.39189   | 4.22686   | 4.39753   |
| AKR7A2P1    | 1.49713   | 1.25013   | 3.21113   | 1.79628   | 1.80112   | 2.28055   |
| SDF4        | 69.4528   | 71.982    | 67.063    | 76.6493   | 75.8303   | 71.8928   |
| MAGEA9B     | 0         | 0         | 0         | 0         | 0         | 0         |
| DSERG1      | 0.383714  | 0.22617   | 0         | 0.1201    | 0         | 0.0797047 |
| IRF4        | 1.526     | 3.11889   | 2.07888   | 2.2922    | 2.92705   | 1.61302   |
| FILIP1L     | 10.5567   | 11.6536   | 16.075    | 7.98675   | 14.8687   | 14.6057   |
| SDC4P       | 1.82754   | 0         | 0.553383  | 0.686412  | 0.931176  | 1.82215   |
| C3orf67     | 0.0394951 | 0.104757  | 0.328878  | 0.111256  | 0.528248  | 0.418398  |
| IRGC        | 0         | 0         | 0.100118  | 0         | 0.0421171 | 0.123624  |
| ZNF212      | 9.38623   | 11.4736   | 8.10127   | 11.4509   | 11.1184   | 8.61856   |
| C13orf30    | 0.0298883 | 0         | 0.0226256 | 0         | 0         | 0         |
| AUP1        | 83.8712   | 96.3522   | 61.9815   | 79.3506   | 89.1286   | 89.5047   |
| EXOC3       | 33.1188   | 39.3301   | 32.2773   | 31.4719   | 35.5478   | 26.6831   |
| GOPC        | 18.5034   | 15.9901   | 19.6276   | 14.1369   | 20.0258   | 17.0424   |
| STRBP       | 5.56791   | 4.09453   | 4.49057   | 3.83213   | 3.73947   | 4.21024   |
| C6orf183    | 0.197762  | 0.0437121 | 0.0748534 | 0.0464238 | 0         | 0.154046  |
| LOC10050651 | 0.57897   | 0.411273  | 0.486494  | 0.285184  | 0.389275  | 0.131542  |
| EZH1        | 22.8435   | 27.3586   | 26.7823   | 23.2094   | 35.2787   | 27.6007   |
| KIF18A      | 0.766987  | 0.778584  | 0.473093  | 0.533473  | 0.796072  | 0.743484  |
| COMMD1      | 36.0994   | 38.6276   | 35.8761   | 43.9789   | 27.2366   | 30.2249   |
| ORC3        | 9.43831   | 9.97344   | 9.78695   | 8.0898    | 10.6458   | 8.95573   |
| MB          | 12.075    | 4.44303   | 3.95675   | 8.21788   | 4.34235   | 4.79164   |
| TACO1       | 15.3741   | 15.1537   | 10.803    | 11.6041   | 12.9309   | 12.6517   |
| UGT2A3      | 0         | 0         | 0         | 0         | 0         | 0         |
| SORCS1      | 0.830725  | 0.879148  | 0.582106  | 0.901926  | 0.957957  | 0.679278  |
| MTRNR2L10   | 0         | 0         | 0         | 0         | 0         | 0         |
| GPR162      | 1.69691   | 1.68667   | 2.00974   | 0.994733  | 4.5506    | 2.86371   |
| PLEKHA6     | 4.46979   | 1.94189   | 2.69332   | 3.18398   | 3.21496   | 3.19359   |
| TF          | 43.624    | 32.9013   | 31.8849   | 21.5237   | 7.7559    | 8.88299   |
| ZGPAT       | 16.8431   | 29.8172   | 19.9577   | 25.7025   | 23.5981   | 22.1173   |
| SCAND3      | 0.41563   | 0.0699949 | 0.194773  | 0.167258  | 0.2269    | 0.493338  |
| NUCB2       | 34.6673   | 14.5372   | 18.0954   | 10.6647   | 13.3741   | 13.4969   |

|             |           |           |           |           |           |           |
|-------------|-----------|-----------|-----------|-----------|-----------|-----------|
| KRTAP9-2    | 12.6858   | 2.75281   | 0.360855  | 96.2435   | 0.917182  | 1008.73   |
| LOC10050585 | 0         | 0         | 0         | 0         | 0         | 0         |
| BASP1       | 10.0299   | 12.0643   | 7.72512   | 14.4006   | 12.7019   | 15.3711   |
| C11orf87    | 0.0322515 | 0.0998015 | 0.0122073 | 0.0605672 | 0.0308117 | 0.0100489 |
| OR4A5       | 0         | 0         | 0         | 0         | 0         | 0         |
| LOC283033   | 0         | 0         | 0         | 0         | 0         | 0         |
| MLX         | 27.8856   | 30.5774   | 27.9455   | 30.6882   | 27.4219   | 25.1903   |
| ALAD        | 29.7808   | 28.8039   | 36.099    | 36.4579   | 34.688    | 38.0267   |
| RASA3       | 8.9837    | 10.297    | 16.9317   | 10.6097   | 13.2427   | 8.67154   |
| MIR4522     | 0         | 0         | 0         | 0         | 0         | 0         |
| TIMELESS    | 5.90395   | 6.26388   | 4.32744   | 4.91014   | 5.10917   | 4.85873   |
| SFMBT2      | 2.59792   | 1.47146   | 1.41395   | 1.23674   | 1.487     | 0.835684  |
| SMPDL3B     | 1.75841   | 0.937587  | 1.53649   | 1.60048   | 1.06137   | 2.06834   |
| PREB        | 39.221    | 45.0363   | 33.8448   | 35.7617   | 35.627    | 32.1944   |
| C1orf204    | 4.97646   | 6.26057   | 4.93323   | 7.93508   | 5.12398   | 8.02029   |
| C19orf12    | 10.4535   | 12.1723   | 12.7717   | 9.4785    | 9.66652   | 7.98652   |
| HIST2H2AA4  | 23.9756   | 25.5385   | 13.2681   | 15.2793   | 20.4213   | 25.7413   |
| RC3H1       | 6.75308   | 5.7739    | 7.05589   | 6.69466   | 7.35926   | 6.61904   |
| COL13A1     | 1.3832    | 2.48054   | 1.63729   | 1.2496    | 4.31625   | 1.92212   |
| HERC2P10    | 0.343409  | 0.264487  | 0.499128  | 0.535674  | 0.548515  | 0.502453  |
| CYP2D6      | 3.00145   | 5.14008   | 3.94116   | 4.39419   | 5.69543   | 4.06849   |
| ATM         | 6.12222   | 4.39718   | 5.80129   | 3.68504   | 6.23975   | 4.76666   |
| SMARCA2     | 35.1171   | 24.2682   | 37.6965   | 26.3304   | 34.6558   | 30.6479   |
| RGS16       | 2.20557   | 2.31796   | 2.39419   | 1.83655   | 3.15404   | 1.53001   |
| ITGB3       | 1.16348   | 1.06354   | 1.52267   | 0.611053  | 1.14294   | 0.909361  |
| MIR448      | 0         | 0         | 0         | 0         | 0         | 0         |
| LOC10013471 | 1.17351   | 1.15395   | 0.345808  | 0.674249  | 0.998159  | 0.730162  |
| ACOX2       | 32.6914   | 27.774    | 27.5492   | 22.1744   | 17.005    | 18.9991   |
| TUBGCP2     | 24.3079   | 32.9609   | 25.898    | 25.1161   | 32.1808   | 28.8429   |
| SUMO2       | 196.641   | 196.467   | 172.07    | 201.54    | 169.88    | 165.844   |
| GMNC        | 0         | 0         | 0         | 0.0254141 | 0.0861909 | 0.0168661 |
| BMF         | 3.1902    | 3.63775   | 4.45816   | 3.93111   | 7.64297   | 6.58891   |
| TAS2R10     | 0.130068  | 0.459991  | 0.295386  | 0.610659  | 1.49114   | 0.486317  |
| UGT3A2      | 1.45267   | 0.849832  | 4.08203   | 3.46318   | 2.60759   | 3.79224   |
| SGOL1       | 0.295041  | 0.590446  | 0.333408  | 0.514473  | 0.527782  | 0.84743   |
| HBG1        | 2.09721   | 3.97807   | 0.945356  | 3.21871   | 0.357918  | 0.0778205 |
| TSSK2       | 6.59E-09  | 1.10E-09  | 3.18E-10  | 3.32E-09  | 8.61E-09  | 5.27E-09  |
| NPBWR1      | 0.47784   | 0.211238  | 0         | 0.673026  | 0.228254  | 1.04219   |
| FAM189A1    | 0.287572  | 0.308735  | 0.295441  | 0.4629    | 0.196239  | 0.358405  |
| PSMA4       | 166.857   | 153.15    | 120.852   | 110.678   | 116.161   | 114.021   |
| RASA2       | 4.42479   | 2.2306    | 4.46613   | 2.5512    | 5.58691   | 4.5472    |
| RABL3       | 9.08083   | 7.87301   | 10.1685   | 7.77092   | 8.20282   | 7.46145   |
| RPS6KA1     | 18.8088   | 24.0516   | 14.9071   | 21.3804   | 19.4017   | 13.9209   |

|             |          |           |           |          |           |           |
|-------------|----------|-----------|-----------|----------|-----------|-----------|
| TGFB1I1     | 19.6815  | 28.0263   | 18.195    | 22.4932  | 19.4128   | 17.7637   |
| MMP10       | 0        | 0.105651  | 0.0452296 | 0        | 0.0380539 | 0.0372325 |
| COX10       | 6.95204  | 5.50267   | 5.92271   | 6.15488  | 5.12359   | 5.73505   |
| DEFB135     | 0        | 0         | 0         | 0        | 0         | 0         |
| PLA2G12B    | 0        | 0         | 0         | 0        | 0         | 0.131069  |
| GOLPH3      | 41.0134  | 28.4059   | 31.388    | 32.1042  | 26.0262   | 24.086    |
| DHRS3       | 64.0719  | 84.5025   | 65.9725   | 76.6595  | 60.6022   | 54.0548   |
| FLJ32154    | 0.319516 | 0.600304  | 0.786096  | 0.562539 | 0.661381  | 0.920879  |
| MIR1185-1   | 0        | 0         | 0         | 0        | 0         | 0         |
| CCK         | 0.342794 | 0.612899  | 0.131192  | 1.32896  | 0.588685  | 0.107996  |
| CHRM1       | 3.39616  | 1.53261   | 2.22277   | 3.35504  | 3.04177   | 2.84384   |
| SOCS6       | 6.39066  | 4.47671   | 5.68128   | 4.43131  | 5.57311   | 5.40176   |
| LOC10050749 | 1.32499  | 1.41686   | 1.99977   | 1.55772  | 2.29833   | 1.94519   |
| MBD1        | 29.1214  | 33.4894   | 32.0406   | 36.3019  | 40.3899   | 35.6196   |
| PHF21A      | 7.31188  | 8.62255   | 8.52477   | 7.38291  | 10.3921   | 9.2163    |
| MIR1302-9   | 0        | 0         | 7.00285   | 0        | 0         | 5.76466   |
| JAKMIP3     | 0.220641 | 0.325128  | 0.411999  | 0.483417 | 0.477794  | 0.311654  |
| NKX2-3      | 0        | 0         | 0         | 0        | 0         | 0         |
| PIR-FIGF    | 1.76E-06 | 6.34E-05  | 4.10E-06  | 0.666632 | 8.98E-05  | 0.78141   |
| DDHD2       | 16.3815  | 15.9069   | 18.2719   | 14.5135  | 19.3571   | 11.8965   |
| PCDHGB6     | 1.66234  | 0.801664  | 1.21676   | 1.08399  | 0.880103  | 1.27859   |
| SLC41A1     | 27.0902  | 26.6572   | 11.7882   | 16.3605  | 20.4462   | 25.2217   |
| CLEC6A      | 0        | 0.0583405 | 0         | 0        | 0         | 0         |
| TP53I11     | 17.1238  | 20.6391   | 22.0113   | 18.22    | 25.24     | 15.3738   |
| PLA2G2C     | 0        | 0.342131  | 0         | 0        | 0         | 0.241141  |
| LOC10012658 | 1.38264  | 1.36571   | 3.84879   | 2.86325  | 4.7757    | 4.03517   |
| IQSEC1      | 13.8557  | 14.8015   | 15.4061   | 14.365   | 14.9606   | 11.1889   |
| NDFIP2      | 28.6783  | 26.5008   | 35.7737   | 25.8748  | 29.5687   | 27.0268   |
| LOC149773   | 0.147139 | 0.303545  | 0.334155  | 0.230268 | 0.531044  | 0.611271  |
| TSPAN32     | 1.03285  | 1.75612   | 0.721732  | 1.11904  | 2.88433   | 0.940692  |
| MOXD2P      | 0        | 0         | 0         | 0        | 0         | 0.04463   |
| CAPRIN2     | 7.9585   | 8.28233   | 10.07     | 8.74874  | 10.7417   | 9.01952   |
| TMEM176A    | 12.5509  | 13.1773   | 20.7272   | 13.8896  | 27.4309   | 15.782    |
| POLR3GL     | 27.573   | 30.9021   | 30.6479   | 23.2468  | 25.0435   | 21.4779   |
| DDA1        | 9.36293  | 10.9389   | 10.9391   | 12.1782  | 13.2349   | 11.1036   |
| OR8B8       | 0        | 0         | 0         | 0        | 0         | 0         |
| MIR513B     | 0        | 0         | 0         | 0        | 0         | 0         |
| CYBB        | 4.56508  | 2.46543   | 2.7408    | 1.26696  | 2.93617   | 1.4434    |
| APOC3       | 0.289759 | 0         | 1.09675   | 0.272079 | 1.29184   | 0.541697  |
| AGAP2       | 3.56979  | 3.98818   | 2.69392   | 2.02117  | 3.33626   | 2.58947   |
| LOC10050630 | 2.66081  | 3.99215   | 2.38047   | 2.1199   | 3.13259   | 2.06007   |
| ZUFSP       | 6.10119  | 4.33178   | 4.61863   | 3.73248  | 6.24096   | 4.95413   |
| MIR1228     | 0        | 0         | 0         | 0        | 0         | 0         |

|             |          |           |          |           |           |          |
|-------------|----------|-----------|----------|-----------|-----------|----------|
| EMX2OS      | 2.88557  | 2.51661   | 3.65713  | 2.10875   | 4.42411   | 3.78347  |
| MTRNR2L7    | 0        | 0         | 0        | 0         | 0         | 0        |
| LOC645434   | 0        | 0.221183  | 0.236724 | 0.0587261 | 0.199167  | 0        |
| CUL7        | 9.23585  | 10.0202   | 10.2547  | 10.163    | 13.2508   | 12.4319  |
| LOC340357   | 0        | 0.146353  | 0.375927 | 0.777162  | 0.527143  | 0.103153 |
| A4GNT       | 0.23715  | 0.209673  | 0.762976 | 0.11134   | 0.226563  | 0.147782 |
| LOC10050551 | 0        | 0         | 0        | 0         | 0         | 0        |
| OSBPL2      | 34.8583  | 33.8696   | 38.3394  | 39.6975   | 36.8929   | 37.2419  |
| AGAP8       | 5.12002  | 6.85047   | 5.62416  | 6.2277    | 12.392    | 11.2003  |
| C21orf37    | 0.979475 | 0         | 0.562797 | 0         | 0.118372  | 0.61773  |
| BSN         | 0.158248 | 0.191733  | 0.199658 | 0.137586  | 0.164249  | 0.171661 |
| MAP1LC3B    | 64.3983  | 58.6682   | 57.7788  | 56.29     | 50.7097   | 56.4653  |
| MIR369      | 0        | 0         | 0        | 0         | 0         | 0        |
| OR4L1       | 0        | 0         | 0        | 0         | 0         | 0        |
| KLHDC10     | 12.9445  | 10.2779   | 12.7623  | 11.918    | 12.1636   | 11.4667  |
| CDH3        | 13.4052  | 19.4855   | 11.1626  | 12.4592   | 15.1076   | 12.5869  |
| KLHL38      | 0        | 0.151137  | 0        | 0.0535043 | 0.0725831 | 0.106525 |
| NIPBL       | 9.43813  | 6.97375   | 9.75806  | 6.69538   | 9.09609   | 8.53234  |
| NHLH1       | 0.590405 | 0.730798  | 0.625716 | 0.480463  | 0.401101  | 0.588664 |
| MRPL9       | 28.7199  | 40.7588   | 31.5067  | 38.0774   | 36.8171   | 33.6821  |
| UBR4        | 17.1395  | 14.8394   | 17.6027  | 17.2606   | 16.8807   | 15.808   |
| BSX         | 0        | 0         | 0        | 0         | 0         | 0        |
| ZNF252      | 5.67956  | 3.58232   | 4.36643  | 3.88762   | 4.18079   | 4.93953  |
| C1orf122    | 103.502  | 156.984   | 83.3338  | 135.892   | 72.1855   | 95.222   |
| HSPA12A     | 9.3997   | 6.60702   | 9.05625  | 7.20568   | 9.44429   | 6.4422   |
| LCLAT1      | 4.59468  | 3.30609   | 3.13184  | 4.1275    | 2.69831   | 3.06141  |
| LOC10028736 | 0        | 0.0261542 | 0        | 0.0277767 | 0         | 0        |
| AGAP5       | 5.157    | 5.98443   | 7.93333  | 7.37577   | 7.71674   | 7.31963  |
| ZNF790      | 2.2252   | 2.39032   | 2.3405   | 2.15577   | 3.15618   | 2.25589  |
| MEGF9       | 19.9473  | 12.642    | 16.7314  | 11.3306   | 15.6748   | 15.9791  |
| MIR92B      | 0        | 0         | 0        | 0         | 0         | 0        |
| LOC10065291 | 4.86796  | 7.81086   | 6.73322  | 9.3676    | 9.37785   | 10.7858  |
| LOC10013163 | 0        | 0         | 0        | 0         | 0         | 0        |
| PDCL2       | 0        | 0         | 0        | 0         | 0         | 0.177903 |
| ZNF271      | 6.13417  | 5.32992   | 4.3878   | 4.31535   | 4.48912   | 4.10292  |
| HRH1        | 2.47515  | 2.46979   | 1.75367  | 1.57825   | 2.16966   | 1.31625  |
| GPR124      | 19.7102  | 19.5154   | 25.304   | 14.4874   | 24.895    | 17.5889  |
| MIR621      | 0        | 0         | 0        | 0         | 0         | 0        |
| MIR516B2    | 0        | 0         | 0        | 0         | 0         | 0        |
| SAFB        | 33.8239  | 43.8075   | 37.208   | 42.4557   | 44.045    | 40.8344  |
| KIAA0141    | 19.8625  | 21.4447   | 16.7001  | 17.2293   | 19.5767   | 15.8966  |
| BRD7        | 13.692   | 13.275    | 12.8326  | 12.1144   | 11.8613   | 11.451   |
| FCGR1B      | 0.405928 | 0.402916  | 0.513946 | 0.0477419 | 0.270221  | 0        |

|             |           |           |           |           |           |           |
|-------------|-----------|-----------|-----------|-----------|-----------|-----------|
| MMP11       | 2.29968   | 2.55151   | 3.038     | 4.82682   | 7.06494   | 2.19175   |
| RIPPLY2     | 0         | 0         | 0         | 0.19278   | 0         | 0.127939  |
| KRTAP19-7   | 5.52129   | 9.76316   | 0         | 0         | 0         | 337.182   |
| CAPZA1      | 58.2803   | 58.2151   | 57.5615   | 53.249    | 63.4398   | 56.9472   |
| BAIAP2      | 39.5545   | 57.6048   | 45.3276   | 58.6192   | 56.1484   | 54.2084   |
| LOC10050668 | 0         | 0         | 0.0885968 | 0         | 0         | 0.0729318 |
| RNF32       | 1.38332   | 1.11333   | 1.54247   | 1.37482   | 1.75932   | 1.23547   |
| ACOT4       | 8.85378   | 10.0152   | 7.58944   | 5.31823   | 3.15122   | 4.90877   |
| SCARNA6     | 0         | 2.66559   | 4.5646    | 0         | 0.960104  | 0         |
| MIR17HG     | 3.8729    | 6.16553   | 3.01236   | 2.79451   | 4.4841    | 5.37517   |
| MIR127      | 0         | 0         | 0         | 0         | 0         | 0         |
| GREB1       | 1.07898   | 0.661225  | 1.29878   | 0.639498  | 6.48728   | 1.75769   |
| LINC00485   | 0         | 0         | 0         | 0         | 0         | 0         |
| DARS2       | 7.39182   | 4.68673   | 5.26125   | 4.2585    | 4.42654   | 5.35869   |
| ZNF527      | 1.57823   | 1.39537   | 1.84899   | 1.39372   | 1.66334   | 1.34644   |
| SNORA14B    | 43.7608   | 0         | 0         | 0         | 0         | 0         |
| KIF1A       | 0.128739  | 0.36044   | 0.105578  | 0.110811  | 0.109326  | 0.147079  |
| RBM41       | 7.26489   | 6.4205    | 7.36038   | 6.0847    | 7.74067   | 7.49898   |
| IL1RAPL2    | 0         | 0.0883468 | 0.0504288 | 0.0312758 | 0.0212141 | 0.0207562 |
| SLC26A8     | 0.0313608 | 0.110909  | 0.0949616 | 0         | 0.13144   | 0.0781712 |
| SMARCB1     | 31.7974   | 33.6958   | 28.3888   | 38.9654   | 31.9053   | 34.438    |
| LOC10050653 | 5.87444   | 6.52246   | 5.79142   | 8.33815   | 10.8764   | 8.17273   |
| PACSIN3     | 20.2959   | 29.9821   | 19.6178   | 29.6031   | 26.163    | 25.4531   |
| OGFOD2      | 10.4102   | 19.8861   | 10.8357   | 14.2475   | 16.1155   | 14.1015   |
| NDN         | 14.8636   | 18.3302   | 19.0576   | 14.4202   | 16.4882   | 12.8511   |
| TM6SF2      | 0.363742  | 0.385917  | 0.330426  | 0.273238  | 0.556006  | 0.317336  |
| TMEM147     | 80.1193   | 98.7186   | 76.7146   | 94.6513   | 87.3984   | 92.452    |
| DNASE2      | 23.3596   | 25.3842   | 23.1363   | 28.5049   | 25.1023   | 26.4842   |
| LOC10050705 | 0         | 0         | 0         | 0         | 0         | 0         |
| DSCR6       | 0.365377  | 0.363424  | 0.207444  | 0.514625  | 0.0581776 | 0.0853828 |
| LIMS2       | 31.8092   | 51.9522   | 34.6543   | 37.4819   | 45.1863   | 35.1879   |
| CILP        | 10.175    | 18.721    | 16.2754   | 6.29472   | 7.71026   | 6.35412   |
| ZNF479      | 0         | 0         | 0         | 0         | 0         | 0         |
| ZNF454      | 0.770314  | 0.604917  | 0.812179  | 0.870755  | 0.621516  | 0.729081  |
| GHSR        | 0         | 0         | 0         | 0         | 0         | 0         |
| CDH12       | 0.380147  | 0.217278  | 0.507515  | 0.335646  | 0.384324  | 0.41778   |
| C10orf43    | 13.4852   | 17.04     | 15.5008   | 19.1881   | 16.6409   | 29.5768   |
| GTF2IP1     | 45.1643   | 41.13     | 45.2341   | 45.1132   | 48.1936   | 49.3021   |
| LOC641746   | 0.397983  | 0.439839  | 1.43106   | 0.840823  | 0.823801  | 1.73604   |
| SMOC1       | 4.08324   | 6.06936   | 3.25048   | 5.12737   | 3.29296   | 3.10594   |
| IER3IP1     | 43.8637   | 44.7727   | 45.064    | 34.4824   | 38.5642   | 35.2345   |
| C14orf1     | 53.677    | 49.4891   | 47.6959   | 56.2853   | 43.4545   | 49.5448   |
| SNORD23     | 0         | 394.019   | 0         | 0         | 283.839   | 0         |

|             |           |           |          |           |           |           |
|-------------|-----------|-----------|----------|-----------|-----------|-----------|
| PITX1       | 3.82994   | 4.9288    | 3.22143  | 4.55526   | 1.30097   | 1.67066   |
| MIR603      | 0         | 0         | 0        | 0         | 0         | 0         |
| MUDENG      | 21.1791   | 14.6975   | 14.78    | 13.7312   | 13.9855   | 13.0456   |
| C10orf28    | 7.89342   | 7.31498   | 6.19669  | 5.16081   | 8.63962   | 6.9046    |
| DNAJC12     | 0.493408  | 0.327183  | 0.504238 | 0.347474  | 0.648459  | 0.483132  |
| GVINP1      | 0.584423  | 0.392317  | 0.26217  | 0.13211   | 0.310185  | 0.25628   |
| GRIP2       | 1.56505   | 2.38157   | 2.32512  | 2.21383   | 1.34542   | 1.37126   |
| PALB2       | 4.34569   | 4.41532   | 4.56197  | 3.26893   | 4.48046   | 4.72786   |
| ICOSLG      | 10.0686   | 8.84805   | 8.8461   | 9.36828   | 12.4562   | 14.8112   |
| TBX6        | 2.26563   | 4.36579   | 2.41872  | 1.85465   | 2.55299   | 2.71509   |
| MIR3142     | 0         | 0         | 0        | 0         | 0         | 0         |
| HDAC5       | 17.371    | 21.9828   | 24.011   | 25.3779   | 24.9974   | 27.284    |
| SNORD114-2l | 0         | 0         | 0        | 0         | 0         | 0         |
| TMEM151A    | 0.0398533 | 0.0704715 | 0        | 0         | 0         | 0.0248349 |
| MBD5        | 1.36746   | 1.32149   | 1.68517  | 0.970481  | 1.43807   | 1.2683    |
| FGF12       | 0.4257    | 0.299406  | 0.200052 | 0.201878  | 0.225783  | 0.232003  |
| ORM2        | 0.329846  | 0.129613  | 0        | 0         | 0.0466847 | 0.045677  |
| ANKRD5      | 2.67085   | 1.15139   | 1.91192  | 1.24725   | 1.27701   | 1.49276   |
| AR          | 2.95022   | 0.553519  | 3.52809  | 1.37345   | 2.1395    | 1.75979   |
| TRUB2       | 23.7392   | 27.7184   | 19.2258  | 25.6167   | 24.7674   | 24.9842   |
| SRSF7       | 55.9637   | 59.8296   | 50.3936  | 44.4094   | 55.9737   | 50.1829   |
| FAM157B     | 0.217532  | 0         | 0.459898 | 0.0814773 | 0.150445  | 0.0961289 |
| COQ2        | 6.1456    | 6.34868   | 7.44361  | 6.37806   | 6.8807    | 6.53061   |
| MIR187      | 0         | 0         | 0        | 0         | 0         | 0         |
| SUSD4       | 18.9312   | 22.3513   | 19.5171  | 22.9138   | 23.3596   | 26.4967   |
| MIR1302-4   | 0         | 0         | 0        | 0         | 0         | 0         |
| TXNDC5      | 47.9175   | 38.9609   | 46.5413  | 45.1633   | 33.4002   | 35.7321   |
| RWDD2A      | 4.9965    | 3.87389   | 3.37504  | 3.60895   | 4.65105   | 3.54472   |
| ZNHIT6      | 4.88975   | 4.2141    | 4.55396  | 4.57691   | 4.98089   | 4.60424   |
| MIR4492     | 0         | 0         | 0        | 0         | 0         | 0         |
| C11orf57    | 12.2043   | 11.2491   | 13.4176  | 10.5616   | 13.9536   | 12.0992   |
| AFAP1L1     | 5.42357   | 7.75382   | 7.23288  | 4.44255   | 4.20393   | 4.24262   |
| SLC38A6     | 5.13017   | 4.61752   | 4.50752  | 4.70625   | 4.51093   | 4.7806    |
| TRIP11      | 7.55956   | 4.53869   | 5.36774  | 4.14893   | 5.1581    | 5.20014   |
| ZAK         | 13.177    | 12.3844   | 13.1975  | 10.6126   | 10.7398   | 10.104    |
| PMM1        | 49.7467   | 75.392    | 44.7195  | 53.7938   | 51.4314   | 54.3577   |
| LOC10012926 | 0.835597  | 1.13056   | 1.991    | 2.19366   | 2.25086   | 1.28745   |
| LOC349196   | 1.76961   | 2.94517   | 1.0771   | 1.30345   | 4.26524   | 3.00553   |
| OXCT2       | 0.286676  | 0.101384  | 0.303821 | 3.55323   | 0.4026    | 10.9687   |
| FAM71D      | 0         | 0.0517861 | 0.310378 | 0.274993  | 0.111915  | 0.0729997 |
| SLC26A11    | 7.97745   | 8.74579   | 8.43713  | 9.73875   | 12.3896   | 9.6381    |
| MIR639      | 0         | 0         | 0        | 0         | 0         | 0         |
| TEPP        | 0.0694627 | 0.925943  | 0.272621 | 0.293508  | 0.276507  | 0.609614  |

|            |          |          |           |          |            |           |
|------------|----------|----------|-----------|----------|------------|-----------|
| MIR3155    | 0        | 0        | 0         | 0        | 0          | 0         |
| FPGS       | 18.2973  | 28.0286  | 17.6979   | 17.349   | 17.8974    | 14.5498   |
| DCTN1      | 38.899   | 38.2898  | 44.6338   | 41.4637  | 42.6275    | 44.2701   |
| LOC221442  | 2.34906  | 2.36041  | 2.26217   | 2.05484  | 2.03079    | 1.23008   |
| SCAND2     | 4.64191  | 5.76405  | 6.31793   | 6.93456  | 6.47925    | 5.58563   |
| RALGAPA2   | 7.864    | 5.56229  | 8.59217   | 6.33064  | 9.07296    | 8.06556   |
| ALG1       | 2.50087  | 2.3339   | 3.20642   | 2.68779  | 2.39872    | 2.6898    |
| CD28       | 0.488049 | 0.545056 | 0.369456  | 0.217076 | 0.621683   | 0.272118  |
| SNORA19    | 0        | 0        | 0         | 0        | 0          | 0         |
| MIR4298    | 0        | 0        | 0         | 0        | 0          | 0         |
| TIAL1      | 27.1254  | 26.8326  | 25.9547   | 24.555   | 31.258     | 27.6691   |
| KATNB1     | 15.3706  | 17.9518  | 17.4965   | 23.6269  | 24.8003    | 25.0927   |
| PPP1R9A    | 1.35633  | 0.677962 | 1.05505   | 0.8048   | 0.870332   | 0.612478  |
| CA8        | 1.34161  | 0.474467 | 0.440096  | 0.755851 | 0.882962   | 0.808167  |
| LOC1002893 | 0        | 0        | 0         | 0        | 0          | 0         |
| TEX13A     | 0        | 0        | 0         | 0        | 0          | 0         |
| LOC1005070 | 7.3183   | 5.30571  | 7.09119   | 5.63485  | 6.05938    | 5.0165    |
| MIR1231    | 0        | 0        | 0         | 0        | 0          | 0         |
| TMEM201    | 6.2233   | 8.47567  | 6.07221   | 7.42318  | 6.65309    | 6.32413   |
| SLC35A4    | 56.256   | 58.1223  | 46.8762   | 51.9366  | 51.6632    | 49.5121   |
| C3orf22    | 0        | 0        | 0         | 0        | 0          | 0         |
| SLC39A3    | 12.7284  | 17.3065  | 16.2339   | 19.3256  | 15.227     | 17.0318   |
| CTSB       | 142.505  | 125.661  | 146.678   | 152.515  | 150.7      | 214.941   |
| COL9A1     | 0.361606 | 0.516159 | 0.395942  | 0.704308 | 0.477726   | 0.73069   |
| IFITM3     | 480.183  | 656.103  | 292.537   | 227.003  | 353.052    | 220.523   |
| RFX1       | 4.36735  | 6.78184  | 4.66548   | 6.30744  | 5.49258    | 6.43778   |
| RAB9B      | 0.489139 | 0.887692 | 1.38368   | 1.01528  | 0.606674   | 0.625663  |
| LGMN       | 28.4481  | 22.8051  | 27.7533   | 25.7247  | 27.281     | 25.3118   |
| LOC1006530 | 0        | 0        | 0.0054759 | 0.100626 | 0.00460714 | 0.0545431 |
| CCL3       | 2.05956  | 0.980502 | 0.599653  | 0.148761 | 1.21084    | 0         |
| LOC1005059 | 0.366264 | 0.226679 | 0.277264  | 0.240741 | 0.163293   | 0.22824   |
| OR8B3      | 0        | 0        | 0         | 0        | 0          | 0         |
| C1QL3      | 0.607507 | 0.322272 | 0.889113  | 0.608469 | 0.928619   | 0.656193  |
| LOC729461  | 0        | 0        | 0         | 0        | 0          | 0         |
| C6orf203   | 23.7696  | 24.2088  | 19.4874   | 18.4587  | 17.7596    | 19.6854   |
| PELP1      | 18.0319  | 22.5932  | 18.3147   | 21.1645  | 17.6516    | 18.351    |
| LOC1005075 | 0        | 0        | 0.301767  | 0.12477  | 0.507782   | 0.165607  |
| LOC1001304 | 0.655698 | 1.15945  | 0.744551  | 2.15492  | 1.46166    | 0.817207  |
| LOC1001291 | 1.23784  | 2.12039  | 1.5445    | 2.16631  | 2.16894    | 1.08199   |
| MIR181B2   | 0        | 0        | 0         | 0        | 0          | 0         |
| LOC285033  | 5.15097  | 4.80717  | 3.24943   | 3.49316  | 4.92102    | 3.03154   |
| C1orf100   | 0        | 0.223853 | 0         | 0.23774  | 0.161257   | 0         |
| LOC285423  | 0        | 0        | 0         | 0        | 0          | 0         |



|            |           |           |           |           |           |           |
|------------|-----------|-----------|-----------|-----------|-----------|-----------|
| NMU        | 14.4218   | 12.7508   | 15.2146   | 14.5502   | 16.0254   | 18.0698   |
| LOC389791  | 0.44407   | 0.578133  | 0.496397  | 0.797205  | 1.08148   | 1.0339    |
| FANCI      | 6.07173   | 8.29446   | 5.54875   | 6.37719   | 6.52398   | 6.44472   |
| DYNLT1     | 57.6248   | 69.2297   | 45.9317   | 57.6099   | 53.757    | 52.8079   |
| TMEM26     | 0.0373564 | 0         | 0.028279  | 0.0350771 | 0.047585  | 0.0814762 |
| CHL1       | 5.29935   | 3.26987   | 5.81546   | 2.83178   | 6.0864    | 4.98056   |
| LOC286178  | 0         | 0.0363504 | 0         | 0.0772108 | 0.0523715 | 0.0768615 |
| PRRT3      | 1.63926   | 1.44933   | 1.71366   | 1.39264   | 1.47493   | 1.70253   |
| LRRC37A    | 1.93583   | 2.07213   | 2.0937    | 1.78682   | 3.57124   | 3.54554   |
| LOC157627  | 0         | 0         | 0.0258011 | 0         | 0         | 0.0212392 |
| TUBB1      | 0.646789  | 0.795617  | 0.702502  | 0.554514  | 0.644781  | 0.648387  |
| OR1S2      | 0         | 0         | 0         | 0         | 0         | 0         |
| ETV2       | 0.580158  | 0.833526  | 0.658774  | 1.63428   | 1.66278   | 1.35574   |
| NAT14      | 4.95745   | 7.54461   | 7.1365    | 12.286    | 7.9712    | 8.5588    |
| SLFN13     | 4.75119   | 4.30944   | 2.64039   | 3.86296   | 3.07591   | 2.47309   |
| AMZ1       | 0.0659062 | 0.0582701 | 0.0332609 | 0.103142  | 0.111936  | 0.04107   |
| FAM98C     | 16.3409   | 23.4275   | 17.9037   | 25.5661   | 26.416    | 22.7662   |
| CTLA4      | 1.10352   | 1.08738   | 1.31192   | 0.595554  | 2.7046    | 1.24215   |
| MKL1       | 10.6862   | 12.4448   | 10.7046   | 12.0244   | 13.073    | 13.4909   |
| LOC1005076 | 0.0800176 | 0.353733  | 1.09033   | 0.563514  | 0.356746  | 0.149591  |
| RFPL1-AS1  | 0.153784  | 0.0998933 | 0.0653268 | 0.0359993 | 0.0936587 | 0.0597581 |
| TAG        | 0         | 0         | 0         | 0         | 0         | 0         |
| SH3PXD2B   | 6.74784   | 6.00916   | 7.62989   | 8.23809   | 7.75613   | 6.89675   |
| SMARCC2    | 31.6139   | 34.4981   | 34.7167   | 34.4771   | 40.782    | 35.9439   |
| SWT1       | 2.51647   | 1.90439   | 2.5288    | 1.36193   | 2.2914    | 2.70956   |
| LOC1005068 | 4.16302   | 4.00299   | 2.62325   | 3.0798    | 4.73101   | 3.98617   |
| CRYBA1     | 0         | 0         | 0.119316  | 0.295998  | 0         | 0         |
| PTCD3      | 13.6731   | 12.7438   | 12.1615   | 11.9882   | 13.4203   | 12.9131   |
| LOC1005056 | 1.67294   | 1.29451   | 0.791614  | 2.3566    | 2.13074   | 2.47597   |
| CCDC86     | 29.9232   | 37.6817   | 25.7655   | 32.5497   | 18.6839   | 22.2442   |
| CBWD2      | 20.393    | 19.7383   | 17.0763   | 17.003    | 17.6711   | 16.7449   |
| PDHA1      | 83.8853   | 63.2305   | 61.031    | 58.5297   | 46.4958   | 50.7691   |
| ZRSR2      | 8.60581   | 10.2498   | 8.72209   | 9.48316   | 9.15025   | 9.61754   |
| PTPN7      | 4.15362   | 4.49399   | 3.01638   | 1.02367   | 6.77964   | 2.04031   |
| KLF2       | 25.6247   | 32.681    | 19.8345   | 31.46     | 21.4207   | 16.7267   |
| CCDC41     | 5.39813   | 5.07613   | 3.87384   | 3.0473    | 4.9083    | 4.33605   |
| MIR4633    | 0         | 0         | 0         | 0         | 0         | 0         |
| ITM2B      | 499.634   | 427.226   | 481.427   | 415.668   | 402.138   | 386.119   |
| GRIN1      | 0.798794  | 0.510791  | 0.664872  | 0.776431  | 0.800758  | 0.656462  |
| SLC24A1    | 2.50909   | 1.90986   | 2.54091   | 2.32479   | 2.78336   | 2.40229   |
| SMURF2     | 6.16631   | 5.42952   | 5.85404   | 4.10525   | 5.45645   | 5.40166   |
| OR4K17     | 0         | 0         | 0         | 0         | 0         | 0         |
| MIR4689    | 0         | 0         | 0         | 0         | 0         | 0         |

|             |          |           |           |            |           |            |
|-------------|----------|-----------|-----------|------------|-----------|------------|
| OR7C2       | 0        | 0         | 0         | 0          | 0         | 0          |
| HDAC9       | 2.40838  | 1.72284   | 2.27134   | 1.19208    | 1.67129   | 1.25782    |
| FCHO1       | 3.70814  | 3.99836   | 6.92852   | 3.84676    | 8.9056    | 8.00657    |
| FLJ42875    | 3.83423  | 10.0637   | 4.66042   | 2.49385    | 3.80865   | 2.20618    |
| ZNF284      | 2.22195  | 0.736692  | 2.0675    | 1.56478    | 2.9188    | 2.27887    |
| LRRC67      | 0        | 0         | 0         | 0          | 0         | 0          |
| EIF3C       | 63.4035  | 65.0158   | 78.1975   | 85.7926    | 87.0614   | 88.1944    |
| LUZP2       | 0.567311 | 0.339781  | 0.332484  | 0.257756   | 0.268079  | 0.307908   |
| LRRC3C      | 0.139086 | 0         | 0         | 0          | 0.177169  | 0          |
| RGPD6       | 4.65243  | 4.58947   | 5.4037    | 5.89121    | 5.07922   | 4.91088    |
| RAVER1      | 12.2366  | 17.0252   | 12.5301   | 16.1321    | 14.5086   | 15.5741    |
| ME1         | 107.402  | 76.0452   | 70.6914   | 31.0464    | 44.5893   | 60.6808    |
| FCGR2B      | 4.16262  | 2.27941   | 3.65993   | 2.29827    | 5.26274   | 2.77424    |
| NOL6        | 14.7523  | 17.2446   | 13.474    | 15.6649    | 16.2152   | 11.6582    |
| EEF2        | 823.106  | 1066.15   | 1027.35   | 1123.69    | 932.252   | 900.309    |
| LOC728405   | 0        | 0         | 0         | 0.00628586 | 0         | 0.00834323 |
| TOMM40L     | 13.1698  | 12.9281   | 8.38684   | 10.8297    | 12.0317   | 11.1743    |
| ELAVL1      | 12.8388  | 12.0214   | 10.9862   | 12.5299    | 10.7217   | 11.1103    |
| LOC10012800 | 0        | 0.0329583 | 0.0846576 | 0.0350029  | 0.0949687 | 0.1176     |
| FERMT3      | 7.30837  | 9.00374   | 7.3993    | 5.10767    | 10.387    | 5.68867    |
| ATF2        | 6.95815  | 3.7428    | 6.4829    | 5.02584    | 5.11348   | 4.27538    |
| SLC20A2     | 17.5538  | 16.6647   | 15.0034   | 17.5623    | 16.9709   | 22.3023    |
| ZCCHC17     | 30.062   | 31.636    | 26.0801   | 26.042     | 26.3479   | 25.1574    |
| IP6K1       | 16.7867  | 18.3188   | 18.4486   | 21.9355    | 18.2353   | 17.2761    |
| HIST3H3     | 0        | 0         | 0         | 0          | 0.66169   | 0.215802   |
| UBE3C       | 23.114   | 17.4461   | 20.4512   | 16.1033    | 17.6681   | 17.3331    |
| BIVM        | 10.4321  | 11.9261   | 10.1616   | 9.88177    | 11.9557   | 10.2896    |
| C10orf71    | 0        | 0.100547  | 0.0550998 | 0          | 0         | 0.0832599  |
| ZNF626      | 8.73088  | 5.86336   | 6.15446   | 5.3197     | 4.56814   | 4.5393     |
| MIR378B     | 0        | 0         | 0         | 0          | 0         | 0          |
| MAPKAPK3    | 43.0816  | 38.0901   | 42.6181   | 45.8366    | 50.8833   | 48.5102    |
| LOC10050684 | 0.669529 | 0.617942  | 1.02333   | 0.963814   | 0.533532  | 0.165519   |
| CLRN1       | 0        | 0.171201  | 0         | 0          | 0         | 0          |
| TMEM45B     | 14.7741  | 9.25421   | 12.8319   | 11.5678    | 14.8963   | 11.7464    |
| JAK3        | 3.64064  | 4.26572   | 2.35463   | 1.5599     | 5.2228    | 2.00438    |
| TSEN34      | 16.4149  | 21.6716   | 17.0917   | 22.9833    | 21.7494   | 20.6242    |
| XAGE1C      | 0.068236 | 0.0603299 | 0         | 0          | 0         | 0.0425217  |
| CNTD1       | 1.86429  | 2.38358   | 1.89398   | 2.97276    | 2.26673   | 1.83695    |
| GTF2H5      | 4.23865  | 4.51052   | 4.20779   | 4.1111     | 3.51597   | 3.37681    |
| CISH        | 17.3899  | 23.3237   | 17.1106   | 12.5191    | 21.3451   | 16.6887    |
| HIST1H3D    | 1.21646  | 0.895203  | 0.77442   | 1.37813    | 0.651558  | 0.545277   |
| C1orf123    | 36.5737  | 47.6139   | 32.0201   | 39.1202    | 34.2791   | 32.4362    |
| SAMD10      | 8.3998   | 11.1191   | 8.66772   | 10.2667    | 10.919    | 9.35759    |

|             |           |           |           |           |            |           |
|-------------|-----------|-----------|-----------|-----------|------------|-----------|
| ENO3        | 4.21979   | 8.95523   | 6.15558   | 7.39546   | 8.08383    | 6.01477   |
| TARBP1      | 14.5179   | 14.551    | 18.3564   | 16.1529   | 18.8877    | 13.0089   |
| RPL28       | 790.571   | 1362.34   | 967.679   | 1747.18   | 1152.45    | 1116.1    |
| CAPN9       | 0.229178  | 0.0718999 | 0.0325288 | 0.0403484 | 0.171053   | 0.10711   |
| SNORA46     | 0         | 0         | 0         | 0         | 0          | 27.2699   |
| ROBO1       | 8.46203   | 9.03701   | 11.1391   | 7.11528   | 10.6472    | 8.08347   |
| ARHGEF11    | 9.73582   | 9.60464   | 9.92826   | 8.40754   | 10.1078    | 9.81088   |
| NKX1-2      | 0         | 0.323559  | 0.277034  | 0.343631  | 0.233082   | 0.228051  |
| GOLGA8F     | 0         | 0         | 0.0526787 | 0.0403348 | 0.00273588 | 0         |
| LOC10050633 | 0.431491  | 0.624778  | 1.24736   | 1.14182   | 0.633379   | 0.619708  |
| PCDH9       | 0.344262  | 0.580106  | 0.662081  | 0.235609  | 0.338402   | 0.156362  |
| ADAM21      | 0.0376731 | 0.133233  | 0.114075  | 0.0707489 | 0.0539869  | 0.0234763 |
| LOC10050689 | 0         | 0         | 0         | 0         | 0          | 0         |
| LOC10050630 | 0         | 0.317172  | 0.135782  | 0         | 0          | 0.111774  |
| PRAP1       | 0         | 1.54271   | 0.587054  | 0.728178  | 1.26435    | 0.107389  |
| RPL19       | 496.014   | 874.236   | 705.028   | 1104.97   | 736.264    | 593.464   |
| RBM24       | 0.931462  | 0.786289  | 1.91925   | 1.89306   | 0.812814   | 0.423066  |
| ZNF136      | 3.88409   | 3.7833    | 5.40712   | 4.4507    | 4.67506    | 4.18442   |
| RPS27L      | 47.972    | 54.1433   | 49.0093   | 42.7528   | 43.5998    | 39.6825   |
| LOC10012888 | 3.14014   | 5.04043   | 4.45959   | 3.91941   | 5.06785    | 5.23126   |
| WASH1       | 20.2206   | 32.8607   | 17.3228   | 22.5705   | 38.025     | 38.0644   |
| LOC10028684 | 0.646458  | 0.810812  | 0.962257  | 0.632499  | 0.586815   | 0.945652  |
| CCNJ        | 3.36178   | 3.06232   | 2.87592   | 2.7403    | 3.01932    | 3.06173   |
| RASIP1      | 8.15949   | 12.552    | 8.16783   | 10.5242   | 9.59414    | 9.03317   |
| LINC00032   | 0         | 0.0302347 | 0.0258872 | 0.0321103 | 0.0217801  | 0.06393   |
| KIF3C       | 1.59209   | 1.62659   | 1.13827   | 1.24579   | 1.57736    | 1.87402   |
| MICAL1      | 13.5657   | 19.9761   | 18.4796   | 17.9944   | 27.2781    | 26.5106   |
| SNORD1B     | 0         | 0         | 0         | 0         | 0          | 0         |
| LOC10050629 | 0.0886881 | 0         | 0.0223791 | 0.0832767 | 0.0376573  | 0.0921111 |
| MFF         | 23.2693   | 22.3141   | 22.9681   | 23.2      | 20.6001    | 19.4726   |
| ZIC3        | 0.371646  | 0.0438115 | 0.356362  | 0.162853  | 0.331385   | 0.0463189 |
| KIAA0368    | 23.5183   | 20.5433   | 22.9236   | 18.6784   | 20.2695    | 18.9826   |
| LOC10050571 | 0.326822  | 0.371514  | 0.95428   | 0.306881  | 0.713673   | 0.785552  |
| LOC10050653 | 0         | 0         | 0         | 0         | 0          | 0         |
| LOC10050686 | 0         | 0         | 0         | 0         | 0          | 0         |
| ZNF461      | 2.78932   | 2.02772   | 2.62768   | 2.50272   | 2.58584    | 2.00857   |
| NAA35       | 9.86086   | 7.64943   | 8.09393   | 7.94658   | 8.42211    | 7.03952   |
| KCNAB3      | 1.98668   | 3.22024   | 2.15563   | 4.10401   | 3.79598    | 3.5077    |
| YBX2        | 7.01297   | 10.4334   | 8.57584   | 13.4234   | 9.31978    | 9.62285   |
| HINT2       | 52.5238   | 73.1076   | 60.6791   | 70.3143   | 49.5745    | 47.0585   |
| GK2         | 0.111754  | 0         | 0         | 0         | 0          | 0         |
| PABPC1L2A   | 0         | 0         | 0         | 0         | 0.0599582  | 0.0916624 |
| YBX1        | 196.137   | 232.543   | 196.587   | 236.166   | 193.384    | 178.931   |

|             |           |           |          |          |           |          |
|-------------|-----------|-----------|----------|----------|-----------|----------|
| RPS4Y2      | 0         | 0         | 0        | 0        | 0         | 0        |
| LOC10050676 | 0         | 0         | 0        | 0        | 0         | 0        |
| GPR176      | 1.34793   | 0.909499  | 1.50374  | 0.832689 | 1.7396    | 0.685242 |
| MIR1236     | 0         | 0         | 0        | 0        | 0         | 0        |
| C12orf70    | 1.39623   | 0.462921  | 0.396357 | 0.327759 | 0.500211  | 0.271897 |
| GALNT11     | 28.9261   | 30.7156   | 33.013   | 26.8156  | 29.088    | 27.7722  |
| KIR2DS4     | 0.0683818 | 0.0604589 | 0        | 0        | 0.0435527 | 0        |
| ZIK1        | 1.98694   | 2.22077   | 1.61764  | 1.61929  | 2.1967    | 2.35954  |
| LOC653125   | 0.592524  | 0.318422  | 0.738815 | 0.638023 | 0.680492  | 0.552672 |
| ALX3        | 3.87092   | 3.42243   | 3.4832   | 3.90906  | 4.37262   | 4.23272  |
| HIST1H4G    | 0         | 0         | 0        | 0        | 0         | 0        |
| TMEM175     | 20.1024   | 33.3825   | 23.0168  | 30.0603  | 30.9742   | 28.4914  |
| RNF121      | 10.2498   | 11.1986   | 10.8956  | 12.101   | 10.9925   | 10.8976  |
| ATP5D       | 163.044   | 283.691   | 170.202  | 290.472  | 173.034   | 210.662  |
| NOC2L       | 27.3896   | 32.7344   | 26.0157  | 32.2833  | 29.147    | 28.9678  |
| MIR31       | 0         | 0         | 0        | 0        | 0         | 0        |
| LOC10050741 | 0         | 0         | 0        | 0        | 0         | 0        |
| LDB1        | 67.0156   | 105.43    | 91.3986  | 102.055  | 124       | 101.08   |
| CHTOP       | 35.5176   | 39.9634   | 32.9372  | 39.4907  | 39.4295   | 36.0167  |
| TDH         | 0.323087  | 0.357066  | 0.244578 | 0.151687 | 0.102888  | 0.755002 |
| LOC389023   | 0.71608   | 1.26622   | 1.49071  | 2.35336  | 1.71028   | 1.22713  |
| BRP44L      | 102.468   | 95.071    | 92.2416  | 89.4924  | 71.3169   | 68.5466  |
| KIAA1407    | 3.75351   | 5.59609   | 6.12858  | 5.8511   | 7.85939   | 5.80934  |
| RINL        | 5.41283   | 6.48338   | 3.87353  | 4.50386  | 4.69119   | 4.18376  |
| SNORD115-20 | 0         | 0         | 0        | 0        | 0         | 0        |
| LOC10028929 | 0         | 0         | 0        | 0        | 0         | 0        |
| SAGE1       | 0         | 0         | 0        | 0        | 0         | 0        |
| MMAA        | 2.96403   | 2.33576   | 2.8779   | 2.17814  | 2.42132   | 1.95748  |
| WFDC10A     | 0         | 0         | 0        | 0        | 0         | 0        |
| ZNF324      | 4.43586   | 5.05788   | 5.81271  | 4.59607  | 4.83205   | 5.26152  |
| MFN1        | 19.7154   | 16.2707   | 20.0405  | 13.6877  | 19.2622   | 18.2721  |
| SNORD116-21 | 0         | 0         | 0        | 0        | 0         | 0        |
| GPR4        | 1.49811   | 1.43971   | 0.862883 | 0.978572 | 0.954152  | 0.588546 |
| NIF3L1      | 17.6286   | 17.0657   | 15.0581  | 14.9597  | 17.6914   | 15.6226  |
| LARP1       | 36.6745   | 29.6752   | 37.1157  | 32.7116  | 32.8581   | 31.3195  |
| LOC401109   | 7.54947   | 9.70875   | 5.15215  | 6.17588  | 5.9011    | 7.23497  |
| LOC10050704 | 0.0928215 | 0         | 0        | 0        | 0         | 0        |
| LOC642852   | 2.44291   | 2.65288   | 2.69354  | 2.24398  | 3.00187   | 3.10254  |
| PRO1768     | 0         | 0         | 0        | 0        | 0         | 0        |
| GRAP        | 1.75717   | 2.20365   | 3.1917   | 1.95678  | 3.89937   | 2.99141  |
| SMPD5       | 0         | 0.138229  | 0.236705 | 0.440411 | 0.199152  | 0.340992 |
| CCDC113     | 2.16763   | 1.68319   | 2.29294  | 1.97043  | 2.2411    | 2.12599  |
| PDXK        | 35.3589   | 35.463    | 37.6354  | 32.6573  | 31.1642   | 23.7192  |

|             |          |           |          |           |          |           |
|-------------|----------|-----------|----------|-----------|----------|-----------|
| GRIA4       | 1.59721  | 1.05364   | 1.64703  | 1.74758   | 1.19503  | 1.01216   |
| PAN3-AS1    | 2.06619  | 2.73926   | 1.7925   | 1.11036   | 2.22001  | 2.50429   |
| PKD1P1      | 31.0312  | 38.0066   | 38.5749  | 33.0459   | 46.4119  | 39.6069   |
| LOC10050706 | 0        | 0         | 2.23E-09 | 0         | 3.08E-10 | 0         |
| KREMEN2     | 2.72485  | 7.05397   | 7.50746  | 4.72342   | 7.95538  | 5.38797   |
| TMTC3       | 6.95876  | 5.76723   | 8.72638  | 5.35628   | 9.32669  | 6.95305   |
| LRRC10      | 0        | 0         | 0        | 0         | 0        | 0         |
| MYBPHL      | 0        | 0.0704877 | 0.120704 | 0         | 0        | 0.0496812 |
| FBXL19-AS1  | 0.345756 | 0.262025  | 0.635652 | 0.18552   | 0.566264 | 0.615601  |
| MIR487B     | 0        | 0         | 0        | 0         | 0        | 0         |
| NPDC1       | 43.348   | 78.1419   | 56.3398  | 77.25     | 69.536   | 69.6111   |
| MAOA        | 32.2866  | 32.8593   | 31.52    | 20.9746   | 19.3297  | 14.6948   |
| LOC728093   | 0.409378 | 0.281634  | 0.431447 | 0.212211  | 0.792334 | 0.402121  |
| H2AFY2      | 9.97196  | 9.51987   | 9.18442  | 11.797    | 11.9504  | 10.5806   |
| DMRT2       | 2.45077  | 7.17157   | 3.2649   | 1.60072   | 2.028    | 1.05478   |
| AGAP4       | 7.05128  | 10.1385   | 7.45879  | 8.57131   | 8.47475  | 7.14455   |
| OR13C8      | 0        | 0         | 0        | 0         | 0        | 0         |
| C14orf177   | 0        | 0         | 0        | 0         | 0        | 0         |
| KLK9        | 11.8416  | 9.13588   | 5.88094  | 7.29467   | 10.9046  | 7.94319   |
| GALNT4      | 1.40763  | 0.370543  | 1.40503  | 0.656756  | 0.967707 | 1.20851   |
| ZNF37A      | 4.73122  | 3.73131   | 4.7471   | 4.22142   | 5.30634  | 5.20423   |
| ELMO1       | 3.67912  | 3.32715   | 3.64098  | 2.58141   | 3.64564  | 2.75354   |
| MRC2        | 27.3711  | 31.8515   | 44.1286  | 42.9002   | 38.6286  | 56.0443   |
| CHD8        | 11.5546  | 10.0348   | 13.1788  | 10.5027   | 12.4574  | 11.2461   |
| LOC10012963 | 0.108888 | 0         | 0        | 0         | 0        | 0         |
| NFE2L2      | 69.1384  | 61.4015   | 74.1775  | 57.2646   | 65.5542  | 62.6481   |
| NOL3        | 35.75    | 58.8118   | 55.2801  | 67.4486   | 72.9393  | 70.0877   |
| CSRNP3      | 0.414773 | 0.232861  | 0.772638 | 0.415542  | 0.707006 | 0.586655  |
| C7          | 3.71792  | 4.66217   | 7.56049  | 2.21329   | 7.22771  | 3.74028   |
| SLC14A2     | 0.106359 | 0         | 0.184033 | 0.0249672 | 0.138304 | 0.104753  |
| TTC1        | 48.0561  | 44.1986   | 36.5544  | 39.0201   | 33.1208  | 38.048    |
| CENPL       | 2.00379  | 1.85865   | 1.6225   | 2.02259   | 0.969827 | 1.39837   |
| MKKS        | 24.8149  | 26.7918   | 21.2235  | 19.6414   | 18.5509  | 18.6356   |
| FAM105A     | 1.1475   | 1.07423   | 1.52272  | 0.887342  | 1.59068  | 0.98428   |
| KRTAP5-6    | 0.532684 | 0         | 0        | 5.00511   | 0.169635 | 36.4589   |
| MYLK        | 135.536  | 107.315   | 92.6198  | 109.815   | 79.1308  | 77.1207   |
| ZNF434      | 6.72623  | 7.07823   | 5.88658  | 4.9602    | 6.89611  | 6.13387   |
| DAAM2       | 7.59619  | 8.17153   | 8.52411  | 5.47336   | 8.20511  | 6.28027   |
| LOC10050633 | 1.17058  | 0.73847   | 4.58119  | 5.67858   | 2.44332  | 2.13115   |
| PCDH12      | 2.61931  | 2.06946   | 2.02502  | 1.2908    | 1.41979  | 1.57436   |
| CAV1        | 153.106  | 147.995   | 193.766  | 139.116   | 104.43   | 84.9356   |
| FBXO22      | 9.98997  | 7.8386    | 10.0198  | 6.13195   | 6.94557  | 5.96811   |
| FOXF2       | 0.280701 | 0.330904  | 0.354154 | 0.307503  | 0.327764 | 0.262382  |

|             |           |             |           |           |           |           |
|-------------|-----------|-------------|-----------|-----------|-----------|-----------|
| CCDC96      | 1.09489   | 2.06234     | 1.18921   | 1.92208   | 1.81916   | 1.6019    |
| MIR3184     | 0         | 0           | 0         | 0         | 0         | 0         |
| SP6         | 6.96063   | 4.55863     | 6.92806   | 13.2413   | 7.52012   | 16.4667   |
| PTPN4       | 2.62348   | 2.73528     | 3.01646   | 2.62609   | 2.33297   | 1.92788   |
| LOC10033501 | 0.0313079 | 0.166083    | 0.0474005 | 0.146988  | 0.0398803 | 0.175588  |
| SCN7A       | 2.85912   | 1.931       | 1.94393   | 1.77735   | 2.80736   | 1.87242   |
| C2orf27B    | 1.08202   | 1.39697     | 0.503253  | 0.704698  | 1.37609   | 1.2946    |
| LOC10050611 | 0.152915  | 0.270395    | 0.463029  | 0.143584  | 0         | 0.28587   |
| BTN1A1      | 0         | 0.0309339   | 0.0529718 | 0         | 0.0222839 | 0         |
| AURKAPS1    | 0.837335  | 0.370159    | 0.319575  | 0.589683  | 0.756207  | 1.56568   |
| CCDC111     | 3.66204   | 3.55663     | 5.26892   | 3.27345   | 5.29406   | 4.36932   |
| TMX4        | 19.5831   | 11.3659     | 10.8345   | 8.81185   | 9.60688   | 9.02566   |
| LOC339926   | 5.98E-16  | 0.000278546 | 1.12E-14  | 2.36E-23  | 4.05E-22  | 0.0445418 |
| RFC4        | 10.7677   | 12.1904     | 9.41244   | 9.85175   | 10.9342   | 9.67286   |
| CCNE1       | 2.82302   | 3.15524     | 2.41929   | 2.60075   | 2.51041   | 1.99153   |
| LINC00113   | 0.596372  | 0           | 0.225728  | 0.559984  | 0         | 0         |
| HTATSF1     | 35.0814   | 25.8264     | 29.0952   | 20.652    | 26.5241   | 25.1185   |
| MMP13       | 0         | 0           | 0.0278924 | 0.0345976 | 0.0469345 | 0.0459214 |
| AKR7L       | 1.03511   | 0.735168    | 1.40111   | 1.11187   | 2.2569    | 1.06731   |
| CABYR       | 2.45116   | 2.42281     | 1.82241   | 2.4829    | 2.49305   | 2.31655   |
| LOC10012890 | 0.166322  | 0.196068    | 0.251813  | 0.156173  | 0.141242  | 0.138193  |
| RGS3        | 15.4389   | 21.7817     | 17.7006   | 16.9536   | 19.278    | 18.7035   |
| SNAI3       | 1.0469    | 1.52452     | 0.932362  | 0.751722  | 1.64733   | 1.03614   |
| NANP        | 2.28995   | 1.79714     | 1.83089   | 1.78783   | 1.90094   | 1.26666   |
| FBXO9       | 27.2703   | 24.7454     | 23.7044   | 20.5245   | 25.4076   | 23.1896   |
| POLR2I      | 27.0275   | 42.2613     | 27.8811   | 41.2068   | 30.9729   | 35.4155   |
| CRYBB3      | 0.867192  | 0.383358    | 0.656469  | 0.678566  | 0.368213  | 0.990728  |
| PRG4        | 0.729268  | 0.355233    | 1.04184   | 0.164973  | 0.388876  | 0.310965  |
| KLF11       | 9.65328   | 11.6914     | 12.5226   | 12.0625   | 12.3452   | 9.80673   |
| TFDP3       | 0.062969  | 0.16702     | 0         | 0         | 0.0401053 | 0.0392396 |
| VSTM2A      | 0.43062   | 0.0761453   | 0         | 0         | 0         | 0.0536688 |
| TUFM        | 92.554    | 105.694     | 87.4858   | 104.783   | 81.0775   | 87.9694   |
| SNORD93     | 0         | 0           | 0         | 0         | 0         | 0         |
| LOC10065278 | 0         | 0           | 0         | 0         | 0         | 0         |
| LOC10012810 | 2.62589   | 6.0316      | 3.23143   | 2.90019   | 6.0352    | 3.53597   |
| SBK1        | 1.15893   | 1.09296     | 1.22824   | 2.3578    | 1.34093   | 1.70919   |
| C19orf56    | 131.802   | 166.498     | 127.4     | 184.838   | 136.965   | 138.011   |
| LRRC14      | 9.20275   | 13.3828     | 10.6851   | 14.5191   | 13.6367   | 13.2639   |
| GPR12       | 8.10222   | 3.80174     | 5.8923    | 11.608    | 3.05563   | 2.97727   |
| LOC643923   | 0.365477  | 0           | 0         | 0.114392  | 0.853506  | 0.303666  |
| LRRC56      | 2.60611   | 5.39641     | 1.9144    | 2.47858   | 5.53933   | 4.99256   |
| OR2L8       | 0         | 0           | 0         | 0         | 0         | 0         |
| DPEP1       | 0.463496  | 0.801566    | 0.49341   | 1.33285   | 3.89443   | 1.48338   |

|             |           |          |           |           |           |           |
|-------------|-----------|----------|-----------|-----------|-----------|-----------|
| ZFP64       | 6.79044   | 6.49477  | 6.83448   | 6.02252   | 6.64674   | 7.18586   |
| LOC10028871 | 42.4219   | 76.8151  | 40.7993   | 58.0652   | 72.7382   | 70.6686   |
| LOC10050664 | 0         | 0        | 0         | 0         | 0         | 0.069661  |
| GOLGB1      | 17.025    | 13.9964  | 17.6892   | 13.6167   | 16.999    | 14.4725   |
| MIR30D      | 0         | 0        | 0         | 0         | 0         | 0         |
| KIAA1958    | 0.523364  | 0.165259 | 0.537685  | 0.526532  | 0.404762  | 0.351225  |
| OLFML2A     | 23.0425   | 15.9887  | 20.9541   | 21.8557   | 22.0324   | 17.7581   |
| ANKRD57     | 16.4418   | 13.8017  | 15.7194   | 18.1125   | 15.4629   | 14.5462   |
| S1PR3       | 6.76591   | 4.7819   | 4.12914   | 4.14431   | 4.03181   | 6.05602   |
| C10orf105   | 0.817902  | 0.659766 | 0.846141  | 0.370913  | 0.932707  | 0.621381  |
| FCRL2       | 0         | 0        | 0.0588391 | 0         | 0.0495042 | 0.0242178 |
| UQCC        | 24.7486   | 23.7445  | 21.4561   | 26.62     | 21.315    | 18.1772   |
| ZNF503-AS1  | 2.3062    | 1.52107  | 1.22857   | 2.1841    | 1.3509    | 1.39886   |
| LOC10050615 | 24.9144   | 24.1276  | 15.1508   | 17.8149   | 22.2005   | 16.8586   |
| SNORA43     | 0         | 2.90966  | 0         | 82.0571   | 81.5038   | 96.3336   |
| OR3A1       | 0         | 0        | 0         | 0         | 0         | 0         |
| LOC10050721 | 0         | 0        | 0         | 0         | 0         | 0         |
| FLJ44838    | 0         | 0        | 0         | 0         | 0         | 0         |
| ZFAND2B     | 26.9066   | 40.7379  | 32.6025   | 45.2023   | 39.0372   | 33.3734   |
| EFR3B       | 1.61793   | 0.754659 | 0.8776    | 1.30389   | 0.527406  | 1.14319   |
| ADRBK1      | 43.7755   | 62.35    | 52.2526   | 59.8322   | 69.1197   | 54.4512   |
| OTUD1       | 9.51931   | 10.1897  | 11.0382   | 9.80543   | 12.5922   | 11.3482   |
| C15orf32    | 0         | 0        | 0         | 0         | 0         | 0         |
| CORO7       | 6.92441   | 10.2729  | 7.36129   | 8.8635    | 11.3687   | 8.0594    |
| TIMP3       | 113.652   | 82.2552  | 111.113   | 116.271   | 70.4357   | 83.387    |
| GPR64       | 2.10116   | 1.91161  | 2.10334   | 1.58977   | 0.870531  | 1.45881   |
| SGCA        | 2.46755   | 5.66844  | 7.29102   | 6.62886   | 3.98837   | 4.11936   |
| LOC339535   | 5.88806   | 5.45375  | 6.63287   | 7.10845   | 6.07165   | 4.28072   |
| MGC21881    | 2.02771   | 2.70665  | 2.41595   | 2.50228   | 4.33799   | 3.91228   |
| MIR1266     | 0         | 0        | 0         | 0         | 0         | 0         |
| EPB41L4A    | 5.97738   | 6.17471  | 7.61927   | 6.96279   | 7.03842   | 6.45129   |
| LINC00327   | 0.591384  | 1.17645  | 0.969976  | 0.601576  | 0.847476  | 0.767762  |
| OR1F1       | 0         | 0        | 0         | 0         | 0         | 0         |
| SPAG5-AS1   | 1.68788   | 1.80988  | 1.15409   | 1.31215   | 1.45523   | 0.990431  |
| TEKT2       | 0.0712872 | 0.126055 | 0.161894  | 0.334688  | 1.22589   | 1.59923   |
| GUCY2C      | 0.0762748 | 0.337187 | 0.134728  | 0         | 0.0971597 | 0.269344  |
| LOC10050691 | 0.243068  | 0        | 9.50E-120 | 1.69E-117 | 0.317909  | 0         |
| CEACAM5     | 2.87993   | 1.22918  | 1.46337   | 3.04594   | 1.29323   | 1.66477   |
| SLC39A9     | 23.6459   | 18.6882  | 20.0686   | 18.4441   | 18.1765   | 17.895    |
| LOC728052   | 1.73311   | 5.36308  | 3.27994   | 3.25473   | 4.04738   | 2.52001   |
| XPA         | 15.5237   | 17.897   | 14.4649   | 14.3955   | 17.7701   | 14.1758   |
| HIGD2B      | 0         | 0        | 0.0774052 | 0         | 0         | 0         |
| LCE5A       | 7.78574   | 5.26398  | 36.4033   | 59.7756   | 59.8943   | 41.4777   |

|            |           |           |           |           |           |           |
|------------|-----------|-----------|-----------|-----------|-----------|-----------|
| PMEPA1     | 25.7916   | 17.1303   | 33.8985   | 23.1092   | 20.1713   | 16.2462   |
| C2CD2L     | 8.66922   | 9.51579   | 9.66539   | 9.96766   | 13.9727   | 11.8152   |
| MIR889     | 0         | 0         | 0         | 0         | 0         | 0         |
| PPIF       | 103.081   | 90.549    | 75.0438   | 83.3567   | 66.0178   | 72.9298   |
| LOC1005060 | 0.792138  | 1.54079   | 1.31924   | 0.595044  | 0.807228  | 1.67833   |
| SLC6A13    | 0.302917  | 0.662819  | 0.139053  | 0.199942  | 0.195554  | 0.188765  |
| LOC1001924 | 0         | 0         | 0         | 0         | 0         | 0         |
| DDX39A     | 28.405    | 43.485    | 26.8608   | 42.8188   | 33.2708   | 29.7471   |
| LOC1005070 | 1.51754   | 2.18028   | 0.574391  | 0.534353  | 1.69142   | 1.65491   |
| FAM27E1    | 0         | 1.11946   | 0.539151  | 0         | 1.06473   | 0.147941  |
| ZNF425     | 2.11856   | 2.49746   | 1.55727   | 2.24876   | 2.83553   | 2.44906   |
| ARTN       | 0.591169  | 0.778304  | 0.447518  | 1.31828   | 0.794254  | 0.878061  |
| MIR3196    | 0         | 0         | 0         | 0         | 0         | 0         |
| AIFM1      | 33.8153   | 26.8796   | 23.847    | 20.3861   | 19.9979   | 20.503    |
| PPIAL4B    | 0.10784   | 0.543827  | 0.237566  | 0.0506301 | 0.224508  | 0.137203  |
| MIR3616    | 0         | 0         | 0         | 0         | 0         | 0         |
| OR6C2      | 0         | 0         | 0         | 0         | 0         | 0         |
| SIAE       | 14.185    | 11.5991   | 13.7718   | 11.8496   | 11.3408   | 9.65092   |
| C12orf10   | 22.1366   | 34.903    | 29.186    | 40.1861   | 29.4903   | 28.9686   |
| SLPI       | 106.124   | 88.7216   | 175.428   | 235.677   | 161.237   | 194.047   |
| ZNF542     | 4.93433   | 5.15878   | 4.67438   | 4.93219   | 5.31134   | 5.00479   |
| KRBA1      | 3.68683   | 5.23261   | 3.01129   | 4.98783   | 5.49964   | 5.92506   |
| ZC3H14     | 19.0563   | 15.8046   | 17.0397   | 14.1472   | 16.99     | 16.6083   |
| VEGFB      | 130.329   | 199.784   | 178.067   | 189.096   | 149.534   | 138.902   |
| TMEM211    | 6.31037   | 3.6265    | 5.49353   | 4.14774   | 2.41147   | 6.29177   |
| KAZALD1    | 1.9664    | 1.20635   | 3.09867   | 0.75364   | 2.19811   | 1.70052   |
| MAGEC3     | 0         | 0.218663  | 0.0468055 | 0.261257  | 0.11298   | 0.205491  |
| RNF19A     | 27.0018   | 24.2914   | 26.9764   | 19.6676   | 26.9892   | 20.0908   |
| CACNA2D3   | 0.32      | 0.660155  | 0.62579   | 1.2019    | 0.645397  | 0.747788  |
| LYZL1      | 0         | 0         | 0         | 0         | 0         | 0         |
| NPR1       | 11.7136   | 15.9662   | 14.7964   | 7.44173   | 8.77791   | 7.34292   |
| MIR3148    | 0         | 0         | 0         | 0         | 0         | 0         |
| SMARCD3    | 17.9183   | 30.665    | 19.6238   | 26.1301   | 29.8585   | 19.6182   |
| MYOF       | 31.2459   | 29.6778   | 30.8153   | 25.0623   | 32.8901   | 25.0941   |
| PPP2R2A    | 22.095    | 19.3239   | 19.6141   | 20.3349   | 18.8573   | 20.039    |
| C11orf93   | 1.92333   | 2.65276   | 1.98012   | 1.25115   | 1.18912   | 1.03242   |
| FOXF1      | 0.47172   | 0.695109  | 0.208305  | 0.369115  | 0.400588  | 0.367445  |
| LOC1006529 | 0.736996  | 0.0930864 | 0.239104  | 0         | 0.60351   | 0.196828  |
| MKL2       | 13.0317   | 10.9307   | 14.1297   | 10.7751   | 12.3627   | 9.13162   |
| WDR69      | 0.0634452 | 0         | 0.240142  | 0.119148  | 0.0404086 | 0.0790727 |
| LOC1005063 | 0         | 0         | 0         | 0         | 0         | 0         |
| PGM2L1     | 1.01339   | 0.679363  | 0.691268  | 0.491462  | 0.638339  | 0.61762   |
| NLK        | 6.13073   | 5.81283   | 4.66199   | 5.05335   | 5.60085   | 5.22065   |



|             |           |           |           |           |           |           |
|-------------|-----------|-----------|-----------|-----------|-----------|-----------|
| CHMP2A      | 150.596   | 151.644   | 135.406   | 164.986   | 121.379   | 133.44    |
| ANO6        | 20.8902   | 16.0482   | 22.2855   | 13.067    | 14.0571   | 12.565    |
| CEP350      | 6.15358   | 3.98033   | 5.84001   | 3.84117   | 5.18867   | 4.81611   |
| UNCX        | 0         | 0         | 0         | 0         | 0         | 0         |
| UGT1A3      | 3.44E-08  | 2.87E-08  | 2.44E-08  | 2.39E-08  | 2.44E-08  | 2.13E-08  |
| HESX1       | 1.25161   | 1.78757   | 1.23901   | 0.813628  | 2.14619   | 1.91988   |
| SMYD2       | 21.5877   | 24.6164   | 23.9429   | 23.0989   | 20.1044   | 20.8827   |
| SHC2        | 5.95096   | 12.2409   | 10.7873   | 9.3511    | 13.313    | 8.42585   |
| TCEAL5      | 0.581916  | 0.603815  | 0.299794  | 0.731799  | 0.681024  | 0.847288  |
| THOP1       | 15.4887   | 22.5674   | 16.6005   | 23.0769   | 19.3019   | 24.7453   |
| FAM161B     | 2.79746   | 1.76393   | 1.61611   | 1.46583   | 1.49809   | 1.68354   |
| APBB1IP     | 7.80906   | 7.98202   | 11.9095   | 5.11492   | 5.60444   | 3.39452   |
| MRPS34      | 71.3139   | 102.855   | 72.6494   | 106.964   | 81.2246   | 85.3789   |
| UBE2MP1     | 38.5698   | 37.1613   | 33.9702   | 40.9756   | 30.5492   | 30.1979   |
| PTPRH       | 0.181396  | 0.259814  | 0.15819   | 0.122636  | 0.187162  | 0.0180861 |
| ZNF707      | 7.91579   | 9.67163   | 7.2009    | 9.07686   | 10.4386   | 9.88502   |
| C4orf3      | 95.0755   | 88.1943   | 91.6427   | 90.2978   | 90.0249   | 85.5619   |
| GATA5       | 0.116295  | 0.37701   | 0.0586908 | 0.109199  | 0         | 0         |
| FGD2        | 5.37934   | 5.79376   | 5.84914   | 3.30618   | 7.3506    | 3.57565   |
| EPHB1       | 1.73703   | 1.02385   | 1.90979   | 1.68929   | 2.66044   | 1.4948    |
| ARHGAP10    | 11.0743   | 10.3367   | 10.0058   | 9.33125   | 9.53534   | 8.92476   |
| TRO         | 3.41891   | 4.4532    | 4.43109   | 3.42498   | 5.32206   | 4.68086   |
| PRDX4       | 39.1861   | 37.995    | 41.0353   | 39.6161   | 35.1905   | 27.1866   |
| FAM27C      | 0.671699  | 0.501081  | 0.335676  | 0.41637   | 0.684494  | 0.640942  |
| SLC30A2     | 0.453992  | 0.35328   | 0.661623  | 0.335136  | 1.02957   | 0.680804  |
| MFAP3       | 9.09208   | 7.7586    | 9.07026   | 7.40829   | 8.27503   | 7.50597   |
| SPINLW1     | 0.0572041 | 0         | 0         | 0         | 0         | 0         |
| LINC00284   | 0.196383  | 0.0347259 | 0         | 0.0368801 | 0.100062  | 0         |
| GNG12       | 57.6845   | 47.3052   | 69.9479   | 46.3148   | 54.1845   | 47.5996   |
| OLFML2B     | 6.95507   | 7.28491   | 5.90537   | 4.03021   | 4.48959   | 4.45124   |
| TRIM59      | 2.01622   | 2.02772   | 2.1368    | 2.12985   | 3.04984   | 3.43946   |
| GRID2       | 0.0300831 | 0         | 0         | 0         | 0.0191601 | 0         |
| SNAPC4      | 4.99315   | 8.53495   | 6.88246   | 7.6774    | 9.58467   | 7.53897   |
| PPA2        | 52.0778   | 40.4906   | 38.5994   | 40.3399   | 41.0903   | 39.2785   |
| C1orf198    | 20.54     | 20.954    | 24.9691   | 23.242    | 24.5349   | 21.5047   |
| ZNF57       | 3.97311   | 4.69871   | 5.58543   | 5.57157   | 4.37067   | 4.82298   |
| LOC10028879 | 0.653738  | 0.577994  | 1.15473   | 0.409233  | 1.3879    | 0.67897   |
| COL3A1      | 120.101   | 93.6585   | 312.233   | 86.9201   | 141.967   | 133.845   |
| RBM27       | 6.31482   | 3.90693   | 5.76292   | 4.32731   | 5.2759    | 5.06205   |
| PTPN14      | 9.17316   | 10.158    | 12.6843   | 10.6506   | 11.3383   | 11.0284   |
| NDUFV2      | 54.2994   | 51.5431   | 44.9128   | 44.2042   | 37.7873   | 36.0071   |
| LOC10050731 | 1.56809   | 2.76263   | 3.62025   | 2.33012   | 2.83857   | 2.13561   |
| RPL18A      | 416.489   | 743.14    | 613.256   | 1063.49   | 642.549   | 623.406   |

|             |           |           |           |           |           |           |
|-------------|-----------|-----------|-----------|-----------|-----------|-----------|
| REG3G       | 1.06396   | 1.24614   | 0.447456  | 0         | 0         | 0.0920849 |
| LOC10050707 | 0         | 0         | 0         | 0         | 0.111425  | 0         |
| C10orf92    | 0.0312867 | 0.0276617 | 0.0947367 | 0.0293777 | 0.17934   | 0.0779861 |
| GPR89C      | 8.74328   | 10.7019   | 8.23473   | 8.89228   | 9.32932   | 7.58552   |
| MIR320E     | 0         | 0         | 0         | 0         | 0         | 0         |
| LOC10050659 | 0         | 0         | 0.0993019 | 0         | 0.167095  | 0.0817441 |
| SNORD109A   | 0         | 0         | 0         | 0         | 0         | 0         |
| PKP3        | 92.9974   | 126.447   | 102.745   | 154.196   | 133.699   | 160.292   |
| TNFSF12-TNF | 1.0939    | 1.34E-07  | 3.06E-14  | 2.64E-07  | 0.327828  | 4.68E-05  |
| NROB1       | 0         | 0.297662  | 0.203889  | 0.189677  | 0.0428854 | 0.0839193 |
| MIR1193     | 0         | 0         | 0         | 0         | 0         | 0         |
| FKBP3       | 57.0842   | 58.7642   | 48.9696   | 51.9135   | 47.9372   | 53.4758   |
| PSD         | 0.767351  | 0.801797  | 1.02096   | 0.938873  | 1.3329    | 1.56495   |
| RNF183      | 0.185398  | 0.409794  | 0.140348  | 0.348172  | 1.23985   | 1.09756   |
| PSMG4       | 14.2034   | 19.774    | 15.8367   | 16.6693   | 17.2327   | 14.3166   |
| GLIS2       | 7.98411   | 6.9188    | 9.16608   | 7.94379   | 8.23386   | 7.38066   |
| TIAM1       | 9.09118   | 6.99807   | 9.57288   | 8.83426   | 12.0097   | 14.3278   |
| GOLGA2P2Y   | 0         | 0.192544  | 0.0412144 | 0         | 0.0693513 | 0.152672  |
| KIAA1244    | 4.04537   | 0.673058  | 1.40974   | 1.27603   | 1.00577   | 1.24673   |
| EPHA4       | 6.92077   | 6.55788   | 12.0271   | 8.56106   | 13.7507   | 11.2319   |
| SSX3        | 0         | 0         | 0         | 0         | 0         | 0         |
| ODF2L       | 10.3768   | 9.68381   | 9.87432   | 8.0343    | 12.4065   | 10.0197   |
| PPIP5K1     | 13.1006   | 11.7299   | 14.1955   | 14.2693   | 16.4757   | 14.1617   |
| FRA10AC1    | 9.28851   | 8.88402   | 9.35632   | 8.0485    | 9.36453   | 8.52223   |
| SLC27A1     | 16.3376   | 25.7801   | 19.8721   | 21.9971   | 21.7811   | 19.361    |
| HEATR2      | 8.74696   | 8.0205    | 7.6322    | 8.24077   | 7.39487   | 8.01741   |
| EBPL        | 46.4538   | 46.4859   | 24.064    | 37.2638   | 37.644    | 37.1327   |
| OR8K5       | 0         | 0         | 0         | 0         | 0         | 0         |
| CAP1        | 81.2868   | 70.5323   | 70.6904   | 69.841    | 68.2626   | 72.3426   |
| LOC10013167 | 1.29499   | 1.37393   | 1.05874   | 2.09147   | 1.38564   | 1.58168   |
| RAB1B       | 122.21    | 138.239   | 116.355   | 142.434   | 125.72    | 124.791   |
| LOC148709   | 0.131422  | 0.154927  | 0.0331625 | 0.082269  | 0.111605  | 0.846268  |
| SLC26A4     | 1.01761   | 0.397947  | 0.518496  | 0.328001  | 1.55502   | 1.60554   |
| LOC10013224 | 0         | 0         | 0.451421  | 0.321378  | 1.27019   | 0.343958  |
| CNTNAP4     | 0.022466  | 0.201114  | 0.0907039 | 0         | 0.103023  | 0         |
| CCDC104     | 29.782    | 28.137    | 24.1555   | 21.7327   | 23.9001   | 22.7479   |
| ATXN8OS     | 0         | 0         | 0         | 0         | 0         | 0         |
| ULK3        | 49.2695   | 62.6438   | 60.3471   | 64.1147   | 78.4946   | 66.0618   |
| C8orf4      | 11.4603   | 5.99881   | 5.48153   | 5.78204   | 3.84928   | 3.51748   |
| UNC5D       | 0.0130421 | 0.0807171 | 0.0691106 | 0.0489853 | 0.041533  | 0.0731456 |
| HEBP1       | 41.107    | 34.4573   | 39.4773   | 44.6108   | 36.051    | 32.4972   |
| ZC3H7B      | 24.1574   | 24.1148   | 25.5033   | 21.0281   | 27.0294   | 22.6723   |
| TNN         | 1.54008   | 1.19144   | 2.47745   | 2.62716   | 4.52025   | 5.20845   |

|            |           |           |           |           |          |           |
|------------|-----------|-----------|-----------|-----------|----------|-----------|
| PCDHGB5    | 1.63464   | 0.898019  | 2.31529   | 0.951027  | 2.16842  | 2.72843   |
| SUSD1      | 2.12329   | 1.90661   | 1.75803   | 1.12148   | 2.11302  | 2.08809   |
| SNORD115-2 | 0         | 0         | 0         | 0         | 0        | 0         |
| LOC1006528 | 0         | 0         | 0.335253  | 0         | 0        | 0         |
| DTNB       | 6.35929   | 6.78489   | 4.79137   | 8.22818   | 5.67905  | 6.21509   |
| C10orf62   | 0.179624  | 0.158812  | 0         | 0         | 0        | 0.0559671 |
| LOC1001298 | 0         | 0         | 0.351271  | 0.872743  | 0.737977 | 0.579485  |
| REXO1L2P   | 0         | 0         | 0         | 0         | 0        | 0         |
| NCF1       | 2.20932   | 2.82651   | 1.53714   | 0.760179  | 2.10288  | 1.00446   |
| TTLL3      | 11.1247   | 16.8354   | 17.2122   | 18.5274   | 27.8251  | 19.9547   |
| TMUB1      | 23.9507   | 46.4475   | 28.7836   | 51.3037   | 40.7224  | 41.3729   |
| RASGRF1    | 0.327792  | 0.213428  | 0.105672  | 0.0842981 | 0.190561 | 0.110447  |
| KIAA0087   | 0.0674313 | 0.0794913 | 0.0850764 | 0.0422113 | 0.186105 | 0.140068  |
| TNIK       | 0.825412  | 0.875173  | 1.17229   | 0.440781  | 1.21818  | 1.36764   |
| ARPM1      | 1.03078   | 0.683514  | 1.09243   | 0.290366  | 0.393906 | 0.513871  |
| HIST1H2AJ  | 0         | 0         | 0         | 0.193009  | 0.130916 | 0.256181  |
| MCAM       | 84.3322   | 104.684   | 96.4433   | 68.7914   | 51.8641  | 46.8709   |
| GOLGA6L9   | 6.78931   | 7.30412   | 11.2395   | 11.2457   | 10.4386  | 10.0649   |
| FBXO41     | 1.80064   | 1.81076   | 1.82093   | 1.98763   | 2.87147  | 2.14995   |
| LOC1001281 | 0.201761  | 0.0445962 | 0.152735  | 0.426264  | 0.192754 | 0.440052  |
| SNORD36B   | 0         | 0         | 0         | 0         | 0        | 0         |
| LOC1002886 | 0         | 0         | 0         | 0         | 0        | 0         |
| LOC1006528 | 0         | 0         | 0         | 0.107442  | 0        | 0.071304  |
| RAB4B-EGLN | 1.57E-07  | 1.74E-08  | 0.434812  | 1.20E-09  | 0.436664 | 1.43E-08  |
| NUDCD1     | 4.4432    | 2.81543   | 3.53252   | 2.24847   | 2.71985  | 2.55347   |
| RBM3       | 97.9795   | 135.59    | 115.315   | 115.649   | 102.431  | 86.2265   |
| CBWD7      | 12.459    | 15.0129   | 9.9452    | 11.7802   | 12.8953  | 11.1843   |
| CYTL1      | 2.112     | 3.7346    | 2.66466   | 2.75436   | 6.35208  | 4.02145   |
| NUDT5      | 23.9738   | 20.2216   | 22.623    | 22.5184   | 21.2757  | 23.8453   |
| HOXD4      | 3.15129   | 5.27114   | 4.2553    | 2.63912   | 5.91274  | 3.66213   |
| DCAF13     | 10.959    | 10.1405   | 8.47551   | 9.12787   | 8.65979  | 9.5892    |
| LOC1005060 | 0         | 0         | 0         | 0         | 0        | 0         |
| SNORD14A   | 0         | 0         | 0         | 0         | 0        | 0         |
| MIR548X    | 0         | 0         | 0         | 0         | 0        | 0         |
| POLI       | 8.16437   | 7.67917   | 7.08902   | 4.55228   | 8.70008  | 7.23298   |
| HAL        | 22.5928   | 10.0433   | 14.4833   | 9.83677   | 19.9764  | 20.1154   |
| FEZ2       | 24.1749   | 22.2619   | 22.0992   | 17.7202   | 19.6406  | 17.8446   |
| LOC1001320 | 0.853511  | 3.39579   | 2.26139   | 1.80322   | 2.71803  | 2.74874   |
| TBX10      | 0         | 0         | 0         | 0         | 0        | 0.0431239 |
| LOC255025  | 0         | 0         | 0         | 0         | 0        | 0         |
| REREP3     | 0.156546  | 0.138408  | 0.829545  | 0.734972  | 0.299116 | 0         |
| NRIP2      | 3.70921   | 3.47049   | 2.83516   | 3.65196   | 3.0505   | 2.76024   |
| CLDN20     | 0.278377  | 0.410206  | 0.772688  | 0.958436  | 0.7683   | 0.983012  |

|             |           |           |           |           |           |          |
|-------------|-----------|-----------|-----------|-----------|-----------|----------|
| C16orf78    | 0         | 0         | 0         | 0         | 0.0774891 | 0        |
| MPP4        | 0.0822646 | 0.0727332 | 0.155687  | 0.463471  | 0.0261974 | 0.256319 |
| WTIP        | 7.18956   | 10.4985   | 7.33857   | 11.324    | 7.62189   | 6.33006  |
| LARS        | 25.3672   | 21.7767   | 24.539    | 25.6143   | 22.0662   | 22.9672  |
| FLJ31485    | 1.67854   | 2.28498   | 2.17828   | 2.20157   | 2.40966   | 2.19161  |
| LEFTY1      | 0.196134  | 0.115606  | 0.299424  | 0.19184   | 0.334604  | 0.203704 |
| LOC10050721 | 2.2475    | 0.99355   | 0.425343  | 0.527592  | 1.25252   | 2.27589  |
| GAGE12G     | 0         | 0.0333516 | 0         | 0         | 0         | 0        |
| MBD3L4      | 0         | 0         | 0         | 0         | 0         | 0        |
| IKBKB       | 24.9751   | 30.791    | 26.4622   | 24.982    | 30.9409   | 24.6397  |
| DPP4        | 4.03122   | 2.70078   | 4.70068   | 2.32758   | 2.2964    | 1.99718  |
| BTNL3       | 0.08293   | 0.0824866 | 0         | 0         | 0.0792279 | 0.103357 |
| MIR424      | 0         | 0         | 0         | 0         | 0         | 0        |
| PCDH10      | 0.181371  | 0.0877172 | 0.284392  | 0.0841008 | 0.126767  | 0.12403  |
| MSH5-C6orf2 | 3.04745   | 6.37026   | 3.86633   | 4.99282   | 7.52741   | 4.45924  |
| LOC644172   | 1.52527   | 1.07066   | 1.18858   | 1.34799   | 1.2285    | 1.03431  |
| LOC400682   | 2.81213   | 2.38692   | 1.23479   | 1.50523   | 0.0358212 | 0.035048 |
| RBPJL       | 0         | 0         | 0         | 0         | 0         | 0        |
| ZNF783      | 6.28908   | 8.38871   | 6.90794   | 8.07132   | 9.95613   | 6.82112  |
| NAA40       | 11.397    | 13.0447   | 11.548    | 10.7016   | 13.7298   | 11.8001  |
| TMEM206     | 3.90847   | 2.47542   | 2.43918   | 2.62899   | 1.7496    | 1.4487   |
| DKFZp779M0  | 0.212395  | 1.12672   | 0.321569  | 0.398872  | 0         | 0        |
| LDOC1       | 33.147    | 28.3972   | 27.6676   | 28.0046   | 25.6966   | 29.5787  |
| SYNGR2      | 92.3746   | 124.521   | 92.2144   | 119.829   | 117.244   | 97.5853  |
| EXOG        | 2.82039   | 3.93026   | 2.69311   | 3.20836   | 3.55462   | 3.05914  |
| LOC10050570 | 0         | 0         | 0         | 0         | 0         | 0.072381 |
| LOC732265   | 0         | 0         | 0.0449559 | 0         | 0         | 0        |
| CPN2        | 0.0655981 | 0.0289988 | 0.0496581 | 0.246382  | 0.125339  | 0.102195 |
| ADAMTS13    | 1.17927   | 2.82194   | 2.00407   | 3.43795   | 3.89396   | 3.57225  |
| HSDL2       | 39.1271   | 27.8161   | 35.6187   | 26.5202   | 32.4138   | 29.4871  |
| MIR582      | 0         | 0         | 0         | 0         | 0         | 0        |
| ZBTB42      | 4.63759   | 4.17178   | 3.83725   | 4.86097   | 4.00124   | 4.43573  |
| C5orf55     | 2.1918    | 5.18659   | 2.5864    | 2.66337   | 2.42241   | 1.76755  |
| CLUL1       | 0.727059  | 0.247156  | 0.211651  | 0.157477  | 0.408572  | 0.557095 |
| C4orf43     | 11.1593   | 9.05212   | 10.334    | 7.78249   | 10.1091   | 8.0005   |
| CPXM1       | 5.82698   | 9.81839   | 9.78101   | 4.83709   | 10.7302   | 7.05176  |
| LCE1B       | 56.3975   | 37.5959   | 146.593   | 165.149   | 152.516   | 139.085  |
| TAT         | 1.20433   | 0         | 0         | 0         | 0         | 0        |
| LOC10050676 | 4.12653   | 3.70726   | 3.92995   | 3.24979   | 3.94231   | 3.31804  |
| SCARB2      | 65.4416   | 44.1528   | 58.8943   | 52.2462   | 46.0344   | 46.1688  |
| LOC728724   | 0         | 0.173873  | 0         | 0         | 0.0626266 | 0        |
| FLT1        | 6.66585   | 5.6956    | 6.67347   | 5.02057   | 4.9271    | 4.23599  |
| LOC10050741 | 0         | 0         | 0         | 0.292007  | 0.0990332 | 0.290687 |

|            |           |           |           |           |           |           |
|------------|-----------|-----------|-----------|-----------|-----------|-----------|
| RRNAD1     | 13.5685   | 19.7855   | 14.9805   | 18.2354   | 19.7758   | 17.8109   |
| MCCD1      | 0         | 0         | 0         | 0         | 0         | 0         |
| TNFAIP8L1  | 2.99976   | 5.41287   | 5.04175   | 5.96505   | 6.10914   | 5.58692   |
| SYT1       | 0.37538   | 0.196896  | 0.168584  | 0.265544  | 0.167424  | 0.138776  |
| LOC1005060 | 0.567017  | 1.33686   | 0.85847   | 0.177473  | 1.08341   | 0.942243  |
| MUTED      | 5.24635   | 6.57602   | 6.70748   | 5.17383   | 6.31954   | 5.6657    |
| LOC1001320 | 7.74635   | 12.6934   | 11.0582   | 13.355    | 10.4446   | 8.39946   |
| OR4F16     | 0         | 0         | 0.267843  | 0.18688   | 0.0473234 | 0.0198437 |
| HUS1       | 5.61481   | 5.61657   | 5.50457   | 4.17065   | 5.17722   | 4.20282   |
| CAPSL      | 0         | 0         | 0         | 0         | 0.310362  | 0         |
| RAB35      | 26.642    | 29.7464   | 24.0476   | 25.2602   | 28.9911   | 27.6083   |
| LOC1002896 | 0.820447  | 1.19899   | 0.923925  | 1.02324   | 1.29711   | 0.760564  |
| LOC1001299 | 0         | 0         | 0.181805  | 0         | 0.382404  | 0.0748299 |
| KSR1       | 3.73305   | 3.03343   | 4.19809   | 2.39088   | 4.86519   | 4.45086   |
| PPHLN1     | 24.2662   | 19.482    | 20.5432   | 18.4356   | 23.1325   | 19.3872   |
| ZBTB7C     | 27.0087   | 21.508    | 21.2756   | 25.974    | 22.5943   | 25.1879   |
| LMOD2      | 0         | 0         | 0         | 0.0895838 | 0         | 0.0297262 |
| TMEM89     | 0.347609  | 0.307334  | 0         | 0         | 0.221394  | 0         |
| LOC1001285 | 0         | 0         | 0.0887093 | 0         | 0.149271  | 0         |
| AMTN       | 0.354253  | 0.208805  | 0.0893904 | 0.221758  | 2.33146   | 0.662266  |
| MIR100HG   | 10.2337   | 9.19023   | 12.132    | 7.3127    | 14.7575   | 9.10454   |
| GLA        | 11.0416   | 11.4571   | 8.59071   | 10.4399   | 9.37659   | 8.50524   |
| MIR520G    | 0         | 0         | 0         | 0         | 0         | 0         |
| LOC441736  | 0.0529892 | 0.0936994 | 0.0401131 | 0.049756  | 0.0674983 | 0.132083  |
| ABHD4      | 17.8568   | 17.5658   | 14.8573   | 14.7658   | 15.5228   | 16.2403   |
| TMTC4      | 5.86554   | 4.89962   | 5.16074   | 3.90238   | 5.32465   | 3.93712   |
| SPSB4      | 0.0420507 | 0.148714  | 0.0954979 | 0.592275  | 0.0535647 | 0.68131   |
| BLZF1      | 6.53662   | 3.80113   | 6.90764   | 4.61364   | 6.37055   | 5.74096   |
| ACSS1      | 15.3854   | 15.442    | 13.5005   | 14.4059   | 21.5947   | 15.43     |
| TAF1A      | 1.91392   | 1.67656   | 2.47244   | 1.54617   | 1.99576   | 1.85338   |
| EXOSC6     | 10.747    | 15.818    | 10.769    | 15.166    | 11.6322   | 10.1036   |
| PLEKHO1    | 17.6589   | 22.196    | 13.2682   | 12.9929   | 21.2352   | 13.1395   |
| LRRC8B     | 5.23786   | 4.67457   | 4.98246   | 4.00852   | 4.60569   | 3.02704   |
| GLT8D2     | 8.27058   | 7.45955   | 10.2107   | 5.68113   | 8.87357   | 6.67582   |
| PON1       | 0.720241  | 0.849056  | 1.13589   | 1.80345   | 1.33795   | 1.57088   |
| GLRX5      | 71.4909   | 74.3821   | 64.1248   | 76.4598   | 48.4825   | 50.6224   |
| CASQ1      | 1.27028   | 3.27572   | 0.641074  | 0.347893  | 3.91041   | 2.80353   |
| LPXN       | 7.16466   | 8.6732    | 5.92428   | 5.17524   | 9.87833   | 5.38974   |
| C7orf23    | 27.625    | 30.3435   | 26.9464   | 23.2116   | 28.489    | 22.1248   |
| ELK3       | 6.00431   | 4.50812   | 5.69966   | 3.1322    | 5.34175   | 4.03859   |
| MIR585     | 0         | 0         | 0         | 0         | 0         | 0         |
| KBTBD3     | 2.1399    | 2.03499   | 2.14212   | 1.68264   | 1.71129   | 1.97811   |
| LOC377711  | 3.07328   | 3.39668   | 3.55208   | 3.14364   | 4.2119    | 3.96715   |

|            |           |           |           |           |          |           |
|------------|-----------|-----------|-----------|-----------|----------|-----------|
| MIR4650-1  | 0         | 0         | 0         | 0         | 0        | 0         |
| TFAP2D     | 0         | 0         | 0         | 0         | 0        | 0         |
| C17orf72   | 0.232737  | 0.942616  | 0.477267  | 0.292964  | 0.45725  | 0.543635  |
| MGAT2      | 10.0542   | 9.77164   | 9.56978   | 8.01765   | 9.27573  | 7.85469   |
| PHC2       | 34.4661   | 40.4936   | 31.4347   | 39.396    | 32.7701  | 29.4469   |
| ZNF778     | 2.30545   | 2.17908   | 2.38772   | 1.96449   | 2.15882  | 2.14789   |
| NPTN       | 73.1805   | 61.8547   | 63.1952   | 61.1315   | 62.2697  | 63.1523   |
| LOC148696  | 0.0921991 | 0.0203792 | 0.13959   | 0.0649301 | 0.161486 | 0.0287273 |
| TMEM57     | 8.86758   | 8.01535   | 8.53164   | 9.25685   | 8.83457  | 8.22711   |
| ARL5A      | 43.6372   | 29.9187   | 39.7958   | 25.3424   | 29.985   | 36.0547   |
| TKT        | 181.055   | 200.975   | 195.083   | 186.446   | 132.907  | 144.968   |
| LOC440934  | 0.487618  | 0.574828  | 0.184565  | 0.457865  | 0.46585  | 0.202575  |
| MIR4464    | 0         | 0         | 0         | 0         | 0        | 0         |
| GTF2H3     | 10.0111   | 6.89131   | 9.31072   | 6.1102    | 8.51672  | 5.48099   |
| SIX5       | 8.58694   | 14.0322   | 10.692    | 11.2326   | 12.9749  | 11.7907   |
| KLHL24     | 8.50633   | 7.63541   | 8.72648   | 6.6358    | 8.78729  | 6.96536   |
| C1orf213   | 4.49048   | 7.07034   | 5.44969   | 6.569     | 7.14353  | 4.94139   |
| RHEB       | 17.608    | 17.3513   | 14.9564   | 14.5465   | 12.9837  | 11.6629   |
| ZEB1-AS1   | 2.40109   | 1.91877   | 1.8526    | 1.08394   | 2.70563  | 1.98542   |
| SNORA16A   | 139.221   | 205.151   | 35.1303   | 130.726   | 88.6706  | 173.513   |
| CEP128     | 0.957055  | 0.596164  | 1.11968   | 0.89866   | 1.01131  | 0.799713  |
| LETM1      | 16.3193   | 16.7451   | 20.461    | 21.0699   | 18.9284  | 16.3062   |
| SERTAD3    | 14.5255   | 20.1038   | 18.4187   | 16.2489   | 16.0346  | 15.3063   |
| TNXB       | 18.9773   | 33.2505   | 36.4384   | 26.0972   | 34.9839  | 24.4415   |
| LYSMD3     | 6.54499   | 5.64553   | 6.40472   | 3.83299   | 6.33269  | 4.93122   |
| SLC25A17   | 31.6223   | 27.0835   | 22.3719   | 24.1175   | 20.4078  | 22.3686   |
| PLEK2      | 10.2247   | 16.2458   | 10.825    | 8.83553   | 15.7613  | 11.2195   |
| NKX2-5     | 0         | 0         | 0.0480281 | 0.268083  | 0        | 0.0395362 |
| GPR89B     | 7.82958   | 8.61013   | 7.15164   | 7.38229   | 8.06732  | 6.97593   |
| LPCAT4     | 17.0195   | 23.3581   | 18.8925   | 19.1874   | 27.3828  | 21.5851   |
| ARL13B     | 3.26613   | 3.02423   | 3.01472   | 2.45688   | 2.97823  | 2.94761   |
| HIST1H3I   | 0         | 0         | 0         | 0         | 0        | 0         |
| UGT2B11    | 36.5451   | 0.162366  | 0.139019  | 0.402357  | 0        | 0.114439  |
| HIST2H2BE  | 28.44     | 21.1233   | 17.8309   | 19.198    | 21.0106  | 26.0733   |
| PAF1       | 22.511    | 23.2625   | 21.7745   | 23.2151   | 23.8343  | 24.1791   |
| SLC25A1    | 115.531   | 154.452   | 110.577   | 133.37    | 88.4806  | 95.2624   |
| LOC1005061 | 0.95382   | 2.10827   | 1.5885    | 2.23905   | 1.70098  | 1.60483   |
| SERPINA4   | 0.318981  | 0.282022  | 0.24147   | 0.359421  | 0.446953 | 0.15902   |
| ZNF737     | 4.14193   | 1.8859    | 3.94711   | 2.27842   | 2.91836  | 2.36306   |
| FUNDC2     | 13.7942   | 14.9556   | 10.9504   | 12.984    | 11.4149  | 10.2064   |
| CRISP2     | 1.30606   | 0.659847  | 1.21468   | 0.77606   | 0.207954 | 0.203467  |
| GPATCH3    | 8.14595   | 9.03463   | 7.07873   | 10.4098   | 8.68793  | 9.04106   |
| LARP6      | 22.3375   | 35.5577   | 26.3917   | 15.665    | 12.1346  | 8.88679   |

|             |           |           |          |          |           |           |
|-------------|-----------|-----------|----------|----------|-----------|-----------|
| SLC19A3     | 8.8838    | 20.3023   | 11.7394  | 8.90274  | 13.3016   | 11.8976   |
| LOC10013096 | 0         | 0         | 0        | 0        | 0         | 0         |
| LOC10050714 | 0         | 0         | 0        | 0        | 0         | 0         |
| SERPINA9    | 3.32896   | 1.46565   | 3.4365   | 1.62641  | 1.98685   | 0.777221  |
| SIRT3       | 12.106    | 14.0095   | 11.4176  | 13.5088  | 14.008    | 12.7665   |
| RABL2B      | 17.2149   | 22.5338   | 18.8094  | 21.0213  | 28.8456   | 25.3355   |
| LOC10065271 | 0.328036  | 0.362536  | 1.25197  | 0.628876 | 0.26116   | 0         |
| TRA2B       | 34.8771   | 34.7732   | 31.9671  | 26.555   | 31.4958   | 30.3645   |
| TSHZ2       | 2.56497   | 1.88276   | 2.47306  | 1.4695   | 1.99851   | 1.83811   |
| CENPC1      | 4.4455    | 3.54      | 4.123    | 3.40018  | 5.21267   | 3.70588   |
| FAM99A      | 0         | 0         | 0        | 0        | 0         | 0         |
| LDLRAP1     | 17.0619   | 21.9528   | 16.819   | 20.3525  | 20.351    | 18.7491   |
| FKSG83      | 0         | 0         | 0        | 0        | 0         | 0         |
| FGF18       | 0.887565  | 0.83089   | 0.158092 | 5.53972  | 0.299274  | 11.0619   |
| HAAO        | 8.6285    | 10.1463   | 8.09946  | 8.4261   | 9.06764   | 8.65683   |
| PCYT1A      | 19.578    | 15.7395   | 23.1241  | 13.74    | 20.6008   | 19.4137   |
| MIR3123     | 0         | 0         | 0        | 0        | 0         | 0         |
| TK2         | 12.9601   | 13.8237   | 13.3323  | 10.9166  | 11.5392   | 8.78518   |
| TIMM50      | 12.9173   | 15.2622   | 13.3639  | 14.6285  | 14.4597   | 12.7572   |
| ATAT1       | 12.1066   | 15.674    | 10.2344  | 14.6788  | 17.0569   | 15.2227   |
| LOC10065281 | 0.879236  | 0.844326  | 1.89397  | 2.02386  | 2.22892   | 1.7045    |
| MIR668      | 0         | 0         | 0        | 0        | 0         | 0         |
| ZNF70       | 1.11634   | 0.729518  | 1.48806  | 0.706411 | 1.12833   | 1.02836   |
| LOC145694   | 0.242634  | 0.432498  | 0.187747 | 0.836008 | 0.49087   | 0.377678  |
| MIR4418     | 0         | 0         | 0        | 0        | 0         | 0         |
| NXPB3       | 2.64471   | 2.76621   | 2.55164  | 2.28857  | 2.8294    | 3.44694   |
| DES         | 46.9684   | 150.659   | 64.6867  | 92.4237  | 86.4484   | 97.3362   |
| OTOR        | 0         | 0.12925   | 0        | 0        | 0         | 0         |
| LRRTM3      | 0         | 0.0151243 | 0.025899 | 0        | 0.0108951 | 0.0106599 |
| RPL24       | 336.219   | 483.934   | 404.162  | 558.592  | 391.969   | 391.452   |
| CDC34       | 37.2725   | 50.8566   | 49.5049  | 62.6731  | 51.9681   | 54.4916   |
| DAOA        | 0         | 0         | 0        | 0        | 0         | 0         |
| CYP4F11     | 1.0382    | 1.12273   | 1.80254  | 1.41426  | 0.0213063 | 0.0208464 |
| ZPLD1       | 0.0271053 | 0         | 0        | 0        | 0         | 0.0168909 |
| LOC10013205 | 0.277558  | 1.96319   | 2.52135  | 0.521244 | 1.41422   | 1.55666   |
| C9orf169    | 27.0243   | 25.5438   | 20.7371  | 34.3698  | 37.5542   | 31.5479   |
| CCDC27      | 0         | 0         | 0        | 0        | 0         | 0         |
| LOC10050689 | 6.662     | 7.22879   | 6.5332   | 6.68203  | 7.5218    | 6.51027   |
| MIR660      | 0         | 0         | 0        | 0        | 0         | 0         |
| MGAT3       | 4.96667   | 5.38607   | 5.21374  | 6.02928  | 4.3495    | 3.73576   |
| LOC10013088 | 0         | 0         | 0        | 0        | 0         | 0         |
| OR2M7       | 0         | 0         | 0        | 0        | 0         | 0         |
| ZNF559      | 6.21474   | 6.5096    | 5.6973   | 4.674    | 9.5186    | 7.03978   |

|             |          |           |           |          |           |           |
|-------------|----------|-----------|-----------|----------|-----------|-----------|
| WASL        | 21.5155  | 17.6847   | 17.5658   | 16.7841  | 15.9942   | 18.1501   |
| FGFBP1      | 51.8878  | 105.329   | 36.8244   | 33.4963  | 40.0946   | 33.7608   |
| NTN1        | 3.55323  | 4.39248   | 4.45463   | 3.26094  | 5.2532    | 3.91747   |
| STARD10     | 31.2719  | 41.542    | 24.1063   | 46.9039  | 30.3233   | 32.3924   |
| LOC10050556 | 1.25987  | 3.52735   | 2.54328   | 1.57734  | 3.07595   | 1.17765   |
| CLASP1      | 9.94604  | 8.86409   | 11.2094   | 8.83221  | 10.498    | 11.7451   |
| BCAS4       | 1.26117  | 1.50898   | 1.08949   | 2.11589  | 1.65614   | 1.50895   |
| OR4B1       | 0        | 0         | 0         | 0        | 0         | 0         |
| CASP14      | 184.56   | 119.689   | 192.688   | 126.049  | 199.716   | 217.716   |
| HIST1H2BN   | 0.393568 | 0.173984  | 0.595866  | 0.369554 | 1.00266   | 0.49051   |
| HSP90AB1    | 291.754  | 234.845   | 241.695   | 247.81   | 229.379   | 231.951   |
| OR2G6       | 0        | 0         | 0         | 0        | 0         | 0         |
| LOC285954   | 0.056149 | 0.198573  | 0.0425051 | 0        | 0.0715232 | 0.139959  |
| CDRT1       | 1.33976  | 1.24877   | 1.2796    | 1.53001  | 1.3376    | 0.992829  |
| AAK1        | 2.75297  | 2.01154   | 2.4059    | 1.86465  | 1.98232   | 1.75378   |
| LOC10050611 | 1.10383  | 0.718439  | 0.275722  | 0.396777 | 0.449111  | 0.399361  |
| LOC387723   | 1.53894  | 1.62613   | 1.27864   | 1.79749  | 2.03204   | 1.82445   |
| RABGAP1     | 21.5245  | 20.0367   | 20.8349   | 19.7765  | 22.6151   | 22.151    |
| PIGV        | 10.9238  | 11.1847   | 10.7009   | 10.4525  | 11.6748   | 12.6379   |
| DBF4B       | 3.74255  | 5.5788    | 2.94591   | 4.22098  | 5.13      | 4.31929   |
| NME9        | 0.529104 | 0.212637  | 0.65542   | 0.541986 | 0.79652   | 0.329715  |
| KCTD14      | 0.802507 | 1.80E-64  | 0.12064   | 0.323414 | 2.90E-52  | 0.312245  |
| AGPAT6      | 13.6402  | 17.2933   | 14.1191   | 14.3858  | 16.7579   | 13.522    |
| LNX2        | 5.20763  | 4.5865    | 5.95136   | 4.56893  | 5.481     | 4.8521    |
| SACS        | 2.35118  | 1.79313   | 2.35955   | 1.57855  | 2.37767   | 1.79696   |
| XIST        | 0.523651 | 0.120042  | 83.7557   | 61.6695  | 88.3937   | 73.6094   |
| MIR575      | 0        | 0         | 0         | 0        | 0         | 0         |
| PHLDA2      | 22.1061  | 34.4637   | 20.0021   | 30.706   | 13.8296   | 28.5293   |
| CTGF        | 30.242   | 13.1209   | 40.4645   | 67.0695  | 18.5847   | 17.0436   |
| SPARC       | 193.02   | 195.161   | 441.994   | 209.563  | 177.486   | 168.075   |
| ADM         | 12.9321  | 19.563    | 22.239    | 17.6881  | 15.1876   | 13.602    |
| PPM1M       | 22.805   | 30.1809   | 19.4897   | 22.8168  | 26.9608   | 17.2149   |
| CDH16       | 0        | 0.133286  | 0.02853   | 0        | 0.108018  | 0         |
| RPL3        | 1264.87  | 1696.77   | 1516.91   | 2006.2   | 1565.23   | 1470.38   |
| RG9MTD1     | 22.3192  | 18.0401   | 17.8455   | 13.7029  | 13.4161   | 15.9247   |
| KCNA1       | 0.225695 | 0.0420095 | 0.233798  | 0.145    | 0.0832215 | 0.0814251 |
| PALM2       | 0.335025 | 0.32349   | 0.24986   | 0.421998 | 0.205455  | 0.174012  |
| MIR3202-1   | 0        | 0         | 0         | 0        | 0         | 0         |
| TLE3        | 16.0716  | 16.2776   | 17.5555   | 18.8653  | 20.1331   | 21.4653   |
| BAMBI       | 4.76841  | 3.35112   | 3.05437   | 10.103   | 3.27065   | 14.5907   |
| GIMAP4      | 21.1394  | 15.7072   | 12.4909   | 8.16753  | 12.3222   | 7.98276   |
| ARHGEF35    | 13.4095  | 9.49682   | 12.9748   | 10.7505  | 12.217    | 11.1812   |
| LOC728407   | 1.3142   | 1.45909   | 1.63881   | 1.04881  | 1.69896   | 1.08775   |



|             |           |           |           |          |           |          |
|-------------|-----------|-----------|-----------|----------|-----------|----------|
| PRR12       | 8.72256   | 10.4402   | 12.0952   | 11.1136  | 12.4823   | 10.6659  |
| MTA3        | 19.4394   | 17.0877   | 18.0757   | 15.932   | 16.2099   | 15.965   |
| NCKAP1      | 56.0034   | 36.5518   | 52.3029   | 38.6027  | 40.3045   | 40.0227  |
| RN28S1      | 0         | 0         | 0         | 0        | 0         | 0        |
| RPL37       | 201.991   | 303.825   | 247.941   | 329.343  | 246.068   | 228.623  |
| ST3GAL1     | 7.47659   | 5.07929   | 5.63246   | 5.06398  | 4.34934   | 3.15169  |
| LOC1001282: | 0.265619  | 0.70453   | 0.502687  | 0.706667 | 0.902262  | 0.441393 |
| SEC23B      | 27.2904   | 18.7085   | 16.0169   | 14.5138  | 14.6212   | 17.019   |
| ACSS3       | 9.00373   | 7.29474   | 8.12948   | 3.78141  | 5.31747   | 4.85584  |
| MIR105-1    | 0         | 0         | 0         | 0        | 0         | 0        |
| CALML5      | 1095.13   | 1117.36   | 846.124   | 1104.15  | 1695.48   | 2000.71  |
| C11orf54    | 17.3065   | 13.2013   | 13.037    | 10.2761  | 14.7509   | 13.9038  |
| MIR4673     | 0         | 0         | 0         | 0        | 0         | 0        |
| ARPP21      | 0.0609813 | 0.0373229 | 0.0319562 | 0        | 0.0388393 | 0.076002 |
| PIGB        | 6.8931    | 7.19699   | 8.34366   | 7.06016  | 8.65097   | 5.94421  |
| TCTEX1D1    | 0.675388  | 1.15446   | 0.92029   | 0.465064 | 1.14709   | 0.757571 |
| GBP4        | 9.55394   | 6.33983   | 2.6197    | 0.774369 | 2.77394   | 1.47295  |
| C9orf93     | 0.333984  | 0.610261  | 0.724772  | 0.480862 | 0.694873  | 0.582749 |
| OR10V1      | 0.128977  | 0.114033  | 0.292909  | 0        | 0.164293  | 0.241119 |
| MIR891A     | 0         | 0         | 0         | 0        | 0         | 0        |
| LOC1005074: | 0.276566  | 0.157756  | 0.263391  | 0.402102 | 0.1591    | 0.177904 |
| DPY19L2P2   | 0.269289  | 0.203193  | 0.296443  | 0.344458 | 0.380719  | 0.345621 |
| MCAT        | 11.2174   | 12.5398   | 11.1905   | 10.6158  | 10.6627   | 11.0643  |
| FAM102A     | 42.8289   | 44.7425   | 38.2608   | 44.9325  | 43.5991   | 36.3587  |
| PCDHA2      | 0.0127944 | 0.0701928 | 0.0778325 | 4.31E-27 | 0.117053  | 0.112095 |
| EXOC8       | 10.1493   | 7.60317   | 9.67184   | 7.41819  | 7.45125   | 6.34819  |
| NAA20       | 71.5812   | 68.3736   | 57.6761   | 55.7819  | 53.3652   | 49.2137  |
| GGT1        | 7.92654   | 3.48769   | 2.46113   | 3.7958   | 3.91551   | 4.51578  |
| LOC1005070: | 0         | 0         | 0         | 0        | 0         | 0        |
| TPM4        | 140.906   | 128.247   | 124.87    | 128.385  | 121.624   | 124.827  |
| GPR115      | 11.0204   | 9.41136   | 19.5527   | 14.8752  | 21.316    | 23.2751  |
| MUC20       | 2.65825   | 2.99422   | 4.00339   | 6.28681  | 8.56413   | 7.05201  |
| NSFP1       | 5.69826   | 2.63352   | 6.19056   | 2.79689  | 2.8426    | 2.77897  |
| PCDHB19P    | 0.0417791 | 0.110815  | 0.189762  | 0.11769  | 0.172961  | 0.130175 |
| 9-Sep       | 69.9719   | 75.465    | 60.3587   | 70.5916  | 73.1498   | 64.7365  |
| ADCK5       | 8.80856   | 16.7792   | 10.8156   | 14.5085  | 14.5732   | 15.2304  |
| MSH3        | 5.33512   | 4.88658   | 5.28999   | 3.54942  | 5.34111   | 4.83783  |
| PGM2        | 19.0247   | 15.3543   | 15.4107   | 11.0336  | 14.7736   | 16.4137  |
| BOLA3       | 27.2014   | 36.8915   | 22.5801   | 26.573   | 21.6363   | 21.999   |
| HOXB1       | 0         | 0         | 0         | 0        | 0         | 0        |
| C2orf44     | 2.90944   | 3.08234   | 3.4934    | 3.55227  | 3.30654   | 2.45434  |
| PRKRIR      | 16.406    | 14.5874   | 16.1993   | 13.0462  | 14.6959   | 12.9679  |
| LOC1005059: | 5.98349   | 13.3227   | 4.46971   | 8.70343  | 5.08458   | 4.16055  |

|             |           |           |           |           |           |           |
|-------------|-----------|-----------|-----------|-----------|-----------|-----------|
| CTU2        | 6.51906   | 10.6057   | 6.96045   | 8.9755    | 7.48231   | 6.75278   |
| LOC10050741 | 0.25273   | 0.184467  | 0.634942  | 0.314139  | 0.347815  | 0.469248  |
| ZNF628      | 1.70206   | 2.40328   | 2.88464   | 4.05516   | 2.45935   | 2.75454   |
| SNORD111B   | 0         | 0         | 0         | 0         | 0         | 0         |
| TECPR1      | 5.33088   | 5.14527   | 7.16306   | 4.98475   | 7.15835   | 6.10413   |
| DICER1-AS   | 5.33162   | 9.42776   | 5.22314   | 7.21497   | 7.39072   | 5.47225   |
| ARRDC5      | 0.388961  | 0.0573159 | 0.196297  | 0.121743  | 0.495463  | 0.201987  |
| LOC10050748 | 4.14654   | 4.33948   | 4.61234   | 3.09894   | 6.30596   | 5.0097    |
| PSG2        | 0         | 0         | 0         | 0         | 0         | 0.041149  |
| ARL6IP5     | 96.3074   | 64.5972   | 76.6655   | 55.2459   | 65.6696   | 57.911    |
| UBE2DNL     | 0         | 0         | 0         | 0         | 0         | 0         |
| MIR3671     | 0         | 0         | 0         | 0         | 0         | 0         |
| LRP6        | 6.13294   | 4.14943   | 6.09351   | 5.14424   | 5.61503   | 5.34818   |
| RETNLB      | 0         | 0         | 0.389746  | 1.2086    | 0.327912  | 0.160417  |
| FLJ25363    | 0         | 0         | 0         | 0         | 0         | 0         |
| RGPD5       | 4.97009   | 4.93885   | 5.80492   | 6.30293   | 5.46863   | 5.23822   |
| TMEM99      | 12.0051   | 12.3939   | 14.1963   | 17.6153   | 10.035    | 12.3993   |
| SNX33       | 14.2157   | 16.7582   | 17.6579   | 14.4392   | 20.3279   | 18.6317   |
| ADCY10      | 0.407872  | 0.112827  | 0.0661585 | 0.018236  | 0.0890599 | 0.100982  |
| LOC285084   | 0.222094  | 0.33662   | 0.336253  | 0.357502  | 1.67723   | 0.751312  |
| LOC339400   | 0.397545  | 0.380774  | 0.72728   | 1.64869   | 0.907295  | 1.81671   |
| LCTL        | 0.0600555 | 0.0515464 | 3.75E-203 | 0.1101    | 0.0386272 | 0.0368515 |
| XGPY2       | 2.47756   | 2.23614   | 0.468882  | 2.37486   | 0.788986  | 1.54391   |
| RNMT        | 9.4614    | 8.29706   | 10.0086   | 8.85517   | 11.3552   | 8.88233   |
| PMS2CL      | 5.33048   | 6.80142   | 7.24486   | 6.59772   | 6.17261   | 5.43545   |
| ZFYVE16     | 9.85621   | 6.46159   | 8.95344   | 5.8677    | 8.12268   | 8.42327   |
| TMPRSS11A   | 0.188354  | 0.231301  | 0         | 0         | 0         | 0         |
| PTPN22      | 1.98406   | 1.46192   | 1.6691    | 0.478844  | 2.50921   | 1.20614   |
| CRNN        | 2.49921   | 0.57643   | 0.987088  | 4.33633   | 1.10731   | 5.58634   |
| TXNDC9      | 26.8671   | 22.8239   | 22.5158   | 16.8625   | 15.9949   | 19.1904   |
| SH3GLB2     | 75.775    | 111.121   | 103.236   | 122.96    | 132.395   | 148.332   |
| HOXA1       | 1.10834   | 1.95293   | 0.981951  | 1.87203   | 2.01797   | 1.32059   |
| BPIFB1      | 0         | 0         | 0         | 0.0572895 | 0         | 0         |
| EFCAB10     | 0.205464  | 0.173404  | 0.165904  | 6.37E-09  | 2.12E-09  | 1.27E-08  |
| TCF20       | 7.99008   | 7.24854   | 8.38698   | 6.78744   | 7.78753   | 7.65703   |
| TPM3        | 61.921    | 61.5237   | 53.1044   | 58.5659   | 56.0755   | 52.2934   |
| SDHD        | 122.454   | 102.439   | 97.2118   | 92.9273   | 88.5239   | 81.7063   |
| CDK1        | 7.90018   | 9.48838   | 6.43691   | 5.94063   | 8.05729   | 7.72115   |
| GJC1        | 1.82685   | 2.21833   | 1.62669   | 1.23704   | 1.44054   | 1.53334   |
| CXCR4       | 5.9441    | 4.52878   | 4.45186   | 2.67092   | 7.21339   | 5.76102   |
| PIGA        | 6.26299   | 5.26237   | 6.75477   | 5.22454   | 6.73303   | 5.3397    |
| FLJ35776    | 3.20056   | 4.1922    | 4.84568   | 1.7809    | 5.05839   | 3.32409   |
| C9orf51     | 0         | 0         | 0         | 0         | 0         | 0         |

|             |           |           |           |           |           |           |
|-------------|-----------|-----------|-----------|-----------|-----------|-----------|
| GOT1L1      | 0         | 0         | 0         | 0         | 0.0505154 | 0         |
| KIRREL3-AS3 | 0         | 0         | 0         | 0         | 0         | 0         |
| PRDM11      | 0.320657  | 0.567009  | 0.589509  | 0.215066  | 0.175053  | 0.285457  |
| GPR137C     | 0.527529  | 0.577457  | 0.456391  | 0.40099   | 0.367985  | 0.782699  |
| ASAH2B      | 1.33732   | 0.390867  | 0.847118  | 0.622672  | 1.1313    | 1.23971   |
| CAMSAP3     | 11.3701   | 13.7816   | 17.5112   | 24.2668   | 15.4159   | 38.2528   |
| KCNC2       | 0         | 0.0260618 | 0.182237  | 0         | 0.145648  | 0.0897698 |
| HSD3B1      | 130.472   | 62.2426   | 33.6535   | 46.592    | 35.5333   | 38.7687   |
| HSP90AA4P   | 12.4813   | 7.7481    | 6.63399   | 6.48326   | 7.61113   | 7.77781   |
| MIR4258     | 0         | 0         | 0         | 0         | 0         | 0         |
| CCZ1        | 31.3807   | 30.175    | 29.9543   | 31.1866   | 25.8949   | 23.8372   |
| API5        | 32.6672   | 27.2204   | 27.6571   | 26.403    | 26.8278   | 24.2097   |
| C10orf40    | 0         | 0         | 0         | 0         | 0         | 0         |
| RPA1        | 26.0273   | 23.4068   | 26.5185   | 24.7539   | 23.3216   | 20.7995   |
| MIR99A      | 0         | 0         | 0         | 0         | 0         | 0         |
| PEG3-AS1    | 0.639396  | 9.50E-07  | 0.69105   | 3.45E-200 | 0.176512  | 0         |
| SNX31       | 0.370356  | 0.509359  | 0.529572  | 0.231839  | 0.602809  | 0.333363  |
| MIR3665     | 0         | 0         | 0         | 0         | 0         | 0         |
| C12orf59    | 0.107532  | 0.0316909 | 0.027134  | 0         | 0.114146  | 0.0670092 |
| PSMA6       | 66.8433   | 56.7631   | 49.6443   | 58.9902   | 46.3766   | 47.6658   |
| FAM133A     | 0.15992   | 0.119299  | 0.121061  | 0.0281546 | 0.212197  | 0.116784  |
| JRKL        | 6.57276   | 5.73828   | 6.68273   | 4.82892   | 7.49668   | 7.04352   |
| DHRS4L2     | 44.1923   | 49.174    | 29.0089   | 39.2485   | 29.8174   | 29.507    |
| MAB21L1     | 0.171365  | 0.242416  | 0.363228  | 0.128727  | 0.130972  | 0.149502  |
| LOC10065295 | 0.0333442 | 0         | 0         | 0.0626194 | 0.0424742 | 0         |
| RCN1        | 29.3902   | 28.3702   | 27.6007   | 19.909    | 24.4646   | 18.4646   |
| LOC10012864 | 1.04204   | 0.956737  | 0.758488  | 0.715025  | 1.32736   | 0.624378  |
| PFKFB3      | 81.0364   | 85.6631   | 65.0547   | 46.6548   | 51.371    | 38.4043   |
| KLC3        | 30.856    | 41.8277   | 44.2482   | 59.4537   | 55.9343   | 62.9273   |
| AGAP9       | 7.41877   | 8.82442   | 7.24686   | 8.02449   | 8.8795    | 6.81696   |
| SH2D2A      | 1.42343   | 1.74829   | 0.751872  | 0.540807  | 2.39213   | 0.865673  |
| RNF25       | 11.3081   | 21.4628   | 13.9559   | 19.4988   | 18.944    | 19.7309   |
| PRR23C      | 0         | 0         | 0         | 0         | 0         | 0         |
| FAM75A1     | 0         | 0         | 0         | 0         | 0         | 0         |
| CYP4F3      | 3.91549   | 2.51504   | 6.20668   | 3.17406   | 4.9449    | 4.60876   |
| IFLTD1      | 0         | 0         | 0         | 0         | 0         | 0         |
| MRPL23      | 88.8732   | 177.26    | 101.578   | 187.654   | 110.348   | 131.042   |
| YPLR6490    | 0         | 0         | 0.0869428 | 0         | 0.0731492 | 0.0715702 |
| PCF11       | 16.7928   | 13.6731   | 19.4423   | 14.1108   | 20.9096   | 18.033    |
| ZNF226      | 14.5403   | 16.4627   | 16.7394   | 13.0925   | 13.6781   | 13.6638   |
| TMEM91      | 191.595   | 268.969   | 200.901   | 262.555   | 168.567   | 217.581   |
| SUGT1P1     | 1.98132   | 0.673754  | 0.922998  | 0.14311   | 1.16484   | 0.854776  |
| RIIAD1      | 0.383748  | 0         | 0         | 0         | 0.244411  | 0.239135  |

|             |           |           |           |           |           |           |
|-------------|-----------|-----------|-----------|-----------|-----------|-----------|
| REV1        | 14.6052   | 12.9676   | 13.9305   | 12.2014   | 14.793    | 12.1044   |
| RNLS        | 5.49149   | 3.38231   | 3.79554   | 3.90728   | 3.18114   | 4.19521   |
| FCN1        | 0.777292  | 1.37446   | 1.43835   | 1.05425   | 1.87023   | 1.45313   |
| ACACA       | 25.4099   | 13.7412   | 17.8189   | 12.3565   | 11.7451   | 15.8768   |
| FOXO6       | 1.35672   | 1.07544   | 1.31037   | 1.6693    | 1.54943   | 1.28275   |
| THSD1       | 4.92808   | 5.42984   | 4.99385   | 4.78826   | 6.36684   | 6.0111    |
| CHUK        | 9.08997   | 7.3465    | 8.56978   | 7.88079   | 7.79622   | 6.30738   |
| C8orf71     | 0         | 0         | 0         | 0         | 0         | 0         |
| CHRNA3      | 0         | 0         | 0         | 0         | 0         | 0         |
| C6orf118    | 0         | 0         | 0         | 0         | 0         | 0.106197  |
| RHOD        | 39.3845   | 57.384    | 36.5833   | 54.623    | 40.1219   | 48.5846   |
| LOC641515   | 0.105045  | 0         | 0.15904   | 0         | 0.200712  | 0.13092   |
| SP7         | 0         | 0         | 0.0253101 | 0.0313943 | 0.173935  | 0.130238  |
| TRMT112     | 122.465   | 166.51    | 121.713   | 150.502   | 111.336   | 117.672   |
| CLEC4G1     | 1.82362   | 1.7546    | 1.86773   | 1.25908   | 3.04034   | 1.60434   |
| THOC2       | 10.792    | 8.79061   | 11.579    | 8.51154   | 12.015    | 9.45002   |
| LONP1       | 25.8696   | 30.703    | 28.4346   | 32.9367   | 27.2309   | 30.852    |
| DBP         | 21.0596   | 46.2633   | 29.097    | 37.4869   | 29.5003   | 32.3255   |
| GLRB        | 2.8887    | 1.96328   | 1.6022    | 1.42608   | 0.971926  | 1.14767   |
| CT47A5      | 0         | 0         | 0         | 0         | 0         | 0         |
| MIR4457     | 0         | 0         | 0         | 0         | 0         | 0         |
| KPNA2       | 21.0644   | 20.9806   | 15.1545   | 18.3067   | 15.5799   | 19.1196   |
| TRIP12      | 23.9257   | 17.2538   | 21.2711   | 16.1905   | 17.991    | 17.7229   |
| SLC36A3     | 0.0348812 | 0.0308397 | 0.0264052 | 0         | 0.088865  | 0         |
| SMARCA5     | 12.3732   | 8.54323   | 9.82108   | 8.3707    | 9.42033   | 8.81508   |
| RRAGD       | 9.46006   | 6.5111    | 7.62095   | 7.9633    | 5.90042   | 4.55254   |
| LOC10065295 | 1.69628   | 2.50762   | 2.54585   | 2.73077   | 3.27766   | 2.1353    |
| PTCHD1      | 0.199956  | 0.0642867 | 0.137607  | 0.0853433 | 0.150508  | 0.124604  |
| C15orf48    | 74.371    | 41.3806   | 60.4024   | 38.8207   | 97.1628   | 79.2115   |
| ARHGAP9     | 4.9997    | 5.07593   | 4.45487   | 2.07604   | 11.4012   | 4.57      |
| ZSCAN23     | 0.187911  | 0.138449  | 0.165958  | 0.0882228 | 0.139629  | 0.195164  |
| ARF5        | 206.794   | 262.958   | 206.656   | 267.246   | 239.924   | 243.834   |
| DNM1P35     | 0.339159  | 0.498468  | 0.357117  | 0.45256   | 0.522713  | 0.503316  |
| ZNF319      | 3.31751   | 3.32014   | 3.1741    | 3.56937   | 3.63895   | 3.73268   |
| KCNH5       | 0.127833  | 0.0282552 | 0.0306994 | 0.152318  | 0.0258289 | 0.0896178 |
| LOC10012859 | 0.445171  | 0.393592  | 0.280831  | 0.15968   | 0.135524  | 0.184941  |
| LIG3        | 7.27372   | 6.55969   | 7.44874   | 6.49725   | 6.74118   | 6.96785   |
| PPIE        | 26.5384   | 27.8738   | 27.3343   | 30.6384   | 30.2756   | 26.4169   |
| LOC10050731 | 3.00401   | 6.49233   | 8.08551   | 12.8499   | 3.18878   | 4.99192   |
| LSAMP       | 1.17547   | 1.04808   | 1.25935   | 0.682827  | 1.63056   | 1.17945   |
| PLCE1       | 0.856137  | 0.901041  | 1.12968   | 0.971994  | 0.912804  | 0.921063  |
| POTED       | 0         | 0         | 0         | 0         | 0         | 0         |
| ETV1        | 6.54936   | 1.80206   | 3.53453   | 2.64406   | 2.01617   | 2.21164   |

|             |          |           |          |          |          |          |
|-------------|----------|-----------|----------|----------|----------|----------|
| C6orf186    | 0.520487 | 0.0920364 | 0.236407 | 0.586475 | 0.729302 | 0.324345 |
| ZNF33A      | 10.6083  | 9.21495   | 10.9304  | 11.7972  | 15.5747  | 9.72656  |
| ENSA        | 232.644  | 261.061   | 231.842  | 278.076  | 250.585  | 253.108  |
| MIR320A     | 0        | 0         | 0        | 0        | 0        | 0        |
| DYNC1LI1    | 22.8131  | 17.5685   | 22.7313  | 18.9611  | 24.1564  | 26.8249  |
| RNASE7      | 21.2819  | 7.56457   | 12.3006  | 10.3967  | 18.6375  | 19.4449  |
| C2          | 6.84262  | 5.09695   | 6.00347  | 2.8895   | 6.25613  | 2.9865   |
| LRCH1       | 8.43135  | 8.32159   | 9.28632  | 7.56554  | 9.87383  | 7.64958  |
| CDKN1C      | 19.0035  | 31.1268   | 22.0765  | 22.2628  | 14.8879  | 14.9047  |
| DNAPTP3     | 23.5029  | 21.2072   | 19.3391  | 19.501   | 20.0259  | 15.859   |
| HEATR8-TTC4 | 0.622011 | 0.177644  | 0.224084 | 0.477871 | 0.866056 | 0.203591 |
| C2orf28     | 101.352  | 116.845   | 109.505  | 117.867  | 106.711  | 85.9206  |
| LOC10050597 | 0.230919 | 0.56145   | 0.305912 | 0.433658 | 0.919209 | 0.467671 |
| SNX1        | 27.2234  | 23.5903   | 24.1069  | 21.6663  | 24.8617  | 21.3989  |
| FRMD1       | 0.284438 | 1.56991   | 1.16752  | 0.753752 | 0.554605 | 0.328499 |
| ZNF646      | 4.37263  | 4.30161   | 4.16095  | 3.71549  | 5.5503   | 5.10503  |
| NUP160      | 10.6411  | 8.761     | 10.5017  | 8.33212  | 10.837   | 9.52386  |
| NDEL1       | 43.7527  | 48.6143   | 50.5131  | 56.5972  | 52.718   | 54.1779  |
| FOXG1       | 0.116786 | 0.275346  | 0.736729 | 0.32898  | 0        | 0.072776 |
| POTEG       | 0        | 0         | 0        | 0        | 0        | 0        |
| PHGDH       | 76.3154  | 87.3663   | 88.8101  | 114.106  | 101.15   | 122.612  |
| ARHGEF7     | 25.0481  | 28.3337   | 25.2785  | 24.3659  | 25.8843  | 23.7252  |
| CDC42EP3    | 5.53703  | 4.50559   | 4.33994  | 5.2452   | 4.54085  | 6.12225  |
| BICC1       | 2.54171  | 0.983159  | 2.50132  | 1.10382  | 2.61036  | 1.74228  |
| TEKT4P2     | 25.9134  | 38.7547   | 4.63336  | 5.4624   | 44.1183  | 30.3786  |
| CXorf51B    | 0        | 0         | 0        | 0        | 0        | 0        |
| IRS2        | 6.89698  | 9.09269   | 11.8941  | 9.81004  | 9.44393  | 7.2649   |
| ZNF558      | 10.6141  | 10.5501   | 10.0312  | 7.79985  | 11.127   | 9.69544  |
| POMP        | 59.9921  | 53.2375   | 45.3024  | 50.0803  | 37.4555  | 41.856   |
| FAM47E      | 2.62575  | 2.26043   | 3.13848  | 2.20601  | 2.68457  | 1.55014  |
| LRRC57      | 8.38722  | 9.08392   | 11.5555  | 12.7583  | 10.3632  | 8.98968  |
| SVOPL       | 0.864697 | 0.684702  | 0.805451 | 1.29725  | 0.827451 | 0.952703 |
| PVT1        | 2.02454  | 1.78997   | 1.90538  | 2.67169  | 2.50918  | 1.12522  |
| HOXC13      | 4.90696  | 4.07662   | 5.53987  | 14.5773  | 6.57384  | 28.4429  |
| CLCC1       | 13.9036  | 12.9395   | 12.2075  | 12.1369  | 11.6809  | 9.98573  |
| CLEC11A     | 8.43495  | 19.0204   | 19.8589  | 22.0896  | 21.7848  | 19.8197  |
| PRAMEF14    | 0        | 0         | 0        | 0        | 0        | 0        |
| RFWD3       | 9.83667  | 8.47308   | 9.79093  | 10.1693  | 10.3466  | 9.12793  |
| UBN2        | 5.81062  | 4.73602   | 7.29021  | 4.89586  | 7.3975   | 6.41745  |
| FABP7       | 32.5428  | 36.0432   | 58.6083  | 88.9135  | 123.013  | 123.506  |
| OR5P2       | 0.85617  | 0.324417  | 0        | 0        | 0.0779   | 0        |
| KIAA1217    | 17.3216  | 16.9207   | 15.0406  | 15.9915  | 17.6359  | 13.9736  |
| HCG8        | 2.50562  | 2.46705   | 1.46568  | 1.81802  | 1.70465  | 1.84529  |

|             |           |           |           |          |           |           |
|-------------|-----------|-----------|-----------|----------|-----------|-----------|
| LOC645355   | 0         | 0         | 0         | 0        | 0         | 0         |
| MIR4644     | 0         | 0         | 0         | 0        | 0         | 0         |
| SNORD114-1  | 0         | 0         | 0         | 0        | 0         | 0         |
| ADAMTS18    | 0.194324  | 0.272031  | 0.441313  | 0.288906 | 0.412553  | 0.383466  |
| C18orf63    | 0.0760991 | 0         | 0         | 0.017864 | 0         | 0         |
| CCL18       | 32.8936   | 22.7664   | 1.2576    | 0        | 12.3796   | 0.310573  |
| RPL27       | 1467.09   | 2287.71   | 1974.37   | 2757.62  | 1966.03   | 1817.05   |
| TTY23B      | 0         | 0         | 0         | 0        | 0         | 0         |
| PRAMEF16    | 0         | 0         | 0         | 0        | 0         | 0         |
| CRABP2      | 297.288   | 272       | 203.625   | 309.088  | 257.064   | 261.362   |
| AZFP        | 0.103282  | 0         | 0         | 0.19396  | 0         | 0         |
| STAT3       | 74.8352   | 61.0231   | 61.4035   | 51.9904  | 63.4327   | 48.796    |
| PLXDC1      | 4.58537   | 5.16124   | 4.82377   | 3.16932  | 6.97522   | 5.12619   |
| ACTG1       | 1141.06   | 1348.95   | 1164.13   | 1274.43  | 1071.33   | 1150.74   |
| ACAP3       | 37.7155   | 71.8321   | 53.5477   | 81.5604  | 73.7882   | 71.4546   |
| BMP2        | 3.01784   | 2.36246   | 4.1407    | 5.07706  | 2.82306   | 7.97293   |
| RPS11       | 1435.65   | 2135.78   | 1616.11   | 2467.95  | 1826.06   | 1675.61   |
| COQ9        | 51.8827   | 51.747    | 40.4986   | 52.4192  | 46.511    | 44.8174   |
| ASPHD2      | 2.05497   | 1.05326   | 2.75052   | 1.62197  | 2.69351   | 2.11572   |
| ABCG8       | 0.150631  | 0.0332946 | 0.114028  | 0        | 0.0959376 | 0.0234667 |
| SMPD2       | 14.6797   | 15.2684   | 12.3866   | 17.7558  | 16.1674   | 19.3438   |
| HOXD9       | 3.64593   | 8.49833   | 5.72907   | 7.88436  | 9.14773   | 6.26519   |
| NUP210P1    | 0         | 0         | 0         | 0        | 0         | 0         |
| LOC10050575 | 0.530393  | 0.242801  | 0.474435  | 0.500808 | 0.76409   | 0.51994   |
| DLEU2       | 0.280475  | 0.722118  | 0.328941  | 0.396987 | 0.412138  | 0.524487  |
| LOC10050753 | 0         | 0         | 0.0724293 | 0        | 0         | 0         |
| LOC729626   | 0.567054  | 0.501393  | 0.643895  | 0        | 0.9029    | 0.883453  |
| TFPT        | 7.82318   | 12.9955   | 9.9459    | 13.8354  | 10.751    | 8.50676   |
| PRAMEF24    | 0         | 0         | 0         | 0        | 0         | 0         |
| SEC16B      | 4.06956   | 5.03299   | 6.28973   | 4.16244  | 5.46156   | 3.98511   |
| 10-Sep      | 35.6615   | 31.0357   | 32.4973   | 30.3639  | 32.0106   | 25.215    |
| FGD5        | 4.55988   | 4.69497   | 6.04826   | 3.44614  | 4.67231   | 3.77462   |
| TRIM52      | 14.7976   | 12.8767   | 10.6765   | 10.8276  | 12.3644   | 11.8282   |
| CTSL1P2     | 0.10363   | 0         | 0.0784483 | 0        | 0         | 0         |
| TUBB3       | 5.77809   | 8.90861   | 6.21652   | 9.64338  | 6.98222   | 9.17676   |
| MIR302C     | 0         | 0         | 0         | 0        | 0         | 0         |
| LOC10050629 | 0         | 0         | 0         | 0        | 0         | 0         |
| RNASEK      | 165.258   | 190.529   | 158.19    | 196.839  | 151.291   | 145.095   |
| FLT3LG      | 16.7086   | 26.6407   | 14.4878   | 14.6817  | 24.2794   | 12.057    |
| ZNF747      | 4.92105   | 5.48589   | 6.28436   | 5.82621  | 5.77794   | 5.46653   |
| ZDHHC6      | 24.3974   | 25.4091   | 23.9346   | 19.5854  | 25.8479   | 20.3496   |
| FAM186B     | 0.261266  | 0.330792  | 0.373239  | 0.760273 | 0.421402  | 0.782008  |
| SC5DL       | 42.8318   | 25.2578   | 22.6481   | 20.1753  | 18.4612   | 20.9807   |

|             |           |           |           |           |           |           |
|-------------|-----------|-----------|-----------|-----------|-----------|-----------|
| RSG1        | 2.33189   | 2.60746   | 2.02485   | 1.93201   | 3.27617   | 4.10297   |
| RAPH1       | 6.91297   | 4.89406   | 5.9618    | 5.38899   | 6.7879    | 6.47729   |
| ZNF16       | 5.10154   | 5.63794   | 4.67642   | 5.27672   | 6.11736   | 5.86114   |
| LRIT3       | 0.649572  | 0.62217   | 0.717106  | 0.355797  | 1.18943   | 1.01197   |
| WBSCR27     | 1.28797   | 0.910994  | 1.755     | 3.26534   | 2.05079   | 2.80913   |
| IL17RE      | 20.2632   | 27.3182   | 27.8615   | 35.1322   | 32.5034   | 32.2712   |
| PAQR7       | 25.8259   | 25.884    | 26.5149   | 33.1665   | 31.3069   | 36.7123   |
| ZNF548      | 5.02257   | 5.45745   | 5.9456    | 5.05856   | 6.38512   | 5.08004   |
| LOC375190   | 5.33093   | 8.42676   | 4.09669   | 3.41295   | 3.80685   | 2.76834   |
| GUK1        | 198.645   | 361.454   | 238.004   | 358.352   | 269.956   | 255.062   |
| FLJ32255    | 1.52319   | 0.929873  | 1.50997   | 1.22593   | 1.82477   | 0.97179   |
| RPS15       | 605.925   | 1209.63   | 832.394   | 1534.09   | 933.964   | 942.513   |
| FAM87B      | 0.215798  | 0.478313  | 0.408401  | 0.253289  | 0.516025  | 0.37065   |
| LOC339822   | 0.0706324 | 0.0624487 | 0.106938  | 0.0663227 | 0.0449862 | 0         |
| ATP6V1G2    | 0.738718  | 0.793709  | 0.634683  | 0.772595  | 1.68961   | 1.2541    |
| IGDCC4      | 1.78069   | 1.53534   | 2.88537   | 0.912022  | 3.05559   | 1.98086   |
| FAM180B     | 5.04695   | 4.87409   | 12.6373   | 3.20794   | 8.60478   | 5.32238   |
| LOC10014460 | 2.32566   | 1.31808   | 1.26397   | 0.839906  | 1.29132   | 1.74653   |
| MEIS3P1     | 5.34507   | 4.47868   | 4.44289   | 3.54274   | 4.04956   | 2.78658   |
| PMCHL1      | 0         | 0         | 0         | 0         | 0         | 0         |
| BLOC1S1-RD1 | 7.91842   | 24.4348   | 15.9195   | 17.7711   | 11.5207   | 5.64339   |
| NRBF2       | 15.5311   | 14.2168   | 14.416    | 13.1406   | 14.0862   | 20.1774   |
| LOC727896   | 1.27001   | 1.27594   | 1.33277   | 0.704577  | 0.955908  | 1.31286   |
| LOC646627   | 0         | 0         | 0.289296  | 0         | 0         | 0.238145  |
| CCDC146     | 11.1855   | 11.6424   | 16.8229   | 13.6983   | 22.2203   | 14.2356   |
| OR5D14      | 0         | 0         | 0         | 0         | 0         | 0         |
| LOC10050601 | 0         | 0         | 0         | 0         | 0         | 0         |
| LOC10065299 | 3.17902   | 2.97602   | 1.98185   | 2.45827   | 1.31012   | 0.466125  |
| RNF103      | 24.938    | 20.6647   | 22.3335   | 20.6595   | 24.1531   | 22.3533   |
| RNF39       | 20.9314   | 15.5732   | 18.9433   | 24.0423   | 28.7725   | 45.322    |
| MIR3619     | 0         | 0         | 0         | 0         | 0         | 0         |
| FAM87A      | 0.228149  | 0.453859  | 0.518131  | 0.428457  | 0.593347  | 0.580539  |
| RAPGEF6     | 3.46912   | 2.60575   | 3.40499   | 2.02195   | 2.93852   | 2.62268   |
| LOC10050723 | 2.13555   | 1.92495   | 3.40244   | 2.05935   | 3.58816   | 3.67384   |
| GABRA2      | 0.301119  | 0.231102  | 0.126638  | 0.209441  | 0.119865  | 0.0260616 |
| CACNA2D1    | 1.09994   | 0.452324  | 2.34307   | 0.624499  | 1.38482   | 1.03612   |
| SLC1A3      | 8.04468   | 7.53483   | 9.29553   | 8.69725   | 7.47744   | 8.01924   |
| LINC00402   | 0         | 0.0259959 | 0.0222579 | 0         | 0         | 0.0183224 |
| LARP7       | 22.9134   | 17.8724   | 22.978    | 16.2353   | 19.9331   | 18.2116   |
| LOC286149   | 0.148241  | 0.367487  | 0.070137  | 0.139196  | 0.340173  | 0.259012  |
| ALDOB       | 0         | 0         | 0.0947638 | 0.0391815 | 0.318918  | 1.69018   |
| MIR4519     | 0         | 0         | 0         | 0         | 0         | 0         |
| OR1L1       | 0         | 0         | 0         | 0         | 0         | 0         |

|             |           |           |          |           |           |           |
|-------------|-----------|-----------|----------|-----------|-----------|-----------|
| ITPR3       | 27.2041   | 25.9485   | 34.4468  | 27.4404   | 43.305    | 39.6296   |
| C6orf223    | 8.69899   | 0.197919  | 0        | 0.260602  | 0.142575  | 0.223611  |
| PLLP        | 16.9092   | 15.968    | 26.7991  | 26.958    | 23.0515   | 23.7646   |
| SERINC2     | 83.0585   | 87.8373   | 46.0543  | 82.0792   | 38.8575   | 59.5896   |
| LOC339505   | 0         | 0         | 0        | 0         | 0         | 0.0161146 |
| TRIM7       | 17.122    | 23.0259   | 18.4242  | 20.5872   | 27.5415   | 21.9924   |
| MTR         | 8.58246   | 7.68272   | 9.83325  | 7.43051   | 11.4836   | 7.6165    |
| DHX30       | 16.7998   | 21.918    | 17.9128  | 22.5769   | 20.78     | 19.3044   |
| LOC10013161 | 0.512439  | 0.906133  | 1.29306  | 1.6841    | 1.03352   | 1.17088   |
| LOC653739   | 0.890778  | 0.451684  | 0.501716 | 0.406322  | 0.322616  | 0.179355  |
| DCUN1D2     | 9.50834   | 13.7406   | 10.6396  | 13.6386   | 12.9471   | 10.8492   |
| ANAPC11     | 56.5176   | 79.0704   | 54.5703  | 88.6353   | 58.2887   | 57.3883   |
| KLK10       | 52.2144   | 38.0622   | 47.2899  | 50.1614   | 50.6092   | 64.6276   |
| USP16       | 21.4056   | 19.7871   | 21.9234  | 16.0848   | 20.961    | 16.8842   |
| SFTPA1      | 0.112489  | 0.0441986 | 0        | 0         | 0         | 0         |
| BCL7B       | 24.9126   | 28.4915   | 26.1416  | 30.3372   | 27.4037   | 22.4438   |
| ATL3        | 13.0183   | 9.83139   | 12.1817  | 7.34285   | 10.0764   | 8.8448    |
| LOC10013131 | 0.79354   | 0.81742   | 0.413824 | 0.980423  | 0.266005  | 0.263025  |
| CENPVL1     | 0         | 0         | 0        | 0         | 0         | 0.0264153 |
| CAMKK1      | 10.9703   | 14.6004   | 12.5495  | 19.0447   | 14.2758   | 15.1287   |
| LOC10050743 | 0         | 0         | 0        | 0         | 0         | 0         |
| PHF12       | 13.2807   | 12.8651   | 12.7137  | 13.0583   | 15.0728   | 11.4531   |
| ITGAE       | 4.7661    | 4.65386   | 3.33336  | 3.23168   | 3.90591   | 3.36427   |
| TRIL        | 6.34702   | 3.8422    | 7.32974  | 6.13873   | 6.70101   | 7.53031   |
| OR2A5       | 0         | 0         | 0        | 0         | 0         | 0         |
| C15orf5     | 0.0711224 | 0.0628819 | 0        | 0.0667828 | 0.0905965 | 0.0886409 |
| RNF185      | 28.6243   | 25.4018   | 27.4468  | 28.1916   | 29.6598   | 27.6857   |
| ANKRD63     | 0         | 0         | 0        | 0         | 0.126602  | 0         |
| RPL21P28    | 811.464   | 1094.24   | 841.459  | 1258.39   | 862.306   | 755.997   |
| PLAC1       | 0.101242  | 0.089512  | 0        | 0         | 0.0644817 | 0.12618   |
| LOC642929   | 0         | 0         | 0        | 0         | 0         | 0         |
| TIGIT       | 1.30704   | 1.21486   | 0.710362 | 0.188813  | 1.70761   | 0.355034  |
| OR10G9      | 0         | 0         | 0        | 0         | 0         | 0         |
| RAB7L1      | 8.59523   | 7.70431   | 5.92274  | 4.36339   | 8.59901   | 6.14398   |
| HSPA9       | 96.1909   | 68.8597   | 70.0368  | 62.1275   | 60.7824   | 61.2      |
| HCLS1       | 16.2893   | 13.4149   | 11.9854  | 5.8132    | 19.8122   | 9.26537   |
| CABP2       | 0         | 0         | 0        | 0         | 0         | 0         |
| PIN4        | 7.9385    | 7.46284   | 7.93325  | 6.98286   | 5.92614   | 6.41682   |
| OGFRL1      | 18.0267   | 11.0711   | 15.2949  | 11.4739   | 11.7895   | 9.23557   |
| POLR3H      | 15.2783   | 17.5976   | 14.0836  | 16.5769   | 15.7272   | 15.7877   |
| POLB        | 17.405    | 18.9816   | 12.5737  | 14.9327   | 14.0866   | 10.9011   |
| FAM13A-AS1  | 4.44784   | 4.8753    | 5.79151  | 5.73889   | 7.11737   | 4.86088   |
| LOC10050621 | 0.388561  | 0.458054  | 0.294143 | 0         | 0.0824922 | 0         |



|            |           |          |           |          |          |           |
|------------|-----------|----------|-----------|----------|----------|-----------|
| LOC154761  | 2.95352   | 2.02308  | 2.04415   | 1.46134  | 2.39756  | 1.56663   |
| CDC14C     | 0.517398  | 0.366217 | 0.625931  | 0.453523 | 0.460798 | 0.279099  |
| LOC1001294 | 0         | 0        | 0         | 0        | 0        | 0         |
| ARHGAP27   | 25.3483   | 20.3335  | 3.20398   | 2.10554  | 2.08669  | 1.98306   |
| ZDHH9      | 23.3614   | 21.0994  | 24.1029   | 23.0107  | 19.4798  | 21.1274   |
| PCNA-AS1   | 1.59E-10  | 9.09E-09 | 0.0138444 | 1.17779  | 4.19E-25 | 1.06E-28  |
| GRK1       | 0         | 0        | 0         | 0        | 0        | 0         |
| TPP1       | 30.227    | 30.3143  | 31.4075   | 30.0015  | 38.2024  | 31.6073   |
| TNNT3      | 2.01428   | 4.82334  | 4.9987    | 5.93089  | 5.05806  | 4.2937    |
| HNRNPCL1   | 0.232384  | 0.205459 | 0.0781849 | 0.29094  | 0.148007 | 0.389383  |
| GYPE       | 0.312923  | 0.669534 | 0.667228  | 0.352596 | 0.686396 | 0.704439  |
| TXLNG      | 9.16333   | 8.34015  | 11.1618   | 8.65101  | 10.944   | 10.7382   |
| BATF3      | 1.68553   | 4.36428  | 2.00508   | 1.13049  | 4.83086  | 1.5005    |
| IGSF9      | 11.8456   | 18.3788  | 15.9643   | 26.0535  | 25.27    | 27.3492   |
| KLHL4      | 0.0736212 | 0.18938  | 0.19904   | 0.185879 | 0.114936 | 0.232425  |
| LOC643339  | 0.253885  | 1.34681  | 0.192192  | 0.238394 | 0.323401 | 0.316421  |
| TBC1D8B    | 1.82947   | 1.05095  | 1.47186   | 0.866944 | 1.35759  | 1.36754   |
| ZNF764     | 2.72036   | 3.29105  | 3.1429    | 3.69682  | 7.58899  | 6.39887   |
| RBFA       | 5.11685   | 7.31848  | 5.87244   | 6.83767  | 6.78108  | 6.65076   |
| LOC1005074 | 0         | 0        | 0         | 0        | 0        | 0         |
| NPPB       | 0         | 0.168754 | 0.288978  | 0        | 0        | 0         |
| C10orf12   | 0.660587  | 0.188403 | 0.40328   | 0.320145 | 0.285012 | 0.185906  |
| MIR4795    | 0         | 0        | 0         | 0        | 0        | 0         |
| LOC1006527 | 0.293809  | 0.779303 | 0.407761  | 0.367843 | 0.311881 | 1.03751   |
| TMEM150B   | 0.279435  | 0.370589 | 0.105767  | 0        | 0.355948 | 0.261198  |
| GLRA4      | 0.252738  | 0        | 0         | 0.491619 | 0.244515 | 0.611516  |
| LAMB3      | 24.7234   | 28.6154  | 25.4751   | 39.6914  | 26.5239  | 21.958    |
| HIVEP3     | 5.23163   | 5.18526  | 5.36285   | 4.90134  | 5.38046  | 3.05621   |
| IDI1       | 159.543   | 73.7996  | 79.0673   | 64.7425  | 56.5696  | 68.8297   |
| ARMC7      | 5.40697   | 8.71074  | 6.03342   | 7.29827  | 6.70297  | 7.01408   |
| WEE1       | 11.3806   | 12.1237  | 19.7403   | 12.7992  | 11.3149  | 14.1823   |
| IL28RA     | 3.37782   | 4.0428   | 3.83852   | 3.86967  | 4.45797  | 3.94865   |
| gene_id    | FPKM      | FPKM     | FPKM      | FPKM     | FPKM     | FPKM      |
| STRADA     | 18.5117   | 23.9777  | 18.3275   | 25.1835  | 27.4456  | 19.97     |
| ZNF34      | 4.33947   | 4.64192  | 5.88056   | 6.58994  | 5.86888  | 5.4084    |
| DNM1P46    | 0.0637908 | 0.217556 | 0.27716   | 0.287513 | 0.139229 | 0.0298138 |
| PCDHGA11   | 0.810896  | 0.904029 | 0.79838   | 0.717718 | 1.07693  | 0.810231  |
| SPATA2     | 4.46702   | 4.65013  | 4.0542    | 4.30721  | 4.84877  | 5.12044   |
| MIR4648    | 0         | 0        | 0         | 0        | 0        | 0         |
| KIF23      | 2.79848   | 3.34544  | 2.14368   | 3.17817  | 3.33262  | 3.04191   |
| RABEP1     | 19.7033   | 13.8524  | 16.215    | 13.4317  | 13.2825  | 12.4442   |
| MFNG       | 7.37507   | 7.96955  | 5.61945   | 5.92943  | 8.31928  | 5.34672   |
| NS3BP      | 3.58981   | 2.96689  | 6.61654   | 5.78894  | 10.6863  | 11.0878   |

|           |           |           |           |           |           |           |
|-----------|-----------|-----------|-----------|-----------|-----------|-----------|
| MIR512-2  | 0         | 0         | 0         | 0         | 0         | 0         |
| ARHGEF17  | 8.28994   | 9.41074   | 8.87474   | 8.73292   | 8.85965   | 8.04287   |
| LOC606724 | 5.69823   | 6.48507   | 4.37683   | 3.15998   | 9.89326   | 5.75416   |
| CDC27     | 11.3331   | 8.80022   | 10.521    | 7.91017   | 8.84033   | 8.08906   |
| EDN1      | 7.43955   | 5.20121   | 6.27157   | 5.29377   | 9.82256   | 6.34388   |
| CLDN22    | 7.21E-08  | 8.40E-07  | 5.92E-08  | 2.81E-07  | 2.42E-08  | 3.03E-08  |
| TRIM8     | 39.692    | 47.8768   | 49.8759   | 46.7247   | 44.5421   | 33.5778   |
| DDX17     | 246.564   | 260.891   | 278.791   | 243.44    | 336.326   | 274.821   |
| GLI4      | 9.40398   | 26.9676   | 15.0425   | 22.8817   | 19.1662   | 16.6123   |
| PMCH      | 1.07321   | 1.1978    | 3.75E-06  | 0.165249  | 0.0978002 | 0.815679  |
| ZNF772    | 2.34277   | 1.99106   | 2.11715   | 1.90996   | 2.48678   | 2.63673   |
| LYPD6B    | 15.0802   | 22.4618   | 25.2484   | 35.0812   | 26.3046   | 36.4887   |
| LOC650623 | 1.79435   | 1.01476   | 1.78663   | 0.758947  | 1.78117   | 1.61176   |
| LOC390956 | 0.59927   | 0.117741  | 0.403245  | 0.781535  | 0.508904  | 0.497919  |
| NONO      | 79.2491   | 85.9886   | 76.2884   | 84.7672   | 85.6063   | 73.2149   |
| SUMO4     | 0.1949    | 0.172319  | 0.147541  | 0.183008  | 0.248266  | 0.121454  |
| KCNMB1    | 12.682    | 11.0247   | 5.52424   | 11.0434   | 7.76139   | 9.97797   |
| RASGRP4   | 1.69862   | 1.31963   | 1.70332   | 1.21204   | 2.29777   | 1.54487   |
| THEM5     | 31.0084   | 26.8025   | 60.6712   | 54.5119   | 58.3229   | 66.3036   |
| NPRL2     | 12.2202   | 17.1738   | 12.0967   | 14.4069   | 15.8255   | 14.7218   |
| PTDSS1    | 36.7993   | 30.9676   | 34.936    | 35.4244   | 34.9383   | 30.7682   |
| OTX2OS1   | 0.0834173 | 0         | 0.094721  | 0.117491  | 0.0531289 | 0.0779732 |
| RAD9A     | 15.6521   | 28.5423   | 15.3664   | 27.0321   | 22.3495   | 19.4165   |
| MFSD6L    | 0.410034  | 0.483369  | 0.413864  | 0.385016  | 0.377221  | 0.709767  |
| KIAA1731  | 2.0117    | 1.80059   | 2.28933   | 1.67931   | 2.08182   | 2.34308   |
| SYDE1     | 5.80337   | 7.35488   | 7.12785   | 6.55834   | 6.94446   | 5.86593   |
| POC1A     | 2.75802   | 3.01955   | 1.86918   | 2.346     | 2.02256   | 2.60169   |
| PGAP3     | 22.2816   | 27.3556   | 24.1567   | 30.875    | 29.1432   | 23.2036   |
| MED16     | 12.6355   | 18.6393   | 17.1966   | 20.126    | 19.3273   | 19.6954   |
| MIR509-2  | 0         | 0         | 0         | 0         | 0         | 0         |
| DNAJA2    | 31.6556   | 28.3046   | 31.6308   | 29.7241   | 29.9313   | 26.3831   |
| ZMYM4     | 9.10612   | 7.64189   | 8.35655   | 6.71004   | 8.18379   | 7.25223   |
| LOC646730 | 0         | 0.125622  | 0         | 0         | 0         | 0         |
| UBE2J1    | 16.3432   | 12.1566   | 12.1519   | 10.5805   | 12.0324   | 11.2989   |
| STAB1     | 7.34412   | 8.34531   | 9.71076   | 3.82792   | 11.6853   | 6.91868   |
| RPL36     | 1711.81   | 3148.29   | 2242.7    | 3901.66   | 2339.03   | 2334.1    |
| C20orf46  | 6.43607   | 11.2182   | 9.46587   | 13.1803   | 11.3996   | 12.2612   |
| FBXO45    | 7.45795   | 3.77002   | 7.82298   | 6.45334   | 9.44676   | 7.76316   |
| DOCK7     | 5.12851   | 3.61551   | 5.24112   | 4.32136   | 4.70186   | 3.57433   |
| KCNA7     | 0.022196  | 0.0600993 | 0.0686101 | 0.0416833 | 0.141367  | 0.0836811 |
| TMPRSS4   | 6.29225   | 4.25674   | 2.76111   | 2.78806   | 4.94737   | 3.71288   |
| LINC00313 | 0.253188  | 0.895413  | 0         | 0         | 0.322514  | 0.473329  |
| SYNJ2     | 6.07318   | 3.85275   | 5.13968   | 5.66061   | 5.30358   | 3.74075   |

|             |          |          |           |           |           |           |
|-------------|----------|----------|-----------|-----------|-----------|-----------|
| ELOVL5      | 578.739  | 386.598  | 205.444   | 142.994   | 139.466   | 222.583   |
| CAPS        | 11.0789  | 22.6037  | 14.3026   | 21.0372   | 25.6458   | 17.8896   |
| TMED2       | 101.865  | 79.024   | 96.9738   | 89.2501   | 85.8397   | 81.8681   |
| MUC13       | 0.104017 | 0.030655 | 0.0262471 | 0         | 0         | 0         |
| FBXO30      | 5.06125  | 3.63824  | 4.56435   | 3.1614    | 5.35387   | 4.5938    |
| CTH         | 2.46811  | 2.22943  | 2.29771   | 2.18969   | 1.99107   | 2.82808   |
| LAD1        | 97.3258  | 100.142  | 95.5554   | 116.644   | 102.678   | 150.703   |
| SNX11       | 15.4862  | 15.419   | 13.3855   | 14.5208   | 14.718    | 14.7965   |
| HNRNPA2B1   | 251.894  | 212.818  | 210.106   | 191.513   | 236.989   | 228.211   |
| RIMBP2      | 0.982099 | 1.04197  | 0.972209  | 0.907988  | 1.9535    | 1.97724   |
| MIR3179-2   | 0        | 0        | 0         | 0         | 0         | 0         |
| PAX8        | 0.702944 | 1.16843  | 0.186334  | 0.140872  | 0.231236  | 0.253266  |
| GCNT4       | 2.83586  | 1.51957  | 2.99245   | 1.07589   | 2.55418   | 2.624     |
| HIST1H2AE   | 15.0512  | 5.83654  | 2.59859   | 3.47122   | 1.51361   | 3.45552   |
| NRSN2       | 10.6665  | 12.2862  | 8.91104   | 10.734    | 11.6925   | 8.95085   |
| CAPN11      | 1.65212  | 2.66172  | 2.05665   | 1.65474   | 2.38509   | 1.34983   |
| NDUFA12     | 98.6307  | 84.0281  | 77.0199   | 75.1544   | 75.9313   | 76.7784   |
| RBM42       | 32.2711  | 42.8549  | 35.0382   | 48.3504   | 38.8553   | 40.26     |
| LOC440040   | 0        | 0        | 0         | 0         | 0         | 0         |
| RXRG        | 1.16486  | 1.97754  | 1.44707   | 1.35781   | 2.31514   | 1.45239   |
| ETFA        | 136.474  | 106.682  | 91.6382   | 86.3162   | 78.4214   | 91.5676   |
| ZBTB45      | 6.43265  | 9.84788  | 8.43184   | 10.4182   | 8.55143   | 8.71658   |
| SNORD110    | 0        | 0        | 0         | 0         | 0         | 0         |
| LOC10065275 | 0        | 0        | 0         | 0         | 0         | 0         |
| OSBPL8      | 16.6015  | 11.3006  | 17.1422   | 9.86721   | 15.3734   | 12.2149   |
| DLX4        | 1.33843  | 2.15065  | 2.10996   | 6.56093   | 1.94322   | 7.01529   |
| MRPL44      | 17.8123  | 16.4402  | 16.3539   | 15.6519   | 16.0973   | 14.5873   |
| POM121L4P   | 0        | 0        | 0.0208706 | 0.0236688 | 0.0301019 | 0.0220891 |
| HEG1        | 7.95698  | 6.2321   | 6.08598   | 5.55274   | 5.75802   | 7.37659   |
| TNS4        | 41.7203  | 65.0166  | 49.746    | 76.5374   | 57.2321   | 48.3592   |
| LCMT1       | 23.2404  | 29.1585  | 24.0561   | 29.6432   | 25.7968   | 33.5385   |
| TCN2        | 9.21501  | 9.73426  | 10.9284   | 6.90433   | 7.72065   | 5.51079   |
| PLEC        | 35.2581  | 47.8789  | 51.8643   | 52.4221   | 53.6437   | 54.0079   |
| CRISPLD1    | 4.77715  | 2.12174  | 2.29204   | 3.896     | 3.67111   | 2.90704   |
| FBRS        | 38.0991  | 51.1871  | 43.7192   | 52.1933   | 56.861    | 58.2913   |
| ANKRD62P1-1 | 0.209018 | 0.0616   | 0.263712  | 0.786544  | 0         | 0.347336  |
| SIRT5       | 9.34045  | 9.30842  | 8.14526   | 9.11095   | 10.237    | 9.76905   |
| SYAP1       | 16.4184  | 11.8298  | 16.1426   | 13.3086   | 13.5686   | 13.7656   |
| SLC16A2     | 4.23943  | 4.21922  | 6.08249   | 4.27254   | 4.6934    | 3.30575   |
| ZBTB20-AS2  | 0        | 0        | 0         | 0         | 0.344391  | 0         |
| FKBP1A-SDCE | 4.08E-08 | 1.05E-08 | 1.17E-10  | 2.49E-11  | 2.34E-09  | 1.83E-09  |
| TIMP4       | 24.9162  | 26.4582  | 59.4415   | 35.0634   | 11.8916   | 13.743    |
| GDF11       | 1.30865  | 1.05245  | 1.00857   | 0.798991  | 1.2379    | 0.934909  |

|             |           |           |           |           |          |           |
|-------------|-----------|-----------|-----------|-----------|----------|-----------|
| LOC10050716 | 0         | 0         | 0         | 0         | 0        | 0         |
| LOC644794   | 9.00135   | 14.3128   | 7.76487   | 12.9075   | 15.3325  | 16.6973   |
| NKD1        | 0.835795  | 0.604601  | 0.862775  | 0.907104  | 1.18217  | 1.25135   |
| TMED11P     | 0         | 0         | 0         | 0         | 0.184549 | 0.180566  |
| LOC10000967 | 1.12238   | 1.8762    | 1.86902   | 1.94229   | 1.19874  | 1.47307   |
| TEP1        | 5.28342   | 5.70673   | 5.63274   | 3.94403   | 6.8329   | 4.97153   |
| HJURP       | 2.34321   | 3.36654   | 1.99555   | 2.50582   | 2.77753  | 3.73159   |
| C7orf34     | 0.166729  | 0.147411  | 0         | 0         | 0        | 0.103898  |
| WDR52       | 3.56982   | 3.03851   | 3.21236   | 2.95931   | 4.98287  | 4.14549   |
| LOC10012808 | 0.0942134 | 0.0832976 | 0         | 0.0884649 | 0.060005 | 0.11742   |
| LIX1L       | 5.36656   | 5.70748   | 5.53444   | 3.06729   | 4.805    | 3.48961   |
| MIR124-2    | 0         | 0         | 0         | 0         | 0        | 0         |
| DYRK2       | 3.59819   | 3.20979   | 4.1566    | 3.25919   | 4.07671  | 3.89323   |
| GPN3        | 14.5964   | 12.3047   | 13.7648   | 10.8933   | 10.4648  | 8.38787   |
| MIR1273F    | 0         | 0         | 0         | 0         | 0        | 0         |
| CTF1        | 3.57373   | 4.95754   | 4.33801   | 4.54405   | 3.73858  | 3.30014   |
| C6orf165    | 0.36903   | 0.122352  | 0.279358  | 0.346513  | 0.117519 | 0.0862364 |
| DNASE1L3    | 4.13917   | 3.85565   | 6.26726   | 3.609     | 3.62486  | 2.80966   |
| PDXP        | 5.82391   | 6.24276   | 4.17464   | 7.25915   | 5.05513  | 4.62484   |
| PLIN4       | 154.397   | 200.47    | 345.337   | 168.145   | 108.606  | 73.1178   |
| TSR2        | 42.2144   | 41.6581   | 46.1734   | 43.306    | 43.9818  | 42.3075   |
| MIR299      | 0         | 0         | 0         | 0         | 0        | 0         |
| SERPINB8    | 12.5464   | 7.17906   | 14.8117   | 11.9583   | 16.8856  | 13.1303   |
| MIR4765     | 0         | 0         | 0         | 0         | 0        | 0         |
| MGAT4A      | 5.5565    | 3.93264   | 3.88524   | 5.08569   | 4.02497  | 3.27998   |
| SOCS5       | 8.2903    | 6.05007   | 7.71965   | 5.16886   | 6.90053  | 6.80588   |
| BCAP31      | 260.471   | 293.273   | 254.736   | 279.412   | 210.435  | 243.53    |
| LOC10029290 | 0         | 0.114353  | 0.0979101 | 0         | 0.24713  | 0.0402992 |
| UBE2B       | 29.6335   | 32.8514   | 31.7412   | 28.3633   | 33.5966  | 31.2453   |
| OR7C1       | 0.246581  | 0.327017  | 0.466658  | 0.578839  | 0.392622 | 0.230488  |
| CAV3        | 0.373945  | 0.671735  | 0.0629059 | 0         | 0        | 0         |
| MIDN        | 20.4493   | 27.8154   | 37.1487   | 28.8629   | 27.7238  | 29.6323   |
| LILRA5      | 0         | 0.597858  | 0.250719  | 0.0777463 | 0.237311 | 0.0692417 |
| GMPPB       | 19.5312   | 15.9984   | 19.0969   | 19.0325   | 17.114   | 16.6815   |
| VAV1        | 2.96843   | 4.7302    | 2.95261   | 2.20392   | 4.44073  | 2.25847   |
| DEFA5       | 0.393568  | 0         | 0         | 0         | 0        | 0.245255  |
| SPATS2L     | 12.9262   | 13.0611   | 11.2673   | 9.81184   | 10.4605  | 10.0897   |
| N6AMT2      | 8.28095   | 8.56243   | 8.28747   | 5.53523   | 6.4363   | 5.77258   |
| PIGT        | 50.4602   | 47.1356   | 54.1489   | 52.1341   | 48.085   | 39.2115   |
| LOC10013230 | 0         | 0         | 0         | 0         | 0        | 0         |
| SST         | 0         | 0         | 0.167332  | 2.69825   | 1.40785  | 1.23971   |
| DEFB125     | 0         | 0         | 0         | 0         | 0        | 0         |
| ADAMTS8     | 0.776023  | 0.851724  | 0.810281  | 0.82918   | 0.920334 | 0.867118  |

|             |           |           |           |          |          |           |
|-------------|-----------|-----------|-----------|----------|----------|-----------|
| GSTTP2      | 0         | 0.0439713 | 0.0188243 | 0        | 0        | 0         |
| LECT1       | 0         | 0.265378  | 0.0567872 | 0        | 0.19117  | 0.0467465 |
| MAPK4       | 1.61765   | 1.30021   | 1.60626   | 1.89376  | 1.39156  | 1.58408   |
| CD14        | 11.8768   | 12.6338   | 10.8563   | 8.3164   | 11.9347  | 9.15391   |
| ZC3H4       | 6.78285   | 8.8849    | 8.83775   | 7.92454  | 9.24726  | 8.96      |
| MIR521-1    | 0         | 0         | 0         | 0        | 0        | 0         |
| REC8        | 7.56391   | 14.9481   | 4.40668   | 5.0797   | 8.72665  | 5.13953   |
| STXBP6      | 5.78233   | 4.55466   | 3.93953   | 3.15899  | 3.58236  | 3.50503   |
| TFEC        | 0.820022  | 0.374288  | 0.386614  | 0.138607 | 0.595527 | 0.254734  |
| MED12       | 7.63701   | 7.74265   | 8.77014   | 7.64568  | 9.85863  | 8.03677   |
| FCGR3B      | 4.34678   | 2.23548   | 2.45123   | 1.62429  | 4.20924  | 4.39478   |
| IGSF11-AS1  | 0         | 0         | 0         | 0        | 0        | 0         |
| RPS29       | 1234.86   | 1792.75   | 1354.72   | 2092.06  | 1453.96  | 1299.59   |
| OPRM1       | 0         | 0         | 0         | 0        | 0        | 0         |
| LOC10029178 | 0         | 0.724239  | 0         | 0        | 0        | 0         |
| ITFG3       | 36.9795   | 45.6596   | 42.7688   | 50.8027  | 43.9702  | 43.6723   |
| FAM32A      | 57.4096   | 66.4215   | 57.8327   | 62.1892  | 63.5594  | 64.3768   |
| FSCN2       | 0.829983  | 0.900894  | 0.944267  | 1.13463  | 1.13455  | 1.34455   |
| C16orf59    | 1.43628   | 2.7129    | 2.02628   | 2.32948  | 1.74639  | 2.72577   |
| NOMO1       | 20.7253   | 17.1235   | 11.5171   | 11.8505  | 15.1337  | 15.4915   |
| DUOX1       | 43.4304   | 44.2889   | 41.5834   | 45.9921  | 47.7992  | 41.4288   |
| SLC5A1      | 11.118    | 6.02267   | 9.93112   | 7.8393   | 11.4972  | 11.5767   |
| LOC10050560 | 3.23077   | 3.32066   | 2.65858   | 2.85991  | 3.9286   | 4.13248   |
| BDKRB1      | 0.944718  | 1.67052   | 0.780171  | 1.85479  | 2.13329  | 1.28445   |
| LOC10049940 | 7.38839   | 7.11945   | 7.80101   | 6.50349  | 7.47346  | 6.91144   |
| LOC10050648 | 0.693339  | 0.245203  | 0.734806  | 0.520828 | 0.883183 | 0.864119  |
| PCNP        | 72.7487   | 60.1285   | 65.1468   | 60.0493  | 61.5755  | 54.9347   |
| CD3D        | 12.4264   | 13.7942   | 4.51552   | 1.34411  | 8.70911  | 2.1906    |
| RBP7        | 52.5851   | 78.9074   | 49.7986   | 49.1798  | 24.1514  | 19.0607   |
| C21orf71    | 0.783793  | 0.69298   | 0.296668  | 1.10395  | 0.249601 | 0.244213  |
| S100A11     | 943.052   | 1013.82   | 688.491   | 889.621  | 773.794  | 891.355   |
| C8orf31     | 0.166722  | 0.19654   | 0.0841398 | 0.15655  | 0.424745 | 0.207789  |
| PTPRF       | 86.7791   | 77.6062   | 107.172   | 85.4603  | 111.33   | 102.735   |
| ASB17       | 0         | 0         | 0         | 0        | 0        | 0         |
| ZFY-AS1     | 2.80983   | 2.06803   | 0         | 0        | 0        | 0         |
| LOC10013285 | 0.0572369 | 0         | 0.315938  | 0        | 0.306102 | 0.0509537 |
| EGFL8       | 19.6957   | 42.6653   | 21.7142   | 39.7069  | 33.4778  | 34.0455   |
| MYCT1       | 4.7925    | 6.11083   | 4.56579   | 3.33679  | 3.7376   | 2.70206   |
| MIR4531     | 0         | 0         | 0         | 0        | 0        | 0         |
| LOC10050578 | 0         | 0         | 0         | 0        | 0        | 0         |
| LOC10013009 | 1.29292   | 1.31529   | 1.4875    | 1.59556  | 1.62662  | 1.93628   |
| DNAJC5G     | 0         | 0.0910843 | 0.116981  | 0        | 0.164036 | 0.032099  |
| BMP2K       | 5.78779   | 4.49056   | 7.58827   | 5.22052  | 6.15234  | 4.85156   |

|             |           |          |           |          |           |           |
|-------------|-----------|----------|-----------|----------|-----------|-----------|
| LOC10050709 | 0         | 0        | 0         | 0        | 0         | 0         |
| CSAG1       | 0         | 0        | 0         | 0        | 0         | 0         |
| USP45       | 3.24365   | 2.37884  | 2.76098   | 2.27377  | 3.13217   | 2.62676   |
| PACS1       | 20.0603   | 21.268   | 19.4522   | 19.9718  | 21.2621   | 17.2104   |
| FUT2        | 4.20573   | 2.95216  | 3.05888   | 3.97908  | 3.98135   | 3.96114   |
| PIK3C2B     | 12.7966   | 12.0646  | 14.526    | 12.3793  | 15.6564   | 14.8906   |
| ZNF833P     | 1.18872   | 0.731123 | 0.978115  | 1.55296  | 1.28378   | 0.644138  |
| STARD3      | 16.6982   | 24.7304  | 19.9743   | 22.1297  | 25.4884   | 25.2237   |
| TGFB1       | 16.1276   | 23.3815  | 18.8584   | 23.0863  | 24.0957   | 18.0148   |
| TPH1        | 0.807205  | 0.305863 | 0.960235  | 0.378976 | 1.17512   | 0.431157  |
| IL12RB2     | 1.61619   | 1.06637  | 0.456518  | 0.249155 | 0.291909  | 0.285608  |
| ADAMTS1     | 8.23684   | 5.5906   | 6.26683   | 7.65614  | 5.63027   | 6.32533   |
| ALG6        | 5.81774   | 6.95302  | 6.77208   | 5.92944  | 6.47971   | 6.01192   |
| NRG4        | 2.51611   | 2.6779   | 2.99815   | 2.84385  | 2.28508   | 2.32286   |
| NT5E        | 6.92612   | 4.89014  | 5.34783   | 2.97078  | 4.34785   | 2.58173   |
| APOA1BP     | 52.0201   | 61.2939  | 46.9318   | 63.2801  | 47.3313   | 49.4181   |
| LOC10050703 | 0.590367  | 0.298266 | 0.5746    | 0.343166 | 0.483439  | 0.64819   |
| ZNF644      | 14.5072   | 13.221   | 11.0005   | 10.162   | 12.4642   | 10.9794   |
| OR5F1       | 0         | 0        | 0         | 0        | 0         | 0         |
| PAPOLB      | 0         | 0        | 0.0172805 | 0        | 0.0145389 | 0.0284501 |
| FLJ43681    | 1.74795   | 1.14669  | 1.27179   | 0.864026 | 1.22884   | 1.23008   |
| GAS8        | 5.86943   | 6.95374  | 6.86101   | 7.94976  | 7.09451   | 7.23093   |
| FITM2       | 13.1567   | 10.3154  | 10.8053   | 7.69206  | 4.98031   | 7.81196   |
| MIR4708     | 0         | 0        | 0         | 0        | 0         | 0         |
| TTC37       | 25.4843   | 18.2809  | 24.8145   | 17.947   | 22.8263   | 20.8041   |
| KRT82       | 0.636028  | 0.69465  | 0.0283222 | 18.2679  | 0.166802  | 18.5816   |
| INTS4       | 8.51156   | 8.0815   | 6.99882   | 7.92331  | 9.16639   | 8.40026   |
| MIR4296     | 0         | 0        | 0         | 0        | 0         | 0         |
| ZNF572      | 0.72341   | 0.879441 | 0.867073  | 0.622665 | 1.05587   | 0.995513  |
| CAPN2       | 83.0429   | 67.6875  | 70.0276   | 63.9798  | 57.1621   | 51.2864   |
| WTAP        | 63.6504   | 57.0188  | 56.0563   | 55.5319  | 65.086    | 54.5807   |
| MIR3140     | 0         | 0        | 0         | 0        | 0         | 0         |
| ASTN2       | 4.42332   | 3.53896  | 2.57237   | 2.74321  | 2.16505   | 2.91403   |
| FAM74A2     | 0.0341673 | 0        | 0         | 0        | 0         | 0         |
| RPL29P2     | 0         | 0        | 0         | 0        | 0         | 0         |
| OR14I1      | 0         | 0        | 0         | 0        | 0         | 0         |
| LOC339290   | 11.5212   | 11.7901  | 15.8659   | 13.5343  | 18.2979   | 15.7033   |
| CD200R1     | 4.08193   | 3.61004  | 5.3799    | 2.52796  | 6.37028   | 3.21008   |
| SH2D5       | 0.183565  | 0.352412 | 0.102933  | 0.111709 | 0.170486  | 0.313988  |
| RARRES3     | 30.3424   | 32.3107  | 15.2283   | 11.4908  | 23.2757   | 8.46163   |
| THAP7       | 20.4723   | 40.1225  | 25.5763   | 39.3507  | 28.7091   | 30.4733   |
| TTC26       | 1.28855   | 0.761025 | 1.29972   | 1.03642  | 1.1845    | 1.30731   |
| TRIM78P     | 1.91811   | 1.32665  | 2.52188   | 0.646957 | 2.16429   | 2.2309    |

|            |          |           |            |           |           |            |
|------------|----------|-----------|------------|-----------|-----------|------------|
| SPAG4      | 0.447425 | 0.395585  | 0.508055   | 0.280083  | 0.52244   | 0.604102   |
| CD53       | 15.738   | 12.3065   | 9.19408    | 4.3575    | 13.8626   | 6.42052    |
| MIR216A    | 0        | 0         | 0          | 0         | 0         | 0          |
| BAP1       | 36.9065  | 49.0908   | 43.4206    | 57.432    | 56.527    | 50.4501    |
| DDR1       | 106.041  | 117.227   | 111.233    | 137.165   | 124.453   | 114.92     |
| TTF2       | 5.38903  | 3.92072   | 4.06447    | 3.58509   | 5.07879   | 4.48588    |
| KRTAP2-2   | 7.57494  | 2.29002   | 0.314686   | 100.793   | 1.82863   | 1296.01    |
| LOC439949  | 0.797629 | 0.88253   | 0.428091   | 0.315967  | 0.596984  | 0.425315   |
| MIR3174    | 0        | 0         | 0          | 0         | 0         | 0          |
| ABCC1      | 14.1359  | 12.4592   | 9.85278    | 8.84567   | 12.4996   | 12.229     |
| RWDD2B     | 15.1686  | 15.7102   | 11.6702    | 10.2318   | 13.9591   | 12.7319    |
| TXLNB      | 0.701825 | 0.365006  | 0.67192    | 0.387649  | 0.841405  | 0.591706   |
| RN5S17     | 11.918   | 288.669   | 37.0903    | 266.797   | 55.8452   | 49.0992    |
| FECH       | 6.15194  | 4.82893   | 5.11174    | 4.21841   | 4.68653   | 4.07018    |
| MIR199B    | 0        | 0         | 0          | 0         | 0         | 0          |
| DUX4L6     | 0        | 0.0414532 | 0.00714616 | 0.0103414 | 0.0354733 | 0.00686307 |
| ARG1       | 18.6435  | 7.9438    | 34.6879    | 30.2311   | 41.3925   | 43.9362    |
| ADAMTS17   | 1.15556  | 1.55062   | 2.28424    | 2.91254   | 1.86104   | 1.92727    |
| MIR203     | 0        | 0         | 337.362    | 836.924   | 283.839   | 555.425    |
| PNLIPRP2   | 0.582906 | 0.128842  | 0.110316   | 0         | 0         | 0.0908106  |
| EXOSC8     | 18.5379  | 24.5702   | 18.6793    | 21.3549   | 24.6898   | 24.0739    |
| LCE3D      | 112.471  | 57.5593   | 37.2712    | 64.8547   | 86.0489   | 78.3752    |
| PEX19      | 45.9792  | 39.35     | 44.752     | 36.4833   | 34.7269   | 29.9859    |
| PLCB4      | 11.4182  | 6.25229   | 7.98975    | 8.76076   | 5.08636   | 4.98773    |
| LOC1002871 | 0.64633  | 1.02871   | 0.781917   | 1.07713   | 0.704734  | 0.643718   |
| CARD14     | 8.85249  | 8.60186   | 9.11129    | 10.4007   | 15.0041   | 15.1016    |
| SNORD3B-2  | 1.29211  | 8.92501   | 6.75218    | 12.3855   | 10.1652   | 1.71102    |
| CDC37L1    | 12.3166  | 13.1994   | 14.3152    | 10.5137   | 12.5195   | 10.3111    |
| CAB39      | 39.2745  | 29.9447   | 33.3148    | 26.1887   | 30.478    | 29.9025    |
| PYGB       | 90.8307  | 90.7644   | 50.263     | 68.9167   | 88.5392   | 79.1398    |
| 6-Sep      | 19.7281  | 16.0555   | 14.5139    | 13.1169   | 17.2507   | 15.1341    |
| SERPINA1   | 3.61788  | 1.9084    | 1.44793    | 2.05724   | 2.2145    | 6.64303    |
| GRB7       | 19.1561  | 17.0642   | 19.7887    | 23.4065   | 31.0799   | 38.8413    |
| RMRP       | 16.1694  | 15.5956   | 1.11276    | 31.7459   | 17.7881   | 6.41205    |
| VTRNA1-2   | 0        | 0         | 0          | 0         | 0         | 0          |
| LOC400950  | 0        | 0         | 0          | 0         | 0.0167613 | 0.0491985  |
| EBF3       | 2.93764  | 3.56142   | 4.22861    | 3.19723   | 2.94824   | 1.92769    |
| ZNF643     | 0.965226 | 0.314407  | 0.461483   | 0.524718  | 0.258845  | 0.474859   |
| PHYH       | 21.3593  | 26.5436   | 28.6334    | 23.5332   | 19.5424   | 16.6267    |
| TXNDC16    | 4.89924  | 3.55101   | 5.087      | 3.73897   | 3.58501   | 3.71507    |
| BIRC3      | 15.2749  | 11.4573   | 6.16107    | 2.7068    | 15.5665   | 6.10368    |
| LOC149837  | 0.792815 | 0.434943  | 0.537914   | 0.10265   | 0.52235   | 0.170309   |
| STK10      | 7.48792  | 6.24084   | 7.04037    | 6.01594   | 9.19394   | 7.29149    |

|            |           |           |           |           |          |           |
|------------|-----------|-----------|-----------|-----------|----------|-----------|
| TM2D1      | 17.7345   | 17.492    | 19.5194   | 15.3972   | 18.9012  | 16.2717   |
| HHIP       | 0.0552492 | 0.0488478 | 0.020912  | 0.103756  | 0.105565 | 0.0344289 |
| WDR41      | 16.2234   | 15.3881   | 16.8121   | 16.8973   | 14.2786  | 13.6678   |
| LOC284751  | 0.223602  | 0.35585   | 0.643218  | 0.377925  | 0.740549 | 0.25081   |
| ST7-AS2    | 0         | 0         | 0         | 0         | 0        | 0         |
| MIR559     | 0         | 0         | 0         | 0         | 0        | 0         |
| LOC144817  | 0.152069  | 0         | 0.0767448 | 0         | 0        | 0         |
| COL9A2     | 11.0743   | 18.0857   | 7.90275   | 18.3466   | 18.3745  | 19.7874   |
| DUX4L4     | 0         | 0.0382792 | 0.007177  | 0.010386  | 0.122156 | 0.0206781 |
| REM1       | 3.39292   | 3.84881   | 2.95615   | 2.82523   | 2.32406  | 1.6755    |
| MUC3A      | 0.365958  | 0.367479  | 0.390152  | 0.156544  | 0.328254 | 0.155404  |
| TNFAIP8L3  | 9.92991   | 10.0165   | 13.8039   | 11.3584   | 12.8501  | 11.532    |
| IL19       | 0         | 0         | 0         | 0         | 0        | 0         |
| GLT25D1    | 25.7297   | 33.6398   | 28.0377   | 32.2899   | 31.7136  | 27.0121   |
| CAMK4      | 0.0910288 | 0.160964  | 0.103364  | 0.0427373 | 0.17393  | 0.170176  |
| CCDC78     | 0.264321  | 0.993209  | 0.650301  | 0.746732  | 1.05217  | 0.947104  |
| TMEM239    | 0         | 0         | 0         | 0         | 0        | 0         |
| TMEM50B    | 27.9012   | 29.7208   | 33.1706   | 29.4332   | 35.6573  | 31.103    |
| LRIF1      | 9.13312   | 7.79431   | 8.07613   | 5.16298   | 8.15844  | 7.55537   |
| FLJ25758   | 0         | 0         | 0         | 0         | 0        | 0         |
| SUMF2      | 85.5009   | 93.0774   | 76.9054   | 87.105    | 79.9054  | 77.5549   |
| UFD1L      | 25.7828   | 26.1703   | 23.7088   | 24.0937   | 19.3239  | 21.1992   |
| TRMU       | 16.6857   | 24.4837   | 15.9319   | 21.1982   | 20.3697  | 19.7547   |
| LSM7       | 50.1471   | 96.7758   | 64.1079   | 88.7853   | 71.9588  | 82.7674   |
| SUCLA2     | 27.7859   | 19.7537   | 27.0899   | 20.7124   | 21.1641  | 20.8547   |
| GRB2       | 29.1808   | 20.0355   | 29.0827   | 20.9434   | 24.8263  | 23.2822   |
| SLC37A4    | 14.3891   | 16.8557   | 12.4372   | 16.2499   | 15.8471  | 15.7625   |
| IRF9       | 65.0728   | 78.941    | 33.62     | 25.2817   | 55.6753  | 27.741    |
| FAM151A    | 0.678296  | 3.46E-07  | 0.645146  | 0.393141  | 0.342022 | 0.242263  |
| BCL11A     | 11.9353   | 11.6678   | 13.5874   | 15.3376   | 19.433   | 15.5704   |
| ATG4C      | 4.94889   | 4.46077   | 5.56257   | 3.57018   | 3.73771  | 3.57594   |
| UBAP1L     | 1.97436   | 3.84033   | 2.39136   | 3.33701   | 3.42035  | 2.70674   |
| RAB13      | 54.3183   | 52.0197   | 43.7961   | 43.0722   | 45.8564  | 42.2958   |
| CCR4       | 0.767676  | 1.07466   | 0.774847  | 0.480557  | 1.79277  | 0.717575  |
| TGDS       | 6.61687   | 7.34904   | 6.91326   | 6.82932   | 8.77694  | 8.48525   |
| DDI2       | 1.573     | 0.861297  | 2.24256   | 1.42928   | 1.52344  | 1.02587   |
| ZNF335     | 12.2604   | 18.8109   | 16.2874   | 20.3664   | 21.2209  | 18.9308   |
| PARP1      | 18.6248   | 15.7312   | 16.3594   | 14.0413   | 15.4786  | 14.0312   |
| GJA9-MYCBP | 3.16508   | 1.42739   | 2.21922   | 1.79343   | 2.3571   | 0.826536  |
| MIR3130-2  | 0         | 0         | 0         | 0         | 0        | 0         |
| EXOSC7     | 29.3593   | 35.034    | 38.049    | 41.5606   | 41.1771  | 34.5806   |
| LY9        | 1.15062   | 1.02239   | 1.10635   | 0.474314  | 1.77659  | 0.868351  |
| MACROD2    | 2.17117   | 1.70245   | 3.64831   | 2.90423   | 2.89978  | 2.52271   |



|             |          |           |           |           |           |            |
|-------------|----------|-----------|-----------|-----------|-----------|------------|
| LOC10050610 | 0        | 0         | 0         | 0         | 0         | 0          |
| FAM66A      | 0.585409 | 0.396274  | 0.249276  | 0.519629  | 0.524321  | 0.307802   |
| C7orf40     | 24.9332  | 46.7229   | 28.1337   | 34.6024   | 31.6603   | 22.4753    |
| TLX2        | 0        | 0.0421103 | 0.108165  | 0         | 0.0606699 | 0.0296802  |
| LOC10012834 | 1.94427  | 3.19243   | 1.26156   | 1.82564   | 1.32677   | 1.29813    |
| GP2         | 0        | 0         | 0         | 0         | 0         | 0.329595   |
| ANKLE1      | 0.645422 | 0.489121  | 0.674717  | 1.06779   | 1.05704   | 0.536266   |
| OR2M2       | 0        | 0         | 0         | 0         | 0         | 0          |
| MIR92A1     | 0        | 0         | 0         | 0         | 0         | 0          |
| NOS3        | 4.21446  | 6.00941   | 6.11785   | 5.40712   | 7.48577   | 9.69104    |
| CDRT15P1    | 1.35544  | 1.84194   | 1.10475   | 0.977458  | 0.73096   | 0.84465    |
| MIR3198-1   | 0        | 0         | 0         | 0         | 0         | 0          |
| LHX8        | 0        | 0         | 0         | 0         | 0         | 0          |
| COPS2       | 26.6258  | 21.7767   | 23.3629   | 17.6066   | 22.0743   | 19.4784    |
| LOC10050635 | 0.608366 | 0         | 1.09377   | 0.49984   | 0.726509  | 0.805604   |
| MIR1265     | 0        | 0         | 0         | 0         | 0         | 0          |
| SLC50A1     | 90.1635  | 93.9303   | 60.9378   | 77.1273   | 50.3859   | 74.1199    |
| MCM7        | 40.895   | 59.1512   | 45.92     | 55.3365   | 63.042    | 50.2968    |
| LEPREL4     | 4.48356  | 5.26266   | 6.17372   | 6.2787    | 6.17894   | 7.56298    |
| RNF8        | 3.12459  | 3.47958   | 3.35092   | 2.92758   | 3.201     | 3.62005    |
| OSR1        | 8.9561   | 16.9056   | 12.5198   | 14.0848   | 8.99372   | 9.82678    |
| C22orf34    | 0.119405 | 0.281521  | 0.0301301 | 0.0373732 | 0.304199  | 0.347238   |
| KIR2DS5     | 0        | 0         | 0         | 0         | 0         | 0          |
| GFRA2       | 1.2871   | 1.10922   | 1.7712    | 1.40073   | 2.01167   | 1.84121    |
| DOM3Z       | 9.82891  | 15.6985   | 11.0855   | 15.3978   | 16.6025   | 13.6628    |
| MXD4        | 25.4309  | 37.4256   | 36.9976   | 40.9323   | 46.9396   | 40.3027    |
| FLJ37201    | 0.347973 | 0.165661  | 0.405258  | 0.175938  | 0.221626  | 0.500405   |
| HHAT        | 4.69077  | 3.87088   | 3.83378   | 4.7137    | 4.1219    | 4.37385    |
| SLC45A1     | 0.54866  | 1.08212   | 0.447288  | 0.277406  | 0.698889  | 0.526002   |
| FOSL2       | 24.4108  | 21.4313   | 32.5928   | 28.6575   | 28.8537   | 30.6825    |
| UBD         | 19.3966  | 15.6763   | 4.77435   | 1.11737   | 6.13902   | 2.07632    |
| SOCS7       | 4.98037  | 4.65554   | 6.02866   | 6.08278   | 6.38947   | 5.70343    |
| IL1RAP      | 6.27595  | 5.52633   | 6.79928   | 4.65103   | 7.25565   | 5.83595    |
| S100PBP     | 10.5162  | 11.6444   | 8.71239   | 9.6839    | 11.8911   | 9.72031    |
| GGT3P       | 2.21237  | 2.33666   | 5.06245   | 7.09993   | 4.19205   | 6.08257    |
| LOC402779   | 0        | 0         | 0         | 0         | 0         | 0          |
| NPY6R       | 0.232904 | 0.0588341 | 0.201497  | 0         | 0.0847647 | 0.0414675  |
| LOC10050737 | 7.23E-07 | 9.68E-07  | 6.26E-06  | 5.75E-07  | 2.04E-06  | 2.13E-06   |
| NLRP7       | 0.068399 | 0.0839926 | 0.116503  | 0.0285444 | 0.139406  | 0.00947141 |
| FBN1        | 6.91261  | 4.49138   | 11.7131   | 5.087     | 6.70128   | 5.48473    |
| LOC10065290 | 5.23934  | 3.28252   | 3.98613   | 3.42326   | 7.27053   | 1.39918    |
| ADAM1       | 4.88552  | 5.46926   | 5.18836   | 5.41251   | 7.58876   | 5.78227    |
| LCA5L       | 0.729829 | 0.341613  | 0.812477  | 0.443428  | 0.792949  | 0.882844   |

|             |           |           |           |           |           |            |
|-------------|-----------|-----------|-----------|-----------|-----------|------------|
| CEP170      | 4.7414    | 4.01716   | 5.17425   | 2.3569    | 5.50312   | 4.17872    |
| PRR5-ARHGA  | 5.71E-24  | 7.13E-17  | 1.08E-10  | 6.73E-65  | 2.36E-10  | 2.30E-20   |
| ODZ1        | 0.940302  | 0.934458  | 1.77669   | 0.92399   | 1.6248    | 1.00835    |
| FAM92A1     | 2.6439    | 3.95589   | 4.6957    | 2.00516   | 4.33932   | 2.40798    |
| ZNF131      | 12.2873   | 8.86146   | 10.7936   | 13.2702   | 11.0042   | 10.5315    |
| LOC541473   | 1.56718   | 4.26408   | 2.73855   | 3.39688   | 2.91766   | 1.72783    |
| HSPG2       | 22.0067   | 23.9943   | 40.0921   | 23.7648   | 23.2357   | 19.8873    |
| ZNF398      | 5.23991   | 4.29384   | 5.26242   | 4.98369   | 4.61651   | 4.36948    |
| ANKRD2      | 0         | 0.322771  | 0.383833  | 0.373746  | 0.297081  | 0.412863   |
| GSC         | 0         | 0.251175  | 0.35843   | 0.355675  | 0.180939  | 0          |
| PSMD9       | 19.1194   | 22.3856   | 19.298    | 24.7106   | 19.3014   | 20.1815    |
| CCDC80      | 57.4596   | 47.0403   | 126.431   | 34.0136   | 75.0252   | 49.0081    |
| FAM177B     | 0.326516  | 0.0721713 | 0.123587  | 0         | 0         | 0.0508678  |
| KCNS3       | 9.81475   | 8.52331   | 8.42046   | 8.02806   | 6.77893   | 6.57824    |
| DUT         | 43.5554   | 57.761    | 42.2472   | 42.9264   | 51.9377   | 41.7203    |
| ANKIB1      | 11.2312   | 8.73384   | 12.8721   | 8.98024   | 11.0604   | 9.12586    |
| MRPL36      | 52.9001   | 56.3702   | 45.4667   | 54.6613   | 34.1338   | 40.4506    |
| LOC10028950 | 0.978262  | 1.62187   | 1.38998   | 1.03528   | 2.02614   | 0.995489   |
| TOR1AIP1    | 19.8045   | 17.5553   | 21.8757   | 16.9319   | 17.9961   | 14.9505    |
| GOLGA1      | 11.3484   | 10.925    | 11.599    | 11.7141   | 14.3424   | 12.1231    |
| PLCG1       | 25.6953   | 28.4576   | 29.3928   | 27.9499   | 40.7182   | 35.4223    |
| DSCC1       | 3.54838   | 3.09755   | 2.48214   | 1.81355   | 2.3172    | 2.63105    |
| POGLUT1     | 9.57158   | 9.04693   | 7.38756   | 7.59674   | 9.19348   | 7.31145    |
| ZNF670-ZNF6 | 0.567585  | 1.44E-19  | 1.55E-144 | 1.59E-154 | 2.09E-42  | 0          |
| INTS4L1     | 0.777928  | 0.850008  | 0.74843   | 0.569574  | 0.587199  | 0.435688   |
| MIR4434     | 0         | 0         | 0         | 0         | 0         | 0          |
| KCNB1       | 0.364794  | 0.115189  | 0.335326  | 0.244668  | 0.099574  | 0.146137   |
| SLC28A2     | 0.0820817 | 0.0362857 | 0.0405788 | 0         | 0.0436106 | 0.00426249 |
| MIR802      | 0         | 0         | 0         | 0         | 0         | 0          |
| LOC10050564 | 0         | 0         | 0         | 0         | 0         | 0          |
| TUT1        | 11.1662   | 15.3085   | 12.3851   | 15.3955   | 16.9918   | 14.9075    |
| PTPRN2      | 1.26458   | 1.22621   | 0.864707  | 1.07258   | 0.876352  | 0.711816   |
| SNORD48     | 0         | 0         | 0         | 0         | 0         | 0          |
| MIR381      | 0         | 0         | 0         | 0         | 0         | 0          |
| GKN1        | 0         | 0         | 0.115375  | 0.14311   | 0.194141  | 0          |
| ZNF280C     | 1.21515   | 1.23825   | 1.07579   | 1.37308   | 1.36423   | 1.27061    |
| GFPT2       | 6.66568   | 6.59358   | 6.14508   | 3.99706   | 6.07388   | 4.25659    |
| PABPC1L2B   | 0         | 0         | 0         | 0         | 0.0592032 | 0.0651659  |
| TCTA        | 29.3674   | 31.7911   | 22.6651   | 24.9749   | 24.787    | 24.3114    |
| DTD1        | 23.3604   | 22.7758   | 22.4683   | 26.292    | 21.2985   | 20.4898    |
| ZNF511      | 15.9863   | 20.5599   | 17.4209   | 21.1943   | 17.2314   | 16.2039    |
| DYRK3       | 1.41957   | 1.75609   | 1.50358   | 1.64329   | 1.65617   | 1.76764    |
| C6orf64     | 10.0099   | 9.99828   | 7.57757   | 9.14514   | 8.54646   | 7.11442    |

|             |           |           |           |           |           |           |
|-------------|-----------|-----------|-----------|-----------|-----------|-----------|
| SIK2        | 9.73804   | 8.50402   | 10.1005   | 8.34903   | 7.72389   | 7.25363   |
| PTH2        | 0         | 0         | 0         | 0         | 0         | 0         |
| MRPL16      | 39.202    | 41.3221   | 35.3081   | 36.5414   | 32.0756   | 30.9672   |
| LOC10050711 | 0         | 0         | 0.395546  | 0         | 0.665584  | 0         |
| C11orf30    | 3.81558   | 2.92678   | 3.54787   | 3.07562   | 3.59531   | 3.10514   |
| MIR197      | 0         | 0         | 0         | 0         | 0         | 0         |
| SPANXA2     | 0         | 0         | 0         | 0         | 0         | 0         |
| SNHG13      | 57.6322   | 80.5086   | 46.3547   | 67.5094   | 47.0758   | 56.3849   |
| TBX3        | 14.1266   | 8.46452   | 9.29219   | 11.7257   | 6.81569   | 9.11764   |
| GAL3ST3     | 0.05943   | 0.0262721 | 0.0674833 | 0.111608  | 0.208182  | 0.185171  |
| CDHR3       | 0.543209  | 0.726897  | 0.611262  | 0.620349  | 0.504933  | 0.265315  |
| CHST11      | 1.96619   | 1.91514   | 1.61454   | 0.876396  | 2.02691   | 1.51595   |
| FMO2        | 6.00149   | 4.9283    | 12.5886   | 8.04294   | 6.01166   | 2.69781   |
| RBMV2FP     | 0         | 0         | 0         | 0         | 0         | 0         |
| MLPH        | 17.267    | 12.2502   | 7.71709   | 9.06035   | 8.32279   | 8.88989   |
| LZIC        | 15.9413   | 11.4259   | 15.5241   | 12.1348   | 12.7653   | 14.1776   |
| IL36RN      | 18.259    | 8.8124    | 16.3276   | 12.5707   | 14.3293   | 13.5334   |
| PAR5        | 0.32138   | 0.0516626 | 0.486573  | 0.603542  | 0.372162  | 0.182064  |
| KCTD12      | 25.6345   | 18.3157   | 21.3077   | 12.6035   | 18.9421   | 15.4683   |
| LOC10032911 | 0.296058  | 0.0320503 | 0         | 0         | 0.0923547 | 0.0225897 |
| DRD2        | 1.19452   | 1.02213   | 0.732248  | 1.1172    | 0.639663  | 0.53345   |
| TMEM9       | 36.5781   | 37.6376   | 35.9704   | 38.9911   | 49.0342   | 39.466    |
| ANKRD13C    | 6.56662   | 5.49156   | 6.18808   | 4.86283   | 7.27593   | 5.57909   |
| LOC10050701 | 3.8237    | 3.38067   | 0.263142  | 0.979198  | 1.99255   | 2.38277   |
| KRTAP9-7    | 4.37241   | 0.62129   | 0         | 12.1216   | 0         | 141.684   |
| BLOC1S1     | 99.0361   | 130.98    | 113.483   | 145.767   | 112.806   | 109.345   |
| IFITM5      | 0         | 0         | 0.404205  | 0.167124  | 0.340077  | 0.110912  |
| LOC10028901 | 2.68007   | 3.07093   | 3.54965   | 5.92988   | 6.15579   | 4.89246   |
| PEX5L-AS2   | 0         | 0         | 0         | 0         | 0         | 0         |
| SNORD116-1  | 0         | 0         | 0         | 0         | 0         | 0         |
| ZNF883      | 0.59687   | 0.86696   | 0.580929  | 0.680548  | 1.1676    | 1.35494   |
| ABCA8       | 13.5072   | 11.8089   | 14.2465   | 6.13695   | 11.5914   | 6.41204   |
| POMC        | 5.64315   | 8.47248   | 3.18765   | 9.87952   | 3.25205   | 7.08757   |
| LOC10050691 | 0         | 0.203222  | 0         | 0         | 0         | 0         |
| PRPH        | 1.02629   | 2.36928   | 1.33801   | 2.19503   | 1.34362   | 1.24355   |
| BEST3       | 0.0278161 | 0.0306319 | 0.0262273 | 0.393805  | 0.158878  | 0.346983  |
| PPY         | 0         | 0         | 0         | 0.357361  | 0         | 0.711488  |
| TMEM55A     | 6.27414   | 5.5472    | 7.49091   | 5.33777   | 6.11474   | 5.11682   |
| C1orf229    | 0.045158  | 0.399259  | 0.205109  | 0.46643   | 0.20133   | 0.225125  |
| PRMT8       | 0         | 0.0766629 | 0.0328197 | 0.0407093 | 0.110451  | 0.0540336 |
| GOLGA6L3    | 1.46312   | 1.4641    | 1.50197   | 1.45249   | 2.03196   | 1.44905   |
| TPPP3       | 57.1272   | 97.9198   | 138.672   | 131.91    | 65.9125   | 72.4313   |
| SNN         | 25.2395   | 26.0255   | 20.7402   | 19.6464   | 16.5525   | 19.0158   |

|             |           |           |           |           |           |           |
|-------------|-----------|-----------|-----------|-----------|-----------|-----------|
| LOC10013227 | 0.186003  | 0.370016  | 0.211207  | 0.26198   | 0.414631  | 0.144886  |
| HLA-DMA     | 51.9628   | 54.5733   | 54.193    | 42.7768   | 68.9326   | 33.5216   |
| SULT1C3     | 77.4626   | 0         | 0         | 0         | 0         | 0.0820942 |
| MIR941-4    | 0         | 0         | 0         | 0         | 0         | 0         |
| KIAA0195    | 15.0885   | 19.5134   | 18.5124   | 18.113    | 21.8678   | 17.2544   |
| UGT1A1      | 0.132754  | 2.15E-08  | 0.18428   | 0.119236  | 0.22707   | 0.0771546 |
| PSMA5       | 28.8783   | 25.2314   | 20.4506   | 21.1135   | 17.4457   | 19.5213   |
| IL11        | 0.776372  | 1.14403   | 0.946878  | 1.4175    | 1.64825   | 1.31702   |
| CDH15       | 0.0697902 | 0.215964  | 0.0528316 | 0.229362  | 0.133349  | 0.217452  |
| PERP        | 604.542   | 529.608   | 726.266   | 676.616   | 718.021   | 767.73    |
| OPTN        | 50.5058   | 51.2277   | 52.7771   | 38.0511   | 48.106    | 37.7703   |
| ACSM2A      | 0.0335625 | 0         | 0         | 0         | 0.0213761 | 0.0209147 |
| FAM110C     | 9.42862   | 8.35795   | 5.2553    | 5.57089   | 7.21244   | 6.59653   |
| COL15A1     | 23.77     | 18.6611   | 25.0922   | 17.078    | 19.9959   | 16.6654   |
| MIR519E     | 0         | 0         | 0         | 0         | 0         | 0         |
| OR7E37P     | 1.1516    | 1.73332   | 1.20251   | 1.34427   | 1.54593   | 1.14636   |
| GUCY2GP     | 0         | 0         | 0         | 0         | 0         | 0.0208389 |
| ABI3BP      | 9.52017   | 10.3075   | 18.7825   | 9.50221   | 17.1782   | 17.1945   |
| LOC10050602 | 0         | 0.107711  | 0         | 0         | 0         | 0         |
| SEMA5B      | 3.32761   | 2.7423    | 2.65897   | 2.52666   | 3.99018   | 3.00804   |
| LOC10050577 | 14.8043   | 39.9411   | 23.1757   | 39.344    | 40.9292   | 26.4221   |
| SLC17A5     | 7.77063   | 4.52756   | 7.50515   | 6.96103   | 5.27152   | 4.23008   |
| MBD3        | 39.1635   | 60.6215   | 38.3176   | 59.0231   | 47.4051   | 51.8842   |
| C3orf39     | 6.71202   | 7.44426   | 8.14769   | 8.72651   | 7.20919   | 6.85558   |
| DAXX        | 26.7536   | 31.2056   | 24.9852   | 26.8956   | 28.8027   | 26.7049   |
| SPRR2A      | 144.863   | 63.834    | 12.6633   | 78.8482   | 76.5904   | 53.1357   |
| LOC10013015 | 0         | 0         | 0         | 0         | 0         | 0         |
| OR13F1      | 0         | 0         | 0         | 0         | 0         | 0         |
| MIR4512     | 0         | 0         | 0         | 0         | 0         | 0         |
| LOC10012796 | 0         | 0         | 0         | 0         | 0.118144  | 0         |
| UMODL1      | 0.0197871 | 0.0942895 | 0.014979  | 0.0743205 | 0.0708907 | 0.133584  |
| LOC10050581 | 0         | 0         | 0         | 0         | 0         | 0         |
| FBXW12      | 0.0733259 | 0.0648302 | 0         | 0         | 0         | 0.184079  |
| SNORD116-1  | 0         | 0         | 0         | 0         | 0         | 0         |
| FAM65A      | 14.4194   | 18.0364   | 16.5172   | 14.7067   | 18.3964   | 13.9849   |
| MIR3136     | 0         | 0         | 0         | 0         | 0         | 0         |
| SIRPG       | 1.58877   | 1.41243   | 1.29547   | 0.101883  | 1.08072   | 0.27046   |
| TENC1       | 29.222    | 46.1739   | 47.4567   | 36.4441   | 44.1379   | 30.4102   |
| CD1E        | 8.66724   | 7.82807   | 9.35732   | 2.47588   | 15.4894   | 5.12681   |
| EFNB1       | 32.0382   | 38.2481   | 36.6934   | 43.6514   | 35.9261   | 41.2766   |
| ADAMTSL1    | 0.859038  | 0.823666  | 1.1722    | 0.488696  | 1.17222   | 0.761209  |
| MIR648      | 0         | 0         | 0         | 0         | 0         | 0         |
| ROM1        | 3.27296   | 5.05354   | 2.7307    | 2.50177   | 3.07551   | 3.00944   |

|             |           |           |           |           |           |           |
|-------------|-----------|-----------|-----------|-----------|-----------|-----------|
| CARD10      | 9.16662   | 14.659    | 6.52207   | 8.11345   | 7.94388   | 7.03886   |
| KBTBD4      | 7.65142   | 4.51406   | 8.41444   | 5.67213   | 6.37683   | 5.56485   |
| ZBTB8A      | 1.65931   | 1.63897   | 1.71733   | 1.38765   | 1.32928   | 1.21981   |
| SBDS        | 84.7487   | 68.7098   | 83.1288   | 74.9663   | 64.5863   | 61.2484   |
| RPL13P5     | 3.73984   | 2.13952   | 2.83108   | 2.27224   | 2.24181   | 1.64507   |
| SEC61B      | 134.382   | 146.284   | 117.409   | 143.887   | 100.135   | 111.544   |
| C9orf23     | 25.5759   | 36.3926   | 19.4355   | 25.8799   | 27.8551   | 26.8545   |
| ARL8A       | 17.5422   | 20.603    | 21.0505   | 21.7997   | 20.4143   | 18.2462   |
| KLC4        | 11.3385   | 13.4074   | 11.0306   | 16.1921   | 15.5964   | 14.6353   |
| TAB3        | 6.0373    | 4.92816   | 7.08923   | 5.16796   | 6.83192   | 6.42197   |
| MYADML2     | 0.0412426 | 0.0364641 | 0         | 0.0387262 | 0         | 0.128503  |
| TMEM132D    | 0         | 0         | 0         | 0.0155774 | 0.031698  | 0.0103379 |
| C6orf145    | 25.7798   | 29.0578   | 25.5501   | 37.1201   | 27.4051   | 21.6716   |
| PSMD7       | 57.7067   | 48.3919   | 50.0553   | 46.8659   | 45.5025   | 52.3159   |
| C22orf28    | 58.0149   | 57.2421   | 54.6329   | 61.3079   | 55.5838   | 54.0734   |
| LOC10050716 | 0         | 0         | 0         | 0         | 0         | 0         |
| CEP89       | 2.39338   | 2.69629   | 3.68205   | 2.46483   | 2.82744   | 3.1513    |
| MIR147      | 0         | 0         | 0         | 0         | 0         | 0         |
| MIR4664     | 0         | 0         | 0         | 0         | 0         | 0         |
| EHD2        | 51.3503   | 61.2607   | 65.1813   | 50.2744   | 41.1825   | 38.7746   |
| SNAR-D      | 0         | 0         | 0         | 0         | 0         | 0         |
| ALPK1       | 7.41033   | 9.19678   | 7.95407   | 6.92457   | 10.5795   | 6.87091   |
| KRT1        | 3355.55   | 3519.72   | 3478.32   | 3891.74   | 4106.52   | 4017.83   |
| VPS4A       | 55.7964   | 64.3475   | 56.0564   | 60.3435   | 56.272    | 48.3437   |
| COASY       | 56.6531   | 62.4881   | 48.6218   | 62.1927   | 55.1754   | 52.8968   |
| PARD3       | 14.6823   | 12.581    | 18.6816   | 15.4673   | 16.5952   | 16.6959   |
| FRMD4B      | 13.9155   | 8.8758    | 13.8148   | 9.28904   | 13.1643   | 13.1954   |
| LOC1001328  | 18.2457   | 14.7653   | 12.3496   | 11.4485   | 9.4607    | 11.7445   |
| CA1         | 0.398409  | 0.0880612 | 0.0696143 | 0         | 0.0634367 | 0.279306  |
| P4HA3       | 0.0449163 | 0.55597   | 0.0680037 | 0.0843513 | 0.228859  | 0.531808  |
| PDZD4       | 3.08427   | 4.06727   | 5.00599   | 5.71854   | 4.52809   | 4.64209   |
| GPR150      | 0.25387   | 0.149637  | 0.192181  | 0.63568   | 0.0538971 | 0.0527337 |
| DEFB115     | 0         | 0         | 0         | 0         | 0         | 0         |
| DKFZP586I14 | 5.47409   | 5.06421   | 8.06829   | 6.02514   | 8.8201    | 7.45499   |
| CARM1       | 16.7431   | 21.7727   | 21.1034   | 22.2485   | 20.1811   | 22.0625   |
| LOC644669   | 0         | 0         | 0         | 0         | 0.0156106 | 0         |
| PRMT5       | 24.942    | 25.5577   | 25.1918   | 25.5778   | 25.2978   | 26.8642   |
| OLFML1      | 9.02051   | 5.85264   | 9.84041   | 5.70042   | 7.53649   | 4.70214   |
| LOC1005056  | 0         | 0         | 0         | 0         | 0         | 0         |
| HHIPL2      | 0.0782202 | 0.103736  | 0.325672  | 0.0367238 | 0.124547  | 0.170602  |
| ABCA1       | 6.48471   | 5.96334   | 7.59769   | 4.38781   | 7.65477   | 5.8519    |
| IMPDH2      | 126.22    | 167.771   | 143.395   | 177.086   | 150.896   | 138.278   |
| LOC646813   | 0         | 0         | 0         | 0         | 0         | 0         |

|             |           |           |           |           |           |           |
|-------------|-----------|-----------|-----------|-----------|-----------|-----------|
| ZNF600      | 5.73422   | 6.59655   | 8.38231   | 7.6989    | 13.5926   | 10.9581   |
| OR5A1       | 0         | 0         | 0         | 0         | 0         | 0         |
| METAP1D     | 2.8674    | 4.63751   | 3.54714   | 3.54614   | 4.1425    | 4.18382   |
| FAM47C      | 0.0298303 | 0         | 0         | 0         | 0         | 0         |
| RERG        | 11.9086   | 10.094    | 10.7575   | 13.1793   | 10.8053   | 10.9535   |
| LOC10050726 | 0.326007  | 0.504411  | 0.431881  | 0.612231  | 0.519089  | 0.660249  |
| SOX11       | 0.151909  | 0.0575608 | 0.098568  | 0.173206  | 0.0483759 | 0.0270467 |
| LOC10012913 | 0.916674  | 0.484932  | 0.553604  | 0.772523  | 0.931549  | 0.56965   |
| COL4A1      | 25.0948   | 19.6043   | 29.2767   | 15.2244   | 15.0062   | 16.9305   |
| ZNF841      | 5.74622   | 5.94947   | 8.69985   | 6.83918   | 8.42718   | 6.81609   |
| IQUB        | 0.0636304 | 0.084387  | 0.120421  | 0.119496  | 0.101316  | 0.158607  |
| MT1G        | 0         | 5.39209   | 6.92513   | 10.976    | 2.58953   | 9.81784   |
| SNORD114-4  | 0         | 0         | 0         | 0         | 0         | 0         |
| ETFB        | 101.231   | 122.576   | 105.955   | 117.901   | 86.8936   | 91.5901   |
| ANXA11      | 68.9116   | 79.8176   | 72.0551   | 65.8451   | 58.5432   | 54.084    |
| DENND4B     | 12.7962   | 15.7009   | 11.4481   | 9.94165   | 14.7251   | 11.5671   |
| CLK4        | 27.1843   | 28.8866   | 27.4247   | 22.4263   | 38.2938   | 28.9721   |
| LOC10012882 | 6.8017    | 8.9191    | 5.6696    | 5.52556   | 6.5224    | 7.04834   |
| KIAA0100    | 30.804    | 24.8328   | 29.8532   | 24.5494   | 24.7791   | 23.8352   |
| CELA2B      | 0         | 0         | 0.0986011 | 0         | 0         | 0         |
| TNRC6A      | 13.94     | 13.1498   | 16.8757   | 14.8734   | 16.5254   | 12.4698   |
| NDUFA3      | 171.786   | 178.65    | 214.246   | 334.762   | 172.99    | 186.209   |
| FLJ43763    | 0         | 0         | 0         | 0         | 0         | 0         |
| LCE1D       | 14.1328   | 12.874    | 0.72945   | 0         | 61.918    | 58.9799   |
| PYCR1       | 10.9068   | 7.07764   | 6.81737   | 7.18962   | 8.09371   | 8.91664   |
| PEPD        | 33.2332   | 32.8762   | 33.0346   | 29.8147   | 29.9034   | 31.8223   |
| ZCCHC24     | 18.2467   | 17.4467   | 23.806    | 14.287    | 15.545    | 10.8831   |
| RPS14       | 1102.53   | 1626.53   | 1390.94   | 2061.55   | 1487.78   | 1351.83   |
| TMEM86A     | 15.1289   | 9.74898   | 13.3267   | 11.9356   | 13.694    | 14.502    |
| SCGB1C1     | 0.426289  | 0         | 0         | 0         | 0         | 0         |
| FAM101A     | 1.38338   | 1.51844   | 1.91484   | 1.29684   | 2.14362   | 2.76415   |
| CRADD       | 12.6894   | 11.8052   | 9.39087   | 9.95891   | 9.83101   | 9.73682   |
| DIP2B       | 11.214    | 8.67657   | 12.8774   | 9.47985   | 12.3486   | 10.6952   |
| GABRR1      | 0.0313185 | 0.0553797 | 0.0474166 | 0.0294076 | 0.0398939 | 0.117098  |
| EPHA6       | 0.0266512 | 0         | 0         | 0.0250251 | 0.0169743 | 0.0332158 |
| LOC10028890 | 0         | 0         | 0         | 0         | 0         | 0         |
| ZNF207      | 52.5246   | 51.076    | 48.5881   | 50.4412   | 49.7292   | 43.436    |
| NRAS        | 13.713    | 13.0287   | 16.4775   | 11.6704   | 14.5426   | 13.2928   |
| VPS37A      | 8.04728   | 6.43311   | 7.92962   | 6.71384   | 6.7726    | 5.62329   |
| HGF         | 0.900045  | 0.569159  | 1.03344   | 0.301781  | 0.789412  | 0.472715  |
| LOC10050619 | 22.8153   | 34.6275   | 21.3946   | 31.5646   | 32.1458   | 29.2882   |
| SPRYD5      | 0         | 0         | 0         | 0         | 0         | 0         |
| OR52N4      | 0.336593  | 0.495991  | 0.169869  | 0         | 0.571675  | 0.139834  |

|             |          |           |           |          |           |            |
|-------------|----------|-----------|-----------|----------|-----------|------------|
| SNRPD3      | 52.034   | 56.5306   | 44.7614   | 55.4477  | 44.3383   | 50.5705    |
| FYN         | 20.8272  | 24.9317   | 24.0071   | 17.7995  | 25.6629   | 24.1172    |
| PIGZ        | 6.04934  | 7.71094   | 7.89452   | 9.44382  | 5.05835   | 4.30161    |
| FGF14       | 1.17982  | 0.750165  | 0.97669   | 0.969675 | 0.727217  | 0.82693    |
| CBFA2T3     | 4.15534  | 5.12091   | 4.18325   | 3.78739  | 6.1348    | 4.42063    |
| CST9L       | 0        | 0         | 0         | 0        | 0         | 0          |
| C3orf55     | 5.10165  | 5.48659   | 6.2731    | 2.64204  | 2.2836    | 1.63734    |
| COG1        | 13.0419  | 11.2657   | 13.9804   | 13.0369  | 13.7064   | 12.157     |
| C3orf62     | 5.27626  | 6.57442   | 5.44282   | 5.2367   | 6.66872   | 5.38337    |
| GJB6        | 83.1003  | 66.3791   | 50.1753   | 151.445  | 89.955    | 251.815    |
| ZNF574      | 5.72893  | 6.96809   | 6.85267   | 7.93532  | 8.38616   | 7.57397    |
| C1orf53     | 3.15169  | 5.39889   | 2.53496   | 2.4045   | 1.63095   | 2.7005     |
| BIN1        | 12.5728  | 16.8797   | 20.4817   | 16.0609  | 17.9167   | 12.9055    |
| KIAA1274    | 8.37076  | 8.86234   | 7.55593   | 5.94973  | 9.77196   | 7.81785    |
| CD79B       | 6.07168  | 8.25669   | 4.9942    | 6.19904  | 6.18334   | 3.78163    |
| LOC92249    | 13.9897  | 11.6969   | 12.0023   | 11.8711  | 13.2222   | 13.0013    |
| RGMB        | 14.2684  | 14.5776   | 19.5063   | 14.7475  | 22.4162   | 17.8883    |
| C6orf221    | 0        | 0.101041  | 0         | 0.321927 | 0         | 0          |
| TADA2B      | 11.5533  | 8.9005    | 9.7006    | 9.76984  | 8.39109   | 8.65438    |
| PGD         | 107.844  | 106.859   | 95.2922   | 96.6021  | 78.3655   | 82.6943    |
| LOC10013439 | 0        | 0         | 0         | 0        | 0         | 0          |
| C11orf71    | 8.53511  | 7.73486   | 8.72252   | 8.81576  | 8.01819   | 7.18027    |
| C2orf74     | 18.1576  | 25.0279   | 19.1564   | 12.6202  | 20.4878   | 18.531     |
| TTL         | 0.078242 | 0.0254945 | 12.4454   | 15.7752  | 16.7857   | 13.1823    |
| LOC644936   | 0        | 0.0345865 | 0         | 0.036732 | 0         | 0          |
| MIR1914     | 0        | 0         | 0         | 0        | 0         | 0          |
| LOC10050571 | 0        | 0         | 0         | 0        | 0         | 0          |
| PRSS3       | 23.0432  | 31.2572   | 25.8082   | 36.5044  | 34.7777   | 31.3318    |
| ACOT12      | 0        | 0.0459784 | 0.0393671 | 0        | 0         | 0.0324065  |
| PLCH2       | 20.6619  | 33.1117   | 34.9697   | 32.8789  | 45.048    | 47.5879    |
| KRIT1       | 12.8384  | 13.8803   | 12.9766   | 10.7624  | 15.1069   | 12.4488    |
| MYO6        | 16.4076  | 9.97691   | 15.1193   | 11.9293  | 13.4627   | 14.259     |
| INTS10      | 30.8727  | 28.5721   | 29.2962   | 27.0489  | 31.6582   | 25.0571    |
| SNX8        | 6.78933  | 8.91364   | 8.1428    | 7.98804  | 8.51808   | 6.6011     |
| TCTN3       | 19.0568  | 17.3321   | 16.437    | 18.7751  | 16.5914   | 16.788     |
| CACNA1D     | 0.323804 | 0.407069  | 0.365479  | 0.549002 | 0.392887  | 0.441799   |
| PARG        | 5.16789  | 4.46981   | 4.93535   | 4.49253  | 4.9205    | 4.60448    |
| TLK2        | 3.92161  | 3.89694   | 4.73928   | 4.20625  | 4.17071   | 4.59635    |
| C2orf72     | 4.22133  | 2.06      | 0.996022  | 1.36415  | 1.4665    | 2.90386    |
| TIGD5       | 2.98153  | 4.86375   | 4.29154   | 6.38783  | 5.64336   | 4.63182    |
| DGKB        | 0.172595 | 0.140124  | 0.0881823 | 0.109381 | 0.0919824 | 0.0977744  |
| LOC10028740 | 0        | 0         | 0         | 0        | 0.0085273 | 0.00834323 |
| MIR4801     | 0        | 0         | 0         | 0        | 0         | 0          |

|             |           |            |          |          |           |           |
|-------------|-----------|------------|----------|----------|-----------|-----------|
| SLC18A2     | 10.521    | 8.67744    | 11.3069  | 7.08356  | 14.8481   | 10.0781   |
| GOLIM4      | 13.296    | 7.12168    | 11.29    | 7.06804  | 8.66988   | 8.52658   |
| EIF4EBP3    | 34.6204   | 71.1228    | 40.0895  | 56.6006  | 47.6312   | 45.5857   |
| LOC10050576 | 0         | 0          | 0        | 0        | 0         | 0         |
| GNAI2       | 84.6163   | 101.934    | 88.8784  | 80.0383  | 98.1589   | 81.7036   |
| RAB18       | 51.0339   | 45.1104    | 46.5711  | 36.2344  | 45.9525   | 45.035    |
| CLEC5A      | 1.62361   | 1.58399    | 1.78005  | 0.94627  | 3.28055   | 1.88398   |
| PEA15       | 81.3721   | 71.5098    | 84.7142  | 63.9928  | 78.6519   | 72.1844   |
| ZNF645      | 0         | 0          | 0        | 0        | 0         | 0         |
| RORB        | 0.435604  | 0.28885    | 0.370974 | 0.153384 | 0.0520197 | 0.203587  |
| CTAGE10P    | 0.368116  | 0.230264   | 0.431062 | 0.221272 | 0.341381  | 0.333665  |
| SNAR-A4     | 0         | 0          | 0        | 0        | 0         | 0         |
| ANAPC5      | 58.1634   | 69.5129    | 60.6204  | 63.2658  | 64.8939   | 59.8198   |
| LOC441666   | 0.629845  | 0.417652   | 0.205889 | 0.134786 | 0.455854  | 0.454935  |
| ZNF407      | 1.72078   | 1.25633    | 2.11539  | 1.95331  | 2.03162   | 1.55691   |
| SLC7A4      | 2.77039   | 2.48828    | 4.36085  | 5.94595  | 4.62125   | 6.93297   |
| MAD1L1      | 9.61291   | 11.8344    | 8.85269  | 9.66469  | 10.0159   | 10.6433   |
| FBXL5       | 34.9444   | 29.4028    | 32.2782  | 26.1701  | 26.3061   | 23.3322   |
| YAP1        | 48.052    | 41.4657    | 49.1416  | 37.94    | 42.3153   | 39.4057   |
| FLJ41278    | 0.0625309 | 0.027643   | 0        | 0        | 0         | 0.0194833 |
| PSMD1       | 36.996    | 29.5074    | 30.0388  | 26.9781  | 23.3143   | 27.9906   |
| H1FOO       | 0         | 0          | 0        | 0        | 0         | 0         |
| MAGEL2      | 0.0903928 | 0.0998995  | 0.119749 | 0.148535 | 0.259073  | 0.0844934 |
| PHF20       | 7.36675   | 5.79432    | 6.94314  | 5.71094  | 6.15233   | 5.72564   |
| NCS1        | 11.2825   | 13.3118    | 10.4463  | 15.2749  | 11.7616   | 12.0792   |
| PIP5KL1     | 3.21971   | 3.53646    | 2.75116  | 5.79225  | 5.86763   | 7.3149    |
| RAVER2      | 8.2119    | 6.90635    | 7.49513  | 7.41663  | 7.49636   | 7.68117   |
| BCL10       | 6.99164   | 6.23802    | 8.26533  | 5.39402  | 6.54735   | 7.12011   |
| SEBOX       | 0         | 0          | 0        | 0        | 0         | 0.127655  |
| LOC729400   | 0.0259872 | 0.00765876 | 0.160659 | 0        | 0.0919523 | 0.0881681 |
| C10orf88    | 4.43336   | 4.77178    | 4.25587  | 4.22318  | 4.89013   | 4.12397   |
| NAA16       | 6.57918   | 5.8293     | 6.9202   | 6.66781  | 8.31803   | 6.9255    |
| NUCKS1      | 53.3344   | 43.852     | 52.413   | 47.7925  | 46.3453   | 38.361    |
| APOC4       | 0         | 0          | 0        | 0        | 0         | 0.328212  |
| TG          | 1.1425    | 1.39635    | 1.22949  | 2.73456  | 1.01302   | 1.22848   |
| TJP1        | 20.1504   | 14.5568    | 18.6868  | 14.8935  | 17.732    | 15.7671   |
| SPDYE3      | 0.317681  | 0.958912   | 0.741759 | 0.529474 | 0.660818  | 0.457859  |
| NFRKB       | 10.9208   | 10.7543    | 10.4602  | 10.6841  | 12.3552   | 12.2893   |
| BAZ2B       | 8.34743   | 6.4334     | 7.50578  | 5.8773   | 9.1038    | 7.58311   |
| RNU1-9      | 44.1589   | 60.1765    | 24.1518  | 70.2567  | 27.227    | 27.9645   |
| PRSS30P     | 0.100724  | 0.267162   | 0.177914 | 0.126104 | 0.98366   | 0.376602  |
| DLGAP4      | 40.4291   | 46.1768    | 48.7875  | 61.2464  | 56.289    | 59.2916   |
| MIR4757     | 0         | 0          | 0        | 0        | 0         | 0         |



|              |          |           |          |          |           |          |
|--------------|----------|-----------|----------|----------|-----------|----------|
| LOC1005061:  | 0        | 0         | 0        | 0        | 0.177848  | 0.348018 |
| E2F2         | 3.28081  | 3.72008   | 2.77825  | 4.83849  | 4.46246   | 4.66645  |
| FAM27D1      | 0        | 0.15195   | 0.130101 | 0.161376 | 0         | 0        |
| PDS5A        | 20.5276  | 18.2915   | 19.9687  | 16.6985  | 17.0493   | 16.4312  |
| CHSY3        | 0.675734 | 0.721908  | 0.916499 | 0.528753 | 0.80696   | 0.438634 |
| FBXW7        | 26.0401  | 31.1674   | 37.8181  | 36.7068  | 41.2496   | 34.0056  |
| POLR1C       | 18.5311  | 25.0536   | 17.488   | 25.6715  | 20.9588   | 19.4708  |
| PRSS58       | 0        | 0         | 0        | 0        | 0         | 0        |
| C15orf62     | 8.52006  | 6.06219   | 11.7324  | 9.02879  | 14.574    | 17.445   |
| TMSB10       | 1199.94  | 1490.4    | 1044.96  | 1175.97  | 1118.25   | 1049.18  |
| GTF3C4       | 4.84106  | 2.95873   | 4.12236  | 3.73575  | 4.24075   | 3.96005  |
| PTPN21       | 8.45825  | 7.24711   | 13.9933  | 9.06851  | 12.3414   | 12.0941  |
| LYN          | 5.80422  | 4.65021   | 4.03306  | 2.95586  | 6.66124   | 3.60693  |
| VTCN1        | 9.99815  | 4.4028    | 5.46463  | 14.3903  | 8.31021   | 14.674   |
| APOBEC3B     | 4.32979  | 4.81571   | 0.215854 | 0.147532 | 3.38014   | 2.52409  |
| ENOSF1       | 20.0193  | 24.0468   | 18.2787  | 23.3827  | 22.7185   | 18.1737  |
| TUSC2        | 20.0597  | 22.0165   | 16.4389  | 22.3195  | 20.2256   | 17.8297  |
| C14orf109    | 24.4796  | 22.0076   | 19.3982  | 20.9411  | 16.7445   | 17.2969  |
| LOC728741    | 2.62291  | 2.3466    | 1.75272  | 3.64775  | 2.49982   | 2.00367  |
| LOC1005069:  | 1.36E-56 | 6.56E-19  | 4.75E-25 | 2.97E-38 | 4.78E-16  | 0        |
| CYTIP        | 2.95964  | 2.6985    | 2.20545  | 1.04214  | 3.23986   | 1.84432  |
| FLJ22763     | 0        | 0         | 0        | 0        | 0         | 0        |
| GPX4         | 433.757  | 720.687   | 572.984  | 663.883  | 429.462   | 353.801  |
| RPL23AP64    | 2.1638   | 1.53047   | 4.09502  | 2.6413   | 2.20502   | 1.21355  |
| TRIM34       | 6.76242  | 6.91191   | 4.7467   | 5.3315   | 6.66266   | 5.30026  |
| MIR432       | 0        | 0         | 0        | 0        | 0         | 0        |
| LOC440104    | 24.09    | 32.9538   | 31.0969  | 33.1714  | 43.3214   | 30.5952  |
| C17orf76-AS1 | 772.021  | 1072.99   | 992.214  | 1240.51  | 866.212   | 864.976  |
| CBX3P2       | 0.683848 | 1.14205   | 1.20791  | 1.14155  | 0.967881  | 0.994338 |
| HDAC4        | 5.1082   | 4.44185   | 5.70871  | 4.46027  | 6.23185   | 5.74291  |
| SH3GL3       | 0.695842 | 0.506235  | 0.856315 | 2.22568  | 0.249286  | 0.977352 |
| E4F1         | 16.8245  | 27.6055   | 23.7841  | 32.2204  | 29.4139   | 30.3395  |
| CDC14B       | 5.7059   | 5.19415   | 6.32282  | 4.95998  | 5.41533   | 4.43603  |
| RRP12        | 6.55066  | 8.56655   | 6.44952  | 8.13005  | 6.4917    | 7.6932   |
| TOMM6        | 140.41   | 170.328   | 134.475  | 160.885  | 139.243   | 134.348  |
| FGF5         | 0        | 0.0540811 | 0        | 0.471779 | 0.0521598 | 0.182266 |
| MRPL50       | 18.5366  | 18.1087   | 16.8908  | 13.2154  | 18.5837   | 16.8277  |
| C6orf123     | 0.513564 | 1.25713   | 0.274086 | 0.386335 | 0.787666  | 0.760075 |
| GSX1         | 0        | 0         | 0        | 0        | 0         | 0        |
| PYCR1        | 5.0195   | 7.88229   | 5.35941  | 7.77332  | 5.22487   | 5.67231  |
| MIR1302-3    | 0        | 0         | 0        | 0        | 0         | 23.0587  |
| BGN          | 49.9171  | 62.126    | 58.6239  | 103.031  | 78.3476   | 85.1852  |
| C1orf105     | 0.11977  | 0.423573  | 0.272    | 0.112462 | 0.305129  | 0.447814 |

|             |           |           |           |           |          |           |
|-------------|-----------|-----------|-----------|-----------|----------|-----------|
| SEC14L5     | 0.384405  | 0.666662  | 0.884183  | 0.472012  | 1.20532  | 0.875261  |
| LOC10050671 | 0         | 0.262141  | 0.112224  | 0.278403  | 0.377677 | 0.923813  |
| CAPZA3      | 0.21374   | 0.47244   | 1.21352   | 1.30454   | 2.45038  | 1.79812   |
| TPT1        | 1860.29   | 2104.28   | 2268.07   | 2283.55   | 1993.52  | 1975.31   |
| ADK         | 23.6265   | 19.6131   | 21.4452   | 21.4233   | 17.6985  | 17.7633   |
| EHBP1       | 19.2158   | 13.1312   | 19.3384   | 13.7869   | 17.235   | 13.2733   |
| LOC10013059 | 2.15639   | 2.20579   | 1.62927   | 2.00944   | 2.63005  | 2.03184   |
| LOC10050548 | 0         | 0         | 1.35089   | 0         | 0        | 0         |
| MIR4719     | 0         | 0         | 0         | 0         | 0        | 0         |
| LTBP2       | 21.1127   | 15.6826   | 16.8033   | 18.5465   | 17.3864  | 27.2025   |
| ZNF793      | 2.85882   | 2.14962   | 2.45659   | 2.53364   | 3.17387  | 3.00526   |
| LOC10050659 | 1.70039   | 1.47331   | 1.41592   | 1.56471   | 1.7761   | 1.58942   |
| RAP2A       | 12.2045   | 9.80591   | 12.1724   | 9.82868   | 11.3334  | 10.8667   |
| SH3BP5      | 31.3673   | 28.9376   | 44.2587   | 32.9662   | 31.3991  | 29.6031   |
| LOC10027071 | 33.2727   | 62.7178   | 38.7694   | 55.8812   | 44.6677  | 48.1714   |
| MIR4419B    | 0         | 0         | 0         | 0         | 0        | 0         |
| GJD3        | 2.94138   | 3.36797   | 3.43122   | 2.89774   | 3.50107  | 2.62922   |
| STK16       | 10.7836   | 13.4748   | 10.2032   | 13.7299   | 10.9657  | 11.7642   |
| LOC10028896 | 0         | 0         | 0         | 0         | 0        | 0         |
| GMCL1P1     | 1.22654   | 0.602461  | 0.954289  | 0.735809  | 0.82459  | 1.29511   |
| TBC1D3P1-DI | 1.91869   | 1.33987   | 2.44508   | 1.61228   | 1.41394  | 1.76072   |
| PSMB7       | 183.7     | 182.823   | 153.892   | 175.348   | 149.313  | 165.291   |
| NMD3        | 18.7975   | 15.2562   | 16.1197   | 12.9966   | 13.8429  | 13.2238   |
| P4HA1       | 10.5006   | 6.3131    | 11.1814   | 7.78328   | 11.64    | 9.81506   |
| HIST1H2AH   | 0         | 0         | 0         | 0         | 0.261833 | 0         |
| SLCO1B3     | 0.0738981 | 0         | 0         | 0         | 0        | 0         |
| MYLK3       | 0.320106  | 0.0628927 | 0.0179498 | 0.0222648 | 0.052857 | 0.022164  |
| LOC10050769 | 0.712395  | 0.719834  | 0.963013  | 0.764489  | 1.65287  | 1.49035   |
| E2F1        | 5.04933   | 6.86058   | 4.91849   | 7.70452   | 5.41509  | 6.20051   |
| ASNA1       | 57.4217   | 57.5837   | 53.9587   | 54.7313   | 50.4178  | 53.7551   |
| EFR3A       | 19.1211   | 13.4555   | 17.9793   | 12.6913   | 13.6808  | 12.9434   |
| RN5S14      | 17.0257   | 185.325   | 66.4116   | 238.893   | 40.664   | 30.5323   |
| PHF11       | 30.365    | 37.5741   | 24.9754   | 25.4364   | 31.4842  | 23.7285   |
| LOC10028759 | 0         | 0         | 0.236211  | 0.292995  | 0        | 0.0972231 |
| ZNF354B     | 9.54225   | 8.51896   | 8.95013   | 5.24498   | 9.90189  | 9.22405   |
| LOC339524   | 30.8681   | 29.4442   | 18.6714   | 12.49     | 14.6277  | 13.5447   |
| ZNF862      | 6.08982   | 7.2034    | 7.95518   | 6.87227   | 9.09414  | 8.85481   |
| LOC10013258 | 0.322639  | 0.0534857 | 0.146696  | 0.681644  | 0.279724 | 0.353417  |
| MMP8        | 0         | 0         | 0         | 0         | 0        | 0         |
| SELK        | 41.7457   | 48.1303   | 41.8657   | 37.4755   | 38.7621  | 37.6714   |
| LOC648570   | 0.056149  | 0         | 0         | 0         | 0        | 0.0349897 |
| FMO1        | 1.88278   | 1.92074   | 4.31238   | 2.53853   | 4.64289  | 4.15158   |
| PGPEP1      | 3.04934   | 4.03811   | 3.62017   | 3.27953   | 2.98593  | 2.41085   |

|             |           |           |           |           |           |           |
|-------------|-----------|-----------|-----------|-----------|-----------|-----------|
| IDH3G       | 38.2902   | 55.8596   | 39.6418   | 59.465    | 45.5977   | 39.4692   |
| LOC645431   | 0         | 1.93E-171 | 0.175259  | 0.0963914 | 0.0974696 | 0.174345  |
| LOC10012890 | 0.199536  | 0.176417  | 0.3021    | 0.187361  | 0.762514  | 0         |
| PSMC5       | 127.821   | 144.1     | 113.077   | 134.436   | 118.227   | 125.254   |
| BTBD3       | 12.4461   | 10.0486   | 11.6035   | 10.5184   | 12.5098   | 12.6718   |
| MIR3163     | 0         | 0         | 0         | 0         | 0         | 0         |
| OR8H3       | 0         | 0         | 0         | 0         | 0         | 0         |
| PSD3        | 4.3911    | 3.03986   | 4.59693   | 4.3338    | 3.94525   | 3.72024   |
| SLC25A33    | 12.6595   | 11.651    | 10.48     | 10.0797   | 8.01578   | 5.02859   |
| MIR1270-1   | 0         | 0         | 0         | 0         | 0         | 0         |
| SLX1B-SULT1 | 2.95939   | 8.98078   | 4.21383   | 3.69767   | 4.75572   | 4.27802   |
| ELL3        | 14.9562   | 15.1481   | 18.1158   | 17.623    | 20.154    | 17.3752   |
| MIR4760     | 0         | 0         | 0         | 0         | 0         | 0         |
| ZNF331      | 10.0797   | 9.90247   | 11.1605   | 10.8696   | 11.6009   | 9.23192   |
| LTA         | 0.797568  | 0.91172   | 0.31803   | 0.0739646 | 1.55701   | 0.306796  |
| MAGEA2      | 0         | 0         | 0         | 0         | 0         | 0         |
| RNF14       | 17.9509   | 14.928    | 15.9814   | 15.3472   | 14.0151   | 13.841    |
| SLC16A13    | 7.40173   | 6.75696   | 7.60753   | 8.70176   | 5.97899   | 8.1749    |
| KYNU        | 9.05444   | 3.44474   | 1.67898   | 1.66693   | 1.2112    | 1.26387   |
| BSG         | 360.674   | 452.849   | 348.842   | 412.597   | 336.814   | 402.985   |
| MAPK1IP1L   | 11.609    | 9.93718   | 10.1776   | 11.4573   | 9.80656   | 9.39977   |
| FAM86FP     | 1.43594   | 1.42447   | 2.19762   | 2.69607   | 1.179     | 1.41144   |
| TSPY10      | 0         | 0         | 0         | 0         | 0         | 0         |
| SF3B5       | 117.1     | 155.064   | 123.809   | 173.142   | 114.516   | 127.783   |
| PELI1       | 19.1184   | 14.5607   | 20.6865   | 19.2446   | 20.4818   | 19.1009   |
| LOC143188   | 0.401016  | 0.272733  | 0.537088  | 0.492409  | 0.609053  | 0.422901  |
| CXCR2       | 2.14826   | 1.23364   | 2.05413   | 1.66362   | 2.57492   | 3.4301    |
| POLR3C      | 11.7289   | 11.5665   | 12.5926   | 11.9134   | 12.5701   | 11.6663   |
| ZSWIM1      | 5.30902   | 6.56512   | 6.32715   | 6.4335    | 7.47095   | 7.11595   |
| LOC1005074  | 3.09248   | 2.53869   | 2.84195   | 3.521     | 2.24955   | 2.19059   |
| SFTPA2      | 0.104521  | 0         | 0         | 0.0436194 | 0.0591734 | 0         |
| TCTEX1D2    | 9.61765   | 11.5828   | 10.297    | 14.7092   | 11.1571   | 12.5433   |
| NDUFB4      | 124.504   | 130.612   | 113.959   | 126.277   | 99.737    | 97.0027   |
| SMYD1       | 0.547264  | 0         | 0         | 0.0205549 | 0.0139422 | 0.0682064 |
| LOC728323   | 1.41623   | 0.717718  | 1.34631   | 0.522897  | 0.568811  | 0.613998  |
| GDAP1L1     | 0.0454696 | 0.0402013 | 0.0688414 | 0.0426952 | 0.0579196 | 0         |
| MIR22HG     | 30.0715   | 32.3579   | 33.2311   | 27.5457   | 24.6754   | 16.7569   |
| FASTKD5     | 10.2762   | 7.90958   | 8.17224   | 7.76928   | 6.31908   | 7.32845   |
| PRDM10      | 4.33746   | 3.53313   | 3.50132   | 3.73677   | 3.29169   | 3.47233   |
| LOC441956   | 0         | 0         | 0         | 0         | 0         | 0.0347991 |
| PLIN5       | 82.2755   | 99.9573   | 86.4624   | 74.7269   | 72.402    | 86.5095   |
| DUOXA1      | 28.6732   | 35.4321   | 30.385    | 34.9757   | 38.2201   | 30.3894   |
| PEX16       | 35.8915   | 58.1654   | 27.9115   | 36.8293   | 27.5937   | 28.8769   |

|             |           |           |           |           |           |           |
|-------------|-----------|-----------|-----------|-----------|-----------|-----------|
| NES         | 18.8756   | 17.4215   | 11.975    | 10.6538   | 9.05221   | 9.11509   |
| GSTK1       | 248.004   | 289.358   | 203.903   | 241.623   | 210.866   | 175.435   |
| OR5W2       | 0         | 0         | 0         | 0         | 0         | 0         |
| MTX1        | 18.9194   | 22.3692   | 22.5023   | 25.0573   | 20.7685   | 19.8505   |
| OR5B3       | 0         | 0         | 0         | 0         | 0         | 0         |
| LOC731223   | 0         | 0         | 0         | 0         | 0.213357  | 0.417503  |
| LOC10065306 | 2411.67   | 3961.45   | 2752.31   | 4595.16   | 2937.65   | 2795.29   |
| S100A4      | 511.864   | 672.531   | 565.05    | 560.7     | 429.631   | 299.658   |
| NDUFAB1     | 121.96    | 114.14    | 96.647    | 98.2406   | 94.7364   | 97.7326   |
| CD209       | 1.86678   | 0.674099  | 2.0879    | 0.931459  | 2.48297   | 1.07709   |
| AGPAT5      | 5.54634   | 3.84304   | 4.35655   | 4.04879   | 2.70197   | 3.17454   |
| OR4F3       | 0         | 0         | 0.267843  | 0.18688   | 0.0473234 | 0.0198437 |
| FARP1       | 9.99534   | 8.85112   | 11.0655   | 16.3081   | 12.6474   | 14.8013   |
| SDR42E1     | 9.37037   | 7.51995   | 8.78493   | 6.49745   | 8.53889   | 8.21983   |
| COPS3       | 34.3336   | 30.4876   | 30.0871   | 27.438    | 25.8842   | 26.3487   |
| CDK13       | 12.1546   | 11.5331   | 12.1867   | 10.4212   | 11.9003   | 11.1583   |
| RNF151      | 0         | 0.140313  | 0.240274  | 0.447051  | 0.303231  | 0.0988952 |
| CYP46A1     | 0.346826  | 0.963732  | 0.90017   | 1.02352   | 1.19915   | 0.648383  |
| LOC10050726 | 2.31585   | 1.84277   | 1.05186   | 1.08727   | 1.76997   | 1.29882   |
| TXN         | 266.019   | 287.185   | 292.069   | 314.744   | 253.342   | 258.847   |
| DNMT3L      | 0.0619754 | 0         | 0         | 0         | 0.0394856 | 0         |
| LOC10050681 | 0.70842   | 1.1632    | 0.970407  | 1.96391   | 1.43953   | 1.87094   |
| EGFL6       | 1.08515   | 1.65878   | 17.0552   | 7.43327   | 1.22144   | 0.753515  |
| MIR3151     | 0         | 0         | 0         | 0         | 0         | 0         |
| KLHL31      | 3.53862   | 2.31695   | 3.8286    | 2.14722   | 2.5408    | 2.12191   |
| WFS1        | 12.9578   | 15.465    | 12.6845   | 11.2312   | 18.8598   | 16.5859   |
| UGT2B17     | 0         | 0         | 0         | 0         | 0         | 0         |
| WBP11       | 29.4531   | 28.1305   | 27.2667   | 26.0706   | 29.0822   | 25.2045   |
| SHE         | 3.44782   | 2.44688   | 2.59832   | 1.8873    | 2.37319   | 2.14854   |
| LNPEP       | 1.89199   | 0.959017  | 2.75791   | 1.28312   | 1.61603   | 1.40627   |
| RASA4P      | 16.9573   | 18.444    | 17.4903   | 19.278    | 18.443    | 15.8724   |
| LOC10050620 | 0.0837766 | 0.04938   | 0.147978  | 0.0524433 | 0.106716  | 0.069608  |
| LOC10050590 | 0         | 0.0394052 | 0.0337391 | 0         | 0.085159  | 0.0555472 |
| NUDT15      | 14.5505   | 11.6007   | 12.8313   | 13.2792   | 10.5029   | 10.1808   |
| ATP13A1     | 18.0896   | 26.4477   | 21.0382   | 24.0159   | 24.0136   | 23.6475   |
| LGALS4      | 1.90719   | 3.44907   | 2.03438   | 1.79082   | 3.92016   | 2.53902   |
| RAET1K      | 0         | 0         | 0.0837364 | 0         | 0.0352257 | 0         |
| LOC10050606 | 0         | 0         | 0.0837777 | 0.103917  | 0.0704862 | 0.0229883 |
| MC1R        | 2.84726   | 7.09954   | 3.36629   | 6.36841   | 5.37918   | 4.92416   |
| TNIP2       | 20.472    | 29.6001   | 18.2153   | 21.0891   | 21.9244   | 17.3107   |
| EMR3        | 0         | 0.0782061 | 0         | 0.0830576 | 0.140843  | 0.0551213 |
| RNF213      | 14.4595   | 13.7181   | 11.2069   | 7.2973    | 14.7244   | 9.49078   |
| LOC10050603 | 6.43984   | 9.53168   | 7.40277   | 8.10734   | 9.41842   | 8.50169   |

|             |           |           |           |            |           |           |
|-------------|-----------|-----------|-----------|------------|-----------|-----------|
| SNHG9       | 75.4061   | 90.3262   | 90.2278   | 82.2254    | 80.5607   | 75.7902   |
| SIGLEC1     | 3.20577   | 1.96899   | 2.08317   | 0.719244   | 3.26142   | 1.64413   |
| TARP        | 1.93084   | 1.40587   | 0.859797  | 0.213297   | 1.95315   | 0.424664  |
| C19orf60    | 45.3312   | 89.0928   | 50.2282   | 78.1137    | 68.4945   | 70.2317   |
| GMIP        | 6.59442   | 7.75737   | 6.1554    | 5.4574     | 8.84496   | 7.78341   |
| TSG1        | 0.020133  | 0         | 0.0457224 | 0.0189046  | 0         | 0.012546  |
| TEX28       | 0         | 0         | 0.21031   | 0.0325955  | 0.447931  | 0.135257  |
| MUC16       | 0.137567  | 0.127242  | 0.0288385 | 0.00794914 | 0.102449  | 0.0540816 |
| CNBP        | 122.417   | 123.085   | 119.008   | 117.824    | 121.3     | 108.588   |
| C2orf73     | 0.054076  | 0.0478106 | 0.0818717 | 0          | 0.0344413 | 0         |
| IDO2        | 0.621268  | 0.510051  | 0.0671862 | 0.375017   | 0.423952  | 0.387148  |
| IFT88       | 4.6339    | 4.47532   | 5.86553   | 3.89122    | 4.66011   | 3.21719   |
| FIBIN       | 3.63503   | 3.24308   | 5.85369   | 4.21999    | 5.13546   | 3.58312   |
| C1orf65     | 0         | 0         | 0         | 0.0460048  | 0         | 0         |
| APH1A       | 93.675    | 103.614   | 99.1368   | 106.479    | 109.894   | 91.0779   |
| PTGES3      | 78.1212   | 73.1892   | 76.1413   | 72.4439    | 70.1891   | 63.9755   |
| LOC1001293: | 0.128306  | 0.0810287 | 0.0416265 | 0.0172111  | 0.0466965 | 0.0685328 |
| TRPM8       | 0.256024  | 0.286723  | 0.310098  | 0.400671   | 0.13045   | 0.276542  |
| GRPEL2      | 9.03704   | 8.30454   | 7.77478   | 6.03571    | 7.59879   | 6.97656   |
| LINC00319   | 0.165406  | 0.438725  | 0.425725  | 0.869757   | 0.737437  | 0.700904  |
| L3MBTL3     | 3.26771   | 2.59818   | 3.89675   | 2.81512    | 1.99142   | 1.65547   |
| TSHB        | 0         | 0         | 0         | 0          | 0         | 0.15821   |
| PNMA2       | 0.338714  | 0.29947   | 0.497734  | 0.318047   | 0.393388  | 0.3104    |
| PIN1        | 34.4391   | 56.2723   | 37.8802   | 49.6235    | 42.905    | 41.2802   |
| CYP1A1      | 0.925309  | 0.68175   | 4.29034   | 6.29916    | 4.76378   | 1.70581   |
| FAM103A1    | 13.6801   | 12.3664   | 12.8056   | 12.2808    | 11.9287   | 11.9923   |
| MIR3656     | 0         | 0         | 0         | 0          | 0         | 0         |
| NACAD       | 1.33959   | 1.77676   | 0.983349  | 1.18162    | 1.29285   | 1.55583   |
| GPR61       | 0         | 0.0625557 | 0.0267804 | 0.0332182  | 0.0225316 | 0.0661358 |
| MIR4446     | 0         | 0         | 0         | 0          | 0         | 0         |
| MIR1288     | 0         | 0         | 0         | 0          | 0         | 0         |
| C6orf222    | 0.262047  | 0.16218   | 0.119023  | 0.172241   | 0.200279  | 0.163297  |
| PLA2G3      | 9.85157   | 9.02121   | 8.25673   | 3.96449    | 9.21259   | 5.45696   |
| OPN1MW2     | 0.0575772 | 0         | 0.0653793 | 0          | 0.246512  | 0.179897  |
| TNFRSF10D   | 2.27886   | 2.55539   | 2.18794   | 2.11372    | 3.41614   | 1.92231   |
| CCNB1IP1    | 37.6017   | 50.4179   | 34.752    | 54.0654    | 39.885    | 35.5828   |
| TRAP1       | 48.3228   | 63.5512   | 48.3714   | 55.0746    | 66.1577   | 58.4584   |
| MSH5        | 4.43787   | 3.60546   | 4.82933   | 6.00718    | 3.86779   | 3.95092   |
| ZMIZ1       | 26.9151   | 21.4848   | 28.816    | 24.7889    | 29.6649   | 28.9697   |
| P2RY4       | 1.10128   | 0.687307  | 1.56928   | 0.790773   | 0.866452  | 1.29181   |
| ARAP2       | 8.83094   | 6.9174    | 9.90055   | 6.30394    | 9.32479   | 7.74774   |
| TMEM70      | 10.1632   | 10.5123   | 11.4179   | 8.89455    | 9.14094   | 9.25384   |
| MIR125A     | 0         | 0         | 0         | 0          | 0         | 0         |

|             |          |           |           |           |           |           |
|-------------|----------|-----------|-----------|-----------|-----------|-----------|
| MIR4498     | 0        | 0         | 0         | 0         | 0         | 0         |
| GTPBP5      | 10.5964  | 11.5766   | 9.37552   | 12.168    | 12.4447   | 11.2508   |
| MRFAP1      | 202.466  | 213.696   | 193.981   | 207.843   | 191.579   | 199.995   |
| ZNF629      | 6.6941   | 7.18278   | 7.12538   | 7.86444   | 7.7864    | 6.03199   |
| CASR        | 0        | 0         | 0.0152839 | 0         | 0         | 0.0125815 |
| LOC643542   | 0        | 0         | 6.77E-13  | 0         | 0.0211683 | 6.13E-13  |
| RNF216P1    | 6.2075   | 7.9519    | 6.10471   | 7.78686   | 6.61283   | 5.60656   |
| METRNL      | 48.5954  | 56.0222   | 74.9688   | 87.7744   | 85.9682   | 96.8425   |
| MIRLET7F2   | 0        | 0         | 0         | 0         | 0         | 0         |
| LOC1002877: | 0.547021 | 0.193457  | 0.496918  | 0.205458  | 0.418081  | 0.340881  |
| FAM196B     | 0.221461 | 0.0244752 | 0.125735  | 0.0779805 | 0.088156  | 0.189757  |
| LOC645405   | 12.3175  | 6.97665   | 10.9271   | 7.22872   | 11.8902   | 13.3126   |
| NEU4        | 0        | 0.0581569 | 0.168995  | 0.152441  | 0.117928  | 0.107957  |
| MIR365-2    | 0        | 0         | 0         | 0         | 0         | 0         |
| RGS6        | 0.624158 | 0.460845  | 0.759554  | 0.456888  | 0.574967  | 0.422047  |
| LOC1005068: | 1.40251  | 2.35096   | 1.98497   | 1.46416   | 1.48685   | 0.90677   |
| SFMBT1      | 5.93414  | 4.82673   | 5.20957   | 4.49142   | 4.23905   | 4.17476   |
| MYL3        | 0        | 1.37032   | 1.17328   | 0.727662  | 1.97427   | 0.965827  |
| ORC1        | 0.782962 | 1.69357   | 0.970014  | 1.12096   | 1.25358   | 1.10978   |
| NRP1        | 20.9626  | 15.2649   | 16.7073   | 9.30531   | 13.2333   | 10.1906   |
| SRCIN1      | 1.809    | 1.38456   | 1.89063   | 2.21835   | 3.06957   | 3.43236   |
| UTP14A      | 6.27676  | 6.14633   | 5.26252   | 7.31773   | 6.76572   | 6.71782   |
| SNORA5A     | 0        | 123.09    | 175.652   | 130.726   | 118.227   | 144.594   |
| MIR551B     | 0        | 0         | 0         | 0         | 0         | 0         |
| DIXDC1      | 7.61819  | 5.5778    | 8.13586   | 5.62558   | 5.88828   | 4.60617   |
| LOC1005064: | 0.996239 | 1.24217   | 0.947532  | 0.719579  | 0.764666  | 0.636732  |
| RLBP1       | 0        | 0.159198  | 0.0454356 | 0         | 0.0382272 | 0         |
| MILR1       | 1.76413  | 2.14463   | 1.16852   | 1.44943   | 2.52807   | 1.23675   |
| LOC1006528: | 1.25E-07 | 2.34E-08  | 1.10E-06  | 1.14E-06  | 5.71E-08  | 6.64E-07  |
| EBP         | 150.491  | 161.795   | 109.105   | 136.436   | 97.7193   | 143.018   |
| ARHGEF18    | 8.59105  | 9.07909   | 10.8862   | 10.1968   | 11.2855   | 9.94907   |
| LOC440895   | 1.41193  | 2.17821   | 0.489454  | 1.32409   | 0.0779922 | 0.0611463 |
| FLRT1       | 0.973771 | 1.12999   | 0.760186  | 1.0858    | 0.562056  | 1.19466   |
| CMKLR1      | 5.15693  | 1.89966   | 3.23116   | 2.7783    | 2.72795   | 3.21818   |
| FOXJ2       | 10.5462  | 10.6564   | 12.665    | 10.6759   | 13.9695   | 10.6986   |
| MRGPRG      | 0        | 0         | 0         | 0         | 0         | 0         |
| IL5RA       | 0.288677 | 0.056717  | 0.158001  | 0.0406508 | 0.258233  | 0.220326  |
| PPP1R3F     | 2.29482  | 3.32844   | 2.336     | 2.53177   | 2.5833    | 2.16231   |
| NXNL1       | 0.266138 | 1.17651   | 0.604403  | 0.749698  | 0.593266  | 0.248769  |
| MDN1        | 4.66081  | 3.69352   | 6.04031   | 3.52433   | 4.92127   | 4.75147   |
| ZNF445      | 3.49456  | 3.17911   | 3.82887   | 3.37632   | 4.09412   | 3.31234   |
| LOC441869   | 9.35263  | 14.6931   | 15.0039   | 20.4446   | 18.0098   | 16.0808   |
| CAMK1D      | 6.217    | 3.69833   | 6.46173   | 4.21792   | 6.39028   | 6.04064   |

|             |           |           |           |           |           |           |
|-------------|-----------|-----------|-----------|-----------|-----------|-----------|
| LOC1005065: | 0.210811  | 0.465964  | 0.877717  | 1.28666   | 1.4098    | 0.591157  |
| SNORD114-2: | 0         | 0         | 0         | 0         | 0         | 0         |
| MT1DP       | 0.615345  | 0         | 0         | 0.300375  | 0         | 0.383457  |
| COLEC11     | 0.857597  | 0.611578  | 0.288535  | 0.883699  | 0.242758  | 0         |
| SLC25A12    | 14.6456   | 12.7977   | 13.4705   | 13.7062   | 13.3389   | 12.3513   |
| DGKI        | 0.0808496 | 0.0893526 | 0.137708  | 0.303666  | 0.128734  | 0.0377865 |
| RAB39B      | 0.141166  | 0.0998477 | 0.0854905 | 0.0530209 | 0.359637  | 0.105562  |
| LOC1005075: | 0.947098  | 0.10467   | 0.358479  | 0.88931   | 1.13102   | 0.95906   |
| LOC642423   | 7.81183   | 12.8613   | 8.40265   | 12.9576   | 10.675    | 12.8797   |
| LOC1006528: | 0         | 0         | 0         | 0.549034  | 0         | 0         |
| LOC1005076: | 0.61145   | 1.03316   | 0.336304  | 0.234697  | 1.52579   | 0.974973  |
| MYL12A      | 245.6     | 226.366   | 213.487   | 198.613   | 192.749   | 190.345   |
| LOC1005060: | 0         | 0         | 0         | 0         | 0         | 0         |
| LOC1005062: | 0.710566  | 0.942356  | 0.806853  | 1.33442   | 0.905126  | 0.885589  |
| FZD7        | 21.8234   | 16.9615   | 18.1724   | 25.2573   | 21.2855   | 24.8901   |
| HP07349     | 1.64587   | 9.14684   | 4.27178   | 3.97402   | 5.09158   | 5.27472   |
| PAR1        | 0.12598   | 0.148511  | 0.127157  | 0.0394311 | 0.0534916 | 0.0785054 |
| LOC1005070: | 0         | 0         | 0         | 0         | 0         | 0         |
| LOC1001321: | 6.49103   | 3.29648   | 7.96661   | 3.78247   | 7.71812   | 8.59385   |
| PARVG       | 7.17633   | 9.85722   | 6.21085   | 3.95093   | 16.9114   | 6.64308   |
| HHLA2       | 0.0377347 | 0.0111209 | 0.0856961 | 0         | 0.0721003 | 0.052908  |
| LOC146880   | 30.8899   | 45.5782   | 33.0258   | 35.9698   | 52.1864   | 41.4716   |
| LOC1006530: | 6.10328   | 7.81573   | 9.87844   | 5.92897   | 9.91993   | 6.03283   |
| FLJ14107    | 0         | 0         | 0.129007  | 0         | 0.144719  | 0.0707978 |
| TBC1D23     | 16.2444   | 14.8727   | 16.5952   | 13.7775   | 15.9339   | 18.0741   |
| SPINT1      | 118.388   | 110.472   | 103.573   | 153.501   | 118.598   | 139.178   |
| BLID        | 0         | 0         | 0         | 0         | 0         | 0         |
| BIK         | 5.01879   | 4.7701    | 2.94442   | 5.53727   | 5.11439   | 6.09862   |
| PLAGL1      | 27.6748   | 32.1833   | 34.1795   | 23.7601   | 42.1399   | 30.9531   |
| ROPN1       | 3.00864   | 1.56077   | 3.84829   | 6.23463   | 1.91622   | 3.10356   |
| LIN28B      | 0.0348916 | 0         | 0         | 0.0327627 | 0         | 0         |
| KGFLP1      | 2.23174   | 1.65303   | 2.23089   | 1.86178   | 2.3153    | 2.24831   |
| LOC729574   | 0         | 0         | 0         | 0         | 0         | 0         |
| LOC1005068: | 0.538906  | 0         | 0         | 0         | 0         | 0         |
| SGCD        | 1.81325   | 1.44448   | 2.13442   | 1.0141    | 1.49419   | 1.061     |
| IL2RA       | 0.676382  | 0.516467  | 0.418929  | 0.202081  | 0.939908  | 0.191587  |
| ARHGAP15    | 4.6006    | 3.85626   | 3.48268   | 2.97343   | 3.99566   | 2.56904   |
| NHLRC4      | 0.655725  | 1.2041    | 0.572754  | 0.52099   | 0.706766  | 0.660078  |
| MIR378E     | 0         | 0         | 0         | 0         | 0         | 0         |
| SLC9A9      | 6.59818   | 5.18816   | 7.02146   | 4.69747   | 7.61258   | 6.85846   |
| BICD1       | 0.602744  | 0.479949  | 0.642468  | 0.620825  | 0.418799  | 0.43054   |
| RSPO3       | 4.45476   | 5.12444   | 1.9581    | 1.66418   | 1.00677   | 0.716391  |
| BUB3        | 42.0636   | 37.757    | 39.2785   | 34.4876   | 38.0009   | 39.0921   |

|             |           |           |            |           |           |          |
|-------------|-----------|-----------|------------|-----------|-----------|----------|
| MEF2B       | 3.08279   | 8.35098   | 5.05531    | 7.80874   | 5.8755    | 4.31634  |
| ASMTL-AS1   | 15.5711   | 11.2243   | 10.5159    | 18.4289   | 15.6162   | 6.63589  |
| SNORA33     | 49.2882   | 174.31    | 335.803    | 0         | 156.96    | 61.4286  |
| AIFM2       | 16.1194   | 21.8112   | 15.1489    | 9.10196   | 10.0117   | 8.23873  |
| BTNL2       | 0         | 0         | 0.0605615  | 0.07512   | 0.203813  | 0        |
| OR2A9P      | 12.0968   | 12.8131   | 14.7787    | 15.2951   | 22.961    | 18.5097  |
| ADAM11      | 0.661108  | 1.50024   | 0.900833   | 0.993233  | 1.79654   | 1.18099  |
| USP22       | 46.4394   | 44.2861   | 43.1516    | 45.3542   | 43.5502   | 39.853   |
| LOC1002878: | 0.241273  | 0         | 0          | 0.226551  | 0         | 0.150351 |
| OR2J3       | 0         | 0         | 0          | 0         | 0         | 0        |
| LCE1E       | 8.31542   | 5.99989   | 5.35446    | 6.73108   | 31.716    | 23.7649  |
| CLDN14      | 0.643396  | 0.0813857 | 0.0696831  | 0.76637   | 0         | 0.802437 |
| BCORL1      | 1.84225   | 1.82945   | 2.37485    | 1.66717   | 2.31267   | 2.36258  |
| EIF3B       | 82.0248   | 88.2675   | 73.9981    | 90.2154   | 79.4379   | 74.8036  |
| TMEM14E     | 0         | 0.0756511 | 0.0647731  | 0.321376  | 0.0544968 | 0        |
| PSORS1C2    | 19.0963   | 10.1824   | 37.1086    | 143.171   | 40.4372   | 574.45   |
| CLEC2A      | 1.31551   | 3.60559   | 7.46888    | 3.58221   | 3.26764   | 3.85293  |
| STK38L      | 12.207    | 10.7091   | 10.2707    | 14.2123   | 11.8425   | 7.92479  |
| TCHH        | 31.94     | 4.29569   | 1.44195    | 107.38    | 3.21756   | 82.8831  |
| SYVN1       | 29.2141   | 30.2017   | 28.9102    | 31.0901   | 26.3993   | 30.8702  |
| RAB3D       | 21.0321   | 21.7112   | 33.6501    | 37.1278   | 38.0721   | 33.1554  |
| LRRTM4      | 0.0270735 | 0.0276993 | 0.106724   | 0.172701  | 0.0199537 | 0        |
| DUX4L2      | 0         | 0.0414532 | 0.0142923  | 0         | 0.0294608 | 0        |
| NPPA-AS1    | 1.2272    | 0.113259  | 2.07547    | 3.29516   | 2.66131   | 2.34169  |
| NTF4        | 10.1164   | 25.2728   | 14.3368    | 23.8583   | 19.7791   | 19.3522  |
| LOC10065278 | 0         | 0         | 0          | 0         | 0         | 0        |
| RNU4-2      | 0         | 195.829   | 23.9529    | 148.555   | 80.6108   | 19.7177  |
| CLEC18A     | 0.797844  | 1.32591   | 0.533082   | 1.76519   | 1.36599   | 1.1706   |
| IL13        | 0.0864466 | 0.305723  | 0.196322   | 0         | 0.110117  | 0        |
| BRWD1-IT2   | 4.37E-06  | 1.08102   | 0.00038188 | 0.474706  | 4.31E-06  | 0.674067 |
| BACE1       | 11.4628   | 10.0688   | 12.9426    | 10.5249   | 11.6721   | 10.751   |
| VAMP7       | 9.46716   | 12.3572   | 10.3341    | 9.44211   | 11.4423   | 10.4882  |
| HINFP       | 9.09469   | 11.0665   | 10.6915    | 13.0935   | 15.3797   | 14.0521  |
| TDRG1       | 0         | 0.281184  | 0          | 0.0995425 | 0.0675189 | 0.198184 |
| MIR4715     | 0         | 0         | 0          | 0         | 0         | 0        |
| C4orf51     | 0         | 0         | 0          | 0         | 0         | 0        |
| KCNMB4      | 3.19222   | 3.05275   | 3.69876    | 4.77144   | 3.9418    | 4.42507  |
| PECR        | 100.038   | 89.0865   | 55.7622    | 41.3018   | 39.2772   | 47.4621  |
| RAI1        | 7.06342   | 7.71477   | 8.71578    | 8.71781   | 8.95001   | 8.21697  |
| AFF3        | 1.55237   | 0.619316  | 0.618594   | 0.471507  | 0.802889  | 0.552849 |
| C17orf61    | 110.064   | 131.029   | 107.138    | 138.895   | 94.5169   | 93.4832  |
| SCARNA21    | 37.0029   | 0         | 0          | 0         | 23.5674   | 23.0587  |
| TAPT1       | 7.828     | 7.40606   | 7.84255    | 7.37018   | 8.73505   | 7.19221  |



|             |          |           |          |          |           |           |
|-------------|----------|-----------|----------|----------|-----------|-----------|
| MIR576      | 0        | 0         | 0        | 0        | 0         | 0         |
| C1QA        | 25.0682  | 18.4698   | 16.6047  | 10.0039  | 18.2945   | 9.37287   |
| LOC10050693 | 0        | 0         | 0        | 0        | 0         | 0         |
| LOC286114   | 0        | 0         | 0        | 0        | 0         | 0         |
| MIR4697     | 0        | 0         | 0        | 0        | 0         | 0         |
| ARHGEF12    | 26.3205  | 20.0688   | 29.0374  | 23.6188  | 25.2131   | 22.6319   |
| TMEM95      | 0        | 0         | 0        | 0        | 0.0615767 | 0.0602476 |
| MYBL2       | 3.32408  | 5.2901    | 2.85186  | 5.30614  | 4.21073   | 5.50079   |
| ZNF585B     | 3.41692  | 3.11628   | 3.46047  | 3.33849  | 3.6957    | 3.61592   |
| VANGL1      | 5.30414  | 4.76705   | 5.40066  | 5.18629  | 4.27164   | 4.67118   |
| OR2T10      | 0        | 0         | 0        | 0        | 0         | 0         |
| MIR3666     | 0        | 0         | 0        | 0        | 0         | 0         |
| RTP1        | 0        | 0         | 0        | 0        | 0.0293503 | 0.0861503 |
| SHPK        | 8.52198  | 7.77922   | 7.86112  | 7.14657  | 7.17317   | 7.54408   |
| TSPY8       | 0        | 0         | 0        | 0        | 0         | 0         |
| SLC15A4     | 14.4451  | 13.944    | 13.8926  | 13.6983  | 14.5422   | 12.1733   |
| ZNF503-AS2  | 1.13336  | 1.72592   | 1.80943  | 1.87851  | 1.59388   | 1.52258   |
| GNG8        | 0        | 6.17185   | 2.6422   | 3.27736  | 2.22301   | 6.52507   |
| LOC10050743 | 0.921712 | 0.81492   | 1.04661  | 0.432736 | 0.293522  | 0.861558  |
| INE1        | 3.69362  | 5.20465   | 7.68924  | 7.04488  | 8.38073   | 6.54548   |
| LOC10050642 | 0        | 0         | 0        | 0        | 0         | 0         |
| PIH1D2      | 1.87071  | 1.35255   | 1.06553  | 1.07368  | 1.32949   | 1.22099   |
| SNX14       | 20.9869  | 19.5095   | 19.8705  | 13.0155  | 16.1809   | 17.9491   |
| LOC10050754 | 1.38867  | 1.66996   | 1.62343  | 0.89369  | 1.34624   | 0.875769  |
| IL1RL1      | 0.753204 | 0.809594  | 1.06516  | 0.367025 | 1.15984   | 0.662951  |
| NQO2        | 112.096  | 119.083   | 87.8045  | 86.7921  | 69.7206   | 74.0627   |
| C18orf18    | 2.79001  | 3.66275   | 3.58409  | 3.57242  | 3.3924    | 3.10844   |
| OR11H6      | 0        | 0         | 0        | 0        | 0         | 0         |
| C1orf190    | 0.848563 | 2.80067   | 1.79876  | 1.91256  | 1.89134   | 2.18521   |
| SNORD3D     | 1.29211  | 8.92501   | 6.75218  | 12.3855  | 10.1652   | 1.71102   |
| CRELD2      | 20.8368  | 27.1822   | 19.0762  | 21.4078  | 18.7873   | 19.1597   |
| C9orf9      | 6.76817  | 8.57166   | 8.16997  | 10.9928  | 11.767    | 11.057    |
| SNORD71     | 0        | 0         | 0        | 0        | 0         | 0         |
| TSPY26P     | 0.461179 | 0.570844  | 0.558584 | 0.173216 | 0.881183  | 0.68973   |
| CSNK1G3     | 7.65014  | 5.59222   | 7.46058  | 5.56326  | 6.8739    | 6.51277   |
| HNF4G       | 0        | 0.0209927 | 0        | 0        | 0.0151225 | 0         |
| DTNBP1      | 10.2914  | 13.3049   | 9.35251  | 9.44643  | 12.3382   | 9.7107    |
| HTATSFP2    | 3.83669  | 2.59509   | 1.93626  | 0.964628 | 2.60384   | 2.15569   |
| UCKL1       | 26.0671  | 35.2479   | 24.3996  | 31.9389  | 32.2289   | 26.5078   |
| HES7        | 0.705911 | 0.624122  | 0.346275 | 0.899424 | 0.610072  | 0.435401  |
| SNORD115-1  | 0        | 0         | 0        | 0        | 0         | 0         |
| GSTM2       | 128.036  | 166.847   | 115.085  | 146.718  | 167.165   | 116.575   |
| LOC10050723 | 47.1207  | 61.6265   | 47.2407  | 49.8648  | 52.3696   | 49.8704   |

|             |           |           |           |           |           |           |
|-------------|-----------|-----------|-----------|-----------|-----------|-----------|
| TMEM41A     | 18.0498   | 17.8323   | 18.4502   | 19.0049   | 18.9426   | 18.9079   |
| CCDC18      | 1.50817   | 1.21402   | 1.19281   | 1.0991    | 1.44801   | 1.29051   |
| CTRB1       | 0         | 0.124093  | 0         | 0         | 0.089393  | 0         |
| ZNF275      | 3.5216    | 3.74164   | 2.68875   | 2.52617   | 2.5991    | 2.09091   |
| LOC10065270 | 160.824   | 135.738   | 122.76    | 138.162   | 109.948   | 106.088   |
| ADSS        | 25.8061   | 21.5768   | 22.0113   | 24.299    | 21.0601   | 17.3579   |
| LOC390858   | 0         | 0         | 0.220736  | 0         | 0         | 0         |
| ZNF132      | 2.49007   | 1.91188   | 2.57947   | 1.19983   | 2.00329   | 2.34798   |
| TECPR2      | 3.70389   | 3.37005   | 4.07671   | 4.51563   | 4.16395   | 4.50194   |
| LOC10028708 | 0         | 0.136555  | 0.467679  | 0.145026  | 0.19674   | 0.192494  |
| LOC10012870 | 0         | 0         | 0.0398613 | 0         | 0         | 0         |
| PLCXD2      | 0.150086  | 0.0884196 | 0.0756965 | 0.187961  | 0.127348  | 0.0311703 |
| TMEM238     | 17.7353   | 28.4436   | 13.8941   | 28.659    | 15.3675   | 12.9796   |
| CPNE1       | 51.5548   | 63.2347   | 52.063    | 59.3049   | 62.8023   | 58.1548   |
| LOC219731   | 0.313718  | 0.471528  | 0.379977  | 0.353491  | 0.459559  | 0.312793  |
| OTOP3       | 0         | 0.0517532 | 0.310181  | 0.109927  | 0.0745629 | 0.10943   |
| GALR3       | 0.0979121 | 0.259703  | 0.07412   | 0.183876  | 0.311804  | 0.0610147 |
| MIR338      | 0         | 0         | 0         | 0         | 0         | 0         |
| FLJ30838    | 0.0904371 | 0.0799588 | 0.051346  | 0.127378  | 0.0144    | 0         |
| FAM98B      | 10.5307   | 5.96814   | 9.05257   | 9.10523   | 8.8055    | 7.28644   |
| OR4M1       | 0         | 0         | 0         | 0         | 0         | 0         |
| FAM179A     | 0.830478  | 0.416078  | 0.440073  | 0.805799  | 0.793404  | 0.931533  |
| ZNF608      | 2.65088   | 2.59915   | 3.8591    | 2.58487   | 3.92869   | 3.62151   |
| KAT5        | 24.4367   | 30.0235   | 27.1066   | 31.0114   | 31.6094   | 29.9548   |
| MIR4672     | 0         | 0         | 0         | 0         | 0         | 0         |
| OSBP        | 25.5695   | 22.2215   | 23.6322   | 22.2118   | 22.2852   | 21.2254   |
| LOC10065295 | 0         | 0         | 0         | 0         | 0         | 0         |
| TSPYL4      | 10.9451   | 9.71855   | 11.8669   | 9.06165   | 14.1668   | 11.3968   |
| ZIC2        | 0.234001  | 0.0591112 | 0.17714   | 0.125556  | 0.319364  | 0.291639  |
| BARHL1      | 0         | 0         | 0         | 0.0511966 | 0         | 0         |
| TCTEX1D4    | 0.437147  | 0.463798  | 1.19132   | 0.410474  | 0.890949  | 0.435859  |
| RPA2        | 28.0735   | 26.5009   | 26.5416   | 25.9577   | 24.6341   | 23.3384   |
| CNGA4       | 0.217579  | 0.0961849 | 0.205886  | 0.357531  | 0.346443  | 0.338965  |
| C7orf58     | 3.75803   | 3.44454   | 5.27416   | 1.66519   | 2.44803   | 1.69258   |
| SCARNA10    | 0         | 0.696312  | 0         | 1.47902   | 0         | 0.98155   |
| RPSAP52     | 0         | 0.0877785 | 0.150313  | 0.0932238 | 0.189699  | 0         |
| TIFA        | 9.65252   | 6.76453   | 6.59831   | 5.30476   | 7.05243   | 6.4375    |
| VSX1        | 0         | 0         | 0.0406974 | 0.0504807 | 0.0684814 | 0         |
| RMND1       | 10.7702   | 11.0132   | 9.34721   | 10.8792   | 10.0815   | 7.59282   |
| TNK2        | 25.5213   | 45.3468   | 35.1472   | 51.5174   | 49.8953   | 51.5782   |
| C11orf74    | 10.5163   | 9.0283    | 6.80711   | 8.15727   | 5.9213    | 7.12313   |
| ADH6        | 0         | 0.319135  | 0.249087  | 0.622937  | 0.364913  | 0.512017  |
| HOPX        | 359.951   | 236.161   | 472.892   | 365.213   | 565.07    | 533.154   |

|             |           |          |           |          |           |           |
|-------------|-----------|----------|-----------|----------|-----------|-----------|
| LOC10050766 | 0         | 0        | 0.0435383 | 0        | 0         | 0.0358402 |
| CD151       | 144.745   | 174.484  | 167.809   | 205.132  | 154.903   | 167.037   |
| DHX29       | 12.0699   | 8.67895  | 11.0235   | 8.28137  | 9.46779   | 8.7908    |
| NUP54       | 18.3741   | 16.5503  | 19.8844   | 17.901   | 19.4402   | 16.0999   |
| KCNA5       | 0.661506  | 0.55408  | 0.13178   | 0.130767 | 0.266095  | 0.0885917 |
| CCDC50      | 15.1685   | 13.1044  | 15.4783   | 12.2184  | 14.0735   | 10.775    |
| NGRN        | 91.2403   | 93.1517  | 82.3303   | 87.1836  | 80.5185   | 81.645    |
| SACM1L      | 22.274    | 17.1469  | 20.9619   | 15.0846  | 18.8648   | 18.0459   |
| DUSP23      | 51.9779   | 65.3783  | 44.9899   | 74.4068  | 47.8461   | 47.18     |
| RNU5B-1     | 0         | 0        | 0         | 0        | 0         | 0         |
| SLC5A9      | 2.01027   | 2.324    | 2.20046   | 2.90361  | 2.57993   | 5.52995   |
| MOB4        | 16.0057   | 9.87243  | 12.5709   | 10.1097  | 11.6028   | 10.3356   |
| TAF7L       | 0.473683  | 1.20106  | 0.816079  | 1.14162  | 0.80415   | 0.874251  |
| LRRC29      | 3.2934    | 3.97049  | 3.3189    | 4.45531  | 5.40138   | 4.17047   |
| LOC10050730 | 0         | 0        | 0         | 0        | 0         | 0.0392179 |
| LOC10050719 | 0         | 0        | 0         | 0        | 0         | 0         |
| PDCD10      | 39.8974   | 32.7348  | 31.9474   | 22.7875  | 29.8487   | 27.0044   |
| ANKRD45     | 0.225394  | 0        | 0         | 0        | 0.0957033 | 0.0468187 |
| ZNF667      | 2.0975    | 1.87726  | 4.24772   | 3.70517  | 4.97916   | 5.45578   |
| SPATA21     | 0         | 0        | 0         | 0        | 0.0979296 | 0         |
| PAPD4       | 22.7477   | 21.3791  | 24.2662   | 20.3629  | 26.5455   | 21.72     |
| LOC10050659 | 0         | 1.17632  | 0.251761  | 0.624712 | 1.05916   | 0.829032  |
| RABEP2      | 16.8838   | 23.6971  | 17.6185   | 30.1172  | 26.4612   | 27.3656   |
| PAK4        | 23.2432   | 20.5123  | 20.1442   | 24.9828  | 25.5324   | 28.5991   |
| FGF10       | 2.90841   | 0.791211 | 0.16936   | 0.210073 | 0.997438  | 0.697077  |
| LHCGR       | 0.0961751 | 0.28344  | 0.436831  | 0.301023 | 0.142927  | 0.139842  |
| USP5        | 34.2395   | 34.1955  | 34.0199   | 36.3882  | 39.4012   | 38.382    |
| TM9SF4      | 23.4898   | 22.199   | 23.0534   | 27.0297  | 27.1575   | 25.4864   |
| AKAP14      | 0         | 0.316883 | 0         | 0.138313 | 0         | 0.315137  |
| NPIPL2      | 10.332    | 14.685   | 26.6803   | 40.1188  | 19.8862   | 13.7677   |
| MICALL1     | 28.7658   | 27.5232  | 24.1041   | 26.9634  | 26.1337   | 32.5196   |
| CNTLN       | 1.70407   | 2.16179  | 1.89411   | 1.25736  | 1.71204   | 1.36409   |
| SENP2       | 11.5988   | 11.3214  | 13.393    | 11.2686  | 13.2972   | 11.449    |
| C11orf88    | 0         | 0        | 0         | 0        | 0         | 0         |
| GPR101      | 0         | 0        | 0         | 0        | 0         | 0         |
| HEATR7B2    | 0.0364345 | 0        | 0.0275812 | 0        | 0         | 0         |
| LOC10050741 | 0         | 0.144795 | 0         | 0        | 0.104306  | 0.204109  |
| MIR4450     | 0         | 0        | 0         | 0        | 0         | 0         |
| ANO1        | 45.4913   | 35.4786  | 37.8969   | 34.0191  | 31.0393   | 28.1779   |
| TIA1        | 36.6886   | 34.1679  | 34.7213   | 28.1646  | 43.4956   | 38.7634   |
| PDE7B       | 1.30235   | 0.867536 | 0.91836   | 0.418797 | 0.68176   | 0.566987  |
| LYPD3       | 343.757   | 341.071  | 343.502   | 382.273  | 404.977   | 429.779   |
| UBL4A       | 28.1189   | 33.6814  | 28.3704   | 35.5635  | 28.0867   | 31.0289   |

|             |          |           |           |          |           |           |
|-------------|----------|-----------|-----------|----------|-----------|-----------|
| TINAG       | 0        | 0         | 0         | 0        | 0         | 0         |
| LOC10065286 | 0        | 0         | 0         | 0        | 0         | 0.0455459 |
| GH1         | 0.189302 | 0.847406  | 0.431843  | 1.027    | 1.6919    | 0.177744  |
| TRANK1      | 3.01023  | 3.1461    | 2.4012    | 1.62     | 2.976     | 2.08303   |
| LOC400958   | 0        | 0.0289885 | 0         | 0        | 0.0208825 | 0         |
| PLK3        | 10.2462  | 14.5401   | 17.2075   | 16.7762  | 17.3566   | 25.6473   |
| NLN         | 4.00953  | 3.01371   | 3.21719   | 2.71852  | 3.08252   | 3.12492   |
| LOC10050549 | 36.5018  | 22.1499   | 34.069    | 15.7315  | 24.099    | 21.3936   |
| LOC10050694 | 6.31E-07 | 7.61E-07  | 3.73E-07  | 4.38E-08 | 1.39E-07  | 6.88E-06  |
| IL17C       | 0        | 0         | 0.0841161 | 0.313011 | 0         | 0.20773   |
| RGPD3       | 1.25036  | 1.20645   | 1.617     | 1.35303  | 1.47355   | 1.39649   |
| LOC10050657 | 0        | 0         | 0.267167  | 0        | 0.449562  | 0.219929  |
| CEMP1       | 16.4671  | 34.5962   | 17.3406   | 26.0043  | 30.843    | 24.3833   |
| LOC10065295 | 22.1048  | 29.2293   | 17.0793   | 26.0688  | 22.7226   | 21.5503   |
| LOC645954   | 0.537733 | 0.267429  | 0.679252  | 0.280513 | 0.419544  | 0.29786   |
| MMP1        | 1.80284  | 0.624627  | 0.155145  | 0.20527  | 0.487319  | 0.278133  |
| TNFRSF11B   | 0.562817 | 0.497608  | 1.01598   | 0.447173 | 0.303314  | 0.107915  |
| DDX59       | 9.07245  | 8.68004   | 9.52216   | 9.1362   | 9.96547   | 7.12841   |
| FAM122A     | 9.08949  | 7.34685   | 9.09975   | 7.42384  | 8.37543   | 6.93779   |
| RRAGB       | 10.1059  | 9.74722   | 9.19732   | 9.69069  | 11.3441   | 8.00527   |
| CRAT        | 465.484  | 597.702   | 276.121   | 290.946  | 146.878   | 200.851   |
| MIR4469     | 0        | 0         | 0         | 0        | 0         | 0         |
| CD3E        | 6.82249  | 9.29936   | 4.62668   | 1.60155  | 10.0937   | 3.14433   |
| MIR1203     | 0        | 0         | 0         | 0        | 0         | 0         |
| GPC3        | 13.8129  | 8.47712   | 23.0391   | 11.6402  | 18.8253   | 10.7995   |
| FZD6        | 20.0212  | 18.6383   | 25.3157   | 19.3516  | 22.0793   | 24.5482   |
| C1orf182    | 0.516037 | 0.304165  | 0.260428  | 0.48455  | 0.547778  | 0.750335  |
| KRT33A      | 1.69122  | 0.0393204 | 0         | 17.9566  | 0.283252  | 173.71    |
| LOC10050568 | 2.09452  | 3.13572   | 2.02232   | 1.81779  | 1.83983   | 1.80151   |
| PGR         | 0.802669 | 0.398848  | 0.75792   | 0.416246 | 0.954132  | 0.390647  |
| ARMCX6      | 25.5179  | 28.0641   | 26.8133   | 40.7091  | 36.5272   | 34.3968   |
| FDX1L       | 14.7066  | 22.8846   | 11.0216   | 24.3043  | 13.7692   | 19.0013   |
| NRIP3       | 0.436433 | 0.635544  | 0.544159  | 0.626758 | 0.539582  | 0.463943  |
| KLK5        | 121.859  | 88.4987   | 127.211   | 135.493  | 166.248   | 214.362   |
| OPHN1       | 3.1855   | 2.57482   | 2.95774   | 2.94736  | 3.48233   | 3.55516   |
| COX18       | 6.404    | 6.45734   | 5.13971   | 5.77192  | 6.0158    | 5.96603   |
| LACE1       | 1.44223  | 1.79316   | 1.36472   | 1.43887  | 1.00468   | 0.926825  |
| LOC10050564 | 0        | 0.563188  | 0         | 0        | 0.129322  | 0.396946  |
| LOC10050593 | 31.5188  | 25.9665   | 28.9207   | 22.8696  | 24.9407   | 23.2122   |
| SIGLEC11    | 0.138636 | 0.0622177 | 0.139932  | 0.101701 | 0.0622497 | 0.0194899 |
| SRPK3       | 0.93402  | 1.09935   | 0.707059  | 0.826218 | 0.890565  | 1.03225   |
| ZHX2        | 6.88007  | 6.83098   | 7.02861   | 5.62399  | 7.54433   | 6.56286   |
| KRTAP10-6   | 0.301378 | 0         | 0         | 10.7101  | 0.156325  | 33.3463   |

|              |           |           |           |          |           |          |
|--------------|-----------|-----------|-----------|----------|-----------|----------|
| LOC1005075:  | 2.58997   | 1.41973   | 1.72535   | 0.680944 | 1.68256   | 1.38801  |
| PTPRR        | 0.152623  | 0.341567  | 0.464211  | 0.611461 | 0.681383  | 0.311265 |
| GJC3         | 3.68515   | 1.99111   | 1.7048    | 2.88358  | 1.43433   | 1.8499   |
| MIR3609      | 0         | 0         | 0         | 0        | 0         | 0        |
| LOC1005074:  | 300.159   | 311.678   | 272.934   | 332.49   | 257.05    | 239.523  |
| SF3B3        | 16.7657   | 16.0849   | 16.1972   | 16.3626  | 18.7079   | 17.8403  |
| MTA2         | 42.3496   | 50.7336   | 45.4208   | 47.233   | 48.6126   | 45.2063  |
| AA06         | 0         | 0         | 0         | 0        | 0         | 0        |
| MIR4701      | 0         | 0         | 0         | 0        | 0         | 0        |
| MAST2        | 12.7172   | 13.6164   | 12.747    | 12.5868  | 16.1897   | 16.4054  |
| BAX          | 33.5517   | 48.6808   | 25.6763   | 32.9061  | 37.1433   | 36.7127  |
| TUBB4        | 0.890523  | 1.78731   | 0.686155  | 1.2405   | 1.12499   | 1.42621  |
| OR10A7       | 0         | 0         | 0         | 0        | 0         | 0        |
| B3GALNT2     | 14.5338   | 16.3428   | 12.4955   | 15.4663  | 13.7087   | 13.7949  |
| ZFP161       | 8.91944   | 9.05509   | 9.62873   | 7.1852   | 9.54239   | 7.62947  |
| DACT2        | 1.82699   | 4.18785   | 4.63576   | 7.71983  | 4.67604   | 3.90043  |
| LOC10028679: | 2.66258   | 2.6005    | 2.20589   | 2.16289  | 3.45039   | 1.7861   |
| ZNF607       | 4.15427   | 4.36123   | 3.98481   | 3.52369  | 5.21843   | 4.59336  |
| RPAP1        | 6.66608   | 7.46783   | 8.1179    | 7.484    | 7.89799   | 7.25018  |
| C8orf39      | 0.373246  | 0.660001  | 0.565098  | 0        | 0.594306  | 0.232591 |
| FAM24A       | 0         | 0         | 0         | 0        | 0         | 0        |
| TUBA3C       | 0         | 0         | 0.0261345 | 0        | 0         | 0        |
| FAM180A      | 3.95531   | 1.9028    | 4.18306   | 5.6802   | 4.44558   | 3.91465  |
| PPIAL4C      | 0.0539201 | 0.0834273 | 0.0481067 | 0        | 0.134565  | 0.358408 |
| ALCAM        | 37.2054   | 18.9077   | 27.7326   | 18.7981  | 22.294    | 23.5406  |
| ZNF483       | 0.339559  | 0.517231  | 0.324099  | 0.446841 | 0.28606   | 0.163366 |
| PDS5B        | 6.01809   | 4.41347   | 5.87928   | 4.29467  | 6.12466   | 4.70553  |
| KRTAP9-8     | 11.1903   | 2.28897   | 0.457811  | 100.206  | 1.24285   | 1251.41  |
| DEPDC4       | 0.294361  | 0.260255  | 0.222833  | 0.368534 | 0.437454  | 0.428011 |
| ZWILCH       | 4.87314   | 4.69429   | 3.83555   | 4.2483   | 4.62798   | 4.48994  |
| TUBA4B       | 3.40464   | 2.73061   | 3.4764    | 4.08906  | 2.52169   | 2.91107  |
| LOC10050729: | 0         | 0.296872  | 0.423641  | 0.210193 | 0.213858  | 0.697473 |
| PLN          | 13.1083   | 11.1542   | 4.47235   | 4.91183  | 5.17386   | 3.98838  |
| HIST1H1D     | 0.656244  | 0         | 0.124195  | 0        | 0.313474  | 0.204472 |
| GALNS        | 11.2961   | 13.519    | 11.1199   | 14.8819  | 15.0183   | 13.5968  |
| WIZ          | 14.3315   | 19.0066   | 16.0085   | 19.55    | 17.8692   | 18.5016  |
| PSMD8        | 121.509   | 132.194   | 108.544   | 116.843  | 97.0477   | 128.558  |
| CHADL        | 3.41074   | 5.40965   | 5.61706   | 5.70276  | 5.28058   | 5.04758  |
| TTLL5        | 5.18026   | 3.89754   | 4.93645   | 4.99771  | 5.34363   | 4.58266  |
| ZNF529       | 9.26995   | 9.18883   | 8.15648   | 8.31795  | 11.5907   | 8.87535  |
| IGFBP1       | 0         | 0         | 0         | 0        | 0.0409435 | 0        |
| TMEM117      | 4.49785   | 5.09414   | 5.37467   | 3.94417  | 5.0665    | 6.02269  |
| COIL         | 9.15381   | 9.00368   | 9.87443   | 9.99197  | 8.67221   | 8.93659  |

|             |           |          |          |          |          |          |
|-------------|-----------|----------|----------|----------|----------|----------|
| GJB2        | 208.115   | 151.821  | 79.4644  | 177.265  | 150.269  | 316.245  |
| FAM20B      | 14.3455   | 12.114   | 13.0656  | 12.0188  | 10.0391  | 10.0632  |
| TEX13B      | 0         | 0        | 0        | 0        | 0        | 0        |
| PRPS1       | 11.4039   | 12.5326  | 11.4957  | 10.2068  | 11.548   | 9.61338  |
| DGKG        | 1.16418   | 0.537345 | 0.532553 | 0.301877 | 0.666216 | 0.630887 |
| RNU6-15     | 0         | 0        | 0        | 0        | 0        | 0        |
| TAF9B       | 13.2389   | 11.2433  | 9.93717  | 8.71924  | 9.59572  | 11.0153  |
| CHKB-CPT1B  | 0.947533  | 0.744101 | 0.54645  | 0.273886 | 2.61476  | 0.648881 |
| LOC285370   | 0         | 0        | 0        | 0        | 0        | 0        |
| SETD8       | 22.156    | 28.338   | 24.098   | 26.5432  | 23.959   | 25.2329  |
| CTCFL       | 0.0854048 | 0        | 0        | 0        | 0        | 0        |
| TMEM109     | 60.5437   | 52.1025  | 45.1249  | 51.3082  | 49.4853  | 43.9722  |
| MIR4300     | 0         | 0        | 0        | 0        | 0        | 0        |
| SLC25A45    | 5.94847   | 9.91159  | 8.27795  | 7.60601  | 8.81447  | 8.35476  |
| C9orf125    | 5.31678   | 5.17954  | 8.3478   | 7.07253  | 9.81396  | 9.0806   |
| ISY1        | 7.80919   | 10.4629  | 7.54388  | 10.2294  | 8.60122  | 7.85081  |
| ABCC6P2     | 1.00244   | 1.06614  | 1.28367  | 0.489738 | 1.16639  | 0.524357 |
| AWAT2       | 297.067   | 241.113  | 144.957  | 124.382  | 133.266  | 195.037  |
| ASMTL       | 9.99066   | 10.4803  | 10.7082  | 13.1057  | 9.81654  | 9.93416  |
| LOC10012919 | 1.46644   | 4.26005  | 2.32594  | 2.55723  | 1.95692  | 2.04523  |
| DCAF6       | 25.9797   | 21.3856  | 23.3716  | 22.6451  | 20.3138  | 21.3909  |
| AP1G2       | 43.9289   | 59.7864  | 41.4293  | 56.0664  | 65.4903  | 58.5008  |
| MIR659      | 0         | 0        | 0        | 0        | 0        | 0        |
| CHKB        | 49.1165   | 79.2573  | 46.003   | 60.272   | 71.4162  | 60.8396  |
| C21orf33    | 133.033   | 153.722  | 117.325  | 125.106  | 108.094  | 114.893  |
| SERTAD2     | 13.0456   | 9.59136  | 13.8442  | 10.3976  | 13.6864  | 12.8519  |
| OR13C5      | 0         | 0        | 0        | 0        | 0        | 0        |
| DCAF16      | 14.821    | 14.497   | 16.2007  | 14.1766  | 16.4379  | 12.8319  |
| CYP4F24P    | 1.10506   | 1.7365   | 0.309717 | 0.10458  | 1.9805   | 1.71671  |
| KIAA0232    | 11.7204   | 9.21822  | 11.913   | 9.73275  | 8.92661  | 7.79054  |
| CXorf67     | 0         | 0        | 0        | 0        | 0        | 0        |
| NUS1        | 38.2851   | 29.6957  | 27.9182  | 24.1483  | 22.4788  | 25.1838  |
| SNHG3       | 33.897    | 42.6252  | 19.6613  | 29.373   | 19.9239  | 25.1644  |
| VPS13D      | 11.2073   | 9.65071  | 14.318   | 11.0539  | 13.1962  | 11.4941  |
| MIR1295     | 0         | 0        | 0        | 0        | 0        | 0        |
| FLJ46020    | 0.135276  | 0.318939 | 0.204809 | 0.423405 | 0.574385 | 0.280993 |
| IQCF4       | 0         | 0        | 0        | 0        | 0        | 0        |
| LOC1002875  | 2.19406   | 3.15226  | 4.1523   | 2.31772  | 3.49353  | 2.39268  |
| TTLL1       | 3.94615   | 6.16645  | 4.26082  | 5.19407  | 4.09176  | 5.09905  |
| CST11       | 0         | 0        | 0        | 0        | 0        | 0.246305 |
| ATP11B      | 12.2953   | 9.30954  | 14.3594  | 8.38754  | 12.6767  | 12.1927  |
| TTLL13      | 0.175383  | 0.206751 | 0.132766 | 0.219576 | 0.186171 | 0.109291 |
| RRAGA       | 70.1657   | 66.0659  | 63.9042  | 69.8026  | 57.282   | 59.7659  |

|             |           |          |           |           |           |           |
|-------------|-----------|----------|-----------|-----------|-----------|-----------|
| MAPRE1      | 46.3221   | 40.3792  | 38.7496   | 35.0412   | 34.5054   | 30.6567   |
| PCDHB2      | 1.27493   | 1.22761  | 1.49504   | 0.975248  | 1.00504   | 0.810803  |
| OR5AK4P     | 0         | 0        | 0.0980475 | 0.121617  | 0.0824922 | 0         |
| LOC728975   | 2.43631   | 2.5302   | 1.67127   | 1.96621   | 0.861396  | 0.811373  |
| ZNF77       | 2.42644   | 3.30735  | 2.56391   | 2.32586   | 3.18742   | 2.5831    |
| CHST9       | 0.136274  | 0.200809 | 0.171934  | 0.725104  | 0.202519  | 0.226454  |
| LOC1006528: | 0.555066  | 0        | 0.197034  | 0.104601  | 0.531218  | 0.187817  |
| 5-Mar       | 14.172    | 11.5408  | 11.6129   | 12.6303   | 11.2591   | 11.3879   |
| LOC285696   | 0.0595067 | 0        | 0.0450469 | 0         | 0         | 0.018541  |
| IL4R        | 23.4927   | 28.981   | 17.0573   | 15.3999   | 24.5572   | 18.3775   |
| SNAR-G1     | 0         | 0        | 0         | 0         | 0         | 0         |
| BNIP3L      | 83.924    | 72.1889  | 91.5331   | 71.7617   | 74.9719   | 76.224    |
| FAM71E2     | 0.0932592 | 0.549693 | 0.423587  | 0.116759  | 0.89096   | 0.368063  |
| TIRAP       | 5.48221   | 4.38959  | 5.35422   | 3.32304   | 4.64215   | 4.14021   |
| TPD52L1     | 99.1894   | 83.8201  | 68.9526   | 99.8327   | 53.8722   | 76.8013   |
| LOC1005072: | 0         | 0        | 0         | 0         | 0         | 0         |
| TOM1        | 41.5799   | 40.8445  | 42.0993   | 57.676    | 47.2263   | 51.001    |
| ZFC3H1      | 13.8748   | 11.9852  | 13.8535   | 12.3918   | 16.3108   | 14.2771   |
| SCHIP1      | 1.64378   | 2.92827  | 1.0817    | 3.27887   | 3.37216   | 2.44023   |
| EMX2        | 2.77049   | 2.89084  | 3.59527   | 2.0363    | 3.74059   | 3.23836   |
| RNF168      | 6.76028   | 6.48569  | 7.55386   | 6.19585   | 8.13037   | 6.96891   |
| MTUS1       | 39.3895   | 28.6416  | 28.2871   | 33.746    | 28.6345   | 29.0666   |
| CCDC90B     | 18.1915   | 16.984   | 17.6592   | 9.49683   | 16.0392   | 17.385    |
| LOC1001309: | 1.26275   | 0.558221 | 2.23045   | 1.58093   | 1.34042   | 1.70493   |
| LEO1        | 14.5091   | 10.5915  | 10.8029   | 8.33561   | 11.3991   | 9.99317   |
| SLC26A10    | 1.65321   | 3.03443  | 1.31326   | 1.49747   | 2.36762   | 1.65861   |
| OR2AG1      | 0         | 0        | 0         | 0         | 0         | 0         |
| ANKRD28     | 12.0002   | 10.6098  | 12.2075   | 9.56754   | 11.5848   | 9.588     |
| TSPAN10     | 1.05276   | 2.21062  | 1.89275   | 3.70697   | 1.08958   | 2.82916   |
| TBX5        | 0         | 0        | 0.0203812 | 0.0379211 | 0         | 0.0503468 |
| C7orf51     | 1.09645   | 1.16329  | 1.26578   | 1.1325    | 1.29192   | 1.96437   |
| LOC1001340: | 7.14E-89  | 0.278283 | 0.0940442 | 6.97E-272 | 0.121277  | 0.191683  |
| LOC1005074: | 2.50847   | 4.7481   | 2.2129    | 1.84909   | 1.52945   | 0.909295  |
| ZMIZ2       | 33.7273   | 41.555   | 39.0338   | 42.3903   | 52.3247   | 40.0575   |
| LYAR        | 11.3013   | 9.1982   | 6.99615   | 6.58152   | 7.1571    | 7.36473   |
| CEACAM19    | 10.4035   | 11.2436  | 11.9355   | 11.4319   | 14.8142   | 15.9912   |
| DUSP28      | 3.44204   | 4.07794  | 4.16904   | 3.42595   | 3.5953    | 3.4748    |
| MTRR        | 13.1808   | 10.3203  | 11.5543   | 9.79961   | 12.6012   | 10.6383   |
| NDUFB11     | 174.266   | 223.119  | 164.675   | 242.004   | 164.219   | 174.728   |
| MME         | 18.4533   | 15.5637  | 18.8076   | 6.10842   | 7.31973   | 6.50078   |
| SCARNA17    | 1.34074   | 5.92698  | 2.70652   | 2.93751   | 1.70785   | 3.62046   |
| FGFR1OP     | 8.21601   | 7.86049  | 8.11155   | 6.72585   | 8.14847   | 8.67686   |
| PRELP       | 21.7338   | 17.9754  | 25.4725   | 20.0896   | 18.7114   | 18.182    |

|             |           |          |           |           |           |            |
|-------------|-----------|----------|-----------|-----------|-----------|------------|
| PNPLA2      | 140.076   | 202.264  | 195.959   | 144.892   | 137.489   | 112.292    |
| FHOD1       | 9.63493   | 12.9348  | 10.7294   | 9.90414   | 11.1427   | 9.19572    |
| ALKBH1      | 3.77607   | 3.92368  | 4.3025    | 3.87465   | 5.15712   | 4.29378    |
| KRT3        | 0.308262  | 0.428286 | 0.300029  | 0.620257  | 0.36462   | 0.274423   |
| PLCB3       | 10.9258   | 15.1107  | 10.9924   | 13.1129   | 13.4081   | 14.1792    |
| TNNI2       | 3.43336   | 3.87336  | 11.8011   | 18.0287   | 11.3814   | 9.24077    |
| NCKAP1L     | 3.4121    | 2.98791  | 3.57932   | 1.74344   | 5.69184   | 2.58831    |
| C3orf37     | 36.0859   | 36.2599  | 30.2025   | 32.8297   | 33.3591   | 33.0873    |
| BCYRN1      | 10.7603   | 65.5274  | 24.8741   | 85.5748   | 45.7644   | 69.5171    |
| LOC286297   | 1.26826   | 0.583678 | 0.607144  | 0.207248  | 0.362616  | 0.217594   |
| LLGL2       | 32.6378   | 34.7458  | 34.1558   | 44.3152   | 36.2889   | 37.3077    |
| APOC4-APOC  | 8.16E-09  | 4.93E-09 | 6.84E-09  | 0.0994233 | 4.63E-09  | 5.96E-08   |
| LINC00204A  | 2.03638   | 3.76641  | 1.4053    | 2.26341   | 1.65297   | 1.27187    |
| NANOS3      | 0.596823  | 0.395755 | 0.451799  | 0.420306  | 0.47515   | 0.278936   |
| FAM19A3     | 0.487692  | 0.354933 | 0.0820403 | 0.636022  | 0.0690247 | 0.270141   |
| DAGLB       | 10.665    | 13.6348  | 10.9778   | 14.2576   | 13.4094   | 13.2384    |
| AKD1        | 2.92914   | 1.8699   | 1.77671   | 2.09472   | 2.09954   | 2.41494    |
| LOC10050748 | 0.0546525 | 0.241602 | 0.0827445 | 0.205271  | 0.104425  | 0.2384     |
| HIST1H2AB   | 0.351582  | 0        | 0         | 0         | 0         | 0          |
| LOC10050696 | 2.87229   | 1.64629  | 2.57921   | 2.75283   | 2.57374   | 2.13552    |
| MIR581      | 0         | 0        | 0         | 0         | 0         | 0          |
| C14orf119   | 15.1977   | 14.2378  | 12.9398   | 13.7077   | 12.8345   | 14.6196    |
| TMEM163     | 0.549781  | 0.923556 | 0.249712  | 0.103247  | 0.315143  | 0.890761   |
| NLRP4       | 0         | 0        | 0.100934  | 0         | 0.0339683 | 0          |
| CD22        | 0.901173  | 1.21348  | 0.955771  | 0.812361  | 1.658     | 1.00938    |
| KCNJ1       | 0.441246  | 0.847411 | 0.49739   | 0.53569   | 0.943514  | 1.05986    |
| MIR371B     | 0         | 0        | 0         | 0         | 0         | 0          |
| C19orf75    | 0         | 0        | 0         | 0         | 0         | 0          |
| BCL2L2      | 43.5139   | 37.5756  | 45.3874   | 34.7215   | 39.9424   | 36.5293    |
| COG4        | 25.7288   | 29.0266  | 25.5555   | 26.6955   | 33.0009   | 37.0022    |
| TGFBR1      | 8.87577   | 6.00775  | 6.69604   | 5.51798   | 6.1113    | 4.98766    |
| LOC728066   | 6.20822   | 6.03048  | 5.72979   | 5.63777   | 5.70897   | 6.0628     |
| RAE1        | 17.0989   | 21.8082  | 18.3225   | 22.0219   | 19.8674   | 20.6985    |
| LOC10065285 | 1.96E-06  | 1.17E-06 | 0.149147  | 1.75E-05  | 3.21E-06  | 0.00731517 |
| MSI1        | 0.775888  | 0.536863 | 0.383055  | 1.52045   | 0.751994  | 2.87998    |
| C6orf70     | 15.2522   | 23.0734  | 17.3939   | 16.042    | 22.74     | 17.0032    |
| DCAF7       | 13.5274   | 10.4319  | 11.7309   | 10.6556   | 12.5215   | 11.2396    |
| LOC494141   | 0.242127  | 0.199557 | 0.127285  | 0.133412  | 0.129581  | 0.0885391  |
| GOSR2       | 18.6155   | 18.1054  | 16.2305   | 14.5787   | 17.2891   | 16.9926    |
| EN2         | 0.261129  | 0.128263 | 0.175712  | 0.13622   | 0.147835  | 0.144644   |
| LOC10050584 | 0         | 0        | 0         | 0         | 0         | 0          |
| PLEKHG6     | 10.7232   | 17.0223  | 12.2299   | 13.0032   | 11.1547   | 9.16206    |
| CD84        | 1.96078   | 1.5419   | 2.21529   | 0.711764  | 3.07397   | 1.58167    |



|             |           |           |           |           |           |           |
|-------------|-----------|-----------|-----------|-----------|-----------|-----------|
| CAND2       | 1.32843   | 1.43538   | 1.14424   | 1.48389   | 1.15236   | 1.05607   |
| MIR4502     | 0         | 0         | 0         | 0         | 0         | 0         |
| APPBP2      | 9.54743   | 6.43204   | 8.33336   | 6.26295   | 7.93231   | 6.74957   |
| P2RX5       | 0.204752  | 0.394477  | 0.111068  | 0.257759  | 0.39189   | 0.228016  |
| NDUFS2      | 78.6269   | 75.4333   | 57.4875   | 63.0852   | 67.2206   | 65.5507   |
| RAC2        | 27.0918   | 32.5446   | 19.1711   | 12.4429   | 27.1483   | 15.6897   |
| USP53       | 11.7148   | 7.03287   | 11.5177   | 8.13459   | 12.4446   | 9.55332   |
| PACS2       | 11.0142   | 14.9885   | 13.6154   | 14.3339   | 14.3184   | 13.0446   |
| PLEKHG7     | 0.0906929 | 0.0801849 | 0.04577   | 0.141932  | 0.154034  | 0.131871  |
| GLS         | 25.2211   | 12.9401   | 20.956    | 19.7107   | 15.9257   | 14.7173   |
| RALGPS1     | 7.61271   | 6.04347   | 7.59397   | 7.03836   | 10.3923   | 7.73251   |
| ATP6V0E1    | 159.295   | 125.738   | 119.676   | 130.489   | 110.763   | 142.589   |
| GALNT14     | 1.77355   | 2.22142   | 2.15374   | 3.1919    | 1.97678   | 2.37158   |
| MIR125B2    | 0         | 0         | 0         | 0         | 0         | 0         |
| HTR3C       | 0         | 0.0549606 | 0         | 0         | 0.039592  | 0.0387374 |
| IFI6        | 111.754   | 147.279   | 26.007    | 12.4105   | 32.8957   | 15.461    |
| AADAC       | 2.78535   | 2.69716   | 3.16278   | 1.3077    | 3.75919   | 3.55407   |
| TMEM174     | 0         | 0         | 0         | 0         | 0         | 0         |
| CAPN8       | 4.10136   | 4.5647    | 3.39696   | 9.37859   | 4.73265   | 15.6956   |
| STX11       | 2.87856   | 2.51419   | 3.2092    | 1.32689   | 2.01115   | 1.45678   |
| PDPN        | 10.849    | 12.226    | 8.97155   | 11.1373   | 7.72306   | 8.38851   |
| EYA4        | 1.12615   | 0.935354  | 0.323401  | 0.301438  | 0.216602  | 0.138193  |
| SNORA47     | 0         | 32.7157   | 0         | 0         | 23.5674   | 0         |
| RPL13AP6    | 27.5      | 42.611    | 35.2092   | 56.5185   | 34.3148   | 35.1044   |
| LOC728034   | 2.73403   | 2.62934   | 3.50865   | 3.85158   | 3.42956   | 2.64687   |
| RELN        | 0.73179   | 0.510453  | 0.775509  | 0.51159   | 0.730139  | 0.607994  |
| HOXB4       | 1.72535   | 1.79464   | 1.53658   | 1.23888   | 2.26241   | 1.48625   |
| SYNPR       | 0         | 0.137139  | 0.11742   | 0         | 0.0246953 | 0         |
| TRNP1       | 7.18241   | 7.52621   | 4.95383   | 9.1421    | 6.84484   | 8.25532   |
| ARL4A       | 23.5165   | 18.9313   | 19.4149   | 16.5696   | 23.1448   | 23.3253   |
| VCY         | 0         | 0         | 0.0522141 | 0.064766  | 0         | 0.042982  |
| SLC2A8      | 10.5533   | 15.0923   | 8.87247   | 10.9597   | 10.9959   | 10.1222   |
| RPL31       | 580.587   | 781.277   | 715.574   | 944.676   | 710.058   | 676.765   |
| ZNF835      | 0.468702  | 0.541903  | 0.518568  | 0.203125  | 0.597038  | 0.33701   |
| MCTP2       | 2.83875   | 2.41121   | 2.39245   | 2.43032   | 2.27997   | 2.28156   |
| LOC91149    | 0.0837479 | 0.0370223 | 0.0633976 | 0.0196595 | 0.0400046 | 0         |
| SPATA4      | 0         | 0         | 0.068589  | 0.0850773 | 0.0577073 | 0.0564616 |
| HSD17B10    | 91.2734   | 96.5397   | 91.2716   | 103.403   | 78.1037   | 84.1384   |
| MIR3689D1   | 0         | 0         | 0         | 0         | 0         | 0         |
| LOC10065275 | 1.72939   | 2.37847   | 3.34562   | 2.4358    | 2.44768   | 2.93369   |
| FLJ44342    | 7.54868   | 8.65031   | 9.45629   | 11.5136   | 12.2839   | 8.46483   |
| FTSJ2       | 20.6992   | 21.5374   | 17.0298   | 23.186    | 19.7963   | 17.5441   |
| BCL9        | 3.68296   | 3.67336   | 4.8848    | 4.18705   | 4.57508   | 4.33407   |

|             |          |          |           |           |           |           |
|-------------|----------|----------|-----------|-----------|-----------|-----------|
| AMFR        | 25.0394  | 26.5321  | 23.7712   | 23.9218   | 21.8955   | 19.2108   |
| OR4D11      | 0.127905 | 0        | 0.0968244 | 0         | 0         | 0         |
| DMBX1       | 2.76902  | 2.60115  | 1.88662   | 2.19783   | 1.41101   | 2.0921    |
| LOC283392   | 12.2482  | 20.325   | 17.8016   | 8.07637   | 11.6134   | 9.42283   |
| SV2B        | 1.04903  | 0.919666 | 0.816123  | 0.533526  | 0.768274  | 0.555647  |
| TIMP2       | 115.092  | 92.6269  | 140.017   | 86.3849   | 110.629   | 87.4984   |
| UBE2Q2P3    | 0.923281 | 0.762139 | 3.14681   | 2.05451   | 1.80474   | 1.48672   |
| C18orf54    | 1.13227  | 0.933208 | 0.958825  | 0.792879  | 1.18565   | 1.04043   |
| LHB         | 0.299153 | 0.793476 | 0.679381  | 1.4045    | 0.95266   | 1.11852   |
| ADRM1       | 73.7338  | 100.484  | 72.814    | 95.2658   | 78.6854   | 88.7382   |
| HAO1        | 0        | 0        | 0         | 0         | 0         | 0         |
| SETP20      | 2.3474   | 1.12419  | 2.59145   | 1.46945   | 2.05572   | 1.52375   |
| IAH1        | 32.5627  | 39.2911  | 32.126    | 30.7012   | 26.3492   | 24.4498   |
| RPS6KL1     | 1.63048  | 2.06406  | 1.5148    | 1.63538   | 1.98252   | 1.57025   |
| ZNF24       | 17.9064  | 13.4362  | 16.0532   | 12.7916   | 16.9191   | 14.0637   |
| ACAA2       | 132.397  | 125.598  | 92.9937   | 90.0013   | 70.5153   | 82.0694   |
| ZNF248      | 7.53102  | 7.14778  | 6.10503   | 5.56811   | 8.23344   | 8.14194   |
| ILK         | 62.1404  | 71.4387  | 57.7603   | 58.9708   | 66.9754   | 56.8537   |
| IGLL3P      | 0.449929 | 1.0608   | 0         | 0         | 0.764166  | 0.498447  |
| CECR5       | 26.43    | 28.2752  | 26.2943   | 33.1836   | 27.365    | 28.2229   |
| SLC6A18     | 0        | 0        | 0         | 0         | 0         | 0         |
| EPGN        | 0        | 0.257997 | 0.110449  | 0.822004  | 0.0929265 | 0         |
| UPK1B       | 0.450516 | 0.796635 | 0.113681  | 0.235015  | 0.127527  | 0.124774  |
| B4GALT2     | 35.3597  | 49.1882  | 39.0939   | 47.54     | 39.0518   | 35.2382   |
| MOCOS       | 7.97007  | 3.50708  | 5.25489   | 3.58669   | 2.66675   | 2.38031   |
| LOC10012929 | 1.02543  | 1.03632  | 0.854743  | 1.02059   | 0.445665  | 0.562394  |
| ARMC1       | 14.7191  | 11.1958  | 11.7601   | 9.68391   | 12.5758   | 10.8807   |
| LOC338667   | 0.178319 | 0.220722 | 0.809932  | 0.468829  | 0.249859  | 0.0444484 |
| PSKH2       | 0        | 0        | 0         | 0.0918405 | 0         | 0         |
| SLC46A1     | 3.74549  | 2.68139  | 3.03797   | 2.78671   | 2.91467   | 3.16982   |
| TNKS        | 7.03071  | 6.19003  | 8.38167   | 6.78639   | 7.75334   | 6.35433   |
| MIR1238     | 0        | 0        | 0         | 0         | 0         | 0         |
| LOC10012815 | 0        | 0        | 0         | 0.490277  | 0.166275  | 0         |
| TUBB6       | 94.616   | 108.836  | 68.8314   | 68.5947   | 63.2727   | 68.6617   |
| MIR4735     | 0        | 0        | 0         | 0         | 0         | 0         |
| MAEL        | 0        | 0.322805 | 0.138194  | 0         | 0.0387565 | 0.0379199 |
| NLRC4       | 0.459401 | 0.620905 | 0.256292  | 0.4883    | 0.544138  | 0.418684  |
| JRK         | 5.34335  | 6.28353  | 5.1456    | 6.02859   | 6.52493   | 6.40467   |
| JMJD6       | 8.85617  | 13.1363  | 8.50733   | 11.7215   | 12.6438   | 9.71782   |
| NETO1       | 0.288578 | 0.103465 | 0.400067  | 0.129989  | 0.0694344 | 0.0862676 |
| LOC10050751 | 0        | 0        | 0         | 0         | 0         | 0         |
| GRPEL1      | 48.8064  | 35.5589  | 31.6377   | 31.717    | 23.9747   | 25.464    |
| DEFB105A    | 0        | 0        | 0         | 0         | 0         | 0         |

|             |          |           |          |           |          |           |
|-------------|----------|-----------|----------|-----------|----------|-----------|
| SNORD115-1  | 0        | 0         | 0        | 0         | 0        | 0         |
| SMAD6       | 3.40805  | 2.5432    | 4.45168  | 4.55844   | 2.69403  | 3.63335   |
| WDR66       | 1.67665  | 2.5917    | 2.25205  | 3.50997   | 3.51375  | 5.2091    |
| UQCRH       | 204.757  | 222.462   | 194.722  | 230.162   | 180.318  | 168.145   |
| LOC80054    | 6.82871  | 7.92681   | 5.83752  | 4.36194   | 6.12445  | 6.36857   |
| DDX1        | 45.4086  | 39.2305   | 41.6177  | 38.4994   | 37.4605  | 36.9519   |
| SHISA3      | 0.367757 | 0.232248  | 0.556788 | 0.295987  | 0.301148 | 0.294648  |
| C19orf57    | 2.67782  | 2.33057   | 2.0588   | 2.82874   | 2.77147  | 3.07668   |
| SLC17A2     | 0        | 0.0754576 | 0        | 0         | 0        | 0         |
| LOC10028759 | 0        | 0.206829  | 0        | 0         | 0        | 0.145777  |
| TFAP4       | 5.12803  | 10.8474   | 6.05874  | 9.04526   | 8.36369  | 8.27264   |
| TRIM66      | 5.34995  | 6.16707   | 6.81825  | 6.21353   | 8.03484  | 6.3904    |
| ZNF213      | 7.45589  | 9.22738   | 7.65897  | 8.8076    | 9.74618  | 9.46746   |
| VDAC3       | 58.6867  | 63.0297   | 56.7827  | 63.0901   | 60.2978  | 48.4617   |
| PTAFR       | 5.32099  | 5.36465   | 4.53853  | 3.6402    | 5.70437  | 4.41059   |
| TMEM225     | 0        | 0         | 0        | 0         | 0        | 0         |
| GPHB5       | 0        | 0         | 0        | 0         | 0        | 0         |
| LOC10050578 | 2.31826  | 2.83799   | 1.07996  | 2.67915   | 1.59009  | 1.22239   |
| ASTL        | 0.170655 | 0.0754412 | 0.452154 | 0.160242  | 0.48911  | 0.797588  |
| BPIFA3      | 0        | 0         | 0        | 0         | 0        | 0         |
| DMC1        | 0.494079 | 0.794242  | 0.54403  | 0.421757  | 0.715185 | 0.783717  |
| LOC10013093 | 8.97821  | 9.6021    | 9.1268   | 7.10562   | 7.92389  | 8.28623   |
| YWHAH       | 66.5872  | 60.7847   | 52.2214  | 56.6507   | 45.5375  | 47.5054   |
| FTO         | 17.6525  | 13.5663   | 14.8707  | 12.3678   | 13.679   | 11.776    |
| CFLAR-AS1   | 0.447271 | 0.397059  | 0.311553 | 0.10498   | 0.370183 | 0.13924   |
| MRPS21      | 127.006  | 188.1     | 126.032  | 168.215   | 139.296  | 129.737   |
| LOC729506   | 0        | 0         | 0        | 0.0629499 | 0        | 0.0417768 |
| TRIM61      | 0.202742 | 0.298752  | 0.358112 | 0.317285  | 0.430424 | 0.171963  |
| POC1B       | 8.34255  | 6.28054   | 6.28527  | 6.74583   | 7.32566  | 7.06771   |
| C11orf52    | 21.5836  | 20.3446   | 12.3268  | 18.1771   | 13.5996  | 13.1135   |
| C10orf55    | 0.484541 | 1.04295   | 1.00556  | 1.16205   | 1.00489  | 1.20092   |
| MIR1185-2   | 0        | 0         | 0        | 0         | 0        | 0         |
| LOC10012948 | 2.33492  | 2.72124   | 2.49064  | 3.18902   | 2.23069  | 1.98412   |
| GMCL1       | 5.36841  | 3.36842   | 4.55552  | 3.78064   | 4.43941  | 7.17635   |
| POTEC       | 0        | 0         | 0        | 0         | 0        | 0         |
| LOC10065289 | 3.6501   | 1.54344   | 3.36383  | 2.53329   | 2.52692  | 2.57127   |
| MIR4474     | 0        | 0         | 0        | 0         | 0        | 0         |
| MIR2355     | 0        | 0         | 0        | 0         | 0        | 0         |
| EXOSC10     | 34.2637  | 38.6627   | 31.2743  | 37.9875   | 35.8224  | 30.9948   |
| METTL10     | 9.75689  | 10.5587   | 7.82915  | 7.62243   | 7.6559   | 7.34473   |
| LAMTOR2     | 66.6672  | 79.0036   | 57.509   | 75.4168   | 57.7064  | 65.1793   |
| SLC31A1     | 34.1335  | 24.3324   | 30.5999  | 23.5634   | 26.3634  | 33.2289   |
| C19orf25    | 9.65714  | 14.9292   | 11.3122  | 14.6785   | 12.7969  | 13.7614   |

|             |           |           |           |           |           |           |
|-------------|-----------|-----------|-----------|-----------|-----------|-----------|
| TMEM88      | 3.21838   | 6.80443   | 2.96597   | 3.54757   | 3.47575   | 3.83672   |
| ACO1        | 84.7963   | 61.2981   | 69.6365   | 38.1616   | 42.2014   | 51.0312   |
| DKFZp451B08 | 0         | 0         | 0.0444331 | 0         | 0.0124612 | 0         |
| LOC10050595 | 9.48032   | 11.3145   | 10.3279   | 10.4377   | 7.78165   | 11.4443   |
| TEX21P      | 0.666701  | 0.196485  | 0.841161  | 0.208674  | 0.636939  | 0.761677  |
| ST20-MTHFS  | 8.01E-10  | 4.60E-11  | 3.01E-14  | 3.12E-12  | 9.84E-20  | 9.87E-17  |
| PTRH2       | 21.5092   | 23.0722   | 15.8037   | 23.6125   | 13.095    | 17.543    |
| DHDH        | 0         | 0.847447  | 0.0806212 | 0.600012  | 0.203492  | 0.199099  |
| ZNF610      | 0.820052  | 0.677121  | 0.625673  | 0.850566  | 1.45751   | 0.779759  |
| C9orf43     | 0.201574  | 0.534595  | 0.343284  | 0.473091  | 0.128328  | 0.0941746 |
| CORIN       | 3.39644   | 1.34613   | 4.74328   | 0.788136  | 2.73509   | 1.80025   |
| ARHGEF33    | 0.367351  | 0.29765   | 0.312536  | 0.254259  | 0.229095  | 0.204948  |
| C22orf40    | 6.57346   | 8.23877   | 6.56196   | 8.54637   | 8.74141   | 6.93221   |
| C1orf94     | 0.0517994 | 0         | 0.0392124 | 0.0486388 | 0         | 0.0322792 |
| LGI1        | 0.514694  | 0.0379217 | 0.324689  | 0.120822  | 0.0273176 | 0.213824  |
| APCDD1      | 93.4399   | 125.641   | 111.126   | 131.995   | 139.246   | 118.685   |
| LHX9        | 0         | 0         | 0         | 0         | 0         | 0         |
| LOC10050634 | 14.7116   | 12.2451   | 20.3457   | 10.388    | 4.80954   | 3.60984   |
| EML6        | 2.10206   | 2.04009   | 2.46922   | 2.00784   | 2.0467    | 1.49812   |
| ERVV-2      | 0         | 0         | 0         | 0         | 0         | 0.0126803 |
| LOC10050747 | 2.93569   | 2.92      | 2.22233   | 1.37828   | 1.1686    | 0.686024  |
| VPS37C      | 17.32     | 19.2321   | 16.5795   | 19.306    | 19.8562   | 18.7544   |
| MAN2A1      | 4.75155   | 2.14202   | 3.99503   | 2.06328   | 3.15787   | 4.17812   |
| SNORD38A    | 0         | 0         | 0         | 0         | 0         | 0         |
| TCEB3       | 15.2825   | 13.8779   | 14.7945   | 14.014    | 14.0351   | 14.4506   |
| TRIM63      | 0.952885  | 1.89558   | 1.35251   | 2.06909   | 1.44138   | 1.74428   |
| GAGE2C      | 0         | 0         | 0         | 0         | 0         | 0         |
| MAVS        | 17.606    | 17.8772   | 18.8455   | 17.0697   | 19.9469   | 16.8585   |
| C3orf17     | 15.6342   | 15.5951   | 13.9677   | 14.075    | 16.2077   | 12.2116   |
| SNAR-H      | 0         | 0         | 0         | 0         | 0         | 0         |
| COX6A1      | 320.448   | 348.89    | 278.193   | 326.36    | 241.988   | 256.596   |
| BPESC1      | 0         | 0         | 0         | 0         | 0         | 0         |
| KBTBD6      | 3.27631   | 2.39225   | 2.85641   | 2.60978   | 3.048     | 2.8331    |
| STRA13      | 49.2305   | 74.549    | 36.0481   | 58.1615   | 46.2916   | 49.7547   |
| CCM2        | 20.6974   | 33.2865   | 23.3364   | 29.7171   | 26.1153   | 20.625    |
| LOC10065283 | 0         | 0         | 0.101866  | 0.151624  | 0.271577  | 0.136963  |
| DSPP        | 0         | 0         | 0         | 0         | 0         | 0         |
| FMN1        | 1.45179   | 1.27013   | 1.95673   | 2.00554   | 1.74902   | 1.92441   |
| RPL6        | 687.632   | 920.516   | 784.76    | 1066.29   | 757.097   | 771.264   |
| ACRC        | 1.24555   | 2.50532   | 1.6972    | 2.04672   | 1.92375   | 1.94044   |
| SBF1P1      | 0.156128  | 0.17945   | 0.177285  | 0.175922  | 0.149158  | 0.243231  |
| FAM134C     | 34.5492   | 36.8315   | 34.1866   | 37.7692   | 40.0124   | 40.1697   |
| GADL1       | 0         | 0         | 0         | 0         | 0.0170829 | 0         |

|             |           |           |           |           |           |           |
|-------------|-----------|-----------|-----------|-----------|-----------|-----------|
| LOC10050679 | 0.236936  | 1.04742   | 0.179362  | 0.444959  | 0.603624  | 0.442946  |
| MRPL54      | 53.09     | 76.1008   | 77.6426   | 100.55    | 65.0367   | 64.6183   |
| FOXD4L5     | 0.107156  | 0.0164426 | 0.12391   | 0.0815005 | 0.0454867 | 0.0480781 |
| HIBCH       | 42.9164   | 34.5375   | 47.1137   | 40.0633   | 25.7849   | 27.4208   |
| ARL1        | 34.1025   | 24.7039   | 33.9779   | 28.3769   | 26.1347   | 26.5496   |
| ESPN        | 12.1593   | 16.3102   | 16.5979   | 13.9778   | 23.2507   | 14.0273   |
| MIR3180-5   | 0         | 0         | 0         | 0         | 0         | 0         |
| SHROOM4     | 1.54027   | 1.49275   | 1.65179   | 1.27016   | 1.84368   | 1.19362   |
| MIR4802     | 0         | 0         | 0         | 0         | 0         | 0         |
| ASXL2       | 3.6331    | 1.92261   | 4.40647   | 2.37804   | 2.99799   | 2.82586   |
| HSPBAP1     | 6.05735   | 8.95747   | 7.87236   | 8.10379   | 8.77429   | 8.08383   |
| COL4A2      | 38.6386   | 40.541    | 45.0234   | 28.3315   | 26.6008   | 27.1578   |
| HFE         | 4.60252   | 2.43956   | 3.88045   | 3.75962   | 4.43369   | 3.19494   |
| KCNG3       | 0.0257989 | 0.142573  | 0.087891  | 0.0969044 | 0.0164315 | 0.0643107 |
| LOC10065300 | 0         | 0         | 0         | 0         | 0         | 0         |
| CLEC12B     | 1.0582    | 2.12557   | 1.65365   | 1.63837   | 2.16164   | 1.54773   |
| TXNDC8      | 0         | 0         | 0         | 0         | 0         | 0         |
| SNORD115-1  | 0         | 0         | 0         | 0         | 0         | 0         |
| MTM1        | 9.25234   | 7.52186   | 7.76303   | 6.64361   | 8.24637   | 7.4793    |
| ZNF276      | 15.4887   | 24.5664   | 19.0638   | 26.0167   | 26.8936   | 20.6226   |
| LOC340508   | 0.0901396 | 0.0796958 | 0         | 0         | 0.0287052 | 0         |
| MIR518F     | 0         | 0         | 0         | 0         | 0         | 0         |
| NTF3        | 1.73384   | 2.21897   | 1.29827   | 2.36127   | 1.20894   | 1.37986   |
| RIC8A       | 29.3276   | 37.4853   | 29.728    | 34.6847   | 32.1226   | 30.9969   |
| OSBP2       | 1.65524   | 1.87877   | 2.38752   | 2.87746   | 2.59284   | 2.78777   |
| SLC26A3     | 7.06006   | 0.426287  | 1.38175   | 0.258704  | 0.175477  | 0.321917  |
| RPL29       | 1001.4    | 1613.8    | 1171.44   | 1896.75   | 1106.04   | 1092.52   |
| LOC10050668 | 6.64643   | 5.23365   | 2.75588   | 4.18908   | 3.03869   | 2.62446   |
| RGPD4       | 1.45506   | 1.46951   | 1.59378   | 1.64027   | 1.58138   | 1.41548   |
| LOC10065282 | 0         | 0         | 0.0626097 | 0         | 0.0263383 | 0.103079  |
| SPAG11A     | 0         | 0         | 0         | 0         | 0         | 0         |
| RAB27A      | 11.7284   | 11.0082   | 9.07815   | 9.61563   | 10.1943   | 10.8575   |
| MLST8       | 21.5007   | 32.7335   | 22.2783   | 30.9568   | 29.6608   | 27.1558   |
| APEH        | 39.0019   | 40.8022   | 31.0077   | 34.8847   | 33.0205   | 33.8904   |
| LOC10012882 | 5.4228    | 1.37773   | 3.68042   | 3.33608   | 2.93772   | 2.95199   |
| INVS        | 2.42261   | 1.85819   | 2.05844   | 1.67498   | 3.029     | 2.1014    |
| FASN        | 444.51    | 339.761   | 391.931   | 248.975   | 259.859   | 359.488   |
| LINC00152   | 6.47639   | 12.9353   | 11.2924   | 14.8574   | 9.32945   | 7.18225   |
| ZCCHC14     | 9.41191   | 8.51636   | 10.6717   | 9.95043   | 10.7778   | 8.64738   |
| FANCC       | 3.45719   | 3.76488   | 3.6863    | 3.38481   | 3.83991   | 3.96721   |
| PRKD2       | 24.8368   | 33.4148   | 25.2422   | 30.6731   | 33.9662   | 28.4448   |
| SLED1       | 1.03207   | 1.36874   | 0.651071  | 0.9691    | 0.657333  | 0.643144  |
| WDR25       | 3.79487   | 4.59572   | 2.75291   | 3.41694   | 3.24337   | 3.85448   |

|           |          |           |           |          |           |           |
|-----------|----------|-----------|-----------|----------|-----------|-----------|
| SEPW1     | 267.015  | 360.819   | 285.984   | 388.136  | 272.066   | 270.656   |
| MAF1      | 55.2917  | 72.7791   | 57.8375   | 68.7428  | 57.4748   | 56.4553   |
| SMAD5-AS1 | 1.2146   | 2.86367   | 1.48865   | 1.62927  | 2.83649   | 2.09045   |
| PPM1N     | 1.28893  | 2.44197   | 2.36962   | 2.76636  | 3.87007   | 3.5188    |
| HIST1H4B  | 0        | 0         | 0         | 0        | 0         | 0         |
| RYBP      | 13.0972  | 8.97862   | 11.9603   | 10.9271  | 10.9649   | 10.9863   |
| MDH1      | 159.429  | 133.23    | 144.648   | 120.904  | 115.371   | 122.815   |
| SLC22A24  | 0        | 0         | 0         | 0        | 0         | 0         |
| SRMS      | 0.921749 | 0.626887  | 0.214698  | 1.86417  | 0.587067  | 1.32553   |
| AGRN      | 20.6913  | 27.6648   | 20.5601   | 26.1246  | 28.1602   | 24.8246   |
| S1PR1     | 9.79591  | 10.1572   | 8.22856   | 5.89785  | 6.28052   | 5.61767   |
| SRGAP2P2  | 5.41181  | 3.15893   | 8.99016   | 3.10553  | 8.0905    | 6.39372   |
| DUX2      | 0        | 0.0211041 | 0.0150579 | 0        | 0.0211149 | 0.0072307 |
| BCDIN3D   | 3.58551  | 3.4681    | 2.58983   | 2.45284  | 3.2417    | 3.20549   |
| AIG1      | 24.1249  | 21.8176   | 25.0664   | 19.4696  | 17.3738   | 15.4266   |
| CCS       | 38.6063  | 64.0747   | 37.856    | 47.6983  | 48.2425   | 46.2867   |
| PRAMEF5   | 0        | 0         | 0         | 0        | 0         | 0         |
| MRPS16    | 38.264   | 38.0007   | 34.7135   | 41.2545  | 31.4829   | 30.6126   |
| TMEM17    | 2.58958  | 2.95733   | 3.06301   | 3.44473  | 2.98939   | 2.92486   |
| TXNL1     | 65.0251  | 56.17     | 53.1621   | 49.5457  | 44.0672   | 48.2025   |
| MGST1     | 974.873  | 774.543   | 772.725   | 630.072  | 505.557   | 638.887   |
| MYCBPAP   | 0.124053 | 0.30162   | 0.539976  | 0.145605 | 0.335793  | 0.270566  |
| OR2H1     | 0        | 0         | 0         | 0        | 0         | 0         |
| C16orf58  | 41.3069  | 50.5559   | 44.1441   | 47.8953  | 51.5096   | 44.9986   |
| NXF4      | 0        | 0         | 0         | 0        | 0         | 0         |
| RNASE6    | 6.32296  | 4.62651   | 6.35451   | 4.50405  | 9.51236   | 5.23096   |
| LOC647208 | 0        | 0.182019  | 0         | 0        | 0         | 0.0641455 |
| PGLYRP3   | 12.9975  | 11.7469   | 22.4479   | 20.1599  | 37.0371   | 30.3181   |
| LOC338588 | 0        | 0         | 0         | 0        | 0         | 0         |
| IFIT1     | 22.3626  | 15.6587   | 10.0978   | 4.15753  | 8.0317    | 4.8547    |
| DEFB122   | 0        | 0.280882  | 0         | 0        | 0         | 0         |
| RNF4      | 25.5401  | 24.8512   | 21.8984   | 23.2125  | 22.8322   | 20.7851   |
| C15orf57  | 8.62435  | 8.37502   | 9.25756   | 8.16962  | 9.18444   | 7.0605    |
| CTNS      | 6.65257  | 7.54197   | 6.944     | 5.62252  | 6.50885   | 6.69549   |
| GUCY2F    | 0        | 0         | 0         | 0        | 0         | 0         |
| CENPN     | 2.42646  | 3.07996   | 2.47763   | 3.55552  | 2.13435   | 2.83209   |
| LRRC8E    | 5.17585  | 4.76884   | 6.35152   | 9.05502  | 5.49999   | 6.11122   |
| RPL10L    | 0        | 0         | 0         | 0        | 0         | 0         |
| SPEG      | 10.9628  | 21.1797   | 7.50093   | 16.8103  | 13.8545   | 16.4675   |
| SLC16A12  | 0.544361 | 0.240645  | 0.443783  | 0.589784 | 0.42716   | 0.313129  |
| PDIA3P    | 101.168  | 71.7392   | 88.1506   | 72.0972  | 68.1149   | 65.3935   |
| RNU6ATAC  | 0        | 75.4493   | 0         | 80.1298  | 0         | 0         |
| MIR4691   | 0        | 0         | 0         | 0        | 0         | 0         |

|             |          |           |           |          |          |           |
|-------------|----------|-----------|-----------|----------|----------|-----------|
| OIP5        | 1.89713  | 3.11503   | 1.91485   | 2.46     | 2.07136  | 1.97035   |
| C14orf142   | 11.7266  | 9.85806   | 9.53      | 7.40243  | 9.17851  | 8.92199   |
| DEFT1P      | 0        | 0         | 0         | 0        | 0        | 0         |
| SGCE        | 15.2725  | 14.055    | 12.6896   | 8.34172  | 11.4741  | 8.24569   |
| CYTH4       | 4.79787  | 5.46991   | 4.56391   | 2.19328  | 7.47864  | 2.65544   |
| MIR374C     | 0        | 0         | 0         | 0        | 0        | 0         |
| UAP1        | 24.9867  | 17.6888   | 17.7907   | 17.5145  | 13.438   | 11.6508   |
| CES1        | 7.95335  | 8.90599   | 26.6038   | 16.7924  | 8.41004  | 6.04884   |
| BOC         | 26.0211  | 33.5037   | 37.8152   | 43.1022  | 36.4997  | 31.8649   |
| LOC731275   | 1.67494  | 1.69465   | 2.26925   | 1.45775  | 2.70917  | 1.92086   |
| EFNB2       | 34.6339  | 27.5316   | 42.3574   | 36.4249  | 37.2854  | 37.6107   |
| PPM1B       | 36.3731  | 28.8966   | 31.0164   | 26.3972  | 28.1902  | 27.1862   |
| PUS7L       | 2.00087  | 1.44185   | 1.49628   | 1.04372  | 1.41621  | 1.53956   |
| FLJ27352    | 4.464    | 3.33959   | 2.72941   | 2.09581  | 2.73379  | 3.74469   |
| LEPRE1      | 9.1479   | 11.8435   | 10.6345   | 10.65    | 11.6896  | 10.5523   |
| ANKRD29     | 6.8107   | 9.8247    | 8.24239   | 7.06831  | 7.5911   | 5.0818    |
| MMD         | 24.0955  | 16.0347   | 35.2277   | 15.1296  | 17.2209  | 8.02344   |
| OLIG3       | 0.558852 | 0.411752  | 0.246782  | 0.306106 | 0.118645 | 0.0870633 |
| SERPINA2    | 0        | 0         | 0         | 0        | 0        | 0         |
| SLC22A2     | 0        | 0.106535  | 0.0304055 | 0        | 0        | 0.0500589 |
| ENPP3       | 3.31526  | 0.884874  | 1.91777   | 0.792929 | 1.59359  | 1.16939   |
| BAD         | 36.4254  | 56.5839   | 49.0073   | 57.9016  | 48.9011  | 45.5689   |
| HPS3        | 4.83182  | 4.74003   | 4.75006   | 3.78697  | 6.25216  | 4.81404   |
| LIG4        | 5.51951  | 4.35639   | 5.31319   | 2.85365  | 6.26496  | 6.44538   |
| APOLD1      | 5.47612  | 3.84824   | 2.28553   | 2.81597  | 2.20145  | 2.31374   |
| AGSK1       | 6.06151  | 11.7236   | 11.6075   | 18.2886  | 11.2072  | 13.4679   |
| SPINK14     | 0        | 0         | 0         | 0        | 0        | 0         |
| SPAG6       | 0.661869 | 0.194823  | 0.326198  | 0.662109 | 0.140345 | 0.235398  |
| DECR1       | 111.825  | 96.5591   | 92.9192   | 76.9397  | 77.3836  | 76.8783   |
| WDR20       | 12.7674  | 14.65     | 15.0451   | 15.3952  | 16.2698  | 13.7426   |
| EFTUD2      | 17.8357  | 21.0401   | 18.9828   | 19.4534  | 19.7735  | 18.7453   |
| ELOVL1      | 386.648  | 390.493   | 297.502   | 330.414  | 223.437  | 308.942   |
| ILF3        | 69.014   | 84.8067   | 74.2255   | 84.7831  | 86.0627  | 72.8294   |
| LRRN2       | 0.775109 | 0.358223  | 0.306713  | 0.20924  | 0.572396 | 0.386812  |
| FAM114A2    | 10.2246  | 7.69614   | 8.55066   | 8.69253  | 7.8321   | 6.69439   |
| LOC10050989 | 1.44404  | 0.760602  | 0.790784  | 0.692388 | 0.684894 | 0.784986  |
| PHLDB1      | 26.1255  | 38.3982   | 49.2326   | 40.4652  | 36.1447  | 25.4105   |
| FAH         | 39.5365  | 39.6989   | 35.4031   | 25.5707  | 22.0984  | 19.4411   |
| TFCP2L1     | 25.2554  | 18.1206   | 21.3206   | 39.4731  | 18.9227  | 17.3417   |
| MYL1        | 0        | 0         | 0         | 0        | 0        | 0         |
| MIR671      | 244.337  | 942.513   | 0         | 524.044  | 1048.15  | 586.503   |
| LOC10065279 | 0.41359  | 0.0914176 | 0.234818  | 0.194177 | 0        | 0.193299  |
| NTRK2       | 15.3307  | 14.8066   | 24.9961   | 13.0529  | 17.0277  | 14.1133   |

|             |           |           |           |           |            |           |
|-------------|-----------|-----------|-----------|-----------|------------|-----------|
| TP53INP1    | 9.82141   | 8.34131   | 12.0557   | 9.30711   | 14.0739    | 12.2846   |
| EGR1        | 18.6255   | 18.5126   | 169.167   | 31.1135   | 51.0721    | 30.5605   |
| IFIH1       | 13.2959   | 8.4985    | 5.53361   | 3.13467   | 6.5803     | 4.34      |
| LOC10050657 | 0         | 0.0788688 | 0.0675282 | 0         | 0          | 0         |
| AHSP        | 2.21621   | 3.63894   | 1.91735   | 1.48642   | 0.604935   | 0.591877  |
| HMCN2       | 0.264565  | 0.825999  | 0.644641  | 0.287238  | 0.489711   | 0.340035  |
| LOC10050586 | 0         | 0         | 0.144295  | 0.134237  | 0.0303506  | 0.118782  |
| CLEC7A      | 6.67764   | 7.82973   | 6.77554   | 3.2146    | 11.0954    | 3.17372   |
| SLC12A6     | 5.56679   | 4.75629   | 6.63991   | 5.31089   | 6.87447    | 6.23687   |
| MTMR9LP     | 7.39293   | 13.9236   | 9.8684    | 8.58494   | 13.4293    | 10.059    |
| MFSD4       | 11.864    | 5.75023   | 6.63666   | 12.1691   | 6.34241    | 5.86405   |
| LOC10050567 | 0         | 0         | 0.251761  | 0.312283  | 0.635457   | 0.414494  |
| MX1         | 33.3213   | 28.7792   | 8.28161   | 4.87253   | 9.07093    | 5.11016   |
| MIR4699     | 0         | 0         | 0         | 0         | 0          | 0         |
| CPT1B       | 17.52     | 26.0521   | 15.2832   | 23.4651   | 25.8359    | 26.9563   |
| SSTR3       | 0         | 0         | 0         | 0         | 0          | 0         |
| C6orf138    | 0.0302211 | 0.18815   | 0.0228775 | 0.0785742 | 0.00962398 | 0.0839353 |
| GRK6        | 10.7642   | 16.4638   | 9.7856    | 14.0008   | 13.5363    | 12.7152   |
| HMGCL       | 48.1445   | 55.1931   | 36.8463   | 42.4954   | 42.5848    | 50.9496   |
| SBK2        | 0.108888  | 0         | 0         | 0         | 0          | 0         |
| OSCAR       | 2.11144   | 3.31828   | 2.3762    | 3.25736   | 3.91673    | 2.13841   |
| LOC10050583 | 0.231585  | 0         | 0         | 0         | 0          | 0.144314  |
| HCFC1       | 9.55215   | 10.0649   | 10.2425   | 10.6682   | 11.0081    | 10.3153   |
| SLC35C2     | 29.1198   | 43.8784   | 35.7748   | 45.5896   | 42.8279    | 37.5065   |
| FLJ14186    | 5.37997   | 7.81738   | 5.92098   | 6.08718   | 6.85536    | 7.11101   |
| SRPX2       | 3.97056   | 3.46922   | 7.67347   | 4.86871   | 3.09415    | 4.80302   |
| C6orf174    | 0.261969  | 0.152479  | 0.258791  | 0.214011  | 0.218978   | 0.236188  |
| BCO2        | 3.35538   | 1.78505   | 1.99907   | 1.97789   | 2.20525    | 2.35734   |
| AADA2L2     | 15.2187   | 15.2325   | 28.3669   | 19.9522   | 26.2439    | 27.1089   |
| SNORD116-2  | 0         | 0         | 0         | 0         | 0          | 0         |
| LOC144486   | 0.0392098 | 0.312002  | 0.267138  | 0.14727   | 0.249729   | 0.0977356 |
| RARRES1     | 16.0916   | 11.5246   | 35.709    | 31.7163   | 14.0284    | 19.5562   |
| SNX29       | 6.0627    | 4.83144   | 7.63544   | 5.16945   | 6.79635    | 6.26399   |
| SCGB3A1     | 26.0543   | 11.3555   | 6.9448    | 12.7491   | 0.46744    | 3.20145   |
| RPPH1       | 13.7357   | 5.75253   | 2.73632   | 11.54     | 3.22307    | 1.802     |
| GAGE12E     | 0         | 0.0333516 | 0         | 0         | 0          | 0         |
| SNORD10     | 136.581   | 140.882   | 292.945   | 277.869   | 275.466    | 85.1114   |
| ACTN4       | 112.273   | 106.973   | 109.62    | 130.76    | 118.766    | 131.463   |
| LOC730227   | 0.438084  | 0.358811  | 0.940949  | 0.280087  | 1.04737    | 0.8428    |
| ZNHIT3      | 37.8853   | 39.02     | 37.5009   | 41.2159   | 34.7985    | 33.1866   |
| SPANXN5     | 0         | 0         | 0         | 0.750273  | 0.33927    | 0         |
| FA2H        | 115.418   | 120.962   | 44.7424   | 48.4973   | 112.967    | 102.344   |
| ACY3        | 0.595092  | 0.0751632 | 0.193066  | 0.079826  | 0.162436   | 0.15893   |



|             |           |          |           |           |           |           |
|-------------|-----------|----------|-----------|-----------|-----------|-----------|
| CEP120      | 6.26978   | 4.78577  | 6.15429   | 4.98454   | 6.05583   | 4.59729   |
| TMEM41B     | 30.4669   | 31.2537  | 32.082    | 31.2929   | 28.2658   | 27.8243   |
| MIR586      | 0         | 0        | 0         | 0         | 0         | 0         |
| TMEM136     | 2.50077   | 2.50823  | 2.78118   | 2.34065   | 3.87325   | 3.12622   |
| NAP1L3      | 1.59635   | 1.28309  | 1.78521   | 1.19235   | 1.84859   | 1.15304   |
| LOC10012890 | 0.122635  | 0.108367 | 0         | 0.115144  | 0         | 0.0254688 |
| GPCRLTM7    | 0         | 0        | 0         | 0         | 0         | 0         |
| TRIM6-TRIM6 | 4.10E-124 | 0        | 2.28E-250 | 1.21E-96  | 1.01E-203 | 1.07E-95  |
| MIR103B2    | 0         | 0        | 0         | 0         | 0         | 0         |
| XKR4        | 0.149704  | 0.088239 | 0.151102  | 0.0234282 | 0.0953471 | 0.139933  |
| TAMM41      | 6.75342   | 6.99229  | 6.65971   | 5.50696   | 6.50853   | 5.09443   |
| MED18       | 11.8247   | 12.871   | 9.54254   | 10.0259   | 12.54     | 11.887    |
| UBE2U       | 0         | 0        | 0.151618  | 0.940332  | 0.063782  | 0.0624052 |
| C1orf170    | 5.81343   | 9.99098  | 6.67537   | 11.0401   | 12.3767   | 12.2927   |
| CLEC2L      | 0.0859635 | 0.152007 | 1.23642   | 1.7758    | 0.438005  | 1.44636   |
| METAP1      | 27.48     | 23.9768  | 23.2081   | 24.6166   | 26.1498   | 26.6204   |
| GPR114      | 0.44234   | 0.52912  | 0.236367  | 0.146594  | 0.662891  | 0.308076  |
| LMO3        | 1.85286   | 1.89104  | 1.87822   | 1.95538   | 1.38006   | 1.26175   |
| NHSL2       | 0.293079  | 0.329791 | 0.705926  | 0.225161  | 0.509082  | 0.431681  |
| SIK1        | 21.5316   | 25.4128  | 53.0875   | 34.2815   | 27.4926   | 20.8433   |
| MIR758      | 0         | 0        | 0         | 0         | 0         | 0         |
| ACN9        | 6.01014   | 6.33226  | 5.80087   | 5.64342   | 4.91246   | 4.21342   |
| TMEM107     | 6.58445   | 5.86437  | 6.93253   | 6.89436   | 7.51947   | 8.69131   |
| MCOLN1      | 11.7096   | 16.1575  | 13.4262   | 15.5957   | 16.0704   | 14.8381   |
| RAI14       | 14.9476   | 9.64041  | 12.3553   | 10.2941   | 12.2872   | 14.0038   |
| LOC641467   | 0.746168  | 0.565667 | 0.478758  | 0.528     | 0.960769  | 0.525254  |
| LINGO4      | 0.308694  | 0.51174  | 0.525787  | 0.543485  | 0.516099  | 0.38473   |
| L1CAM       | 4.41408   | 5.14669  | 3.83759   | 5.03159   | 6.69068   | 5.39316   |
| C7orf61     | 1.51954   | 1.65351  | 0.530907  | 0.768289  | 0.81891   | 0.801233  |
| LOC154822   | 0         | 0.021479 | 0         | 0.0456229 | 0.0618913 | 0.0302777 |
| IST1        | 69.2589   | 71.3637  | 61.2004   | 69.5797   | 74.3451   | 64.2      |
| DOHH        | 9.22585   | 14.6127  | 9.6826    | 12.5791   | 12.0633   | 12.2935   |
| FNIP1       | 6.85286   | 5.45151  | 7.33813   | 6.13289   | 7.2197    | 5.46424   |
| LOC1001280  | 0.229611  | 0.459142 | 0.0441963 | 0.211564  | 0.156846  | 0.141636  |
| LOC1005066  | 8.96548   | 17.552   | 16.4825   | 25.2553   | 18.762    | 27.9345   |
| HSD11B1L    | 3.76739   | 6.12878  | 4.17221   | 8.01962   | 6.59639   | 6.37562   |
| KCMF1       | 9.17953   | 8.68297  | 8.35778   | 8.92643   | 8.24916   | 8.23566   |
| MIR149      | 0         | 0        | 0         | 0         | 0         | 0         |
| BRD1        | 15.3957   | 17.4745  | 18.3167   | 18.5191   | 20.3336   | 18.023    |
| SLC18A1     | 0         | 0        | 0.0275179 | 0.213337  | 0         | 0.229363  |
| STK31       | 0.247359  | 0.430397 | 0.254769  | 0.204771  | 0.386908  | 0.416203  |
| FGD1        | 4.06799   | 5.5256   | 4.95471   | 5.48426   | 5.47134   | 5.73561   |
| PTCRA       | 0         | 0        | 0.160871  | 0         | 0.135349  | 0.0662136 |

|             |           |           |           |           |           |           |
|-------------|-----------|-----------|-----------|-----------|-----------|-----------|
| C6orf125    | 76.723    | 86.5886   | 71.4215   | 98.4008   | 54.4443   | 66.4876   |
| DNAH10      | 0.102795  | 0.024236  | 0.466899  | 0.418267  | 0.0349178 | 0.0939511 |
| BMPER       | 2.31823   | 0.512408  | 0.54841   | 0.489775  | 0.516772  | 0.469502  |
| GPR62       | 0.0939375 | 0.372166  | 0.248298  | 0.2199    | 0.119258  | 0.145847  |
| VEPH1       | 0.734301  | 0.518959  | 0.694461  | 0.89005   | 0.775135  | 1.13955   |
| NIPA2       | 21.9638   | 17.6616   | 18.213    | 18.1539   | 24.1191   | 24.3823   |
| DEF6        | 20.2161   | 31.5928   | 21.4118   | 28.4323   | 34.4483   | 26.6046   |
| CYB5D2      | 16.5447   | 17.1569   | 17.2402   | 19.49     | 14.6253   | 13.8215   |
| PRSS36      | 1.02006   | 1.95924   | 1.22485   | 1.38719   | 2.12827   | 1.16172   |
| MIR548I1    | 0         | 0         | 0         | 0         | 0         | 0         |
| OR6C4       | 0         | 0         | 0         | 0         | 0         | 0         |
| NME1        | 69.0615   | 72.1726   | 58.2453   | 71.7119   | 53.0845   | 64.8575   |
| TRIB3       | 9.65077   | 9.51713   | 9.42871   | 10.7659   | 9.37755   | 8.81532   |
| POU5F2      | 0.0854065 | 0.0755111 | 0.0646532 | 0.0801954 | 0.163188  | 0         |
| LOC10065278 | 0.396102  | 0.399788  | 0.64221   | 0.410779  | 2.40199   | 0.742114  |
| SLIRP       | 178.427   | 162.819   | 128.183   | 154.251   | 105.593   | 113.079   |
| FAIM3       | 1.60194   | 1.11752   | 1.07579   | 1.10032   | 1.58009   | 1.22517   |
| FMN2        | 0.0445472 | 0.0919002 | 0.0337225 | 0.0557721 | 0.0567447 | 0.0740264 |
| GOLGA5      | 19.5145   | 15.8817   | 19.5489   | 16.1871   | 16.7329   | 14.968    |
| OR51L1      | 0         | 0         | 0         | 0         | 0         | 0         |
| MEF2C       | 5.80632   | 4.32259   | 4.78138   | 4.21499   | 4.24779   | 3.27475   |
| NOX4        | 0.102671  | 0.160126  | 0.353461  | 0.459229  | 0.508955  | 0.335683  |
| PRMT6       | 7.54004   | 7.63792   | 5.04815   | 4.98089   | 6.15369   | 6.0917    |
| SNX18       | 7.61549   | 6.56676   | 8.61127   | 6.01252   | 6.80674   | 6.61684   |
| MIR3920     | 0         | 0         | 0         | 0         | 0         | 0         |
| TTLL8       | 0         | 0         | 0         | 0         | 0         | 0         |
| CTAG1A      | 0         | 0         | 0.0872976 | 2.97804   | 0.0550858 | 0         |
| KRT72       | 3.49335   | 3.12738   | 3.99434   | 13.9085   | 4.79878   | 15.441    |
| GJB5        | 43.4369   | 53.3986   | 56.7902   | 63.7798   | 58.9126   | 67.6701   |
| RAB6C       | 2.90567   | 1.89053   | 2.49759   | 2.16641   | 2.05147   | 2.37887   |
| LOC10018894 | 0.526956  | 0.349426  | 0.199454  | 0.742206  | 0         | 0.57466   |
| LOC10050751 | 0.0993885 | 0.175746  | 0.225713  | 0.0933242 | 0         | 0.0619347 |
| THNSL1      | 2.85495   | 2.22586   | 2.14157   | 1.80342   | 2.5622    | 2.32898   |
| LLPH        | 20.7117   | 18.3934   | 18.3269   | 15.9042   | 17.0022   | 17.3809   |
| PTPN20A     | 1.78838   | 1.18987   | 1.56945   | 1.33515   | 1.58146   | 1.79978   |
| LINC00244   | 0         | 0.205785  | 0.176195  | 0.655654  | 0.444725  | 0.290083  |
| C13orf33    | 10.7742   | 6.7131    | 9.50476   | 4.38128   | 7.94278   | 6.10605   |
| SNAR-B2     | 0         | 0         | 0         | 0         | 0         | 0         |
| SNX19       | 15.1714   | 11.716    | 17.2987   | 13.8319   | 15.6869   | 15.6229   |
| PDIK1L      | 6.35774   | 3.79587   | 4.63892   | 3.41457   | 5.60725   | 4.72161   |
| MCTP1       | 2.1183    | 1.56084   | 1.9324    | 1.1989    | 1.97167   | 1.20161   |
| DPY19L3     | 7.12728   | 5.31469   | 5.9141    | 5.36582   | 7.18968   | 6.14047   |
| CCDC87      | 0.068343  | 0.332335  | 0.12934   | 0.128346  | 0.152348  | 0.127765  |

|             |           |           |          |           |           |           |
|-------------|-----------|-----------|----------|-----------|-----------|-----------|
| ARPC4       | 104.187   | 122.66    | 97.1412  | 123.446   | 109.302   | 103.738   |
| EIF1        | 426.69    | 480.24    | 443.574  | 517.1     | 402.46    | 360.316   |
| KCP         | 0.404844  | 0.432468  | 0.472462 | 0.138072  | 0.889022  | 0.483426  |
| TARS        | 26.1207   | 21.794    | 20.8337  | 18.6089   | 18.7104   | 23.7613   |
| NFYB        | 13.1607   | 13.0091   | 12.4213  | 9.70579   | 12.825    | 10.665    |
| PCDHB14     | 2.67264   | 2.83167   | 4.52868  | 3.03196   | 4.06178   | 2.95289   |
| C2orf80     | 0         | 0         | 0        | 0         | 0         | 0         |
| LINC00261   | 0         | 0         | 0        | 0         | 0         | 0         |
| FLJ22447    | 1.20002   | 0.212196  | 0.666176 | 0.07512   | 0.509533  | 0.348974  |
| GCSH        | 14.5075   | 16.7131   | 11.7585  | 11.2141   | 9.08428   | 9.22308   |
| FAM83E      | 1.43827   | 1.45329   | 1.0499   | 2.21871   | 3.46788   | 2.68881   |
| QRFP        | 0         | 0.415194  | 0.710986 | 0.440951  | 0.897281  | 1.46319   |
| TGM2        | 5.12747   | 3.32308   | 1.28153  | 0.772008  | 2.02926   | 2.34218   |
| GAGE2E      | 0         | 0.0385341 | 0        | 0         | 0         | 0         |
| KBTBD5      | 0         | 0         | 0        | 0         | 0         | 0         |
| MGC72080    | 13.6154   | 15.696    | 10.9812  | 18.5198   | 12.5215   | 11.8546   |
| CD72        | 1.93766   | 3.42632   | 1.51921  | 2.98907   | 3.2175    | 2.71681   |
| SCAP        | 44.3756   | 50.1515   | 52.4318  | 57.9449   | 61.753    | 58.845    |
| FER         | 1.1807    | 1.25268   | 1.65991  | 1.26704   | 0.923878  | 1.30335   |
| C6orf108    | 50.9849   | 64.6767   | 44.9621  | 60.8189   | 48.9397   | 47.1751   |
| LOC10065281 | 0.0996351 | 0.0770797 | 0.274589 | 0.0935558 | 0.465399  | 0.490356  |
| FOXO3       | 12.8612   | 9.86016   | 12.1519  | 10.1911   | 12.5194   | 13.8518   |
| SPATA17     | 0.452141  | 0.239853  | 0.410728 | 0.169821  | 0.460754  | 0.225404  |
| PPP1R16B    | 3.3256    | 3.06415   | 2.37239  | 1.58348   | 3.06273   | 1.95292   |
| PLSCR3      | 15.9653   | 20.3164   | 12.3972  | 29.4959   | 13.3637   | 21.8166   |
| HLA-DQB2    | 39.9976   | 41.0273   | 37.7196  | 23.5845   | 72.948    | 33.9652   |
| TTC29       | 0.0587215 | 0.0519179 | 0.133358 | 0         | 0.0374001 | 0.0731856 |
| NFKB1       | 19.46     | 17.9043   | 17.295   | 14.4662   | 17.2116   | 15.0996   |
| LOC10050716 | 4.20522   | 6.72792   | 6.51833  | 7.70936   | 6.88713   | 5.82336   |
| LOC10029370 | 2.16138   | 4.58629   | 4.58129  | 6.4944    | 6.33233   | 6.19565   |
| HPR         | 0.524527  | 0.982551  | 0.135976 | 0.189747  | 0.573607  | 0.125926  |
| MIR4731     | 0         | 0         | 0        | 0         | 0         | 0         |
| KPRP        | 54.045    | 26.9664   | 102.16   | 97.5537   | 141.607   | 111.897   |
| HSD17B2     | 16.4964   | 14.0498   | 13.118   | 20.0373   | 19.6638   | 19.8052   |
| TNRC18      | 11.9654   | 13.6511   | 15.7821  | 13.5693   | 16.4786   | 15.4234   |
| PARM1       | 12.2226   | 9.59265   | 9.61346  | 10.2056   | 8.67121   | 26.2838   |
| OGFR        | 25.6904   | 45.1317   | 24.7056  | 27.7767   | 39.7333   | 30.4018   |
| TNIP3       | 0.386575  | 0.341788  | 0        | 0         | 0.107715  | 0         |
| SRSF3       | 70.8803   | 75.1027   | 65.5602  | 63.8003   | 65.6222   | 62.0056   |
| HOXD1       | 0.681425  | 1.01957   | 0.490926 | 0.836724  | 0.715189  | 0.555292  |
| MIR3197     | 0         | 0         | 0        | 0         | 0         | 0         |
| DEFA3       | 0         | 0         | 0        | 0.208942  | 0.0708618 | 0         |
| LRRN4CL     | 5.21643   | 5.50691   | 8.04508  | 4.56917   | 6.76872   | 5.11858   |

|             |           |           |           |           |            |           |
|-------------|-----------|-----------|-----------|-----------|------------|-----------|
| ACAD10      | 8.35492   | 12.0752   | 10.2041   | 11.292    | 11.2922    | 11.0787   |
| LOC441124   | 8.39279   | 15.8685   | 7.79992   | 12.5443   | 9.47648    | 12.5747   |
| AARSD1      | 13.564    | 14.6978   | 13.2332   | 13.4522   | 13.5236    | 12.6745   |
| SNX15       | 15.9372   | 20.1042   | 20.6493   | 17.281    | 19.1709    | 17.7088   |
| NBPF8       | 2.75459   | 1.8149    | 3.74691   | 2.06368   | 3.05985    | 2.49082   |
| ZNF83       | 31.5771   | 37.6748   | 44.1737   | 44.044    | 59.7982    | 47.6251   |
| USP37       | 3.94261   | 2.54651   | 3.065     | 2.29438   | 2.69902    | 2.62605   |
| SAA2-SAA4   | 0.0161009 | 0.956025  | 5.57E-07  | 0.212202  | 0.00466426 | 6.90E-06  |
| CSNK1G2     | 32.0348   | 46.8009   | 34.4544   | 43.5744   | 42.5976    | 37.8736   |
| ANKRD36     | 2.14908   | 2.5918    | 2.91604   | 2.47232   | 3.15006    | 2.4362    |
| STON1       | 2.62987   | 2.15465   | 2.93828   | 2.29694   | 3.32571    | 3.36193   |
| TCEAL8      | 41.9152   | 39.4452   | 45.5427   | 39.2832   | 43.2849    | 41.5966   |
| PDCD1LG2    | 3.35032   | 1.88836   | 2.06067   | 0.904445  | 2.72064    | 1.48754   |
| BBS12       | 1.24966   | 1.13178   | 1.22257   | 1.08767   | 1.26134    | 1.12025   |
| ENPP2       | 11.7515   | 23.239    | 16.0256   | 10.7559   | 12.1907    | 7.8911    |
| CLDN18      | 0.183929  | 0.104064  | 0.379143  | 0.147373  | 0.263231   | 0.1672    |
| LOC10050615 | 0         | 0         | 0         | 0         | 0          | 0         |
| RASSF8      | 4.26373   | 2.81913   | 3.27181   | 2.64474   | 2.4708     | 1.88764   |
| A2MP1       | 0.374179  | 0.330826  | 0.070814  | 0.351349  | 0.297896   | 0.116586  |
| NCOA3       | 12.1079   | 9.63995   | 12.0248   | 8.75464   | 11.8648    | 10.5379   |
| ATP1A1OS    | 5.30756   | 4.38767   | 5.30259   | 4.92677   | 6.40568    | 4.28487   |
| FAM8A1      | 16.2745   | 12.4079   | 17.0073   | 11.5902   | 15.9955    | 15.8533   |
| FZD8        | 3.91293   | 2.9928    | 3.92597   | 7.08592   | 4.62831    | 6.17334   |
| LOC221122   | 0         | 0         | 0.0681873 | 0         | 0          | 0         |
| SLC8A1      | 2.18001   | 2.23691   | 1.69846   | 1.43447   | 2.22957    | 1.24942   |
| CENPH       | 8.01423   | 10.0033   | 5.65047   | 6.78747   | 7.15604    | 4.99413   |
| GRIK1-AS2   | 0.339451  | 0         | 0.170143  | 0.10514   | 0.417622   | 0.344775  |
| CXCR5       | 0.110051  | 0.221041  | 6.09E-17  | 0.140408  | 0.309835   | 0.13211   |
| RPTN        | 5.0342    | 7.22363   | 8.14245   | 8.85996   | 6.58783    | 8.69131   |
| ALAS2       | 0.338967  | 1.19832   | 0.277501  | 0.767803  | 0.184226   | 0.321237  |
| LOC10065273 | 0.477551  | 0         | 0         | 0         | 0.152077   | 0         |
| TRHDE       | 0.952297  | 0.67743   | 0.972931  | 0.505274  | 0.437729   | 0.70774   |
| TCEB3CL     | 0         | 0         | 0         | 0.0202478 | 0.0137339  | 0         |
| TLCD2       | 10.1262   | 10.0218   | 9.23799   | 7.58837   | 6.91968    | 5.55176   |
| SNORD74     | 0         | 0         | 0         | 0         | 0          | 0         |
| MIR564      | 0         | 0         | 0         | 0         | 0          | 0         |
| MTA1        | 23.8316   | 38.0021   | 30.026    | 33.9365   | 35.5209    | 32.2212   |
| KIF5A       | 0.275649  | 0.177245  | 0.0758792 | 0.0705901 | 0.319205   | 0.21862   |
| TOB2P1      | 0.027322  | 0.169094  | 0.330926  | 0.0513098 | 0.22622    | 0.0851294 |
| PRSS56      | 0         | 0.0419803 | 0         | 0.0445845 | 0          | 0         |
| MIR186      | 0         | 0         | 0         | 0         | 0          | 0         |
| ZNF295-AS1  | 0.214985  | 0         | 0         | 0         | 0          | 0.13397   |
| METTL5      | 35.315    | 32.7161   | 29.3843   | 25.1218   | 24.8703    | 24.7125   |

|             |           |           |           |           |           |           |
|-------------|-----------|-----------|-----------|-----------|-----------|-----------|
| CNOT4       | 7.77394   | 7.2942    | 7.23326   | 6.7577    | 7.54636   | 7.21419   |
| LOC10050736 | 0.593475  | 0.587873  | 0.415985  | 0.123836  | 0.29574   | 0.359984  |
| FBXO17      | 10.333    | 15.3757   | 14.5966   | 15.6799   | 12.0751   | 12.2169   |
| MIR4266     | 0         | 0         | 0         | 0         | 0         | 0         |
| TMSB4Y      | 0.951678  | 1.57064   | 0         | 0         | 0         | 0         |
| REG4        | 0         | 0         | 0         | 0         | 0         | 0         |
| LILRB1      | 0.954967  | 0.993201  | 0.453314  | 0.13674   | 0.503872  | 0.218055  |
| LOC646576   | 0.905221  | 0.800339  | 0.609118  | 0.661102  | 1.02496   | 1.56693   |
| SP9         | 0.0743905 | 0         | 0         | 0         | 0.379038  | 0.092714  |
| C14orf105   | 0         | 0         | 0         | 0         | 0         | 0         |
| IL15RA      | 9.52172   | 11.678    | 6.85591   | 4.68442   | 10.2307   | 7.35836   |
| CCNH        | 17.9798   | 15.6049   | 19.3489   | 11.4125   | 13.6478   | 12.4807   |
| MIR4291     | 0         | 0         | 0         | 0         | 0         | 0         |
| CXorf49     | 0.0187964 | 0.155799  | 0.151776  | 0.0176495 | 0.127696  | 0.095657  |
| NINJ1       | 61.0886   | 77.9559   | 81.6809   | 102.048   | 76.3273   | 69.6652   |
| HNRNPUL2-B  | 9.65653   | 2.42925   | 12.5255   | 0.362728  | 7.89163   | 10.8128   |
| SRP9        | 147.328   | 124.466   | 117.797   | 99.5937   | 115.244   | 109.53    |
| 12-Sep      | 0         | 0.0899445 | 0         | 0         | 0.167375  | 0.106858  |
| MIR204      | 0         | 0         | 0         | 0         | 0         | 0         |
| GLIS3-AS1   | 0         | 0.649547  | 1.13836   | 0.907723  | 0.817135  | 0.804567  |
| LOC10065274 | 5.12E-09  | 9.95E-09  | 2.24E-08  | 1.75E-08  | 5.85E-09  | 9.71E-10  |
| SCCPDH      | 11.2721   | 9.28003   | 13.8508   | 13.5756   | 8.28049   | 7.96598   |
| LOC10028783 | 0.335864  | 0.360993  | 0.739033  | 0.186452  | 0.34066   | 0.164612  |
| PAQR4       | 12.5011   | 18.4456   | 13.7918   | 17.2558   | 14.1629   | 15.5443   |
| ITGA9       | 1.32972   | 1.00148   | 1.84544   | 0.85551   | 1.28604   | 0.951381  |
| GRAMD1B     | 0.326142  | 0.256315  | 0.0822972 | 0.136108  | 0.323123  | 0.270984  |
| PUF60       | 68.6345   | 87.7527   | 66.0013   | 90.2574   | 68.9777   | 78.8374   |
| RNU1-3      | 48.9911   | 64.514    | 22.6473   | 65.5909   | 29.0632   | 22.9783   |
| MIR548M     | 0         | 0         | 0         | 0         | 0         | 0         |
| MFSD8       | 10.5907   | 10.268    | 10.9047   | 9.9445    | 12.3098   | 10.9552   |
| NIT2        | 74.7397   | 86.8026   | 64.9979   | 71.765    | 60.6385   | 57.479    |
| CCL23       | 1.83603   | 1.06009   | 0.907657  | 1.50654   | 1.88713   | 1.76674   |
| LOC643406   | 0.0579243 | 0.0843012 | 0         | 0.0241733 | 0.0512393 | 0.0160427 |
| SPIN2B      | 5.15495   | 7.29285   | 5.29181   | 5.38497   | 7.30071   | 7.13737   |
| ALG3        | 23.9825   | 28.4368   | 19.2398   | 27.9746   | 20.125    | 21.775    |
| SPP2        | 0         | 0         | 0         | 0         | 0         | 0         |
| MIR301A     | 0         | 0         | 0         | 0         | 0         | 0         |
| LRP4        | 7.68138   | 8.32813   | 15.1258   | 10.4067   | 17.5477   | 14.7624   |
| FAM126B     | 7.01317   | 5.36849   | 6.72628   | 5.05535   | 6.35526   | 4.90005   |
| ELF4        | 7.03633   | 8.371     | 7.99021   | 6.45939   | 8.11536   | 7.64441   |
| OR5M3       | 0         | 0         | 0         | 0         | 0         | 0         |
| CASQ2       | 6.19529   | 4.8543    | 3.70696   | 3.06539   | 4.60739   | 2.77412   |
| RBM1A1      | 0         | 0         | 0         | 0         | 0         | 0         |

|             |          |           |          |          |           |          |
|-------------|----------|-----------|----------|----------|-----------|----------|
| SRP14       | 141.84   | 143.219   | 144.136  | 144.974  | 127.158   | 133.582  |
| CD46        | 126.523  | 88.314    | 102.821  | 80.9768  | 95.1911   | 80.7349  |
| MIR4751     | 0        | 0         | 0        | 0        | 0         | 0        |
| LOC10050710 | 9.31673  | 13.3465   | 12.0524  | 12.6241  | 7.51124   | 7.05514  |
| SNORD96A    | 0        | 0         | 0        | 0        | 0         | 0        |
| MBOAT7      | 23.5977  | 31.2437   | 23.5342  | 31.9381  | 28.093    | 30.5235  |
| AGR3        | 0        | 0         | 0        | 0        | 0         | 0        |
| RANBP9      | 24.7056  | 21.7587   | 23.1128  | 22.6302  | 24.2516   | 23.2321  |
| CD4         | 14.3298  | 12.2092   | 12.6938  | 8.36083  | 21.7834   | 11.3895  |
| PWWP2B      | 7.76684  | 13.306    | 10.2383  | 14.581   | 11.8404   | 12.8251  |
| AQP5        | 201.335  | 94.0571   | 135.786  | 171.467  | 87.5363   | 89.6439  |
| APOPT1      | 25.8927  | 33.8193   | 27.7927  | 31.1622  | 25.9558   | 28.8329  |
| CYP20A1     | 3.02767  | 3.14837   | 2.55241  | 3.11753  | 2.79938   | 2.49775  |
| ZNF512B     | 10.559   | 14.293    | 13.2877  | 15.1765  | 15.6681   | 13.2879  |
| UBE2A       | 58.4368  | 49.2052   | 48.8273  | 45.2949  | 48.5483   | 49.9455  |
| LOC442454   | 35.1711  | 34.3176   | 32.7411  | 33.3226  | 27.1431   | 30.1113  |
| LOC401052   | 4.38779  | 8.48628   | 6.93381  | 5.45909  | 6.6372    | 3.3495   |
| HORMAD1     | 0        | 0         | 0.16807  | 0        | 0.638558  | 0.384328 |
| OR8D2       | 0        | 0         | 0        | 0        | 0         | 0        |
| ZNF192P1    | 0.841567 | 0.457884  | 0.980109 | 0.729432 | 0.907075  | 0.685792 |
| VWCE        | 0.555652 | 0.835163  | 0.694042 | 0.80871  | 0.654711  | 0.605953 |
| BRSK2       | 0.448573 | 0.148725  | 0.169786 | 0.289577 | 0.142849  | 0.209649 |
| LOC283403   | 0        | 0         | 0        | 0.241256 | 0.109095  | 0.16011  |
| DEFB134     | 0        | 0         | 0        | 0        | 0         | 0        |
| ZBTB8OS     | 12.6726  | 11.8532   | 12.5123  | 8.85232  | 7.95387   | 9.80497  |
| KDM4B       | 12.482   | 12.8221   | 15.8131  | 13.9069  | 17.4083   | 15.3289  |
| CLVS1       | 0.431198 | 0.674111  | 0.507391 | 0.422256 | 0.547769  | 0.601969 |
| GOLGA2      | 34.018   | 33.7605   | 36.4693  | 37.1614  | 38.8918   | 40.4545  |
| KLF7        | 3.04473  | 1.71827   | 2.84431  | 1.33823  | 1.81542   | 2.26067  |
| RNF135      | 18.2072  | 23.1293   | 19.1184  | 23.2349  | 23.0521   | 19.598   |
| LOC285441   | 0        | 0.0799508 | 0        | 0        | 0.0374716 | 0        |
| MGC2752     | 6.52291  | 6.96754   | 7.64142  | 7.78778  | 7.95178   | 7.48585  |
| MXD3        | 8.17234  | 20.4164   | 9.49991  | 19.4103  | 18.0335   | 15.4609  |
| PTPN5       | 1.01393  | 1.73375   | 0.372886 | 0.310611 | 0.247318  | 0.226214 |
| MIR4679-1   | 0        | 0         | 0        | 0        | 0         | 0        |
| SLITRK5     | 0.501461 | 0.154212  | 0.31359  | 0.327557 | 0.33327   | 0.434768 |
| RAB11FIP3   | 13.9968  | 19.8505   | 17.1152  | 19.1111  | 18.5126   | 18.0642  |
| RIPK2       | 8.36965  | 7.15899   | 6.92526  | 6.87203  | 6.59516   | 7.93258  |
| LOC10065276 | 55.7455  | 80.197    | 47.9928  | 80.0961  | 50.7152   | 46.5757  |
| MIR5095     | 0        | 0         | 0        | 0        | 0         | 0        |
| WDSUB1      | 7.93232  | 6.15002   | 7.86202  | 6.68453  | 6.07684   | 7.49874  |
| PPM1L       | 2.33826  | 1.29209   | 1.91758  | 1.25027  | 1.40651   | 1.74043  |
| KCNJ5       | 0.547352 | 0.302459  | 0.543832 | 0.44971  | 0.544705  | 0.575584 |

|             |           |           |           |          |          |           |
|-------------|-----------|-----------|-----------|----------|----------|-----------|
| PTF1A       | 0         | 0.0729456 | 0         | 0        | 0        | 0         |
| LOC10050744 | 15.2882   | 23.1389   | 21.74     | 20.0082  | 15.0451  | 17.0293   |
| FRAT2       | 12.7028   | 14.756    | 10.8093   | 14.6267  | 14.2617  | 13.9538   |
| SCFD2       | 5.45298   | 4.95893   | 5.11864   | 3.94992  | 3.98903  | 4.23304   |
| KRTAP19-6   | 0         | 0         | 0         | 0        | 0        | 49.3819   |
| LOC10050721 | 0.240421  | 0.070855  | 0.0606667 | 0.225751 | 0.102084 | 0.39952   |
| TRIAP1      | 30.9991   | 30.4434   | 24.9828   | 26.6     | 26.3652  | 24.8451   |
| ANKMY1      | 1.91962   | 4.13243   | 4.09379   | 4.49091  | 4.15255  | 3.6006    |
| DUX5        | 0.490236  | 0.682413  | 1.53793   | 0.998966 | 1.9258   | 0.458241  |
| IFI27       | 409.433   | 559.497   | 88.9428   | 52.7522  | 124.944  | 62.9638   |
| LOC400743   | 0         | 0         | 0.194873  | 0        | 0.163956 | 0         |
| LOC10028886 | 0.286841  | 0.0838452 | 0.223359  | 0.178344 | 0.416955 | 0.490099  |
| LOC10050689 | 0         | 0.0470697 | 0.1313    | 0.10015  | 0.143737 | 0.0993856 |
| ADAMTS9-AS  | 0.870787  | 0.769895  | 0.797967  | 0.903724 | 1.22598  | 0.713997  |
| ANKRD54     | 15.6267   | 23.2493   | 15.3131   | 23.8288  | 17.7817  | 17.956    |
| MIR944      | 0         | 0         | 0         | 0        | 0        | 0         |
| ZNF195      | 8.04452   | 8.52549   | 7.00127   | 7.52705  | 8.31351  | 8.55012   |
| LOC10012984 | 0.104319  | 0.242728  | 0.526785  | 0.456665 | 0.880359 | 0.273966  |
| PLIN3       | 102.201   | 109.938   | 79.7028   | 80.2448  | 81.4104  | 78.8816   |
| ATP2A2      | 38.353    | 29.6579   | 33.8739   | 32.6645  | 31.7642  | 26.0928   |
| PTPLA       | 3.71661   | 2.8379    | 2.36589   | 1.34835  | 3.06651  | 2.94768   |
| UBE2Q1      | 23.925    | 23.5666   | 24.7754   | 26.843   | 24.8496  | 22.937    |
| LDLRAD1     | 0         | 0         | 0         | 0        | 0        | 0         |
| MIR615      | 0         | 0         | 0         | 0        | 0        | 0         |
| LINC00264   | 0.238524  | 0.547398  | 0.401254  | 0.31107  | 0.202557 | 0.264246  |
| MTRF1       | 6.07512   | 6.99509   | 5.098     | 4.99691  | 6.53877  | 6.74979   |
| MAMDC2      | 3.11802   | 2.99648   | 4.16655   | 2.39314  | 4.5071   | 4.34223   |
| ESRRG       | 2.84881   | 0.618056  | 1.03      | 1.9162   | 0.772978 | 0.870789  |
| RAP1B       | 34.7206   | 33.9466   | 33.4666   | 29.6118  | 33.7606  | 26.4603   |
| LOC10050751 | 0         | 1.21559   | 0         | 0        | 0        | 0.214194  |
| STRADB      | 5.75818   | 8.23736   | 6.20297   | 4.7286   | 5.75512  | 4.55418   |
| CNR1        | 1.18016   | 1.39119   | 1.12274   | 0.85554  | 1.22945  | 1.29167   |
| MIR3156-1   | 0         | 0         | 0         | 0        | 0        | 0         |
| ZKSCAN5     | 3.71208   | 3.83235   | 2.86243   | 2.46815  | 3.48022  | 2.85915   |
| MIR4497     | 0         | 0         | 0         | 0        | 0        | 0         |
| LOC10065291 | 1014.44   | 1481.49   | 1102.1    | 1746.74  | 1147.44  | 1104.33   |
| TUBAL3      | 0.252219  | 0.401394  | 0.577569  | 0.933902 | 0.845475 | 1.10172   |
| OPRL1       | 0.431692  | 0.570551  | 1.20709   | 0.950748 | 1.11316  | 0.691712  |
| LOC283588   | 2.29312   | 2.34422   | 1.7359    | 2.11956  | 2.98946  | 2.45605   |
| LOC441009   | 0.0651933 | 0.0576398 | 0.0493517 | 0.122431 | 0.041522 | 0.0406257 |
| INSL3       | 0.874736  | 0.154677  | 0.132436  | 0.164273 | 0.334274 | 0.10902   |
| MYSM1       | 14.3303   | 10.0236   | 14.5474   | 9.4524   | 15.0328  | 11.6326   |
| OCEL1       | 13.3712   | 17.0348   | 11.3973   | 15.3235  | 14.6184  | 12.4658   |

|             |           |           |           |           |           |            |
|-------------|-----------|-----------|-----------|-----------|-----------|------------|
| MRPL19      | 8.48546   | 6.11974   | 6.88237   | 5.61155   | 5.77503   | 6.13383    |
| MIR551A     | 0         | 0         | 0         | 0         | 0         | 0          |
| RASD2       | 4.81723   | 3.66755   | 1.72204   | 2.16742   | 1.70451   | 2.54327    |
| APLN        | 0.521269  | 0.325322  | 0.5803    | 0.374296  | 0.663999  | 0.535019   |
| SCYL2       | 15.8488   | 12.2865   | 14.0977   | 10.9985   | 15.084    | 12.5014    |
| CCL19       | 68.5997   | 124.953   | 55.2039   | 24.1783   | 121.685   | 43.4834    |
| ZDHHC12     | 26.7741   | 38.467    | 29.1355   | 46.8611   | 37.8668   | 34.0081    |
| SECISBP2    | 23.8514   | 25.6617   | 23.3678   | 24.2165   | 31.0448   | 24.5932    |
| LOC10065271 | 0.21377   | 0.0933644 | 0.0805409 | 0.20325   | 0.0677914 | 0.0678554  |
| LOC10050571 | 0.0588339 | 0.0520172 | 0         | 0         | 0         | 0          |
| HOMEZ       | 5.54752   | 4.04875   | 5.36823   | 3.90677   | 4.76655   | 4.35384    |
| POLR1E      | 14.6343   | 19.7067   | 14.6148   | 15.1156   | 14.0527   | 13.0479    |
| RADIL       | 0.774451  | 1.53472   | 0.869288  | 1.00303   | 1.10557   | 1.36461    |
| CCDC84      | 16.3109   | 32.396    | 19.4563   | 37.0452   | 26.7306   | 23.15      |
| NUDT9P1     | 0.422104  | 0.373197  | 0.239651  | 0.198174  | 0.26884   | 0.394556   |
| ATXN7L3     | 22.3012   | 26.4907   | 26.9832   | 27.3534   | 30.1643   | 26.7806    |
| XIAP        | 8.47063   | 6.72502   | 7.58245   | 6.55116   | 7.49902   | 7.06773    |
| APOBEC3H    | 0.591867  | 0.717635  | 0.602733  | 0.651284  | 1.06432   | 0.536897   |
| MGC12982    | 1.36741   | 1.13786   | 0.913358  | 0.604226  | 1.28075   | 1.30323    |
| NUP205      | 11.8008   | 9.9078    | 11.3801   | 9.39145   | 10.8953   | 8.93092    |
| DNAH12      | 0.0502481 | 0.0590042 | 0.216881  | 0.0589876 | 0.106299  | 0.00616506 |
| TMPRSS11BN  | 0         | 0         | 0         | 0         | 0         | 0          |
| MIR4315-2   | 0         | 0         | 0         | 0         | 0         | 0          |
| LOC10050671 | 0.311429  | 0.240928  | 0.117877  | 0.182767  | 0.421495  | 0.36388    |
| MALL        | 12.4596   | 10.7963   | 11.6325   | 9.31486   | 11.6591   | 10.0707    |
| ALPP        | 0.0173949 | 0         | 0         | 0         | 0         | 0          |
| B3GAT2      | 0.0826799 | 3.77E-132 | 7.95E-198 | 4.59E-185 | 4.05E-137 | 0.0953668  |
| SYNJ1       | 4.19737   | 2.6681    | 3.48894   | 2.6533    | 4.41184   | 3.58151    |
| HIST1H2BM   | 0         | 0.352478  | 0         | 0         | 0         | 0          |
| SLC12A7     | 18.0226   | 22.1864   | 21.0962   | 28.7383   | 21.1559   | 15.7278    |
| MIR4489     | 0         | 0         | 0         | 0         | 0         | 0          |
| LOC729737   | 6.39921   | 7.52048   | 8.85702   | 7.44476   | 9.37525   | 7.72287    |
| C11orf94    | 0.595852  | 1.58044   | 0.451063  | 0         | 0.379501  | 1.11393    |
| MIR3973     | 0         | 0         | 0         | 0         | 0         | 0          |
| SHF         | 6.37947   | 7.24675   | 8.09977   | 12.1321   | 12.5494   | 19.9526    |
| DEFB124     | 3.29254   | 5.82212   | 0         | 9.27494   | 8.38816   | 8.2071     |
| MAP1A       | 3.07277   | 2.18151   | 3.95784   | 1.70533   | 2.19074   | 1.89195    |
| NSAP11      | 0.0501661 | 0         | 0.0379761 | 0         | 0.0319511 | 0.0312614  |
| JPX         | 1.77281   | 1.8473    | 2.34855   | 2.67531   | 2.78245   | 1.85438    |
| ITGAD       | 0.0249574 | 0.110329  | 0.0755714 | 0.0468691 | 0.0953729 | 0.0466571  |
| FOXI3       | 0         | 0         | 0.20007   | 0         | 0.448877  | 0.109797   |
| RFPL4A      | 0         | 0         | 0         | 0         | 0         | 0          |
| ZNF99       | 0.0731077 | 0         | 0.0276715 | 0         | 0         | 0          |



|             |           |           |          |           |           |           |
|-------------|-----------|-----------|----------|-----------|-----------|-----------|
| TTY21B      | 0         | 0         | 0        | 0         | 0         | 0         |
| CPE         | 69.4552   | 42.3515   | 57.6906  | 43.8827   | 40.3066   | 34.5785   |
| TIAM2       | 0.97481   | 0.454638  | 0.547774 | 0.643741  | 1.05463   | 1.31933   |
| SETD2       | 10.824    | 9.76847   | 11.9508  | 8.90896   | 11.3539   | 10.3695   |
| CXorf56     | 11.3193   | 12.1419   | 10.4975  | 11.7783   | 11.7186   | 11.9831   |
| DKK4        | 0         | 0         | 0.115757 | 0.287169  | 0         | 0.0952899 |
| ZNF100      | 3.64308   | 3.27847   | 3.62785  | 2.34164   | 2.52745   | 1.95939   |
| PRPF6       | 35.9977   | 40.8436   | 42.7392  | 43.2872   | 43.5127   | 39.5453   |
| NPY2R       | 0.081149  | 0.0239156 | 0        | 0         | 0.0172281 | 0         |
| TMPRSS12    | 0.0737956 | 0.326227  | 0.111727 | 0.0692929 | 0.0470008 | 0.0919726 |
| LACC1       | 5.09018   | 3.84514   | 5.8349   | 2.89518   | 4.46625   | 4.0211    |
| KIAA1949    | 18.6987   | 24.6595   | 20.0606  | 19.3677   | 25.9966   | 16.6243   |
| C4orf38     | 0.563689  | 0.747567  | 0.391156 | 0.352863  | 0.658197  | 0.380539  |
| YIPF4       | 20.4541   | 14.8682   | 15.8031  | 13.5631   | 14.5382   | 16.0312   |
| MIR4771-1   | 0         | 0         | 0        | 0         | 0         | 0         |
| SNORA74B    | 0         | 0         | 0        | 0         | 2.67503   | 0         |
| LOC10050554 | 0         | 0         | 0        | 0         | 0         | 0         |
| KRT18P55    | 0.0531724 | 0         | 0        | 0         | 0         | 0         |
| HEXIM2      | 3.78617   | 3.79885   | 3.87469  | 4.67831   | 3.90536   | 4.22381   |
| TMEM63A     | 18.2052   | 13.5186   | 18.2838  | 15.3394   | 22.3875   | 25.4326   |
| GNB5        | 5.67486   | 5.8732    | 5.15503  | 6.26889   | 5.57024   | 5.17959   |
| TM4SF20     | 0         | 0.078394  | 0        | 0         | 0.0282363 | 0.0276268 |
| MOB3B       | 4.50393   | 3.90452   | 4.87072  | 4.1742    | 4.85237   | 3.42631   |
| SYNRG       | 7.18449   | 6.37048   | 7.03656  | 6.26914   | 8.22675   | 6.56772   |
| NLRP1       | 16.3783   | 27.49     | 29.5363  | 26.0976   | 35.836    | 25.6122   |
| PPIAL4F     | 2.53544   | 1.91688   | 2.23929  | 1.36701   | 1.73484   | 1.64942   |
| OSTF1       | 57.7409   | 53.7742   | 50.6842  | 53.797    | 44.6763   | 50.308    |
| FEV         | 0         | 0         | 0        | 0         | 0         | 0         |
| TSPYL2      | 20.4086   | 31.936    | 28.814   | 32.9557   | 38.8377   | 25.7436   |
| PYDC1       | 18.3702   | 13.4059   | 12.5819  | 16.1541   | 13.9287   | 16.5353   |
| NPTX1       | 0.44174   | 0.390559  | 1.07008  | 0.829575  | 0.393886  | 0.385384  |
| PRSS16      | 2.78529   | 2.70884   | 3.9534   | 4.11917   | 3.52576   | 4.07884   |
| IL17B       | 0.384121  | 0.679232  | 1.01774  | 0.90171   | 0.733947  | 1.31653   |
| LYSMD4      | 10.2284   | 13.5344   | 9.78332  | 11.8431   | 13.3592   | 11.1974   |
| DEFB126     | 0.464886  | 0.411023  | 0        | 0         | 0.296089  | 0         |
| LOC10028811 | 0         | 0.0418082 | 0.10739  | 0.0444017 | 0.331291  | 0.0294672 |
| MTMR7       | 1.66504   | 0.890973  | 1.45829  | 1.42402   | 1.3948    | 1.59801   |
| MZT2B       | 69.8784   | 148.208   | 98.5539  | 166.247   | 86.7119   | 86.8252   |
| TRIM56      | 3.68289   | 1.81171   | 5.45016  | 2.0281    | 3.7213    | 2.12246   |
| LETMD1      | 49.085    | 64.222    | 50.8595  | 58.707    | 53.1184   | 46.3025   |
| FAM5B       | 0.165599  | 0.12201   | 0.167146 | 0.0777473 | 0.404305  | 0.154791  |
| LCE3E       | 28.3963   | 19.7554   | 12.8622  | 22.2922   | 34.0956   | 40.1767   |
| AATF        | 20.5494   | 24.9022   | 19.303   | 21.4095   | 19.8913   | 18.5068   |

|             |           |           |           |           |           |            |
|-------------|-----------|-----------|-----------|-----------|-----------|------------|
| IDI2        | 5.002     | 5.77749   | 4.21344   | 3.48497   | 3.90682   | 3.66943    |
| POM121L2    | 0         | 0         | 0.0709083 | 0         | 0.0198862 | 0.0194569  |
| SLC16A1     | 10.0134   | 9.02982   | 9.43267   | 6.94046   | 9.74923   | 7.79598    |
| OR5M11      | 0         | 0         | 0         | 0         | 0         | 0          |
| KRBA2       | 1.79339   | 1.72551   | 2.83501   | 1.58491   | 2.92275   | 3.22122    |
| MIR3065     | 0         | 0         | 0         | 0         | 0         | 0          |
| DAO         | 0         | 0         | 0         | 0         | 0         | 0          |
| WNT1        | 0.0891814 | 0         | 0.0675108 | 0.0837399 | 0.255601  | 0.138935   |
| TAL1        | 1.77331   | 2.41994   | 2.24707   | 1.71941   | 2.45529   | 1.94585    |
| LMLN        | 3.04065   | 3.41795   | 4.24139   | 3.15193   | 3.82124   | 3.96079    |
| LOC10027221 | 3.20298   | 4.17907   | 5.55559   | 4.55517   | 6.65476   | 4.94146    |
| ASPRV1      | 205.674   | 106.845   | 241.53    | 209.373   | 280.727   | 327.289    |
| SH3GL1P2    | 0.362436  | 0.559575  | 0.509497  | 0.543287  | 0.248253  | 0.344417   |
| HLA-DRA     | 342.625   | 302.927   | 251.37    | 138.739   | 364.895   | 163.316    |
| MIR3135B    | 0         | 0         | 0         | 0         | 0         | 0          |
| SEMA6A      | 5.51274   | 5.10729   | 6.55935   | 6.03694   | 6.75687   | 9.63098    |
| PPP1R13B    | 12.7202   | 12.5533   | 13.5212   | 17.3316   | 15.6209   | 16.0352    |
| C18orf61    | 0         | 0.371714  | 0.106088  | 0.526364  | 0.178514  | 0.0873306  |
| KBTBD13     | 0.190366  | 0.140258  | 0.12009   | 0.0893754 | 0         | 0.0197714  |
| TRIM46      | 0.693479  | 1.0033    | 0.381795  | 0.473575  | 0.983744  | 0.707149   |
| PLA2G2D     | 0.22922   | 0.202662  | 0.0289202 | 0         | 0.0973278 | 0.14284    |
| SRXN1       | 47.2059   | 36.8609   | 26.4979   | 29.8931   | 19.803    | 27.3939    |
| ATP5L       | 109.315   | 111.251   | 95.0627   | 108.259   | 86.3281   | 90.4688    |
| LOC10028721 | 0.0582398 | 0         | 0         | 0         | 0.0370932 | 0.0362925  |
| NEK5        | 0.102628  | 0.0472592 | 0.0258968 | 0.128489  | 0.0871529 | 0.00266474 |
| KCNK16      | 0         | 0         | 0         | 0.0970881 | 0         | 0          |
| ITIH5       | 15.2564   | 18.2941   | 30.8232   | 15.4357   | 13.3605   | 8.76402    |
| CUEDC1      | 8.20893   | 6.88674   | 7.27349   | 6.00002   | 6.53539   | 4.97013    |
| NIPAL1      | 4.24225   | 1.81354   | 8.18732   | 4.02718   | 5.34444   | 6.01344    |
| POTEJ       | 2.32316   | 2.59922   | 2.10365   | 1.73548   | 2.36935   | 2.32596    |
| WNK2        | 9.78627   | 7.95807   | 9.99376   | 7.98487   | 7.60323   | 9.28947    |
| OXR1        | 33.0159   | 27.4645   | 32.1115   | 21.7613   | 26.6149   | 26.4697    |
| TPCN2       | 4.67967   | 7.12754   | 7.21574   | 7.59969   | 8.68908   | 7.55336    |
| CCDC53      | 29.7702   | 30.2535   | 24.3365   | 27.5402   | 28.5254   | 23.1345    |
| DLX2        | 0.309147  | 0.429516  | 0.267458  | 1.78317   | 0.196898  | 0.880674   |
| TEKT3       | 0.0587964 | 0.675793  | 0.400583  | 0.49688   | 0.674059  | 0.549591   |
| LOC10013070 | 0         | 0         | 0         | 0         | 0         | 0          |
| MIR510      | 0         | 0         | 0         | 0         | 0         | 0          |
| MIR4252     | 0         | 0         | 0         | 0         | 0         | 0          |
| LOC10013089 | 1.72336   | 1.238     | 1.10075   | 1.36537   | 1.02902   | 0.839006   |
| MIR4420     | 0         | 0         | 0         | 0         | 0         | 0          |
| THBD        | 21.7314   | 22.8681   | 32.1879   | 25.4671   | 20.0761   | 17.4887    |
| TPMT        | 11.3089   | 10.348    | 9.36636   | 9.5627    | 8.94529   | 8.5817     |

|             |           |           |           |           |           |           |
|-------------|-----------|-----------|-----------|-----------|-----------|-----------|
| IFT140      | 3.87123   | 5.48308   | 4.39084   | 5.67544   | 5.71953   | 4.68823   |
| WNT10A      | 7.30384   | 12.0844   | 9.57075   | 15.3206   | 11.5344   | 10.4071   |
| LOC10050687 | 0         | 0         | 0         | 0         | 0         | 0         |
| LHFPL1      | 0.238068  | 0         | 0.135164  | 0.223542  | 0.22744   | 0.22253   |
| LOC10050737 | 2.04021   | 1.31249   | 3.05615   | 1.7775    | 2.02044   | 1.72902   |
| MIR4762     | 0         | 0         | 0         | 0         | 0         | 0         |
| LOC10050687 | 0         | 0         | 0         | 0.605414  | 0         | 0.401783  |
| ARMCX3-AS1  | 0.593217  | 0.850775  | 1.61985   | 1.82958   | 1.38346   | 1.25572   |
| SNORA11B    | 0         | 0         | 0         | 0         | 0         | 0         |
| G2E3        | 3.55947   | 2.91901   | 4.41279   | 3.9074    | 4.5998    | 3.58969   |
| RPS7P5      | 0         | 0         | 0         | 0         | 0         | 0         |
| BRMS1L      | 5.91965   | 4.68285   | 5.71943   | 5.19277   | 6.02745   | 4.46548   |
| SPATA2L     | 4.49568   | 6.58106   | 5.30833   | 9.59834   | 6.7598    | 7.42317   |
| DEFB116     | 0         | 0         | 0         | 0         | 0         | 0         |
| CPO         | 0.371169  | 0.328165  | 0.140489  | 0.697044  | 0.591     | 0.40477   |
| CES5AP1     | 0.138668  | 0.367804  | 0.104972  | 0.130207  | 0.0883183 | 0         |
| UG0898H09   | 0.43257   | 0.167323  | 0.255827  | 0.253861  | 0.189411  | 0.185322  |
| C7orf57     | 0.241509  | 0.0854108 | 0.0731294 | 0.0453546 | 0.153818  | 0.0601993 |
| SLC25A28    | 37.0364   | 57.2738   | 35.9058   | 51.777    | 51.0358   | 41.5689   |
| SLC38A11    | 1.46998   | 0.832279  | 0.88201   | 0.637814  | 0.548351  | 0.274289  |
| AGAP3       | 35.8124   | 46.61     | 43.2257   | 55.1184   | 51.0525   | 48.9654   |
| RUFY4       | 1.70399   | 2.85375   | 0.684385  | 0.277887  | 2.45095   | 0.337963  |
| R3HDML      | 0         | 0         | 0.120185  | 0         | 0         | 0         |
| POP1        | 2.74991   | 3.23909   | 2.25588   | 2.33227   | 2.57062   | 2.29587   |
| GPR21       | 0.110452  | 0         | 0.167225  | 0.207425  | 0.140695  | 0         |
| CRABP1      | 8.27662   | 10.8301   | 8.89694   | 7.92705   | 16.236    | 11.8626   |
| OR52A5      | 0         | 0         | 0         | 0         | 0         | 0         |
| APCS        | 0         | 0         | 0         | 0         | 0         | 0         |
| LOC401463   | 0.0741951 | 0.163997  | 0.252748  | 0.034834  | 0.165394  | 0.115588  |
| SPESP1      | 3.51864   | 2.84303   | 0.690745  | 0.743265  | 0.794149  | 0.487488  |
| TTY8        | 0         | 0         | 0         | 0         | 0         | 0         |
| ZSWIM3      | 2.26779   | 2.41344   | 1.63719   | 1.43194   | 2.10334   | 2.82739   |
| HNRNPA1P1C  | 168.89    | 179.547   | 175.281   | 174.524   | 183.443   | 167.993   |
| GLT25D2     | 0.371533  | 0.279213  | 0.464067  | 0.174432  | 0.331284  | 0.254676  |
| SULT1C4     | 0.700305  | 0.675453  | 1.34943   | 0.358677  | 1.05425   | 0.476073  |
| TRPC6       | 1.65778   | 1.11319   | 2.11276   | 1.12314   | 2.05824   | 1.39921   |
| SNORD9      | 0         | 0         | 0         | 0         | 0         | 0         |
| DUSP5       | 16.354    | 16.6809   | 13.4973   | 11.798    | 13.6169   | 18.4683   |
| TACC3       | 5.64504   | 8.71038   | 4.92657   | 6.61731   | 8.72503   | 9.8736    |
| CDCP1       | 10.4347   | 10.4934   | 12.2186   | 12.6322   | 11.6887   | 10.7526   |
| LSM5        | 14.494    | 15.4226   | 14.678    | 11.8989   | 12.0663   | 12.3555   |
| RASL10B     | 1.51761   | 1.75252   | 1.40674   | 0.872456  | 1.63726   | 1.02291   |
| CBR1        | 66.8335   | 84.684    | 77.7586   | 103.126   | 68.6722   | 68.5867   |

|             |           |           |           |          |           |           |
|-------------|-----------|-----------|-----------|----------|-----------|-----------|
| SPAG5       | 3.56947   | 4.45005   | 3.90737   | 3.80982  | 5.3319    | 4.30467   |
| VEZF1       | 12.9068   | 10.7836   | 11.8258   | 11.0211  | 12.4504   | 10.1253   |
| DBX2        | 0.0736033 | 0.0976132 | 0.557181  | 0.241893 | 0.0468784 | 0.114666  |
| LOC10065298 | 0         | 0         | 0         | 0        | 0         | 0         |
| SAMD11      | 0.378785  | 1.34837   | 0.839683  | 2.44628  | 1.30148   | 1.23487   |
| LOC10050663 | 3.33723   | 2.7236    | 5.6356    | 6.02617  | 9.9735    | 3.99927   |
| USP6        | 0.472133  | 0.434886  | 0.735578  | 0.659145 | 0.93207   | 0.800753  |
| DIRAS3      | 8.66459   | 7.77588   | 6.26324   | 6.72895  | 8.21555   | 8.68776   |
| CIAO1       | 27.6707   | 33.3919   | 27.0981   | 31.1743  | 32.5218   | 26.7862   |
| AKT1        | 51.7363   | 55.2443   | 49.8246   | 56.1647  | 53.8852   | 46.3457   |
| C14orf180   | 17.8061   | 24.5059   | 30.3392   | 10.2972  | 12.0369   | 5.21336   |
| CENPF       | 2.43479   | 1.96655   | 1.51748   | 2.20028  | 1.78392   | 2.46982   |
| GPRC5B      | 12.2432   | 10.9487   | 7.64824   | 6.29161  | 7.75308   | 6.99549   |
| PIK3C2A     | 10.4329   | 8.4563    | 10.986    | 7.52162  | 10.1964   | 7.92553   |
| LOC10049919 | 0         | 0.0388239 | 0         | 0        | 0         | 0         |
| FBXO25      | 11.8716   | 12.8288   | 10.7875   | 9.85827  | 10.2895   | 10.5527   |
| LOC10028820 | 0         | 0         | 0         | 0        | 0         | 0         |
| SLIT1       | 0.0959438 | 0.127263  | 0.199577  | 0.101348 | 0.0839163 | 0.0373205 |
| LOC10013000 | 0.608513  | 0.593155  | 0.368518  | 0.345687 | 0.196205  | 0.342464  |
| GMDS        | 17.2005   | 15.73     | 12.3819   | 16.4621  | 13.1461   | 11.7181   |
| LOC84856    | 0.397095  | 0.468115  | 0.601206  | 0.145866 | 1.37696   | 0.962316  |
| CINP        | 22.2113   | 20.7051   | 19.2812   | 20.2344  | 19.0668   | 22.0399   |
| CYP2U1      | 2.72517   | 2.30154   | 2.78655   | 2.10059  | 3.08277   | 2.1291    |
| FAM110A     | 24.5718   | 30.3791   | 26.7941   | 38.9775  | 28.1499   | 39.1703   |
| FOXP3       | 2.60312   | 3.13318   | 2.3422    | 2.15327  | 3.63377   | 2.12265   |
| LOC10028918 | 4.32105   | 4.09297   | 5.06059   | 2.80345  | 4.38867   | 2.37256   |
| CCDC136     | 0.622803  | 0.80046   | 0.523695  | 0.366132 | 1.0127    | 0.546212  |
| ZSCAN1      | 0         | 0.532245  | 0.265832  | 0.141316 | 0.127804  | 0.125046  |
| PLXNB3      | 5.82057   | 7.91388   | 7.35083   | 8.36628  | 8.56632   | 9.0431    |
| DCTPP1      | 34.6504   | 36.6728   | 23.839    | 37.8951  | 27.2618   | 27.3719   |
| CLYBL       | 2.59124   | 2.27632   | 2.15019   | 2.6047   | 2.32745   | 1.99773   |
| ANP32AP1    | 6.87624   | 5.97472   | 6.13935   | 7.44969  | 5.50154   | 5.60249   |
| PHF17       | 17.4561   | 13.4861   | 15.6295   | 15.157   | 13.1017   | 11.4189   |
| ZNF486      | 0.635206  | 0.936015  | 1.33571   | 0.463904 | 0.719978  | 1.27546   |
| USP35       | 1.77959   | 2.62898   | 1.73937   | 2.05175  | 2.13774   | 2.62502   |
| PARP8       | 4.36791   | 3.64438   | 4.0133    | 2.81444  | 5.52913   | 3.16329   |
| LOC10065297 | 0         | 0         | 0.0677903 | 0        | 0         | 0         |
| ZNF688      | 8.73885   | 17.3619   | 12.9741   | 18.3904  | 15.0891   | 15.4667   |
| CRTC2       | 20.6399   | 26.5613   | 21.4093   | 22.7572  | 28.367    | 23.9731   |
| MIR3183     | 0         | 0         | 0         | 0        | 0         | 0         |
| LAMP2       | 63.5726   | 48.0163   | 56.8405   | 47.8421  | 53.3689   | 46.368    |
| PRR25       | 0         | 0         | 0.140489  | 0.174261 | 0.0591    | 0.0578243 |
| MIR3607     | 0         | 0         | 0         | 0        | 0         | 0         |

|             |          |           |           |           |          |           |
|-------------|----------|-----------|-----------|-----------|----------|-----------|
| C1orf49     | 0.664974 | 0.522602  | 0.447455  | 0.935709  | 0.509056 | 0         |
| PRAC        | 0        | 0         | 0         | 0         | 0        | 0         |
| OR5B2       | 0        | 0         | 0         | 0         | 0.140863 | 0         |
| MIR4417     | 0        | 0         | 0         | 0         | 0        | 0         |
| EFHD1       | 28.3338  | 13.381    | 7.61584   | 14.0271   | 10.2314  | 27.0736   |
| COL11A1     | 1.63188  | 0.90062   | 0.760481  | 2.53124   | 1.97478  | 5.10988   |
| CABP1       | 1.29322  | 2.81584   | 0.386691  | 1.35593   | 2.40303  | 2.05376   |
| BID         | 12.2488  | 16.0497   | 12.3221   | 14.6246   | 12.8356  | 11.4726   |
| DENND4C     | 15.573   | 11.384    | 15.698    | 12.2175   | 15.7195  | 13.8683   |
| FRZB        | 24.5551  | 10.3123   | 15.1167   | 22.9212   | 11.3845  | 9.18101   |
| SNORA35     | 0        | 0         | 0         | 0         | 0        | 0         |
| ARMCX3      | 21.8166  | 14.5313   | 18.5092   | 12.889    | 17.4252  | 16.9802   |
| LOC10050598 | 0        | 0         | 0         | 0         | 0        | 0         |
| GNB2        | 117.524  | 152.99    | 121.063   | 143.471   | 149.217  | 141.116   |
| POLE        | 11.8352  | 15.2465   | 14.465    | 15.5333   | 15.3687  | 14.8937   |
| OR10J5      | 0        | 0         | 0         | 0         | 0        | 0         |
| RCAN1       | 19.0154  | 24.6868   | 19.6117   | 41.0137   | 24.1402  | 20.5789   |
| C18orf21    | 18.4136  | 20.9167   | 16.1651   | 24.1452   | 17.3111  | 16.3474   |
| LOC10050586 | 1.17378  | 1.29723   | 2.22139   | 1.65324   | 1.68207  | 0.914312  |
| LINGO1      | 1.25644  | 2.582     | 1.49096   | 4.43212   | 1.75186  | 3.55505   |
| C9orf139    | 0.483597 | 0.541545  | 0.468738  | 0.216593  | 0.770818 | 0.386024  |
| LOC10050619 | 0        | 0         | 0         | 0         | 0        | 0         |
| VGLL4       | 29.2526  | 28.9      | 29.9897   | 34.3786   | 32.423   | 28.7975   |
| KIAA2018    | 2.93384  | 2.02555   | 2.86288   | 2.4466    | 2.97927  | 2.1777    |
| PLA2G4C     | 6.35339  | 10.8103   | 3.9325    | 3.97737   | 5.44282  | 3.88447   |
| SLC25A6     | 257.69   | 257.99    | 328.167   | 384.039   | 371.151  | 259.633   |
| OR4S2       | 0        | 0         | 0         | 0         | 0        | 0         |
| TSPAN18     | 9.37371  | 8.18468   | 9.1451    | 8.62863   | 10.3255  | 9.83235   |
| LOC286184   | 0        | 0         | 0         | 0         | 0        | 0         |
| LOC10013014 | 0        | 0         | 0         | 0         | 0        | 0.0205265 |
| PP2D1       | 0.135149 | 0.119021  | 0.204282  | 2.08E-11  | 0.215894 | 0.0425466 |
| FBP2        | 1.18473  | 2.76829   | 2.49835   | 3.01948   | 0.485074 | 0.685538  |
| KCNV1       | 0        | 0.0300565 | 0.0257346 | 0         | 0        | 0         |
| CCAR1       | 25.6143  | 21.6314   | 23.4292   | 17.4321   | 25.6484  | 21.228    |
| AGPAT4      | 4.03335  | 3.99183   | 4.38394   | 4.12641   | 2.19312  | 3.39873   |
| FZD4        | 21.8633  | 19.546    | 30.6687   | 18.0431   | 17.0356  | 10.8449   |
| A2M         | 86.0627  | 78.6166   | 64.7269   | 47.0144   | 48.5224  | 39.3997   |
| TRIM64C     | 0        | 0         | 0         | 0.0507398 | 0        | 0         |
| AP3B1       | 15.6348  | 9.79969   | 12.3543   | 9.44262   | 11.3604  | 11.7099   |
| VWA5A       | 25.0302  | 29.2818   | 31.5938   | 21.8638   | 35.9438  | 24.8223   |
| HYOU1       | 23.4474  | 18.6578   | 18.143    | 17.3152   | 16.0612  | 19.2335   |
| KCNK15      | 1.89209  | 1.31768   | 1.98608   | 1.70218   | 1.63945  | 1.2893    |
| RN5S9       | 0        | 0         | 0         | 0         | 0        | 0         |

|             |            |           |           |             |           |           |
|-------------|------------|-----------|-----------|-------------|-----------|-----------|
| LOC10028778 | 1.47071    | 1.30031   | 1.85556   | 1.38097     | 1.40505   | 1.52747   |
| C14orf34    | 0.370665   | 0.359292  | 0.243572  | 0           | 0         | 0.230983  |
| ZER1        | 18.4764    | 20.3845   | 21.7781   | 22.9262     | 22.3033   | 20.0748   |
| C9orf72     | 7.66058    | 7.75125   | 9.09451   | 6.3452      | 8.94514   | 5.92456   |
| MYADM       | 25.9774    | 23.4177   | 38.4136   | 24.5718     | 20.5218   | 18.3576   |
| FAM96B      | 46.8097    | 72.4732   | 55.331    | 65.678      | 56.1455   | 60.6547   |
| LOC644838   | 0          | 0         | 0.0370495 | 0           | 0         | 0.0304987 |
| MIR3153     | 0          | 0         | 0         | 0           | 0         | 0         |
| HDAC6       | 17.8011    | 21.4655   | 18.8286   | 20.3211     | 23.2098   | 19.7333   |
| FTSJ1       | 18.3192    | 22.7813   | 18.6548   | 22.2615     | 21.2523   | 18.4039   |
| ATN1        | 55.598     | 69.9278   | 60.5945   | 64.7535     | 82.2644   | 67.357    |
| MAGEB4      | 0          | 0         | 0         | 0           | 0         | 0.0563915 |
| LOC10050709 | 0          | 0.123838  | 0         | 0           | 0.0892092 | 0.058189  |
| KIF17       | 0.59734    | 1.00858   | 0.706495  | 0.512343    | 0.676987  | 0.485101  |
| PSMG3       | 49.9261    | 73.5214   | 43.6463   | 66.3468     | 55.2354   | 58.1755   |
| SDHAP2      | 12.5272    | 14.3982   | 9.92772   | 10.5031     | 14.7381   | 14.4383   |
| TMEM104     | 5.98307    | 6.80124   | 4.85273   | 5.54157     | 5.18456   | 6.4803    |
| ACTR8       | 4.16199    | 4.82671   | 5.6057    | 5.12613     | 5.35322   | 5.15346   |
| PLEKHO2     | 12.0679    | 10.5846   | 11.7939   | 7.17592     | 10.8027   | 6.97037   |
| C21orf56    | 4.72272    | 9.54463   | 0.427518  | 1.64843     | 9.03287   | 9.29176   |
| SLC38A1     | 24.496     | 11.1683   | 15.9197   | 12.2435     | 17.3723   | 13.8516   |
| LOC10050766 | 36.5918    | 57.9594   | 30.2151   | 43.6752     | 33.5572   | 30.6008   |
| ZDHHC1      | 7.35366    | 10.7755   | 8.75893   | 12.6993     | 8.48286   | 8.39592   |
| IWS1        | 17.1828    | 14.2449   | 15.323    | 14.5686     | 14.58     | 15.0291   |
| HAR1A       | 0.214647   | 0.379554  | 0.108326  | 0.100775    | 0.592408  | 0.133759  |
| CCDC117     | 11.9189    | 8.39574   | 7.89253   | 7.6756      | 9.74233   | 8.57121   |
| UPP1        | 6.08374    | 7.16261   | 4.11369   | 4.76989     | 4.43895   | 4.45354   |
| LOC10028793 | 7.25474    | 8.91284   | 6.49033   | 10.4389     | 8.46082   | 7.33873   |
| POF1B       | 41.1039    | 16.6738   | 58.1341   | 27.6414     | 56.3099   | 57.528    |
| RASGRF2     | 1.38533    | 0.654647  | 1.39224   | 0.38127     | 0.562863  | 0.506061  |
| FLJ20712    | 0          | 0.290185  | 0.165639  | 0.102729    | 0.418081  | 0.136352  |
| MIR4328     | 0          | 0         | 0         | 0           | 0         | 0         |
| C1orf124    | 9.0651     | 9.55813   | 8.54277   | 6.39644     | 6.17228   | 5.48536   |
| PAQR9       | 0          | 0         | 0         | 0           | 0         | 0         |
| SNORD115-40 | 0          | 0         | 0         | 0           | 0         | 0         |
| SMAD3       | 14.1811    | 14.8187   | 17.6314   | 16.0309     | 18.3261   | 15.9085   |
| KLHL23      | 0.00286525 | 1.15608   | 2.03274   | 0.000163188 | 1.50551   | 1.26484   |
| GCNT6       | 0.0959772  | 0.084857  | 0.0726553 | 0           | 0.0611284 | 0.119618  |
| SLC38A8     | 0          | 0         | 0.0638846 | 0.079242    | 0         | 0.052589  |
| AQP4        | 0.246107   | 0.0166207 | 1.35216   | 1.38981     | 0.14256   | 0.107111  |
| HKR1        | 19.2073    | 21.4002   | 17.7826   | 23.7492     | 23.3623   | 23.0063   |
| CCT4        | 76.6282    | 66.7875   | 65.8193   | 72.6477     | 60.9507   | 62.2668   |
| OR5K2       | 1.0024     | 0.997037  | 0.379409  | 0.352963    | 0.159608  | 0.395287  |

|             |           |          |           |          |          |           |
|-------------|-----------|----------|-----------|----------|----------|-----------|
| ZDHC3       | 12.5968   | 12.6804  | 15.9394   | 14.8352  | 16.8178  | 15.3889   |
| CMAHP       | 11.9951   | 13.0576  | 17.7609   | 9.24284  | 12.4445  | 9.40782   |
| VPS26B      | 28.9034   | 28.7194  | 29.8879   | 30.0996  | 32.0707  | 28.948    |
| TTY1B       | 0         | 0        | 0         | 0        | 0        | 0         |
| CLECL1      | 0.219467  | 0.388079 | 1.16297   | 0        | 0.27956  | 0.410288  |
| ZNF304      | 5.64328   | 5.20299  | 5.83451   | 4.26803  | 6.61507  | 4.65238   |
| CLEC4M      | 0         | 0        | 0         | 0        | 0.157319 | 0.194349  |
| LRR9        | 0.0405937 | 0        | 0         | 0        | 0        | 0         |
| RBMS2       | 7.00004   | 8.17244  | 7.56876   | 8.0964   | 8.84138  | 6.6474    |
| ZNF888      | 3.9547    | 3.56136  | 3.09949   | 2.62291  | 3.08049  | 2.64752   |
| C1orf15-NBL | 10.6111   | 22.6506  | 30.7913   | 17.9393  | 19.9996  | 19.2512   |
| ABCA9       | 5.60971   | 4.51738  | 8.32098   | 4.11428  | 9.03834  | 5.45144   |
| NCAPH       | 1.20726   | 1.16268  | 0.799663  | 0.850196 | 0.961136 | 0.994126  |
| PKLR        | 21.5348   | 13.6343  | 12.6482   | 14.6207  | 13.4293  | 14.792    |
| PSMG1       | 20.4964   | 25.1188  | 20.1244   | 19.6269  | 16.9316  | 12.8989   |
| SATB1       | 11.8912   | 11.5128  | 14.0304   | 9.29193  | 12.6525  | 11.7662   |
| LOC643529   | 1.31359   | 0.861033 | 0.445763  | 0.489123 | 1.15398  | 1.03027   |
| MIR631      | 0         | 0        | 0         | 0        | 0        | 0         |
| TTLL6       | 0.0396477 | 0        | 0.0862559 | 0.148915 | 0.101008 | 0.0247068 |
| ENPP5       | 3.01005   | 0.80736  | 1.92019   | 1.74665  | 1.1632   | 1.34884   |
| SLC38A2     | 69.8718   | 55.7493  | 75.4314   | 68.8308  | 80.8312  | 75.2046   |
| SIRT2       | 40.3147   | 49.6325  | 39.3981   | 46.9852  | 44.7092  | 48.235    |
| ZNF7        | 15.1696   | 19.3639  | 17.0581   | 16.4393  | 18.8172  | 15.6234   |
| SKOR1       | 0.180835  | 0.351743 | 0.574951  | 0.611285 | 0.529805 | 0.315529  |
| MCRS1       | 34.7496   | 43.7876  | 31.5551   | 45.9185  | 40.4721  | 37.9952   |
| MIR4427     | 0         | 0        | 0         | 0        | 0        | 0         |
| PHLDB2      | 7.58208   | 8.7778   | 8.11565   | 6.18024  | 7.91882  | 5.15165   |
| FREM2       | 0.138866  | 0.143239 | 0.262805  | 0.347714 | 0.460648 | 0.31369   |
| SKINTL      | 0.284709  | 0.377583 | 0.377171  | 0        | 0.679998 | 0.354837  |
| TAF15       | 88.5189   | 90.1796  | 81.17     | 83.3797  | 87.5047  | 83.6043   |
| LOC595101   | 2.92454   | 2.4468   | 2.70591   | 2.2989   | 2.87204  | 2.25213   |
| TBX18       | 5.84004   | 3.97835  | 7.37427   | 4.11278  | 6.93605  | 4.6684    |
| MIR3687     | 0         | 0        | 0         | 0        | 0        | 0         |
| KCTD5       | 13.5025   | 12.7726  | 15.0059   | 13.1796  | 17.278   | 15.8905   |
| HULC        | 0         | 0.605544 | 0         | 0        | 0.218108 | 0         |
| ANKRD11     | 11.0863   | 12.4408  | 15.094    | 11.325   | 14.7318  | 14.3232   |
| PUS7        | 7.93118   | 8.16013  | 7.13634   | 8.48081  | 7.15459  | 6.08556   |
| TTC31       | 14.2273   | 19.1101  | 14.232    | 15.32    | 22.3899  | 16.0261   |
| UCKL1-AS1   | 0.524427  | 0.49656  | 0.739982  | 0.445383 | 1.13737  | 0.819933  |
| LOC10050650 | 0.524817  | 0.170659 | 0.541811  | 0.35966  | 0.769818 | 0.453667  |
| SETDB2      | 5.91914   | 5.21717  | 5.89054   | 4.90906  | 5.2934   | 5.27062   |
| MIR184      | 0         | 0        | 0         | 0        | 0        | 0         |
| BIRC2       | 22.6483   | 18.2668  | 17.3032   | 14.5868  | 21.3207  | 18.4159   |

|             |           |           |           |           |          |          |
|-------------|-----------|-----------|-----------|-----------|----------|----------|
| STAG2       | 15.8784   | 12.8446   | 17.2846   | 12.3694   | 15.065   | 14.3888  |
| APAF1       | 4.90157   | 4.36787   | 4.54903   | 3.28201   | 6.23347  | 4.47434  |
| TUSC3       | 8.87965   | 7.19317   | 7.64832   | 7.43966   | 5.75911  | 6.17246  |
| ADAD1       | 0         | 0         | 0         | 0         | 0        | 0        |
| HIPK4       | 0.0412426 | 0.255249  | 0.0936627 | 0.193631  | 0.157606 | 0.308408 |
| FLJ42969    | 0.159701  | 0.0470659 | 0         | 0.0499857 | 0.101715 | 0.033173 |
| SNRPA1      | 11.2553   | 14.6855   | 9.34754   | 10.5685   | 11.3444  | 11.6444  |
| CD7         | 2.41824   | 3.51252   | 1.69986   | 0.729864  | 2.86035  | 1.23785  |
| GAL3ST2     | 0         | 0.132182  | 0.565877  | 0.070191  | 0.42849  | 0.419241 |
| MIR132      | 0         | 0         | 0         | 0         | 0        | 0        |
| CTSW        | 2.73642   | 3.32617   | 2.26443   | 1.12357   | 4.29688  | 1.22465  |
| VPRBP       | 7.27665   | 5.06162   | 7.04559   | 5.49716   | 6.12888  | 4.85128  |
| LOC1005060: | 0.359598  | 0.794835  | 0.41173   | 0.337657  | 0.343545 | 0.168065 |
| MRPS25      | 41.1201   | 39.5757   | 33.172    | 30.5748   | 33.9307  | 31.7397  |
| TNFSF12     | 23.6854   | 32.4649   | 30.4732   | 30.3949   | 30.9962  | 21.0801  |
| PNPLA1      | 6.53395   | 4.39908   | 7.49328   | 6.77601   | 7.86776  | 9.90822  |
| RBM47       | 31.6835   | 20.0777   | 18.5775   | 17.8506   | 17.4118  | 16.9359  |
| PTBP1       | 75.2018   | 91.4454   | 86.9265   | 107.773   | 88.8586  | 83.1933  |
| SNORD83B    | 0         | 0         | 0         | 0         | 0        | 0        |
| GUCA1B      | 1.93046   | 2.61972   | 1.76724   | 2.82439   | 3.25966  | 2.68572  |
| HOXD12      | 0         | 0         | 0         | 0         | 0        | 0        |
| MIR491      | 0         | 0         | 0         | 0         | 0        | 0        |
| UPF2        | 12.761    | 10.0472   | 11.2114   | 9.00867   | 10.3226  | 9.77472  |
| RPS5        | 752.855   | 1239.54   | 955.969   | 1735.3    | 938.472  | 876.035  |
| ANKRD37     | 6.51996   | 8.93771   | 5.41746   | 8.99381   | 7.44453  | 7.4232   |
| C4orf39     | 0.988972  | 0.999299  | 0.891259  | 0.663307  | 1.46972  | 1.52604  |
| SIT1        | 3.78685   | 3.34809   | 1.70635   | 0.592632  | 3.04354  | 1.23609  |
| F2RL1       | 12.553    | 12.3521   | 16.9373   | 13.8977   | 18.0385  | 16.0329  |
| CHRNA1      | 1.09791   | 0.649358  | 0.634473  | 0.352573  | 0.336302 | 0.14624  |
| SUMO3       | 67.2187   | 68.089    | 60.053    | 72.5305   | 63.1477  | 47.5572  |
| PIWIL3      | 0.0280529 | 0         | 0         | 0         | 0        | 0        |
| LMCD1       | 15.365    | 21.4242   | 16.0908   | 17.792    | 16.1296  | 21.988   |
| C19orf66    | 23.3452   | 39.2033   | 18.127    | 19.0224   | 26.5657  | 20.1197  |
| ATAD3B      | 17.4149   | 30.8554   | 18.4521   | 26.8588   | 22.9338  | 21.0045  |
| RSAD2       | 5.06525   | 4.60209   | 1.08042   | 0.446714  | 1.15854  | 0.889386 |
| INCA1       | 1.67264   | 2.5631    | 1.92912   | 1.75748   | 3.20605  | 2.51697  |
| MIR519B     | 0         | 0         | 0         | 0         | 0        | 0        |
| ZNF22       | 14.7446   | 11.6877   | 11.7919   | 10.7577   | 11.4623  | 9.96811  |
| SNORD18A    | 0         | 0         | 0         | 0         | 0        | 0        |
| FKBP9L      | 7.21846   | 7.38352   | 8.92972   | 6.84541   | 8.39988  | 7.26225  |
| TIMM23      | 38.7292   | 40.5312   | 34.0439   | 44.8934   | 28.3756  | 30.7585  |
| SNORD111    | 0         | 0         | 0         | 0         | 0        | 0        |
| FAN1        | 11.2952   | 12.2729   | 13.4745   | 14.7119   | 16.3421  | 14.3056  |



|             |            |           |          |           |           |           |
|-------------|------------|-----------|----------|-----------|-----------|-----------|
| SNORD114-9  | 0          | 0         | 0        | 0         | 0         | 0         |
| SNORD63     | 0          | 0         | 0        | 0         | 0         | 0         |
| DNAJB9      | 15.2907    | 10.1481   | 12.5673  | 10.3674   | 10.017    | 10.1472   |
| TMEM30B     | 11.0862    | 7.81438   | 9.94524  | 7.82783   | 8.03383   | 7.30285   |
| LOC1005056: | 10.6354    | 11.1081   | 8.77168  | 9.80586   | 11.341    | 7.96884   |
| OS9         | 107.015    | 102.011   | 109.86   | 99.3607   | 104.077   | 95.1522   |
| LOC729082   | 15.1649    | 10.6389   | 16.1385  | 12.795    | 9.93859   | 10.717    |
| POM121L8P   | 0.0873448  | 0.145418  | 0.289074 | 0.224002  | 0.0785663 | 0.0767557 |
| UBE2J2      | 21.2487    | 32.3083   | 27.0577  | 32.2105   | 30.8379   | 29.2048   |
| FASTKD3     | 10.4595    | 10.458    | 10.3238  | 8.77203   | 10.7953   | 8.87632   |
| MAFF        | 14.9188    | 13.5547   | 15.4559  | 25.4243   | 18.3236   | 14.214    |
| PIP5K1P1    | 0.206161   | 0.385082  | 0.294789 | 0.194254  | 0.262824  | 0.228392  |
| TMEM167A    | 33.0497    | 23.1749   | 28.3259  | 18.5089   | 24.7998   | 23.7779   |
| ST6GALNAC4  | 39.9298    | 45.7227   | 20.7545  | 29.6367   | 16.7984   | 22.7864   |
| P2RY13      | 2.60097    | 1.40532   | 2.2971   | 0.780169  | 2.43884   | 1.01301   |
| GPR37L1     | 0.287798   | 0.363504  | 0.062247 | 0.0386054 | 0.157114  | 0.051241  |
| MECR        | 35.3475    | 43.7861   | 28.7937  | 35.8034   | 24.6345   | 26.6251   |
| FBP1        | 50.6416    | 38.2644   | 26.4513  | 36.4452   | 27.4273   | 36.6725   |
| PURG        | 0.224545   | 0.132574  | 0.169806 | 0.0700058 | 0.366043  | 0.116148  |
| LINC00323   | 0.0511392  | 0.0904281 | 0.387126 | 0.144057  | 0.227996  | 0.0637355 |
| LOC1005065: | 0          | 0         | 0.203384 | 0.252275  | 0         | 0.167423  |
| QSOX2       | 8.57471    | 9.58523   | 11.7034  | 10.7621   | 13.769    | 10.6068   |
| SNCA        | 4.21536    | 4.70801   | 3.82031  | 6.73059   | 4.40831   | 4.06368   |
| KANK1       | 21.1771    | 14.8449   | 27.3233  | 22.0223   | 22.0577   | 25.6501   |
| TGFB2       | 2.18657    | 1.13739   | 2.19871  | 2.7579    | 2.13046   | 2.25733   |
| ZMYM1       | 5.76238    | 5.54852   | 6.18119  | 5.78319   | 5.80974   | 5.69887   |
| MTBP        | 1.88161    | 1.60624   | 1.37527  | 1.64495   | 1.59099   | 1.55665   |
| MARK2       | 20.8011    | 20.5084   | 23.7227  | 25.1961   | 25.5262   | 26.5203   |
| LOC728392   | 11.6209    | 25.8457   | 20.7633  | 31.3122   | 28.6862   | 26.8525   |
| PXT1        | 0.146206   | 0         | 0.258251 | 0.137285  | 0.12416   | 0.121479  |
| FOSL1       | 1.46024    | 2.75051   | 5.33482  | 1.13269   | 0.930037  | 1.93861   |
| ZSWIM6      | 3.52472    | 3.30146   | 4.01556  | 4.2108    | 3.63409   | 3.25119   |
| FAM157A     | 0.154697   | 0.0256451 | 0.16674  | 0.0817078 | 0.431315  | 0.211002  |
| LOC150622   | 0.00791859 | 0         | 0        | 0         | 0         | 0         |
| PELI3       | 7.36008    | 8.99628   | 5.85587  | 7.43828   | 6.98358   | 6.31767   |
| LOC1001304: | 0          | 0         | 0        | 0         | 0         | 0         |
| IQCF1       | 0          | 0         | 0        | 0         | 0         | 0         |
| UQCRQ       | 76.8954    | 90.0924   | 69.0843  | 89.6538   | 54.9362   | 65.0794   |
| ENAH        | 8.27376    | 6.44287   | 7.20127  | 6.45712   | 6.58532   | 7.01949   |
| MIR605      | 0          | 0         | 0        | 0         | 0         | 0         |
| MIR3928     | 0          | 0         | 0        | 0         | 0         | 0         |
| ATP5B       | 567.493    | 472.199   | 448.398  | 491.594   | 437.82    | 442.212   |
| CAPNS2      | 50.8746    | 70.1402   | 60.758   | 84.4162   | 79.97     | 105.676   |

|             |           |          |           |           |           |           |
|-------------|-----------|----------|-----------|-----------|-----------|-----------|
| GUCY1B3     | 6.47739   | 4.86652  | 3.7754    | 2.7127    | 3.17643   | 3.14577   |
| SIRT4       | 2.13208   | 2.62268  | 2.38591   | 1.74086   | 2.42066   | 1.90628   |
| SGK223      | 5.62566   | 6.85985  | 5.43018   | 5.81261   | 6.40681   | 5.55174   |
| LOC440434   | 20.6217   | 19.0896  | 26.4122   | 19.5605   | 25.2134   | 20.682    |
| CLDN25      | 0         | 0        | 0         | 0.182238  | 0         | 0.120943  |
| LMO4        | 23.681    | 22.8392  | 20.8337   | 20.9674   | 24.7413   | 21.8807   |
| SKA3        | 1.50902   | 1.48077  | 0.829755  | 1.27869   | 1.63509   | 1.40343   |
| OR13C3      | 0         | 0        | 0         | 0         | 0         | 0         |
| ACD         | 8.9179    | 12.5935  | 10.1807   | 13.5692   | 11.9934   | 11.3966   |
| KLF4        | 56.2133   | 56.333   | 121.982   | 88.3548   | 101.311   | 82.561    |
| MIR1269     | 0         | 0        | 0         | 0         | 0         | 0         |
| LOC10050637 | 0.0894089 | 0.204616 | 0.282865  | 0.109974  | 0.236709  | 0.180561  |
| NEUROD4     | 0         | 0        | 0         | 0         | 0         | 0         |
| MIR941-1    | 0         | 0        | 0         | 165.817   | 0         | 0         |
| PRKCQ       | 0.792211  | 0.905758 | 0.539463  | 0.436528  | 0.652481  | 0.501772  |
| C6orf35     | 4.9088    | 4.8656   | 4.67401   | 4.3212    | 4.35992   | 4.26581   |
| C5orf48     | 0         | 0        | 0         | 0         | 0         | 0         |
| SHB         | 6.38877   | 7.60165  | 6.06346   | 8.49105   | 6.08332   | 7.61579   |
| BATF2       | 1.29399   | 2.37287  | 0.471638  | 0.270008  | 0.732576  | 0.477842  |
| RARRES2     | 93.7745   | 168.299  | 152.591   | 121.957   | 123.582   | 85.8522   |
| C2CD3       | 2.28132   | 1.11607  | 1.91118   | 1.05678   | 1.85014   | 1.7249    |
| WSB1        | 86.8923   | 95.3915  | 85.0099   | 86.3677   | 118.074   | 104.857   |
| RHPN2       | 21.8144   | 5.43674  | 13.8175   | 17.7662   | 9.33927   | 7.95862   |
| CYP19A1     | 0.295613  | 0.089843 | 0.0769243 | 0.113086  | 0.0575289 | 0.0633232 |
| LOC256483   | 0         | 0        | 0         | 0         | 0         | 0         |
| TFDP1       | 32.0248   | 35.292   | 29.6281   | 31.7158   | 29.8516   | 27.2976   |
| GNLY        | 6.1053    | 5.09004  | 3.90139   | 0.872811  | 3.32802   | 0.97395   |
| MIR2054     | 0         | 0        | 0         | 0         | 0         | 0         |
| HAO2        | 36.0078   | 20.143   | 26.4531   | 27.5947   | 19.7418   | 26.8175   |
| DFNA5       | 1.85992   | 2.4858   | 1.75098   | 1.36363   | 1.6175    | 1.49787   |
| LOC10050588 | 3.91474   | 4.12068  | 7.20788   | 13.4675   | 7.60271   | 16.5101   |
| LOC389493   | 1.91516   | 2.96321  | 0.906116  | 3.59661   | 1.82966   | 1.19345   |
| MIR22       | 0         | 0        | 0         | 0         | 0         | 0         |
| RUVBL2      | 43.84     | 43.8218  | 36.0944   | 48.4455   | 40.2445   | 49.4455   |
| FHL2        | 32.8965   | 33.2277  | 25.253    | 44.2374   | 26.9187   | 26.6051   |
| CCDC112     | 4.89445   | 3.86251  | 3.73574   | 2.01365   | 4.63713   | 3.35246   |
| FLJ31662    | 0         | 0        | 0.0274972 | 0.0682146 | 0         | 0.0452707 |
| ZRANB2      | 67.8208   | 63.3642  | 72.0603   | 46.4093   | 76.7005   | 60.2492   |
| BHLHE41     | 13.1736   | 15.5602  | 16.3008   | 12.5156   | 9.47828   | 8.24148   |
| ARL17B      | 1.34976   | 3.88468  | 3.57622   | 3.80941   | 3.00884   | 3.15793   |
| PCMTD2      | 31.8056   | 32.0151  | 33.3555   | 26.5748   | 37.073    | 39.3966   |
| WDR85       | 14.5275   | 25.1889  | 17.5445   | 24.2568   | 25.5018   | 21.9807   |
| CYLC2       | 0         | 0        | 0         | 0         | 0         | 0         |

|             |          |          |           |          |          |          |
|-------------|----------|----------|-----------|----------|----------|----------|
| ABCC13      | 0        | 0        | 0         | 0        | 0        | 0        |
| LOC348120   | 0        | 0        | 0         | 0        | 0        | 0        |
| P4HTM       | 10.9163  | 14.3396  | 16.8241   | 19.7801  | 20.6946  | 18.7418  |
| ATF1        | 10.5958  | 9.11881  | 10.278    | 7.94431  | 8.82698  | 8.53602  |
| MYBPH       | 1.56556  | 1.74302  | 4.82833   | 4.90011  | 1.95729  | 2.02344  |
| C15orf37    | 2.28322  | 2.90506  | 3.15984   | 2.79509  | 2.07073  | 2.1764   |
| TMEM69      | 23.404   | 18.5854  | 18.5516   | 18.6694  | 19.0923  | 16.84    |
| GPATCH1     | 4.2805   | 4.9251   | 4.86054   | 5.03792  | 4.89236  | 4.25692  |
| MIR3972     | 0        | 0        | 0         | 0        | 0        | 0        |
| SNORD24     | 0        | 0        | 0         | 0        | 0        | 0        |
| FAAH        | 9.32375  | 14.6647  | 12.4446   | 15.4977  | 17.2525  | 12.7518  |
| MIR548G     | 0        | 0        | 0         | 0        | 0        | 0        |
| USP40       | 10.1461  | 11.0999  | 13.2665   | 13.3763  | 15.546   | 13.039   |
| SNORD119    | 0        | 0        | 0         | 0        | 0        | 0        |
| MARVELD1    | 18.8839  | 24.5301  | 20.185    | 19.8823  | 29.0515  | 23.0205  |
| TNFRSF8     | 0.773609 | 1.14011  | 0.977497  | 0.521234 | 0.928989 | 0.85715  |
| FAM41A2     | 0        | 0        | 0         | 0        | 0        | 0        |
| RAD17       | 13.3103  | 13.3879  | 13.4954   | 12.8024  | 11.7879  | 11.9796  |
| ARHGAP1     | 44.5266  | 47.5225  | 47.7161   | 48.6997  | 55.2545  | 54.8392  |
| TREM1       | 0.301203 | 0.258831 | 0.228013  | 0.377101 | 0.258965 | 0.182429 |
| NINJ2       | 4.79107  | 7.79802  | 7.66587   | 8.69074  | 4.64654  | 3.93555  |
| MS4A7       | 4.12794  | 2.03096  | 3.41871   | 0.830941 | 2.74053  | 2.00394  |
| KIR3DL3     | 0        | 0        | 0.0473127 | 0        | 0        | 0        |
| MTHFD2L     | 2.49348  | 1.86249  | 1.82249   | 1.41288  | 1.77978  | 1.41988  |
| KBTBD8      | 0.805215 | 0.511122 | 0.593923  | 0.310188 | 0.460246 | 0.540374 |
| C1orf55     | 6.59055  | 5.48292  | 7.86102   | 4.17889  | 7.18696  | 6.25893  |
| ENTPD1      | 7.02235  | 4.8466   | 6.4166    | 5.33255  | 7.51496  | 6.45323  |
| TCF7L1      | 14.6774  | 16.6888  | 13.4623   | 14.9037  | 13.4135  | 12.9538  |
| ATP9B       | 7.23806  | 6.4782   | 6.70999   | 6.46183  | 6.59582  | 7.00856  |
| AVP         | 0        | 0.201715 | 1.20897   | 0.428457 | 0.145309 | 0        |
| SIGLEC9     | 0.13321  | 0.339163 | 0.562203  | 0.23053  | 0.628259 | 0.33896  |
| LOC400043   | 6.40464  | 7.73426  | 10.6427   | 6.52724  | 9.50144  | 9.83174  |
| LOC10050643 | 0        | 0        | 0.278605  | 0.691159 | 0.234404 | 0.458688 |
| C1QTNF9     | 0.801695 | 1.01325  | 1.17043   | 0.967859 | 1.93318  | 1.67717  |
| PRDX3       | 85.6777  | 65.5559  | 70.4918   | 58.2917  | 53.0742  | 48.8788  |
| LOC10065271 | 0        | 0        | 0         | 0.259634 | 0        | 0        |
| KRT16P3     | 6.86234  | 6.78546  | 3.30961   | 6.1451   | 2.27246  | 18.9098  |
| KIAA1656    | 0        | 0.479266 | 0.410351  | 0.508997 | 0.345249 | 0.675592 |
| EDA2R       | 1.72401  | 1.32114  | 1.89208   | 1.2683   | 1.62781  | 1.62913  |
| PPIA        | 231.145  | 252.938  | 205.318   | 260.181  | 215.272  | 213.6    |
| EPC2        | 7.99858  | 6.28608  | 7.25781   | 6.39786  | 6.89537  | 6.62905  |
| SLC24A6     | 11.4285  | 16.2793  | 14.242    | 14.4651  | 18.3462  | 10.8284  |
| SNORA62     | 106.367  | 62.6956  | 26.8402   | 83.2311  | 79.037   | 66.2836  |

|             |           |           |           |           |           |           |
|-------------|-----------|-----------|-----------|-----------|-----------|-----------|
| CTSG        | 37.8498   | 52.209    | 100.333   | 64.1191   | 57.4916   | 55.4401   |
| INHA        | 1.51716   | 3.28638   | 2.297     | 4.62992   | 3.57527   | 2.97811   |
| IRAK2       | 2.58027   | 2.88297   | 1.48105   | 1.0916    | 2.87141   | 2.191     |
| SUGP2       | 24.3302   | 22.2186   | 24.628    | 21.2533   | 27.8511   | 23.9624   |
| PABPC5      | 0.770784  | 0.454319  | 0.302549  | 0.294863  | 0.527281  | 0.498109  |
| SEL1L2      | 0         | 0         | 0.311784  | 0         | 0         | 0         |
| LOC10050679 | 1.18425   | 0         | 0         | 0         | 0         | 0         |
| PTGER4      | 5.10184   | 3.84813   | 4.53854   | 2.54413   | 5.34222   | 3.95161   |
| AIMP1       | 25.3011   | 22.624    | 22.8235   | 19.7603   | 23.8401   | 21.2489   |
| LOC10050680 | 0.351991  | 0.311208  | 0.266459  | 0.0734475 | 0.498189  | 0.219346  |
| TTC28       | 2.82423   | 2.80351   | 3.17123   | 2.34195   | 2.41037   | 2.25728   |
| GABRG3      | 0.103136  | 0.0911861 | 0.234223  | 0.0484214 | 0.131375  | 0.224944  |
| LOC10050703 | 1.96129   | 2.3567    | 2.19012   | 2.02447   | 3.05665   | 1.73106   |
| LOC148189   | 1.79005   | 1.76466   | 1.39552   | 1.30659   | 1.31406   | 1.37764   |
| DGAT1       | 21.0248   | 27.3512   | 21.8869   | 22.524    | 21.8839   | 16.8312   |
| LOC10050730 | 102.848   | 241.826   | 147.251   | 232.334   | 150.945   | 149.545   |
| LOC10028807 | 0         | 0.180316  | 0         | 0         | 0         | 0         |
| LOC285456   | 0         | 0.0458553 | 0.0588925 | 0.0730499 | 0         | 0.0323197 |
| C12orf28    | 1.54299   | 0.944458  | 0.808653  | 0.891597  | 1.05834   | 1.33135   |
| LOC10050595 | 0         | 0         | 0         | 0         | 2.71E-11  | 0.638056  |
| MET         | 4.09746   | 5.11876   | 4.58987   | 3.70537   | 3.99927   | 4.1953    |
| RESP18      | 0         | 0         | 0         | 0         | 0         | 0         |
| TRPV6       | 7.98992   | 7.33822   | 6.30912   | 10.7362   | 9.16866   | 10.8164   |
| QSER1       | 8.84431   | 5.7746    | 8.20701   | 7.3192    | 7.79403   | 7.35911   |
| KIAA1919    | 3.5861    | 2.42199   | 2.58273   | 2.10456   | 1.53853   | 1.7381    |
| MIR4536     | 0         | 0         | 0         | 0         | 0         | 0         |
| CCDC3       | 52.7315   | 82.1541   | 83.075    | 98.5818   | 100.243   | 79.2561   |
| CCT8L2      | 0         | 0         | 0         | 0         | 0         | 0         |
| LOC10050589 | 7.40204   | 14.7777   | 8.13394   | 13.9008   | 9.12464   | 9.07648   |
| GATAD1      | 14.4075   | 16.01     | 18.4329   | 17.258    | 21.7779   | 14.4358   |
| RNF41       | 7.52924   | 7.99688   | 8.15233   | 8.17726   | 7.88327   | 6.60589   |
| LRRC61      | 4.97889   | 5.33904   | 3.61762   | 5.82241   | 4.89737   | 4.49643   |
| U2AF1       | 61.0512   | 70.8457   | 64.2711   | 75.3194   | 60.6603   | 57.9862   |
| MIR224      | 0         | 0         | 0         | 0         | 0         | 0         |
| MIR2277     | 0         | 0         | 0         | 0         | 0         | 0         |
| MGAM        | 0.0294376 | 0.0130134 | 0         | 0.0414621 | 0.0382791 | 0.0183443 |
| ATXN1       | 5.71633   | 4.45203   | 5.75499   | 5.17931   | 6.27542   | 5.48296   |
| LOC10028749 | 8.2647    | 6.72676   | 9.43395   | 8.86848   | 11.2791   | 8.82837   |
| XCL1        | 0.800708  | 0.428301  | 0.607824  | 0.0751852 | 0.305985  | 0.0498967 |
| NAT8        | 0         | 0.190076  | 0         | 0         | 0         | 0.0669849 |
| ZEB2        | 10.8899   | 9.41695   | 12.2071   | 6.85018   | 10.0951   | 6.60136   |
| C8orf46     | 1.30591   | 0.753005  | 1.61182   | 0.933004  | 1.19337   | 0.725335  |
| CNPY2       | 42.1984   | 47.7511   | 40.8034   | 42.3594   | 41.1214   | 41.1686   |

|             |          |           |           |           |           |           |
|-------------|----------|-----------|-----------|-----------|-----------|-----------|
| KCNQ5       | 0.427855 | 0.351855  | 0.393689  | 0.473994  | 0.175804  | 0.228985  |
| PXK         | 6.72058  | 5.08664   | 7.43856   | 4.87631   | 6.7124    | 6.12337   |
| HGSNAT      | 30.4184  | 32.8505   | 30.4883   | 34.5245   | 35.9141   | 28.5597   |
| METTL17     | 34.6801  | 53.4623   | 37.3206   | 49.615    | 57.1483   | 43.3833   |
| PSMB10      | 43.2557  | 71.3338   | 30.3618   | 30.3255   | 43.8124   | 24.4122   |
| ACVR1C      | 2.2644   | 3.31216   | 4.63565   | 1.21674   | 1.82665   | 1.08132   |
| MIR614      | 0        | 0         | 0         | 0         | 0         | 0         |
| YTHDF3      | 18.7529  | 14.2186   | 17.4906   | 13.0837   | 15.3343   | 13.8742   |
| RTBDN       | 0        | 0.0984791 | 0         | 0         | 0         | 0.0694103 |
| ASXL3       | 0.198784 | 0.0659072 | 0.122266  | 0.0816617 | 0.0474776 | 0.0309685 |
| POLRMT      | 6.8975   | 9.64812   | 9.21548   | 10.2386   | 10.857    | 9.55876   |
| ARC         | 0.304387 | 0.478436  | 0.870487  | 1.07975   | 1.1632    | 1.11701   |
| IFT43       | 13.8778  | 19.3929   | 19.5562   | 23.1177   | 21.0021   | 20.2585   |
| LOC283440   | 0        | 0         | 0.195966  | 0         | 0.164876  | 0         |
| CGB5        | 0        | 0.353092  | 0.672523  | 0.764061  | 0.310954  | 0.3733    |
| PEX6        | 18.9703  | 22.388    | 14.935    | 19.2906   | 21.7302   | 24.4486   |
| SPRNP1      | 0        | 0.0786329 | 0.192723  | 0.213429  | 0.23366   | 0.196458  |
| EDN3        | 0.985107 | 0.93209   | 1.59871   | 0.845318  | 0.699577  | 0.763564  |
| MAGEH1      | 13.5371  | 13.1459   | 13.4395   | 11.8081   | 12.815    | 10.1413   |
| LPAR1       | 13.7183  | 8.5698    | 12.229    | 6.08619   | 11.1654   | 8.64469   |
| MAP1LC3A    | 39.1074  | 52.587    | 46.0155   | 61.9905   | 73.1306   | 70.2196   |
| NT5DC2      | 30.0285  | 38.2101   | 31.7458   | 53.5929   | 42.3665   | 54.7404   |
| SOLH        | 10.7162  | 16.0492   | 16.0086   | 17.5613   | 16.531    | 15.4506   |
| PGAM1       | 155.263  | 141.302   | 116.931   | 132.225   | 124.745   | 131.996   |
| C19orf22    | 38.4287  | 50.4526   | 31.9384   | 44.5071   | 39.662    | 41.9074   |
| NKX6-3      | 0        | 0         | 0         | 0         | 0         | 0         |
| NEU2        | 0.993885 | 0.263619  | 0.526663  | 1.30654   | 0.696312  | 5.8838    |
| FAM107B     | 20.4693  | 18.4176   | 24.0257   | 15.4103   | 15.0946   | 14.8654   |
| SLC5A11     | 0.17285  | 0.45847   | 0.0327121 | 0         | 0.192656  | 0.188498  |
| ATP6V0C     | 257.254  | 332.658   | 249.754   | 300.274   | 235.16    | 292.383   |
| MIR1910     | 0        | 0         | 0         | 0         | 0         | 0         |
| PIN1P1      | 0        | 0.313208  | 0.0893904 | 0         | 0.150417  | 0.29434   |
| TMEM86B     | 5.70562  | 10.3015   | 5.45582   | 10.3766   | 8.30069   | 5.80108   |
| LOC10050700 | 0        | 0         | 0         | 0         | 0         | 0         |
| SIRPB2      | 1.47     | 0.491327  | 0.782613  | 0.268392  | 1.49031   | 0.717169  |
| CD163       | 4.48824  | 1.44848   | 2.70364   | 0.756971  | 2.29589   | 0.865588  |
| FAM178A     | 11.6109  | 14.115    | 11.7362   | 12.0031   | 13.1023   | 11.3749   |
| PSME4       | 15.2536  | 13.2493   | 12.2676   | 12.3721   | 12.7373   | 11.4266   |
| SLC25A27    | 11.8473  | 13.5059   | 15.2073   | 15.3392   | 18.7226   | 16.2375   |
| TUBB        | 217.777  | 246.542   | 211.614   | 222.029   | 220.69    | 206.538   |
| ENTHD1      | 0.184893 | 0.196165  | 0.139965  | 0.104167  | 0.0471038 | 0.0691306 |
| RTN4IP1     | 3.39168  | 2.72916   | 2.50982   | 2.68376   | 2.33008   | 2.23229   |
| KLHL6       | 0.967306 | 0.694875  | 0.846671  | 0.326415  | 1.08777   | 0.640458  |

|             |           |           |           |           |           |           |
|-------------|-----------|-----------|-----------|-----------|-----------|-----------|
| TMEM143     | 4.30899   | 7.81999   | 6.00882   | 8.00697   | 6.84661   | 5.99219   |
| LOC10028874 | 0.890693  | 1.16052   | 0.851697  | 0.660274  | 1.13458   | 1.373     |
| PABPC1P2    | 0.0248097 | 0         | 0         | 0         | 0         | 0         |
| F3          | 26.0804   | 15.2055   | 28.583    | 21.7569   | 24.7831   | 20.0087   |
| POFUT2      | 11.1737   | 13.4647   | 13.058    | 13.5853   | 15.7798   | 12.2179   |
| TPI1        | 216.87    | 220.86    | 180.353   | 237.772   | 227.654   | 229.876   |
| LOC10028706 | 0.509141  | 0.375125  | 0.513896  | 0.0796792 | 0.216183  | 0.158637  |
| PEX5        | 19.0993   | 19.5946   | 18.7331   | 18.6838   | 20.9271   | 17.3415   |
| FAM47B      | 0         | 0         | 0         | 0         | 0         | 0         |
| KIF25-AS1   | 0         | 0         | 0         | 0         | 0.0226707 | 0.0221813 |
| SCAF1       | 16.4138   | 20.5438   | 17.6579   | 22.1776   | 18.5706   | 19.208    |
| TUBA1A      | 64.6455   | 57.4241   | 62.2344   | 59.6956   | 64.4869   | 71.9747   |
| GIN51       | 2.91142   | 4.13978   | 2.38573   | 3.29744   | 3.28804   | 3.17965   |
| RNF11       | 57.314    | 45.6803   | 49.47     | 35.3931   | 39.0112   | 45.3685   |
| C2orf50     | 0         | 0         | 0         | 0         | 0.0698458 | 0.136676  |
| SF3B2       | 60.0621   | 60.5023   | 61.3271   | 62.6386   | 62.1407   | 57.3656   |
| PYROXD2     | 5.38574   | 6.08443   | 4.68104   | 3.93332   | 7.05098   | 6.24619   |
| ZNRD1-AS1   | 0.541478  | 0.147305  | 0.914396  | 0.234664  | 0.610155  | 0.571029  |
| ANKDD1A     | 7.64092   | 9.09194   | 6.72415   | 6.39744   | 7.23899   | 5.87251   |
| ILDR2       | 0.0349874 | 0.0206225 | 0.0617999 | 0.0438035 | 0.0519953 | 0.050873  |
| PSG8        | 0         | 0.0809983 | 0.0569567 | 0         | 0.0479205 | 0         |
| UCP3        | 1.18621   | 1.99162   | 1.99565   | 1.91579   | 2.04368   | 1.77497   |
| UBE2R2      | 23.5131   | 22.7696   | 24.2212   | 24.1413   | 21.7777   | 22.907    |
| ACAD8       | 76.5487   | 67.1737   | 63.5541   | 58.1005   | 57.7548   | 60.5933   |
| LOC10050752 | 0.265755  | 0.117482  | 0.100589  | 0.249539  | 0.253891  | 0.0828035 |
| LOC10050659 | 2.96E-10  | 0.100816  | 0.64739   | 1.13E-11  | 0.4585    | 0.294013  |
| SIPA1L1     | 7.93357   | 5.77957   | 7.24791   | 6.20791   | 6.96385   | 7.10805   |
| SRSF10      | 55.9869   | 57.1393   | 49.4977   | 44.2424   | 57.6944   | 47.2965   |
| RASD1       | 19.4974   | 32.1356   | 29.1091   | 24.1277   | 24.6059   | 27.2997   |
| NAPA        | 131.38    | 158.894   | 117.299   | 158.808   | 120.259   | 135.762   |
| ANGPTL5     | 2.65678   | 1.51546   | 3.66557   | 0.925445  | 1.52837   | 1.14824   |
| ZNF552      | 6.07291   | 4.35147   | 5.21829   | 5.17557   | 4.98605   | 5.27299   |
| TMEM202     | 0         | 0         | 0.0645934 | 0         | 0         | 0         |
| SOX14       | 0         | 0         | 0         | 0         | 0         | 0         |
| CNTN4       | 0.54203   | 0.615569  | 0.534319  | 1.08092   | 0.744007  | 1.4145    |
| NUFIP1      | 2.19949   | 1.47095   | 1.92118   | 1.90642   | 1.68823   | 1.35306   |
| NUPR1       | 193.33    | 251.249   | 195.48    | 252.263   | 234.706   | 236.054   |
| ELF3        | 16.3253   | 7.07043   | 8.44649   | 13.6527   | 13.2837   | 11.5893   |
| PCGF5       | 10.3727   | 6.98733   | 8.31704   | 5.37756   | 8.15386   | 6.36399   |
| KIF11       | 2.77019   | 3.06992   | 2.36995   | 2.69025   | 2.92447   | 3.01505   |
| LOC401397   | 36.7291   | 33.5469   | 32.615    | 25.9542   | 29.37     | 30.1279   |
| FAM171A1    | 7.87619   | 8.68817   | 7.34543   | 5.44818   | 7.53245   | 5.15428   |
| SPDEF       | 19.6155   | 6.36388   | 6.82141   | 7.01663   | 3.56949   | 6.06042   |

|             |          |          |          |           |          |          |
|-------------|----------|----------|----------|-----------|----------|----------|
| C1orf52     | 7.88123  | 9.81468  | 9.47759  | 7.91083   | 11.5399  | 8.62135  |
| VAMP4       | 11.3843  | 10.8574  | 10.947   | 9.60745   | 13.3204  | 9.76766  |
| AQP6        | 0.983515 | 0.702339 | 0.257721 | 0.390714  | 0.361388 | 0.18858  |
| DENND3      | 3.84682  | 5.4293   | 4.94249  | 3.67838   | 5.11366  | 3.04595  |
| GPR148      | 0        | 0        | 0        | 0         | 0        | 0        |
| SLC9A10     | 0.30693  | 0.18787  | 0.571933 | 0.243864  | 0.375934 | 0.367819 |
| OR10A2      | 0        | 0.116976 | 0        | 0         | 0        | 0        |
| NBN         | 16.2089  | 10.239   | 13.697   | 9.08474   | 11.6573  | 10.0485  |
| PRR13       | 68.9787  | 78.7529  | 66.4458  | 57.3692   | 65.477   | 59.1573  |
| GNG5        | 56.9088  | 67.4528  | 52.0269  | 70.1455   | 53.9343  | 55.9081  |
| TP53RK      | 7.35768  | 6.14263  | 7.09469  | 6.93497   | 7.53121  | 7.35135  |
| EGLN2       | 30.8664  | 45.9426  | 32.6043  | 38.9839   | 36.462   | 34.1194  |
| LOC284788   | 0        | 0        | 0        | 0         | 0        | 0        |
| GCDH        | 16.4759  | 19.6424  | 13.1242  | 11.5357   | 11.4807  | 16.9208  |
| MIR183      | 0        | 0        | 0        | 0         | 0        | 0        |
| ZNF815      | 0.63779  | 0.657339 | 1.82246  | 1.66218   | 1.03738  | 1.14723  |
| FAM69B      | 6.49947  | 12.3218  | 9.9483   | 11.2451   | 12.3322  | 9.32973  |
| CERCAM      | 11.4115  | 14.0789  | 22.7256  | 14.1119   | 19.1914  | 19.4744  |
| FAM104A     | 15.6436  | 17.9027  | 17.7188  | 20.9739   | 17.5673  | 15.577   |
| LOC1006528: | 16.3128  | 15.3757  | 15.5991  | 21.1994   | 21.099   | 20.1613  |
| MIR3152     | 0        | 0        | 0        | 0         | 0        | 0        |
| RFC1        | 21.1427  | 16.2055  | 23.928   | 23.3425   | 21.7531  | 19.9345  |
| SRP72       | 28.8571  | 23.8647  | 26.462   | 24.9192   | 22.4885  | 21.3749  |
| NEMF        | 15.1418  | 12.8444  | 14.0732  | 11.1348   | 13.9016  | 14.0873  |
| LOC730236   | 0.208195 | 0.276109 | 0.236407 | 0.195492  | 0.198901 | 0.194607 |
| SOX8        | 5.43686  | 4.69179  | 5.05224  | 9.53771   | 2.67483  | 4.76757  |
| PPP2R2B     | 1.78713  | 2.98588  | 2.03126  | 1.26097   | 3.70811  | 1.95674  |
| ALDH3B2     | 190.062  | 181.129  | 174.712  | 214.142   | 211.928  | 261.086  |
| FKBP2       | 100.789  | 138.606  | 102.401  | 149.966   | 105.562  | 129.83   |
| DNAJC11     | 22.4193  | 20.8013  | 20.2043  | 19.5631   | 21.1723  | 21.4474  |
| TSPAN11     | 7.42033  | 4.71447  | 4.42847  | 3.72684   | 4.79199  | 3.73149  |
| HMGCLL1     | 0.373899 | 0.509211 | 0.466751 | 0.426667  | 0.187534 | 0.258027 |
| IRX1        | 5.44645  | 7.54579  | 6.88582  | 7.59211   | 7.58146  | 8.4675   |
| RAB33A      | 0.619691 | 0.273946 | 0.547295 | 0         | 1.05249  | 0.321804 |
| KDM6A       | 6.30971  | 5.05016  | 11.363   | 8.40375   | 11.4215  | 10.461   |
| NARS        | 68.6146  | 54.4639  | 58.7074  | 49.7006   | 53.9341  | 47.6121  |
| F2RL3       | 0.25669  | 0.259371 | 0.249835 | 0.0344326 | 0.233554 | 0.18281  |
| C19orf51    | 0.33067  | 1.12766  | 0.679437 | 1.46376   | 0.872509 | 0.70649  |
| MIR3198-2   | 0        | 0        | 0        | 0         | 0        | 0        |
| GNAL        | 4.11083  | 2.6619   | 4.59934  | 2.74419   | 2.78678  | 2.88496  |
| MIR1251     | 0        | 0        | 0        | 0         | 0        | 0        |
| SYT2        | 0.175861 | 0.133587 | 0.114378 | 0.270246  | 0.254775 | 0.210417 |
| MIR4271     | 0        | 0        | 0        | 0         | 0        | 0        |

|             |           |           |           |           |           |           |
|-------------|-----------|-----------|-----------|-----------|-----------|-----------|
| CTAGE15P    | 2.18731   | 1.81442   | 3.13521   | 3.26012   | 5.21349   | 5.1519    |
| BEGAIN      | 1.83778   | 2.55267   | 1.39121   | 2.67582   | 2.6023    | 2.73354   |
| LOC157381   | 1.67308   | 1.40648   | 1.51568   | 1.49373   | 1.57219   | 1.82881   |
| TCEB3C      | 0         | 0         | 0         | 0.0173735 | 0.0117843 | 0         |
| ERCC3       | 25.8406   | 33.723    | 27.1933   | 30.6888   | 31.9193   | 26.3541   |
| CCDC67      | 0.0376424 | 0         | 0         | 0.106037  | 0.0239746 | 0.0703714 |
| SPTY2D1     | 7.72931   | 5.17592   | 7.20868   | 5.44951   | 6.81823   | 6.09522   |
| SLC25A42    | 7.49627   | 6.87941   | 8.16489   | 7.90018   | 9.32723   | 6.54384   |
| C8orf77     | 0.152706  | 0.270025  | 0.369917  | 0.372809  | 0.466843  | 0.609022  |
| PRKAB2      | 12.7209   | 10.8084   | 13.6131   | 10.2312   | 15.1772   | 14.7171   |
| PRR5L       | 1.8738    | 2.45955   | 1.75894   | 1.96115   | 1.95464   | 1.97965   |
| IFITM4P     | 0.717537  | 0         | 0.543179  | 0         | 0         | 0         |
| LOC1001299: | 3.04939   | 0.719012  | 3.48397   | 1.13797   | 2.9269    | 2.73064   |
| MAGEC2      | 0         | 0         | 0         | 0         | 0         | 0         |
| C11orf83    | 10.9622   | 18.0245   | 8.38394   | 16.2765   | 9.99041   | 11.8291   |
| DNAJA4      | 50.0237   | 39.352    | 34.6123   | 36.6813   | 36.5547   | 37.4525   |
| RBBP5       | 6.26046   | 5.11333   | 6.28691   | 5.47166   | 5.43026   | 5.70012   |
| IPCEF1      | 0.461774  | 0.630623  | 0.476474  | 0.354931  | 0.605606  | 0.461894  |
| EMR2        | 1.61704   | 1.33271   | 1.76836   | 1.54027   | 1.9849    | 1.89269   |
| SMARCAD1    | 12.0544   | 10.8512   | 13.0377   | 10.9135   | 14.663    | 12.8979   |
| MYL10       | 0         | 0         | 0         | 0.109065  | 0         | 0.072381  |
| RBM4        | 81.1746   | 84.8071   | 61.094    | 80.2907   | 73.8078   | 79.3927   |
| C1orf114    | 0.167631  | 0.395223  | 0.169197  | 0.367273  | 0.177942  | 0.348202  |
| SAP30BP     | 25.3075   | 35.8642   | 26.4432   | 32.6119   | 33.2317   | 29.312    |
| DKFZp686D0: | 0         | 0         | 0         | 0         | 0         | 0.0131274 |
| PLOD3       | 9.32585   | 13.5562   | 10.5497   | 9.84903   | 11.2973   | 9.05839   |
| FBLN1       | 131.446   | 101.535   | 224.96    | 76.9641   | 138.851   | 107.816   |
| LOC1005059: | 0.11467   | 0.0506921 | 0.130209  | 0.269184  | 0.146068  | 0.214373  |
| EEF1B2      | 216.463   | 284.571   | 256.61    | 314.594   | 253.662   | 242.099   |
| PHB2        | 180.013   | 223.153   | 182.223   | 251.024   | 170.89    | 162.733   |
| CYP2G1P     | 0.040183  | 0.0355273 | 0.0912563 | 0         | 0.0511856 | 0         |
| LOC1005074: | 0         | 0         | 0         | 0         | 0         | 0         |
| ASB5        | 0.0655282 | 0.0289679 | 0.0744078 | 0.030765  | 0.0208676 | 0.0204172 |
| ZYG11B      | 6.6342    | 5.18637   | 6.29087   | 5.21303   | 5.64122   | 4.4968    |
| LOC1001331: | 0         | 0         | 0         | 0         | 0.0786295 | 0         |
| TIMMDC1     | 40.6799   | 39.8054   | 36.9134   | 37.2569   | 37.2684   | 36.5889   |
| FOXL1       | 0.496212  | 0.4113    | 0.258249  | 0.436815  | 0.256783  | 0.154609  |
| LOC1005056: | 0         | 0         | 0         | 0         | 0         | 0         |
| LOC1001291: | 0.0847637 | 0.0749383 | 0.1925    | 1.03152   | 0         | 0.710157  |
| SNORD26     | 0         | 0         | 0         | 0         | 0         | 0         |
| LPIN1       | 68.122    | 54.1116   | 27.1267   | 23.2479   | 24.8417   | 34.252    |
| LOC1005061: | 1.31032   | 1.02978   | 1.68994   | 1.27594   | 2.25638   | 1.20968   |
| TXNDC17     | 21.0529   | 18.4032   | 14.2451   | 16.233    | 14.1665   | 17.1385   |



|             |          |          |           |          |          |           |
|-------------|----------|----------|-----------|----------|----------|-----------|
| SNAR-C4     | 0        | 0        | 0         | 0        | 0        | 0         |
| GNPAT       | 88.9784  | 74.7548  | 53.0689   | 47.6916  | 40.046   | 46.8578   |
| HSPBP1      | 20.4398  | 25.744   | 17.8557   | 28.3814  | 21.662   | 23.6977   |
| SPZ1        | 0        | 0        | 0         | 0        | 0        | 0         |
| QPCT        | 23.0005  | 26.9131  | 23.9819   | 27.2438  | 21.0063  | 25.4593   |
| LOC284837   | 9.62058  | 9.51099  | 15.2987   | 14.9044  | 18.7979  | 22.7474   |
| CDK5RAP1    | 20.8549  | 27.7767  | 22.0436   | 23.6396  | 22.2845  | 23.4977   |
| PNLIPRP3    | 83.2411  | 66.6758  | 58.0111   | 59.6144  | 40.5015  | 56.9973   |
| MIR4311     | 0        | 0        | 0         | 0        | 0        | 0         |
| LOC10012959 | 0.386966 | 0        | 0         | 0.363355 | 0.985844 | 0.241141  |
| ACAP2       | 14.7398  | 10.4866  | 14.5125   | 9.28092  | 12.7932  | 10.971    |
| KLHL30      | 0.717924 | 1.26949  | 2.23428   | 1.17347  | 0.406444 | 0.530228  |
| RPL32       | 263.979  | 404.77   | 314.343   | 505.462  | 325.168  | 302.703   |
| RPL3L       | 0.491418 | 0        | 0.159431  | 0.329595 | 0.134137 | 0.131242  |
| ZBTB12      | 2.05944  | 1.93942  | 1.48792   | 1.43225  | 2.57466  | 2.20486   |
| MIR4695     | 0        | 0        | 0         | 0        | 0        | 0         |
| YJEFN3      | 6.35084  | 13.932   | 6.47903   | 13.7536  | 11.61    | 13.25     |
| GXYLT1      | 3.59793  | 2.3631   | 3.15165   | 2.44915  | 3.32279  | 2.79458   |
| NCOA6       | 11.2258  | 9.7097   | 9.82423   | 8.32642  | 10.3224  | 9.54823   |
| RNF157      | 3.01323  | 2.43983  | 2.3577    | 1.05613  | 1.58026  | 0.954812  |
| FBXO24      | 0.647811 | 0.889641 | 0.202157  | 0.437494 | 0.297591 | 0.84363   |
| LOC644135   | 0        | 0        | 0         | 0        | 0        | 0.084848  |
| OR13H1      | 0        | 0        | 0         | 0        | 0        | 0         |
| GTPBP2      | 23.2995  | 28.5979  | 21.6051   | 22.254   | 28.68    | 23.1102   |
| SAMD8       | 5.98573  | 5.34189  | 6.44849   | 5.19831  | 5.72093  | 6.06111   |
| PAGE4       | 0        | 0        | 0         | 0        | 0        | 0         |
| RPL22L1     | 15.7276  | 16.1918  | 13.2377   | 16.2051  | 12.3363  | 12.1359   |
| HRCT1       | 3.01128  | 6.32315  | 5.79386   | 5.53727  | 4.87466  | 3.51844   |
| CHRNA6      | 0        | 0.152463 | 0.13054   | 0        | 0.146441 | 0         |
| 4-Sep       | 13.2958  | 18.9336  | 12.6916   | 13.0567  | 13.4886  | 11.6331   |
| SLC25A39    | 99.9807  | 124.014  | 85.3568   | 119.192  | 111.052  | 124.789   |
| LOC10050729 | 0.714855 | 1.53791  | 1.86147   | 2.80531  | 2.02008  | 1.83507   |
| MAPK6       | 18.5687  | 13.9354  | 18.3067   | 14.7134  | 17.4833  | 17.0486   |
| C7orf59     | 136.979  | 219.021  | 205.747   | 250.484  | 219.092  | 234.28    |
| INSIG1      | 319.77   | 279.879  | 225.126   | 238.501  | 123.307  | 195.182   |
| MIR4435-2   | 0        | 0        | 0         | 0        | 0        | 0         |
| TRIM22      | 45.2017  | 39.8227  | 22.391    | 11.9491  | 25.5609  | 12.6146   |
| E2F8        | 3.63587  | 3.77366  | 2.53298   | 2.17706  | 3.22185  | 3.11947   |
| C1orf74     | 4.31765  | 3.45383  | 4.09858   | 4.95514  | 4.23403  | 3.63014   |
| AFMID       | 42.3629  | 19.714   | 17.749    | 28.2606  | 21.7006  | 24.7208   |
| H1FNT       | 0.170026 | 0.526143 | 0.193066  | 0.079826 | 0.162436 | 0.0529766 |
| C7orf33     | 0        | 0        | 0.0613056 | 0        | 0        | 0         |
| SNORA71B    | 41.3253  | 0        | 0         | 38.8038  | 26.3203  | 0         |

|             |           |           |          |          |          |          |
|-------------|-----------|-----------|----------|----------|----------|----------|
| DHCR24      | 480.856   | 357.059   | 328.931  | 302.076  | 277.26   | 364.478  |
| MMP23A      | 5.87274   | 10.0293   | 7.02135  | 3.13408  | 8.55701  | 7.52675  |
| FAM169B     | 0         | 0         | 0        | 0.028101 | 0        | 0        |
| ACAP1       | 6.35722   | 9.39147   | 5.20841  | 2.94688  | 12.0956  | 5.84203  |
| CCIN        | 0.0533878 | 0.0472021 | 0.161659 | 0.150391 | 0        | 0.066538 |
| CYP3A7      | 0.0990401 | 0.087565  | 0.488111 | 0.511484 | 0.536173 | 0.678893 |
| CCDC132     | 9.63944   | 8.05128   | 8.40707  | 6.34869  | 9.11396  | 8.71418  |
| STAG3L2     | 8.31758   | 6.08289   | 11.1718  | 8.84779  | 10.1116  | 8.59611  |
| C9orf172    | 0.237792  | 0.540618  | 0.59146  | 0.414667 | 0.562531 | 0.52922  |
| FNDC3B      | 8.61395   | 5.85741   | 7.86194  | 4.75269  | 5.25925  | 4.35934  |
| ARID5A      | 10.7039   | 18.3948   | 10.3829  | 13.9667  | 17.4812  | 10.1353  |
| OR2A1       | 0.65022   | 0.255504  | 0.843999 | 0.492457 | 0.409016 | 0.400187 |
| FAM111B     | 2.26728   | 2.18676   | 1.24793  | 1.82435  | 1.83839  | 2.87959  |
| MYOM3       | 0.710415  | 0.876424  | 0.925495 | 1.179    | 0.568214 | 0.916287 |
| LRR3        | 1.0475    | 1.42481   | 1.46393  | 0.832261 | 1.12903  | 0.903814 |
| TAS2R5      | 1.9729    | 2.2676    | 3.13633  | 1.57464  | 2.95289  | 1.96708  |
| TMEM158     | 1.79567   | 2.18298   | 2.12396  | 2.37109  | 2.10865  | 2.06313  |
| XAGE2B      | 1.68989   | 0         | 0.284279 | 0.352617 | 0.239178 | 1.05307  |
| LOC10050630 | 0.703164  | 2.17593   | 2.39535  | 0        | 0.895698 | 0.657273 |
| LOC10012940 | 0         | 0         | 0.278901 | 0        | 0        | 0        |
| CFL2        | 12.9752   | 11.866    | 12.9561  | 7.89021  | 8.05052  | 7.0025   |
| RAB17       | 5.37859   | 5.19335   | 3.37686  | 6.0215   | 4.90768  | 5.5751   |
| LOC149134   | 0.711036  | 0.71846   | 0.538258 | 0.858409 | 1.03511  | 0.69628  |
| BANF1       | 59.6715   | 64.2976   | 54.5255  | 69.6276  | 54.9439  | 58.1711  |
| SPR         | 22.9869   | 19.2091   | 14.4823  | 14.2735  | 13.9321  | 15.8956  |
| ALG9        | 4.752     | 5.3838    | 6.30083  | 6.29063  | 5.64411  | 5.3921   |
| MIR1206     | 0         | 0         | 0        | 0        | 0        | 0        |
| C4orf27     | 19.0738   | 19.8781   | 18.2057  | 14.7952  | 18.4864  | 16.0202  |
| AGAP7       | 4.26052   | 7.5304    | 9.09781  | 10.7908  | 8.61282  | 7.40729  |
| HRAS        | 70.3155   | 133.559   | 72.527   | 124.559  | 80.3226  | 88.3465  |
| C17orf90    | 34.8207   | 52.3166   | 31.528   | 47.8688  | 45.3697  | 38.5757  |
| DMTF1       | 27.2193   | 28.4543   | 29.7389  | 26.7654  | 39.624   | 33.788   |
| KLHDC8A     | 0.282635  | 0.249888  | 0.366782 | 0.644518 | 0.154296 | 0.679344 |
| FLJ32756    | 0         | 0.170518  | 0        | 0.362192 | 0        | 0.240369 |
| KCNH2       | 0.295494  | 0.503108  | 0.502534 | 0.72007  | 0.911541 | 1.26149  |
| BLCAP       | 73.7251   | 93.0241   | 72.3149  | 80.0961  | 70.6538  | 61.2707  |
| ERVMER34-1  | 0.628865  | 0.4641    | 0.712666 | 0.28595  | 0.400528 | 0.60832  |
| C9orf89     | 19.5733   | 28.2787   | 22.0235  | 29.866   | 28.1059  | 21.2897  |
| KRTAP4-3    | 5.58138   | 1.23368   | 0.288078 | 74.2054  | 1.21187  | 499.895  |
| ENTPD6      | 20.7359   | 26.1691   | 17.7342  | 23.2563  | 27.2127  | 23.9729  |
| B3GALT5     | 0.349431  | 0.152058  | 0.58025  | 0.318598 | 0.294538 | 0.250812 |
| SPATA24     | 1.19463   | 2.46451   | 2.11014  | 1.12174  | 2.66304  | 1.61296  |
| GAP43       | 0.625608  | 0.823643  | 0.565967 | 0.99018  | 0.629232 | 0.389852 |

|             |           |           |           |           |           |           |
|-------------|-----------|-----------|-----------|-----------|-----------|-----------|
| AURKA       | 2.96429   | 2.5779    | 1.98546   | 2.14363   | 1.94946   | 2.60242   |
| OTOF        | 0.108369  | 0.217376  | 0.153779  | 0.12749   | 0.182258  | 0.153211  |
| GPR157      | 4.42482   | 4.2599    | 5.806     | 4.70882   | 5.63639   | 5.75983   |
| MRPL45P2    | 6.32678   | 4.46637   | 4.96678   | 5.94075   | 3.96315   | 3.1152    |
| OSTC        | 60.5954   | 51.496    | 49.188    | 53.4863   | 47.306    | 54.6095   |
| SDS         | 0.265462  | 0.176028  | 0.100478  | 0         | 0.253611  | 0.0827123 |
| GDF2        | 0         | 0         | 0         | 0         | 0         | 0         |
| HBD         | 0         | 0.29166   | 0         | 0.154877  | 0.328286  | 0.205568  |
| LOC162632   | 1.11815   | 1.03286   | 18.1092   | 15.0899   | 14.8588   | 12.6506   |
| C6orf62     | 108.37    | 102.879   | 100.315   | 86.9189   | 103.655   | 97.5917   |
| MIR4634     | 0         | 0         | 0         | 0         | 0         | 0         |
| LOC10050601 | 0         | 0         | 0         | 0         | 0         | 0         |
| PPARGC1B    | 5.18976   | 4.28718   | 4.40397   | 4.26702   | 5.1968    | 3.87068   |
| LCE3B       | 0         | 0         | 0         | 0         | 0         | 0         |
| CTIF        | 12.5695   | 13.4012   | 17.1974   | 12.3303   | 11.0527   | 11.42     |
| SP110       | 9.60635   | 7.5169    | 5.0516    | 4.57121   | 6.98593   | 5.7086    |
| MIR4500     | 0         | 0         | 0         | 0         | 0         | 0         |
| FRAT1       | 2.42394   | 2.04264   | 2.80975   | 2.7028    | 2.99116   | 2.54897   |
| MIR4730     | 0         | 0         | 0         | 0         | 0         | 0         |
| PRDM2       | 18.0464   | 15.266    | 17.8743   | 16.654    | 21.0009   | 17.152    |
| CLCNKA      | 4.41384   | 4.63917   | 3.46523   | 4.96612   | 2.66062   | 2.25457   |
| MIR1296     | 0         | 0         | 0         | 0         | 0         | 0         |
| PRKCH       | 20.2699   | 13.4596   | 15.111    | 14.005    | 15.6063   | 15.2345   |
| PNO1        | 10.7796   | 8.7904    | 7.76409   | 10.0727   | 7.73212   | 6.65217   |
| KLK1        | 16.9315   | 23.5062   | 33.1553   | 46.3812   | 48.0367   | 51.6213   |
| LRRC40      | 7.6717    | 7.49996   | 7.08671   | 5.52171   | 6.86644   | 4.9281    |
| DFFA        | 10.0723   | 8.82543   | 7.81261   | 5.72883   | 6.62864   | 7.00724   |
| MIR3940     | 0         | 0         | 0         | 0         | 0         | 0         |
| LOC10013058 | 1.07707   | 0.928463  | 1.22297   | 1.2377    | 1.50659   | 1.10337   |
| LOC10050678 | 2.70574   | 3.93012   | 3.2187    | 2.54065   | 1.96949   | 2.64959   |
| LRRC16B     | 2.63025   | 2.51154   | 2.77163   | 2.98347   | 3.41745   | 3.34368   |
| GOLGA6L10   | 5.05208   | 4.35253   | 6.24142   | 5.6848    | 7.40804   | 7.57188   |
| CHTF18      | 6.54673   | 14.5273   | 8.62426   | 12.8671   | 12.2432   | 12.1189   |
| GAPDHS      | 1.22959   | 2.36519   | 2.24312   | 2.58004   | 2.16496   | 2.20725   |
| LOC10050644 | 0         | 0         | 0         | 0         | 0         | 0         |
| KALRN       | 3.50387   | 3.06791   | 3.5361    | 3.48551   | 4.1617    | 6.4398    |
| MIR3126     | 0         | 0         | 0         | 0         | 0         | 0         |
| BPY2        | 8.53242   | 8.58588   | 0         | 0         | 0         | 0         |
| FAM74A3     | 0.138653  | 0.0488995 | 0         | 0         | 0         | 0         |
| LOC10065273 | 0.0496533 | 0.131701  | 0.375878  | 0.0932473 | 0.28462   | 0.278476  |
| APC         | 4.24881   | 2.87077   | 4.229     | 2.5627    | 3.36111   | 3.29743   |
| TERT        | 0.114886  | 0.154445  | 0.0869696 | 0.0239722 | 0.0162602 | 0.0944933 |
| DCN         | 553.298   | 355.296   | 821.497   | 291.77    | 503.647   | 364.709   |

|             |           |           |           |           |           |           |
|-------------|-----------|-----------|-----------|-----------|-----------|-----------|
| NPIPL3      | 38.7517   | 49.6727   | 34.278    | 46.0302   | 47.2084   | 43.9549   |
| KCNJ12      | 1.93188   | 2.00086   | 2.66026   | 2.24591   | 3.22255   | 3.03833   |
| IGJ         | 9.3479    | 6.62552   | 0.994206  | 2.39387   | 3.19828   | 2.45525   |
| GBP2        | 59.3881   | 57.2712   | 36.0068   | 25.5891   | 45.0505   | 35.7761   |
| TNFRSF10A   | 2.58423   | 2.17854   | 1.81979   | 1.74937   | 2.37317   | 1.68528   |
| MIR548K     | 0         | 174.35    | 0         | 0         | 0         | 0         |
| MIR1258     | 0         | 0         | 0         | 0         | 0         | 0         |
| ZNF488      | 0.421819  | 0.870207  | 0.702502  | 1.32027   | 1.43285   | 0.806103  |
| LAPTM4A     | 163.01    | 126.92    | 171.968   | 139.809   | 149.081   | 133.255   |
| PTRHD1      | 30.4907   | 44.7952   | 35.2247   | 60.4595   | 42.7822   | 35.7626   |
| PRR20A      | 0         | 0         | 0         | 0         | 0         | 0         |
| 10-Mar      | 0.297129  | 0.179581  | 0.131207  | 0.190721  | 0.0827919 | 0.108008  |
| KU-MEL-3    | 0.695719  | 0.527238  | 0.150475  | 0.279973  | 0.379806  | 0.681282  |
| KCNJ3       | 0.0689816 | 0.121978  | 0.0261097 | 0         | 0.0878695 | 0.0429864 |
| TTC36       | 7.54972   | 8.78288   | 3.30879   | 3.17142   | 3.03692   | 1.48568   |
| ZNF627      | 5.67717   | 4.06479   | 5.32592   | 4.67669   | 4.96898   | 3.97185   |
| LOC10028909 | 0         | 0         | 0         | 0         | 0         | 0         |
| THAP3       | 12.1207   | 25.6105   | 15.24     | 26.2707   | 18.9457   | 18.0992   |
| FAHD1       | 19.4103   | 20.0149   | 19.5228   | 19.3269   | 15.149    | 18.5725   |
| EIF3A       | 63.2298   | 46.5918   | 55.6462   | 41.7883   | 49.4618   | 46.1122   |
| CPSF4L      | 0         | 0.946539  | 0         | 0         | 0         | 0         |
| HSH2D       | 1.54337   | 1.44035   | 0.681529  | 0.281788  | 1.03759   | 0.507596  |
| WDR55       | 17.07     | 22.4025   | 18.3054   | 16.9818   | 22.4705   | 16.4718   |
| CSDE1       | 176.509   | 140.415   | 177.496   | 147.745   | 142.777   | 136.87    |
| DLEU7       | 0.286739  | 0.0845054 | 0.144709  | 0.0897477 | 0.487001  | 0.0595611 |
| C5orf51     | 8.95614   | 5.53966   | 8.20278   | 5.65836   | 8.21595   | 7.71706   |
| FOXA1       | 8.50346   | 1.40791   | 0.94026   | 1.46534   | 0.973645  | 1.76633   |
| C11orf48    | 35.7973   | 39.3812   | 26.9013   | 29.9418   | 23.7119   | 25.905    |
| UBE2K       | 23.9573   | 18.9758   | 23.243    | 20.2391   | 21.7428   | 20.0389   |
| STX19       | 4.59699   | 3.54551   | 4.73865   | 3.76546   | 5.23275   | 7.37495   |
| LOC10050738 | 7.35533   | 5.08056   | 5.22002   | 5.39573   | 7.46616   | 5.72941   |
| ECI2        | 56.529    | 41.2754   | 42.5554   | 41.0412   | 33.9446   | 31.3983   |
| COG6        | 9.36747   | 7.27873   | 9.09925   | 5.40537   | 7.32936   | 7.16527   |
| FOXB2       | 0         | 0         | 0         | 0         | 0         | 0         |
| PXDNL       | 0.180842  | 0.230951  | 0.410695  | 0.207543  | 0.486313  | 0.388165  |
| MIR4710     | 0         | 0         | 0         | 0         | 0         | 0         |
| ADAM28      | 1.22266   | 0.950051  | 1.32527   | 0.705509  | 1.93706   | 0.967506  |
| PTGER3      | 11.8269   | 11.2834   | 17.0973   | 8.22791   | 12.077    | 10.1596   |
| HOTTIP      | 0         | 0         | 0         | 0         | 0         | 0         |
| UPF1        | 25.1811   | 27.2728   | 25.8565   | 27.3095   | 28.96     | 28.7496   |
| ADAM29      | 0.288592  | 0         | 0         | 0         | 0         | 0         |
| LOC10065288 | 6.41958   | 6.89203   | 4.97536   | 6.67373   | 9.7836    | 8.33419   |
| ST7-OT4     | 2.04E-26  | 3.25E-36  | 4.87E-21  | 0.0699792 | 3.29E-13  | 0.0930975 |

|             |           |           |            |           |           |           |
|-------------|-----------|-----------|------------|-----------|-----------|-----------|
| MAN1A1      | 10.8162   | 5.67931   | 10.0114    | 3.72542   | 6.43764   | 5.0772    |
| MCTS1       | 8.30212   | 6.35428   | 7.56035    | 5.85572   | 8.06937   | 6.1865    |
| ASPM        | 1.44258   | 1.56622   | 1.09305    | 1.17915   | 1.60404   | 1.47678   |
| VOPP1       | 17.7832   | 16.3206   | 13.3084    | 11.3649   | 17.0755   | 10.6604   |
| HSD17B7P2   | 8.78889   | 7.35784   | 4.47466    | 5.18518   | 10.2045   | 10.5658   |
| LOC440297   | 1.03383   | 1.06527   | 2.24641    | 1.66188   | 2.09199   | 1.68018   |
| PROK1       | 0         | 0.140975  | 0.844931   | 0.598883  | 0.152332  | 0.0993624 |
| LOC401561   | 1.14112   | 1.76559   | 2.59151    | 1.60724   | 3.27054   | 1.24442   |
| C12orf66    | 2.01156   | 1.8127    | 2.48913    | 1.99779   | 2.02031   | 1.15709   |
| BCRP2       | 0.856424  | 0.922969  | 0.775739   | 1.10791   | 1.30066   | 1.28424   |
| LOC10023315 | 0         | 0         | 0          | 0         | 0         | 0         |
| FAM90A12    | 0.0156343 | 0         | 0.00986272 | 0         | 0.020745  | 0.11453   |
| C1QL2       | 0.100606  | 0.266848  | 0.418875   | 0         | 0.256305  | 0.0940399 |
| LOC151162   | 12.2096   | 9.60813   | 10.1753    | 12.0344   | 10.2943   | 13.4982   |
| PRSS55      | 0         | 0.401483  | 0          | 0         | 0         | 0         |
| NARF        | 30.3107   | 50.204    | 40.2505    | 43.5403   | 48.7692   | 43.2877   |
| LOC10012999 | 0.283331  | 0.250503  | 0.12869    | 0.266043  | 0.397001  | 0.388431  |
| CCDC144NL   | 0.0118696 | 0.0262359 | 0.013478   | 0         | 0.0833154 | 0.0221899 |
| YIPF6       | 13.4142   | 9.45224   | 12.7797    | 9.38256   | 9.91247   | 9.51166   |
| FAM198B     | 12.5337   | 8.1593    | 9.78696    | 8.46604   | 8.894     | 7.14632   |
| IFI16       | 51.4162   | 50.2613   | 40.0508    | 27.4445   | 51.5469   | 31.3716   |
| SNORD94     | 78.1578   | 103.653   | 0          | 73.3889   | 49.7791   | 97.4093   |
| LOC10028787 | 0         | 0         | 0.0729766  | 0.0905197 | 0.0306994 | 0.0300367 |
| AIP         | 23.6481   | 38.9324   | 27.2298    | 33.8608   | 40.7991   | 33.5947   |
| ZNF716      | 0.0369451 | 0         | 0          | 0         | 0         | 0         |
| FLJ45974    | 0         | 0         | 0          | 0         | 0         | 0         |
| PHF2P1      | 0         | 0         | 0          | 0         | 0         | 0         |
| SLC33A1     | 9.16006   | 6.53347   | 7.55576    | 6.62347   | 7.84753   | 7.61086   |
| NEDD4       | 4.77586   | 4.7964    | 5.13957    | 3.59349   | 5.16279   | 4.03409   |
| LOC10050727 | 0         | 0         | 0          | 0         | 0         | 0         |
| TRIM67      | 0.0333239 | 0.0294629 | 0.0336351  | 0.0208604 | 0.0282989 | 0.0622981 |
| PPM1D       | 2.81075   | 2.57448   | 2.69414    | 2.44938   | 3.55461   | 3.32667   |
| ZNF586      | 3.68162   | 3.74992   | 2.89808    | 3.92478   | 3.78343   | 4.31469   |
| PQBP1       | 71.3712   | 102.674   | 66.5244    | 90.2693   | 82.9759   | 77.5175   |
| WBP4        | 11.1076   | 11.7078   | 11.1454    | 10.2663   | 12.5954   | 10.7492   |
| IL4I1       | 1.51917   | 2.06533   | 0.79574    | 0.438937  | 1.82432   | 0.436837  |
| DSCAML1     | 0.179465  | 0.329549  | 0.177658   | 0.129627  | 0.246189  | 0.0946295 |
| CTCF        | 21.3672   | 18.3383   | 20.6419    | 21.4452   | 20.8302   | 20.1854   |
| OR6C70      | 0         | 0         | 0          | 0         | 0         | 0         |
| MIR128-1    | 0         | 0         | 0          | 0         | 0         | 0         |
| TBCD        | 15.338    | 21.2409   | 16.9057    | 18.1208   | 20.713    | 18.5343   |
| LRFN2       | 0.126001  | 0.167103  | 0.143075   | 0.236626  | 0.100313  | 0.215926  |
| CADPS       | 0.386189  | 0.3738    | 0.430961   | 0.186926  | 0.537661  | 0.400439  |

|              |           |             |          |           |           |           |
|--------------|-----------|-------------|----------|-----------|-----------|-----------|
| MIRLET7A1    | 0         | 0           | 0        | 0         | 0         | 0         |
| MUM1L1       | 0.746754  | 0.516166    | 0.353923 | 0.243215  | 0.268181  | 0.595976  |
| GAGE1        | 0         | 0           | 0        | 0         | 0         | 0         |
| MIR208A      | 0         | 0           | 0        | 0         | 0         | 0         |
| ZBP1         | 1.62187   | 1.50303     | 0.308649 | 0.397813  | 0.792084  | 0.68294   |
| UGT2B7       | 0.0551754 | 0           | 0        | 0         | 0.105424  | 0.412595  |
| RNU11        | 0         | 0           | 0        | 0         | 0         | 0         |
| CCDC144B     | 0.63843   | 0.461786    | 1.76531  | 1.12719   | 1.06604   | 0.492746  |
| LOC10012551  | 1.96641   | 1.36008     | 1.09595  | 1.77466   | 0.889107  | 1.3266    |
| FAM83F       | 11.3331   | 14.1511     | 10.5736  | 11.8552   | 11.1121   | 12.2352   |
| C9orf131     | 0.139887  | 0.146583    | 0.117289 | 0.249401  | 0.260587  | 0.152897  |
| UGT1A9       | 1.44E-08  | 1.12E-08    | 1.18E-08 | 9.98E-09  | 0.073322  | 8.76E-09  |
| MIOX         | 0.226458  | 0.13348     | 0        | 0.07088   | 0         | 0.0940792 |
| FAM75A6      | 0         | 0           | 0        | 0         | 0.0073476 | 0         |
| SREBF1       | 80.3469   | 66.5638     | 52.253   | 55.2492   | 51.4395   | 54.758    |
| CCDC158      | 0.270497  | 0.263072    | 0.143337 | 0.279391  | 0.120597  | 0.084281  |
| OTX1         | 16.1749   | 14.4243     | 11.7684  | 17.1233   | 11.9706   | 12.7789   |
| POM121       | 14.1675   | 13.6938     | 14.5701  | 14.3347   | 15.2222   | 13.456    |
| OR2A7        | 2.64131   | 1.36358     | 3.65566  | 2.99697   | 6.31286   | 5.39655   |
| CDK2         | 18.6027   | 22.4531     | 17.813   | 21.4697   | 23.4135   | 24.1509   |
| OR6N1        | 0         | 0           | 0        | 0         | 0         | 0         |
| ITGB2        | 12.3992   | 12.0421     | 9.13045  | 4.82603   | 17.2049   | 8.81499   |
| LOC10065284  | 0.0996351 | 0.113784    | 0.685547 | 0.0935558 | 0.675345  | 0.362339  |
| OSBPL11      | 7.57263   | 4.5926      | 6.91693  | 5.32804   | 5.4741    | 4.71894   |
| KCNA2        | 0.815683  | 0.650904    | 1.09043  | 0.674752  | 1.29766   | 0.549701  |
| KIAA0040     | 7.62796   | 7.23993     | 7.86759  | 7.12418   | 6.72315   | 6.09449   |
| FERMT1       | 8.87933   | 9.13969     | 11.1226  | 9.6189    | 9.11991   | 7.21066   |
| ARMCX1       | 9.58012   | 11.2653     | 12.9089  | 9.44536   | 13.6982   | 11.4026   |
| C8orf44-SGK3 | 5.70E-42  | 0.000872032 | 0.797536 | 1.62054   | 3.21E-05  | 0.301881  |
| LOC10050576  | 0         | 0           | 0        | 0         | 0.13025   | 0         |
| MIR4707      | 0         | 0           | 0        | 0         | 0         | 0         |
| FIG4         | 7.72592   | 6.15334     | 6.33192  | 7.25452   | 7.46236   | 7.14212   |
| MTFMT        | 5.43146   | 5.35005     | 5.10507  | 4.65509   | 4.41122   | 4.33872   |
| RAET1E       | 5.39483   | 3.68103     | 6.08775  | 3.28386   | 7.0493    | 5.19856   |
| FBXW10       | 0.372039  | 0.278961    | 0.498524 | 0.403563  | 0.346317  | 0.23221   |
| FLJ44635     | 83.9036   | 94.356      | 91.057   | 102.023   | 83.362    | 83.2327   |
| RNF216       | 8.85715   | 9.52569     | 10.3373  | 9.30754   | 9.717     | 8.28379   |
| DSCR3        | 19.4801   | 18.1367     | 17.2082  | 17.6067   | 17.4976   | 17.3661   |
| TRIT1        | 15.8415   | 16.6881     | 13.924   | 16.4574   | 17.5111   | 13.5024   |
| PCBD2        | 6.99514   | 7.69311     | 7.39413  | 6.96883   | 6.08521   | 4.83751   |
| NR5A1        | 0         | 0.0566486   | 0        | 0         | 0.020404  | 0.0399271 |
| LIPT2        | 1.81583   | 3.04571     | 2.87075  | 3.56327   | 2.52759   | 2.53227   |
| GHRL         | 1.69345   | 0.64957     | 0.962078 | 0.571381  | 2.91723   | 1.09948   |

|             |           |           |           |           |           |           |
|-------------|-----------|-----------|-----------|-----------|-----------|-----------|
| UBXN2A      | 9.43937   | 8.39421   | 10.0953   | 9.43026   | 9.61219   | 8.54973   |
| MIR4704     | 0         | 0         | 0         | 0         | 0         | 0         |
| MASP2       | 3.62449   | 2.58549   | 4.83296   | 4.06118   | 4.17096   | 3.69612   |
| CCDC150     | 0.425437  | 0.681761  | 0.805145  | 0.724054  | 1.06692   | 0.646216  |
| HHLA1       | 0         | 0         | 0         | 0         | 0         | 0         |
| FLJ27354    | 0         | 0.852134  | 0.729604  | 0.301665  | 0.511543  | 0.500501  |
| HOXC10      | 4.70523   | 3.22522   | 4.08216   | 6.20525   | 5.45483   | 6.39132   |
| PLXNA4      | 2.53841   | 1.85696   | 3.09948   | 1.22111   | 1.839     | 1.64055   |
| LOC10050631 | 0.545145  | 0.160661  | 0.641943  | 0.284379  | 0.154314  | 0.415203  |
| CSTF2       | 6.96265   | 6.60857   | 6.5497    | 5.19179   | 6.554     | 6.98679   |
| KIAA1456    | 3.22963   | 2.85309   | 2.18025   | 1.69712   | 2.32914   | 2.25977   |
| DCUN1D5     | 2.81611   | 2.52894   | 3.37072   | 2.69274   | 2.70448   | 2.10861   |
| RNASET2     | 45.4503   | 40.7358   | 33.7989   | 47.4469   | 28.38     | 30.2109   |
| LUZP4       | 0         | 0         | 0         | 0         | 0         | 0         |
| ZNF90       | 0.964916  | 1.33732   | 1.42141   | 1.3713    | 1.0797    | 1.07258   |
| SHISA6      | 0.197415  | 0.22064   | 0.129759  | 0.100408  | 0.134029  | 0.179918  |
| ANKRD20A4   | 0.228221  | 0.0713973 | 0.104511  | 0.0514255 | 0.148368  | 0.1548    |
| RP9P        | 6.13791   | 10.7029   | 6.38901   | 8.16501   | 6.84133   | 7.70289   |
| TXK         | 0.41021   | 0.302235  | 0.672817  | 0.641967  | 1.06683   | 1.08641   |
| ARHGEF26-A  | 0.542772  | 0.342305  | 0.351701  | 0.54531   | 0.567428  | 0.337769  |
| SH3D19      | 24.5931   | 24.0012   | 37.3319   | 24.4922   | 28.2677   | 22.2646   |
| SLC16A5     | 6.51267   | 8.51817   | 9.28982   | 11.8263   | 12.6495   | 10.1628   |
| LOC10050689 | 0.0683177 | 0.0302011 | 0.0517169 | 0.142834  | 0.121505  | 0.255436  |
| CSNK2B      | 145.339   | 178.711   | 146.791   | 168.065   | 166.911   | 155.552   |
| DAND5       | 0.0608112 | 0.107531  | 0         | 0.114201  | 0.232386  | 0.113685  |
| TMEM106C    | 32.527    | 42.5071   | 36.178    | 49.1011   | 34.5168   | 36.854    |
| TMEM126A    | 33.1825   | 28.9322   | 24.6563   | 26.4195   | 21.8158   | 20.8685   |
| TBRG4       | 28.1358   | 35.8696   | 23.3063   | 29.7297   | 26.2981   | 24.2412   |
| GNPTG       | 57.2639   | 72.9466   | 59.5386   | 66.9803   | 61.9687   | 62.7736   |
| IFNA8       | 0         | 0         | 0         | 0         | 0.071286  | 0         |
| KCNQ3       | 0.369883  | 0.264822  | 0.373239  | 0.182231  | 0.263593  | 0.225014  |
| LOC10049917 | 33.5695   | 39.8329   | 33.0532   | 33.2719   | 41.2366   | 29.8016   |
| BLK         | 0.0776933 | 0         | 0.0588143 | 0.182382  | 0.14845   | 0.0726228 |
| GPR125      | 9.28      | 9.106     | 8.50396   | 9.19233   | 8.33148   | 9.36909   |
| NHLRC2      | 3.83907   | 1.74336   | 3.92393   | 2.03385   | 2.74006   | 2.15032   |
| FAM200A     | 4.01836   | 3.5169    | 3.41064   | 3.08715   | 4.26553   | 3.28818   |
| MIR105-2    | 0         | 0         | 0         | 0         | 0         | 0         |
| FARSA       | 30.1877   | 35.9021   | 30.6118   | 35.3793   | 31.8891   | 32.745    |
| CCDC61      | 10.142    | 14.6916   | 9.84636   | 11.8906   | 13.6124   | 12.5687   |
| DOK5        | 1.36839   | 1.4619    | 0.647425  | 0.374762  | 0.835222  | 0.248711  |
| RN5S4       | 11.918    | 128.79    | 39.3458   | 334.99    | 9.48827   | 24.137    |
| TMEM221     | 0.806885  | 0.808516  | 0.610816  | 0.808162  | 1.16486   | 1.1062    |
| LOC286370   | 0         | 0         | 0.0278813 | 0.0691675 | 0.0234579 | 0.0918062 |

|             |           |           |           |           |           |           |
|-------------|-----------|-----------|-----------|-----------|-----------|-----------|
| CIDECP      | 10.036    | 15.3894   | 14.0075   | 12.3685   | 11.2858   | 10.1628   |
| CCL4L1      | 1.2457    | 0.749544  | 0.528256  | 0         | 0.528929  | 0         |
| NAT8L       | 6.11771   | 11.6255   | 14.832    | 7.72052   | 6.48362   | 4.02579   |
| GAPT        | 1.19875   | 1.18215   | 0.977263  | 0.779265  | 0.939679  | 1.00559   |
| DNAJC28     | 2.31813   | 1.40334   | 1.35457   | 1.30073   | 1.01105   | 1.56656   |
| C1QTNF3     | 2.59574   | 2.8233    | 4.66581   | 3.89895   | 4.75137   | 4.05636   |
| GPSM1       | 11.227    | 15.9654   | 15.9512   | 21.4009   | 25.2358   | 26.6981   |
| CKMT1A      | 55.5042   | 54.497    | 65.9204   | 74.6225   | 65.0668   | 75.8532   |
| SNTG2       | 0.441139  | 0.877562  | 1.66972   | 1.29445   | 1.47506   | 1.03087   |
| TBC1D26     | 0         | 0.197253  | 0.211112  | 0.163664  | 0.320825  | 0.069514  |
| GPR110      | 0.171874  | 0.256432  | 0.115214  | 0.03026   | 0.0615754 | 0.0200821 |
| TBC1D9      | 9.85553   | 4.96816   | 6.91737   | 6.60778   | 5.13981   | 5.03978   |
| GTSF1       | 0         | 0.136555  | 0         | 0.145026  | 0.0983702 | 0         |
| RPLP1       | 2854.9    | 5084.47   | 3658.77   | 6273.11   | 4000.92   | 4040.62   |
| FJX1        | 4.92659   | 10.6915   | 5.7072    | 7.46466   | 5.63373   | 4.00036   |
| SLC37A3     | 14.0694   | 11.9538   | 12.1633   | 10.2573   | 11.4354   | 9.86175   |
| LOC401068   | 0.831605  | 0.632911  | 0.420852  | 0.669889  | 0.630292  | 0.462401  |
| ZNF468      | 4.04204   | 3.13252   | 3.53203   | 2.71772   | 3.8058    | 3.39107   |
| APOBEC3C    | 11.9335   | 12.8756   | 11.407    | 7.78677   | 15.9095   | 10.3354   |
| KIAA0895L   | 10.9314   | 13.7932   | 12.3288   | 16.0872   | 18.6658   | 17.81     |
| MIR4743     | 0         | 0         | 0         | 0         | 0         | 0         |
| CLLU1       | 0         | 0.0396156 | 0.0339192 | 0.0420731 | 0.0285379 | 0.0279219 |
| MMP2        | 73.929    | 62.9031   | 101.148   | 41.1898   | 69.3069   | 55.509    |
| C19orf73    | 1.74286   | 1.84912   | 2.11097   | 3.92765   | 2.33108   | 3.14963   |
| MIR4276     | 0         | 0         | 0         | 0         | 0         | 0         |
| LOC151475   | 0         | 0.10222   | 0.175043  | 0.108561  | 0.073636  | 0.168109  |
| DEFB104B    | 0         | 0         | 0         | 0         | 0         | 0         |
| KAT2B       | 14.9745   | 11.2749   | 14.4577   | 10.602    | 12.5975   | 12.5626   |
| MIR409      | 0         | 0         | 0         | 0         | 0         | 0         |
| BCL2L14     | 0.556985  | 0.260311  | 0.18805   | 0         | 0.425455  | 0.183485  |
| CCDC115     | 38.4747   | 42.1406   | 42.6621   | 46.0075   | 45.4735   | 37.6532   |
| MED9        | 16.1807   | 17.2728   | 13.3972   | 17.9558   | 16.6294   | 15.7549   |
| LOC92659    | 1.04334   | 0.776805  | 1.20551   | 1.59843   | 1.46892   | 1.74518   |
| MIR4499     | 0         | 0         | 0         | 0         | 0         | 0         |
| C4orf46     | 2.34149   | 2.46452   | 2.06794   | 2.2248    | 2.57429   | 2.01497   |
| LOC10013117 | 0.0541713 | 0         | 0         | 0         | 0.103506  | 0.0337572 |
| UNC5C       | 0.563348  | 0.346121  | 0.375861  | 0.466215  | 0.267579  | 0.279654  |
| SPPL2A      | 21.689    | 16.1769   | 16.1074   | 13.8988   | 14.1085   | 12.0424   |
| VAX1        | 0         | 0         | 0         | 0         | 0         | 0         |
| TBPL2       | 0         | 0.150743  | 0         | 0         | 0         | 0         |
| NSUN3       | 2.86967   | 3.05311   | 3.5655    | 2.71927   | 2.77291   | 3.50398   |
| LOC10050609 | 5.78054   | 4.62353   | 4.26957   | 5.03294   | 4.96288   | 5.98073   |
| SDHAF2      | 32.0621   | 33.302    | 27.9573   | 32.0899   | 24.5164   | 22.2316   |



|             |           |           |            |             |            |            |
|-------------|-----------|-----------|------------|-------------|------------|------------|
| ZNF837      | 2.33545   | 3.59872   | 3.45829    | 4.62253     | 3.28529    | 4.06102    |
| GPR33       | 0.427977  | 0.37839   | 0          | 0           | 0.0681452  | 0          |
| CYBA        | 50.869    | 86.6762   | 51.9343    | 71.9222     | 73.1144    | 64.9777    |
| MIR3649     | 0         | 0         | 0          | 0           | 0          | 0          |
| IGSF22      | 0.580472  | 0.329139  | 0.331914   | 0.802282    | 0.576199   | 0.652801   |
| LOC10012826 | 0.399695  | 0.219881  | 0.649148   | 0.515605    | 0.76379    | 0.808735   |
| MRPS22      | 37.177    | 33.3186   | 31.6803    | 34.241      | 32.4767    | 29.5603    |
| SNORD79     | 0         | 0         | 0          | 0           | 0          | 0          |
| TWISTNB     | 6.75004   | 5.70173   | 6.59149    | 5.5842      | 6.50464    | 5.0351     |
| SYP         | 1.87181   | 1.8756    | 1.73186    | 1.44514     | 2.03993    | 1.73669    |
| H3F3B       | 257.703   | 245.043   | 289.496    | 314.277     | 315.663    | 260.153    |
| DEPDC1      | 0.68863   | 1.10823   | 0.783648   | 0.487316    | 1.2663     | 1.19851    |
| MFI2        | 40.4295   | 21.3935   | 29.7977    | 43.1642     | 23.7472    | 28.3128    |
| MIR4445     | 0         | 0         | 0          | 0           | 0          | 0          |
| SNORD14C    | 0         | 0         | 0          | 0           | 0          | 0          |
| LOC10050657 | 0         | 0         | 1.32E-05   | 0.000135794 | 0          | 0          |
| LOC10050624 | 0.0528073 | 0.0466889 | 0.199877   | 0.198341    | 0.235433   | 0.0658145  |
| MEPE        | 0         | 0         | 0          | 0           | 0          | 0          |
| LOC643783   | 2.39901   | 2.9558    | 3.36355    | 3.12656     | 3.32238    | 3.35788    |
| TCEANC2     | 2.30551   | 2.12244   | 2.50097    | 1.85239     | 3.13358    | 2.90301    |
| SNORD20     | 0         | 0         | 0          | 0           | 0          | 0          |
| DTYMK       | 16.027    | 25.7828   | 16.3469    | 24.1247     | 16.7197    | 19.9527    |
| DDX5        | 273.147   | 239.573   | 240.758    | 199.252     | 240.306    | 222.005    |
| MCOLN3      | 4.46834   | 7.36396   | 4.43792    | 3.96074     | 4.43962    | 3.36365    |
| SHFM1       | 265.963   | 254.144   | 220.804    | 240.87      | 178.101    | 199.209    |
| AAAS        | 23.7173   | 33.7504   | 22.6041    | 25.6756     | 32.1311    | 32.1848    |
| SAT2        | 50.9602   | 78.6295   | 47.6303    | 62.0516     | 65.8035    | 57.6477    |
| GGA1        | 30.6154   | 41.9738   | 33.8857    | 41.1524     | 42.9       | 42.2604    |
| OR4P4       | 0         | 0         | 0          | 0           | 0          | 0          |
| C17orf74    | 0         | 0.0568367 | 0          | 0           | 0.0409435  | 0          |
| PSMD14      | 49.9381   | 39.2041   | 34.6997    | 25.7555     | 31.845     | 35.2328    |
| IL5         | 0         | 0         | 0          | 0           | 0          | 0.0956067  |
| DEFB121     | 0         | 0         | 0          | 0           | 0          | 0          |
| PDRG1       | 17.7633   | 19.3674   | 16.2207    | 19.2225     | 18.7714    | 19.4582    |
| GTF2F2      | 29.4824   | 27.0538   | 28.3488    | 22.79       | 35.9428    | 34.6102    |
| XPO5        | 11.0209   | 10.758    | 9.68585    | 10.9205     | 9.94109    | 10.9995    |
| GPR112      | 0         | 0         | 0.00718942 | 0           | 0.00604881 | 0.00591824 |
| LINC00246B  | 0.25513   | 0.27294   | 0.115881   | 0.143738    | 0.390724   | 0.286176   |
| PSG11       | 0         | 0         | 0          | 0.0653227   | 0          | 0          |
| USP41       | 1.46247   | 1.29303   | 1.40233    | 0.918037    | 0.746578   | 0.609256   |
| OR3A4P      | 0         | 0         | 0          | 0           | 0          | 0          |
| HMGA1P4     | 0.471999  | 1.66925   | 0          | 0.443199    | 0.601237   | 0.588259   |
| CCDC169     | 0.245194  | 1.38E-10  | 0.232934   | 3.89E-47    | 0.162777   | 0.209725   |

|             |           |           |           |           |          |           |
|-------------|-----------|-----------|-----------|-----------|----------|-----------|
| PCDHGB8P    | 0.104954  | 0.0927936 | 0.317803  | 0.049275  | 0.100269 | 0.327014  |
| ITPRIPL2    | 10.9244   | 12.2109   | 12.109    | 9.78692   | 12.3722  | 10.4464   |
| TYW1        | 8.32047   | 7.01611   | 6.43311   | 6.95086   | 7.71327  | 6.71645   |
| AGPS        | 5.79649   | 4.3912    | 5.86001   | 3.00053   | 4.48067  | 3.62756   |
| LOC10050658 | 0         | 0         | 0         | 0         | 0        | 0         |
| RFC5        | 8.19196   | 7.7545    | 8.12142   | 7.73202   | 7.98938  | 7.93295   |
| MIR139      | 0         | 0         | 0         | 0         | 0        | 0         |
| LOC10050659 | 11.5556   | 18.9195   | 17.791    | 20.5805   | 19.1056  | 17.0098   |
| LOC10013050 | 0         | 0         | 0         | 0         | 0        | 0.163106  |
| DUSP2       | 7.27956   | 6.60258   | 15.8194   | 16.3814   | 12.3504  | 12.0056   |
| LOC401093   | 1.10818   | 1.18225   | 1.283     | 0.889293  | 0.949764 | 0.786256  |
| LOC10028882 | 1.71E-06  | 1.74205   | 0.15208   | 0.746418  | 1.21128  | 1.78615   |
| SMC4        | 14.0595   | 11.9014   | 11.941    | 9.08896   | 12.1786  | 13.1297   |
| SAA1        | 88.7415   | 85.3345   | 22.9745   | 23.2737   | 225.827  | 147.224   |
| LOC440419   | 0         | 0         | 0         | 0         | 0        | 0.0200471 |
| TNIP1       | 50.7109   | 52.6909   | 51.665    | 47.9857   | 51.1354  | 42.8      |
| SASS6       | 1.75318   | 1.77149   | 1.97179   | 1.95193   | 2.37678  | 2.23184   |
| BPY2B       | 8.53242   | 8.58588   | 0         | 0         | 0        | 0         |
| TMEM105     | 0.0891163 | 0.157582  | 0.0674616 | 0.0557859 | 0.151357 | 0.0185112 |
| KIR3DX1     | 0         | 0         | 0         | 0         | 0        | 0         |
| LOC10050572 | 0.447603  | 1.06341   | 0.569158  | 0.914848  | 0.573412 | 0.417566  |
| PRORS1P     | 0.808852  | 0.967537  | 1.4047    | 0.580794  | 0.727288 | 0.65229   |
| RNU2-2      | 0         | 32.7157   | 0         | 34.7452   | 53.0266  | 115.293   |
| KLF16       | 11.7746   | 14.8675   | 13.2002   | 16.6328   | 14.2288  | 11.9852   |
| AGAP6       | 11.5246   | 15.8112   | 13.8543   | 16.4006   | 13.7627  | 12.513    |
| MIS12       | 12.9898   | 12.6975   | 11.91     | 12.0079   | 12.2558  | 12.7454   |
| MAPK3       | 33.5926   | 35.3377   | 42.9969   | 45.5606   | 37.7862  | 41.1987   |
| ZNF687      | 7.88462   | 7.8951    | 9.02224   | 9.07612   | 9.19164  | 7.71786   |
| MIR598      | 0         | 0         | 0         | 0         | 0        | 0         |
| USP31       | 6.08241   | 6.00807   | 5.95043   | 5.74435   | 6.89009  | 5.08482   |
| CHCHD10     | 143.511   | 177.846   | 144.951   | 196.479   | 128.869  | 116.985   |
| PMF1        | 33.7547   | 47.962    | 40.2374   | 53.6399   | 45.7374  | 39.6743   |
| GSTP1       | 384.895   | 483.034   | 327.636   | 467.934   | 401.297  | 541.346   |
| DUSP13      | 1.47501   | 1.16114   | 1.08949   | 0.625972  | 1.34369  | 0.825733  |
| RBMV2EP     | 0         | 0         | 0         | 0         | 0        | 0         |
| BORA        | 2.5324    | 2.45033   | 2.30549   | 2.17199   | 3.55754  | 3.02658   |
| LOC10013290 | 1.58015   | 0.894122  | 3.21812   | 2.62629   | 2.12001  | 2.88801   |
| LOC10050590 | 0.0606912 | 0.482934  | 0.459436  | 0.227952  | 0.541164 | 0.189101  |
| TKTL1       | 0.243919  | 0.0345041 | 0.132946  | 0.164905  | 0.374762 | 0.222355  |
| LOC389765   | 2.20396   | 2.63302   | 2.11918   | 1.39804   | 2.54138  | 2.11557   |
| H3F3A       | 163.412   | 176.957   | 167.275   | 182.161   | 178.721  | 177.613   |
| TMEM37      | 10.1525   | 32.1924   | 32.5447   | 19.8899   | 19.1191  | 9.91948   |
| YWHAZ       | 276.753   | 234.885   | 254.461   | 251.18    | 249.062  | 259.636   |

|             |           |          |           |          |          |           |
|-------------|-----------|----------|-----------|----------|----------|-----------|
| RHOA        | 217.806   | 181.648  | 205.894   | 173.577  | 165.225  | 164.114   |
| SNORD116-4  | 0         | 0        | 0         | 0        | 0        | 0         |
| PCNXL3      | 10.6205   | 14.3869  | 12.9011   | 13.6286  | 14.9443  | 13.5353   |
| PPP4C       | 68.2496   | 82.2114  | 60.9337   | 84.9033  | 65.4926  | 73.1005   |
| WNT9B       | 0.0738547 | 0.130595 | 0.33545   | 0        | 0.188154 | 0.138069  |
| C8orf82     | 14.6274   | 23.4696  | 15.0392   | 26.6067  | 20.8404  | 18.7153   |
| ATP13A3     | 13.4654   | 10.8959  | 11.1656   | 8.52664  | 8.70838  | 7.2674    |
| HOXB9       | 0         | 0        | 0.0280944 | 0.034848 | 0        | 0         |
| HOXB3       | 3.98569   | 5.96898  | 6.97845   | 5.24456  | 7.32187  | 4.89979   |
| CDK2AP1     | 71.4923   | 66.2967  | 58.6592   | 73.3173  | 40.5818  | 42.498    |
| TRAM2       | 6.00137   | 4.91255  | 6.82992   | 5.39458  | 8.34035  | 5.6139    |
| MIR3913-2   | 0         | 0        | 0         | 0        | 0        | 0         |
| GNG3        | 1.07287   | 0.948847 | 0.406151  | 0.503926 | 0.512617 | 0.250815  |
| SQRDL       | 57.9962   | 51.8364  | 45.8685   | 41.616   | 45.0838  | 46.1623   |
| SRP54       | 30.9463   | 22.9486  | 28.3629   | 24.3952  | 24.019   | 23.8205   |
| MIR1252     | 0         | 0        | 0         | 0        | 0        | 0         |
| MIR1973     | 0         | 0        | 0         | 0        | 0        | 0         |
| LOC10050748 | 13.0757   | 13.4875  | 13.4517   | 19.0465  | 15.8018  | 19.5349   |
| UBL5        | 132.324   | 170.786  | 152.983   | 182.257  | 142.398  | 147.933   |
| RNF215      | 5.62061   | 9.79544  | 7.03684   | 7.66277  | 6.95307  | 7.88069   |
| FSD1        | 0.0565273 | 0.199912 | 0.085583  | 0.212313 | 0.396028 | 0.140902  |
| ANKRD18A    | 0.445227  | 0.625196 | 0.872337  | 0.762347 | 0.667218 | 0.505932  |
| NOVA2       | 0.943623  | 0.98152  | 0.546251  | 0.938168 | 0.318176 | 0.933924  |
| ATXN7L3B    | 42.474    | 33.8823  | 38.9624   | 33.0105  | 40.205   | 36.1365   |
| C9orf156    | 10.1854   | 11.2851  | 9.71121   | 8.53491  | 11.2909  | 7.91381   |
| LAMA3       | 10.1937   | 13.4008  | 13.87     | 14.5366  | 14.0016  | 11.4573   |
| PCGF1       | 15.0478   | 22.1642  | 19.0757   | 15.8931  | 16.7264  | 14.7899   |
| PTGR2       | 11.4981   | 9.72873  | 8.82074   | 8.93636  | 8.88405  | 7.95074   |
| MCHR1       | 0.250705  | 0.147772 | 0.253047  | 0.431581 | 0.505639 | 1.35398   |
| MIR383      | 0         | 0        | 0         | 0        | 0        | 0         |
| ATF7IP2     | 2.70087   | 3.01508  | 2.95328   | 2.48484  | 2.2241   | 2.12509   |
| CUBN        | 0.700845  | 0.64053  | 0.572272  | 0.532381 | 0.591819 | 0.471087  |
| MIR4723     | 0         | 0        | 0         | 0        | 0        | 0         |
| WBSCR17     | 3.10083   | 1.61268  | 1.77201   | 2.22654  | 1.37471  | 1.2882    |
| TEAD2       | 13.1294   | 16.2949  | 10.0217   | 11.5462  | 12.6189  | 10.0778   |
| HPGD        | 55.6638   | 19.5636  | 29.47     | 22.2597  | 31.9139  | 27.7417   |
| GAR1        | 27.0382   | 31.4877  | 23.7087   | 26.5906  | 24.2471  | 22.7959   |
| ZNF717      | 1.19655   | 0.514662 | 1.46886   | 0.880615 | 1.70956  | 1.30991   |
| SHISA8      | 0.465089  | 0.959473 | 0.821509  | 1.81963  | 0.789915 | 1.54573   |
| STAT4       | 2.10181   | 1.73013  | 2.52378   | 1.7694   | 3.02351  | 1.67107   |
| CHGA        | 0.151404  | 0.267723 | 0.725886  | 0.473886 | 0.835726 | 0.0943485 |
| TCEB3B      | 0         | 0.057629 | 0         | 0.030602 | 0        | 0         |
| MIR181C     | 0         | 0        | 0         | 0        | 0        | 0         |

|             |          |           |           |           |           |           |
|-------------|----------|-----------|-----------|-----------|-----------|-----------|
| PPIC        | 34.6001  | 30.1918   | 36.7242   | 23.7517   | 23.5905   | 22.068    |
| LOC10050693 | 8.43065  | 9.51799   | 7.26572   | 6.57657   | 10.5738   | 7.7592    |
| TRIM60      | 0        | 0         | 0         | 0         | 0         | 0         |
| GDEP        | 0        | 0         | 0         | 0         | 0.0313211 | 0         |
| KPNA1       | 14.9088  | 12.1913   | 13.1499   | 11.7943   | 13.4294   | 11.7167   |
| CSNK2A1P    | 20.0128  | 12.3322   | 19.7917   | 14.3627   | 16.1367   | 15.4525   |
| LOC10050662 | 0.388561 | 0.343541  | 0.0980475 | 0.243235  | 0         | 0.322846  |
| FLJ42289    | 0.386492 | 1.25327   | 0.499971  | 0.753553  | 1.01376   | 0.74363   |
| BTLA        | 0.551343 | 0.205648  | 0.320141  | 0.161781  | 0.351154  | 0.184057  |
| SLC38A10    | 23.832   | 29.4402   | 23.7706   | 25.2028   | 27.3488   | 26.5145   |
| CNPPD1      | 48.1874  | 55.504    | 45.9076   | 48.4625   | 54.7125   | 64.8192   |
| C7orf71     | 0.207781 | 0.0459267 | 0         | 0         | 0.0330842 | 0.0647401 |
| WDFY1       | 16.4706  | 13.2064   | 15.0765   | 11.0075   | 13.5544   | 11.6515   |
| SNAP29      | 14.0823  | 12.5179   | 13.6692   | 13.3158   | 11.5538   | 11.6075   |
| ATXN3       | 6.01275  | 5.90447   | 6.17498   | 5.438     | 7.78866   | 6.56003   |
| MAGEB5      | 0        | 0         | 0         | 0         | 0         | 0         |
| DNPEP       | 35.443   | 42.6381   | 34.5069   | 39.8663   | 36.1164   | 29.2677   |
| LOC10050606 | 0        | 0         | 0         | 0         | 0         | 0         |
| ZNF283      | 1.60965  | 1.59671   | 1.24824   | 2.175     | 1.72533   | 1.5413    |
| CAMKV       | 0.131196 | 0.0579977 | 0         | 0.0615955 | 0         | 0.020439  |
| MAP3K1      | 11.7222  | 8.17274   | 13.5261   | 10.164    | 15.5601   | 13.3409   |
| LGALS17A    | 0        | 0.445604  | 0         | 0         | 0.0642    | 0         |
| MYL9        | 332.996  | 556.555   | 308.852   | 389.239   | 318.263   | 340.024   |
| COL6A6      | 4.53824  | 4.98094   | 5.2886    | 1.12306   | 4.03663   | 2.36134   |
| MIR3118-3   | 0        | 0         | 0         | 0         | 0         | 0         |
| HSF1        | 35.3755  | 49.6421   | 37.1144   | 56.0223   | 45.9374   | 44.8772   |
| LOC10065290 | 0.577384 | 0.340324  | 1.89403   | 0.542154  | 1.59354   | 0.719602  |
| LOC284276   | 0.272952 | 0.482654  | 0.585441  | 0.299014  | 0.753326  | 0.42523   |
| PRMT1       | 59.4329  | 70.9804   | 49.5428   | 68.6234   | 56.7327   | 56.7819   |
| MIR198      | 0        | 0         | 0         | 0         | 0         | 0         |
| CCNY        | 20.3477  | 20.0617   | 22.1434   | 20.2178   | 20.8452   | 17.7979   |
| LOC10050698 | 10.1214  | 7.1819    | 10.7362   | 8.07713   | 10.9215   | 11.0473   |
| MIR1468     | 0        | 0         | 0         | 0         | 0         | 0         |
| TMEM110-M   | 7.02E-07 | 2.57E-07  | 2.96E-07  | 1.54E-07  | 1.87E-07  | 4.75E-07  |
| CASP14L     | 0.227201 | 0.468712  | 0.0573308 | 0         | 0.0482352 | 0.047194  |
| AZI1        | 4.71648  | 10.259    | 6.99911   | 9.16258   | 8.9233    | 7.70463   |
| LOC653375   | 12.1904  | 10.5017   | 10.0563   | 10.4189   | 10.4516   | 10.5181   |
| EIF4G3      | 13.3828  | 10.4963   | 11.9728   | 9.89453   | 13.2925   | 12.9723   |
| PEBP4       | 3.12365  | 2.40151   | 3.08428   | 4.71839   | 2.94095   | 3.30063   |
| YIPF1       | 16.5076  | 16.2826   | 15.0571   | 15.9604   | 14.7304   | 13.943    |
| CPXM2       | 5.73216  | 5.34699   | 8.57903   | 8.14768   | 11.1367   | 10.88     |
| PLEKHB1     | 10.3988  | 5.70682   | 6.04948   | 12.4661   | 8.33011   | 8.69387   |
| KLF1        | 0        | 0         | 0.0498803 | 0         | 0.0839334 | 0.123182  |

|             |           |           |           |           |           |           |
|-------------|-----------|-----------|-----------|-----------|-----------|-----------|
| COQ7        | 11.8063   | 9.39931   | 10.6477   | 9.47703   | 8.85702   | 7.59221   |
| C1orf56     | 5.20022   | 4.90519   | 4.97013   | 6.52638   | 5.77607   | 5.73965   |
| LOC10013399 | 2.26032   | 2.59616   | 3.43105   | 1.75037   | 2.8595    | 2.5746    |
| ANAPC1      | 7.10289   | 5.55738   | 7.06486   | 6.05371   | 7.36735   | 6.1615    |
| STK11IP     | 10.273    | 12.817    | 10.6853   | 13.6889   | 13.4156   | 14.1788   |
| HIF1AN      | 14.4258   | 12.3402   | 14.4666   | 14.2442   | 16.919    | 14.8709   |
| CA5B        | 2.85508   | 2.83763   | 4.11683   | 3.64428   | 4.38359   | 3.39303   |
| ARGLU1      | 118.016   | 132.539   | 129.212   | 108.785   | 171.624   | 133.462   |
| RAB41       | 0.538718  | 0.285781  | 0.489375  | 0.303509  | 0.686226  | 0.738554  |
| LOC729040   | 0.221967  | 0.0981244 | 0         | 0         | 0.141372  | 0         |
| STX5        | 29.2121   | 30.0115   | 27.421    | 36.7557   | 31.4058   | 30.5822   |
| DHFRL1      | 3.42859   | 2.02972   | 2.83585   | 2.09373   | 2.25498   | 1.99252   |
| ROMO1       | 105.243   | 157.233   | 111.74    | 136.926   | 94.8629   | 121.962   |
| WFDC10B     | 4.30543   | 4.6823    | 2.56644   | 7.23337   | 3.37883   | 5.49999   |
| RN5S2       | 40.8616   | 82.8334   | 36.0878   | 248.473   | 24.6695   | 24.9622   |
| UNC80       | 0.0311112 | 0.123255  | 0.0845671 | 0.0984053 | 0.155085  | 0.182036  |
| NUDT3       | 13.0407   | 12.0857   | 7.78291   | 9.37851   | 10.9676   | 10.2604   |
| FCER2       | 0.880255  | 0.899973  | 1.00036   | 0.758995  | 1.6193    | 1.11029   |
| PIM2        | 6.64326   | 7.90034   | 5.13523   | 3.86575   | 9.8925    | 5.30594   |
| LOC730651   | 0.194942  | 0.301622  | 0.147572  | 0.0915236 | 0.186239  | 0.303699  |
| TJP2        | 30.2741   | 26.8113   | 30.3642   | 23.9587   | 24.6931   | 25.4729   |
| LOC10050641 | 0         | 0         | 0         | 0         | 0         | 0         |
| FRY         | 5.22793   | 4.12502   | 5.66696   | 3.71264   | 5.87592   | 4.3474    |
| LOC10012821 | 0.0412058 | 0.0364315 | 0.062386  | 0         | 0.0262442 | 0.0513554 |
| FAM123A     | 0.035134  | 0.124254  | 0         | 0         | 0         | 0         |
| CA10        | 0         | 0         | 0         | 0         | 0         | 0         |
| TGM7        | 0.747922  | 0.311184  | 0.432962  | 0.330488  | 0.336251  | 0.575738  |
| SREK1IP1    | 6.01626   | 6.14226   | 7.34516   | 6.07103   | 7.3037    | 7.01618   |
| AGTPBP1     | 5.33333   | 5.91849   | 5.00101   | 4.65756   | 5.3818    | 4.43134   |
| LOC10012821 | 0         | 0         | 0         | 0.0613889 | 0         | 0         |
| ATP6V0B     | 136.394   | 150.51    | 113.168   | 151.279   | 116.209   | 130.936   |
| MIR3689B    | 0         | 0         | 0         | 0         | 0         | 0         |
| MYOM1       | 2.74883   | 2.68686   | 2.41814   | 0.973044  | 1.96852   | 1.43081   |
| PPIAL4A     | 0.138101  | 0.560896  | 0.304228  | 0         | 0.287506  | 0.0860584 |
| LOC10050641 | 1.14936   | 1.32887   | 1.20472   | 1.12074   | 0.985431  | 1.84568   |
| KIAA0564    | 7.63991   | 4.69321   | 6.77006   | 5.24129   | 5.50038   | 5.24768   |
| MTSS1       | 24.7465   | 20.7734   | 27.488    | 25.4771   | 28.5931   | 30.1344   |
| ZC3H10      | 4.6467    | 3.80875   | 3.95728   | 5.49942   | 4.93252   | 3.83067   |
| LOXHD1      | 0.212301  | 0.377941  | 0.128659  | 0.0361539 | 0.196665  | 0.135939  |
| KCTD11      | 18.3164   | 17.113    | 22.0768   | 16.5279   | 25.3793   | 24.1434   |
| OR2T8       | 0         | 0         | 0         | 0         | 0.20535   | 0.0198437 |
| TMPRSS11F   | 2.52688   | 1.22657   | 2.96306   | 1.90746   | 2.84009   | 2.59353   |
| LIPN        | 6.66873   | 2.57434   | 5.97259   | 3.79238   | 9.69114   | 7.74574   |

|             |           |           |           |           |           |            |
|-------------|-----------|-----------|-----------|-----------|-----------|------------|
| MIR655      | 0         | 0         | 0         | 0         | 0         | 0          |
| SCARNA13    | 1.13E-15  | 6.73892   | 11.9186   | 11.9567   | 12.7282   | 11.0392    |
| SCAF11      | 20.9274   | 16.27     | 20.8485   | 14.1451   | 20.0887   | 16.8272    |
| INO80C      | 13.7441   | 22.0636   | 19.2561   | 25.017    | 18.8115   | 20.2835    |
| SNAI1       | 2.59338   | 2.51127   | 1.68274   | 3.30483   | 3.22482   | 1.80847    |
| LOC729059   | 0.312315  | 0         | 0.472848  | 0.293259  | 0.198915  | 0          |
| LIM2        | 0         | 0         | 0         | 0         | 0         | 0          |
| CD70        | 0.660582  | 0.700854  | 1.30017   | 0         | 0.589019  | 0.329317   |
| KLRC4-KLRK1 | 1.96E-05  | 3.19E-05  | 2.18E-06  | 6.74E-07  | 0.948904  | 2.73E-07   |
| SAC3D1      | 7.84646   | 13.754    | 7.54098   | 11.9805   | 9.64726   | 8.9288     |
| GALNT13     | 0.745078  | 0.46412   | 0.397383  | 0.508812  | 0.280412  | 0.284912   |
| TMED5       | 20.8945   | 13.6312   | 16.0476   | 11.3005   | 12.7352   | 12.3846    |
| PHACTR3     | 1.56645   | 2.00792   | 0.434026  | 0.266428  | 0.876314  | 0.379296   |
| OR2S2       | 0         | 0         | 0         | 0         | 0         | 0          |
| ADAM6       | 0         | 0         | 0         | 0         | 0         | 0          |
| EPHA8       | 0.253132  | 0.0170632 | 0.0425828 | 0.105639  | 0.143308  | 0.140215   |
| AOC3        | 54.9829   | 63.5322   | 72.6513   | 37.8742   | 36.8231   | 26.5836    |
| KRTAP12-4   | 0.396954  | 0         | 0         | 1.86367   | 0         | 13.3577    |
| RTKN        | 26.994    | 33.06     | 24.0847   | 29.5464   | 27.5209   | 30.8797    |
| C22orf36    | 10.2585   | 24.2926   | 8.65135   | 19.7722   | 17.3086   | 18.8977    |
| WNT5A       | 5.25108   | 3.38045   | 3.8633    | 3.92914   | 3.87746   | 4.48912    |
| ZNF821      | 5.79688   | 8.98919   | 6.26741   | 7.5334    | 8.37038   | 7.16945    |
| MIR1269B    | 0         | 0         | 0         | 0         | 0         | 0          |
| LOC10050575 | 3.95986   | 6.51736   | 4.70398   | 2.80299   | 4.3263    | 4.10004    |
| SPINT2      | 191.185   | 177.393   | 174.045   | 212.956   | 177.014   | 197.063    |
| LINC00251   | 0         | 0         | 0         | 0         | 0         | 0          |
| CCDC42      | 0         | 0.0864756 | 0         | 0         | 0         | 0          |
| MIR3682     | 0         | 0         | 0         | 0         | 0         | 0          |
| LOC440704   | 0         | 0         | 0         | 0         | 0         | 0          |
| LOC10050675 | 0.9724    | 0.729012  | 0.57962   | 1.81463   | 0.914491  | 0.913462   |
| ABHD14B     | 65.1458   | 76.5996   | 57.1281   | 68.6943   | 53.9035   | 46.1171    |
| MYH2        | 0.0491141 | 0.0434236 | 0.0535387 | 0.0295151 | 0.0613109 | 0.00979387 |
| HAPLN3      | 10.006    | 16.1865   | 6.24281   | 5.78184   | 11.5319   | 6.33811    |
| ALDOA       | 769.115   | 833.7     | 672.966   | 827.045   | 678.548   | 708.494    |
| SNORD14D    | 0         | 0         | 0         | 0         | 0         | 0          |
| PDHX        | 29.9372   | 20.2214   | 18.9873   | 17.8301   | 16.5391   | 16.0728    |
| USP18       | 8.20304   | 7.25261   | 8.17179   | 6.15386   | 3.45479   | 4.03885    |
| DAZAP2      | 136.524   | 121.816   | 117.455   | 121.404   | 123.293   | 99.4563    |
| KIR2DL3     | 0         | 0.0147646 | 0         | 0         | 0.010636  | 0          |
| OMP         | 0.332575  | 0         | 0         | 0         | 0         | 0          |
| LOC10050575 | 42.764    | 41.9112   | 35.5793   | 49.4357   | 44.1953   | 34.3165    |
| LOC157273   | 0.0571835 | 0.101116  | 0.194797  | 0.295319  | 1.40219   | 0.979945   |
| LBX1        | 0         | 0         | 0         | 0         | 0         | 0.0537189  |

|             |           |           |           |           |           |           |
|-------------|-----------|-----------|-----------|-----------|-----------|-----------|
| LOC10028814 | 0         | 0.0411337 | 0.105657  | 0         | 0         | 0         |
| TCF4        | 12.7038   | 10.1493   | 12.3462   | 8.88106   | 12.9172   | 11.3469   |
| FLJ37798    | 1.92054   | 2.66357   | 1.9955    | 2.40448   | 2.01469   | 1.3376    |
| HOXC11      | 2.076     | 1.56686   | 1.57154   | 2.42478   | 1.54796   | 2.30337   |
| FAM197Y2P   | 0         | 0         | 0         | 0         | 0         | 0         |
| C6orf204    | 2.38951   | 1.31023   | 1.91977   | 1.02804   | 1.95444   | 1.15639   |
| SLC30A7     | 6.27938   | 4.96383   | 5.39722   | 4.03567   | 5.76737   | 4.6089    |
| DNA2        | 1.7306    | 1.65088   | 1.9134    | 1.58224   | 1.4358    | 1.5609    |
| ZFPM1       | 2.13435   | 4.28631   | 2.70055   | 3.92234   | 3.12657   | 3.07808   |
| LINC00307   | 0         | 0         | 0         | 0         | 0         | 0         |
| PTH2R       | 1.10803   | 0.391859  | 0.223675  | 0.624252  | 0.188189  | 0.506349  |
| ARPC4-TTLL3 | 11.8297   | 18.2432   | 10.5433   | 13.587    | 16.339    | 15.5202   |
| MIR125B1    | 0         | 0         | 0         | 0         | 0         | 0         |
| KIAA0240    | 6.45905   | 5.38695   | 6.69678   | 5.18477   | 6.37127   | 5.9143    |
| GPX6        | 0         | 0         | 0         | 0         | 0         | 0         |
| SERINC4     | 1.31156   | 2.48786   | 1.54191   | 2.38162   | 2.50828   | 2.68731   |
| ZIC5        | 0         | 0.0186167 | 0         | 0         | 0.0536438 | 0.0262429 |
| GGT8P       | 0.0477203 | 0.0808874 | 0.25846   | 0.238042  | 0.168602  | 0.278721  |
| COX5B       | 508.623   | 622.716   | 484.835   | 576.925   | 437.66    | 478.497   |
| CLDN5       | 20.4078   | 44.6455   | 30.4293   | 29.1822   | 30.2634   | 23.7346   |
| LOC10050647 | 0         | 0.361431  | 0         | 0.383852  | 0         | 1.91058   |
| KLF17       | 0.0316407 | 0.0279747 | 0         | 0         | 0         | 0         |
| ST6GALNAC6  | 50.0812   | 67.1466   | 49.3332   | 45.0545   | 46.9976   | 37.6345   |
| ZC3HAV1     | 10.0647   | 8.31523   | 7.86965   | 5.79395   | 8.71959   | 7.31434   |
| TRIM24      | 8.57996   | 6.70175   | 7.69006   | 6.71787   | 8.44372   | 7.44887   |
| CEP164      | 7.14235   | 10.806    | 9.12317   | 9.65168   | 10.3683   | 10.7853   |
| TBC1D25     | 5.69454   | 7.57481   | 6.36911   | 8.55052   | 7.28645   | 7.00129   |
| ZNF514      | 10.063    | 9.3883    | 11.2864   | 11.1011   | 15.7477   | 12.9456   |
| MAGEA6      | 0         | 0         | 0         | 0         | 0         | 0         |
| LOC10013027 | 1.45096   | 1.49245   | 1.31657   | 1.65377   | 1.76602   | 1.15154   |
| LOC646096   | 0         | 0.125622  | 0         | 0         | 0         | 0         |
| LOC650157   | 0         | 0.134974  | 0         | 0         | 0         | 0         |
| TMEM35      | 1.19296   | 1.58211   | 0.903079  | 0.746782  | 1.07639   | 0.898279  |
| GSTZ1       | 25.2944   | 33.3111   | 26.8687   | 38.5304   | 25.8946   | 33.7651   |
| KRT76       | 0         | 0         | 0         | 0         | 0.0253938 | 0.0248456 |
| PTCHD2      | 0.0369155 | 0.081596  | 0.0419179 | 0.0693262 | 0.0940468 | 0.0460084 |
| STRC        | 0.731203  | 1.12365   | 1.67375   | 2.55018   | 1.64106   | 1.03065   |
| C14orf183   | 0.364035  | 0         | 0.183718  | 0.113941  | 0.0772853 | 0.151234  |
| TMEM59      | 157.01    | 110.217   | 134.701   | 123.352   | 116.967   | 128.234   |
| SLCO5A1     | 0.235543  | 0.114751  | 0.142866  | 0.24921   | 0.136339  | 0.147045  |
| FP6628      | 1.27967   | 1.47082   | 1.21089   | 1.41187   | 1.73193   | 1.39551   |
| GGTLC2      | 1.89375   | 1.78338   | 1.14495   | 1.94933   | 1.8526    | 2.45098   |
| ZNF582      | 1.32937   | 0.940276  | 0.905706  | 0.956997  | 1.21358   | 0.911248  |

|            |           |           |           |           |           |           |
|------------|-----------|-----------|-----------|-----------|-----------|-----------|
| S1PR2      | 3.77938   | 4.18897   | 4.79946   | 4.01166   | 5.26773   | 3.5754    |
| SNAR-A9    | 0         | 0         | 0         | 0         | 0         | 0         |
| MIR1294    | 0         | 0         | 0         | 0         | 0         | 0         |
| TXNRD1     | 18.0101   | 12.4121   | 12.8755   | 13.4672   | 12.3464   | 15.9483   |
| SLC6A19    | 0         | 0         | 0         | 0         | 0         | 0         |
| SDHAP1     | 9.39776   | 10.004    | 8.77631   | 7.34615   | 10.7737   | 9.57285   |
| LXN        | 10.0318   | 11.6751   | 12.631    | 11.0537   | 9.64916   | 10.3339   |
| HIST1H3H   | 0         | 0.315657  | 0         | 0.670478  | 0.45478   | 0.222482  |
| MCM4       | 16.0189   | 13.7893   | 14.0323   | 14.4368   | 16.6752   | 14.384    |
| STK24      | 42.5494   | 38.8075   | 44.3974   | 48.1774   | 47.5107   | 45.6004   |
| TMEM119    | 12.8409   | 9.12188   | 15.789    | 14.5665   | 16.3096   | 13.5755   |
| ITM2A      | 36.1011   | 24.2235   | 52.6054   | 35.7675   | 30.4477   | 29.4102   |
| SNORD114-6 | 0         | 0         | 0         | 0         | 0         | 0         |
| LOC90246   | 0.434857  | 0.416512  | 0.329189  | 0.102081  | 0.161561  | 0.135492  |
| LOC1005074 | 0         | 0.0432258 | 0         | 0.0918146 | 0         | 0.121866  |
| ZDHHC8P1   | 1.06774   | 1.57338   | 1.01784   | 0.891191  | 1.83865   | 2.19325   |
| MIR592     | 0         | 0         | 0         | 0         | 0         | 0         |
| OR8G1      | 0         | 0         | 0         | 0         | 0         | 0         |
| NIPAL4     | 28.4425   | 23.5196   | 23.4759   | 26.8638   | 31.2559   | 30.1328   |
| LOC285593  | 0.176727  | 0.156251  | 0.548875  | 0.438338  | 0.585915  | 0.403805  |
| LOC1001280 | 0         | 0         | 0         | 0         | 0         | 0         |
| SUFU       | 6.90129   | 6.68264   | 8.4606    | 7.87847   | 7.8181    | 7.59037   |
| LOC1005055 | 0         | 0.0320268 | 0.0274216 | 0         | 0         | 0         |
| FABP9      | 56.5013   | 6.63118   | 3.02809   | 151.65    | 6.68767   | 133.359   |
| AFAP1L2    | 8.67356   | 8.39419   | 7.97479   | 7.12614   | 9.38839   | 12.6175   |
| RPL23      | 948.076   | 1254.87   | 1052.26   | 1365.14   | 1070.82   | 1042.47   |
| SNORD49A   | 0         | 0         | 0         | 0         | 0         | 0         |
| SNX30      | 4.50692   | 2.88093   | 4.62147   | 3.43477   | 4.46077   | 3.16639   |
| FLT4       | 3.18192   | 3.64646   | 3.65704   | 2.18666   | 3.9889    | 3.19533   |
| PRELID2    | 0.973264  | 1.20862   | 0.962789  | 0.828322  | 0.652948  | 0.837988  |
| LOC440117  | 0         | 0         | 0         | 0         | 0         | 0         |
| MIR549     | 0         | 0         | 0         | 0         | 0         | 0         |
| SRI        | 21.5862   | 23.402    | 23.3441   | 20.5587   | 20.6225   | 18.576    |
| PDZRN3     | 10.8262   | 10.9983   | 11.9481   | 18.5528   | 9.94823   | 44.777    |
| LOC285889  | 0.0371573 | 0         | 0         | 0.0348901 | 0.0473314 | 0.0231549 |
| PATE1      | 0         | 0         | 0         | 0         | 0         | 0         |
| C12orf53   | 0.424712  | 0.751008  | 0.392956  | 1.01915   | 0.871616  | 0.67636   |
| CACNA1C    | 0.774843  | 0.839232  | 0.860574  | 0.983809  | 1.16508   | 0.941905  |
| FAM100A    | 16.4775   | 25.0521   | 14.397    | 24.871    | 19.8122   | 23.0312   |
| MOGAT1     | 14.1329   | 11.0145   | 8.08343   | 6.48782   | 4.26728   | 4.69707   |
| KLHL9      | 10.7064   | 8.76621   | 10.1352   | 7.51407   | 10.2355   | 8.32946   |
| LOC1002891 | 1.01676   | 2.76345   | 5.33083   | 6.32944   | 4.31719   | 3.40267   |
| MIR935     | 0         | 0         | 0         | 0         | 0         | 0         |



|             |            |            |           |           |            |             |
|-------------|------------|------------|-----------|-----------|------------|-------------|
| GOLGA8DP    | 0.00600251 | 0.00796056 | 0.026086  | 0.0140907 | 0.00229382 | 0           |
| PTPLAD2     | 2.9186     | 3.12369    | 4.88393   | 2.88476   | 4.6961     | 3.11101     |
| LCP1        | 31.7966    | 25.3515    | 22.9956   | 10.9054   | 30.4758    | 14.4908     |
| ODF3L2      | 0.132826   | 0.35231    | 0.150825  | 0         | 0.169196   | 0.0413859   |
| LOC729668   | 0.20469    | 0.180974   | 0.154952  | 0.448469  | 0.347649   | 0.170072    |
| LOC441601   | 0          | 0          | 0         | 0         | 0          | 0           |
| SFTPD       | 2.24551    | 1.75626    | 3.98814   | 6.73097   | 2.47531    | 2.31424     |
| CD1B        | 4.13959    | 3.72902    | 3.07456   | 0.880077  | 5.91975    | 0.73008     |
| MATN1       | 0.214682   | 0.119992   | 0.105123  | 0.0750741 | 0.0695535  | 0.0714335   |
| SNORD90     | 0          | 0          | 0         | 0         | 0          | 0           |
| UGT2A1      | 4.37151    | 2.20231    | 6.89312   | 4.43834   | 2.09567    | 2.5539      |
| ANG         | 14.2079    | 19.7626    | 21.2152   | 19.1747   | 19.7692    | 16.9551     |
| PRR3        | 3.67233    | 5.24187    | 4.94681   | 4.78311   | 4.64094    | 3.96883     |
| LINC00242   | 0.41879    | 0.407294   | 0.242326  | 0.0786474 | 0.160038   | 0.142587    |
| MIR940      | 0          | 0          | 0         | 0         | 0          | 0           |
| RAB3C       | 0.348456   | 0.616165   | 0.175855  | 0.872519  | 0.739778   | 0.072381    |
| LOC10050571 | 0.5319     | 0.313515   | 0.93952   | 0.83241   | 0.677541   | 0.55243     |
| TBX15       | 8.21391    | 7.16274    | 10.4769   | 6.4713    | 9.65675    | 7.55514     |
| NUFIP2      | 12.883     | 9.24845    | 11.6519   | 8.56292   | 11.3353    | 9.30058     |
| C11orf95    | 8.13195    | 7.56976    | 8.44651   | 7.31291   | 8.081      | 6.37453     |
| AMICA1      | 7.83827    | 7.67923    | 7.61733   | 3.8794    | 17.1685    | 5.90749     |
| LOC10065293 | 16.5772    | 8.71424    | 10.0726   | 2.9528    | 10.7268    | 8.8415      |
| ADAMTSL5    | 0.873038   | 1.14239    | 1.21605   | 1.44279   | 1.22329    | 2.04559     |
| MIR30A      | 0          | 0          | 0         | 0         | 0          | 0           |
| HLA-A       | 431.729    | 499.599    | 400.003   | 314.43    | 413.567    | 246.003     |
| SNORD19B    | 0          | 0          | 0         | 0         | 0          | 0           |
| HSF2        | 6.67616    | 8.6491     | 8.29966   | 9.05126   | 8.08894    | 6.88065     |
| LINC00282   | 0.296294   | 0.115466   | 0.151384  | 0.103468  | 0.297241   | 0.184638    |
| CCDC165     | 1.31884    | 1.31873    | 1.53321   | 1.62167   | 1.99994    | 2.98408     |
| PYDC2       | 0          | 0          | 0         | 0         | 0          | 0           |
| DNAJC19     | 21.2266    | 18.108     | 16.8268   | 12.7098   | 16.4874    | 14.8729     |
| CCNYL1      | 7.68411    | 6.91252    | 6.86915   | 6.68672   | 5.59324    | 5.32235     |
| LOC10028925 | 3.24336    | 3.43124    | 3.66933   | 3.12118   | 12.8652    | 5.53344     |
| SNHG8       | 654.55     | 850.931    | 571.776   | 756.55    | 294.026    | 313.029     |
| LOC399815   | 0.159162   | 0.223103   | 0.19328   | 0.144206  | 0.317488   | 0.0633668   |
| LOC10050636 | 2.38465    | 0.780979   | 0.256768  | 1.30E-07  | 0.977576   | 0.000768613 |
| LOC283922   | 2.72123    | 3.49249    | 3.78779   | 2.55536   | 3.91365    | 2.62569     |
| SH3BP4      | 17.2728    | 9.49135    | 10.1371   | 15.0505   | 10.8474    | 10.3007     |
| LOC10050598 | 0          | 0          | 0         | 0         | 0          | 0.117965    |
| MAP6        | 5.22148    | 5.09704    | 4.38374   | 15.7648   | 4.15484    | 3.32458     |
| CEP68       | 10.2975    | 9.39196    | 12.1318   | 9.96382   | 12.2737    | 9.85975     |
| FOXE1       | 1.53492    | 1.73405    | 1.31256   | 2.32204   | 2.13623    | 3.57801     |
| DKFZp686O1  | 0.0203461  | 0.14391    | 0.0462063 | 0.0955233 | 0.0647927  | 0.0760729   |

|             |           |           |           |          |           |           |
|-------------|-----------|-----------|-----------|----------|-----------|-----------|
| MOCS2       | 40.1016   | 31.4397   | 27.4354   | 21.3047  | 22.456    | 23.5475   |
| FOXN3       | 16.8444   | 15.7778   | 21.9084   | 17.1013  | 21.8176   | 17.9559   |
| C20orf103   | 0.51127   | 0.769977  | 0.703171  | 2.04558  | 0.868126  | 3.08356   |
| FIGNL1      | 5.63086   | 5.61921   | 6.96354   | 5.15643  | 4.94291   | 4.63798   |
| MRPL18      | 51.0733   | 58.4243   | 36.4639   | 43.525   | 33.8393   | 40.6507   |
| MIR33A      | 0         | 0         | 0         | 0        | 0         | 0         |
| KDM3B       | 16.4602   | 14.3553   | 18.4949   | 16.5852  | 20.5397   | 15.6256   |
| RSPO1       | 3.29808   | 3.7984    | 4.05674   | 7.6923   | 4.47718   | 4.74399   |
| MIR4738     | 0         | 0         | 0         | 0        | 0         | 0         |
| MIR670      | 0         | 0         | 0         | 0        | 0         | 0         |
| TRMT61A     | 8.96426   | 14.5034   | 10.0174   | 13.7712  | 12.681    | 11.5713   |
| LOC10050591 | 0.668122  | 0.295356  | 0.126443  | 0        | 0.212765  | 0.104086  |
| EDF1        | 448.812   | 608.952   | 444.394   | 615.966  | 512.401   | 562.612   |
| TOMM34      | 18.2265   | 19.1538   | 12.1855   | 15.3982  | 13.8085   | 14.0119   |
| LOC10028861 | 0.137429  | 0.0810039 | 0         | 0        | 0.497944  | 0.301523  |
| ZBTB16      | 5.68444   | 5.68323   | 7.27902   | 4.1231   | 5.73882   | 4.73991   |
| TWF1        | 30.3851   | 23.2039   | 27.0245   | 17.4493  | 21.8027   | 19.5645   |
| ZNF497      | 1.53052   | 2.50569   | 2.44255   | 2.68747  | 3.01687   | 3.062     |
| RPL12       | 187.471   | 311.538   | 268.936   | 390.579  | 248.171   | 249.139   |
| LOC10013074 | 8.76333   | 7.57055   | 8.71001   | 6.2813   | 6.8595    | 7.50346   |
| CNBD1       | 0         | 0         | 0         | 0        | 0         | 0         |
| RBPJ        | 12.5002   | 17.6036   | 16.0195   | 17.7436  | 16.6621   | 12.1828   |
| RWDD1       | 38.5553   | 48.6984   | 38.231    | 36.3862  | 30.1586   | 25.7042   |
| ZBED1       | 6.77271   | 11.1957   | 12.7908   | 13.0092  | 12.58     | 10.8322   |
| SDK2        | 1.17682   | 1.13365   | 0.910803  | 0.964826 | 0.822237  | 0.831853  |
| FAM24B-CUZ  | 1.64E-14  | 0.195224  | 3.69E-12  | 1.90E-39 | 1.08E-16  | 2.97E-15  |
| ZW10        | 10.4742   | 8.12979   | 9.36829   | 7.72527  | 9.29107   | 10.5338   |
| HHLA3       | 4.42684   | 3.67839   | 3.58986   | 4.44405  | 4.92947   | 5.80658   |
| C9orf167    | 1.26886   | 2.15903   | 1.57673   | 0.876721 | 2.19572   | 1.19351   |
| CDR2L       | 4.25074   | 4.37232   | 5.82575   | 5.68706  | 3.83979   | 3.75691   |
| MAGEB17     | 0         | 0         | 0.0608251 | 0        | 0.0511752 | 0         |
| HAS2-AS1    | 0.766629  | 0.550875  | 0.774077  | 0.306007 | 0.624975  | 0.499202  |
| AP4E1       | 4.49448   | 4.37741   | 4.29884   | 3.06805  | 4.34382   | 3.63655   |
| LOC10050741 | 0.0734432 | 0.454537  | 0.389178  | 0.482734 | 0.374211  | 0.640734  |
| DPPA5       | 0         | 0.366299  | 0         | 0        | 0         | 0         |
| NDUFS5      | 304.177   | 325.244   | 249.124   | 290.338  | 238.256   | 274.727   |
| CSGALNACT2  | 9.38707   | 8.74116   | 9.93256   | 6.19717  | 9.84723   | 7.27516   |
| LOC10050581 | 0         | 0         | 0         | 0        | 0.0339049 | 0         |
| LOC201651   | 0.171767  | 0         | 0.195043  | 0        | 0         | 0.0535189 |
| TMEM48      | 7.48      | 6.1943    | 6.25359   | 6.40636  | 6.95008   | 6.05645   |
| LOC645188   | 0         | 0         | 0         | 0        | 0         | 0         |
| NDRG2       | 233.162   | 183.983   | 177.89    | 212.56   | 211.742   | 204.678   |
| MIR502      | 0         | 0         | 0         | 0        | 0         | 0         |

|             |           |           |          |          |          |           |
|-------------|-----------|-----------|----------|----------|----------|-----------|
| RFC2        | 19.2352   | 22.4673   | 17.0454  | 20.0714  | 23.1319  | 20.1166   |
| CCDC88A     | 4.66604   | 3.32554   | 4.17655  | 2.50007  | 4.29659  | 3.00906   |
| LOC10050565 | 0.626185  | 0         | 1.23649  | 0.159093 | 0.107912 | 0.4224    |
| NLRP5       | 0         | 0         | 0        | 0        | 0        | 0         |
| C3AR1       | 2.12079   | 1.21879   | 2.24763  | 0.846339 | 1.72219  | 1.32158   |
| ZNF673      | 7.04278   | 6.74922   | 4.95727  | 5.52215  | 6.94515  | 7.85236   |
| MPO         | 0.0615097 | 0         | 0        | 0.086635 | 0.019588 | 0.0191651 |
| DDOST       | 70.001    | 64.8782   | 66.0135  | 74.2067  | 69.9508  | 63.3266   |
| FBXL7       | 3.4386    | 3.05896   | 3.18149  | 2.96969  | 2.9336   | 2.64542   |
| SF3B4       | 30.717    | 34.498    | 29.6554  | 32.2045  | 30.5354  | 30.329    |
| LOC10050668 | 2.46519   | 3.17975   | 3.15593  | 2.53174  | 2.53082  | 2.32213   |
| REPS2       | 1.56284   | 1.1075    | 1.0566   | 1.03061  | 1.01812  | 0.966412  |
| LOC10050563 | 2.14069   | 1.84142   | 1.71137  | 0.918595 | 1.67785  | 1.1738    |
| KANK4       | 3.08621   | 2.77515   | 4.5      | 2.70032  | 2.44587  | 1.5626    |
| LOC10065274 | 2.16738   | 3.63582   | 4.9591   | 5.89759  | 4.34506  | 3.13389   |
| TMEM150C    | 4.79739   | 3.16897   | 5.1344   | 3.36556  | 5.12759  | 3.7455    |
| GRIN3B      | 0.394857  | 0.563829  | 0.5977   | 0.798311 | 1.39244  | 0.964938  |
| LOC10050699 | 0.469708  | 0.242995  | 0.358983 | 0.184741 | 0.32192  | 0.317923  |
| H2BFXP      | 0.901063  | 2.52277   | 2.2737   | 2.11521  | 2.19992  | 1.21659   |
| BZW1        | 112.108   | 84.418    | 70.7866  | 59.9386  | 55.582   | 67.5747   |
| CCDC72      | 84.306    | 120.18    | 86.8743  | 97.6448  | 79.7146  | 82.3913   |
| SLC25A20    | 35.9221   | 33.1705   | 23.2371  | 26.6536  | 18.9899  | 19.0257   |
| LOC728228   | 0         | 0         | 0        | 0        | 0.125726 | 0         |
| DNAH8       | 0.454215  | 0.497743  | 0.198557 | 0.114134 | 0.052969 | 0.0637854 |
| LYNX1       | 63.3518   | 74.6301   | 87.1395  | 87.0024  | 91.4122  | 70.3844   |
| ARRDC2      | 20.3825   | 26.2178   | 18.2594  | 19.4449  | 28.2482  | 21.1024   |
| MIR515-1    | 0         | 0         | 0        | 0        | 0        | 0         |
| DGCR6       | 41.086    | 51.6722   | 27.2583  | 43.6942  | 43.8092  | 47.2362   |
| GPRASP2     | 3.64677   | 3.89102   | 4.37729  | 3.02181  | 5.67737  | 4.63571   |
| HOXB13      | 0         | 0.0288961 | 0        | 0        | 0        | 0         |
| PPP1R12C    | 37.8384   | 65.0417   | 44.6804  | 53.1613  | 53.2315  | 48.9909   |
| SIRPB1      | 1.70555   | 1.00694   | 1.76977  | 0.801742 | 1.33334  | 1.5887    |
| WIF1        | 1.18454   | 2.81965   | 0.413864 | 0.770031 | 2.37939  | 1.78861   |
| LOC10050730 | 2.69188   | 2.08558   | 2.03777  | 2.84078  | 3.20417  | 3.34351   |
| MIR3655     | 0         | 0         | 0        | 0        | 0        | 0         |
| HAX1        | 67.2229   | 75.8015   | 56.6836  | 73.4335  | 54.1981  | 63.3166   |
| METTL21CP1  | 0.175982  | 0.38898   | 0.432962 | 0.371799 | 0.420314 | 0.411241  |
| SERPINI1    | 5.56714   | 4.7426    | 2.81502  | 2.31228  | 2.69318  | 2.30653   |
| FN3K        | 10.1483   | 9.776     | 6.24906  | 11.0225  | 9.64704  | 10.5243   |
| C2orf55     | 4.09066   | 4.33112   | 4.26268  | 5.78531  | 4.31011  | 5.27135   |
| BTG2        | 46.8598   | 45.6329   | 60.5094  | 42.9602  | 73.4164  | 59.6913   |
| LOC10061653 | 3.63201   | 0         | 0        | 0        | 0        | 0         |
| FTLP10      | 0         | 0         | 0        | 0        | 0        | 0         |

|             |          |           |           |           |           |           |
|-------------|----------|-----------|-----------|-----------|-----------|-----------|
| ZFHX3       | 2.54114  | 1.68847   | 2.45181   | 1.64825   | 1.93668   | 1.51951   |
| RGS9BP      | 2.20412  | 2.04009   | 1.85102   | 2.06963   | 0.833514  | 0.815522  |
| MIR375      | 0        | 0         | 0         | 0         | 0         | 0         |
| MLF1IP      | 5.58867  | 5.77495   | 9.63371   | 11.4793   | 9.85479   | 10.6103   |
| FGF17       | 0.274512 | 0.647218  | 0.554153  | 0.687368  | 1.16559   | 1.53958   |
| PCDH8       | 0.189968 | 0.282263  | 0.0898792 | 0.0247743 | 0.186716  | 0.198945  |
| GRHL2       | 16.5741  | 13.9544   | 15.9444   | 14.6301   | 14.2232   | 15.9911   |
| EHD1        | 22.3407  | 21.262    | 25.1849   | 23.1956   | 25.177    | 22.931    |
| C5orf17     | 0        | 0         | 0         | 0         | 0         | 0.219091  |
| PCGF3       | 21.7855  | 25.622    | 39.2881   | 36.478    | 41.6547   | 32.2993   |
| KIAA0319    | 0.506399 | 0.318935  | 0.425553  | 0.338769  | 0.596363  | 0.475977  |
| EBF1        | 8.20749  | 9.0465    | 11.9844   | 7.6382    | 7.60877   | 5.19412   |
| C5orf22     | 9.04465  | 6.6279    | 7.79266   | 5.71286   | 6.43525   | 5.78857   |
| DNAJC3-AS1  | 2.51783  | 2.2261    | 1.72324   | 1.23068   | 1.58165   | 1.99887   |
| MYL4        | 1.03738  | 1.04033   | 0.785183  | 0.974082  | 0.774881  | 0.478852  |
| LOC10050613 | 0        | 0         | 0.587678  | 0         | 0         | 0         |
| SNORD88A    | 0        | 0         | 0         | 0         | 0         | 0         |
| PTX4        | 0        | 0.0675689 | 0         | 0         | 0.0973492 | 0         |
| TRAPPC3     | 56.6465  | 63.7919   | 50.8845   | 59.5598   | 51.9575   | 51.0556   |
| SCN5A       | 0.19375  | 0.241348  | 0.249542  | 0.171319  | 0.491785  | 0.170108  |
| NLRP8       | 0        | 0         | 0         | 0         | 0         | 0         |
| ECHDC3      | 23.9758  | 27.6026   | 26.8365   | 29.7964   | 29.1932   | 30.0811   |
| C19orf20    | 8.92558  | 17.4156   | 10.7175   | 16.184    | 10.5854   | 11.7634   |
| MIR215      | 0        | 0         | 0         | 0         | 0         | 0         |
| MIR320B2    | 0        | 0         | 0         | 0         | 23.5674   | 0         |
| ZNF665      | 0.449927 | 0.371277  | 0.476836  | 0.16899   | 0.725954  | 0.467292  |
| ZNF174      | 5.67451  | 5.48546   | 5.08193   | 6.20839   | 5.18294   | 4.60216   |
| SSPO        | 0.221933 | 0.291677  | 0.444985  | 0.388622  | 0.53484   | 0.459752  |
| SCUBE2      | 6.38546  | 5.12123   | 6.34358   | 7.42354   | 6.47207   | 5.86312   |
| TARM1       | 0        | 0         | 0         | 0         | 0         | 0         |
| ZNF391      | 1.73674  | 0.944934  | 0.859627  | 0.689943  | 0.978509  | 0.999013  |
| C10orf26    | 24.6664  | 20.1325   | 30.7025   | 21.9637   | 28.4406   | 25.2788   |
| NIPSNAP1    | 33.5722  | 28.9946   | 25.7391   | 31.6532   | 29.4171   | 29.8559   |
| RNF10       | 44.2452  | 43.1542   | 38.9426   | 40.4642   | 39.8673   | 41.756    |
| SLC35A2     | 33.0977  | 35.2237   | 27.3497   | 28.3362   | 30.1656   | 30.0707   |
| SSBP1       | 104.747  | 110.133   | 84.9826   | 92.069    | 89.9573   | 92.2011   |
| OR56B1      | 0        | 0         | 0         | 0         | 0.134113  | 0.0656092 |
| H2BFM       | 0        | 0         | 0.0209466 | 0.0519641 | 0         | 0.017243  |
| RARA        | 11.2718  | 14.7391   | 14.058    | 16.405    | 15.4913   | 11.5587   |
| LOC10028716 | 0        | 0.847276  | 0.290178  | 0.179967  | 0.244141  | 0.358307  |
| LINC00316   | 0        | 0         | 0.569164  | 0         | 0.478865  | 0         |
| FANCA       | 5.33716  | 7.38303   | 3.72457   | 4.49353   | 5.28217   | 6.01818   |
| GRM8        | 0.12416  | 0         | 0         | 0         | 0.0790782 | 0         |

|             |           |           |           |           |           |           |
|-------------|-----------|-----------|-----------|-----------|-----------|-----------|
| ALDH7A1     | 8.41312   | 9.42862   | 8.18894   | 9.18137   | 8.43515   | 7.60204   |
| EMP2        | 95.4847   | 96.9887   | 90.216    | 106.373   | 101.109   | 102.69    |
| COL10A1     | 0.120019  | 0.15917   | 0.227139  | 0.225393  | 0.363095  | 0.33656   |
| RNF113A     | 10.4856   | 14.0985   | 8.84113   | 13.1277   | 11.8364   | 10.9434   |
| ADAMTS12    | 0.486656  | 0.464692  | 0.839954  | 0.36557   | 0.458731  | 0.570135  |
| SLC9A3      | 1.99174   | 3.77203   | 4.2329    | 3.71529   | 5.26441   | 3.85749   |
| BCL2L1      | 43.1783   | 41.8805   | 39.6883   | 47.7877   | 38.2786   | 47.8497   |
| PDZK1IP1    | 99.2777   | 104.586   | 79.9858   | 110.053   | 130.93    | 121.277   |
| SYPL1       | 114.706   | 85.3156   | 93.932    | 84.456    | 91.3444   | 89.2424   |
| C9orf53     | 0         | 0         | 0         | 0         | 0         | 0         |
| P2RY6       | 1.46372   | 0.945634  | 0.900424  | 0.716606  | 1.40283   | 0.576537  |
| CDH8        | 0.0194786 | 0.0172217 | 0.0589815 | 0.0731602 | 0.024812  | 0.0121382 |
| MAGEE2      | 0.0451802 | 0.0798909 | 0.102605  | 0.169694  | 0.0863265 | 0.197081  |
| PRDM14      | 0         | 0         | 0         | 0         | 0         | 0         |
| DAZL        | 0.0325428 | 0.153458  | 0.110862  | 0.162978  | 0.0932735 | 0.0202793 |
| CRYBA2      | 0         | 0         | 0         | 0.184159  | 0         | 0         |
| COL4A3BP    | 13.2534   | 10.7085   | 15.4143   | 8.60521   | 12.242    | 11.4963   |
| LINC00461   | 0.239662  | 0.103784  | 0.268806  | 0.124001  | 0.116818  | 0.0731494 |
| AGPHD1      | 4.78252   | 3.84353   | 4.67221   | 3.87286   | 4.33457   | 3.93044   |
| SNAPC3      | 7.84885   | 5.29665   | 7.1057    | 4.57242   | 6.89655   | 6.88743   |
| TYR         | 3.54062   | 8.24485   | 3.62403   | 9.22456   | 4.73241   | 11.2494   |
| RCAN2       | 23.6684   | 13.3548   | 14.0681   | 16.2215   | 11.7793   | 10.6172   |
| HSPB3       | 0.162044  | 0.429808  | 0.122668  | 1.36941   | 0.722448  | 0.807833  |
| WBP2NL      | 0.26322   | 0.271509  | 0.564566  | 0.823864  | 0.754407  | 0.437406  |
| ATXN2L      | 35.8606   | 47.3359   | 40.3705   | 42.9215   | 54.8406   | 47.087    |
| LAMP3       | 10.2419   | 8.76815   | 4.6921    | 3.10403   | 9.38047   | 5.99604   |
| CRYGN       | 0.181484  | 0.320914  | 0         | 0         | 0         | 0.113093  |
| LOC10050766 | 2.37E-07  | 0.200445  | 2.24E-07  | 1.08E-07  | 1.61E-07  | 1.91E-07  |
| STARD8      | 2.49394   | 1.85224   | 1.91526   | 1.43524   | 2.13475   | 1.46709   |
| MIR3137     | 0         | 0         | 0         | 0         | 0         | 0         |
| C17orf104   | 0.289181  | 0.292201  | 0.40655   | 0.21335   | 0.381518  | 0.257436  |
| AP1S2       | 9.94858   | 9.03252   | 9.52363   | 9.00644   | 12.1611   | 11.5928   |
| RFFL        | 6.30176   | 4.68625   | 6.57222   | 5.33957   | 6.68426   | 7.21105   |
| CRLS1       | 14.6713   | 16.0551   | 14.335    | 12.3666   | 11.8384   | 11.7002   |
| SPACA7      | 0         | 0         | 0         | 0         | 0         | 0         |
| OR10A6      | 0.505315  | 0.111692  | 0.191263  | 0         | 0.241378  | 0         |
| LRRFIP2     | 26.3293   | 27.8013   | 25.2745   | 28.7114   | 29.3313   | 26.6209   |
| CANX        | 81.8036   | 41.2188   | 68.693    | 40.6265   | 44.8171   | 46.8674   |
| OR5M10      | 0         | 0         | 0         | 0         | 0         | 0         |
| TMCO7       | 2.88656   | 2.39261   | 2.18514   | 1.86342   | 2.27255   | 1.97366   |
| PRR23A      | 0         | 0         | 0         | 0         | 0         | 0         |
| PRR11       | 1.09111   | 1.29059   | 1.07153   | 1.46757   | 1.38047   | 1.34148   |
| PIGK        | 6.92385   | 4.82703   | 5.43142   | 4.53722   | 4.86282   | 3.62379   |

|             |           |          |          |           |           |          |
|-------------|-----------|----------|----------|-----------|-----------|----------|
| MIR200B     | 0         | 0        | 0        | 0         | 0         | 0        |
| ZSCAN20     | 0.645394  | 0.366825 | 0.540913 | 0.497797  | 0.55786   | 0.703818 |
| MIR4514     | 0         | 0        | 0        | 0         | 0         | 0        |
| SYS1        | 12.2913   | 11.0537  | 10.3322  | 9.65773   | 10.6344   | 9.85533  |
| MIR1244-1   | 0         | 0        | 0        | 0         | 0         | 0        |
| TSLP        | 1.30383   | 1.26408  | 2.03595  | 1.10609   | 1.25822   | 0.943264 |
| LOC1005076: | 0.362635  | 2.56495  | 1.37258  | 5.78865   | 0.230964  | 2.03381  |
| DCHS1       | 3.27396   | 4.58187  | 4.62548  | 3.09064   | 5.19628   | 3.73126  |
| ZNF845      | 2.52302   | 1.89212  | 2.01225  | 1.22682   | 2.12339   | 2.02141  |
| SNORD109B   | 0         | 0        | 0        | 0         | 0         | 0        |
| MIR1279     | 0         | 0        | 0        | 0         | 0         | 0        |
| TFIP11      | 12.3499   | 12.7465  | 13.513   | 13.1105   | 14.4547   | 14.7666  |
| ZNF735      | 0         | 0        | 0        | 0         | 0         | 0        |
| LOC1002887: | 0         | 0        | 0.151377 | 0         | 0         | 0        |
| DBNDD1      | 5.54353   | 5.04349  | 5.55571  | 7.17068   | 5.0224    | 5.4455   |
| TAC4        | 0.563316  | 0.724533 | 0.21041  | 0.25569   | 0.859171  | 0.343404 |
| C4orf40     | 0.0201374 | 0        | 0        | 0         | 0.0256513 | 0        |
| CDH19       | 1.64662   | 1.34584  | 1.43452  | 1.69186   | 2.07751   | 1.62613  |
| POTEH       | 0         | 0        | 0        | 0         | 0         | 0        |
| LOC1006529: | 0         | 0.154093 | 0        | 0         | 0         | 0.108608 |
| LOC1006529: | 7.75E-09  | 1.53E-09 | 8.44E-09 | 1.63E-08  | 1.06E-09  | 2.27E-11 |
| CLSTN2      | 1.75959   | 1.52076  | 2.58921  | 1.54084   | 1.28439   | 1.62627  |
| MIR4423     | 0         | 0        | 0        | 0         | 0         | 0        |
| KRTAP19-5   | 31.1083   | 19.2528  | 0        | 49.6574   | 0         | 3729.75  |
| LSS         | 35.1033   | 43.8249  | 40.1661  | 42.6546   | 44.4544   | 40.5789  |
| POGK        | 18.6462   | 15.4765  | 16.9768  | 17.6753   | 18.339    | 17.8166  |
| LY75        | 8.27641   | 5.89583  | 6.42774  | 4.98509   | 7.60342   | 4.39274  |
| TNKS2       | 22.4017   | 17.7192  | 23.9559  | 19.7193   | 21.843    | 18.1164  |
| ZDHHC4      | 23.2043   | 25.3689  | 19.824   | 22.421    | 21.0614   | 18.0296  |
| C1R         | 153.163   | 164.476  | 65.2477  | 62.9819   | 19.8203   | 79.7815  |
| OR51F2      | 0         | 0        | 0        | 0         | 0         | 0        |
| LOC727849   | 6.90111   | 13.192   | 12.2887  | 20.0192   | 12.1923   | 14.4105  |
| LOC1005072( | 0         | 0        | 0        | 0         | 0         | 0        |
| C22orf25    | 14.3144   | 16.5439  | 12.025   | 14.2837   | 14.2993   | 12.8349  |
| ZFP91       | 22.2052   | 18.7441  | 22.1211  | 19.1522   | 20.0515   | 16.6445  |
| LACTB2      | 11.1004   | 10.119   | 7.82897  | 5.17289   | 7.463     | 6.57231  |
| OR5K4       | 0         | 0        | 0        | 0         | 0         | 0        |
| IFIT1B      | 0         | 0        | 0        | 0.0493031 | 0         | 0.03272  |
| LRRC30      | 0         | 0        | 0        | 0         | 0         | 0        |
| GZMM        | 1.88976   | 3.34161  | 1.71667  | 1.18297   | 2.88863   | 1.0206   |
| CFB         | 12.5463   | 16.639   | 6.97843  | 3.34028   | 9.76924   | 5.36317  |
| TMC4        | 7.53693   | 8.56358  | 10.3769  | 16.0985   | 15.9711   | 14.5467  |
| TNS1        | 50.8653   | 47.5586  | 76.1034  | 42.5773   | 47.4906   | 32.4858  |

|             |           |           |           |          |           |           |
|-------------|-----------|-----------|-----------|----------|-----------|-----------|
| LOC10028696 | 0         | 0         | 0         | 0        | 0         | 0         |
| USP13       | 3.22802   | 1.95552   | 2.9233    | 2.24523  | 2.20823   | 1.74335   |
| LOC10028896 | 0.154109  | 0         | 0.102271  | 0.255632 | 0.662993  | 0.168123  |
| NOTCH3      | 42.6248   | 47.7074   | 58.1415   | 55.9939  | 60.6472   | 62.3244   |
| SEMG2       | 0         | 0         | 0         | 0        | 0         | 0         |
| LMAN2       | 48.4367   | 53.2156   | 50.8327   | 54.1062  | 55.0134   | 54.4303   |
| NDUFA5      | 44.2205   | 37.6067   | 39.4377   | 26.7972  | 37.138    | 33.1309   |
| RASL10A     | 1.59156   | 2.2577    | 1.08624   | 1.70618  | 1.26265   | 1.89814   |
| MLN         | 0         | 0         | 0         | 0        | 0         | 0         |
| MIR4776-1   | 0         | 0         | 0         | 0        | 0         | 0         |
| MEST        | 16.2109   | 19.191    | 27.2589   | 20.3983  | 10.5245   | 15.1667   |
| GGNBP1      | 0         | 0         | 0         | 0        | 0.0749209 | 0         |
| PAX2        | 0.0965297 | 0         | 0         | 0        | 0         | 0.0150367 |
| TMEM128     | 18.5475   | 18.0652   | 15.7898   | 15.0746  | 17.2353   | 14.3622   |
| RDM1        | 1.25657   | 0.246884  | 0.479727  | 0        | 0.529241  | 1.15877   |
| DCDC2       | 0.0838792 | 0         | 0.104079  | 0.123066 | 0.13523   | 0.0522699 |
| TMEM60      | 21.722    | 23.0463   | 20.3689   | 20.1334  | 19.0118   | 18.5141   |
| LOC10065276 | 1.65054   | 2.89603   | 1.89476   | 0.769287 | 1.31602   | 1.30684   |
| MIR153-2    | 0         | 0         | 0         | 0        | 0         | 0         |
| SNORD115-4  | 0         | 0         | 0         | 0        | 0         | 0         |
| LOC284551   | 0.109575  | 0.064586  | 0         | 0        | 0         | 0.0227608 |
| FPR2        | 0.244487  | 0.21616   | 0.185078  | 0        | 0.034603  | 0.033856  |
| DMXL2       | 2.77633   | 2.83066   | 1.58221   | 1.28822  | 2.74613   | 2.33773   |
| ERN2        | 0.108357  | 0.311359  | 0.328109  | 0.152619 | 0.10352   | 0.101286  |
| ELAC1       | 3.70311   | 3.59742   | 3.94535   | 3.56301  | 3.58147   | 3.27625   |
| AASDHPPT    | 20.0447   | 14.0216   | 16.5195   | 12.2397  | 15.5648   | 15.3369   |
| MYT1        | 0         | 0         | 0         | 0        | 0.0331398 | 0.0108081 |
| LOC729121   | 0         | 0         | 0         | 0        | 0         | 0         |
| TMEM54      | 85.6243   | 109.8     | 86.8931   | 146.22   | 103.231   | 123.681   |
| LOC10050656 | 0.075829  | 0.402259  | 0.358769  | 0.427213 | 0.872345  | 0.665486  |
| FBXL21      | 0.175272  | 0.154965  | 0         | 0        | 0         | 0         |
| GPIHBP1     | 5.314     | 10.2652   | 8.62012   | 8.17649  | 7.67915   | 4.42455   |
| EFHD2       | 36.1252   | 56.2922   | 38.0893   | 45.2411  | 57.6141   | 42.3626   |
| LOC10028909 | 0.588304  | 1.55905   | 1.1127    | 5.7937   | 1.1225    | 1.46429   |
| SMYD4       | 3.76332   | 4.35717   | 4.40894   | 3.57577  | 5.23604   | 4.15983   |
| C17orf50    | 0.226044  | 0.0999271 | 0.0855584 | 0        | 0.431907  | 0.211292  |
| FAM156A     | 26.5535   | 44.1753   | 32.3331   | 37.495   | 48.4407   | 39.7073   |
| SASH3       | 4.72659   | 5.00158   | 3.71893   | 0.908607 | 7.18228   | 2.15688   |
| MIR103B1    | 0         | 0         | 0         | 0        | 0         | 0         |
| LOC10050740 | 0         | 0         | 0         | 0        | 0.332792  | 0         |
| PRR5        | 17.1392   | 22.8272   | 28.3815   | 21.3958  | 20.3185   | 14.7747   |
| CT47A9      | 0         | 0         | 0         | 0        | 0         | 0         |
| HIST1H4D    | 0         | 0.533582  | 0         | 0        | 0         | 0.37608   |

|             |           |           |           |           |          |           |
|-------------|-----------|-----------|-----------|-----------|----------|-----------|
| MIR3176     | 0         | 0         | 0         | 0         | 0        | 0         |
| LOC10065291 | 0         | 0         | 0         | 0         | 0        | 0         |
| RNU1-1      | 48.9911   | 52.5215   | 19.355    | 64.9374   | 31.1737  | 27.9645   |
| FAM197Y7    | 0         | 0         | 0         | 0         | 0        | 0         |
| SNORD116-2  | 0         | 0         | 0         | 0         | 0        | 0         |
| TIMM8A      | 8.79627   | 8.78208   | 6.73089   | 8.8655    | 6.70324  | 8.64689   |
| ARHGEF6     | 9.50621   | 8.45319   | 15.5389   | 8.08668   | 11.9929  | 8.19791   |
| LOC728554   | 12.4186   | 13.5602   | 7.23488   | 9.18904   | 9.07587  | 8.87996   |
| KDM4C       | 7.13648   | 6.50088   | 8.51653   | 6.50664   | 9.69077  | 8.27157   |
| DOK2        | 6.22918   | 7.13346   | 4.49098   | 2.22823   | 7.63253  | 2.80966   |
| IFRD1       | 31.4367   | 26.9294   | 23.1186   | 22.7884   | 21.3569  | 30.224    |
| C14orf39    | 0         | 0.0640285 | 0.30152   | 0         | 0.138373 | 0.0902572 |
| UBTD1       | 16.3597   | 22.4256   | 28.5153   | 33.1112   | 25.3923  | 27.1144   |
| MIR3154     | 0         | 0         | 0         | 0         | 0        | 0         |
| ESYT3       | 5.14543   | 2.73727   | 6.2718    | 4.2173    | 6.0544   | 6.31772   |
| CCDC57      | 9.12022   | 11.6994   | 8.09243   | 9.19695   | 8.956    | 7.48134   |
| LOC728819   | 0.676059  | 1.02468   | 0.584892  | 0.816183  | 0.492098 | 0.361107  |
| FHOD3       | 3.3574    | 4.07294   | 3.69414   | 6.06681   | 4.26426  | 7.22535   |
| CUEDC2      | 35.9162   | 48.4635   | 37.7226   | 44.4955   | 38.6843  | 38.0836   |
| CRK         | 19.6973   | 17.2398   | 18.6594   | 16.6961   | 15.6934  | 14.1477   |
| GALNT7      | 11.387    | 3.90745   | 6.05962   | 4.12867   | 4.85411  | 5.57835   |
| TTY5        | 0         | 0         | 0         | 0         | 0        | 0         |
| MIRLET7F1   | 0         | 0         | 0         | 0         | 0        | 0         |
| ABHD13      | 4.73415   | 4.15356   | 4.9706    | 3.72996   | 4.65566  | 3.88828   |
| GAS2L2      | 0.0991371 | 0.292169  | 0.725457  | 0.620587  | 0.357799 | 0.185334  |
| VWA1        | 15.1069   | 19.1571   | 10.405    | 13.8375   | 15.6112  | 13.1325   |
| SNORD86     | 0         | 0         | 0         | 0         | 0        | 0         |
| ANKRD34C    | 0         | 0.0156613 | 0         | 0         | 0        | 0         |
| MAP1LC3C    | 0.537066  | 0.751212  | 0.500262  | 0.138509  | 0.493967 | 0.41181   |
| RSPH10B     | 0.0319142 | 0.0282166 | 0.0120796 | 0.179802  | 0.182937 | 0.0596628 |
| SLC2A11     | 3.95687   | 4.44676   | 4.58434   | 4.42049   | 4.07581  | 3.88691   |
| RBM15       | 2.02043   | 2.06951   | 1.48226   | 2.28831   | 1.85455  | 1.42191   |
| ERAS        | 0.0877621 | 0.155187  | 0         | 0.0824072 | 0.279481 | 0.0546896 |
| IL17RA      | 5.80629   | 5.80442   | 6.50152   | 5.97863   | 7.12997  | 5.50959   |
| COL1A2      | 123.049   | 81.9117   | 301.652   | 90.6181   | 153.044  | 155.651   |
| CHST12      | 7.36869   | 7.90479   | 8.77628   | 9.64059   | 8.97958  | 9.398     |
| OVCH2       | 1.86993   | 1.87371   | 1.03807   | 0.468222  | 1.23067  | 1.28179   |
| LOC10050550 | 1.04E-08  | 4.04E-09  | 0.166572  | 0.181563  | 0.542965 | 0.288264  |
| YWHAQ       | 161.249   | 137.256   | 131.409   | 144.394   | 132.928  | 186.125   |
| LOC10028857 | 1.11607   | 1.39472   | 0.364887  | 0.988031  | 0.409329 | 0.243275  |
| CLCA4       | 2.4932    | 2.39973   | 4.27862   | 2.42961   | 3.57969  | 2.92516   |
| HIST1H3F    | 0         | 0         | 0         | 0         | 0        | 0         |
| SLC38A3     | 0.329793  | 0.109343  | 0.686553  | 0.774177  | 0.210047 | 1.92669   |



|             |           |           |           |           |           |           |
|-------------|-----------|-----------|-----------|-----------|-----------|-----------|
| ZNF286A     | 2.56897   | 2.22465   | 2.32469   | 2.08989   | 2.53963   | 2.61519   |
| DEDD2       | 16.6078   | 20.4887   | 18.4197   | 20.9307   | 23.8377   | 31.3572   |
| AP1M2       | 27.447    | 22.7801   | 24.5057   | 28.8929   | 25.3228   | 30.3653   |
| IL1R2       | 25.6347   | 27.5853   | 22.7488   | 26.3725   | 20.4621   | 17.3319   |
| ASCL4       | 0.180456  | 0.0398869 | 0.204909  | 0.508335  | 0.1724    | 0.477922  |
| LOC10050624 | 4.29796   | 4.2222    | 5.96489   | 7.62301   | 6.6914    | 2.97589   |
| DDX10       | 5.05007   | 4.35539   | 3.84639   | 3.81101   | 3.90706   | 3.35936   |
| EVPLL       | 3.30248   | 2.82977   | 3.52313   | 4.50485   | 4.05765   | 5.58167   |
| AMPD1       | 0.0423127 | 0.149655  | 0.0320309 | 0         | 0         | 0.140647  |
| RSRC1       | 8.8413    | 5.17296   | 7.67717   | 5.86012   | 6.33496   | 5.87413   |
| RIMS2       | 0.313065  | 0.146085  | 0.191686  | 0.266123  | 0.123986  | 0.481803  |
| KSR2        | 0.120889  | 0.0777324 | 0.0457567 | 0.103193  | 0.0559961 | 0.0890295 |
| BRSK1       | 1.46704   | 1.83281   | 1.4727    | 2.0064    | 2.49841   | 1.55016   |
| SON         | 34.8884   | 28.4642   | 34.215    | 28.9165   | 33.3546   | 30.0322   |
| MIR450B     | 0         | 0         | 0         | 0         | 0         | 0         |
| MIR1302-11  | 0         | 0         | 7.00285   | 0         | 0         | 5.76466   |
| MIR3139     | 0         | 0         | 0         | 0         | 0         | 0         |
| INTS9       | 7.61074   | 7.3438    | 7.2533    | 7.41623   | 6.56308   | 6.66295   |
| NPVF        | 0         | 0.167278  | 0         | 0         | 0         | 0         |
| RAB11FIP2   | 5.88737   | 4.75869   | 7.18099   | 4.32768   | 5.6396    | 4.50479   |
| NR2F1       | 0.989432  | 0.929468  | 2.48108   | 0.493564  | 1.29974   | 1.27168   |
| UBE3A       | 24.0296   | 16.6334   | 21.7971   | 17.6449   | 19.2212   | 18.9505   |
| LOC10013173 | 0.859123  | 0.887605  | 0.37434   | 0.119246  | 0.868868  | 0.22596   |
| LOC399940   | 0.0656571 | 0         | 0         | 0         | 0         | 0.0409148 |
| CCHCR1      | 13.5872   | 19.8934   | 14.3124   | 21.5081   | 19.9796   | 20.5638   |
| PGAM1P5     | 0.0477272 | 0         | 0.0722595 | 0.0896302 | 0.0607954 | 0.148708  |
| RNF214      | 7.16215   | 6.93365   | 8.39357   | 5.90696   | 7.86845   | 9.21047   |
| LINC00486   | 0         | 0.284905  | 0         | 0         | 0         | 0         |
| ZNF684      | 3.08827   | 2.64378   | 1.89254   | 2.43955   | 3.21579   | 2.2605    |
| SS18L1      | 13.522    | 15.5137   | 14.2501   | 15.2563   | 17.4957   | 14.7693   |
| SERPIND1    | 0.183963  | 0         | 0.174076  | 0.0863692 | 0.0585836 | 0.143298  |
| COX6A2      | 0         | 0.361858  | 0         | 0.768611  | 0.782014  | 0.255045  |
| MIR210HG    | 11.6207   | 16.9935   | 14.7173   | 22.2381   | 25.8059   | 22.0274   |
| ZEB1        | 9.32246   | 7.0909    | 9.50151   | 5.08434   | 7.50856   | 5.3659    |
| P2RY1       | 2.23091   | 2.16967   | 2.84685   | 1.1671    | 2.84176   | 1.82713   |
| RAB38       | 61.274    | 52.5369   | 41.0564   | 42.2296   | 42.093    | 46.6326   |
| CLTC        | 41.7661   | 28.1181   | 37.9952   | 28.2421   | 30.2355   | 31.4399   |
| FSCN3       | 0.220175  | 0.291997  | 0.333347  | 0.361796  | 0.175288  | 0.102903  |
| C4orf10     | 3.36356   | 3.66511   | 2.43011   | 3.55993   | 3.64806   | 3.67602   |
| FKTN        | 4.34974   | 4.41653   | 5.1714    | 4.07221   | 5.8612    | 4.11007   |
| DNAH11      | 0.0718613 | 0.0724638 | 0.124043  | 0.0205568 | 0.0876622 | 0.0772622 |
| SERPINC1    | 0.599877  | 0.648235  | 0.100913  | 0         | 0.297162  | 0.207677  |
| MIR4453     | 0         | 0         | 0         | 0         | 0         | 0         |

|             |          |           |           |           |           |          |
|-------------|----------|-----------|-----------|-----------|-----------|----------|
| HSP90B1     | 143.831  | 104.941   | 109.874   | 85.3922   | 92.0168   | 104.542  |
| MED8        | 44.938   | 42.902    | 40.9998   | 40.3457   | 42.2438   | 44.3193  |
| LOC10065291 | 0.301653 | 0.266702  | 0.570882  | 0.708118  | 0.512332  | 0.250636 |
| KRTAP6-2    | 0        | 0         | 0         | 0         | 0         | 3.70427  |
| CENPQ       | 2.98762  | 2.37193   | 2.6309    | 1.71755   | 2.64067   | 3.15359  |
| PDHA2       | 0        | 0         | 0         | 0         | 0         | 0        |
| BOP1        | 16.2885  | 22.4524   | 13.0102   | 19.4295   | 15.2483   | 16.4377  |
| OR10Z1      | 0        | 0         | 0         | 0         | 0         | 0        |
| KIAA0020    | 18.4331  | 15.5252   | 13.2928   | 12.9921   | 11.5352   | 11.5727  |
| C19orf35    | 0.246386 | 0.450286  | 0.207598  | 0.466298  | 0.42418   | 0.244131 |
| LOC10065279 | 0        | 0         | 0         | 0         | 0         | 0        |
| ME2         | 6.13043  | 5.30915   | 5.59108   | 4.81338   | 3.91783   | 4.18529  |
| TGFBRAP1    | 4.31254  | 2.89672   | 5.61797   | 3.39029   | 4.53505   | 3.99972  |
| ARHGAP20    | 1.59089  | 1.1471    | 1.64863   | 0.710654  | 0.70829   | 0.721876 |
| MIR28       | 0        | 0         | 0         | 0         | 0         | 0        |
| RAD18       | 3.00666  | 3.07182   | 3.51525   | 3.43491   | 3.07458   | 2.62308  |
| ZNF404      | 3.15779  | 3.09105   | 3.67107   | 2.96512   | 4.27383   | 5.65743  |
| LOC729458   | 0        | 0         | 0         | 0         | 0         | 0        |
| RHBG        | 3.51536  | 4.2471    | 3.19183   | 4.40059   | 4.40233   | 6.17085  |
| PCTP        | 50.986   | 48.7097   | 31.0572   | 31.8587   | 23.9562   | 27.6213  |
| NBL1        | 81.8011  | 98.2883   | 89.0104   | 94.0862   | 108.976   | 82.6021  |
| PCMTD1      | 34.9203  | 21.7824   | 28.2148   | 21.666    | 30.299    | 27.8832  |
| CD247       | 2.95892  | 4.07048   | 3.1511    | 1.18741   | 4.60932   | 1.80836  |
| KISS1R      | 0.261698 | 0         | 0.0495266 | 0.122865  | 0.416692  | 0.122309 |
| CCDC79      | 0.124061 | 0.0731243 | 0         | 0         | 0         | 0        |
| RBSG2       | 0        | 0         | 0         | 0.103218  | 0.0700122 | 0        |
| IL24        | 8.37E-43 | 3.51E-79  | 5.38E-296 | 0.0932029 | 5.47E-66  | 0.125086 |
| C19orf29    | 10.0072  | 13.645    | 10.8962   | 14.5269   | 14.3151   | 13.9296  |
| MIR129-1    | 0        | 0         | 0         | 0         | 0         | 0        |
| SNORD115-3b | 0        | 0         | 0         | 0         | 0         | 0        |
| SPRR2F      | 21.6918  | 13.83     | 2.32397   | 5.81448   | 2.52377   | 4.35604  |
| PDCD2       | 26.9986  | 25.9082   | 26.8785   | 25.4284   | 26.382    | 23.2695  |
| IMMP2L      | 6.43741  | 7.25516   | 7.28295   | 7.50596   | 6.26267   | 6.17157  |
| LOC10024073 | 0        | 0         | 0.505344  | 0         | 0.425171  | 0.831986 |
| SURF6       | 17.4685  | 22.0415   | 18.407    | 19.7409   | 22.1119   | 20.1303  |
| GNL3L       | 3.98554  | 3.47971   | 3.43483   | 3.22376   | 3.41521   | 3.35719  |
| TGOLN2      | 42.8558  | 29.8263   | 39.5391   | 29.7088   | 33.5696   | 27.7468  |
| PPM1K       | 12.3022  | 10.0169   | 9.29296   | 8.54028   | 5.49145   | 6.76528  |
| LOC154092   | 1.09237  | 0.515124  | 0.34665   | 0.561845  | 0.639923  | 0.182627 |
| AMPD3       | 6.00461  | 5.11438   | 7.27583   | 6.46255   | 9.12623   | 7.92564  |
| LAGE3       | 10.8328  | 18.2384   | 12.5189   | 21.48     | 12.331    | 14.5784  |
| C22orf29    | 11.5804  | 11.7729   | 10.4776   | 14.8722   | 16.9624   | 15.8411  |
| ZNF277      | 8.06169  | 8.48057   | 9.54966   | 7.14925   | 9.08052   | 8.34958  |

|              |          |           |           |           |           |           |
|--------------|----------|-----------|-----------|-----------|-----------|-----------|
| MFRP         | 2.91607  | 4.5394    | 3.62253   | 3.53384   | 4.00025   | 2.43842   |
| NMNAT1       | 5.27831  | 4.39223   | 4.62249   | 3.25557   | 3.88912   | 4.78872   |
| THRAP3       | 39.6469  | 34.4794   | 36.9861   | 30.2767   | 35.4243   | 34.2552   |
| C16orf88     | 10.1028  | 5.40634   | 11.2303   | 10.435    | 6.67156   | 7.05771   |
| ZNF876P      | 0.192773 | 0.238612  | 0.612906  | 0.724042  | 0.908557  | 0.792843  |
| MIR136       | 0        | 0         | 0         | 0         | 0         | 0         |
| SRC          | 12.1471  | 14.9027   | 13.0249   | 12.7699   | 15.4571   | 15.5591   |
| ADCY2        | 2.22746  | 2.30405   | 1.82947   | 2.20091   | 2.16975   | 1.73281   |
| ZBTB39       | 2.16011  | 2.30263   | 2.78334   | 1.97077   | 2.80036   | 2.30076   |
| SPCS3        | 32.8976  | 26.3859   | 34.103    | 25.8672   | 27.0963   | 25.1727   |
| MIR3125      | 0        | 0         | 0         | 0         | 0         | 0         |
| C14orf56     | 0        | 0.0815491 | 0         | 0         | 0         | 0         |
| C14orf102    | 3.85996  | 3.81266   | 4.29641   | 4.21007   | 4.53641   | 3.60742   |
| PTCH1        | 3.36606  | 2.613     | 4.23689   | 3.14866   | 4.08233   | 3.24736   |
| KCTD13       | 12.3698  | 18.1732   | 12.6251   | 19.8207   | 17.2854   | 15.8768   |
| NKX2-8       | 0        | 0.256811  | 0         | 0         | 0.0369998 | 0.144805  |
| WARS         | 63.2585  | 67.2683   | 32.2459   | 28.9554   | 27.7262   | 24.4974   |
| MIR23A       | 0        | 0         | 0         | 0         | 0         | 0         |
| HTATIP2      | 52.3103  | 46.811    | 34.6179   | 39.0204   | 31.7513   | 33.7712   |
| FNBP1        | 13.9734  | 14.1865   | 14.3408   | 15.2162   | 20.4578   | 16.7642   |
| C6orf170     | 2.42076  | 2.43892   | 3.18206   | 2.32591   | 3.13139   | 1.9529    |
| CRB1         | 0.019259 | 0.0824024 | 0.0836192 | 0.0777903 | 0.0527645 | 0.0516256 |
| BRCA1        | 2.59464  | 3.06549   | 2.26906   | 2.86769   | 3.14291   | 3.89173   |
| MIR1324      | 0        | 0         | 0         | 0         | 0         | 0         |
| LOC100505959 | 2.5305   | 2.33458   | 0.499723  | 0.929778  | 0.560588  | 0.377085  |
| C7orf60      | 3.91153  | 2.45147   | 4.36661   | 3.09171   | 4.14686   | 4.04192   |
| STAG3        | 0.794032 | 0.91951   | 0.645243  | 0.617401  | 0.839267  | 0.662849  |
| PREPL        | 17.0687  | 11.7013   | 17.0099   | 11.9682   | 14.7652   | 14.0589   |
| MIR23C       | 0        | 0         | 0         | 0         | 0         | 0         |
| LOC10050756  | 0.958891 | 1.11551   | 2.06304   | 2.41682   | 2.28218   | 2.23291   |
| MAML1        | 11.224   | 10.753    | 10.9949   | 10.9481   | 12.9209   | 11.3057   |
| DDB2         | 31.184   | 50.8963   | 34.2693   | 42.1714   | 48.3938   | 33.6549   |
| ARID3A       | 1.30894  | 1.72028   | 3.77603   | 2.49136   | 4.50632   | 4.78382   |
| C20orf26     | 0.165871 | 0.188015  | 0.053798  | 0         | 0.0528287 | 0.101341  |
| ZNF473       | 2.35152  | 2.7909    | 2.16505   | 2.28762   | 2.47189   | 2.74589   |
| MIR522       | 0        | 0         | 0         | 0         | 0         | 0         |
| PLEKHH3      | 15.6528  | 24.7558   | 20.8772   | 25.5917   | 23.7572   | 22.726    |
| C18orf34     | 0.214637 | 0.189768  | 0.22849   | 0.283417  | 0.101261  | 0.0743053 |
| IL13RA1      | 36.6783  | 29.4375   | 33.035    | 25.1618   | 30.3052   | 24.0242   |
| PHRF1        | 13.6633  | 18.4021   | 15.0806   | 16.1595   | 18.3677   | 17.0288   |
| CCDC135      | 0        | 0         | 0         | 0         | 0         | 0         |
| DAPL1        | 85.9861  | 119.855   | 95.4116   | 137.634   | 95.1401   | 133.463   |
| AGR2         | 23.7762  | 9.66136   | 24.5438   | 10.7117   | 11.4721   | 18.1088   |

|             |           |          |           |           |           |           |
|-------------|-----------|----------|-----------|-----------|-----------|-----------|
| CCL16       | 0.215863  | 0.890644 | 0.272349  | 0.337819  | 0.504109  | 0.358711  |
| MIR196B     | 0         | 0        | 0         | 0         | 0         | 0         |
| LOC10012996 | 3.08046   | 2.64573  | 3.06482   | 2.39665   | 2.24224   | 1.64538   |
| CXorf1      | 0.206675  | 0.182729 | 0.312908  | 0.194064  | 0.184285  | 0.128791  |
| CMAS        | 35.7275   | 27.4725  | 27.412    | 21.5703   | 27.0673   | 24.2981   |
| OR6V1       | 0         | 0        | 0         | 0         | 0         | 0         |
| CPLX3       | 1.43747   | 0.907802 | 0.932722  | 2.74774   | 1.04633   | 2.84728   |
| MIR1246     | 0         | 0        | 0         | 0         | 0         | 0         |
| COPS6       | 56.5191   | 65.2581  | 57.2584   | 68.3766   | 54.8207   | 54.5867   |
| ZDHHC11B    | 1.74734   | 2.51044  | 3.85821   | 2.87168   | 2.61258   | 1.49719   |
| YLPM1       | 8.829     | 7.12637  | 9.72561   | 7.72157   | 8.5412    | 7.8318    |
| FGF14-IT1   | 0         | 0        | 0         | 0.0904724 | 0         | 0         |
| MIR199A1    | 0         | 0        | 0         | 0         | 0         | 0         |
| BPNT1       | 10.5158   | 9.91482  | 11.6609   | 10.9542   | 9.83707   | 9.36875   |
| COPS7A      | 39.8462   | 42.0244  | 42.2775   | 44.2663   | 39.6618   | 39.127    |
| LOC284749   | 0.027322  | 0        | 0         | 0         | 0.0522045 | 0.0510776 |
| VSIG10L     | 27.7146   | 12.1928  | 16.7599   | 21.2647   | 15.4091   | 16.3564   |
| KRTAP10-10  | 2.29273   | 0.368561 | 0         | 45.1117   | 0.862876  | 162.161   |
| MIR4753     | 0         | 0        | 0         | 0         | 0         | 0         |
| PAPL        | 10.8822   | 5.2264   | 8.9752    | 11.4481   | 14.2255   | 25.0601   |
| ICAM4       | 0.376084  | 0.619117 | 0.496532  | 0.0882835 | 0.507672  | 0.421848  |
| MON1A       | 6.05036   | 9.31604  | 6.63238   | 6.84187   | 6.19907   | 6.54038   |
| ATP2B2      | 0.739579  | 0.445448 | 0.681422  | 0.815054  | 0.662017  | 0.621032  |
| LTN1        | 7.75776   | 5.22533  | 7.50293   | 4.86011   | 6.67887   | 6.10007   |
| OLFML3      | 49.1549   | 16.6289  | 43.2376   | 20.8567   | 32.1889   | 20.3849   |
| C2orf40     | 33.3811   | 32.9519  | 23.675    | 25.7145   | 15.8939   | 15.8537   |
| C9orf71     | 0.537304  | 0.395875 | 0.271161  | 0.50452   | 0.513317  | 0.390629  |
| AASDH       | 6.91927   | 5.41077  | 6.2396    | 5.97939   | 6.09244   | 5.54865   |
| SDCBP2      | 38.4578   | 47.4906  | 44.6755   | 51.122    | 53.6581   | 60.0197   |
| LOC10019098 | 15.2118   | 7.76343  | 23.5612   | 11.9224   | 17.9328   | 12.3051   |
| ANKRD19P    | 7.74703   | 11.6063  | 7.9121    | 11.3877   | 9.32518   | 7.61243   |
| LOC10050613 | 0.0677293 | 0.059882 | 0.0512715 | 0.445177  | 0.258823  | 0.379854  |
| ANXA7       | 68.3649   | 57.2202  | 63.5558   | 55.3191   | 52.8615   | 46.8474   |
| TMEM218     | 8.69328   | 8.85191  | 10.4259   | 8.62143   | 8.52293   | 9.03895   |
| LOC646938   | 0         | 0        | 0         | 0         | 0         | 0         |
| APOL1       | 22.3239   | 22.8975  | 7.51512   | 5.21683   | 10.0867   | 4.56828   |
| HIPK3       | 11.8073   | 6.37653  | 13.53     | 6.66594   | 9.32151   | 7.34966   |
| LOC339788   | 0         | 0        | 0         | 0         | 0.0301328 | 0         |
| CD300LG     | 12.2956   | 13.4008  | 10.919    | 9.36323   | 4.92396   | 2.84655   |
| GART        | 18.1356   | 18.3289  | 18.8097   | 16.3339   | 16.0449   | 13.9486   |
| LOC10050731 | 0.110452  | 0.195309 | 0.0836127 | 0         | 0.0703474 | 0.137658  |
| LOC730183   | 2.53188   | 4.92477  | 3.44997   | 2.3774    | 3.22514   | 3.15552   |
| MIR4771-2   | 0         | 0        | 0         | 0         | 0         | 0         |

|             |           |           |         |          |           |           |
|-------------|-----------|-----------|---------|----------|-----------|-----------|
| ISY1-RAB43  | 9.03462   | 5.54098   | 7.13177 | 5.42276  | 7.61043   | 6.42153   |
| C6orf195    | 0.0497336 | 0.0439713 | 0       | 0.093398 | 0.0633512 | 0.0619837 |
| ATP2A3      | 60.5761   | 29.3672   | 39.597  | 53.5406  | 28.9442   | 22.0158   |
| LOC10050711 | 2.38717   | 3.94613   | 3.6142  | 3.92426  | 4.00106   | 4.54105   |
| MIR19B1     | 0         | 0         | 0       | 0        | 0         | 0         |
| NLRP3       | 0.54467   | 0.338078  | 0.44483 | 0.148841 | 0.564776  | 0.333617  |
| BEX4        | 34.3685   | 37.0239   | 34.3943 | 41.891   | 36.4285   | 42.1843   |
| ZFP28       | 2.52593   | 2.78105   | 3.33723 | 2.57319  | 4.29513   | 3.40054   |
| ABCC5       | 16.7913   | 17.124    | 18.3776 | 15.1043  | 22.5667   | 26.5961   |

nib before and during treatment compared to normal controls. Results are reported in fragme

| Patient 10 TO | Patient 10 T24 | Patient 11 TO | Patient 11 T24 | Patient 12 TO | Patient 12 T24 |
|---------------|----------------|---------------|----------------|---------------|----------------|
| 74.2626       | 120.576        | 36.8387       | 48.9404        | 8.06793       | 8.12195        |
| 0             | 0              | 0.0259371     | 0              | 0.0445997     | 0              |
| 11.7261       | 10.4874        | 16.6995       | 17.8221        | 18.4911       | 22.7124        |
| 4.21236       | 3.57535        | 7.64474       | 4.21121        | 5.89996       | 4.9139         |
| 7.75641       | 7.49684        | 6.34324       | 4.24216        | 6.24987       | 7.20006        |
| 11.4918       | 15.304         | 12.8523       | 15.4162        | 8.92844       | 11.1751        |
| 0.0479124     | 0              | 0.120725      | 0.3821         | 0.103795      | 0.201403       |
| 12.6701       | 12.5793        | 12.3021       | 13.2746        | 9.79826       | 10.6771        |
| 181.011       | 203.384        | 192.498       | 189.81         | 180.946       | 204.904        |
| 3.64828       | 4.02578        | 3.243         | 3.44566        | 3.33898       | 5.2752         |
| 65.0906       | 67.5005        | 65.5118       | 70.5389        | 63.7047       | 73.9009        |
| 93.4059       | 79.0725        | 85.2353       | 75.7016        | 81.569        | 92.9998        |
| 18.1759       | 18.7047        | 17.5799       | 17.9356        | 19.5134       | 20.6651        |
| 0.351421      | 0.30818        | 0.327955      | 0.400368       | 0.63442       | 0.87539        |
| 0.943489      | 0.817558       | 1.1981        | 0.701277       | 1.85354       | 0.699687       |
| 0.218967      | 0.438673       | 0.260657      | 0.290763       | 0.341957      | 0.479239       |
| 2.34239       | 1.16347        | 2.01987       | 1.65093        | 1.79384       | 1.05853        |
| 0             | 0              | 0             | 0              | 0             | 0              |
| 34.7781       | 36.577         | 33.6126       | 38.3343        | 40.3714       | 48.5701        |
| 1.47168       | 2.0481         | 2.06245       | 1.96287        | 3.85838       | 3.39465        |
| 13.4689       | 16.1525        | 19.0306       | 17.1233        | 13.8372       | 13.0405        |
| 0             | 0              | 0             | 0              | 0             | 0              |
| 21.155        | 17.9862        | 32.6967       | 18.756         | 23.3094       | 14.1101        |
| 0             | 0.0411572      | 0             | 0              | 0.0715466     | 0              |
| 37.8033       | 40.3253        | 40.1378       | 37.4995        | 33.8135       | 38.8831        |
| 0             | 0              | 0             | 0              | 0             | 0              |
| 14.8592       | 14.7778        | 14.9932       | 14.8727        | 16.683        | 17.3932        |
| 0.147408      | 0.0803685      | 0.127677      | 0.178435       | 0.0997932     | 0.147164       |
| 1.44569       | 1.42099        | 3.56576       | 2.59816        | 2.77899       | 1.74608        |
| 0             | 0              | 0             | 0.0351103      | 0             | 0              |
| 22.7107       | 21.6613        | 24.1446       | 21.6352        | 23.6786       | 20.9522        |
| 7.61897       | 7.50245        | 6.57322       | 4.89492        | 9.64994       | 8.52112        |
| 59.3385       | 56.2042        | 50.6369       | 56.6394        | 48.1646       | 61.3248        |
| 0.0496993     | 0.0929028      | 0.0626139     | 0              | 0.0538333     | 0.0208914      |
| 2757.85       | 3054.2         | 2096.22       | 2537.34        | 1911.38       | 2570.32        |
| 26.2362       | 27.1739        | 23.4879       | 30.1664        | 35.4525       | 32.8906        |
| 9.60346       | 10.7174        | 12.117        | 12.7047        | 17.1715       | 15.6655        |
| 27.0239       | 26.7498        | 28.9414       | 26.515         | 30.0698       | 29.0537        |
| 78.838        | 81.4017        | 65.9364       | 76.2717        | 57.375        | 70.4437        |
| 0             | 0              | 0             | 0              | 0             | 0              |
| 31.9096       | 34.5375        | 31.5125       | 32.0089        | 24.0983       | 31.289         |

|           |           |          |           |           |           |
|-----------|-----------|----------|-----------|-----------|-----------|
| 13.783    | 12.1519   | 13.2905  | 11.4598   | 24.3392   | 19.5548   |
| 0         | 0.0446927 | 0.135547 | 0.286009  | 0.116539  | 0.0301507 |
| 105.815   | 107.822   | 103.334  | 107.244   | 66.9387   | 82.2875   |
| 32.6222   | 31.4739   | 25.7791  | 29.1732   | 18.9344   | 21.8227   |
| 14.867    | 14.4631   | 17.3157  | 14.444    | 19.3033   | 17.9382   |
| 14.2995   | 13.6488   | 15.9211  | 12.0238   | 18.8309   | 10.9689   |
| 0         | 0         | 0        | 0         | 0         | 0         |
| 46.3658   | 48.9179   | 54.8818  | 57.9659   | 51.704    | 57.6081   |
| 12.125    | 9.20052   | 14.7978  | 10.1708   | 11.5779   | 8.74701   |
| 0.939926  | 1.12004   | 0.838427 | 1.01613   | 0.743145  | 0.53065   |
| 1.43013   | 0.201995  | 0.400124 | 0.543128  | 2.01456   | 1.60162   |
| 6.9967    | 7.43171   | 4.26264  | 3.91966   | 6.1292    | 5.42508   |
| 4.23143   | 4.41477   | 5.57893  | 4.14812   | 5.11635   | 5.04656   |
| 0.473668  | 0.473617  | 1.01393  | 0.399323  | 0.411662  | 0.296158  |
| 0         | 0         | 0        | 0         | 0         | 0         |
| 0.0928866 | 0.098445  | 0.167893 | 0.273851  | 0.136428  | 0.0386613 |
| 0         | 0         | 0        | 0         | 0.0476195 | 2.05E-07  |
| 29.3422   | 29.9264   | 30.358   | 34.5836   | 28.7531   | 29.4392   |
| 7.68195   | 8.5869    | 9.8541   | 8.64724   | 9.63211   | 9.708     |
| 32.1277   | 32.0202   | 36.5378  | 29.5422   | 40.404    | 37.0529   |
| 4.05908   | 5.90328   | 2.123    | 2.43953   | 1.77487   | 1.58885   |
| 9.84402   | 30.669    | 12.402   | 28.0378   | 7.99713   | 20.69     |
| 34.4146   | 34.432    | 34.7451  | 34.8073   | 35.957    | 36.2111   |
| 0.240088  | 0.149599  | 0.340285 | 0.15386   | 0.17879   | 0.151384  |
| 8.1845    | 8.52736   | 9.0404   | 6.57139   | 7.72403   | 5.82152   |
| 0         | 0         | 0        | 0         | 0         | 0         |
| 0         | 0         | 0        | 0         | 0         | 0         |
| 30.4703   | 29.5643   | 35.5543  | 29.3874   | 31.8321   | 29.0402   |
| 1.08145   | 0.74872   | 1.21108  | 1.50587   | 1.43496   | 0.711352  |
| 0         | 0         | 0        | 0         | 0         | 0         |
| 4.55775   | 6.2104    | 6.2104   | 6.86889   | 5.37688   | 5.69406   |
| 1.6696    | 2.17523   | 2.61338  | 2.248     | 4.00058   | 3.25393   |
| 4.81008   | 3.25803   | 5.93004  | 6.75171   | 7.17861   | 3.81366   |
| 10.6991   | 8.79388   | 9.58021  | 7.2239    | 14.9817   | 7.9955    |
| 3.18948   | 1.67082   | 2.84942  | 1.90923   | 2.99134   | 2.05697   |
| 0.319793  | 0.996314  | 0.879038 | 4.67011   | 0.472354  | 1.4787    |
| 0         | 0         | 0        | 0         | 0         | 0         |
| 0.809859  | 0.693214  | 0.848262 | 0.500421  | 0.887609  | 0.680859  |
| 7.48773   | 8.19325   | 3.91143  | 5.40968   | 8.20977   | 8.75162   |
| 1.66572   | 2.32772   | 0.895919 | 1.84194   | 2.59998   | 1.85581   |
| 130.152   | 126.826   | 119.089  | 115.584   | 149.553   | 159.338   |
| 0.127116  | 0.0792057 | 0.160147 | 0.0724103 | 0.0688445 | 0.106868  |
| 0.0222748 | 0.0555177 | 0        | 0         | 0         | 0         |

|           |           |           |           |           |           |
|-----------|-----------|-----------|-----------|-----------|-----------|
| 1.42909   | 1.70969   | 1.83645   | 1.80723   | 1.84207   | 2.10254   |
| 1.62633   | 1.31567   | 1.21949   | 1.95461   | 1.52368   | 1.51487   |
| 17.6694   | 18.8654   | 18.5303   | 18.3601   | 18.0925   | 18.9158   |
| 56.5528   | 55.0076   | 57.5778   | 50.0907   | 52.6329   | 54.9766   |
| 0         | 0         | 0         | 0         | 0         | 0         |
| 4.08847   | 4.08997   | 4.02967   | 4.11925   | 3.64533   | 3.55414   |
| 0         | 0         | 0         | 0         | 0         | 0         |
| 0.884342  | 1.1022    | 0.563193  | 1.02978   | 0.421056  | 0.539225  |
| 37.1876   | 27.8878   | 32.7904   | 22.054    | 45.8506   | 29.7408   |
| 39.5506   | 32.5436   | 36.9726   | 32.4653   | 32.2452   | 32.9078   |
| 0.807335  | 0.307443  | 0.917234  | 1.07016   | 1.11988   | 0.789851  |
| 0.0215903 | 0.0538117 | 0.0544014 | 0.122988  | 0.0233862 | 0.072605  |
| 0         | 0         | 0         | 0         | 301.382   | 467.836   |
| 55.0048   | 58.3147   | 55.1872   | 64.0481   | 42.1683   | 50.1043   |
| 0.0347541 | 0.108276  | 0.218926  | 0.237569  | 0.07529   | 0.131482  |
| 26.6387   | 6.37526   | 61.0145   | 51.9128   | 2.75553   | 2.00152   |
| 14.8724   | 16.2507   | 12.1246   | 13.5667   | 9.78659   | 12.897    |
| 0         | 0         | 0         | 0         | 0         | 0         |
| 24.9665   | 22.9035   | 31.5247   | 31.8637   | 42.7107   | 30.3864   |
| 0.0418004 | 0         | 0         | 0         | 0.090494  | 0.0351287 |
| 25.5062   | 24.1458   | 27.0458   | 25.0592   | 28.9402   | 24.9432   |
| 5.43622   | 4.95998   | 8.11261   | 4.60817   | 7.53575   | 3.12847   |
| 0.114329  | 0         | 0.0411595 | 0.241925  | 0.0884466 | 0.109837  |
| 1.14868   | 1.45665   | 0.82449   | 1.24711   | 0.781219  | 0.91452   |
| 1.49518   | 2.17748   | 2.9744    | 3.25663   | 1.76372   | 1.5527    |
| 161.49    | 139.555   | 170.721   | 141.58    | 116.118   | 142.653   |
| 3.83859   | 3.58865   | 4.35295   | 4.17566   | 6.76886   | 5.47343   |
| 61.8542   | 65.1381   | 46.7681   | 57.5575   | 43.8515   | 45.6366   |
| 14.6458   | 14.704    | 12.0951   | 11.1968   | 12.2966   | 13.9256   |
| 33.2555   | 35.3359   | 39.3878   | 46.4262   | 32.8519   | 41.1993   |
| 0         | 0         | 0         | 0.0284211 | 0         | 0         |
| 2.76899   | 2.45572   | 2.63244   | 1.52895   | 3.25692   | 1.71381   |
| 8.94759   | 9.25211   | 7.55557   | 7.78244   | 10.6645   | 8.93335   |
| 0         | 0         | 0         | 0         | 0.0411934 | 0         |
| 0.0967325 | 0.120616  | 0.0609613 | 0.220456  | 0.104824  | 0.121993  |
| 10.9759   | 18.4709   | 8.88613   | 13.2494   | 8.01258   | 10.0905   |
| 2.28096   | 2.35244   | 1.51942   | 0.95583   | 0.482779  | 0.837587  |
| 0.276066  | 0.137613  | 0.556484  | 0.125807  | 0.41864   | 0.0464183 |
| 17.2212   | 18.4319   | 19.598    | 17.2551   | 16.4908   | 15.5319   |
| 3.0026    | 2.76749   | 3.0364    | 2.47973   | 3.98142   | 2.46636   |
| 12.3471   | 12.9788   | 12.6468   | 11.994    | 11.4033   | 12.4796   |
| 0.0368205 | 0.140731  | 0         | 0         | 0         | 0         |
| 42.4114   | 43.7628   | 47.8297   | 42.8128   | 43.3576   | 42.9785   |



|           |           |           |           |           |           |
|-----------|-----------|-----------|-----------|-----------|-----------|
| 0.11006   | 1.09726   | 0.831961  | 0.62695   | 0.476861  | 0.185058  |
| 3.84151   | 4.38834   | 1.63565   | 3.2419    | 2.2539    | 2.8558    |
| 43.424    | 40.9309   | 32.3078   | 28.4368   | 31.2194   | 27.207    |
| 7.13568   | 8.15144   | 7.6466    | 7.0316    | 7.97354   | 5.86115   |
| 56.4831   | 55.2201   | 61.9374   | 66.6123   | 48.7185   | 57.4043   |
| 0         | 0         | 0         | 0         | 0         | 0         |
| 0         | 0         | 0         | 0         | 0.0582973 | 0         |
| 13.9477   | 13.5825   | 13.0284   | 12.4626   | 16.7697   | 17.1343   |
| 0.0163652 | 0         | 0         | 0         | 0         | 0.0275168 |
| 0         | 0         | 0         | 0         | 0         | 0         |
| 0.799511  | 0.530382  | 0.0986018 | 0.452374  | 0.126924  | 0.499024  |
| 0         | 0         | 0         | 0         | 0         | 0         |
| 8.71446   | 8.57126   | 9.26281   | 9.02258   | 7.93075   | 7.45174   |
| 1.8339    | 1.54425   | 1.90531   | 1.60391   | 6.84972   | 3.60473   |
| 17.4568   | 16.18     | 19.038    | 18.2678   | 16.9043   | 17.0154   |
| 27.5227   | 28.4635   | 26.8139   | 25.7595   | 28.7708   | 29.6435   |
| 13.8026   | 15.1484   | 16.3721   | 15.3733   | 18.5082   | 18.918    |
| 0.822721  | 1.44745   | 1.46331   | 1.76435   | 1.04842   | 1.38334   |
| 30.1965   | 29.1847   | 32.6949   | 29.6643   | 29.3504   | 25.421    |
| 14.0847   | 13.962    | 14.6129   | 13.4972   | 15.4626   | 14.0185   |
| 19.5709   | 18.6431   | 18.9042   | 17.9299   | 19.0496   | 17.0885   |
| 2.17186   | 3.5377    | 2.79941   | 2.95378   | 1.39038   | 1.93017   |
| 0         | 0         | 0         | 0         | 0         | 0         |
| 12.602    | 12.0702   | 13.7105   | 10.9397   | 15.1339   | 11.7152   |
| 1.96851   | 3.07264   | 2.60529   | 2.53719   | 1.74457   | 1.57137   |
| 0.0057964 | 0         | 0         | 0         | 0         | 0         |
| 0         | 0         | 0         | 0         | 0         | 0         |
| 25.6956   | 22.2425   | 27.486    | 23.0526   | 31.8621   | 27.0616   |
| 0.102852  | 0.0427247 | 0.172771  | 0.0390592 | 0.111407  | 0.028823  |
| 0         | 0         | 0         | 0         | 0         | 0         |
| 9.02845   | 9.40121   | 9.76212   | 9.0737    | 8.5811    | 8.63124   |
| 14.4088   | 14.5561   | 14.3539   | 12.9573   | 15.2695   | 14.9507   |
| 1.43725   | 0.578943  | 1.46322   | 0.82699   | 1.21085   | 1.31816   |
| 10.67     | 12.1007   | 13.6287   | 12.5347   | 11.6375   | 13.0366   |
| 0         | 0         | 0         | 0         | 0         | 0         |
| 0.262908  | 0.561255  | 0.470576  | 0.371579  | 0.517274  | 0.273306  |
| 5.36063   | 4.08561   | 6.75362   | 7.34806   | 7.61767   | 7.39002   |
| 1.7796    | 2.50749   | 3.41749   | 2.84071   | 2.67373   | 2.62332   |
| 30.4516   | 37.256    | 42.2556   | 45.0728   | 34.0216   | 37.5188   |
| 0.848002  | 0.746733  | 0.605835  | 0.866246  | 1.66342   | 0.9059    |
| 267.717   | 230.893   | 93.5981   | 82.4398   | 89.2275   | 102.873   |
| 0         | 0         | 0         | 0         | 0         | 0         |
| 0.118675  | 0.591573  | 0.448541  | 0.27041   | 0.514187  | 0.399088  |

|           |           |           |           |           |           |
|-----------|-----------|-----------|-----------|-----------|-----------|
| 10.3355   | 14.2827   | 12.5576   | 12.6628   | 11.1952   | 10.982    |
| 30.8588   | 32.3255   | 34.1822   | 32.4394   | 32.9413   | 30.3299   |
| 31.8766   | 22.637    | 27.0788   | 22.7794   | 41.5484   | 39.8836   |
| 4.49256   | 5.41994   | 4.45572   | 4.51934   | 3.77911   | 3.37514   |
| 11.9096   | 13.4528   | 11.815    | 15.8722   | 10.434    | 11.311    |
| 1.47878   | 2.07687   | 1.95177   | 1.65801   | 1.52551   | 1.48004   |
| 3.61484   | 3.98525   | 4.54261   | 3.64039   | 3.45359   | 3.54412   |
| 0.695779  | 1.73416   | 0.681785  | 0.572498  | 1.29796   | 0.454961  |
| 5.35136   | 5.66494   | 4.85709   | 3.99892   | 7.87408   | 7.44182   |
| 0         | 0         | 0         | 0         | 0         | 0         |
| 0         | 0         | 0         | 0         | 0         | 0         |
| 24.2702   | 24.5819   | 24.5729   | 23.0482   | 23.0413   | 22.7923   |
| 7.38485   | 7.05      | 7.36199   | 7.23632   | 8.31101   | 6.83509   |
| 0.107564  | 0.0335115 | 0.135515  | 0.153182  | 0.0873834 | 0.0226076 |
| 1.41429   | 1.1766    | 2.03634   | 1.15091   | 2.48081   | 1.58534   |
| 0         | 0         | 0         | 0         | 0         | 0         |
| 4.5383    | 5.0119    | 4.55549   | 4.24562   | 4.83587   | 5.64556   |
| 1.17E-09  | 0.143418  | 2.09E-10  | 8.53E-10  | 4.52E-09  | 0         |
| 0         | 0         | 0         | 0         | 0.179599  | 0         |
| 0         | 0         | 0         | 0         | 0         | 0         |
| 2.2878    | 2.32183   | 3.60311   | 3.29552   | 4.76172   | 4.69874   |
| 10.7517   | 10.5831   | 11.6184   | 10.7969   | 11.1413   | 9.29776   |
| 0         | 0         | 0         | 0         | 0         | 0         |
| 0.0491378 | 0.306256  | 0.0619387 | 0.0560373 | 0.106505  | 0.0826235 |
| 0.0697945 | 0.0869778 | 0         | 0         | 0.0756    | 0.0586771 |
| 31.8673   | 28.0629   | 25.431    | 26.9056   | 21.31     | 24.1424   |
| 3.84764   | 8.05882   | 1.57193   | 2.71615   | 1.24855   | 1.70984   |
| 1.85034   | 0.913656  | 2.26518   | 1.63076   | 4.31103   | 2.42146   |
| 0         | 0.0448528 | 0         | 0.0410047 | 0         | 0.0302587 |
| 5.99661   | 5.65236   | 7.47638   | 5.09001   | 8.58694   | 5.48415   |
| 22.9162   | 26.1797   | 27.0681   | 27.2021   | 23.0361   | 22.5253   |
| 8.19577   | 8.31396   | 8.62589   | 8.3425    | 9.19611   | 6.57963   |
| 0.733197  | 0.152285  | 0         | 0.27844   | 0.264728  | 0.205469  |
| 25.6626   | 25.5413   | 27.3274   | 32.1754   | 28.1413   | 34.1106   |
| 0.522212  | 0.336146  | 0.65791   | 0.65741   | 0.499163  | 1.01733   |
| 147.98    | 148.525   | 134.392   | 112.191   | 133.318   | 120.635   |
| 0         | 0         | 0         | 0         | 0         | 0         |
| 1.10169   | 6.97475   | 4.54166   | 4.73971   | 10.6006   | 10.8788   |
| 16.0697   | 15.7781   | 14.7249   | 14.9163   | 18.2358   | 17.1198   |
| 56.6597   | 55.1202   | 55.7985   | 55.7877   | 55.1314   | 53.813    |
| 0.230278  | 0.353196  | 0.513283  | 0.484341  | 0.537238  | 0.521223  |
| 0.342285  | 0.365619  | 0.462031  | 0.417814  | 0.6091    | 0.678299  |
| 3.62519   | 3.43601   | 4.51896   | 3.24302   | 5.44794   | 3.83116   |

|           |           |           |           |           |            |
|-----------|-----------|-----------|-----------|-----------|------------|
| 1.20516   | 1.21754   | 1.56913   | 2.72734   | 3.30379   | 3.1608     |
| 0         | 0         | 0         | 0         | 0         | 0          |
| 25.5167   | 25.3561   | 26.3247   | 23.2706   | 27.0596   | 23.6525    |
| 50.9337   | 62.9105   | 67.0545   | 83.2773   | 54.8377   | 66.083     |
| 5.79387   | 8.96822   | 6.13692   | 6.23247   | 7.49073   | 6.62418    |
| 17.3613   | 15.8126   | 16.7208   | 14.7232   | 16.4018   | 11.6332    |
| 6.2568    | 7.04905   | 6.5236    | 5.52501   | 6.51282   | 5.14976    |
| 0.0972882 | 0.0603594 | 0.152219  | 0.105127  | 0.174912  | 0.120868   |
| 0         | 0         | 0         | 0         | 0         | 0.095635   |
| 0.0837827 | 0.042285  | 0.0775818 | 0.0343613 | 0.0588067 | 0.00633873 |
| 29.4052   | 22.581    | 25.8322   | 19.1951   | 18.2498   | 17.9065    |
| 0         | 0         | 0         | 0         | 0         | 0          |
| 0.660201  | 0.524414  | 1.93365   | 1.45713   | 0.616689  | 0.416212   |
| 0.0569599 | 0         | 0.0751207 | 0.0648934 | 0.0616978 | 0          |
| 0         | 0         | 0         | 0         | 0         | 0          |
| 77.1937   | 74.1188   | 64.2715   | 68.7419   | 64.0642   | 78.8177    |
| 0.759574  | 0.641484  | 0.870394  | 0.513761  | 0.778561  | 0.547053   |
| 0.153251  | 0.0687534 | 0.517439  | 0.174597  | 0.0398397 | 0.0463825  |
| 2.09576   | 1.59425   | 2.75714   | 1.5277    | 3.45527   | 1.99533    |
| 47.5823   | 48.8461   | 63.7828   | 56.7526   | 56.7529   | 55.9044    |
| 20.9255   | 15.2118   | 1.28154   | 1.15889   | 6.45354   | 9.28484    |
| 20.4759   | 18.7686   | 18.1546   | 17.741    | 28.2139   | 28.204     |
| 7.85204   | 9.12847   | 6.85012   | 6.46275   | 7.30552   | 6.86384    |
| 6.0568    | 6.35377   | 6.28625   | 5.61022   | 6.21672   | 4.90467    |
| 2.26655   | 2.19689   | 2.16327   | 1.4085    | 3.02545   | 1.6553     |
| 6.57156   | 5.48246   | 8.24476   | 6.32825   | 8.39334   | 7.03507    |
| 33.2185   | 31.6374   | 29.2737   | 30.2958   | 25.5414   | 29.8083    |
| 5.84075   | 6.84855   | 7.20193   | 7.1734    | 7.77736   | 5.68816    |
| 3.4534    | 5.93778   | 4.05554   | 2.78899   | 2.99398   | 4.72773    |
| 16.0888   | 18.2135   | 20.8347   | 18.2916   | 16.6666   | 18.5014    |
| 35.7439   | 32.935    | 38.2773   | 29.9022   | 50.3237   | 44.7985    |
| 0.737759  | 1.21009   | 0.602115  | 0.988151  | 0.613545  | 0.459758   |
| 0.145889  | 0.151505  | 0.39823   | 0.886446  | 0.316048  | 0.367951   |
| 0.0431957 | 0.0788869 | 0.0655411 | 0.0798417 | 0.046043  | 0.052458   |
| 0.0269539 | 0         | 0         | 0         | 0.0497068 | 0          |
| 10.4929   | 9.54515   | 12.2286   | 7.049     | 13.5105   | 10.04      |
| 4.72778   | 4.66064   | 4.88992   | 3.69804   | 7.41403   | 6.40698    |
| 24.1382   | 23.4862   | 20.4745   | 16.998    | 20.9316   | 20.4655    |
| 20.2699   | 21.9258   | 24.2082   | 25.6796   | 22.4306   | 22.0602    |
| 23.4383   | 20.6405   | 26.1413   | 20.0166   | 31.5187   | 24.8246    |
| 3.34796   | 3.56473   | 4.58659   | 3.1477    | 5.5981    | 2.67804    |
| 0.267445  | 0.179464  | 0.388779  | 0.328133  | 0.579382  | 0.36321    |
| 9.82238   | 10.4072   | 9.1039    | 10.5989   | 8.20218   | 8.91259    |

|             |           |          |          |           |           |
|-------------|-----------|----------|----------|-----------|-----------|
| 21.0008     | 18.2855   | 21.1432  | 22.7243  | 21.7046   | 19.159    |
| 1.85183     | 1.48109   | 1.60179  | 2.17274  | 2.63457   | 2.23072   |
| 78.9616     | 78.8388   | 71.6096  | 67.1851  | 61.087    | 65.4995   |
| 0.000223257 | 1.09901   | 1.42222  | 0.924412 | 1.27349   | 8.41E-06  |
| 1.20232     | 1.69166   | 1.75906  | 2.20933  | 3.15079   | 3.91279   |
| 1.48909     | 1.63738   | 1.76568  | 3.0936   | 1.61295   | 1.76738   |
| 0           | 0.0441848 | 0.357351 | 0        | 0.0768096 | 0.059616  |
| 0.0464447   | 0         | 0        | 0        | 0.573151  | 0.429513  |
| 19.5436     | 19.2959   | 20.5785  | 17.1121  | 20.9617   | 18.9515   |
| 0.493607    | 0.136696  | 0.898261 | 0.874779 | 2.01985   | 1.19883   |
| 0           | 0         | 0        | 0        | 0         | 0         |
| 0.312097    | 0.0729431 | 0.171975 | 0.311042 | 0.190176  | 0.114716  |
| 0.219701    | 37.7832   | 0.553583 | 468.315  | 1.07089   | 17.547    |
| 0           | 0         | 0        | 0        | 0         | 0         |
| 0.406824    | 0.253492  | 0.128135 | 0.231744 | 0.110166  | 0.171011  |
| 0.700347    | 0.810731  | 0.778163 | 0.598246 | 0.717031  | 0.55741   |
| 29.8575     | 30.2361   | 24.7722  | 26.0154  | 28.79     | 35.1585   |
| 579.933     | 514.524   | 260.91   | 270.307  | 195.925   | 255.582   |
| 18.6149     | 19.8721   | 11.9139  | 13.8278  | 14.2839   | 17.4409   |
| 6.86438     | 7.37775   | 5.89936  | 6.13428  | 7.96052   | 7.00453   |
| 19.5019     | 20.9876   | 21.5122  | 20.6193  | 19.0655   | 17.3788   |
| 10.6822     | 15.2236   | 13.8978  | 16.2894  | 14.7383   | 16.7051   |
| 1.14088     | 0.980526  | 1.28865  | 0.986043 | 1.74713   | 1.19067   |
| 2.56063     | 1.0775    | 4.73429  | 2.95517  | 6.51982   | 4.1098    |
| 1.75981     | 1.76755   | 1.52219  | 1.34659  | 1.16647   | 1.45741   |
| 0.203244    | 0         | 0        | 0        | 0         | 0.341739  |
| 5.19658     | 5.07576   | 5.43471  | 5.80608  | 6.21561   | 5.12789   |
| 4.20861     | 4.10181   | 3.36924  | 2.64642  | 2.96175   | 2.52216   |
| 0.635372    | 0.735242  | 0.514591 | 0.361934 | 0.835698  | 0.534165  |
| 0.578272    | 0.489848  | 0.571788 | 0.224554 | 0.292448  | 0.219301  |
| 10.2841     | 11.4089   | 9.52045  | 8.72807  | 12.1368   | 10.8805   |
| 5.21695     | 3.44475   | 9.3357   | 3.25271  | 8.85588   | 4.015     |
| 535.972     | 607.588   | 587.186  | 586.376  | 553.711   | 600.126   |
| 0           | 0         | 0        | 0        | 0         | 0         |
| 0.428258    | 0.530644  | 0.990857 | 0.502971 | 0.625258  | 0.442389  |
| 31.0785     | 28.2601   | 24.9855  | 22.8824  | 20.7035   | 23.5128   |
| 13.0863     | 14.1637   | 14.6818  | 15.6918  | 15.1512   | 12.8834   |
| 0.139883    | 0.0435805 | 0.044058 | 0        | 0.0378796 | 0.0294003 |
| 36.7339     | 38.0025   | 39.9182  | 36.1507  | 38.7608   | 32.2846   |
| 0.863543    | 0.511953  | 0.457225 | 0.349802 | 1.18132   | 0.832566  |
| 31.6471     | 30.9945   | 29.0243  | 31.6957  | 29.3577   | 33.8105   |
| 2.89792     | 2.0314    | 2.60131  | 2.47616  | 2.35423   | 1.94905   |
| 0.18339     | 0.15236   | 0.46209  | 0.417867 | 0.198645  | 0.154178  |

|          |           |           |           |           |           |
|----------|-----------|-----------|-----------|-----------|-----------|
| 31.257   | 34.8223   | 32.3475   | 40.9322   | 33.1763   | 29.1284   |
| 0.210729 | 1.15985   | 0.5193    | 2.03281   | 1.01266   | 1.3516    |
| 0.320334 | 0.309435  | 0.234617  | 0         | 0.0252129 | 0.0391396 |
| 0.235836 | 0.764135  | 0.297119  | 0.698577  | 0.204362  | 0.0793079 |
| 1.76151  | 1.90127   | 2.37577   | 2.88163   | 2.46278   | 2.04841   |
| 45.2123  | 51.1877   | 60.2884   | 62.4618   | 63.7746   | 63.1241   |
| 18.8158  | 16.8379   | 24.6412   | 19.9405   | 29.0086   | 19.944    |
| 34.2576  | 24.9195   | 25.2968   | 20.9375   | 23.3587   | 27.7417   |
| 14.5014  | 16.0138   | 13.4688   | 12.6381   | 14.8133   | 16.0892   |
| 0.890809 | 0.910946  | 1.12229   | 0.884817  | 1.17514   | 0.777709  |
| 1.32871  | 1.29192   | 1.59372   | 0.565165  | 0.18241   | 0.458896  |
| 10.1681  | 11.3057   | 11.0844   | 10.0929   | 9.06831   | 10.4168   |
| 13.1253  | 12.9902   | 12.4529   | 11.3283   | 13.8988   | 12.9848   |
| 83.4742  | 80.7323   | 82.7556   | 82.7451   | 71.4026   | 87.4805   |
| 18.1597  | 19.5317   | 17.9038   | 19.7925   | 19.711    | 22.2843   |
| 15.2561  | 17.8693   | 14.2962   | 16.8847   | 13.7812   | 14.3099   |
| 0        | 0         | 0         | 0         | 0         | 0         |
| 4.07624  | 3.59303   | 4.96846   | 3.13375   | 5.5281    | 4.84787   |
| 0.688661 | 0.246851  | 0.79565   | 0.791749  | 0.685533  | 0.349478  |
| 0.772707 | 0.272311  | 0.91102   | 0.433151  | 0.456059  | 0.492383  |
| 1.73342  | 0.972083  | 1.69249   | 2.61668   | 3.52051   | 2.69602   |
| 6.64592  | 7.13728   | 8.71765   | 9.33084   | 8.19402   | 6.60617   |
| 0.957145 | 0.53013   | 0.334962  | 0.363486  | 0.287989  | 0.491751  |
| 4.53325  | 4.65855   | 4.77988   | 5.03753   | 4.70323   | 4.62483   |
| 8.92073  | 9.31311   | 9.84133   | 7.58451   | 11.447    | 7.80535   |
| 7.49474  | 8.20369   | 8.494     | 8.54557   | 9.50781   | 6.33894   |
| 6.32345  | 7.11147   | 7.63653   | 6.46386   | 7.28476   | 5.67913   |
| 79.8965  | 65.2255   | 81.5664   | 77.7893   | 70.202    | 77.4166   |
| 1.01449  | 0.67183   | 0.865204  | 0.566061  | 1.27054   | 1.25261   |
| 59.8134  | 68.8816   | 56.7441   | 69.157    | 66.8963   | 80.5785   |
| 0.419935 | 0.429872  | 0.793586  | 0.615118  | 0.601072  | 0.40348   |
| 44.6994  | 49.0025   | 38.9113   | 39.691    | 46.1307   | 39.6244   |
| 7.79411  | 7.36849   | 7.44923   | 5.9198    | 6.71512   | 7.14008   |
| 0        | 0         | 0         | 0         | 0         | 0         |
| 0.360208 | 0         | 0.174593  | 0         | 0.133211  | 0.41112   |
| 0        | 0         | 0         | 0         | 0         | 0         |
| 0.790881 | 0.197119  | 0.398558  | 0.545127  | 0.770999  | 0.465432  |
| 0        | 0.0373465 | 0         | 0.0341424 | 0.0649221 | 0.0251947 |
| 0        | 0         | 0.0809428 | 0         | 0         | 0         |
| 0.279354 | 0.626546  | 0.137672  | 0.110662  | 0.118366  | 0.0816628 |
| 14.14    | 15.9626   | 11.501    | 17.1879   | 12.9826   | 10.1018   |
| 2.22349  | 2.66225   | 3.07591   | 2.63252   | 2.97513   | 1.79601   |
| 0        | 0         | 0         | 0         | 0         | 0         |

|           |           |           |           |           |           |
|-----------|-----------|-----------|-----------|-----------|-----------|
| 0         | 0         | 0         | 0         | 0         | 0         |
| 1.77148   | 2.00226   | 1.29757   | 1.78355   | 0.490865  | 1.10832   |
| 0         | 0         | 0         | 0         | 0         | 0         |
| 3.9038    | 3.53697   | 1.07188   | 2.30138   | 1.7314    | 1.77647   |
| 4.02496   | 3.32134   | 4.2143    | 4.7095    | 4.27138   | 4.29838   |
| 480.488   | 591.971   | 494.327   | 537.711   | 469.966   | 577.268   |
| 0         | 0         | 0         | 0         | 0         | 0         |
| 35.8068   | 35.2668   | 40.8117   | 31.2353   | 41.8668   | 40.3301   |
| 1.77987   | 2.08498   | 1.7939    | 1.46      | 2.35206   | 2.30439   |
| 1.63164   | 1.48379   | 1.00004   | 1.40674   | 1.09863   | 0.704407  |
| 10.9643   | 11.5162   | 11.4221   | 14.6368   | 11.7535   | 12.6251   |
| 0.267175  | 0.190259  | 0.144258  | 0.130452  | 0.289398  | 0.128353  |
| 11.5511   | 11.5969   | 11.9796   | 12.5128   | 11.0322   | 10.075    |
| 1.91876   | 2.67179   | 2.07161   | 1.79767   | 2.02936   | 1.47874   |
| 8.96292   | 9.74298   | 9.70606   | 10.2187   | 7.9983    | 8.5354    |
| 9.85863   | 9.88596   | 10.2478   | 9.20153   | 9.71354   | 7.85332   |
| 1.15256   | 1.08973   | 1.33526   | 1.08676   | 1.86533   | 1.01351   |
| 2.8893    | 2.72888   | 5.50644   | 5.17026   | 2.86475   | 3.52301   |
| 0.062629  | 0.0260161 | 0.170957  | 0.154596  | 0.633159  | 0.219387  |
| 7.54166   | 6.68338   | 7.70352   | 6.91385   | 8.56627   | 6.5445    |
| 0.04636   | 0.0288869 | 0         | 0         | 0.0753243 | 0.0584631 |
| 91.4443   | 85.3924   | 88.4976   | 88.5418   | 87.1202   | 87.4493   |
| 0         | 0         | 0         | 0         | 0         | 0         |
| 13.4309   | 12.2026   | 13.4825   | 13.5832   | 14.7296   | 14.6327   |
| 2.12333   | 1.61067   | 1.34585   | 1.05177   | 1.32854   | 1.09768   |
| 12.3743   | 11.5335   | 13.2539   | 10.7621   | 12.6865   | 11.6033   |
| 0         | 0         | 0         | 0         | 0         | 0         |
| 0.141082  | 0         | 0         | 0.0542248 | 0.0515546 | 0         |
| 6.37036   | 7.72443   | 5.60908   | 6.44809   | 7.59454   | 6.90848   |
| 66.7637   | 77.9794   | 67.867    | 83.9409   | 51.6743   | 58.0881   |
| 83.2201   | 83.7406   | 84.1225   | 88.2831   | 73.76     | 94.0194   |
| 28.1332   | 21.0609   | 35.6976   | 24.132    | 29.4094   | 34.1122   |
| 0         | 0         | 0         | 0         | 0         | 0         |
| 0         | 0         | 0.185764  | 0         | 0.249552  | 0.0619809 |
| 43.4076   | 49.7757   | 35.9482   | 42.916    | 33.094    | 33.0295   |
| 55.0298   | 52.8891   | 64.3135   | 55.2793   | 62.8261   | 49.457    |
| 0         | 0         | 0         | 0         | 0         | 0         |
| 40.034    | 35.1797   | 40.7871   | 37.6813   | 40.9372   | 40.2967   |
| 0         | 0         | 0         | 0         | 0         | 0         |
| 0.187102  | 0.0666189 | 0.0336744 | 0         | 0.492186  | 0.247184  |
| 41.8245   | 48.3415   | 45.8304   | 54.7589   | 38.7437   | 53.5582   |
| 2.58901   | 2.74024   | 4.15541   | 4.00016   | 1.95921   | 2.68349   |
| 0.0563803 | 0.0526958 | 0.0177577 | 0         | 0         | 0         |

|            |           |           |           |           |            |
|------------|-----------|-----------|-----------|-----------|------------|
| 6.62773    | 6.12981   | 11.586    | 9.75796   | 8.2323    | 7.84713    |
| 12.887     | 9.9038    | 14.1673   | 12.2818   | 16.6657   | 13.2649    |
| 0          | 0         | 0         | 0         | 0         | 0          |
| 2.41741    | 2.95437   | 2.3425    | 2.77098   | 1.3594    | 1.01042    |
| 21.6393    | 22.553    | 23.4449   | 19.866    | 26.466    | 20.2665    |
| 1.44163    | 1.09993   | 1.61238   | 1.18992   | 1.48187   | 1.06359    |
| 0          | 0         | 0         | 0         | 0         | 0          |
| 0          | 0         | 0         | 0         | 0         | 0          |
| 0.185941   | 0.0695157 | 0.234258  | 0.317759  | 0.422955  | 0.297013   |
| 32.8544    | 23.4733   | 53.0201   | 22.844    | 46.7758   | 27.6576    |
| 10.0297    | 11.3549   | 9.54205   | 10.3938   | 11.1002   | 9.44512    |
| 7.45654    | 8.24447   | 8.65461   | 7.48292   | 8.38609   | 7.73597    |
| 86.06      | 88.4795   | 93.9501   | 96.0443   | 76.6674   | 87.2728    |
| 3.15782    | 3.22963   | 4.03326   | 3.84576   | 4.03381   | 3.44211    |
| 0.00919975 | 0.0458589 | 0.0115903 | 0.115292  | 0.0298949 | 0.00773434 |
| 0          | 0         | 0         | 0         | 0         | 0          |
| 6.2851     | 6.30652   | 5.89354   | 5.55839   | 6.87007   | 5.25983    |
| 0          | 0         | 0         | 0         | 0         | 0          |
| 2.64406    | 2.71887   | 2.77399   | 2.68015   | 3.85489   | 2.67083    |
| 105.08     | 94.2951   | 62.5448   | 51.1146   | 44.6999   | 51.7888    |
| 52.9621    | 48.7273   | 57.7679   | 65.1054   | 53.5356   | 56.408     |
| 6.85348    | 7.38723   | 4.8218    | 5.00932   | 7.46211   | 5.20807    |
| 0          | 0         | 0         | 0         | 0         | 0          |
| 1.00997    | 2.05956   | 0.115674  | 0.0697357 | 0.895072  | 1.0292     |
| 0          | 0         | 0         | 0         | 0         | 0          |
| 34.5137    | 37.1862   | 37.2828   | 38.257    | 32.0112   | 36.9374    |
| 7.89724    | 7.7849    | 9.18407   | 7.09404   | 8.18402   | 8.80976    |
| 4.40282    | 5.41321   | 3.44465   | 2.82827   | 3.38238   | 2.86956    |
| 26.1316    | 26.3991   | 24.8405   | 25.5703   | 24.8583   | 24.5525    |
| 7.98684    | 7.84505   | 7.44188   | 7.61432   | 8.73129   | 8.04357    |
| 0.60027    | 0.550652  | 0.724742  | 0.512908  | 0.478619  | 0.567736   |
| 0.131997   | 0.164495  | 0.166298  | 0         | 0.90147   | 0.0993626  |
| 37.6238    | 28.1098   | 23.8521   | 30.0812   | 30.2242   | 37.4242    |
| 2.07292    | 1.49308   | 1.84487   | 1.71165   | 2.80152   | 1.31104    |
| 11.8952    | 10.846    | 9.89254   | 11.4428   | 10.4414   | 10.3224    |
| 0.0164071  | 0         | 0         | 0         | 0.0177719 | 0          |
| 9.49E-37   | 1.97E-169 | 0.138708  | 0.17261   | 4.81E-90  | 5.79E-237  |
| 0          | 0         | 0         | 0         | 0         | 0          |
| 41.1972    | 37.0219   | 41.3743   | 38.9072   | 43.2314   | 41.722     |
| 9.48077    | 9.26606   | 10.9051   | 9.23065   | 11.6403   | 8.3126     |
| 0          | 0         | 0         | 0         | 0         | 0          |
| 14.779     | 14.5185   | 13.9647   | 15.0936   | 15.9978   | 17.5992    |
| 78.2813    | 53.4876   | 110.349   | 74.9533   | 106.047   | 65.0717    |

|          |          |          |          |          |          |
|----------|----------|----------|----------|----------|----------|
| 7.73889  | 10.9351  | 8.13787  | 7.9837   | 12.409   | 9.73365  |
| 0        | 0        | 0        | 0        | 0        | 0        |
| 0        | 0        | 0        | 0        | 0        | 0        |
| 0.23635  | 0.293093 | 0.176036 | 0.245372 | 0.144005 | 0.228458 |
| 333.663  | 311.384  | 360.517  | 304.085  | 326.201  | 277.322  |
| 3.8226   | 3.1771   | 3.80611  | 3.27457  | 4.56761  | 4.09606  |
| 0.197513 | 0.196912 | 0.398139 | 0.360036 | 0.342306 | 0.232472 |
| 11.2727  | 11.2958  | 12.3664  | 12.7263  | 15.2173  | 18.9285  |
| 30.2178  | 32.754   | 25.3517  | 30.6356  | 20.2379  | 25.5935  |
| 1.47008  | 3.42589  | 3.25542  | 2.94382  | 4.43328  | 6.99069  |
| 20.2569  | 20.7381  | 20.4556  | 19.1062  | 18.0043  | 17.9201  |
| 353.178  | 372.312  | 360.661  | 328.015  | 416.94   | 373.914  |
| 5.03178  | 4.68931  | 4.60289  | 4.287    | 5.28444  | 4.70848  |
| 1.67074  | 1.6757   | 2.9997   | 1.5933   | 2.23555  | 1.44966  |
| 0        | 0        | 0        | 0        | 0        | 0        |
| 77.9356  | 61.0489  | 35.9086  | 38.8142  | 25.6873  | 48.8603  |
| 0        | 0        | 0        | 0        | 0        | 0        |
| 7.49779  | 6.7165   | 7.26017  | 5.83984  | 7.63253  | 5.74373  |
| 1.46203  | 3.47833  | 2.0094   | 3.48276  | 0.863806 | 1.67611  |
| 13.1837  | 14.5342  | 16.4067  | 16.5252  | 15.3975  | 16.4833  |
| 9.27754  | 9.04207  | 10.3737  | 8.41492  | 9.69601  | 7.30626  |
| 25.8009  | 0        | 0        | 0        | 0        | 0        |
| 0        | 23.4193  | 0        | 0        | 0        | 0        |
| 0        | 0        | 0        | 0        | 0        | 0        |
| 3.07032  | 8.92787  | 1.54726  | 2.09878  | 0.665142 | 0.860419 |
| 2.37429  | 2.5335   | 3.2156   | 2.53593  | 3.34332  | 1.87134  |
| 1.8969   | 0.78797  | 1.39406  | 1.08055  | 1.88346  | 3.32238  |
| 17.3319  | 13.7421  | 13.9513  | 13.6763  | 11.8185  | 12.713   |
| 173.851  | 197.264  | 162.996  | 174.581  | 119.438  | 147.671  |
| 9.64786  | 10.1941  | 11.1155  | 9.06657  | 8.23224  | 8.21526  |
| 0        | 0        | 0        | 0        | 0        | 0        |
| 0.758562 | 0.726185 | 0.602955 | 0.756826 | 0.946785 | 0.725976 |
| 9.53687  | 8.32494  | 7.35408  | 9.21818  | 14.138   | 14.6946  |
| 6.80384  | 7.16402  | 11.2305  | 11.4407  | 11.1138  | 15.6308  |
| 1.12945  | 1.42386  | 0.824255 | 1.33852  | 0.749576 | 0.586731 |
| 5.87772  | 6.33598  | 6.54401  | 5.55998  | 8.71614  | 5.71098  |
| 1.61342  | 1.15684  | 1.68153  | 1.26852  | 1.51484  | 1.84231  |
| 14.126   | 16.5149  | 17.4756  | 14.5588  | 13.9996  | 13.5287  |
| 1.20808  | 1.64222  | 1.62566  | 2.31395  | 2.52691  | 2.37649  |
| 2.33706  | 2.32008  | 4.54129  | 1.94052  | 2.57436  | 2.49762  |
| 0        | 0        | 0        | 0        | 0        | 0        |
| 0.858698 | 1.28413  | 1.73094  | 1.36962  | 1.30217  | 1.44384  |
| 41.6977  | 39.832   | 33.1551  | 20.5919  | 55.6404  | 25.2347  |



|           |           |           |             |           |           |
|-----------|-----------|-----------|-------------|-----------|-----------|
| 10.2467   | 9.61651   | 8.22499   | 8.93826     | 9.56021   | 10.663    |
| 2.06465   | 2.71204   | 2.81206   | 2.35222     | 2.59905   | 2.25182   |
| 0         | 0         | 0         | 0           | 0         | 0         |
| 0         | 0         | 0         | 0           | 0         | 0         |
| 6.71897   | 6.76363   | 7.07411   | 6.04117     | 7.51165   | 5.93514   |
| 792.19    | 683.57    | 537.206   | 585.91      | 402.617   | 627.574   |
| 3.32E-23  | 7.48E-08  | 4.40E-05  | 0.000170953 | 1.18E-06  | 2.03E-05  |
| 0.0515108 | 0.0641926 | 0         | 0           | 0.111591  | 0         |
| 42.992    | 39.3144   | 41.5278   | 36.4622     | 47.5852   | 41.9862   |
| 0         | 0         | 0         | 0           | 0         | 0         |
| 40.0817   | 42.8859   | 42.0486   | 43.8693     | 36.5266   | 45.118    |
| 0         | 0         | 0         | 0           | 0         | 0         |
| 18.6466   | 18.5222   | 21.732    | 16.7452     | 18.0539   | 15.2849   |
| 0.258552  | 0.393809  | 0.542897  | 0.458211    | 0.591235  | 0.893624  |
| 44.9189   | 40.2929   | 46.0375   | 42.4014     | 40.9993   | 39.9222   |
| 12.3943   | 12.2267   | 13.4843   | 14.6275     | 15.4665   | 16.8138   |
| 0         | 0         | 0         | 0           | 0         | 0         |
| 0.486571  | 0.500576  | 0.792751  | 0.860893    | 0.490012  | 0.234768  |
| 0.028728  | 0.179004  | 0.289545  | 0.229105    | 0.155588  | 0.193216  |
| 0         | 0         | 0         | 0           | 0         | 0         |
| 0         | 0         | 0         | 0.0373054   | 0.0354683 | 0         |
| 11.9002   | 10.753    | 11.9656   | 10.5432     | 13.5301   | 12.4446   |
| 20.013    | 21.6046   | 22.777    | 23.1354     | 20.999    | 22.7436   |
| 40.8115   | 37.198    | 39.185    | 40.3974     | 32.8941   | 39.4581   |
| 0         | 0         | 0         | 0           | 0         | 0         |
| 0         | 0         | 0         | 0           | 0         | 0         |
| 0         | 0         | 350.539   | 0           | 0         | 0         |
| 1.79665   | 2.39329   | 1.44676   | 1.62369     | 1.06505   | 1.73481   |
| 31.9694   | 31.4744   | 24.676    | 26.5113     | 31.1106   | 35.2843   |
| 0.252398  | 0.351543  | 0.18705   | 0.169149    | 0.595031  | 0.274604  |
| 0.586486  | 0.474484  | 0.839082  | 0.574076    | 0.540878  | 0.218816  |
| 11.6831   | 12.1793   | 18.1162   | 13.8608     | 14.2568   | 12.0562   |
| 0.0347178 | 0         | 0.0218697 | 0           | 0         | 0.0291877 |
| 0         | 0         | 0         | 0.475231    | 0         | 0         |
| 0.583218  | 0.363101  | 1.1037    | 0.166481    | 0.631205  | 0.367704  |
| 33.3381   | 30.3369   | 32.0788   | 30.4362     | 31.7003   | 38.6369   |
| 1.44942   | 1.59377   | 2.14831   | 2.42838     | 1.56998   | 1.68446   |
| 58.8415   | 38.7531   | 40.5746   | 30.887      | 49.6677   | 21.8604   |
| 11.7255   | 7.28966   | 12.207    | 6.06243     | 10.2176   | 11.1164   |
| 0         | 0         | 0         | 0           | 0         | 0         |
| 0         | 0         | 0         | 0           | 0         | 0         |
| 0.111172  | 0.0692712 | 0         | 0.0633282   | 0.0602096 | 0.0467318 |
| 17.053    | 17.5476   | 17.4329   | 20.9824     | 15.7271   | 21.505    |

|           |           |           |          |          |           |
|-----------|-----------|-----------|----------|----------|-----------|
| 0         | 0         | 0         | 0        | 0        | 0         |
| 0.670651  | 0.368303  | 0.687395  | 0.466207 | 0.455561 | 0.248465  |
| 13.353    | 12.8076   | 10.5255   | 14.4814  | 9.90502  | 12.1986   |
| 6.87628   | 6.40631   | 13.9318   | 12.429   | 37.4919  | 21.7203   |
| 0         | 0         | 0         | 0        | 0        | 0         |
| 11.7013   | 10.9876   | 14.5142   | 11.5963  | 14.834   | 11.458    |
| 0         | 0         | 0         | 0        | 0        | 0         |
| 0         | 0         | 0         | 0        | 0        | 0         |
| 65.0447   | 61.1777   | 65.4289   | 68.8245  | 70.3811  | 85.1493   |
| 1.37218   | 1.19816   | 1.28439   | 1.49342  | 1.84589  | 1.06518   |
| 0         | 0.221277  | 0         | 0        | 0        | 0         |
| 113.57    | 123.341   | 102.302   | 123.645  | 84.2542  | 108.381   |
| 0         | 0         | 0         | 0        | 0        | 0         |
| 12.991    | 10.4055   | 13.4978   | 8.82098  | 17.431   | 13.3285   |
| 5.78607   | 9.41606   | 4.53625   | 2.52741  | 0.621599 | 1.2406    |
| 40.7552   | 38.6377   | 38.1709   | 37.7378  | 33.063   | 37.1147   |
| 0.0936087 | 0         | 0         | 0        | 0.101395 | 0.0786979 |
| 7.782     | 8.74655   | 7.01186   | 7.49113  | 6.90883  | 5.3209    |
| 2.27087   | 2.36203   | 1.64305   | 1.44537  | 1.99715  | 1.468     |
| 7.63398   | 7.32633   | 7.7559    | 8.47821  | 8.7629   | 9.49556   |
| 40.8788   | 45.4827   | 46.1652   | 47.4653  | 45.605   | 41.6945   |
| 0         | 0         | 0         | 0        | 0        | 0         |
| 10.3759   | 10.0754   | 11.9814   | 9.78768  | 10.0126  | 9.507     |
| 354.283   | 329.968   | 365.901   | 377.629  | 457.602  | 467.604   |
| 25.544    | 26.8261   | 23.8705   | 27.6236  | 26.331   | 25.418    |
| 10.9155   | 10.1986   | 10.5996   | 9.62439  | 12.5694  | 9.95843   |
| 0.1303    | 0.0541268 | 0.0547199 | 0        | 0        | 0.0365151 |
| 6.56025   | 6.30474   | 5.36522   | 3.53431  | 7.39499  | 4.83289   |
| 0.369594  | 0.177149  | 0.0358181 | 0.161951 | 0        | 0.215115  |
| 43.0314   | 40.1092   | 48.7163   | 41.5988  | 47.4973  | 42.9441   |
| 0         | 0.0963421 | 0         | 0        | 0        | 0         |
| 0.360566  | 0.46713   | 0.769861  | 0.652429 | 0.466278 | 0.494801  |
| 2.19864   | 1.79961   | 2.19631   | 1.44761  | 2.36743  | 2.39166   |
| 32.7825   | 30.7646   | 34.0892   | 30.0296  | 35.5084  | 31.7686   |
| 17.125    | 16.0121   | 22.2693   | 22.2197  | 19.5151  | 24.3448   |
| 38.5572   | 41.5518   | 37.6583   | 37.1502  | 34.7639  | 36.9228   |
| 0.665221  | 0.552665  | 0.558721  | 1.26312  | 1.0408   | 0.994238  |
| 15.0749   | 12.791    | 14.714    | 13.1857  | 14.4618  | 15.6396   |
| 1.2623    | 0         | 1.9879    | 1.43812  | 2.05095  | 0.530617  |
| 0.996731  | 0.962376  | 1.72663   | 0.823384 | 2.17264  | 1.42445   |
| 2.16181   | 2.14813   | 2.30456   | 1.86519  | 5.12685  | 3.11186   |
| 0.0376196 | 0.140644  | 0.142185  | 0        | 0        | 0.189763  |
| 21.314    | 21.7774   | 23.6786   | 22.958   | 25.3393  | 26.122    |

|           |           |           |           |           |           |
|-----------|-----------|-----------|-----------|-----------|-----------|
| 26.0067   | 23.2055   | 27.0925   | 20.9703   | 20.4093   | 19.9658   |
| 11.9518   | 11.8541   | 14.1947   | 10.959    | 14.1976   | 11.3343   |
| 31.2706   | 32.6191   | 32.3543   | 32.1479   | 29.7137   | 32.8195   |
| 9.80741   | 10.7002   | 10.8415   | 11.0865   | 4.7949    | 3.20825   |
| 0         | 0         | 0         | 0         | 0         | 0         |
| 6.97471   | 7.54684   | 7.41907   | 6.89937   | 5.20245   | 5.1966    |
| 0.930517  | 0.739561  | 0.515436  | 0.175403  | 0.245146  | 1.09278   |
| 0.409521  | 0.100533  | 0.100533  | 0.158814  | 0.519996  | 0.562455  |
| 1.95115   | 1.36987   | 1.558     | 1.8159    | 3.09576   | 2.79554   |
| 18.5048   | 21.0428   | 20.9401   | 22.5772   | 18.6063   | 18.4375   |
| 18.7824   | 18.6644   | 19.4656   | 16.4235   | 20.8732   | 15.5668   |
| 0.0274267 | 0         | 0         | 0         | 0         | 0         |
| 0.0196199 | 0         | 0         | 0.0223526 | 0         | 0.0659787 |
| 18.9782   | 17.1594   | 13.8721   | 10.8772   | 22.5841   | 18.2595   |
| 0         | 0         | 0         | 0         | 0         | 0         |
| 2.67462   | 3.56141   | 2.35413   | 1.87838   | 3.25427   | 4.55878   |
| 1.33516   | 1.67849   | 1.72424   | 1.05667   | 1.94386   | 1.04289   |
| 4.54722   | 3.79735   | 5.51481   | 4.37888   | 6.02929   | 5.50648   |
| 12.0954   | 11.8493   | 11.7298   | 12.772    | 10.5819   | 13.0039   |
| 0.157527  | 0.294466  | 0.396923  | 0.897342  | 0.511892  | 0.198653  |
| 1.70209   | 1.9472    | 1.64379   | 1.6826    | 2.16135   | 1.79075   |
| 0.113946  | 0         | 0.0358889 | 0         | 0.0925681 | 0         |
| 38.9635   | 41.4745   | 45.5221   | 34.7277   | 46.3447   | 39.7441   |
| 0         | 0         | 0         | 0         | 0         | 0         |
| 2.18302   | 2.86472   | 2.98918   | 2.93708   | 4.15756   | 4.66017   |
| 0         | 0         | 0         | 0         | 0         | 0         |
| 0         | 0         | 0         | 0         | 0         | 0         |
| 1.8066    | 2.14787   | 1.33423   | 1.0646    | 1.46203   | 3.71851   |
| 0.705545  | 0.839783  | 0.242423  | 0.184969  | 0.277903  | 0.136494  |
| 0         | 0.293369  | 0         | 0         | 0         | 0.197913  |
| 1.87544   | 2.4164    | 2.64311   | 2.7523    | 2.54791   | 2.16463   |
| 0         | 0         | 0         | 0         | 0         | 0         |
| 2.76057   | 2.77351   | 3.15439   | 2.29175   | 2.73521   | 2.46477   |
| 2.10408   | 1.44525   | 2.7552    | 2.83127   | 1.47154   | 1.29535   |
| 0         | 0         | 0         | 0         | 0         | 0         |
| 8.51168   | 7.97323   | 8.15655   | 6.91495   | 9.74047   | 7.86425   |
| 0.138788  | 0.0432393 | 0.0437131 | 0.0395296 | 0.112749  | 0.0291701 |
| 3.95911   | 4.68563   | 4.27531   | 4.80886   | 3.70974   | 3.56619   |
| 0.665148  | 0.62168   | 1.25698   | 0.189448  | 1.26083   | 0.978597  |
| 0.484847  | 0.928862  | 0.708292  | 0.700756  | 0.72011   | 0.470346  |
| 221.881   | 248.383   | 220.536   | 223.077   | 222.477   | 233.774   |
| 21.7034   | 24.2694   | 21.8807   | 20.2481   | 17.6694   | 25.2647   |
| 55.8256   | 62.6598   | 54.4548   | 44.9077   | 81.7909   | 67.5048   |

|           |           |           |           |           |           |
|-----------|-----------|-----------|-----------|-----------|-----------|
| 0         | 0         | 0         | 0         | 0         | 0         |
| 0.0876022 | 0.0236684 | 0.0245251 | 0.0998036 | 0.151823  | 0.0163658 |
| 1.22287   | 0.787802  | 1.17547   | 1.23141   | 1.45078   | 0.884139  |
| 0.77828   | 0.515771  | 1.12902   | 0.411703  | 0.518059  | 0.0972155 |
| 22.2614   | 26.1186   | 23.6244   | 26.7114   | 20.7832   | 25.7652   |
| 0.0706274 | 0.176031  | 0.0889802 | 0         | 0.0382511 | 0.0593773 |
| 1.16764   | 1.10829   | 1.01842   | 1.0811    | 1.50324   | 0.93988   |
| 12.5801   | 12.9122   | 13.1243   | 14.2897   | 8.9244    | 10.267    |
| 0         | 0         | 0         | 0         | 0         | 0         |
| 0         | 0         | 0         | 0         | 0         | 0         |
| 0.0777573 | 0.477364  | 0.323877  | 0.281779  | 0.71241   | 0.395693  |
| 6.41463   | 6.24342   | 7.07869   | 6.24121   | 6.79605   | 6.29823   |
| 13.4218   | 12.2108   | 17.6733   | 12.8016   | 23.8842   | 18.9171   |
| 36.6127   | 34.5101   | 0         | 0         | 0         | 0         |
| 15.9958   | 15.4728   | 17.2349   | 12.8743   | 19.1694   | 14.775    |
| 17.7881   | 11.8655   | 7.35848   | 7.24559   | 7.93755   | 10.6869   |
| 0.634034  | 0.569648  | 0.717425  | 0.766297  | 1.17262   | 0.530148  |
| 0.116354  | 0.338332  | 0.635217  | 0.353492  | 0.462116  | 0.260853  |
| 1.22151   | 0.779575  | 0.970849  | 0.960761  | 0.945219  | 0.892503  |
| 0         | 0         | 0         | 0         | 0         | 0         |
| 2.69158   | 1.76539   | 2.39155   | 2.03356   | 2.17893   | 2.78687   |
| 9.75561   | 12.6455   | 14.3696   | 12.038    | 9.63016   | 9.58681   |
| 6.19233   | 6.16878   | 5.6716    | 5.52274   | 6.80875   | 6.94161   |
| 9.48832   | 8.86395   | 11.3101   | 11.2662   | 10.6216   | 9.54447   |
| 2.01065   | 2.08806   | 1.62844   | 1.52713   | 1.24451   | 1.24766   |
| 6.20245   | 4.76584   | 7.87491   | 4.90616   | 5.67406   | 5.29552   |
| 3.25689   | 4.04069   | 1.02124   | 5.54104   | 2.65604   | 1.06482   |
| 4.0019    | 2.4393    | 3.5523    | 2.02754   | 4.59832   | 2.60923   |
| 0.0169527 | 0.0422528 | 0.0213579 | 0.0193139 | 0         | 0         |
| 0.0646273 | 0         | 0         | 0         | 0         | 0         |
| 2.13361   | 2.00181   | 1.94651   | 2.16535   | 2.55016   | 2.13394   |
| 12.283    | 11.8652   | 11.867    | 9.70455   | 13.9187   | 11.3652   |
| 16.2966   | 17.726    | 18.0095   | 25.2059   | 15.4456   | 13.5965   |
| 14.1768   | 15.4424   | 17.6392   | 13.9985   | 19.7077   | 15.4864   |
| 8.82393   | 7.98893   | 5.22103   | 3.88751   | 6.29223   | 8.95798   |
| 18.4246   | 18.0529   | 19.977    | 19.2509   | 22.2276   | 20.7369   |
| 63.4492   | 61.5444   | 55.9007   | 71.9139   | 57.6266   | 75.2477   |
| 2.33047   | 1.82704   | 3.36511   | 1.39491   | 2.80698   | 0.892163  |
| 3.33803   | 3.37714   | 4.90979   | 2.33041   | 4.63211   | 2.98071   |
| 0.278342  | 1.19536   | 0.187024  | 0         | 0.48239   | 0.617774  |
| 46.8526   | 46.8198   | 46.7926   | 47.8338   | 48.7961   | 50.8842   |
| 11.7621   | 11.2352   | 12.0087   | 11.9548   | 10.0488   | 10.7208   |
| 0.0418436 | 0.0651819 | 0.0263584 | 0.131097  | 0.192628  | 0.0527677 |

|           |           |           |           |          |           |
|-----------|-----------|-----------|-----------|----------|-----------|
| 0         | 0         | 0         | 0         | 0        | 0.0136614 |
| 47.4253   | 50.8996   | 43.5925   | 51.3039   | 48.6851  | 50.1926   |
| 0.0693555 | 0.0345723 | 0.0873778 | 0.0158031 | 0.105174 | 0.058308  |
| 25.648    | 27.1087   | 20.5541   | 22.1208   | 29.0932  | 34.6089   |
| 0         | 0         | 0         | 0         | 0        | 0         |
| 4.64142   | 5.14511   | 6.44691   | 4.77596   | 6.70523  | 4.96873   |
| 27.6205   | 27.1351   | 36.866    | 38.9404   | 34.6333  | 35.7095   |
| 0.697016  | 0.466481  | 0.504117  | 0.676454  | 0.265646 | 0.141072  |
| 1.31074   | 0.466697  | 0.825668  | 0.559987  | 1.21694  | 0.590331  |
| 0.152509  | 0.207334  | 0.104803  | 0.0789775 | 0.045053 | 0.0349679 |
| 1.24604   | 1.34791   | 0.652865  | 0.830943  | 0.662924 | 0.553983  |
| 1.33415   | 3.74088   | 4.83239   | 2.46995   | 5.23856  | 2.94429   |
| 6.52075   | 8.72607   | 7.4433    | 8.42616   | 7.96381  | 8.79339   |
| 7.31046   | 6.68577   | 8.13317   | 6.58234   | 8.14205  | 7.06293   |
| 33.7368   | 33.9785   | 37.4313   | 31.8753   | 34.4551  | 31.9924   |
| 20.1869   | 21.1297   | 25.7492   | 18.3373   | 20.2292  | 18.9971   |
| 12.0908   | 13.8327   | 14.3091   | 15.3501   | 14.6307  | 13.1018   |
| 0         | 0         | 0         | 0         | 0        | 2.22E-276 |
| 10.8643   | 8.55133   | 9.25971   | 9.60847   | 4.69402  | 7.81259   |
| 9.94709   | 9.49713   | 10.6478   | 6.18368   | 14.1049  | 10.9688   |
| 26.8276   | 26.8656   | 34.2174   | 27.1555   | 39.2052  | 32.9913   |
| 47.1589   | 46.6257   | 45.5057   | 41.1507   | 41.8507  | 35.5811   |
| 4.77629   | 3.91422   | 4.8074    | 2.95736   | 3.88018  | 2.64062   |
| 0.191747  | 0.32259   | 0.181179  | 0.294914  | 0.781029 | 1.42028   |
| 7.36605   | 8.00398   | 8.64799   | 7.59169   | 8.56575  | 5.9565    |
| 0.0233946 | 0.0291543 | 0.184223  | 0.119945  | 0.231702 | 0.0885113 |
| 0.736506  | 0.7968    | 1.16241   | 0.931296  | 1.08707  | 0.605581  |
| 0         | 0         | 0         | 0         | 0        | 0         |
| 0.213827  | 0.370099  | 0.26939   | 0.0541349 | 0.255537 | 0.179767  |
| 7.84233   | 6.55372   | 6.48605   | 5.59203   | 9.44405  | 4.25839   |
| 11.3427   | 9.40168   | 11.4443   | 9.29448   | 13.3824  | 10.3907   |
| 0.451352  | 0         | 0.568638  | 0         | 0        | 0.379457  |
| 0.476765  | 0.334206  | 0.150164  | 1.22213   | 0.193658 | 0.150308  |
| 20.0459   | 20.8564   | 16.1025   | 20.5375   | 17.1805  | 19.975    |
| 0         | 0         | 0.112667  | 0.101885  | 0        | 0         |
| 13.2901   | 13.3142   | 12.8512   | 9.38307   | 10.9996  | 8.94487   |
| 82.5092   | 80.3278   | 82.6817   | 74.1565   | 78.8599  | 71.1471   |
| 0         | 0         | 0         | 0         | 0        | 0         |
| 13.8164   | 10.7134   | 12.0686   | 10.8086   | 14.0011  | 14.4033   |
| 16.3055   | 22.2698   | 14.7805   | 18.2601   | 14.5717  | 16.4249   |
| 116.974   | 144.904   | 96.4544   | 119.672   | 104.25   | 135.686   |
| 46.97     | 54.3346   | 44.0349   | 49.7146   | 44.4296  | 40.4806   |
| 0.44163   | 0.687948  | 0.32456   | 0.838569  | 0.279046 | 0.433164  |

|           |           |           |           |           |          |
|-----------|-----------|-----------|-----------|-----------|----------|
| 0.291711  | 0         | 0         | 0         | 0.315975  | 0.49049  |
| 1.28312   | 1.3943    | 0.859013  | 0.796765  | 1.65852   | 0.970975 |
| 1.0101    | 1.01961   | 0.865349  | 0.701978  | 0.678351  | 0.683605 |
| 0         | 0         | 0         | 0         | 0         | 0        |
| 0.0235846 | 0         | 0         | 0.0268695 | 0.101523  | 0        |
| 8.51674   | 8.2643    | 7.54906   | 7.63198   | 6.56335   | 8.34876  |
| 7.7163    | 3.93386   | 14.1425   | 8.65826   | 12.3913   | 25.1508  |
| 2.94002   | 2.77583   | 3.69329   | 3.13568   | 3.27703   | 2.81347  |
| 6.4667    | 6.24352   | 5.05644   | 4.26695   | 5.84135   | 4.60627  |
| 59.8837   | 73.4736   | 71.2469   | 70.9661   | 61.5564   | 68.1382  |
| 5.78383   | 4.82131   | 4.29588   | 5.76954   | 5.60136   | 8.28153  |
| 460.601   | 671.549   | 194.947   | 191.793   | 143.569   | 90.8146  |
| 0         | 0.128332  | 0.0648689 | 0.0586608 | 0.250974  | 0        |
| 5.12304   | 5.33738   | 6.91086   | 4.61673   | 7.52975   | 5.84423  |
| 1.09174   | 0.846549  | 1.23789   | 1.40964   | 0.998598  | 0.897442 |
| 0         | 0         | 0         | 0         | 0         | 0        |
| 3.66324   | 3.71342   | 2.82419   | 3.48827   | 3.67183   | 3.63132  |
| 3.71701   | 3.33001   | 4.46709   | 3.47365   | 4.52715   | 3.54255  |
| 31.0973   | 31.0273   | 35.0402   | 31.1007   | 31.7757   | 28.573   |
| 8.51899   | 10.6625   | 13.8592   | 8.73499   | 11.8755   | 9.96455  |
| 0.176285  | 0         | 3.35E-26  | 0         | 3.29E-280 | 0        |
| 0.0336627 | 0.0419504 | 0         | 0.0383513 | 0         | 0        |
| 136.068   | 58.3823   | 57.8458   | 38.3309   | 52.1906   | 40.7328  |
| 1.64687   | 2.89103   | 2.13478   | 2.69676   | 0.92166   | 1.12735  |
| 1.63369   | 1.26206   | 1.46994   | 1.63355   | 1.91214   | 1.68819  |
| 1.46444   | 1.66477   | 1.08104   | 0.85334   | 1.33299   | 0.785603 |
| 60.4432   | 60.7016   | 62.1963   | 43.1878   | 45.6622   | 35.6131  |
| 7.45975   | 6.16747   | 10.4323   | 12.9269   | 7.19116   | 5.07403  |
| 39.527    | 36.3446   | 40.2608   | 34.2162   | 38.3788   | 34.3264  |
| 0         | 0         | 0         | 0         | 0         | 0        |
| 1.65931   | 1.77742   | 1.68104   | 1.54349   | 1.86698   | 1.36387  |
| 2.24374   | 2.72005   | 3.32677   | 1.42619   | 2.18236   | 1.36037  |
| 1.32928   | 1.76008   | 1.46536   | 1.51442   | 1.25986   | 1.04769  |
| 6.20833   | 5.68419   | 7.59102   | 5.03614   | 8.17338   | 4.53296  |
| 0.402033  | 0.320551  | 0.949884  | 0.249699  | 1.1878    | 0.753763 |
| 2.1107    | 2.62437   | 3.19596   | 3.02386   | 2.97723   | 1.23169  |
| 116.692   | 133.693   | 104.27    | 106.358   | 83.8931   | 110.041  |
| 2.8904    | 3.68828   | 4.77758   | 5.09833   | 4.37292   | 3.23093  |
| 0.181274  | 0         | 0.228379  | 0         | 0.523607  | 0.1524   |
| 0.713304  | 0.384397  | 0.607202  | 0.395346  | 0.542934  | 0.372776 |
| 0         | 0         | 0         | 0         | 0         | 0        |
| 10.2003   | 7.06903   | 13.0274   | 7.92105   | 13.0972   | 8.2281   |
| 36.4771   | 41.5998   | 29.0551   | 39.6916   | 30.108    | 34.4811  |

|           |           |          |           |           |           |
|-----------|-----------|----------|-----------|-----------|-----------|
| 0         | 0         | 0.265077 | 0         | 0.0759681 | 0.0589628 |
| 0.673913  | 0.614875  | 0.803548 | 0.562123  | 0.560512  | 0.566567  |
| 25.4566   | 22.9097   | 31.2499  | 24.2789   | 17.959    | 19.3453   |
| 12.7484   | 13.8172   | 17.9273  | 16.9276   | 24.8461   | 29.3605   |
| 144.077   | 148.05    | 91.5364  | 104.041   | 65.4988   | 103.246   |
| 4.86571   | 4.31361   | 5.2055   | 4.16904   | 5.40647   | 6.77078   |
| 0.0579336 | 0         | 0        | 0         | 0.0627525 | 0.097411  |
| 4.28266   | 3.69363   | 4.0631   | 3.45112   | 2.55988   | 3.02968   |
| 44.6449   | 144.243   | 22.1339  | 280.994   | 70.6186   | 13.2062   |
| 16.7712   | 15.2798   | 15.8261  | 15.1881   | 16.8083   | 13.38     |
| 3170.87   | 3641.39   | 3311.52  | 3273.97   | 3193.05   | 3770.22   |
| 6.07112   | 5.36124   | 5.11051  | 4.57923   | 7.50017   | 5.0937    |
| 0.212521  | 0.0529687 | 0.214197 | 0.193697  | 0.368318  | 0.357338  |
| 1.0901    | 0.813279  | 1.20904  | 1.41852   | 1.41401   | 1.11837   |
| 6.00894   | 5.39655   | 6.21982  | 6.28344   | 5.59205   | 6.26136   |
| 0.0972827 | 0.0871589 | 0.139387 | 0.0925706 | 0.112367  | 0.0702688 |
| 0         | 0         | 0        | 0         | 0         | 0         |
| 1.29383   | 0.403091  | 1.73191  | 0.557369  | 0.175181  | 0.475884  |
| 0.215591  | 0.134334  | 0        | 0         | 0.116762  | 0.0906248 |
| 35.6788   | 36.6005   | 35.5398  | 42.3832   | 29.5348   | 34.0194   |
| 4.85909   | 4.67452   | 4.85809  | 4.38574   | 3.22193   | 3.6978    |
| 0         | 0.0458922 | 0.167007 | 0         | 0.143587  | 0.0309598 |
| 0.0100939 | 0         | 0        | 0         | 0         | 0         |
| 3.71561   | 2.94335   | 2.92117  | 2.8549    | 2.30873   | 1.92511   |
| 164.617   | 175.794   | 112.691  | 113.413   | 93.3043   | 93.0944   |
| 72.17     | 65.4038   | 73.883   | 58.0858   | 76.4866   | 57.9493   |
| 50.0918   | 55.8241   | 47.5737  | 50.2056   | 29.1264   | 37.7528   |
| 5.97975   | 5.6099    | 5.89709  | 6.17474   | 9.19416   | 10.3746   |
| 0         | 0         | 0        | 0         | 0         | 0         |
| 5.68428   | 6.09395   | 5.27782  | 5.37596   | 7.068     | 7.30573   |
| 0         | 0         | 0        | 0         | 0         | 0         |
| 0         | 0         | 0        | 0         | 0         | 0         |
| 2.51895   | 3.07699   | 2.94436  | 3.23742   | 8.1183    | 6.9491    |
| 0         | 0         | 0        | 0         | 0         | 0         |
| 1.73808   | 1.66712   | 2.34791  | 1.18747   | 1.90368   | 2.13478   |
| 2.96511   | 2.89024   | 2.81095  | 2.8095    | 3.11634   | 2.4928    |
| 18.2999   | 18.1362   | 16.2157  | 17.1319   | 15.6809   | 16.8634   |
| 5.2848    | 5.7168    | 5.46704  | 5.31462   | 5.69083   | 4.41694   |
| 18.9868   | 19.7226   | 18.5175  | 19.3485   | 17.3294   | 18.8396   |
| 0         | 0         | 0        | 0         | 0         | 0         |
| 4.20051   | 4.40188   | 2.23708  | 1.7402    | 1.57178   | 1.76571   |
| 0.0271444 | 0         | 0.205188 | 0.0618503 | 0.0294023 | 0.0912825 |
| 10.7207   | 13.4333   | 10.6953  | 10.6362   | 7.32187   | 6.94306   |

|           |           |           |           |           |           |
|-----------|-----------|-----------|-----------|-----------|-----------|
| 0         | 0.47318   | 0.478365  | 0.216292  | 0.411281  | 0.319217  |
| 3.71221   | 3.61884   | 3.35677   | 3.4789    | 4.05342   | 3.14607   |
| 0         | 0         | 0         | 0         | 0         | 0         |
| 1.08818   | 1.17417   | 1.40438   | 0.86177   | 1.96927   | 1.23838   |
| 7.43837   | 6.60596   | 7.58295   | 6.04423   | 9.26006   | 7.70905   |
| 7.92426   | 6.82389   | 7.92442   | 6.50342   | 7.22573   | 6.97296   |
| 0.0975017 | 0.0486026 | 0.0982703 | 0.177731  | 0.147857  | 0.0819709 |
| 754.814   | 708.479   | 483.409   | 577.377   | 502.728   | 702.76    |
| 0.942013  | 0.503115  | 1.27157   | 0.459951  | 0.947486  | 0.282844  |
| 0.779601  | 0.686459  | 0.578828  | 0.626379  | 1.39004   | 1.07888   |
| 0.383222  | 0.411566  | 0.27943   | 0.251389  | 0.41892   | 0.27693   |
| 478.311   | 489.977   | 469.352   | 533.065   | 403.267   | 508.831   |
| 7.56838   | 7.33318   | 7.9731    | 6.83053   | 9.88155   | 6.79839   |
| 99.4196   | 98.3527   | 104.477   | 105.461   | 101.827   | 93.1605   |
| 0.29787   | 0.895138  | 0.265942  | 0.339205  | 1.18607   | 0.660339  |
| 3.94363   | 3.77007   | 3.2669    | 4.06209   | 5.67605   | 4.58714   |
| 24.761    | 25.9796   | 24.1682   | 25.7815   | 21.1076   | 23.015    |
| 1.14915   | 0.824525  | 0.438716  | 0.39673   | 0.490351  | 0.468415  |
| 12.5853   | 12.2868   | 16.6856   | 13.0512   | 20.174    | 15.1554   |
| 47.8708   | 44.6301   | 52.2782   | 41.7485   | 42.7852   | 49.2874   |
| 5.83338   | 7.80265   | 2.98868   | 4.65211   | 2.69594   | 3.23677   |
| 5.70751   | 6.98158   | 5.30182   | 4.94429   | 5.24207   | 5.97029   |
| 0.0360424 | 0         | 0         | 0.0410624 | 0.142521  | 0.110618  |
| 0.611961  | 0.672904  | 0.634926  | 0.656185  | 0.584879  | 0.605274  |
| 7.29057   | 7.17969   | 8.22006   | 6.27785   | 7.47559   | 6.00662   |
| 0         | 0         | 0         | 0         | 0.0256763 | 0         |
| 46.733    | 48.7652   | 54.6454   | 45.895    | 40.308    | 40.2601   |
| 0.0892089 | 0.185287  | 0.187317  | 0.0338781 | 0.0322098 | 0.274996  |
| 7.58807   | 7.4307    | 6.34909   | 6.75871   | 6.03246   | 7.46851   |
| 19.2166   | 13.869    | 29.087    | 19.1368   | 23.7352   | 26.7324   |
| 2.21192   | 2.25068   | 2.85708   | 2.15898   | 2.57366   | 2.00326   |
| 0         | 0         | 0         | 0         | 0         | 0         |
| 0.037515  | 0.350634  | 0.118159  | 1.17536   | 0.142224  | 0.630787  |
| 0         | 0         | 0         | 0.0816659 | 0         | 0.0301319 |
| 10.3415   | 10.8352   | 12.3619   | 12.4705   | 9.51504   | 9.80514   |
| 0         | 0         | 0         | 0         | 0         | 0         |
| 50.9481   | 38.1228   | 48.2374   | 45.024    | 70.7383   | 65.3354   |
| 45.6194   | 53.8993   | 38.7916   | 47.3979   | 42.6099   | 44.0668   |
| 78.4809   | 83.8039   | 80.7616   | 85.341    | 72.5546   | 84.8716   |
| 12.1363   | 11.8158   | 12.1291   | 10.8353   | 12.103    | 9.89247   |
| 0         | 0         | 0         | 0         | 0         | 0         |
| 39.8576   | 40.9418   | 33.1964   | 40.0892   | 35.0442   | 44.4447   |
| 4.69432   | 3.49527   | 5.2125    | 3.94319   | 4.97709   | 3.96329   |



|           |           |           |           |           |           |
|-----------|-----------|-----------|-----------|-----------|-----------|
| 426.961   | 446.424   | 503.397   | 463.448   | 446.493   | 445.941   |
| 10.1255   | 7.66124   | 13.0669   | 8.02997   | 12.8816   | 16.5272   |
| 1.50155   | 1.22037   | 1.15149   | 0.743778  | 1.2493    | 1.5551    |
| 0         | 0         | 0         | 0         | 0         | 0         |
| 1.07832   | 0.993664  | 0.843472  | 0.987846  | 1.01583   | 0.985309  |
| 0         | 0         | 0         | 0         | 0         | 0         |
| 0.213308  | 0.318989  | 0.752464  | 0.243018  | 0.0462102 | 0         |
| 28.6639   | 24.6803   | 27.4554   | 25.3505   | 27.298    | 26.6781   |
| 4.06E-207 | 0.064752  | 0         | 0         | 0.0272549 | 0         |
| 8.48651   | 8.29443   | 8.67852   | 8.13076   | 7.14219   | 6.5608    |
| 0.124253  | 0.0819764 | 0.478832  | 0.283119  | 0.625442  | 0.301094  |
| 1.0163    | 1.38714   | 1.03651   | 1.16076   | 1.3128    | 1.13922   |
| 0         | 0         | 0         | 0         | 0         | 0         |
| 0         | 0         | 0         | 0         | 0         | 0         |
| 275.292   | 290.02    | 306.325   | 333.394   | 352.246   | 277.315   |
| 0.0403039 | 1.35612   | 0.101554  | 5.69378   | 0.0873127 | 0.440492  |
| 2.30862   | 2.63725   | 0.484754  | 3.06853   | 1.6671    | 1.6174    |
| 8.59815   | 7.04984   | 10.4543   | 8.80419   | 11.6539   | 6.96365   |
| 0         | 0         | 0         | 0         | 0         | 0         |
| 4.74224   | 6.24428   | 5.63635   | 6.50375   | 5.54375   | 5.46124   |
| 0.0267288 | 0.0666189 | 0.0336744 | 0.0304517 | 0.231617  | 0.0674137 |
| 0         | 0         | 0         | 0         | 0         | 0         |
| 6.11354   | 7.3946    | 9.36342   | 11.6767   | 9.28398   | 8.44023   |
| 0.0770109 | 0         | 0.0485112 | 0.131606  | 0.166833  | 0.016186  |
| 0.28313   | 0.352836  | 1.42681   | 0         | 1.5334    | 0.238031  |
| 8.06575   | 8.48552   | 8.64922   | 8.15832   | 10.0315   | 10.2456   |
| 11.7665   | 12.2756   | 17.4853   | 11.7643   | 17.2969   | 38.266    |
| 0.175156  | 0.124731  | 0.472867  | 0.313583  | 0.271037  | 0.0841463 |
| 0         | 0         | 0         | 0         | 0         | 0         |
| 135.619   | 147.304   | 112.912   | 138.398   | 78.8713   | 124.434   |
| 20.3403   | 20.9559   | 22.674    | 20.8447   | 23.3825   | 20.05     |
| 2.62873   | 2.8182    | 1.6635    | 1.3359    | 2.80871   | 2.58353   |
| 52.661    | 50.8358   | 54.7659   | 55.0219   | 53.907    | 64.5793   |
| 2.06153   | 2.60645   | 2.267     | 2.19786   | 3.38127   | 2.55331   |
| 0         | 0         | 0         | 0         | 0         | 0         |
| 4.09723   | 4.63966   | 6.38757   | 5.28602   | 7.27513   | 5.39495   |
| 4.86226   | 6.47879   | 4.03743   | 4.47435   | 5.48633   | 5.9937    |
| 0.0163466 | 0.0814845 | 0.0411887 | 0.0372468 | 0.0177063 | 0         |
| 0         | 0         | 0         | 0         | 3.13271   | 0         |
| 0.0468221 | 0         | 0.0589891 | 0.106687  | 0.202867  | 0.157456  |
| 12.0387   | 12.0662   | 11.4648   | 10.815    | 11.6612   | 11.4644   |
| 0         | 0         | 0         | 0         | 0         | 0         |
| 0         | 0.217085  | 0         | 0         | 0.0943438 | 0.0732251 |

|           |           |           |           |           |           |
|-----------|-----------|-----------|-----------|-----------|-----------|
| 4.17074   | 4.13477   | 4.88656   | 5.05779   | 3.72043   | 3.94838   |
| 9.76136   | 19.9831   | 11.1324   | 13.2864   | 12.851    | 25.2408   |
| 13.4669   | 12.975    | 14.1414   | 12.1434   | 19.8411   | 19.5247   |
| 5.30899   | 5.03486   | 5.17416   | 6.2006    | 8.96947   | 7.04589   |
| 11.2759   | 11.8236   | 14.4667   | 13.3852   | 13.7453   | 12.5486   |
| 11.0022   | 14.4326   | 14.8825   | 15.4374   | 9.28301   | 11.3917   |
| 0         | 0         | 0         | 0         | 0         | 0         |
| 1.96932   | 0.838008  | 1.27079   | 1.42278   | 2.13313   | 2.18059   |
| 0.694877  | 0.865954  | 0.583629  | 0.791661  | 1.00357   | 0.681556  |
| 0.404918  | 0.243964  | 0.638389  | 0.158799  | 0.345532  | 0.29637   |
| 6.93995   | 6.64295   | 6.48546   | 5.97793   | 8.54835   | 6.65868   |
| 0         | 0.0768545 | 0.0194228 | 0.017564  | 0         | 0         |
| 42.7336   | 44.8235   | 65.1019   | 56.2958   | 64.3728   | 56.0173   |
| 3.46123   | 3.84283   | 5.54992   | 3.89553   | 6.65756   | 16.2778   |
| 13.9759   | 13.0998   | 15.5864   | 13.2584   | 17.7154   | 13.8139   |
| 0.512127  | 0.322264  | 0.842295  | 1.32727   | 0.670328  | 0.922672  |
| 1.67452   | 1.2331    | 1.4247    | 0.941488  | 2.1004    | 1.15183   |
| 0         | 0         | 0         | 0.150147  | 0         | 0         |
| 2.76115   | 4.31944   | 2.5292    | 1.70408   | 2.42493   | 1.54055   |
| 0         | 0         | 0         | 0         | 0         | 0         |
| 0.864609  | 1.17369   | 1.9365    | 2.05216   | 0.674299  | 1.40725   |
| 0.383737  | 0.159404  | 0.107434  | 0.218592  | 0.323288  | 0.161306  |
| 14.5267   | 14.154    | 11.5211   | 11.9762   | 7.12697   | 8.28111   |
| 0         | 0         | 0         | 0         | 0         | 0         |
| 33.1248   | 29.6071   | 30.0321   | 31.5415   | 28.9634   | 29.371    |
| 0         | 0         | 0         | 0         | 0         | 0         |
| 2.43055   | 1.81726   | 2.92595   | 2.36281   | 3.76769   | 2.27045   |
| 17.5096   | 17.737    | 19.442    | 16.8234   | 19.8116   | 17.7026   |
| 30.6058   | 29.2778   | 28.3589   | 27.201    | 28.2941   | 33.6111   |
| 1373.17   | 1739.99   | 1357.16   | 1432.61   | 1290.35   | 1598.02   |
| 30.8115   | 37.42     | 30.6679   | 36.0676   | 36.4019   | 38.7976   |
| 0         | 0         | 0         | 0         | 0         | 0         |
| 0         | 0         | 0         | 0.0561261 | 0         | 0         |
| 18.7967   | 21.0611   | 23.6452   | 23.4339   | 17.0155   | 20.9576   |
| 0         | 0         | 0         | 0         | 0         | 0         |
| 9.84298   | 10.1194   | 10.5611   | 9.01184   | 8.72736   | 9.1141    |
| 24.7095   | 23.4148   | 25.9522   | 23.9145   | 33.4428   | 28.7128   |
| 0.0913599 | 0.170779  | 0.143875  | 0.104085  | 0.0494796 | 0.0192019 |
| 23.4259   | 26.1333   | 23.6649   | 26.0966   | 21.2587   | 26.7164   |
| 32.0083   | 34.5967   | 24.7182   | 32.2018   | 30.9973   | 32.9431   |
| 29.2775   | 28.036    | 34.4217   | 27.9418   | 38.5225   | 36.8901   |
| 1.89878   | 2.42315   | 2.62257   | 2.6323    | 5.02883   | 2.29815   |
| 5.33097   | 6.38943   | 7.62491   | 6.34143   | 6.30088   | 6.31408   |

|           |           |           |           |           |           |
|-----------|-----------|-----------|-----------|-----------|-----------|
| 4.16576   | 16.9489   | 16.8863   | 15.8092   | 9.26323   | 11.2131   |
| 0.977917  | 1.03597   | 0.873371  | 1.0323    | 1.56816   | 0.874173  |
| 13.5003   | 12.275    | 13.978    | 10.0596   | 10.5483   | 8.49163   |
| 28.4371   | 26.8892   | 31.3001   | 33.1411   | 29.7532   | 24.6799   |
| 0         | 0         | 0         | 0         | 0         | 0         |
| 26.8446   | 23.9295   | 24.5753   | 21.7295   | 20.2402   | 19.575    |
| 12.3027   | 11.9376   | 9.82037   | 12.3044   | 9.1553    | 10.1062   |
| 0         | 0         | 0         | 0         | 0         | 0         |
| 1.1301    | 1.38732   | 2.40485   | 1.70551   | 3.13469   | 2.01803   |
| 61.9756   | 30.6423   | 91.2225   | 68.0611   | 152.35    | 117.62    |
| 29.9943   | 25.8926   | 18.3778   | 22.2235   | 18.2428   | 20.0469   |
| 1.31787   | 1.84762   | 1.7641    | 0.563036  | 2.14124   | 1.03871   |
| 0.109433  | 0         | 0         | 0         | 0         | 0         |
| 65.3221   | 61.72     | 59.8022   | 57.4743   | 48.6866   | 53.4365   |
| 0         | 0         | 0         | 0         | 0         | 0         |
| 0.0400796 | 0         | 0         | 0         | 0         | 0         |
| 18.4199   | 17.8946   | 11.3614   | 7.57842   | 10.1414   | 8.55888   |
| 11.4857   | 9.78435   | 8.88186   | 9.96847   | 9.86524   | 8.67543   |
| 8.23891   | 8.5108    | 11.6271   | 13.0569   | 11.2325   | 7.8153    |
| 2.87187   | 3.62794   | 2.67643   | 3.00295   | 2.72723   | 3.20819   |
| 0.327946  | 0.631605  | 0.751207  | 0.203794  | 0.290638  | 0.40103   |
| 0         | 0         | 0         | 0         | 0         | 0         |
| 9.2553    | 8.48851   | 8.7954    | 8.5839    | 8.35241   | 9.14036   |
| 1.33144   | 1.2007    | 2.02232   | 1.96919   | 2.93058   | 3.04552   |
| 0         | 0         | 0         | 0         | 0         | 0         |
| 10.3928   | 10.0397   | 11.3507   | 9.92369   | 11.1357   | 9.18518   |
| 0.530691  | 0.509571  | 0.554209  | 0.465853  | 0.543755  | 0.474322  |
| 0         | 0         | 0.0178407 | 0.0161333 | 0         | 0.0357157 |
| 0         | 0         | 0         | 0         | 0         | 0         |
| 0.323907  | 0.58767   | 0.439012  | 0.537252  | 0.590962  | 0.355015  |
| 4.69681   | 4.90633   | 4.56851   | 3.5411    | 4.22711   | 3.58574   |
| 2.42813   | 2.50931   | 2.95961   | 3.46353   | 2.6301    | 2.83798   |
| 132.992   | 127.868   | 158.89    | 174.575   | 147.183   | 158.044   |
| 0.10988   | 0         | 0.0307625 | 0.0278184 | 0         | 0.0205281 |
| 0.0676122 | 0.0134789 | 0.12461   | 0.0554596 | 0.0732362 | 0.0568424 |
| 191.761   | 177.38    | 211.471   | 166.967   | 208.623   | 166.871   |
| 3.47687   | 2.27585   | 5.35386   | 3.92113   | 5.09752   | 1.50581   |
| 8.17428   | 7.78156   | 10.5656   | 9.52508   | 11.0948   | 10.704    |
| 0         | 0         | 0         | 0.30507   | 0.580094  | 0         |
| 3.57018   | 3.0479    | 3.62094   | 3.33798   | 4.70884   | 3.85552   |
| 2.27493   | 2.16795   | 2.82393   | 2.84906   | 2.51851   | 1.73677   |
| 0         | 0         | 0.378377  | 0.229215  | 0.0810474 | 0         |
| 1.11664   | 0.9909    | 1.17227   | 1.02153   | 1.2461    | 1.35119   |

|           |           |          |           |           |           |
|-----------|-----------|----------|-----------|-----------|-----------|
| 0.0946591 | 0.202224  | 1.07331  | 0.415968  | 1.37687   | 0.829916  |
| 18.546    | 21.0121   | 21.2294  | 17.9295   | 18.551    | 15.1196   |
| 9.45126   | 8.6448    | 9.414    | 7.73901   | 11.7084   | 9.01885   |
| 0.481733  | 0.164296  | 0.625305 | 0.746095  | 0.947171  | 0.497249  |
| 20.1808   | 18.5898   | 18.5954  | 16.4226   | 20.0047   | 16.7459   |
| 0.545603  | 0.649028  | 0.969921 | 0.932492  | 2.46867   | 0.977161  |
| 22.4737   | 21.8198   | 23.7622  | 21.6901   | 27.656    | 20.7013   |
| 3.25984   | 4.13305   | 3.39267  | 3.29404   | 3.96085   | 3.95597   |
| 6.01512   | 3.48581   | 5.98769  | 3.32775   | 6.86401   | 3.10078   |
| 0         | 0         | 0        | 0.0550313 | 0         | 0         |
| 0.147994  | 0.110658  | 0.261031 | 0.0337214 | 0.224426  | 0.12442   |
| 0.0566371 | 0.0352905 | 0        | 0         | 0.0613481 | 0         |
| 6.1783    | 6.35749   | 8.02224  | 6.64504   | 7.37584   | 6.42421   |
| 13.9297   | 14.5172   | 17.0447  | 13.7281   | 14.4207   | 12.7213   |
| 1.97059   | 1.31835   | 2.01226  | 1.11071   | 2.40412   | 1.43005   |
| 14.7991   | 13.6727   | 13.8176  | 12.3854   | 15.7196   | 13.029    |
| 5.12993   | 5.77755   | 7.54589  | 6.2299    | 8.60734   | 6.4346    |
| 19.4781   | 19.8785   | 20.9449  | 19.5732   | 24.2353   | 21.3813   |
| 10.2449   | 7.71347   | 11.4617  | 12.2189   | 11.097    | 8.5457    |
| 20.6481   | 18.411    | 17.5852  | 14.185    | 17.9149   | 24.2854   |
| 42.6995   | 43.4339   | 47.6928  | 38.2822   | 42.4567   | 40.8417   |
| 0         | 0         | 0        | 0         | 0         | 0         |
| 11.4987   | 11.0792   | 10.5734  | 11.0734   | 11.0141   | 9.78285   |
| 0         | 0         | 0        | 0         | 0         | 0.0271279 |
| 52.611    | 52.2573   | 44.7748  | 49.7347   | 50.0257   | 55.2723   |
| 0         | 0         | 0        | 0         | 0         | 0         |
| 0         | 0         | 0        | 0         | 0         | 0         |
| 0         | 0         | 0        | 0         | 0         | 0         |
| 40.7013   | 38.622    | 31.7788  | 32.5266   | 21.9316   | 28.8482   |
| 0.327297  | 0.186721  | 0.186721 | 0.201626  | 0.341652  | 0.305421  |
| 59.3615   | 57.9769   | 66.8728  | 67.2955   | 48.08     | 58.5      |
| 498.481   | 695.943   | 636.38   | 659.802   | 587.817   | 598.438   |
| 3.9286    | 3.51609   | 4.27454  | 3.32293   | 5.22251   | 3.90333   |
| 27.5742   | 27.6655   | 22.655   | 29.2938   | 23.3576   | 23.8605   |
| 12.7144   | 13.2589   | 12.6716  | 12.7546   | 11.3573   | 13.3457   |
| 15.5317   | 15.9791   | 16.0748  | 15.0389   | 15.4586   | 14.5806   |
| 0.233493  | 0.145489  | 0.294167 | 0.221679  | 0.126457  | 0.130867  |
| 168.945   | 182.399   | 189.64   | 175.56    | 169.126   | 166.434   |
| 107.351   | 80.3251   | 127.588  | 93.4194   | 102.599   | 80.2088   |
| 1.26421   | 0.8804    | 1.31165  | 1.44029   | 1.93322   | 1.00031   |
| 13.5341   | 13.5532   | 13.7571  | 11.2766   | 12.7679   | 12.0618   |
| 1.93529   | 1.09625   | 1.55157  | 1.20264   | 1.52456   | 1.03538   |
| 0.543428  | 0.334981  | 1.43318  | 1.7644    | 1.72991   | 1.45304   |

|           |          |          |          |          |           |
|-----------|----------|----------|----------|----------|-----------|
| 0.298059  | 0.457878 | 0.957681 | 0.550955 | 0.975434 | 0.537633  |
| 4835.39   | 5694.72  | 5504.52  | 5933.52  | 5420.75  | 6777.9    |
| 0         | 0        | 0        | 0        | 0        | 0         |
| 0.614604  | 0.52822  | 0.854412 | 0.531192 | 1.07894  | 0.374166  |
| 0         | 0        | 0        | 0        | 0        | 0         |
| 9.04446   | 10.2465  | 9.6189   | 11.0179  | 8.99098  | 12.2451   |
| 16.7677   | 16.8346  | 15.7123  | 17.4623  | 15.6497  | 14.1809   |
| 0         | 0        | 0        | 0        | 0        | 0         |
| 15.9809   | 17.2528  | 16.5303  | 17.9272  | 16.4267  | 15.5408   |
| 0         | 0        | 0        | 0        | 0        | 0         |
| 1.77224   | 1.92227  | 2.10872  | 1.30866  | 1.42197  | 1.13125   |
| 119.088   | 154.075  | 120.151  | 141.255  | 93.9792  | 107.766   |
| 0.136837  | 0.475749 | 0.294002 | 0.203707 | 0.379819 | 0.397671  |
| 9.45038   | 8.91882  | 10.6804  | 7.76115  | 9.83261  | 8.57581   |
| 0.0309837 | 0        | 0        | 0        | 0        | 0.0260483 |
| 44.4724   | 43.3556  | 44.436   | 37.8254  | 49.0809  | 43.4502   |
| 0         | 0        | 0        | 0        | 0        | 0         |
| 1.02887   | 1.00836  | 1.13377  | 0.953988 | 2.07764  | 1.29622   |
| 40.2213   | 42.7597  | 34.6682  | 39.0678  | 30.7432  | 35.3637   |
| 19.8969   | 20.2043  | 21.6475  | 21.3895  | 15.5594  | 17.7993   |
| 0.210398  | 0.203931 | 0.26507  | 0.399504 | 0.379831 | 0.393075  |
| 1.77113   | 1.3465   | 2.72579  | 2.95302  | 2.35306  | 2.16017   |
| 0.560729  | 0.908414 | 1.76609  | 0.894361 | 0.668108 | 0.612835  |
| 0.784474  | 0.859299 | 0.983793 | 1.13672  | 0.676913 | 0.507073  |
| 0.645408  | 0.609542 | 1.12447  | 1.1235   | 0.602196 | 0.458093  |
| 2.55872   | 2.32395  | 2.78651  | 2.66806  | 2.34877  | 2.36991   |
| 26.4906   | 25.6585  | 33.286   | 32.8896  | 30.1662  | 27.876    |
| 1.70103   | 1.22869  | 1.37467  | 1.39809  | 2.61796  | 1.89269   |
| 0         | 0        | 0        | 0        | 0        | 0         |
| 0.0759436 | 0.147878 | 0.127572 | 0.115363 | 0.148071 | 0.130355  |
| 0         | 0        | 0        | 0        | 0        | 0         |
| 0         | 0        | 0        | 0        | 0        | 0         |
| 627.045   | 352.697  | 206.081  | 126.192  | 251.794  | 117.036   |
| 6.48359   | 6.23042  | 5.99219  | 5.97999  | 6.27185  | 6.38146   |
| 8.34134   | 7.45248  | 11.5468  | 7.93605  | 10.0709  | 7.23529   |
| 24.8217   | 22.2788  | 25.1439  | 21.9039  | 24.4464  | 21.8784   |
| 71.5503   | 70.4384  | 73.4336  | 66.0328  | 66.0397  | 61.0715   |
| 0.347412  | 0.498752 | 0.986259 | 0.641198 | 0.728537 | 0.427262  |
| 0         | 0        | 0        | 0        | 0        | 0         |
| 0         | 0        | 0        | 0        | 0        | 0.0217449 |
| 0.372711  | 0.98468  | 0.262954 | 0.169849 | 0.11304  | 0.188005  |
| 8.12979   | 9.39222  | 8.06108  | 7.56686  | 9.95512  | 8.21211   |
| 0         | 0        | 0        | 0        | 0        | 0         |

|           |           |           |           |           |           |
|-----------|-----------|-----------|-----------|-----------|-----------|
| 42.9596   | 39.8962   | 45.9383   | 45.2137   | 41.9604   | 40.3138   |
| 6.86236   | 6.47517   | 9.41494   | 6.66255   | 8.9299    | 7.55313   |
| 29.2761   | 29.8824   | 34.5827   | 31.2125   | 31.9128   | 27.4297   |
| 13.3232   | 14.8184   | 13.9699   | 16.0973   | 12.5541   | 13.2265   |
| 0         | 0         | 0         | 0         | 0         | 0         |
| 0.427898  | 0.473996  | 0.59043   | 0.371426  | 0.272208  | 0.239826  |
| 51.9881   | 53.9176   | 51.1532   | 53.7432   | 43.0286   | 49.727    |
| 0.240417  | 0.171204  | 0.0865401 | 0.117387  | 0.0372021 | 0.144373  |
| 14.0561   | 11.1769   | 10.7324   | 12.4516   | 10.3995   | 11.1233   |
| 0.278472  | 0.377209  | 0.488118  | 0.275877  | 0.65573   | 0.407157  |
| 2.9903    | 3.2125    | 3.05284   | 3.40679   | 2.90396   | 2.68736   |
| 6.68107   | 7.38927   | 9.39041   | 8.80095   | 8.8877    | 8.67102   |
| 15.6058   | 13.7642   | 14.2611   | 13.3345   | 17.0824   | 16.3075   |
| 0.112226  | 0.069928  | 0.388818  | 0.0639286 | 0.0911707 | 0.0235874 |
| 1.14299   | 0.979271  | 0.840001  | 1.0309    | 0.928548  | 1.041     |
| 1084.7    | 977.075   | 939.872   | 756.757   | 1089.54   | 1160.65   |
| 1.62617   | 1.5199    | 1.44617   | 1.24419   | 2.33131   | 1.51458   |
| 0.0467083 | 0         | 0         | 0         | 0         | 0         |
| 2.72581   | 3.1809    | 3.33755   | 2.69481   | 3.48015   | 2.10031   |
| 22.8593   | 24.9671   | 17.6465   | 17.5169   | 16.0866   | 16.8189   |
| 29.297    | 33.207    | 29.3633   | 32.362    | 31.1289   | 31.4749   |
| 5.71142   | 3.89017   | 4.16229   | 4.22933   | 5.69684   | 4.15973   |
| 0         | 0         | 0         | 0         | 0         | 0         |
| 0         | 0         | 0         | 0         | 0         | 0         |
| 0.238144  | 0.205113  | 0.0859584 | 0.472963  | 0.176378  | 0.213199  |
| 3.3058    | 4.73898   | 3.59318   | 4.18471   | 2.41059   | 2.65207   |
| 0.198506  | 0.247378  | 0.250088  | 0.339231  | 1.07509   | 0.834431  |
| 0.0214033 | 0.0800678 | 0.188968  | 0.0487994 | 0.0927388 | 0.0539644 |
| 9.53996   | 9.4625    | 9.68115   | 7.72189   | 8.17936   | 8.92801   |
| 25.8565   | 28.1567   | 20.4747   | 22.112    | 16.62     | 19.5156   |
| 5.8881    | 5.94475   | 5.65287   | 6.29569   | 6.82125   | 6.30025   |
| 66.5488   | 68.943    | 78.054    | 66.2697   | 82.2247   | 74.6873   |
| 3.3034    | 2.9059    | 3.18256   | 2.14003   | 4.56042   | 3.32176   |
| 2.57593   | 3.64105   | 2.25655   | 3.41999   | 2.97863   | 2.95733   |
| 0.981689  | 1.43123   | 2.03198   | 1.43618   | 1.96638   | 1.49491   |
| 0         | 0         | 0         | 0         | 0         | 0.0366126 |
| 5.6907    | 6.46792   | 7.26882   | 4.28332   | 6.36673   | 6.74036   |
| 9.70784   | 12.1156   | 10.0964   | 15.5845   | 7.2158    | 9.40606   |
| 0.0575287 | 0         | 0.0724778 | 0.131083  | 0.0623139 | 0.0483651 |
| 9.2633    | 8.18481   | 10.8882   | 10.2855   | 10.081    | 7.76767   |
| 34.3459   | 42.0394   | 37.105    | 41.6188   | 36.6821   | 36.6631   |
| 0         | 0         | 0         | 0         | 0         | 0         |
| 6.48189   | 6.02258   | 7.72141   | 5.81491   | 8.3197    | 6.1568    |

|           |          |           |           |           |           |
|-----------|----------|-----------|-----------|-----------|-----------|
| 11.7548   | 10.9136  | 11.4055   | 9.36876   | 9.74492   | 9.56513   |
| 5.22961   | 8.09242  | 6.69242   | 6.8318    | 4.22178   | 5.09187   |
| 6.1445    | 4.84637  | 6.17334   | 6.0699    | 4.80214   | 4.80611   |
| 28.4665   | 28.5187  | 31.9278   | 40.7656   | 34.0496   | 36.2388   |
| 0.576499  | 0.299347 | 0.0605254 | 0         | 0.0260188 | 0.0201946 |
| 31.1094   | 34.9624  | 32.8997   | 34.822    | 31.825    | 36.5241   |
| 3.85226   | 3.79589  | 4.46954   | 3.30692   | 4.89078   | 3.43447   |
| 0         | 0        | 0         | 0         | 0         | 0         |
| 2.6516    | 2.34507  | 4.76848   | 3.98323   | 11.2107   | 6.01353   |
| 2.98825   | 2.05493  | 2.72715   | 1.5256    | 3.7984    | 1.55867   |
| 94.6666   | 113.04   | 74.5682   | 87.4469   | 61.3993   | 77.6084   |
| 7.58573   | 8.07126  | 6.11978   | 4.87708   | 5.98234   | 6.4893    |
| 0         | 0        | 0         | 0         | 0         | 0         |
| 15.762    | 14.9376  | 15.2813   | 16.9377   | 18.9898   | 19.7966   |
| 4.59151   | 4.97249  | 5.94098   | 4.99177   | 6.17284   | 5.14418   |
| 0         | 0        | 0         | 0         | 0         | 0         |
| 21.2381   | 19.7859  | 20.5656   | 18.4016   | 22.074    | 19.9642   |
| 0.181583  | 0.614404 | 0.326919  | 0.206925  | 0.140524  | 0.23993   |
| 0.598459  | 0.351847 | 0.501133  | 0.338819  | 0.652167  | 0.503298  |
| 0         | 0        | 0         | 0         | 0         | 0         |
| 0         | 0        | 0         | 0         | 0         | 0         |
| 16.7635   | 16.4758  | 18.6062   | 15.5501   | 20.8386   | 19.3252   |
| 0.389745  | 0.809499 | 0.81837   | 0.88806   | 0.844328  | 1.31065   |
| 2.35277   | 2.72259  | 2.11725   | 5.04184   | 1.51695   | 2.44896   |
| 6.91045   | 7.47483  | 7.44277   | 6.43558   | 9.00746   | 6.0486    |
| 1.67327   | 2.39234  | 3.0656    | 2.28858   | 1.98876   | 2.8296    |
| 4.90505   | 3.7236   | 6.61193   | 6.13457   | 3.57352   | 4.51782   |
| 0.267846  | 0.429343 | 0.308118  | 0.367555  | 0.462195  | 0.589948  |
| 9.39633   | 9.55084  | 10.9357   | 10.1757   | 11.8793   | 9.01248   |
| 0.18906   | 0.117803 | 0.119094  | 0.0538483 | 0.204786  | 0.178814  |
| 9.9879    | 9.24491  | 9.89373   | 9.09454   | 11.3885   | 10.634    |
| 58.6242   | 57.9909  | 59.5043   | 50.2576   | 51.0955   | 55.5807   |
| 117.765   | 126.133  | 140.958   | 121.317   | 141.508   | 121.057   |
| 7.49251   | 6.53359  | 4.8858    | 3.94856   | 2.67905   | 3.43644   |
| 2.90479   | 3.96768  | 5.51108   | 4.43579   | 5.41829   | 4.80917   |
| 0.0085052 | 0        | 0         | 0         | 0         | 0         |
| 0.536201  | 0.375103 | 0.871755  | 0.461741  | 1.48517   | 0.808746  |
| 3.31465   | 1.63136  | 1.32735   | 1.41339   | 0.660484  | 0.170879  |
| 0         | 0        | 0         | 0         | 0         | 0         |
| 36.3421   | 35.3653  | 40.4761   | 30.3856   | 38.7876   | 31.6712   |
| 0         | 0        | 0         | 0         | 0         | 0.0610435 |
| 14.9699   | 14.0138  | 16.3193   | 17.2171   | 18.4251   | 16.9135   |
| 2.31193   | 1.73884  | 1.85795   | 2.27046   | 3.02212   | 2.1447    |

|           |           |           |           |           |           |
|-----------|-----------|-----------|-----------|-----------|-----------|
| 0         | 0         | 0         | 0         | 0         | 0         |
| 65.0493   | 51.5722   | 41.6359   | 40.1804   | 37.4305   | 43.0318   |
| 0.100593  | 0.438757  | 0.190099  | 0.343812  | 0         | 0.211425  |
| 8.71719   | 9.02987   | 9.03614   | 10.0466   | 9.82077   | 7.60695   |
| 0.269899  | 0.240063  | 0.19203   | 0.175992  | 0.240662  | 0.242707  |
| 8.813     | 9.62406   | 9.84398   | 9.78173   | 10.9238   | 11.3048   |
| 0         | 0         | 0         | 0         | 0         | 0         |
| 0         | 0         | 0         | 0         | 0         | 0         |
| 0         | 0         | 0         | 0         | 0         | 0         |
| 0         | 0         | 0         | 0         | 0         | 0         |
| 6.71719   | 7.07838   | 6.84481   | 6.58364   | 8.45291   | 8.31867   |
| 0.381239  | 0.308173  | 0.376456  | 0.270128  | 0.424111  | 0.337837  |
| 5.98621   | 6.48956   | 7.42541   | 5.99475   | 9.9487    | 6.90177   |
| 4.42768   | 4.1139    | 4.662     | 4.3783    | 5.71501   | 3.89025   |
| 0         | 0         | 0         | 0         | 0         | 0         |
| 0         | 0.0507952 | 0         | 0         | 0.0441505 | 0.0685351 |
| 13.9296   | 14.0037   | 17.0596   | 11.2429   | 17.5897   | 13.0414   |
| 0         | 0         | 0         | 0         | 0         | 0         |
| 12.0491   | 12.1797   | 10.7638   | 11.5515   | 10.2756   | 10.5325   |
| 2.52079   | 2.47924   | 2.8489    | 1.91459   | 3.43985   | 2.58674   |
| 13.1575   | 5.08876   | 13.9398   | 7.20331   | 22.5432   | 11.7631   |
| 1.2147    | 1.72255   | 1.37203   | 2.00425   | 2.72222   | 2.85235   |
| 0         | 0         | 0.168235  | 0         | 0.12857   | 0.0997897 |
| 0.116557  | 0.0871515 | 0.117475  | 0.0265582 | 0.101001  | 0.0979905 |
| 82.2943   | 84.6959   | 73.6164   | 73.655    | 72.2593   | 74.4017   |
| 7.32514   | 4.50841   | 6.67366   | 5.23604   | 6.98733   | 5.24992   |
| 0         | 0         | 0         | 0         | 0.0425472 | 0         |
| 0.0335402 | 0.0208989 | 0.0422558 | 0.0382118 | 0.018165  | 0.0140988 |
| 32.8686   | 38.0166   | 33.7208   | 36.0774   | 31.9466   | 33.6886   |
| 7.47642   | 7.18754   | 7.97429   | 6.32269   | 7.32789   | 5.82362   |
| 60.189    | 60.3823   | 54.8185   | 54.7327   | 47.131    | 48.7552   |
| 0.282949  | 0.176305  | 0.200517  | 0.161179  | 0.312869  | 0.178409  |
| 0         | 0         | 0         | 0.132539  | 0.126012  | 0         |
| 2.60778   | 2.38246   | 3.95139   | 2.79033   | 4.84778   | 5.14027   |
| 1.96564   | 1.85932   | 1.32772   | 1.36254   | 1.73153   | 1.25434   |
| 5.18218   | 4.80689   | 5.89558   | 5.83598   | 6.84861   | 5.96126   |
| 0.0688137 | 0.0428777 | 0         | 0         | 0.0372688 | 0         |
| 2.8775    | 4.07763   | 5.20638   | 5.45208   | 4.16562   | 5.25622   |
| 12.4636   | 10.5361   | 10.5516   | 7.64244   | 17.5848   | 14.416    |
| 0         | 0         | 0         | 0         | 0         | 0         |
| 19.4861   | 19.8414   | 20.924    | 19.3103   | 22.9566   | 23.0466   |
| 1.57408   | 1.16471   | 1.70424   | 1.40104   | 2.15791   | 1.17861   |
| 0         | 0.187346  | 0         | 0.0856365 | 0.0814194 | 0.126388  |



|           |            |            |           |           |           |
|-----------|------------|------------|-----------|-----------|-----------|
| 0         | 0          | 0          | 0         | 0         | 0         |
| 0         | 0          | 0          | 0         | 0         | 0         |
| 31.4028   | 21.0501    | 32.2807    | 30.4641   | 29.0429   | 31.6686   |
| 2.26704   | 2.9059     | 2.20331    | 2.43521   | 4.0693    | 2.28711   |
| 0.0178178 | 0.00760264 | 0.0361118  | 0.0079433 | 0         | 0         |
| 70.8084   | 67.7524    | 74.6988    | 62.5278   | 72.7838   | 68.06     |
| 49.0005   | 41.2238    | 40.9072    | 46.58     | 34.2792   | 43.7104   |
| 0.247101  | 0          | 0.103771   | 0         | 0.0892183 | 0.138494  |
| 7.4946    | 7.83827    | 8.55449    | 8.25928   | 8.87007   | 7.70002   |
| 20.7142   | 18.7972    | 20.6198    | 19.5051   | 23.2099   | 21.0659   |
| 5.05136   | 4.75095    | 6.00376    | 5.68254   | 8.29333   | 8.17298   |
| 8.13708   | 7.60193    | 5.95096    | 5.8632    | 9.02112   | 7.06461   |
| 34.0148   | 35.6053    | 35.7353    | 38.412    | 35.7369   | 38.1558   |
| 14.5753   | 13.7597    | 18.3944    | 15.7687   | 19.0376   | 16.3698   |
| 0         | 0          | 0          | 0         | 0         | 0         |
| 0.48764   | 0.972315   | 0.982969   | 0.611116  | 0.475382  | 0.655944  |
| 4.78674   | 4.12072    | 6.07028    | 4.84353   | 4.40035   | 4.60673   |
| 53.188    | 48.759     | 67.0132    | 52.0349   | 75.8022   | 56.5101   |
| 0         | 0          | 0          | 0         | 0         | 0         |
| 0         | 0          | 0          | 0         | 0         | 0         |
| 1.12496   | 0.495684   | 1.25161    | 1.11354   | 1.30854   | 1.27817   |
| 22.763    | 23.5105    | 19.1931    | 24.6217   | 18.3244   | 24.8708   |
| 22.8091   | 22.3835    | 24.6357    | 24.4013   | 22.4285   | 20.4515   |
| 102.929   | 100.765    | 99.8229    | 93.5596   | 77.2223   | 83.4773   |
| 0         | 0          | 0          | 0         | 0         | 0         |
| 9.56704   | 9.13208    | 9.5675     | 10.2574   | 11.2956   | 9.17522   |
| 11.8745   | 12.177     | 11.1146    | 7.20951   | 8.7697    | 6.52497   |
| 0.842638  | 0.875079   | 1.5924     | 0.960003  | 0.456364  | 1.00359   |
| 52.1208   | 57.3755    | 44.7436    | 33.3506   | 15.8916   | 26.7791   |
| 0         | 0          | 0          | 0         | 0         | 0         |
| 3.20063   | 1.22229    | 3.86419    | 1.84483   | 3.9358    | 1.79992   |
| 28.5513   | 30.4277    | 30.5763    | 27.5664   | 28.8656   | 29.9911   |
| 0         | 0          | 0.130981   | 0.0789641 | 0.0375378 | 0.029135  |
| 0         | 0          | 0          | 0         | 0         | 0         |
| 0         | 0          | 0          | 0         | 0         | 0         |
| 22.7539   | 24.1587    | 29.0731    | 24.7549   | 26.418    | 25.2567   |
| 3.97034   | 5.06752    | 5.44572    | 5.52939   | 4.23124   | 4.68369   |
| 0.0647796 | 0.0106748  | 0.00616673 | 0.117108  | 0.0800821 | 0.0209185 |
| 0         | 0          | 0          | 0         | 0         | 0         |
| 0.254275  | 0.528129   | 0.213566   | 0         | 0.367234  | 0.285029  |
| 229.501   | 203.283    | 192.828    | 230.718   | 147.484   | 215.946   |
| 63.9247   | 42.7091    | 45.1859    | 41.7096   | 58.2549   | 47.87     |
| 5.61619   | 4.65867    | 6.43069    | 5.55163   | 7.23841   | 5.67862   |

|           |           |           |           |           |           |
|-----------|-----------|-----------|-----------|-----------|-----------|
| 3.67828   | 3.75044   | 2.61195   | 5.40969   | 3.04251   | 3.20483   |
| 2.35275   | 3.39122   | 3.14268   | 3.26175   | 1.93437   | 1.57286   |
| 1.13963   | 1.49666   | 1.18178   | 1.12859   | 0.788199  | 0.714922  |
| 0         | 0         | 0         | 0         | 0.168103  | 0         |
| 11.2076   | 11.5209   | 10.8481   | 17.3875   | 7.14483   | 8.08134   |
| 0.0478726 | 0         | 0         | 0         | 0.155564  | 0         |
| 0         | 0         | 0         | 0         | 0         | 0         |
| 27.3      | 34.3247   | 21.4126   | 37.2196   | 14.7948   | 19.9423   |
| 0.0404378 | 0         | 0         | 0         | 0         | 0.0339966 |
| 1.73129   | 0.413895  | 0.39161   | 0.553196  | 1.27887   | 1.76375   |
| 0.119408  | 0.0992041 | 0.0501456 | 0         | 0.0862269 | 0.167313  |
| 0         | 0         | 0         | 0         | 0         | 0         |
| 0         | 0         | 0         | 0         | 0         | 0         |
| 1.83686   | 2.40648   | 1.2461    | 1.74392   | 1.40296   | 1.84125   |
| 0.455445  | 0.567575  | 1.0478    | 1.0152    | 0.92231   | 0.832387  |
| 8.76539   | 8.90421   | 10.6478   | 10.9091   | 13.0447   | 11.0607   |
| 0.0129542 | 0.0645813 | 0         | 0.0664231 | 0.0140317 | 0.0435679 |
| 1496.57   | 1707.16   | 1450.7    | 1502.26   | 1421.55   | 1560.9    |
| 0         | 0.100491  | 0         | 0         | 0.17469   | 0.0677932 |
| 25.1486   | 21.6865   | 16.2791   | 16.7702   | 14.1244   | 17.3891   |
| 0         | 0         | 0         | 0         | 0         | 0         |
| 0.146996  | 0         | 0         | 0         | 0.077987  | 0         |
| 259.706   | 275.761   | 382.877   | 422.935   | 378.129   | 475.253   |
| 73.8907   | 40.8734   | 68.5521   | 66.1433   | 83.1676   | 45.1118   |
| 50.4378   | 48.0026   | 47.8968   | 47.045    | 45.6644   | 42.0448   |
| 2.63926   | 2.21761   | 1.93963   | 2.36904   | 2.51227   | 2.28609   |
| 130.791   | 145.32    | 122.899   | 140.936   | 122.916   | 149.574   |
| 0         | 84.8911   | 343.285   | 155.216   | 73.7862   | 0         |
| 38.6965   | 45.0866   | 44.1049   | 47.1224   | 42.4693   | 45.5634   |
| 2.75752   | 0.943521  | 3.40917   | 1.4323    | 3.53692   | 0.777038  |
| 11.4854   | 10.139    | 6.78587   | 5.33716   | 9.16813   | 6.77338   |
| 13.3664   | 14.5979   | 12.3624   | 16.3757   | 13.5955   | 14.1394   |
| 0.0214058 | 0.0533519 | 0.0809047 | 0.0731619 | 0.0231864 | 0.0359923 |
| 4.14572   | 4.86689   | 3.63339   | 3.65531   | 2.86355   | 2.81859   |
| 0         | 0         | 0         | 0         | 0         | 0         |
| 0         | 0         | 0         | 0         | 0         | 0         |
| 0.670005  | 0.898327  | 0.637808  | 0.39428   | 0.431843  | 0.290951  |
| 10.5097   | 10.5384   | 10.9945   | 9.92912   | 10.7453   | 10.2833   |
| 2.34242   | 2.00079   | 7.87832   | 4.68732   | 4.7841    | 2.66062   |
| 0         | 0         | 0         | 0         | 0         | 0         |
| 7.06896   | 4.80013   | 3.3758    | 4.1163    | 3.80523   | 3.68142   |
| 30.1149   | 30.533    | 29.6939   | 23.3865   | 30.185    | 26.3588   |
| 0         | 0         | 0         | 0         | 0         | 0         |

|           |            |           |           |           |            |
|-----------|------------|-----------|-----------|-----------|------------|
| 8.15125   | 8.57034    | 6.95557   | 7.7102    | 8.13183   | 8.43074    |
| 0.0195019 | 0          | 0.0368543 | 0.0111091 | 0.021124  | 0.00819774 |
| 15.8687   | 19.0976    | 17.2627   | 16.621    | 11.4895   | 14.2738    |
| 0         | 0          | 0         | 0         | 0         | 0          |
| 7.20913   | 6.94129    | 8.42082   | 7.1254    | 10.1187   | 7.26494    |
| 21.7128   | 14.9962    | 13.6775   | 24.588    | 21.9604   | 34.8589    |
| 9.19469   | 8.93064    | 10.183    | 8.23483   | 10.071    | 7.39249    |
| 27.9184   | 24.0613    | 32.5535   | 26.1531   | 25.0336   | 22.4299    |
| 0.428713  | 0          | 0         | 0         | 0         | 0          |
| 7.4846    | 8.05611    | 8.72269   | 7.27779   | 10.0407   | 9.48682    |
| 4.53494   | 5.41013    | 5.41494   | 4.89672   | 4.8924    | 5.33334    |
| 29.6989   | 32.6125    | 30.0844   | 33.0227   | 23.9541   | 22.443     |
| 2.99691   | 3.8134     | 2.75656   | 2.91936   | 2.67943   | 2.67953    |
| 0.671921  | 2.24E-05   | 0.832484  | 0.889778  | 0.606629  | 1.13388    |
| 85.3933   | 91.1895    | 93.7459   | 106.805   | 100.919   | 114.79     |
| 0.754534  | 1.06696    | 1.01191   | 0.273119  | 0.415471  | 0.626447   |
| 46.6736   | 45.9907    | 37.5334   | 39.7816   | 39.0656   | 41.9971    |
| 0.132912  | 0.165635   | 0.16745   | 0.757122  | 0         | 0.111741   |
| 4.93705   | 5.06692    | 5.8993    | 4.18866   | 6.7853    | 4.83783    |
| 0         | 0          | 0         | 0         | 0         | 0          |
| 3.63209   | 3.61356    | 4.70791   | 3.65589   | 4.80409   | 4.55436    |
| 6.09401   | 5.9808     | 7.34823   | 5.27224   | 7.90162   | 5.63838    |
| 0.0462876 | 0.00760264 | 0.0447493 | 0.0781734 | 0.010573  | 0.00820625 |
| 18.3959   | 18.8887    | 20.0634   | 16.8307   | 19.829    | 17.5858    |
| 0.23895   | 0.238011   | 0.385112  | 0.33194   | 0.325838  | 0.21276    |
| 0.110654  | 0.230888   | 0.090866  | 0.0894168 | 0.0725758 | 0.0636502  |
| 21.7762   | 23.7322    | 21.556    | 22.223    | 21.4018   | 21.8065    |
| 6.71007   | 6.30957    | 6.45556   | 6.67171   | 4.88952   | 4.154      |
| 263.426   | 282.715    | 198.889   | 489       | 138.822   | 243.936    |
| 0         | 0          | 0         | 0         | 0         | 0          |
| 0.232149  | 0.301466   | 0.214968  | 0.0952134 | 0.0905247 | 0.0790438  |
| 32.9242   | 32.8228    | 32.4147   | 35.7014   | 32.7188   | 33.2207    |
| 1.63634   | 1.90764    | 2.66006   | 3.90891   | 4.40252   | 5.5915     |
| 13.8435   | 14.0351    | 13.0402   | 13.3754   | 10.8518   | 9.88954    |
| 0.917947  | 0.953287   | 1.63835   | 0.784351  | 0.966682  | 0.728856   |
| 2.03004   | 1.73429    | 1.86589   | 1.54186   | 2.50315   | 1.34173    |
| 1.0666    | 1.59504    | 1.56772   | 1.41769   | 0.924257  | 1.34506    |
| 2.75984   | 3.16384    | 2.94063   | 3.01148   | 3.15387   | 3.42992    |
| 0.231082  | 0.0411391  | 0.103975  | 0.188048  | 0.643637  | 0.346917   |
| 2.75708   | 3.04647    | 3.77455   | 3.14109   | 2.7475    | 2.79694    |
| 167.413   | 169.341    | 144.408   | 148.965   | 143.218   | 165.403    |
| 0.169304  | 0.464288   | 0.767875  | 0.154308  | 0.293419  | 0.370138   |
| 6.81442   | 7.69599    | 9.17541   | 8.34582   | 7.48123   | 5.81848    |

|           |           |          |          |           |           |
|-----------|-----------|----------|----------|-----------|-----------|
| 0.470116  | 0.246677  | 1.02869  | 0.648352 | 0.750429  | 0.624051  |
| 3.47843   | 2.93366   | 4.53725  | 3.02222  | 3.15883   | 5.46471   |
| 48.2152   | 48.2951   | 46.5861  | 46.9288  | 37.01     | 42.0634   |
| 23.1718   | 24.148    | 20.7522  | 24.3222  | 19.6589   | 25.4311   |
| 2.90133   | 3.26289   | 5.17085  | 5.29408  | 1.81406   | 1.58646   |
| 14.514    | 14.6391   | 13.8632  | 15.1313  | 13.719    | 11.8792   |
| 0.0745575 | 0.0929135 | 0.187863 | 0        | 0.0807592 | 0.0626814 |
| 3.56528   | 2.84582   | 4.13546  | 3.56757  | 3.91898   | 2.49119   |
| 0.0546181 | 0.117432  | 0.068662 | 0.056014 | 0.134802  | 0.0831137 |
| 0         | 0         | 0        | 0        | 0         | 0         |
| 37.8637   | 44.3724   | 41.2389  | 44.5403  | 38.0122   | 43.3922   |
| 123.724   | 109.334   | 145.326  | 109.847  | 99.8152   | 79.008    |
| 0.11773   | 0         | 0.148323 | 0        | 0.0637613 | 0.0247442 |
| 0.841633  | 1.30336   | 0.538452 | 1.57612  | 0.513623  | 0.52814   |
| 56.604    | 58.6938   | 65.533   | 61.7999  | 51.81     | 48.0295   |
| 0         | 0         | 0        | 0        | 0         | 0         |
| 41.0854   | 46.4896   | 50.6963  | 49.2673  | 60.9463   | 81.3345   |
| 26.3223   | 26.2885   | 37.0591  | 31.1134  | 30.8138   | 33.596    |
| 0         | 0         | 0        | 0        | 0         | 0         |
| 0         | 0         | 0        | 0        | 0         | 0         |
| 2.97053   | 2.25637   | 5.41184  | 2.86857  | 4.50466   | 1.83139   |
| 0.229266  | 0.571423  | 0.577684 | 1.25376  | 0.248336  | 0.424043  |
| 1.11367   | 1.28009   | 1.30774  | 0.960867 | 1.5811    | 1.22716   |
| 0         | 0         | 0        | 0        | 0         | 0         |
| 7.6517    | 7.13871   | 9.79708  | 6.80353  | 11.1816   | 7.14154   |
| 156.175   | 165.087   | 141.471  | 141.991  | 114.477   | 114.724   |
| 55.4373   | 59.5083   | 53.1245  | 59.8899  | 47.395    | 57.5047   |
| 18.4392   | 18.0009   | 23.5508  | 20.5329  | 23.3794   | 20.9531   |
| 3.01028   | 2.70593   | 2.85993  | 2.86733  | 2.1916    | 2.73822   |
| 0.169503  | 0.084494  | 0.427099 | 0.270357 | 0.293764  | 0.142504  |
| 8.66487   | 8.83134   | 7.75849  | 8.81405  | 7.97777   | 7.64889   |
| 0.158561  | 0.126463  | 0.363659 | 0.404647 | 0.278235  | 0.127972  |
| 0.801367  | 0.399465  | 0        | 0.54779  | 0.34721   | 0         |
| 22.9264   | 28.5709   | 0        | 0        | 0         | 19.2745   |
| 3.16841   | 2.32115   | 3.88972  | 2.88316  | 6.84199   | 4.10196   |
| 11.5162   | 10.7296   | 10.3791  | 10.6057  | 13.6103   | 11.7762   |
| 17.6193   | 15.6049   | 19.3453  | 16.6378  | 24.3018   | 18.7854   |
| 0.0982339 | 0.0816126 | 0.12376  | 0.111916 | 0.0354683 | 0.0550576 |
| 0         | 0         | 0        | 0        | 0         | 0.0735582 |
| 13.1597   | 15.0863   | 16.8773  | 12.2447  | 15.7397   | 11.7307   |
| 1.32039   | 1.89862   | 0.83175  | 1.62001  | 2.14533   | 1.40893   |
| 289.735   | 301.921   | 261.732  | 265.076  | 248.744   | 261.09    |
| 1.12079   | 1.17079   | 0.809843 | 1.52101  | 0.874808  | 0.969977  |

|           |            |           |            |           |          |
|-----------|------------|-----------|------------|-----------|----------|
| 0.231536  | 0.4809     | 0.226879  | 0.0879285  | 0.222929  | 0.389311 |
| 0.0649918 | 0.161985   | 0.16376   | 0.074044   | 0.422387  | 0.163918 |
| 5.76016   | 5.25777    | 6.68401   | 5.0082     | 6.62237   | 4.84264  |
| 0.0620252 | 0.115944   | 0.13675   | 0.105996   | 0.0335922 | 0.039109 |
| 8.5917    | 9.36781    | 7.93283   | 6.53227    | 8.01963   | 6.12594  |
| 0         | 0          | 0         | 0          | 0         | 0        |
| 0.0572202 | 0          | 0.0180223 | 0.0162975  | 0.0309899 | 0        |
| 1.77199   | 1.4958     | 1.43767   | 1.31674    | 3.30542   | 1.96444  |
| 3.80947   | 2.98033    | 6.10901   | 3.84065    | 6.65533   | 3.4764   |
| 0         | 0          | 0         | 0          | 0         | 0        |
| 29.233    | 31.0654    | 30.2391   | 28.1356    | 23.8241   | 28.5348  |
| 15.1005   | 15.0673    | 16.3071   | 13.7173    | 16.0034   | 15.4161  |
| 1.86968   | 1.61233    | 1.80534   | 1.12203    | 1.74676   | 1.07238  |
| 6.95882   | 7.45392    | 7.77017   | 9.7311     | 6.22675   | 6.39822  |
| 73.0754   | 72.0521    | 69.9559   | 65.9687    | 56.7042   | 68.2477  |
| 164.739   | 178.512    | 138.257   | 164.281    | 145.998   | 161.71   |
| 30.4762   | 30.0633    | 30.8292   | 33.5861    | 36.1778   | 34.0389  |
| 83.613    | 80.0433    | 77.3059   | 82.8462    | 79.3122   | 96.2379  |
| 5.48326   | 7.45444    | 4.81474   | 8.14001    | 4.49951   | 6.07661  |
| 18.3815   | 16.9798    | 20.1443   | 19.8899    | 18.4255   | 16.8178  |
| 1.46613   | 1.36257    | 1.47143   | 1.27399    | 1.615     | 1.31616  |
| 0.448583  | 0.209634   | 0.0706437 | 0.0638829  | 0.242948  | 0.424271 |
| 0         | 0          | 0         | 0          | 0         | 0        |
| 7.10249   | 7.69337    | 7.43792   | 5.63355    | 8.43988   | 10.7833  |
| 7.11027   | 6.93455    | 5.84211   | 4.41424    | 6.96501   | 6.48016  |
| 0         | 0          | 0         | 0          | 0         | 0        |
| 0.0551092 | 0.0826125  | 0.106203  | 0.0480197  | 0.17146   | 0.138993 |
| 130.28    | 145.625    | 190.804   | 229.459    | 154.884   | 138.324  |
| 12.7582   | 12.2174    | 8.66783   | 8.42497    | 9.02373   | 12.1919  |
| 16.0827   | 13.9979    | 17.9127   | 14.3878    | 23.0054   | 17.1282  |
| 1.13867   | 0.548121   | 0.675638  | 0.63551    | 1.78955   | 0.785416 |
| 9.1802    | 9.83022    | 11.6942   | 9.06433    | 11.2696   | 11.6626  |
| 0         | 0          | 0         | 0          | 0         | 0        |
| 1.44985   | 4.51474    | 2.9911    | 3.43559    | 5.03519   | 5.94288  |
| 7.26815   | 6.71529    | 8.9891    | 7.09059    | 8.3099    | 6.5416   |
| 783.84    | 531.964    | 1077.65   | 587.144    | 951.217   | 693.784  |
| 8.07538   | 6.82494    | 9.65743   | 7.25281    | 11.1842   | 8.64397  |
| 7.82373   | 7.71869    | 6.64367   | 7.03463    | 5.87817   | 5.91654  |
| 17.9741   | 21.1509    | 17.0476   | 14.4663    | 17.1036   | 15.5844  |
| 0.0181088 | 0.00451344 | 0.0365032 | 0.00412622 | 0.0392302 | 0.021314 |
| 83.4195   | 91.8222    | 84.8249   | 80.2464    | 74.2354   | 88.2202  |
| 20.3794   | 9.98613    | 18.9447   | 12.7924    | 15.8862   | 17.4659  |
| 26.1318   | 29.6378    | 27.2236   | 31.479     | 28.2994   | 36.0638  |

|           |            |           |          |           |           |
|-----------|------------|-----------|----------|-----------|-----------|
| 1.12262   | 1.35962    | 1.11568   | 1.69316  | 1.37008   | 1.5285    |
| 0         | 0          | 0         | 0        | 0         | 0         |
| 0         | 0          | 0         | 0        | 0         | 0         |
| 23.4382   | 18.4326    | 28.9911   | 25.4712  | 29.3623   | 30.968    |
| 3.17215   | 3.00379    | 4.56836   | 4.14517  | 6.18889   | 5.30649   |
| 0         | 0.319477   | 0         | 0        | 0         | 0.323289  |
| 6.52605   | 5.82411    | 6.15315   | 5.6722   | 7.62756   | 6.36261   |
| 0.63686   | 0.465245   | 0.332007  | 0.150117 | 0.666046  | 0.387715  |
| 4.28063   | 4.28796    | 3.60021   | 2.93674  | 4.18186   | 3.34382   |
| 0.0224572 | 0.0279861  | 0         | 0        | 0.0729754 | 0.05664   |
| 56.0602   | 54.8817    | 61.0503   | 52.7331  | 49.0005   | 52.2623   |
| 27.2544   | 24.3583    | 19.731    | 19.7536  | 17.3835   | 20.2285   |
| 39.7661   | 42.0145    | 50.4369   | 52.6268  | 57.7508   | 67.6742   |
| 0         | 0          | 0         | 0        | 0         | 0         |
| 84.8158   | 85.7687    | 85.7461   | 74.7942  | 88.1066   | 85.356    |
| 0.663943  | 0.419305   | 0.34692   | 0.280002 | 0.282109  | 0.273594  |
| 3.04992   | 3.12089    | 4.1968    | 3.48067  | 4.19163   | 2.94835   |
| 4.82259   | 5.01572    | 5.76438   | 5.71013  | 4.25783   | 4.83656   |
| 0         | 0          | 0         | 0        | 0         | 0         |
| 0         | 0.00651062 | 0.0131639 | 0        | 0         | 0         |
| 0.0648991 | 0          | 0.0408817 | 0.221815 | 0.0351487 | 0.0545615 |
| 38.7587   | 40.1366    | 40.9726   | 38.4546  | 45.7296   | 38.5115   |
| 590.293   | 679.8      | 602.844   | 632.091  | 519.531   | 657.553   |
| 0.0871297 | 0          | 0         | 0        | 0         | 0         |
| 32.6203   | 48.5134    | 31.2317   | 50.3691  | 29.1432   | 34.4233   |
| 4.818     | 4.01232    | 4.64402   | 4.18215  | 5.12764   | 3.87696   |
| 0.194313  | 0.244598   | 0.289316  | 0.383562 | 0.402824  | 0.431229  |
| 9.17872   | 3.01777    | 6.19759   | 3.38039  | 12.4756   | 6.73025   |
| 0         | 0.03006    | 0         | 0        | 0.0783833 | 0         |
| 52.2299   | 61.931     | 70.2004   | 62.5436  | 73.3081   | 86.1773   |
| 0         | 0          | 0         | 0        | 0         | 0         |
| 0         | 0          | 0         | 0        | 0         | 0         |
| 1.37089   | 2.15421    | 1.30405   | 1.84291  | 1.60601   | 1.75182   |
| 32.9379   | 19.0952    | 28.8678   | 17.8807  | 30.8126   | 20.7253   |
| 0         | 0          | 0         | 0        | 0         | 0         |
| 0         | 0          | 0         | 0        | 0         | 0         |
| 83.5381   | 85.9771    | 85.3073   | 77.4962  | 60.9131   | 68.4204   |
| 0.665031  | 1.82425    | 2.46905   | 2.12441  | 4.88851   | 4.45835   |
| 15.3057   | 13.9382    | 17.5297   | 14.0448  | 21.0287   | 17.0093   |
| 2.47482   | 2.40712    | 1.74907   | 1.37538  | 1.24226   | 1.87763   |
| 0         | 0          | 0         | 0        | 0         | 0         |
| 60.4167   | 42.8213    | 48.7575   | 34.2249  | 90.1342   | 43.1052   |
| 496.223   | 577.309    | 542.549   | 571.772  | 453.992   | 568.684   |

|           |           |           |           |           |           |
|-----------|-----------|-----------|-----------|-----------|-----------|
| 0         | 0         | 0         | 0         | 0         | 0         |
| 0.0878762 | 3.01162   | 0.193745  | 98.0635   | 0.356946  | 2.34568   |
| 44.6449   | 231.647   | 0         | 247.743   | 44.6484   | 20.3306   |
| 5.99776   | 4.98516   | 5.68747   | 5.25908   | 6.91429   | 4.62369   |
| 6.41544   | 6.08666   | 5.98705   | 5.65474   | 5.84809   | 5.33805   |
| 0         | 0.0317481 | 0         | 0         | 0         | 0         |
| 26.3735   | 28.8534   | 30.7985   | 36.1436   | 24.5603   | 31.895    |
| 0         | 0         | 0         | 0         | 0         | 0         |
| 9.83882   | 6.77968   | 6.05191   | 3.36276   | 6.70777   | 5.9361    |
| 0.863318  | 0.57112   | 0.665575  | 0.792905  | 0.596584  | 0.763464  |
| 1.74671   | 1.67599   | 1.48019   | 1.62024   | 2.59512   | 2.15714   |
| 0         | 0         | 0         | 0         | 0.0409358 | 0         |
| 8.79131   | 9.03927   | 9.35359   | 7.68948   | 8.49535   | 6.23455   |
| 0         | 0         | 0.0251289 | 0         | 0.021605  | 0         |
| 0.283886  | 0.458806  | 0.212357  | 0.146552  | 0.288281  | 0.17527   |
| 18.4816   | 17.2513   | 18.8067   | 15.5044   | 20.3176   | 14.8171   |
| 12.9133   | 12.5863   | 15.8144   | 15.5543   | 16.4293   | 15.2383   |
| 1.27064   | 1.48451   | 1.30067   | 0.814287  | 2.0645    | 1.46884   |
| 0         | 0         | 0         | 0         | 0         | 0         |
| 16.8734   | 18.9469   | 15.0016   | 12.6505   | 15.1392   | 15.6495   |
| 0         | 0         | 0         | 0         | 0         | 0         |
| 0.393455  | 0.658442  | 0.692704  | 1.31572   | 0.919558  | 0.503343  |
| 40.3737   | 44.5885   | 43.8773   | 46.9889   | 32.3773   | 38.5764   |
| 4.87291   | 4.84116   | 5.13541   | 4.42582   | 5.61272   | 4.36671   |
| 3.05907   | 2.83341   | 3.0832    | 2.75045   | 3.37621   | 2.63435   |
| 4.93986   | 4.45783   | 5.18952   | 5.64554   | 4.98174   | 4.95149   |
| 0.863137  | 0.507299  | 0.850278  | 0.517349  | 1.20248   | 0.596564  |
| 2.63593   | 2.47317   | 4.53824   | 2.33596   | 4.15678   | 3.38392   |
| 0.0128204 | 0.0159767 | 0         | 0         | 0         | 0         |
| 0         | 0         | 0.0865676 | 0.0782828 | 0         | 0.0577673 |
| 0         | 0         | 0         | 0.0564155 | 0         | 0         |
| 9.11539   | 8.13342   | 8.89734   | 7.04011   | 10.8191   | 9.06436   |
| 0         | 0         | 0         | 0         | 0.216886  | 0         |
| 18.9651   | 22.3086   | 14.6326   | 20.062    | 20.9      | 22.4667   |
| 12.291    | 12.4157   | 12.4539   | 9.53405   | 14.808    | 10.2618   |
| 1.99077   | 2.6772    | 2.28193   | 3.02412   | 1.49849   | 2.29774   |
| 13.8312   | 13.5449   | 12.8252   | 11.6705   | 14.6216   | 12.5149   |
| 0         | 0         | 0         | 0         | 0         | 0         |
| 16.5076   | 16.1566   | 13.4591   | 19.2657   | 6.97813   | 10.0871   |
| 0         | 0         | 0         | 0         | 0         | 0         |
| 0         | 0         | 0         | 0         | 0         | 0         |
| 0         | 0         | 0         | 0         | 0         | 0         |
| 19.8218   | 17.7717   | 18.478    | 19.1491   | 16.5167   | 16.5118   |

|           |           |           |           |           |           |
|-----------|-----------|-----------|-----------|-----------|-----------|
| 0         | 0.0791184 | 0         | 0         | 0         | 0         |
| 3.27412   | 3.52816   | 3.04585   | 3.72789   | 3.93364   | 3.84579   |
| 0.120597  | 0         | 0.0759671 | 0.0686969 | 0.261256  | 0.101387  |
| 10.7946   | 8.97636   | 11.5349   | 9.18676   | 17.611    | 14.8279   |
| 35.9532   | 34.0875   | 26.8532   | 26.0078   | 31.3208   | 28.5698   |
| 0         | 0         | 0         | 0         | 0         | 0         |
| 3.40272   | 4.06993   | 4.62933   | 5.86176   | 4.79248   | 4.68604   |
| 5.76566   | 6.12581   | 6.96899   | 5.48797   | 8.0868    | 6.7841    |
| 0         | 0         | 0         | 0         | 0.0439357 | 0         |
| 0         | 0         | 0         | 0         | 0.0788211 | 0.0305886 |
| 1.67011   | 2.62271   | 2.43928   | 1.91982   | 2.27837   | 1.87446   |
| 26.756    | 28.0974   | 26.0775   | 25.8891   | 23.464    | 25.2885   |
| 0.263847  | 0.0897639 | 0.345236  | 0.624817  | 0.369354  | 0.511878  |
| 48.3355   | 52.863    | 39.7066   | 36.9044   | 51.741    | 56.3488   |
| 0.672454  | 68.9329   | 0.952151  | 885.315   | 2.26704   | 24.9052   |
| 8.48794   | 6.81991   | 14.9952   | 9.35207   | 10.8982   | 10.2578   |
| 101.27    | 108.369   | 84.239    | 95.2885   | 65.7419   | 80.3966   |
| 4.68193   | 3.59233   | 4.25036   | 3.03216   | 7.03252   | 4.11579   |
| 4.2086    | 4.58195   | 3.5251    | 3.63561   | 3.83229   | 3.07164   |
| 16.636    | 16.5962   | 14.5777   | 12.9836   | 14.6144   | 15.124    |
| 3.77102   | 3.3648    | 2.5275    | 2.42309   | 3.79059   | 3.90586   |
| 0         | 0         | 0         | 0         | 0.0861396 | 0         |
| 0         | 0         | 0         | 0         | 0         | 0         |
| 0.0950588 | 0.133278  | 0.15817   | 0.0919309 | 0.163636  | 0.205813  |
| 0.0286231 | 0         | 0.0480812 | 0.0326098 | 0.0723425 | 0.032085  |
| 0.151218  | 0.167508  | 0.428654  | 0.239278  | 0.145596  | 0.12713   |
| 0.0526208 | 0.0291449 | 0.0589284 | 0.0266444 | 0.0791635 | 0         |
| 0.761887  | 0.658593  | 0.77703   | 0.705276  | 0.733686  | 0.742974  |
| 2.26285   | 2.28005   | 1.64587   | 2.31688   | 3.1581    | 2.11019   |
| 8.73242   | 7.79841   | 8.60058   | 7.58304   | 10.1674   | 7.72407   |
| 10.1908   | 10.7107   | 7.27026   | 7.83342   | 8.31213   | 7.53533   |
| 0.188641  | 0.552194  | 8.90357   | 6.10727   | 8.37967   | 11.5674   |
| 0         | 0         | 0         | 0         | 0         | 0         |
| 5.83419   | 5.53603   | 6.42927   | 6.63319   | 3.94772   | 4.34186   |
| 18.1291   | 15.6269   | 16.388    | 14.5363   | 23.0129   | 21.7487   |
| 72.5297   | 76.7154   | 64.9933   | 79.267    | 56.5341   | 69.8919   |
| 0         | 0         | 0         | 0         | 0         | 0         |
| 0         | 0         | 0         | 0         | 0         | 0         |
| 16.118    | 15.9253   | 17.6432   | 14.4495   | 17.3806   | 16.8423   |
| 37.0727   | 34.8623   | 37.3786   | 37.0394   | 30.8644   | 32.4394   |
| 4.01795   | 150.6     | 11.5754   | 645.183   | 37.8608   | 126.401   |
| 2.25944   | 2.50286   | 0.527143  | 2.76482   | 0.906438  | 0.914594  |
| 2.84132   | 3.18      | 2.55364   | 3.6082    | 2.31315   | 2.31266   |



|           |           |           |           |            |            |
|-----------|-----------|-----------|-----------|------------|------------|
| 4.39269   | 4.46857   | 3.7657    | 3.61623   | 6.9147     | 14.5499    |
| 0         | 0.263508  | 0         | 0         | 0.229037   | 0          |
| 25.4302   | 25.2234   | 25.7318   | 24.4006   | 25.2154    | 24.2855    |
| 7.69661   | 10.4703   | 7.13285   | 8.24066   | 3.90652    | 4.25165    |
| 10.254    | 12.2548   | 9.10653   | 9.76711   | 12.9278    | 11.8711    |
| 0.756377  | 0.807343  | 0.673348  | 0.661489  | 0.847712   | 0.794202   |
| 0         | 0         | 0         | 0         | 0.00923618 | 0.00477912 |
| 28.1196   | 29.1278   | 29.0857   | 26.4125   | 29.3581    | 29.4109    |
| 6.46531   | 6.74279   | 6.29676   | 6.00758   | 7.8971     | 7.47858    |
| 0.0788715 | 0.0982896 | 0         | 0.089857  | 0.598024   | 0.198925   |
| 9.23721   | 7.21889   | 6.3365    | 6.046     | 5.90526    | 7.70155    |
| 0.0233586 | 0         | 0         | 0         | 0          | 0          |
| 6.04687   | 5.68328   | 6.00091   | 5.54207   | 6.80599    | 5.31088    |
| 5.42781   | 5.30202   | 19.2768   | 32.3118   | 9.95801    | 12.5489    |
| 0         | 0         | 0         | 0         | 0          | 0          |
| 29.391    | 29.9106   | 38.6127   | 36.6367   | 37.7125    | 39.5713    |
| 0         | 0         | 0         | 0         | 0          | 0          |
| 5.6698    | 5.93994   | 5.8272    | 5.32179   | 8.09852    | 6.48633    |
| 4.88145   | 4.42215   | 4.44791   | 4.14536   | 4.64362    | 4.54306    |
| 0.148251  | 0.288673  | 0         | 0.0422247 | 0.214111   | 0.124636   |
| 0         | 0         | 0         | 0         | 0.0251478  | 0          |
| 0.141826  | 0.0964054 | 0.0487309 | 0.0293781 | 0.544663   | 0.433581   |
| 0.349028  | 0.220319  | 0.373182  | 0.239678  | 0.292791   | 0.609378   |
| 0.0117963 | 0.0147005 | 0         | 0         | 0.0575203  | 0.06201    |
| 0         | 0.23143   | 0         | 0.105787  | 0.301734   | 0.0780638  |
| 14.413    | 14.4573   | 13.5703   | 14.9675   | 13.4149    | 15.1013    |
| 15.0659   | 19.2931   | 21.6426   | 23.6013   | 17.2946    | 19.7902    |
| 0         | 0         | 0         | 0         | 0          | 0          |
| 0         | 0.0672583 | 0         | 0         | 0.05846    | 0          |
| 0         | 0         | 0         | 0         | 0          | 0          |
| 1.03958   | 2.10824   | 0.526233  | 0.939027  | 0.767844   | 0.818297   |
| 0         | 0         | 0         | 0         | 0          | 0          |
| 14.5191   | 15.7873   | 14.1541   | 14.1804   | 12.5221    | 12.1844    |
| 1.11154   | 0.691675  | 1.2721    | 1.05021   | 1.42218    | 0.561607   |
| 0         | 0         | 0         | 0         | 0          | 0          |
| 28.3548   | 25.4396   | 39.5466   | 32.1383   | 46.0699    | 32.8736    |
| 93.9768   | 97.5295   | 87.939    | 86.4195   | 59.8332    | 69.003     |
| 4.88426   | 5.65456   | 4.15085   | 3.45727   | 7.41927    | 4.98096    |
| 0.500115  | 0.42283   | 0.58464   | 0.264041  | 0.811838   | 0.375501   |
| 0.233851  | 0.0546421 | 0.115085  | 0.0666056 | 0.296839   | 0.153595   |
| 342.78    | 390.412   | 315.19    | 413.775   | 271.752    | 346.555    |
| 0.661035  | 0.274594  | 0.277603  | 0         | 0.477346   | 0.740987   |
| 6.70853   | 5.66644   | 7.91885   | 4.8273    | 9.85769    | 6.71634    |

|           |           |           |           |           |           |
|-----------|-----------|-----------|-----------|-----------|-----------|
| 6.98361   | 5.39064   | 8.86399   | 5.28441   | 12.0806   | 5.17017   |
| 3.41979   | 5.43411   | 2.45136   | 3.71343   | 7.85507   | 6.03907   |
| 0         | 0         | 0         | 0         | 0         | 0         |
| 16.8681   | 16.1604   | 16.3169   | 15.537    | 16.0251   | 16.6419   |
| 0.340376  | 0.726933  | 0.904635  | 0.178455  | 0.810181  | 0.65551   |
| 0.394505  | 0.983264  | 0.786947  | 0.33709   | 1.46001   | 0.912079  |
| 0.200634  | 0.583402  | 0.674051  | 0.990506  | 0.579526  | 1.40563   |
| 25.9718   | 26.0271   | 21.9928   | 26.1034   | 27.4735   | 26.8422   |
| 0.0326654 | 0         | 0.0411537 | 0.0744303 | 0.0884563 | 0.12358   |
| 0.0228853 | 0.0394383 | 0.0398705 | 0.153163  | 0         | 0.0865813 |
| 0.838599  | 0.870885  | 1.5093    | 1.04639   | 0.865099  | 0.788952  |
| 0         | 0         | 0         | 0         | 0         | 0         |
| 5.76511   | 5.94064   | 6.44552   | 5.48997   | 7.0547    | 6.29895   |
| 32.7958   | 30.0323   | 27.3678   | 22.9511   | 26.0935   | 25.0768   |
| 1.17362   | 0.579981  | 1.28739   | 0.714647  | 2.09316   | 1.08024   |
| 0         | 0         | 0.0465143 | 0         | 0.119974  | 0.0310394 |
| 1.70077   | 0.712019  | 1.58721   | 1.41229   | 0.818466  | 0.608835  |
| 56.1175   | 54.0699   | 54.3316   | 53.8105   | 55.0856   | 55.2846   |
| 0         | 0         | 0         | 0         | 0         | 0         |
| 6.9896    | 6.4721    | 7.27838   | 4.73249   | 5.34318   | 4.63909   |
| 0.372311  | 0.541302  | 0.0781763 | 0.141389  | 0.604919  | 0.156503  |
| 0.166576  | 0.570864  | 0.157396  | 0.426999  | 0.180432  | 0.315095  |
| 21.2602   | 18.1676   | 21.8104   | 16.8165   | 12.3696   | 16.9545   |
| 0         | 0         | 0         | 0         | 0         | 0         |
| 0.53435   | 0.713471  | 0.577031  | 0.565292  | 0.206713  | 0.513411  |
| 26.4882   | 29.5987   | 22.107    | 22.3127   | 20.2257   | 24.2376   |
| 0.294774  | 0.314285  | 0.43885   | 0.141538  | 0.651276  | 0.595405  |
| 26.3593   | 26.9012   | 27.3904   | 29.166    | 20.3723   | 21.3927   |
| 0         | 0         | 0.0294284 | 0         | 0.0253015 | 0.0785513 |
| 5.49605   | 6.22787   | 6.25124   | 5.27431   | 5.52889   | 4.82019   |
| 1.49297   | 0.895739  | 1.79065   | 1.32428   | 0.488419  | 0.247565  |
| 3.21957   | 2.47138   | 10.0033   | 1.46188   | 7.68232   | 0.961186  |
| 3.72703   | 4.18812   | 2.71494   | 3.02646   | 4.99416   | 3.95009   |
| 11.9752   | 12.274    | 11.9735   | 13.9537   | 10.8652   | 12.8482   |
| 0.850445  | 0         | 0.535719  | 0.322966  | 0.767654  | 0         |
| 31.6517   | 36.1418   | 27.7444   | 29.9988   | 19.7953   | 24.2025   |
| 1.20985   | 0.59029   | 0.683342  | 0.581025  | 1.51016   | 0.777597  |
| 14.4552   | 14.3646   | 15.0106   | 13.7721   | 16.686    | 14.2999   |
| 7.36512   | 8.61183   | 7.76112   | 7.30324   | 5.63859   | 6.6315    |
| 9.26419   | 6.284     | 5.08229   | 3.60725   | 6.04627   | 2.9971    |
| 0         | 0         | 0         | 0         | 0         | 0         |
| 14.0011   | 13.881    | 13.3648   | 12.769    | 14.6383   | 13.3381   |
| 1.69331   | 1.14158   | 1.46884   | 1.04364   | 1.05238   | 1.1202    |

|           |           |          |           |           |           |
|-----------|-----------|----------|-----------|-----------|-----------|
| 0.163601  | 0.0679599 | 0        | 0.0621293 | 0         | 0.0916943 |
| 11.0043   | 11.9271   | 10.193   | 11.8151   | 10.709    | 12.3761   |
| 17.7232   | 17.6278   | 19.9979  | 17.9479   | 18.5868   | 19.1222   |
| 15.3706   | 16.6351   | 13.7242  | 14.9023   | 17.4759   | 14.4486   |
| 24.5063   | 19.4933   | 16.8153  | 11.9786   | 15.9418   | 11.5284   |
| 4.8974    | 3.04732   | 2.41111  | 1.74728   | 4.59331   | 3.69414   |
| 117.411   | 106.623   | 118.456  | 113.3     | 117.483   | 122.021   |
| 3.91991   | 4.37453   | 2.85275  | 2.94E-05  | 3.90E-09  | 7.69E-23  |
| 0.100402  | 0.125121  | 0.168656 | 0.0762578 | 0.0725025 | 0.112546  |
| 11.2447   | 12.9177   | 15.0368  | 13.5392   | 14.9128   | 14.7034   |
| 0.130045  | 0.105341  | 0.131071 | 0.111119  | 0.22538   | 0.169463  |
| 0.094878  | 0.236474  | 0.119532 | 0.0540464 | 0.20554   | 0.558355  |
| 319.153   | 356.417   | 333.805  | 349.079   | 268.497   | 300.962   |
| 0         | 0         | 0        | 0         | 0         | 0         |
| 15.4281   | 16.8694   | 15.1386  | 15.4644   | 11.7703   | 14.7478   |
| 10.1018   | 9.42711   | 9.68262  | 8.40658   | 9.41194   | 8.94581   |
| 0.0615217 | 0.0766683 | 0.155017 | 0         | 0.266556  | 0.103444  |
| 0.106796  | 0.133089  | 0.134548 | 0         | 0         | 0         |
| 32.8247   | 33.4493   | 35.5986  | 35.5331   | 39.9969   | 43.5065   |
| 9.61613   | 8.30687   | 8.40399  | 7.45933   | 7.87411   | 7.99986   |
| 0         | 0         | 0        | 0         | 0.0774772 | 0         |
| 320.857   | 305.116   | 358.194  | 378.876   | 283.86    | 307.764   |
| 0.345465  | 0.704484  | 0.63307  | 0.572483  | 0.612328  | 0.448857  |
| 0.042348  | 0.158322  | 0        | 0.144739  | 0.0458705 | 0.106807  |
| 7.3894    | 6.90958   | 6.67817  | 6.12182   | 6.73555   | 6.28748   |
| 6.36673   | 7.37685   | 6.95288  | 7.71638   | 7.20972   | 7.8113    |
| 11.0629   | 9.08538   | 14.9255  | 9.65804   | 15.5183   | 9.87084   |
| 4.16818   | 2.60109   | 3.51743  | 2.52688   | 6.62512   | 4.18214   |
| 0         | 0         | 0        | 0         | 0         | 0         |
| 18.4735   | 20.2343   | 16.1769  | 18.2462   | 13.4597   | 18.1542   |
| 65.7662   | 72.4801   | 61.524   | 67.6012   | 63.7787   | 71.2245   |
| 53.5582   | 52.1781   | 22.9048  | 25.5711   | 40.1746   | 54.8739   |
| 8.99297   | 8.92207   | 8.9649   | 8.92751   | 7.84957   | 7.52376   |
| 0.765591  | 0.857288  | 1.13228  | 0.758456  | 0.336516  | 0.503719  |
| 2.13175   | 1.88606   | 1.58459  | 1.76862   | 1.01334   | 1.59195   |
| 0         | 0         | 0        | 0         | 0         | 0         |
| 19.2805   | 20.1892   | 22.0338  | 18.5645   | 21.9055   | 21.7181   |
| 18.9872   | 18.3852   | 18.486   | 19.9631   | 16.2013   | 19.0747   |
| 0.210088  | 39.1407   | 0.397019 | 487.853   | 0.341344  | 13.6001   |
| 14.9247   | 14.837    | 16.093   | 15.9716   | 21.8069   | 15.7833   |
| 0         | 0         | 0        | 0         | 0         | 0         |
| 0.809778  | 0.807316  | 0.816162 | 0.369027  | 0.526281  | 0.340395  |
| 155.011   | 151.204   | 174.732  | 116.255   | 188.042   | 139.151   |

|           |           |           |          |           |           |
|-----------|-----------|-----------|----------|-----------|-----------|
| 1.0326    | 0.994369  | 1.0644    | 1.06948  | 1.47438   | 1.26272   |
| 198.103   | 205.567   | 208.384   | 216.509  | 184.135   | 192.627   |
| 0         | 0         | 0         | 0        | 0         | 0         |
| 0.191824  | 0.033201  | 0         | 0.136588 | 0.235676  | 0.13999   |
| 55.4513   | 53.6431   | 49.0961   | 45.5787  | 46.0063   | 56.4773   |
| 7.98436   | 8.12769   | 10.0657   | 7.87919  | 12.6763   | 11.1932   |
| 0.173914  | 0.0722437 | 0.0973804 | 0.242167 | 0.0627933 | 0.0487371 |
| 15.1867   | 14.0087   | 14.9076   | 12.0755  | 15.4718   | 12.6702   |
| 0.157431  | 0.174392  | 0.826419  | 0.079715 | 0.227369  | 0         |
| 0.0597357 | 0.0744425 | 0         | 0        | 0.0647045 | 0.100441  |
| 3.03954   | 2.75203   | 2.45203   | 1.74395  | 2.98472   | 3.62177   |
| 34.1063   | 34.9983   | 34.3677   | 29.5841  | 34.0046   | 33.2604   |
| 23.1122   | 23.8775   | 19.3269   | 19.6971  | 18.46     | 21.0997   |
| 1.91005   | 2.38031   | 0.267377  | 1.69252  | 1.60917   | 1.24896   |
| 0         | 0         | 0         | 0        | 0         | 0         |
| 0.330999  | 0.309368  | 0.364884  | 0.282826 | 0.179266  | 0.278275  |
| 6.01951   | 7.02101   | 6.04538   | 8.85919  | 6.70586   | 6.66353   |
| 0         | 0         | 0         | 0        | 0         | 0         |
| 0.0963225 | 0         | 0.0303386 | 0        | 0.187804  | 0.0809795 |
| 0         | 0         | 0         | 0        | 0         | 0         |
| 2.54812   | 2.40006   | 3.06094   | 3.71317  | 2.0861    | 2.39133   |
| 4.34211   | 5.12003   | 5.24005   | 5.34792  | 5.84256   | 5.13669   |
| 47.2394   | 50.6169   | 46.7219   | 53.819   | 48.0387   | 59.0828   |
| 7.71523   | 7.2097    | 17.4071   | 11.6911  | 11.0903   | 8.82932   |
| 4.64705   | 4.6144    | 6.00832   | 4.51466  | 6.54098   | 4.25024   |
| 0.362791  | 0.173888  | 0.56254   | 0.222558 | 0.36274   | 0.445773  |
| 22.0481   | 21.3485   | 15.0663   | 15.3012  | 18.5425   | 23.2754   |
| 0         | 0         | 0         | 0        | 0         | 0         |
| 27.6437   | 29.1243   | 28.3019   | 30.0731  | 28.2179   | 27.6916   |
| 2.28811   | 2.14695   | 2.21666   | 1.82232  | 1.95922   | 2.60623   |
| 0         | 0         | 0         | 0        | 0         | 0         |
| 2.27198   | 2.04995   | 2.21089   | 1.4586   | 2.77429   | 1.68456   |
| 33.7941   | 30.5411   | 30.6646   | 28.723   | 28.6885   | 25.4516   |
| 1.79328   | 3.06656   | 2.10165   | 6.74693  | 0.813118  | 1.22715   |
| 57.3762   | 56.4362   | 53.5573   | 59.1397  | 61.2844   | 68.7685   |
| 5.54644   | 5.68778   | 5.53628   | 4.96896  | 4.66245   | 4.50069   |
| 17.1109   | 18.7566   | 7.75924   | 4.40031  | 12.4945   | 12.5914   |
| 2.08139   | 1.50243   | 3.06645   | 2.66932  | 3.3017    | 1.88372   |
| 0.0284429 | 0         | 0.191121  | 0.127176 | 0.123238  | 0.0239123 |
| 16.6714   | 23.9297   | 20.986    | 25.4444  | 15.9625   | 12.5903   |
| 9.89618   | 10.8003   | 10.5774   | 11.0076  | 10.8273   | 10.0509   |
| 629.582   | 561.048   | 632.526   | 703.231  | 545.363   | 579.466   |
| 1.46072   | 1.29271   | 1.33355   | 1.59182  | 2.65997   | 2.06454   |

|           |           |           |           |           |           |
|-----------|-----------|-----------|-----------|-----------|-----------|
| 1178.96   | 1420.71   | 1074.35   | 1217.09   | 1107.81   | 1278.97   |
| 15.5883   | 14.1972   | 18.5325   | 17.4259   | 18.2722   | 16.9712   |
| 0.891645  | 0.838156  | 0.731093  | 0.909898  | 1.09867   | 0.646501  |
| 30.2511   | 34.5783   | 29.2582   | 38.9279   | 32.0237   | 40.169    |
| 9.49725   | 9.92976   | 11.83     | 11.1563   | 12.7864   | 11.3978   |
| 0.660757  | 0.640449  | 0.369981  | 0.878254  | 0.795242  | 0.894982  |
| 6.46427   | 6.13144   | 7.54197   | 6.6786    | 7.5926    | 4.95033   |
| 0.536404  | 0.850775  | 0.614356  | 0.83334   | 0.739483  | 0.491958  |
| 0         | 0         | 0         | 0         | 0         | 0         |
| 32.6093   | 37.3009   | 34.2158   | 41.6181   | 30.4534   | 37.0626   |
| 19.2265   | 19.7994   | 19.094    | 19.0517   | 20.0961   | 21.7161   |
| 0.317909  | 0.181331  | 0.134123  | 0.143275  | 0.179324  | 0.094281  |
| 27.3682   | 24.9581   | 26.5528   | 23.254    | 30.7252   | 28.9653   |
| 11.0424   | 12.3474   | 10.272    | 9.6322    | 9.65704   | 9.22388   |
| 0.0516833 | 0.0966115 | 0.162784  | 0.0883228 | 0.195938  | 0.217254  |
| 8.58186   | 8.59912   | 9.42388   | 8.41188   | 8.13373   | 6.9955    |
| 0.142817  | 0.272531  | 0.033735  | 0.137285  | 0.11602   | 0.140705  |
| 2.6418    | 2.53433   | 2.71392   | 3.15704   | 4.39093   | 3.22081   |
| 0.144712  | 0.27051   | 0.410211  | 0.082434  | 0.208999  | 0.0709691 |
| 3.82478   | 4.25802   | 4.85079   | 4.44466   | 5.68962   | 3.88008   |
| 0         | 0         | 0.0754146 | 0.340986  | 0         | 0.0503249 |
| 0         | 0         | 0         | 0         | 0         | 0         |
| 0.805562  | 0.729613  | 0.560955  | 0.522963  | 0.695042  | 0.437138  |
| 6.31096   | 6.11843   | 7.38857   | 6.98893   | 7.54423   | 6.12599   |
| 0.022249  | 0         | 0.0280305 | 0         | 0         | 0.018705  |
| 5.32117   | 5.45757   | 5.87348   | 5.41853   | 2.55035   | 3.52343   |
| 335.953   | 336.104   | 280.645   | 269.585   | 205.943   | 248.428   |
| 0.370224  | 0.115343  | 0.583035  | 0.84358   | 0.300764  | 0.544691  |
| 0         | 0         | 0         | 0         | 0         | 0         |
| 5.35046   | 7.81943   | 3.86064   | 3.82366   | 5.21609   | 4.66176   |
| 0.205253  | 0.0735277 | 0.254596  | 0.140305  | 0.277052  | 0.084115  |
| 31.4536   | 45.6304   | 44.2611   | 60.5764   | 28.8498   | 38.4447   |
| 4.8585    | 7.70453   | 0.952567  | 1.49116   | 1.60089   | 1.84013   |
| 0.361235  | 0.300114  | 0         | 0.137183  | 0         | 0.303695  |
| 0         | 0         | 0         | 0         | 0         | 0         |
| 14.4357   | 14.859    | 16.8032   | 13.3541   | 15.7185   | 13.4947   |
| 0         | 0         | 0         | 0         | 0         | 0         |
| 11.2559   | 12.3191   | 12.2521   | 10.3486   | 12.1764   | 9.68361   |
| 6.92E-10  | 0.0568247 | 0.0666436 | 0.0407926 | 0.0493913 | 0.0127784 |
| 1.64079   | 2.64327   | 2.14983   | 1.66246   | 1.51663   | 1.81812   |
| 56.0437   | 50.6249   | 40.5743   | 31.824    | 31.5984   | 37.4383   |
| 53.7199   | 52.1298   | 41.8026   | 37.2794   | 39.4083   | 44.4688   |
| 1.84535   | 1.13098   | 1.37205   | 0.965022  | 2.19545   | 1.9329    |

|          |          |          |          |           |          |
|----------|----------|----------|----------|-----------|----------|
| 1.24365  | 1.31921  | 1.72487  | 1.25966  | 1.87182   | 2.21154  |
| 15.4503  | 17.3881  | 18.1789  | 19.4633  | 14.9661   | 15.9648  |
| 0        | 0        | 0        | 0        | 0         | 0        |
| 13.1157  | 13.4976  | 14.6316  | 16.027   | 16.3147   | 16.1485  |
| 0        | 0        | 0        | 0        | 0         | 0        |
| 0.48204  | 0.700837 | 0.581995 | 0.434767 | 0.652669  | 0.320828 |
| 0        | 0        | 0        | 0        | 0         | 0        |
| 46.7466  | 64.5248  | 63.5007  | 72.7255  | 82.256    | 113.43   |
| 77.8974  | 84.8955  | 73.2843  | 88.2861  | 105.154   | 131.289  |
| 0        | 0        | 0        | 0        | 0         | 0        |
| 39.3587  | 42.5848  | 41.5626  | 42.885   | 37.8425   | 36.4401  |
| 0        | 0        | 1.23995  | 0        | 0         | 0        |
| 40.5087  | 42.1572  | 45.6542  | 41.1819  | 54.9731   | 48.5842  |
| 0.104853 | 0        | 0        | 0        | 0         | 0        |
| 0        | 0        | 0        | 0        | 0         | 0        |
| 0.72129  | 0.434962 | 0.618371 | 0.483071 | 0.280048  | 0.244653 |
| 4.94094  | 3.77534  | 2.40816  | 1.15048  | 1.99232   | 2.72885  |
| 13.8107  | 12.3275  | 14.7435  | 12.9998  | 9.63873   | 12.164   |
| 0.623501 | 0.811562 | 1.48322  | 0.139613 | 1.20888   | 0.676177 |
| 7.42654  | 6.36783  | 6.25457  | 6.41673  | 7.61028   | 5.73589  |
| 11.5746  | 10.8726  | 5.61909  | 5.96012  | 4.83835   | 4.86687  |
| 1.67366  | 1.07375  | 1.08458  | 0.940803 | 1.66745   | 1.53331  |
| 12.7695  | 17.6624  | 33.1115  | 51.4303  | 31.1212   | 26.5841  |
| 0.119344 | 0        | 0        | 0        | 0.0588286 | 0.491473 |
| 3.48745  | 3.65264  | 3.91975  | 3.07141  | 3.43798   | 4.09154  |
| 0        | 0        | 0        | 0.12258  | 0         | 0        |
| 0        | 0        | 0        | 0        | 0.0685421 | 0        |
| 15.5342  | 14.8529  | 17.7523  | 12.2761  | 18.4362   | 14.5375  |
| 1.8104   | 1.74043  | 1.80295  | 1.0411   | 2.03569   | 1.50753  |
| 0        | 0        | 0        | 0        | 0         | 0        |
| 9.98258  | 8.71935  | 12.0846  | 8.51815  | 12.5049   | 8.08468  |
| 14.2157  | 13.627   | 15.0053  | 14.0604  | 15.3309   | 14.771   |
| 0        | 0        | 0        | 0        | 0         | 0        |
| 0        | 0        | 0        | 0        | 0         | 0        |
| 30.006   | 29.3475  | 32.8451  | 26.9903  | 31.3825   | 27.6705  |
| 6.60621  | 5.92427  | 3.36902  | 4.1616   | 1.704     | 2.24817  |
| 1.97484  | 1.73797  | 2.95921  | 0.327588 | 1.44592   | 1.00033  |
| 1.84442  | 1.82293  | 2.57733  | 2.77667  | 2.06553   | 2.22955  |
| 1.99932  | 2.02102  | 1.70734  | 2.10063  | 1.90094   | 1.58753  |
| 28.3724  | 29.7064  | 29.0064  | 28.4824  | 28.5912   | 36.7571  |
| 1.82076  | 3.63765  | 4.47855  | 15.0803  | 3.72529   | 4.6165   |
| 3.27773  | 3.39391  | 3.92704  | 3.35901  | 3.90715   | 3.35674  |
| 1.99778  | 2.75912  | 3.64519  | 3.74856  | 4.19302   | 4.5171   |

|          |           |           |           |          |           |
|----------|-----------|-----------|-----------|----------|-----------|
| 58.2204  | 57.7675   | 35.3728   | 36.2795   | 48.4418  | 46.2218   |
| 9.72387  | 13.6816   | 10.6421   | 15.2818   | 8.92471  | 9.60361   |
| 24.1867  | 25.2436   | 22.0171   | 24.1516   | 28.7088  | 28.1773   |
| 182.94   | 194.764   | 195.307   | 177.786   | 183.699  | 187.705   |
| 41.1669  | 33.679    | 36.5479   | 38.6541   | 50.1915  | 42.88     |
| 0        | 0.0368671 | 0         | 0         | 0        | 0         |
| 0.888857 | 1.1975    | 0.317789  | 0.520014  | 0.75462  | 0.979533  |
| 5.4696   | 5.67264   | 6.47467   | 4.72584   | 5.52701  | 5.40075   |
| 0.487018 | 0.606921  | 0.531762  | 0.22194   | 0.527527 | 0.600514  |
| 66.2628  | 70.701    | 78.6829   | 75.0638   | 82.008   | 78.1531   |
| 12.6818  | 13.519    | 13.3725   | 12.5481   | 14.1998  | 12.0756   |
| 0.825082 | 1.3174    | 0.454774  | 0.616876  | 1.42435  | 0.67198   |
| 21.2553  | 20.975    | 18.821    | 17.0759   | 19.8971  | 19.3422   |
| 0.745495 | 0.704268  | 0.87862   | 0.424665  | 1.09404  | 0.717726  |
| 0        | 0         | 0         | 0.0201685 | 0        | 0         |
| 0        | 0         | 1.03457   | 0         | 0.592994 | 0.69038   |
| 11.3564  | 10.2638   | 9.49584   | 10.2031   | 9.81322  | 10.6684   |
| 18.1923  | 18.6391   | 15.6131   | 16.5184   | 18.9782  | 21.0684   |
| 0        | 0         | 0         | 0         | 0        | 0         |
| 1.24855  | 0.853256  | 1.57299   | 0.734167  | 1.5269   | 1.15125   |
| 0        | 0         | 0         | 0         | 0        | 0         |
| 0        | 0         | 0         | 0         | 0        | 0         |
| 8.95601  | 8.68771   | 7.30729   | 6.64116   | 6.2433   | 7.70913   |
| 0        | 0         | 0         | 0         | 0        | 0         |
| 82.5412  | 73.13     | 75.6368   | 66.2005   | 54.1061  | 63.5893   |
| 42.341   | 44.1368   | 41.4067   | 42.3218   | 33.5321  | 38.5836   |
| 0        | 0         | 0         | 0         | 0        | 0.0686581 |
| 3.95782  | 3.19951   | 2.2043    | 2.40245   | 3.21816  | 1.76259   |
| 1.05718  | 1.19769   | 1.45297   | 0.437973  | 2.29023  | 1.85836   |
| 11.5812  | 11.8469   | 11.8816   | 13.9894   | 11.1552  | 15.6037   |
| 0        | 0         | 0         | 0.189448  | 0.720475 | 0.419399  |
| 0.330145 | 0.37004   | 0.332529  | 0.132342  | 0.107211 | 0.0693436 |
| 12.4778  | 11.476    | 13.3245   | 9.98025   | 15.5523  | 12.8254   |
| 0.279384 | 0.757152  | 5.67E-29  | 1.29853   | 0.328381 | 0.363371  |
| 105.062  | 129.081   | 112.102   | 118.33    | 100.797  | 108.763   |
| 2.59579  | 2.12421   | 2.28487   | 1.95954   | 3.11617  | 2.2885    |
| 118.924  | 107.852   | 135.159   | 127.817   | 160.381  | 145.183   |
| 0        | 0         | 0         | 0         | 0        | 0         |
| 9.54969  | 9.8007    | 12.056    | 11.3005   | 9.48527  | 9.55756   |
| 1421.25  | 1622.86   | 1468.8    | 1437.37   | 1324.64  | 1520.7    |
| 2.68091  | 2.9273    | 2.83071   | 1.89076   | 3.15281  | 2.66171   |
| 14.3246  | 14.7979   | 13.9134   | 13.542    | 14.0522  | 12.8416   |
| 0        | 0         | 0.0631862 | 0         | 0        | 0         |

|           |           |           |           |           |           |
|-----------|-----------|-----------|-----------|-----------|-----------|
| 0         | 0         | 0         | 0         | 0         | 0         |
| 1.36407   | 1.06027   | 0.988487  | 0.525184  | 0.351941  | 0.126926  |
| 7.76398   | 8.30223   | 5.49866   | 4.92319   | 8.3318    | 7.33862   |
| 17.5523   | 16.6156   | 16.9792   | 14.4536   | 15.4316   | 14.704    |
| 0         | 0.076476  | 0         | 0         | 0         | 0         |
| 79.4542   | 74.6557   | 62.5297   | 68.851    | 49.5947   | 54.3953   |
| 11.3074   | 10.6884   | 11.7906   | 10.7307   | 12.287    | 9.59727   |
| 1.33555   | 1.04533   | 1.5032    | 0.805592  | 2.71859   | 1.77977   |
| 45.799    | 44.6961   | 51.3005   | 45.8754   | 45.9553   | 39.8178   |
| 4.10694   | 6.81271   | 8.05296   | 6.17557   | 6.83979   | 3.09122   |
| 42.9286   | 48.1316   | 36.5002   | 39.0253   | 30.0509   | 38.4752   |
| 10.3023   | 10.2538   | 14.0389   | 14.5194   | 18.3829   | 13.5406   |
| 11.6029   | 11.8276   | 15.5315   | 15.5815   | 13.9598   | 12.8244   |
| 37.2451   | 39.484    | 38.7156   | 37.1911   | 28.5407   | 33.9393   |
| 2.91225   | 2.33856   | 4.20325   | 4.28658   | 4.4246    | 4.12918   |
| 0.0686388 | 0.106922  | 0.216187  | 0.0586492 | 0.241631  | 0.0865582 |
| 69.2041   | 72.9536   | 28.5915   | 28.4748   | 56.3678   | 52.209    |
| 0.415586  | 0.0690536 | 0.663198  | 0.126259  | 0.360123  | 0.256218  |
| 11.2387   | 8.28347   | 7.93349   | 7.27388   | 10.2314   | 7.02202   |
| 0.508101  | 0.41002   | 0.660875  | 0.53287   | 0.644908  | 0.463372  |
| 0         | 0         | 0         | 0.0624981 | 0         | 0.0230597 |
| 8.47E-10  | 9.71E-10  | 0.0245616 | 0.0199893 | 0.0360356 | 0.0203589 |
| 58.0452   | 63.7357   | 54.7195   | 56.8085   | 52.3537   | 67.5442   |
| 26.3256   | 29.5803   | 25.2733   | 31.6494   | 29.9925   | 34.6986   |
| 0         | 0         | 0         | 0         | 0         | 0         |
| 12.3739   | 12.4522   | 10.1571   | 11.0447   | 8.58658   | 11.4152   |
| 2.39136   | 3.05369   | 3.97983   | 3.12806   | 4.54097   | 4.16981   |
| 0         | 0.0232169 | 0         | 0         | 0         | 0.0156626 |
| 62.3757   | 59.7184   | 60.5484   | 60.6203   | 52.5127   | 66.4568   |
| 17.6194   | 16.5201   | 20.0325   | 16.9003   | 22.9134   | 19.7406   |
| 0.905263  | 1.08418   | 0.62209   | 1.25905   | 1.20978   | 0.751181  |
| 4.68068   | 4.64358   | 7.19199   | 4.3053    | 7.44968   | 4.66811   |
| 7.57387   | 7.03722   | 6.65915   | 6.60116   | 5.08755   | 4.69121   |
| 0         | 0         | 0         | 0         | 0.0409627 | 0         |
| 12.2358   | 10.9211   | 15.858    | 11.5618   | 20.3505   | 12.7195   |
| 1.28569   | 1.13595   | 1.14734   | 1.3427    | 1.27658   | 1.80178   |
| 1.87464   | 1.79319   | 2.81468   | 1.38535   | 1.7932    | 1.90874   |
| 0         | 0         | 0         | 0         | 0         | 0         |
| 0.486841  | 0.317796  | 0.311542  | 0.281727  | 0.678004  | 0.532731  |
| 0         | 0         | 0         | 0.0220893 | 0         | 0         |
| 7.43742   | 7.16202   | 6.12658   | 5.71801   | 5.99979   | 5.96851   |
| 0         | 0         | 0         | 0         | 0         | 0         |
| 14.444    | 14.6737   | 13.483    | 10.2032   | 12.4299   | 11.0736   |



|            |           |           |           |           |          |
|------------|-----------|-----------|-----------|-----------|----------|
| 13.3419    | 15.553    | 13.9247   | 11.1898   | 11.8387   | 10.4717  |
| 0.0209304  | 0         | 0         | 0         | 0         | 0        |
| 54.6429    | 102.144   | 172.105   | 31.1269   | 0         | 160.786  |
| 22.3098    | 31.2137   | 28.1333   | 35.2234   | 32.7404   | 38.4662  |
| 0          | 0         | 0         | 0         | 0         | 0        |
| 6.44568    | 5.66232   | 9.25217   | 8.00556   | 7.72579   | 7.99518  |
| 0.436815   | 0.870974  | 0.330194  | 0.199062  | 0.0946299 | 0.220342 |
| 1.22481    | 1.26239   | 2.03248   | 1.45872   | 2.44805   | 1.82167  |
| 1080.6     | 1239.37   | 1062.08   | 1177.91   | 1044.67   | 1299.61  |
| 4.50424    | 3.98234   | 3.67709   | 3.56788   | 4.29206   | 3.9692   |
| 0          | 0         | 0         | 0         | 0         | 0        |
| 17.988     | 18.7413   | 17.4973   | 13.559    | 16.6749   | 14.8941  |
| 0.00589672 | 0         | 0         | 0         | 0         | 0        |
| 2.15188    | 1.61205   | 2.03571   | 1.71848   | 1.75024   | 2.62402  |
| 4.87193    | 15.0224   | 7.29535   | 46.656    | 20.5157   | 20.6667  |
| 15.3601    | 14.0829   | 13.1314   | 12.6246   | 13.9935   | 16.4877  |
| 1.00411    | 1.18302   | 1.79244   | 2.16555   | 1.202     | 1.46197  |
| 1.41E-08   | 1.44E-08  | 0.0960205 | 1.46E-08  | 1.12E-08  | 0.131402 |
| 0.0867057  | 0.324157  | 0         | 0.197565  | 0.187836  | 0.145789 |
| 0.111065   | 0         | 0         | 0.189801  | 0.36091   | 0.186747 |
| 1.38468    | 1.72559   | 0.387666  | 0.876412  | 1.49986   | 0.905424 |
| 1.01625    | 1.54775   | 0.894441  | 0.937391  | 0.820485  | 0.732388 |
| 0.0535703  | 0         | 0.0674908 | 0.0610317 | 0         | 0        |
| 76.5425    | 80.3737   | 85.7037   | 86.2762   | 63.7691   | 71.657   |
| 6.15228    | 7.85569   | 6.08154   | 5.90928   | 6.74604   | 4.72668  |
| 0          | 0         | 0         | 0         | 0         | 0        |
| 2.21615    | 1.58722   | 1.89344   | 1.58164   | 2.67641   | 1.7989   |
| 20.2655    | 18.1914   | 19.536    | 20.6513   | 16.5647   | 18.8356  |
| 3.08275    | 3.18412   | 2.23931   | 1.20235   | 1.8952    | 2.03133  |
| 0          | 0.0350151 | 0         | 0.0640221 | 0         | 0.023622 |
| 1.52742    | 1.33088   | 1.65836   | 1.24592   | 2.63639   | 1.5138   |
| 17.8931    | 18.5856   | 21.0768   | 18.5979   | 26.7107   | 27.552   |
| 0          | 0         | 0         | 0         | 0         | 0        |
| 7.0922     | 6.72113   | 6.86273   | 7.31196   | 5.72508   | 5.37305  |
| 19.3091    | 20.1599   | 17.7732   | 15.6999   | 20.1482   | 19.477   |
| 93.1577    | 103.626   | 97.2263   | 112.827   | 75.6798   | 92.1135  |
| 0          | 0         | 0         | 0         | 0         | 0        |
| 5.19203    | 5.63106   | 5.11218   | 4.41895   | 6.12493   | 6.49598  |
| 11.215     | 11.2459   | 9.4414    | 8.12183   | 6.27167   | 6.53422  |
| 0.151847   | 0.189232  | 0.0743966 | 0.153775  | 0.164478  | 0.177305 |
| 10.6723    | 9.92911   | 10.2009   | 8.34745   | 11.4693   | 8.53244  |
| 11.003     | 9.13775   | 10.7902   | 10.0574   | 11.6931   | 8.66864  |
| 0.156231   | 0.171438  | 0.239868  | 0.225966  | 0.189357  | 0.192082 |

|          |           |           |           |           |           |
|----------|-----------|-----------|-----------|-----------|-----------|
| 2.22582  | 1.71371   | 2.26099   | 1.63642   | 2.57773   | 1.56717   |
| 0        | 0         | 0         | 0         | 0         | 0         |
| 2.09276  | 1.24116   | 0.125477  | 0.056734  | 1.76524   | 1.67573   |
| 0        | 0         | 0.0331596 | 0.0299861 | 0.0285095 | 0         |
| 51.9497  | 50.3696   | 43.448    | 47.2942   | 51.4679   | 45.6436   |
| 2.59579  | 1.97125   | 3.27032   | 2.44905   | 3.25104   | 3.20527   |
| 0        | 0         | 0         | 0         | 0         | 0         |
| 0        | 0         | 0         | 0         | 0         | 0         |
| 9.35836  | 8.33233   | 7.68037   | 11.5316   | 7.00428   | 6.87572   |
| 0        | 0         | 0         | 0         | 0         | 0         |
| 7.34525  | 6.7332    | 7.20739   | 7.68436   | 7.15295   | 5.78928   |
| 13.5096  | 11.4836   | 14.0521   | 11.6384   | 12.2848   | 10.4638   |
| 0.323833 | 0.379822  | 0.119995  | 0.108511  | 0.206335  | 0.224206  |
| 4.76278  | 4.02969   | 5.76422   | 4.56574   | 6.71973   | 4.82977   |
| 0        | 0         | 0         | 0         | 0         | 0         |
| 0        | 0         | 0         | 0         | 0         | 0         |
| 1.27969  | 0.579907  | 0.366413  | 0.331347  | 0.630059  | 0.489022  |
| 0        | 0         | 0         | 0         | 0         | 0         |
| 75.7647  | 67.3239   | 47.5091   | 63.366    | 37.6455   | 49.3355   |
| 108.73   | 108.232   | 93.3595   | 103.698   | 89.1363   | 94.2238   |
| 12.289   | 11.0025   | 9.42918   | 8.2804    | 9.56327   | 5.6677    |
| 0        | 0         | 0         | 0         | 0.085432  | 0         |
| 11.4925  | 12.4664   | 13.1753   | 14.5911   | 15.5437   | 12.5995   |
| 12.827   | 7.16353   | 12.338    | 9.27757   | 17.5259   | 12.9763   |
| 0.535401 | 17.7184   | 0.224842  | 153.555   | 0.902121  | 11.0863   |
| 0        | 0         | 0         | 0         | 0         | 0         |
| 6.26531  | 10.6822   | 9.27816   | 7.72048   | 3.70071   | 6.01153   |
| 1.12081  | 1.19721   | 0.268963  | 0.364833  | 0.231245  | 0.403833  |
| 4.20821  | 6.42275   | 4.34861   | 4.63273   | 3.02176   | 4.80994   |
| 9.13674  | 11.3862   | 7.16969   | 9.67573   | 7.74773   | 10.2711   |
| 12.9428  | 13.9332   | 13.0181   | 14.5058   | 14.6691   | 11.4505   |
| 10.0164  | 10.0211   | 9.26194   | 9.48276   | 11.24     | 9.44877   |
| 5.90788  | 5.18988   | 6.3144    | 3.58605   | 8.07779   | 5.41465   |
| 2.9998   | 5.29599   | 1.88966   | 4.27203   | 2.70777   | 5.2541    |
| 0.328115 | 0.260207  | 0.150319  | 0.475766  | 0.129239  | 0.426315  |
| 3.8123   | 3.9112    | 2.87494   | 3.26512   | 4.47152   | 5.19376   |
| 14.9051  | 20.0829   | 19.0725   | 21.0933   | 21.8255   | 23.4374   |
| 4.24675  | 2.4562    | 1.87968   | 1.32737   | 2.37902   | 1.21387   |
| 24.4022  | 21.8977   | 28.1336   | 22.6423   | 34.4087   | 25.6517   |
| 2.67971  | 2.25701   | 2.58442   | 2.54763   | 3.1228    | 2.53253   |
| 0        | 0         | 0.303106  | 0         | 0         | 0         |
| 4.52642  | 4.22608   | 7.82965   | 5.35585   | 7.56721   | 3.57294   |
| 0.098829 | 0.0788221 | 0.12451   | 0.112594  | 0.0770754 | 0.0709006 |

|           |           |           |          |           |           |
|-----------|-----------|-----------|----------|-----------|-----------|
| 55.4118   | 61.3562   | 50.6986   | 58.6795  | 43.4905   | 57.0097   |
| 42.6271   | 40.2141   | 41.3436   | 37.5698  | 26.4662   | 38.9704   |
| 10.6315   | 10.9392   | 11.5816   | 9.29821  | 11.7362   | 10.9137   |
| 151.896   | 209.173   | 121.021   | 84.8826  | 2.57366   | 5.42193   |
| 11.9967   | 6.83253   | 10.8274   | 8.01718  | 10.0705   | 7.38713   |
| 0.462732  | 0.648034  | 0.45994   | 0.527182 | 0.360346  | 0.330483  |
| 3.78039   | 2.73313   | 6.47142   | 4.07673  | 5.47013   | 2.59591   |
| 6.32033   | 5.30038   | 6.94009   | 5.33883  | 7.24462   | 5.20439   |
| 18.3296   | 15.597    | 19.919    | 15.6441  | 22.1461   | 16.7286   |
| 0         | 0         | 0         | 0        | 0.0745167 | 0.231345  |
| 0.0646998 | 0.0806289 | 0         | 0        | 0         | 0         |
| 3.08765   | 2.66324   | 3.86142   | 2.747    | 4.14064   | 2.79406   |
| 0         | 0         | 0         | 0        | 0         | 0         |
| 2.55153   | 1.96443   | 2.93469   | 1.88561  | 2.78511   | 1.27858   |
| 1.40747   | 1.68629   | 0.687469  | 0.771826 | 1.26803   | 1.27109   |
| 0.0622015 | 0.116273  | 0.313459  | 0        | 0.101063  | 0.0261468 |
| 0         | 0.0923162 | 0         | 0.042198 | 0         | 0.0622784 |
| 0         | 0         | 0.0250474 | 0        | 0.351737  | 0.133715  |
| 0         | 0         | 0         | 0        | 0         | 0         |
| 0         | 0         | 0         | 0        | 0         | 0         |
| 3.19786   | 4.77345   | 3.85175   | 4.1237   | 1.97935   | 1.97943   |
| 2.41927   | 2.1535    | 0.870837  | 2.75623  | 0.748716  | 1.16223   |
| 10.742    | 10.1545   | 11.9659   | 10.9873  | 12.5399   | 11.0903   |
| 16.9918   | 16.5072   | 16.609    | 16.8075  | 13.6447   | 13.2009   |
| 57.7022   | 40.4114   | 42.8432   | 42.6153  | 71.0271   | 61.2115   |
| 3.5943    | 3.54847   | 3.44033   | 3.53653  | 4.57586   | 3.61043   |
| 27.4932   | 27.9059   | 25.76     | 26.3883  | 27.7948   | 27.5008   |
| 9.72774   | 11.0531   | 8.74108   | 10.1863  | 12.0864   | 10.8241   |
| 0         | 0         | 0         | 0        | 0         | 0         |
| 0         | 0         | 0         | 0        | 0         | 0         |
| 4.11666   | 4.38839   | 4.52468   | 3.70395  | 4.87499   | 5.06622   |
| 0.36617   | 1.00362   | 0.195006  | 0.852635 | 0.941838  | 0.579756  |
| 0.640586  | 0.233648  | 0.767676  | 0.765408 | 2.55547   | 1.49743   |
| 47.6925   | 46.0919   | 34.8009   | 43.4264  | 27.8714   | 36.7716   |
| 1.75325   | 0.993137  | 0.200804  | 0.907932 | 0.863221  | 1.07199   |
| 0.0834086 | 0.103944  | 0         | 0.095026 | 0.542079  | 0.350613  |
| 0.406174  | 0.553224  | 0.811338  | 0.891499 | 1.33041   | 1.5156    |
| 38.6371   | 35.5805   | 39.362    | 37.2365  | 33.2261   | 32.3445   |
| 15.3926   | 11.1101   | 17.7762   | 13.4694  | 25.622    | 18.4107   |
| 0.555329  | 0.331543  | 0.588753  | 0.362748 | 1.14423   | 0.871387  |
| 27.427    | 26.2481   | 29.3266   | 27.4814  | 22.9668   | 24.3294   |
| 11.0174   | 10.7472   | 12.1383   | 12.4189  | 13.7233   | 12.1227   |
| 0.0538198 | 0.0670702 | 0.0678051 | 0        | 0.590259  | 0.167821  |

|           |           |           |           |           |           |
|-----------|-----------|-----------|-----------|-----------|-----------|
| 1.13E-19  | 3.13E-36  | 8.16E-54  | 1.25E-20  | 0.179183  | 1.28E-19  |
| 22.8571   | 20.5716   | 21.7469   | 20.3281   | 23.0423   | 22.5343   |
| 0         | 0         | 0         | 0         | 0         | 0         |
| 701.225   | 849.889   | 640.781   | 634.951   | 676.878   | 859.411   |
| 35.2253   | 33.7797   | 37.4089   | 32.3145   | 38.9609   | 33.7023   |
| 5.52702   | 6.54338   | 5.22243   | 9.44526   | 5.08874   | 6.27295   |
| 510.298   | 669.557   | 606.541   | 786.652   | 429.535   | 612.651   |
| 7.50299   | 8.20745   | 6.63486   | 8.06853   | 7.05928   | 5.83239   |
| 21.0532   | 23.1768   | 23.0878   | 26.4781   | 23.3586   | 25.7844   |
| 3.92054   | 4.4436    | 4.79716   | 3.99716   | 4.46561   | 3.07966   |
| 4.69285   | 4.03961   | 2.36492   | 2.48512   | 0.837786  | 1.14707   |
| 3.82205   | 5.02049   | 5.14058   | 4.35439   | 5.03509   | 5.99226   |
| 0         | 0         | 0         | 0.0923865 | 0         | 0         |
| 7.11049   | 7.27079   | 6.5188    | 7.30581   | 8.76655   | 9.29568   |
| 0.227863  | 0.0982571 | 0.158934  | 0.229958  | 0.437267  | 0.403021  |
| 12.6701   | 14.199    | 15.0001   | 15.7541   | 10.8558   | 13.2729   |
| 0         | 0         | 0         | 0         | 0         | 0         |
| 2.96569   | 2.11107   | 3.94732   | 2.39273   | 4.05595   | 2.49489   |
| 0.0425838 | 0.0530679 | 0         | 0         | 0         | 0         |
| 27.3665   | 32.6213   | 26.752    | 34.9321   | 22.4056   | 28.5476   |
| 0         | 0         | 0         | 0         | 0         | 0         |
| 0         | 0         | 0         | 0.161576  | 0         | 0.059616  |
| 5.29951   | 3.62357   | 5.43583   | 4.32787   | 7.21351   | 5.99306   |
| 16.2152   | 19.8427   | 17.939    | 19.7144   | 21.423    | 18.3675   |
| 0.6125    | 1.04366   | 0.953232  | 1.4346    | 0.728837  | 0.824913  |
| 5.42793   | 5.36064   | 5.97386   | 4.49562   | 7.51273   | 5.63365   |
| 20.6313   | 19.8006   | 18.7854   | 17.9797   | 17.0218   | 16.3538   |
| 0.0569656 | 0.106486  | 0.0717684 | 0.146025  | 0.015426  | 0.0598646 |
| 146.001   | 131.953   | 91.8527   | 94.5506   | 83.2112   | 100.504   |
| 0.371963  | 0.0617367 | 1.82558   | 0         | 0.526238  | 0.3877    |
| 0.0947999 | 0.0590698 | 0.179151  | 0         | 0.0513427 | 0.0398497 |
| 1217.32   | 1084.71   | 1109.36   | 998.221   | 999.617   | 1356.32   |
| 12.3709   | 12.4651   | 18.9143   | 15.5994   | 21.3748   | 19.5048   |
| 0.8795    | 0.571434  | 0.636354  | 0.334758  | 0.577264  | 0.857737  |
| 0.673224  | 0.838971  | 0.848164  | 1.78965   | 0.607685  | 0.377325  |
| 0.349316  | 0.198006  | 0.480494  | 0.253565  | 0.275306  | 0.641193  |
| 4.2701    | 4.43222   | 4.03824   | 3.15153   | 4.92255   | 2.77781   |
| 0.988121  | 0.772797  | 0.821454  | 0.379204  | 1.95907   | 0.475503  |
| 0         | 0         | 0         | 0         | 0         | 0         |
| 6.97246   | 7.24535   | 7.51402   | 6.57493   | 7.78486   | 6.98008   |
| 7.46137   | 7.1824    | 7.9307    | 7.75379   | 8.11333   | 6.6478    |
| 4.04176   | 3.33194   | 4.20052   | 2.5669    | 6.26426   | 3.84352   |
| 11.4199   | 10.7903   | 10.3893   | 11.7937   | 10.7214   | 11.4411   |

|           |           |          |           |           |           |
|-----------|-----------|----------|-----------|-----------|-----------|
| 32.5959   | 32.2472   | 38.1576  | 33.725    | 40.7184   | 44.094    |
| 1.12084   | 0.93119   | 0.74527  | 0.922242  | 1.38269   | 0.916126  |
| 4.35391   | 4.6793    | 5.88781  | 4.45984   | 3.1588    | 3.92899   |
| 41.1612   | 48.8434   | 47.7253  | 54.6565   | 42.68     | 42.1241   |
| 0         | 0.299488  | 0        | 0         | 0         | 0         |
| 7.71355   | 6.87896   | 6.45598  | 5.43868   | 6.55364   | 6.36395   |
| 0         | 0         | 0        | 0         | 0         | 0         |
| 0.93905   | 2.17331   | 0.507028 | 1.68118   | 1.01716   | 0.676689  |
| 0.150758  | 0.0626249 | 0.126622 | 0.171756  | 0         | 0.0422481 |
| 0.177218  | 0.206328  | 0.409256 | 0.20163   | 0.265871  | 0.296474  |
| 1.29824   | 1.47342   | 1.08066  | 0.8892    | 1.42297   | 0.896547  |
| 0         | 0.0933079 | 0.282991 | 0.0853027 | 0         | 0.314737  |
| 0.79628   | 0.950977  | 1.1704   | 0.415795  | 0.970329  | 1.05995   |
| 0.0147679 | 0         | 0        | 0         | 0         | 0         |
| 0.8014    | 0.642024  | 0.669379 | 0.244559  | 0.880725  | 1.23731   |
| 8.96453   | 8.65155   | 8.43713  | 8.77648   | 10.6311   | 9.65732   |
| 0.869875  | 1.23324   | 2.3877   | 0.861075  | 3.91147   | 2.99981   |
| 10.4435   | 9.847     | 7.22828  | 6.78474   | 7.0013    | 5.95916   |
| 11.2876   | 9.9294    | 12.5478  | 9.80246   | 15.7027   | 12.2807   |
| 0         | 0         | 0        | 0         | 0         | 0         |
| 0         | 0         | 0        | 0         | 0         | 0         |
| 63.1616   | 63.3716   | 64.7917  | 65.4386   | 100.821   | 113.457   |
| 1.61675   | 1.72467   | 1.31992  | 1.1936    | 1.54109   | 1.26134   |
| 0         | 0         | 0        | 0         | 0         | 0         |
| 20.1132   | 19.6342   | 22.5244  | 21.005    | 20.3338   | 22.6867   |
| 22.7866   | 29.1423   | 22.1747  | 25.3355   | 19.7132   | 21.4625   |
| 0.748076  | 0.52824   | 1.1541   | 0.572258  | 1.16992   | 1.12404   |
| 0         | 0         | 0        | 0         | 0         | 0         |
| 6.5993    | 6.90278   | 6.85259  | 5.79404   | 7.27249   | 6.40812   |
| 29.2761   | 25.3596   | 32.6548  | 27.5937   | 33.3815   | 31.8705   |
| 5.22412   | 4.42968   | 5.19067  | 2.81225   | 5.60032   | 3.07891   |
| 7.97E-07  | 2.39E-06  | 1.97E-06 | 0.716188  | 0.161814  | 6.64E-07  |
| 19.5367   | 17.6618   | 19.1636  | 16.3419   | 27.4507   | 24.0409   |
| 9.50836   | 9.55496   | 8.60268  | 8.47855   | 8.2798    | 7.70644   |
| 0         | 0         | 0        | 0         | 0         | 0         |
| 0.583758  | 0.145496  | 0        | 0         | 0         | 0         |
| 0.0503846 | 0.0627892 | 0.190432 | 0.114805  | 0.0545755 | 0         |
| 188.049   | 220.502   | 133.463  | 144.436   | 163.25    | 194.2     |
| 133.958   | 78.1144   | 137.486  | 105.257   | 173.775   | 120.5     |
| 0         | 0         | 0        | 0         | 0         | 0         |
| 37.3152   | 27.8917   | 36.9989  | 24.5787   | 47.6114   | 25.4979   |
| 11.8768   | 11.7032   | 15.6449  | 16.2969   | 13.715    | 14.5791   |
| 2.89624   | 2.21675   | 2.69717  | 2.02865   | 3.01635   | 2.44973   |

|           |           |           |           |           |           |
|-----------|-----------|-----------|-----------|-----------|-----------|
| 0         | 0         | 0         | 0         | 0         | 0         |
| 3.251     | 3.15252   | 3.18566   | 2.06165   | 2.60284   | 2.05981   |
| 7.61432   | 7.27471   | 9.04931   | 6.61951   | 10.2905   | 6.84343   |
| 0         | 0.01603   | 0.0162057 | 0.0146547 | 0         | 0         |
| 12.2749   | 11.4007   | 10.7355   | 9.51523   | 7.19557   | 6.86952   |
| 0         | 0         | 0         | 0         | 0         | 0         |
| 10.6498   | 10.7918   | 11.2248   | 10.2502   | 12.7626   | 11.0348   |
| 12.9258   | 14.3956   | 13.514    | 12.6004   | 11.4631   | 12.3007   |
| 6.38089   | 6.86067   | 5.50004   | 5.83483   | 6.84287   | 5.09717   |
| 19.3131   | 22.1245   | 13.9462   | 16.9546   | 10.5239   | 15.0816   |
| 25.7353   | 28.491    | 26.1406   | 25.1867   | 25.6149   | 26.9478   |
| 1.29E-124 | 0.958402  | 2.88E-188 | 0.515558  | 0         | 0.124573  |
| 4.92009   | 7.55417   | 6.26709   | 5.51247   | 11.6892   | 7.35864   |
| 0.0510875 | 0         | 0.0643628 | 0         | 0.0830054 | 0.107375  |
| 0         | 0         | 0         | 0         | 0         | 0         |
| 0         | 0         | 0         | 0         | 0         | 0.132895  |
| 27.831    | 29.2937   | 24.9841   | 30.6241   | 26.4718   | 32.5372   |
| 3.52414   | 2.92785   | 3.4981    | 2.55499   | 4.08718   | 4.72848   |
| 10.4355   | 11.2305   | 11.3752   | 9.78542   | 11.4894   | 10.1123   |
| 0         | 0         | 0         | 0         | 0         | 0.173302  |
| 0.215715  | 0.179826  | 0.310405  | 0.23412   | 0.289033  | 0.189946  |
| 2.9663    | 3.84208   | 3.75189   | 4.19109   | 3.30164   | 3.44611   |
| 0         | 0         | 0.182037  | 0         | 0         | 0.121475  |
| 0         | 0         | 0         | 0         | 0         | 0         |
| 75.5749   | 64.7804   | 85.2073   | 67.3826   | 100.261   | 75.8909   |
| 47.2557   | 25.6542   | 44.3989   | 25.4009   | 63.0124   | 25.0682   |
| 0         | 0         | 0         | 0         | 0         | 0         |
| 3.962     | 3.98047   | 4.83158   | 3.46791   | 4.94913   | 4.1946    |
| 22.6382   | 23.5006   | 24.4435   | 18.5249   | 27.6075   | 21.6601   |
| 1.60138   | 1.88776   | 1.38135   | 1.47926   | 0.718836  | 0.751987  |
| 0.560962  | 0.48735   | 0.462415  | 0.484561  | 0.492214  | 0.481624  |
| 0         | 0         | 0         | 0         | 0         | 0         |
| 0.0723641 | 0.12024   | 0.212726  | 0.0274811 | 0.0783833 | 0.121675  |
| 0         | 0         | 0         | 0.0788471 | 0         | 0         |
| 0.174089  | 0.192844  | 0.194957  | 0.242411  | 0.251426  | 0.130097  |
| 1517.93   | 1778.05   | 1614.55   | 1611.38   | 1537.82   | 1573.63   |
| 0.0502516 | 0.0375741 | 0.0759716 | 0         | 0.0326589 | 0.0675954 |
| 8.16974   | 9.33051   | 10.3059   | 8.09933   | 8.78105   | 7.30098   |
| 0.394259  | 0.409437  | 0.532188  | 0.25667   | 0.518565  | 0.142054  |
| 0.0617856 | 0         | 0         | 0         | 0.13385   | 0         |
| 0.13833   | 0.114925  | 0.348552  | 0.105065  | 0.149837  | 0.116296  |
| 5.96243   | 5.07671   | 4.95477   | 3.69455   | 5.44434   | 4.83785   |
| 13.0512   | 11.7873   | 13.6314   | 15.7803   | 10.215    | 11.2023   |

|           |           |          |           |           |           |
|-----------|-----------|----------|-----------|-----------|-----------|
| 4.1994    | 4.97613   | 5.24443  | 6.44028   | 2.88972   | 3.19764   |
| 7.00515   | 5.52175   | 9.78871  | 11.5301   | 9.07649   | 8.29921   |
| 0         | 0         | 0        | 0         | 0.0332037 | 0         |
| 0         | 0         | 0        | 0         | 0         | 0         |
| 22.1237   | 22.1012   | 18.4966  | 18.4755   | 18.845    | 20.1075   |
| 1.9126    | 1.84039   | 1.6623   | 1.65492   | 1.8881    | 1.23139   |
| 99.6001   | 102.787   | 92.0301  | 85.0506   | 62.2011   | 79.7393   |
| 54.8025   | 49.7217   | 50.903   | 45.4862   | 49.8131   | 49.4264   |
| 13.8973   | 14.3152   | 13.1799  | 13.5156   | 12.4056   | 15.0466   |
| 3.90904   | 3.29695   | 4.90529  | 3.48067   | 4.77468   | 3.76202   |
| 1.6393    | 2.49423   | 2.28141  | 2.19337   | 2.31248   | 1.77881   |
| 20.4533   | 19.5871   | 20.6808  | 18.1933   | 19.7012   | 18.5513   |
| 12.3247   | 11.1767   | 11.6937  | 12.0835   | 11.5669   | 11.5764   |
| 0.276527  | 0.337575  | 0.188049 | 0.457251  | 0.405318  | 0.31728   |
| 0.268742  | 0.202706  | 0.178198 | 0.161144  | 0.681777  | 0.654022  |
| 2.41271   | 2.54198   | 2.65292  | 2.12188   | 1.88507   | 2.65548   |
| 0.102304  | 0.127491  | 0        | 0.0777022 | 0.110814  | 0         |
| 170.805   | 173.087   | 153.788  | 149.477   | 131.643   | 171.132   |
| 5.69796   | 4.553     | 6.43927  | 2.93308   | 4.7981    | 2.72142   |
| 0.194432  | 0.291067  | 0.162141 | 0.138446  | 0.223045  | 0.102163  |
| 29.1876   | 26.7033   | 31.9242  | 26.1755   | 35.2962   | 27.7518   |
| 0.0347177 | 0.0432651 | 0        | 0         | 0         | 0         |
| 0         | 0.390768  | 0        | 0         | 0         | 0         |
| 7.71294   | 7.28373   | 5.63193  | 9.63858   | 5.59376   | 4.99229   |
| 10.0461   | 13.0834   | 12.6159  | 18.7379   | 11.5908   | 10.6745   |
| 0.0786181 | 0.0979738 | 0.231111 | 0.119424  | 0.170315  | 0.0881269 |
| 1.92142   | 1.98085   | 1.83579  | 1.49008   | 2.16637   | 1.75775   |
| 64.6445   | 63.9686   | 62.4331  | 58.1439   | 51.0073   | 49.9532   |
| 26.3544   | 23.1909   | 29.8046  | 27.1926   | 31.6314   | 30.1121   |
| 0         | 0         | 0        | 0         | 0         | 0         |
| 16.2926   | 18.2647   | 20.0138  | 20.6093   | 21.9215   | 23.2306   |
| 51.1733   | 43.0365   | 42.1205  | 44.0403   | 45.3749   | 54.1684   |
| 0         | 0         | 0        | 0         | 0         | 0         |
| 14.8305   | 13.8167   | 16.4421  | 12.1885   | 19.1218   | 14.9102   |
| 3.91623   | 11.6111   | 20.0066  | 18.4106   | 26.2444   | 37.9352   |
| 30.7324   | 35.4151   | 31.5213  | 37.8552   | 19.66     | 21.7032   |
| 1.65692   | 1.15118   | 1.90264  | 1.40318   | 2.22342   | 1.42989   |
| 1.43217   | 1.62654   | 1.80432  | 1.92362   | 2.42199   | 2.05845   |
| 0         | 0         | 0        | 0         | 0         | 0         |
| 0         | 0         | 0        | 0         | 0         | 0         |
| 1.5734    | 1.2746    | 1.607    | 1.16524   | 1.33784   | 1.43135   |
| 31.0859   | 31.0596   | 31.3224  | 26.4682   | 31.0421   | 25.8494   |
| 181.792   | 199.539   | 238.305  | 218.223   | 225.127   | 251.516   |

|           |           |           |           |           |           |
|-----------|-----------|-----------|-----------|-----------|-----------|
| 44.9722   | 43.737    | 49.218    | 41.3481   | 54.6318   | 45.7756   |
| 7.22935   | 7.8166    | 7.29288   | 6.34607   | 8.56867   | 8.47392   |
| 9.58847   | 9.31678   | 8.97035   | 9.38273   | 9.79475   | 10.8546   |
| 0         | 0         | 0.0281392 | 0         | 0.0241931 | 0.0187775 |
| 0         | 0         | 0         | 0         | 0         | 0         |
| 2.62078   | 2.19636   | 2.42253   | 1.65464   | 2.7613    | 3.55693   |
| 0         | 0         | 0         | 0         | 0         | 0         |
| 13.0021   | 11.6335   | 10.6873   | 11.8183   | 14.8428   | 17.3759   |
| 0         | 0         | 0         | 0         | 0         | 0         |
| 0         | 0         | 0.173286  | 0.535349  | 0.0372463 | 0         |
| 4.02839   | 3.94472   | 4.52034   | 4.07301   | 6.3067    | 5.64635   |
| 2.68475   | 2.61086   | 3.35922   | 3.80398   | 3.88146   | 2.21582   |
| 1.38747   | 1.309     | 1.74993   | 1.15193   | 3.75547   | 1.1067    |
| 0.160255  | 0.0869845 | 0.175875  | 0.0795218 | 0.130381  | 0.129339  |
| 2.67632   | 3.10679   | 3.00227   | 3.1744    | 3.01807   | 3.14386   |
| 9.12914   | 11.0765   | 7.62799   | 8.89154   | 8.75835   | 9.5347    |
| 1.2628    | 0.393424  | 1.59094   | 0.431605  | 0.889094  | 0.796237  |
| 2.64337   | 2.09893   | 3.47242   | 2.7214    | 3.7344    | 2.39479   |
| 10.175    | 10.0106   | 8.38528   | 7.62957   | 6.71945   | 4.73737   |
| 1.19958   | 1.73323   | 0.60036   | 0.792815  | 0.643154  | 0.877112  |
| 1.84918   | 2.4279    | 2.74572   | 1.93745   | 1.78839   | 1.59627   |
| 8.00691   | 8.05172   | 9.46057   | 6.5137    | 15.0071   | 11.7569   |
| 2.13339   | 2.29193   | 1.0195    | 1.34099   | 2.17804   | 2.14404   |
| 17.5942   | 16.9754   | 15.1563   | 17.0752   | 17.2388   | 17.1832   |
| 0         | 0         | 0         | 0         | 0         | 0         |
| 94.3886   | 76.6455   | 102.003   | 90.166    | 107.594   | 125.789   |
| 0         | 0         | 0         | 0         | 0         | 0         |
| 0         | 0         | 0         | 0         | 0         | 0         |
| 36.7789   | 38.534    | 37.1374   | 31.2351   | 38.0968   | 35.7773   |
| 0.641095  | 0.798932  | 1.02024   | 0.961038  | 2.08326   | 1.04959   |
| 15.4305   | 15.5597   | 15.2479   | 16.2377   | 13.4924   | 12.4032   |
| 12.9984   | 14.6882   | 11.3755   | 15.2231   | 12.5371   | 14.6724   |
| 0         | 0         | 0         | 0         | 0         | 0         |
| 8.61525   | 8.96483   | 8.57472   | 11.5819   | 8.81868   | 11.3352   |
| 0.351263  | 0.214403  | 0.0541876 | 0.20882   | 0.186357  | 0.162722  |
| 0.867204  | 1.1037    | 0.813602  | 1.17718   | 2.4183    | 2.69911   |
| 0.0398229 | 0.0992545 | 0.100342  | 0.0680543 | 0.258812  | 0.100439  |
| 18.1982   | 18.7286   | 15.6634   | 16.3124   | 11.3654   | 13.2779   |
| 12.5177   | 11.3017   | 12.5716   | 11.5983   | 14.8867   | 15.4921   |
| 2.66828   | 2.596     | 2.35905   | 2.55994   | 2.53529   | 2.34165   |
| 33.2213   | 30.6272   | 27.7662   | 28.3761   | 28.6033   | 29.2142   |
| 0         | 0         | 0         | 0         | 0         | 0         |
| 0.107795  | 5.23904   | 0.135806  | 36.2288   | 0.233523  | 0.634374  |



|           |           |           |           |           |           |
|-----------|-----------|-----------|-----------|-----------|-----------|
| 10.1241   | 10.4816   | 10.9104   | 10.0082   | 11.3712   | 11.305    |
| 38.711    | 34.9751   | 35.3611   | 25.3591   | 34.0689   | 46.3772   |
| 9.98711   | 10.12     | 9.94208   | 10.4082   | 9.9666    | 11.0666   |
| 65.6038   | 72.9993   | 48.8785   | 60.1576   | 43.7007   | 60.7526   |
| 0         | 0         | 0         | 0         | 0         | 0         |
| 35.4368   | 34.798    | 30.6019   | 28.6477   | 28.4104   | 26.4968   |
| 1.58397   | 1.93869   | 1.55013   | 0.918407  | 1.51658   | 1.27816   |
| 7.17539   | 6.97083   | 8.50937   | 6.71132   | 8.15436   | 6.52895   |
| 15.3677   | 14.6102   | 16.9966   | 16.9527   | 16.1707   | 16.1164   |
| 3.38517   | 4.58113   | 3.76504   | 3.94705   | 4.35426   | 4.20223   |
| 14.3147   | 12.987    | 12.2787   | 9.73341   | 11.82     | 9.71677   |
| 0         | 0         | 0         | 0         | 0         | 0         |
| 0         | 0         | 0.351364  | 0         | 0.0503485 | 0.0390781 |
| 1.02511   | 0.604926  | 1.3362    | 0.670039  | 1.60876   | 0.758583  |
| 0.230575  | 0.287343  | 0.290491  | 0.328363  | 0.312193  | 0.484618  |
| 0         | 0         | 0         | 0         | 0.0439357 | 0         |
| 0         | 0         | 0         | 0         | 0         | 0         |
| 0.0342432 | 0         | 0.0431415 | 0         | 0.0741831 | 0.0287887 |
| 7.7846    | 7.59139   | 7.92215   | 7.8356    | 7.84269   | 7.67562   |
| 3.4462    | 3.95286   | 3.54548   | 3.19258   | 5.28282   | 2.74688   |
| 5.57224   | 5.38946   | 3.71966   | 4.21645   | 2.97283   | 2.76185   |
| 9.05555   | 8.02905   | 4.37644   | 3.7209    | 4.21302   | 4.5679    |
| 24.4208   | 24.2142   | 24.867    | 29.0048   | 28.1096   | 25.924    |
| 55.783    | 46.4862   | 76.3667   | 65.03     | 111.412   | 82.1124   |
| 0.174551  | 0         | 0         | 0         | 0         | 0         |
| 0.0716483 | 0         | 0.0200589 | 0         | 0.0172459 | 0         |
| 54.672    | 56.4181   | 47.2203   | 48.2731   | 46.2896   | 54.9844   |
| 36.7938   | 36.734    | 35.912    | 35.805    | 38.5002   | 37.109    |
| 4.77274   | 4.61755   | 5.4851    | 5.15386   | 7.30437   | 6.31138   |
| 0.0302511 | 0         | 0.0381126 | 0.0344646 | 0.147455  | 0.0254325 |
| 9.89249   | 10.296    | 11.2182   | 9.51966   | 9.9706    | 7.96613   |
| 8.34318   | 8.94106   | 9.80455   | 8.34704   | 9.78393   | 7.65276   |
| 0         | 0         | 0         | 0         | 0.0458032 | 0         |
| 0         | 0.0830268 | 0.0139888 | 0.228502  | 0         | 0.233789  |
| 0         | 0         | 0         | 0         | 0         | 0         |
| 0.29424   | 0.23687   | 0.154979  | 1.22E-25  | 0.260506  | 0.0627524 |
| 0.299168  | 0.186411  | 0.062818  | 0.227224  | 0         | 0.125757  |
| 48.0032   | 47.4841   | 46.1687   | 42.1823   | 39.5646   | 42.7397   |
| 29.0421   | 28.6844   | 32.5012   | 28.9715   | 26.6403   | 26.9891   |
| 12.5656   | 11.0859   | 14.9775   | 11.4801   | 14.3958   | 9.61697   |
| 18.9581   | 19.4573   | 23.1903   | 27.1113   | 44.4726   | 32.3316   |
| 0         | 0         | 0         | 0         | 0         | 0         |
| 85.9648   | 92.9724   | 92.5572   | 126.96    | 78.4503   | 111.137   |

|           |           |           |           |           |           |
|-----------|-----------|-----------|-----------|-----------|-----------|
| 3.17596   | 3.34896   | 4.49843   | 3.92519   | 4.61059   | 3.65751   |
| 7.57758   | 5.94585   | 8.38679   | 6.81976   | 8.56392   | 4.47019   |
| 0         | 0         | 0         | 0         | 0         | 0         |
| 17.1883   | 16.0047   | 13.7866   | 12.6359   | 16.9535   | 15.6031   |
| 0         | 0         | 0         | 0         | 0         | 0         |
| 25.3388   | 19.9648   | 31.854    | 23.8415   | 46.1476   | 38.7443   |
| 3.0485    | 3.59909   | 4.81768   | 4.63081   | 3.50483   | 4.00174   |
| 0         | 0         | 0         | 0         | 0         | 0         |
| 0.129732  | 0.194006  | 0.0326887 | 0.177362  | 0.140523  | 0.283575  |
| 0         | 0         | 0         | 0         | 0         | 0         |
| 22.9263   | 18.9138   | 22.7875   | 21.6713   | 25.7012   | 24.767    |
| 11.2544   | 10.1776   | 8.28145   | 9.53132   | 11.8671   | 11.0526   |
| 13.3538   | 14.1296   | 16.452    | 15.1672   | 14.902    | 13.7274   |
| 0.0433757 | 0.0810822 | 0.163941  | 0.123543  | 0.0704756 | 0.145866  |
| 0.308871  | 2.71E-05  | 0.969558  | 0.446242  | 8.88E-06  | 2.19E-06  |
| 0         | 14.2155   | 0.384259  | 184.584   | 0.991119  | 11.1799   |
| 0         | 0         | 0         | 0         | 0         | 0         |
| 5.04036   | 5.42475   | 6.35012   | 3.91527   | 3.72247   | 8.28237   |
| 8.66941   | 5.79      | 8.24996   | 4.67954   | 6.83776   | 5.13731   |
| 13.397    | 8.57363   | 22.0101   | 8.55962   | 33.5329   | 7.30573   |
| 2.75331   | 2.88329   | 3.82238   | 3.34296   | 3.57005   | 3.02463   |
| 0.472118  | 0.313788  | 2.29989   | 1.79292   | 1.90918   | 0.899675  |
| 0         | 0         | 0         | 0         | 0         | 0         |
| 4.99558   | 4.60724   | 5.78366   | 4.20326   | 5.27873   | 3.04392   |
| 0         | 0.0337003 | 0.0681392 | 0         | 0         | 0         |
| 0         | 0         | 0         | 0         | 0         | 0         |
| 14.1175   | 15.4871   | 17.7309   | 15.6025   | 19.237    | 17.2458   |
| 0.435586  | 0.502746  | 1.17747   | 0.77127   | 0.523497  | 0.501477  |
| 21.0733   | 18.7461   | 28.353    | 19.581    | 29.9761   | 29.6283   |
| 6.94E-09  | 0.272254  | 0.255787  | 0.963729  | 0.903486  | 1.15276   |
| 96.4233   | 93.1897   | 87.6072   | 92.2033   | 77.1821   | 103.702   |
| 6.81957   | 7.23152   | 6.04883   | 5.71769   | 6.54836   | 5.77616   |
| 4.33668   | 5.3049    | 4.29042   | 5.39537   | 4.81268   | 4.07088   |
| 0.953564  | 1.04573   | 1.29746   | 1.04292   | 0.950251  | 1.15441   |
| 9.5361    | 9.13653   | 7.42807   | 9.14121   | 10.3293   | 9.82743   |
| 0         | 0         | 0         | 0         | 0         | 0         |
| 0.0290613 | 0         | 0         | 0.0331091 | 0.0314786 | 0.0244322 |
| 0         | 0         | 0.15532   | 0.140456  | 0.0593507 | 0         |
| 3.8994    | 4.39498   | 4.09998   | 3.42708   | 3.7991    | 3.54781   |
| 32.2615   | 34.2666   | 34.2375   | 32.015    | 31.1568   | 31.3193   |
| 6.2341    | 4.86464   | 5.51874   | 5.61333   | 9.32215   | 8.97361   |
| 3.38326   | 3.54864   | 3.94273   | 2.4733    | 5.13054   | 2.74953   |
| 0.276282  | 0.237664  | 0.309773  | 0.0964323 | 0.59125   | 0.193835  |

|           |           |           |           |           |           |
|-----------|-----------|-----------|-----------|-----------|-----------|
| 0         | 0.108829  | 0.109982  | 0         | 0.0946092 | 0         |
| 0.230079  | 0.208526  | 0.105406  | 0         | 0.11328   | 0.0703382 |
| 0.0891524 | 0.0830211 | 1.04E-08  | 4.34E-08  | 2.71E-09  | 4.81E-08  |
| 7.84423   | 6.66991   | 7.06409   | 7.42045   | 7.2084    | 7.18993   |
| 1.28823   | 1.73213   | 3.4595    | 2.47184   | 1.54226   | 1.56754   |
| 15.975    | 18.2691   | 16.4713   | 18.5085   | 14.8318   | 16.9099   |
| 0         | 0         | 0         | 0         | 0         | 0         |
| 0.0325045 | 0         | 0.241853  | 0.111095  | 0.140833  | 0.0403476 |
| 22.6275   | 20.8577   | 21.6824   | 18.3046   | 20.0219   | 19.7603   |
| 45.8529   | 57.1418   | 57.768    | 52.2394   | 99.3338   | 77.0982   |
| 0         | 0         | 0         | 0         | 0         | 0         |
| 0.0201077 | 0.0375872 | 0.0253327 | 0         | 0         | 0.0947651 |
| 25.632    | 25.0567   | 22.8176   | 24.4808   | 25.8521   | 26.9364   |
| 0         | 1.17475   | 0.197938  | 0         | 0         | 0.198128  |
| 15.936    | 12.0871   | 22.6166   | 17.129    | 20.9348   | 13.1185   |
| 61.5172   | 60.8429   | 61.2682   | 57.5362   | 58.9257   | 59.4151   |
| 3.03499   | 3.99232   | 1.31703   | 2.26672   | 3.21438   | 4.6495    |
| 0         | 0.302346  | 0.611318  | 0         | 0.262795  | 0.203969  |
| 1022.11   | 1150.44   | 866.763   | 555.917   | 246.452   | 498.921   |
| 10.7607   | 12.592    | 10.7641   | 10.807    | 9.708     | 10.8224   |
| 17.3832   | 17.7073   | 13.8747   | 18.7269   | 15.5007   | 15.6359   |
| 0         | 0         | 0         | 0         | 0         | 0         |
| 4.61672   | 5.07649   | 4.24255   | 4.17686   | 4.23592   | 3.33338   |
| 0         | 0         | 0         | 0         | 0         | 0         |
| 29.2994   | 28.1979   | 25.9072   | 29.7459   | 24.2585   | 28.4829   |
| 32.5688   | 26.4437   | 41.462    | 23.6241   | 48.4339   | 30.3462   |
| 17.7808   | 20.2046   | 19.318    | 18.9206   | 22.9413   | 23.6097   |
| 0.0643638 | 0.040105  | 0         | 0.0366643 | 0.156865  | 0.0405836 |
| 3.84785   | 4.56611   | 2.68632   | 8.27893   | 2.94674   | 4.13123   |
| 0.401368  | 1.83308   | 0         | 0         | 0         | 0         |
| 7.39869   | 9.30683   | 10.0601   | 8.37319   | 8.03662   | 9.8247    |
| 16.5685   | 16.0894   | 13.5608   | 13.5416   | 15.1835   | 15.3373   |
| 75.3149   | 74.9599   | 83.51     | 59.2224   | 108.949   | 77.1674   |
| 2.11247   | 1.33383   | 2.27106   | 2.50297   | 3.0204    | 2.62845   |
| 0.922038  | 1.4353    | 0.66736   | 0.232993  | 0.22152   | 0.171933  |
| 0.779978  | 1.28526   | 0.667197  | 0.999448  | 0.703539  | 0.701618  |
| 2.01604   | 1.78062   | 2.31798   | 1.82855   | 1.84451   | 1.25061   |
| 11.8379   | 12.8656   | 10.5865   | 10.3819   | 11.1621   | 10.2626   |
| 9.59705   | 7.27535   | 22.4091   | 14.7378   | 15.3314   | 12.4821   |
| 0.372337  | 0         | 0.234545  | 0         | 0         | 0         |
| 0         | 0         | 0         | 0         | 0         | 0         |
| 1.91493   | 2.246     | 2.1287    | 1.41165   | 1.58616   | 2.4622    |
| 4.05798   | 5.43871   | 1.35046   | 0.523379  | 0.501752  | 0.773898  |

|           |            |           |           |           |            |
|-----------|------------|-----------|-----------|-----------|------------|
| 15.3882   | 17.3543    | 15.2415   | 17.3043   | 13.5001   | 13.7473    |
| 11.6471   | 9.42301    | 16.2115   | 15.0126   | 16.501    | 13.7866    |
| 3.25132   | 3.17195    | 3.20484   | 2.74458   | 2.96781   | 2.67426    |
| 0.238333  | 0.29701    | 0.450397  | 0.135764  | 0.387236  | 0          |
| 0         | 0          | 0         | 0         | 0         | 0          |
| 14.6937   | 16.5641    | 10.4947   | 12.2908   | 18.2037   | 24.3849    |
| 0         | 0          | 0.0900845 | 0.0407316 | 0.0387258 | 0.0300571  |
| 42.9356   | 45.4066    | 35.3718   | 41.043    | 42.6248   | 47.8442    |
| 0.0408648 | 0.00760264 | 0.0412357 | 0.105307  | 0         | 0.00820625 |
| 1.06002   | 0.789804   | 0.371121  | 0.889053  | 0.66481   | 0.774999   |
| 15.1359   | 14.3275    | 13.9086   | 14.683    | 14.3342   | 17.5986    |
| 62.3675   | 0          | 52.3826   | 47.3695   | 0         | 0          |
| 0.0588034 | 2.03E-143  | 0.0719968 | 0.0349118 | 0.100219  | 0.0795383  |
| 53.6012   | 56.7924    | 50.7677   | 51.0488   | 42.7373   | 49.9488    |
| 0.466062  | 0.290403   | 0.146792  | 0.398232  | 0.631036  | 0.293868   |
| 0         | 0          | 0         | 0         | 0         | 0          |
| 2.93531   | 4.54069    | 3.28734   | 4.31918   | 2.18168   | 2.12516    |
| 1.16192   | 4.83688    | 3.08343   | 1.38009   | 12.8535   | 0.228622   |
| 12.2417   | 10.6502    | 12.3673   | 9.69259   | 13.9897   | 17.6627    |
| 2.71062   | 2.391      | 1.97996   | 1.76807   | 2.25964   | 2.87953    |
| 0.030295  | 0.0377535  | 0         | 0.0220893 | 0         | 0.0163004  |
| 21.8671   | 22.7509    | 21.2898   | 22.8175   | 20.7552   | 19.9786    |
| 34.159    | 34.418     | 35.155    | 36.1823   | 33.3945   | 36.9452    |
| 10.7388   | 10.7695    | 11.7267   | 8.18185   | 11.3297   | 9.14478    |
| 18.9424   | 20.3339    | 20.5567   | 17.8826   | 18.7054   | 18.1447    |
| 10.2237   | 9.30846    | 4.86236   | 5.63206   | 4.72049   | 2.39672    |
| 1.24758   | 1.1211     | 1.34723   | 0.908885  | 1.59956   | 0.906151   |
| 0         | 0          | 0         | 0         | 0         | 0          |
| 0         | 0.134839   | 0         | 0         | 0         | 0          |
| 0.581054  | 0.460103   | 0.433087  | 0.442546  | 0.861612  | 0.561802   |
| 7.33506   | 6.15224    | 5.41524   | 5.87281   | 6.78128   | 8.56265    |
| 4.347     | 3.89876    | 5.10318   | 4.4272    | 5.56468   | 7.14303    |
| 13.8342   | 15.728     | 13.5843   | 13.9803   | 17.7988   | 15.6202    |
| 20.8912   | 23.3962    | 23.378    | 28.6345   | 16.7609   | 17.0399    |
| 0.0565129 | 0.260838   | 0.126574  | 0.0214614 | 0.0612137 | 0.129336   |
| 0.891903  | 0.932216   | 2.60981   | 4.19563   | 1.09075   | 1.4271     |
| 0.256204  | 0.266067   | 0.295881  | 0.0972962 | 0.161884  | 0.125646   |
| 0         | 0          | 0         | 0         | 0         | 0          |
| 1134.33   | 952.666    | 1261.15   | 1010.03   | 441.424   | 476.91     |
| 1.69704   | 1.87091    | 1.5598    | 1.25005   | 1.85663   | 1.03355    |
| 0.0253862 | 0          | 0         | 0         | 0         | 0          |
| 0.530582  | 0          | 0.66845   | 0         | 0.287334  | 0          |
| 0.805122  | 1.35267    | 1.33488   | 0.866148  | 0.979335  | 0.717907   |

|            |           |           |           |           |           |
|------------|-----------|-----------|-----------|-----------|-----------|
| 12.9332    | 13.6841   | 10.053    | 12.4366   | 12.3624   | 14.9167   |
| 8.49257    | 11.4394   | 14.9477   | 19.6888   | 12.8177   | 17.2852   |
| 0.00464441 | 0         | 0.0234055 | 0.0211655 | 0.0201232 | 0         |
| 6.77411    | 6.32901   | 7.07362   | 5.61954   | 6.14109   | 8.56164   |
| 0          | 0         | 0.421886  | 0.152604  | 0         | 0         |
| 0          | 0         | 0         | 0         | 0         | 0         |
| 4.95322    | 5.50175   | 5.64343   | 5.27509   | 4.84037   | 3.75686   |
| 7.43599    | 7.0178    | 8.20047   | 6.7724    | 7.96557   | 5.78556   |
| 0.491437   | 0         | 0         | 0.279943  | 1.06463   | 0         |
| 0.412023   | 0.515246  | 0.576766  | 0.419117  | 0.198353  | 0.194846  |
| 0          | 0         | 0         | 0         | 0         | 0         |
| 31.7378    | 30.5164   | 31.6299   | 29.2924   | 24.1727   | 22.6778   |
| 23.7679    | 17.8322   | 21.1769   | 17.3976   | 20.371    | 16.2869   |
| 0.548289   | 0.455518  | 0.46051   | 0.624657  | 1.18779   | 0.230477  |
| 0.333781   | 0.73948   | 0.513963  | 0.591533  | 0.642746  | 0.654765  |
| 0          | 0         | 0         | 0         | 0         | 0         |
| 0.0967691  | 0.0904452 | 0         | 0.0826855 | 0.104818  | 0.0406775 |
| 10.974     | 12.1807   | 12.2074   | 12.2388   | 14.0429   | 11.5248   |
| 0.928543   | 1.27286   | 0.81888   | 0.634724  | 1.50867   | 1.01483   |
| 0.280816   | 0.194418  | 0.353788  | 0.177738  | 0.202783  | 0.314781  |
| 18.7879    | 16.9066   | 24.2701   | 23.8155   | 20.3606   | 20.9396   |
| 13.6849    | 12.367    | 12.636    | 11.5574   | 10.864    | 10.1838   |
| 12.929     | 11.9703   | 10.8591   | 9.94467   | 11.8286   | 13.7251   |
| 3.18385    | 2.89798   | 3.10673   | 3.02275   | 2.92462   | 2.28307   |
| 17.8416    | 17.1595   | 32.8689   | 45.6465   | 27.3624   | 23.3844   |
| 60.5647    | 57.348    | 56.6464   | 60.2614   | 46.216    | 46.7153   |
| 33.5094    | 33.4406   | 31.2489   | 30.1774   | 42.4201   | 42.1928   |
| 9.23271    | 10.517    | 11.4956   | 10.4776   | 9.92256   | 12.0676   |
| 2.0539     | 1.23565   | 3.03375   | 0.887575  | 2.5316    | 1.07177   |
| 0.241982   | 0.196805  | 0.27176   | 0.263712  | 0.3532    | 0.305071  |
| 0.0717553  | 0.0298071 | 0.0602675 | 0.0136249 | 0.0647699 | 0.0807931 |
| 161.82     | 114.31    | 167.529   | 151.496   | 203.869   | 291.852   |
| 7.87441    | 8.25309   | 9.74486   | 7.5752    | 9.88935   | 8.00955   |
| 20.4185    | 25.3338   | 23.8382   | 25.2815   | 22.5869   | 24.7895   |
| 20.8448    | 23.4779   | 22.1489   | 25.1826   | 24.3466   | 23.6796   |
| 2.53796    | 2.61839   | 2.77812   | 2.08564   | 3.15467   | 2.57093   |
| 6.78938    | 6.11046   | 7.78273   | 7.05905   | 8.26474   | 8.58149   |
| 15.6892    | 17.9835   | 15.3731   | 16.8696   | 16.1974   | 13.9161   |
| 0          | 0         | 0         | 0         | 0         | 0         |
| 22.6834    | 21.0409   | 21.1482   | 15.8068   | 21.7077   | 22.2383   |
| 0.247497   | 0.213924  | 0.646788  | 0.248344  | 0.652411  | 0.152934  |
| 71.5246    | 76.323    | 65.2666   | 74.4645   | 64.871    | 77.0828   |
| 0.191946   | 0.241522  | 0.0964615 | 0.254723  | 0.25917   | 0.114435  |

|           |           |          |           |           |           |
|-----------|-----------|----------|-----------|-----------|-----------|
| 0.756667  | 0.544139  | 0.842149 | 0.661237  | 0.860664  | 0.223149  |
| 30.9834   | 29.4626   | 30.4839  | 29.5787   | 33.7778   | 37.5786   |
| 10.571    | 7.28748   | 11.4288  | 11.36     | 9.58249   | 9.07623   |
| 3.10581   | 4.41505   | 2.26121  | 5.68989   | 2.58651   | 2.62422   |
| 1.02296   | 0.916274  | 1.26865  | 1.01976   | 1.67939   | 0.96752   |
| 2.56958   | 3.6948    | 0.701372 | 1.30769   | 0.391476  | 0.501052  |
| 3.96241   | 4.60257   | 5.1388   | 3.62116   | 4.92256   | 3.9044    |
| 1.70198   | 1.67233   | 1.44324  | 1.0441    | 1.57765   | 1.27953   |
| 0.629676  | 22.582    | 1.14588  | 194.755   | 1.3641    | 10.2346   |
| 3.38479   | 3.37471   | 4.92069  | 4.20064   | 4.67024   | 3.22237   |
| 30.2673   | 28.4891   | 26.8378  | 27.6513   | 20.1535   | 20.2084   |
| 0.0254647 | 0.0317341 | 0.128327 | 0         | 0.0275829 | 0         |
| 8.21E-25  | 2.74E-19  | 3.74E-09 | 1.71E-119 | 1.19E-06  | 9.01E-43  |
| 26.2364   | 23.3212   | 27.5385  | 32.1035   | 24.7787   | 27.6169   |
| 5.42983   | 3.82133   | 5.2336   | 1.77577   | 7.41436   | 4.19963   |
| 0         | 0         | 0        | 0.0386908 | 0         | 0         |
| 1.2801    | 1.40366   | 1.84085  | 1.21468   | 1.74579   | 0.890302  |
| 0         | 0         | 0        | 0         | 0         | 0         |
| 0         | 0         | 0        | 0         | 0         | 0         |
| 0         | 0         | 0        | 0         | 0         | 0         |
| 0         | 0         | 0        | 0         | 0.241443  | 0         |
| 6.75856   | 5.89088   | 5.56169  | 5.91958   | 6.62251   | 8.99924   |
| 6.14793   | 6.32353   | 5.73216  | 4.41418   | 6.39406   | 5.66884   |
| 1.51097   | 1.93043   | 2.01557  | 1.5623    | 2.77818   | 1.7293    |
| 0.130091  | 0.0405299 | 0        | 0         | 0.105684  | 0.0546847 |
| 34.8636   | 35.0859   | 32.3045  | 28.9627   | 24.2331   | 30.9306   |
| 0.0898136 | 0         | 0        | 0.102323  | 0         | 0.0755073 |
| 0.0630179 | 0         | 0.11909  | 0.0717952 | 0.10239   | 0.02649   |
| 0.0932519 | 0         | 0.274129 | 0.318721  | 0.269356  | 0.130663  |
| 0.0499303 | 0.041482  | 0        | 0.0758463 | 0         | 0.0335816 |
| 14.5676   | 15.5015   | 16.4131  | 20.1395   | 12.9178   | 18.9482   |
| 0         | 0         | 0        | 0         | 0         | 0         |
| 0         | 0         | 0        | 0         | 0         | 0         |
| 0         | 0         | 0        | 0         | 0         | 0         |
| 5.79796   | 6.45872   | 7.93226  | 6.75409   | 9.12698   | 8.06218   |
| 21.4159   | 23.9227   | 17.8071  | 22.116    | 19.3291   | 19.2618   |
| 9.1287    | 10.093    | 14.3698  | 15.2355   | 15.4648   | 14.5501   |
| 0.37041   | 0.153868  | 0.116666 | 0.492335  | 0.33435   | 0.207605  |
| 16.7454   | 9.23301   | 11.9144  | 11.529    | 12.9186   | 13.6729   |
| 1.9531    | 1.12357   | 2.7187   | 1.55036   | 2.75165   | 1.14831   |
| 1.01607   | 0.539531  | 0.54752  | 0.515217  | 1.13774   | 0.686627  |
| 2.80325   | 2.97858   | 6.13397  | 6.0512    | 7.25544   | 8.36016   |
| 49.3132   | 53.4743   | 47.3913  | 48.9882   | 37.7877   | 44.4949   |

|           |           |           |           |          |           |
|-----------|-----------|-----------|-----------|----------|-----------|
| 0.556601  | 0.510365  | 0.463136  | 0.454615  | 0.38673  | 0.361959  |
| 32.5921   | 32.7914   | 31.2154   | 32.2709   | 31.424   | 32.1904   |
| 6.85355   | 6.86589   | 6.76994   | 6.36721   | 7.38494  | 7.75874   |
| 0         | 0         | 0         | 0.0264504 | 0        | 0         |
| 2.80458   | 2.40182   | 3.81804   | 3.02864   | 2.72112  | 2.64839   |
| 0         | 0         | 0         | 0         | 0        | 0         |
| 25.571    | 26.8838   | 28.8677   | 27.9642   | 28.1844  | 25.0651   |
| 0.0298596 | 0.037211  | 0         | 0         | 0        | 0         |
| 0         | 0         | 0         | 0         | 0        | 0         |
| 0.998151  | 0.969271  | 0.99618   | 0.66747   | 1.03627  | 1.11646   |
| 0.145527  | 0.0362711 | 0.110006  | 0.0994777 | 0.094579 | 0.0489385 |
| 12.5631   | 14.0765   | 9.38251   | 7.04265   | 8.55878  | 9.40849   |
| 63.7816   | 62.6386   | 62.6048   | 68.0563   | 50.5583  | 56.8531   |
| 1.35031   | 1.50468   | 1.78929   | 1.39974   | 1.15308  | 1.22984   |
| 51.0991   | 60.4205   | 51.1398   | 62.6495   | 46.1178  | 47.3337   |
| 14.6337   | 17.1006   | 14.7871   | 13.643    | 11.1407  | 13.5789   |
| 30.8526   | 29.2177   | 28.8886   | 25.4635   | 34.1864  | 26.7504   |
| 7.77346   | 8.08629   | 10.1898   | 8.39441   | 12.7127  | 14.2089   |
| 2.88285   | 2.87408   | 3.63197   | 2.53366   | 4.46092  | 3.04687   |
| 14.1508   | 15.6043   | 15.0531   | 13.5781   | 16.0796  | 15.169    |
| 7.0132    | 7.4077    | 6.72775   | 6.86607   | 5.65705  | 5.73057   |
| 31.9738   | 35.0791   | 34.9187   | 33.0789   | 28.0571  | 36.1548   |
| 15.757    | 14.7567   | 15.6023   | 13.6309   | 14.6275  | 15.1693   |
| 0         | 0.0542085 | 0.0548025 | 0.0991155 | 0        | 0.0365702 |
| 84.9404   | 65.2123   | 184.922   | 96.908    | 134.082  | 91.6835   |
| 0         | 0         | 0         | 0.275247  | 0        | 0         |
| 0         | 0         | 0         | 0         | 0        | 0         |
| 78.3872   | 66.389    | 81.6908   | 67.6998   | 94.4605  | 70.1071   |
| 0         | 0         | 46.9163   | 0         | 40.337   | 62.6154   |
| 0         | 0.0798429 | 0         | 0         | 0        | 0         |
| 46.6286   | 46.8482   | 42.752    | 38.8035   | 34.2403  | 33.8458   |
| 28.4363   | 27.9683   | 25.8535   | 27.9067   | 22.3868  | 24.6872   |
| 20.0044   | 18.8103   | 18.1231   | 19.0596   | 18.6682  | 18.1369   |
| 29.6022   | 27.6336   | 25.8807   | 25.9329   | 25.448   | 27.8322   |
| 0         | 0         | 0         | 0         | 0        | 0         |
| 0.047714  | 0         | 0         | 0.0350167 | 0        | 0         |
| 2.09049   | 2.68411   | 1.28227   | 1.22772   | 2.12714  | 1.9255    |
| 0         | 0         | 0         | 0         | 0        | 0         |
| 3.41523   | 4.4334    | 3.94414   | 4.5394    | 2.81302  | 4.09748   |
| 10.961    | 11.078    | 10.8343   | 11.3238   | 14.5282  | 12.9505   |
| 8.01582   | 7.37846   | 5.66908   | 6.64166   | 8.66284  | 9.526     |
| 16.9738   | 16.5716   | 25.8852   | 26.1075   | 20.4291  | 25.4927   |
| 0.417582  | 9.29E-163 | 4.93E-55  | 1.05E-89  | 4.37E-64 | 0.283464  |

|           |           |           |           |           |           |
|-----------|-----------|-----------|-----------|-----------|-----------|
| 108.526   | 91.9405   | 70.6495   | 64.5502   | 52.5524   | 65.5488   |
| 1.52296   | 0.843515  | 0.639568  | 1.34951   | 1.09976   | 0.853579  |
| 9.30066   | 9.71019   | 9.58235   | 7.67717   | 11.2849   | 8.41865   |
| 7.19916   | 7.72592   | 8.37487   | 6.64024   | 9.69394   | 8.40457   |
| 0         | 0         | 0         | 0         | 0         | 0         |
| 0.994881  | 1.81545   | 2.59634   | 2.63123   | 2.15527   | 2.24038   |
| 0.70941   | 0.715672  | 0.766074  | 0.461839  | 0.402505  | 0.738412  |
| 0.128657  | 0.123332  | 0.187025  | 0.146576  | 0.0643192 | 0.108163  |
| 5.02209   | 4.62777   | 6.37172   | 4.43462   | 5.84985   | 3.95924   |
| 0.840004  | 0.575747  | 1.21703   | 0.933078  | 2.27469   | 1.65957   |
| 0.124001  | 0.231795  | 0.0390559 | 4.48541   | 0.134316  | 0.755808  |
| 0         | 0         | 0.676864  | 0.306043  | 0         | 0         |
| 15.7017   | 13.47     | 10.7596   | 10.1099   | 10.3348   | 10.0033   |
| 0         | 0         | 0         | 0         | 0         | 0         |
| 20.1518   | 16.7127   | 25.4772   | 20.8678   | 22.2867   | 22.5495   |
| 0         | 0         | 0         | 0         | 0         | 0         |
| 0         | 0         | 0         | 0         | 0         | 0         |
| 13.633    | 12.2498   | 12.1791   | 12.8519   | 13.0286   | 14.2227   |
| 0         | 0.0488008 | 0         | 0         | 0         | 0         |
| 0.217311  | 0.067703  | 0.492806  | 0.505475  | 1.41153   | 0.285464  |
| 1.00772   | 0.579608  | 1.07426   | 0.574038  | 1.25947   | 1.01012   |
| 4.49339   | 5.33918   | 6.13422   | 4.72302   | 6.70475   | 4.66634   |
| 0.0803584 | 0.0500615 | 0.0506073 | 0.182928  | 0         | 0.0337353 |
| 8.31058   | 8.01457   | 7.92862   | 7.89663   | 4.53828   | 5.66772   |
| 0.197126  | 0.245658  | 0.24835   | 0.153548  | 0.290871  | 0.195735  |
| 1740.7    | 2343.8    | 739.634   | 482.386   | 38.9221   | 64.3749   |
| 0.195885  | 0         | 0         | 0         | 0         | 0.0411706 |
| 60.9016   | 43.1962   | 45.0819   | 37.3846   | 33.8042   | 17.9839   |
| 13.2891   | 14.4327   | 14.04     | 15.8106   | 15.1078   | 19.0017   |
| 15.6008   | 14.0562   | 15.7068   | 13.9607   | 14.728    | 11.0055   |
| 27.1809   | 25.9143   | 22.6127   | 18.1014   | 25.0839   | 21.1368   |
| 0         | 1.39968   | 0         | 0         | 0         | 0         |
| 0.793302  | 0.593167  | 0.509602  | 0.518314  | 0.72427   | 0.395872  |
| 16.8367   | 16.5278   | 17.5934   | 17.3493   | 17.4628   | 15.904    |
| 0.132606  | 0.330507  | 0.334129  | 0         | 0.287273  | 0.445934  |
| 22.8854   | 20.4948   | 24.8698   | 20.7591   | 23.5308   | 25.68     |
| 0         | 0         | 0         | 0         | 0         | 0         |
| 0.83496   | 0.424923  | 1.06243   | 1.10077   | 1.13347   | 0.819214  |
| 0.119224  | 16.0216   | 0.225307  | 106.219   | 1.03313   | 9.6725    |
| 0.225488  | 0.148087  | 0.0832949 | 0.0150938 | 0.15827   | 0.100192  |
| 0         | 0         | 0         | 0         | 0         | 0         |
| 0         | 0         | 0         | 0         | 0         | 0         |
| 0.138384  | 0.319445  | 0.171988  | 0.182172  | 0.123165  | 0.286343  |



|           |           |           |           |           |           |
|-----------|-----------|-----------|-----------|-----------|-----------|
| 27.7996   | 29.305    | 25.7091   | 28.1582   | 30.4795   | 33.2759   |
| 0.649827  | 0.551871  | 0.589865  | 0.37794   | 0.674861  | 0.349415  |
| 23.1023   | 28.79     | 0         | 0         | 25.0239   | 0         |
| 0         | 0.0246856 | 0         | 0         | 0         | 0         |
| 0.0383202 | 0         | 0         | 0         | 0         | 0         |
| 4.11162   | 4.93366   | 3.88442   | 3.88122   | 5.54015   | 4.07473   |
| 0.0841231 | 0.104834  | 0         | 0.14376   | 0.182241  | 0.194489  |
| 0.436947  | 0.363657  | 1.18977   | 1.01167   | 1.75069   | 1.62346   |
| 14.579    | 14.2865   | 15.3759   | 16.9005   | 15.7917   | 12.4929   |
| 0.439646  | 0.76372   | 0.755304  | 0.92587   | 0.678246  | 0.660827  |
| 2.30262   | 3.0716    | 2.86026   | 5.39453   | 2.35377   | 2.01773   |
| 0         | 0         | 0.0849062 | 0.0341246 | 0         | 0         |
| 8.06335   | 7.99695   | 7.68502   | 6.04774   | 13.1492   | 7.67437   |
| 22.813    | 24.9468   | 30.92     | 26.3785   | 48.0205   | 37.3906   |
| 0.675732  | 13.6339   | 0.932402  | 76.875    | 2.23067   | 11.416    |
| 0         | 0         | 0         | 0         | 0         | 0         |
| 14.8574   | 16.2766   | 16.6907   | 14.4112   | 13.5393   | 13.8751   |
| 0.0427799 | 0.0266561 | 0.0269482 | 0.170584  | 0.254861  | 0.0719311 |
| 20.3744   | 13.8348   | 28.7192   | 15.2592   | 34.5032   | 29.1148   |
| 0.0810615 | 0.252547  | 0.153188  | 0.184704  | 0.263412  | 0.0681493 |
| 0         | 0         | 0         | 0         | 0         | 0         |
| 12.3421   | 13.5672   | 15.1925   | 15.9654   | 11.416    | 10.8326   |
| 1.01844   | 1.02283   | 0.924955  | 1.13162   | 1.19316   | 0.746052  |
| 1.74625   | 1.74707   | 1.89016   | 1.40104   | 1.78494   | 1.63351   |
| 32.8629   | 33.5128   | 32.6311   | 35.1032   | 37.96     | 39.5577   |
| 9.38018   | 7.0101    | 7.63187   | 6.8952    | 7.30529   | 4.83083   |
| 0         | 0         | 0         | 0         | 0         | 0         |
| 21.6493   | 21.7101   | 23.4599   | 25.9108   | 20.2478   | 22.46     |
| 0.320129  | 0.445878  | 1.32857   | 0.858158  | 0.346757  | 0.221641  |
| 4.65611   | 4.60105   | 5.90047   | 4.48673   | 5.93211   | 4.39154   |
| 7.64961   | 7.02111   | 8.39657   | 6.43265   | 7.90654   | 8.82691   |
| 24.116    | 25.3343   | 61.1806   | 66.2709   | 31.5774   | 33.7006   |
| 0.09418   | 0         | 0         | 0.0357659 | 0         | 0         |
| 10.8118   | 11.3953   | 11.828    | 11.024    | 9.99189   | 9.42368   |
| 3.3615    | 3.10154   | 4.19428   | 3.53511   | 2.73083   | 3.26083   |
| 0.0968873 | 0.167207  | 0.268624  | 0.2738    | 0.480742  | 0.105857  |
| 0.194989  | 0         | 0         | 0.222148  | 0.422417  | 0         |
| 5.22968   | 4.61843   | 8.04408   | 4.09306   | 9.0116    | 5.6127    |
| 0.0534904 | 0.0333396 | 0         | 0         | 0.0918507 | 0         |
| 5.57777   | 6.17599   | 5.47747   | 5.49172   | 6.40001   | 5.18955   |
| 0.0670318 | 0.027845  | 0.1126    | 0.0509121 | 0         | 0.0563545 |
| 0         | 34.048    | 34.4211   | 31.1269   | 59.1881   | 22.9695   |
| 8.5888    | 8.3648    | 8.411     | 7.44159   | 9.55078   | 9.08151   |

|           |           |           |           |           |           |
|-----------|-----------|-----------|-----------|-----------|-----------|
| 0.196025  | 0.326413  | 0.410425  | 0.749281  | 0.390959  | 0.44098   |
| 15.8189   | 17.2292   | 16.4244   | 16.8203   | 22.8084   | 26.9506   |
| 0.0812463 | 0.0506245 | 0.0767689 | 0.0925625 | 0.110005  | 0.0853809 |
| 0.0454553 | 0.453171  | 0         | 0         | 0         | 0         |
| 31.1556   | 31.4558   | 33.1052   | 30.2355   | 34.9364   | 33.0742   |
| 73.3167   | 85.3765   | 77.348    | 77.9047   | 140.776   | 162.568   |
| 0         | 0         | 0.120141  | 0.289716  | 0.0344312 | 0.0534476 |
| 5.04973   | 4.3187    | 5.14567   | 4.90703   | 3.8342    | 4.3078    |
| 3.8228    | 4.23464   | 4.58683   | 3.52568   | 5.06095   | 5.71356   |
| 1.29827   | 2.134     | 0.513672  | 0.59824   | 0.606046  | 0.254623  |
| 9.45077   | 9.20212   | 7.30241   | 10.2869   | 7.06192   | 8.40339   |
| 12.6109   | 13.933    | 14.56     | 15.2679   | 12.7219   | 12.2478   |
| 0         | 0         | 0         | 0.169504  | 0.0805784 | 0.125082  |
| 8.00195   | 6.59766   | 6.95847   | 5.82443   | 8.74051   | 6.76698   |
| 270.1     | 268.11    | 136.384   | 153.355   | 104.143   | 145.543   |
| 9.20523   | 9.95922   | 11.7837   | 12.4769   | 9.00909   | 9.58037   |
| 15.7951   | 20.3315   | 10.7335   | 20.8478   | 6.63548   | 8.00986   |
| 2.82341   | 2.85622   | 2.2598    | 1.36235   | 3.20218   | 2.73671   |
| 24.5051   | 22.2272   | 19.3444   | 20.8504   | 18.9836   | 19.4283   |
| 6.00487   | 6.57431   | 5.54492   | 5.70294   | 4.97837   | 4.66197   |
| 0         | 0         | 0         | 0         | 0         | 0         |
| 9.12361   | 6.11277   | 11.0722   | 4.76822   | 11.1889   | 6.1238    |
| 0         | 0         | 0         | 0         | 0.213375  | 0         |
| 0         | 0         | 0         | 0         | 0         | 0         |
| 0.105462  | 0.183997  | 0.15944   | 0.0720905 | 0.0228468 | 0.0354652 |
| 0         | 0         | 0         | 0         | 0         | 0         |
| 0         | 0         | 0         | 0         | 0         | 0         |
| 25.0878   | 30.6664   | 20.5313   | 19.4848   | 15.5937   | 18.3967   |
| 0.083288  | 0         | 0.0524654 | 0         | 0.0902159 | 0.0350106 |
| 0         | 0         | 0         | 0         | 0         | 0         |
| 0.0932134 | 0.096802  | 0.0782902 | 0.0353988 | 0.084139  | 0.156731  |
| 1.10172   | 1.09837   | 0         | 0         | 0.716019  | 0         |
| 8.21852   | 8.72459   | 9.58717   | 9.44029   | 9.52492   | 6.94738   |
| 228.594   | 210.39    | 159.936   | 167.734   | 125.473   | 182.226   |
| 0.0455271 | 0.170208  | 0         | 0         | 0.0493141 | 0         |
| 14.8919   | 17.5466   | 0.0936135 | 0.056241  | 0.098031  | 0.0831612 |
| 17.9314   | 17.6678   | 14.9679   | 15.3972   | 13.2038   | 11.3745   |
| 0.558448  | 0.306402  | 0.258559  | 0.496776  | 0.501771  | 0.195309  |
| 1.86541   | 1.49814   | 1.92139   | 2.29236   | 1.53728   | 1.58451   |
| 0.298157  | 0.504264  | 0.469543  | 0.327553  | 0.461368  | 0.447614  |
| 0.790376  | 0.849532  | 0.709478  | 0.641579  | 0.824014  | 0.531583  |
| 0.0318088 | 0.15856   | 0.0801488 | 0.0724784 | 0.0861365 | 0.120339  |
| 11.6821   | 10.8174   | 7.95343   | 8.58488   | 11.1957   | 9.54811   |

|           |           |           |           |           |           |
|-----------|-----------|-----------|-----------|-----------|-----------|
| 12.6662   | 13.1479   | 11.0407   | 11.2611   | 12.4634   | 13.3439   |
| 1.02598   | 0.974157  | 0.584743  | 0.695766  | 0.793804  | 0.533964  |
| 10.1591   | 1.39322   | 0.379633  | 0.645607  | 0.434509  | 2.17377   |
| 3.60519   | 3.61743   | 4.62731   | 3.16728   | 4.99592   | 3.32975   |
| 17.1562   | 20.1893   | 17.4558   | 27.3146   | 14.3021   | 14.4235   |
| 9.18268   | 5.91577   | 14.7639   | 8.935     | 14.6739   | 7.54673   |
| 0.446226  | 0.390895  | 0.512765  | 0.118453  | 0.246586  | 0.0924875 |
| 0.144059  | 0         | 0.124068  | 0         | 0.156042  | 0.0798823 |
| 0         | 0         | 0         | 0         | 0         | 0         |
| 1.22989   | 0.566156  | 1.40194   | 1.15019   | 1.20444   | 1.05858   |
| 58.9297   | 68.6456   | 56.9147   | 58.5834   | 44.5693   | 56.0984   |
| 0         | 0         | 0         | 0         | 0         | 0         |
| 0.0694579 | 0         | 0         | 0.0791322 | 0         | 0         |
| 0.510566  | 0.397666  | 1.12567   | 0.581679  | 1.0715    | 0.509721  |
| 3.35647   | 4.38198   | 3.89193   | 2.9137    | 4.7435    | 4.67066   |
| 6.56928   | 6.0725    | 6.83631   | 6.4425    | 7.57184   | 6.81761   |
| 2.89375   | 2.2425    | 3.6457    | 2.78427   | 3.27932   | 1.85016   |
| 0.506513  | 1.36763   | 3.29702   | 4.23178   | 0.548644  | 0.496803  |
| 0         | 0         | 0         | 0         | 0         | 0         |
| 0         | 0         | 0         | 0         | 0         | 0         |
| 0.630568  | 0.785814  | 0         | 0.179599  | 0.170755  | 0         |
| 5.83966   | 4.45451   | 8.14646   | 5.17966   | 6.96925   | 4.02482   |
| 13.268    | 15.2619   | 15.9143   | 13.0179   | 13.7732   | 11.3516   |
| 0         | 0         | 0         | 0         | 0         | 0         |
| 5.99782   | 33.6351   | 7.55638   | 30.7494   | 53.0565   | 20.1698   |
| 23.1417   | 16.5503   | 28.9548   | 26.1837   | 37.04     | 67.37     |
| 0.168099  | 0.733195  | 0.42356   | 0.287268  | 0.0910405 | 0.353307  |
| 7.53987   | 8.97981   | 4.43293   | 4.58136   | 6.39751   | 6.55015   |
| 0.0349071 | 0         | 0.0268485 | 0         | 0         | 0         |
| 35.5912   | 33.0938   | 36.6012   | 32.2292   | 45.3901   | 42.9822   |
| 6.68686   | 6.26501   | 8.35837   | 4.86271   | 8.7671    | 6.37039   |
| 24.3829   | 24.8799   | 26.0919   | 24.1296   | 27.8168   | 27.4635   |
| 0.289985  | 0.438817  | 0.260956  | 0.377571  | 0.314106  | 0.487749  |
| 45.298    | 44.4761   | 49.694    | 51.3133   | 46.7779   | 53.7948   |
| 22.2068   | 22.4418   | 22.0678   | 26.122    | 18.9731   | 23.33     |
| 0         | 0         | 0         | 0         | 0         | 0         |
| 12.7273   | 12.0603   | 11.3051   | 14.0572   | 13.8574   | 15.2592   |
| 24.0062   | 24.1687   | 22.7809   | 21.6558   | 24.14     | 25.8527   |
| 0         | 0         | 0         | 0         | 0         | 0         |
| 38.6336   | 36.6388   | 31.2038   | 29.6755   | 22.5678   | 21.5357   |
| 29.7387   | 34.4532   | 33.2098   | 31.9042   | 33.9907   | 38.6466   |
| 0         | 0.0130387 | 0.0527265 | 0.0357603 | 0.0226662 | 0.0175924 |
| 29.3948   | 29.8073   | 36.0294   | 33.2014   | 43.6491   | 40.1356   |

|           |           |           |           |           |           |
|-----------|-----------|-----------|-----------|-----------|-----------|
| 3.73872   | 2.68763   | 3.63634   | 2.18018   | 4.18063   | 3.60028   |
| 0         | 0         | 0         | 0.117111  | 0.445379  | 0.0781898 |
| 73.8093   | 58.1424   | 99.8743   | 65.1482   | 85.9309   | 68.098    |
| 12.0917   | 21.7429   | 7.9299    | 13.7129   | 6.57863   | 8.58739   |
| 0         | 0         | 0         | 0         | 0         | 0         |
| 2.11E-266 | 4.96E-132 | 3.14E-151 | 3.93E-141 | 3.44E-178 | 3.29E-122 |
| 254.607   | 255.361   | 349.599   | 356.765   | 335.861   | 354.908   |
| 15.3405   | 10.6396   | 13.7248   | 12.2799   | 19.7647   | 15.5984   |
| 1.86458   | 1.90243   | 1.0859    | 1.36903   | 1.8425    | 1.41531   |
| 2.21051   | 2.10107   | 2.61971   | 2.02752   | 2.31326   | 2.31515   |
| 0         | 0         | 0         | 0         | 0         | 0         |
| 0         | 0         | 0         | 0         | 0         | 0         |
| 1.61182   | 0.942832  | 0.87028   | 1.12427   | 1.14017   | 0.719018  |
| 8.3379    | 11.7089   | 5.997     | 6.74634   | 5.74014   | 6.25997   |
| 0.226336  | 0.112824  | 0.671935  | 0.257861  | 0.58839   | 0.133198  |
| 5.9028    | 7.78084   | 3.59512   | 5.18359   | 6.93403   | 5.8989    |
| 0         | 0         | 0         | 0         | 0         | 0         |
| 4.24852   | 3.13364   | 5.29639   | 2.43861   | 5.37289   | 2.68875   |
| 0.0571034 | 0.106098  | 0.0535095 | 0         | 0.12151   | 0         |
| 0.0766403 | 0         | 0         | 0         | 0         | 0.0322162 |
| 5.98345   | 6.29666   | 6.63368   | 3.87803   | 6.39474   | 4.31493   |
| 0.754013  | 0.416723  | 0.187246  | 0.0376262 | 0.892757  | 0.391031  |
| 15.7395   | 16.2705   | 14.9055   | 16.8989   | 15.8192   | 20.6355   |
| 0.0786813 | 0.196105  | 0.198254  | 0.13446   | 0.085226  | 0.132297  |
| 6.40432   | 5.93396   | 7.92769   | 4.6856    | 6.31202   | 3.82772   |
| 1.48057   | 1.62741   | 1.6138    | 1.21297   | 2.00015   | 1.51047   |
| 0.688528  | 0.750788  | 0.699871  | 0.793342  | 1.44075   | 1.15113   |
| 27.0324   | 26.7306   | 27.978    | 28.4731   | 28.2077   | 29.8499   |
| 6.83817   | 6.56764   | 7.67853   | 8.76008   | 9.13559   | 8.17715   |
| 1.72452   | 2.27935   | 2.69935   | 2.02426   | 1.9816    | 2.41638   |
| 9.39468   | 9.22412   | 11.3431   | 8.7602    | 12.033    | 10.0728   |
| 0.0338808 | 0         | 0.213424  | 0.0385998 | 0.0733979 | 0.028484  |
| 2.53989   | 2.51551   | 2.97639   | 2.94207   | 2.77463   | 2.38223   |
| 21.5376   | 22.1852   | 18.7147   | 20.0406   | 16.4371   | 16.9851   |
| 0.0701117 | 0         | 0         | 0.0399385 | 0         | 0.0294719 |
| 16.1342   | 16.1998   | 16.9189   | 14.0684   | 15.7493   | 13.5893   |
| 51.3432   | 57.5782   | 41.1432   | 54.8619   | 28.5919   | 40.9717   |
| 0         | 0.0486191 | 0.0491518 | 0.0222239 | 0.0211295 | 0         |
| 14.4717   | 14.2055   | 15.3763   | 13.3331   | 14.2292   | 12.5032   |
| 0         | 0         | 0         | 0         | 0         | 0         |
| 13.1055   | 13.9897   | 14.3879   | 12.8485   | 12.5949   | 12.6526   |
| 19.9069   | 19.7636   | 7.59046   | 8.74539   | 8.21155   | 9.25294   |
| 0         | 0         | 0         | 0         | 0         | 0         |

|          |           |            |           |          |          |
|----------|-----------|------------|-----------|----------|----------|
| 1.05354  | 1.12423   | 1.42365    | 1.41853   | 1.28973  | 1.442    |
| 7.24591  | 5.6529    | 11.6634    | 6.64769   | 9.96081  | 8.22609  |
| 0        | 0         | 0          | 0         | 0        | 0        |
| 2.56879  | 2.0748    | 2.81996    | 1.99116   | 3.42928  | 2.63412  |
| 1.21907  | 1.42426   | 2.39977    | 1.07059   | 2.42087  | 1.40922  |
| 0        | 0.0713352 | 0          | 0.0652151 | 0        | 0.192498 |
| 6.41919  | 6.16034   | 4.50198    | 5.31478   | 4.24397  | 5.16806  |
| 0        | 0.20255   | 1.13924    | 0         | 0.360738 | 0.439388 |
| 25.04    | 26.4066   | 26.445     | 25.1696   | 25.7565  | 27.8713  |
| 0        | 0         | 0.00831199 | 0.015033  | 0        | 0        |
| 9.98674  | 10.923    | 10.3703    | 9.62106   | 9.78965  | 8.22646  |
| 0.99096  | 1.23493   | 0          | 0         | 0        | 0.833112 |
| 29.4087  | 27.5758   | 32.7605    | 31.9701   | 30.7206  | 31.7187  |
| 38.4536  | 36.8197   | 36.4707    | 32.0065   | 32.1482  | 29.8523  |
| 1.14717  | 1.70715   | 0.924521   | 2.17614   | 1.55277  | 1.17843  |
| 14.5761  | 13.2146   | 14.6316    | 15.1874   | 14.3057  | 18.3673  |
| 0.298878 | 0.260131  | 0.262981   | 0.104042  | 0.495974 | 0.442381 |
| 378.826  | 327.863   | 382.887    | 363.847   | 383.257  | 338.52   |
| 5.59614  | 3.42683   | 5.39872    | 3.71612   | 5.50649  | 4.91744  |
| 0        | 0         | 0          | 0         | 0        | 0        |
| 3.22223  | 2.59337   | 3.12923    | 3.70928   | 3.4539   | 2.79363  |
| 0.107393 | 0         | 0.4059     | 0.244703  | 0.116326 | 0.180574 |
| 24.3209  | 21.5632   | 23.0818    | 25.023    | 22.2821  | 29.3643  |
| 1.63107  | 1.45269   | 2.49028    | 1.67764   | 3.14474  | 2.26204  |
| 0.529729 | 0.465767  | 0.845947   | 0.39083   | 0.777905 | 0.422479 |
| 3.12315  | 2.2674    | 2.86982    | 2.39931   | 3.92607  | 1.63803  |
| 0.336243 | 0.580189  | 0.488789   | 0.412543  | 0.336195 | 0.369663 |
| 167.577  | 174.704   | 185.397    | 180.501   | 139.225  | 162.152  |
| 0        | 0         | 0          | 0         | 0        | 0        |
| 15.8129  | 15.643    | 12.939     | 11.6388   | 10.948   | 9.7536   |
| 0.56082  | 0.72839   | 1.29065    | 0.49773   | 0.921865 | 0.48999  |
| 11.0265  | 12.221    | 13.9672    | 10.4698   | 14.5806  | 12.5739  |
| 20.791   | 22.0713   | 24.7385    | 24.8566   | 20.6206  | 24.6005  |
| 6.26403  | 6.11344   | 5.61001    | 5.01414   | 4.97956  | 5.28695  |
| 20.1403  | 19.7192   | 18.1163    | 17.8447   | 17.5978  | 16.1966  |
| 3.83151  | 3.77174   | 1.83467    | 1.85192   | 3.85106  | 4.37111  |
| 0        | 0         | 0          | 0         | 0        | 0        |
| 40.6118  | 45.2801   | 38.8405    | 40.2375   | 38.0725  | 47.4107  |
| 3.15343  | 2.70577   | 2.99593    | 2.9448    | 3.13576  | 3.56381  |
| 0        | 0         | 0          | 0         | 0        | 0        |
| 14.7214  | 14.4911   | 17.611     | 15.5009   | 18.986   | 16.5074  |
| 46.1355  | 43.897    | 51.0068    | 44.1693   | 52.6727  | 46.4928  |
| 13.8372  | 13.8337   | 18.6471    | 15.6761   | 18.9722  | 19.4474  |

|           |           |           |           |           |           |
|-----------|-----------|-----------|-----------|-----------|-----------|
| 8.62504   | 9.14195   | 6.92609   | 10.3955   | 5.53392   | 4.63183   |
| 0.851687  | 0.831073  | 0.789567  | 1.28154   | 0.722358  | 1.01324   |
| 0         | 0         | 0         | 0         | 0.0864978 | 0.0671354 |
| 1.78174   | 0.994209  | 1.87619   | 1.48456   | 2.10277   | 1.60972   |
| 5.7478    | 5.12713   | 5.755     | 4.68725   | 6.38974   | 4.85768   |
| 13.6899   | 14.0991   | 14.2482   | 10.2979   | 12.3853   | 13.43     |
| 0         | 0         | 0         | 0         | 0         | 0         |
| 7.48101   | 7.70008   | 6.88377   | 8.11574   | 8.0203    | 7.10506   |
| 0         | 0         | 0         | 0         | 0         | 0         |
| 0         | 0         | 0         | 0         | 0         | 0         |
| 27.1805   | 28.1148   | 20.8725   | 25.9094   | 23.7755   | 25.524    |
| 276.892   | 200.951   | 230.213   | 278.766   | 244.75    | 284.076   |
| 0         | 0         | 0         | 0         | 0         | 0         |
| 10.061    | 9.5928    | 9.31511   | 8.19284   | 12.2875   | 10.0195   |
| 0         | 0         | 0         | 0         | 0         | 0         |
| 0         | 0         | 0         | 0.509871  | 0         | 0         |
| 18.6552   | 16.5496   | 20.3155   | 16.3956   | 25.4599   | 20.455    |
| 6.13835   | 8.30048   | 5.9452    | 8.37941   | 4.65894   | 6.39521   |
| 24.2848   | 22.6465   | 23.357    | 22.4108   | 23.5562   | 20.9144   |
| 0         | 0         | 0.211944  | 0         | 0         | 0         |
| 4.03521   | 4.94046   | 4.25135   | 3.17237   | 5.23992   | 2.89648   |
| 52.9832   | 54.5942   | 50.3635   | 49.7706   | 73.0515   | 94.7154   |
| 0         | 0         | 0         | 0         | 0         | 0         |
| 0         | 0         | 0         | 0         | 0.0447842 | 0.0347594 |
| 5.52386   | 3.29729   | 3.84028   | 2.8205    | 4.94422   | 3.49924   |
| 14.6744   | 14.5369   | 15.74     | 13.7603   | 13.8725   | 11.5611   |
| 4.15415   | 3.31783   | 4.60694   | 5.63256   | 4.37296   | 3.78756   |
| 0.223532  | 0.0304672 | 0.164276  | 0.148555  | 0.158894  | 0.0822171 |
| 24.5691   | 29.7195   | 25.9459   | 31.2442   | 27.1881   | 38.8069   |
| 0.368448  | 0.48381   | 0.103651  | 0.485199  | 0.432534  | 0.202713  |
| 0.0533718 | 0.133024  | 0.0672407 | 0.0608056 | 0.635924  | 0.0448703 |
| 2.39222   | 5.96236   | 0         | 0         | 0         | 0         |
| 7.56732   | 12.9803   | 7.50643   | 8.547     | 12.4365   | 14.1133   |
| 0.280719  | 0.699664  | 0.353665  | 1.11937   | 1.21628   | 1.29802   |
| 8.34939   | 9.04283   | 4.48303   | 5.27287   | 4.96293   | 4.04747   |
| 0         | 0         | 0         | 0         | 0         | 0         |
| 12.3876   | 10.3058   | 14.3797   | 13.1268   | 12.5688   | 10.7042   |
| 35.5592   | 36.6972   | 33.7683   | 33.0011   | 32.7149   | 30.0856   |
| 0.240588  | 0         | 0         | 0         | 0         | 0.404531  |
| 3.45868   | 3.39479   | 3.00909   | 3.50761   | 4.70585   | 4.30584   |
| 0.458158  | 0.441524  | 0.551727  | 0.382841  | 1.10574   | 0.376106  |
| 4.32022   | 7.99406   | 4.92216   | 6.52627   | 10.4871   | 10.1811   |
| 0.0822216 | 0.102464  | 0.0776904 | 0.0702552 | 0.0222652 | 0.0460831 |

|           |           |           |           |           |           |
|-----------|-----------|-----------|-----------|-----------|-----------|
| 0         | 0         | 0         | 0         | 0         | 0         |
| 103.75    | 70.6173   | 46.9404   | 48.7655   | 35.2999   | 51.5248   |
| 0.480492  | 0.162268  | 0.255101  | 0.347365  | 0.205202  | 0.249435  |
| 0.667999  | 0.41695   | 0.726427  | 0.276592  | 0.525943  | 0.204106  |
| 8.878     | 10.2409   | 11.5541   | 11.5404   | 11.447    | 10.4341   |
| 2.36763   | 2.40015   | 3.70102   | 4.16437   | 5.60371   | 3.76462   |
| 3.27597   | 3.45697   | 4.57659   | 3.58177   | 3.64863   | 3.10953   |
| 2.29516   | 1.59836   | 2.29625   | 1.92267   | 2.12047   | 2.44034   |
| 8.11135   | 8.51307   | 7.93764   | 7.26702   | 8.60639   | 7.39017   |
| 263.504   | 149.128   | 334.57    | 177.017   | 384.692   | 153.001   |
| 32.5164   | 35.793    | 30.431    | 40.0225   | 24.293    | 23.7646   |
| 0         | 0         | 0         | 0         | 0         | 0         |
| 0.961348  | 1.07324   | 1.13547   | 0.867071  | 1.18232   | 0.913454  |
| 0         | 0         | 0         | 0         | 0         | 0         |
| 12.7205   | 13.0538   | 15.741    | 16.5046   | 19.1059   | 20.5705   |
| 7.51911   | 7.65792   | 8.65546   | 7.47924   | 5.3332    | 6.06466   |
| 0         | 0         | 0.0339379 | 0.0460349 | 0.043768  | 0.0226471 |
| 18.6812   | 17.39     | 17.1719   | 15.931    | 15.861    | 14.1953   |
| 9.70252   | 9.42407   | 9.73278   | 10.1947   | 10.6862   | 10.5733   |
| 0         | 0         | 0         | 0         | 0         | 0.0259229 |
| 1.89738   | 2.25415   | 1.83087   | 1.82442   | 1.7374    | 1.62036   |
| 6.19985   | 5.07392   | 4.77887   | 3.45278   | 6.66399   | 6.32013   |
| 1.03026   | 1.23026   | 0.748698  | 0.814118  | 1.57254   | 1.18025   |
| 0         | 0         | 0         | 0         | 0         | 0         |
| 11.2904   | 11.4827   | 12.4804   | 8.67289   | 12.5507   | 8.45298   |
| 4.27131   | 4.11315   | 4.36206   | 3.87087   | 5.0472    | 4.37986   |
| 0.234585  | 0.330061  | 0.295543  | 0.965581  | 0.319672  | 0.241752  |
| 3.08253   | 3.38951   | 4.11198   | 3.51187   | 3.33893   | 3.58239   |
| 0.0494918 | 0.074012  | 0.074823  | 0.0563852 | 0.0536085 | 0.141469  |
| 4.23976   | 3.93086   | 4.81057   | 4.743     | 4.85525   | 3.91872   |
| 2.35894   | 2.08893   | 1.56431   | 2.42515   | 2.30574   | 3.12236   |
| 0.143325  | 0.0723972 | 0.173756  | 0.0791483 | 3.28E-94  | 0.262419  |
| 2.7571    | 3.31527   | 4.07624   | 4.47699   | 4.92682   | 4.24384   |
| 43.557    | 71.5528   | 34.8663   | 49.1671   | 44.8948   | 52.6109   |
| 5.74992   | 3.08044   | 1.43783   | 1.70212   | 0.171694  | 0.710725  |
| 0.17107   | 0.213187  | 0.492624  | 0.0835273 | 0.450013  | 0.102729  |
| 4.99847   | 4.86925   | 5.49892   | 4.3312    | 6.02428   | 5.47477   |
| 6.08109   | 5.25532   | 5.74305   | 5.56138   | 7.68639   | 5.79513   |
| 0.621426  | 0.610149  | 0.284693  | 0.10727   | 0.448744  | 0.379957  |
| 0         | 0         | 0         | 0         | 0         | 0         |
| 19.1502   | 16.9687   | 19.3104   | 18.126    | 14.6307   | 13.4982   |
| 0.525816  | 0.448515  | 0.272814  | 0.137153  | 0.358169  | 0.462311  |
| 7.43964   | 7.22408   | 8.04463   | 5.59359   | 7.64449   | 6.0181    |

|           |           |           |           |           |           |
|-----------|-----------|-----------|-----------|-----------|-----------|
| 0         | 12.8533   | 0         | 165.179   | 0.319198  | 5.69816   |
| 20.6942   | 19.8673   | 17.011    | 15.6784   | 17.3      | 17.5137   |
| 0         | 0         | 0         | 0.0972073 | 0.0462102 | 0         |
| 16.5395   | 14.3662   | 14.0552   | 11.5803   | 12.1801   | 11.1359   |
| 29.5379   | 35.0024   | 23.5305   | 28.1172   | 29.0506   | 32.2366   |
| 9.95967   | 10.4001   | 10.0507   | 8.91837   | 9.49778   | 9.25154   |
| 32.4959   | 33.8549   | 30.2138   | 32.9496   | 23.5129   | 24.2599   |
| 5.24606   | 4.80632   | 5.39017   | 3.92938   | 6.49848   | 5.16002   |
| 0         | 0         | 0         | 0         | 0         | 0         |
| 0.142052  | 0.0590083 | 0.0894824 | 0.107892  | 0.0512892 | 0.119425  |
| 1.3435    | 0.918983  | 0.793179  | 1.00478   | 1.03198   | 0.942955  |
| 23.0896   | 26.8754   | 25.1931   | 19.8885   | 23.3846   | 21.7461   |
| 97.9601   | 112.314   | 99.9126   | 109.404   | 87.8305   | 98.3347   |
| 0.889309  | 0.580515  | 7.25592   | 7.23696   | 1.42199   | 1.74452   |
| 0         | 0         | 0         | 0         | 0         | 0         |
| 0.240417  | 0.128403  | 0.17308   | 0.508677  | 0.70684   | 0.635239  |
| 0.837768  | 1.42367   | 0.287854  | 0.173537  | 0.659966  | 1.5367    |
| 94.4929   | 85.3326   | 76.907    | 65.0822   | 69.5059   | 65.3187   |
| 2.86702   | 3.17143   | 4.05887   | 4.11046   | 3.62889   | 3.06031   |
| 0         | 0.191221  | 0         | 0.174816  | 0.332414  | 0         |
| 5.99674   | 6.34475   | 5.66274   | 4.01519   | 4.05423   | 5.62207   |
| 28.3059   | 30.9849   | 27.2617   | 31.1401   | 21.8505   | 28.4587   |
| 10.0991   | 9.95195   | 10.7651   | 8.80627   | 10.7205   | 9.15144   |
| 0.0978594 | 0.121952  | 0         | 0.0557447 | 0.0529996 | 0.0411358 |
| 8.52823   | 7.83357   | 8.93348   | 7.56543   | 8.39688   | 7.52424   |
| 5.04009   | 4.99063   | 3.8638    | 3.31014   | 5.88926   | 4.44838   |
| 0         | 0         | 0         | 0         | 0         | 0.0392682 |
| 44.489    | 45.9114   | 40.5686   | 38.2401   | 33.9223   | 34.6345   |
| 0         | 0         | 0.0635884 | 0         | 0         | 0         |
| 7.90246   | 8.32185   | 8.53566   | 8.08447   | 9.53868   | 8.01447   |
| 7.91334   | 8.10404   | 7.6914    | 8.0189    | 10.3213   | 9.7482    |
| 15.6362   | 17.4324   | 14.2355   | 17.4272   | 14.6756   | 16.4216   |
| 28.6328   | 29.3587   | 29.9614   | 26.0776   | 25.79     | 25.5251   |
| 0.241714  | 0.0860639 | 0.0870069 | 0.15736   | 0.112208  | 0.116121  |
| 0         | 0         | 0         | 0         | 0         | 0         |
| 0         | 0         | 0         | 0.0233124 | 0         | 0         |
| 0.132972  | 0.0736484 | 0.297822  | 0.0673299 | 0.0800178 | 0.0869484 |
| 0.719347  | 0.599452  | 3.1146    | 2.47931   | 1.65189   | 0.647661  |
| 1.03562   | 1.23461   | 1.62846   | 0.804637  | 1.15183   | 1.2652    |
| 15.9528   | 13.1887   | 12.1533   | 9.17627   | 14.3265   | 12.808    |
| 0.294741  | 0.204059  | 0.144406  | 0.205207  | 0.567569  | 0.234026  |
| 7.15779   | 7.71137   | 6.8117    | 8.67014   | 6.26105   | 8.08002   |
| 0.203898  | 0         | 0.256882  | 0.261335  | 0.386502  | 0.299984  |



|           |           |            |           |           |           |
|-----------|-----------|------------|-----------|-----------|-----------|
| 16.4039   | 16.4071   | 15.541     | 18.2774   | 16.5571   | 20.5466   |
| 19.4066   | 19.3662   | 20.2316    | 17.7408   | 22.2333   | 17.843    |
| 0.126875  | 0.221356  | 0.0319688  | 0.0867279 | 0         | 0.0853323 |
| 0.898582  | 1.11981   | 0.716986   | 0.682493  | 0.194665  | 0.0503633 |
| 38.0989   | 36.5175   | 35.436     | 37.7111   | 37.0218   | 42.3293   |
| 1.18792   | 2.06357   | 0.99774    | 1.02529   | 2.06657   | 1.96726   |
| 0.684569  | 0.321928  | 0.537001   | 0.338455  | 0.923391  | 0.510371  |
| 0         | 0         | 0          | 0         | 0         | 0         |
| 3.20062   | 3.43372   | 3.67113    | 3.29195   | 3.6642    | 3.44759   |
| 61.476    | 68.1352   | 56.6874    | 68.8464   | 48.3128   | 72.357    |
| 34.8193   | 37.5668   | 36.2716    | 38.7584   | 35.4556   | 39.866    |
| 0         | 0         | 0          | 0         | 0         | 0         |
| 69.8254   | 70.6166   | 64.6159    | 103.772   | 65.9756   | 89.022    |
| 0.671452  | 0.278921  | 0.140989   | 0.59498   | 0.242434  | 0.282249  |
| 28.7697   | 24.9899   | 30.353     | 28.1494   | 24.7267   | 24.5166   |
| 21.2012   | 21.5402   | 23.5164    | 25.2689   | 21.2267   | 20.0419   |
| 0         | 0         | 0          | 0         | 0         | 0         |
| 0.0228364 | 0.021344  | 0.00719263 | 0.0130085 | 0.0494718 | 0.0191988 |
| 23.6134   | 26.3472   | 27.222     | 23.3852   | 27.1793   | 27.4515   |
| 0         | 0.0974291 | 0          | 0.0429444 | 0.152086  | 0.0587876 |
| 0.237131  | 0.295512  | 0.252789   | 0.374067  | 0.41492   | 0.368047  |
| 2.54977   | 2.84169   | 4.75322    | 3.33002   | 3.32322   | 2.73617   |
| 1.1349    | 0.885154  | 1.82546    | 1.57499   | 0.759563  | 0.939954  |
| 0.0714262 | 0.0175825 | 0.0899866  | 0         | 0.153249  | 0.023723  |
| 0         | 0         | 0          | 0         | 0         | 0         |
| 6.49316   | 5.99897   | 6.10697    | 5.63295   | 5.60436   | 4.93336   |
| 0.274389  | 0.321829  | 0.427029   | 0.367773  | 0.524493  | 0.407086  |
| 44.2528   | 42.3716   | 46.5582    | 33.9034   | 59.9022   | 41.2031   |
| 10.4895   | 13.5231   | 13.1502    | 10.6901   | 12.8944   | 10.666    |
| 0.0964247 | 0.120164  | 0.218666   | 0.329565  | 0.0835562 | 0.0324262 |
| 23.8291   | 21.3577   | 23.3047    | 20.7483   | 21.1799   | 16.3937   |
| 49.4146   | 38.7489   | 44.9559    | 45.0474   | 59.2685   | 68.0389   |
| 184.259   | 185.084   | 161.544    | 187.649   | 135.87    | 174.329   |
| 3.17409   | 2.86686   | 3.99889    | 3.68254   | 5.17293   | 6.04695   |
| 20.7884   | 16.7174   | 18.2844    | 12.8027   | 24.3355   | 17.2315   |
| 0.0154811 | 3.77E-150 | 0.0704073  | 1.00E-38  | 0.0341069 | 4.91E-27  |
| 1.07289   | 0.993224  | 1.11997    | 0.733394  | 1.42776   | 0.618508  |
| 96.4815   | 104.601   | 64.2525    | 63.5059   | 53.5142   | 72.161    |
| 86.2506   | 82.0903   | 63.5579    | 58.3504   | 45.1249   | 59.6174   |
| 0.0499303 | 0.041482  | 0          | 0.0758463 | 0.0721113 | 0.0335816 |
| 3.09969   | 5.10172   | 1.88701    | 3.7985    | 0.533428  | 0.486968  |
| 0         | 0         | 0          | 0         | 0         | 11.9483   |
| 1.87095   | 1.69154   | 1.94116    | 1.50462   | 2.54316   | 2.18977   |

|           |           |           |           |           |           |
|-----------|-----------|-----------|-----------|-----------|-----------|
| 0.1898    | 0.189223  | 0.191296  | 0.324354  | 0.287822  | 0.430831  |
| 0.365576  | 0.172527  | 0.204396  | 0.212929  | 0.535881  | 0.37245   |
| 16.8601   | 17.6582   | 17.3998   | 18.9165   | 17.8185   | 21.1541   |
| 18.0092   | 18.3703   | 18.3703   | 19.9478   | 17.963    | 19.4971   |
| 0.0919978 | 0.0382158 | 0.0579519 | 0.0698743 | 0.0830418 | 0.0515624 |
| 34.5569   | 43.5479   | 33.1041   | 42.1579   | 43.667    | 48.9257   |
| 43.6804   | 44.0576   | 51.7511   | 49.0465   | 53.1233   | 61.0894   |
| 10.8832   | 11.5652   | 11.8333   | 10.4999   | 14.4795   | 11.656    |
| 19.3711   | 16.7695   | 13.4481   | 9.20852   | 15.8046   | 15.5167   |
| 19.6946   | 18.1121   | 18.3408   | 18.7733   | 18.2258   | 17.6673   |
| 0.0225892 | 0.0563014 | 0.0569183 | 0         | 0.0489364 | 0         |
| 9.3319    | 9.9232    | 12.956    | 11.6282   | 12.0902   | 13.8692   |
| 9.88448   | 8.4958    | 14.657    | 9.59616   | 13.951    | 10.0125   |
| 3.56931   | 3.68722   | 5.39428   | 3.87923   | 3.6119    | 3.00076   |
| 0.24478   | 0.228783  | 0.0770968 | 0.139437  | 0.13257   | 0.0514474 |
| 37.9205   | 36.1633   | 37.7083   | 35.7427   | 28.6723   | 28.9852   |
| 72.1576   | 70.116    | 71.6852   | 65.3076   | 52.9098   | 58.2586   |
| 0.60546   | 0.251508  | 0         | 0.22993   | 0         | 0         |
| 0.158394  | 0.098695  | 0         | 0         | 0         | 0.199745  |
| 3.9477    | 2.49188   | 4.18428   | 3.86119   | 5.78296   | 4.0895    |
| 0         | 0         | 0.107654  | 0         | 0.138836  | 0.0359193 |
| 0         | 0         | 0         | 0         | 0         | 0         |
| 0         | 0         | 0         | 0         | 0         | 0         |
| 5.56883   | 10.3061   | 2.80128   | 6.25543   | 7.88616   | 3.56273   |
| 10.608    | 13.1628   | 13.3645   | 14.2427   | 14.4309   | 11.354    |
| 0         | 0.0266462 | 0         | 0         | 0         | 0.0179761 |
| 0         | 0         | 0         | 0         | 0         | 0         |
| 85.2005   | 78.8816   | 61.1297   | 73.2126   | 51.1209   | 68.3285   |
| 0.353599  | 0.220327  | 0.278427  | 0.302137  | 0.861775  | 0.891825  |
| 15.554    | 16.1571   | 14.4639   | 21.6107   | 11.6116   | 12.5522   |
| 209.779   | 217.715   | 219.101   | 219.254   | 195.764   | 236.927   |
| 0         | 0         | 0         | 0         | 0         | 0         |
| 15.5941   | 15.1521   | 15.0779   | 14.0964   | 18.0958   | 15.8656   |
| 10.7367   | 11.9236   | 13.7286   | 12.1159   | 14.1268   | 15.4141   |
| 13.024    | 13.5866   | 15.4803   | 13.9316   | 12.5913   | 10.0205   |
| 1.31947   | 1.32528   | 1.29018   | 2.89433   | 1.47189   | 1.85439   |
| 0         | 0         | 0         | 0         | 0         | 0         |
| 0.0474677 | 0.0887312 | 0.0299012 | 0.162237  | 0.077124  | 0.11972   |
| 0.830824  | 1.27233   | 0.862123  | 0.440293  | 1.77019   | 0.991257  |
| 1.49745   | 1.13729   | 2.0647    | 0.937213  | 2.58965   | 1.15627   |
| 0.0752079 | 0.0624826 | 0.0526394 | 0.0476017 | 0.0271545 | 0.0140507 |
| 0.20762   | 31.6951   | 0.472462  | 327.62    | 0.764624  | 10.8918   |
| 0         | 0.141013  | 0         | 0         | 0         | 0.03171   |

|           |           |           |           |           |           |
|-----------|-----------|-----------|-----------|-----------|-----------|
| 16.9373   | 16.4199   | 15.8163   | 15.3476   | 15.4299   | 13.9783   |
| 2.59053   | 2.43706   | 4.54357   | 3.09602   | 6.54736   | 4.5266    |
| 1.49216   | 1.30617   | 1.84087   | 1.27058   | 2.19232   | 1.56267   |
| 3.24474   | 2.70192   | 3.91171   | 2.42932   | 4.65508   | 3.10442   |
| 0         | 0         | 0         | 0         | 0         | 0         |
| 0         | 0         | 0         | 0         | 0         | 0         |
| 4.53504   | 4.89862   | 10.3671   | 10.0259   | 13.7306   | 14.3444   |
| 0         | 0         | 0         | 0         | 0         | 0         |
| 0         | 0         | 0         | 0         | 0         | 0         |
| 0.0215984 | 0.0807478 | 0.217687  | 0.0492135 | 0.070185  | 0.0544742 |
| 11.3142   | 13.1167   | 13.8851   | 14.2382   | 15.8196   | 16.8639   |
| 11.8246   | 12.7608   | 13.1659   | 11.493    | 14.2529   | 11.5599   |
| 0.905382  | 1.74284   | 1.72736   | 1.57724   | 0.901399  | 0.88841   |
| 0.0347388 | 0.0865828 | 0         | 0.0791546 | 0         | 0         |
| 69.0719   | 63.3991   | 60.0974   | 64.9322   | 50.0857   | 59.1068   |
| 21.6934   | 22.1332   | 18.1376   | 21.3312   | 26.5848   | 20.5528   |
| 5.2569    | 5.67771   | 6.80236   | 5.5607    | 6.27249   | 5.5743    |
| 23.0666   | 24.6171   | 24.6131   | 25.4028   | 24.2791   | 24.8491   |
| 0         | 38.3485   | 0         | 0         | 0         | 0         |
| 0         | 0         | 0         | 0         | 0         | 0         |
| 0.322417  | 0.120704  | 0.406199  | 0.300393  | 0.354086  | 0.221669  |
| 10.6858   | 11.6755   | 6.51594   | 4.86178   | 9.28409   | 8.73697   |
| 5.89636   | 5.53166   | 5.94701   | 4.52873   | 6.85327   | 4.85966   |
| 0         | 0         | 0         | 0         | 0         | 0.0139325 |
| 4.34762   | 4.16306   | 7.28365   | 5.13192   | 5.15739   | 7.29061   |
| 58.013    | 55.6807   | 54.9526   | 51.3864   | 50.5934   | 50.2819   |
| 0.146013  | 0.0699852 | 0.311309  | 0.396682  | 0.669133  | 0.321052  |
| 64.6372   | 47.8998   | 87.2427   | 64.9894   | 101.094   | 67.6362   |
| 0.616735  | 0.967946  | 1.15082   | 2.05531   | 0.717232  | 0.364767  |
| 7.46632   | 7.42853   | 8.57488   | 8.17742   | 10.923    | 8.32522   |
| 0.10353   | 0.172025  | 0.0434774 | 0.0393165 | 0         | 0         |
| 23.7956   | 22.1043   | 25.3365   | 24.1213   | 28.0749   | 27.3562   |
| 2.57676   | 1.83652   | 2.72279   | 2.23474   | 4.17852   | 3.57948   |
| 48.8424   | 49.8914   | 49.3693   | 56.6714   | 43.4841   | 63.5527   |
| 5.29824   | 5.72143   | 5.15661   | 5.71339   | 6.06532   | 6.31194   |
| 22.0766   | 23.9138   | 20.5492   | 19.0884   | 18.7436   | 18.3253   |
| 0         | 0         | 0         | 0         | 0         | 0         |
| 0.187242  | 0         | 0.0471795 | 0.127993  | 0.0405633 | 0         |
| 7.36322   | 8.98858   | 8.85705   | 8.64626   | 7.1617    | 7.15398   |
| 0.269012  | 0.363628  | 0.490927  | 0.148562  | 0.289915  | 0.231685  |
| 8.42794   | 7.57185   | 6.61771   | 6.43097   | 11.1034   | 9.91966   |
| 19.6246   | 22.035    | 23.1292   | 17.7073   | 18.3017   | 17.8939   |
| 24.2084   | 25.4025   | 23.079    | 21.7853   | 24.3165   | 21.992    |

|          |          |          |           |           |           |
|----------|----------|----------|-----------|-----------|-----------|
| 6.27765  | 6.30325  | 6.52596  | 5.39541   | 7.42614   | 6.26776   |
| 0        | 0        | 0        | 0         | 0         | 0         |
| 21.289   | 22.5771  | 27.4993  | 26.873    | 29.1791   | 28.8355   |
| 0        | 0        | 0        | 0.174692  | 0.0415223 | 0.0644553 |
| 3.02715  | 2.79411  | 3.18387  | 3.20859   | 3.61528   | 3.37352   |
| 2.94441  | 3.66932  | 4.05242  | 3.83373   | 1.71527   | 3.47388   |
| 12.45    | 12.9214  | 9.48739  | 12.0284   | 7.62407   | 9.35337   |
| 19.9771  | 19.9996  | 22.7941  | 17.882    | 18.6456   | 18.5544   |
| 2.00378  | 2.26053  | 2.01957  | 1.7542    | 2.1476    | 2.4471    |
| 13.8564  | 18.0477  | 12.3889  | 22.4065   | 20.9158   | 24.6514   |
| 0.38261  | 0.20446  | 0.18722  | 0.144509  | 0.490546  | 0.231775  |
| 101.215  | 64.614   | 117.579  | 87.0249   | 125.928   | 160.484   |
| 1.06859  | 1.62761  | 1.19669  | 1.42034   | 1.54331   | 1.04811   |
| 80.1331  | 79.7582  | 74.3495  | 59.4092   | 74.9548   | 83.0752   |
| 12.8815  | 13.2478  | 12.9168  | 13.3654   | 12.3335   | 14.1587   |
| 1.13183  | 1.51898  | 0.548439 | 1.0415    | 0.848752  | 1.24433   |
| 1.67187  | 2.80152  | 2.32052  | 2.59345   | 1.81094   | 1.56438   |
| 0.60739  | 0.968198 | 0.938288 | 1.21282   | 1.61197   | 1.10455   |
| 13.7253  | 14.8574  | 13.5715  | 14.911    | 14.0687   | 15.8247   |
| 0        | 0        | 0        | 0         | 0         | 0         |
| 3.93E-06 | 4.58E-06 | 5.21E-06 | 0.0403064 | 4.63E-06  | 4.05E-06  |
| 9.74942  | 9.66384  | 12.3026  | 16.3581   | 15.0946   | 14.2274   |
| 0.790168 | 0.350331 | 0.31629  | 0.483408  | 0.79069   | 0.477378  |
| 0        | 0        | 0        | 0.0961769 | 0         | 0         |
| 0        | 0        | 0        | 0         | 0         | 0         |
| 1.9827   | 1.76541  | 2.75372  | 1.83828   | 2.48196   | 2.13125   |
| 60.2808  | 66.7872  | 60.0384  | 63.5025   | 69.3958   | 76.3908   |
| 0        | 0        | 0        | 0         | 0         | 0         |
| 1.41952  | 1.18969  | 2.23917  | 1.30318   | 2.60443   | 1.42369   |
| 0        | 0        | 0        | 0         | 0         | 0         |
| 1.43466  | 1.1907   | 1.3601   | 1.27459   | 1.72317   | 1.03309   |
| 13.2397  | 13.5587  | 16.631   | 10.9422   | 15.4748   | 13.5227   |
| 0.348841 | 0.579633 | 0.146496 | 0.794857  | 0.377857  | 0.488791  |
| 0        | 0        | 0        | 0         | 0         | 0         |
| 31.7854  | 33.9092  | 34.4461  | 35.1913   | 28.3001   | 29.4497   |
| 0        | 0        | 0        | 0         | 0         | 0         |
| 0.45517  | 0.288968 | 0.443611 | 0.567489  | 0.697686  | 0.368227  |
| 24.9718  | 24.8013  | 27.7319  | 25.0349   | 29.9469   | 25.3251   |
| 7.56929  | 6.98266  | 7.82204  | 7.84775   | 7.11882   | 6.31214   |
| 226.116  | 195.108  | 184.178  | 185.019   | 260.178   | 172.291   |
| 23.6611  | 25.9458  | 23.6678  | 29.1313   | 28.4024   | 36.6936   |
| 39.6725  | 41.54    | 44.9587  | 44.4207   | 46.8296   | 48.9557   |
| 4.45852  | 3.98748  | 4.09448  | 2.70825   | 4.15176   | 2.47338   |

|           |           |           |           |           |           |
|-----------|-----------|-----------|-----------|-----------|-----------|
| 296.547   | 313.271   | 85.6974   | 95.0634   | 151.663   | 154.459   |
| 45.7478   | 45.8552   | 49.9897   | 46.9808   | 50.5978   | 48.3261   |
| 42.1938   | 53.7225   | 44.1639   | 47.6536   | 32.3196   | 37.3965   |
| 14.1746   | 9.30879   | 14.8501   | 8.0227    | 9.52034   | 5.13549   |
| 21.0106   | 21.9373   | 27.7768   | 22.2269   | 22.4258   | 19.7836   |
| 0.759542  | 0.426051  | 0.191432  | 0.043283  | 0.082314  | 0.0959449 |
| 7.02476   | 8.04774   | 8.063     | 5.96782   | 6.86898   | 5.05307   |
| 23.2438   | 24.2509   | 21.8642   | 25.7481   | 22.0019   | 24.9565   |
| 2.08734   | 1.97501   | 2.24042   | 1.76153   | 2.3447    | 1.1699    |
| 0         | 0         | 0         | 0         | 0         | 0         |
| 0         | 0         | 0         | 0         | 0         | 0.137031  |
| 4.13368   | 2.24123   | 5.6345    | 3.4335    | 8.23058   | 4.25637   |
| 0         | 0.0710955 | 0.0718746 | 0         | 0         | 0         |
| 4.86085   | 4.6781    | 3.69583   | 4.5455    | 3.67912   | 3.69054   |
| 0.648076  | 0.549189  | 0.849141  | 0.590674  | 0.898538  | 0.74099   |
| 0         | 0         | 0         | 0         | 0         | 0         |
| 0         | 0.0733025 | 0.370528  | 0.402081  | 0.318568  | 0.197806  |
| 25.4762   | 28.4719   | 27.299    | 31.8134   | 24.5511   | 30.2598   |
| 85.7247   | 87.7185   | 69.1839   | 77.6325   | 64.8915   | 75.2517   |
| 0.669864  | 0.515494  | 0.491854  | 0.39374   | 0.754739  | 0.384786  |
| 0.0916721 | 0         | 0.358233  | 0.0809874 | 0.0769992 | 0         |
| 72.1358   | 75.4122   | 69.97     | 81.3896   | 66.8917   | 82.0792   |
| 0.406349  | 0.555714  | 0.611806  | 0.182851  | 0.87187   | 0.275543  |
| 7.74613   | 8.21371   | 8.18386   | 6.42525   | 10.2452   | 9.10575   |
| 0         | 39.7988   | 1.08743   | 1152.5    | 0         | 61.6803   |
| 0         | 0.0634539 | 0.0427661 | 0.05801   | 0.0183844 | 0.0285382 |
| 0.818323  | 0.494899  | 0.454838  | 0.45244   | 0.795144  | 0.607036  |
| 17.0564   | 18.1683   | 20.5079   | 18.259    | 18.5498   | 22.2763   |
| 1.85994   | 1.03927   | 1.53568   | 1.17054   | 1.17439   | 1.40227   |
| 0.0763153 | 0         | 0.192292  | 0.391251  | 0         | 0         |
| 0.286065  | 0.511927  | 0.416227  | 0.406645  | 0.464263  | 0.450049  |
| 0.979573  | 0.910961  | 1.50662   | 0.844564  | 1.55984   | 1.36542   |
| 5.398     | 5.67395   | 5.08486   | 4.65486   | 7.50527   | 6.73899   |
| 0         | 0         | 0         | 0         | 0         | 0         |
| 18.2505   | 17.7982   | 19.2887   | 18.1066   | 26.992    | 25.9864   |
| 17.0987   | 15.2248   | 16.0035   | 13.0936   | 23.2181   | 17.6913   |
| 0         | 0         | 0         | 0         | 0         | 0         |
| 17.571    | 19.0732   | 13.3084   | 15.4152   | 15.6714   | 19.448    |
| 0.181414  | 0.414476  | 0.342833  | 0.826728  | 0.884268  | 1.93188   |
| 0         | 0         | 0         | 0         | 0         | 0         |
| 15.5826   | 16.0864   | 16.7114   | 17.5924   | 18.5875   | 16.3114   |
| 3.68807   | 3.42833   | 4.60868   | 3.39403   | 5.25321   | 3.16326   |
| 9.18914   | 9.39203   | 7.39004   | 8.19315   | 7.69133   | 6.18339   |

|            |            |           |            |            |           |
|------------|------------|-----------|------------|------------|-----------|
| 0          | 0.00651062 | 0         | 0.00529071 | 0          | 0         |
| 0.976105   | 0.845702   | 1.10092   | 0.857875   | 2.25557    | 1.97731   |
| 453.869    | 440.002    | 416.887   | 396.432    | 282.077    | 322.834   |
| 5.91361    | 4.68865    | 6.27701   | 5.08213    | 8.33219    | 5.90333   |
| 0.37076    | 0.34103    | 0.166823  | 0.311855   | 0.325104   | 0.398302  |
| 0.0810918  | 0.30317    | 0         | 0          | 0.175674   | 0.0681749 |
| 2.01904    | 1.64974    | 1.41357   | 1.73814    | 1.62825    | 1.56544   |
| 0.00997204 | 0.0124271  | 0.0251266 | 0.00568049 | 0.00540075 | 0         |
| 1.19204    | 0.76916    | 1.39527   | 0.753463   | 1.79813    | 1.03769   |
| 3.9249     | 4.35832    | 4.21367   | 3.88001    | 4.1025     | 2.8375    |
| 28.8531    | 30.1458    | 26.8283   | 27.6937    | 26.4211    | 26.4649   |
| 110.598    | 124.238    | 143.008   | 153.919    | 134.726    | 142.56    |
| 0.187828   | 0.117035   | 0.236636  | 0.106994   | 0.203451   | 0         |
| 0.0301566  | 0.263067   | 0.303943  | 0.309212   | 0.0979949  | 0.152118  |
| 4.06529    | 4.73395    | 4.44998   | 3.41669    | 5.60657    | 4.14611   |
| 0.416397   | 0.829611   | 0.402788  | 0.551111   | 1.44118    | 1.18019   |
| 6.82467    | 6.64256    | 7.29465   | 5.90035    | 7.25472    | 5.43748   |
| 51.1856    | 59.5507    | 40.7651   | 50.2873    | 33.438     | 46.7621   |
| 0.24894    | 0.232672   | 0.196018  | 0.177258   | 0.471882   | 0.313931  |
| 0.401806   | 0.0556367  | 0.0562464 | 0          | 0.241794   | 0.150135  |
| 43.3051    | 45.8385    | 48.3707   | 48.4162    | 42.9449    | 44.3118   |
| 1.57045    | 2.16949    | 2.43866   | 1.98336    | 6.67244    | 6.27396   |
| 12.3123    | 12.5857    | 10.8857   | 8.74601    | 14.0159    | 16.4636   |
| 19.1809    | 20.515     | 15.8867   | 16.2233    | 16.5675    | 18.1144   |
| 12.6882    | 12.1033    | 9.06792   | 9.3828     | 7.64636    | 10.3567   |
| 3.50479    | 3.41997    | 5.2903    | 5.42439    | 6.66147    | 4.05842   |
| 1.22117    | 1.24357    | 1.07931   | 0.751986   | 1.32358    | 1.37021   |
| 17.9698    | 13.5168    | 17.4981   | 15.5652    | 15.0831    | 16.3714   |
| 0.462371   | 0.242613   | 0.183954  | 0.360423   | 0.316314   | 0.245508  |
| 0.0421961  | 0.0591579  | 0.0132902 | 0.0540825  | 0.0114265  | 0.0354748 |
| 50.6085    | 50.2498    | 69.0922   | 54.9267    | 64.5923    | 50.8984   |
| 11.7001    | 12.5485    | 11.967    | 10.3975    | 9.0818     | 8.73396   |
| 112.214    | 93.3765    | 120.17    | 95.6681    | 92.8617    | 98.1713   |
| 11.1298    | 13.1778    | 12.5187   | 10.5003    | 11.2757    | 8.30194   |
| 111.991    | 91.7532    | 73.7911   | 58.7014    | 69.8699    | 125.043   |
| 19.7628    | 19.7291    | 18.4729   | 19.3681    | 23.0179    | 30.0585   |
| 0.845097   | 1.21113    | 0.42588   | 0.385122   | 0.961161   | 0.781532  |
| 0          | 0          | 0         | 0          | 0          | 0         |
| 0          | 0          | 0         | 0          | 0          | 0         |
| 0.409046   | 0.458656   | 0.500776  | 0.570256   | 0.781369   | 1.02731   |
| 13.3582    | 11.6797    | 13.7809   | 11.0553    | 15.1874    | 10.8403   |
| 3.24733    | 3.77842    | 1.89965   | 2.1142     | 0.915594   | 0.869047  |
| 23.6023    | 43.9175    | 35.4021   | 38.0893    | 77.6509    | 63.1927   |

|           |           |           |           |           |           |
|-----------|-----------|-----------|-----------|-----------|-----------|
| 0         | 0         | 0         | 0         | 0         | 0         |
| 32.7175   | 30.2897   | 25.3972   | 30.6877   | 33.6156   | 42.5364   |
| 10.6005   | 10.6333   | 6.595     | 6.35954   | 6.00543   | 7.08658   |
| 0.211449  | 0         | 0         | 0         | 0.229037  | 0.355536  |
| 22.187    | 24.5226   | 25.3277   | 23.9456   | 25.9899   | 26.887    |
| 324.716   | 436.626   | 316.556   | 510.135   | 253.713   | 291.832   |
| 0.0647816 | 0.103182  | 0.0473272 | 0.0838489 | 0.428494  | 0.208902  |
| 0         | 0.152609  | 0         | 0.279031  | 0         | 0         |
| 0         | 0         | 0         | 0         | 0         | 0         |
| 1.37327   | 0.792302  | 1.85828   | 0.724328  | 2.14862   | 1.75317   |
| 0.422654  | 0.332156  | 0.609406  | 0.650055  | 0.773318  | 0.398778  |
| 0         | 0         | 0         | 0         | 0         | 0         |
| 0.153374  | 0.10922   | 0.0828124 | 0.149774  | 0.450928  | 0.239466  |
| 2.33254   | 2.5623    | 2.85159   | 2.12594   | 2.62013   | 1.81573   |
| 18.3882   | 19.2206   | 15.1009   | 17.7806   | 17.5099   | 18.5532   |
| 0         | 0         | 0         | 0         | 0         | 0         |
| 0.250419  | 0.0891634 | 0.0901404 | 0.611353  | 0.658747  | 0.601515  |
| 0         | 0         | 0         | 0         | 0         | 0         |
| 20.1514   | 23.2274   | 19.4544   | 20.0965   | 18.7977   | 18.4053   |
| 6.67482   | 6.44941   | 7.7642    | 5.85443   | 8.43833   | 7.87161   |
| 170.767   | 172.16    | 199.626   | 153.403   | 176.975   | 147.836   |
| 0.0387384 | 0.0965516 | 0.170817  | 0.110335  | 0.272745  | 0.260543  |
| 0         | 0         | 0         | 0         | 0         | 0         |
| 0.390086  | 0.583349  | 0         | 0.355534  | 0.591546  | 0.459129  |
| 0.17277   | 0         | 0.435329  | 0.196833  | 0.187141  | 0.14525   |
| 118.232   | 113.827   | 99.3296   | 94.0069   | 87.4115   | 104.293   |
| 0.144688  | 0.174254  | 0.177952  | 0.215382  | 0.285596  | 0.174434  |
| 124.96    | 137.847   | 122.596   | 143.611   | 130.569   | 148.221   |
| 0         | 0         | 0         | 0         | 0.156867  | 0.0811686 |
| 11.5025   | 9.64056   | 11.2522   | 10.201    | 11.14     | 10.6373   |
| 29.7632   | 173.899   | 41.9241   | 236.6     | 55.6186   | 20.3306   |
| 0.715596  | 1.74498   | 1.46741   | 0.904567  | 1.40676   | 2.75367   |
| 10.2914   | 9.77835   | 10.119    | 11.8489   | 11.9505   | 13.7301   |
| 0.116073  | 0.123986  | 0.125344  | 0.207806  | 0.16165   | 0.0697028 |
| 23.5007   | 26.065    | 20.2317   | 25.1675   | 16.546    | 18.1108   |
| 42.0223   | 35.4873   | 40.7009   | 36.8503   | 42.2847   | 50.3718   |
| 7.84702   | 7.29756   | 9.7485    | 7.49464   | 9.59177   | 8.20044   |
| 0.0916724 | 0.114242  | 0         | 0         | 0.0992976 | 0         |
| 37.3224   | 39.9337   | 29.1307   | 42.6639   | 25.3178   | 31.9056   |
| 46.4234   | 43.5516   | 41.0233   | 39.692    | 47.7495   | 45.3695   |
| 15.2209   | 15.1229   | 18.1932   | 15.0627   | 17.0161   | 13.1303   |
| 0.0745688 | 0         | 0.0234865 | 0         | 0.0403857 | 0.0470182 |
| 6.97339   | 6.94791   | 7.10209   | 10.4101   | 10.1419   | 11.6187   |

|           |           |           |           |           |           |
|-----------|-----------|-----------|-----------|-----------|-----------|
| 0         | 0         | 0         | 0         | 0         | 0         |
| 4.2458    | 4.62966   | 4.20842   | 3.27226   | 3.48308   | 3.59569   |
| 0.100437  | 0         | 0.0316338 | 0.178793  | 0.122391  | 0.172397  |
| 0.196002  | 0.0814193 | 0.219497  | 0.347359  | 0.424612  | 0.238018  |
| 109.33    | 107.148   | 125.643   | 103.129   | 93.3145   | 116.39    |
| 11.2777   | 10.8726   | 10.5387   | 14.2927   | 11.9291   | 13.8457   |
| 6.76026   | 6.63161   | 9.30628   | 7.38104   | 8.65285   | 7.31632   |
| 0         | 0         | 0         | 0         | 0.387867  | 0.0602088 |
| 6.51511   | 6.01026   | 6.43144   | 5.31789   | 6.33911   | 5.833     |
| 0         | 0         | 0         | 0         | 0         | 0         |
| 1.98151   | 1.39572   | 3.31046   | 1.66859   | 2.47294   | 1.37616   |
| 6.17005   | 5.81102   | 6.92454   | 6.44364   | 7.14418   | 6.29027   |
| 1.50812   | 1.17374   | 2.29393   | 0.787694  | 3.26374   | 1.90121   |
| 0         | 0         | 0         | 0         | 0         | 0         |
| 9.642     | 9.59575   | 10.0261   | 9.89796   | 18.1887   | 13.9794   |
| 3.01998   | 3.25033   | 3.09718   | 2.67254   | 3.78485   | 3.07406   |
| 4.21735   | 4.20452   | 4.64417   | 4.96491   | 4.77117   | 3.887     |
| 0         | 0         | 0         | 0         | 0         | 0         |
| 2.53821   | 1.74861   | 2.53738   | 1.0191    | 3.27293   | 1.43855   |
| 0         | 0         | 0         | 0         | 0         | 0         |
| 8.7884    | 8.48218   | 8.46013   | 7.73961   | 7.54209   | 7.95855   |
| 3.25188   | 3.16183   | 3.91681   | 3.88802   | 4.27717   | 4.97209   |
| 0.186895  | 0.316883  | 0.129742  | 0.187723  | 0.22664   | 0.138526  |
| 33.5061   | 36.2121   | 32.5492   | 30.6867   | 31.6256   | 28.679    |
| 15.0413   | 17.7825   | 18.0107   | 16.2569   | 16.392    | 16.2218   |
| 0         | 0         | 0         | 0         | 0         | 0         |
| 3.22405   | 2.65744   | 4.12579   | 3.9334    | 4.61963   | 4.1191    |
| 6.99651   | 7.61011   | 11.1959   | 8.04929   | 13.512    | 7.57629   |
| 7.82558   | 6.15158   | 6.55982   | 5.38176   | 4.63497   | 3.05211   |
| 3.97757   | 3.48115   | 2.60121   | 2.59442   | 3.15732   | 3.16531   |
| 109.077   | 118.587   | 106.34    | 116.852   | 97.8978   | 110.134   |
| 3.13181   | 2.41059   | 3.71353   | 0.524708  | 5.08847   | 1.62623   |
| 0.345046  | 0.572768  | 0.631971  | 1.14246   | 0.58836   | 0.702661  |
| 14.6079   | 15.4061   | 13.8852   | 16.5743   | 12.5729   | 13.7346   |
| 47.7294   | 48.9465   | 42.3069   | 34.7379   | 40.3426   | 41.5628   |
| 0.0292829 | 0         | 0         | 0.0333615 | 0.0317186 | 0.0492369 |
| 92.5707   | 92.8231   | 94.5668   | 83.5352   | 79.8515   | 78.9446   |
| 219.663   | 162.322   | 203.711   | 190.772   | 256.026   | 368.284   |
| 6.70816   | 7.45373   | 3.99668   | 5.49657   | 8.37575   | 7.66768   |
| 0.604223  | 0.592301  | 0.20284   | 0.375131  | 0.868918  | 0.694887  |
| 52.1495   | 49.5014   | 40.4557   | 40.5637   | 39.5913   | 56.8414   |
| 0.113495  | 0.159118  | 0.28602   | 0.232748  | 0.030733  | 0.194811  |
| 14.2273   | 14.1267   | 12.5825   | 13.9928   | 13.0635   | 14.9393   |



|           |           |           |           |           |           |
|-----------|-----------|-----------|-----------|-----------|-----------|
| 3.26377   | 2.03265   | 3.67541   | 1.80054   | 4.57286   | 2.7739    |
| 0.0204631 | 0.0255011 | 0.051561  | 0.0466265 | 0.0443304 | 0.0172036 |
| 0.502322  | 0.391246  | 0.395533  | 1.14775   | 0.766281  | 0.675693  |
| 0         | 0         | 0         | 0         | 0         | 0         |
| 0         | 0         | 0.840878  | 0.380202  | 0.722958  | 0.280563  |
| 4.29705   | 4.6034    | 2.70683   | 1.88951   | 4.4095    | 5.54562   |
| 11.2476   | 14.1021   | 13.8504   | 13.1705   | 10.8012   | 12.2182   |
| 3.28761   | 3.012     | 3.67683   | 2.95198   | 3.84023   | 3.20898   |
| 0         | 0         | 0         | 0         | 0         | 0         |
| 1.68895   | 1.19514   | 1.4683    | 1.01066   | 2.01229   | 0.723567  |
| 14.7689   | 14.3829   | 12.994    | 14.6306   | 12.2347   | 12.8092   |
| 51.8758   | 53.5051   | 52.1305   | 52.8883   | 45.9906   | 54.2445   |
| 8.59625   | 7.91506   | 11.7958   | 16.0627   | 12.4842   | 14.546    |
| 30.8582   | 36.4429   | 34.9134   | 36.1423   | 36.9235   | 41.1544   |
| 0.0125622 | 0.0626252 | 0.113967  | 0.0644107 | 0.0612389 | 0.0475307 |
| 13.5185   | 16.5258   | 14.3279   | 13.6901   | 14.0387   | 12.7362   |
| 1.74476   | 1.10247   | 1.20743   | 1.42784   | 1.06473   | 0.826389  |
| 2.01872   | 1.91538   | 2.80341   | 2.01241   | 4.29873   | 3.81862   |
| 38.1522   | 36.2511   | 51.0856   | 40.6103   | 47.9796   | 42.5506   |
| 0.721306  | 0.719112  | 0.45437   | 0.698505  | 0.351587  | 0.60641   |
| 0         | 0.160095  | 0         | 0         | 0.139152  | 0         |
| 13.8602   | 12.4219   | 16.4407   | 12.9082   | 18.6883   | 14.1694   |
| 119.743   | 94.3649   | 96.156    | 106.467   | 133.935   | 183.15    |
| 0         | 0         | 0         | 0         | 0         | 0         |
| 0         | 0         | 0         | 0         | 0         | 0         |
| 2.53861   | 1.9499    | 2.49425   | 1.38243   | 1.97153   | 2.20135   |
| 12.6404   | 12.8949   | 11.6286   | 12.9684   | 16.979    | 16.8334   |
| 0.362891  | 0.357027  | 0.433127  | 0.195838  | 0.0827529 | 0.1124    |
| 0         | 0         | 0.0450414 | 0         | 0         | 0         |
| 77.3695   | 84.7689   | 76.1356   | 96.1544   | 54.9159   | 81.4192   |
| 18.6809   | 17.6578   | 20.1913   | 18.2373   | 19.1072   | 19.8575   |
| 4.57553   | 5.16827   | 4.19733   | 4.55155   | 4.28822   | 3.75985   |
| 0         | 0         | 0.0358181 | 0.0647804 | 0         | 0         |
| 12.3018   | 13.0029   | 12.672    | 10.1172   | 12.8746   | 9.94905   |
| 12.9058   | 12.3937   | 13.5688   | 12.7088   | 13.334    | 11.3279   |
| 8.5396    | 6.45155   | 12.8371   | 7.90181   | 14.6163   | 8.78596   |
| 0.417908  | 0.236726  | 0.574367  | 0.605965  | 0.987643  | 0.606861  |
| 0         | 0         | 0         | 0         | 0         | 0         |
| 0         | 0         | 0         | 0         | 0         | 0         |
| 2.2575    | 2.14857   | 2.95457   | 3.4566    | 2.36122   | 2.99083   |
| 1.07347   | 1.12653   | 0.747385  | 0.740225  | 0.336587  | 0.427488  |
| 1.97103   | 1.21218   | 1.43508   | 1.45814   | 1.76067   | 1.36655   |
| 0.89329   | 1.59031   | 1.44696   | 4.07084   | 1.10582   | 0.643714  |

|           |           |           |          |           |           |
|-----------|-----------|-----------|----------|-----------|-----------|
| 0.0886037 | 0.0552089 | 0.334883  | 0.151417 | 0         | 0.0744902 |
| 31.0912   | 30.3501   | 29.8279   | 31.363   | 27.9979   | 32.5153   |
| 0         | 0         | 0.0385171 | 0        | 0         | 0         |
| 2.54254   | 2.22901   | 2.57003   | 1.76832  | 3.8108    | 2.08783   |
| 0         | 0         | 0.170198  | 0        | 0         | 0         |
| 7.87806   | 8.06612   | 8.76027   | 6.68304  | 9.67113   | 6.87815   |
| 0.260417  | 0.649063  | 0.164044  | 0        | 0.705197  | 0.766276  |
| 0         | 0         | 0         | 0        | 0.0391141 | 0         |
| 0.0681113 | 0.0848803 | 0.128716  | 0.038799 | 0.0184442 | 0.0429465 |
| 2.92601   | 3.05938   | 2.64038   | 3.56268  | 5.00012   | 2.49817   |
| 9.27994   | 12.1876   | 11.0381   | 17.8786  | 12.4516   | 17.0329   |
| 29.6746   | 25.9972   | 26.2821   | 27.659   | 19.8408   | 20.5174   |
| 7.78026   | 8.10906   | 8.86526   | 8.47083  | 9.2012    | 7.02305   |
| 37.2704   | 41.5519   | 36.4789   | 34.6563  | 44.1336   | 49.1591   |
| 15.7697   | 15.2063   | 11.8804   | 9.83736  | 13.1433   | 15.3591   |
| 5.79904   | 6.56922   | 5.97709   | 10.211   | 4.22531   | 5.76126   |
| 31.8761   | 34.5056   | 43.1871   | 41.2982  | 37.01     | 44.0359   |
| 0.391056  | 0.289354  | 0.523465  | 0.37591  | 0.820693  | 0.534244  |
| 2.18684   | 2.79512   | 2.68446   | 1.34154  | 3.03685   | 2.4042    |
| 0.0393604 | 0.0245254 | 0.0495883 | 0.112107 | 0         | 0.0165454 |
| 0         | 0         | 0         | 0        | 0         | 0         |
| 0.91407   | 0.569556  | 3.52676   | 4.8164   | 0.43317   | 0.576352  |
| 2.80115   | 2.8561    | 1.71105   | 1.5473   | 3.264     | 2.06951   |
| 3.97562   | 4.51134   | 5.7824    | 4.7503   | 4.06124   | 4.15756   |
| 0.104045  | 0.12966   | 0.196622  | 0.355609 | 0.112699  | 0.0874717 |
| 6.33251   | 6.31325   | 6.6148    | 5.77161  | 6.11338   | 5.26179   |
| 0.538964  | 0.632147  | 0.778871  | 0.307016 | 0.927203  | 0.333172  |
| 4.40591   | 3.84451   | 4.21947   | 4.19431  | 6.90473   | 3.66111   |
| 1.53275   | 2.08376   | 1.57995   | 3.17498  | 1.35838   | 1.64004   |
| 5.35709   | 6.62599   | 6.26887   | 5.87465  | 4.99857   | 5.58332   |
| 37.8674   | 38.1714   | 37.5632   | 36.1438  | 36.8734   | 32.4323   |
| 18.624    | 18.9798   | 17.3841   | 19.9565  | 17.2265   | 19.3885   |
| 0.243275  | 0         | 0.102164  | 0.27716  | 0.087837  | 0.13635   |
| 0         | 0         | 0         | 0        | 0         | 0         |
| 184.976   | 139.525   | 259.018   | 216.247  | 307.381   | 274.854   |
| 0         | 0.0417556 | 0         | 0.11452  | 0         | 0         |
| 20.8354   | 21.1226   | 23.5085   | 19.1605  | 20.6941   | 17.9929   |
| 1.64966   | 1.54752   | 1.37789   | 1.54974  | 1.81031   | 1.38496   |
| 0         | 0         | 0         | 0        | 0.0142626 | 0         |
| 2.37831   | 2.96385   | 1.08957   | 0.738974 | 1.17097   | 0.727083  |
| 6.55026   | 5.98924   | 6.91368   | 5.86083  | 7.68504   | 5.40128   |
| 0         | 0         | 0         | 0        | 0         | 0         |
| 0.825302  | 0.652964  | 0.498791  | 0.402896 | 0.474911  | 0.332848  |

|           |           |           |           |           |           |
|-----------|-----------|-----------|-----------|-----------|-----------|
| 1.84434   | 1.79876   | 1.61642   | 2.10123   | 1.99776   | 1.55056   |
| 4.75345   | 5.36764   | 5.57311   | 4.53136   | 5.82134   | 5.0239    |
| 0         | 0         | 0         | 0         | 0         | 0         |
| 0         | 0         | 0         | 0         | 0         | 0         |
| 2.68896   | 2.36092   | 2.92574   | 2.29775   | 2.68105   | 3.18545   |
| 54.0804   | 61.4781   | 48.0942   | 51.2269   | 50.8643   | 57.0022   |
| 0         | 0.104135  | 0         | 0.0952004 | 0         | 0.140503  |
| 0         | 0         | 0         | 0         | 0         | 0         |
| 1.30357   | 0.922081  | 2.99212   | 2.90463   | 4.1328    | 2.66722   |
| 4.18829   | 4.44444   | 5.8512    | 5.10229   | 4.49177   | 4.53199   |
| 5.51419   | 5.12656   | 7.99465   | 3.29069   | 8.91188   | 4.96698   |
| 8.3943    | 12.3355   | 7.37311   | 10.6818   | 8.9775    | 6.51351   |
| 24.6538   | 23.7198   | 23.3007   | 26.3351   | 29.1415   | 27.3415   |
| 71.4818   | 73.8842   | 71.8401   | 82.1722   | 75.372    | 108.616   |
| 10.6941   | 9.9417    | 13.5597   | 13.5156   | 9.05091   | 10.465    |
| 0.0450995 | 0.0562029 | 0         | 0         | 0         | 0         |
| 153.145   | 152.664   | 156.57    | 136.458   | 112.034   | 121.595   |
| 0.619657  | 0.421209  | 0.390339  | 0.994769  | 0.762727  | 0.876149  |
| 14.6215   | 13.8509   | 16.8349   | 14.6295   | 16.6169   | 15.4676   |
| 10.229    | 11.7401   | 13.2519   | 11.3023   | 13.4128   | 9.71962   |
| 0         | 0         | 0         | 0         | 0         | 0         |
| 26.0057   | 25.605    | 25.0798   | 24.3971   | 22.9978   | 21.4697   |
| 0         | 0.0426739 | 0.215707  | 0.117038  | 0.0370916 | 0.0575774 |
| 4.37223   | 1.96719   | 4.28486   | 7.88535   | 4.20993   | 3.16463   |
| 25.2551   | 24.5888   | 22.3572   | 19.5686   | 24.6819   | 24.2799   |
| 0.0673155 | 0.0209721 | 0.0212019 | 0.0766914 | 0         | 0.0377286 |
| 0.973947  | 1.09809   | 0.905938  | 1.30994   | 0.616961  | 0.774066  |
| 0.199883  | 0         | 0         | 0.113862  | 0         | 0         |
| 451.738   | 455.546   | 424.211   | 523.823   | 199.731   | 333.407   |
| 10.337    | 11.2236   | 12.7836   | 12.5348   | 12.5868   | 13.5251   |
| 22.4595   | 24.712    | 22.3759   | 27.7324   | 17.7905   | 24.9344   |
| 1.127     | 0.86516   | 0.681805  | 0.313978  | 0.356356  | 0.172102  |
| 0         | 0         | 0         | 0         | 0         | 0         |
| 0         | 0         | 0         | 0         | 0         | 258.678   |
| 89.7642   | 87.6096   | 90.396    | 97.9485   | 74.8796   | 88.4781   |
| 3.55E-25  | 4.72E-14  | 1.10E-08  | 1.17E-16  | 7.55E-20  | 2.59486   |
| 25.4777   | 28.5863   | 27.5322   | 24.6591   | 22.9511   | 20.6204   |
| 5.99782   | 33.6351   | 7.55638   | 30.7494   | 53.0565   | 20.1698   |
| 10.5532   | 9.28189   | 7.75167   | 6.05492   | 10.6056   | 10.1373   |
| 1.63421   | 1.03786   | 0.970041  | 0.769792  | 0.970172  | 0.779422  |
| 17.2509   | 15.624    | 14.7245   | 12.1986   | 13.8364   | 16.4667   |
| 7.25712   | 7.24941   | 8.83815   | 7.23115   | 7.22442   | 5.92683   |
| 0.0234035 | 0.0274503 | 0.24729   | 0.0745974 | 0.255791  | 0.109436  |

|           |           |           |           |           |           |
|-----------|-----------|-----------|-----------|-----------|-----------|
| 5.43871   | 4.37068   | 5.05894   | 5.73296   | 5.67087   | 4.40146   |
| 0         | 0         | 0         | 0         | 0         | 0         |
| 0         | 0         | 0         | 0         | 0         | 0         |
| 14.5807   | 15.0015   | 13.1764   | 16.1209   | 18.348    | 20.1889   |
| 42.455    | 34.0804   | 32.6286   | 24.8303   | 40.6345   | 37.3994   |
| 0         | 0         | 0         | 0         | 0         | 0         |
| 0         | 0         | 0         | 0         | 0         | 0         |
| 17.0875   | 18.5078   | 15.798    | 14.5207   | 14.2018   | 14.0826   |
| 4.30554   | 4.26498   | 3.77493   | 3.12416   | 4.43327   | 4.30679   |
| 15.3927   | 13.9758   | 14.3338   | 15.5797   | 14.2794   | 15.6049   |
| 126.315   | 76.2314   | 98.0395   | 64.4665   | 116.638   | 72.8301   |
| 19.3384   | 19.2796   | 19.2151   | 22.6971   | 18.5229   | 18.4462   |
| 0         | 0.88239   | 0         | 0.806686  | 0         | 0.14882   |
| 28.4937   | 31.0181   | 27.4021   | 30.4572   | 21.5607   | 27.4228   |
| 32.1942   | 41.9696   | 27.7879   | 42.7023   | 27.108    | 32.0299   |
| 18.2723   | 14.9743   | 14.3673   | 21.3832   | 22.584    | 14.6899   |
| 20.1632   | 23.9728   | 22.588    | 24.417    | 21.6732   | 20.8952   |
| 1.3358    | 1.42768   | 1.96716   | 1.97825   | 2.64564   | 2.76934   |
| 3.26381   | 5.11787   | 3.89408   | 7.85544   | 2.20078   | 5.05173   |
| 0         | 0         | 0         | 0         | 0         | 25.8707   |
| 115.712   | 126.518   | 107.899   | 130.102   | 79.7583   | 93.8424   |
| 0.940089  | 0.782993  | 0.790321  | 0.841324  | 0.882812  | 1.05727   |
| 0.156295  | 0.0973876 | 0         | 1.1129    | 0.084648  | 0.164249  |
| 2.96561   | 3.58862   | 3.2489    | 4.99455   | 3.86406   | 4.01084   |
| 7.51583   | 7.27427   | 8.59166   | 7.47603   | 6.91158   | 6.43893   |
| 0         | 0         | 0.141425  | 0         | 0.121592  | 0.141561  |
| 0.455478  | 1.0091    | 1.68782   | 1.13428   | 1.07842   | 1.44399   |
| 0.112694  | 0         | 0.0709892 | 0.0641953 | 0.0610341 | 0.0473717 |
| 14.5203   | 14.2159   | 16.7837   | 12.6194   | 17.9729   | 14.4208   |
| 11.5341   | 12.4137   | 12.7856   | 11.8607   | 16.7932   | 13.4749   |
| 0.0657741 | 0.117097  | 0.17757   | 0.0642303 | 0.152668  | 0.0473975 |
| 35.4144   | 35.426    | 32.5712   | 31.9209   | 28.8789   | 33.6668   |
| 0.512162  | 0.793234  | 1.21882   | 0.647255  | 1.01678   | 0.923947  |
| 0.542097  | 0.9224    | 0.656696  | 0.997665  | 0.632357  | 0.482041  |
| 0         | 0         | 0         | 0         | 0         | 0         |
| 118.723   | 125.776   | 143.332   | 142.502   | 120.629   | 147.445   |
| 5.51225   | 5.14597   | 5.95067   | 5.13072   | 6.15196   | 5.49414   |
| 0.217373  | 0.295517  | 0.273858  | 0.607867  | 0.599338  | 0.348883  |
| 0         | 0         | 0         | 0.276406  | 0         | 0         |
| 16.718    | 16.1014   | 13.0762   | 14.5736   | 24.1087   | 20.6565   |
| 15.658    | 15.8466   | 14.826    | 14.5616   | 13.6321   | 16.3518   |
| 0.178849  | 0.0607857 | 0.225323  | 0.0740943 | 0.0880569 | 0.0683456 |
| 0.386752  | 0.240985  | 0.213172  | 0.302926  | 0.340374  | 0.264182  |

|           |           |           |           |           |           |
|-----------|-----------|-----------|-----------|-----------|-----------|
| 0.761454  | 0.838583  | 1.09318   | 0.625415  | 0.97824   | 0.714601  |
| 0         | 0         | 0         | 0.0218249 | 0.0207501 | 0         |
| 0.936054  | 1.08874   | 1.13998   | 0.995335  | 0.47316   | 0.550866  |
| 22.1342   | 21.9433   | 21.3245   | 19.2837   | 19.6773   | 19.5728   |
| 0.142795  | 0.355901  | 0         | 0.325367  | 0         | 0         |
| 0         | 0         | 0         | 0.0546312 | 0         | 0         |
| 14.5919   | 12.3858   | 36.3218   | 39.1434   | 17.1564   | 14.6616   |
| 0         | 0         | 0         | 0         | 0         | 0         |
| 0         | 0         | 0         | 0         | 0         | 0         |
| 153.463   | 164.816   | 140.304   | 167.294   | 122.528   | 150.081   |
| 0.706147  | 0.72      | 0.808766  | 0.731365  | 0.486745  | 0.755576  |
| 0.172253  | 0.643985  | 0.651041  | 0.78498   | 0.746324  | 0.724076  |
| 26.1894   | 21.1136   | 24.9412   | 19.6729   | 32.7781   | 24.0754   |
| 2.02691   | 1.80879   | 2.03805   | 1.44235   | 3.60838   | 2.15381   |
| 0.032838  | 0.0818452 | 0         | 0         | 0.0355694 | 0         |
| 26.3502   | 25.6595   | 25.0786   | 24.0124   | 20.1305   | 18.3788   |
| 0.932132  | 1.07868   | 1.64392   | 1.18123   | 0.953529  | 0.854459  |
| 5.92433   | 5.96659   | 6.75432   | 6.06356   | 7.16452   | 6.72563   |
| 0         | 0         | 0         | 0         | 0         | 0         |
| 19.8459   | 17.5521   | 17.7785   | 16.5406   | 17.524    | 15.751    |
| 0         | 0.0653614 | 0.0660776 | 0.0597538 | 0.45449   | 0         |
| 0.0707894 | 0.0220544 | 0.0445921 | 0         | 0.0383388 | 0.0446351 |
| 0         | 0         | 0         | 0         | 0         | 0         |
| 0         | 0         | 0.0203632 | 0         | 0         | 0.0135886 |
| 1.16573   | 1.21061   | 2.16801   | 0.774725  | 1.83392   | 0.455021  |
| 0.0609904 | 0         | 0         | 0         | 0         | 0.0128187 |
| 8.83964   | 8.1969    | 3.94606   | 6.30419   | 0         | 0         |
| 6.78657   | 6.49467   | 7.6202    | 6.57434   | 7.06046   | 6.13357   |
| 0.140237  | 0.0907883 | 0.229935  | 0.0559135 | 0.088714  | 0.15794   |
| 3.94882   | 4.54108   | 4.90178   | 3.4899    | 4.79622   | 3.95449   |
| 0.0647167 | 0.0788206 | 0.0648011 | 0.0439313 | 0.0738221 | 0.0356631 |
| 0.0190301 | 0.118577  | 0.0959008 | 0.0216807 | 0.185518  | 0.0799943 |
| 6.98134   | 7.42412   | 9.03002   | 6.46903   | 9.09966   | 7.84529   |
| 32.9781   | 46.9217   | 34.1037   | 39.0698   | 31.058    | 37.373    |
| 5.35784   | 5.52212   | 5.56141   | 4.95238   | 5.78526   | 5.071     |
| 14.9499   | 14.7463   | 13.7946   | 12.006    | 16.3776   | 13.7867   |
| 3.1505    | 1.96772   | 0.724861  | 0.816959  | 3.26128   | 2.89907   |
| 6.2836    | 6.82231   | 8.76908   | 7.50898   | 9.79397   | 7.54003   |
| 11.8751   | 9.81623   | 18.7199   | 16.3165   | 19.8437   | 17.9101   |
| 10.4278   | 9.82059   | 14.6202   | 13.3398   | 18.3789   | 12.3737   |
| 18.1603   | 19.3411   | 23.3278   | 19.851    | 18.8735   | 17.1741   |
| 0         | 0.273547  | 0.276545  | 0         | 0         | 0.369082  |
| 55.7805   | 68.1717   | 56.3252   | 75.7366   | 44.1351   | 55.6236   |

|           |          |           |           |           |            |
|-----------|----------|-----------|-----------|-----------|------------|
| 0.0935949 | 0.102666 | 0.058958  | 0.0399866 | 0         | 0.00983579 |
| 0         | 0        | 0         | 0         | 0         | 0          |
| 0         | 0        | 0         | 0         | 0         | 0          |
| 0.680987  | 0.9657   | 0.443765  | 0.508307  | 0.991987  | 0.454063   |
| 6.38453   | 6.16547  | 5.84717   | 6.71013   | 6.07347   | 7.46703    |
| 51.0425   | 47.1492  | 51.9048   | 53.1648   | 45.5725   | 51.1374    |
| 0.0935101 | 0        | 0.0589045 | 0.0266336 | 0.0506441 | 0          |
| 0.754453  | 0.614745 | 1.16985   | 0.363649  | 0.785777  | 0.683068   |
| 3.4435    | 4.90432  | 3.56361   | 3.78301   | 4.92883   | 4.75605    |
| 0         | 0        | 0         | 0         | 0         | 0          |
| 255.296   | 279.924  | 275.153   | 259.082   | 221.747   | 227.761    |
| 0         | 0        | 0         | 0         | 0         | 0          |
| 7.6101    | 7.3928   | 8.90818   | 5.05184   | 10.385    | 15.6169    |
| 3.81068   | 4.62965  | 3.25424   | 4.08708   | 2.08984   | 2.39945    |
| 0         | 0        | 0.0613317 | 0         | 0.105462  | 0.0409272  |
| 3.43726   | 2.38389  | 2.83613   | 3.47386   | 3.28891   | 2.45946    |
| 0         | 0        | 0         | 0         | 0         | 0          |
| 1.67611   | 1.59734  | 0.49799   | 0.224839  | 1.07026   | 1.32477    |
| 22.9925   | 29.7725  | 25.9121   | 24.9671   | 23.2512   | 27.4598    |
| 0         | 0        | 0         | 0.0209875 | 0.019954  | 0          |
| 0.75795   | 0.659049 | 0.58568   | 0.564194  | 0.753405  | 0.531993   |
| 11.3669   | 12.5618  | 9.73954   | 7.2641    | 14.6053   | 10.9777    |
| 31.0835   | 32.4033  | 32.7583   | 31.7461   | 31.9718   | 29.7993    |
| 0.0374971 | 0        | 0         | 0.0854397 | 0.0406161 | 0          |
| 12.4434   | 13.6264  | 13.492    | 12.9719   | 16.1041   | 14.6203    |
| 0         | 0        | 0         | 0.0408076 | 0         | 0          |
| 10.0528   | 9.0382   | 12.1711   | 11.453    | 17.6225   | 16.0262    |
| 4.32348   | 4.81179  | 3.58099   | 4.55503   | 4.88012   | 4.68565    |
| 0         | 0        | 0         | 0         | 0         | 0          |
| 85.4675   | 90.0774  | 83.7508   | 85.0417   | 64.5496   | 82.8526    |
| 0         | 0        | 0         | 0         | 0.020823  | 0.00580081 |
| 25.7517   | 29.6462  | 23.335    | 28.5932   | 22.7973   | 26.3675    |
| 0.0373737 | 0.0207   | 0         | 0         | 0         | 0.00698234 |
| 0         | 0        | 0         | 0         | 0         | 0          |
| 4.67715   | 6.00529  | 4.85688   | 4.1337    | 3.6538    | 3.09805    |
| 10.0564   | 8.89004  | 5.32744   | 6.14988   | 6.73349   | 6.17916    |
| 17.2667   | 19.6823  | 16.1871   | 18.4566   | 14.8523   | 16.096     |
| 4.02849   | 4.45645  | 5.25259   | 3.80726   | 4.38016   | 3.01954    |
| 12.2965   | 11.6897  | 12.229    | 9.79923   | 11.4833   | 9.37306    |
| 2.66698   | 3.32359  | 2.58      | 2.79428   | 3.40468   | 4.18403    |
| 0.107594  | 0        | 0         | 0.24516   | 0         | 0          |
| 0.19832   | 0.276688 | 0.309768  | 0.124499  | 0.318278  | 0.0204158  |
| 14.2578   | 16.3118  | 17.472    | 17.4864   | 23.2923   | 21.7464    |

|           |           |           |           |           |           |
|-----------|-----------|-----------|-----------|-----------|-----------|
| 0.834097  | 0.976883  | 1.1933    | 1.08885   | 1.91898   | 1.65101   |
| 0         | 0         | 0         | 0         | 0         | 0         |
| 0.349258  | 0         | 0.943963  | 0.524821  | 1.12795   | 0.621236  |
| 0         | 0         | 0         | 0         | 0         | 0         |
| 0.0351893 | 0         | 0         | 0.0200453 | 0.0571745 | 0.0443761 |
| 0.352338  | 0.266586  | 0.285361  | 0.143362  | 0.490687  | 0.370268  |
| 15.1452   | 17.2233   | 20.0239   | 18.2387   | 19.399    | 17.2352   |
| 31.7657   | 32.9717   | 27.8972   | 39.6949   | 30.9841   | 33.8578   |
| 10.5579   | 9.29024   | 8.58156   | 9.01055   | 10.9032   | 10.9759   |
| 37.2093   | 40.9978   | 37.5778   | 37.6471   | 33.9845   | 36.5093   |
| 0.316689  | 0.631452  | 0.379033  | 0.613357  | 0.325879  | 0.492552  |
| 2.12035   | 1.67901   | 3.33916   | 3.19574   | 3.63647   | 2.50678   |
| 8.52201   | 9.4159    | 9.99827   | 9.01798   | 8.16191   | 7.09541   |
| 0         | 0         | 0         | 0         | 0         | 0         |
| 4.00244   | 3.86276   | 3.3743    | 5.31418   | 5.54144   | 6.1479    |
| 0         | 0.346232  | 0         | 0         | 0         | 0         |
| 11.2928   | 9.72185   | 7.34414   | 5.7421    | 11.4171   | 9.9876    |
| 6.12205   | 7.37012   | 7.15612   | 6.42684   | 6.68759   | 6.16314   |
| 19.4976   | 21.1079   | 19.6925   | 22.6632   | 21.5471   | 21.4399   |
| 0         | 0         | 0         | 0         | 0         | 0         |
| 0.0981929 | 0.61184   | 0         | 0.11187   | 0.478623  | 0.123828  |
| 0.140581  | 0.0583971 | 0.059037  | 0         | 0.050758  | 0.275772  |
| 0.545381  | 0.29128   | 0.0981573 | 0.0887634 | 0.253177  | 0.262005  |
| 5.01909   | 5.37999   | 6.32332   | 5.83813   | 5.81676   | 6.31466   |
| 4.36446   | 3.21395   | 3.37413   | 2.93821   | 4.94238   | 4.86454   |
| 10.6667   | 9.5897    | 8.57653   | 9.34733   | 9.62273   | 10.4731   |
| 14.047    | 14.2639   | 16.9694   | 13.3579   | 18.6417   | 14.9532   |
| 0.173411  | 19.6657   | 0.327709  | 279.274   | 0         | 7.84838   |
| 95.1972   | 108.317   | 94.5033   | 74.3498   | 68.9315   | 73.4547   |
| 2.68558   | 1.47881   | 5.90136   | 3.34426   | 5.95324   | 3.78051   |
| 3.94487   | 3.53514   | 3.98377   | 2.77966   | 4.40494   | 3.56447   |
| 11.0152   | 10.5503   | 10.7539   | 9.89773   | 10.8264   | 9.74539   |
| 9.80425   | 10.2536   | 13.1754   | 11.564    | 22.7804   | 40.6956   |
| 0         | 0         | 0         | 0         | 0         | 0         |
| 0.301201  | 0.653078  | 0.438388  | 0.486693  | 0.0287914 | 0.29254   |
| 0.233781  | 0.0752979 | 0.271876  | 0.298297  | 0.494306  | 0.0923852 |
| 0.0636093 | 0.118905  | 0.120208  | 0.072469  | 0.137801  | 0         |
| 8.85381   | 9.52537   | 9.9058    | 8.27915   | 11.6443   | 9.36899   |
| 0         | 0         | 0         | 0         | 0         | 0         |
| 5.637     | 3.37732   | 2.04859   | 0.741015  | 4.69683   | 2.82523   |
| 0         | 0         | 0         | 0         | 0         | 0         |
| 14.6267   | 15.2441   | 13.9304   | 15.9201   | 19.3798   | 21.7391   |
| 18.9504   | 18.0636   | 19.5836   | 16.5999   | 18.2603   | 18.1816   |

|           |           |           |           |           |            |
|-----------|-----------|-----------|-----------|-----------|------------|
| 0         | 0         | 0         | 0         | 0         | 0          |
| 97.1352   | 98.1671   | 84.7051   | 89.3285   | 86.4558   | 108.039    |
| 2.98606   | 3.05331   | 5.30538   | 2.96581   | 4.47845   | 3.34722    |
| 1.08957   | 1.35782   | 0         | 0         | 0         | 0          |
| 0         | 0         | 0         | 0         | 0         | 0          |
| 7.7582    | 8.47018   | 9.92357   | 6.80432   | 7.76591   | 5.10914    |
| 0.139468  | 0.278087  | 0.0351417 | 0.158893  | 0.211496  | 0.211054   |
| 66.6253   | 88.3681   | 41.4398   | 80.5314   | 79.1745   | 93.2132    |
| 2.93992   | 2.74789   | 3.18146   | 2.44425   | 2.60711   | 2.1318     |
| 0         | 0         | 0         | 0         | 0         | 0.0803961  |
| 20.5177   | 14.6566   | 30.2806   | 19.5352   | 25.3992   | 23.0711    |
| 0.0342337 | 0.085324  | 0         | 0         | 0.0370813 | 0.0287807  |
| 0.252886  | 0.315146  | 0.2124    | 0.576217  | 0.821763  | 0.850417   |
| 0         | 0         | 0         | 0         | 0         | 0          |
| 0         | 0.0431262 | 0         | 0.0262841 | 0         | 0.00969794 |
| 13.5393   | 14.7125   | 13.9171   | 12.3005   | 14.9719   | 13.643     |
| 199.686   | 236.404   | 183.605   | 189.373   | 156.337   | 166.919    |
| 50.4765   | 56.9545   | 46.231    | 62.8147   | 53.6035   | 63.6542    |
| 32.6047   | 24.6968   | 37.2906   | 35.5293   | 38.1111   | 37.5877    |
| 14.604    | 13.4221   | 16.1481   | 14.6013   | 14.5753   | 14.4615    |
| 71.0911   | 76.8616   | 77.613    | 67.451    | 74.0813   | 68.1494    |
| 1.64557   | 2.0507    | 3.99826   | 4.82082   | 1.61269   | 1.41639    |
| 0.52789   | 0.518724  | 1.13182   | 0.653452  | 0.747709  | 0.601669   |
| 12.2025   | 11.1865   | 15.1388   | 12.2137   | 18.8912   | 12.2744    |
| 0.112863  | 0         | 0         | 0         | 0.244503  | 0.0948856  |
| 1.22234   | 0.986915  | 0.867591  | 1.90256   | 1.95805   | 2.40265    |
| 26.9665   | 26.5672   | 23.335    | 24.2713   | 23.2214   | 22.2737    |
| 0         | 0         | 0.117746  | 0         | 0         | 0          |
| 10.9967   | 10.9486   | 13.4023   | 13.9788   | 18.3575   | 16.7745    |
| 0         | 0         | 0         | 0         | 0         | 0          |
| 0         | 0         | 0         | 0         | 0         | 0          |
| 94.4427   | 84.4376   | 82.088    | 85.8801   | 85.2174   | 105.768    |
| 1.16854   | 0         | 0         | 0         | 0.63287   | 1.47361    |
| 1.3482    | 1.26009   | 1.69896   | 1.67998   | 1.87106   | 1.31055    |
| 16.0928   | 16.8002   | 18.2963   | 14.5084   | 18.6319   | 16.0912    |
| 0         | 0         | 0         | 0         | 0         | 0          |
| 0         | 0         | 0         | 0         | 0         | 0          |
| 8.40552   | 9.01807   | 9.86597   | 9.50737   | 10.1855   | 9.44759    |
| 97.5749   | 95.585    | 55.5776   | 57.7022   | 37.4226   | 47.3925    |
| 0         | 0         | 0         | 0         | 0         | 0          |
| 42.5636   | 41.7499   | 67.1217   | 49.6268   | 53.1828   | 50.3056    |
| 1.79513   | 1.98065   | 2.25959   | 3.60723   | 3.36751   | 2.66592    |
| 0         | 0         | 0         | 0         | 0         | 0          |



|           |           |           |           |          |           |
|-----------|-----------|-----------|-----------|----------|-----------|
| 59.3241   | 66.5433   | 60.5026   | 70.9448   | 64.4881  | 71.599    |
| 6.96745   | 3.34088   | 10.5627   | 5.29815   | 10.0695  | 6.21605   |
| 0         | 0         | 0         | 0         | 0        | 0         |
| 88.5751   | 90.8588   | 89.0035   | 103.67    | 76.7921  | 98.6525   |
| 7.32588   | 7.39972   | 6.80075   | 5.95223   | 6.03499  | 5.78562   |
| 2.16531   | 2.70455   | 3.25403   | 3.46053   | 4.62719  | 4.40276   |
| 0         | 0         | 0         | 0         | 0        | 0         |
| 6.91823   | 6.29357   | 7.56177   | 8.25622   | 7.46586  | 8.34758   |
| 0.723894  | 0.590152  | 0         | 0.61854   | 0.58808  | 0         |
| 0.153485  | 0.0478181 | 0.0966842 | 0.30601   | 0.249377 | 0.419369  |
| 7.64576   | 7.53257   | 8.86535   | 8.32526   | 6.91366  | 7.67933   |
| 16.025    | 17.2999   | 15.6924   | 15.0592   | 15.0561  | 12.9461   |
| 0         | 0         | 0         | 0         | 0        | 0         |
| 0.720822  | 0.684409  | 1.42706   | 0.586585  | 0.520519 | 0.346288  |
| 0.230366  | 0.861247  | 0.464365  | 1.1023    | 0.299434 | 0.503546  |
| 2.84473   | 4.40262   | 3.19798   | 3.80255   | 3.73155  | 3.38538   |
| 1.99528   | 1.88791   | 1.69912   | 2.75729   | 2.12122  | 2.06576   |
| 0         | 0         | 0.0759671 | 0         | 0        | 0.0506935 |
| 0.218524  | 0.10893   | 0.688271  | 1.17011   | 0.686432 | 0.661377  |
| 5.31199   | 6.69491   | 7.63428   | 10.8626   | 7.52639  | 8.10852   |
| 32.6499   | 36.6871   | 32.397    | 38.2433   | 31.493   | 34.7642   |
| 1.42489   | 3.32942   | 1.57076   | 1.62335   | 4.24437  | 3.44402   |
| 35.7047   | 34.882    | 36.8269   | 36.5925   | 34.7742  | 33.2102   |
| 31.345    | 27.624    | 27.8805   | 24.9385   | 27.5797  | 31.5861   |
| 0.494575  | 0.899329  | 0.622367  | 0.745229  | 0.840034 | 0.312361  |
| 3.22919   | 2.95448   | 3.86232   | 3.44611   | 3.09931  | 2.95537   |
| 0         | 20.5146   | 0.412722  | 201.167   | 0.532266 | 11.2919   |
| 13.8177   | 11.7721   | 16.1715   | 14.6027   | 13.1413  | 12.8469   |
| 0         | 0         | 0         | 0         | 0        | 0         |
| 1.48612   | 1.35512   | 1.36997   | 0.660726  | 0.785236 | 1.03609   |
| 92.3172   | 0         | 77.5375   | 0         | 0        | 25.8707   |
| 0.894778  | 1.04073   | 1.20244   | 1.33655   | 0.947668 | 1.03643   |
| 11.955    | 10.8516   | 10.4493   | 10.274    | 11.1571  | 10.6767   |
| 0.294415  | 0.184     | 0.218593  | 0.364964  | 0.206185 | 0.334735  |
| 1.31563   | 0.897841  | 1.26286   | 1.32044   | 1.23845  | 1.0929    |
| 5.19377   | 3.26496   | 8.95633   | 5.65565   | 8.16553  | 4.79433   |
| 0.688465  | 1.28695   | 0.758945  | 1.37262   | 1.86433  | 0.1447    |
| 0.028263  | 0.140885  | 0.106822  | 0.0321995 | 0        | 0.047522  |
| 5.18137   | 5.65163   | 5.33452   | 4.60818   | 5.62442  | 5.3865    |
| 0.988563  | 0.781234  | 0.668287  | 0.714209  | 0.731272 | 0.891908  |
| 0.0477628 | 0         | 0         | 0         | 0        | 0         |
| 3.06725   | 4.24181   | 3.25186   | 5.32646   | 3.44389  | 3.4904    |
| 0         | 0         | 0         | 0         | 0        | 0         |

|           |           |           |           |           |          |
|-----------|-----------|-----------|-----------|-----------|----------|
| 0.0243972 | 0.0304037 | 0.0307369 | 0         | 0         | 0.020511 |
| 0         | 0         | 0         | 0         | 0         | 0        |
| 0.537296  | 0.641679  | 0.987168  | 0.73966   | 0.775985  | 0.639925 |
| 17.8421   | 14.7061   | 18.1147   | 18.813    | 16.9705   | 16.7947  |
| 3.79683   | 3.85054   | 4.42056   | 3.69918   | 3.43193   | 2.86183  |
| 2.92705   | 2.63533   | 0.838182  | 1.50176   | 1.32831   | 1.82925  |
| 29.9046   | 24.6777   | 24.1885   | 24.6213   | 18.459    | 25.9593  |
| 0         | 0         | 0         | 0         | 0         | 0        |
| 37.7349   | 39.7648   | 39.6478   | 37.6307   | 40.7152   | 42.1827  |
| 8.67106   | 9.09233   | 9.13825   | 7.84373   | 7.2525    | 6.98683  |
| 12.2426   | 13.2423   | 9.8492    | 10.1934   | 10.824    | 10.9656  |
| 0.381179  | 0.573989  | 1.06051   | 0.398082  | 0.688142  | 0.253699 |
| 19.3401   | 19.9848   | 12.686    | 13.8997   | 11.4619   | 15.2783  |
| 0.164333  | 0.130322  | 0.13175   | 0.0510604 | 0.291276  | 0.100478 |
| 5.92303   | 7.18143   | 9.89662   | 11.0203   | 11.8445   | 11.8777  |
| 0         | 0         | 0         | 0.149778  | 0         | 0        |
| 67.1774   | 62.0401   | 70.3885   | 55.5464   | 68.1369   | 49.7498  |
| 0         | 0.0352559 | 0.0356422 | 0         | 0         | 0        |
| 25.2148   | 23.9665   | 30.6229   | 26.3532   | 31.5942   | 23.444   |
| 0.0376934 | 0         | 0         | 0         | 0.0408287 | 0        |
| 0.464038  | 0.578284  | 0.779494  | 0.176224  | 1.00527   | 0.520164 |
| 1.58398   | 1.64496   | 1.99559   | 2.40614   | 3.14552   | 2.72216  |
| 5.75011   | 4.99835   | 7.90016   | 5.7018    | 6.97171   | 4.86403  |
| 0.0407601 | 0         | 0.102704  | 0.0928746 | 0         | 0.13707  |
| 0.497101  | 0.702659  | 0.543659  | 0.314632  | 0.46742   | 0.906862 |
| 44.4612   | 43.3467   | 44.6264   | 54.0279   | 43.6098   | 57.2159  |
| 0         | 0         | 0         | 0         | 0         | 0        |
| 0.0482333 | 0.180325  | 0.0607669 | 0.109903  | 0.208981  | 0.202752 |
| 0         | 0         | 0         | 0         | 0         | 0        |
| 2.80695   | 3.79335   | 1.7284    | 0.658901  | 3.74292   | 1.35062  |
| 0.933181  | 0.925586  | 1.15903   | 1.75373   | 1.66647   | 1.51529  |
| 2.4623    | 1.9513    | 3.31078   | 1.76804   | 3.36347   | 1.64558  |
| 39.8375   | 43.8578   | 46.7438   | 46.7972   | 36.8909   | 45.6392  |
| 12.7453   | 12.9338   | 13.0174   | 12.0083   | 13.3552   | 10.6278  |
| 27.4574   | 15.2206   | 25.2492   | 20.4622   | 15.7875   | 16.5091  |
| 32.9644   | 32.8395   | 34.7125   | 30.8592   | 32.4924   | 29.8637  |
| 0.154265  | 36.9111   | 0.194352  | 315.65    | 1.16968   | 20.751   |
| 6.41065   | 7.29008   | 6.47566   | 6.37728   | 7.51345   | 6.68401  |
| 8.1048    | 7.1328    | 9.05562   | 7.71718   | 9.32364   | 7.80852  |
| 2.93222   | 2.99109   | 2.55627   | 2.90108   | 2.99716   | 2.33012  |
| 12.4427   | 11.4006   | 10.8551   | 11.1443   | 10.87     | 9.56591  |
| 122.417   | 140.035   | 103.684   | 126.182   | 156.235   | 135.809  |
| 57.6697   | 45.5793   | 46.7769   | 49.6659   | 45.7796   | 56.1553  |

|           |           |          |           |           |           |
|-----------|-----------|----------|-----------|-----------|-----------|
| 160.235   | 167.093   | 166.945  | 180.613   | 119.762   | 175.437   |
| 28.5054   | 36.4298   | 32.9714  | 36.013    | 32.3382   | 33.1892   |
| 0         | 0         | 0        | 0         | 0         | 0         |
| 3.29247   | 2.53999   | 4.7406   | 1.78621   | 2.54738   | 2.89983   |
| 7.16972   | 6.69372   | 6.99299  | 8.68964   | 5.89859   | 6.37387   |
| 0.502125  | 0.550657  | 0.835037 | 0.549179  | 0.935493  | 0.540478  |
| 0.251151  | 0.248782  | 0.46245  | 0.616284  | 0.174385  | 0.167834  |
| 1.52265   | 1.48939   | 3.19732  | 2.92857   | 3.90143   | 4.58849   |
| 9.07091   | 10.1691   | 8.72075  | 6.88512   | 8.09096   | 6.87296   |
| 0.0268659 | 0.0334803 | 0.101541 | 0.0612158 | 0         | 0.045173  |
| 13.6528   | 14.4058   | 12.7922  | 13.8302   | 13.3758   | 13.5219   |
| 0         | 0         | 0        | 0         | 0         | 0         |
| 16.9361   | 17.5773   | 17.2779  | 17.2335   | 21.038    | 20.2686   |
| 12.2109   | 11.924    | 12.6286  | 11.0567   | 12.4864   | 11.5683   |
| 0.257024  | 0.264914  | 0.373594 | 0.26469   | 0.374709  | 0.220235  |
| 4.07696   | 2.67405   | 11.9849  | 14.4777   | 10.0459   | 9.78155   |
| 2.16992   | 1.87447   | 2.64059  | 1.17989   | 5.12818   | 3.83514   |
| 6.80843   | 6.92043   | 8.29904  | 6.50765   | 7.35477   | 6.9477    |
| 0         | 0         | 0        | 0.0731148 | 0.0347572 | 0.0269768 |
| 24.1254   | 23.4312   | 24.7381  | 24.4533   | 29.3436   | 27.5531   |
| 54.3994   | 53.0229   | 68.5329  | 67.0222   | 78.837    | 57.4989   |
| 3.72621   | 3.33205   | 2.9027   | 3.40265   | 2.9886    | 3.8979    |
| 704.81    | 848.42    | 710.118  | 779.11    | 687.317   | 850.427   |
| 4.15741   | 4.72981   | 2.20699  | 9.87459   | 2.4414    | 3.3321    |
| 0.897695  | 1.16794   | 1.28551  | 1.54763   | 1.56501   | 1.34341   |
| 0         | 0         | 0        | 0         | 0         | 0         |
| 1.08094   | 1.10153   | 0.697449 | 1.0336    | 1.39016   | 1.36275   |
| 10.0751   | 9.84315   | 10.8679  | 7.88906   | 10.8364   | 7.58346   |
| 440.863   | 355.146   | 291.768  | 276.919   | 174.889   | 105.055   |
| 8.19782   | 9.04395   | 8.20809  | 7.35373   | 7.38418   | 7.97296   |
| 0         | 0         | 0        | 0         | 0         | 0         |
| 46.6167   | 48.5292   | 48.0731  | 49.0571   | 45.9127   | 49.8662   |
| 23.1231   | 25.5989   | 21.9589  | 17.9448   | 21.9337   | 19.3316   |
| 0         | 0         | 0        | 0         | 0         | 0         |
| 29.9055   | 32.9216   | 27.4658  | 30.8247   | 25.2102   | 29.7893   |
| 0.338745  | 0.211072  | 0.42677  | 0.257285  | 7.70536   | 6.028     |
| 22.9592   | 22.3196   | 24.5818  | 21.7836   | 29.0005   | 23.1371   |
| 2.75E-09  | 1.75E-17  | 1.87E-33 | 3.71E-13  | 7.12E-21  | 4.29E-19  |
| 0         | 0         | 0        | 0         | 0         | 0         |
| 3.26939   | 3.19566   | 2.54793  | 2.46274   | 3.2297    | 3.00643   |
| 15.5917   | 15.9704   | 15.8211  | 14.7888   | 14.9766   | 14.051    |
| 5.90974   | 8.46949   | 14.5908  | 10.9889   | 9.42536   | 20.5999   |
| 19.6546   | 19.0128   | 16.5494  | 23.7509   | 12.1541   | 12.3964   |

|           |           |            |           |           |           |
|-----------|-----------|------------|-----------|-----------|-----------|
| 26.3381   | 29.88     | 24.6229    | 26.2181   | 21.2911   | 30.8964   |
| 0.0309422 | 0         | 0.00866283 | 0         | 0         | 0         |
| 0.199057  | 0.0902053 | 0.216585   | 0.144316  | 0.196013  | 0.152136  |
| 68.6193   | 68.4012   | 71.6263    | 64.9466   | 80.9718   | 78.4931   |
| 26.2541   | 27.6738   | 32.8152    | 26.7948   | 29.3216   | 25.1328   |
| 11.2185   | 11.9505   | 7.396      | 9.73464   | 7.19114   | 9.35404   |
| 0         | 0         | 0          | 0         | 0         | 0         |
| 2.46502   | 2.55992   | 1.81158    | 1.40417   | 1.55753   | 2.59046   |
| 0         | 0         | 0          | 0         | 0         | 0         |
| 84.6193   | 81.3388   | 67.4335    | 90.8118   | 68.5088   | 111.607   |
| 96.2554   | 89.5483   | 63.6908    | 69.5891   | 55.7733   | 64.3465   |
| 19.1875   | 20.7335   | 21.0902    | 20.8759   | 21.3181   | 23.0815   |
| 0         | 0         | 0          | 0         | 0         | 0         |
| 1.46518   | 1.07406   | 1.08583    | 1.0801    | 1.49369   | 1.52162   |
| 79.3871   | 88.0235   | 71.1157    | 91.5275   | 66.7597   | 76.3534   |
| 0.0805251 | 0         | 0.10145    | 0         | 0.174446  | 0.0676984 |
| 1.13795   | 1.43934   | 1.95912    | 2.17087   | 2.32737   | 1.96447   |
| 17.9782   | 16.1074   | 21.3582    | 15.0175   | 25.1848   | 19.3625   |
| 1.36581   | 3.22497   | 3.35087    | 5.89657   | 3.27028   | 5.13691   |
| 2.37922   | 3.36929   | 3.40621    | 3.26504   | 2.34283   | 2.18207   |
| 0         | 0.224039  | 0.226494   | 0.409636  | 0.194732  | 0         |
| 0.667877  | 0.719834  | 0.670868   | 0.658076  | 1.18291   | 0.925704  |
| 34.0747   | 32.8804   | 33.6414    | 36.7885   | 33.1939   | 41.054    |
| 0         | 0         | 0          | 0         | 0         | 0         |
| 0.302588  | 0.0707025 | 1.00665    | 0.846168  | 0.0614537 | 0.0476974 |
| 7.0624    | 6.92286   | 8.58564    | 7.04031   | 14.5417   | 10.9879   |
| 5.84741   | 4.94104   | 6.70803    | 6.5955    | 5.0926    | 5.17473   |
| 3.43586   | 3.78545   | 4.79236    | 4.06673   | 4.77466   | 4.02042   |
| 0         | 0         | 0          | 0         | 0         | 0         |
| 0         | 0         | 0          | 0         | 0         | 0         |
| 0.413795  | 0         | 0.521321   | 0         | 0.448214  | 0.347882  |
| 34.8815   | 26.2848   | 25.1251    | 24.0086   | 24.7938   | 24.7598   |
| 5.78997   | 4.86191   | 5.79178    | 5.01101   | 5.54483   | 5.30642   |
| 0.438144  | 0.546015  | 4.41598    | 1.49751   | 1.6136    | 3.60986   |
| 9.84168   | 6.48726   | 10.8623    | 5.46779   | 11.718    | 7.5216    |
| 0.769273  | 0.871515  | 1.4097     | 1.22168   | 1.38877   | 1.41106   |
| 42.3554   | 41.8015   | 37.8215    | 39.5106   | 32.8376   | 40.7398   |
| 0.2127    | 0.373713  | 0          | 0.0500388 | 0.454883  | 0.221279  |
| 0.0898145 | 0.111927  | 0.226306   | 0.102324  | 0.389141  | 0.151016  |
| 0.512081  | 0.395896  | 0.310847   | 1.44092   | 1.5609    | 1.78285   |
| 1.32736   | 0.761437  | 1.24758    | 1.12818   | 3.17222   | 2.17872   |
| 0         | 0         | 0          | 0         | 0         | 0         |
| 98.8105   | 102.093   | 72.7371    | 79.2952   | 77.1206   | 88.6349   |

|           |           |            |           |            |            |
|-----------|-----------|------------|-----------|------------|------------|
| 0.0204922 | 0.102149  | 0.0516343  | 0.0700392 | 0.0665902  | 0.189508   |
| 0         | 0.301078  | 0          | 0         | 0.261693   | 0          |
| 110.455   | 105.643   | 111.375    | 108.602   | 106.328    | 101.054    |
| 8.89865   | 7.30898   | 7.70756    | 9.15883   | 10.3325    | 11.5619    |
| 0.287607  | 0.23041   | 0.103526   | 0.0234047 | 0.222521   | 0.0518131  |
| 28.7096   | 28.4971   | 34.7359    | 37.0414   | 37.8681    | 41.1166    |
| 18.0298   | 15.2427   | 19.0922    | 16.0352   | 16.3177    | 14.4431    |
| 0         | 0         | 0.0158709  | 0.1196    | 0          | 0          |
| 0.341514  | 0.299768  | 0.426168   | 0.498273  | 0.226176   | 0.284386   |
| 0         | 0         | 0.209406   | 0         | 0.0450097  | 0.139739   |
| 123.918   | 120.557   | 149.132    | 121.694   | 141.302    | 113.472    |
| 30.3663   | 34.3595   | 40.7852    | 38.334    | 56.3937    | 44.6994    |
| 0         | 0         | 0          | 0         | 0          | 0          |
| 1.65448   | 1.80986   | 1.67821    | 2.17382   | 1.62685    | 1.94408    |
| 7.5702    | 7.93095   | 7.44361    | 4.85659   | 9.81325    | 6.95867    |
| 9.24389   | 9.32072   | 7.17323    | 6.212     | 6.48655    | 6.296      |
| 2.42166   | 2.67406   | 1.93098    | 2.23511   | 2.78911    | 1.88129    |
| 16.821    | 18.7301   | 14.7039    | 18.4305   | 13.5514    | 15.2475    |
| 2555.76   | 2786.64   | 2643.43    | 2656.72   | 2457.76    | 2952.46    |
| 3.69937   | 4.77829   | 5.67156    | 8.70792   | 4.55715    | 4.91833    |
| 0         | 0         | 0          | 0         | 0          | 0          |
| 0         | 0         | 0          | 0         | 0          | 0          |
| 3.84482   | 4.10849   | 4.81314    | 4.64848   | 4.20872    | 3.74355    |
| 6.75992   | 6.31532   | 7.26734    | 6.25618   | 8.17049    | 7.67944    |
| 23.4946   | 26.8946   | 38.0201    | 30.022    | 35.9788    | 25.3711    |
| 0.105458  | 0.143369  | 0.132861   | 0.0655342 | 0.062307   | 0.0644797  |
| 0         | 0         | 0          | 0         | 0          | 0          |
| 274.523   | 309.449   | 288.172    | 304.081   | 223.575    | 252.167    |
| 0         | 0.0168837 | 0.00426718 | 0.0122195 | 0.00733755 | 0.00607472 |
| 9.84E-12  | 1.87E-12  | 0.0309609  | 0.0557866 | 5.35E-11   | 0.0204827  |
| 36.0364   | 33.0997   | 29.8162    | 30.2067   | 22.3231    | 27.2352    |
| 35.4665   | 31.0773   | 36.7207    | 29.5569   | 33.3397    | 30.3443    |
| 0         | 0         | 0          | 0         | 0          | 0          |
| 3.14517   | 2.52164   | 2.54927    | 3.6083    | 3.97855    | 4.04949    |
| 63.54     | 62.5863   | 51.0585    | 43.0906   | 44.334     | 43.7075    |
| 4.38538   | 2.9692    | 1.74014    | 1.49492   | 6.09666    | 2.96109    |
| 0         | 0         | 0          | 0         | 0          | 0          |
| 8.18558   | 8.18009   | 11.1828    | 8.65729   | 11.1497    | 7.27674    |
| 0.231102  | 0.358518  | 0.552831   | 0.93515   | 0.349349   | 0.524622   |
| 11.5195   | 9.30135   | 8.84509    | 6.95023   | 9.78275    | 5.98836    |
| 2.08251   | 2.19974   | 4.29827    | 2.50617   | 3.42145    | 3.64985    |
| 0.748654  | 0.855224  | 1.25759    | 1.06616   | 0.946081   | 0.472052   |
| 66.2999   | 61.3693   | 51.6247    | 49.5148   | 65.4974    | 75.166     |

|           |           |          |           |           |           |
|-----------|-----------|----------|-----------|-----------|-----------|
| 1.91791   | 1.41714   | 1.83894  | 1.19887   | 1.70975   | 1.62668   |
| 1.68948   | 2.00674   | 1.46334  | 1.65412   | 1.28673   | 0.732377  |
| 2.29551   | 2.42663   | 2.83218  | 2.11023   | 2.88943   | 2.55541   |
| 2.08972   | 3.09249   | 3.00297  | 2.78998   | 2.15744   | 2.71763   |
| 13.1975   | 11.8749   | 13.5956  | 13.1358   | 13.4437   | 12.6775   |
| 7.99225   | 7.0134    | 6.99965  | 6.53461   | 6.73867   | 6.01627   |
| 0         | 0         | 0        | 0         | 0         | 0         |
| 146.315   | 135.845   | 225.141  | 183.066   | 207.196   | 174.46    |
| 0.47816   | 0.794509  | 0.602412 | 0.544759  | 0.345289  | 1.33998   |
| 21.8991   | 24.4128   | 24.6407  | 25.1819   | 22.3593   | 22.4126   |
| 4.82439   | 4.62473   | 4.53514  | 3.55148   | 5.66785   | 3.21354   |
| 12.8391   | 11.045    | 12.3318  | 11.8619   | 12.3283   | 10.8629   |
| 0.0311175 | 0.116336  | 0        | 0.141807  | 0.0337059 | 0         |
| 0.0213186 | 0         | 0.107432 | 0.109295  | 0.144325  | 0.0716903 |
| 92.3868   | 78.9461   | 63.7758  | 72.2833   | 52.7878   | 69.4927   |
| 0         | 0         | 0        | 0         | 0         | 0         |
| 0         | 0.0299597 | 0        | 0.0273893 | 0         | 0.0202114 |
| 10.4095   | 10.0818   | 12.7669  | 9.09619   | 13.4292   | 9.04741   |
| 12.7792   | 10.7437   | 12.3683  | 8.5521    | 11.6539   | 8.05021   |
| 8.73415   | 9.68063   | 10.5655  | 11.6341   | 10.7895   | 10.0903   |
| 351.2     | 342.548   | 397.82   | 372.505   | 397.499   | 355.75    |
| 4.39149   | 3.73197   | 4.99593  | 3.71171   | 4.70524   | 3.88499   |
| 21.3521   | 22.7058   | 19.5586  | 21.9374   | 20.1165   | 21.7576   |
| 1.40315   | 1.78379   | 1.61263  | 1.16012   | 0.953885  | 0.844034  |
| 10.0777   | 10.5844   | 10.5283  | 10.2075   | 10.9278   | 10.3804   |
| 0.0261457 | 0.0380132 | 0.105442 | 0.0301845 | 0         | 0         |
| 9.96273   | 9.02949   | 12.3942  | 8.30819   | 13.2948   | 9.85927   |
| 21.4942   | 22.6833   | 17.1154  | 22.2461   | 19.757    | 24.8151   |
| 0.628273  | 0.369466  | 0.677862 | 0.612989  | 1.14711   | 0.734694  |
| 9.29962   | 10.0105   | 7.8625   | 5.7159    | 8.05936   | 6.03638   |
| 0         | 0         | 0        | 0.168359  | 0         | 0         |
| 0         | 0         | 0        | 0         | 0         | 0         |
| 0         | 0         | 0        | 0         | 0         | 0         |
| 0         | 0         | 0        | 0         | 0         | 0         |
| 55.7846   | 63.5458   | 47.888   | 46.7937   | 38.5046   | 36.0416   |
| 1.79515   | 1.52841   | 1.70189  | 1.6402    | 2.19475   | 2.43567   |
| 0         | 0.0574502 | 0.232319 | 0         | 0.0499349 | 0.0193785 |
| 8.05081   | 7.39002   | 7.744    | 6.17647   | 9.26301   | 8.61649   |
| 5.71416   | 5.61445   | 5.00875  | 5.29393   | 5.54112   | 4.67612   |
| 21.5026   | 20.2344   | 19.8719  | 17.0343   | 20.513    | 20.7239   |
| 22.8216   | 13.953    | 25.5406  | 22.9877   | 34.7059   | 31.4834   |
| 29.023    | 24.3329   | 23.4883  | 21.2132   | 17.7625   | 15.2987   |
| 163.678   | 40.7951   | 41.2421  | 37.2952   | 0         | 27.5213   |

|           |           |           |           |           |           |
|-----------|-----------|-----------|-----------|-----------|-----------|
| 0         | 0         | 0         | 0         | 0         | 0         |
| 0.206902  | 0.191158  | 0.292126  | 0.23572   | 0.363216  | 0.212933  |
| 0.0645356 | 0.120636  | 0.0406527 | 0.0735243 | 0.0349518 | 0         |
| 6.2803    | 8.13363   | 5.04284   | 6.05891   | 5.37591   | 6.18458   |
| 8.59009   | 7.91179   | 10.0904   | 9.55135   | 8.03697   | 7.72328   |
| 88.8448   | 84.1492   | 93.2972   | 86.1902   | 98.3638   | 106.116   |
| 0         | 0         | 0         | 0         | 0         | 0         |
| 0         | 0         | 0         | 0         | 0         | 0         |
| 6.79357   | 6.27603   | 6.6753    | 5.70774   | 6.61992   | 5.99811   |
| 0         | 0         | 0         | 0         | 0         | 0         |
| 0         | 0         | 0         | 0         | 0         | 0         |
| 0         | 0         | 0         | 0         | 0         | 0         |
| 0.696864  | 0.830837  | 0.46092   | 0.587896  | 1.82639   | 1.74206   |
| 2.09727   | 2.3097    | 3.28745   | 3.83412   | 3.35475   | 3.87494   |
| 0.188182  | 0.156342  | 0.474164  | 0.357321  | 0         | 0.0527357 |
| 0         | 0         | 0         | 0         | 0         | 0         |
| 0         | 0         | 0         | 0         | 0         | 0         |
| 20.5112   | 19.4341   | 24.0344   | 20.7885   | 20.022    | 21.9675   |
| 0         | 0.0688416 | 0         | 2.18526   | 0         | 0.258011  |
| 55.1944   | 64.9803   | 53.3766   | 60.6485   | 48.6054   | 60.7799   |
| 4.0842    | 2.94265   | 4.00205   | 3.42626   | 5.99021   | 5.06316   |
| 0         | 0         | 0         | 0         | 0         | 0         |
| 58.0255   | 35.2286   | 80.1082   | 58.1228   | 77.7381   | 51.844    |
| 85.4092   | 80.6745   | 49.055    | 61.522    | 38.5852   | 53.9829   |
| 20.9968   | 18.5609   | 21.1968   | 18.1553   | 21.7056   | 20.5605   |
| 0.648308  | 0.20198   | 1.22516   | 0         | 0.526675  | 0.13626   |
| 14.0648   | 13.7893   | 13.8055   | 12.8155   | 13.4278   | 11.5028   |
| 20.6385   | 20.1116   | 21.505    | 21.7649   | 22.5793   | 24.4538   |
| 0         | 0         | 0         | 0         | 0         | 0         |
| 15.8028   | 14.8918   | 12.4072   | 13.3533   | 12.5789   | 13.3762   |
| 2.06837   | 1.62236   | 4.49259   | 2.41296   | 2.73257   | 2.39105   |
| 0.979936  | 1.24774   | 0.96619   | 0.995073  | 1.59217   | 0.752205  |
| 0         | 0         | 0         | 0         | 0         | 0         |
| 11.7113   | 9.7297    | 9.83631   | 17.7899   | 29.5992   | 19.6916   |
| 16.1031   | 16.1081   | 16.6645   | 16.3203   | 16.354    | 14.3115   |
| 48.8951   | 50.5102   | 50.1394   | 50.6131   | 47.0204   | 45.0351   |
| 25.3581   | 27.8332   | 25.5831   | 26.1869   | 29.3723   | 30.4182   |
| 0         | 0.0298923 | 0.0483517 | 0.0273277 | 0         | 0.0403319 |
| 4.01433   | 4.6908    | 3.8358    | 3.94387   | 4.56283   | 3.74307   |
| 3.16682   | 3.19915   | 3.57793   | 4.51357   | 3.17644   | 3.67011   |
| 0.575419  | 0.742696  | 0.517817  | 0.936521  | 0.400681  | 0.241881  |
| 0.0787889 | 0.0490933 | 0.198525  | 0.0897629 | 0.426713  | 0.231836  |
| 31.8487   | 31.1876   | 32.2767   | 31.5697   | 28.4602   | 34.4739   |

|          |          |           |           |           |           |
|----------|----------|-----------|-----------|-----------|-----------|
| 20.3004  | 20.2461  | 21.1123   | 21.1494   | 24.055    | 26.5469   |
| 0.378242 | 0.124121 | 0.221708  | 0.292002  | 0.877693  | 0.543914  |
| 21.3308  | 21.3155  | 18.3289   | 19.2852   | 18.4864   | 18.7772   |
| 5.41269  | 4.35279  | 5.50841   | 4.98124   | 9.49872   | 6.68519   |
| 0.115037 | 0.382291 | 0.0483099 | 0.262119  | 0.207676  | 0.41909   |
| 5.47883  | 5.76942  | 6.11737   | 5.69577   | 6.86925   | 5.42371   |
| 16.5614  | 14.3464  | 17.204    | 12.9803   | 19.1696   | 13.4002   |
| 0        | 0        | 0         | 0         | 0         | 0         |
| 0.693939 | 0.951264 | 2.36051   | 1.4626    | 1.72882   | 1.34183   |
| 79.5821  | 91.3298  | 94.296    | 119.132   | 119.704   | 143.574   |
| 0        | 0        | 0         | 0         | 0         | 0         |
| 3.86332  | 2.49982  | 2.52721   | 1.60821   | 3.29945   | 3.49778   |
| 52.2948  | 44.525   | 65.5364   | 42.5112   | 50.5222   | 43.6494   |
| 3.81604  | 2.80237  | 4.5501    | 2.79485   | 3.69058   | 3.1509    |
| 0.137073 | 0        | 0.107933  | 0.0390414 | 0.222713  | 0.0720246 |
| 0.406081 | 0.224605 | 0.363307  | 0.243361  | 0.83338   | 0.404119  |
| 75.0538  | 89.2305  | 67.63     | 85.0356   | 66.6705   | 82.46     |
| 20.2508  | 20.7866  | 27.5467   | 23.0528   | 24.7787   | 22.7138   |
| 7.96602  | 8.23436  | 8.95401   | 6.36085   | 9.71512   | 6.34483   |
| 15.0137  | 15.2845  | 15.6133   | 15.3928   | 21.6233   | 21.5641   |
| 5.37687  | 4.06108  | 6.05073   | 8.54391   | 8.96893   | 3.80783   |
| 0.468327 | 0.880423 | 0.643662  | 1.01851   | 0.648181  | 0.570298  |
| 30.2322  | 30.5149  | 34.4734   | 35.05     | 29.7805   | 33.0215   |
| 0.219241 | 0.32526  | 0.157835  | 0.107048  | 0.101776  | 0.184319  |
| 34.2801  | 37.7082  | 35.0269   | 46.5586   | 36.7783   | 44.6092   |
| 8.73779  | 8.39271  | 8.61153   | 6.09956   | 8.84494   | 6.87887   |
| 26.741   | 22.7504  | 29.7562   | 30.0052   | 33.0236   | 35.3589   |
| 207.72   | 239.721  | 227.118   | 206.745   | 229.837   | 232.698   |
| 1.08503  | 1.04141  | 0.531605  | 0.81799   | 0.925537  | 0.543203  |
| 0.795822 | 0.537199 | 0.292431  | 0.528889  | 1.25711   | 0.52967   |
| 4.75139  | 4.78512  | 4.63747   | 4.28117   | 5.63185   | 6.22453   |
| 19.2443  | 28.1203  | 21.4253   | 61.9285   | 26.9257   | 23.0577   |
| 0.185059 | 0.183986 | 0.391068  | 0.308952  | 0.0599692 | 0.265624  |
| 0        | 0        | 0         | 0         | 0         | 0         |
| 0        | 0        | 0.0335272 | 0.0303185 | 0.0288255 | 0         |
| 0.211946 | 0.176084 | 0.326359  | 0.375614  | 0.280592  | 0.0593951 |
| 0.348501 | 2.68E-06 | 0.166479  | 0.487064  | 6.13E-05  | 0.0873134 |
| 4.78676  | 3.59291  | 5.64828   | 3.97617   | 6.38029   | 4.34901   |
| 40.9537  | 33.5487  | 40.2409   | 34.1489   | 40.0673   | 38.0584   |
| 14.6515  | 15.0011  | 12.9089   | 13.181    | 14.8565   | 13.3894   |
| 7.02691  | 8.26554  | 8.5667    | 8.49605   | 7.61139   | 6.41324   |
| 7.06E-07 | 8.99E-08 | 4.04E-08  | 1.35E-08  | 6.24E-08  | 1.89E-08  |
| 0        | 0        | 0         | 0         | 0         | 0         |



|           |           |           |           |          |           |
|-----------|-----------|-----------|-----------|----------|-----------|
| 0.217007  | 0.721158  | 0.273398  | 0         | 0.391763 | 0.486509  |
| 0         | 0         | 0         | 0         | 0        | 0         |
| 1.11545   | 0.495535  | 0.843306  | 0.52673   | 0.321583 | 0.589479  |
| 0.270037  | 0.288446  | 0.194404  | 0.263699  | 0.334284 | 0.259455  |
| 0         | 0         | 0         | 0         | 0        | 0         |
| 1.90058   | 2.04094   | 3.26053   | 1.8428    | 2.56238  | 1.83581   |
| 13.9793   | 13.1615   | 14.725    | 13.5345   | 13.5059  | 12.7535   |
| 17.3752   | 18.7547   | 17.5981   | 18.8352   | 16.6447  | 16.0947   |
| 12.3049   | 11.2301   | 13.4005   | 12.6794   | 13.6612  | 12.6994   |
| 29.408    | 28.168    | 14.504    | 15.0509   | 13.7911  | 16.8562   |
| 8.04863   | 8.20491   | 9.90727   | 7.79598   | 7.13747  | 8.33393   |
| 21.3085   | 21.3732   | 22.1953   | 21.15     | 21.4862  | 19.0268   |
| 2.07946   | 2.67369   | 2.86932   | 2.25628   | 1.68038  | 1.24873   |
| 0.093643  | 0.0893095 | 0.0144459 | 0.209951  | 0.101432 | 0.0602501 |
| 0         | 0         | 0         | 0         | 0        | 0         |
| 4.21425   | 6.13661   | 4.61682   | 4.95779   | 4.41594  | 4.81382   |
| 1.16466   | 0.568053  | 1.37154   | 0.708385  | 1.03781  | 0.326468  |
| 0.109924  | 0.171234  | 0.207733  | 0.156543  | 0.208368 | 0.207933  |
| 7.11053   | 7.73335   | 8.16711   | 6.31239   | 4.54117  | 5.15497   |
| 28.5358   | 33.4984   | 31.1016   | 37.6004   | 28.9994  | 37.487    |
| 7.48782   | 6.89297   | 7.41095   | 7.17325   | 8.9122   | 7.52881   |
| 0.0745832 | 0         | 0.093964  | 0         | 0        | 0.188109  |
| 77.9799   | 80.4836   | 76.8858   | 72.0072   | 69.8623  | 76.2843   |
| 0.379401  | 0.197004  | 0.179246  | 0.0720409 | 0.325343 | 0.119613  |
| 1.3157    | 2.7327    | 3.59144   | 1.49895   | 2.13771  | 0.460885  |
| 80.9107   | 90.6852   | 69.403    | 90.3007   | 70.0428  | 93.109    |
| 56.222    | 59.3378   | 50.1143   | 52.6951   | 46.4223  | 54.0545   |
| 0.252219  | 0.173193  | 0.0389088 | 0.158335  | 0.505683 | 0.247252  |
| 1.42478   | 1.02384   | 1.37493   | 1.23832   | 1.43923  | 1.23841   |
| 1.22193   | 1.00503   | 1.26235   | 0.946643  | 2.99126  | 0.986198  |
| 70.2802   | 77.3932   | 88.1121   | 67.3927   | 88.1847  | 75.1212   |
| 46.3676   | 40.3809   | 54.1411   | 42.5617   | 58.7469  | 48.2728   |
| 0.112694  | 0.210659  | 0.0709892 | 0.192586  | 0.370225 | 0.379458  |
| 15.3629   | 10.6587   | 15.9514   | 12.1544   | 12.1828  | 11.0572   |
| 10.0383   | 10.8462   | 6.70807   | 6.59026   | 7.37304  | 6.81146   |
| 231.653   | 231.339   | 252.026   | 247.471   | 190.377  | 202.041   |
| 0         | 0         | 0         | 0         | 0        | 0         |
| 0.143865  | 0         | 0         | 0         | 0        | 0         |
| 0         | 0         | 0         | 0         | 0        | 0         |
| 0.20839   | 0         | 0.262541  | 0.237415  | 0.225724 | 0.175196  |
| 4.46494   | 4.64256   | 2.98304   | 4.27253   | 5.57627  | 3.73651   |
| 0.228865  | 0.142606  | 0         | 0.391113  | 0        | 0.0962049 |
| 3.22936   | 1.81396   | 4.27788   | 2.1952    | 2.28877  | 3.05246   |

|           |           |           |           |          |           |
|-----------|-----------|-----------|-----------|----------|-----------|
| 2.1195    | 1.8168    | 2.34828   | 2.17034   | 3.69311  | 2.68399   |
| 46.641    | 54.3851   | 53.1295   | 50.9723   | 51.9379  | 46.661    |
| 0         | 0         | 0         | 0         | 0        | 0         |
| 17.3255   | 20.8295   | 13.5124   | 17.1278   | 13.7689  | 15.2594   |
| 1.32718   | 1.90143   | 1.39257   | 1.37653   | 1.25571  | 1.39256   |
| 0         | 0         | 0         | 0         | 0        | 0         |
| 0         | 0         | 0         | 0         | 0        | 0         |
| 33.9603   | 40.5947   | 34.191    | 35.5426   | 30.2809  | 30.9676   |
| 1.22496   | 1.52654   | 1.3375    | 1.30254   | 1.53325  | 1.53332   |
| 0.923025  | 0.633824  | 1.49513   | 0.90136   | 1.02021  | 1.09273   |
| 111.176   | 121.348   | 127.869   | 118.95    | 114.44   | 123.885   |
| 14.8372   | 13.568    | 14.5387   | 14.2038   | 17.7702  | 17.2958   |
| 614.142   | 770.57    | 593.067   | 723.27    | 561.17   | 725.53    |
| 0         | 0         | 0         | 0         | 0        | 0         |
| 28.2315   | 30.3884   | 34.3244   | 31.3003   | 38.193   | 48.6939   |
| 0.687262  | 0.636455  | 0.722865  | 0.589035  | 1.01761  | 0.530082  |
| 0         | 0.0569038 | 0         | 0         | 0.02473  | 0         |
| 0         | 0         | 0         | 0         | 0        | 0         |
| 0         | 0         | 0         | 0         | 0        | 0         |
| 0.0911391 | 0.0425281 | 0.0859888 | 0.0254166 | 0.223638 | 0.0430356 |
| 0         | 0         | 0         | 0         | 0        | 0         |
| 0         | 0         | 0         | 0         | 0        | 0         |
| 16.6238   | 12.0257   | 17.1635   | 11.7331   | 25.2971  | 18.2027   |
| 0.0822495 | 0.204998  | 0.828979  | 0.468527  | 0.356364 | 0.345741  |
| 14.8792   | 15.0442   | 16.5976   | 15.7351   | 16.322   | 15.2889   |
| 4.20471   | 4.46621   | 4.53264   | 4.91223   | 4.49025  | 5.54473   |
| 10.6422   | 8.47914   | 5.9345    | 5.76407   | 12.4722  | 11.7338   |
| 21.4864   | 20.3588   | 22.573    | 25.086    | 21.9849  | 24.6325   |
| 11.9545   | 10.2849   | 12.2731   | 10.3742   | 13.5041  | 14.1376   |
| 3.81188   | 3.7499    | 4.78228   | 3.78762   | 5.6326   | 4.89749   |
| 0.479486  | 0.398357  | 1.81225   | 0.910451  | 3.11622  | 0.67185   |
| 25.0179   | 23.6166   | 32.7212   | 29.7451   | 30.9631  | 25.9042   |
| 0         | 0         | 0         | 0         | 0        | 0         |
| 0         | 0         | 0         | 0         | 0        | 0         |
| 23.1829   | 24.6269   | 22.946    | 26.8224   | 19.4683  | 27.2122   |
| 105.486   | 95.892    | 67.6669   | 106.756   | 68.0976  | 108.367   |
| 0         | 0         | 0         | 0         | 0        | 0         |
| 5.1511    | 4.75185   | 8.9253    | 6.47618   | 9.39598  | 7.40367   |
| 71.1217   | 75.8257   | 69.8767   | 66.1778   | 62.0109  | 70.9103   |
| 0         | 0         | 0         | 0         | 0        | 0         |
| 2.17658   | 2.54839   | 2.41045   | 1.70982   | 2.77591  | 1.69706   |
| 3.45697   | 3.06281   | 4.30281   | 2.61033   | 4.64656  | 2.8013    |
| 0         | 0         | 0         | 0         | 0        | 0         |

|           |          |           |           |           |           |
|-----------|----------|-----------|-----------|-----------|-----------|
| 0.0480723 | 0        | 0         | 0         | 0         | 0.040415  |
| 0         | 0        | 0         | 0         | 0         | 0         |
| 2.15577   | 2.08804  | 2.15125   | 1.86026   | 1.60682   | 1.63294   |
| 2.66501   | 1.82662  | 0.629536  | 0.645193  | 0.793838  | 0.53212   |
| 3.00219   | 2.96991  | 3.62635   | 2.29198   | 4.92815   | 4.05918   |
| 5.85865   | 5.05233  | 6.63118   | 4.90345   | 7.5341    | 5.15148   |
| 15.2928   | 15.6158  | 11.4047   | 11.6262   | 13.3406   | 14.0097   |
| 27.7965   | 21.8295  | 30.3735   | 26.2588   | 39.1296   | 35.4344   |
| 4.46388   | 3.84721  | 5.49      | 4.00319   | 5.52396   | 4.25067   |
| 6.97041   | 6.06969  | 6.4334    | 6.9327    | 5.68865   | 5.51643   |
| 7.54014   | 8.33676  | 7.46388   | 6.81415   | 7.7682    | 4.7424    |
| 5.01162   | 5.8428   | 6.78344   | 5.95735   | 6.70384   | 6.89325   |
| 2.40747   | 2.47472  | 2.24954   | 1.41471   | 2.16117   | 1.52243   |
| 0         | 0        | 0         | 0         | 0         | 0         |
| 10.0037   | 9.76523  | 8.89577   | 7.47301   | 13.8736   | 10.5586   |
| 0.395138  | 0.265149 | 0.536109  | 0.311659  | 0.296311  | 0.178875  |
| 5.28386   | 6.65148  | 4.70031   | 3.82339   | 5.14332   | 3.90195   |
| 1.2199    | 1.14018  | 1.53689   | 1.3319    | 1.81688   | 1.15378   |
| 0         | 0        | 0         | 0         | 0         | 0         |
| 0         | 0        | 0         | 0         | 0         | 0         |
| 0         | 0        | 0         | 0         | 0         | 0         |
| 14.0807   | 15.7422  | 15.9773   | 16.0896   | 14.7484   | 19.0897   |
| 38.3153   | 45.5425  | 37.7523   | 41.2832   | 33.5822   | 36.7456   |
| 0.608909  | 0.379411 | 0.575352  | 0.34686   | 0.989337  | 0.639896  |
| 2.31479   | 1.80214  | 1.43958   | 1.73184   | 0.720974  | 0.855582  |
| 30.4969   | 26.8228  | 26.6844   | 22.5651   | 25.0692   | 20.6814   |
| 1.56616   | 1.19515  | 1.45215   | 1.0326    | 2.38233   | 1.42398   |
| 0.240981  | 0.250258 | 0.1518    | 0.274545  | 0.478546  | 0.57402   |
| 16.0946   | 15.5061  | 14.0075   | 14.4739   | 17.328    | 14.9946   |
| 4.49707   | 3.56633  | 5.59207   | 2.06268   | 5.31396   | 4.51724   |
| 0.743565  | 0.895743 | 0.499618  | 0.818894  | 0.724873  | 0.583642  |
| 1.1128    | 0.931739 | 1.16101   | 0.970658  | 1.86455   | 1.66644   |
| 0         | 0        | 0.10145   | 0.0917409 | 0         | 0         |
| 3.70149   | 3.26628  | 4.24588   | 3.10064   | 5.78955   | 5.01726   |
| 9.01709   | 9.89563  | 9.53434   | 8.24868   | 10.1154   | 8.80384   |
| 48.4173   | 51.0858  | 41.3436   | 57.49     | 46.734    | 49.5697   |
| 0.143682  | 0.044764 | 0.0980513 | 0.0545647 | 0.155633  | 0.0603974 |
| 0.133728  | 0.111101 | 0         | 0         | 0.434555  | 0.187378  |
| 0.452828  | 0.267703 | 0.833107  | 0.520483  | 0.428209  | 0.4153    |
| 0         | 0        | 0         | 0         | 0.0723567 | 0         |
| 13.6067   | 0        | 0         | 0         | 0         | 0         |
| 83.3467   | 87.9908  | 92.4478   | 90.2714   | 108.484   | 117.355   |
| 42.4911   | 50.2808  | 46.6624   | 54.278    | 35.4047   | 41.1557   |

|           |           |           |           |           |           |
|-----------|-----------|-----------|-----------|-----------|-----------|
| 24.5337   | 25.3133   | 22.7999   | 23.4273   | 21.9114   | 20.8717   |
| 11.7706   | 10.7379   | 13.0584   | 8.23477   | 13.5836   | 10.0499   |
| 6.20674   | 6.37486   | 4.7605    | 5.15967   | 6.27974   | 7.04154   |
| 0.494541  | 0.713606  | 0.623049  | 0.47446   | 0.873998  | 0.503296  |
| 3.17319   | 2.59693   | 1.61103   | 2.21226   | 3.95014   | 3.38444   |
| 0.30863   | 1.41E-67  | 1.26E-103 | 1.59E-23  | 7.47E-79  | 4.73E-79  |
| 23.3731   | 23.6106   | 25.9836   | 22.9138   | 26.0611   | 25.4218   |
| 7.4065    | 6.95409   | 8.07844   | 6.99322   | 11.4954   | 12.6667   |
| 19.7418   | 20.2372   | 18.156    | 17.4047   | 23.1356   | 23.8594   |
| 1.91859   | 1.71889   | 1.46086   | 1.73063   | 1.9164    | 1.78069   |
| 1.01762   | 1.11896   | 1.88537   | 1.56854   | 2.72323   | 2.81819   |
| 10.8706   | 8.82588   | 12.1706   | 11.0276   | 14.7566   | 9.86917   |
| 0.128658  | 0.187889  | 0.0466004 | 0.18938   | 0.0238146 | 0         |
| 73.0505   | 49.0519   | 138.745   | 106.341   | 170.912   | 152.624   |
| 5.25575   | 4.18048   | 4.06645   | 2.94964   | 4.8801    | 4.98505   |
| 0.125548  | 0.0625831 | 0.158172  | 0.114428  | 0.108793  | 0.0211099 |
| 500.742   | 324.55    | 458.451   | 421.479   | 783       | 634.355   |
| 0         | 0         | 0         | 0         | 0         | 0         |
| 0.706965  | 3.34787   | 0.356269  | 0.161087  | 0.612616  | 0.594354  |
| 46.4622   | 47.9377   | 41.2017   | 46.8282   | 39.4481   | 45.6052   |
| 0         | 0         | 0         | 0         | 0         | 0         |
| 24.4486   | 24.5963   | 23.7296   | 27.954    | 20.3458   | 23.2295   |
| 55.0916   | 52.7433   | 52.2137   | 50.2214   | 49.6982   | 47.108    |
| 572.537   | 438.226   | 881.584   | 639.149   | 695.429   | 561.01    |
| 16.6625   | 15.8708   | 16.0851   | 16.0261   | 18.9731   | 20.6173   |
| 0.177795  | 0.0995253 | 0.34842   | 0.416417  | 1.64E-37  | 0.316847  |
| 24.9964   | 26.199    | 22.0763   | 23.8382   | 20.586    | 21.5908   |
| 8.16323   | 7.41697   | 9.87474   | 8.44801   | 8.52519   | 10.1987   |
| 2.57935   | 2.61491   | 3.186     | 2.02115   | 2.3992    | 1.75653   |
| 2.07111   | 2.13889   | 2.48851   | 1.83386   | 3.42479   | 2.42983   |
| 0         | 0         | 0         | 0         | 0         | 0         |
| 0         | 0         | 0         | 0         | 0         | 0         |
| 1.12045   | 0.923097  | 1.1498    | 0.68939   | 1.80349   | 0.983927  |
| 14.396    | 16.7445   | 7.57015   | 12.693    | 16.8816   | 16.7862   |
| 0         | 9.43E-285 | 0         | 1.55E-256 | 0         | 0         |
| 0.933567  | 0.556411  | 1.34953   | 1.00389   | 3.1298    | 2.02898   |
| 3.28E-09  | 0.316071  | 0.210211  | 1.23E-09  | 1.30E-09  | 0.213228  |
| 0.0510091 | 0         | 0         | 0         | 0.055252  | 0.042884  |
| 5.46E-05  | 6.07E-05  | 2.19E-05  | 4.15E-05  | 9.73E-06  | 1.05E-05  |
| 0         | 0         | 0         | 0         | 0         | 0         |
| 32.2227   | 31.7771   | 32.9618   | 32.8252   | 32.6456   | 28.7612   |
| 0         | 0         | 0         | 0         | 0         | 0         |
| 81.3962   | 76.2181   | 74.4424   | 76.5454   | 73.7947   | 73.7128   |

|           |          |           |          |           |          |
|-----------|----------|-----------|----------|-----------|----------|
| 1.68122   | 1.1331   | 4.87566   | 5.17562  | 4.56917   | 6.61101  |
| 47.4365   | 50.5935  | 59.4364   | 58.9036  | 56.4316   | 53.8159  |
| 0.437934  | 0.725969 | 0.442794  | 0.238265 | 0.599643  | 0.56282  |
| 17.5979   | 16.2975  | 16.3843   | 16.623   | 17.5732   | 21.1165  |
| 0.0712246 | 0.159768 | 0.0897326 | 0.227206 | 0.0154298 | 0        |
| 10.7349   | 9.39322  | 12.5416   | 11.2912  | 15.2022   | 13.93    |
| 16.5306   | 14.8776  | 17.0508   | 14.0184  | 9.89791   | 14.0774  |
| 22.4293   | 21.5366  | 19.7086   | 22.6585  | 18.5532   | 21.3079  |
| 5.83279   | 6.04461  | 3.75611   | 4.78454  | 5.56795   | 4.68481  |
| 1.0792    | 0.733582 | 0.927026  | 0.502984 | 0.797025  | 0.866058 |
| 10.3126   | 9.40028  | 10.2228   | 8.56924  | 12.3142   | 8.99604  |
| 1.04836   | 1.50005  | 1.31541   | 1.21169  | 1.32173   | 1.34107  |
| 0         | 0        | 0         | 0        | 0         | 0        |
| 0         | 0        | 0         | 0        | 0         | 0        |
| 0.360232  | 0.168345 | 0.567299  | 0.307804 | 0.390196  | 0.227138 |
| 23.6229   | 23.0336  | 25.4657   | 21.6055  | 25.0119   | 22.017   |
| 14.4882   | 15.2314  | 15.4231   | 15.2684  | 14.7465   | 14.2401  |
| 4.8604    | 4.91464  | 6.47228   | 6.22275  | 7.70568   | 6.51062  |
| 42.923    | 42.8336  | 44.2896   | 43.9634  | 43.3124   | 43.5768  |
| 20.6896   | 23.2625  | 20.3682   | 22.4233  | 20.4297   | 20.3412  |
| 2.59932   | 2.20328  | 2.81315   | 2.95874  | 4.33361   | 3.12751  |
| 0         | 0        | 0         | 0        | 0         | 0        |
| 20.5051   | 18.3443  | 19.8517   | 15.9426  | 15.4587   | 14.5006  |
| 0.902365  | 0.449811 | 0.682109  | 0.719635 | 0.195485  | 0.455178 |
| 0         | 0        | 0         | 0        | 0         | 0        |
| 16.4998   | 21.6217  | 15.7957   | 15.1085  | 23.2222   | 24.5643  |
| 1.38E-21  | 0.913509 | 0.140846  | 1.07068  | 3.62E-35  | 0.291401 |
| 11.0073   | 10.3136  | 11.4356   | 10.2476  | 10.8774   | 10.2208  |
| 0         | 0        | 0         | 0        | 0         | 0        |
| 0         | 0        | 0         | 0        | 0         | 0        |
| 5.18431   | 5.04123  | 4.60684   | 4.43027  | 6.23023   | 5.8233   |
| 25.9065   | 21.5386  | 22.4759   | 18.6893  | 26.6137   | 23.1699  |
| 108.854   | 50.8699  | 51.4274   | 170.521  | 29.477    | 91.5145  |
| 3.50032   | 4.00889  | 3.57076   | 3.26132  | 3.89893   | 3.24061  |
| 293.693   | 241.323  | 435.127   | 420.363  | 86.7381   | 180.352  |
| 10.6476   | 9.82953  | 9.42637   | 10.0145  | 11.1507   | 9.61141  |
| 20.6356   | 21.4067  | 22.2228   | 15.8665  | 19.1667   | 16.7055  |
| 17.7167   | 16.7298  | 19.7464   | 14.6071  | 19.9033   | 14.8831  |
| 39.8949   | 42.3477  | 36.4634   | 40.6743  | 38.9281   | 50.076   |
| 43.9193   | 37.0207  | 32.5977   | 22.8113  | 20.4623   | 34.9209  |
| 5.06003   | 4.97287  | 8.75902   | 5.67107  | 8.64471   | 6.32917  |
| 0.453542  | 0.459228 | 1.14279   | 1.42096  | 0.921127  | 0.667272 |
| 2.03232   | 1.62473  | 1.64254   | 1.79115  | 2.20137   | 1.99874  |

|           |           |           |          |           |           |
|-----------|-----------|-----------|----------|-----------|-----------|
| 2.09711   | 1.87086   | 3.90529   | 2.55225  | 4.44918   | 5.32611   |
| 0         | 0.0472517 | 0         | 0        | 0.0410705 | 0         |
| 9.73154   | 9.47506   | 12.0503   | 7.37671  | 11.3326   | 9.15155   |
| 0.100993  | 0         | 0         | 0        | 0.109393  | 0.0849058 |
| 0         | 0         | 0         | 0        | 0         | 0         |
| 9.02469   | 10.991    | 9.04416   | 9.01983  | 6.88719   | 7.31127   |
| 3.4258    | 3.36823   | 4.60544   | 5.61963  | 4.76469   | 3.15278   |
| 1.11696   | 1.10397   | 1.48809   | 1.02388  | 1.80786   | 1.37079   |
| 84.7375   | 106.92    | 31.0833   | 23.6565  | 0         | 111.667   |
| 0.793377  | 0.832594  | 2.1306    | 2.16456  | 3.79932   | 2.10632   |
| 0         | 0         | 0         | 0        | 0         | 0         |
| 1065.94   | 0         | 0         | 0        | 0         | 0         |
| 0.0460635 | 0.287818  | 0.232133  | 0.15875  | 0.0748425 | 0.129446  |
| 5.61281   | 5.01954   | 6.52211   | 6.10705  | 5.8652    | 6.97114   |
| 5.28333   | 6.16678   | 5.2031    | 5.00187  | 4.71526   | 5.7868    |
| 527.585   | 677.018   | 627.792   | 595.899  | 480.57    | 636.79    |
| 0.625434  | 0         | 0.590967  | 0.178137 | 0.508093  | 0.657263  |
| 1.01955   | 0.988546  | 1.25576   | 1.47277  | 0.744835  | 1.02153   |
| 871.328   | 765.074   | 924.214   | 940.988  | 1103.92   | 905.511   |
| 2.96423   | 3.6991    | 2.30304   | 3.65299  | 3.26118   | 4.19369   |
| 3.59287   | 3.55541   | 2.26312   | 2.40769  | 2.06021   | 2.08763   |
| 7.74417   | 7.97416   | 9.73585   | 9.10318  | 9.29469   | 8.82795   |
| 57.003    | 55.5486   | 55.1524   | 50.1198  | 61.0228   | 55.2364   |
| 9.92329   | 7.38713   | 7.04734   | 7.18819  | 5.77484   | 5.08379   |
| 0.248207  | 51.0371   | 0.550491  | 452.481  | 0.942278  | 17.8067   |
| 1.51103   | 1.18562   | 1.19861   | 0.765106 | 1.63671   | 1.69379   |
| 0.0330496 | 0         | 0.0208188 | 0.094132 | 0.107396  | 0.0972481 |
| 1.06204   | 0.661755  | 0.382289  | 0.950684 | 0.410849  | 0.829092  |
| 58.1052   | 53.5203   | 58.7377   | 55.2406  | 43.5291   | 52.9253   |
| 0         | 0         | 0         | 0        | 0         | 0         |
| 0         | 0         | 0         | 0        | 0         | 0         |
| 0         | 0         | 0         | 0        | 0         | 0         |
| 24.8481   | 24.7036   | 27.9944   | 23.4508  | 27.664    | 23.448    |
| 0         | 0         | 0         | 0        | 0         | 0         |
| 0         | 0         | 0         | 0        | 0         | 0         |
| 1.01847   | 1.1001    | 1.85171   | 1.25453  | 1.70162   | 1.42036   |
| 1.76986   | 1.96928   | 2.22976   | 1.51228  | 0.821603  | 0.956533  |
| 10.6488   | 10.6331   | 9.02997   | 11.0824  | 8.91352   | 5.9132    |
| 1.51537   | 1.74239   | 2.07791   | 1.74551  | 2.55738   | 1.35845   |
| 12.0681   | 11.6963   | 12.299    | 8.97934  | 12.7761   | 8.76648   |
| 0         | 0         | 0         | 0        | 0         | 0         |
| 7.6622    | 8.20115   | 8.84452   | 8.20814  | 7.49326   | 6.70007   |
| 1.24581   | 0.873786  | 1.74112   | 1.02039  | 2.46649   | 0.961725  |

|           |           |           |           |           |           |
|-----------|-----------|-----------|-----------|-----------|-----------|
| 26.4228   | 24.3294   | 28.9465   | 26.2861   | 29.6167   | 26.9119   |
| 0.189928  | 0.284273  | 0.478663  | 0.216382  | 0.480186  | 0.301667  |
| 40.3741   | 40.7279   | 44.9433   | 39.956    | 45.8464   | 41.6692   |
| 0         | 0         | 0         | 0         | 0         | 0         |
| 72.564    | 74.7176   | 100.61    | 98.4313   | 103.086   | 133.456   |
| 3.70565   | 3.12433   | 3.43563   | 1.97935   | 4.49031   | 3.00445   |
| 0.485707  | 0.151322  | 0         | 0.276971  | 0.131805  | 0.409083  |
| 2.34468   | 2.16336   | 1.76101   | 1.95207   | 2.44203   | 2.08493   |
| 0         | 0         | 0         | 0         | 0         | 0         |
| 0         | 0         | 0         | 0         | 0         | 0         |
| 42.5778   | 33.9519   | 37.6977   | 36.9661   | 29.3622   | 39.4788   |
| 0         | 0         | 0         | 0         | 0         | 0         |
| 0         | 0         | 0         | 0         | 0         | 0         |
| 2.01082   | 2.27776   | 2.54613   | 2.30924   | 3.1431    | 2.04842   |
| 0.0486313 | 0.072725  | 0.0490146 | 0.132971  | 0.0210706 | 0.0408849 |
| 0.226746  | 0.311278  | 0.37823   | 0.317281  | 0.305042  | 0.339856  |
| 0.21828   | 0.211572  | 0.0916672 | 0.165789  | 0.0788123 | 0.122341  |
| 4.1647    | 3.07045   | 4.54142   | 3.15824   | 6.59668   | 4.31496   |
| 17.4869   | 17.9435   | 18.3422   | 19.2828   | 17.2906   | 17.7024   |
| 2.77813   | 1.91467   | 1.91467   | 2.10304   | 3.18103   | 4.22323   |
| 1.49365   | 1.21527   | 1.80449   | 1.49256   | 1.81609   | 1.58748   |
| 0.0458168 | 0.0570968 | 0         | 0.0521983 | 0         | 0         |
| 0         | 0         | 0         | 0         | 0         | 0         |
| 24.073    | 24.1805   | 24.1932   | 23.9141   | 22.7782   | 24.777    |
| 1272.88   | 1380.84   | 1129.14   | 1311.73   | 1143.36   | 1587.53   |
| 58.3137   | 56.0474   | 60.9531   | 58.2375   | 64.3515   | 62.4708   |
| 7.13066   | 6.62055   | 7.00941   | 7.70761   | 7.55105   | 6.49133   |
| 2.04837   | 2.97177   | 2.46509   | 3.06512   | 2.84795   | 2.7759    |
| 6.58153   | 5.76247   | 7.17783   | 5.62796   | 7.19952   | 6.04768   |
| 19.616    | 20.514    | 20.7388   | 17.6481   | 18.7067   | 16.3894   |
| 7.24538   | 6.74348   | 9.29409   | 6.53436   | 8.50663   | 7.44585   |
| 0         | 0         | 0.0190145 | 0         | 0         | 0         |
| 163.407   | 180.011   | 115.723   | 140.299   | 89.2667   | 108.687   |
| 0.191575  | 0.11937   | 0.241357  | 0         | 0.103755  | 0.0805297 |
| 18.0938   | 17.0543   | 21.8263   | 21.7828   | 19.7951   | 16.6988   |
| 28.0644   | 28.1632   | 26.8032   | 26.1758   | 28.3148   | 28.2707   |
| 136.862   | 119.429   | 134.137   | 113.818   | 133.582   | 117.88    |
| 2.94942   | 3.9914    | 6.09607   | 4.62017   | 3.11989   | 3.64181   |
| 0.499007  | 0.155465  | 0.314338  | 0.473758  | 0.270257  | 0.524401  |
| 2.71845   | 2.32907   | 3.16799   | 2.20667   | 4.23282   | 2.71396   |
| 0         | 0         | 0         | 0         | 0         | 0         |
| 22.0608   | 19.7578   | 17.0494   | 19.7061   | 15.683    | 17.3112   |
| 0         | 0         | 0         | 0         | 0         | 0         |

|           |           |           |           |           |           |
|-----------|-----------|-----------|-----------|-----------|-----------|
| 74.5865   | 76.6161   | 58.943    | 62.1381   | 41.2022   | 52.548    |
| 63.1863   | 62.6252   | 65.7654   | 57.3411   | 78.9068   | 58.3616   |
| 92.7462   | 97.5364   | 96.173    | 112.033   | 87.0427   | 97.3477   |
| 2.12101   | 2.01511   | 2.0372    | 2.72746   | 2.09271   | 3.1426    |
| 0         | 0         | 0         | 0         | 0         | 0         |
| 13.2458   | 13.3682   | 12.0652   | 13.6017   | 12.3249   | 15.2108   |
| 232.122   | 182.924   | 200.018   | 246.971   | 223.22    | 221.037   |
| 4.32306   | 4.50179   | 4.99877   | 4.0481    | 5.50051   | 3.64689   |
| 229.078   | 209.5     | 151.525   | 162.488   | 136.93    | 168.272   |
| 6.03053   | 4.47263   | 7.70528   | 4.28362   | 14.1354   | 7.51254   |
| 0         | 0         | 0         | 0         | 0         | 0         |
| 8.29063   | 11.0181   | 13.8414   | 10.238    | 11.3352   | 11.2349   |
| 7.62375   | 10.6849   | 12.755    | 13.4523   | 2.71731   | 0.882386  |
| 0.553275  | 0         | 0.512115  | 0         | 0.599296  | 0.607536  |
| 46.8542   | 59.0438   | 56.2081   | 74.2699   | 62.5771   | 83.8123   |
| 0         | 0.0239847 | 0         | 0.123702  | 0.0590698 | 0.0458471 |
| 19.5414   | 21.9035   | 13.2512   | 14.285    | 8.63468   | 10.4018   |
| 0         | 0         | 0         | 0         | 0         | 0         |
| 0         | 0         | 0         | 0         | 0         | 0         |
| 38.9318   | 38.1577   | 32.7224   | 37.7538   | 23.8893   | 27.0832   |
| 9.63821   | 9.87597   | 11.1408   | 9.67072   | 12.4203   | 11.1455   |
| 5.38661   | 4.91593   | 5.62101   | 3.33189   | 5.81993   | 4.66582   |
| 0.466259  | 0.929683  | 0.900709  | 0.672855  | 1.24577   | 1.04531   |
| 7.52704   | 7.58322   | 7.32115   | 8.36187   | 6.93485   | 7.58884   |
| 0         | 0         | 0         | 0         | 0         | 0         |
| 19.8191   | 24.3662   | 22.5524   | 22.3971   | 19.044    | 14.6911   |
| 22.2069   | 23.2092   | 25.6518   | 21.8293   | 26.231    | 22.2323   |
| 13.3382   | 12.7435   | 14.2835   | 11.9504   | 13.0831   | 10.729    |
| 0.0126776 | 0.110592  | 0         | 0.0722171 | 0.0274643 | 0.0639495 |
| 2.71546   | 2.7495    | 1.49672   | 2.90032   | 1.6545    | 3.13901   |
| 12.5747   | 12.9284   | 13.7166   | 18.5931   | 15.1909   | 14.8952   |
| 72.9107   | 74.1162   | 66.1517   | 68.0914   | 68.8898   | 64.6707   |
| 27.8916   | 32.9528   | 32.2998   | 36.6827   | 29.4269   | 30.9944   |
| 2.38515   | 2.06098   | 2.41861   | 2.29129   | 3.7808    | 3.17203   |
| 40.7621   | 41.1726   | 32.679    | 28.633    | 35.6214   | 33.0111   |
| 0         | 0         | 0         | 0         | 0.0506345 | 0.0393001 |
| 48.1212   | 38.9816   | 48.1214   | 48.185    | 64.0191   | 63.8199   |
| 12.3247   | 11.3054   | 11.5734   | 12.0725   | 19.9559   | 56.2723   |
| 12.8306   | 11.4606   | 12.7386   | 10.1112   | 11.8627   | 10.3919   |
| 0         | 0.102533  | 0.0518285 | 0.0468684 | 0.0891207 | 0         |
| 0         | 0         | 0         | 0         | 0         | 0         |
| 7.78354   | 7.35601   | 8.75807   | 6.94742   | 9.06042   | 8.36817   |
| 0.081551  | 0         | 0         | 0         | 0         | 0         |



|           |           |          |           |           |           |
|-----------|-----------|----------|-----------|-----------|-----------|
| 10.7991   | 10.5435   | 11.1526  | 10.7828   | 10.013    | 10.345    |
| 2.7299    | 4.53213   | 2.15649  | 3.49745   | 2.09876   | 2.82279   |
| 19.2003   | 18.8372   | 15.6675  | 17.2606   | 14.3158   | 17.4105   |
| 26.375    | 27.6185   | 28.7574  | 34.3828   | 17.8659   | 23.0539   |
| 4.47335   | 5.68223   | 4.54851  | 5.85458   | 3.69254   | 4.21625   |
| 0.745442  | 0.714591  | 0.469574 | 0.326642  | 0.807447  | 1.80779   |
| 0.89912   | 0.864215  | 0.947906 | 0.898763  | 1.3806    | 1.61337   |
| 0         | 0         | 0        | 0         | 0         | 0         |
| 1.17042   | 1.85637   | 1.74266  | 1.93955   | 3.11181   | 1.78906   |
| 19.0881   | 21.4969   | 20.8418  | 20.9413   | 20.5226   | 23.4176   |
| 209.655   | 186.706   | 221.351  | 175.69    | 193.843   | 170.003   |
| 6.22695   | 5.87555   | 6.69397  | 4.67362   | 7.60108   | 4.29861   |
| 0.737247  | 1.06849   | 1.26735  | 0.976273  | 1.23788   | 0.814203  |
| 10.105    | 10.9262   | 12.5187  | 9.48086   | 10.291    | 8.87854   |
| 8.0181    | 8.25957   | 7.03108  | 5.23695   | 11.2438   | 8.61382   |
| 14.4567   | 7.20647   | 10.1939  | 6.89462   | 11.9205   | 6.48214   |
| 2.8726    | 2.60351   | 2.13853  | 2.90081   | 2.97011   | 4.06164   |
| 0         | 0         | 0        | 0         | 0.0820113 | 0.254613  |
| 0.0993063 | 0.247511  | 0.125111 | 0.150851  | 0.0358555 | 0.139147  |
| 0.995946  | 0.842207  | 1.18753  | 0.749689  | 2.35022   | 1.42043   |
| 1.11837   | 0.978002  | 0.961063 | 0.554247  | 0.981904  | 0.889143  |
| 1.44424   | 0.988134  | 2.17631  | 1.41956   | 2.14718   | 1.11896   |
| 9.16618   | 6.21184   | 5.47747  | 9.55949   | 8.99875   | 12.4555   |
| 2.92292   | 2.45794   | 2.39515  | 3.03224   | 3.19174   | 3.17654   |
| 0.657557  | 0         | 1.45837  | 0.187286  | 0.712252  | 0.138204  |
| 181.711   | 168.537   | 197.345  | 193.911   | 188.878   | 214.406   |
| 0.14992   | 0.523123  | 0.377754 | 0.0683203 | 0.389736  | 0.0252078 |
| 12.7833   | 13.8049   | 11.2285  | 11.2281   | 13.5004   | 10.9966   |
| 23.3706   | 22.8409   | 20.9948  | 20.8956   | 21.5324   | 20.0507   |
| 12.7425   | 13.2044   | 10.574   | 10.7478   | 14.3945   | 12.2082   |
| 15.0633   | 13.9425   | 11.2903  | 12.6025   | 16.0406   | 15.7001   |
| 12.4522   | 11.948    | 13.1141  | 12.3194   | 12.8551   | 12.0795   |
| 11.5728   | 16.2852   | 15.1382  | 16.1497   | 10.0763   | 14.5243   |
| 14.3919   | 16.0322   | 15.4481  | 12.0188   | 15.8579   | 10.3517   |
| 0         | 0         | 0        | 0         | 0         | 0         |
| 13.2423   | 13.937    | 15.7019  | 12.4877   | 16.1518   | 28.4872   |
| 0         | 0         | 0        | 0         | 0         | 0         |
| 1.96899   | 1.85153   | 2.20346  | 2.25617   | 2.26827   | 2.35437   |
| 0.0664422 | 0.0414001 | 0        | 0         | 0.0179922 | 0         |
| 1.31397   | 1.34585   | 2.00594  | 2.88422   | 2.18543   | 1.90304   |
| 2.16333   | 2.24662   | 1.81699  | 4.9293    | 1.56219   | 3.03124   |
| 7.47793   | 3.07258   | 7.14431  | 3.4062    | 6.38247   | 6.51508   |
| 6.97234   | 6.91377   | 9.41449  | 8.96926   | 7.09215   | 8.7612    |

|           |           |           |           |           |           |
|-----------|-----------|-----------|-----------|-----------|-----------|
| 0.158075  | 0.393985  | 0.398302  | 0.720367  | 0.171223  | 0.265791  |
| 1.63936   | 1.45278   | 1.74407   | 2.53176   | 1.93356   | 1.43948   |
| 6.33651   | 7.7343    | 7.10822   | 4.15344   | 8.36799   | 14.4491   |
| 70.878    | 74.6109   | 110.231   | 117.972   | 107.665   | 134.382   |
| 0.432781  | 0.346512  | 0.446254  | 0.653806  | 0.433859  | 0.521974  |
| 0.423737  | 0.246428  | 0.427077  | 0.225286  | 0.397785  | 0.37999   |
| 6.45084   | 5.5287    | 9.00327   | 7.21272   | 10.2863   | 13.2323   |
| 0         | 0         | 0         | 0         | 0         | 0         |
| 0.275846  | 0.182306  | 0.22202   | 0.1859    | 0.294151  | 0.0948197 |
| 18.0327   | 17.1404   | 16.6502   | 17.5828   | 10.681    | 16.5476   |
| 0.0174236 | 0         | 0         | 0         | 0         | 0         |
| 21.2897   | 16.4786   | 21.1616   | 22.3355   | 17.6964   | 19.4008   |
| 13.7184   | 14.4252   | 14.3578   | 14.0852   | 14.2983   | 15.4965   |
| 0         | 0.0824318 | 0.0208338 | 0.0753597 | 0.0806047 | 0.0139026 |
| 15.3058   | 11.4021   | 15.25     | 12.9923   | 19.9012   | 13.1645   |
| 1.24143   | 1.36633   | 1.78327   | 1.04423   | 2.04845   | 0.999791  |
| 0.24264   | 0.174915  | 0.244081  | 0.188789  | 0.276613  | 0.288394  |
| 0.891443  | 1.59392   | 1.17192   | 1.54549   | 1.1755    | 1.62923   |
| 14.6669   | 14.2989   | 30.6866   | 16.5157   | 22.4819   | 13.3228   |
| 3.66656   | 5.41916   | 3.61848   | 3.24049   | 3.66621   | 4.43292   |
| 38.8707   | 34.9837   | 37.6923   | 37.156    | 36.0102   | 36.2382   |
| 8.70695   | 10.9035   | 7.7589    | 8.41963   | 8.37305   | 7.85565   |
| 0.197665  | 0.492661  | 0.24903   | 0.225197  | 0.214107  | 0.16618   |
| 7.87395   | 7.52188   | 8.44923   | 7.9236    | 5.97292   | 8.1859    |
| 7.2342    | 7.37611   | 9.1635    | 9.62848   | 10.1219   | 9.29198   |
| 59.2536   | 60.8722   | 60.188    | 60.7206   | 42.0126   | 57.183    |
| 6.62366   | 6.38693   | 7.62989   | 7.4048    | 7.59721   | 6.37369   |
| 0         | 0         | 0         | 0         | 0         | 0         |
| 0         | 0         | 0.127014  | 0.229716  | 0         | 0         |
| 17.5251   | 16.7033   | 16.6819   | 15.9358   | 17.3482   | 14.4198   |
| 4.47914   | 4.45172   | 3.83171   | 3.94391   | 5.9539    | 4.16768   |
| 0         | 0         | 0         | 0         | 0         | 0         |
| 0         | 0.0643683 | 0.0162677 | 0         | 0         | 0.0434242 |
| 7.85307   | 6.87611   | 8.19792   | 6.39797   | 7.51174   | 6.42978   |
| 1.44384   | 0.692045  | 0.559702  | 0.44287   | 0.842123  | 0.513555  |
| 0.254375  | 0.422668  | 0.106825  | 0         | 0.183689  | 0.213856  |
| 4.50208   | 3.79087   | 6.54064   | 5.86848   | 5.44769   | 7.16072   |
| 0.863615  | 0.766329  | 1.22728   | 0.700583  | 1.0851    | 0.882861  |
| 42.539    | 45.5789   | 46.9301   | 43.5392   | 43.9773   | 39.3404   |
| 5.87417   | 8.49291   | 6.31389   | 8.29291   | 8.1401    | 11.3843   |
| 0         | 0         | 0         | 0         | 0         | 0         |
| 0         | 0.266812  | 0.107894  | 0.0975685 | 0.0463819 | 0.107998  |
| 18.9918   | 20.9317   | 23.8688   | 23.2839   | 19.1057   | 19.0048   |

|           |            |            |           |           |            |
|-----------|------------|------------|-----------|-----------|------------|
| 0.0455958 | 0.13263    | 0.0383586  | 0.0691302 | 0.0329478 | 0          |
| 41.2627   | 47.3012    | 28.958     | 29.1129   | 39.5989   | 37.1364    |
| 29.8118   | 30.5447    | 28.4252    | 31.6324   | 28.8727   | 33.6732    |
| 1.70246   | 1.768      | 3.21727    | 2.97403   | 2.08994   | 3.19652    |
| 0         | 0          | 0          | 0         | 0         | 0          |
| 0         | 0.00757969 | 0.00638562 | 0.034647  | 0         | 0          |
| 0.0758175 | 0.0250483  | 0.146467   | 4.41E-12  | 0.0229751 | 0.00843596 |
| 13.9487   | 16.9937    | 18.6225    | 17.4332   | 13.8687   | 15.665     |
| 3.76206   | 4.03832    | 4.36244    | 4.31582   | 5.25731   | 4.47822    |
| 0         | 0          | 0.0281392  | 0         | 0         | 0          |
| 9.06235   | 6.43101    | 6.9772     | 5.52078   | 10.975    | 3.1216     |
| 0         | 0          | 0          | 0         | 0         | 0          |
| 0         | 0          | 0          | 0         | 0         | 0          |
| 0.454616  | 1.16707    | 0.34365    | 1.27412   | 0.196972  | 0.259897   |
| 28.9219   | 26.9173    | 27.0193    | 27.8542   | 27.8763   | 33.7423    |
| 15.9655   | 15.1809    | 16.9491    | 14.9075   | 17.7036   | 17.1098    |
| 8.34751   | 6.64725    | 9.39447    | 9.3817    | 9.30968   | 6.67731    |
| 116.986   | 116.275    | 121.42     | 131.573   | 126.977   | 130.938    |
| 0.262036  | 0          | 0          | 0         | 0.141916  | 0.0550743  |
| 0         | 0          | 0          | 0         | 0         | 0          |
| 2.88005   | 2.50144    | 1.3563     | 0.629707  | 0.851084  | 0.855991   |
| 10.8389   | 11.427     | 11.7279    | 11.4975   | 15.1137   | 16.1336    |
| 0         | 0          | 0          | 0         | 0         | 0          |
| 4.356     | 4.63626    | 4.8006     | 2.83972   | 3.40036   | 3.50095    |
| 32.7356   | 81.5902    | 206.211    | 223.771   | 106.376   | 192.649    |
| 9.90191   | 11.049     | 9.95091    | 11.558    | 8.20848   | 9.59639    |
| 5.545     | 5.79645    | 2.41088    | 2.30323   | 5.35098   | 5.77393    |
| 3.64104   | 4.55828    | 3.45091    | 5.30891   | 4.34191   | 4.81627    |
| 45.2349   | 42.8582    | 44.1749    | 42.6298   | 39.5525   | 46.8099    |
| 37.6132   | 41.4305    | 29.4759    | 35.3769   | 16.7535   | 18.4162    |
| 2.10039   | 2.03547    | 2.49506    | 1.4721    | 2.3113    | 1.67956    |
| 133.831   | 132.208    | 170.725    | 134.418   | 159.528   | 174.434    |
| 106.082   | 126.415    | 106.529    | 116.719   | 78.1098   | 93.8784    |
| 39.1245   | 35.2357    | 44.5702    | 40.1301   | 42.4896   | 32.8495    |
| 15.6474   | 14.7673    | 17.0112    | 15.7437   | 13.7877   | 16.0816    |
| 0.317894  | 0          | 0          | 0.181085  | 0.172168  | 0          |
| 1.08365   | 1.21474    | 0.930343   | 0.706697  | 0.971008  | 0.943656   |
| 3.24165   | 3.79241    | 4.8758     | 5.23825   | 3.33214   | 3.90718    |
| 0         | 0          | 0          | 0         | 0         | 0          |
| 0.414171  | 0.331804   | 0.819963   | 0.337041  | 0.576799  | 0.298456   |
| 15.1499   | 16.5909    | 13.4572    | 13.2373   | 13.7742   | 18.1571    |
| 0         | 0          | 0.696324   | 0         | 0         | 0          |
| 0         | 0          | 0          | 0         | 0         | 0          |

|           |            |           |           |           |           |
|-----------|------------|-----------|-----------|-----------|-----------|
| 14.8376   | 15.844     | 17.3779   | 16.1541   | 16.5251   | 13.9155   |
| 94.2158   | 109.835    | 80.3434   | 70.8297   | 107.241   | 102.524   |
| 10.7184   | 9.92833    | 13.7541   | 8.65044   | 11.5969   | 7.93063   |
| 0.160888  | 0.160399   | 0.121618  | 0.146638  | 0.139417  | 0.135261  |
| 3.88121   | 3.83209    | 4.54153   | 4.80231   | 3.39318   | 3.81488   |
| 0         | 0          | 9.04154   | 0         | 0         | 0         |
| 0.390901  | 0.487141   | 0.328319  | 0.940178  | 1.12911   | 0.693786  |
| 105.152   | 109.727    | 116.587   | 99.0289   | 125.72    | 109.165   |
| 0.207067  | 0.903164   | 0.391312  | 0.235908  | 0.560727  | 0.261126  |
| 55.7114   | 53.1652    | 56.804    | 50.8436   | 57.9896   | 54.0457   |
| 0         | 0          | 0         | 0         | 0         | 0         |
| 8.03859   | 8.14691    | 8.4192    | 7.33761   | 8.81214   | 6.43244   |
| 117.69    | 108.829    | 108.648   | 96.687    | 77.9276   | 87.858    |
| 19.4808   | 17.0396    | 22.6367   | 16.2495   | 20.0287   | 17.3411   |
| 12.2126   | 11.9079    | 14.304    | 15.2591   | 17.5313   | 17.9847   |
| 0         | 0          | 0         | 0         | 0         | 0         |
| 0         | 0          | 0         | 0         | 0         | 0         |
| 10.7826   | 11.9967    | 16.2808   | 16.0502   | 13.5957   | 12.7829   |
| 3.40587   | 2.77048    | 3.23418   | 3.54013   | 3.7858    | 2.83377   |
| 0         | 0          | 0         | 0         | 0         | 0         |
| 0.777049  | 0.691231   | 0.889719  | 0.450609  | 2.71E-08  | 0.301029  |
| 0.867144  | 0.720127   | 0.951847  | 0.78407   | 0.701859  | 0.71378   |
| 8.29568   | 2.69689    | 11.133    | 5.95832   | 11.1345   | 17.7389   |
| 1.56365   | 1.26917    | 1.63301   | 1.59392   | 2.32886   | 1.91998   |
| 43.2271   | 42.658     | 36.8541   | 32.7256   | 41.4114   | 36.9463   |
| 0         | 0.00882289 | 0         | 0         | 0         | 0         |
| 0.0714388 | 0          | 0         | 0         | 0         | 0         |
| 0         | 0          | 0         | 0         | 0         | 0         |
| 0         | 0          | 0         | 0         | 0         | 0         |
| 1.89561   | 2.33937    | 2.24908   | 1.46772   | 2.65133   | 1.79481   |
| 0.105488  | 0.0876397  | 0.1329    | 0.0801208 | 0.0380876 | 0         |
| 0.0980108 | 0.0173802  | 0.0881914 | 0.0476348 | 0.0301952 | 0.0586405 |
| 72.8304   | 78.1861    | 55.2738   | 61.473    | 51.7145   | 75.8185   |
| 1.14877   | 0.994166   | 1.6081    | 1.30878   | 2.41953   | 1.60965   |
| 0.479341  | 0.215046   | 0.339693  | 0.196596  | 0.381622  | 0.438854  |
| 0.747315  | 0.764883   | 0.731121  | 0.707516  | 1.3947    | 0.956741  |
| 1.49834   | 1.14906    | 1.88769   | 1.87117   | 0.780275  | 0.92053   |
| 17.4656   | 17.2286    | 16.6783   | 13.8522   | 13.6425   | 13.7001   |
| 0         | 0          | 0         | 0         | 0         | 0         |
| 17.3932   | 16.3925    | 16.991    | 15.1756   | 18.885    | 18.7457   |
| 4.84102   | 7.40398    | 4.80526   | 7.85511   | 5.16425   | 5.73487   |
| 0.183345  | 0.228484   | 0.230988  | 0.104441  | 0         | 0.0770701 |
| 0         | 0          | 0         | 0.0332086 | 0         | 0         |

|           |           |           |           |           |           |
|-----------|-----------|-----------|-----------|-----------|-----------|
| 0         | 0         | 0         | 0         | 0         | 0         |
| 0.426975  | 0.755964  | 0.337303  | 0.8005    | 0.325846  | 0.51285   |
| 3.90025   | 3.56235   | 4.77641   | 3.07732   | 5.98277   | 4.76574   |
| 0         | 0         | 0         | 0         | 0         | 0         |
| 0.768961  | 46.1171   | 1.64692   | 453.553   | 1.04115   | 19.5235   |
| 7.46352   | 7.65221   | 9.36733   | 7.54325   | 9.199     | 7.10179   |
| 75.1429   | 70.4877   | 79.0781   | 67.122    | 61.8851   | 65.6921   |
| 18.989    | 18.3407   | 21.0073   | 18.139    | 22.2599   | 19.7764   |
| 5.54476   | 4.91774   | 6.73122   | 5.70607   | 7.39223   | 7.06827   |
| 7.30004   | 8.28472   | 9.83988   | 8.28451   | 13.9106   | 10.2367   |
| 35.5438   | 34.0547   | 33.0105   | 39.6409   | 26.25     | 35.1419   |
| 0         | 0         | 0         | 0         | 0         | 0         |
| 0         | 0         | 0         | 0         | 0         | 0         |
| 0         | 0         | 0         | 0.144572  | 0         | 0         |
| 7.6457    | 8.704     | 8.64499   | 7.58125   | 8.51547   | 7.93895   |
| 0         | 0         | 0         | 0         | 0         | 0         |
| 3.42563   | 3.03325   | 4.11136   | 3.55357   | 2.4607    | 1.69767   |
| 3.73675   | 2.71766   | 4.89836   | 3.60162   | 7.60935   | 4.44323   |
| 4.65107   | 3.33069   | 3.55428   | 2.16256   | 1.9096    | 1.75717   |
| 0.0722431 | 0.0300098 | 0.0303386 | 0.0823054 | 0.0260841 | 0         |
| 4.30028   | 6.01135   | 3.71965   | 8.53435   | 3.01926   | 3.26832   |
| 0         | 0.119172  | 0.240956  | 0.54474   | 0.207166  | 0.0803961 |
| 0         | 0         | 0         | 0         | 0         | 0         |
| 0.130399  | 0.0270838 | 0.123213  | 0         | 0.192251  | 0.0365426 |
| 10.8964   | 10.8692   | 9.9758    | 11.9563   | 7.93681   | 10.2537   |
| 36.6495   | 38.5605   | 41.9644   | 38.1749   | 39.5378   | 35.2152   |
| 0.0942691 | 0         | 0.118765  | 0         | 0.0340368 | 0.0792532 |
| 0.0845366 | 0.108869  | 0.21542   | 0.200733  | 0.252139  | 0.0951891 |
| 0         | 0         | 0         | 0         | 0         | 0         |
| 54.6716   | 56.2646   | 58.5264   | 57.2294   | 52.0367   | 45.8389   |
| 10.0613   | 8.87101   | 10.9723   | 10.9416   | 9.56283   | 10.8993   |
| 19.6888   | 19.6883   | 20.6814   | 22.1033   | 21.0822   | 16.2896   |
| 0.601438  | 0.617245  | 1.47088   | 1.2495    | 0.689787  | 0.44615   |
| 13.1277   | 13.1924   | 15.6771   | 12.8871   | 14.5857   | 12.799    |
| 0         | 0         | 0         | 0         | 0         | 0         |
| 10.1977   | 13.651    | 10.9416   | 10.3732   | 12.6846   | 12.0356   |
| 199.043   | 193.018   | 175.79    | 177.572   | 101.274   | 158.289   |
| 4.83276   | 4.11518   | 5.49642   | 4.22896   | 5.05199   | 4.20481   |
| 8.16995   | 8.5027    | 9.48129   | 8.04012   | 8.52175   | 7.60713   |
| 2.62075   | 2.89139   | 2.27221   | 2.14037   | 2.55386   | 1.98218   |
| 48.7965   | 51.7192   | 45.1548   | 55.2205   | 43.0944   | 48.7372   |
| 0.297041  | 0.358695  | 0.362625  | 0.437228  | 0.796752  | 0.645288  |
| 0         | 0         | 0         | 0         | 0         | 0.0653245 |

|          |           |           |           |             |           |
|----------|-----------|-----------|-----------|-------------|-----------|
| 0        | 0         | 0         | 0         | 0           | 0         |
| 0        | 0         | 0         | 0         | 0           | 0         |
| 4.99646  | 6.53985   | 2.37599   | 3.9025    | 1.26033     | 3.17035   |
| 1.15909  | 1.22628   | 1.20169   | 1.12107   | 1.50399     | 0.872953  |
| 21.1222  | 21.4604   | 21.9498   | 21.7651   | 17.1958     | 20.3027   |
| 9.99617  | 6.14046   | 10.366    | 7.37295   | 9.53803     | 8.55255   |
| 14.4532  | 16.0644   | 18.1923   | 16.1898   | 19.3004     | 18.2324   |
| 0.828161 | 1.57403   | 0.871221  | 1.10823   | 0.000961804 | 7.16E-05  |
| 0        | 0         | 0         | 0         | 0           | 0         |
| 1.59156  | 1.53979   | 2.52941   | 1.05507   | 2.13861     | 0.897761  |
| 14.6669  | 13.6477   | 12.2291   | 12.8895   | 19.8712     | 18.2188   |
| 5.59307  | 5.8872    | 6.15216   | 5.45183   | 5.97876     | 4.67129   |
| 542.465  | 587.792   | 536.838   | 581.204   | 529.345     | 644.053   |
| 0.027677 | 0.0687484 | 0         | 0.0160047 | 0           | 0.0118053 |
| 0.217239 | 0.366267  | 0.310438  | 0.137496  | 0.388311    | 0.305128  |
| 3.51735  | 4.0626    | 3.22449   | 3.43691   | 3.67054     | 3.20951   |
| 35.7317  | 36.8434   | 35.3249   | 41.5537   | 31.5842     | 34.9122   |
| 13.9924  | 14.1301   | 15.3934   | 14.4122   | 13.8225     | 11.9994   |
| 0        | 0         | 0         | 0         | 0           | 0         |
| 38.9799  | 41.2673   | 39.4616   | 41.9961   | 40.678      | 45.6463   |
| 0        | 0         | 0         | 0         | 0           | 0.0124788 |
| 0.290245 | 0.361703  | 0         | 0.330671  | 0           | 0         |
| 0        | 0         | 0         | 0         | 4.70E-105   | 0         |
| 0.051123 | 0.0516047 | 0.0946892 | 0.119418  | 0.128782    | 0.0658195 |
| 3.80207  | 4.37956   | 3.40323   | 2.84885   | 3.7275      | 3.16965   |
| 62.2173  | 60.2985   | 52.4189   | 58.7232   | 42.2354     | 48.854    |
| 0        | 0         | 0         | 0         | 0           | 0         |
| 39.5574  | 41.0052   | 43.4203   | 38.952    | 37.6152     | 44.3594   |
| 0.145544 | 0.11845   | 0         | 0.835218  | 0.140759    | 0.11799   |
| 10.0947  | 8.98299   | 9.21469   | 10.6571   | 8.74092     | 8.98218   |
| 41.0948  | 34.7074   | 29.4937   | 28.8154   | 25.4631     | 23.222    |
| 0        | 0         | 0         | 0         | 0           | 0         |
| 0.108853 | 0.12058   | 0.0609507 | 0.0964557 | 0.340621    | 0.274542  |
| 0.266603 | 0.38386   | 0.259884  | 0.709888  | 0.26381     | 0.206766  |
| 9.62498  | 11.8818   | 10.4155   | 10.7593   | 9.1183      | 9.86747   |
| 0.278682 | 0.173647  | 0.526649  | 0.158749  | 0.150932    | 0.234292  |
| 0.187643 | 0.107926  | 0.200033  | 0.180889  | 0.125078    | 0.157754  |
| 30.2105  | 31.9089   | 24.0792   | 26.2828   | 32.7162     | 30.6295   |
| 7.61886  | 10.2023   | 15.0836   | 14.1253   | 7.43246     | 8.39448   |
| 1.73367  | 2.65432   | 1.09208   | 1.42492   | 0.321921    | 0.37479   |
| 0        | 0         | 0         | 0         | 0           | 0         |
| 42.3072  | 36.5275   | 50.1466   | 40.6466   | 50.3313     | 39.861    |
| 21.4998  | 21.4454   | 20.6046   | 19.5057   | 16.648      | 15.6639   |

|           |           |           |          |           |           |
|-----------|-----------|-----------|----------|-----------|-----------|
| 16.4067   | 12.2227   | 18.4085   | 13.0193  | 19.2351   | 16.867    |
| 3.93736   | 3.35127   | 2.1739    | 2.97521  | 2.50881   | 2.75745   |
| 128.897   | 138.286   | 117.367   | 124.452  | 99.5199   | 126.426   |
| 0.0994205 | 0         | 0.167007  | 0        | 0.0358968 | 0         |
| 0.568198  | 0.669049  | 0.518814  | 0.433649 | 0.85333   | 0.372456  |
| 1731.16   | 2379.6    | 2283.67   | 3322.82  | 1858.31   | 2852      |
| 46.9697   | 50.2562   | 41.7662   | 43.3996  | 32.5045   | 38.092    |
| 12.7039   | 12.391    | 10.3039   | 11.0678  | 11.8044   | 14.3451   |
| 10.2909   | 10.2596   | 10.6683   | 12.4611  | 16.7203   | 15.9685   |
| 10.7191   | 10.399    | 10.9862   | 9.56793  | 10.2738   | 8.3688    |
| 20.6923   | 19.9999   | 20.2783   | 21.09    | 20.9037   | 20.3902   |
| 0         | 0.141074  | 0         | 0        | 0         | 0         |
| 0         | 0.102499  | 0         | 0        | 0         | 0         |
| 5.43567   | 7.9394    | 8.02819   | 8.11217  | 6.09071   | 6.61635   |
| 0.168229  | 0.209647  | 0         | 0        | 0.182223  | 0         |
| 2.49387   | 3.12975   | 4.3146    | 2.50108  | 4.62267   | 5.61069   |
| 36.3657   | 37.3951   | 32.6877   | 35.0518  | 33.5857   | 35.4132   |
| 4.71572   | 5.77656   | 3.89886   | 4.25835  | 3.9761    | 4.49393   |
| 0.0809607 | 0.0252232 | 0.0254996 | 0.103767 | 0.0181592 | 0.0170161 |
| 263.728   | 261.763   | 254.649   | 297.445  | 267.959   | 269.242   |
| 26.454    | 26.197    | 28.7915   | 33.0682  | 30.5686   | 38.3172   |
| 0         | 0         | 0         | 0        | 0         | 0         |
| 0.246092  | 0.16728   | 0.225484  | 0.280368 | 0.399843  | 0.35736   |
| 17.3048   | 18.2836   | 17.3952   | 18.399   | 16.0353   | 16.4475   |
| 0         | 0         | 0         | 0        | 0         | 0         |
| 0         | 0         | 0         | 0        | 0         | 0         |
| 16.3453   | 17.4079   | 12.6276   | 19.5651  | 12.9656   | 17.3391   |
| 30.7724   | 0         | 38.7688   | 0        | 33.3321   | 0         |
| 7.05749   | 6.49298   | 5.37699   | 4.02087  | 7.31694   | 5.84856   |
| 2.76246   | 1.74487   | 1.81166   | 1.46583  | 2.95125   | 2.89509   |
| 6.85665   | 8.27745   | 7.68258   | 5.72135  | 9.18784   | 6.67467   |
| 21.3075   | 19.6264   | 20.2595   | 19.3966  | 19.3533   | 20.5959   |
| 2.80023   | 2.96619   | 2.8223    | 2.65854  | 3.89254   | 3.21738   |
| 7.1406    | 6.96712   | 7.99654   | 12.7388  | 6.85517   | 6.98045   |
| 0.74982   | 1.15419   | 0.654682  | 0.622789 | 1.06226   | 1.04204   |
| 0.501569  | 0.435541  | 0.382881  | 0.467422 | 0.526834  | 0.191853  |
| 16.3084   | 15.8845   | 12.3033   | 14.2912  | 10.9511   | 12.3916   |
| 1.14303   | 1.42444   | 0.698847  | 0.80432  | 0.546223  | 0.73485   |
| 32.1722   | 38.6468   | 47.5527   | 40.4268  | 39.8401   | 35.1966   |
| 25.4849   | 25.9764   | 26.0378   | 24.0317  | 28.3092   | 28.8305   |
| 2.2872    | 1.90419   | 3.3596    | 2.31517  | 4.3578    | 2.77668   |
| 142.45    | 141.342   | 67.3689   | 75.4838  | 58.753    | 81.6754   |
| 10.5128   | 11.3629   | 12.4962   | 13.6937  | 12.8981   | 10.1629   |

|           |           |           |           |           |           |
|-----------|-----------|-----------|-----------|-----------|-----------|
| 0         | 0         | 0.420208  | 0.189996  | 0.36128   | 0         |
| 38.458    | 32.8481   | 38.5351   | 33.6377   | 47.03     | 41.6731   |
| 8.47527   | 8.88285   | 10.2436   | 8.89008   | 8.57188   | 7.30834   |
| 10.2189   | 9.48177   | 9.40973   | 8.60541   | 10.4622   | 9.49823   |
| 26.4946   | 22.2398   | 22.6564   | 20.3904   | 34.8507   | 31.3629   |
| 0.744247  | 0.15458   | 0.312548  | 0.141318  | 0.403077  | 0.208566  |
| 0         | 0.0375418 | 0         | 0         | 0         | 0         |
| 8.48902   | 6.38311   | 15.2076   | 13.0584   | 14.1225   | 17.0441   |
| 0.0391801 | 0.292957  | 0.246806  | 0         | 0.0424391 | 0         |
| 19.4883   | 16.8981   | 19.2129   | 16.0484   | 21.4277   | 19.3498   |
| 20.3025   | 21.0874   | 19.7986   | 19.3144   | 16.3172   | 19.2705   |
| 0.892805  | 0.680379  | 0.235029  | 0.48655   | 0.0688712 | 0.104001  |
| 0         | 0         | 0         | 0         | 0         | 0         |
| 21.1359   | 23.1889   | 16.1676   | 20.4153   | 22.7321   | 24.8641   |
| 2.58204   | 2.81089   | 2.24344   | 2.67117   | 2.94148   | 2.61987   |
| 23.0127   | 22.8541   | 22.6663   | 23.3244   | 23.0853   | 20.7276   |
| 20.9274   | 21.8988   | 24.4221   | 17.1614   | 26.462    | 35.2441   |
| 0         | 0         | 0.0997764 | 0.0902276 | 0         | 0.133163  |
| 0         | 0         | 0.698925  | 0.185893  | 0.742303  | 0.658446  |
| 1.13728   | 1.68915   | 1.88501   | 1.49838   | 1.74989   | 1.89478   |
| 0.411005  | 0.214791  | 0.317365  | 0.196363  | 0.761134  | 0.289916  |
| 2.60899   | 2.86425   | 0.547824  | 0.495396  | 1.48029   | 1.35782   |
| 64.9647   | 68.9349   | 60.1628   | 57.8711   | 65.5312   | 77.7366   |
| 0.0159661 | 0         | 0.140805  | 0.145519  | 0.0172941 | 0.0268458 |
| 11.7175   | 11.6802   | 8.54971   | 8.01632   | 12.5016   | 13.1237   |
| 15.608    | 6.68278   | 16.9175   | 11.0268   | 17.473    | 10.5561   |
| 0.427642  | 0.355326  | 0.359188  | 0.32479   | 0.617566  | 0.11983   |
| 0         | 0         | 0         | 0         | 0         | 0         |
| 5.02098   | 5.20458   | 10.0256   | 5.80729   | 5.59508   | 2.77414   |
| 11.1309   | 10.9053   | 10.8734   | 8.68242   | 10.4943   | 9.74191   |
| 0         | 0         | 0         | 0         | 0         | 0         |
| 1.30E-239 | 0         | 0         | 3.41E-240 | 0         | 1.13E-283 |
| 15.576    | 15.8091   | 16.422    | 15.4926   | 13.3224   | 15.7041   |
| 0         | 0         | 0         | 0         | 0         | 0         |
| 9.2305    | 9.00949   | 9.94339   | 9.24852   | 11.5825   | 10.7441   |
| 1.7922    | 2.02323   | 1.96571   | 1.60943   | 1.91843   | 1.68398   |
| 0.353593  | 0.422287  | 0.612529  | 0.352697  | 0.829844  | 0.656472  |
| 0         | 0         | 0         | 0         | 0         | 0         |
| 0.0369204 | 0.138031  | 0.139543  | 0.126188  | 0.0399914 | 0         |
| 31.3065   | 30.1768   | 34.3104   | 31.4904   | 31.6867   | 29.1654   |
| 0         | 0         | 0         | 0         | 0         | 0         |
| 18.5136   | 20.2149   | 20.9205   | 19.5628   | 20.923    | 20.0977   |
| 3.0586    | 2.28697   | 3.75063   | 1.97461   | 4.81493   | 3.6171    |



|           |           |           |           |           |           |
|-----------|-----------|-----------|-----------|-----------|-----------|
| 7.58997   | 7.54602   | 7.94411   | 6.55749   | 8.6189    | 6.77412   |
| 0         | 0         | 0         | 0         | 0         | 0         |
| 24.3858   | 25.1517   | 23.8545   | 22.1405   | 24.6562   | 24.4548   |
| 11.6986   | 13.832    | 14.0232   | 12.5186   | 11.2243   | 13.6793   |
| 1.28783   | 1.40428   | 1.46023   | 1.35716   | 0.94159   | 1.27216   |
| 29.1793   | 33.4409   | 28.5726   | 31.3034   | 29.9194   | 33.0179   |
| 0.0254985 | 0.0635525 | 0.0321244 | 0         | 0.0828585 | 0         |
| 1.41425   | 1.31033   | 1.50364   | 1.27882   | 1.8313    | 1.40942   |
| 1.75518   | 1.65401   | 2.00042   | 1.75966   | 2.47231   | 1.6999    |
| 1.02435   | 1.50752   | 1.29356   | 1.62326   | 1.01345   | 1.05307   |
| 20.4504   | 20.1567   | 21.6593   | 20.1912   | 21.4009   | 19.449    |
| 0.0762347 | 0.237509  | 0         | 0.217132  | 0.123864  | 0.128183  |
| 35.1948   | 31.0876   | 29.2401   | 23.3609   | 26.975    | 25.3064   |
| 13.1768   | 13.3687   | 14.8317   | 15.1237   | 12.8579   | 12.7114   |
| 10.0419   | 9.55189   | 10.9247   | 8.98111   | 15.094    | 11.7051   |
| 23.6785   | 25.794    | 24.3359   | 24.9338   | 25.2704   | 26.736    |
| 0         | 0         | 0.0198012 | 0         | 0.0172048 | 0         |
| 21.6991   | 17.7904   | 20.5752   | 19.647    | 20.7825   | 24.0996   |
| 0.11878   | 0.0298362 | 0.175952  | 0.0194832 | 0.106063  | 0.0354994 |
| 0         | 0         | 0         | 0         | 0         | 0         |
| 35.6229   | 39.4942   | 29.8126   | 26.1904   | 29.1807   | 34.5134   |
| 0.0689024 | 0.028622  | 0.0578713 | 0.0784993 | 0.0497558 | 0.019309  |
| 0.114064  | 0.0284293 | 0.0574817 | 0.0259903 | 0.0988417 | 0.0575371 |
| 0         | 0         | 0         | 0         | 0         | 0         |
| 0         | 0         | 0         | 0         | 0         | 0         |
| 6.61684   | 7.14052   | 7.88878   | 7.171     | 7.27863   | 6.72509   |
| 4.90917   | 4.63127   | 4.18432   | 5.00061   | 6.037     | 5.26788   |
| 0         | 0         | 0         | 0         | 0         | 0         |
| 0.638285  | 1.20689   | 0.529494  | 0.624585  | 0.9491    | 0.38389   |
| 40.0335   | 21.8781   | 32.985    | 21.6775   | 23.0832   | 19.5371   |
| 3.72812   | 3.07349   | 2.45683   | 1.7643    | 3.87255   | 2.78066   |
| 54.0989   | 77.668    | 41.3075   | 73.2461   | 56.2833   | 56.6268   |
| 0.141626  | 0.306473  | 0.130884  | 0.346097  | 0.220189  | 0.173935  |
| 5.74851   | 5.34059   | 6.03463   | 7.13587   | 7.81152   | 5.98199   |
| 5.87358   | 5.37423   | 9.5141    | 6.04696   | 9.06764   | 6.8246    |
| 43.5358   | 21.5834   | 18.7037   | 17.7355   | 19.4238   | 30.1053   |
| 11.3767   | 11.3043   | 10.4733   | 10.9889   | 11.0959   | 10.5706   |
| 17.0813   | 17.4731   | 17.532    | 15.8381   | 16.2843   | 17.3389   |
| 0.0408179 | 0         | 0.102849  | 0.0930062 | 0         | 0         |
| 2.49678   | 2.89782   | 2.76757   | 2.13646   | 3.56339   | 2.59456   |
| 0         | 0         | 0         | 0         | 0         | 0         |
| 0.485185  | 0.604637  | 0.815017  | 0.737017  | 1.48904   | 0.883785  |
| 10.033    | 9.52227   | 10.3465   | 9.15951   | 8.98195   | 8.11091   |

|           |           |           |           |           |           |
|-----------|-----------|-----------|-----------|-----------|-----------|
| 42.9584   | 44.8857   | 59.2471   | 56.9852   | 43.6802   | 43.3589   |
| 0.1278    | 0.0995398 | 0.201261  | 0.1638    | 0.761364  | 0.214885  |
| 76.677    | 75.8971   | 70.8371   | 76.8746   | 62.3325   | 68.6814   |
| 0.306056  | 0.0610123 | 0.329029  | 0.0557778 | 0         | 0.164663  |
| 0         | 0         | 0         | 0         | 0         | 0         |
| 10.6603   | 12.3469   | 10.3526   | 10.8518   | 10.6916   | 10.2485   |
| 0.313123  | 0.250508  | 0.36581   | 0.229016  | 0.290317  | 0.319218  |
| 5.12643   | 5.12235   | 4.59663   | 4.57765   | 5.35274   | 5.35819   |
| 87.1919   | 97.1429   | 98.0403   | 90.1976   | 85.5647   | 73.6554   |
| 5.19264   | 4.44104   | 9.91127   | 5.54624   | 7.69232   | 3.89475   |
| 282.708   | 278.169   | 283.372   | 332.418   | 249.565   | 272.04    |
| 0.292316  | 0.341516  | 0.299224  | 0.166515  | 0.949893  | 0.245754  |
| 1.2543    | 1.11083   | 1.51789   | 1.01553   | 1.23355   | 1.10999   |
| 25.0319   | 23.6346   | 25.7601   | 25.1922   | 29.7004   | 26.0126   |
| 0         | 0         | 0         | 0         | 0         | 0         |
| 0         | 0         | 0         | 0         | 0         | 0         |
| 0         | 0         | 0         | 0         | 0         | 0         |
| 0.0151635 | 0.0188967 | 0         | 0.0172755 | 0         | 0         |
| 9.12161   | 10.4649   | 14.9792   | 15.4657   | 10.5987   | 10.2221   |
| 0.454278  | 0.198142  | 0.343395  | 0.284653  | 0.590478  | 0.362821  |
| 44.5347   | 43.4002   | 51.1884   | 48.4542   | 48.662    | 52.0364   |
| 0.0295224 | 3.55E-167 | 0.13327   | 3.47E-40  | 0.0977006 | 0.0235646 |
| 1.10888   | 1.22395   | 0.279405  | 0.50533   | 0.102953  | 0.106543  |
| 18.0723   | 16.2304   | 21.3814   | 17.2242   | 14.9508   | 14.0874   |
| 15.2283   | 12.0466   | 21.0762   | 16.1927   | 31.3405   | 26.6258   |
| 81.909    | 80.484    | 83.5177   | 67.8879   | 74.368    | 64.6238   |
| 1.53281   | 1.29146   | 1.77904   | 1.56923   | 1.63404   | 1.17652   |
| 3.61248   | 3.77491   | 4.25014   | 3.73129   | 5.14623   | 4.40195   |
| 39.3816   | 40.4784   | 39.2147   | 41.5112   | 35.2382   | 39.4327   |
| 129.31    | 142.348   | 107.921   | 126.799   | 107.852   | 131.663   |
| 14.4483   | 13.0052   | 14.1468   | 13.5122   | 17.3908   | 15.0716   |
| 0.0148012 | 0.110671  | 0.0745893 | 0         | 0.0320647 | 0         |
| 7.08412   | 6.74859   | 8.59516   | 6.6915    | 8.48855   | 6.67094   |
| 19.1096   | 23.3077   | 26.0072   | 26.3902   | 23.2409   | 15.2063   |
| 0.0572998 | 0         | 0         | 0         | 0.062066  | 0         |
| 0         | 0         | 0         | 0         | 0.0179044 | 0.0138966 |
| 18.2528   | 20.1949   | 25.9124   | 22.8933   | 32.387    | 28.8049   |
| 5.30015   | 5.13505   | 5.66779   | 5.61798   | 6.04687   | 4.605     |
| 16.4771   | 17.268    | 13.6574   | 13.1597   | 9.07956   | 10.1109   |
| 13.1399   | 12.4216   | 12.6217   | 10.8083   | 13.6363   | 11.6765   |
| 37.861    | 37.7095   | 38.7938   | 42.6899   | 50.013    | 45.2273   |
| 2.92431   | 3.09041   | 2.6536    | 2.0474    | 2.38613   | 2.39171   |
| 15.4733   | 17.7714   | 15.3984   | 16.2518   | 11.0274   | 12.4976   |

|           |           |           |           |           |           |
|-----------|-----------|-----------|-----------|-----------|-----------|
| 0         | 0         | 0.144067  | 0.0434264 | 0.165152  | 0.0961371 |
| 2.78E-05  | 1.67E-23  | 4.35E-11  | 1.78E-05  | 3.60E-05  | 9.08E-05  |
| 6.20691   | 5.99059   | 7.26771   | 6.03092   | 9.13683   | 8.52747   |
| 0.0762851 | 0         | 0.0480541 | 0         | 0.0826305 | 0.0641338 |
| 6.93723   | 7.43636   | 7.6803    | 9.12931   | 6.06788   | 6.72489   |
| 0         | 0         | 0         | 0         | 0.0774772 | 0         |
| 0         | 0         | 0         | 0         | 0         | 0         |
| 8.98421   | 10.2937   | 8.15798   | 8.944     | 7.43673   | 6.77716   |
| 2.14866   | 2.10795   | 2.13104   | 2.21356   | 2.82258   | 2.51744   |
| 0.158947  | 0         | 0         | 0         | 0         | 0.133629  |
| 14.5058   | 13.5657   | 11.1259   | 12.1991   | 9.54065   | 8.22036   |
| 1.07733   | 1.58629   | 0.850633  | 1.31221   | 1.31286   | 0.90907   |
| 13.8167   | 13.1859   | 13.1634   | 12.0152   | 15.658    | 15.8772   |
| 7.98341   | 9.70507   | 7.49472   | 9.15629   | 8.07733   | 6.8823    |
| 8.14124   | 8.42176   | 6.88997   | 6.3825    | 8.85105   | 8.06277   |
| 2.00258   | 3.10303   | 1.77289   | 2.03534   | 1.52486   | 1.27449   |
| 4.68754   | 5.36624   | 4.72259   | 6.97229   | 4.10649   | 5.40659   |
| 0         | 0         | 0         | 0         | 0         | 0         |
| 0         | 0         | 0         | 0         | 0.0230055 | 0.0238077 |
| 0.919735  | 0.386373  | 1.89353   | 0.699666  | 0.425476  | 0.180206  |
| 0.13867   | 0         | 0.174705  | 0         | 0.150205  | 0.116582  |
| 0         | 0         | 0         | 0         | 0         | 0         |
| 95.199    | 94.3109   | 96.6293   | 94.1241   | 107.915   | 84.8785   |
| 14.3566   | 13.8291   | 14.2873   | 12.9232   | 14.8439   | 13.5166   |
| 5.25053   | 4.93866   | 5.18237   | 4.07679   | 6.04951   | 6.45258   |
| 7.90876   | 8.11577   | 8.73654   | 7.71314   | 8.35184   | 8.61049   |
| 18.0437   | 19.1548   | 21.2985   | 18.2609   | 24.6569   | 23.0967   |
| 6.7403    | 6.27182   | 6.22732   | 5.00239   | 7.20361   | 6.04084   |
| 27.1227   | 26.4745   | 23.6961   | 26.7129   | 33.6251   | 32.9821   |
| 0         | 0         | 0         | 0         | 0         | 0         |
| 1.10041   | 1.09706   | 1.90128   | 1.03876   | 1.32816   | 1.18945   |
| 16.5214   | 14.6771   | 15.4445   | 12.9363   | 15.9751   | 15.5383   |
| 0.827933  | 0.85121   | 0.651922  | 0.636694  | 0.62776   | 0.904869  |
| 6.62704   | 5.59986   | 6.80298   | 5.7002    | 6.87151   | 5.52382   |
| 15.9723   | 15.2491   | 15.27     | 13.4025   | 14.5081   | 12.6219   |
| 0.0536524 | 0.0668615 | 0.0225314 | 0.0407502 | 0.0387434 | 0.0300708 |
| 3.9973    | 3.48278   | 3.94773   | 3.58922   | 5.81587   | 5.5535    |
| 0         | 0         | 0         | 0         | 0         | 0         |
| 127.045   | 119.478   | 211.504   | 171.652   | 229.984   | 218.551   |
| 7.61944   | 6.82775   | 7.45421   | 7.61667   | 8.32091   | 8.85004   |
| 0         | 0         | 0         | 0         | 0         | 0         |
| 41.0795   | 39.9437   | 46.5846   | 39.776    | 44.6484   | 37.3418   |
| 0.0627776 | 0.0391167 | 0.0395453 | 0         | 0.135999  | 0.0263889 |

|           |           |           |           |           |          |
|-----------|-----------|-----------|-----------|-----------|----------|
| 57.1378   | 60.6764   | 53.9889   | 46.6244   | 48.9834   | 41.6931  |
| 1.86421   | 2.2649    | 4.1439    | 4.20655   | 2.68618   | 2.3711   |
| 28.0345   | 10.5499   | 4.52592   | 9.44401   | 1.98672   | 1.11973  |
| 2.2134    | 1.74809   | 0.871425  | 0.38705   | 1.04891   | 0.614978 |
| 0.268628  | 0.334764  | 0         | 0         | 0         | 0        |
| 1.51586   | 1.94545   | 1.79574   | 1.36613   | 1.4949    | 1.06517  |
| 53.5339   | 50.9755   | 56.596    | 50.2788   | 50.2149   | 48.0634  |
| 0         | 0         | 0         | 0         | 0         | 0        |
| 59.6769   | 43.3821   | 43.8575   | 62.3232   | 37.7071   | 29.2665  |
| 0.153708  | 0.383101  | 0.387299  | 0.291861  | 0.443981  | 0.344597 |
| 14.1762   | 13.6603   | 13.0796   | 13.479    | 12.6725   | 13.3802  |
| 1.25706   | 2.01412   | 2.63951   | 1.63673   | 3.37162   | 1.96267  |
| 4.95E-08  | 0.117441  | 2.03E-05  | 2.53E-06  | 0         | 0        |
| 22.5163   | 22.0652   | 18.7435   | 17.3447   | 21.1663   | 44.3827  |
| 0.0985064 | 0.0306896 | 0.186156  | 0.196397  | 0.0533501 | 0.124223 |
| 3.61441   | 3.37309   | 3.81668   | 4.20446   | 3.22645   | 3.87915  |
| 82.3024   | 83.7478   | 78.6252   | 82.5767   | 62.5302   | 68.9416  |
| 0         | 0         | 0         | 0         | 0         | 0        |
| 20.7263   | 21.1893   | 24.2897   | 22.2623   | 30.6444   | 28.45    |
| 9.51232   | 8.65858   | 10.7646   | 12.0093   | 9.50211   | 14.077   |
| 3.30801   | 3.26797   | 3.72812   | 2.80944   | 3.75256   | 2.64962  |
| 6.78908   | 12.2998   | 21.5369   | 19.1596   | 39.2011   | 46.8689  |
| 0.84573   | 0.405746  | 0.716366  | 0.752902  | 1.01137   | 0.930022 |
| 0         | 0         | 0         | 0         | 0         | 0        |
| 1.02635   | 1.08226   | 1.39251   | 1.13932   | 1.76735   | 1.15048  |
| 4.23862   | 12.0807   | 15.1361   | 9.63203   | 5.29971   | 9.69813  |
| 5.64532   | 6.4556    | 5.18786   | 4.59243   | 6.90368   | 4.61387  |
| 7.44611   | 9.63162   | 11.1367   | 9.06398   | 6.82861   | 6.17936  |
| 13.7367   | 19.0208   | 16.5371   | 18.4323   | 15.0447   | 17.7079  |
| 0         | 0         | 0         | 0.0345922 | 0         | 0        |
| 0         | 0         | 0.183077  | 0.993336  | 0.157403  | 0.366507 |
| 0.0272085 | 0         | 0.0342787 | 0         | 0.0294717 | 0        |
| 0         | 0         | 0         | 0         | 0         | 0        |
| 0         | 0         | 0.130908  | 0.11838   | 0         | 0        |
| 0.671404  | 0.526931  | 0.393978  | 0         | 2.97667   | 2.2084   |
| 10.1132   | 9.29938   | 10.3928   | 8.25544   | 10.2117   | 8.77761  |
| 0         | 0         | 0         | 0         | 0         | 0        |
| 0         | 0         | 0         | 0         | 0         | 0        |
| 3.50356   | 3.2969    | 5.28457   | 5.5133    | 5.27734   | 4.56633  |
| 18.8088   | 21.4089   | 20.5095   | 23.5325   | 15.7507   | 22.284   |
| 12.0332   | 11.0588   | 11.562    | 10.4996   | 12.461    | 12.8655  |
| 22.2183   | 25.5967   | 21.7814   | 23.6102   | 16.2737   | 20.1167  |
| 67.6756   | 70.8591   | 64.8227   | 57.9848   | 46.3431   | 51.2796  |

|           |           |           |           |           |            |
|-----------|-----------|-----------|-----------|-----------|------------|
| 13.1936   | 15.3645   | 12.9656   | 14.7052   | 10.8669   | 10.9425    |
| 0.137051  | 0.102475  | 0.103598  | 0.256069  | 0.0771942 | 0.0506968  |
| 4.55209   | 4.07005   | 4.72771   | 4.00385   | 3.9734    | 3.92458    |
| 49.4407   | 49.4425   | 66.2309   | 66.6061   | 57.3277   | 56.7454    |
| 4.52845   | 3.86447   | 9.79804   | 7.51447   | 7.14442   | 5.95898    |
| 0.920764  | 1.46845   | 1.43453   | 1.51993   | 1.69218   | 2.63842    |
| 0         | 0         | 0.146654  | 0         | 0.126088  | 0.0978633  |
| 59.0845   | 63.7713   | 58.2228   | 54.6536   | 46.2463   | 42.739     |
| 7.83487   | 6.82241   | 2.31282   | 2.98783   | 1.81094   | 2.72845    |
| 1.03225   | 1.1655    | 1.13764   | 1.98405   | 1.11811   | 1.30156    |
| 0.105764  | 0.0659014 | 0.266494  | 0         | 0.114561  | 0          |
| 0.466229  | 0.546837  | 0.950175  | 0.406186  | 1.09914   | 0.507248   |
| 0         | 0.131201  | 0         | 0.119944  | 0.0570189 | 0          |
| 13.0364   | 16.4782   | 12.7367   | 14.5026   | 13.2992   | 14.5464    |
| 1.08332   | 1.15717   | 0.931547  | 1.07748   | 0.707783  | 0.766195   |
| 0         | 0         | 0         | 0         | 0         | 0          |
| 18.276    | 17.5103   | 21.0615   | 19.5859   | 18.3072   | 15.9895    |
| 11.6517   | 11.7156   | 12.968    | 10.6868   | 11.3265   | 12.3907    |
| 50.1565   | 43.9581   | 37.6578   | 44.0486   | 43.3353   | 41.6606    |
| 0.0296036 | 0.0122973 | 0.0870244 | 0.0224845 | 0.0305866 | 0.00829602 |
| 0.0414046 | 0.103197  | 0.0521637 | 0.235858  | 0.0896972 | 0.0696186  |
| 0.0954701 | 0.345256  | 0.346665  | 3.32E-08  | 1.58E-09  | 1.16E-10   |
| 60.4977   | 56.5566   | 45.674    | 55.3381   | 34.7842   | 50.3477    |
| 4.5218    | 4.38635   | 3.72239   | 2.86856   | 3.92387   | 3.41271    |
| 15.9561   | 15.7607   | 14.9543   | 15.4653   | 17.0525   | 14.268     |
| 1.04556   | 0.847968  | 1.54725   | 0.567233  | 2.4628    | 1.0604     |
| 40.1356   | 28.9598   | 52.1327   | 34.2479   | 48.0363   | 43.4428    |
| 14.1581   | 13.5398   | 15.1528   | 15.823    | 15.4428   | 15.0396    |
| 1.83078   | 1.8282    | 2.30498   | 2.16973   | 2.54999   | 2.97116    |
| 0         | 0         | 0         | 0         | 0         | 0          |
| 0.814209  | 0.894508  | 0.688355  | 0.73843   | 0.794901  | 0.432325   |
| 0.355965  | 0.124764  | 0.378392  | 0.11406   | 0.650657  | 0.589177   |
| 0.299482  | 0.382885  | 0.244852  | 0.157453  | 0.164179  | 0.243303   |
| 0         | 0         | 0         | 0         | 0         | 0          |
| 14.2406   | 12.3535   | 15.9413   | 12.4879   | 17.777    | 14.3138    |
| 30.8976   | 35.4467   | 28.1881   | 29.8308   | 33.2578   | 36.7247    |
| 0         | 0         | 0         | 0         | 0         | 0          |
| 33.3521   | 28.6722   | 32.1512   | 29.7719   | 34.7754   | 33.8247    |
| 0.505464  | 0.350835  | 0.572324  | 0.342604  | 0.803937  | 0.42495    |
| 0         | 0         | 0         | 0         | 0         | 0.189597   |
| 151.483   | 113.875   | 283.253   | 189.915   | 82.4994   | 102.404    |
| 1.23447   | 0.890652  | 0.859484  | 0.592174  | 1.58347   | 0.682787   |
| 17.343    | 16.6819   | 16.0717   | 18.5691   | 22.5047   | 23.7866    |

|           |           |          |          |           |           |
|-----------|-----------|----------|----------|-----------|-----------|
| 6.68588   | 6.61645   | 6.97442  | 5.19824  | 6.44699   | 5.46631   |
| 2.16126   | 2.00977   | 2.17     | 2.41229  | 2.53117   | 1.86311   |
| 10.3559   | 10.7112   | 12.6333  | 11.3903  | 12.7043   | 12.0935   |
| 0         | 0         | 0        | 0        | 0         | 0         |
| 1.9468    | 1.73293   | 0.817563 | 1.79549  | 1.00416   | 1.87052   |
| 37.9817   | 94.6654   | 59.8142  | 43.2719  | 20.5705   | 31.9317   |
| 12.3053   | 12.3192   | 12.8668  | 11.3313  | 11.6966   | 7.64066   |
| 3.95857   | 4.36229   | 3.57427  | 2.4105   | 4.75203   | 4.21372   |
| 73.6781   | 79.3304   | 72.65    | 69.2787  | 65.2286   | 65.0805   |
| 21.342    | 24.9528   | 22.3664  | 22.7628  | 24.5102   | 25.0717   |
| 15.7144   | 15.3803   | 15.9608  | 13.0301  | 17.1846   | 13.3741   |
| 6.02666   | 7.9839    | 6.88296  | 7.23923  | 3.74648   | 4.81335   |
| 15.6811   | 13.0961   | 17.8941  | 14.6226  | 14.1397   | 9.75517   |
| 0         | 0         | 0        | 0        | 0         | 0         |
| 0         | 0         | 0.174115 | 0.157452 | 0.0374238 | 0.154919  |
| 0         | 0         | 0        | 0        | 0         | 0         |
| 0.71559   | 0.841718  | 1.47123  | 0.898971 | 1.04219   | 0.736003  |
| 11.0231   | 13.3878   | 12.0045  | 13.3035  | 12.2436   | 11.7019   |
| 89.9916   | 60.9029   | 129.237  | 66.246   | 15.9635   | 11.8837   |
| 7.70236   | 7.79892   | 7.4433   | 8.32644  | 6.17844   | 5.88679   |
| 0         | 0         | 0        | 0        | 0         | 0         |
| 19.7992   | 22.2645   | 23.6003  | 27.9492  | 22.3848   | 26.3132   |
| 6.4204    | 5.75009   | 5.47515  | 4.66589  | 7.54208   | 7.59288   |
| 95.8366   | 108.208   | 90.3383  | 92.3587  | 71.7946   | 102.436   |
| 19.0905   | 18.7046   | 15.5693  | 16.5286  | 13.7769   | 15.4728   |
| 0         | 0         | 0        | 0        | 0         | 0         |
| 15.753    | 14.4996   | 14.8343  | 13.2477  | 16.5417   | 15.2564   |
| 10.6134   | 10.2764   | 11.6464  | 10.0139  | 7.11842   | 7.14928   |
| 0.273247  | 0.501321  | 0.831941 | 0.92527  | 0.887927  | 0.676404  |
| 2.84058   | 3.59124   | 1.3485   | 2.72031  | 2.00665   | 2.83805   |
| 5.72629   | 4.46006   | 4.80953  | 3.80559  | 2.58442   | 4.2149    |
| 28.9506   | 31.6065   | 33.8022  | 33.1687  | 27.737    | 24.0649   |
| 11.6646   | 9.28719   | 11.8382  | 7.79825  | 10.6168   | 8.10407   |
| 12.0769   | 10.6322   | 13.2337  | 11.2279  | 19.8909   | 16.6595   |
| 0.0607904 | 0.0378785 | 0.114881 | 0.207772 | 0.0658469 | 0.102214  |
| 11.2077   | 10.5059   | 12.4345  | 10.7792  | 12.3167   | 10.8204   |
| 41.2767   | 46.57     | 40.5822  | 38.7158  | 30.5983   | 30.1647   |
| 1.02502   | 0.973241  | 0.823075 | 0.915409 | 1.76506   | 1.21213   |
| 8.97987   | 8.73068   | 7.26589  | 8.7313   | 5.78578   | 6.08514   |
| 0.229697  | 65.5825   | 1.67468  | 939.945  | 1.30342   | 26.4346   |
| 61.1794   | 60.4414   | 71.7162  | 70.5292  | 65.7039   | 76.619    |
| 0.0634397 | 0.0527056 | 0        | 0        | 0         | 0.0355563 |
| 1.52948   | 1.57119   | 1.45821  | 1.53058  | 1.94774   | 1.78977   |

|           |          |          |           |           |           |
|-----------|----------|----------|-----------|-----------|-----------|
| 3.20697   | 3.13651  | 3.83574  | 3.19116   | 2.99004   | 2.66201   |
| 64.844    | 56.4771  | 69.0265  | 53.2771   | 43.6238   | 42.0506   |
| 0.881133  | 0.366022 | 0.246689 | 0.44616   | 0.954425  | 0.905396  |
| 0         | 0        | 0        | 0         | 0         | 0         |
| 16.6898   | 13.4042  | 18.9858  | 15.7953   | 17.976    | 18.5923   |
| 0.663727  | 0.620352 | 0.8362   | 0.486111  | 0.718936  | 0.219216  |
| 33.1023   | 35.0376  | 33.7583  | 46.9154   | 41.0814   | 55.9752   |
| 12.3701   | 12.6638  | 16.1452  | 15.9485   | 15.5475   | 13.6664   |
| 13.202    | 13.7003  | 12.7096  | 12.0905   | 15.1433   | 10.5648   |
| 88.6352   | 91.2326  | 92.3163  | 81.4026   | 108.797   | 101.999   |
| 0         | 0        | 0        | 0         | 0         | 0         |
| 24.6899   | 27.2021  | 28.0901  | 31.656    | 27.5326   | 29.7102   |
| 0.913642  | 1.18755  | 2.30211  | 2.12656   | 1.7026    | 1.46189   |
| 0         | 0        | 0        | 0         | 0         | 0         |
| 11.2657   | 7.73005  | 15.6406  | 11.8253   | 19.1159   | 15.7603   |
| 0         | 0        | 0        | 0.0742955 | 0         | 0         |
| 1.61221   | 2.05503  | 2.14256  | 2.07247   | 3.28556   | 1.5333    |
| 18.2708   | 19.5419  | 19.9373  | 9.17853   | 11.6873   | 11.9739   |
| 0         | 0        | 0        | 0         | 0         | 0         |
| 6.93554   | 7.45392  | 7.85813  | 6.41669   | 8.11747   | 6.67215   |
| 0         | 0        | 0        | 0         | 0         | 0         |
| 25.9321   | 25.8958  | 26.2025  | 25.7435   | 25.7421   | 28.96     |
| 62.0083   | 74.1982  | 67.2357  | 65.0199   | 58.5148   | 61.4912   |
| 0         | 0        | 0        | 0         | 0         | 0         |
| 0         | 0        | 0        | 0         | 0         | 0         |
| 0         | 0.146455 | 0.231344 | 0.13389   | 0.127297  | 0         |
| 0         | 0        | 0        | 0         | 0         | 0         |
| 11.3292   | 7.74931  | 11.3189  | 10.8408   | 12.3324   | 11.3936   |
| 10.3005   | 10.4127  | 11.047   | 11.8094   | 7.37937   | 10.2766   |
| 13.4969   | 15.8877  | 21.1353  | 19.1547   | 12.058    | 13.3996   |
| 1.671     | 1.15442  | 1.15025  | 1.39037   | 1.4299    | 1.65544   |
| 87.8394   | 92.4572  | 105.696  | 110.803   | 108.764   | 141.064   |
| 154.267   | 166.79   | 154.541  | 160.422   | 146.613   | 181.062   |
| 4.9358    | 4.36262  | 6.32474  | 5.20464   | 8.85322   | 5.52304   |
| 0.356645  | 0.251614 | 0.351929 | 0.282951  | 1.42772   | 0.612707  |
| 0.0642119 | 0.120031 | 0        | 0.0365778 | 0.0695531 | 0.0269919 |
| 29.6886   | 26.6657  | 29.6474  | 25.5092   | 28.7164   | 27.0047   |
| 14.2494   | 14.2675  | 12.9843  | 15.2386   | 14.2941   | 15.841    |
| 0         | 0.140165 | 0.141701 | 0         | 0.0609149 | 0         |
| 2.99185   | 2.23009  | 2.71248  | 2.00691   | 2.84698   | 2.60931   |
| 11.7294   | 10.8528  | 12.8406  | 10.631    | 13.3795   | 10.4039   |
| 13.0811   | 14.1804  | 9.09628  | 9.44324   | 8.41103   | 7.24967   |
| 0         | 0.145201 | 0        | 0         | 0         | 0.0979559 |

|           |           |           |          |           |           |
|-----------|-----------|-----------|----------|-----------|-----------|
| 3.57186   | 4.49763   | 3.87145   | 3.9995   | 4.76695   | 3.41593   |
| 5.26402   | 5.21132   | 5.56844   | 4.61378  | 6.23806   | 4.48167   |
| 132.162   | 124.664   | 125.095   | 118.329  | 117.049   | 117.089   |
| 2.53491   | 1.25621   | 5.8643    | 2.24621  | 4.5281    | 2.84151   |
| 0.103006  | 0.0570514 | 0.0576766 | 0.117353 | 0.0495884 | 0.192441  |
| 21.774    | 21.546    | 20.7021   | 19.0218  | 12.8263   | 11.409    |
| 2.16485   | 2.77041   | 3.14793   | 2.85171  | 3.78705   | 2.76664   |
| 0         | 0         | 0         | 0        | 0         | 0         |
| 0         | 0         | 0         | 0        | 0         | 0         |
| 0         | 0.116968  | 0         | 0.106933 | 0.0677779 | 0.026303  |
| 5.57234   | 5.41807   | 4.86028   | 4.67418  | 6.46698   | 4.98075   |
| 0.38477   | 0.4795    | 0.242377  | 1.0959   | 0.83355   | 0.323481  |
| 0.0360819 | 0.0224826 | 0         | 0        | 0         | 0         |
| 3.21184   | 2.48336   | 3.21944   | 3.81945  | 4.90108   | 4.0405    |
| 0         | 0         | 0         | 0        | 0         | 0.0631115 |
| 0.0931817 | 3.14E-07  | 1.62E-07  | 9.64E-08 | 1.59E-07  | 1.23E-07  |
| 81.9283   | 77.3455   | 82.2772   | 80.7152  | 84.9762   | 82.7033   |
| 5.15827   | 9.53293   | 8.36531   | 8.1774   | 26.6171   | 15.8794   |
| 8.30563   | 7.48498   | 7.64192   | 7.38481  | 7.4291    | 6.66601   |
| 7.90024   | 7.57415   | 7.83811   | 5.12421  | 9.38395   | 6.19653   |
| 36.9967   | 40.8916   | 49.0224   | 40.0426  | 52.899    | 39.8917   |
| 8.12471   | 8.84214   | 6.19924   | 7.43115  | 6.69336   | 5.9647    |
| 15.3446   | 16.325    | 13.8131   | 14.2565  | 13.872    | 12.9708   |
| 42.6716   | 38.2425   | 47.0788   | 50.8265  | 53.9433   | 50.5016   |
| 0         | 0         | 0         | 0        | 0         | 0         |
| 0         | 0         | 0         | 0        | 0         | 0         |
| 1.16845   | 1.38285   | 0.783535  | 1.34016  | 0.71148   | 1.05275   |
| 0         | 0         | 0         | 0        | 0         | 0         |
| 14.131    | 14.8022   | 16.1369   | 15.7086  | 14.431    | 16.7186   |
| 11.3081   | 13.199    | 7.62493   | 11.825   | 11.4724   | 13.9925   |
| 0         | 0         | 0         | 0        | 0.112347  | 0         |
| 9.84026   | 10.382    | 10.9432   | 11.1771  | 11.4602   | 10.3504   |
| 42.2605   | 51.5866   | 37.9218   | 48.887   | 39.121    | 53.2364   |
| 0         | 0         | 0         | 0        | 0         | 0         |
| 0         | 0         | 0         | 0        | 0         | 0         |
| 2.51715   | 2.43711   | 3.29322   | 1.74271  | 2.32804   | 2.01853   |
| 81.7988   | 56.5014   | 74.6518   | 55.5832  | 130.895   | 93.1737   |
| 0         | 0         | 0         | 0        | 0         | 0         |
| 10.0581   | 10.0076   | 8.67191   | 9.87856  | 11.3282   | 11.9625   |
| 92.1441   | 83.3686   | 83.8042   | 93.0066  | 77.5787   | 91.074    |
| 0         | 0.489303  | 0         | 0        | 0.212648  | 0.165047  |
| 5.45926   | 4.65185   | 6.43699   | 5.42225  | 5.93863   | 5.70766   |
| 18.1833   | 18.2355   | 23.0019   | 16.6447  | 23.4452   | 16.1278   |



|           |           |           |          |           |             |
|-----------|-----------|-----------|----------|-----------|-------------|
| 0         | 0         | 0         | 0        | 0         | 0           |
| 24.1833   | 21.4741   | 23.0364   | 20.9277  | 17.9348   | 17.4268     |
| 51.166    | 58.1581   | 51.5299   | 51.0082  | 51.2462   | 54.2936     |
| 0.101886  | 0         | 0.128361  | 0.116077 | 0         | 0.0428283   |
| 0         | 0         | 0         | 0        | 0         | 0           |
| 4.67491   | 2.93449   | 4.57151   | 3.09165  | 2.23078   | 2.88571     |
| 0.0499475 | 0.232527  | 0.251707  | 0        | 0.216409  | 0.185918    |
| 1.24586   | 1.43677   | 1.33686   | 1.4898   | 1.5395    | 1.10149     |
| 0.824759  | 0.761102  | 0.67029   | 0.709836 | 0.679661  | 0.616763    |
| 12.3774   | 12.7002   | 14.1515   | 11.591   | 13.8824   | 13.0109     |
| 36.3711   | 33.6421   | 31.6653   | 28.1804  | 34.8591   | 38.1242     |
| 0.608648  | 0.172385  | 0.975936  | 0.724941 | 1.28858   | 0.534956    |
| 0         | 0.0958278 | 0.0968778 | 0        | 0.0832922 | 0.129295    |
| 42.2368   | 54.0013   | 46.5442   | 49.9897  | 49.7235   | 62.0655     |
| 11.3213   | 13.6712   | 13.7104   | 14.298   | 13.4038   | 12.7644     |
| 14.9756   | 16.259    | 12.6733   | 15.2088  | 11.7973   | 14.5931     |
| 0.455415  | 0.514321  | 0.771687  | 0.644218 | 1.45989   | 0.633187    |
| 3.15548   | 3.95099   | 4.20153   | 3.69721  | 4.14689   | 3.77182     |
| 1.337     | 0.925647  | 1.62204   | 0.959064 | 1.7164    | 0.790984    |
| 1.33861   | 1.53548   | 1.72479   | 1.62904  | 1.21928   | 1.38116     |
| 5.86492   | 4.55448   | 4.31935   | 2.99392  | 7.20105   | 4.46251     |
| 0         | 0         | 0         | 0        | 0         | 0           |
| 1.09557   | 1.05374   | 1.06529   | 0.627438 | 2.00612   | 1.59241     |
| 0.621304  | 0.723497  | 0.419179  | 0.282363 | 0.250071  | 0.236907    |
| 3.00E-05  | 4.14719   | 0.41025   | 5.53101  | 2.63E-05  | 0.000461025 |
| 0.168858  | 0.278492  | 0.3046    | 0.296331 | 0.361342  | 0.234099    |
| 0         | 0         | 0         | 0        | 0         | 0           |
| 20.406    | 19.955    | 20.943    | 20.2954  | 18.356    | 17.1139     |
| 0.0281938 | 0         | 0         | 0        | 0         | 0           |
| 20.1704   | 19.1846   | 23.8846   | 18.8644  | 25.3932   | 22.5828     |
| 9.54318   | 8.73669   | 9.45497   | 8.44455  | 9.03229   | 9.13953     |
| 1.49228   | 1.03315   | 2.29784   | 0.755611 | 1.6164    | 0.696986    |
| 0         | 0         | 0         | 0        | 0         | 0           |
| 1.77153   | 2.52797   | 1.91613   | 1.61874  | 2.83615   | 2.73624     |
| 27.5386   | 24.698    | 25.2925   | 24.7047  | 22.2508   | 24.9447     |
| 3.13065   | 2.44002   | 1.26636   | 1.00202  | 1.39499   | 1.338       |
| 1.40694   | 0.807909  | 1.35077   | 0.738596 | 2.61207   | 0.976429    |
| 38.0369   | 35.9067   | 47.7015   | 44.2856  | 51.2011   | 51.8803     |
| 0.0945302 | 0         | 0         | 0        | 0         | 0.0794727   |
| 16.2164   | 16.6902   | 15.8455   | 14.8996  | 16.5837   | 14.303      |
| 1.4481    | 2.43481   | 1.4769    | 2.19973  | 0.896318  | 1.52663     |
| 0         | 0         | 0         | 0        | 0         | 0           |
| 3.63866   | 3.9452    | 4.42262   | 3.73456  | 4.41011   | 3.50377     |

|           |           |           |           |          |           |
|-----------|-----------|-----------|-----------|----------|-----------|
| 0.483369  | 0.202337  | 0         | 0.183131  | 2.28E-84 | 0.26979   |
| 10.089    | 8.31156   | 10.4459   | 8.66458   | 13.3584  | 10.6314   |
| 2.29875   | 2.14029   | 2.79622   | 1.02349   | 2.17513  | 1.39946   |
| 3.7721    | 5.14591   | 4.83158   | 4.01765   | 5.25994  | 3.97834   |
| 7.96408   | 7.90455   | 9.37921   | 7.87193   | 8.4049   | 8.25689   |
| 0         | 0         | 0         | 0         | 0        | 0         |
| 0         | 0         | 0         | 0         | 0        | 0         |
| 0.860386  | 1.53173   | 1.39366   | 1.3303    | 2.19674  | 1.39501   |
| 8.6933    | 8.1924    | 8.76155   | 7.6522    | 7.00019  | 6.9548    |
| 12.1834   | 12.2983   | 13.9061   | 12.2144   | 12.8896  | 12.5183   |
| 0.429865  | 0.238088  | 0.21061   | 0.163246  | 0.336282 | 0.321238  |
| 1.02153   | 0.813027  | 1.24372   | 1.31051   | 1.42264  | 0.88768   |
| 6.28313   | 5.79733   | 7.09547   | 6.38841   | 7.26381  | 5.92394   |
| 36.7894   | 32.5748   | 32.0899   | 29.6417   | 32.1516  | 28.2228   |
| 0.207085  | 0.0368671 | 0         | 0.0674082 | 0.160222 | 0.0746139 |
| 0.0554648 | 1.76256   | 0.0349388 | 5.14999   | 0.300391 | 1.32895   |
| 14.5927   | 14.917    | 12.0729   | 11.2239   | 13.5848  | 14.0209   |
| 8.92291   | 10.2072   | 8.68197   | 11.0047   | 11.2202  | 11.295    |
| 0.974265  | 0.148669  | 0.601191  | 0.543655  | 0.581494 | 0.100295  |
| 3.7997    | 4.06273   | 4.58879   | 3.20188   | 6.52677  | 4.80114   |
| 412.569   | 292.031   | 210.558   | 244.785   | 131.961  | 143.008   |
| 0.0593267 | 0.184832  | 0.0186857 | 0.101385  | 0.20885  | 0.074815  |
| 0         | 0         | 0         | 0         | 0.101892 | 0         |
| 2.22112   | 2.4461    | 2.50544   | 1.89786   | 2.57372  | 1.91075   |
| 0.0721411 | 0.0674266 | 0.0908873 | 0.123284  | 0.117213 | 0.030325  |
| 26.8554   | 31.3638   | 25.0242   | 30.4242   | 25.5306  | 28.6846   |
| 9.90642   | 9.27379   | 10.7688   | 9.50418   | 9.90896  | 7.95652   |
| 147.472   | 142.515   | 183.824   | 119.658   | 162.779  | 126.051   |
| 1.85982   | 2.89713   | 0.878662  | 2.20714   | 2.09846  | 2.47566   |
| 3.26551   | 3.86463   | 4.55711   | 2.89088   | 4.22666  | 4.69166   |
| 8.39425   | 7.86358   | 8.44144   | 7.42874   | 8.88733  | 6.62953   |
| 1.42E-06  | 7.97E-07  | 3.88E-07  | 4.48E-07  | 0.54138  | 0.600839  |
| 0.314429  | 0.209915  | 0.339544  | 0.230287  | 0.304092 | 0.339871  |
| 0.773706  | 0.853998  | 1.55961   | 1.48591   | 1.58035  | 1.88635   |
| 0.389979  | 0.242996  | 0.245658  | 0.222148  | 0.844834 | 0.16393   |
| 46.5798   | 40.4963   | 48.6382   | 49.2045   | 50.3164  | 60.7104   |
| 18.7896   | 19.7643   | 20.3903   | 21.2658   | 22.0279  | 22.4789   |
| 8.42773   | 7.64104   | 5.53968   | 3.59015   | 5.55663  | 4.06634   |
| 0.165036  | 0.123401  | 0.207922  | 0.188023  | 0.178764 | 0.0277496 |
| 22.0647   | 18.9393   | 26.3919   | 16.4663   | 23.6723  | 20.8758   |
| 0.0498067 | 0.124138  | 0.0627492 | 0.170232  | 0.107899 | 0.167492  |
| 0.287802  | 0.224161  | 0.226618  | 0.20493   | 0.467611 | 0.332693  |
| 0.49274   | 0.175443  | 0.443415  | 0.721762  | 0.609973 | 0.414253  |

|           |           |          |           |          |           |
|-----------|-----------|----------|-----------|----------|-----------|
| 6.39767   | 9.09564   | 6.45335  | 8.3228    | 4.58831  | 5.73332   |
| 1.1572    | 1.4421    | 0.728951 | 0.593754  | 1.19078  | 0.608298  |
| 36.5265   | 41.2667   | 38.6414  | 52.7293   | 27.9635  | 32.7541   |
| 60.7105   | 61.3103   | 55.8954  | 55.4093   | 64.324   | 65.7221   |
| 4.82951   | 8.33866   | 4.75575  | 9.78668   | 7.90992  | 8.01179   |
| 12.4001   | 13.7538   | 12.8025  | 12.9255   | 11.871   | 11.2468   |
| 0         | 0         | 0        | 0         | 0        | 0         |
| 0.646423  | 0.475578  | 0.686842 | 0.363793  | 0.919529 | 1.01489   |
| 10.3311   | 12.666    | 11.5714  | 15.5418   | 7.5487   | 10.5807   |
| 0.515853  | 0.643256  | 0.228249 | 0.206405  | 0.409177 | 0.334195  |
| 1.59895   | 1.7327    | 2.49615  | 3.4057    | 1.73195  | 2.07483   |
| 18.1548   | 17.1325   | 19.523   | 18.3641   | 17.0965  | 17.196    |
| 0         | 0         | 0        | 0.0300888 | 0        | 0         |
| 0.280976  | 0.210091  | 0.247792 | 0.640221  | 0.273912 | 0.354329  |
| 0.619657  | 0.702015  | 0.851648 | 0.641786  | 1.15935  | 0.75775   |
| 0.136753  | 0         | 0.103373 | 0.0934802 | 0.148128 | 0.206946  |
| 14.7561   | 13.0664   | 17.0609  | 14.2467   | 19.8064  | 15.7165   |
| 0         | 0         | 0        | 0         | 0        | 0         |
| 0.0742214 | 0.0462473 | 0.420786 | 0.126839  | 0.32158  | 0.0935982 |
| 0.930749  | 1.34033   | 0.859912 | 0.926856  | 1.70268  | 1.11288   |
| 0         | 0         | 0        | 0         | 0        | 0         |
| 8.01494   | 8.9503    | 7.64479  | 8.3303    | 9.6072   | 9.1935    |
| 7.18803   | 9.26884   | 7.208    | 8.14179   | 5.19437  | 4.88867   |
| 3.13344   | 2.13839   | 3.10175  | 3.10239   | 3.43449  | 2.44616   |
| 98.8632   | 112.028   | 106.597  | 109.312   | 79.1654  | 96.7029   |
| 67.7286   | 81.9627   | 64.7221  | 83.3891   | 47.5614  | 48.1146   |
| 19.253    | 20.1414   | 19.5103  | 22.0813   | 20.9591  | 16.2945   |
| 26.0711   | 31.3181   | 19.3999  | 26.0708   | 34.7712  | 36.4456   |
| 5.80514   | 5.39555   | 6.56846  | 5.7917    | 5.8327   | 5.49493   |
| 10.2286   | 9.79196   | 10.2507  | 8.56343   | 12.5064  | 9.81107   |
| 2.29265   | 2.40088   | 1.69912  | 1.49261   | 3.58931  | 3.01261   |
| 3.60348   | 2.49481   | 2.72392  | 2.91939   | 1.64803  | 2.49092   |
| 17.4751   | 16.6904   | 16.1533  | 15.9495   | 16.4963  | 15.6558   |
| 19.675    | 20.4153   | 20.8229  | 23.0443   | 21.3803  | 26.3024   |
| 2.09349   | 4.41869   | 2.03158  | 6.48913   | 2.15527  | 3.29013   |
| 9.85983   | 8.03401   | 4.77767  | 4.32044   | 6.57229  | 5.73873   |
| 35.4578   | 37.2007   | 43.2746  | 41.3997   | 51.4193  | 46.342    |
| 17.2184   | 15.8606   | 19.2619  | 15.2294   | 20.0947  | 15.7036   |
| 6.1553    | 7.13432   | 4.17565  | 4.46258   | 4.14958  | 4.88534   |
| 0         | 0.0279099 | 0        | 0         | 0        | 0         |
| 0.373178  | 0.258363  | 0.470149 | 0.425155  | 0.494045 | 0.313735  |
| 10.4438   | 10.6467   | 11.0786  | 11.9324   | 10.7834  | 10.6685   |
| 1.15787   | 1.60326   | 2.37721  | 1.31914   | 2.09029  | 1.65844   |

|           |           |           |           |           |           |
|-----------|-----------|-----------|-----------|-----------|-----------|
| 1.13075   | 1.11105   | 1.09583   | 1.33779   | 0.77728   | 0.438754  |
| 1.59914   | 1.64117   | 1.30362   | 1.3932    | 1.52837   | 1.18625   |
| 23.0665   | 21.843    | 20.1505   | 23.126    | 22.9565   | 26.5769   |
| 4.78717   | 4.32909   | 4.47119   | 4.41302   | 4.17117   | 4.13204   |
| 0.168338  | 0.149844  | 0.136338  | 0.301375  | 0.0781456 | 0.0707617 |
| 0.920227  | 0.382262  | 0.257634  | 0.116489  | 0.332257  | 0.429803  |
| 4.84624   | 7.01967   | 7.55504   | 6.89725   | 12.9924   | 8.85069   |
| 0.611027  | 0.380731  | 0.144338  | 0.580111  | 0.883389  | 0.299657  |
| 0.2146    | 0         | 0.270364  | 0         | 0.23245   | 0         |
| 0         | 0         | 0         | 0         | 0         | 0         |
| 0         | 0         | 0         | 0         | 0         | 0         |
| 0.443015  | 0.510112  | 0.34955   | 0.449415  | 0.197315  | 0.229422  |
| 0         | 0         | 0         | 0         | 0         | 0         |
| 1.90481   | 1.95019   | 2.76058   | 3.26888   | 2.76863   | 3.1872    |
| 0.0404035 | 0.0471448 | 0.0821184 | 2.19E-10  | 0.106156  | 0.0744392 |
| 16.9429   | 18.3605   | 15.9098   | 18.2238   | 33.6268   | 30.1693   |
| 168.235   | 195.043   | 149.533   | 165.067   | 121.579   | 135.947   |
| 0.293303  | 0.229587  | 0.598335  | 0.386226  | 0.471787  | 0.322284  |
| 0         | 0.0549554 | 0         | 0         | 0         | 0         |
| 0         | 0         | 0         | 0         | 0         | 0         |
| 21.2878   | 19.464    | 26.7181   | 22.815    | 21.6323   | 21.247    |
| 14.8791   | 15.396    | 14.8067   | 13.5406   | 13.0033   | 12.1175   |
| 0.0707242 | 0.176273  | 0.267307  | 0.100719  | 0.229821  | 0.163511  |
| 3.0408    | 3.43279   | 2.88449   | 3.09752   | 4.72748   | 4.9625    |
| 0         | 0         | 0         | 0         | 0.0439357 | 0         |
| 1.9518    | 4.226     | 1.64399   | 2.12906   | 2.43448   | 3.47881   |
| 14.4861   | 12.2422   | 13.0689   | 12.688    | 16.6724   | 15.3024   |
| 7.34874   | 5.35811   | 7.50818   | 5.23037   | 6.4274    | 4.35182   |
| 0.441516  | 0.183406  | 0.370831  | 0.670682  | 1.59414   | 0.371188  |
| 35.8246   | 66.9472   | 22.1711   | 76.7706   | 16.8409   | 18.4358   |
| 3.89669   | 2.45357   | 4.29651   | 3.19649   | 5.76943   | 3.34512   |
| 32.3823   | 33.0578   | 49.0659   | 44.3995   | 38.5871   | 32.0178   |
| 40.6225   | 44.2733   | 38.9866   | 38.6625   | 45.0509   | 47.3057   |
| 0.646854  | 0.577668  | 0.382938  | 0.199926  | 0.70131   | 0.30824   |
| 0         | 0         | 0         | 0.0141172 | 0         | 0         |
| 0.959303  | 0.934928  | 0.960668  | 0.686576  | 1.35882   | 1.27178   |
| 6.28868   | 18.4495   | 25.6902   | 13.2523   | 29.0108   | 31.5408   |
| 0         | 0         | 0         | 0         | 0         | 0         |
| 0         | 0         | 0         | 0         | 0         | 0         |
| 59.531    | 61.5804   | 42.1903   | 44.0796   | 27.434    | 37.9989   |
| 8.54286   | 8.85744   | 7.87191   | 8.02644   | 8.41014   | 7.89361   |
| 0.202211  | 0.218059  | 0.119042  | 0.216047  | 0.123842  | 0.216248  |
| 8.59747   | 10.7772   | 13.8084   | 14.4055   | 14.9123   | 17.6799   |

|           |          |           |           |          |          |
|-----------|----------|-----------|-----------|----------|----------|
| 61.4599   | 58.1262  | 35.5288   | 32.0811   | 44.1407  | 56.0874  |
| 7.27259   | 6.79922  | 5.17904   | 3.96358   | 5.1809   | 3.44715  |
| 42.3504   | 50.9817  | 39.3672   | 34.6941   | 35.5685  | 32.3886  |
| 14.6698   | 14.0472  | 18.7196   | 19.2016   | 20.622   | 14.9856  |
| 3.60834   | 3.60398  | 3.54319   | 2.66      | 3.01757  | 2.81051  |
| 0.561235  | 0.437131 | 0.486113  | 0.0799256 | 0.569923 | 0.442347 |
| 0         | 0        | 0         | 0         | 0        | 0        |
| 1.65269   | 1.54094  | 0.968999  | 1.48146   | 0.988301 | 1.11017  |
| 7.85588   | 5.6162   | 8.99752   | 5.33077   | 8.80278  | 5.30019  |
| 1661.65   | 1815.02  | 1700.41   | 1874.74   | 1723.6   | 2190.35  |
| 25.3387   | 25.7137  | 23.8597   | 27.798    | 17.8775  | 22.4009  |
| 0         | 0        | 0         | 0         | 0        | 0        |
| 6.69202   | 6.53456  | 7.16764   | 6.14054   | 7.36935  | 6.39299  |
| 0.756945  | 1.10052  | 1.24881   | 0.965038  | 1.46412  | 0.734859 |
| 56.5958   | 85.6385  | 88.6178   | 92.8182   | 86.918   | 82.8599  |
| 22.1039   | 22.2004  | 24.1189   | 18.1013   | 25.2271  | 20.9774  |
| 0         | 0        | 0         | 0         | 0        | 0        |
| 0.431261  | 0.487443 | 0.429607  | 0.479902  | 0.423679 | 0.455316 |
| 0         | 0        | 0.0954467 | 0         | 0        | 0        |
| 0         | 0        | 0         | 0         | 0        | 0        |
| 9.64473   | 15.1306  | 10.1961   | 12.8364   | 9.08679  | 9.89806  |
| 0.613422  | 0.262778 | 1.98036   | 1.48508   | 0.436043 | 0.741335 |
| 4.53487   | 4.12909  | 5.70735   | 5.05994   | 5.76463  | 4.80767  |
| 0.395839  | 0.690612 | 0.39896   | 0.811751  | 0.471641 | 0.831967 |
| 23.5391   | 23.9439  | 29.6193   | 27.2828   | 29.4417  | 26.4641  |
| 21.5794   | 22.569   | 21.8039   | 22.4638   | 18.5127  | 17.3512  |
| 0         | 0        | 0         | 0         | 0        | 0        |
| 12.2251   | 10.8713  | 9.5114    | 9.36209   | 9.20799  | 7.74237  |
| 1.71399   | 1.51104  | 2.1028    | 1.74807   | 1.77549  | 1.17669  |
| 45.5752   | 49.8762  | 43.371    | 52.1242   | 42.1846  | 47.7118  |
| 0         | 0        | 0         | 0         | 0        | 0        |
| 8.93152   | 8.95815  | 8.35536   | 8.9858    | 7.80718  | 8.12585  |
| 6.2823    | 7.41976  | 7.94973   | 5.54998   | 12.7311  | 11.0414  |
| 0         | 0        | 0         | 0         | 0        | 0        |
| 103.684   | 106.587  | 109.75    | 103.439   | 98.2694  | 112.88   |
| 15.5814   | 14.9844  | 15.3818   | 15.3951   | 15.5262  | 14.4798  |
| 18.714    | 21.2625  | 20.3915   | 24.4705   | 31.695   | 26.9547  |
| 0.0655837 | 0        | 0         | 0         | 0        | 0        |
| 0         | 0        | 0         | 0         | 0        | 0        |
| 2.67487   | 2.99445  | 3.43057   | 2.92501   | 2.83189  | 2.07972  |
| 0.273621  | 0.298362 | 0.215451  | 0.506563  | 0.185238 | 0.402563 |
| 6.26315   | 5.15458  | 5.76317   | 4.59062   | 6.35576  | 4.82521  |
| 0         | 0        | 0         | 0         | 0        | 0        |

|           |           |           |           |           |           |
|-----------|-----------|-----------|-----------|-----------|-----------|
| 41.4944   | 45.136    | 62.4977   | 64.4672   | 50.8294   | 62.4825   |
| 0         | 0         | 0         | 0         | 0         | 0         |
| 0         | 0         | 0         | 0         | 0         | 0         |
| 17.8662   | 16.0767   | 16.9276   | 20.7428   | 21.6724   | 20.0953   |
| 3.15115   | 3.31286   | 4.42149   | 2.24621   | 3.60731   | 2.95253   |
| 0         | 0         | 0         | 0         | 0         | 0         |
| 0.218292  | 0.246127  | 0.170248  | 0.153955  | 0.180152  | 0.139825  |
| 0.140223  | 0         | 0         | 0.0399384 | 0         | 0         |
| 7.9336    | 7.47224   | 9.19899   | 7.35556   | 9.90862   | 10.1687   |
| 0.215782  | 0.0597554 | 0         | 0.0546288 | 0.0519386 | 0.0403122 |
| 0.739945  | 1.05852   | 0.700173  | 0.669138  | 1.3673    | 0.454301  |
| 0.960969  | 0.387086  | 0.711505  | 1.60423   | 0.898436  | 0.791965  |
| 0         | 0         | 0         | 0         | 0         | 0         |
| 7.35186   | 7.36966   | 6.85276   | 6.34936   | 7.46084   | 6.30056   |
| 0.0432617 | 0.0269564 | 0         | 0.347065  | 0.0234301 | 0.054556  |
| 0         | 0         | 0         | 0         | 0         | 0         |
| 0.0778743 | 0.129396  | 0.0981102 | 0.0295736 | 0.168704  | 0.0436465 |
| 0.0601243 | 0         | 0.0378739 | 0.102748  | 0.227939  | 0.935123  |
| 0         | 0         | 0         | 0         | 0         | 0         |
| 0.224846  | 0.140101  | 0         | 0         | 0.121774  | 0.0945153 |
| 13.8258   | 13.4851   | 12.8662   | 13.1082   | 13.2248   | 11.5276   |
| 10.06     | 10.4434   | 9.41642   | 9.5474    | 8.81146   | 8.20368   |
| 24.1475   | 24.0863   | 21.5621   | 23.8689   | 23.4925   | 28.7358   |
| 0.0291054 | 0.108813  | 0         | 0.0331592 | 0         | 0.0244692 |
| 5.53079   | 5.60832   | 6.53746   | 4.97143   | 7.05575   | 4.91058   |
| 16.851    | 19.7019   | 18.1683   | 23.57     | 15.8339   | 17.656    |
| 0         | 0         | 0         | 0         | 0         | 0         |
| 3.36179   | 2.22844   | 2.25286   | 1.79278   | 5.4234    | 2.40536   |
| 30.7924   | 31.1217   | 34.3037   | 28.8719   | 32.2041   | 32.145    |
| 110.5     | 92.0421   | 84.4775   | 105.515   | 103.204   | 143.32    |
| 54.6194   | 55.0124   | 57.1516   | 51.9302   | 56.78     | 47.2346   |
| 32.5731   | 30.4845   | 35.6306   | 32.9052   | 31.2383   | 34.5645   |
| 0         | 0         | 0         | 0         | 0         | 0         |
| 30.3184   | 27.2904   | 32.5411   | 30.5181   | 34.3758   | 35.2988   |
| 5.17263   | 4.34313   | 5.86971   | 5.68412   | 5.08631   | 5.0889    |
| 10.5587   | 9.229     | 10.4387   | 10.4839   | 7.54519   | 7.82883   |
| 0.482895  | 0.46094   | 0.427158  | 0.550154  | 0.523062  | 0.23322   |
| 11.6533   | 10.2867   | 10.6761   | 11.3666   | 13.1862   | 12.8911   |
| 0         | 0         | 0         | 0         | 0         | 0         |
| 3.41261   | 2.10721   | 1.73923   | 1.06046   | 0.957824  | 1.3695    |
| 1.0322    | 0.612132  | 0.60217   | 0.358272  | 0.842692  | 0.594486  |
| 61.44     | 58.0001   | 68.227    | 57.832    | 79.9698   | 72.9947   |
| 414.821   | 481.957   | 449.504   | 474.304   | 367.814   | 396.587   |

|           |           |           |           |           |           |
|-----------|-----------|-----------|-----------|-----------|-----------|
| 12.0241   | 13.4027   | 9.93072   | 10.7307   | 10.2747   | 11.8497   |
| 5.03834   | 4.56284   | 4.58852   | 3.96832   | 4.38294   | 4.1438    |
| 8.11122   | 8.58485   | 8.13454   | 7.51173   | 8.76964   | 8.37092   |
| 7.53109   | 7.17013   | 8.14394   | 6.53082   | 10.4004   | 6.0966    |
| 19.472    | 25.0526   | 18.6589   | 21.1883   | 19.3033   | 19.9628   |
| 0         | 0         | 0         | 0         | 0         | 0         |
| 113.905   | 108.682   | 132.328   | 130.078   | 141.604   | 141.646   |
| 0.0299995 | 0.0373854 | 0.0755901 | 0.102534  | 0.0649898 | 0.0504419 |
| 30.1084   | 29.3605   | 28.0264   | 28.4513   | 29.5133   | 31.2448   |
| 64.6999   | 65.4566   | 65.2645   | 66.5843   | 31.4746   | 46.5993   |
| 0         | 0         | 0         | 0         | 0         | 0         |
| 13.6955   | 14.4641   | 15.4298   | 16.5292   | 15.5223   | 14.7635   |
| 9.40518   | 8.35537   | 8.33746   | 8.02046   | 11.4248   | 8.99786   |
| 21.7779   | 20.812    | 21.7379   | 19.6935   | 22.756    | 22.4215   |
| 46.5069   | 46.5028   | 43.9203   | 50.3881   | 43.7291   | 49.893    |
| 39.8814   | 43.5132   | 35.6735   | 37.8426   | 32.4733   | 32.6525   |
| 1.32928   | 1.55301   | 0.523342  | 2.17698   | 0.629932  | 0.558769  |
| 7.80096   | 8.47642   | 9.15028   | 6.93926   | 8.5539    | 7.8668    |
| 0.403255  | 0.379703  | 0.403467  | 0.0684091 | 0.520429  | 0.315513  |
| 15.9856   | 17.0176   | 17.2591   | 15.4281   | 17.6935   | 17.7969   |
| 1.85972   | 1.4262    | 0.6308    | 1.05937   | 1.23963   | 1.26282   |
| 0         | 0         | 0         | 0         | 0         | 0         |
| 304.921   | 350.851   | 0.212711  | 0.0961769 | 0.182881  | 0.0709719 |
| 0         | 0         | 0.109029  | 0         | 0.0937392 | 0         |
| 22.5908   | 16.4398   | 27.2175   | 13.2539   | 30.0935   | 17.3272   |
| 0         | 0.535295  | 0.044724  | 0.0808876 | 0.0769043 | 0         |
| 30.0116   | 29.012    | 32.5299   | 28.7988   | 33.6188   | 30.2785   |
| 147.595   | 161.208   | 161.915   | 120.849   | 150.247   | 132.522   |
| 0         | 0         | 0         | 0         | 0         | 0         |
| 59.3037   | 60.0567   | 59.1806   | 62.1415   | 46.1824   | 52.0329   |
| 0.036731  | 0.140383  | 0         | 0         | 0         | 0         |
| 17.8564   | 18.046    | 15.0479   | 13.403    | 19.1902   | 14.777    |
| 30.3609   | 33.5224   | 29.8598   | 35.7073   | 26.6627   | 35.1811   |
| 0.934943  | 1.25733   | 1.21179   | 1.01919   | 0.888855  | 0.644648  |
| 2.17816   | 2.49046   | 1.46718   | 1.15478   | 1.49503   | 1.11202   |
| 0.825358  | 0.971418  | 0.808758  | 1.35824   | 1.34102   | 1.19503   |
| 5.63569   | 4.75724   | 7.00463   | 5.061     | 5.8751    | 4.50222   |
| 0.192327  | 0         | 0.030288  | 0.082168  | 0.156243  | 0.0606343 |
| 47.1962   | 51.1834   | 50.1394   | 48.59     | 45.4867   | 41.1465   |
| 17.4066   | 15.3977   | 16.4472   | 13.2179   | 14.5315   | 12.6745   |
| 1.08048   | 1.66332   | 2.32213   | 2.02749   | 2.89147   | 2.77856   |
| 0.556225  | 0.567137  | 0.366308  | 0.38886   | 0.629878  | 0.510136  |
| 0.605849  | 1.59713   | 2.02563   | 1.46011   | 2.95309   | 2.93852   |

|           |           |          |           |           |           |
|-----------|-----------|----------|-----------|-----------|-----------|
| 1.09791   | 0.507563  | 0.95932  | 0.665764  | 1.78385   | 0.684826  |
| 0.513515  | 0.388467  | 0.654539 | 0.947036  | 0.397888  | 0.524136  |
| 0.306626  | 0.169679  | 0.130842 | 0.245426  | 0.261443  | 0.337083  |
| 0.115751  | 0         | 0.145829 | 0.131873  | 0.125379  | 0         |
| 5.87738   | 5.57686   | 6.56639  | 6.12357   | 7.25916   | 4.85103   |
| 31.8221   | 32.6196   | 33.4958  | 34.512    | 35.7433   | 38.8688   |
| 36.7444   | 28.9379   | 24.8701  | 38.684    | 27.8864   | 34.6663   |
| 0         | 0         | 0        | 0         | 0         | 0         |
| 0         | 0         | 0        | 0         | 0         | 0         |
| 0.136701  | 0.0118216 | 0.172204 | 0.346452  | 0.259403  | 0.239704  |
| 0.263287  | 0         | 0.552838 | 0.399944  | 0.285187  | 0.295131  |
| 0         | 0         | 0        | 0         | 0         | 0         |
| 0.183345  | 0         | 0.461975 | 0.208881  | 0         | 0.23121   |
| 14.8456   | 9.69926   | 15.2122  | 9.80831   | 18.0361   | 10.867    |
| 0.140984  | 0.194039  | 0.188319 | 0.231624  | 1.02509   | 0.583252  |
| 0         | 0         | 0        | 0         | 0         | 0         |
| 31.9144   | 24.6215   | 17.9889  | 16.4016   | 10.2293   | 14.2525   |
| 0.29807   | 0.358226  | 0.429029 | 0.642144  | 0.357362  | 0.268441  |
| 6.93673   | 7.55349   | 6.53324  | 5.75454   | 5.8359    | 3.00083   |
| 0         | 0         | 0        | 0         | 0         | 0         |
| 0.0369678 | 0.0921385 | 0.046574 | 0.0842336 | 0.0400428 | 0.0310793 |
| 12.9515   | 14.1534   | 11.6113  | 21.9688   | 10.9369   | 9.68857   |
| 0.0710088 | 0.153626  | 0.115519 | 0.103551  | 0.158911  | 0.13452   |
| 25.4216   | 23.5365   | 29.8819  | 27.0709   | 29.7706   | 21.4604   |
| 611.478   | 598.158   | 372.697  | 431.683   | 311.018   | 483.519   |
| 0.179265  | 0.0992888 | 0.276036 | 0.158848  | 0.107876  | 0.251184  |
| 31.0061   | 31.6598   | 25.6763  | 26.8446   | 36.8798   | 41.7142   |
| 0.298972  | 0.282708  | 0.212582 | 0.295671  | 0.2024    | 0.157093  |
| 0         | 0         | 0        | 0         | 0         | 0         |
| 1.09724   | 1.2648    | 0.814012 | 0.577518  | 1.11142   | 0.727664  |
| 0         | 0         | 0        | 0         | 0         | 0         |
| 20.5889   | 19.2041   | 15.9921  | 18.754    | 17.562    | 18.908    |
| 1.53133   | 1.01953   | 1.2157   | 0.884261  | 1.81776   | 1.11105   |
| 0         | 0         | 0        | 0         | 0         | 0         |
| 0.981761  | 0.97353   | 1.43604  | 0.839243  | 1.40146   | 0.771022  |
| 0.339624  | 0.282415  | 0.679926 | 0.24829   | 2.6582    | 0.921888  |
| 5.46703   | 6.39482   | 4.40388  | 5.46387   | 8.28444   | 5.63064   |
| 0         | 0         | 0        | 0         | 0         | 0         |
| 39.1869   | 32.6445   | 42.8005  | 41.141    | 46.85     | 35.9615   |
| 0.127944  | 0.150647  | 1.06819  | 3.84E-06  | 2.43E-06  | 4.01E-06  |
| 2.89912   | 2.60152   | 2.77722  | 2.71994   | 2.48756   | 2.32742   |
| 3.4069    | 3.74194   | 4.54681  | 4.63796   | 4.12811   | 4.07787   |
| 0         | 0         | 0        | 0         | 0         | 0         |



|          |           |           |           |           |           |
|----------|-----------|-----------|-----------|-----------|-----------|
| 3.59105  | 4.47515   | 4.02638   | 4.01177   | 2.58057   | 3.12651   |
| 3.81292  | 7.40518   | 2.49544   | 6.65703   | 3.5937    | 5.74505   |
| 0.130811 | 0.250979  | 0.594006  | 0.461824  | 0.172653  | 0.254769  |
| 6.75587  | 9.10005   | 6.60605   | 5.19517   | 7.21889   | 3.65817   |
| 0.118367 | 0.0737543 | 0.0745624 | 0         | 0         | 0         |
| 6.95889  | 6.44002   | 6.90701   | 5.92887   | 7.17067   | 6.18618   |
| 2.73343  | 1.04582   | 2.35623   | 1.47512   | 2.93853   | 2.77656   |
| 0        | 0         | 0         | 0.0821017 | 0.562022  | 0.0605854 |
| 0.103447 | 0         | 0.0868851 | 0         | 0         | 0         |
| 0        | 0         | 0         | 0         | 0         | 0         |
| 11.4059  | 10.4526   | 9.63083   | 12.0269   | 10.9582   | 10.3797   |
| 6.50469  | 7.80222   | 7.36413   | 9.14806   | 10.1585   | 8.44807   |
| 0.828363 | 1.0581    | 0.808674  | 0.424615  | 1.09909   | 0.905195  |
| 0        | 0         | 0.0104868 | 0.0094832 | 0         | 0         |
| 12.309   | 11.1672   | 13.3098   | 13.612    | 16.0402   | 12.9678   |
| 9.11817  | 7.93581   | 8.28216   | 7.6906    | 7.55083   | 7.38138   |
| 159.012  | 163.674   | 129.298   | 117.614   | 114.867   | 108.907   |
| 0        | 0         | 0         | 0         | 0         | 0         |
| 0        | 0         | 0         | 0         | 0         | 0         |
| 0.505124 | 0.503748  | 0.262986  | 0.256053  | 0.252114  | 0.276469  |
| 13.1532  | 12.4231   | 7.66321   | 6.34922   | 5.97487   | 5.76195   |
| 0        | 0         | 0         | 0         | 0         | 0         |
| 46.7334  | 42.3672   | 37.0625   | 33.5532   | 34.3159   | 33.2193   |
| 37.2395  | 0         | 46.9163   | 0         | 0         | 0         |
| 0.118929 | 0.166735  | 0.187291  | 0.237114  | 0.0644107 | 0.112483  |
| 11.5869  | 11.7584   | 12.2922   | 7.37438   | 14.6028   | 11.877    |
| 16.7333  | 15.795    | 14.9581   | 14.0765   | 13.614    | 11.8977   |
| 4.64738  | 4.6549    | 3.00959   | 3.46381   | 1.55253   | 2.30045   |
| 0        | 0         | 0         | 0         | 0         | 0         |
| 0        | 0         | 0         | 0         | 0         | 0         |
| 0        | 0         | 0         | 0         | 0         | 0         |
| 2.53451  | 2.02839   | 1.42079   | 1.3113    | 3.37499   | 1.83756   |
| 1.02351  | 0.889878  | 1.64932   | 0.759297  | 1.98524   | 1.00055   |
| 3.85912  | 3.94487   | 4.58873   | 3.52407   | 4.22726   | 3.20793   |
| 0        | 0         | 0         | 0         | 0         | 0         |
| 0.93148  | 1.04103   | 0.995659  | 1.05137   | 1.04349   | 1.08405   |
| 3.75625  | 3.94676   | 3.0621    | 3.44033   | 4.4277    | 2.87929   |
| 10.7235  | 13.6874   | 13.4356   | 13.9334   | 9.98225   | 12.7638   |
| 0        | 0         | 0.362497  | 0         | 0         | 0.120949  |
| 3.53364  | 4.59248   | 3.20688   | 3.50594   | 2.92178   | 2.81072   |
| 4.98572  | 7.09495   | 4.21341   | 4.76049   | 4.17972   | 3.92144   |
| 0.150473 | 0.173257  | 0.286065  | 0.47478   | 0.207564  | 0.264851  |
| 0.443031 | 0.357244  | 0.44324   | 0.638344  | 0.77628   | 0.657285  |

|          |          |          |          |          |          |
|----------|----------|----------|----------|----------|----------|
| 0        | 0        | 0        | 0        | 0        | 0        |
| 14.071   | 15.2548  | 17.3625  | 21.9826  | 19.8882  | 16.4115  |
| 0        | 0        | 0        | 0        | 0        | 0        |
| 7.56193  | 7.25603  | 6.92698  | 6.59993  | 6.19509  | 4.78354  |
| 6.10279  | 6.55154  | 4.52749  | 4.99471  | 5.31621  | 4.96842  |
| 0        | 0        | 0        | 0        | 0        | 0        |
| 2.47361  | 150.311  | 6.90799  | 458.48   | 34.1172  | 101.034  |
| 0.404316 | 0.287919 | 0.43661  | 0.394826 | 0.50051  | 0.679826 |
| 14.042   | 13.4399  | 13.4392  | 11.9976  | 14.3628  | 12.2274  |
| 0.426785 | 0.965229 | 0.537687 | 0.987896 | 0.642064 | 0.425249 |
| 3.67204  | 3.19491  | 3.16962  | 3.12369  | 3.80794  | 4.42575  |
| 0        | 0        | 0        | 0        | 0        | 0        |
| 0        | 0        | 0        | 0        | 0        | 0        |
| 189.146  | 193.592  | 173.059  | 181.995  | 135.125  | 178.395  |
| 26.2152  | 41.2669  | 37.8802  | 40.625   | 23.2119  | 25.7095  |
| 1.18263  | 1.1096   | 0.927077 | 1.00602  | 1.75355  | 2.10533  |
| 0        | 0        | 0        | 0        | 0        | 0        |
| 0        | 0        | 0        | 0        | 0        | 0        |
| 4.71681  | 4.24614  | 3.59727  | 2.7679   | 5.95429  | 4.40346  |
| 39.6081  | 41.2813  | 41.3698  | 36.5665  | 38.613   | 38.2801  |
| 21.937   | 26.0023  | 22.3533  | 19.6714  | 25.2379  | 25.7619  |
| 1.95122  | 1.78693  | 2.60914  | 1.36352  | 1.95302  | 1.35613  |
| 37.2076  | 39.1933  | 38.5042  | 35.4629  | 38.2238  | 30.1048  |
| 0.860877 | 0.880339 | 0.973381 | 0.779465 | 0.765179 | 0.98348  |
| 0        | 0        | 0        | 0        | 0        | 0        |
| 7.42192  | 6.90338  | 8.67296  | 6.37239  | 11.0394  | 6.14927  |
| 41.6587  | 46.6742  | 40.0811  | 41.5032  | 46.9726  | 33.106   |
| 0.666516 | 0.781751 | 0.740923 | 0.357341 | 0.594552 | 0.131847 |
| 73.2928  | 65.4031  | 55.7589  | 55.3934  | 59.7035  | 73.1501  |
| 22.1934  | 25.978   | 24.1265  | 23.2539  | 19.4247  | 22.4594  |
| 23.9411  | 24.1363  | 24.2966  | 21.4087  | 22.2963  | 20.8631  |
| 7.54047  | 7.29828  | 7.84269  | 7.0444   | 9.12058  | 7.90308  |
| 6.1375   | 6.78282  | 6.12051  | 6.08435  | 7.37973  | 5.2418   |
| 26.3067  | 23.4215  | 29.735   | 24.4997  | 26.7695  | 23.1684  |
| 0        | 0.148294 | 0.049973 | 0.225952 | 0.214825 | 0.433516 |
| 3.64041  | 3.94417  | 4.48733  | 4.03101  | 4.47975  | 3.63147  |
| 0        | 0        | 0        | 0        | 0        | 0        |
| 0.1274   | 0.194949 | 0.614887 | 0.914666 | 0.32245  | 0.393385 |
| 8.29185  | 8.83109  | 9.15796  | 7.28274  | 9.65419  | 6.64861  |
| 0.23378  | 0.119375 | 0.231955 | 0.157837 | 0.248949 | 0.250459 |
| 15.1328  | 14.5367  | 16.2185  | 18.7371  | 18.7819  | 20.7179  |
| 0        | 0        | 0        | 0        | 0        | 0        |
| 0.606029 | 0.408233 | 0.268259 | 0.335889 | 0.549988 | 0.316713 |

|           |           |          |          |           |           |
|-----------|-----------|----------|----------|-----------|-----------|
| 10.3445   | 12.0141   | 13.9965  | 10.8788  | 13.625    | 10.6265   |
| 11.4598   | 13.122    | 10.7205  | 10.9916  | 10.9984   | 9.31222   |
| 13.8706   | 13.5719   | 14.7308  | 11.9661  | 14.923    | 12.3127   |
| 0         | 0         | 0        | 0        | 0.170864  | 0.0663083 |
| 19.1884   | 16.3225   | 15.47    | 14.5864  | 13.5489   | 12.9661   |
| 24.1839   | 25.5348   | 11.5809  | 13.4426  | 12.5648   | 15.357    |
| 19.6459   | 17.3418   | 17.6386  | 17.0643  | 14.2577   | 17.5914   |
| 19.9308   | 16.4985   | 16.5276  | 16.4542  | 18.1469   | 18.5774   |
| 14.9273   | 14.8932   | 13.205   | 10.5576  | 13.3023   | 10.6776   |
| 0.0567439 | 0.0157143 | 0        | 0        | 0         | 0         |
| 0.0552131 | 0         | 0        | 0.125807 | 0.179417  | 0         |
| 8.78587   | 6.0915    | 8.44104  | 8.66538  | 11.0914   | 9.1577    |
| 38.9141   | 46.9022   | 39.9331  | 52.2294  | 48.843    | 67.8743   |
| 2.55E-234 | 0.085936  | 0.161476 | 0        | 0.0670497 | 0.0520358 |
| 1.35585   | 1.7941    | 1.99054  | 0.905894 | 1.55526   | 1.46641   |
| 32.3431   | 38.5351   | 22.2492  | 27.2119  | 20.5949   | 27.1912   |
| 0         | 0         | 0        | 0        | 0         | 0.0392046 |
| 0.478174  | 0.63483   | 0.917173 | 0.816445 | 0.318946  | 0.764449  |
| 0         | 0         | 0        | 0        | 0         | 0         |
| 7.81267   | 8.31224   | 9.08237  | 7.67405  | 8.61848   | 7.35316   |
| 0         | 0         | 0        | 0        | 0         | 0         |
| 19.8417   | 19.8463   | 15.9246  | 16.3683  | 20.0274   | 24.1485   |
| 13.5708   | 13.2265   | 11.2436  | 12.571   | 11.5396   | 11.8645   |
| 0.190428  | 0.149911  | 0.681444 | 0.164116 | 0.361903  | 0.32043   |
| 10.3097   | 10.4279   | 15.0972  | 12.5649  | 12.5793   | 14.3951   |
| 0         | 0         | 0        | 0        | 0         | 0         |
| 13.8366   | 14.0052   | 14.1564  | 12.548   | 13.6891   | 10.8972   |
| 12.2565   | 11.6665   | 14.8336  | 12.4919  | 16.3077   | 15.9699   |
| 0         | 0         | 0        | 0        | 0         | 0.0790834 |
| 71.7088   | 68.092    | 55.5187  | 52.4465  | 41.9182   | 49.4942   |
| 2.52361   | 2.93086   | 3.19602  | 3.46217  | 2.91957   | 3.01027   |
| 0         | 0         | 0        | 0        | 0         | 0         |
| 38.114    | 37.1924   | 36.262   | 39.405   | 41.5656   | 43.4032   |
| 0         | 0         | 0        | 0        | 0         | 0         |
| 25.9616   | 56.2654   | 38.1024  | 50.1836  | 24.9961   | 20.1826   |
| 0         | 0         | 0        | 0        | 0         | 0         |
| 0.194726  | 0.364002  | 0.183995 | 0.110924 | 0.141359  | 0.0818544 |
| 32.1736   | 34.1143   | 31.4389  | 32.7552  | 32.282    | 33.7799   |
| 0         | 0         | 0        | 0        | 0         | 0         |
| 0.347097  | 0.38449   | 0.437291 | 0.395442 | 0.501291  | 0.389078  |
| 0.833241  | 0.991184  | 0.445353 | 0.805464 | 1.0393    | 0.806654  |
| 1.8356    | 1.31829   | 1.66389  | 1.20233  | 2.08945   | 1.04288   |
| 0         | 0.145496  | 0.14709  | 0.133013 | 0         | 0         |

|           |           |           |           |           |            |
|-----------|-----------|-----------|-----------|-----------|------------|
| 13.2894   | 14.3118   | 14.2895   | 13.2782   | 13.8406   | 12.2122    |
| 5.12571   | 6.93416   | 4.88623   | 4.84192   | 6.43936   | 5.42449    |
| 14.5613   | 13.592    | 14.329    | 13.9694   | 13.7994   | 11.6389    |
| 47.7312   | 46.6135   | 43.8516   | 44.1246   | 63.2112   | 60.736     |
| 0.0811213 | 0.0577676 | 0.0146001 | 0.0132029 | 0.0878689 | 0.00974281 |
| 0.0378171 | 0         | 0         | 0.183976  | 0         | 0.14307    |
| 8.75926   | 8.42366   | 9.85672   | 8.44708   | 9.94388   | 7.92443    |
| 0         | 0         | 0         | 0         | 0         | 0          |
| 0         | 0         | 0         | 0         | 0         | 0          |
| 0.0214621 | 0.013373  | 0.0225326 | 0.0285266 | 0.0542437 | 0.0210507  |
| 0         | 0         | 0         | 0         | 0         | 0          |
| 77.3004   | 56.2046   | 66.2962   | 68.4288   | 94.2545   | 75.0686    |
| 0.976572  | 1.02832   | 1.15344   | 0.890006  | 1.72712   | 0.924071   |
| 3.31563   | 3.68977   | 3.76185   | 3.55956   | 3.89145   | 3.45743    |
| 9.18067   | 7.97681   | 10.4392   | 9.31879   | 13.086    | 9.78069    |
| 1.26737   | 1.5794    | 1.34123   | 1.27063   | 1.04332   | 1.49169    |
| 33.6878   | 27.0641   | 33.4449   | 27.3202   | 36.2247   | 28.7829    |
| 1.83488   | 1.88804   | 1.52699   | 1.59181   | 1.95104   | 1.69829    |
| 0.0309827 | 0.0386106 | 0.0195162 | 0.0176485 | 0.0755105 | 0.0586076  |
| 0.488688  | 0         | 0.49254   | 0.334052  | 0.423469  | 0          |
| 4.79286   | 5.07928   | 5.0874    | 3.86959   | 4.71121   | 3.79146    |
| 0         | 0         | 0         | 0         | 0         | 0          |
| 0         | 0         | 0         | 0         | 0         | 0          |
| 0         | 0         | 0         | 0         | 0         | 0          |
| 18.6805   | 19.8631   | 14.9336   | 12.4632   | 6.78361   | 9.24219    |
| 5.47329   | 6.19776   | 5.43685   | 5.03649   | 5.07345   | 5.61906    |
| 20.6493   | 22.3637   | 17.3323   | 14.5562   | 19.9838   | 20.3241    |
| 10.4747   | 10.831    | 11.3059   | 9.06445   | 12.0308   | 8.59451    |
| 24.8031   | 25.2908   | 23.2983   | 20.7662   | 38.57     | 33.4958    |
| 0.334002  | 44.0374   | 0.925745  | 639.569   | 1.37478   | 18.9072    |
| 1.28574   | 0.828771  | 1.39642   | 1.3638    | 1.8249    | 0.29819    |
| 0         | 0         | 0         | 0.041795  | 0         | 0          |
| 0.898917  | 0.630129  | 0.920159  | 0.384045  | 0.912833  | 0.75573    |
| 0.16486   | 0         | 0         | 0         | 0         | 0          |
| 15.6819   | 17.2879   | 14.3562   | 17.6732   | 14.2482   | 15.1717    |
| 6.17049   | 5.05931   | 7.97135   | 5.72995   | 10.137    | 5.61991    |
| 19.2181   | 17.0095   | 23.3876   | 17.3398   | 21.0357   | 13.8459    |
| 5.17483   | 4.96326   | 6.28059   | 6.79074   | 6.80849   | 5.62609    |
| 0.490875  | 0.308891  | 0.571044  | 0.599253  | 0.268484  | 0.647938   |
| 18.9514   | 19.0347   | 18.486    | 18.0059   | 17.9618   | 16.2299    |
| 0.752453  | 0.771017  | 1.17082   | 1.17541   | 1.43224   | 0.953104   |
| 0         | 0         | 0         | 0         | 0         | 0          |
| 0         | 0         | 0         | 0.0704669 | 0.0669968 | 0          |

|           |           |           |           |           |           |
|-----------|-----------|-----------|-----------|-----------|-----------|
| 0.971566  | 1.53747   | 1.08937   | 0.902574  | 1.13432   | 0.865302  |
| 0.0379416 | 0.0472828 | 0         | 0         | 0.0410976 | 0         |
| 0         | 0         | 0         | 0         | 0         | 0         |
| 9.78946   | 8.99543   | 9.65146   | 7.95498   | 10.2834   | 8.6109    |
| 10.9222   | 10.1046   | 12.0642   | 9.13055   | 14.2431   | 12.328    |
| 2.33956   | 2.00812   | 1.11964   | 1.70644   | 2.22926   | 2.38059   |
| 0.0997428 | 0         | 0         | 0         | 0         | 0         |
| 2.18912   | 1.75513   | 2.23723   | 1.46502   | 1.32655   | 0.682113  |
| 2.90125   | 2.61003   | 2.94626   | 2.79269   | 3.36571   | 3.10764   |
| 22.9816   | 29.4393   | 30.0651   | 27.3249   | 30.425    | 32.8422   |
| 0.328289  | 0.701336  | 0.295425  | 0.694596  | 0.507993  | 0.827988  |
| 20.2188   | 22.576    | 19.0922   | 22.2044   | 19.6648   | 21.9528   |
| 68.6272   | 68.6532   | 72.8535   | 70.8098   | 53.7913   | 58.7183   |
| 0.155144  | 0.635261  | 0.390918  | 0.227254  | 0.192056  | 0.167698  |
| 27.6899   | 26.525    | 26.9343   | 23.8711   | 30.0278   | 23.6202   |
| 1.06E-06  | 5.47E-07  | 1.12E-08  | 2.25E-06  | 5.48E-07  | 8.04E-09  |
| 0         | 0         | 0         | 0         | 0.052071  | 0         |
| 2.1733    | 2.11143   | 2.24929   | 2.57131   | 1.67933   | 1.99898   |
| 0         | 0         | 0         | 0         | 0         | 0         |
| 0.333949  | 0.149677  | 0.235718  | 0.210649  | 0.278668  | 0.156511  |
| 0.0333126 | 0.0415142 | 0         | 0         | 0.252585  | 0.112025  |
| 44.7822   | 41.249    | 22.5231   | 15.1244   | 15.1465   | 16.8652   |
| 0.824047  | 1.48334   | 2.88412   | 2.24305   | 8.57886   | 7.83877   |
| 2.34129   | 2.80268   | 2.64309   | 3.63301   | 2.02701   | 3.08305   |
| 7.67342   | 8.58612   | 4.08651   | 3.74695   | 9.14763   | 7.36561   |
| 0         | 0         | 0         | 0         | 0         | 0         |
| 0         | 0         | 0         | 0         | 0         | 0         |
| 0         | 0.0991036 | 0         | 0         | 0         | 0         |
| 0.257814  | 0         | 0.649616  | 0         | 0.279259  | 0         |
| 0         | 0         | 0         | 0         | 0         | 0         |
| 8.12458   | 8.09135   | 9.66223   | 7.68667   | 10.9128   | 8.61114   |
| 57.9131   | 55.5813   | 53.027    | 43.3204   | 54.0958   | 48.0851   |
| 76.749    | 78.6566   | 72.3706   | 77.2474   | 70.1029   | 82.2976   |
| 16.8417   | 15.3576   | 18.0618   | 17.4386   | 16.8622   | 17.2026   |
| 2.96465   | 3.24215   | 3.69692   | 3.20525   | 3.27679   | 3.45887   |
| 23.8583   | 25.7077   | 31.5656   | 29.843    | 26.5783   | 31.5754   |
| 150.418   | 160.188   | 134.819   | 141.895   | 110.835   | 143.002   |
| 0.423586  | 0.351914  | 0.23718   | 0.335128  | 0.356859  | 0.514386  |
| 2.14304   | 1.65118   | 2.749     | 1.26545   | 4.6423    | 2.17834   |
| 0.0625407 | 0.156804  | 0.0337681 | 0.0305364 | 0.0483877 | 0.0150225 |
| 16.384    | 16.1376   | 16.6666   | 15.208    | 20.0287   | 18.844    |
| 0         | 0         | 0.103928  | 0.0313271 | 0         | 0.0231173 |
| 0         | 0         | 0         | 0         | 0         | 0         |

|           |           |           |           |          |           |
|-----------|-----------|-----------|-----------|----------|-----------|
| 68.927    | 77.2585   | 62.4056   | 70.8521   | 57.1552  | 74.0989   |
| 0.716661  | 10.9103   | 0.902889  | 30.8718   | 1.69941  | 6.33445   |
| 10.112    | 11.0098   | 11.6511   | 9.15214   | 14.6222  | 10.1594   |
| 0         | 0         | 0         | 0         | 0        | 0         |
| 6.96097   | 4.15815   | 6.523     | 5.30886   | 5.04743  | 4.20776   |
| 0.502221  | 0.312933  | 0.553634  | 0.572172  | 0.849993 | 0.818057  |
| 208.759   | 186.87    | 107.679   | 105.737   | 73.1787  | 88.2184   |
| 0.448242  | 0.166442  | 0.676066  | 0.25735   | 0.54839  | 0.284221  |
| 0.779667  | 0.688231  | 0.695773  | 0.925273  | 1.44272  | 0.819345  |
| 22.5127   | 21.9699   | 26.051    | 15.477    | 31.3472  | 20.3384   |
| 0         | 0         | 0         | 0         | 0        | 0         |
| 57.0983   | 59.4512   | 56.1187   | 54.7248   | 55.0059  | 62.8137   |
| 0         | 0         | 0         | 0         | 0        | 0         |
| 10.9913   | 13.9114   | 10.3856   | 14.0875   | 8.74317  | 8.8074    |
| 35.3067   | 28.8301   | 30.4016   | 29.8844   | 27.5068  | 28.0221   |
| 16.2173   | 15.6503   | 19.7088   | 16.1758   | 20.4303  | 18.7603   |
| 3.17118   | 3.35271   | 2.5529    | 2.58248   | 3.22414  | 3.35902   |
| 2.53081   | 122.865   | 1.02031   | 497.861   | 6.25022  | 41.2771   |
| 19.824    | 20.0871   | 19.841    | 18.4908   | 23.5746  | 19.1868   |
| 27.2819   | 31.2946   | 32.1512   | 34.0623   | 26.9061  | 30.5368   |
| 0         | 0         | 0         | 0         | 0        | 0         |
| 0.0199944 | 0.0498339 | 0         | 0.0455585 | 0        | 0         |
| 0         | 0         | 0         | 0         | 0        | 0         |
| 9.17224   | 10.0262   | 10.6471   | 8.29307   | 5.90741  | 6.51128   |
| 86.5145   | 91.9789   | 91.1156   | 90.057    | 66.3617  | 71.3464   |
| 7.78263   | 8.6493    | 6.42643   | 6.56644   | 6.81362  | 7.68321   |
| 0.366712  | 0.158955  | 0.582526  | 0.236141  | 0.362675 | 0.120639  |
| 12.4255   | 11.3899   | 13.3228   | 12.1339   | 12.6409  | 11.3036   |
| 104.475   | 126.011   | 98.7372   | 101.784   | 87.9302  | 100.199   |
| 0         | 0         | 0         | 0         | 0        | 0         |
| 0         | 0         | 0.444301  | 0.108946  | 0.103582 | 0         |
| 1.02327   | 0.881498  | 1.05156   | 0.741401  | 1.33316  | 0.715842  |
| 21.5875   | 21.1324   | 21.1453   | 20.1107   | 19.183   | 17.1758   |
| 12.2936   | 11.2604   | 12.9287   | 10.0398   | 20.5851  | 17.1268   |
| 9.78579   | 9.13963   | 10.0798   | 7.19485   | 11.1274  | 8.29579   |
| 0.248362  | 0.358379  | 0.329369  | 0.223386  | 0.552201 | 0.263749  |
| 21.3235   | 23.5071   | 25.4085   | 23.2741   | 15.4654  | 15.9838   |
| 449.198   | 427.02    | 434.44    | 506.456   | 390.452  | 547.011   |
| 0.145337  | 0.301864  | 0.0305172 | 0         | 0.472277 | 0.32583   |
| 8.30885   | 9.32417   | 12.0004   | 10.4068   | 9.42806  | 8.82693   |
| 3.03153   | 3.40384   | 3.5924    | 4.17188   | 2.27583  | 3.58324   |
| 378.432   | 468.853   | 418.739   | 585.416   | 263.962  | 397.378   |
| 0         | 0.426969  | 0.143883  | 0.390338  | 0.123705 | 0.0960141 |

|           |           |           |           |           |           |
|-----------|-----------|-----------|-----------|-----------|-----------|
| 0         | 0         | 0         | 0         | 0         | 0.0212862 |
| 1.24357   | 2.0357    | 2.55545   | 1.74083   | 3.04799   | 3.06819   |
| 1.26307   | 1.30462   | 1.14454   | 1.09414   | 1.62115   | 1.30923   |
| 0.972887  | 0.339475  | 0.882501  | 0.31035   | 0.927354  | 0.0327167 |
| 4.74921   | 4.51677   | 5.26839   | 4.83314   | 4.89797   | 5.03001   |
| 0.35319   | 0.146715  | 0.667451  | 0.570043  | 0.637613  | 0.247442  |
| 2.52236   | 1.78407   | 1.84656   | 1.88342   | 1.18148   | 0.587457  |
| 0.500143  | 0.354936  | 0.455756  | 0.316361  | 0.304067  | 0.350868  |
| 0         | 0         | 0         | 0         | 0         | 0         |
| 0.0820153 | 0.102207  | 0.206655  | 0.0934386 | 0.888373  | 0.413708  |
| 6.7467    | 6.38564   | 7.50462   | 6.49454   | 8.53359   | 7.12594   |
| 0         | 0         | 0         | 0         | 0         | 0         |
| 66.2178   | 70.6278   | 68.7622   | 68.4371   | 62.5691   | 65.0762   |
| 0         | 0         | 0         | 0.0754687 | 0         | 0         |
| 0.381588  | 0.365402  | 0.444972  | 0.664979  | 0.485806  | 0.271107  |
| 16.7693   | 14.7213   | 17.4062   | 15.7111   | 14.7984   | 16.3219   |
| 3.51137   | 3.42139   | 4.48319   | 2.59089   | 5.20739   | 3.3582    |
| 12.9504   | 11.7373   | 12.4839   | 14.2512   | 12.0085   | 9.27919   |
| 7.71352   | 7.69592   | 10.0587   | 7.23443   | 9.04172   | 7.84754   |
| 0         | 0.117271  | 0.0592781 | 0.10721   | 0         | 0         |
| 69.0116   | 73.8668   | 79.9761   | 71.6153   | 78.7549   | 65.7229   |
| 0.121709  | 0.151674  | 0.0383338 | 0.138661  | 0.175777  | 0.13643   |
| 41.515    | 45.7278   | 42.242    | 40.4337   | 31.5384   | 32.0837   |
| 0.316787  | 0.098695  | 0.399106  | 1.08273   | 0.514706  | 0.266327  |
| 14.4056   | 12.7104   | 13.6948   | 10.9185   | 13.7943   | 19.3594   |
| 0.127774  | 0.245728  | 0         | 0         | 0         | 0         |
| 55.1234   | 56.4578   | 66.5892   | 58.2577   | 64.5275   | 67.4282   |
| 4.45009   | 4.31864   | 4.61239   | 4.13154   | 5.22188   | 4.66088   |
| 0.725392  | 1.62717   | 0.594028  | 0.991713  | 0.550011  | 0.762308  |
| 1.13721   | 0.983437  | 1.36067   | 1.32573   | 1.39901   | 1.02647   |
| 0         | 0         | 0         | 0         | 0         | 0         |
| 0.506091  | 0.487351  | 0.666583  | 0.760038  | 1.66948   | 1.31511   |
| 0         | 0         | 0         | 0         | 0         | 0         |
| 0         | 0         | 0         | 0         | 0         | 0         |
| 700.455   | 854.65    | 711.129   | 781.641   | 675.386   | 794.564   |
| 0         | 0         | 0         | 0         | 0         | 0         |
| 0.0781229 | 0.0973567 | 0.196847  | 0.178008  | 0.507727  | 0.131358  |
| 0.153546  | 0.170088  | 0.22927   | 0.470376  | 0.197118  | 0.234272  |
| 0.0760602 | 0.0947861 | 0         | 0         | 0.0823868 | 0         |
| 0.473152  | 0.550332  | 0.914024  | 0.718739  | 0.99085   | 0.928164  |
| 0.414732  | 0.580873  | 0.587238  | 0.589637  | 0.755841  | 0.888906  |
| 2.04786   | 1.36504   | 2.25      | 1.51922   | 2.88882   | 1.74168   |
| 6.44241   | 6.72813   | 6.21995   | 5.94485   | 7.24108   | 7.35639   |

|           |           |           |          |           |           |
|-----------|-----------|-----------|----------|-----------|-----------|
| 0         | 0         | 0         | 0        | 0         | 0         |
| 0.629471  | 0.633948  | 0.70974   | 0.955716 | 0.433927  | 0.427674  |
| 15.8684   | 19.9723   | 15.9667   | 20.2744  | 16.29     | 21.0408   |
| 8.82077   | 8.27409   | 10.3707   | 7.61864  | 9.69245   | 6.57242   |
| 0.692094  | 1.14998   | 0.145323  | 0.26283  | 0.499775  | 0.193951  |
| 0.0575862 | 0.287055  | 0.217651  | 0.328035 | 0.124752  | 0.193654  |
| 61.4775   | 64.9183   | 90.0799   | 85.6775  | 62.0964   | 67.464    |
| 0         | 0         | 0         | 0        | 0         | 0         |
| 0         | 0         | 0         | 0        | 0         | 0         |
| 3.44774   | 4.87064   | 3.82681   | 3.02836  | 2.98987   | 4.43198   |
| 0         | 0         | 0         | 0        | 0         | 0         |
| 37.4671   | 44.4801   | 32.3444   | 34.8074  | 44.7557   | 49.0808   |
| 4.18501   | 3.08615   | 4.06122   | 2.82138  | 7.31983   | 6.24389   |
| 0.0152316 | 0.0189816 | 0.0383793 | 0        | 0         | 0         |
| 0.149981  | 0.15971   | 0.127172  | 0.112875 | 0.0972605 | 0.0924827 |
| 39.0157   | 21.7218   | 34.1942   | 33.8626  | 31.0766   | 30.9615   |
| 21.402    | 21.6224   | 24.1278   | 20.8769  | 20.5899   | 19.0165   |
| 0         | 0         | 0         | 0        | 0         | 0         |
| 4.46E-08  | 6.14E-07  | 3.69E-07  | 0.247315 | 5.92E-07  | 9.91E-07  |
| 0.984225  | 1.03916   | 0.752982  | 0.488819 | 1.43966   | 0.611098  |
| 30.7264   | 18.764    | 22.9639   | 20.027   | 39.7051   | 34.6741   |
| 74.7256   | 70.0108   | 67.164    | 65.4393  | 65.1449   | 83.9125   |
| 8.31559   | 11.8433   | 1.18155   | 1.13971  | 2.16716   | 2.6282    |
| 0.980966  | 0.916859  | 0.662076  | 0.399142 | 0.721025  | 0.736348  |
| 16.122    | 14.4995   | 16.5317   | 14.593   | 27.4661   | 26.0552   |
| 12.8206   | 17.1757   | 12.6737   | 12.7751  | 8.51904   | 8.78864   |
| 0         | 0         | 0         | 0        | 0         | 0         |
| 0         | 0         | 0         | 0        | 0         | 0         |
| 6.13058   | 7.27286   | 5.49857   | 6.71441  | 8.16633   | 9.32071   |
| 0.195338  | 0.152081  | 0.565688  | 0.557125 | 0.276885  | 0.327906  |
| 42.5246   | 38.0344   | 32.5301   | 37.0937  | 43.1791   | 48.8422   |
| 0.227788  | 0.405528  | 0.696952  | 0.222442 | 0.740207  | 0.601871  |
| 112.207   | 99.5942   | 109.895   | 101.715  | 131.246   | 130.999   |
| 1.8698    | 1.00837   | 5.34349   | 5.79015  | 5.65664   | 5.77752   |
| 18.957    | 15.4723   | 26.5349   | 14.7763  | 23.9576   | 12.7677   |
| 9.33917   | 12.7547   | 9.62      | 12.1289  | 7.65063   | 7.25899   |
| 0         | 0         | 0         | 0        | 0         | 0         |
| 26.9126   | 28.6656   | 27.6887   | 30.6918  | 24.5069   | 21.9683   |
| 7.60871   | 7.77154   | 7.32286   | 6.69551  | 8.39127   | 6.83041   |
| 1.35362   | 1.26516   | 2.1809    | 1.66079  | 6.76715   | 5.93077   |
| 17.2219   | 9.51209   | 16.5231   | 9.94937  | 20.8357   | 8.22266   |
| 11.3361   | 12.7744   | 15.4213   | 14.0829  | 12.1485   | 13.4338   |
| 0         | 0         | 0         | 0        | 0         | 0         |



|           |           |           |           |           |           |
|-----------|-----------|-----------|-----------|-----------|-----------|
| 0         | 0         | 0         | 0         | 0         | 0         |
| 0.234918  | 8.78E-133 | 1.48E-98  | 4.14E-72  | 3.19E-45  | 0.184673  |
| 29.5238   | 29.0683   | 25.5688   | 32.1361   | 25.4737   | 28.3948   |
| 0.0998725 | 0         | 0         | 0.142229  | 0         | 0.020991  |
| 67.9384   | 65.4227   | 68.1487   | 67.3701   | 74.7823   | 78.6704   |
| 2.2358    | 1.82804   | 4.23943   | 3.86874   | 2.16441   | 1.82059   |
| 5.43838   | 6.81297   | 7.53673   | 5.89513   | 6.22145   | 4.89296   |
| 22.3016   | 23.4944   | 21.4415   | 20.7495   | 25.0447   | 24.3805   |
| 0.0551415 | 0         | 0.138941  | 0.125644  | 0.119456  | 0.0309054 |
| 0.162534  | 0.20255   | 0.204769  | 0         | 0.528161  | 0.273289  |
| 0.733948  | 0.844288  | 0.497898  | 0.643211  | 0.550383  | 0.379716  |
| 8.16559   | 7.54556   | 7.99704   | 8.46039   | 9.6959    | 10.5953   |
| 5.01085   | 3.52951   | 3.56818   | 3.49972   | 4.15333   | 4.39584   |
| 0         | 0         | 0         | 0         | 0         | 0         |
| 5.96558   | 4.59986   | 6.34937   | 5.09265   | 5.60146   | 4.5964    |
| 8.55952   | 9.56435   | 9.52436   | 9.02023   | 10.8399   | 10.8489   |
| 9.94571   | 8.5019    | 8.7282    | 7.95978   | 10.7348   | 9.14136   |
| 0.94625   | 1.27164   | 1.12423   | 0.708828  | 1.66149   | 1.39534   |
| 3.03442   | 2.86178   | 2.49117   | 2.48228   | 2.19793   | 1.39967   |
| 3.12254   | 2.83388   | 2.26629   | 2.32008   | 3.38227   | 3.70946   |
| 5.78614   | 6.19481   | 6.66544   | 6.55563   | 6.04235   | 5.17355   |
| 0.302034  | 0.549234  | 0.424286  | 0.369978  | 0.314617  | 0.195013  |
| 0         | 0         | 0         | 0         | 0         | 0         |
| 0.418474  | 0.499077  | 0.303576  | 0.25918   | 0.233426  | 0.392509  |
| 0.579109  | 0.80795   | 0.476468  | 0.659768  | 0.345643  | 0.3726    |
| 682.201   | 766.256   | 719.996   | 706.445   | 576.322   | 723.259   |
| 56.6662   | 50.4595   | 81.4133   | 65.768    | 94.6335   | 93.7273   |
| 2.96726   | 2.70224   | 3.83417   | 2.68711   | 4.12061   | 2.04686   |
| 18.1943   | 19.2769   | 12.5342   | 14.2848   | 15.7219   | 14.265    |
| 0.106201  | 0.264696  | 0.222997  | 0.403311  | 0.0766901 | 0.208331  |
| 4.10502   | 3.65228   | 4.03133   | 3.30769   | 4.12529   | 3.35652   |
| 9.32543   | 10.1461   | 10.0941   | 9.30474   | 11.1342   | 11.566    |
| 1.44689   | 1.29824   | 1.60412   | 0.659365  | 2.3822    | 1.70298   |
| 34.8032   | 32.1967   | 32.2214   | 30.6421   | 39.5731   | 37.639    |
| 2.94113   | 3.7741    | 2.64147   | 2.38867   | 3.53273   | 2.57057   |
| 0.111996  | 0         | 0         | 0         | 0.323498  | 0.188313  |
| 5.77748   | 4.9778    | 4.62797   | 4.30686   | 7.59724   | 6.30636   |
| 0         | 0         | 0         | 0         | 0         | 0         |
| 0.349648  | 0.631164  | 0.368869  | 0.627154  | 0.293797  | 0.353895  |
| 8.16509   | 10.1076   | 6.63181   | 7.35027   | 8.84745   | 7.23702   |
| 0         | 0         | 0         | 0         | 0         | 0         |
| 0.824171  | 0.671954  | 0.782594  | 0.467579  | 1.3707    | 0.497704  |
| 0         | 0         | 0.0527705 | 0.0954405 | 0         | 0.0352142 |

|           |           |            |           |          |           |
|-----------|-----------|------------|-----------|----------|-----------|
| 73.9609   | 85.08     | 67.6679    | 72.3609   | 64.55    | 70.9353   |
| 6.9598    | 7.44724   | 10.6443    | 8.10349   | 13.6844  | 10.2767   |
| 3.21765   | 3.25436   | 3.34877    | 3.98458   | 4.3945   | 3.13637   |
| 0         | 0.0363998 | 0          | 0.0998308 | 0.126553 | 0.0491121 |
| 21.5577   | 19.9106   | 21.5737    | 16.587    | 19.4413  | 17.9808   |
| 1.43463   | 1.10313   | 0.999852   | 0.486857  | 2.1491   | 0.923829  |
| 9.73786   | 8.41488   | 12.4297    | 10.0432   | 8.02192  | 10.5135   |
| 1.13198   | 1.39119   | 0.888246   | 1.7369    | 1.73477  | 1.15722   |
| 27.9069   | 28.299    | 28.9987    | 33.2628   | 25.9559  | 26.6206   |
| 5.76068   | 4.96489   | 4.51058    | 5.1063    | 5.99201  | 4.54887   |
| 1.13283   | 1.07499   | 1.25699    | 0.864359  | 1.5085   | 0.87375   |
| 11.1269   | 11.685    | 13.4143    | 11.1524   | 15.1561  | 12.0165   |
| 0         | 0         | 0          | 0         | 0        | 0         |
| 1.30387   | 1.28637   | 0.684454   | 0.24758   | 0.058847 | 0.182697  |
| 11.8057   | 11.708    | 11.4964    | 10.9153   | 13.3375  | 11.6144   |
| 128.877   | 121.22    | 153.353    | 154.673   | 168.607  | 187.228   |
| 27.5193   | 27.0068   | 27.9939    | 23.7664   | 23.5009  | 18.6282   |
| 0.746778  | 0.465317  | 0.721304   | 0.510475  | 1.24031  | 0.627825  |
| 0.093826  | 0         | 0          | 0         | 0.100452 | 0.0780693 |
| 84.0201   | 78.9951   | 59.095     | 59.1454   | 49.9577  | 59.5133   |
| 0.0171901 | 0.0102827 | 0.00866283 | 0         | 0        | 0         |
| 4.16259   | 5.26512   | 4.65501    | 4.45818   | 3.93467  | 3.35536   |
| 8.6695    | 8.92913   | 12.0788    | 9.90607   | 6.71154  | 9.56087   |
| 0         | 0         | 0          | 0         | 0        | 0         |
| 39.9084   | 43.9255   | 45.4264    | 41.3863   | 41.8157  | 39.3344   |
| 2.75179   | 2.65363   | 2.72089    | 2.35426   | 2.1509   | 2.37491   |
| 29.5359   | 30.8137   | 28.591     | 35.1161   | 24.8017  | 27.1662   |
| 0.722259  | 0.383367  | 0.775135   | 0.32      | 0.927214 | 0.382319  |
| 5.61065   | 5.01656   | 4.63795    | 4.72874   | 6.24679  | 6.73348   |
| 0         | 0         | 0          | 0         | 0        | 0         |
| 0         | 0         | 0          | 0         | 0        | 0         |
| 0         | 0         | 0          | 0         | 0        | 0         |
| 3.52649   | 4.53428   | 5.55652    | 4.72168   | 3.66245  | 5.06095   |
| 0         | 0         | 0          | 0         | 0        | 0         |
| 19.6678   | 19.6035   | 20.9061    | 21.8149   | 19.6869  | 22.4712   |
| 1.4449    | 0.360127  | 0.910183   | 0.987691  | 0.939053 | 1.39696   |
| 21.5353   | 21.1633   | 18.7759    | 22.0719   | 18.744   | 18.0077   |
| 13.099    | 14.5675   | 16.6494    | 15.1297   | 16.9338  | 10.208    |
| 0         | 0         | 0          | 0         | 0        | 0         |
| 2.18154   | 2.47985   | 1.23036    | 1.10425   | 3.31697  | 1.69465   |
| 0.235704  | 0.303863  | 0.481268   | 0.388911  | 0.669088 | 0.286989  |
| 0         | 0         | 0          | 0         | 0        | 0         |
| 0         | 0         | 0          | 0         | 0        | 0         |

|           |            |           |           |           |            |
|-----------|------------|-----------|-----------|-----------|------------|
| 0.761093  | 1.07494    | 1.08672   | 0.751487  | 0.604561  | 1.19441    |
| 0         | 0          | 0         | 0.0836716 | 0         | 0          |
| 2.45616   | 2.89541    | 4.26526   | 4.43184   | 4.78883   | 4.25263    |
| 2.56623   | 2.35575    | 2.99359   | 2.17771   | 3.1343    | 2.28176    |
| 29.7138   | 35.96      | 28.8886   | 30.1945   | 36.6953   | 40.3232    |
| 0.0964288 | 0          | 0.121486  | 0.10986   | 0.208899  | 0          |
| 16.4208   | 17.3478    | 15.668    | 12.4194   | 12.7513   | 11.7247    |
| 22.5896   | 19.758     | 22.7479   | 24.7806   | 19.9836   | 21.1725    |
| 0         | 0          | 0         | 0         | 0         | 0          |
| 0.247879  | 0.148272   | 0.337215  | 0.182996  | 0.460554  | 0.117221   |
| 1.44419   | 1.50471    | 1.07379   | 0.728268  | 0.974496  | 0.975302   |
| 0.297983  | 0.285651   | 0.14439   | 0.130572  | 0.124142  | 0.211977   |
| 7.57592   | 7.01078    | 7.87212   | 6.96808   | 7.33317   | 6.51537    |
| 11.4756   | 10.8589    | 13.4586   | 10.2402   | 13.6938   | 8.52764    |
| 13.2696   | 16.5809    | 17.2556   | 15.5231   | 6.66647   | 11.9934    |
| 2.41976   | 2.52384    | 2.61777   | 2.36725   | 2.73499   | 2.60924    |
| 0         | 0          | 0         | 0         | 0.062066  | 0          |
| 0.367417  | 0.20939    | 0.492824  | 0.394775  | 0.61816   | 0.420395   |
| 0.574542  | 1.11377    | 0.670222  | 0.921241  | 0.599283  | 0.787151   |
| 0.010842  | 0.00337783 | 0         | 0         | 0.0088079 | 0.00683627 |
| 6.27384   | 6.95061    | 6.54119   | 6.8668    | 6.98546   | 5.89463    |
| 78.7665   | 78.0423    | 69.7091   | 88.4448   | 82.369    | 100.393    |
| 2.6819    | 2.51623    | 3.12739   | 2.32331   | 2.95495   | 1.80279    |
| 0.475655  | 0.44457    | 0.470844  | 0.329014  | 0.441617  | 0.228508   |
| 57.1982   | 37.0593    | 41.3486   | 29.1605   | 52.3683   | 32.8939    |
| 0.69844   | 1.12947    | 1.17225   | 0.729692  | 1.56193   | 0.747006   |
| 0.157203  | 0          | 0         | 0.119399  | 0.113519  | 0.176216   |
| 0.0839555 | 0.104625   | 0.0528859 | 0         | 0.0454695 | 0          |
| 2.31564   | 1.43466    | 2.36872   | 2.2523    | 3.47825   | 1.58901    |
| 0         | 0          | 0.0269282 | 0         | 0         | 0          |
| 0.407293  | 0.284716   | 0         | 0         | 0         | 0          |
| 18.8114   | 19.9866    | 20.3684   | 19.2593   | 19.5791   | 18.9169    |
| 0.438488  | 0.156126   | 0.236756  | 0.35683   | 0.23748   | 0.105326   |
| 0         | 0          | 0         | 0         | 0         | 0          |
| 0         | 0          | 0         | 0         | 0.0478764 | 0          |
| 0.306254  | 0.127218   | 0.22507   | 0.20353   | 0.331728  | 0.278927   |
| 0.559169  | 0.696836   | 0.90649   | 0.819067  | 1.08157   | 0.705151   |
| 0.265281  | 2.01504    | 1.28912   | 0.921082  | 2.20755   | 1.06202    |
| 2.57375   | 3.06161    | 2.21083   | 2.53238   | 3.29471   | 2.16378    |
| 1.75365   | 1.36209    | 1.89118   | 1.61558   | 2.40191   | 1.6498     |
| 3.6373    | 3.22136    | 3.27992   | 3.55497   | 4.15983   | 3.97357    |
| 11.2003   | 10.5527    | 12.219    | 10.657    | 14.6117   | 11.8376    |
| 0         | 0.311529   | 0         | 0         | 0         | 0          |

|           |          |           |           |           |           |
|-----------|----------|-----------|-----------|-----------|-----------|
| 0         | 0        | 0         | 0         | 0         | 0         |
| 1.43565   | 1.65148  | 1.55828   | 1.61045   | 1.86608   | 1.74546   |
| 0         | 0        | 0         | 0         | 0         | 0         |
| 0.476004  | 0.4271   | 0.43178   | 0.542303  | 0.916618  | 1.15653   |
| 0         | 0        | 0         | 0         | 0         | 0         |
| 4.89462   | 7.48729  | 6.66629   | 5.99596   | 5.35232   | 4.58057   |
| 6.01866   | 6.64407  | 5.78211   | 6.4871    | 6.0726    | 6.35359   |
| 67.439    | 65.8192  | 69.0395   | 67.3988   | 65.974    | 71.0773   |
| 62.2268   | 65.1555  | 69.6676   | 90.4396   | 82.208    | 94.7947   |
| 7.41066   | 7.09163  | 10.2437   | 6.97454   | 9.86955   | 6.84571   |
| 0.534728  | 0.630371 | 0.382514  | 0.387038  | 0.500967  | 0.431334  |
| 7.26595   | 7.46894  | 7.34391   | 8.2312    | 8.35944   | 8.76597   |
| 0.532239  | 0.53062  | 0.536435  | 0.242548  | 0.691812  | 0.760681  |
| 0.183001  | 0.172583 | 0.168243  | 0.163411  | 0.214296  | 0.1788    |
| 0.176954  | 0.107381 | 0.2217    | 0         | 0.284763  | 0.585647  |
| 0         | 0        | 0         | 0.0607343 | 0         | 0         |
| 14.1124   | 11.3517  | 11.8305   | 12.8895   | 12.9468   | 10.9569   |
| 1.35965   | 2.62632  | 2.39815   | 3.17551   | 1.25184   | 1.82892   |
| 0         | 0        | 0         | 0         | 0         | 0         |
| 21.2307   | 20.6139  | 22.3905   | 24.1477   | 26.3744   | 23.3386   |
| 53.6119   | 71.602   | 48.8412   | 59.3757   | 46.0404   | 59.7967   |
| 0.0302871 | 0        | 0         | 0         | 0         | 0.0127314 |
| 5.81336   | 5.47311  | 4.651     | 3.81914   | 3.67703   | 3.99551   |
| 15.2911   | 14.107   | 15.1128   | 15.844    | 12.69     | 11.5117   |
| 0.0731843 | 0        | 0.0461007 | 0         | 0.0396358 | 0.0615269 |
| 6.90794   | 6.83002  | 6.85691   | 5.59362   | 7.00844   | 5.00765   |
| 0.449439  | 0.366789 | 0.388668  | 0.13039   | 0.181925  | 0.22708   |
| 8.29633   | 8.0186   | 7.94549   | 8.02733   | 10.9439   | 7.53496   |
| 15.6257   | 15.5476  | 11.3527   | 11.4131   | 14.5053   | 14.7854   |
| 2.06736   | 1.5841   | 2.44618   | 1.67099   | 3.40437   | 2.70103   |
| 0         | 0        | 0         | 0         | 0         | 0         |
| 0         | 0        | 0         | 0         | 0         | 0         |
| 183.523   | 153.634  | 233.022   | 230.007   | 181.631   | 141.369   |
| 0.670957  | 1.16063  | 2.18605   | 2.79665   | 0.605396  | 1.55903   |
| 0.388796  | 0.605646 | 0.36737   | 0.332211  | 0.631704  | 0.367724  |
| 6.20436   | 6.53987  | 6.4894    | 8.09199   | 8.46356   | 6.56357   |
| 587.225   | 611.494  | 587.978   | 730.609   | 743.735   | 936.314   |
| 35.2658   | 38.2259  | 34.3313   | 32.6025   | 40.2453   | 39.4673   |
| 13.9168   | 9.71092  | 19.5719   | 13.2741   | 18.0767   | 12.5861   |
| 0         | 0        | 0         | 0         | 0         | 0         |
| 2.54397   | 1.17418  | 9.85249   | 2.46892   | 3.46998   | 0.950553  |
| 2.64126   | 2.24998  | 2.4359    | 1.71608   | 1.78905   | 1.57396   |
| 6.12373   | 4.29345  | 7.04518   | 2.79195   | 3.93769   | 4.80801   |

|           |           |           |           |           |           |
|-----------|-----------|-----------|-----------|-----------|-----------|
| 0.498478  | 0         | 0.314005  | 0.567908  | 0.359961  | 0.349231  |
| 0.106347  | 0.0441767 | 0.0446607 | 0.0201933 | 0.0767956 | 0.0447038 |
| 16.0337   | 15.3146   | 18.5058   | 16.1008   | 19.5939   | 16.4135   |
| 0.0838041 | 0         | 0         | 0.381908  | 0         | 0         |
| 0         | 0         | 0         | 0         | 0         | 0         |
| 13.9359   | 14.8186   | 10.9421   | 10.2336   | 7.61312   | 10.2225   |
| 0         | 0         | 0         | 0         | 0         | 0         |
| 2.38437   | 2.55398   | 2.00265   | 2.58716   | 4.55004   | 4.58143   |
| 3.27692   | 2.86176   | 4.84357   | 4.27417   | 5.72662   | 4.59874   |
| 0.12901   | 2.19722   | 0.162534  | 13.0811   | 0.0232902 | 1.03037   |
| 3.66756   | 3.96421   | 3.81906   | 2.77138   | 5.31034   | 5.31722   |
| 3.31932   | 3.53677   | 3.05282   | 2.02331   | 4.24737   | 3.41845   |
| 8.60814   | 8.54432   | 9.81758   | 7.74245   | 9.78219   | 8.27807   |
| 7.15867   | 7.49438   | 7.55236   | 6.9909    | 8.215     | 6.24755   |
| 17.7626   | 16.8833   | 19.9129   | 21.2656   | 16.8758   | 17.0214   |
| 54.303    | 54.9071   | 50.9332   | 55.5196   | 60.2322   | 60.0206   |
| 123.284   | 42.9324   | 27.197    | 20.9667   | 32.6604   | 50.0029   |
| 17.7264   | 19.607    | 17.9868   | 19.7697   | 20.6995   | 19.8573   |
| 0         | 0         | 0         | 0         | 0         | 0         |
| 5.63213   | 5.07853   | 4.80811   | 2.71379   | 6.86688   | 4.02886   |
| 0.70447   | 0.673064  | 1.18337   | 0.428048  | 0.483276  | 0.355354  |
| 8.08965   | 8.93176   | 10.6868   | 7.47814   | 7.40297   | 7.78605   |
| 0.0789906 | 0.0738285 | 0.0746375 | 0         | 0.192512  | 0.215827  |
| 8.81289   | 8.03238   | 9.91079   | 7.16996   | 11.8897   | 8.39983   |
| 113.622   | 109.745   | 90.5123   | 102.718   | 65.1807   | 86.2895   |
| 0         | 0         | 0         | 0         | 0         | 0         |
| 36.9881   | 37.1976   | 33.9424   | 27.4921   | 32.1917   | 30.2273   |
| 0.0213108 | 0.159345  | 0         | 0.121395  | 0.184668  | 0.107498  |
| 51.4755   | 58.3809   | 50.2522   | 56.8132   | 50.8616   | 63.0782   |
| 1.07898   | 1.38417   | 1.05992   | 0.578475  | 1.51247   | 0.907108  |
| 0.133566  | 0.183094  | 0.168273  | 0.167386  | 0.188078  | 0.0786032 |
| 0         | 0         | 0         | 0         | 0         | 0         |
| 3.05865   | 4.15042   | 3.30306   | 3.38035   | 3.05545   | 2.79997   |
| 0         | 0.216431  | 0.218802  | 0.593587  | 0.0940594 | 0.0730044 |
| 6.50291   | 5.7339    | 7.70966   | 5.50407   | 7.11027   | 7.3625    |
| 15.8967   | 11.1372   | 14.0492   | 12.6145   | 12.336    | 10.9044   |
| 0         | 0         | 0         | 0         | 0         | 0         |
| 0         | 0         | 0         | 0         | 0         | 0         |
| 14.0739   | 14.619    | 14.3729   | 14.4402   | 14.6696   | 16.4541   |
| 16.5978   | 19.6981   | 19.7      | 19.0458   | 16.7084   | 15.7834   |
| 0.144907  | 0.256206  | 0.0689671 | 0.0541376 | 0.0915062 | 0.10273   |
| 16.6689   | 15.0224   | 16.5602   | 14.1946   | 17.7761   | 14.3182   |
| 74.1679   | 73.729    | 59.954    | 75.2182   | 48.7591   | 51.1802   |

|           |          |           |          |           |           |
|-----------|----------|-----------|----------|-----------|-----------|
| 42.9554   | 46.0467  | 44.9627   | 43.009   | 37.7897   | 32.8513   |
| 4.65995   | 4.20411  | 4.52248   | 4.23279  | 4.73052   | 4.98511   |
| 6.81128   | 7.64914  | 8.26514   | 6.36669  | 8.02344   | 6.21458   |
| 14.5897   | 14.6785  | 14.5206   | 17.1983  | 13.002    | 15.1018   |
| 6.06463   | 6.6894   | 2.95868   | 3.20475  | 3.5501    | 1.99605   |
| 0.986268  | 1.27351  | 0.673674  | 0.934109 | 0.888109  | 0.949047  |
| 0.13013   | 0.182439 | 0.334722  | 0.166787 | 0.140955  | 0.328207  |
| 7.77874   | 7.38244  | 7.73455   | 4.72145  | 6.77031   | 5.92092   |
| 24.8491   | 25.3014  | 14.0918   | 15.8912  | 12.3625   | 12.5456   |
| 2.78722   | 2.43634  | 3.11208   | 2.06177  | 2.94752   | 2.6542    |
| 6.72072   | 6.74813  | 7.9244    | 7.32466  | 8.34397   | 7.48132   |
| 68.0981   | 56.5142  | 49.9022   | 52.3844  | 33.3238   | 47.2047   |
| 0         | 0        | 0         | 0        | 0         | 0         |
| 0         | 0        | 0         | 0        | 0.0439357 | 0         |
| 3.46511   | 2.69067  | 4.3033    | 3.49028  | 4.94779   | 2.65353   |
| 6.21339   | 6.15642  | 6.76927   | 6.23748  | 6.04065   | 7.02199   |
| 0.35187   | 0        | 0         | 0        | 0         | 0         |
| 4.01426   | 4.33108  | 4.07306   | 3.9288   | 4.78589   | 3.21628   |
| 0.156407  | 1.44E-08 | 0.12475   | 7.42E-06 | 4.82E-07  | 2.87E-06  |
| 27.6032   | 28.1937  | 27.2753   | 25.5283  | 31.5407   | 35.0825   |
| 2.34032   | 2.38014  | 3.66016   | 3.01873  | 3.86076   | 2.71384   |
| 0.0922596 | 0        | 0.116234  | 0        | 0.299801  | 0.0775637 |
| 3.72034   | 3.54188  | 4.43563   | 3.17434  | 5.29235   | 3.71838   |
| 0.110832  | 0.230198 | 0.930883  | 0.631347 | 0.560239  | 0.559068  |
| 20.0476   | 19.4752  | 20.4985   | 18.0991  | 23.8369   | 21.5452   |
| 0.726292  | 0.810303 | 0.862479  | 0.780178 | 1.07859   | 0.773403  |
| 6.88298   | 7.80019  | 5.64025   | 5.77     | 4.5511    | 4.68668   |
| 2.00099   | 2.28197  | 2.76832   | 1.88675  | 3.41032   | 3.23235   |
| 12.9523   | 12.6964  | 14.129    | 14.7563  | 15.7691   | 18.5027   |
| 22.1438   | 22.8657  | 24.4107   | 20.3545  | 24.8943   | 30.0404   |
| 9.59499   | 8.85298  | 6.50908   | 5.25549  | 8.29449   | 6.36023   |
| 0.0553192 | 16.4763  | 0.487859  | 175.207  | 0.119841  | 4.88329   |
| 0.0301093 | 0.187611 | 0.0758666 | 0.034303 | 0.0652275 | 0.0759397 |
| 0.742522  | 0.948867 | 0.959003  | 0.54624  | 0.763232  | 1.2006    |
| 0         | 0        | 0         | 0        | 0         | 0         |
| 0.0672683 | 26.1269  | 0.932231  | 229.693  | 0.947227  | 12.536    |
| 5.86935   | 6.2477   | 7.11723   | 5.67454  | 6.94329   | 6.55183   |
| 0         | 0        | 0         | 0        | 0         | 0         |
| 23.6382   | 31.3916  | 25.6195   | 28.8563  | 24.5003   | 28.6931   |
| 0.666113  | 0.579019 | 0.965969  | 0.760389 | 1.03507   | 0.550902  |
| 16.0206   | 23.8152  | 14.7052   | 23.0757  | 29.7482   | 38.0009   |
| 0         | 0        | 0         | 0        | 0         | 0         |
| 6.9906    | 7.61551  | 9.79867   | 6.06551  | 7.67237   | 7.16148   |

|           |            |           |            |           |           |
|-----------|------------|-----------|------------|-----------|-----------|
| 1.15623   | 1.69324    | 0.0853526 | 0          | 0.146766  | 0.0854348 |
| 7.78524   | 7.77015    | 7.2911    | 6.27936    | 7.16416   | 8.51448   |
| 0         | 0          | 0         | 0          | 0         | 0         |
| 10.4252   | 9.97931    | 11.3      | 8.98231    | 10.9949   | 8.02559   |
| 9.6452    | 9.97369    | 9.84315   | 8.9915     | 10.0351   | 9.5959    |
| 0.684753  | 0.805931   | 1.34196   | 1.21353    | 0.74171   | 0.351804  |
| 1.21347   | 1.44787    | 0.780661  | 1.73546    | 1.51017   | 1.04188   |
| 3.50156   | 2.24468    | 1.64551   | 2.33295    | 4.02497   | 3.31524   |
| 31.8726   | 33.2631    | 33.6481   | 35.5879    | 28.9273   | 29.112    |
| 40.8645   | 41.1002    | 30.0513   | 35.9216    | 34.3494   | 36.9793   |
| 10.986    | 7.09893    | 8.88548   | 7.06382    | 8.64681   | 9.15465   |
| 2.92523   | 1.94605    | 2.74324   | 2.73128    | 4.47885   | 2.94004   |
| 0.319048  | 0.198799   | 0.200977  | 0.666392   | 0.460782  | 0.849388  |
| 2.17373   | 1.88401    | 2.99481   | 2.16044    | 2.39712   | 2.56171   |
| 0.850445  | 0.883187   | 0         | 0.161483   | 0.614123  | 0.71498   |
| 0         | 0          | 0         | 0          | 0         | 0         |
| 0.141095  | 0.156295   | 0.210678  | 0.0238139  | 0         | 0.0263598 |
| 13.2849   | 11.6671    | 14.5335   | 9.37604    | 11.7835   | 8.44034   |
| 5.17137   | 4.19719    | 8.08548   | 6.79805    | 6.42497   | 4.41452   |
| 0.144995  | 0.108415   | 0.091336  | 0.0660759  | 0.0942331 | 0.195038  |
| 1.3843    | 1.23216    | 1.84359   | 0.878781   | 1.84209   | 1.24692   |
| 4.6382    | 4.37476    | 4.51436   | 5.55361    | 5.77268   | 4.17464   |
| 3.52553   | 4.18757    | 7.98111   | 5.83659    | 4.49006   | 4.45752   |
| 0         | 0          | 0         | 0          | 0         | 0         |
| 34.7645   | 33.6122    | 32.9688   | 34.9344    | 26.4316   | 26.6395   |
| 64.3534   | 57.2622    | 67.3372   | 63.072     | 83.6      | 77.52     |
| 92.8025   | 86.6003    | 81.7127   | 71.8819    | 61.6778   | 64.8107   |
| 0         | 0          | 0         | 0.18209    | 0         | 0         |
| 0         | 0.00651062 | 0.0105311 | 0.00529071 | 0         | 0         |
| 53.4308   | 50.7736    | 48.445    | 45.7284    | 43.0086   | 43.2248   |
| 11.2778   | 11.3244    | 11.9572   | 10.0949    | 12.2017   | 9.51308   |
| 0         | 0          | 0         | 0          | 0         | 0         |
| 15.774    | 15.176     | 15.6415   | 15.9215    | 16.7927   | 19.4532   |
| 15.1728   | 19.2174    | 15.3095   | 26.5585    | 18.4129   | 22.2329   |
| 0.114512  | 0.0356763  | 0.144269  | 0.489233   | 0.217066  | 0.192544  |
| 0.0324721 | 0          | 0.0204551 | 0          | 0         | 0         |
| 0.709131  | 1.32558    | 0.744502  | 0.942551   | 1.40821   | 1.49044   |
| 2.72835   | 2.92655    | 3.25152   | 2.32033    | 3.71769   | 2.53044   |
| 0.0524009 | 0.146929   | 0         | 0          | 0.113519  | 0         |
| 0         | 0.141074   | 0         | 0          | 0         | 0         |
| 0.0813207 | 0.101342   | 0         | 0.741179   | 0.17617   | 0.341837  |
| 0.249066  | 0.102607   | 0.16208   | 0.140706   | 0.178369  | 0.173052  |
| 0         | 0          | 0         | 0          | 0         | 0         |

|           |           |           |           |           |           |
|-----------|-----------|-----------|-----------|-----------|-----------|
| 1.05599   | 0.5028    | 0.89122   | 0.740062  | 2.09179   | 0.872229  |
| 7.59166   | 7.06551   | 0         | 0         | 0         | 0         |
| 0.0902365 | 0.674716  | 0.45474   | 0.102805  | 0         | 0         |
| 0         | 0         | 0         | 0         | 0         | 0         |
| 1.69119   | 1.06951   | 1.46283   | 1.03526   | 1.55845   | 1.9311    |
| 0.121967  | 0.0379987 | 0         | 0.176467  | 0         | 0.0447382 |
| 35.5662   | 34.9811   | 32.3504   | 41.0651   | 38.3519   | 40.4266   |
| 2.66443   | 2.44745   | 2.97857   | 1.88888   | 3.36706   | 2.2295    |
| 551.965   | 568.06    | 492.385   | 531.443   | 350.789   | 503.625   |
| 0.590613  | 0.270846  | 0.342206  | 0.247557  | 0.291477  | 0.306443  |
| 19.4897   | 20.7014   | 24.3043   | 26.6723   | 26.5523   | 26.9627   |
| 0.0341617 | 0.0565839 | 0.128709  | 0.0129323 | 0.154138  | 0.0192369 |
| 7.89714   | 7.41671   | 10.2537   | 6.92529   | 12.163    | 11.5144   |
| 0.541612  | 0.202487  | 0.409411  | 0.24682   | 0.439997  | 0.546408  |
| 0         | 0         | 0         | 0         | 0         | 0         |
| 0         | 0         | 0         | 0         | 0         | 0         |
| 0.688382  | 0.171572  | 0.693808  | 1.25482   | 1.0439    | 0.694477  |
| 41.0721   | 42.2589   | 44.0994   | 40.0873   | 46.7377   | 38.0807   |
| 9.39272   | 10.034    | 10.8476   | 8.5221    | 9.55066   | 7.14602   |
| 0.12791   | 0.0980928 | 0.247919  | 0.235402  | 0.245125  | 0.157167  |
| 0.0272342 | 0.0339393 | 0         | 0         | 0         | 0         |
| 1.31077   | 1.33649   | 0.650544  | 0.859802  | 0.516292  | 0.300541  |
| 0.112785  | 0         | 0         | 0.0856627 | 0.162889  | 0         |
| 34.4998   | 37.4446   | 42.5069   | 39.4288   | 31.9974   | 32.5348   |
| 0.203412  | 0.126746  | 0.128135  | 0.231744  | 0.110166  | 0.342022  |
| 7.34364   | 8.98284   | 9.95425   | 8.86961   | 11.3822   | 10.5662   |
| 49.1198   | 51.2141   | 45.6116   | 46.8811   | 40.1788   | 47.069    |
| 49.7897   | 37.9306   | 49.7245   | 52.1144   | 65.3018   | 83.9148   |
| 6.97493   | 7.95034   | 8.35194   | 5.80714   | 10.4201   | 7.11788   |
| 71.7457   | 70.8198   | 75.989    | 65.8419   | 91.4636   | 80.7732   |
| 48.9484   | 56.5865   | 72.17     | 65.3789   | 23.1239   | 32.4768   |
| 0         | 0.0499901 | 0.101076  | 0         | 0.065176  | 0.0337243 |
| 40.2856   | 42.4268   | 48.4276   | 44.2514   | 47.1233   | 41.3558   |
| 10.8189   | 13.7761   | 8.981     | 15.6117   | 8.3314    | 14.3376   |
| 0         | 0         | 0         | 0         | 0         | 0         |
| 0.604629  | 0.696977  | 0.666527  | 0.671623  | 0.638549  | 0.648107  |
| 244.302   | 272.027   | 238.906   | 279.974   | 263.148   | 254.275   |
| 7.12178   | 6.4936    | 7.81188   | 6.71967   | 7.31208   | 6.39192   |
| 0.239312  | 0.0994102 | 0.100499  | 0.181763  | 0.259218  | 0.100596  |
| 0         | 0         | 0.0987225 | 0         | 0.0424391 | 0.0329392 |
| 301.23    | 353.129   | 307.489   | 347.441   | 277.701   | 298.885   |
| 123.108   | 127.411   | 126.839   | 114.689   | 121.949   | 120.564   |
| 0.153025  | 0.108971  | 0.358037  | 0.149433  | 0.165753  | 0.2573    |



|           |           |           |           |           |           |
|-----------|-----------|-----------|-----------|-----------|-----------|
| 0.27228   | 0.34923   | 0.292722  | 0.500905  | 0         | 0.176698  |
| 21.8837   | 20.8179   | 24.4461   | 21.8537   | 22.1872   | 20.7676   |
| 1.22217   | 2.2257    | 2.31341   | 1.94029   | 2.00929   | 2.43968   |
| 0.0640151 | 0.0709116 | 0.0716887 | 0.0648279 | 0.0154089 | 0.0119596 |
| 0.081926  | 0.051048  | 0.361252  | 0.326679  | 0.133111  | 0.103314  |
| 10.1602   | 10.5634   | 11.863    | 9.12366   | 12.8334   | 8.96461   |
| 0.351594  | 0.472657  | 0.281339  | 0.297705  | 0.580135  | 0.350004  |
| 0         | 0         | 0         | 0         | 0.129409  | 0         |
| 7.17434   | 5.83586   | 6.7717    | 5.96594   | 4.9725    | 5.72125   |
| 0.804766  | 0.790162  | 0.983164  | 0.750155  | 1.63775   | 1.08662   |
| 7.05765   | 7.01539   | 5.82217   | 7.70566   | 6.41619   | 6.63977   |
| 3.96133   | 3.26546   | 2.97329   | 3.09715   | 3.17853   | 3.54275   |
| 0         | 0         | 0         | 0         | 0         | 0         |
| 0         | 0         | 0         | 0         | 0         | 0         |
| 0.0872435 | 0.16988   | 0.287676  | 0.132743  | 0.126001  | 0.174932  |
| 6.84937   | 6.58682   | 6.91864   | 5.44164   | 8.45646   | 7.56229   |
| 0.44086   | 1.23615   | 0.485992  | 0.125566  | 1.19383   | 0.370636  |
| 0         | 0         | 0         | 0         | 0         | 0         |
| 0.164808  | 0.205383  | 0.726718  | 0.344231  | 0.208269  | 0.184741  |
| 0.0326704 | 0.0407138 | 0.0205799 | 0.0372208 | 0.0176939 | 0         |
| 222.681   | 221.621   | 211.238   | 228.449   | 171.228   | 197.019   |
| 2.53081   | 2.36542   | 2.51888   | 3.11398   | 1.53514   | 1.59576   |
| 0.119326  | 0.0991357 | 0         | 0.135946  | 0.0861674 | 0.100319  |
| 0         | 0.0334024 | 0         | 0         | 0         | 0         |
| 30.5359   | 34.9368   | 38.3946   | 42.8133   | 40.719    | 47.8897   |
| 18.6284   | 28.0337   | 32.8189   | 30.5614   | 50.3087   | 45.4594   |
| 6.4006    | 6.03638   | 6.44682   | 6.24936   | 7.67319   | 6.35363   |
| 0         | 0         | 0         | 0         | 0         | 0         |
| 0         | 0         | 0         | 0         | 0         | 0         |
| 0         | 0         | 0         | 0         | 0         | 0         |
| 0.0402985 | 0         | 0.0953574 | 0.104837  | 0.0995343 | 0         |
| 2.22215   | 2.24556   | 2.27016   | 2.12129   | 2.66711   | 2.92819   |
| 1.61252   | 1.61293   | 2.51179   | 1.43118   | 2.59898   | 1.6204    |
| 92.0263   | 95.8162   | 87.0441   | 85.8509   | 67.4318   | 77.4777   |
| 5.51004   | 9.30886   | 14.0268   | 10.8724   | 16.3669   | 20.7342   |
| 27.4529   | 18.231    | 26.8337   | 20.6132   | 28.5789   | 33.7991   |
| 2.14395   | 1.51613   | 2.62809   | 1.71607   | 2.57285   | 1.94853   |
| 0         | 0         | 0         | 0         | 0         | 0         |
| 0.530901  | 0.937279  | 0.473774  | 0.806462  | 0.81467   | 0.725294  |
| 32.7894   | 36.9785   | 34.238    | 29.3441   | 28.3045   | 27.5827   |
| 0.993731  | 0.92098   | 0.898986  | 0.754924  | 0.607092  | 0.700134  |
| 0.960324  | 1.04601   | 0.907561  | 0.659931  | 0.887307  | 0.427677  |
| 0.0805641 | 0.0660976 | 9.07E-14  | 0.0604268 | 0.230931  | 0.0668862 |

|            |           |           |           |           |            |
|------------|-----------|-----------|-----------|-----------|------------|
| 175.424    | 172.451   | 193.357   | 180.653   | 227.73    | 240.098    |
| 0.330293   | 0.627373  | 0.675962  | 1.01242   | 0.58453   | 1.15153    |
| 1.02374    | 1.05302   | 0         | 0.0555393 | 0.616051  | 0.355196   |
| 2.10995    | 1.34833   | 2.38435   | 1.70024   | 3.50022   | 2.24392    |
| 4.04167    | 3.81494   | 5.01629   | 4.33106   | 4.20447   | 4.55854    |
| 4.02779    | 4.81029   | 4.35555   | 8.48927   | 6.36245   | 4.82535    |
| 86.2405    | 86.6199   | 82.3516   | 97.3597   | 86.9277   | 95.9812    |
| 0.291715   | 0.382668  | 1.35401   | 1.20694   | 1.56327   | 1.26496    |
| 0          | 0         | 0         | 0         | 0         | 0          |
| 0          | 0         | 0         | 0         | 0         | 0          |
| 2.46068    | 2.31933   | 1.52644   | 2.09188   | 2.62476   | 2.13173    |
| 0.0930808  | 0.131571  | 0.310417  | 0.236709  | 0.252934  | 0.228814   |
| 2.0863     | 1.27141   | 0.987047  | 0.346587  | 1.00535   | 0.684469   |
| 13.0777    | 13.2746   | 12.3333   | 11.842    | 9.71026   | 9.44789    |
| 73.383     | 66.5844   | 60.934    | 59.0238   | 29.9121   | 47.375     |
| 90.7416    | 100.457   | 87.6004   | 100.419   | 75.7105   | 102.881    |
| 30.5147    | 16.6596   | 54.9812   | 27.8671   | 49.8417   | 28.9932    |
| 0.0712621  | 0         | 0         | 0         | 0.0771897 | 0          |
| 32.5298    | 30.0231   | 31.9808   | 27.4296   | 36.0809   | 28.8679    |
| 334.899    | 289.259   | 297.765   | 278.593   | 330.82    | 287.429    |
| 0.215613   | 0.223914  | 0.271641  | 0.0614112 | 0.369784  | 0.302115   |
| 0          | 0         | 0         | 0.025635  | 0.0487453 | 0.0567506  |
| 36.92      | 37.3665   | 47.6162   | 43.0326   | 39.3751   | 39.2729    |
| 0          | 0         | 0         | 0         | 0         | 0          |
| 0.676372   | 0.983376  | 0.781119  | 0.577934  | 0.468071  | 0.41068    |
| 0          | 0         | 0.187329  | 0.0847008 | 0.161059  | 0.0625033  |
| 11.9093    | 10.4229   | 9.96447   | 11.7555   | 8.27169   | 10.0887    |
| 3.86141    | 4.17591   | 4.22167   | 2.99745   | 4.59377   | 3.97263    |
| 0          | 0.169147  | 0         | 0         | 0.29404   | 0          |
| 9.83654    | 9.56212   | 11.0132   | 9.56337   | 12.1095   | 10.4175    |
| 0          | 0         | 0         | 0         | 0.0600937 | 0          |
| 0          | 0.139016  | 0         | 0.762537  | 0.120831  | 0.0937833  |
| 0.0881868  | 0.0143097 | 0.073345  | 0.039246  | 0.112106  | 0.00579217 |
| 0          | 0.04801   | 0.0970722 | 0.043891  | 0.208648  | 0.0971657  |
| 13.528     | 18.0627   | 18.7476   | 17.5589   | 14.2869   | 12.2667    |
| 1.98571    | 2.33685   | 2.49212   | 2.68419   | 2.40906   | 1.8149     |
| 10.8227    | 8.42953   | 9.15609   | 8.011     | 8.02544   | 6.87699    |
| 2.34648    | 2.94238   | 2.39331   | 2.30378   | 2.99594   | 3.58207    |
| 1.12666    | 1.07914   | 2.33444   | 0.944126  | 1.31115   | 0.454029   |
| 0.418785   | 0.197637  | 0.639374  | 0.13551   | 0.389738  | 0.0249987  |
| 16.2644    | 17.7173   | 20.6182   | 22.3483   | 21.8535   | 27.7628    |
| 4.42116    | 3.51679   | 12.2066   | 8.14485   | 0.203783  | 0.711751   |
| 0.00744946 | 0.0092835 | 0         | 0         | 0         | 0.0250514  |

|           |           |           |           |           |            |
|-----------|-----------|-----------|-----------|-----------|------------|
| 7.29735   | 7.65641   | 6.66615   | 6.59957   | 7.00797   | 4.99652    |
| 3.06633   | 3.26612   | 3.10384   | 2.32917   | 3.63361   | 3.39303    |
| 13.8098   | 14.2195   | 14.1428   | 13.6113   | 15.2675   | 13.8108    |
| 0         | 0.166672  | 0.0919084 | 0.318598  | 0.158039  | 0.153328   |
| 0.173408  | 0.0918657 | 0.252738  | 0.142224  | 0.269377  | 0.273789   |
| 0         | 0         | 0         | 0         | 0         | 0          |
| 28.1113   | 26.5049   | 26.6913   | 29.6809   | 28.3272   | 27.9755    |
| 0.69798   | 1.21811   | 0.455469  | 0.900347  | 1.01845   | 0.659638   |
| 108.323   | 105.168   | 115.702   | 130.928   | 100.339   | 90.7897    |
| 16.9874   | 17.6801   | 18.2878   | 19.7118   | 14.8567   | 15.3984    |
| 0         | 0         | 0         | 0         | 0         | 0          |
| 0         | 0         | 0         | 0         | 0         | 0          |
| 2.30405   | 1.69088   | 4.9992    | 4.1416    | 1.58061   | 1.95856    |
| 0         | 0         | 0         | 0         | 0         | 0          |
| 0.271377  | 0.135276  | 0.263748  | 0.282675  | 0.361139  | 0.254224   |
| 0         | 0         | 0         | 0         | 0         | 0          |
| 3.68979   | 3.93646   | 4.85442   | 3.86245   | 4.98481   | 3.80028    |
| 13.2019   | 14.7831   | 17.9582   | 16.0761   | 17.3051   | 19.383     |
| 6.12214   | 6.40062   | 6.57601   | 6.49147   | 6.58338   | 6.04426    |
| 1.54777   | 1.54306   | 2.14496   | 1.67518   | 1.42503   | 0.97592    |
| 1.62747   | 3.22549   | 3.60669   | 2.59134   | 7.40182   | 5.39051    |
| 4.62999   | 5.19153   | 4.85617   | 5.49516   | 4.13016   | 3.72472    |
| 35.4606   | 34.3165   | 29.0553   | 35.1369   | 29.5787   | 30.9332    |
| 10.4596   | 9.8482    | 12.8532   | 9.11082   | 13.1977   | 9.88996    |
| 0.0358762 | 0         | 0.008474  | 0.0408732 | 0.0455398 | 0.00565478 |
| 0.19441   | 0.141326  | 0.12055   | 0.174422  | 0.20087   | 0.0767344  |
| 2.39349   | 2.2831    | 2.79208   | 3.34966   | 3.45677   | 3.03077    |
| 100.515   | 100.095   | 87.554    | 90.2604   | 65.8009   | 91.7017    |
| 5.52027   | 5.5597    | 5.06811   | 7.13472   | 5.88551   | 7.8361     |
| 7.05188   | 6.96249   | 8.60252   | 8.38309   | 10.8073   | 8.20533    |
| 3.5129    | 2.89045   | 4.34063   | 3.71998   | 3.56119   | 3.67274    |
| 0.249832  | 0.5189    | 0.524586  | 0.664135  | 0.691566  | 0.910159   |
| 0         | 0         | 0         | 0         | 0         | 0          |
| 66.0016   | 56.7951   | 70.5842   | 63.9982   | 81.3004   | 80.699     |
| 156.368   | 0         | 197       | 178.147   | 169.374   | 525.841    |
| 0         | 0         | 0         | 0         | 0         | 0          |
| 4.30386   | 5.63983   | 4.58406   | 4.42608   | 4.13695   | 3.77022    |
| 0         | 0         | 0         | 0         | 0         | 0          |
| 0.384618  | 0.304324  | 0.35161   | 0.357705  | 1.05806   | 0.469265   |
| 0         | 0         | 0         | 0         | 0         | 0          |
| 81.6844   | 76.8247   | 81.4485   | 86.0964   | 64.1605   | 69.5946    |
| 151.519   | 153.017   | 189.287   | 179.498   | 173.255   | 174.117    |
| 0         | 0.240553  | 0.243189  | 0.439831  | 0.836343  | 0.486847   |

|           |           |           |           |           |           |
|-----------|-----------|-----------|-----------|-----------|-----------|
| 3.36498   | 4.08591   | 6.19603   | 7.76563   | 5.93461   | 7.2538    |
| 1207.3    | 1599.22   | 1094.63   | 1361.69   | 1012.2    | 1353.26   |
| 42.3651   | 45.2259   | 37.1044   | 40.6189   | 43.2352   | 44.2207   |
| 0         | 0         | 0         | 0         | 0         | 0         |
| 15.149    | 16.3361   | 16.0636   | 14.6807   | 17.9822   | 16.0642   |
| 4.63193   | 4.18642   | 4.34956   | 4.13479   | 4.75234   | 3.65638   |
| 0.223104  | 0         | 0.281079  | 0.12709   | 0         | 0.187567  |
| 3.13725   | 2.7867    | 3.09054   | 2.62363   | 2.68725   | 2.94154   |
| 0         | 0         | 0         | 0         | 0         | 0         |
| 0         | 0         | 0         | 0         | 0.0716918 | 0.0556437 |
| 7.11552   | 6.28855   | 7.89132   | 5.58077   | 8.69244   | 6.34481   |
| 0         | 0         | 0         | 0         | 0         | 0         |
| 14.708    | 14.2477   | 12.2002   | 13.2658   | 14.1132   | 16.0642   |
| 0         | 0         | 0         | 0         | 0         | 0         |
| 26.8958   | 28.0869   | 28.6133   | 30.2338   | 29.4906   | 29.2055   |
| 35.219    | 38.1752   | 31.8629   | 34.9518   | 23.392    | 35.4413   |
| 32.4027   | 33.8081   | 29.8354   | 27.1129   | 25.9401   | 27.82     |
| 9.5452    | 8.41199   | 9.96554   | 6.92604   | 11.5805   | 8.47124   |
| 35.1704   | 36.3553   | 33.043    | 28.6623   | 27.4825   | 24.36     |
| 5.58637   | 5.34386   | 5.45198   | 4.57165   | 6.30672   | 5.82105   |
| 11.984    | 11.3254   | 12.3727   | 10.2606   | 13.6128   | 10.3469   |
| 13.4333   | 15.7929   | 12.693    | 14.1493   | 12.2514   | 11.8795   |
| 4.17714   | 4.27696   | 5.02735   | 4.43631   | 7.05526   | 7.16753   |
| 8.62252   | 9.67349   | 11.1187   | 9.69248   | 9.27757   | 8.21276   |
| 2.47068   | 3.7616    | 2.46039   | 3.53517   | 1.73583   | 1.83035   |
| 0.0892212 | 0.166781  | 0         | 0.203296  | 0         | 0.0375047 |
| 1.07308   | 1.5727    | 1.84448   | 5.17812   | 0.963895  | 0.677462  |
| 4.46657   | 5.24511   | 4.16632   | 3.66973   | 3.16337   | 4.2606    |
| 0.190467  | 0.341205  | 0.0524914 | 0.128841  | 0.0193416 | 0.030024  |
| 1.23394   | 0.723642  | 0.960188  | 0.578863  | 1.37589   | 0.518696  |
| 0.101237  | 0.100929  | 0.229578  | 0.276809  | 0.394767  | 0.357466  |
| 9.56504   | 9.26923   | 10.3531   | 8.73486   | 10.5576   | 9.29077   |
| 0.279093  | 0.335812  | 0.218245  | 0.186394  | 0.208488  | 0.307455  |
| 0         | 0         | 0         | 0         | 0         | 0         |
| 0         | 0.0311287 | 0         | 0.0284581 | 0         | 0         |
| 0.0771164 | 0.115323  | 0.0777243 | 0.0702859 | 0.133649  | 0.0388996 |
| 3.81775   | 3.05677   | 2.8254    | 3.46262   | 1.60897   | 2.46963   |
| 0.215841  | 0.0768516 | 0.155388  | 0.210775  | 0.133597  | 0.18146   |
| 461.792   | 506.871   | 475.072   | 525.803   | 377.028   | 440.917   |
| 1.68046   | 1.32095   | 1.98685   | 1.85561   | 3.33244   | 2.43434   |
| 23.7699   | 23.2109   | 20.7646   | 15.4126   | 18.9878   | 21.8258   |
| 0         | 0         | 0         | 0         | 0         | 0         |
| 0         | 0.118447  | 0         | 0         | 0.0343176 | 0         |

|           |           |           |           |           |           |
|-----------|-----------|-----------|-----------|-----------|-----------|
| 0         | 0         | 0         | 0         | 0         | 0         |
| 6.69206   | 6.05933   | 7.85832   | 5.33625   | 8.65731   | 5.77123   |
| 3.7316    | 5.30416   | 6.45477   | 6.74289   | 5.60399   | 6.02646   |
| 2.17033   | 3.45946   | 2.35277   | 2.93265   | 2.40553   | 2.20652   |
| 0.675047  | 0.757119  | 0.425231  | 0.845977  | 0.511838  | 0.454016  |
| 9.78241   | 12.1908   | 9.91965   | 11.1449   | 8.27013   | 11.0325   |
| 0.0645549 | 0         | 0         | 0         | 0         | 0.054272  |
| 1.3498    | 1.1114    | 1.85238   | 1.79868   | 2.37587   | 1.21585   |
| 0         | 0         | 0.0981573 | 0.0887634 | 0         | 0         |
| 29.0154   | 31.7114   | 33.1368   | 31.8048   | 43.9565   | 48.9508   |
| 0         | 0         | 0         | 0         | 0         | 0         |
| 0         | 0         | 0         | 0         | 0         | 0         |
| 2.85885   | 2.24547   | 2.82419   | 2.00433   | 3.18886   | 2.21263   |
| 0         | 0         | 0         | 0         | 0         | 0         |
| 0         | 0         | 0         | 0.0210954 | 0.0200566 | 0         |
| 24.0719   | 30.3473   | 20.6611   | 26.1552   | 22.1127   | 33.0262   |
| 79.1225   | 88.3811   | 85.1937   | 124.727   | 87.9249   | 134.575   |
| 0         | 0         | 0         | 0         | 0         | 0         |
| 61.6999   | 62.9396   | 57.9678   | 56.022    | 77.4718   | 84.3803   |
| 4.77274   | 3.27735   | 3.48506   | 2.21939   | 2.74312   | 1.67051   |
| 5.29939   | 4.92474   | 5.24957   | 4.02316   | 7.47284   | 5.03541   |
| 1.9733    | 3.13654   | 4.71376   | 2.86522   | 0.997736  | 0.864788  |
| 12.6582   | 8.17461   | 12.3845   | 9.85964   | 14.0817   | 10.3967   |
| 84.4237   | 85.3142   | 49.3647   | 57.2899   | 42.8011   | 65.0471   |
| 1.34294   | 1.16709   | 1.33571   | 3.44246   | 2.33508   | 1.26272   |
| 0         | 0         | 0         | 0         | 0         | 0         |
| 0.909401  | 1.32218   | 0.381904  | 0.863388  | 0.985045  | 0.668976  |
| 36.1476   | 30.2974   | 25.4072   | 20.8022   | 21.3939   | 23.7703   |
| 5.44908   | 6.20524   | 6.03651   | 6.52915   | 6.46214   | 6.63471   |
| 0.102066  | 34.9786   | 0.642943  | 308.032   | 2.32168   | 22.5676   |
| 2.13978   | 1.47513   | 3.44145   | 3.1121    | 3.25473   | 2.18169   |
| 0         | 0.129723  | 0         | 0         | 0         | 0         |
| 13.1383   | 14.3207   | 12.3346   | 13.4902   | 11.3577   | 12.308    |
| 2.20213   | 1.99931   | 2.10048   | 2.54468   | 1.90814   | 1.50745   |
| 1.88395   | 1.87518   | 1.78784   | 1.64461   | 2.70321   | 2.08782   |
| 13.2928   | 13.7705   | 10.6969   | 13.6368   | 12.6086   | 15.8662   |
| 1.93029   | 1.35657   | 2.19672   | 1.51574   | 2.84518   | 1.59298   |
| 64.1837   | 59.7771   | 60.4032   | 64.0696   | 64.9029   | 68.9209   |
| 0.3283    | 0.136376  | 0.68935   | 0.249351  | 0.237072  | 0.46001   |
| 13.4519   | 15.616    | 9.86553   | 12.86     | 14.6986   | 15.7146   |
| 0         | 0.0453133 | 0         | 0         | 0.0393857 | 0.0305693 |
| 51.0757   | 54.5912   | 56.1204   | 54.7829   | 56.9995   | 63.1962   |
| 0         | 0         | 0.206491  | 0         | 0.266301  | 0         |

|           |           |           |          |           |           |
|-----------|-----------|-----------|----------|-----------|-----------|
| 0.0986269 | 0.0921813 | 0.0232977 | 0.021068 | 0.163585  | 0.157413  |
| 0.525484  | 0.467755  | 0.283728  | 0.17105  | 0.569193  | 0.252446  |
| 5.01066   | 4.52227   | 4.70281   | 4.13429  | 7.60796   | 4.40615   |
| 50.9449   | 57.2529   | 52.4325   | 55.9361  | 50.8914   | 68.8242   |
| 10.4443   | 11.0242   | 9.92267   | 8.64793  | 8.22207   | 9.78828   |
| 1.533     | 1.97487   | 2.74056   | 2.14566  | 2.1697    | 2.26202   |
| 22.4822   | 26.4101   | 22.0466   | 26.564   | 18.524    | 20.0185   |
| 14.6019   | 13.2487   | 16.6809   | 15.7683  | 20.1324   | 13.5087   |
| 4.73857   | 4.54246   | 6.65874   | 5.96957  | 6.07043   | 6.20549   |
| 0.0990869 | 8.03E-11  | 0.165768  | 3.71E-11 | 0.0365622 | 0.0528173 |
| 7.07927   | 4.94812   | 12.0284   | 4.80323  | 9.64343   | 3.05303   |
| 3.94525   | 3.80481   | 2.01987   | 3.35573  | 3.86634   | 3.00086   |
| 0.578099  | 0.576341  | 0.466125  | 0.474205 | 0.743073  | 0.453614  |
| 0.0296133 | 0         | 0         | 0        | 0         | 0         |
| 10.9123   | 10.2964   | 10.3758   | 10.8659  | 11.7624   | 10.9274   |
| 21.7636   | 19.8107   | 17.7999   | 23.0811  | 22.0287   | 19.7472   |
| 65.6086   | 64.3098   | 68.6727   | 70.8106  | 60.4757   | 79.2812   |
| 33.4064   | 34.1264   | 34.1927   | 32.1369  | 34.2432   | 35.3001   |
| 2.34708   | 2.60636   | 1.08324   | 0.979574 | 3.03313   | 2.21743   |
| 0         | 0         | 0         | 0        | 0         | 0.066037  |
| 0.201223  | 0.261427  | 0.19029   | 0.234274 | 0.251091  | 0.169171  |
| 0         | 0         | 0         | 0        | 0         | 0         |
| 1.07276   | 1.092     | 0.842155  | 1.11201  | 0.678265  | 0.808406  |
| 42.5931   | 44.2804   | 40.8912   | 47.6236  | 45.3362   | 55.6306   |
| 7.88661   | 7.37122   | 8.0549    | 6.03004  | 8.8329    | 6.16367   |
| 14.0447   | 13.7655   | 12.0153   | 9.82204  | 12.6862   | 11.6598   |
| 2.86565   | 3.17751   | 4.00866   | 4.3462   | 5.15545   | 5.60531   |
| 40.7417   | 37.3241   | 39.5653   | 38.8764  | 41.0942   | 38.4162   |
| 0         | 0         | 0         | 0        | 0         | 0         |
| 1.4287    | 1.50652   | 1.4538    | 1.69029  | 2.26178   | 2.40224   |
| 44.6063   | 42.5406   | 38.0374   | 38.4613  | 35.6563   | 40.3295   |
| 1.45203   | 2.13707   | 1.49363   | 2.80184  | 2.42585   | 2.03212   |
| 7.72894   | 8.37547   | 7.62053   | 6.47009  | 7.06146   | 7.00634   |
| 46.5557   | 48.4316   | 50.2329   | 48.5704  | 47.3268   | 45.8294   |
| 0.792222  | 0.628729  | 0.720685  | 0.656534 | 0.709577  | 0.365282  |
| 3.62407   | 3.83686   | 6.88834   | 5.95596  | 4.26516   | 5.03613   |
| 0.944627  | 0.599298  | 1.23337   | 0.763122 | 3.5719    | 0.837477  |
| 0.443033  | 0.325025  | 0.288294  | 0.340659 | 0.70872   | 0.550075  |
| 0         | 0         | 0         | 0        | 0.299689  | 0         |
| 0.369344  | 0.154913  | 0.49359   | 0.070811 | 0.134648  | 0.322655  |
| 4.95961   | 4.01341   | 2.35329   | 3.00865  | 5.9305    | 4.33206   |
| 10.3617   | 9.77511   | 5.97233   | 5.03531  | 6.97871   | 7.41616   |
| 10.2766   | 11.0438   | 7.01535   | 14.3554  | 7.98407   | 9.64615   |

|           |           |           |           |          |           |
|-----------|-----------|-----------|-----------|----------|-----------|
| 1.66509   | 1.43656   | 2.33982   | 1.51396   | 2.28917  | 1.4537    |
| 18.5156   | 17.3746   | 19.5098   | 20.6482   | 23.9497  | 28.0518   |
| 1.52984   | 1.13193   | 1.70265   | 1.08811   | 3.03487  | 1.79959   |
| 4.57633   | 7.22218   | 7.67241   | 10.1448   | 7.69434  | 12.224    |
| 4.62958   | 4.74215   | 5.00671   | 4.99806   | 5.28066  | 5.40997   |
| 0.744809  | 0.771913  | 1.29261   | 1.54554   | 0.876732 | 1.37477   |
| 31.6027   | 36.6623   | 37.355    | 40.1291   | 31.3303  | 33.6558   |
| 10.9288   | 8.81187   | 11.8782   | 9.84194   | 10.6162  | 7.96817   |
| 79.6128   | 105.578   | 119.522   | 66.0094   | 12.7377  | 35.2517   |
| 0         | 0         | 0         | 0         | 0        | 0         |
| 0         | 0         | 0         | 0         | 0        | 0         |
| 0.586229  | 0.498068  | 0.326949  | 0.595835  | 0.45883  | 0.263034  |
| 9.90614   | 9.72679   | 8.33848   | 8.58224   | 11.131   | 8.85902   |
| 9.68122   | 10.0745   | 10.0799   | 9.57452   | 9.43053  | 8.52011   |
| 0.46955   | 0.304279  | 0.82819   | 0.363766  | 0.996869 | 0.331595  |
| 16.5415   | 16.1954   | 17.4811   | 15.3173   | 17.614   | 13.8585   |
| 1.16203   | 1.24865   | 2.25043   | 1.76882   | 2.26078  | 1.05767   |
| 355.633   | 378.749   | 195.909   | 238.618   | 284.492  | 439.885   |
| 0.264199  | 0.329245  | 0         | 0.128999  | 0.286175 | 0.0317308 |
| 17.4539   | 15.7274   | 21.5304   | 16.3184   | 24.431   | 19.8214   |
| 37.261    | 39.3777   | 34.42     | 32.3966   | 30.1861  | 34.211    |
| 34.0819   | 30.2152   | 15.7998   | 14.736    | 10.6542  | 12.1559   |
| 3.40567   | 3.98147   | 3.53595   | 3.03325   | 3.50871  | 2.73262   |
| 2.17434   | 1.46035   | 2.05665   | 1.89841   | 2.45792  | 1.86217   |
| 89.3767   | 78.7128   | 70.4331   | 82.2594   | 79.0274  | 69.2427   |
| 2.38847   | 3.54891   | 2.00608   | 3.27932   | 3.64853  | 4.01603   |
| 3.33084   | 3.06376   | 2.1981    | 2.71055   | 1.37444  | 2.26689   |
| 15.0944   | 16.988    | 16.6082   | 14.5971   | 12.5094  | 13.3344   |
| 33.0647   | 29.4357   | 43.2903   | 32.7838   | 36.0176  | 44.527    |
| 78.8885   | 75.8289   | 58.9887   | 61.9017   | 42.8467  | 49.4591   |
| 12.1161   | 9.46168   | 11.8278   | 7.58811   | 11.548   | 7.14749   |
| 10.6775   | 13.2546   | 9.9477    | 12.5541   | 11.7736  | 14.014    |
| 0         | 0         | 0         | 0         | 0        | 0         |
| 0         | 0         | 0         | 0         | 0        | 0         |
| 1.2926    | 2.17071   | 1.4333    | 1.54626   | 1.84676  | 1.57323   |
| 1.77086   | 2.17325   | 3.24307   | 3.29411   | 2.77501  | 1.9526    |
| 2.27313   | 3.48648   | 0.146862  | 0.132807  | 0.757601 | 0.0490011 |
| 0.551346  | 0.294466  | 0.496154  | 0.358937  | 0.767837 | 0.198653  |
| 1.11892   | 1.57515   | 1.51409   | 0.755414  | 0.785547 | 0.958106  |
| 0.0344631 | 0.0429479 | 0.0651277 | 0.0196316 | 0        | 0.0289735 |
| 0.873996  | 0.658894  | 0.880752  | 0.800076  | 1.74791  | 0.663546  |
| 4.24683   | 3.66788   | 4.49085   | 3.74283   | 3.96594  | 3.03601   |
| 48.4429   | 48.1175   | 48.1827   | 41.4543   | 48.2753  | 46.1872   |

|          |           |          |          |           |           |
|----------|-----------|----------|----------|-----------|-----------|
| 0        | 0         | 0        | 0        | 0         | 0         |
| 0        | 0         | 0        | 0        | 0         | 0.0161784 |
| 12.31    | 14.1612   | 8.4112   | 9.83541  | 5.85128   | 6.2439    |
| 22.5055  | 22.329    | 23.1377  | 21.2302  | 19.7165   | 19.7202   |
| 0.441071 | 0.371429  | 0.403888 | 0.204166 | 0.498819  | 0.381241  |
| 1.24223  | 1.1111    | 1.35351  | 1.75338  | 1.2579    | 0.97632   |
| 1.52816  | 1.87794   | 2.03222  | 1.74101  | 2.00012   | 0.945714  |
| 0.876442 | 0.697808  | 1.22688  | 1.10946  | 0.896603  | 0.573094  |
| 0        | 0         | 0        | 0        | 0         | 0         |
| 2.7367   | 1.87768   | 1.40016  | 2.61756  | 2.35192   | 2.31133   |
| 0.201188 | 0.260364  | 0.214473 | 0.255658 | 0.184396  | 0.14312   |
| 0.188012 | 0.2343    | 0.355301 | 0.401623 | 0.661864  | 0.414918  |
| 34.9869  | 34.6287   | 33.9181  | 31.7279  | 32.1799   | 30.5007   |
| 0.977856 | 1.03254   | 0.711564 | 0.630759 | 0.96064   | 0.778197  |
| 0.272197 | 0         | 0.296809 | 0.310109 | 0.0655197 | 0.271217  |
| 0        | 0.0894411 | 0        | 0.122651 | 0.077741  | 0.0301694 |
| 0        | 0         | 0        | 0        | 0         | 0         |
| 6.41251  | 6.58346   | 6.92083  | 6.26868  | 5.92668   | 5.72169   |
| 8.69019  | 9.68111   | 8.00392  | 10.4069  | 6.34667   | 8.81418   |
| 4.75196  | 4.54927   | 5.03524  | 4.10519  | 8.86278   | 6.70689   |
| 24.151   | 21.9804   | 23.9787  | 27.3497  | 23.6179   | 23.2866   |
| 16.2385  | 15.5523   | 14.7622  | 14.218   | 15.2565   | 14.5234   |
| 12.6571  | 12.5696   | 13.1759  | 14.283   | 13.5322   | 11.1376   |
| 9.72591  | 10.0616   | 10.9362  | 9.17709  | 10.3934   | 7.80788   |
| 77.6458  | 79.1709   | 113.682  | 123.79   | 116.053   | 144.76    |
| 0        | 0         | 0        | 0        | 0         | 0         |
| 0        | 0         | 0        | 0        | 0         | 0         |
| 7.28767  | 7.02475   | 7.54188  | 7.03971  | 9.1804    | 6.95095   |
| 40.0143  | 39.3704   | 38.1011  | 38.0356  | 35.617    | 35.7918   |
| 0        | 0         | 0        | 0        | 0         | 0         |
| 1.60071  | 1.50333   | 1.98743  | 1.42721  | 1.40719   | 1.32623   |
| 0        | 0         | 0        | 0        | 0         | 0         |
| 0.779798 | 0.149505  | 0.529002 | 0.546714 | 0.649739  | 0.958163  |
| 18.0419  | 18.9066   | 19.5652  | 19.7823  | 28.0944   | 26.9853   |
| 6.45066  | 5.69528   | 7.16947  | 5.66182  | 8.40158   | 6.28342   |
| 16.6969  | 17.7433   | 19.4975  | 15.7508  | 16.577    | 14.2686   |
| 1.28799  | 0.94562   | 1.13337  | 1.3901   | 1.21856   | 1.63447   |
| 10.5247  | 8.6047    | 10.3279  | 7.71724  | 11.143    | 7.72262   |
| 10.4516  | 11.3435   | 11.3039  | 11.4629  | 10.5815   | 8.55445   |
| 0.119551 | 0.273139  | 0.401646 | 0.317806 | 0.431652  | 0.217768  |
| 11.1671  | 11.918    | 13.0448  | 11.1223  | 10.6774   | 9.37983   |
| 12.1028  | 12.1971   | 9.75939  | 9.97167  | 8.71427   | 7.42519   |
| 0.895235 | 0.442892  | 1.05279  | 0.694388 | 1.5236    | 1.32453   |



|          |           |           |           |           |           |
|----------|-----------|-----------|-----------|-----------|-----------|
| 5.4343   | 7.35377   | 7.66193   | 8.2235    | 5.976     | 6.10634   |
| 1.12289  | 1.16116   | 1.35448   | 1.1432    | 1.94089   | 1.10471   |
| 0        | 0         | 0         | 0         | 0         | 0         |
| 0        | 0.15569   | 0         | 0         | 0.0451079 | 0.0700212 |
| 2.8032   | 3.26319   | 3.47721   | 4.51227   | 2.87464   | 1.58238   |
| 0        | 0         | 0         | 0         | 0.269186  | 0.0668574 |
| 2.90601  | 2.76081   | 4.03404   | 2.9429    | 5.89714   | 3.87581   |
| 5.34751  | 6.04196   | 6.77375   | 4.30065   | 5.93198   | 5.81788   |
| 52.0342  | 57.2811   | 47.4593   | 62.6074   | 41.5068   | 52.7248   |
| 69.4011  | 64.1693   | 79.2889   | 69.326    | 90.3843   | 80.4125   |
| 0        | 0         | 0         | 0         | 0         | 0         |
| 0        | 0         | 0         | 0         | 0         | 0         |
| 1.50569  | 1.55976   | 1.29172   | 1.51187   | 1.89358   | 1.73916   |
| 0.98941  | 0.408164  | 0.562667  | 0.746427  | 1.24555   | 0.823275  |
| 0        | 0         | 0.210905  | 0         | 0.120886  | 0         |
| 0        | 0         | 0         | 0.053474  | 0         | 0         |
| 17.5994  | 17.6582   | 17.7059   | 16.5319   | 17.3608   | 17.6384   |
| 23.5719  | 23.3013   | 21.8664   | 21.457    | 24.5577   | 24.3004   |
| 38.1885  | 35.4896   | 38.8558   | 34.2114   | 29.9983   | 31.1675   |
| 22.0711  | 21.63     | 22.0097   | 23.2231   | 23.1441   | 23.8154   |
| 3039.31  | 3632.8    | 3088.35   | 3469.66   | 2912.49   | 3580.56   |
| 0.919437 | 0.805158  | 0.813981  | 0.934256  | 1.23817   | 1.23259   |
| 0.11911  | 0.305533  | 0.16225   | 0.344741  | 0.30943   | 0.406467  |
| 0.46264  | 0.892709  | 0.413642  | 0.306045  | 0.614279  | 0.401494  |
| 0        | 0         | 0.199553  | 0         | 0         | 0         |
| 0        | 0         | 0         | 0         | 0         | 0         |
| 0.104422 | 0         | 0         | 0         | 0         | 0         |
| 0        | 0         | 0         | 0         | 0         | 0         |
| 3.60796  | 4.21286   | 4.45001   | 4.42136   | 3.76028   | 2.84208   |
| 14.3057  | 14.1184   | 15.1656   | 13.4748   | 16.4443   | 14.6081   |
| 37.4272  | 43.4915   | 35.7406   | 39.6001   | 35.2922   | 38.3725   |
| 0        | 0         | 0         | 0         | 0         | 0         |
| 11.5866  | 11.2181   | 11.7902   | 10.3234   | 12.6147   | 10.5153   |
| 86.1693  | 85.596    | 83.1596   | 92.9752   | 71.5435   | 83.3567   |
| 0        | 0.0630014 | 0.0318459 | 2.10E-08  | 0.0547599 | 0.0359783 |
| 8.5664   | 8.74953   | 8.57936   | 8.76697   | 9.73059   | 9.62458   |
| 85.8953  | 89.0313   | 81.4595   | 86.7802   | 59.7923   | 78.0207   |
| 1.70417  | 3.17431   | 1.6902    | 3.86758   | 2.4596    | 2.3396    |
| 8.16715  | 8.07771   | 6.14095   | 7.42972   | 9.83337   | 9.47056   |
| 11.2498  | 12.5539   | 15.8177   | 11.9378   | 17.0737   | 14.2646   |
| 0        | 0         | 0         | 0         | 0         | 0         |
| 0        | 0         | 0.278384  | 0.251742  | 0         | 0.185768  |
| 0        | 0         | 0         | 0.0313536 | 0         | 0         |

|           |           |            |           |           |           |
|-----------|-----------|------------|-----------|-----------|-----------|
| 0         | 0         | 0          | 0         | 0         | 0         |
| 3.57182   | 2.57701   | 35.2893    | 29.9844   | 3.25804   | 1.73851   |
| 0         | 0         | 0          | 0         | 0         | 0         |
| 1.13843   | 1.26108   | 0.478085   | 1.00877   | 1.23312   | 1.16978   |
| 0.640904  | 0         | 0          | 0.292068  | 0.277686  | 0.215526  |
| 0.0716373 | 0         | 0.0451263  | 0         | 0.116394  | 0         |
| 0.139559  | 0.173918  | 0.058608   | 0.0529991 | 0.302335  | 0.117329  |
| 0         | 0         | 0          | 0         | 0         | 0         |
| 0.320483  | 0.254154  | 0.367056   | 0.564277  | 0.441815  | 0.538868  |
| 5.20521   | 5.10377   | 5.32613    | 4.696     | 5.8099    | 4.30944   |
| 20.2191   | 21.2932   | 20.4423    | 22.9922   | 19.5795   | 20.9952   |
| 0.24265   | 0.151195  | 0.305703   | 0.0691116 | 0.229979  | 0.280498  |
| 20.1973   | 19.7946   | 21.9321    | 22.1212   | 19.9392   | 21.6309   |
| 9.38686   | 10.0143   | 10.5642    | 10.3493   | 11.631    | 12.0039   |
| 195.388   | 229.286   | 198.888    | 207.383   | 147.717   | 178.69    |
| 1.07304   | 1.22466   | 2.08953    | 0.92326   | 1.55755   | 1.09022   |
| 103.753   | 114.185   | 107.376    | 118.332   | 106.587   | 118.26    |
| 0.547413  | 0.294397  | 0.470657   | 0.714953  | 0.803957  | 0.899035  |
| 0.785523  | 1.20482   | 1.1419     | 0.619569  | 1.63627   | 1.0668    |
| 1.71783   | 1.93131   | 1.4821     | 1.16663   | 1.9188    | 1.53418   |
| 3.06221   | 2.44403   | 3.20772    | 2.54794   | 3.61517   | 2.8637    |
| 110.407   | 101.908   | 108.006    | 95.4882   | 90.8762   | 94.0449   |
| 3.26577   | 3.09979   | 1.63325    | 1.59823   | 1.71781   | 2.09184   |
| 7.69633   | 7.21618   | 9.85056    | 8.70231   | 9.56223   | 9.14052   |
| 18.6493   | 21.2517   | 17.992     | 16.2063   | 18.866    | 22.7176   |
| 30.084    | 29.1834   | 27.37      | 29.9387   | 21.4644   | 27.299    |
| 13.5562   | 10.9831   | 13.4373    | 10.7      | 17.7808   | 14.9368   |
| 42.1955   | 42.5167   | 41.4446    | 39.3668   | 40.6156   | 37.8546   |
| 0.626483  | 0.436051  | 0.615551   | 0.979053  | 1.20584   | 0.818787  |
| 12.0598   | 12.2449   | 13.3118    | 11.1434   | 12.7524   | 10.3183   |
| 0.621648  | 0.393659  | 0.397973   | 0.266306  | 0.673357  | 0.425703  |
| 85.5388   | 111.041   | 86.0513    | 107.349   | 70.0612   | 95.8807   |
| 0.0262658 | 0.0327324 | 0.0661821  | 0         | 0         | 0         |
| 8.62586   | 6.0044    | 11.0342    | 7.52889   | 6.76548   | 5.64176   |
| 0.013557  | 0         | 0.00683196 | 0.0203878 | 0.0528649 | 0.0992956 |
| 0         | 0         | 0          | 0         | 0         | 0         |
| 35.2383   | 35.0926   | 25.8257    | 29.6122   | 26.6266   | 32.2026   |
| 24.7602   | 24.0344   | 28.4996    | 27.9198   | 29.3525   | 30.5995   |
| 1.10176   | 1.32566   | 1.1966     | 0.649249  | 1.02879   | 1.05402   |
| 0.131918  | 0.0410991 | 0.420688   | 0.300584  | 0.142891  | 0.166358  |
| 15.6753   | 13.4112   | 14.8165    | 12.1256   | 16.8196   | 15.5213   |
| 0         | 0         | 0          | 0         | 0         | 0         |
| 0.269007  | 0.335236  | 0.637947   | 0.366254  | 0.462512  | 0.470243  |

|            |           |           |           |           |            |
|------------|-----------|-----------|-----------|-----------|------------|
| 0.0400026  | 0         | 0.0755962 | 0.0227871 | 0.021665  | 0.0168153  |
| 23.3986    | 22.9968   | 22.0192   | 17.9266   | 31.9014   | 28.7355    |
| 0.0795248  | 0         | 0         | 0         | 0         | 0          |
| 0.0904223  | 0         | 0.037973  | 0         | 0         | 0.0253397  |
| 36.1871    | 34.3112   | 35.8252   | 33.2089   | 29.9561   | 24.7458    |
| 0          | 0.257377  | 0.260232  | 0.235309  | 0.223617  | 0          |
| 0          | 0         | 0         | 0         | 0         | 0          |
| 0          | 0         | 0         | 0         | 0         | 0          |
| 0          | 0         | 0         | 0.152835  | 0         | 0          |
| 0          | 0         | 0         | 0         | 0         | 0          |
| 1.87556    | 1.63738   | 3.0482    | 1.23706   | 2.5567    | 1.97915    |
| 0          | 0.0836686 | 0.0211463 | 0.191226  | 0         | 0          |
| 6.49944    | 6.59036   | 8.29006   | 7.68065   | 8.89117   | 7.45147    |
| 16.5198    | 16.2885   | 15.7841   | 16.4535   | 15.8541   | 20.375     |
| 1.51257    | 1.00597   | 2.57772   | 1.06338   | 1.31755   | 0.399805   |
| 3.76E-07   | 4.71E-07  | 5.14E-52  | 4.02E-07  | 3.64E-07  | 3.57E-07   |
| 72.2184    | 74.22     | 63.202    | 64.2345   | 35.8262   | 42.7481    |
| 9.00179    | 9.41568   | 4.80655   | 3.43747   | 9.18335   | 5.93274    |
| 2.21794    | 2.40783   | 3.78808   | 2.04496   | 17.9062   | 13.7442    |
| 0.00991882 | 0         | 0.0340176 | 0         | 0.0537193 | 0.0583721  |
| 17.9623    | 19.7443   | 15.1899   | 17.6098   | 16.5916   | 19.8665    |
| 16.1732    | 18.9617   | 14.4775   | 14.789    | 12.9085   | 14.1338    |
| 2.62713    | 3.12493   | 2.35684   | 2.81149   | 2.2419    | 2.10814    |
| 17.0901    | 26.5402   | 15.3132   | 16.2634   | 17.4311   | 14.9288    |
| 15.7125    | 19.5775   | 17.4812   | 16.0808   | 16.5846   | 19.9887    |
| 0          | 0         | 0         | 0         | 0         | 0          |
| 32.1151    | 39.1353   | 39.6548   | 44.1053   | 56.5485   | 64.9386    |
| 0          | 0         | 0.0238492 | 0         | 0         | 0.0159148  |
| 0.0234177  | 0.0583663 | 0.0147515 | 0.093378  | 0.0253656 | 0.00984379 |
| 0.0243986  | 0.0232469 | 0         | 0.148767  | 0.0194944 | 0.0784144  |
| 14.1658    | 15.2395   | 17.0615   | 15.2581   | 17.2734   | 17.6414    |
| 2.78133    | 3.78736   | 2.06459   | 3.23131   | 3.11209   | 3.00562    |
| 2.96574    | 4.32221   | 5.58494   | 3.50505   | 4.79169   | 3.63906    |
| 4.08891    | 4.16051   | 4.13785   | 3.47635   | 3.70769   | 3.82559    |
| 6.12197    | 8.39898   | 4.44018   | 4.9372    | 4.34654   | 4.04725    |
| 20.6068    | 20.1942   | 19.684    | 20.8149   | 17.3924   | 19.4603    |
| 13.0139    | 10.3243   | 19.9045   | 14.8254   | 25.217    | 14.99      |
| 14.5696    | 17.6065   | 14.2394   | 17.303    | 12.5295   | 12.7684    |
| 13.5709    | 12.9437   | 13.7171   | 10.7387   | 12.0934   | 9.85106    |
| 0          | 0         | 0         | 0.89161   | 0         | 0.164487   |
| 0.3944     | 0.327667  | 0.745329  | 0         | 1.13922   | 0.386839   |
| 15.3105    | 11.8602   | 11.7816   | 10.137    | 14.4292   | 7.92587    |
| 4.76398    | 5.69034   | 5.88113   | 6.0587    | 5.5532    | 4.4872     |

|           |           |           |          |           |           |
|-----------|-----------|-----------|----------|-----------|-----------|
| 0         | 0.0973567 | 0         | 0        | 0.0846211 | 0.0656789 |
| 0.508614  | 0.595329  | 0.267095  | 0.284243 | 0.492664  | 0.322129  |
| 0         | 0         | 0         | 0        | 0         | 0         |
| 0         | 0         | 0         | 0.120998 | 0         | 0         |
| 8.72755   | 25.3724   | 53.0308   | 41.1865  | 98.1102   | 86.272    |
| 0.821335  | 0.878619  | 1.06223   | 0.91089  | 0.976256  | 0.849384  |
| 0         | 0         | 0         | 0        | 0         | 0         |
| 0         | 0         | 0         | 0        | 0         | 0         |
| 0         | 0         | 0         | 0        | 0         | 0         |
| 0.299633  | 0.280051  | 0.117967  | 0.106677 | 0.141993  | 0.15744   |
| 0         | 0         | 0         | 0        | 0         | 0         |
| 4.01728   | 4.51838   | 5.52611   | 4.25021  | 7.8433    | 6.44823   |
| 2.7635    | 1.94402   | 2.84752   | 2.21993  | 3.80334   | 3.33445   |
| 904.36    | 1010.6    | 909.434   | 1081.93  | 877.938   | 1027.28   |
| 0.78401   | 0.868473  | 1.07005   | 1.01727  | 0.731276  | 0.970381  |
| 0         | 0         | 0         | 0        | 0         | 0         |
| 15.3875   | 18.8164   | 13.2593   | 14.7873  | 13.8322   | 9.4471    |
| 0         | 0         | 0         | 0        | 0         | 0         |
| 6.64635   | 6.52299   | 8.15873   | 4.77069  | 5.24777   | 4.64616   |
| 29.8741   | 23.0785   | 43.2535   | 33.7414  | 32.3756   | 30.9556   |
| 0         | 0         | 0         | 0        | 0         | 0         |
| 11.709    | 11.2326   | 10.9664   | 10.5134  | 11.7624   | 8.29945   |
| 6.8301    | 5.74937   | 7.71703   | 4.88749  | 8.72762   | 5.60458   |
| 32.7356   | 0         | 82.4843   | 0        | 70.9172   | 27.5213   |
| 2.91094   | 2.80766   | 3.04969   | 2.24648  | 4.16981   | 2.9168    |
| 0         | 0         | 0         | 0        | 0         | 0         |
| 0         | 0         | 0         | 0        | 0         | 0         |
| 0         | 0         | 0         | 0        | 0         | 0         |
| 0         | 0         | 0         | 0        | 0         | 0.406227  |
| 0.0284023 | 0.0707898 | 0.0715655 | 0.129433 | 0.184589  | 0.191025  |
| 30.0942   | 35.4198   | 27.2163   | 28.9224  | 26.9262   | 24.8197   |
| 13.2882   | 14.5972   | 16.4901   | 14.1987  | 21.0733   | 14.4475   |
| 3.23273   | 3.58105   | 1.49949   | 3.06923  | 2.43181   | 2.982     |
| 0         | 0         | 0         | 0        | 0         | 0         |
| 42.0228   | 39.0724   | 35.4038   | 32.7449  | 25.8892   | 29.7701   |
| 5.94895   | 4.7888    | 6.5494    | 6.91383  | 7.39014   | 5.83339   |
| 0.832569  | 1.5244    | 1.58248   | 2.00681  | 2.77411   | 2.01565   |
| 1.16235   | 1.09444   | 0.943721  | 1.17711  | 0.867337  | 0.868626  |
| 6.90897   | 8.43423   | 6.70597   | 7.34923  | 6.59749   | 7.31976   |
| 0.114683  | 0.607403  | 0.216726  | 0.489963 | 0.124223  | 0.144624  |
| 17.1181   | 14.5786   | 18.1893   | 13.8292  | 17.8746   | 13.7702   |
| 0.0451694 | 0.187634  | 0.246597  | 0.171536 | 0.0978532 | 0.13924   |
| 0.812917  | 0.662524  | 0.796354  | 0.945155 | 1.30741   | 0.659423  |

|           |           |          |           |           |          |
|-----------|-----------|----------|-----------|-----------|----------|
| 0         | 0         | 0        | 0.0263653 | 0         | 0        |
| 1.43427   | 1.59588   | 1.74243  | 1.28388   | 1.55357   | 1.09814  |
| 9.60888   | 9.34649   | 12.3056  | 11.0195   | 12.5035   | 10.4245  |
| 0.105621  | 1.84529   | 0        | 12.4948   | 0         | 2.69488  |
| 32.2152   | 36.9524   | 36.2611  | 36.0421   | 48.8659   | 43.3642  |
| 0         | 0         | 0        | 0         | 0         | 0        |
| 60.053    | 69.0616   | 58.8567  | 64.4988   | 58.0886   | 70.0896  |
| 1.92395   | 2.0551    | 0.779108 | 0.861111  | 2.53055   | 1.73302  |
| 0.117068  | 0.238729  | 0.174305 | 0.109124  | 0.2075    | 0.107368 |
| 0         | 0         | 0        | 0         | 0         | 0        |
| 25.3435   | 24.432    | 26.9048  | 24.0509   | 25.6024   | 22.2908  |
| 9.72211   | 9.3877    | 10.2873  | 9.99156   | 10.6738   | 8.32734  |
| 0         | 0         | 0        | 0         | 0.0439357 | 0        |
| 3.00185   | 2.8741    | 2.45891  | 2.74201   | 2.79195   | 2.99792  |
| 1.51274   | 1.83745   | 2.68988  | 1.85433   | 2.12599   | 1.88352  |
| 0.0767424 | 0.0761419 | 0.483421 | 0.218578  | 0.29094   | 0.129037 |
| 0         | 0         | 0        | 0         | 0         | 0        |
| 3.88776   | 3.67295   | 4.67815  | 2.84974   | 5.32431   | 3.03211  |
| 0.0620341 | 0         | 0        | 0.0706743 | 0.033597  | 0.104306 |
| 0         | 0         | 0        | 0         | 0         | 0        |
| 18.8769   | 19.8858   | 17.4518  | 17.174    | 18.3877   | 18.8956  |
| 42.7457   | 47.8085   | 40.6252  | 39.8199   | 30.9946   | 38.9787  |
| 0.0809747 | 0.0864948 | 0.11659  | 0.144969  | 0.0626501 | 0.145878 |
| 0.133976  | 0.413055  | 0.298172 | 0.619666  | 0.14512   | 0.220496 |
| 36.0836   | 46.9358   | 30.0787  | 29.2809   | 2.35272   | 4.99378  |
| 0         | 0         | 0        | 0         | 0         | 0        |
| 8.21593   | 7.45877   | 8.19362  | 6.97993   | 8.20168   | 6.39216  |
| 0         | 0.177951  | 0        | 0         | 0         | 0        |
| 1.06047   | 0.503843  | 1.80365  | 1.25348   | 3.82654   | 2.75266  |
| 23.9641   | 23.294    | 23.1981  | 20.1204   | 31.4239   | 26.0927  |
| 286.795   | 218.945   | 299.258  | 286.433   | 252.759   | 368.908  |
| 0         | 0         | 0        | 0         | 0         | 0        |
| 14.8912   | 14.0318   | 15.2232  | 13.4464   | 21.422    | 20.27    |
| 0.206709  | 0.161     | 0.276699 | 0.132468  | 0.433811  | 0.325842 |
| 1.76995   | 2.02191   | 1.7963   | 1.8111    | 1.70416   | 1.43291  |
| 0         | 0         | 0        | 0         | 0         | 0        |
| 22.741    | 26.256    | 34.034   | 32.0046   | 22.2579   | 25.554   |
| 19.9403   | 22.2776   | 22.1217  | 24.454    | 25.3822   | 25.5465  |
| 0.859042  | 0.778572  | 1.52501  | 0.622804  | 0.63443   | 0.722207 |
| 0.260142  | 0.324188  | 0.983222 | 1.77825   | 0.28178   | 0        |
| 0.268165  | 0.104434  | 0        | 0         | 0.0544634 | 0        |
| 0.482125  | 0.492172  | 0.374943 | 0.44839   | 0.333547  | 0.44201  |
| 7.09168   | 6.37381   | 4.00698  | 3.9173    | 4.42272   | 3.17976  |

|           |           |           |           |           |           |
|-----------|-----------|-----------|-----------|-----------|-----------|
| 55.3388   | 53.6784   | 57.2412   | 53.8043   | 48.8097   | 48.9017   |
| 0         | 0         | 0         | 0         | 0         | 0         |
| 5.26337   | 5.93452   | 4.81543   | 4.49735   | 4.81885   | 4.42498   |
| 28.4446   | 28.7175   | 27.4698   | 32.5297   | 29.5376   | 35.8069   |
| 4.21812   | 3.77366   | 4.39023   | 7.78819   | 3.84396   | 3.13001   |
| 25.7184   | 24.2397   | 25.186    | 23.4322   | 20.4446   | 20.8647   |
| 0.873708  | 1.07223   | 1.32235   | 1.46688   | 2.14124   | 1.37984   |
| 34.8383   | 37.077    | 35.5288   | 34.8432   | 33.9889   | 38.71     |
| 3.11281   | 2.49377   | 2.14074   | 0.967686  | 1.84729   | 1.79024   |
| 2.01838   | 1.84162   | 2.10396   | 1.32779   | 3.03156   | 1.73624   |
| 5.72703   | 6.6042    | 8.67528   | 11.2292   | 6.26434   | 8.98634   |
| 53.6779   | 48.216    | 36.9831   | 33.2085   | 38.0123   | 45.581    |
| 0.200223  | 0.0415863 | 0.21021   | 0         | 0.0722925 | 0.140275  |
| 9.75239   | 8.25042   | 10.097    | 7.7314    | 7.78551   | 7.58575   |
| 0         | 10.2679   | 0.296584  | 2.4138    | 2.03994   | 0.791652  |
| 5.12684   | 5.2105    | 6.08281   | 3.96956   | 6.41593   | 4.64497   |
| 45.4716   | 180.306   | 31.5082   | 154.134   | 66.0131   | 21.0257   |
| 1.92957   | 1.98799   | 2.67874   | 2.35559   | 2.68694   | 1.78755   |
| 24.0149   | 24.0385   | 26.0726   | 23.8535   | 27.5611   | 25.181    |
| 0.1186    | 0         | 0.132174  | 2.11E-11  | 0         | 0.0984092 |
| 0.0165321 | 0.123613  | 0.0979378 | 0.117717  | 0.0358144 | 0.0277974 |
| 1.71023   | 1.85694   | 0.840044  | 1.63497   | 2.03137   | 2.8716    |
| 0         | 0         | 0         | 0         | 0         | 0         |
| 1.32594   | 1.88716   | 1.40121   | 1.31664   | 1.39699   | 1.34216   |
| 0         | 0         | 0         | 0         | 0         | 0         |
| 17.2196   | 15.7055   | 16.7161   | 15.0689   | 16.5795   | 16.3067   |
| 42.3626   | 41.8661   | 46.8592   | 44.082    | 39.5593   | 34.8012   |
| 1.63908   | 1.95039   | 1.69955   | 1.91271   | 2.92729   | 1.87727   |
| 1.0215    | 1.46082   | 1.66142   | 1.16098   | 1.34496   | 1.11988   |
| 0.0621858 | 0.0774958 | 0.078345  | 0         | 0.202075  | 0.104561  |
| 4.37574   | 4.66463   | 5.44638   | 4.82504   | 5.71048   | 4.36821   |
| 13.7278   | 14.3381   | 14.1991   | 17.0592   | 10.6904   | 12.7158   |
| 0.0576736 | 0.715825  | 1.72433   | 2.42175   | 1.35529   | 1.51661   |
| 4.07347   | 4.3743    | 5.53234   | 4.59146   | 4.45924   | 5.47696   |
| 0.319193  | 0.309382  | 0.223409  | 0.282839  | 0.268911  | 0.119266  |
| 0.233895  | 0.109501  | 0.395371  | 0.13904   | 0.20761   | 0.0650031 |
| 10.9879   | 10.9986   | 13.4448   | 9.53636   | 16.7639   | 11.3849   |
| 13.3196   | 12.4491   | 12.5858   | 10.1833   | 13.3834   | 12.6715   |
| 0.143764  | 0.0358318 | 0.126786  | 0.0818942 | 0.436024  | 0.37468   |
| 11.2136   | 8.22064   | 11.6492   | 7.44038   | 16.9797   | 8.14458   |
| 0.943841  | 0.529296  | 0.614369  | 0.931928  | 1.07347   | 0.317399  |
| 11.7351   | 11.2306   | 12.6506   | 10.2884   | 12.3666   | 10.6211   |
| 25.9486   | 24.3817   | 31.2315   | 26.7102   | 27.569    | 29.7133   |

|           |           |          |           |          |           |
|-----------|-----------|----------|-----------|----------|-----------|
| 17.0787   | 21.1657   | 18.7081  | 20.7089   | 22.3277  | 27.717    |
| 0         | 0         | 0        | 0         | 0        | 0         |
| 16.4432   | 16.7723   | 16.7929  | 18.9576   | 19.5676  | 14.2113   |
| 0         | 0         | 0        | 0         | 0        | 0         |
| 17.0233   | 14.5414   | 15.8521  | 12.8637   | 20.9307  | 15.8402   |
| 15.8009   | 17.7472   | 9.97164  | 9.05021   | 9.2929   | 7.81984   |
| 7.47221   | 5.56032   | 7.28053  | 8.35985   | 7.65704  | 8.6879    |
| 0.0969247 | 0.0201312 | 0        | 0.165637  | 0.122485 | 0.190133  |
| 20.4047   | 24.0567   | 16.1069  | 21.414    | 14.8569  | 19.2899   |
| 7.98511   | 8.62133   | 7.74578  | 7.74275   | 10.0493  | 11.668    |
| 8.01247   | 4.79484   | 9.84468  | 2.25952   | 11.042   | 4.80203   |
| 2.14424   | 2.71456   | 2.76575  | 3.29597   | 4.22123  | 3.57676   |
| 15.3867   | 17.4965   | 13.0575  | 12.4756   | 12.7474  | 15.023    |
| 4.61375   | 4.37118   | 6.03268  | 5.57141   | 6.02224  | 3.81765   |
| 0         | 0         | 0        | 0         | 0        | 0         |
| 8.97296   | 9.05123   | 10.6145  | 10.9269   | 9.67667  | 9.0371    |
| 0         | 0         | 0        | 0         | 0        | 0         |
| 0.63597   | 0.873723  | 0.637147 | 0.872985  | 0.547792 | 0.712672  |
| 0         | 0         | 0        | 0         | 0        | 0         |
| 0.647581  | 0.554822  | 0.356937 | 0.83      | 0.613765 | 0.680536  |
| 0.638767  | 0.484541  | 1.60951  | 2.46798   | 0.902478 | 0.770506  |
| 2.86056   | 3.11655   | 2.76226  | 2.45887   | 3.17271  | 3.25454   |
| 0         | 0         | 0        | 0         | 53.4713  | 0         |
| 0.052457  | 0.148859  | 0.21258  | 0.0693703 | 0.171673 | 0.0980034 |
| 7.40283   | 7.09431   | 8.02248  | 7.40852   | 7.09244  | 6.20474   |
| 0.0369357 | 0.0920584 | 0.077556 | 0.126241  | 0.026672 | 0.0103508 |
| 3.06216   | 3.09775   | 3.90327  | 3.26293   | 4.29242  | 3.19528   |
| 3.19441   | 3.15942   | 2.72558  | 1.7619    | 3.12143  | 2.5719    |
| 2.20437   | 2.25475   | 1.8407   | 1.37118   | 1.82498  | 1.50658   |
| 0         | 0         | 0        | 0.155453  | 0        | 0         |
| 10.6142   | 10.655    | 11.0446  | 10.6409   | 10.0065  | 9.24486   |
| 0.536152  | 0.517876  | 0.351111 | 0.40581   | 0.627191 | 0.39928   |
| 26.9194   | 24.4038   | 41.3428  | 59.3012   | 37.308   | 48.6947   |
| 11.0652   | 10.8625   | 11.5612  | 13.5442   | 11.9331  | 10.6868   |
| 0         | 0         | 0        | 0         | 0        | 0         |
| 9.04833   | 9.19429   | 7.36588  | 8.3394    | 9.57479  | 9.28449   |
| 5.51764   | 4.66151   | 7.89223  | 4.92921   | 5.41089  | 5.59561   |
| 6.50242   | 6.57025   | 5.65821  | 5.40591   | 6.83178  | 7.87987   |
| 0.0753637 | 0         | 0        | 0         | 0        | 0         |
| 0.932215  | 1.24471   | 1.51001  | 1.44136   | 1.44251  | 1.39951   |
| 21.908    | 21.7084   | 19.6185  | 18.7092   | 21.1891  | 21.5256   |
| 4.06658   | 6.20056   | 4.49042  | 4.49672   | 4.19755  | 5.45001   |
| 22.976    | 21.9899   | 20.6676  | 21.2524   | 22.9026  | 22.9469   |

|           |           |           |           |           |           |
|-----------|-----------|-----------|-----------|-----------|-----------|
| 30.1565   | 30.4752   | 31.3843   | 34.0217   | 30.3937   | 31.8591   |
| 10.6646   | 10.9516   | 12.2249   | 10.012    | 11.5021   | 9.79315   |
| 2.06127   | 2.3155    | 2.77979   | 1.78609   | 2.10694   | 1.97701   |
| 33.9804   | 40.4092   | 37.0091   | 35.5794   | 35.0851   | 33.3638   |
| 16.2729   | 15.0665   | 16.5127   | 14.3785   | 18.587    | 16.1758   |
| 0.299039  | 0.293471  | 0.383474  | 0.198736  | 0.297716  | 0.134793  |
| 1.65117   | 2.86098   | 0.599229  | 0.753905  | 2.31178   | 1.53208   |
| 45.5037   | 48.4894   | 109.403   | 98.0196   | 158.064   | 178.239   |
| 23.3967   | 28.0006   | 23.7054   | 27.7125   | 22.2734   | 28.166    |
| 0         | 0         | 0         | 0         | 0         | 0         |
| 47.6659   | 48.1631   | 46.0623   | 47.8237   | 39.1631   | 42.1622   |
| 0.211444  | 0         | 1.02063   | 0         | 0.916139  | 0         |
| 25.28     | 28.3763   | 25.8312   | 27.8557   | 23.9846   | 22.2572   |
| 0.319657  | 0.199178  | 0         | 0         | 0.51937   | 0.40311   |
| 38.6821   | 41.002    | 44.622    | 38.3416   | 46.1714   | 39.1328   |
| 0.526718  | 0.712063  | 0.312985  | 1.18873   | 0.48443   | 0.288224  |
| 2.22385   | 1.23915   | 3.54851   | 2.05582   | 2.81617   | 2.21421   |
| 11.775    | 10.6413   | 13.7034   | 11.8018   | 13.367    | 10.3588   |
| 178.812   | 138.962   | 52.0151   | 57.5791   | 40.4959   | 59.2688   |
| 20.5559   | 25.8261   | 17.7729   | 18.623    | 14.6984   | 20.5572   |
| 16.8055   | 15.0694   | 15.7647   | 16.3186   | 15.3306   | 16.2346   |
| 19.3798   | 16.6323   | 22.2723   | 18.5554   | 24.4244   | 20.2763   |
| 10.0327   | 6.42033   | 5.46584   | 6.79628   | 2.05596   | 3.19148   |
| 0         | 0         | 0         | 0         | 0         | 0         |
| 0         | 0         | 0         | 0         | 0         | 0         |
| 1.99771   | 1.19128   | 2.51731   | 2.60023   | 2.47253   | 1.78788   |
| 0         | 0         | 0         | 0         | 0         | 0         |
| 63.8896   | 71.4633   | 57.6536   | 58.0336   | 65.8475   | 72.7796   |
| 0.0350345 | 0         | 0         | 0         | 0         | 0         |
| 0.0369441 | 0         | 0         | 0         | 0         | 0         |
| 0.0984017 | 0.20438   | 0.0413239 | 0.186846  | 0.0710578 | 0.0827275 |
| 0.007933  | 0.0296583 | 0.119933  | 0.0271138 | 0.137486  | 0.286783  |
| 0.217299  | 0.369269  | 0.0746631 | 0.292576  | 0.363759  | 0.282332  |
| 28.2873   | 28.9037   | 29.7172   | 26.7047   | 24.3751   | 21.4469   |
| 0.356876  | 0.527097  | 0         | 0.406583  | 0.342344  | 0.416708  |
| 2.46235   | 2.10545   | 2.30967   | 2.12958   | 3.71847   | 2.26657   |
| 2.97E-06  | 8.83E-06  | 7.09E-08  | 3.15E-05  | 0.296671  | 0.446689  |
| 5.06581   | 4.9387    | 5.11974   | 4.31589   | 5.6604    | 4.49927   |
| 0.0630018 | 0.157026  | 0.396865  | 0.143554  | 0.0682423 | 0.0529664 |
| 6.85704   | 5.67069   | 9.51068   | 10.0578   | 8.67666   | 8.02135   |
| 3.4949    | 3.20145   | 4.34753   | 2.50917   | 4.13514   | 3.96687   |
| 71.978    | 72.5419   | 73.2476   | 61.4218   | 78.3488   | 72.7027   |
| 2.01272   | 1.32288   | 2.04103   | 1.52397   | 2.34013   | 1.42924   |



|           |          |          |           |           |           |
|-----------|----------|----------|-----------|-----------|-----------|
| 0         | 0        | 0        | 0         | 0         | 0         |
| 482.155   | 468.19   | 395.124  | 425.661   | 331.456   | 436.058   |
| 13.0831   | 11.526   | 11.2883  | 9.51608   | 10.0446   | 11.2291   |
| 0         | 0        | 0        | 0         | 0         | 0         |
| 0         | 0        | 0        | 0         | 0.0793489 | 0         |
| 0.802692  | 0.836181 | 0.727843 | 0.451648  | 0.772932  | 1.28907   |
| 5.63764   | 6.02859  | 8.04025  | 7.77951   | 8.04134   | 8.32173   |
| 0         | 0        | 0        | 0         | 0         | 0         |
| 0.0385441 | 0        | 0        | 0         | 0         | 0         |
| 25.6934   | 22.7941  | 31.638   | 21.4256   | 26.3183   | 22.8139   |
| 264.556   | 309.49   | 279.728  | 277.54    | 264.477   | 275.205   |
| 0         | 0        | 0        | 0         | 0         | 0         |
| 0         | 0        | 0        | 0         | 0         | 0         |
| 1.34218   | 0.873197 | 1.60434  | 1.31695   | 1.18847   | 1.23522   |
| 0.808097  | 0.533858 | 2.42868  | 2.44028   | 1.63462   | 1.20323   |
| 108.355   | 149.315  | 65.5715  | 96.1213   | 140.957   | 91.7127   |
| 1.42021   | 1.53244  | 1.78926  | 1.08526   | 3.78957   | 2.62095   |
| 0.0127    | 0        | 0        | 0.0289378 | 0.0412691 | 0.010677  |
| 0.253349  | 0.315723 | 0.725416 | 0.629752  | 0.224527  | 0.0580892 |
| 0.640367  | 0.612688 | 0.340355 | 0.639147  | 1.869     | 0.756944  |
| 8.4976    | 10.1438  | 7.88843  | 9.47735   | 6.06523   | 7.89604   |
| 13.453    | 14.6498  | 14.8896  | 15.8997   | 13.6868   | 15.8024   |
| 9.39913   | 10.0356  | 10.2331  | 8.75448   | 10.706    | 10.406    |
| 5.63274   | 5.05854  | 5.3949   | 4.92145   | 6.11058   | 5.19364   |
| 6.83E-10  | 4.88E-09 | 0        | 0.175379  | 1.82E-09  | 3.83E-09  |
| 34.3441   | 25.1657  | 30.7747  | 30.7102   | 36.8296   | 35.2064   |
| 0         | 1.52E-09 | 0        | 0         | 0         | 0         |
| 0.36678   | 0.304721 | 0        | 0.278578  | 0.264859  | 0.154178  |
| 2.06E-06  | 9.16E-10 | 5.28E-08 | 9.16E-08  | 5.65E-07  | 3.25E-05  |
| 0         | 0        | 0.10482  | 0         | 0         | 0         |
| 6.58264   | 6.99962  | 7.12138  | 6.43986   | 7.59517   | 6.91756   |
| 1.54991   | 1.25807  | 0.950568 | 0.738993  | 1.12475   | 1.19931   |
| 1.4743    | 1.84851  | 1.36933  | 1.44932   | 1.70483   | 1.14078   |
| 1.33884   | 1.48241  | 1.45184  | 1.07489   | 1.99766   | 1.52385   |
| 33.4247   | 36.2985  | 35.7648  | 34.2258   | 35.553    | 33.9926   |
| 5.32975   | 5.70522  | 6.35443  | 4.45997   | 8.77247   | 6.51462   |
| 0.203963  | 0.508358 | 0.770893 | 0.232372  | 0.662787  | 0.535858  |
| 46.3355   | 48.2714  | 45.5499  | 48.1021   | 41.8058   | 48.393    |
| 14.0213   | 13.0944  | 16.5234  | 14.045    | 16.7925   | 15.6887   |
| 0.0328939 | 0        | 0.165767 | 0.0374755 | 0.142521  | 0.110618  |
| 0         | 0        | 0        | 0         | 0         | 0         |
| 0.237807  | 0.243163 | 0.169006 | 0.222301  | 0.270797  | 0.36397   |
| 6.77225   | 1.94759  | 28.2214  | 19.5855   | 3.38564   | 2.62778   |

|           |           |          |          |          |          |
|-----------|-----------|----------|----------|----------|----------|
| 0.62726   | 0.964085  | 0.263419 | 0.524059 | 0.860618 | 1.14258  |
| 1.44767   | 1.59783   | 1.89908  | 2.44448  | 1.43841  | 0.680841 |
| 0         | 0         | 0        | 0.561643 | 0        | 0        |
| 2.75689   | 3.66468   | 12.0407  | 9.63203  | 5.77334  | 6.48971  |
| 3753.07   | 4668.44   | 3752.27  | 3986.06  | 2312.29  | 2988.29  |
| 0.151665  | 0.0472509 | 0.191076 | 0.043197 | 0.219042 | 0.199231 |
| 22.7969   | 20.5776   | 19.2202  | 23.2527  | 25.9398  | 27.8729  |
| 0         | 0         | 0        | 0        | 0        | 0        |
| 0         | 0         | 0        | 0        | 0        | 0        |
| 38.376    | 35.6622   | 37.1416  | 35.7876  | 35.2916  | 32.605   |
| 0.0137224 | 0         | 0        | 0        | 0        | 0        |
| 0         | 0         | 0        | 0        | 0        | 0        |
| 45.3204   | 37.019    | 46.4199  | 34.1847  | 55.6919  | 43.1421  |
| 0         | 0         | 0        | 0        | 0        | 0        |
| 0         | 0         | 0        | 0        | 0        | 0        |
| 193.974   | 217.904   | 156.35   | 207.724  | 163.795  | 219.335  |
| 44.4459   | 31.4244   | 58.7795  | 49.8098  | 60.3796  | 52.2017  |
| 0.556911  | 0.804902  | 0.538481 | 0.480552 | 0.595242 | 0.543004 |
| 0.510427  | 0.954141  | 0.964596 | 0.436141 | 1.38221  | 1.07281  |
| 24.7943   | 27.2067   | 27.9198  | 23.3863  | 29.2106  | 23.35    |
| 0.239167  | 0.234182  | 0.215226 | 0.661735 | 0.148035 | 0.172346 |
| 321.993   | 310.424   | 202.655  | 264.774  | 99.0669  | 208.207  |
| 0         | 0         | 0        | 0        | 0        | 0        |
| 0.127644  | 0.191445  | 0.196101 | 0.21888  | 0.595929 | 0.301861 |
| 25.7733   | 16.676    | 8.75359  | 10.1711  | 17.1319  | 24.1809  |
| 21.6274   | 25.4236   | 19.093   | 21.4439  | 15.8236  | 23.3482  |
| 30.7724   | 38.3485   | 38.7688  | 0        | 66.6641  | 0        |
| 242.12    | 282.406   | 258.109  | 285.129  | 271.507  | 319.71   |
| 0.907024  | 0.6487    | 0.238476 | 0.220146 | 0.379605 | 0.690699 |
| 0.106843  | 0.133147  | 0        | 0.182586 | 0.173595 | 0.404207 |
| 8.19713   | 8.84926   | 8.98225  | 9.07823  | 10.8199  | 8.99892  |
| 0.557827  | 0.444583  | 0.48387  | 0.447796 | 0.792237 | 0.937825 |
| 5.47489   | 6.19173   | 10.1273  | 9.79865  | 7.62673  | 6.99765  |
| 7.09598   | 7.20468   | 9.94763  | 9.22119  | 7.20154  | 6.47835  |
| 0.701895  | 0.788397  | 0.589524 | 0.932933 | 0.963019 | 0.590092 |
| 5.1719    | 4.06512   | 5.71733  | 3.74524  | 6.27032  | 3.43157  |
| 3.92523   | 4.29977   | 3.11502  | 2.61018  | 3.0867   | 2.58364  |
| 18.2853   | 18.6857   | 18.6661  | 19.021   | 18.024   | 17.733   |
| 1.48509   | 1.55328   | 1.00232  | 0.896322 | 1.54159  | 0.356723 |
| 21.6898   | 22.4859   | 23.1494  | 20.359   | 27.0245  | 23.4806  |
| 14.3934   | 12.3316   | 11.5834  | 10.6815  | 12.5318  | 12.4719  |
| 11.093    | 11.1245   | 10.5995  | 10.1742  | 11.5003  | 12.1652  |
| 2.90634   | 2.75953   | 3.40462  | 2.43979  | 3.32167  | 2.42503  |

|           |           |           |            |           |           |
|-----------|-----------|-----------|------------|-----------|-----------|
| 4.41219   | 4.22782   | 4.90475   | 4.11854    | 6.51618   | 4.48867   |
| 0         | 0         | 0         | 0          | 0         | 0         |
| 28.1069   | 28.4186   | 32.7205   | 24.3453    | 29.5017   | 23.9937   |
| 1.11675   | 1.30269   | 1.16973   | 0.969016   | 1.38546   | 0.878823  |
| 3.62784   | 4.74723   | 5.199     | 7.02633    | 5.09216   | 3.88871   |
| 28.1538   | 32.8658   | 28.9602   | 32.5434    | 29.6371   | 32.0362   |
| 0.0864419 | 0.0307782 | 0.0466732 | 0.0422065  | 0.0535041 | 0.0622909 |
| 25.7757   | 25.1322   | 22.6578   | 24.5038    | 27.8812   | 24.566    |
| 37.6199   | 30.5346   | 43.1604   | 30.9027    | 48.3467   | 31.5534   |
| 1.79258   | 1.77637   | 1.41762   | 2.0782     | 1.97065   | 2.07759   |
| 0.143275  | 0.267823  | 0.135379  | 0.285653   | 0.620768  | 0.301132  |
| 0.2282    | 0.284382  | 0.287499  | 0.259984   | 0.247181  | 0.19185   |
| 11.149    | 13.5283   | 11.8283   | 10.5014    | 14.7777   | 12.2714   |
| 0         | 0         | 0         | 0.00529071 | 0         | 0         |
| 28.845    | 30.9898   | 32.2092   | 31.7211    | 36.9012   | 31.2191   |
| 0.146023  | 0         | 0.183968  | 0          | 0.18746   | 0.145497  |
| 7.40482   | 7.2363    | 6.28367   | 3.90925    | 9.47236   | 4.51716   |
| 0.0953614 | 0.158452  | 0.360424  | 0.39836    | 0.172156  | 0.534476  |
| 41.7138   | 42.4701   | 33.1167   | 35.2437    | 34.6683   | 39.629    |
| 6.48478   | 6.99911   | 5.36957   | 5.23917    | 4.21964   | 2.74325   |
| 27.5805   | 23.9942   | 34.5847   | 28.1632    | 24.2841   | 26.3928   |
| 0.125729  | 0.235024  | 0.2376    | 0.0716202  | 0.136187  | 0.211403  |
| 0         | 0.0371532 | 0.112681  | 0.169829   | 0.0645862 | 0.100257  |
| 0.605962  | 0.385965  | 0.27144   | 0.368193   | 0.481335  | 0.656612  |
| 0.343244  | 0.46941   | 0.307511  | 0.656934   | 0.165242  | 0.205205  |
| 0         | 0         | 0         | 0          | 0         | 0         |
| 2.50191   | 1.88249   | 2.14101   | 1.1294     | 2.14756   | 1.07153   |
| 34.7834   | 37.1076   | 34.1206   | 34.9359    | 48.3644   | 47.3267   |
| 8.94597   | 8.57015   | 8.73748   | 7.22071    | 10.1872   | 7.90071   |
| 9.40605   | 8.39899   | 9.75221   | 10.8426    | 7.71815   | 4.91312   |
| 0         | 0         | 0         | 0          | 0         | 0         |
| 0.975173  | 0.791065  | 1.10108   | 0.534537   | 1.7638    | 1.2839    |
| 0.096009  | 0.0861449 | 0.155517  | 0.0175004  | 0.119802  | 0.0581151 |
| 11.8641   | 11.6834   | 10.9743   | 10.021     | 12.3467   | 10.4621   |
| 0         | 0         | 0         | 0          | 0         | 0         |
| 3.14886   | 3.31795   | 3.06403   | 2.88746    | 4.93593   | 3.4221    |
| 0.137123  | 0.113922  | 0.0575851 | 0.416592   | 0.198039  | 0.153708  |
| 17.0878   | 18.3822   | 22.1073   | 21.2356    | 22.3479   | 21.3073   |
| 5.14538   | 4.36917   | 5.68491   | 4.25322    | 4.87011   | 4.98079   |
| 14.132    | 13.3259   | 12.1399   | 12.9123    | 13.9379   | 14.4889   |
| 0         | 0         | 0         | 0          | 0         | 0         |
| 17.1279   | 21.6828   | 19.0892   | 17.439     | 18.5711   | 19.4071   |
| 3.48858   | 2.02664   | 4.36205   | 2.27113    | 4.88681   | 2.4257    |

|           |           |           |           |           |           |
|-----------|-----------|-----------|-----------|-----------|-----------|
| 10.0588   | 9.8387    | 15.8653   | 12.7035   | 12.8592   | 13.7664   |
| 18.6994   | 18.0476   | 17.9217   | 15.4692   | 21.5599   | 17.8767   |
| 5.80045   | 7.20795   | 4.80816   | 3.06157   | 1.75538   | 0.94811   |
| 5.56407   | 4.63306   | 9.87158   | 9.71714   | 5.1017    | 8.76865   |
| 4.71803   | 4.35185   | 5.01044   | 4.02321   | 5.2798    | 4.15538   |
| 354.642   | 318.548   | 295.092   | 263.996   | 266.297   | 302.941   |
| 7.87779   | 6.84656   | 9.20172   | 6.11904   | 11.6545   | 6.28319   |
| 0         | 0.0283508 | 0         | 0         | 0.0246421 | 0         |
| 3.69111   | 3.28561   | 3.44815   | 3.74751   | 2.82861   | 3.3987    |
| 0         | 0         | 0         | 0         | 0         | 0         |
| 14.7433   | 11.8162   | 13.5143   | 11.2594   | 11.1848   | 9.27845   |
| 30.2095   | 29.7477   | 30.7405   | 30.4032   | 25.6848   | 24.9628   |
| 2.83922   | 2.69882   | 4.15427   | 2.88811   | 4.92051   | 3.18465   |
| 4.28254   | 3.55793   | 3.59692   | 3.53801   | 3.41803   | 4.65313   |
| 139.694   | 181.05    | 210.474   | 225.018   | 181.953   | 218.564   |
| 32.9481   | 32.0468   | 32.6229   | 33.6207   | 27.3227   | 35.1691   |
| 2.88159   | 3.15007   | 5.98058   | 3.22093   | 6.76051   | 4.13949   |
| 28.5633   | 27.5369   | 32.923    | 29.5923   | 26.2753   | 22.4099   |
| 0         | 0.109536  | 0         | 0.100139  | 0         | 0         |
| 0.124111  | 0         | 0.974251  | 1.00549   | 0.0597485 | 0.139122  |
| 0         | 0         | 0         | 0         | 0         | 0         |
| 33.55     | 32.5362   | 34.633    | 29.9501   | 32.6918   | 31.1068   |
| 10.3647   | 9.30534   | 8.6252    | 11.3469   | 10.5745   | 10.2979   |
| 1.04716   | 0.939574  | 1.16095   | 0.524923  | 1.04352   | 0.809928  |
| 6.78438   | 8.19048   | 7.71635   | 7.08528   | 6.02197   | 7.31784   |
| 0.262213  | 0.217846  | 0.623995  | 0.464699  | 0.568048  | 0.269434  |
| 9.94207   | 9.59745   | 10.8705   | 9.67129   | 10.7879   | 10.0781   |
| 2.53975   | 1.44905   | 3.34106   | 2.13816   | 6.55158   | 5.5052    |
| 0         | 0         | 0         | 0         | 0         | 0         |
| 0.0489963 | 0.0828119 | 0.355673  | 0.689686  | 0.0639813 | 0.0513232 |
| 369.697   | 412.35    | 691.2     | 209.914   | 851.309   | 699.605   |
| 0         | 0         | 0         | 0         | 0         | 0         |
| 52.7744   | 59.301    | 51.1283   | 58.7311   | 38.1781   | 47.8963   |
| 0.215046  | 0.267989  | 0.180617  | 0.122499  | 0.0776443 | 0.0903957 |
| 0         | 0         | 0         | 0         | 0         | 0.0106049 |
| 0         | 0         | 0         | 0         | 0         | 0         |
| 3.57264   | 4.45222   | 4.461     | 3.61801   | 2.76912   | 1.8022    |
| 0.327128  | 0         | 0.103032  | 0.093172  | 0.553657  | 0.309398  |
| 56.6861   | 46.525    | 35.3211   | 33.0343   | 30.481    | 35.9611   |
| 17.9607   | 18.4951   | 12.9813   | 14.4314   | 14.0279   | 12.8746   |
| 6.41421   | 6.94911   | 6.96768   | 7.35968   | 6.35363   | 6.81428   |
| 5.62902   | 4.32799   | 9.88941   | 4.85391   | 7.87327   | 3.50587   |
| 0.0540909 | 0.033704  | 0.0170367 | 0.0462186 | 0.17577   | 0.0113687 |

|           |          |           |           |           |           |
|-----------|----------|-----------|-----------|-----------|-----------|
| 7.25737   | 7.41543  | 7.6188    | 5.6043    | 8.63104   | 6.92794   |
| 218.431   | 226.295  | 202.913   | 214.187   | 168.765   | 202.749   |
| 0.192636  | 0.400104 | 0.323591  | 0.292622  | 0.208659  | 0.323903  |
| 45.306    | 47.0399  | 49.1217   | 46.7437   | 48.4281   | 45.5734   |
| 27.0579   | 26.4523  | 32.5242   | 23.1199   | 27.4586   | 22.0653   |
| 1.23162   | 1.00646  | 0.99205   | 0.41405   | 1.00602   | 1.01847   |
| 12.5709   | 11.8836  | 11.936    | 11.6674   | 15.778    | 8.72616   |
| 0         | 0        | 0         | 0.461477  | 0         | 0         |
| 31.7818   | 29.4241  | 27.0067   | 25.944    | 18.7102   | 23.7157   |
| 53.9152   | 53.2927  | 55.8527   | 47.0326   | 68.737    | 63.3541   |
| 18.5796   | 18.9433  | 17.6389   | 17.611    | 16.4575   | 16.2687   |
| 1.95121   | 1.70737  | 0.71526   | 0.77453   | 1.28985   | 1.2376    |
| 0.3924    | 0.326005 | 0.164789  | 0.298036  | 0.425039  | 0.109965  |
| 0.0606012 | 0.151042 | 0.0763486 | 0.0276167 | 0.0525135 | 0.0611378 |
| 6.34664   | 4.24194  | 5.83779   | 5.37918   | 17.2458   | 24.0629   |
| 8.02961   | 8.22569  | 8.54788   | 7.8617    | 8.82919   | 7.83705   |
| 18.9499   | 20.3147  | 22.9811   | 23.7992   | 20.9302   | 19.8515   |
| 0.468665  | 0.106191 | 0.134193  | 0.194161  | 0.184599  | 0.143277  |
| 5.45203   | 5.51568  | 5.70285   | 5.20292   | 6.65734   | 5.08254   |
| 0         | 0        | 0         | 0         | 0         | 0         |
| 1.76557   | 1.77242  | 2.13168   | 2.15117   | 2.25773   | 2.18527   |
| 0.0181432 | 0        | 0.0685733 | 0.124021  | 0.0786094 | 0.0152532 |
| 0         | 0        | 0.572562  | 0.517766  | 0.109393  | 0.382076  |
| 5.69766   | 4.83087  | 5.27714   | 5.98736   | 6.93246   | 6.91173   |
| 2.2443    | 1.83543  | 2.82749   | 1.43825   | 2.12711   | 1.00237   |
| 24.7396   | 19.6883  | 32.3166   | 22.6967   | 28.9131   | 18.719    |
| 149.057   | 132.481  | 158.244   | 118.481   | 203.901   | 153.195   |
| 0.797419  | 1.18608  | 0.712965  | 0.908486  | 1.6857    | 0.973161  |
| 0.621191  | 0.653483 | 0.729375  | 0.640278  | 1.1293    | 0.618785  |
| 10.3044   | 6.67988  | 10.4359   | 5.77583   | 18.437    | 8.30999   |
| 0         | 0        | 0         | 0         | 0         | 0         |
| 1.6861    | 1.65395  | 1.98052   | 1.44074   | 2.11825   | 1.93725   |
| 41.1814   | 27.8914  | 30.4528   | 29.5782   | 24.2428   | 21.8267   |
| 4.50869   | 2.59326  | 4.04175   | 1.77808   | 3.09929   | 1.60368   |
| 5.69347   | 6.44324  | 5.74411   | 5.30011   | 5.54602   | 5.17515   |
| 23.6344   | 23.9287  | 20.2936   | 23.9992   | 23.8689   | 25.316    |
| 0.0936087 | 0        | 0         | 0         | 0.506975  | 0         |
| 0         | 0        | 0         | 0         | 0         | 0         |
| 0.714165  | 0.879761 | 1.05487   | 1.44958   | 1.3782    | 1.22152   |
| 0         | 0        | 0         | 0         | 0         | 0         |
| 0         | 0        | 0         | 0         | 0         | 0         |
| 0.262543  | 0.373368 | 0.447623  | 0.299112  | 0.546013  | 0.298703  |
| 10.3987   | 10.3201  | 8.82528   | 10.4757   | 10.0698   | 8.69357   |

|           |           |           |             |           |           |
|-----------|-----------|-----------|-------------|-----------|-----------|
| 35.5655   | 34.4719   | 33.252    | 31.2689     | 36.3102   | 39.4563   |
| 0.595618  | 0.228387  | 0.923559  | 0.574181    | 0.545906  | 0.577781  |
| 0         | 0         | 0         | 0           | 0         | 0         |
| 71.2118   | 75.7792   | 68.4808   | 70.538      | 67.3924   | 71.2882   |
| 7.09442   | 8.42006   | 7.0936    | 6.79961     | 5.70241   | 6.79277   |
| 3.60322   | 2.40108   | 4.22428   | 1.73896     | 5.71888   | 2.96616   |
| 2.55777   | 2.48973   | 2.78956   | 2.04417     | 2.35702   | 2.31083   |
| 5.11002   | 4.52119   | 5.51239   | 4.65118     | 6.11999   | 4.56615   |
| 0         | 0         | 0         | 0           | 0         | 0         |
| 13.7188   | 13.9747   | 14.4347   | 13.0117     | 14.0864   | 12.6204   |
| 3.291     | 2.62577   | 3.03873   | 2.75234     | 5.10709   | 4.05956   |
| 16.0405   | 15.9254   | 15.7331   | 17.8377     | 17.9977   | 20.4235   |
| 220.805   | 226.947   | 42.5353   | 53.0665     | 52.877    | 81.9879   |
| 30.3713   | 22.1788   | 23.2343   | 25.6389     | 32.3388   | 25.4793   |
| 0         | 0         | 0         | 0           | 0         | 0         |
| 0         | 0         | 0         | 0           | 0         | 0         |
| 35.8474   | 33.4501   | 24.0192   | 24.9967     | 21.5983   | 27.7252   |
| 0.139473  | 0.0579369 | 0.0878577 | 0.0264832   | 0.025179  | 0.0586282 |
| 73.8439   | 58.4556   | 83.4758   | 88.2445     | 95.4693   | 104.004   |
| 0.0449922 | 0         | 0         | 0.0512588   | 0         | 0         |
| 9.51842   | 8.60624   | 10.0299   | 7.75133     | 11.6039   | 9.35273   |
| 9.64397   | 10.1473   | 5.99836   | 4.86951     | 6.82351   | 6.91382   |
| 4.9669    | 7.46358   | 5.70416   | 6.82325     | 3.00583   | 3.31528   |
| 9.43808   | 10.5985   | 9.51249   | 8.38943     | 8.91997   | 7.91727   |
| 0.0419778 | 0.209251  | 0.0528859 | 0.143474    | 0.272817  | 0.176456  |
| 13.2331   | 15.1337   | 17.2099   | 18.0077     | 16.7292   | 20.2443   |
| 0         | 0         | 0         | 0           | 0         | 0         |
| 0.991383  | 0.849379  | 0.858686  | 0.682385    | 0.939615  | 0.989743  |
| 19.5706   | 18.3614   | 17.0956   | 17.9596     | 16.9621   | 13.4412   |
| 6.25284   | 5.38464   | 6.44685   | 6.3504      | 7.1123    | 7.10057   |
| 0.225118  | 0         | 0         | 0           | 0.174174  | 0.0540742 |
| 3.9544    | 19.9884   | 5.74993   | 156.19      | 8.52056   | 25.0456   |
| 0         | 0         | 0         | 0           | 0.197711  | 0.690541  |
| 3.12702   | 2.78008   | 3.11453   | 2.94785     | 3.39543   | 2.71529   |
| 4.91696   | 4.66716   | 5.49566   | 4.36233     | 5.24751   | 4.61885   |
| 604.202   | 0         | 0         | 0.000287472 | 0.000167  | 2.63E-05  |
| 14.4067   | 14.3102   | 14.3893   | 13.5139     | 14.7179   | 12.5709   |
| 1.2415    | 0.843901  | 0.710957  | 0.900083    | 0.366754  | 0.474428  |
| 0.408824  | 0.363912  | 0.0735798 | 0.0665381   | 0.0632614 | 0.0491005 |
| 7.72899   | 8.37964   | 7.23204   | 5.95961     | 6.53588   | 6.02418   |
| 1.62635   | 1.73164   | 1.48991   | 0.841306    | 1.90211   | 1.31732   |
| 21.5436   | 21.0513   | 0.0169844 | 0           | 0         | 0         |
| 39.5635   | 41.575    | 36.1906   | 43.6609     | 32.1291   | 34.8167   |

|          |           |          |           |           |           |
|----------|-----------|----------|-----------|-----------|-----------|
| 6.16296  | 6.74933   | 7.15269  | 6.76603   | 11.126    | 9.4833    |
| 0        | 0         | 0        | 0.0278188 | 0         | 0         |
| 20.6179  | 21.7104   | 24.1633  | 20.212    | 21.6404   | 26.0678   |
| 0.150468 | 0.187513  | 0.341221 | 0.27428   | 0.619338  | 0.5313    |
| 0.094722 | 0         | 0.119336 | 0         | 0.153901  | 0.039817  |
| 5.4146   | 5.79251   | 6.43224  | 5.38006   | 6.69518   | 5.04059   |
| 0.641177 | 0.679608  | 1.125    | 0.629749  | 1.4569    | 1.23648   |
| 1.0592   | 0.862385  | 1.47678  | 1.30327   | 1.88158   | 1.25855   |
| 15.1833  | 14.3164   | 11.3971  | 12.6832   | 12.1498   | 12.7805   |
| 6.18784  | 6.22505   | 7.61454  | 6.67598   | 7.75073   | 5.65667   |
| 20.5955  | 24.8956   | 23.0627  | 26.6726   | 23.9951   | 22.031    |
| 0.25451  | 0.0792919 | 0        | 0.0724892 | 0.367575  | 0.21397   |
| 8.24405  | 7.06995   | 8.38254  | 7.10096   | 9.99641   | 8.77393   |
| 15.025   | 20.1523   | 16.2023  | 15.377    | 16.8265   | 16.9137   |
| 9.08689  | 6.92431   | 6.43278  | 6.73346   | 8.90805   | 6.16853   |
| 0        | 0         | 0        | 0         | 0         | 0         |
| 3.34815  | 4.47049   | 4.35     | 3.50797   | 6.81616   | 4.41074   |
| 19.6419  | 19.4029   | 18.3918  | 17.2062   | 16.8546   | 17.4319   |
| 17.7098  | 16.8564   | 21.0488  | 17.7248   | 23.0194   | 19.2375   |
| 0        | 0         | 0        | 0         | 31.3836   | 0         |
| 9.97809  | 10.4303   | 9.21193  | 9.42977   | 8.24173   | 9.8449    |
| 0        | 0         | 0        | 0         | 0.0728636 | 0         |
| 3.77E-62 | 2.27E-58  | 3.52E-57 | 1.74E-45  | 4.63E-34  | 1.44E-62  |
| 2.11127  | 1.89742   | 2.98255  | 2.03552   | 2.7799    | 1.9539    |
| 0.704122 | 0         | 2.36558  | 0         | 0.25423   | 0.591964  |
| 0.402849 | 0.214229  | 0.218271 | 0.841671  | 0.254581  | 0.215862  |
| 0.581035 | 0.965447  | 1.22003  | 0.220655  | 2.30767   | 0.976967  |
| 0        | 0         | 0        | 0         | 0         | 0         |
| 0.328068 | 0         | 0        | 0         | 0         | 0         |
| 1.30836  | 1.19488   | 2.13231  | 1.733     | 1.97404   | 1.37881   |
| 2.06467  | 2.7338    | 3.08891  | 1.32314   | 3.49439   | 2.38672   |
| 31.1614  | 36.0595   | 33.0435  | 34.669    | 29.5072   | 33.5013   |
| 158.274  | 151.408   | 171.44   | 184.943   | 123.166   | 171.03    |
| 4.39773  | 4.90078   | 6.49943  | 5.49201   | 5.35897   | 4.72818   |
| 10.1119  | 9.45848   | 11.732   | 8.80703   | 9.7307    | 8.25639   |
| 0        | 0         | 0        | 0         | 0.0801643 | 0         |
| 0        | 0         | 0        | 0         | 0         | 0         |
| 19.8892  | 19.8109   | 25.213   | 19.2177   | 21.8066   | 19.1003   |
| 0.314221 | 0.335641  | 0        | 0         | 0.0972449 | 0.0377384 |
| 1.1817   | 0.589055  | 0.709953 | 0.532704  | 1.39098   | 0.86843   |
| 6.65356  | 5.60315   | 5.30893  | 6.20205   | 5.67824   | 7.33965   |
| 11.8223  | 11.6581   | 14.049   | 12.7535   | 14.073    | 14.6604   |
| 14.3963  | 28.8191   | 13.993   | 25.7922   | 13.9173   | 28.7036   |

|           |           |           |           |           |           |
|-----------|-----------|-----------|-----------|-----------|-----------|
| 0.162271  | 0.220606  | 0.334535  | 0.252099  | 0.527306  | 0.310053  |
| 25.9616   | 43.5476   | 35.0021   | 47.5995   | 32.6671   | 27.5162   |
| 77.6361   | 72.5553   | 38.6663   | 38.0472   | 39.1407   | 56.0098   |
| 0.0793846 | 0.108575  | 0.0926141 | 0.0923257 | 0.148285  | 0.248287  |
| 9.84357   | 8.72654   | 10.8599   | 10.913    | 9.87203   | 10.6668   |
| 78.8434   | 91.6264   | 82.01     | 104.062   | 68.1852   | 90.6581   |
| 19.6242   | 18.4177   | 14.3568   | 17.3926   | 19.6147   | 20.7082   |
| 7.63434   | 9.86776   | 8.87369   | 8.67015   | 9.19078   | 10.5346   |
| 0.151763  | 0.17367   | 0.144471  | 0.172901  | 0.0978163 | 0.117161  |
| 0         | 0         | 0         | 0         | 0         | 0         |
| 0.0435396 | 0.0271295 | 0.0548536 | 0.12401   | 0         | 0.0549065 |
| 7.28986   | 6.28935   | 8.83093   | 3.83318   | 7.59253   | 5.65724   |
| 39.1228   | 37.7687   | 39.0369   | 41.3627   | 37.1222   | 43.9424   |
| 0.102813  | 0.320314  | 0.291442  | 0.146417  | 0.278413  | 0.108045  |
| 0.163921  | 0         | 0         | 0.186753  | 0         | 0.137811  |
| 2.69136   | 1.74198   | 1.91878   | 1.68761   | 2.50845   | 2.94671   |
| 7.4182    | 8.1013    | 8.74804   | 7.04586   | 7.82965   | 6.74188   |
| 10.3467   | 11.685    | 10.1747   | 9.72831   | 11.0586   | 13.6051   |
| 151.704   | 127.408   | 190.51    | 159.532   | 248.511   | 225.574   |
| 0.322385  | 0.163678  | 0.314137  | 0.149635  | 0.402177  | 0.129399  |
| 8.07206   | 8.17878   | 10.4886   | 9.73868   | 11.892    | 8.08904   |
| 14.233    | 14.0925   | 14.64     | 15.6379   | 14.2765   | 13.0805   |
| 6.3808    | 7.30701   | 2.64342   | 3.70026   | 2.30385   | 2.99634   |
| 26.1138   | 27.1223   | 26.3996   | 26.4453   | 29.1121   | 31.7819   |
| 0.0283198 | 0.0196068 | 0.0475718 | 0.0382392 | 0.061351  | 0.0476177 |
| 11.5485   | 13.1125   | 9.37632   | 11.4445   | 7.5849    | 10.572    |
| 0.153036  | 0         | 0         | 0         | 0         | 0         |
| 3.82466   | 3.46169   | 6.01988   | 4.85333   | 5.31041   | 4.1304    |
| 9.70578   | 9.7968    | 11.1227   | 8.42456   | 13.1444   | 10.4952   |
| 9.56209   | 11.2026   | 8.0502    | 11.6783   | 6.98397   | 7.30865   |
| 0.0263499 | 0.0328372 | 0         | 0.0300199 | 0.0285416 | 0.0221526 |
| 0         | 0         | 0         | 0         | 0         | 0         |
| 11.8273   | 9.82426   | 11.5743   | 9.3931    | 16.0377   | 11.6823   |
| 0.560636  | 0.65534   | 0.725303  | 0.883181  | 1.21263   | 0.861542  |
| 0.154772  | 0.289315  | 0.0974952 | 0.146941  | 0.027941  | 0.216865  |
| 0.0453742 | 0.0565452 | 0         | 0.051694  | 0.0737226 | 0.0953665 |
| 9.45071   | 10.2883   | 9.85893   | 8.59772   | 13.648    | 16.5241   |
| 6.45472   | 11.854    | 7.70544   | 11.0722   | 5.81878   | 7.54833   |
| 0         | 0         | 0         | 0         | 0         | 0         |
| 0.613656  | 0.657015  | 0.893654  | 0.718718  | 1.27858   | 0.668148  |
| 3.69818   | 2.86854   | 6.3525    | 5.03226   | 2.31279   | 2.67306   |
| 2.41747   | 5.91877   | 5.91877   | 6.57355   | 6.91158   | 6.85859   |
| 0         | 0         | 0         | 0         | 0         | 0         |



|          |          |           |           |           |           |
|----------|----------|-----------|-----------|-----------|-----------|
| 0.204234 | 5.75218  | 0.308766  | 0.420279  | 0.0442444 | 0.171702  |
| 1.60955  | 2.00919  | 1.00162   | 0.49041   | 1.56182   | 2.28419   |
| 12.8616  | 12.3266  | 17.7852   | 12.1549   | 25.8382   | 21.0748   |
| 14.2835  | 15.8124  | 14.9019   | 13.4349   | 15.7919   | 14.404    |
| 0        | 0        | 0         | 0         | 0         | 0         |
| 0.844041 | 0.767008 | 0.520155  | 0.564856  | 0.298845  | 0.236709  |
| 0.487924 | 0.506709 | 0.409809  | 0.289523  | 0.44593   | 0.617442  |
| 1.18224  | 1.04147  | 2.05441   | 1.30046   | 2.58323   | 2.07353   |
| 2.22884  | 2.12948  | 2.43361   | 1.60821   | 2.49471   | 2.6858    |
| 8.79621  | 8.17209  | 10.2127   | 9.91133   | 8.31508   | 6.31294   |
| 0.72472  | 0.656833 | 0.66403   | 0.375301  | 0.999093  | 0.775448  |
| 0.681947 | 0.59803  | 0.280913  | 0.483104  | 0.599522  | 0.619789  |
| 6.93867  | 6.73955  | 6.04207   | 3.8363    | 4.91845   | 4.07482   |
| 11.6266  | 7.82564  | 8.70589   | 6.64829   | 13.3441   | 8.34838   |
| 5.42508  | 6.05676  | 6.47225   | 6.54498   | 5.58771   | 5.51075   |
| 40.7548  | 40.8577  | 43.8048   | 43.3784   | 46.2992   | 43.6709   |
| 1.61158  | 2.2315   | 1.72957   | 1.39404   | 2.35984   | 1.78141   |
| 6.61604  | 7.51664  | 8.70336   | 7.98932   | 8.16106   | 8.40469   |
| 0        | 0        | 0         | 0         | 0         | 0         |
| 2.52196  | 1.3623   | 1.05357   | 1.53984   | 1.11515   | 2.00265   |
| 20.9019  | 22.3156  | 23.4074   | 19.8622   | 22.5722   | 23.0059   |
| 0.041644 | 0        | 0.0524654 | 0.0474443 | 0         | 0.0350106 |
| 0.141441 | 0.176264 | 0         | 0         | 0         | 0         |
| 229.435  | 325.482  | 168.186   | 164.715   | 203.127   | 309.569   |
| 35.5103  | 36.3255  | 35.1807   | 41.7038   | 37.5452   | 39.0131   |
| 0.177671 | 0.180259 | 0.174852  | 0.112538  | 0.259985  | 0.174681  |
| 0        | 0        | 0         | 0         | 0         | 0         |
| 4.44028  | 5.40188  | 4.62255   | 3.80419   | 5.78353   | 4.50619   |
| 0.529586 | 0.549975 | 0.389201  | 0.301674  | 0.812652  | 0.593639  |
| 5.85387  | 6.39353  | 7.76239   | 6.05106   | 8.63289   | 6.05674   |
| 5.66462  | 3.37508  | 2.57467   | 2.64473   | 3.46012   | 3.46957   |
| 5.7726   | 3.80848  | 5.13362   | 4.25546   | 9.56305   | 3.71119   |
| 0.322997 | 0.536696 | 0.457798  | 0         | 0.349871  | 0         |
| 0        | 0        | 0         | 0         | 0         | 0         |
| 11.7485  | 12.8879  | 11.4396   | 10.4808   | 9.09917   | 10.0623   |
| 10.6417  | 11.9268  | 4.58505   | 3.87071   | 5.73846   | 5.83528   |
| 9.17625  | 10.7901  | 12.0499   | 10.2557   | 8.02952   | 9.5938    |
| 0        | 0        | 0         | 0.171843  | 0         | 0         |
| 0        | 0        | 0         | 0         | 0         | 0         |
| 8.21155  | 7.21773  | 7.49015   | 8.05673   | 8.65311   | 8.29521   |
| 0.399147 | 0.316775 | 0.714474  | 0.551616  | 0.683467  | 0.407054  |
| 29.0252  | 40.0294  | 32.6914   | 34.1702   | 43.3865   | 50.4467   |
| 4.23722  | 2.712    | 2.73782   | 1.40459   | 3.01147   | 1.62019   |

|           |           |           |           |           |           |
|-----------|-----------|-----------|-----------|-----------|-----------|
| 5.28585   | 5.86362   | 6.10445   | 5.13245   | 5.87736   | 4.57854   |
| 1.14761   | 1.63437   | 2.02394   | 1.7929    | 2.8762    | 1.18509   |
| 0         | 0         | 0         | 0         | 0         | 0         |
| 1.61526   | 1.9636    | 1.45645   | 1.70493   | 1.9256    | 1.21166   |
| 0         | 0         | 0         | 0         | 0         | 0         |
| 103.855   | 114.535   | 99.0485   | 112.823   | 96.0954   | 108.958   |
| 0         | 0         | 0         | 0         | 0         | 0         |
| 1.77096   | 1.96038   | 2.09347   | 1.59432   | 2.57928   | 2.42607   |
| 15.2847   | 14.2744   | 15.209    | 10.7513   | 17.0034   | 12.7025   |
| 23.5608   | 21.6702   | 23.98     | 22.7844   | 24.8541   | 26.2396   |
| 9.17392   | 7.5798    | 11.7271   | 9.9157    | 12.7397   | 14.2387   |
| 10.3322   | 11.6105   | 10.6183   | 10.7301   | 8.38683   | 8.30222   |
| 4.46003   | 3.98988   | 5.12907   | 4.87873   | 5.88673   | 6.24751   |
| 3.87065   | 4.36073   | 4.25253   | 3.60799   | 8.05347   | 7.31351   |
| 2.57328   | 2.77704   | 2.38969   | 3.23393   | 2.91663   | 2.99975   |
| 5.71038   | 6.10177   | 6.77051   | 6.19627   | 5.24824   | 5.08433   |
| 3.53466   | 5.89577   | 4.59017   | 4.83237   | 5.18342   | 3.88597   |
| 15.766    | 12.2959   | 15.4361   | 12.2631   | 23.2621   | 12.4785   |
| 12.3012   | 11.8107   | 9.60648   | 8.88669   | 10.2404   | 7.13763   |
| 0         | 0         | 0         | 0         | 0         | 0         |
| 16.6115   | 15.9341   | 17.1753   | 14.7869   | 19.1957   | 15.3964   |
| 0.200071  | 0.249329  | 0.376796  | 0.260115  | 0.232002  | 0.132704  |
| 0.0491383 | 0         | 0         | 0         | 0         | 0         |
| 0.0396657 | 0         | 0         | 0         | 0.0429651 | 0         |
| 4.73377   | 5.32668   | 4.38246   | 5.75763   | 3.93673   | 3.8349    |
| 0.358963  | 0.505688  | 0.393254  | 0.444523  | 0.473348  | 0.328027  |
| 0         | 0         | 0         | 0         | 0         | 0         |
| 1.4425    | 2.39686   | 2.72601   | 3.56074   | 1.19047   | 0.779612  |
| 4.66517   | 4.38367   | 4.4506    | 3.88795   | 5.78439   | 4.53371   |
| 0         | 0         | 0         | 0         | 0         | 0         |
| 0.336689  | 0.314686  | 0.530223  | 0.479479  | 0.455868  | 0.212294  |
| 4.19645   | 3.43244   | 8.95339   | 3.35999   | 9.45692   | 2.97096   |
| 8.98745   | 7.42793   | 9.18426   | 6.55819   | 9.78856   | 7.46638   |
| 0         | 0         | 0         | 0         | 0         | 0         |
| 18.9443   | 20.4456   | 17.8537   | 19.7146   | 21.2914   | 22.4614   |
| 0.032304  | 0.0134191 | 0.0339153 | 0.0306695 | 0.0787298 | 0.0912823 |
| 11.7301   | 12.6555   | 13.5878   | 14.49     | 12.9764   | 12.8293   |
| 0         | 5.63E-10  | 0         | 0.0326642 | 0         | 0         |
| 1.26942   | 1.3534    | 1.54256   | 1.0562    | 1.54713   | 1.77036   |
| 70.6235   | 58.282    | 75.7309   | 72.6291   | 67.69     | 109.646   |
| 425.796   | 490.668   | 1120.86   | 343.289   | 1215.6    | 809.646   |
| 181.447   | 181.458   | 198.889   | 198.994   | 185.723   | 216.143   |
| 9.54808   | 9.88987   | 9.36577   | 8.41203   | 9.91949   | 9.87488   |

|           |           |          |           |           |           |
|-----------|-----------|----------|-----------|-----------|-----------|
| 0         | 0         | 0        | 0         | 0         | 0         |
| 0         | 0         | 0        | 0         | 0         | 0         |
| 0         | 0         | 0        | 0         | 0         | 0         |
| 1.06511   | 0.975189  | 1.1228   | 1.16393   | 0.776986  | 0.895452  |
| 0         | 0         | 0        | 0         | 0         | 0         |
| 250.606   | 224.214   | 219.641  | 237.539   | 247.493   | 257.461   |
| 181.678   | 226.795   | 271.708  | 296.053   | 176.954   | 224.854   |
| 12.2627   | 10.3505   | 15.2484  | 8.2641    | 11.0385   | 8.44121   |
| 0         | 0         | 0.128361 | 0.116077  | 0.220721  | 0         |
| 0         | 0         | 0        | 0         | 0         | 0         |
| 0         | 0         | 0        | 0         | 0         | 0         |
| 0         | 0         | 0        | 0         | 0         | 0         |
| 3.11619   | 3.37958   | 3.16179  | 2.42337   | 3.70336   | 3.02405   |
| 31.7046   | 29.8948   | 34.3611  | 30.0121   | 44.5125   | 36.1062   |
| 0         | 0         | 0        | 0         | 0         | 0         |
| 0         | 0         | 0        | 0         | 0         | 0         |
| 1.54E-46  | 1.82E-230 | 3.36E-89 | 2.41E-86  | 0.100647  | 0.0638638 |
| 1.72108   | 0.984308  | 1.2156   | 0.516933  | 2.97639   | 1.29926   |
| 1.20467   | 1.21186   | 1.11542  | 1.10789   | 1.49353   | 0.939566  |
| 0         | 0         | 0        | 0         | 0         | 0         |
| 0.0875816 | 0.0363813 | 0        | 0.0997802 | 0.126489  | 0.0490872 |
| 30.5237   | 27.0914   | 31.1913  | 27.8782   | 31.8421   | 27.8261   |
| 11.3968   | 14.7989   | 10.5769  | 12.7363   | 10.4129   | 10.8248   |
| 0.415278  | 0.517519  | 0        | 0         | 0.22491   | 0.523694  |
| 8.21386   | 7.96141   | 7.87266  | 6.85398   | 8.63481   | 7.88416   |
| 0.904083  | 1.01713   | 0.972907 | 0.729588  | 1.04729   | 0.928979  |
| 6.89071   | 5.21185   | 9.53162  | 7.47864   | 9.51507   | 7.886     |
| 0.237002  | 0.149962  | 0        | 0         | 0.0645194 | 0.174861  |
| 0         | 0         | 0        | 0         | 0         | 0         |
| 5.21121   | 5.54125   | 5.67333  | 5.09811   | 5.78272   | 7.41696   |
| 4.7963    | 4.23809   | 5.18435  | 3.79938   | 6.18908   | 3.61199   |
| 19.1015   | 14.4497   | 16.2311  | 12.4911   | 21.1888   | 14.3569   |
| 0.158394  | 10.2643   | 0.299329 | 77.0544   | 0.343137  | 3.06276   |
| 8.00081   | 6.73514   | 9.35227  | 7.84579   | 10.8388   | 9.45769   |
| 0.0163281 | 0         | 0        | 0         | 0.0176863 | 0         |
| 0.5292    | 0.217151  | 0.241634 | 0.18888   | 0.875756  | 0.423545  |
| 0         | 0         | 0        | 0         | 0         | 0.057887  |
| 5.07444   | 4.80845   | 4.98615  | 4.26393   | 5.75113   | 4.11566   |
| 10.2307   | 12.6705   | 11.7749  | 12.3748   | 10.9097   | 11.7336   |
| 0.0827885 | 0.368687  | 0.104301 | 0.1965    | 0.313037  | 0.0522004 |
| 8.72668   | 9.11327   | 10.2355  | 8.19256   | 10.9431   | 8.2787    |
| 27.297    | 26.1585   | 24.9036  | 23.8921   | 26.2188   | 30.3825   |
| 1.74856   | 1.74324   | 0.367155 | 0.531227  | 1.7046    | 2.10705   |

|            |           |           |           |           |           |
|------------|-----------|-----------|-----------|-----------|-----------|
| 37.2675    | 38.4939   | 34.4992   | 35.8654   | 27.9841   | 29.716    |
| 0.104095   | 0.129723  | 0.655721  | 0.592967  | 0.112753  | 0.0875138 |
| 13.4755    | 13.1004   | 11.9714   | 13.9642   | 14.5446   | 15.7473   |
| 0.276006   | 0.0906923 | 0.246534  | 0.314449  | 0.211961  | 0.232042  |
| 5.84416    | 7.07831   | 6.50064   | 5.69139   | 7.85725   | 9.34324   |
| 45.9011    | 44.611    | 46.9653   | 51.3352   | 40.5678   | 44.8382   |
| 0          | 0.0611319 | 0         | 0         | 0.159405  | 0         |
| 0.297978   | 0.074268  | 0.0375409 | 0.203689  | 0.0322764 | 0.150308  |
| 3.27992    | 2.22516   | 3.58679   | 2.67727   | 5.14826   | 3.60375   |
| 0          | 0         | 0         | 0         | 0         | 0         |
| 0.0527517  | 0.0438261 | 0.0886127 | 0.0200331 | 0.133326  | 0.059132  |
| 4.81802    | 4.89159   | 4.67675   | 5.20955   | 5.91635   | 4.91391   |
| 22.9622    | 25.6015   | 23.4655   | 23.8801   | 27.8834   | 30.5695   |
| 8.46322    | 9.34564   | 10.2444   | 9.32306   | 10.9863   | 10.2165   |
| 0          | 0         | 0         | 0         | 0         | 0         |
| 0.00697287 | 0.0260688 | 0.0087848 | 0         | 0.0679759 | 0.0527596 |
| 0.449281   | 0.559894  | 0         | 0.511859  | 0.486652  | 0.377716  |
| 0.383422   | 0.523327  | 0.575066  | 0.49923   | 0.375761  | 0.184199  |
| 17.7237    | 16.2149   | 23.1563   | 20.5663   | 25.4704   | 21.9961   |
| 1.38015    | 1.40043   | 1.69638   | 1.12641   | 1.33517   | 2.08216   |
| 9.78764    | 8.15157   | 10.8204   | 7.11555   | 11.5673   | 8.3364    |
| 16.4015    | 12.8018   | 14.8286   | 16.7156   | 26.0263   | 25.8214   |
| 29.027     | 29.5648   | 29.8887   | 31.5534   | 26.8368   | 27.4959   |
| 3.36698    | 3.95441   | 2.13624   | 3.21583   | 4.1848    | 4.224     |
| 13.3206    | 19.3968   | 17.542    | 41.2389   | 22.4793   | 28.9302   |
| 15.763     | 16.4403   | 15.8374   | 17.2505   | 14.6568   | 15.0333   |
| 0          | 0         | 0         | 0         | 0         | 0         |
| 0.254331   | 0.25382   | 0         | 0         | 0         | 0         |
| 0          | 0         | 0         | 0         | 0         | 0         |
| 2.0725     | 2.39827   | 1.88835   | 1.68655   | 1.88411   | 1.89795   |
| 158.139    | 157.914   | 159.161   | 192.927   | 176.814   | 220.888   |
| 0          | 0         | 0         | 0         | 0         | 0         |
| 3.63043    | 1.53455   | 4.89918   | 1.84223   | 4.4022    | 1.50574   |
| 5.19254    | 5.23508   | 6.0505    | 5.87768   | 5.02097   | 6.15468   |
| 0          | 0         | 0         | 0         | 0         | 0         |
| 0          | 0         | 0.0253306 | 0         | 0.0217784 | 0.0169034 |
| 0.544874   | 1.68139   | 0.686462  | 0.945929  | 1.01177   | 0.894351  |
| 0.940955   | 0.923124  | 1.36202   | 1.08342   | 2.16856   | 1.41383   |
| 2.36792    | 2.93522   | 2.96581   | 2.32395   | 4.06614   | 4.6431    |
| 6.48042    | 7.29165   | 7.92395   | 8.5239    | 7.28978   | 5.83332   |
| 46.5382    | 57.1819   | 43.7507   | 54.8186   | 34.4905   | 48.4146   |
| 0.0805922  | 0.14153   | 0         | 0.179251  | 0.1364    | 0.0716871 |
| 0          | 0         | 0         | 0.0139403 | 0         | 0         |

|           |           |           |          |            |          |
|-----------|-----------|-----------|----------|------------|----------|
| 33.0146   | 31.8135   | 30.6239   | 22.7028  | 26.7768    | 25.4919  |
| 1.72843   | 1.20943   | 1.4452    | 1.30684  | 2.27016    | 1.64085  |
| 0         | 0         | 0         | 0        | 0          | 0        |
| 18.8572   | 14.6851   | 17.1959   | 16.3002  | 10.1495    | 11.4012  |
| 3.06691   | 2.91737   | 1.97766   | 2.47066  | 1.76912    | 1.991    |
| 0         | 0         | 0         | 0        | 0          | 0        |
| 0         | 0         | 0         | 0        | 0          | 0        |
| 0.0452056 | 0.0563352 | 0.0569525 | 0.206008 | 0.0489658  | 0        |
| 0         | 0         | 0         | 0        | 0          | 0        |
| 9.35605   | 9.16863   | 7.50104   | 7.41302  | 9.51952    | 8.82518  |
| 2.24847   | 2.48132   | 2.73035   | 2.74682  | 3.13973    | 2.84686  |
| 113.252   | 117.97    | 115.251   | 119.222  | 89.3013    | 90.3652  |
| 0         | 0         | 0         | 0        | 0          | 0        |
| 27.97     | 30.5091   | 24.6546   | 31.8699  | 28.078     | 41.0398  |
| 6.99883   | 7.85368   | 8.27887   | 6.33202  | 7.88971    | 6.68273  |
| 1.35059   | 1.09402   | 0.454218  | 0.25645  | 0.268204   | 0.378485 |
| 0.400144  | 0.373994  | 0.666163  | 0.683816 | 0.309591   | 0.336406 |
| 4.86162   | 3.78411   | 0         | 0        | 0          | 0        |
| 20.1648   | 19.2233   | 22.7781   | 16.6415  | 25.3399    | 19.3402  |
| 41.6217   | 44.9768   | 40.322    | 45.2582  | 36.2905    | 44.4799  |
| 1.45353   | 0.946236  | 1.44881   | 0.503815 | 1.58908    | 0.230515 |
| 5.55847   | 5.2404    | 6.54878   | 5.25522  | 6.20787    | 4.86675  |
| 4.36572   | 4.52058   | 4.74651   | 3.30619  | 4.90809    | 3.84153  |
| 10.3783   | 7.10544   | 9.05785   | 8.9194   | 8.82989    | 7.99711  |
| 0.668882  | 1.36401   | 1.91521   | 1.87048  | 3.55673    | 5.06104  |
| 5.65732   | 5.72824   | 5.48661   | 5.54563  | 7.09814    | 5.52906  |
| 0         | 0         | 0         | 0        | 0          | 0        |
| 3.1845    | 3.62933   | 3.96057   | 3.89162  | 4.00954    | 3.51246  |
| 0         | 0         | 0         | 0        | 0          | 0        |
| 24.9854   | 24.6652   | 18.2635   | 19.5751  | 20.4779    | 20.4265  |
| 1.65397   | 1.54861   | 1.5215    | 1.48554  | 1.61145    | 1.62596  |
| 26.8629   | 24.5338   | 28.3527   | 26.4953  | 23.0744    | 21.8891  |
| 4.70772   | 3.07045   | 3.21496   | 2.65665  | 5.0993     | 3.14407  |
| 0         | 0         | 0         | 0        | 0          | 0        |
| 34.9066   | 33.4486   | 32.1124   | 33.0225  | 32.9272    | 30.8819  |
| 0.898466  | 1.63951   | 0.7681    | 0.731148 | 1.42504    | 1.29489  |
| 4.60268   | 4.9997    | 5.82972   | 4.15014  | 6.63849    | 4.92486  |
| 132.783   | 120.882   | 128.076   | 122.245  | 111.269    | 124.086  |
| 14.5885   | 12.8729   | 13.1282   | 12.732   | 14.3625    | 12.9504  |
| 4.74627   | 4.35226   | 4.15242   | 4.43716  | 3.19456    | 2.80075  |
| 0         | 0         | 0         | 0        | 0.00305125 | 0        |
| 19.3079   | 23.6664   | 20.3834   | 20.0268  | 19.5399    | 21.3642  |
| 1.29247   | 0.949883  | 2.3381    | 0.679609 | 0.861522   | 0.195029 |

|           |          |           |          |           |           |
|-----------|----------|-----------|----------|-----------|-----------|
| 0.230002  | 0        | 0.0965898 | 0        | 0         | 0         |
| 0         | 0        | 0         | 0        | 0         | 0         |
| 0.110271  | 0.13742  | 0         | 0        | 0.238887  | 0         |
| 66.5308   | 64.2767  | 4.92207   | 4.75955  | 42.9316   | 45.7924   |
| 25.8995   | 24.3019  | 25.272    | 26.8069  | 25.9635   | 27.8508   |
| 4.73367   | 8.47252  | 7.72483   | 21.3284  | 7.67391   | 9.53514   |
| 0.734686  | 0.732452 | 7.88609   | 8.00186  | 0.636637  | 0.790604  |
| 62.5781   | 64.9271  | 68.41     | 57.642   | 67.6579   | 61.4515   |
| 7.27166   | 7.35587  | 8.17151   | 6.43161  | 9.67597   | 9.30996   |
| 0         | 0.14253  | 0         | 0.130302 | 0.123886  | 0.288462  |
| 131.906   | 167.518  | 136.95    | 146.425  | 101.727   | 101.638   |
| 5.42599   | 5.59363  | 5.7742    | 5.01856  | 6.9993    | 5.87574   |
| 25.9444   | 24.4128  | 25.5085   | 24.278   | 30.4799   | 29.6412   |
| 37.8296   | 37.7352  | 42.0305   | 42.5782  | 43.7334   | 48.8452   |
| 10.0932   | 11.0566  | 11.562    | 10.9087  | 12.4595   | 11.0534   |
| 0         | 0        | 0         | 0        | 0         | 0         |
| 0.12622   | 0        | 0.089448  | 0        | 0.4375    | 0.162488  |
| 0.0101513 | 0        | 0         | 0.127217 | 0.0109956 | 0         |
| 5.22773   | 4.70829  | 5.22005   | 4.68147  | 5.73676   | 4.56775   |
| 0.118189  | 0        | 0         | 0        | 0.256039  | 0.0993626 |
| 10.9328   | 8.90124  | 16.0692   | 14.2823  | 5.28977   | 8.51725   |
| 17.7732   | 22.0524  | 17.6849   | 21.207   | 15.5676   | 18.3157   |
| 0         | 0        | 0         | 0        | 0         | 0         |
| 3.39554   | 3.3525   | 3.7199    | 3.88716  | 6.60081   | 4.34406   |
| 0         | 0        | 0         | 0        | 0         | 0         |
| 372.041   | 278.182  | 749.947   | 1186.81  | 161.195   | 437.891   |
| 16.9292   | 17.7198  | 16.0389   | 17.4694  | 14.8969   | 18.0369   |
| 37.7443   | 26.7211  | 46.9626   | 30.8193  | 48.9179   | 37.2483   |
| 2.37981   | 2.81552  | 3.20953   | 2.74689  | 3.1158    | 2.56576   |
| 14.0004   | 16.2004  | 7.71386   | 8.87125  | 11.8745   | 12.0821   |
| 0.559759  | 0.545595 | 0.271512  | 0.605031 | 0.551925  | 0.476627  |
| 0         | 0        | 0         | 0        | 0.0105514 | 0         |
| 0.412474  | 0.308415 | 0.357986  | 0.292397 | 0.327641  | 0.200357  |
| 5.50578   | 6.43852  | 3.83319   | 3.11352  | 7.98597   | 3.98488   |
| 5.6855    | 5.53233  | 5.64201   | 4.92459  | 5.1039    | 4.71439   |
| 0         | 0        | 0         | 0        | 0         | 0         |
| 0         | 0        | 0         | 0        | 0         | 0         |
| 7.88331   | 6.14613  | 6.61067   | 7.45847  | 8.8357    | 8.79419   |
| 42.1637   | 55.0663  | 43.6881   | 52.7386  | 47.0555   | 62.3836   |
| 0         | 0        | 0         | 0        | 0         | 0         |
| 0.0283706 | 0        | 0         | 0.113127 | 0.0768261 | 0.0357773 |
| 0         | 0        | 0         | 0        | 0         | 0         |
| 55.3207   | 49.7869  | 54.2072   | 51.2783  | 46.7135   | 50.2498   |

|           |           |            |           |           |          |
|-----------|-----------|------------|-----------|-----------|----------|
| 0.798638  | 0.296111  | 0          | 0.270707  | 1.05095   | 0.449466 |
| 3.34206   | 3.65518   | 5.35464    | 6.48981   | 12.1505   | 5.07622  |
| 0.936992  | 0.667245  | 0.927515   | 0.940416  | 0.77328   | 0.506405 |
| 0.531648  | 1.49071   | 0          | 0.151424  | 0.575871  | 1.56437  |
| 0.279274  | 0.297877  | 0.399981   | 0.361702  | 0.480303  | 0.376894 |
| 1.03439   | 1.03124   | 0.608149   | 0.628512  | 0.672256  | 0.579748 |
| 27.4443   | 25.4514   | 25.7642    | 26.1728   | 24.8172   | 24.7299  |
| 31.0352   | 22.5862   | 47.1947    | 23.8251   | 58.2382   | 31.4425  |
| 94.4163   | 64.6324   | 95.6488    | 70.7458   | 144.229   | 52.0994  |
| 9.41353   | 11.4169   | 11.1184    | 12.3525   | 11.198    | 12.8604  |
| 1.01181   | 0.847613  | 1.10227    | 1.02465   | 0.730645  | 0.665545 |
| 2.63996   | 1.99561   | 4.28013    | 2.85974   | 6.79731   | 4.1903   |
| 81.5523   | 91.3203   | 92.488     | 82.7176   | 82.7764   | 93.2912  |
| 1.54461   | 1.27579   | 2.14231    | 1.78924   | 1.72596   | 1.72524  |
| 8.38334   | 8.05534   | 8.94361    | 8.5679    | 8.55246   | 7.92336  |
| 3.05964   | 3.77258   | 4.84079    | 4.55729   | 4.37483   | 2.74078  |
| 0.248414  | 0.176899  | 0.715349   | 0.525597  | 0.499714  | 0.149175 |
| 0         | 0         | 0.0744859  | 0         | 0         | 0        |
| 0         | 0         | 0          | 0         | 0         | 0        |
| 0.664078  | 0.46618   | 0.857004   | 0.53754   | 0.742461  | 0.324935 |
| 0         | 0         | 0          | 0         | 0         | 0        |
| 0.416324  | 0.470783  | 0.532833   | 0.42161   | 0.651378  | 0.466678 |
| 0         | 0         | 0          | 0.0134685 | 0         | 0        |
| 0.334657  | 0         | 1.12432    | 0.762537  | 1.9333    | 0.468916 |
| 0.0206282 | 0         | 0.00866283 | 0         | 0         | 0        |
| 2.42403   | 4.49439   | 0.968317   | 0.943004  | 1.79313   | 2.8829   |
| 47.9172   | 33.1534   | 56.505     | 38.7816   | 140.844   | 94.3625  |
| 0.036662  | 0.0913762 | 0.415699   | 0.710062  | 0.357404  | 0.647266 |
| 0         | 0         | 0          | 0         | 0         | 0        |
| 8.45149   | 8.54416   | 7.69746    | 6.04925   | 5.3156    | 4.96487  |
| 23.9013   | 22.6841   | 16.272     | 18.7694   | 11.1474   | 16.9311  |
| 1.50716   | 2.35869   | 1.74424    | 2.13636   | 1.68947   | 1.34075  |
| 0.805061  | 0.545087  | 0.905091   | 0.584888  | 1.35066   | 1.52111  |
| 24.8584   | 28.0095   | 13.8922    | 14.0082   | 11.0048   | 13.5282  |
| 83.7499   | 79.2857   | 64.9593    | 68.5903   | 77.992    | 118.811  |
| 3.20409   | 2.88051   | 4.1788     | 3.64051   | 4.32072   | 4.02555  |
| 5.31289   | 9.86696   | 4.98126    | 7.53329   | 7.17741   | 7.76401  |
| 0         | 0.759847  | 0.256058   | 0         | 0.880599  | 0.683479 |
| 2.35749   | 2.20342   | 1.85631    | 1.34292   | 3.83037   | 1.48648  |
| 9.45208   | 8.44536   | 10.3292    | 9.76427   | 9.52199   | 7.91159  |
| 0.177229  | 0.220862  | 0.0744274  | 0.0673045 | 0.0959852 | 0.198664 |
| 5.90468   | 5.33444   | 3.03833    | 4.30962   | 2.98767   | 3.63674  |
| 0         | 0         | 0          | 0         | 0         | 0        |

|           |           |           |          |           |           |
|-----------|-----------|-----------|----------|-----------|-----------|
| 25.3295   | 23.2445   | 23.4568   | 23.6519  | 25.4385   | 25.9422   |
| 0         | 0         | 0         | 0        | 0         | 0         |
| 10.5046   | 9.12045   | 7.88241   | 7.20695  | 7.82734   | 7.84148   |
| 8.48716   | 4.78016   | 6.89132   | 6.94792  | 10.4868   | 6.81817   |
| 0         | 0         | 0         | 0        | 0         | 0         |
| 0.0736908 | 0         | 0.0618931 | 0        | 0.239461  | 0.0619527 |
| 19.899    | 21.773    | 22.3136   | 20.861   | 26.0987   | 23.935    |
| 10.8372   | 10.4182   | 12.366    | 11.5564  | 11.5529   | 10.8912   |
| 0         | 0         | 0         | 0        | 0         | 0         |
| 0         | 0         | 0         | 0        | 0         | 0         |
| 185.068   | 184.259   | 150.956   | 209.333  | 110.791   | 138.563   |
| 0.0629227 | 0.117621  | 0.0990919 | 0.232982 | 0.102235  | 0.0396749 |
| 0         | 0         | 0         | 0        | 0         | 0         |
| 8.30398   | 7.53437   | 7.789     | 7.06432  | 8.79745   | 6.36887   |
| 3.30664   | 3.16724   | 3.60428   | 2.5241   | 3.46638   | 2.93655   |
| 0         | 0         | 0         | 0        | 0         | 0         |
| 32.5933   | 33.0209   | 31.9931   | 41.0381  | 30.488    | 33.6767   |
| 6.09145   | 10.5433   | 5.40046   | 10.217   | 4.58204   | 5.54792   |
| 3.687     | 4.28841   | 3.6497    | 3.08039  | 3.29003   | 3.21779   |
| 41.8735   | 38.5325   | 32.4886   | 33.8718  | 30.8478   | 32.4672   |
| 57.3661   | 56.0497   | 51.8584   | 50.6691  | 44.468    | 46.5114   |
| 7.19028   | 10.6013   | 11.235    | 8.43445  | 8.58929   | 7.68969   |
| 14.2101   | 12.4119   | 19.6754   | 12.7762  | 19.4458   | 13.5714   |
| 10.3016   | 11.1444   | 10.9889   | 8.15903  | 10.0844   | 8.32105   |
| 2.80137   | 2.98794   | 3.50855   | 2.06512  | 3.49847   | 2.35514   |
| 18.5251   | 19.8552   | 16.2283   | 17.4442  | 15.4931   | 18.2986   |
| 0         | 0.0576809 | 0.058313  | 0        | 0.0752033 | 0.0194564 |
| 0.447228  | 0.371557  | 0.187814  | 0.50952  | 0.161476  | 0.50132   |
| 0         | 0         | 0         | 0        | 0.293709  | 0         |
| 0         | 0         | 0         | 0        | 0         | 0         |
| 12.3682   | 10.7236   | 12.0738   | 11.2327  | 14.5655   | 13.583    |
| 0.0591672 | 0.0737341 | 0         | 0        | 0.128177  | 0.0746139 |
| 3.02457   | 3.7543    | 2.65197   | 2.7152   | 3.37086   | 3.13628   |
| 83.4645   | 88.745    | 76.9036   | 85.2484  | 76.9396   | 80.777    |
| 10.1547   | 9.50591   | 9.12957   | 19.2817  | 28.6086   | 42.1647   |
| 13.7776   | 13.584    | 14.8133   | 14.6249  | 14.2044   | 13.3506   |
| 4.71186   | 5.36737   | 4.67592   | 5.22836  | 3.41378   | 3.94797   |
| 0.240232  | 0.299377  | 0.100886  | 0.638616 | 0         | 0.538576  |
| 0         | 0         | 0         | 0        | 0         | 0         |
| 0         | 0         | 0         | 0        | 0         | 0         |
| 26.4139   | 35.0509   | 29.6241   | 37.1254  | 24.3459   | 36.748    |
| 0         | 0         | 0.18589   | 0        | 0         | 0.248092  |
| 1.06291   | 1.08376   | 0.852164  | 1.32104  | 1.36066   | 1.01546   |



|           |           |           |           |           |           |
|-----------|-----------|-----------|-----------|-----------|-----------|
| 39.8309   | 0         | 0         | 0         | 0         | 0         |
| 31.4733   | 31.0256   | 33.5659   | 31.0309   | 34.0912   | 30.9585   |
| 0.821885  | 0.646457  | 0.959001  | 0.798108  | 1.21911   | 0.53797   |
| 0         | 0.0853477 | 0.0862829 | 0         | 0.0370916 | 0.0287887 |
| 0.583427  | 1.10314   | 0.950474  | 0.74491   | 0.893456  | 0.515865  |
| 0         | 0         | 0         | 0         | 0         | 0         |
| 0.255347  | 0.372874  | 0.714425  | 0.531922  | 0.128623  | 0.0685004 |
| 0.806344  | 0.63417   | 0.878068  | 1.20427   | 1.54446   | 0.737572  |
| 29.97     | 26.1661   | 26.709    | 28.2074   | 24.2576   | 20.9647   |
| 79.3503   | 84.3619   | 64.823    | 69.3276   | 55.9835   | 66.4535   |
| 9.24566   | 10.1027   | 9.252     | 7.98534   | 9.09909   | 8.21711   |
| 15.8136   | 16.2931   | 14.8716   | 17.0799   | 15.025    | 17.482    |
| 0.619818  | 0.064625  | 1.90944   | 0         | 0.592702  | 0.435235  |
| 2.68033   | 2.88702   | 2.69806   | 1.88743   | 2.53854   | 2.00427   |
| 1.25119   | 1.11945   | 1.02393   | 0.475152  | 1.39001   | 1.11482   |
| 0         | 0         | 0.14054   | 0.508358  | 0         | 0         |
| 9.82064   | 11.4793   | 10.986    | 11.2537   | 11.3235   | 10.0125   |
| 0.151628  | 0.0354295 | 0.0358178 | 0.12956   | 0.138578  | 0.107557  |
| 0.130681  | 0.0407138 | 0         | 0         | 0         | 0.0823991 |
| 0.309937  | 0.0347619 | 0.0527143 | 0.286016  | 0         | 0.21106   |
| 0.263382  | 0         | 0.121894  | 0         | 0.28529   | 0.162682  |
| 133.784   | 142.302   | 142.16    | 137.332   | 123.122   | 143.262   |
| 7.7764    | 6.1713    | 7.70137   | 6.72492   | 8.84448   | 7.09527   |
| 0         | 0         | 0         | 0         | 0         | 0         |
| 5.78636   | 4.90533   | 7.62295   | 6.32344   | 5.81778   | 4.73769   |
| 0         | 0         | 0         | 0         | 0         | 0         |
| 0         | 0         | 0         | 0.0696444 | 0         | 0.0513928 |
| 8.77182   | 7.72935   | 6.80929   | 8.37841   | 8.15777   | 7.15111   |
| 3.74E-21  | 7.74E-22  | 1.49E-18  | 4.38E-22  | 4.59E-16  | 0.211272  |
| 0.208026  | 0.494916  | 0.0953027 | 0.0646365 | 0.532597  | 0.476973  |
| 1.0206    | 1.2321    | 0.715998  | 0.86016   | 0.535714  | 0.51079   |
| 70.1046   | 71.5175   | 58.9408   | 64.7871   | 49.7245   | 50.6606   |
| 0.0524359 | 0.0653456 | 0.132123  | 0.149348  | 0.0283988 | 0         |
| 19.188    | 18.5704   | 20.588    | 17.0917   | 19.043    | 18.5527   |
| 0.584114  | 0.447952  | 0.509468  | 0.6403    | 0.754373  | 0.509959  |
| 1.76455   | 1.95004   | 1.5939    | 1.59308   | 2.74077   | 1.93132   |
| 106.932   | 113.266   | 99.9413   | 112.309   | 88.2031   | 118.501   |
| 1.18263   | 1.1096    | 0.927077  | 1.00602   | 1.75355   | 2.10533   |
| 23.001    | 23.0753   | 24.9459   | 23.4497   | 28.947    | 25.7554   |
| 0.494037  | 0.153917  | 0.778019  | 0         | 0.802697  | 0.415343  |
| 18.8574   | 12.7561   | 27.846    | 20.7298   | 20.4435   | 17.7404   |
| 0.0701609 | 0.0490501 | 0.11207   | 0.0756707 | 0.14837   | 0.130472  |
| 0.021639  | 0.0269665 | 0.054524  | 0         | 0.0234389 | 0.0545765 |

|           |           |          |          |          |           |
|-----------|-----------|----------|----------|----------|-----------|
| 11.8514   | 13.3269   | 13.2008  | 13.8713  | 13.4222  | 10.9107   |
| 1.02333   | 1.02061   | 0.99962  | 0.700381 | 1.08078  | 1.35447   |
| 0         | 0         | 0        | 0        | 0        | 0         |
| 0.105839  | 0.0827563 | 0.187734 | 0.10564  | 0.375997 | 0.285275  |
| 6.37707   | 5.65342   | 5.74803  | 6.99948  | 5.95281  | 6.342     |
| 0.0959471 | 0.478276  | 0        | 0.109311 | 0.207856 | 0.161328  |
| 1.90847   | 1.64967   | 1.67933  | 2.26751  | 2.5713   | 1.50121   |
| 8.53753   | 7.37826   | 7.9365   | 6.69129  | 8.63202  | 6.82918   |
| 10.3486   | 10.9825   | 12.2545  | 10.9572  | 13.5722  | 10.309    |
| 5.21559   | 6.16917   | 4.12072  | 2.97101  | 6.94208  | 5.49959   |
| 7.94066   | 9.0724    | 9.00196  | 14.9907  | 8.71798  | 8.16058   |
| 20.529    | 16.606    | 20.2546  | 15.921   | 19.457   | 18.9745   |
| 1.44926   | 1.71621   | 1.68959  | 1.94684  | 1.79629  | 1.33964   |
| 3.15987   | 2.90331   | 3.50865  | 3.17286  | 3.82884  | 3.57957   |
| 81.5934   | 63.7431   | 67.7871  | 59.663   | 68.5132  | 76.1235   |
| 10.9306   | 11.1692   | 9.4168   | 9.0423   | 10.6538  | 10.7516   |
| 1.30532   | 1.26333   | 1.62207  | 1.32054  | 1.74301  | 1.50278   |
| 0.821444  | 1.00014   | 1.08722  | 0.529356 | 1.13602  | 0.868129  |
| 0.513331  | 1.59928   | 0.646722 | 0.584829 | 0.556029 | 0.215782  |
| 7.37311   | 5.38525   | 9.75731  | 6.5031   | 12.6912  | 6.26867   |
| 0         | 0         | 0        | 0        | 0        | 0         |
| 22.4188   | 21.2556   | 23.0521  | 17.8571  | 22.4014  | 21.3552   |
| 4.05234   | 4.51216   | 6.60348  | 5.49422  | 6.09198  | 6.47098   |
| 1.02143   | 0.636454  | 1.20643  | 1.96374  | 2.14364  | 1.98581   |
| 37.4349   | 35.2179   | 40.623   | 34.0318  | 45.5188  | 40.2714   |
| 1.21161   | 0.833815  | 1.39739  | 0.281846 | 0.731103 | 0.235418  |
| 1.33E-09  | 2.03E-10  | 1.48E-09 | 3.00E-09 | 6.83E-09 | 3.81E-09  |
| 0.285599  | 0.600959  | 0.373968 | 0.612615 | 0.234221 | 0.412101  |
| 9.63022   | 7.86283   | 9.95733  | 8.32324  | 7.19415  | 9.21296   |
| 29.6039   | 34.8491   | 30.7284  | 31.5821  | 27.977   | 35.0927   |
| 144.868   | 324.961   | 146.01   | 33.0091  | 188.301  | 170.509   |
| 12.8701   | 10.7347   | 14.8725  | 11.4531  | 16.2361  | 11.9955   |
| 0         | 0         | 0        | 0        | 0        | 0         |
| 0.07363   | 0.0917576 | 0        | 0        | 0        | 0.0619017 |
| 0         | 0         | 0        | 0        | 0        | 0         |
| 1.0351    | 0.963154  | 0.730281 | 0.78618  | 1.56968  | 1.53159   |
| 45.2122   | 44.6692   | 42.3996  | 29.9629  | 42.1494  | 39.9855   |
| 2.21408   | 2.45043   | 1.82589  | 2.18815  | 3.27893  | 2.0777    |
| 21.0737   | 21.8411   | 19.4747  | 20.5157  | 24.4158  | 23.5192   |
| 2.91439   | 3.28044   | 2.053    | 3.0704   | 3.73386  | 2.60824   |
| 10.3003   | 10.6866   | 11.4532  | 9.56645  | 10.5558  | 10.4099   |
| 11.853    | 13.0156   | 10.3065  | 12.4239  | 13.5216  | 12.937    |
| 0.604883  | 0.456051  | 0.311176 | 0.416925 | 0.458638 | 0.560657  |

|           |           |           |           |           |           |
|-----------|-----------|-----------|-----------|-----------|-----------|
| 213.523   | 237.47    | 275.3     | 306.321   | 231.832   | 302.14    |
| 3.34877   | 3.11096   | 2.49302   | 3.26026   | 4.31981   | 4.91407   |
| 17.5597   | 17.0885   | 14.5411   | 17.7099   | 15.7929   | 18.6884   |
| 11.7526   | 11.3419   | 12.2838   | 11.7166   | 11.7687   | 10.0731   |
| 52.0341   | 58.215    | 49.3754   | 55.4406   | 56.4799   | 60.7493   |
| 2.05505   | 1.76069   | 1.35521   | 1.28039   | 1.51298   | 1.28228   |
| 0         | 0         | 0.0202766 | 0.0733467 | 0         | 0.0135307 |
| 0.330856  | 0.149932  | 0.151575  | 0.102801  | 0.325797  | 0.227581  |
| 8.93935   | 10.654    | 8.12025   | 7.09243   | 9.35701   | 7.64377   |
| 80.3146   | 78.8417   | 67.573    | 86.6495   | 73.1002   | 85.8707   |
| 0.160668  | 0.240375  | 0.203036  | 0.292995  | 0.0348869 | 0.188909  |
| 0         | 0.0489438 | 0         | 0         | 0         | 0         |
| 6.75714   | 7.82458   | 8.13632   | 7.35766   | 10.8169   | 7.64144   |
| 10.4717   | 10.973    | 11.7538   | 8.60212   | 12.0792   | 8.06066   |
| 0.0833004 | 0.0968882 | 0.0629678 | 0.0949027 | 0.174443  | 0.149401  |
| 16.4452   | 13.4769   | 15.6426   | 12.3329   | 20.0256   | 12.7316   |
| 0.307787  | 1.40658   | 1.06493   | 1.68849   | 0.96583   | 1.00666   |
| 1.54996   | 1.45528   | 1.36423   | 0.798256  | 0.505964  | 0.696159  |
| 37.3633   | 34.1088   | 32.7105   | 35.732    | 30.8359   | 36.1659   |
| 24.161    | 24.2909   | 23.1485   | 21.23     | 22.6957   | 21.7515   |
| 13.7941   | 16.9588   | 12.5287   | 19.1645   | 10.9013   | 13.9449   |
| 29.0192   | 28.35     | 26.9533   | 28.5115   | 25.072    | 25.8551   |
| 3.14289   | 2.55614   | 6.12694   | 7.04822   | 3.61933   | 4.33888   |
| 0         | 0         | 0         | 0         | 0         | 0         |
| 0         | 0         | 0         | 0         | 0         | 0         |
| 0.380507  | 0.316125  | 0.319589  | 0.289004  | 0.343465  | 0.42653   |
| 7.04968   | 5.7756    | 7.75697   | 4.53715   | 9.40117   | 8.74202   |
| 21.662    | 24.2537   | 20.0142   | 20.7331   | 15.9704   | 18.2745   |
| 31.693    | 22.8275   | 30.895    | 30.4199   | 30.3867   | 31.624    |
| 78.2001   | 64.2132   | 72.1409   | 85.8314   | 60.3235   | 75.945    |
| 0         | 0         | 0         | 0         | 0         | 0         |
| 0         | 0         | 0         | 0         | 0         | 0         |
| 3.6073    | 4.41726   | 3.48731   | 2.69689   | 4.20594   | 3.58025   |
| 70.7654   | 74.954    | 83.5732   | 69.5971   | 65.8402   | 58.8887   |
| 0.0327815 | 0.0136174 | 0.0137666 | 0.0622457 | 0.0710165 | 0.0643062 |
| 0.0979867 | 0.014366  | 0.0871405 | 0.0656674 | 0.0187301 | 0.072687  |
| 18.7003   | 23.7179   | 16.477    | 21.8164   | 21.165    | 26.7333   |
| 26.4252   | 25.7746   | 26.0005   | 24.6708   | 21.8684   | 16.9858   |
| 15.4577   | 16.5567   | 16.5634   | 13.6358   | 17.269    | 13.9473   |
| 14.4792   | 14.2119   | 14.7031   | 14.0132   | 11.8283   | 12.5189   |
| 0.198125  | 0.406663  | 0.939702  | 1.0091    | 0.694309  | 0.966746  |
| 53.8089   | 59.0286   | 57.2336   | 49.5731   | 40.6332   | 42.361    |
| 0         | 0         | 0         | 0         | 0         | 0         |

|           |           |           |           |           |            |
|-----------|-----------|-----------|-----------|-----------|------------|
| 49.2827   | 49.6585   | 47.5041   | 40.2753   | 49.9224   | 47.7881    |
| 0.704261  | 0.947759  | 1.90162   | 1.74488   | 2.38471   | 1.8968     |
| 26.2353   | 30.8761   | 24.2974   | 26.6331   | 23.5847   | 24.7826    |
| 27.1276   | 30.5669   | 27.6268   | 32.7826   | 26.3732   | 30.488     |
| 12.7173   | 10.5013   | 13.2948   | 10.7453   | 10.8861   | 10.4641    |
| 5.75559   | 3.39981   | 4.02155   | 3.93248   | 3.3203    | 2.67126    |
| 0.427066  | 0.805506  | 0.348999  | 1.38075   | 0.250048  | 0.300817   |
| 0         | 0         | 0.0954937 | 0.0345419 | 0.180625  | 0.165682   |
| 0.0162303 | 0         | 0.0409094 | 0.0536123 | 0.0263704 | 0.00682249 |
| 0         | 0         | 0         | 0         | 0         | 0          |
| 5.10752   | 4.62181   | 7.90598   | 5.86277   | 9.17426   | 7.18535    |
| 6.48518   | 4.79137   | 5.74845   | 6.09547   | 5.24337   | 5.17956    |
| 15.7486   | 17.034    | 16.1756   | 19.024    | 19.4154   | 18.0407    |
| 0         | 0         | 0         | 0.0478487 | 0.0905308 | 0          |
| 0.241582  | 0.123094  | 0.124443  | 0.037511  | 0.107363  | 0.0467109  |
| 0.758917  | 0.68305   | 2.12472   | 1.58514   | 1.59842   | 1.91409    |
| 0.0275995 | 0         | 0         | 0         | 0         | 0          |
| 0         | 0         | 0         | 0         | 0         | 0          |
| 0         | 0         | 0         | 0         | 0         | 0          |
| 225.103   | 230.328   | 184.213   | 211.971   | 168.389   | 213.413    |
| 8.56007   | 8.52174   | 10.9571   | 6.71826   | 8.69193   | 8.98912    |
| 0.843864  | 0.525811  | 0.93658   | 0.732495  | 0.957582  | 0.979711   |
| 1.58E-06  | 1.46E-06  | 1.35E-06  | 1.90E-06  | 1.30E-06  | 3.36E-32   |
| 0.0763626 | 0.190326  | 0.192411  | 0.0869986 | 0.0827144 | 0.385194   |
| 4.98964   | 5.76469   | 4.91111   | 4.20425   | 7.31884   | 4.44983    |
| 25.949    | 23.1259   | 21.7573   | 20.2568   | 22.7937   | 21.8156    |
| 9.1186    | 8.5534    | 7.48279   | 7.06148   | 7.31438   | 6.2952     |
| 0.0476105 | 0.0355993 | 0.131961  | 0.0325451 | 0.0618848 | 0.0560374  |
| 103.932   | 83.8972   | 105.218   | 94.8635   | 110.168   | 134.354    |
| 0.38251   | 1.14404   | 0.173486  | 0.296335  | 0.397754  | 0.205812   |
| 18.6282   | 17.968    | 16.7089   | 17.3251   | 17.5648   | 17.5964    |
| 0.553474  | 0.513148  | 0.840687  | 0.856726  | 1.62946   | 0.918544   |
| 0.101264  | 0         | 0.0598024 | 0         | 0         | 0.023944   |
| 6.34809   | 6.45409   | 5.7706    | 6.07873   | 7.41454   | 7.41854    |
| 24.8033   | 21.7176   | 29.8598   | 24.4725   | 28.709    | 25.6754    |
| 4.87037   | 6.17689   | 5.13146   | 4.27208   | 3.64156   | 4.90986    |
| 0.2164    | 0.809034  | 0.272633  | 1.84906   | 1.2892    | 0.363861   |
| 0.441488  | 0.25393   | 1.49749   | 0.309526  | 2.68534   | 2.6267     |
| 29.0634   | 32.7772   | 28.7608   | 32.8092   | 23.7086   | 24.8294    |
| 4.94732   | 4.77512   | 5.21445   | 4.54964   | 4.53575   | 4.36316    |
| 35.1519   | 38.0829   | 33.0107   | 33.2727   | 30.4224   | 37.0274    |
| 0         | 0         | 0         | 0         | 0         | 0          |
| 18.6055   | 19.2004   | 17.557    | 15.2134   | 16.5219   | 14.4832    |

|           |           |           |           |           |           |
|-----------|-----------|-----------|-----------|-----------|-----------|
| 38.5132   | 34.3315   | 34.6428   | 34.5575   | 36.4751   | 31.1259   |
| 42.3905   | 44.5546   | 35.8195   | 43.2509   | 64.7756   | 64.9475   |
| 13.0609   | 11.6537   | 2.56057   | 3.0494    | 2.63458   | 3.1186    |
| 0.406234  | 0         | 0         | 0         | 0.440024  | 0         |
| 0         | 0         | 0         | 0         | 0         | 0         |
| 24.5804   | 28.2585   | 22.2141   | 21.8588   | 21.2758   | 23.0442   |
| 2.74505   | 2.77197   | 2.72286   | 2.13707   | 2.21448   | 2.14831   |
| 11.2965   | 9.87566   | 14.6856   | 9.85505   | 11.9279   | 8.40865   |
| 15.1974   | 14.967    | 13.5015   | 11.0253   | 17.0619   | 13.2038   |
| 0.799295  | 0.509446  | 1.1223    | 0.813305  | 0.812908  | 0.579644  |
| 2.25745   | 2.02188   | 0.488792  | 1.32604   | 1.41356   | 2.31288   |
| 0.594493  | 0.123476  | 0.249658  | 0.451531  | 0.321972  | 0.749697  |
| 26.3186   | 26.2355   | 26.8182   | 24.0549   | 26.4906   | 25.2887   |
| 0.123925  | 0.145956  | 0.0612215 | 0.096524  | 0.220932  | 0.103215  |
| 0.83955   | 0.747318  | 0.868833  | 0.580723  | 0.746993  | 0.93269   |
| 1.03777   | 0.658787  | 0.584578  | 0.558787  | 0.860151  | 0.574873  |
| 0.0563325 | 0.117124  | 0.144899  | 0.171321  | 0.0305091 | 0.0644614 |
| 0.0746541 | 0.0465169 | 0.0940533 | 0         | 0.0404319 | 0         |
| 3.25405   | 3.0414    | 2.88135   | 2.83293   | 2.89293   | 1.80661   |
| 17.3989   | 20.8021   | 23.298    | 26.9827   | 19.6032   | 21.6158   |
| 7.58899   | 6.72361   | 6.31177   | 8.2745    | 9.44043   | 9.27117   |
| 20.0817   | 29.6307   | 14.9928   | 21.7392   | 10.0027   | 14.3345   |
| 6.53045   | 7.84679   | 6.93551   | 7.19408   | 7.22955   | 6.8212    |
| 6.19561   | 4.64368   | 7.44049   | 6.1463    | 12.324    | 6.26259   |
| 0         | 0         | 0         | 0         | 0         | 0         |
| 1.81335   | 0.747432  | 1.73044   | 1.86913   | 1.6154    | 1.79324   |
| 2.89847   | 3.01292   | 3.54244   | 4.02572   | 3.64867   | 3.09342   |
| 5.39843   | 5.69251   | 6.38269   | 6.77483   | 5.64955   | 6.85666   |
| 0.963064  | 1.1512    | 1.2665    | 0.80408   | 1.28662   | 0.815802  |
| 0.524809  | 0.899272  | 0.826478  | 0.710013  | 0.568462  | 0.33091   |
| 0         | 0         | 0         | 0         | 0         | 0         |
| 0         | 0         | 0         | 0         | 0         | 0         |
| 0         | 1.35165   | 1.02485   | 0.308922  | 0         | 0.455926  |
| 10.2603   | 10.8868   | 10.3276   | 9.5315    | 9.03562   | 9.16474   |
| 10.6897   | 11.383    | 13.9394   | 10.5266   | 15.7225   | 12.2412   |
| 40.9379   | 29.1015   | 50.4482   | 41.1374   | 59.7418   | 56.4805   |
| 2.12974   | 2.28555   | 3.20076   | 2.86019   | 4.46165   | 3.56401   |
| 0         | 0         | 0         | 0         | 0         | 0         |
| 0.499706  | 0.51096   | 0.694127  | 0.350342  | 0.846604  | 0.538601  |
| 0.579643  | 0.47905   | 0.4843    | 0.510921  | 0.264938  | 0.332906  |
| 0.101404  | 0.294861  | 0.227115  | 0.0385092 | 0.0732256 | 0.0284171 |
| 1.82797   | 1.15971   | 2.21923   | 2.9156    | 4.24804   | 4.63832   |
| 0         | 0         | 0         | 0         | 0         | 0         |

|           |           |            |           |           |            |
|-----------|-----------|------------|-----------|-----------|------------|
| 0         | 0         | 0          | 0         | 0         | 0          |
| 0.0630179 | 0.117799  | 0.11909    | 0.0358976 | 0.170649  | 0.02649    |
| 0.286731  | 0.525047  | 0.0884668  | 0.400001  | 0.23769   | 0.236139   |
| 0         | 0         | 0          | 0         | 0         | 0          |
| 0         | 0         | 0.327741   | 1.1855    | 0         | 0.437408   |
| 5.46845   | 4.8993    | 6.30668    | 6.1811    | 6.16484   | 5.24272    |
| 15.543    | 38.7394   | 58.7458    | 17.7079   | 33.6717   | 26.1344    |
| 22.544    | 45.6983   | 24.1179    | 36.3919   | 4.52878   | 8.96096    |
| 0         | 0         | 0          | 0         | 0         | 0          |
| 14.1426   | 12.5998   | 11.3761    | 11.2215   | 8.28455   | 10.7953    |
| 0         | 0         | 0          | 0         | 0         | 0          |
| 1.52939   | 1.30341   | 1.52496    | 0.595566  | 1.31048   | 1.07266    |
| 52.9259   | 61.0381   | 48.9365    | 64.0239   | 52.9657   | 64.6525    |
| 0.0243728 | 0.0269976 | 0.00682259 | 0         | 0         | 0.0204905  |
| 102.378   | 99.1609   | 87.7786    | 97.6926   | 90.8822   | 80.5884    |
| 13.8911   | 15.0549   | 15.054     | 14.1571   | 13.4778   | 12.993     |
| 0.0739356 | 0.0460692 | 0          | 0         | 0.0400428 | 0          |
| 0.128468  | 0         | 0.0539706  | 0         | 0         | 0.0357159  |
| 18.951    | 20.1678   | 22.6625    | 20.3775   | 26.0466   | 24.0631    |
| 0.134142  | 0.0595275 | 0.141877   | 0.141313  | 0.168055  | 0.0757398  |
| 78.593    | 69.3141   | 61.11      | 58.9036   | 52.8861   | 72.4275    |
| 0.815635  | 0.89483   | 0.904635   | 0.272214  | 0.989723  | 0.644039   |
| 3.70862   | 3.89963   | 3.90577    | 4.39028   | 3.70327   | 3.28844    |
| 2.87667   | 2.42704   | 3.30903    | 2.58523   | 2.86435   | 2.25321    |
| 21.373    | 20.1316   | 19.5888    | 19.2866   | 17.7793   | 19.8104    |
| 113.738   | 107.669   | 96.7398    | 115.506   | 74.0349   | 100.14     |
| 0.296736  | 0.123264  | 0.124615   | 0.338067  | 0.321419  | 0.166313   |
| 2.93965   | 2.36594   | 6.01824    | 5.16319   | 4.70992   | 3.06351    |
| 15.5812   | 16.3165   | 20.899     | 15.929    | 21.4977   | 16.9345    |
| 4.00028   | 3.38298   | 4.6509     | 3.35546   | 5.06408   | 3.80572    |
| 12.0825   | 11.1066   | 18.1538    | 19.2096   | 22.5965   | 18.6485    |
| 5.11556   | 4.75637   | 2.95755    | 4.44834   | 3.60921   | 3.50503    |
| 13.567    | 13.1891   | 15.4992    | 15.3121   | 14.8018   | 13.9692    |
| 13.118    | 15.0732   | 9.68813    | 10.5087   | 9.07523   | 10.1191    |
| 27.6982   | 25.8966   | 23.2543    | 24.1356   | 33.0201   | 34.4258    |
| 2.30051   | 1.91486   | 2.4608     | 1.63187   | 2.40724   | 1.96687    |
| 0         | 0         | 0          | 0         | 0         | 0          |
| 123.21    | 151.234   | 141.268    | 159.968   | 127.225   | 177.992    |
| 0.0340863 | 0.0121642 | 0.0619766  | 0.0362744 | 0.010573  | 0.00820625 |
| 4.20752   | 4.33937   | 5.48366    | 3.04143   | 4.46321   | 2.85425    |
| 0         | 0         | 0          | 0         | 0         | 0          |
| 3.11237   | 2.3175    | 2.81962    | 2.11598   | 2.26112   | 2.20335    |
| 0         | 0         | 0          | 0         | 0         | 0          |

|           |           |           |            |           |           |
|-----------|-----------|-----------|------------|-----------|-----------|
| 1.78846   | 2.80768   | 3.42369   | 2.27572    | 2.41524   | 2.40182   |
| 18.1051   | 13.9895   | 17.2156   | 16.1381    | 27.4351   | 22.95     |
| 8.5354    | 10.022    | 7.70761   | 7.1386     | 7.77573   | 8.50313   |
| 0.131396  | 0.163746  | 0         | 0          | 0.284652  | 0         |
| 1.09614   | 1.78134   | 1.25987   | 1.62768    | 1.47619   | 1.22772   |
| 46.8091   | 46.1552   | 46.3571   | 48.6414    | 46.7689   | 46.0971   |
| 12.8097   | 11.6201   | 13.2416   | 11.2983    | 14.8672   | 12.801    |
| 0         | 0.0061241 | 0.0123824 | 0.00497662 | 0         | 0         |
| 0         | 0         | 0         | 0          | 0         | 0         |
| 13.8691   | 15.4302   | 16.0209   | 16.3091    | 18.5669   | 16.1301   |
| 0         | 0         | 0         | 0          | 0         | 0         |
| 48.7264   | 43.595    | 52.6963   | 52.1842    | 70.5972   | 69.2149   |
| 0.31634   | 0.156223  | 0.348399  | 0.390427   | 0.330451  | 0.351224  |
| 0         | 0         | 0.0391191 | 0          | 0         | 0         |
| 1.69894   | 1.69031   | 1.37566   | 1.67481    | 1.53116   | 1.52336   |
| 0         | 0         | 0         | 0          | 0         | 0         |
| 16.8346   | 17.2148   | 14.795    | 14.2685    | 16.029    | 16.0933   |
| 4.63909   | 4.86032   | 4.12403   | 3.90918    | 5.30338   | 3.85694   |
| 0.0713904 | 0.0450795 | 0.0784919 | 0.07098    | 0.146799  | 0.164528  |
| 1.63967   | 1.58927   | 1.49192   | 1.14158    | 0.986696  | 1.53165   |
| 0         | 0         | 0         | 0          | 0         | 0         |
| 0         | 0         | 0         | 0          | 0         | 0         |
| 0         | 0         | 0         | 0          | 0         | 0         |
| 42.5198   | 52.1693   | 46.1503   | 74.6009    | 66.7263   | 59.3183   |
| 184.064   | 144.869   | 86.6634   | 74.8795    | 58.9603   | 72.8085   |
| 0.81809   | 0.805126  | 1.27002   | 1.55263    | 1.27535   | 0.957142  |
| 209.281   | 185.887   | 120.165   | 128.46     | 72.1059   | 100.541   |
| 15.3583   | 20.9598   | 15.9841   | 23.3458    | 6.8713    | 10.1401   |
| 7.61123   | 7.20944   | 6.03181   | 5.01749    | 6.13338   | 4.37341   |
| 8.44975   | 13.953    | 7.66605   | 6.291      | 5.49339   | 10.8917   |
| 17.2038   | 19.939    | 14.2726   | 12.0246    | 13.7432   | 13.268    |
| 3.51249   | 4.03577   | 4.58215   | 3.63277    | 3.93957   | 2.87969   |
| 0         | 0         | 0         | 0          | 0         | 0         |
| 5.745     | 4.70942   | 9.43949   | 4.87778    | 7.26395   | 3.48927   |
| 49.3425   | 53.8945   | 52.9325   | 61.2601    | 58.4048   | 68.8429   |
| 18.0649   | 16.0933   | 12.1794   | 9.1127     | 8.84077   | 10.4909   |
| 0         | 0         | 0         | 0          | 0         | 0         |
| 0.0251205 | 0         | 0.126593  | 0.0858582  | 0.0544201 | 0.0633574 |
| 1.26086   | 1.57128   | 0         | 0          | 0         | 0.212004  |
| 104.611   | 109.613   | 105.725   | 111.504    | 97.8772   | 116.187   |
| 17.3233   | 15.3971   | 16.3995   | 14.4472    | 20.5656   | 19.5083   |
| 0.591902  | 0.865661  | 0.85824   | 0.853355   | 0.774169  | 0.488353  |
| 0.499491  | 0.430937  | 0.822912  | 1.05058    | 0.541038  | 0.807554  |

|           |           |           |          |           |            |
|-----------|-----------|-----------|----------|-----------|------------|
| 0         | 0         | 0         | 0        | 0         | 0          |
| 3.75261   | 3.70222   | 2.56086   | 3.3846   | 4.23411   | 3.02341    |
| 0.202245  | 0.252038  | 0.398125  | 0.270225 | 0.246452  | 0          |
| 3.38531   | 3.89835   | 3.99506   | 4.44267  | 2.78498   | 3.74672    |
| 14.3313   | 14.8908   | 14.116    | 13.7617  | 19.0111   | 19.1837    |
| 2.00147   | 1.99538   | 2.5936    | 1.38986  | 3.07643   | 1.36215    |
| 0         | 0         | 0         | 0        | 0         | 0          |
| 35.4549   | 35.5881   | 32.2828   | 40.9439  | 25.2419   | 28.3983    |
| 9.8412    | 10.268    | 9.97539   | 10.7259  | 10.0239   | 9.44038    |
| 1.60123   | 1.75578   | 2.72325   | 1.66046  | 2.15726   | 1.69812    |
| 13.06     | 14.1454   | 10.8633   | 9.07943  | 9.46385   | 8.56742    |
| 0         | 0         | 0         | 0        | 0         | 0          |
| 0         | 0         | 0         | 0        | 0         | 0          |
| 0         | 0         | 0         | 0        | 0         | 0          |
| 4.50523   | 6.63109   | 4.66708   | 5.18248  | 3.90164   | 5.44836    |
| 0         | 0.218074  | 0         | 0.498412 | 0.0947736 | 0          |
| 319.75    | 265.719   | 264.293   | 244.096  | 381.987   | 298.018    |
| 2.32548   | 2.58211   | 2.66595   | 3.95523  | 2.22046   | 1.72342    |
| 67.1652   | 72.8288   | 96.7321   | 100.829  | 77.5153   | 97.9071    |
| 198.796   | 161.796   | 165.379   | 137.241  | 235.879   | 177.542    |
| 10.6401   | 10.6424   | 11.0509   | 10.2572  | 10.4212   | 8.64018    |
| 6.31831   | 5.57579   | 7.30414   | 7.09111  | 7.61652   | 6.89933    |
| 3.06713   | 3.32458   | 3.39275   | 3.71473  | 2.63841   | 2.77372    |
| 0.634172  | 0.556126  | 0.503202  | 0.240777 | 0.788503  | 0.63174    |
| 31.9581   | 34.8476   | 31.9853   | 33.4133  | 31.8345   | 28.9566    |
| 5.2847    | 9.82001   | 22.2134   | 21.0617  | 47.7696   | 62.7792    |
| 0         | 0         | 0         | 0        | 0         | 0.00782303 |
| 7.99123   | 7.12102   | 8.93271   | 7.09335  | 8.49821   | 6.78174    |
| 0         | 0         | 0         | 0        | 0         | 0          |
| 0.0644375 | 0.0160604 | 0.0324727 | 0        | 0.0418784 | 0.0433387  |
| 3.36039   | 4.38595   | 4.1835    | 4.32681  | 4.07066   | 3.5815     |
| 10.7942   | 8.30411   | 10.4571   | 9.10112  | 16.5461   | 8.97651    |
| 38.6341   | 38.9123   | 41.7258   | 34.3564  | 45.6605   | 38.6338    |
| 14.933    | 12.6454   | 13.5161   | 15.8893  | 11.5479   | 13.6698    |
| 1.73343   | 1.18156   | 1.92583   | 1.23825  | 2.35967   | 1.66615    |
| 57.6334   | 54.8685   | 60.487    | 57.5414  | 57.3945   | 58.9442    |
| 0         | 0         | 0         | 0        | 0         | 0          |
| 19.3923   | 20.0928   | 18.4936   | 21.6414  | 17.5675   | 20.8395    |
| 4.63708   | 4.53358   | 4.51873   | 4.42997  | 4.97938   | 4.7061     |
| 1.71191   | 1.4667    | 2.15676   | 1.70656  | 2.0861    | 0.899516   |
| 9.46922   | 11.1466   | 9.62252   | 12.1249  | 8.00447   | 8.5621     |
| 97.0914   | 82.7678   | 77.5701   | 77.6629  | 73.2858   | 78.9171    |
| 32.7912   | 81.3451   | 142.75    | 85.679   | 196.771   | 249.018    |



|             |           |          |             |           |             |
|-------------|-----------|----------|-------------|-----------|-------------|
| 0           | 0         | 0        | 0           | 0         | 0           |
| 18.0785     | 18.6842   | 17.2267  | 14.8183     | 23.4407   | 22.0385     |
| 6.22988     | 5.57323   | 6.60498  | 6.3015      | 7.07008   | 5.39378     |
| 34.9946     | 37.0354   | 37.9688  | 45.7735     | 43.5131   | 50.0186     |
| 2.70733     | 2.52397   | 4.19195  | 3.81432     | 4.8577    | 3.81375     |
| 0           | 0         | 0        | 0           | 0         | 0           |
| 0           | 0.0350322 | 0        | 0           | 0.0304495 | 0           |
| 0.27644     | 0.574164  | 0.812638 | 0.157471    | 0.299434  | 0.464812    |
| 1.34E-14    | 3.61E-19  | 1.45E-21 | 4.54652     | 1.26E-16  | 4.77517     |
| 18.4942     | 15.8      | 21.8524  | 15.0654     | 25.9267   | 18.2292     |
| 0           | 0         | 0        | 0           | 0         | 0           |
| 0.22693     | 0.282799  | 0.6589   | 0.460768    | 0.132931  | 0.0886448   |
| 0           | 0         | 0        | 0           | 0         | 0           |
| 2007.8      | 2972.67   | 906.396  | 748.156     | 38.6407   | 54.1724     |
| 12.9029     | 12.4857   | 14.6624  | 12.473      | 14.0795   | 11.6877     |
| 0.510387    | 0.593748  | 1.5417   | 0.890975    | 1.58314   | 0.857403    |
| 0.652386    | 0.478237  | 0.754225 | 0.550881    | 0.931117  | 0.567827    |
| 0           | 0         | 0        | 0           | 0         | 0           |
| 0.0252216   | 0.031425  | 0        | 0.028743    | 0.109251  | 0.0423977   |
| 17.4887     | 15.8178   | 17.4875  | 16.8        | 18.8146   | 15.5823     |
| 0.17633     | 0         | 0.111075 | 0.100445    | 0         | 0.148243    |
| 0.888374    | 0.955137  | 1.11922  | 0.873193    | 0.698117  | 0.424689    |
| 0           | 0         | 0        | 0           | 0         | 0           |
| 0.475525    | 0.488118  | 1.08019  | 0.817763    | 0.716931  | 0.532766    |
| 3.8155      | 3.68204   | 3.62887  | 3.70444     | 4.1492    | 3.89443     |
| 12.8749     | 14.2003   | 12.8364  | 9.88819     | 11.3663   | 11.8884     |
| 0           | 0         | 0        | 0           | 0         | 0           |
| 19.9643     | 23.1679   | 23.2507  | 21.5669     | 21.1667   | 20.7135     |
| 0           | 0         | 0        | 0           | 0         | 0           |
| 8.69713     | 8.54273   | 9.57479  | 8.78461     | 8.59189   | 7.82801     |
| 208.817     | 250.971   | 156.836  | 260.21      | 236.371   | 231.472     |
| 0.000719328 | 8.42E-06  | 1.85567  | 0.000145156 | 0.341458  | 0.000437403 |
| 0.0497313   | 0.12395   | 0.125308 | 0.075544    | 0.0897798 | 0.0975559   |
| 26.1284     | 27.4395   | 24.1244  | 24.588      | 27.5433   | 26.6706     |
| 154.805     | 32.153    | 65.0107  | 29.3945     | 111.788   | 0           |
| 0           | 0         | 0        | 0           | 0         | 0           |
| 0           | 0         | 0        | 0.0610684   | 0         | 0.0450642   |
| 2.69187     | 4.64484   | 1.30437  | 1.29749     | 1.45789   | 1.47971     |
| 0           | 0         | 0        | 0           | 0         | 0           |
| 434.646     | 504.15    | 351.952  | 461.161     | 328.397   | 452.974     |
| 360.652     | 415.622   | 340.995  | 347.981     | 240.004   | 304.269     |
| 186.799     | 179.455   | 214.153  | 171.773     | 238.829   | 224.872     |
| 0           | 0         | 0        | 0           | 0         | 0           |

|           |           |           |           |          |           |
|-----------|-----------|-----------|-----------|----------|-----------|
| 6.72441   | 7.62102   | 4.92663   | 6.62011   | 5.10654  | 5.46895   |
| 24.4645   | 22.3074   | 29.1283   | 20.999    | 30.8333  | 29.7302   |
| 0.428716  | 0.66376   | 1.03063   | 1.25079   | 0.77793  | 1.00293   |
| 20.3413   | 21.785    | 20.4506   | 22.7246   | 21.2588  | 19.5237   |
| 1.07453   | 1.19835   | 0.925575  | 0.515074  | 0.919298 | 0.998327  |
| 0         | 0         | 0.032911  | 0         | 0        | 0.0219618 |
| 19.5708   | 28.4001   | 14.599    | 19.8027   | 16.5961  | 19.9172   |
| 20.0687   | 18.4542   | 19.7122   | 19.9883   | 13.2302  | 16.7255   |
| 12.5799   | 12.4031   | 13.7393   | 13.4128   | 13.8955  | 12.702    |
| 0.380978  | 0.431613  | 0.261805  | 0.276208  | 0.187576 | 0.291175  |
| 30.782    | 31.6226   | 37.4367   | 29.1876   | 34.211   | 33.5656   |
| 26.365    | 25.61     | 27.1282   | 29.1686   | 24.6075  | 26.6506   |
| 0         | 0         | 0         | 0         | 0        | 0         |
| 0         | 0         | 0         | 0         | 0        | 0         |
| 4.73139   | 4.43451   | 6.84088   | 4.66967   | 7.52325  | 3.71181   |
| 0.0655821 | 0.0272428 | 0.0275413 | 0.0249055 | 0.023679 | 0.0183785 |
| 0.121849  | 0         | 0.153512  | 0.50901   | 0.131985 | 0.10244   |
| 20.2206   | 19.146    | 25.5448   | 20.9946   | 25.4332  | 18.8512   |
| 4.56175   | 4.55024   | 3.44758   | 3.62622   | 4.23593  | 4.49373   |
| 8.35693   | 7.86394   | 9.26617   | 8.03934   | 9.74482  | 8.28038   |
| 20.3942   | 18.7215   | 19.3496   | 23.0436   | 17.2725  | 15.0289   |
| 0         | 0         | 0         | 0         | 0        | 0         |
| 121.764   | 136.792   | 99.5441   | 115.075   | 83.7397  | 111.488   |
| 0         | 0         | 0         | 0         | 0        | 0         |
| 1.59737   | 1.39841   | 3.79164   | 2.4223    | 1.75811  | 1.78776   |
| 10.4127   | 9.98175   | 9.43431   | 8.64153   | 11.4653  | 10.6437   |
| 12.5653   | 17.0214   | 10.8475   | 11.8294   | 5.64856  | 9.91756   |
| 0         | 0         | 0         | 0         | 0        | 0.125655  |
| 26.9924   | 27.6733   | 23.9381   | 25.2277   | 27.2808  | 29.2534   |
| 0.467806  | 0         | 0.392912  | 0         | 0.675624 | 0         |
| 0.134428  | 0.104167  | 0.172625  | 0.0665082 | 0.218154 | 0.116834  |
| 5.76382   | 5.14838   | 6.98162   | 4.95984   | 6.57728  | 4.80759   |
| 9.84062   | 10.3325   | 11.2823   | 9.45125   | 11.8716  | 12.3534   |
| 1.1973    | 0.747153  | 1.22842   | 0.594351  | 1.34882  | 0.341316  |
| 697.407   | 692.221   | 767.351   | 718.337   | 617.867  | 613.142   |
| 1.78869   | 1.91062   | 3.86312   | 0.291117  | 0.553563 | 1.28895   |
| 39.0216   | 36.3952   | 35.5753   | 33.5617   | 46.3071  | 47.3377   |
| 2.9579    | 1.75339   | 1.90891   | 0.883903  | 3.47742  | 1.88027   |
| 6.69022   | 8.06825   | 8.892     | 7.33337   | 9.6036   | 8.30676   |
| 4.94227   | 5.62559   | 4.31445   | 4.78826   | 5.35336  | 6.01988   |
| 0.0727319 | 0.354334  | 0.425073  | 0.780031  | 0.276474 | 0.263184  |
| 3.4604    | 4.63152   | 3.78141   | 3.37759   | 4.20709  | 3.82269   |
| 9.72415   | 9.21435   | 10.6371   | 9.01589   | 11.0656  | 8.12439   |

|           |           |           |            |           |           |
|-----------|-----------|-----------|------------|-----------|-----------|
| 111.641   | 118.65    | 117.175   | 127.304    | 103.225   | 128.02    |
| 381.126   | 388.469   | 392.483   | 401.403    | 420.401   | 430.595   |
| 0.0712387 | 0.0887775 | 0         | 0.0405805  | 0         | 0         |
| 6.6164    | 8.73469   | 5.8622    | 4.63014    | 9.59112   | 8.41801   |
| 1422.93   | 1651.72   | 1177.34   | 1347.59    | 1319.18   | 1757.22   |
| 22.7451   | 29.2449   | 22.2551   | 28.268     | 21.8226   | 30.8884   |
| 60.5415   | 67.6473   | 64.2519   | 57.1107    | 52.0935   | 62.522    |
| 0.162695  | 0.152063  | 0.563674  | 0.139017   | 0.484627  | 0.102585  |
| 49.813    | 49.8263   | 47.1964   | 49.9353    | 42.8592   | 50.4022   |
| 3.91504   | 4.22672   | 3.96872   | 3.32519    | 3.47758   | 2.89374   |
| 82.4055   | 90.2488   | 82.9164   | 91.8675    | 71.459    | 91.3917   |
| 4.98957   | 5.26049   | 7.85215   | 5.6152     | 6.95986   | 4.98527   |
| 9.32299   | 9.66778   | 10.824    | 11.4743    | 10.5592   | 8.42436   |
| 12.6696   | 12.6248   | 15.6299   | 16.8177    | 22.3107   | 18.8799   |
| 2.90886   | 3.95688   | 5.88422   | 4.85432    | 4.5709    | 4.30548   |
| 2.16172   | 1.87552   | 4.34374   | 1.58992    | 3.94208   | 2.92162   |
| 9.5896    | 9.01387   | 10.7383   | 9.93143    | 11.8308   | 10.6493   |
| 70.3499   | 62.4177   | 59.4988   | 54.7588    | 48.3451   | 40.1678   |
| 0.808626  | 0.839757  | 0.792361  | 0.511807   | 0.827226  | 0.868661  |
| 0         | 0.146386  | 0         | 0          | 0         | 0         |
| 29.6717   | 32.7282   | 25.0436   | 29.7907    | 28.8138   | 31.9018   |
| 0.113193  | 0.359054  | 0.222923  | 0.272675   | 0.272104  | 0.179823  |
| 0         | 0         | 0         | 0          | 0         | 0         |
| 15.1433   | 18.9321   | 10.6057   | 16.5369    | 12.7861   | 9.25014   |
| 30.7406   | 24.9551   | 27.4609   | 21.3722    | 33.8764   | 32.0626   |
| 0         | 0         | 0         | 0.00603653 | 0         | 5.92E-05  |
| 0.100142  | 0.253006  | 0.170638  | 0.1288     | 0.14634   | 0.163059  |
| 0.130979  | 0.0816126 | 0.37257   | 0.448513   | 0.177342  | 0.193849  |
| 19.6673   | 16.0122   | 27.109    | 21.9772    | 26.6847   | 16.621    |
| 0         | 0         | 0         | 0          | 0.0317595 | 0         |
| 0         | 0         | 0         | 0          | 0         | 0         |
| 7.12258   | 7.90532   | 7.57131   | 6.76747    | 6.6301    | 7.49674   |
| 0.201986  | 0         | 0.127236  | 2.64636    | 0.218787  | 0.509435  |
| 0         | 0         | 0         | 0          | 0         | 0         |
| 13.6847   | 13.8599   | 16.5903   | 19.456     | 14.1142   | 12.5493   |
| 0         | 0         | 0         | 0          | 0         | 0         |
| 37.2114   | 39.3506   | 33.6739   | 43.3633    | 42.0417   | 49.3752   |
| 0         | 0         | 0         | 0          | 0         | 0         |
| 6.92969   | 6.08089   | 7.88454   | 7.2529     | 7.75284   | 6.06778   |
| 0.075165  | 0.062447  | 0.0946969 | 0.0856341  | 0.0542781 | 0.0842561 |
| 14.8081   | 15.2424   | 14.772    | 13.4217    | 15.2316   | 14.8462   |
| 0.178398  | 0.289016  | 0.0224756 | 0.26422    | 0.193237  | 0.0899889 |
| 0         | 0         | 0         | 0          | 0         | 0         |

|          |           |          |            |           |           |
|----------|-----------|----------|------------|-----------|-----------|
| 7.08054  | 7.41616   | 7.62486  | 6.33815    | 7.6695    | 6.91646   |
| 0        | 0         | 0        | 0          | 0         | 0         |
| 0.664847 | 0.479676  | 0.352678 | 0.797315   | 1.06127   | 1.00022   |
| 34.1784  | 34.315    | 35.9862  | 34.2448    | 34.4774   | 32.514    |
| 6.75853  | 5.28559   | 8.06172  | 7.21666    | 9.56784   | 7.78268   |
| 0.207584 | 0.469476  | 0.47462  | 0.0525549  | 0.0499668 | 0.0387819 |
| 0.623612 | 0.73323   | 0.607775 | 0.402153   | 1.09611   | 1.15737   |
| 7.91326  | 6.11729   | 9.80962  | 7.37627    | 9.2132    | 7.86237   |
| 31.8514  | 30.9432   | 26.0298  | 21.5673    | 28.2113   | 20.9848   |
| 3.87248  | 4.03631   | 3.94643  | 3.511      | 3.72243   | 3.19598   |
| 21.5529  | 25.455    | 21.373   | 23.0452    | 26.1225   | 27.7821   |
| 45.8104  | 52.3612   | 42.8632  | 43.4174    | 44.2293   | 47.6637   |
| 35.9236  | 39.3137   | 12.0866  | 14.8258    | 12.781    | 24.4613   |
| 0.561322 | 0.505902  | 0.494842 | 0.205555   | 0.697974  | 0.269663  |
| 0.104995 | 0.0675848 | 0        | 0.00988521 | 0.0587438 | 0.0518613 |
| 11.7413  | 9.87503   | 10.205   | 9.02827    | 12.5842   | 12.4241   |
| 33.7649  | 35.0541   | 36.5705  | 37.3436    | 36.4548   | 37.1106   |
| 1.57983  | 1.49948   | 1.72421  | 1.01505    | 1.56201   | 1.59073   |
| 0        | 0         | 0        | 0          | 0         | 0         |
| 38.3669  | 38.8754   | 39.2151  | 33.463     | 34.4978   | 31.1657   |
| 2.80913  | 2.31071   | 3.25287  | 2.64734    | 2.74717   | 2.19493   |
| 1.35562  | 1.35566   | 2.69887  | 1.9639     | 4.27823   | 3.12357   |
| 17.5664  | 13.8718   | 20.1328  | 10.9161    | 22.7934   | 15.6399   |
| 0        | 0         | 0        | 0          | 0         | 0         |
| 9.23199  | 11.633    | 9.6728   | 9.1817     | 11.7527   | 9.19765   |
| 0        | 0         | 0        | 0          | 0         | 0         |
| 30.4205  | 31.1496   | 27.3418  | 27.6807    | 21.3477   | 20.7973   |
| 0        | 0         | 0        | 0          | 0         | 0         |
| 0.110267 | 0.0458047 | 0        | 0          | 0.27869   | 0.185405  |
| 10.8871  | 12.9261   | 11.8679  | 13.4005    | 11.291    | 11.2951   |
| 53.8557  | 46.9211   | 51.7923  | 46.2091    | 42.1069   | 40.9827   |
| 0.781248 | 0.785287  | 1.42741  | 1.01769    | 1.46342   | 1.06173   |
| 0        | 0         | 0        | 0          | 0         | 0         |
| 13.9338  | 18.6002   | 18.2788  | 17.912     | 12.9158   | 22.2079   |
| 21.0505  | 23.2688   | 27.2295  | 27.3336    | 26.7079   | 25.4602   |
| 3.66604  | 3.55532   | 3.50613  | 3.33541    | 4.35495   | 3.3669    |
| 14.5528  | 12.3446   | 16.5734  | 10.6786    | 20.3013   | 17.6262   |
| 6.47737  | 5.72231   | 4.7325   | 6.69382    | 5.00685   | 3.63659   |
| 2.27084  | 1.43707   | 2.72682  | 2.44565    | 2.55581   | 1.77489   |
| 6.96598  | 6.66576   | 7.83582  | 5.99941    | 10.1055   | 8.61028   |
| 0        | 0.0246941 | 0        | 0.0225755  | 0         | 0         |
| 92.6798  | 118.68    | 125.242  | 116.14     | 121.109   | 158.872   |
| 1.05819  | 1.03204   | 1.50706  | 0.655206   | 1.22096   | 0.831614  |

|           |           |           |           |           |           |
|-----------|-----------|-----------|-----------|-----------|-----------|
| 5.25394   | 5.21253   | 5.01259   | 11.9714   | 5.30419   | 6.26106   |
| 1.0156    | 1.75242   | 1.27951   | 1.06805   | 1.43856   | 0.853825  |
| 0         | 0         | 0         | 0         | 0         | 0         |
| 0.527377  | 5.14879   | 0.442946  | 41.7578   | 0.856866  | 6.28111   |
| 8.04493   | 7.38775   | 12.3173   | 9.39311   | 10.3816   | 7.43546   |
| 8.60346   | 9.56704   | 11.3483   | 9.27451   | 11.5921   | 10.8213   |
| 0.977972  | 0.421514  | 0.882064  | 0.383849  | 1.08806   | 0.658962  |
| 0         | 0         | 0.0853461 | 0         | 0.0733777 | 0.0569522 |
| 0         | 0         | 0         | 0         | 0         | 0         |
| 0         | 0         | 0.222833  | 0         | 0         | 0         |
| 8.38072   | 9.21933   | 8.73568   | 8.98819   | 8.10203   | 7.66543   |
| 315.787   | 353.185   | 294.228   | 330.576   | 233.521   | 308.701   |
| 9.49501   | 9.41753   | 8.90531   | 8.56951   | 6.5368    | 6.57205   |
| 0.548186  | 0.683148  | 0.644592  | 0.957626  | 1.1084    | 0.399417  |
| 2.14971   | 2.17213   | 3.56839   | 2.234     | 4.35811   | 4.0786    |
| 20.954    | 20.6516   | 16.6096   | 21.649    | 18.1895   | 23.6225   |
| 0.25062   | 0.485124  | 0.438535  | 2.34667   | 0.0603258 | 0.428089  |
| 1.16793   | 1.77506   | 0.500116  | 0.912089  | 0.596052  | 0.763585  |
| 7.30169   | 6.23822   | 5.54792   | 5.05985   | 7.7256    | 8.08463   |
| 24.4238   | 25.4136   | 23.9993   | 25.5295   | 23.8732   | 26.5641   |
| 45.4094   | 46.4      | 42.2125   | 37.642    | 37.1427   | 38.3368   |
| 2.22721   | 1.44048   | 1.05068   | 2.51938   | 2.04753   | 1.40613   |
| 0         | 0.106764  | 0.107934  | 0.0650693 | 0.061865  | 0.168058  |
| 0         | 0         | 0         | 0         | 0         | 0         |
| 0.215887  | 0         | 0.0679966 | 0.122978  | 0.52615   | 0.226874  |
| 0.0874957 | 12.8666   | 0.440927  | 144.171   | 0.379094  | 8.04272   |
| 2.10524   | 1.23761   | 2.52257   | 1.74563   | 2.12194   | 1.84026   |
| 0.949853  | 0.591949  | 0.598528  | 0.360872  | 0.685945  | 0.133098  |
| 23.8219   | 24.8928   | 28.8723   | 27.058    | 30.3505   | 29.4621   |
| 0         | 0         | 0         | 0         | 0         | 0         |
| 2.49732   | 2.04114   | 1.46924   | 1.02589   | 3.00049   | 1.8025    |
| 0.0322678 | 0         | 0.691096  | 0.220573  | 0.38447   | 0.189896  |
| 0.0225001 | 0         | 0.11339   | 0         | 0.0974886 | 0         |
| 2.83967   | 3.08522   | 1.8758    | 2.7024    | 2.92498   | 2.59113   |
| 0.769341  | 0.733664  | 0.571209  | 0.67072   | 0.71104   | 0.570856  |
| 0         | 0.160399  | 0.283774  | 0.073319  | 0         | 0         |
| 4.2149    | 4.38985   | 4.59187   | 4.89475   | 4.58755   | 3.69758   |
| 132.463   | 127.471   | 129.944   | 113.287   | 103.838   | 101.391   |
| 11.6308   | 13.2762   | 9.8508    | 12.1372   | 13.551    | 13.7222   |
| 0.207384  | 0.161526  | 0         | 0         | 0.112317  | 0.0217938 |
| 0.180706  | 0.0750652 | 0         | 0         | 0.0652456 | 0.0506405 |
| 0         | 0         | 0         | 0.234081  | 0.890216  | 0         |
| 0         | 0         | 0         | 0         | 0         | 0         |

|           |           |           |           |           |           |
|-----------|-----------|-----------|-----------|-----------|-----------|
| 5.00697   | 5.51808   | 5.32108   | 5.74316   | 5.93997   | 4.81077   |
| 1.53098   | 1.00795   | 1.74685   | 1.31639   | 1.59575   | 1.57854   |
| 0.187096  | 0         | 0.0589284 | 0.2398    | 0.126662  | 0.0393235 |
| 1.85994   | 1.475     | 2.98232   | 2.119     | 2.5641    | 1.4926    |
| 29.7657   | 31.8847   | 36.6524   | 36.8678   | 38.8031   | 43.3924   |
| 0         | 0.0782542 | 0.0527411 | 0.0238468 | 0.0680175 | 0         |
| 13.6482   | 13.866    | 13.3624   | 11.354    | 14.0031   | 8.51313   |
| 8454.19   | 3926.53   | 2127.36   | 1840.58   | 3111.04   | 1852.03   |
| 2.66704   | 2.83214   | 4.85082   | 6.07703   | 4.964     | 4.40548   |
| 0         | 0         | 0         | 0         | 0         | 0         |
| 0         | 0         | 0         | 0.0285571 | 0         | 0         |
| 0.132637  | 0.082646  | 0.0417758 | 0.0377778 | 0.0359174 | 0.11151   |
| 2.66071   | 2.74847   | 3.37188   | 1.90462   | 4.02974   | 2.01914   |
| 22.8041   | 25.0673   | 15.4899   | 27.4673   | 19.4298   | 19.4569   |
| 20.4609   | 20.7758   | 18.9083   | 15.1419   | 18.9144   | 17.9237   |
| 2.57805   | 2.1767    | 2.72906   | 2.07685   | 3.46996   | 2.23152   |
| 1.20198   | 1.21907   | 1.1268    | 1.13847   | 2.26461   | 1.90822   |
| 0         | 0         | 0         | 0         | 0         | 0         |
| 0.9421    | 0.915064  | 0.96      | 0.915478  | 0.960436  | 0.640616  |
| 3.15691   | 2.47766   | 2.45574   | 1.59815   | 4.23917   | 1.86797   |
| 168.57    | 141.279   | 159.057   | 157.481   | 148.903   | 131.205   |
| 41.2968   | 40.0111   | 28.9162   | 29.0036   | 24.6767   | 32.2122   |
| 24.5217   | 26.7309   | 21.6632   | 21.8172   | 20.2175   | 21.2345   |
| 5.79781   | 3.21121   | 9.94209   | 4.77053   | 9.59455   | 7.10834   |
| 0         | 0         | 0.0296447 | 0         | 0.0254875 | 0.0197822 |
| 0.601203  | 1.16545   | 0.841587  | 1.36988   | 0.506497  | 0.673918  |
| 7.75879   | 8.44268   | 5.79344   | 6.18762   | 7.39976   | 5.3138    |
| 7.99905   | 8.96584   | 8.22428   | 9.87262   | 6.84688   | 8.63802   |
| 17.1172   | 15.9774   | 17.4421   | 14.2737   | 21.3017   | 14.5893   |
| 0         | 0         | 0         | 0         | 0         | 0         |
| 0         | 0         | 0         | 0         | 0         | 0         |
| 92.9684   | 100.82    | 119.682   | 126.34    | 103.465   | 112.925   |
| 0         | 0         | 0         | 0         | 0         | 0         |
| 10.6741   | 10.3475   | 11.2443   | 9.18604   | 13.637    | 11.0625   |
| 2.57806   | 2.82334   | 2.16532   | 1.86909   | 2.70788   | 1.77333   |
| 3.00995   | 3.58611   | 3.30593   | 2.92674   | 3.10506   | 3.50377   |
| 2.84595   | 2.00279   | 0.906915  | 0.59125   | 0.417067  | 0.422227  |
| 0.0209087 | 0.0260563 | 0.0526837 | 0.0238209 | 0.0452957 | 0.0351563 |
| 33.8065   | 36.1795   | 33.7018   | 33.5237   | 34.8564   | 30.078    |
| 15.7645   | 15.9037   | 12.484    | 13.0853   | 17.4824   | 14.8312   |
| 0.0909622 | 0.134893  | 0.165135  | 0.242194  | 0.224154  | 0.13009   |
| 0.141681  | 0.0782007 | 0.276702  | 0.160856  | 0.169928  | 0.171457  |
| 0.0513262 | 0.0426418 | 0.0215545 | 0.0974585 | 0         | 0         |

|           |           |           |          |           |           |
|-----------|-----------|-----------|----------|-----------|-----------|
| 3.79823   | 3.73246   | 3.76282   | 3.85068  | 3.14452   | 3.27762   |
| 4.941     | 5.43068   | 5.84226   | 5.4354   | 7.36118   | 5.19585   |
| 0         | 0         | 0         | 0        | 0         | 0         |
| 3.89333   | 3.5152    | 5.05824   | 3.94346  | 7.05315   | 6.20188   |
| 12.0535   | 8.99641   | 15.5188   | 11.6318  | 18.7731   | 16.2281   |
| 6.57443   | 7.18326   | 6.65874   | 6.1054   | 6.50291   | 7.09092   |
| 1.51755   | 1.00862   | 1.65697   | 1.4984   | 3.61632   | 2.38154   |
| 0         | 0         | 0         | 0        | 0         | 0         |
| 0         | 0         | 0         | 0        | 0         | 0         |
| 0         | 0         | 0         | 0        | 0         | 0         |
| 3.36682   | 2.26235   | 6.94465   | 5.56548  | 3.93289   | 2.55296   |
| 22.2801   | 20.8532   | 25.2509   | 16.5479  | 25.0606   | 19.2331   |
| 8.76316   | 9.4769    | 9.84272   | 9.5776   | 9.78167   | 7.44222   |
| 11.8388   | 10.0726   | 10.2766   | 8.43162  | 10.5811   | 9.8384    |
| 4.66353   | 5.95006   | 1.85354   | 2.46679  | 1.20272   | 1.63362   |
| 0         | 0         | 0         | 0        | 0.0418978 | 0         |
| 12.0308   | 11.741    | 13.8141   | 11.6934  | 13.8059   | 11.0008   |
| 0.431562  | 0.361457  | 0.461533  | 0.425791 | 0.876157  | 1.5428    |
| 1.07309   | 1.08256   | 0.836914  | 0.93147  | 1.49445   | 1.63248   |
| 0         | 0         | 0         | 0        | 0         | 0.198612  |
| 23.3545   | 24.3464   | 25.6877   | 24.7564  | 25.4731   | 22.571    |
| 0.0244386 | 0         | 0         | 0        | 0         | 0.0205458 |
| 8.79779   | 8.30947   | 4.58218   | 5.20771  | 6.07219   | 7.21133   |
| 27.4653   | 29.2491   | 28.8825   | 30.8766  | 28.5342   | 30.4088   |
| 19.1976   | 21.4761   | 18.3494   | 19.4897  | 18.2377   | 22.0799   |
| 0         | 0         | 0         | 0        | 0         | 0         |
| 0.682907  | 0.453887  | 0.745648  | 0.363078 | 1.18354   | 1.07171   |
| 7.13446   | 6.42903   | 6.55424   | 6.81576  | 6.32086   | 7.50045   |
| 0         | 0         | 0         | 0        | 0         | 0         |
| 85.5041   | 95.0451   | 104.708   | 103.264  | 87.3738   | 116.055   |
| 1.06191   | 0.712352  | 0.906004  | 0.840305 | 1.11849   | 0.821615  |
| 0         | 0         | 0         | 0        | 0         | 0         |
| 0         | 0         | 0         | 0        | 0         | 0         |
| 1.34534   | 1.32732   | 0.84075   | 1.2023   | 1.44533   | 1.35706   |
| 15.5938   | 15.0875   | 15.006    | 13.6145  | 12.2651   | 13.5381   |
| 4.80604   | 5.3027    | 4.43615   | 3.69     | 3.55493   | 3.20138   |
| 0         | 0.0784899 | 0.198375  | 0.071756 | 0.102334  | 0.0264755 |
| 8.97473   | 9.22705   | 10.4942   | 9.64962  | 9.76682   | 8.38221   |
| 6.20255   | 5.69978   | 6.01314   | 5.10212  | 6.98185   | 5.53862   |
| 0.326518  | 0.162763  | 0.493639  | 0.260398 | 0.389046  | 0.192156  |
| 0         | 0         | 0.0266315 | 0        | 0.0228969 | 0         |
| 73.0424   | 71.3887   | 76.4708   | 68.027   | 64.7639   | 75.4759   |
| 0.450158  | 0.41249   | 0.41701   | 0.256428 | 0.272483  | 0.200357  |

|           |           |           |           |           |           |
|-----------|-----------|-----------|-----------|-----------|-----------|
| 4.88594   | 4.69294   | 8.44904   | 5.96239   | 6.68796   | 4.3124    |
| 1.13451   | 1.17008   | 1.25411   | 0.720981  | 1.11422   | 1.38485   |
| 175.833   | 170.442   | 159.77    | 190.83    | 204.406   | 189.669   |
| 15.3043   | 16.6523   | 16.6921   | 15.1372   | 16.0691   | 14.7918   |
| 2.48652   | 2.20052   | 3.06455   | 2.36755   | 3.41547   | 2.94379   |
| 0.643768  | 0.320905  | 0.162211  | 0.733434  | 0.41839   | 0.974203  |
| 0.0805227 | 0.200695  | 0.0338156 | 0         | 0         | 0.0451309 |
| 0.370736  | 0.372589  | 0.150669  | 0.163499  | 0.142494  | 0.080434  |
| 0         | 0         | 0         | 0         | 0         | 0         |
| 15.5445   | 13.8202   | 13.5269   | 11.3568   | 13.3957   | 13.0946   |
| 92.4474   | 83.1562   | 86.8448   | 86.3939   | 68.1879   | 80.2272   |
| 0.0798554 | 0         | 0         | 0         | 0.0864978 | 0         |
| 0         | 0.042247  | 0.227785  | 0.0386217 | 0.229502  | 0         |
| 482.363   | 630.779   | 413.38    | 436.15    | 384.79    | 361.077   |
| 18.0332   | 15.5684   | 18.7042   | 13.1833   | 18.5044   | 14.6834   |
| 43.1423   | 41.1732   | 43.2436   | 43.6407   | 42.438    | 43.7517   |
| 43.6529   | 43.6186   | 42.0158   | 41.5163   | 38.8769   | 46.7421   |
| 5.9798    | 5.45636   | 6.05392   | 6.39279   | 5.83788   | 5.20388   |
| 39.4065   | 49.29     | 34.8384   | 31.2132   | 35.1527   | 32.3695   |
| 23.4267   | 24.9512   | 18.1673   | 20.0774   | 19.7901   | 21.2819   |
| 13.9544   | 15.5167   | 13.3054   | 14.3009   | 13.7524   | 15.9968   |
| 0         | 0         | 0         | 0         | 0         | 0         |
| 0         | 0         | 0         | 0         | 0         | 0         |
| 0.226876  | 0.157074  | 0.158795  | 0.172317  | 0.327664  | 0.105965  |
| 0         | 0         | 0         | 0         | 0         | 0         |
| 19.7428   | 20.465    | 18.7583   | 18.6469   | 20.1992   | 23.7619   |
| 0         | 0         | 0         | 0         | 0         | 0         |
| 6.74289   | 7.25489   | 7.97646   | 7.19076   | 7.04897   | 5.77594   |
| 0         | 0         | 0         | 0         | 0         | 0         |
| 21.0832   | 21.6591   | 22.4754   | 22.8496   | 24.6522   | 22.2016   |
| 37.6624   | 34.3705   | 36.5254   | 41.0958   | 35.0193   | 35.1479   |
| 5.8276    | 4.87581   | 3.85072   | 3.61946   | 3.9289    | 2.8575    |
| 23.0146   | 21.1658   | 25.8815   | 28.4373   | 33.0966   | 34.3723   |
| 0         | 0.0916405 | 0         | 0         | 0.159305  | 0.185468  |
| 0         | 0         | 0.0726228 | 0         | 0         | 0         |
| 0.149399  | 0.0744598 | 0.150598  | 0.0340316 | 0.0323542 | 0.226045  |
| 21.4218   | 22.1827   | 20.8149   | 19.4291   | 21.5772   | 21.5444   |
| 0         | 0         | 0         | 0         | 0         | 0         |
| 251.486   | 268.335   | 240.698   | 237.83    | 181.141   | 211.776   |
| 64.331    | 61.8349   | 62.8685   | 59.9395   | 57.7716   | 57.7117   |
| 0         | 0         | 0         | 0         | 0         | 0         |
| 0.355315  | 0.265676  | 0.447645  | 0.647686  | 0.423357  | 0.17923   |
| 3.91233   | 3.84357   | 2.23063   | 1.62673   | 2.28911   | 2.28079   |



|           |           |           |           |           |           |
|-----------|-----------|-----------|-----------|-----------|-----------|
| 0.0876288 | 0         | 0         | 0         | 0         | 0         |
| 0         | 0         | 0         | 0         | 0         | 0         |
| 10.744    | 9.92719   | 11.6372   | 9.18471   | 11.1955   | 8.47197   |
| 1.46168   | 1.09293   | 0.491069  | 0.166527  | 1.16106   | 0.573466  |
| 0         | 0         | 0         | 0         | 0         | 0         |
| 4.18092   | 3.7508    | 3.82141   | 3.60246   | 4.83313   | 3.15065   |
| 0.902572  | 0.708198  | 1.68461   | 0.457016  | 1.44837   | 0.927427  |
| 29.7475   | 15.6396   | 18.6324   | 12.3241   | 21.0541   | 14.9913   |
| 0         | 0         | 0         | 0         | 0.0977406 | 0         |
| 0.798878  | 0.758523  | 0.718907  | 0.476744  | 0.288443  | 0.28784   |
| 0.0221101 | 0.0275536 | 0.0139278 | 0.0503794 | 0.0598731 | 0.0371765 |
| 8.82628   | 10.1096   | 9.32103   | 8.61383   | 8.75202   | 8.97536   |
| 27.2701   | 27.7668   | 28.9983   | 28.821    | 29.8854   | 26.313    |
| 0         | 0         | 0         | 0         | 0         | 0         |
| 0.0777645 | 0.048455  | 0.220437  | 0.243638  | 0.168466  | 0.130755  |
| 16.534    | 15.0796   | 16.0794   | 13.0536   | 15.1956   | 13.4813   |
| 7.51045   | 8.19229   | 2.99074   | 0.534227  | 0         | 0.197111  |
| 0.980792  | 1.37041   | 1.34799   | 1.25284   | 1.44869   | 1.29931   |
| 0.558797  | 1.53612   | 0.890357  | 1.16091   | 0.712092  | 0.497422  |
| 57.446    | 60.0785   | 62.7665   | 54.6687   | 62.0915   | 75.7782   |
| 23.7878   | 24.5886   | 22.8165   | 22.4964   | 26.4309   | 30.5408   |
| 9.19512   | 13.0903   | 10.3408   | 8.29333   | 11.0701   | 11.0753   |
| 33.5533   | 32.4907   | 35.6364   | 32.5479   | 41.3861   | 39.7424   |
| 0         | 0         | 0         | 0.0389202 | 0.0370036 | 0.0287204 |
| 0.306887  | 0.382442  | 0.386633  | 0         | 0.166207  | 0         |
| 0.37426   | 0.416847  | 0.331802  | 0.276524  | 0.308094  | 0.119741  |
| 0.843065  | 0.745606  | 1.02788   | 1.39426   | 2.59228   | 1.23464   |
| 5.14E-05  | 0.626538  | 0.132843  | 0.390984  | 1.04E-05  | 1.22364   |
| 0.0328942 | 0         | 0         | 0.0374758 | 0         | 0         |
| 1.26966   | 1.4384    | 1.94858   | 1.4991    | 1.95038   | 1.96016   |
| 0.0563643 | 0.0702411 | 0.189362  | 0.0856199 | 0.162807  | 0.0157954 |
| 3.00524   | 4.68141   | 10.7669   | 8.55955   | 4.7811    | 3.94773   |
| 0         | 0         | 0         | 0         | 0         | 0         |
| 5.20989   | 4.97256   | 7.28812   | 4.58565   | 8.26669   | 7.13401   |
| 0         | 0         | 0         | 0         | 0         | 0         |
| 13.2546   | 13.4162   | 10.3991   | 11.0634   | 11.8887   | 12.5669   |
| 4.43681   | 4.67712   | 4.54847   | 3.85733   | 5.24641   | 3.59108   |
| 3.89616   | 4.17684   | 4.16163   | 4.05284   | 4.3513    | 4.89297   |
| 0         | 0         | 0         | 0         | 0         | 0         |
| 22.1987   | 21.7342   | 18.1621   | 15.9645   | 24.1325   | 17.9677   |
| 6.30814   | 6.04256   | 5.78864   | 5.16546   | 6.64379   | 5.7776    |
| 9.34303   | 8.78821   | 11.1102   | 9.04514   | 9.38325   | 14.2182   |
| 0.801712  | 1.66333   | 0.538332  | 0.667906  | 0.868238  | 0.671368  |

|           |           |          |          |           |            |
|-----------|-----------|----------|----------|-----------|------------|
| 8.64327   | 7.79857   | 7.20501  | 6.32217  | 7.01625   | 8.18949    |
| 30.6163   | 29.2717   | 31.8269  | 28.5031  | 30.5895   | 28.1749    |
| 6.72085   | 7.56715   | 5.19842  | 4.94725  | 6.10886   | 5.2413     |
| 0.0322678 | 0.0804242 | 0.243916 | 0.441146 | 0.0349518 | 0.108512   |
| 28.1283   | 30.3115   | 22.4487  | 26.039   | 20.072    | 23.558     |
| 42.1454   | 49.8253   | 40.7222  | 62.1145  | 32.0119   | 37.1783    |
| 3.57E-107 | 0         | 0        | 0        | 0         | 0          |
| 2.93104   | 2.69143   | 1.55481  | 1.93327  | 1.83807   | 2.59385    |
| 0         | 0         | 0        | 0        | 0         | 0          |
| 0.715821  | 1.18663   | 1.7966   | 0.849712 | 3.44642   | 1.31849    |
| 5.91347   | 5.91408   | 5.82552  | 5.84643  | 6.0619    | 4.41701    |
| 0.997798  | 0.771799  | 0.953647 | 0.783982 | 1.26714   | 1.2149     |
| 0.316131  | 0         | 0        | 0        | 0.0570711 | 0.132887   |
| 23.4766   | 21.8312   | 15.977   | 22.1189  | 12.769    | 14.9381    |
| 0.639706  | 0.532113  | 0.749341 | 0.34962  | 1.1863    | 0.318264   |
| 10.6435   | 10.8357   | 13.0672  | 11.0585  | 12.1899   | 8.70612    |
| 8.16336   | 7.85564   | 8.00281  | 6.29767  | 7.67198   | 6.29066    |
| 0         | 0         | 0        | 0        | 0         | 0          |
| 4.37146   | 4.21272   | 6.11104  | 6.35424  | 8.20915   | 9.04321    |
| 0.326194  | 0.338752  | 0.445203 | 0.619379 | 0.647765  | 1.02838    |
| 9.28832   | 9.03535   | 9.08767  | 8.21796  | 9.68631   | 7.12346    |
| 2.67246   | 2.89954   | 3.69037  | 3.14911  | 5.38093   | 3.79084    |
| 13.634    | 12.5143   | 14.7655  | 10.7013  | 13.8592   | 10.4152    |
| 5.10136   | 5.80046   | 5.5591   | 5.91795  | 5.94919   | 4.88357    |
| 0         | 0         | 0        | 0        | 0         | 0          |
| 50.2043   | 47.9393   | 44.4676  | 35.7941  | 52.5507   | 46.4183    |
| 25.9567   | 23.493    | 27.0877  | 21.6467  | 30.5158   | 22.9772    |
| 0         | 0         | 0        | 0        | 0         | 0          |
| 16.2954   | 17.5179   | 13.7618  | 12.5468  | 11.9289   | 18.4629    |
| 2.82387   | 2.79167   | 3.2525   | 2.5639   | 4.43555   | 2.90559    |
| 0         | 0         | 0        | 0        | 0         | 0          |
| 0         | 0         | 0        | 0        | 0         | 0          |
| 5.7778    | 6.48888   | 6.90869  | 6.20809  | 7.38266   | 5.66705    |
| 0.0151425 | 0         | 0        | 0        | 0         | 0.00636524 |
| 175.785   | 94.721    | 109.081  | 106.055  | 185.121   | 114.074    |
| 0.24781   | 109.528   | 0.936613 | 795.405  | 2.7737    | 37.5701    |
| 13.0156   | 11.3785   | 12.9556  | 10.9933  | 12.6997   | 10.5256    |
| 256.158   | 258.579   | 289.095  | 262.079  | 203.198   | 215.059    |
| 11.1093   | 12.0554   | 12.0555  | 12.7878  | 10.9233   | 10.8686    |
| 36.4261   | 39.0256   | 36.7774  | 31.2773  | 33.1902   | 31.2763    |
| 1.66644   | 1.653     | 1.15714  | 1.33688  | 1.08692   | 1.2009     |
| 2.23627   | 1.39316   | 2.39883  | 1.0982   | 5.94302   | 2.96451    |
| 0.74376   | 0.529642  | 1.20475  | 0.242101 | 1.0358    | 0.580625   |

|            |           |           |          |           |           |
|------------|-----------|-----------|----------|-----------|-----------|
| 8.47348    | 7.67415   | 8.87543   | 9.76594  | 6.51019   | 8.65619   |
| 4.70228    | 4.1934    | 8.96966   | 7.29804  | 2.76821   | 4.2657    |
| 9.25338    | 9.93726   | 9.2918    | 9.25971  | 8.86001   | 8.51219   |
| 0.0794919  | 0.0242602 | 0.261884  | 0.19961  | 0.0210867 | 0.0163665 |
| 0          | 0         | 0         | 0        | 0         | 0         |
| 6.07669    | 7.71564   | 8.06019   | 5.85195  | 7.40181   | 4.89668   |
| 1.27068    | 1.5014    | 3.20174   | 1.601    | 1.9559    | 1.79965   |
| 0          | 0         | 0         | 0        | 0         | 0         |
| 0.0194411  | 0.0726825 | 0.024493  | 0        | 0.0842329 | 0.0163444 |
| 27.8773    | 28.9984   | 30.4357   | 27.373   | 25.6685   | 21.6382   |
| 1.4217     | 1.53314   | 1.22517   | 1.07612  | 1.70303   | 1.23024   |
| 16.7551    | 16.9522   | 17.9321   | 17.6902  | 15.9565   | 14.2535   |
| 1.8141     | 1.17026   | 2.01662   | 1.87226  | 1.84941   | 1.91988   |
| 3.71128    | 0         | 0         | 0        | 0         | 0         |
| 0.350068   | 0.383603  | 0.326974  | 0.460713 | 0.281121  | 0.253712  |
| 0.10868    | 0.0338592 | 0.0342302 | 0.123817 | 0.02943   | 0.0913686 |
| 0          | 0         | 0         | 0        | 0         | 0         |
| 6.1512     | 5.5858    | 5.43675   | 4.91644  | 6.24966   | 5.41192   |
| 7.82557    | 7.72316   | 7.22784   | 7.2548   | 5.71563   | 5.85521   |
| 0          | 0         | 0         | 0        | 0         | 0         |
| 24.4711    | 24.3967   | 25.3191   | 21.3627  | 28.859    | 26.1793   |
| 14.0681    | 13.7682   | 15.1007   | 17.6731  | 12.7189   | 13.1046   |
| 3.08624    | 2.76437   | 2.52127   | 2.33491  | 2.37663   | 2.71627   |
| 0.0309622  | 3.77E-150 | 5.96E-19  | 1.00E-38 | 0.0341069 | 0.0386613 |
| 1.3355     | 0.936171  | 2.73413   | 1.52152  | 2.03427   | 0.947341  |
| 15.1724    | 14.4713   | 10.9612   | 9.23453  | 12.5206   | 10.5687   |
| 1.42426    | 0.989853  | 1.31126   | 1.373    | 1.7504    | 0.967124  |
| 0          | 0         | 0         | 0        | 0         | 0         |
| 15.838     | 15.3573   | 14.3227   | 14.9948  | 14.7522   | 13.3871   |
| 0.292848   | 0         | 0         | 0        | 0.47581   | 0         |
| 0.575384   | 0.717043  | 0.801205  | 0.655525 | 0.656046  | 0.738328  |
| 16.5133    | 18.2401   | 16.5121   | 14.5268  | 17.0332   | 15.8339   |
| 1.09       | 1.21995   | 3.54081   | 2.64437  | 3.08823   | 1.67982   |
| 11.4788    | 10.9461   | 12.9355   | 11.8193  | 12.7811   | 12.4677   |
| 0.27282    | 0.251843  | 0         | 0.269808 | 0.0410433 | 0.127424  |
| 0.00898875 | 0         | 0         | 0        | 0         | 0         |
| 4.09845    | 3.58287   | 3.94189   | 3.18018  | 5.32603   | 4.40716   |
| 29.6155    | 29.7599   | 30.2366   | 30.0833  | 24.4486   | 28.5049   |
| 10.7716    | 6.60755   | 10.1682   | 7.56776  | 13.4407   | 9.86861   |
| 14.6384    | 20.8933   | 20.7261   | 19.0186  | 18.2057   | 15.1507   |
| 4.50672    | 4.28036   | 6.28418   | 4.73564  | 6.25602   | 5.99595   |
| 35.5274    | 38.102    | 34.8843   | 35.0134  | 33.5598   | 39.1974   |
| 1.19073    | 1.02017   | 1.0626    | 1.13048  | 1.23603   | 0.938494  |

|            |           |           |           |           |           |
|------------|-----------|-----------|-----------|-----------|-----------|
| 0          | 0         | 0         | 0         | 0         | 0         |
| 4.40703    | 7.05443   | 4.59494   | 6.7089    | 3.16869   | 3.48147   |
| 3.88116    | 3.86346   | 3.60764   | 2.7501    | 2.92229   | 2.4671    |
| 0.420108   | 0.397889  | 0.254052  | 0.287173  | 1.27415   | 0.875912  |
| 13.2003    | 16.7645   | 14.8297   | 12.3088   | 15.2091   | 16.1516   |
| 0          | 84.8911   | 85.8213   | 155.216   | 0         | 57.2693   |
| 1.56648    | 1.56172   | 1.10518   | 1.78466   | 1.69678   | 1.84374   |
| 51.9652    | 50.8566   | 45.5878   | 38.7807   | 38.7817   | 35.832    |
| 0          | 0         | 0         | 0         | 0         | 0         |
| 21.2315    | 27.4628   | 27.4628   | 26.0809   | 22.2422   | 26.5145   |
| 2.67047    | 3.42769   | 3.33068   | 2.61642   | 4.36772   | 4.37783   |
| 0          | 0         | 0         | 0.0390824 | 0         | 0         |
| 26.9131    | 29.4524   | 26.8783   | 29.8027   | 26.2393   | 29.9464   |
| 301.517    | 380.944   | 464.873   | 510.605   | 461.382   | 647.801   |
| 0          | 4.93972   | 0         | 0         | 0         | 1.59695   |
| 0.115923   | 0.171215  | 0.392702  | 0.0293481 | 0.200905  | 0.369619  |
| 34.7853    | 35.8613   | 33.0614   | 36.7896   | 27.1854   | 35.0177   |
| 148.486    | 184.893   | 233.839   | 289.156   | 258.021   | 336.686   |
| 24.1259    | 23.0212   | 29.1986   | 20.7365   | 27.3907   | 20.2226   |
| 0.218038   | 0         | 0.137348  | 0         | 0.236175  | 0.0916537 |
| 5.48027    | 5.11898   | 5.45481   | 4.93277   | 6.23128   | 6.04128   |
| 15.6644    | 15.7044   | 17.4766   | 19.6965   | 19.9599   | 19.7623   |
| 0.118656   | 0.0591477 | 0.388673  | 0.446104  | 0.154231  | 0.209487  |
| 40.4604    | 43.9006   | 40.4025   | 32.0786   | 31.722    | 31.7238   |
| 18.9966    | 17.3459   | 19.9076   | 19.1323   | 17.0537   | 18.1885   |
| 13.5222    | 12.6947   | 14.2421   | 12.838    | 15.311    | 13.7481   |
| 3.59685    | 3.45481   | 4.56733   | 2.98024   | 3.75744   | 3.77691   |
| 0          | 0         | 0         | 0         | 0         | 0         |
| 0.213716   | 0.221944  | 0.224376  | 0.162322  | 0.115746  | 0.0898368 |
| 8.04216    | 8.4558    | 9.54856   | 9.60372   | 11.219    | 8.15151   |
| 32.2675    | 34.5376   | 30.9598   | 32.1511   | 30.6828   | 33.0108   |
| 0          | 0         | 0         | 0         | 0         | 0         |
| 0.143769   | 0         | 0.45282   | 0         | 0.155728  | 0         |
| 0          | 0         | 0         | 0         | 0         | 0         |
| 14.2425    | 13.6237   | 17.1969   | 13.6189   | 14.3427   | 11.7334   |
| 0.323609   | 0.316863  | 0.116486  | 0.447685  | 0.275413  | 0.116598  |
| 20.6878    | 21.5734   | 23.55     | 18.1075   | 26.1072   | 21.9201   |
| 0          | 0         | 0         | 0         | 0         | 0         |
| 0.00681533 | 0.0468087 | 0.0473216 | 0         | 0.0406855 | 0.026644  |
| 0.525555   | 1.1789    | 0.496592  | 1.16757   | 0.284635  | 0.243012  |
| 7.80582    | 6.87902   | 6.37231   | 5.97025   | 7.52004   | 8.40239   |
| 5.44566    | 5.57623   | 5.10765   | 3.59243   | 5.46483   | 4.31728   |
| 0.131277   | 0.0817986 | 0.0413475 | 0.224342  | 0.213295  | 0.165549  |

|           |           |          |           |           |           |
|-----------|-----------|----------|-----------|-----------|-----------|
| 0         | 0         | 0        | 0         | 0         | 0         |
| 0         | 0.0352401 | 0        | 0         | 0         | 0         |
| 0         | 0         | 0        | 0         | 0         | 0         |
| 0         | 0         | 0        | 0         | 0         | 0         |
| 3.24153   | 3.16495   | 3.90939  | 2.69051   | 4.82515   | 6.95699   |
| 4.94463   | 1.99359   | 2.44295  | 1.49118   | 2.73047   | 1.14114   |
| 0         | 0         | 0        | 0.242663  | 0.230713  | 0         |
| 0.0498613 | 0.0621371 | 0.188454 | 0.0568061 | 0.0540087 | 0.083838  |
| 0.308311  | 0.384217  | 0.29132  | 0.175627  | 0.584423  | 0.194401  |
| 0.159155  | 0         | 0.175597 | 0.133979  | 0.608202  | 0.280257  |
| 11.3466   | 11.3428   | 14.5857  | 13.5401   | 13.4562   | 10.7737   |
| 25.7093   | 22.4848   | 20.7704  | 24.0364   | 18.2947   | 17.9795   |
| 111.808   | 126.849   | 89.5742  | 186.577   | 38.8314   | 61.06     |
| 0.638496  | 0.795692  | 4.16506  | 2.66723   | 0.414963  | 0.799222  |
| 7.12146   | 6.62476   | 7.76921  | 6.9112    | 6.10631   | 5.74565   |
| 13.56     | 13.7631   | 16.8778  | 15.8209   | 14.6702   | 17.1001   |
| 6.54734   | 6.67278   | 3.94067  | 4.34873   | 5.16822   | 5.77185   |
| 0.0943525 | 0.106664  | 0.022285 | 0.0806169 | 0.137973  | 0.0793233 |
| 29.2351   | 28.3096   | 23.2152  | 23.5482   | 27.171    | 29.9881   |
| 8.97259   | 8.35904   | 10.876   | 12.6575   | 12.0288   | 9.4312    |
| 20.2058   | 21.5581   | 22.3492  | 27.2749   | 29.9007   | 22.2004   |
| 13.3896   | 11.6461   | 20.1794  | 20.5649   | 13.4638   | 15.3269   |
| 5.01864   | 4.88218   | 4.58891  | 3.64801   | 4.75037   | 4.31179   |
| 0.80537   | 1.2231    | 0.491893 | 0.931874  | 0.899608  | 0.751105  |
| 1.01477   | 1.22099   | 1.19029  | 1.43517   | 1.97093   | 1.47091   |
| 9.23355   | 8.75543   | 9.57371  | 7.6143    | 12.4487   | 8.89228   |
| 0         | 0         | 0        | 0         | 0         | 0         |
| 0         | 0         | 0        | 0         | 0         | 0         |
| 7.53895   | 8.94988   | 6.11092  | 7.49663   | 5.35578   | 5.8323    |
| 0.0254535 | 0.0317201 | 0.096203 | 0         | 0.0275707 | 0.106995  |
| 1.10444   | 1.24198   | 0.42153  | 0.3143    | 2.04602   | 1.23973   |
| 0.566284  | 1.58354   | 0.468218 | 7.39083   | 0.726617  | 0.758962  |
| 0         | 0         | 0        | 0         | 0         | 0         |
| 75.8713   | 70.8155   | 83.5678  | 88.7624   | 83.4423   | 103.218   |
| 0         | 0         | 0        | 0         | 0         | 0         |
| 0.0375346 | 0         | 0        | 0         | 0         | 0         |
| 0.259362  | 0.142827  | 0.503179 | 0.140669  | 0.581165  | 0.736764  |
| 29.9263   | 30.6006   | 28.6837  | 24.298    | 26.3018   | 29.0767   |
| 0.741281  | 0.855355  | 0.484248 | 0.875808  | 0.594771  | 0.507796  |
| 0.208417  | 0.130699  | 0.131039 | 0.157998  | 0.337989  | 0.160313  |
| 0.978133  | 1.46948   | 28.3292  | 16.9623   | 5.29282   | 8.16117   |
| 0.676007  | 0.383596  | 0.703462 | 0.396438  | 0.252267  | 0.294626  |
| 6.57828   | 3.03934   | 5.15847  | 4.92679   | 6.62723   | 5.14374   |

|            |           |          |           |           |           |
|------------|-----------|----------|-----------|-----------|-----------|
| 46.0134    | 48.3548   | 44.2095  | 50.5907   | 38.3276   | 38.3085   |
| 0.0595105  | 0.0741619 | 0        | 0.118649  | 0.273957  | 0.11257   |
| 0.0232075  | 0.0289211 | 0        | 0         | 0.0251379 | 0.0195108 |
| 5.49E-09   | 6.91E-10  | 0.140778 | 1.10E-10  | 8.02E-10  | 0.081054  |
| 0.683051   | 12.9386   | 0.344218 | 125.6     | 1.03581   | 8.21176   |
| 8.71977    | 9.36657   | 10.657   | 9.8728    | 9.67776   | 7.92199   |
| 0          | 0         | 0        | 0         | 0         | 0         |
| 0          | 0         | 0        | 0         | 0         | 0         |
| 81.7191    | 69.6245   | 74.3243  | 68.0147   | 82.9981   | 80.9277   |
| 0          | 0         | 0        | 0         | 0         | 0         |
| 0          | 0         | 0        | 0         | 0         | 0         |
| 0.415295   | 0.676783  | 0.643952 | 1.09186   | 1.07269   | 1.23543   |
| 0.445118   | 0.277353  | 0.630881 | 0.316947  | 1.26562   | 0.140331  |
| 6.13388    | 2.73001   | 3.00526  | 2.16302   | 3.11113   | 1.51431   |
| 0          | 0         | 0        | 0         | 0         | 0         |
| 0          | 0         | 0        | 0         | 0         | 0         |
| 17.9343    | 16.8808   | 18.6117  | 17.2365   | 20.6665   | 18.7981   |
| 0.13477    | 0.13436   | 0.203748 | 0.0921244 | 0.0291959 | 0.113302  |
| 0.283957   | 0.566188  | 0.858588 | 0.711717  | 0.738184  | 1.14589   |
| 3.69719    | 3.31608   | 3.14289  | 2.76923   | 4.47587   | 3.57075   |
| 0          | 0         | 0        | 0         | 0         | 0         |
| 0          | 0         | 0        | 0         | 0         | 0         |
| 0          | 0         | 0        | 0         | 0         | 0         |
| 0.00820288 | 0         | 0.120879 | 0.0069779 | 0.029025  | 0         |
| 4.47689    | 4.34651   | 3.90225  | 3.5288    | 5.21579   | 4.42025   |
| 32.2364    | 41.247    | 47.1255  | 41.5276   | 36.9923   | 37.8138   |
| 10.5563    | 9.47393   | 9.68604  | 10.9865   | 7.4971    | 9.38833   |
| 12.4576    | 10.9682   | 10.4264  | 11.3991   | 9.36744   | 9.88428   |
| 13.911     | 12.2507   | 12.1512  | 12.9958   | 10.849    | 11.0714   |
| 2.0851     | 2.45176   | 2.16085  | 2.49046   | 2.83227   | 1.81658   |
| 1.68516    | 1.54314   | 1.8377   | 1.73514   | 1.35418   | 1.1677    |
| 0          | 0         | 0        | 0         | 0         | 0         |
| 0.245264   | 0.211602  | 0.202036 | 0.204195  | 0.316754  | 0.222058  |
| 0.0305975  | 0         | 0        | 0.0348592 | 0         | 0.0514474 |
| 0          | 0         | 0        | 0         | 0         | 0         |
| 10.395     | 9.84083   | 12.2198  | 10.7825   | 11.3233   | 9.75233   |
| 41.6509    | 40.9448   | 43.3683  | 38.1134   | 46.8616   | 39.0359   |
| 35.6245    | 37.2461   | 41.491   | 37.9237   | 37.437    | 34.7729   |
| 0.627434   | 0.547335  | 0.474285 | 0.357412  | 0.611661  | 0.342869  |
| 10.1696    | 8.82862   | 12.2844  | 11.2172   | 11.8406   | 8.98199   |
| 4.21809    | 6.80196   | 4.10116  | 10.8044   | 3.68391   | 3.52768   |
| 12.4607    | 13.0058   | 14.9833  | 12.5337   | 16.1035   | 14.9312   |
| 14.1888    | 13.8302   | 23.3097  | 19.2928   | 23.8215   | 21.8284   |

|           |           |           |           |           |           |
|-----------|-----------|-----------|-----------|-----------|-----------|
| 10.6966   | 9.30948   | 14.8739   | 10.7113   | 19.8603   | 14.5049   |
| 0.12744   | 0.105877  | 0.124876  | 0.104859  | 0.115033  | 0.101188  |
| 0         | 0         | 0         | 0         | 0         | 0         |
| 16.4655   | 18.0214   | 13.9198   | 13.7224   | 23.6957   | 17.5386   |
| 0.839507  | 1.52905   | 0.488149  | 0.956435  | 1.04923   | 0.615298  |
| 8.8681    | 7.32757   | 15.2529   | 12.8927   | 16.3715   | 14.7003   |
| 90.7876   | 100.428   | 99.6884   | 109.557   | 85.915    | 100.203   |
| 0         | 0         | 0         | 0         | 0         | 0         |
| 3.31211   | 2.97184   | 3.21304   | 2.98101   | 2.04494   | 2.45039   |
| 0         | 0         | 0         | 0         | 0         | 0         |
| 0.284053  | 0.252893  | 0.25201   | 0.185017  | 0.212013  | 0.0796483 |
| 4.53623   | 5.06685   | 5.75592   | 5.57945   | 5.92524   | 4.83218   |
| 3.60251   | 3.54097   | 1.59811   | 2.25446   | 2.80296   | 3.19945   |
| 0         | 0         | 0         | 0         | 0         | 0         |
| 0.0206095 | 0         | 0         | 0.02348   | 0.0223238 | 0         |
| 3.86448   | 4.66618   | 4.82492   | 3.68873   | 4.7044    | 4.24403   |
| 70.2212   | 68.4147   | 51.0057   | 63.5593   | 41.1154   | 57.5961   |
| 0         | 0         | 0         | 0         | 0         | 0         |
| 0.155204  | 0.331568  | 0.391068  | 0.429422  | 0.0960649 | 0.0932012 |
| 5.73414   | 5.73644   | 3.90359   | 2.77083   | 5.24127   | 3.66062   |
| 7.01826   | 6.98874   | 6.19765   | 5.97815   | 6.28766   | 4.61825   |
| 0.141441  | 0.176264  | 0         | 0         | 0         | 0         |
| 38.3733   | 39.3854   | 42.4936   | 44.2722   | 37.3103   | 40.1394   |
| 2.2637    | 2.28838   | 2.53284   | 1.51494   | 2.53773   | 1.63695   |
| 0         | 0         | 0         | 0         | 0         | 0         |
| 131.287   | 116.727   | 72.4843   | 63.8703   | 69.6308   | 68.0081   |
| 76.7186   | 91.6511   | 82.9977   | 101.435   | 70.0834   | 93.7093   |
| 5.9939    | 3.84301   | 6.1021    | 5.72102   | 7.10568   | 5.2537    |
| 0.268115  | 0.227921  | 0.233533  | 0.0823167 | 0.687193  | 0.463289  |
| 0         | 0         | 0         | 0         | 0         | 0         |
| 5.88259   | 6.20767   | 6.8715    | 5.17592   | 7.82012   | 6.0804    |
| 29.867    | 29.0878   | 29.505    | 28.1896   | 34.312    | 40.0884   |
| 0         | 0         | 0         | 0         | 0         | 0         |
| 2.7373    | 1.50881   | 0.464234  | 0.779639  | 1.02634   | 1.77021   |
| 25.344    | 27.3531   | 32.2073   | 26.645    | 26.9193   | 21.8741   |
| 16.8833   | 14.2252   | 13.0319   | 13.3694   | 11.0023   | 11.5787   |
| 50.6192   | 54.1757   | 40.7645   | 41.1979   | 35.5857   | 53.2924   |
| 3.04745   | 3.02768   | 1.7162    | 2.38393   | 3.08797   | 2.80996   |
| 0.0906397 | 0.0429858 | 0.0427156 | 0         | 7.18E-276 | 0.0539865 |
| 0.0774924 | 0         | 0.390517  | 0.264857  | 0         | 0.130298  |
| 9.02528   | 7.70422   | 11.6336   | 12.35     | 19.9491   | 24.8255   |
| 2.39832   | 2.80765   | 1.87702   | 1.82158   | 2.16503   | 1.74135   |
| 3.62149   | 4.50961   | 4.14306   | 3.14527   | 3.66051   | 3.93583   |

|           |            |           |           |           |           |
|-----------|------------|-----------|-----------|-----------|-----------|
| 0         | 0          | 0         | 0         | 0         | 0         |
| 1.08788   | 0.938572   | 1.58143   | 0.858049  | 0.725151  | 0.914594  |
| 9.63772   | 9.67056    | 10.2201   | 9.09158   | 8.65976   | 6.83228   |
| 1.72177   | 1.17136    | 0.664034  | 0.57046   | 1.37971   | 0.989626  |
| 0.447489  | 0.55766    | 0.241616  | 0.327739  | 0.623199  | 0.376209  |
| 138.827   | 158.357    | 116.024   | 149.635   | 95.3722   | 130.177   |
| 3.09989   | 3.52716    | 0.509401  | 1.68905   | 1.45988   | 1.35971   |
| 0.026666  | 0.00977384 | 0.150289  | 0.0357412 | 0.0254859 | 0         |
| 0         | 0          | 0         | 0         | 0         | 0         |
| 0.020743  | 0.0516999  | 0.0522664 | 0.0472644 | 0.0449369 | 0.0174389 |
| 56.1158   | 53.885     | 50.9073   | 56.7657   | 46.5151   | 46.0698   |
| 0         | 0          | 0         | 0         | 0         | 0         |
| 16.0126   | 14.8303    | 17.4549   | 13.6903   | 23.2287   | 16.2461   |
| 45.8529   | 171.425    | 0         | 52.2394   | 49.6669   | 0         |
| 13.088    | 11.4484    | 14.9586   | 13.0378   | 13.684    | 10.5884   |
| 0.149227  | 0.0619887  | 0.125336  | 0         | 0.134699  | 0.0209094 |
| 7.14141   | 5.9897     | 6.43824   | 5.07325   | 6.75493   | 6.32675   |
| 0         | 0          | 0         | 0         | 0         | 0         |
| 0         | 0          | 0         | 0         | 0         | 0         |
| 148.317   | 141.029    | 92.3903   | 85.9818   | 79.5558   | 75.294    |
| 0.0196332 | 0          | 0         | 0         | 0         | 0         |
| 147.911   | 146.515    | 94.9692   | 126.398   | 74.6849   | 116.404   |
| 0.620218  | 0.764948   | 0.974679  | 0.684755  | 1.31581   | 0.510676  |
| 40.5348   | 40.9746    | 30.5589   | 38.2629   | 38.2856   | 45.4443   |
| 0         | 0          | 0         | 0         | 0         | 0         |
| 7.38666   | 6.77895    | 10.7926   | 5.26486   | 13.085    | 9.02338   |
| 4.60534   | 3.72271    | 5.72365   | 3.40332   | 6.34787   | 3.11311   |
| 0         | 0          | 0         | 0         | 0         | 0         |
| 0.108685  | 0.270886   | 0.136927  | 0.0990582 | 0.0706351 | 0.0913727 |
| 60.3932   | 65.9442    | 58.4879   | 73.432    | 47.4399   | 58.6769   |
| 11.6155   | 13.0832    | 11.5352   | 14.4294   | 11.0015   | 13.4427   |
| 4.88543   | 4.12428    | 3.80547   | 3.80037   | 3.67012   | 3.6656    |
| 1.17003   | 0.821834   | 1.79569   | 0.59379   | 2.54623   | 1.02837   |
| 1.11415   | 1.12144    | 2.37544   | 3.61272   | 2.50649   | 2.44978   |
| 8.19935   | 8.58442    | 7.64225   | 7.81865   | 9.88366   | 8.62202   |
| 11.0782   | 10.7227    | 12.0561   | 10.8558   | 11.3715   | 11.1535   |
| 7.25571   | 7.20322    | 7.42059   | 6.61028   | 6.97503   | 6.54493   |
| 0.483931  | 0.150768   | 0.217744  | 0.157524  | 0.748834  | 0.421377  |
| 7.68994   | 6.5906     | 0         | 0         | 0         | 0         |
| 3.0658    | 4.04533    | 3.63525   | 3.90373   | 3.90683   | 7.27751   |
| 0         | 0.0234366  | 0         | 0         | 0.0570033 | 0.0158109 |
| 0.817078  | 0.654584   | 0.661757  | 0.332458  | 0.842898  | 0.441596  |
| 20.5813   | 19.9624    | 21.4187   | 18.6659   | 22.6827   | 21.7358   |



|           |           |           |           |           |           |
|-----------|-----------|-----------|-----------|-----------|-----------|
| 0.407269  | 0.362528  | 0.40315   | 0.663286  | 0.661719  | 0.586965  |
| 36.1475   | 34.8571   | 35.7632   | 34.4553   | 33.2439   | 32.0982   |
| 0.0955368 | 0.0714347 | 0.132399  | 0.0544217 | 0.382889  | 0.112446  |
| 276.321   | 267.388   | 245.184   | 257.262   | 198.847   | 219.817   |
| 0         | 0.40396   | 0.816773  | 0.553954  | 0         | 0.13626   |
| 0.247142  | 0.238938  | 0.601914  | 0.248417  | 0.732793  | 0.474566  |
| 1.04468   | 1.10759   | 0.712815  | 0.551703  | 1.47217   | 0.30997   |
| 0         | 0         | 0         | 0         | 0         | 0         |
| 20.1087   | 23.2496   | 24.8632   | 21.7838   | 27.1016   | 24.6089   |
| 3.02304   | 2.52172   | 3.65502   | 3.49964   | 3.48251   | 3.88396   |
| 24.4049   | 24.1061   | 23.8325   | 30.8598   | 27.744    | 27.3902   |
| 14.4295   | 16.7889   | 14.5605   | 15.2706   | 8.51856   | 10.2913   |
| 3.53287   | 3.17991   | 3.55377   | 2.57713   | 3.9714    | 2.7665    |
| 113.892   | 142.94    | 148.449   | 184.398   | 115.063   | 134.684   |
| 18.3028   | 16.108    | 16.7622   | 17.4356   | 16.577    | 16.1988   |
| 0         | 0         | 0         | 0         | 0         | 0         |
| 13.953    | 14.3214   | 13.0842   | 12.5459   | 13.0963   | 11.6902   |
| 0.116568  | 0.0435799 | 0.0587432 | 0.106243  | 0.113637  | 0.0195999 |
| 0         | 0         | 0         | 0         | 0         | 0         |
| 0         | 0         | 0         | 0         | 0         | 0         |
| 7.04903   | 5.91518   | 5.98      | 7.06229   | 5.71693   | 6.90894   |
| 0         | 0         | 0         | 0         | 0.0438712 | 0.0681014 |
| 75.2436   | 79.6368   | 80.902    | 80.0901   | 58.6235   | 67.344    |
| 0         | 0.0143957 | 0         | 0         | 0.0125126 | 0         |
| 109.541   | 126.746   | 79.9004   | 95.5589   | 78.825    | 98.1581   |
| 9.37413   | 8.60394   | 9.95696   | 7.64343   | 11.5338   | 9.30407   |
| 23.0825   | 24.0079   | 29.1405   | 22.6294   | 31.2217   | 22.3742   |
| 4327.1    | 4325.19   | 5908.53   | 4985.93   | 6538.63   | 7268.85   |
| 0         | 0         | 0         | 0         | 0.170289  | 0         |
| 34.4522   | 39.7909   | 30.771    | 37.148    | 29.721    | 36.0503   |
| 0.0231589 | 0         | 0         | 0.0131923 | 0.0250852 | 0.0584099 |
| 1.98527   | 1.45173   | 1.74817   | 1.428     | 2.60066   | 2.35438   |
| 47.7279   | 41.8794   | 50.6531   | 43.6946   | 47.5435   | 45.2133   |
| 10.6012   | 13.2488   | 7.41483   | 8.52379   | 9.36327   | 10.1444   |
| 0         | 0         | 0         | 0         | 0         | 0         |
| 7.28038   | 5.75647   | 5.62978   | 5.83462   | 4.51398   | 5.27641   |
| 0         | 0         | 0         | 0         | 0         | 0         |
| 18.5295   | 17.9188   | 17.1563   | 15.6605   | 16.1599   | 14.5148   |
| 8.32404   | 8.21642   | 10.4153   | 9.50938   | 9.76882   | 9.35316   |
| 0         | 0         | 0         | 0         | 0         | 0.428271  |
| 17.9989   | 12.1547   | 19.55     | 16.0264   | 21.9977   | 24.0859   |
| 0.183139  | 0.0855854 | 0.16151   | 0.0730265 | 0.272762  | 0.134721  |
| 1.13896   | 0.745768  | 1.70244   | 0.879723  | 1.77735   | 1.08737   |

|           |          |           |           |           |           |
|-----------|----------|-----------|-----------|-----------|-----------|
| 0.332015  | 0.318197 | 0.275729  | 0.166227  | 0.0702407 | 0.103072  |
| 16.3378   | 15.8536  | 18.6441   | 14.9055   | 16.1802   | 14.2343   |
| 2.16078   | 2.54915  | 1.17965   | 1.2801    | 2.44974   | 2.19202   |
| 0.0662625 | 0        | 0         | 0         | 0         | 0         |
| 0.107742  | 0.134268 | 0.0678694 | 0.0613741 | 0.0583518 | 0.0452899 |
| 3.83735   | 1.54715  | 2.27506   | 3.98608   | 3.66754   | 5.59825   |
| 14.6857   | 14.8286  | 13.6073   | 14.2052   | 12.4041   | 13.3553   |
| 10.164    | 8.7784   | 9.39207   | 8.52121   | 7.36552   | 8.31816   |
| 14.4465   | 10.5704  | 19.5902   | 10.8051   | 15.9638   | 9.8704    |
| 1324.32   | 1591.84  | 1388.22   | 1530.58   | 1312.58   | 1496.97   |
| 48.7566   | 49.9874  | 46.1105   | 47.9383   | 50.4698   | 52.3761   |
| 14.2538   | 15.3638  | 16.9551   | 15.1006   | 13.7577   | 13.177    |
| 31.1422   | 34.4938  | 30.3581   | 36.5549   | 28.4034   | 37.3115   |
| 3.71702   | 3.12464  | 4.82145   | 4.15957   | 6.26563   | 6.37933   |
| 16.9848   | 18.7965  | 17.7251   | 22.6405   | 14.6959   | 13.4763   |
| 36.0564   | 43.4422  | 38.0391   | 38.8518   | 27.4771   | 27.3622   |
| 41.9621   | 42.2683  | 49.5041   | 42.4009   | 56.4561   | 44.5739   |
| 0         | 0        | 0         | 0         | 0         | 0         |
| 5.95371   | 5.66427  | 5.97776   | 4.53889   | 5.95077   | 5.02534   |
| 17.0358   | 20.4679  | 14.8587   | 19.3091   | 13.9106   | 17.6273   |
| 0         | 0        | 0         | 0         | 0         | 0         |
| 13.9201   | 14.3061  | 15.3289   | 14.7625   | 15.5061   | 15.2425   |
| 19.749    | 20.3942  | 18.3423   | 17.1231   | 18.64     | 19.6606   |
| 15.4899   | 14.3069  | 15.1226   | 15.8316   | 18.0192   | 16.5399   |
| 49.3141   | 54.9011  | 46.5195   | 53.3271   | 65.9292   | 61.0198   |
| 0.205845  | 0.410441 | 0.849999  | 0.425606  | 0.845634  | 0.389381  |
| 27.4452   | 32.5282  | 24.8636   | 29.6425   | 33.2204   | 38.3019   |
| 0         | 0        | 0         | 0         | 0         | 0         |
| 0.833936  | 0.762467 | 1.07396   | 0.570603  | 1.54512   | 1.02799   |
| 0         | 0        | 0         | 0         | 0         | 0         |
| 28.1964   | 26.8529  | 23.1945   | 21.8569   | 25.1623   | 26.2529   |
| 4.20083   | 5.11464  | 4.25171   | 5.07291   | 4.78876   | 4.17578   |
| 8.25377   | 7.82359  | 8.83979   | 5.87202   | 9.74345   | 7.36891   |
| 0         | 0        | 0         | 0         | 0         | 0         |
| 0         | 0        | 0         | 0         | 0         | 0         |
| 22.7869   | 24.6887  | 26.9937   | 32.0037   | 24.1248   | 24.9767   |
| 25.9616   | 56.2654  | 38.1024   | 50.1836   | 24.9961   | 20.1826   |
| 7.47294   | 8.79178  | 8.49309   | 11.2525   | 8.60398   | 7.99603   |
| 0         | 0        | 0         | 0         | 0         | 0         |
| 0         | 0        | 0         | 0         | 0         | 0         |
| 1.33062   | 1.21603  | 1.00583   | 0.909574  | 1.63348   | 1.11867   |
| 12.9936   | 14.0842  | 12.6428   | 15.0453   | 12.8693   | 16.5049   |
| 0.520379  | 0.603601 | 0.519145  | 0.634127  | 0.616033  | 0.457667  |

|          |           |           |           |           |           |
|----------|-----------|-----------|-----------|-----------|-----------|
| 1.41038  | 1.82792   | 1.35042   | 1.70323   | 1.31382   | 1.54144   |
| 0.335725 | 0.0975378 | 0.35283   | 0.382486  | 0.449434  | 0.300246  |
| 0        | 0         | 0         | 0.0647654 | 0.123152  | 0.0955848 |
| 23.3166  | 21.2932   | 25.8887   | 20.0102   | 19.0356   | 19.9808   |
| 0.955004 | 0.884092  | 0.928156  | 0.404121  | 1.35955   | 0.619367  |
| 0        | 0         | 0         | 0         | 0         | 0         |
| 76.3531  | 74.9618   | 87.6921   | 76.1142   | 100.13    | 84.0702   |
| 21.7503  | 23.0683   | 18.6569   | 19.9594   | 20.0507   | 23.1768   |
| 0        | 0         | 0         | 0         | 0         | 0         |
| 162.423  | 93.8159   | 424.849   | 316.046   | 152.754   | 123.546   |
| 3.67957  | 4.65725   | 3.4489    | 4.04584   | 4.44982   | 4.75874   |
| 13.831   | 9.8448    | 16.3969   | 11.871    | 13.527    | 7.81504   |
| 0.817418 | 0.608183  | 0.487813  | 0.441128  | 0.869876  | 0.687213  |
| 6.21857  | 12.0827   | 14.1737   | 11.1032   | 31.5968   | 27.3909   |
| 12.0082  | 13.0596   | 16.8315   | 13.7862   | 14.0746   | 13.1393   |
| 0        | 0         | 0         | 0         | 0         | 0         |
| 0        | 0         | 0.0154146 | 0         | 0.0132529 | 0.0102863 |
| 4.43119  | 4.43988   | 4.77195   | 3.60598   | 5.69513   | 4.07722   |
| 69.5381  | 54.2394   | 52.9429   | 47.0529   | 71.1678   | 64.7703   |
| 0        | 0         | 0         | 0         | 0         | 0         |
| 1.02924  | 0.807584  | 1.41675   | 0.760013  | 2.11615   | 1.52227   |
| 10.4852  | 10.0543   | 11.6674   | 10.9263   | 12.4285   | 10.9792   |
| 0        | 0         | 0         | 0         | 0.0864978 | 0         |
| 6.03272  | 5.67051   | 5.95053   | 6.6813    | 4.64199   | 5.32067   |
| 0        | 0         | 0         | 0         | 0         | 0         |
| 7.71871  | 6.89794   | 8.2813    | 7.45935   | 14.4277   | 12.8245   |
| 12.1409  | 11.4551   | 10.9421   | 9.96489   | 9.74035   | 9.26438   |
| 2.80513  | 2.43575   | 2.21163   | 1.17524   | 3.01885   | 2.06922   |
| 0.259588 | 0.467275  | 0.436057  | 0.230023  | 0.468634  | 0.557721  |
| 0.194743 | 0.131745  | 0.133189  | 0.114103  | 0.259157  | 0.135656  |
| 13.189   | 13.1911   | 12.5841   | 10.7919   | 9.06417   | 9.65811   |
| 11.5518  | 11.4164   | 9.76809   | 10.3606   | 7.69639   | 9.35484   |
| 0        | 0         | 0         | 0.0328111 | 0         | 0         |
| 1.97837  | 1.49089   | 2.57086   | 0.988276  | 3.32838   | 1.88472   |
| 0        | 0         | 0         | 0         | 0         | 0         |
| 2.35179  | 1.96687   | 1.89178   | 2.39278   | 1.23364   | 2.11357   |
| 6.67678  | 6.59512   | 4.80672   | 5.39833   | 3.63274   | 4.39747   |
| 3.58763  | 3.26664   | 3.75443   | 2.8875    | 4.48149   | 4.04263   |
| 11.5328  | 10.3479   | 13.0135   | 10.2828   | 11.3841   | 9.10557   |
| 0        | 0         | 0         | 0         | 0         | 0.0566194 |
| 0.883811 | 5.10651   | 1.03755   | 25.3101   | 0.239332  | 1.08922   |
| 0.14127  | 0.0586835 | 0.0593266 | 0.107298  | 0.153021  | 0.118767  |
| 9.17957  | 10.3878   | 10.1496   | 10.4516   | 8.28728   | 9.50401   |

|          |          |           |           |           |           |
|----------|----------|-----------|-----------|-----------|-----------|
| 13.0443  | 14.0114  | 14.893    | 12.2356   | 12.343    | 11.844    |
| 0.560224 | 0.53948  | 0.0320818 | 0.116046  | 0.0827486 | 0.042817  |
| 0        | 0        | 0         | 0.0366498 | 0.068948  | 0         |
| 3.16522  | 2.25692  | 1.90306   | 1.0297    | 2.28745   | 1.90187   |
| 10.4351  | 11.4094  | 11.5344   | 10.3745   | 9.59699   | 8.93847   |
| 2.78402  | 2.94739  | 3.74935   | 2.61498   | 3.14793   | 2.53132   |
| 13.1996  | 7.01099  | 11.6418   | 8.07122   | 15.6713   | 10.8076   |
| 172.386  | 84.4245  | 117.82    | 84.3832   | 157.679   | 96.3742   |
| 7.10466  | 6.74728  | 8.46683   | 7.03794   | 8.79975   | 6.29595   |
| 0        | 0        | 0         | 0         | 0.22015   | 0.17087   |
| 1.69159  | 0.263508 | 0         | 0.722701  | 0.458075  | 0.177768  |
| 0        | 0        | 0         | 0         | 0         | 0         |
| 4.10467  | 7.39438  | 1.9688    | 3.10113   | 4.10419   | 4.8759    |
| 23.6736  | 25.4727  | 0         | 0         | 0         | 0         |
| 1.37029  | 1.60106  | 1.10843   | 0.735118  | 1.19104   | 0.923303  |
| 0.211946 | 0.190171 | 0.0854466 | 0.315516  | 0.444458  | 0.342116  |
| 2.33543  | 2.85223  | 3.53323   | 3.02133   | 4.14734   | 3.14319   |
| 0        | 0        | 0         | 0         | 0         | 0         |
| 28.855   | 28.6143  | 27.9751   | 28.2934   | 28.3744   | 34.2631   |
| 0.11684  | 0        | 0.235522  | 0.0266228 | 0.177182  | 0.0785831 |
| 0.51541  | 0.275273 | 0.834868  | 1.00663   | 0.797545  | 0.74282   |
| 3.34284  | 2.34997  | 3.77955   | 3.02722   | 7.36559   | 4.58787   |
| 0.400594 | 0.49922  | 0.497931  | 0.325993  | 0.675907  | 0.408953  |
| 0.302338 | 0.235484 | 0.380902  | 0.0430561 | 0.0818717 | 0.317724  |
| 4.41491  | 4.44417  | 4.87438   | 3.52621   | 6.2085    | 4.54455   |
| 0.231251 | 0.592453 | 0.565231  | 0.257037  | 0.928684  | 0.235159  |
| 0        | 0        | 0         | 0         | 0         | 0         |
| 0        | 0        | 0         | 0         | 0         | 0         |
| 27.7964  | 18.4313  | 29.8065   | 21.2722   | 35.6224   | 23.9614   |
| 96.8992  | 65.5184  | 101.497   | 59.9079   | 77.9176   | 67.8115   |
| 4.01945  | 4.05164  | 4.82545   | 3.28544   | 4.20906   | 3.07966   |
| 21.054   | 20.5688  | 20.1748   | 17.7304   | 23.8588   | 20.1802   |
| 0        | 0        | 0         | 0         | 0         | 0         |
| 7.23855  | 9.69325  | 7.39876   | 12.6804   | 8.74375   | 7.59384   |
| 0        | 0        | 0.120678  | 0.218258  | 0         | 0.422781  |
| 0        | 0        | 0         | 0         | 0         | 0         |
| 0        | 6.51255  | 0.109732  | 107.367   | 0.0943438 | 4.32028   |
| 28.1144  | 27.4311  | 24.6164   | 26.8735   | 27.4382   | 29.5431   |
| 3.55181  | 5.22812  | 6.09605   | 5.1901    | 11.4581   | 9.58565   |
| 5.09503  | 4.60845  | 3.72716   | 3.76056   | 4.85123   | 4.20285   |
| 11.2504  | 9.61184  | 11.9821   | 11.2318   | 10.4902   | 10.5797   |
| 0.545788 | 0.68016  | 0.541755  | 0.602964  | 0.662845  | 0.403232  |
| 279.146  | 273.157  | 309.925   | 318.504   | 236.281   | 278.785   |

|           |           |           |          |           |           |
|-----------|-----------|-----------|----------|-----------|-----------|
| 0.160773  | 0.477974  | 0.307987  | 0.128174 | 0.896905  | 0.702902  |
| 606.592   | 401.73    | 630.437   | 460.602  | 862.591   | 733.799   |
| 0.119362  | 3.09E-08  | 0.0269066 | 4.42E-12 | 8.91E-06  | 7.62E-08  |
| 3.15989   | 4.4629    | 4.06947   | 4.96002  | 1.21697   | 2.18428   |
| 1.64237   | 1.54246   | 2.12912   | 2.27789  | 1.65007   | 1.50083   |
| 13.0816   | 13.2923   | 14.4948   | 14.1999  | 18.0442   | 14.5166   |
| 5.88746   | 5.33535   | 4.9064    | 5.25035  | 4.97315   | 5.0164    |
| 0         | 0         | 0         | 0        | 0         | 0         |
| 0         | 0         | 0         | 0        | 0         | 0         |
| 5.60044   | 5.82464   | 6.32619   | 6.16372  | 9.56985   | 7.67108   |
| 282.286   | 244.212   | 284.402   | 295.489  | 222.849   | 304.755   |
| 0         | 0         | 0         | 0        | 0         | 0         |
| 8.60826   | 6.63692   | 10.4243   | 7.00837  | 6.90583   | 6.09033   |
| 0.034886  | 0.0434749 | 0         | 0.15898  | 0.0755756 | 0.0586582 |
| 3.65044   | 4.84748   | 2.29951   | 2.93167  | 6.06076   | 4.02488   |
| 0         | 0         | 0         | 0        | 0         | 0         |
| 74.3242   | 69.5367   | 64.8814   | 52.5595  | 53.7171   | 54.7962   |
| 7.61684   | 5.23964   | 5.34823   | 5.02152  | 6.66633   | 5.94251   |
| 0         | 0         | 0         | 0        | 0         | 0         |
| 5.03217   | 5.34022   | 4.0119    | 4.52386  | 4.30098   | 5.68492   |
| 12.683    | 9.43001   | 17.9271   | 10.272   | 16.1084   | 9.75513   |
| 7.35713   | 9.5006    | 7.02406   | 6.72311  | 7.45944   | 5.9454    |
| 0         | 0         | 0         | 0        | 0         | 0         |
| 0.0389945 | 0         | 0         | 0        | 0.0844761 | 0.0327832 |
| 0.399277  | 0.398063  | 0.402425  | 0.272934 | 0.432489  | 0.872761  |
| 1.30728   | 1.44812   | 1.88227   | 0.99291  | 1.95546   | 0.662918  |
| 0.646488  | 0         | 0.20362   | 0.60016  | 0.700263  | 0         |
| 0.340717  | 0.0849203 | 0.858509  | 0.465808 | 0.221435  | 0.0572891 |
| 7.75805   | 7.74521   | 7.32711   | 8.21167  | 6.62685   | 5.56979   |
| 0.528083  | 0.315886  | 0.665307  | 0.385047 | 1.12114   | 0.728103  |
| 4.48115   | 5.50555   | 5.26839   | 5.60744  | 4.57219   | 6.34221   |
| 0.0644995 | 0.120569  | 0.12189   | 0        | 0.0349323 | 0.0542255 |
| 0         | 0         | 0         | 0        | 0         | 0         |
| 0         | 1.35536   | 0         | 0        | 0         | 0         |
| 21.3114   | 22.5277   | 23.3714   | 17.8841  | 23.5432   | 16.7848   |
| 0.840111  | 0         | 1.41122   | 0.159521 | 1.21332   | 0.470861  |
| 0         | 0         | 0         | 0        | 0         | 0         |
| 9.95516   | 9.70687   | 10.0406   | 10.4559  | 11.445    | 10.4705   |
| 0         | 0         | 0         | 0        | 0         | 0         |
| 13.8578   | 14.6036   | 13.7879   | 12.2205  | 10.6787   | 10.9466   |
| 0         | 0         | 0         | 0        | 0         | 0         |
| 0.121683  | 0         | 0         | 0.277263 | 0.131805  | 0.306902  |
| 0         | 0         | 0         | 0        | 0.0395354 | 0.0306855 |

|           |           |           |           |           |           |
|-----------|-----------|-----------|-----------|-----------|-----------|
| 17.5669   | 14.9518   | 14.9802   | 14.355    | 11.9712   | 12.1295   |
| 0         | 0         | 0         | 0         | 0         | 0         |
| 8.24139   | 8.61737   | 8.1207    | 8.7074    | 9.13354   | 8.16684   |
| 16.0564   | 16.4972   | 15.676    | 19.318    | 14.6282   | 15.248    |
| 0.187486  | 0.0467289 | 0.614132  | 0.213599  | 0.0812322 | 0.22067   |
| 42.8668   | 37.2448   | 39.0205   | 47.6797   | 47.6083   | 54.1551   |
| 27.5405   | 32.718    | 25.3555   | 27.0664   | 16.6367   | 21.4998   |
| 4.78371   | 6.68476   | 3.79441   | 5.51515   | 4.18831   | 6.73823   |
| 0.0946469 | 0.260756  | 0.35895   | 0.282962  | 0.230582  | 0.320448  |
| 0         | 0         | 0         | 0         | 0         | 0         |
| 96.1748   | 112.185   | 99.9643   | 101.514   | 85.1252   | 89.7535   |
| 14.8791   | 16.5932   | 16.1051   | 16.7971   | 16.1506   | 16.217    |
| 2.86544   | 2.5947    | 2.86443   | 2.80666   | 2.95743   | 2.60634   |
| 11.4295   | 12.3595   | 11.2091   | 11.8672   | 2.15146   | 2.10379   |
| 114.415   | 127.459   | 116.347   | 128.437   | 118.599   | 140.008   |
| 0.0144812 | 0.0180465 | 0.0182442 | 0         | 0         | 0.0121745 |
| 21.2086   | 23.5032   | 15.7032   | 21.1385   | 11.3062   | 11.0772   |
| 3.90518   | 4.21151   | 4.76227   | 4.76287   | 5.15194   | 5.53503   |
| 3.27319   | 2.24026   | 2.76138   | 2.21934   | 2.01602   | 2.99971   |
| 4.05277   | 4.31204   | 4.35929   | 3.52828   | 5.17675   | 3.33489   |
| 0         | 0         | 0         | 0         | 0         | 0         |
| 20.3108   | 19.0618   | 23.2424   | 19.3253   | 22.0392   | 18.3023   |
| 5.77925   | 5.0316    | 7.77972   | 4.87051   | 10.3761   | 5.59082   |
| 0.0954861 | 0.0297486 | 0         | 0.0271964 | 0.0517143 | 0         |
| 12.7549   | 11.0143   | 6.89933   | 6.73264   | 5.38743   | 6.49803   |
| 0         | 0         | 0         | 0         | 0         | 0         |
| 14.8945   | 15.8867   | 18.1124   | 16.1741   | 15.6096   | 14.3568   |
| 0.143065  | 0.154763  | 0.133512  | 0.0226371 | 0.0968526 | 0.0668196 |
| 0.0406165 | 0         | 1.02342   | 0.601557  | 0.659924  | 0.853669  |
| 6.52501   | 7.63319   | 7.85091   | 9.99949   | 9.6878    | 7.74067   |
| 2.51186   | 2.77048   | 2.50984   | 2.03939   | 3.94047   | 3.39822   |
| 28.6289   | 27.091    | 30.9272   | 23.4158   | 30.6721   | 26.8698   |
| 0         | 0.0690049 | 0         | 0         | 0.119956  | 0         |
| 0         | 0         | 0         | 0         | 0         | 0         |
| 16.0074   | 17.7747   | 16.4014   | 16.7618   | 21.7797   | 26.0766   |
| 6.19037   | 6.64911   | 7.09843   | 5.2415    | 8.39626   | 6.80468   |
| 9.41275   | 6.34063   | 4.48707   | 5.79664   | 6.61343   | 5.77465   |
| 18.7345   | 17.295    | 18.1781   | 18.1248   | 18.4756   | 17.104    |
| 57.5863   | 59.0766   | 56.2913   | 49.5862   | 74.425    | 67.1573   |
| 18.1489   | 20.4776   | 19.5176   | 19.3727   | 16.0279   | 16.8044   |
| 0         | 0         | 0         | 0         | 0         | 0         |
| 3.01994   | 2.51423   | 3.13327   | 2.18288   | 4.17825   | 2.35755   |
| 0         | 0         | 0.0164312 | 0         | 0.0635715 | 0.0109647 |

|           |           |           |           |           |           |
|-----------|-----------|-----------|-----------|-----------|-----------|
| 12.0541   | 19.4837   | 20.0731   | 16.0445   | 8.20895   | 10.1842   |
| 3.0223    | 2.8417    | 3.42005   | 3.77315   | 2.90124   | 3.16469   |
| 1.26242   | 2.09858   | 1.67882   | 3.75544   | 1.97517   | 1.88729   |
| 13.8923   | 15.4262   | 11.0325   | 10.9115   | 8.56596   | 9.91921   |
| 0         | 0         | 0         | 0         | 0         | 0         |
| 0.194841  | 0.582744  | 0.540036  | 0.177583  | 0.168838  | 0.032761  |
| 0.300621  | 0.431129  | 0.194274  | 0.234242  | 0.34102   | 0.360114  |
| 1.97737   | 2.20463   | 3.38682   | 2.33182   | 2.60526   | 2.08764   |
| 16.1655   | 13.3545   | 16.6842   | 16.4748   | 17.4772   | 19.5881   |
| 16.2748   | 14.1461   | 10.5043   | 11.195    | 15.9441   | 20.1203   |
| 12.5197   | 14.8497   | 16.0594   | 13.1426   | 13.826    | 11.437    |
| 23.9382   | 23.0178   | 24.0334   | 23.5988   | 25.5516   | 25.4318   |
| 0         | 0         | 0         | 0         | 0         | 0         |
| 40.7104   | 44.0034   | 44.4082   | 80.0519   | 34.143    | 51.4505   |
| 0         | 0         | 0         | 0         | 0         | 0         |
| 1.83664   | 1.74453   | 2.18692   | 2.22005   | 3.42082   | 3.23882   |
| 2102.23   | 2384.67   | 2265.98   | 2321.78   | 2171.02   | 2481.07   |
| 28.1253   | 20.2986   | 31.61     | 22.937    | 46.793    | 42.8677   |
| 0.335021  | 0.147354  | 0.670359  | 1.27976   | 0.170771  | 0.0662721 |
| 19.4406   | 19.1221   | 21.5902   | 19.2055   | 21.0055   | 19.1638   |
| 3.92792   | 3.48567   | 3.18237   | 3.30595   | 3.48372   | 4.10163   |
| 0.375988  | 0.0462771 | 0.292402  | 0.047273  | 0         | 0.195122  |
| 36.2729   | 35.7095   | 29.0225   | 25.7095   | 30.3116   | 31.1506   |
| 0         | 0         | 0         | 0         | 0         | 0         |
| 1.98413   | 2.38052   | 2.86196   | 1.33575   | 4.09928   | 2.09857   |
| 3.50805   | 3.35166   | 3.32946   | 2.8776    | 3.47053   | 2.18245   |
| 3.49293   | 6.91531   | 5.12705   | 5.80276   | 4.51564   | 2.26338   |
| 6.33598   | 6.26117   | 7.04266   | 6.05378   | 8.41979   | 6.18474   |
| 0         | 0         | 0         | 0         | 0         | 0         |
| 62.2466   | 58.528    | 68.3867   | 71.3199   | 57.7101   | 63.1947   |
| 9.57322   | 10.1854   | 8.80695   | 8.28603   | 9.43859   | 9.96797   |
| 6.83569   | 6.48296   | 4.86835   | 5.48163   | 6.63097   | 5.02872   |
| 3.54746   | 3.49638   | 3.85847   | 3.38626   | 4.35858   | 4.11801   |
| 0.727281  | 0.371831  | 0.516869  | 0.743597  | 1.81795   | 1.411     |
| 4.07127   | 3.85154   | 4.51147   | 3.96122   | 3.75005   | 3.27287   |
| 18.1945   | 18.6362   | 18.4216   | 18.2678   | 17.7282   | 18.7188   |
| 0.166342  | 0.118455  | 0.149691  | 0.027073  | 0.180179  | 0.119868  |
| 22.8353   | 20.9341   | 21.3002   | 18.6795   | 27.0149   | 23.5027   |
| 38.986    | 37.4266   | 40.5265   | 39.8388   | 38.9111   | 47.2951   |
| 0.0565253 | 0.0117403 | 0.0237379 | 0.0643983 | 0.0816361 | 0.0237608 |
| 0         | 0         | 0         | 0         | 0         | 0         |
| 0.110389  | 0.137566  | 0.162253  | 0.146725  | 0.139499  | 0.0618701 |
| 26.4739   | 26.3977   | 25.6581   | 27.8546   | 20.8712   | 22.6789   |

|           |           |           |           |            |           |
|-----------|-----------|-----------|-----------|------------|-----------|
| 0         | 0         | 0         | 0         | 0          | 0         |
| 0.0425744 | 0.185697  | 0.160913  | 0.0242521 | 0          | 0.0357928 |
| 75.229    | 81.7081   | 72.1161   | 84.4866   | 54.6803    | 62.7824   |
| 14.0963   | 16.0705   | 15.7984   | 14.4891   | 15.3531    | 13.2996   |
| 1.42856   | 0.93012   | 0.655896  | 1.18315   | 1.38863    | 0.975913  |
| 18.8674   | 17.7058   | 18.7659   | 17.6662   | 20.4368    | 20.8069   |
| 0         | 0         | 0         | 0         | 0.00925993 | 0         |
| 5.51083   | 4.90317   | 4.71471   | 4.04449   | 5.01138    | 4.10508   |
| 4.21439   | 4.05768   | 5.06641   | 4.12049   | 7.25532    | 5.29128   |
| 8.23245   | 8.71867   | 8.23736   | 7.48032   | 9.39334    | 8.64563   |
| 36.8428   | 33.1673   | 37.7203   | 28.8254   | 26.4202    | 28.4765   |
| 14.4079   | 12.285    | 22.2338   | 24.8183   | 17.0624    | 19.5023   |
| 0.0533718 | 0         | 0         | 0         | 0          | 0.0448703 |
| 2.51234   | 2.74024   | 2.47048   | 2.79876   | 3.6058     | 2.81826   |
| 0.0454816 | 0.0566792 | 0.0859503 | 0.103633  | 0.0246324  | 0         |
| 1.13565   | 1.12696   | 0.927341  | 0.972767  | 1.45336    | 0.845136  |
| 11.2758   | 11.1968   | 9.67813   | 10.3385   | 8.71021    | 9.06428   |
| 14.7169   | 15.5903   | 9.93671   | 14.3876   | 9.1966     | 12.9632   |
| 0         | 0.0384053 | 0         | 0.0702207 | 0          | 0         |
| 0.197147  | 0         | 0.124188  | 0.33691   | 0.427092   | 0.41436   |
| 0.428148  | 40.4851   | 0.930197  | 531.961   | 1.15896    | 23.654    |
| 3.42033   | 3.47425   | 4.11374   | 2.98532   | 4.26366    | 3.41548   |
| 0.266003  | 0.150679  | 0         | 0.0275503 | 0          | 0.0609906 |
| 96.5491   | 97.8447   | 98.7933   | 98.9045   | 88.1345    | 83.8902   |
| 0.284056  | 0.35399   | 0.304188  | 0.242715  | 0.0615367  | 0.167166  |
| 15.0197   | 15.0325   | 16.2616   | 13.7963   | 15.8623    | 13.5348   |
| 15.3372   | 13.2804   | 14.4753   | 14.2498   | 11.629     | 13.0164   |
| 8.88711   | 8.88666   | 10.1126   | 8.26194   | 10.7276    | 8.20072   |
| 39.2792   | 40.5544   | 38.5749   | 39.8842   | 36.4094    | 42.8226   |
| 8.81577   | 8.72663   | 12.6032   | 10.1861   | 11.3099    | 8.88332   |
| 0         | 0         | 0         | 0         | 0.127236   | 0         |
| 8.82273   | 8.92467   | 10.4548   | 10.629    | 11.4857    | 10.8806   |
| 1.90E-45  | 3.90E-49  | 2.94E-32  | 7.22E-63  | 0.1316     | 4.34E-28  |
| 0         | 0         | 0         | 0.0650173 | 0          | 0         |
| 8.61517   | 9.13233   | 9.92731   | 9.42611   | 9.70164    | 10.4227   |
| 5.51264   | 5.70544   | 5.50315   | 5.40227   | 4.3772     | 5.1844    |
| 28.8146   | 28.682    | 27.4443   | 27.214    | 21.1547    | 25.5888   |
| 0.0531722 | 0         | 0.0680518 | 0.170087  | 0.326491   | 0.0926795 |
| 1.14598   | 0.960011  | 1.7646    | 0.145066  | 1.79586    | 0         |
| 0         | 0         | 0         | 0         | 0          | 0         |
| 2459.56   | 2165.45   | 1101.97   | 1053.33   | 849.441    | 1300.43   |
| 20.2023   | 24.2112   | 23.501    | 34.6446   | 9.75956    | 16.5109   |
| 0         | 0         | 0         | 0         | 0          | 0         |



|          |           |           |           |           |          |
|----------|-----------|-----------|-----------|-----------|----------|
| 71.7474  | 78.7379   | 82.0023   | 80.9899   | 71.8158   | 69.0703  |
| 3.51235  | 4.38699   | 3.27482   | 5.48188   | 4.36105   | 4.17126  |
| 0.490369 | 0.63656   | 0.643535  | 1.11734   | 0.885263  | 0.824519 |
| 1.06628  | 0.994584  | 0.716246  | 0.545892  | 0.915994  | 0.617014 |
| 0        | 0.098695  | 0.199553  | 0.270683  | 0         | 0.199745 |
| 0.355508 | 0.276896  | 0.503875  | 0.354396  | 0.529484  | 0.1868   |
| 0        | 0         | 0         | 0         | 0         | 0        |
| 6.04316  | 6.82403   | 8.23489   | 6.29747   | 12.5659   | 9.05153  |
| 29.2633  | 31.1243   | 35.1321   | 30.7686   | 36.6855   | 28.8019  |
| 0        | 0         | 0         | 0         | 0         | 0        |
| 51.3241  | 46.9685   | 45.8073   | 44.265    | 44.4866   | 57.8735  |
| 0.904971 | 0.619513  | 0.59787   | 0.999379  | 1.06437   | 1.14056  |
| 24.1951  | 21.0201   | 14.1495   | 15.2724   | 19.9998   | 13.4353  |
| 103.599  | 103.912   | 103.205   | 100.196   | 97.8362   | 104.282  |
| 69.5925  | 77.9607   | 66.7738   | 76.9758   | 58.8439   | 64.9076  |
| 3.65243  | 2.91345   | 4.03693   | 3.31872   | 4.27986   | 3.57928  |
| 195.943  | 214.282   | 198.355   | 205.739   | 189.193   | 218.201  |
| 0        | 0         | 9.68E-06  | 0         | 0         | 0        |
| 0.1873   | 0.273533  | 0.234265  | 0.034231  | 0         | 0.134722 |
| 0.113307 | 0.141203  | 0         | 0.129089  | 0.245464  | 0        |
| 0.155672 | 0.387996  | 0.196124  | 0.177354  | 0.0337241 | 0.130875 |
| 29.5073  | 26.6135   | 22.832    | 29.5922   | 18.0806   | 19.3024  |
| 3.44554  | 3.65222   | 4.51551   | 4.12848   | 3.92518   | 3.24631  |
| 0        | 0         | 0         | 0         | 0         | 0        |
| 0.222152 | 0         | 0.0699706 | 0.0632726 | 0         | 0        |
| 0        | 0         | 0         | 0         | 0         | 0        |
| 0        | 0         | 0         | 0         | 0         | 0        |
| 0        | 0.0214035 | 0         | 0         | 0         | 0        |
| 0        | 0         | 0         | 0         | 0         | 0        |
| 5.09091  | 5.66867   | 5.45614   | 5.72597   | 5.409     | 4.87861  |
| 58.3163  | 58.9458   | 55.1538   | 55.7909   | 46.8239   | 49.7462  |
| 19.2897  | 20.0938   | 27.0714   | 29.3834   | 25.9405   | 29.1837  |
| 1.74214  | 1.98595   | 1.22933   | 1.67542   | 1.94881   | 1.35351  |
| 0        | 0         | 0         | 0         | 0         | 0        |
| 28.7161  | 30.0855   | 30.2035   | 33.2197   | 28.6931   | 27.6714  |
| 0.80439  | 0.802779  | 0.76006   | 0.962249  | 0.479214  | 0.473382 |
| 2.06959  | 1.98394   | 3.73056   | 2.75687   | 3.10394   | 2.32883  |
| 0.423485 | 0         | 0.29637   | 0.268003  | 0.286678  | 0        |
| 489.767  | 0         | 0         | 0         | 0         | 0        |
| 0.371393 | 0.419775  | 0.631122  | 0.492002  | 0.0841992 | 0.203316 |
| 43.2783  | 43.7441   | 48.0309   | 36.5153   | 48.2814   | 41.0176  |
| 0.309128 | 0.243653  | 0.992111  | 0.519839  | 1.42382   | 0.984156 |
| 15.2658  | 14.4282   | 15.5716   | 15.4657   | 20.3035   | 16.8932  |

|           |           |           |           |           |           |
|-----------|-----------|-----------|-----------|-----------|-----------|
| 10.6873   | 9.5302    | 10.2368   | 9.27889   | 5.92272   | 7.5544    |
| 44.9137   | 42.9453   | 53.0561   | 45.9874   | 56.8976   | 45.46     |
| 29.7139   | 32.3372   | 28.0137   | 29.7462   | 29.2297   | 33.8809   |
| 10.6404   | 10.3127   | 9.75147   | 7.95384   | 10.5379   | 8.44608   |
| 0.779876  | 0.509177  | 0.702298  | 0.426798  | 1.43794   | 0.566786  |
| 32.496    | 36.9879   | 36.6167   | 33.1932   | 25.8673   | 23.7282   |
| 0         | 0         | 0         | 0         | 0         | 0         |
| 0         | 0.0250756 | 0.0126752 | 0         | 0.0217954 | 0         |
| 14.502    | 13.1644   | 14.6514   | 13.1542   | 15.2437   | 13.2124   |
| 1.31E-08  | 0.446013  | 8.57E-09  | 2.85E-10  | 0.201305  | 1.27E-09  |
| 0.120658  | 0.100243  | 0.202683  | 0.32075   | 0.17426   | 0.202878  |
| 17.9837   | 20.9736   | 24.4627   | 24.5433   | 24.0035   | 23.5537   |
| 5.07608   | 6.52007   | 6.43075   | 4.97557   | 7.64831   | 7.25932   |
| 0         | 0         | 30.7384   | 27.7966   | 0         | 20.512    |
| 3.45318   | 3.25108   | 3.76658   | 3.05176   | 3.82359   | 3.00974   |
| 0         | 0         | 0         | 0         | 0         | 0         |
| 12.6604   | 14.3237   | 13.6127   | 13.9721   | 16.7603   | 17.1841   |
| 7.69395   | 7.33447   | 8.59402   | 6.64196   | 8.60027   | 7.40198   |
| 29.6563   | 25.6956   | 31.7883   | 29.6191   | 24.7932   | 22.9145   |
| 0.573158  | 0.383797  | 0.549775  | 0.586173  | 0.458906  | 0.250835  |
| 28.6696   | 30.3311   | 28.4995   | 25.5781   | 24.607    | 22.7563   |
| 6.96727   | 6.49337   | 9.37513   | 7.84192   | 8.45485   | 6.51264   |
| 28.7504   | 28.816    | 33.8669   | 37.1744   | 31.7502   | 33.4296   |
| 23.007    | 22.0247   | 16.7625   | 12.8871   | 14.9554   | 17.8294   |
| 5.57483   | 5.73727   | 6.1656    | 5.89383   | 5.7977    | 5.59926   |
| 1.29274   | 1.17164   | 1.62866   | 0.736398  | 1.27297   | 1.43263   |
| 0.230345  | 0.215291  | 0.798052  | 0.196821  | 0.623762  | 0.0484134 |
| 62.0783   | 26.7395   | 22.0003   | 36.9907   | 24.7605   | 29.0129   |
| 0.0145104 | 0.0361657 | 0.054843  | 0.0330629 | 0         | 0.0243982 |
| 1.38839   | 0.576736  | 1.36046   | 0.351504  | 0.334194  | 0.389078  |
| 1.93235   | 1.60021   | 1.68669   | 2.13784   | 2.16073   | 1.64365   |
| 3.77894   | 4.10845   | 4.10845   | 4.14199   | 7.89881   | 6.49796   |
| 2.44722   | 3.83075   | 1.87996   | 3.36609   | 2.90939   | 3.41228   |
| 9.85007   | 10.0286   | 11.6002   | 12.4831   | 9.16167   | 11.1432   |
| 466.771   | 428.223   | 587.281   | 654.226   | 972.237   | 748.413   |
| 0         | 0         | 0         | 0         | 0         | 0         |
| 0.791594  | 1.12741   | 0         | 1.15952   | 0.489965  | 1.33101   |
| 0.180927  | 0.197287  | 0         | 0.0515317 | 0         | 0.0380268 |
| 0         | 0.0404614 | 0.0818095 | 0.03699   | 0.0351685 | 0.0272961 |
| 1.95315   | 3.74464   | 1.32498   | 4.27921   | 1.46466   | 2.65252   |
| 7.68839   | 8.15724   | 8.18572   | 8.78444   | 8.10717   | 7.9285    |
| 0         | 0         | 0         | 0         | 0         | 0         |
| 0.0258649 | 0.0966982 | 0.0651719 | 0.147337  | 0.112065  | 0.0652347 |

|            |            |          |          |            |            |
|------------|------------|----------|----------|------------|------------|
| 0.141428   | 0.484681   | 0.579081 | 0.604225 | 0.344682   | 0.297251   |
| 0          | 0          | 0        | 0        | 0          | 0          |
| 16.9722    | 15.4584    | 15.9461  | 14.62    | 14.7137    | 14.9752    |
| 6.37387    | 6.51742    | 7.7985   | 5.94275  | 9.45618    | 7.29936    |
| 0.280092   | 0.907531   | 0.77809  | 1.1171   | 0.531896   | 0.753526   |
| 0.643398   | 0.0842538  | 0.594957 | 0.482378 | 0.872181   | 0.579923   |
| 0.18802    | 0.108143   | 0.163992 | 0.378983 | 0.0783305  | 0.109433   |
| 22.289     | 23.2192    | 19.184   | 17.8868  | 17.9963    | 18.2881    |
| 0          | 0          | 0        | 0        | 0          | 0          |
| 0.529845   | 0.621656   | 0.278885 | 0.903162 | 0.396774   | 0.666471   |
| 30.9254    | 27.9496    | 32.6593  | 34.4239  | 29.2863    | 31.7516    |
| 0.0187975  | 0.0468508  | 0        | 0        | 0.0814443  | 0.0316066  |
| 0          | 0          | 0        | 0        | 0          | 0          |
| 5.00141    | 4.6448     | 8.73539  | 5.07057  | 8.14304    | 8.19049    |
| 0.00735005 | 0.00915962 | 0        | 0        | 0.00796142 | 0.00617928 |
| 0.32823    | 0.286097   | 0.468556 | 0.554051 | 0.442083   | 0.527039   |
| 1.29412    | 0.638152   | 1.77721  | 1.93909  | 3.61592    | 0.944525   |
| 0.0962677  | 0.119969   | 0        | 0        | 0          | 0          |
| 15.1554    | 15.6683    | 16.2681  | 17.4985  | 14.2812    | 19.4548    |
| 6.40269    | 7.54023    | 6.74292  | 5.89727  | 7.08697    | 5.52577    |
| 0.566006   | 0.156359   | 0.366921 | 0.169207 | 0.247357   | 0.0527415  |
| 1.65059    | 2.36941    | 1.7373   | 1.83288  | 1.49367    | 2.07272    |
| 11.0719    | 11.9767    | 11.0933  | 10.7211  | 10.8337    | 11.8781    |
| 1.05208    | 1.31489    | 1.29951  | 0.22424  | 0.447878   | 1.86405    |
| 9.74761    | 8.38803    | 10.3212  | 9.53044  | 8.57312    | 8.16916    |
| 43.4559    | 44.403     | 34.3852  | 31.4082  | 28.9766    | 30.982     |
| 0          | 0          | 0        | 0        | 0          | 0          |
| 7.21063    | 5.51888    | 6.83114  | 5.33648  | 7.07241    | 5.6086     |
| 23.7402    | 20.2461    | 25.044   | 26.3098  | 31.9928    | 31.0935    |
| 1.98174    | 1.35432    | 0.966464 | 0.983217 | 5.85115    | 4.38015    |
| 29.4168    | 27.9277    | 28.6356  | 28.7817  | 25.6326    | 24.9993    |
| 28.9735    | 0          | 0        | 0        | 0          | 0          |
| 16.8089    | 13.6157    | 15.8268  | 15.9248  | 15.2843    | 14.652     |
| 0.188467   | 0.657628   | 0.332417 | 0.386491 | 0.285801   | 0.221825   |
| 1.50811    | 1.53769    | 1.13058  | 1.22117  | 0.756025   | 0.827793   |
| 0.559488   | 0.630831   | 0.80557  | 0.667769 | 0.692602   | 0.470369   |
| 0          | 0          | 0        | 0        | 0          | 0          |
| 1.93371    | 2.27591    | 0.730858 | 0.905695 | 1.21019    | 0.957353   |
| 52.1902    | 47.0304    | 49.1779  | 44.7777  | 51.9504    | 48.7904    |
| 14.6214    | 14.7462    | 12.8223  | 12.5185  | 12.5145    | 12.6606    |
| 0.0313717  | 0          | 0        | 0        | 0          | 0          |
| 0.181262   | 0.566684   | 0.383779 | 0.347051 | 0.356982   | 0.235169   |
| 12.2949    | 11.7486    | 12.5068  | 13.6733  | 11.6235    | 12.2084    |

|           |          |           |           |           |           |
|-----------|----------|-----------|-----------|-----------|-----------|
| 0         | 0        | 0         | 0         | 0         | 0         |
| 0         | 0        | 0         | 0         | 0         | 0         |
| 1.80641   | 1.25906  | 0.85713   | 0.764591  | 1.28202   | 0.686181  |
| 0         | 0        | 0         | 0         | 0         | 0         |
| 0         | 0        | 0         | 0         | 0         | 0         |
| 23.7536   | 23.6208  | 23.1971   | 21.989    | 27.8363   | 24.3059   |
| 0         | 0        | 0         | 0         | 0         | 0         |
| 0.0494335 | 0        | 0         | 0.0563187 | 0.0535453 | 0         |
| 17.4809   | 16.177   | 14.0985   | 16.5338   | 14.2395   | 14.221    |
| 28.634    | 26.0729  | 19.9801   | 22.3081   | 15.737    | 22.1944   |
| 98.5862   | 93.0105  | 83.157    | 65.975    | 75.8803   | 74.6818   |
| 0.180397  | 0.224811 | 0.0568184 | 0.0513807 | 0.195403  | 0         |
| 7.21252   | 10.3329  | 10.16     | 9.83464   | 6.3976    | 6.35012   |
| 20.4482   | 19.572   | 20.0314   | 19.2283   | 19.9688   | 19.3069   |
| 152.156   | 165.696  | 164.64    | 194.804   | 136.711   | 211.01    |
| 2160.84   | 2742.83  | 2800.76   | 4097.77   | 2360.05   | 3693.06   |
| 34.7849   | 42.984   | 43.3047   | 35.2981   | 27.5077   | 27.8234   |
| 11.9596   | 11.5977  | 9.10215   | 11.6723   | 11.4512   | 10.5007   |
| 30.6881   | 34.8419  | 33.5518   | 33.0382   | 31.1009   | 27.879    |
| 0         | 0        | 0         | 0         | 0         | 0         |
| 0         | 0        | 0         | 0         | 0         | 0         |
| 1.79212   | 2.13517  | 2.25781   | 2.44559   | 2.85846   | 2.5994    |
| 22.3166   | 23.8182  | 21.7131   | 25.0892   | 23.056    | 27.2449   |
| 0         | 0        | 0         | 0         | 0         | 0.0116532 |
| 10.0609   | 7.56188  | 9.18953   | 6.59074   | 9.43334   | 6.52874   |
| 18.7951   | 12.5224  | 20.413    | 18.1353   | 24.0464   | 17.7633   |
| 0.350572  | 0.390895 | 0.395178  | 0.441443  | 0.479662  | 0.372291  |
| 0         | 0        | 0         | 0         | 0         | 0         |
| 0         | 0        | 0.0115682 | 0         | 0         | 0         |
| 12.6825   | 11.2877  | 11.8765   | 10.3418   | 9.85866   | 9.28199   |
| 0         | 0        | 0         | 0         | 0         | 0         |
| 2.93618   | 3.07577  | 2.70062   | 2.80589   | 2.87748   | 2.55044   |
| 3.07974   | 2.53875  | 3.47118   | 2.38894   | 3.88256   | 3.16048   |
| 0         | 0        | 0         | 0         | 0         | 0         |
| 0.682375  | 1.50748  | 1.13323   | 0.74208   | 0.907119  | 1.17344   |
| 13.8247   | 16.187   | 14.7375   | 15.8368   | 21.4746   | 19.7329   |
| 9.10788   | 7.63135  | 8.71322   | 6.46845   | 11.0742   | 7.54935   |
| 3.25411   | 3.86192  | 8.41602   | 5.29588   | 5.29624   | 3.38693   |
| 4.66074   | 4.45746  | 5.1208    | 3.70458   | 5.61588   | 3.93353   |
| 0         | 0        | 0         | 0         | 0         | 0         |
| 0         | 0        | 0         | 0         | 0         | 0         |
| 22.6603   | 19.3492  | 22.8389   | 16.2548   | 16.2725   | 14.8878   |
| 4.72393   | 5.18935  | 5.30092   | 3.63884   | 3.80809   | 3.97146   |

|           |          |           |           |          |           |
|-----------|----------|-----------|-----------|----------|-----------|
| 0.350204  | 0.245488 | 0.124089  | 0         | 0        | 0.372626  |
| 0         | 0.286349 | 0         | 0.261782  | 0        | 0.289766  |
| 10.42     | 10.6183  | 10.9886   | 10.1993   | 10.2271  | 10.8913   |
| 0.903539  | 1.02948  | 0.829353  | 1.14703   | 1.09055  | 0.6511    |
| 11.0699   | 12.0604  | 11.6136   | 10.5483   | 11.6491  | 9.71569   |
| 0         | 0        | 0         | 0         | 0        | 0         |
| 20.8848   | 22.1347  | 21.3385   | 19.9927   | 20.8536  | 20.2796   |
| 40.5994   | 32.4662  | 38.2472   | 46.0261   | 39.7901  | 34.9652   |
| 16.9135   | 16.6188  | 19.3243   | 14.647    | 26.2567  | 20.3072   |
| 0         | 0        | 0         | 0         | 0        | 0         |
| 0         | 0        | 0         | 0         | 0        | 0         |
| 32.7042   | 29.5449  | 27.685    | 29.69     | 31.2116  | 34.1387   |
| 37.7203   | 38.9007  | 38.0625   | 38.8654   | 26.6252  | 40.345    |
| 0         | 0        | 0         | 0         | 0        | 0         |
| 0         | 0        | 0.0484389 | 0         | 0        | 0.0646474 |
| 0         | 0        | 0         | 0.0360158 | 0        | 0         |
| 0.108608  | 0        | 0         | 0         | 0        | 0         |
| 0.525267  | 0.327294 | 0.49632   | 0.598428  | 0.640078 | 1.87679   |
| 30.6533   | 31.8675  | 31.3906   | 32.3083   | 26.1008  | 31.4209   |
| 1.92648   | 2.19071  | 2.00235   | 1.75585   | 2.53016  | 1.61962   |
| 8.07337   | 7.18715  | 9.27592   | 8.12922   | 11.5183  | 11.0647   |
| 0.168497  | 0.929914 | 0.728152  | 0.30166   | 0.312878 | 0.142501  |
| 4.52187   | 4.02951  | 5.5096    | 3.62736   | 5.01877  | 3.95782   |
| 8.03468   | 7.20327  | 9.79731   | 8.96997   | 9.47195  | 7.67721   |
| 0         | 0        | 0         | 0         | 0        | 0         |
| 11.8841   | 13.737   | 11.2888   | 12.6276   | 9.29771  | 8.70907   |
| 3.59077   | 3.7057   | 4.75357   | 3.33984   | 4.74026  | 3.49049   |
| 0.919085  | 0.959099 | 3.01596   | 1.38801   | 2.1532   | 2.60557   |
| 8.77426   | 9.27668  | 9.40446   | 7.77074   | 10.0336  | 9.59879   |
| 0         | 0        | 0         | 0         | 0        | 0         |
| 0         | 0        | 4.45135   | 1.51491   | 0.123455 | 0.03194   |
| 7.40261   | 5.6413   | 8.48548   | 8.70066   | 7.42234  | 5.81058   |
| 1.95227   | 1.88907  | 2.41057   | 2.37238   | 1.00471  | 1.02064   |
| 0.14315   | 0        | 0         | 0         | 0.155057 | 0         |
| 7.66792   | 8.66215  | 8.15967   | 6.23242   | 6.96529  | 6.70904   |
| 5.30967   | 5.0021   | 4.37354   | 3.87259   | 5.82966  | 6.0701    |
| 8.66691   | 10.8369  | 7.80884   | 12.4431   | 7.65888  | 8.37288   |
| 3.5458    | 3.49735  | 3.33858   | 2.90641   | 3.59893  | 3.94565   |
| 0.227113  | 0.141514 | 0.306567  | 0.221782  | 0.351434 | 0.259128  |
| 2225.9    | 693.479  | 1752.7    | 1584.96   | 1506.91  | 1403.51   |
| 6.54689   | 5.23604  | 6.17184   | 4.18848   | 5.98311  | 4.76561   |
| 0.0209462 | 0        | 0         | 0         | 0.16336  | 0.248009  |
| 30.9209   | 27.6659  | 30.8988   | 28.9141   | 32.9974  | 35.1224   |

|           |           |           |           |           |           |
|-----------|-----------|-----------|-----------|-----------|-----------|
| 0.208595  | 0.0455759 | 0.1747    | 0.162647  | 0.0750047 | 0.230451  |
| 4.40933   | 2.77516   | 2.41814   | 2.15304   | 2.93177   | 3.4661    |
| 0.0154896 | 0.0193031 | 0.058544  | 0.0529412 | 0.100668  | 0.130223  |
| 0.0710817 | 0.0443693 | 0.0455197 | 0         | 0.097028  | 0.0300698 |
| 0.280441  | 0         | 0.314058  | 0.0710003 | 0.303768  | 0.0523933 |
| 5.91808   | 5.51967   | 6.37194   | 5.84737   | 6.9209    | 5.90004   |
| 0         | 0.0788577 | 0         | 0         | 0         | 0         |
| 4.45284   | 3.92048   | 5.89192   | 3.96713   | 4.79157   | 4.38718   |
| 89.8747   | 72.1307   | 78.7369   | 71.0802   | 80.2728   | 90.784    |
| 0.626192  | 0.615669  | 0.523001  | 0.250155  | 0.705039  | 0.444552  |
| 2.02331   | 1.69729   | 1.25937   | 2.53753   | 1.03581   | 1.83711   |
| 590.309   | 529.487   | 223.472   | 195.816   | 224.877   | 218.842   |
| 25.2871   | 18.2155   | 34.0679   | 18.5955   | 36.4679   | 20.44     |
| 0         | 0         | 0         | 0         | 0         | 0         |
| 0         | 0         | 0         | 0         | 0         | 0         |
| 4.42533   | 6.74036   | 1.23895   | 2.28744   | 1.66438   | 0.826761  |
| 0         | 0         | 0         | 0         | 0         | 0         |
| 21.3107   | 21.651    | 20.9859   | 20.9332   | 23.2815   | 20.1798   |
| 5.49271   | 6.73401   | 3.70314   | 5.34446   | 4.66319   | 5.71607   |
| 0.107086  | 0.085406  | 0.0215843 | 0.0780787 | 0.0742338 | 0         |
| 40.5294   | 41.4331   | 41.878    | 38.5723   | 48.2747   | 53.2662   |
| 0         | 0         | 0         | 0         | 0         | 0         |
| 19.9368   | 19.6112   | 24.5357   | 24.4578   | 15.2704   | 16.8958   |
| 0.105882  | 0         | 0.150071  | 0.0301568 | 0         | 0.0222537 |
| 9.75454   | 10.9446   | 12.2321   | 10.6749   | 13.5506   | 10.0675   |
| 50.9959   | 50.5243   | 44.8474   | 38.5337   | 46.3834   | 49.3254   |
| 22.3713   | 23.4902   | 19.3105   | 23.0572   | 20.8472   | 27.0649   |
| 0         | 0         | 0         | 0         | 0         | 0         |
| 0         | 0         | 0         | 0         | 0         | 0         |
| 24.8712   | 25.4788   | 23.6649   | 25.0664   | 25.1017   | 25.8327   |
| 1.00594   | 0.914254  | 1.88789   | 0.844099  | 2.35348   | 1.0092    |
| 6.64031   | 5.95246   | 6.26239   | 5.19221   | 5.38188   | 5.4122    |
| 1.53444   | 0.191221  | 0.193317  | 0.699262  | 1.66207   | 0.645009  |
| 0         | 0         | 0         | 0         | 0.0290871 | 0         |
| 0         | 0         | 0         | 0         | 0         | 0         |
| 0         | 0         | 0         | 0         | 0         | 0         |
| 0         | 0         | 0         | 0.0532571 | 0         | 0         |
| 99.0632   | 95.4188   | 68.8123   | 88.3822   | 44.8843   | 69.8331   |
| 0.927418  | 1.30965   | 0.894698  | 0.709965  | 3.06113   | 2.47435   |
| 5.12372   | 5.92147   | 5.39199   | 4.59592   | 6.88736   | 5.43082   |
| 0         | 0         | 0         | 0         | 0         | 0         |
| 0         | 0         | 0.0650706 | 0.176529  | 0         | 0         |
| 0.0733157 | 0.0609106 | 0.0615781 | 0.0835273 | 0.105885  | 0.143821  |

|           |           |          |           |           |           |
|-----------|-----------|----------|-----------|-----------|-----------|
| 80.7352   | 86.3072   | 78.2202  | 78.6289   | 64.1686   | 80.0817   |
| 4.49639   | 4.44418   | 1.88163  | 1.22782   | 3.23284   | 3.69221   |
| 0.0730264 | 0.182011  | 0        | 0.166395  | 0         | 0.0613942 |
| 0.203623  | 0.225559  | 0.142519 | 0.231984  | 0.269573  | 0.171188  |
| 0         | 0.0432914 | 0        | 0.118732  | 0         | 0.0292053 |
| 39.833    | 41.6918   | 54.2013  | 52.2579   | 39.137    | 39.2569   |
| 2.58421   | 4.14927   | 2.50145  | 5.38021   | 2.03817   | 2.42425   |
| 13.8391   | 13.1099   | 6.98118  | 8.18775   | 14.716    | 10.0266   |
| 24.4692   | 24.7125   | 28.0828  | 26.5022   | 29.7649   | 27.3822   |
| 0.138704  | 0.345706  | 0        | 0.0790116 | 0         | 0.0583051 |
| 0         | 1.59559   | 0.35846  | 1.29662   | 0.308192  | 1.07642   |
| 0         | 0         | 0        | 0         | 0         | 0         |
| 45.4562   | 47.8655   | 32.7132  | 39.5398   | 32.7331   | 31.8997   |
| 21.1654   | 21.4619   | 17.7282  | 17.96     | 17.2167   | 20.9742   |
| 0         | 0         | 0        | 0         | 0         | 0         |
| 33.8526   | 32.0707   | 30.9023  | 36.0927   | 32.6808   | 34.5196   |
| 8.18391   | 9.34366   | 9.55147  | 8.17976   | 8.55646   | 9.06118   |
| 1.81603   | 2.28496   | 2.18899  | 1.98233   | 2.51323   | 2.16562   |
| 0.467136  | 0.578802  | 0.947561 | 0.289277  | 0.567473  | 0.277295  |
| 0         | 0         | 0        | 0         | 0         | 0         |
| 347.254   | 320.227   | 201.68   | 184.546   | 143.151   | 211.973   |
| 25.919    | 27.0462   | 28.2799  | 24.8255   | 31.3508   | 26.0785   |
| 15.67     | 17.9413   | 15.0068  | 18.1126   | 16.8931   | 19.2024   |
| 0         | 0         | 0        | 0.183482  | 0         | 0         |
| 2.57903   | 3.57109   | 2.72772  | 2.53922   | 2.37969   | 3.07833   |
| 1154.85   | 1409.66   | 1113.72  | 1227.93   | 1092.4    | 1345.57   |
| 0.167545  | 0.104397  | 0        | 0.143161  | 0         | 0         |
| 39.0042   | 39.6814   | 39.2237  | 36.9546   | 43.0874   | 36.91     |
| 0         | 0         | 0        | 0         | 0         | 0         |
| 0         | 0         | 0        | 0         | 0         | 0         |
| 0         | 0         | 0        | 0.371638  | 0.370098  | 0.0718122 |
| 15.3045   | 17.0858   | 14.1397  | 13.6583   | 14.5054   | 15.172    |
| 15.408    | 14.3061   | 14.1491  | 13.6985   | 13.8656   | 11.0197   |
| 5.09198   | 4.29912   | 5.82536  | 4.65435   | 6.47824   | 4.21324   |
| 28.0376   | 29.1807   | 29.6232  | 24.6153   | 27.8063   | 25.8304   |
| 0.092355  | 0.115093  | 0        | 0.105218  | 0.0333457 | 0.0517626 |
| 30.9135   | 35.3909   | 22.2989  | 29.4974   | 25.4743   | 28.7199   |
| 0         | 0         | 0        | 0         | 0         | 0         |
| 0.751356  | 0.595852  | 0.860544 | 2.41238   | 0.22196   | 0.459399  |
| 3.8894    | 5.36459   | 4.73357  | 4.60295   | 2.45429   | 3.2855    |
| 11.8647   | 14.1664   | 11.8956  | 12.2433   | 10.6311   | 12.6904   |
| 26.6288   | 25.5114   | 23.9105  | 16.8543   | 16.6018   | 16.9641   |
| 16.8208   | 19.237    | 18.9194  | 21.362    | 20.1737   | 22.2878   |

|          |          |           |          |           |          |
|----------|----------|-----------|----------|-----------|----------|
| 0        | 0        | 0         | 0        | 0         | 0        |
| 0        | 0        | 0         | 0        | 0         | 0        |
| 14.8988  | 15.3762  | 17.6036   | 22.544   | 18.9703   | 19.8646  |
| 263.509  | 289.976  | 323.91    | 370.71   | 230.007   | 292.237  |
| 15.1852  | 16.3202  | 12.6676   | 23.9177  | 11.1301   | 12.0149  |
| 2.25956  | 1.08302  | 1.75182   | 2.57427  | 1.8827    | 2.48414  |
| 0        | 0        | 0         | 0        | 0         | 0        |
| 5.94769  | 5.13033  | 9.50459   | 6.90666  | 8.8547    | 7.21657  |
| 15.4129  | 14.6918  | 16.3464   | 14.3856  | 17.3793   | 15.3859  |
| 1.58605  | 1.22357  | 2.85456   | 2.01748  | 3.02691   | 1.96837  |
| 14.0811  | 13.9483  | 10.4423   | 12.8372  | 17.7309   | 16.9266  |
| 594.456  | 665.684  | 653.505   | 602.65   | 559.488   | 645.523  |
| 0        | 0        | 0         | 0        | 0         | 0        |
| 0.423256 | 1.16196  | 0.531563  | 1.66526  | 0.543377  | 1.42379  |
| 4.27504  | 2.19938  | 2.16295   | 2.29217  | 5.70565   | 4.73403  |
| 0        | 0        | 0         | 0        | 0         | 0        |
| 62.3451  | 65.3103  | 31.4538   | 32.6778  | 22.725    | 32.8783  |
| 5.67168  | 5.5565   | 6.1985    | 5.50799  | 5.68084   | 6.49171  |
| 8.09509  | 7.55167  | 9.05396   | 7.0373   | 10.2057   | 8.00299  |
| 0.581815 | 0.718281 | 0.911115  | 0.650462 | 1.20741   | 1.08342  |
| 0        | 0        | 0         | 0        | 0         | 0        |
| 39.1918  | 46.512   | 42.154    | 43.4138  | 40.4544   | 44.9854  |
| 0.130238 | 0        | 0.0820406 | 0        | 0.0352679 | 0        |
| 20.2471  | 18.2855  | 16.1076   | 18.7207  | 16.9781   | 17.7895  |
| 91.8749  | 83.2612  | 35.2632   | 36.1454  | 24.8329   | 33.308   |
| 1.52141  | 1.44455  | 2.00803   | 0.825388 | 1.33406   | 0.487263 |
| 0        | 0        | 0         | 0        | 0         | 0        |
| 6.06927  | 5.9101   | 6.68339   | 5.57391  | 5.31268   | 4.38368  |
| 0        | 0        | 0         | 0        | 0         | 0        |
| 2.60708  | 3.11898  | 2.8904    | 3.20782  | 3.16281   | 3.68223  |
| 16.6778  | 15.8127  | 14.8314   | 14.1983  | 17.3804   | 14.148   |
| 48.6963  | 50.3716  | 46.4784   | 55.5675  | 56.2595   | 74.4524  |
| 0        | 0        | 0         | 0        | 0         | 0        |
| 31.4241  | 31.8523  | 24.6865   | 24.4576  | 36.2379   | 38.6283  |
| 23.9382  | 27.7661  | 32.9161   | 30.468   | 27.6787   | 24.0286  |
| 13.3858  | 14.3759  | 13.5439   | 13.6249  | 19.9143   | 19.3494  |
| 12.6331  | 14.3543  | 18.9046   | 19.4562  | 16.1452   | 17.1687  |
| 48.6493  | 43.1074  | 38.5825   | 42.2274  | 33.7972   | 41.6358  |
| 12.4984  | 11.4026  | 12.7859   | 11.8523  | 13.8415   | 11.8929  |
| 30.388   | 28.8713  | 30.6874   | 30.6137  | 30.2413   | 28.2535  |
| 0        | 0        | 0         | 0        | 0         | 0        |
| 1.94306  | 1.67604  | 1.94641   | 1.86655  | 1.87314   | 1.78974  |
| 12.2741  | 10.956   | 12.0381   | 12.6839  | 15.4677   | 14.4677  |



|           |            |            |            |           |            |
|-----------|------------|------------|------------|-----------|------------|
| 10.9588   | 9.5184     | 6.55459    | 12.2329    | 10.4315   | 11.1675    |
| 7.98208   | 8.66778    | 10.1259    | 7.68515    | 9.22005   | 7.12833    |
| 0         | 0          | 0          | 0          | 0         | 0          |
| 0.559454  | 0.921288   | 0.969183   | 0.409742   | 1.79633   | 0.907084   |
| 0         | 0          | 0          | 0          | 0         | 0          |
| 0         | 0.019298   | 0.156075   | 0          | 0.0335471 | 0          |
| 6.64221   | 5.19877    | 7.89184    | 6.2139     | 8.05043   | 6.92423    |
| 1.38366   | 1.43304    | 3.30974    | 3.20601    | 3.96966   | 3.04962    |
| 33.9619   | 32.8464    | 34.6262    | 29.531     | 35.5881   | 26.7085    |
| 0.424228  | 0.75912    | 0.342606   | 0.743563   | 0.341691  | 0.283494   |
| 6.4234    | 7.58009    | 7.86133    | 6.21289    | 7.49727   | 5.35615    |
| 0.0509908 | 0.0500263  | 0.00822533 | 0.0273431  | 0.0282874 | 0.00548884 |
| 39.4564   | 42.6115    | 36.7312    | 31.7559    | 36.8853   | 38.5401    |
| 7.55698   | 8.04101    | 7.73499    | 7.64817    | 7.01759   | 8.83274    |
| 0         | 0          | 0          | 0          | 0         | 0          |
| 0         | 0.00651062 | 0          | 0.00529071 | 0         | 0          |
| 3.30362   | 2.97612    | 2.70786    | 2.72079    | 2.54369   | 2.5097     |
| 0.0613906 | 0          | 0          | 0          | 0         | 0          |
| 30.2792   | 30.623     | 25.8922    | 29.1124    | 25.4313   | 29.0078    |
| 0         | 0          | 0          | 0          | 0         | 0          |
| 0.0635578 | 0.0792057  | 0.240221   | 0.144821   | 0.413067  | 0.0534338  |
| 11.4251   | 11.6754    | 12.7462    | 13.7695    | 12.8755   | 11.897     |
| 3.04083   | 2.82349    | 3.21244    | 2.22928    | 2.72348   | 1.77966    |
| 2.39304   | 1.72089    | 1.26388    | 0.913253   | 0.56311   | 0.225419   |
| 0.690857  | 0.815261   | 0.752122   | 0.4091     | 0.574096  | 0.223737   |
| 0.517394  | 0.184222   | 0.651841   | 0.252625   | 0.56043   | 0.497119   |
| 2.56745   | 2.7833     | 3.95297    | 3.56463    | 3.52033   | 3.56408    |
| 1.38166   | 0.979937   | 1.7748     | 1.17325    | 1.61388   | 0.683822   |
| 1.29E-06  | 4.24215    | 1.09328    | 6.09E-06   | 0.584804  | 3.02546    |
| 0         | 0          | 0          | 0          | 0.355113  | 0          |
| 15.8362   | 18.6406    | 19.2307    | 16.2925    | 17.5307   | 15.7323    |
| 0         | 0          | 0          | 0          | 0         | 0          |
| 0.918891  | 1.02929    | 1.04057    | 1.10578    | 0.835233  | 1.26075    |
| 1.10549   | 1.69911    | 1.06778    | 1.21748    | 1.31719   | 1.67291    |
| 4.36567   | 4.32045    | 3.78537    | 3.51087    | 2.80946   | 3.6055     |
| 0         | 0          | 0          | 0          | 0         | 0          |
| 1.46344   | 1.37528    | 1.84372    | 1.36662    | 2.57265   | 1.99677    |
| 0.475958  | 0.118628   | 0.179891   | 0.32535    | 0.773321  | 0.320115   |
| 7.66731   | 6.69197    | 7.28705    | 5.29815    | 8.35551   | 5.69922    |
| 9.63377   | 8.98355    | 8.96126    | 7.87107    | 11.5866   | 10.7781    |
| 13.2405   | 11.8564    | 12.7       | 10.1394    | 13.2477   | 11.6823    |
| 33.8789   | 36.7542    | 37.2129    | 47.963     | 33.3972   | 41.4256    |
| 0         | 0          | 0          | 0          | 0         | 0          |

|           |           |           |           |           |           |
|-----------|-----------|-----------|-----------|-----------|-----------|
| 45.8342   | 53.903    | 46.1955   | 49.8973   | 38.5405   | 68.4467   |
| 10.0605   | 10.5322   | 10.3601   | 11.461    | 10.6474   | 9.72932   |
| 0.0734207 | 0         | 0         | 0         | 0.0795278 | 0         |
| 0         | 0.0496356 | 0.0501795 | 0.0424436 | 0         | 0.133942  |
| 1.0534    | 81.3903   | 1.64111   | 585.962   | 1.87717   | 28.6727   |
| 2.13728   | 2.28298   | 0.6924    | 0.765277  | 0.463013  | 0.718736  |
| 3.38549   | 3.29019   | 3.94692   | 3.72031   | 4.57018   | 4.52422   |
| 0         | 40.7951   | 41.2421   | 0         | 70.9172   | 27.5213   |
| 1.9701    | 2.24844   | 1.85517   | 3.30749   | 1.23574   | 1.48199   |
| 34.7175   | 24.5836   | 30.8554   | 23.3035   | 31.0676   | 23.7268   |
| 23.6569   | 22.7829   | 21.0439   | 24.3981   | 23.9965   | 24.4903   |
| 0         | 0         | 0         | 0         | 0         | 0         |
| 3.26156   | 2.33686   | 3.70951   | 2.50255   | 3.4066    | 2.40636   |
| 0.023413  | 0.0437659 | 0         | 0.013337  | 0.0507209 | 0         |
| 20.4996   | 20.9235   | 23.2905   | 23.1513   | 23.187    | 23.004    |
| 14.1746   | 14.2878   | 21.2398   | 21.4651   | 23.8864   | 23.9389   |
| 70.8535   | 68.7169   | 75.9924   | 67.2966   | 72.5635   | 70.428    |
| 13.0144   | 14.663    | 16.4861   | 14.0976   | 16.3977   | 16.3559   |
| 231.788   | 180.534   | 255.517   | 132.036   | 251.068   | 48.7168   |
| 0.22346   | 0.649777  | 0         | 0.763754  | 0.484095  | 0.125244  |
| 52.5288   | 62.0951   | 49.5254   | 60.4999   | 56.1511   | 67.6435   |
| 0.0906874 | 0.100479  | 0.152481  | 0.103413  | 0.283822  | 0.203395  |
| 3.92055   | 3.73096   | 5.52306   | 3.28905   | 6.29278   | 3.11627   |
| 17.8146   | 18.0379   | 14.495    | 14.1648   | 16.4823   | 13.4168   |
| 2.45942   | 1.98318   | 2.27831   | 1.73063   | 3.13411   | 1.3379    |
| 10.9447   | 11.4268   | 14.7962   | 10.8601   | 13.9014   | 12.0831   |
| 1.7208    | 1.90168   | 1.51348   | 1.36863   | 2.60247   | 3.38472   |
| 10.7495   | 10.397    | 1.13194   | 0.767706  | 0.799415  | 1.45675   |
| 0         | 0         | 0         | 0         | 0         | 0         |
| 0         | 0         | 0.229357  | 0.207407  | 0.197193  | 0.306104  |
| 0         | 0         | 0         | 0         | 0         | 0         |
| 1.34267   | 1.22704   | 1.17605   | 1.04893   | 1.302     | 1.03205   |
| 135.643   | 132.751   | 142.747   | 132.614   | 134.88    | 140.424   |
| 11.8763   | 13.0075   | 12.0752   | 10.5675   | 9.6001    | 9.91229   |
| 200.216   | 215.554   | 183.895   | 216.924   | 168.735   | 199.889   |
| 0         | 0         | 0         | 0         | 0         | 0         |
| 0         | 0.068855  | 0         | 0         | 0         | 0.0232255 |
| 4.46209   | 5.5569    | 3.64896   | 2.53981   | 2.10906   | 3.70529   |
| 0.44348   | 0.0921108 | 0.651841  | 0.589458  | 0.160123  | 0.0621399 |
| 2.81861   | 2.53877   | 3.76199   | 1.97123   | 3.74831   | 4.08235   |
| 53.9777   | 54.8325   | 53.5546   | 48.8097   | 54.2267   | 59.8964   |
| 2.52048   | 2.11677   | 2.83028   | 1.87274   | 3.62039   | 2.39539   |
| 4.34063   | 4.03417   | 5.70972   | 4.028     | 7.89102   | 5.15435   |

|           |           |           |           |           |           |
|-----------|-----------|-----------|-----------|-----------|-----------|
| 1.00293   | 0.763939  | 2.78321   | 4.13849   | 2.91862   | 3.80706   |
| 0.88984   | 0.777936  | 1.36857   | 1.62974   | 0.305858  | 0.571521  |
| 0         | 0         | 0         | 0         | 0         | 0         |
| 0         | 1.41505   | 0         | 16.8174   | 0         | 24.8202   |
| 33.6028   | 31.9738   | 32.4006   | 29.2306   | 32.2916   | 33.4261   |
| 0         | 0         | 0         | 0         | 0.0460737 | 0.107281  |
| 12.0834   | 13.3735   | 7.27484   | 6.92669   | 7.23092   | 7.34178   |
| 0         | 0         | 0         | 0         | 0         | 0         |
| 383.719   | 43.4718   | 175.793   | 278.195   | 226.711   | 234.616   |
| 14.8602   | 19.08     | 15.1287   | 18.2411   | 12.0858   | 10.7265   |
| 29.3686   | 29.6915   | 32.0414   | 27.8075   | 31.3196   | 26.1786   |
| 6.73951   | 5.38617   | 6.55268   | 4.50717   | 8.17313   | 4.98872   |
| 0.13694   | 0.12287   | 0.124217  | 0.133131  | 0.452323  | 0.259421  |
| 12.7912   | 12.9931   | 12.2155   | 11.6785   | 8.23174   | 9.6064    |
| 0         | 0         | 0         | 0         | 0         | 0         |
| 16.8807   | 15.86     | 20.5672   | 18.2974   | 17.0525   | 13.6357   |
| 0         | 0.0567965 | 0.0287094 | 0.0389428 | 0.0246834 | 0.0191581 |
| 17.3062   | 14.8616   | 15.2606   | 14.6083   | 17.7598   | 14.0994   |
| 0.240409  | 0.389476  | 0.30288   | 0.301283  | 0.208324  | 0.262749  |
| 0.272746  | 0         | 0         | 0         | 0.147716  | 0         |
| 17.5455   | 23.3832   | 15.3563   | 23.9167   | 12.8141   | 15.4578   |
| 28.9203   | 31.7862   | 28.2395   | 27.9585   | 32.1631   | 41.8043   |
| 0.487016  | 0.531054  | 0.119305  | 0.0847686 | 0.0805943 | 0.0568667 |
| 27.3108   | 28.8497   | 29.7096   | 29.2042   | 45.6596   | 45.0599   |
| 95.1085   | 94.3648   | 87.5518   | 87.9799   | 65.2912   | 73.9339   |
| 14.7463   | 14.5829   | 15.1822   | 14.5602   | 15.6981   | 13.1839   |
| 0         | 0         | 0         | 0         | 0         | 0         |
| 33.5171   | 33.016    | 38.4995   | 37.9447   | 37.0903   | 39.1964   |
| 0.181392  | 0.169538  | 0.571318  | 0.413313  | 0.09824   | 0.190623  |
| 0.804229  | 0.764859  | 1.06654   | 0.506345  | 1.10037   | 0.71171   |
| 0.950958  | 1.11902   | 2.02966   | 1.68497   | 1.80236   | 1.86515   |
| 0.0356404 | 1.80E-14  | 0.190428  | 0.102977  | 0.199626  | 0.121186  |
| 0         | 0         | 0.987357  | 0.446432  | 0         | 0         |
| 1.01402   | 0.924641  | 0.841296  | 0.817136  | 1.60737   | 0.790125  |
| 0         | 0         | 0         | 0         | 0         | 0.26245   |
| 1.35087   | 1.19008   | 1.28827   | 0.884361  | 1.26641   | 0.69235   |
| 2.28265   | 1.475     | 5.11255   | 2.119     | 3.20512   | 0.497532  |
| 0         | 0         | 0         | 0.0505501 | 0         | 0         |
| 4.05413   | 3.20596   | 4.0369    | 3.20569   | 6.20761   | 3.99734   |
| 8.65936   | 9.31719   | 11.2962   | 9.34159   | 10.3325   | 8.91309   |
| 20.4323   | 20.2896   | 18.8616   | 21.3012   | 20.7682   | 22.3553   |
| 9.66123   | 4.80443   | 6.38653   | 8.06733   | 6.35279   | 10.0218   |
| 14.8847   | 13.8341   | 14.5947   | 13.3498   | 14.191    | 13.1864   |

|           |           |           |           |           |          |
|-----------|-----------|-----------|-----------|-----------|----------|
| 10.9918   | 10.9922   | 11.9248   | 12.2587   | 11.3304   | 10.1536  |
| 5.1296    | 5.21957   | 4.7728    | 5.17387   | 4.61324   | 4.49056  |
| 0         | 0         | 0         | 0         | 0         | 0        |
| 0.0419287 | 0.0784132 | 0.0531118 | 0.334047  | 0.0453831 | 0.017612 |
| 0.0925908 | 0.115387  | 0.524929  | 0.0527435 | 0.40117   | 0.116763 |
| 0.336341  | 0.586808  | 0.169496  | 0.0766376 | 0.218591  | 0.226213 |
| 0         | 0         | 0         | 0         | 0         | 0        |
| 5.77283   | 6.29826   | 7.07143   | 5.68221   | 5.75274   | 5.15827  |
| 1.62957   | 1.44026   | 1.54153   | 1.36969   | 0.737752  | 1.19908  |
| 62.4335   | 60.7555   | 57.0204   | 51.2876   | 48.5079   | 46.4991  |
| 2.2513    | 2.4279    | 0.600314  | 0.690542  | 0.352135  | 0.255136 |
| 13.8331   | 13.412    | 13.33     | 11.4454   | 12.1358   | 11.0028  |
| 18.3932   | 20.5355   | 18.5793   | 14.5502   | 19.4819   | 21.046   |
| 47.9164   | 50.7341   | 45.5942   | 47.3615   | 48.7782   | 50.1925  |
| 1.16191   | 1.08488   | 0.788546  | 1.9885    | 1.18403   | 1.1674   |
| 0         | 0         | 0         | 0         | 0         | 0        |
| 0         | 0         | 0         | 0         | 0         | 0        |
| 542.167   | 526.752   | 290.319   | 254.918   | 294.744   | 361.285  |
| 0         | 0         | 0         | 0         | 0         | 0        |
| 0.458617  | 0.528265  | 0.44688   | 0.192561  | 0.646086  | 0.559995 |
| 0.615508  | 0.436196  | 0.775469  | 0.467492  | 1.17      | 0.390652 |
| 8.01197   | 8.3281    | 10.3684   | 7.83944   | 10.6291   | 7.43704  |
| 7.79822   | 8.35435   | 8.96634   | 7.36512   | 7.91306   | 6.20267  |
| 63.5764   | 146.711   | 295.59    | 315.519   | 425.099   | 546.847  |
| 1.73019   | 1.13583   | 0.467096  | 0.844787  | 0.736254  | 0.675344 |
| 203.775   | 198.02    | 177.975   | 176.147   | 138.637   | 166.462  |
| 0         | 0         | 0         | 0         | 0         | 0        |
| 5.59131   | 5.08369   | 6.53933   | 5.68408   | 7.25268   | 6.22406  |
| 6.25128   | 5.26743   | 5.87114   | 5.43815   | 6.14826   | 5.45319  |
| 40.7523   | 45.631    | 35.5173   | 42.0245   | 38.6449   | 42.7728  |
| 2.86565   | 3.17751   | 4.00866   | 4.3462    | 5.15545   | 5.60531  |
| 0         | 0         | 0         | 0         | 0         | 0        |
| 3.17576   | 3.23628   | 4.17837   | 3.51115   | 4.57526   | 3.61028  |
| 42.0545   | 46.8458   | 42.0052   | 47.7057   | 41.405    | 51.8152  |
| 55.5222   | 51.0801   | 54.8084   | 48.074    | 43.6902   | 42.901   |
| 0.669622  | 0.44837   | 0.881116  | 1.01087   | 0.833731  | 0.934714 |
| 3.95172   | 7.33802   | 3.56085   | 10.1372   | 3.57174   | 8.69068  |
| 4.18512   | 3.95749   | 4.68974   | 3.42628   | 4.55602   | 3.76602  |
| 0.288434  | 0.359446  | 0.363385  | 0.82152   | 0.52071   | 0.282905 |
| 0.339513  | 0.33848   | 0         | 0.541521  | 0.147101  | 0.114173 |
| 16.5969   | 17.6484   | 14.235    | 13.1862   | 16.1609   | 13.0641  |
| 5.16796   | 2.76773   | 5.13826   | 3.5953    | 6.73481   | 3.06006  |
| 0         | 0         | 0         | 0         | 0         | 0        |

|           |           |           |           |           |          |
|-----------|-----------|-----------|-----------|-----------|----------|
| 0         | 0         | 0         | 0         | 0         | 0        |
| 10.0584   | 9.66539   | 10.9164   | 10.7      | 10.3919   | 9.98448  |
| 10.3671   | 9.20206   | 8.66628   | 6.36981   | 5.73833   | 6.13023  |
| 26.0859   | 25.9345   | 28.49     | 26.3467   | 26.1342   | 25.7293  |
| 27.1172   | 25.833    | 26.2281   | 26.0619   | 29.1095   | 37.5197  |
| 1.19355   | 0.977432  | 1.54666   | 1.47634   | 2.77034   | 2.8096   |
| 6.97808   | 6.54408   | 6.83855   | 7.44641   | 7.0478    | 5.27692  |
| 0.180629  | 0.225099  | 0.245071  | 0.364085  | 0.240804  | 0.36212  |
| 40.7865   | 40.5736   | 35.4201   | 39.1238   | 33.632    | 40.9539  |
| 0         | 0         | 0         | 0         | 0         | 0        |
| 0         | 0         | 0         | 0         | 0         | 0        |
| 0         | 0         | 0         | 0         | 0         | 0        |
| 13.1384   | 13.068    | 13.2485   | 14.8072   | 14.3839   | 11.733   |
| 18.6283   | 20.5551   | 13.7051   | 13.111    | 12.5359   | 10.7745  |
| 0         | 0.417513  | 0.0562784 | 3.91871   | 0.0725794 | 0.544549 |
| 4.46082   | 4.05426   | 3.9913    | 4.19197   | 4.46256   | 4.08468  |
| 0         | 0         | 0         | 0         | 0         | 0        |
| 0         | 0.0541138 | 0.0547068 | 0         | 0         | 0        |
| 1.32513   | 1.00298   | 1.05885   | 1.34784   | 1.30525   | 0.91636  |
| 172.636   | 145.881   | 158.15    | 159.942   | 143.653   | 148.639  |
| 0.489352  | 0.896809  | 0.689044  | 0.721485  | 1.27837   | 0.484005 |
| 5.63933   | 4.45089   | 10.4992   | 7.49559   | 18.5967   | 8.05979  |
| 0         | 0.0273257 | 0         | 0         | 0         | 0        |
| 0.386345  | 0.337024  | 0.121685  | 0.0660235 | 0.209241  | 0.227364 |
| 0         | 0         | 0.0276041 | 0         | 0.0474662 | 0        |
| 53.6484   | 53.7233   | 55.0762   | 46.7475   | 53.2984   | 47.2828  |
| 0.68437   | 0.393609  | 0.621891  | 0.482233  | 0.63964   | 0.371718 |
| 0.207725  | 0.110943  | 0.0373862 | 0.0338083 | 0.417864  | 0.149689 |
| 10.0369   | 9.4107    | 10.2434   | 11.2101   | 15.6117   | 11.0678  |
| 6.17919   | 5.19583   | 4.69694   | 4.76901   | 5.8802    | 3.93511  |
| 0.460005  | 0.191086  | 0.482949  | 0.698767  | 0.249134  | 0.515642 |
| 15.6044   | 13.905    | 14.3216   | 11.5173   | 15.1303   | 14.9526  |
| 1.88654   | 1.95917   | 0.990321  | 1.07465   | 4.25722   | 3.56859  |
| 0.132317  | 0.0392135 | 0.144499  | 0.0382392 | 0.157553  | 0.181079 |
| 0.0858843 | 0.142705  | 0.0721345 | 0         | 0.0620187 | 0.024068 |
| 0         | 0         | 0         | 0         | 0         | 0        |
| 18.0722   | 17.0535   | 18.1495   | 17.4408   | 18.7121   | 20.5845  |
| 2.22977   | 2.46033   | 1.02418   | 2.38156   | 0.553492  | 1.50358  |
| 0.266821  | 0.332512  | 1.05649   | 0.564544  | 0.495455  | 0.44864  |
| 0.194022  | 0.23014   | 0.197762  | 0.0946778 | 0.620106  | 0.32604  |
| 0         | 0         | 0         | 0         | 0         | 0        |
| 33.0356   | 32.4457   | 33.5553   | 35.5069   | 33.2533   | 33.872   |
| 0.768365  | 0.478767  | 0.484014  | 0         | 0         | 0        |

|           |            |            |           |           |           |
|-----------|------------|------------|-----------|-----------|-----------|
| 1.83179   | 1.84796    | 1.64842    | 1.35816   | 1.32277   | 0.977781  |
| 0         | 0          | 0          | 0         | 0         | 0         |
| 5.14306   | 4.80695    | 5.26459    | 6.0425    | 8.87855   | 8.78278   |
| 20.062    | 22.9884    | 21.259     | 19.7571   | 16.3901   | 18.8079   |
| 0         | 0.98319    | 1.49094    | 1.79768   | 2.56373   | 0.663281  |
| 13.6231   | 14.0275    | 14.4074    | 13.2216   | 16.4042   | 15.047    |
| 0         | 0          | 0          | 0         | 0         | 0         |
| 2.66112   | 1.42448    | 2.45527    | 1.66869   | 2.75225   | 2.30026   |
| 28.1967   | 32.257     | 34.0869    | 33.6513   | 33.9253   | 36.0753   |
| 2.27174   | 3.34091    | 4.72332    | 5.62913   | 5.35451   | 3.90722   |
| 0.378995  | 0.236151   | 0.270571   | 0.15832   | 0.150524  | 0.329246  |
| 2.06665   | 1.73694    | 1.72569    | 1.56054   | 1.82208   | 1.09096   |
| 0.0578309 | 0.0360344  | 0.0364293  | 0         | 0         | 0.0486192 |
| 0         | 0.85112    | 0          | 0         | 0.739783  | 0         |
| 120.991   | 127.254    | 127.29     | 129.035   | 87.6294   | 104.59    |
| 3.44716   | 3.54406    | 4.00562    | 4.08544   | 4.66351   | 4.56658   |
| 4.64547   | 6.12726    | 6.99231    | 4.48632   | 6.52808   | 4.39854   |
| 0         | 0.654283   | 0.992179   | 0         | 0.568694  | 0.66209   |
| 116.664   | 136.542    | 129.916    | 132.95    | 104.194   | 118.382   |
| 1.16557   | 1.00823    | 0.846519   | 0.812373  | 1.21796   | 0.795457  |
| 0         | 0          | 0          | 0         | 0         | 0         |
| 5.41672   | 5.71059    | 8.62991    | 6.56479   | 9.0578    | 6.36069   |
| 0.687924  | 0.354098   | 0.0565228  | 0.170378  | 0.12959   | 0.0880091 |
| 22.6753   | 25.1555    | 29.5001    | 27.4179   | 25.764    | 28.68     |
| 0         | 0          | 0          | 0         | 0         | 0         |
| 100.098   | 106.391    | 94.6776    | 93.3424   | 95.5429   | 97.2577   |
| 0         | 12.148     | 0          | 140.877   | 0.183102  | 8.00582   |
| 0.569303  | 70.9231    | 0.969327   | 479.125   | 2.19535   | 30.3608   |
| 3.41204   | 3.53904    | 3.69773    | 2.88085   | 5.92451   | 4.62284   |
| 2.77006   | 1.56201    | 4.27944    | 3.09876   | 2.67463   | 1.74925   |
| 13.7953   | 10.0285    | 13.2764    | 11.4819   | 10.5845   | 9.82595   |
| 4.14819   | 4.38962    | 3.01538    | 3.75578   | 4.12986   | 2.70642   |
| 0.653368  | 0.618812   | 0.460963   | 0.357298  | 0.19816   | 0.549294  |
| 3.5479    | 3.13982    | 3.75725    | 2.28464   | 3.23036   | 1.94528   |
| 3.16941   | 3.88823    | 3.26999    | 4.01238   | 3.22237   | 3.64303   |
| 0.0487118 | 0.0910569  | 0.276164   | 0.16649   | 0.0527637 | 0.102382  |
| 7.41688   | 6.80146    | 7.36992    | 6.8646    | 8.37148   | 9.87905   |
| 2.57273   | 1.92921    | 3.46106    | 1.73877   | 3.07017   | 1.92468   |
| 0.290055  | 0.470726   | 0.361481   | 0.431649  | 0.526576  | 0.32637   |
| 15.8633   | 16.3901    | 13.7227    | 13.7427   | 19.1505   | 18.2085   |
| 0.0232347 | 0.00723876 | 0.00731808 | 0.0198532 | 0         | 0.0146503 |
| 0.260038  | 0.330361   | 0.220897   | 0.490559  | 0.327515  | 0.284323  |
| 0.183702  | 0.15262    | 0.250725   | 0.296493  | 0.298474  | 0.334622  |

|          |           |          |           |           |           |
|----------|-----------|----------|-----------|-----------|-----------|
| 8.93019  | 10.4846   | 10.0721  | 11.0488   | 11.3836   | 14.1019   |
| 24.079   | 25.4292   | 27.0675  | 23.0185   | 27.2309   | 27.2808   |
| 4.30687  | 2.27424   | 5.11949  | 3.04939   | 7.56434   | 3.57995   |
| 5.08534  | 5.19321   | 1.72678  | 1.50509   | 4.61658   | 3.63992   |
| 21.729   | 19.4946   | 18.3763  | 18.4926   | 12.7651   | 14.4158   |
| 2.90905  | 2.84228   | 5.12481  | 2.87446   | 4.34996   | 2.12115   |
| 5.19898  | 4.63344   | 2.50089  | 2.26155   | 3.48125   | 4.71521   |
| 0.653937 | 0.862872  | 0.751171 | 0.56972   | 0.520832  | 0.501263  |
| 0        | 0         | 0        | 0         | 0         | 0         |
| 7.63876  | 7.17794   | 5.16111  | 5.4041    | 3.4698    | 3.91017   |
| 1.30082  | 1.54377   | 1.87646  | 1.55147   | 1.51183   | 0.825243  |
| 0.018665 | 0.0233971 | 0        | 0         | 0         | 0.0156845 |
| 0        | 0.168749  | 0.098243 | 0.462815  | 0         | 0         |
| 6.88897  | 4.5045    | 2.23231  | 0.791392  | 0.0767694 | 0.0357508 |
| 9.89678  | 9.88969   | 11.5879  | 9.30146   | 11.5359   | 9.06087   |
| 2.15428  | 2.60158   | 1.29955  | 1.59971   | 1.66101   | 1.01727   |
| 0.055471 | 0.0864099 | 0.297013 | 0.126394  | 0.195276  | 0.209858  |
| 0        | 0.203684  | 0        | 0.0744838 | 0         | 0.13741   |
| 0.742641 | 0.481249  | 0.411672 | 0.507647  | 0.450472  | 0.324661  |
| 1.03527  | 2.03296   | 1.10667  | 1.28668   | 0.747586  | 0.949485  |
| 12.3497  | 13.0386   | 14.116   | 11.4382   | 13.2078   | 10.6177   |
| 3.05738  | 3.03704   | 1.95384  | 2.70076   | 1.79983   | 1.69496   |
| 0.448188 | 0.670238  | 0.338791 | 0.765919  | 0.728202  | 0.301438  |
| 2.43035  | 2.13065   | 2.96393  | 2.41591   | 3.92087   | 3.3482    |
| 0        | 0         | 0        | 0         | 0         | 0         |
| 16.5152  | 17.1675   | 17.6697  | 17.9305   | 17.6443   | 19.5935   |
| 0.824286 | 0.860001  | 0.313959 | 0.37127   | 0.726738  | 0.709103  |
| 1.19524  | 1.94751   | 1.53474  | 1.85894   | 2.11576   | 1.8353    |
| 0.400582 | 0.424325  | 0.883182 | 0.319464  | 0.607464  | 0.589355  |
| 0.682302 | 0.700234  | 1.31468  | 0.457256  | 1.30422   | 0.337423  |
| 0        | 0         | 0        | 0         | 0         | 0         |
| 64.6811  | 59.5859   | 92.7984  | 55.7332   | 56.1924   | 50.8828   |
| 0        | 0         | 0        | 0         | 0         | 0.0636924 |
| 4.6379   | 4.44595   | 7.04165  | 5.28388   | 6.69823   | 4.59898   |
| 63.1226  | 69.7517   | 88.8755  | 97.0604   | 56.6496   | 77.2134   |
| 4.92962  | 5.47941   | 4.85276  | 5.23011   | 5.6156    | 5.39688   |
| 0.30383  | 0.375527  | 0.360674 | 0.395799  | 0.423996  | 0.301353  |
| 1.12138  | 1.31325   | 1.2513   | 0.949061  | 0.983266  | 1.14931   |
| 23.751   | 22.6322   | 23.4802  | 23.4476   | 21.692    | 23.0657   |
| 189.939  | 133.103   | 222.041  | 183.395   | 203.067   | 114.733   |
| 0        | 0         | 0        | 0         | 0         | 0         |
| 15.4511  | 15.6556   | 15.8712  | 14.8291   | 12.7812   | 14.7114   |
| 10.3447  | 10.9602   | 8.66096  | 12.8917   | 7.17122   | 7.50116   |

|            |           |          |          |           |           |
|------------|-----------|----------|----------|-----------|-----------|
| 0.47499    | 0.656341  | 0.341099 | 1.38827  | 0.381098  | 0.525033  |
| 14.5917    | 15.1901   | 12.4323  | 16.3612  | 14.9527   | 13.9335   |
| 61.3677    | 60.2228   | 64.9293  | 64.2182  | 61.0954   | 72.3564   |
| 0          | 0         | 0        | 0        | 0         | 0         |
| 77.1466    | 82.555    | 61.0981  | 67.7499  | 50.4864   | 66.6793   |
| 5.29142    | 5.23757   | 6.31193  | 7.69377  | 4.84358   | 7.07125   |
| 9.07276    | 10.2039   | 11.1669  | 11.2467  | 9.1653    | 9.45333   |
| 4.00474    | 5.61606   | 6.18064  | 7.75251  | 6.17842   | 6.64571   |
| 25.1687    | 27.8882   | 25.3766  | 34.5878  | 17.4804   | 20.134    |
| 0.381015   | 0         | 1.43586  | 1.6525   | 1.09746   | 1.07691   |
| 142.477    | 76.1968   | 126.133  | 95.891   | 196.724   | 155.331   |
| 77.4747    | 88.6609   | 85.3428  | 97.1725  | 70.8599   | 92.6684   |
| 22.6444    | 28.5083   | 44.5618  | 60.8125  | 14.2312   | 17.9328   |
| 0.675135   | 0.872539  | 0.223491 | 0.179646 | 0.170799  | 0.231494  |
| 92.6723    | 110.501   | 84.9413  | 97.8743  | 84.2351   | 96.3579   |
| 2.249      | 2.27513   | 3.16675  | 2.5321   | 2.694     | 1.24568   |
| 0.616074   | 1.069     | 0.294488 | 0.835231 | 1.20116   | 0.679913  |
| 2.39826    | 1.40095   | 1.55794  | 1.45153  | 3.61248   | 2.55181   |
| 0          | 0         | 0        | 0        | 0         | 0         |
| 2.39864    | 2.20133   | 2.52999  | 2.66917  | 3.14195   | 2.70438   |
| 0.0107472  | 0.053574  | 0.054161 | 0        | 0.0116411 | 0.0361421 |
| 1.57791    | 1.91661   | 2.06343  | 2.09351  | 1.06011   | 1.17544   |
| 7.91963    | 7.28859   | 7.54247  | 7.16641  | 7.66615   | 7.5586    |
| 5.07132    | 3.59935   | 6.60061  | 2.71662  | 5.82049   | 5.11052   |
| 16.1113    | 9.90332   | 8.36649  | 5.53031  | 8.00748   | 3.38853   |
| 0.0210154  | 0.0785682 | 0        | 0        | 0         | 0         |
| 12.5972    | 14.5661   | 10.528   | 10.779   | 14.3205   | 15.9233   |
| 4.23982    | 3.66367   | 3.67717  | 3.78622  | 3.71529   | 4.11939   |
| 19.7844    | 17.4057   | 23.5186  | 18.4221  | 27.3132   | 19.9759   |
| 3.64571    | 4.09947   | 6.76432  | 4.04096  | 6.40605   | 5.18649   |
| 28.472     | 31.2995   | 33.3996  | 30.8363  | 37.2846   | 37.8426   |
| 7.46284    | 7.91509   | 7.54278  | 7.54724  | 8.19752   | 7.31187   |
| 37.6643    | 35.5115   | 34.5567  | 30.1211  | 35.1852   | 28.9104   |
| 81.0977    | 88.3096   | 103.096  | 136.752  | 105.605   | 125.529   |
| 5.83324    | 7.01869   | 6.29851  | 7.80483  | 5.51355   | 5.88686   |
| 7.55968    | 7.39078   | 9.23549  | 8.49662  | 9.1259    | 7.83205   |
| 0.383938   | 0.239231  | 0.362779 | 0.656121 | 0.415874  | 0.282434  |
| 15.5222    | 14.4987   | 15.3485  | 13.8157  | 15.8421   | 13.6334   |
| 0.7632     | 0.671643  | 1.38224  | 0.975099 | 0.795264  | 0.756759  |
| 12.8788    | 13.5869   | 12.6484  | 13.6375  | 12.9012   | 13.9594   |
| 1.53474    | 2.7152    | 1.44783  | 3.23146  | 2.1057    | 3.23638   |
| 0.00812261 | 0         | 0        | 0        | 0.035193  | 0.0273151 |
| 0          | 0         | 0        | 0        | 0         | 0         |



|             |           |            |             |           |             |
|-------------|-----------|------------|-------------|-----------|-------------|
| 8.26687     | 8.87065   | 9.56644    | 7.95301     | 10.2968   | 7.13024     |
| 122.661     | 141.491   | 100.478    | 126.494     | 81.8002   | 120.049     |
| 0           | 0         | 0.00585063 | 0           | 0.0845572 | 0.0087844   |
| 1.25344     | 0.868523  | 1.03329    | 1.19868     | 1.94382   | 1.24979     |
| 0           | 0         | 0          | 0           | 0         | 0           |
| 1.12494     | 1.3896    | 0.832948   | 2.15852     | 1.51779   | 1.28588     |
| 0           | 0         | 0          | 0           | 0         | 0           |
| 34.0192     | 35.4503   | 27.0018    | 26.6818     | 32.7124   | 33.6783     |
| 0           | 0         | 0          | 2.18E-07    | 0         | 0           |
| 0           | 0         | 0          | 0.12209     | 0         | 0           |
| 1.70107     | 1.89158   | 1.68151    | 2.89209     | 1.67248   | 1.69413     |
| 0.0894289   | 0.0990633 | 0.264455   | 0.138677    | 0.145301  | 0.112776    |
| 69.732      | 83.7264   | 64.599     | 70.9727     | 52.8652   | 66.8506     |
| 22.448      | 13.7007   | 32.048     | 29.2966     | 19.9304   | 22.8203     |
| 5.34917     | 4.08066   | 6.42694    | 4.34209     | 8.03581   | 4.50475     |
| 24.0886     | 22.6729   | 19.8094    | 22.8786     | 18.5414   | 18.8816     |
| 35.927      | 23.4637   | 38.8289    | 26.3496     | 53.6684   | 31.8765     |
| 27.1595     | 41.491    | 10.2479    | 13.822      | 12.0662   | 9.5469      |
| 18.2957     | 18.2133   | 21.1206    | 17.018      | 20.9816   | 20.5537     |
| 0           | 0         | 0          | 0           | 0         | 0           |
| 0.494233    | 0.615912  | 0.578317   | 0.703481    | 0.459103  | 0.400711    |
| 1.96416     | 2.18553   | 2.01066    | 1.51861     | 2.88728   | 1.54811     |
| 2.1374      | 3.90029   | 1.68953    | 1.74682     | 1.24414   | 1.76051     |
| 0           | 0         | 0          | 0           | 0         | 0           |
| 15.9048     | 17.3015   | 9.49335    | 9.15713     | 13.6526   | 10.3773     |
| 0.000165019 | 3.64E-20  | 1.21841    | 0.000116284 | 7.10E-06  | 0.000114042 |
| 9.65695     | 12.2852   | 10.5822    | 7.90768     | 6.59211   | 8.03414     |
| 18.4524     | 13.3263   | 14.4246    | 13.7026     | 15.6768   | 15.0272     |
| 0           | 0         | 0          | 0           | 0         | 0           |
| 15.8176     | 12.2026   | 14.8668    | 13.7301     | 19.5809   | 14.7756     |
| 49.9656     | 51.2661   | 51.0998    | 53.5067     | 46.972    | 55.778      |
| 6.89316     | 5.73674   | 5.6794     | 5.02717     | 7.90573   | 6.05584     |
| 0           | 0         | 0          | 0           | 0         | 0           |
| 16.9581     | 17.5944   | 16.2083    | 16.7684     | 13.17     | 13.2257     |
| 15.6279     | 16.3763   | 17.4884    | 15.1281     | 18.7042   | 14.8733     |
| 0           | 0         | 0          | 0           | 0         | 0           |
| 0.6033      | 0.66086   | 0.369764   | 0.604162    | 0.475661  | 0.415166    |
| 0           | 0         | 0          | 0           | 0         | 0           |
| 21.2951     | 17.7207   | 18.5649    | 18.8687     | 16.2504   | 17.8026     |
| 2.06413     | 2.82126   | 1.77831    | 2.74978     | 0.513321  | 0.890233    |
| 42.2901     | 44.0197   | 36.7258    | 41.7401     | 40.4128   | 39.3301     |
| 0.219505    | 0.273547  | 0          | 0           | 0         | 0           |
| 0.531245    | 0.291296  | 0.602362   | 0.278409    | 0.679011  | 0.437691    |

|           |           |           |           |           |           |
|-----------|-----------|-----------|-----------|-----------|-----------|
| 0.316997  | 0.434545  | 0.359433  | 0.505608  | 0.892747  | 0.453055  |
| 8.77344   | 9.13659   | 9.69854   | 6.23671   | 8.8679    | 7.33485   |
| 0.0514553 | 0         | 0.133071  | 5.95E-225 | 0.225419  | 0.174814  |
| 7.36342   | 7.79938   | 7.22154   | 6.41215   | 7.05221   | 8.19168   |
| 32.3957   | 33.5137   | 30.9468   | 32.2308   | 27.7366   | 29.9409   |
| 1.11418   | 1.18475   | 1.49479   | 1.49086   | 0.937508  | 0.836121  |
| 6.73609   | 7.05138   | 7.35496   | 6.54874   | 7.49096   | 4.90803   |
| 0.191977  | 0.191145  | 0.241863  | 0.218716  | 0.467878  | 0.161397  |
| 119.385   | 103.239   | 124.366   | 110.603   | 130.725   | 145.83    |
| 0.466454  | 0.904236  | 0.685608  | 0.797135  | 0.659636  | 0.7952    |
| 10.8573   | 9.5301    | 11.8945   | 8.9276    | 13.8569   | 12.4219   |
| 0         | 0         | 0         | 0         | 0         | 0         |
| 4.09305   | 4.05542   | 4.65893   | 4.49393   | 3.31129   | 3.35766   |
| 117.939   | 121.611   | 132.899   | 128.875   | 113.055   | 126.578   |
| 8.3267    | 8.1332    | 9.28868   | 9.51415   | 7.20066   | 8.65461   |
| 12.4671   | 13.0681   | 19.083    | 24.6904   | 13.7566   | 20.2769   |
| 0         | 0         | 0         | 0.0678448 | 0.83855   | 0.150194  |
| 0.556334  | 1.12662   | 1.05135   | 1.18842   | 1.20522   | 0.876969  |
| 0.043699  | 5.54E-286 | 0.0474393 | 0.0239819 | 0.0971447 | 0.023999  |
| 3.32302   | 2.26862   | 2.01588   | 2.45258   | 2.16458   | 2.50398   |
| 0.0991923 | 0.123613  | 0.333248  | 0.376694  | 0.179072  | 0.166784  |
| 0         | 0         | 0         | 0         | 0         | 0         |
| 0.0172518 | 0.0214992 | 0         | 0.0196547 | 0.0186868 | 0.0145038 |
| 9.48871   | 8.32741   | 11.7406   | 7.96371   | 10.4202   | 8.8964    |
| 76.9582   | 71.5284   | 64.9074   | 66.8565   | 56.8496   | 62.5379   |
| 0         | 0         | 0         | 0         | 0         | 0         |
| 0.812129  | 1.46188   | 2.04633   | 1.74768   | 1.85711   | 0.910355  |
| 167.995   | 188.79    | 163.548   | 174.632   | 122.177   | 141.552   |
| 44.0141   | 48.7249   | 43.4181   | 48.7446   | 44.4888   | 48.7898   |
| 7.19116   | 7.44071   | 7.87706   | 6.37452   | 9.02991   | 7.00858   |
| 23.9998   | 27.3096   | 24.944    | 29.606    | 26.655    | 31.3928   |
| 17.4093   | 16.2639   | 16.6635   | 14.8167   | 30.1185   | 15.2149   |
| 0         | 0         | 0         | 0         | 0         | 0         |
| 34.1162   | 32.0639   | 35.17     | 30.5416   | 33.7744   | 38.5531   |
| 2.91958   | 1.66564   | 4.37505   | 6.8119    | 1.79304   | 2.58687   |
| 14.3887   | 16.7534   | 16.8477   | 16.4736   | 16.8396   | 16.95     |
| 15.8915   | 18.2504   | 15.5853   | 14.4371   | 18.1927   | 15.1339   |
| 0.204667  | 0.196196  | 0.0793385 | 0.0717456 | 0.204638  | 0.0661791 |
| 1.218     | 0.934221  | 0.810356  | 0.945887  | 0.698694  | 0.747051  |
| 0         | 0         | 0         | 0         | 0.589029  | 0         |
| 0.313598  | 0.293104  | 0.172851  | 0.267957  | 0.275992  | 0.214212  |
| 87.5569   | 93.2329   | 89.4673   | 99.227    | 70.9473   | 83.7452   |
| 0         | 0         | 0         | 0         | 0.0320773 | 0         |

|           |           |          |           |           |          |
|-----------|-----------|----------|-----------|-----------|----------|
| 61.9083   | 71.4871   | 62.6773  | 62.1683   | 57.1779   | 68.0286  |
| 2.80151   | 3.434     | 3.18233  | 3.08706   | 4.72592   | 4.13136  |
| 0.135193  | 0.112318  | 0.113549 | 0.102682  | 0.19525   | 0.37886  |
| 9.39216   | 7.60792   | 11.9807  | 8.62714   | 10.4277   | 8.34026  |
| 0         | 0         | 0        | 0         | 0.0637787 | 0        |
| 0.0256005 | 0.0319033 | 0        | 0.0387876 | 0         | 0        |
| 47.7534   | 24.3145   | 44.6803  | 16.8249   | 28.4898   | 18.0343  |
| 117.369   | 116.354   | 85.0133  | 89.0262   | 75.9378   | 91.0797  |
| 7.12513   | 5.0385    | 12.176   | 6.4965    | 12.1929   | 8.0981   |
| 14.5081   | 12.775    | 14.3297  | 14.1887   | 12.849    | 13.27    |
| 22.9785   | 22.586    | 24.4397  | 21.2874   | 20.2594   | 18.2306  |
| 6.72937   | 7.21887   | 9.49768  | 7.8117    | 10.4412   | 10.0458  |
| 3.54952   | 3.43383   | 3.02582  | 2.78725   | 2.8974    | 2.9317   |
| 0.413194  | 0.514922  | 0.195212 | 0.529588  | 0.447564  | 0.173689 |
| 11.5421   | 8.91311   | 11.287   | 9.7645    | 14.5563   | 12.1138  |
| 2.55975   | 1.45342   | 3.86339  | 2.4544    | 3.98857   | 1.12895  |
| 17.3159   | 17.4834   | 16.9524  | 15.1534   | 15.8345   | 12.4333  |
| 472.896   | 508.447   | 424.441  | 444.71    | 282.477   | 332.979  |
| 5.49182   | 5.09085   | 4.06912  | 3.01299   | 4.21768   | 4.49405  |
| 0         | 32.153    | 32.5053  | 0         | 0         | 0        |
| 6.81672   | 7.38887   | 7.06727  | 7.40213   | 7.86444   | 6.104    |
| 0         | 0         | 0        | 0         | 0         | 0        |
| 14.0361   | 13.3622   | 14.6535  | 14.1646   | 14.6213   | 12.1227  |
| 26.4993   | 26.2361   | 32.2678  | 28.9637   | 24.5175   | 21.1102  |
| 0         | 0         | 0.445348 | 0         | 0         | 0.19731  |
| 2.26662   | 1.83221   | 3.47304  | 3.14066   | 1.1944    | 1.59656  |
| 0         | 0         | 0        | 0         | 0         | 0        |
| 6.22866   | 4.41377   | 6.07773  | 5.9135    | 4.23326   | 4.56911  |
| 11.7739   | 11.0236   | 12.0272  | 9.81183   | 11.6687   | 8.81886  |
| 11.9159   | 10.8426   | 11.5024  | 12.9143   | 11.5142   | 10.9229  |
| 12.5312   | 3.61913   | 5.81948  | 3.46494   | 5.17678   | 3.67192  |
| 0.626652  | 0.630226  | 0.761788 | 0.651308  | 0.547784  | 0.462135 |
| 6.86048   | 6.56045   | 6.06788  | 6.38043   | 7.55246   | 8.47497  |
| 38.5566   | 38.7202   | 39.2966  | 36.514    | 41.1243   | 35.7084  |
| 5.00116   | 5.53908   | 4.15149  | 4.06264   | 4.44696   | 3.64931  |
| 9.76891   | 9.12295   | 10.9331  | 9.34827   | 10.8703   | 8.17208  |
| 0.276347  | 0.196791  | 0.136776 | 0.0674652 | 0.374167  | 0.248923 |
| 0.487728  | 0.318637  | 0.17533  | 0.26419   | 0.276198  | 0.272605 |
| 0         | 0         | 0        | 0         | 0         | 0        |
| 0         | 0         | 0        | 0         | 0         | 0        |
| 3.18525   | 3.24774   | 4.37777  | 3.20475   | 4.50319   | 3.33866  |
| 13.1114   | 15.0438   | 11.934   | 12.437    | 12.6379   | 11.6542  |
| 11.858    | 10.9448   | 12.7203  | 13.7119   | 17.5995   | 14.1095  |

|          |           |           |           |           |           |
|----------|-----------|-----------|-----------|-----------|-----------|
| 0        | 0         | 0         | 0         | 0         | 0         |
| 0.53388  | 0.66532   | 0.569566  | 0.934735  | 0.976367  | 0.68977   |
| 426.39   | 425.108   | 392.668   | 376.557   | 284.936   | 343.092   |
| 16.4338  | 17.222    | 16.0041   | 16.4115   | 14.4382   | 14.5754   |
| 0        | 0         | 0         | 0         | 0         | 0         |
| 311.478  | 420.633   | 237.236   | 421.165   | 450.531   | 453.874   |
| 6.56814  | 7.45439   | 3.86303   | 5.95583   | 4.80953   | 5.78956   |
| 0        | 0.0169557 | 0.0428538 | 0.015501  | 0         | 0.0343161 |
| 50.3311  | 50.8651   | 62.4661   | 49.6223   | 61.9614   | 53.7805   |
| 7.11669  | 7.00997   | 8.33076   | 6.01362   | 11.1505   | 8.7119    |
| 0.427588 | 0.271654  | 0.70242   | 0.515799  | 1.11248   | 0.570936  |
| 7.37185  | 9.50284   | 4.57982   | 7.6281    | 5.75069   | 7.13577   |
| 0        | 0         | 0         | 0         | 0         | 0         |
| 31.3974  | 32.4223   | 26.7505   | 26.7546   | 24.3584   | 24.3667   |
| 3.48005  | 3.10631   | 3.41343   | 3.10047   | 5.33472   | 2.77387   |
| 0.36673  | 0.838507  | 0.617231  | 1.00124   | 0.41164   | 0.796245  |
| 12.9744  | 10.477    | 7.73315   | 7.45706   | 9.23255   | 9.90503   |
| 0.563626 | 0.70239   | 0.539666  | 0.642129  | 1.41638   | 0.360124  |
| 5.93278  | 6.20389   | 7.57679   | 6.78606   | 7.70021   | 11.5051   |
| 2.1298   | 2.6905    | 2.04435   | 2.75473   | 2.82626   | 2.41918   |
| 16.3376  | 14.1161   | 16.4336   | 16.1456   | 15.0717   | 15.3161   |
| 0.493494 | 0.423437  | 0.815384  | 0.755783  | 0.876299  | 0.81617   |
| 0        | 0         | 0         | 0         | 0         | 0         |
| 8.97248  | 10.0071   | 9.90133   | 7.82093   | 10.3097   | 7.61788   |
| 0.140208 | 0.291212  | 0.176642  | 0.0798684 | 0.27843   | 0.157166  |
| 0.1127   | 0.0401275 | 0.263687  | 0.0917119 | 0.0348783 | 0.0812125 |
| 0.793142 | 0.720131  | 0.874607  | 0.849445  | 1.04798   | 0.901257  |
| 72.7847  | 66.7654   | 76.5948   | 79.8656   | 67.6468   | 73.6211   |
| 7.8388   | 7.14707   | 6.72056   | 7.58959   | 6.6733    | 6.50596   |
| 11.5923  | 10.2891   | 14.3945   | 14.062    | 13.2792   | 22.4597   |
| 0.13013  | 0.182439  | 0.334722  | 0.166787  | 0.140955  | 0.328207  |
| 34.4512  | 36.0868   | 37.9222   | 36.3408   | 37.9336   | 34.0541   |
| 0.165682 | 0.206472  | 0         | 0.283137  | 0         | 0.348226  |
| 0        | 0         | 0         | 0.0211907 | 0.0201472 | 0         |
| 1.85988  | 2.07731   | 1.69219   | 1.74986   | 1.26086   | 1.25096   |
| 15.2486  | 14.8117   | 14.5373   | 13.4333   | 15.3779   | 15.1413   |
| 1.84038  | 0.849438  | 1.07343   | 0.81539   | 1.25515   | 1.7478    |
| 45.0081  | 48.6351   | 41.3916   | 48.8554   | 45.9516   | 50.5883   |
| 0        | 0         | 0         | 0         | 0         | 0.0436964 |
| 74.7109  | 78.4173   | 79.4731   | 87.8318   | 75.9015   | 76.1756   |
| 0        | 0         | 0         | 0.0891249 | 0         | 0         |
| 3.92765  | 3.58537   | 3.68575   | 2.68851   | 5.18226   | 4.48423   |
| 5.32688  | 4.60535   | 5.95609   | 4.15967   | 7.02012   | 4.8609    |

|          |           |           |           |            |            |
|----------|-----------|-----------|-----------|------------|------------|
| 17.4054  | 18.7587   | 25.5423   | 26.3474   | 23.6333    | 23.1766    |
| 0.05075  | 0.0316223 | 0         | 0         | 0          | 0          |
| 12.9407  | 13.4752   | 13.7247   | 15.6022   | 14.6765    | 12.1926    |
| 11.1374  | 11.6708   | 9.47287   | 8.57124   | 11.4098    | 8.68773    |
| 1.12754  | 0.819664  | 1.18378   | 0.856391  | 1.73021    | 1.07959    |
| 1.8729   | 1.10558   | 1.24188   | 1.34764   | 0.427092   | 0.248616   |
| 31.9991  | 27.8375   | 32.19     | 29.6775   | 34.4347    | 31.8456    |
| 153.862  | 0         | 77.5375   | 35.0585   | 33.3321    | 25.8707    |
| 4.64285  | 4.56333   | 6.16549   | 5.3285    | 4.70777    | 4.19101    |
| 8.21056  | 6.95697   | 8.19965   | 8.14657   | 10.5806    | 11.708     |
| 58.6848  | 57.9206   | 59.4723   | 55.0995   | 52.8216    | 50.5608    |
| 31.2709  | 33.8863   | 31.7194   | 35.0583   | 44.2689    | 45.4428    |
| 0        | 0.0146557 | 0.0148163 | 0.0133983 | 0          | 0          |
| 0        | 0.131625  | 0         | 0         | 0          | 0          |
| 53.7186  | 50.0772   | 53.9861   | 48.6636   | 51.3377    | 45.7176    |
| 17.9761  | 18.6936   | 16.2562   | 15.1428   | 19.3942    | 20.9909    |
| 910.494  | 917.67    | 798.723   | 980.238   | 651.604    | 835.888    |
| 0        | 0         | 0.0281938 | 0         | 0.0242401  | 0.056442   |
| 0        | 0         | 0         | 0.0132805 | 0          | 0          |
| 39.5771  | 38.5274   | 35.3606   | 36.2728   | 33.5036    | 35.6938    |
| 4.22154  | 4.2188    | 4.52443   | 2.79999   | 4.26606    | 2.57555    |
| 0        | 0.0605646 | 0         | 0         | 0          | 0.122575   |
| 9.28184  | 6.71926   | 14.9917   | 9.69848   | 16.5426    | 10.8207    |
| 0        | 0         | 0         | 0         | 0          | 0          |
| 26.1499  | 28.4336   | 27.18     | 27.6155   | 30.889     | 34.9445    |
| 432.801  | 477.887   | 477.128   | 470.005   | 402.004    | 482.057    |
| 34.6717  | 28.7006   | 36.7926   | 36.8311   | 27.7301    | 35.6947    |
| 0.105334 | 0.0210021 | 0.0212322 | 0.0768023 | 0          | 0.0885552  |
| 2.1417   | 2.44694   | 2.17676   | 1.49701   | 2.64233    | 2.11137    |
| 50.2598  | 49.1815   | 52.1233   | 50.0014   | 50.0667    | 46.1263    |
| 0        | 0         | 0         | 0         | 0          | 0          |
| 3.08271  | 3.33902   | 2.34115   | 3.20026   | 1.65396    | 1.91348    |
| 11.9306  | 11.0286   | 10.9211   | 11.7341   | 13.3483    | 12.0108    |
| 0        | 0         | 0.011074  | 0.0100142 | 0.00952104 | 0.00738978 |
| 40.0969  | 37.0716   | 45.658    | 34.2664   | 69.1966    | 59.3811    |
| 0        | 25.7856   | 0.13866   | 279.369   | 0.476861   | 18.7834    |
| 1.70557  | 0.708728  | 2.73712   | 0.717107  | 0.330293   | 0.273123   |
| 0        | 0         | 0         | 0         | 0          | 0.0666734  |
| 1.36619  | 1.09843   | 2.09426   | 1.19724   | 3.89962    | 1.86938    |
| 12.3152  | 9.34559   | 4.21824   | 3.96588   | 2.94876    | 4.27639    |
| 0        | 43.4718   | 0         | 119.227   | 75.5702    | 0          |
| 19.8816  | 21.2914   | 25.8709   | 23.5112   | 22.4419    | 22.6181    |
| 0.104543 | 0.078169  | 0.184393  | 0.0238209 | 0.294422   | 0.0878908  |

|           |           |           |           |           |           |
|-----------|-----------|-----------|-----------|-----------|-----------|
| 6.66703   | 7.69839   | 6.54925   | 7.1707    | 8.40836   | 6.99652   |
| 0         | 0         | 0.021794  | 0         | 0         | 0         |
| 0.189248  | 0.261562  | 0.370156  | 0.190785  | 0.228049  | 0.246268  |
| 0.178393  | 0.14228   | 0         | 0.146333  | 0.139127  | 0.0959849 |
| 1.75622   | 1.92678   | 2.76234   | 2.01925   | 2.53835   | 1.53989   |
| 0.771478  | 0.524408  | 0.176718  | 0.0799029 | 0.0759681 | 0.117926  |
| 0         | 0         | 0         | 0         | 0         | 0         |
| 12.7786   | 15.6743   | 14.0969   | 15.2245   | 13.0896   | 13.4769   |
| 10.3837   | 9.49576   | 8.5706    | 11.2315   | 11.5731   | 10.3705   |
| 0.328529  | 0         | 0.206949  | 0.0935719 | 0.177928  | 0.345248  |
| 2.90227   | 2.59725   | 2.12418   | 1.45532   | 3.09342   | 2.32302   |
| 0         | 0         | 0         | 0         | 0         | 0         |
| 3.85652   | 1.03171   | 1.03171   | 1.18626   | 0.635975  | 1.84145   |
| 5.14955   | 5.66563   | 5.52773   | 4.32594   | 4.53246   | 4.31861   |
| 48.3042   | 46.0589   | 46.4737   | 37.4739   | 46.2939   | 43.4892   |
| 4.70621   | 3.72549   | 3.84089   | 2.32678   | 5.12973   | 2.58794   |
| 0         | 0         | 0         | 0         | 0         | 0         |
| 0         | 0         | 0         | 0         | 0         | 0         |
| 0.175231  | 0.128862  | 0.0825445 | 0.127489  | 0.106502  | 0.0746742 |
| 59.1843   | 64.201    | 63.5594   | 64.1644   | 70.0874   | 50.7834   |
| 2.15149   | 2.09158   | 2.4759    | 1.87925   | 2.88984   | 2.12213   |
| 2.8487    | 3.35083   | 2.98302   | 4.82778   | 3.36617   | 2.75982   |
| 0.226975  | 0.0314285 | 0.0953187 | 0.258589  | 0.191221  | 0.169619  |
| 0         | 0         | 0         | 0         | 0.045411  | 0         |
| 0         | 0         | 0         | 0         | 0         | 0         |
| 0.204454  | 0.234194  | 0.38821   | 0.250084  | 0.534587  | 0.111534  |
| 0         | 0         | 0.133252  | 0         | 0         | 0         |
| 2.2398    | 2.38556   | 3.41563   | 2.35053   | 3.8617    | 2.84758   |
| 0.0349495 | 0.043554  | 0.132094  | 0.0398174 | 0.454279  | 0.11753   |
| 0         | 0.0204742 | 0         | 0.0187176 | 0         | 0.0276246 |
| 3.9628    | 3.52744   | 3.37842   | 3.44535   | 3.51814   | 3.24392   |
| 0         | 0         | 0         | 0         | 0         | 0         |
| 8.16557   | 9.59354   | 7.62222   | 6.47621   | 10.5969   | 8.33557   |
| 20.2227   | 19.5962   | 19.3588   | 16.6797   | 19.3586   | 21.1303   |
| 3.37152   | 3.52391   | 3.97358   | 3.03572   | 4.5944    | 3.84026   |
| 0.810256  | 0.432746  | 0.291658  | 0.725301  | 0.626895  | 0.437909  |
| 0         | 0         | 0         | 0         | 0         | 0         |
| 0.184452  | 0.160905  | 0.162668  | 0.0630431 | 0.299693  | 0.295548  |
| 0.0355971 | 0.0384053 | 0.179389  | 0.0405552 | 0.208634  | 0.0299269 |
| 0.811367  | 0.692465  | 0.628108  | 0.989754  | 1.24866   | 0.849615  |
| 0         | 0         | 0         | 0         | 0         | 0         |
| 22.2117   | 22.9588   | 22.754    | 22.4976   | 23.2827   | 23.0346   |
| 0         | 0         | 0         | 0         | 0         | 0         |

|           |           |          |           |           |           |
|-----------|-----------|----------|-----------|-----------|-----------|
| 0         | 0         | 0        | 0         | 0         | 0         |
| 3.91805   | 3.92819   | 4.19448  | 2.5508    | 5.24351   | 5.18854   |
| 8.06003   | 8.78012   | 11.2533  | 9.5367    | 10.2337   | 12.2369   |
| 6.1568    | 6.28993   | 6.15162  | 5.31793   | 6.46872   | 5.60885   |
| 9.52498   | 8.84289   | 10.1825  | 11.3884   | 14.1763   | 11.7084   |
| 0.0526403 | 0.196801  | 0        | 0         | 0.0570189 | 0         |
| 1.31532   | 0.413758  | 1.07586  | 0.53797   | 0.813281  | 0.426037  |
| 0         | 0         | 0        | 0         | 0         | 0         |
| 0.17573   | 0.154584  | 0.221394 | 0.306197  | 0.257528  | 0.286786  |
| 0.365741  | 0.438999  | 0.563676 | 0.340726  | 0.451608  | 0.354425  |
| 18.6814   | 18.6212   | 19.9121  | 15.6151   | 15.5619   | 14.256    |
| 10.417    | 9.6908    | 10.5762  | 9.92031   | 12.1416   | 10.1482   |
| 0         | 0         | 0        | 0         | 0.0346606 | 0         |
| 0         | 0         | 0        | 0         | 0         | 0         |
| 0         | 0         | 0        | 0         | 0         | 0         |
| 12.2291   | 11.4001   | 13.7003  | 9.48412   | 16.799    | 10.3585   |
| 2.85997   | 2.60178   | 3.38695  | 2.73698   | 2.63318   | 3.39022   |
| 84.026    | 82.9521   | 81.8445  | 80.3072   | 73.5464   | 68.8385   |
| 33.3601   | 27.1596   | 32.6207  | 36.8814   | 26.5463   | 29.826    |
| 66.0041   | 68.5003   | 67.4713  | 67.3164   | 67.2806   | 67.0924   |
| 9.83736   | 8.95838   | 8.54841  | 8.13562   | 6.59226   | 6.32206   |
| 31.2964   | 29.783    | 31.2398  | 28.1254   | 28.3287   | 29.4024   |
| 0.202104  | 0.107941  | 0.290996 | 0.361827  | 0.250188  | 0.0970921 |
| 31.8581   | 28.5229   | 31.2346  | 31.2173   | 23.9233   | 27.3419   |
| 0.641911  | 1.02373   | 0.920124 | 0.917617  | 0.703121  | 0.551033  |
| 0         | 0         | 0.213566 | 0         | 0.045904  | 0         |
| 15.5096   | 19.0875   | 17.6346  | 27.1647   | 9.93345   | 14.3647   |
| 0.275573  | 0.392478  | 0.446376 | 0.672761  | 0.341137  | 0.430258  |
| 0.141557  | 0.0392013 | 0        | 0.0358381 | 0         | 0         |
| 0.639435  | 0.682738  | 1.37454  | 0.954684  | 1.99363   | 1.22478   |
| 0.741019  | 0.62963   | 0.466788 | 0.19187   | 0.693203  | 0.707936  |
| 24.225    | 29.6438   | 26.1734  | 26.0409   | 27.1267   | 26.9248   |
| 12.9879   | 11.4549   | 12.4895  | 11.33     | 13.1507   | 12.3169   |
| 27.559    | 26.242    | 30.0813  | 35.314    | 31.3159   | 37.3658   |
| 1.27331   | 1.5868    | 3.36878  | 1.88586   | 2.75844   | 0.74934   |
| 8.20376   | 9.79153   | 8.33394  | 8.49074   | 8.16455   | 9.32528   |
| 5.96165   | 4.40478   | 5.96332  | 4.07138   | 7.46734   | 5.92567   |
| 1.19739   | 0.701477  | 0.645018 | 0.416365  | 0.455517  | 0.439653  |
| 2.49884   | 2.61179   | 2.38652  | 3.62749   | 2.66304   | 3.65947   |
| 17.5696   | 18.1608   | 21.9283  | 21.7472   | 14.3622   | 17.5665   |
| 0.0492953 | 0.276443  | 0.217367 | 0.365634  | 0.214536  | 0.0414432 |
| 1.7258    | 1.68362   | 2.23799  | 1.65321   | 2.62884   | 1.72526   |
| 2.41739   | 1.81709   | 1.74032  | 0.918029  | 1.87033   | 2.16136   |

|          |          |           |           |          |          |
|----------|----------|-----------|-----------|----------|----------|
| 17.5507  | 17.7156  | 18.35     | 18.4665   | 17.6495  | 17.7818  |
| 0        | 0        | 0         | 0         | 0        | 0        |
| 6.24588  | 7.29922  | 8.86518   | 7.66555   | 9.48029  | 9.35262  |
| 1.04049  | 1.24218  | 2.66332   | 2.82013   | 2.14535  | 2.11999  |
| 70.2253  | 66.9409  | 70.7173   | 78.3695   | 64.3216  | 78.1621  |
| 10.0612  | 8.35887  | 10.2535   | 9.70039   | 10.2405  | 9.0298   |
| 21.39    | 22.6215  | 23.6072   | 22.6941   | 21.2628  | 21.9051  |
| 8.41197  | 17.263   | 9.58852   | 23.0867   | 14.6826  | 20.1946  |
| 19.2583  | 17.7703  | 19.5233   | 15.2517   | 21.4349  | 16.5891  |
| 6.5746   | 5.64242  | 10.0427   | 8.56706   | 8.13721  | 5.59838  |
| 37.827   | 31.3979  | 41.6642   | 33.1      | 40.8785  | 39.1607  |
| 1.11198  | 1.09705  | 1.45931   | 2.00587   | 2.10784  | 1.86972  |
| 44.0678  | 38.7071  | 35.551    | 37.2253   | 31.1023  | 41.6219  |
| 0        | 0        | 0         | 0         | 0        | 0        |
| 6.10664  | 6.30987  | 5.45115   | 4.50993   | 7.14641  | 6.60444  |
| 43.5887  | 36.8967  | 35.8579   | 35.0029   | 32.611   | 29.5831  |
| 0.488585 | 0.432104 | 0.555977  | 0.520725  | 0.597513 | 0.808268 |
| 0        | 0        | 0         | 0         | 0        | 0        |
| 12.0497  | 12.4494  | 11.4893   | 10.7643   | 12.0674  | 11.5206  |
| 3.37675  | 4.13854  | 5.2035    | 4.38757   | 3.83899  | 3.1908   |
| 13.8017  | 16.3147  | 15.3548   | 17.4302   | 15.1734  | 16.759   |
| 1.35622  | 1.68864  | 1.70836   | 1.75234   | 2.22116  | 2.00085  |
| 4.0025   | 2.9226   | 3.50616   | 2.60061   | 3.52254  | 2.86547  |
| 0        | 0        | 0         | 0         | 0        | 0        |
| 0        | 0        | 0.0494306 | 0         | 0.127496 | 0        |
| 10.1922  | 8.18789  | 12.1366   | 7.22492   | 7.95781  | 5.57614  |
| 2.03732  | 1.58332  | 1.4644    | 1.57304   | 2.94911  | 2.71608  |
| 16.9672  | 17.637   | 13.474    | 17.4064   | 19.685   | 25.0135  |
| 11.3927  | 14.8783  | 9.65925   | 13.0158   | 15.6234  | 9.93889  |
| 0        | 0        | 0         | 0         | 0        | 0        |
| 1.60879  | 2.03892  | 1.84923   | 1.44728   | 2.34947  | 1.50284  |
| 12.6175  | 10.7057  | 8.49303   | 6.52479   | 8.98213  | 8.8523   |
| 0.273267 | 0.113515 | 0.0459035 | 0.124531  | 0.295997 | 0.137843 |
| 2.14831  | 2.1028   | 2.63397   | 3.1696    | 2.38942  | 2.31819  |
| 20.7148  | 21.9035  | 22.2854   | 21.5096   | 19.9274  | 20.338   |
| 0        | 5.45182  | 0         | 82.3061   | 0.304317 | 4.55522  |
| 14.7439  | 8.88621  | 12.7642   | 10.8085   | 20.4096  | 14.6089  |
| 7.694    | 5.75866  | 8.37283   | 4.11609   | 5.19963  | 3.19446  |
| 5.23863  | 5.39272  | 6.95447   | 6.49874   | 4.7363   | 5.44283  |
| 14.5961  | 8.48042  | 10.323    | 8.59142   | 14.712   | 14.5479  |
| 0.329042 | 0.410052 | 0.248727  | 0.0749744 | 0.213847 | 0.110652 |
| 0        | 0        | 0         | 0         | 0        | 0        |
| 13.9291  | 13.0877  | 13.4633   | 15.9112   | 12.9723  | 14.5296  |



|           |           |           |           |           |           |
|-----------|-----------|-----------|-----------|-----------|-----------|
| 13.3008   | 16.3798   | 15.779    | 18.0268   | 16.6995   | 16.4709   |
| 42.0599   | 45.0639   | 44.0085   | 39.9719   | 47.7645   | 47.8793   |
| 0         | 0         | 0         | 0         | 0.19449   | 0.0377384 |
| 30.1394   | 31.0496   | 32.3269   | 29.8182   | 35.4852   | 27.5568   |
| 12.299    | 11.1923   | 12.6311   | 10.598    | 14.1453   | 9.54943   |
| 6.51646   | 6.14357   | 5.85394   | 5.7456    | 5.95369   | 5.95486   |
| 1.27534   | 0.816139  | 1.04221   | 0.70685   | 1.86678   | 1.53584   |
| 6.36791   | 6.74934   | 6.45053   | 5.40817   | 6.96727   | 5.56989   |
| 6.82915   | 10.1104   | 11.58     | 14.6856   | 10.497    | 10.6248   |
| 0.0538897 | 0.0449996 | 0.067756  | 0.0813687 | 0.136896  | 0.120939  |
| 1.25134   | 0.931394  | 0.941599  | 0.872745  | 2.67758   | 1.87112   |
| 4.8563    | 5.6333    | 5.52419   | 4.98015   | 6.06129   | 4.66349   |
| 5.61098   | 6.11004   | 7.74042   | 5.90676   | 6.97657   | 5.48528   |
| 7.16013   | 6.48497   | 6.99968   | 5.17082   | 7.24713   | 5.61391   |
| 2.92036   | 1.834     | 2.08586   | 1.78145   | 0.996307  | 1.60457   |
| 5.62314   | 5.08518   | 4.35966   | 4.65044   | 4.7526    | 4.69657   |
| 5.17138   | 6.12941   | 6.30644   | 6.40831   | 8.58651   | 8.16742   |
| 88.8694   | 95.3055   | 75.9757   | 84.0369   | 83.8469   | 94.6295   |
| 127.66    | 131.118   | 138.112   | 132.196   | 125.306   | 123.619   |
| 0.0270544 | 0         | 0         | 0         | 0         | 0         |
| 3.44833   | 3.98169   | 4.5653    | 4.60559   | 2.72224   | 4.28307   |
| 20.2636   | 22.8265   | 22.0847   | 19.3823   | 23.0975   | 22.4334   |
| 15.1516   | 15.9187   | 12.157    | 9.40275   | 11.7849   | 10.344    |
| 0.553711  | 1.82826   | 1.29611   | 0.95575   | 0.397065  | 1.09383   |
| 26.6325   | 30.9987   | 26.7982   | 30.1417   | 22.945    | 22.0208   |
| 0.088898  | 7.95E-166 | 0.133844  | 4.53E-40  | 0.06537   | 0.0725542 |
| 25.6065   | 24.2298   | 28.3784   | 27.4205   | 21.611    | 29.3704   |
| 21.8289   | 17.6106   | 39.8223   | 46.2557   | 27.3954   | 34.5204   |
| 4.32615   | 4.10573   | 5.86141   | 4.1732    | 7.04609   | 5.09717   |
| 0.108467  | 0         | 0.0455511 | 0.0411917 | 0.156653  | 0.0303966 |
| 0         | 0         | 0         | 0         | 0.0569149 | 0         |
| 0         | 0         | 0         | 0         | 0         | 0         |
| 0.306645  | 0.235163  | 0.178305  | 0.0806205 | 0.281051  | 0.118985  |
| 0         | 0.102353  | 0         | 0         | 0         | 0         |
| 0.687841  | 0.48286   | 0.889384  | 0.581148  | 0.208546  | 0.536154  |
| 95.8522   | 88.2039   | 137.008   | 108.675   | 149.874   | 153.786   |
| 0         | 0         | 0         | 0         | 0         | 0         |
| 0         | 0         | 0         | 0         | 0         | 0         |
| 3.90987   | 3.86649   | 3.90677   | 3.89695   | 2.06766   | 2.27266   |
| 9.71645   | 9.24861   | 11.1924   | 8.11758   | 12.0782   | 8.94702   |
| 0.234826  | 0.495237  | 0.955813  | 0.782021  | 0.64568   | 0.880802  |
| 36.6745   | 36.6886   | 36.4779   | 41.343    | 42.6774   | 42.334    |
| 9.48616   | 9.41848   | 10.9762   | 9.79726   | 9.43434   | 10.3546   |

|          |          |          |           |           |          |
|----------|----------|----------|-----------|-----------|----------|
| 39.6559  | 32.7545  | 40.2484  | 46.2828   | 32.7094   | 43.6216  |
| 0        | 0        | 0        | 0         | 0         | 0        |
| 0.259267 | 0.223538 | 0.57485  | 0.571701  | 0.0877555 | 0.104301 |
| 1.47217  | 1.71996  | 2.00928  | 1.78205   | 1.72751   | 1.7018   |
| 107.383  | 115.354  | 91.5585  | 106.723   | 95.6942   | 111.639  |
| 38.8779  | 41.2825  | 45.0504  | 50.9651   | 34.2382   | 44.6765  |
| 3.64056  | 5.34723  | 3.71535  | 3.76154   | 5.30577   | 3.19337  |
| 0        | 0        | 0        | 0         | 0         | 0        |
| 0.102071 | 0.157826 | 0.388884 | 0.417633  | 0.189466  | 0.132732 |
| 11.8897  | 13.2856  | 12.6961  | 11.3602   | 12.9265   | 12.3814  |
| 0        | 0        | 0        | 0         | 0         | 0        |
| 11.1496  | 9.15324  | 10.0241  | 7.14494   | 11.4922   | 10.5147  |
| 2.98611  | 2.90881  | 4.13641  | 3.60223   | 3.72428   | 3.33717  |
| 39.509   | 38.9416  | 40.7825  | 36.6274   | 34.1978   | 38.2282  |
| 0        | 2.83929  | 0        | 8.67816   | 0.128919  | 0.714719 |
| 9.57355  | 9.11631  | 9.03738  | 8.64051   | 7.68323   | 6.71931  |
| 0.189157 | 0.314303 | 0.198592 | 0.350318  | 0.307337  | 0.503585 |
| 6.12166  | 6.32079  | 0        | 0         | 0         | 0        |
| 2.3088   | 2.26983  | 4.43779  | 5.53358   | 2.76371   | 2.0417   |
| 24.0276  | 23.3461  | 23.2909  | 26.8429   | 25.6102   | 28.9399  |
| 0.963739 | 0.930783 | 1.27488  | 0.960725  | 2.00951   | 0.769716 |
| 19.9022  | 15.1781  | 21.0878  | 19.5735   | 22.3003   | 29.119   |
| 8.80683  | 6.30482  | 5.42962  | 4.91      | 3.45041   | 7.24648  |
| 14.0685  | 11.1883  | 21.5723  | 19.6132   | 15.8403   | 14.8623  |
| 41.7438  | 46.3879  | 25.1979  | 35.4743   | 24.017    | 40.6358  |
| 2.28506  | 1.64863  | 1.80306  | 1.28796   | 3.32188   | 1.73908  |
| 54.1694  | 62.3032  | 54.0296  | 60.054    | 49.3115   | 51.3619  |
| 0.556421 | 0.414368 | 0.937882 | 0.370638  | 0.297463  | 0.631893 |
| 13.9028  | 13.6941  | 14.89    | 12.3159   | 14.5877   | 12.5154  |
| 19.8754  | 19.832   | 20.8604  | 19.0342   | 19.0741   | 19.5627  |
| 10.1114  | 7.28228  | 7.8584   | 8.75201   | 11.6637   | 11.1504  |
| 243.11   | 280.509  | 204.659  | 291.402   | 262.071   | 262.529  |
| 0        | 0        | 0        | 0.0132725 | 0         | 0        |
| 2.10849  | 2.09135  | 2.75397  | 1.98056   | 3.11352   | 2.19951  |
| 32.6704  | 32.1259  | 32.103   | 36.0992   | 32.7923   | 35.9161  |
| 18.6292  | 19.4628  | 24.5919  | 20.2209   | 23.1265   | 21.8104  |
| 0.627277 | 0.373862 | 0.13744  | 0.155358  | 0.0886244 | 0.206358 |
| 30.59    | 101.153  | 31.5082  | 184.035   | 50.1495   | 12.5112  |
| 2.6319   | 3.04698  | 4.17909  | 2.96299   | 4.8582    | 3.35173  |
| 0        | 0        | 0        | 0         | 0         | 0        |
| 0.142353 | 0.239492 | 0.30745  | 0.398084  | 0.236112  | 0.227204 |
| 6.24884  | 6.34619  | 7.21769  | 5.60833   | 7.2053    | 5.53889  |
| 1.24715  | 3.24967  | 0.85703  | 1.03335   | 0.614038  | 0.889628 |

|           |          |           |           |          |           |
|-----------|----------|-----------|-----------|----------|-----------|
| 83.1477   | 89.8675  | 84.2319   | 85.2473   | 74.6319  | 74.5195   |
| 0         | 0        | 0         | 0         | 0        | 0         |
| 53.3594   | 48.2712  | 51.2533   | 52.8449   | 42.71    | 60.0539   |
| 0         | 0        | 0         | 0         | 0        | 0         |
| 9.40837   | 6.51944  | 7.48761   | 4.34182   | 10.8175  | 6.32064   |
| 0         | 0        | 0         | 0         | 0        | 0         |
| 0.829912  | 0.736411 | 0.856731  | 1.3619    | 0.92882  | 0.953932  |
| 12.5858   | 12.1848  | 12.5119   | 13.2323   | 12.0354  | 13.8792   |
| 0.0566797 | 0        | 0         | 0.0645742 | 0.306972 | 0.0476513 |
| 2.59721   | 2.36828  | 2.36763   | 2.52594   | 2.42443  | 2.29002   |
| 13.8059   | 12.2652  | 14.7606   | 11.3205   | 17.0353  | 13.0236   |
| 0.71423   | 0.76215  | 0.561395  | 0.466303  | 0.77983  | 0.524057  |
| 0         | 0        | 0         | 0         | 0        | 0         |
| 0.126424  | 0.212692 | 0         | 0.027006  | 0.101144 | 0.124554  |
| 0         | 0        | 0         | 0         | 0        | 0         |
| 18.8479   | 15.7107  | 23.0775   | 17.7474   | 23.6373  | 17.2569   |
| 7.34604   | 3.90598  | 5.46385   | 3.53367   | 11.3433  | 8.33748   |
| 2.5796    | 2.08955  | 2.39681   | 2.07559   | 2.14801  | 1.93827   |
| 1.55762   | 1.57992  | 1.31799   | 0.767718  | 1.45982  | 1.47052   |
| 1.93891   | 2.42648  | 2.2322    | 2.88579   | 2.5909   | 3.8014    |
| 10.6413   | 9.86172  | 9.85638   | 8.70779   | 8.72499  | 7.1289    |
| 27.2134   | 152.61   | 85.7123   | 46.5056   | 58.954   | 80.0752   |
| 3.77521   | 2.41202  | 3.68064   | 3.58655   | 7.21738  | 3.97527   |
| 70.5414   | 67.9851  | 82.177    | 64.8041   | 56.703   | 64.6788   |
| 2.74949   | 3.04976  | 3.58548   | 3.01517   | 3.31038  | 5.89159   |
| 2.42643   | 2.65243  | 0.0471792 | 0.266652  | 0.182535 | 0.141675  |
| 0.037439  | 0        | 0         | 0         | 0        | 0         |
| 0.796149  | 1.22508  | 0.648739  | 0.319993  | 0.760587 | 0.66924   |
| 0.152762  | 0.107198 | 0.138993  | 0.320257  | 0.324219 | 0.102985  |
| 14.749    | 15.4509  | 12.7891   | 15.067    | 14.8007  | 16.113    |
| 12.3998   | 12.3728  | 7.78516   | 7.66725   | 4.78321  | 5.40082   |
| 8.37218   | 6.95701  | 9.71832   | 9.66194   | 8.59945  | 6.95344   |
| 2.94355   | 2.4455   | 3.3479    | 3.58642   | 3.09982  | 3.28238   |
| 11.2905   | 19.6843  | 11.789    | 12.0667   | 10.4816  | 7.29322   |
| 0.453896  | 0.642777 | 0.207943  | 0.258558  | 0.513998 | 0.312215  |
| 0.343479  | 0.856087 | 1.2982    | 2.54358   | 2.41832  | 3.75397   |
| 22.9793   | 20.3585  | 21.7745   | 19.2283   | 22.2698  | 20.8268   |
| 6.14151   | 5.91278  | 7.13319   | 5.70256   | 8.45288  | 5.94614   |
| 16.9172   | 18.6339  | 18.4256   | 18.7761   | 16.1964  | 13.9013   |
| 0.364101  | 0        | 0.229357  | 0         | 1.57755  | 0.76526   |
| 0         | 0        | 0         | 0         | 0        | 0         |
| 21.8695   | 20.0105  | 17.0671   | 17.5981   | 15.0412  | 20.3254   |
| 0         | 0        | 0         | 0         | 0        | 0         |

|           |           |          |           |           |           |
|-----------|-----------|----------|-----------|-----------|-----------|
| 2.71896   | 3.25943   | 3.52715  | 3.63556   | 8.02414   | 4.44505   |
| 45.3798   | 48.0937   | 39.5482  | 38.4648   | 28.8911   | 32.7594   |
| 2.62667   | 2.42966   | 2.50489  | 2.30221   | 1.87299   | 2.27351   |
| 0.102838  | 0.192234  | 0.12956  | 0         | 0         | 0.172914  |
| 86.4857   | 88.2346   | 72.8867  | 66.1898   | 63.3552   | 64.6453   |
| 43.1766   | 43.2784   | 40.2632  | 40.8558   | 36.1554   | 36.8689   |
| 0.410675  | 0.938267  | 0.776085 | 0.935749  | 0.593113  | 0.604203  |
| 13.2415   | 12.5471   | 15.3113  | 11.6913   | 14.1062   | 11.4382   |
| 27.5233   | 22.9405   | 31.602   | 36.0878   | 32.7121   | 34.2005   |
| 12.0314   | 11.6757   | 13.3485  | 11.5616   | 17.8899   | 15.6224   |
| 15.3154   | 17.4745   | 13.6175  | 17.0836   | 13.6485   | 15.1449   |
| 0.175169  | 0.109156  | 0.825107 | 0.199618  | 0.758993  | 0.294545  |
| 45.0525   | 40.2792   | 39.704   | 42.0337   | 58.2089   | 49.9907   |
| 0.0370139 | 0.201103  | 0.101265 | 0.0919179 | 0.107269  | 0.0155316 |
| 19.3798   | 22.18     | 20.6818  | 15.8456   | 20.3423   | 21.3486   |
| 0.0839555 | 0.0523126 | 0.158658 | 0.0478245 | 0.136408  | 0.141165  |
| 729.77    | 830.659   | 805.638  | 932.735   | 592.341   | 665.656   |
| 648.651   | 647.575   | 837.55   | 747.096   | 1073.82   | 856.914   |
| 8.37719   | 9.02218   | 9.19714  | 8.06074   | 8.45977   | 7.04058   |
| 42.4845   | 53.1239   | 39.9281  | 44.4982   | 31.4108   | 44.0647   |
| 0.276604  | 0.391799  | 0.949549 | 0.402523  | 1.11138   | 0.923968  |
| 0.147966  | 0.138296  | 0.326228 | 0.168575  | 0.280479  | 0.0932977 |
| 3.54702   | 3.65717   | 3.42089  | 2.85759   | 4.45926   | 3.41941   |
| 0         | 0         | 0        | 0         | 0         | 0         |
| 7.45464   | 7.48699   | 5.49911  | 7.01225   | 7.11848   | 9.11216   |
| 0.0424104 | 0.0528518 | 0        | 0.144952  | 0.321566  | 0.0713098 |
| 0         | 0         | 0        | 0         | 0         | 0         |
| 1.68219   | 0.926584  | 1.79534  | 1.10479   | 2.18441   | 1.86126   |
| 21.0988   | 20.5069   | 19.214   | 26.5829   | 9.11206   | 10.5949   |
| 6.36834   | 5.86308   | 5.20688  | 4.79745   | 4.95538   | 4.89505   |
| 0         | 0         | 0        | 0         | 0         | 0         |
| 1.74829   | 1.70336   | 2.64311  | 1.91937   | 2.37575   | 1.84394   |
| 0.695779  | 0.722566  | 0.827881 | 1.01288   | 0.418696  | 0.58495   |
| 4.65132   | 4.38546   | 4.66061  | 3.38889   | 5.58302   | 3.33336   |
| 2.77533   | 2.5067    | 3.78521  | 1.62445   | 4.96433   | 2.23693   |
| 0         | 0.0259434 | 0        | 0         | 0.0225496 | 0         |
| 7.00604   | 5.50427   | 6.33212  | 5.3598    | 7.44216   | 5.94697   |
| 39.3542   | 47.6926   | 36.1072  | 48.9138   | 47.1791   | 54.6625   |
| 13.9139   | 19.5231   | 20.9393  | 25.8207   | 20.1806   | 16.7126   |
| 0         | 0         | 0        | 0         | 0         | 0         |
| 59.7563   | 59.8258   | 55.0041  | 61.1835   | 46.3639   | 57.2322   |
| 4.15568   | 5.75422   | 6.399    | 7.89082   | 7.00209   | 6.98745   |
| 1.30885   | 1.643     | 1.93783  | 1.48027   | 1.8627    | 1.27707   |

|           |           |           |           |           |           |
|-----------|-----------|-----------|-----------|-----------|-----------|
| 12.7128   | 12.9698   | 12.215    | 11.1233   | 11.5302   | 12.4263   |
| 9.66814   | 9.57587   | 9.44778   | 8.29458   | 10.9459   | 9.20245   |
| 30.8179   | 32.2512   | 25.9098   | 35.3986   | 16.8941   | 27.1725   |
| 2.34836   | 4.94345   | 15.2727   | 12.618    | 13.5091   | 16.2746   |
| 1526.76   | 1819.37   | 1746.7    | 1688.89   | 1620.85   | 1708.34   |
| 3.87294   | 3.40741   | 3.96876   | 2.53245   | 4.63084   | 3.73182   |
| 1.71724   | 1.93522   | 2.14457   | 1.41651   | 1.79528   | 1.8036    |
| 1.1397    | 1.39759   | 1.6066    | 1.03453   | 2.88696   | 1.78602   |
| 41.4362   | 40.3102   | 43.5583   | 38.6912   | 42.636    | 35.1261   |
| 0.277133  | 0.288991  | 0.221474  | 0.163085  | 0.251187  | 0.23117   |
| 28.6091   | 24.9662   | 27.8914   | 29.6725   | 29.8005   | 26.6243   |
| 1.20385   | 2.7045    | 0.663026  | 0.580277  | 0.386699  | 0.357033  |
| 979.384   | 1163.32   | 978.631   | 1101.53   | 916.974   | 1057.78   |
| 48.7789   | 48.0455   | 57.7701   | 56.34     | 47.1161   | 52.4763   |
| 0         | 0.079645  | 0         | 0.145624  | 0.138453  | 0.0537302 |
| 27.4132   | 28.1138   | 23.5081   | 25.9128   | 29.7118   | 34.1322   |
| 5.8446    | 4.00781   | 7.69399   | 5.64041   | 7.91216   | 4.30353   |
| 5.63827   | 4.37951   | 5.63715   | 5.61285   | 8.48998   | 7.06165   |
| 0.373544  | 0.46551   | 0.235305  | 1.06393   | 1.21384   | 0.785107  |
| 0.76569   | 0.643531  | 0.493546  | 0.466599  | 0.964395  | 0.853309  |
| 6.15428   | 6.18084   | 7.40445   | 5.51548   | 6.76926   | 5.2422    |
| 0.854336  | 0.443613  | 2.33207   | 0.689442  | 1.27242   | 0.329198  |
| 0.0437967 | 0.218317  | 0.165532  | 0.0498968 | 0.142319  | 0.110461  |
| 1.55415   | 3.20952   | 1.1748    | 2.98475   | 2.2606    | 2.76251   |
| 1.0801    | 1.13349   | 0.429717  | 1.16578   | 1.41625   | 1.33819   |
| 0         | 0         | 0.0646072 | 0         | 0         | 0         |
| 0         | 0         | 0         | 0         | 0         | 0         |
| 1.71087   | 1.48061   | 1.73633   | 1.41856   | 2.15174   | 1.40638   |
| 1.53595   | 1.99385   | 1.65288   | 2.26026   | 2.1143    | 1.64102   |
| 41.153    | 33.1482   | 41.9565   | 36.2146   | 60.4251   | 58.6116   |
| 9.61722   | 11.5855   | 10.8149   | 12.6205   | 8.75815   | 10.3612   |
| 0.121187  | 0.0823763 | 0.124919  | 0.0376545 | 0.0835338 | 0.0277864 |
| 4.49058   | 4.50952   | 4.66879   | 4.76834   | 6.56417   | 4.94818   |
| 0         | 0         | 0         | 0         | 0         | 0         |
| 136.791   | 108.214   | 88.3446   | 89.2888   | 83.8724   | 112.777   |
| 0         | 0         | 0         | 0         | 0         | 0         |
| 0.180473  | 30.3435   | 0.800531  | 346.573   | 0.700584  | 8.14294   |
| 0.0299527 | 0.0746541 | 0         | 0         | 0.0324442 | 0.0251816 |
| 1.48352   | 0.953267  | 1.54778   | 1.92783   | 2.13419   | 1.98775   |
| 3.60583   | 3.94289   | 4.36467   | 4.00737   | 4.30782   | 4.01223   |
| 0.460031  | 1.14307   | 0.628335  | 1.00384   | 1.11773   | 0.86753   |
| 0         | 0         | 0         | 0         | 0         | 0         |
| 61.0548   | 62.0998   | 42.2243   | 45.0703   | 42.683    | 44.0569   |

|           |           |           |           |           |           |
|-----------|-----------|-----------|-----------|-----------|-----------|
| 0.586382  | 1.09612   | 1.84689   | 0.668055  | 0.952735  | 0.492978  |
| 86.9299   | 91.4184   | 90.3331   | 95.5944   | 87.9633   | 105.757   |
| 4.93581   | 4.81966   | 6.51522   | 4.29789   | 8.16794   | 5.52104   |
| 3.39254   | 0.797963  | 2.36065   | 1.45131   | 3.40844   | 4.75352   |
| 2.29879   | 1.76017   | 4.14628   | 2.19386   | 4.67225   | 2.80713   |
| 69.3878   | 64.41     | 66.6842   | 57.5321   | 63.0611   | 53.6562   |
| 1.73305   | 1.77076   | 2.33116   | 1.81269   | 1.9471    | 1.71529   |
| 1.02201   | 1.20659   | 0.655085  | 1.54226   | 0.883672  | 0.964731  |
| 9.91648   | 8.92522   | 9.99937   | 8.84611   | 11.074    | 9.12964   |
| 71.6488   | 66.5686   | 78.0724   | 76.7384   | 87.4364   | 74.6803   |
| 4.13167   | 3.83376   | 4.95633   | 4.27147   | 5.79412   | 4.54926   |
| 0.0797707 | 0         | 0.200999  | 0         | 0.086406  | 0.0670642 |
| 105.671   | 100.847   | 109.41    | 105.208   | 117.398   | 102.551   |
| 0.0450237 | 0         | 0.354521  | 0.128237  | 0.134114  | 0.075704  |
| 0         | 0         | 0         | 0         | 0.174088  | 0         |
| 7.04982   | 8.94097   | 10.5323   | 13.5047   | 8.37957   | 11.1194   |
| 5.55805   | 6.23382   | 5.20981   | 4.96449   | 5.94813   | 5.43903   |
| 0         | 0.0745379 | 0         | 0.0340715 | 0         | 0         |
| 6.83451   | 5.79044   | 7.03086   | 6.86215   | 9.95943   | 9.42485   |
| 35.4987   | 38.6088   | 33.5301   | 35.6244   | 33.7668   | 36.4147   |
| 0         | 0         | 0         | 0         | 0         | 0         |
| 6.52708   | 4.797     | 6.07952   | 5.75192   | 8.21812   | 8.91115   |
| 1.71E-11  | 2.29E-37  | 0.112341  | 3.00E-22  | 0.0783223 | 8.43E-38  |
| 2779.89   | 2955.07   | 2961.18   | 3534.17   | 2158.03   | 2855.5    |
| 3.54089   | 3.31536   | 3.96887   | 3.41241   | 3.56112   | 2.92997   |
| 55.0354   | 53.783    | 60.494    | 59.825    | 58.6986   | 54.6413   |
| 48.7967   | 60.8104   | 0         | 55.5933   | 0         | 20.512    |
| 0         | 0         | 0         | 0         | 0         | 0         |
| 0.261321  | 0         | 0.329227  | 0         | 0         | 0.219696  |
| 0         | 0         | 0         | 0         | 0         | 0         |
| 3.35177   | 2.88566   | 2.68754   | 2.42982   | 3.69627   | 1.8955    |
| 0.0354382 | 0.28706   | 0.0223235 | 0.96898   | 0.038386  | 0.238347  |
| 0         | 0         | 0         | 0         | 0.083713  | 0.064974  |
| 0.247993  | 0.400015  | 0.271368  | 0.283281  | 0.23063   | 0.268131  |
| 25.0942   | 24.6629   | 40.4213   | 40.3214   | 35.3753   | 32.2154   |
| 5.65232   | 4.35973   | 3.75972   | 4.82562   | 5.68413   | 5.89441   |
| 12.2052   | 11.841    | 9.69938   | 8.50579   | 12.9793   | 10.0163   |
| 4.01604   | 2.76427   | 1.73557   | 1.06405   | 0.581699  | 0.902974  |
| 2.79373   | 2.32103   | 2.05315   | 1.06095   | 1.76523   | 1.56581   |
| 14.2805   | 13.9696   | 15.9631   | 19.6322   | 9.26812   | 13.4596   |
| 2.1819    | 2.03278   | 2.18721   | 1.70302   | 2.69859   | 1.5786    |
| 5.62929   | 6.21323   | 6.47685   | 4.73571   | 6.87613   | 5.37412   |
| 1.59792   | 1.50916   | 1.38998   | 1.01095   | 2.54581   | 1.06983   |

|           |           |           |           |           |           |
|-----------|-----------|-----------|-----------|-----------|-----------|
| 15.8953   | 16.2957   | 16.7023   | 14.6487   | 14.5546   | 16.4912   |
| 0.0947792 | 0.0295284 | 0.14926   | 0.0269951 | 0.102663  | 0         |
| 7.02038   | 7.12628   | 7.06559   | 6.32714   | 7.05092   | 6.40064   |
| 0         | 0         | 0         | 0         | 0         | 0         |
| 9.06522   | 8.84805   | 8.83854   | 8.49821   | 9.56749   | 8.08313   |
| 4.72203   | 5.08638   | 7.50605   | 5.44174   | 5.33172   | 4.25371   |
| 3.32842   | 2.72397   | 4.7879    | 2.80156   | 5.78458   | 3.84236   |
| 95.9235   | 94.2582   | 128.246   | 107.562   | 126.977   | 115.217   |
| 1.56762   | 1.46321   | 1.27737   | 1.45913   | 1.53901   | 1.13976   |
| 70.0523   | 77.1244   | 62.7459   | 75.0345   | 54.8311   | 72.3017   |
| 3.94721   | 3.04065   | 5.9486    | 3.03594   | 7.83848   | 6.84696   |
| 0         | 0         | 0         | 0         | 0         | 0         |
| 47.7358   | 52.0214   | 43.9822   | 42.3116   | 36.3125   | 40.923    |
| 4.18777   | 3.16953   | 5.3779    | 2.07208   | 5.63377   | 2.97712   |
| 0         | 0         | 0         | 0         | 0         | 0         |
| 9.5585    | 12.9706   | 12.5775   | 8.95387   | 11.9641   | 13.929    |
| 0.853404  | 1.05295   | 0.627287  | 0.876666  | 0.833495  | 0.735712  |
| 125.615   | 126.909   | 119.921   | 130.82    | 119.805   | 132.311   |
| 12.5512   | 12.2602   | 11.0735   | 13.3222   | 12.4615   | 11.6851   |
| 0         | 0         | 0         | 0         | 0         | 0         |
| 0         | 0         | 0         | 0         | 0         | 0         |
| 10.9839   | 8.48318   | 11.8903   | 9.45104   | 20.4582   | 7.09061   |
| 0.0540089 | 0.0789909 | 0.136087  | 0         | 0.175504  | 0.0681089 |
| 20.7681   | 20.1539   | 18.9726   | 21.7113   | 16.8778   | 18.8222   |
| 51.8256   | 114.168   | 34.5624   | 35.6708   | 30.5964   | 75.295    |
| 4.53771   | 4.82611   | 4.94254   | 3.65911   | 5.42058   | 4.03955   |
| 0         | 0         | 0         | 0         | 0         | 0         |
| 0         | 0         | 0         | 0         | 0         | 0         |
| 0         | 0         | 0         | 0         | 0         | 0         |
| 14.8795   | 18.7      | 15.2192   | 17.9863   | 17.9292   | 17.5555   |
| 2.98802   | 2.2708    | 6.84444   | 2.93949   | 3.10008   | 0.997509  |
| 63.8343   | 85.1698   | 57.1296   | 83.4581   | 53.17     | 88.8496   |
| 4.49561   | 3.43148   | 3.85847   | 3.23312   | 1.4913    | 1.88976   |
| 15.737    | 14.7932   | 19.319    | 16.3526   | 18.9136   | 17.3828   |
| 7.0841    | 8.90702   | 9.50266   | 7.11599   | 9.9685    | 6.44756   |
| 0.379507  | 0.392526  | 0.366348  | 0.230273  | 1.06661   | 0.624315  |
| 3.0442    | 3.22426   | 4.01358   | 2.94767   | 5.28437   | 3.66313   |
| 0.139084  | 0         | 0         | 0.396139  | 0.0753262 | 0.409252  |
| 0.119396  | 0.0247985 | 0.0376053 | 0.0340064 | 0.043109  | 0.108742  |
| 6.0692    | 4.56054   | 6.22844   | 6.25353   | 6.12122   | 5.93449   |
| 0         | 0         | 0         | 0         | 0         | 0         |
| 0.0262599 | 0         | 0         | 0         | 0         | 0         |
| 0         | 0         | 0         | 0         | 0         | 0         |

|           |           |           |          |           |           |
|-----------|-----------|-----------|----------|-----------|-----------|
| 0         | 0         | 0.093964  | 0        | 0.080787  | 0         |
| 0         | 0         | 0         | 0        | 0         | 0         |
| 33.2088   | 37.3139   | 39.3383   | 40.2996  | 42.0788   | 49.4385   |
| 0.0254985 | 0         | 0         | 0        | 0         | 0         |
| 0         | 0.0614844 | 0         | 0        | 0         | 0.0207393 |
| 55.9513   | 61.0403   | 48.1594   | 55.5205  | 53.7092   | 68.526    |
| 0         | 0         | 0         | 0        | 0         | 0         |
| 0.0342202 | 0.0431494 | 0         | 0        | 0         | 0         |
| 0.0678937 | 0.028203  | 0.14256   | 0.128917 | 0.122569  | 0.0856186 |
| 1.62658   | 1.61242   | 1.39722   | 1.5162   | 0.680727  | 1.08777   |
| 7.45389   | 6.22598   | 7.06835   | 5.90489  | 15.569    | 11.0732   |
| 0         | 0         | 0.0248281 | 0        | 0         | 0.016568  |
| 13.5899   | 12.3898   | 9.31156   | 11.0009  | 13.5065   | 15.9752   |
| 86.8724   | 107.278   | 281.848   | 301.854  | 268.426   | 268.898   |
| 4.24602   | 4.78603   | 3.426     | 2.4323   | 3.74654   | 3.58974   |
| 0         | 0         | 0         | 0        | 0         | 0         |
| 11.1779   | 10.3779   | 12.4224   | 9.6736   | 14.2581   | 12.7159   |
| 1.29476   | 108.693   | 1.48292   | 1408.32  | 2.93386   | 44.3326   |
| 13.018    | 10.6678   | 12.5739   | 12.3593  | 13.4599   | 9.48512   |
| 11.2654   | 10.3752   | 7.62657   | 7.73002  | 8.8998    | 7.50619   |
| 0         | 0         | 0         | 0        | 0         | 0         |
| 13.0356   | 11.503    | 12.9748   | 11.2285  | 10.5914   | 11.3368   |
| 0         | 0         | 0         | 0        | 0         | 0         |
| 0         | 0         | 0         | 0.172963 | 0         | 0         |
| 0.1177    | 0.0488927 | 0.098857  | 0.22349  | 0.594957  | 0.329841  |
| 88.2222   | 102.318   | 93.0612   | 94.7297  | 68.7609   | 102.899   |
| 0.948884  | 0.665155  | 0.896591  | 0.608089 | 1.41324   | 0.797738  |
| 9.32417   | 8.42819   | 9.86317   | 7.33776  | 9.79055   | 8.05539   |
| 52.4227   | 58.0786   | 47.778    | 49.001   | 29.5628   | 35.0325   |
| 0.287622  | 0.0896085 | 0.0452952 | 0.204802 | 0.35049   | 0.483615  |
| 27.5119   | 29.521    | 47.8952   | 31.466   | 38.3922   | 28.086    |
| 166.982   | 184.882   | 176.778   | 172.007  | 149.163   | 160.403   |
| 0         | 0         | 0         | 0        | 0         | 0         |
| 0         | 0.0379353 | 0         | 0        | 0.0329729 | 0         |
| 15.909    | 16.6074   | 14.2149   | 14.4542  | 17.0965   | 15.7147   |
| 6.68243   | 6.55711   | 6.55746   | 5.81854  | 8.81363   | 9.54145   |
| 0         | 0         | 0         | 0        | 0         | 0         |
| 27.8794   | 29.559    | 25.1616   | 33.7029  | 28.8436   | 37.7785   |
| 0.157325  | 0.505381  | 0.508783  | 0.242221 | 0.621859  | 0.382653  |
| 91.4621   | 95.2803   | 77.1578   | 84.9727  | 64.732    | 77.1338   |
| 12.5816   | 14.2287   | 13.7562   | 14.2709  | 15.129    | 13.9791   |
| 20.9754   | 23.7238   | 18.9843   | 21.2926  | 21.1552   | 22.9691   |
| 34.3212   | 28.1554   | 40.4118   | 41.1533  | 50.0568   | 49.87     |



|           |           |           |           |          |          |
|-----------|-----------|-----------|-----------|----------|----------|
| 0         | 0         | 0.470611  | 0         | 0.404615 | 0.157021 |
| 28.2314   | 27.4108   | 31.3868   | 24.5974   | 36.8201  | 31.6315  |
| 70.2098   | 70.1751   | 66.3763   | 62.8637   | 58.4999  | 49.215   |
| 0.349112  | 0.281512  | 0.362213  | 0.187171  | 0.578349 | 0.569741 |
| 7.24662   | 5.62775   | 8.39825   | 6.62461   | 8.50347  | 7.72516  |
| 10.9207   | 11.748    | 7.63989   | 9.24221   | 12.9949  | 12.5123  |
| 7.38335   | 6.95288   | 8.24034   | 8.36097   | 8.92631  | 7.56482  |
| 3.97209   | 2.21024   | 4.14305   | 3.28349   | 5.50318  | 2.87342  |
| 0.387766  | 0.493639  | 1.49616   | 1.28395   | 1.3082   | 1.27352  |
| 0.139178  | 0.126141  | 1.37088   | 1.26851   | 0.123345 | 0.170195 |
| 0         | 0         | 0         | 0         | 0        | 0        |
| 0.200437  | 0.271389  | 0.444468  | 0.248105  | 0.317601 | 0.194124 |
| 0.0255664 | 0         | 0         | 0         | 0        | 0        |
| 3.64165   | 2.57144   | 2.96907   | 2.55736   | 3.10136  | 2.46092  |
| 3.66306   | 3.32058   | 5.74122   | 3.24072   | 9.63955  | 8.39929  |
| 5.83011   | 6.88967   | 4.89672   | 5.34425   | 5.11737  | 5.90616  |
| 0.182281  | 0.25961   | 0.164034  | 0.178003  | 0.310268 | 0.218923 |
| 0         | 0         | 0         | 0         | 0        | 0        |
| 93.3409   | 84.8355   | 40.429    | 42.2932   | 42.0897  | 59.8109  |
| 2.22597   | 2.40413   | 4.01964   | 3.46588   | 5.38485  | 2.24568  |
| 29.7632   | 75.2121   | 9.37434   | 198.396   | 51.2689  | 19.4618  |
| 13.0896   | 12.7076   | 14.3696   | 12.6274   | 13.4963  | 11.63    |
| 6.94486   | 8.85364   | 8.59866   | 7.82122   | 9.42478  | 7.08018  |
| 0.0987315 | 0.123064  | 0.0414419 | 0.225024  | 0.285199 | 0.249011 |
| 0         | 0         | 0         | 0         | 0        | 0        |
| 20.9846   | 21.725    | 22.7823   | 21.0009   | 23.7867  | 17.9364  |
| 44.2984   | 44.6609   | 31.9003   | 29.7216   | 39.8049  | 37.9561  |
| 77.733    | 55.9692   | 81.7329   | 42.3283   | 17.4857  | 21.3798  |
| 11.7907   | 12.0862   | 13.8451   | 13.5091   | 13.0229  | 11.5433  |
| 1.10306   | 1.01905   | 1.34467   | 1.13087   | 1.76001  | 0.771918 |
| 50.8185   | 44.2842   | 52.5657   | 42.7282   | 75.2221  | 61.7996  |
| 235.497   | 235.111   | 533.545   | 130.23    | 195.613  | 440.35   |
| 0.0780872 | 0.0727316 | 0.148121  | 0.0838072 | 0.242453 | 0.352102 |
| 15.7523   | 16.8741   | 14.0463   | 12.9745   | 14.0516  | 15.4546  |
| 1.06228   | 1.2757    | 2.52448   | 1.07331   | 1.54913  | 0.518115 |
| 0.287874  | 0.489201  | 0.494562  | 0.536677  | 1.13389  | 1.2321   |
| 12.1477   | 12.9137   | 17.798    | 17.4212   | 19.506   | 23.8515  |
| 3.23877   | 3.2157    | 5.25929   | 3.75237   | 2.19687  | 1.63668  |
| 0         | 0         | 0         | 0         | 0        | 0        |
| 15.469    | 16.9182   | 15.606    | 13.4868   | 11.5761  | 11.8202  |
| 49.7303   | 50.3915   | 53.7993   | 61.116    | 60.4223  | 69.174   |
| 4.09872   | 5.53348   | 4.79495   | 4.78079   | 2.82764  | 3.85607  |
| 0         | 0         | 0         | 0         | 0        | 0        |

|           |           |           |           |           |           |
|-----------|-----------|-----------|-----------|-----------|-----------|
| 0.0116309 | 0.144944  | 0.131879  | 0.0795051 | 0.037795  | 0.0684475 |
| 77.469    | 81.7519   | 75.8339   | 90.6479   | 95.7974   | 107.226   |
| 0         | 0         | 0         | 0         | 0         | 0         |
| 0         | 0         | 0         | 0         | 0         | 0         |
| 11.6729   | 12.2233   | 12.8678   | 12.8369   | 11.9414   | 12.0624   |
| 56.6557   | 59.8379   | 60.9686   | 60.1392   | 61.9543   | 62.1024   |
| 1.71879   | 1.78497   | 8.39104   | 8.15914   | 6.36102   | 11.7809   |
| 19.0206   | 18.5806   | 17.9923   | 21.3711   | 17.2484   | 21.8379   |
| 3.83719   | 4.07384   | 2.54423   | 2.72389   | 3.27815   | 2.27403   |
| 1.88766   | 1.99628   | 1.76415   | 2.00116   | 1.12187   | 1.05486   |
| 38.2096   | 36.4596   | 39.2414   | 35.6969   | 38.1473   | 36.3332   |
| 8.59317   | 9.76737   | 7.89631   | 13.3671   | 8.36834   | 7.24422   |
| 0.031999  | 0.0398771 | 0         | 0.0364559 | 0.0346606 | 0.0538039 |
| 6.18497   | 5.66037   | 6.16372   | 5.7395    | 8.01008   | 8.08898   |
| 0         | 0         | 0         | 0         | 0         | 0         |
| 15.8338   | 17.2868   | 18.6755   | 16.8882   | 14.1205   | 15.7617   |
| 0.341993  | 0.403509  | 0.205248  | 0.173444  | 0.543783  | 0.227265  |
| 0.248066  | 0.165808  | 0.0896921 | 0.144193  | 0.205723  | 0.119705  |
| 65.3962   | 73.4975   | 75.0855   | 76.5886   | 93.7874   | 95.2976   |
| 0.0897108 | 0.0479132 | 0.0322921 | 0         | 0.124937  | 0.0430977 |
| 0.83807   | 0.751236  | 0.870609  | 0.502525  | 1.01926   | 0.902351  |
| 0         | 0         | 0         | 0         | 0         | 0         |
| 3.67903   | 3.40706   | 4.61682   | 3.66959   | 5.07141   | 3.82674   |
| 133.73    | 137.091   | 81.3266   | 91.9576   | 22.4095   | 30.229    |
| 0         | 0         | 0         | 0         | 0         | 0         |
| 3.31775   | 3.40812   | 2.68647   | 2.56465   | 2.73638   | 3.22073   |
| 0.187238  | 0.233294  | 0.471788  | 0.373102  | 0.760134  | 0.747307  |
| 0.519245  | 0.326237  | 0.163543  | 0.197189  | 0.516737  | 0.327401  |
| 0         | 0         | 0         | 0         | 0         | 0         |
| 0         | 0         | 0         | 0         | 0         | 0         |
| 4.43825   | 3.92999   | 6.65094   | 3.77909   | 6.24958   | 2.82798   |
| 5.43614   | 5.44297   | 6.61258   | 5.61669   | 4.81218   | 13.3009   |
| 156.636   | 145.28    | 105.889   | 115.15    | 47.4673   | 78.0764   |
| 13.7216   | 14.1115   | 16.7837   | 15.7846   | 6.63783   | 12.4319   |
| 0         | 0.0576007 | 0         | 0         | 0         | 0         |
| 0.230074  | 0.669008  | 0.43479   | 0.218433  | 0.207676  | 0.515803  |
| 9.21756   | 9.08178   | 8.09199   | 7.88046   | 10.001    | 8.12575   |
| 0.813806  | 0.74469   | 0.102973  | 0.216163  | 0.241422  | 0.529882  |
| 61.068    | 62.2535   | 67.9995   | 64.2033   | 67.7975   | 51.4424   |
| 0.559033  | 1.13208   | 1.49664   | 0.716509  | 1.05968   | 1.17497   |
| 32.9031   | 32.3448   | 36.8063   | 33.0443   | 30.3399   | 28.3655   |
| 0.0909485 | 0.199899  | 0.175014  | 0.414466  | 0.610919  | 0.211318  |
| 25.8875   | 25.4247   | 22.3697   | 25.3381   | 18.0118   | 21.8249   |

|          |           |          |           |           |           |
|----------|-----------|----------|-----------|-----------|-----------|
| 0        | 0         | 0        | 0         | 0         | 0.0194408 |
| 0        | 0         | 0        | 0         | 0         | 0         |
| 0        | 0         | 0        | 0         | 0         | 0         |
| 14.656   | 13.9135   | 15.7556  | 13.0044   | 16.0378   | 13.4014   |
| 0        | 0         | 0        | 0         | 0         | 0         |
| 10.2868  | 8.76682   | 8.85267  | 7.61936   | 7.55266   | 9.41895   |
| 77.5237  | 79.1869   | 79.4075  | 75.9909   | 84.9361   | 69.4472   |
| 2.02046  | 2.09179   | 2.54548  | 2.93931   | 3.56897   | 3.16205   |
| 6.81512  | 5.58047   | 6.82929  | 5.59395   | 11.4452   | 9.85741   |
| 0        | 0         | 0        | 0         | 0         | 0         |
| 0.142011 | 0.0353949 | 0.214696 | 0.129433  | 0.153824  | 0.214903  |
| 0        | 0         | 0        | 0         | 0         | 0.0315654 |
| 0.061195 | 0         | 0        | 0.0697184 | 0         | 0         |
| 0.050078 | 0.249629  | 0.063091 | 0.342318  | 0.216974  | 0.168405  |
| 0        | 0         | 0        | 0         | 0.170864  | 0         |
| 5.35854  | 6.27808   | 4.11239  | 4.55717   | 4.59845   | 4.86983   |
| 29.3402  | 26.196    | 33.0677  | 28.1574   | 30.6639   | 27.3994   |
| 7.81206  | 8.48067   | 8.13758  | 7.12179   | 7.63894   | 6.93046   |
| 1.53566  | 1.10558   | 1.63355  | 1.67182   | 1.77427   | 1.54907   |
| 0        | 0         | 0        | 0         | 0         | 0         |
| 84.1967  | 61.2172   | 71.2262  | 61.919    | 93.6219   | 69.3325   |
| 1.69512  | 1.90536   | 1.46563  | 1.72297   | 2.41217   | 2.10972   |
| 28.0773  | 28.8674   | 28.3515  | 29.2341   | 24.688    | 26.7582   |
| 2.1461   | 2.63702   | 3.12668  | 4.92092   | 2.27124   | 2.81532   |
| 22.7211  | 26.0635   | 25.3846  | 26.5486   | 24.3125   | 24.1219   |
| 2.26894  | 1.27696   | 3.56548  | 2.77953   | 3.43545   | 3.07665   |
| 11.7902  | 8.93703   | 8.87463  | 10.3383   | 16.2115   | 10.9066   |
| 89.2758  | 89.8858   | 79.2787  | 77.9074   | 76.7479   | 74.434    |
| 3.08313  | 2.46874   | 2.99671  | 2.91653   | 3.70981   | 2.18739   |
| 0.644968 | 1.0047    | 1.14267  | 0.413326  | 0.698616  | 0.626956  |
| 3.84146  | 4.23009   | 3.14997  | 2.9051    | 3.98164   | 3.99519   |
| 0        | 0         | 0        | 0         | 0         | 0         |
| 19.6537  | 17.2808   | 18.2763  | 18.9782   | 19.8342   | 18.1002   |
| 105.913  | 99.2614   | 99.6856  | 103.194   | 78.9388   | 93.9266   |
| 0.188751 | 0.277133  | 0.133761 | 0.103218  | 1.3803    | 0.329159  |
| 5.31926  | 5.99071   | 5.91006  | 4.62097   | 6.67891   | 6.37212   |
| 0.83373  | 0.335251  | 0.785332 | 0.956952  | 1.92138   | 1.56761   |
| 13.1051  | 13.1282   | 14.9008  | 13.3588   | 13.6618   | 12.3119   |
| 45.4619  | 41.0857   | 43.9904  | 42.8577   | 49.4133   | 49.169    |
| 2.77892  | 2.491     | 1.4127   | 1.58299   | 0.475275  | 0.389379  |
| 0.041896 | 0.0522108 | 0.159671 | 0.0745813 | 0.0926541 | 0.0786793 |
| 22.7469  | 23.4221   | 23.7946  | 21.0986   | 18.5663   | 17.0953   |
| 5.55801  | 5.98973   | 6.26017  | 4.57042   | 6.78132   | 4.86418   |

|          |           |          |           |           |           |
|----------|-----------|----------|-----------|-----------|-----------|
| 2.95388  | 2.90028   | 3.28649  | 3.26333   | 3.47661   | 3.93468   |
| 2.03181  | 1.57293   | 2.59857  | 2.0693    | 4.30159   | 3.98572   |
| 27.794   | 29.2805   | 23.8773  | 29.299    | 22.2631   | 28.4839   |
| 0        | 0         | 0.345857 | 0.239889  | 0.0743387 | 0.259643  |
| 9.91596  | 9.4099    | 10.7158  | 10.1352   | 11.4459   | 11.1366   |
| 0        | 0         | 0        | 0         | 0         | 0         |
| 0        | 0         | 0        | 0         | 0         | 0         |
| 1.6686   | 1.23003   | 2.96062  | 0.797654  | 3.47844   | 0.739349  |
| 52.3842  | 61.8604   | 54.3159  | 57.5373   | 54.2465   | 62.7922   |
| 2.76684  | 2.41841   | 1.57346  | 2.10148   | 3.87111   | 2.48765   |
| 1.53922  | 1.7216    | 2.52939  | 1.76995   | 2.31966   | 2.43939   |
| 42.6308  | 44.5121   | 47.6593  | 43.6049   | 44.9287   | 46.6541   |
| 10.5715  | 13.0857   | 15.3006  | 16.2548   | 12.5167   | 13.4022   |
| 2.64056  | 2.19377   | 1.94058  | 2.00556   | 1.98625   | 1.6033    |
| 0.921905 | 0.229775  | 1.85834  | 0.210062  | 0.998588  | 0.620045  |
| 1.48937  | 1.22371   | 0.806357 | 0.84227   | 1.2427    | 1.10375   |
| 0.165618 | 0.0515983 | 0.625965 | 0.141515  | 0.94182   | 0.278475  |
| 0        | 0         | 0        | 0         | 0.0374252 | 0         |
| 0.232548 | 0.0579603 | 0.146489 | 0.0794815 | 0.0755675 | 0.254158  |
| 3.67E-07 | 0.0645226 | 0        | 0         | 0         | 0         |
| 9.19261  | 8.819     | 8.58652  | 8.23132   | 10.5193   | 9.75798   |
| 0        | 0.125417  | 0.126792 | 0.114657  | 0.109011  | 0.169218  |
| 11.1316  | 7.79467   | 8.2436   | 10.2253   | 11.9567   | 12.9951   |
| 14.3987  | 13.7821   | 16.2644  | 14.8973   | 14.7848   | 12.4964   |
| 0.601718 | 0.37493   | 0.32489  | 0.734493  | 1.21043   | 1.08401   |
| 17.7609  | 16.9793   | 16.4571  | 11.4326   | 10.3999   | 11.7415   |
| 8.4974   | 7.87165   | 12.1256  | 10.352    | 14.07     | 10.0011   |
| 6.75892  | 7.60783   | 8.46947  | 8.27991   | 9.76149   | 7.48475   |
| 0        | 0         | 0        | 0         | 0.0185157 | 0         |
| 0        | 0         | 0        | 0         | 0         | 0         |
| 0.568784 | 0.748939  | 0.324491 | 0.207851  | 0.895081  | 0.812009  |
| 20.8737  | 19.036    | 21.4335  | 18.2826   | 21.1724   | 18.34     |
| 10.8882  | 11.4386   | 10.0072  | 8.63672   | 9.53972   | 8.6227    |
| 19.4717  | 18.6988   | 18.6629  | 18.6673   | 18.1851   | 17.4176   |
| 0        | 0         | 0        | 0         | 0         | 0         |
| 0        | 0         | 0        | 0         | 0         | 0         |
| 6.90506  | 7.81041   | 7.87314  | 5.93921   | 5.97333   | 4.20177   |
| 10.6638  | 11.5189   | 12.3749  | 13.3149   | 15.6439   | 13.6103   |
| 21.4976  | 22.3817   | 20.0748  | 20.5993   | 25.0543   | 20.9287   |
| 0        | 0         | 0        | 0         | 0         | 0.0345856 |
| 9.22489  | 10.1956   | 9.4396   | 10.0818   | 10.3991   | 8.70298   |
| 9.96955  | 8.76285   | 10.0117  | 8.14823   | 12.0509   | 7.81466   |
| 56.2726  | 52.9135   | 64.1598  | 62.8215   | 67.5217   | 72.0272   |

|           |           |           |           |           |           |
|-----------|-----------|-----------|-----------|-----------|-----------|
| 0.0161632 | 0.0805701 | 0.0610897 | 0         | 0.0700305 | 0.149474  |
| 6.09069   | 6.19654   | 7.63768   | 7.88395   | 8.36414   | 6.85716   |
| 1.47E-107 | 7.17E-281 | 2.64E-107 | 1.51E-246 | 2.87E-71  | 4.74E-129 |
| 0         | 0         | 0         | 0         | 0.0356711 | 0         |
| 3.02967   | 4.06923   | 5.85264   | 4.6789    | 5.0319    | 2.23577   |
| 2.40749   | 2.67657   | 2.53106   | 2.93542   | 3.9457    | 2.45263   |
| 4.45654   | 5.34709   | 4.04773   | 4.29796   | 3.18822   | 3.86866   |
| 37.7039   | 43.0951   | 33.9435   | 36.8987   | 28.1213   | 30.4615   |
| 6.42518   | 6.7608    | 6.42542   | 5.18387   | 6.78811   | 6.20042   |
| 10.4618   | 8.8877    | 14.4735   | 11.8589   | 10.514    | 11.472    |
| 0         | 0         | 0         | 0         | 0         | 0         |
| 5.4095    | 6.2452    | 5.32528   | 6.38972   | 5.238     | 5.81768   |
| 0.0004392 | 1.99E-06  | 0.39972   | 1.66E-06  | 1.75E-06  | 0.535341  |
| 11.6631   | 13.426    | 11.2321   | 9.43643   | 9.54987   | 9.50618   |
| 0.173506  | 0.0960993 | 0.194305  | 0.0439273 | 0.271467  | 0.226907  |
| 1.2535    | 1.32902   | 0.870551  | 0.822855  | 0.883964  | 0.633499  |
| 0         | 0         | 0         | 0         | 0         | 0         |
| 0         | 0         | 0         | 0         | 0         | 0         |
| 7.49305   | 7.50194   | 10.6411   | 10.8075   | 13.7358   | 11.7636   |
| 2.42996   | 3.17776   | 4.38422   | 4.30642   | 4.64677   | 4.71632   |
| 33.8814   | 32.6562   | 33.4746   | 33.4055   | 28.301    | 30.1344   |
| 0.0933022 | 0.175015  | 0.114418  | 0.161691  | 0.0673754 | 0.0929663 |
| 0.925331  | 0.899063  | 1.48193   | 1.19716   | 1.59688   | 1.14713   |
| 0         | 0         | 0         | 0.011314  | 0         | 0         |
| 15.9268   | 18.4138   | 15.1462   | 17.3881   | 15.2481   | 17.5191   |
| 0         | 0         | 0         | 0         | 0         | 0         |
| 6.16883   | 5.73967   | 7.41104   | 6.72897   | 7.56081   | 6.67085   |
| 0         | 0         | 0         | 0         | 0         | 0         |
| 6.45774   | 6.67334   | 9.46001   | 7.3711    | 9.39057   | 10.7396   |
| 39.3893   | 36.4079   | 34.4591   | 32.8919   | 39.5853   | 37.4437   |
| 0         | 0         | 0.0502497 | 0.0908814 | 0.043203  | 0         |
| 2.50341   | 1.94248   | 2.85639   | 2.69065   | 3.99072   | 2.4819    |
| 0         | 0         | 0.0593266 | 1.34122   | 0.051007  | 0.197946  |
| 0.0764604 | 1.51E-07  | 0.0413851 | 0.0554057 | 0.0534249 | 0.0851984 |
| 21.5852   | 23.8979   | 19.5441   | 23.3009   | 21.0328   | 24.0106   |
| 0         | 0         | 0         | 0         | 0.0715911 | 0         |
| 2.11024   | 1.95281   | 1.1582    | 2.11852   | 1.04104   | 0.948532  |
| 0.0631907 | 0         | 0.318444  | 0.359961  | 0.342235  | 0.132813  |
| 30.1061   | 26.5885   | 28.5723   | 26.0014   | 28.189    | 29.6434   |
| 9.45939   | 7.67882   | 26.565    | 17.067    | 18.6351   | 12.0557   |
| 0         | 0         | 0         | 0         | 0         | 0         |
| 1.08366   | 0.800268  | 1.11243   | 0.777335  | 1.73896   | 1.14724   |
| 5.90114   | 7.2495    | 3.8       | 4.91366   | 8.74876   | 10.44     |

|          |           |           |          |           |           |
|----------|-----------|-----------|----------|-----------|-----------|
| 52.0068  | 49.9032   | 55.2732   | 47.1699  | 47.6303   | 55.1778   |
| 56.3917  | 56.5956   | 55.1242   | 59.4702  | 57.4802   | 61.9769   |
| 9.46599  | 10.0412   | 10.3768   | 8.07812  | 11.8437   | 9.58392   |
| 23.0527  | 31.8961   | 20.2687   | 27.295   | 23.6877   | 23.9477   |
| 4.66865  | 5.08729   | 5.4556    | 6.11547  | 5.52115   | 5.11955   |
| 39.5428  | 41.2181   | 32.2838   | 39.1712  | 26.503    | 32.7561   |
| 0.17629  | 0.219693  | 0.2221    | 0        | 0.334169  | 0.129683  |
| 12.8886  | 12.9056   | 16.1041   | 14.8348  | 14.0755   | 13.6671   |
| 0.268101 | 0.0668214 | 0.202661  | 0.183266 | 0.406562  | 0.135237  |
| 13.1011  | 13.2632   | 14.781    | 12.4435  | 12.0426   | 13.9968   |
| 0.238953 | 0.148892  | 0.551918  | 0.207417 | 0.523821  | 0.29177   |
| 1.57949  | 1.25431   | 2.26222   | 1.71871  | 0.857379  | 1.14766   |
| 3.85055  | 2.95295   | 4.47797   | 7.08647  | 0.9625    | 0.249016  |
| 49.9576  | 57.0805   | 43.0747   | 48.6504  | 45.9302   | 53.9238   |
| 4.32204  | 5.44452   | 3.9595    | 2.85541  | 4.75182   | 4.81911   |
| 0.908269 | 0.699351  | 1.06178   | 0.946732 | 0.879773  | 0.63329   |
| 3312.31  | 3790.68   | 3215.29   | 3372.42  | 3151.67   | 3472.17   |
| 0.085923 | 0         | 0.0864603 | 0.225175 | 0.0735187 | 0.0735643 |
| 11.4893  | 10.2752   | 10.4729   | 11.2416  | 10.7612   | 13.466    |
| 0        | 0.287496  | 0         | 0.26283  | 0         | 0.0969753 |
| 3.04959  | 2.24322   | 3.33281   | 2.95574  | 2.86473   | 2.88008   |
| 0        | 0         | 0         | 0        | 0         | 0         |
| 0        | 0         | 0         | 0        | 0         | 0         |
| 28.655   | 29.3928   | 41.7486   | 32.8848  | 34.1243   | 40.6911   |
| 6.28467  | 5.98481   | 5.26603   | 4.59319  | 7.12849   | 6.55464   |
| 0        | 0         | 0         | 0        | 0         | 0         |
| 8.07727  | 8.91648   | 8.86605   | 7.85985  | 8.12215   | 6.76888   |
| 0        | 0         | 0         | 0        | 0         | 0         |
| 0        | 0         | 0         | 0        | 0         | 0         |
| 1.86122  | 1.65382   | 1.363     | 1.07291  | 1.43935   | 1.48085   |
| 0        | 0         | 0         | 0        | 0         | 0         |
| 28.4462  | 28.6418   | 25.9568   | 28.2739  | 20.4571   | 27.1628   |
| 0.996702 | 2.27716   | 1.46498   | 1.45095  | 1.61941   | 1.39657   |
| 0.449799 | 0.428648  | 0.100003  | 0.211008 | 0.286596  | 0.378152  |
| 76.7363  | 70.4884   | 61.9643   | 61.1726  | 50.0344   | 52.4282   |
| 31.2888  | 35.5332   | 35.164    | 31.381   | 28.7864   | 30.3331   |
| 0        | 0         | 0         | 0        | 0         | 0         |
| 4.56473  | 4.05428   | 4.73416   | 4.45348  | 3.85173   | 3.39237   |
| 0.465027 | 0.347481  | 0.263467  | 0.238252 | 0.302026  | 0.195349  |
| 4.75988  | 5.179     | 6.14896   | 6.66157  | 4.89409   | 4.6314    |
| 18.2208  | 15.7819   | 16.1087   | 17.6923  | 17.8871   | 20.0841   |
| 23.7689  | 20.9317   | 25.7438   | 23.2858  | 19.9139   | 25.2113   |
| 6.04407  | 6.3398    | 6.66698   | 6.54763  | 6.40387   | 5.84685   |

|           |           |           |           |           |           |
|-----------|-----------|-----------|-----------|-----------|-----------|
| 14.0955   | 16.5101   | 11.386    | 12.1492   | 10.6535   | 12.2582   |
| 43.2885   | 45.7726   | 47.0386   | 49.3775   | 34.4059   | 42.405    |
| 44.2746   | 31.2942   | 38.334    | 34.5325   | 36.6404   | 29.6573   |
| 9.79585   | 10.1957   | 11.7643   | 9.82848   | 10.7333   | 8.48873   |
| 16.9074   | 17.7201   | 17.37     | 18.7566   | 15.3767   | 16.4919   |
| 0         | 0         | 0.200934  | 0         | 0         | 0.134085  |
| 768.189   | 847.081   | 708.492   | 722.639   | 420.08    | 606.666   |
| 7.84378   | 7.6042    | 8.04615   | 8.68669   | 8.7625    | 5.91513   |
| 41.9131   | 46.0713   | 40.7035   | 48.7156   | 40.6857   | 43.5695   |
| 7.2424    | 8.49107   | 10.465    | 10.0606   | 7.86204   | 7.73114   |
| 55.2348   | 56.7682   | 57.8038   | 62.0307   | 55.67     | 52.6447   |
| 0         | 0         | 0         | 0.0492135 | 0         | 0.0181581 |
| 0         | 0.0565126 | 0         | 0         | 0         | 0         |
| 6.12177   | 6.4723    | 6.89153   | 7.19941   | 7.52937   | 6.93967   |
| 23.5549   | 22.0744   | 23.4077   | 19.0403   | 24.3718   | 24.4901   |
| 4.94158   | 6.14756   | 5.06441   | 4.1519    | 5.72241   | 4.87197   |
| 6.71581   | 6.47459   | 4.86459   | 4.6414    | 6.17729   | 4.94513   |
| 0.358082  | 0.90364   | 0.91554   | 1.14908   | 0.744661  | 1.26739   |
| 0         | 0         | 0         | 0         | 0         | 0         |
| 13.3593   | 13.0678   | 14.1646   | 13.8872   | 13.7301   | 14.5266   |
| 0         | 0         | 0         | 0         | 0.0640405 | 0         |
| 0.265312  | 0.243948  | 0.399361  | 0.490451  | 0.402508  | 0.262732  |
| 15.0554   | 16.5214   | 18.3185   | 14.7388   | 23.5613   | 22.4243   |
| 0.227343  | 0         | 0         | 0         | 0.0324284 | 0.134237  |
| 0.29531   | 0.220809  | 0.223229  | 0.201865  | 0.255899  | 0.645504  |
| 3.66264   | 3.9792    | 5.67925   | 4.92174   | 5.188     | 5.52682   |
| 0.568002  | 0.613464  | 1.14496   | 0.388269  | 1.06643   | 0.668537  |
| 0.588098  | 0.716231  | 0.286264  | 0.48728   | 0.970001  | 0.786579  |
| 34.4931   | 33.3746   | 32.0704   | 29.8592   | 23.1026   | 28.8215   |
| 0         | 0         | 0         | 0         | 0         | 0         |
| 0         | 0         | 0.0591332 | 0         | 0         | 0         |
| 9.18416   | 11.8025   | 12.0877   | 12.1383   | 10.8788   | 12.146    |
| 18.6741   | 18.3608   | 15.9688   | 14.9805   | 18.5406   | 15.5516   |
| 0.0605349 | 0.301754  | 0.0762652 | 0.482765  | 0.0983553 | 0.279908  |
| 0         | 0         | 0         | 0         | 0         | 0         |
| 0         | 0         | 0         | 0         | 0         | 0         |
| 0         | 0         | 0         | 0         | 0         | 0         |
| 13.3395   | 13.5377   | 12.7149   | 12.2619   | 12.1622   | 11.1349   |
| 14.5211   | 14.1441   | 15.5909   | 14.873    | 15.6127   | 15.5858   |
| 0.56798   | 0.613888  | 0.833555  | 0.700189  | 0.533583  | 0.517479  |
| 0.024071  | 0         | 0         | 0.246813  | 0         | 0.0404735 |
| 0         | 0         | 0         | 0         | 0         | 0         |
| 0         | 0.0702197 | 0         | 0         | 0.0610341 | 0.0473717 |

|          |           |          |           |          |           |
|----------|-----------|----------|-----------|----------|-----------|
| 0        | 0         | 0        | 0         | 0        | 0         |
| 0        | 0         | 0        | 0.0638208 | 0.121356 | 0         |
| 15.8133  | 7.64981   | 8.57424  | 5.62521   | 11.13    | 6.11433   |
| 10.4774  | 9.26455   | 10.6474  | 9.30656   | 12.468   | 8.87631   |
| 0.206344 | 0.110205  | 0.185688 | 0.0671668 | 0.319296 | 0.198258  |
| 0        | 0         | 0        | 0         | 0        | 0         |
| 4.05784  | 4.00628   | 4.80074  | 4.1492    | 5.94167  | 3.35478   |
| 19.3809  | 18.0179   | 20.6638  | 20.7543   | 25.0413  | 24.2476   |
| 5.92799  | 6.13534   | 4.85235  | 4.69322   | 5.44159  | 4.11087   |
| 14.1711  | 13.4297   | 13.2035  | 12.8607   | 14.7371  | 16.0814   |
| 7.04591  | 6.33473   | 5.51513  | 5.33549   | 5.84439  | 5.88128   |
| 2.8688   | 3.27852   | 2.79085  | 2.7974    | 3.33533  | 3.15807   |
| 6.83774  | 5.97521   | 0.811737 | 0.587241  | 1.42198  | 1.40159   |
| 0.739115 | 0.710969  | 2.05948  | 1.21338   | 1.03338  | 0.741807  |
| 0        | 0         | 0        | 0         | 0        | 0         |
| 12.6662  | 8.97958   | 10.9401  | 7.99869   | 9.58383  | 10.3552   |
| 25.7045  | 22.8138   | 22.0845  | 24.7347   | 19.6263  | 23.548    |
| 42.8485  | 45.2834   | 41.8103  | 42.1163   | 35.9016  | 37.0475   |
| 11.2812  | 8.44698   | 9.67416  | 13.5545   | 13.3491  | 14.4256   |
| 5.50475  | 6.27787   | 3.76417  | 5.02291   | 4.77572  | 4.58796   |
| 0.605763 | 1.23991   | 0.860669 | 1.17323   | 1.4008   | 1.02488   |
| 0.755164 | 0.578466  | 0.678222 | 0.925465  | 3.34856  | 3.12196   |
| 19.6016  | 19.9238   | 19.7833  | 18.4019   | 20.9579  | 17.8335   |
| 1.77553  | 1.00575   | 2.33858  | 1.26427   | 2.73184  | 1.88284   |
| 18.7384  | 17.3618   | 21.7927  | 19.9517   | 19.7527  | 19.9463   |
| 0        | 0.0472517 | 0        | 0         | 0        | 0.063754  |
| 0        | 0.0826713 | 0        | 0         | 0        | 0.0557718 |
| 28.9735  | 36.1068   | 146.01   | 33.0091   | 0        | 24.3584   |
| 31.0975  | 32.5744   | 43.3982  | 37.7858   | 36.3875  | 31.9692   |
| 15.0765  | 15.3025   | 16.8208  | 13.2348   | 18.5481  | 16.8904   |
| 3.22367  | 3.61971   | 3.81185  | 3.48465   | 3.80167  | 3.30216   |
| 2.25743  | 2.06302   | 1.45362  | 1.77172   | 1.52146  | 2.40395   |
| 0        | 0         | 0        | 0         | 0        | 0         |
| 16.5462  | 14.4236   | 16.0313  | 14.874    | 16.835   | 17.8147   |
| 19.2651  | 19.3058   | 18.8413  | 18.2871   | 19.3864  | 17.7244   |
| 51.4962  | 53.7615   | 43.0566  | 47.67     | 40.9646  | 48.1137   |
| 0        | 0         | 0        | 0         | 0        | 0.136221  |
| 0.762873 | 2.33351   | 0.786362 | 0.197529  | 1.8029   | 0.0874577 |
| 0        | 0         | 0        | 0         | 0        | 0         |
| 0        | 0         | 0        | 0         | 0        | 0         |
| 1.76014  | 2.42039   | 2.02635  | 1.867     | 2.89269  | 2.3217    |
| 2.66573  | 1.87156   | 2.23895  | 1.5399    | 3.07725  | 2.10433   |
| 19.5858  | 18.802    | 19.6891  | 24.2786   | 23.4211  | 20.6535   |



|           |           |           |           |           |           |
|-----------|-----------|-----------|-----------|-----------|-----------|
| 0         | 0         | 0         | 0         | 0         | 0         |
| 0.683988  | 1.02286   | 0.631932  | 0.467554  | 0.444529  | 0.766716  |
| 0.14726   | 0.183515  | 0         | 0.188742  | 0.159509  | 0.123803  |
| 18.7043   | 17.7081   | 16.3371   | 12.1337   | 15.7394   | 13.8356   |
| 0         | 0         | 0         | 0.0995666 | 0         | 0         |
| 13.1123   | 12.9921   | 16.33     | 11.9142   | 18.9295   | 12.8579   |
| 0         | 0         | 0         | 0         | 0         | 0         |
| 8.79947   | 7.08023   | 8.95313   | 7.47099   | 9.49787   | 8.71118   |
| 7.16146   | 6.84737   | 9.94988   | 7.22601   | 9.74958   | 6.41194   |
| 65.774    | 72.0813   | 68.9048   | 69.1916   | 72.0948   | 81.8367   |
| 173.001   | 208.013   | 168.686   | 178.087   | 133.232   | 156.014   |
| 14.6421   | 15.4671   | 16.6725   | 17.8618   | 21.5262   | 23.3475   |
| 6.59509   | 6.18905   | 5.76911   | 5.64286   | 4.71424   | 4.29872   |
| 0         | 0         | 0         | 0         | 0         | 0.0448288 |
| 15.771    | 13.3916   | 9.30149   | 11.3178   | 15.8267   | 20.2133   |
| 0         | 0         | 0         | 0         | 0         | 0         |
| 2.24E-44  | 4.89E-25  | 8.14E-73  | 1.76E-32  | 0.16971   | 3.72E-30  |
| 1.07842   | 2.14335   | 2.83658   | 12.9574   | 1.9403    | 2.28676   |
| 9.91601   | 7.35521   | 12.1224   | 11.5848   | 13.9986   | 12.8137   |
| 35.8382   | 33.8401   | 30.2162   | 33.8162   | 24.4761   | 31.3035   |
| 25.3506   | 22.932    | 25.8779   | 25.2495   | 24.4957   | 25.7366   |
| 31.0385   | 31.6923   | 29.128    | 28.6151   | 25.447    | 26.5625   |
| 118.405   | 121.612   | 116.416   | 107.384   | 98.4189   | 126.355   |
| 15.0007   | 13.3598   | 15.4223   | 13.4255   | 17.0595   | 12.3298   |
| 14.5892   | 13.2675   | 11.4144   | 9.60089   | 8.96288   | 7.43743   |
| 0.401655  | 0.206106  | 0.0595326 | 0.0538352 | 0.153552  | 0         |
| 0         | 0         | 0         | 0         | 0         | 0         |
| 24.538    | 22.9293   | 25.4342   | 23.3315   | 27.3033   | 20.2422   |
| 5.72995   | 4.73919   | 5.58744   | 3.2764    | 5.38347   | 3.62742   |
| 6.22532   | 5.68978   | 7.06368   | 6.27984   | 6.41407   | 5.87103   |
| 0         | 0         | 0         | 0         | 0         | 0         |
| 0         | 0         | 0         | 0         | 0         | 0         |
| 18.194    | 18.6228   | 20.0753   | 20.0959   | 16.7448   | 15.6292   |
| 0         | 0         | 0         | 0         | 0         | 0         |
| 15.9368   | 14.7919   | 15.413    | 14.8304   | 16.1723   | 13.997    |
| 0         | 0.0143637 | 0         | 0         | 0         | 0         |
| 0         | 0         | 0         | 0         | 0.0478031 | 0.0371024 |
| 0.0659652 | 0.107278  | 0.129646  | 0.237483  | 0         | 0.0894718 |
| 1.17109   | 0.707595  | 0.581221  | 0.76818   | 1.03787   | 0.895048  |
| 27.3226   | 35.0302   | 24.5989   | 28.4665   | 21.9898   | 33.6842   |
| 2.70291   | 1.93453   | 2.79806   | 3.07755   | 1.36963   | 1.79056   |
| 2.86714   | 2.38482   | 2.03615   | 2.46836   | 1.99349   | 2.04331   |
| 0         | 0         | 0.0519025 | 0         | 0.0337789 | 0         |

|           |           |           |           |           |           |
|-----------|-----------|-----------|-----------|-----------|-----------|
| 7.35971   | 7.09506   | 8.5024    | 6.2965    | 9.08494   | 6.28079   |
| 58.7624   | 55.4703   | 44.5522   | 59.9315   | 67.8427   | 71.293    |
| 3.42594   | 4.31822   | 3.41419   | 5.0925    | 4.56135   | 3.72244   |
| 0.870506  | 0.813618  | 0.274178  | 0.371907  | 0         | 0.823326  |
| 0.051934  | 0.0369829 | 0.0186941 | 0.0253575 | 0.0562539 | 0.0748484 |
| 2.63101   | 3.04862   | 2.82176   | 2.41548   | 1.64117   | 2.2013    |
| 1.29932   | 1.45293   | 1.91939   | 1.5377    | 1.1837    | 1.23415   |
| 2.09065   | 2.32544   | 2.13325   | 1.7913    | 2.5827    | 2.16436   |
| 0.990357  | 1.20533   | 1.37004   | 1.25373   | 1.46462   | 1.56277   |
| 0.111412  | 0.173552  | 0.175454  | 0.412522  | 0.211189  | 0.374662  |
| 2.09839   | 2.70336   | 2.30442   | 2.19682   | 2.59544   | 2.49126   |
| 0         | 0         | 0         | 0         | 0         | 0         |
| 4.01624   | 5.39376   | 4.08654   | 3.55337   | 4.42801   | 4.43156   |
| 0.508866  | 0.443382  | 0.727437  | 0.763447  | 0.750816  | 0.331124  |
| 7.90587   | 7.84664   | 7.86148   | 8.81402   | 5.99443   | 5.19856   |
| 0         | 0         | 0         | 0         | 0         | 0         |
| 0.0409921 | 0         | 0         | 0         | 0.0888037 | 0.0689252 |
| 36.922    | 37.6366   | 40.3182   | 32.115    | 38.5447   | 30.2773   |
| 9.90026   | 8.03074   | 12.0265   | 13.1451   | 14.7931   | 13.4993   |
| 0         | 0         | 0         | 0         | 0         | 0.0743491 |
| 37.5276   | 33.76     | 40.6803   | 36.8824   | 47.0685   | 41.3687   |
| 7.23093   | 7.4673    | 8.1384    | 7.57557   | 9.13323   | 6.13227   |
| 24.2009   | 24.4432   | 25.4262   | 31.0518   | 29.0256   | 37.3987   |
| 0.100482  | 0.313052  | 0.0949446 | 0.543768  | 0.19047   | 0.190072  |
| 33.774    | 32.1785   | 34.1236   | 32.5844   | 35.3655   | 33.7926   |
| 25.6119   | 24.6001   | 26.1474   | 20.5191   | 28.6327   | 20.141    |
| 8.58125   | 7.66481   | 9.30683   | 7.78081   | 8.81536   | 8.04997   |
| 0         | 0.0444437 | 0         | 0         | 0.0386299 | 0         |
| 8.84535   | 8.48862   | 8.24931   | 8.01445   | 6.64505   | 7.1168    |
| 8.62837   | 8.32257   | 8.12917   | 8.76055   | 6.0285    | 8.97052   |
| 12.8341   | 7.80265   | 11.2289   | 6.51344   | 20.1984   | 12.643    |
| 10.1383   | 11.663    | 13.1808   | 17.2722   | 11.6205   | 15.338    |
| 0.367058  | 0.422241  | 0.747018  | 0.289511  | 0.672845  | 0.30859   |
| 3.78505   | 4.04093   | 2.39949   | 2.37585   | 2.11523   | 1.89509   |
| 0         | 0         | 0         | 0         | 0         | 0         |
| 1.50866   | 0.401087  | 0.304112  | 0         | 0.261465  | 0.202936  |
| 0.0840876 | 0.03493   | 0.0353127 | 0.0957996 | 0         | 0.047129  |
| 3.98042   | 3.82732   | 5.83272   | 3.10097   | 6.72137   | 4.11395   |
| 0.315304  | 0.224564  | 0.425173  | 0.534361  | 0.170218  | 0.396515  |
| 12.6035   | 11.2294   | 7.86511   | 10.266    | 6.73026   | 7.37755   |
| 0         | 11.2174   | 0.0900025 | 135.269   | 0.619049  | 8.46839   |
| 0         | 0         | 0         | 0         | 0         | 0         |
| 28.043    | 31.6908   | 25.6559   | 27.5817   | 30.9514   | 30.0511   |

|           |          |          |           |           |           |
|-----------|----------|----------|-----------|-----------|-----------|
| 30.6645   | 30.8514  | 25.762   | 22.9593   | 34.6584   | 30.4938   |
| 0.743601  | 0.836786 | 1.02807  | 1.67808   | 1.12034   | 1.05376   |
| 17.4186   | 17.4224  | 19.9166  | 17.9863   | 18.663    | 16.718    |
| 3.41238   | 4.41714  | 2.86115  | 2.92963   | 2.06219   | 1.51563   |
| 0         | 0        | 0        | 0         | 0         | 0         |
| 1.55119   | 1.30118  | 0.486036 | 0.572553  | 1.65896   | 0.738844  |
| 0.223798  | 0.383483 | 0.140977 | 0.0318711 | 0.0909051 | 0.251587  |
| 0.250322  | 0.519919 | 0.315369 | 0         | 0.271144  | 0.420898  |
| 27.0182   | 24.326   | 29.1942  | 21.916    | 25.1362   | 20.3101   |
| 11.0881   | 9.59267  | 7.22379  | 8.88161   | 7.45085   | 9.9161    |
| 0         | 0        | 0        | 0         | 0         | 0         |
| 1.42256   | 1.63097  | 2.86755  | 2.20415   | 1.54089   | 0.908933  |
| 0.12397   | 0.308983 | 0.312369 | 0.918041  | 0.537128  | 0.364781  |
| 28.6758   | 28.7081  | 27.5181  | 26.3795   | 28.8253   | 27.2502   |
| 7.14668   | 6.36208  | 7.66444  | 5.19319   | 7.49742   | 5.30603   |
| 0         | 0        | 0        | 0         | 0         | 0         |
| 0.230523  | 0.205198 | 0.331914 | 0.675335  | 0.392382  | 0.166117  |
| 36.3825   | 38.3668  | 33.8636  | 33.7975   | 34.4344   | 41.8566   |
| 9.33753   | 8.04342  | 6.68686  | 7.428     | 9.15603   | 6.22505   |
| 1.67205   | 1.17128  | 1.73444  | 1.63124   | 2.64      | 1.54362   |
| 0.129595  | 0.319181 | 0.451391 | 0.0885875 | 0.458559  | 0.260193  |
| 0.0259815 | 0.102341 | 0        | 0.0296003 | 0.0281426 | 0.0196587 |
| 0.333449  | 0.104627 | 0.196908 | 0.109434  | 0.554039  | 0.412336  |
| 103.479   | 107.766  | 111.383  | 110.991   | 121.262   | 112.046   |
| 0.205894  | 0.170696 | 0.262576 | 0.11043   | 0.213397  | 0.151063  |
| 26.829    | 19.0491  | 29.7819  | 14.2125   | 29.0264   | 15.4529   |
| 0         | 0        | 0        | 0         | 0         | 0.292292  |
| 19.8879   | 19.7923  | 20.3929  | 18.7882   | 24.1302   | 18.8863   |
| 4.08549   | 5.05548  | 5.79958  | 5.11343   | 4.05135   | 4.28131   |
| 0.305836  | 0.564641 | 0.620776 | 0.600081  | 0.730033  | 0.380919  |
| 3.13245   | 2.57258  | 3.85572  | 3.15856   | 3.57228   | 2.67385   |
| 0.32937   | 0.537552 | 0.25587  | 0.262448  | 0.491045  | 0.713277  |
| 29.032    | 24.1576  | 28.1207  | 25.8216   | 33.0257   | 35.1986   |
| 0         | 0        | 0        | 0         | 0         | 0         |
| 0         | 0        | 0        | 0         | 0         | 0         |
| 20.5925   | 31.9804  | 38.3239  | 27.24     | 53.899    | 34.8352   |
| 0.0667999 | 0        | 0        | 0.0380518 | 0         | 0         |
| 14.7471   | 14.6398  | 15.7238  | 14.8027   | 16.8001   | 14.3104   |
| 8.26257   | 8.97971  | 9.64986  | 8.59134   | 10.9214   | 9.73265   |
| 0         | 0        | 0        | 0         | 0         | 0         |
| 0         | 0        | 0.245658 | 0         | 0.211209  | 0         |
| 2.67713   | 3.01465  | 3.11177  | 2.73211   | 4.50623   | 3.25491   |
| 9.55969   | 8.67464  | 7.46819  | 6.24229   | 11.1809   | 8.3962    |

|           |           |           |           |           |           |
|-----------|-----------|-----------|-----------|-----------|-----------|
| 0         | 0         | 0         | 0         | 0         | 0         |
| 4.79979   | 3.62237   | 4.99151   | 3.99202   | 10.4669   | 6.04616   |
| 20.9401   | 23.1353   | 21.3022   | 19.1208   | 19.8042   | 31.1101   |
| 3.25963   | 3.01759   | 2.87466   | 2.78523   | 3.68208   | 3.36679   |
| 0.753735  | 1.02481   | 1.20829   | 2.0552    | 0.818042  | 0.36458   |
| 2168.57   | 2359.04   | 2246.69   | 2175.89   | 1801.48   | 1754.67   |
| 19.0997   | 22.0396   | 19.4028   | 19.2616   | 18.9684   | 15.8315   |
| 0.239373  | 0.44746   | 0.188484  | 0.272714  | 0.453747  | 0.427643  |
| 7.71999   | 4.94301   | 4.01577   | 4.27689   | 2.30146   | 2.26262   |
| 11.3467   | 9.19149   | 9.96437   | 8.60752   | 11.1782   | 7.48117   |
| 15.1991   | 13.7967   | 14.1473   | 14.4674   | 13.2938   | 13.8938   |
| 31.1187   | 38.3144   | 31.6196   | 31.6865   | 33.839    | 31.4399   |
| 0         | 0         | 0         | 0         | 0         | 0         |
| 4.23982   | 3.66367   | 3.67717   | 3.78622   | 3.71529   | 4.11939   |
| 10.2816   | 8.02621   | 9.08346   | 7.0877    | 8.12127   | 12.3739   |
| 0         | 0         | 0         | 0         | 0         | 0         |
| 179.931   | 78.5733   | 73.2863   | 232.892   | 263.944   | 269.757   |
| 18.2364   | 17.2793   | 18.1587   | 17.9724   | 20.1365   | 20.7811   |
| 0.207085  | 0.331804  | 0.0745421 | 0.303337  | 0.288399  | 0.671525  |
| 123.612   | 125.12    | 108.006   | 126.836   | 83.9892   | 113.784   |
| 0.012833  | 0.0159924 | 0.0323353 | 0.0292407 | 0.0278008 | 0.0107888 |
| 10.6134   | 10.5117   | 13.7543   | 17.4882   | 12.8956   | 17.1429   |
| 125.782   | 88.7582   | 115.035   | 103.329   | 174.374   | 294.137   |
| 5.13076   | 5.13288   | 6.17288   | 3.75749   | 5.55879   | 4.64234   |
| 7.47569   | 7.34755   | 6.26957   | 9.99945   | 9.50428   | 9.12476   |
| 3.33881   | 2.38216   | 3.36684   | 3.04462   | 4.75139   | 4.56887   |
| 0.125986  | 0.177937  | 0.402101  | 0.411463  | 0.227442  | 0.374243  |
| 27.2894   | 26.7541   | 24.567    | 28.6701   | 26.444    | 30.5726   |
| 51.6118   | 53.7412   | 45.8817   | 50.8647   | 41.6026   | 53.1583   |
| 3.9645    | 2.99673   | 2.34756   | 4.59073   | 3.0975    | 3.98867   |
| 8.17324   | 7.74901   | 8.09581   | 6.66049   | 3.51175   | 3.30009   |
| 0.920463  | 1.45247   | 1.76206   | 1.94753   | 1.42585   | 1.76376   |
| 0         | 0         | 0         | 0         | 0         | 0         |
| 14.6169   | 15.2065   | 14.5826   | 19.4854   | 18.4055   | 19.915    |
| 5.67297   | 6.21583   | 7.11259   | 6.8378    | 7.25805   | 7.30377   |
| 0.0665868 | 0.0414902 | 0.0419448 | 0.0758612 | 0         | 0.0279901 |
| 0.0432379 | 0         | 0.0544735 | 0.0985204 | 0.0936688 | 0.0363506 |
| 0         | 0         | 0         | 0         | 0         | 0         |
| 30.1794   | 28.16     | 32.6672   | 33.929    | 24.2423   | 31.4563   |
| 10.7403   | 10.5555   | 12.3349   | 11.9028   | 10.1843   | 12.3795   |
| 3.38274   | 3.91141   | 3.93214   | 3.9904    | 18.1032   | 19.3703   |
| 0         | 0         | 0         | 0         | 0         | 0         |
| 34.71     | 32.0203   | 32.1541   | 35.4813   | 30.7326   | 35.0441   |

|           |           |           |            |           |           |
|-----------|-----------|-----------|------------|-----------|-----------|
| 0.139005  | 0.519684  | 0.525378  | 0.316732   | 0.451702  | 0         |
| 0         | 0         | 0         | 0          | 0         | 0         |
| 32.0167   | 32.9659   | 33.0517   | 35.6599    | 31.6655   | 39.0433   |
| 0         | 0         | 0         | 0          | 0         | 0         |
| 47.5492   | 42.4632   | 46.8247   | 44.7029    | 46.0009   | 45.0127   |
| 8.49793   | 8.40306   | 7.73874   | 8.73445    | 8.80451   | 6.87252   |
| 31.9671   | 38.1395   | 23.1408   | 23.0245    | 26.2634   | 27.2145   |
| 62.1537   | 61.2819   | 44.8823   | 40.6       | 49.4448   | 66.6482   |
| 0.0501216 | 0.0624614 | 0         | 0.285513   | 0.0542907 | 0         |
| 5.64832   | 5.68221   | 4.78488   | 5.47407    | 4.59177   | 3.37161   |
| 0         | 0         | 0         | 0          | 0         | 0         |
| 3.69106   | 4.83995   | 5.88194   | 4.61335    | 7.88383   | 5.49391   |
| 0         | 0         | 0         | 0          | 0         | 0         |
| 7.70084   | 5.50361   | 10.8117   | 6.06165    | 13.8264   | 5.49802   |
| 29.9738   | 32.0902   | 28.7367   | 27.8955    | 34.3191   | 34.0975   |
| 12.8427   | 13.2115   | 13.8045   | 13.9019    | 12.5237   | 14.5456   |
| 0         | 0         | 0         | 0          | 0         | 0         |
| 0         | 0         | 0         | 0          | 0         | 0         |
| 3.73294   | 5.2387    | 2.77521   | 1.97532    | 0.990292  | 0.76264   |
| 0.379417  | 0.452271  | 0.207831  | 0.770556   | 0.553925  | 0.499274  |
| 11.8275   | 15.8732   | 19.3861   | 24.9667    | 15.7106   | 18.3572   |
| 5.80545   | 4.75542   | 5.58824   | 6.42826    | 7.13621   | 6.19686   |
| 7.24174   | 6.04602   | 6.05244   | 4.95023    | 9.39578   | 7.79824   |
| 0.100593  | 0         | 0.126733  | 0.343812   | 0.0544802 | 0.126855  |
| 0.0353579 | 4.16E-59  | 5.87E-42  | 0          | 0.0491183 | 0.119054  |
| 2.49431   | 2.48672   | 1.88548   | 1.32614    | 1.98131   | 2.79599   |
| 73.7195   | 84.7968   | 65.7677   | 78.6262    | 55.6182   | 72.0477   |
| 13.2109   | 11.6331   | 16.444    | 13.3839    | 14.1496   | 12.4556   |
| 0         | 0         | 0         | 0          | 0.0251384 | 0         |
| 0.720932  | 0.653956  | 0.426331  | 0.407879   | 0.424979  | 0.470034  |
| 0.429761  | 0.468622  | 0.609116  | 0.48962    | 0.872828  | 0.587121  |
| 4.35619   | 7.58527   | 5.26262   | 7.81831    | 4.00752   | 5.97005   |
| 13.8021   | 14.4247   | 14.0193   | 14.4934    | 16.1082   | 18.3713   |
| 0.189761  | 0.208488  | 0.131733  | 0.105889   | 0.379468  | 0.159534  |
| 0.0766291 | 0.0954159 | 0         | 0.0872722  | 0         | 0         |
| 0         | 0         | 0         | 0          | 0         | 0         |
| 24.3846   | 21.0201   | 22.1927   | 20.154     | 22.4429   | 17.199    |
| 0.203496  | 0.0633991 | 0.128188  | 0.289799   | 0.220423  | 0.171081  |
| 0         | 0         | 0         | 0          | 0         | 0         |
| 0         | 0         | 29.1055   | 0          | 25.0239   | 0         |
| 0.020949  | 0.0261067 | 0.0351903 | 0.00795563 | 0.052947  | 0.0058707 |
| 7.07693   | 3.55649   | 4.84582   | 6.59726    | 13.3884   | 12.4143   |
| 30.5321   | 27.9271   | 31.0687   | 40.7494    | 28.5668   | 38.791    |

|           |           |           |           |           |           |
|-----------|-----------|-----------|-----------|-----------|-----------|
| 14.3749   | 13.6977   | 16.0564   | 13.9805   | 13.6338   | 10.523    |
| 18.0556   | 17.0376   | 13.7881   | 16.1438   | 18.8044   | 21.2018   |
| 12.2012   | 7.50784   | 8.85912   | 5.71615   | 9.9018    | 5.73601   |
| 0         | 0         | 0         | 0         | 0         | 0         |
| 60.884    | 55.9036   | 71.0502   | 63.5885   | 70.886    | 64.7863   |
| 16.7668   | 16.2341   | 16.4965   | 14.1582   | 17.8623   | 14.4675   |
| 6.98634   | 6.76024   | 7.57643   | 6.36754   | 7.45618   | 5.26888   |
| 0.116993  | 0.143159  | 0         | 0.0661916 | 0.142254  | 0.0922077 |
| 0         | 0         | 0         | 0         | 0         | 0         |
| 0         | 0         | 0         | 0         | 0         | 0         |
| 0         | 77.1402   | 134.926   | 30.6532   | 69.2157   | 22.14     |
| 22.7946   | 23.8558   | 21.745    | 20.5199   | 20.6734   | 17.9405   |
| 0         | 0         | 0         | 0         | 0         | 0         |
| 26.421    | 24.8564   | 26.7997   | 18.0725   | 31.858    | 23.24     |
| 0         | 0         | 0         | 0         | 0         | 0         |
| 8.48734   | 10.4024   | 7.48261   | 8.85514   | 6.73441   | 6.34599   |
| 100.301   | 102.201   | 89.9707   | 63.7234   | 134.379   | 114.744   |
| 51.0819   | 56.0371   | 61.3343   | 57.1038   | 48.4469   | 48.6913   |
| 23.5732   | 25.5759   | 25.6608   | 18.9056   | 23.2942   | 17.4714   |
| 0.0447052 | 0.0278558 | 0.0563221 | 0.178262  | 0.0968476 | 0.150337  |
| 88.3896   | 80.6439   | 108.303   | 97.8449   | 78.2993   | 94.6974   |
| 419.345   | 377.114   | 297.919   | 260.564   | 266.417   | 345.319   |
| 0.678277  | 0.96761   | 0.652142  | 0.732079  | 0.638026  | 0.55523   |
| 19.0266   | 21.5513   | 19.0929   | 17.2237   | 18.1329   | 16.0269   |
| 0         | 0         | 0         | 0         | 0         | 0         |
| 0.120072  | 0.0498777 | 0.151273  | 0.136796  | 0.130059  | 0.134594  |
| 13.4602   | 14.9616   | 14.8515   | 13.7597   | 12.3488   | 14.5167   |
| 6.06655   | 5.47565   | 5.42557   | 5.87337   | 5.15147   | 4.39711   |
| 0         | 0         | 0         | 0.343232  | 0.489495  | 0.379923  |
| 3.56687   | 3.78443   | 5.64829   | 4.85184   | 5.42066   | 16.3532   |
| 1.61239   | 2.16748   | 1.9017    | 1.73037   | 1.66766   | 1.78112   |
| 48.1457   | 47.3248   | 42.0834   | 54.4263   | 29.3093   | 32.7107   |
| 0.824824  | 0.808711  | 1.07736   | 0.628775  | 1.19562   | 0.739329  |
| 0.108608  | 0         | 0         | 0         | 0.705853  | 0.365233  |
| 0.329388  | 0.289752  | 0.0732318 | 0.375266  | 0.272836  | 0.130315  |
| 13.7778   | 12.4294   | 12.6574   | 13.0841   | 14.845    | 15.0719   |
| 18.6973   | 17.4044   | 23.3977   | 19.5313   | 24.8572   | 22.2019   |
| 1.2418    | 1.01396   | 1.13571   | 7.96E-05  | 0.490844  | 0.345299  |
| 0.499911  | 0.186897  | 0.377889  | 0.113908  | 0.324896  | 0.168112  |
| 55.7951   | 53.1166   | 53.2955   | 54.415    | 54.6821   | 61.5983   |
| 7.14177   | 7.23456   | 8.12079   | 5.04368   | 8.82155   | 7.57253   |
| 714.667   | 695.443   | 466.975   | 417.757   | 367.307   | 527.069   |
| 0.0445761 | 0         | 0         | 0         | 0         | 0         |

|           |           |           |           |           |            |
|-----------|-----------|-----------|-----------|-----------|------------|
| 29.6846   | 29.411    | 20.9734   | 24.298    | 18.9736   | 25.0686    |
| 0         | 0         | 0         | 0         | 0         | 0          |
| 8.73693   | 9.26194   | 13.634    | 15.4616   | 16.9901   | 15.6444    |
| 2.72238   | 2.47418   | 5.02153   | 3.1701    | 4.187     | 3.7429     |
| 0         | 0         | 0         | 0         | 0         | 0          |
| 0.283727  | 0.17679   | 0.223409  | 0.161623  | 0.192079  | 0.208716   |
| 15.5754   | 15.5355   | 11.8452   | 14.0207   | 17.2648   | 21.473     |
| 0.570857  | 0.304886  | 0.616454  | 0.557458  | 0.0883343 | 0.342804   |
| 1.78032   | 1.9415    | 0.935485  | 0.732905  | 1.19942   | 0.853989   |
| 7.92396   | 10.1676   | 8.50231   | 8.70298   | 10.6628   | 9.38768    |
| 0.0628884 | 0.13715   | 0.118845  | 0.0716477 | 0.0681194 | 0.132178   |
| 12.2775   | 9.77027   | 12.362    | 12.0777   | 9.34668   | 10.4877    |
| 0         | 0         | 0         | 0         | 0         | 0          |
| 11.9463   | 12.9098   | 13.7059   | 10.9221   | 11.7239   | 10.2398    |
| 0.245118  | 0.111078  | 0.308813  | 0.507743  | 0.265507  | 0.206074   |
| 27.4505   | 27.9651   | 29.4545   | 28.0491   | 26.4737   | 27.3434    |
| 0.0868772 | 0         | 0.0364842 | 0         | 0.0627357 | 0.0730387  |
| 9.6088    | 8.21024   | 8.59648   | 7.25303   | 9.77717   | 8.69884    |
| 13.8113   | 15.1732   | 16.791    | 14.4872   | 16.5779   | 17.148     |
| 2.55493   | 2.20356   | 3.10557   | 2.54374   | 2.60514   | 2.5322     |
| 0.807291  | 0.550648  | 0.743129  | 0.556668  | 1.20462   | 0.651001   |
| 0.998851  | 0.879728  | 0.560742  | 0.774558  | 1.23826   | 0.853171   |
| 21.9117   | 21.5819   | 25.8529   | 21.4337   | 23.2417   | 22.2929    |
| 4.99942   | 4.57736   | 6.83423   | 4.95253   | 7.69994   | 6.57689    |
| 0         | 0         | 0         | 0.0244964 | 0         | 0.00401665 |
| 0.829283  | 0.620071  | 0.626866  | 0.141718  | 0.988089  | 0.766907   |
| 65.9651   | 66.3461   | 56.2791   | 73.9477   | 51.3904   | 58.9428    |
| 4.17464   | 3.60055   | 4.63543   | 4.21868   | 4.34305   | 3.95581    |
| 11.8178   | 13.6177   | 8.87332   | 8.42773   | 9.13087   | 10.8092    |
| 0.0764609 | 0.045737  | 0.0786772 | 0.0367498 | 0.137923  | 0.104136   |
| 3.03697   | 2.45235   | 1.37881   | 1.02758   | 3.02297   | 1.78709    |
| 0.323807  | 0.441434  | 0.33855   | 1.39855   | 0.231737  | 0.395356   |
| 0         | 0         | 0         | 0         | 0         | 0          |
| 0         | 0         | 0         | 0         | 0         | 0          |
| 0.097572  | 0.236795  | 0.553169  | 0         | 0.986387  | 0.437493   |
| 3.59928   | 3.31713   | 3.81748   | 3.31863   | 5.31307   | 4.10968    |
| 24.6726   | 17.5176   | 25.2041   | 18.8241   | 27.9472   | 23.0733    |
| 1.30495   | 1.32505   | 1.01014   | 1.32645   | 1.20386   | 0.791752   |
| 0.0855866 | 0         | 0.0359422 | 0.162512  | 0.0927057 | 0.143907   |
| 11.7166   | 10.1297   | 15.3748   | 12.5868   | 18.8075   | 12.6877    |
| 8.08715   | 8.90356   | 6.85573   | 6.11929   | 10.1946   | 6.38796    |
| 0.132522  | 0.0202223 | 0.250438  | 0.197199  | 0.035154  | 0.0920863  |
| 0         | 0         | 0.161573  | 0.0730551 | 0.0694575 | 0.107819   |

|          |           |           |           |           |           |
|----------|-----------|-----------|-----------|-----------|-----------|
| 30.6629  | 31.0028   | 30.2934   | 32.272    | 37.4788   | 41.5212   |
| 7.53876  | 8.72833   | 7.83133   | 7.61816   | 7.54952   | 5.5683    |
| 2.73741  | 3.34699   | 2.47268   | 4.64861   | 1.28675   | 2.08426   |
| 0        | 0         | 0         | 0         | 0         | 0         |
| 28.237   | 30.0169   | 30.4568   | 25.2594   | 31.2655   | 27.1266   |
| 10.6337  | 9.25812   | 11.3688   | 9.10766   | 12.2558   | 9.78744   |
| 10.6083  | 12.5461   | 14.412    | 13.0822   | 16.3921   | 18.3307   |
| 1.79319  | 2.01422   | 1.31627   | 2.79097   | 0.57362   | 0.992087  |
| 30.8439  | 29.5017   | 22.4984   | 25.9739   | 32.7592   | 33.1756   |
| 1.23538  | 1.15465   | 0         | 0         | 1.67268   | 0.259651  |
| 0        | 0         | 0.0428241 | 0         | 0.0368187 | 0.0285769 |
| 4.29616  | 5.58257   | 5.65861   | 4.44611   | 6.22028   | 5.79029   |
| 0.859717 | 1.18437   | 1.75112   | 1.8602    | 1.12524   | 1.39303   |
| 0.982955 | 1.89312   | 1.01322   | 0.661738  | 1.83906   | 1.95327   |
| 0.187289 | 0.291748  | 0.353934  | 0.266718  | 0.355017  | 0.118092  |
| 1.44835  | 2.22962   | 0.483011  | 1.26183   | 0.138426  | 0.179065  |
| 3.49983  | 3.21958   | 3.58087   | 2.88867   | 4.14278   | 2.88747   |
| 0.143784 | 0.088191  | 0.12383   | 0.0806248 | 0.155743  | 0.107974  |
| 0.805538 | 1.14075   | 1.01486   | 1.0846    | 1.50712   | 2.00089   |
| 17.9399  | 18.0517   | 13.6813   | 17.338    | 15.1218   | 17.1302   |
| 4.17837  | 4.03395   | 3.80766   | 2.72826   | 3.5957    | 2.77692   |
| 0.122822 | 0.0644467 | 0.0570088 | 0.0220941 | 0.0560162 | 0.0271732 |
| 0        | 0         | 0         | 0         | 0         | 0         |
| 0        | 0         | 0         | 0         | 0         | 0         |
| 24.372   | 24.0145   | 27.1462   | 23.4859   | 24.6604   | 22.0507   |
| 0        | 0         | 0         | 0         | 0         | 0         |
| 3.71851  | 3.3212    | 4.32823   | 3.43931   | 4.05336   | 3.03367   |
| 3.25073  | 3.59194   | 5.21487   | 5.18491   | 3.28639   | 4.02652   |
| 10.2479  | 11.0789   | 11.1371   | 12.7817   | 10.9428   | 12.3365   |
| 55.8313  | 60.5749   | 54.2585   | 58.1559   | 56.4148   | 63.1033   |
| 9.49666  | 10.8145   | 10.211    | 9.74677   | 8.64606   | 11.8039   |
| 9.25445  | 9.71382   | 11.6593   | 10.2774   | 13.0283   | 12.4191   |
| 16.5954  | 14.9587   | 9.2698    | 8.81097   | 7.85351   | 11.446    |
| 24.6172  | 25.1964   | 19.3826   | 20.0266   | 29.1829   | 24.7084   |
| 0        | 0         | 0         | 0         | 0.0363993 | 0         |
| 6.50363  | 6.15262   | 5.46171   | 5.90346   | 6.79977   | 4.57698   |
| 5.58116  | 5.93159   | 5.33483   | 6.96215   | 5.6837    | 6.60845   |
| 1.12116  | 0.924306  | 0.830987  | 0.788673  | 2.6073    | 2.03749   |
| 0        | 0         | 0         | 0         | 0         | 0         |
| 0        | 0         | 0.870837  | 0.393748  | 0.374358  | 0.581117  |
| 0        | 0         | 0         | 0         | 0         | 0         |
| 6.06077  | 5.07607   | 6.87585   | 4.03191   | 7.50659   | 4.46372   |
| 0        | 0         | 0         | 0         | 0         | 0         |



|           |           |           |           |           |           |
|-----------|-----------|-----------|-----------|-----------|-----------|
| 5.18361   | 3.84444   | 9.81182   | 6.88509   | 21.3362   | 14.5193   |
| 0.028872  | 0         | 0         | 0         | 0         | 0         |
| 10.5178   | 10.6679   | 9.22179   | 9.97254   | 9.76515   | 10.0477   |
| 26.6532   | 23.0772   | 26.0947   | 40.1216   | 34.5515   | 42.0707   |
| 0.0785676 | 0.156657  | 0.0197967 | 0.0716086 | 0.0851028 | 0.132105  |
| 122.314   | 117.054   | 116.162   | 118.567   | 104.475   | 114.157   |
| 0         | 0         | 0         | 0         | 0         | 0         |
| 14.2669   | 13.4861   | 11.6163   | 15.0072   | 12.7024   | 13.5959   |
| 18.9552   | 19.1025   | 15.5346   | 21.2097   | 15.6609   | 19.879    |
| 8.34408   | 7.88947   | 10.2902   | 7.40258   | 11.8546   | 8.19976   |
| 7.41287   | 7.69285   | 9.61324   | 8.18216   | 12.1756   | 9.55602   |
| 11.3397   | 11.2097   | 12.9414   | 10.7232   | 9.69938   | 10.8191   |
| 5.26733   | 5.9251    | 4.47408   | 5.81121   | 5.65636   | 4.53385   |
| 6.79154   | 6.01185   | 7.74146   | 6.21762   | 8.77229   | 6.03827   |
| 0         | 0         | 0         | 0         | 0         | 0         |
| 0         | 0.345401  | 0.261889  | 0.0789419 | 0.525381  | 0.233015  |
| 0.0601096 | 0         | 0.227188  | 0.0684818 | 0.260438  | 0.505349  |
| 3.28377   | 4.34478   | 4.17355   | 5.07654   | 4.77137   | 4.40297   |
| 5.16951   | 5.02658   | 6.72024   | 7.82145   | 6.72297   | 5.32878   |
| 0.81457   | 0.858944  | 0.55259   | 0.856639  | 0.678712  | 0.526784  |
| 0         | 0         | 0         | 0.0977525 | 0         | 0.0721346 |
| 9.73639   | 8.58136   | 9.20871   | 8.97046   | 12.9612   | 13.3103   |
| 1.88768   | 2.45527   | 1.77598   | 2.03349   | 1.2545    | 1.30722   |
| 42.7384   | 43.7719   | 42.5309   | 43.2328   | 40.1952   | 35.7728   |
| 21.8877   | 19.2465   | 18.5811   | 20.5317   | 23.3538   | 23.3025   |
| 7.85775   | 7.14333   | 7.70304   | 6.12232   | 7.12729   | 5.98364   |
| 1.64671   | 2.03444   | 2.21769   | 2.11866   | 3.01381   | 3.03138   |
| 0.189708  | 1.41848   | 1.52963   | 1.38324   | 2.42476   | 2.83892   |
| 3.17784   | 2.36306   | 2.27541   | 1.54941   | 1.91527   | 1.73227   |
| 1.29913   | 2.50205   | 0.297584  | 0.807314  | 0.298495  | 0.132387  |
| 0         | 0         | 0         | 0         | 0         | 0.0208824 |
| 8.1198    | 8.17643   | 8.76812   | 6.60143   | 9.8715    | 6.82495   |
| 12.6983   | 10.467    | 10.8332   | 9.19861   | 10.1209   | 8.62417   |
| 0         | 0         | 0         | 0         | 0.0833775 | 0         |
| 23.6759   | 27.5038   | 24.2973   | 22.4196   | 31.3257   | 26.9847   |
| 6.33687   | 6.38242   | 5.76241   | 4.55803   | 5.43015   | 5.24671   |
| 0         | 0         | 0         | 0.11838   | 0.4502    | 0         |
| 3.96182   | 4.50789   | 5.20833   | 2.35494   | 5.59743   | 5.06853   |
| 7.3037    | 5.67138   | 4.17611   | 3.77672   | 5.27422   | 3.73142   |
| 2.96848   | 4.73818   | 3.13431   | 3.7975    | 5.12242   | 5.45641   |
| 40.6078   | 46.3811   | 36.669    | 37.9007   | 14.358    | 17.9837   |
| 0.0213661 | 0.0266265 | 0.0269182 | 0.0486842 | 0         | 0.0179628 |
| 6.45402   | 3.79917   | 6.01042   | 3.74771   | 6.28859   | 5.76263   |

|           |           |           |           |           |           |
|-----------|-----------|-----------|-----------|-----------|-----------|
| 8.40201   | 10.6316   | 8.50839   | 7.2738    | 8.40113   | 9.90844   |
| 14.5577   | 12.9166   | 14.1936   | 12.746    | 14.961    | 12.9636   |
| 5.13732   | 5.44756   | 4.65549   | 5.59615   | 6.00395   | 4.20535   |
| 0         | 0         | 0         | 0         | 0         | 27.5213   |
| 7.72586   | 4.27602   | 8.57673   | 5.20464   | 8.84149   | 4.79547   |
| 4.39998   | 4.95736   | 7.32624   | 6.73842   | 7.55731   | 6.20712   |
| 0         | 0         | 0         | 0         | 0         | 0         |
| 24.8189   | 25.0778   | 26.6924   | 22.7958   | 23.4809   | 21.3332   |
| 0         | 0         | 0         | 0         | 0         | 0         |
| 34.7555   | 28.7895   | 32.1448   | 34.1745   | 29.5355   | 35.9303   |
| 1.50676   | 1.74065   | 0.957121  | 1.1493    | 1.82642   | 1.47836   |
| 0         | 0         | 0         | 0         | 0         | 0         |
| 24.6      | 25.4121   | 23.2976   | 25.2964   | 21.2306   | 25.3574   |
| 0         | 0         | 0         | 0         | 0         | 0         |
| 16.1987   | 17.5131   | 14.0984   | 15.8782   | 13.9483   | 12.9472   |
| 0.543302  | 0.677062  | 1.30674   | 1.01287   | 1.12349   | 0.955045  |
| 1.21007   | 9.85215   | 2.03268   | 4.50345   | 4.28168   | 1.35642   |
| 6.10849   | 5.28457   | 6.54413   | 4.10526   | 7.73312   | 4.66409   |
| 0         | 0.707408  | 0         | 0.38803   | 0         | 0         |
| 49.8562   | 47.1964   | 40.6572   | 41.3129   | 36.8326   | 44.377    |
| 15.2033   | 14.146    | 15.5093   | 14.9385   | 15.4518   | 16.3372   |
| 14.8115   | 13.5499   | 15.0131   | 13.4868   | 16.9187   | 14.4616   |
| 0         | 0         | 0         | 0         | 0         | 0         |
| 6.66723   | 6.36491   | 8.37571   | 9.44878   | 9.72762   | 8.86409   |
| 14.9825   | 14.7928   | 18.2263   | 13.2372   | 20.5056   | 14.6997   |
| 17.7253   | 14.4864   | 10.6636   | 10.3632   | 7.67986   | 8.13248   |
| 0         | 0         | 0         | 0         | 0         | 0         |
| 6.39896   | 5.64693   | 5.90167   | 5.79032   | 7.51159   | 6.89835   |
| 0         | 0         | 0         | 0         | 0.167836  | 0         |
| 12.1557   | 11.2135   | 13.2414   | 13.4941   | 11.0473   | 11.2663   |
| 0.226876  | 0.409046  | 0.286823  | 1.12006   | 0.301041  | 0.42414   |
| 0         | 0         | 0         | 0         | 0         | 0         |
| 38.8967   | 35.8503   | 43.1981   | 35.7445   | 42.8013   | 47.5091   |
| 0         | 0.0555278 | 0.0124746 | 0.0112808 | 0.0482641 | 0         |
| 23.019    | 19.8354   | 25.5901   | 22.1733   | 28.0661   | 28.7744   |
| 0.077153  | 0.0292274 | 0.0797507 | 0.0570464 | 0.0130034 | 6.61E-108 |
| 0         | 0         | 0         | 0         | 0         | 0         |
| 5.82769   | 5.27993   | 6.25164   | 5.43735   | 7.25886   | 6.09135   |
| 26.2014   | 23.339    | 23.6515   | 19.0543   | 15.7509   | 18.3187   |
| 1.89752   | 1.60776   | 1.68496   | 1.13564   | 1.95593   | 1.29395   |
| 0         | 0         | 0         | 0         | 0         | 0         |
| 2.80591   | 2.70071   | 4.23799   | 4.62353   | 3.43124   | 4.56464   |
| 0.0445841 | 0.166682  | 0.168509  | 0.380955  | 0.241463  | 0.187412  |

|           |           |           |           |           |           |
|-----------|-----------|-----------|-----------|-----------|-----------|
| 0.167765  | 0.118824  | 0.134476  | 0.210306  | 0.0660662 | 0.124958  |
| 30.2136   | 31.535    | 28.5712   | 32.3159   | 25.9683   | 27.1799   |
| 0.824558  | 70.5654   | 1.03882   | 835.179   | 1.02357   | 36.6922   |
| 0         | 0         | 0         | 0         | 0         | 0         |
| 0         | 0         | 0         | 0         | 0         | 0         |
| 0.383562  | 0.438161  | 0.483232  | 0.436985  | 0.3116    | 0.429953  |
| 2.56516   | 2.17957   | 1.68931   | 2.39109   | 2.02075   | 2.91626   |
| 0         | 0.0169635 | 0         | 0         | 0         | 0         |
| 1.29089   | 1.12354   | 1.25201   | 1.10885   | 1.2207    | 1.2403    |
| 31.738    | 32.5272   | 31.1854   | 32.1564   | 32.6082   | 33.8597   |
| 0         | 0         | 0         | 0         | 0         | 0.0260483 |
| 39.916    | 42.5002   | 35.3317   | 30.4101   | 31.4805   | 26.5115   |
| 0.559603  | 0.591713  | 0.470012  | 0.502309  | 0.551046  | 0.741339  |
| 2.81042   | 2.36253   | 2.11605   | 2.40614   | 3.76471   | 2.62839   |
| 0         | 0.249792  | 0.368135  | 0.11005   | 0.438967  | 0.403056  |
| 0         | 0         | 0         | 0         | 0         | 0         |
| 3.05022   | 3.73652   | 4.66814   | 4.87691   | 4.67201   | 4.78924   |
| 15.778    | 16.0665   | 14.7326   | 18.1745   | 15.8049   | 17.5788   |
| 0         | 0         | 0         | 0         | 0         | 0         |
| 0         | 0         | 0.0657624 | 0.0594687 | 0.0565402 | 0.0658257 |
| 4.04387   | 5.11807   | 4.40409   | 4.31022   | 5.546     | 4.09847   |
| 2.44237   | 3.58881   | 1.74518   | 2.32571   | 0.671251  | 0.858106  |
| 6.7123    | 6.28914   | 6.82786   | 5.21143   | 7.37834   | 8.21388   |
| 1.1086    | 1.18812   | 1.34081   | 0.808324  | 1.94531   | 0.950652  |
| 0         | 0         | 0         | 0         | 0         | 0         |
| 328.821   | 287.72    | 231.677   | 210.692   | 229.072   | 203.191   |
| 0.165091  | 0.290134  | 0         | 0         | 0.378078  | 0.302966  |
| 8.22954   | 8.47169   | 13.1629   | 12.5763   | 19.2932   | 17.0632   |
| 53.6327   | 61.3958   | 57.5696   | 53.7835   | 40.8708   | 41.0782   |
| 0.796886  | 1.19169   | 1.07089   | 1.14998   | 1.0358    | 1.69721   |
| 7.09787   | 9.63626   | 9.22209   | 9.67602   | 9.5562    | 9.79277   |
| 0         | 0         | 0.0236317 | 0         | 0.101589  | 0.0157697 |
| 13.1432   | 14.1989   | 13.2666   | 12.3802   | 12.8395   | 12.0584   |
| 0         | 0         | 0         | 0         | 0         | 0         |
| 4.80787   | 5.16276   | 6.44958   | 6.53939   | 10.1003   | 8.27054   |
| 0         | 0         | 0         | 0         | 0         | 0         |
| 0         | 0         | 0         | 0         | 0         | 0         |
| 0         | 0         | 0         | 0         | 0         | 0.0201778 |
| 4.93211   | 7.71092   | 4.85801   | 8.27535   | 4.17675   | 4.37266   |
| 0.985736  | 1.22842   | 0.993507  | 1.23534   | 0.960957  | 2.0718    |
| 12.9638   | 13.0404   | 14.4609   | 14.4136   | 14.4644   | 14.871    |
| 0.0697917 | 0.103614  | 0.0961024 | 0.0492846 | 0.0918409 | 0.0654635 |
| 1.35403   | 1.38366   | 1.05765   | 1.69689   | 2.02399   | 2.4816    |

|          |           |           |           |           |           |
|----------|-----------|-----------|-----------|-----------|-----------|
| 0.454402 | 0.519085  | 0.190827  | 1.16481   | 0.328132  | 0.159175  |
| 1.59511  | 1.38496   | 5.40288   | 2.38332   | 6.28803   | 3.68233   |
| 0.798277 | 85.388    | 1.74088   | 711.504   | 2.06192   | 35.4576   |
| 12.4858  | 10.5247   | 13.3191   | 11.4907   | 19.0197   | 14.5579   |
| 0.115267 | 0         | 0         | 0.175096  | 0.166473  | 0.129209  |
| 19.4616  | 19.193    | 16.9926   | 17.3869   | 15.7724   | 17.0286   |
| 15.4285  | 10.0315   | 13.1627   | 10.3172   | 24.6499   | 16.0304   |
| 0.834369 | 0.431548  | 2.2308    | 1.07831   | 0.859895  | 0.847042  |
| 11.0058  | 9.75698   | 9.53655   | 9.24317   | 9.96107   | 9.37383   |
| 9.81968  | 10.7658   | 10.6491   | 9.33551   | 10.722    | 10.1752   |
| 0        | 0         | 0         | 0         | 0         | 0         |
| 0.043012 | 16.9917   | 0.325133  | 216.004   | 1.21133   | 13.3794   |
| 0        | 0         | 0         | 0         | 0         | 0         |
| 1.35262  | 0.722415  | 1.37951   | 0.660436  | 0.837218  | 2.81584   |
| 8.66486  | 6.37541   | 6.20143   | 5.89922   | 5.11597   | 5.83599   |
| 0        | 0         | 0         | 0.037263  | 0         | 0         |
| 3.46565  | 2.71718   | 3.16622   | 3.47769   | 3.96523   | 2.81713   |
| 0        | 0         | 0         | 0         | 0.0913041 | 0.023622  |
| 0        | 0         | 0         | 0.10986   | 0         | 0         |
| 0        | 0         | 0         | 0         | 0         | 0         |
| 0.157587 | 0.179679  | 0.0990804 | 0.0447991 | 0.255558  | 0.187504  |
| 0.135539 | 0.307107  | 0.452011  | 1.96872   | 0.327709  | 0.475355  |
| 28.8712  | 27.931    | 34.7935   | 33.2309   | 34.5628   | 35.8443   |
| 20.0183  | 18.0554   | 17.7226   | 21.8472   | 15.6273   | 25.2698   |
| 25.428   | 32.2466   | 23.4064   | 29.7154   | 18.7957   | 27.4632   |
| 1.41492  | 1.08      | 1.31476   | 1.85379   | 2.49049   | 2.28989   |
| 9.29601  | 10.107    | 12.817    | 10.2396   | 13.8195   | 10.9852   |
| 5.85527  | 7.94027   | 4.53956   | 6.14516   | 3.96246   | 4.09139   |
| 38.5543  | 40.4221   | 38.8583   | 41.2435   | 43.8134   | 39.9001   |
| 17.8819  | 19.6331   | 21.4198   | 21.2861   | 19.5171   | 17.0288   |
| 65.9669  | 60.05     | 74.9331   | 58.918    | 67.8148   | 58.8899   |
| 11.694   | 11.9361   | 11.1061   | 12.7009   | 10.4719   | 11.7359   |
| 0        | 0         | 0         | 0         | 0         | 0         |
| 3.51395  | 2.44498   | 3.65232   | 3.06926   | 3.17186   | 2.28952   |
| 0        | 0         | 0         | 0         | 0         | 0         |
| 0        | 0.0960542 | 0.0971067 | 0         | 0         | 0.0648002 |
| 3.54292  | 3.74821   | 4.14261   | 3.07822   | 5.41117   | 3.42853   |
| 9.69459  | 9.84434   | 11.9549   | 9.30776   | 11.6782   | 8.28218   |
| 11.962   | 11.0017   | 14.164    | 11.6506   | 16.4972   | 10.9099   |
| 9.98709  | 9.53926   | 9.34796   | 9.59472   | 7.74881   | 7.40925   |
| 8.19149  | 6.94437   | 8.05949   | 7.12312   | 8.22097   | 7.3458    |
| 5.62339  | 5.27752   | 7.12838   | 5.00271   | 5.84674   | 5.39886   |
| 21.9311  | 16.3487   | 20.9687   | 11.1731   | 28.451    | 10.2166   |

|           |           |           |           |           |             |
|-----------|-----------|-----------|-----------|-----------|-------------|
| 21.7743   | 21.153    | 18.2009   | 21.8663   | 25.8456   | 28.1195     |
| 3.34565   | 2.91854   | 3.04632   | 1.69216   | 3.09682   | 2.05841     |
| 13.2949   | 13.9394   | 15.3834   | 16.8728   | 12.1481   | 16.0102     |
| 2.3301    | 2.34543   | 2.08878   | 1.68467   | 2.18415   | 2.03428     |
| 0.120072  | 0.149633  | 0.151273  | 0.31919   | 0.433531  | 0.168243    |
| 2226.08   | 1040.46   | 5258.09   | 3804.93   | 4521.89   | 4679.1      |
| 1.18564   | 0.799496  | 0.572941  | 0.194291  | 0.897227  | 0.402811    |
| 0         | 0         | 0         | 0         | 0         | 0           |
| 1.09203   | 0.957656  | 0.86624   | 1.05981   | 1.00762   | 0.81607     |
| 19.3107   | 20.1736   | 21.0172   | 17.9991   | 20.1987   | 19.7171     |
| 0.102536  | 0.0283956 | 0.12918   | 0.561975  | 0.0987244 | 0.0862033   |
| 3.28915   | 4.51856   | 3.30502   | 4.28111   | 3.28792   | 3.3072      |
| 0         | 0         | 0         | 0         | 0         | 0           |
| 0         | 0         | 0         | 0         | 0         | 0           |
| 0.809857  | 0.812318  | 1.24427   | 0.742626  | 1.51909   | 0.905041    |
| 9.18517   | 9.1266    | 9.6028    | 8.00345   | 9.43556   | 8.32745     |
| 14.9255   | 14.4974   | 15.1153   | 12.5124   | 19.578    | 16.7709     |
| 18.7713   | 16.2528   | 15.1012   | 17.2203   | 16.2635   | 13.7954     |
| 0.589501  | 0.613631  | 0.421159  | 0.618552  | 1.12843   | 0.910218    |
| 0         | 0         | 0         | 0         | 0.0326479 | 0           |
| 12.915    | 14.5875   | 11.5366   | 9.79283   | 11.0261   | 10.8215     |
| 16.6104   | 17.4014   | 25.4683   | 19.1426   | 21.36     | 18.1481     |
| 0         | 0         | 0         | 0.0769732 | 0         | 2.09E-10    |
| 10.5355   | 12.7488   | 8.43019   | 7.14081   | 8.12025   | 7.5116      |
| 7.47947   | 6.90867   | 6.6332    | 6.33359   | 6.37394   | 8.24091     |
| 1.292     | 0.95321   | 1.77926   | 1.00106   | 1.69204   | 1.17288     |
| 0         | 0         | 0         | 0         | 0         | 0           |
| 19.0928   | 18.1375   | 7.65729   | 8.43495   | 9.50409   | 10.9209     |
| 19.459    | 21.9994   | 22.2797   | 20.0056   | 20.9764   | 20.3903     |
| 0         | 0         | 0         | 0         | 0         | 0           |
| 2.76924   | 1.70E-05  | 6.95E-05  | 8.38E-05  | 2.7739    | 0.000716738 |
| 1.4974    | 1.16909   | 1.68194   | 1.68541   | 0.703496  | 0.864532    |
| 4.33789   | 4.69673   | 4.12575   | 6.11307   | 3.97548   | 3.54857     |
| 0         | 0         | 0         | 0.3362    | 0.159822  | 0           |
| 0.381774  | 0.778918  | 0.128923  | 0.138175  | 0.245328  | 0.193573    |
| 0         | 0         | 0         | 0         | 0.167546  | 0           |
| 2.00002   | 1.93011   | 2.66569   | 2.12575   | 3.94307   | 2.34786     |
| 1.72564   | 1.51046   | 0.828212  | 0.468093  | 1.11261   | 0.397234    |
| 5.34447   | 5.45564   | 4.63717   | 4.77579   | 5.67828   | 4.62601     |
| 29.8185   | 31.4642   | 30.2194   | 33.0025   | 39.8868   | 40.9698     |
| 0.0407025 | 0.101447  | 0.0512793 | 0.0463717 | 0.0440882 | 0.0684382   |
| 0         | 0         | 0         | 0         | 0         | 0           |
| 0.0364723 | 0.0305046 | 0.0245765 | 0.0192938 | 0.019911  | 0.0289748   |

|          |          |           |           |           |           |
|----------|----------|-----------|-----------|-----------|-----------|
| 0        | 0        | 0.112802  | 0         | 0.0969829 | 0.0752735 |
| 1.41535  | 0.766875 | 1.35674   | 1.82281   | 1.29979   | 1.62965   |
| 0.610997 | 0.30457  | 0.461861  | 1.11376   | 0.794184  | 1.13008   |
| 13.6905  | 15.4605  | 15.5418   | 12.3296   | 14.7728   | 12.3761   |
| 27.805   | 27.2753  | 25.3243   | 27.2774   | 13.1582   | 13.4599   |
| 44.2124  | 43.7887  | 37.7493   | 29.5634   | 32.332    | 30.3405   |
| 7.84041  | 7.10005  | 8.26441   | 8.60493   | 9.59661   | 11.8941   |
| 22.9686  | 23.2569  | 24.0047   | 23.0455   | 24.1726   | 23.5891   |
| 0.268777 | 0.5742   | 0.145123  | 0.218724  | 0.291134  | 0.161403  |
| 0        | 0        | 0         | 0         | 0         | 0         |
| 24.3205  | 29.2347  | 20.6078   | 27.4462   | 18.6302   | 27.085    |
| 2.38435  | 1.71891  | 3.40674   | 2.35279   | 4.70168   | 3.24024   |
| 24.1588  | 23.3818  | 26.475    | 22.822    | 23.2332   | 21.1756   |
| 2.05924  | 2.13852  | 2.70244   | 2.63932   | 4.18224   | 3.82313   |
| 0        | 0        | 0.0319266 | 0.0288712 | 0.0274494 | 0         |
| 0        | 0        | 0         | 0         | 0         | 0         |
| 10.109   | 9.35661  | 11.4101   | 10.1396   | 10.7068   | 10.2839   |
| 0.967321 | 0.844189 | 0.908796  | 1.28605   | 0.666863  | 0.63578   |
| 79.6512  | 91.5017  | 74.0646   | 87.0602   | 74.5395   | 91.9137   |
| 0.955146 | 0.899465 | 1.61509   | 1.03805   | 1.27634   | 0.686527  |
| 4.35736  | 4.21816  | 4.20433   | 4.04093   | 5.20521   | 3.53503   |
| 0        | 0        | 0         | 0         | 0         | 0         |
| 0.427362 | 0.332861 | 0.381376  | 0.26373   | 0.308606  | 0.314377  |
| 19.0949  | 21.6375  | 18.5579   | 19.4219   | 18.32     | 18.3917   |
| 8.44874  | 8.3031   | 7.2083    | 7.81517   | 8.04555   | 7.92666   |
| 34.9026  | 33.7368  | 32.4217   | 31.7657   | 29.3521   | 29.5248   |
| 12.6587  | 14.2978  | 13.78     | 15.3804   | 9.40347   | 13.0216   |
| 0.188237 | 0.104258 | 0.843202  | 0.256287  | 0.524419  | 0.250078  |
| 0.845431 | 0.988409 | 1.22672   | 0.726005  | 1.40079   | 0.889322  |
| 0        | 0        | 0         | 0         | 0         | 0         |
| 2.31832  | 3.92464  | 1.54341   | 3.68758   | 2.15588   | 2.96018   |
| 43.3179  | 42.2425  | 47.332    | 43.9075   | 48.1534   | 41.0555   |
| 0        | 0        | 0         | 0         | 0         | 0         |
| 8.76136  | 8.88158  | 8.38465   | 7.53499   | 7.04042   | 5.78399   |
| 32.3506  | 36.0755  | 39.9877   | 37.4475   | 38.5448   | 37.0716   |
| 21.2624  | 24.9043  | 26.2918   | 29.7197   | 20.2667   | 20.0398   |
| 4.53775  | 4.0075   | 3.87136   | 3.29734   | 4.76032   | 4.35558   |
| 3.59364  | 4.2756   | 4.66415   | 4.15598   | 3.98069   | 3.29484   |
| 5.4576   | 5.12578  | 6.85874   | 4.37013   | 7.00513   | 5.15422   |
| 0        | 0        | 0         | 0.186126  | 0         | 0         |
| 3.58906  | 4.31294  | 7.26701   | 8.32395   | 2.22148   | 3.34066   |
| 11.9225  | 12.2901  | 13.6338   | 9.97766   | 16.7631   | 14.8586   |
| 0.072221 | 0.135003 | 0.0909879 | 0.0822801 | 0         | 0.0910756 |

|           |           |           |           |           |           |
|-----------|-----------|-----------|-----------|-----------|-----------|
| 0.557491  | 0.320651  | 0.270137  | 0.0488569 | 0.371608  | 0.216318  |
| 0         | 0         | 0         | 0         | 0         | 0         |
| 13.1389   | 13.9786   | 11.6664   | 11.4921   | 9.44369   | 11.3398   |
| 0         | 0         | 0         | 0         | 0         | 0.0257237 |
| 35.8024   | 35.2631   | 29.2124   | 33.7528   | 33.129    | 34.3257   |
| 30.1259   | 22.714    | 26.7861   | 15.6781   | 28.2728   | 25.1025   |
| 0.0663669 | 0         | 0.337666  | 0.0594083 | 0         | 0.0478246 |
| 0         | 0         | 0         | 0         | 0         | 0         |
| 0.858101  | 0.612656  | 0.70946   | 0.885968  | 0.484103  | 0.676327  |
| 4.16975   | 5.2739    | 4.93965   | 4.60872   | 4.65141   | 4.91825   |
| 15.5642   | 14.3168   | 17.2475   | 14.5553   | 18.1461   | 15.8711   |
| 8.73957   | 8.00132   | 10.017    | 7.54917   | 11.5711   | 7.66519   |
| 21.8535   | 22.7358   | 26.83     | 21.8444   | 37.921    | 37.0892   |
| 23.7534   | 24.5167   | 26.0027   | 21.9075   | 23.0453   | 20.9243   |
| 45.4068   | 58.1077   | 37.2341   | 55.9541   | 42.4764   | 54.4323   |
| 5.18798   | 5.48808   | 4.75097   | 5.07949   | 5.42383   | 4.47783   |
| 0         | 0         | 0         | 0         | 0         | 0         |
| 2.55174   | 0.49741   | 2.0589    | 0.543437  | 1.45342   | 0.697728  |
| 1.91626   | 4.76922   | 4.01608   | 5.99377   | 2.07173   | 2.54597   |
| 0         | 0         | 0         | 0.186126  | 0         | 0         |
| 3.6871    | 3.64406   | 3.73655   | 3.79243   | 2.73972   | 2.40642   |
| 1.32745   | 0.940662  | 2.00031   | 2.96538   | 1.60703   | 1.37859   |
| 13.903    | 10.9482   | 11.7131   | 12.6326   | 12.2877   | 19.0503   |
| 7.9589    | 7.04192   | 9.80986   | 5.45574   | 12.3245   | 7.1501    |
| 75.6834   | 69.6565   | 65.2389   | 53.0726   | 70.3489   | 57.044    |
| 0.150783  | 0.150324  | 0.113979  | 0.0343568 | 0.13066   | 0.126765  |
| 8.07407   | 7.53992   | 6.86029   | 6.51274   | 7.27676   | 6.17408   |
| 19.637    | 18.9684   | 14.6642   | 15.8023   | 12.0653   | 14.0851   |
| 1.45686   | 0.691633  | 4.45748   | 2.37111   | 1.35261   | 0.116648  |
| 0.145795  | 0.0754814 | 0.13746   | 0.0974397 | 0.0658901 | 0.102146  |
| 0.675399  | 1.3527    | 0.303894  | 0.384735  | 0.182894  | 0.283908  |
| 0.0173876 | 0         | 0         | 0.0792374 | 0.0376677 | 0.0438538 |
| 29.9587   | 30.6445   | 32.9875   | 40.6026   | 25.998    | 38.8719   |
| 102.716   | 108.764   | 117.044   | 120.116   | 108.144   | 115.051   |
| 532.088   | 573.955   | 589.67    | 565.627   | 426.588   | 490.104   |
| 6.64226   | 6.80322   | 8.09077   | 7.86714   | 6.24155   | 5.79068   |
| 4.36987   | 4.71977   | 4.43234   | 3.61034   | 3.79042   | 3.72202   |
| 0.512086  | 0.81847   | 0.418832  | 0.655299  | 0.360097  | 0.430517  |
| 324.61    | 364.727   | 330.369   | 326.201   | 324.704   | 350.472   |
| 0.0990438 | 0.0246856 | 0.0748684 | 0.0677033 | 0.0643693 | 0.0832673 |
| 0         | 0         | 0         | 0         | 0.192222  | 0         |
| 0.0213206 | 0.0929938 | 0.067152  | 0.0850155 | 0.080829  | 0.0716978 |
| 0.244003  | 0.152038  | 0.153704  | 0.138994  | 0.330373  | 0.25642   |

|           |           |           |           |           |           |
|-----------|-----------|-----------|-----------|-----------|-----------|
| 1.32581   | 17.8343   | 0.589529  | 82.084    | 6.63137   | 20.0633   |
| 0         | 0         | 0         | 0         | 0         | 0         |
| 0.624892  | 0.664704  | 0.526904  | 0.949956  | 0.311161  | 0.254701  |
| 4.68336   | 4.21859   | 5.49157   | 7.6073    | 7.58435   | 8.34257   |
| 9.58E-05  | 9.17E-05  | 1.85151   | 0.433421  | 0.0001201 | 0.059707  |
| 6.00123   | 6.24164   | 7.44066   | 5.28347   | 8.79754   | 6.26765   |
| 2.97217   | 3.24093   | 2.36372   | 3.40731   | 3.23952   | 3.93552   |
| 1.39804   | 1.38587   | 1.28097   | 1.15837   | 1.17016   | 1.04179   |
| 7.26876   | 7.68446   | 5.29458   | 5.60944   | 5.39506   | 4.84165   |
| 66.3456   | 68.6121   | 49.6669   | 73.6339   | 83.2082   | 87.3017   |
| 25.9616   | 48.7989   | 35.0021   | 47.5995   | 26.7232   | 27.5162   |
| 1.81091   | 0.932136  | 0.595168  | 0.58306   | 0.341137  | 0.132387  |
| 5.40685   | 5.11809   | 5.89358   | 4.75149   | 5.66911   | 5.22296   |
| 0         | 0         | 0         | 0         | 0         | 0         |
| 310.304   | 359.442   | 332.156   | 343.54    | 322.447   | 371.326   |
| 2.80293   | 2.53339   | 2.83279   | 3.7548    | 4.00362   | 3.67711   |
| 0         | 0         | 0         | 0         | 0.400718  | 0.155509  |
| 0         | 0         | 0         | 0         | 0         | 0         |
| 0         | 0         | 0.120278  | 0.217535  | 0         | 0.0401314 |
| 3.84129   | 4.01585   | 3.91276   | 3.20575   | 4.09757   | 3.35702   |
| 5.68587   | 7.36451   | 7.9306    | 6.90261   | 9.53103   | 8.317     |
| 31.9732   | 32.2221   | 31.535    | 29.6286   | 30.3443   | 27.0538   |
| 0.169006  | 0.252738  | 0.298092  | 0         | 0.329515  | 0.113668  |
| 2688.36   | 3918.77   | 1325.83   | 790.492   | 45.8417   | 70.325    |
| 10.1744   | 8.95545   | 11.3858   | 9.00086   | 10.4049   | 11.6051   |
| 10.19     | 13.4925   | 15.6462   | 16.5847   | 14.2898   | 14.8008   |
| 0         | 0         | 0         | 0         | 0         | 0         |
| 0.145146  | 0.0678301 | 0.182862  | 0.0413405 | 0.058957  | 0.0610128 |
| 1.02671   | 0.295264  | 1.99      | 1.04974   | 1.79648   | 0.951693  |
| 0         | 0         | 0         | 0         | 0         | 0         |
| 31.2698   | 33.1179   | 29.6786   | 32.5689   | 27.7414   | 34.3589   |
| 19.9858   | 18.6387   | 22.2113   | 20.5311   | 22.4586   | 19.5055   |
| 0.261007  | 0.162633  | 0         | 0         | 0.141359  | 0         |
| 8.77124   | 8.86752   | 10.1278   | 8.21103   | 10.6393   | 9.54109   |
| 2.6304    | 1.59207   | 1.896     | 1.21632   | 2.06248   | 0.802369  |
| 0.0520338 | 0.0412647 | 0.0238382 | 0.0215568 | 0.0358667 | 0.027838  |
| 11.5139   | 10.3446   | 11.8729   | 10.5809   | 14.344    | 11.3165   |
| 124.887   | 113.066   | 173.632   | 194.469   | 166.374   | 170.362   |
| 7.42866   | 7.76115   | 5.57025   | 6.13497   | 5.65984   | 4.49897   |
| 0         | 0.109591  | 0.124645  | 0         | 0.0238129 | 0.0739324 |
| 27.6432   | 30.1255   | 30.7062   | 31.9014   | 20.9443   | 30.1103   |
| 0.0789413 | 0.0655843 | 0         | 0.0599576 | 0.116385  | 0.13384   |
| 31.7267   | 33.3188   | 29.7797   | 33.6134   | 36.5881   | 39.5789   |



|           |           |           |            |           |           |
|-----------|-----------|-----------|------------|-----------|-----------|
| 0         | 0         | 0         | 0          | 0         | 0         |
| 0         | 0         | 0         | 0          | 0         | 0         |
| 0.106924  | 0         | 0.0449029 | 0.0812112  | 0.038606  | 0         |
| 190.609   | 193.537   | 184.285   | 171.016    | 236.44    | 262.545   |
| 4.0749    | 2.87793   | 3.29547   | 1.66241    | 2.97023   | 1.89646   |
| 0         | 0         | 0.0645632 | 0          | 0.0832639 | 0         |
| 6.70793   | 12.6733   | 2.29534   | 5.71752    | 8.03733   | 17.7259   |
| 0         | 0.0440348 | 0         | 0          | 0         | 0         |
| 35.971    | 32.823    | 41.2122   | 34.2976    | 44.193    | 32.5753   |
| 10.6879   | 9.45828   | 12.5299   | 9.34515    | 10.5715   | 9.51234   |
| 7.30268   | 6.90914   | 9.32124   | 5.94557    | 8.36593   | 6.41303   |
| 0         | 0         | 0         | 0          | 0         | 0         |
| 11.5977   | 16.5178   | 6.47078   | 16.1388    | 11.4856   | 12.0486   |
| 4.16483   | 3.82118   | 4.9492    | 3.93407    | 5.00085   | 3.7031    |
| 32.5903   | 27.8288   | 30.2644   | 25.773     | 33.1317   | 29.1388   |
| 1.0722    | 0.417556  | 1.43525   | 1.18337    | 0.471814  | 0.788738  |
| 0.285018  | 0.483057  | 0.316162  | 0.220807   | 0.333423  | 0.354635  |
| 0.0732555 | 0         | 0         | 0          | 0         | 0.123174  |
| 3.73787   | 2.79488   | 2.28731   | 2.06841    | 3.9331    | 3.41183   |
| 0.184588  | 0.34505   | 0.0581386 | 0.105149   | 0.0499856 | 0.155186  |
| 3.57478   | 3.92136   | 4.44976   | 3.85319    | 5.14737   | 4.22909   |
| 4.76203   | 4.46678   | 6.77358   | 5.96977    | 6.15648   | 5.1084    |
| 79.8424   | 78.5103   | 68.4923   | 63.5162    | 52.9987   | 68.2895   |
| 12.6329   | 14.168    | 12.4808   | 14.3222    | 14.3789   | 12.4439   |
| 15.6902   | 17.2946   | 15.8566   | 16.4515    | 15.71     | 13.5105   |
| 2.54563   | 2.82028   | 3.44092   | 3.47609    | 3.69148   | 3.80379   |
| 373.527   | 497.09    | 388.459   | 369.051    | 345.611   | 370.533   |
| 0         | 0         | 0.058419  | 0.330177   | 0.0502266 | 0.138748  |
| 2.30441   | 1.54883   | 2.74415   | 2.14768    | 4.00277   | 1.92337   |
| 0         | 0         | 0.0105311 | 0.00529071 | 0         | 0         |
| 1.40706   | 1.53979   | 1.66978   | 1.58713    | 1.03129   | 1.2295    |
| 0         | 0         | 0         | 0          | 0         | 0         |
| 38.6022   | 40.0147   | 40.5923   | 40.7455    | 28.3901   | 39.568    |
| 16.4273   | 16.9573   | 12.5468   | 13.1659    | 9.52699   | 12.1029   |
| 0.403069  | 0.439516  | 0.507808  | 0.325273   | 0.345639  | 0.324746  |
| 1.03857   | 1.00438   | 0.857617  | 0.775541   | 0.969892  | 0.632451  |
| 0.406245  | 0.344258  | 0.34803   | 0.629446   | 0.598449  | 0.409842  |
| 0.0536568 | 0.066867  | 0.0675997 | 0          | 0.05812   | 0.0676649 |
| 12.0934   | 8.73559   | 8.71796   | 9.85542    | 8.62248   | 8.51525   |
| 0         | 0         | 0         | 0          | 0         | 0         |
| 63.5155   | 57.2801   | 72.8967   | 73.3283    | 56.5241   | 64.6879   |
| 1.89364   | 2.00588   | 2.70381   | 1.97761    | 5.50394   | 5.12097   |
| 2.83775   | 4.28353   | 1.15815   | 2.18569    | 3.03051   | 3.29299   |

|           |           |          |           |          |          |
|-----------|-----------|----------|-----------|----------|----------|
| 50.8657   | 63.3888   | 59.7298  | 76.6442   | 44.1637  | 64.9603  |
| 0.54344   | 0.677234  | 0.947619 | 0.642926  | 1.10894  | 1.054    |
| 0         | 0         | 0        | 0         | 0        | 0        |
| 0.813119  | 0.432021  | 0.405977 | 0.450711  | 0.770611 | 1.22137  |
| 0.521373  | 0.216211  | 1.44562  | 1.0349    | 2.23967  | 1.6235   |
| 9.06959   | 15.654    | 11.0836  | 21.7506   | 13.6062  | 16.7367  |
| 0         | 0         | 0        | 0         | 0        | 0        |
| 17.7277   | 16.6819   | 13.1423  | 11.6785   | 11.0381  | 12.3692  |
| 11.1415   | 11.0901   | 11.0463  | 11.4386   | 10.0347  | 9.90032  |
| 5.60775   | 6.68779   | 5.69753  | 5.83923   | 4.31072  | 4.81589  |
| 6.39074   | 5.90887   | 6.75539  | 5.63935   | 6.25449  | 5.02614  |
| 0         | 0         | 0        | 0         | 0        | 0        |
| 0.253672  | 0.368442  | 0.37248  | 0.378937  | 0.500384 | 0.388374 |
| 40.382    | 38.838    | 39.3539  | 29.704    | 35.0782  | 31.7486  |
| 0.0776213 | 0.0483658 | 0        | 0.0884326 | 0        | 0        |
| 0.264094  | 0.575948  | 0.374309 | 0.357292  | 0.357576 | 0.277533 |
| 0.0358873 | 0         | 0.324605 | 0.187393  | 0        | 0.106157 |
| 1.20091   | 0.935337  | 1.25113  | 0.776216  | 1.73855  | 1.18433  |
| 0.340099  | 0.382678  | 0.435231 | 0.0726497 | 0.259896 | 0.201719 |
| 1.43875   | 1.46147   | 2.26748  | 2.27855   | 2.36927  | 1.67851  |
| 0.373029  | 0.185947  | 0.471268 | 0.169994  | 0.284524 | 0.188166 |
| 44.5382   | 45.7581   | 43.5844  | 45.7264   | 48.1307  | 52.5955  |
| 5.39091   | 5.88639   | 7.05049  | 7.46759   | 6.54742  | 7.06444  |
| 7.20654   | 5.97066   | 6.93418  | 7.77468   | 7.72078  | 5.81076  |
| 0         | 0         | 0        | 0         | 0        | 0        |
| 1.48685   | 1.47454   | 1.49083  | 1.0776    | 1.35415  | 1.09184  |
| 13.1782   | 13.2666   | 13.6694  | 11.3893   | 12.8883  | 11.2509  |
| 0.296617  | 0         | 0.560542 | 0.675862  | 0.803224 | 0.24937  |
| 0.946459  | 0.294869  | 0.5962   | 0.359428  | 1.28148  | 0.530466 |
| 5.18921   | 5.58641   | 2.92305  | 1.85141   | 3.33939  | 2.59262  |
| 24.5403   | 27.4894   | 35.2946  | 33.6299   | 31.958   | 23.5401  |
| 0         | 0         | 0        | 0         | 0        | 0        |
| 0         | 0         | 0        | 0         | 0        | 0        |
| 8.4663    | 19.6846   | 5.62138  | 56.8857   | 6.64958  | 9.17715  |
| 0         | 0.291305  | 0        | 0.266313  | 0        | 0        |
| 12.2272   | 13.9194   | 15.1913  | 12.3637   | 11.9382  | 12.3959  |
| 24.3918   | 22.7569   | 32.7419  | 30.2219   | 31.5551  | 29.7164  |
| 64.5892   | 60.9616   | 56.6359  | 59.5424   | 52.432   | 60.4536  |
| 20.7479   | 20.8546   | 22.1732  | 21.5613   | 24.0292  | 24.3924  |
| 0.0949422 | 0.100569  | 0.155497 | 0.0811245 | 0.113123 | 0.155647 |
| 0.95191   | 0         | 0.399756 | 0         | 1.37479  | 0.800282 |
| 0         | 0         | 0        | 0         | 0        | 0        |
| 967.834   | 1003.21   | 778.628  | 1147.1    | 740.487  | 1186.75  |

|           |           |           |           |               |           |
|-----------|-----------|-----------|-----------|---------------|-----------|
| 0         | 0         | 0         | 0         | 0             | 0         |
| 35.0731   | 37.0717   | 37.0841   | 42.7283   | 30.0822       | 32.7653   |
| 10.9813   | 7.72127   | 13.2319   | 12.9699   | 11.9765       | 14.6175   |
| 8.74434   | 9.81953   | 19.0973   | 30.7818   | 40.6184       | 41.6113   |
| 1.41565   | 2.11702   | 2.14022   | 0.64513   | 2.45345       | 2.14228   |
| 0.0522889 | 0         | 0.0219588 | 0         | 0.0188794     | 0         |
| 46.4779   | 47.4294   | 32.4816   | 31.5044   | 43.6314       | 46.0047   |
| 0         | 0         | 0         | 0         | 0             | 0         |
| 31.2991   | 32.8421   | 34.345    | 37.9364   | 55.5073       | 57.1369   |
| 0.159632  | 0.364712  | 0.100557  | 0.212177  | 0.0576368     | 0         |
| 0.966173  | 1.01809   | 0.75151   | 0.802525  | 0.969587      | 0.478287  |
| 3.94998   | 3.77489   | 3.26671   | 2.81604   | 3.8848        | 2.62811   |
| 0.29571   | 0.040946  | 0.206973  | 0.449197  | 0.0711794     | 0.359099  |
| 0.77335   | 1.13382   | 0.573123  | 0.518273  | 1.23188       | 0.61192   |
| 0.514045  | 0.213534  | 0.755559  | 0.292821  | 1.11361       | 0.360137  |
| 87.4286   | 103.711   | 84.3098   | 101.724   | 87.8648       | 120.434   |
| 38.4259   | 38.9583   | 36.7278   | 34.9979   | 36.646        | 38.9469   |
| 0.424827  | 0.441182  | 0.909874  | 0.387198  | 0.368131      | 0.214294  |
| 3.14403   | 2.78402   | 2.8927    | 2.722     | 4.40234       | 3.07793   |
| 15.2875   | 16.3261   | 18.1183   | 18.2472   | 19.888        | 20.0073   |
| 0         | 0         | 0         | 0         | 0             | 0         |
| 5.84183   | 5.82407   | 4.41591   | 1.3311    | 6.32775       | 0.98226   |
| 10.4151   | 8.23168   | 9.82273   | 7.1604    | 8.97649       | 8.64855   |
| 0.281131  | 0.301015  | 0.251979  | 0.294663  | 0.251847      | 0.180843  |
| 30.6585   | 32.1226   | 26.7852   | 27.4878   | 36.8079       | 40.1603   |
| 29.642    | 31.6942   | 35.7438   | 40.7629   | 27.6438       | 32.0847   |
| 3.97937   | 3.38043   | 4.07197   | 3.3982    | 3.91834       | 2.2759    |
| 0         | 0         | 0         | 0         | 0             | 0         |
| 72.473    | 96.2797   | 59.5579   | 72.4068   | 54.4423       | 69.7139   |
| 2.13655   | 1.78047   | 2.55758   | 1.59849   | 2.5105        | 1.78157   |
| 0.0855965 | 0.160005  | 0.125812  | 0.0487593 | 0.108169      | 0.119937  |
| 2.07E-217 | 3.74E-238 | 6.73E-185 | 5.99E-256 | 3.07716979343 | 1.81E-181 |
| 5.75657   | 7.57685   | 4.72631   | 5.45302   | 8.96776       | 9.48891   |
| 57.5855   | 61.5076   | 39.9989   | 55.6268   | 47.9023       | 52.9259   |
| 0.0136688 | 0.017034  | 0.0114804 | 0.0311452 | 0             | 0         |
| 0.0232736 | 0.0290036 | 0.0879642 | 0         | 0.126048      | 0.0195664 |
| 0         | 0         | 0         | 0         | 0             | 0         |
| 196.414   | 40.7951   | 288.695   | 261.066   | 212.751       | 55.0425   |
| 0.389213  | 0.43398   | 0.593584  | 0.466762  | 0.465965      | 0.757764  |
| 0         | 0         | 0         | 0         | 0             | 0         |
| 1.28294   | 1.22465   | 1.09597   | 1.28886   | 0.86977       | 1.19908   |
| 840.108   | 926.677   | 1255.44   | 1390.98   | 1138.75       | 1453.6    |
| 0.115717  | 0.212925  | 0.314892  | 0.194657  | 0.133251      | 0.197657  |

|            |           |           |           |           |           |
|------------|-----------|-----------|-----------|-----------|-----------|
| 0          | 0         | 0         | 0         | 0         | 0         |
| 5.4543     | 5.00199   | 3.39716   | 4.35245   | 6.06723   | 6.72092   |
| 0          | 0.159749  | 0.0358888 | 0.0324542 | 0.030856  | 0.0639112 |
| 107.314    | 109.234   | 101.629   | 105.956   | 90.1095   | 106.231   |
| 0.153852   | 1.06174   | 0         | 1.04543   | 0.749927  | 0.382444  |
| 0          | 0         | 0         | 0         | 0         | 0         |
| 7.43205    | 8.77434   | 8.50737   | 7.81047   | 8.71923   | 7.52901   |
| 5.87E-70   | 5.23E-73  | 1.50E-124 | 2.24E-138 | 5.54E-74  | 2.46E-77  |
| 15.6412    | 15.8599   | 16.8319   | 16.8504   | 15.4716   | 16.3611   |
| 114.207    | 118.915   | 120.284   | 126.492   | 105.959   | 115.871   |
| 10.699     | 9.16689   | 8.29775   | 7.26778   | 11.9415   | 14.9136   |
| 49.6246    | 51.1107   | 55.0726   | 56.7027   | 40.4724   | 46.2708   |
| 15.9728    | 17.5424   | 16.9022   | 16.5611   | 15.1854   | 15.7713   |
| 5.51954    | 5.36566   | 5.28108   | 5.0998    | 5.95811   | 5.78847   |
| 1.32137    | 1.23502   | 1.09248   | 1.43485   | 0.492003  | 0.729023  |
| 12.7978    | 51.4479   | 54.1717   | 43.4284   | 89.9919   | 147.334   |
| 9.92127    | 9.73923   | 7.10911   | 6.5042    | 3.65869   | 3.40764   |
| 0.140886   | 0.307252  | 0.288431  | 0.180573  | 0.0953782 | 0.162862  |
| 19.1335    | 16.8011   | 19.7895   | 18.7409   | 17.9891   | 17.1741   |
| 6.70913    | 7.03437   | 6.11691   | 6.93153   | 7.47866   | 6.82272   |
| 0          | 0         | 0         | 0         | 0         | 0         |
| 0.489443   | 0.381214  | 0.323729  | 0.306688  | 0.424123  | 0.555499  |
| 20.0384    | 17.7374   | 20.6512   | 18.6251   | 23.7997   | 21.1031   |
| 0.411809   | 0.205927  | 0.214982  | 0.18826   | 0.340932  | 0.219031  |
| 0.00833346 | 0.0415406 | 0         | 0.0474709 | 0.0361065 | 0.0210181 |
| 0          | 0         | 0         | 0         | 0         | 0         |
| 0          | 0         | 0         | 0         | 0         | 0         |
| 82.851     | 84.1149   | 72.7794   | 81.8574   | 59.1502   | 72.2104   |
| 2.15247    | 1.81044   | 2.03791   | 1.19914   | 2.08306   | 1.46718   |
| 136.933    | 126.767   | 141.471   | 131.623   | 78.3393   | 94.6773   |
| 6.97813    | 14.7334   | 20.1495   | 20.7981   | 38.4879   | 50.9112   |
| 11.8798    | 12.7941   | 10.4706   | 11.8079   | 10.1673   | 10.9739   |
| 81.3878    | 85.3578   | 95.8291   | 94.1715   | 78.7625   | 81.1672   |
| 7.80827    | 5.95275   | 8.92873   | 5.35605   | 8.56715   | 6.65179   |
| 2.66582    | 2.55457   | 1.87933   | 2.81783   | 2.07446   | 2.314     |
| 2.43405    | 2.97498   | 2.65374   | 2.71974   | 2.41248   | 1.81917   |
| 0          | 0         | 0         | 0         | 0         | 0         |
| 1.50665    | 1.72743   | 4.35246   | 2.4944    | 6.75367   | 4.78733   |
| 0          | 0         | 0         | 0         | 0         | 0         |
| 0.614882   | 0.35759   | 1.13617   | 0.420315  | 0.932439  | 0.758177  |
| 99.5824    | 94.9348   | 104.444   | 92.4798   | 106.809   | 98.7845   |
| 0          | 0.361486  | 0         | 0.371782  | 0.314199  | 0.27435   |
| 1.97954    | 2.51301   | 1.94957   | 2.51075   | 1.14789   | 1.47207   |

|           |           |           |           |           |           |
|-----------|-----------|-----------|-----------|-----------|-----------|
| 0.0820057 | 0.163513  | 0.0918356 | 0         | 0         | 0.110309  |
| 34.6835   | 32.6613   | 37.2763   | 34.13     | 39.3606   | 39.3826   |
| 86.2608   | 87.389    | 84.5078   | 90.7948   | 89.8101   | 96.225    |
| 33.9417   | 33.86     | 29.7417   | 33.9292   | 28.1724   | 31.1766   |
| 0.887011  | 1.18984   | 1.0061    | 0.903639  | 0.626715  | 0.638662  |
| 0.868928  | 0.61951   | 0.731878  | 0.615777  | 0.936745  | 0.803119  |
| 8.74434   | 9.81953   | 19.0973   | 30.9998   | 40.6184   | 42.0911   |
| 0.442318  | 0.317935  | 0.376576  | 0.16874   | 0.363375  | 0.412489  |
| 0.380951  | 0.487847  | 0.654831  | 0.496683  | 0.584569  | 0.482033  |
| 0         | 0         | 0         | 0         | 0         | 0         |
| 0         | 0         | 0         | 0         | 0         | 0         |
| 8.44271   | 8.64434   | 10.0447   | 7.88697   | 10.2825   | 8.72425   |
| 80.5263   | 71.4866   | 52.1405   | 68.7547   | 67.84     | 62.9898   |
| 0         | 0         | 0         | 0         | 0         | 0         |
| 17.1385   | 16.7648   | 16.4342   | 16.2656   | 12.6841   | 13.0317   |
| 33.3705   | 39.9481   | 24.4928   | 31.3941   | 28.0956   | 34.6012   |
| 0.0172264 | 0.042935  | 0.0217027 | 0         | 0         | 0.0289649 |
| 2.91669   | 4.31327   | 3.08667   | 4.29766   | 5.93949   | 5.16575   |
| 0         | 0         | 0         | 0         | 0         | 0         |
| 23.0918   | 20.7404   | 18.6636   | 20.4264   | 25.8182   | 24.9824   |
| 4.84854   | 4.09136   | 4.96704   | 4.38691   | 3.4315    | 4.74812   |
| 2.97406   | 2.51203   | 3.83015   | 4.02831   | 3.04247   | 2.30586   |
| 0         | 0         | 0         | 0         | 0         | 0         |
| 21.1182   | 26.5456   | 24.7764   | 21.6774   | 21.4141   | 20.0496   |
| 0.0586013 | 0.0730289 | 0.0984398 | 0.0751094 | 0.0158686 | 0.0554256 |
| 0         | 0         | 0         | 0         | 0         | 0         |
| 33.412    | 29.907    | 32.9419   | 28.8346   | 32.1703   | 35.0326   |
| 15.0794   | 12.9232   | 10.9859   | 15.437    | 8.02332   | 11.2092   |
| 0.235076  | 0.378765  | 0.820139  | 0.477773  | 0.931215  | 0.605765  |
| 0.0319457 | 0         | 0         | 0         | 0         | 0         |
| 0.765746  | 0.607264  | 0.920877  | 0.356891  | 0.923695  | 0.819346  |
| 27.2509   | 25.6995   | 29.3553   | 29.5209   | 28.2606   | 31.9729   |
| 0         | 0         | 0         | 0         | 0         | 0         |
| 44.6658   | 42.0352   | 48.8875   | 37.4135   | 52.317    | 49.0931   |
| 6.66788   | 5.9688    | 4.96935   | 6.63365   | 5.79836   | 5.92159   |
| 0.0886143 | 0.0736207 | 0         | 0.134609  | 0         | 0.024833  |
| 1.64188   | 1.25077   | 2.71709   | 2.00453   | 1.10158   | 1.83423   |
| 1.07542   | 0.448726  | 1.3821    | 0.613479  | 1.06839   | 0.597117  |
| 25.6231   | 25.2351   | 23.7932   | 25.628    | 25.3819   | 23.8259   |
| 20.2871   | 20.2479   | 22.086    | 20.9025   | 23.4789   | 24.0596   |
| 15.4372   | 14.5136   | 13.8044   | 14.4482   | 16.1966   | 16.7324   |
| 39.154    | 33.8224   | 24.387    | 17.6194   | 25.3292   | 29.9015   |
| 478.496   | 515.196   | 434.815   | 698.754   | 119.249   | 273.936   |

|           |           |           |           |           |           |
|-----------|-----------|-----------|-----------|-----------|-----------|
| 1.42E-233 | 0         | 0         | 0         | 0         | 0         |
| 0.346934  | 0.425642  | 0.285595  | 0.393513  | 0.42333   | 0.509616  |
| 0.0996364 | 0         | 0.376582  | 0.113514  | 0.161886  | 0.125648  |
| 0         | 0         | 0.0796343 | 0.576105  | 0.0684669 | 0.106281  |
| 0         | 0         | 0         | 0         | 0         | 0         |
| 31.3526   | 34.5782   | 31.1251   | 30.4242   | 31.3829   | 27.4208   |
| 0.060047  | 24.2203   | 0.607905  | 361.196   | 0.587407  | 6.28527   |
| 0         | 0.240553  | 0.486378  | 0.219915  | 0         | 0         |
| 7.07346   | 6.76495   | 8.08254   | 8.90202   | 4.18728   | 5.32441   |
| 3.23639   | 4.14626   | 3.40779   | 3.29826   | 2.21381   | 2.77536   |
| 9.52794   | 8.62725   | 8.72176   | 9.61837   | 8.75281   | 7.28021   |
| 3.88699   | 3.21574   | 3.8271    | 3.18794   | 4.72923   | 2.98408   |
| 45.2556   | 46.2699   | 37.9157   | 43.8047   | 39.0947   | 38.0926   |
| 0.0267537 | 0         | 0         | 0.03048   | 0.057958  | 0.0224921 |
| 4.39032   | 4.55934   | 5.04828   | 4.24757   | 3.01937   | 3.31018   |
| 0.530806  | 0.220497  | 0.445825  | 0.10079   | 1.24622   | 0.743758  |
| 0         | 0         | 0         | 0         | 0         | 0         |
| 0.107318  | 0.153049  | 0.174715  | 0.192353  | 0.165908  | 0.0385893 |
| 0         | 0         | 0         | 0         | 0         | 0         |
| 0.194204  | 0.14521   | 0.324742  | 0.132752  | 0.240955  | 0.151395  |
| 12.1063   | 12.1948   | 11.8942   | 12.3262   | 10.5561   | 11.2372   |
| 0         | 0.157634  | 0.478085  | 0.14411   | 0.411041  | 0         |
| 0         | 0         | 0         | 0         | 0         | 0         |
| 18.7833   | 20.4877   | 21.8929   | 18.3762   | 21.1467   | 20.2372   |
| 2.92173   | 2.72694   | 3.48487   | 2.18738   | 4.14613   | 2.70608   |
| 11.661    | 14.028    | 17.4086   | 31.7155   | 12.5215   | 12.9203   |
| 1.10099   | 0.864677  | 0.975661  | 0.804114  | 1.46772   | 0.865035  |
| 7.76341   | 7.37126   | 7.19506   | 5.25042   | 9.8314    | 7.85177   |
| 6.54038   | 6.51819   | 7.61234   | 5.97999   | 7.68393   | 6.80923   |
| 0         | 0         | 0         | 0         | 0.379094  | 0         |
| 5.5583    | 3.56011   | 1.63429   | 1.99005   | 4.04298   | 2.74799   |
| 0         | 0.156719  | 0         | 0.0358176 | 0         | 0         |
| 0         | 0         | 0         | 0         | 0         | 0         |
| 1185.91   | 0         | 6484.45   | 0         | 883.927   | 2817.98   |
| 553.9     | 458.289   | 553.641   | 418.649   | 402.82    | 325.06    |
| 2.07104   | 2.4711    | 1.66545   | 2.00808   | 2.43423   | 2.51911   |
| 1.74363   | 2.74844   | 4.32297   | 2.45825   | 3.71791   | 2.42583   |
| 4.99939   | 5.26718   | 5.7941    | 5.25901   | 5.75314   | 4.02104   |
| 4.17152   | 2.78262   | 4.53587   | 2.36641   | 4.64975   | 3.69622   |
| 0.170394  | 0.0265431 | 0.167712  | 0         | 0.279158  | 0.107439  |
| 5.94889   | 6.66265   | 8.47432   | 6.51784   | 6.29616   | 4.91892   |
| 0         | 0         | 0         | 0         | 0         | 0         |
| 46.4839   | 53.5419   | 41.4043   | 50.4237   | 47.0286   | 57.0781   |

|           |           |           |           |           |           |
|-----------|-----------|-----------|-----------|-----------|-----------|
| 25.4723   | 20.4905   | 24.8358   | 23.442    | 25.1159   | 31.3206   |
| 0         | 1.45623   | 0         | 0.408257  | 0         | 0         |
| 14.0079   | 14.9165   | 12.8944   | 16.0578   | 11.462    | 13.8548   |
| 0.10652   | 0.0331863 | 0.0670998 | 0.0606782 | 0.346141  | 0.0671645 |
| 0.863134  | 1.15838   | 0.794655  | 1.28592   | 0.287671  | 0.865195  |
| 1.67332   | 1.70615   | 0.670773  | 1.21316   | 0.988642  | 0.895226  |
| 0         | 0         | 0         | 0         | 0         | 0         |
| 12.9239   | 11.7529   | 11.7839   | 10.833    | 13.2422   | 13.0188   |
| 0.286444  | 0.356966  | 0.552849  | 0.229597  | 0.658387  | 0.583413  |
| 5.13299   | 5.10215   | 4.87578   | 3.87542   | 5.84678   | 5.47984   |
| 0.77998   | 0.861     | 1.09478   | 0.761918  | 1.20642   | 1.42292   |
| 24.2876   | 25.9383   | 29.5553   | 29.2597   | 30.9063   | 25.2384   |
| 0         | 0         | 0         | 0         | 0         | 0         |
| 66.3835   | 57.8637   | 70.5325   | 61.9915   | 94.8259   | 84.1716   |
| 0.246025  | 0.284696  | 0.309955  | 0.340354  | 0.399733  | 0.325028  |
| 15.7868   | 15.7271   | 16.026    | 15.6135   | 15.8599   | 17.5273   |
| 23.7908   | 23.4047   | 26.5474   | 23.4044   | 29.1511   | 22.6257   |
| 5.08427   | 4.9545    | 0         | 0         | 0         | 0         |
| 66.2451   | 56.5269   | 89.6703   | 97.9812   | 56.4094   | 106.562   |
| 0         | 0         | 0         | 0         | 0         | 0         |
| 54.8002   | 54.4144   | 55.5969   | 60.7187   | 54.7811   | 64.1458   |
| 0.816305  | 1.18682   | 0.857021  | 0.465001  | 0.58947   | 0.457518  |
| 11.4422   | 9.66346   | 11.9105   | 10.0479   | 12.1303   | 10.4081   |
| 5.24233   | 4.82501   | 3.10803   | 4.37202   | 4.45363   | 7.51832   |
| 0         | 0         | 0         | 0         | 0         | 0         |
| 4.04776   | 3.57983   | 2.38529   | 3.12395   | 4.31373   | 4.44585   |
| 23.5223   | 25.7613   | 25.6073   | 29.1961   | 24.7863   | 21.6231   |
| 0.91502   | 0.781917  | 0.856359  | 0.327632  | 0.547523  | 0.43595   |
| 8.81688   | 7.18107   | 9.67979   | 7.60855   | 13.2506   | 10.3237   |
| 1.87796   | 1.95608   | 2.04814   | 1.37313   | 3.82544   | 2.73348   |
| 0.0672683 | 0.0838297 | 0         | 0.153275  | 0.0728636 | 0         |
| 17.4753   | 16.5966   | 19.4754   | 17.2824   | 22.8098   | 16.9378   |
| 0.347624  | 0.433209  | 0         | 0         | 0         | 0         |
| 0.331001  | 0.165136  | 0.273664  | 0.169879  | 0.215379  | 0.125316  |
| 0.149806  | 0.38639   | 0.0974858 | 0.826653  | 0.171429  | 0.312629  |
| 0.572933  | 0.433993  | 0.679353  | 0.831915  | 0.438063  | 0.491116  |
| 7.35047   | 6.69754   | 6.86523   | 5.90121   | 7.32947   | 4.05263   |
| 52.3113   | 50.1425   | 44.3767   | 38.4735   | 44.5039   | 47.5251   |
| 9.19816   | 8.64183   | 8.05752   | 10.5612   | 10.0411   | 11.6599   |
| 2.10143   | 2.76355   | 2.40903   | 2.82292   | 2.42174   | 2.24848   |
| 66.7544   | 75.761    | 64.9217   | 74.1633   | 58.1869   | 67.8274   |
| 0         | 0         | 0         | 0.12304   | 0         | 0         |
| 0.122194  | 0.253797  | 0.153947  | 0.139213  | 0.352955  | 0.273946  |

|           |           |           |           |           |           |
|-----------|-----------|-----------|-----------|-----------|-----------|
| 0         | 0         | 0         | 0         | 0         | 0         |
| 0         | 0         | 0         | 0.23002   | 0.656133  | 0         |
| 4.71028   | 5.09369   | 5.67406   | 4.48076   | 4.41692   | 4.22333   |
| 10.3963   | 9.58161   | 10.7486   | 11.9607   | 11.5378   | 11.9401   |
| 0         | 0.0686791 | 6.04056   | 6.40426   | 6.08889   | 6.53287   |
| 1.39124   | 1.41702   | 1.59547   | 1.24465   | 1.67118   | 1.54826   |
| 13.1091   | 14.6378   | 12.9058   | 14.7131   | 13.0168   | 16.8559   |
| 0         | 0         | 0         | 0         | 0         | 0         |
| 0         | 0         | 0         | 0         | 0         | 0         |
| 11.9095   | 10.1648   | 10.5335   | 8.46381   | 9.87211   | 9.26124   |
| 0.114734  | 0.168213  | 0.0765255 | 0.0692018 | 0.0365522 | 0.119154  |
| 22.6061   | 16.9351   | 28.2215   | 26.9694   | 29.2308   | 29.9873   |
| 2.67999   | 2.31217   | 0         | 0         | 0         | 0         |
| 2.04437   | 1.96993   | 2.12005   | 2.55976   | 3.0576    | 2.25046   |
| 0         | 0         | 0         | 0         | 0         | 0         |
| 35.0355   | 33.2419   | 36.1998   | 31.3524   | 33.654    | 30.975    |
| 0         | 0.0486855 | 0         | 0         | 0         | 0         |
| 1.59199   | 4.55039   | 1.82978   | 1.69991   | 2.11379   | 3.51859   |
| 0.0849862 | 0.0529549 | 0.0892252 | 0.0322745 | 0.0153426 | 0.0833571 |
| 0         | 0         | 0         | 0         | 0         | 0         |
| 79.2336   | 80.6131   | 79.8948   | 72.8073   | 77.6018   | 71.9563   |
| 0         | 0         | 0         | 0         | 0         | 0         |
| 0.220956  | 0.780173  | 0.185582  | 0.587374  | 0.558449  | 0.557281  |
| 5.64323   | 5.98158   | 6.8088    | 5.83126   | 6.12215   | 5.40258   |
| 0.963303  | 0.953312  | 1.07084   | 0.871524  | 1.0901    | 0.809861  |
| 0.0413748 | 0         | 0.0521263 | 0         | 0.134449  | 0.0695686 |
| 22.2235   | 21.51     | 18.9316   | 20.7042   | 18.361    | 19.1009   |
| 1.43113   | 0.76476   | 0.257976  | 0.544189  | 0.295742  | 0.516144  |
| 584.222   | 529.051   | 566.47    | 522.146   | 336.546   | 474.646   |
| 0         | 0         | 0         | 0         | 0         | 0         |
| 1.03315   | 1.88835   | 2.77679   | 1.17705   | 0.89527   | 0.463244  |
| 2.74263   | 3.07098   | 2.7271    | 3.58848   | 2.71543   | 2.86469   |
| 38.6323   | 41.7125   | 39.9783   | 48.3684   | 36.5421   | 41.8389   |
| 16.8555   | 17.4207   | 18.4473   | 16.306    | 16.4512   | 14.7559   |
| 0         | 0         | 0         | 0         | 0         | 0.0287375 |
| 16.8571   | 11.8272   | 21.0567   | 21.729    | 35.2915   | 30.5728   |
| 5.13958   | 4.64355   | 6.42834   | 4.89646   | 4.71181   | 4.19784   |
| 0         | 0         | 0         | 0         | 0         | 0         |
| 0         | 0.0489438 | 0         | 0         | 0         | 0         |
| 0.763982  | 0.993468  | 0.87881   | 0.756862  | 1.54712   | 0.837768  |
| 1.18098   | 1.74308   | 0.997811  | 1.55385   | 2.02125   | 0.645275  |
| 36.9536   | 37.029    | 36.3926   | 41.5727   | 44.9154   | 43.8754   |
| 0         | 0         | 0         | 0.357243  | 0         | 0         |



|           |           |           |           |           |           |
|-----------|-----------|-----------|-----------|-----------|-----------|
| 0.0705639 | 0.0879366 | 0.0889002 | 2.73333   | 0.0764333 | 0.296619  |
| 0         | 0         | 0         | 0         | 0         | 0         |
| 0.815956  | 0.762745  | 1.06841   | 1.17254   | 0.923032  | 0.48293   |
| 0         | 0         | 0         | 0         | 0         | 0         |
| 13.0915   | 11.9926   | 11.8636   | 12.5861   | 10.5731   | 12.3964   |
| 56.5765   | 52.3755   | 49.3613   | 37.1831   | 34.2681   | 38.4399   |
| 0         | 0         | 0         | 0         | 0.013684  | 0         |
| 0         | 0         | 0         | 0         | 0.0190893 | 0         |
| 1.72774   | 1.36915   | 2.46692   | 2.2813    | 2.58164   | 2.23466   |
| 39.4388   | 38.7795   | 40.1362   | 37.439    | 38.893    | 34.9659   |
| 6.30913   | 7.18141   | 6.94741   | 5.7217    | 6.6284    | 6.58222   |
| 0.105815  | 0         | 0         | 0         | 0         | 0.0889604 |
| 0.712344  | 0.459167  | 0.649878  | 0.307834  | 1.11749   | 0.516273  |
| 0.189832  | 0.135182  | 0.375824  | 0.247168  | 0.234997  | 0.296389  |
| 3.05627   | 3.53667   | 4.72139   | 5.01567   | 3.94106   | 3.27298   |
| 3.23675   | 5.15813   | 2.54018   | 2.77346   | 2.18877   | 2.1309    |
| 6.13535   | 4.42484   | 5.18051   | 3.91137   | 5.67004   | 3.44603   |
| 0.683361  | 0.745153  | 0.107617  | 0.778541  | 0.555152  | 0.502696  |
| 0.559712  | 0.523134  | 0.352578  | 0.318835  | 0.606269  | 0.529376  |
| 0         | 0         | 0         | 0.0252407 | 0.0239977 | 0         |
| 0.197223  | 0.187734  | 0.31754   | 0.745083  | 0.161297  | 0.0414752 |
| 0         | 0         | 0         | 0         | 0         | 0         |
| 0.678141  | 1.17375   | 1.44766   | 0.90136   | 0.958994  | 0.554285  |
| 0         | 0         | 0         | 0         | 0         | 0         |
| 0         | 0         | 0         | 0         | 0         | 0         |
| 92.5837   | 91.3184   | 105.378   | 100.183   | 87.5896   | 94.2347   |
| 0         | 0         | 0         | 0         | 0         | 0         |
| 1.45309   | 1.02704   | 1.12027   | 0.840093  | 1.62094   | 1.40396   |
| 1.40027   | 1.17126   | 0.604443  | 0.56301   | 1.47637   | 0.873122  |
| 7.29768   | 7.61473   | 7.47926   | 10.2277   | 6.86956   | 7.93687   |
| 0         | 0.0484637 | 0         | 0         | 0         | 0         |
| 0.0278832 | 0         | 0         | 0         | 0         | 0.0117209 |
| 10.9072   | 14.6634   | 23.5285   | 22.5154   | 24.4647   | 21.7157   |
| 16.3835   | 19.4008   | 14.7256   | 15.456    | 13.7045   | 16.9939   |
| 0         | 0.252456  | 0         | 0.166173  | 0         | 0.0258675 |
| 177.376   | 152.934   | 237.276   | 242.109   | 252.842   | 181.441   |
| 5.74906   | 4.75763   | 4.41371   | 3.17255   | 2.57846   | 1.35936   |
| 13.1133   | 12.5276   | 13.2086   | 13.6198   | 12.757    | 13.2132   |
| 0         | 0         | 0         | 0         | 0         | 0         |
| 30.2926   | 47.1966   | 29.6055   | 37.4244   | 31.7546   | 37.0322   |
| 22.3232   | 9.6836    | 19.5794   | 8.23156   | 17.2029   | 9.74183   |
| 14.4303   | 19.3125   | 13.721    | 17.2554   | 25.4118   | 23.0162   |
| 12.142    | 11.5178   | 16.2901   | 12.0656   | 17.2942   | 13.8636   |

|           |           |           |           |           |           |
|-----------|-----------|-----------|-----------|-----------|-----------|
| 10.3227   | 12.5518   | 14.1098   | 16.3561   | 11.7783   | 12.0276   |
| 34.4892   | 35.617    | 30.4107   | 40.9139   | 30.5255   | 34.8474   |
| 3.05677   | 3.74383   | 2.98557   | 4.89373   | 3.48145   | 5.18207   |
| 4.03328   | 4.60976   | 5.47344   | 4.86139   | 4.6554    | 4.0356    |
| 0.135634  | 0         | 0.202526  | 0.0431408 | 0.330574  | 0.159311  |
| 1.77843   | 1.79745   | 1.7554    | 1.40393   | 1.78984   | 1.88365   |
| 18.8693   | 18.5583   | 19.8396   | 17.3086   | 21.4408   | 18.3715   |
| 6.59793   | 8.474     | 6.33179   | 5.45772   | 8.54238   | 9.44611   |
| 0.623488  | 0.667155  | 0.563634  | 1.3744    | 0.450988  | 0.745337  |
| 14.2935   | 16.3213   | 15.4068   | 13.8874   | 16.3655   | 13.6971   |
| 11.9678   | 7.69964   | 5.59335   | 14.5153   | 8.15434   | 11.0904   |
| 3.56463   | 4.88647   | 2.29649   | 4.67029   | 0.921408  | 1.94113   |
| 2.34688   | 2.53298   | 2.74553   | 2.07694   | 1.95196   | 1.93782   |
| 50.8782   | 49.7455   | 57.9693   | 48.8751   | 53.1551   | 43.4996   |
| 30.4896   | 34.9722   | 38.9973   | 31.9558   | 37.2768   | 34.9638   |
| 1.94591   | 2.0658    | 2.72146   | 1.90242   | 2.54036   | 2.21068   |
| 0.10927   | 0.15259   | 0.176879  | 0.117286  | 3.55E-242 | 0.0904195 |
| 10.5917   | 10.5067   | 10.1014   | 9.40014   | 10.5893   | 9.9553    |
| 9.75566   | 8.972     | 12.3498   | 12.3034   | 14.225    | 14.5633   |
| 2.41275   | 1.99396   | 2.1118    | 1.30223   | 1.43052   | 0.790168  |
| 28.6361   | 25.558    | 28.2498   | 28.3512   | 27.9183   | 28.6706   |
| 335.02    | 268.204   | 396.488   | 316.041   | 392.73    | 359.8     |
| 0.745821  | 0.60986   | 1.0474    | 0.288778  | 0.27073   | 0.123693  |
| 13.1924   | 12.5872   | 15.2355   | 11.716    | 17.4405   | 10.4556   |
| 154.411   | 120.146   | 143.135   | 112.991   | 137.846   | 126.986   |
| 11.0098   | 13.9723   | 10.7754   | 11.7504   | 10.0099   | 11.359    |
| 0.140558  | 0.173152  | 0         | 0         | 0.148862  | 0         |
| 1.77E-05  | 2.38E-06  | 1.42E-05  | 3.93E-07  | 2.47E-06  | 1.72E-06  |
| 0.0788715 | 0         | 0         | 0.089857  | 0         | 0.132617  |
| 12.5524   | 15.9247   | 13.2498   | 14.0431   | 11.2692   | 12.0741   |
| 7.61374   | 7.1046    | 8.46923   | 7.46828   | 7.74418   | 8.72717   |
| 0.0901284 | 0.0561589 | 0         | 0         | 0         | 0         |
| 0         | 0         | 0         | 0         | 0         | 0         |
| 16.7713   | 13.6205   | 31.6942   | 33.3841   | 32.8628   | 22.8133   |
| 0         | 0         | 0.0515341 | 0         | 0         | 0         |
| 8.86025   | 9.95862   | 10.6625   | 8.44449   | 8.08638   | 7.11687   |
| 31.589    | 31.4393   | 35.009    | 33.8181   | 37.4974   | 32.3155   |
| 0.57822   | 0.519486  | 0.542119  | 0.291078  | 1.03415   | 0.350456  |
| 17.9979   | 17.828    | 18.1615   | 29.8019   | 24.2044   | 22.2456   |
| 1.37838   | 1.3551    | 1.15481   | 1.50661   | 2.45384   | 1.93924   |
| 20.3221   | 26.4031   | 27.1464   | 25.2873   | 25.2129   | 25.87     |
| 12.6727   | 14.5058   | 15.1773   | 11.7819   | 18.2854   | 12.969    |
| 8.34522   | 5.91831   | 9.19954   | 5.37928   | 10.645    | 6.0697    |

|           |           |           |           |           |           |
|-----------|-----------|-----------|-----------|-----------|-----------|
| 1.9818    | 2.195     | 1.93429   | 2.00916   | 2.18291   | 1.78988   |
| 0.0262522 | 0         | 0.0165359 | 0         | 0         | 0.0882848 |
| 29.6456   | 28.6822   | 23.5809   | 34.6396   | 32.9289   | 35.346    |
| 0         | 0         | 0         | 0         | 0         | 0         |
| 21.8806   | 23.5798   | 24.742    | 25.3369   | 25.7405   | 27.2914   |
| 0         | 0         | 0         | 0         | 0         | 0         |
| 38.0112   | 34.8606   | 24.3766   | 26.3073   | 19.5456   | 28.9488   |
| 4.30895   | 4.08186   | 3.96701   | 4.75095   | 4.27526   | 4.20751   |
| 0.127419  | 0.370508  | 0.160529  | 0.290332  | 0.230029  | 0.464197  |
| 43.0967   | 44.1083   | 47.1332   | 49.8654   | 49.1976   | 56.1209   |
| 73.3601   | 72.8738   | 79.3305   | 79.6619   | 83.076    | 85.5922   |
| 0         | 0         | 0         | 0         | 0.23245   | 0.180417  |
| 50.0572   | 56.0349   | 47.1146   | 53.5516   | 50.0866   | 60.9731   |
| 39.1315   | 40.9024   | 40.9411   | 41.3115   | 39.8344   | 35.5165   |
| 2.52466   | 1.42471   | 1.32029   | 0.868318  | 1.59952   | 0.881043  |
| 24.2411   | 25.1035   | 21.9375   | 21.6532   | 19.8473   | 28.0819   |
| 0         | 0         | 0         | 0         | 0         | 0         |
| 0         | 0         | 0         | 0         | 0         | 0         |
| 5.92217   | 5.75434   | 0.41307   | 0         | 0         | 0.275645  |
| 10.6975   | 10.3987   | 9.95468   | 12.3028   | 12.7291   | 12.9185   |
| 0.645632  | 1.98912   | 22.956    | 15.7736   | 8.39203   | 13.8562   |
| 11.1694   | 12.5193   | 16.6154   | 14.5801   | 15.9079   | 13.1272   |
| 22.797    | 20.8633   | 14.9633   | 18.825    | 17.4029   | 20.4768   |
| 16.003    | 15.1145   | 11.6261   | 13.416    | 12.5495   | 13.6309   |
| 103.447   | 102.322   | 102.454   | 109.591   | 122.685   | 158.631   |
| 0         | 0         | 0         | 0         | 0         | 0         |
| 109.704   | 116.169   | 117.982   | 112.603   | 116.529   | 118.596   |
| 8.83628   | 8.3831    | 10.9798   | 8.48187   | 11.832    | 10.943    |
| 0         | 0         | 0         | 0         | 0         | 0         |
| 0         | 0         | 0         | 0         | 0         | 0         |
| 2.15538   | 2.68603   | 3.20285   | 2.26669   | 3.4122    | 2.13729   |
| 52.6748   | 59.1918   | 57.9448   | 65.4945   | 52.6693   | 63.7041   |
| 0.0357742 | 0.26749   | 0.180281  | 0.326055  | 0.0387498 | 0.0902273 |
| 0.118345  | 0.196642  | 0.198797  | 0.179772  | 0.0427297 | 0.0331648 |
| 41.6415   | 41.5043   | 37.5833   | 42.4038   | 37.8173   | 45.2864   |
| 0         | 0.0594119 | 0         | 0         | 0         | 0.0400805 |
| 12.1759   | 13.8338   | 12.9018   | 19.047    | 12.49     | 17.4675   |
| 24.0421   | 25.3813   | 20.3021   | 13.5912   | 21.1232   | 11.5176   |
| 0.130385  | 0.0406213 | 0.164266  | 0         | 0.246916  | 0.223801  |
| 0         | 0.0963119 | 0.0973672 | 0.264147  | 0.083713  | 0.064974  |
| 0.0830918 | 0.0517745 | 0.104684  | 0.0946651 | 0.247509  | 0.244497  |
| 1.42698   | 1.57622   | 1.71606   | 1.18235   | 3.12647   | 2.64474   |
| 5.68057   | 8.06233   | 6.7094    | 6.74143   | 3.33292   | 4.67623   |

|           |           |           |           |           |           |
|-----------|-----------|-----------|-----------|-----------|-----------|
| 0.735725  | 0.829539  | 0.971044  | 0.878113  | 0.796922  | 0.854164  |
| 14.8584   | 14.6855   | 16.5893   | 14.7098   | 16.9823   | 15.6361   |
| 15.3167   | 14.0256   | 16.8039   | 14.1526   | 18.8487   | 14.9559   |
| 16.3591   | 18.3193   | 12.5112   | 10.5001   | 19.6166   | 21.2304   |
| 0.131999  | 0         | 0         | 0         | 0.142978  | 0.110973  |
| 0.0893758 | 0.083535  | 0.0281501 | 0.0763682 | 0         | 0.0187848 |
| 0         | 0         | 0         | 0         | 0         | 0         |
| 1144.57   | 1316.58   | 1150.82   | 1207.86   | 1232.62   | 1516.56   |
| 6.86054   | 6.36131   | 7.23703   | 8.51396   | 9.23002   | 6.72903   |
| 0         | 0         | 0         | 0         | 0         | 0         |
| 0         | 0         | 0         | 0         | 0         | 0         |
| 0.0842953 | 20.0644   | 0.955798  | 181.284   | 1.00438   | 13.6067   |
| 0         | 0.0837059 | 0.0846231 | 0.114787  | 0.18189   | 0.0282349 |
| 14.158    | 13.022    | 14.2824   | 11.5818   | 12.4194   | 17.5753   |
| 2.5154    | 2.00761   | 1.88718   | 1.67437   | 2.90832   | 1.16429   |
| 48.1015   | 48.2434   | 59.9163   | 62.1723   | 69.5572   | 63.2063   |
| 0         | 0         | 0         | 0         | 0         | 0         |
| 1.52643   | 2.60102   | 7.6843    | 3.70454   | 5.83971   | 3.17919   |
| 0.0185104 | 0.069203  | 0         | 0         | 0.0601504 | 0.0155619 |
| 0         | 0         | 0         | 0         | 0         | 0         |
| 18.3006   | 16.9897   | 22.9503   | 18.1249   | 22.7012   | 23.7453   |
| 39.4269   | 42.1891   | 34.5585   | 37.8003   | 42.1811   | 39.6025   |
| 10.7283   | 9.59463   | 10.1768   | 10.7846   | 12.1675   | 11.1416   |
| 2.077     | 2.18239   | 1.7796    | 2.09392   | 1.73151   | 1.4896    |
| 93.1326   | 96.3457   | 71.6912   | 79.5385   | 73.9524   | 88.9102   |
| 23.9473   | 25.528    | 21.3132   | 25.9088   | 21.7026   | 24.5356   |
| 454.424   | 516.765   | 459.639   | 464.546   | 436.091   | 487.177   |
| 0.346848  | 0.69159   | 0.388424  | 0.395158  | 0.445273  | 0.396462  |
| 11.633    | 11.9037   | 11.676    | 11.0379   | 11.0733   | 8.63279   |
| 1.19011   | 0.787841  | 1.59261   | 1.25281   | 1.68012   | 1.28949   |
| 561.163   | 425.673   | 399.599   | 667.12    | 449.273   | 594.848   |
| 32.5075   | 37.7745   | 38.9477   | 34.0281   | 35.7439   | 31.8603   |
| 0         | 0         | 0         | 0         | 0         | 0         |
| 8.36979   | 8.79079   | 6.57048   | 6.57376   | 8.20746   | 7.71625   |
| 51.3961   | 52.9752   | 48.2991   | 56.4866   | 45.84     | 54.6665   |
| 5.96489   | 4.9165    | 4.33754   | 2.70635   | 2.98115   | 2.15546   |
| 3.07557   | 4.67015   | 4.0956    | 5.66377   | 4.1131    | 5.04505   |
| 3.54779   | 2.98859   | 2.20637   | 1.80225   | 5.71018   | 3.51241   |
| 0         | 0         | 0         | 0.0113866 | 0.0541293 | 0.0336101 |
| 4.04678   | 3.47799   | 6.46084   | 2.62317   | 7.82208   | 4.16473   |
| 7.44046   | 6.85091   | 6.92209   | 7.08364   | 5.6356    | 6.76956   |
| 25.6749   | 28.3614   | 24.5244   | 27.7154   | 27.4276   | 25.5976   |
| 7.87959   | 8.25044   | 10.2853   | 10.7818   | 8.18305   | 6.82935   |

|           |           |          |           |           |           |
|-----------|-----------|----------|-----------|-----------|-----------|
| 0.0365921 | 0         | 0        | 0         | 0         | 0         |
| 13.4808   | 10.4612   | 10.0548  | 8.19744   | 7.30105   | 7.47452   |
| 1.568     | 1.71574   | 1.68636  | 2.83209   | 2.4855    | 2.4114    |
| 10.3806   | 7.86103   | 9.60604  | 5.30273   | 12.9357   | 8.1093    |
| 0.853715  | 1.32793   | 1.14252  | 1.24454   | 1.04512   | 1.36265   |
| 19.0821   | 19.6315   | 18.6095  | 26.5429   | 18.0039   | 15.6908   |
| 0.635638  | 0.766175  | 0.577786 | 0.475047  | 0.620678  | 0.333049  |
| 0.115519  | 0.0719797 | 0.291074 | 0.0658043 | 0.0625638 | 0.097118  |
| 1.34099   | 1.24422   | 1.13824  | 1.88268   | 1.38377   | 1.57189   |
| 0.360153  | 0.343217  | 0.587193 | 0.50686   | 0.4819    | 0.320857  |
| 0.21754   | 0.321218  | 0.190781 | 0.329797  | 0.449646  | 0.322515  |
| 11.5467   | 17.4095   | 11.4342  | 14.4542   | 6.1249    | 7.43039   |
| 659.106   | 533.112   | 724.38   | 570.885   | 1178.07   | 949.216   |
| 0.315165  | 1.44924   | 0        | 0         | 0         | 0         |
| 14.9598   | 15.7794   | 17.061   | 15.5396   | 11.1205   | 16.9747   |
| 9.21525   | 9.50306   | 10.2955  | 9.9328    | 12.8068   | 8.68708   |
| 0.905625  | 0.564294  | 0        | 0.515882  | 0         | 0.190342  |
| 11.0442   | 10.7402   | 12.2251  | 10.6188   | 11.2022   | 10.8415   |
| 0         | 0         | 0        | 0         | 0         | 0         |
| 1.24609   | 1.06249   | 0.661007 | 0.298873  | 1.42078   | 1.26815   |
| 21.5029   | 21.8194   | 22.2103  | 26.2239   | 20.0281   | 22.5067   |
| 7.19924   | 7.55171   | 6.22951  | 6.46557   | 7.70922   | 6.20856   |
| 43.8186   | 38.4763   | 47.2756  | 21.7441   | 43.1824   | 21.3598   |
| 1.30275   | 0.870566  | 0.570879 | 0.688326  | 1.0839    | 0.68254   |
| 1.62652   | 1.88516   | 2.01844  | 1.90865   | 2.66914   | 2.31774   |
| 4.28261   | 5.83845   | 5.35925  | 4.61714   | 4.23411   | 5.60606   |
| 0         | 0         | 0        | 0         | 0         | 0         |
| 2.36081   | 3.63429   | 3.23672  | 7.00096   | 3.27169   | 5.07866   |
| 0.27161   | 0.0564134 | 0.427737 | 0.17406   | 0.329616  | 0.228346  |
| 4.7166    | 4.95355   | 2.16266  | 2.15122   | 4.6347    | 4.93754   |
| 106.699   | 106.191   | 108.865  | 107.376   | 113.726   | 114.164   |
| 6.10472   | 5.94207   | 8.49512  | 6.03294   | 10.1542   | 6.49704   |
| 38.4521   | 39.5584   | 42.6752  | 43.5625   | 42.3495   | 44.7784   |
| 32.0907   | 37.3473   | 25.2267  | 32.4813   | 16.2309   | 25.1953   |
| 0.113486  | 0.141426  | 0.35303  | 0.0287306 | 0.223089  | 0.0212012 |
| 0         | 0         | 0        | 0         | 0         | 0         |
| 23.1126   | 24.6514   | 27.915   | 26.0492   | 25.6331   | 24.8923   |
| 10.6082   | 10.7561   | 9.91959  | 10.5883   | 14.18     | 13.7614   |
| 0         | 0         | 0        | 0         | 0         | 0         |
| 0.237705  | 0.222171  | 0.199649 | 0.0902711 | 0.30039   | 0.166535  |
| 29.9248   | 28.6545   | 33.8183  | 29.8607   | 35.4372   | 28.5893   |
| 0.62586   | 0.288869  | 0.262831 | 0.0528171 | 1.05454   | 0.448217  |
| 2.6909    | 2.35435   | 3.86922  | 3.33758   | 5.3233    | 2.53275   |

|           |           |            |           |           |           |
|-----------|-----------|------------|-----------|-----------|-----------|
| 0         | 0         | 0          | 0         | 0         | 0         |
| 0.535786  | 1.24187   | 2.47827    | 2.09038   | 1.67603   | 0.878905  |
| 0         | 0.0419018 | 0          | 0         | 0         | 0         |
| 7.95425   | 7.8199    | 7.30263    | 6.64812   | 6.84451   | 5.48588   |
| 24.3188   | 24.8944   | 24.8799    | 21.2229   | 19.6007   | 20.0107   |
| 0         | 0         | 0          | 0.0534305 | 0         | 0         |
| 29.6679   | 30.4923   | 21.3804    | 23.0913   | 24.4434   | 27.6736   |
| 7.11506   | 6.3544    | 6.84487    | 6.52044   | 7.70638   | 5.89766   |
| 84.3635   | 80.8573   | 95.2792    | 92.6705   | 92.2172   | 86.3755   |
| 0         | 0.176637  | 0.178573   | 0         | 0         | 0.119163  |
| 0         | 0         | 0          | 0         | 0         | 0         |
| 0         | 0         | 0          | 0         | 0         | 0         |
| 21.4716   | 18.1858   | 15.5105    | 21.9223   | 18.1104   | 23.4273   |
| 20.6751   | 21.2843   | 23.3579    | 25.219    | 17.5872   | 22.3413   |
| 54.1278   | 60.3665   | 53.0509    | 56.0172   | 42.3643   | 59.5439   |
| 2.64385   | 1.95245   | 2.77572    | 1.47816   | 3.18196   | 1.91401   |
| 0.121967  | 0.0759975 | 0.115245   | 0.173693  | 0.462392  | 0.128174  |
| 0.362428  | 0.180663  | 0.456606   | 0.275272  | 0.628119  | 0.304697  |
| 19.7808   | 22.7141   | 18.5605    | 20.5887   | 17.531    | 19.4165   |
| 1.53691   | 1.76438   | 1.10242    | 1.35224   | 1.57387   | 1.21381   |
| 0         | 0         | 0          | 0         | 0         | 0         |
| 13.4462   | 13.9856   | 13.9948    | 13.3775   | 13.2509   | 13.5511   |
| 5.831     | 5.77638   | 7.13795    | 6.20595   | 3.89961   | 6.72406   |
| 29.3478   | 24.6484   | 14.8421    | 11.8512   | 12.5697   | 14.9574   |
| 51.0147   | 51.9008   | 48.1392    | 52.8988   | 42.2671   | 49.0637   |
| 0         | 0         | 0          | 0         | 0         | 0         |
| 0.0407985 | 0.0285992 | 0.137948   | 0.113997  | 0.102139  | 0.0784661 |
| 0         | 0         | 0          | 0         | 0         | 0         |
| 0.0216028 | 0.0346133 | 0.00388806 | 0.0105479 | 0.0334282 | 0.0211887 |
| 13.4434   | 13.8431   | 12.3133    | 16.9415   | 13.1639   | 14.9217   |
| 6.94751   | 6.91428   | 5.33153    | 5.3106    | 8.29038   | 7.93807   |
| 12.8205   | 14.8817   | 11.2673    | 13.2516   | 11.5911   | 11.1695   |
| 104.164   | 121.43    | 112.826    | 127.922   | 92.7942   | 113.014   |
| 18.4123   | 19.9714   | 20.767     | 18.4671   | 17.6436   | 16.4658   |
| 2.19258   | 1.96308   | 1.55549    | 1.35812   | 1.3143    | 2.32653   |
| 13.8553   | 12.1482   | 16.6643    | 17.2301   | 18.6321   | 23.2661   |
| 3.28487   | 2.78557   | 4.78204    | 4.14095   | 4.07653   | 3.78797   |
| 5.36768   | 6.06438   | 4.49594    | 5.30889   | 6.35724   | 7.56245   |
| 0.592749  | 0.816439  | 0.176868   | 0.28434   | 0.321027  | 0.288508  |
| 1972.95   | 2209.87   | 1841.38    | 2164      | 1823.28   | 2274.45   |
| 0         | 0         | 0          | 0         | 0         | 0         |
| 1.66087   | 3.29888   | 1.75373    | 3.358     | 1.78503   | 2.64019   |
| 124.388   | 11.0461   | 7.76851    | 8.00446   | 9.98641   | 28.3369   |

|           |           |          |           |           |           |
|-----------|-----------|----------|-----------|-----------|-----------|
| 0.117726  | 0.179311  | 0.115358 | 0.0447075 | 0.0566746 | 0.0659822 |
| 13.0134   | 12.2203   | 11.3827  | 13.4882   | 12.1025   | 14.6242   |
| 2.85918   | 1.76009   | 3.29836  | 2.51174   | 3.69402   | 3.41738   |
| 1.25064   | 1.55855   | 0.675269 | 2.84967   | 0.580573  | 0.751021  |
| 81.1931   | 80.4797   | 71.9586  | 73.9176   | 60.4547   | 82.2132   |
| 337.202   | 356.493   | 249.175  | 249.805   | 247.574   | 267.553   |
| 11.6002   | 12.4919   | 13.4537  | 10.5561   | 15.6755   | 12.7665   |
| 76.7184   | 72.7692   | 81.132   | 81.2704   | 62.8015   | 63.6277   |
| 0.0873485 | 0.0362845 | 0.146728 | 0.0663431 | 0.0946141 | 0.0734349 |
| 0.121885  | 0.0620834 | 0        | 0         | 0.053962  | 0.102471  |
| 0.447228  | 1.30045   | 2.81721  | 0.50952   | 1.61476   | 2.13061   |
| 0.870774  | 0.361719  | 0.365683 | 0.661372  | 0.524003  | 0.325365  |
| 2.696     | 3.35975   | 3.67888  | 2.98559   | 5.10942   | 6.35769   |
| 5.54948   | 7.35346   | 5.25102  | 6.13569   | 4.00739   | 5.9254    |
| 2.73231   | 3.01914   | 3.01283  | 3.01657   | 2.46894   | 2.23107   |
| 0.0524009 | 0.130604  | 0.132035 | 0.0596995 | 0         | 0.0440541 |
| 2.86717   | 2.73935   | 2.44828  | 2.17768   | 2.51903   | 1.74089   |
| 1.99E-61  | 0.0461333 | 5.27E-12 | 0.113284  | 1.97E-37  | 8.29E-14  |
| 0.0723358 | 15.8358   | 0.36453  | 143.516   | 0.470116  | 8.43286   |
| 0         | 0         | 0        | 0.22911   | 0.0726093 | 0.0563559 |
| 46.5955   | 45.1354   | 50.4111  | 54.3243   | 51.2546   | 65.4723   |
| 1.05367   | 0.843741  | 0.768756 | 0.794185  | 1.3847    | 1.05247   |
| 10.0931   | 11.3077   | 10.9682  | 10.3575   | 10.6437   | 9.80374   |
| 59.9522   | 59.0833   | 38.8615  | 51.3301   | 42.9131   | 59.6664   |
| 42.8287   | 40.223    | 75.7513  | 78.7099   | 61.683    | 51.1232   |
| 1.9674    | 1.42781   | 4.03095  | 1.17164   | 2.76612   | 1.50597   |
| 7.0336    | 5.9395    | 8.26794  | 6.08898   | 9.14965   | 6.61597   |
| 98.0537   | 82.7931   | 120.921  | 85.1598   | 93.7781   | 63.9295   |
| 0         | 0         | 0        | 0         | 0         | 0         |
| 0         | 0         | 0        | 0         | 0         | 0         |
| 0         | 0         | 0        | 0         | 0         | 0         |
| 15.9978   | 16.5348   | 15.5912  | 13.9121   | 17.2395   | 16.9434   |
| 25.2784   | 32.1467   | 19.2759  | 25.1783   | 9.3672    | 16.7156   |
| 0         | 0         | 0        | 0.0899775 | 0.0285156 | 0.0221324 |
| 0.0445416 | 0         | 0        | 0         | 0.0964931 | 0.0748933 |
| 29.4933   | 30.0106   | 32.7744  | 31.1791   | 32.0722   | 31.9123   |
| 0         | 0         | 0        | 0         | 0         | 0         |
| 13.9106   | 12.1889   | 11.5401  | 12.5582   | 14.8659   | 14.7229   |
| 0         | 0         | 0        | 0         | 0         | 0         |
| 0         | 0         | 0.192411 | 0         | 0.0827144 | 0.064199  |
| 1.04743   | 1.27633   | 0.909606 | 0.928462  | 1.53759   | 0.939234  |
| 12.7204   | 12.4262   | 12.5624  | 13.3243   | 10.5988   | 11.321    |
| 4.37932   | 4.25048   | 6.40949  | 4.68639   | 7.65279   | 5.14532   |

|           |           |           |           |           |           |
|-----------|-----------|-----------|-----------|-----------|-----------|
| 12.4669   | 12.6499   | 12.3716   | 11.1472   | 11.8015   | 11.5739   |
| 11.5967   | 12.6001   | 10.7525   | 10.525    | 11.3262   | 13.8663   |
| 22.0206   | 21.5893   | 20.7255   | 21.8093   | 16.4109   | 17.9865   |
| 0.199504  | 0.42621   | 0.32316   | 0.227292  | 0.216099  | 0.119804  |
| 3.5216    | 3.31758   | 3.56521   | 3.94045   | 3.97346   | 3.82418   |
| 0.945853  | 1.37517   | 0.794424  | 0.538797  | 0.853774  | 1.06025   |
| 6.44154   | 4.86448   | 8.20659   | 6.75014   | 8.10537   | 5.82337   |
| 19.1963   | 18.4572   | 16.3185   | 24.564    | 20.7609   | 31.5959   |
| 10.6843   | 12.7934   | 10.0118   | 10.7144   | 13.2876   | 12.8978   |
| 5.54009   | 6.24963   | 6.17005   | 6.25848   | 6.55548   | 4.65358   |
| 0         | 0         | 0         | 0         | 0         | 0         |
| 1.9338    | 2.20263   | 2.58401   | 2.18489   | 2.17386   | 2.49882   |
| 0.0351199 | 0         | 0.176984  | 0         | 0.114124  | 0.0885773 |
| 24.593    | 28.3204   | 29.101    | 31.2642   | 24.7395   | 27.2092   |
| 20.3303   | 19.7923   | 21.8997   | 22.1744   | 20.926    | 18.6402   |
| 0         | 0         | 0         | 0         | 0         | 0         |
| 0.0272729 | 0         | 0.10308   | 0         | 0         | 0         |
| 9.97559   | 8.78635   | 12.2337   | 7.88775   | 16.1903   | 11.5899   |
| 0         | 0         | 0         | 0         | 0         | 0         |
| 46.9038   | 44.3121   | 49.0527   | 47.4275   | 50.1124   | 43.8138   |
| 0         | 0         | 0         | 0         | 0         | 0         |
| 0.185092  | 0.0887161 | 0.430504  | 0.324419  | 0.200488  | 0.0718198 |
| 0.952982  | 0.494835  | 0.300154  | 0.72381   | 0.516125  | 0.467357  |
| 3.43241   | 4.63392   | 3.24325   | 3.96062   | 3.57492   | 5.27189   |
| 32.8749   | 31.5526   | 29.512    | 25.6805   | 29.5454   | 28.5053   |
| 3.67681   | 3.92746   | 4.49375   | 4.20285   | 4.36635   | 2.88575   |
| 2.26115   | 1.08379   | 1.97219   | 1.58529   | 1.88403   | 1.90098   |
| 0.111331  | 0.0277481 | 0.0841566 | 0.0253675 | 0.0482366 | 0.0187195 |
| 24.9185   | 24.615    | 28.8647   | 27.5427   | 25.1038   | 25.9308   |
| 5.97008   | 5.83217   | 5.95281   | 7.05526   | 6.47988   | 6.67687   |
| 1197.11   | 1406.76   | 1221.54   | 1323.65   | 1075.94   | 1299.81   |
| 0         | 0         | 0         | 0         | 0         | 0         |
| 13.2787   | 15.1429   | 13.5207   | 17.3641   | 12.6983   | 14.0948   |
| 0         | 0         | 0         | 0         | 0         | 0         |
| 0.031734  | 0.0395468 | 0.135404  | 0.115695  | 0.097173  | 0.0704507 |
| 0         | 0         | 0         | 0         | 0         | 0         |
| 379.988   | 423.097   | 688.011   | 203.401   | 868.952   | 689.945   |
| 1.5813    | 1.4545    | 2.06335   | 1.39405   | 4.54715   | 2.16821   |
| 17.1239   | 17.3748   | 16.0386   | 17.1965   | 13.6331   | 14.5267   |
| 18.3633   | 14.6814   | 15.6433   | 13.507    | 13.6521   | 8.77244   |
| 0         | 0         | 0         | 0         | 0         | 0         |
| 0.388481  | 0.457228  | 0.571     | 0.270471  | 0.257152  | 0.199589  |
| 0.682973  | 53.6206   | 5.16268   | 184.41    | 6.65804   | 15.503    |



|           |           |           |          |           |           |
|-----------|-----------|-----------|----------|-----------|-----------|
| 1.78716   | 1.71818   | 2.61968   | 1.48997  | 1.90947   | 1.45383   |
| 8.44647   | 7.36819   | 7.75296   | 3.43676  | 4.83592   | 3.9563    |
| 65.4322   | 64.9746   | 62.7986   | 71.6863  | 71.0651   | 87.1249   |
| 164.302   | 153.39    | 158.957   | 171.535  | 125.429   | 128.938   |
| 1.96133   | 1.8398    | 2.07079   | 1.25594  | 3.49192   | 1.97629   |
| 19.2425   | 16.5057   | 15.0576   | 19.4965  | 12.4046   | 12.2769   |
| 0.912645  | 1.3648    | 1.37976   | 1.42596  | 2.00536   | 1.688     |
| 0.149764  | 0.223962  | 0.0754722 | 0        | 0.129777  | 0.100727  |
| 36.4675   | 30.063    | 28.7025   | 25.5929  | 25.7007   | 29.6582   |
| 1.13525   | 1.18839   | 2.17398   | 1.50031  | 2.33639   | 1.67977   |
| 0.0386544 | 0.192684  | 0.194796  | 0.176153 | 0.167479  | 0.227481  |
| 19.2789   | 21.3158   | 20.503    | 21.0865  | 20.9252   | 22.8337   |
| 0         | 0         | 0         | 0        | 0         | 0         |
| 16.9129   | 15.1562   | 26.9385   | 20.007   | 31.7595   | 19.325    |
| 372.758   | 263.96    | 470.048   | 356.25   | 545.144   | 370.27    |
| 0         | 30.4052   | 0         | 27.7966  | 0         | 0         |
| 7.27524   | 7.46511   | 8.20812   | 7.03084  | 8.05681   | 5.64472   |
| 8.57355   | 10.3258   | 8.84046   | 9.51604  | 7.28357   | 6.84079   |
| 0.237061  | 0.295425  | 0.0477852 | 0.54016  | 0.328678  | 0.255104  |
| 0.137358  | 0.460272  | 1.15505   | 1.38893  | 0.498488  | 0.335938  |
| 6.29415   | 6.01071   | 7.58494   | 4.73508  | 8.76296   | 6.01053   |
| 47.4254   | 41.9478   | 43.19     | 42.5491  | 51.8115   | 49.6775   |
| 17.7401   | 16.5882   | 16.7998   | 18.6459  | 17.0863   | 18.4189   |
| 69.4552   | 88.4386   | 68.4612   | 76.5052  | 49.8172   | 74.3059   |
| 1.82539   | 1.51653   | 1.14986   | 2.57066  | 0.713999  | 0.916515  |
| 0.752921  | 1.44653   | 1.62047   | 1.85854  | 0.815549  | 0.738488  |
| 20.0959   | 20.6504   | 21.481    | 21.201   | 20.7804   | 18.0844   |
| 0         | 0         | 0         | 0        | 0         | 0         |
| 0         | 0         | 0         | 0        | 0         | 0         |
| 0.0815915 | 0.228778  | 0.359777  | 0.395062 | 0.287229  | 0.325826  |
| 1.08076   | 0.96524   | 0.975817  | 1.3339   | 1.09262   | 0.681458  |
| 52.5707   | 57.3251   | 51.702    | 54.2944  | 48.4134   | 45.2903   |
| 6.04846   | 6.50368   | 8.26456   | 6.67839  | 8.88209   | 6.61775   |
| 6.83785   | 7.43417   | 5.24336   | 5.92623  | 3.78409   | 5.5597    |
| 0.048832  | 0.101424  | 0.594705  | 1.03849  | 0.123419  | 0.123161  |
| 0         | 0.0552512 | 0         | 0        | 0.0480236 | 0.0372736 |
| 18.3166   | 15.8424   | 20.2496   | 14.4498  | 22.7777   | 19.2024   |
| 26.8215   | 31.1254   | 20.652    | 14.3494  | 23.6649   | 20.0087   |
| 14.5335   | 12.4006   | 15.0897   | 13.2296  | 16.4346   | 14.7052   |
| 29.3277   | 25.5529   | 32.8136   | 29.1907  | 38.4952   | 31.51     |
| 9.04049   | 10.1555   | 6.89799   | 6.96316  | 10.2062   | 10.1696   |
| 4.27956   | 2.28158   | 3.6444    | 1.48615  | 3.43328   | 1.90476   |
| 0.754506  | 0.905456  | 1.41934   | 0.685476 | 0.624675  | 0.152051  |

|           |           |           |           |           |          |
|-----------|-----------|-----------|-----------|-----------|----------|
| 5.29524   | 4.93182   | 6.19722   | 6.47729   | 6.08285   | 5.635    |
| 47.0912   | 51.9547   | 45.7837   | 42.1496   | 48.8214   | 51.5138  |
| 0         | 0         | 0         | 0         | 0         | 0        |
| 0.0791968 | 0         | 0         | 0         | 0         | 0        |
| 0         | 0         | 0         | 0         | 0         | 0        |
| 0.411424  | 0.622584  | 0.592382  | 0.502807  | 0.318319  | 0.469421 |
| 0         | 0.0821961 | 0.0276989 | 0.0500961 | 0.142888  | 0.073935 |
| 9.37553   | 7.8155    | 10.7743   | 12.4858   | 8.9204    | 4.20735  |
| 36.4964   | 39.6198   | 36.4379   | 41.5615   | 38.184    | 45.8414  |
| 2.5193    | 3.55822   | 3.45114   | 2.252     | 3.69444   | 3.23675  |
| 17.2161   | 17.2487   | 17.4512   | 18.3627   | 17.3389   | 18.0605  |
| 0         | 0         | 0         | 0         | 0         | 0        |
| 22.5049   | 23.527    | 24.5577   | 27.4855   | 29.8141   | 31.0708  |
| 2.23855   | 3.05856   | 2.71831   | 2.5401    | 2.42475   | 2.49418  |
| 0         | 0.0742117 | 0         | 0         | 0.0645038 | 0        |
| 0         | 0.0955429 | 0         | 0         | 0         | 0        |
| 14.1203   | 13.5117   | 14.8246   | 12.8313   | 15.659    | 12.2718  |
| 34.0918   | 30.2365   | 47.1821   | 33.1609   | 68.2824   | 89.0524  |
| 2.90126   | 2.90815   | 2.94002   | 4.09576   | 3.41585   | 2.86332  |
| 19.5609   | 20.7794   | 17.6052   | 19.1878   | 13.9234   | 16.3208  |
| 0.251703  | 0.0627343 | 0.824483  | 0.172056  | 0.327167  | 0.211609 |
| 2.62491   | 2.22489   | 2.68226   | 2.23414   | 1.95488   | 1.84478  |
| 0         | 0         | 0         | 0         | 0         | 0        |
| 11.9414   | 9.85775   | 8.81587   | 7.45225   | 10.0512   | 8.24887  |
| 35.7115   | 60.5709   | 20.5816   | 42.1046   | 38.9953   | 15.4298  |
| 3.90137   | 4.50251   | 3.7387    | 3.77884   | 2.46199   | 2.90034  |
| 15.2921   | 18.8655   | 15.4417   | 20.4424   | 14.4      | 15.6665  |
| 15.1608   | 15.3729   | 11.745    | 16.0566   | 12.1379   | 13.5903  |
| 1.68332   | 1.64754   | 2.57354   | 1.36997   | 1.95274   | 2.02096  |
| 134.853   | 139.985   | 124.309   | 136.253   | 111.127   | 145.259  |
| 0         | 0         | 0         | 0         | 0         | 0        |
| 26.6585   | 25.5844   | 36.8443   | 20.2566   | 30.2946   | 23.046   |
| 18.5746   | 18.9649   | 20.5002   | 17.5382   | 25.2505   | 21.4177  |
| 0         | 0         | 0         | 0         | 0         | 0        |
| 9.84527   | 10.0193   | 7.91961   | 7.33758   | 9.84555   | 9.14197  |
| 0.520489  | 0.419263  | 0.254314  | 0.344963  | 0.327976  | 0.119166 |
| 0         | 0         | 0         | 0         | 0         | 0        |
| 0         | 0         | 0         | 0         | 0         | 0        |
| 5.98248   | 5.08319   | 5.39584   | 5.57651   | 4.7128    | 6.80131  |
| 6.32074   | 6.42979   | 6.53377   | 5.07018   | 6.77683   | 5.99103  |
| 0         | 0         | 0         | 0         | 0         | 0        |
| 736.842   | 721.237   | 525.752   | 473.231   | 397.548   | 462.777  |
| 0.0433268 | 0         | 0         | 0.0246807 | 0.0469307 | 0        |

|           |            |           |           |            |          |
|-----------|------------|-----------|-----------|------------|----------|
| 76.1943   | 80.2699    | 65.7209   | 62.2924   | 57.1906    | 74.9964  |
| 82.0949   | 81.5243    | 91.1695   | 76.2175   | 84.4043    | 79.8852  |
| 0.123679  | 0.0689522  | 0.119065  | 0.0482044 | 0.377255   | 0.205258 |
| 4.69989   | 4.22761    | 4.38523   | 4.48893   | 4.97599    | 4.27062  |
| 0         | 0          | 0         | 0         | 0          | 0        |
| 0         | 0          | 0         | 0         | 0          | 0        |
| 12.0244   | 12.5471    | 14.4704   | 12.2386   | 14.0291    | 11.3612  |
| 23.1051   | 22.9079    | 22.3989   | 20.9887   | 21.3553    | 22.3891  |
| 0         | 0          | 0         | 0         | 0          | 0        |
| 4.61219   | 4.02452    | 5.03484   | 3.57087   | 5.65854    | 4.10322  |
| 2.44229   | 2.63228    | 1.82953   | 2.30618   | 2.21645    | 2.46022  |
| 26.1526   | 27.2781    | 21.2425   | 23.7942   | 21.9941    | 22.0101  |
| 49.3219   | 51.9887    | 49.1467   | 47.7527   | 61.2258    | 47.4474  |
| 0.0357742 | 0          | 0         | 0         | 0.0387498  | 0        |
| 0         | 0          | 0         | 0         | 0          | 0        |
| 9.97703   | 10.706     | 10.605    | 8.67715   | 11.0571    | 9.10399  |
| 0         | 0          | 0         | 0         | 0.00307873 | 0        |
| 37.5745   | 44.6748    | 41.4765   | 47.5865   | 36.5808    | 37.4635  |
| 10.0764   | 6.75744    | 9.03693   | 6.39659   | 10.4983    | 7.0355   |
| 14.5898   | 14.1135    | 16.1469   | 13.5455   | 17.3313    | 13.4743  |
| 0         | 0.0934293  | 0         | 0         | 0          | 0        |
| 24.5127   | 24.032     | 19.7856   | 22.9116   | 26.5454    | 29.1941  |
| 0.073336  | 0.216562   | 0.15049   | 0.213519  | 0.468677   | 0.228249 |
| 6.88979   | 8.05831    | 9.17226   | 7.51867   | 8.52599    | 6.61857  |
| 0.562115  | 0.980709   | 1.13309   | 0.768489  | 1.58306    | 1.60676  |
| 37.5255   | 37.9137    | 34.6404   | 36.0824   | 34.0829    | 38.6534  |
| 8.8726    | 9.27406    | 9.93594   | 9.15463   | 13.1935    | 11.5936  |
| 6.59506   | 5.9757     | 6.40749   | 5.53138   | 8.04846    | 6.11491  |
| 0         | 0          | 0         | 0         | 0          | 0        |
| 0.0440245 | 3.56E-08   | 0.351954  | 0.0156935 | 1.25E-06   | 3.65E-09 |
| 0         | 0          | 0         | 0         | 0          | 0        |
| 4.04395   | 3.32333    | 4.78127   | 3.68136   | 5.29772    | 6.17353  |
| 46.262    | 49.4675    | 40.3923   | 45.8033   | 41.8416    | 49.854   |
| 3.12757   | 3.32158    | 3.6815    | 3.35959   | 4.17878    | 3.69801  |
| 36.1454   | 33.2942    | 38.1127   | 29.8709   | 41.0576    | 33.0393  |
| 0.727349  | 1.29489    | 0.916354  | 0.236759  | 1.46315    | 1.74712  |
| 5.21447   | 5.13417    | 4.89724   | 4.89989   | 6.65648    | 5.14471  |
| 267.098   | 288.613    | 218.605   | 227.456   | 186.208    | 227.974  |
| 5.57275   | 4.68698    | 7.01845   | 6.63735   | 9.72966    | 8.94305  |
| 0.841146  | 1.25788    | 1.48361   | 0.958304  | 1.45778    | 0.990027 |
| 0.0178178 | 0.00760264 | 0.0156159 | 0.0190639 | 0          | 0        |
| 67.2725   | 62.807     | 66.628    | 66.0524   | 62.4951    | 65.479   |
| 1.71621   | 1.60405    | 1.31989   | 1.95524   | 2.10082    | 2.33662  |

|           |           |           |           |           |           |
|-----------|-----------|-----------|-----------|-----------|-----------|
| 0         | 0         | 0         | 0         | 0         | 0         |
| 0.124113  | 0.0618077 | 0.0908147 | 0.0268892 | 0.134926  | 0.0218995 |
| 107.959   | 98.6348   | 118.946   | 121.449   | 116.419   | 122.24    |
| 0.525146  | 0.447772  | 0.452679  | 0.346378  | 0.359259  | 0.27884   |
| 12.0449   | 13.8284   | 16.4891   | 12.75     | 14.2795   | 11.4817   |
| 0.0967527 | 0.482292  | 0.85326   | 0.110229  | 0.628803  | 0.569388  |
| 44.1047   | 46.3348   | 50.7678   | 47.0925   | 42.4485   | 44.3555   |
| 20.2677   | 17.7507   | 22.1681   | 18.8886   | 19.9651   | 19.4533   |
| 4.62802   | 4.48578   | 6.53246   | 5.76082   | 7.38021   | 8.10589   |
| 0.290733  | 0.431007  | 0.35105   | 0.244037  | 0.605532  | 0.336115  |
| 0         | 0         | 0         | 0         | 0         | 0         |
| 0         | 0.0453675 | 0         | 0.186647  | 0.157737  | 0         |
| 373.089   | 394.713   | 383.928   | 379.161   | 274.899   | 310.603   |
| 0.18099   | 0.212282  | 0.026826  | 0.0242587 | 0.0115321 | 0.0537038 |
| 0         | 0         | 0         | 0         | 0         | 0         |
| 0.927165  | 0.90803   | 0.876301  | 0.754253  | 1.00395   | 0.946197  |
| 4.41891   | 4.09409   | 5.77121   | 7.03759   | 5.38791   | 6.12688   |
| 28.2736   | 25.9234   | 34.2891   | 30.822    | 23.9498   | 23.073    |
| 1.31857   | 1.12817   | 1.51244   | 0.784746  | 1.85459   | 1.48908   |
| 1.10604   | 1.89689   | 0.925361  | 0.964415  | 0.95505   | 1.26745   |
| 13.7738   | 14.2941   | 14.9949   | 16.2937   | 12.4762   | 12.8709   |
| 4.36456   | 5.50884   | 4.7585    | 4.28716   | 5.22764   | 5.78626   |
| 31.0101   | 27.754    | 42.1759   | 30.8328   | 38.0172   | 42.898    |
| 7.98821   | 9.26835   | 8.56016   | 6.90407   | 9.05048   | 7.87367   |
| 0.389979  | 0.728987  | 0.245658  | 0.444296  | 0.633626  | 0.49179   |
| 0.775257  | 0.479003  | 0.976711  | 0.415641  | 1.67243   | 0.345054  |
| 16.6382   | 16.3605   | 11.6615   | 15.5234   | 8.39912   | 10.7377   |
| 0.0181604 | 0.0452628 | 0         | 0.0206898 | 0.0393418 | 0         |
| 7.27955   | 6.92952   | 9.19327   | 7.17435   | 9.31007   | 6.32646   |
| 917.987   | 1115.88   | 903.849   | 916.023   | 877.873   | 995.353   |
| 0.778832  | 0.349408  | 0         | 0         | 0         | 0         |
| 4.37906   | 6.2862    | 4.72519   | 5.8875    | 3.64553   | 4.01315   |
| 1.51187   | 2.03186   | 2.98782   | 1.72245   | 2.56883   | 1.2212    |
| 38.9406   | 39.6454   | 36.5483   | 37.4972   | 42.5444   | 43.6777   |
| 0.197138  | 0.193029  | 0.177404  | 0.240639  | 0.274546  | 0.106545  |
| 3.26414   | 3.18561   | 2.21956   | 2.61168   | 2.7147    | 2.35112   |
| 559.363   | 644.309   | 550.226   | 602.579   | 425.735   | 540.931   |
| 51.9045   | 51.5768   | 53.8243   | 53.7903   | 52.1765   | 51.8404   |
| 0         | 0         | 0.106314  | 0.0480697 | 0         | 0         |
| 0         | 0         | 0         | 0         | 0         | 0         |
| 30.0126   | 30.0856   | 37.3965   | 33.5104   | 34.2286   | 28.2538   |
| 0         | 0.0473764 | 0         | 0         | 0         | 0         |
| 0.33481   | 0.373319  | 0.266407  | 0.341291  | 0.305397  | 0.311108  |

|           |           |           |           |           |           |
|-----------|-----------|-----------|-----------|-----------|-----------|
| 0.921959  | 0.665178  | 0.603692  | 0.449172  | 0.683285  | 0.423246  |
| 6.97466   | 8.75765   | 7.48896   | 6.65185   | 7.65496   | 6.44116   |
| 0         | 0         | 0         | 0         | 0         | 0         |
| 49.8999   | 49.7364   | 57.1944   | 55.1523   | 49.0722   | 54.5595   |
| 0         | 0         | 0         | 0         | 0         | 0         |
| 0.0449236 | 0         | 0         | 0         | 0         | 0         |
| 6.6585    | 7.22432   | 5.82278   | 5.17627   | 6.10929   | 6.01531   |
| 6.8108    | 8.82082   | 8.60937   | 7.70409   | 8.52867   | 7.64064   |
| 0.174295  | 0.584045  | 0.260251  | 0.198571  | 0.674261  | 0.490946  |
| 0         | 0.588342  | 0         | 0         | 0         | 0         |
| 0.341569  | 0.311062  | 0.132408  | 0.61365   | 0.256141  | 0.309251  |
| 0.542269  | 0.112629  | 0         | 0.102966  | 0         | 0.075982  |
| 0         | 0         | 0         | 0         | 0         | 0         |
| 47.0813   | 47.2668   | 53.0394   | 56.5687   | 52.6897   | 54.4994   |
| 40.1436   | 39.7051   | 41.4188   | 41.2954   | 40.3219   | 40.4074   |
| 2.299     | 2.32578   | 3.18051   | 2.77044   | 3.02165   | 1.91586   |
| 3.44068   | 3.45396   | 5.13737   | 4.13767   | 5.69371   | 5.14232   |
| 834.713   | 0         | 350.539   | 0         | 0         | 0         |
| 24.6486   | 24.9236   | 24.931    | 24.1852   | 31.0871   | 26.1633   |
| 1.52566   | 1.45482   | 1.60446   | 1.11841   | 2.14119   | 2.07443   |
| 3.00137   | 2.66386   | 3.31658   | 2.86897   | 3.65186   | 3.1619    |
| 172.225   | 169.549   | 149.286   | 164.95    | 123.466   | 160.279   |
| 9.02348   | 7.38961   | 3.57289   | 4.69957   | 3.07185   | 5.41868   |
| 32.7069   | 35.7213   | 24.7465   | 29.7422   | 23.8739   | 33.5456   |
| 0.35995   | 0.269142  | 0.471624  | 0.328068  | 0.467869  | 0.205778  |
| 8.17978   | 7.86361   | 8.75969   | 8.02811   | 10.0546   | 8.16638   |
| 2.03451   | 1.02918   | 1.62063   | 0.96301   | 1.37257   | 1.09721   |
| 0         | 0         | 0         | 0         | 0         | 0         |
| 0.100849  | 0.0153888 | 0         | 0.0140685 | 0         | 0.0415269 |
| 0         | 0         | 0         | 0         | 0         | 0.012793  |
| 1.42115   | 3.53533   | 5.10424   | 6.84391   | 9.31303   | 4.72398   |
| 10.8515   | 12.4939   | 13.6907   | 14.9928   | 12.2507   | 10.3526   |
| 13.0079   | 12.3993   | 17.6283   | 15.0344   | 15.0201   | 13.3309   |
| 7.91278   | 7.23592   | 7.08825   | 7.18349   | 8.94621   | 8.57079   |
| 0.0535029 | 0.0889003 | 0.0224686 | 0.142228  | 0.0386355 | 0.0749676 |
| 2.07165   | 1.74477   | 2.89679   | 1.77663   | 2.16999   | 1.48328   |
| 0         | 0         | 0         | 0         | 0         | 0         |
| 25.6348   | 25.1663   | 23.6419   | 23.2034   | 22.6388   | 22.1449   |
| 14.1342   | 9.63999   | 19.3151   | 11.3364   | 19.3388   | 13.1054   |
| 0         | 0         | 0         | 0         | 0         | 0         |
| 0         | 0         | 0         | 0         | 0         | 0         |
| 10.9555   | 9.54295   | 9.64752   | 7.10038   | 8.86978   | 6.71983   |
| 6.76704   | 6.36865   | 5.19799   | 8.26153   | 6.09416   | 5.71104   |

|           |           |           |           |           |           |
|-----------|-----------|-----------|-----------|-----------|-----------|
| 14.4995   | 13.643    | 12.0087   | 16.2624   | 15.2056   | 15.3852   |
| 0         | 0         | 0         | 0         | 0         | 0         |
| 6.46595   | 6.11682   | 6.70014   | 5.85129   | 6.02973   | 5.50177   |
| 0.119644  | 0.12425   | 0.0753668 | 0.068154  | 0.161995  | 0.0251465 |
| 74.2598   | 71.7018   | 92.3582   | 76.0343   | 78.4719   | 92.131    |
| 5.34779   | 6.0967    | 5.19406   | 5.66645   | 8.20435   | 7.96771   |
| 0         | 0         | 0         | 0         | 0         | 0         |
| 0.0771177 | 0.0859059 | 0.27148   | 0.546555  | 0.191229  | 0.161603  |
| 14.7024   | 13.886    | 14.1549   | 14.3      | 16.0057   | 16.6157   |
| 0.504688  | 0         | 0.423889  | 0.191661  | 0.364445  | 0.848594  |
| 5.06807   | 5.23011   | 6.40158   | 5.29235   | 5.23951   | 4.0115    |
| 5.73696   | 5.52788   | 5.71885   | 4.98625   | 6.69464   | 5.10904   |
| 5.81843   | 4.98681   | 8.60181   | 5.26209   | 10.926    | 6.6363    |
| 0.246046  | 0.204415  | 0.516637  | 0.0934386 | 0.0888373 | 0.0689513 |
| 4.44164   | 3.85584   | 3.83522   | 5.62882   | 4.10822   | 3.98575   |
| 0         | 0         | 0         | 0         | 0         | 0         |
| 0.1082    | 0.539355  | 0.545266  | 0.493082  | 0         | 0.36386   |
| 0.478738  | 0.275355  | 0.556745  | 0.125866  | 0.47867   | 0.402481  |
| 0.0664981 | 0.094607  | 0.0502475 | 4.90E-10  | 0.0152447 | 0.0522073 |
| 3.53845   | 3.08414   | 3.62079   | 3.11977   | 2.37623   | 3.15083   |
| 0         | 0         | 0         | 0         | 0         | 0         |
| 0.0502966 | 0         | 0.126733  | 0         | 0.10896   | 0         |
| 14.7981   | 13.68     | 13.9559   | 13.8568   | 14.0357   | 13.2146   |
| 2.85454   | 2.12519   | 1.59553   | 1.88032   | 1.01579   | 1.2456    |
| 37.0662   | 34.004    | 42.9707   | 35.4031   | 43.6891   | 39.757    |
| 0.0713779 | 0         | 0.0899258 | 0.0542131 | 0.0515434 | 0.0200028 |
| 52.1478   | 54.8645   | 58.2006   | 48.6856   | 49.7328   | 54.3169   |
| 26.8809   | 26.1666   | 18.7553   | 18.9669   | 19.5614   | 23.4615   |
| 39.318    | 36.1178   | 31.9262   | 27.1594   | 28.8817   | 35.3201   |
| 0.341789  | 0.204317  | 0.162655  | 0.0204195 | 0.582748  | 0.152645  |
| 2.91085   | 2.55783   | 4.73358   | 4.37521   | 4.74516   | 4.41729   |
| 98.1833   | 93.8718   | 74.288    | 57.716    | 50.1472   | 52.3262   |
| 184.782   | 169.547   | 169.699   | 146.307   | 183.323   | 175.147   |
| 0         | 0         | 0         | 0         | 0         | 0         |
| 0         | 0         | 0         | 0         | 0         | 0         |
| 23.0424   | 22.1069   | 24.2561   | 22.7912   | 22.965    | 19.0496   |
| 3.4713    | 3.05203   | 4.96429   | 2.48529   | 5.79234   | 2.80595   |
| 2.22156   | 2.65415   | 1.86187   | 2.8586    | 1.65013   | 2.36135   |
| 34.4396   | 33.7208   | 30.4246   | 29.9946   | 33.1215   | 30.7869   |
| 4.44987   | 4.26026   | 4.16932   | 4.45327   | 3.66102   | 4.14047   |
| 0.589113  | 0.337313  | 0.341009  | 0.217676  | 0.500144  | 0.441731  |
| 71.5559   | 84.6169   | 71.9755   | 82.8623   | 85.623    | 61.3508   |
| 49.4191   | 44.9354   | 51.7041   | 47.4143   | 56.5192   | 49.8232   |

|           |           |           |          |           |           |
|-----------|-----------|-----------|----------|-----------|-----------|
| 55.4847   | 62.8447   | 49.9032   | 58.173   | 48.518    | 60.9382   |
| 207.072   | 202.714   | 147.11    | 189.536  | 201.82    | 270.785   |
| 0         | 0.0352401 | 0         | 0        | 0         | 0         |
| 70.5088   | 73.1971   | 64.7322   | 79.2716  | 60.1948   | 74.9874   |
| 40.1898   | 46.9041   | 41.2366   | 37.1865  | 32.8154   | 33.0799   |
| 24.7727   | 23.6538   | 26.0856   | 23.3472  | 29.8506   | 23.9325   |
| 0         | 0.0788881 | 0.0598144 | 0.05409  | 0.0857106 | 0.0532196 |
| 0         | 0         | 0         | 0        | 0         | 0         |
| 10.7971   | 9.84716   | 14.8961   | 11.0394  | 12.0984   | 9.94161   |
| 1.68896   | 0.84191   | 0.585155  | 0.432944 | 2.33254   | 1.9169    |
| 1.13059   | 0.451094  | 1.11507   | 0.792428 | 1.0539    | 1.20739   |
| 12.3256   | 9.27988   | 9.4794    | 9.07148  | 11.5613   | 6.81608   |
| 0         | 0         | 0         | 0        | 0         | 0.122087  |
| 1.75631   | 1.92148   | 1.62965   | 1.7079   | 1.80404   | 1.28354   |
| 2.66334   | 2.74945   | 2.77957   | 3.26462  | 3.88459   | 3.42886   |
| 3.7823    | 3.85511   | 3.34388   | 3.71751  | 3.72288   | 4.00151   |
| 63.5435   | 72.4215   | 55.8254   | 100.138  | 21.2183   | 37.4007   |
| 1.62276   | 2.18696   | 1.67094   | 1.75611  | 3.01874   | 2.43807   |
| 0         | 0         | 0         | 0        | 0         | 0         |
| 15.7419   | 17.433    | 14.0061   | 11.0251  | 14.7898   | 12.5319   |
| 13.1083   | 12.9245   | 10.8191   | 10.1193  | 19.3061   | 8.8613    |
| 3.87619   | 3.5111    | 3.35402   | 2.50466  | 3.86296   | 3.59897   |
| 16.8823   | 17.7963   | 17.0199   | 14.9719  | 15.6241   | 16.9811   |
| 0.0676881 | 0         | 0         | 0        | 0         | 0         |
| 74.7887   | 88.1089   | 75.9123   | 91.7133  | 85.9242   | 109.751   |
| 3.42941   | 3.62827   | 3.96464   | 3.04877  | 5.52526   | 3.5693    |
| 7.02528   | 8.00753   | 8.63496   | 7.32053  | 11.5073   | 8.71545   |
| 23.1471   | 23.9708   | 18.7711   | 20.1444  | 16.7507   | 20.4574   |
| 78.3899   | 75.2319   | 75.8439   | 96.2572  | 65.675    | 72.3677   |
| 0         | 0         | 0         | 0        | 0         | 0         |
| 11.4533   | 5.36273   | 16.7232   | 9.91843  | 58.9465   | 25.8256   |
| 0.598023  | 0.901746  | 0.888942  | 0.921661 | 1.02254   | 0.827145  |
| 5.06E-07  | 1.01E-05  | 2.37E-06  | 2.92E-07 | 7.40E-07  | 7.22E-07  |
| 1160.16   | 1436.53   | 882.853   | 1043.3   | 1074.89   | 1136.97   |
| 8.12428   | 9.26748   | 6.00424   | 8.34485  | 6.61737   | 8.45706   |
| 0         | 0.0229938 | 0.0232458 | 0        | 0         | 0.0310242 |
| 2.09958   | 2.23392   | 1.8841    | 2.06397  | 1.70041   | 1.37034   |
| 13.0522   | 13.0107   | 17.1077   | 14.9644  | 19.5977   | 17.2942   |
| 3.00503   | 2.70935   | 3.61381   | 3.15125  | 3.35362   | 2.39239   |
| 0.323938  | 0.109106  | 0.109106  | 0.170191 | 0.430557  | 0.850671  |
| 0.231894  | 0.273777  | 0.169141  | 0.152954 | 0.647788  | 0.236     |
| 14.0785   | 12.7771   | 8.48285   | 11.1578  | 6.57499   | 8.57679   |
| 14.2076   | 8.93726   | 16.4309   | 13.359   | 17.2928   | 12.7426   |

|          |           |          |           |           |           |
|----------|-----------|----------|-----------|-----------|-----------|
| 0        | 0         | 0        | 0         | 0         | 0         |
| 0.108672 | 0.315996  | 0        | 0.0412694 | 0.0784742 | 0.0913619 |
| 28.4024  | 29.2707   | 30.3429  | 25.6517   | 29.9157   | 23.5818   |
| 7.03418  | 7.8778    | 7.80796  | 11.1559   | 6.66267   | 6.73434   |
| 1.16219  | 0.536415  | 0.976127 | 0.686551  | 1.63186   | 1.7732    |
| 0.41533  | 0.226935  | 0.294536 | 0.177865  | 0.730116  | 0.327136  |
| 0.168616 | 0.13133   | 0.318646 | 0.0720378 | 0.182641  | 0         |
| 4.43009  | 5.05912   | 5.4257   | 3.7135    | 4.9693    | 4.63621   |
| 14.6171  | 14.1821   | 19.1956  | 14.3753   | 15.3532   | 14.6494   |
| 5.25956  | 6.48582   | 4.2114   | 3.73457   | 5.45508   | 3.31706   |
| 3.76117  | 4.29168   | 3.83977  | 3.75127   | 3.64624   | 2.35065   |
| 21.8166  | 22.5081   | 24.893   | 23.1364   | 29.3402   | 26.102    |
| 12.6888  | 11.5961   | 11.6361  | 10.9454   | 11.8369   | 11.045    |
| 0        | 0.796369  | 0        | 0         | 0         | 0.179082  |
| 22.3366  | 27.1246   | 24.4435  | 26.3764   | 23.8854   | 20.492    |
| 0        | 0         | 0        | 0         | 0         | 0         |
| 0.515792 | 0.448032  | 0.604117 | 0.664799  | 0.432772  | 0.329453  |
| 0.129687 | 0         | 0.276374 | 0.196894  | 0.234233  | 0.220372  |
| 0.643412 | 0.259412  | 0.35762  | 0.388074  | 0.225478  | 0.238643  |
| 0.412593 | 0.372332  | 0.215092 | 0.405224  | 0.508555  | 0.334911  |
| 39.1571  | 43.8647   | 41.3739  | 47.5842   | 41.2787   | 46.9792   |
| 27.4866  | 27.2353   | 29.7084  | 25.3153   | 28.2201   | 28.6056   |
| 0.672374 | 0.523695  | 0.600024 | 0.510683  | 0.728302  | 0.447508  |
| 0        | 0         | 0        | 0         | 0         | 0         |
| 27.5097  | 28.6431   | 26.7951  | 25.5856   | 22.8091   | 25.7544   |
| 7.01673  | 5.93452   | 9.08995  | 7.68862   | 10.332    | 9.68602   |
| 0        | 0         | 0        | 0         | 0         | 0         |
| 1.76943  | 1.99167   | 1.94159  | 1.91834   | 2.48851   | 1.65554   |
| 13.5681  | 12.3186   | 13.3523  | 10.0178   | 17.1567   | 12.8389   |
| 11.8689  | 11.4161   | 15.0838  | 12.6255   | 13.4767   | 11.7552   |
| 0.605786 | 0.74561   | 1.21143  | 0.690161  | 0.648074  | 1.20721   |
| 29.0107  | 31.832    | 36.4036  | 38.4502   | 28.6695   | 41.0057   |
| 0        | 0.0687561 | 0        | 0         | 0.0298809 | 0.0231921 |
| 0        | 0         | 0        | 0         | 0         | 0         |
| 13.6835  | 14.6935   | 16.3442  | 14.5478   | 14.7189   | 13.3803   |
| 0        | 0         | 0        | 0         | 0         | 0         |
| 2.44637  | 3.28318   | 4.74164  | 6.36032   | 6.99834   | 6.96111   |
| 5.16105  | 4.45873   | 4.39113  | 3.61722   | 4.92691   | 6.72862   |
| 3.9314   | 4.05942   | 2.6416   | 2.13285   | 2.14948   | 1.88867   |
| 41.3095  | 38.5489   | 39.5422  | 35.0892   | 49.4242   | 54.8075   |
| 5.99912  | 5.19936   | 6.72549  | 5.16661   | 9.1507    | 5.67533   |
| 13.5239  | 17.8235   | 16.402   | 13.5413   | 13.8736   | 11.5194   |
| 1.38511  | 2.46635   | 0.341139 | 0.658434  | 0.794642  | 0.769666  |



|           |           |           |           |           |           |
|-----------|-----------|-----------|-----------|-----------|-----------|
| 84.4505   | 93.017    | 86.6029   | 86.9804   | 68.8373   | 79.1263   |
| 20.653    | 19.3033   | 19.6446   | 18.7819   | 18.7127   | 19.2015   |
| 0         | 0         | 0         | 0         | 0         | 0         |
| 9.45587   | 9.92506   | 9.44359   | 8.4005    | 7.54479   | 7.24497   |
| 5.41443   | 5.84674   | 5.71529   | 6.51476   | 5.9845    | 6.16706   |
| 0.334932  | 0.169565  | 0.395592  | 0.500826  | 0.306105  | 0.219985  |
| 0.0300837 | 0.0374903 | 0.0758022 | 0.0342739 | 0         | 0.0404668 |
| 0.0480416 | 0.0299347 | 0.0302627 | 0.0136832 | 0.0260188 | 0.0201946 |
| 0.993063  | 0.907539  | 1.91838   | 0.905104  | 1.57764   | 1.4193    |
| 38.3447   | 40.9426   | 42.4109   | 41.5562   | 41.4795   | 41.6717   |
| 19.3145   | 21.2835   | 21.6555   | 19.6704   | 17.3381   | 14.5326   |
| 1.60232   | 0.936073  | 2.0879    | 0.531588  | 2.19051   | 1.32017   |
| 0.349296  | 0.0967315 | 0.635645  | 0.176865  | 0.336311  | 0.2284    |
| 1.12598   | 1.33303   | 1.53397   | 1.33499   | 1.69805   | 1.37091   |
| 0.455028  | 0.314141  | 0.504838  | 0.492003  | 0.782499  | 0.410493  |
| 0.0245167 | 0.0195521 | 0.0197664 | 0.057775  | 0.0347003 | 0.0399049 |
| 0.0776597 | 0.0725845 | 0.1223    | 0.132714  | 0.0420597 | 0         |
| 0         | 0         | 0         | 0         | 0.0565539 | 0         |
| 0         | 0         | 0         | 0         | 0         | 0         |
| 10.498    | 11.6116   | 7.25511   | 8.10928   | 7.49685   | 5.98409   |
| 123.019   | 123.929   | 116.279   | 110.111   | 160.342   | 147.817   |
| 83.8403   | 86.2339   | 72.9112   | 98.9287   | 59.628    | 76.5923   |
| 0         | 0         | 0         | 0         | 0         | 0         |
| 7.38659   | 7.74856   | 6.81409   | 6.10022   | 8.35608   | 6.82671   |
| 6.07954   | 9.74563   | 13.7858   | 14.2264   | 20.1199   | 16.5976   |
| 0         | 0         | 0         | 0         | 0         | 0         |
| 0.0360653 | 0         | 0         | 0         | 0         | 0         |
| 0         | 0         | 0         | 0         | 0         | 0         |
| 1.33215   | 0.461146  | 0.559438  | 0.590215  | 0.961972  | 1.05774   |
| 0.0316096 | 6.73E-143 | 1.30E-18  | 4.21E-38  | 0.0695959 | 2.18E-26  |
| 0.270344  | 0.682907  | 0.514877  | 0.703289  | 0.184826  | 0.456012  |
| 0.132167  | 0.0549022 | 0.111008  | 0.276055  | 0.477202  | 0.629649  |
| 12.3981   | 11.6156   | 12.3685   | 11.3161   | 12.9395   | 12.8613   |
| 10.99     | 10.8046   | 10.824    | 9.72088   | 10.7116   | 10.0658   |
| 12.4554   | 11.7389   | 15.0789   | 12.9758   | 13.1777   | 10.7539   |
| 9.72816   | 9.02976   | 8.02984   | 7.29958   | 12.2451   | 11.6756   |
| 0         | 0         | 0         | 0         | 0         | 0         |
| 0.416827  | 0.691953  | 0.178849  | 0.476527  | 2.38E-14  | 1.64E-20  |
| 0.787283  | 1.03562   | 0.716345  | 0.523214  | 0.734329  | 0.514794  |
| 25.0927   | 24.8799   | 25.4845   | 22.653    | 24.2379   | 25.9862   |
| 9.31842   | 9.2588    | 9.57233   | 8.36723   | 9.59712   | 8.75143   |
| 13.2988   | 15.0222   | 14.6061   | 17.0998   | 18.2369   | 19.2989   |
| 0.377228  | 0.523827  | 0.325887  | 0.245582  | 0.466978  | 0.362446  |

|          |           |           |           |           |          |
|----------|-----------|-----------|-----------|-----------|----------|
| 19.0859  | 18.1345   | 14.3166   | 13.3564   | 19.1533   | 12.6877  |
| 110.721  | 100.468   | 101.771   | 97.3711   | 119.874   | 122.475  |
| 5.13004  | 3.4707    | 7.04783   | 2.89466   | 6.7739    | 2.99856  |
| 10.0646  | 13.6175   | 14.543    | 19.0482   | 11.4802   | 16.9343  |
| 0        | 0         | 0         | 0         | 0         | 0        |
| 6.31445  | 7.23131   | 15.0488   | 16.6797   | 23.1011   | 28.6858  |
| 18.4533  | 18.051    | 15.9513   | 13.4344   | 12.7831   | 16.2845  |
| 12.4878  | 12.6385   | 13.7305   | 13.7529   | 10.2064   | 9.06704  |
| 1.57357  | 2.2446    | 1.76101   | 1.81401   | 1.618     | 1.59936  |
| 1.30973  | 16.3928   | 0.968521  | 38.3419   | 3.36165   | 3.56664  |
| 169.371  | 162.989   | 169.228   | 163.02    | 125.427   | 140.657  |
| 0.152112 | 0.208479  | 0.0180243 | 0.0889563 | 0.205626  | 0.064765 |
| 0.210676 | 0         | 0         | 0         | 0.4564    | 0        |
| 28.7841  | 32.6424   | 33.0001   | 32.4653   | 26.6055   | 25.8931  |
| 11.0351  | 10.8291   | 11.3044   | 9.45679   | 10.3926   | 10.5681  |
| 12.2204  | 11.8756   | 11.7086   | 9.90854   | 13.1368   | 10.2622  |
| 5.85384  | 4.29233   | 5.87759   | 3.79081   | 6.72313   | 3.79424  |
| 39.4662  | 36.3083   | 36.3628   | 34.1245   | 38.0909   | 36.1372  |
| 6.68797  | 7.27291   | 7.1915    | 6.89151   | 7.29041   | 5.83753  |
| 0        | 0         | 0         | 0         | 0         | 0.146568 |
| 0.551804 | 0.542383  | 0.756771  | 1.02673   | 0.962942  | 0.752303 |
| 59.13    | 54.3768   | 58.8631   | 56.6776   | 55.5991   | 63.6682  |
| 18.2925  | 20.7187   | 22.044    | 22.8411   | 23.8153   | 24.9894  |
| 33.9112  | 33.9291   | 34.6693   | 32.4056   | 37.6235   | 34.8118  |
| 13.6866  | 12.8779   | 16.4105   | 17.2921   | 17.4636   | 20.4843  |
| 83.055   | 92.2085   | 75.2369   | 84.0358   | 61.4951   | 65.8263  |
| 0.475094 | 0.364346  | 0.920845  | 0.416359  | 1.1084    | 0.491591 |
| 7.61707  | 7.14033   | 7.81404   | 9.46388   | 8.69936   | 8.46727  |
| 0.475837 | 1.77732   | 0.468672  | 2.28481   | 0.467206  | 0.512342 |
| 0        | 0         | 0         | 0.149437  | 0         | 0.055137 |
| 3.23581  | 3.61506   | 3.07384   | 4.28005   | 4.51253   | 3.42846  |
| 0.463257 | 0.446598  | 0.487281  | 0.368451  | 0.565698  | 0.749538 |
| 21.6532  | 19.2536   | 20.718    | 20.0686   | 19.6509   | 20.0245  |
| 1.63397  | 1.72707   | 1.97342   | 2.42214   | 3.05148   | 2.82556  |
| 68.93    | 74.5755   | 57.5681   | 81.649    | 53.3196   | 62.9556  |
| 3.92988  | 2.93845   | 6.95213   | 3.19004   | 5.7289    | 4.04727  |
| 1.75101  | 1.90031   | 1.39031   | 1.66877   | 2.75324   | 2.27504  |
| 0        | 0.0662195 | 0.0334725 | 0.0605383 | 0.0287786 | 0        |
| 0.270557 | 0.306516  | 0.278888  | 0.196154  | 0.386309  | 0.268817 |
| 0        | 0         | 0         | 0         | 0         | 0        |
| 1.47E-07 | 2.84E-07  | 4.52E-07  | 1.37E-07  | 1.84E-06  | 6.03E-07 |
| 0        | 1.37755   | 0.696324  | 0         | 0         | 0        |
| 1.8689   | 1.52722   | 1.46676   | 1.53582   | 1.6593    | 1.51969  |

|           |           |          |          |           |           |
|-----------|-----------|----------|----------|-----------|-----------|
| 2.75452   | 2.50361   | 2.54093  | 2.29775  | 3.77417   | 2.96232   |
| 19.912    | 14.6713   | 4.74229  | 3.50614  | 1.75301   | 4.34484   |
| 0.356026  | 0.591573  | 0.448541 | 0.27041  | 0.385641  | 0.299316  |
| 0.278476  | 0.182206  | 0.688494 | 0.546471 | 0.224463  | 0.407231  |
| 1.58113   | 1.03067   | 0.766151 | 1.49651  | 1.65995   | 0.736213  |
| 0         | 0         | 0.111542 | 0        | 0         | 0         |
| 6.11279   | 5.28306   | 7.99704  | 7.40866  | 5.98929   | 8.36475   |
| 0         | 0         | 0        | 0        | 0         | 0         |
| 944.834   | 1115.78   | 940.857  | 955.97   | 995.558   | 1099.37   |
| 24.3234   | 24.3351   | 25.8656  | 23.7033  | 26.1085   | 20.2295   |
| 0         | 0.0182622 | 0        | 0        | 0         | 0         |
| 0.724644  | 1.18982   | 0.693953 | 1.41114  | 1.17062   | 0.391273  |
| 0.845983  | 1.89147   | 0.87773  | 9.52475  | 2.31783   | 2.59389   |
| 0         | 0         | 0        | 0        | 0         | 0         |
| 0.0543144 | 0         | 0        | 0        | 0.0588323 | 0         |
| 0         | 0         | 0        | 0        | 0         | 0         |
| 1.3667    | 0         | 1.98357  | 1.03175  | 0         | 0.735362  |
| 282.943   | 169.979   | 280.316  | 239.287  | 373.206   | 511.819   |
| 0.139207  | 0         | 0.438451 | 0.317192 | 0.414662  | 0.234066  |
| 21.9309   | 22.4368   | 21.0622  | 21.0167  | 24.1446   | 22.3382   |
| 32.2146   | 36.1238   | 31.2119  | 33.4683  | 23.5707   | 26.8787   |
| 0.467414  | 0.477093  | 1.22885  | 0.290774 | 0.688957  | 0.256128  |
| 6.24765   | 5.89017   | 5.52125  | 4.60086  | 6.27866   | 4.65873   |
| 40.6038   | 38.1746   | 41.74    | 36.6601  | 47.0998   | 42.0561   |
| 27.8093   | 24.6214   | 25.9499  | 28.158   | 27.0246   | 29.4693   |
| 1.96892   | 1.56353   | 1.56014  | 1.96728  | 3.07927   | 1.84861   |
| 5.34626   | 6.09528   | 5.76259  | 5.37428  | 5.14159   | 5.26873   |
| 0.331737  | 0.371651  | 0.55622  | 0.475284 | 0.858107  | 0.486623  |
| 2.77688   | 2.04025   | 2.59821  | 2.89572  | 3.33118   | 2.7604    |
| 2.11528   | 1.30539   | 1.96132  | 2.25986  | 2.68271   | 1.64483   |
| 0.210754  | 0.328301  | 0.531038 | 0.300135 | 0.114142  | 0.0442958 |
| 0.87531   | 1.00907   | 0.551381 | 0.423847 | 1.34608   | 0.91973   |
| 16.4904   | 15.718    | 9.30785  | 16.7876  | 15.5188   | 18.9425   |
| 16.6733   | 16.9644   | 42.4943  | 39.1668  | 30.0067   | 26.9442   |
| 1.18148   | 1.63865   | 1.46998  | 1.48944  | 1.35222   | 1.07389   |
| 2.54818   | 6.79138   | 11.8912  | 9.16432  | 19.0008   | 21.1782   |
| 1.70623   | 2.94848   | 2.23559  | 1.50327  | 1.65102   | 1.07106   |
| 0         | 0.0991036 | 0        | 0        | 0         | 0.0668574 |
| 103.933   | 105.06    | 80.7187  | 70.8491  | 55.0545   | 79.6057   |
| 0         | 0         | 0        | 0        | 0         | 0         |
| 14.5394   | 13.1462   | 12.9795  | 11.9357  | 10.6878   | 11.7477   |
| 0         | 0         | 0        | 0        | 0         | 0         |
| 0.397197  | 0.409079  | 3.24556  | 2.5971   | 1.27443   | 1.57953   |

|          |          |           |          |          |          |
|----------|----------|-----------|----------|----------|----------|
| 4.06557  | 3.61299  | 4.78131   | 2.69698  | 3.55782  | 2.45921  |
| 12.6677  | 11.9031  | 14.1286   | 14.6412  | 22.6948  | 16.9408  |
| 1.56618  | 1.63526  | 1.56051   | 1.18961  | 2.41848  | 1.44578  |
| 0        | 0        | 0         | 0        | 0        | 0        |
| 23.965   | 21.1666  | 19.4932   | 23.0617  | 19.3428  | 23.8643  |
| 0.206503 | 0        | 0.0578138 | 0.209126 | 0.22368  | 0.15432  |
| 2.72778  | 3.90609  | 2.02781   | 3.47446  | 2.38576  | 3.9883   |
| 0.281161 | 0.81756  | 0.767482  | 0.53387  | 0.456822 | 0.630335 |
| 0.198506 | 0.123689 | 0.500177  | 0        | 0        | 0        |
| 2.51494  | 1.79841  | 2.23295   | 2.02793  | 3.24427  | 1.85468  |
| 26.0604  | 24.3948  | 26.049    | 24.2174  | 30.3745  | 26.0488  |
| 19.0256  | 18.0598  | 22.0876   | 21.2277  | 26.3988  | 28.7955  |
| 0.135859 | 0.167831 | 0.167512  | 0.312608 | 0.333702 | 0.544988 |
| 11.646   | 11.8662  | 10.6256   | 8.29845  | 11.8515  | 9.52089  |
| 0        | 0        | 0         | 0        | 0        | 0        |
| 4.92568  | 3.28788  | 7.57789   | 5.90129  | 7.90478  | 6.30828  |
| 3.2002   | 2.41073  | 2.89      | 3.57934  | 3.53743  | 3.40683  |
| 0        | 0        | 0         | 0        | 0        | 0        |
| 0        | 0        | 0         | 0        | 0        | 0        |
| 5.42498  | 5.27098  | 7.51043   | 5.65681  | 6.8722   | 6.75109  |
| 18.6526  | 20.4398  | 17.3713   | 19.534   | 21.1821  | 20.7209  |
| 0.449612 | 0.560306 | 0.566446  | 0.416191 | 0.578325 | 0.838675 |
| 31.4602  | 31.1375  | 39.4399   | 40.6012  | 32.8173  | 41.8735  |
| 0        | 0        | 0.0971067 | 0        | 0        | 0        |
| 13.6965  | 14.7051  | 9.263     | 11.8923  | 9.04547  | 9.9808   |
| 1.44193  | 108.415  | 1.968     | 1132.41  | 5.07692  | 40.0042  |
| 0.849481 | 0.717131 | 0.690466  | 0.811703 | 0.595288 | 0.368603 |
| 0        | 0        | 0         | 0        | 0        | 0.150204 |
| 27.3071  | 24.9863  | 26.6276   | 27.9305  | 32.8537  | 38.6403  |
| 0.466745 | 0.781406 | 0.703627  | 0.862167 | 0.679705 | 0.638119 |
| 0.433024 | 0.481992 | 0.27402   | 0.265278 | 0.519162 | 0.389981 |
| 0        | 0        | 0         | 0        | 0        | 0        |
| 6.13166  | 6.25325  | 8.57851   | 7.32582  | 11.7909  | 8.87155  |
| 2.05711  | 1.91708  | 2.53227   | 1.57318  | 2.69945  | 1.49874  |
| 162.289  | 161.871  | 169.059   | 162.579  | 191.49   | 171.935  |
| 3.08641  | 3.63979  | 2.29672   | 2.99716  | 2.61981  | 2.29853  |
| 6.9947   | 6.94431  | 7.18341   | 7.04755  | 7.97884  | 6.69198  |
| 10.949   | 12.9773  | 15.0681   | 19.7567  | 14.8914  | 22.1002  |
| 0        | 0        | 0         | 27.8769  | 0        | 30.8569  |
| 0.321981 | 0.351095 | 0.507061  | 0.596094 | 0.871907 | 0.30453  |
| 1.1741   | 0.76642  | 0.845257  | 0.509576 | 1.09008  | 1.03409  |
| 0        | 0        | 0         | 0        | 0        | 0        |
| 3.64456  | 2.65805  | 3.07543   | 3.28909  | 5.444    | 2.94327  |

|           |           |            |           |           |           |
|-----------|-----------|------------|-----------|-----------|-----------|
| 60.9059   | 34.762    | 92.1813    | 73.7259   | 70.2981   | 96.4891   |
| 0.650537  | 0.661711  | 0.609748   | 0.600589  | 0.891675  | 0.801009  |
| 46.8397   | 42.8148   | 53.3004    | 41.6417   | 41.8512   | 41.4958   |
| 0.477293  | 0.467764  | 0.47289    | 0.718124  | 0.223109  | 0.230003  |
| 10.5561   | 11.1796   | 10.0714    | 11.1384   | 9.0504    | 10.7016   |
| 40.7698   | 36.2102   | 59.421     | 29.201    | 50.6331   | 22.8781   |
| 27.9656   | 30.3796   | 32.3901    | 29.3679   | 28.4318   | 23.9757   |
| 0.062933  | 0.397037  | 0.323753   | 0         | 0.340839  | 0.105817  |
| 0.0855018 | 0.0530908 | 0.0487038  | 0.172755  | 0.226118  | 0.0727707 |
| 8.4489    | 7.63512   | 9.6125     | 6.46225   | 11.4458   | 7.45709   |
| 14.1241   | 14.1395   | 16.1311    | 14.38     | 15.5398   | 14.5757   |
| 9.94063   | 9.40357   | 9.81085    | 8.25766   | 10.9973   | 10.8637   |
| 0.023284  | 0.058033  | 0.00733361 | 0.0464223 | 0         | 0.0244689 |
| 11.3931   | 10.6001   | 13.0946    | 10.745    | 15.3478   | 10.9725   |
| 12.868    | 12.0725   | 14.6989    | 14.5677   | 14.1492   | 14.4743   |
| 288.352   | 368.15    | 318.279    | 298.28    | 27.2333   | 74.8782   |
| 0         | 0         | 0          | 0         | 0         | 0         |
| 1.21996   | 1.37552   | 0.841675   | 0.69494   | 0.849494  | 1.07447   |
| 87.4507   | 84.3723   | 90.5476    | 92.6512   | 82.5265   | 87.5552   |
| 0.142878  | 0.715395  | 0          | 0.081389  | 0.464287  | 0.482621  |
| 25.381    | 24.7386   | 25.436     | 29.2876   | 19.0467   | 21.7632   |
| 0         | 0         | 0          | 0         | 0         | 0         |
| 0         | 0         | 0          | 0         | 0         | 0         |
| 4.47307   | 5.58107   | 5.80115    | 4.85476   | 7.39623   | 6.39257   |
| 0         | 0         | 0          | 0         | 0         | 0         |
| 28.2069   | 31.9954   | 32.8411    | 34.2249   | 26.7695   | 23.1632   |
| 0.371839  | 0.360411  | 0.0520515  | 0         | 0.134256  | 0.173672  |
| 1.05063   | 0.798139  | 1.57728    | 0.838708  | 1.59018   | 0.83824   |
| 103.747   | 79.4149   | 97.3819    | 86.5801   | 142.176   | 100.976   |
| 21.7162   | 24.5478   | 23.9325    | 25.0158   | 22.4771   | 21.3      |
| 1.21536   | 0.85195   | 1.91397    | 1.38464   | 1.72784   | 1.08563   |
| 6.1057    | 4.77422   | 3.24283    | 5.66037   | 3.04743   | 5.48553   |
| 0         | 0         | 0.0299367  | 0         | 0.0257385 | 0.019977  |
| 3.31718   | 3.53962   | 3.69004    | 3.47651   | 4.58168   | 3.64198   |
| 6.51052   | 5.30848   | 7.27661    | 4.96961   | 8.74455   | 5.70023   |
| 12.0575   | 12.3634   | 7.77226    | 7.43986   | 12.7562   | 15.3571   |
| 0         | 0         | 0          | 0         | 0         | 0         |
| 38.8514   | 37.0668   | 42.6676    | 38.8711   | 43.8936   | 40.4035   |
| 0.64662   | 0.927835  | 1.16139    | 1.09654   | 1.12215   | 1.0606    |
| 0.108933  | 0.17996   | 0.131515   | 2.19781   | 0.222936  | 0.411425  |
| 0.0367555 | 0.0916094 | 0.231533   | 0         | 0.159251  | 0.0309008 |
| 13.0563   | 13.1834   | 13.8272    | 13.887    | 14.8938   | 21.3492   |
| 0.0872324 | 0.0634135 | 0.119058   | 0.0414093 | 0.110236  | 0.055003  |

|           |           |           |           |           |            |
|-----------|-----------|-----------|-----------|-----------|------------|
| 0         | 0         | 0         | 0         | 0         | 0          |
| 1.44207   | 2.28723   | 2.14713   | 1.94164   | 2.84004   | 1.87366    |
| 0         | 0         | 0         | 0         | 0         | 0          |
| 0.0370153 | 0         | 0.0466339 | 0.0843418 | 0         | 0          |
| 0         | 0.121745  | 0.123079  | 0         | 0         | 0          |
| 0         | 0         | 0         | 0         | 0         | 0          |
| 0         | 0         | 0         | 0         | 0         | 0          |
| 10.5429   | 7.67147   | 4.4572    | 3.70819   | 5.86319   | 6.87071    |
| 0         | 0         | 0         | 0         | 0         | 0          |
| 0         | 0         | 0         | 0         | 0         | 0          |
| 4.20593   | 3.00611   | 4.98717   | 2.60728   | 6.56569   | 4.15998    |
| 0.0111169 | 0         | 0         | 0         | 0         | 0.00934614 |
| 1.90223   | 1.97546   | 2.31664   | 1.96851   | 2.98765   | 2.73201    |
| 0         | 0         | 0         | 0         | 0         | 0          |
| 10.1518   | 10.8555   | 10.4519   | 8.82452   | 12.3858   | 9.79233    |
| 5.70043   | 6.7151    | 7.82485   | 7.1083    | 6.78898   | 5.72229    |
| 49.878    | 53.9085   | 50.0768   | 54.7267   | 50.6972   | 56.8583    |
| 1.82729   | 1.42323   | 2.01436   | 2.47214   | 1.97929   | 0.480071   |
| 0         | 0         | 0         | 0         | 0         | 0          |
| 0         | 0         | 0.172627  | 0         | 0         | 0.230391   |
| 0.213797  | 0.157438  | 0.25711   | 0.254647  | 0.200001  | 0.310463   |
| 0.242243  | 0.067085  | 0.0339101 | 0.0817728 | 0.116619  | 0.0301713  |
| 0.0460267 | 0.0860375 | 0.0579869 | 0.131093  | 0.199421  | 0.0580428  |
| 41.0044   | 52.3142   | 40.0264   | 42.3483   | 31.2264   | 31.8752    |
| 7.25039   | 4.42551   | 4.67285   | 3.75363   | 5.83401   | 3.98073    |
| 0         | 0.177614  | 0         | 0         | 0         | 0          |
| 2.40875   | 1.93663   | 3.52413   | 1.23933   | 2.6091    | 2.48233    |
| 107.373   | 122.134   | 107.787   | 135.492   | 107.799   | 152.258    |
| 0.0438182 | 0.0910103 | 0.0184015 | 0.0166404 | 0.0949259 | 0.0368385  |
| 5.64512   | 5.04681   | 6.18438   | 5.31289   | 6.91225   | 4.12755    |
| 10.1329   | 9.56471   | 9.45222   | 9.20261   | 8.56261   | 7.28631    |
| 0.512123  | 0.229754  | 0.232272  | 0.280057  | 0.177511  | 0.27555    |
| 51.4058   | 48.6669   | 48.6227   | 48.7816   | 37.3293   | 44.5606    |
| 0         | 0         | 0         | 0         | 0         | 0          |
| 1.47742   | 2.85639   | 2.05321   | 2.54732   | 1.89066   | 1.75442    |
| 0.54872   | 0.315607  | 0.555409  | 0.256471  | 0.929644  | 0.382458   |
| 5.96742   | 5.84304   | 3.40104   | 4.46764   | 6.49457   | 5.23189    |
| 0.0348897 | 0.0173918 | 0.0527471 | 0.0317994 | 0.0529085 | 0.0410651  |
| 7.07443   | 7.36994   | 6.86792   | 5.8452    | 6.24822   | 4.74362    |
| 0         | 0         | 0         | 0         | 0         | 0          |
| 0         | 0         | 0         | 0         | 0         | 0          |
| 20.7795   | 27.0568   | 17.7908   | 21.4971   | 19.382    | 16.7867    |
| 0.239845  | 0.0853985 | 0.0863343 | 0.117108  | 0.111341  | 0.144029   |

|           |            |           |           |           |            |
|-----------|------------|-----------|-----------|-----------|------------|
| 23.4261   | 22.4566    | 21.8198   | 22.5069   | 22.1336   | 25.4739    |
| 2.10523   | 3.36005    | 4.30856   | 3.66788   | 5.5736    | 3.71939    |
| 0         | 0          | 0         | 0         | 0         | 0          |
| 15.419    | 13.7672    | 17.2311   | 13.892    | 14.4861   | 15.9486    |
| 25.9673   | 25.0619    | 20.7063   | 15.6039   | 29.5416   | 23.4071    |
| 25.9687   | 16.2445    | 17.8338   | 17.0553   | 20.1865   | 24.0154    |
| 8.79228   | 8.65587    | 9.39416   | 8.06543   | 11.2088   | 8.45529    |
| 12.1014   | 13.436     | 13.8978   | 13.4619   | 12.2966   | 10.8186    |
| 2.10534   | 2.53548    | 2.58555   | 3.52732   | 1.7258    | 1.57662    |
| 25.649    | 24.5786    | 26.0728   | 25.8987   | 13.7983   | 18.8229    |
| 12.0838   | 12.6046    | 15.6822   | 13.8423   | 17.9977   | 16.7821    |
| 0         | 0          | 0         | 0.0611454 | 0         | 0          |
| 145.138   | 131.907    | 146.922   | 159.75    | 141.701   | 146.72     |
| 7.79447   | 8.40963    | 10.3734   | 10.7606   | 11.1164   | 9.50391    |
| 0.546864  | 0.341782   | 0.476453  | 0.523301  | 0.605336  | 0.394154   |
| 4.59463   | 5.04046    | 4.65512   | 4.95729   | 6.40128   | 5.96031    |
| 0         | 0.00651062 | 0.0105311 | 0         | 0.0226358 | 0          |
| 3.48176   | 3.96491    | 3.70886   | 5.23195   | 3.05611   | 3.86082    |
| 0         | 0          | 0         | 0         | 0         | 0          |
| 0         | 0          | 0         | 0         | 0         | 0          |
| 0         | 0          | 0         | 0         | 0         | 0          |
| 0.107147  | 0.0567239  | 0.100966  | 0         | 0.0438242 | 0.00850279 |
| 37.9078   | 45.2634    | 39.0168   | 39.6757   | 42.6532   | 47.1775    |
| 15.5884   | 19.4688    | 17.3742   | 17.8856   | 12.9091   | 19.2613    |
| 26.1315   | 32.1058    | 21.5868   | 28.7741   | 39.5639   | 28.9005    |
| 5.69214   | 7.09353    | 1.79282   | 3.24248   | 7.70701   | 5.98181    |
| 4.88583   | 4.68149    | 7.07974   | 8.04687   | 9.04196   | 8.20854    |
| 77.2391   | 77.679     | 56.0321   | 83.7694   | 41.6875   | 63.3427    |
| 0         | 0          | 0         | 0         | 0         | 0          |
| 5.43321   | 6.27677    | 5.45756   | 5.08582   | 5.52692   | 6.09856    |
| 0.546441  | 0.318441   | 0.688435  | 0.62255   | 0.66588   | 0.574249   |
| 29.3032   | 27.9325    | 25.534    | 25.7039   | 22.7056   | 23.5504    |
| 3.15989   | 3.12477    | 4.83522   | 2.53603   | 5.41816   | 4.29136    |
| 0         | 0          | 0         | 0         | 0         | 0          |
| 2.94084   | 3.75371    | 2.98648   | 4.5079    | 3.88047   | 2.847      |
| 14.5659   | 14.1041    | 14.6893   | 13.3435   | 15.2889   | 13.8652    |
| 0         | 0          | 0         | 0         | 0         | 0          |
| 0         | 0          | 0         | 0         | 0         | 0          |
| 0         | 0          | 0         | 0         | 0         | 0          |
| 0         | 0          | 0         | 0         | 0         | 0          |
| 0.0476351 | 0.41554    | 0.18004   | 0.217079  | 0.515974  | 0.520616   |
| 0.403195  | 0.471369   | 0.382443  | 0.345842  | 0.87608   | 0.589688   |
| 19.5553   | 20.3287    | 16.8709   | 16.2942   | 14.7498   | 18.0913    |

|           |           |           |           |           |           |
|-----------|-----------|-----------|-----------|-----------|-----------|
| 0.119844  | 0.14935   | 0.150986  | 0         | 0.519251  | 0.0503772 |
| 15.0292   | 14.3822   | 16.036    | 13.2623   | 17.2474   | 16.0731   |
| 0.693513  | 0.590193  | 0.881527  | 0.617169  | 0.973787  | 0.987679  |
| 9.60773   | 11.2166   | 15.6806   | 13.9312   | 13.1411   | 11.8516   |
| 3.0438    | 3.52189   | 3.47806   | 2.38771   | 2.51409   | 1.98761   |
| 29.4398   | 29.2758   | 30.315    | 28.9518   | 31.7713   | 28.3154   |
| 0.2164    | 0.404517  | 0         | 0         | 0.2344    | 0.454826  |
| 10.1963   | 11.0204   | 7.88406   | 9.60698   | 10.966    | 10.9556   |
| 37.948    | 40.785    | 37.9881   | 37.7985   | 48.2247   | 51.6182   |
| 1.20021   | 0.794559  | 1.37045   | 2.0513    | 1.62516   | 1.07198   |
| 0.0902155 | 0.0281066 | 0.0568292 | 0.0513905 | 0.0488598 | 0.15169   |
| 0.274226  | 0.478436  | 0.069097  | 0.124968  | 0.0594072 | 0.138327  |
| 21.1684   | 20.1066   | 24.6488   | 20.8123   | 23.5636   | 19.9068   |
| 0         | 0         | 0         | 0         | 0         | 0         |
| 0.837307  | 0.927182  | 1.24979   | 1.09516   | 1.91415   | 1.53768   |
| 69.9136   | 66.0348   | 71.1778   | 77.8077   | 81.0368   | 95.9605   |
| 1.1743    | 1.39024   | 1.40547   | 1.03684   | 1.30378   | 1.87577   |
| 0.210875  | 0.112625  | 0.417484  | 0.240246  | 0.195785  | 0.329244  |
| 1.6241    | 2.05072   | 4.93082   | 4.73909   | 1.58856   | 1.53942   |
| 0         | 0         | 0         | 0         | 0         | 0.0184121 |
| 27.1503   | 28.2048   | 28.1823   | 24.9509   | 21.6932   | 20.1109   |
| 6.75499   | 6.37556   | 5.6778    | 5.66025   | 5.47972   | 4.52885   |
| 2.05018   | 2.49686   | 2.58292   | 2.12339   | 1.51412   | 1.72361   |
| 10.3466   | 10.3917   | 12.2532   | 10.9316   | 12.8234   | 10.5732   |
| 5.02572   | 3.38697   | 4.72485   | 3.78832   | 7.31865   | 4.25072   |
| 0.234687  | 0.487444  | 0.788457  | 0.53475   | 1.01683   | 0.789217  |
| 3.94201   | 2.79323   | 5.64686   | 2.13966   | 3.93895   | 1.13093   |
| 0         | 0         | 0         | 0         | 0         | 0         |
| 4.94288   | 4.12216   | 6.15628   | 5.78123   | 6.94192   | 4.80336   |
| 0         | 0.0183369 | 0         | 0         | 0         | 0.0123704 |
| 0.208672  | 0.208038  | 0.422513  | 0.380379  | 0.453315  | 0.456858  |
| 1.18487   | 0.861339  | 1.70009   | 0.712447  | 1.17647   | 0.913121  |
| 2.01332   | 2.53888   | 1.40899   | 1.62569   | 0.875662  | 0.931155  |
| 28.5572   | 33.8049   | 24.6735   | 33.2756   | 27.3254   | 27.7467   |
| 4.69449   | 3.39418   | 4.10385   | 3.36806   | 5.18875   | 3.12976   |
| 23.912    | 22.9898   | 25.3826   | 23.1526   | 25.6988   | 28.06     |
| 0         | 0         | 0         | 0         | 0         | 0         |
| 30.6951   | 20.0182   | 37.2722   | 20.1527   | 42.6919   | 34.853    |
| 23.279    | 26.9344   | 20.3041   | 20.5434   | 16.1937   | 20.2011   |
| 6.90224   | 6.87374   | 5.54406   | 9.06546   | 4.73394   | 7.75397   |
| 0         | 0         | 0         | 0         | 0         | 0         |
| 0         | 0         | 0         | 0         | 0         | 0         |
| 0         | 0         | 0         | 0         | 0         | 0.0370949 |



|           |           |           |           |           |           |
|-----------|-----------|-----------|-----------|-----------|-----------|
| 6.32155   | 5.93626   | 7.3391    | 5.86791   | 7.09461   | 6.12389   |
| 4.60907   | 4.66386   | 4.26086   | 4.12394   | 5.42441   | 5.05478   |
| 3.67709   | 4.95408   | 4.32146   | 4.4002    | 3.50917   | 3.06979   |
| 62.8152   | 67.4575   | 68.6663   | 61.9184   | 63.3663   | 57.6971   |
| 25.8335   | 29.7282   | 29.0449   | 26.3437   | 26.7702   | 27.007    |
| 0.0445323 | 0.0639146 | 0.0267004 | 0.0965804 | 0.0229561 | 0.047127  |
| 4.8929    | 5.25932   | 5.99818   | 5.76972   | 5.17132   | 4.52376   |
| 0         | 0.219743  | 0         | 0.100445  | 0.0954987 | 0         |
| 9.40037   | 7.25291   | 10.0228   | 7.29681   | 7.39823   | 6.43287   |
| 2.91496   | 4.34813   | 3.22728   | 3.62286   | 3.2531    | 3.63883   |
| 17.1278   | 18.8847   | 15.3955   | 18.513    | 14.4953   | 18.2296   |
| 18.9855   | 21.8101   | 20.3944   | 18.6985   | 20.6377   | 16.692    |
| 0.248291  | 0.688421  | 0.2523    | 0.310414  | 0.347714  | 0.314086  |
| 22.3231   | 22.2147   | 23.0365   | 20.7264   | 22.7521   | 16.7133   |
| 0         | 0         | 0         | 0         | 0         | 0         |
| 0.0270306 | 0.0336855 | 0         | 0         | 0         | 0         |
| 10.5553   | 12.2332   | 13.0322   | 14.3504   | 12.6528   | 12.9264   |
| 0         | 0         | 0         | 0         | 0         | 0         |
| 18.6917   | 18.1158   | 18.5115   | 19.7904   | 21.0122   | 22.6669   |
| 0.176103  | 0.146306  | 0.369773  | 0.535016  | 0.572253  | 0.197403  |
| 29.9732   | 30.8643   | 29.4715   | 28.1339   | 27.2576   | 35.2601   |
| 2.82184   | 2.34147   | 5.02182   | 3.4744    | 5.81191   | 3.925     |
| 35.1787   | 32.0695   | 17.9913   | 41.8854   | 41.4048   | 40.4858   |
| 0         | 0         | 0         | 0         | 0         | 0         |
| 0         | 0.0821041 | 0.166008  | 0         | 0.214091  | 0.0553892 |
| 1.22883   | 0         | 0.393255  | 1.60042   | 0.338118  | 0.258273  |
| 0         | 0         | 0         | 0         | 0         | 0         |
| 23.219    | 22.9023   | 25.5838   | 23.0272   | 27.1937   | 25.8891   |
| 139.886   | 158.822   | 72.8584   | 133.208   | 63.7453   | 110.195   |
| 0         | 0         | 0         | 0         | 0         | 0         |
| 7.29759   | 5.92989   | 7.00274   | 7.82013   | 19.8898   | 15.2816   |
| 3.11774   | 1.99694   | 3.67139   | 2.00074   | 3.76301   | 2.08622   |
| 0         | 0         | 0         | 0         | 0         | 0         |
| 3.8943    | 4.08636   | 2.81939   | 2.67281   | 5.01647   | 4.10953   |
| 2.60E-15  | 1.81E-33  | 0.0514193 | 9.03E-14  | 2.36E-14  | 5.76E-26  |
| 35.6505   | 36.661    | 36.4081   | 38.9686   | 37.5234   | 41.6388   |
| 8.08421   | 8.41683   | 8.10734   | 7.9285    | 8.16665   | 6.83671   |
| 2.39471   | 1.40758   | 1.24668   | 1.22248   | 2.64038   | 1.26975   |
| 1.27342   | 0.948574  | 1.3325    | 1.07938   | 1.3678    | 1.04838   |
| 1.31731   | 0.84872   | 1.7281    | 0.35811   | 1.61754   | 0.746704  |
| 65.0071   | 63.9918   | 77.5516   | 72.7335   | 84.4857   | 88.5288   |
| 4.26644   | 3.07765   | 15.2123   | 19.009    | 3.99659   | 2.8045    |
| 3.15036   | 2.27293   | 3.13342   | 0.755611  | 5.02881   | 0.557589  |

|           |           |           |           |          |           |
|-----------|-----------|-----------|-----------|----------|-----------|
| 2.76736   | 3.03621   | 3.47488   | 3.00616   | 2.97763  | 1.77003   |
| 1.11268   | 1.05383   | 0.785016  | 0.40565   | 0.723139 | 1.01028   |
| 16.0658   | 15.0498   | 16.7408   | 14.7854   | 15.2474  | 13.5614   |
| 9.34812   | 10.4529   | 7.86656   | 9.42254   | 9.17402  | 11.3139   |
| 0.0610845 | 0.266048  | 0.231181  | 0.418621  | 0.218962 | 0.384494  |
| 83.3338   | 93.841    | 89.1562   | 95.6377   | 69.3343  | 73.4525   |
| 1.92952   | 3.01664   | 2.895     | 2.75783   | 2.01402  | 1.53369   |
| 0.152167  | 0         | 0.143781  | 0.0866808 | 0.206031 | 0.159911  |
| 43.9336   | 44.6444   | 46.3662   | 39.6981   | 42.8634  | 43.0976   |
| 4.18551   | 4.66692   | 6.00661   | 3.99763   | 6.44256  | 4.92104   |
| 21.611    | 26.7251   | 23.9377   | 23.2223   | 24.5714  | 24.2549   |
| 6.8868    | 7.30493   | 10.3128   | 8.98031   | 11.9877  | 9.86319   |
| 36.6765   | 35.2456   | 27.6651   | 26.1637   | 25.9372  | 32.5347   |
| 11.0257   | 12.2854   | 8.60681   | 9.80278   | 9.83529  | 8.57879   |
| 2.99858   | 3.19421   | 3.51753   | 3.18089   | 2.90031  | 2.88653   |
| 44.4925   | 47.87     | 49.7872   | 39.3552   | 38.0159  | 38.3347   |
| 9.09722   | 9.76798   | 9.71443   | 8.47866   | 8.21297  | 6.41038   |
| 30.9094   | 28.7995   | 29.8763   | 29.1704   | 28.7164  | 30.2856   |
| 0         | 0         | 0         | 0         | 2.42E-80 | 0         |
| 0         | 0         | 0         | 0         | 0        | 0         |
| 0.345653  | 0.704868  | 0.475061  | 0.572796  | 0.136147 | 0.501937  |
| 5.481     | 6.13473   | 4.44366   | 5.5795    | 6.43165  | 6.63459   |
| 8.08582   | 9.7536    | 9.81868   | 9.12132   | 8.61276  | 7.23323   |
| 7.17805   | 5.51205   | 8.97961   | 7.31397   | 13.716   | 8.86077   |
| 0.936805  | 1.20576   | 0.977527  | 1.87951   | 1.99589  | 1.27896   |
| 0.228855  | 0.0950664 | 0.0480541 | 0.217276  | 0.289207 | 0.0641338 |
| 22.9755   | 24.0187   | 27.6132   | 23.4978   | 20.8131  | 22.181    |
| 18.0421   | 19.7783   | 21.738    | 35.9659   | 14.8809  | 15.1682   |
| 0.25755   | 0.456743  | 0.332159  | 0.137151  | 0.306072 | 0.538792  |
| 0         | 0         | 0         | 0         | 0        | 0         |
| 11.7349   | 12.5195   | 14.0205   | 11.3303   | 14.7904  | 10.9214   |
| 0         | 0.0663888 | 0         | 0         | 0.115409 | 0.0447873 |
| 36.195    | 28.9142   | 38.585    | 34.3636   | 29.6556  | 24.1876   |
| 9.25695   | 9.47958   | 6.84532   | 9.12482   | 13.3838  | 12.0797   |
| 48.1238   | 47.9138   | 38.2523   | 42.2436   | 34.1862  | 42.9814   |
| 0.0899548 | 0.112101  | 0         | 0.102484  | 0.292311 | 0.151252  |
| 0         | 0.275648  | 0         | 1.008     | 0        | 0.371916  |
| 29.956    | 32.9871   | 28.292    | 26.8818   | 30.6977  | 31.6527   |
| 0         | 0         | 0         | 0         | 0        | 0         |
| 2.03916   | 2.81487   | 2.49      | 3.32394   | 1.6311   | 2.98033   |
| 20.9741   | 22.9209   | 22.6029   | 22.572    | 20.3769  | 25.5274   |
| 1.98796   | 2.14211   | 2.41039   | 1.97536   | 1.94285  | 1.92263   |
| 1.05456   | 0.924042  | 0.373667  | 0.713357  | 0.356962 | 0.263204  |

|           |           |           |            |           |           |
|-----------|-----------|-----------|------------|-----------|-----------|
| 289.378   | 259.775   | 174.984   | 166.163    | 101.971   | 171.546   |
| 10.9941   | 8.46613   | 17.3849   | 11.2899    | 17.842    | 13.1318   |
| 7.24159   | 9.20739   | 7.33567   | 7.52554    | 6.35996   | 6.29377   |
| 7.63935   | 8.4225    | 8.6796    | 8.03771    | 8.30312   | 9.58975   |
| 2.11873   | 2.91408   | 1.78364   | 1.994      | 3.0444    | 2.17985   |
| 0.615542  | 0.511392  | 1.18605   | 0.618773   | 1.425     | 0.62911   |
| 1.96147   | 1.76675   | 2.33103   | 1.59434    | 2.48666   | 3.11066   |
| 4.68998   | 5.11503   | 3.67203   | 3.65588    | 4.43564   | 4.39521   |
| 31.156    | 28.9799   | 30.5604   | 26.82      | 31.3388   | 27.029    |
| 25.9269   | 27.4425   | 27.6154   | 24.421     | 27.1022   | 22.0034   |
| 3.87868   | 3.70832   | 3.68432   | 4.34877    | 4.49029   | 5.03793   |
| 2.64673   | 2.86387   | 1.94703   | 2.19316    | 2.11984   | 1.66696   |
| 3.23932   | 2.8089    | 1.77611   | 2.78172    | 3.0441    | 4.53023   |
| 25.0111   | 29.1852   | 23.035    | 27.0674    | 18.5215   | 23.2354   |
| 22.9264   | 28.5709   | 0         | 0          | 0         | 19.2745   |
| 3.89534   | 3.79849   | 5.26054   | 4.29624    | 5.09564   | 4.00068   |
| 11.6318   | 12.593    | 15.8756   | 14.5495    | 14.8042   | 17.6022   |
| 0         | 0         | 0         | 0          | 0         | 0         |
| 0.0970788 | 0.483918  | 0.366915  | 0.331801   | 0.315461  | 0.408076  |
| 1.54972   | 1.52892   | 1.54567   | 1.17705    | 1.60869   | 0.86858   |
| 29.7894   | 30.3262   | 33.0132   | 30.8966    | 29.2099   | 28.7747   |
| 28.0243   | 30.6315   | 30.1917   | 33.3386    | 28.1738   | 31.5719   |
| 0         | 0         | 0         | 0          | 0         | 0         |
| 0         | 0         | 0         | 0.086654   | 0         | 0         |
| 0         | 0         | 0         | 0          | 0         | 0         |
| 6.94154   | 6.94723   | 7.07423   | 7.62194    | 6.66775   | 5.34294   |
| 0         | 0         | 0         | 0          | 0         | 0         |
| 0         | 0         | 0.0190145 | 0.00529071 | 0         | 0         |
| 2.50342   | 1.89929   | 2.73119   | 2.05587    | 4.07882   | 1.81677   |
| 0.0280237 | 0.0775688 | 0.0418448 | 0.0927303  | 0.0309595 | 0.234805  |
| 14.3864   | 8.19516   | 24.2427   | 11.1207    | 24.4118   | 9.31535   |
| 0         | 0         | 0         | 0          | 0         | 0         |
| 0.0244179 | 0.0304295 | 0         | 0          | 0.0528978 | 0.0821135 |
| 134.506   | 137.819   | 121.4     | 115.339    | 107.807   | 111.708   |
| 6.3437    | 5.85542   | 5.57472   | 8.96638    | 7.5075    | 5.82696   |
| 15.441    | 14.9215   | 15.7921   | 15.1334    | 19.0288   | 19.3778   |
| 0         | 0         | 0         | 0          | 0         | 0         |
| 0.926806  | 1.15498   | 2.98397   | 1.29054    | 2.00779   | 1.90465   |
| 0         | 0         | 0         | 0          | 0         | 0         |
| 95.9104   | 99.848    | 103.461   | 100.621    | 79.5833   | 87.6733   |
| 0         | 0         | 0         | 0          | 29.5941   | 0         |
| 8.98197   | 8.87611   | 9.52263   | 7.68373    | 11.7034   | 7.85595   |
| 0         | 0         | 0         | 0          | 0         | 0         |

|           |           |           |           |           |           |
|-----------|-----------|-----------|-----------|-----------|-----------|
| 0         | 0         | 0         | 0         | 0         | 0         |
| 5.85062   | 6.24412   | 6.48264   | 6.28951   | 6.35352   | 6.38168   |
| 748.76    | 226.481   | 1373.07   | 973.272   | 56.2331   | 122.817   |
| 7.37967   | 6.52056   | 5.1968    | 6.63659   | 6.10053   | 5.68324   |
| 0.0944684 | 0.0882948 | 0.0297541 | 0.0807196 | 0.255815  | 0.0595655 |
| 0         | 0         | 0         | 0         | 0         | 0         |
| 0.4182    | 0.417718  | 0.140499  | 0.0635264 | 0.664379  | 0.375416  |
| 45.1683   | 44.5222   | 43.925    | 40.2489   | 52.5818   | 49.3168   |
| 9.52599   | 8.71901   | 11.643    | 6.94614   | 12.2421   | 14.802    |
| 4.20439   | 5.17758   | 3.32251   | 3.35623   | 1.62437   | 1.81955   |
| 3.25035   | 3.6554    | 2.89644   | 2.8902    | 3.52071   | 3.79899   |
| 13.7072   | 15.8562   | 19.1179   | 12.4739   | 20.1238   | 20.8707   |
| 0.354833  | 0.331644  | 0.111759  | 0.202127  | 0.288261  | 0.0745781 |
| 16.2596   | 17.2236   | 15.9625   | 16.4192   | 17.5934   | 17.2588   |
| 18.3035   | 20.4249   | 20.9283   | 20.8837   | 20.8132   | 17.4549   |
| 6.99526   | 8.09806   | 7.50416   | 7.52348   | 8.49379   | 7.29817   |
| 17.042    | 16.1724   | 15.1157   | 18.4672   | 14.3751   | 16.0154   |
| 0         | 0         | 0         | 0         | 0         | 0         |
| 1.12581   | 1.00213   | 0.865749  | 1.04941   | 1.75791   | 1.46274   |
| 0.24599   | 0.0875862 | 0.132819  | 0.0400359 | 0.190322  | 0.0295438 |
| 3.16912   | 4.28472   | 2.33335   | 2.2483    | 3.23231   | 2.66962   |
| 1.03816   | 0.554466  | 2.05532   | 0.675862  | 1.4458    | 1.37153   |
| 8.00105   | 7.02236   | 8.33293   | 6.40686   | 10.3421   | 7.50814   |
| 2.43786   | 2.63299   | 3.0031    | 2.7157    | 2.93405   | 2.68718   |
| 3.56473   | 3.54824   | 4.22462   | 2.75338   | 4.68748   | 3.22549   |
| 0.49717   | 0.524254  | 0.385453  | 0.304994  | 0.745649  | 0.450129  |
| 27.1259   | 27.4615   | 27.9485   | 24.8148   | 25.7001   | 23.3799   |
| 13.8967   | 14.8077   | 12.8498   | 14.525    | 12.9535   | 13.2051   |
| 3.11721   | 4.11729   | 4.00528   | 2.50884   | 3.73626   | 2.80692   |
| 0.574537  | 0.561973  | 0.746026  | 0.552432  | 0.576506  | 0.584378  |
| 0.474107  | 0.6645    | 0.597692  | 0.375423  | 1.1668    | 0.59555   |
| 94.8916   | 70.2002   | 95.1422   | 67.9975   | 159.443   | 132.366   |
| 1.60249   | 1.83185   | 1.97338   | 1.21671   | 3.14066   | 2.2963    |
| 0         | 0         | 0         | 0         | 0         | 0         |
| 0.424391  | 0.555384  | 0.47374   | 0.348121  | 0.392273  | 0.281005  |
| 0.283671  | 0.334021  | 0.302778  | 0.128825  | 0.24622   | 0.225337  |
| 0         | 0         | 0         | 0         | 0         | 0         |
| 0.171863  | 0.0560455 | 0.0570919 | 0.0952114 | 0.0504675 | 0.0732739 |
| 70.2677   | 61.4932   | 79.0801   | 56.5964   | 65.1739   | 50.8899   |
| 1.43418   | 1.58724   | 1.70545   | 1.76514   | 2.32281   | 1.78582   |
| 1.77664   | 2.00767   | 1.74912   | 1.5163    | 1.73109   | 1.25139   |
| 2.43158   | 1.58611   | 2.6866    | 2.17392   | 7.31389   | 4.43853   |
| 51.6444   | 49.3566   | 44.3707   | 49.126    | 37.5814   | 46.2679   |

|           |           |           |           |           |           |
|-----------|-----------|-----------|-----------|-----------|-----------|
| 48.402    | 50.0705   | 49.2781   | 55.292    | 39.8875   | 48.3807   |
| 39.4464   | 45.1358   | 46.2505   | 43.2396   | 37.927    | 41.7879   |
| 0.0401255 | 0         | 0.0168508 | 0.0152381 | 0.0579509 | 0.0562234 |
| 8.26566   | 7.52218   | 11.7837   | 9.0452    | 10.6025   | 8.09197   |
| 21.9682   | 22.7203   | 34.0516   | 32.9864   | 30.2418   | 33.7456   |
| 0.0257148 | 0.0640914 | 0.0323969 | 0         | 0.0278537 | 0.0648562 |
| 7.59565   | 8.81616   | 11.1429   | 8.55019   | 9.33382   | 6.72209   |
| 0.0498613 | 0         | 0         | 0         | 0         | 0.372967  |
| 19.2541   | 18.6905   | 20.3635   | 18.1155   | 17.2365   | 17.0094   |
| 0.711308  | 0.612248  | 0.567101  | 0.331686  | 0.385237  | 0.601565  |
| 3.26692   | 3.26771   | 3.61761   | 3.03633   | 4.43262   | 3.35366   |
| 25.7757   | 27.4768   | 27.844    | 22.7271   | 30.1374   | 24.1415   |
| 6.92911   | 7.8716    | 7.16451   | 4.82518   | 5.6912    | 5.38123   |
| 3.09626   | 2.9325    | 3.7253    | 2.38107   | 3.0855    | 1.62691   |
| 7.459     | 7.30083   | 4.99665   | 4.91984   | 6.97819   | 6.02545   |
| 0         | 0         | 0.0445994 | 0.0201656 | 0         | 0         |
| 1.05669   | 0.929007  | 1.58617   | 0.772223  | 1.21743   | 0.71691   |
| 6.54532   | 7.9924    | 6.81294   | 11.007    | 4.33957   | 5.17007   |
| 23.9241   | 24.3327   | 23.7773   | 22.8746   | 25.6737   | 23.9687   |
| 3.17743   | 3.16538   | 3.34277   | 1.82305   | 2.40151   | 2.82586   |
| 27.6843   | 27.5937   | 25.4978   | 30.2463   | 24.3956   | 28.4109   |
| 43.4033   | 41.9967   | 46.1194   | 38.4712   | 41.9478   | 37.0455   |
| 0         | 0         | 0         | 0         | 0.168896  | 0.0436964 |
| 5.45909   | 5.99022   | 5.57151   | 3.49371   | 7.02037   | 3.21217   |
| 15.2507   | 12.8482   | 11.8862   | 9.52526   | 19.3434   | 15.1504   |
| 0         | 0         | 0         | 0         | 0         | 0         |
| 22.931    | 25.0041   | 31.4616   | 43.5691   | 37.6086   | 41.2633   |
| 6.42074   | 4.69474   | 5.95764   | 5.17255   | 9.72358   | 7.19392   |
| 16.4579   | 15.1131   | 28.2221   | 27.52     | 26.3762   | 24.4005   |
| 4.69938   | 5.62442   | 3.89817   | 3.57811   | 6.42583   | 4.57669   |
| 42.5013   | 43.8969   | 42.5291   | 41.9944   | 29.038    | 28.6012   |
| 18.947    | 18.0555   | 17.4744   | 17.7274   | 16.8396   | 17.8984   |
| 0.127941  | 0.298951  | 0.201485  | 0.163982  | 0.173229  | 0.0941167 |
| 0         | 0         | 0         | 0         | 0         | 0         |
| 10.0986   | 7.77653   | 12.5428   | 10.7454   | 10.5775   | 12.0543   |
| 10.9314   | 13.5069   | 12.3284   | 9.38453   | 10.566    | 10.3877   |
| 52.9437   | 50.2164   | 40.5172   | 45.3289   | 34.0092   | 46.3271   |
| 0.444087  | 0         | 0         | 0         | 0         | 0.186675  |
| 1.33111   | 1.72246   | 1.52977   | 1.75274   | 1.45052   | 2.30128   |
| 37.7648   | 35.6241   | 36.832    | 41.328    | 39.839    | 36.9303   |
| 0.102929  | 0.256542  | 0.162467  | 0.146919  | 0.0839381 | 0         |
| 0         | 0         | 0         | 0         | 0         | 0         |
| 0         | 0         | 0         | 0         | 0         | 0         |

|           |           |          |          |           |            |
|-----------|-----------|----------|----------|-----------|------------|
| 0.46288   | 0.43263   | 0.255133 | 0.494391 | 0.3447    | 0.243218   |
| 0.0159132 | 0         | 0        | 0        | 0.0172368 | 0.0133784  |
| 0         | 0         | 0        | 0        | 0         | 0          |
| 4.43585   | 6.31024   | 3.47965  | 5.4351   | 5.7114    | 5.69947    |
| 0         | 0         | 0        | 0        | 0         | 0          |
| 41.4398   | 40.9399   | 39.3735  | 37.1682  | 40.3514   | 40.2398    |
| 1.02964   | 0.348805  | 1.56164  | 0.660537 | 1.5592    | 0.983284   |
| 9.35256   | 8.29646   | 7.80456  | 6.62227  | 10.6752   | 8.16718    |
| 0.507377  | 0.4659    | 0.639221 | 0.425929 | 0.752057  | 0.628612   |
| 3.86749   | 3.59235   | 3.55926  | 3.69364  | 3.36381   | 3.92833    |
| 4.18442   | 4.37356   | 0        | 0        | 0         | 0          |
| 101.628   | 105.997   | 94.147   | 104.067  | 105.09    | 109.819    |
| 0         | 0         | 0        | 0        | 0         | 0          |
| 134.159   | 64.8282   | 224.525  | 161.447  | 125.367   | 181.425    |
| 4.95627   | 5.13335   | 5.82789  | 4.11574  | 5.41625   | 4.25939    |
| 325.646   | 301.182   | 381.517  | 332.477  | 386.842   | 315.252    |
| 0.0844574 | 0         | 0.141872 | 0        | 0         | 0          |
| 15.1524   | 17.2961   | 13.6356  | 13.201   | 13.9301   | 87.7799    |
| 0.0308509 | 0.0384464 | 0        | 0        | 0.0334171 | 0          |
| 0         | 0         | 0        | 0        | 0         | 0          |
| 50.8321   | 59.3278   | 44.0483  | 53.4603  | 56.7791   | 62.0441    |
| 9.74009   | 10.1075   | 9.04586  | 10.9775  | 11.591    | 11.9032    |
| 116.608   | 97.0694   | 103.504  | 87.0482  | 101.81    | 99.8367    |
| 1.94363   | 2.31035   | 2.5052   | 2.16324  | 1.61946   | 1.53348    |
| 1.61614   | 1.36238   | 1.59233  | 1.0833   | 1.81413   | 1.21313    |
| 0.550288  | 0.685768  | 1.13457  | 2.13774  | 0.59606   | 0.986667   |
| 0         | 0         | 0        | 0        | 0         | 0          |
| 0.182036  | 0.499076  | 0.229338 | 0.20739  | 0.236613  | 0.15304    |
| 0.0769748 | 0         | 0.303053 | 0.155904 | 0.0416887 | 0.0161784  |
| 0         | 0         | 0        | 0        | 0         | 0          |
| 28.0204   | 28.6381   | 31.4173  | 24.7449  | 31.2283   | 26.2562    |
| 1.1634    | 1.84524   | 2.46507  | 2.4099   | 2.3485    | 1.91171    |
| 1.67515   | 1.69789   | 1.85719  | 2.20537  | 1.62094   | 1.44593    |
| 242.804   | 275.814   | 200.547  | 237.86   | 172.636   | 248.878    |
| 5.34891   | 5.22192   | 8.7337   | 7.45274  | 11.3063   | 11.1709    |
| 0.606241  | 0.863424  | 0.763775 | 1.8747   | 1.68857   | 2.22072    |
| 1.12476   | 1.33698   | 2.24545  | 1.83342  | 1.63067   | 1.20746    |
| 0         | 0         | 0        | 0        | 0         | 0          |
| 32.2284   | 31.9345   | 33.869   | 28.1201  | 31.844    | 32.7782    |
| 7.76353   | 7.79438   | 8.0862   | 8.50873  | 9.90083   | 9.9893     |
| 4.89535   | 5.82116   | 5.60247  | 4.49155  | 5.72755   | 3.81712    |
| 2.14958   | 1.61928   | 2.1827   | 1.3707   | 2.6064    | 1.94204    |
| 0.0910021 | 0.050403  | 0        | 0        | 0         | 0.00566715 |

|           |            |            |            |            |           |
|-----------|------------|------------|------------|------------|-----------|
| 2.49644   | 1.7099     | 2.78502    | 1.21582    | 3.0034     | 2.02669   |
| 0.624369  | 0.864542   | 0.699212   | 0.395185   | 1.5029     | 1.34145   |
| 0         | 0          | 0          | 0          | 0          | 0         |
| 28.2476   | 30.1563    | 24.6655    | 29.0344    | 26.0051    | 34.0403   |
| 6.8933    | 5.96599    | 8.36062    | 5.03567    | 8.42157    | 4.95121   |
| 0.287085  | 0.939132   | 0.0904212  | 0.0817676  | 0.310964   | 0.331864  |
| 11.5751   | 9.78941    | 10.7795    | 9.62277    | 13.4406    | 11.1012   |
| 0.778906  | 0.788671   | 0.797313   | 0.221849   | 0.527309   | 0.0409272 |
| 13.5627   | 8.75668    | 15.1759    | 13.7617    | 25.2498    | 16.8315   |
| 26.3467   | 23.0746    | 27.8215    | 22.3779    | 21.1304    | 17.2256   |
| 11.9572   | 8.67576    | 12.2534    | 16.87      | 11.9527    | 13.6715   |
| 0.2204    | 0.250286   | 0.15619    | 0.318267   | 0.0214855  | 0.15247   |
| 3.39897   | 3.14336    | 3.88234    | 2.66101    | 4.28523    | 3.18124   |
| 1.31006   | 1.50781    | 0.672809   | 0.655952   | 1.26538    | 1.40304   |
| 0.0939233 | 0.117047   | 0.0537862  | 0.00972775 | 0.0739897  | 0.0861409 |
| 0.204486  | 0.127415   | 0          | 0.163077   | 0.0664484  | 0.103148  |
| 9.76104   | 10.1137    | 9.88308    | 10.2262    | 9.21023    | 11.0243   |
| 0.0800608 | 0.0748288  | 0.0504325  | 0.022803   | 0.0216801  | 0.0504811 |
| 8.05467   | 10.4467    | 10.5522    | 14.3053    | 15.1439    | 14.511    |
| 4.91703   | 4.15221    | 4.73334    | 3.21291    | 5.5561     | 4.12578   |
| 49.6046   | 50.4752    | 34.9353    | 34.078     | 38.8568    | 45.8646   |
| 8.08756   | 7.91521    | 10.1807    | 8.5778     | 9.93374    | 7.77221   |
| 0         | 0          | 0          | 0          | 0          | 0         |
| 15.9295   | 14.4546    | 11.5972    | 11.8757    | 18.6217    | 13.6482   |
| 0         | 0          | 0          | 0          | 0          | 0         |
| 0.0757601 | 0          | 0.190893   | 0          | 0          | 0.127385  |
| 0         | 0          | 0          | 0          | 0          | 0         |
| 2.43723   | 3.67298    | 2.5707     | 3.93903    | 1.35068    | 2.09666   |
| 20.6056   | 18.1817    | 17.6372    | 16.9101    | 17.7216    | 22.0973   |
| 0.0652298 | 0.162578   | 0.08218    | 0          | 0.0706555  | 0.0274197 |
| 1.79049   | 0          | 7.89516    | 3.05982    | 0.969713   | 2.25793   |
| 4.38828   | 4.4241     | 3.47867    | 3.81984    | 4.43285    | 5.4028    |
| 0.21889   | 0.113659   | 0.0919232  | 0.124689   | 0.237097   | 0.0306706 |
| 0         | 0          | 0          | 0          | 0          | 0         |
| 7.95533   | 8.68019    | 7.9735     | 8.3383     | 7.77449    | 6.77732   |
| 0         | 0          | 0          | 0          | 0          | 0         |
| 14.6406   | 13.9156    | 13.8678    | 14.4914    | 17.7083    | 14.4419   |
| 154.021   | 146.818    | 115.347    | 129.039    | 131.254    | 165.637   |
| 0         | 0          | 0          | 0          | 0          | 0         |
| 0.108373  | 0          | 0.20455    | 0          | 0.17772    | 0.0227777 |
| 9.01366   | 8.56698    | 10.4693    | 9.42415    | 9.7512     | 9.56793   |
| 0         | 0.00720101 | 0.00727991 | 0.0131664  | 0.00625902 | 0.0145739 |
| 30.9318   | 35.6126    | 28.1483    | 31.5289    | 28.0302    | 32.5059   |

|            |            |            |          |           |            |
|------------|------------|------------|----------|-----------|------------|
| 1.96E-06   | 1.08E-05   | 3.81E-06   | 1.17E-05 | 1.32E-05  | 8.67E-06   |
| 0.16592    | 0.20677    | 0.087098   | 0.094515 | 0.269582  | 0.156928   |
| 0          | 0          | 0          | 0        | 0.0307648 | 0          |
| 1.9113     | 1.07673    | 2.01213    | 1.70025  | 1.2762    | 1.98105    |
| 11.4756    | 10.8376    | 13.368     | 11.6902  | 11.4435   | 9.58592    |
| 0.99531    | 0.598882   | 0.216221   | 0.508378 | 1.48707   | 0.548232   |
| 7.81756    | 7.96221    | 4.16678    | 6.85092  | 4.72233   | 5.75064    |
| 2.50093    | 2.80499    | 1.81171    | 2.49311  | 1.21903   | 1.52436    |
| 5.23815    | 5.07979    | 6.29729    | 5.18177  | 7.03428   | 4.54621    |
| 0          | 0          | 0          | 0        | 0         | 0          |
| 7.19733    | 10.0111    | 8.15221    | 8.97961  | 6.25436   | 6.70563    |
| 2.0995     | 1.23326    | 2.50553    | 2.49672  | 2.03661   | 0.796278   |
| 0.165598   | 0.278599   | 0.357655   | 0.603734 | 0.842289  | 0.445514   |
| 6.07627    | 8.78644    | 5.41042    | 4.99717  | 5.42693   | 3.63413    |
| 16.9605    | 15.4671    | 15.7781    | 16.8594  | 14.843    | 17.4222    |
| 2.29725    | 2.56852    | 2.81306    | 2.39708  | 2.51159   | 2.23818    |
| 79.8185    | 109        | 34.4113    | 85.3078  | 67.6563   | 118.599    |
| 50.4755    | 49.8976    | 44.4666    | 51.4866  | 45.9243   | 55.8952    |
| 0.400747   | 0.599292   | 0.538541   | 0.517439 | 0.636651  | 0.651364   |
| 0.218443   | 0.136112   | 0.412809   | 0.539214 | 0.788709  | 0.244863   |
| 0.237523   | 0.0740001  | 0.149622   | 0.169128 | 0.25728   | 0.199688   |
| 1.05583    | 2.03347    | 0.906948   | 0.984181 | 1.24762   | 0.887648   |
| 1.45289    | 0.113162   | 0.915213   | 0        | 0.590152  | 0.61073    |
| 0.195466   | 0.292147   | 0.109257   | 0.204943 | 0.218859  | 0.144688   |
| 0          | 0          | 0          | 0        | 0         | 0          |
| 0.544692   | 0.38614    | 0.343709   | 0.550124 | 0.45608   | 0.509912   |
| 7.91094    | 8.49986    | 8.61324    | 7.29141  | 8.11943   | 8.37833    |
| 6.22999    | 7.48995    | 7.69874    | 7.69025  | 8.22398   | 9.16505    |
| 0          | 0          | 0          | 0        | 0         | 0          |
| 14.8582    | 118.367    | 11.3701    | 520.118  | 20.1474   | 70.7848    |
| 11.3198    | 11.6037    | 13.9239    | 9.83368  | 13.6783   | 9.79378    |
| 0.0961605  | 0.117389   | 0.267948   | 0.215595 | 0.104159  | 0.11879    |
| 4.64869    | 5.19093    | 2.29048    | 2.33346  | 1.32116   | 1.54781    |
| 0.756515   | 0.314256   | 0.3177     | 0.57459  | 0.273147  | 0.212004   |
| 0          | 0          | 0.0482778  | 0        | 0         | 0          |
| 1.30486    | 1.1707     | 1.67966    | 0.906638 | 1.42921   | 1.40606    |
| 0          | 0          | 0.0489071  | 0        | 0         | 0.0652571  |
| 0.962733   | 0.787611   | 0.682644   | 0.583077 | 0.651594  | 0.961069   |
| 0          | 0          | 0          | 0        | 0         | 0          |
| 17.9526    | 20.8927    | 27.1443    | 21.2554  | 31.1504   | 33.1831    |
| 2.47E-08   | 0.0500906  | 0.0817818  | 0.205559 | 0.142187  | 5.01E-06   |
| 6.78639    | 5.50109    | 6.66969    | 6.72937  | 10.2946   | 7.52796    |
| 0.00636048 | 0.00792642 | 0.00801327 | 0.028991 | 0         | 0.00534733 |



|           |           |          |           |          |           |
|-----------|-----------|----------|-----------|----------|-----------|
| 0.50445   | 0.449032  | 0.453953 | 0.738915  | 0.390293 | 0.181756  |
| 0.774468  | 0.896203  | 0.766635 | 1.00839   | 0.958729 | 1.30221   |
| 144.06    | 142.982   | 135.399  | 162.71    | 145.544  | 174.113   |
| 8.59548   | 8.01825   | 6.3165   | 6.53233   | 10.4303  | 9.07914   |
| 34.5262   | 33.3979   | 34.1037  | 32.5575   | 37.346   | 32.0661   |
| 0.210399  | 0.137367  | 0.370134 | 0.334711  | 0.348384 | 0.235296  |
| 2.32966   | 3.69152   | 3.73197  | 2.91312   | 2.44265  | 2.07943   |
| 0.0801889 | 0         | 0        | 0         | 0.260577 | 0         |
| 0         | 0         | 0        | 0         | 0        | 0         |
| 20.7875   | 23.312    | 20.2206  | 19.1682   | 22.4206  | 21.1242   |
| 0.174388  | 0.0362205 | 0.128161 | 0.0496695 | 0.204635 | 0.0733053 |
| 0         | 0.160453  | 0        | 0         | 0        | 0         |
| 1.26385   | 2.04259   | 1.29372  | 1.57487   | 1.13368  | 1.06253   |
| 109.626   | 117.83    | 103.059  | 114.688   | 95.3749  | 109.026   |
| 31.0377   | 29.6557   | 31.6702  | 27.0397   | 43.812   | 38.7605   |
| 0.254911  | 0.459969  | 0.319694 | 0.210253  | 0.276051 | 0.253552  |
| 0         | 0         | 0        | 0         | 0        | 0         |
| 6.1453    | 6.562     | 7.2039   | 5.27268   | 3.3215   | 4.14161   |
| 76.7955   | 71.5669   | 85.9947  | 73.2725   | 95.3153  | 69.1813   |
| 41.7359   | 45.0381   | 41.1347  | 43.8687   | 45.5824  | 53.1775   |
| 0         | 0         | 0        | 0         | 0        | 0         |
| 4.94944   | 6.82042   | 10.0602  | 11.3534   | 12.5335  | 17.2622   |
| 11.7688   | 11.1355   | 14.0033  | 9.96734   | 16.7609  | 19.5527   |
| 15.7315   | 15.6675   | 17.3013  | 13.1664   | 14.8926  | 14.7162   |
| 0         | 0         | 0        | 0         | 0        | 0         |
| 31.97     | 30.5963   | 30.1247  | 39.6639   | 33.797   | 40.2765   |
| 12.1293   | 10.5913   | 11.7913  | 10.0652   | 11.297   | 10.0567   |
| 29.7383   | 30.8212   | 27.9089  | 27.6206   | 35.007   | 39.8799   |
| 3.67455   | 4.0069    | 3.45323  | 3.52449   | 3.45659  | 4.26249   |
| 8.76493   | 8.44898   | 9.69996  | 10.7243   | 9.34809  | 8.84586   |
| 0.113528  | 0.227813  | 0.226494 | 0.0259176 | 0.22261  | 0.0944372 |
| 14.591    | 14.8513   | 14.989   | 15.4342   | 16.2138  | 15.5424   |
| 0.26042   | 0.0865428 | 0.240601 | 0.257134  | 0.263277 | 0.233535  |
| 0         | 0         | 0        | 0         | 0        | 0         |
| 0         | 0         | 0        | 0         | 0        | 0         |
| 1.45375   | 2.40009   | 2.03519  | 1.86829   | 1.60054  | 0.826593  |
| 5.58594   | 4.98036   | 5.95039  | 4.97994   | 5.38649  | 4.87275   |
| 0.323056  | 0.513052  | 0.358817 | 0.512736  | 0.731257 | 0.304054  |
| 11.7428   | 11.977    | 12.7478  | 10.2941   | 15.4688  | 10.4414   |
| 24.5208   | 22.2573   | 24.041   | 21.4279   | 21.5585  | 19.8755   |
| 1.85248   | 2.5149    | 2.44685  | 2.67694   | 1.61744  | 2.4401    |
| 0.975389  | 0.347294  | 2.1066   | 0.793745  | 2.71677  | 1.87433   |
| 9.298     | 9.08469   | 29.105   | 35.5263   | 19.9874  | 30.4759   |

|          |           |          |           |           |          |
|----------|-----------|----------|-----------|-----------|----------|
| 23.3678  | 24.7681   | 21.7637  | 26.9637   | 21.8726   | 24.1067  |
| 11.103   | 11.2288   | 13.2643  | 12.358    | 11.5475   | 14.8915  |
| 0.881112 | 1.16068   | 1.39327  | 1.2902    | 1.25228   | 1.03529  |
| 34.0554  | 35.4561   | 31.5653  | 35.5025   | 34.8747   | 37.686   |
| 3.47476  | 3.60855   | 3.75289  | 2.69618   | 5.10791   | 4.11816  |
| 4.52456  | 4.83841   | 2.86713  | 3.89333   | 4.00727   | 3.97837  |
| 10.2291  | 11.2393   | 10.4912  | 9.71696   | 11.1111   | 9.71401  |
| 0.314907 | 0.28766   | 0.31531  | 0.201268  | 0.499942  | 0.325891 |
| 0        | 0.234274  | 0.236841 | 0         | 0.203628  | 0        |
| 40.9242  | 40.6421   | 39.4941  | 37.3097   | 39.5334   | 42.4183  |
| 43.043   | 41.6192   | 37.4722  | 37.214    | 37.7626   | 40.3089  |
| 0.169903 | 0.0423467 | 0.256864 | 0.0774272 | 0.0828161 | 0.116652 |
| 0.658516 | 0.273547  | 0        | 0.500158  | 0.237764  | 0.553623 |
| 32.3787  | 28.0964   | 33.3677  | 22.7621   | 47.4369   | 27.5171  |
| 12.9844  | 15.7826   | 13.2157  | 12.9347   | 12.9559   | 14.8685  |
| 5.35354  | 6.59278   | 4.24862  | 5.47487   | 4.703     | 6.06012  |
| 85.5613  | 86.3063   | 93.0069  | 92.0009   | 77.3533   | 94.0599  |
| 165.828  | 174.239   | 172.669  | 161.844   | 166.274   | 179.969  |
| 0        | 0.0643653 | 0        | 0.235373  | 0.0559455 | 0.130267 |
| 4.55899  | 4.07765   | 4.66492  | 3.90632   | 4.95333   | 4.58709  |
| 0        | 0.272509  | 0        | 0         | 0         | 0.18384  |
| 21.6047  | 22.9225   | 19.7764  | 20.2066   | 17.8886   | 17.5615  |
| 0        | 0         | 0        | 0         | 0         | 0        |
| 0.871811 | 0.652277  | 0        | 0         | 0         | 0        |
| 24.3391  | 21.9625   | 19.332   | 21.428    | 16.436    | 20.7875  |
| 0        | 0         | 0        | 0         | 0         | 0        |
| 39.0691  | 36.7177   | 26.6956  | 25.9442   | 22.1726   | 26.7364  |
| 0.637303 | 1.15864   | 1.29798  | 0.68978   | 1.7871    | 0.921162 |
| 0        | 0         | 0        | 0         | 0         | 0        |
| 0        | 0         | 0        | 0         | 0         | 0        |
| 130.575  | 129.221   | 129.134  | 125.502   | 104.377   | 101.296  |
| 21.1369  | 18.2406   | 22.0453  | 21.2922   | 21.856    | 22.1082  |
| 0        | 0         | 0        | 0         | 0         | 0        |
| 25.8665  | 23.8053   | 15.5877  | 14.9943   | 17.4398   | 16.4823  |
| 0        | 0         | 0        | 0         | 0         | 0        |
| 24.3996  | 26.4986   | 25.2954  | 29.7151   | 24.9378   | 28.1974  |
| 9.74386  | 6.31425   | 8.66323  | 6.56545   | 12.032    | 10.2514  |
| 0.13013  | 60.8131   | 0.658709 | 521.97    | 1.41047   | 26.6486  |
| 20.071   | 18.9308   | 22.5499  | 16.6302   | 24.1247   | 14.4147  |
| 0        | 0         | 0        | 0         | 0         | 0        |
| 30.6057  | 26.4809   | 27.8189  | 26.0567   | 27.6563   | 25.7656  |
| 1.72568  | 2.0961    | 2.47691  | 1.59274   | 3.35987   | 2.57104  |
| 12.5672  | 9.2921    | 8.98955  | 10.1826   | 10.6974   | 8.38587  |

|           |           |           |           |           |           |
|-----------|-----------|-----------|-----------|-----------|-----------|
| 0.0532556 | 0.176979  | 0.0670943 | 0.222468  | 0.0769139 | 0         |
| 4.58794   | 2.38752   | 3.52525   | 2.29757   | 6.03447   | 5.57377   |
| 5.64576   | 6.47036   | 5.62494   | 5.90704   | 6.71598   | 5.6788    |
| 11.4084   | 12.9381   | 11.6376   | 11.1085   | 10.9891   | 10.3213   |
| 0.36673   | 0.55499   | 0.450104  | 0.991972  | 0.249302  | 0.559449  |
| 5.93692   | 7.39858   | 2.49322   | 4.52472   | 8.57433   | 1.66908   |
| 0.205987  | 0.160438  | 0.365481  | 0.187742  | 0.133872  | 0.202279  |
| 0.131269  | 0.163587  | 0.396912  | 0.179463  | 0.312813  | 0.154503  |
| 10.7532   | 10.0353   | 11.498    | 9.56356   | 14.8724   | 8.57537   |
| 0.0284828 | 0.0354952 | 0         | 0         | 0.030852  | 0.0119729 |
| 12.423    | 12.9358   | 11.9404   | 13.4497   | 16.1322   | 15.7162   |
| 0         | 0         | 0         | 0         | 0         | 0         |
| 9.2018    | 9.02935   | 10.8627   | 9.98817   | 9.57479   | 9.88836   |
| 0.991057  | 1.15366   | 0.922646  | 0.459742  | 1.06584   | 0.89573   |
| 0.946391  | 0.0893854 | 0.203321  | 0.0933905 | 0.291347  | 0.432404  |
| 0         | 0         | 0         | 0.324563  | 0.30858   | 0         |
| 0.138516  | 0.243236  | 0.111052  | 0.186502  | 0.347815  | 0.121746  |
| 0.811696  | 1.23728   | 0.908278  | 0.821209  | 0.68361   | 0.757989  |
| 0         | 0         | 0         | 0         | 0         | 0.0676984 |
| 157.664   | 165.371   | 163.2     | 194.031   | 173.803   | 209.647   |
| 2.15885   | 1.20105   | 2.52556   | 1.66898   | 2.50545   | 1.45846   |
| 0         | 0         | 0         | 0         | 0         | 0         |
| 0         | 0         | 0         | 0         | 0         | 0         |
| 2.91544   | 2.81829   | 3.05514   | 2.48337   | 2.80378   | 2.51977   |
| 28.3204   | 27.654    | 25.8019   | 27.2844   | 25.1173   | 25.0876   |
| 6.873     | 6.80995   | 8.33233   | 6.10408   | 8.81977   | 5.61978   |
| 1.87544   | 0.751232  | 1.6877    | 0.661345  | 1.7896    | 1.29515   |
| 0         | 0         | 0         | 0         | 0         | 0         |
| 39.922    | 35.3852   | 38.5454   | 36.1357   | 29.4499   | 26.7139   |
| 9.87393   | 9.68963   | 10.8677   | 9.85106   | 9.90388   | 9.06102   |
| 9.93374   | 9.42414   | 10.5687   | 9.42525   | 11.6051   | 11.1439   |
| 0.17033   | 0.106132  | 0.14306   | 0.452792  | 0.399745  | 0.357996  |
| 0.473655  | 0.583446  | 0.44188   | 0.16487   | 0.235127  | 0.323163  |
| 11.1826   | 9.8536    | 10.9478   | 9.6226    | 13.05     | 10.3734   |
| 37.8631   | 38.4337   | 41.1073   | 42.571    | 36.9565   | 43.89     |
| 4.97315   | 3.34897   | 3.45618   | 3.70093   | 6.6239    | 3.70044   |
| 4.02654   | 3.66168   | 3.88192   | 3.47968   | 5.18896   | 4.10398   |
| 10.0641   | 11.5028   | 12.3041   | 11.805    | 8.32099   | 10.9141   |
| 0         | 0         | 0         | 0         | 0.0229308 | 0         |
| 28.4066   | 26.1906   | 34.3393   | 31.8714   | 31.4436   | 31.2429   |
| 3.62476   | 6.24468   | 2.01252   | 2.61359   | 3.83453   | 3.24119   |
| 0         | 0         | 0         | 0         | 0         | 0         |
| 7.11863   | 6.33592   | 6.76276   | 6.98202   | 7.70811   | 5.68939   |

|           |           |           |           |           |           |
|-----------|-----------|-----------|-----------|-----------|-----------|
| 110.727   | 93.2789   | 71.7591   | 67.6593   | 52.319    | 74.2928   |
| 1.07119   | 0.687535  | 1.66354   | 0.659774  | 1.01891   | 0.33399   |
| 0.791587  | 1.24664   | 1.11157   | 0.767054  | 1.1346    | 1.0363    |
| 8.78153   | 6.89333   | 8.32341   | 7.10063   | 12.3261   | 10.0393   |
| 0.529674  | 1.51227   | 1.21105   | 0.134099  | 0.678948  | 0.379416  |
| 7.42129   | 8.17403   | 11.5538   | 8.58705   | 10.3595   | 10.8465   |
| 0.271706  | 0.0615635 | 0.124476  | 0.112563  | 0.133775  | 0.166128  |
| 0.353101  | 0.195571  | 0.247142  | 0.312886  | 0.127491  | 0.197904  |
| 10.9931   | 10.9673   | 10.2978   | 9.16941   | 12.3028   | 11.1719   |
| 0.147332  | 0.183605  | 0.168743  | 0.0610374 | 0.130571  | 0.0900828 |
| 4.21086   | 3.4319    | 4.40957   | 3.3376    | 5.04611   | 4.17784   |
| 1.13005   | 1.1357    | 1.88296   | 0.166122  | 1.18456   | 0.153233  |
| 28.5945   | 26.7529   | 29.7055   | 28.6441   | 26.833    | 30.4138   |
| 0         | 0         | 0         | 0.149097  | 0.141755  | 0.165035  |
| 7.64796   | 6.9787    | 11.0567   | 9.41504   | 11.5039   | 6.55177   |
| 5.5901    | 4.80189   | 7.34923   | 6.06166   | 6.63847   | 6.28495   |
| 1.35661   | 1.4704    | 1.09873   | 1.34425   | 0.833515  | 0.982382  |
| 4.71981   | 4.45629   | 5.49819   | 4.34776   | 5.97662   | 5.30145   |
| 1.03722   | 1.41376   | 1.59259   | 1.14476   | 1.33415   | 0.436001  |
| 19.1785   | 19.0007   | 18.3028   | 18.5313   | 18.268    | 16.7686   |
| 0.338059  | 0.568739  | 0.212952  | 0.231087  | 0.109854  | 0.298421  |
| 8.45392   | 9.06672   | 8.32692   | 7.58838   | 9.04612   | 7.71036   |
| 15.0017   | 14.3058   | 15.5185   | 16.3335   | 14.3976   | 13.3271   |
| 0.0180184 | 0.0673634 | 0.0681015 | 0.020528  | 0.0390342 | 0.0151483 |
| 3.01116   | 3.83909   | 3.99787   | 4.53878   | 3.1362    | 2.47311   |
| 0         | 0         | 0         | 0.126656  | 0.0602096 | 0         |
| 0.0401634 | 0.0500516 | 0.0506    | 0.0457575 | 0.261025  | 0.168829  |
| 1.27153   | 2.01285   | 1.68854   | 1.91846   | 1.89844   | 1.90685   |
| 0         | 0         | 0         | 0         | 0         | 0         |
| 8.63574   | 8.3949    | 10.4387   | 8.27449   | 12.7165   | 8.89856   |
| 0         | 0         | 0         | 0         | 0         | 0         |
| 18.0665   | 16.7717   | 17.1819   | 15.7584   | 13.792    | 13.4255   |
| 3.69853   | 3.39098   | 3.42814   | 5.1467    | 5.08402   | 4.95283   |
| 10.2397   | 10.4297   | 5.59882   | 7.6459    | 5.44481   | 4.56825   |
| 0         | 0         | 0.0656592 | 0         | 0         | 0         |
| 13.1556   | 14.1078   | 12.4992   | 12.7557   | 10.5106   | 13.7793   |
| 7.63871   | 7.02247   | 7.57271   | 7.29976   | 7.48285   | 8.47487   |
| 65.664    | 69.6088   | 60.8895   | 65.3731   | 60.7052   | 72.4091   |
| 0         | 0         | 0         | 0         | 0         | 0.0791783 |
| 0.15442   | 0.0769752 | 0.0778187 | 0.140742  | 0.200718  | 0.181752  |
| 0.520635  | 0.146431  | 0.49254   | 0.369496  | 0.0656774 | 0.0205422 |
| 0         | 0         | 0         | 0         | 0         | 0         |
| 0.1381    | 0.129075  | 0.0652448 | 0.118001  | 0.205683  | 0.0290256 |

|            |           |           |           |           |            |
|------------|-----------|-----------|-----------|-----------|------------|
| 34.9652    | 39.9655   | 35.4653   | 82.5629   | 27.5488   | 36.548     |
| 39.4322    | 36.9585   | 47.6959   | 58.0432   | 43.6992   | 41.0907    |
| 88.6692    | 82.0174   | 105.023   | 85.5407   | 82.1048   | 61.9609    |
| 30.434     | 24.698    | 25.8516   | 30.7072   | 22.4638   | 30.7131    |
| 0.00201813 | 7.26E-07  | 8.33E-07  | 9.48E-07  | 1.00E-06  | 0.329157   |
| 5.36077    | 7.31431   | 6.00761   | 6.89942   | 4.20966   | 4.18932    |
| 203.143    | 235.946   | 182.293   | 199.755   | 123.304   | 163.057    |
| 17.0622    | 16.773    | 18.7715   | 16.0807   | 18.2995   | 17.3316    |
| 0          | 0.0618161 | 0.0624935 | 0         | 0         | 0.0417024  |
| 10.435     | 10.8613   | 11.7329   | 8.65018   | 12.2755   | 10.2823    |
| 153.814    | 156.398   | 131.522   | 154.704   | 123.079   | 152.198    |
| 2.14126    | 1.48246   | 0.499569  | 1.17457   | 1.54624   | 1.93353    |
| 0.153036   | 0.190713  | 0.385606  | 0         | 0.663062  | 0.257318   |
| 1.47103    | 1.39672   | 1.41203   | 1.75573   | 1.44164   | 3.00345    |
| 4.44092    | 4.6497    | 5.9618    | 5.99257   | 9.64035   | 7.6813     |
| 0          | 0         | 0         | 0.0330753 | 0         | 0.00813577 |
| 11.2077    | 11.7555   | 12.6657   | 10.8443   | 10.895    | 9.53129    |
| 0          | 0         | 0.0808766 | 0         | 0.0695349 | 0.0539697  |
| 19.1365    | 16.9315   | 23.1197   | 16.9798   | 28.1922   | 25.1084    |
| 33.5615    | 33.0272   | 33.3774   | 30.9298   | 37.2545   | 33.1533    |
| 3.15439    | 2.96222   | 3.17275   | 4.00459   | 3.06902   | 3.15356    |
| 32.3806    | 39.3202   | 35.6628   | 37.9919   | 32.6809   | 39.8183    |
| 3.98224    | 4.60933   | 3.88049   | 4.30197   | 5.97465   | 5.57986    |
| 0          | 0         | 0         | 0         | 0         | 0          |
| 10.1875    | 11.7258   | 13.7609   | 11.9244   | 12.981    | 12.5827    |
| 3.23217    | 3.93087   | 4.61173   | 3.32743   | 4.26028   | 3.66675    |
| 0.456682   | 0.379411  | 0.575352  | 2.42802   | 0.494668  | 0.255959   |
| 0          | 0         | 0         | 0         | 0         | 0.0107768  |
| 0          | 0         | 0         | 0         | 0         | 0          |
| 0.0913815  | 0         | 0         | 0.104109  | 0.0989826 | 0.153651   |
| 3.8193     | 2.85233   | 4.58594   | 4.09993   | 4.67465   | 3.17616    |
| 32.1159    | 37.8477   | 30.3236   | 35.9701   | 32.0293   | 37.5097    |
| 11.0257    | 14.1712   | 16.3965   | 21.1326   | 5.62013   | 9.92372    |
| 0          | 0         | 0         | 0         | 0         | 0          |
| 1.09582    | 1.31375   | 1.08348   | 1.13782   | 1.72786   | 1.14284    |
| 42.3765    | 40.2842   | 30.6116   | 38.6816   | 27.4898   | 34.0697    |
| 12.5916    | 9.73576   | 12.0189   | 11.153    | 18.3725   | 13.7653    |
| 19.678     | 20.0333   | 20.0239   | 22.0526   | 22.7774   | 21.3665    |
| 58.4388    | 61.5481   | 229.014   | 241.502   | 37.9135   | 48.7711    |
| 8.3746     | 6.33915   | 7.42462   | 5.30057   | 8.43285   | 7.69253    |
| 6.89838    | 6.55178   | 6.24114   | 8.34156   | 8.60776   | 7.87633    |
| 13.8616    | 13.1252   | 16.2592   | 14.5905   | 16.9249   | 15.4365    |
| 30.709     | 32.2275   | 32.5288   | 31.3432   | 26.9767   | 24.1511    |

|           |           |          |           |          |           |
|-----------|-----------|----------|-----------|----------|-----------|
| 0.0611447 | 0.218192  | 0.163067 | 0.220366  | 0.380537 | 0.0576933 |
| 7.31794   | 6.74795   | 8.45475  | 6.19958   | 9.23814  | 10.3441   |
| 15.9303   | 15.4112   | 15.1579  | 14.9912   | 17.4533  | 15.7999   |
| 7.97168   | 6.99555   | 8.67195  | 6.32835   | 10.4509  | 6.8173    |
| 0         | 0         | 0        | 0         | 0        | 0         |
| 48.2003   | 46.6553   | 59.5855  | 51.0742   | 45.4385  | 49.5821   |
| 0         | 0         | 0        | 0         | 0        | 0         |
| 4.99968   | 5.29867   | 5.03371  | 4.30855   | 4.62868  | 4.43681   |
| 0         | 0         | 0        | 0.0293619 | 0        | 0         |
| 0         | 0         | 0        | 0.0336437 | 0.170696 | 0.169454  |
| 11.5156   | 8.43497   | 13.5844  | 5.93547   | 13.8695  | 11.0796   |
| 0         | 0         | 0        | 0         | 0        | 0         |
| 11.3398   | 10.7891   | 12.615   | 11.2998   | 12.486   | 10.7789   |
| 0         | 0         | 0        | 0         | 0        | 2.40623   |
| 0         | 0         | 0        | 0         | 0        | 0         |
| 5.14572   | 4.87089   | 4.36141  | 6.28616   | 7.0594   | 5.68016   |
| 26.2657   | 28.3702   | 18.6425  | 18.6814   | 41.2067  | 41.0632   |
| 164.309   | 160.099   | 62.7484  | 63.7278   | 75.5331  | 87.2405   |
| 2.76458   | 2.71219   | 2.5937   | 2.27846   | 3.88653  | 3.11544   |
| 5.46258   | 163.231   | 9.02647  | 653.896   | 42.9194  | 138.506   |
| 5.44011   | 4.91027   | 5.27258  | 4.65527   | 5.99882  | 4.49141   |
| 59.8497   | 59.428    | 52.1599  | 54.9584   | 49.5709  | 53.4452   |
| 0         | 0         | 0        | 0         | 0        | 0         |
| 0.372429  | 0.519834  | 0.104071 | 0.476692  | 0.358254 | 0.198697  |
| 0         | 23.2723   | 0.553583 | 245.922   | 0.475952 | 11.6366   |
| 11.659    | 11.1943   | 10.5765  | 8.9765    | 10.3503  | 8.19341   |
| 13.047    | 13.1123   | 16.1377  | 16.6363   | 11.8727  | 12.5841   |
| 0.24364   | 0         | 0        | 0         | 0.527813 | 0         |
| 2.34267   | 2.24246   | 3.15817  | 2.33373   | 4.49278  | 2.61174   |
| 13.5736   | 12.4715   | 12.8488  | 11.3477   | 10.9961  | 10.6376   |
| 80.3266   | 88.3993   | 65.8976  | 77.9289   | 53.8015  | 68.6072   |
| 0         | 0         | 0        | 0         | 0        | 0         |
| 0         | 0         | 0        | 0         | 0        | 0.0553892 |
| 0.0798554 | 0.0995157 | 0        | 0.272934  | 0.259493 | 0.201406  |
| 23.5472   | 23.7871   | 23.904   | 23.7096   | 21.2628  | 21.7166   |
| 0         | 0         | 0.947089 | 0         | 0        | 0         |
| 5.99154   | 5.51652   | 6.41443  | 6.87176   | 5.3021   | 5.48743   |
| 0         | 0         | 0        | 0         | 0        | 0         |
| 2.138     | 3.58313   | 2.87934  | 2.93975   | 1.51728  | 2.23131   |
| 9.66427   | 11.0988   | 8.45198  | 10.3719   | 12.0431  | 16.7512   |
| 10.9972   | 11.1653   | 9.60362  | 12.0436   | 13.8543  | 11.9317   |
| 57.4332   | 61.3404   | 51.7338  | 51.4502   | 38.666   | 24.1437   |
| 39.6474   | 44.22     | 47.7755  | 50.9064   | 54.6046  | 50.4435   |

|           |           |           |           |           |           |
|-----------|-----------|-----------|-----------|-----------|-----------|
| 0         | 0         | 0         | 0         | 0.0507168 | 0         |
| 10.6809   | 7.26734   | 11.2633   | 5.99221   | 9.14504   | 4.89225   |
| 42.9252   | 39.233    | 44.4027   | 46.3332   | 49.9123   | 49.4168   |
| 35.8565   | 41.9506   | 33.5801   | 38.4007   | 36.8781   | 41.172    |
| 0.797821  | 0.597279  | 0.724951  | 0.616794  | 1.00199   | 0.750952  |
| 20.815    | 18.743    | 17.5219   | 15.4914   | 12.0953   | 13.4881   |
| 11.9341   | 12.531    | 14.4884   | 14.616    | 16.2556   | 18.1791   |
| 0         | 0         | 0         | 0         | 0         | 0         |
| 2.59779   | 1.8616    | 3.28007   | 0.848977  | 3.21108   | 2.07435   |
| 0.14807   | 0.29524   | 0.149237  | 1.11338   | 0.0320773 | 0.149381  |
| 8.53253   | 9.78236   | 7.33999   | 5.7064    | 5.10168   | 4.9496    |
| 0         | 0         | 0         | 0         | 0         | 0         |
| 4.214     | 3.20637   | 5.22468   | 3.65175   | 6.16159   | 3.84098   |
| 0         | 0         | 0         | 0         | 0         | 0         |
| 1.08957   | 1.35782   | 5.49079   | 0         | 0         | 0         |
| 11.9722   | 12.2071   | 13.4021   | 12.9389   | 12.7836   | 10.5665   |
| 1.94817   | 1.25887   | 1.90899   | 1.31527   | 2.26654   | 2.48711   |
| 10.7257   | 10.5011   | 10.961    | 9.34128   | 11.1854   | 10.315    |
| 19.7892   | 20.9852   | 18.9327   | 19.4494   | 22.668    | 21.0306   |
| 19.2264   | 19.6214   | 19.8111   | 16.6481   | 27.8482   | 23.9598   |
| 0         | 0         | 0         | 0         | 0         | 0         |
| 0         | 0.0817867 | 0.0485036 | 0         | 0.0831468 | 0.0122608 |
| 0.0355096 | 0.044252  | 0.13721   | 0         | 0.0384632 | 0.128095  |
| 3.12906   | 2.15793   | 2.8705    | 2.11124   | 3.85001   | 2.93712   |
| 31.8655   | 27.4038   | 35.9332   | 25.2844   | 34.7825   | 21.6597   |
| 1.21468   | 1.07056   | 0.620964  | 0.513578  | 1.25923   | 0.859524  |
| 0.882492  | 0.754882  | 1.07538   | 0.988941  | 1.19084   | 0.899955  |
| 12.4258   | 11.8609   | 12.3025   | 10.3186   | 12.5356   | 11.3786   |
| 64.7982   | 74.1397   | 53.8753   | 62.392    | 75.7378   | 90.6103   |
| 0.129288  | 0.251748  | 0.293192  | 0.0368238 | 0.218816  | 0.463762  |
| 10.6919   | 8.90785   | 7.10327   | 7.3074    | 6.74822   | 6.65178   |
| 3.8868    | 2.95349   | 5.9717    | 5.4542    | 4.77487   | 3.86542   |
| 0.871811  | 0.652277  | 0         | 0         | 0         | 0         |
| 18.9106   | 17.7108   | 19.9743   | 21.2525   | 20.8236   | 20.9176   |
| 1.34493   | 1.50192   | 2.28856   | 2.02974   | 3.74606   | 4.72838   |
| 0         | 0         | 0         | 0         | 0.0374477 | 0.0290651 |
| 14.9551   | 15.4051   | 11.871    | 14.4774   | 14.3263   | 18.9684   |
| 0.20744   | 0         | 0         | 0.118166  | 0.112347  | 0         |
| 0.1958    | 0.0406676 | 0.12334   | 0.148714  | 0.353478  | 0.109741  |
| 0         | 0         | 0         | 0         | 0         | 0         |
| 0         | 0.366138  | 0.370151  | 0         | 0         | 0.049401  |
| 4.52043   | 3.06376   | 4.89577   | 3.61407   | 6.35678   | 3.0003    |
| 0         | 0         | 0         | 0         | 0         | 0         |

|           |           |           |           |           |           |
|-----------|-----------|-----------|-----------|-----------|-----------|
| 0.468984  | 0.116889  | 0.354511  | 0         | 0.457194  | 0.078856  |
| 0         | 0         | 0         | 0         | 0         | 0         |
| 10.3339   | 9.09646   | 15.1891   | 10.2783   | 14.0363   | 8.41206   |
| 3.31E-09  | 3.84E-08  | 7.85E-11  | 0.224179  | 2.51E-08  | 1.67E-07  |
| 0.177436  | 0.221121  | 0.253349  | 0.350393  | 0.461268  | 0.358014  |
| 0.763196  | 0.317031  | 0         | 0         | 0         | 0.213876  |
| 0.13363   | 39.4053   | 0.515586  | 617.81    | 0.407097  | 12.4071   |
| 175.218   | 272.945   | 303.53    | 349.34    | 403.309   | 368.269   |
| 2.63695   | 1.94988   | 2.57778   | 1.86985   | 3.04592   | 1.61899   |
| 0.0448699 | 0.0393399 | 0.108429  | 0.0548776 | 0.122058  | 0.0621792 |
| 0.85936   | 0.458971  | 1.1136    | 1.06297   | 1.54254   | 0.825685  |
| 3.05958   | 2.30537   | 6.36448   | 4.1341    | 5.20216   | 3.23013   |
| 0.353647  | 0.130582  | 0.20627   | 0         | 0.227001  | 0.0495526 |
| 2.65153   | 1.27089   | 1.54179   | 2.32372   | 1.10465   | 2.91507   |
| 6.91204   | 6.52869   | 5.94366   | 5.34359   | 7.87321   | 7.40215   |
| 26.4128   | 28.2281   | 28.0497   | 29.6978   | 30.939    | 36.023    |
| 1.3356    | 3.94629   | 1.05845   | 4.73667   | 0.980018  | 2.49925   |
| 0.0385828 | 0.0721227 | 0         | 0.0439567 | 0.0626881 | 0.0810925 |
| 24.9244   | 26.2798   | 31.3262   | 24.5006   | 23.6409   | 22.5913   |
| 29.3348   | 29.5131   | 27.8985   | 29.3042   | 26.7374   | 30.7374   |
| 21.9048   | 14.9627   | 17.5469   | 15.8542   | 23.27     | 15.5696   |
| 0         | 0         | 0         | 0         | 0         | 0         |
| 6.83287   | 6.01693   | 7.51698   | 7.36848   | 6.68551   | 7.35192   |
| 0         | 0         | 0         | 0         | 0         | 0         |
| 8.60113   | 7.38215   | 8.51715   | 6.67255   | 5.61894   | 6.13375   |
| 0.428855  | 0.167012  | 0.472758  | 0.0610734 | 0.145165  | 0.022534  |
| 0         | 0         | 0         | 0         | 0         | 0         |
| 0         | 0         | 0         | 0         | 0         | 0         |
| 0.265497  | 0.291117  | 0.683862  | 0.993307  | 0.419709  | 0.869045  |
| 0.0515907 | 0.0642923 | 0.0974952 | 0.0587764 | 0.139705  | 0.0867459 |
| 0         | 0         | 0.0506707 | 0         | 0.0435649 | 0         |
| 0         | 0         | 0         | 0         | 0         | 0         |
| 0.0348649 | 0         | 0.0439247 | 0         | 0         | 0.0293113 |
| 0         | 0         | 0         | 0         | 26.4278   | 0         |
| 0         | 0.0224826 | 0.0227289 | 0         | 0.0195416 | 0.0758361 |
| 22.1027   | 24.4077   | 32.0081   | 34.1452   | 18.4189   | 22.615    |
| 1.73107   | 1.593     | 1.87884   | 1.35521   | 2.49978   | 1.13439   |
| 6.50207   | 6.55261   | 6.62646   | 7.44043   | 7.83835   | 8.4862    |
| 0         | 0         | 0         | 0         | 0         | 0         |
| 0         | 0         | 0         | 0         | 0         | 0         |
| 15.3425   | 15.5829   | 13.5674   | 14.4783   | 12.567    | 15.1914   |
| 0         | 0         | 0         | 0.0819991 | 0         | 0.0605097 |
| 0         | 0         | 0         | 0         | 0         | 0         |



|          |            |           |           |           |           |
|----------|------------|-----------|-----------|-----------|-----------|
| 9.77041  | 9.30514    | 10.3278   | 10.2806   | 8.20836   | 9.42952   |
| 0.129506 | 0.161391   | 0.0815796 | 0.221317  | 0.210418  | 0.217755  |
| 0.162135 | 0          | 0.723532  | 3.66E-18  | 0.537926  | 0         |
| 2.3397   | 2.91574    | 2.45641   | 3.33198   | 2.74551   | 3.05981   |
| 0.437928 | 0.272873   | 0.413794  | 0.124731  | 0.474355  | 0.0920428 |
| 0.716558 | 0.515177   | 0.624987  | 0.408181  | 0.89557   | 0.602419  |
| 13.9312  | 13.2748    | 10.4525   | 10.8013   | 13.1083   | 13.419    |
| 13.4612  | 13.5911    | 15.5459   | 11.8571   | 18.2936   | 17.971    |
| 14.7475  | 13.2395    | 17.7357   | 14.1519   | 13.6594   | 14.3454   |
| 0        | 0          | 0         | 0         | 0         | 0         |
| 0        | 0.221277   | 0         | 1.01147   | 0         | 0.149278  |
| 0.612736 | 0.806013   | 2.05878   | 0.620515  | 0.811193  | 0.658553  |
| 24.7175  | 22.9414    | 28.2155   | 24.1125   | 27.9673   | 24.4178   |
| 1.50032  | 1.32734    | 1.32746   | 1.89196   | 2.20818   | 1.60797   |
| 0        | 0          | 0         | 0         | 0         | 0         |
| 2.83168  | 4.41025    | 4.54639   | 3.63482   | 6.13405   | 5.9844    |
| 12.4321  | 11.8312    | 13.9913   | 10.6194   | 14.517    | 11.8099   |
| 11.2485  | 12.8498    | 15.409    | 15.5614   | 12.2328   | 15.1985   |
| 2.44542  | 1.38522    | 2.70743   | 1.51965   | 0.963209  | 1.30829   |
| 14.0319  | 14.4978    | 17.0267   | 15.9136   | 18.2623   | 15.8162   |
| 1.95652  | 2.65023    | 2.65546   | 1.73369   | 2.76426   | 1.74023   |
| 0        | 0          | 0         | 0         | 0         | 0         |
| 0.584236 | 0.663538   | 0.383237  | 0.291085  | 0.724687  | 0.679265  |
| 0.020093 | 0          | 0.0112508 | 0         | 0         | 0         |
| 0        | 0          | 0         | 0         | 0         | 0         |
| 0        | 0.648376   | 0.655481  | 0.296375  | 0         | 0.656113  |
| 0.22872  | 0          | 0.288154  | 0.208462  | 0.247745  | 0.230745  |
| 0        | 0          | 0         | 0         | 0.0753262 | 0.0584646 |
| 5.05E-56 | 1.05527    | 1.46326   | 4.30496   | 0.581966  | 4.94394   |
| 1.1161   | 1.02221    | 1.6433    | 1.53199   | 1.10698   | 1.09659   |
| 78.4762  | 66.4016    | 71.6138   | 61.7005   | 86.203    | 58.7704   |
| 0        | 0          | 0         | 0.256163  | 0         | 0         |
| 0.925152 | 1.79344    | 0.518025  | 1.63957   | 0.334035  | 0.604945  |
| 50.7004  | 52.8664    | 50.4993   | 52.0622   | 50.7901   | 63.247    |
| 0.122493 | 0.114488   | 0.40751   | 0.259128  | 0.497414  | 0.29112   |
| 3.64111  | 2.46686    | 3.42857   | 2.6585    | 7.1972    | 3.77298   |
| 0        | 0          | 0         | 0         | 0         | 0         |
| 36.0514  | 33.3673    | 29.5597   | 27.9243   | 44.4536   | 30.7558   |
| 0        | 0.0376599  | 0         | 0.0344289 | 0.0327335 | 0         |
| 3.35695  | 4.42925    | 1.11885   | 1.71488   | 1.03345   | 1.15906   |
| 0        | 0          | 0         | 0         | 0         | 0         |
| 13.0526  | 15.4268    | 15.4343   | 15.5282   | 16.2573   | 17.0668   |
| 0        | 0.00651062 | 0.0105311 | 0         | 0         | 0         |

|           |           |           |           |           |           |
|-----------|-----------|-----------|-----------|-----------|-----------|
| 1.55178   | 1.8616    | 1.89058   | 1.95466   | 2.18429   | 1.75575   |
| 33.6612   | 31.9093   | 18.4493   | 24.9739   | 17.1656   | 21.478    |
| 21.1096   | 19.1074   | 22.1519   | 21.5877   | 21.8083   | 21.3562   |
| 0.0255872 | 0.127552  | 0.128621  | 0.0291511 | 0.273047  | 0.174398  |
| 14.6051   | 13.4114   | 13.7344   | 16.4801   | 18.9989   | 20.0921   |
| 0.270992  | 0.31011   | 0.425406  | 0.466184  | 0.534909  | 0.283877  |
| 0.0496993 | 0.0929028 | 0.0939208 | 0.0283108 | 0.0538333 | 0         |
| 0         | 0         | 0         | 0         | 0         | 0         |
| 0.0581089 | 0.217246  | 0.146418  | 0         | 0.0629424 | 0         |
| 99.592    | 109.887   | 93.1149   | 90.9658   | 69.8567   | 87.7107   |
| 0.116041  | 0.0482034 | 0.0487316 | 0.0881357 | 0.0418978 | 0.032519  |
| 0.0527196 | 0.0875987 | 0.177117  | 0.0800833 | 0.0951746 | 0.07387   |
| 3.87822   | 3.0981    | 2.97544   | 2.20929   | 6.30124   | 5.39231   |
| 3.01926   | 3.43002   | 3.96712   | 3.15312   | 3.65853   | 2.96138   |
| 0         | 0         | 0         | 0         | 0         | 0         |
| 2.53707   | 3.47644   | 3.47644   | 2.69972   | 2.83717   | 3.1187    |
| 99.2885   | 93.7413   | 111.214   | 95.4352   | 105.436   | 104.456   |
| 27.985    | 37.6281   | 29.8757   | 30.5404   | 19.8362   | 23.8575   |
| 20.4137   | 20.6506   | 19.7197   | 19.8186   | 19.2284   | 22.2838   |
| 0.243921  | 0.0921133 | 0.121059  | 0.252932  | 0.288229  | 0.22371   |
| 0.288508  | 0.293623  | 0.290782  | 0.525907  | 0.813817  | 0.438109  |
| 0         | 0         | 0         | 0         | 0         | 0         |
| 1.91677   | 1.44663   | 1.28461   | 1.88262   | 1.639     | 2.27633   |
| 2.3368    | 2.70637   | 2.49602   | 2.02564   | 2.68249   | 2.3276    |
| 49.1836   | 39.3751   | 48.8419   | 31.4062   | 62.2247   | 40.86     |
| 7.91971   | 9.17559   | 10.5753   | 8.74084   | 10.1869   | 9.79656   |
| 5.88025   | 7.36288   | 7.7339    | 7.51659   | 7.14744   | 8.21111   |
| 4.30336   | 3.9204    | 3.94424   | 3.40622   | 5.56024   | 4.04712   |
| 4.60499   | 4.68834   | 4.48071   | 5.34007   | 3.80783   | 4.66651   |
| 3.32163   | 2.83182   | 2.65921   | 2.27152   | 3.13779   | 2.67702   |
| 0         | 0         | 0         | 0.0400359 | 0.0380644 | 0.0886313 |
| 0         | 0         | 0         | 0         | 0         | 0         |
| 0.683076  | 0.327403  | 1.05917   | 0.598628  | 0.967553  | 0.265048  |
| 0.104853  | 0.261334  | 0.264198  | 0.119457  | 0.113574  | 0.0881508 |
| 0.898674  | 0.600755  | 1.01973   | 0.562775  | 0.709118  | 0.355247  |
| 0         | 0         | 0         | 0         | 0         | 0         |
| 0         | 0         | 0         | 0         | 0         | 0         |
| 2.40908   | 1.92801   | 3.80082   | 2.49282   | 4.32118   | 2.52703   |
| 1.79983   | 1.44545   | 2.11635   | 1.91381   | 6.93168   | 4.97653   |
| 7.69601   | 7.19309   | 7.49006   | 5.52384   | 17.4225   | 17.1134   |
| 1.01201   | 0.892844  | 0.926648  | 0.430441  | 1.28078   | 0.720563  |
| 0.475705  | 0.593797  | 0.77916   | 0.338476  | 0.321828  | 0.197239  |
| 0.235893  | 0.29397   | 0.445787  | 0.268749  | 0.127757  | 0.694114  |

|           |           |          |           |           |          |
|-----------|-----------|----------|-----------|-----------|----------|
| 9.97936   | 7.33421   | 8.05932  | 9.71736   | 10.717    | 11.2581  |
| 0.0236339 | 0.058905  | 0.208427 | 0.134628  | 0.230398  | 0.139085 |
| 10.0762   | 11.1545   | 6.28249  | 6.84614   | 12.4897   | 11.1487  |
| 30.6786   | 35.2234   | 35.0704  | 71.8992   | 30.0862   | 35.5281  |
| 1.73017   | 2.12531   | 2.27324  | 1.74621   | 2.06138   | 1.78231  |
| 3.27538   | 2.96712   | 3.414    | 2.89365   | 3.24114   | 3.24487  |
| 14.2245   | 15.8556   | 16.7654  | 14.3622   | 13.7183   | 12.6954  |
| 19.2142   | 27.7061   | 45.297   | 29.8981   | 14.3362   | 19.6354  |
| 0.249983  | 0         | 0.629885 | 0.284802  | 0.541554  | 0        |
| 3.5822    | 3.21739   | 3.84219  | 3.25388   | 4.21225   | 2.83524  |
| 4.17423   | 3.83559   | 4.01075  | 3.37107   | 5.68041   | 4.02017  |
| 40.4625   | 42.9512   | 34.2663  | 39.8105   | 35.2519   | 36.2219  |
| 25.1424   | 30.1353   | 21.1522  | 28.2636   | 17.9145   | 23.6656  |
| 5.70671   | 5.56407   | 7.26412  | 6.33312   | 5.95719   | 5.31973  |
| 0.035587  | 0         | 0        | 0         | 0         | 0        |
| 37.887    | 37.8632   | 35.5049  | 31.2711   | 29.2977   | 38.2168  |
| 0.0314572 | 0.0392019 | 0        | 0.0358387 | 0.0340738 | 0        |
| 1.22173   | 1.08453   | 2.44585  | 2.30711   | 1.4865    | 1.12561  |
| 13.4164   | 13.8704   | 12.6391  | 14.1712   | 12.9846   | 14.3141  |
| 0         | 0.0973567 | 0        | 0         | 0         | 0        |
| 123.47    | 131.441   | 146.949  | 135.194   | 140.707   | 135.548  |
| 0         | 0         | 0        | 0         | 0         | 0        |
| 19.4988   | 19.2646   | 21.0294  | 19.6225   | 37.8882   | 35.1811  |
| 0         | 0.0258221 | 0.026105 | 0.0236067 | 0.0224442 | 0        |
| 13.7807   | 10.718    | 32.6001  | 17.818    | 24.8873   | 18.7329  |
| 0.65785   | 0.815101  | 0.824933 | 1.48028   | 0.658716  | 0.747752 |
| 0         | 0         | 0        | 0         | 0         | 0        |
| 0         | 0.349832  | 0.353665 | 0.479728  | 0.152035  | 0.826014 |
| 59.8311   | 56.7081   | 91.9853  | 75.2187   | 80.1842   | 68.8472  |
| 125.292   | 122.125   | 113.935  | 127.273   | 140.004   | 158.793  |
| 2.09666   | 2.42089   | 0.910869 | 0.907204  | 1.53438   | 1.84572  |
| 0         | 0         | 0        | 0         | 0         | 0        |
| 2.85977   | 1.3893    | 2.71744  | 1.04922   | 4.89586   | 3.15812  |
| 17.9572   | 18.7317   | 13.8535  | 20.5286   | 16.4482   | 17.5828  |
| 0.483883  | 0.491345  | 0.869276 | 0.377728  | 0.75708   | 0.429406 |
| 0         | 0         | 0        | 0         | 0.186991  | 0        |
| 6.70213   | 6.895     | 8.41676  | 5.01189   | 10.3488   | 6.3179   |
| 26.5486   | 29.5765   | 24.1184  | 33.0411   | 22.8096   | 31.6856  |
| 5.90655   | 5.80543   | 8.18864  | 5.13843   | 9.3157    | 5.62018  |
| 1.01879   | 1.53555   | 0.999404 | 0.619436  | 1.57368   | 0.884883 |
| 10.2327   | 9.92397   | 13.2886  | 10.8022   | 13.5733   | 12.3849  |
| 0         | 0         | 0        | 0         | 0         | 0        |
| 2.40308   | 2.47508   | 3.08282  | 2.47526   | 3.54193   | 2.95203  |

|          |           |          |          |          |          |
|----------|-----------|----------|----------|----------|----------|
| 0.838822 | 0.42536   | 0.674975 | 0.404445 | 1.03195  | 0.609549 |
| 12.9615  | 15.1312   | 14.2744  | 14.4977  | 15.9795  | 16.3364  |
| 12.9959  | 10.4774   | 12.4902  | 8.56012  | 7.11781  | 7.05314  |
| 24.0671  | 22.518    | 23.076   | 17.0875  | 26.5127  | 21.4053  |
| 0.192385 | 0.71925   | 0.242377 | 0.438362 | 2.50065  | 0.646962 |
| 37.7067  | 36.8583   | 44.0834  | 32.1279  | 46.834   | 36.4121  |
| 22.3851  | 19.3368   | 28.1879  | 22.2066  | 40.5599  | 23.7604  |
| 9.14048  | 8.15722   | 7.95161  | 8.10794  | 10.8969  | 11.8955  |
| 1.97883  | 2.34272   | 2.06923  | 1.62321  | 2.31491  | 2.0629   |
| 0        | 0         | 0        | 0        | 0        | 0        |
| 0.600278 | 0.385034  | 0.622804 | 0.6336   | 0.879694 | 0.831206 |
| 5.61975  | 5.3419    | 8.3242   | 5.92901  | 10.4027  | 8.16382  |
| 0        | 0         | 0        | 0        | 0        | 0        |
| 0.361331 | 0.49532   | 0.227612 | 0.205829 | 0.352248 | 0.273398 |
| 7.50511  | 6.37766   | 7.38781  | 5.49646  | 9.43627  | 6.90193  |
| 1.63295  | 1.25465   | 2.39757  | 1.4967   | 1.83527  | 0.836089 |
| 0        | 0         | 0        | 0        | 0        | 0        |
| 6.3442   | 5.53351   | 7.17995  | 6.85312  | 7.43372  | 6.11003  |
| 27.2619  | 18.1528   | 30.2632  | 31.4524  | 22.1472  | 17.33    |
| 0.479757 | 0.676783  | 0.603705 | 0.692015 | 1.03839  | 1.15502  |
| 1.88163  | 0.750364  | 2.4654   | 1.54347  | 3.75019  | 1.77174  |
| 36.599   | 33.0787   | 37.8922  | 34.3517  | 55.0396  | 45.0449  |
| 0.65401  | 0.623643  | 0.575876 | 0.563568 | 0.356418 | 0.632763 |
| 15.5485  | 13.8671   | 16.6466  | 16.8391  | 19.5609  | 15.4342  |
| 0.272303 | 0.0769768 | 0.160844 | 0.047395 | 0        | 0        |
| 1.36918  | 1.28291   | 1.80278  | 1.09074  | 2.37513  | 1.51458  |
| 9.84477  | 10.4481   | 14.9119  | 10.3296  | 15.8241  | 15.1714  |
| 0.54491  | 0.773592  | 1.17159  | 0.83525  | 1.46438  | 0.868654 |
| 3.4774   | 4.78183   | 3.02139  | 3.4153   | 2.72758  | 2.72187  |
| 1.3903   | 1.53988   | 2.23834  | 0.915538 | 2.67716  | 0.870211 |
| 0        | 0         | 0        | 0        | 0        | 0        |
| 15.0789  | 15.5199   | 13.5365  | 15.1273  | 12.9938  | 12.677   |
| 662.017  | 0         | 0        | 0        | 716.88   | 834.41   |
| 53.5333  | 112.385   | 24.2996  | 77.7353  | 19.6023  | 15.9059  |
| 1.09744  | 1.0941    | 0.829567 | 0.416764 | 1.34722  | 1.96828  |
| 0        | 0         | 0        | 0        | 0        | 0        |
| 1.25841  | 1.3907    | 1.07689  | 1.10908  | 1.13162  | 0.578885 |
| 47.1134  | 48.2775   | 37.3438  | 36.8992  | 28.6359  | 35.7281  |
| 20.6092  | 22.2671   | 21.6584  | 21.1278  | 22.7999  | 25.9184  |
| 18.7307  | 17.9661   | 14.1119  | 14.3057  | 17.9384  | 19.4879  |
| 89.1007  | 104.884   | 73.6412  | 78.4312  | 54.0012  | 74.8146  |
| 1.29623  | 1.29229   | 0.816529 | 0.738385 | 0.982833 | 1.08975  |
| 11.3847  | 10.827    | 12.6124  | 9.37067  | 12.9384  | 10.0651  |

|            |            |            |           |               |           |
|------------|------------|------------|-----------|---------------|-----------|
| 3.24587    | 3.5523     | 3.02728    | 3.13382   | 3.46883       | 3.71822   |
| 12.1748    | 12.0717    | 13.6283    | 10.9046   | 12.8909       | 10.966    |
| 11.6052    | 10.9851    | 11.4783    | 10.1149   | 13.4177       | 9.86326   |
| 0.969733   | 0.60424    | 0.407241   | 0.368267  | 0.525198      | 0.679389  |
| 0          | 0          | 0          | 0         | 0             | 0         |
| 0          | 0          | 0          | 0         | 0             | 0         |
| 6.29307    | 8.09652    | 6.2068     | 5.29421   | 4.15426       | 4.52097   |
| 2.76868    | 2.17475    | 2.7905     | 1.94994   | 3.54424       | 2.05963   |
| 55.7907    | 58.7914    | 55.4926    | 54.5981   | 40.7438       | 51.0319   |
| 0.411679   | 0.256517   | 0.622386   | 0.328313  | 0.312145      | 0.311493  |
| 0          | 0          | 0          | 0         | 0             | 0         |
| 0          | 0          | 0          | 0         | 0             | 0         |
| 4.36214    | 3.93836    | 0.770903   | 2.26369   | 6.09899       | 8.92713   |
| 0          | 0          | 0          | 0.11541   | 0.0548634     | 0.0425823 |
| 0          | 0.150003   | 1.22E-284  | 0.429006  | 1.38335000000 | 4.96E-228 |
| 21.5319    | 24.0646    | 23.1924    | 21.8082   | 11.7576       | 12.4609   |
| 8.10113    | 7.15849    | 9.59201    | 6.45954   | 10.2653       | 8.85108   |
| 1.34982    | 1.34922    | 1.48801    | 1.10532   | 2.17792       | 1.83225   |
| 40.4075    | 46.4545    | 34.2387    | 43.6517   | 35.3964       | 45.7611   |
| 31.1002    | 29.2855    | 25.9744    | 26.8394   | 25.6334       | 31.108    |
| 0          | 0          | 0          | 0         | 0             | 0         |
| 22.5839    | 21.9755    | 23.9215    | 21.0741   | 25.1047       | 20.9264   |
| 0.0212323  | 0.0529193  | 0.106998   | 0.0725687 | 0.0689951     | 0.0178502 |
| 2.08944    | 2.57253    | 3.94495    | 3.68392   | 2.31199       | 1.40594   |
| 0          | 0          | 0.0250474  | 0         | 0.0430698     | 0.0668574 |
| 1.58592    | 1.97637    | 1.3321     | 1.61484   | 1.55679       | 1.66664   |
| 0.00742415 | 0.00925196 | 0.00467667 | 0         | 0.0160834     | 0.0156039 |
| 42.5346    | 48.7819    | 51.5693    | 42.3343   | 39.3346       | 33.3059   |
| 0          | 0          | 0          | 0         | 0             | 0         |
| 14.3895    | 15.9298    | 19.3437    | 17.3951   | 18.6632       | 18.4532   |
| 105.479    | 82.3067    | 86.1133    | 77.2012   | 110.613       | 89.6331   |
| 0.117152   | 0.200743   | 0.424336   | 0.375384  | 0.285519      | 0.412433  |
| 0.0736594  | 0.095619   | 0.1856     | 0.141613  | 0.108598      | 0.104501  |
| 25.5079    | 25.13      | 25.7871    | 25.4715   | 25.3123       | 26.1241   |
| 0          | 0          | 0          | 0         | 0.420256      | 0         |
| 0.501642   | 0.304855   | 0.31147    | 0.277885  | 0.796607      | 0         |
| 6.82702    | 6.26905    | 8.60104    | 7.60239   | 8.91997       | 6.44012   |
| 6.67465    | 6.40132    | 6.83417    | 6.22328   | 8.25565       | 7.42038   |
| 11.4719    | 11.0412    | 12.9294    | 10.544    | 16.2421       | 11.8608   |
| 26.551     | 25.1448    | 26.3607    | 21.9697   | 36.4468       | 27.4591   |
| 27.5642    | 27.3031    | 25.1959    | 23.4124   | 19.4256       | 20.1195   |
| 0.0389418  | 0          | 0          | 0.0443657 | 0.0843619     | 0.0327388 |
| 0.512349   | 0.404376   | 0.408807   | 0.272398  | 0.443973      | 0.473812  |

|           |           |           |           |           |           |
|-----------|-----------|-----------|-----------|-----------|-----------|
| 8.06172   | 7.30127   | 8.78083   | 6.78297   | 10.7173   | 7.4721    |
| 9.22902   | 9.20038   | 8.8384    | 8.47968   | 12.4941   | 11.5013   |
| 4.70709   | 4.45586   | 6.04419   | 6.14929   | 4.87644   | 4.83271   |
| 0         | 0         | 0         | 0         | 0         | 0         |
| 3.85911   | 3.777     | 4.9805    | 3.00257   | 5.38317   | 4.9853    |
| 65.8118   | 77.5785   | 82.6952   | 71.329    | 75.631    | 58.3973   |
| 0.0263202 | 0         | 0.0331596 | 0.119944  | 0.0570189 | 0         |
| 0         | 0         | 0         | 0         | 0         | 0         |
| 7.79671   | 7.4046    | 8.73153   | 7.43093   | 10.4774   | 8.3018    |
| 0         | 0         | 0         | 0         | 0         | 0         |
| 2.29611   | 2.11381   | 2.56134   | 2.02455   | 2.73068   | 3.00428   |
| 22.0255   | 21.2818   | 21.4191   | 17.6925   | 20.2295   | 16.1065   |
| 12.4872   | 13.8305   | 14.2164   | 13.8181   | 15.007    | 15.8035   |
| 0.234088  | 0.291721  | 0.663564  | 0.666732  | 0.824069  | 0.738004  |
| 0.102175  | 0.0318326 | 0         | 0.0582031 | 0.0276685 | 0.0644248 |
| 32.8083   | 36.2238   | 28.6464   | 36.928    | 24.7984   | 32.2827   |
| 0         | 0         | 0         | 0         | 0         | 0         |
| 0         | 0         | 0         | 0         | 0         | 0         |
| 14.7497   | 14.4148   | 18.1249   | 16.8179   | 24.353    | 20.5464   |
| 7.90168   | 8.67123   | 8.2946    | 6.07044   | 8.33599   | 7.18545   |
| 50.0129   | 91.3891   | 14.522    | 16.7097   | 0.74664   | 0.354948  |
| 1.6826    | 0.706317  | 1.28763   | 0.36431   | 0.380163  | 0.197708  |
| 6.13153   | 5.81991   | 7.32458   | 6.37024   | 8.53422   | 4.94118   |
| 4.98399   | 3.86164   | 7.66704   | 4.1045    | 6.22757   | 3.81347   |
| 14.0734   | 16.6959   | 13.3947   | 12.3928   | 16.7751   | 15.2417   |
| 14.17     | 13.1285   | 16.1998   | 12.7167   | 15.642    | 13.4349   |
| 0         | 0         | 0         | 0         | 0         | 0         |
| 14.4287   | 12.6154   | 14.5927   | 12.8929   | 14.1177   | 12.682    |
| 5.46985   | 4.86178   | 1.41878   | 0.962249  | 2.57052   | 1.58921   |
| 0.396384  | 0.444576  | 0.34957   | 0.180637  | 0.343484  | 0.0333245 |
| 2.01452   | 3.08036   | 1.72488   | 1.49545   | 1.35712   | 2.3506    |
| 0.0191567 | 0         | 0.0325859 | 0.0294673 | 0         | 0         |
| 0         | 0         | 0         | 0         | 0         | 0         |
| 10.2248   | 12.3908   | 8.94757   | 17.3602   | 6.69451   | 11.4038   |
| 0         | 0         | 0         | 0         | 0         | 0         |
| 30.8153   | 32.2062   | 30.9676   | 28.0069   | 31.3625   | 30.1462   |
| 3.7475    | 4.14236   | 4.54118   | 4.01458   | 4.92934   | 4.8428    |
| 20.597    | 21.4637   | 21.6852   | 38.3607   | 17.5088   | 24.5803   |
| 0.517808  | 0.514608  | 0.109898  | 0.0993805 | 0         | 0         |
| 0         | 0         | 0         | 0         | 0         | 0         |
| 47.338    | 49.5917   | 43.8574   | 39.9755   | 43.1045   | 36.9079   |
| 184.175   | 201.193   | 177.945   | 215.609   | 166.573   | 186.02    |
| 16.9688   | 17.9205   | 17.8672   | 16.7217   | 17.6692   | 15.5051   |

|           |           |           |           |           |          |
|-----------|-----------|-----------|-----------|-----------|----------|
| 0         | 0         | 0         | 0         | 0         | 0        |
| 6.04781   | 18.4873   | 19.9      | 19.5762   | 47.6286   | 59.2889  |
| 0.0904147 | 0.0482892 | 0.0976366 | 0.0588617 | 0.209862  | 0.238897 |
| 53.3101   | 53.0493   | 52.5801   | 45.3099   | 35.8376   | 37.2734  |
| 12.4045   | 12.5605   | 11.5006   | 11.7897   | 10.3035   | 9.68121  |
| 3.23068   | 2.71144   | 2.65808   | 2.37866   | 2.57099   | 1.9031   |
| 84.6305   | 88.8056   | 86.7388   | 92.0197   | 88.5337   | 114.681  |
| 1.56788   | 1.24812   | 2.14058   | 1.43205   | 3.23191   | 2.82926  |
| 0.0317649 | 0.0197927 | 0         | 0         | 0.0702479 | 0        |
| 22.2046   | 20.8228   | 22.7755   | 21.0481   | 21.3016   | 21.5292  |
| 0         | 0         | 0         | 0         | 0         | 0        |
| 0         | 0         | 0         | 0         | 0         | 0        |
| 1.45863   | 0.90417   | 1.87208   | 0.368687  | 1.49719   | 2.30253  |
| 40.4621   | 40.1918   | 39.9661   | 37.842    | 40.122    | 47.0119  |
| 1.18973   | 2.79102   | 1.10212   | 0.997059  | 0.454831  | 0.882798 |
| 5.73428   | 2.46416   | 12.3935   | 4.33654   | 0.963816  | 0.748068 |
| 4.71108   | 5.05107   | 5.45327   | 4.07787   | 6.46929   | 4.91752  |
| 0         | 0         | 0         | 0         | 0         | 0        |
| 0.136124  | 0.0983359 | 0.138076  | 0.182656  | 0.229831  | 0.207622 |
| 4.08157   | 2.93271   | 7.45508   | 5.01047   | 8.02703   | 4.51398  |
| 95.9289   | 101.808   | 87.5751   | 93.2321   | 79.0526   | 97.1669  |
| 0.191729  | 0.094391  | 0.0954253 | 0.115059  | 0.145154  | 0.112661 |
| 0         | 0         | 0         | 0         | 0         | 0        |
| 7.4271    | 7.64278   | 5.765     | 3.24955   | 7.21841   | 5.2424   |
| 4.99035   | 4.54063   | 5.37956   | 4.42464   | 6.35535   | 4.45876  |
| 18.4912   | 18.7602   | 15.7971   | 16.9615   | 17.9768   | 18.3719  |
| 4.30115   | 4.60926   | 5.08146   | 6.42559   | 5.4203    | 7.24613  |
| 18.6086   | 18.5521   | 19.2682   | 15.3262   | 15.9992   | 14.0882  |
| 14.6336   | 12.3082   | 11.1794   | 10.953    | 19.9143   | 19.1179  |
| 8.1118    | 7.16365   | 7.68398   | 5.95842   | 6.689     | 4.81993  |
| 52.1762   | 30.6725   | 57.3751   | 28.6731   | 63.6562   | 30.1164  |
| 1.62842   | 1.3988    | 1.02928   | 0.594478  | 1.65527   | 1.40436  |
| 0.690418  | 0.344159  | 1.13077   | 0.707923  | 1.64526   | 0.812619 |
| 14.8553   | 15.1888   | 14.7508   | 14.2659   | 12.4652   | 15.3859  |
| 11.4268   | 11.1152   | 12.5515   | 10.1041   | 12.2861   | 11.2196  |
| 0.18418   | 0.114763  | 0.23204   | 0.183604  | 0.0997501 | 0.309685 |
| 3.81867   | 3.41167   | 4.35011   | 3.9839    | 8.96922   | 4.12223  |
| 4.22569   | 4.39874   | 4.93641   | 3.90186   | 3.30983   | 2.75789  |
| 5.5492    | 5.64085   | 6.51915   | 5.98754   | 6.58115   | 5.27824  |
| 10.0106   | 10.3296   | 11.3062   | 9.02241   | 12.1756   | 9.55456  |
| 18.1451   | 17.2543   | 17.8411   | 18.343    | 15.6812   | 16.5312  |
| 33.1716   | 33.6334   | 28.7137   | 29.0289   | 24.5887   | 25.9326  |
| 22.119    | 16.9177   | 21.071    | 26.3133   | 28.5075   | 19.0218  |

|            |           |            |            |           |            |
|------------|-----------|------------|------------|-----------|------------|
| 51.1634    | 58.1708   | 53.9652    | 53.1802    | 41.8702   | 52.0679    |
| 3.85801    | 3.2057    | 4.4569     | 2.48511    | 5.74608   | 2.59266    |
| 0.0135394  | 0.0253091 | 0.0255864  | 0.00771258 | 0.0366639 | 0.0227654  |
| 68.8807    | 71.3303   | 72.9485    | 80.1557    | 70.6783   | 92.2224    |
| 24.9139    | 10.8551   | 29.3722    | 15.8579    | 17.3216   | 17.1254    |
| 13.6597    | 11.6969   | 12.6302    | 9.37377    | 15.3151   | 12.0547    |
| 0.0408971  | 0.0509659 | 0.128811   | 0.0465934  | 0.0221495 | 0.0687654  |
| 6.5675     | 7.10217   | 8.47923    | 6.49285    | 4.99728   | 6.70779    |
| 20.5072    | 24.5385   | 19.9282    | 25.357     | 21.2275   | 30.9508    |
| 0.0495185  | 0         | 0          | 0          | 0.21455   | 0.124892   |
| 30.7353    | 35.0495   | 32.4408    | 32.0425    | 33.3554   | 35.9979    |
| 0          | 0         | 0          | 0          | 0         | 0          |
| 7.59542    | 6.91605   | 8.42083    | 7.86876    | 5.92359   | 6.69207    |
| 48.1711    | 44.4859   | 60.7775    | 41.2244    | 48.2625   | 42.7701    |
| 28.3162    | 31.2398   | 23.8436    | 27.7176    | 29.3495   | 28.6085    |
| 1.28904    | 1.28352   | 1.55856    | 1.63831    | 1.30505   | 1.13262    |
| 20.6872    | 19.8628   | 21.929     | 18.8586    | 20.3914   | 21.7767    |
| 3.47265    | 3.0563    | 3.61843    | 3.82758    | 5.0267    | 4.59395    |
| 69.4286    | 71.8202   | 60.0578    | 69.0447    | 52.0583   | 61.7558    |
| 0          | 0.0492615 | 0          | 0          | 0         | 0          |
| 0.34688    | 0.472724  | 0.247613   | 0.234574   | 0.0117294 | 0.0912912  |
| 7.72524    | 8.00537   | 8.52433    | 6.65884    | 10.199    | 7.28964    |
| 0          | 0         | 0          | 0          | 0         | 0          |
| 0.757039   | 0         | 1.14896    | 1.40326    | 0.250153  | 0.873708   |
| 21.3926    | 21.4778   | 23.193     | 21.8853    | 21.4268   | 20.3184    |
| 0.167337   | 0.208535  | 0.168656   | 0.266902   | 0.725025  | 0.56273    |
| 1.48956    | 1.225     | 1.14725    | 0.934396   | 0.986365  | 0.68952    |
| 23.1077    | 21.414    | 18.5225    | 15.7957    | 16.5297   | 14.7853    |
| 0.272432   | 1.45E-223 | 0.171082   | 0.050821   | 0.508648  | 0.150987   |
| 0          | 0.0863502 | 0          | 0          | 0         | 0.116507   |
| 0.00645441 | 0         | 0.00406581 | 0          | 0.0101956 | 0.00678287 |
| 7.91652    | 7.50292   | 5.19688    | 4.04934    | 4.99233   | 4.65681    |
| 110.622    | 99.7791   | 106.82     | 97.8241    | 116.771   | 121.839    |
| 0          | 0         | 13.1673    | 11.2445    | 10.841    | 10.4799    |
| 428.296    | 456.963   | 418.717    | 477.967    | 331.466   | 400.241    |
| 0          | 0         | 0          | 0          | 0         | 0          |
| 2.46994    | 2.37817   | 2.40423    | 2.55822    | 2.24946   | 2.39148    |
| 12.8106    | 13.2639   | 16.2111    | 12.0427    | 16.3701   | 15.1569    |
| 0.58823    | 0.3258    | 0.521503   | 0.421953   | 0.495568  | 0.384636   |
| 4.14584    | 4.07062   | 3.17995    | 2.87561    | 4.00822   | 2.67891    |
| 4.61169    | 3.59096   | 6.4218     | 3.54549    | 6.47773   | 3.04306    |
| 11.7796    | 11.3663   | 10.596     | 11.1555    | 10.4779   | 10.0526    |
| 7.83339    | 6.5253    | 9.05418    | 8.0213     | 10.417    | 8.51483    |



|           |           |           |           |           |           |
|-----------|-----------|-----------|-----------|-----------|-----------|
| 9.03905   | 10.9434   | 9.40636   | 9.9416    | 11.8225   | 12.5735   |
| 0.293505  | 0.146306  | 0.443728  | 0.334385  | 0.0635837 | 0.0493506 |
| 19.4846   | 19.0231   | 15.4657   | 14.8051   | 14.1973   | 19.2298   |
| 0         | 0.174491  | 0.176403  | 0         | 0.30333   | 0.235431  |
| 0.648378  | 0.617298  | 1.11859   | 0.788822  | 0.93824   | 0.522566  |
| 0         | 0         | 0         | 0         | 0         | 0         |
| 0.0433962 | 0.0540803 | 0.041004  | 0.139766  | 0.0470059 | 0.0364837 |
| 1.58998   | 1.37599   | 1.39107   | 1.7108    | 1.48303   | 2.00507   |
| 32.1447   | 27.2007   | 29.4776   | 28.5694   | 26.5465   | 29.5288   |
| 0.308253  | 0.263093  | 0.327836  | 0.573364  | 0.317416  | 0.21893   |
| 6.12288   | 6.07944   | 5.36212   | 4.65046   | 6.96918   | 6.47632   |
| 9.22984   | 11.2364   | 9.39296   | 10.4954   | 10.2567   | 11.3275   |
| 0.0529305 | 0         | 0         | 0.0603028 | 0.0573332 | 0.0444993 |
| 4.50813   | 4.08584   | 3.0119    | 4.66913   | 5.84495   | 5.28309   |
| 6.77156   | 7.74417   | 6.53004   | 8.31794   | 6.85187   | 6.46605   |
| 78.1446   | 62.7973   | 69.7695   | 59.0126   | 54.0285   | 64.9445   |
| 71.0523   | 71.0845   | 60.8893   | 59.2866   | 46.9977   | 52.4675   |
| 0         | 0         | 0         | 0         | 0         | 0         |
| 2.79627   | 3.4579    | 3.76678   | 3.0387    | 5.19566   | 4.28579   |
| 0         | 0         | 0         | 0         | 0         | 0         |
| 2.18698   | 2.66484   | 2.63282   | 2.9899    | 3.6323    | 2.69664   |
| 0.0374241 | 0.139913  | 0.0942977 | 0.0426366 | 0         | 0         |
| 0.821276  | 0.400489  | 0.224932  | 0.691579  | 0.0386778 | 0         |
| 0.299425  | 0.201979  | 1.27621   | 0         | 0.148773  | 0.613169  |
| 21.422    | 21.6528   | 21.1268   | 26.9732   | 17.5079   | 18.3968   |
| 46.5421   | 43.0648   | 51.622    | 59.1167   | 53.2714   | 57.2482   |
| 0.270614  | 0.486215  | 0.397373  | 0.853375  | 0.406412  | 0.189903  |
| 0.475983  | 3.25951   | 1.56454   | 0.858092  | 0.187309  | 0.222726  |
| 3.30209   | 4.09677   | 1.03542   | 4.68162   | 2.6929    | 1.0796    |
| 27.7662   | 27.2531   | 22.5986   | 29.3947   | 29.5435   | 24.996    |
| 9.88612   | 12.5525   | 7.52004   | 20.1354   | 13.9412   | 15.9171   |
| 5.88214   | 5.49348   | 6.27583   | 6.01728   | 5.55836   | 5.55329   |
| 0         | 0         | 0         | 0         | 0         | 0         |
| 14.8848   | 18.3894   | 13.386    | 20.9125   | 12.5238   | 14.5977   |
| 0         | 0         | 0         | 0         | 0         | 0         |
| 3.83017   | 5.07051   | 3.98485   | 4.86226   | 6.15333   | 4.12006   |
| 9.71713   | 10.4474   | 9.57346   | 10.3555   | 10.0398   | 9.55441   |
| 47.8724   | 51.4459   | 41.3107   | 50.5415   | 42.3305   | 50.6189   |
| 0         | 0         | 0         | 0         | 0         | 0         |
| 1.48177   | 0.846491  | 0.856921  | 0.859603  | 1.10973   | 0.698196  |
| 0.0154481 | 0         | 0         | 0         | 0.0334661 | 0         |
| 30.9716   | 32.3379   | 34.4499   | 38.7822   | 32.9434   | 34.2485   |
| 28.2097   | 30.878    | 32.6584   | 30.4333   | 40.7889   | 32.7909   |

|           |           |           |           |           |           |
|-----------|-----------|-----------|-----------|-----------|-----------|
| 1.80735   | 2.10247   | 1.01267   | 1.14441   | 1.74045   | 1.41817   |
| 17.1619   | 17.997    | 20.8323   | 17.0961   | 19.5317   | 15.8613   |
| 3.91296   | 7.12782   | 8.60931   | 6.77548   | 12.9081   | 12.082    |
| 1.99635   | 1.52043   | 2.42913   | 2.91013   | 2.74828   | 2.71593   |
| 17.2537   | 13.4461   | 16.2135   | 13.0589   | 19.7753   | 15.3908   |
| 18.769    | 19.7033   | 19.3942   | 19.5573   | 25.2638   | 22.3434   |
| 0         | 0         | 0         | 0         | 0         | 0         |
| 84.596    | 81.8182   | 95.816    | 111.647   | 88.7825   | 80.0162   |
| 1.8784    | 2.25921   | 1.18326   | 1.39351   | 2.55514   | 2.43307   |
| 19.5203   | 18.3626   | 22.2506   | 22.4353   | 24.2765   | 23.3285   |
| 0         | 0         | 0         | 0         | 0         | 0         |
| 2.62843   | 2.52122   | 2.97099   | 2.57756   | 3.39346   | 2.38262   |
| 1.88962   | 2.23464   | 3.14301   | 1.89262   | 2.9322    | 2.4915    |
| 8.44398   | 8.31259   | 9.35091   | 11.0697   | 9.20899   | 8.00658   |
| 0.182998  | 0.126695  | 0.333017  | 0.138991  | 0.35239   | 0.0683771 |
| 2.32876   | 1.5544    | 3.44396   | 1.74126   | 2.5693    | 2.43332   |
| 22.2291   | 20.9251   | 21.4234   | 22.5352   | 24.2821   | 25.1711   |
| 14.814    | 13.2265   | 13.7606   | 11.7655   | 15.8211   | 13.4457   |
| 13.8046   | 12.345    | 9.0985    | 9.7568    | 9.69169   | 7.4685    |
| 3.1081    | 2.50474   | 2.50615   | 2.73838   | 2.24448   | 2.52595   |
| 0.0347807 | 0         | 0.0438186 | 0.0396251 | 0.0753475 | 0         |
| 26.0116   | 18.2719   | 32.1816   | 15.4298   | 106.133   | 89.9532   |
| 4.56277   | 4.47481   | 4.29749   | 3.98614   | 4.79893   | 4.33297   |
| 53.2115   | 63.7293   | 58.3864   | 57.7932   | 51.3137   | 46.8194   |
| 36.113    | 35.3889   | 30.4847   | 37.7873   | 36.1765   | 41.7484   |
| 110.344   | 68.4164   | 96.1753   | 65.2163   | 127.844   | 75.7334   |
| 11.5291   | 10.9094   | 11.8757   | 11.5503   | 15.1639   | 14.4496   |
| 3.94467   | 3.17252   | 3.57247   | 3.33108   | 4.4639    | 4.77848   |
| 0.171143  | 0.106639  | 0.0718718 | 0.0758257 | 0.144183  | 0.183849  |
| 299.509   | 503.802   | 252.463   | 566.604   | 121.481   | 235.428   |
| 184.587   | 180.625   | 168.099   | 155.054   | 141.532   | 154.875   |
| 1.41972   | 1.20849   | 1.68131   | 2.43886   | 1.20058   | 0.912496  |
| 25.7312   | 23.9023   | 26.3059   | 24.6332   | 20.5764   | 20.1067   |
| 0.0790177 | 0.0738538 | 0.0746631 | 0.135035  | 0.171181  | 0.116254  |
| 0.0572847 | 0.035694  | 0.144341  | 0.0652634 | 0         | 0.0963198 |
| 13.9671   | 13.8292   | 12.2747   | 13.7312   | 13.7221   | 11.6805   |
| 1.416     | 0         | 0.44599   | 0.403307  | 0.766894  | 0.892839  |
| 1.03979   | 0.822188  | 0.708758  | 0.584303  | 1.27012   | 0.377129  |
| 2.13436   | 2.03228   | 0.0604247 | 0.0819628 | 0.701339  | 1.00815   |
| 69.7602   | 72.3992   | 61.2301   | 71.1769   | 51.8899   | 64.0503   |
| 0         | 0         | 0         | 0         | 0         | 0         |
| 6.66723   | 6.8488    | 8.12399   | 8.08613   | 8.39396   | 7.37642   |
| 54.1503   | 50.3664   | 54.2125   | 54.751    | 51.3123   | 44.7565   |

|           |           |           |           |           |           |
|-----------|-----------|-----------|-----------|-----------|-----------|
| 27.3836   | 24.6274   | 27.3642   | 26.1182   | 29.9224   | 27.8844   |
| 14.0378   | 16.2164   | 13.4508   | 17.9745   | 13.519    | 14.2819   |
| 119.314   | 80.3524   | 70.8469   | 54.1296   | 15.4273   | 35.3957   |
| 0.0537827 | 0.121636  | 0.123389  | 0.0726208 | 0.0874589 | 0.0723454 |
| 20.9664   | 22.8121   | 21.5462   | 19.3739   | 22.7103   | 26.1696   |
| 5.67377   | 5.81018   | 5.92799   | 4.22564   | 4.17915   | 4.08806   |
| 0.0238517 | 0.029724  | 0.0300497 | 0.0271739 | 0         | 0         |
| 0.246831  | 0.512667  | 0.518285  | 0.187473  | 1.02489   | 0.415027  |
| 7.89608   | 7.38946   | 11.4876   | 8.49163   | 16.5283   | 12.524    |
| 0         | 0         | 0         | 0.616353  | 0.1172    | 0.272896  |
| 0         | 1.61797   | 0         | 144.493   | 0.23245   | 0.360833  |
| 0.563918  | 0.504541  | 0.455419  | 0.494201  | 0.751784  | 0.534874  |
| 2.14318   | 2.19765   | 2.75211   | 1.97003   | 2.80964   | 2.30189   |
| 0         | 0.019569  | 0         | 0         | 0.0340182 | 0.0594075 |
| 31.0117   | 32.436    | 28.8468   | 31.5633   | 33.607    | 34.1645   |
| 3.43737   | 3.43633   | 3.8547    | 4.00221   | 6.58736   | 4.303     |
| 48.7967   | 30.4052   | 0         | 0         | 0         | 0         |
| 1.93517   | 2.23428   | 2.18706   | 2.56135   | 2.34274   | 2.36861   |
| 6.42108   | 5.99923   | 6.3981    | 6.42065   | 9.19941   | 7.63777   |
| 14.8814   | 15.6853   | 13.8938   | 13.8321   | 10.9512   | 10.9355   |
| 1.46972   | 1.49476   | 1.34481   | 0.876378  | 1.33003   | 0.825942  |
| 0.943136  | 1.09209   | 1.0009    | 0.735073  | 1.1807    | 1.4618    |
| 35.9378   | 45.6267   | 20.1937   | 30.4357   | 39.1098   | 37.4475   |
| 0.924643  | 1.15743   | 1.02537   | 1.05813   | 1.00155   | 1.0713    |
| 0.299299  | 97.4986   | 1.0558    | 1183.09   | 2.20452   | 40.8135   |
| 0.875367  | 1.15098   | 1.10369   | 1.91931   | 0.819038  | 1.94994   |
| 17.2708   | 14.0353   | 16.5795   | 15.4085   | 17.3109   | 15.1537   |
| 0.164692  | 0.0684132 | 0.138326  | 0.0625437 | 0.594638  | 0.369224  |
| 0.0906235 | 0.0392135 | 0.144499  | 0.0143397 | 0.185587  | 0.0964258 |
| 11.5445   | 11.3018   | 11.9444   | 11.6856   | 14.503    | 10.9825   |
| 142.44    | 154.096   | 148.203   | 157.149   | 158.327   | 152.435   |
| 13.2326   | 13.596    | 13.668    | 11.8725   | 13.9526   | 11.5359   |
| 3.38407   | 3.13949   | 5.11612   | 2.57027   | 4.82631   | 2.51311   |
| 0.206893  | 0.51566   | 0         | 0         | 0.672308  | 0.347875  |
| 0         | 0         | 27.5936   | 0         | 0         | 0         |
| 1.99178   | 1.87185   | 3.70199   | 2.82304   | 2.60094   | 1.90266   |
| 5.02394   | 5.08321   | 4.98821   | 5.1377    | 4.8847    | 4.636     |
| 2.53282   | 2.62375   | 2.29352   | 1.69529   | 1.98903   | 1.251     |
| 0.291257  | 0.303742  | 0         | 0         | 0.0757159 | 0         |
| 4.77971   | 5.5157    | 4.94381   | 4.25236   | 6.35628   | 4.74583   |
| 0         | 0         | 0         | 0         | 0         | 0         |
| 13.8475   | 12.6446   | 15.193    | 17.0553   | 12.2516   | 12.306    |
| 23.4187   | 25.775    | 15.4414   | 20.4468   | 13.1575   | 17.2044   |

|           |          |           |           |           |           |
|-----------|----------|-----------|-----------|-----------|-----------|
| 0         | 0        | 0         | 32.2523   | 0         | 4.57692   |
| 0.552334  | 0.588996 | 1.24481   | 1.42508   | 0.932803  | 1.27033   |
| 0.939798  | 0.975979 | 1.05245   | 1.36811   | 0.791754  | 1.14125   |
| 9.49057   | 8.41458  | 10.4664   | 8.00508   | 10.5825   | 10.6717   |
| 0.137676  | 0.467057 | 0.878101  | 0.794065  | 0.552327  | 0.930103  |
| 18.9639   | 20.1613  | 21.1921   | 24.6568   | 18.6071   | 19.1408   |
| 13.8903   | 14.0171  | 14.1257   | 12.4485   | 11.7194   | 12.5483   |
| 1.7634    | 1.52864  | 1.54556   | 0.989892  | 1.3565    | 1.28916   |
| 0.163102  | 0.203257 | 0.205485  | 0.185819  | 0.176669  | 0.205683  |
| 5.77122   | 5.99614  | 5.71404   | 5.51166   | 6.22279   | 5.24981   |
| 23.7887   | 22.3556  | 21.6179   | 53.7599   | 21.1209   | 55.5723   |
| 5.02327   | 5.22819  | 10.1881   | 15.0616   | 16.562    | 8.72449   |
| 0.765646  | 0.727727 | 0.60397   | 0.747675  | 0.830472  | 0.643688  |
| 0.444901  | 0.184812 | 0.373674  | 0.281594  | 0.910271  | 0.415593  |
| 1.85016   | 1.66868  | 2.37532   | 1.73976   | 2.71007   | 2.16279   |
| 0         | 0.159076 | 0         | 0         | 0.13099   | 0.0362192 |
| 0         | 0        | 0         | 0         | 0         | 0         |
| 1.52849   | 1.59091  | 1.85199   | 1.07184   | 2.4924    | 1.84654   |
| 11.3419   | 10.8167  | 12.1182   | 9.77674   | 13.8017   | 10.5073   |
| 4.2405    | 4.5835   | 3.97955   | 4.97902   | 3.56209   | 3.71055   |
| 63.8209   | 58.7062  | 62.0185   | 62.7925   | 77.0975   | 83.6594   |
| 50.537    | 52.119   | 47.0294   | 66.9439   | 48.0734   | 49.4667   |
| 0         | 0        | 0         | 0.0713866 | 0         | 0         |
| 0         | 0        | 0         | 0         | 0         | 0         |
| 0.703171  | 0.576507 | 0.303068  | 0.316228  | 1.02223   | 0.637835  |
| 0.155873  | 0.048562 | 0.0490942 | 0.133187  | 0.0422095 | 0.065522  |
| 2.11047   | 2.10405  | 0         | 0         | 0         | 0         |
| 0         | 0        | 0         | 0         | 0         | 0         |
| 3.00547   | 3.5736   | 3.43907   | 4.99476   | 4.95786   | 7.60338   |
| 297.932   | 464.099  | 187.672   | 212.142   | 80.6775   | 93.9265   |
| 0.0606305 | 0.151115 | 0         | 0.0345376 | 0.0656737 | 0.0254864 |
| 29.5854   | 29.0757  | 30.3103   | 25.3109   | 33.5297   | 29.773    |
| 0         | 0        | 0         | 0         | 0         | 0         |
| 9.39322   | 10.0709  | 10.3664   | 10.6178   | 10.8453   | 8.92051   |
| 12.3207   | 12.9059  | 10.5112   | 12.2868   | 13.0216   | 16.5411   |
| 3.5884    | 3.92762  | 3.71642   | 4.31306   | 3.3958    | 1.5297    |
| 0         | 0.32019  | 0.161849  | 0.597636  | 0.313093  | 0.0540017 |
| 0.193181  | 0.361113 | 0         | 0         | 0         | 0.0812048 |
| 7.2281    | 6.33482  | 6.21274   | 5.54121   | 6.73176   | 7.78051   |
| 0         | 0        | 0         | 0.295354  | 0         | 0         |
| 0.563889  | 0.8464   | 0.70241   | 0.889163  | 1.20805   | 1.12409   |
| 0.11125   | 0.10031  | 0.0672262 | 0.0537503 | 0.196184  | 0.158814  |
| 11.488    | 14.9815  | 16.3444   | 27.551    | 18.2757   | 24.6232   |

|           |           |           |          |           |           |
|-----------|-----------|-----------|----------|-----------|-----------|
| 1.37493   | 2.08559   | 1.79386   | 2.87946  | 1.39854   | 1.30124   |
| 0.0770336 | 1.74479   | 0.115024  | 10.8634  | 0.187745  | 0.993268  |
| 4.98296   | 4.44301   | 6.19536   | 5.00808  | 7.13147   | 5.71833   |
| 0         | 0         | 0         | 0        | 0         | 0         |
| 55.4754   | 51.2206   | 58.884    | 54.2403  | 60.2221   | 55.3653   |
| 0.780782  | 0.810841  | 1.39353   | 1.3343   | 1.05716   | 1.20342   |
| 46.3308   | 48.9754   | 51.6395   | 49.6007  | 42.7683   | 41.2998   |
| 4.5441    | 5.95326   | 3.66981   | 3.3186   | 3.02897   | 4.31006   |
| 5.88583   | 8.10285   | 5.42493   | 7.20717  | 6.75829   | 6.03687   |
| 162.584   | 154.888   | 107.612   | 124.732  | 76.0904   | 121.719   |
| 8.62352   | 6.43444   | 7.36973   | 6.66443  | 10.4575   | 7.00404   |
| 1.35107   | 1.0622    | 1.49081   | 1.18801  | 1.84651   | 1.15492   |
| 0.118189  | 0.147286  | 0         | 0        | 0         | 0         |
| 0.0505614 | 0         | 0         | 0        | 0         | 0.0425076 |
| 10.9958   | 9.16634   | 10.9737   | 9.9784   | 11.6982   | 12.6448   |
| 2.13422   | 1.75572   | 1.88919   | 1.25547  | 1.89623   | 1.42485   |
| 0         | 0         | 0         | 0        | 0         | 0         |
| 2.77844   | 2.39608   | 3.47298   | 2.28222  | 4.78312   | 2.52629   |
| 20.6515   | 19.659    | 23.9065   | 19.4506  | 26.1522   | 22.507    |
| 6.31795   | 7.69244   | 6.07107   | 5.61249  | 7.08543   | 7.93463   |
| 0.111955  | 0.0706485 | 0.0353585 | 0.032168 | 0.0947488 | 0.118722  |
| 0         | 0         | 0         | 0        | 0         | 0         |
| 14.2539   | 13.0456   | 14.8432   | 13.0706  | 11.632    | 13.3149   |
| 5.04095   | 4.45736   | 5.01793   | 3.94782  | 4.14289   | 4.04973   |
| 18.1612   | 20.3165   | 22.6624   | 21.1409  | 17.0535   | 14.5192   |
| 0.719317  | 0.417029  | 1.24747   | 0.45904  | 0.523702  | 0.195372  |
| 8.85271   | 6.71384   | 9.51363   | 7.41513  | 8.83022   | 5.87414   |
| 18.0748   | 18.6726   | 18.7215   | 16.9298  | 18.5068   | 15.4603   |
| 13.3255   | 9.55941   | 12.3433   | 11.6265  | 18.7339   | 14.1321   |
| 9.28177   | 9.19423   | 6.14668   | 7.72756  | 5.49953   | 6.00254   |
| 0.131167  | 0.326921  | 0.330503  | 0.373592 | 0.355194  | 0.275685  |
| 0.845914  | 0.508957  | 1.16107   | 0.77453  | 1.42339   | 1.0287    |
| 109.059   | 118.381   | 82.0467   | 100.156  | 83.3458   | 102.368   |
| 3.13209   | 1.99562   | 4.68769   | 3.78297  | 3.95379   | 2.3956    |
| 0         | 0         | 0         | 0        | 0         | 0.0670425 |
| 1.57482   | 1.74973   | 1.64939   | 0.67011  | 0.780974  | 0.733767  |
| 0.575264  | 0.685724  | 0.189065  | 0.227961 | 0.650206  | 0.672878  |
| 14.3871   | 13.623    | 18.8174   | 16.5326  | 18.0905   | 19.0374   |
| 1.19686   | 0.97867   | 0.644418  | 0.708323 | 1.00963   | 1.07356   |
| 10.6029   | 8.90865   | 8.35671   | 9.26498  | 8.53493   | 8.76002   |
| 0.104472  | 0.650966  | 0.13162   | 0.238047 | 0.339487  | 0.0878311 |
| 278.238   | 0         | 0         | 0        | 0         | 0         |
| 7.23918   | 7.00975   | 7.35511   | 6.55987  | 5.49297   | 5.03984   |

|           |           |           |           |           |           |
|-----------|-----------|-----------|-----------|-----------|-----------|
| 11.1607   | 11.5017   | 9.2068    | 8.63527   | 7.88415   | 6.58437   |
| 9.52906   | 9.58444   | 14.2228   | 11.8353   | 12.4383   | 11.8209   |
| 0         | 0         | 0         | 0         | 0         | 0         |
| 0         | 0         | 0         | 0         | 0         | 0         |
| 7.31831   | 7.02124   | 6.92136   | 7.28687   | 10.3155   | 12.3385   |
| 0         | 0         | 0         | 0         | 0         | 0         |
| 0.480057  | 0.681337  | 0.672003  | 0.592498  | 0.707762  | 0.627807  |
| 9.14602   | 5.71718   | 21.4953   | 19.9503   | 4.25501   | 3.15129   |
| 0.720764  | 0.663898  | 1.14494   | 0.74975   | 0.814661  | 1.31729   |
| 0.193607  | 0.0804242 | 0.0406527 | 0.183811  | 0.104855  | 0.0542559 |
| 3.26922   | 2.03705   | 2.74583   | 8.06991   | 4.13135   | 2.2904    |
| 26.8208   | 26.5816   | 27.2109   | 24.5522   | 28.0865   | 23.4347   |
| 8.79607   | 11.4547   | 14.9511   | 25.2843   | 14.094    | 14.0527   |
| 1.8387    | 1.84604   | 2.09138   | 1.7749    | 2.03839   | 1.95359   |
| 27.2049   | 27.8791   | 30.5082   | 26.556    | 32.2751   | 30.1433   |
| 0         | 0         | 0         | 0         | 0         | 0         |
| 10.9021   | 11.6587   | 11.6037   | 13.4673   | 10.3692   | 9.02317   |
| 0         | 0         | 0         | 0         | 0.0929387 | 0         |
| 0         | 0         | 0         | 0         | 0         | 0         |
| 1.5106    | 1.37921   | 1.31498   | 1.09243   | 2.53388   | 1.63498   |
| 14.85     | 14.9214   | 13.7907   | 15.93     | 12.2277   | 14.73     |
| 46.5991   | 49.8502   | 45.976    | 46.1258   | 54.1011   | 55.2581   |
| 0         | 0         | 0         | 0         | 0         | 0         |
| 1.41754   | 0.692544  | 1.97162   | 0.956051  | 2.81291   | 0.753199  |
| 10.4203   | 10.527    | 9.86363   | 9.18627   | 11.0435   | 9.75436   |
| 54.4988   | 58.0206   | 40.0819   | 41.9038   | 36.3101   | 53.6245   |
| 7.02681   | 8.24916   | 8.1471    | 8.70166   | 7.22522   | 6.8065    |
| 0         | 0         | 0         | 0         | 0         | 0         |
| 29.5099   | 29.1581   | 31.8494   | 30.1383   | 24.6818   | 27.0292   |
| 6.97973   | 6.40919   | 5.29465   | 5.59575   | 4.53885   | 5.02081   |
| 0.167448  | 0         | 0.0602741 | 0.0272529 | 0         | 0.0402215 |
| 16.675    | 17.2094   | 17.7008   | 15.3539   | 20.8854   | 19.9403   |
| 5.95789   | 7.69373   | 5.87432   | 7.91901   | 5.37789   | 5.04517   |
| 5.0952    | 5.14917   | 4.9995    | 3.5271    | 4.7184    | 3.94743   |
| 6.57733   | 7.65688   | 6.82106   | 6.6486    | 7.68806   | 8.135     |
| 10.5292   | 10.1909   | 10.0623   | 8.90626   | 8.69716   | 8.51359   |
| 0.56852   | 0.340075  | 0.544352  | 0.259082  | 0.960663  | 0.370939  |
| 0         | 0         | 0         | 0         | 0         | 0         |
| 0         | 0         | 0         | 0         | 0         | 0         |
| 0         | 0         | 0         | 0         | 0         | 0         |
| 24.2964   | 25.2871   | 24.0952   | 23.688    | 26.5233   | 23.1754   |
| 0.623113  | 0.55932   | 0.471383  | 0.340611  | 0.486153  | 0.398258  |
| 0.0833035 | 0         | 0.026223  | 0         | 0.162459  | 0.0174988 |

|           |           |           |           |          |           |
|-----------|-----------|-----------|-----------|----------|-----------|
| 8.65804   | 8.81603   | 10.4026   | 11.5143   | 9.22148  | 8.61396   |
| 1.84018   | 1.89976   | 1.60829   | 2.08335   | 2.44857  | 2.18478   |
| 12.5607   | 12.6466   | 16.4633   | 21.6857   | 16.0985  | 15.2676   |
| 0.941878  | 0.836309  | 0.860306  | 0.603599  | 1.97668  | 0.979912  |
| 0.162412  | 0         | 0         | 0         | 0        | 0.068271  |
| 8.37576   | 9.81779   | 10.8657   | 8.12518   | 8.44367  | 7.63421   |
| 1.13205   | 1.026     | 1.12368   | 1.01614   | 1.85789  | 1.55737   |
| 8.54201   | 9.00634   | 8.45821   | 8.64776   | 8.63745  | 8.2475    |
| 1.42786   | 1.30156   | 3.13839   | 1.32505   | 1.83412  | 0.82992   |
| 0         | 0         | 0         | 0         | 0        | 0         |
| 0         | 0         | 2.65E-144 | 2.94E-209 | 2.81E-64 | 1.95E-208 |
| 5.13101   | 5.26631   | 6.07883   | 6.756     | 5.85884  | 4.92299   |
| 45.3986   | 49.8882   | 46.2197   | 47.5705   | 46.8964  | 59.2257   |
| 0         | 0         | 0         | 0         | 0        | 0         |
| 664.311   | 732.772   | 585.992   | 604.935   | 512.481  | 568.894   |
| 0.914013  | 0.736214  | 0.766745  | 0.584131  | 0.964216 | 0.749348  |
| 4.22E-06  | 0.767912  | 4.59E-06  | 0.314737  | 1.33E-05 | 4.65E-06  |
| 55.5856   | 61.4042   | 51.5923   | 51.4658   | 65.2584  | 60.8282   |
| 123.589   | 52.94     | 45.2388   | 66.3877   | 8.81321  | 14.5626   |
| 445.01    | 355.555   | 499.693   | 487.763   | 466.26   | 378.778   |
| 27.0728   | 23.4741   | 23.7314   | 20.4176   | 24.8641  | 51.9537   |
| 2.65438   | 2.81204   | 3.30916   | 4.08258   | 3.7022   | 3.23131   |
| 0.363964  | 0.0907142 | 0.183417  | 0.497589  | 0.473086 | 0.489582  |
| 0         | 0.11146   | 0.112681  | 0.441554  | 0.161465 | 0.350901  |
| 0         | 0         | 0         | 0         | 0        | 0         |
| 0         | 0         | 0         | 0         | 0        | 0         |
| 3.67979   | 4.61572   | 2.51495   | 4.38412   | 3.51694  | 4.04397   |
| 18.4375   | 17.6124   | 19.122    | 19.8716   | 22.208   | 19.768    |
| 0.308733  | 0.497925  | 0.276928  | 0.622784  | 0.316239 | 0.215087  |
| 1.64031   | 1.87516   | 2.72053   | 2.14222   | 2.07587  | 1.87489   |
| 20.3346   | 26.7334   | 28.5612   | 25.4269   | 25.8369  | 24.3122   |
| 50.3917   | 52.2417   | 55.4185   | 58.4054   | 57.31    | 53.9659   |
| 2.01794   | 2.7082    | 2.41194   | 2.00426   | 2.12975  | 1.56601   |
| 0.638718  | 0.824125  | 1.12045   | 0.909491  | 1.01273  | 0.920332  |
| 8.7603    | 9.09757   | 9.63291   | 10.5058   | 11.5699  | 15.8281   |
| 2.47597   | 2.87991   | 1.97287   | 1.75554   | 1.41938  | 1.29374   |
| 39.5509   | 38.6639   | 43.3002   | 43.2081   | 36.9012  | 38.2566   |
| 0.0621344 | 0.0387159 | 0         | 0.0353943 | 0        | 0.0261186 |
| 20.4969   | 21.1004   | 24.7557   | 21.0836   | 23.2777  | 19.3968   |
| 3.29763   | 1.91657   | 2.86039   | 2.17222   | 3.45377  | 3.58105   |
| 0.280756  | 0.396853  | 0.30704   | 0         | 0.225265 | 0.14752   |
| 0.400743  | 1.85E-07  | 1.91E-05  | 6.11E-08  | 5.05E-06 | 0.820918  |
| 4.71404   | 4.55077   | 6.77548   | 6.12705   | 4.2791   | 4.35388   |

|           |           |          |           |           |           |
|-----------|-----------|----------|-----------|-----------|-----------|
| 0.272199  | 0.233445  | 0.260441 | 0.0704475 | 0.0613036 | 0.0445966 |
| 12.2883   | 10.6948   | 12.3963  | 9.87782   | 10.7296   | 10.3866   |
| 17.4905   | 21.2411   | 17.6447  | 17.4796   | 16.2502   | 16.8576   |
| 3.72538   | 3.63636   | 3.88995  | 2.9166    | 3.63408   | 3.10069   |
| 0.231453  | 0.318798  | 0.38368  | 0.222055  | 0.356265  | 0.256033  |
| 1.62994   | 3.45309   | 3.69628  | 1.67127   | 2.64828   | 1.64437   |
| 0         | 0         | 0        | 0         | 0         | 0         |
| 411.276   | 432.275   | 523.108  | 521.359   | 679.227   | 625.456   |
| 7.27394   | 5.88415   | 5.78785  | 4.65239   | 4.56151   | 5.36429   |
| 4.1388    | 4.33577   | 4.62071  | 4.04637   | 4.74215   | 3.89391   |
| 73.7388   | 78.4964   | 72.2324  | 78.4282   | 44.53     | 49.5529   |
| 6.77827   | 6.02167   | 5.41125  | 2.44669   | 6.61514   | 6.14994   |
| 0.373548  | 0.562943  | 0.347759 | 0.782216  | 0.298989  | 0.478466  |
| 0.124808  | 0.155535  | 0.360725 | 0.125463  | 0.230617  | 0.0678941 |
| 0         | 0         | 0        | 0         | 0         | 0         |
| 5.51895   | 5.61855   | 6.42788  | 4.63303   | 5.40294   | 4.14082   |
| 0.323926  | 0.242206  | 0.636636 | 0.487138  | 1.26313   | 0.642696  |
| 14.8723   | 14.7938   | 16.9972  | 15.1735   | 16.3569   | 14.7159   |
| 9.04285   | 7.95828   | 11.1951  | 6.0793    | 8.44496   | 4.91837   |
| 9.18322   | 7.68333   | 10.0569  | 8.61383   | 6.22132   | 7.74773   |
| 30.8555   | 28.2525   | 31.6681  | 29.9908   | 25.4132   | 24.9062   |
| 0.925592  | 0.576736  | 0.583055 | 1.05451   | 2.17226   | 1.42662   |
| 27.4759   | 32.4845   | 25.2501  | 35.001    | 26.2362   | 32.7734   |
| 77.0846   | 82.8435   | 67.1786  | 74.0578   | 71.2434   | 79.1889   |
| 0.0561677 | 0         | 0        | 0         | 0         | 0.0236104 |
| 3.8009    | 7.37874   | 1.10905  | 3.41589   | 1.1566    | 0.898613  |
| 1.7746    | 1.88629   | 1.81928  | 1.70463   | 2.18605   | 1.93073   |
| 0.231926  | 0.144513  | 0.243494 | 0.0880766 | 0.0418696 | 0.0649944 |
| 26.543    | 21.4678   | 25.1534  | 20.7265   | 25.1424   | 21.3822   |
| 9.87492   | 10.483    | 11.2634  | 9.21322   | 14.4378   | 13.085    |
| 2.92379   | 2.54123   | 2.64463  | 2.25485   | 6.49639   | 4.1346    |
| 0.0504472 | 0         | 0        | 0         | 0.0497342 | 0.0461658 |
| 3.38981   | 2.28688   | 2.56882  | 2.55527   | 3.06441   | 1.60706   |
| 7.23892   | 7.50077   | 7.47861  | 6.40936   | 7.00977   | 6.68359   |
| 0.128011  | 0.0796742 | 4.05E-19 | 1.08E-05  | 2.57E-06  | 0.106789  |
| 308.377   | 337.988   | 304.486  | 326.238   | 248.682   | 314.963   |
| 1.17128   | 0.843352  | 1.83635  | 1.18615   | 4.7647    | 3.30425   |
| 6.79372   | 5.43408   | 3.5511   | 2.79955   | 4.27958   | 4.09125   |
| 0         | 0         | 0        | 0         | 0         | 0         |
| 58.9618   | 54.3206   | 49.4547  | 59.1259   | 54.4752   | 77.4422   |
| 0         | 0         | 0        | 0         | 0         | 0         |
| 540.754   | 600.343   | 571.539  | 549.373   | 529.683   | 619.44    |
| 3.11903   | 3.60643   | 3.58518  | 3.68168   | 5.74688   | 3.55485   |



|          |          |           |           |          |           |
|----------|----------|-----------|-----------|----------|-----------|
| 0        | 0        | 0         | 0         | 0        | 0         |
| 0        | 0        | 0         | 0         | 0        | 0         |
| 0        | 0        | 0         | 0         | 0        | 0         |
| 2.28294  | 1.67924  | 2.63765   | 1.89042   | 1.95414  | 1.32946   |
| 0.329042 | 0.246031 | 0.331636  | 0.749744  | 0.427694 | 0.387281  |
| 0.148538 | 0.462771 | 0.0935683 | 0.0846136 | 0        | 0.0312195 |
| 7.82389  | 7.84929  | 8.6386    | 8.21338   | 8.23341  | 6.98771   |
| 3.79073  | 4.33306  | 7.75666   | 5.65186   | 7.42209  | 5.26726   |
| 86.5717  | 70.2472  | 62.8458   | 81.5568   | 60.8457  | 84.6175   |
| 76.522   | 71.8057  | 72.5185   | 70.7778   | 63.6078  | 64.8695   |
| 0        | 0        | 0         | 0         | 0        | 0         |
| 15.1185  | 14.0552  | 14.4122   | 14.6437   | 15.2416  | 16.7288   |
| 0.872869 | 1.306    | 0.866004  | 0.365346  | 1.33243  | 0.90328   |
| 22.9809  | 19.2089  | 17.3281   | 18.6416   | 23.3512  | 25.265    |
| 8.01877  | 6.71582  | 5.24334   | 7.21646   | 6.26662  | 7.79883   |
| 1.58302  | 1.58603  | 1.7905    | 2.21572   | 3.08618  | 3.15886   |
| 1.58762  | 2.80286  | 2.50021   | 8.44151   | 1.28976  | 2.66946   |
| 0        | 0        | 0         | 0         | 0        | 0         |
| 2.15248  | 1.77856  | 2.24019   | 2.0258    | 1.57124  | 1.53424   |
| 25.3365  | 23.0243  | 23.685    | 19.7771   | 29.6091  | 24.9038   |
| 0.298142 | 0.371545 | 0.30145   | 0.156411  | 0.386891 | 0.353479  |
| 18.5413  | 20.65    | 19.7828   | 18.9155   | 16.6415  | 17.094    |
| 0.126142 | 12.34    | 0.15892   | 114.178   | 1.29802  | 8.74902   |
| 0        | 0        | 0         | 0         | 0        | 0         |
| 10.4493  | 10.8424  | 8.70423   | 12.0527   | 8.34043  | 9.79855   |
| 0        | 0        | 0         | 0         | 0        | 0         |
| 27.5822  | 29.3549  | 31.4803   | 35.7055   | 26.2176  | 32.6171   |
| 0.7888   | 0.924678 | 0.840668  | 0.550272  | 0.693985 | 0.49053   |
| 5.52122  | 7.19348  | 5.6039    | 11.8368   | 4.71548  | 5.20391   |
| 0        | 0        | 0         | 0         | 0        | 0         |
| 22.6272  | 24.0745  | 21.2725   | 25.2408   | 20.305   | 22.935    |
| 41.1462  | 57.7611  | 40.6575   | 34.7325   | 37.3575  | 46.7219   |
| 22.7931  | 24.2788  | 22.5647   | 24.3149   | 24.5044  | 24.2344   |
| 2.50123  | 3.15414  | 3.08907   | 3.08953   | 1.48338  | 1.90365   |
| 24.8951  | 26.1756  | 25.0417   | 24.8614   | 24.7366  | 26.9502   |
| 36.0783  | 34.8997  | 33.8991   | 25.2506   | 35.1191  | 30.0677   |
| 3.85214  | 4.01638  | 3.65422   | 3.63187   | 4.28803  | 3.42458   |
| 0        | 0        | 0         | 0         | 0        | 0         |
| 5.57784  | 6.93549  | 4.8023    | 4.77679   | 4.93969  | 6.67504   |
| 3.4905   | 3.1528   | 2.77828   | 4.71651   | 2.16885  | 2.82077   |
| 2.55078  | 3.82541  | 1.96916   | 0.800391  | 2.27871  | 2.6682    |
| 6.5376   | 8.51591  | 6.77892   | 7.724     | 6.99397  | 8.02945   |
| 203.319  | 124.684  | 190.426   | 140.855   | 236.68   | 279.981   |

|           |           |           |           |           |           |
|-----------|-----------|-----------|-----------|-----------|-----------|
| 0.0435971 | 0.0724409 | 0.0732347 | 0.0827824 | 0.0787059 | 0.0366526 |
| 0         | 0         | 0.0361571 | 0         | 0         | 0         |
| 44.9127   | 46.027    | 44.3291   | 45.226    | 47.3354   | 50.0368   |
| 0.0202758 | 0.0505354 | 0         | 0         | 0.109812  | 0         |
| 0         | 0         | 0         | 0         | 0         | 0         |
| 0.269482  | 0.316073  | 0.119826  | 0.361195  | 0.154534  | 0.106615  |
| 22.7581   | 23.1428   | 26.0733   | 19.9707   | 27.0951   | 22.962    |
| 4.81377   | 4.51403   | 5.54675   | 4.02495   | 6.04664   | 4.21729   |
| 3.86258   | 3.79249   | 4.66574   | 3.39777   | 5.13728   | 3.56221   |
| 12.2476   | 15.7425   | 10.8254   | 10.666    | 13.4748   | 14.4478   |
| 24.3499   | 23.5974   | 25.7574   | 22.2345   | 24.0577   | 21.3686   |
| 0.115155  | 0.0717531 | 0.181348  | 0.180392  | 0.218284  | 0.15732   |
| 3.33311   | 5.68949   | 2.62793   | 3.74045   | 2.44284   | 3.34409   |
| 0.979554  | 0.646263  | 1.94188   | 1.52628   | 1.26388   | 0.762969  |
| 25.2975   | 22.1542   | 26.6612   | 21.5586   | 29.4416   | 26.1972   |
| 0.857266  | 0.534162  | 1.26004   | 1.70917   | 1.31548   | 1.08107   |
| 3.32758   | 3.58061   | 3.85123   | 2.87714   | 3.2566    | 3.53288   |
| 0.0455536 | 0.0283844 | 0.143477  | 0.0518984 | 0.074014  | 0.114892  |
| 10.6453   | 9.80478   | 9.20945   | 6.96435   | 11.2916   | 8.19      |
| 11.3855   | 9.81193   | 12.5023   | 11.2382   | 8.46146   | 7.99653   |
| 3.6768    | 1.55182   | 4.96838   | 2.00994   | 8.79946   | 4.46174   |
| 28.6522   | 29.4115   | 24.5057   | 31.4264   | 27.3441   | 31.7808   |
| 0         | 0         | 0         | 0         | 0         | 0         |
| 0.238309  | 0.252983  | 0.233516  | 0.402224  | 0.353736  | 0.281973  |
| 5.09155   | 5.8223    | 13.8608   | 13.4246   | 8.36856   | 9.62674   |
| 0         | 0         | 0         | 0         | 0         | 0         |
| 0         | 15.3948   | 0.262897  | 169.933   | 0.184591  | 8.81846   |
| 102.53    | 110.56    | 82.2202   | 98.6247   | 71.6364   | 105.862   |
| 0         | 0         | 0         | 0         | 0         | 0         |
| 11.3728   | 11.2732   | 11.7254   | 14.9635   | 11.6828   | 12.8519   |
| 4.73098   | 6.09876   | 6.089     | 4.86533   | 4.64247   | 5.31528   |
| 6.79566   | 7.28986   | 7.83102   | 6.64135   | 7.90519   | 6.2506    |
| 23.5826   | 24.5573   | 24.0163   | 25.3375   | 22.6559   | 19.4605   |
| 39.288    | 43.3764   | 42.5634   | 41.4447   | 43.1797   | 39.1552   |
| 0         | 0         | 0         | 0         | 0         | 0         |
| 12.6756   | 15.1584   | 10.2421   | 13.088    | 13.5304   | 11.8961   |
| 10.2864   | 9.5951    | 11.5736   | 9.35205   | 11.9363   | 11.7303   |
| 0.868177  | 1.03199   | 0.673093  | 0.669544  | 0.622105  | 0.640055  |
| 51.8031   | 53.064    | 39.9534   | 36.6375   | 43.1517   | 45.3673   |
| 0.905521  | 0.897638  | 1.19268   | 1.45368   | 0.824799  | 0.605566  |
| 80.4163   | 80.1372   | 80.1372   | 85.2223   | 81.6443   | 83.0913   |
| 1.97168   | 2.03278   | 1.32432   | 2.20649   | 1.57987   | 1.57237   |
| 12.1594   | 9.99454   | 10.43     | 16.6236   | 17.3182   | 17.5306   |

|           |           |          |           |           |          |
|-----------|-----------|----------|-----------|-----------|----------|
| 17.331    | 19.3227   | 12.0357  | 19.1608   | 11.1877   | 10.2707  |
| 0         | 0         | 0        | 0         | 0         | 0        |
| 127.237   | 135.99    | 148.097  | 119.546   | 173.4     | 132.361  |
| 0         | 0.198627  | 0        | 0         | 0         | 0        |
| 13.5963   | 16.8486   | 14.3023  | 20.7443   | 11.9415   | 11.8936  |
| 3.88437   | 5.62752   | 2.88782  | 3.97191   | 2.33418   | 2.42326  |
| 0.230933  | 0.21062   | 0.132633 | 0.184751  | 0.257179  | 0.136334 |
| 0         | 0         | 0        | 0         | 0         | 0        |
| 3.22568   | 2.82836   | 3.52917  | 2.46864   | 3.79887   | 2.7945   |
| 0.087247  | 0.0604268 | 0.135619 | 0.12264   | 0.327996  | 0.36468  |
| 266.513   | 293.733   | 259.694  | 294.486   | 231.27    | 234.945  |
| 9.10507   | 9.67629   | 11.4093  | 10.5036   | 9.10105   | 7.69597  |
| 8.8516    | 9.36893   | 8.98033  | 7.14354   | 9.15705   | 6.8909   |
| 4.47203   | 5.05576   | 3.31887  | 4.90146   | 2.08284   | 3.86624  |
| 26.9347   | 32.3351   | 38.5809  | 39.4693   | 31.2615   | 31.4724  |
| 0         | 0         | 0        | 0         | 0         | 0        |
| 12.3217   | 10.7366   | 12.884   | 9.9701    | 15.3854   | 14.8615  |
| 28.5742   | 29.1729   | 33.8247  | 35.1043   | 30.0746   | 31.9244  |
| 5.45805   | 7.34067   | 3.35066  | 3.71468   | 3.72513   | 4.12667  |
| 83.4727   | 95.2016   | 84.0803  | 84.3736   | 75.2136   | 96.3167  |
| 7.36607   | 8.45085   | 7.09795  | 6.25355   | 11.1247   | 7.97058  |
| 0.924604  | 1.39229   | 1.79583  | 0.790039  | 1.04324   | 1.65182  |
| 23.9999   | 23.2101   | 27.7681  | 25.2251   | 28.7441   | 29.1938  |
| 0         | 0         | 0        | 0         | 0         | 0        |
| 0.475779  | 9.55217   | 0.867008 | 88.3483   | 0.378788  | 4.32024  |
| 0.0546234 | 0.0340358 | 0        | 0.124463  | 0.0591669 | 0        |
| 40.177    | 44.866    | 42.4673  | 40.9633   | 39.8627   | 43.6742  |
| 3.92926   | 4.11332   | 4.3442   | 4.08161   | 5.36273   | 4.51706  |
| 0         | 0         | 0        | 0         | 0         | 0.261235 |
| 0.249186  | 0.103512  | 0.262033 | 0.129595  | 0.427362  | 0.363146 |
| 22.0759   | 21.6373   | 21.1638  | 25.1507   | 26.9957   | 28.0086  |
| 55.6954   | 57.414    | 55.3016  | 42.1952   | 73.2282   | 47.2909  |
| 17.3089   | 18.3775   | 13.5734  | 14.2686   | 11.5245   | 12.7865  |
| 0.0325596 | 0         | 0        | 0.0741891 | 0.0352679 | 0        |
| 2.64391   | 2.13663   | 2.09941  | 1.92963   | 2.18895   | 2.10115  |
| 0.0773447 | 0.024096  | 0        | 0         | 0.0209439 | 0        |
| 18.3028   | 18.4918   | 18.7752  | 18.7609   | 16.8953   | 19.3991  |
| 4.31033   | 3.29616   | 6.51029  | 5.74773   | 9.52341   | 7.20631  |
| 26.9332   | 27.9756   | 28.7836  | 25.7719   | 28.7567   | 28.6663  |
| 14.009    | 13.824    | 10.768   | 11.9466   | 10.4156   | 11.8384  |
| 7.49135   | 7.29434   | 7.95489  | 7.03298   | 7.76544   | 6.247    |
| 2.39222   | 5.96236   | 0        | 0         | 0         | 0        |
| 27.6318   | 28.4424   | 25.0259  | 25.2065   | 29.84     | 30.0609  |

|           |           |           |           |           |           |
|-----------|-----------|-----------|-----------|-----------|-----------|
| 0         | 0         | 0         | 0         | 0         | 0         |
| 0         | 0         | 0         | 0         | 0         | 0         |
| 14.1568   | 15.0453   | 17.2087   | 17.5681   | 19.163    | 20.1843   |
| 0.223226  | 0.389457  | 0.0562464 | 0         | 0.0967174 | 0.0375337 |
| 5.51181   | 4.23079   | 4.07587   | 3.23076   | 4.36955   | 4.80174   |
| 21.6782   | 22.7281   | 21.6713   | 20.5018   | 17.199    | 17.3908   |
| 0         | 0         | 0         | 0         | 0         | 0         |
| 7.21731   | 6.60213   | 7.93199   | 5.97011   | 8.77406   | 7.16503   |
| 24.1077   | 24.7413   | 21.7813   | 21.9311   | 19.6746   | 18.8471   |
| 2.34776   | 2.06755   | 2.20852   | 1.53353   | 2.67868   | 1.94748   |
| 6.81267   | 6.21598   | 7.86539   | 6.00982   | 7.60264   | 6.47701   |
| 59.9077   | 61.1571   | 53.7173   | 63.665    | 59.2481   | 65.3834   |
| 1.86579   | 1.31795   | 1.92044   | 1.52914   | 3.11609   | 1.14927   |
| 0.0873216 | 0.0466372 | 0.0157161 | 0.042636  | 0.0270243 | 0.0314624 |
| 17.0758   | 15.3563   | 19.0438   | 15.2194   | 18.7401   | 16.8558   |
| 0.0188743 | 0         | 0         | 0.0645094 | 0.0613327 | 0.0793392 |
| 3.24199   | 4.42698   | 3.25885   | 4.00788   | 3.58637   | 3.30549   |
| 17.1567   | 17.1444   | 21.4673   | 22.8486   | 19.6803   | 18.0432   |
| 16.2461   | 16.5521   | 17.9603   | 30.2035   | 12.675    | 20.3196   |
| 2.23287   | 2.6423    | 2.19847   | 2.50112   | 1.72757   | 1.57748   |
| 0         | 0         | 0         | 0         | 0         | 0         |
| 0         | 0         | 0         | 0         | 0         | 0         |
| 1.27608   | 35.8224   | 1.38204   | 109.036   | 9.99082   | 22.642    |
| 0.628467  | 0.987506  | 0.481951  | 1.24522   | 0.82873   | 0.804025  |
| 17.944    | 16.4438   | 16.1111   | 14.6852   | 16.6809   | 18.2797   |
| 0.0276924 | 0         | 0.0348884 | 0         | 0         | 0         |
| 17.0649   | 20.1385   | 18.8917   | 18.7559   | 18.495    | 19.9403   |
| 41.8524   | 39.0618   | 42.3069   | 35.2822   | 39.182    | 37.9474   |
| 30.7877   | 34.8508   | 27.5101   | 32.2694   | 27.6987   | 29.8255   |
| 0         | 0         | 0         | 0         | 0         | 0         |
| 0         | 0         | 0         | 0         | 0         | 0         |
| 36.9438   | 35.5448   | 47.2655   | 41.0959   | 49.6486   | 49.8904   |
| 3.38827   | 2.89739   | 4.1854    | 2.8111    | 4.71713   | 3.52862   |
| 78.4025   | 79.41     | 83.8329   | 93.575    | 83.2057   | 97.7736   |
| 23.859    | 23.4308   | 21.9254   | 22.7158   | 24.5488   | 25.8819   |
| 0.0366387 | 0.0913181 | 0         | 0.333934  | 0.0396863 | 0.154013  |
| 0         | 0         | 0         | 0         | 0         | 0         |
| 1.92901   | 2.02929   | 2.09887   | 1.59832   | 2.08946   | 1.68493   |
| 7.53423   | 8.06628   | 8.82335   | 6.74006   | 11.5263   | 8.72846   |
| 23.8297   | 24.2306   | 33.396    | 32.3015   | 36.7494   | 29.0285   |
| 19.9216   | 18.8571   | 19.3381   | 19.4097   | 18.2181   | 17.6636   |
| 0.52459   | 0.472518  | 0.62368   | 0.200715  | 0.851641  | 0.342742  |
| 3.84225   | 9.66653   | 3.51626   | 14.7424   | 5.69296   | 11.6103   |

|           |           |           |           |           |           |
|-----------|-----------|-----------|-----------|-----------|-----------|
| 6.26133   | 6.36052   | 9.37042   | 6.85241   | 16.1538   | 10.9746   |
| 65.6243   | 59.2594   | 71.3519   | 61.2271   | 76.3034   | 73.1959   |
| 50.3634   | 50.5931   | 52.26     | 41.1794   | 57.9107   | 42.2859   |
| 0.363828  | 0.906805  | 0.392889  | 0.414503  | 0.619286  | 0.393268  |
| 0.0721546 | 0         | 0         | 0         | 0         | 0         |
| 3.42E-11  | 0.0161725 | 0         | 0.0443551 | 3.53E-11  | 0.0109103 |
| 10.6387   | 6.72232   | 12.1656   | 9.0287    | 14.95     | 9.54593   |
| 0         | 0         | 0         | 0         | 0         | 0         |
| 1.71367   | 1.23253   | 1.76419   | 1.48379   | 1.8403    | 1.45305   |
| 9.70048   | 8.08062   | 13.0175   | 9.15852   | 12.6352   | 10.5371   |
| 0         | 0         | 0         | 0         | 0         | 0         |
| 0.0223249 | 0.0278212 | 0.112509  | 0.114461  | 0.221106  | 0.084464  |
| 0.234805  | 0.168176  | 0.478193  | 0.229513  | 0.0483101 | 0.037496  |
| 0.137866  | 0.137446  | 0.0694762 | 0.0314136 | 0.328533  | 0.162267  |
| 4.36239   | 3.89691   | 4.68103   | 4.28065   | 5.66606   | 3.98483   |
| 1.12726   | 1.25527   | 0.141263  | 0.0612012 | 3.44832   | 1.97503   |
| 14.4109   | 10.8041   | 18.0833   | 9.87714   | 12.3758   | 10.233    |
| 59.3459   | 49.2303   | 40.6781   | 46.8641   | 33.6649   | 40.0292   |
| 2.17552   | 1.83354   | 3.5013    | 2.13469   | 4.75382   | 2.07215   |
| 0         | 0         | 0         | 0         | 0         | 0         |
| 0         | 0         | 0         | 0         | 0         | 0         |
| 18.7747   | 22.7882   | 20.312    | 21.2307   | 18.2952   | 21.9452   |
| 5.88816   | 5.97961   | 6.71182   | 7.02727   | 10.663    | 9.93159   |
| 7.95703   | 7.3634    | 7.50364   | 5.6905    | 8.73836   | 7.3784    |
| 0.190933  | 0.158627  | 0.400914  | 0.0362545 | 0.310223  | 0.133767  |
| 0         | 0         | 0         | 0         | 0.0262487 | 0.020373  |
| 21.4321   | 22.764    | 22.7494   | 22.0784   | 19.8677   | 19.2517   |
| 0         | 0         | 0         | 0         | 0         | 0         |
| 0         | 0         | 0         | 0         | 0         | 0         |
| 0.0383448 | 0.191143  | 0.301936  | 0.571896  | 0.339203  | 0.263273  |
| 9.70249   | 10.4664   | 11.1106   | 9.87713   | 10.1977   | 9.09012   |
| 2.78302   | 2.38219   | 2.30205   | 1.98565   | 3.1972    | 2.33971   |
| 0.105428  | 0.131384  | 0         | 0.360338  | 0.228395  | 0.0886348 |
| 109.969   | 110.384   | 106.975   | 96.4502   | 97.3249   | 107.035   |
| 0.72642   | 1.38897   | 1.25079   | 0.827799  | 1.04525   | 1.29041   |
| 48.3216   | 44.4171   | 42.2272   | 36.7078   | 42.6466   | 44.4936   |
| 0         | 0         | 0         | 0         | 0         | 0         |
| 1.02497   | 0.873463  | 1.17738   | 0.729835  | 1.73882   | 1.07714   |
| 0         | 0.0641201 | 0.0648227 | 0.0879285 | 0         | 0.0432568 |
| 19.6947   | 18.3195   | 22.1304   | 22.2605   | 21.2133   | 18.2791   |
| 0         | 0         | 0         | 0         | 0         | 0         |
| 69.826    | 72.0943   | 49.961    | 71.7559   | 40.2596   | 56.7424   |
| 7.78713   | 8.32641   | 7.74771   | 5.59657   | 7.5794    | 7.13102   |

|           |           |           |           |           |           |
|-----------|-----------|-----------|-----------|-----------|-----------|
| 1.26814   | 1.79107   | 1.59767   | 1.34845   | 1.8315    | 1.84798   |
| 27.7888   | 26.264    | 26.7982   | 33.043    | 32.136    | 34.8497   |
| 333.356   | 358.019   | 649.937   | 457.651   | 1223.34   | 692.096   |
| 43.6338   | 43.3174   | 38.4151   | 43.525    | 47.0604   | 55.5621   |
| 0         | 0         | 0         | 0         | 0         | 0         |
| 135.876   | 149.916   | 129.357   | 133.549   | 117.921   | 136.634   |
| 14.9431   | 16.226    | 19.1905   | 17.6617   | 15.5412   | 15.8927   |
| 6.81157   | 5.74575   | 8.15131   | 7.26313   | 10.3993   | 8.29475   |
| 7.77583   | 8.53106   | 9.0709    | 5.89241   | 10.5794   | 7.72625   |
| 9.79724   | 7.99834   | 10.2019   | 8.54222   | 9.55095   | 8.38794   |
| 1.12518   | 1.03867   | 1.62758   | 0.680516  | 1.15859   | 0.397068  |
| 13.5404   | 10.9106   | 15.4833   | 18.2143   | 15.4325   | 14.7667   |
| 31.3944   | 32.5749   | 32.4264   | 27.5881   | 33.414    | 28.4095   |
| 0.217002  | 0.15453   | 0.234335  | 0.176591  | 0.436526  | 0.286686  |
| 0         | 0         | 0         | 0         | 0         | 0         |
| 25.2721   | 25.5577   | 28.0534   | 20.9196   | 29.7292   | 23.2025   |
| 20.6473   | 20.8183   | 22.4525   | 23.4961   | 19.3682   | 18.9256   |
| 0         | 0         | 0         | 0.0415831 | 0.0395354 | 0         |
| 11.5125   | 12.1293   | 10.0068   | 12.5815   | 11.6641   | 11.9544   |
| 53.1534   | 57.7895   | 51.7813   | 55.968    | 51.8286   | 58.7901   |
| 0.0442758 | 0.0275882 | 0         | 0.0252213 | 0.0239793 | 0         |
| 9.68711   | 9.84439   | 11.1859   | 9.20945   | 10.2437   | 9.3375    |
| 4.15199   | 3.59589   | 2.21262   | 2.06005   | 3.35137   | 3.27323   |
| 8.91943   | 8.98375   | 9.08222   | 8.25905   | 11.984    | 9.44059   |
| 16.9737   | 25.2249   | 53.7199   | 45.7019   | 72.2478   | 88.7623   |
| 98.4766   | 74.5131   | 101.095   | 99.0303   | 105.007   | 71.9036   |
| 2.32553   | 1.56971   | 1.98939   | 0.568765  | 2.14462   | 1.24582   |
| 0         | 0         | 0         | 0         | 0         | 0         |
| 2.49629   | 2.22446   | 3.4545    | 1.82411   | 3.5915    | 2.5617    |
| 2.29337   | 2.17475   | 2.9835    | 3.43622   | 2.01517   | 2.55664   |
| 7.16076   | 6.63128   | 8.24899   | 7.29377   | 7.91399   | 6.47449   |
| 17.4601   | 18.4727   | 23.0464   | 33.4693   | 17.3581   | 18.0723   |
| 0         | 0         | 0.0814209 | 0         | 0         | 0.0543329 |
| 7.5693    | 9.30874   | 6.90121   | 9.19092   | 7.44375   | 10.0478   |
| 0.410695  | 1.59384   | 0.916804  | 0.460906  | 0.349289  | 0.454962  |
| 20.4534   | 19.3433   | 17.763    | 16.8194   | 16.402    | 16.2387   |
| 2.44352   | 2.01739   | 2.57823   | 1.9835    | 3.60623   | 2.86318   |
| 32.2286   | 34.1904   | 38.4551   | 33.4973   | 30.683    | 30.879    |
| 1.06072   | 1.20169   | 1.45784   | 1.31832   | 2.82014   | 2.18886   |
| 7.70503   | 7.38344   | 9.3512    | 6.64267   | 9.54986   | 6.80239   |
| 0         | 0         | 0         | 0         | 0         | 0         |
| 6.57419   | 9.23001   | 4.72682   | 4.25592   | 4.62562   | 3.24287   |
| 10.9099   | 13.1282   | 12.6746   | 11.7384   | 10.8309   | 11.7596   |

|           |           |          |           |          |           |
|-----------|-----------|----------|-----------|----------|-----------|
| 1.27107   | 1.4316    | 0.439863 | 0.932605  | 1.05632  | 0.67357   |
| 0.170207  | 0.0707038 | 0.50035  | 0.129276  | 0.737457 | 0.28619   |
| 1.69992   | 2.03965   | 2.18653  | 1.7721    | 2.50651  | 2.11101   |
| 0.251247  | 0.313104  | 0.158267 | 0.322022  | 0.612328 | 0.31684   |
| 9.12475   | 9.31507   | 10.2955  | 11.2374   | 10.9319  | 11.5779   |
| 2.74864   | 2.03562   | 2.88229  | 1.62951   | 2.84472  | 1.25371   |
| 45.6198   | 39.2556   | 48.3355  | 40.3716   | 51.4441  | 48.6369   |
| 0         | 0         | 0        | 0         | 0        | 0         |
| 0.242676  | 0         | 0.036411 | 0.0329264 | 0.213047 | 0.236984  |
| 0         | 0         | 0        | 0         | 0        | 0.140043  |
| 8.20073   | 9.89912   | 8.3059   | 10.7353   | 9.19638  | 11.5448   |
| 0.419024  | 0.41775   | 1.37256  | 0.483354  | 0.363103 | 0.0704557 |
| 1.32E-151 | 0.151997  | 0.151865 | 0         | 0        | 0.101265  |
| 5.46901   | 6.26947   | 6.79375  | 6.14285   | 8.75187  | 6.54729   |
| 11.3037   | 10.8212   | 11.5488  | 11.8977   | 12.3184  | 13.5615   |
| 1.45381   | 1.08386   | 1.76617  | 0.902151  | 2.03872  | 1.10222   |
| 2.25389   | 2.87901   | 3.83342  | 3.78752   | 3.90618  | 3.26865   |
| 31.7679   | 35.8112   | 26.3252  | 33.0723   | 24.9462  | 27.2932   |
| 0.578565  | 0.481433  | 0.491426 | 0.222198  | 0.293846 | 0.518756  |
| 37.57     | 37.3417   | 37.3407  | 34.6163   | 48.0611  | 43.2029   |
| 17.3023   | 16.4829   | 12.8588  | 14.8716   | 12.859   | 15.2673   |
| 1.55908   | 1.23459   | 0.486424 | 0.857187  | 0.457841 | 0.386127  |
| 12.0731   | 9.7179    | 10.5226  | 10.6881   | 11.2765  | 10.4162   |
| 6.92819   | 9.95812   | 8.46076  | 7.21523   | 8.01091  | 8.89772   |
| 5.27217   | 3.99308   | 2.2392   | 1.67485   | 1.61011  | 2.76529   |
| 0.661644  | 0.2395    | 0.47433  | 0.416283  | 0.763379 | 0.333182  |
| 1.75359   | 1.85753   | 1.62618  | 1.26356   | 1.05021  | 1.05798   |
| 0         | 0         | 0        | 0         | 0        | 0         |
| 0.386932  | 0.217308  | 0.420073 | 0.426501  | 0.578284 | 0.521725  |
| 11.6975   | 11.292    | 12.3752  | 9.67801   | 13.4425  | 11.123    |
| 3.70475   | 3.10273   | 4.14522  | 2.28189   | 5.63299  | 2.53702   |
| 428.21    | 538.499   | 145.08   | 219.176   | 119.393  | 131.117   |
| 4.23375   | 3.98641   | 3.88193  | 3.43003   | 3.88102  | 3.55937   |
| 0.16015   | 0.199579  | 0.201766 | 0.304094  | 0.144559 | 0.49368   |
| 11.8881   | 15.3167   | 13.8656  | 14.9139   | 12.91    | 12.4261   |
| 365.414   | 340.41    | 390.106  | 394.131   | 225.053  | 360.249   |
| 26.1434   | 27.2634   | 27.5622  | 27.9901   | 27.8677  | 27.6807   |
| 5.34866   | 4.84927   | 5.09462  | 4.33424   | 4.42669  | 4.72748   |
| 3.34083   | 2.40491   | 4.54882  | 2.50591   | 4.06825  | 1.65729   |
| 1.95746   | 2.22255   | 1.53447  | 1.68496   | 2.82704  | 2.77934   |
| 0         | 0.0765865 | 0        | 0         | 0        | 0         |
| 277.211   | 268.105   | 249.984  | 257.403   | 320.745  | 390.672   |
| 12.9694   | 12.4645   | 12.6361  | 8.70961   | 12.0155  | 9.31034   |

|           |           |           |           |           |          |
|-----------|-----------|-----------|-----------|-----------|----------|
| 0         | 0         | 0         | 0         | 0         | 0        |
| 3.53354   | 4.21801   | 3.2333    | 4.57625   | 1.81654   | 1.95014  |
| 8.26989   | 8.20909   | 9.18301   | 7.57465   | 10.6549   | 7.38785  |
| 7.52867   | 7.40604   | 5.67608   | 7.54734   | 4.99247   | 5.04611  |
| 2.97122   | 3.0677    | 3.07575   | 3.15267   | 2.12391   | 2.52041  |
| 8.93227   | 8.55338   | 8.00755   | 7.92072   | 8.91935   | 8.88938  |
| 15.4202   | 17.806    | 16.9268   | 16.0148   | 14.0336   | 14.8655  |
| 50.8935   | 50.1658   | 41.7226   | 38.2376   | 42.3725   | 42.5199  |
| 9.91583   | 9.49622   | 10.9846   | 9.64625   | 13.0309   | 10.6525  |
| 2.80E-63  | 6.26E-107 | 0         | 0         | 9.81E-178 | 0        |
| 13.2122   | 14.461    | 8.53986   | 7.19901   | 8.2134    | 8.98273  |
| 0.409207  | 0.659939  | 0.0303259 | 0.246813  | 0.365025  | 0.121421 |
| 38.2905   | 30.745    | 52.0967   | 37.4967   | 84.1417   | 72.416   |
| 5.32093   | 5.62185   | 5.43035   | 5.61812   | 6.92411   | 6.6179   |
| 1893.35   | 2132.55   | 2139.17   | 2081.59   | 2064.57   | 2195.71  |
| 4.72785   | 4.46413   | 5.16357   | 5.12899   | 3.47816   | 3.67632  |
| 9.07026   | 9.24758   | 7.48387   | 8.22122   | 7.19637   | 7.73359  |
| 0         | 0.0953189 | 0.0481817 | 0         | 0.041425  | 0        |
| 0.0128415 | 0         | 0.0161785 | 0.0438904 | 0.0417291 | 0.010796 |
| 5.03431   | 4.07419   | 3.99249   | 2.92488   | 3.58468   | 2.95088  |
| 21.2062   | 22.6518   | 25.5671   | 25.7815   | 26.291    | 25.3769  |
| 12.0686   | 11.6623   | 12.9498   | 14.3904   | 12.0339   | 14.6497  |
| 0.60688   | 1.03493   | 0.804821  | 1.67393   | 0.691958  | 0.805596 |
| 14.3317   | 17.2037   | 16.9823   | 15.9396   | 16.9504   | 15.149   |
| 0.0467785 | 0.0582952 | 0.0147335 | 0.0133235 | 0         | 0        |
| 1.11262   | 1.07776   | 1.01516   | 0.365933  | 1.17554   | 1.01221  |
| 0.0584627 | 0.145712  | 0.220963  | 0         | 0.0633256 | 0.147451 |
| 278.063   | 307.133   | 311.224   | 351.999   | 254.62    | 278.847  |
| 5.28277   | 5.58054   | 6.02336   | 5.52241   | 8.57303   | 8.81094  |
| 5.46477   | 5.21108   | 5.41515   | 4.68222   | 5.18063   | 4.54149  |
| 158.103   | 161.098   | 137.104   | 160.909   | 105.222   | 131.81   |
| 869.364   | 705.187   | 602.371   | 643.586   | 824.306   | 1047.34  |
| 89.5992   | 87.0067   | 88.957    | 105.482   | 96.7251   | 123.576  |
| 0         | 0         | 0         | 0         | 0         | 0        |
| 0         | 0         | 0         | 0         | 0         | 0        |
| 0.668652  | 0.277758  | 0.374402  | 0.423213  | 0.643796  | 0.377886 |
| 2.08004   | 2.47779   | 2.54348   | 1.35913   | 2.41873   | 1.67157  |
| 1557.43   | 1639.95   | 1135.16   | 1729.07   | 548.541   | 1102.24  |
| 0         | 0         | 0         | 0         | 0         | 0        |
| 0.375205  | 0.196876  | 0.522462  | 0.24748   | 0.363634  | 0.265633 |
| 0.237284  | 0.538602  | 0.192178  | 0.0868929 | 0.247842  | 0.142491 |
| 6.80923   | 6.35049   | 5.58559   | 5.07115   | 5.23278   | 4.81877  |
| 52.0406   | 57.6943   | 53.4423   | 52.2886   | 49.4698   | 52.9541  |



|           |           |           |           |           |           |
|-----------|-----------|-----------|-----------|-----------|-----------|
| 31.0065   | 29.1106   | 20.2267   | 17.0242   | 12.1063   | 13.2523   |
| 10.3395   | 11.101    | 12.1938   | 9.59096   | 11.6369   | 9.52577   |
| 0         | 0         | 0         | 0         | 0         | 0         |
| 12.9599   | 13.6761   | 13.4863   | 12.7763   | 14.8702   | 13.2898   |
| 8.62277   | 8.70432   | 9.08349   | 8.35604   | 11.9438   | 11.6986   |
| 4.47123   | 3.12481   | 5.20069   | 3.50913   | 5.98163   | 4.93      |
| 0.0924773 | 0.0256096 | 0         | 0.0936511 | 0         | 0         |
| 0         | 0         | 0         | 0         | 0         | 0         |
| 6.26161   | 7.89122   | 7.32524   | 4.80053   | 7.52189   | 3.72057   |
| 0         | 0         | 0         | 0         | 0         | 0         |
| 17.0804   | 20.7592   | 30.7029   | 33.4885   | 19.2691   | 20.9969   |
| 0.0179734 | 0.0223984 | 0.0679316 | 0.122861  | 0.0973421 | 0.0906627 |
| 0         | 0         | 0         | 0         | 0         | 0         |
| 4.64786   | 4.69902   | 4.40393   | 3.83894   | 3.88568   | 3.71933   |
| 0.137421  | 0.119877  | 0.069252  | 0.109593  | 0.0148851 | 0.0346593 |
| 0.217764  | 0.477364  | 0.701983  | 0.604562  | 0.590481  | 0.292333  |
| 15.829    | 16.2817   | 16.1486   | 15.4265   | 15.0376   | 15.061    |
| 0.0856964 | 0.0213589 | 0.172744  | 0.0585795 | 0.0185649 | 0         |
| 3.44786   | 3.57846   | 4.73566   | 3.75051   | 5.92462   | 5.4473    |
| 18.8557   | 21.6698   | 19.1684   | 18.5652   | 25.4483   | 27.4816   |
| 9.2045    | 9.68406   | 10.0775   | 7.96234   | 7.30554   | 7.90269   |
| 11.6626   | 11.6091   | 11.8387   | 9.5436    | 12.6718   | 10.0705   |
| 5.66252   | 6.00479   | 5.68024   | 5.17314   | 6.53857   | 5.46116   |
| 1.96668   | 2.16949   | 2.11484   | 2.87708   | 4.10326   | 2.78587   |
| 0         | 0         | 0         | 0         | 0         | 0         |
| 20.1095   | 21.4751   | 18.2411   | 18.067    | 19.6943   | 17.5504   |
| 30.3443   | 22.3723   | 19.9922   | 13.7607   | 24.2915   | 18.5804   |
| 6.08805   | 6.07976   | 6.42869   | 7.31356   | 4.43344   | 6.33764   |
| 922.717   | 964.204   | 594.52    | 647.297   | 463.555   | 502.585   |
| 17.7502   | 15.2809   | 22.5184   | 16.9272   | 20.3781   | 20.3058   |
| 13.8999   | 13.0903   | 13.4619   | 15.5265   | 14.5167   | 16.8626   |
| 8.3869    | 10.4517   | 7.09242   | 6.54455   | 7.46672   | 7.24414   |
| 0         | 0         | 0         | 0         | 0         | 0         |
| 13.6551   | 12.0005   | 15.1318   | 11.9739   | 19.0908   | 12.2037   |
| 0         | 0         | 0         | 0         | 0         | 0         |
| 35.61     | 38.5625   | 43.3586   | 42.2709   | 37.7634   | 45.9422   |
| 69.3493   | 68.2914   | 91.5881   | 81.4406   | 87.7005   | 82.8026   |
| 0.22873   | 0.180528  | 0.403434  | 0.243216  | 0.495512  | 0.288445  |
| 0         | 0         | 0         | 0         | 0         | 0         |
| 8.70797   | 9.34759   | 7.71218   | 7.95635   | 8.1248    | 10.6914   |
| 19.7937   | 18.7723   | 14.3789   | 20.5446   | 14.8617   | 20.2466   |
| 459.792   | 422.737   | 450.893   | 598.301   | 428.167   | 453.437   |
| 1.15885   | 1.06627   | 1.37676   | 1.16578   | 0.872933  | 0.75112   |

|           |           |          |          |          |          |
|-----------|-----------|----------|----------|----------|----------|
| 19.9148   | 20.4922   | 17.2617  | 19.0033  | 18.1381  | 16.498   |
| 6.81585   | 7.71745   | 6.56511  | 7.24893  | 6.11483  | 5.42858  |
| 14.374    | 14.7653   | 8.66547  | 6.24634  | 7.61568  | 8.55339  |
| 8.83522   | 9.54091   | 8.73635  | 8.30128  | 7.53028  | 6.24415  |
| 163.577   | 155.693   | 128.921  | 176.408  | 148.922  | 184.387  |
| 16.4225   | 15.256    | 17.5978  | 13.106   | 15.3137  | 12.3806  |
| 13.0809   | 11.7658   | 15.9162  | 15.0589  | 18.1136  | 13.7177  |
| 78.0434   | 73.606    | 81.9303  | 72.1695  | 102.16   | 101.867  |
| 0.91161   | 1.04538   | 0.911067 | 0.972762 | 1.06529  | 0.87611  |
| 0.861544  | 0.484198  | 0.6172   | 0.654362 | 1.15279  | 0.866333 |
| 197.461   | 0         | 186.579  | 56.2409  | 160.414  | 124.506  |
| 94.7846   | 83.2916   | 87.4583  | 82.4472  | 89.6042  | 95.8492  |
| 18.0641   | 17.1632   | 19.2288  | 19.5516  | 16.3892  | 16.5962  |
| 0.0618012 | 0.192541  | 0        | 0.140818 | 0.100413 | 0.129892 |
| 2.39888   | 2.77594   | 3.34605  | 3.41625  | 3.43362  | 3.24123  |
| 1.6258    | 1.06369   | 0.256035 | 0.555675 | 1.3648   | 0.922612 |
| 4.12097   | 3.27839   | 3.64076  | 3.57399  | 1.64333  | 2.27034  |
| 0         | 0.0417071 | 0        | 0        | 0        | 0        |
| 1.29698   | 0.76061   | 1.63401  | 0.84022  | 1.51505  | 0.833826 |
| 17.7618   | 15.9976   | 17.1549  | 16.1051  | 15.683   | 14.7042  |
| 0         | 0         | 0        | 0        | 0        | 0        |
| 0         | 0         | 0        | 0        | 0        | 0        |
| 1.26994   | 1.95498   | 1.3176   | 3.27663  | 1.61833  | 1.63289  |
| 4.16113   | 4.8831    | 4.76186  | 5.09625  | 4.88285  | 5.07255  |
| 18.3508   | 18.244    | 15.9197  | 16.4712  | 19.2854  | 15.4086  |
| 4.94268   | 4.7108    | 6.28375  | 4.73389  | 5.84939  | 5.10751  |
| 0         | 0         | 0        | 0        | 0        | 0        |
| 55.7329   | 56.6142   | 62.9351  | 49.9766  | 51.6491  | 51.2858  |
| 2.08971   | 3.19105   | 2.81813  | 3.52085  | 2.51857  | 1.33619  |
| 0         | 0         | 0        | 0        | 0        | 0        |
| 0.162756  | 0.202826  | 0        | 0        | 0        | 0        |
| 2.33722   | 1.51617   | 2.37985  | 2.22504  | 1.90739  | 1.10359  |
| 6.2926    | 6.09662   | 7.08088  | 5.33956  | 8.31271  | 6.84438  |
| 0         | 0         | 0        | 0        | 0        | 0        |
| 22.5904   | 22.4773   | 25.0991  | 22.9402  | 26.3576  | 23.5979  |
| 123.09    | 38.3485   | 77.5375  | 210.351  | 133.328  | 103.483  |
| 9.12634   | 9.73165   | 9.83999  | 9.5354   | 9.93955  | 9.48765  |
| 0         | 0         | 0        | 0        | 0        | 0        |
| 15.6055   | 15.3295   | 14.9277  | 14.1121  | 16.7042  | 16.7654  |
| 0.30547   | 0.407868  | 0.412337 | 0.422592 | 0.685392 | 0.587    |
| 16.7243   | 21.5942   | 15.0831  | 16.2419  | 13.4798  | 15.8922  |
| 8.82153   | 8.02953   | 7.57626  | 7.13615  | 7.02791  | 6.73815  |
| 0.166792  | 0.670238  | 1.73125  | 0.84063  | 5.2044   | 4.22876  |

|           |          |            |           |           |           |
|-----------|----------|------------|-----------|-----------|-----------|
| 7.46287   | 6.79575  | 8.2077     | 7.41163   | 10.38     | 10.2199   |
| 17.2904   | 18.3043  | 17.2124    | 16.8194   | 14.7715   | 13.4003   |
| 35.7121   | 34.0279  | 36.8882    | 36.5232   | 40.6467   | 35.3755   |
| 0         | 0        | 0          | 0         | 0         | 0         |
| 13.7376   | 13.2     | 17.1203    | 13.9819   | 20.8469   | 18.075    |
| 2.25367   | 2.32533  | 3.20565    | 1.32519   | 2.70361   | 1.40573   |
| 0.0248711 | 0        | 0.031334   | 0         | 0.10776   | 0.104547  |
| 10.2315   | 10.6496  | 10.6371    | 10.1556   | 10.6947   | 10.2283   |
| 0         | 0        | 0          | 0         | 0.0322764 | 0         |
| 3.92654   | 4.46935  | 3.85626    | 2.67698   | 3.85129   | 3.79489   |
| 3.16909   | 2.96199  | 2.79969    | 2.24555   | 4.43739   | 2.0632    |
| 14.435    | 16.1002  | 12.5169    | 17.5496   | 12.194    | 21.8933   |
| 12.2672   | 13.1774  | 10.1422    | 12.0104   | 8.0971    | 8.62115   |
| 1.87767   | 1.89711  | 1.55037    | 2.29672   | 1.91769   | 2.35549   |
| 1.24234   | 0.914689 | 1.55679    | 1.51935   | 2.14886   | 1.82406   |
| 21.5533   | 20.401   | 29.7718    | 17.3705   | 25.3147   | 20.8622   |
| 0.245134  | 0.229113 | 0.308833   | 0.227808  | 0.0497848 | 0         |
| 2.10551   | 2.89268  | 1.26477    | 2.38802   | 2.64246   | 3.05836   |
| 0.151092  | 4.69E-05 | 0.00639588 | 8.33E-13  | 4.54E-05  | 0.0871216 |
| 20.0881   | 23.4067  | 22.8109    | 20.3591   | 23.0881   | 22.7999   |
| 0         | 0        | 0          | 0         | 0         | 0         |
| 0.0281938 | 0        | 0          | 0.0642414 | 0.030539  | 0.0474057 |
| 17.27     | 16.8979  | 16.3985    | 17.8998   | 18.585    | 20.1767   |
| 65.7728   | 66.4531  | 43.9514    | 50.6331   | 42.5137   | 55.1213   |
| 16.8835   | 16.3506  | 18.9003    | 13.4318   | 20.9319   | 14.8213   |
| 0         | 0        | 0          | 0         | 0         | 0         |
| 0.350204  | 0.245488 | 0.124089   | 0         | 0         | 0.372626  |
| 3.56837   | 4.95699  | 8.33014    | 6.40896   | 5.61589   | 5.54995   |
| 49.4983   | 51.5851  | 52.7344    | 47.1618   | 43.0817   | 48.4156   |
| 0.407032  | 0.250015 | 0.58685    | 0.34859   | 0.479798  | 0.336411  |
| 6.23347   | 5.93438  | 7.20115    | 5.31573   | 6.77599   | 5.3338    |
| 37.2041   | 88.8637  | 19.7903    | 214.761   | 71.738    | 27.2813   |
| 0.479842  | 55.8114  | 0.60813    | 741.397   | 1.33651   | 26.1064   |
| 0         | 0        | 0          | 0         | 0         | 0         |
| 18.7742   | 26.6353  | 18.0304    | 19.9087   | 12.0941   | 16.3012   |
| 7.32498   | 7.48433  | 6.61659    | 7.40048   | 6.46445   | 6.53846   |
| 18.8863   | 15.4598  | 21.7472    | 18.426    | 22.7818   | 21.0801   |
| 0         | 0        | 0          | 0         | 0         | 0         |
| 4.73797   | 4.57222  | 7.14012    | 5.45032   | 7.14399   | 7.3221    |
| 13.4648   | 12.6158  | 11.3019    | 9.50559   | 12.309    | 11.4732   |
| 23.2764   | 22.6608  | 22.0641    | 21.4242   | 24.4457   | 25.5209   |
| 1.05448   | 0.821305 | 0.830304   | 0.57064   | 1.31352   | 0.421093  |
| 0         | 0        | 0          | 0         | 0         | 0         |

|           |           |           |           |           |           |
|-----------|-----------|-----------|-----------|-----------|-----------|
| 4.38376   | 4.20204   | 4.60805   | 4.7448    | 4.52731   | 4.27378   |
| 0.0574319 | 0.0715715 | 0.0241186 | 0         | 0.0207363 | 0.0482837 |
| 5.45738   | 5.16895   | 4.94025   | 5.55111   | 5.12904   | 4.98614   |
| 6.67626   | 8.7247    | 7.86552   | 10.6897   | 9.8115    | 11.1953   |
| 15.2097   | 14.2306   | 15.3697   | 14.4431   | 15.1292   | 12.9923   |
| 0         | 0.133336  | 0         | 5.44504   | 0         | 0         |
| 0.44992   | 0.747586  | 0.692796  | 0.740402  | 0.649792  | 0.840562  |
| 23.0492   | 23.1705   | 21.8043   | 25.5473   | 21.5614   | 24.8209   |
| 54.3875   | 45.8564   | 38.469    | 20.7861   | 36.6964   | 28.3899   |
| 10.8034   | 10.8597   | 12.5701   | 11.5533   | 13.3397   | 12.7107   |
| 0.242461  | 0.102792  | 0.068445  | 0.276232  | 0.264812  | 0         |
| 0         | 0         | 0.759289  | 1.13557   | 0.376621  | 0.50668   |
| 1.27389   | 0.769704  | 1.75081   | 1.14346   | 1.37985   | 1.03852   |
| 0         | 0         | 0         | 0         | 0         | 0         |
| 1.25664   | 1.25282   | 1.26655   | 0.715837  | 0.95282   | 0.845181  |
| 4.32163   | 4.69047   | 5.69043   | 5.13223   | 6.86869   | 6.047     |
| 4.66473   | 3.52943   | 7.41606   | 3.16336   | 12.0303   | 8.17019   |
| 5.22291   | 4.87118   | 5.61203   | 4.19952   | 7.26167   | 4.39096   |
| 0         | 0         | 0         | 0         | 0         | 0         |
| 0         | 0.427766  | 0.608137  | 0.496592  | 0.32275   | 0.213763  |
| 3.45713   | 3.4967    | 3.4967    | 2.6616    | 2.27849   | 2.48826   |
| 65.6037   | 72.9606   | 67.9987   | 76.7994   | 64.5171   | 74.8041   |
| 5.23886   | 5.3311    | 15.3884   | 5.23567   | 6.34029   | 0.858569  |
| 77.5395   | 74.0254   | 74.1177   | 71.6774   | 71.0428   | 73.621    |
| 0.036662  | 0         | 0         | 0.0835367 | 0         | 0         |
| 0         | 0         | 0         | 0.457033  | 0.108632  | 0         |
| 56.5704   | 67.4913   | 54.5728   | 58.4931   | 50.8326   | 45.9322   |
| 0.397045  | 0.388769  | 0.428759  | 0.323105  | 0.522229  | 0.381486  |
| 0.958202  | 1.66234   | 0.890077  | 1.29248   | 0.710758  | 0.847905  |
| 8.93732   | 7.79638   | 13.2436   | 10.4973   | 17.5636   | 12.6421   |
| 77.1426   | 76.9856   | 83.9475   | 117.945   | 70.7514   | 84.0338   |
| 62.4933   | 77.2717   | 79.3636   | 68.1967   | 59.8886   | 63.0283   |
| 55.2654   | 67.5442   | 50.3647   | 63.4627   | 50.4962   | 68.4819   |
| 31.1524   | 30.1639   | 30.6787   | 32.1521   | 59.6728   | 36.6917   |
| 10.2337   | 6.4755    | 7.09616   | 6.77856   | 5.88621   | 8.63698   |
| 5.52686   | 5.33124   | 5.65747   | 5.53985   | 5.91463   | 6.58999   |
| 1274.06   | 342.269   | 344.431   | 1209.48   | 423.205   | 1399.93   |
| 33.4314   | 32.5879   | 30.3857   | 30.2643   | 29.1391   | 31.7543   |
| 7.20743   | 7.35344   | 6.48226   | 7.64139   | 6.32517   | 5.72464   |
| 3.45268   | 3.44971   | 4.41328   | 3.54366   | 4.20872   | 3.09735   |
| 7.11403   | 5.36234   | 40.5119   | 22.2554   | 51.3295   | 28.5292   |
| 20.1121   | 22.506    | 20.6667   | 21.475    | 20.2403   | 21.6885   |
| 32.7949   | 34.1473   | 29.6596   | 34.6428   | 27.6207   | 36.8394   |

|           |           |           |           |           |           |
|-----------|-----------|-----------|-----------|-----------|-----------|
| 0         | 0         | 0         | 0         | 0         | 0         |
| 19.2185   | 20.9088   | 19.645    | 21.228    | 23.0121   | 29.0458   |
| 12.3459   | 13.3262   | 12.3347   | 12.0419   | 11.0308   | 10.8505   |
| 0.0188863 | 0         | 0         | 0         | 0         | 0         |
| 4.12582   | 4.17848   | 3.70324   | 2.80283   | 3.46597   | 3.03896   |
| 0         | 0         | 0         | 0         | 0         | 0         |
| 0.232734  | 0.236953  | 0.114364  | 0.249489  | 0.0839034 | 0.147753  |
| 2.55E-18  | 7.42E-16  | 4.72E-48  | 5.76E-53  | 0.110585  | 1.66E-26  |
| 0         | 0         | 0         | 0         | 0         | 0         |
| 0.0368025 | 0         | 0.0463658 | 0.0419285 | 0.0398637 | 0         |
| 0         | 0         | 0         | 0         | 0.117864  | 0         |
| 0         | 0         | 0         | 0         | 0         | 0         |
| 1.14267   | 0.981967  | 1.19512   | 1.39325   | 1.26895   | 1.21238   |
| 0         | 0         | 0         | 0         | 0         | 0         |
| 0.714261  | 1.25241   | 1.09359   | 0.988929  | 1.10776   | 0.990231  |
| 18.9643   | 18.0547   | 22.2375   | 18.3668   | 28.5766   | 25.9845   |
| 0         | 0         | 0         | 0         | 0         | 0         |
| 0.0991802 | 0.123602  | 0.143946  | 0.112997  | 0.19099   | 0.135081  |
| 0.391488  | 0.292723  | 0.55898   | 0.208141  | 0.310971  | 0.0877676 |
| 4.03359   | 3.72166   | 4.00675   | 5.16982   | 5.46138   | 3.88019   |
| 1.48361   | 1.25126   | 1.66145   | 1.34879   | 2.01283   | 1.29769   |
| 0.0327446 | 0.0816126 | 0.0412535 | 0.111916  | 0.0354683 | 0.0825864 |
| 36.1597   | 37.9402   | 25.9197   | 37.8815   | 30.0509   | 36.2236   |
| 0.365056  | 0         | 2.32833   | 0.831805  | 1.18626   | 2.45526   |
| 0.0887082 | 0.110548  | 0.558797  | 0.101064  | 0         | 0         |
| 13.3491   | 14.7634   | 10.3022   | 13.2373   | 10.4106   | 13.2725   |
| 0.713087  | 0.731085  | 0.712665  | 0.775269  | 0.949599  | 0.775657  |
| 34.8551   | 37.3915   | 33.5186   | 33.2659   | 38.1545   | 38.4141   |
| 1.4946    | 1.21535   | 1.43527   | 1.16956   | 1.32092   | 0.847097  |
| 28.0756   | 29.6768   | 37.6849   | 43.2318   | 36.3677   | 34.7466   |
| 12.8872   | 13.3684   | 14.5126   | 14.9692   | 13.3742   | 12.8621   |
| 39.0188   | 38.3422   | 34.6202   | 36.7336   | 33.8947   | 37.4069   |
| 18.9641   | 19.2239   | 20.54     | 19.4449   | 20.0816   | 20.179    |
| 0         | 0         | 0         | 0         | 0         | 0         |
| 0.120153  | 0.199647  | 0.252293  | 0.197728  | 0.477208  | 0.404058  |
| 33.4838   | 30.8158   | 34.6313   | 33.6012   | 43.3403   | 39.4405   |
| 30.7444   | 29.4055   | 26.3469   | 25.644    | 26.3607   | 29.5618   |
| 508.642   | 604.465   | 584.531   | 970.993   | 769.466   | 810.681   |
| 0.097572  | 0         | 0.491706  | 0         | 0.105688  | 0         |
| 0.0773861 | 0         | 0         | 0.117553  | 0.0838231 | 0.043373  |
| 0         | 0         | 0         | 0         | 0         | 0         |
| 0.912602  | 0.785394  | 1.17859   | 1.28551   | 1.64834   | 1.71495   |
| 3.08275   | 2.59722   | 3.63766   | 2.31668   | 3.43323   | 2.48828   |

|           |           |           |           |           |           |
|-----------|-----------|-----------|-----------|-----------|-----------|
| 6.72867   | 10.23     | 4.4505    | 14.1818   | 5.90357   | 8.3156    |
| 6.04993   | 6.95786   | 6.8975    | 7.42096   | 10.1693   | 22.2983   |
| 1.27614   | 1.52796   | 1.76537   | 1.59642   | 1.95147   | 0.904573  |
| 0.106995  | 0         | 0         | 0         | 0         | 0         |
| 32.9689   | 34.7392   | 37.5298   | 37.2683   | 27.9517   | 33.5499   |
| 2.16076   | 2.11968   | 2.23652   | 1.8405    | 3.05743   | 2.35497   |
| 9.92869   | 10.9373   | 11.865    | 9.90763   | 11.091    | 7.88391   |
| 19.293    | 17.6729   | 18.6126   | 16.4763   | 19.4799   | 18.4996   |
| 9.97599   | 10.6981   | 12.224    | 9.9501    | 10.4155   | 9.3165    |
| 2.88383   | 0.34954   | 1.71571   | 1.0051    | 1.43351   | 3.47603   |
| 30.4236   | 30.9758   | 24.9891   | 28.3755   | 24.9772   | 31.9003   |
| 0         | 0         | 0.0595326 | 0         | 0.0767761 | 0.0397266 |
| 0.25923   | 0.290747  | 0.42457   | 0.443005  | 0.280793  | 0.305113  |
| 18.3014   | 20.6426   | 16.763    | 19.8642   | 22.97     | 23.459    |
| 3.37796   | 3.29832   | 3.6152    | 3.06292   | 3.38616   | 3.09762   |
| 11.2974   | 14.6716   | 7.64094   | 9.75533   | 16.1015   | 16.8963   |
| 6.25592   | 5.17357   | 7.80924   | 4.70791   | 7.56374   | 4.61607   |
| 0         | 0         | 0         | 0         | 0.258442  | 0         |
| 0         | 0         | 0         | 0         | 0         | 0         |
| 2.77E-08  | 2.60E-08  | 3.15E-08  | 2.74E-08  | 2.05E-08  | 0.0683358 |
| 69.0811   | 70.4226   | 69.0522   | 68.9108   | 69.7372   | 71.4148   |
| 0.0138114 | 0.0172118 | 0.0522012 | 0.0157351 | 0.150849  | 0.0232229 |
| 26.6333   | 22.4345   | 36.006    | 33.5483   | 30.7505   | 32.8128   |
| 0.185589  | 0.27591   | 0.35623   | 0.621472  | 0.36949   | 0.401319  |
| 105.234   | 115.648   | 109.435   | 113.769   | 106.474   | 123.179   |
| 17.5263   | 15.3855   | 13.8742   | 10.6821   | 16.9994   | 12.7986   |
| 0         | 0         | 0         | 0         | 0         | 0         |
| 0.192735  | 0.514685  | 0.138753  | 0.376422  | 0.38771   | 0.0694434 |
| 0         | 0         | 0         | 0         | 0         | 0         |
| 4.80521   | 4.87415   | 5.19154   | 5.1562    | 3.51028   | 4.34513   |
| 7.786     | 6.76885   | 7.22605   | 6.01254   | 6.78836   | 6.1794    |
| 6.46729   | 6.00615   | 6.69472   | 5.44393   | 5.83398   | 5.72284   |
| 16.1787   | 16.7891   | 17.5885   | 15.9504   | 15.8383   | 14.5705   |
| 0.529939  | 0.49482   | 0.801287  | 0.924182  | 1.18372   | 0.638608  |
| 26.025    | 23.1003   | 25.4844   | 23.4917   | 24.2484   | 22.2132   |
| 0         | 0         | 0         | 0         | 0         | 0         |
| 0         | 0         | 0         | 0         | 0         | 0         |
| 8.50003   | 8.77471   | 10.6525   | 9.25995   | 9.48923   | 7.15233   |
| 8.68298   | 9.3884    | 9.60511   | 8.94158   | 8.41      | 9.52038   |
| 0         | 0         | 0         | 0         | 0         | 0         |
| 5.3623    | 5.55135   | 5.48902   | 5.02735   | 6.17136   | 4.98949   |
| 6.6918    | 6.51177   | 6.58312   | 6.40728   | 7.03252   | 6.43187   |
| 0         | 0         | 0         | 0         | 0         | 0         |

|          |          |          |          |          |          |
|----------|----------|----------|----------|----------|----------|
| 77.9411  | 72.6578  | 78.375   | 72.0786  | 69.519   | 65.0741  |
| 4.23267  | 4.81539  | 8.75237  | 10.136   | 6.26372  | 5.84053  |
| 0        | 0        | 0        | 0        | 0        | 0        |
| 11.0572  | 7.87145  | 15.8613  | 11.4387  | 17.7638  | 14.4376  |
| 5.47658  | 5.81659  | 3.58368  | 4.37763  | 3.77934  | 4.86415  |
| 0.482497 | 0.4373   | 0.165784 | 0.149918 | 0.712679 | 0.663776 |
| 3.11305  | 3.05277  | 2.80482  | 3.0757   | 2.37087  | 2.22498  |
| 7.05734  | 6.84812  | 7.42407  | 6.21216  | 8.30339  | 5.44194  |
| 26.2224  | 47.592   | 12.4164  | 28.5214  | 11.0564  | 10.7268  |
| 281.382  | 396.749  | 133.299  | 189.798  | 5.49271  | 5.0891   |
| 0        | 0        | 0        | 0        | 0        | 0        |
| 5.5876   | 5.18691  | 5.17192  | 5.26157  | 5.5583   | 5.32071  |
| 0        | 0        | 0        | 0        | 0        | 0        |
| 9.80806  | 10.2869  | 10.1694  | 11.0247  | 11.45    | 11.3955  |
| 0        | 0        | 0        | 0.613476 | 0        | 0.1006   |
| 25.1336  | 25.0394  | 29.9832  | 26.1497  | 25.3654  | 25.5786  |
| 11.0322  | 11.7656  | 13.8162  | 10.142   | 13.1748  | 11.309   |
| 0        | 0        | 0        | 0        | 0        | 0        |
| 49.7955  | 63.2315  | 48.7258  | 55.9587  | 35.2123  | 45.9979  |
| 1.80255  | 1.76498  | 1.78432  | 1.02681  | 1.39463  | 1.62367  |
| 2.0772   | 1.94575  | 0.218386 | 4.29204  | 0.894622 | 0.194307 |
| 103.203  | 0        | 97.516   | 29.3945  | 195.629  | 108.455  |
| 0        | 0        | 0        | 0        | 0        | 0        |
| 2.45456  | 2.37357  | 3.08084  | 2.50676  | 6.54896  | 4.63491  |
| 293.885  | 332.569  | 233.945  | 315.623  | 156.61   | 256.24   |
| 5.95655  | 4.94223  | 4.13427  | 4.16385  | 5.27279  | 3.32106  |
| 5.96588  | 5.39198  | 6.34407  | 4.89574  | 6.33416  | 5.67358  |
| 0        | 0        | 0        | 0        | 0        | 0        |
| 13.0032  | 10.9633  | 8.79216  | 7.128    | 10.0311  | 6.02119  |
| 13.5238  | 17.1597  | 12.7513  | 16.3318  | 8.1355   | 11.5246  |
| 0        | 0        | 0        | 0        | 0        | 0        |
| 0.178227 | 0.312895 | 0.466851 | 0.388752 | 0.575929 | 0.256113 |
| 2.10485  | 2.95791  | 2.25685  | 2.04086  | 2.32844  | 2.63553  |
| 0        | 0        | 0        | 0        | 0        | 0        |
| 1.17351  | 1.34993  | 0.796086 | 1.23411  | 1.27112  | 0.910689 |
| 26.8072  | 43.5336  | 18.4697  | 52.365   | 9.66387  | 24.1922  |
| 0.153843 | 0.191719 | 0.387639 | 0.315487 | 0.399934 | 0.362145 |
| 0        | 0.148198 | 0.299645 | 0        | 0        | 0        |
| 0.032413 | 0.121179 | 0        | 0.221566 | 0.245764 | 0.19075  |
| 0.490644 | 0.580868 | 0.339977 | 0.503084 | 0.372019 | 0.288743 |
| 25.5802  | 24.7513  | 24.7212  | 21.8373  | 26.6132  | 24.4353  |
| 15.7047  | 14.286   | 14.4749  | 14.3781  | 14.561   | 15.7962  |
| 166.282  | 174.395  | 150.894  | 152.093  | 118.397  | 123.615  |

|          |           |           |           |           |          |
|----------|-----------|-----------|-----------|-----------|----------|
| 3.48481  | 2.32113   | 2.05892   | 2.43687   | 2.21274   | 1.6164   |
| 0.306742 | 0.127421  | 1.28817   | 2.0968    | 2.5473    | 2.23584  |
| 0        | 0.0608211 | 0         | 0         | 0         | 0        |
| 0.879219 | 0.97046   | 2.40526   | 2.11783   | 1.79586   | 3.27347  |
| 1.12518  | 0.667673  | 0.71027   | 0.993914  | 1.9797    | 2.38722  |
| 2.16063  | 2.00802   | 1.61479   | 1.37681   | 2.49902   | 1.84725  |
| 0        | 0.0491942 | 0         | 0.0449737 | 0         | 0.199125 |
| 0        | 0         | 0         | 0         | 0.149644  | 0.464511 |
| 1.01814  | 0.666122  | 0.994098  | 0.724968  | 0.551414  | 0.44938  |
| 9.86184  | 9.37416   | 8.77426   | 8.41495   | 8.98774   | 9.3545   |
| 22.3221  | 26.5784   | 22.9431   | 27.1471   | 26.1314   | 29.7522  |
| 0        | 0         | 0.0838669 | 0         | 0         | 0        |
| 38.4911  | 41.7263   | 41.0849   | 41.9907   | 43.0149   | 42.3363  |
| 172.867  | 195.609   | 231.562   | 248.892   | 416.306   | 373.956  |
| 0        | 0         | 0         | 0         | 0         | 0        |
| 48.2187  | 45.0701   | 40.2704   | 41.269    | 38.9869   | 49.338   |
| 0        | 0         | 0         | 0         | 0         | 0        |
| 4.18947  | 3.10142   | 3.67108   | 3.84779   | 3.06756   | 3.54843  |
| 25.7252  | 27.8803   | 21.8122   | 21.0938   | 18.8498   | 23.0493  |
| 24.9495  | 28.082    | 23.9863   | 24.6691   | 19.9146   | 20.7365  |
| 0        | 0         | 0         | 0         | 0         | 0        |
| 1.17636  | 1.1328    | 0.269462  | 1.09653   | 0.579185  | 0.62935  |
| 0        | 0.1263    | 0.399012  | 0.0577321 | 0.0548891 | 0        |
| 2.15617  | 2.11618   | 2.79583   | 1.61534   | 3.76643   | 2.93731  |
| 13.9157  | 13.9077   | 12.92     | 11.4381   | 14.1301   | 11.6648  |
| 24.1042  | 25.0865   | 22.1121   | 20.5337   | 20.3246   | 19.9572  |
| 65.4851  | 81.7508   | 59.1576   | 76.5072   | 59.6502   | 73.5345  |
| 12.2291  | 14.1005   | 12.8727   | 13.3334   | 11.6617   | 11.415   |
| 2.29326  | 3.27804   | 3.60285   | 2.77295   | 2.40824   | 2.3108   |
| 2.40955  | 2.52844   | 2.83571   | 2.58239   | 3.47678   | 2.57464  |
| 0.224242 | 0.319371  | 0.201794  | 0.182482  | 0.242894  | 0.377046 |
| 49.1307  | 48.3154   | 50.2971   | 46.1779   | 47.304    | 45.9495  |
| 2.61032  | 1.96981   | 3.66481   | 3.83384   | 2.24162   | 2.37592  |
| 0.220601 | 0.14662   | 0.240868  | 0.134041  | 0.19116   | 0.148369 |
| 1.46217  | 2.24773   | 1.84212   | 0.70277   | 0.939604  | 0.729276 |
| 9.61496  | 9.1924    | 11.9723   | 8.32921   | 9.05822   | 8.82778  |
| 28.4765  | 38.9151   | 34.7385   | 53.424    | 29.3561   | 51.4682  |
| 26.8849  | 33.6205   | 27.6036   | 25.4748   | 24.1231   | 23.8589  |
| 9.39735  | 9.68218   | 9.1942    | 8.30149   | 10.2277   | 7.88159  |
| 25.708   | 27.1042   | 28.6069   | 24.1842   | 28.9771   | 29.6219  |
| 0.790745 | 1.80661   | 1.16226   | 1.75171   | 1.80821   | 1.66197  |
| 17.356   | 17.631    | 14.3916   | 13.4758   | 17.0638   | 13.1269  |
| 132.761  | 101.456   | 124.455   | 70.9996   | 132.082   | 92.4176  |



|           |           |           |           |           |           |
|-----------|-----------|-----------|-----------|-----------|-----------|
| 0         | 0         | 0         | 0.0815914 | 0         | 0         |
| 8.17548   | 6.03139   | 7.27299   | 7.14012   | 10.998    | 8.86613   |
| 0.229616  | 0.0476911 | 0         | 0.087199  | 0.0414525 | 0         |
| 19.182    | 19.0561   | 19.8376   | 17.5919   | 20.6207   | 17.4357   |
| 0.683349  | 0.414286  | 0.418826  | 0.462909  | 0.480123  | 0.621081  |
| 1.79425   | 1.61123   | 1.7951    | 0.811652  | 2.42937   | 1.33099   |
| 3.808     | 3.42225   | 3.82879   | 2.92007   | 5.55255   | 5.20233   |
| 0.0727331 | 0.1133    | 0.0916331 | 0.0207159 | 0.078783  | 0.0611476 |
| 5.87915   | 5.36151   | 7.57856   | 6.56495   | 9.61553   | 9.59075   |
| 1.20672   | 0.835449  | 3.91896   | 3.54391   | 3.07892   | 2.45735   |
| 190.925   | 200.217   | 140.197   | 162.835   | 125.444   | 157.597   |
| 0.64598   | 0.818436  | 0.888442  | 0.962872  | 1.90671   | 2.25379   |
| 23.073    | 21.7281   | 20.7509   | 18.0076   | 20.1648   | 16.9886   |
| 0.296617  | 0.554466  | 0.373694  | 0.168965  | 0.160645  | 0.748109  |
| 0.0264652 | 0.0329809 | 0         | 0         | 0         | 0         |
| 1.51479   | 1.86941   | 2.11223   | 1.72578   | 2.02311   | 1.43424   |
| 26.6492   | 29.0296   | 27.6856   | 30.7475   | 27.0694   | 23.8937   |
| 1.37145   | 0.920282  | 2.12655   | 1.11175   | 2.08545   | 1.77383   |
| 6.03462   | 3.93922   | 8.20613   | 7.52991   | 6.0178    | 6.28132   |
| 1.46537   | 1.3889    | 1.50824   | 1.15217   | 1.4085    | 1.45752   |
| 0         | 0         | 0         | 0.0611454 | 0         | 0.0451211 |
| 0         | 0         | 0         | 0         | 0         | 0         |
| 0         | 0.053017  | 0         | 0         | 0.0921633 | 0.0536496 |
| 1.26771   | 0.947888  | 2.71511   | 3.03298   | 3.70751   | 1.9184    |
| 3.97262   | 4.81466   | 3.49244   | 2.43704   | 3.02632   | 2.93611   |
| 8.97539   | 6.44383   | 3.59493   | 2.62041   | 7.41791   | 2.60247   |
| 0.204234  | 0.101807  | 0.308766  | 0.186144  | 0.132733  | 0.137362  |
| 0.115963  | 0         | 0         | 0         | 0         | 0.0324972 |
| 7.7571    | 7.99451   | 7.78189   | 7.22291   | 12.0907   | 12.2732   |
| 0.0203187 | 0.0759636 | 0.102395  | 0.138893  | 0.132053  | 0.136658  |
| 206.138   | 180.673   | 129.829   | 123.751   | 117.583   | 160.504   |
| 14.0423   | 11.3511   | 12.1375   | 12.073    | 12.3639   | 11.8546   |
| 68.7721   | 64.5665   | 54.8349   | 62.0443   | 70.7528   | 90.9602   |
| 0         | 0         | 0         | 0         | 0         | 0.0586771 |
| 1.56675   | 1.7947    | 1.95394   | 1.67679   | 2.2799    | 2.40819   |
| 20.7565   | 22.0525   | 17.3143   | 18.8825   | 14.4904   | 14.0556   |
| 25.9422   | 25.0256   | 28.883    | 27.2971   | 24.7393   | 20.5782   |
| 0         | 0         | 0.149514  | 0         | 0         | 0.199544  |
| 8.81677   | 8.47821   | 13.0681   | 12.6863   | 19.8934   | 18.0308   |
| 9.28343   | 8.74117   | 10.1601   | 8.60499   | 10.3385   | 8.44517   |
| 2.38112   | 2.61705   | 2.78262   | 2.38797   | 2.70734   | 1.89026   |
| 0.408096  | 0.508569  | 3.08485   | 0         | 0         | 1.37237   |
| 45.0493   | 35.2934   | 62.2301   | 44.3137   | 74.0688   | 54.1253   |

|           |           |           |           |           |          |
|-----------|-----------|-----------|-----------|-----------|----------|
| 0.0390474 | 0         | 0.098388  | 0         | 0         | 0        |
| 0.153305  | 0.023881  | 0.072428  | 0.0218321 | 0.186813  | 0.144996 |
| 12.871    | 9.02669   | 13.4842   | 8.01448   | 18.7029   | 10.7932  |
| 5.52124   | 5.55737   | 6.87828   | 7.41407   | 5.0901    | 5.47683  |
| 0         | 0         | 0         | 0         | 0         | 0        |
| 6.79993   | 6.44246   | 8.78386   | 7.66084   | 9.09917   | 7.59694  |
| 23.8576   | 25.0171   | 25.7678   | 22.2961   | 25.6782   | 25.6336  |
| 12.4985   | 14.3697   | 13.7145   | 15.1886   | 11.1799   | 11.3663  |
| 3.8441    | 3.96666   | 3.52747   | 3.63195   | 6.056     | 5.54246  |
| 0         | 0         | 0         | 0         | 0         | 0        |
| 0.790044  | 1.4065    | 1.99068   | 1.543     | 0.97801   | 1.61306  |
| 75.9141   | 78.2534   | 71.861    | 72.4839   | 58.8416   | 58.5582  |
| 9.2543    | 9.64981   | 11.0774   | 9.92167   | 11.8652   | 9.59735  |
| 0         | 0         | 0         | 0         | 0         | 0        |
| 0         | 0         | 0         | 0         | 0         | 0        |
| 0.221952  | 0.148937  | 0.150569  | 0.077805  | 0.314388  | 0.344488 |
| 15.4283   | 15.4194   | 14.7612   | 12.8575   | 15.0005   | 13.5071  |
| 0.971966  | 1.33486   | 1.37448   | 0.881355  | 1.74037   | 0.983907 |
| 0         | 0         | 0         | 0         | 0         | 0        |
| 0.668707  | 0         | 0.280825  | 0         | 1.6901    | 0.374794 |
| 0.843787  | 0.394322  | 0.930167  | 0.120164  | 0.971096  | 0.177345 |
| 2.42738   | 3.32157   | 2.57844   | 2.71125   | 2.06219   | 2.16077  |
| 0         | 0         | 0         | 0.0603582 | 0         | 0        |
| 1.03056   | 0.297188  | 1.1298    | 1.76273   | 0.971366  | 0.978958 |
| 5.50363   | 4.25707   | 4.70221   | 2.41438   | 12.6766   | 8.42959  |
| 1.21127   | 3.80166   | 0.452155  | 0.459993  | 0.0485935 | 0.018858 |
| 6.46662   | 5.57413   | 7.14517   | 5.68191   | 7.14688   | 6.69932  |
| 14.3636   | 12.7556   | 13.0017   | 12.1049   | 16.3106   | 13.2925  |
| 32.1185   | 31.3444   | 34.7521   | 32.1105   | 36.4062   | 34.758   |
| 0         | 0         | 0         | 0         | 0         | 0        |
| 22.2493   | 22.9267   | 21.6264   | 16.0918   | 18.4888   | 20.492   |
| 0.286927  | 0.243796  | 0.345054  | 0.282315  | 0.367301  | 0.296046 |
| 2.60876   | 2.72509   | 3.85756   | 2.47241   | 6.12359   | 2.92633  |
| 178.793   | 174.124   | 179.976   | 171.303   | 155.909   | 150.262  |
| 0.311478  | 0.241534  | 0.0488156 | 0.176656  | 0.335719  | 0.130294 |
| 7.60977   | 7.40556   | 8.91787   | 7.32126   | 10.6036   | 9.66276  |
| 0.0931809 | 0.0928975 | 0.164352  | 0.148623  | 0.0807453 | 0.125341 |
| 22.6399   | 21.7421   | 24.9005   | 20.5166   | 22.7825   | 20.1197  |
| 7.32103   | 7.72551   | 8.40522   | 5.4708    | 8.23393   | 6.0278   |
| 0         | 0         | 0         | 0         | 0         | 0        |
| 0.810358  | 1.20475   | 1.30751   | 0.680272  | 1.01636   | 0.554406 |
| 21.6348   | 22.3535   | 21.7146   | 19.5068   | 21.6475   | 20.3088  |
| 13.1253   | 15.0425   | 13.9489   | 15.2996   | 15.3721   | 18.7783  |

|           |          |          |           |           |           |
|-----------|----------|----------|-----------|-----------|-----------|
| 0         | 0        | 0        | 0         | 0         | 0         |
| 42.3589   | 41.6695  | 53.8382  | 47.6608   | 69.3512   | 64.2269   |
| 0.0411973 | 0.05134  | 0        | 0         | 0         | 0         |
| 391.127   | 384.736  | 222.867  | 264.479   | 198.477   | 236.127   |
| 3.44599   | 3.73917  | 4.41017  | 2.44466   | 4.15611   | 3.02703   |
| 0         | 0        | 0        | 0.0277014 | 0         | 0         |
| 23.4943   | 25.2037  | 22.1233  | 24.6971   | 17.9604   | 15.5044   |
| 7.66384   | 9.35634  | 11.0095  | 9.95586   | 9.94553   | 13.4104   |
| 12.7073   | 11.4894  | 13.0628  | 12.7313   | 13.9453   | 12.5893   |
| 9.03672   | 9.60847  | 12.0116  | 11.051    | 13.5729   | 10.6043   |
| 2.09912   | 1.82342  | 0.58896  | 0.412228  | 0.689756  | 0.375241  |
| 0         | 0        | 0        | 0         | 0         | 0         |
| 5.97381   | 6.81435  | 11.5249  | 7.85157   | 11.8747   | 9.30183   |
| 0         | 0        | 0        | 0         | 0         | 0.043228  |
| 0         | 0        | 0        | 0         | 0         | 0         |
| 2.01664   | 2.41971  | 3.03084  | 2.60619   | 3.5027    | 1.89264   |
| 17.3418   | 16.5893  | 14.0973  | 13.7542   | 14.5381   | 17.8378   |
| 0.32787   | 0.572964 | 0.290602 | 6.15E-08  | 0.40629   | 0.297424  |
| 0         | 0        | 0        | 0         | 0         | 0         |
| 2.37454   | 1.21848  | 0.703901 | 1.75047   | 2.42076   | 2.46603   |
| 162.044   | 159.82   | 156.939  | 177.26    | 132.217   | 158.808   |
| 0         | 0        | 0        | 0         | 0         | 0         |
| 0         | 0        | 0        | 0         | 0.0868589 | 0         |
| 0.905549  | 1.12849  | 1.23593  | 0.601811  | 1.63479   | 0.697864  |
| 1.65839   | 1.5131   | 1.49237  | 0.742252  | 1.63594   | 0.896287  |
| 6.7883    | 6.33279  | 6.27167  | 5.83907   | 6.76826   | 5.47781   |
| 37.7355   | 40.5134  | 40.2494  | 35.7775   | 37.2109   | 34.6932   |
| 0         | 0        | 0        | 0         | 0         | 0         |
| 18.438    | 19.4323  | 18.1409  | 18.7254   | 19.7434   | 17.8926   |
| 3.3007    | 3.93099  | 2.19273  | 2.77671   | 2.0123    | 2.20567   |
| 8.21373   | 7.90224  | 7.73255  | 7.53033   | 7.5641    | 7.34299   |
| 0         | 0        | 0        | 0         | 0         | 0         |
| 5.0882    | 5.71925  | 4.90206  | 7.16087   | 8.32118   | 6.62625   |
| 0.764318  | 0.855004 | 0.706623 | 0.368236  | 0.525153  | 0.26374   |
| 96.0743   | 90.9161  | 100.818  | 97.8532   | 89.3833   | 91.9323   |
| 7.03E-10  | 3.39E-09 | 0.127584 | 7.28E-10  | 7.36E-10  | 0.0430487 |
| 0.0908054 | 6.56337  | 0.114402 | 63.7271   | 0.491793  | 2.67194   |
| 69.7383   | 55.2959  | 54.3257  | 55.04     | 61.2963   | 69.9157   |
| 331.862   | 329.51   | 322.71   | 335.899   | 255.196   | 299.822   |
| 5.50355   | 7.00261  | 4.98176  | 5.47975   | 4.03267   | 4.82131   |
| 0         | 0        | 0        | 0         | 0         | 0         |
| 14.8797   | 15.9125  | 12.2861  | 12.201    | 13.4486   | 16.0196   |
| 0         | 0        | 0        | 0         | 0         | 0         |

|           |           |           |           |           |           |
|-----------|-----------|-----------|-----------|-----------|-----------|
| 15.0503   | 14.4812   | 13.6522   | 12.4013   | 13.9139   | 11.7269   |
| 2.47189   | 3.81046   | 3.74439   | 2.92597   | 4.62678   | 4.88547   |
| 7.15541   | 6.28248   | 7.10255   | 5.1259    | 3.75786   | 3.91928   |
| 23.1426   | 27.2503   | 20.8972   | 25.3635   | 20.1589   | 21.8606   |
| 7.33658   | 6.00946   | 7.7738    | 6.46125   | 6.62749   | 3.52166   |
| 12.9725   | 14.3335   | 15.1031   | 14.8662   | 12.3581   | 13.7662   |
| 6.03644   | 4.90849   | 7.31082   | 5.5365    | 5.20412   | 3.78654   |
| 0         | 0         | 0         | 0         | 0         | 0         |
| 0.139301  | 0.173596  | 0.239316  | 0.129848  | 0.576117  | 0.415215  |
| 25.7132   | 25.3405   | 26.7818   | 23.5688   | 25.7774   | 24.9862   |
| 1.38778   | 1.29709   | 1.52985   | 1.77871   | 2.20785   | 1.20318   |
| 1922.49   | 1728.01   | 1598.27   | 2161.14   | 831.032   | 1929.86   |
| 0         | 0.27671   | 0.559485  | 0.50594   | 0.240513  | 0         |
| 0.649201  | 0.674195  | 0.817899  | 1.10944   | 0.351601  | 0.545791  |
| 0.48263   | 0.451089  | 0.699249  | 0.219941  | 0.470497  | 0.263739  |
| 25.1206   | 24.321    | 17.9774   | 22.6873   | 18.4702   | 22.7566   |
| 0.0457957 | 0.0342423 | 0.0807743 | 0.073044  | 0.20338   | 0.130903  |
| 0.0259682 | 0.199111  | 0.0978279 | 2.22E-49  | 0.0885152 | 0.124354  |
| 12.1143   | 12.6115   | 11.9178   | 10.8693   | 14.0415   | 11.7253   |
| 0.10821   | 0.558395  | 0.388453  | 0.789793  | 1.21782   | 3.54E-07  |
| 0.145719  | 0.0302657 | 0.152987  | 0.0553383 | 0.0263066 | 0.0204179 |
| 4.91965   | 3.6221    | 3.92795   | 4.55701   | 4.30775   | 4.68343   |
| 0.295879  | 0.692084  | 1.62018   | 1.69359   | 1.78737   | 1.7875    |
| 83.8582   | 87.5797   | 63.1087   | 90.6473   | 68.276    | 80.5821   |
| 12.5281   | 11.1747   | 12.3242   | 11.3728   | 9.88332   | 10.5806   |
| 7.32905   | 7.1337    | 6.45951   | 7.319     | 8.67937   | 7.08789   |
| 0.452359  | 1.97614   | 0         | 0         | 0         | 0         |
| 37.501    | 39.6138   | 40.4274   | 36.9327   | 43.2845   | 37.9573   |
| 0         | 0         | 0         | 0         | 0         | 0         |
| 41.1917   | 47.3576   | 38.109    | 41.3708   | 42.7282   | 50.5665   |
| 0.636779  | 0.504989  | 0.182329  | 0.32976   | 0.627042  | 0.097336  |
| 17.7616   | 18.842    | 14.929    | 16.3016   | 15.5555   | 16.4718   |
| 27.1326   | 30.4353   | 29.1661   | 29.8113   | 29.924    | 26.7437   |
| 2.12708   | 2.24913   | 2.43619   | 1.54213   | 3.21165   | 1.7702    |
| 0.0112925 | 0.0140727 | 0.102441  | 0.0128653 | 0.0999002 | 0.0379765 |
| 0         | 0.0581245 | 0.0587615 | 0         | 0.227345  | 0.0588181 |
| 55.5316   | 61.7297   | 61.3102   | 60.6062   | 56.3324   | 56.8854   |
| 21.7176   | 23.5278   | 21.5169   | 24.9891   | 22.1234   | 20.7386   |
| 0         | 0         | 0         | 0         | 0         | 0         |
| 1.69395   | 1.85969   | 2.13413   | 2.98673   | 1.17955   | 1.11895   |
| 8.96931   | 8.26532   | 11.6186   | 9.29021   | 10.9617   | 9.65195   |
| 0.60693   | 0.667372  | 0.832112  | 0.854162  | 0.928114  | 0.660328  |
| 7.05943   | 7.58798   | 8.28249   | 6.14719   | 7.77178   | 6.01266   |

|           |           |           |           |           |           |
|-----------|-----------|-----------|-----------|-----------|-----------|
| 33.4854   | 30.6422   | 32.4167   | 28.4663   | 39.7077   | 34.2195   |
| 26.0262   | 25.6736   | 20.426    | 28.8526   | 24.5929   | 29.5156   |
| 9.17772   | 9.33387   | 9.15589   | 9.48911   | 8.76863   | 9.40396   |
| 0         | 0.0392235 | 0         | 0.0358584 | 0.0340926 | 0         |
| 0         | 0         | 0         | 0         | 0         | 0         |
| 0         | 0         | 0         | 0         | 0         | 0         |
| 713.566   | 754.61    | 662.542   | 672.144   | 530.553   | 690.895   |
| 0         | 0         | 0         | 0         | 0         | 0         |
| 0.0133255 | 0.0664254 | 0.0755476 | 0.0683175 | 0.103925  | 0.0504136 |
| 13.0334   | 13.6966   | 11.6958   | 11.028    | 13.3579   | 9.68858   |
| 0         | 0         | 0         | 0         | 0         | 0.0330968 |
| 0         | 0         | 0         | 0         | 0         | 0         |
| 158.421   | 129.36    | 31.3712   | 22.1814   | 30.1723   | 37.0011   |
| 2.78117   | 2.28854   | 3.49049   | 2.60014   | 3.80587   | 2.945     |
| 0.477808  | 80.5834   | 0.702297  | 857.138   | 2.93345   | 32.3145   |
| 0.65424   | 1.01914   | 0.789903  | 1.02488   | 1.09252   | 1.48966   |
| 0         | 0         | 0         | 0         | 0         | 0         |
| 0         | 0         | 0         | 0         | 0         | 0         |
| 0.0504058 | 0.270998  | 0.189695  | 0.172841  | 0.365146  | 0.169505  |
| 3.37867   | 3.79407   | 3.18078   | 3.53201   | 2.65429   | 2.71563   |
| 0         | 0.0460692 | 0         | 0.0421168 | 0.0800855 | 0         |
| 0         | 0         | 0         | 0         | 0         | 0         |
| 0.612451  | 0.564188  | 0.729576  | 0.68259   | 0.898399  | 0.678565  |
| 25.8689   | 29.3099   | 30.549    | 27.7669   | 26.5688   | 28.5762   |
| 0         | 0.0277374 | 0         | 0         | 0         | 0.0187122 |
| 0         | 0         | 0         | 0         | 0         | 0         |
| 18.5446   | 17.499    | 18.095    | 16.2753   | 18.7695   | 15.0811   |
| 0         | 0         | 0         | 0         | 0         | 0         |
| 1.43567   | 1.12997   | 1.71353   | 0.688686  | 1.14585   | 1.07993   |
| 21.9098   | 20.9643   | 22.9913   | 22.9989   | 24.1695   | 23.1718   |
| 5.52006   | 4.72818   | 3.88275   | 3.46456   | 5.4744    | 3.08727   |
| 0.935431  | 1.66029   | 1.60705   | 0.936542  | 1.28958   | 0.714935  |
| 6.71916   | 5.82483   | 5.98046   | 5.56525   | 5.72227   | 4.82307   |
| 15.4192   | 15.6699   | 16.2536   | 17.3806   | 20.74     | 22.847    |
| 14.4246   | 13.8116   | 14.7348   | 14.9109   | 12.6081   | 12.1269   |
| 5.40391   | 6.60138   | 3.4839    | 3.36015   | 2.07057   | 1.69654   |
| 148.833   | 150.536   | 141.833   | 151.525   | 126.933   | 157.46    |
| 0         | 0.192761  | 0.194874  | 0         | 0         | 0.130041  |
| 0         | 0.212271  | 0         | 0         | 0         | 0.143203  |
| 1.13165   | 6.10023   | 0         | 0         | 1.69637   | 1.42E-06  |
| 0         | 0         | 0         | 0.0853027 | 0         | 0.0629475 |
| 0         | 0         | 0         | 0         | 119.424   | 0         |
| 32.1512   | 22.7816   | 32.4153   | 25.8757   | 43.1547   | 30.3415   |

|           |           |          |           |          |           |
|-----------|-----------|----------|-----------|----------|-----------|
| 0.893164  | 0         | 0        | 0         | 0        | 0.250298  |
| 91.9845   | 88.4203   | 92.634   | 98.2831   | 84.4546  | 99.1249   |
| 56.882    | 60.0587   | 46.9827  | 44.7479   | 38.291   | 53.3841   |
| 0.0301882 | 0.0376204 | 0.190163 | 0.0343929 | 0.130797 | 0         |
| 3.72259   | 3.67927   | 3.34246  | 4.48495   | 4.00157  | 4.37671   |
| 37.0478   | 34.177    | 42.3775  | 34.0686   | 34.7636  | 34.0413   |
| 6.96358   | 4.81408   | 8.70906  | 12.3346   | 4.07422  | 6.45263   |
| 47.947    | 56.1572   | 47.2973  | 50.015    | 48.303   | 50.5654   |
| 0.0646983 | 0.349383  | 0.108681 | 0.147419  | 0.303679 | 0.543926  |
| 56.9934   | 58.0302   | 52.007   | 58.7257   | 52.134   | 63.054    |
| 1.67892   | 1.40908   | 1.25185  | 0.741683  | 1.74434  | 1.44029   |
| 9.4365    | 9.32244   | 8.03349  | 5.06101   | 10.734   | 9.67973   |
| 0.875482  | 1.00481   | 1.48819  | 0.600725  | 0.973715 | 1.61623   |
| 169.365   | 168.981   | 135.27   | 163.013   | 127.736  | 153.844   |
| 18.2645   | 19.4554   | 13.8294  | 16.4661   | 16.4149  | 17.5854   |
| 27.5113   | 28.8641   | 22.9242  | 25.025    | 23.9104  | 33.9775   |
| 13.6452   | 17.3093   | 10.8543  | 16.8058   | 11.7782  | 15.152    |
| 3.71128   | 0         | 0        | 0         | 4.01998  | 0         |
| 0         | 0.128792  | 0.130203 | 0.235485  | 0.111944 | 0.434429  |
| 0.118331  | 0.0987151 | 0.181113 | 0.0713055 | 0.141238 | 0.0989338 |
| 3.72923   | 3.87747   | 3.61387  | 3.94796   | 3.67415  | 2.96059   |
| 0.0343044 | 0         | 0        | 0         | 0        | 0.0288401 |
| 1.57118   | 0.813323  | 1.91855  | 0.881239  | 1.44004  | 0.406433  |
| 12.9068   | 10.3013   | 13.3159  | 13.0572   | 13.3428  | 17.8972   |
| 3.0203    | 3.08486   | 2.58424  | 2.85195   | 3.02294  | 2.99827   |
| 1.72146   | 1.56299   | 2.30821  | 1.66704   | 1.49172  | 1.01308   |
| 7.44783   | 7.76613   | 9.0176   | 8.26479   | 10.1328  | 8.05047   |
| 20.7382   | 19.3184   | 15.0949  | 25.4803   | 22.0319  | 28.6385   |
| 3.02491   | 3.92042   | 2.59144  | 3.63003   | 2.57753  | 2.78043   |
| 4.671     | 4.34685   | 4.66197  | 4.66503   | 3.74537  | 3.64647   |
| 24.9483   | 23.9995   | 25.3518  | 25.0018   | 26.1369  | 25.0945   |
| 2.43732   | 2.56819   | 2.69619  | 3.25088   | 4.14252  | 3.84827   |
| 0.885856  | 0.827964  | 0.837037 | 0.958778  | 1.70319  | 1.89911   |
| 15.9129   | 15.1909   | 18.4888  | 16.6573   | 17.7513  | 16.4729   |
| 1.84155   | 1.58947   | 1.78337  | 1.47285   | 2.71588  | 2.75549   |
| 89.1442   | 92.0375   | 81.951   | 84.2372   | 72.8845  | 75.8931   |
| 0.842495  | 1.04995   | 0.846225 | 1.24128   | 0.901918 | 1.00523   |
| 0         | 0         | 0        | 0         | 0        | 0         |
| 29.709    | 32.1983   | 26.7637  | 30.4406   | 26.7349  | 31.7123   |
| 7.35343   | 5.10259   | 3.05299  | 1.80881   | 3.34896  | 4.00433   |
| 0         | 0         | 0        | 0         | 0        | 0         |
| 0         | 0         | 0        | 0         | 0        | 0         |
| 5.71698   | 4.8151    | 5.74402  | 4.09625   | 5.56886  | 5.49311   |

|           |           |           |           |           |           |
|-----------|-----------|-----------|-----------|-----------|-----------|
| 1.0224    | 0.802223  | 1.33579   | 0.905961  | 2.83014   | 2.19662   |
| 15.8453   | 16.543    | 15.2011   | 15.79     | 14.7089   | 13.2563   |
| 30.7213   | 28.6605   | 30.7103   | 31.753    | 43.1347   | 34.1504   |
| 14.2496   | 13.7974   | 17.337    | 14.6751   | 13.7393   | 14.5501   |
| 22.452    | 24.06     | 23.6393   | 21.4871   | 22.8127   | 19.8908   |
| 76.0122   | 83.0786   | 70.0607   | 78.2343   | 61.3278   | 75.1412   |
| 0.287381  | 0.399938  | 0.467776  | 0.365625  | 0.674714  | 0.552487  |
| 0         | 0.0892743 | 3.33934   | 2.36684   | 0.077596  | 0         |
| 5.96812   | 8.68128   | 5.95358   | 17.2189   | 6.1336    | 12.4837   |
| 0         | 0         | 0.0439779 | 0.119307  | 0         | 0         |
| 13.3816   | 16.1174   | 13.5708   | 19.6331   | 11.6521   | 11.2486   |
| 0.583859  | 0.454751  | 0.388947  | 0.369542  | 0.395264  | 0.259526  |
| 0.0377428 | 0         | 0.0475504 | 0         | 0.0408822 | 0         |
| 0         | 0         | 0         | 0         | 0         | 0         |
| 7.90405   | 7.43453   | 10.7601   | 7.82829   | 13.2305   | 9.24595   |
| 43.4727   | 47.1093   | 44.3783   | 48.7447   | 42.808    | 38.5993   |
| 0         | 0         | 0         | 0         | 0         | 0         |
| 17.6719   | 10.1062   | 17.0554   | 9.83125   | 12.474    | 6.58239   |
| 106.871   | 127.533   | 107.648   | 124.631   | 116.134   | 128.098   |
| 0.0533712 | 0         | 0         | 0         | 0         | 0.0448698 |
| 17.8435   | 18.1578   | 20.6616   | 19.0329   | 17.6614   | 15.6224   |
| 24.5051   | 25.9428   | 26.8114   | 25.3987   | 29.1574   | 25.448    |
| 0         | 0.147393  | 0.0488956 | 0         | 0.0320279 | 0.0326285 |
| 3.81473   | 3.67138   | 3.66269   | 3.75108   | 3.96096   | 3.35202   |
| 0.0597574 | 0.130322  | 0.0564642 | 0.187222  | 0.097092  | 0.163276  |
| 7.97108   | 4.62832   | 5.81144   | 3.63536   | 8.97985   | 5.99494   |
| 74.3833   | 66.1787   | 44.5832   | 38.0503   | 33.1201   | 52.7347   |
| 8.56965   | 12.3469   | 2.84964   | 3.44799   | 3.3127    | 3.82996   |
| 0.374256  | 0.534355  | 0.500951  | 0.417509  | 0.472894  | 0.236067  |
| 1.58161   | 0         | 1.46E-05  | 3.13E-08  | 0.28639   | 0.273436  |
| 48.4288   | 45.4279   | 51.7453   | 42.0225   | 39.476    | 38.2146   |
| 6.50817   | 6.89884   | 6.40176   | 7.29833   | 3.46898   | 2.71562   |
| 0.122355  | 0.155656  | 0.0867094 | 0.104548  | 0.0993997 | 0.120724  |
| 0         | 0.040461  | 0.218158  | 0.176939  | 0.14194   | 0.0272959 |
| 12.2848   | 11.323    | 9.9185    | 11.6817   | 12.6452   | 11.3171   |
| 7.83497   | 8.40489   | 8.55035   | 8.03362   | 6.91549   | 6.70267   |
| 0.254512  | 0.317173  | 0.320648  | 0.507432  | 0.206762  | 0.320957  |
| 0.235366  | 0.293313  | 0.0847219 | 0.383069  | 0.619149  | 0.169607  |
| 0.0193043 | 0         | 0         | 0         | 0.02091   | 0.0162294 |
| 0         | 0         | 0         | 0         | 0         | 0         |
| 0.072221  | 0.405008  | 0.181976  | 0.0822801 | 0.195571  | 0.121434  |
| 0.174111  | 0.216976  | 0.219354  | 0.278946  | 0.342897  | 0.127063  |
| 0.329795  | 0.164396  | 0.66479   | 1.05204   | 0.571564  | 0.887241  |

|           |           |           |           |           |           |
|-----------|-----------|-----------|-----------|-----------|-----------|
| 0.0835617 | 0         | 0         | 0         | 0         | 0         |
| 1.87192   | 1.56561   | 4.12947   | 2.74407   | 0.672759  | 0.633841  |
| 64.883    | 67.199    | 83.5691   | 91.2587   | 70.3722   | 83.3629   |
| 23.7383   | 24.6482   | 28.0273   | 23.8812   | 33.2615   | 30.5983   |
| 0         | 0         | 0         | 0         | 0.169364  | 0         |
| 3.22564   | 3.33556   | 4.15029   | 3.51853   | 6.09581   | 5.53906   |
| 0.505562  | 0.664086  | 0.585291  | 0.498143  | 0.740019  | 0.436519  |
| 68.9876   | 63.9848   | 77.5839   | 76.7883   | 66.9736   | 58.8795   |
| 1.43766   | 1.27678   | 1.64469   | 1.50611   | 1.68254   | 1.63933   |
| 28.3312   | 25.8443   | 35.9307   | 33.195    | 37.0184   | 33.7463   |
| 0         | 0         | 0         | 0         | 0         | 0         |
| 0         | 0         | 0         | 0         | 0         | 0         |
| 0         | 0         | 0         | 0.140712  | 0         | 0         |
| 8.02591   | 10.5514   | 6.88914   | 8.08873   | 7.4038    | 7.15529   |
| 39.8334   | 43.4828   | 37.9648   | 41.5592   | 30.13     | 31.061    |
| 0.648308  | 0         | 0.816773  | 1.10791   | 0.526675  | 0.81756   |
| 0         | 0         | 0         | 0         | 0         | 0         |
| 21.7256   | 21.2929   | 18.1524   | 14.4814   | 17.5678   | 17.2503   |
| 0.230767  | 0.122916  | 0.247224  | 0.223151  | 0.514533  | 0.249682  |
| 16.554    | 9.03992   | 16.0388   | 20.0958   | 15.2782   | 10.0686   |
| 30.7956   | 32.9171   | 32.9      | 32.581    | 26.4656   | 32.1249   |
| 0         | 0         | 0         | 0         | 59.1881   | 0         |
| 0.0249789 | 0.0311287 | 0         | 0.0853742 | 0.0541134 | 0         |
| 2.62936   | 2.23036   | 3.22909   | 2.84454   | 3.8054    | 3.88236   |
| 3.65371   | 2.65389   | 3.23535   | 2.75922   | 4.29688   | 2.45738   |
| 24.0829   | 22.2348   | 25.5025   | 23.8518   | 25.4505   | 22.5338   |
| 35.4504   | 39.224    | 38.6862   | 38.4742   | 34.853    | 40.7983   |
| 4.28725   | 4.20113   | 3.83009   | 4.48454   | 4.39058   | 4.11221   |
| 0         | 0         | 0         | 0         | 0         | 0         |
| 5.75511   | 5.22569   | 5.80495   | 5.47632   | 6.21788   | 4.95167   |
| 1.57559   | 1.61761   | 1.74813   | 1.00886   | 3.32694   | 1.67801   |
| 36.0592   | 29.7645   | 33.269    | 32.1767   | 56.6961   | 63.5271   |
| 0.510782  | 0.607602  | 1.08227   | 0.132256  | 0.729309  | 0.44894   |
| 0.0653778 | 0.0407369 | 0.0411832 | 0         | 0         | 0.0824459 |
| 4.05129   | 7.21895   | 7.65957   | 5.60729   | 4.70184   | 6.8031    |
| 0.0105606 | 0         | 0.0266097 | 0.0721892 | 0.0571952 | 0.11542   |
| 64.5628   | 64.7824   | 45.8342   | 65.812    | 34.492    | 43.0989   |
| 13.5351   | 12.6574   | 15.0998   | 18.4559   | 12.975    | 13.4721   |
| 3.51274   | 2.38328   | 8.52226   | 4.59715   | 7.56198   | 4.3469    |
| 21.4689   | 18.952    | 23.8031   | 18.8957   | 33.3109   | 45.8144   |
| 50.2258   | 45.7407   | 73.0928   | 57.4665   | 65.1624   | 65.8995   |
| 1.27078   | 1.08771   | 0.696144  | 0.956622  | 1.54011   | 1.02164   |
| 0.238827  | 0         | 0.150443  | 0.136046  | 0.388038  | 0.200785  |



|           |           |           |           |           |           |
|-----------|-----------|-----------|-----------|-----------|-----------|
| 54.141    | 69.7151   | 51.8056   | 63.0108   | 61.5803   | 70.0205   |
| 64.0819   | 65.9253   | 45.3943   | 44.3308   | 35.2131   | 45.1654   |
| 7.73278   | 8.19398   | 7.64207   | 6.48868   | 7.64874   | 8.68104   |
| 22.9389   | 25.0666   | 17.2148   | 18.872    | 16.5784   | 17.5843   |
| 0.417873  | 0.347169  | 0.394844  | 0.634767  | 0.150877  | 0.117104  |
| 0.156711  | 0.223193  | 0.535891  | 0.22955   | 0.412242  | 0.28232   |
| 0.66839   | 0.990782  | 0.561727  | 1.03958   | 0.322462  | 0.0988748 |
| 2.20869   | 2.8661    | 2.38694   | 2.25084   | 2.06318   | 1.40543   |
| 0         | 0         | 0         | 0         | 0         | 0         |
| 1.11181   | 0.494835  | 0.70036   | 0.904763  | 0.774188  | 0.534122  |
| 5.02393   | 5.22508   | 5.34458   | 4.86124   | 6.50756   | 5.46431   |
| 0         | 0         | 0         | 0         | 0.0367422 | 0.0285175 |
| 73.283    | 88.5274   | 66.0996   | 87.1432   | 63.3887   | 86.2057   |
| 0.0517876 | 0.0430251 | 0.0217483 | 0.0590007 | 0.0747937 | 0.0290256 |
| 1.55823   | 1.84477   | 4.31892   | 2.04156   | 1.77224   | 1.24452   |
| 0.0928013 | 0.192748  | 0.077944  | 0.0704846 | 0.0335068 | 0         |
| 0.161129  | 0.0752996 | 0.0761248 | 0.0229465 | 0.545412  | 0.135463  |
| 1.37167   | 1.25844   | 1.06005   | 0.939506  | 2.03237   | 1.30887   |
| 14.9258   | 15.2631   | 17.2298   | 19.4049   | 12.8411   | 14.0493   |
| 0         | 0         | 0         | 0         | 0         | 0         |
| 3.73476   | 3.59275   | 4.07788   | 3.55325   | 4.30091   | 2.86443   |
| 1.5536    | 3.7154    | 1.13433   | 1.35427   | 4.91647   | 3.32386   |
| 0         | 0         | 0         | 0.0882437 | 0         | 0         |
| 0.0882974 | 0.110036  | 0.222484  | 0.0335319 | 0.159403  | 0.17321   |
| 15.9594   | 15.4517   | 18.2967   | 16.3475   | 19.1065   | 16.9627   |
| 14.3631   | 13.031    | 19.6497   | 19.0073   | 19.4075   | 20.2489   |
| 10.719    | 12.1401   | 11.723    | 11.5842   | 10.0678   | 10.2003   |
| 0.221654  | 0.236764  | 0.241353  | 0.218255  | 0.275614  | 0.133105  |
| 12.8466   | 11.7533   | 14.9111   | 13.6183   | 16.796    | 14.5627   |
| 0.646611  | 0.379119  | 0.309122  | 0.380349  | 0.390243  | 0.294572  |
| 1.25322   | 0.880264  | 1.11956   | 1.0903    | 1.20937   | 1.07275   |
| 4.23939   | 4.43963   | 3.50091   | 3.55142   | 1.48588   | 2.32122   |
| 0.202422  | 0.0630641 | 0         | 0         | 0         | 0.0425444 |
| 12.1702   | 11.9302   | 14.6591   | 11.5158   | 15.0763   | 11.73     |
| 0.941062  | 0.903216  | 1.0287    | 1.07543   | 1.1343    | 0.761013  |
| 0         | 0         | 0         | 0         | 0         | 0         |
| 0.864899  | 0.848666  | 0.577288  | 0.462492  | 0.468758  | 0.451871  |
| 0         | 0         | 0         | 0         | 0         | 0         |
| 4.45518   | 4.79443   | 4.66407   | 3.32868   | 5.04199   | 4.43208   |
| 0         | 0         | 0         | 0         | 0         | 0         |
| 0         | 0         | 0         | 0         | 0         | 0         |
| 62.3036   | 57.4434   | 57.1463   | 53.0894   | 53.5148   | 55.2819   |
| 33.9195   | 32.5723   | 31.1036   | 53.6857   | 56.6229   | 57.4392   |

|           |           |           |           |           |           |
|-----------|-----------|-----------|-----------|-----------|-----------|
| 0         | 0         | 0         | 0         | 0         | 0         |
| 2.4225    | 2.25188   | 2.7518    | 2.37533   | 2.3659    | 1.95316   |
| 0.938549  | 1.42953   | 0.794859  | 0.371275  | 0.225915  | 0.273976  |
| 15.9117   | 15.4576   | 11.2737   | 11.5689   | 12.3053   | 13.6758   |
| 9.19538   | 10.1948   | 7.51017   | 6.1171    | 9.04436   | 8.40599   |
| 0         | 0         | 0         | 0         | 0         | 0         |
| 0         | 0         | 0         | 0         | 0         | 0         |
| 0         | 0         | 0         | 0         | 0         | 0         |
| 139.262   | 151.194   | 130.222   | 131.186   | 91.2705   | 122.886   |
| 0.126951  | 0.369147  | 0         | 0.241055  | 0.0458368 | 0.106729  |
| 0         | 0         | 0         | 0         | 0         | 0         |
| 0         | 0         | 0         | 0         | 0         | 0         |
| 1117.7    | 1280.1    | 1144.38   | 1269.95   | 1195.02   | 1422.99   |
| 12.5284   | 12.3878   | 13.8648   | 11.71     | 15.2142   | 10.2746   |
| 1.08189   | 1.10644   | 1.56303   | 0.676575  | 1.9043    | 0.687109  |
| 19.6267   | 22.6293   | 19.7106   | 18.9734   | 19.2354   | 16.764    |
| 2.9207    | 2.22088   | 2.95204   | 2.36873   | 3.89646   | 2.5387    |
| 64.6088   | 64.5025   | 69.2738   | 64.3391   | 67.1543   | 68.0358   |
| 3.44191   | 2.91673   | 4.3363    | 2.98019   | 4.32472   | 3.58813   |
| 0         | 0.13848   | 0         | 0         | 0         | 0         |
| 13.6096   | 14.5495   | 13.8551   | 13.4261   | 12.8508   | 12.8955   |
| 25.0874   | 25.4619   | 26.4113   | 26.7492   | 27.0413   | 28.7262   |
| 0.468907  | 0.438263  | 0.590754  | 0.133554  | 0.634888  | 0.295662  |
| 17.2235   | 17.5328   | 20.6564   | 19.2535   | 20.8777   | 19.1083   |
| 0         | 0         | 0         | 0         | 0         | 0         |
| 0         | 0.115287  | 0         | 0         | 0.100206  | 0         |
| 20.0634   | 18.1335   | 20.5468   | 22.2215   | 31.236    | 28.4117   |
| 0         | 0.494426  | 0.444375  | 0.42053   | 0.0436258 | 0.0338603 |
| 14.5437   | 16.5064   | 12.0126   | 14.9829   | 10.4839   | 14.9107   |
| 0.0499579 | 0.0622575 | 0.0629397 | 0.0569162 | 0.08117   | 0.0210001 |
| 1.47955   | 1.10629   | 2.70904   | 1.14623   | 2.17956   | 0.912177  |
| 0.562124  | 0.403328  | 0.697464  | 0.349319  | 0.904096  | 0.143207  |
| 1.29275   | 1.54659   | 1.28123   | 0.765862  | 1.19491   | 0.681082  |
| 0.0277725 | 0.13844   | 0.0699786 | 0.0632814 | 0.0601652 | 0.070046  |
| 12.6374   | 16.157    | 14.3181   | 13.4104   | 13.6587   | 19.0633   |
| 0.140472  | 0.0964599 | 0.0975166 | 0.100614  | 0.238974  | 0.174977  |
| 0.151587  | 0.0269868 | 0.0272825 | 0.0493429 | 0.0469131 | 0.0364117 |
| 4.97551   | 5.30897   | 7.1759    | 5.50715   | 8.6135    | 5.66783   |
| 3.19807   | 3.25341   | 3.12461   | 3.08583   | 3.14595   | 3.3471    |
| 0.061335  | 0.0764356 | 0.0343436 | 0.124227  | 0.0664368 | 0.0229178 |
| 1.97288   | 1.77875   | 1.99558   | 1.7164    | 1.00193   | 0.84205   |
| 0.225168  | 0.350756  | 1.0638    | 0.705459  | 0.914616  | 0.662556  |
| 42.468    | 43.6795   | 51.7536   | 54.3426   | 37.9976   | 47.0579   |

|           |           |           |           |           |          |
|-----------|-----------|-----------|-----------|-----------|----------|
| 3.0006    | 2.74785   | 3.03571   | 4.16958   | 2.9301    | 2.80931  |
| 11.348    | 11.1064   | 12.8888   | 11.59     | 12.2919   | 12.6242  |
| 10.2309   | 11.1394   | 14.0695   | 13.583    | 12.2369   | 11.1536  |
| 0.111194  | 0.390514  | 0.140088  | 0.16123   | 0.394176  | 0.221042 |
| 0         | 0         | 0         | 0         | 0         | 0        |
| 0         | 0         | 0         | 0         | 0         | 0        |
| 31.879    | 34.5668   | 35.6078   | 34.8947   | 30.0192   | 33.7976  |
| 17.6447   | 17.8743   | 16.1821   | 16.3971   | 11.9397   | 17.2799  |
| 25.974    | 28.6598   | 28.2239   | 25.0543   | 18.5336   | 20.9904  |
| 16.2383   | 12.5598   | 17.5578   | 15.8061   | 22.2884   | 18.832   |
| 0.35736   | 0.226577  | 0.513411  | 0.171425  | 0.251266  | 0.089604 |
| 6.22488   | 12.3112   | 11.3468   | 14.475    | 11.2606   | 20.0907  |
| 15.2557   | 15.4983   | 12.7965   | 14.4876   | 15.3768   | 14.8092  |
| 37.9648   | 37.1111   | 36.1826   | 34.2211   | 35.4807   | 37.364   |
| 22.9196   | 22.1608   | 28.6938   | 24.0218   | 30.8019   | 24.0098  |
| 0.144129  | 0         | 0.0907906 | 0         | 0.0780586 | 0        |
| 0.126579  | 0.0525808 | 0.053157  | 0.0480697 | 0.0457026 | 0        |
| 0         | 0         | 0         | 0         | 0         | 0        |
| 1.97401   | 1.74226   | 1.85478   | 1.62442   | 2.29654   | 1.72254  |
| 0         | 0         | 0         | 0         | 0         | 0        |
| 0.450236  | 0.641239  | 0.364649  | 0.146556  | 0.8012    | 0.324445 |
| 95.3187   | 95.7719   | 102.08    | 80.8881   | 104.181   | 94.3869  |
| 63.4478   | 59.766    | 62.9936   | 61.4249   | 72.5251   | 75.8661  |
| 5.17152   | 4.56763   | 4.55443   | 5.3198    | 4.0789    | 5.06535  |
| 0         | 0         | 0         | 0         | 0         | 0        |
| 0.0266917 | 0.0665263 | 0.0672552 | 0         | 0.0867356 | 0        |
| 5.87151   | 5.97002   | 7.71315   | 5.32964   | 8.19563   | 7.04462  |
| 9.28471   | 10.7576   | 9.42223   | 7.96036   | 8.31598   | 8.21116  |
| 3.84628   | 4.48489   | 5.27598   | 3.73697   | 3.77841   | 3.6985   |
| 19.4774   | 20.7345   | 15.7976   | 17.4983   | 14.149    | 13.4339  |
| 0         | 0         | 0.0841587 | 0.152209  | 0         | 0        |
| 1098.99   | 1005.02   | 615.25    | 562.882   | 410.859   | 588.192  |
| 49.9251   | 43.6327   | 46.3153   | 41.1772   | 39.552    | 36.4266  |
| 0.0131857 | 0         | 0         | 0.0150222 | 0         | 0.044352 |
| 12.9483   | 14.0372   | 14.5105   | 11.1824   | 13.1033   | 11.0228  |
| 1.67417   | 0.882493  | 1.98453   | 0.795564  | 1.27162   | 1.66158  |
| 1.81633   | 1.761     | 3.68591   | 2.95016   | 4.91704   | 2.79881  |
| 0.460106  | 0.49015   | 0.373978  | 0.456553  | 0.200958  | 0.193408 |
| 4.00976   | 3.64778   | 3.56988   | 3.28914   | 3.86553   | 3.21374  |
| 51.151    | 54.7361   | 44.9685   | 49.6214   | 26.785    | 32.6172  |
| 16.871    | 17.743    | 17.2282   | 16.4484   | 16.2482   | 15.6646  |
| 5.96121   | 6.0176    | 5.63294   | 3.19237   | 3.42255   | 3.50834  |
| 492.661   | 549.064   | 656.004   | 830.512   | 624.749   | 727.351  |

|           |           |          |           |            |           |
|-----------|-----------|----------|-----------|------------|-----------|
| 1.07636   | 1.63943   | 1.35605  | 0.749391  | 1.87838    | 0.904907  |
| 11.6385   | 9.38872   | 25.0861  | 16.1288   | 22.6158    | 19.5983   |
| 4.51141   | 5.25728   | 5.52297  | 4.67046   | 7.98941    | 6.71137   |
| 25.7865   | 21.4019   | 25.3742  | 20.1467   | 23.9395    | 20.2313   |
| 50.3817   | 62.3326   | 55.5967  | 60.2704   | 53.9425    | 48.8353   |
| 2.795     | 2.18283   | 2.87385  | 2.13134   | 3.05417    | 2.12902   |
| 0.151099  | 0.11298   | 0.15229  | 0.137716  | 0.163668   | 0.228656  |
| 0         | 0         | 0        | 0         | 0          | 0         |
| 9.99015   | 10.7329   | 10.7822  | 10.9513   | 10.2663    | 8.86688   |
| 6.17675   | 6.05738   | 5.75557  | 5.64982   | 5.10464    | 5.06829   |
| 3.42996   | 2.23348   | 2.41367  | 3.20361   | 4.15039    | 4.07862   |
| 0.424553  | 0.449984  | 0.349238 | 0.19983   | 0          | 0.589842  |
| 0         | 0         | 0        | 0         | 0          | 0         |
| 0.319104  | 0.397666  | 0.241214 | 0.181775  | 0.864116   | 0.482894  |
| 3.65409   | 3.86251   | 5.19545  | 5.88914   | 4.06429    | 4.16908   |
| 0         | 0         | 0        | 0.258958  | 0          | 0         |
| 77.1344   | 69.2767   | 83.339   | 88.3419   | 91.4803    | 105.688   |
| 0         | 0         | 0        | 0         | 0          | 0.0580953 |
| 0.851886  | 0.915158  | 0.923012 | 1.15896   | 0.892981   | 1.02898   |
| 3.24155   | 0.367237  | 0.371261 | 1.34292   | 2.87278    | 0.743238  |
| 0.113143  | 0.125412  | 0.172225 | 0.0458609 | 0.166988   | 0.0703376 |
| 5.14052   | 5.86584   | 7.72481  | 6.98552   | 6.47381    | 5.38914   |
| 0.0330905 | 0.0366545 | 0        | 0         | 0.00796433 | 0         |
| 19.4683   | 24.5423   | 17.8035  | 21.3235   | 16.6097    | 19.7797   |
| 30.5964   | 30.5508   | 29.471   | 28.6184   | 28.8424    | 30.4657   |
| 16.0195   | 15.206    | 16.438   | 14.9716   | 16.7013    | 13.8879   |
| 14.9959   | 14.0778   | 19.1901  | 11.7537   | 13.259     | 16.1162   |
| 3.20452   | 2.82871   | 3.64472  | 3.04238   | 3.76032    | 3.62952   |
| 0         | 0         | 0        | 0         | 0          | 0         |
| 0.356011  | 31.2699   | 0.647865 | 180.07    | 4.32755    | 14.1448   |
| 9.97174   | 9.89853   | 10.1821  | 9.45534   | 9.63136    | 10.1225   |
| 0         | 0         | 0        | 0         | 0          | 0         |
| 0         | 0         | 0        | 0         | 0          | 0         |
| 8.94341   | 8.59147   | 11.2861  | 8.81687   | 11.0698    | 7.62369   |
| 0.100146  | 0.0998411 | 0.252338 | 0         | 0.0650854  | 0.0841936 |
| 8.69764   | 9.16784   | 11.2509  | 11.1289   | 9.54428    | 9.32967   |
| 196.791   | 224.916   | 172.236  | 204.745   | 154.203    | 204.393   |
| 0.370895  | 0.35749   | 0.223091 | 0.263608  | 0.163675   | 0.0952769 |
| 0.660441  | 0.856886  | 0.610306 | 0.46554   | 0.741936   | 0.53388   |
| 7.48695   | 4.98098   | 3.68818  | 4.233     | 2.19508    | 2.2243    |
| 87.0782   | 85.2734   | 89.4895  | 90.3711   | 82.748     | 79.3921   |
| 0         | 0         | 0        | 0         | 0          | 0         |
| 0         | 0         | 0        | 0         | 0          | 0         |

|             |          |          |            |           |             |
|-------------|----------|----------|------------|-----------|-------------|
| 3.62199     | 3.16553  | 3.43924  | 3.44769    | 4.97623   | 9.86225     |
| 4.55707     | 8.78099  | 2.89474  | 14.2665    | 1.90808   | 5.34434     |
| 0           | 0.461146 | 0.279719 | 0.337266   | 0         | 0.248879    |
| 10.2779     | 10.2508  | 12.4254  | 10.3328    | 15.3969   | 12.6778     |
| 0.512226    | 0.905546 | 0.330169 | 0.502142   | 0.799991  | 0.42062     |
| 1.44097     | 1.73587  | 2.60209  | 2.29834    | 1.66488   | 1.53449     |
| 0.012582    | 0.125439 | 0        | 0          | 0.0272573 | 0           |
| 5.10863     | 3.67161  | 4.59724  | 3.51058    | 9.07622   | 6.06738     |
| 0           | 0        | 0        | 0          | 0         | 0           |
| 0.0772845   | 0        | 0.194734 | 0          | 0         | 0           |
| 1.93406     | 1.39386  | 1.87885  | 2.20344    | 1.99397   | 2.23328     |
| 0           | 0        | 0        | 0          | 0         | 0           |
| 8.55E-09    | 9.25E-09 | 1.09E-08 | 9.07E-09   | 7.13E-09  | 1.90E-08    |
| 4.1231      | 5.89354  | 3.35658  | 3.98444    | 2.90707   | 3.80817     |
| 1.43296     | 0.446438 | 3.00887  | 1.4965     | 1.81085   | 1.80706     |
| 5.65238     | 3.89463  | 6.63509  | 4.2638     | 6.3524    | 5.02774     |
| 0.000316345 | 3.36E-05 | 6.84E-05 | 0.00176631 | 4.08E-06  | 0.000754299 |
| 7.17837     | 7.21629  | 5.82846  | 6.19109    | 5.43632   | 4.77237     |
| 18.5975     | 18.4309  | 14.1491  | 18.2768    | 14.7527   | 16.1902     |
| 16.445      | 18.9228  | 13.7882  | 8.16009    | 23.3368   | 8.67108     |
| 0           | 0        | 0        | 0          | 0         | 0           |
| 5.26181     | 5.05746  | 5.28919  | 5.22941    | 5.03252   | 4.04719     |
| 4.62738     | 5.00154  | 5.86963  | 5.08673    | 4.88849   | 4.47445     |
| 1.96797     | 1.2801   | 1.71743  | 1.00623    | 2.5892    | 1.91276     |
| 1186.74     | 1350.07  | 1255.1   | 1356.87    | 1108.25   | 1205.4      |
| 23.9302     | 24.1743  | 21.3059  | 23.5484    | 21.5507   | 26.4838     |
| 12.9549     | 17.1916  | 17.4241  | 15.8762    | 15.8529   | 13.364      |
| 0           | 0        | 0        | 0          | 0         | 1261.16     |
| 0           | 0.615052 | 0.932687 | 0          | 0         | 0           |
| 12.7763     | 7.00562  | 9.33588  | 5.53123    | 14.9462   | 10.0968     |
| 22.5059     | 20.3954  | 23.9199  | 20.361     | 23.7168   | 20.9429     |
| 1.18965     | 1.67231  | 1.03921  | 0.429897   | 1.03194   | 0.951081    |
| 1.46304     | 1.00506  | 1.27131  | 1.24284    | 2.02524   | 1.33596     |
| 208.693     | 212.395  | 194.13   | 192.472    | 169.3     | 193.409     |
| 0.122812    | 0.076524 | 0        | 0.104938   | 0.0997705 | 0.0774371   |
| 2.01297     | 2.58023  | 1.12311  | 1.14667    | 1.71318   | 1.1121      |
| 13.4003     | 12.7127  | 15.483   | 12.1297    | 24.6946   | 21.566      |
| 0           | 0        | 0        | 0          | 0         | 0           |
| 0           | 0        | 0        | 0          | 0         | 0           |
| 6.41887     | 5.35644  | 13.793   | 13.3702    | 13.857    | 17.1872     |
| 1.46186     | 2.14499  | 1.75262  | 2.92801    | 2.04317   | 1.4867      |
| 2.59986     | 2.46313  | 3.4718   | 2.07121    | 3.7166    | 1.97719     |
| 4.15017     | 3.55446  | 3.57322  | 3.06695    | 3.97468   | 2.95024     |

|           |           |           |           |           |           |
|-----------|-----------|-----------|-----------|-----------|-----------|
| 14.6541   | 13.1103   | 13.753    | 13.2171   | 14.014    | 13.6657   |
| 67.969    | 62.7252   | 60.4594   | 52.2201   | 51.1888   | 42.1852   |
| 5.27991   | 5.59083   | 6.70293   | 5.93228   | 7.05238   | 5.10608   |
| 0.627973  | 0.521719  | 0.527436  | 0.476959  | 0.340104  | 0.791916  |
| 1.07962   | 0.569218  | 1.77868   | 1.18269   | 1.48427   | 1.04729   |
| 0         | 0         | 0         | 0         | 0         | 0         |
| 10.8003   | 12.8185   | 12.9694   | 16.1678   | 14.1784   | 15.7508   |
| 1.09933   | 0.926593  | 1.52114   | 1.57827   | 2.03022   | 1.72025   |
| 11.874    | 10.0993   | 16.3202   | 9.74903   | 20.4824   | 12.4765   |
| 0.0412268 | 0         | 0         | 0         | 0.044656  | 0         |
| 273.215   | 204.288   | 481.895   | 280.142   | 414.317   | 229.695   |
| 0.0558014 | 0         | 0.0703016 | 0         | 0.120886  | 0         |
| 2.10516   | 1.74896   | 2.57852   | 1.59891   | 3.4204    | 0.909497  |
| 0         | 0         | 0         | 0         | 0         | 0         |
| 1.33558   | 1.92973   | 1.36562   | 1.38929   | 6.05925   | 8.54332   |
| 12.3614   | 12.4858   | 10.6807   | 11.4318   | 11.3435   | 11.7391   |
| 0.0662625 | 0         | 0         | 0         | 0         | 0         |
| 0         | 0         | 0         | 0         | 0         | 0         |
| 15.389    | 14.964    | 14.9763   | 12.8584   | 13.791    | 13.085    |
| 20.1344   | 20.4296   | 19.7848   | 20.0296   | 20.3571   | 20.1903   |
| 52.1005   | 54.1688   | 48.3616   | 50.5762   | 44.0255   | 47.3641   |
| 0         | 0         | 0         | 0         | 0         | 0         |
| 0.178719  | 0.447428  | 0.45032   | 0.358441  | 0.0967924 | 0.112688  |
| 57.226    | 60.1232   | 62.7761   | 62.0753   | 57.4533   | 64.5073   |
| 0.22139   | 0.275896  | 0.278919  | 0         | 0         | 0.186125  |
| 0         | 0         | 0         | 0         | 0         | 0         |
| 3.06324   | 2.6825    | 3.04566   | 2.60327   | 3.89196   | 3.14604   |
| 12.8947   | 12.4593   | 15.0027   | 9.88527   | 14.0558   | 9.33609   |
| 6.95751   | 6.82994   | 8.19831   | 6.88208   | 6.9189    | 6.57925   |
| 40.0474   | 38.1297   | 49.3736   | 43.5627   | 43.2022   | 39.4777   |
| 0         | 0         | 0         | 0         | 0         | 0         |
| 2.54681   | 2.9893    | 2.94744   | 2.46293   | 2.79073   | 2.29051   |
| 0         | 0         | 0         | 0         | 0         | 0         |
| 1.89635   | 1.5781    | 1.5268    | 1.56205   | 2.29995   | 0.966427  |
| 2.71676   | 2.82135   | 3.3382    | 5.04395   | 5.23153   | 4.39883   |
| 0         | 0.0750051 | 0         | 0.0342851 | 0         | 0.0759    |
| 17.203    | 16.5447   | 15.1458   | 13.566    | 19.508    | 18.7808   |
| 0         | 0         | 0         | 0.0261137 | 0.132417  | 0.0770815 |
| 23.6219   | 22.1197   | 19.8585   | 20.175    | 21.0207   | 20.97     |
| 13.2092   | 13.0329   | 16.2856   | 13.5248   | 12.9609   | 10.4715   |
| 20.8617   | 21.6311   | 22.6037   | 18.8355   | 20.0629   | 15.0488   |
| 1.70289   | 1.27328   | 2.47912   | 2.41431   | 3.23818   | 3.05416   |
| 7.78098   | 7.16955   | 8.89453   | 6.16081   | 9.9739    | 5.96066   |

|           |          |           |           |           |          |
|-----------|----------|-----------|-----------|-----------|----------|
| 4.13129   | 3.08904  | 5.29157   | 2.66713   | 4.51222   | 1.53401  |
| 0.824333  | 0.440264 | 0.445089  | 0.536657  | 0.255115  | 0.445517 |
| 1.4704    | 1.58424  | 1.49383   | 0.813444  | 1.33216   | 1.22977  |
| 4.3855    | 3.64433  | 3.83151   | 3.9309    | 1.08076   | 1.67265  |
| 6.9568    | 7.5509   | 5.32833   | 4.70039   | 4.78679   | 5.03595  |
| 0.343071  | 0.694744 | 0.702357  | 0.195428  | 0.325157  | 0.396583 |
| 0.407416  | 0.559136 | 0.675717  | 0.387781  | 0.497166  | 0.338184 |
| 7.82699   | 6.91596  | 7.75777   | 6.44856   | 11.1244   | 8.98742  |
| 23.7044   | 20.6753  | 23.6687   | 26.0542   | 23.5559   | 20.5307  |
| 0.0147974 | 0        | 0.0186425 | 0.0168584 | 0.0160282 | 0        |
| 69.1293   | 69.8627  | 60.93     | 60.4009   | 55.6851   | 63.2501  |
| 3.1315    | 3.27636  | 3.21489   | 3.4796    | 2.07241   | 1.65802  |
| 1.044     | 1.05252  | 1.19706   | 1.14932   | 2.08379   | 2.06112  |
| 11.9577   | 13.1924  | 16.2418   | 15.4544   | 16.7807   | 15.5429  |
| 0.34716   | 0.57684  | 0.328028  | 0.823986  | 0.125345  | 0.510758 |
| 0         | 0        | 0         | 45.3786   | 0         | 0        |
| 3.06215   | 3.2933   | 2.69522   | 3.44086   | 2.95336   | 2.57438  |
| 0         | 0        | 0         | 0         | 0.158999  | 0        |
| 26.8954   | 30.0047  | 24.6523   | 28.3479   | 30.2664   | 30.1258  |
| 21.8881   | 24.1469  | 26.0302   | 22.115    | 28.3397   | 22.5673  |
| 53.5294   | 52.5235  | 56.916    | 49.5762   | 48.659    | 54.0542  |
| 11.3985   | 13.6171  | 10.7512   | 11.0002   | 11.6357   | 11.4043  |
| 0.266148  | 1.49253  | 0.335308  | 0         | 0         | 0        |
| 3.97275   | 5.43147  | 5.08629   | 5.47642   | 5.15477   | 5.11869  |
| 13.6754   | 12.1785  | 14.0081   | 12.9293   | 11.5178   | 11.8588  |
| 0         | 0.410896 | 0.207699  | 0         | 0.178573  | 0.554398 |
| 0.820434  | 1.07671  | 1.24979   | 2.43363   | 0.278627  | 0.83764  |
| 63.9621   | 59.0332  | 48.3903   | 40.7637   | 44.464    | 52.9707  |
| 0.641424  | 1.12288  | 0.38481   | 1.80951   | 0.860201  | 0.770361 |
| 0         | 0        | 0         | 0.183542  | 0.0436258 | 0        |
| 0         | 0        | 0         | 0         | 0         | 0        |
| 2.85147   | 3.16262  | 3.48467   | 4.67804   | 2.93423   | 3.4281   |
| 3.57747   | 4.61543  | 4.69349   | 4.12104   | 3.25327   | 3.09808  |
| 13.0687   | 11.3687  | 10.125    | 16.2087   | 11.0971   | 10.0435  |
| 55.7524   | 49.485   | 61.1639   | 54.2398   | 59.1835   | 61.2667  |
| 20.8827   | 19.1169  | 21.3323   | 17.3826   | 24.7475   | 17.9569  |
| 0         | 11.3703  | 0.143687  | 25.0342   | 1.02947   | 6.26438  |
| 5.30073   | 5.18707  | 5.82657   | 3.28296   | 5.93431   | 5.5331   |
| 2.11473   | 1.8553   | 2.02483   | 2.29363   | 2.69378   | 1.96278  |
| 19.1795   | 19.3677  | 17.3198   | 19.2666   | 17.4548   | 18.9904  |
| 16.5426   | 13.0342  | 16.215    | 9.89516   | 17.9504   | 12.6998  |
| 21.1896   | 21.7979  | 79.1856   | 92.0754   | 14.9207   | 15.8528  |
| 41.6878   | 43.8953  | 33.3987   | 34.5713   | 31.9817   | 32.0291  |

|           |          |           |          |           |           |
|-----------|----------|-----------|----------|-----------|-----------|
| 0         | 0        | 0         | 0        | 0         | 0         |
| 4.05203   | 2.71418  | 4.33922   | 5.30887  | 5.26689   | 3.57692   |
| 0         | 0        | 0         | 0        | 0         | 0.178421  |
| 1.50025   | 1.23659  | 1.89857   | 1.50163  | 1.31152   | 1.0462    |
| 17.37     | 17.668   | 19.0345   | 14.7658  | 18.7751   | 16.6308   |
| 15.514    | 14.2942  | 19.1768   | 13.2064  | 16.2333   | 14.8734   |
| 7.92765   | 7.42684  | 8.10189   | 7.516    | 11.3193   | 9.64774   |
| 10.4626   | 10.3586  | 11.8405   | 10.8978  | 13.3135   | 10.0319   |
| 390.539   | 458.238  | 403.78    | 462.709  | 350.995   | 406.558   |
| 5.20498   | 5.42227  | 6.1989    | 6.28512  | 8.11917   | 6.55241   |
| 26.7563   | 26.5686  | 23.368    | 24.5321  | 23.0931   | 26.1687   |
| 2.92601   | 3.18336  | 1.87243   | 2.27529  | 1.05647   | 0.819979  |
| 34.9885   | 33.5812  | 37.0766   | 34.7686  | 34.5242   | 29.8729   |
| 0         | 0        | 0         | 0        | 0.0188229 | 0.0162327 |
| 1.84613   | 2.73523  | 1.91196   | 1.70102  | 1.68388   | 1.79887   |
| 0.602983  | 0.901725 | 1.44338   | 0.206091 | 1.04502   | 0.506935  |
| 33.5108   | 31.8053  | 30.0581   | 32.0935  | 32.2492   | 36.1068   |
| 9.63032   | 7.8706   | 6.88465   | 6.37886  | 7.71435   | 9.05657   |
| 0.0810918 | 0.101057 | 0.204328  | 0        | 0         | 0         |
| 0.556659  | 0.693707 | 0.742562  | 0.522276 | 0.532025  | 0.908451  |
| 0         | 0        | 0         | 0        | 0         | 0         |
| 0         | 0        | 0         | 0        | 0         | 0         |
| 81.5011   | 87.309   | 80.2416   | 88.0602  | 58.8961   | 85.31     |
| 3.29841   | 3.29919  | 3.79099   | 3.82374  | 2.67957   | 2.79733   |
| 5.74402   | 6.25121  | 6.04572   | 4.98059  | 5.85796   | 5.33822   |
| 21.0725   | 19.6619  | 16.373    | 14.9619  | 12.0026   | 16.9445   |
| 16.9239   | 11.0407  | 20.3915   | 14.8167  | 21.4073   | 15.6127   |
| 19.9628   | 24.0139  | 17.0704   | 17.4627  | 15.4325   | 15.5257   |
| 5.79793   | 6.45348  | 5.26315   | 7.70184  | 3.82393   | 3.91985   |
| 0.382501  | 0.476672 | 0.52289   | 0.181573 | 0.7945    | 0.455562  |
| 5.46182   | 6.34111  | 6.25376   | 5.65526  | 6.32065   | 6.7024    |
| 42.262    | 43.7119  | 47.7135   | 40.1892  | 54.4848   | 49.5121   |
| 3.03704   | 2.79189  | 2.86937   | 3.14014  | 2.49711   | 1.97419   |
| 1.46705   | 1.23107  | 1.35045   | 1.62827  | 1.6126    | 2.50324   |
| 0.0297056 | 0        | 0.0374248 | 0        | 0.128706  | 0.0249739 |
| 9.81318   | 9.78638  | 11.2622   | 10.9103  | 9.48563   | 7.30107   |
| 0         | 0.104742 | 0.21178   | 0.191512 | 0.0910405 | 0.0706613 |
| 0.0737242 | 0        | 0         | 0        | 0         | 0         |
| 0         | 0        | 0.199149  | 0.180089 | 0.171221  | 0         |
| 0.192648  | 0.330107 | 0.121354  | 0.192046 | 0.286925  | 0.141717  |
| 0         | 0        | 0         | 0        | 0         | 0         |
| 50.9676   | 48.8752  | 65.1576   | 60.3811  | 59.9432   | 62.8997   |
| 67.7676   | 72.9371  | 117.866   | 125.867  | 100.118   | 124.426   |



|          |           |          |          |          |          |
|----------|-----------|----------|----------|----------|----------|
| 7.74173  | 7.6644    | 7.70308  | 5.16294  | 8.85318  | 6.6522   |
| 0.33687  | 0.337239  | 0.145113 | 0.316582 | 0.435797 | 0.246073 |
| 23.718   | 23.1783   | 30.1621  | 26.8458  | 24.294   | 27.8464  |
| 0.166411 | 0.118504  | 0.449258 | 0.189589 | 0.231754 | 0.199863 |
| 3.52148  | 3.47943   | 3.80276  | 4.04062  | 2.80631  | 2.49532  |
| 14.1744  | 12.3689   | 14.62    | 12.1247  | 17.7879  | 14.854   |
| 9.0661   | 8.89161   | 7.35001  | 9.47198  | 11.2514  | 8.16885  |
| 0        | 0         | 0        | 0        | 0        | 0        |
| 5.64254  | 7.54528   | 6.90909  | 6.89794  | 6.14622  | 5.85649  |
| 21.5885  | 19.7527   | 18.7953  | 17.6076  | 21.1536  | 20.6765  |
| 1.05036  | 1.07796   | 1.7125   | 1.26704  | 0.803099 | 0.727215 |
| 0        | 0         | 0        | 0        | 0        | 0        |
| 44.0744  | 19.6435   | 51.543   | 23.0144  | 52.4374  | 29.8489  |
| 1.72175  | 1.73      | 2.21858  | 1.41708  | 2.51525  | 1.75886  |
| 9.02541  | 9.09468   | 7.96661  | 9.19996  | 8.31653  | 9.49624  |
| 21.5679  | 25.7667   | 19.7431  | 23.9326  | 21.8673  | 24.8375  |
| 8.44     | 8.21654   | 9.53473  | 7.11547  | 7.53761  | 7.67393  |
| 0        | 0.853147  | 0        | 0        | 0.247181 | 0        |
| 0.438738 | 0.218702  | 0.460622 | 0.283246 | 0.554437 | 0.282787 |
| 0.25435  | 0.374913  | 0.159528 | 0.145361 | 0.412729 | 0.406283 |
| 0        | 0         | 0        | 0        | 0        | 0        |
| 0.472109 | 0.0420244 | 0.16994  | 0.192095 | 0.292217 | 0.311856 |
| 17.1254  | 18.822    | 18.8754  | 16.9768  | 18.8346  | 16.3014  |
| 248.883  | 316.544   | 200.802  | 232.281  | 174.521  | 312.79   |
| 0        | 0         | 0        | 0        | 0        | 0        |
| 2.41891  | 2.22021   | 2.49309  | 2.74733  | 3.48183  | 2.90096  |
| 7.5541   | 7.59802   | 8.35762  | 8.43151  | 11.2561  | 9.12329  |
| 5.98392  | 4.86053   | 6.37492  | 4.23162  | 9.05616  | 6.47325  |
| 0.561652 | 1.28321   | 1.0614   | 1.06647  | 1.21674  | 0.629584 |
| 4.23487  | 4.80657   | 5.42643  | 5.74642  | 4.36438  | 4.432    |
| 3.47625  | 4.51462   | 5.02498  | 3.54355  | 4.95448  | 3.84543  |
| 0        | 0         | 0        | 0        | 0        | 0        |
| 6.76191  | 7.68453   | 5.81424  | 5.69525  | 5.98676  | 5.22892  |
| 0        | 0         | 0        | 0        | 0        | 0        |
| 2.8299   | 2.13968   | 3.26411  | 2.95432  | 3.95732  | 2.04224  |
| 0        | 0         | 0        | 0        | 0        | 0        |
| 0        | 0         | 0        | 0        | 0        | 0        |
| 0        | 0         | 0        | 0        | 0        | 0        |
| 20.6122  | 20.0169   | 19.2809  | 20.4201  | 19.9746  | 20.8353  |
| 0        | 0         | 0        | 0        | 0        | 0        |
| 1.71175  | 1.82434   | 1.19297  | 2.40056  | 1.97143  | 1.15832  |
| 49.5779  | 43.8201   | 51.8522  | 44.1459  | 51.8852  | 52.5096  |
| 11.4574  | 11.3393   | 11.4711  | 10.7707  | 10.434   | 9.91059  |

|           |           |           |           |           |            |
|-----------|-----------|-----------|-----------|-----------|------------|
| 2.90E-05  | 5.15E-06  | 0.438141  | 1.28E-05  | 8.11E-06  | 1.68744    |
| 3.19342   | 2.5855    | 3.66448   | 3.05888   | 3.61327   | 2.95835    |
| 174.783   | 175.509   | 174.843   | 159.682   | 162.041   | 144.23     |
| 0.366894  | 0.342917  | 0.288896  | 0.365747  | 0.422251  | 0.269896   |
| 24.4358   | 20.3942   | 31.7482   | 26.7479   | 28.5158   | 37.3608    |
| 17.5254   | 16.9951   | 14.1471   | 17.7743   | 13.5332   | 15.891     |
| 0         | 0         | 0         | 0         | 0         | 0          |
| 0.411983  | 0.318156  | 0.0954754 | 0.485503  | 0.113136  | 0.119397   |
| 0.0410585 | 0.0121642 | 0.0412357 | 0.0781734 | 0         | 0.00820625 |
| 0         | 0         | 0         | 0         | 0         | 0          |
| 25.3476   | 22.7165   | 25.6272   | 20.6635   | 26.5998   | 25.7198    |
| 23.44     | 20.1059   | 27.5452   | 31.4219   | 32.3535   | 41.0283    |
| 1.24E-06  | 0.797656  | 1.07445   | 1.07004   | 0.270665  | 0.370763   |
| 4.47983   | 6.07851   | 2.92653   | 4.33041   | 7.62516   | 8.5366     |
| 0.260835  | 0.347527  | 0.646703  | 0.929441  | 0.401476  | 0.172689   |
| 1.75396   | 1.79498   | 2.00218   | 1.05057   | 2.07253   | 1.78713    |
| 20.2574   | 18.3247   | 18.9467   | 19.0058   | 22.5376   | 19.5621    |
| 376.775   | 380.751   | 406.819   | 411.387   | 340.049   | 395.883    |
| 0.276139  | 0.442445  | 0.993985  | 0.404486  | 0.683675  | 1.39292    |
| 0         | 0.351114  | 0.709923  | 0         | 0         | 0.236869   |
| 25.611    | 22.8032   | 31.6777   | 29.4373   | 34.4151   | 32.3666    |
| 6.71446   | 6.22668   | 7.28566   | 7.43538   | 8.19334   | 7.24832    |
| 0.347842  | 0.340592  | 0.406928  | 0.509516  | 0.493396  | 0.30636    |
| 0.641093  | 0.599197  | 0.605763  | 0.730387  | 0.34721   | 0.808463   |
| 66.6401   | 66.96     | 58.0176   | 57.2562   | 55.4929   | 66.6331    |
| 0.644452  | 0.67484   | 0.682235  | 0.220944  | 0.659815  | 0.526853   |
| 16.3372   | 17.1319   | 22.5501   | 25.3969   | 21.7565   | 22.2965    |
| 0         | 0.293688  | 0         | 0.268492  | 0         | 0          |
| 1.55759   | 2.2445    | 1.60453   | 1.21909   | 2.82061   | 2.19609    |
| 0.243005  | 0.412959  | 0.288142  | 0.396296  | 0.216768  | 0.164342   |
| 184.71    | 193.283   | 184.689   | 210.771   | 134.018   | 126.449    |
| 17.9999   | 20.9099   | 26.5127   | 24.5187   | 25.4848   | 22.8639    |
| 11.7059   | 12.569    | 8.75644   | 10.0618   | 8.60398   | 11.0275    |
| 14.2855   | 14.6428   | 16.1667   | 14.2849   | 16.1269   | 11.5681    |
| 0.13689   | 0         | 0         | 0.155957  | 0         | 0          |
| 0.191014  | 0.416573  | 0.120325  | 0.0544048 | 0.0517257 | 0.040147   |
| 0         | 0.0963522 | 0         | 0.0293619 | 0         | 0          |
| 55.4147   | 54.693    | 57.1875   | 57.8287   | 52.1484   | 67.5149    |
| 28.9504   | 30.6048   | 26.4738   | 29.2397   | 25.9031   | 29.4597    |
| 0.11077   | 0.0690204 | 0.104665  | 0.0946484 | 0.0599917 | 0.069844   |
| 0         | 0         | 0         | 0         | 0         | 0          |
| 0         | 0         | 0         | 0         | 0         | 0          |
| 0.771169  | 0.556386  | 0.613617  | 0.46241   | 0.615495  | 0.648331   |

|           |           |           |          |          |           |
|-----------|-----------|-----------|----------|----------|-----------|
| 39.6414   | 40.8417   | 40.7182   | 39.006   | 33.6108  | 35.2029   |
| 10.4051   | 10.8797   | 12.6274   | 11.132   | 12.9036  | 10.4101   |
| 0.975963  | 0.428868  | 0.867135  | 0.392074 | 1.05617  | 1.44703   |
| 0.735598  | 0.835217  | 0.700208  | 0.670443 | 1.1332   | 1.08568   |
| 0.968392  | 0.482724  | 0.976027  | 0.661964 | 1.04894  | 0.162828  |
| 7.01039   | 7.06343   | 7.03715   | 7.19576  | 8.01135  | 6.90123   |
| 27.7822   | 28.8429   | 34.126    | 30.2622  | 30.3645  | 27.2436   |
| 0.529102  | 0.421995  | 0.426619  | 0.729385 | 0.693467 | 0.360306  |
| 43.7338   | 47.4361   | 52.766    | 44.2827  | 49.2044  | 46.3484   |
| 0         | 0         | 0         | 0        | 0        | 0         |
| 22.9403   | 22.3397   | 22.7409   | 15.7335  | 26.6278  | 17.6482   |
| 20.8294   | 11.8277   | 35.872    | 41.2926  | 20.2161  | 10.1749   |
| 7.55449   | 8.83326   | 7.22629   | 8.18168  | 6.92008  | 7.44888   |
| 37.0234   | 34.5044   | 37.5245   | 26.1613  | 36.4999  | 50.1535   |
| 0.0233731 | 0.0910234 | 0         | 0.106514 | 0.151903 | 0.0994783 |
| 1.87563   | 1.89914   | 1.3292    | 0.93488  | 2.41257  | 1.18265   |
| 12.4538   | 11.4206   | 12.3476   | 10.6654  | 16.1437  | 12.8946   |
| 22.8792   | 34.4069   | 33.4677   | 41.6057  | 35.7224  | 50.3181   |
| 4.70352   | 3.90768   | 1.38268   | 1.42897  | 2.20773  | 3.03164   |
| 25.9616   | 56.2654   | 38.1024   | 50.1836  | 24.9961  | 20.1826   |
| 23.11     | 12.868    | 19.8232   | 29.5045  | 16.5107  | 19.8423   |
| 24.17     | 8.74469   | 9.42988   | 4.26371  | 17.0595  | 14.1585   |
| 68.2305   | 71.191    | 54.0587   | 67.4799  | 58.6195  | 82.8858   |
| 0.208076  | 0.232293  | 0.169302  | 0.128406 | 0.220688 | 0.233243  |
| 9.25941   | 8.74163   | 11.0623   | 9.55468  | 9.01772  | 7.3314    |
| 8.31464   | 8.86362   | 11.6111   | 12.6113  | 8.40945  | 7.66397   |
| 0         | 0         | 0         | 0        | 0        | 0         |
| 10.2762   | 10.206    | 9.79208   | 9.09267  | 10.7355  | 9.25333   |
| 17.4491   | 15.9234   | 16.2567   | 14.1085  | 17.1256  | 12.8682   |
| 0         | 0         | 0         | 0        | 0        | 0         |
| 0         | 0         | 0         | 0        | 0        | 0         |
| 0         | 0         | 0         | 0        | 0        | 0         |
| 4.54478   | 4.46726   | 3.22968   | 4.58035  | 3.70098  | 4.59612   |
| 24.5377   | 21.8462   | 20.3936   | 14.8662  | 28.3337  | 16.0363   |
| 0         | 0         | 0         | 0        | 0        | 0         |
| 0.561133  | 1.34946   | 1.36704   | 1.03367  | 0.687933 | 1.23048   |
| 1.27293   | 0.982007  | 1.6037    | 0.828699 | 1.51012  | 1.12112   |
| 6.69247   | 5.91183   | 6.73565   | 5.47884  | 6.67298  | 6.38393   |
| 79.9574   | 61.3099   | 83.9631   | 81.0705  | 96.7944  | 81.9226   |
| 0.116835  | 0         | 0.0367986 | 0        | 0        | 0.0982243 |
| 7.21903   | 6.55486   | 6.65351   | 7.01146  | 5.81273  | 5.71106   |
| 5.60582   | 5.36164   | 6.02566   | 5.59562  | 6.00265  | 4.57839   |
| 33.4517   | 33.6459   | 30.2012   | 27.211   | 24.8379  | 21.9209   |

|           |           |           |           |           |           |
|-----------|-----------|-----------|-----------|-----------|-----------|
| 2.0507    | 2.45211   | 2.69606   | 1.82162   | 3.7514    | 2.25146   |
| 0.861878  | 0.93748   | 1.15379   | 0.807563  | 1.23998   | 1.0176    |
| 0         | 0         | 0         | 0         | 0         | 0         |
| 0         | 0         | 0         | 0         | 0         | 0         |
| 0.0816666 | 0.101773  | 0.51444   | 0         | 0.0884595 | 0.411948  |
| 0         | 0         | 0         | 0         | 0         | 0         |
| 21.7492   | 23.7122   | 20.7143   | 18.8719   | 21.6878   | 22.1618   |
| 17.9307   | 21.1905   | 15.0601   | 17.6833   | 14.6545   | 16.4379   |
| 30.3584   | 28.0855   | 25.9802   | 27.782    | 27.9391   | 28.4944   |
| 28.8542   | 28.2063   | 30.3154   | 27.9097   | 31.9528   | 35.8454   |
| 11.806    | 13.5992   | 15.9894   | 14.341    | 14.1791   | 13.2317   |
| 0         | 0         | 0         | 0         | 0         | 0         |
| 8.83544   | 6.74106   | 13.544    | 9.67403   | 16.9294   | 11.4195   |
| 0.136287  | 0.0849203 | 38.9763   | 40.9911   | 37.5701   | 47.2826   |
| 0         | 0.0320457 | 0         | 0         | 0         | 0.0216187 |
| 0         | 0         | 0         | 0         | 0         | 0         |
| 1.73528   | 3.67949   | 3.00195   | 4.01297   | 1.93573   | 1.63307   |
| 0         | 0         | 0         | 0         | 0         | 0         |
| 21.3503   | 22.3895   | 24.7422   | 22.6785   | 25.3765   | 19.4325   |
| 12.1536   | 15.1281   | 17.2594   | 16.8433   | 18.4761   | 17.8381   |
| 0.0372788 | 0.13937   | 0.140897  | 0.169884  | 0         | 0         |
| 5.13484   | 1.74608   | 7.52759   | 12.3626   | 11.5036   | 13.3968   |
| 73.108    | 76.2889   | 59.5416   | 67.4477   | 53.2657   | 71.29     |
| 1.56343   | 1.52708   | 1.75675   | 1.49275   | 4.23372   | 3.3748    |
| 17.9522   | 19.1137   | 20.6978   | 24.3461   | 24.1953   | 25.9333   |
| 42.6657   | 43.1604   | 51.4219   | 44.1288   | 51.4967   | 43.5528   |
| 0.382159  | 0.368706  | 0.232967  | 0.323029  | 0.373887  | 0.228009  |
| 2.52685   | 3.54054   | 2.88656   | 8.38283   | 4.11264   | 3.24707   |
| 0.324553  | 0.270559  | 0.0683807 | 0.0618364 | 0.423299  | 0.364577  |
| 5.8962    | 6.81402   | 7.04741   | 8.75564   | 14.5201   | 13.4941   |
| 23.3455   | 29.0625   | 25.6013   | 26.5622   | 17.6687   | 17.3351   |
| 0         | 0         | 0         | 0         | 0         | 0         |
| 0         | 0.0273464 | 0.124408  | 0.0250003 | 0         | 0.0830184 |
| 0.295137  | 0.372212  | 0.150448  | 0.314239  | 0.142627  | 0.174945  |
| 34.6759   | 33.4547   | 37.5303   | 32.8321   | 32.3495   | 28.438    |
| 0         | 0         | 0         | 0         | 0         | 0         |
| 226.702   | 172.549   | 159.086   | 122.932   | 252.759   | 192.137   |
| 0.676033  | 0.84411   | 0.655004  | 0.97588   | 1.002     | 1.1026    |
| 0.0594113 | 0.111057  | 0.187124  | 0.0338431 | 0.0965296 | 0.224765  |
| 20.1838   | 20.9555   | 15.6585   | 18.0272   | 12.3031   | 12.9296   |
| 5.66145   | 5.91735   | 6.90252   | 4.78548   | 9.89092   | 9.36577   |
| 25.8061   | 25.4971   | 22.7309   | 26.6774   | 22.9225   | 22.606    |
| 0         | 0         | 0.036836  | 0.0333107 | 0         | 0.024581  |

|           |           |           |           |           |           |
|-----------|-----------|-----------|-----------|-----------|-----------|
| 0.352467  | 0         | 0.394693  | 0.0892128 | 0         | 0.0658572 |
| 11.3195   | 8.97087   | 0.657187  | 0.297146  | 3.61617   | 1.66648   |
| 3.20828   | 2.76101   | 3.03691   | 3.04204   | 2.29605   | 2.42216   |
| 2.03215   | 2.13772   | 2.72672   | 1.96848   | 2.79816   | 2.06669   |
| 42.1136   | 39.5942   | 42.0182   | 42.9674   | 39.7307   | 40.9995   |
| 0         | 0         | 0         | 0         | 0         | 0         |
| 0.552794  | 0.32185   | 0.137829  | 0.33133   | 0.281338  | 0.284742  |
| 0.66363   | 0         | 1.25412   | 1.13409   | 0.718831  | 0.836883  |
| 0         | 0.545018  | 0         | 0         | 0.236861  | 0         |
| 0         | 0         | 0         | 0         | 0         | 0         |
| 0.751322  | 0.88735   | 0.897074  | 0.632508  | 0.810331  | 1.02854   |
| 0.457856  | 0.432257  | 0.402034  | 0.363559  | 0.450855  | 0.489905  |
| 0.852821  | 0.788518  | 1.26506   | 0.626842  | 0.938658  | 0.47413   |
| 20.1826   | 21.5071   | 20.6277   | 17.2946   | 22.7158   | 19.572    |
| 1.41448   | 0.881361  | 0.445509  | 0.863299  | 0.930225  | 1.23164   |
| 0         | 0         | 0         | 1.19065   | 0         | 0         |
| 10.4152   | 10.586    | 11.4243   | 9.64512   | 9.21156   | 8.29029   |
| 0.168772  | 0.11812   | 0.374664  | 0.300302  | 0.217716  | 0.0995717 |
| 17.901    | 16.0405   | 19.005    | 18.4476   | 25.0535   | 24.8891   |
| 2.86951   | 3.03825   | 3.11222   | 2.52009   | 3.1067    | 2.41613   |
| 8.42E-08  | 1.07E-06  | 2.44E-06  | 3.48E-08  | 2.74E-07  | 6.77E-07  |
| 26.2818   | 26.6191   | 27.7684   | 25.3271   | 30.3053   | 24.2909   |
| 26.8929   | 27.0586   | 30.6153   | 24.0217   | 35.2556   | 31.4361   |
| 0.260429  | 2.61E-07  | 4.35E-10  | 1.42E-09  | 7.18E-12  | 1.01E-09  |
| 5306.07   | 7241.83   | 5774.49   | 5986.66   | 7911.8    | 7450.38   |
| 0.211732  | 0.0613394 | 0.266751  | 0         | 0.322564  | 0.220702  |
| 44.0077   | 52.3565   | 53.5254   | 56.5101   | 52.0529   | 43.658    |
| 9.36582   | 9.685     | 10.356    | 10.1027   | 8.63393   | 8.04149   |
| 0         | 0         | 0         | 0         | 0         | 0         |
| 0         | 0.0640057 | 0.0647071 | 0         | 0         | 0         |
| 235.64    | 262.184   | 265.244   | 272.011   | 233.912   | 290.18    |
| 4.63207   | 4.48971   | 4.89914   | 3.25756   | 5.26514   | 4.75963   |
| 13.537    | 14.2469   | 14.8977   | 12.4345   | 16.0613   | 12.0947   |
| 1.91628   | 1.8791    | 1.61273   | 2.23918   | 2.32024   | 2.01872   |
| 0.612374  | 0.50876   | 0.300029  | 0.193797  | 0.58961   | 0.600636  |
| 16.6192   | 15.0505   | 14.7358   | 11.7498   | 17.6716   | 9.62383   |
| 0.0169945 | 0.0211542 | 0.0427243 | 3.34E-13  | 0.0187816 | 2.79E-12  |
| 3.75229   | 3.3827    | 4.30488   | 1.86459   | 4.66972   | 2.2619    |
| 14.9626   | 13.029    | 13.1657   | 12.6248   | 15.4429   | 12.806    |
| 6.43978   | 3.95021   | 4.04221   | 3.83154   | 4.29337   | 2.56656   |
| 0.0283046 | 0         | 0         | 0         | 0         | 0.023796  |
| 0         | 0.0700986 | 0.0354334 | 0.0320423 | 0.121858  | 0.070935  |
| 7.33706   | 6.85665   | 7.84987   | 6.35967   | 9.01403   | 6.86218   |

|           |           |           |          |           |          |
|-----------|-----------|-----------|----------|-----------|----------|
| 12.1701   | 13.8823   | 14.9514   | 15.3475  | 14.0874   | 12.2362  |
| 10.2435   | 10.6999   | 13.7938   | 14.0064  | 16.6679   | 15.6414  |
| 9.87917   | 8.85374   | 11.7578   | 9.19578  | 10.6554   | 8.48225  |
| 0.959985  | 0.672937  | 1.58739   | 0.649381 | 1.42977   | 0.857513 |
| 73.5028   | 65.4599   | 85.7706   | 71.0263  | 93.6953   | 71.177   |
| 13.2315   | 13.5405   | 15.4806   | 12.481   | 15.5812   | 12.7756  |
| 0.222159  | 0.351172  | 0.43019   | 0.272508 | 0.277545  | 0.301404 |
| 0.698792  | 1.48042   | 1.14449   | 1.35341  | 0.983992  | 0.99872  |
| 18.6079   | 16.8576   | 15.3408   | 17.2431  | 13.3984   | 15.752   |
| 0.759079  | 0.567578  | 1.07109   | 0.207553 | 1.05244   | 0.102107 |
| 18.8952   | 15.9063   | 13.9637   | 15.5827  | 11.8459   | 13.9524  |
| 305.116   | 346.566   | 287.774   | 422.263  | 239.237   | 357.575  |
| 0         | 0         | 0         | 0        | 0         | 0        |
| 265.765   | 260.216   | 927.461   | 877.346  | 561.581   | 993.936  |
| 6.03651   | 6.44802   | 6.21847   | 4.57624  | 5.88722   | 5.447    |
| 2.77096   | 2.20025   | 3.58369   | 2.79372  | 3.55924   | 2.59759  |
| 0         | 0         | 0         | 0        | 0         | 0        |
| 0.0775523 | 0.135304  | 0.175868  | 0.65382  | 0         | 0.130398 |
| 0.326667  | 0.358374  | 0.796693  | 1.10655  | 0.533021  | 0.633694 |
| 7.01859   | 5.64294   | 3.13763   | 0.773822 | 3.1881    | 2.47445  |
| 0.176739  | 0.799516  | 0.839106  | 0.750588 | 3.75073   | 7.45021  |
| 0         | 0         | 0         | 0        | 0         | 0        |
| 0.527459  | 0.455916  | 0.4355    | 0.393822 | 0.527537  | 0.647542 |
| 2.77784   | 2.86489   | 3.86171   | 3.383    | 3.94269   | 2.57695  |
| 105.642   | 104.259   | 135.038   | 151.076  | 87.9899   | 112.855  |
| 4.62211   | 4.12795   | 3.5745    | 4.19695  | 3.9385    | 3.58703  |
| 84.2058   | 82.0227   | 79.1547   | 83.7285  | 88.7977   | 75.6065  |
| 3.48282   | 2.89352   | 4.18184   | 4.32186  | 4.79978   | 3.79409  |
| 0.317225  | 0.279054  | 0.0235093 | 0.127556 | 0.202125  | 0.282383 |
| 5.45053   | 6.1095    | 4.28627   | 4.43189  | 3.48648   | 3.78136  |
| 2.2465    | 1.91024   | 2.082     | 2.29055  | 2.48103   | 1.95638  |
| 112.255   | 103.587   | 128.069   | 121.579  | 123.926   | 87.4569  |
| 1.84043   | 2.79525   | 0.905731  | 2.03125  | 1.55743   | 1.7165   |
| 0         | 0         | 0         | 0.371662 | 0.706719  | 0.274261 |
| 0.900705  | 0.96461   | 0.764252  | 0.588185 | 0.663179  | 0.425695 |
| 8.9407    | 10.2505   | 7.62947   | 9.69706  | 8.67721   | 9.28044  |
| 3.15561   | 2.62093   | 2.95389   | 2.46554  | 3.1582    | 2.82886  |
| 0         | 0         | 0         | 0        | 0         | 0        |
| 0.198656  | 0.372778  | 0.686763  | 0.409324 | 0.78726   | 0.851073 |
| 0         | 0.0322617 | 0         | 0        | 0.0841244 | 0        |
| 0         | 0         | 0         | 0        | 0         | 0        |
| 0.505193  | 0.40586   | 1.37946   | 0.87104  | 1.11513   | 0.670701 |
| 70.5419   | 60.6585   | 59.9722   | 58.0285  | 56.3738   | 68.5457  |

|           |          |           |          |           |           |
|-----------|----------|-----------|----------|-----------|-----------|
| 0         | 0        | 0         | 0        | 0         | 0         |
| 4.96972   | 3.94669  | 2.39396   | 2.83096  | 2.05825   | 2.70348   |
| 71.0136   | 80.3083  | 60.2429   | 69.7655  | 53.9815   | 64.2944   |
| 68.4469   | 70.5228  | 70.9201   | 84.3865  | 66.4719   | 71.3493   |
| 9.87822   | 9.09011  | 11.3261   | 7.85026  | 8.30918   | 8.01057   |
| 11.0743   | 8.37606  | 15.3149   | 10.4746  | 14.3625   | 9.3225    |
| 12.9862   | 12.1978  | 13.6175   | 11.7065  | 14.7988   | 12.2238   |
| 0         | 0        | 0         | 0        | 0         | 0         |
| 0.115984  | 0.289078 | 0.0730614 | 0.264277 | 0.0628157 | 0.0975091 |
| 0         | 0        | 0         | 0        | 0         | 0         |
| 0         | 21.258   | 0         | 0        | 18.4772   | 0         |
| 0         | 0        | 0         | 0        | 0         | 0         |
| 0         | 0        | 0         | 0        | 0.0872232 | 0.152321  |
| 0         | 0        | 0         | 0        | 0         | 0         |
| 2.90785   | 2.86656  | 2.46054   | 2.12617  | 2.1625    | 2.15277   |
| 10.3247   | 9.62346  | 9.57492   | 8.56769  | 11.4041   | 8.93313   |
| 33.6817   | 34.2313  | 32.289    | 28.314   | 32.9855   | 30.0005   |
| 0.741748  | 0.992454 | 0.398412  | 1.18082  | 2.0678    | 1.49496   |
| 16.8567   | 16.5373  | 19.028    | 20.7709  | 18.302    | 17.8737   |
| 0.539231  | 0.727988 | 0.93411   | 0.793519 | 0.912632  | 0.642229  |
| 59.1445   | 68.5274  | 78.51     | 84.2977  | 90.8751   | 97.4377   |
| 0.606668  | 0.567391 | 0.891506  | 0.518713 | 1.20406   | 1.21761   |
| 17.6913   | 17.117   | 15.9913   | 15.8062  | 14.6136   | 13.8023   |
| 8.88774   | 11.647   | 3.46634   | 3.65704  | 17.6332   | 17.9083   |
| 4.93909   | 4.43224  | 5.49914   | 5.42735  | 4.65009   | 4.98293   |
| 14.8377   | 15.0439  | 13.6638   | 13.1633  | 14.9355   | 14.7537   |
| 16.3943   | 13.5324  | 10.6868   | 9.75021  | 19.1438   | 16.9284   |
| 1.49739   | 1.29969  | 2.23065   | 1.36968  | 2.26353   | 1.93696   |
| 0.0231521 | 0        | 0         | 0        | 0         | 0         |
| 8.98947   | 9.41199  | 9.4065    | 7.54446  | 8.48536   | 8.31735   |
| 0         | 0        | 0         | 0        | 0         | 0         |
| 0.0266917 | 0        | 0.0336276 | 0        | 0         | 0         |
| 6.12108   | 5.46471  | 5.22118   | 4.4357   | 5.7933    | 4.60615   |
| 13.1604   | 12.4305  | 14.6124   | 12.3859  | 16.9855   | 14.3275   |
| 0.493499  | 0.403353 | 0.631888  | 0.983373 | 0.699966  | 0.649137  |
| 21.5627   | 21.309   | 18.7607   | 21.6683  | 16.3796   | 19.4116   |
| 0         | 0        | 0         | 0        | 0         | 0         |
| 17.1014   | 19.2113  | 19.7326   | 18.7965  | 16.6982   | 16.6929   |
| 12.9335   | 15.3314  | 32.4749   | 33.7823  | 19.4762   | 16.0637   |
| 15.0287   | 13.7601  | 14.553    | 17.1599  | 13.1868   | 14.0909   |
| 12.2188   | 12.382   | 13.4977   | 10.8396  | 13.1804   | 12.8029   |
| 10.0716   | 9.71959  | 8.74293   | 8.48593  | 6.26563   | 9.09431   |
| 0         | 0        | 0         | 0        | 0         | 0         |

|          |           |           |           |          |           |
|----------|-----------|-----------|-----------|----------|-----------|
| 4.59184  | 6.57296   | 5.08146   | 6.5746    | 5.30985  | 6.10362   |
| 0.125471 | 0.212205  | 0.191948  | 0.326735  | 0.310645 | 0.226039  |
| 17.0734  | 15.7015   | 15.4644   | 11.8982   | 20.7282  | 17.1309   |
| 2.6442   | 2.38041   | 2.86877   | 2.76274   | 2.85636  | 2.21917   |
| 4.21939  | 2.48198   | 3.88773   | 2.58858   | 3.82204  | 2.40121   |
| 22.5078  | 22.6467   | 18.7491   | 19.1461   | 22.8344  | 22.7878   |
| 49.4545  | 48.148    | 52.6823   | 45.6469   | 47.927   | 44.9396   |
| 0        | 0         | 0         | 0         | 0        | 0         |
| 0        | 0         | 0         | 0         | 0        | 0         |
| 0.963207 | 0.809531  | 0.971001  | 1.0364    | 1.48472  | 1.12471   |
| 0.162435 | 0         | 0.137418  | 0.0290732 | 0.277455 | 0.129277  |
| 59.2993  | 57.7599   | 76.6116   | 76.5693   | 74.7076  | 70.2349   |
| 0        | 0.127491  | 0.0429627 | 0.34966   | 0        | 0.0286694 |
| 2.09137  | 2.86054   | 4.04863   | 2.38267   | 2.7626   | 1.80113   |
| 15.1022  | 17.5029   | 14.7773   | 14.6821   | 15.7585  | 13.2044   |
| 13.8903  | 13.6065   | 15.2991   | 15.0989   | 10.8318  | 11.4126   |
| 10.0565  | 12.2012   | 6.80929   | 6.71282   | 4.22284  | 6.59244   |
| 6.29042  | 6.2273    | 2.97346   | 4.19593   | 3.70108  | 3.68762   |
| 4.84276  | 3.99205   | 4.93791   | 3.84277   | 5.04147  | 4.3882    |
| 37.7258  | 40.0948   | 26.4943   | 29.058    | 31.7165  | 38.0359   |
| 0.875474 | 0.924206  | 1.47918   | 0.809724  | 1.51714  | 0.684082  |
| 14.7912  | 14.6272   | 13.9716   | 12.3297   | 12.6969  | 11.4076   |
| 17.1506  | 15.0635   | 0         | 0         | 0        | 0         |
| 14.688   | 15.5387   | 18.6176   | 17.802    | 29.4001  | 28.6962   |
| 0.251923 | 0.0627892 | 0         | 0.229609  | 0.163727 | 0         |
| 77.2844  | 25.9717   | 40.6972   | 23.1499   | 51.7326  | 32.779    |
| 0        | 0         | 0         | 0         | 0        | 0         |
| 1.99425  | 0.776635  | 0.785145  | 0.994007  | 1.75511  | 1.46702   |
| 0.883895 | 0.647784  | 1.30819   | 0.805737  | 1.38777  | 0.511981  |
| 49.2847  | 52.5074   | 45.7803   | 48.7767   | 35.7905  | 43.6861   |
| 19.9243  | 23.5482   | 20.1027   | 22.7821   | 24.0101  | 28.0702   |
| 1.23675  | 2.35104   | 0.871495  | 1.50454   | 2.58843  | 1.6918    |
| 0.148831 | 0.0498266 | 0.29713   | 0.133336  | 0.210261 | 0.0676564 |
| 3.12548  | 4.20247   | 2.48694   | 3.09228   | 2.85091  | 3.38826   |
| 0        | 0         | 0.0455511 | 0         | 0        | 0         |
| 1.6474   | 1.98531   | 1.34564   | 1.25811   | 1.58834  | 1.81114   |
| 12.9636  | 9.85519   | 12.8935   | 13.1218   | 14.4669  | 11.3887   |
| 0        | 0         | 0         | 0         | 0        | 0         |
| 0        | 0         | 0         | 0         | 0        | 0         |
| 0        | 0         | 0         | 0         | 0        | 0         |
| 0        | 0         | 0         | 0         | 0        | 0         |
| 24.662   | 23.3459   | 27.6943   | 22.1438   | 27.6929  | 22.626    |
| 8.74236  | 8.2333    | 8.77608   | 9.07317   | 7.99939  | 6.69542   |



|           |           |           |           |           |           |
|-----------|-----------|-----------|-----------|-----------|-----------|
| 8.96087   | 8.81944   | 7.28187   | 7.59775   | 8.84176   | 9.4624    |
| 0         | 0         | 0         | 0         | 0         | 0.329148  |
| 22.694    | 24.33     | 24.6617   | 24.5395   | 22.6903   | 24.8014   |
| 3.09938   | 3.07471   | 7.80953   | 4.57645   | 6.93524   | 6.26281   |
| 0         | 0.228314  | 0         | 0         | 0         | 0         |
| 0         | 0         | 0         | 0         | 0         | 0         |
| 17.4528   | 21.0956   | 16.6686   | 16.7008   | 16.6653   | 12.3187   |
| 1.02384   | 1.43361   | 1.01128   | 0.539364  | 1.04335   | 1.88986   |
| 0         | 0         | 0.149816  | 0.0225797 | 0.0966049 | 0.0999734 |
| 11.3049   | 13.8723   | 11.2061   | 10.7561   | 9.85082   | 8.68786   |
| 0.039846  | 0.0496561 | 0.01004   | 0.0544751 | 0.0517925 | 0.0200994 |
| 0         | 0         | 0         | 0         | 0         | 0         |
| 0.71815   | 1.13904   | 1.31602   | 0.892556  | 1.62649   | 1.15263   |
| 16.3427   | 14.8636   | 14.9336   | 11.7949   | 12.8555   | 15.8333   |
| 28.9506   | 28.0321   | 24.3315   | 18.4001   | 25.9453   | 19.0614   |
| 65.6504   | 72.9641   | 65.2612   | 69.5812   | 53.7939   | 67.6121   |
| 12.034    | 12.7894   | 16.5254   | 17.7112   | 18.2204   | 19.7321   |
| 26.2377   | 25.5646   | 28.7917   | 24.7037   | 28.2295   | 26.7832   |
| 0.414977  | 0.27967   | 0.619077  | 0.165984  | 0.328966  | 0.122484  |
| 2.39222   | 5.96236   | 0         | 0         | 0         | 0         |
| 1.53636   | 1.91461   | 1.60378   | 2.86724   | 1.36302   | 2.26344   |
| 0.625434  | 0.779416  | 0.590967  | 0.53441   | 7.28267   | 4.86375   |
| 54.3156   | 47.9164   | 54.8134   | 49.7938   | 45.7526   | 38.7782   |
| 0         | 0         | 0         | 0         | 0         | 0         |
| 6.73359   | 3.74035   | 9.53554   | 4.10334   | 9.49876   | 3.88372   |
| 1.0508    | 1.25926   | 0.835273  | 0.653741  | 1.56154   | 0.825901  |
| 0.0299372 | 0         | 0         | 0         | 0.0324273 | 0.140003  |
| 0.0678014 | 0         | 0.0427099 | 0         | 0.0367205 | 0         |
| 0.0672867 | 0.0419263 | 0.169543  | 0.114988  | 0.0728835 | 0.169706  |
| 0         | 0         | 0         | 0         | 0.0210762 | 0         |
| 0         | 0         | 0         | 0         | 0         | 0         |
| 0.124125  | 0         | 0         | 0.0471376 | 0.179266  | 0.104353  |
| 2.7438    | 3.20251   | 2.57342   | 2.65225   | 1.58189   | 2.23469   |
| 9.64035   | 10.044    | 10.8856   | 7.72021   | 13.6369   | 9.1835    |
| 7.53559   | 4.92929   | 4.87418   | 4.11167   | 5.84815   | 3.39822   |
| 3.86365   | 3.2019    | 4.34958   | 3.9444    | 4.29382   | 2.97819   |
| 1.58959   | 0.731847  | 3.62536   | 0.622528  | 4.0293    | 0.933349  |
| 83.1281   | 84.2606   | 84.0617   | 85.1706   | 75.5396   | 75.2424   |
| 10.8443   | 9.38583   | 12.3667   | 9.08182   | 12.2325   | 9.30762   |
| 3.14708   | 3.30762   | 3.29609   | 2.07349   | 2.83387   | 3.31521   |
| 24.6809   | 25.2082   | 27.6325   | 28.5523   | 27.0028   | 29.1969   |
| 8.41086   | 8.30746   | 8.41006   | 7.69935   | 8.30485   | 7.80446   |
| 0.0890832 | 0.222031  | 0.112232  | 0.152236  | 0.0964931 | 0.149787  |

|          |           |          |           |           |           |
|----------|-----------|----------|-----------|-----------|-----------|
| 0.337043 | 1.36797   | 5.05138  | 1.94562   | 4.03888   | 4.37191   |
| 8.97836  | 9.51005   | 9.70679  | 8.68804   | 13.8314   | 12.6252   |
| 116.03   | 106.693   | 126.901  | 116.127   | 110.133   | 132.723   |
| 0        | 0         | 0        | 0         | 0         | 0         |
| 2.10176  | 2.17339   | 3.21129  | 2.35629   | 4.40782   | 2.93241   |
| 31.4684  | 30.795    | 30.2581  | 29.5256   | 28.256    | 32.8414   |
| 73.9313  | 71.4396   | 72.5441  | 73.7942   | 70.5062   | 90.3572   |
| 0        | 0         | 0        | 0         | 0         | 0         |
| 4.98751  | 4.11305   | 5.28076  | 4.23846   | 7.17208   | 4.94822   |
| 4.90112  | 5.13446   | 5.10106  | 5.21961   | 5.71273   | 6.67331   |
| 0        | 0         | 0        | 0         | 0         | 0         |
| 1.38559  | 1.08085   | 2.28747  | 1.12677   | 3.95235   | 1.86982   |
| 13.5004  | 14.2035   | 19.0373  | 18.4019   | 15.7925   | 16.0625   |
| 188.836  | 186.448   | 190.381  | 189.206   | 178.02    | 196.396   |
| 0.640691 | 0.319371  | 0.686101 | 0.401461  | 0.242894  | 0.242387  |
| 1.04009  | 0.951872  | 0.906505 | 0.869755  | 0.806288  | 0.873172  |
| 4.63191  | 4.00641   | 4.44116  | 3.72273   | 6.0032    | 2.93114   |
| 39.2015  | 40.1329   | 33.3967  | 35.9699   | 28.1311   | 33.0444   |
| 0.901068 | 0.583913  | 0.95358  | 0.698068  | 2.88901   | 2.09081   |
| 9.80979  | 11.3856   | 9.77646  | 11.5431   | 8.97637   | 9.15807   |
| 9.6092   | 8.754     | 6.55014  | 8.24673   | 6.41004   | 6.39945   |
| 15.8806  | 16.0054   | 19.5576  | 16.7516   | 15.4945   | 15.7705   |
| 58.3116  | 68.7251   | 65.5542  | 68.3104   | 82.4964   | 76.0958   |
| 1.24077  | 1.19792   | 2.11117  | 1.2962    | 1.91187   | 1.14575   |
| 0.057527 | 0.0716901 | 0        | 0.0655396 | 0.0973703 | 0.0120892 |
| 51.1947  | 43.6831   | 55.6039  | 43.2906   | 58.863    | 45.8627   |
| 13.2549  | 12.6109   | 14.7955  | 14.4749   | 13.4399   | 13.5658   |
| 3.20881  | 2.75328   | 2.81659  | 3.38606   | 3.2478    | 2.91885   |
| 0        | 0         | 0        | 0         | 0         | 0         |
| 4.56602  | 1.80155   | 3.21908  | 3.23807   | 4.29885   | 4.58794   |
| 0.171487 | 0.244237  | 0.416665 | 0.279103  | 0.570522  | 0.381024  |
| 12.2213  | 7.86552   | 8.24403  | 7.24879   | 8.39316   | 8.88378   |
| 0        | 0         | 0        | 0         | 0         | 0         |
| 121.708  | 98.5458   | 80.4357  | 89.9867   | 40.5911   | 57.1778   |
| 0.220385 | 0.0633792 | 0.277653 | 0.309022  | 0.183628  | 0.242289  |
| 9.09636  | 8.48227   | 9.95149  | 8.01782   | 10.1716   | 7.82404   |
| 1.62465  | 2.09402   | 2.53404  | 2.59131   | 0.855172  | 1.11587   |
| 0.244903 | 0.254331  | 0.249772 | 0.172722  | 0.258957  | 0.294132  |
| 2.01903  | 1.91038   | 2.18568  | 2.26617   | 2.07357   | 1.86088   |
| 7.2501   | 13.4585   | 2.21216  | 4.216     | 3.12899   | 4.04762   |
| 0        | 0         | 0        | 0         | 0         | 0.0328499 |
| 19.8372  | 15.7008   | 19.781   | 16.6789   | 31.1845   | 20.8867   |
| 31.398   | 32.0276   | 26.1694  | 28.1151   | 15.6891   | 26.3375   |

|          |          |          |          |          |           |
|----------|----------|----------|----------|----------|-----------|
| 0.181414 | 0.113039 | 0.15237  | 0.034447 | 0.131003 | 0.152517  |
| 53.5596  | 28.3442  | 28.1333  | 18.8288  | 40.1233  | 23.1283   |
| 2.31084  | 2.29444  | 2.27491  | 1.75255  | 1.749    | 1.8314    |
| 46.9162  | 45.6413  | 49.459   | 50.6507  | 44.8525  | 48.5381   |
| 641.747  | 799.745  | 1368.24  | 1124.82  | 695.127  | 1079.05   |
| 0        | 0        | 0        | 0        | 0        | 0         |
| 1.04589  | 0.719112 | 1.81748  | 0.698505 | 2.18765  | 1.12186   |
| 0        | 0        | 0        | 0        | 0        | 0         |
| 17.9797  | 16.4094  | 18.5799  | 17.5109  | 13.8738  | 15.7195   |
| 0.15908  | 0.185029 | 0.334029 | 0.14499  | 0.643299 | 0.47255   |
| 0.969733 | 1.00707  | 1.0181   | 1.47307  | 2.45092  | 4.07633   |
| 0        | 0        | 0        | 0        | 0        | 0         |
| 0        | 0.122633 | 0        | 0        | 0.213181 | 0.165461  |
| 0.943185 | 1.22622  | 1.14331  | 1.82965  | 0.530148 | 0.998684  |
| 0.777109 | 0.522444 | 1.10787  | 1.11833  | 0.919279 | 0.722096  |
| 0.800096 | 0.600284 | 0.890591 | 0.478014 | 1.13586  | 0.640004  |
| 112.51   | 111.803  | 94.4517  | 70.8963  | 144.188  | 117.635   |
| 2.67039  | 2.75363  | 4.15163  | 2.4124   | 4.92385  | 2.37104   |
| 20.0966  | 22.0369  | 21.6268  | 18.6765  | 19.9062  | 17.9302   |
| 4.20388  | 4.06204  | 5.25928  | 4.18469  | 3.9142   | 3.44768   |
| 0        | 0        | 0        | 0        | 0        | 0         |
| 3.32756  | 3.0448   | 3.68059  | 3.49999  | 3.85977  | 3.44183   |
| 57.4014  | 62.623   | 51.779   | 61.3886  | 42.1014  | 53.5239   |
| 0        | 0        | 0        | 0        | 0        | 0         |
| 0        | 0        | 0.198064 | 0        | 0.340578 | 0.66085   |
| 52.7574  | 36.5301  | 61.6845  | 43.0623  | 49.6714  | 51.1248   |
| 48.5703  | 49.6164  | 39.4361  | 54.64    | 29.3454  | 36.0115   |
| 9.85125  | 10.742   | 11.4631  | 11.5871  | 10.8683  | 9.81578   |
| 28.7648  | 32.9188  | 31.12    | 30.3225  | 23.3724  | 26.0911   |
| 6.22929  | 6.8658   | 5.44177  | 8.00078  | 5.04467  | 6.50925   |
| 4.53604  | 4.89964  | 3.60243  | 3.21324  | 4.16734  | 3.16333   |
| 17.342   | 18.6263  | 21.7417  | 17.8495  | 21.939   | 18.1138   |
| 0.100044 | 0        | 0        | 0.113978 | 0.169323 | 0.0210265 |
| 0.610478 | 0.652094 | 0.466961 | 0.471951 | 0.566792 | 0.219958  |
| 0.416465 | 0.476879 | 1.17079  | 0.772    | 0.839619 | 0.484867  |
| 4.62735  | 3.04021  | 2.22087  | 1.66763  | 0.971763 | 0.608681  |
| 1.61249  | 0.843981 | 2.39717  | 0.551124 | 1.39729  | 0.189789  |
| 24.3046  | 21.2237  | 26.3026  | 21.6738  | 28.637   | 27.8421   |
| 0.485394 | 1.69371  | 0.366915 | 0.884801 | 0.946384 | 0.489692  |
| 0        | 0        | 0        | 0        | 0        | 0         |
| 0        | 0        | 0        | 0        | 0        | 0         |
| 0        | 0        | 0        | 0        | 0        | 0         |
| 12.258   | 10.9334  | 10.9877  | 12.502   | 12.6089  | 10.0064   |

|           |           |           |           |           |            |
|-----------|-----------|-----------|-----------|-----------|------------|
| 52.3454   | 52.5572   | 53.2895   | 44.6565   | 38.9641   | 40.4618    |
| 3.28485   | 3.24742   | 3.13658   | 2.66217   | 3.57133   | 2.98789    |
| 0.770448  | 0.384053  | 1.24244   | 1.0182    | 0.634246  | 0.725452   |
| 61.1398   | 69.478    | 71.1468   | 69.6715   | 52.3064   | 56.54      |
| 2.39846   | 1.53049   | 3.03991   | 2.55145   | 3.31788   | 2.86671    |
| 0         | 0         | 0         | 0         | 0         | 0          |
| 25.3668   | 27.1275   | 24.2113   | 23.7215   | 23.5471   | 22.3793    |
| 0.961925  | 1.19875   | 0.727131  | 2.19181   | 1.25032   | 1.13218    |
| 0.0317649 | 0.0593781 | 0.0800384 | 0.0180946 | 0.120425  | 0.0667629  |
| 0.234602  | 0.14618   | 0.197043  | 0.222732  | 0.211764  | 0.197233   |
| 0         | 0         | 0         | 0         | 0         | 0.0562403  |
| 0         | 0         | 0         | 0         | 0         | 0          |
| 9.23168   | 11.6325   | 8.06189   | 9.04605   | 7.8375    | 7.82288    |
| 1.64237   | 2.38784   | 0         | 8.73191   | 0         | 0          |
| 9.31107   | 10.8394   | 10.5946   | 14.249    | 9.65297   | 13.386     |
| 1.35872   | 1.37214   | 1.27432   | 1.44662   | 1.80513   | 2.05994    |
| 0         | 0         | 0.023298  | 0         | 0.0726117 | 0          |
| 24.167    | 28.2717   | 24.673    | 24.9425   | 25.6044   | 22.0069    |
| 0         | 0.0263916 | 0.0266808 | 0         | 0         | 0.0356086  |
| 61.6746   | 60.1872   | 62.386    | 63.2398   | 63.0631   | 64.548     |
| 24.0523   | 24.5295   | 35.5672   | 31.9875   | 31.531    | 22.876     |
| 19.1602   | 17.0614   | 16.8981   | 20.9289   | 18.5141   | 22.3691    |
| 4.84764   | 5.83794   | 3.08982   | 3.64438   | 4.54447   | 4.73959    |
| 0.068568  | 0.0854493 | 0.345543  | 0.273414  | 0.445629  | 0.201761   |
| 0.400535  | 0.164945  | 0.340581  | 0.271503  | 0.0358247 | 0.111275   |
| 8.27216   | 6.95841   | 6.93992   | 6.36142   | 8.24749   | 6.60678    |
| 5.51436   | 8.40477   | 5.1911    | 5.55842   | 5.24029   | 7.42792    |
| 0.0410798 | 0.204774  | 0.155264  | 0.187206  | 0.0889936 | 0          |
| 1.59121   | 1.64019   | 2.15977   | 1.82801   | 2.25285   | 1.41297    |
| 24.1413   | 27.8577   | 21.5811   | 25.3899   | 28.471    | 24.5928    |
| 0.558971  | 0.630248  | 0         | 0.242601  | 0.864952  | 2.12589    |
| 25.3053   | 25.8683   | 27.7226   | 27.2422   | 20.6571   | 23.8644    |
| 0.479148  | 0.365973  | 0.35051   | 0.42262   | 0.971038  | 0.701695   |
| 0         | 0         | 0         | 0         | 0         | 0.00312372 |
| 1.53454   | 1.47099   | 2.94574   | 3.63201   | 2.86913   | 2.14639    |
| 2.6158    | 1.95977   | 1.58127   | 1.67107   | 1.58877   | 0.991649   |
| 9.44592   | 8.86117   | 12.1703   | 9.05329   | 15.1833   | 11.2355    |
| 0.126693  | 0.210513  | 0.266025  | 0.553302  | 0.274463  | 0.33729    |
| 38.7985   | 33.7457   | 41.0853   | 39.973    | 41.6315   | 47.8566    |
| 17.8963   | 24.5877   | 30.0579   | 25.1923   | 18.7178   | 25.4882    |
| 20.2002   | 21.5496   | 24.0755   | 24.2562   | 24.0179   | 26.8054    |
| 27.4192   | 26.5376   | 29.3521   | 24.7551   | 24.5864   | 23.1697    |
| 71.9919   | 76.2748   | 110.515   | 106.03    | 106.123   | 105.581    |

|           |           |          |           |           |           |
|-----------|-----------|----------|-----------|-----------|-----------|
| 0         | 0         | 0        | 0         | 0         | 0         |
| 13.6646   | 12.6449   | 13.2996  | 11.9843   | 13.0724   | 11.1367   |
| 109.243   | 124.882   | 110.758  | 116.211   | 90.591    | 105.553   |
| 143.75    | 143.45    | 136.59   | 143.795   | 96.6207   | 107.265   |
| 202.318   | 220.153   | 295.149  | 301.946   | 281.184   | 342.727   |
| 27.9492   | 30.9451   | 30.5262  | 28.041    | 20.8393   | 24.5433   |
| 0         | 0         | 0        | 0         | 0         | 0         |
| 10.7777   | 10.3106   | 11.4227  | 10.206    | 15.4199   | 13.815    |
| 0.0782282 | 0.097488  | 0.443506 | 0.356498  | 0.381311  | 0.263071  |
| 16.6298   | 17.4744   | 18.32    | 20.4141   | 18.5377   | 17.5244   |
| 2.1209    | 2.64306   | 3.02829  | 2.09413   | 1.53154   | 3.09064   |
| 74.2898   | 76.0875   | 73.1071  | 77.4989   | 70.6848   | 75.6274   |
| 0.0846658 | 0         | 0        | 0.0964583 | 0         | 0.0711796 |
| 0.0502964 | 0         | 0        | 0.257859  | 0         | 0         |
| 0.277993  | 0.10393   | 0.105069 | 0.0316713 | 0.18067   | 0.0701136 |
| 0.34855   | 1.30309   | 0.351298 | 0.635356  | 0.52856   | 0.820485  |
| 0.037546  | 0         | 0.141907 | 0         | 0         | 0.0315654 |
| 88.0559   | 90.4965   | 82.9204  | 80.2006   | 85.076    | 99.5272   |
| 2.53514   | 3.39773   | 1.62709  | 1.58036   | 2.02065   | 1.84983   |
| 0         | 0         | 0        | 0         | 0         | 0         |
| 0         | 0         | 0        | 0         | 0         | 0         |
| 19.6589   | 18.7737   | 20.6361  | 18.551    | 16.5939   | 16.1072   |
| 0.873848  | 0.445495  | 0.750628 | 0.678791  | 0.430243  | 0.601081  |
| 12.8425   | 16.2688   | 12.7476  | 17.2108   | 13.5275   | 16.9834   |
| 14.5832   | 14.0029   | 13.1636  | 14.035    | 13.0702   | 15.4633   |
| 29.0607   | 27.7775   | 30.8457  | 27.2303   | 33.5902   | 31.2398   |
| 0.127078  | 0.0791824 | 0        | 0         | 0.103237  | 0.106836  |
| 0.0224129 | 0.0817958 | 0.027492 | 0.0748421 | 0.0945006 | 0.018339  |
| 0.321785  | 0.328097  | 0.257983 | 0.266621  | 0.221805  | 0.0245935 |
| 2.05376   | 2.05527   | 2.43062  | 3.2261    | 3.80877   | 2.95618   |
| 6.61753   | 5.99764   | 4.45509  | 3.37678   | 2.59064   | 2.29446   |
| 0.519357  | 0.615669  | 0.12967  | 0.250155  | 0.828198  | 0.444552  |
| 19.6117   | 19.2942   | 20.2775  | 19.3732   | 18.111    | 17.714    |
| 0.0819792 | 0.0908105 | 0.022951 | 0.0207546 | 0.0197325 | 0.0153154 |
| 5.73294   | 5.6022    | 5.72723  | 5.16473   | 7.65967   | 4.55435   |
| 7.25009   | 9.17265   | 5.84209  | 7.21169   | 9.80647   | 8.47764   |
| 18.8779   | 17.7121   | 17.0273  | 22.749    | 21.0148   | 18.6198   |
| 5.35965   | 9.29578   | 1.44793  | 2.92088   | 2.40598   | 2.71284   |
| 0         | 0.148423  | 0.15005  | 0         | 0         | 0.0500648 |
| 0.539185  | 0.775092  | 0.731553 | 0.759751  | 0.602951  | 0.732084  |
| 0         | 0         | 0        | 16.9256   | 0         | 0         |
| 0         | 0         | 0        | 0         | 0         | 0         |
| 1.81822   | 2.69556   | 0.926923 | 1.77666   | 0.469181  | 0.83698   |

|           |          |          |          |           |          |
|-----------|----------|----------|----------|-----------|----------|
| 98.4386   | 100.959  | 80.1725  | 94.7959  | 68.8907   | 103.091  |
| 9.35911   | 8.44012  | 9.99238  | 6.40878  | 10.2142   | 7.48525  |
| 9.30192   | 10.1154  | 9.9861   | 9.13747  | 8.7118    | 9.52022  |
| 0.438748  | 1.94334  | 0        | 0        | 0         | 0        |
| 0.436371  | 0.327986 | 0.220738 | 0.100332 | 0.286597  | 0.333892 |
| 3.04546   | 0.81796  | 3.91E-06 | 1.90272  | 4.50E-07  | 5.17E-07 |
| 0         | 0        | 0        | 0        | 0         | 0        |
| 18.4583   | 16.6854  | 18.5007  | 22.0133  | 16.7188   | 17.0278  |
| 4.24103   | 4.31404  | 4.81444  | 3.46587  | 3.60362   | 2.44419  |
| 0.0453837 | 0        | 0.343061 | 0.10341  | 0.147476  | 0        |
| 1.23329   | 1.94827  | 2.28657  | 1.79233  | 2.68989   | 1.69088  |
| 104.012   | 113.921  | 117.167  | 112.138  | 94.7447   | 118.562  |
| 0         | 0        | 0        | 0        | 0.0326308 | 0        |
| 0         | 0        | 0        | 0        | 0         | 0        |
| 4.46871   | 3.38699  | 6.03601  | 3.75575  | 6.18145   | 5.0133   |
| 0.378536  | 0.236672 | 0.372838 | 0.221966 | 0.525123  | 0.308317 |
| 172.609   | 206.93   | 166.64   | 166.421  | 144.849   | 128.014  |
| 6.21118   | 7.09534  | 4.97225  | 5.1598   | 3.85449   | 4.67788  |
| 27.1262   | 26.0098  | 24.0679  | 26.2885  | 22.6336   | 27.8061  |
| 20.9706   | 15.9522  | 16.1209  | 12.9046  | 23.0418   | 17.0399  |
| 8.22828   | 9.36593  | 7.75442  | 9.7065   | 9.2636    | 10.1585  |
| 0         | 0        | 0        | 0        | 0         | 0        |
| 0         | 0        | 0        | 0        | 0.0480608 | 0        |
| 0         | 0        | 0        | 0        | 0         | 0        |
| 23.7542   | 23.5598  | 11.9433  | 14.959   | 6.13745   | 7.78665  |
| 24.8409   | 24.0725  | 22.8918  | 22.4238  | 20.1054   | 22.8307  |
| 0         | 0        | 0        | 0        | 0         | 0        |
| 1.53183   | 0.707023 | 1.26276  | 1.24964  | 1.22907   | 0.906248 |
| 0.878184  | 0        | 1.21928  | 0        | 0.951231  | 1.21543  |
| 6.84022   | 6.38612  | 8.96124  | 5.56639  | 9.8584    | 5.94171  |
| 2.29348   | 3.07383  | 2.90038  | 3.66737  | 1.96455   | 1.82543  |
| 4.28694   | 5.23639  | 2.16734  | 2.95419  | 3.32703   | 1.82656  |
| 0         | 0.201894 | 0        | 0        | 0         | 0        |
| 0.502966  | 0.250718 | 0.506931 | 0.114604 | 1.25305   | 0.42285  |
| 39.4934   | 39.7333  | 41.0776  | 36.7726  | 32.7233   | 35.8224  |
| 2.6248    | 2.18475  | 3.80043  | 1.72952  | 3.70244   | 1.67973  |
| 0         | 0        | 0        | 0        | 0         | 0        |
| 0.254702  | 0.875209 | 0.300593 | 0.939511 | 0.375045  | 0.578207 |
| 52.3755   | 61.9555  | 48.2324  | 52.9242  | 52.8906   | 57.7697  |
| 4.5498    | 7.72051  | 6.24515  | 3.54958  | 4.70533   | 6.24445  |
| 0.261872  | 0.190797 | 0.297118 | 0.439705 | 0.381865  | 0.704209 |
| 0.958972  | 0.796713 | 0.805444 | 0.728361 | 0.51937   | 1.88118  |
| 0         | 0        | 0        | 0        | 0         | 0        |

|           |           |           |           |           |           |
|-----------|-----------|-----------|-----------|-----------|-----------|
| 0         | 0         | 0         | 0         | 0         | 0.0233712 |
| 20.4593   | 21.8729   | 13.5833   | 14.0232   | 14.8937   | 19.6614   |
| 0         | 0         | 0         | 0.083565  | 0.0794499 | 0         |
| 12.9792   | 13.6173   | 11.7015   | 16.8517   | 12.2834   | 12.8611   |
| 0.0510359 | 0.0814092 | 0.186575  | 0.0624189 | 0.138831  | 0.0760471 |
| 16.8237   | 19.4316   | 15.0061   | 16.5332   | 19.9045   | 21.1942   |
| 8.67858   | 8.28046   | 9.0545    | 8.11077   | 7.71131   | 9.20573   |
| 8.64922   | 7.87258   | 8.97058   | 8.5026    | 9.42814   | 8.18225   |
| 0         | 0         | 0         | 0         | 0         | 0         |
| 0.194354  | 0.0302755 | 0.0306073 | 0         | 0.0789452 | 0.0204245 |
| 8.95946   | 9.43376   | 9.25544   | 9.46137   | 8.00941   | 7.58603   |
| 4.68071   | 4.39225   | 4.3464    | 3.95168   | 5.29224   | 4.06055   |
| 11.9205   | 13.3204   | 11.8611   | 13.097    | 13.3875   | 13.2592   |
| 23.8032   | 23.3818   | 21.874    | 16.2711   | 22.5981   | 20.247    |
| 0.299496  | 0.0933079 | 0.282991  | 0.511816  | 0.081102  | 0.0629475 |
| 2.12899   | 2.58046   | 1.32274   | 2.72456   | 1.927     | 1.91246   |
| 1.33546   | 1.22464   | 1.58725   | 1.49276   | 1.74677   | 1.73707   |
| 6.82562   | 6.39579   | 6.99102   | 5.66899   | 9.34048   | 7.51246   |
| 1.49499   | 1.73311   | 1.21839   | 0.756489  | 2.9094    | 2.19278   |
| 16.1624   | 14.9728   | 19.004    | 15.6175   | 15.9806   | 15.9083   |
| 0.354545  | 0.31812   | 0.339473  | 0.678598  | 0.445482  | 0.286148  |
| 19.0607   | 16.9156   | 23.775    | 21.441    | 28.0052   | 28.259    |
| 11.3459   | 10.4853   | 9.07726   | 8.87214   | 12.0753   | 12.2467   |
| 0.100834  | 0         | 0.095277  | 0.0861587 | 0         | 0.127158  |
| 261.497   | 237.171   | 241.396   | 240.386   | 173.48    | 202.17    |
| 1.62181   | 0.659381  | 1.71453   | 0.602811  | 2.01638   | 0.662392  |
| 3.44714   | 4.29582   | 0         | 0         | 0         | 0         |
| 29.6538   | 30.3107   | 27.5468   | 26.5849   | 29.5675   | 29.2123   |
| 0         | 0         | 0         | 0         | 0         | 0         |
| 0.855821  | 0.837982  | 0.231045  | 0.487511  | 2.18509   | 1.90153   |
| 0.157743  | 0         | 0         | 0         | 0         | 0         |
| 9.05425   | 10.2839   | 8.86961   | 9.62492   | 10.1162   | 10.3991   |
| 15.4462   | 16.6109   | 18.036    | 15.7172   | 18.7519   | 18.5813   |
| 1.31315   | 1.46112   | 1.12262   | 0.534305  | 1.37158   | 0.709704  |
| 17.1579   | 16.3797   | 17.6479   | 14.6568   | 17.785    | 14.5303   |
| 0.980726  | 0.937706  | 1.43795   | 1.25217   | 1.53851   | 1.31495   |
| 0         | 0         | 0         | 0         | 0         | 0         |
| 10.7988   | 12.5157   | 8.69118   | 8.85919   | 13.3077   | 12.2757   |
| 1.07771   | 0.91327   | 0.597415  | 0.638466  | 1.77438   | 2.31948   |
| 0         | 0         | 0         | 0         | 0         | 0         |
| 0.102713  | 0.0853342 | 0.32351   | 0.195033  | 0.185429  | 0.158313  |
| 0.0795858 | 0         | 0         | 0         | 0.0565003 | 0.0214989 |
| 52.9124   | 149.429   | 19.7903   | 265.772   | 62.7828   | 27.2813   |

|           |           |           |           |           |           |
|-----------|-----------|-----------|-----------|-----------|-----------|
| 1.96896   | 2.17489   | 1.97321   | 2.19222   | 1.26026   | 2.97207   |
| 11.4802   | 11.2309   | 16.4537   | 12.6502   | 15.0756   | 12.3425   |
| 6.21062   | 5.17701   | 6.19005   | 5.25173   | 5.78542   | 5.16333   |
| 0         | 0         | 0         | 0         | 0         | 0         |
| 4.81309   | 6.03049   | 6.85044   | 6.63944   | 3.21261   | 4.17766   |
| 0.44759   | 0.371857  | 0.438587  | 0.056659  | 0.646427  | 0.167242  |
| 1.14478   | 1.41278   | 0.809453  | 0.637914  | 1.34442   | 0.839882  |
| 1.88818   | 2.58958   | 2.28543   | 2.32642   | 1.7355    | 1.64575   |
| 0         | 0         | 0         | 0         | 0         | 0.0113123 |
| 6.84611   | 6.91557   | 6.34797   | 5.39206   | 6.91228   | 5.53485   |
| 16.3214   | 16.3403   | 14.5325   | 16.6783   | 15.1692   | 18.0757   |
| 3.84345   | 4.00667   | 4.63309   | 5.27624   | 5.60037   | 5.03632   |
| 0.32421   | 0.25711   | 0.519855  | 0.251841  | 1.34086   | 0.396462  |
| 2.82184   | 3.12368   | 2.90259   | 2.9529    | 2.26553   | 1.94641   |
| 1.01E-12  | 0.55425   | 8.20E-12  | 0.224104  | 0.885307  | 0.615052  |
| 0.0251534 | 0         | 0         | 0.0286569 | 0         | 0         |
| 22.2688   | 22.962    | 22.8278   | 22.6804   | 19.9797   | 20.9145   |
| 37.6567   | 41.2338   | 32.7666   | 38.4971   | 35.568    | 41.3952   |
| 17.5789   | 21.1606   | 26.5099   | 29.3288   | 26.7022   | 33.3005   |
| 10.2151   | 10.0397   | 11.0195   | 7.37868   | 10.6656   | 8.67652   |
| 0         | 0         | 0         | 0         | 0         | 0         |
| 13.6059   | 13.9827   | 20.6158   | 19.7656   | 26.4225   | 23.4495   |
| 22.5135   | 22.2263   | 20.9836   | 17.5954   | 22.9023   | 18.6656   |
| 0         | 0         | 0         | 0         | 0         | 0         |
| 12.7839   | 9.78386   | 17.375    | 11.6357   | 21.3353   | 14.2522   |
| 6.23722   | 4.89006   | 0.522668  | 1.06133   | 1.53938   | 1.60755   |
| 7.36213   | 6.19191   | 4.84566   | 4.10971   | 5.59192   | 5.60117   |
| 7.47035   | 7.39931   | 7.53856   | 7.18531   | 10.3322   | 8.60756   |
| 2.63439   | 2.12464   | 2.12074   | 1.96919   | 4.10522   | 1.57118   |
| 93.4249   | 95.2682   | 76.3106   | 96.1296   | 52.8001   | 69.9063   |
| 3.79883   | 4.08431   | 4.59828   | 4.24308   | 3.87276   | 5.26024   |
| 25.8472   | 28.6037   | 32.3449   | 34.9618   | 36.237    | 40.5846   |
| 0.181588  | 0.276582  | 0.152516  | 0.0459733 | 0.109273  | 0.0678503 |
| 7.1841    | 8.29699   | 7.78656   | 6.78725   | 7.37071   | 7.48024   |
| 1.48543   | 1.81232   | 1.75751   | 0.87926   | 1.65241   | 1.07911   |
| 0         | 0.339469  | 0.0878562 | 0.0993102 | 0.0472099 | 0.036642  |
| 69.7925   | 88.4277   | 67.5658   | 81.9542   | 60.1515   | 70.4191   |
| 541.457   | 263.245   | 894.926   | 669.541   | 299.652   | 193.766   |
| 0         | 0.0231644 | 0.0702548 | 0.0635312 | 0.0201342 | 0         |
| 9.61445   | 8.41214   | 11.0119   | 10.5516   | 11.1397   | 11.1445   |
| 6.70364   | 5.65921   | 10.0666   | 5.54323   | 9.49818   | 8.58101   |
| 1.94697   | 1.45964   | 2.04823   | 2.00133   | 2.31136   | 2.14337   |
| 0.38152   | 0.887507  | 2.25012   | 2.61125   | 0.804617  | 2.17677   |



|           |          |          |           |           |           |
|-----------|----------|----------|-----------|-----------|-----------|
| 0         | 0.365877 | 0        | 0         | 0         | 0         |
| 29.4114   | 28.5898  | 28.4815  | 28.721    | 21.6681   | 25.7268   |
| 0         | 0        | 0        | 0         | 0         | 0         |
| 17.3409   | 16.1904  | 17.1218  | 14.3835   | 16.979    | 13.8633   |
| 8.30739   | 9.04948  | 6.98167  | 9.23203   | 6.75367   | 6.08015   |
| 1.01302   | 0.942606 | 1.39537  | 0.907901  | 1.72638   | 1.13554   |
| 0         | 0        | 0        | 0         | 0         | 0         |
| 37.4358   | 35.4353  | 57.5185  | 23.9559   | 30.7519   | 15.8915   |
| 0.462746  | 0.645874 | 1.0171   | 0.461982  | 0.501237  | 0.533758  |
| 16.9014   | 16.8752  | 19.0653  | 12.4628   | 20.4965   | 11.7667   |
| 0.567182  | 0.656465 | 1.12421  | 1.77576   | 1.28798   | 0.85104   |
| 8.87819   | 7.34993  | 8.61618  | 6.39768   | 7.27198   | 6.19802   |
| 8.43502   | 8.82331  | 8.53456  | 8.36507   | 7.29038   | 8.12023   |
| 64.386    | 48.1501  | 58.0578  | 52.626    | 74.4922   | 53.7793   |
| 2.85986   | 2.61657  | 3.27526  | 2.43333   | 4.2735    | 3.75142   |
| 15.2027   | 14.2272  | 14.9672  | 14.085    | 20.6521   | 18.725    |
| 52.2641   | 53.3383  | 71.5491  | 58.1087   | 61.6015   | 64.9642   |
| 10.3058   | 12.7395  | 11.9292  | 11.4238   | 9.90355   | 11.5268   |
| 0         | 0        | 0        | 0         | 0         | 0         |
| 0.592558  | 0.738445 | 0.715431 | 0.196902  | 0.748821  | 0.415142  |
| 2.5884    | 2.6195   | 2.42934  | 2.39476   | 2.91661   | 2.76029   |
| 2.28333   | 2.29974  | 1.34309  | 2.78666   | 2.35541   | 1.71458   |
| 47.4126   | 44.649   | 36.3357  | 38.5185   | 24.8327   | 36.4524   |
| 3.2722    | 4.05     | 3.7163   | 2.72343   | 3.57738   | 3.53912   |
| 0         | 0        | 0        | 0         | 0         | 0         |
| 0         | 0        | 0        | 0         | 0         | 0         |
| 0.0418558 | 0        | 0        | 0         | 0.136012  | 0.0351887 |
| 13.5098   | 13.2222  | 11.4816  | 11.1287   | 13.1137   | 13.4586   |
| 1.95035   | 1.51958  | 1.02174  | 1.11734   | 1.09973   | 1.20259   |
| 8.5363    | 8.55204  | 8.04326  | 8.47212   | 8.44342   | 8.52341   |
| 61.2125   | 78.0827  | 65.6069  | 64.2643   | 56.7376   | 58.607    |
| 0.114229  | 0.177939 | 0.215867 | 0.0650693 | 0.0309325 | 0.0240083 |
| 0         | 0        | 0        | 0         | 0         | 0         |
| 4.05042   | 3.63032  | 4.37395  | 3.34159   | 3.50122   | 3.28782   |
| 39.8851   | 41.5991  | 37.9109  | 41.3543   | 43.2874   | 46.5734   |
| 9.78538   | 8.34114  | 9.73837  | 7.94261   | 8.53172   | 7.32951   |
| 0         | 0        | 0        | 0         | 0.0144844 | 0.0224841 |
| 0         | 0        | 0        | 0         | 0         | 0         |
| 1.00612   | 1.32758  | 0.447375 | 13.0808   | 0.897487  | 1.19415   |
| 0         | 0        | 0        | 0         | 0         | 0         |
| 4.67828   | 4.54366  | 4.30456  | 4.04979   | 4.87846   | 4.39717   |
| 4.81689   | 5.06862  | 4.31065  | 3.34003   | 4.64676   | 3.2634    |
| 0.609686  | 0        | 0.170692 | 0.617426  | 0.293511  | 0.398666  |

|           |          |          |           |           |          |
|-----------|----------|----------|-----------|-----------|----------|
| 53.6583   | 57.3552  | 58.2991  | 61.6841   | 62.5576   | 68.1908  |
| 0         | 0        | 123.726  | 0         | 35.4586   | 0        |
| 4.44343   | 4.58893  | 6.17621  | 3.95295   | 6.80129   | 4.70484  |
| 4.66558   | 3.9379   | 5.15785  | 3.47983   | 6.51386   | 3.84115  |
| 1.84866   | 1.52215  | 1.45565  | 1.67363   | 0.983334  | 1.02687  |
| 22.1929   | 20.6917  | 26.5978  | 16.918    | 12.7265   | 12.793   |
| 2.02918   | 2.24032  | 2.20446  | 2.83569   | 1.53526   | 1.68699  |
| 4.73786   | 10.14    | 1.62202  | 27.8396   | 13.583    | 25.8041  |
| 4.16404   | 1.96231  | 3.52678  | 3.66765   | 4.81363   | 3.91262  |
| 1.46497   | 1.40595  | 2.20629  | 1.38125   | 1.95161   | 1.71294  |
| 8.46538   | 9.4695   | 7.21307  | 5.37899   | 10.9248   | 8.38535  |
| 122.642   | 117.683  | 60.7965  | 58.3193   | 61.8585   | 81.4539  |
| 0         | 0        | 0        | 0         | 0         | 0        |
| 2.77016   | 2.54139  | 2.99992  | 2.69939   | 4.58387   | 2.50729  |
| 19.4561   | 21.0681  | 21.2428  | 18.9059   | 20.1359   | 18.9999  |
| 0.115119  | 0.143461 | 1.88542  | 1.70498   | 2.24449   | 2.22598  |
| 0         | 0        | 0        | 0         | 0         | 0        |
| 0         | 0        | 0        | 0         | 0         | 0        |
| 0.517575  | 0.388654 | 0.342754 | 0.302392  | 0.445626  | 0.234301 |
| 15.7894   | 16.2059  | 18.1007  | 17.9231   | 18.0346   | 14.4879  |
| 31.4634   | 36.1055  | 30.7204  | 34.9496   | 29.2524   | 36.371   |
| 21.015    | 21.798   | 21.2053  | 18.3498   | 20.4369   | 21.1378  |
| 0         | 0        | 0        | 0.056954  | 0         | 0        |
| 6.36111   | 24.735   | 7.80653  | 8.64E-06  | 5.32498   | 18.596   |
| 0         | 0        | 0        | 0         | 0         | 0        |
| 3.86432   | 3.16058  | 5.28682  | 2.85503   | 4.28385   | 3.75635  |
| 0         | 0        | 0        | 0         | 0         | 0        |
| 0         | 0        | 0        | 0         | 0         | 0        |
| 33.0568   | 37.3429  | 27.4004  | 33.1807   | 26.6181   | 29.0565  |
| 12.6334   | 17.233   | 16.1313  | 21.2005   | 13.3144   | 15.3575  |
| 0.0733488 | 0        | 0.369635 | 0.083565  | 0.0794499 | 0        |
| 0         | 0        | 0        | 0         | 0         | 0        |
| 15.1512   | 13.5878  | 15.5658  | 15.5908   | 13.7848   | 13.6446  |
| 12.2309   | 12.4855  | 12.4965  | 12.2125   | 12.5324   | 12.26    |
| 0         | 0        | 0        | 0         | 0         | 0        |
| 20.7009   | 22.3985  | 23.4913  | 21.2529   | 28.5965   | 28.6876  |
| 0.142318  | 0.215059 | 0.240287 | 0.196608  | 0.147602  | 0.106933 |
| 0         | 0        | 0        | 0         | 0         | 0        |
| 0         | 0        | 0        | 0         | 0         | 0        |
| 0.0199736 | 0        | 0.130119 | 0.0721555 | 0.0939346 | 0.112231 |
| 0         | 0        | 0        | 0         | 0         | 0        |
| 0         | 0        | 0        | 0         | 0         | 0        |
| 4.94015   | 8.92679  | 11.5141  | 7.87951   | 17.8369   | 14.9171  |

|           |           |           |           |          |           |
|-----------|-----------|-----------|-----------|----------|-----------|
| 0         | 0         | 0         | 0         | 0        | 0         |
| 13.8443   | 11.0301   | 17.1429   | 16.7398   | 13.0604  | 13.9889   |
| 12.8042   | 12.7761   | 14.4356   | 11.6744   | 17.6023  | 15.0548   |
| 29.0305   | 32.4414   | 26.4046   | 27.0306   | 22.4519  | 20.3103   |
| 17.887    | 21.5539   | 18.4378   | 23.2415   | 18.174   | 22.6189   |
| 5.31948   | 4.87847   | 6.32606   | 4.82028   | 6.50814  | 4.83228   |
| 1.98818   | 1.43633   | 2.1055    | 0.722206  | 2.05993  | 1.81684   |
| 9.79096   | 9.55983   | 10.0276   | 9.14327   | 12.2244  | 10.5942   |
| 0.292629  | 0.158941  | 0.454127  | 0.15632   | 0.32751  | 0.229657  |
| 18.8276   | 20.6375   | 18.8766   | 23.3591   | 16.6566  | 18.5633   |
| 0.0386285 | 0.0481388 | 0.0973325 | 0.0440088 | 0        | 0         |
| 7.87426   | 5.66274   | 8.37269   | 5.27809   | 9.20259  | 4.47971   |
| 12.1418   | 12.56     | 10.6524   | 10.7504   | 12.0161  | 10.1224   |
| 0.152928  | 0.285868  | 0.0963334 | 0         | 0.579769 | 0.128568  |
| 11.5199   | 12.2832   | 11.7428   | 10.8732   | 12.3776  | 12.468    |
| 0         | 0         | 0         | 0         | 0        | 0         |
| 0.225207  | 0.561306  | 0.189152  | 0.3421    | 0.162627 | 0.315558  |
| 49.034    | 53.7046   | 51.0382   | 55.4294   | 57.2036  | 62.3744   |
| 0         | 0         | 0         | 0         | 0        | 0         |
| 1.69031   | 0.609375  | 2.47149   | 1.65031   | 0.848223 | 0.668927  |
| 13.2003   | 17.9778   | 10.4902   | 31.229    | 10.4855  | 15.4619   |
| 33.248    | 31.3509   | 29.5443   | 31.3257   | 28.3453  | 28.2709   |
| 9.80505   | 10.1535   | 9.30867   | 7.096     | 7.08672  | 6.38777   |
| 7.12789   | 7.21614   | 9.23105   | 6.59705   | 8.69167  | 7.27234   |
| 0         | 0         | 0         | 0         | 0        | 0         |
| 0.682716  | 0.912658  | 1.2906    | 1.12998   | 1.37553  | 1.15693   |
| 0         | 0         | 0         | 0         | 0        | 0         |
| 17.8916   | 17.7121   | 16.1696   | 19.3324   | 14.4106  | 19.1587   |
| 5.28229   | 4.5999    | 3.33111   | 2.63888   | 4.31875  | 4.25192   |
| 0         | 0         | 0         | 0         | 0        | 0         |
| 12.9927   | 12.9324   | 17.2265   | 14.1902   | 17.3719  | 18.0714   |
| 0.182818  | 0.236083  | 0         | 0         | 0        | 0.0384214 |
| 17.0915   | 21.699    | 17.3298   | 20.1518   | 17.7867  | 18.9185   |
| 43.9603   | 43.0949   | 43.5037   | 38.7579   | 47.1807  | 46.1664   |
| 3.06184   | 3.08981   | 3.46503   | 2.76265   | 3.34585  | 3.13217   |
| 0.0621061 | 0.188676  | 0.085505  | 0.0686712 | 0.109322 | 0.0388277 |
| 15.0349   | 15.4807   | 16.9131   | 15.0511   | 14.568   | 11.7559   |
| 0.0207897 | 0.0906784 | 0.052384  | 0.746089  | 0        | 0.0786517 |
| 3.59513   | 3.49917   | 4.16567   | 3.49794   | 5.34383  | 4.91979   |
| 7.36531   | 7.65612   | 8.09183   | 6.80043   | 10.1962  | 7.18011   |
| 0.143519  | 0.201209  | 0.0904062 | 0.224824  | 0.252617 | 0.316727  |
| 7.22175   | 6.80285   | 6.01079   | 5.24888   | 5.70509  | 5.81079   |
| 8.37084   | 8.82752   | 2.64328   | 2.32135   | 7.42406  | 7.53745   |

|           |           |          |           |           |           |
|-----------|-----------|----------|-----------|-----------|-----------|
| 10.4758   | 10.2862   | 12.1547  | 10.5389   | 13.1703   | 11.2523   |
| 0         | 0         | 0        | 0.0706946 | 0         | 0         |
| 21.388    | 23.7997   | 23.278   | 23.3057   | 19.1938   | 30.333    |
| 29.1476   | 35.0035   | 28.18    | 27.7935   | 32.654    | 34.1997   |
| 25.8383   | 31.0111   | 27.9645  | 28.7456   | 28.5825   | 27.1168   |
| 0.249687  | 0.276128  | 0.144499 | 0.0143397 | 0.429712  | 0.570369  |
| 0.733959  | 0.609772  | 0.821938 | 0.929096  | 0.441672  | 0.75417   |
| 0.378758  | 0.149712  | 0.232479 | 0.394594  | 0.42158   | 0.645524  |
| 4.34837   | 3.5765    | 3.17742  | 5.25127   | 5.36948   | 6.21474   |
| 0.169642  | 0         | 0.106862 | 0.0966348 | 0         | 0.0356549 |
| 9.66152   | 6.59438   | 9.83596  | 3.95184   | 8.49525   | 4.8145    |
| 0         | 0         | 0        | 0         | 0         | 0         |
| 0         | 0         | 0        | 0         | 0         | 0         |
| 4.20508   | 4.99161   | 3.62127  | 4.09338   | 3.34407   | 4.56451   |
| 3.48169   | 2.9204    | 2.9524   | 1.37306   | 1.66807   | 0.675484  |
| 0.0779094 | 0         | 0        | 0         | 0         | 0         |
| 0         | 0         | 0        | 0         | 0         | 0         |
| 0.677582  | 0.943743  | 0.70301  | 0.454093  | 0.733943  | 0.871232  |
| 4.41753   | 4.42214   | 2.46339  | 2.16576   | 1.78456   | 2.26028   |
| 0         | 0         | 0        | 0         | 0         | 0         |
| 26.4727   | 23.1766   | 25.8277  | 26.6945   | 26.4054   | 25.1569   |
| 18.7456   | 19.1918   | 21.9323  | 20.6293   | 20.8373   | 18.4397   |
| 0         | 0         | 0        | 0         | 0         | 0         |
| 1.84324   | 50.535    | 1.54815  | 334.246   | 1.6638    | 17.8208   |
| 4.66967   | 4.82329   | 5.12342  | 5.00055   | 6.2429    | 4.62141   |
| 6.86268   | 6.16379   | 7.251    | 6.91565   | 8.70591   | 6.50667   |
| 18.644    | 17.7464   | 19.4589  | 15.1756   | 23.2798   | 16.1531   |
| 5.77289   | 4.17007   | 5.63175  | 4.94727   | 6.41909   | 4.87481   |
| 0         | 0         | 0        | 0         | 0         | 0         |
| 557.993   | 535.183   | 423.921  | 371.941   | 307.765   | 321.119   |
| 0         | 0.255174  | 0.128985 | 0.408242  | 0.110897  | 0.172145  |
| 30.5499   | 27.5722   | 31.2249  | 31.9344   | 37.0047   | 31.9133   |
| 0         | 0         | 0        | 0         | 0         | 0         |
| 16.9284   | 16.8021   | 16.9649  | 14.5428   | 18.1331   | 13.5332   |
| 0         | 0.0503676 | 0        | 0         | 0.0437789 | 0         |
| 21.0091   | 24.4616   | 17.9676  | 22.922    | 21.2617   | 25.7075   |
| 42.2858   | 47.6886   | 47.1232  | 35.8325   | 31.1999   | 30.7055   |
| 4.32214   | 4.25218   | 5.34429  | 3.88021   | 5.45134   | 5.12757   |
| 31.0317   | 25.3156   | 25.593   | 25.8571   | 41.2764   | 34.8635   |
| 10.2496   | 11.3545   | 13.5634  | 8.68345   | 10.5762   | 7.95226   |
| 8.06827   | 7.4087    | 7.9714   | 8.10351   | 7.61246   | 7.4257    |
| 0.0388625 | 0         | 0        | 0         | 0         | 0.136524  |
| 0         | 0.0398771 | 0        | 0         | 0.103982  | 0         |

|             |           |            |           |           |           |
|-------------|-----------|------------|-----------|-----------|-----------|
| 61.4892     | 64.9267   | 61.8492    | 54.4535   | 61.1957   | 69.388    |
| 2.0245      | 3.42398   | 1.12347    | 6.64485   | 2.6628    | 3.44457   |
| 13.2737     | 9.88174   | 14.3191    | 11.764    | 19.7158   | 11.7568   |
| 0           | 0         | 0          | 0         | 0         | 0         |
| 2.33806     | 2.60768   | 2.13589    | 2.23313   | 1.11953   | 1.86087   |
| 2.73896     | 2.25277   | 2.82957    | 1.62263   | 2.64044   | 1.93425   |
| 75.9298     | 87.1466   | 87.3197    | 79.4344   | 81.7974   | 78.6199   |
| 0           | 0.135603  | 0          | 0.619845  | 0.117864  | 0.274442  |
| 33.2495     | 30.0087   | 33.3281    | 30.5892   | 31.6393   | 30.9863   |
| 30.0162     | 34.1416   | 31.416     | 39.2982   | 30.3491   | 35.6274   |
| 2.61129     | 2.23996   | 3.3191     | 2.58261   | 4.68124   | 3.87578   |
| 0.0997685   | 0.124331  | 0          | 0.113665  | 0         | 0         |
| 0           | 0         | 0          | 0         | 0         | 0         |
| 7.73844     | 6.878     | 6.12675    | 6.50777   | 7.02342   | 5.97041   |
| 1.85658     | 1.35802   | 2.38986    | 1.37946   | 2.22959   | 1.01794   |
| 206.895     | 220.721   | 157.621    | 256.998   | 136.586   | 174.178   |
| 54.2843     | 56.5058   | 60.794     | 53.2081   | 59.4356   | 44.9519   |
| 6.98441     | 4.92968   | 7.9817     | 5.65103   | 10.2266   | 7.35283   |
| 0           | 0         | 0          | 0         | 0         | 0         |
| 28.3105     | 20.6142   | 30.4758    | 23.2024   | 38.3397   | 24.8976   |
| 0.000126655 | 0.291909  | 1.23E-22   | 0.939772  | 0.62548   | 0.234614  |
| 0.140596    | 0.0438025 | 0.0885649  | 0.120134  | 0.1047    | 0.1182    |
| 0           | 0         | 0.0404263  | 0.0365574 | 0.0347572 | 0         |
| 0.0470577   | 0.036652  | 0.00741073 | 0.0603135 | 0.0637149 | 0.0247262 |
| 0.977654    | 0.771108  | 0.841923   | 0.648556  | 2.05093   | 0.957179  |
| 27.244      | 20.5381   | 24.5562    | 21.9983   | 22.4206   | 24.5267   |
| 1.25353     | 1.68235   | 1.68429    | 1.67582   | 1.8655    | 1.56585   |
| 0           | 0         | 0          | 0         | 0         | 0         |
| 0           | 0         | 0.194213   | 0         | 0         | 0.0648002 |
| 22.4575     | 23.397    | 19.1535    | 20.1784   | 15.6394   | 19.5753   |
| 2.14515     | 2.91642   | 2.29135    | 2.51125   | 2.60138   | 1.99138   |
| 64.4593     | 76.4629   | 64.9672    | 69.9567   | 66.0138   | 67.9599   |
| 11.7355     | 10.8332   | 12.3252    | 12.1072   | 12.6881   | 10.7441   |
| 3.89302     | 4.20234   | 5.11188    | 4.18538   | 5.16712   | 4.88632   |
| 15.8262     | 17.1073   | 18.6945    | 17.8899   | 16.1531   | 19.7608   |
| 45.4356     | 59.62     | 64.0905    | 84.5538   | 32.7308   | 44.3867   |
| 0           | 0         | 0          | 1.38203   | 0         | 0         |
| 0           | 0         | 0          | 0         | 0         | 0         |
| 176.034     | 152.133   | 134.263    | 134.098   | 91.9701   | 126.94    |
| 6.74072     | 8.30427   | 7.08509    | 7.85516   | 7.55174   | 7.17584   |
| 4.17407     | 3.22334   | 1.81776    | 3.00215   | 2.30327   | 2.47078   |
| 1.66543     | 1.28981   | 2.59593    | 2.54204   | 2.13668   | 1.566     |
| 0.181659    | 0.265293  | 0.245247   | 0.35479   | 0.592943  | 0.488713  |

|           |           |             |           |           |            |
|-----------|-----------|-------------|-----------|-----------|------------|
| 17.4686   | 17.5566   | 16.5383     | 15.6789   | 16.3194   | 16.3306    |
| 7.10039   | 6.2117    | 7.94007     | 8.75591   | 10.4096   | 10.9719    |
| 6.53624   | 6.01713   | 5.73773     | 4.61211   | 5.48123   | 5.63691    |
| 72.459    | 70.6699   | 75.6605     | 67.0205   | 83.6742   | 59.0845    |
| 41.8277   | 48.2918   | 45.0595     | 51.9448   | 48.8126   | 51.4151    |
| 0         | 0         | 0           | 0         | 0         | 0.00400552 |
| 0         | 0         | 0           | 0         | 0         | 0          |
| 0         | 0         | 0           | 0         | 0         | 0.0221425  |
| 0         | 0         | 0           | 0         | 0         | 0          |
| 0.0877758 | 0.0820396 | 0.0829385   | 0.0500007 | 0.0475385 | 0.110691   |
| 11.4144   | 11.2313   | 12.6666     | 12.5683   | 14.2748   | 11.5083    |
| 9.60385   | 8.5157    | 5.84089     | 6.16041   | 0.778798  | 0.716431   |
| 0         | 0.377571  | 0.381708    | 0.460237  | 0.437573  | 0.339623   |
| 36.44     | 36.8994   | 38.1235     | 39.7437   | 41.2842   | 42.7638    |
| 0.35132   | 0.622449  | 0.384309    | 0.298753  | 0.134613  | 0.0783598  |
| 12.3989   | 11.7881   | 12.6018     | 13.6284   | 13.3777   | 13.7272    |
| 0         | 0         | 0           | 0         | 0         | 0          |
| 0.391823  | 0.424041  | 0.532612    | 0.340777  | 0.502596  | 0.450772   |
| 0.15905   | 0.0991036 | 0           | 0.181202  | 0.344558  | 0.133715   |
| 7.78909   | 7.68451   | 7.37687     | 6.87117   | 7.63137   | 6.36648    |
| 0.226417  | 0.0940536 | 0.404108    | 0.171969  | 0.327001  | 0.23794    |
| 0.101748  | 0.443793  | 0.320469    | 1.21716   | 0.385739  | 0.299392   |
| 0.0984342 | 0.179989  | 0.146617    | 0.0951995 | 0.359945  | 0.140506   |
| 8.96049   | 10.359    | 9.69093     | 8.82341   | 10.1866   | 7.48432    |
| 30.5822   | 41.3357   | 30.255      | 33.7081   | 23.4253   | 30.6187    |
| 4.38896   | 1.59935   | 0.000127527 | 11.2681   | 7.27431   | 10.017     |
| 3.01228   | 4.45991   | 5.07793     | 4.48339   | 5.70909   | 6.3252     |
| 0.100519  | 0.0417556 | 0.168853    | 0.0381732 | 0.0725868 | 0.0281692  |
| 608.869   | 757.271   | 738.263     | 1070.21   | 502.547   | 834.022    |
| 26.0618   | 24.9674   | 32.0829     | 25.6577   | 31.4789   | 27.5327    |
| 0         | 0         | 0           | 0         | 0         | 0          |
| 0.0905534 | 0.169271  | 0.399294    | 0         | 0.539471  | 0.0380647  |
| 0.169344  | 0.22893   | 0           | 0.131245  | 0         | 0.0266941  |
| 70.585    | 78.7386   | 40.7909     | 49.216    | 39.0603   | 44.2755    |
| 0.0431957 | 0.0788869 | 0.0655411   | 0.0798417 | 0.046043  | 0.052458   |
| 9.17041   | 11.9633   | 8.42354     | 9.67897   | 5.5812    | 5.77581    |
| 0.0345354 | 0         | 0.0652644   | 0.0590184 | 0.130928  | 0.0435515  |
| 0.0283858 | 0.141504  | 0.035762    | 0.145536  | 0.030747  | 0.194906   |
| 22.2204   | 19.8158   | 20.1619     | 16.7158   | 16.6532   | 12.8147    |
| 0         | 0         | 0           | 0         | 0         | 0          |
| 0         | 0         | 0           | 0         | 0         | 0          |
| 0         | 0         | 0.209497    | 0         | 0         | 0          |
| 43.1387   | 49.7287   | 48.0849     | 47.4947   | 34.0075   | 33.5523    |

|           |           |           |           |           |           |
|-----------|-----------|-----------|-----------|-----------|-----------|
| 23.339    | 19.7061   | 25.6385   | 23.4634   | 27.0364   | 23.2838   |
| 0         | 0         | 0         | 0         | 0         | 0         |
| 0         | 0         | 0         | 0         | 0         | 0         |
| 0.308385  | 0.208167  | 0.348049  | 0.146391  | 0.354913  | 0.297072  |
| 0.099313  | 0         | 0.18768   | 0.0565728 | 0.134467  | 0.0834936 |
| 23.1883   | 56.2654   | 38.1024   | 47.5995   | 27.5577   | 20.1826   |
| 52.0241   | 50.4836   | 47.6659   | 45.5199   | 53.124    | 49.6104   |
| 10.4815   | 8.89898   | 10.346    | 7.869     | 12.9759   | 8.1564    |
| 0         | 0         | 0         | 0         | 0         | 0         |
| 3.3339    | 2.88868   | 4.21826   | 2.1518    | 5.03711   | 4.13812   |
| 8.46264   | 8.16998   | 9.92852   | 9.35778   | 9.35058   | 9.61159   |
| 3.42772   | 1.52847   | 6.54479   | 3.0154    | 9.48025   | 5.24619   |
| 10.2045   | 9.04203   | 9.79828   | 8.17203   | 11.4546   | 8.42521   |
| 3.38838   | 1.7016    | 3.10512   | 2.05643   | 6.60206   | 1.86108   |
| 0         | 0         | 0         | 0         | 0         | 0         |
| 6.00428   | 6.56111   | 4.73305   | 4.86626   | 6.66774   | 7.03927   |
| 0.132468  | 0.178834  | 0.0566385 | 0.215078  | 0.137317  | 0.317367  |
| 4.30306   | 4.97518   | 5.19417   | 6.37385   | 7.23972   | 8.04754   |
| 0.0242126 | 0         | 0.0305044 | 0.082755  | 0.0262266 | 0         |
| 0.0945665 | 0.0589243 | 0.17871   | 0         | 0.204865  | 0.318013  |
| 42.2973   | 42.2389   | 39.6819   | 41.5344   | 29.2443   | 31.8645   |
| 0.508442  | 0.330434  | 0.453943  | 0.422274  | 0.917624  | 0.29381   |
| 19.756    | 19.4204   | 24.3338   | 20.9167   | 23.3529   | 21.01     |
| 3.58187   | 3.38499   | 3.7856    | 3.29862   | 4.58033   | 3.57177   |
| 0         | 0         | 0         | 0         | 0         | 0         |
| 11.1694   | 11.2694   | 12.1457   | 10.3888   | 12.8808   | 12.0568   |
| 18.5726   | 19.0121   | 14.78     | 16.2828   | 14.8733   | 12.5116   |
| 2.0701    | 2.65953   | 2.60753   | 3.06355   | 1.71013   | 1.22038   |
| 0.483141  | 0.527609  | 0.416458  | 0.686888  | 0.426275  | 0.454597  |
| 0         | 346.74    | 0         | 0         | 0         | 233.918   |
| 123.825   | 123.478   | 137.462   | 130.608   | 152.462   | 171.106   |
| 0.0423889 | 0         | 0         | 0.048293  | 0.0918296 | 0.0237579 |
| 0         | 0         | 0         | 0         | 0         | 0         |
| 0         | 0         | 0         | 0         | 0         | 0         |
| 7.02173   | 5.82872   | 5.55472   | 3.36208   | 4.56645   | 4.01753   |
| 29.6263   | 28.5899   | 26.6164   | 24.2554   | 24.5431   | 21.6345   |
| 5.57016   | 4.04936   | 10.4282   | 10.2003   | 7.24227   | 7.18532   |
| 7.32566   | 8.11486   | 8.64327   | 8.8759    | 5.41595   | 6.64756   |
| 33.8174   | 35.8469   | 38.9131   | 35.1123   | 35.5723   | 33.1597   |
| 2.53884   | 1.75772   | 2.66548   | 1.60692   | 2.75002   | 2.01586   |
| 0.119511  | 0.106136  | 0.136784  | 0.0659255 | 0.0713149 | 0.0672673 |
| 50.7374   | 52.767    | 50.544    | 60.1659   | 46.705    | 40.7226   |
| 0.286572  | 0.0973979 | 0.361039  | 0.237445  | 0.507942  | 0.328533  |

|           |           |           |           |           |           |
|-----------|-----------|-----------|-----------|-----------|-----------|
| 1.69335   | 1.82183   | 2.40961   | 1.96453   | 2.45434   | 1.85374   |
| 13.9302   | 16.7787   | 13.6582   | 18.9914   | 16.0359   | 15.1414   |
| 86.1459   | 74.9657   | 36.5089   | 27.7052   | 43.1551   | 13.5738   |
| 458.529   | 457.134   | 404.376   | 208.958   | 645.67    | 462.589   |
| 12.2635   | 13.9303   | 10.7673   | 11.6842   | 15.6346   | 15.1914   |
| 0         | 0         | 0         | 0         | 0         | 0         |
| 8.59691   | 9.25505   | 9.26998   | 7.91576   | 9.10982   | 9.38272   |
| 0.7072    | 0.676115  | 0.900799  | 0.982823  | 0.881238  | 0.805159  |
| 20.309    | 22.5055   | 22.2474   | 24.0389   | 17.592    | 17.359    |
| 2.45603   | 2.05474   | 3.39717   | 5.10705   | 2.97659   | 1.97818   |
| 4.81121   | 4.68853   | 5.61262   | 5.56331   | 5.33026   | 5.91341   |
| 40.8094   | 41.1911   | 44.5919   | 37.8874   | 50.6985   | 43.8171   |
| 4.55019   | 4.35283   | 5.54229   | 3.48465   | 4.72417   | 3.58731   |
| 0.26536   | 0.127189  | 0.154299  | 0.418597  | 1.74671   | 0.531988  |
| 0         | 0         | 0         | 0         | 0         | 0         |
| 0         | 0         | 0         | 0         | 0         | 0         |
| 0         | 0         | 0.472141  | 0.213478  | 0         | 0         |
| 13.1174   | 12.7143   | 18.0406   | 14.2657   | 15.1996   | 12.2265   |
| 0.559612  | 0.634985  | 0.205353  | 0.583443  | 0.478174  | 0.449721  |
| 0         | 0         | 0.0977607 | 0.0884047 | 0         | 0.130473  |
| 0.0565125 | 0.0704258 | 0.0711975 | 0.0643837 | 0         | 0.0475108 |
| 0.303988  | 0.505152  | 0.170264  | 0.346619  | 0.439245  | 0.567644  |
| 7.78793   | 7.81558   | 7.85405   | 7.14505   | 8.55738   | 7.83799   |
| 0.206153  | 2.56908   | 0         | 336.329   | 0.223301  | 18.3714   |
| 14.4388   | 14.728    | 13.4328   | 12.3521   | 10.7141   | 10.5838   |
| 0         | 0         | 0         | 0         | 0         | 0         |
| 0         | 0         | 0         | 0         | 0         | 0         |
| 9.41565   | 8.53963   | 8.73768   | 9.28421   | 13.1221   | 13.4741   |
| 0.0520057 | 0.0216032 | 0         | 0.138248  | 0.0751087 | 0.0582958 |
| 0.84936   | 1.05847   | 0.927394  | 0.580597  | 1.22668   | 0.618859  |
| 0.326601  | 0.313084  | 0.113044  | 0.128436  | 0.311101  | 0.239171  |
| 0.134857  | 0.0373457 | 0.27184   | 0.182092  | 0.265098  | 0.363053  |
| 7.46641   | 7.14753   | 7.12265   | 6.84235   | 10.1251   | 7.8028    |
| 13.4682   | 10.3551   | 10.9845   | 9.01201   | 8.91114   | 11.1848   |
| 296.3     | 315.026   | 177.978   | 183.553   | 134.252   | 193.363   |
| 8.30E-66  | 2.95E-20  | 4.52E-18  | 4.43E-80  | 6.09E-76  | 1.88E-05  |
| 0.0205503 | 0.136587  | 0         | 0.146331  | 0         | 0.0172769 |
| 3.31937   | 2.95471   | 8.49661   | 8.16379   | 2.79648   | 4.29669   |
| 0.180141  | 0         | 0         | 0.136821  | 0.130083  | 0.151447  |
| 0.900886  | 0.51031   | 0.722263  | 0         | 1.33067   | 0.688533  |
| 341.283   | 439.936   | 274.379   | 264.597   | 169.475   | 183.964   |
| 2.58879   | 3.44122   | 4.85601   | 0.589873  | 9.65865   | 0.725476  |
| 22.0656   | 21.6017   | 22.3346   | 21.1445   | 24.6333   | 19.5491   |



|           |           |           |           |           |           |
|-----------|-----------|-----------|-----------|-----------|-----------|
| 26.8416   | 24.3005   | 24.3586   | 29.1278   | 30.6853   | 32.9262   |
| 0.494988  | 0.357125  | 0.525147  | 0.771695  | 1.46739   | 1.05131   |
| 2.8029    | 3.32794   | 3.92051   | 3.16815   | 4.61382   | 3.74802   |
| 1.00637   | 0.969104  | 0.864462  | 1.25077   | 1.53602   | 0.769151  |
| 0.856825  | 0.749441  | 0.99025   | 1.26474   | 1.80564   | 1.43944   |
| 1661.4    | 1904.92   | 1608.94   | 1633.48   | 1707.46   | 1915.8    |
| 1.4085    | 1.74077   | 0         | 0         | 0         | 0         |
| 0         | 0         | 0         | 0         | 0.046176  | 0         |
| 0.184579  | 0.337532  | 0.0581323 | 0         | 0         | 0.0426946 |
| 0         | 0         | 0         | 0         | 0         | 0         |
| 25.3772   | 25.759    | 27.8039   | 23.6839   | 31.7652   | 27.249    |
| 7.35233   | 7.21234   | 8.16762   | 6.79166   | 9.98179   | 7.7265    |
| 12.1593   | 9.50005   | 20.3195   | 11.8432   | 14.4674   | 12.3412   |
| 0.0374971 | 0         | 0         | 0.0427198 | 0         | 0         |
| 2.49798   | 2.45182   | 1.29974   | 1.1544    | 3.07693   | 1.52085   |
| 0.780836  | 0.53687   | 0.542753  | 0.598174  | 0.656213  | 0.237683  |
| 3.49406   | 3.97565   | 3.89162   | 4.61533   | 4.25092   | 3.27807   |
| 25.1448   | 26.1989   | 23.3809   | 26.0252   | 24.904    | 25.724    |
| 2.89852   | 2.52276   | 1.70993   | 1.80837   | 3.63797   | 1.64389   |
| 0         | 0         | 0         | 0         | 0         | 0         |
| 0.0551075 | 0.0686749 | 0.0694274 | 0         | 0         | 0         |
| 1.37339   | 1.4905    | 1.62245   | 1.08788   | 2.52542   | 1.80607   |
| 39.0508   | 41.0194   | 41.5287   | 43.3637   | 41.1181   | 39.356    |
| 1.65273   | 2.04744   | 0         | 0         | 0         | 0         |
| 0         | 0         | 0         | 0         | 0         | 0         |
| 0         | 0         | 0         | 0         | 0         | 0         |
| 38.7818   | 41.1747   | 36.8104   | 39.7088   | 39.3761   | 45.2811   |
| 27.3767   | 23.5887   | 28.6692   | 25.0375   | 29.4881   | 28.8665   |
| 20.626    | 18.845    | 20.7147   | 18.7084   | 27.9101   | 21.7447   |
| 0.0668823 | 0.0416743 | 0         | 0         | 0.096594  | 0.0187429 |
| 0.210579  | 0.605507  | 1.21736   | 0.922375  | 0.843616  | 0.863106  |
| 7.10498   | 8.45829   | 8.82867   | 8.42857   | 8.72559   | 7.18437   |
| 38.4363   | 36.7654   | 23.498    | 20.6649   | 23.7697   | 26.6484   |
| 26.3994   | 27.3089   | 22.9759   | 22.6202   | 16.8864   | 17.6195   |
| 0         | 0         | 0         | 0         | 0.139729  | 0.135564  |
| 0.0819843 | 0.102169  | 0.103288  | 0         | 0.133206  | 0.172313  |
| 0         | 0.0359983 | 0         | 0         | 0.0312892 | 0.0728556 |
| 0         | 0         | 0         | 0         | 0         | 0         |
| 6.23199   | 5.63035   | 6.5817    | 5.67063   | 7.70091   | 6.26527   |
| 1155.06   | 1335.86   | 1204.78   | 1075.36   | 1176.84   | 1300.68   |
| 0.224949  | 0.210248  | 0         | 0.44849   | 0.487319  | 0.283675  |
| 2.31966   | 1.31617   | 1.72766   | 1.65374   | 1.97806   | 1.09399   |
| 1.15623   | 1.69324   | 0.0853526 | 0         | 0.146766  | 0.0854348 |

|           |           |          |          |           |           |
|-----------|-----------|----------|----------|-----------|-----------|
| 58.1824   | 45.9154   | 58.155   | 51.7953  | 66.1745   | 75.6657   |
| 0.275492  | 0.135246  | 0.520619 | 0.385196 | 0.75506   | 0.287757  |
| 11.9808   | 9.00971   | 5.59518  | 5.84416  | 8.09216   | 7.67003   |
| 12.5622   | 8.23647   | 17.9034  | 9.23404  | 16.269    | 9.68858   |
| 1.17669   | 0.733195  | 1.69424  | 0.383024 | 2.64018   | 1.69587   |
| 14.1572   | 14.0576   | 14.4081  | 12.3188  | 12.9284   | 11.5503   |
| 0.0904275 | 0.135333  | 0.136816 | 0.95206  | 0.20165   | 0.211177  |
| 8.6527    | 8.49946   | 8.74656  | 6.69562  | 9.69732   | 8.32422   |
| 33.1056   | 36.3901   | 35.096   | 34.7348  | 26.8287   | 28.9194   |
| 0         | 0         | 0        | 0        | 0         | 0         |
| 1.28283   | 2.27836   | 1.32095  | 0.808593 | 1.02577   | 1.37069   |
| 2.66876   | 2.11642   | 2.75093  | 0.552813 | 1.05118   | 2.44763   |
| 2.70322   | 3.41599   | 2.16446  | 3.52599  | 3.09226   | 4.0249    |
| 10.5679   | 9.05415   | 10.293   | 8.29372  | 10.3115   | 8.4379    |
| 0.512723  | 0.638955  | 0.484467 | 0.292068 | 0.138843  | 0.538816  |
| 0.979227  | 0.541452  | 0.52598  | 0.533331 | 0.772106  | 0.77266   |
| 1.28341   | 1.25666   | 2.19438  | 2.19326  | 0.794381  | 2.23503   |
| 7.50887   | 8.48503   | 7.85761  | 7.00227  | 7.88279   | 6.91167   |
| 7.8879    | 8.09288   | 7.93412  | 5.93329  | 9.38125   | 6.61015   |
| 7.01908   | 5.909     | 6.62051  | 5.08302  | 6.21782   | 4.31591   |
| 0.120802  | 0.173292  | 0.109226 | 0.168371 | 0.151286  | 0.116906  |
| 41.5848   | 48.3058   | 42.2237  | 49.8889  | 35.8726   | 48.048    |
| 0.153652  | 0.0589171 | 0.104235 | 0.188518 | 0.0384075 | 0.0397467 |
| 0         | 0         | 0        | 0        | 0         | 0         |
| 22.6796   | 23.7346   | 25.6261  | 26.0876  | 21.2961   | 22.5317   |
| 1.8254    | 1.65791   | 1.819    | 0.904704 | 2.02192   | 1.19649   |
| 0         | 0         | 2.54E-11 | 1.53E-11 | 0         | 0         |
| 149.126   | 153.575   | 187.067  | 122.754  | 128.595   | 81.9577   |
| 10.5758   | 10.2514   | 10.6988  | 10.5141  | 21.8513   | 22.4631   |
| 3.75464   | 4.96965   | 1.82161  | 0.876774 | 5.25419   | 9.68538   |
| 17.9086   | 17.5353   | 17.0559  | 21.7388  | 17.8541   | 22.6968   |
| 6.51867   | 4.56007   | 20.4856  | 6.46032  | 18.3478   | 5.9489    |
| 5.69921   | 6.04725   | 5.2817   | 4.55895  | 5.96072   | 6.45911   |
| 0         | 0         | 0        | 0        | 0         | 0         |
| 0.651684  | 0.74004   | 0.5352   | 0.483973 | 0.963555  | 1.34127   |
| 0         | 0         | 0        | 0        | 0         | 0         |
| 0         | 0         | 0        | 0        | 0         | 0         |
| 1.84903   | 1.53625   | 1.88157  | 1.64749  | 2.05418   | 1.65408   |
| 0         | 0         | 0        | 0        | 0         | 0         |
| 46.4758   | 44.7471   | 52.4212  | 45.1838  | 45.8042   | 43.7681   |
| 3.92992   | 4.59374   | 4.66967  | 3.72529  | 5.26877   | 4.57599   |
| 17.0599   | 19.4692   | 18.3486  | 19.9653  | 18.1863   | 17.8697   |
| 9.92592   | 8.9617    | 8.67708  | 7.96206  | 7.75282   | 7.77716   |

|           |           |           |           |           |           |
|-----------|-----------|-----------|-----------|-----------|-----------|
| 48.7224   | 33.4831   | 40.8189   | 39.1031   | 59.0433   | 55.1283   |
| 3.02736   | 2.86204   | 3.91925   | 3.04465   | 4.61346   | 2.36961   |
| 0.157955  | 0.0656143 | 0.0663333 | 0.149963  | 0.228124  | 0.132794  |
| 0.0361785 | 0.0450856 | 0         | 0.0412176 | 0.274315  | 0.121663  |
| 535.03    | 639.592   | 533.095   | 621.499   | 429.075   | 569.266   |
| 20.8257   | 23.4246   | 21.7767   | 23.2278   | 21.9116   | 22.6088   |
| 0         | 0         | 0         | 0         | 0         | 0         |
| 20.6926   | 17.6229   | 20.7098   | 17.1122   | 19.8176   | 15.9524   |
| 0         | 0         | 0         | 0         | 0.0317832 | 0         |
| 0         | 0         | 0         | 0         | 0         | 0         |
| 4.11E-10  | 8.35E-10  | 3.38E-09  | 2.22E-09  | 3.58E-10  | 5.04E-10  |
| 0         | 0         | 0         | 0         | 0         | 0         |
| 0.0619185 | 0.0771627 | 0.312033  | 0.423256  | 0.0670688 | 0.0520556 |
| 22.8038   | 23.9152   | 24.8682   | 25.3113   | 26.6837   | 25.8276   |
| 28.075    | 30.7359   | 30.274    | 32.1917   | 27.6962   | 29.1865   |
| 0.535748  | 0.553707  | 0.660386  | 0.672347  | 0.895775  | 0.624979  |
| 0.444911  | 0.332669  | 1.01244   | 2.02885   | 0.289151  | 0.0748084 |
| 19.0301   | 18.7494   | 18.6116   | 17.3445   | 18.7039   | 17.0583   |
| 0.0533834 | 0.0665263 | 0         | 0         | 0.231295  | 0         |
| 13.101    | 15.0542   | 14.7369   | 17.7364   | 12.0252   | 12.6234   |
| 13.106    | 12.9742   | 12.0857   | 16.6677   | 16.1249   | 10.6408   |
| 0.0418781 | 0.0260942 | 0         | 0         | 0         | 0.0176037 |
| 0         | 0         | 0         | 0.0344109 | 0         | 0         |
| 0.541104  | 0.269729  | 0.136342  | 0.523999  | 0.498195  | 0.477658  |
| 11.8596   | 12.2614   | 12.7647   | 12.3104   | 11.7359   | 15.4358   |
| 6.83646   | 5.90351   | 8.92173   | 8.63856   | 9.03079   | 9.58515   |
| 26.6929   | 26.2243   | 25.0502   | 29.6575   | 29.1645   | 33.0813   |
| 6.65875   | 6.22817   | 4.40749   | 4.70579   | 5.12685   | 5.83289   |
| 19.7189   | 17.916    | 25.0257   | 16.0669   | 30.601    | 21.2953   |
| 0         | 0         | 0         | 0         | 0         | 0         |
| 4.41703   | 5.54144   | 3.13721   | 5.33621   | 2.53671   | 3.06547   |
| 1.33243   | 1.77288   | 0.0149211 | 0.0303596 | 0.0513149 | 0.0311158 |
| 5.74852   | 5.3779    | 5.283     | 4.26649   | 6.67785   | 5.67176   |
| 0.536508  | 1.18862   | 0.976332  | 1.01872   | 0.710276  | 1.00233   |
| 0         | 0         | 0         | 0         | 0         | 0         |
| 136.751   | 129.613   | 141.79    | 158.443   | 143.695   | 181.192   |
| 0         | 0         | 0         | 0         | 0         | 0         |
| 0         | 0         | 0         | 0         | 0         | 0         |
| 5.07327   | 4.80198   | 5.24822   | 3.81371   | 5.65641   | 3.83989   |
| 3.24919   | 4.10696   | 4.16199   | 5.02331   | 4.42412   | 3.12171   |
| 0.950015  | 1.39161   | 1.40686   | 0.996888  | 1.29081   | 0.721622  |
| 9.11E-09  | 9.09E-09  | 0.376062  | 0.260003  | 6.84E-09  | 0.0643401 |
| 23.2157   | 25.4173   | 21.9972   | 23.7648   | 22.3434   | 24.0643   |

|           |           |           |           |           |           |
|-----------|-----------|-----------|-----------|-----------|-----------|
| 8.64784   | 8.1414    | 9.62876   | 8.15858   | 9.16304   | 9.17154   |
| 22.6586   | 22.4959   | 21.3478   | 20.5288   | 21.49     | 15.7527   |
| 4.58981   | 4.16874   | 5.10692   | 3.61241   | 6.7835    | 4.81302   |
| 7.25113   | 7.94764   | 8.25485   | 8.55969   | 6.05631   | 6.75714   |
| 2.13512   | 1.56063   | 2.24946   | 2.57903   | 2.73271   | 2.56154   |
| 27.8442   | 35.3915   | 32.9407   | 40.599    | 30.0362   | 33.8307   |
| 0         | 0         | 0         | 0         | 0         | 0         |
| 35.2078   | 35.3102   | 33.0501   | 33.1699   | 31.1138   | 31.0632   |
| 113.417   | 129.743   | 106.085   | 127.375   | 104.945   | 122.487   |
| 3.16839   | 3.3937    | 3.15048   | 2.69981   | 2.77958   | 2.92787   |
| 0         | 0         | 0         | 0         | 0         | 0         |
| 19.2942   | 19.2117   | 17.061    | 16.1736   | 17.0677   | 16.9772   |
| 0         | 0         | 0         | 0         | 0         | 0         |
| 0         | 0         | 0         | 0         | 0         | 0         |
| 0.0279341 | 0.0348114 | 0.175964  | 0.0636496 | 0.181546  | 0.140907  |
| 0         | 0         | 0         | 0         | 0         | 0         |
| 1.02845   | 0.961238  | 1.02576   | 0.976411  | 1.29966   | 0.75655   |
| 0         | 0         | 0         | 0         | 0.151017  | 0         |
| 11.8915   | 12.2505   | 12.1351   | 12.7801   | 10.6909   | 9.86404   |
| 20.4577   | 21.8853   | 31.0126   | 24.4914   | 29.9814   | 28.4829   |
| 0.612446  | 0.915876  | 0.462956  | 0.41865   | 0.246402  | 0.38249   |
| 80.0508   | 88.108    | 68.1259   | 63.1361   | 52.8085   | 68.8605   |
| 22.3224   | 103.861   | 19.7903   | 209.864   | 61.6634   | 13.2062   |
| 19.0541   | 20.9885   | 13.483    | 17.3564   | 19.2627   | 19.1652   |
| 0.723025  | 0.450516  | 0.34159   | 0.102966  | 0.195791  | 0.151964  |
| 0.01351   | 0.0168362 | 0.0170207 | 0         | 0.073169  | 0.124939  |
| 0.355856  | 0.0969616 | 0.378275  | 0.354573  | 0.0842778 | 0.299173  |
| 3.89539   | 3.87975   | 4.69055   | 4.32937   | 4.88159   | 3.73206   |
| 25.8293   | 38.8719   | 25.7481   | 27.5444   | 21.1953   | 23.3967   |
| 109.355   | 124.661   | 102.667   | 122.867   | 105.869   | 107.901   |
| 9.33587   | 9.40527   | 16.9522   | 13.1999   | 14.1874   | 11.7489   |
| 0.757155  | 0.960711  | 0.936574  | 1.09773   | 0.775433  | 0.821614  |
| 0.0261584 | 0.0325986 | 0.0329558 | 0         | 0         | 0.0659752 |
| 56.9609   | 54.4728   | 66.2309   | 65.279    | 63.2908   | 71.5684   |
| 1.61017   | 0         | 1.52144   | 1.83444   | 0.872053  | 1.69211   |
| 0.293213  | 0         | 0.24627   | 0         | 0.105867  | 0.0821691 |
| 0.0774559 | 0.0965898 | 0         | 0         | 0         | 0.091205  |
| 0.287474  | 0.777453  | 0         | 0         | 0         | 0.0402805 |
| 8.79005   | 8.55324   | 11.681    | 7.81943   | 7.56479   | 9.617     |
| 0.0535858 | 0.178076  | 0.202531  | 0.345947  | 0.0193477 | 0.0750838 |
| 16.213    | 14.7451   | 15.4724   | 14.5241   | 15.3239   | 16.2843   |
| 0.125487  | 0.0781908 | 0.197619  | 0.178706  | 0         | 0.131873  |
| 0.17769   | 0.110719  | 0         | 0.202439  | 0.0962351 | 0.149386  |

|           |           |           |           |           |           |
|-----------|-----------|-----------|-----------|-----------|-----------|
| 14.2879   | 15.8145   | 13.9336   | 13.0246   | 13.1931   | 12.1437   |
| 0         | 0         | 0         | 0         | 0         | 0         |
| 0         | 0         | 0         | 0         | 0         | 0         |
| 7.68362   | 9.06117   | 9.98393   | 9.01495   | 9.31526   | 7.01423   |
| 6.84929   | 8.14806   | 7.8662    | 6.27432   | 8.12811   | 5.90963   |
| 166.989   | 153.493   | 180.488   | 162.083   | 236.976   | 182.283   |
| 0         | 0         | 0         | 0         | 0         | 0         |
| 0         | 0         | 0         | 0         | 0         | 0         |
| 0.444905  | 1.10888   | 1.12103   | 0.579283  | 1.78996   | 0.69464   |
| 48.0246   | 51.3671   | 61.6152   | 53.7362   | 53.2827   | 44.7227   |
| 1.57787   | 1.33475   | 1.57228   | 1.12761   | 1.63142   | 1.65216   |
| 0.446004  | 0.754313  | 0.240814  | 0.290357  | 0.207044  | 0.214263  |
| 6.31215   | 7.47308   | 3.50864   | 4.44154   | 3.74046   | 4.29209   |
| 2.97007   | 3.53558   | 2.51336   | 2.57579   | 3.45717   | 3.61491   |
| 5.39347   | 5.41129   | 6.93367   | 6.65909   | 7.85335   | 6.67085   |
| 0         | 0         | 0         | 0         | 0         | 0         |
| 11.5254   | 11.3823   | 13.1323   | 12.6644   | 12.9575   | 12.5495   |
| 0         | 0         | 0         | 0         | 0         | 0         |
| 7.02738   | 6.3386    | 8.00709   | 5.50312   | 11.8826   | 6.71504   |
| 0         | 0         | 0         | 0         | 0         | 0         |
| 2.11699   | 1.97865   | 1.85447   | 2.09153   | 1.7019    | 1.65464   |
| 3.67528   | 2.51458   | 3.08688   | 2.87356   | 3.12235   | 4.30156   |
| 0         | 0         | 0         | 0         | 0         | 0         |
| 0         | 0         | 0.0466259 | 0.0210818 | 0.0400874 | 0.0311139 |
| 0.128541  | 0.114419  | 0.231346  | 0.188285  | 0.0994518 | 0.0926277 |
| 0.163551  | 0.237988  | 0.304138  | 0.0649367 | 0.138915  | 0.11832   |
| 3.98858   | 3.79177   | 4.80654   | 3.68199   | 5.584     | 3.89665   |
| 1.32731   | 0.987027  | 1.4608    | 1.43924   | 2.05928   | 1.36167   |
| 0         | 0.0647134 | 0         | 0         | 0         | 0.043657  |
| 12.9111   | 14.6307   | 14.5048   | 16.387    | 14.7062   | 15.1874   |
| 0.0216348 | 0.188791  | 0.0545685 | 0.197193  | 0.164123  | 0.0545461 |
| 0.184763  | 0.307001  | 0.155183  | 1.54364   | 0.266841  | 0.517774  |
| 0         | 0         | 0.0249219 | 0.112684  | 0.149989  | 0.182936  |
| 20.325    | 17.8338   | 22.6061   | 21.2979   | 22.1025   | 22.6779   |
| 1.21E-19  | 5.94E-32  | 1.29E-14  | 8.03E-21  | 2.04143   | 3.33E-25  |
| 0         | 0         | 0         | 0         | 0         | 0         |
| 0.772541  | 1.17572   | 0.86534   | 0.928959  | 0.836117  | 0.973431  |
| 0.314196  | 0.39155   | 0.0989602 | 0.357958  | 0.170165  | 0.396222  |
| 65.4713   | 448.746   | 329.937   | 410.247   | 354.586   | 302.734   |
| 4.65572   | 5.18907   | 3.61584   | 3.402     | 7.36943   | 6.39743   |
| 11.0985   | 11.9778   | 10.5554   | 13.5121   | 9.9002    | 13.2946   |
| 416.318   | 424.937   | 396.045   | 493.916   | 374.944   | 462.167   |
| 0.220487  | 0.146544  | 0.135804  | 0.161883  | 0.238827  | 0.148293  |

|           |           |           |          |           |           |
|-----------|-----------|-----------|----------|-----------|-----------|
| 19.4903   | 20.5144   | 21.1707   | 19.0179  | 18.585    | 17.0766   |
| 4.88319   | 4.67754   | 5.04717   | 4.10689  | 5.15251   | 4.48652   |
| 35.9388   | 38.0928   | 48.93     | 51.727   | 44.4696   | 46.5578   |
| 0.696806  | 1.195     | 1.50895   | 0.703466 | 2.17052   | 0.330435  |
| 55.5846   | 59.7437   | 57.2085   | 60.4328  | 52.3379   | 57.116    |
| 173.923   | 118.092   | 238.015   | 159.152  | 240.066   | 205.197   |
| 0         | 0         | 0         | 0        | 0         | 0         |
| 13.9988   | 13.2849   | 14.2996   | 10.5281  | 14.8133   | 13.2991   |
| 17.9942   | 18.8562   | 16.9427   | 16.6944  | 19.7151   | 17.642    |
| 50.0369   | 52.9535   | 43.9325   | 49.1771  | 42.3323   | 45.891    |
| 3.20209   | 3.0375    | 3.13099   | 2.64985  | 3.12332   | 2.38399   |
| 0         | 0         | 0         | 0        | 0         | 0         |
| 31.9024   | 28.6792   | 40.1183   | 29.4521  | 44.0383   | 36.1536   |
| 5.09625   | 4.83142   | 6.28267   | 4.54158  | 6.77317   | 4.20562   |
| 53.2788   | 66.396    | 0         | 0        | 0         | 0         |
| 1.25862   | 1.3639    | 1.99933   | 1.24689  | 1.20524   | 1.11948   |
| 27.2915   | 29.0503   | 28.5408   | 24.6214  | 31.0211   | 28.088    |
| 68.8504   | 59.42     | 73.3301   | 83.1207  | 72.1452   | 76.5684   |
| 12.5253   | 11.7822   | 13.7908   | 12.9455  | 15.7601   | 15.6609   |
| 0.470352  | 0         | 0.39505   | 0.535864 | 3.05686   | 1.3181    |
| 0         | 0         | 0         | 0        | 0         | 0         |
| 1.31763   | 1.05111   | 0.848266  | 0.705717 | 2.52895   | 2.05917   |
| 22.1718   | 28.6583   | 24.3515   | 23.8821  | 20.2577   | 19.2354   |
| 0         | 0         | 0         | 0        | 0         | 0         |
| 16.7956   | 16.1511   | 17.4956   | 15.0441  | 15.6973   | 13.2763   |
| 13.6232   | 18.2221   | 13.7567   | 14.7788  | 14.6506   | 18.4534   |
| 179.131   | 200.397   | 200.83    | 188.933  | 177.183   | 183.878   |
| 0.153036  | 0.190713  | 2.69924   | 2.96397  | 0.331531  | 0.257318  |
| 15.7524   | 14.3519   | 15.1761   | 13.6483  | 13.8365   | 15.1351   |
| 21.6675   | 22.4572   | 21.9193   | 22.7517  | 25.0342   | 14.621    |
| 0         | 0         | 0         | 0        | 0         | 0         |
| 15.8749   | 18.757    | 17.7825   | 15.9116  | 16.012    | 14.6108   |
| 0.0536838 | 0.0570885 | 0.0432858 | 0.176755 | 0.0581492 | 0.0144424 |
| 0         | 0         | 0         | 0        | 0         | 0         |
| 15.6516   | 15.023    | 16.0806   | 12.7491  | 17.5186   | 13.8372   |
| 4.37523   | 4.54952   | 4.53076   | 3.9834   | 1.66763   | 2.22471   |
| 12.2404   | 12.8756   | 10.7782   | 12.1009  | 13.4724   | 13.1308   |
| 2.19476   | 2.16562   | 1.50458   | 0.69728  | 2.35041   | 0.908723  |
| 0         | 0         | 0         | 0        | 0         | 0         |
| 66.899    | 68.5354   | 63.1541   | 58.687   | 57.0713   | 56.2622   |
| 0.577873  | 0.330392  | 0.64499   | 0.283356 | 0.578968  | 0.151154  |
| 1.59078   | 0.664885  | 1.53435   | 0.554216 | 2.13987   | 0.597781  |
| 13.0276   | 12.3973   | 10.6297   | 8.03066  | 10.0723   | 10.3827   |

|           |           |           |           |           |           |
|-----------|-----------|-----------|-----------|-----------|-----------|
| 156.054   | 156.938   | 145.384   | 143.131   | 122.263   | 132.414   |
| 0         | 0         | 0         | 0         | 0         | 0         |
| 2.62653   | 2.57722   | 2.64943   | 2.99236   | 3.03404   | 2.6043    |
| 1.21471   | 1.12019   | 1.04065   | 1.1348    | 1.36838   | 1.26632   |
| 28.428    | 30.5591   | 17.5886   | 19.2842   | 22.0171   | 21.4064   |
| 0.169404  | 0.168889  | 0         | 0.154399  | 0.220194  | 0.14242   |
| 0         | 0         | 0         | 0         | 0         | 0         |
| 1.55416   | 1.54902   | 1.46808   | 1.68065   | 1.34686   | 1.30587   |
| 1.08983   | 1.20144   | 1.47865   | 0.429795  | 1.08968   | 0.704797  |
| 8.56172   | 7.60771   | 8.20874   | 6.76394   | 10.2912   | 9.18601   |
| 0         | 0         | 0         | 0         | 0         | 0         |
| 0         | 0         | 0         | 0         | 0         | 0         |
| 52.5243   | 53.0311   | 30.2892   | 34.6763   | 27.5642   | 45.6532   |
| 0.663234  | 0.20663   | 0.417789  | 1.51122   | 1.796     | 0.836383  |
| 8.38391   | 9.54782   | 8.83541   | 7.16008   | 9.7554    | 8.0956    |
| 8.18543   | 8.36035   | 7.81408   | 7.78729   | 8.22646   | 10.1096   |
| 19.2333   | 15.7147   | 17.4423   | 15.5719   | 17.3735   | 15.2607   |
| 2.24732   | 2.33692   | 4.56977   | 4.70276   | 4.47219   | 5.44294   |
| 59.6869   | 52.9837   | 52.6385   | 46.4117   | 52.9456   | 56.1676   |
| 49.5261   | 49.2213   | 48.8051   | 47.7497   | 54.9751   | 61.1847   |
| 0.359978  | 0.299249  | 0.151288  | 0.957388  | 0         | 0.50446   |
| 1.36577   | 1.25809   | 1.38975   | 1.78253   | 1.87424   | 1.4113    |
| 0         | 0         | 0         | 0         | 0         | 0         |
| 2.73422   | 1.83254   | 1.96841   | 1.93709   | 2.439     | 1.98962   |
| 5.51962   | 4.00693   | 7.32285   | 3.20159   | 6.04458   | 3.12517   |
| 35.421    | 37.0868   | 32.0945   | 36.2735   | 24.9742   | 29.2286   |
| 0         | 0         | 0         | 0.0327942 | 0.124718  | 0         |
| 0.105089  | 2.09538   | 0.0661981 | 21.6105   | 0.0569149 | 0.57427   |
| 0         | 0         | 0         | 0         | 0         | 0         |
| 16.4793   | 15.967    | 19.8907   | 14.9887   | 20.8364   | 17.4819   |
| 1.39587   | 1.16647   | 1.92257   | 1.41304   | 1.29459   | 0.941942  |
| 9.61611   | 6.47151   | 6.81704   | 5.94528   | 9.19153   | 6.39909   |
| 0.65845   | 1.0619    | 0.536768  | 1.10318   | 0.335633  | 0.748943  |
| 7.15189   | 6.14916   | 7.06315   | 5.07474   | 8.74502   | 6.81975   |
| 0.0612704 | 0.0733009 | 0.0988054 | 0.0223374 | 0.0477841 | 0.0834474 |
| 0.245654  | 0.133934  | 0.25146   | 0.27987   | 0.033261  | 0.193617  |
| 34.4476   | 34.8216   | 38.1243   | 35.9851   | 39.9822   | 37.4259   |
| 71.2143   | 63.4473   | 79.5228   | 53.3871   | 67.3799   | 70.2038   |
| 0.503539  | 0.352357  | 0.293031  | 0.506806  | 0.16474   | 0.309252  |
| 22.4735   | 22.1493   | 26.0288   | 22.0037   | 26.1577   | 20.6164   |
| 0         | 0         | 0         | 0         | 0         | 0         |
| 15.2758   | 12.5127   | 18.6629   | 14.0472   | 15.3512   | 13.4986   |
| 0         | 0         | 0         | 0         | 0         | 0         |

|           |           |           |          |           |           |
|-----------|-----------|-----------|----------|-----------|-----------|
| 0         | 0         | 0         | 0        | 0         | 0         |
| 35.6254   | 36.1317   | 34.1342   | 33.8821  | 38.4848   | 46.5476   |
| 26.5142   | 31.4457   | 19.2472   | 21.4831  | 24.4078   | 26.4236   |
| 1.42781   | 1.64931   | 1.26331   | 1.51454  | 1.46593   | 1.23826   |
| 3.58495   | 3.30275   | 4.68047   | 5.16262  | 4.85713   | 4.28711   |
| 0.526857  | 0.562773  | 0.758586  | 0.600239 | 0.815258  | 0.632764  |
| 0.0300778 | 0         | 0         | 0        | 0         | 0         |
| 0         | 0         | 0         | 0        | 0         | 0         |
| 0.227153  | 0.339694  | 0.152629  | 0.172528 | 0.164032  | 0.0891195 |
| 3.46505   | 3.72296   | 3.17465   | 2.63613  | 3.05559   | 3.61193   |
| 0         | 0         | 0         | 0        | 0         | 0         |
| 3.12677   | 3.18811   | 1.16388   | 1.01201  | 1.42402   | 0.806537  |
| 1.25191   | 1.01747   | 1.50864   | 0.434084 | 1.59187   | 1.23553   |
| 14.791    | 13.5558   | 14.8115   | 14.2819  | 17.4762   | 16.1292   |
| 2.79118   | 1.7316    | 3.40222   | 2.27399  | 0.0211918 | 0         |
| 6.40798   | 5.8443    | 4.95863   | 4.97903  | 4.93257   | 6.35277   |
| 9.83019   | 9.00751   | 9.82753   | 13.8726  | 14.6319   | 12.0078   |
| 0         | 0         | 0         | 0        | 0         | 0         |
| 0         | 0         | 0         | 0        | 0         | 0         |
| 0.654959  | 0.326483  | 1.37525   | 0.746183 | 1.74995   | 0.991137  |
| 7.9262    | 7.25294   | 8.79079   | 7.89454  | 11.6679   | 10.2455   |
| 0         | 0.0400741 | 0.253224  | 0.334982 | 0.156752  | 0         |
| 14.9867   | 14.65     | 18.8523   | 16.0224  | 21.2514   | 15.2919   |
| 33.3      | 32.6213   | 32.006    | 34.0453  | 38.1399   | 41.3525   |
| 30.7683   | 33.0978   | 42.2548   | 39.2307  | 30.1904   | 40.2494   |
| 3.06872   | 4.58861   | 3.32307   | 5.39345  | 3.08005   | 3.61531   |
| 277.939   | 292.285   | 291.779   | 294.313  | 302.383   | 250.273   |
| 7.76829   | 7.24043   | 8.61053   | 8.39225  | 8.63043   | 7.41852   |
| 41.0479   | 48.8033   | 37.3314   | 42.6086  | 41.6619   | 57.3635   |
| 41.9679   | 41.3629   | 42.2513   | 38.6013  | 40.5609   | 34.0422   |
| 102.16    | 104.038   | 88.2456   | 96.0985  | 71.6729   | 83.2877   |
| 7.57176   | 8.18967   | 5.17963   | 2.83929  | 2.20084   | 1.93506   |
| 88.0226   | 97.6027   | 77.06     | 90.7242  | 76.9151   | 103.023   |
| 10.1758   | 10.3195   | 6.80643   | 9.43245  | 12.6781   | 12.7205   |
| 2.87769   | 2.65241   | 2.02479   | 1.95473  | 2.4113    | 2.3554    |
| 3.87749   | 5.73814   | 5.19038   | 2.76097  | 2.75626   | 3.36172   |
| 0.11647   | 0.099644  | 0.0952599 | 0.254769 | 0.055987  | 0.167182  |
| 19.2014   | 18.1024   | 19.0037   | 16.0452  | 19.1522   | 19.8038   |
| 1.83152   | 1.47719   | 2.14032   | 1.43334  | 2.89235   | 1.81319   |
| 65.5694   | 60.4127   | 35.5641   | 31.957   | 28.5132   | 38.4523   |
| 0         | 0         | 0         | 0        | 0         | 0         |
| 0.139091  | 0.305838  | 0.887504  | 0.763238 | 1.59127   | 1.21124   |
| 0         | 0         | 0         | 0        | 0         | 0         |



|            |           |           |          |           |           |
|------------|-----------|-----------|----------|-----------|-----------|
| 247.991    | 259.856   | 239.489   | 282.519  | 231.955   | 267.159   |
| 10.423     | 9.96756   | 12.9034   | 9.28434  | 11.8676   | 7.90003   |
| 15.2982    | 15.9357   | 16.2044   | 15.5575  | 17.3593   | 16.5731   |
| 0.265557   | 0.318576  | 0.644179  | 0.585312 | 0.287985  | 0.438938  |
| 0          | 0         | 0         | 0        | 0         | 0         |
| 23.7315    | 21.2025   | 31.5967   | 20.757   | 32.332    | 46.8827   |
| 69.3512    | 52.5069   | 62.6058   | 49.4583  | 74.6442   | 63.1918   |
| 18.7099    | 22.8775   | 20.3257   | 22.2067  | 24.5057   | 24.5489   |
| 11.6279    | 14.3245   | 13.6231   | 11.2899  | 13.4134   | 10.1867   |
| 0          | 0         | 0.0476912 | 0.172625 | 0         | 0.0318247 |
| 0          | 0         | 0         | 0        | 0         | 0         |
| 0          | 0         | 0         | 0        | 0         | 0         |
| 0          | 0         | 0         | 0        | 0         | 0         |
| 102.282    | 117.524   | 106.808   | 107.248  | 109.529   | 155.939   |
| 2.34979    | 2.11974   | 1.7674    | 1.57828  | 1.99441   | 2.09344   |
| 0          | 0         | 0         | 0        | 0.0484714 | 0         |
| 0.0867057  | 0         | 0         | 0        | 0         | 0         |
| 0          | 0         | 0         | 0        | 0         | 0         |
| 4.40311    | 5.51229   | 3.43522   | 9.80261  | 2.82222   | 3.90549   |
| 13.9926    | 47.6528   | 5.50897   | 157.492  | 8.75421   | 42.9226   |
| 71.9004    | 56.5109   | 39.0221   | 49.6802  | 47.2337   | 59.5112   |
| 4.51876    | 7.44016   | 3.01138   | 2.72319  | 3.82064   | 2.78026   |
| 7.43123    | 6.99429   | 6.90982   | 5.41485  | 7.69537   | 6.33115   |
| 2.31272    | 1.85376   | 3.28768   | 2.31606  | 3.60505   | 2.67974   |
| 0          | 0         | 0         | 0        | 0.0395605 | 0         |
| 8.21771    | 7.38857   | 9.43245   | 9.28375  | 11.2759   | 10.6297   |
| 12.7757    | 13.4286   | 13.8852   | 13.0513  | 15.0821   | 18.3826   |
| 9.57792    | 14.898    | 7.30274   | 11.7308  | 12.484    | 12.7829   |
| 3.93413    | 3.79215   | 4.53388   | 3.91889  | 4.96617   | 3.51658   |
| 2.96017    | 2.43139   | 1.73251   | 1.5667   | 2.89402   | 1.69237   |
| 5.55678    | 4.22955   | 5.86888   | 5.19349  | 6.59567   | 5.90251   |
| 10.2943    | 11.3255   | 10.0118   | 8.68202  | 6.12135   | 5.32026   |
| 9.88426    | 8.90838   | 8.67244   | 7.84246  | 7.32881   | 8.0625    |
| 0          | 0.0895824 | 0         | 0        | 0         | 0         |
| 0.602878   | 0.533185  | 0.808541  | 0.443128 | 0.969005  | 0.555897  |
| 79.5813    | 73.2853   | 81.71     | 77.7654  | 65.5779   | 75.4264   |
| 8.6583     | 10.7218   | 11.2063   | 9.35798  | 8.06671   | 8.31341   |
| 0.339502   | 0.601669  | 0.584967  | 0.617791 | 0.110017  | 0.213475  |
| 9.40351    | 10.2004   | 9.72842   | 8.68009  | 8.90319   | 8.1509    |
| 10.1868    | 9.22077   | 11.9255   | 8.58406  | 9.47188   | 9.47556   |
| 0.00823331 | 0.0102603 | 0.0103728 | 0        | 0.0356729 | 0.0276876 |
| 0.49117    | 0.693707  | 0.618802  | 0.373054 | 0.602961  | 0.660691  |
| 3.41819    | 2.74517   | 2.39246   | 2.33657  | 4.27847   | 5.74744   |

|           |           |          |           |           |           |
|-----------|-----------|----------|-----------|-----------|-----------|
| 19.5331   | 19.7402   | 19.2073  | 16.9759   | 19.3293   | 17.5066   |
| 13.9308   | 14.3321   | 13.4379  | 17.4962   | 16.0626   | 12.2399   |
| 36.0329   | 37.5725   | 42.2758  | 54.9032   | 32.0773   | 38.7824   |
| 3.42604   | 2.77708   | 3.0558   | 2.90152   | 3.92449   | 2.84208   |
| 38.4957   | 36.8333   | 29.1984  | 30.5305   | 22.8059   | 26.8623   |
| 39.6891   | 40.2844   | 39.7242  | 39.3404   | 47.4248   | 46.1685   |
| 0.012395  | 0         | 0        | 0         | 0         | 0         |
| 5.82392   | 6.0798    | 6.22325  | 4.82868   | 6.6056    | 6.15234   |
| 0.191601  | 1.00344   | 0.579334 | 55.2704   | 0.207538  | 0.419482  |
| 20.3751   | 21.3956   | 21.026   | 20.4409   | 21.8704   | 22.6202   |
| 0.0992764 | 0         | 0        | 0         | 0.149353  | 0         |
| 10.2194   | 8.70218   | 10.6379  | 9.26569   | 10.5958   | 9.24153   |
| 26.3465   | 30.6602   | 21.9584  | 24.1027   | 17.7374   | 24.3373   |
| 1.0701    | 0.35226   | 0.839427 | 0.207025  | 1.77147   | 0.678978  |
| 15.8328   | 16.6047   | 17.2185  | 13.7953   | 18.8237   | 15.253    |
| 8.04039   | 7.74492   | 9.41628  | 8.85547   | 8.32165   | 8.41149   |
| 0.129361  | 0.0806048 | 0.20372  | 0         | 0.0350303 | 0         |
| 0         | 0         | 0        | 0         | 0         | 0         |
| 2.76554   | 2.7794    | 1.76045  | 1.32144   | 2.85056   | 2.74594   |
| 0.176785  | 0.0881237 | 0.133634 | 0         | 0.076596  | 0.0594502 |
| 3.31036   | 2.06268   | 4.17057  | 3.77143   | 4.03393   | 2.43518   |
| 7.07239   | 4.8938    | 6.98964  | 4.97173   | 8.52147   | 5.46985   |
| 5.7002    | 7.10358   | 3.23868  | 4.45676   | 5.20582   | 6.57757   |
| 6.3948    | 4.86171   | 8.86724  | 5.74286   | 9.25015   | 5.22967   |
| 19.7745   | 18.3127   | 17.6356  | 15.2914   | 12.626    | 13.004    |
| 0.0740084 | 0.276687  | 0.466199 | 0.421582  | 0.0801643 | 0.0622197 |
| 0         | 0         | 0        | 0         | 0         | 0         |
| 25.1089   | 29.9125   | 19.9969  | 22.3741   | 23.4093   | 24.9795   |
| 0         | 0         | 0        | 0         | 0         | 0         |
| 0.488016  | 0.649375  | 0.757301 | 0.272753  | 0.974813  | 0.267256  |
| 0         | 0.151963  | 0        | 0.416775  | 0         | 0.205034  |
| 0         | 0         | 0        | 0         | 0         | 0.0389837 |
| 0         | 0         | 0        | 0         | 0         | 0         |
| 8.60224   | 9.69719   | 8.27295  | 8.32284   | 9.56672   | 7.85308   |
| 0         | 0         | 0        | 0         | 0         | 0         |
| 5.67981   | 11.7196   | 19.8629  | 17.1006   | 33.1161   | 50.2591   |
| 0         | 0         | 0        | 0.0665381 | 0.0632614 | 0         |
| 53.848    | 53.5067   | 44.6696  | 61.961    | 36.2642   | 52.3805   |
| 0         | 0         | 0        | 0         | 0         | 0         |
| 20.9643   | 22.4781   | 24.1338  | 21.894    | 28.2192   | 28.8596   |
| 0.1705    | 0.394748  | 0.047937 | 0.452695  | 0.0412146 | 0.143341  |
| 8.50145   | 7.91559   | 12.0382  | 7.10922   | 14.0493   | 13.9867   |
| 40.4773   | 36.7095   | 36.9332  | 47.8642   | 42.2914   | 56.2326   |

|            |           |            |            |           |            |
|------------|-----------|------------|------------|-----------|------------|
| 29.5769    | 30.5301   | 31.3089    | 30.8572    | 33.9896   | 30.7362    |
| 0          | 0         | 0          | 0          | 0         | 0          |
| 0          | 0.0315251 | 0.0318705  | 0          | 0         | 0.0638025  |
| 2.53167    | 1.88824   | 3.94353    | 2.89511    | 6.13791   | 3.25051    |
| 0.00276953 | 0.0172569 | 0.00348921 | 0.00631056 | 0.0059998 | 0.00465676 |
| 333.852    | 351.34    | 275.038    | 373.699    | 267.071   | 395.681    |
| 7.78387    | 7.48484   | 5.87699    | 6.40812    | 8.17271   | 8.63037    |
| 3.84649    | 5.54675   | 6.29982    | 12.3329    | 5.59493   | 9.83996    |
| 8.87562    | 8.35089   | 8.02307    | 7.15412    | 8.50829   | 8.1334     |
| 1.31322    | 1.92986   | 1.35642    | 2.01056    | 1.9784    | 1.69537    |
| 0          | 0         | 0          | 0          | 0         | 0          |
| 30.9085    | 33.1379   | 22.8658    | 27.5333    | 22.1803   | 23.7141    |
| 22.644     | 17.9347   | 22.4421    | 18.1159    | 22.3473   | 19.0371    |
| 13.3176    | 7.73476   | 13.7342    | 7.74422    | 14.7463   | 10.3958    |
| 6.46709    | 6.10224   | 7.69581    | 5.72663    | 8.92035   | 6.37777    |
| 22.406     | 21.1585   | 26.1021    | 22.398     | 22.828    | 24.4253    |
| 37.094     | 39.5136   | 45.3919    | 41.2339    | 42.963    | 40.6771    |
| 6.87347    | 6.68577   | 7.83076    | 5.18178    | 8.18235   | 6.03607    |
| 0.874571   | 1.25981   | 1.23536    | 0.880648   | 1.06825   | 1.00365    |
| 4.53078    | 4.13642   | 4.46173    | 3.87138    | 4.96201   | 3.791      |
| 8.50815    | 6.93      | 7.27363    | 10.0324    | 7.71374   | 5.77657    |
| 0.097572   | 0         | 0          | 0.111162   | 0         | 0          |
| 0          | 0         | 0          | 0          | 0         | 0          |
| 12.2322    | 36.1582   | 43.479     | 28.1134    | 51.338    | 53.5578    |
| 0          | 0         | 0          | 0          | 0         | 0          |
| 24.5224    | 25.5315   | 30.1256    | 26.123     | 28.1427   | 27.3382    |
| 3.87642    | 3.12981   | 3.78317    | 3.1412     | 3.8736    | 2.93765    |
| 0.462467   | 0.211776  | 0.653617   | 0.514089   | 0.830552  | 0.815165   |
| 0.23716    | 0.176357  | 0.0570525  | 0          | 0.204259  | 0.152004   |
| 25.5981    | 24.5995   | 28.7357    | 22.4763    | 23.1475   | 19.9322    |
| 11.2606    | 12.4874   | 12.26      | 13.5314    | 12.0883   | 12.5843    |
| 9.88995    | 11.0392   | 10.936     | 10.9432    | 12.2154   | 9.86985    |
| 8.20137    | 8.63067   | 8.72524    | 10.4857    | 8.63679   | 9.88282    |
| 5.75275    | 5.87863   | 4.05867    | 4.36934    | 6.04432   | 6.48078    |
| 8.41383    | 8.05003   | 8.13237    | 7.48815    | 7.82364   | 7.35391    |
| 4.58396    | 3.94622   | 3.15315    | 3.09666    | 4.51828   | 3.6577     |
| 0          | 0         | 0          | 0          | 0         | 0          |
| 0          | 0         | 0          | 0          | 0         | 0          |
| 0          | 0.0559504 | 0.141409   | 0.127875   | 0.145894  | 0.0188727  |
| 0.453229   | 1.27083   | 0.428252   | 0.903624   | 0.490929  | 0.476294   |
| 14.9919    | 13.8374   | 15.0767    | 14.3877    | 17.174    | 16.0051    |
| 5.0162     | 6.46098   | 5.02366    | 5.99726    | 4.08262   | 5.56398    |
| 2.60012    | 2.76946   | 3.02379    | 2.02549    | 5.36801   | 3.15749    |

|           |           |           |           |           |            |
|-----------|-----------|-----------|-----------|-----------|------------|
| 0.343338  | 0.130221  | 0.620624  | 0.0850346 | 0.371897  | 0.0627497  |
| 4.44612   | 2.97555   | 3.42216   | 3.10505   | 5.17399   | 4.634      |
| 181.592   | 189.338   | 197.968   | 180.414   | 162.071   | 183.99     |
| 0         | 0         | 0         | 0         | 0         | 0          |
| 0.0748719 | 0         | 0         | 0         | 0.0540665 | 0.0209819  |
| 0.500089  | 0.155803  | 0.0525033 | 0         | 0.361124  | 0.350359   |
| 213.924   | 212.61    | 199.869   | 187.712   | 145.067   | 168.743    |
| 4.31311   | 3.77014   | 4.85876   | 2.6083    | 3.74193   | 3.66046    |
| 0         | 0         | 0         | 0         | 0.0142691 | 0          |
| 0         | 0         | 0         | 0         | 0         | 0          |
| 19.1499   | 20.1357   | 19.3385   | 19.2945   | 16.9507   | 16.2756    |
| 0         | 0         | 0         | 0         | 0         | 0          |
| 30.2637   | 32.3762   | 32.0036   | 32.8098   | 29.2968   | 31.3517    |
| 88.2985   | 89.1317   | 70.6957   | 64.0049   | 88.6163   | 91.2333    |
| 31.9354   | 34.7869   | 30.1022   | 32.0205   | 28.3697   | 29.1596    |
| 7.59448   | 4.51492   | 6.83994   | 3.82673   | 9.87371   | 5.41684    |
| 2.22863   | 2.10295   | 2.74496   | 2.04421   | 3.20068   | 2.58598    |
| 21.5697   | 22.8175   | 22.6782   | 21.7396   | 23.3838   | 23.1635    |
| 37.6623   | 39.0038   | 43.149    | 38.8074   | 46.8139   | 47.3631    |
| 0         | 0         | 0         | 0         | 0         | 0          |
| 0         | 0         | 0         | 0         | 0         | 0          |
| 0.0688844 | 0.109717  | 0.0492976 | 0.0780144 | 0.0635766 | 0.106914   |
| 4.98356   | 4.9571    | 5.69738   | 4.75582   | 5.29979   | 4.57121    |
| 5.79402   | 6.6064    | 8.34635   | 7.95872   | 6.76524   | 7.24332    |
| 0.0231915 | 0.0433518 | 0.014609  | 0         | 0.0251206 | 0.00974869 |
| 1.18948   | 1.2931    | 1.02031   | 0.980326  | 1.0417    | 0.893628   |
| 86.3243   | 87.6495   | 89.2105   | 103.384   | 100.014   | 112.686    |
| 22.8608   | 25.6148   | 19.1175   | 23.2924   | 21.4435   | 21.9712    |
| 2.49773   | 2.57768   | 2.13883   | 2.28984   | 1.54298   | 2.11628    |
| 0.394783  | 0.286987  | 0.186513  | 0.262366  | 0.605796  | 0.580823   |
| 0.205685  | 0.256324  | 0.345284  | 0.277728  | 0.44519   | 0.349588   |
| 0         | 0         | 0         | 0         | 0         | 0          |
| 0         | 0         | 0         | 2.7462    | 0         | 0          |
| 1.04908   | 1.04589   | 1.44185   | 1.62982   | 1.77683   | 1.50738    |
| 4.06327   | 4.18628   | 5.47393   | 3.39934   | 3.68224   | 3.11164    |
| 22.3413   | 25.8622   | 18.6923   | 22.8567   | 19.4356   | 24.9543    |
| 23.6094   | 24.6704   | 18.7601   | 17.6336   | 16.2486   | 14.6832    |
| 219.9     | 282.441   | 148.833   | 263.989   | 195.829   | 204.222    |
| 8.04581   | 7.41363   | 8.70858   | 7.81418   | 10.532    | 8.504      |
| 20.1012   | 17.308    | 26.5973   | 16.9581   | 30.3506   | 17.5135    |
| 0.016775  | 0         | 0.0422681 | 0.0955572 | 0.0545109 | 0.0564117  |
| 53.6702   | 61.0026   | 57.8989   | 58.7738   | 57.3888   | 57.993     |
| 9.04556   | 9.62916   | 11.9792   | 8.65861   | 12.691    | 8.54773    |

|          |           |           |           |           |           |
|----------|-----------|-----------|-----------|-----------|-----------|
| 0.833588 | 0.924546  | 0.724637  | 0.550821  | 0.776515  | 0.700807  |
| 1.71612  | 1.83066   | 1.66046   | 1.26693   | 1.85887   | 1.13113   |
| 11.0304  | 11.1242   | 12.8573   | 10.7485   | 10.3776   | 8.69188   |
| 0.842339 | 2.15185   | 1.96207   | 1.06468   | 2.1458    | 4.03944   |
| 6.22641  | 6.70885   | 5.18935   | 4.73637   | 4.57576   | 3.73671   |
| 0        | 0         | 0         | 0         | 0         | 0         |
| 21.5285  | 22.1472   | 18.0211   | 22.4968   | 14.9984   | 11.6208   |
| 36.9973  | 33.6236   | 44.7628   | 33.7542   | 43.7834   | 34.2301   |
| 17.3025  | 21.4224   | 14.5631   | 22.8522   | 15.3845   | 19.5723   |
| 7.53012  | 7.30204   | 5.76532   | 6.59282   | 5.21909   | 5.41465   |
| 0        | 0         | 0         | 0         | 0         | 0         |
| 0.111692 | 0.463967  | 0.422146  | 0.254497  | 0.201637  | 0.187801  |
| 0        | 0         | 0         | 0         | 0         | 0         |
| 323.459  | 347.418   | 297.729   | 317.277   | 261.739   | 309.189   |
| 13.0066  | 14.6384   | 14.2867   | 15.1422   | 9.81779   | 13.9531   |
| 0        | 0         | 0         | 0         | 0.0598362 | 0.185768  |
| 195.292  | 214.291   | 199.997   | 204.667   | 146.344   | 177.722   |
| 13.2327  | 11.5662   | 13.7513   | 10.2395   | 16.3436   | 7.4375    |
| 1.7232   | 2.03629   | 3.44449   | 2.75184   | 0.817134  | 1.91828   |
| 45.0793  | 48.0124   | 48.4285   | 50.7609   | 47.6935   | 50.1644   |
| 1.48804  | 1.05058   | 1.10037   | 0.797386  | 2.73946   | 1.44052   |
| 0        | 0         | 0         | 0         | 0         | 0         |
| 0        | 0         | 0         | 0         | 0         | 0         |
| 1.09284  | 0.151322  | 0.15298   | 0.553358  | 0.657635  | 0.714595  |
| 1.36309  | 1.34049   | 2.07942   | 1.11986   | 2.18954   | 1.68383   |
| 1.38175  | 1.03316   | 0         | 0         | 1.19735   | 0.232332  |
| 0        | 0         | 0         | 0         | 0         | 0         |
| 212.783  | 186.887   | 170.814   | 167.683   | 145.049   | 159.298   |
| 0        | 0.0478819 | 0         | 0.0875479 | 0         | 0.0323022 |
| 5.41159  | 4.89549   | 5.87733   | 4.58212   | 6.14017   | 5.45303   |
| 1.96344  | 2.24047   | 5.51355   | 5.33625   | 5.3297    | 2.02855   |
| 0.188203 | 0.429987  | 0.019759  | 0.214416  | 0.152893  | 0.145039  |
| 2.0151   | 1.78605   | 1.5341    | 1.97657   | 1.78586   | 1.56728   |
| 34.0336  | 38.508    | 40.2063   | 38.4505   | 39.7121   | 41.5493   |
| 0.483433 | 0.3919    | 1.20014   | 0.159234  | 0.78568   | 0.367744  |
| 0        | 0.058876  | 0.0595212 | 0.215299  | 0         | 0.079438  |
| 8.08103  | 7.92952   | 8.99817   | 6.46003   | 9.92525   | 7.39792   |
| 4.44755  | 5.54253   | 4.576     | 5.02479   | 5.17881   | 4.86084   |
| 47.6435  | 48.6879   | 53.4538   | 45.7594   | 48.8843   | 44.5196   |
| 7.49399  | 7.29227   | 6.95378   | 7.62153   | 6.43268   | 6.57416   |
| 23.9141  | 30.1711   | 25.103    | 35.6924   | 20.5612   | 22.9611   |
| 0        | 0         | 0         | 0.0326079 | 0         | 0         |
| 56.9718  | 43.5222   | 53.462    | 43.3411   | 54.0211   | 42.5928   |

|           |           |           |           |           |           |
|-----------|-----------|-----------|-----------|-----------|-----------|
| 12.8383   | 14.887    | 14.9051   | 15.8071   | 15.1534   | 12.9471   |
| 149.689   | 126.282   | 110.399   | 85.2738   | 68.5158   | 72.8629   |
| 0         | 0         | 0         | 127.279   | 40.337    | 31.3077   |
| 1.99664   | 1.76169   | 2.31906   | 1.79053   | 2.50101   | 1.48017   |
| 0         | 0         | 0         | 0         | 0         | 0         |
| 0.973286  | 0.396875  | 0.776563  | 0.257237  | 1.496     | 0.612253  |
| 32.7863   | 30.2003   | 33.7782   | 31.6693   | 28.1525   | 28.1325   |
| 8.92207   | 9.38642   | 1.24216   | 1.50998   | 2.34602   | 2.18776   |
| 0         | 0         | 0         | 0         | 0         | 0         |
| 0.0313376 | 0.0781057 | 0.0394808 | 0.0357024 | 0.0678884 | 0         |
| 0.147928  | 0         | 0         | 0.168532  | 0         | 0         |
| 248.202   | 265.895   | 269.41    | 309.173   | 248.686   | 274.77    |
| 11.4129   | 8.23639   | 13.0884   | 9.27213   | 13.2671   | 12.1607   |
| 0         | 0.0693381 | 0.140196  | 0         | 0         | 0.0935539 |
| 1.28344   | 1.04962   | 1.21271   | 1.37081   | 1.3902    | 1.21388   |
| 27.7605   | 25.8509   | 29.0572   | 26.8839   | 23.8439   | 28.8267   |
| 0.491859  | 0.780123  | 0.563337  | 0.305654  | 0.629639  | 0.71477   |
| 3.9365    | 3.02402   | 2.06615   | 3.43704   | 2.91259   | 3.14355   |
| 14.9566   | 13.4088   | 19.4254   | 14.5182   | 22.8474   | 19.1072   |
| 8.75138   | 9.43662   | 9.07569   | 9.94408   | 11.9394   | 11.3247   |
| 0.331158  | 0.157215  | 0.218539  | 0.143727  | 0.546596  | 0.291666  |
| 0.236044  | 0.196105  | 0.495635  | 0.448201  | 1.06532   | 0.39689   |
| 20.0295   | 20.9332   | 24.4045   | 26.0801   | 33.2798   | 31.9244   |
| 4.59713   | 3.85687   | 5.01375   | 4.26926   | 6.07582   | 4.11572   |
| 1.78848   | 1.56079   | 2.63728   | 1.95738   | 1.9965    | 1.70771   |
| 1.64131   | 1.16669   | 1.74918   | 2.04153   | 1.97789   | 2.41519   |
| 4.99665   | 4.03501   | 4.66986   | 4.20627   | 5.68124   | 4.71743   |
| 14.1459   | 14.1017   | 12.5382   | 11.0647   | 13.0436   | 11.2347   |
| 8.8644    | 6.80114   | 7.94939   | 5.09674   | 6.30381   | 5.65381   |
| 34.2079   | 36.8005   | 31.4005   | 35.5553   | 38.4457   | 42.5681   |
| 0         | 0.073077  | 0.0246259 | 0.200422  | 0.105863  | 0.0985986 |
| 0.157743  | 0.196579  | 0.397467  | 0.359428  | 0.085432  | 0.0663083 |
| 0         | 0         | 0         | 0         | 0         | 0         |
| 1.34183   | 1.38793   | 1.67675   | 0.912136  | 3.58877   | 3.23457   |
| 10.5389   | 11.7186   | 11.9707   | 13.9961   | 11.3256   | 10.9223   |
| 2.696     | 3.10205   | 3.99583   | 2.14691   | 2.27012   | 2.18024   |
| 172.814   | 184.521   | 155.865   | 160.338   | 139.903   | 142.329   |
| 12.7867   | 11.8382   | 18.7391   | 12.7911   | 19.8596   | 20.1814   |
| 1.3187    | 1.54348   | 1.13345   | 1.57792   | 1.58921   | 1.35048   |
| 0         | 0         | 0         | 0         | 0         | 0         |
| 0.683482  | 0.681403  | 0.344435  | 0.311472  | 0.740334  | 0.919378  |
| 3.39198   | 3.9398    | 4.23191   | 3.60179   | 4.74425   | 5.64798   |
| 35.6287   | 26.597    | 38.0554   | 16.8701   | 33.5847   | 32.7297   |

|           |          |          |          |           |           |
|-----------|----------|----------|----------|-----------|-----------|
| 11.9723   | 12.1728  | 12.7897  | 13.3895  | 19.3739   | 14.2392   |
| 29.4564   | 30.1436  | 37.0514  | 41.2512  | 29.3809   | 29.1535   |
| 9.64015   | 9.95732  | 13.0945  | 11.0273  | 13.3551   | 9.63376   |
| 17.493    | 18.1829  | 14.8277  | 13.7513  | 11.5527   | 13.2987   |
| 0         | 0        | 0        | 0        | 0         | 0         |
| 0         | 0.214662 | 0.217014 | 0        | 0.186581  | 0         |
| 0         | 0        | 0        | 0        | 0         | 0         |
| 1.51968   | 0.315638 | 0        | 0        | 0.823044  | 0.425872  |
| 0.699214  | 0.541825 | 0.748918 | 0.913634 | 0.746049  | 0.682646  |
| 0.691684  | 0.430988 | 0.396101 | 0.859662 | 0.88544   | 0.872261  |
| 0         | 0        | 0        | 0        | 0         | 0         |
| 0.60719   | 1.16941  | 0.591114 | 0.59743  | 0.418533  | 0.324846  |
| 0         | 0        | 0        | 0        | 0         | 0         |
| 0.157584  | 2.54E-08 | 2.10E-08 | 7.53E-08 | 0.679285  | 0.292701  |
| 0.703914  | 0.701774 | 0.354732 | 0.481175 | 0.0762466 | 0.236716  |
| 0.0325228 | 0        | 0        | 0        | 0.0704561 | 0.0273423 |
| 0         | 0        | 0        | 0        | 0         | 0         |
| 24.2636   | 26.9547  | 25.671   | 24.0445  | 24.0361   | 26.1947   |
| 36.8634   | 36.7055  | 31.8749  | 34.2249  | 36.6895   | 41.0319   |
| 25.6448   | 25.5578  | 28.0084  | 22.7908  | 27.6786   | 23.3027   |
| 0.750358  | 1.12627  | 1.27356  | 1.41636  | 1.21891   | 1.17349   |
| 0.387217  | 0.529546 | 0.301132 | 0.355824 | 0.542288  | 0.357243  |
| 0.335452  | 0.35832  | 0.21131  | 0.327578 | 0.285493  | 0.463316  |
| 387.813   | 180.279  | 378.172  | 282.232  | 286.068   | 283.955   |
| 28.8001   | 30.1207  | 30.7071  | 31.6619  | 28.9637   | 32.7688   |
| 0.326225  | 0        | 0        | 0        | 0         | 0         |
| 0         | 0        | 0        | 0        | 0         | 0         |
| 0.599859  | 0.815502 | 0.824438 | 0.745537 | 0.590686  | 1.192     |
| 0         | 0        | 0        | 0        | 0         | 0         |
| 20.336    | 18.8446  | 14.8905  | 16.0397  | 16.5677   | 23.5263   |
| 9.67272   | 10.3852  | 12.6814  | 12.746   | 8.57421   | 7.30946   |
| 28.1564   | 38.4668  | 34.3515  | 44.3347  | 31.5183   | 40.6145   |
| 11.2551   | 11.9455  | 8.63118  | 10.2976  | 9.91518   | 11.4951   |
| 0         | 0        | 0        | 0        | 0         | 0         |
| 0         | 0        | 0        | 0        | 0         | 0         |
| 0         | 0        | 0        | 0        | 0         | 0         |
| 410.954   | 401.318  | 446.348  | 477.655  | 376.658   | 327.584   |
| 16.2184   | 11.1382  | 16.4108  | 11.1275  | 20.2102   | 14.6287   |
| 0.691741  | 0.828917 | 0.536644 | 0.742657 | 0.461412  | 0.492159  |
| 12.0111   | 11.2091  | 10.7791  | 10.3724  | 10.0398   | 9.82122   |
| 41.8905   | 41.4754  | 39.8731  | 49.8728  | 41.516    | 48.3739   |
| 21.1412   | 18.1198  | 15.6355  | 13.6851  | 15.3666   | 14.8686   |
| 0.115705  | 0.623758 | 0.240319 | 0.625934 | 0.384602  | 7.80E-77  |

|            |           |           |           |           |            |
|------------|-----------|-----------|-----------|-----------|------------|
| 0.368929   | 0.81735   | 0.774662  | 0.700525  | 0.266411  | 0.482476   |
| 0          | 0         | 0         | 0         | 0         | 0          |
| 11.0236    | 11.5141   | 3.49166   | 3.01945   | 9.64664   | 9.47992    |
| 53.709     | 60.0162   | 52.025    | 56.708    | 52.3707   | 48.7556    |
| 0.0495032  | 0.033313  | 0.415871  | 0.796914  | 0.112671  | 0.0679829  |
| 11.0756    | 13.1298   | 10.9061   | 12.8951   | 8.76263   | 8.22385    |
| 0.0850392  | 0         | 0.0714246 | 0.161473  | 0.0614085 | 0.0238312  |
| 0.0842009  | 0.0524655 | 0.265202  | 0.239822  | 0.0456024 | 0.141577   |
| 0          | 0         | 0         | 0         | 0         | 0          |
| 0          | 0         | 0         | 0         | 0         | 0          |
| 0.275311   | 0.076981  | 0.316243  | 0.225207  | 0.242864  | 0.279287   |
| 0          | 0         | 0         | 0         | 0         | 0          |
| 0          | 0         | 0         | 0         | 0         | 0          |
| 30.019     | 31.584    | 24.5965   | 27.5098   | 25.904    | 30.4234    |
| 10.092     | 9.54082   | 11.4555   | 10.3756   | 21.5719   | 10.7795    |
| 0.00399263 | 0         | 0         | 0         | 0         | 0.00335665 |
| 13.6331    | 15.2056   | 13.5311   | 12.4891   | 13.6026   | 13.8024    |
| 8.83501    | 8.53235   | 9.88922   | 6.90408   | 10.8621   | 6.85354    |
| 8.87868    | 9.59658   | 12.4018   | 11.5974   | 9.71898   | 8.28041    |
| 0.46423    | 0.454553  | 0.125327  | 0.0755555 | 0.14367   | 0.195142   |
| 11.6709    | 11.6333   | 13.7759   | 11.3672   | 15.5306   | 13.448     |
| 0          | 0         | 0         | 0         | 0         | 0          |
| 0          | 0         | 0         | 0         | 0         | 0          |
| 16.4652    | 15.248    | 15.1556   | 13.7051   | 18.7421   | 14.5814    |
| 0          | 0         | 0         | 0         | 0         | 0          |
| 41.3653    | 47.8673   | 45.8351   | 41.8225   | 43.7393   | 44.0601    |
| 13.1639    | 14.5202   | 14.7227   | 14.2534   | 13.9052   | 15.9071    |
| 12.8849    | 13.5763   | 12.9053   | 12.8655   | 15.5441   | 13.4922    |
| 32.7319    | 33.7448   | 33.7397   | 30.1153   | 27.3161   | 38.4628    |
| 0.990312   | 1.13357   | 0.946704  | 0.992947  | 0.82659   | 1.10203    |
| 0.879944   | 0.913821  | 0.519657  | 0.375939  | 0.754567  | 0.593365   |
| 0          | 0         | 0         | 0         | 0         | 0          |
| 0          | 3.41E-11  | 7.44E-11  | 3.12E-10  | 0.211564  | 0.15625    |
| 0.526263   | 0.457554  | 0.43173   | 0.320696  | 0.55678   | 0.401279   |
| 3.5292     | 2.86832   | 3.4797    | 1.5788    | 3.15793   | 2.06403    |
| 18.4158    | 18.0843   | 17.9777   | 18.619    | 14.7455   | 16.6734    |
| 3.11205    | 2.88344   | 5.60098   | 3.50085   | 4.41381   | 3.30345    |
| 0.0709094  | 0         | 0.0297785 | 0         | 0         | 0.0198715  |
| 0.463546   | 0.273633  | 0.245895  | 0.111181  | 0.132133  | 0.266643   |
| 304.02     | 359.492   | 321.385   | 326.922   | 316.134   | 334.369    |
| 8.04859    | 8.94296   | 7.53413   | 7.6467    | 8.55042   | 9.96055    |
| 40.6165    | 39.8148   | 35.2466   | 33.0048   | 28.4864   | 29.918     |
| 2.67016    | 2.11011   | 3.96834   | 2.91161   | 3.45635   | 2.99659    |



|           |           |           |           |           |           |
|-----------|-----------|-----------|-----------|-----------|-----------|
| 103.521   | 95.0411   | 95.8444   | 70.1714   | 111.855   | 93.4277   |
| 35.8078   | 39.9816   | 46.6265   | 48.7353   | 38.0054   | 38.2867   |
| 21.9918   | 22.3066   | 21.3625   | 21.663    | 23.2902   | 24.9057   |
| 4.9524    | 4.74744   | 4.55949   | 2.82109   | 3.71377   | 6.08626   |
| 115.64    | 110.769   | 107.175   | 113.12    | 93.2403   | 116.583   |
| 0.874855  | 0.761998  | 0.888863  | 0.835948  | 0.723456  | 0.300527  |
| 10.13     | 13.6355   | 11.0852   | 13.5014   | 13.1178   | 17.5514   |
| 4.5435    | 4.59014   | 4.23304   | 4.85924   | 3.73371   | 2.77302   |
| 0         | 0.0893854 | 0         | 0         | 0         | 0         |
| 0         | 0         | 0         | 0         | 0         | 0         |
| 7.26513   | 8.71828   | 6.52561   | 7.58712   | 6.19341   | 6.33397   |
| 1.84833   | 0.460676  | 0.465724  | 0.421153  | 0.400414  | 0.310782  |
| 0.196062  | 0.170136  | 0.117831  | 0.169881  | 0.337456  | 0.364843  |
| 0         | 0         | 0         | 0         | 0         | 0         |
| 0         | 0         | 0         | 0         | 0         | 0         |
| 15.0039   | 15.5164   | 15.5004   | 12.7694   | 15.8521   | 11.9054   |
| 0         | 0         | 0         | 0         | 0         | 0         |
| 12.7252   | 12.461    | 16.0554   | 11.8948   | 17.4256   | 13.3346   |
| 1.77529   | 1.08046   | 1.4564    | 0.987762  | 1.7888    | 0.902448  |
| 1.18397   | 1.04151   | 1.53551   | 1.30921   | 1.43333   | 1.05393   |
| 0.700313  | 0.733599  | 1.09967   | 0.728476  | 1.16536   | 0.665557  |
| 9.70049   | 10.012    | 8.82317   | 9.27655   | 10.6835   | 9.30572   |
| 0         | 0         | 0         | 0         | 0         | 0         |
| 0.0510359 | 0.0814092 | 0.106571  | 0.0624189 | 0.120153  | 0.0617242 |
| 3.6691    | 3.56257   | 3.51653   | 3.02611   | 3.68171   | 3.72808   |
| 0.588726  | 0.533578  | 0.539425  | 0.12195   | 1.33336   | 0.539944  |
| 27.4687   | 25.3404   | 36.8619   | 33.0588   | 40.5776   | 34.8918   |
| 0.223591  | 0.0934906 | 0.0632205 | 0.0284169 | 0.0269753 | 0.0834559 |
| 1.90299   | 1.95695   | 1.76438   | 1.72724   | 1.24975   | 1.17994   |
| 0.451065  | 0.560578  | 0.174537  | 0.207083  | 0.230725  | 0.155293  |
| 3.13175   | 2.8297    | 2.83605   | 3.12208   | 1.54066   | 1.56331   |
| 16.9521   | 16.5683   | 15.8991   | 16.8354   | 13.945    | 13.9274   |
| 46.1497   | 41.9657   | 43.318    | 37.7944   | 36.9065   | 37.6365   |
| 0.2164    | 0         | 0.272633  | 0         | 0.937602  | 0.272896  |
| 0.0675221 | 0.0373982 | 0.02363   | 0.0128211 | 0.142214  | 0.0599204 |
| 27.8337   | 28.1814   | 26.2517   | 26.5274   | 26.4324   | 29.7154   |
| 9.96539   | 8.73188   | 8.67761   | 9.95264   | 11.9281   | 12.6735   |
| 0         | 0         | 0         | 0.0545858 | 0.0518977 | 0         |
| 0         | 0         | 0         | 0         | 0.486652  | 0         |
| 0         | 0         | 0         | 0         | 0         | 0         |
| 13.7984   | 14.3941   | 15.876    | 16.9934   | 14.2451   | 15.1539   |
| 36.0466   | 33.1371   | 26.4498   | 30.608    | 25.2452   | 29.514    |
| 7.4687    | 6.80692   | 8.5481    | 6.92353   | 7.69641   | 6.05776   |

|           |           |           |           |           |           |
|-----------|-----------|-----------|-----------|-----------|-----------|
| 0         | 0         | 0.0387846 | 0.105218  | 0.100037  | 0.0258813 |
| 136.044   | 131.257   | 118.003   | 107.335   | 103.785   | 132.549   |
| 93.7867   | 85.4356   | 82.9313   | 89.8665   | 65.5123   | 82.9053   |
| 45.4716   | 121.45    | 41.9241   | 157.325   | 43.2091   | 20.3306   |
| 5.39434   | 5.38507   | 7.15662   | 5.70554   | 7.03645   | 5.38918   |
| 0         | 0         | 0         | 0.191661  | 0         | 0         |
| 8.86059   | 10.2678   | 4.70608   | 3.66271   | 6.63256   | 5.11149   |
| 13.6639   | 15.9186   | 15.6445   | 16.784    | 9.20823   | 13.5827   |
| 0         | 0         | 0         | 0         | 0         | 46.3455   |
| 1.29324   | 1.27866   | 2.35642   | 0.706244  | 2.11859   | 1.49159   |
| 167.454   | 177.527   | 154.871   | 168.869   | 129.308   | 184.06    |
| 45.0872   | 48.1883   | 47.2886   | 56.4674   | 53.2961   | 70.4852   |
| 3.22253   | 6.924     | 2.65995   | 3.54478   | 2.88876   | 2.6158    |
| 24.1744   | 23.3924   | 23.944    | 23.9764   | 21.9483   | 21.7891   |
| 8.72283   | 9.26022   | 9.2472    | 8.09256   | 7.68171   | 6.47217   |
| 73.065    | 74.2954   | 62.7001   | 65.3978   | 52.9885   | 58.0456   |
| 0         | 0         | 0         | 0         | 0         | 0         |
| 0         | 0         | 0         | 0         | 0         | 0         |
| 4.40618   | 4.32205   | 3.68135   | 2.84871   | 3.0852    | 3.25591   |
| 0         | 0         | 0         | 0         | 0         | 0.0341708 |
| 0         | 0         | 0         | 0         | 0         | 0         |
| 0.116949  | 0         | 0.0174461 | 0.310539  | 0.0599983 | 0.0797505 |
| 0.252516  | 21.9934   | 0.318134  | 152.347   | 1.00291   | 13.0444   |
| 0         | 0         | 0         | 0         | 0         | 0         |
| 0         | 0         | 0         | 0         | 0         | 0         |
| 28.3376   | 28.1028   | 26.0733   | 31.0263   | 26.2448   | 33.0896   |
| 0         | 0         | 0         | 0         | 0         | 0         |
| 0         | 0         | 0         | 0.0253675 | 0         | 0         |
| 0         | 0         | 0         | 0         | 0         | 0         |
| 8.11899   | 6.80084   | 8.03805   | 8.35851   | 8.25312   | 7.21768   |
| 0.510819  | 0.489588  | 0.677986  | 0.512337  | 0.473468  | 0.378069  |
| 0         | 0         | 0         | 0         | 0         | 0         |
| 23.8556   | 22.0027   | 23.0928   | 20.8828   | 19.7084   | 20.509    |
| 2.02616   | 1.76169   | 2.25586   | 2.79148   | 0.969714  | 1.22808   |
| 1.86474   | 1.96237   | 2.02425   | 2.68093   | 2.27792   | 2.68247   |
| 14.5701   | 12.5854   | 26.0615   | 16.0237   | 21.57     | 18.7157   |
| 0         | 0         | 0         | 0         | 0         | 0         |
| 18.999    | 17.8868   | 20.7906   | 21.2352   | 20.8255   | 22.1215   |
| 0         | 0         | 0         | 0         | 0         | 0         |
| 13.9249   | 10.9313   | 21.6957   | 12.467    | 19.201    | 16.9774   |
| 0         | 0         | 0         | 0         | 0         | 0         |
| 7.61555   | 7.34604   | 8.74248   | 6.14141   | 8.1246    | 5.35118   |
| 0.0656759 | 0.0818452 | 0.165484  | 0.149647  | 0.106708  | 0.0276073 |

|           |           |          |          |           |           |
|-----------|-----------|----------|----------|-----------|-----------|
| 77.9322   | 78.1169   | 87.2168  | 75.921   | 88.9575   | 66.2869   |
| 11.1304   | 9.20025   | 15.0649  | 12.2951  | 15.559    | 17.2396   |
| 16.1073   | 11.6039   | 10.8682  | 9.25791  | 14.1232   | 10.4302   |
| 0         | 0         | 0        | 0        | 0         | 0         |
| 0         | 0         | 0        | 0        | 0         | 0         |
| 6.5364    | 7.23292   | 7.12935  | 6.63541  | 6.23105   | 5.84722   |
| 0.767834  | 0.521931  | 0.857431 | 0.43739  | 0.793897  | 0.381448  |
| 0         | 0         | 0        | 0        | 0         | 0         |
| 39.8276   | 35.4186   | 31.8495  | 17.9836  | 46.2881   | 46.8552   |
| 2.7002    | 3.24565   | 1.25458  | 0.850888 | 2.50993   | 1.35239   |
| 14.7372   | 14.2366   | 17.6315  | 14.7169  | 16.1493   | 11.6287   |
| 4.57663   | 5.68831   | 4.95745  | 4.57956  | 4.51142   | 4.59069   |
| 8.53842   | 10.0663   | 11.4743  | 13.4952  | 14.2106   | 16.3393   |
| 16.9178   | 16.2486   | 17.7851  | 17.0855  | 18.9426   | 16.4424   |
| 0.68057   | 1.06016   | 0.535887 | 0.678441 | 0.36859   | 0.679444  |
| 1.99089   | 1.24052   | 1.67215  | 1.13409  | 1.07825   | 2.51065   |
| 0         | 0         | 0        | 0        | 0         | 0         |
| 1.30386   | 1.35597   | 1.78815  | 2.12145  | 2.16276   | 1.99155   |
| 1.90463   | 1.02854   | 0.479912 | 1.88059  | 1.1003    | 2.29512   |
| 0.0236851 | 0.0590326 | 0.149199 | 0.026984 | 0.102621  | 0.0796492 |
| 0         | 0         | 0        | 0        | 0         | 0         |
| 7.20564   | 6.31739   | 8.62504  | 6.77946  | 10.1572   | 7.77683   |
| 23.886    | 22.2549   | 23.6646  | 23.8789  | 19.8855   | 21.1116   |
| 0.200717  | 0.230893  | 0.369586 | 0.175903 | 0.0836204 | 0.181726  |
| 2.95224   | 3.27589   | 4.8968   | 4.70149  | 4.29866   | 3.24573   |
| 20.3272   | 18.9397   | 10.8047  | 13.8129  | 15.9689   | 19.3651   |
| 18.1215   | 19.0648   | 18.8209  | 19.5935  | 18.885    | 18.2634   |
| 0.521317  | 0.385738  | 2.36031  | 1.28066  | 1.42935   | 1.28744   |
| 149.121   | 109.685   | 249.489  | 212.165  | 281.178   | 252.013   |
| 0         | 0         | 0        | 0        | 0         | 0         |
| 0         | 0         | 0        | 0        | 0         | 0         |
| 11.4702   | 13.0069   | 13.231   | 14.0458  | 10.6766   | 9.4839    |
| 23.9811   | 25.2692   | 27.2512  | 26.7802  | 23.121    | 19.5623   |
| 20.3825   | 20.9813   | 18.5551  | 21.6896  | 22.6821   | 25.3001   |
| 48.1499   | 43.2798   | 26.1191  | 25.1265  | 21.3709   | 24.857    |
| 22.6411   | 22.2976   | 23.7604  | 17.6299  | 26.2675   | 19.3079   |
| 50.8107   | 48.0819   | 49.2838  | 43.2897  | 52.8017   | 44.1385   |
| 60.1597   | 57.3688   | 57.944   | 49.2988  | 46.7539   | 47.1253   |
| 0         | 0         | 0        | 0        | 0         | 0         |
| 1.40776   | 2.06393   | 2.2952   | 1.41515  | 1.97334   | 1.63604   |
| 48.9375   | 51.8063   | 52.8007  | 49.2908  | 41.9112   | 48.4028   |
| 26.6003   | 26.9027   | 26.1928  | 25.1138  | 24.2472   | 29.3068   |
| 8.23254   | 9.20716   | 8.04485  | 7.84609  | 9.20312   | 9.41588   |

|           |          |           |           |           |           |
|-----------|----------|-----------|-----------|-----------|-----------|
| 8.21788   | 9.22965  | 10.0657   | 11.3853   | 7.88492   | 7.16476   |
| 3.01571   | 10.2341  | 13.1582   | 12.1707   | 34.7879   | 42.7427   |
| 0         | 0        | 0         | 0         | 0         | 0         |
| 162.219   | 179.384  | 224.034   | 282.803   | 178.217   | 194.909   |
| 0.0694056 | 0        | 0.0349764 | 0.0158145 | 0.0150357 | 0         |
| 0.301249  | 0.375416 | 0.0813277 | 0.122574  | 0.233076  | 0.144722  |
| 370.044   | 301.853  | 340.209   | 328.415   | 379.782   | 559.295   |
| 8.94322   | 7.89718  | 9.15619   | 7.08137   | 6.39808   | 7.66661   |
| 1.30788   | 1.3347   | 1.90722   | 1.53697   | 1.77362   | 1.65365   |
| 45.3081   | 49.99    | 44.5504   | 52.6563   | 37.9306   | 47.4837   |
| 20.8634   | 19.8053  | 24.1577   | 20.514    | 32.1013   | 24.9652   |
| 13.7734   | 15.3007  | 16.771    | 13.4201   | 26.0783   | 21.2187   |
| 13.1118   | 14.5398  | 18.0736   | 16.3816   | 15.5147   | 15.012    |
| 0.453648  | 0.590578 | 4.12E-20  | 1.66463   | 7.66E-19  | 0.162984  |
| 45.9878   | 44.5003  | 40.3423   | 39.137    | 39.3138   | 38.8874   |
| 1.71851   | 2.62192  | 2.42886   | 1.93261   | 1.37253   | 2.25038   |
| 9.73909   | 10.206   | 10.4108   | 9.5195    | 10.9488   | 11.2737   |
| 20.1036   | 18.2783  | 22.076    | 17.6899   | 18.4494   | 20.6246   |
| 0         | 0        | 0         | 0         | 0         | 0         |
| 0         | 0        | 0         | 0         | 0.092225  | 0         |
| 0.900578  | 1.23948  | 0.846666  | 1.4394    | 0.553329  | 0.711885  |
| 1.43322   | 1.57089  | 1.78389   | 1.49513   | 2.18837   | 1.64044   |
| 53.5319   | 55.3444  | 53.2004   | 57.9897   | 56.2354   | 68.27     |
| 19.2245   | 23.4015  | 18.6982   | 19.271    | 12.9206   | 14.3089   |
| 3.29183   | 2.7401   | 3.90842   | 2.5626    | 4.85913   | 3.42615   |
| 0.589762  | 0.821273 | 1.13577   | 0.652182  | 0.545069  | 0.452158  |
| 0         | 0        | 0.0832895 | 0         | 0         | 0         |
| 0.0406711 | 0.108126 | 0.491901  | 0.130513  | 0.0719551 | 0.0923203 |
| 0         | 0.790523 | 0         | 7.22701   | 0         | 0         |
| 3.77072   | 4.84904  | 4.39679   | 3.63325   | 5.67032   | 4.70455   |
| 0.567526  | 0.544402 | 0.467133  | 0.152073  | 0.211806  | 0.256502  |
| 0.234473  | 2.54212  | 0.249246  | 0.200348  | 0.0476205 | 0         |
| 10.4243   | 8.91487  | 9.94828   | 10.0205   | 14.2835   | 14.8656   |
| 0.214601  | 0.267435 | 0.135183  | 0.183368  | 0.290564  | 0.0902087 |
| 40.6534   | 41.4252  | 38.8299   | 43.0413   | 40.8398   | 42.444    |
| 45.5501   | 46.0309  | 34.4837   | 33.914    | 45.3065   | 43.4027   |
| 8.60268   | 9.3942   | 11.6694   | 13.4118   | 14.7796   | 12.4515   |
| 11.1203   | 11.2415  | 9.36475   | 7.13974   | 10.291    | 9.88297   |
| 0.631722  | 0.980821 | 1.41456   | 1.5139    | 1.20034   | 2.32195   |
| 11.5144   | 11.7947  | 9.89974   | 9.55193   | 11.2819   | 11.6365   |
| 0.928246  | 0.905172 | 0.577358  | 0.773085  | 0.605957  | 0.503737  |
| 16.5472   | 16.4173  | 13.6297   | 18.5958   | 13.3081   | 12.5681   |
| 0         | 0        | 0         | 0         | 0         | 0         |

|          |           |          |           |           |           |
|----------|-----------|----------|-----------|-----------|-----------|
| 0        | 0         | 0        | 0         | 0         | 0         |
| 26.9119  | 18.7968   | 26.6039  | 18.2695   | 26.9577   | 26.2291   |
| 2.70948  | 2.83329   | 2.55171  | 1.60456   | 2.03406   | 1.33629   |
| 9.48652  | 9.20554   | 10.7256  | 8.61953   | 12.0813   | 9.30695   |
| 0        | 0.0524272 | 0        | 0.287576  | 0.182276  | 0.212211  |
| 9.64136  | 10.4786   | 9.04014  | 9.46723   | 9.8023    | 10.0335   |
| 0.545289 | 0.536477  | 0.723141 | 0.359664  | 0.0621732 | 0.0482559 |
| 0        | 0         | 0        | 0         | 0         | 0         |
| 0.460899 | 0.191499  | 0.357491 | 0.323098  | 0.522938  | 0.447148  |
| 9.09022  | 9.81473   | 13.0288  | 7.42134   | 8.5707    | 7.48755   |
| 41.8551  | 43.8473   | 46.9067  | 49.7467   | 39.5646   | 45.4344   |
| 29.8308  | 26.0936   | 29.1941  | 28.4961   | 25.788    | 28.7066   |
| 0.397791 | 0.571094  | 0.414097 | 0.384307  | 0.627423  | 0.47971   |
| 2.20513  | 1.61649   | 1.08947  | 1.13298   | 2.76323   | 1.01782   |
| 1.5008   | 0.997493  | 2.22694  | 1.63385   | 1.62564   | 1.20567   |
| 0.552215 | 0.346768  | 0.826437 | 0.689707  | 1.08012   | 0.842743  |
| 14.3705  | 13.7547   | 16.2435  | 14.643    | 13.8212   | 14.7706   |
| 0        | 0         | 0        | 0         | 0.0389676 | 0         |
| 0        | 0         | 0        | 0         | 0         | 0         |
| 37.5607  | 32.481    | 29.8646  | 24.8306   | 37.5616   | 32.05     |
| 0        | 0         | 0        | 0         | 0         | 0         |
| 0.709021 | 1.14589   | 0.837434 | 1.37574   | 1.056     | 1.24805   |
| 0.569037 | 0.567306  | 0.430142 | 0.388976  | 0.431458  | 0.526236  |
| 0        | 0         | 0        | 0         | 0         | 0         |
| 170.52   | 178.798   | 84.0803  | 94.2589   | 56.8568   | 84.0983   |
| 35.7613  | 31.331    | 40.3211  | 36.8738   | 43.0399   | 36.5639   |
| 47.9103  | 49.4507   | 47.7225  | 44.8669   | 46.7761   | 46.5179   |
| 0        | 0         | 0        | 0         | 0         | 0         |
| 9.35549  | 9.4346    | 9.41444  | 7.41853   | 9.00773   | 7.55199   |
| 0.331023 | 0.51565   | 0.299748 | 0.259276  | 0.302532  | 0.469663  |
| 56.8908  | 49.8157   | 47.6091  | 48.6475   | 42.3718   | 60.0155   |
| 0.533274 | 0.332283  | 1.41088  | 0.789814  | 0.433223  | 0.145707  |
| 15.3489  | 15.1124   | 14.1272  | 16.1725   | 12.5316   | 15.188    |
| 0.276012 | 0         | 0.173868 | 0.157228  | 0         | 0         |
| 0        | 0         | 0        | 0         | 0         | 0         |
| 1.2693   | 1.5818    | 1.79903  | 1.80762   | 1.63267   | 0.90038   |
| 0        | 0         | 0        | 0         | 0         | 0         |
| 0        | 0         | 0        | 0         | 0         | 0         |
| 3.11796  | 3.07419   | 2.06807  | 2.01642   | 2.52305   | 1.88888   |
| 23.9174  | 24.1285   | 20.525   | 18.7864   | 19.7922   | 24.2707   |
| 0        | 0         | 0        | 0         | 0         | 0         |
| 0        | 0         | 0.128116 | 0.0257451 | 0.0244773 | 0.0189981 |
| 11.4838  | 8.70578   | 12.9209  | 8.22992   | 16.2307   | 7.77992   |

|           |           |           |           |           |            |
|-----------|-----------|-----------|-----------|-----------|------------|
| 3.54287   | 3.8311    | 3.16459   | 3.39564   | 2.72081   | 2.31663    |
| 0         | 0         | 0         | 0         | 0         | 0          |
| 1.3618    | 0.833653  | 1.38458   | 0.871007  | 2.95016   | 2.14917    |
| 1.02E-05  | 2.87E-06  | 0         | 0.152391  | 0.144534  | 8.16E-06   |
| 6.85216   | 6.48543   | 6.82969   | 7.75714   | 12.3545   | 8.78688    |
| 0.0301712 | 0         | 0         | 0         | 0.0326809 | 0          |
| 28.5015   | 18.2381   | 20.6822   | 15.3204   | 17.4035   | 17.2664    |
| 15.5975   | 12.4804   | 15.2341   | 13.5345   | 12.0471   | 9.17985    |
| 21.1367   | 22.6565   | 18.542    | 26.4382   | 19.5784   | 20.4327    |
| 19.6296   | 19.6823   | 22.1152   | 21.7724   | 19.9426   | 18.5325    |
| 1.71863   | 1.79711   | 1.84169   | 1.30534   | 2.52491   | 1.75491    |
| 8.00076   | 7.56691   | 7.92773   | 7.45356   | 6.07565   | 6.10276    |
| 15.3158   | 16.1627   | 19.1142   | 17.0101   | 19.7838   | 17.3932    |
| 0.0374484 | 0         | 0         | 0.170657  | 0         | 0.0629666  |
| 0.875331  | 0.305434  | 1.27924   | 0.35901   | 0.455107  | 0.206052   |
| 74.8568   | 72.2581   | 31.3177   | 32.9493   | 38.5528   | 35.2081    |
| 14.2662   | 14.3432   | 14.2647   | 11.4961   | 14.9645   | 11.9702    |
| 0.178651  | 0.222635  | 0.0750249 | 0.271379  | 0         | 0.10013    |
| 3.08917   | 3.07066   | 2.69401   | 2.47234   | 2.46948   | 2.24809    |
| 86.1745   | 85.9335   | 83.8219   | 88.4172   | 88.9775   | 88.6765    |
| 4.4313    | 4.26194   | 6.38752   | 5.24559   | 6.87552   | 4.9337     |
| 23.2146   | 23.0894   | 25.2831   | 22.6772   | 24.345    | 24.9905    |
| 26.6959   | 26.0456   | 23.1796   | 22.468    | 21.937    | 22.9085    |
| 0         | 0         | 0         | 0         | 0         | 0          |
| 1994.47   | 1225.73   | 1721.05   | 2210.01   | 1420.51   | 2457.73    |
| 0.426326  | 0.467532  | 0.49414   | 0.524562  | 0.554145  | 0.516121   |
| 3.81E-19  | 1.94E-33  | 9.61E-37  | 3.62E-41  | 1.64E-22  | 6.63E-31   |
| 0         | 0         | 0         | 0         | 0         | 0          |
| 1.4315    | 1.96232   | 1.98382   | 1.79397   | 1.39551   | 2.40695    |
| 12.511    | 10.127    | 15.9094   | 8.65872   | 8.99224   | 9.73176    |
| 2.82721   | 3.07027   | 3.1548    | 1.79455   | 4.37482   | 3.12388    |
| 0.392464  | 0.52699   | 0.239065  | 0.269942  | 0.0661025 | 0.00997051 |
| 0.0746736 | 0.0202755 | 0         | 0.0370729 | 0         | 0          |
| 0.0909106 | 0.113293  | 0         | 0.103573  | 0.0492363 | 0.152859   |
| 0         | 0         | 0         | 0         | 0         | 0          |
| 10.5028   | 10.4961   | 10.9228   | 10.1465   | 8.80636   | 8.77309    |
| 9.72633   | 7.43439   | 10.0692   | 9.4003    | 9.34773   | 9.61806    |
| 0         | 0.0158407 | 0         | 0.0144817 | 0.027537  | 0.0106865  |
| 0.332168  | 0.261441  | 0.220254  | 0.239011  | 0.605975  | 0.382142   |
| 16.4107   | 14.5585   | 16.0843   | 14.201    | 15.5459   | 12.0103    |
| 0         | 0         | 0         | 0         | 0         | 0          |
| 11.6078   | 10.5632   | 13.247    | 8.92278   | 18.8896   | 13.5296    |
| 14.5428   | 15.3497   | 14.2609   | 16.6557   | 16.7499   | 15.3553    |

|           |           |           |           |           |           |
|-----------|-----------|-----------|-----------|-----------|-----------|
| 83.0345   | 76.3788   | 85.4216   | 130.769   | 76.7392   | 90.4366   |
| 0         | 0         | 0         | 0         | 0         | 0         |
| 0         | 0         | 0         | 0         | 0         | 0         |
| 0         | 0         | 0         | 0         | 0         | 0         |
| 3.37306   | 2.82569   | 4.69813   | 3.58668   | 3.45065   | 1.51241   |
| 0         | 0         | 0         | 0         | 0         | 0.213876  |
| 10.5221   | 9.43908   | 9.99216   | 9.69851   | 8.16137   | 9.04606   |
| 0.0411601 | 0.0512936 | 0.0518557 | 0         | 0         | 0.0692075 |
| 0         | 0         | 0.221653  | 0         | 0.190569  | 0         |
| 0.0496465 | 0.0618694 | 0.0774254 | 0.0565614 | 0.107552  | 0.0417384 |
| 0.335306  | 1.95      | 0.140812  | 6.87615   | 0.726393  | 2.25517   |
| 21.8936   | 24.9086   | 23.4113   | 25.4085   | 27.8884   | 30.3867   |
| 0.50408   | 1.00509   | 0.381041  | 1.3783    | 0.982817  | 0.339029  |
| 1.03516   | 0.540396  | 0.279364  | 0.307969  | 1.00651   | 0.891214  |
| 0         | 0.0173111 | 0         | 0         | 0         | 0         |
| 20.4831   | 19.4349   | 20.6237   | 22.4161   | 21.644    | 20.4844   |
| 4.626     | 3.83955   | 4.74674   | 3.27344   | 5.57701   | 3.3195    |
| 0         | 0         | 0         | 0         | 0         | 0         |
| 8.6127    | 8.21356   | 9.34775   | 9.3765    | 8.90076   | 7.25499   |
| 1.99946   | 3.17211   | 7.40635   | 6.16501   | 6.61647   | 6.48833   |
| 0         | 0         | 0         | 0         | 0         | 0         |
| 0         | 0.0367162 | 0.0371186 | 0.100699  | 0.0319133 | 0         |
| 7.26726   | 6.01262   | 5.91871   | 4.03318   | 7.9843    | 5.54396   |
| 0.768858  | 1.2081    | 1.05288   | 1.29488   | 0.760393  | 1.09605   |
| 0         | 0         | 0.0220321 | 0.0199236 | 0         | 0         |
| 62.3748   | 60.286    | 68.922    | 63.4485   | 73.6906   | 67.2859   |
| 0.726911  | 0.312371  | 0.915801  | 0.485471  | 0.841676  | 0.484683  |
| 0         | 0         | 0         | 0         | 0         | 0         |
| 20.8247   | 24.0619   | 21.0663   | 21.9068   | 38.4427   | 28.3059   |
| 0         | 0         | 0         | 0         | 0         | 0         |
| 14.971    | 17.1704   | 11.2576   | 15.3303   | 13.8531   | 15.0238   |
| 6.1143    | 7.03758   | 8.07758   | 8.07853   | 8.47407   | 7.21079   |
| 13.2025   | 14.9856   | 12.1655   | 12.9452   | 11.9029   | 15.1097   |
| 37.2362   | 36.5464   | 37.1903   | 34.6507   | 35.1962   | 34.6254   |
| 10.9283   | 6.52874   | 6.62495   | 8.18871   | 7.12784   | 6.28145   |
| 13.1743   | 12.9945   | 13.2846   | 12.9241   | 16.5002   | 15.461    |
| 0         | 0         | 0         | 0         | 0         | 0.0212206 |
| 0         | 0         | 0         | 0         | 0         | 0         |
| 0.0378414 | 0.0943158 | 0         | 0.0718534 | 0.0956411 | 0.0106046 |
| 0.168436  | 0.167924  | 0.339528  | 0.0767587 | 0.328404  | 0.0708033 |
| 0.153608  | 0.145625  | 0.170876  | 0.130379  | 0.172165  | 0.0855204 |
| 11.7844   | 15.2951   | 10.9963   | 10.1947   | 17.5315   | 13.2988   |
| 0         | 0         | 0         | 0         | 0         | 0         |

|           |           |           |          |           |           |
|-----------|-----------|-----------|----------|-----------|-----------|
| 0.921342  | 0.902328  | 0.870798  | 0.749516 | 0.997649  | 0.940255  |
| 17.9693   | 19.4807   | 17.4532   | 18.6501  | 15.6891   | 18.7171   |
| 0.860207  | 0.78245   | 0.821921  | 0.982093 | 0.311175  | 0.68237   |
| 18.0706   | 18.4467   | 18.809    | 14.9227  | 19.1605   | 14.1872   |
| 0         | 0         | 0         | 0        | 0         | 0         |
| 0.735306  | 1.05192   | 3.44216   | 5.38603  | 1.59513   | 1.94391   |
| 0         | 0         | 0         | 0        | 0         | 0         |
| 1.23801   | 0.882227  | 0.668225  | 0.555177 | 0.909652  | 0.891825  |
| 0         | 0         | 0         | 0        | 0.021427  | 0.0498918 |
| 9.86255   | 10.9251   | 12.3192   | 16.8063  | 6.75671   | 12.331    |
| 10.87     | 10.844    | 13.0728   | 11.2747  | 9.28195   | 9.8035    |
| 0.938152  | 1.16912   | 0         | 0.356273 | 0.338729  | 1.18307   |
| 0         | 0         | 0         | 0        | 0.0665491 | 0         |
| 6.37599   | 6.64459   | 7.52419   | 7.27991  | 5.66983   | 5.1497    |
| 13.5879   | 12.5213   | 13.0479   | 11.7544  | 10.9564   | 11.2959   |
| 24.495    | 23.3854   | 22.0736   | 18.3464  | 21.7222   | 18.4305   |
| 0.0620727 | 0.10314   | 0.0260675 | 0.165009 | 0.0448239 | 0.104371  |
| 40.2661   | 62.918    | 24.9757   | 25.0143  | 26.1045   | 27.4184   |
| 175.697   | 169.647   | 166.39    | 159.99   | 165.046   | 162.334   |
| 0         | 0         | 0         | 0        | 0         | 0         |
| 0         | 0         | 0         | 0        | 0.0445601 | 0         |
| 0.0884782 | 0.110261  | 0.11147   | 0.134402 | 0.127784  | 0.0247949 |
| 4.1623    | 4.7549    | 4.71629   | 4.29751  | 7.18676   | 4.96745   |
| 14.2272   | 14.9304   | 13.8362   | 8.34134  | 15.5908   | 12.0309   |
| 29.0249   | 29.7679   | 25.9317   | 23.0899  | 22.6317   | 18.0667   |
| 3.81312   | 4.24707   | 4.46727   | 3.81125  | 5.73975   | 4.38741   |
| 0         | 0         | 0         | 0        | 0         | 0         |
| 10.9535   | 10.6795   | 10.6152   | 10.1847  | 11.3081   | 10.0553   |
| 12.7282   | 11.4614   | 21.6476   | 14.4589  | 17.29     | 12.3889   |
| 0         | 0         | 0         | 0        | 0         | 0         |
| 2.17616   | 2.30931   | 2.21174   | 1.90285  | 2.36377   | 1.55279   |
| 0         | 0.107282  | 0         | 0.049039 | 0.0932482 | 0.0542811 |
| 29.3054   | 29.6058   | 27.0258   | 26.3536  | 24.294    | 26.1156   |
| 18.7511   | 15.6344   | 16.2232   | 13.3346  | 11.9127   | 12.3322   |
| 0         | 0         | 0         | 0        | 0         | 0         |
| 0         | 0         | 0         | 0        | 0         | 0         |
| 1.28833   | 1.85585   | 1.24451   | 1.07864  | 1.87204   | 1.13958   |
| 4.45782   | 4.10758   | 4.56104   | 4.70936  | 5.32612   | 3.72503   |
| 5.14492   | 3.3113    | 4.73852   | 3.66451  | 6.34307   | 4.46772   |
| 0         | 0         | 0         | 0        | 0         | 0         |
| 0.0225273 | 0.0280735 | 0.0951777 | 0        | 0         | 0.0852257 |
| 0         | 0         | 0         | 0        | 0         | 0         |
| 12.3269   | 12.933    | 13.1975   | 11.3238  | 12.4022   | 14.2957   |



|           |           |           |           |           |           |
|-----------|-----------|-----------|-----------|-----------|-----------|
| 6.47856   | 6.96637   | 7.41667   | 4.94841   | 8.50205   | 6.01174   |
| 5.22276   | 5.02294   | 7.22361   | 5.04474   | 6.36434   | 6.06127   |
| 4.84803   | 4.58936   | 6.78975   | 5.85909   | 5.82797   | 5.25482   |
| 6.93879   | 4.45072   | 9.14182   | 5.36058   | 13.4845   | 7.37769   |
| 0.387126  | 1.12568   | 0.162574  | 0.735077  | 0.559103  | 0         |
| 0.138415  | 0.258739  | 0.0871915 | 0         | 0.149929  | 0.116367  |
| 0         | 0         | 0         | 0         | 0         | 0         |
| 0.0690675 | 0         | 0         | 0.0786875 | 0.0119699 | 0.0668919 |
| 23.7592   | 23.1827   | 21.3833   | 22.3036   | 28.1299   | 27.0148   |
| 8.3116    | 7.99927   | 9.21321   | 6.68904   | 9.82299   | 7.75955   |
| 13.5737   | 16.5948   | 12.704    | 13.7785   | 13.3832   | 16.22     |
| 0.315284  | 1.17872   | 0         | 0         | 0         | 0         |
| 0.111763  | 0.0557116 | 0.168966  | 0.280125  | 0.193695  | 0.0751684 |
| 0.446038  | 0.240287  | 0.321319  | 0.0727848 | 0.550255  | 0.428559  |
| 56.3389   | 65.1668   | 48.548    | 57.0936   | 39.4472   | 45.9517   |
| 3.02752   | 2.31173   | 2.49275   | 0.94389   | 9.63921   | 4.1535    |
| 1.93222   | 1.75713   | 2.10535   | 2.52857   | 2.12122   | 1.20735   |
| 12.8792   | 14.7084   | 16.5711   | 14.5169   | 14.9681   | 12.4074   |
| 2.12557   | 195.828   | 2.86918   | 2440.3    | 4.60474   | 93.1787   |
| 42.949    | 46.7066   | 40.7731   | 43.4251   | 46.2148   | 46.9281   |
| 35.1595   | 37.1365   | 29.5756   | 33.7062   | 26.1247   | 26.0444   |
| 0.764205  | 0.982112  | 1.78862   | 0.544154  | 1.78488   | 0.783018  |
| 69.5657   | 32.6228   | 90.9229   | 48.9468   | 112.378   | 65.7516   |
| 0         | 0         | 0         | 0         | 0         | 0         |
| 5.22276   | 5.72454   | 5.92253   | 5.20702   | 7.48149   | 6.62948   |
| 0         | 0         | 0         | 0         | 0.025322  | 0         |
| 70.8459   | 66.484    | 72.8526   | 62.9906   | 59.6822   | 54.803    |
| 0         | 0         | 0         | 0         | 0         | 0         |
| 0         | 0         | 0         | 0         | 0         | 0         |
| 0         | 0         | 0         | 0         | 0         | 0         |
| 0         | 0         | 0         | 0         | 0         | 0         |
| 3.47884   | 2.82711   | 2.88878   | 2.65124   | 3.95707   | 3.94017   |
| 0.364325  | 0.534569  | 0.159572  | 0.144301  | 0.0805067 | 0.12021   |
| 15.3536   | 14.0618   | 14.4872   | 13.4687   | 13.7151   | 12.0752   |
| 3.0248    | 2.53882   | 3.78184   | 2.6069    | 3.55528   | 1.94792   |
| 2.10711   | 2.52469   | 1.06653   | 2.28157   | 0.881057  | 1.2473    |
| 5.48088   | 5.78887   | 5.5191    | 5.90544   | 7.55276   | 6.73518   |
| 0.304576  | 0.276541  | 0.28188   | 0.538321  | 0.636839  | 0.494863  |
| 0         | 0         | 0.270112  | 0.244262  | 0.309644  | 0.340469  |
| 0.277662  | 0.207613  | 0.769591  | 1.13881   | 0.300758  | 0.326808  |
| 5.18564   | 4.97352   | 3.79197   | 6.62921   | 4.27668   | 5.47853   |
| 23.9009   | 26.2525   | 23.1841   | 22.7751   | 24.1948   | 24.2646   |
| 0         | 0         | 0         | 0         | 0         | 0         |

|           |           |           |           |          |           |
|-----------|-----------|-----------|-----------|----------|-----------|
| 80.7254   | 81.7586   | 89.0109   | 73.3507   | 93.5123  | 79.2208   |
| 34.9233   | 28.7577   | 42.0331   | 30.8622   | 43.2075  | 35.9473   |
| 0.13787   | 0.114651  | 0.232029  | 0.262457  | 0.24896  | 0.19303   |
| 0         | 0         | 0         | 0         | 0        | 0         |
| 0.0691537 | 0.129269  | 0.0871236 | 0.27575   | 0.168538 | 0.101742  |
| 0         | 0         | 0         | 0         | 0        | 0         |
| 0         | 0         | 0         | 0         | 0        | 0         |
| 13.464    | 12.9558   | 22.9224   | 24.1912   | 26.6562  | 26.6488   |
| 16.3942   | 15.5003   | 16.4305   | 15.2018   | 11.9112  | 11.8943   |
| 0.367495  | 0.46044   | 0.336825  | 0.453515  | 0.123478 | 0.179882  |
| 0         | 0         | 0         | 0         | 0        | 0         |
| 0.103163  | 0.128561  | 0.25994   | 0         | 0.111744 | 0.17346   |
| 0         | 0         | 0         | 0         | 0        | 0.0249353 |
| 3.56298   | 3.10813   | 3.20631   | 3.31698   | 6.88067  | 24.3886   |
| 143.774   | 154.402   | 126.176   | 148.339   | 119.876  | 135.974   |
| 0.251754  | 0.188241  | 0.444043  | 0.172092  | 0.245425 | 0.296314  |
| 2.71751   | 2.77096   | 3.05215   | 2.25694   | 4.27989  | 2.43642   |
| 23.4046   | 25.415    | 29.0068   | 27.7184   | 28.6547  | 25.1731   |
| 125.826   | 124.421   | 127.862   | 132.088   | 112.869  | 131.789   |
| 0.456678  | 0.390023  | 0.980599  | 0.504332  | 1.29625  | 0.549556  |
| 6.24199   | 6.93901   | 6.83631   | 5.93963   | 5.33981  | 5.15827   |
| 13.8917   | 17.8971   | 16.4438   | 16.289    | 14.9025  | 14.3711   |
| 8.01057   | 6.04085   | 8.02196   | 8.56468   | 8.94386  | 7.45984   |
| 4.81869   | 5.31542   | 5.63993   | 7.11696   | 6.43424  | 5.63193   |
| 9.51213   | 8.90249   | 9.35866   | 7.76658   | 10.3361  | 10.575    |
| 0.863148  | 1.38298   | 0.466046  | 1.19409   | 0.333909 | 0.57016   |
| 0.599994  | 0.401549  | 0.741907  | 0.240513  | 0.740165 | 0.308258  |
| 80.5183   | 42.2281   | 46.7346   | 46.2845   | 69.1865  | 38.5494   |
| 16.8117   | 15.8883   | 15.0619   | 13.689    | 13.7524  | 10.9412   |
| 1.55152   | 1.41609   | 2.1474    | 1.31949   | 1.94102  | 1.15741   |
| 0.065405  | 0.0407538 | 0.0206002 | 0.0186287 | 0.106268 | 0.0824802 |
| 83.9847   | 70.3765   | 122.231   | 118.269   | 99.2619  | 94.9011   |
| 0.139481  | 0.171687  | 0.708973  | 0.530443  | 0.543779 | 0.364204  |
| 0.226871  | 0.0565452 | 1.02897   | 0.310164  | 0.29489  | 0         |
| 8.58697   | 7.40669   | 7.16421   | 6.90363   | 10.2024  | 10.7709   |
| 2.19985   | 1.94474   | 2.41351   | 1.05481   | 3.2631   | 1.18508   |
| 18.5338   | 20.9857   | 19.8359   | 21.6138   | 18.7387  | 18.2627   |
| 13.5615   | 12.8223   | 11.0111   | 12.2225   | 11.7552  | 12.7989   |
| 33.8148   | 37.7055   | 27.3615   | 26.948    | 32.8708  | 39.2371   |
| 5.75701   | 5.59387   | 7.0775    | 5.40087   | 9.64471  | 6.17594   |
| 17.2208   | 16.252    | 18.3057   | 15.0505   | 19.8917  | 12.0821   |
| 1.43696   | 1.72363   | 1.694     | 1.52312   | 1.93937  | 1.19505   |
| 2.92723   | 4.32287   | 3.52028   | 3.40709   | 6.03245  | 5.45837   |

|           |           |           |           |           |           |
|-----------|-----------|-----------|-----------|-----------|-----------|
| 2.19427   | 2.3747    | 1.52773   | 2.30254   | 3.1899    | 2.30594   |
| 0.152397  | 0.151933  | 0.287997  | 0.156261  | 0.412683  | 0.230619  |
| 0         | 0         | 0         | 0         | 0         | 0         |
| 55.8705   | 56.567    | 57.6117   | 54.3569   | 48.2418   | 58.9166   |
| 9.80021   | 11.0126   | 9.41312   | 10.8229   | 6.48417   | 6.84775   |
| 14.2706   | 13.1081   | 13.0882   | 11.5027   | 12.1323   | 12.0634   |
| 0         | 0         | 0         | 0         | 0         | 0         |
| 0.229481  | 0.0357474 | 0.108417  | 0         | 0.0621423 | 0.0482318 |
| 13.9064   | 11.4379   | 16.2585   | 10.8051   | 16.7803   | 16.5314   |
| 0.458052  | 0.707821  | 0.577078  | 0.83496   | 0.416768  | 0.338879  |
| 28.866    | 29.8261   | 29.3963   | 28.4699   | 30.0054   | 25.3238   |
| 180.175   | 302.453   | 122.972   | 250.663   | 103.19    | 127.139   |
| 0         | 0         | 0         | 0         | 0         | 0         |
| 210.284   | 172.041   | 224.585   | 180.788   | 270.315   | 211.535   |
| 0.407293  | 0.284716  | 0         | 0         | 0         | 0         |
| 0.203772  | 0.12697   | 0.128361  | 0.116077  | 0         | 0         |
| 9.81524   | 9.01618   | 10.6448   | 11.1247   | 10.3029   | 10.3573   |
| 0.232223  | 0.289396  | 0.117027  | 0         | 0.25154   | 0.0390466 |
| 0.107997  | 0.403759  | 0.272122  | 0.376722  | 0.116981  | 0.183721  |
| 12.3715   | 11.2975   | 13.9117   | 10.8719   | 14.7295   | 11.9481   |
| 35.092    | 33.7918   | 34.8528   | 34.3279   | 35.3932   | 37.6716   |
| 0.01898   | 0.0473057 | 0         | 0         | 0         | 0         |
| 31.4226   | 31.0873   | 34.2153   | 27.6759   | 38.1521   | 29.855    |
| 0.105974  | 0.0247619 | 0.133512  | 0.184875  | 0.710954  | 0.202132  |
| 0.229412  | 0.259903  | 0.551777  | 0.356408  | 1.03916   | 0.771479  |
| 23.8068   | 22.1197   | 26.6989   | 16.1326   | 26.94     | 27.7542   |
| 1.01734   | 0.960463  | 0.880362  | 0.550252  | 1.35798   | 0.88121   |
| 0.85606   | 1.36842   | 1.39631   | 1.62986   | 0.84576   | 0.677331  |
| 8.40352   | 9.87491   | 5.4345    | 10.5294   | 7.35529   | 8.87507   |
| 4.59587   | 5.30312   | 3.21674   | 3.87852   | 3.13439   | 4.72243   |
| 0.132317  | 0.0392135 | 0.144499  | 0.0382392 | 0.157553  | 0.181079  |
| 0         | 0         | 0         | 0         | 0         | 0         |
| 0.0425985 | 0.0530862 | 0.0536679 | 0.0970635 | 0.0922837 | 0         |
| 149.006   | 132.421   | 142.093   | 111.17    | 176.96    | 166.643   |
| 2.3708    | 3.05636   | 2.72937   | 4.75005   | 3.36496   | 3.95195   |
| 9.22483   | 8.81936   | 10.5557   | 10.461    | 15.6097   | 12.6415   |
| 15.8805   | 15.5888   | 14.4099   | 15.6514   | 18.4301   | 22.9138   |
| 12.0078   | 10.8662   | 14.7242   | 12.7648   | 13.5325   | 10.9011   |
| 577.092   | 467.269   | 345.784   | 447.496   | 157.651   | 234.008   |
| 0.182036  | 0.136112  | 0.275206  | 0         | 0.394355  | 0.15304   |
| 2.86624   | 3.18749   | 3.09683   | 3.43354   | 2.91629   | 2.64753   |
| 9.07253   | 6.64232   | 8.87799   | 7.66007   | 19.3509   | 16.1425   |
| 0.673652  | 1.14664   | 0.1242    | 0.58029   | 0.231364  | 0.179574  |

|          |           |           |           |           |           |
|----------|-----------|-----------|-----------|-----------|-----------|
| 0.99173  | 0.560258  | 0.816284  | 0.346467  | 0.916658  | 1.04497   |
| 0.208794 | 0.0975743 | 0.493218  | 0.0892031 | 0.339241  | 0.131651  |
| 104.883  | 116.195   | 89.8763   | 88.6443   | 75.571    | 84.2916   |
| 15.3904  | 16.0403   | 14.2036   | 14.5242   | 10.5148   | 13.1197   |
| 4.3092   | 4.68991   | 4.70511   | 5.10578   | 6.06793   | 6.038     |
| 62.4909  | 54.8359   | 46.1196   | 51.0265   | 52.7192   | 56.1507   |
| 2.61973  | 2.52012   | 2.98201   | 1.95309   | 4.61987   | 3.36548   |
| 4.99571  | 6.48857   | 5.99695   | 6.75393   | 6.75729   | 6.69393   |
| 0        | 0         | 0         | 0         | 0         | 0         |
| 2.82363  | 1.70765   | 3.29579   | 2.79114   | 2.78863   | 2.23422   |
| 14.9042  | 19.8783   | 16.9149   | 20.2077   | 15.8103   | 19.0541   |
| 8.79837  | 8.81986   | 10.6147   | 8.89606   | 9.37191   | 7.62144   |
| 92.9139  | 95.2855   | 102.104   | 82.3939   | 104.622   | 88.5446   |
| 6.21E-95 | 2.63E-38  | 0         | 1.18E-36  | 9.46E-117 | 5.55E-160 |
| 24.1141  | 30.7142   | 21.1733   | 27.6826   | 22.3283   | 26.262    |
| 5.38468  | 5.80815   | 7.09746   | 5.38718   | 5.83258   | 5.42095   |
| 1.97326  | 1.32652   | 1.40458   | 1.67264   | 2.08267   | 1.95631   |
| 2.05935  | 2.44644   | 1.28512   | 1.79801   | 2.41827   | 2.41091   |
| 25.9134  | 25.6041   | 22.4441   | 25.6207   | 21.0442   | 22.7127   |
| 15.9134  | 17.645    | 18.6264   | 18.726    | 16.019    | 19.0588   |
| 7.49255  | 8.47704   | 8.72615   | 8.56746   | 10.6469   | 10.2328   |
| 2.31837  | 3.00195   | 1.31167   | 2.66821   | 1.76235   | 1.26953   |
| 31.5577  | 34.8068   | 27.7545   | 30.691    | 16.8163   | 22.7495   |
| 0.632945 | 0.260779  | 0.525103  | 0.211916  | 1.08234   | 0.625518  |
| 0        | 0         | 0         | 0         | 0         | 0         |
| 0        | 0         | 0         | 33.0091   | 0         | 0         |
| 1.06746  | 0.630129  | 0.849378  | 0.448053  | 2.37336   | 1.46423   |
| 0        | 0         | 0         | 0         | 0         | 0         |
| 28.5984  | 28.5794   | 27.6673   | 28.577    | 26.6152   | 25.4058   |
| 6.23313  | 5.23302   | 6.34841   | 6.34268   | 5.94142   | 6.32812   |
| 7.21889  | 5.76216   | 6.79232   | 7.24578   | 11.4865   | 9.85308   |
| 0.369472 | 0.115109  | 0.698222  | 0.210467  | 1.00051   | 0.427102  |
| 4.98697  | 4.57391   | 4.43937   | 4.25335   | 4.80483   | 5.12696   |
| 0.385955 | 0.320651  | 0.378192  | 0.488569  | 0.046451  | 0.108159  |
| 0        | 0.218126  | 0.441032  | 0.664707  | 0.126395  | 0.0981015 |
| 0.497799 | 0.370472  | 0.168388  | 0.607974  | 0.271567  | 0.252932  |
| 0        | 0.0141571 | 0.0143123 | 0.0517701 | 0.0123052 | 0.0095507 |
| 0        | 0         | 0         | 0         | 0         | 0         |
| 4.47611  | 4.50696   | 6.00702   | 4.63764   | 6.86861   | 6.06734   |
| 66.5039  | 69.2198   | 49.5659   | 50.3914   | 56.9624   | 54.8833   |
| 16.9683  | 16.4433   | 14.5791   | 13.7815   | 12.1125   | 12.1521   |
| 15.4867  | 14.8858   | 13.6059   | 13.9889   | 15.2782   | 15.1047   |
| 1.57687  | 1.53241   | 2.00485   | 0.873528  | 1.7237    | 1.07028   |

|          |          |           |          |           |           |
|----------|----------|-----------|----------|-----------|-----------|
| 6.04367  | 5.39105  | 7.61414   | 7.50151  | 11.8868   | 9.39982   |
| 87.7519  | 82.886   | 84.9442   | 83.6041  | 79.7424   | 82.2521   |
| 6.43273  | 7.68758  | 6.27564   | 6.38912  | 6.32462   | 7.68224   |
| 0        | 0        | 0         | 0        | 0         | 0         |
| 0        | 0        | 0         | 0        | 0         | 0         |
| 8.92256  | 8.78433  | 9.10422   | 10.8181  | 8.1581    | 7.45856   |
| 38.3515  | 34.7259  | 32.3882   | 29.4975  | 25.0067   | 27.1726   |
| 0        | 0        | 0         | 0        | 0         | 0         |
| 0        | 0        | 0         | 0        | 0         | 0         |
| 17.7094  | 12.9207  | 14.1331   | 13.4931  | 19.7134   | 18.3958   |
| 4.33152  | 4.99802  | 4.27227   | 5.42849  | 3.47337   | 4.91309   |
| 0        | 0        | 0         | 0        | 0         | 0         |
| 12.0915  | 13.2231  | 13.6417   | 15.697   | 13.8847   | 13.2559   |
| 28.9324  | 28.7651  | 33.3378   | 31.4491  | 39.022    | 28.7833   |
| 195.334  | 169.307  | 149.861   | 181.83   | 135.21    | 192.951   |
| 7.29708  | 10.9929  | 3.60748   | 6.05092  | 2.50128   | 2.83441   |
| 1.42271  | 1.22274  | 1.37521   | 1.13181  | 1.34177   | 0.907377  |
| 4.74801  | 3.87159  | 4.91099   | 4.30743  | 5.63502   | 4.47219   |
| 0.228118 | 0.35535  | 0.287395  | 0.194918 | 0.123546  | 0.119863  |
| 10.3702  | 9.25628  | 9.81613   | 7.9665   | 12.3071   | 10.0071   |
| 17.289   | 18.9254  | 19.7592   | 16.5572  | 23.5025   | 16.888    |
| 22.2908  | 19.7803  | 23.2206   | 22.5958  | 25.6638   | 21.0857   |
| 0.162131 | 0.202048 | 0.131036  | 0.132436 | 0.288278  | 0.200601  |
| 62.8578  | 66.0736  | 62.7762   | 65.7058  | 53.3761   | 55.3221   |
| 64.4944  | 76.3069  | 48.4594   | 54.1487  | 34.6714   | 46.7417   |
| 5.0112   | 6.6123   | 5.16212   | 7.79135  | 3.83155   | 4.7334    |
| 22.4768  | 23.1297  | 20.8688   | 25.3801  | 25.4273   | 28.156    |
| 62.5109  | 58.523   | 61.1517   | 61.1452  | 61.6267   | 67.0839   |
| 0.951481 | 0.592867 | 0.599364  | 0.38259  | 0.712344  | 0.505833  |
| 6.60107  | 6.73467  | 6.35153   | 6.48745  | 4.9501    | 8.65982   |
| 0        | 0        | 0.104068  | 0        | 0.0894742 | 0.0694456 |
| 0        | 0        | 0         | 0        | 0         | 0         |
| 0        | 0        | 0         | 0        | 0         | 0         |
| 4.67549  | 5.12353  | 5.23548   | 4.70557  | 3.15214   | 3.33682   |
| 5.38386  | 4.63655  | 5.3491    | 4.43823  | 3.60332   | 4.87586   |
| 82.5903  | 51.4057  | 59.3861   | 55.0707  | 40.8633   | 37.903    |
| 9.68887  | 8.33586  | 7.97551   | 9.365    | 9.16394   | 9.61034   |
| 0        | 0.259989 | 4.2054    | 4.75367  | 4.21827   | 3.09862   |
| 0        | 0        | 0         | 0        | 0         | 0         |
| 0.572394 | 1.38444  | 0.20047   | 0.314572 | 0.104265  | 0.271088  |
| 0.011524 | 0        | 0.0435557 | 0        | 0         | 0         |
| 6.31643  | 4.03027  | 11.3165   | 8.91751  | 17.057    | 17.7784   |
| 4.47986  | 5.3729   | 5.95316   | 6.28712  | 4.37121   | 3.45071   |

|           |           |           |           |           |           |
|-----------|-----------|-----------|-----------|-----------|-----------|
| 52.0777   | 50.423    | 40.8633   | 54.5208   | 51.0977   | 61.5156   |
| 0         | 0         | 0         | 0         | 0         | 0         |
| 8.83504   | 8.90088   | 8.55318   | 7.20485   | 10.1743   | 8.69434   |
| 17.1805   | 19.3086   | 21.017    | 19.3378   | 23.1414   | 23.3311   |
| 12.606    | 12.7708   | 12.9885   | 11.9995   | 12.158    | 11.6646   |
| 0.27123   | 4.53E-09  | 4.45E-09  | 0.20061   | 0.0996305 | 0.152961  |
| 0.0845097 | 0         | 0.0532349 | 0.0481402 | 0         | 0         |
| 0         | 0         | 0         | 0         | 0         | 0         |
| 0         | 0         | 43.9481   | 39.7422   | 37.7851   | 0         |
| 0         | 0         | 0         | 0         | 0         | 0         |
| 0         | 0         | 0         | 0         | 0         | 0         |
| 0         | 0         | 0         | 0         | 0         | 0         |
| 11.1166   | 11.4157   | 13.5634   | 8.62264   | 7.07281   | 6.40828   |
| 1.80516   | 1.37706   | 2.06744   | 1.94436   | 3.76804   | 2.81421   |
| 0         | 0         | 0         | 0         | 0         | 0         |
| 11.8045   | 11.5006   | 11.0711   | 12.1935   | 12.4744   | 13.2972   |
| 5.20044   | 4.57413   | 3.82128   | 4.94095   | 3.5126    | 3.93693   |
| 0.0848208 | 0         | 0.267154  | 0.19327   | 0.22969   | 0.106965  |
| 0         | 0         | 0         | 0         | 0         | 0         |
| 83.9105   | 104.584   | 97.0708   | 94.1898   | 115.272   | 105.43    |
| 2.98213   | 3.49381   | 3.17216   | 4.53669   | 2.4948    | 2.14684   |
| 3.62461   | 3.95843   | 2.72516   | 3.90744   | 2.49075   | 3.44045   |
| 0         | 0         | 0         | 0         | 0.0693803 | 0         |
| 0.116335  | 0.362442  | 0.439696  | 0.198808  | 0.504048  | 0.0978044 |
| 14.9597   | 11.821    | 21.611    | 13.6633   | 26.5919   | 23.643    |
| 0.218452  | 0.272234  | 0.412826  | 0.497757  | 0.118311  | 0.550965  |
| 2.80953   | 3.03339   | 2.48687   | 2.63518   | 1.61343   | 2.1482    |
| 44.4771   | 42.5364   | 46.3858   | 45.5539   | 44.6214   | 42.8557   |
| 2.98925   | 4.2111    | 2.56526   | 2.51718   | 2.70998   | 2.64058   |
| 0         | 0         | 0         | 0         | 0         | 0         |
| 0.192385  | 0         | 0.110736  | 0         | 0         | 0.474571  |
| 0         | 0         | 0         | 0         | 0         | 0         |
| 15.2467   | 13.0505   | 22.8545   | 20.6288   | 9.05033   | 14.3517   |
| 1.89925   | 1.33279   | 1.90493   | 1.68061   | 2.51661   | 2.99192   |
| 188.3     | 177.004   | 119.312   | 134.893   | 75.5469   | 112.798   |
| 0         | 0         | 0         | 0         | 0         | 0         |
| 43.2144   | 39.1525   | 44.28     | 36.6108   | 29.8472   | 27.7251   |
| 3.34089   | 2.53211   | 3.88765   | 2.72951   | 5.0213    | 2.77695   |
| 0.231161  | 0.0720181 | 0         | 0.131679  | 0.125194  | 0.485849  |
| 8.97626   | 9.60003   | 9.55585   | 9.27772   | 9.69462   | 8.45527   |
| 1.95303   | 2.43386   | 2.41229   | 2.1378    | 1.78364   | 2.09266   |
| 0         | 0         | 0         | 0         | 0         | 0         |
| 0.65085   | 18.5055   | 0.279964  | 171.045   | 1.22387   | 13.7023   |

|           |           |            |           |           |           |
|-----------|-----------|------------|-----------|-----------|-----------|
| 67.2527   | 59.0671   | 58.9872    | 58.5499   | 59.8679   | 69.8164   |
| 6.79887   | 6.09784   | 7.87559    | 5.18494   | 8.99452   | 6.17911   |
| 0         | 0         | 0          | 0         | 0.446601  | 0.173315  |
| 13.843    | 14.7481   | 13.5092    | 12.1098   | 21.9081   | 18.6712   |
| 0.153131  | 0         | 0.192923   | 0         | 0         | 0.0643696 |
| 0         | 0         | 0.147389   | 0.799699  | 0         | 0         |
| 4.1801    | 4.19324   | 2.37181    | 3.6907    | 1.69112   | 2.71845   |
| 1.18122   | 0.846489  | 2.65883    | 1.25993   | 1.58788   | 0.592146  |
| 0         | 0         | 0          | 0         | 0         | 0         |
| 4.07482   | 6.40998   | 3.61882    | 3.80522   | 3.54548   | 4.82975   |
| 1.5596    | 1.94358   | 2.40151    | 3.55366   | 3.19096   | 2.76804   |
| 0         | 0         | 0          | 0.274098  | 0         | 0         |
| 0.0177409 | 0.0221087 | 0.044702   | 0.141484  | 0         | 0.02983   |
| 0         | 0         | 0          | 0         | 0         | 0         |
| 0         | 0         | 0          | 0         | 0         | 0         |
| 28.287    | 38.0035   | 39.5972    | 43.0659   | 34.0903   | 39.2782   |
| 1.39624   | 0.964192  | 2.23485    | 2.00243   | 1.67029   | 1.30301   |
| 8.97199   | 7.48233   | 8.71878    | 8.67905   | 7.83684   | 10.1683   |
| 11.8534   | 6.50922   | 12.5523    | 8.55319   | 15.0999   | 10.5991   |
| 75.1581   | 79.8085   | 62.3208    | 75.0772   | 77.6495   | 92.4816   |
| 9.54408   | 8.78015   | 11.8482    | 8.15063   | 11.128    | 7.98468   |
| 15.0168   | 11.7554   | 15.5542    | 12.0089   | 18.2526   | 20.7165   |
| 0         | 0.169581  | 0.228589   | 0.0387565 | 0         | 0.0285997 |
| 0         | 0         | 0.0805177  | 0         | 0         | 0         |
| 0         | 0         | 0          | 0         | 0         | 0.0288573 |
| 86.1226   | 93.8747   | 62.4392    | 56.7693   | 90.624    | 91.4165   |
| 2.57806   | 2.34043   | 2.73175    | 2.43141   | 3.3473    | 2.00952   |
| 0.958536  | 1.34207   | 1.09099    | 0.936607  | 0.960841  | 0.728027  |
| 0         | 0.041323  | 0          | 0.0755555 | 0.0359174 | 0         |
| 0         | 0         | 0          | 0         | 0         | 0         |
| 10.4315   | 10.659    | 9.74672    | 7.85986   | 7.94795   | 7.49308   |
| 0         | 0         | 0          | 0         | 0         | 0         |
| 0.0491934 | 0.106779  | 0.00683196 | 0.0566672 | 0.010573  | 0         |
| 22.6142   | 21.4753   | 24.5254    | 20.5625   | 24.1164   | 25.1044   |
| 3.12219   | 2.04174   | 2.39515    | 2.00745   | 2.86289   | 1.97514   |
| 12.1527   | 12.8078   | 16.9139    | 12.5443   | 14.0764   | 15.9099   |
| 0.630219  | 0.384675  | 0.567131   | 0.468896  | 0.58512   | 0.529832  |
| 38.183    | 34.8287   | 38.7314    | 35.1441   | 35.3045   | 35.9817   |
| 0         | 0.40396   | 0.204193   | 0.184651  | 1.22891   | 0.40878   |
| 4.386     | 4.71344   | 1.62791    | 1.49778   | 3.91726   | 4.31306   |
| 0.449455  | 0.286166  | 0.28242    | 0.14514   | 0.362123  | 0.0663616 |
| 6.05332   | 5.17735   | 6.51113    | 5.33498   | 6.77333   | 6.25335   |
| 0.0514296 | 0         | 0          | 0         | 0         | 0         |

|           |           |           |           |           |           |
|-----------|-----------|-----------|-----------|-----------|-----------|
| 1.53826   | 1.62206   | 1.40131   | 1.59075   | 1.40987   | 0.974902  |
| 10.5273   | 10.5629   | 16.5899   | 12.0309   | 13.9403   | 9.35004   |
| 8.26201   | 7.52573   | 11.6502   | 9.90685   | 13.6695   | 11.6541   |
| 155.768   | 137.653   | 150.887   | 160.815   | 153.205   | 156.694   |
| 0         | 0         | 0         | 0.03549   | 0         | 0         |
| 0         | 0         | 0         | 0         | 0         | 0         |
| 0.178997  | 0         | 0.0563774 | 0         | 0.0484714 | 0.0752424 |
| 0.0432943 | 0.0269766 | 0         | 0         | 0         | 0         |
| 0.160224  | 0.366064  | 0.269146  | 0.0608469 | 0.202477  | 0.0673513 |
| 7.15919   | 6.30225   | 6.99442   | 6.64904   | 6.91091   | 7.16229   |
| 0.380978  | 0.647419  | 0.82905   | 0.4735    | 0.375152  | 0.145588  |
| 0         | 0         | 0         | 0         | 0         | 0         |
| 2.45715   | 1.56558   | 2.37411   | 1.97852   | 3.28189   | 2.87342   |
| 11.3775   | 14.2649   | 15.1205   | 12.9622   | 12.1735   | 12.4814   |
| 0.316008  | 0.321887  | 0.441482  | 0.370188  | 0.556746  | 0.325921  |
| 0         | 0         | 0         | 0         | 0         | 0         |
| 23.4843   | 26.8227   | 25.6929   | 23.2784   | 30.6941   | 27.3059   |
| 0         | 0         | 0         | 0         | 0         | 0         |
| 10.8185   | 11.1897   | 16.4959   | 12.9871   | 23.3843   | 23.0331   |
| 0.197767  | 0.143766  | 0.437973  | 0.273818  | 0.423206  | 0.148513  |
| 7.72856   | 8.80141   | 8.19132   | 7.82668   | 8.58023   | 8.50126   |
| 26.7767   | 27.0239   | 27.867    | 21.9053   | 27.3652   | 23.6603   |
| 13.811    | 13.7098   | 13.5078   | 12.9636   | 15.0053   | 14.9252   |
| 0         | 0.262289  | 0         | 0         | 0.113989  | 0         |
| 3.37881   | 3.77684   | 3.27645   | 3.0562    | 3.30496   | 3.25378   |
| 0.129623  | 0.161536  | 0.367438  | 0.0738385 | 0.438765  | 0.0544877 |
| 0         | 0         | 0         | 0         | 0         | 0         |
| 56.3778   | 46.8386   | 118.38    | 42.8202   | 142.49    | 94.795    |
| 27.51     | 29.7445   | 24.829    | 28.7519   | 26.4646   | 27.9608   |
| 0.0777573 | 0.276497  | 0.255903  | 0.293062  | 0.522744  | 0.430546  |
| 0.0793988 | 0.0247367 | 0         | 0         | 0.205769  | 0.0511067 |
| 0.22139   | 0.551791  | 0.278919  | 0         | 0.359707  | 0.186125  |
| 5.75299   | 5.08121   | 4.92578   | 4.3271    | 6.57436   | 4.80531   |
| 106.816   | 129.56    | 176.476   | 178.4     | 116.05    | 139.421   |
| 2.54083   | 2.87259   | 4.4551    | 3.43189   | 3.40475   | 3.06102   |
| 14.8988   | 14.9476   | 15.6701   | 13.9786   | 12.3041   | 13.637    |
| 0.0739114 | 0         | 0.0620784 | 1.71219   | 0.133432  | 0.144989  |
| 3.6746    | 2.77564   | 4.76948   | 2.02987   | 4.58427   | 2.05959   |
| 54.8442   | 59.5472   | 55.7142   | 59.4783   | 52.1934   | 59.2487   |
| 132.155   | 100.87    | 118.502   | 95.3109   | 136.527   | 117.064   |
| 16.7275   | 14.276    | 12.7845   | 15.1736   | 13.1813   | 16.0625   |
| 0.809313  | 1.14147   | 1.51117   | 0.920929  | 0.683826  | 1.21761   |
| 11.6448   | 10.7766   | 13.8001   | 11.8108   | 10.4267   | 8.45471   |



|           |           |           |           |           |           |
|-----------|-----------|-----------|-----------|-----------|-----------|
| 0.104944  | 0         | 0         | 0.119561  | 0         | 0.117691  |
| 13.412    | 14.6543   | 15.1374   | 13.7014   | 12.454    | 12.5389   |
| 10.3318   | 9.96003   | 11.4974   | 10.6906   | 11.4424   | 9.76045   |
| 1.65518   | 0         | 1.04264   | 0         | 0.448214  | 1.73941   |
| 154.116   | 137.988   | 99.7442   | 143.804   | 105.899   | 112.987   |
| 0         | 0         | 0         | 0         | 0         | 0         |
| 22.9686   | 23.2569   | 24.0047   | 23.1942   | 24.0312   | 23.5891   |
| 0         | 0         | 0         | 0         | 0         | 0         |
| 15.4316   | 15.7416   | 18.0338   | 16.2787   | 17.1395   | 16.6502   |
| 0.0635366 | 0.0891582 | 0.0496834 | 0.0299421 | 0.0189784 | 0.0761887 |
| 11.053    | 11.3638   | 11.3934   | 9.84507   | 10.8296   | 10.2428   |
| 15.083    | 11.2828   | 13.9218   | 17.0712   | 22.1403   | 15.5722   |
| 0         | 0         | 0         | 0         | 0         | 0         |
| 0         | 0         | 0         | 0         | 0         | 0         |
| 0.499002  | 0.238157  | 0.749053  | 0.157246  | 0.448507  | 0.214221  |
| 10.5317   | 10.4541   | 11.6399   | 7.76609   | 12.7391   | 9.11761   |
| 80.3588   | 95.2204   | 69.4375   | 80.8633   | 60.3685   | 66.3133   |
| 3.25786   | 1.69801   | 1.6231    | 0.861535  | 1.67733   | 1.08311   |
| 0         | 0         | 0         | 0         | 0.0439357 | 0         |
| 7.68E-08  | 4.39E-09  | 1.35E-08  | 2.99E-06  | 6.03E-08  | 7.65E-08  |
| 14.9977   | 15.6874   | 16.9164   | 15.9364   | 16.5094   | 13.5882   |
| 11.909    | 12.0942   | 13.0657   | 13.0545   | 14.1238   | 14.7845   |
| 0         | 0         | 0         | 0         | 0         | 0.0306467 |
| 15.8909   | 14.7934   | 15.5244   | 13.1094   | 15.7454   | 14.0944   |
| 6.07643   | 4.96406   | 7.12178   | 6.25253   | 10.1662   | 10.0351   |
| 0         | 0.0341329 | 0.138028  | 0         | 0.0296678 | 0.0230268 |
| 0         | 0         | 0         | 0.075405  | 0         | 0         |
| 62.9922   | 57.7223   | 64.2886   | 62.1877   | 60.155    | 63.2369   |
| 0         | 0.0317903 | 0         | 0         | 0         | 0.0214464 |
| 2.1396    | 1.53728   | 2.93823   | 2.33383   | 3.85884   | 3.06992   |
| 53.7188   | 60.0784   | 59.0985   | 68.3295   | 65.1608   | 75.4134   |
| 46.417    | 44.0767   | 36.1817   | 37.8358   | 36.7708   | 44.1455   |
| 3.29473   | 3.85892   | 1.9819    | 3.11764   | 0.9259    | 0.92686   |
| 0         | 0.202542  | 0.0501456 | 0.0453465 | 0.344908  | 0.0334626 |
| 5.81686   | 5.05748   | 5.07881   | 3.72971   | 8.68423   | 6.07308   |
| 0.0739747 | 0         | 0.0310658 | 0.084278  | 0.0267093 | 0.0414609 |
| 0.0636969 | 0.105839  | 0.133748  | 0.0241896 | 0.0459968 | 0.0535507 |
| 1.40036   | 1.29269   | 1.17617   | 0.906035  | 0.730332  | 0.479641  |
| 4.42857   | 4.84379   | 4.40021   | 5.21338   | 4.16403   | 4.58067   |
| 4.81793   | 4.45164   | 4.76268   | 4.69628   | 4.00798   | 4.31023   |
| 0         | 0.382841  | 0         | 0         | 0         | 0         |
| 2.99644   | 2.59069   | 5.49712   | 3.52019   | 3.428     | 3.24302   |
| 10.0998   | 12.6529   | 7.41805   | 8.3254    | 9.22271   | 10.5269   |

|           |           |          |          |          |          |
|-----------|-----------|----------|----------|----------|----------|
| 19.0213   | 26.0676   | 28.4568  | 49.0304  | 15.346   | 33.2546  |
| 27.3259   | 26.866    | 28.9181  | 35.7708  | 30.5581  | 26.9898  |
| 64.7059   | 60.991    | 51.6044  | 59.2902  | 49.7975  | 68.8721  |
| 11.6531   | 10.8427   | 7.85492  | 8.94349  | 9.06047  | 10.1375  |
| 69.1421   | 59.0317   | 75.8389  | 64.8891  | 90.6013  | 57.9096  |
| 0.3792    | 0.177209  | 0.119434 | 0.324012 | 0.966914 | 0.518046 |
| 74.4128   | 66.9977   | 63.7986  | 57.6929  | 67.2411  | 64.0527  |
| 7.20738   | 5.19912   | 4.17193  | 3.62719  | 7.26514  | 3.41785  |
| 0.577015  | 0.647168  | 1.01774  | 0.723122 | 0.875016 | 0.776166 |
| 0         | 0.870384  | 0.293307 | 0.530474 | 0        | 0        |
| 41.6517   | 45.6215   | 46.2343  | 44.4042  | 46.3703  | 46.1746  |
| 1.59462   | 1.62951   | 1.3929   | 1.2717   | 1.3818   | 1.51936  |
| 0         | 0         | 0        | 0        | 0        | 0        |
| 3.02926   | 3.89199   | 2.07412  | 2.54239  | 1.69193  | 2.11291  |
| 13.2307   | 13.994    | 12.8984  | 13.0975  | 14.3341  | 12.7214  |
| 0.790173  | 0.680162  | 0.841559 | 0.881669 | 0.802957 | 0.65746  |
| 0         | 0         | 0        | 0        | 0        | 0        |
| 0         | 0.204862  | 0        | 0        | 0        | 0        |
| 64.3654   | 60.9908   | 67.0449  | 47.6342  | 73.2511  | 62.3239  |
| 6.91346   | 6.74221   | 7.87738  | 5.87419  | 8.10994  | 5.85497  |
| 56.1995   | 59.1964   | 43.8138  | 55.1895  | 41.3226  | 37.9282  |
| 0.0657994 | 0.131201  | 5.38882  | 0.479778 | 0.442698 | 0.231281 |
| 0.160379  | 2.78E-06  | 0.942213 | 0.260636 | 0        | 0.159727 |
| 0         | 0         | 0        | 0        | 0.134649 | 0.104508 |
| 0.0149991 | 0.0186919 | 0        | 0        | 0        | 0        |
| 0.798543  | 4.88907   | 1.15868  | 0.385336 | 1.99464  | 0.768326 |
| 89.6914   | 85.864    | 82.4711  | 98.1218  | 75.8739  | 90.3478  |
| 9.18661   | 9.89064   | 13.8671  | 13.3557  | 10.8972  | 9.49853  |
| 39.8548   | 42.7117   | 43.8483  | 41.8826  | 50.3054  | 52.4749  |
| 143.188   | 110.878   | 125.643  | 95.2583  | 190.341  | 135.865  |
| 4.45888   | 4.88779   | 7.17796  | 7.80803  | 6.35024  | 5.41469  |
| 23.9762   | 25.2085   | 24.1197  | 26.0932  | 22.2305  | 30.3263  |
| 12.3004   | 11.4552   | 11.2402  | 12.3848  | 11.4565  | 12.0203  |
| 0         | 0         | 0        | 0        | 0        | 0        |
| 0.389051  | 0.370756  | 0.461315 | 0.260729 | 0.520568 | 0.6734   |
| 44.5862   | 43.817    | 42.8561  | 43.0164  | 38.9011  | 46.6366  |
| 0.541804  | 0.698479  | 0.376604 | 0.308634 | 0.758886 | 0.416234 |
| 4.16113   | 5.40165   | 4.9366   | 4.46416  | 6.3477   | 5.42238  |
| 13.8185   | 13.8236   | 18.193   | 15.5646  | 17.6909  | 16.6016  |
| 14.9424   | 15.453    | 14.3793  | 13.7931  | 16.0601  | 16.5828  |
| 30.5978   | 29.7028   | 26.6318  | 27.3856  | 36.2248  | 34.0586  |
| 2.37404   | 3.17753   | 2.10399  | 2.90491  | 3.42814  | 3.10361  |
| 0.25329   | 0.458201  | 0.169848 | 0.186174 | 0.367286 | 0.16486  |

|           |           |           |           |           |           |
|-----------|-----------|-----------|-----------|-----------|-----------|
| 0         | 0         | 0         | 0         | 0         | 0         |
| 4.55737   | 6.24924   | 6.80829   | 4.84033   | 6.41524   | 4.85946   |
| 3.39133   | 4.0399    | 1.83356   | 4.48842   | 1.67613   | 2.05492   |
| 22.7608   | 25.3995   | 27.2765   | 29.7257   | 27.4029   | 28.4695   |
| 6.82188   | 5.01647   | 7.50915   | 4.92292   | 6.49699   | 6.15778   |
| 0.122153  | 0.213118  | 0.123116  | 0.12525   | 0.410173  | 0.143774  |
| 0         | 0         | 0.589368  | 0.177655  | 0         | 0         |
| 0.570679  | 1.47566   | 0.980378  | 1.20056   | 0.789026  | 0.586372  |
| 0.262152  | 0.178197  | 0.150124  | 0.19006   | 0.0516287 | 0.180323  |
| 9.28741   | 9.0144    | 11.3871   | 9.69927   | 13.6066   | 10.8111   |
| 0         | 0         | 0         | 0         | 0         | 0         |
| 0         | 0         | 0         | 0         | 0         | 0         |
| 0.761137  | 0.435533  | 0.440305  | 0.325034  | 0.51566   | 0.347009  |
| 305.866   | 306.732   | 314.93    | 323.487   | 296.795   | 341.261   |
| 0.0198088 | 0.0246856 | 0.0249561 | 0         | 0.0429129 | 0         |
| 6.48413   | 5.79399   | 6.80006   | 6.67694   | 9.05912   | 7.72764   |
| 155.874   | 156.762   | 155.205   | 152.717   | 121.02    | 132.415   |
| 8.17564   | 7.38524   | 8.80916   | 6.30907   | 9.15903   | 6.88855   |
| 0         | 0         | 0         | 0         | 0         | 0         |
| 5.5817    | 5.35294   | 3.51637   | 2.12978   | 4.45328   | 3.0952    |
| 3.48075   | 3.4703    | 4.00599   | 3.02601   | 4.66332   | 3.26308   |
| 0         | 0         | 0         | 0         | 0         | 0.0188593 |
| 41.321    | 55.6557   | 33.6302   | 52.7696   | 26.7988   | 42.9709   |
| 0         | 0         | 0.140583  | 0.190975  | 0         | 0         |
| 6.03926   | 6.22407   | 9.09836   | 7.25953   | 8.54213   | 5.74919   |
| 0         | 0         | 0.0695428 | 0         | 0         | 0         |
| 30.4065   | 27.9155   | 17.4594   | 13.2389   | 14.1538   | 14.1706   |
| 0         | 0         | 0         | 0         | 0         | 0         |
| 16.1198   | 17.0785   | 16.3726   | 15.3142   | 17.6313   | 15.6269   |
| 8.1977    | 9.31417   | 5.53841   | 5.94739   | 12.5686   | 12.7748   |
| 5.46326   | 157.501   | 4.67618   | 878.119   | 3.79455   | 56.9045   |
| 0.194765  | 0.0910184 | 0.0613439 | 0.0554731 | 0.342819  | 0.122806  |
| 10.7206   | 11.7817   | 11.4434   | 10.9749   | 11.6123   | 11.5189   |
| 2.58779   | 2.66946   | 2.72385   | 2.03117   | 2.15453   | 1.99662   |
| 26.1304   | 22.1825   | 38.5599   | 40.0874   | 51.5041   | 37.13     |
| 1.79979   | 2.16379   | 3.05224   | 1.93859   | 2.55723   | 2.17456   |
| 6.0628    | 5.97408   | 4.17439   | 6.86709   | 5.68895   | 10.2534   |
| 11.0836   | 12.6296   | 9.97116   | 10.703    | 11.9881   | 12.2934   |
| 0         | 0         | 0         | 0         | 0         | 0         |
| 0         | 0         | 0         | 0         | 0         | 0         |
| 0         | 0         | 0         | 0         | 0.0833775 | 0         |
| 0.673848  | 0.873338  | 0.713118  | 0.82912   | 0.78829   | 0.815777  |
| 0.364886  | 0.727552  | 0.275822  | 0.249425  | 0.474284  | 0.122706  |

|          |           |           |          |          |          |
|----------|-----------|-----------|----------|----------|----------|
| 0.797781 | 0.932056  | 0.879452  | 1.07932  | 0.918149 | 0.293433 |
| 0.1163   | 0         | 0.0224825 | 0.211951 | 0.100797 | 0.104312 |
| 5.09909  | 4.30877   | 6.57921   | 4.14951  | 8.29039  | 4.5025   |
| 52.931   | 61.2977   | 51.8094   | 56.7278  | 59.4032  | 86.2451  |
| 2.09106  | 1.78297   | 3.09662   | 1.33744  | 2.50342  | 1.85051  |
| 123.518  | 122.57    | 128.37    | 124.087  | 114.763  | 107.114  |
| 3.97894  | 3.12604   | 4.27729   | 4.34836  | 4.74323  | 3.79055  |
| 3.7471   | 3.94324   | 4.19626   | 3.64288  | 4.6721   | 3.20623  |
| 0        | 0.0657204 | 0.465084  | 0.060082 | 0.34274  | 0        |
| 3.25112  | 3.05101   | 1.96927   | 2.82725  | 2.44678  | 2.92703  |
| 0        | 0         | 0         | 0        | 0        | 0        |
| 31.0867  | 31.8782   | 24.8444   | 28.9069  | 21.9547  | 27.0122  |
| 0        | 0         | 0         | 0        | 0        | 0        |
| 1.50071  | 2.10378   | 1.35456   | 2.23937  | 3.08893  | 2.62668  |
| 16.3712  | 17.2661   | 16.7581   | 18.9141  | 16.616   | 16.2725  |
| 19.4641  | 19.7171   | 22.8586   | 21.0561  | 21.2156  | 20.3737  |
| 20.2079  | 20.4481   | 19.9178   | 19.2679  | 19.8491  | 20.3129  |
| 12.8766  | 14.785    | 14.7577   | 11.7338  | 14.2453  | 12.2072  |
| 4.42521  | 4.28783   | 5.7468    | 4.74063  | 4.98213  | 4.39341  |
| 6.43282  | 6.35497   | 7.04807   | 5.96619  | 7.56344  | 5.67393  |
| 7.54494  | 7.51896   | 7.83383   | 6.25878  | 7.72523  | 7.20177  |
| 3.50409  | 3.04116   | 3.03507   | 1.39012  | 4.60889  | 2.78811  |
| 12.6048  | 12.2797   | 10.4398   | 9.09875  | 9.84264  | 9.89616  |
| 0        | 0         | 0         | 0        | 0        | 0        |
| 23.0429  | 28.1962   | 20.2701   | 36.9653  | 19.5135  | 23.3145  |
| 0        | 0         | 0         | 0        | 0        | 0        |
| 0.857125 | 0.534074  | 0.87738   | 0.854444 | 0.290131 | 0.720595 |
| 1.73541  | 2.12368   | 1.80711   | 1.51357  | 1.81563  | 1.49683  |
| 29.0999  | 29.4959   | 29.3156   | 27.0895  | 25.3521  | 40.8737  |
| 0.147928 | 0.368695  | 1.1182    | 0.337063 | 0.801162 | 0.870553 |
| 97.4913  | 102.529   | 104.617   | 96.9081  | 86.9174  | 86.5139  |
| 13.6472  | 15.6028   | 15.4058   | 14.7397  | 14.9632  | 14.8066  |
| 0.192902 | 0.0948224 | 0.27639   | 0.210978 | 0.290166 | 0.20745  |
| 1.51111  | 0.355022  | 1.6151    | 1.3253   | 1.23432  | 1.02621  |
| 0        | 0         | 0         | 0        | 0        | 0        |
| 0.356498 | 0.0892199 | 0.179752  | 0.313261 | 0.262916 | 0.301211 |
| 1.98253  | 2.28166   | 1.35011   | 1.34299  | 1.50901  | 1.39646  |
| 0        | 0         | 0         | 0        | 0        | 0        |
| 8.32607  | 7.86694   | 10.9478   | 8.95301  | 8.37143  | 8.33209  |
| 2.6624   | 4.69243   | 3.4433    | 7.65071  | 2.20756  | 2.86257  |
| 0        | 0         | 0         | 0        | 0        | 0        |
| 0        | 0         | 0         | 0        | 0        | 0        |
| 0        | 0         | 0         | 0        | 0        | 0.103836 |

|           |           |           |          |           |           |
|-----------|-----------|-----------|----------|-----------|-----------|
| 1.1392    | 1.20672   | 1.00466   | 0.389361 | 1.97433   | 0.814077  |
| 22.1104   | 23.4248   | 19.0388   | 20.8859  | 20.6959   | 21.1659   |
| 15.0245   | 16.9572   | 13.9287   | 18.2476  | 14.8925   | 15.8487   |
| 1.37347   | 0.708255  | 1.07402   | 1.45685  | 2.20592   | 1.95103   |
| 8.18267   | 6.82696   | 6.72704   | 5.58289  | 6.76015   | 5.5384    |
| 2.45864   | 1.96093   | 2.18892   | 3.95887  | 2.94722   | 3.74818   |
| 10.015    | 9.4837    | 10.3236   | 10.8595  | 6.97751   | 7.2251    |
| 0         | 0         | 0         | 0        | 0.0387258 | 0.0300571 |
| 0.379328  | 0.61817   | 0.845512  | 0.897567 | 0.790154  | 0.760467  |
| 7.02322   | 7.37765   | 6.81909   | 6.06044  | 6.81083   | 5.79116   |
| 13.6206   | 13.5687   | 12.0226   | 14.1767  | 14.1616   | 20.2514   |
| 10.5484   | 11.802    | 9.36603   | 11.1744  | 13.0152   | 9.18336   |
| 48.8438   | 46.7868   | 39.8899   | 35.8335  | 41.9461   | 37.4886   |
| 0.068797  | 0.0219397 | 0         | 0.125359 | 0.101706  | 0.0514119 |
| 0.498252  | 0.590383  | 0.638015  | 0.707235 | 0.495458  | 0.590561  |
| 4.44353   | 4.16771   | 5.71606   | 4.87593  | 5.06646   | 4.58118   |
| 0         | 0         | 0         | 0        | 0         | 0         |
| 3.58415   | 2.80911   | 3.53626   | 2.74326  | 4.35642   | 3.82012   |
| 17.0583   | 0         | 0         | 0        | 0         | 0         |
| 15.7538   | 16.5019   | 17.9796   | 13.0664  | 20.2383   | 18.4965   |
| 8.11516   | 7.90617   | 8.13991   | 7.09484  | 10.4765   | 6.31533   |
| 0.208182  | 0.302675  | 0.0437131 | 0        | 0.037583  | 0         |
| 0         | 0         | 0         | 0        | 0         | 0.0945153 |
| 14.8852   | 13.511    | 14.6131   | 14.3084  | 19.3574   | 14.0879   |
| 5.1481    | 5.38735   | 5.473     | 4.36757  | 2.211     | 2.00859   |
| 3.17643   | 2.23047   | 4.36114   | 2.70014  | 4.46326   | 4.79527   |
| 5.26875   | 6.04161   | 6.58023   | 5.72005  | 6.70442   | 4.98227   |
| 0.653524  | 0.40721   | 0.411672  | 0.54149  | 0.353942  | 0.599373  |
| 0.653967  | 0.488984  | 1.09854   | 0.298022 | 1.18061   | 0.549798  |
| 1.815     | 2.45211   | 2.13705   | 1.46872  | 2.3702    | 1.36903   |
| 0.689868  | 1.38396   | 0.33973   | 0.916743 | 1.4803    | 1.38457   |
| 5.31379   | 4.71873   | 2.07461   | 4.77653  | 1.67307   | 2.68615   |
| 0         | 0         | 0         | 0        | 0         | 0         |
| 2.21049   | 2.20058   | 1.57509   | 3.32305  | 1.90186   | 2.50008   |
| 0.84361   | 5.04627   | 1.27539   | 2027.94  | 0.182756  | 32.9084   |
| 4.36151   | 4.6223    | 5.29011   | 3.33191  | 5.83178   | 3.73254   |
| 3.42816   | 2.14776   | 4.88541   | 2.66779  | 4.24089   | 2.06314   |
| 138.847   | 131.988   | 115.727   | 133.758  | 104.424   | 120.994   |
| 0.0336643 | 0.0494438 | 0.0860359 | 0.072323 | 0.0338598 | 0.0574125 |
| 13.6491   | 8.78691   | 9.05857   | 5.97244  | 10.3588   | 7.26923   |
| 0.091748  | 0.0549943 | 0.116621  | 0.344109 | 0.405854  | 0.398121  |
| 11.3958   | 10.8779   | 11.6874   | 9.36365  | 12.2153   | 10.5747   |
| 2.45659   | 2.53779   | 3.09494   | 2.24627  | 2.27569   | 1.71194   |

|           |           |           |           |           |          |
|-----------|-----------|-----------|-----------|-----------|----------|
| 5.87135   | 4.33885   | 8.51358   | 6.40065   | 5.72547   | 6.45288  |
| 0         | 0         | 0         | 0         | 0         | 0        |
| 4.65356   | 3.71434   | 4.04423   | 4.28353   | 5.71406   | 4.37558  |
| 0.697904  | 0.638486  | 0.850022  | 0.847992  | 0.982256  | 0.645273 |
| 0         | 0         | 0         | 0         | 0         | 0        |
| 19.6907   | 20.1604   | 0.0142249 | 0         | 0.0122301 | 0        |
| 13.5442   | 15.0703   | 11.3397   | 17.2824   | 11.8313   | 10.3657  |
| 0         | 0         | 0         | 0         | 0         | 0        |
| 0.211449  | 0         | 0         | 0.2409    | 0         | 0        |
| 6.81415   | 6.2734    | 5.80904   | 5.36947   | 5.53178   | 5.50793  |
| 44.9515   | 45.9706   | 47.7826   | 43.4294   | 47.2002   | 54.1632  |
| 0         | 0         | 0         | 0         | 0         | 0        |
| 1.3819    | 1.13007   | 1.98727   | 0.737943  | 1.61703   | 1.39792  |
| 3.32493   | 2.7695    | 2.65877   | 2.20805   | 2.3419    | 2.13631  |
| 56.4115   | 58.0873   | 57.3659   | 58.3556   | 48.5489   | 47.9137  |
| 0.120597  | 0.150287  | 0.303868  | 0.755666  | 0.979709  | 0.152081 |
| 2.846     | 1.14722   | 3.4189    | 1.2265    | 4.03733   | 2.94708  |
| 13.6703   | 14.2201   | 16.7904   | 12.0621   | 15.8917   | 11.6885  |
| 0         | 0         | 0         | 0         | 0.107694  | 0        |
| 29.5785   | 29.5546   | 40.7953   | 40.2544   | 39.5797   | 37.2302  |
| 0.995836  | 0.545186  | 1.23275   | 0.921976  | 1.21116   | 0.586939 |
| 0.287085  | 0.357764  | 0.542527  | 0.367954  | 0.699669  | 0.241355 |
| 0         | 0         | 0         | 0         | 0         | 0        |
| 0.403567  | 0.241875  | 0.508435  | 0.24266   | 0.561457  | 0.371435 |
| 67.2457   | 61.3056   | 73.7607   | 66.2411   | 62.7898   | 71.4052  |
| 14.7318   | 18.139    | 15.6752   | 12.6148   | 16.7769   | 13.9792  |
| 0         | 0         | 0         | 0         | 0         | 0        |
| 0.98169   | 0.810837  | 1.51691   | 1.28836   | 2.91578   | 1.84922  |
| 0         | 0         | 0.0779022 | 0         | 0         | 0        |
| 96.0708   | 74.5108   | 92.8243   | 74.6275   | 93.299    | 72.05    |
| 0.14449   | 0         | 0         | 0         | 0         | 0        |
| 165.011   | 161.628   | 218.697   | 243.692   | 154.773   | 185.956  |
| 0         | 0         | 0         | 0         | 0         | 0        |
| 4.34067   | 3.90365   | 4.90484   | 3.77267   | 5.04103   | 3.9126   |
| 0.119863  | 0.0331934 | 0.0671153 | 0.0303456 | 0.259668  | 0.100771 |
| 27.574    | 29.3523   | 27.4144   | 25.298    | 24.3056   | 23.5099  |
| 4.49735   | 4.55799   | 6.42982   | 6.11453   | 5.29668   | 4.97585  |
| 33.6193   | 32.0102   | 32.5441   | 28.7426   | 32.7086   | 27.2148  |
| 0.0523462 | 0.036694  | 0.0164871 | 0.0298186 | 0.113401  | 0.011002 |
| 7.01524   | 7.83489   | 7.90839   | 6.80218   | 4.15245   | 3.26312  |
| 0.998131  | 0.967454  | 1.21093   | 0.842336  | 0.840898  | 0.776982 |
| 0.405591  | 0.409749  | 0.248492  | 0.222233  | 0.710543  | 0.25914  |
| 19.025    | 18.3779   | 19.5936   | 22.6336   | 23.1964   | 24.1503  |

|           |          |           |           |           |           |
|-----------|----------|-----------|-----------|-----------|-----------|
| 0.258237  | 0.179837 | 0.0382754 | 0.0951839 | 0.156312  | 0.0702391 |
| 49.7018   | 58.7254  | 47.7297   | 55.8085   | 46.8544   | 60.5099   |
| 7.00359   | 7.85029  | 6.58614   | 5.65824   | 7.37843   | 5.93328   |
| 11.4583   | 9.49542  | 10.2006   | 7.92019   | 9.39409   | 10.4799   |
| 2.82096   | 3.51548  | 2.31783   | 2.51571   | 1.99279   | 2.11383   |
| 8.51469   | 10.097   | 9.46523   | 9.33141   | 10.7229   | 10.2133   |
| 5.86699   | 5.56012  | 6.66106   | 5.47497   | 6.85531   | 5.8578    |
| 2.25437   | 2.32778  | 3.24591   | 1.10073   | 3.83725   | 1.89527   |
| 14.241    | 12.6614  | 14.1904   | 12.542    | 16.0222   | 14.7953   |
| 20.4969   | 20.3664  | 22.871    | 24.4353   | 24.1664   | 29.4307   |
| 3.81483   | 3.65043  | 3.30422   | 3.60888   | 3.65253   | 3.75125   |
| 43.723    | 50.7362  | 40.3498   | 46.4021   | 41.1771   | 51.4729   |
| 9.99581   | 10.1917  | 12.5044   | 9.24598   | 13.6691   | 9.00549   |
| 0         | 0        | 0         | 0         | 0         | 0         |
| 196.721   | 194.323  | 193.633   | 202.311   | 168.304   | 191.178   |
| 67.7502   | 71.3021  | 81.4753   | 79.4927   | 76.9502   | 76.4287   |
| 3.53414   | 4.19015  | 2.50454   | 3.55105   | 3.19009   | 3.17753   |
| 0         | 0        | 0         | 0         | 0         | 0         |
| 4.07674   | 3.16582  | 4.26358   | 2.81391   | 4.04634   | 3.6397    |
| 41.2844   | 38.4157  | 42.0898   | 38.7689   | 46.6402   | 47.5074   |
| 17.3606   | 18.7879  | 17.0824   | 17.0719   | 18.8428   | 20.4172   |
| 0.17392   | 0.178491 | 0.386671  | 0.151522  | 0.277039  | 0.197822  |
| 51.9764   | 55.3451  | 55.8633   | 52.5122   | 49.2687   | 55.4754   |
| 100.938   | 100.016  | 100.265   | 137.244   | 134.524   | 149.913   |
| 10.3485   | 8.92176  | 8.96716   | 8.96122   | 7.61497   | 8.84263   |
| 0.151168  | 0.144173 | 0.0932817 | 0.0887725 | 0.163743  | 0.24893   |
| 18.141    | 20.8365  | 19.9006   | 19.4751   | 21.972    | 22.523    |
| 0.924637  | 0.979026 | 0.834717  | 0.47312   | 1.34336   | 0.868076  |
| 18.7757   | 19.197   | 18.8175   | 21.4975   | 16.1787   | 16.0605   |
| 0         | 0        | 0.0688501 | 0         | 0.0295975 | 0.0229722 |
| 34.1785   | 31.4859  | 34.5969   | 29.5025   | 35.195    | 34.0296   |
| 13.4815   | 12.6629  | 13.5316   | 13.7852   | 15.9304   | 14.1629   |
| 0.728188  | 0.707281 | 1.45368   | 0.859637  | 1.63708   | 0.879317  |
| 1.03392   | 0.84768  | 1.1312    | 0.836951  | 0.589434  | 0.526114  |
| 0.192415  | 0.221343 | 0.186473  | 0.286666  | 0.288582  | 0.323532  |
| 6.33608   | 5.07333  | 6.88351   | 4.32422   | 9.5155    | 6.22748   |
| 35.5765   | 35.2657  | 34.14     | 35.0611   | 33.7467   | 30.0702   |
| 0.457866  | 0.760789 | 0.384563  | 1.10124   | 0.716373  | 0.855407  |
| 1.47511   | 1.83828  | 0.619474  | 0         | 2.13041   | 1.65352   |
| 0         | 0        | 0         | 0         | 0         | 0         |
| 0         | 0        | 0         | 0         | 0         | 0         |
| 0.0556923 | 0        | 0.0701642 | 0.105749  | 0.0603248 | 0.0156071 |
| 43.439    | 46.2961  | 54.8496   | 56.4877   | 39.131    | 52.2793   |

|           |           |           |          |          |           |
|-----------|-----------|-----------|----------|----------|-----------|
| 3.43474   | 2.41367   | 3.29295   | 2.84018  | 3.58513  | 3.38581   |
| 0.803846  | 0.809107  | 0.623218  | 0.493127 | 0.401866 | 0.363894  |
| 22.3232   | 26.119    | 18.555    | 18.7995  | 19.9963  | 18.9423   |
| 40.7102   | 39.9217   | 34.2139   | 36.1954  | 35.5831  | 38.9791   |
| 34.6456   | 33.5022   | 34.7668   | 28.2199  | 36.704   | 33.304    |
| 0.556706  | 0.925022  | 0.23379   | 0.634246 | 1.00502  | 0.46803   |
| 13.7      | 12.7547   | 13.786    | 12.2747  | 13.1472  | 12.1284   |
| 7.75209   | 7.33134   | 8.07586   | 8.08105  | 8.18926  | 8.21963   |
| 0.197768  | 0.32735   | 0.205916  | 0.186209 | 0.214218 | 0.248196  |
| 0.326081  | 0.152386  | 0         | 0        | 0        | 0         |
| 0.686918  | 94.3121   | 1.822     | 1168.88  | 3.296    | 43.8021   |
| 5.49718   | 4.22393   | 4.80848   | 3.78042  | 3.8565   | 2.6101    |
| 13.6883   | 13.5951   | 14.4704   | 10.8457  | 16.8444  | 12.2287   |
| 2.60948   | 2.83038   | 6.30116   | 5.39533  | 4.39683  | 3.49386   |
| 4.60701   | 4.67009   | 5.4723    | 5.59541  | 6.54007  | 5.60379   |
| 0         | 0         | 0         | 0        | 0        | 0         |
| 1.46533   | 1.32806   | 1.67827   | 1.00165  | 2.39525  | 0.963136  |
| 0.297564  | 0.47989   | 0.264627  | 0.179476 | 1.47886  | 1.39799   |
| 3.20628   | 3.07695   | 3.56768   | 2.75964  | 4.53768  | 3.3842    |
| 34.3779   | 19.9766   | 31.6414   | 22.038   | 27.5108  | 24.6927   |
| 0.0848979 | 0.0528998 | 0         | 0.072542 | 0        | 0.0178437 |
| 5.34194   | 5.07819   | 5.43583   | 5.42277  | 4.3768   | 5.06681   |
| 12.3686   | 14.9981   | 17.0542   | 14.646   | 15.6615  | 14.0912   |
| 0.384444  | 0.741599  | 0.638249  | 1.25105  | 0.640805 | 1.27991   |
| 78.3662   | 78.5363   | 75.2157   | 71.6077  | 65.1815  | 76.1411   |
| 17.6124   | 17.4951   | 17.7808   | 17.558   | 14.8117  | 14.9075   |
| 10.6255   | 11.2568   | 12.7564   | 12.854   | 9.91729  | 10.1474   |
| 1.29473   | 0.934124  | 1.71702   | 0.698712 | 0.738116 | 0.63018   |
| 1.36864   | 2.04672   | 2.414     | 1.55927  | 1.48248  | 0.69038   |
| 0.0915236 | 0.114057  | 0.0384355 | 0.139028 | 0.198273 | 0.0256483 |
| 2.97137   | 4.08597   | 1.90108   | 2.80687  | 4.66635  | 3.15978   |
| 1.44819   | 1.22896   | 1.12734   | 1.29765  | 0.822948 | 1.36524   |
| 49.5702   | 47.783    | 66.24     | 56.189   | 75.1926  | 61.2965   |
| 0.294712  | 0.244847  | 0.371295  | 0        | 0.638453 | 0.165179  |
| 1.31526   | 1.54801   | 1.74909   | 1.24871  | 1.89954  | 1.16718   |
| 6.81113   | 6.05334   | 7.92354   | 5.62547  | 9.72577  | 8.96617   |
| 0         | 0         | 0         | 0        | 0        | 0         |
| 2.79692   | 2.41788   | 2.82531   | 2.0382   | 2.81122  | 1.92772   |
| 1.08584   | 1.13666   | 1.14912   | 1.43501  | 1.17616  | 1.09545   |
| 0         | 0         | 0         | 0        | 0        | 0.119379  |
| 0         | 0         | 0         | 0        | 0        | 0         |
| 0         | 0         | 0         | 0        | 0        | 0         |
| 2.46963   | 0         | 1.04549   | 1.25328  | 2.91769  | 3.93627   |



|           |           |           |           |           |           |
|-----------|-----------|-----------|-----------|-----------|-----------|
| 2.38997   | 2.46134   | 2.42942   | 1.85074   | 3.01917   | 1.85698   |
| 37.4769   | 36.7707   | 40.76     | 37.4231   | 34.9904   | 30.8205   |
| 4.31634   | 4.28959   | 4.7496    | 3.23685   | 4.73455   | 4.86902   |
| 1.71444   | 1.61177   | 1.43996   | 2.1247    | 1.72688   | 1.59317   |
| 9.50002   | 12.0889   | 9.97069   | 9.58144   | 10.4311   | 9.32923   |
| 10.8353   | 11.0378   | 0         | 0         | 0         | 0         |
| 0         | 0         | 0         | 0         | 0         | 0         |
| 9.55091   | 10.4313   | 9.56536   | 10.3921   | 10.2582   | 11.1647   |
| 16.9688   | 17.3542   | 17.0636   | 15.8014   | 17.8423   | 18.5849   |
| 0.405352  | 0.201401  | 0.14479   | 0.0545546 | 0.0345787 | 0.157903  |
| 5.31915   | 3.21843   | 6.04581   | 3.77661   | 5.44847   | 3.8724    |
| 0.0272953 | 0.0340154 | 0.0171941 | 0.0310971 | 0.0295657 | 0.0803162 |
| 132.611   | 119.632   | 93.996    | 73.0731   | 44.8203   | 49.0984   |
| 18.2886   | 20.015    | 17.8654   | 18.9119   | 17.7341   | 18.1243   |
| 0         | 0         | 0         | 0         | 0         | 0         |
| 6.90023   | 6.17241   | 5.39714   | 4.00461   | 4.96477   | 5.50728   |
| 5.08244   | 5.50184   | 6.99566   | 5.0471    | 7.93734   | 7.58912   |
| 16.6275   | 25.4059   | 21.1303   | 20.2612   | 16.9142   | 15.5591   |
| 1.47578   | 1.63039   | 1.1519    | 0.924487  | 1.31695   | 0.790913  |
| 0         | 0         | 0         | 0         | 0         | 0         |
| 0         | 0         | 0         | 0         | 0         | 0         |
| 6.60703   | 5.34342   | 8.48068   | 7.16637   | 8.97025   | 5.52607   |
| 12.4368   | 9.61112   | 19.8986   | 9.66943   | 18.1941   | 8.13128   |
| 0         | 0         | 0         | 0         | 0         | 0         |
| 1.30189   | 1.23238   | 0.688915  | 0.684547  | 1.08925   | 0.848945  |
| 24.5265   | 24.1371   | 24.1491   | 21.7486   | 26.8498   | 23.0443   |
| 7.89064   | 9.18656   | 8.14012   | 7.67044   | 7.20822   | 7.87269   |
| 15.391    | 15.8071   | 17.0113   | 17.2479   | 16.4667   | 14.58     |
| 0         | 0         | 0         | 0         | 0         | 0         |
| 2.64915   | 2.80491   | 1.69501   | 1.21331   | 1.99844   | 2.20034   |
| 549.738   | 660.848   | 665.889   | 712.197   | 572.121   | 725.089   |
| 140.908   | 166.522   | 117.797   | 147.337   | 106.323   | 131.246   |
| 6.22422   | 5.81746   | 5.56868   | 5.33121   | 6.0702    | 5.24226   |
| 6.59044   | 5.48386   | 6.4234    | 5.19271   | 6.59749   | 4.46475   |
| 12.8926   | 15.8108   | 20.2437   | 23.7993   | 15.5664   | 15.4419   |
| 0         | 0         | 0         | 0         | 0         | 0         |
| 1.32017   | 2.07398   | 1.73546   | 1.6347    | 1.27471   | 1.7608    |
| 15.1198   | 16.3149   | 18.8945   | 11.9745   | 20.5714   | 9.50851   |
| 0         | 0         | 0         | 0         | 0         | 0         |
| 0         | 0.191892  | 0.0646648 | 0         | 0.222386  | 0.129454  |
| 0         | 0         | 0         | 0         | 0         | 0         |
| 55.7783   | 58.3712   | 61.3502   | 49.2799   | 62.7515   | 52.0125   |
| 64.592    | 59.5803   | 59.2527   | 57.4215   | 62.0848   | 50.9404   |

|           |           |            |          |          |           |
|-----------|-----------|------------|----------|----------|-----------|
| 1.06626   | 1.2919    | 1.25366    | 1.28061  | 1.45311  | 1.2582    |
| 57.9406   | 59.4729   | 53.961     | 50.485   | 47.311   | 44.7884   |
| 51.7994   | 48.6002   | 49.9909    | 43.131   | 51.4821  | 45.6487   |
| 0         | 0         | 0          | 0        | 0        | 0         |
| 3.0867    | 2.40833   | 3.75353    | 2.93562  | 4.09937  | 3.42995   |
| 2.49958   | 1.84845   | 1.66107    | 1.18916  | 1.66615  | 0.577316  |
| 3.14404   | 3.23994   | 4.1066     | 2.6575   | 6.19168  | 4.8654    |
| 58.8205   | 55.1081   | 61.1413    | 65.2376  | 55.374   | 66.1137   |
| 1.19E-82  | 4.02E-88  | 8.04E-73   | 1.56E-53 | 1.46E-51 | 9.31E-65  |
| 23.892    | 21.3224   | 21.9302    | 19.5847  | 30.2831  | 23.5199   |
| 0.376667  | 0.5473    | 0.186671   | 0.335343 | 0.316911 | 0.244419  |
| 0         | 0         | 0          | 0        | 0        | 0         |
| 0.320254  | 0.0426987 | 0.364337   | 0.156143 | 0.148454 | 0.141823  |
| 3.94283   | 4.68769   | 3.14954    | 5.75407  | 3.26335  | 3.07766   |
| 0.0668572 | 2.54118   | 0          | 9.14031  | 0.217255 | 1.91106   |
| 1.95802   | 0.580643  | 0.00413517 | 0.744081 | 0.408138 | 4.46E-07  |
| 0.97606   | 1.18575   | 0.697019   | 0.777963 | 2.35655  | 1.47389   |
| 56.8918   | 60.1829   | 62.5652    | 52.6625  | 64.1727  | 57.5268   |
| 41.3615   | 36.333    | 39.0158    | 46.8398  | 30.9442  | 42.6364   |
| 269.621   | 288.088   | 302.911    | 276.309  | 287.825  | 265.948   |
| 14.9942   | 16.3014   | 13.7743    | 16.015   | 12.8578  | 13.3937   |
| 174.208   | 126.621   | 250.754    | 133.28   | 108.002  | 73.2377   |
| 0.0192379 | 0.0239743 | 0          | 0.144796 | 0        | 0.0854119 |
| 0.394929  | 0.49216   | 0.45928    | 0.346105 | 0.296155 | 0.306482  |
| 0.150635  | 0         | 0          | 0        | 0        | 0.253282  |
| 4.15677   | 9.61363   | 3.34974    | 2.94384  | 11.1549  | 8.59494   |
| 7.72857   | 8.34068   | 8.81089    | 7.43479  | 7.20136  | 6.75965   |
| 60.3641   | 66.9774   | 54.2993    | 63.6248  | 50.0965  | 60.7375   |
| 486.392   | 484.625   | 490.725    | 619.268  | 163.355  | 289.18    |
| 7.53704   | 7.84335   | 6.85247    | 6.01963  | 6.14402  | 7.1857    |
| 0.360482  | 0.449232  | 0.756924   | 0.582287 | 1.04124  | 0.7483    |
| 0         | 0         | 0          | 0        | 0        | 0         |
| 0         | 0         | 0          | 0        | 0        | 0         |
| 6.31006   | 6.81177   | 4.91163    | 4.85368  | 4.39699  | 4.4602    |
| 47.3501   | 46.0726   | 49.9879    | 48.4114  | 42.9946  | 45.3608   |
| 0         | 0         | 0.0237731  | 0.144514 | 0        | 0         |
| 0.113097  | 0.0939613 | 0.213729   | 0.1718   | 0.122505 | 0.0316941 |
| 13.9333   | 12.2227   | 14.9031    | 13.911   | 16.5997  | 14.3882   |
| 0.239821  | 0         | 0.302139   | 0.68306  | 0.259769 | 0.10081   |
| 0         | 0.0929455 | 0          | 0        | 0.080787 | 0         |
| 20.754    | 20.9286   | 22.6773    | 17.4207  | 23.3999  | 18.0232   |
| 88.9716   | 86.3457   | 98.7636    | 96.7979  | 109.551  | 110.486   |
| 0         | 0         | 0          | 0        | 0        | 0         |

|           |           |           |           |           |           |
|-----------|-----------|-----------|-----------|-----------|-----------|
| 10.332    | 8.7802    | 8.98983   | 8.48851   | 12.7519   | 10.1434   |
| 0         | 0         | 0         | 0         | 0         | 0         |
| 18.7375   | 14.5982   | 35.9208   | 27.0987   | 21.2973   | 21.0366   |
| 32.686    | 31.0466   | 25.7242   | 31.983    | 27.7191   | 25.5219   |
| 2.57034   | 1.75608   | 0.879603  | 0.377777  | 3.76927   | 2.33252   |
| 0.786363  | 0.500408  | 1.22257   | 0.571845  | 0.326211  | 0.32352   |
| 4.75623   | 4.37296   | 5.91226   | 1.78215   | 9.34203   | 2.23923   |
| 18.1116   | 18.1263   | 19.1789   | 15.7485   | 21.2941   | 21.8921   |
| 2.20602   | 1.93025   | 2.72013   | 1.55075   | 3.35549   | 2.60437   |
| 0         | 0         | 0         | 0         | 0         | 0         |
| 2.28178   | 2.64044   | 3.14849   | 2.04253   | 1.82426   | 1.50725   |
| 8.27932   | 7.36836   | 8.11617   | 7.50061   | 9.74701   | 9.84995   |
| 0.250782  | 0.468786  | 0.631897  | 0.428567  | 0.814926  | 1.15959   |
| 14.6262   | 14.4486   | 17.8846   | 15.9248   | 16.1558   | 15.6501   |
| 0         | 0         | 0         | 0         | 0         | 0         |
| 25.4179   | 28.0708   | 24.9577   | 29.2511   | 27.654    | 25.4733   |
| 18.1092   | 17.137    | 17.7019   | 17.0385   | 15.5563   | 17.2197   |
| 537.066   | 623.053   | 536.572   | 588.937   | 490.49    | 633.38    |
| 0.121607  | 0.256384  | 0.159714  | 0.279586  | 0.436702  | 0.435583  |
| 0         | 0         | 0         | 0         | 0         | 0         |
| 37.7105   | 42.1288   | 35.7294   | 42.7756   | 41.797    | 49.885    |
| 60.7971   | 61.5762   | 50.5618   | 51.4166   | 45.8014   | 53.2502   |
| 0         | 0         | 0         | 0         | 0         | 0         |
| 3.58912   | 3.49869   | 3.78824   | 2.78054   | 5.39953   | 3.25881   |
| 0.300772  | 0.405267  | 0.0290627 | 0.307409  | 0.44161   | 0.158385  |
| 1.72225   | 3.08219   | 1.95724   | 3.0611    | 1.51067   | 0.707818  |
| 0.21192   | 0.105106  | 0.169866  | 0.0292493 | 0.151404  | 0.0661009 |
| 0.168403  | 0.0390755 | 0.106478  | 0.120142  | 0.273758  | 0.0268404 |
| 53.2622   | 51.7372   | 49.516    | 54.0138   | 40.5438   | 45.5653   |
| 0         | 0         | 0         | 0         | 0.0480238 | 0         |
| 28.145    | 29.7788   | 29.2864   | 29.0656   | 28.4284   | 30.1762   |
| 0.824315  | 0.587006  | 0.469805  | 0.402484  | 1.08421   | 0.940516  |
| 29.1759   | 27.456    | 26.8767   | 29.6255   | 24.7526   | 28.7051   |
| 6.64486   | 4.71338   | 4.84365   | 5.89839   | 5.14737   | 3.31139   |
| 3.7802    | 2.06736   | 2.87806   | 2.2618    | 3.26981   | 2.49215   |
| 70.0909   | 63.1945   | 64.8643   | 66.1454   | 64.5383   | 70.0261   |
| 0         | 0         | 0         | 0         | 0         | 0         |
| 5.91343   | 6.61283   | 6.30227   | 4.95049   | 6.24214   | 5.13773   |
| 0.0920558 | 0.0908265 | 0.287543  | 0.260024  | 0.115644  | 0.15909   |
| 32.2759   | 30.8099   | 28.0246   | 31.2314   | 30.4993   | 34.8739   |
| 0.102996  | 0         | 0.0324396 | 0         | 0.125509  | 0.08659   |
| 12.388    | 11.983    | 15.0888   | 10.3355   | 13.8369   | 10.8749   |
| 1.67426   | 1.63529   | 2.43636   | 2.59463   | 2.11078   | 1.76869   |

|           |           |           |          |           |           |
|-----------|-----------|-----------|----------|-----------|-----------|
| 0.0507396 | 0         | 0         | 0        | 0         | 0         |
| 0         | 0         | 0         | 0        | 0         | 0         |
| 1.40081   | 1.7994    | 1.24495   | 1.76148  | 1.82699   | 1.29627   |
| 0         | 0         | 0         | 0        | 0         | 0         |
| 8.48094   | 8.17331   | 9.80148   | 8.42543  | 10.1908   | 7.85254   |
| 3.60186   | 3.49438   | 3.89925   | 2.90421  | 3.2064    | 2.76817   |
| 51.6109   | 53.7944   | 62.0736   | 69.1384  | 63.7257   | 67.8013   |
| 8.90486   | 9.37979   | 5.47585   | 4.83102  | 6.5452    | 7.3973    |
| 0.0307846 | 0.0383637 | 0.155137  | 0.14029  | 0.133382  | 0.211364  |
| 120.291   | 112.984   | 131.879   | 103.539  | 140.769   | 116.239   |
| 34.5698   | 34.2894   | 28.185    | 33.5739  | 28.9336   | 37.5765   |
| 0.236615  | 0.294869  | 0.5962    | 1.258    | 0.598024  | 0.198925  |
| 35.4125   | 39.3996   | 37.4795   | 36.2193  | 35.994    | 37.8254   |
| 0         | 0         | 0         | 0        | 0         | 0         |
| 41.4149   | 42.258    | 30.8081   | 44.2619  | 19.4158   | 26.4923   |
| 0         | 0         | 0         | 0        | 0         | 0         |
| 0.205127  | 0.149782  | 0.318785  | 0.192845 | 0.456205  | 0.293408  |
| 0.149445  | 0.109741  | 0.0554717 | 0.26873  | 0.208114  | 0.0246779 |
| 0.330669  | 0.228933  | 0.52901   | 0.427305 | 0.265314  | 0.173749  |
| 43.9619   | 45.8589   | 45.459    | 52.3291  | 53.2436   | 54.1216   |
| 23.7357   | 30.9118   | 17.1905   | 31.9244  | 16.624    | 19.1674   |
| 18.4426   | 16.3882   | 18.2576   | 15.908   | 18.8816   | 16.0979   |
| 0         | 0         | 1752.7    | 316.992  | 301.382   | 233.918   |
| 0         | 0         | 0         | 0        | 0         | 0         |
| 6.29526   | 5.86919   | 6.78377   | 4.3091   | 7.04027   | 5.11021   |
| 2.544     | 3.14968   | 2.22504   | 2.19758  | 2.53351   | 2.39454   |
| 0.831538  | 1.0698    | 0.770386  | 0.839281 | 1.00767   | 0.78967   |
| 17.5285   | 18.7669   | 14.5815   | 15.6974  | 14.3063   | 14.4146   |
| 0         | 0         | 0         | 0        | 0         | 0         |
| 15.1939   | 16.0875   | 14.8679   | 13.5596  | 13.956    | 12.0961   |
| 2.02819   | 0.919101  | 2.09064   | 1.26037  | 1.79746   | 1.3951    |
| 3.83876   | 4.89623   | 6.57279   | 6.73625  | 6.93475   | 11.1006   |
| 0.0374727 | 0         | 0         | 0        | 0         | 0         |
| 0.810221  | 0.511844  | 0.342914  | 0.157453 | 0.855431  | 0.258413  |
| 3.58363   | 3.16971   | 3.41367   | 2.64882  | 4.74327   | 3.13037   |
| 42.3911   | 45.7002   | 38.6421   | 39.6713  | 35.1668   | 35.9216   |
| 0.0616534 | 0.0768324 | 0.0776743 | 0        | 0.0667817 | 0.103666  |
| 4.87E-09  | 6.63E-10  | 8.51E-09  | 1.16E-08 | 4.21E-09  | 9.18E-10  |
| 13.6365   | 13.1229   | 14.0863   | 11.6417  | 13.0807   | 10.6245   |
| 1.35922   | 0.787287  | 2.26715   | 2.18104  | 1.86627   | 1.85087   |
| 19.2329   | 20.6129   | 19.3572   | 20.1137  | 17.9835   | 22.0621   |
| 6.38027   | 7.85212   | 6.21434   | 9.23952  | 5.67733   | 5.96159   |
| 0         | 0         | 0         | 0        | 0         | 0         |

|            |           |           |           |           |           |
|------------|-----------|-----------|-----------|-----------|-----------|
| 7.60061    | 10.2062   | 6.2558    | 6.77917   | 10.9641   | 8.50964   |
| 8.05543    | 9.29707   | 7.74985   | 5.3686    | 10.5274   | 8.21636   |
| 15.0053    | 14.0745   | 16.4054   | 13.5414   | 18.6678   | 14.2963   |
| 0          | 0         | 0         | 0         | 0         | 0         |
| 1.23153    | 1.06441   | 1.32632   | 1.38043   | 2.13005   | 1.33595   |
| 1.25965    | 1.20739   | 2.2617    | 0.766801  | 2.19317   | 1.44842   |
| 0          | 0         | 0         | 0         | 0         | 0         |
| 0          | 0         | 0         | 0         | 0         | 0         |
| 42.5766    | 40.8284   | 40.7985   | 38.5999   | 40.1514   | 36.6845   |
| 69.3727    | 57.584    | 72.1979   | 66.0126   | 58.8148   | 44.2249   |
| 0.754873   | 1.05139   | 1.00697   | 1.82121   | 0.769565  | 1.04527   |
| 10.1952    | 10.6313   | 11.2431   | 11.466    | 11.3839   | 10.3781   |
| 7.92265    | 7.5004    | 10.4777   | 10.6375   | 8.58165   | 11.0352   |
| 0.0245146  | 0.0101834 | 0.0411798 | 0         | 0.115066  | 0.0618292 |
| 44.2842    | 43.7828   | 49.5009   | 39.745    | 55.4665   | 41.9921   |
| 7.47687    | 7.84873   | 7.99297   | 6.46441   | 8.11131   | 5.74183   |
| 5.79064    | 4.36333   | 3.90217   | 1.53423   | 0.826582  | 1.50954   |
| 0.513932   | 0.904779  | 0.832473  | 0.483281  | 0.556681  | 0.548659  |
| 21.1228    | 24.7666   | 30.197    | 25.7231   | 30.631    | 27.4685   |
| 18.0352    | 20.1408   | 18.7214   | 16.4956   | 18.9507   | 15.9632   |
| 23.9456    | 24.4272   | 19.2655   | 16.1151   | 19.0295   | 18.7143   |
| 0          | 0         | 0         | 0         | 0         | 0         |
| 1.42138    | 1.47278   | 1.48892   | 1.38282   | 1.45311   | 1.35609   |
| 1.35334    | 0.782825  | 1.35442   | 0.70269   | 1.30191   | 0.613666  |
| 1.35974    | 1.59569   | 0.107842  | 0.128791  | 1.21432   | 0.575993  |
| 21.3342    | 20.6887   | 18.4882   | 15.6052   | 22.3273   | 16.7828   |
| 0.102978   | 0         | 0.240416  | 0.192911  | 0         | 0         |
| 1.68127    | 1.18722   | 1.08607   | 1.08537   | 1.50391   | 1.48892   |
| 3.64107    | 3.26707   | 4.58722   | 2.90381   | 4.72398   | 5.06101   |
| 9.84609    | 7.73555   | 7.9102    | 7.86673   | 7.63387   | 7.31799   |
| 0.652032   | 0.677135  | 0.867103  | 1.073     | 0.470845  | 0.913619  |
| 1.13921    | 0.971937  | 0.596177  | 0.34943   | 1.12956   | 0.714628  |
| 2.23242    | 2.37359   | 3.00133   | 2.66426   | 2.84417   | 2.4301    |
| 0          | 0         | 0         | 0         | 0         | 0         |
| 17.6679    | 17.4321   | 20.5401   | 18.0719   | 21.6304   | 19.2564   |
| 0          | 0         | 0         | 0         | 0.0598057 | 0         |
| 0.776918   | 0.968194  | 0.326268  | 1.20476   | 0.631156  | 0.217721  |
| 34.752     | 37.4419   | 40.4976   | 32.5151   | 29.2649   | 26.995    |
| 19.2127    | 17.127    | 16.1957   | 15.6043   | 17.8233   | 18.6675   |
| 0.213442   | 0.265991  | 0.115245  | 0.0347387 | 0.099084  | 0.128174  |
| 0.00836735 | 0         | 0.0421666 | 0.0571967 | 0.0362534 | 0.0281381 |
| 11.6767    | 15.2864   | 10.9961   | 17.6031   | 8.30423   | 9.32096   |
| 1.51628    | 1.27396   | 1.84446   | 2.05491   | 3.56488   | 2.19691   |

|           |           |           |           |           |           |
|-----------|-----------|-----------|-----------|-----------|-----------|
| 0         | 0         | 0         | 0         | 0         | 0.06089   |
| 0.29154   | 0.611868  | 0.540443  | 0.235532  | 0.508686  | 0.504519  |
| 4.71883   | 2.95624   | 3.67819   | 4.04514   | 5.45068   | 4.03302   |
| 10.0856   | 9.23523   | 8.91405   | 10.5097   | 8.73794   | 9.07462   |
| 15.2726   | 13.3749   | 12.8544   | 13.2682   | 17.2191   | 27.4658   |
| 154.782   | 148.072   | 77.4395   | 71.4097   | 53.7468   | 74.0873   |
| 31.6883   | 35.6474   | 40.266    | 46.2853   | 37.0458   | 43.576    |
| 57.4519   | 57.5859   | 51.2792   | 55.4886   | 53.6647   | 61.4311   |
| 0         | 0         | 0         | 0         | 0         | 0         |
| 0.473776  | 0.452165  | 0.300242  | 0.187555  | 0.73402   | 0.441465  |
| 0         | 0         | 0         | 0         | 0         | 0         |
| 169.46    | 183.883   | 149.211   | 182.147   | 126.018   | 148.205   |
| 0.917567  | 1.33405   | 0.963334  | 1.04537   | 1.49084   | 0.642842  |
| 35.9286   | 30.1259   | 33.2604   | 32.0876   | 26.7581   | 31.042    |
| 0.39366   | 0.0700826 | 0.566805  | 0.25628   | 0.304575  | 0.236396  |
| 41.154    | 33.3342   | 48.8724   | 51.1798   | 37.6628   | 37.6305   |
| 0.793461  | 0.659207  | 0.999645  | 0.770054  | 0.954956  | 0.494128  |
| 36.2419   | 37.7403   | 30.3354   | 30.0907   | 23.4464   | 28.7995   |
| 0         | 0         | 0         | 0         | 0         | 0         |
| 3.75258   | 3.79843   | 5.09434   | 4.06585   | 6.83537   | 4.98336   |
| 45.1208   | 55.3448   | 43.4721   | 50.8852   | 36.1676   | 50.0233   |
| 4.53101   | 7.50868   | 4.68568   | 5.01966   | 3.96894   | 5.40958   |
| 0.0245636 | 0.0612222 | 0.0618931 | 0         | 0.0798204 | 0.0413018 |
| 8.98979   | 9.94665   | 7.35649   | 7.32249   | 6.41587   | 6.32173   |
| 52.2067   | 54.0013   | 69.853    | 70.1784   | 48.0599   | 56.3066   |
| 12.8897   | 10.0274   | 10.9506   | 9.28623   | 15.2759   | 10.2565   |
| 20.0477   | 23.5725   | 23.3937   | 23.7206   | 21.9303   | 22.1036   |
| 0.15212   | 0         | 0.0958247 | 0         | 0.24716   | 0.191834  |
| 675.098   | 680.259   | 171.387   | 162.534   | 98.8818   | 158.661   |
| 1.30996   | 1.28265   | 1.002     | 1.75891   | 1.26689   | 0.825971  |
| 0.256362  | 0         | 0         | 0         | 0         | 0.538816  |
| 64.3353   | 66.158    | 64.8283   | 62.7245   | 52.6914   | 64.2525   |
| 0         | 0.0328823 | 0         | 0         | 0         | 0         |
| 11.9794   | 11.8062   | 14.0083   | 12.2799   | 13.6108   | 10.8184   |
| 0.704854  | 1.01852   | 0.786677  | 0.656134  | 1.58785   | 0.929228  |
| 0         | 0.0279316 | 0         | 0         | 0         | 0         |
| 0         | 0         | 0         | 0         | 0         | 0         |
| 0.0307806 | 0.0191794 | 0.0387791 | 0.0350678 | 0.100023  | 0.0129388 |
| 0.0626411 | 0.273221  | 0.276215  | 0.35683   | 0.169629  | 0.0789947 |
| 5.84825   | 4.97993   | 6.23319   | 5.73782   | 8.73942   | 10.0894   |
| 17.7258   | 19.4036   | 20.8044   | 18.4406   | 19.6589   | 18.2517   |
| 13.5851   | 14.8717   | 14.2421   | 20.6289   | 13.2883   | 12.9914   |
| 168.621   | 246.806   | 121.851   | 205.589   | 208.326   | 206.33    |

|           |          |           |           |           |           |
|-----------|----------|-----------|-----------|-----------|-----------|
| 3.73211   | 5.77191  | 4.33186   | 4.35514   | 5.17203   | 7.50466   |
| 14.4867   | 13.8178  | 14.537    | 13.1137   | 17.0442   | 14.6655   |
| 6.85512   | 6.98301  | 7.04119   | 5.82013   | 8.60771   | 6.31381   |
| 1.57557   | 1.09741  | 1.86208   | 0.919677  | 2.67953   | 1.69199   |
| 64.6466   | 72.7104  | 57.4411   | 57.1954   | 55.1068   | 62.4079   |
| 0.77837   | 1.54965  | 1.1109    | 1.1187    | 2.54266   | 1.12875   |
| 0.576183  | 0.401228 | 0.661376  | 0.368338  | 1.53736   | 0.339839  |
| 0         | 0        | 0         | 0         | 0         | 0         |
| 25.6312   | 23.9172  | 24.3371   | 21.1897   | 22.3626   | 26.3511   |
| 0.795715  | 0.681738 | 1.00248   | 0.849885  | 0.700295  | 0.627157  |
| 0         | 0        | 0         | 0         | 0         | 0         |
| 10.1687   | 11.0735  | 13.6487   | 12.4494   | 12.5481   | 11.5345   |
| 4.41037   | 4.84835  | 4.33534   | 3.55185   | 4.51571   | 4.12355   |
| 0         | 0        | 0         | 0         | 0         | 0         |
| 4.83141   | 4.87181  | 3.52584   | 4.15073   | 3.35338   | 5.27633   |
| 46.2408   | 48.8757  | 34.5943   | 42.5878   | 32.3189   | 44.6705   |
| 4.26227   | 4.79089  | 3.86944   | 3.9514    | 3.30418   | 4.04004   |
| 0         | 0        | 0         | 0         | 0         | 0         |
| 0.473103  | 0.27177  | 0.549302  | 0.639381  | 0.396928  | 0.27689   |
| 20.5484   | 19.0856  | 20.6981   | 17.66     | 19.2016   | 16.5428   |
| 0         | 0        | 0.0641495 | 0.213373  | 0         | 0.0428076 |
| 5.41143   | 5.82725  | 1.32899   | 1.11268   | 1.16541   | 1.35966   |
| 11.077    | 9.72395  | 12.7209   | 13.5728   | 12.7103   | 11.6231   |
| 3.31789   | 2.76222  | 3.11685   | 2.72505   | 5.37222   | 4.81336   |
| 0.230199  | 0.606969 | 0.484047  | 0.350555  | 0.417712  | 0.452468  |
| 25.7787   | 24.2241  | 30.8028   | 27.8696   | 36.6695   | 34.8974   |
| 0.241961  | 0.480646 | 0.131494  | 0.243873  | 0.0896365 | 0.0579362 |
| 5.41734   | 4.10275  | 6.05697   | 3.17525   | 5.41512   | 4.24689   |
| 18.8965   | 17.6422  | 23.0887   | 19.9862   | 19.8445   | 19.4226   |
| 3.78576   | 3.59716  | 3.42677   | 3.88301   | 4.43737   | 3.74275   |
| 4.1579    | 4.1392   | 4.11918   | 3.46876   | 3.03563   | 2.61788   |
| 16.091    | 12.058   | 17.6898   | 14.7953   | 15.0973   | 15.0924   |
| 61.5146   | 62.8598  | 68.8946   | 63.4847   | 70.6281   | 74.4936   |
| 0         | 0        | 0         | 0         | 0         | 0         |
| 0.738445  | 0.843562 | 0.658986  | 0.736136  | 1.16648   | 1.1123    |
| 32.1428   | 34.0934  | 35.1762   | 36.8762   | 36.0969   | 30.6669   |
| 3.70263   | 3.45157  | 4.26071   | 3.94905   | 4.28427   | 3.12099   |
| 1.25289   | 1.01028  | 1.6713    | 0.79766   | 1.51676   | 1.85879   |
| 6.21505   | 6.39669  | 6.15218   | 5.31052   | 5.40965   | 5.20174   |
| 70.3467   | 74.7618  | 70.7641   | 77.1959   | 82.3346   | 84.6179   |
| 0.36338   | 0.251543 | 0.643804  | 0.525714  | 0.87862   | 0.305498  |
| 4.0465    | 2.53665  | 3.44501   | 3.3528    | 4.47606   | 3.51534   |
| 0.0226507 | 0        | 0.0285365 | 0.0258055 | 0.0245347 | 0         |

|          |          |           |           |           |           |
|----------|----------|-----------|-----------|-----------|-----------|
| 7.83063  | 10.2041  | 7.48795   | 9.13517   | 8.32784   | 12.0673   |
| 0        | 0        | 0         | 0         | 0         | 0         |
| 22.1505  | 19.1441  | 22.4724   | 18.2356   | 25.2682   | 18.9732   |
| 19.1011  | 18.8221  | 21.5833   | 18.516    | 22.566    | 18.0988   |
| 0        | 0        | 0         | 0         | 0         | 0         |
| 0        | 0.109325 | 0         | 0.0999456 | 0.142536  | 0.221259  |
| 0.120912 | 0        | 0         | 0         | 0.0436564 | 0         |
| 0.261292 | 0.45587  | 0.263352  | 0.416759  | 0.169815  | 0         |
| 3.49174  | 3.21628  | 2.6775    | 1.80306   | 2.90043   | 1.97885   |
| 89.158   | 84.692   | 73.7534   | 66.7898   | 61.2362   | 59.9067   |
| 0.533369 | 0.640066 | 3.2354    | 2.74572   | 0.363759  | 0.365371  |
| 184.634  | 268.44   | 77.5375   | 140.234   | 299.988   | 232.837   |
| 0.713168 | 0.330107 | 0.71879   | 0.603571  | 1.08148   | 0.942259  |
| 44.9745  | 49.0111  | 44.8457   | 49.6685   | 36.6399   | 39.3069   |
| 1.08546  | 0.801352 | 0.574367  | 0.770212  | 0.421964  | 0.589963  |
| 37.0729  | 38.3324  | 38.1492   | 39.5094   | 33.1559   | 32.1235   |
| 0.154835 | 0.231546 | 0.19507   | 0.0352802 | 0.2348    | 0.234309  |
| 2.51253  | 1.28091  | 1.43883   | 1.0409    | 2.59781   | 3.45651   |
| 1.10101  | 1.49298  | 1.55134   | 1.52936   | 1.7915    | 1.26903   |
| 38.5289  | 45.8926  | 45.2163   | 42.7273   | 143.822   | 160.833   |
| 8.58279  | 6.5432   | 10.0783   | 5.22267   | 8.30405   | 5.32461   |
| 87.5061  | 82.54    | 93.8449   | 72.2854   | 74.8704   | 73.634    |
| 2.43068  | 2.3114   | 1.98972   | 2.22169   | 3.31707   | 2.43602   |
| 10.4187  | 8.94778  | 14.65     | 8.58021   | 17.0758   | 7.97184   |
| 0.422338 | 0.380118 | 0.384283  | 0.695012  | 0.737031  | 0.414242  |
| 0        | 0        | 0         | 0         | 0         | 0         |
| 0        | 0        | 0         | 0         | 0.0345647 | 0         |
| 0.261292 | 0.586118 | 0.263352  | 0.238148  | 0.396236  | 0.175737  |
| 1.36861  | 0.741936 | 0.720006  | 0.248554  | 0.438682  | 0.157666  |
| 0.530242 | 0.361522 | 0.163218  | 0.227994  | 0.103778  | 0.0520948 |
| 0.580138 | 0.239159 | 0.0335779 | 0.189791  | 0.115482  | 0.140053  |
| 0        | 0        | 0         | 0         | 0         | 0         |
| 1.79715  | 1.7737   | 2.92476   | 1.66085   | 3.08376   | 2.86819   |
| 31.4446  | 30.92    | 33.9055   | 30.1935   | 29.635    | 31.4701   |
| 0.889928 | 1.13311  | 0.658733  | 1.25318   | 0.538851  | 0.731925  |
| 12.6333  | 11.3463  | 12.1851   | 11.8983   | 10.3398   | 11.6406   |
| 29.1558  | 32.7139  | 26.8213   | 34.1248   | 34.1614   | 33.7244   |
| 0        | 0        | 0         | 0         | 0         | 0         |
| 60.6481  | 63.9821  | 65.2378   | 63.0061   | 61.5721   | 59.7102   |
| 0        | 0.148813 | 0.300887  | 0         | 0         | 0.100392  |
| 7.4946   | 7.72677  | 8.49527   | 8.15793   | 8.26499   | 6.40611   |
| 0.889806 | 0.769824 | 1.10507   | 0.676932  | 1.35603   | 0.864306  |
| 15.3638  | 18.3521  | 15.5525   | 17.733    | 16.242    | 15.3419   |



|           |           |           |            |           |           |
|-----------|-----------|-----------|------------|-----------|-----------|
| 5.19678   | 8.27516   | 3.07809   | 4.69123    | 1.31863   | 1.58802   |
| 0.710452  | 3.01024   | 0.358027  | 0.971287   | 2.15473   | 3.70317   |
| 4.44554   | 2.86018   | 4.943     | 3.22469    | 5.89052   | 3.35322   |
| 0         | 0         | 0         | 0          | 0         | 0         |
| 1.43374   | 1.28815   | 2.03131   | 1.52439    | 1.34094   | 1.04691   |
| 13.0277   | 14.1086   | 13.2916   | 13.182     | 10.6238   | 10.2982   |
| 2.02899   | 1.9922    | 2.36509   | 2.64463    | 4.66817   | 4.78151   |
| 0.222092  | 0.553541  | 0.0466339 | 0.126513   | 0.922167  | 0.311192  |
| 0         | 0         | 0         | 0          | 0         | 0         |
| 16.3302   | 17.4815   | 15.4647   | 15.8037    | 13.3396   | 12.7117   |
| 0.0856403 | 0.266812  | 0.161841  | 0.0487843  | 0.0927638 | 0         |
| 1.65319   | 1.27285   | 2.10459   | 0.779124   | 2.25007   | 1.04787   |
| 24.5897   | 24.5676   | 24.4569   | 24.1257    | 24.091    | 23.8321   |
| 0.132187  | 0.41847   | 0.734131  | 0.604562   | 0.658675  | 0.437351  |
| 0.280925  | 0.350131  | 0.884974  | 0.879981   | 1.5986    | 1.1209    |
| 0.451702  | 0.056291  | 0.341447  | 0.102923   | 0.293565  | 0.0759503 |
| 12.4858   | 14.7891   | 17.9662   | 15.5162    | 19.5857   | 21.3587   |
| 5.20038   | 6.96242   | 6.23138   | 5.74424    | 6.96207   | 7.90323   |
| 0         | 0         | 0         | 0.00529071 | 0         | 0         |
| 0.52365   | 0.155374  | 0.409054  | 0.116003   | 0.675527  | 0.231125  |
| 2.12184   | 2.1046    | 3.27332   | 1.5787     | 3.51786   | 2.69399   |
| 3.95219   | 3.7485    | 3.51977   | 2.16261    | 3.69046   | 2.55337   |
| 0.0896118 | 0.0973502 | 0.0659662 | 0.0907976  | 0.101164  | 0.0521739 |
| 3.50312   | 5.14629   | 1.48302   | 1.09135    | 1.53602   | 2.09055   |
| 0         | 0         | 0         | 0          | 0         | 0         |
| 0         | 0         | 0         | 0.0202306  | 0         | 0         |
| 39.3546   | 43.2939   | 37.1878   | 39.0794    | 38.6823   | 40.2883   |
| 9.67108   | 10.839    | 11.171    | 11.6208    | 11.209    | 11.2974   |
| 0         | 0         | 0         | 0          | 0         | 0         |
| 0.0194018 | 0.0241785 | 0         | 0          | 0.0210157 | 0         |
| 10.2703   | 10.7406   | 11.8425   | 9.14992    | 12.0732   | 9.40158   |
| 2.62654   | 3.07114   | 2.88011   | 2.47517    | 3.24896   | 2.5353    |
| 4.24E-270 | 3.58E-173 | 0.0188978 | 0          | 0         | 0         |
| 0         | 0.0426992 | 0.0863343 | 0          | 0.0742272 | 0.0576116 |
| 10.5738   | 9.66947   | 11.3408   | 9.55488    | 9.57874   | 9.06537   |
| 1.28479   | 1.90967   | 1.77462   | 2.3453     | 1.84366   | 1.73045   |
| 7.63184   | 8.22004   | 7.45163   | 5.96216    | 7.33665   | 6.71407   |
| 27.1509   | 24.1352   | 27.0459   | 23.8769    | 20.8274   | 23.722    |
| 10.8861   | 27.5345   | 54.1485   | 45.1997    | 82.0172   | 111.384   |
| 0         | 0         | 0         | 0          | 0         | 0         |
| 23.3214   | 24.5388   | 25.9001   | 23.096     | 22.924    | 22.5912   |
| 0.424614  | 0.661442  | 0.601821  | 0.241878   | 0.287458  | 0.713957  |
| 0         | 0         | 0.0833852 | 0.15081    | 0.0358459 | 0         |

|           |           |           |           |          |           |
|-----------|-----------|-----------|-----------|----------|-----------|
| 1.47845   | 1.71385   | 1.11801   | 1.31416   | 2.05499  | 1.66541   |
| 12.3461   | 12.1704   | 9.21242   | 11.1209   | 13.4717  | 13.4329   |
| 4.31247   | 4.64586   | 5.73998   | 6.5078    | 5.63435  | 6.47058   |
| 2.237     | 2.39746   | 2.33918   | 2.62503   | 4.2646   | 2.82101   |
| 6.64387   | 4.94028   | 8.01014   | 5.87369   | 9.06521  | 8.31226   |
| 651.126   | 756.747   | 642.587   | 698.902   | 620.925  | 677.3     |
| 0.902907  | 1.6878    | 3.41259   | 1.543     | 0.733508 | 0.569314  |
| 31.4036   | 35.6024   | 32.8077   | 35.9851   | 24.3389  | 29.3525   |
| 6.17914   | 4.16452   | 5.75917   | 5.208     | 9.69819  | 5.67196   |
| 0.913279  | 0.347692  | 0.671449  | 0.202276  | 1.09894  | 0.426474  |
| 5.32359   | 6.13018   | 6.27955   | 6.52591   | 5.39894  | 6.14299   |
| 1.68161   | 1.47646   | 2.02229   | 1.61104   | 5.50586  | 3.7593    |
| 60.3001   | 62.0526   | 52.0922   | 60.2475   | 46.6955  | 53.972    |
| 14.126    | 14.3797   | 19.3152   | 16.2274   | 21.1761  | 15.5585   |
| 11.227    | 10.7711   | 9.06228   | 9.17866   | 4.3604   | 5.05111   |
| 4.25843   | 3.97564   | 4.91791   | 3.98117   | 6.56657  | 4.55025   |
| 26.4874   | 28.8026   | 24.9723   | 25.0365   | 42.0028  | 33.5274   |
| 5.77076   | 5.78287   | 5.05924   | 5.24155   | 5.43452  | 4.78486   |
| 0         | 0         | 0         | 0         | 0        | 0.0470953 |
| 0.671582  | 0.54722   | 0.748469  | 0.382561  | 0.447658 | 0.325735  |
| 2.54115   | 2.83918   | 2.8335    | 1.66385   | 2.75252  | 2.6275    |
| 13.6107   | 15.0106   | 12.2668   | 10.2726   | 13.2946  | 14.8151   |
| 2.54947   | 3.10956   | 3.21073   | 3.05937   | 3.0319   | 2.98465   |
| 17.2564   | 16.5772   | 16.5061   | 16.0499   | 15.0833  | 15.8274   |
| 0         | 0         | 0         | 0         | 0        | 0.0717074 |
| 0.0224135 | 0         | 0.169426  | 0.0766059 | 0.33989  | 0.282649  |
| 23.5136   | 23.3878   | 22.1383   | 18.6936   | 20.798   | 17.3574   |
| 400.959   | 401.711   | 376.6     | 454.123   | 297.89   | 410.032   |
| 3.07077   | 3.03343   | 4.24615   | 2.55986   | 5.84112  | 2.92795   |
| 0         | 0         | 0         | 0         | 0        | 0         |
| 14.4276   | 14.8116   | 11.851    | 12.8167   | 13.5624  | 12.931    |
| 0         | 0         | 0         | 0         | 0        | 0         |
| 54.6137   | 50.2489   | 70.2636   | 74.7143   | 80.0282  | 78.3219   |
| 0.852243  | 1.17099   | 2.09234   | 2.68877   | 1.98829  | 2.18622   |
| 8.31289   | 11.4497   | 10.8048   | 13.2      | 9.0208   | 15.4178   |
| 0.572163  | 0.520615  | 1.33619   | 0.801659  | 0.54768  | 0.341979  |
| 5.00323   | 6.25212   | 7.59925   | 6.4179    | 5.83642  | 4.5523    |
| 0.0457631 | 1.70E-266 | 0.0166452 | 1.03E-48  | 2.93E-67 | 1.99E-37  |
| 3.20E-08  | 6.00E-08  | 4.10E-08  | 5.10E-08  | 4.86E-08 | 2.00E-08  |
| 2.98795   | 3.29073   | 2.45425   | 2.37535   | 4.17261  | 4.66143   |
| 1.27865   | 0.695386  | 1.62555   | 0.728356  | 2.16562  | 0.557064  |
| 26.5333   | 25.2776   | 24.6569   | 25.0094   | 25.4401  | 25.2238   |
| 0         | 0         | 0         | 0         | 0        | 0         |

|           |          |           |            |           |           |
|-----------|----------|-----------|------------|-----------|-----------|
| 21.7709   | 19.9791  | 16.7722   | 14.2737    | 21.2327   | 16.1993   |
| 6.36399   | 4.21232  | 8.45823   | 5.01949    | 12.2212   | 5.91862   |
| 27.2254   | 25.8198  | 15.6768   | 24.322     | 9.2887    | 11.9233   |
| 3.23483   | 4.22631  | 3.35236   | 4.42841    | 3.33436   | 4.67151   |
| 0         | 0.117752 | 0.0595212 | 0          | 0         | 0         |
| 11.7008   | 10.3644  | 10.9178   | 8.56747    | 13.2268   | 8.86613   |
| 0         | 0        | 0         | 0          | 0         | 0         |
| 7.73881   | 7.54729  | 5.06113   | 4.62945    | 9.82168   | 6.79617   |
| 0.452104  | 0.140853 | 0.35599   | 0.128768   | 0.122427  | 0.0950222 |
| 923.846   | 1039.73  | 972.438   | 947.66     | 985.464   | 990.074   |
| 1.78778   | 1.86366  | 1.93547   | 1.13843    | 2.82741   | 1.78303   |
| 9.87882   | 9.63677  | 10.197    | 8.47522    | 11.2111   | 11.2831   |
| 15.0339   | 16.6425  | 19.1194   | 15.8457    | 15.0543   | 13.508    |
| 8.35998   | 7.34725  | 6.94624   | 5.21288    | 9.44281   | 8.34946   |
| 0         | 0        | 0         | 0          | 0         | 0         |
| 0.129042  | 0.160812 | 0         | 0          | 0         | 0         |
| 0.453297  | 0.225959 | 0.533016  | 0.344289   | 0.196401  | 0.431905  |
| 0         | 0        | 0         | 0          | 0         | 0         |
| 0.306072  | 0        | 0         | 0          | 0         | 0         |
| 50.7642   | 54.3228  | 45.7753   | 52.9154    | 53.048    | 60.185    |
| 0.0652601 | 0        | 0.0274061 | 0.123916   | 0.0471256 | 0.0731533 |
| 16.2185   | 14.7315  | 15.4195   | 14.2677    | 14.4253   | 15.5609   |
| 5.04707   | 5.62312  | 6.1503    | 6.20428    | 6.70984   | 6.01724   |
| 0.656571  | 0.632259 | 0.977581  | 0.476013   | 1.19608   | 0.501806  |
| 20.7306   | 21.4808  | 21.7888   | 13.8209    | 23.3282   | 23.6575   |
| 32.2138   | 32.4384  | 33.01     | 29.4096    | 29.7917   | 30.7717   |
| 0         | 0        | 0.185415  | 0.670682   | 0.24073   | 0.589593  |
| 0         | 0        | 0         | 0          | 0         | 0         |
| 97.07     | 59.1019  | 118.513   | 117.896    | 70.5336   | 89.5853   |
| 47.4796   | 46.208   | 49.799    | 49.5733    | 47.2693   | 44.7367   |
| 26.7273   | 25.481   | 26.5817   | 24.3674    | 26.1747   | 24.0456   |
| 0         | 0        | 0         | 0          | 0         | 0         |
| 0         | 0        | 0.27342   | 0.556319   | 0.470154  | 0.547366  |
| 20.0775   | 17.2901  | 21.8839   | 19.6537    | 21.5392   | 20.4596   |
| 0.285119  | 0        | 0.205262  | 0          | 0.264716  | 0.10273   |
| 0         | 0        | 0.15298   | 0          | 0.131527  | 0.102085  |
| 15.0162   | 18.3898  | 17.543    | 15.9228    | 14.4178   | 14.283    |
| 19.0753   | 17.5489  | 20.8592   | 16.3873    | 18.0352   | 17.5985   |
| 0         | 0        | 0         | 0.00529071 | 0         | 0         |
| 0.0903751 | 0.112625 | 0.113859  | 0.0686418  | 0.0326308 | 0.0253265 |
| 129.854   | 62.1204  | 250.681   | 187.22     | 212.287   | 333.515   |
| 0.653999  | 1.95603  | 0.659155  | 1.49018    | 0.425039  | 0.87972   |
| 0         | 0        | 0         | 0          | 0         | 0         |

|           |           |           |           |           |           |
|-----------|-----------|-----------|-----------|-----------|-----------|
| 6.17029   | 5.63021   | 6.4034    | 4.93271   | 7.13666   | 6.55903   |
| 9.06819   | 9.14942   | 12.0496   | 13.0666   | 13.4978   | 13.5793   |
| 31.5248   | 31.3917   | 29.7122   | 43.2099   | 31.8534   | 33.6034   |
| 0         | 0         | 0         | 0         | 0         | 0         |
| 8.74434   | 9.81953   | 19.0973   | 30.7818   | 40.6184   | 42.0911   |
| 0         | 0         | 0         | 0         | 0         | 0         |
| 13.7125   | 11.7943   | 10.9316   | 10.1097   | 13.3429   | 13.1554   |
| 0.401529  | 0.426799  | 0.297569  | 0.242182  | 0.281424  | 0.287928  |
| 3.2445    | 3.3694    | 2.92543   | 3.53332   | 3.46269   | 2.71432   |
| 32.8298   | 30.5607   | 29.5995   | 34.1806   | 30.7705   | 33.4247   |
| 6.72526   | 7.60138   | 5.61573   | 5.92467   | 6.05644   | 8.28378   |
| 0         | 0         | 0         | 0         | 0         | 0         |
| 0         | 0         | 0         | 0         | 0.0274253 | 0         |
| 0.252072  | 0.157066  | 0.0396967 | 0.107693  | 0.204779  | 0.23841   |
| 27.7436   | 30.6105   | 26.0124   | 27.8049   | 20.0943   | 21.4991   |
| 0.174363  | 0.0501441 | 0.135183  | 0.152807  | 0.188866  | 0.124037  |
| 11.6045   | 12.1629   | 11.142    | 11.1612   | 10.9953   | 10.8652   |
| 1.20322   | 1.04962   | 1.3643    | 1.69067   | 1.17298   | 1.01157   |
| 0.0150841 | 0.0187978 | 0         | 0.0859251 | 0.0163388 | 0.0380441 |
| 1.46012   | 1.67014   | 1.34613   | 1.38556   | 2.02487   | 1.69493   |
| 5.30467   | 5.98285   | 5.89561   | 7.43899   | 5.75432   | 6.18996   |
| 25.1065   | 20.9952   | 22.4756   | 16.8942   | 43.0595   | 37.3173   |
| 0.649186  | 0.970817  | 0.163576  | 0.295842  | 2.60178   | 1.36445   |
| 48.827    | 57.766    | 53.914    | 60.58     | 51.9142   | 60.8338   |
| 0.57657   | 0.307937  | 0.311312  | 0.563036  | 0.0892183 | 0.069247  |
| 0         | 0         | 0         | 0         | 0         | 0         |
| 0.0689372 | 0.0859094 | 0.0434254 | 0.117808  | 0.0746713 | 0.202847  |
| 0         | 0         | 0         | 0         | 0         | 0         |
| 0         | 0         | 0         | 0         | 0         | 0         |
| 8.24651   | 6.80113   | 7.28777   | 8.64978   | 11.6178   | 9.98691   |
| 8.00008   | 11.0264   | 13.1009   | 15.7493   | 18.4668   | 15.3116   |
| 0         | 0         | 0         | 0         | 0         | 0         |
| 0.0971171 | 0.0605136 | 0.18353   | 0.0553219 | 0.368183  | 0.122471  |
| 6.64047   | 5.89477   | 6.48326   | 6.4698    | 6.57348   | 5.41885   |
| 4.27821   | 3.76898   | 5.97066   | 5.37214   | 9.60437   | 4.1582    |
| 36.8223   | 38.2293   | 33.8422   | 36.0879   | 28.017    | 35.5094   |
| 0         | 1.10093   | 0         | 1.00648   | 0.212648  | 0.742711  |
| 44.0401   | 42.2457   | 49.4135   | 39.8289   | 45.2368   | 41.9573   |
| 1965.47   | 2300.16   | 1316.16   | 2050.61   | 862.224   | 1401.46   |
| 0.193181  | 0         | 0         | 0.220088  | 0.104625  | 0.0812048 |
| 13.4304   | 13.3368   | 13.4636   | 16.0091   | 14.3994   | 16.6921   |
| 0         | 0         | 0         | 0         | 0         | 0         |
| 0         | 0         | 0         | 0         | 0         | 0         |

|           |           |           |           |           |           |
|-----------|-----------|-----------|-----------|-----------|-----------|
| 24.733    | 27.5673   | 21.4312   | 23.7391   | 26.4633   | 29.1314   |
| 0.020085  | 0         | 0         | 0         | 0.0435113 | 0.0168857 |
| 0         | 0         | 0         | 0         | 0         | 0         |
| 0         | 0         | 0         | 0         | 0         | 0.0654128 |
| 12.8992   | 11.0153   | 11.8034   | 10.6244   | 13.4303   | 11.3527   |
| 0         | 0         | 0         | 0         | 0         | 0.0100459 |
| 72.0095   | 75.6068   | 61.5534   | 63.8733   | 52.8324   | 67.6754   |
| 32.6135   | 29.3392   | 32.9081   | 28.573    | 26.2753   | 19.7237   |
| 2.42865   | 2.55415   | 2.62347   | 1.56389   | 2.93618   | 2.00804   |
| 2.22657   | 1.73533   | 3.27827   | 2.0605    | 2.05247   | 1.79572   |
| 162.698   | 165.324   | 87.537    | 108.976   | 93.8719   | 124.504   |
| 3.54998   | 3.17525   | 3.46653   | 3.67383   | 4.28349   | 2.61116   |
| 0.131396  | 0         | 0.331081  | 0.149698  | 0.426978  | 0.110467  |
| 0.359868  | 0.133586  | 0.472674  | 0.331483  | 0.514207  | 0.128743  |
| 2.55515   | 3.37605   | 1.82288   | 2.63046   | 3.20119   | 2.97635   |
| 2.73612   | 3.16532   | 2.28215   | 2.08534   | 2.17919   | 2.3628    |
| 0         | 0         | 0         | 0         | 0         | 0         |
| 5.3397    | 6.13691   | 5.75117   | 5.64215   | 6.38388   | 6.14229   |
| 1.90642   | 1.68069   | 1.20147   | 0.787093  | 1.13364   | 1.32027   |
| 16.0983   | 15.9133   | 17.0095   | 14.9144   | 16.2764   | 15.2369   |
| 0.102352  | 0.0255101 | 0         | 0.046643  | 0.0221731 | 0.0172097 |
| 0         | 0         | 0         | 0         | 0         | 0         |
| 0.275935  | 0.52223   | 0.810738  | 0.226009  | 0.514556  | 0.315179  |
| 1.28638   | 1.11759   | 0.912899  | 0.993797  | 1.30244   | 1.30111   |
| 12.0951   | 11.6638   | 8.91812   | 7.28375   | 8.72994   | 8.39518   |
| 0         | 0         | 0.161489  | 0         | 0         | 0         |
| 47.1882   | 48.1274   | 47.1644   | 48.0245   | 44.3046   | 43.9216   |
| 129.734   | 144.397   | 152.002   | 132.609   | 130.073   | 127.59    |
| 0         | 0         | 0         | 0         | 0         | 0         |
| 28.5373   | 28.277    | 27.7944   | 28.8225   | 27.6658   | 22.2384   |
| 18.403    | 16.9393   | 15.4046   | 16.3699   | 16.3706   | 17.7415   |
| 0         | 0         | 0         | 0         | 0         | 0         |
| 0.0682298 | 0.0212562 | 0.0214891 | 0         | 0         | 0         |
| 0.299559  | 0.37331   | 0.0838667 | 0.0758404 | 0.519162  | 0.251843  |
| 0.0986976 | 10.988    | 0.186517  | 94.7626   | 0.534536  | 6.7904    |
| 127.088   | 109.304   | 102.281   | 105.37    | 99.7105   | 110.24    |
| 19.9049   | 18.5919   | 20.873    | 21.5591   | 18.4988   | 18.5497   |
| 191.588   | 202.575   | 186.816   | 193.605   | 155.643   | 174.998   |
| 2.49741   | 2.54449   | 3.22078   | 2.23007   | 3.78355   | 2.82312   |
| 11.3026   | 12.0081   | 13.1543   | 10.6152   | 12.6891   | 9.27395   |
| 2.42922   | 3.02729   | 2.10407   | 1.72973   | 1.15118   | 1.65935   |
| 10.7435   | 11.1781   | 10.4451   | 10.5371   | 11.8088   | 13.8379   |
| 18.0821   | 19.0445   | 14.8901   | 21.9605   | 16.1861   | 14.5947   |

|          |           |          |           |           |           |
|----------|-----------|----------|-----------|-----------|-----------|
| 0.711308 | 0.612248  | 0.567101 | 0.331686  | 0.385237  | 0.601565  |
| 0        | 0         | 0        | 0         | 0         | 0         |
| 0        | 0.0938855 | 0        | 0         | 0         | 0         |
| 13.0532  | 15.3564   | 11.7234  | 17.5629   | 10.7222   | 14.6858   |
| 0        | 0         | 0        | 0         | 0         | 0         |
| 1.59349  | 1.68798   | 1.004    | 0.937911  | 1.17938   | 1.67447   |
| 3.80894  | 3.97488   | 4.7597   | 5.22147   | 4.52828   | 5.41514   |
| 11.1451  | 11.2992   | 10.7721  | 11.7452   | 12.4006   | 12.9954   |
| 34.2184  | 37.8421   | 35.5601  | 33.9282   | 26.0113   | 28.7696   |
| 28.9735  | 72.2136   | 73.0049  | 132.036   | 156.918   | 267.943   |
| 9.85293  | 10.867    | 11.068   | 9.64134   | 10.3509   | 8.67462   |
| 4.56467  | 4.76505   | 2.96884  | 3.64551   | 4.21531   | 3.30332   |
| 2.83754  | 2.62821   | 2.88245  | 2.09692   | 2.35363   | 2.90135   |
| 5.66162  | 5.82359   | 5.97798  | 6.30686   | 5.56798   | 5.54553   |
| 53.89    | 49.6763   | 60.0071  | 58.6196   | 58.3779   | 57.3451   |
| 4.68765  | 4.36382   | 4.5841   | 4.94825   | 4.89203   | 4.88408   |
| 1.99135  | 1.60151   | 3.52942  | 2.48415   | 6.09923   | 3.71793   |
| 16.1814  | 14.2158   | 13.5486  | 12.5955   | 13.5537   | 17.6174   |
| 0        | 0         | 0        | 0         | 0         | 0         |
| 16.0284  | 20.318    | 24.2381  | 26.5789   | 17.6434   | 18.1441   |
| 0        | 0         | 0        | 0         | 0         | 0         |
| 17.7215  | 18.0088   | 17.5354  | 16.1461   | 16.1199   | 18.8205   |
| 16.7151  | 16.2763   | 20.0842  | 20.1997   | 24.3151   | 30.2888   |
| 3.74073  | 4.51127   | 3.94404  | 3.80873   | 3.09392   | 2.52982   |
| 16.512   | 14.5045   | 16.6052  | 15.6521   | 19.5531   | 16.9526   |
| 0.102038 | 0.0317896 | 0        | 0.0290623 | 0.0276311 | 0.0857848 |
| 0.125939 | 0.156945  | 0        | 0         | 0         | 0.105879  |
| 3.48612  | 1.72279   | 3.63105  | 1.79907   | 4.20818   | 2.70707   |
| 20.5006  | 22.8229   | 27.024   | 29.3383   | 18.6052   | 21.5251   |
| 22.0258  | 21.9209   | 24.9661  | 20.4499   | 23.4466   | 22.6552   |
| 3.91948  | 3.7589    | 7.13927  | 8.51278   | 4.04235   | 3.17721   |
| 14.4432  | 13.6125   | 15.1913  | 12.0334   | 13.4446   | 13.1307   |
| 12.6201  | 13.3726   | 15.1365  | 11.9493   | 13.5911   | 10.7931   |
| 31.3429  | 33.7663   | 32.9602  | 33.6103   | 35.2956   | 38.8073   |
| 127.141  | 128.811   | 94.1895  | 91.2832   | 87.9017   | 99.4735   |
| 0.107242 | 0.122507  | 0.163256 | 0.203631  | 0.130682  | 0.082646  |
| 61.3575  | 42.7968   | 73.071   | 66.078    | 83.8204   | 119.079   |
| 0        | 0         | 0        | 0         | 0         | 0         |
| 0        | 0         | 0        | 0         | 0         | 0         |
| 1.98067  | 1.8173    | 2.03909  | 1.80745   | 2.80022   | 1.70045   |
| 12.5487  | 11.5262   | 11.1697  | 14.5936   | 13.9937   | 11.9096   |
| 2.77727  | 3.40143   | 8.25688  | 7.04329   | 3.38084   | 3.15621   |
| 2.881    | 2.81402   | 4.36538  | 2.70566   | 6.4662    | 4.05864   |

|           |           |           |           |           |            |
|-----------|-----------|-----------|-----------|-----------|------------|
| 30.9595   | 30.5467   | 24.4928   | 22.9329   | 28.0267   | 33.0546    |
| 5.34237   | 3.25235   | 6.7764    | 6.05853   | 5.69233   | 8.33342    |
| 0         | 0         | 0         | 0         | 0         | 0          |
| 9.55039   | 9.69552   | 9.87924   | 8.10322   | 8.63007   | 7.73378    |
| 0         | 0.0352401 | 0         | 0         | 0         | 0          |
| 0         | 0         | 0.0642638 | 0         | 0.499089  | 0.0428838  |
| 7.38561   | 5.74009   | 6.8035    | 2.26191   | 8.77413   | 2.53708    |
| 38.9301   | 32.8082   | 39.5323   | 36.995    | 39.0938   | 41.0481    |
| 110.413   | 100.496   | 102.55    | 85.5269   | 85.6294   | 97.9119    |
| 27.1341   | 25.6511   | 27.3195   | 27.0854   | 30.0945   | 31.4762    |
| 45.7649   | 43.134    | 44.2088   | 45.1359   | 40.9142   | 52.8963    |
| 0.0633993 | 0         | 0         | 0         | 0         | 0          |
| 40.8826   | 42.5538   | 43.3305   | 37.8756   | 43.2745   | 37.8585    |
| 6.05668   | 6.29159   | 7.14617   | 4.91439   | 7.21708   | 6.21993    |
| 0.839228  | 1.4007    | 1.73052   | 1.32748   | 1.26963   | 0.944604   |
| 7.4704    | 5.75948   | 5.89063   | 7.65715   | 11.7705   | 9.9902     |
| 1.0518    | 0.698246  | 1.7208    | 0.996061  | 2.03071   | 1.33995    |
| 4.45579   | 4.81675   | 4.1362    | 4.81234   | 7.41932   | 7.101      |
| 9.72681   | 9.67768   | 13.6379   | 13.137    | 9.94111   | 9.76018    |
| 0.039913  | 0         | 0         | 0         | 0.0432329 | 0.0335553  |
| 8.35664   | 7.82507   | 8.88129   | 9.14827   | 11.2599   | 9.0076     |
| 13.9575   | 13.0122   | 9.73187   | 13.2918   | 8.42483   | 12.0926    |
| 46.3677   | 42.5359   | 26.9121   | 35.5727   | 18.8898   | 29.042     |
| 1.05539   | 1.61647   | 0.902257  | 0.976471  | 1.21824   | 0.756954   |
| 15.2592   | 18.2517   | 13.1355   | 11.3787   | 13.1815   | 17.592     |
| 0         | 4.16788   | 0.0489947 | 37.8815   | 0.294868  | 2.71365    |
| 0.0664915 | 0         | 0         | 0.0378761 | 0         | 0          |
| 16.3501   | 17.1567   | 19.7142   | 19.3988   | 17.52     | 16.9292    |
| 0.0443386 | 0.0444225 | 0.0225345 | 0.0301284 | 0.105791  | 0.00752233 |
| 50.7472   | 50.1215   | 46.4123   | 48.2225   | 48.928    | 44.8754    |
| 0         | 0         | 0         | 0         | 0         | 0          |
| 84.5741   | 109.108   | 43.9446   | 82.0804   | 9.00104   | 21.9012    |
| 20.5023   | 19.2862   | 23.3814   | 20.6427   | 21.0812   | 18.5934    |
| 0.551642  | 0.323509  | 0.613225  | 0.295754  | 0.632676  | 0.463772   |
| 0.394203  | 0.25316   | 0.192065  | 0.103069  | 0.118021  | 0.164746   |
| 0.0813476 | 0         | 0.102486  | 0.0926779 | 0.176228  | 0.102585   |
| 9.65284   | 5.5118    | 16.2554   | 9.88747   | 26.7651   | 11.8284    |
| 0         | 0         | 0         | 0         | 0         | 0          |
| 298.838   | 340.66    | 327.905   | 394.278   | 222.738   | 283.897    |
| 486.687   | 495.227   | 414.57    | 443.501   | 339.01    | 366.553    |
| 3.17502   | 2.22425   | 2.39569   | 2.54733   | 2.64361   | 2.48043    |
| 0.423336  | 0.372317  | 0.372317  | 0.461402  | 0.426624  | 0.294492   |
| 9.93705   | 9.34102   | 10.3203   | 8.39038   | 11.4761   | 9.95141    |

|           |          |           |           |           |           |
|-----------|----------|-----------|-----------|-----------|-----------|
| 0         | 0        | 0         | 0         | 0         | 0         |
| 0.0730914 | 0.364346 | 0.0920845 | 0.374723  | 0.0395856 | 0.153622  |
| 8.11544   | 8.22479  | 8.62287   | 6.51709   | 8.89638   | 7.02825   |
| 0.0867175 | 0        | 0.327755  | 0.316126  | 0.201177  | 0.0766222 |
| 225.861   | 258.944  | 236.949   | 249.963   | 215.837   | 269.662   |
| 9.33897   | 9.93506  | 10.4744   | 12.3265   | 15.3279   | 13.2612   |
| 6.09915   | 5.86635  | 7.01362   | 6.76211   | 7.0942    | 7.53658   |
| 0.197092  | 1.07178  | 0.519189  | 1.5514    | 0.310526  | 0.843553  |
| 0.0900355 | 0        | 0.068059  | 0.0820607 | 0.0585148 | 0.0454164 |
| 6.19738   | 5.49051  | 6.2877    | 5.89422   | 7.20794   | 5.80962   |
| 0         | 0        | 0         | 0         | 0         | 0         |
| 8.02659   | 7.13901  | 9.91859   | 6.63194   | 11.0763   | 7.26519   |
| 0.482992  | 0.398729 | 0.893372  | 0.388028  | 0.33491   | 0.26375   |
| 1.27237   | 0.65619  | 0.850815  | 0.42596   | 0.647974  | 1.13158   |
| 22.2498   | 22.885   | 25.4737   | 25.1003   | 27.9238   | 27.315    |
| 0         | 0        | 0         | 0         | 0         | 0         |
| 0.0174985 | 0        | 0.0661365 | 0         | 0         | 0         |
| 20.4415   | 18.9317  | 20.7999   | 19.7315   | 26.9316   | 17.6044   |
| 0.669781  | 0.776892 | 1.21611   | 0.416712  | 0.715894  | 0.527209  |
| 18.6926   | 19.2681  | 18.1285   | 20.3688   | 13.4083   | 12.6469   |
| 42.7053   | 44.7335  | 44.0906   | 43.8788   | 55.0654   | 53.6551   |
| 0.49085   | 0.333653 | 0.913544  | 0.368575  | 0.712932  | 0.29074   |
| 8.44905   | 9.1435   | 9.94591   | 9.33642   | 9.81623   | 9.39218   |
| 154.403   | 172.262  | 172.676   | 184.928   | 139.797   | 161.742   |
| 2.42747   | 2.15588  | 2.24062   | 1.98463   | 2.56427   | 2.62209   |
| 0         | 0        | 0         | 0         | 0         | 0         |
| 26.4607   | 24.8502  | 23.1812   | 19.8712   | 22.3387   | 21.7081   |
| 3.23447   | 3.37455  | 3.20996   | 2.61662   | 1.97285   | 1.67774   |
| 5.37125   | 5.57951  | 5.34484   | 5.24795   | 6.21193   | 4.97678   |
| 8.99869   | 10.0324  | 5.84645   | 5.8616    | 4.80803   | 6.64932   |
| 0         | 0        | 0.132582  | 0         | 0.569945  | 0         |
| 29.5374   | 26.6597  | 55.9413   | 29.8904   | 44.8354   | 27.307    |
| 4.52579   | 4.61829  | 5.47459   | 4.95066   | 4.99105   | 4.13575   |
| 1.31328   | 0.997073 | 1.3294    | 0.528393  | 1.55091   | 0.642021  |
| 3.68074   | 3.82097  | 3.81813   | 2.26879   | 5.33137   | 3.55335   |
| 1.76417   | 2.26271  | 2.77198   | 1.96293   | 2.87385   | 2.50737   |
| 1.71301   | 1.61293  | 1.72652   | 1.99498   | 2.39153   | 2.8163    |
| 0         | 0        | 0.0274573 | 0         | 0         | 0         |
| 1.48374   | 1.11411  | 0.624148  | 0.32677   | 0.988415  | 0.432466  |
| 1.00705   | 0.717135 | 1.45646   | 0.0819512 | 0.63631   | 1.20949   |
| 1.5198    | 1.33591  | 0         | 0         | 0         | 0         |
| 3.63058   | 3.91942  | 2.5795    | 2.02001   | 2.10351   | 2.43115   |
| 0.102607  | 0.127869 | 0.0517079 | 0.070139  | 0         | 0         |



|           |           |           |           |           |           |
|-----------|-----------|-----------|-----------|-----------|-----------|
| 3.41941   | 3.24295   | 3.30708   | 2.90859   | 3.59965   | 3.36299   |
| 14.9981   | 14.7832   | 12.3775   | 11.1334   | 18.057    | 13.6635   |
| 0.536022  | 0.673562  | 0.225506  | 0.239891  | 0.565458  | 0.637479  |
| 9.28945   | 9.20244   | 8.95888   | 7.79562   | 9.29145   | 10.3909   |
| 6.92606   | 7.88445   | 6.49454   | 6.4983    | 6.08057   | 6.52619   |
| 0.082878  | 0.103282  | 0.104414  | 0.0944215 | 0         | 0.0232255 |
| 5.7698    | 3.80488   | 6.57249   | 4.65619   | 9.73924   | 7.19527   |
| 8.1755    | 7.33465   | 10.9874   | 7.1517    | 12.417    | 7.41432   |
| 0.497872  | 0.620448  | 0.139388  | 0.567218  | 0.419444  | 0.74412   |
| 0         | 0         | 0         | 0         | 0         | 0         |
| 1.07028   | 0.986072  | 1.56511   | 1.52419   | 1.4181    | 1.3015    |
| 8.07508   | 9.66063   | 4.06937   | 7.54384   | 5.59793   | 5.43106   |
| 0         | 0         | 0         | 37.2952   | 35.4586   | 0         |
| 0.669103  | 0.55589   | 0.638615  | 0.900896  | 0.724758  | 0.289784  |
| 27.1189   | 24.9589   | 21.3042   | 20.3682   | 18.8613   | 18.2224   |
| 1.10738   | 1.76047   | 1.43735   | 1.05891   | 2.04819   | 1.82766   |
| 0.459079  | 0.520095  | 0.683532  | 0.19019   | 0.135618  | 0.31578   |
| 0         | 0.20085   | 0.203051  | 0.367237  | 0         | 0         |
| 0.387644  | 0.772902  | 0.486227  | 0.440382  | 0.250746  | 0.162501  |
| 28.0356   | 26.462    | 27.5702   | 28.6108   | 26.4202   | 24.1007   |
| 4.30808   | 4.4408    | 4.58997   | 4.45367   | 6.10669   | 5.20922   |
| 12.4181   | 11.0532   | 14.5413   | 13.086    | 15.0995   | 12.6909   |
| 7.52023   | 6.49611   | 9.04521   | 7.15437   | 9.99771   | 7.37067   |
| 268.382   | 304.052   | 92.2152   | 55.5933   | 317.134   | 205.12    |
| 0.733652  | 0.228569  | 0.635452  | 0.261199  | 0.248336  | 0.0770988 |
| 0.0451431 | 0         | 0         | 0.146443  | 0.0977961 | 0.0202619 |
| 64.1169   | 62.069    | 64.8151   | 60.5151   | 65.8515   | 63.924    |
| 65.1486   | 62.9928   | 56.4705   | 55.8946   | 49.6089   | 60.9834   |
| 38.9121   | 39.8276   | 38.7358   | 35.777    | 38.63     | 45.1607   |
| 20.8928   | 17.5335   | 24.7559   | 22.5675   | 27.2141   | 39.5988   |
| 6.33619   | 7.17165   | 17.58     | 18.3434   | 16.7501   | 20.0039   |
| 0.0362695 | 0.0451991 | 0.0456943 | 0.0413213 | 0         | 0.121969  |
| 0         | 0         | 0         | 0         | 0         | 0         |
| 0         | 0.0379385 | 0.0383542 | 0         | 0.0329757 | 0         |
| 4.00449   | 6.43829   | 5.32905   | 12.4424   | 5.10734   | 5.88919   |
| 0.12385   | 0.173635  | 0.0585125 | 0.0705503 | 0.301842  | 0.0520612 |
| 10.6564   | 8.99275   | 11.6548   | 10.7784   | 8.52077   | 8.65916   |
| 11.2177   | 12.7458   | 10.1073   | 12.1892   | 13.0622   | 13.6632   |
| 0.0905476 | 0.626891  | 0.139744  | 0.974317  | 0.294238  | 0.110134  |
| 0.362038  | 0.287109  | 0.116102  | 0.232479  | 0.249551  | 0.127282  |
| 28.7393   | 33.2603   | 29.9254   | 31.0784   | 21.4444   | 27.2261   |
| 12.3767   | 13.9326   | 11.4843   | 13.6751   | 11.1771   | 11.0433   |
| 42.9744   | 39.9642   | 40.7631   | 38.5507   | 34.6284   | 35.595    |

|           |           |           |           |           |           |
|-----------|-----------|-----------|-----------|-----------|-----------|
| 0.0652667 | 0         | 0.0411133 | 0.0743572 | 0         | 0.0548705 |
| 0.0896539 | 0.0558633 | 0.141189  | 0.0766059 | 0.0485556 | 0.0188433 |
| 0.148691  | 0         | 0         | 0         | 0.161059  | 0         |
| 0         | 0         | 0.203051  | 0         | 0.174576  | 0         |
| 0         | 0         | 0         | 0         | 0         | 0         |
| 2.51091   | 2.817     | 2.14052   | 1.54806   | 2.0964    | 2.74482   |
| 5.84347   | 7.21513   | 4.95916   | 7.46683   | 6.20444   | 5.69935   |
| 13.4395   | 11.6703   | 14.0578   | 11.8649   | 14.1814   | 13.842    |
| 0.366715  | 0.416383  | 0.430543  | 0.260301  | 0.479384  | 0.392302  |
| 8.09329   | 6.84483   | 7.7512    | 6.61138   | 6.32785   | 5.27034   |
| 0         | 0         | 0         | 0         | 0.0478397 | 0         |
| 3.74595   | 3.76169   | 4.33681   | 3.90246   | 4.52277   | 4.30506   |
| 0         | 0.0198969 | 0.0201149 | 0         | 0.0172941 | 0.0134229 |
| 23.3003   | 22.2341   | 19.9651   | 20.2595   | 24.019    | 25.2602   |
| 37.2023   | 38.0057   | 36.7959   | 35.6075   | 30.3288   | 30.6635   |
| 0         | 0         | 0         | 0         | 0         | 0         |
| 0.432914  | 0.593446  | 0.418146  | 0.44389   | 0.390769  | 0.266901  |
| 75.7723   | 91.2869   | 87.0197   | 87.1971   | 111.393   | 112.951   |
| 0         | 0         | 0         | 0         | 0         | 0         |
| 2.99792   | 2.9624    | 2.93104   | 2.68277   | 3.20606   | 3.12047   |
| 18.9216   | 21.6663   | 18.7253   | 20.6823   | 12.4755   | 16.507    |
| 3.33726   | 2.97296   | 3.28421   | 2.49662   | 3.52729   | 3.00453   |
| 34.8835   | 0         | 0         | 119.227   | 0         | 117.308   |
| 5.89776   | 5.77757   | 5.34474   | 7.63015   | 5.12613   | 5.58535   |
| 0.0495155 | 0.0723121 | 0.0116963 | 0.010577  | 0.0536342 | 0.0921581 |
| 2.9626    | 2.39655   | 3.14311   | 2.48702   | 3.82832   | 3.62693   |
| 23.3536   | 22.1113   | 27.0156   | 23.7695   | 27.5947   | 25.2288   |
| 0         | 0         | 0.0140818 | 0.0509365 | 0.145285  | 0.0375876 |
| 21.5035   | 23.6156   | 23.6536   | 22.3311   | 24.1328   | 31.2209   |
| 0.0382752 | 0.0238493 | 0.0964423 | 0.0218031 | 0.124377  | 0.0804461 |
| 0         | 0         | 0.212064  | 0         | 0         | 0         |
| 0.991434  | 1.57653   | 1.0399    | 1.16588   | 0.72199   | 0.724906  |
| 5.34917   | 4.79414   | 4.64665   | 4.49414   | 5.42371   | 5.04129   |
| 0.297138  | 0.222176  | 0.14974   | 0.0677048 | 0.128741  | 0.099923  |
| 34.225    | 39.1988   | 30.2879   | 35.0592   | 38.2599   | 44.7551   |
| 3.70147   | 3.3704    | 3.94222   | 3.63365   | 4.19726   | 4.01584   |
| 14.7885   | 12.1376   | 19.4149   | 14.2384   | 20.6538   | 16.0419   |
| 0         | 0         | 0         | 0         | 0         | 0         |
| 0.304572  | 0.339031  | 0.041968  | 0.0379516 | 0.144333  | 0.149366  |
| 3.34327   | 3.66115   | 3.96837   | 4.70048   | 4.26969   | 3.75524   |
| 0         | 0         | 0         | 0.0469265 | 0.0223078 | 0         |
| 21.0619   | 21.6859   | 24.1511   | 27.1142   | 26.8625   | 23.3724   |
| 11.3531   | 9.73729   | 20.5293   | 15.5212   | 26.0271   | 24.5916   |

|           |            |           |           |           |           |
|-----------|------------|-----------|-----------|-----------|-----------|
| 0.367704  | 0.057279   | 0.231627  | 0.471284  | 1.34423   | 1.00468   |
| 0         | 0          | 0         | 0         | 0         | 0         |
| 0.0390738 | 0          | 0.0492273 | 0.0445162 | 0         | 0         |
| 5.13101   | 3.31132    | 6.88047   | 9.21873   | 3.94491   | 2.92626   |
| 12.1128   | 15.095     | 15.544    | 18.2118   | 14.1609   | 16.619    |
| 52.5808   | 57.9732    | 47.0764   | 52.5709   | 26.6209   | 35.1041   |
| 0.0331927 | 0.102137   | 0.0931277 | 0.0768339 | 0.0575268 | 0.173878  |
| 4.96831   | 4.93208    | 4.91955   | 5.2427    | 4.44053   | 3.90502   |
| 0.433007  | 0.34019    | 0.3202    | 0.15014   | 0.356866  | 0.110793  |
| 1.164     | 2.86721    | 28.9636   | 23.9712   | 32.3757   | 24.3773   |
| 0.732256  | 0.338745   | 0.670936  | 0.834247  | 0.865271  | 1.1193    |
| 7.44969   | 6.86194    | 9.87521   | 8.11829   | 8.84121   | 6.68512   |
| 6.61      | 4.93819    | 4.8496    | 3.99337   | 5.10433   | 2.32489   |
| 32.114    | 36.0497    | 33.1049   | 32.7017   | 34.2534   | 26.0729   |
| 163.388   | 162.284    | 148.95    | 165.553   | 116.448   | 160.168   |
| 0         | 0          | 0         | 0         | 0         | 0         |
| 4.59628   | 5.51945    | 4.43606   | 5.73591   | 3.07479   | 3.85184   |
| 0.199738  | 0.135384   | 0.291302  | 0.13465   | 0.48893   | 0.137581  |
| 3.42564   | 2.90232    | 4.17608   | 2.6814    | 6.35337   | 5.21089   |
| 2.27809   | 2.50087    | 3.06523   | 2.37933   | 2.50789   | 2.69796   |
| 0.133008  | 0.165754   | 0         | 0.303067  | 0.192095  | 0.0745475 |
| 14.6288   | 16.2924    | 11.4358   | 10.7176   | 11.5377   | 11.6248   |
| 4.30781   | 2.38595    | 3.91965   | 2.45391   | 3.62921   | 2.71622   |
| 0.258142  | 0.281485   | 0.243916  | 0.441146  | 0.419422  | 0.325535  |
| 0.349981  | 0.109036   | 0         | 0.398727  | 0.379092  | 0.331013  |
| 49.0958   | 48.9283    | 54.2246   | 50.8751   | 49.5366   | 43.3556   |
| 42.8545   | 35.8447    | 42.632    | 36.2956   | 36.6003   | 36.1573   |
| 2.4417    | 2.1871     | 2.73975   | 3.9304    | 2.30044   | 2.79289   |
| 0         | 0          | 0         | 0         | 0         | 0         |
| 0.0482737 | 0          | 0         | 0         | 0         | 0         |
| 0         | 0.0477863  | 0.0483099 | 0.0436866 | 0         | 0         |
| 2.67383   | 2.50007    | 2.53197   | 2.06906   | 2.32335   | 2.28548   |
| 22.8585   | 27.3113    | 21.9336   | 38.3541   | 22.428    | 27.9711   |
| 2.42427   | 2.32458    | 2.49428   | 2.37065   | 3.68358   | 2.64388   |
| 5.61742   | 5.52704    | 7.82209   | 8.67366   | 8.96707   | 8.82398   |
| 0.902079  | 0          | 1.13649   | 0         | 0         | 0         |
| 0         | 0.0508312  | 0         | 0         | 0.0441818 | 0         |
| 0.36756   | 1.14513    | 1.0805    | 1.8844    | 1.99067   | 2.4721    |
| 27.4689   | 28.0768    | 32.1206   | 28.6796   | 30.8164   | 26.1387   |
| 0.0329242 | 0.00760264 | 0.0225455 | 0.0566672 | 0         | 0         |
| 19.7211   | 19.4159    | 18.4648   | 19.5623   | 20.3181   | 23.2152   |
| 12.1785   | 11.0672    | 10.1386   | 6.1078    | 13.1719   | 7.37603   |
| 5.40185   | 6.60788    | 7.89109   | 6.56955   | 6.99987   | 5.32152   |

|          |           |          |           |           |          |
|----------|-----------|----------|-----------|-----------|----------|
| 16.1327  | 20.9688   | 17.152   | 23.0371   | 19.491    | 20.4979  |
| 0        | 0         | 0        | 0         | 0         | 0        |
| 286.234  | 251.333   | 247.029  | 255.341   | 186.144   | 347.987  |
| 5.54183  | 5.44304   | 4.46723  | 4.60152   | 5.01081   | 3.5338   |
| 0.269388 | 0.0839276 | 0.509084 | 0.666035  | 0.513681  | 0.227264 |
| 12.9711  | 12.5547   | 10.8453  | 11.4734   | 13.8601   | 13.2739  |
| 47.7771  | 54.8469   | 55.9012  | 60.4978   | 70.5084   | 68.1498  |
| 0.1029   | 0.0256468 | 0.155567 | 0.0937859 | 0.133751  | 0.121113 |
| 5.36101  | 5.2393    | 6.85857  | 6.18801   | 6.84887   | 5.20422  |
| 9.90685  | 8.52586   | 12.6382  | 12.4149   | 8.14506   | 11.0126  |
| 48.7382  | 52.715    | 134.306  | 138.237   | 82.0634   | 79.0012  |
| 0        | 0         | 123.726  | 0         | 0         | 27.5213  |
| 1.00398  | 1.59238   | 0.804914 | 0.467924  | 2.3727    | 1.76484  |
| 17.2147  | 17.9223   | 19.2955  | 17.9869   | 19.5695   | 18.8999  |
| 7.21286  | 6.88274   | 14.0202  | 12.3497   | 17.7686   | 13.3176  |
| 17.4892  | 18.6255   | 18.5009  | 17.1903   | 16.762    | 15.352   |
| 12.5433  | 14.3289   | 9.28759  | 10.1224   | 10.9945   | 12.141   |
| 0.122733 | 0.038224  | 0.206171 | 0.0349446 | 0.207733  | 0.185738 |
| 0.109576 | 0         | 0        | 0.0780205 | 0.0659334 | 0.068237 |
| 13.483   | 13.6649   | 12.057   | 11.653    | 14.6988   | 14.6051  |
| 5.94086  | 6.09619   | 7.19843  | 8.58554   | 9.45601   | 8.6235   |
| 7.28454  | 7.69128   | 7.38557  | 6.86594   | 6.8368    | 5.4521   |
| 0        | 0         | 0        | 0         | 0         | 0        |
| 8.67403  | 9.55274   | 7.23149  | 5.02365   | 6.1772    | 5.93575  |
| 1.45855  | 1.45412   | 2.20508  | 1.32936   | 0.315975  | 0.735734 |
| 19.3929  | 19.2913   | 18.8344  | 17.6658   | 18.8951   | 20.907   |
| 1.49317  | 1.38569   | 0.800501 | 1.62875   | 1.27325   | 1.20191  |
| 1.91501  | 2.79794   | 3.24457  | 2.03127   | 2.00277   | 3.88613  |
| 21.6339  | 20.2987   | 22.5543  | 23.6706   | 16.824    | 20.986   |
| 3.05178  | 2.7605    | 2.91121  | 2.45104   | 2.31308   | 2.73314  |
| 1.90998  | 1.83962   | 2.95281  | 3.03165   | 2.60184   | 1.8017   |
| 4.16659  | 5.48414   | 2.10642  | 3.26208   | 3.69244   | 3.44264  |
| 0        | 0.292163  | 0        | 0         | 0         | 0        |
| 28.1104  | 28.6371   | 45.2979  | 40.1895   | 47.9639   | 47.217   |
| 0.648694 | 0.425474  | 0.430136 | 0.505663  | 0.258872  | 0.602771 |
| 0        | 0         | 0        | 0         | 0         | 0        |
| 25.4278  | 21.4058   | 23.4767  | 26.4687   | 26.8214   | 23.6415  |
| 24.2309  | 25.9538   | 23.3182  | 24.7173   | 25.3455   | 31.5646  |
| 0.139679 | 0.174068  | 0.351951 | 0.318268  | 0         | 0        |
| 56.1072  | 54.8964   | 50.1631  | 52.4507   | 43.5895   | 42.4085  |
| 1.36988  | 1.21424   | 0.836292 | 1.02147   | 0.994702  | 0.670841 |
| 15.9542  | 12.0892   | 16.3748  | 14.1986   | 17.3861   | 14.1989  |
| 21.2145  | 24.3682   | 25.0483  | 22.9076   | 19.0479   | 22.1892  |

|           |           |           |           |           |           |
|-----------|-----------|-----------|-----------|-----------|-----------|
| 1.87164   | 0         | 0         | 0         | 0         | 0         |
| 0.0089895 | 0         | 0         | 0.0204832 | 0         | 0         |
| 2.32333   | 2.56678   | 2.57415   | 2.36534   | 2.60583   | 2.29957   |
| 2.62433   | 1.62744   | 2.55562   | 2.55657   | 4.4218    | 3.30409   |
| 40.9661   | 44.5195   | 52.0121   | 47.2148   | 56.8738   | 48.2993   |
| 0.437028  | 0.412284  | 0.749166  | 0.559035  | 0.448445  | 0.328635  |
| 0.266744  | 6.87E-27  | 0.17254   | 4.86E-25  | 0.161838  | 0.0550577 |
| 4.53351   | 5.19916   | 1.79274   | 2.55732   | 2.21936   | 2.40001   |
| 2.96135   | 3.8806    | 2.85972   | 2.78907   | 4.18589   | 3.61646   |
| 0         | 0         | 0         | 0         | 0         | 0         |
| 0         | 0         | 0         | 0         | 0         | 0         |
| 0.688524  | 0.796749  | 0.43372   | 0.224121  | 1.33178   | 0.785583  |
| 0.0298751 | 0.111691  | 0.0376382 | 0.0680723 | 0.12944   | 0.0502327 |
| 0         | 0         | 0         | 0         | 0         | 0         |
| 123.431   | 114.257   | 111.112   | 121.106   | 106.364   | 103.183   |
| 0.226771  | 0.353252  | 0.392836  | 0.161473  | 0.245634  | 0.40513   |
| 0         | 0.0596092 | 0         | 0         | 0.0518116 | 0.120641  |
| 37.2545   | 33.4644   | 35.2014   | 35.163    | 36.3769   | 37.6644   |
| 7.86033   | 15.5305   | 3.27451   | 4.21916   | 3.55579   | 6.79645   |
| 0.0633912 | 0.118503  | 0.0399317 | 0.0722301 | 0         | 0         |
| 21.7559   | 21.697    | 23.0144   | 24.6456   | 10.7161   | 10.1835   |
| 3.86292   | 4.43103   | 3.87125   | 5.40129   | 5.32539   | 4.61307   |
| 8.97404   | 8.52966   | 8.62982   | 7.14679   | 8.38705   | 9.48484   |
| 0.0048697 | 0         | 0.0383445 | 0         | 0.0638246 | 0.0163761 |
| 16.6172   | 19.3845   | 18.5097   | 18.8817   | 15.1902   | 17.1923   |
| 38.785    | 39.1529   | 31.0168   | 47.1028   | 30.1891   | 52.8737   |
| 6.70227   | 6.84168   | 7.31314   | 5.31185   | 8.66122   | 5.69348   |
| 0         | 0.500368  | 0.337234  | 0.30496   | 0.144971  | 0         |
| 0         | 0         | 0         | 0         | 0         | 0         |
| 0.419603  | 0.377657  | 0.49927   | 0.239023  | 0.328254  | 0.235177  |
| 4.57544   | 5.07653   | 6.56396   | 5.24635   | 4.55634   | 4.45464   |
| 15.851    | 14.9669   | 16.1182   | 15.6723   | 15.461    | 15.8403   |
| 4.62907   | 4.54866   | 4.78544   | 4.9022    | 5.19004   | 5.16391   |
| 112.178   | 108.793   | 95.7276   | 104.473   | 81.525    | 112.079   |
| 0.196141  | 0.366645  | 0.123554  | 0         | 0.318683  | 0.0824489 |
| 34.5615   | 34.3191   | 32.6455   | 30.1049   | 29.9391   | 29.9349   |
| 193.955   | 166.236   | 139.056   | 157.774   | 120.225   | 165.6     |
| 63.0199   | 62.2594   | 59.5499   | 60.7106   | 61.7399   | 64.6061   |
| 1.99779   | 2.10488   | 1.76184   | 1.26217   | 1.57379   | 0.992469  |
| 476.922   | 545.208   | 514.615   | 505.401   | 409.385   | 427.759   |
| 27.4909   | 29.9917   | 23.8188   | 26.8833   | 33.5387   | 34.8353   |
| 0.211403  | 0.0496612 | 0.361546  | 0.045158  | 0.269822  | 0.033508  |
| 1.49886   | 1.63798   | 0.813441  | 1.41864   | 1.27385   | 1.08563   |

|           |           |           |           |           |           |
|-----------|-----------|-----------|-----------|-----------|-----------|
| 0         | 0         | 0         | 0         | 0         | 0         |
| 1.61017   | 1.0033    | 0.507146  | 1.03187   | 0.436027  | 1.38189   |
| 22.7317   | 21.4959   | 41.8603   | 27.7808   | 61.3011   | 33.8405   |
| 7.87547   | 9.62976   | 10.6391   | 10.314    | 10.2209   | 10.489    |
| 65.4616   | 60.6772   | 69.8223   | 71.3129   | 55.1334   | 59.4154   |
| 8.74837   | 8.42165   | 7.36842   | 7.83911   | 8.49119   | 6.13594   |
| 19.5554   | 23.8971   | 24.2024   | 28.0552   | 16.8858   | 23.0514   |
| 2.88387   | 2.81989   | 1.99754   | 2.66698   | 2.13345   | 1.98107   |
| 0         | 0         | 0         | 0         | 0         | 0         |
| 12.005    | 13.5498   | 14.1693   | 14.8943   | 12.9671   | 15.4831   |
| 120.367   | 135.808   | 98.6979   | 114.913   | 87.0155   | 115.824   |
| 5.58789   | 6.26718   | 8.74951   | 10.4586   | 7.30637   | 6.74462   |
| 42.963    | 51.0407   | 45.8457   | 54.9241   | 45.1965   | 57.5429   |
| 0.583525  | 0.949797  | 0.960205  | 0.407021  | 0.825552  | 0.810954  |
| 0.0395495 | 0         | 0.0249133 | 0         | 0.0214196 | 0.0332498 |
| 1.09192   | 1.11776   | 0.945767  | 1.0774    | 0.749777  | 0.483585  |
| 215.522   | 202.668   | 225.57    | 303.029   | 260.119   | 249.426   |
| 0         | 0         | 0         | 0         | 0         | 0         |
| 0         | 0         | 0         | 0         | 0         | 0         |
| 8.88158   | 9.01615   | 9.3273    | 8.83349   | 9.26923   | 7.41235   |
| 5.11498   | 4.87636   | 6.07316   | 3.13176   | 5.40403   | 2.85382   |
| 0         | 0         | 0         | 0         | 0         | 0         |
| 0         | 0         | 0         | 0         | 0         | 0         |
| 1.71832   | 1.64753   | 1.33807   | 1.33427   | 1.4876    | 1.52815   |
| 1.45E-08  | 3.16E-09  | 1.97E-09  | 2.21E-07  | 7.66E-10  | 0.244358  |
| 31.7159   | 32.3718   | 26.2513   | 24.0238   | 23.9542   | 24.9802   |
| 140.038   | 151.291   | 171.747   | 164.822   | 161.357   | 167.454   |
| 0         | 0         | 0         | 0         | 0         | 0         |
| 29.0853   | 25.3273   | 24.3965   | 25.8124   | 26.3384   | 23.7914   |
| 87.068    | 81.063    | 98.4424   | 78.4655   | 120.085   | 92.1689   |
| 3.25263   | 3.20444   | 4.74161   | 3.78369   | 5.03075   | 4.1784    |
| 1.19676   | 1.21097   | 1.14692   | 1.28188   | 1.79489   | 1.76288   |
| 0.0176    | 0.0219331 | 0.0665204 | 0.0200514 | 0.019064  | 0.0295931 |
| 0.079005  | 0.24614   | 0.19907   | 0.225023  | 0.128365  | 0.0332102 |
| 22.6689   | 20.6541   | 21.1627   | 18.6064   | 23.3926   | 21.2811   |
| 0         | 0         | 0         | 0         | 0         | 0         |
| 0.311058  | 0.38764   | 0.465367  | 0.310085  | 0.905504  | 1.01335   |
| 28.4962   | 27.9226   | 28.9269   | 27.6549   | 24.4523   | 26.4196   |
| 0.257814  | 0         | 0.324808  | 1.17489   | 0         | 0.866989  |
| 39.5      | 44.4975   | 42.4859   | 44.7241   | 41.6923   | 43.39     |
| 5.44802   | 7.53906   | 7.07426   | 8.12982   | 4.34443   | 4.53807   |
| 0.146212  | 0.39834   | 0.0497355 | 0.410594  | 0.121156  | 0.339418  |
| 0         | 0         | 0.0757293 | 0         | 0.0651095 | 0         |

|           |           |           |           |           |           |
|-----------|-----------|-----------|-----------|-----------|-----------|
| 12.3118   | 12.1653   | 12.0895   | 8.3713    | 11.6036   | 9.14566   |
| 47.4982   | 51.7712   | 45.3339   | 58.1009   | 37.0506   | 61.7847   |
| 0.413787  | 0.51566   | 1.04262   | 0.117855  | 0         | 1.21756   |
| 12.6416   | 14.1802   | 10.801    | 13.6376   | 10.2081   | 10.8588   |
| 0.353085  | 0.66002   | 0.347527  | 0.754244  | 0.262937  | 0.742106  |
| 1.23764   | 0.97111   | 0         | 0         | 0         | 0         |
| 0.508996  | 0.50554   | 0.641085  | 0.646753  | 0.815356  | 0.761071  |
| 14.8837   | 12.9387   | 17.8844   | 16.0359   | 17.5493   | 15.7953   |
| 48.3502   | 46.1361   | 48.439    | 43.4679   | 41.1281   | 42.8674   |
| 19.7585   | 18.5333   | 24.0753   | 17.6976   | 25.0886   | 21.5322   |
| 0         | 0         | 0         | 0         | 0         | 0         |
| 103.314   | 102.871   | 115.061   | 124.25    | 117.581   | 143.813   |
| 2.27127   | 2.8922    | 3.39764   | 0.97      | 2.55127   | 3.4448    |
| 0.74176   | 0.660985  | 0.446734  | 1.42447   | 0.270256  | 0.252545  |
| 1.26267   | 1.06595   | 3.28419   | 3.0627    | 2.42656   | 1.95187   |
| 7.49362   | 7.26238   | 10.3295   | 7.54123   | 7.86251   | 8.44609   |
| 0.465353  | 0.802969  | 0.450982  | 0.774862  | 0.659157  | 1.23387   |
| 0         | 0         | 0         | 13.6446   | 0         | 27.6892   |
| 7.9777    | 7.79109   | 8.47714   | 7.54344   | 9.95056   | 7.94333   |
| 3.23374   | 3.56627   | 3.01047   | 3.70045   | 2.89827   | 3.01938   |
| 0.472089  | 0.418015  | 0.579112  | 0.353844  | 0.659382  | 0.344669  |
| 9.59914   | 9.49548   | 8.20352   | 8.76593   | 9.26478   | 10.2159   |
| 0         | 0         | 0         | 0         | 0         | 0         |
| 0.353425  | 0.440439  | 0.31691   | 0.252659  | 0.334561  | 0.802506  |
| 8.07968   | 7.28332   | 10.7476   | 9.34521   | 7.15245   | 7.22368   |
| 8.32923   | 8.49389   | 12.8729   | 9.38486   | 13.1607   | 11.6791   |
| 0         | 0         | 0         | 0         | 0         | 0         |
| 1.3851    | 1.69915   | 0.969965  | 1.18356   | 1.58104   | 0.967792  |
| 3.9209    | 5.07909   | 5.68722   | 4.96661   | 5.42056   | 4.46741   |
| 23.2228   | 22.8595   | 23.2282   | 20.2398   | 24.0569   | 21.0765   |
| 47.827    | 38.4473   | 61.4329   | 44.9198   | 73.8937   | 61.8208   |
| 12.8132   | 14.9285   | 14.4265   | 11.6346   | 13.1949   | 10.3609   |
| 0         | 0         | 0         | 0         | 0         | 0         |
| 12.1277   | 12.8519   | 15.2288   | 11.4347   | 12.7094   | 11.1735   |
| 7.02782   | 6.52665   | 10.5963   | 6.13996   | 8.80645   | 6.66689   |
| 21.624    | 18.7917   | 22.926    | 22.4676   | 23.0666   | 33.0356   |
| 14.9751   | 10.5164   | 13.7245   | 11.572    | 19.2787   | 12.3059   |
| 29.9193   | 27.997    | 25.5338   | 25.2061   | 29.0184   | 27.0942   |
| 2.29323   | 1.95004   | 2.03939   | 1.47537   | 3.27301   | 4.26416   |
| 0.0996261 | 0.0558693 | 0.0784465 | 0.0227005 | 0.0647478 | 0.0670055 |
| 0.589475  | 0.413639  | 0.665369  | 0.489895  | 1.10375   | 0.866759  |
| 3.06785   | 3.7605    | 4.50268   | 5.49374   | 4.30332   | 4.05774   |
| 9.03477   | 8.60731   | 9.0957    | 7.92213   | 6.50946   | 7.20963   |

|          |           |           |          |           |          |
|----------|-----------|-----------|----------|-----------|----------|
| 8.12223  | 8.89915   | 7.3624    | 9.60237  | 6.60278   | 7.69506  |
| 9.45447  | 9.26339   | 13.043    | 10.1061  | 10.2409   | 10.0064  |
| 9.39422  | 9.7592    | 11.5038   | 8.92193  | 12.6029   | 9.61418  |
| 35.0355  | 44.3008   | 35.4943   | 35.5297  | 39.8531   | 35.4112  |
| 2.90542  | 3.83212   | 3.82585   | 2.84257  | 3.69236   | 2.88423  |
| 16.0371  | 14.8188   | 21.9048   | 15.6437  | 47.6027   | 22.6954  |
| 393.97   | 378.061   | 384.969   | 466.625  | 350.975   | 494.588  |
| 6.73342  | 6.14503   | 5.68219   | 4.46382  | 5.72557   | 4.51606  |
| 0        | 0         | 0         | 1.02465  | 0.121774  | 0.283546 |
| 2.45555  | 2.86478   | 1.28353   | 0.982124 | 4.6405    | 4.1947   |
| 20.8025  | 19.4801   | 23.4504   | 17.8088  | 27.8762   | 25.6589  |
| 0.114259 | 0.0711945 | 0         | 0        | 0         | 0.144088 |
| 8.65716  | 8.80482   | 9.65272   | 8.01222  | 10.9609   | 11.7531  |
| 0.31224  | 0.752285  | 0.327814  | 2.90512  | 0.552413  | 0.621259 |
| 10.9908  | 10.7339   | 10.0413   | 8.48093  | 10.744    | 9.04346  |
| 0.319954 | 0.455687  | 0.287925  | 0.208296 | 0.0990194 | 0.038427 |
| 0.971826 | 0.356406  | 1.96537   | 0.68516  | 1.60665   | 0.344083 |
| 7.48167  | 7.38089   | 8.70611   | 5.23879  | 11.6599   | 6.1703   |
| 3.06309  | 1.20971   | 6.71748   | 1.15263  | 1.97478   | 3.79233  |
| 0        | 0         | 0         | 0        | 0         | 0        |
| 9.26042  | 7.82989   | 7.44311   | 7.58549  | 8.53244   | 9.42126  |
| 0.26951  | 0.0915991 | 0.0926028 | 0.223308 | 0.159233  | 0.247179 |
| 0        | 0         | 0         | 0        | 0         | 0        |
| 23.6675  | 22.9315   | 29.2087   | 24.1264  | 29.099    | 24.0645  |
| 2.28959  | 0.951094  | 0.320505  | 2.02882  | 5.23563   | 3.42202  |
| 3.31296  | 3.1092    | 2.96006   | 2.92011  | 2.78124   | 2.21979  |
| 7.0623   | 4.93382   | 7.77405   | 7.75653  | 6.40482   | 7.48212  |
| 16.8384  | 17.0346   | 16.2974   | 15.7748  | 14.9279   | 14.061   |
| 36.4024  | 33.6086   | 32.0193   | 30.3458  | 32.5481   | 32.1201  |
| 39.8309  | 198.549   | 0         | 45.3786  | 43.144    | 33.4863  |
| 0        | 0         | 0         | 0        | 0         | 0        |
| 1.19952  | 1.43452   | 1.01582   | 1.88175  | 1.91921   | 1.54518  |
| 0        | 0.831763  | 0         | 0.760403 | 0         | 0.280563 |
| 14.4092  | 13.4906   | 15.5388   | 11.8506  | 17.8291   | 12.8206  |
| 22.2741  | 21.571    | 21.7228   | 21.7841  | 18.9309   | 18.3031  |
| 0.545605 | 0.523025  | 0.60807   | 0.549876 | 0.795561  | 0.670403 |
| 1.06955  | 1.55048   | 0.687488  | 0.895239 | 0.472863  | 0.752378 |
| 7.26813  | 8.73625   | 7.97232   | 6.87265  | 8.45635   | 6.12815  |
| 7.58782  | 7.21883   | 6.90862   | 6.29425  | 7.96938   | 6.97834  |
| 3.37583  | 3.6311    | 5.23949   | 3.45119  | 4.7828    | 3.25895  |
| 1.72212  | 2.05072   | 2.31426   | 1.13359  | 4.39396   | 2.92778  |
| 0.142317 | 0.0591184 | 0         | 0        | 0.154155  | 0.119648 |
| 1.81387  | 1.87526   | 1.8958    | 2.69773  | 1.29518   | 1.47297  |



|           |          |          |           |           |          |
|-----------|----------|----------|-----------|-----------|----------|
| 67.148    | 62.4941  | 59.1102  | 56.0783   | 62.2193   | 48.2306  |
| 26.1683   | 22.8897  | 27.7268  | 25.1379   | 30.1092   | 25.7259  |
| 1.25381   | 0.403224 | 1.78343  | 1.56668   | 1.84      | 1.25811  |
| 0         | 0        | 0        | 0         | 0.0415076 | 0        |
| 74.7003   | 69.9286  | 49.0034  | 50.6213   | 47.6192   | 52.9027  |
| 52.0219   | 54.4254  | 37.4233  | 46.0167   | 30.7429   | 36.3683  |
| 0         | 0        | 0        | 0         | 0         | 0        |
| 20.1387   | 21.6316  | 21.7094  | 23.2797   | 24.2326   | 25.3255  |
| 59.1926   | 58.0894  | 65.7447  | 63.9906   | 71.505    | 81.3863  |
| 7.2511    | 8.46635  | 8.77334  | 7.95925   | 7.06493   | 8.04679  |
| 0         | 0        | 0        | 0         | 0         | 0        |
| 4.95976   | 4.6241   | 6.08954  | 4.33045   | 6.85288   | 4.30511  |
| 9.72491   | 11.9601  | 3.29028  | 3.55595   | 17.6288   | 18.3238  |
| 4.47332   | 4.28322  | 4.00376  | 4.30929   | 4.10644   | 3.98584  |
| 0         | 0        | 0        | 0         | 0         | 0        |
| 79.0252   | 81.8646  | 83.6016  | 86.8727   | 76.7836   | 76.4549  |
| 0         | 0        | 0        | 0         | 0         | 0        |
| 4.57735   | 3.75977  | 5.45511  | 4.3581    | 6.68218   | 4.93695  |
| 1.26248   | 2.03219  | 1.92191  | 1.16864   | 2.73499   | 1.56997  |
| 478.567   | 438.658  | 1479.36  | 1440.24   | 2562.7    | 2623.22  |
| 2.92135   | 2.12416  | 2.83569  | 2.01121   | 3.37824   | 2.78805  |
| 0         | 0        | 0        | 0         | 0         | 0        |
| 1.46131   | 1.24103  | 1.29554  | 0.727599  | 1.71183   | 1.10114  |
| 0         | 0        | 0        | 0         | 0         | 0        |
| 31.6219   | 33.4336  | 33.3786  | 28.0675   | 27.9599   | 29.0216  |
| 0.0403604 | 0        | 0        | 0         | 0         | 0        |
| 7.54505   | 6.50631  | 7.05251  | 7.15448   | 12.7044   | 10.9174  |
| 0.214578  | 0.42021  | 0.193098 | 0.454006  | 0.298834  | 0.43811  |
| 0         | 0        | 0        | 0.0927395 | 0         | 0        |
| 28.5668   | 31.5113  | 26.3036  | 32.9988   | 39.0198   | 40.9005  |
| 7.39231   | 6.95867  | 7.55414  | 6.90788   | 7.95288   | 6.26235  |
| 0.273781  | 0.511442 | 0.361932 | 0.436393  | 0.237334  | 0.253022 |
| 0.199903  | 0.166079 | 0.860482 | 0.910984  | 0.306752  | 0.182066 |
| 0         | 0        | 0        | 0         | 0         | 0        |
| 5.83387   | 6.04462  | 7.49683  | 5.86785   | 7.81767   | 5.81546  |
| 16.1442   | 14.2637  | 15.1546  | 14.8881   | 11.9594   | 13.2559  |
| 8.37518   | 6.57987  | 9.27923  | 8.25141   | 12.4967   | 11.4531  |
| 0.190987  | 0.214089 | 0.288767 | 0.282921  | 0.247765  | 0.129135 |
| 79.5909   | 44.5715  | 52.8899  | 45.0695   | 59.6816   | 58.5136  |
| 0         | 0        | 0        | 0         | 0         | 0        |
| 0.747542  | 1.18827  | 1.50922  | 1.06482   | 1.80361   | 1.16839  |
| 43.1831   | 42.1981  | 39.4559  | 37.0794   | 37.9304   | 34.2876  |
| 2.2496    | 2.49195  | 1.38559  | 1.70862   | 2.65332   | 1.97532  |

|           |           |           |           |           |           |
|-----------|-----------|-----------|-----------|-----------|-----------|
| 98.8882   | 121.494   | 112.261   | 135.047   | 119.307   | 160.377   |
| 34.0419   | 35.6258   | 35.0531   | 34.6626   | 37.8242   | 33.2814   |
| 0         | 0         | 0         | 0         | 0         | 0         |
| 0         | 0         | 0         | 0         | 0         | 0         |
| 47.0776   | 22.6219   | 31.2578   | 21.432    | 51.2607   | 32.3736   |
| 0.958724  | 0.537642  | 1.20785   | 1.48668   | 2.08271   | 1.28962   |
| 1.01378   | 1.12411   | 0.715936  | 0.522192  | 0.615562  | 0.990518  |
| 17.7512   | 18.3074   | 17.9297   | 16.2137   | 15.6916   | 14.9665   |
| 82.0556   | 79.8494   | 70.7269   | 73.522    | 60.3636   | 68.4033   |
| 0.0257954 | 0.0321462 | 0.0324984 | 0         | 0.111764  | 0         |
| 0         | 0         | 0         | 0         | 0         | 0         |
| 3.43191   | 2.79763   | 6.20924   | 3.42485   | 4.98911   | 2.77678   |
| 0         | 0         | 0         | 0         | 0         | 0.0831566 |
| 0         | 0         | 0         | 0         | 0         | 0         |
| 17.0955   | 17.8817   | 14.5511   | 18.1967   | 21.2588   | 24.5696   |
| 16.1592   | 16.8137   | 16.1365   | 14.3917   | 14.3356   | 17.8139   |
| 10.7474   | 13.6175   | 11.9499   | 16.1035   | 15.4515   | 19.7024   |
| 0         | 0         | 0         | 0         | 0         | 0         |
| 18.4537   | 19.4212   | 24.2333   | 26.5076   | 18.6028   | 23.3796   |
| 6.33E-35  | 2.34E-14  | 3.86E-19  | 2.18E-08  | 4.21E-14  | 1.43E-28  |
| 0.0834086 | 0.0519718 | 0         | 0         | 0.0903465 | 0.0701226 |
| 0         | 0         | 0         | 0         | 0         | 0         |
| 7.65322   | 7.66893   | 9.96428   | 6.71347   | 11.1538   | 6.71679   |
| 0.215207  | 0.144513  | 0.124569  | 0.119403  | 0.18258   | 0.166356  |
| 188.544   | 201.628   | 208.919   | 222.846   | 186.319   | 179.282   |
| 10.4545   | 11.0815   | 11.0864   | 9.38227   | 12.4163   | 13.1783   |
| 0.146099  | 0.58822   | 0.948633  | 0.320092  | 0.572139  | 0.661376  |
| 2.69486   | 3.45023   | 2.69808   | 1.81095   | 2.78106   | 2.2179    |
| 4.18718   | 4.08079   | 2.46854   | 1.62071   | 3.8377    | 2.84325   |
| 0         | 0         | 0         | 0         | 0         | 0         |
| 42.2124   | 45.0662   | 36.6201   | 34.3732   | 35.5697   | 36.4756   |
| 29.3995   | 35.8663   | 31.4883   | 34.9432   | 29.0281   | 26.673    |
| 2.54017   | 2.39815   | 0.775816  | 1.31544   | 3.08497   | 2.00612   |
| 25.7497   | 24.179    | 25.6133   | 23.3138   | 15.0584   | 13.157    |
| 44.1529   | 41.389    | 35.4317   | 31.8155   | 26.8119   | 30.7764   |
| 7.28934   | 8.18136   | 3.09831   | 2.35562   | 6.27183   | 7.26113   |
| 0.389433  | 0.269617  | 0.763201  | 0.690161  | 1.21861   | 1.09134   |
| 0.170981  | 0.479423  | 0.161559  | 0.32466   | 0.138903  | 0.143746  |
| 0         | 0         | 0         | 0         | 0.110752  | 0         |
| 31.8603   | 32.7284   | 38.5948   | 41.5909   | 35.6812   | 30.6777   |
| 0         | 0         | 0         | 0         | 0         | 0         |
| 0.0978788 | 0.0304941 | 0.0924848 | 0.0836337 | 0.15903   | 0.0822879 |
| 8.56535   | 7.53056   | 11.7082   | 10.5151   | 11.9096   | 9.72795   |

|           |            |            |           |           |           |
|-----------|------------|------------|-----------|-----------|-----------|
| 2.13541   | 1.8797     | 2.49814    | 2.08529   | 3.37776   | 2.17996   |
| 0.104142  | 0.23553    | 0.234293   | 0.164788  | 0.176519  | 0.233375  |
| 0.357395  | 0.242937   | 0.511665   | 0.240603  | 0.475105  | 0.600932  |
| 7.63774   | 10.6415    | 11.413     | 11.781    | 11.705    | 10.5      |
| 12.5158   | 14.1749    | 13.132     | 11.8319   | 11.0432   | 12.3451   |
| 1.65737   | 1.44579    | 1.20063    | 1.84101   | 2.15428   | 2.2294    |
| 15.7104   | 16.8034    | 20.1824    | 16.4893   | 20.702    | 17.9919   |
| 8.18492   | 7.33199    | 5.62798    | 7.19017   | 5.43444   | 6.56742   |
| 5.02264   | 4.58422    | 2.85218    | 4.12062   | 3.9441    | 3.81575   |
| 2.98558   | 1.73202    | 2.26981    | 2.22852   | 3.90301   | 3.09424   |
| 0         | 0          | 0          | 0         | 0         | 0         |
| 0.991426  | 1.07779    | 1.88687    | 1.16556   | 1.75936   | 0.993111  |
| 2.95312   | 3.68018    | 3.5079     | 4.51797   | 1.49276   | 2.50637   |
| 0.560339  | 0.657813   | 3.34557    | 3.37696   | 1.85603   | 1.20843   |
| 32.2107   | 29.9905    | 29.8512    | 29.1478   | 33.089    | 30.483    |
| 0         | 0.11949    | 0          | 0.273096  | 0         | 0.0403051 |
| 0         | 0          | 0          | 0         | 0         | 0         |
| 87.6568   | 105.522    | 89.3995    | 94.7706   | 82.6758   | 89.8617   |
| 0         | 0          | 0          | 0         | 0         | 0         |
| 5.69814   | 5.57159    | 6.01967    | 6.37581   | 7.4014    | 7.00859   |
| 2446.94   | 2250.59    | 2661.91    | 2593.08   | 2346.87   | 3013.98   |
| 9.65948   | 9.84707    | 8.45751    | 8.16306   | 6.56428   | 6.61489   |
| 39.3263   | 36.9332    | 22.9279    | 25.1477   | 16.5594   | 24.9109   |
| 0.0242099 | 0.0603407  | 0.0305009  | 0.0965367 | 0.0393355 | 0.091591  |
| 0.0776034 | 0.0181327  | 0.239979   | 0.0745977 | 0.0840584 | 0         |
| 3.83622   | 2.98882    | 8.04602    | 10.4058   | 6.74109   | 8.44639   |
| 0         | 0          | 0          | 0         | 0         | 0         |
| 0.616616  | 0.625756   | 0.197998   | 0.242899  | 0.393852  | 0.471156  |
| 0         | 0          | 0          | 0         | 0         | 0         |
| 0         | 0          | 0          | 0         | 0         | 0         |
| 0.075076  | 0.156695   | 0          | 0.143143  | 0.237897  | 0.232972  |
| 9.12596   | 10.7975    | 12.2579    | 10.397    | 11.7313   | 12.8071   |
| 0.0076931 | 0.00958713 | 0.00646146 | 0.0175292 | 0         | 0         |
| 19.3261   | 19.8986    | 20.1167    | 20.9672   | 16.5948   | 19.6307   |
| 5.1627    | 6.11206    | 5.52861    | 7.37484   | 4.53823   | 4.22349   |
| 2.44009   | 2.9938     | 2.04454    | 2.42658   | 3.79047   | 2.51593   |
| 9.65259   | 9.91054    | 9.4584     | 10.2974   | 8.15833   | 8.8655    |
| 4.69034   | 5.0977     | 5.65728    | 3.87197   | 6.38357   | 5.13263   |
| 0         | 0          | 0          | 0         | 0         | 0         |
| 0         | 0.0680888  | 0.275339   | 0.124494  | 0         | 0.0459341 |
| 32.2512   | 30.9249    | 35.1453    | 38.061    | 43.5531   | 37.6334   |
| 5.59172   | 5.23557    | 3.97003    | 4.65172   | 4.48674   | 2.53642   |
| 0         | 0          | 0          | 0         | 0         | 0         |

|           |           |           |           |           |           |
|-----------|-----------|-----------|-----------|-----------|-----------|
| 0.0354658 | 0         | 0.0446818 | 0         | 0         | 0         |
| 6.91908   | 6.55633   | 7.43705   | 5.82101   | 8.56483   | 5.66386   |
| 20.6735   | 16.3253   | 9.79933   | 11.6599   | 9.97713   | 14.283    |
| 0         | 0         | 0         | 0         | 0         | 0         |
| 4.16343   | 3.73271   | 4.03776   | 5.76706   | 3.04975   | 3.27361   |
| 4.76854   | 6.68212   | 5.11212   | 7.36007   | 3.1447    | 2.90987   |
| 0.237504  | 0.443965  | 0.44883   | 0.49607   | 0.343012  | 0.632295  |
| 7.53068   | 7.7464    | 10.5757   | 10.1842   | 7.96275   | 11.43     |
| 0         | 0         | 0         | 0         | 0         | 0         |
| 9.15715   | 8.63458   | 10.7564   | 8.70186   | 12.1147   | 9.26493   |
| 0         | 0.0454279 | 0.137777  | 0.29902   | 0.157942  | 0.399351  |
| 0         | 0         | 0         | 0         | 0         | 0         |
| 0.141441  | 0.176264  | 0         | 0         | 0         | 0         |
| 14.195    | 16.1196   | 15.5111   | 16.7754   | 15.5655   | 17.0584   |
| 0.0553192 | 0.0689387 | 0         | 0.189073  | 0         | 0         |
| 11.1816   | 9.76519   | 9.01256   | 8.22526   | 9.63218   | 8.23474   |
| 4.75331   | 6.15218   | 5.60184   | 6.56687   | 4.48284   | 4.52585   |
| 51.3393   | 47.3012   | 54.9724   | 49.7124   | 57.9964   | 56.3344   |
| 20.6832   | 20.0184   | 20.8771   | 18.6199   | 20.3376   | 22.3021   |
| 5.95986   | 3.02058   | 2.69028   | 4.40004   | 4.63325   | 5.13876   |
| 3.60455   | 3.22953   | 4.09604   | 3.48932   | 3.77678   | 3.22845   |
| 0         | 0.053883  | 0         | 0         | 0.0468344 | 0.0363506 |
| 0.260117  | 0.108052  | 0.327709  | 0.0987823 | 0.281753  | 0.145789  |
| 14.4121   | 14.2201   | 13.9952   | 14.5453   | 12.4496   | 14.6175   |
| 14.06     | 14.151    | 15.7911   | 16.474    | 15.6513   | 16.1381   |
| 0.640619  | 0.498962  | 0.605315  | 0.547385  | 0.260215  | 0.403932  |
| 18.2563   | 13.9019   | 24.8122   | 13.075    | 26.1242   | 19.5058   |
| 0         | 0.0402798 | 0.0407212 | 0         | 0.0350107 | 0         |
| 12.7454   | 14.6243   | 13.2558   | 13.4451   | 14.2331   | 12.2283   |
| 0         | 0         | 0         | 0         | 0         | 0.0197622 |
| 0.106415  | 0.116282  | 0.117556  | 0.121237  | 0.161714  | 0.193696  |
| 38.1602   | 35.6872   | 44.6069   | 34.7722   | 51.7409   | 56.9023   |
| 11.3269   | 11.8749   | 10.5765   | 10.8919   | 10.7834   | 10.2513   |
| 0.156653  | 0.204337  | 0         | 0.210157  | 0.17721   | 0.0493876 |
| 11.0481   | 10.772    | 13.1427   | 11.695    | 12.61     | 9.76816   |
| 5.02539   | 6.91049   | 9.82437   | 7.30474   | 9.94828   | 9.32393   |
| 5.84743   | 5.73849   | 4.63222   | 5.17843   | 4.77925   | 4.26132   |
| 4.76752   | 6.89203   | 6.09952   | 5.97413   | 6.2416    | 5.14447   |
| 0         | 0         | 0         | 0         | 0         | 0         |
| 34.9634   | 39.1986   | 26.5235   | 30.0614   | 23.9189   | 32.5538   |
| 2.47693   | 2.62031   | 3.49504   | 2.74668   | 3.52959   | 2.84131   |
| 0         | 0         | 0         | 0         | 0         | 0         |
| 45.8988   | 48.5484   | 42.0408   | 38.5342   | 34.674    | 32.7443   |

|           |           |           |           |           |           |
|-----------|-----------|-----------|-----------|-----------|-----------|
| 0.0679213 | 0         | 0         | 0         | 0         | 0.0285511 |
| 4.92258   | 4.93582   | 6.1661    | 4.41566   | 7.10939   | 5.08985   |
| 2.80424   | 2.50365   | 2.16493   | 2.28885   | 2.45032   | 2.80525   |
| 0         | 0         | 0         | 0         | 0.786289  | 0.76285   |
| 5.25466   | 4.36535   | 3.20497   | 3.72179   | 2.18334   | 2.72297   |
| 0         | 0         | 0         | 0         | 0         | 0         |
| 0.517121  | 0.53703   | 0         | 0.392765  | 0.373423  | 0.362292  |
| 11.0436   | 11.0267   | 9.16512   | 9.11267   | 11.4368   | 12.1182   |
| 2.90689   | 2.90228   | 3.03019   | 5.52744   | 2.04703   | 4.00061   |
| 0.215852  | 0.336554  | 0.619822  | 0.341479  | 0.284533  | 0.148496  |
| 0         | 0         | 0         | 0         | 0.170289  | 0         |
| 0.0777573 | 0.0484505 | 0         | 0         | 0.0210563 | 0.0186776 |
| 0.374502  | 0.678841  | 0.536156  | 0.40727   | 0.331898  | 0.314848  |
| 0.682931  | 0.672324  | 1.79446   | 2.46971   | 1.81949   | 1.9943    |
| 0.682739  | 0.567219  | 1.0513    | 0.950684  | 0.821699  | 0.637763  |
| 0         | 0.0355526 | 0         | 0.0325024 | 0         | 0         |
| 0         | 0         | 0         | 0         | 0         | 0         |
| 0.274055  | 0.0620959 | 0.376658  | 0.312227  | 0.269865  | 0.33513   |
| 0.629364  | 0.4005    | 0.388018  | 0.594977  | 0.449641  | 0.484083  |
| 26.7968   | 21.9428   | 29.3853   | 21.6488   | 32.5353   | 24.6662   |
| 0         | 0         | 0         | 0         | 0         | 0         |
| 0.734323  | 0.305038  | 0.539665  | 0.395062  | 0.552364  | 0.41157   |
| 5.95667   | 6.10126   | 6.25806   | 6.65851   | 5.11531   | 5.04215   |
| 0.0199042 | 0.0248046 | 0.15673   | 0.0864943 | 0.514862  | 0.606809  |
| 0         | 0         | 0.066869  | 0         | 0.0574917 | 0         |
| 0.0485068 | 0.0604491 | 0.0305557 | 0.0552629 | 0.210166  | 0.0611703 |
| 0.300429  | 0.408429  | 0.378496  | 0.0311157 | 0.355002  | 0.229613  |
| 3.71174   | 3.83015   | 4.58406   | 3.84892   | 5.53091   | 4.13903   |
| 4.12893   | 4.69398   | 4.68291   | 4.09416   | 5.20972   | 4.51202   |
| 86.6664   | 102.955   | 73.3501   | 91.8421   | 60.4284   | 62.4446   |
| 7.68358   | 7.10216   | 7.3082    | 5.88414   | 7.79906   | 8.06388   |
| 8.04619   | 8.6807    | 9.17617   | 8.7614    | 13.3142   | 13.0375   |
| 2.23532   | 2.378     | 3.91517   | 2.17398   | 4.57676   | 3.11682   |
| 6.72938   | 5.24683   | 8.2561    | 4.51571   | 7.65167   | 6.39798   |
| 2382.33   | 2790.75   | 2484.72   | 2680.96   | 2279.05   | 2806.6    |
| 0         | 0         | 0         | 0         | 0         | 0         |
| 18.0681   | 14.9344   | 17.2659   | 14.2832   | 17.3742   | 17.8251   |
| 4.50132   | 5.1063    | 5.59036   | 5.66377   | 4.88257   | 5.08713   |
| 5.75392   | 4.9397    | 9.82656   | 4.7587    | 6.67112   | 3.09951   |
| 14.8259   | 16.7267   | 18.5126   | 16.9408   | 18.4346   | 17.1844   |
| 0         | 0         | 0         | 0         | 0.0199856 | 0         |
| 272.619   | 244.825   | 254.346   | 239.851   | 282.744   | 218.46    |
| 2.25456   | 2.05904   | 2.34822   | 1.89166   | 2.7154    | 2.12809   |

|           |           |           |           |           |           |
|-----------|-----------|-----------|-----------|-----------|-----------|
| 0.221743  | 0.394766  | 0.518819  | 0.396987  | 0.531844  | 0.759005  |
| 0.470457  | 0.196562  | 0.5393    | 0.135099  | 0.475567  | 0.724786  |
| 0.0406367 | 0.108035  | 0.493679  | 0.130402  | 0.0718942 | 0.0409965 |
| 0         | 0         | 0         | 0         | 0         | 0         |
| 55.2771   | 63.7521   | 57.0094   | 54.6198   | 49.4559   | 44.8484   |
| 16.5143   | 17.9321   | 16.953    | 17.3621   | 14.0703   | 13.5021   |
| 9.10297   | 22.3513   | 3.17936   | 10.1655   | 10.7388   | 21.4435   |
| 21.8134   | 22.7772   | 22.4158   | 19.9843   | 25.3074   | 25.602    |
| 0.101679  | 0.0950343 | 0.128101  | 0.463365  | 0.0826026 | 0.235078  |
| 0.196225  | 0.0271706 | 0.109873  | 0.149037  | 0.0944653 | 0.0733194 |
| 0.0629315 | 0.0522835 | 0.0528564 | 0.238989  | 0.295387  | 0.282172  |
| 0.179192  | 0.432327  | 0.489459  | 0.473844  | 0.139749  | 0.315542  |
| 0         | 0         | 0         | 0         | 0         | 0         |
| 0         | 0.0644809 | 0         | 0         | 0         | 0         |
| 33.1109   | 30.5263   | 37.9858   | 27.8496   | 40.8419   | 27.5481   |
| 102.654   | 100.262   | 85.5397   | 107.401   | 85.1779   | 121.15    |
| 0.475996  | 0.593186  | 0.743488  | 0.477991  | 0.693874  | 1.07473   |
| 10.9072   | 11.2483   | 12.1408   | 10.7909   | 10.3131   | 9.84961   |
| 0         | 0         | 0         | 0         | 0         | 0         |
| 2.45177   | 2.92255   | 1.20869   | 3.88627   | 0.808258  | 2.59894   |
| 3.31071   | 3.21845   | 2.09181   | 2.77379   | 2.71162   | 3.70959   |
| 11.5755   | 11.5153   | 11.3568   | 10.5273   | 10.3081   | 10.7661   |
| 67.8054   | 74.4978   | 70.4472   | 125.543   | 55.8202   | 62.4286   |
| 7.44317   | 6.15017   | 6.85461   | 5.64557   | 7.60221   | 6.88672   |
| 8.49089   | 7.76348   | 7.77878   | 6.34036   | 8.16747   | 5.81934   |
| 0.324912  | 0.347061  | 0.204671  | 0.290845  | 0.402215  | 0.214624  |
| 8.15635   | 2.07808   | 0.9538    | 0.548971  | 1.20294   | 0.699396  |
| 14.7088   | 12.7048   | 13.7811   | 12.6118   | 16.3273   | 13.7944   |
| 13.6683   | 14.4484   | 13.9427   | 13.5856   | 14.957    | 12.7307   |
| 28.4558   | 32.4741   | 31.3837   | 31.2358   | 31.4095   | 33.7633   |
| 46.3576   | 47.7123   | 39.8589   | 41.8767   | 39.3162   | 45.8368   |
| 0.0766675 | 0.0955429 | 0.0965898 | 0         | 0.0830446 | 0.128911  |
| 10.0556   | 19.2318   | 6.53413   | 19.8044   | 6.66579   | 10.3873   |
| 0.0860239 | 0.107203  | 0.216755  | 0.0980056 | 0.279538  | 0.108482  |
| 3.613     | 4.13396   | 3.97916   | 4.46751   | 4.86895   | 4.08718   |
| 1.69941   | 2.88256   | 2.73573   | 1.82854   | 2.30095   | 2.38119   |
| 2.80583   | 3.81093   | 0.75465   | 2.11912   | 1.09275   | 0.980665  |
| 19.3967   | 19.4325   | 20.9424   | 21.1638   | 15.8366   | 22.8763   |
| 0.45536   | 0.361116  | 0.304228  | 0.353716  | 0.216725  | 0.237816  |
| 252.172   | 253.357   | 163.87    | 164.686   | 97.8086   | 113.69    |
| 24.0589   | 23.2759   | 23.531    | 22.7327   | 19.2296   | 19.4337   |
| 0         | 0.0352401 | 0         | 0         | 0         | 0         |
| 15.9781   | 22.0682   | 14.0479   | 16.7827   | 8.5555    | 12.6655   |

|           |           |           |           |           |          |
|-----------|-----------|-----------|-----------|-----------|----------|
| 0.775897  | 0.792559  | 0.432672  | 0.449229  | 1.08843   | 0.791322 |
| 0.219074  | 0.458811  | 1.57267   | 3.01554   | 0.91063   | 1.30464  |
| 0         | 0         | 0         | 0         | 0         | 0        |
| 0         | 0         | 0         | 0.0795157 | 0         | 0        |
| 1.66786   | 1.65301   | 1.33936   | 1.9376    | 1.41716   | 1.49845  |
| 15.8463   | 17.5878   | 18.6595   | 17.2423   | 16.3398   | 14.6438  |
| 4.81395   | 4.27325   | 5.79351   | 5.93339   | 6.60185   | 6.96088  |
| 9.70929   | 8.27632   | 8.54404   | 7.5104    | 8.11391   | 7.77304  |
| 5.17031   | 4.59714   | 5.23302   | 3.01141   | 7.55106   | 3.34552  |
| 8.67145   | 13.0202   | 12.6716   | 14.2289   | 9.72166   | 7.80141  |
| 11.1279   | 11.2211   | 9.20366   | 7.6938    | 9.33917   | 8.24843  |
| 0         | 0         | 0         | 0         | 0         | 0        |
| 4.61E-08  | 1.96E-07  | 2.14E-07  | 5.07E-08  | 9.70E-07  | 7.70E-08 |
| 16.1122   | 18.769    | 33.5231   | 41.078    | 20.8532   | 40.0965  |
| 0         | 0         | 0         | 0         | 0         | 0        |
| 4.9335    | 5.30773   | 6.72972   | 6.02502   | 6.34344   | 5.43074  |
| 8.90483   | 8.94719   | 9.73375   | 9.15624   | 16.0875   | 14.2611  |
| 6.2394    | 5.56352   | 6.26825   | 5.25473   | 5.81163   | 5.43772  |
| 0         | 38.3485   | 0         | 35.0585   | 33.3321   | 25.8707  |
| 26.1383   | 24.6195   | 22.1132   | 27.5281   | 23.8269   | 27.2555  |
| 212       | 225.005   | 214.765   | 162.849   | 153.484   | 171.91   |
| 0.377818  | 0         | 0.95199   | 0         | 0.272829  | 0.317636 |
| 0.0733488 | 0.274222  | 0         | 0.584955  | 0         | 0.184996 |
| 0.667781  | 0.766489  | 0.819167  | 0.640667  | 1.02789   | 0.81257  |
| 6.70548   | 4.38479   | 7.75167   | 7.32463   | 8.24099   | 7.51134  |
| 2.22181   | 2.47924   | 2.31377   | 2.9665    | 3.06602   | 2.66902  |
| 5.23806   | 5.87361   | 5.40641   | 6.82349   | 5.26132   | 4.89684  |
| 0.479642  | 3.28751   | 1.20856   | 1140.85   | 0.389654  | 21.3718  |
| 0.211946  | 0.190171  | 0.0854466 | 0.315516  | 0.444458  | 0.342116 |
| 10.429    | 9.18011   | 9.84678   | 8.09615   | 11.0403   | 8.71805  |
| 8.6241    | 9.07737   | 13.3144   | 10.2866   | 7.78413   | 8.10444  |
| 0         | 0         | 0.256828  | 0         | 0         | 0        |
| 0.212558  | 0.344356  | 0.267792  | 0.217947  | 0.59862   | 0.12509  |
| 0         | 0         | 0         | 0         | 0         | 0        |
| 7.04732   | 5.85491   | 7.18743   | 6.8819    | 8.69097   | 8.02793  |
| 0         | 0         | 0         | 0         | 0         | 0        |
| 0.0718845 | 0.0895824 | 0         | 0         | 0.0778638 | 0        |
| 5.4797    | 49.45     | 30.8356   | 59.1484   | 14.3527   | 10.5939  |
| 53.3822   | 46.4498   | 45.8234   | 44.2935   | 45.1628   | 45.909   |
| 10.9053   | 11.2686   | 9.80985   | 10.3018   | 8.38883   | 9.44976  |
| 14.675    | 12.8727   | 15.1681   | 13.0044   | 16.6124   | 14.5291  |
| 30.2265   | 34.0102   | 24.9488   | 27.3069   | 16.7741   | 22.1766  |
| 7.16672   | 5.03692   | 8.68336   | 4.63216   | 9.97373   | 5.90641  |

|           |           |           |           |           |           |
|-----------|-----------|-----------|-----------|-----------|-----------|
| 0         | 0         | 0.331838  | 0         | 0         | 0         |
| 12.9886   | 7.35746   | 10.5883   | 11.0785   | 23.7744   | 14.3066   |
| 21.9448   | 21.3738   | 22.1644   | 24.5246   | 27.7147   | 26.4528   |
| 0         | 0         | 0         | 0         | 0.101067  | 0         |
| 14.6034   | 16.0179   | 17.5999   | 17.5999   | 17.3215   | 16.691    |
| 29.0664   | 27.5903   | 30.7698   | 27.7391   | 30.9321   | 29.8791   |
| 18.6614   | 18.945    | 18.2351   | 17.133    | 16.1315   | 16.3777   |
| 8.76043   | 8.6717    | 8.93576   | 9.89325   | 9.01156   | 9.12164   |
| 48.4878   | 41.8909   | 49.3575   | 44.6339   | 47.0637   | 43.204    |
| 2.07923   | 4.22765   | 1.10296   | 0.997404  | 0.711216  | 0.46001   |
| 2.18875   | 1.88644   | 2.19131   | 1.79179   | 2.03861   | 2.5396    |
| 50.7404   | 56.5452   | 50.9681   | 53.2808   | 54.8441   | 59.6255   |
| 0.666141  | 0.377338  | 0.553136  | 0.465703  | 0.918337  | 0.610945  |
| 0.0136025 | 0         | 0.0171372 | 0.0309943 | 0         | 0.0343075 |
| 0         | 0         | 0         | 0         | 0         | 0         |
| 71.9184   | 75.5477   | 74.1594   | 70.6161   | 64.5864   | 72.9218   |
| 26.9771   | 26.6995   | 27.7306   | 27.002    | 27.1571   | 24.9341   |
| 11.3734   | 11.2693   | 9.30996   | 8.82743   | 12.9882   | 12.1126   |
| 0.527672  | 0.849339  | 0.977641  | 0.964235  | 0.869146  | 0.749039  |
| 12.5715   | 8.74119   | 12.3376   | 10.4041   | 9.91008   | 7.53504   |
| 38.7845   | 37.4669   | 36.8144   | 35.4631   | 26.6416   | 30.5834   |
| 0         | 0         | 0         | 0         | 0         | 0         |
| 7.03681   | 7.25626   | 4.88234   | 6.3453    | 7.24028   | 7.73174   |
| 0         | 0.0376599 | 0         | 0.0344289 | 0.0982005 | 0         |
| 50.6152   | 51.745    | 40.715    | 35.4757   | 33.9961   | 45.494    |
| 31.9119   | 28.5237   | 41.8753   | 43.3101   | 45.7767   | 46.8518   |
| 53.498    | 55.3077   | 48.5031   | 57.0729   | 53.2527   | 60.5045   |
| 0         | 0         | 0         | 0         | 0         | 0         |
| 0         | 0.0607183 | 0.0613836 | 0         | 0         | 0         |
| 0.883325  | 1.06284   | 0.575618  | 1.7698    | 0.659862  | 0.819445  |
| 0         | 0         | 0         | 0         | 0         | 0         |
| 22.641    | 22.162    | 23.3968   | 25.6734   | 19.5461   | 20.4964   |
| 0.0758577 | 0.0630225 | 0.0318566 | 0         | 0.109557  | 0.0425163 |
| 0.92199   | 1.49365   | 0.943149  | 1.15824   | 0.987911  | 2.01125   |
| 0         | 0         | 0         | 0         | 0         | 0         |
| 16.2652   | 18.899    | 14.5591   | 13.4906   | 10.1713   | 12.4815   |
| 0.0320524 | 0         | 0.0403813 | 0.10955   | 0.0347185 | 0         |
| 0.540938  | 0.598935  | 0.452041  | 0.272439  | 1.07916   | 0.786006  |
| 10.9241   | 12.2728   | 7.43744   | 8.68468   | 8.87455   | 9.97252   |
| 15.4208   | 14.2437   | 13.4086   | 11.7505   | 15.9908   | 13.4455   |
| 0         | 0         | 0         | 0         | 0         | 0         |
| 7.63273   | 8.05869   | 11.4859   | 7.36731   | 11.1383   | 9.6254    |
| 1.15023   | 0.836161  | 0.966084  | 0.586968  | 0.908476  | 0.493581  |



|           |          |           |           |           |           |
|-----------|----------|-----------|-----------|-----------|-----------|
| 0         | 0        | 0         | 0         | 0         | 0         |
| 8.71E-05  | 3.04E-12 | 4.02E-06  | 7.63E-14  | 8.61E-05  | 1.21E-05  |
| 1.96724   | 1.56901  | 1.42097   | 1.4344    | 1.449     | 1.25695   |
| 2.203     | 1.77535  | 2.19089   | 3.95584   | 1.75064   | 0.999722  |
| 0.129519  | 0.107605 | 0.0543918 | 0.0491864 | 0.140293  | 0.0362962 |
| 9.66327   | 9.77418  | 9.38486   | 8.46533   | 8.67851   | 9.41756   |
| 3.66497   | 3.91337  | 2.95766   | 3.34133   | 3.67568   | 3.09595   |
| 21.8509   | 23.6317  | 18.8877   | 22.0983   | 26.8794   | 36.0082   |
| 48.4669   | 49.4828  | 52.4775   | 51.3364   | 47.2988   | 54.0995   |
| 0.496725  | 0.463386 | 0.418271  | 0.23535   | 0.447521  | 0.591028  |
| 7.93315   | 7.57578  | 8.2989    | 8.10383   | 11.084    | 9.98177   |
| 9.23611   | 8.88768  | 9.91937   | 9.82503   | 9.34258   | 8.48631   |
| 4.96445   | 5.31259  | 4.21221   | 5.09654   | 5.96832   | 4.45542   |
| 1.34249   | 1.38517  | 1.19829   | 1.43312   | 1.28595   | 0.917852  |
| 27.9985   | 27.8447  | 26.4144   | 27.0581   | 26.4638   | 30.3934   |
| 153.299   | 141.776  | 126.573   | 127.679   | 128.544   | 144.171   |
| 0.164494  | 0.245991 | 0         | 0.0312342 | 0.0890883 | 0.069146  |
| 4.56455   | 5.06977  | 5.7787    | 4.30981   | 5.6848    | 4.18167   |
| 0         | 0        | 0.0315108 | 0         | 0.0270919 | 0.0210274 |
| 0.787233  | 0.880382 | 0.73862   | 1.24259   | 0.613201  | 0.60362   |
| 0         | 0        | 0         | 0         | 0         | 0         |
| 0.924643  | 1.44036  | 0.582458  | 0.395036  | 1.12675   | 1.26321   |
| 6.91305   | 5.02203  | 4.21025   | 5.97226   | 4.04569   | 6.61067   |
| 1.9577    | 1.6511   | 2.41659   | 2.7936    | 2.80597   | 2.27761   |
| 0         | 0        | 0         | 0         | 0         | 0         |
| 11.9063   | 12.1483  | 13.472    | 10.2544   | 11.9839   | 10.7776   |
| 127.042   | 131.33   | 113.178   | 121.817   | 129.562   | 144.495   |
| 5.19873   | 6.28881  | 4.59874   | 6.35529   | 7.17293   | 7.1547    |
| 5.41932   | 5.71235  | 5.86029   | 3.78168   | 6.43264   | 3.96757   |
| 7.40156   | 7.34252  | 10.4068   | 8.0026    | 8.42055   | 7.84431   |
| 0         | 0        | 0         | 0         | 0         | 0         |
| 20.3194   | 20.041   | 21.939    | 16.1317   | 23.2327   | 19.9601   |
| 0.754483  | 0.582016 | 1.04445   | 0.589931  | 1.51218   | 1.00526   |
| 3.24841   | 2.64971  | 4.39016   | 3.90273   | 2.62297   | 3.07856   |
| 0         | 0        | 0         | 0         | 0.0632614 | 0         |
| 0.0724071 | 0.102514 | 0.0259093 | 0.164008  | 0         | 0.0345791 |
| 5.03802   | 5.47932  | 5.93128   | 4.46807   | 5.38958   | 4.17573   |
| 6.56486   | 6.03866  | 6.36712   | 5.27952   | 8.31568   | 5.36038   |
| 71.019    | 77.2055  | 74.3582   | 77.0545   | 60.5917   | 65.855    |
| 0         | 0        | 0         | 0         | 0         | 0         |
| 0         | 0        | 0         | 0         | 0         | 0         |
| 16.5735   | 16.33    | 31.2468   | 24.0873   | 39.3147   | 77.0181   |
| 18.1357   | 19.9627  | 19.3057   | 17.2061   | 38.6383   | 34.8236   |

|           |           |          |          |           |          |
|-----------|-----------|----------|----------|-----------|----------|
| 13.4204   | 14.6809   | 16.3175  | 11.1718  | 13.0505   | 10.101   |
| 21.9784   | 22.6402   | 27.0308  | 22.461   | 25.5598   | 29.2197  |
| 10.7274   | 12.0774   | 8.11967  | 6.54382  | 9.71376   | 6.719    |
| 683.268   | 660.686   | 394.833  | 373.227  | 367.776   | 437.711  |
| 16.4192   | 15.8864   | 15.1592  | 15.3805  | 14.7377   | 14.26    |
| 3.78436   | 3.6064    | 4.62751  | 3.86763  | 6.17888   | 4.39803  |
| 53.9508   | 55.4901   | 41.8658  | 52.0129  | 32.2193   | 38.8529  |
| 0.153351  | 0.0764425 | 0.11592  | 0.279537 | 0.166107  | 0.386773 |
| 87.5377   | 82.5743   | 90.5456  | 85.0114  | 88.379    | 88.4166  |
| 1.04233   | 1.234     | 0.328296 | 0.118751 | 0.112903  | 0.43815  |
| 6.52844   | 5.88683   | 5.617    | 5.01896  | 8.33629   | 10.3524  |
| 7.75334   | 7.12939   | 9.0094   | 6.8179   | 10.3755   | 8.06884  |
| 0.124911  | 0         | 0        | 0        | 0.0676504 | 0        |
| 6.94255   | 6.76044   | 8.82447  | 6.37948  | 7.69095   | 8.14507  |
| 0.11109   | 0.10383   | 0.104968 | 0.316407 | 0.210578  | 0.140092 |
| 2.85869   | 1.48127   | 0.850278 | 0.951776 | 0.852743  | 0.729338 |
| 14.9668   | 16.1961   | 17.3251  | 16.406   | 17.5427   | 16.7816  |
| 9.44534   | 9.42288   | 10.1275  | 9.98819  | 8.68      | 8.8278   |
| 202.897   | 224.8     | 122.115  | 107.727  | 8.52662   | 28.9436  |
| 13.6767   | 16.5893   | 16.6835  | 14.4554  | 14.1518   | 13.1864  |
| 0.43615   | 0.654523  | 0.286096 | 0.755241 | 0.982463  | 0.736428 |
| 0         | 0         | 1.02505  | 0.926951 | 0.881304  | 1.36805  |
| 0         | 0         | 0        | 0        | 0         | 0        |
| 2.31956   | 2.06879   | 1.89091  | 1.2695   | 3.37464   | 1.79714  |
| 0         | 0         | 0        | 0        | 0         | 0        |
| 0         | 0         | 0        | 0        | 0         | 0        |
| 42.2212   | 41.8022   | 48.0394  | 39.326   | 45.0422   | 49.6223  |
| 0         | 0         | 0        | 0        | 0         | 0        |
| 0.822747  | 0.79045   | 0        | 0        | 0         | 0        |
| 5.49059   | 3.79792   | 4.40294  | 4.25385  | 4.90156   | 5.07605  |
| 0         | 0         | 0        | 0        | 0         | 0        |
| 28.6976   | 27.8074   | 28.8134  | 31.5208  | 27.0358   | 26.9742  |
| 2.68557   | 2.59968   | 2.79295  | 2.14946  | 3.65933   | 3.17241  |
| 4.47696   | 4.23375   | 4.04373  | 4.53139  | 6.76807   | 6.20938  |
| 1.14256   | 1.21291   | 0.479818 | 0.578531 | 1.00841   | 1.31632  |
| 6.21062   | 6.07349   | 9.56325  | 6.60067  | 7.44354   | 5.33012  |
| 2.13899   | 1.02737   | 3.92994  | 3.08422  | 3.24609   | 2.46326  |
| 78.3959   | 97.0719   | 71.698   | 72.0825  | 68.874    | 70.9338  |
| 12.0132   | 8.47999   | 9.83549  | 11.2368  | 10.2974   | 9.7156   |
| 23.1378   | 23.6924   | 20.8482  | 21.387   | 22.4038   | 23.3957  |
| 0.0493066 | 0         | 0.124238 | 0        | 0.0534079 | 0        |
| 13.033    | 12.1083   | 12.9784  | 12.8477  | 15.2583   | 14.8936  |
| 0.135958  | 0         | 0.519999 | 0.142665 | 0.332369  | 0.27438  |

|           |           |          |           |           |           |
|-----------|-----------|----------|-----------|-----------|-----------|
| 434.773   | 242.329   | 446.197  | 353.298   | 732.569   | 662.041   |
| 0.391264  | 0.341314  | 0.443641 | 0.401184  | 0.353174  | 0.383763  |
| 19.0297   | 18.0429   | 23.4342  | 19.9245   | 18.9036   | 18.1068   |
| 2.77498   | 3.95564   | 3.31642  | 3.36881   | 3.20123   | 3.30462   |
| 12.1883   | 12.4312   | 11.7859  | 11.3647   | 17.0581   | 15.8143   |
| 0         | 0         | 0        | 0         | 0         | 0         |
| 0         | 0.0412513 | 0        | 0         | 0         | 0.0556581 |
| 8.14831   | 8.32088   | 10.2859  | 8.23483   | 9.25493   | 9.0049    |
| 0.129326  | 0.107444  | 0.380173 | 0.0491128 | 0         | 0.0362418 |
| 5.88593   | 6.85141   | 7.25243  | 6.5952    | 6.5857    | 7.39537   |
| 39.9688   | 41.5161   | 32.2158  | 35.8476   | 26.3269   | 33.5091   |
| 2.87617   | 0.955808  | 1.20785  | 1.74761   | 1.66155   | 3.70765   |
| 132.705   | 154.216   | 131.684  | 152.773   | 101.157   | 138.703   |
| 0.522643  | 0         | 0.329227 | 0.297719  | 0         | 0.219696  |
| 19.5801   | 28.4681   | 10.0115  | 10.3315   | 21.9259   | 10.818    |
| 21.1396   | 21.06     | 23.855   | 20.3072   | 22.8312   | 21.415    |
| 3.77143   | 2.96415   | 3.13189  | 2.61451   | 3.55081   | 2.36202   |
| 1.80593   | 1.95827   | 2.06837  | 2.16435   | 2.56586   | 1.97178   |
| 12.0081   | 13.3486   | 10.9105  | 10.9236   | 19.4237   | 17.7491   |
| 16.6263   | 14.7015   | 15.8847  | 11.994    | 16.3053   | 10.5757   |
| 0.613457  | 0.662557  | 0.850152 | 1.30461   | 0.310092  | 0.189105  |
| 0.395727  | 0.457929  | 0.498558 | 1.07881   | 0.81136   | 1.14066   |
| 0         | 0.144326  | 0        | 0         | 0         | 0         |
| 3.00962   | 2.21151   | 3.06255  | 2.36964   | 5.64011   | 3.4975    |
| 1.34344   | 1.90249   | 2.46187  | 2.78282   | 1.52133   | 2.00219   |
| 0.517338  | 0.558745  | 0.217257 | 0.235758  | 0.485654  | 0.376942  |
| 3.95473   | 4.07355   | 5.41899  | 4.38169   | 6.7215    | 5.89527   |
| 2.15833   | 1.78051   | 2.183    | 1.21216   | 2.37078   | 1.72508   |
| 64.0979   | 84.7505   | 98.6     | 83.7124   | 91.9621   | 79.2223   |
| 0.794338  | 0.86511   | 1.3664   | 1.5136    | 1.75127   | 1.6328    |
| 27.1678   | 27.8575   | 23.4225  | 22.8199   | 16.7815   | 19.5143   |
| 0         | 0         | 0        | 0         | 0         | 0.0261609 |
| 0         | 0         | 0        | 0         | 0         | 0         |
| 1.51047   | 1.36907   | 2.10838  | 1.58226   | 4.41427   | 2.99207   |
| 672.863   | 779.236   | 856.634  | 893.556   | 708.325   | 798.571   |
| 0.762812  | 1.29499   | 0.944241 | 1.13671   | 0.94622   | 0.664857  |
| 0         | 0         | 0        | 0         | 0         | 0         |
| 31.5408   | 31.9879   | 29.6457  | 31.0639   | 30.2759   | 33.4774   |
| 0         | 0         | 0        | 0         | 0         | 0         |
| 0         | 0         | 0        | 0         | 0         | 0         |
| 0         | 0         | 0        | 0         | 0         | 0         |
| 1.51412   | 1.82183   | 2.63113  | 3.92588   | 2.82769   | 2.98482   |
| 0.0712387 | 0.0887775 | 0        | 0         | 0.0385821 | 0         |

|          |           |           |           |           |           |
|----------|-----------|-----------|-----------|-----------|-----------|
| 3.75267  | 3.49643   | 2.86703   | 2.87115   | 4.33297   | 4.61409   |
| 15.8031  | 16.5407   | 19.4848   | 19.5628   | 18.0963   | 20.9216   |
| 525.48   | 578.726   | 559.555   | 551.055   | 532.728   | 567.881   |
| 31.8586  | 33.9262   | 32.0419   | 30.4689   | 33.2662   | 34.7246   |
| 0.737068 | 0.264917  | 0.563831  | 0.135965  | 0.972891  | 0.54368   |
| 8.07877  | 6.64761   | 11.9799   | 6.03325   | 6.74101   | 3.60719   |
| 803.308  | 825.802   | 670.487   | 631.011   | 384.395   | 597.693   |
| 4.96097  | 5.44885   | 3.45609   | 4.11922   | 5.47608   | 5.55805   |
| 0.276312 | 0.0528896 | 0.0267341 | 0.048352  | 0.245182  | 0         |
| 0        | 0         | 0.0721177 | 0.0652158 | 0.253184  | 0         |
| 0.755593 | 0.564971  | 1.0154    | 0.373028  | 0.518347  | 0.148222  |
| 26.3396  | 24.2585   | 32.4482   | 20.5994   | 27.0002   | 19.9644   |
| 1.98425  | 1.89845   | 2.19343   | 2.2752    | 1.37278   | 2.04487   |
| 4.41725  | 3.44743   | 4.86243   | 4.24458   | 4.37387   | 4.03248   |
| 0.333229 | 42.3575   | 0.251892  | 492.838   | 0.721893  | 17.4814   |
| 6.47438  | 6.203     | 7.04668   | 5.98138   | 9.91139   | 5.5492    |
| 6.98936  | 7.05751   | 6.72401   | 5.73375   | 7.28815   | 6.61626   |
| 26.0771  | 25.6149   | 25.5294   | 24.7419   | 16.9568   | 18.6069   |
| 52.9364  | 55.9657   | 64.3122   | 55.5869   | 53.9689   | 53.2056   |
| 22.7808  | 23.2991   | 25.8153   | 20.5126   | 24.1371   | 21.932    |
| 16.7338  | 17.4794   | 17.0571   | 16.4941   | 12.8271   | 11.7164   |
| 0        | 0         | 0         | 0         | 0         | 0         |
| 41.2745  | 44.9317   | 36.6225   | 43.7299   | 32.7915   | 44.0838   |
| 1.24816  | 1.09671   | 1.5732    | 0.584467  | 2.12852   | 1.44556   |
| 6.00577  | 5.76437   | 7.09643   | 3.65488   | 7.83871   | 6.52309   |
| 8.11286  | 8.23893   | 7.1731    | 7.88849   | 8.60696   | 8.27587   |
| 0        | 0         | 0         | 0         | 0         | 0.0493774 |
| 48.4051  | 45.8474   | 46.4723   | 47.0633   | 47.4304   | 50.419    |
| 670.311  | 742.525   | 609.912   | 424.263   | 1048.76   | 657.461   |
| 1.18364  | 0.694141  | 1.57893   | 0.951882  | 0.82959   | 0.702423  |
| 0.318537 | 0         | 0.40131   | 0.567039  | 0.0802658 | 0.0669493 |
| 26.2592  | 26.5685   | 26.037    | 29.3668   | 28.1974   | 27.7089   |
| 9.89034  | 12.6561   | 13.6109   | 10.9168   | 11.6997   | 10.5052   |
| 0        | 0.0607853 | 1.63E-54  | 0         | 3.35E-75  | 0         |
| 27.7667  | 28.3709   | 23.4389   | 25.6579   | 30.4552   | 35.1873   |
| 5.9049   | 5.48162   | 6.75347   | 6.37917   | 5.1074    | 5.34054   |
| 30.7393  | 29.0994   | 28.8498   | 24.2896   | 25.3539   | 26.5541   |
| 0        | 0         | 0         | 0.0197676 | 0         | 0         |
| 2.03476  | 1.21273   | 2.34058   | 1.10869   | 3.01853   | 1.33876   |
| 7.96787  | 6.96537   | 6.90084   | 7.40326   | 7.43661   | 8.07896   |
| 0.209279 | 0.156482  | 0.316393  | 0.715283  | 0.0906746 | 0.0703773 |
| 13.2131  | 12.9575   | 13.5044   | 12.2625   | 13.6518   | 11.7142   |
| 110.96   | 107.2     | 107.58    | 110.882   | 76.6753   | 89.1655   |

|           |           |           |           |           |           |
|-----------|-----------|-----------|-----------|-----------|-----------|
| 1.36138   | 1.47904   | 1.97901   | 0.715844  | 2.4577    | 1.76081   |
| 0         | 0         | 0         | 0         | 0         | 0         |
| 13.6275   | 15.3896   | 15.1772   | 12.0354   | 16.6657   | 14.736    |
| 0         | 0         | 0         | 0         | 0         | 0         |
| 126.734   | 124.359   | 131.064   | 156.382   | 134.515   | 139.051   |
| 0.236635  | 0         | 0.298126  | 0         | 0         | 0.397885  |
| 0.118578  | 0.0369429 | 0.186739  | 0.0675469 | 0.417434  | 0.124612  |
| 0         | 0         | 0         | 0         | 0         | 0         |
| 0         | 0         | 0         | 0         | 0         | 0         |
| 10.093    | 9.40607   | 10.2103   | 7.66919   | 8.32307   | 6.34186   |
| 0.511123  | 150.464   | 4.79378   | 491.085   | 26.144    | 83.1723   |
| 33.5296   | 35.7502   | 33.2335   | 31.368    | 32.2324   | 30.7212   |
| 6.657     | 7.38198   | 7.10749   | 7.61634   | 5.31638   | 5.92862   |
| 0.463266  | 0.428188  | 0.517073  | 0.407404  | 0.315171  | 0.267588  |
| 12.495    | 10.3763   | 13.7621   | 9.21258   | 18.7353   | 10.9726   |
| 22.9868   | 23.2833   | 20.272    | 21.0421   | 27.9967   | 31.0852   |
| 541.816   | 585.049   | 444.563   | 579.278   | 469.907   | 648.187   |
| 2.14254   | 2.29647   | 2.63543   | 2.58836   | 3.72957   | 2.62892   |
| 0.961139  | 0.836392  | 0.403098  | 0.529716  | 0.784005  | 0.387528  |
| 133.921   | 141.742   | 129.326   | 148.316   | 101.61    | 123.167   |
| 13.2665   | 10.3561   | 17.4168   | 13.745    | 10.0875   | 4.24441   |
| 11.0659   | 11.0822   | 14.0876   | 15.5878   | 9.31258   | 13.5159   |
| 7.7996    | 6.36529   | 8.69905   | 7.72211   | 10.7018   | 7.81099   |
| 56.9417   | 38.4866   | 58.999    | 46.6819   | 69.0249   | 55.129    |
| 0         | 0         | 0         | 0         | 0         | 0         |
| 0.0315262 | 0         | 0         | 0.0359173 | 0         | 0         |
| 289.728   | 182.558   | 301.673   | 348.874   | 315.003   | 275.143   |
| 553.384   | 527.106   | 605.293   | 599.6     | 518.101   | 579.465   |
| 17.0569   | 18.1304   | 20.6992   | 23.4335   | 11.7172   | 18.5312   |
| 9.52661   | 8.85375   | 10.468    | 8.2321    | 10.8874   | 8.90847   |
| 0         | 0.0694544 | 0         | 0         | 0         | 0.0468554 |
| 5.11042   | 3.82116   | 4.38423   | 3.49333   | 5.43007   | 4.00997   |
| 0.0248888 | 0.0103388 | 0.0418083 | 0.0378072 | 0.0898634 | 0.0278991 |
| 0.082858  | 0.0877689 | 0.292289  | 0.269036  | 0.157063  | 0.0626938 |
| 0         | 0         | 0         | 0         | 0         | 0         |
| 0         | 0         | 0         | 0         | 0         | 0         |
| 4.93939   | 4.71445   | 4.6254    | 4.96495   | 4.26241   | 2.82684   |
| 11.351    | 8.93208   | 7.59994   | 6.8726    | 13.9463   | 14.0145   |
| 1.99391   | 3.00248   | 1.04668   | 1.51442   | 0.899903  | 1.04769   |
| 0         | 0         | 0         | 0         | 0         | 0         |
| 4.16073   | 4.93631   | 5.56138   | 6.15426   | 5.75407   | 4.33237   |
| 0.299886  | 0.373717  | 0.188906  | 0.0854137 | 0.32483   | 0.0630294 |
| 0.270809  | 0.224988  | 0.454906  | 0.359949  | 0.146667  | 0.113836  |

|           |           |           |           |           |           |
|-----------|-----------|-----------|-----------|-----------|-----------|
| 0         | 0         | 0         | 0         | 0         | 0         |
| 7.40688   | 8.12914   | 8.50247   | 6.0844    | 6.20447   | 6.26563   |
| 0         | 0.0387154 | 0.0391396 | 0         | 0.0336509 | 0         |
| 85.2972   | 102.913   | 89.3826   | 118.815   | 120.847   | 154.601   |
| 34.6115   | 35.7284   | 30.2058   | 38.7091   | 27.8326   | 26.3303   |
| 0         | 0         | 0         | 0         | 0         | 0         |
| 7.0722    | 9.6049    | 9.88975   | 9.66688   | 10.1954   | 11.1804   |
| 1.08E-56  | 0.374058  | 0.289037  | 0.313454  | 2.95E-32  | 2.04E-61  |
| 14.1919   | 15.1153   | 13.4136   | 14.4659   | 11.5192   | 9.38718   |
| 11.1313   | 11.262    | 14.9979   | 13.8562   | 14.4826   | 15.8859   |
| 0.0910415 | 0.113456  | 0.114699  | 0         | 0.295843  | 0.0510265 |
| 5.21614   | 6.68643   | 8.41595   | 10.4809   | 8.72981   | 9.03622   |
| 13.5602   | 8.13076   | 13.2893   | 8.34502   | 14.035    | 12.7891   |
| 0.384088  | 0.766824  | 0.548283  | 0.645492  | 0.575268  | 0.636157  |
| 0         | 0         | 0         | 0         | 0         | 0         |
| 12.4237   | 11.5862   | 13.2559   | 11.3482   | 13.1236   | 10.6345   |
| 0.794679  | 1.72231   | 0.478825  | 0.669182  | 0.112276  | 0.319524  |
| 0.495697  | 1.85337   | 1.87358   | 0.565175  | 0         | 0.834437  |
| 23.8906   | 21.5086   | 24.2621   | 26.235    | 25.5335   | 30.6241   |
| 7.78753   | 8.38891   | 8.14825   | 4.96242   | 7.91107   | 5.69632   |
| 3.96808   | 5.32786   | 5.06371   | 4.34577   | 4.13176   | 3.01317   |
| 3.36466   | 2.351     | 3.06844   | 2.34175   | 2.86686   | 1.97659   |
| 2067.73   | 2549.96   | 2083.65   | 2126.74   | 2049.93   | 2196.73   |
| 0.0377181 | 0         | 0.0475193 | 0         | 0         | 0         |
| 0.0472729 | 0.0589115 | 0.119114  | 0.1885    | 0.0256025 | 0.0596144 |
| 0.0214777 | 0         | 0.0811762 | 0         | 0         | 0         |
| 51.6017   | 128.612   | 0         | 88.1834   | 27.947    | 0         |
| 0         | 0         | 0         | 0         | 0         | 0         |
| 7.71914   | 7.81853   | 8.49702   | 6.85418   | 8.36122   | 6.61202   |
| 3.6977    | 3.99614   | 3.74881   | 3.22551   | 5.22549   | 3.2544    |
| 0         | 0         | 0         | 0         | 0         | 0         |
| 0         | 0         | 0         | 0         | 0.0980495 | 0         |
| 9.86113   | 10.5718   | 11.657    | 10.721    | 10.0912   | 8.50249   |
| 0         | 0         | 0         | 0         | 3.04E-265 | 0         |
| 0.121586  | 0.287889  | 0.382952  | 0.166225  | 0.605818  | 0.367988  |
| 0.0280839 | 0.0349981 | 0         | 0.0639909 | 0         | 0         |
| 0         | 0         | 0         | 0         | 0         | 0         |
| 1.60137   | 1.03345   | 1.98147   | 1.58007   | 1.79652   | 1.4665    |
| 18.7823   | 19.6249   | 12.808    | 14.122    | 21.77     | 22.343    |
| 0.067981  | 0.169436  | 0.285487  | 0.0774495 | 0.564539  | 0.114305  |
| 17.4267   | 16.7669   | 19.0303   | 18.0538   | 17.4212   | 18.3414   |
| 0.0833897 | 0.0519597 | 0         | 0         | 0.0225807 | 0         |
| 0         | 0         | 0         | 0         | 0         | 0         |

|           |           |          |           |          |           |
|-----------|-----------|----------|-----------|----------|-----------|
| 7.81741   | 7.77521   | 17.2098  | 18.5575   | 12.0043  | 13.6141   |
| 4.42313   | 4.4736    | 4.68412  | 4.76115   | 6.33931  | 5.21603   |
| 164.145   | 176.917   | 158.134  | 164.448   | 179.09   | 184.211   |
| 9.0948    | 10.1067   | 9.1587   | 10.0796   | 9.51064  | 9.19787   |
| 12.6976   | 12.3737   | 13.9019  | 10.5877   | 16.8478  | 11.2425   |
| 5.15535   | 5.87628   | 6.41319  | 6.56237   | 9.77025  | 7.55889   |
| 41.1262   | 36.6687   | 42.1772  | 37.2475   | 41.7588  | 38.9656   |
| 0         | 0         | 0        | 0         | 0        | 0         |
| 0         | 0         | 0        | 0         | 0        | 0         |
| 0         | 0         | 0.124188 | 0         | 0        | 0.0828721 |
| 0.115594  | 0.168061  | 0.26699  | 0.0658469 | 0.187813 | 0.161968  |
| 0         | 0.0264013 | 0        | 0.0241362 | 0        | 0         |
| 0         | 0         | 0        | 0         | 0        | 0         |
| 0         | 0         | 0        | 0         | 0        | 0         |
| 0.141372  | 0.058736  | 0.089081 | 0         | 0.102133 | 0.01983   |
| 3.14231   | 2.73736   | 2.69048  | 2.433     | 4.22982  | 2.92391   |
| 25.9693   | 25.3492   | 23.9471  | 26.2286   | 26.3516  | 28.1151   |
| 10.5113   | 11.4707   | 9.34621  | 7.92327   | 8.77941  | 8.78841   |
| 5.13209   | 3.59824   | 6.86979  | 3.10686   | 2.17147  | 2.02305   |
| 18.4104   | 18.7135   | 18.1435  | 19.9449   | 25.2254  | 24.4777   |
| 0.824689  | 0.58114   | 0.712967 | 0.531925  | 0.965812 | 0.845275  |
| 5.84976   | 4.95081   | 5.18873  | 4.56759   | 5.03354  | 4.25917   |
| 14.818    | 15.4497   | 13.2022  | 14.1773   | 16.571   | 17.3471   |
| 0         | 0         | 0        | 0         | 0        | 0         |
| 1.55166   | 2.35475   | 1.86038  | 1.56322   | 2.49644  | 1.51506   |
| 0         | 0         | 0        | 0         | 0        | 0         |
| 3.86595   | 4.37812   | 4.37053  | 4.53838   | 4.3945   | 3.79389   |
| 4.59538   | 4.93998   | 3.66849  | 4.83584   | 2.01447  | 3.32877   |
| 15.4082   | 18.5158   | 16.1952  | 22.4192   | 15.8076  | 16.8769   |
| 5.02672   | 3.96641   | 4.48336  | 3.71978   | 4.63066  | 3.76195   |
| 22.3743   | 20.2923   | 22.7901  | 25.8749   | 28.6425  | 32.1425   |
| 0.243184  | 0.151528  | 0.255314 | 0.046176  | 0.131706 | 0.238523  |
| 0.703577  | 0.477994  | 0.402693 | 0.218493  | 0.207733 | 0.403081  |
| 21.4038   | 21.7742   | 21.3478  | 16.2981   | 17.1713  | 16.9692   |
| 50.5451   | 53.066    | 55.2542  | 47.0958   | 47.3709  | 39.3036   |
| 11.4886   | 10.169    | 11.1837  | 11.6309   | 11.7087  | 10.6125   |
| 1.00868   | 0.959298  | 0.735717 | 0.756031  | 1.86888  | 1.31664   |
| 0         | 0         | 0        | 0         | 0        | 0         |
| 0.0826033 | 0.30882   | 0.208136 | 0         | 0.268423 | 0.0694456 |
| 6.69979   | 6.35966   | 6.86036  | 5.19691   | 7.73059  | 4.9455    |
| 0.277575  | 35.4994   | 0.554104 | 256.699   | 0.826826 | 14.6726   |
| 101.784   | 100.138   | 97.0487  | 95.7985   | 80.7444  | 79.7363   |
| 0         | 0         | 0        | 0         | 0        | 0         |

|           |           |           |          |           |           |
|-----------|-----------|-----------|----------|-----------|-----------|
| 53.2788   | 0         | 134.247   | 0        | 0         | 44.7921   |
| 12.5289   | 13.4344   | 9.40608   | 10.3806  | 13.667    | 11.7339   |
| 6.75659   | 12.6877   | 9.56178   | 10.123   | 9.62446   | 13.6952   |
| 18.3829   | 14.0408   | 25.152    | 34.0047  | 20.7684   | 19.2768   |
| 1.1542    | 1.43837   | 1.38488   | 1.15842  | 1.72648   | 1.57105   |
| 15.0909   | 16.8575   | 16.9437   | 15.7081  | 11.4903   | 10.5178   |
| 3.17894   | 2.89151   | 3.01526   | 3.55927  | 3.97768   | 3.50199   |
| 10.556    | 12.893    | 13.1791   | 15.3288  | 12.3704   | 14.6154   |
| 0.139874  | 0.139448  | 0.0352441 | 0.127485 | 0.0909051 | 0.0705562 |
| 0         | 0         | 0         | 0        | 0         | 0         |
| 5.32411   | 4.70121   | 0.0160034 | 0        | 0         | 0         |
| 0.194971  | 0.188978  | 0.218342  | 0.172765 | 0.117327  | 0.20034   |
| 0.0644446 | 0.211178  | 0.0519621 | 0.505372 | 0.0744201 | 0.200227  |
| 46.7596   | 49.8369   | 54.3487   | 47.1778  | 53.3873   | 46.5237   |
| 20.9022   | 22.0956   | 18.3856   | 20.6289  | 18.647    | 18.4177   |
| 0         | 0         | 0         | 0        | 0         | 0         |
| 11.6299   | 13.3457   | 11.1082   | 11.0942  | 9.19521   | 11.8029   |
| 2.29107   | 2.56962   | 0.288642  | 0.522036 | 0.992657  | 0.57784   |
| 2.44993   | 3.13057   | 2.05172   | 3.1578   | 2.70197   | 2.1598    |
| 12.6395   | 11.9803   | 11.9429   | 14.1559  | 10.7612   | 11.0764   |
| 86.2846   | 112.055   | 83.1393   | 98.7403  | 82.4647   | 92.3616   |
| 4.36564   | 4.5078    | 4.93434   | 4.12106  | 5.08005   | 5.05445   |
| 11.8611   | 11.9913   | 13.1429   | 10.0942  | 12.435    | 9.49124   |
| 0         | 0         | 0         | 0        | 0         | 0         |
| 5.48268   | 5.63105   | 5.6484    | 4.94012  | 5.48164   | 5.02129   |
| 1.18624   | 1.12146   | 2.73131   | 1.53787  | 1.90521   | 2.02896   |
| 0.127604  | 0.0796963 | 0.0837874 | 0.069178 | 0.181714  | 0.238227  |
| 3.61998   | 4.97526   | 3.03895   | 3.24091  | 5.24814   | 5.76469   |
| 12.587    | 12.2707   | 10.996    | 14.0267  | 12.4362   | 13.317    |
| 0.157549  | 0.0981688 | 0.347356  | 0.13462  | 8.19139   | 7.59952   |
| 4.13911   | 3.54076   | 5.56821   | 5.1552   | 5.54732   | 5.98643   |
| 0.234992  | 0.244614  | 0.261226  | 0.110239 | 0.296463  | 0.225452  |
| 6.64583   | 7.94225   | 13.5682   | 12.2697  | 12.0715   | 11.2509   |
| 3.55889   | 3.48756   | 4.3625    | 3.21966  | 5.35323   | 3.74289   |
| 2.31501   | 2.92937   | 2.14094   | 2.71623  | 2.52042   | 2.04167   |
| 0         | 0.0340881 | 0.0172308 | 0        | 0.0148144 | 0.0114983 |
| 0         | 0.129023  | 0         | 0.117954 | 0         | 0.174084  |
| 15.429    | 23.0414   | 20.5093   | 12.542   | 20.4416   | 9.32653   |
| 0.0540342 | 0         | 0         | 0.123121 | 0.263379  | 0.0454272 |
| 0.227188  | 0.176402  | 0.154804  | 0.182919 | 0.0851806 | 0.134982  |
| 26.3718   | 25.5519   | 23.3764   | 24.214   | 27.8263   | 28.4902   |
| 0         | 0         | 0.0488803 | 0        | 0         | 0         |
| 0         | 0         | 0.661453  | 1.1963   | 1.99043   | 0.66209   |



|            |           |           |          |          |           |
|------------|-----------|-----------|----------|----------|-----------|
| 4.24082    | 3.96928   | 3.93388   | 3.82962  | 3.56632  | 3.33215   |
| 8.48461    | 7.81658   | 8.60971   | 8.13502  | 8.7819   | 7.28458   |
| 2.53E-07   | 0.232128  | 0.214214  | 4.64E-07 | 0.184334 | 2.71E-07  |
| 0          | 0         | 0         | 0        | 0        | 0         |
| 17.6586    | 17.8326   | 18.8431   | 20.2807  | 16.5716  | 17.7174   |
| 0          | 0         | 0         | 0        | 0        | 0         |
| 9.93797    | 9.4058    | 11.1246   | 8.98982  | 11.5864  | 8.97863   |
| 27.2754    | 27.0573   | 32.3704   | 34.5782  | 27.5901  | 31.9441   |
| 1.14574    | 0.698657  | 1.30869   | 0.820368 | 0.751173 | 0.248757  |
| 0.25926    | 0.079124  | 0.079991  | 0.38579  | 0.171934 | 0.160136  |
| 2.36037    | 3.26238   | 0.70288   | 2.34688  | 2.18482  | 3.53583   |
| 0.333883   | 0.0665731 | 0.0673026 | 0.273879 | 0.231459 | 0.410623  |
| 0          | 0         | 0         | 0        | 0        | 0         |
| 9.2715     | 10.6997   | 9.86438   | 15.4291  | 10.765   | 14.232    |
| 10.9183    | 9.54458   | 8.70102   | 10.3037  | 11.0064  | 10.4938   |
| 6.7437     | 5.72999   | 7.40774   | 5.1749   | 8.96478  | 9.55851   |
| 0.0728825  | 0.0726608 | 0.0918213 | 0        | 0.110523 | 0.0980371 |
| 72.6537    | 54.6232   | 136.545   | 58.1297  | 79.9334  | 57.4822   |
| 931.116    | 952.724   | 389.971   | 528.16   | 189.793  | 340.805   |
| 8.44027    | 8.91096   | 9.22275   | 7.48509  | 10.703   | 7.89588   |
| 9.15141    | 9.15272   | 12.6944   | 7.27764  | 10.3041  | 7.42563   |
| 23.2557    | 40.1838   | 87.8964   | 56.7404  | 301.725  | 233.19    |
| 0.291728   | 0         | 0.122512  | 0        | 0.315994 | 0         |
| 0.02818    | 0.105354  | 0.284022  | 0.06421  | 0.641004 | 0.403122  |
| 0.0583798  | 0.0727529 | 0.0551626 | 0.116395 | 0.142281 | 0.0368105 |
| 3.80661    | 4.86313   | 4.34334   | 4.1186   | 4.64189  | 5.23314   |
| 4.98495    | 6.29354   | 6.77564   | 4.9789   | 6.25107  | 5.9118    |
| 10.7872    | 11.4303   | 12.6849   | 9.38532  | 12.1633  | 7.90943   |
| 1.51542    | 0.944256  | 1.76234   | 1.52728  | 2.6516   | 1.32303   |
| 0          | 0         | 0         | 0        | 0        | 0         |
| 0.00749494 | 0         | 0         | 0        | 0        | 0         |
| 0          | 0         | 0         | 0        | 0        | 0         |
| 0.190333   | 0.174774  | 0.151447  | 0.148366 | 0.368926 | 0.240023  |
| 14.1969    | 15.1187   | 16.4321   | 12.549   | 14.0857  | 12.6355   |
| 16.7665    | 21.3775   | 14.408    | 19.5433  | 12.1775  | 17.8438   |
| 0.11006    | 0.137157  | 0         | 0        | 0        | 0.185058  |
| 0          | 0         | 0         | 0        | 0        | 0         |
| 2.97782    | 2.05842   | 1.69995   | 1.21921  | 2.94832  | 2.62084   |
| 5.68238    | 7.4742    | 3.11421   | 4.51952  | 5.39675  | 6.2344    |
| 4.67652    | 6.04419   | 6.27609   | 8.97661  | 5.52676  | 5.52874   |
| 12.0593    | 11.6738   | 11.8469   | 11.5309  | 12.5959  | 10.0931   |
| 0          | 0         | 0         | 0        | 0        | 0         |
| 3.23912    | 3.32384   | 3.22828   | 2.74286  | 3.74462  | 2.58668   |

|           |           |           |           |           |           |
|-----------|-----------|-----------|-----------|-----------|-----------|
| 507.299   | 519.807   | 358.97    | 347.21    | 386.324   | 564.53    |
| 0         | 0         | 0         | 0         | 0         | 0         |
| 7.01794   | 8.64153   | 8.42827   | 6.50773   | 9.92191   | 7.39266   |
| 28.7017   | 26.4738   | 26.4306   | 20.5484   | 30.094    | 24.8976   |
| 11.2708   | 11.547    | 10.7983   | 9.27683   | 9.47707   | 10.1562   |
| 7.02827   | 4.07093   | 5.15343   | 3.55694   | 6.6831    | 2.89357   |
| 5.68101   | 4.26619   | 2.95262   | 2.48519   | 5.9542    | 4.06639   |
| 0         | 0         | 0         | 0         | 0         | 0         |
| 0         | 0         | 0         | 0         | 0         | 0         |
| 0.0160372 | 0.0599566 | 0.0404091 | 0.0182709 | 0.138969  | 0.0269653 |
| 3.63397   | 3.9087    | 5.36326   | 4.3709    | 5.39373   | 5.319     |
| 49.5093   | 49.324    | 61.7718   | 50.5877   | 56.4875   | 51.2359   |
| 0         | 0         | 0         | 0         | 0         | 0         |
| 8.83094   | 6.32795   | 15.4807   | 10.2587   | 12.5079   | 11.0556   |
| 2.98314   | 1.83401   | 2.10466   | 1.90324   | 2.80044   | 2.40764   |
| 3.12936   | 3.40564   | 3.15407   | 3.65604   | 3.14145   | 3.20176   |
| 0.146325  | 0         | 0.0921741 | 0         | 0.0792481 | 0.0615086 |
| 7.14437   | 8.14527   | 6.66211   | 7.48287   | 6.68957   | 5.46858   |
| 2.2109    | 3.02965   | 2.80965   | 2.29562   | 3.00124   | 2.53774   |
| 1.11133   | 0.857347  | 1.17686   | 1.39495   | 1.35569   | 1.07048   |
| 17.7422   | 11.6399   | 10.4162   | 10.5225   | 11.6663   | 12.3862   |
| 0.138039  | 0         | 0.0434771 | 0.0393162 | 0.0373801 | 0.116051  |
| 2.08322   | 1.23315   | 2.55894   | 1.18669   | 2.31291   | 1.55435   |
| 1.64062   | 1.83428   | 1.91828   | 1.63881   | 2.19875   | 1.99078   |
| 0.0102415 | 0.0127629 | 0         | 0         | 0         | 0         |
| 3.87818   | 2.5962    | 4.59145   | 4.47546   | 4.56258   | 4.13125   |
| 0         | 0         | 0.0105311 | 0         | 0         | 0         |
| 16.175    | 17.7464   | 16.9359   | 13.4298   | 22.1564   | 16.8997   |
| 0         | 0         | 0         | 0         | 0         | 0         |
| 22.0139   | 19.772    | 29.4079   | 20.5062   | 27.1663   | 20.2534   |
| 0         | 0         | 0         | 0         | 0         | 0         |
| 7.65068   | 7.07521   | 8.09042   | 7.82887   | 6.44965   | 8.21706   |
| 63.4092   | 69.0966   | 68.6559   | 72.5796   | 52.784    | 58.6048   |
| 10.4349   | 10.0657   | 9.95513   | 7.96801   | 11.1302   | 11.0496   |
| 57.3771   | 56.6515   | 46.0306   | 52.1725   | 38.2733   | 55.8827   |
| 0         | 0         | 0         | 0         | 0         | 0         |
| 6.10282   | 5.61909   | 5.32692   | 5.25932   | 3.99847   | 3.3603    |
| 2.01962   | 2.17478   | 1.2899    | 1.41839   | 2.23005   | 1.1127    |
| 0         | 0         | 0         | 0         | 0         | 0         |
| 1.73847   | 2.01368   | 1.958     | 2.62248   | 2.40654   | 1.78261   |
| 5.2327    | 6.10957   | 5.91656   | 5.04944   | 6.82122   | 4.9543    |
| 0.271419  | 0.338241  | 0.341948  | 0.428154  | 0.40707   | 0.368606  |
| 1.16557   | 1.26841   | 0.78593   | 1.32791   | 1.56482   | 1.54577   |

|           |           |           |           |           |          |
|-----------|-----------|-----------|-----------|-----------|----------|
| 10.6706   | 11.602    | 11.2178   | 11.2049   | 12.4631   | 12.5231  |
| 20.1373   | 19.0139   | 22.3422   | 17.9581   | 20.2396   | 15.4506  |
| 11.9721   | 9.87686   | 14.9425   | 8.61617   | 9.12895   | 7.43738  |
| 0         | 0         | 0         | 0         | 0         | 0        |
| 0         | 0         | 0         | 0         | 0         | 0        |
| 52.8368   | 49.4336   | 56.2159   | 49.061    | 53.5249   | 40.3232  |
| 0.189437  | 0.104923  | 0.0530362 | 0.0639473 | 0.106397  | 0.117972 |
| 33.9267   | 37.0798   | 33.6046   | 33.1876   | 28.8921   | 27.0473  |
| 0         | 0         | 0         | 0         | 0         | 0        |
| 13.1572   | 12.2771   | 10.4988   | 12.0258   | 12.026    | 11.6194  |
| 12.4289   | 10.7974   | 11.7261   | 11.3798   | 10.3686   | 10.8149  |
| 17.6585   | 21.9648   | 12.0655   | 9.83827   | 13.044    | 12.6008  |
| 16.2002   | 14.2179   | 7.73058   | 5.48135   | 2.43753   | 2.871    |
| 2387.71   | 2804.54   | 2534.26   | 2592.12   | 2492.39   | 2884.18  |
| 0         | 0         | 0         | 0         | 0         | 0        |
| 9.07623   | 9.78802   | 10.2178   | 9.02531   | 10.3867   | 10.1479  |
| 24.9943   | 24.6546   | 24.7332   | 21.4978   | 23.6449   | 23.7472  |
| 1.9908    | 1.65395   | 1.91095   | 1.83607   | 1.74565   | 1.23534  |
| 0         | 0         | 0         | 0         | 0         | 0        |
| 1.43438   | 1.37002   | 1.66446   | 1.12892   | 1.47193   | 0.785471 |
| 0.0239582 | 0         | 0.219863  | 0.102324  | 0.0180209 | 0        |
| 0.629267  | 0.441798  | 0.714623  | 0.3837    | 0.432006  | 0.484326 |
| 82.3104   | 62.7225   | 78.0306   | 79.2025   | 106.033   | 83.1316  |
| 6.70603   | 8.64214   | 7.52035   | 6.66999   | 7.33458   | 5.10014  |
| 24.4357   | 23.3268   | 24.9391   | 22.7011   | 25.5421   | 20.6476  |
| 0.153036  | 0.190713  | 0.192803  | 0.818482  | 0         | 0        |
| 8.34942   | 8.54607   | 7.22828   | 6.66911   | 9.70906   | 8.46412  |
| 0.0319812 | 0.0398549 | 0.0402917 | 0.25505   | 0.103924  | 0.053774 |
| 0         | 0         | 0         | 0         | 0         | 0        |
| 71.5566   | 82.0864   | 66.517    | 80.266    | 51.8563   | 70.1492  |
| 0         | 0         | 0         | 0.0307801 | 0         | 0        |
| 72.0074   | 77.847    | 66.7828   | 64.7588   | 70.0745   | 70.9548  |
| 0.0445416 | 0.222031  | 0.0561159 | 0.405964  | 0.0964931 | 0.11234  |
| 0.439272  | 0.912367  | 1.29131   | 0         | 2.85486   | 0.246201 |
| 14.2402   | 16.7823   | 16.3615   | 14.9779   | 17.1578   | 14.4828  |
| 10.1396   | 9.51652   | 10.2403   | 9.23977   | 12.6194   | 10.5379  |
| 4.02671   | 4.47264   | 5.03631   | 5.41864   | 3.35025   | 4.80811  |
| 34.8872   | 36.0865   | 37.7591   | 37.4545   | 37.8202   | 38.3215  |
| 1.48163   | 1.67855   | 1.86664   | 1.38109   | 1.53193   | 1.18901  |
| 0.934379  | 0.921834  | 0.948285  | 0.931457  | 1.36352   | 0.851006 |
| 29.7632   | 143.601   | 32.5498   | 198.587   | 60.7678   | 14.7701  |
| 0.554101  | 0.470809  | 0.571162  | 0.459111  | 0.409221  | 0.614061 |
| 0.595839  | 0.526959  | 0.411658  | 0.48476   | 0.522972  | 0.471144 |

|           |           |           |           |           |           |
|-----------|-----------|-----------|-----------|-----------|-----------|
| 0.814227  | 0.375811  | 0.913556  | 0.515353  | 0.685964  | 0.634927  |
| 7.354     | 8.66266   | 7.89722   | 7.8966    | 9.3731    | 8.42304   |
| 0.0853704 | 0.106388  | 0.0879989 | 0.0618934 | 0.589959  | 0.182692  |
| 4.02915   | 4.35491   | 4.62959   | 5.90226   | 5.14699   | 4.36838   |
| 0.70875   | 0.857637  | 0.677926  | 0.576356  | 0.414401  | 0.56868   |
| 55.0755   | 61.805    | 42.0498   | 49.5288   | 40.9898   | 52.8361   |
| 7.37427   | 6.58499   | 6.91182   | 6.0643    | 8.5688    | 7.54857   |
| 0.135086  | 0.303018  | 0.0680753 | 0.0923404 | 0.292644  | 0.181709  |
| 14.9772   | 13.4356   | 16.5938   | 14.3261   | 10.6158   | 13.9549   |
| 0         | 0         | 0         | 0         | 0         | 0         |
| 0         | 0         | 0         | 0         | 0         | 0         |
| 6.56512   | 6.63213   | 4.94617   | 5.93889   | 4.7723    | 4.47418   |
| 4.8126    | 4.31466   | 4.17028   | 3.96773   | 6.91766   | 5.15767   |
| 8.9516    | 10.0704   | 8.02123   | 8.27651   | 8.51732   | 6.95385   |
| 19.8699   | 18.3018   | 18.1811   | 17.4569   | 17.6643   | 17.6176   |
| 1.17974   | 1.29927   | 0.588446  | 0.918141  | 0.638548  | 0.677211  |
| 0         | 0.118778  | 0.120079  | 0.108587  | 0.10324   | 0.0801301 |
| 0         | 0         | 0         | 0         | 0         | 0         |
| 4.29311   | 3.78963   | 3.90628   | 3.09088   | 4.58568   | 4.48652   |
| 14.3229   | 15.6965   | 18.7702   | 15.1974   | 17.6192   | 14.4618   |
| 0.195451  | 0.31      | 0.671564  | 0.344133  | 0.519649  | 0.373451  |
| 14.194    | 13.5322   | 17.5567   | 14.6351   | 20.4111   | 16.9156   |
| 8.49595   | 7.96714   | 8.78508   | 6.93868   | 9.81358   | 6.57739   |
| 18.4756   | 21.2973   | 21.4528   | 21.7945   | 22.0789   | 20.0933   |
| 14.0767   | 13.0333   | 11.5216   | 11.456    | 17.2524   | 18.4677   |
| 7.35511   | 6.83164   | 13.4294   | 11.1468   | 17.948    | 11.9624   |
| 0         | 0         | 0         | 0         | 0         | 0         |
| 0.633805  | 0.905365  | 0.393133  | 0.26087   | 0.491868  | 0.500333  |
| 0         | 0.0494563 | 0         | 0.0226066 | 0         | 0         |
| 0.0301089 | 0.141872  | 0.0379328 | 0.0171511 | 0.0733804 | 0.0253129 |
| 122.752   | 115.982   | 78.6004   | 85.0918   | 75.1472   | 93.003    |
| 11.6944   | 37.0473   | 81.2356   | 69.027    | 152.185   | 151.503   |
| 77.756    | 82.4717   | 53.6593   | 66.2869   | 48.666    | 60.7562   |
| 6.78268   | 6.70166   | 7.88679   | 6.90635   | 10.3822   | 9.38193   |
| 0.0860125 | 0.107189  | 0.144484  | 0.261314  | 0.155278  | 0.0723118 |
| 124.007   | 77.3356   | 81.0384   | 69.2252   | 73.4539   | 85.9557   |
| 59.2568   | 59.8448   | 51.3566   | 47.9142   | 41.57     | 48.6477   |
| 12.0132   | 11.556    | 12.1233   | 13.6856   | 11.354    | 13.0142   |
| 10.9929   | 9.84187   | 11.0879   | 10.8551   | 11.8924   | 10.6627   |
| 0.0456715 | 0         | 0.172618  | 0.312197  | 0.247352  | 0         |
| 13.0337   | 11.9901   | 7.86678   | 9.35829   | 5.20129   | 6.32906   |
| 5.39181   | 7.18806   | 8.05669   | 8.85706   | 6.38358   | 8.53883   |
| 40.0053   | 40.308    | 43.7896   | 38.6318   | 40.1757   | 36.3616   |

|          |          |           |           |          |          |
|----------|----------|-----------|-----------|----------|----------|
| 0        | 0        | 0         | 0         | 0        | 0        |
| 43.5961  | 45.664   | 42.1639   | 40.6743   | 34.4225  | 31.9745  |
| 0        | 0        | 0         | 0         | 0        | 0        |
| 13.7149  | 13.8683  | 13.7953   | 11.6302   | 11.4447  | 9.69046  |
| 191.473  | 185.786  | 183.408   | 191.839   | 176.224  | 193.908  |
| 0.684783 | 1.34571  | 0.696818  | 1.26026   | 0.741743 | 0.974271 |
| 8.11581  | 8.20839  | 8.15015   | 7.54883   | 10.6595  | 6.5264   |
| 2.00943  | 3.44004  | 2.19916   | 2.72867   | 1.53899  | 1.60403  |
| 0        | 0        | 0.0769316 | 0.0231897 | 0        | 0        |
| 3.18214  | 2.66914  | 3.46936   | 2.78874   | 5.43538  | 2.82961  |
| 9.45415  | 8.05771  | 6.2702    | 7.90951   | 13.9738  | 16.1859  |
| 50.6048  | 37.8382  | 50.1344   | 50.0535   | 69.7634  | 74.2588  |
| 0.560759 | 0.698817 | 0.706474  | 0.638863  | 1.51851  | 0.707155 |
| 14.9249  | 14.4092  | 12.0112   | 12.0045   | 13.9684  | 17.1472  |
| 0        | 0        | 0         | 0         | 0        | 0        |
| 6.5602   | 5.75531  | 8.0372    | 4.99868   | 8.72198  | 6.27819  |
| 18.5421  | 18.8469  | 19.9429   | 18.754    | 22.2982  | 21.4304  |
| 5.77831  | 6.04765  | 6.36985   | 5.60595   | 5.52548  | 4.87687  |
| 35.3634  | 37.8456  | 34.8144   | 40.8855   | 33.339   | 35.4119  |
| 0.166287 | 0.414453 | 0.209497  | 0.568344  | 0.180119 | 0.419399 |
| 0        | 0        | 0         | 0         | 0        | 0        |
| 19.1862  | 19.5626  | 18.019    | 17.2219   | 11.9655  | 13.0018  |
| 0.407256 | 0.697842 | 0.865827  | 0.318986  | 0.441131 | 0.427981 |
| 0        | 0        | 0         | 0         | 0        | 0        |
| 0.590067 | 0.945438 | 0.2124    | 0.768289  | 0.821763 | 0.566945 |
| 177.546  | 202.84   | 163.575   | 163.134   | 146.173  | 169.271  |
| 2103.35  | 1691.95  | 2963.69   | 1909.58   | 2734.31  | 1957.18  |
| 0.143506 | 0.357674 | 0         | 0.653977  | 0.621772 | 0.48259  |
| 0.114149 | 0.142253 | 0.378225  | 0.370422  | 0.257746 | 0.546029 |
| 5.47538  | 4.50832  | 5.05045   | 4.23293   | 6.30149  | 4.46621  |
| 33.7602  | 34.2522  | 32.1248   | 33.9167   | 31.2547  | 35.6223  |
| 4.60034  | 4.36305  | 4.58181   | 4.02336   | 5.17912  | 5.02927  |
| 62.4267  | 60.8105  | 72.3271   | 55.6733   | 55.2728  | 45.8222  |
| 9.90491  | 10.2803  | 9.47799   | 9.06731   | 13.2144  | 10.6227  |
| 1.09633  | 1.38861  | 1.25289   | 0.708114  | 0.898703 | 1.33055  |
| 32.1499  | 36.9948  | 33.1032   | 32.1668   | 30.6868  | 26.7392  |
| 15.9553  | 15.2027  | 15.1493   | 15.1243   | 13.6683  | 14.2174  |
| 19.5065  | 18.8071  | 19.9218   | 18.1956   | 18.2903  | 15.4234  |
| 13.6494  | 9.30457  | 12.1256   | 12.0417   | 14.7595  | 12.1618  |
| 80.9442  | 74.9203  | 68.5904   | 65.9183   | 65.0388  | 62.9949  |
| 0        | 0        | 0         | 0         | 0        | 0        |
| 3.17019  | 1.98083  | 7.58991   | 4.87759   | 8.92895  | 8.92848  |
| 8.81516  | 7.57002  | 8.52384   | 6.97913   | 9.57587  | 8.24794  |

|           |           |           |           |           |           |
|-----------|-----------|-----------|-----------|-----------|-----------|
| 28.7151   | 39.5704   | 17.7752   | 21.4777   | 20.5555   | 18.1584   |
| 51.2477   | 48.1272   | 48.3849   | 47.0333   | 61.7247   | 59.2412   |
| 0.704273  | 7.33E-144 | 0.424001  | 1.42E-170 | 0.363067  | 0.288197  |
| 25.0393   | 23.1286   | 21.8539   | 24.8167   | 17.3855   | 24.4173   |
| 15.3903   | 20.0037   | 15.7228   | 19.5436   | 21.4472   | 22.5039   |
| 4.28887   | 3.72319   | 4.48531   | 3.80699   | 4.69072   | 3.90326   |
| 0         | 0         | 0         | 0         | 0         | 0         |
| 61.6154   | 64.6233   | 66.7221   | 64.6811   | 64.9018   | 60.1812   |
| 17.064    | 21.6179   | 14.732    | 14.7491   | 16.5876   | 11.6339   |
| 0         | 0         | 0         | 0         | 0         | 0         |
| 2.9604    | 3.47558   | 2.77925   | 3.72433   | 2.89712   | 2.24861   |
| 0         | 0.0558199 | 0.0846473 | 0.0255154 | 0.0970358 | 0.0564859 |
| 50.0911   | 42.3905   | 51.4931   | 40.9974   | 68.6884   | 57.4874   |
| 47.3986   | 65.8682   | 56.3454   | 64.6054   | 49.7187   | 59.8178   |
| 17.4058   | 19.6511   | 18.243    | 20.6336   | 17.3077   | 19.0103   |
| 0         | 0         | 0         | 0         | 0         | 0         |
| 0.076872  | 0         | 0         | 0         | 0         | 0         |
| 0         | 0         | 0         | 0         | 0         | 0         |
| 0.213013  | 0         | 0         | 0.242682  | 0.922925  | 0.537247  |
| 7.18677   | 5.53213   | 6.28378   | 4.36536   | 9.4245    | 4.70423   |
| 9.495     | 10.0852   | 9.92892   | 8.75448   | 8.40794   | 8.08527   |
| 0.391682  | 0.335578  | 0.616827  | 0.753023  | 0.371229  | 0.740906  |
| 0.816004  | 1.13399   | 1.29056   | 1.04135   | 1.08428   | 0.655716  |
| 17.3602   | 14.4891   | 16.264    | 12.6597   | 18.2274   | 13.4873   |
| 100.543   | 72.0443   | 100.722   | 83.2882   | 72.5135   | 89.5565   |
| 0.0661864 | 0         | 0         | 0         | 0.143384  | 0.111287  |
| 9.09348   | 10.3554   | 15.6045   | 11.0745   | 8.49127   | 8.30405   |
| 33.0992   | 38.3305   | 37.1344   | 32.9351   | 27.3192   | 31.1737   |
| 6.09226   | 5.6324    | 5.91252   | 6.70098   | 5.47906   | 5.36648   |
| 46.8466   | 46.4583   | 35.8413   | 42.5573   | 32.4939   | 46.061    |
| 24.232    | 21.2838   | 30.4612   | 23.1511   | 29.6338   | 24.2273   |
| 1.33494   | 1.78995   | 1.70312   | 1.8674    | 2.98348   | 2.89809   |
| 0.196803  | 0.040876  | 0.0826478 | 0.186846  | 0.177644  | 0.303334  |
| 245.057   | 286.032   | 269.367   | 265.265   | 230.622   | 257.493   |
| 0         | 0         | 0.0602124 | 0         | 0         | 0         |
| 2.78283   | 2.06E-07  | 3.72E-07  | 1.29E-08  | 3.97E-07  | 3.51E-07  |
| 4.49293   | 4.73769   | 4.7896    | 5.51247   | 1.12307   | 2.61503   |
| 3.71845   | 2.86501   | 3.02413   | 3.09191   | 4.39385   | 5.68357   |
| 0.0311849 | 0         | 0.0392884 | 0.106585  | 0.0337789 | 0.0262175 |
| 0.667647  | 0.542622  | 0.859424  | 0.892924  | 1.27343   | 0.573501  |
| 0         | 0         | 0         | 0         | 0         | 0         |
| 1.77989   | 1.73919   | 2.01306   | 1.54389   | 1.99366   | 1.63241   |
| 0         | 0         | 0         | 0         | 0         | 0         |

|           |          |           |           |          |           |
|-----------|----------|-----------|-----------|----------|-----------|
| 0         | 0        | 0         | 0         | 0        | 0         |
| 16.6159   | 15.4679  | 17.2413   | 16.6936   | 16.3157  | 18.3764   |
| 0.426917  | 0.33856  | 0.68454   | 0.265298  | 0.252233 | 0.326286  |
| 1.26682   | 1.13002  | 0.991204  | 0.546921  | 1.67552  | 1.09866   |
| 3.07128   | 3.20749  | 3.70587   | 2.71053   | 4.53328  | 2.96953   |
| 11.0415   | 9.62071  | 10.961    | 8.64413   | 11.2209  | 10.0271   |
| 52.6299   | 54.0156  | 54.3636   | 42.292    | 41.7679  | 47.2921   |
| 1.14282   | 1.08755  | 1.46596   | 1.44402   | 1.14785  | 0.716217  |
| 0         | 0        | 0         | 0         | 0        | 0         |
| 78.3699   | 80.6794  | 73.7293   | 80.9564   | 56.2843  | 65.2916   |
| 0         | 0.195384 | 0         | 0.178621  | 0.169825 | 0.13181   |
| 124.428   | 113.506  | 115.201   | 114.44    | 112.836  | 101.386   |
| 1.84873   | 2.33989  | 1.81964   | 1.77713   | 2.3154   | 2.01567   |
| 4.89421   | 4.71958  | 5.33407   | 5.17761   | 7.76263  | 6.75973   |
| 6.74998   | 7.26573  | 9.41123   | 7.17614   | 9.18159  | 6.4042    |
| 19.856    | 18.12    | 20.4136   | 16.4844   | 31.5455  | 25.7866   |
| 9.25935   | 10.0303  | 9.91876   | 8.36928   | 11.0936  | 11.267    |
| 29.7794   | 34.1366  | 30.185    | 34.1064   | 26.6479  | 27.8655   |
| 74.0856   | 67.94    | 69.0347   | 75.5299   | 69.2833  | 79.0093   |
| 23.0015   | 21.6124  | 17.0944   | 14.7893   | 14.8492  | 14.5368   |
| 0.0824038 | 0        | 0.0346056 | 0         | 0        | 0.0230926 |
| 0.387737  | 0.483198 | 0.710535  | 0.883485  | 0.687255 | 0.385244  |
| 10.9308   | 13.7704  | 13.9229   | 10.6963   | 19.7988  | 14.0064   |
| 1.7952    | 1.8933   | 0.31285   | 0.176871  | 0.269139 | 0.350846  |
| 2.51194   | 1.60159  | 1.72954   | 1.2978    | 2.30959  | 1.6207    |
| 12.1806   | 12.6193  | 11.2152   | 11.6785   | 10.3842  | 9.15873   |
| 0         | 0        | 0         | 0         | 0        | 0         |
| 1.7234    | 1.55523  | 2.02149   | 2.36967   | 1.5449   | 1.24904   |
| 6.73932   | 6.36119  | 7.77931   | 7.50379   | 8.65031  | 6.26899   |
| 6.79078   | 7.29736  | 8.19161   | 7.07039   | 7.00225  | 5.29237   |
| 1.12075   | 1.1386   | 0.895174  | 0.957311  | 1.29497  | 0.749218  |
| 0.0808703 | 0.146546 | 0         | 0.0812271 | 0.125119 | 0.0324658 |
| 1.5549    | 2.32526  | 2.51207   | 3.08445   | 2.31831  | 2.8759    |
| 19.5419   | 23.4535  | 21.9453   | 22.4283   | 21.1637  | 27.8229   |
| 7.84811   | 4.89104  | 3.06802   | 6.68944   | 6.31514  | 5.45356   |
| 6.1006    | 6.23511  | 6.22102   | 6.45809   | 6.62082  | 5.10818   |
| 4.89782   | 4.46823  | 6.90865   | 4.75235   | 8.55436  | 7.74278   |
| 0.633374  | 0.689786 | 0.417828  | 0.337048  | 0.424111 | 0.430838  |
| 10.9853   | 9.54987  | 11.202    | 10.8456   | 13.2447  | 11.9619   |
| 138.026   | 181.098  | 125.849   | 114.196   | 93.3171  | 105.642   |
| 8.6581    | 8.43388  | 10.3205   | 12.348    | 10.5659  | 10.7436   |
| 0.111065  | 0        | 0.0699628 | 2.39E-10  | 4.58E-10 | 0.0466868 |
| 41.3852   | 37.7364  | 38.5302   | 32.4358   | 37.5947  | 40.1425   |

|           |            |           |           |           |            |
|-----------|------------|-----------|-----------|-----------|------------|
| 1.61126   | 1.66794    | 1.56345   | 1.57903   | 2.49793   | 2.016      |
| 1.69835   | 1.88618    | 1.36552   | 1.38934   | 1.40282   | 1.31208    |
| 28.1408   | 28.9554    | 23.7635   | 36.5466   | 21.7035   | 28.112     |
| 4.1632    | 4.3939     | 4.28828   | 4.95936   | 5.05299   | 4.1499     |
| 0         | 0          | 0.0618544 | 0.167804  | 0         | 0          |
| 8.71139   | 9.56651    | 7.37386   | 8.74488   | 6.81236   | 6.68378    |
| 229.241   | 194.361    | 180.104   | 161.504   | 157.086   | 223.826    |
| 64.6608   | 66.6008    | 63.9982   | 56.0126   | 65.3533   | 62.0906    |
| 25.2958   | 24.0742    | 24.8886   | 22.2412   | 26.5687   | 27.3271    |
| 0.0600732 | 0.00742445 | 0.0112587 | 0         | 0         | 0.00751304 |
| 17.1111   | 16.3014    | 13.5543   | 14.1519   | 16.9083   | 16.9545    |
| 86.1925   | 66.447     | 51.9937   | 47.4411   | 60.4521   | 34.8159    |
| 11.9632   | 11.5832    | 12.1584   | 12.6161   | 11.0796   | 10.9549    |
| 2.83076   | 3.43249    | 3.82249   | 2.75583   | 3.5234    | 2.34211    |
| 2.29987   | 2.47077    | 3.19724   | 2.6202    | 1.54624   | 2.13355    |
| 0         | 0.130599   | 3.47E-227 | 0         | 4.25E-84  | 0          |
| 0         | 0.0528518  | 0.0534309 | 0.0483174 | 0         | 0          |
| 60.7272   | 50.5511    | 55.5446   | 54.0121   | 52.1176   | 49.5839    |
| 43.4305   | 45.4717    | 42.2911   | 44.7431   | 32.1433   | 37.5029    |
| 0.0174455 | 0          | 0         | 0         | 0         | 0          |
| 4.97637   | 7.24682    | 4.1853    | 4.70211   | 4.59449   | 7.43907    |
| 57.1696   | 55.5535    | 58.5922   | 59.2067   | 50.1878   | 58.2296    |
| 10.4835   | 10.7852    | 10.1165   | 10.4698   | 8.93943   | 9.6387     |
| 2.12856   | 1.20573    | 1.95031   | 4.40915   | 2.41041   | 4.79913    |
| 3.86E-07  | 4.96E-07   | 2.34E-07  | 3.09E-07  | 3.45E-07  | 1.55E-07   |
| 0.222669  | 0.308108   | 0.243816  | 0.211751  | 0.267804  | 0.104936   |
| 3.65328   | 3.94703    | 3.29852   | 3.34947   | 3.61874   | 4.36853    |
| 3.73572   | 3.67759    | 5.37267   | 3.12887   | 5.72786   | 4.38833    |
| 2.0735    | 1.62857    | 1.88789   | 1.44914   | 2.45358   | 1.50883    |
| 0         | 0          | 0         | 0         | 0         | 0          |
| 15.2411   | 12.4836    | 32.4414   | 15.0535   | 24.4083   | 18.4451    |
| 0         | 0          | 0         | 0         | 0         | 0          |
| 2.92342   | 2.22638    | 3.06924   | 1.29523   | 9.14792   | 3.82317    |
| 7.52689   | 7.54495    | 7.99892   | 6.99497   | 6.52857   | 5.96479    |
| 18.8357   | 18.4986    | 29.1127   | 36.1324   | 20.3349   | 18.6145    |
| 0.136378  | 0.105679   | 0.171816  | 0.192194  | 0.0849012 | 0.0245031  |
| 0         | 0          | 0         | 0         | 0         | 0          |
| 77.5115   | 84.2765    | 86.047    | 81.5194   | 84.1078   | 73.4147    |
| 20.1496   | 19.6786    | 18.9868   | 19.884    | 18.3047   | 19.1759    |
| 14.9577   | 14.5043    | 14.2068   | 14.6233   | 17.1032   | 15.7774    |
| 1.03374   | 0.206845   | 0.303275  | 1.04975   | 0.503277  | 0.549372   |
| 1.8339    | 2.43777    | 1.23224   | 1.60182   | 2.05266   | 1.54178    |
| 22.6077   | 23.6304    | 22.9393   | 24.4281   | 21.3276   | 23.3497    |



|          |          |           |           |           |           |
|----------|----------|-----------|-----------|-----------|-----------|
| 58.51    | 56.0339  | 61.6107   | 57.0011   | 65.0057   | 63.6393   |
| 11.6878  | 12.3133  | 17.7387   | 14.6636   | 16.2651   | 11.7826   |
| 8.0064   | 9.66947  | 6.80446   | 9.18655   | 4.61428   | 5.85172   |
| 73.0427  | 72.4125  | 77.8072   | 82.6998   | 55.4101   | 61.1114   |
| 2.15293  | 1.57319  | 2.07302   | 1.86092   | 2.3268    | 2.64198   |
| 6.2604   | 5.74503  | 6.72099   | 5.4811    | 6.82071   | 5.39119   |
| 37.8961  | 37.0878  | 22.8339   | 18.5368   | 8.47735   | 16.9687   |
| 0.200929 | 0        | 0.759423  | 0.343372  | 0.326463  | 0.591232  |
| 6.24418  | 6.86905  | 6.87472   | 6.40564   | 7.90081   | 6.51937   |
| 0.251316 | 0.537855 | 0.644847  | 1.21325   | 0.423021  | 0.780799  |
| 0.106356 | 0.212292 | 0.161332  | 0         | 0.325903  | 0.345627  |
| 31.6632  | 30.2336  | 28.4749   | 33.3094   | 30.1643   | 32.5293   |
| 100.778  | 100.234  | 92.1536   | 84.4193   | 82.3415   | 80.8495   |
| 0.287149 | 0.511207 | 0.206724  | 1.21511   | 0.222167  | 0.655255  |
| 0.21948  | 0.20861  | 0.250178  | 0.226235  | 0.566096  | 0.342737  |
| 37.0296  | 37.1595  | 37.2126   | 38.1658   | 39.6534   | 43.3767   |
| 45.4968  | 40.6864  | 49.4131   | 45.2307   | 46.7097   | 42.2474   |
| 5.39858  | 3.64658  | 5.78507   | 5.15618   | 4.85941   | 3.91689   |
| 8.12832  | 7.96811  | 8.78107   | 8.44206   | 9.82787   | 7.89452   |
| 4.77231  | 4.62564  | 3.08329   | 4.69349   | 1.72309   | 2.94909   |
| 31.572   | 36.1179  | 32.2475   | 35.0616   | 24.2731   | 26.0405   |
| 0.933087 | 0.775208 | 0.783702  | 1.24023   | 0.673801  | 1.30743   |
| 14.1598  | 13.2228  | 17.7431   | 13.3539   | 23.1971   | 20.3022   |
| 2.36365  | 1.73802  | 3.21608   | 2.82757   | 4.68526   | 3.93455   |
| 0        | 0        | 0         | 0         | 0         | 0         |
| 1.47854  | 1.84255  | 2.23529   | 2.33581   | 1.90048   | 2.75123   |
| 20.5204  | 20.1678  | 21.5464   | 23.1098   | 21.3164   | 22.7273   |
| 0.167856 | 0.170055 | 0.251047  | 0.230039  | 0.344811  | 0.282237  |
| 0        | 0        | 0         | 0         | 0         | 0         |
| 9.39062  | 10.1132  | 10.3093   | 8.49971   | 10.6974   | 8.30283   |
| 5.27056  | 13.5529  | 3.69597   | 39.1003   | 4.13732   | 7.24381   |
| 49.2767  | 48.7506  | 43.1458   | 47.2265   | 48.9152   | 58.1024   |
| 19.7728  | 19.0723  | 20.6887   | 19.536    | 16.9404   | 17.9381   |
| 0        | 0        | 0         | 0         | 0         | 0         |
| 11.962   | 11.0602  | 10.0211   | 10.9253   | 10.4599   | 11.3987   |
| 0.3283   | 0        | 0         | 0         | 0         | 0.0920019 |
| 8.02599  | 7.22366  | 5.8583    | 6.02335   | 7.72764   | 6.8011    |
| 17.5963  | 19.7547  | 19.6051   | 18.2695   | 19.0161   | 15.7265   |
| 0        | 0        | 0         | 0         | 0         | 0         |
| 0.142678 | 0.132465 | 0.0946847 | 0.0722445 | 0.0686869 | 0.0740437 |
| 0        | 0        | 0         | 0         | 0         | 0         |
| 5.15805  | 4.75305  | 4.45741   | 3.8735    | 4.11167   | 3.88754   |
| 155.379  | 148.499  | 155.769   | 136.542   | 141.973   | 137.179   |

|           |           |           |           |           |           |
|-----------|-----------|-----------|-----------|-----------|-----------|
| 0.91054   | 1.73869   | 1.0355    | 1.59683   | 0.670365  | 0.950267  |
| 0.0627715 | 0.0260753 | 0.079083  | 0.0953527 | 0.113321  | 0.0703637 |
| 1.7732    | 2.21697   | 1.04833   | 1.05302   | 1.71432   | 2.16588   |
| 8.56877   | 7.60156   | 8.41675   | 7.31341   | 9.40736   | 7.17945   |
| 0.177157  | 0.126156  | 0.0956536 | 0.144166  | 0.0548265 | 0.0212768 |
| 0         | 0         | 0.204193  | 1.10791   | 0         | 0         |
| 0         | 0         | 0         | 84.0835   | 0         | 17.9612   |
| 7.12683   | 7.4667    | 7.62798   | 8.23923   | 7.8335    | 7.68835   |
| 19.096    | 20.9866   | 21.827    | 23.1071   | 23.5738   | 26.7149   |
| 43.4337   | 44.2052   | 55.0784   | 59.2018   | 37.5243   | 42.1131   |
| 43.237    | 43.5647   | 43.7624   | 43.2409   | 43.0589   | 42.0132   |
| 0         | 0         | 0         | 0         | 0         | 0         |
| 3.59775   | 3.36883   | 3.45583   | 2.53631   | 4.54293   | 2.74059   |
| 5.48892   | 6.10366   | 4.92802   | 4.31236   | 5.81732   | 4.81364   |
| 24.6136   | 24.3148   | 20.9705   | 22.8441   | 28.6804   | 30.0755   |
| 4.6303    | 4.66143   | 5.64198   | 4.17526   | 6.11052   | 5.06142   |
| 0.214481  | 0         | 0         | 0         | 0.232321  | 0.0901582 |
| 5.61546   | 8.56552   | 7.58403   | 11.9251   | 7.10441   | 8.95098   |
| 0.290159  | 0.723192  | 0.365558  | 0.583365  | 0.905908  | 0.860966  |
| 7.24339   | 7.91609   | 7.8569    | 11.3415   | 6.73381   | 8.64832   |
| 3.13939   | 2.4426    | 2.97161   | 2.15735   | 2.59088   | 2.82087   |
| 12.2267   | 14.5379   | 11.8708   | 14.5686   | 13.2741   | 14.2163   |
| 0         | 0         | 0         | 0         | 0         | 0.0568186 |
| 0         | 0         | 0         | 0         | 0         | 0         |
| 0         | 0         | 0         | 0         | 0         | 0         |
| 0.0313376 | 0.117159  | 0.197404  | 0.0714047 | 0.0339442 | 0.0263459 |
| 0         | 0         | 0         | 0         | 0         | 0         |
| 1.40315   | 1.58047   | 1.68277   | 2.02128   | 1.51255   | 1.23636   |
| 39.2419   | 36.9335   | 39.2917   | 36.634    | 43.4529   | 44.3294   |
| 23.1492   | 111.07    | 19.7903   | 151.604   | 53.6036   | 0         |
| 9.19408   | 8.18988   | 9.53696   | 7.94618   | 11.0258   | 9.92166   |
| 0         | 0         | 0         | 0         | 0         | 0         |
| 0         | 0         | 0         | 0         | 0         | 0         |
| 3.22594   | 6.03024   | 4.51579   | 6.53379   | 11.4535   | 6.02686   |
| 5.10698   | 5.73637   | 7.01741   | 3.95644   | 6.71189   | 4.84307   |
| 0.702307  | 1.5876    | 0.84365   | 1.67468   | 0.495355  | 1.26326   |
| 966.066   | 1108.84   | 996.962   | 1096.16   | 864.906   | 1082.24   |
| 0.672404  | 0.363111  | 0.338853  | 0.383029  | 0.874002  | 0.226119  |
| 0         | 0         | 0         | 0.160691  | 0         | 0         |
| 1.70373   | 1.90107   | 1.15847   | 1.915     | 1.48136   | 1.69579   |
| 2.98913   | 2.59928   | 5.23737   | 3.32678   | 4.86507   | 2.73307   |
| 0         | 0         | 0         | 0         | 0         | 0         |
| 1.88979   | 1.52925   | 2.53546   | 2.0132    | 2.685     | 1.9808    |

|           |           |           |           |           |            |
|-----------|-----------|-----------|-----------|-----------|------------|
| 2.96952   | 2.28141   | 2.2993    | 1.46724   | 3.48723   | 2.08037    |
| 14.3307   | 15.6644   | 14.275    | 12.8259   | 11.5168   | 10.461     |
| 0.06072   | 0.0610336 | 0.181673  | 0.0409939 | 0.129917  | 0.0605014  |
| 4.13088   | 4.12752   | 4.22509   | 3.67359   | 7.09726   | 5.6207     |
| 4.31914   | 4.51698   | 3.82818   | 3.31345   | 3.691     | 3.35745    |
| 0.366651  | 0.373844  | 0.419933  | 0.303796  | 0.541567  | 0.280225   |
| 1.08119   | 1.61686   | 0.85134   | 1.38576   | 0.995456  | 1.4998     |
| 0         | 0         | 0         | 0         | 0         | 0          |
| 3.09231   | 3.4201    | 3.11668   | 2.36335   | 3.838     | 3.49882    |
| 17.2887   | 17.539    | 19.8081   | 19.9763   | 23.7157   | 23.8165    |
| 8.30289   | 7.81138   | 10.6834   | 7.53847   | 10.9787   | 8.24111    |
| 0         | 0         | 0         | 0         | 0         | 0          |
| 1.31377   | 0.942643  | 1.4211    | 0.650107  | 1.4518    | 0.613613   |
| 4.3627    | 4.68017   | 4.36082   | 3.52275   | 4.87475   | 4.55183    |
| 8.68912   | 6.20319   | 16.503    | 6.6659    | 9.64836   | 4.69872    |
| 13.0128   | 15.3141   | 16.9471   | 16.1252   | 13.6673   | 15.2938    |
| 1.81587   | 1.82019   | 1.84013   | 1.30424   | 2.22347   | 1.36069    |
| 3.28165   | 1.02E-05  | 21.2322   | 3.71E-07  | 37.3096   | 1.31E-06   |
| 2.22458   | 1.11006   | 5.23011   | 5.53076   | 8.70237   | 9.6011     |
| 0.0237851 | 0.0148205 | 0.0599316 | 0         | 0.0257636 | 0.00999822 |
| 8.97083   | 8.6217    | 5.14116   | 5.77885   | 5.70139   | 6.97293    |
| 13.7755   | 12.4851   | 15.2633   | 11.9109   | 16.0644   | 13.0481    |
| 0         | 0         | 0         | 0         | 0         | 0          |
| 9.36178   | 10.5861   | 9.91692   | 9.27655   | 10.5661   | 7.52886    |
| 0         | 0         | 0         | 0         | 0         | 0          |
| 2.23217   | 1.58512   | 1.94578   | 1.78877   | 2.03884   | 2.89127    |
| 2.39846   | 2.93637   | 3.27669   | 3.64678   | 1.91177   | 1.9171     |
| 4.57933   | 4.29725   | 4.86566   | 5.84572   | 3.64547   | 3.73394    |
| 0         | 0         | 0         | 0         | 0         | 0          |
| 40.9227   | 40.5233   | 69.448    | 52.1927   | 108.689   | 89.3926    |
| 0         | 0         | 0         | 0         | 0         | 0          |
| 0         | 0         | 0         | 0         | 0         | 0          |
| 8.14371   | 8.06177   | 11.6471   | 8.72915   | 13.9647   | 9.41155    |
| 1.03086   | 1.02121   | 1.18002   | 0.897966  | 1.4833    | 0.845693   |
| 1.0042    | 0.521429  | 1.68686   | 1.33474   | 0.725151  | 0.562827   |
| 11.991    | 10.5363   | 11.4483   | 9.60795   | 10.4      | 8.59449    |
| 0.695147  | 0.55368   | 0.470547  | 0.486005  | 1.18984   | 0.805698   |
| 13.7542   | 16.1354   | 16.3657   | 15.5732   | 13.6721   | 13.0385    |
| 5.27419   | 4.55044   | 6.97096   | 6.21884   | 9.72791   | 10.1413    |
| 3.12035   | 3.43639   | 4.05932   | 2.35624   | 4.59418   | 3.83011    |
| 20.9104   | 20.0204   | 17.1815   | 18.4008   | 20.2583   | 25.4602    |
| 0.359274  | 0.408229  | 0.284966  | 0.127421  | 0.439571  | 0.393734   |
| 0         | 0         | 0         | 0         | 0         | 0          |

|           |           |           |           |           |           |
|-----------|-----------|-----------|-----------|-----------|-----------|
| 0         | 0         | 0         | 0         | 0         | 0         |
| 9.17654   | 8.59603   | 10.3972   | 7.85855   | 12.5415   | 11.9606   |
| 0.76428   | 0.698459  | 0.706113  | 0.783658  | 0.413926  | 0.364106  |
| 8.85157   | 9.43499   | 11.1517   | 8.13922   | 11.2426   | 8.5182    |
| 0.0526036 | 0         | 0.0147269 | 0         | 0.113241  | 0.0393104 |
| 15.9967   | 15.6303   | 18.7441   | 16.0251   | 11.0382   | 13.5307   |
| 2.36E-08  | 0.0962494 | 3.42E-10  | 7.18E-10  | 0.191298  | 0.0779965 |
| 5.83188   | 5.20104   | 5.43214   | 5.25865   | 7.39475   | 6.22742   |
| 2.86413   | 1.45002   | 1.69143   | 1.26443   | 2.67579   | 1.73068   |
| 24.2045   | 25.8967   | 23.6254   | 24.6651   | 20.1982   | 21.124    |
| 31.6285   | 33.3496   | 36.0757   | 34.5295   | 39.8185   | 38.2004   |
| 0.0398027 | 0.0992041 | 0         | 0         | 0.172454  | 0.0334626 |
| 11.7566   | 10.8739   | 12.1866   | 12.9823   | 13.4562   | 10.2184   |
| 8.26022   | 7.45234   | 7.94954   | 6.87833   | 9.66184   | 9.05433   |
| 0.215402  | 0         | 0.814125  | 0         | 0.233319  | 0.362182  |
| 0         | 0         | 0         | 0         | 0         | 0         |
| 0.0299995 | 0         | 0.037795  | 0.0341779 | 0.0974846 | 0.0756629 |
| 3.49183   | 3.29131   | 3.86328   | 3.51375   | 3.12954   | 2.80152   |
| 0.247936  | 0.114081  | 0.148065  | 0.0894134 | 0.276608  | 0.175416  |
| 4.29521   | 4.7089    | 3.70319   | 4.06571   | 4.6007    | 4.8469    |
| 52.435    | 55.5128   | 53.4631   | 50.0781   | 45.5759   | 54.7419   |
| 0.869671  | 0.797552  | 1.19216   | 1.07807   | 1.46762   | 1.09615   |
| 0.498947  | 0.534737  | 0.565741  | 0.761712  | 1.52407   | 1.89601   |
| 0         | 0         | 0         | 0         | 0         | 0         |
| 0         | 0         | 0         | 0         | 0         | 0         |
| 6.33938   | 8.46442   | 5.99002   | 8.76999   | 8.09288   | 8.56541   |
| 0         | 0         | 0         | 0         | 0         | 0         |
| 5.45833   | 5.85887   | 4.20593   | 3.52919   | 5.43646   | 4.20121   |
| 24.9234   | 25.346    | 24.2412   | 25.9498   | 20.7889   | 22.5116   |
| 1.06497   | 0.439391  | 0.446345  | 0.494911  | 1.20625   | 1.12386   |
| 2.70425   | 2.84116   | 2.54901   | 2.70985   | 2.23431   | 2.54731   |
| 13.6957   | 16.883    | 13.4306   | 15.2659   | 14.033    | 14.6571   |
| 9.92481   | 11.4521   | 17.1349   | 8.58507   | 17.5191   | 5.5626    |
| 0.0635632 | 0.102289  | 0.496366  | 0.793062  | 0.342053  | 0.155494  |
| 10.2568   | 8.7876    | 12.2355   | 8.76402   | 7.49919   | 8.55116   |
| 51.2963   | 48.174    | 41.0305   | 44.1461   | 32.2787   | 42.5049   |
| 2.7571    | 2.74465   | 2.32255   | 2.43483   | 1.69644   | 1.72816   |
| 3.73836   | 4.09144   | 4.58814   | 3.53612   | 5.00562   | 4.00109   |
| 34.4596   | 26.9469   | 33.993    | 30.014    | 37.0439   | 31.4197   |
| 6.45425   | 6.18857   | 7.79222   | 5.74284   | 8.09284   | 6.01091   |
| 3.30239   | 2.94006   | 4.0054    | 3.8215    | 5.80324   | 4.60564   |
| 12.6101   | 5.75468   | 7.4835    | 5.5982    | 9.61902   | 6.95151   |
| 0.419454  | 0.14935   | 0         | 0         | 0         | 0         |

|           |           |           |           |           |            |
|-----------|-----------|-----------|-----------|-----------|------------|
| 72.0039   | 98.2255   | 73.7214   | 93.9059   | 66.3782   | 71.1078    |
| 2.73683   | 2.5888    | 2.63794   | 1.78441   | 1.58939   | 2.19       |
| 4.3107    | 3.14055   | 5.93217   | 5.47778   | 5.49537   | 6.63482    |
| 1.37988   | 1.02575   | 1.37279   | 1.65496   | 1.83521   | 1.89309    |
| 0.531829  | 0.387462  | 0.494789  | 0.372863  | 0.753317  | 0.405843   |
| 0.0198274 | 0.0370633 | 0.0281021 | 0.0571784 | 0.0429533 | 0.00416728 |
| 0         | 0         | 0         | 0         | 0         | 0          |
| 11.0316   | 11.3511   | 12.9569   | 9.75875   | 13.8934   | 11.2747    |
| 1.84207   | 1.8758    | 1.9359    | 1.22599   | 2.12959   | 1.38325    |
| 0.6157    | 0.652192  | 0.542984  | 0.596238  | 0.46684   | 0.439982   |
| 6.50363   | 9.21608   | 6.74008   | 5.97553   | 6.30605   | 4.85046    |
| 2.49257   | 1.87669   | 1.57014   | 2.24813   | 1.46245   | 1.61531    |
| 71.1172   | 62.7955   | 64.8948   | 69.6289   | 65.5333   | 70.1716    |
| 0         | 0         | 0         | 0.0923337 | 0         | 0          |
| 0.0798554 | 0.0995157 | 0         | 0.181956  | 0.345991  | 0.201406   |
| 4.01144   | 4.16933   | 4.11026   | 2.61804   | 2.42452   | 1.57152    |
| 14.3116   | 13.1208   | 16.6071   | 16.6483   | 14.4825   | 12.2256    |
| 2.0538    | 0.568765  | 2.87499   | 0.259984  | 0         | 0.959252   |
| 0.172608  | 0.399477  | 0.434921  | 0.393298  | 0.133546  | 0.103652   |
| 0.0412859 | 0         | 0.0520142 | 0         | 0         | 0.0347095  |
| 10.1443   | 10.5395   | 9.59224   | 10.748    | 8.92032   | 10.7865    |
| 0         | 0         | 0         | 0         | 0         | 0          |
| 85.067    | 87.7008   | 80.1093   | 84.557    | 89.4194   | 101.232    |
| 32.7898   | 30.593    | 35.3317   | 34.7566   | 34.8319   | 34.3683    |
| 19.0161   | 16.9841   | 21.0554   | 14.8729   | 21.7943   | 17.2535    |
| 5.13384   | 5.38657   | 3.75904   | 4.241     | 3.58073   | 3.28883    |
| 0         | 0.076934  | 0         | 0.0703335 | 0.100305  | 0          |
| 0.291914  | 0.129884  | 0.551547  | 0.283804  | 0.304944  | 0.340988   |
| 23.5057   | 23.7355   | 27.2223   | 24.4838   | 38.656    | 35.2712    |
| 0.656213  | 0.773568  | 0.692668  | 0.7072    | 0.710796  | 0.581507   |
| 35.5988   | 38.6017   | 34.2194   | 37.6601   | 32.3001   | 33.2321    |
| 9.76004   | 8.01658   | 10.3276   | 10.287    | 10.4891   | 9.43591    |
| 4.72162   | 3.65066   | 2.34784   | 4.40086   | 3.78938   | 3.47143    |
| 15.0179   | 14.6517   | 15.1016   | 17.1097   | 12.4864   | 15.3285    |
| 0         | 0         | 0         | 0         | 0         | 0          |
| 0.872605  | 0.59819   | 0.5838    | 0.51918   | 1.41615   | 0.682713   |
| 0         | 0         | 0         | 0         | 0         | 0          |
| 2.67991   | 2.74891   | 2.88856   | 1.90274   | 3.00468   | 2.78232    |
| 2.63829   | 2.07863   | 3.05108   | 3.21589   | 2.95327   | 2.44052    |
| 28.533    | 26.2782   | 22.3685   | 18.419    | 18.6988   | 26.056     |
| 22.8926   | 23.6685   | 24.0972   | 22.782    | 22.4876   | 24.3469    |
| 0.210065  | 0.261783  | 0.28022   | 0.140779  | 0.227539  | 0.238936   |
| 18.0573   | 16.6975   | 16.361    | 15.5467   | 15.6743   | 10.086     |

|           |           |           |           |           |           |
|-----------|-----------|-----------|-----------|-----------|-----------|
| 0.291539  | 55.1332   | 0.85731   | 630.62    | 1.26447   | 27.5739   |
| 0         | 0         | 0         | 0         | 0         | 0         |
| 9.13819   | 11.8871   | 11.1458   | 19.2043   | 12.2644   | 13.3451   |
| 0.0503394 | 0.112919  | 0.0253681 | 0.0114702 | 0.0109053 | 0.0253926 |
| 0         | 0         | 0         | 0         | 0         | 0         |
| 0         | 0         | 0         | 0         | 0         | 0         |
| 26.1511   | 28.7928   | 31.036    | 28.32     | 28.0966   | 28.4677   |
| 22.3973   | 30.8139   | 25.8699   | 40.0442   | 36.4324   | 38.5567   |
| 10.5094   | 9.60189   | 12.6211   | 10.705    | 14.155    | 14.0369   |
| 0         | 0         | 0         | 0         | 0         | 0         |
| 5.87427   | 6.92678   | 5.82328   | 5.75925   | 5.14608   | 5.70592   |
| 1.7341    | 1.51845   | 2.0907    | 1.22638   | 1.55462   | 1.27574   |
| 1.4497    | 1.83607   | 1.27083   | 3.27269   | 1.13019   | 1.1713    |
| 36.194    | 33.706    | 33.7155   | 30.9264   | 32.731    | 34.9649   |
| 3.68274   | 5.16156   | 6.36506   | 11.2803   | 6.09983   | 5.96002   |
| 8.65198   | 9.14135   | 10.2923   | 8.78617   | 10.0053   | 8.4738    |
| 20.0183   | 18.0554   | 17.7226   | 21.8472   | 15.6273   | 25.2698   |
| 6.94683   | 7.01228   | 6.66498   | 7.06209   | 7.47836   | 5.68754   |
| 2.19694   | 1.78546   | 2.70864   | 1.36156   | 3.20105   | 2.93611   |
| 0.412432  | 0.475001  | 0.648278  | 0.443033  | 0.608012  | 0.423217  |
| 6.51557   | 6.78584   | 7.63832   | 8.73413   | 4.97159   | 5.82267   |
| 5.00733   | 4.75227   | 7.13917   | 4.28873   | 9.26492   | 5.11609   |
| 35.8834   | 32.1237   | 35.3318   | 27.0467   | 37.7839   | 31.3377   |
| 3.74134   | 2.10458   | 2.7823    | 1.95362   | 2.84241   | 1.50716   |
| 1.07114   | 0.905241  | 1.05476   | 0.925764  | 2.3338    | 1.71823   |
| 0         | 0         | 0         | 0         | 0         | 0         |
| 0.529432  | 1.06442   | 0.870722  | 0.881669  | 0.575126  | 0.650117  |
| 27.0947   | 23.2415   | 22.8031   | 21.1849   | 22.6445   | 29.3928   |
| 28.4528   | 26.9747   | 31.5224   | 29.1538   | 28.6569   | 28.2524   |
| 169.262   | 182.748   | 193.131   | 187.7     | 162.925   | 151.496   |
| 0.101388  | 0.0631747 | 0.042578  | 0.0577547 | 0.0732142 | 0.0142063 |
| 5.41264   | 5.21235   | 6.63162   | 4.36158   | 6.57992   | 5.98444   |
| 0.406031  | 0.404796  | 0.409231  | 0.185033  | 0.703686  | 0.068271  |
| 2.96399   | 2.18376   | 3.65173   | 6.54564   | 1.41796   | 2.79089   |
| 0.904058  | 0.702594  | 0.314816  | 1.10229   | 0.660549  | 0.398347  |
| 0.155935  | 0.58298   | 0.392912  | 0         | 2.03071   | 1.31097   |
| 1.59E-09  | 1.32E-09  | 6.89E-10  | 1.67E-09  | 1.41E-08  | 1.34E-09  |
| 0.820415  | 0.929455  | 0.187928  | 0.764742  | 0.161574  | 0.438921  |
| 0.166717  | 0.207762  | 0.371608  | 0.379876  | 0.277822  | 0.194069  |
| 153.676   | 163.748   | 148.035   | 129.246   | 97.6499   | 99.4187   |
| 4.02267   | 3.80509   | 5.58699   | 3.61668   | 6.19469   | 3.68751   |
| 9.07747   | 8.59189   | 9.00261   | 7.9979    | 9.90057   | 8.00123   |
| 20.4503   | 20.9783   | 20.7147   | 20.3405   | 14.7507   | 14.3519   |

|          |          |             |          |            |          |
|----------|----------|-------------|----------|------------|----------|
| 20.8172  | 20.7267  | 16.1203     | 20.689   | 23.2038    | 24.5362  |
| 0        | 0        | 0           | 0        | 0          | 0        |
| 5.22916  | 4.86815  | 5.41624     | 5.6514   | 4.27608    | 5.72262  |
| 0        | 0        | 0           | 0        | 0          | 0        |
| 0        | 0        | 0           | 0        | 0          | 0        |
| 28.9298  | 27.3893  | 31.9652     | 26.4527  | 28.3953    | 23.4362  |
| 50.1749  | 58.9639  | 54.2283     | 61.1228  | 56.7797    | 72.5871  |
| 0.897685 | 0.90117  | 0.659722    | 0.71022  | 0.540197   | 0.775659 |
| 0        | 0        | 0           | 0        | 0          | 0        |
| 0.432801 | 0.606775 | 0           | 0        | 0.468801   | 0.409343 |
| 3.18052  | 2.28455  | 2.50437     | 1.78659  | 3.15799    | 3.17526  |
| 6.90564  | 6.27267  | 6.65074     | 4.55731  | 5.39671    | 4.68753  |
| 2.45903  | 1.42613  | 1.14201     | 0.6124   | 3.12474    | 2.06795  |
| 35.9556  | 36.0949  | 34.6278     | 33.3698  | 41.4776    | 38.159   |
| 8.56229  | 8.2569   | 10.0092     | 9.206    | 10.8988    | 10.2756  |
| 0        | 0        | 0           | 0        | 0          | 0        |
| 0.449997 | 0.469229 | 0.462801    | 0.470823 | 0.35811    | 0.231623 |
| 0        | 0        | 0           | 0        | 0          | 0        |
| 0.336884 | 0.514985 | 0.000221356 | 1.57E-05 | 0.00203141 | 5.61E-06 |
| 13.8135  | 16.632   | 16.4188     | 14.3127  | 19.9532    | 12.9351  |
| 1.30223  | 0.852232 | 0.973927    | 1.33194  | 1.52911    | 0.947076 |
| 39.3645  | 30.0367  | 12.4196     | 10.7646  | 19.6363    | 21.902   |
| 0        | 0.05134  | 0           | 0        | 0          | 0        |
| 17.0348  | 15.3623  | 16.435      | 16.9202  | 19.5357    | 14.6656  |
| 0        | 0        | 0           | 0        | 0.523386   | 0        |
| 4.25993  | 4.21856  | 1.35178     | 1.14969  | 3.83274    | 4.01107  |
| 11.4619  | 11.5739  | 14.4961     | 13.596   | 15.1003    | 12.5865  |
| 31.3984  | 32.2408  | 32.7085     | 28.711   | 30.8059    | 30.1712  |
| 0.489942 | 0.496084 | 0.347206    | 0.38375  | 0.43119    | 0.257438 |
| 1.63692  | 0.927241 | 2.99969     | 1.63887  | 2.90141    | 1.41788  |
| 0        | 0        | 0           | 0        | 0          | 0        |
| 9.0028   | 9.7898   | 11.8521     | 10.7352  | 14.8362    | 11.9557  |
| 26.3531  | 11.3346  | 24.4161     | 15.3838  | 26.6254    | 17.4106  |
| 24.5493  | 21.3775  | 27.8739     | 21.2699  | 28.6923    | 26.907   |
| 10.6921  | 11.3918  | 10.9342     | 10.6693  | 11.5007    | 12.5369  |
| 0        | 0        | 0           | 0        | 0          | 0        |
| 0        | 0        | 0           | 0        | 0          | 0        |
| 2.68166  | 2.44955  | 4.65207     | 2.84723  | 3.37617    | 2.73846  |
| 0.180907 | 0.450893 | 1.3675      | 2.47325  | 0.195955   | 0.152091 |
| 3.12033  | 3.42465  | 3.43711     | 3.07673  | 2.25375    | 2.2988   |
| 2.91975  | 3.19945  | 3.17109     | 2.6382   | 2.39923    | 2.7086   |
| 4.87697  | 6.11358  | 5.08988     | 5.91789  | 4.7512     | 3.68765  |
| 0        | 0        | 0           | 0        | 0          | 0        |

|           |           |          |           |           |           |
|-----------|-----------|----------|-----------|-----------|-----------|
| 3.61128   | 2.6413    | 3.74861  | 3.03695   | 7.9911    | 5.48956   |
| 0         | 0         | 0        | 0         | 0         | 0         |
| 0.156189  | 0.243304  | 0.344358 | 0.44486   | 0.211477  | 0.0328276 |
| 11.6252   | 10.1053   | 10.3507  | 10.2551   | 10.1357   | 10.6922   |
| 0.516739  | 1.6743    | 0        | 0         | 0.223889  | 0.434429  |
| 0.55523   | 0.322899  | 0.512973 | 0.548222  | 0.120283  | 0.0933576 |
| 0         | 0         | 0        | 0         | 0         | 0         |
| 39.1402   | 37.7829   | 40.8944  | 35.9026   | 36.1494   | 37.331    |
| 5.68825   | 6.60203   | 8.43081  | 10.0633   | 10.2683   | 10.0961   |
| 0.725274  | 0.771271  | 0.657886 | 0.594925  | 0.565627  | 0         |
| 0.120756  | 0.164166  | 0.221287 | 0.162588  | 0.237818  | 0.159972  |
| 66.2138   | 63.2284   | 52.7893  | 53.4986   | 52.4592   | 51.7422   |
| 0         | 0         | 0        | 0         | 0         | 0         |
| 0         | 0         | 0        | 0         | 0         | 0         |
| 11.4051   | 12.4595   | 13.0859  | 11.823    | 13.4267   | 11.1061   |
| 17.2919   | 20.5415   | 13.2785  | 14.6742   | 7.71334   | 9.33786   |
| 0.0711507 | 0         | 0.134459 | 0.121591  | 0.115603  | 0.179452  |
| 8.64689   | 8.60747   | 10.2485  | 7.44109   | 11.4546   | 7.91934   |
| 0.466907  | 0.336866  | 0.278638 | 0.335962  | 0.798544  | 0.454514  |
| 30.2644   | 34.8176   | 31.5756  | 34.4481   | 35.5181   | 33.0152   |
| 15.1858   | 14.0502   | 19.0037  | 15.9394   | 20.1506   | 17.0589   |
| 0         | 0         | 0        | 0         | 0         | 0         |
| 4.2797    | 4.57039   | 3.78545  | 3.46093   | 4.98959   | 4.8571    |
| 105.206   | 131.273   | 81.3503  | 80.5854   | 65.6659   | 90.158    |
| 6.17194   | 7.4177    | 9.54176  | 6.19733   | 10.3792   | 8.40765   |
| 3.27841   | 2.70828   | 3.61405  | 3.23983   | 2.63646   | 2.704     |
| 0         | 0.0230159 | 0        | 0.0210413 | 0         | 0         |
| 6.82421   | 7.02687   | 9.66258  | 10.0016   | 9.6395    | 9.02783   |
| 1.86988   | 2.75884   | 2.11085  | 2.47145   | 2.37478   | 1.55799   |
| 18.3637   | 19.1964   | 19.2978  | 20.6696   | 19.5164   | 16.9331   |
| 0         | 0         | 0        | 0         | 0         | 0         |
| 8.74252   | 9.25834   | 7.1853   | 8.80602   | 10.1606   | 12.1763   |
| 0         | 0         | 0        | 0         | 0         | 0         |
| 0.0891199 | 0.111061  | 0        | 0.304598  | 0.0965328 | 0.224772  |
| 4.76706   | 4.96881   | 4.89853  | 4.05614   | 5.42602   | 4.96207   |
| 2.29697   | 1.76708   | 2.21511  | 2.31001   | 3.74733   | 1.96685   |
| 22.3346   | 15.5929   | 18.8961  | 14.7303   | 32.6425   | 21.4154   |
| 0         | 0         | 0        | 0         | 0         | 0         |
| 0         | 0         | 0        | 0         | 0         | 0         |
| 39.8455   | 39.0842   | 37.1709  | 35.269    | 45.3879   | 42.0378   |
| 16.7045   | 17.2417   | 20.2444  | 19.0265   | 20.1217   | 18.1178   |
| 12.3998   | 13.9074   | 13.9015  | 12.8725   | 13.8765   | 12.1342   |
| 0.364947  | 0.315831  | 0.386343 | 0.0692961 | 0.231966  | 0.172584  |



|          |            |           |           |           |           |
|----------|------------|-----------|-----------|-----------|-----------|
| 4.30733  | 6.52554    | 2.87291   | 2.98285   | 3.01892   | 1.91712   |
| 0.256362 | 0          | 0.161489  | 0         | 0.138843  | 0         |
| 0        | 0          | 0         | 66.7636   | 0         | 8.69416   |
| 60.9331  | 65.4728    | 64.9831   | 69.68     | 53.844    | 52.7232   |
| 46.1962  | 44.8543    | 43.9068   | 45.5598   | 41.7918   | 44.4555   |
| 0        | 0          | 0         | 0         | 0         | 0         |
| 1.38607  | 1.26273    | 1.3237    | 1.19702   | 2.39441   | 1.57584   |
| 6.99096  | 7.54713    | 4.55741   | 6.01982   | 3.87428   | 5.09145   |
| 1.88231  | 5.86434    | 2.37144   | 0         | 5.09721   | 3.95621   |
| 3.92028  | 3.66854    | 4.55224   | 4.20348   | 3.30548   | 3.5043    |
| 0        | 0          | 0         | 0         | 0         | 0         |
| 1.44797  | 1.30622    | 1.59232   | 2.49848   | 2.63438   | 1.3885    |
| 0        | 0.00409748 | 0.0414238 | 0         | 0         | 0.0276425 |
| 5.33205  | 4.83466    | 5.04979   | 4.02188   | 4.56071   | 4.37452   |
| 1.46629  | 1.21332    | 1.72908   | 1.52351   | 1.8805    | 1.7061    |
| 0        | 34.048     | 0         | 0         | 0         | 0         |
| 0.421978 | 0.559256   | 0.17721   | 0.259453  | 0.580416  | 0.354762  |
| 6.82757  | 7.9782     | 8.06056   | 5.91187   | 9.29253   | 6.48966   |
| 0        | 0          | 0.0261992 | 0.0236919 | 0.0225252 | 0.034966  |
| 0.200327 | 0.109801   | 0.177608  | 0.0892276 | 0.152701  | 0.0877919 |
| 30.7635  | 34.6236    | 29.6881   | 31.7076   | 30.2933   | 36.5423   |
| 4.77645  | 7.12162    | 8.70406   | 8.4541    | 9.60839   | 14.4849   |
| 22.6563  | 21.3226    | 17.074    | 19.2133   | 18.3328   | 21.1528   |
| 13.383   | 13.7817    | 12.8532   | 13.011    | 12.785    | 15.0196   |
| 15.4437  | 14.1677    | 17.2134   | 15.293    | 19.3989   | 16.7838   |
| 0.635873 | 0.452813   | 0.28611   | 0.413965  | 0.590369  | 0.190923  |
| 92.8938  | 98.6124    | 83.1555   | 93.864    | 72.6889   | 99.3621   |
| 26.5343  | 27.7827    | 23.0282   | 29.9007   | 24.8791   | 28.6003   |
| 0        | 0          | 0         | 0         | 0         | 0         |
| 0.285147 | 0.21321    | 0.538866  | 0.487295  | 0.277979  | 0.191782  |
| 38.5056  | 36.965     | 31.7677   | 32.7285   | 52.6956   | 52.6907   |
| 10.0639  | 9.25009    | 8.32757   | 5.16957   | 18.2809   | 14.8264   |
| 0        | 0          | 0         | 0         | 0         | 0         |
| 0.488215 | 0.533147   | 1.03328   | 0.590661  | 0.862053  | 0.446944  |
| 0        | 0          | 0         | 0         | 0         | 0         |
| 0.488192 | 0.678028   | 0.456894  | 0.23865   | 0.453256  | 0.340069  |
| 14.324   | 18.9661    | 17.0163   | 19.9956   | 30.7466   | 31.1854   |
| 46.0912  | 44.7937    | 48.2824   | 48.0377   | 46.2769   | 43.6256   |
| 0.621187 | 0.619298   | 0.547824  | 0         | 0.538286  | 1.82784   |
| 1.83757  | 3.15579    | 3.02236   | 3.46837   | 4.73074   | 4.3966    |
| 55.5902  | 58.902     | 42.0099   | 39.7516   | 36.1679   | 34.2675   |
| 62.5479  | 59.801     | 47.2589   | 44.0731   | 34.2755   | 36.5792   |
| 0        | 0          | 0         | 0         | 301.382   | 0         |

|           |           |           |           |           |           |
|-----------|-----------|-----------|-----------|-----------|-----------|
| 3.18823   | 4.43671   | 2.37655   | 2.36099   | 0.805799  | 1.45187   |
| 0         | 0         | 0         | 0         | 0         | 0         |
| 16.3877   | 16.3507   | 16.1739   | 12.4788   | 12.7829   | 11.8645   |
| 7.26447   | 6.73285   | 8.39337   | 6.30085   | 8.02688   | 7.21216   |
| 0.584814  | 1.10144   | 0.748844  | 0.379089  | 0.633458  | 0.396565  |
| 0.324335  | 0.252616  | 0.383076  | 0.0769811 | 0.614797  | 0.159059  |
| 1.06973   | 1.01759   | 2.4536    | 2.7647    | 2.62636   | 2.04005   |
| 4.27212   | 4.8569    | 4.43799   | 4.16696   | 4.30273   | 3.67984   |
| 10.5341   | 9.51928   | 13.1994   | 11.0247   | 9.18191   | 9.68892   |
| 2.64768   | 2.53115   | 2.01056   | 2.97514   | 2.6322    | 3.47612   |
| 0         | 0         | 0         | 0         | 0         | 0         |
| 18.6479   | 19.0633   | 24.8823   | 25.8556   | 28.8383   | 36.5559   |
| 0         | 0         | 0         | 0         | 0         | 0         |
| 0.0746456 | 0.0310077 | 0.0313475 | 0         | 0.053903  | 0.0627554 |
| 1.69758   | 1.31138   | 1.45082   | 1.22149   | 1.67749   | 1.00987   |
| 0.145756  | 0.193556  | 0.210716  | 0.202138  | 0.336006  | 0.149888  |
| 0.0457634 | 0.356439  | 1.0414    | 0.0521374 | 0.0495699 | 0.0384738 |
| 1.83689   | 1.51949   | 1.86374   | 1.24101   | 1.91926   | 1.96477   |
| 2.02293   | 1.50086   | 2.50024   | 1.21653   | 3.39303   | 1.60732   |
| 25.0785   | 28.7314   | 20.8659   | 25.3552   | 18.9591   | 23.7736   |
| 57.489    | 55.9928   | 55.6903   | 46.5154   | 56.3953   | 51.8071   |
| 0.498906  | 0.396167  | 0.364392  | 0.21945   | 0.402685  | 0.185977  |
| 8.11812   | 8.50616   | 8.39583   | 8.19051   | 7.2622    | 8.25112   |
| 0         | 0         | 0         | 0         | 0         | 0         |
| 23.9949   | 26.7789   | 24.2876   | 20.8728   | 13.8238   | 18.8      |
| 0         | 0         | 0         | 0         | 0         | 0         |
| 53.5746   | 50.9358   | 57.9701   | 58.3881   | 36.0909   | 33.1386   |
| 4.22332   | 3.52866   | 4.71613   | 3.82737   | 4.2627    | 3.75233   |
| 5.13299   | 3.94847   | 5.02301   | 4.47647   | 5.62253   | 4.74447   |
| 0         | 0         | 0         | 0         | 0         | 0         |
| 13.3165   | 11.3075   | 13.6508   | 13.5177   | 13.6016   | 12.24     |
| 5.63388   | 5.22533   | 3.90298   | 4.15324   | 7.64762   | 5.29369   |
| 5.08548   | 5.16856   | 4.47646   | 4.22668   | 5.81629   | 5.34999   |
| 5.66365   | 5.21601   | 5.60505   | 4.79352   | 6.70542   | 4.68153   |
| 11.7692   | 12.3704   | 12.7274   | 11.5782   | 14.7898   | 10.483    |
| 48.6729   | 58.4835   | 50.1572   | 54.1008   | 49.1782   | 62.9665   |
| 1.48767   | 1.81104   | 1.06841   | 1.15098   | 1.63198   | 1.58831   |
| 1.84145   | 1.34998   | 0.982733  | 0.98723   | 0.516238  | 0.47353   |
| 0.28765   | 1.69546   | 0.184151  | 14.7632   | 0.234582  | 1.41444   |
| 0         | 0.0455721 | 0.138214  | 0         | 0.0792214 | 0.0614878 |
| 9.4234    | 7.52348   | 8.27116   | 8.10973   | 11.7637   | 11.6588   |
| 0         | 0         | 0         | 0         | 0         | 0         |
| 0.396508  | 1.54902   | 0.446206  | 0.881241  | 0.708245  | 1.02228   |

|            |           |            |          |           |           |
|------------|-----------|------------|----------|-----------|-----------|
| 0          | 0         | 0          | 0        | 0         | 0         |
| 17.1818    | 16.1544   | 16.3176    | 15.5782  | 17.2137   | 16.3344   |
| 41.4792    | 40.4031   | 43.8132    | 42.5338  | 45.0919   | 46.8892   |
| 1.02524    | 0.784012  | 2.60848    | 1.81159  | 2.84069   | 2.51694   |
| 5.60289    | 6.26321   | 6.52855    | 6.36002  | 6.462     | 6.18624   |
| 7.94322    | 6.83565   | 8.67561    | 5.94991  | 10.2163   | 9.1651    |
| 3.69659    | 2.7782    | 3.32875    | 3.02764  | 2.81682   | 3.06135   |
| 0.497153   | 0.599566  | 0.808181   | 0.511585 | 0.45165   | 0.188757  |
| 0          | 0         | 0          | 0        | 0         | 0         |
| 0          | 0         | 0          | 0        | 0         | 0         |
| 29.1868    | 29.0117   | 29.9444    | 26.7713  | 34.5954   | 29.2984   |
| 20.7329    | 26.5165   | 19.8217    | 21.839   | 15.1941   | 21.6137   |
| 0.902059   | 0.589077  | 1.15282    | 0.739167 | 1.58206   | 0.77398   |
| 0.698013   | 0.626302  | 1.37186    | 0.349903 | 0.998018  | 0.586828  |
| 0          | 0         | 0          | 0        | 0         | 0         |
| 0          | 0         | 0          | 0        | 0         | 0         |
| 5.57427    | 5.5801    | 5.29586    | 8.01643  | 3.06846   | 4.68636   |
| 0          | 0         | 0          | 0        | 0         | 0         |
| 8.14335    | 7.55213   | 7.36315    | 6.71913  | 5.60853   | 5.9453    |
| 51.823     | 49.9429   | 50.0146    | 49.8503  | 45.9136   | 52.0955   |
| 0          | 0         | 0          | 0        | 0         | 0.0661272 |
| 17.2672    | 14.37     | 13.6475    | 13.7762  | 10.9404   | 16.7055   |
| 164.106    | 173.699   | 130.668    | 152.852  | 117.286   | 121.882   |
| 0.529134   | 0.533078  | 0.309744   | 0.48598  | 0.331826  | 0.206695  |
| 333.634    | 260.215   | 327.012    | 282.689  | 355.651   | 567.993   |
| 6.13161    | 5.79558   | 4.28969    | 5.28259  | 5.33729   | 5.31783   |
| 0.578628   | 1.10166   | 0.769486   | 1.02545  | 1.47984   | 0.93238   |
| 29.6748    | 24.5889   | 24.0704    | 32.8462  | 27.9957   | 25.4165   |
| 0.00331189 | 0.038046  | 0.00948297 | 0.112375 | 0.0247651 | 0.0170858 |
| 0.197824   | 0         | 0.373845   | 0.112689 | 1.28567   | 0         |
| 0.228672   | 0.826415  | 0.345712   | 0.494992 | 0.148616  | 0.153798  |
| 0          | 0         | 0          | 0        | 0         | 0         |
| 0.404575   | 0.378135  | 0.700844   | 0.345694 | 0.465616  | 0.361389  |
| 0.0109658  | 0.0136656 | 0          | 0        | 0         | 0         |
| 23.4672    | 18.8068   | 19.9501    | 19.263   | 18.4025   | 19.2261   |
| 18.8687    | 19.4879   | 18.9881    | 20.0358  | 17.57     | 18.9994   |
| 0.16592    | 0.103385  | 0.313553   | 0.094515 | 0.179721  | 0.418473  |
| 1.02344    | 1.27541   | 0.257877   | 2.33198  | 1.77371   | 1.0325    |
| 1.40443    | 2.14601   | 2.12808    | 1.714    | 1.85106   | 1.57422   |
| 0          | 0         | 0          | 0        | 0         | 0         |
| 4.64524    | 4.453     | 6.97778    | 2.44257  | 4.45106   | 2.85388   |
| 0          | 0         | 0          | 0        | 0.342446  | 0         |
| 0          | 0         | 0.0377361  | 0        | 0         | 0         |

|           |           |           |           |           |           |
|-----------|-----------|-----------|-----------|-----------|-----------|
| 11.9734   | 13.131    | 18.9465   | 18.3337   | 13.3844   | 18.0387   |
| 0.953404  | 1.10114   | 1.1093    | 0.867911  | 0.726241  | 0.900541  |
| 7.94596   | 9.16895   | 6.96036   | 7.16659   | 6.13008   | 6.03068   |
| 53.8601   | 61.8457   | 60.5237   | 58.9508   | 46.6492   | 48.1275   |
| 0.0816303 | 0.05813   | 0.058767  | 0         | 0.0378944 | 0.0490197 |
| 3.4403    | 4.02658   | 3.85594   | 3.11616   | 7.33542   | 5.81066   |
| 0.0256689 | 0.0639772 | 0.0323391 | 0.0877326 | 0.111216  | 0         |
| 1.44582   | 1.11346   | 1.51453   | 2.03587   | 1.61888   | 1.5433    |
| 4.25074   | 4.94327   | 3.1106    | 2.74283   | 3.54754   | 2.58719   |
| 0.0425587 | 0         | 0.0268089 | 0         | 0.0230493 | 0         |
| 0.825185  | 0.765788  | 0.575105  | 0.280035  | 0.798736  | 0.442815  |
| 0         | 0         | 0         | 0         | 0         | 0         |
| 0.724427  | 0.733509  | 0.85563   | 1.44432   | 0.784685  | 1.14194   |
| 7.00206   | 9.80089   | 8.24625   | 7.34145   | 7.03489   | 7.93427   |
| 2.58247   | 2.89644   | 4.03613   | 3.22047   | 3.6667    | 3.32708   |
| 0.205738  | 0.119649  | 0.05184   | 0.0937576 | 0.163424  | 0.0691867 |
| 18.4041   | 19.2173   | 19.3516   | 18.6803   | 20.6808   | 24.9644   |
| 1.46501   | 1.30642   | 1.56789   | 1.08265   | 1.87945   | 0.645577  |
| 11.5767   | 10.3308   | 12.7532   | 12.9128   | 12.074    | 11.4648   |
| 0.349705  | 0.373545  | 2.83228   | 2.36202   | 0.32468   | 0.315001  |
| 0.259234  | 0.146568  | 0.135416  | 0.188634  | 0.0254691 | 0.0494198 |
| 0         | 0         | 0         | 0         | 0         | 0         |
| 9.01245   | 7.96539   | 7.08328   | 6.28388   | 7.98792   | 5.24553   |
| 34.2255   | 34.0964   | 37.2692   | 32.9601   | 43.5457   | 39.1165   |
| 2.2954    | 2.34618   | 2.64898   | 2.01065   | 3.79441   | 2.63208   |
| 5.36808   | 4.37366   | 3.70809   | 2.39695   | 4.51265   | 5.17826   |
| 0         | 0.122633  | 0         | 0         | 0         | 0.165461  |
| 12.3572   | 13.821    | 13.9168   | 13.1185   | 14.4667   | 12.9124   |
| 0.652811  | 1.30155   | 0.987292  | 1.4874    | 2.26299   | 1.53663   |
| 42.0004   | 39.1679   | 25.1127   | 26.0985   | 20.3776   | 19.4428   |
| 18.9952   | 22.1133   | 20.8709   | 21.1216   | 14.3054   | 14.3117   |
| 60.8493   | 59.7969   | 57.953    | 51.3117   | 43.2095   | 51.679    |
| 5.86137   | 6.03181   | 9.06275   | 9.71316   | 13.0024   | 13.3646   |
| 3.61916   | 3.29124   | 5.30257   | 2.42308   | 5.39756   | 2.05786   |
| 23.2777   | 12.1119   | 13.1012   | 13.9435   | 26.5137   | 24.3447   |
| 4.50009   | 6.38469   | 4.73686   | 4.83836   | 4.76891   | 3.43936   |
| 0         | 0         | 0         | 0         | 0         | 0         |
| 466.825   | 412.427   | 424.812   | 440.496   | 416.492   | 431.571   |
| 0.816113  | 0.479761  | 0.896593  | 0.595933  | 0.926501  | 0.751606  |
| 2.38608   | 2.2754    | 2.24805   | 1.7847    | 2.97786   | 2.23277   |
| 5.96411   | 5.8398    | 5.62549   | 4.26024   | 6.90456   | 5.31919   |
| 0         | 0         | 0         | 0         | 0         | 0         |
| 0         | 0         | 0         | 0         | 0         | 0         |

|           |           |           |           |           |           |
|-----------|-----------|-----------|-----------|-----------|-----------|
| 0         | 0         | 0         | 0         | 0         | 0         |
| 1.96863   | 1.4602    | 2.3372    | 1.30086   | 2.48304   | 1.36163   |
| 6.73655   | 6.50044   | 7.70089   | 6.65345   | 6.13572   | 8.01366   |
| 1.49799   | 1.78049   | 3.07119   | 3.87359   | 6.28666   | 5.43683   |
| 2.13867   | 1.7648    | 2.80365   | 1.02072   | 2.97397   | 1.67652   |
| 0.0662625 | 0         | 0.166962  | 0.0754917 | 0.0717742 | 0         |
| 82.2482   | 83.867    | 68.3952   | 78.7317   | 60.0402   | 72.715    |
| 0.217086  | 0.284771  | 0.273497  | 0.143187  | 0.222767  | 0.163296  |
| 0.0868364 | 0         | 0         | 0         | 0         | 0.219013  |
| 4.46212   | 5.15207   | 5.1493    | 5.44707   | 5.61781   | 5.09214   |
| 15.2454   | 14.961    | 14.8242   | 12.2204   | 14.3154   | 14.6378   |
| 79.5207   | 80.9127   | 70.6848   | 65.3105   | 50.1023   | 55.7972   |
| 3.98463   | 2.16952   | 6.63364   | 4.29653   | 9.30347   | 4.52958   |
| 14.7247   | 14.5462   | 14.3743   | 14.3103   | 12.7753   | 14.2361   |
| 963.609   | 976.49    | 841.058   | 848.248   | 817.946   | 1035.03   |
| 0         | 0         | 0         | 0         | 0         | 0         |
| 11.447    | 12.5192   | 11.3647   | 13.0001   | 8.82192   | 9.68958   |
| 11.0721   | 12.4588   | 11.7631   | 11.5696   | 10.9145   | 11.3475   |
| 0.0232736 | 0         | 0.0293214 | 0         | 0.0567214 | 0.0440245 |
| 8.80429   | 7.4469    | 9.54184   | 6.66568   | 10.2277   | 7.11193   |
| 4.58726   | 3.78585   | 4.63107   | 3.94559   | 6.41669   | 4.67385   |
| 15.6933   | 18.2879   | 18.2772   | 29.0452   | 13.2197   | 13.6649   |
| 28.7761   | 28.0469   | 25.2677   | 24.1268   | 20.9147   | 24.4368   |
| 18.2594   | 18.1106   | 19.2636   | 17.1275   | 18.1787   | 18.4531   |
| 0         | 0         | 0.272394  | 0         | 0         | 0         |
| 21.3332   | 20.3884   | 20.4169   | 19.5731   | 19.4386   | 18.4422   |
| 10.4228   | 10.6712   | 11.5217   | 10.4398   | 10.7582   | 9.64501   |
| 0.0113602 | 0.0260091 | 0.0286245 | 0.0258851 | 0.0226068 | 0.0382047 |
| 5.77853   | 4.84744   | 4.99364   | 4.75285   | 5.16156   | 3.74044   |
| 0         | 0         | 0         | 0         | 0         | 0         |
| 45.6273   | 52.9967   | 50.3062   | 62.1204   | 40.9306   | 49.7401   |
| 0.686141  | 0.4675    | 0.98765   | 0.420492  | 0.515148  | 1.08425   |
| 0         | 0         | 0         | 0         | 0         | 0         |
| 15.5276   | 16.9001   | 15.8832   | 13.4078   | 9.14563   | 9.21333   |
| 3.3212    | 3.25885   | 3.795     | 1.93589   | 4.21895   | 1.59553   |
| 18.5869   | 18.0623   | 17.9632   | 17.4828   | 16.3171   | 18.2376   |
| 0         | 0.0352401 | 0         | 0         | 0         | 0         |
| 1.74845   | 2.00925   | 2.10712   | 2.52789   | 1.78011   | 1.99912   |
| 4.01705   | 4.14702   | 3.92295   | 3.76415   | 3.57879   | 3.39051   |
| 19.3224   | 15.92     | 23.9296   | 18.419    | 24.6834   | 18.4477   |
| 0.338571  | 0.902808  | 0.342385  | 0.440499  | 0.480435  | 0.476593  |
| 31.7033   | 30.9439   | 34.0212   | 33.4858   | 40.0757   | 40.1191   |
| 10.2542   | 11.0993   | 10.5565   | 8.94542   | 9.01267   | 10.1972   |

|           |           |           |           |           |           |
|-----------|-----------|-----------|-----------|-----------|-----------|
| 7.1499    | 7.60048   | 5.97078   | 6.85099   | 7.53823   | 7.16443   |
| 14.3697   | 16.8071   | 19.3342   | 16.024    | 16.2421   | 13.2599   |
| 1168      | 1335.81   | 1024.93   | 1166.86   | 921.834   | 1096.95   |
| 0.120728  | 0.150451  | 0.135198  | 0.163013  | 0.0290595 | 0.0853699 |
| 27.3215   | 0         | 0         | 0         | 0         | 0         |
| 10.0458   | 10.086    | 10.2189   | 8.94611   | 9.42936   | 7.20345   |
| 10.2982   | 9.2541    | 9.42607   | 9.98398   | 11.4508   | 11.1544   |
| 0.533125  | 0.474557  | 0.191903  | 0.520612  | 0.164991  | 0.192088  |
| 0         | 0         | 0         | 0         | 0.0072624 | 0         |
| 0.48981   | 0.701961  | 1.0182    | 0.613836  | 1.37944   | 1.6554    |
| 0.115946  | 0.0992038 | 0.344329  | 0.178478  | 0.412064  | 0.197051  |
| 0.070562  | 0.0146557 | 0.0888979 | 0.0535934 | 0.17834   | 0.0444918 |
| 0         | 0         | 0         | 0         | 0         | 0         |
| 0         | 0.139557  | 0.141086  | 0.382751  | 0.970406  | 0.564887  |
| 0.73749   | 0.536329  | 0.847201  | 0.122577  | 1.01439   | 0.459272  |
| 685.376   | 720.48    | 572.44    | 744.027   | 646.453   | 812.352   |
| 0.844846  | 0.560933  | 0.732662  | 0.632576  | 1.08637   | 0.732421  |
| 5.03491   | 4.7635    | 4.78981   | 4.8465    | 5.40919   | 5.40776   |
| 44.7935   | 45.3344   | 48.1686   | 41.2185   | 54.6202   | 50.0255   |
| 6.18181   | 5.83315   | 2.99014   | 3.50015   | 4.24901   | 4.48511   |
| 33.3378   | 36.5498   | 19.8287   | 23.3536   | 32.9831   | 35.8253   |
| 0.643152  | 0.637067  | 1.3789    | 0.647362  | 1.25837   | 0.580122  |
| 4.03617   | 3.51181   | 3.58727   | 3.663     | 3.25715   | 2.70228   |
| 8.56509   | 9.27855   | 6.51209   | 8.33368   | 8.38818   | 9.24021   |
| 0.0213503 | 0.0266067 | 0.0268983 | 0.024324  | 0.115631  | 0.0358989 |
| 1.61249   | 1.44518   | 1.3497    | 1.58543   | 2.15337   | 1.64348   |
| 19.5937   | 23.5974   | 25.5487   | 32.0254   | 30.4908   | 22.6913   |
| 0         | 0         | 0         | 0         | 0         | 0         |
| 0.129199  | 0.0460023 | 0.0697596 | 0         | 0.0199923 | 0.0465512 |
| 21.9254   | 21.9946   | 25.8046   | 24.76     | 25.4397   | 22.8277   |
| 0.247501  | 0.0771089 | 0.155908  | 0.123364  | 0.217822  | 0.273101  |
| 22.1334   | 20.8195   | 21.6545   | 18.7772   | 21.7135   | 20.4503   |
| 0.64129   | 0.363261  | 0.514138  | 0.531353  | 1.07352   | 0.710685  |
| 0         | 0         | 0         | 0         | 0         | 0         |
| 0         | 0         | 0         | 0         | 0         | 0         |
| 2.16717   | 2.58015   | 2.55967   | 2.86582   | 3.06004   | 2.30999   |
| 9.17582   | 8.61286   | 9.12329   | 8.4114    | 7.84389   | 5.9889    |
| 3.63837   | 4.22499   | 2.60444   | 4.56907   | 3.00054   | 3.1631    |
| 7.45178   | 5.14162   | 6.78918   | 6.09147   | 7.06837   | 6.37099   |
| 52.0202   | 54.1597   | 43.1389   | 55.5149   | 40.5131   | 52.038    |
| 0         | 0         | 0         | 0         | 0         | 0         |
| 0         | 0         | 0.0370239 | 0         | 0         | 0         |
| 192.553   | 222.704   | 189.165   | 204.879   | 188.369   | 203.207   |

|          |           |           |           |           |           |
|----------|-----------|-----------|-----------|-----------|-----------|
| 0        | 0         | 0         | 0         | 0         | 0         |
| 0        | 0         | 0         | 0.770141  | 0         | 0         |
| 0.841563 | 0.883162  | 1.86938   | 1.48863   | 2.3029    | 1.52674   |
| 0        | 0         | 0         | 0         | 0         | 0         |
| 0.544822 | 0.543165  | 0.274558  | 0.496565  | 0.649154  | 0.458038  |
| 36.1652  | 33.902    | 29.2367   | 29.6846   | 30.3631   | 30.9711   |
| 0        | 0         | 0.0537872 | 0         | 0.184978  | 0         |
| 1.75545  | 2.27515   | 1.5039    | 1.46663   | 2.33247   | 1.65293   |
| 0.784717 | 0.919047  | 0.276734  | 0.401945  | 0.832005  | 0.520968  |
| 4.05833  | 2.89811   | 4.19373   | 2.90922   | 4.3959    | 4.33195   |
| 0        | 0         | 0         | 0         | 0.408132  | 0         |
| 28.4406  | 29.1004   | 21.0205   | 24.6875   | 26.6552   | 34.612    |
| 12.3588  | 12.7075   | 12.0693   | 12.0528   | 10.0068   | 11.3718   |
| 187.643  | 208.537   | 156.623   | 201.856   | 148.074   | 226.953   |
| 34.7398  | 36.0518   | 25.7504   | 30.612    | 31.0813   | 34.514    |
| 0        | 0         | 0         | 0         | 0         | 0         |
| 0        | 0         | 0         | 0         | 0         | 0         |
| 95.0333  | 93.6776   | 106.226   | 94.5943   | 117.276   | 114.106   |
| 35.6259  | 33.8136   | 39.6645   | 38.0563   | 36.366    | 38.8706   |
| 0.201715 | 0.251377  | 0.317664  | 0.172358  | 0.16387   | 0.296772  |
| 0.558843 | 0.835715  | 2.53462   | 2.03738   | 3.99516   | 3.28878   |
| 90.4122  | 95.8621   | 85.4539   | 71.9192   | 68.628    | 72.7058   |
| 6.09603  | 5.76446   | 6.79246   | 5.1303    | 6.9515    | 5.27953   |
| 7.08097  | 5.62936   | 3.94793   | 4.03371   | 4.16566   | 4.07165   |
| 0        | 0         | 0         | 0         | 0         | 0         |
| 0        | 0         | 0         | 0         | 0         | 0         |
| 0        | 0         | 0         | 0         | 0.0220399 | 0         |
| 2.67525  | 2.28109   | 2.69888   | 1.91351   | 2.23325   | 2.34212   |
| 0        | 0         | 0         | 0         | 0         | 0         |
| 5.44337  | 4.97458   | 5.39006   | 4.93947   | 5.35827   | 4.56026   |
| 20.1896  | 19.6198   | 21.3944   | 17.6386   | 19.1684   | 14.6871   |
| 0        | 0         | 0         | 0         | 0         | 0         |
| 0.874323 | 0.760172  | 0.819735  | 1.08876   | 0.792878  | 1.05984   |
| 16.3393  | 17.1277   | 17.5022   | 16.4721   | 16.6085   | 15.9912   |
| 36.8433  | 35.3333   | 35.0718   | 31.7565   | 31.5037   | 31.3695   |
| 4.78482  | 5.16186   | 4.54363   | 4.71901   | 3.67439   | 6.03403   |
| 0        | 0.0240732 | 0.0486739 | 0         | 0         | 0.0162403 |
| 2.88461  | 2.83038   | 2.60032   | 2.04927   | 3.72611   | 3.17775   |
| 0        | 0         | 0         | 0         | 0.0595774 | 0         |
| 2.74434  | 2.45085   | 3.41846   | 3.37916   | 3.77813   | 3.14494   |
| 0.195221 | 0.243285  | 0.184463  | 0.0556031 | 0.264325  | 0.205156  |
| 2.4265   | 2.21611   | 1.77912   | 1.42119   | 2.01402   | 1.87719   |
| 28.25    | 27.4107   | 29.7772   | 24.9125   | 27.0382   | 30.7589   |

|           |          |          |           |           |          |
|-----------|----------|----------|-----------|-----------|----------|
| 1.02415   | 0.931756 | 0.946551 | 0.462774  | 2.14396   | 1.55294  |
| 1.90407   | 2.28446  | 2.02123  | 1.17369   | 2.40276   | 1.53318  |
| 41.1628   | 42.3164  | 37.6596  | 34.4476   | 58.0111   | 50.2128  |
| 1.82E-09  | 1.83E-10 | 1.62E-09 | 0         | 0         | 0        |
| 3.60214   | 4.71896  | 7.47773  | 4.10004   | 8.12023   | 7.6318   |
| 8.03793   | 8.0854   | 7.62353  | 5.81382   | 7.77782   | 6.02984  |
| 0         | 0        | 0        | 0.0275272 | 0         | 0        |
| 0.0995503 | 0        | 0.188128 | 0.056708  | 0.0539154 | 0.167386 |
| 0.370059  | 0.557244 | 0.505073 | 0.527003  | 0.668068  | 0.388892 |
| 0         | 0        | 0        | 0         | 0         | 0        |
| 59.9905   | 57.6872  | 54.7641  | 60.8003   | 70.7611   | 76.4326  |
| 15.066    | 14.8676  | 22.7809  | 18.6104   | 27.5922   | 26.1357  |
| 0.401038  | 0.237976 | 0.433728 | 0.255414  | 0.680615  | 0.189067 |
| 9.07682   | 10.2152  | 10.7641  | 8.26222   | 6.74367   | 7.25499  |
| 0.383437  | 0.884214 | 0.67705  | 0.440087  | 1.28499   | 1.67054  |
| 9.05029   | 9.14339  | 7.84833  | 8.45767   | 9.43831   | 9.83015  |
| 0         | 0        | 0        | 0         | 0         | 0        |
| 0         | 0        | 0        | 0         | 0         | 0        |
| 16.6228   | 26.5836  | 8.42437  | 12.983    | 10.4054   | 12.1143  |
| 1.39928   | 1.14006  | 1.77E-12 | 1.62617   | 1.42129   | 1.06388  |
| 5.17727   | 5.52732  | 5.0051   | 4.77679   | 6.37833   | 4.91357  |
| 3.26866   | 2.66417  | 4.09855  | 2.59456   | 5.62353   | 3.57636  |
| 31.9204   | 32.0125  | 34.9805  | 50.9083   | 33.1258   | 31.8738  |
| 12.9829   | 11.3518  | 13.199   | 11.5445   | 14.1897   | 12.3345  |
| 0         | 0        | 0        | 0         | 0         | 0        |
| 66.8747   | 69.4037  | 81.5289  | 68.1638   | 68.5767   | 70.2063  |
| 50.1018   | 56.689   | 51.4785  | 59.3737   | 56.6609   | 73.8784  |
| 0.52772   | 0.607114 | 0.740103 | 0.457778  | 0.805094  | 0.422757 |
| 3.17084   | 1.7016   | 4.20504  | 3.23222   | 10.1394   | 3.77543  |
| 0.103756  | 0.189148 | 0.150586 | 0.221374  | 0.129469  | 0.100488 |
| 41.1154   | 42.4474  | 40.0517  | 44.31     | 37.8367   | 37.8563  |
| 1.90717   | 2.3759   | 1.65783  | 2.10482   | 1.12884   | 1.02385  |
| 21.0709   | 21.7721  | 22.4278  | 19.9985   | 20.8156   | 19.8089  |
| 1.62671   | 0.882307 | 1.91138  | 0.931444  | 2.35545   | 1.14084  |
| 0.166287  | 2.62679  | 0.209497 | 52.8562   | 0.180119  | 1.398    |
| 137.101   | 169.984  | 97.6566  | 111.736   | 113.987   | 94.0488  |
| 6.63711   | 6.48418  | 6.83912  | 6.90808   | 6.47914   | 6.78543  |
| 9.79282   | 8.41927  | 9.00219  | 6.51096   | 11.8447   | 9.78875  |
| 0.50675   | 0.982971 | 3.55423  | 3.22699   | 3.95224   | 3.79702  |
| 1.67012   | 1.61879  | 1.54886  | 1.53277   | 1.60804   | 1.82337  |
| 69.7993   | 87.6127  | 132.345  | 108.562   | 162.794   | 131.482  |
| 7.90457   | 8.58499  | 8.95234  | 6.07234   | 9.5399    | 6.84867  |
| 0.292087  | 0.436797 | 0.625577 | 0.465877  | 0.601126  | 0.442009 |



|           |           |           |           |           |           |
|-----------|-----------|-----------|-----------|-----------|-----------|
| 1.78326   | 2.25933   | 2.24664   | 1.79461   | 1.22334   | 1.84902   |
| 0         | 0         | 0         | 0         | 0         | 0         |
| 8.27306   | 10.7712   | 8.31395   | 21.4913   | 9.85036   | 12.2055   |
| 1.69975   | 2.27227   | 2.86173   | 2.79911   | 2.86212   | 2.37733   |
| 0.17592   | 0.121795  | 0.172382  | 0.0890767 | 0.0635176 | 0.0492993 |
| 2.64452   | 1.53451   | 1.76997   | 1.26163   | 5.36197   | 1.83421   |
| 0.468558  | 0.25862   | 0.261454  | 0.295541  | 0.561974  | 0.829342  |
| 0.47735   | 0.356924  | 0.481114  | 0.108767  | 0.206822  | 0.240789  |
| 0         | 0.0544442 | 0.0550408 | 0         | 0.0473222 | 0         |
| 0.479213  | 0.814357  | 0.71351   | 0.893389  | 1.03815   | 0.696393  |
| 3.91372   | 3.38273   | 6.87573   | 5.54491   | 7.6579    | 5.03981   |
| 9.92561   | 10.2022   | 11.7296   | 10.4546   | 10.2006   | 7.57984   |
| 0.0170392 | 0.089219  | 5.02E-91  | 1.67E-210 | 3.52E-123 | 3.05E-89  |
| 11.2827   | 11.6518   | 11.9303   | 10.4809   | 11.8687   | 12.3942   |
| 3.15922   | 3.19106   | 2.59758   | 2.5763    | 2.08922   | 2.40437   |
| 0         | 0.464006  | 0         | 0.424197  | 0         | 0         |
| 27.6432   | 25.0221   | 30.3772   | 25.6725   | 28.9929   | 24.6592   |
| 0.0230041 | 0.0286677 | 0.0289819 | 0.0524164 | 0         | 0         |
| 1.03214   | 1.1025    | 0.743054  | 0.842261  | 0.958279  | 0.847602  |
| 2.4552    | 2.89908   | 0.855826  | 1.93507   | 1.43859   | 2.42055   |
| 0.103841  | 0.215677  | 0.130824  | 0.591519  | 0.149971  | 0.291     |
| 15.8823   | 15.726    | 11.8557   | 12.8444   | 25.0964   | 14.9625   |
| 0.999649  | 1.29367   | 1.25941   | 0.700851  | 1.29103   | 1.32527   |
| 1.59034   | 1.9018    | 2.36789   | 2.03146   | 1.63562   | 0.999387  |
| 26.8009   | 27.7605   | 27.0243   | 24.0778   | 24.3425   | 22.5439   |
| 31.8894   | 37.7567   | 26.6465   | 31.9731   | 24.0922   | 34.0438   |
| 0.360946  | 0.562263  | 0.682109  | 1.64488   | 0.879681  | 0.758629  |
| 1.12903   | 0.52053   | 0.813035  | 0.716234  | 0.307871  | 0.353467  |
| 9.48038   | 9.19351   | 10.4802   | 11.5697   | 11.1193   | 10.8202   |
| 0.0393138 | 0         | 0.0495297 | 0         | 0         | 0.0330516 |
| 0.0537703 | 0         | 0.0677427 | 0         | 0.0582429 | 0         |
| 92.6667   | 99.238    | 100.365   | 111.596   | 75.9365   | 99.4306   |
| 0         | 0         | 0         | 0         | 0         | 0         |
| 0         | 0         | 0         | 0         | 0         | 0         |
| 4.72649   | 3.13814   | 6.51179   | 3.53902   | 5.59861   | 4.22145   |
| 1.70037   | 1.41266   | 1.33699   | 2.32189   | 1.21481   | 1.318     |
| 129.658   | 139.897   | 139.064   | 154.866   | 123.783   | 156.918   |
| 12.4934   | 11.9654   | 11.4665   | 12.8836   | 12.9379   | 13.1923   |
| 1.91403   | 1.22361   | 6.95234   | 6.6693    | 4.7523    | 3.62581   |
| 1.36908   | 0.379144  | 0.287474  | 0.259962  | 1.48296   | 1.151     |
| 3.54104   | 3.76466   | 3.2969    | 4.37136   | 4.49097   | 3.99631   |
| 0         | 0         | 0         | 0         | 0         | 0         |
| 2.3305    | 3.95608   | 2.1259    | 8.97028   | 1.00337   | 1.01352   |

|           |          |           |           |           |           |
|-----------|----------|-----------|-----------|-----------|-----------|
| 6.40775   | 6.16796  | 6.80641   | 7.08418   | 7.11691   | 7.32218   |
| 59.7676   | 68.2064  | 72.7059   | 96.0157   | 40.3965   | 49.486    |
| 0.0232642 | 0        | 0         | 0.0265045 | 0.0251993 | 0.039117  |
| 16.632    | 14.4767  | 18.8036   | 13.8689   | 19.6025   | 14.4331   |
| 0         | 0        | 0         | 0         | 0         | 0         |
| 0.280076  | 0.290858 | 0.264641  | 0.398857  | 0.556182  | 0.313951  |
| 15.488    | 13.1171  | 20.568    | 17.0643   | 27.2208   | 20.3773   |
| 15.3005   | 14.8949  | 18.3771   | 16.9436   | 16.8824   | 13.6052   |
| 4.66101   | 5.73586  | 4.34256   | 5.1437    | 3.29642   | 3.38363   |
| 0.539102  | 0.575702 | 1.16409   | 0.471047  | 1.00437   | 0.763651  |
| 0.0485272 | 0.151186 | 0.183412  | 0.0276431 | 0.0262818 | 0.0611961 |
| 20.0174   | 23.5297  | 21.4807   | 19.4551   | 19.6985   | 20.957    |
| 4.93974   | 3.99498  | 0.780046  | 2.57969   | 3.53032   | 3.42199   |
| 25.838    | 26.6094  | 22.8267   | 20.2763   | 20.5382   | 18.4627   |
| 106.594   | 2.75E-22 | 0         | 0         | 90.5696   | 134.58    |
| 0         | 0        | 0         | 0         | 0         | 0         |
| 0         | 0        | 0         | 0         | 0         | 0         |
| 0         | 0        | 0         | 0         | 0         | 0         |
| 36.1736   | 34.5119  | 35.7692   | 40.1114   | 35.6364   | 40.5188   |
| 0.803334  | 0.763226 | 0.851754  | 1.30488   | 1.27508   | 1.25044   |
| 61.2084   | 56.61    | 59.4479   | 60.3437   | 59.5944   | 63.6972   |
| 11.3299   | 9.46245  | 12.0453   | 10.1452   | 14.0594   | 13.4189   |
| 0         | 0        | 0         | 0         | 0         | 0         |
| 10.2156   | 10.0862  | 9.27309   | 9.56237   | 9.63123   | 8.35447   |
| 67.9961   | 53.9183  | 96.778    | 101.86    | 128.894   | 95.3953   |
| 2.7014    | 2.09479  | 0.850568  | 0.957703  | 1.08538   | 0.995714  |
| 5.48985   | 6.89983  | 4.61098   | 4.1548    | 4.83882   | 4.83028   |
| 1.48796   | 7.14447  | 8.43573   | 5.38476   | 7.11055   | 7.91037   |
| 3.2259    | 3.38287  | 2.73503   | 3.20359   | 3.47216   | 3.35673   |
| 0         | 0        | 0         | 0         | 0         | 0         |
| 6.36089   | 6.4726   | 9.01552   | 7.62673   | 8.25132   | 6.95414   |
| 1.0769    | 0.996937 | 0.387639  | 0.560865  | 1.16648   | 0.801892  |
| 0         | 0        | 0         | 0         | 0         | 0         |
| 1.65166   | 1.31957  | 0.603717  | 1.25116   | 1.30178   | 1.25492   |
| 0.267043  | 0.332789 | 0.616798  | 0.507063  | 0.289256  | 0.299342  |
| 0.158737  | 0.237382 | 0.119991  | 0.180846  | 0.361076  | 0.133452  |
| 0         | 0        | 1.30E-112 | 1.20E-110 | 0.330877  | 0.123416  |
| 0.754447  | 1.31522  | 1.69253   | 1.88069   | 1.56705   | 1.31641   |
| 20.3061   | 19.7958  | 19.9707   | 18.4518   | 17.8921   | 17.4078   |
| 2.70511   | 1.34844  | 4.77127   | 4.93102   | 5.27422   | 2.88068   |
| 15.1995   | 16.8076  | 15.3966   | 12.5428   | 16.5718   | 14.5547   |
| 0         | 0        | 0         | 0.0727313 | 0         | 0         |
| 40.0312   | 21.38    | 22.2147   | 23.3463   | 21.5772   | 27.1641   |

|           |           |          |          |          |           |
|-----------|-----------|----------|----------|----------|-----------|
| 16.8686   | 18.3986   | 20.1519  | 17.7496  | 18.5879  | 18.7183   |
| 12.979    | 9.95699   | 10.1589  | 8.72521  | 11.1272  | 11.1747   |
| 0         | 0         | 0        | 0        | 0        | 0         |
| 84.5818   | 91.8159   | 84.6737  | 88.6638  | 56.0762  | 76.2131   |
| 0.296736  | 0.616321  | 0.747689 | 0.901511 | 1.17854  | 1.24883   |
| 0.149561  | 0.165675  | 0.167488 | 0.170392 | 0.61685  | 0.389178  |
| 0         | 0         | 0        | 0        | 0        | 0         |
| 33.9327   | 37.6466   | 34.1979  | 41.0359  | 30.6817  | 35.7143   |
| 1.42118   | 2.65661   | 1.49206  | 2.0239   | 2.30909  | 2.3896    |
| 0.964978  | 0.754242  | 0.560209 | 1.37907  | 0.856264 | 1.24957   |
| 2.49203   | 1.79167   | 2.19771  | 1.57244  | 1.82723  | 1.83722   |
| 0.622134  | 0.718476  | 0.829533 | 0.708787 | 0.73386  | 0.490076  |
| 0         | 0         | 0        | 0        | 0        | 0         |
| 25.7932   | 24.1988   | 23.1267  | 21.1197  | 19.5235  | 21.6651   |
| 0.179543  | 0.27426   | 0.129671 | 0.348686 | 0.358195 | 0.285515  |
| 0         | 0         | 0        | 0        | 0        | 0         |
| 0         | 0         | 0        | 0        | 0        | 0         |
| 13.654    | 13.0366   | 12.2323  | 11.3693  | 10.8251  | 10.5118   |
| 26.9503   | 27.1267   | 28.3671  | 31.6882  | 26.5099  | 31.033    |
| 221.157   | 175.811   | 155.402  | 302.113  | 98.1319  | 138.815   |
| 5.28833   | 5.36498   | 5.50409  | 3.52314  | 5.78233  | 4.25573   |
| 4.86108   | 4.98217   | 5.7236   | 5.72792  | 4.31404  | 3.99765   |
| 16.8461   | 16.2916   | 16.8671  | 15.0139  | 19.0996  | 16.1485   |
| 110.214   | 126.011   | 132.48   | 138.036  | 129.858  | 157.01    |
| 4.92474   | 3.43683   | 2.72996  | 1.79541  | 7.6815   | 7.1213    |
| 2.05451   | 1.40506   | 1.51515  | 1.42724  | 1.95401  | 0.716177  |
| 0         | 0         | 0        | 0        | 0.223006 | 0.112808  |
| 23.2875   | 23.7789   | 32.106   | 20.8056  | 31.184   | 25.9763   |
| 0.732554  | 1.41086   | 0.922911 | 1.10014  | 0.541014 | 0.447903  |
| 0         | 0         | 0        | 0        | 0        | 0         |
| 4.48372   | 5.65993   | 6.08757  | 5.81908  | 13.0297  | 13.4556   |
| 0         | 0         | 0        | 0        | 0        | 0         |
| 24.6711   | 27.7019   | 23.6716  | 24.3681  | 25.4375  | 23.1175   |
| 30.9197   | 29.4462   | 36.508   | 30.0241  | 36.5521  | 30.4539   |
| 22.3754   | 23.5148   | 22.2089  | 21.1285  | 19.4188  | 18.7631   |
| 1.16976   | 1.40302   | 1.94802  | 1.4775   | 2.39102  | 1.70549   |
| 0.441768  | 0.489361  | 0.371042 | 0.475338 | 0.292425 | 0.288866  |
| 0.328667  | 0.163834  | 0.414072 | 0.224666 | 0.213603 | 0.276314  |
| 12.8303   | 12.2541   | 12.897   | 10.7038  | 14.9278  | 10.4127   |
| 0.0396111 | 0.0493634 | 0        | 0.135385 | 0.128718 | 0.0333016 |
| 0         | 0         | 0.150132 | 0        | 0        | 0         |
| 0.736984  | 0.502536  | 0.68323  | 0.712896 | 1.12212  | 0.660508  |
| 5.19588   | 6.12976   | 6.15329  | 5.84065  | 6.45353  | 5.19821   |

|           |          |           |           |           |           |
|-----------|----------|-----------|-----------|-----------|-----------|
| 149.2     | 147.298  | 134.64    | 139.057   | 116.403   | 139.18    |
| 13.5943   | 13.7629  | 15.0834   | 12.7994   | 20.4257   | 15.0732   |
| 5.01231   | 4.8203   | 5.9201    | 4.31753   | 7.22955   | 4.51751   |
| 0         | 0        | 0         | 0         | 0         | 0         |
| 2.77E-08  | 2.60E-08 | 3.15E-08  | 2.74E-08  | 2.05E-08  | 0.136672  |
| 2.10384   | 2.47198  | 1.89323   | 1.16419   | 1.56263   | 1.66765   |
| 17.4743   | 20.8488  | 22.0151   | 22.7204   | 19.3522   | 21.4764   |
| 10.1858   | 11.2446  | 8.3746    | 7.97626   | 12.4475   | 11.8994   |
| 0.84889   | 0.377298 | 1.047     | 1.24276   | 0.396811  | 0.45816   |
| 20.3517   | 25.2086  | 20.7608   | 25.8282   | 17.4753   | 22.9377   |
| 1.45144   | 1.49948  | 2.02939   | 1.56706   | 2.33348   | 1.6649    |
| 2.68746   | 3.61585  | 8.4795    | 4.85011   | 6.33722   | 6.01835   |
| 77.8436   | 94.459   | 83.0356   | 83.7189   | 70.758    | 91.4702   |
| 38.359    | 40.8778  | 28.9766   | 35.1724   | 28.4243   | 34.3901   |
| 0.0966419 | 0.101617 | 0.122164  | 0.0206441 | 0.122672  | 0.121906  |
| 10.4741   | 9.53056  | 10.0354   | 9.04083   | 9.37598   | 10.1038   |
| 89.8728   | 93.3966  | 87.893    | 89.7855   | 80.8462   | 71.866    |
| 0         | 0        | 0.0609831 | 0.0275734 | 0         | 0.0203473 |
| 6.18781   | 4.4644   | 6.00067   | 3.50164   | 7.07732   | 4.65457   |
| 1.38143   | 1.38367  | 3.82239   | 2.63288   | 2.22353   | 2.14911   |
| 10.6448   | 11.3705  | 10.5244   | 11.0649   | 11.684    | 11.563    |
| 2.75276   | 3.17774  | 3.9812    | 5.29033   | 3.98899   | 3.67536   |
| 33.599    | 32.013   | 33.5967   | 40.6944   | 31.8004   | 29.2069   |
| 0.57772   | 0.858433 | 0.550354  | 0.238888  | 0.646772  | 1.09075   |
| 1.35253   | 0.986598 | 0.137504  | 0.284217  | 0.445605  | 0.391501  |
| 7.99013   | 7.99312  | 9.07624   | 8.76179   | 8.88609   | 7.14068   |
| 0.0349654 | 0        | 0         | 0         | 0         | 0.0591416 |
| 0.0735653 | 0.030559 | 0.154469  | 0.0279372 | 0.0796845 | 0.103079  |
| 53.2938   | 51.3515  | 72.6107   | 55.5057   | 52.3111   | 48.4884   |
| 8.46945   | 7.31267  | 5.5446    | 7.06412   | 8.0934    | 4.83461   |
| 2.39172   | 3.66687  | 3.29075   | 4.08726   | 2.74405   | 2.63249   |
| 0.018782  | 0        | 0.0236626 | 0         | 0         | 0         |
| 8.70276   | 7.93168  | 8.03496   | 7.28079   | 7.71016   | 7.98264   |
| 45.7293   | 43.3496  | 48.3573   | 49.01     | 39.023    | 39.0885   |
| 22.5321   | 21.1563  | 26.2932   | 24.6251   | 27.555    | 23.3656   |
| 5.02533   | 4.61663  | 5.27599   | 5.68858   | 5.16425   | 5.63315   |
| 0.816305  | 0.339093 | 0.514212  | 0.465001  | 1.17894   | 1.1438    |
| 323.202   | 342.615  | 124.93    | 136.066   | 102.229   | 96.533    |
| 5.41762   | 5.77559  | 5.74711   | 5.34233   | 5.75977   | 4.52404   |
| 8.40561   | 9.72064  | 10.963    | 10.008    | 11.4305   | 11.2445   |
| 52.1803   | 48.2685  | 45.551    | 45.0448   | 35.4998   | 37.6403   |
| 3.37294   | 3.38431  | 3.28408   | 2.54662   | 4.52337   | 3.64624   |
| 539.289   | 612.328  | 522.791   | 612.341   | 603.532   | 713.093   |

|             |            |           |           |            |           |
|-------------|------------|-----------|-----------|------------|-----------|
| 0           | 0          | 0.464933  | 0         | 0.399734   | 0         |
| 0           | 0          | 0         | 0         | 0          | 0         |
| 0.0586002   | 0.0243425  | 0.0738277 | 0.111127  | 0.190424   | 0.197064  |
| 9.51382     | 10.8879    | 8.84246   | 7.41772   | 8.56996    | 7.98884   |
| 0           | 0          | 0         | 0         | 0          | 0         |
| 0.0818987   | 0.51031    | 0.206361  | 0.186612  | 0.266133   | 0.137707  |
| 0           | 0          | 0         | 0         | 0          | 0         |
| 132.8       | 138.883    | 126.976   | 180.678   | 107.951    | 151.741   |
| 0.000295196 | 0.00390549 | 7.26E-05  | 3.67E-05  | 0.00049433 | 5.60E-07  |
| 0.084078    | 0.157167   | 0.158889  | 0.0957887 | 0.182143   | 0.141371  |
| 0           | 0          | 0         | 0         | 0          | 0         |
| 55.9759     | 58.9856    | 59.5347   | 51.1159   | 50.4862    | 47.1796   |
| 1.1469      | 0.777955   | 0.786479  | 1.04201   | 1.22657    | 1.29375   |
| 0.868131    | 1.08186    | 0.291658  | 0.395619  | 0.564205   | 0.486566  |
| 14.7855     | 24.6752    | 18.2778   | 12.9512   | 16.8685    | 20.0421   |
| 10.2831     | 6.66454    | 9.21217   | 7.35269   | 9.04667    | 6.95221   |
| 10.8899     | 10.5381    | 10.2378   | 11.2694   | 10.1604    | 10.2719   |
| 0           | 0          | 0.0428241 | 0         | 0.0368187  | 0.0285769 |
| 1.2648      | 1.09159    | 1.4549    | 1.14114   | 1.67634    | 1.03031   |
| 8.3318      | 9.25932    | 10.4732   | 9.39597   | 11.1208    | 12.4615   |
| 0           | 0          | 0         | 0         | 0          | 0         |
| 11.4609     | 10.9376    | 9.94929   | 7.52463   | 9.08547    | 6.65973   |
| 16.2651     | 15.0395    | 14.9269   | 12.9979   | 14.1331    | 12.8865   |
| 7.87692     | 7.49329    | 10.0753   | 8.53258   | 11.4703    | 9.63846   |
| 16.7352     | 17.1928    | 19.1236   | 17.904    | 24.1946    | 26.7776   |
| 8.97227     | 9.41661    | 9.40661   | 9.18329   | 7.30651    | 8.32854   |
| 32.2979     | 39.1212    | 40.1202   | 36.7965   | 32.0418    | 41.4912   |
| 0           | 0          | 0         | 0         | 0          | 0         |
| 73.7412     | 73.032     | 76.864    | 86.0308   | 74.1866    | 69.3433   |
| 1.19659     | 1.04786    | 0.692648  | 0.921118  | 1.85661    | 1.7129    |
| 119.002     | 123.013    | 112.433   | 122.943   | 114.881    | 140.622   |
| 0.136753    | 0.374927   | 0.103373  | 0.560881  | 0.0592512  | 0.0919759 |
| 2.03932     | 0.532908   | 0.822659  | 0.494891  | 0.456059   | 0.328696  |
| 0           | 0.17453    | 0.341315  | 0.877374  | 0.769646   | 0.562609  |
| 0.0748075   | 0.109248   | 0         | 0.01598   | 0.168813   | 0.0628916 |
| 23.3222     | 25.82      | 22.3548   | 24.2303   | 27.5639    | 27.066    |
| 0           | 0          | 0         | 0         | 0          | 0         |
| 55.8089     | 61.9553    | 72.0403   | 76.906    | 72.2422    | 77.396    |
| 4.62765     | 4.16997    | 4.03627   | 3.12277   | 7.28752    | 6.79345   |
| 0.0895693   | 0.0608842  | 0.0307757 | 0.0556608 | 0.00881996 | 0.0136913 |
| 30.1255     | 29.4563    | 37.5888   | 38.2816   | 36.0199    | 41.2049   |
| 24.8077     | 22.1483    | 23.0586   | 21.1073   | 28.8655    | 25.7796   |
| 6.75233     | 5.05466    | 6.20332   | 5.08657   | 3.43697    | 5.2827    |

|           |           |           |           |           |           |
|-----------|-----------|-----------|-----------|-----------|-----------|
| 1.82704   | 1.47442   | 1.61128   | 1.59427   | 2.41929   | 1.50339   |
| 2.92056   | 2.52965   | 3.07928   | 2.6666    | 3.05131   | 1.91552   |
| 0         | 0         | 0         | 0         | 0         | 0         |
| 0         | 0         | 0.0870869 | 0         | 0         | 0         |
| 5.67502   | 5.5155    | 7.25575   | 7.74235   | 6.45507   | 6.51462   |
| 0         | 0         | 0         | 0.0638829 | 0         | 0.0942824 |
| 0.142818  | 0.17773   | 0.182074  | 0.329749  | 0.470516  | 0.121616  |
| 0         | 0         | 0         | 0         | 0.024091  | 0         |
| 1.5582    | 1.45667   | 1.98394   | 1.64675   | 2.9002    | 1.51459   |
| 17.2111   | 19.1207   | 19.6741   | 18.69     | 25.1868   | 23.0485   |
| 37.9735   | 36.2476   | 30.6139   | 34.3587   | 34.8332   | 44.5475   |
| 0.174345  | 0.2032    | 0.302718  | 0.145049  | 0.230258  | 0.0837426 |
| 0.140333  | 0.0524647 | 0.0707195 | 0.0159879 | 0.0608022 | 0.0589897 |
| 0.867238  | 0.891689  | 1.51792   | 1.31955   | 1.66436   | 0.756396  |
| 0.868798  | 0.681697  | 0.770245  | 0.439914  | 0.522813  | 0.513991  |
| 0         | 0         | 0         | 0         | 0         | 0.107891  |
| 45.0745   | 55.4348   | 57.8816   | 64.933    | 76.4886   | 79.9067   |
| 9.13121   | 9.86473   | 9.34534   | 9.0431    | 9.05278   | 8.17267   |
| 2.57452   | 2.83405   | 2.17316   | 2.10206   | 2.45402   | 2.2005    |
| 0.283426  | 0.274715  | 0.515775  | 1.00458   | 0.102334  | 0.264755  |
| 0         | 0         | 0         | 0         | 0         | 0         |
| 0         | 0         | 0         | 0         | 0         | 0         |
| 0.0714388 | 0         | 0         | 0         | 0         | 0         |
| 2.00E-15  | 6.04E-09  | 3.41E-10  | 8.90E-32  | 7.72E-06  | 0.353145  |
| 2.97438   | 3.22656   | 3.20368   | 2.3091    | 3.50556   | 2.5006    |
| 118.219   | 132.905   | 107.53    | 118.437   | 91.2376   | 83.187    |
| 12.6941   | 14.3693   | 12.6612   | 13.9865   | 9.2258    | 9.91371   |
| 3.44301   | 2.83002   | 2.58416   | 2.92106   | 5.63377   | 2.27871   |
| 28.2942   | 29.9637   | 20.7291   | 25.1691   | 19.5306   | 21.9124   |
| 4.94525   | 4.70491   | 3.88556   | 4.24068   | 9.27325   | 6.92922   |
| 10.4521   | 11.6945   | 9.94487   | 9.92688   | 7.85108   | 7.83004   |
| 0         | 0         | 0         | 0         | 0         | 0         |
| 0         | 0         | 0         | 0         | 0         | 0         |
| 0         | 0         | 0         | 0         | 0         | 0         |
| 6.96074   | 7.6178    | 7.87518   | 6.73959   | 12.5484   | 9.16755   |
| 37.5489   | 41.4905   | 17.6964   | 18.5315   | 30.273    | 28.6694   |
| 17.2571   | 15.5209   | 19.4392   | 20.2437   | 22.8709   | 16.4054   |
| 4.75421   | 5.97783   | 1.51578   | 3.08629   | 1.98046   | 2.35198   |
| 0         | 0         | 0         | 0         | 0         | 0         |
| 0         | 0         | 0         | 0         | 0         | 0         |
| 0.399095  | 0.243601  | 1.35756   | 1.11351   | 0.238201  | 0.335524  |
| 3.08023   | 2.46566   | 3.05919   | 3.17626   | 5.84487   | 3.36458   |
| 0.753137  | 0.938559  | 0.875855  | 1.18805   | 0.815783  | 1.12023   |

|           |           |           |           |           |           |
|-----------|-----------|-----------|-----------|-----------|-----------|
| 0         | 0         | 0         | 0         | 0.0822782 | 0         |
| 0.256804  | 0.352032  | 0.258828  | 0.146286  | 0.389431  | 0.215898  |
| 6.31311   | 6.4238    | 6.16583   | 7.62128   | 9.50446   | 8.18035   |
| 21.7592   | 23.0883   | 21.5193   | 21.0178   | 24.956    | 25.7519   |
| 1.59691   | 1.72058   | 2.93399   | 2.36893   | 2.68471   | 2.55923   |
| 0.204089  | 0.864742  | 0.205698  | 0.465031  | 0.138166  | 0.275754  |
| 1.4032    | 1.3115    | 0.883912  | 0.999149  | 0.569968  | 1.47461   |
| 0         | 0         | 0         | 0         | 0         | 0         |
| 0         | 0         | 0         | 0         | 0         | 0         |
| 29.8854   | 29.8061   | 29.3267   | 25.8058   | 33.0579   | 31.9806   |
| 3.64238   | 2.47411   | 2.40275   | 2.29747   | 4.58879   | 3.23304   |
| 0         | 0.0161309 | 0         | 0         | 0.0280415 | 0.0435289 |
| 0         | 0         | 0         | 0         | 0         | 0         |
| 0.102252  | 0.0278745 | 0.197276  | 0.0573369 | 0.33661   | 0.168111  |
| 5.25188   | 5.70637   | 5.2896    | 6.2419    | 4.97113   | 5.67429   |
| 1.31624   | 1.04688   | 0.952856  | 0.893556  | 1.51656   | 1.31833   |
| 0.754956  | 0.65639   | 0.0691232 | 0.0625079 | 0.266245  | 0.398533  |
| 0         | 0.0320827 | 0         | 0         | 0.112465  | 0.0220367 |
| 8.11115   | 7.48372   | 7.58288   | 8.66817   | 10.1888   | 9.37393   |
| 11.8408   | 13.5416   | 13.0183   | 9.88712   | 11.5113   | 9.46008   |
| 2.70391   | 2.58913   | 3.19888   | 3.19319   | 2.60747   | 2.93836   |
| 0.397819  | 0.661015  | 0.167064  | 0.151076  | 0.287273  | 0.557418  |
| 22.9175   | 25.4206   | 21.5301   | 29.9359   | 27.3917   | 32.5961   |
| 90.1762   | 80.1703   | 111.352   | 109.095   | 87.3849   | 103.597   |
| 3.23076   | 3.99998   | 4.04499   | 3.89385   | 2.98379   | 2.78556   |
| 0         | 0         | 0         | 0.0826184 | 0         | 0         |
| 0         | 0         | 0         | 0         | 0         | 0         |
| 0.0204776 | 0.0255192 | 0.0773965 | 0.629905  | 0.0887238 | 0.12051   |
| 2.50426   | 2.27517   | 2.41599   | 2.4399    | 2.6133    | 2.29774   |
| 28.1295   | 26.6803   | 31.9546   | 25.5499   | 27.6386   | 29.8013   |
| 0         | 0         | 0         | 0         | 0         | 0         |
| 4.19162   | 4.48935   | 3.60538   | 4.23844   | 3.39153   | 4.11834   |
| 2.49535   | 3.61127   | 3.80296   | 4.17266   | 2.44134   | 2.97762   |
| 0.488167  | 0.478217  | 0.659786  | 0.357758  | 0.151069  | 0.117259  |
| 10.4169   | 10.3684   | 10.9933   | 8.86231   | 10.917    | 8.58701   |
| 11.8366   | 13.3709   | 6.27728   | 8.34947   | 6.36773   | 4.18889   |
| 118.471   | 103.836   | 122.875   | 115.589   | 139.666   | 197.995   |
| 0.028641  | 0.488994  | 0.22839   | 0         | 0.0245452 | 0         |
| 5.15268   | 2.89993   | 3.50757   | 2.08303   | 4.23097   | 2.86466   |
| 53.1952   | 51.1819   | 52.2082   | 48.8182   | 49.0289   | 44.8287   |
| 0         | 0         | 0         | 0.0699413 | 0         | 0.0516118 |
| 7.34699   | 6.09949   | 5.94941   | 4.13074   | 4.79871   | 3.69691   |
| 0.194158  | 0.241959  | 0         | 0         | 0.105154  | 0         |

|           |           |           |           |           |           |
|-----------|-----------|-----------|-----------|-----------|-----------|
| 16.0295   | 17.3017   | 16.0985   | 16.05     | 17.6821   | 20.7846   |
| 0         | 0         | 0         | 0         | 0         | 0         |
| 4.84584   | 5.35455   | 5.03719   | 5.95806   | 5.47406   | 5.09578   |
| 0.139295  | 0.190145  | 0.226481  | 0.0977804 | 0.401559  | 0.242967  |
| 0.944025  | 1.17644   | 1.41233   | 1.27717   | 0.89473   | 0.843257  |
| 5.51444   | 5.67184   | 6.11899   | 5.65256   | 7.1276    | 6.23682   |
| 12.1912   | 13.1162   | 11.6771   | 13.1262   | 11.7716   | 13.812    |
| 0         | 0         | 0.0250474 | 0         | 0.0430698 | 0.0668574 |
| 5.60406   | 4.77003   | 5.58081   | 3.96278   | 6.04005   | 4.50333   |
| 0         | 0         | 0         | 0         | 0         | 0         |
| 26.6072   | 24.3491   | 25.9969   | 25.0053   | 26.3449   | 24.8613   |
| 1.10243   | 1.37385   | 0.853344  | 1.25598   | 0.736951  | 1.21118   |
| 0.0749714 | 0.186859  | 0.283359  | 0.341655  | 0         | 0.126059  |
| 3.98775   | 4.0965    | 4.97312   | 3.71435   | 5.01994   | 5.01752   |
| 22.107    | 22.0893   | 21.4206   | 21.644    | 20.8098   | 17.9429   |
| 25.0025   | 24.5164   | 26.3444   | 28.1698   | 18.9749   | 21.9259   |
| 0         | 0.0742296 | 0.0375215 | 0         | 0.0645194 | 0.0250384 |
| 0.43405   | 0         | 0         | 0.741758  | 0         | 0         |
| 0         | 0         | 0         | 0         | 0         | 0.0615086 |
| 0.0737242 | 0.735     | 0.185764  | 1.76385   | 1.11799   | 2.04537   |
| 10.1063   | 7.61174   | 13.6943   | 9.52243   | 18.7817   | 11.9761   |
| 11.5373   | 12.588    | 11.7006   | 11.2899   | 10.6302   | 10.3032   |
| 0         | 0         | 0         | 0         | 0         | 0         |
| 0.0992493 | 0.0412281 | 0.12504   | 0.075382  | 0.0716698 | 0.0556267 |
| 15.1913   | 13.4554   | 16.7346   | 14.99     | 18.6308   | 18.1756   |
| 5.32866   | 5.87471   | 4.8821    | 4.77007   | 5.65897   | 5.52751   |
| 0.236284  | 0.458044  | 0         | 1.16651   | 0.0853128 | 0.309006  |
| 6.65567   | 4.881     | 6.62532   | 5.99126   | 7.53563   | 5.01983   |
| 14.3814   | 15.2976   | 16.6015   | 14.5503   | 18.8163   | 18.589    |
| 2.82215   | 1.6613    | 1.79031   | 1.26748   | 2.47578   | 1.26693   |
| 12.1396   | 11.31     | 12.7043   | 11.4001   | 11.5949   | 12.0644   |
| 19.4996   | 20.3016   | 21.8198   | 20.6221   | 23.3051   | 19.4025   |
| 5.90475   | 5.72856   | 5.92449   | 4.10116   | 3.9953    | 2.91681   |
| 9.63414   | 7.55777   | 6.8547    | 6.86988   | 10.886    | 7.4003    |
| 1.46144   | 1.91464   | 1.18025   | 0.768457  | 0.811794  | 0.787595  |
| 73.0654   | 84.7486   | 61.2414   | 58.743    | 49.5867   | 56.1604   |
| 6.47685   | 9.2245    | 1.62365   | 1.69415   | 3.86573   | 5.00066   |
| 6.785     | 5.78046   | 8.49636   | 6.58569   | 8.58888   | 6.34428   |
| 27.1884   | 27.1321   | 31.463    | 20.7971   | 29.9197   | 23.6218   |
| 5.4148    | 5.82101   | 4.72283   | 4.6098    | 6.57418   | 4.17714   |
| 0         | 0         | 0         | 0         | 0         | 0         |
| 1.91868   | 1.94663   | 2.20756   | 2.01277   | 2.24133   | 1.8663    |
| 4.63712   | 4.35543   | 4.38171   | 3.39613   | 5.59181   | 4.14809   |



|          |           |          |           |          |           |
|----------|-----------|----------|-----------|----------|-----------|
| 0        | 0         | 0        | 0         | 0        | 0         |
| 0        | 0         | 0        | 0         | 0        | 0         |
| 0.6547   | 0.554582  | 0.556268 | 0.394073  | 1.05066  | 0.715361  |
| 9.43884  | 8.8292    | 8.78057  | 8.36092   | 8.67412  | 7.25629   |
| 35.0457  | 36.0601   | 32.3524  | 34.5589   | 33.499   | 33.6661   |
| 2.39866  | 2.73606   | 2.95556  | 2.27085   | 2.72333  | 1.86269   |
| 67.7859  | 66.775    | 69.3109  | 65.0662   | 64.9304  | 55.671    |
| 0.18708  | 0.0538014 | 0.163173 | 0.0327904 | 0.202642 | 0.0604926 |
| 9.15508  | 9.09641   | 8.39727  | 8.59789   | 10.1679  | 8.42487   |
| 44.4595  | 44.7465   | 43.6266  | 42.3936   | 39.9151  | 37.2442   |
| 168.04   | 174.64    | 133.303  | 144.474   | 117.311  | 175.866   |
| 0.405916 | 0.379389  | 0.383547 | 0.17342   | 0.43968  | 0.298601  |
| 0        | 0         | 0        | 0         | 0        | 0         |
| 8.79509  | 9.01315   | 8.88693  | 7.9347    | 9.86518  | 7.65688   |
| 9.2988   | 10.3211   | 10.178   | 9.49876   | 11.8344  | 13.8531   |
| 7.63429  | 7.92988   | 8.50635  | 6.74227   | 10.9877  | 7.62294   |
| 6.35297  | 6.74998   | 5.76915  | 4.31276   | 7.03152  | 7.81437   |
| 14.121   | 15.9638   | 13.6939  | 13.3477   | 13.6856  | 12.618    |
| 2.13332  | 2.3352    | 2.90559  | 1.74073   | 2.9353   | 2.03587   |
| 115.894  | 36.1068   | 73.0049  | 66.0181   | 156.918  | 73.0752   |
| 1.09999  | 0.846175  | 1.00943  | 0.78905   | 0.838452 | 0.536597  |
| 20.4104  | 18.0333   | 19.6141  | 21.527    | 15.9002  | 16.6054   |
| 18.3349  | 14.8718   | 19.6724  | 14.4936   | 16.4361  | 17.2942   |
| 38.3347  | 22.9311   | 28.3475  | 24.5158   | 50.0512  | 43.5876   |
| 5.86601  | 6.35208   | 6.81631  | 5.2556    | 7.18674  | 4.7401    |
| 24.7138  | 24.4753   | 20.5213  | 20.7331   | 17.6131  | 21.1786   |
| 9.80674  | 10.3188   | 13.812   | 11.9632   | 10.2216  | 16.4504   |
| 0        | 0.167996  | 0        | 0.0451281 | 0        | 0.0333014 |
| 8.50401  | 9.47006   | 7.97814  | 6.50587   | 7.74545  | 6.69431   |
| 20.1063  | 18.5697   | 19.9591  | 20.7362   | 28.6084  | 27.7627   |
| 3.28729  | 3.40964   | 3.44653  | 3.22381   | 4.28273  | 2.60898   |
| 0        | 0         | 0        | 0         | 0        | 0         |
| 0.345161 | 5.04866   | 0.144449 | 0.348333  | 0        | 0         |
| 24.0381  | 21.3054   | 21.0329  | 19.1072   | 20.6623  | 24.5259   |
| 23.5141  | 21.6687   | 21.49    | 22.9915   | 23.7135  | 23.2696   |
| 123.784  | 127.034   | 76.439   | 88.7231   | 71.2487  | 98.6769   |
| 2.20337  | 1.33581   | 1.2004   | 1.9675    | 1.80611  | 1.75227   |
| 0.238981 | 0.248182  | 0.702524 | 0.272267  | 0.172573 | 0.267886  |
| 3.43151  | 3.39824   | 2.78744  | 2.1514    | 3.14451  | 2.26883   |
| 9.42943  | 10.7586   | 12.1965  | 11.268    | 10.7585  | 11.9616   |
| 0.318521 | 0.338722  | 1.2469   | 0.261276  | 0.993653 | 1.11578   |
| 8.48638  | 8.47557   | 10.4262  | 9.73696   | 8.8989   | 10.373    |
| 9.73071  | 8.79579   | 10.8845  | 11.5932   | 15.386   | 13.8742   |

|           |           |           |           |           |           |
|-----------|-----------|-----------|-----------|-----------|-----------|
| 4.75181   | 7.01307   | 8.11152   | 7.31675   | 16.1614   | 21.8561   |
| 0         | 0         | 0         | 0         | 0         | 0         |
| 0.0374971 | 0         | 0.0472409 | 0         | 0         | 0         |
| 5.80336   | 7.15147   | 8.94969   | 6.41685   | 0.731261  | 0.419402  |
| 10.327    | 11.39     | 11.7345   | 13.562    | 11.7893   | 14.3316   |
| 21.1069   | 20.4704   | 22.7634   | 22.4871   | 21.8545   | 25.1294   |
| 1.92005   | 1.66164   | 0.90846   | 0.174998  | 1.11845   | 1.91313   |
| 33.1314   | 33.1904   | 32.9663   | 28.5766   | 31.0383   | 28.2937   |
| 2.06476   | 1.4873    | 2.6902    | 1.87602   | 2.92709   | 2.33313   |
| 4.26428   | 4.23757   | 4.3535    | 3.81122   | 5.73391   | 3.6932    |
| 0         | 0         | 0         | 0         | 0         | 0         |
| 15.142    | 17.656    | 20.8377   | 19.8568   | 18.9937   | 20.5462   |
| 0         | 0         | 0         | 0         | 0         | 0         |
| 0.195579  | 2.19357   | 0.328534  | 7.50158   | 0.564924  | 1.56204   |
| 5.97966   | 5.90777   | 7.73711   | 5.2168    | 7.76079   | 8.28805   |
| 20.0258   | 23.1898   | 19.9962   | 19.5215   | 23.9868   | 20.8001   |
| 0         | 0         | 0         | 0         | 0         | 0         |
| 9.27922   | 9.87535   | 11.7722   | 9.02672   | 12.3017   | 10.851    |
| 15.2008   | 17.0854   | 13.4548   | 14.7008   | 12.1504   | 13.7657   |
| 13.9374   | 15.6617   | 12.3379   | 13.817    | 14.9336   | 14.2548   |
| 0.923761  | 1.20884   | 1.35639   | 1.20299   | 2.29531   | 1.50999   |
| 0         | 0         | 0         | 0         | 0         | 0         |
| 0.818182  | 0.94409   | 1.31712   | 0.863093  | 1.8053    | 0.993569  |
| 0.189422  | 0.0461701 | 0.37747   | 0.589755  | 0.200562  | 0.15959   |
| 0         | 0         | 0         | 0         | 0         | 0         |
| 2.96782   | 2.50153   | 2.73288   | 2.27462   | 3.14454   | 3.40238   |
| 139.32    | 223.004   | 75.0661   | 181.503   | 195.705   | 287.501   |
| 0         | 0         | 0         | 0         | 0         | 0.0383662 |
| 0.01068   | 0.0266189 | 0.0134553 | 0.0243352 | 0.0115684 | 0.0179577 |
| 381.691   | 446.941   | 391.051   | 378.561   | 380.693   | 387.385   |
| 62.6168   | 62.1035   | 47.2109   | 50.801    | 42.0611   | 58.0618   |
| 0         | 0         | 0         | 0         | 0         | 0         |
| 0.21147   | 0.212562  | 0.948049  | 0.690935  | 1.08575   | 0.91187   |
| 0.0507684 | 0.0632675 | 0         | 0.0385597 | 0.0183304 | 0.0142272 |
| 1.38631   | 0.431906  | 1.74655   | 1.18455   | 1.50163   | 1.0198    |
| 44.7406   | 35.5921   | 35.2543   | 39.9124   | 26.5216   | 30.2572   |
| 0.0294024 | 0         | 0.0740856 | 0         | 0         | 0         |
| 5.86087   | 8.48185   | 8.09841   | 7.10798   | 6.55316   | 5.40414   |
| 0         | 0         | 0         | 0         | 0         | 0         |
| 4.15465   | 3.92468   | 5.4479    | 4.41575   | 5.10335   | 4.69528   |
| 0         | 0         | 0         | 0         | 0         | 0         |
| 0         | 0         | 0         | 0         | 0         | 0         |
| 5.02669   | 6.11857   | 6.26258   | 4.45498   | 9.19265   | 7.55419   |

|           |           |           |           |          |           |
|-----------|-----------|-----------|-----------|----------|-----------|
| 18.4719   | 19.8116   | 19.2524   | 17.9247   | 18.4956  | 15.9901   |
| 36.6235   | 42.4491   | 24.008    | 31.5478   | 22.1248  | 31.3405   |
| 7.41813   | 6.66752   | 6.19678   | 5.22634   | 8.6658   | 6.7091    |
| 31.9989   | 33.3185   | 32.3739   | 47.1519   | 32.4085  | 37.9994   |
| 1.83536   | 1.47036   | 1.65164   | 1.64293   | 2.41404  | 1.87366   |
| 10.4584   | 10.5353   | 11.066    | 9.85414   | 12.3578  | 10.9279   |
| 1.17705   | 1.05048   | 0.922104  | 1.02503   | 0.973788 | 1.22406   |
| 0         | 0         | 0         | 0         | 0        | 0         |
| 285.844   | 323.094   | 202.345   | 215.45    | 183.275  | 220.495   |
| 0.491437  | 1.22486   | 0.619139  | 0         | 0.266157 | 0.619736  |
| 238.39    | 222.672   | 229.705   | 216.733   | 239.983  | 258.6     |
| 0         | 0         | 0         | 0         | 0        | 0         |
| 0.0701117 | 0.0873731 | 0.176661  | 0.079877  | 0        | 0.0884156 |
| 1.92166   | 2.05671   | 1.45256   | 1.15901   | 0.979653 | 0.830241  |
| 1.97605   | 2.04985   | 2.54125   | 2.18268   | 2.66514  | 2.06395   |
| 0.652809  | 0.543923  | 0.464117  | 0.542642  | 0.321853 | 0.794818  |
| 1.66385   | 1.54782   | 1.68301   | 1.76211   | 2.20839  | 1.81256   |
| 20.0615   | 19.4482   | 21.7397   | 21.8542   | 23.4519  | 19.6398   |
| 12.8139   | 11.8252   | 10.5776   | 9.59991   | 12.0478  | 14.4457   |
| 3.97855   | 5.03497   | 3.03633   | 1.85494   | 4.1082   | 4.28439   |
| 0.600616  | 0.636214  | 0.794523  | 0.410563  | 0.618046 | 0.55544   |
| 4.98E-62  | 0.131787  | 1.30E-47  | 6.68E-54  | 2.89E-46 | 2.58E-57  |
| 16.1626   | 15.7601   | 15.385    | 13.8157   | 16.3808  | 14.4886   |
| 6.06326   | 5.81955   | 5.2507    | 4.37635   | 5.58858  | 4.77029   |
| 2.11411   | 1.82002   | 2.65406   | 1.45536   | 3.44303  | 1.91553   |
| 0.184472  | 0.211056  | 89.847    | 59.2931   | 100.674  | 63.9313   |
| 0         | 0         | 0         | 0         | 0        | 0         |
| 26.705    | 23.5095   | 16.4621   | 19.3526   | 12.9151  | 18.7436   |
| 19.2715   | 15.4737   | 10.6856   | 22.4233   | 20.9905  | 20.9766   |
| 220.723   | 273.041   | 228.825   | 241.829   | 197.945  | 177.09    |
| 9.98747   | 10.7016   | 13.1707   | 16.4829   | 11.1215  | 14.3998   |
| 21.1813   | 21.2574   | 27.6309   | 22.8138   | 28.2996  | 25.0225   |
| 0.0941205 | 0.029323  | 0         | 0.0268073 | 0        | 0.142432  |
| 1450.5    | 1617.89   | 1363.21   | 1409.07   | 1283     | 1667.28   |
| 18.8819   | 18.7012   | 18.075    | 15.2649   | 16.1655  | 13.8986   |
| 0.192823  | 0.0646951 | 0.0280303 | 0.033797  | 0.104431 | 0.0623496 |
| 0.151071  | 0.176481  | 0.270983  | 0.214199  | 0.212978 | 0.204945  |
| 0         | 0         | 0         | 0         | 0        | 0         |
| 22.0104   | 20.29     | 20.359    | 20.6582   | 17.1133  | 18.0955   |
| 2.51908   | 6.4688    | 3.7507    | 18.872    | 5.00246  | 4.65278   |
| 11.4866   | 9.18761   | 13.2275   | 11.4741   | 16.1141  | 13.7522   |
| 15.0016   | 13.1236   | 13.2246   | 10.2159   | 9.1513   | 8.1532    |
| 1.86515   | 1.4537    | 1.82913   | 0.891446  | 2.09426  | 1.11972   |

|           |           |           |           |           |           |
|-----------|-----------|-----------|-----------|-----------|-----------|
| 13.6659   | 12.7728   | 13.4198   | 11.7843   | 13.3836   | 12.4825   |
| 21.2568   | 20.4141   | 13.346    | 18.0632   | 14.3621   | 15.3347   |
| 45.3627   | 44.6177   | 51.5575   | 44.4003   | 44.2706   | 40.0196   |
| 0         | 0         | 0         | 0         | 0         | 0         |
| 237.004   | 266.856   | 233.849   | 260.894   | 220.346   | 265.895   |
| 5.04606   | 4.0315    | 5.30516   | 4.04637   | 5.64644   | 4.17575   |
| 0.690981  | 0.792212  | 0.766071  | 0.818712  | 0.808333  | 1.06889   |
| 20.9351   | 18.3467   | 20.5343   | 17.5933   | 14.2802   | 15.1172   |
| 4.1087    | 4.81457   | 6.33525   | 5.49607   | 5.91181   | 5.1212    |
| 0         | 0         | 0         | 0         | 0         | 0         |
| 1565.17   | 1741.13   | 1505.85   | 1594.13   | 1790.93   | 2144.1    |
| 18.8825   | 16.3036   | 17.0161   | 14.1505   | 18.0148   | 14.2271   |
| 0         | 0         | 0         | 0         | 0         | 0         |
| 0.0380729 | 0         | 0         | 0         | 0.0206199 | 0         |
| 6.56991   | 6.32167   | 8.24418   | 7.52063   | 6.68534   | 6.58896   |
| 1.43367   | 1.086     | 0.849986  | 0.57648   | 1.00484   | 0.496303  |
| 2.23765   | 1.87653   | 3.73296   | 1.61593   | 3.8468    | 4.12042   |
| 0.834073  | 0.692947  | 0.683027  | 0.506797  | 0.767933  | 0.724589  |
| 0.3221    | 0.10035   | 0.2029    | 0.0917409 | 1.22112   | 0.338492  |
| 0         | 0         | 0         | 0         | 0         | 0         |
| 0.2228    | 0.26377   | 0.273678  | 0.520356  | 0.349932  | 0.149849  |
| 0.346408  | 0.28939   | 0.270577  | 0.0989361 | 0.793652  | 0.313223  |
| 12.8318   | 12.0525   | 10.3708   | 11.1617   | 9.65991   | 9.27038   |
| 49.7055   | 44.556    | 41.7491   | 38.2604   | 32.3331   | 33.841    |
| 0.0885673 | 3.55E-167 | 0.0444233 | 0.0326021 | 0.032567  | 1.48E-28  |
| 9.0034    | 7.92607   | 10.0793   | 7.62249   | 7.91176   | 6.74587   |
| 64.5051   | 63.6138   | 58.3392   | 60.6315   | 52.8455   | 52.2868   |
| 3.80966   | 3.37687   | 3.01204   | 3.59559   | 3.06086   | 2.62063   |
| 0         | 0         | 0         | 0         | 0         | 0         |
| 129.626   | 137.519   | 127.132   | 147.966   | 120.559   | 117.324   |
| 19.3707   | 18.6834   | 22.9267   | 24.1843   | 24.7225   | 29.6837   |
| 4.34719   | 3.72596   | 6.77074   | 6.6907    | 10.7943   | 10.9196   |
| 4.02167   | 4.04799   | 5.32988   | 3.7029    | 5.86533   | 2.47078   |
| 0.130421  | 0.113771  | 0.098587  | 0.0594346 | 0.211904  | 0.0548233 |
| 62.6863   | 64.6632   | 68.198    | 69.5903   | 64.8205   | 56.8848   |
| 12.8032   | 15.299    | 10.3331   | 12.7116   | 12.5695   | 15.0695   |
| 4.45159   | 4.04601   | 5.77619   | 5.29596   | 5.2351    | 4.28049   |
| 16.2923   | 19.3061   | 18.6774   | 17.2662   | 13.4369   | 12.3675   |
| 21.581    | 32.8564   | 25.244    | 29.6578   | 23.5318   | 22.7092   |
| 0         | 0         | 0         | 0         | 0         | 0         |
| 2.7661    | 2.9661    | 2.93943   | 2.06497   | 3.49438   | 3.11989   |
| 14.7931   | 14.1883   | 16.8645   | 17.3168   | 16.1494   | 13.446    |
| 6.6409    | 6.82737   | 4.28438   | 6.64764   | 7.14732   | 7.93879   |

|           |           |           |           |          |           |
|-----------|-----------|-----------|-----------|----------|-----------|
| 6.3851    | 8.43176   | 5.89186   | 7.85986   | 6.67056  | 7.06063   |
| 0.655466  | 0.423404  | 0.525113  | 0.269061  | 0.484216 | 0.308803  |
| 2.39495   | 2.49045   | 2.07813   | 2.81888   | 2.28492  | 2.6135    |
| 0         | 0         | 0         | 0         | 0        | 0         |
| 6.68429   | 6.01413   | 6.28968   | 5.94058   | 7.61581  | 6.86703   |
| 4.50357   | 6.22237   | 5.79718   | 8.47703   | 5.09027  | 7.07855   |
| 0.202369  | 0.151315  | 0.152973  | 0.322778  | 0.306883 | 0.136107  |
| 4.17384   | 4.54302   | 5.92405   | 4.57461   | 4.92161  | 5.64105   |
| 0.0824536 | 0.209789  | 0.207759  | 0.517833  | 0        | 0         |
| 75.8453   | 62.8496   | 85.881    | 71.4874   | 92.1665  | 64.8272   |
| 0         | 0         | 0         | 0         | 0        | 0         |
| 0         | 0         | 0         | 0         | 0        | 0         |
| 5.51005   | 5.02631   | 6.22856   | 5.35982   | 6.4552   | 4.46552   |
| 0         | 0         | 0.202484  | 0         | 0        | 0.13512   |
| 0         | 0         | 0         | 0         | 0        | 0         |
| 4.78252   | 5.55849   | 5.53957   | 5.8337    | 6.01698  | 5.47301   |
| 11.666    | 12.9853   | 13.5449   | 14.5177   | 15.7787  | 19.7837   |
| 17.4836   | 15.7464   | 19.2373   | 15.1348   | 22.1424  | 20.2347   |
| 0.101173  | 0.0620552 | 0.0814726 | 0.140084  | 0.133185 | 0.103213  |
| 0.415984  | 0.345599  | 0.673816  | 0.654465  | 0.836801 | 0.549564  |
| 0.455036  | 0.695944  | 1.79801   | 4.26514   | 0.470482 | 0.591221  |
| 0.146065  | 0.0439531 | 0.0884682 | 0.0441088 | 0.117482 | 0.0300316 |
| 2.70695   | 2.89149   | 1.09619   | 1.32171   | 2.51324  | 1.52621   |
| 10.1498   | 10.1669   | 10.7631   | 9.02064   | 11.1712  | 9.86763   |
| 7.29875   | 6.97489   | 7.19425   | 5.64405   | 7.70099  | 7.88474   |
| 9.23456   | 9.48401   | 10.7904   | 7.12514   | 9.8778   | 7.33425   |
| 0.0261278 | 0.146548  | 0.131687  | 0.0297669 | 0        | 0         |
| 1.3768    | 1.02937   | 1.75549   | 0.983729  | 1.74505  | 1.07233   |
| 0.474889  | 3.29721   | 1.75214   | 8.92704   | 1.13901  | 3.30803   |
| 22.7305   | 26.4164   | 19.8087   | 21.8548   | 18.3117  | 15.6119   |
| 116.856   | 112.598   | 109.333   | 131.389   | 111.635  | 145.379   |
| 1.50586   | 1.78494   | 1.59874   | 1.56446   | 1.33717  | 1.49883   |
| 0         | 0         | 0         | 0         | 0        | 0         |
| 0.264279  | 0.17345   | 0.178404  | 4.93E-09  | 0.299841 | 0.472001  |
| 8.45403   | 8.15723   | 7.84802   | 6.90434   | 8.02157  | 7.57248   |
| 60.0928   | 59.9906   | 62.0247   | 57.843    | 52.6139  | 50.5322   |
| 97.8023   | 102.92    | 100.188   | 84.3148   | 86.6449  | 85.1707   |
| 8.56095   | 11.9906   | 9.52614   | 10.249    | 7.8619   | 6.7175    |
| 1.52072   | 1.9338    | 1.80837   | 1.49393   | 2.09262  | 1.3829    |
| 8.6519    | 7.28016   | 9.54905   | 6.74636   | 7.01274  | 5.24933   |
| 5.63738   | 6.26263   | 6.7169    | 5.77508   | 5.60815  | 5.58603   |
| 3.47839   | 3.50471   | 4.66199   | 3.62561   | 4.97019  | 4.79092   |
| 0         | 0.0596852 | 0         | 0         | 0        | 0         |

|           |           |          |           |           |           |
|-----------|-----------|----------|-----------|-----------|-----------|
| 0         | 0         | 0        | 0         | 0         | 0         |
| 0         | 0         | 0        | 0         | 0         | 0         |
| 0.371796  | 0.285127  | 0.50444  | 0.228082  | 0.898379  | 0.456838  |
| 0.721445  | 0.762249  | 0.533494 | 0.661117  | 0.390727  | 0.606527  |
| 1.24637   | 0.386962  | 0.69547  | 0.78614   | 0.896913  | 1.27626   |
| 22.7356   | 23.1163   | 16.217   | 22.1275   | 22.0698   | 29.8906   |
| 0.0552115 | 0.0738044 | 0.144914 | 0.111825  | 0.0803092 | 0.0719072 |
| 34.3603   | 31.8454   | 47.8457  | 55.4047   | 34.8762   | 67.5905   |
| 9.06364   | 8.40245   | 6.26645  | 7.24083   | 8.38083   | 8.131     |
| 0         | 0         | 0        | 0         | 0         | 0         |
| 32.439    | 31.6334   | 27.5208  | 29.6798   | 29.7982   | 28.7947   |
| 28.6714   | 27.7282   | 30.9035  | 25.9868   | 27.5003   | 24.3337   |
| 0         | 0         | 0        | 0         | 0         | 0         |
| 24.828    | 25.2392   | 24.0572  | 23.7572   | 22.693    | 23.0075   |
| 0         | 0         | 0        | 0         | 0         | 0         |
| 0.254262  | 0.553052  | 0.36215  | 0         | 0.356357  | 0.0902058 |
| 0.513837  | 0.544291  | 0.550256 | 0.995189  | 0.75138   | 0.604784  |
| 0         | 0         | 0        | 0         | 0         | 0         |
| 0         | 0.0557765 | 0        | 0         | 0         | 0         |
| 58.8703   | 59.8708   | 51.8543  | 54.0808   | 43.8836   | 44.3688   |
| 0.0748823 | 0.145811  | 0.192615 | 0.41837   | 0.108149  | 0.0708242 |
| 6.69627   | 6.44054   | 7.78738  | 3.81447   | 7.95999   | 6.39469   |
| 47.7211   | 52.9349   | 24.8889  | 30.927    | 27.0338   | 34.5951   |
| 0.0427958 | 0         | 0.188708 | 0.0487565 | 0.486733  | 0.521694  |
| 0         | 0.0259434 | 0        | 0         | 0.0450993 | 0.0175019 |
| 27.2862   | 24.8323   | 25.199   | 21.6466   | 30.4778   | 22.2348   |
| 0.85076   | 0.873119  | 0.693539 | 1.56791   | 1.19256   | 1.19909   |
| 39.6676   | 31.2542   | 47.5527  | 29.6784   | 60.3059   | 62.2296   |
| 40.667    | 45.0725   | 50.2349  | 62.0629   | 44.1306   | 65.1814   |
| 8.19369   | 8.33455   | 12.2209  | 12.3823   | 18.5785   | 17.0594   |
| 1.21415   | 1.59053   | 1.69685  | 0.952539  | 0.995587  | 0.564569  |
| 15.4038   | 19.4628   | 17.4659  | 19.5102   | 16.0362   | 18.418    |
| 0         | 0         | 0        | 0         | 0         | 0         |
| 0         | 0         | 0        | 0         | 0         | 0         |
| 5.89198   | 5.93714   | 5.54886  | 4.87985   | 3.31924   | 3.79415   |
| 0         | 0         | 0        | 0         | 0         | 0         |
| 128.777   | 163.204   | 123.848  | 143.935   | 97.3701   | 128.65    |
| 0         | 0         | 0        | 0         | 0         | 0         |
| 19.0545   | 17.2234   | 19.5393  | 14.2829   | 22.7786   | 16.3367   |
| 14.1579   | 16.0638   | 16.6713  | 17.1953   | 15.1656   | 13.7533   |
| 309.499   | 329.547   | 107.195  | 108.172   | 149.059   | 209.342   |
| 1.90309   | 1.3044    | 1.19881  | 0.758857  | 1.44298   | 1.35996   |
| 0         | 0         | 0.301845 | 0.272958  | 0         | 0         |

|           |           |          |           |           |           |
|-----------|-----------|----------|-----------|-----------|-----------|
| 15.494    | 16.2624   | 15.4098  | 13.5423   | 15.1113   | 12.4363   |
| 4.74415   | 4.17311   | 2.79973  | 3.34894   | 2.86472   | 3.22068   |
| 3.01984   | 2.35188   | 2.37765  | 0.982905  | 2.10305   | 1.4053    |
| 19.1842   | 19.1286   | 13.3824  | 12.9575   | 13.5795   | 14.1177   |
| 1.25597   | 1.05559   | 0.662376 | 1.16469   | 1.32881   | 1.12958   |
| 4.48451   | 5.07466   | 4.86077  | 6.24351   | 5.63618   | 6.37614   |
| 9.71399   | 8.56935   | 8.99223  | 7.83415   | 9.23974   | 7.17145   |
| 0         | 0         | 0        | 0         | 0         | 0         |
| 0         | 0         | 0        | 0         | 0         | 0         |
| 0         | 0         | 0        | 0.0404056 | 0         | 0         |
| 50.2447   | 57.2472   | 36.8268  | 54.4558   | 31.9342   | 52.8412   |
| 0.524669  | 0.0817303 | 0        | 0         | 0.0710389 | 0.110274  |
| 0.294033  | 0.138759  | 0        | 0.477044  | 0.141338  | 0.0936099 |
| 119.614   | 124.122   | 112.087  | 127.724   | 117.2     | 141.443   |
| 1.60737   | 0.876358  | 2.32037  | 0.72487   | 3.88114   | 2.28038   |
| 11.632    | 11.3242   | 12.1703  | 9.27404   | 13.9451   | 10.237    |
| 28.3842   | 28.8036   | 28.2922  | 30.9326   | 25.0357   | 30.1673   |
| 28.7165   | 30.3581   | 27.0323  | 21.5045   | 26.9548   | 29.737    |
| 1.2363    | 1.03948   | 2.19176  | 1.1616    | 2.59533   | 1.37765   |
| 0         | 0         | 0        | 0         | 0         | 0         |
| 0         | 0         | 0        | 0         | 0         | 0         |
| 21.7338   | 24.3599   | 20.2277  | 25.0212   | 12.7606   | 13.2787   |
| 21.9754   | 21.4348   | 20.887   | 18.8246   | 21.0513   | 17.2199   |
| 0.0217776 | 0.108558  | 0        | 0         | 0         | 0.0823902 |
| 10.2989   | 10.1574   | 10.7598  | 8.43541   | 11.6305   | 8.36577   |
| 4.86685   | 4.35831   | 6.56289  | 6.4642    | 6.86113   | 6.30192   |
| 3.63091   | 2.38609   | 4.17116  | 2.38025   | 5.4456    | 3.56653   |
| 0.12484   | 0.169718  | 0.114385 | 0.168087  | 0.352513  | 0.17234   |
| 81.2878   | 54.6068   | 74.8838  | 55.8728   | 43.4147   | 53.7887   |
| 7.38086   | 5.44346   | 8.64224  | 4.31432   | 8.99227   | 4.16379   |
| 0.0782131 | 0.0974691 | 0.17244  | 0.0222767 | 0.338876  | 0.164387  |
| 239.132   | 253.235   | 215.578  | 243.075   | 181.949   | 241.246   |
| 0.431111  | 0.354964  | 0.542986 | 0.444859  | 0.634267  | 0.574237  |
| 3.45207   | 3.1727    | 3.55177  | 3.44127   | 3.84827   | 3.31334   |
| 0.106415  | 0.167595  | 0        | 0.115383  | 0.0274252 | 0.0894641 |
| 0.0610396 | 0.115455  | 0.333598 | 0.079162  | 0.285706  | 0.019472  |
| 6.65417   | 8.14706   | 5.44265  | 5.82002   | 6.8921    | 5.78487   |
| 29.1732   | 27.9144   | 23.722   | 23.6391   | 30.212    | 31.3518   |
| 0.83356   | 2.85665   | 1.05016  | 4.03606   | 6.32026   | 5.95666   |
| 1.76631   | 1.9919    | 1.41039  | 1.1337    | 1.81891   | 0.909797  |
| 1.209     | 1.06919   | 0.952897 | 1.08622   | 2.02894   | 1.34996   |
| 0         | 0         | 0        | 0         | 0         | 0         |
| 1.84078   | 1.47813   | 3.91787  | 1.5401    | 3.14339   | 2.50487   |

|          |          |          |           |           |          |
|----------|----------|----------|-----------|-----------|----------|
| 0.519934 | 0.566949 | 0.245641 | 0.666396  | 0.703978  | 0.163918 |
| 10.497   | 11.5901  | 14.4214  | 12.7716   | 13.2708   | 11.1451  |
| 246.551  | 261.929  | 234.563  | 242.355   | 205.072   | 227.644  |
| 0        | 0        | 0        | 0         | 0         | 0        |
| 25.1393  | 23.0495  | 24.1581  | 24.1396   | 20.8793   | 18.7654  |
| 21.8608  | 18.9637  | 16.0611  | 15.6491   | 13.3226   | 20.9071  |
| 7.14986  | 4.30737  | 6.64987  | 4.38111   | 10.3305   | 5.53772  |
| 9.53418  | 8.77814  | 11.6195  | 7.9279    | 11.5294   | 9.44379  |
| 15.1014  | 13.9236  | 17.3438  | 16.4833   | 19.0948   | 20.9339  |
| 32.0118  | 29.6181  | 22.8495  | 19.1955   | 29.271    | 21.8314  |
| 0.474284 | 0.284662 | 0.871484 | 0.515856  | 0.794646  | 0.615359 |
| 106.405  | 106.641  | 97.1236  | 97.0075   | 90.8771   | 100.625  |
| 0.432513 | 0.49408  | 0.726537 | 0.410629  | 0.897937  | 0.484825 |
| 23.6023  | 21.8895  | 27.46    | 22.5611   | 29.922    | 25.5772  |
| 0.135907 | 0.144526 | 0.602747 | 0.324312  | 1.02083   | 1.07824  |
| 4.99858  | 4.58806  | 5.18331  | 3.80086   | 5.84126   | 4.96203  |
| 9.8094   | 9.01554  | 11.4315  | 8.06427   | 12.352    | 9.28711  |
| 50.3916  | 45.3792  | 54.0132  | 54.7945   | 53.2682   | 55.8049  |
| 0.170132 | 0.18173  | 0.214341 | 0.0553795 | 0.0789785 | 0.143032 |
| 0        | 0        | 0        | 0         | 0         | 0        |
| 70.8457  | 91.3318  | 84.0548  | 117.971   | 71.4009   | 93.3318  |
| 24.3091  | 23.0221  | 24.3909  | 21.3032   | 27.9982   | 25.8708  |
| 6.08794  | 7.3771   | 4.93341  | 5.99483   | 6.13041   | 4.51379  |
| 2.43983  | 1.40902  | 2.52404  | 1.53672   | 2.66426   | 1.95114  |
| 11.2273  | 11.5166  | 29.9267  | 36.505    | 94.2235   | 79.6638  |
| 0        | 0        | 0        | 0         | 0         | 0        |
| 6.57371  | 6.62569  | 6.709    | 6.69588   | 11.7755   | 10.689   |
| 10.5781  | 11.1564  | 13.0504  | 10.3633   | 11.5026   | 11.6788  |
| 53.5273  | 52.4322  | 48.9337  | 47.9338   | 33.8173   | 38.2451  |
| 0.949097 | 0.860192 | 0.326107 | 0.835542  | 2.14954   | 0.979262 |
| 7.98558  | 10.0495  | 11.9079  | 11.7824   | 11.5142   | 9.92728  |
| 0.767468 | 0.528026 | 0.540689 | 0.391714  | 0.436244  | 0.8452   |
| 1.84475  | 2.08606  | 2.195    | 2.60765   | 2.18321   | 1.72322  |
| 6.62898  | 11.4206  | 5.95588  | 22.4161   | 5.77862   | 9.50307  |
| 11.7293  | 12.7905  | 13.3096  | 11.2228   | 12.4591   | 11.3687  |
| 21.2099  | 19.5077  | 14.7303  | 17.724    | 17.2699   | 16.4504  |
| 0        | 0        | 0        | 0         | 0         | 0        |
| 9.41274  | 10.1995  | 10.8322  | 9.68465   | 9.20774   | 9.11984  |
| 5.57528  | 5.46448  | 7.44742  | 5.21246   | 9.34581   | 6.47767  |
| 32.6402  | 33.5464  | 31.7886  | 30.5012   | 152.147   | 100.144  |
| 0        | 0        | 0.288617 | 0.173997  | 0.330858  | 0.320995 |
| 15.4825  | 16.9299  | 18.5533  | 13.6596   | 14.2052   | 10.8489  |
| 1.42214  | 1.46212  | 1.74689  | 1.45819   | 2.38766   | 2.06242  |



|           |           |          |           |           |           |
|-----------|-----------|----------|-----------|-----------|-----------|
| 0         | 0         | 0        | 0         | 0         | 0         |
| 0         | 0         | 0        | 0         | 0         | 0         |
| 0         | 0         | 0        | 0         | 0         | 0         |
| 0.505514  | 0.86936   | 0.35665  | 0.645035  | 0.240928  | 0.348493  |
| 0.0118779 | 0.0148022 | 0        | 0.0270645 | 0         | 0         |
| 17.6324   | 4.26544   | 9.93108  | 1.0635    | 39.8834   | 1.22078   |
| 1874.71   | 2241.04   | 1942.18  | 1996.89   | 1841.22   | 1921.66   |
| 0         | 0         | 0        | 0         | 0         | 0         |
| 0         | 0         | 0        | 0         | 0         | 0         |
| 290.041   | 351.877   | 248.267  | 267.652   | 118.749   | 163.128   |
| 0         | 0.0803581 | 0.487432 | 0         | 0.0698462 | 0.0542113 |
| 71.9968   | 60.1602   | 64.0533  | 50.6912   | 53.1084   | 43.2184   |
| 7.7004    | 7.32484   | 7.47644  | 5.64087   | 6.91503   | 4.89091   |
| 1189.33   | 1210.28   | 1156.09  | 1305.9    | 850.29    | 1133.16   |
| 58.6837   | 61.8421   | 55.1886  | 61.5982   | 77.8673   | 92.1266   |
| 2.72809   | 5.38089   | 2.79411  | 10.7776   | 3.29516   | 3.20106   |
| 1611.84   | 1854.51   | 1751.97  | 1934.4    | 1534.13   | 1831.76   |
| 44.7058   | 47.6144   | 45.305   | 45.1839   | 41.6045   | 52.7193   |
| 2.78911   | 2.34036   | 3.11563  | 2.64799   | 4.06843   | 2.97013   |
| 0         | 0.0585989 | 0.148103 | 0.0535715 | 0.101867  | 0.118596  |
| 14.1225   | 15.065    | 14.1515  | 17.4383   | 12.2985   | 16.59     |
| 9.89841   | 8.38118   | 7.73435  | 8.52658   | 9.41422   | 11.7722   |
| 0         | 0         | 0        | 0         | 0         | 0         |
| 0.194339  | 0.658155  | 0.400525 | 0.724248  | 0.578298  | 0.750712  |
| 0.269602  | 0.326666  | 0.368521 | 0.37648   | 0.558619  | 0.310798  |
| 0         | 0         | 0        | 0         | 0         | 0         |
| 0.708178  | 0.441255  | 1.5611   | 0.806791  | 0.767019  | 1.19065   |
| 12.159    | 11.9716   | 12.3933  | 10.2859   | 10.6635   | 12.281    |
| 0         | 0         | 0        | 0         | 0         | 0         |
| 4.08339   | 3.46787   | 4.15369  | 3.75617   | 5.71721   | 3.9034    |
| 26.4927   | 27.1423   | 34.6226  | 30.4689   | 33.6324   | 25.2394   |
| 5.76895   | 4.52329   | 4.47067  | 3.62698   | 7.25916   | 5.59159   |
| 9.54581   | 10.9947   | 12.3778  | 8.34021   | 14.1501   | 12.4398   |
| 0         | 0.0806289 | 0        | 0.0737114 | 0.140163  | 0         |
| 9.11133   | 10.6078   | 6.15587  | 12.3721   | 5.97508   | 7.73788   |
| 0         | 0         | 0        | 0         | 0         | 0         |
| 0         | 0         | 0        | 0         | 0         | 0         |
| 175.14    | 177.864   | 162.092  | 170.102   | 147.467   | 154.908   |
| 14.8368   | 10.8923   | 14.036   | 12.0848   | 24.2364   | 20.6678   |
| 5.77075   | 5.65998   | 5.62102  | 5.47876   | 5.55623   | 6.22167   |
| 25.8976   | 24.453    | 26.0201  | 23.3285   | 27.4773   | 23.6301   |
| 0.309535  | 0.603824  | 0.589621 | 1.00179   | 0.440514  | 0.45868   |
| 26.8224   | 26.7182   | 20.7205  | 19.0337   | 15.059    | 14.7651   |

|          |          |           |           |           |          |
|----------|----------|-----------|-----------|-----------|----------|
| 2.56921  | 2.18786  | 2.69736   | 1.60988   | 3.29312   | 3.31195  |
| 6.15723  | 5.82401  | 7.99308   | 6.15363   | 7.19243   | 5.29412  |
| 5.47412  | 5.14747  | 6.8339    | 6.47972   | 5.49824   | 6.04551  |
| 0.794205 | 0.821272 | 0.830271  | 0.577547  | 0.896874  | 0.525635 |
| 1.76908  | 2.10441  | 0.709158  | 0.549677  | 0.958116  | 1.14927  |
| 24.3019  | 21.6173  | 24.8911   | 30.7556   | 31.2901   | 34.4236  |
| 30.0942  | 39.0883  | 29.9024   | 34.7532   | 28.5755   | 35.5104  |
| 4.74505  | 4.79235  | 5.77602   | 4.2136    | 6.5782    | 5.91004  |
| 4.69     | 5.09038  | 5.33694   | 5.05582   | 5.89932   | 4.83314  |
| 229.293  | 263.234  | 229.766   | 294.193   | 234.01    | 302.58   |
| 1.51705  | 0.733644 | 1.16958   | 1.16083   | 1.74134   | 1.31347  |
| 828.512  | 944.464  | 775.915   | 925.657   | 786.999   | 1023.77  |
| 0.573132 | 0.462778 | 0.551658  | 0.345367  | 0.438642  | 0.368127 |
| 0.132295 | 0.109911 | 0.0555575 | 0.100481  | 0.0477665 | 0.148296 |
| 1.21405  | 1.57132  | 1.17679   | 1.17043   | 1.11263   | 1.04224  |
| 2.85747  | 2.22132  | 2.1762    | 1.28753   | 2.52788   | 1.68393  |
| 16.9669  | 8.09517  | 8.18388   | 4.30785   | 7.82385   | 3.95324  |
| 0.707381 | 0.27838  | 0.703577  | 0.254497  | 0.92753   | 1.18941  |
| 4.97294  | 4.34898  | 5.27591   | 3.80189   | 3.96908   | 3.63069  |
| 0        | 0        | 0         | 0         | 0         | 0        |
| 2.19818  | 9.14451  | 11.4708   | 13.5798   | 6.05841   | 10.4022  |
| 16.1724  | 16.8662  | 17.051    | 18.7373   | 14.6228   | 13.6828  |
| 1.17119  | 1.01058  | 1.08962   | 0.698108  | 1.71756   | 1.05038  |
| 0        | 0        | 0         | 0.271828  | 0         | 0        |
| 16.6643  | 14.2054  | 20.2265   | 16.4385   | 19.7314   | 12.4567  |
| 0        | 0        | 0         | 0         | 0         | 0        |
| 0        | 0        | 0         | 0         | 0         | 0        |
| 0.116752 | 0.581982 | 0.44127   | 1.33013   | 2.02341   | 0.588927 |
| 21.4043  | 21.0268  | 22.8399   | 26.6775   | 23.5642   | 20.804   |
| 28.1876  | 26.1353  | 28.0927   | 34.2111   | 30.9127   | 40.9845  |
| 0        | 0        | 0         | 0         | 0         | 0        |
| 1.14462  | 0.898648 | 0.897279  | 0.324563  | 0.630018  | 0.47901  |
| 2.8674   | 3.08281  | 3.72084   | 2.62528   | 3.92407   | 2.44566  |
| 2.80854  | 4.53885  | 3.57745   | 2.44827   | 2.83508   | 3.94619  |
| 0.104444 | 0        | 0.236852  | 0.118991  | 0.342223  | 0.137199 |
| 1.11794  | 1.07473  | 1.79073   | 0.709603  | 2.24886   | 1.02042  |
| 4.74279  | 6.04953  | 6.14978   | 5.58449   | 8.06137   | 9.84114  |
| 0        | 0        | 0.0231273 | 0         | 0         | 0        |
| 20.6546  | 18.6225  | 20.8441   | 18.0709   | 23.081    | 19.8605  |
| 0.241021 | 0.094193 | 0.396448  | 0.443125  | 0.300752  | 0.186743 |
| 0.13026  | 0.422057 | 0.19693   | 0.0593612 | 0.056438  | 0.175218 |
| 0        | 0        | 0         | 0         | 0         | 0        |
| 0        | 0        | 0         | 0         | 0         | 0        |

|           |           |           |           |           |           |
|-----------|-----------|-----------|-----------|-----------|-----------|
| 28.3053   | 25.8796   | 32.9693   | 31.0719   | 47.6418   | 41.9731   |
| 0.156468  | 0.952649  | 0.134754  | 0.103985  | 0.082366  | 0.0767334 |
| 18.2839   | 13.884    | 27.3931   | 28.7124   | 27.7851   | 29.9121   |
| 46.8891   | 49.8623   | 30.5234   | 54.3708   | 36.8781   | 54.7598   |
| 0         | 0         | 0.0203404 | 0         | 0         | 0.0135733 |
| 21.5098   | 19.0713   | 18.206    | 17.8682   | 26.3957   | 29.5188   |
| 8.26031   | 7.78123   | 10.898    | 8.27493   | 12.6277   | 8.78955   |
| 20.6055   | 21.0064   | 18.3944   | 21.4924   | 19.9882   | 20.5336   |
| 1.65299   | 1.12965   | 0.604606  | 1.03274   | 0.75085   | 0.986233  |
| 0.276793  | 0.446703  | 0.752533  | 0.410855  | 0.349106  | 0.231336  |
| 12.8963   | 15.153    | 11.6569   | 11.824    | 11.7296   | 11.0486   |
| 61.091    | 70.5966   | 53.3247   | 64.6648   | 48.4426   | 63.0154   |
| 56.0131   | 62.7889   | 49.6697   | 53.0695   | 30.6875   | 50.5563   |
| 19.5821   | 19.793    | 23.5942   | 19.844    | 19.6989   | 16.5716   |
| 0         | 0         | 0         | 0         | 0         | 0         |
| 21.5007   | 23.5732   | 23.7041   | 26.8377   | 26.5049   | 27.6006   |
| 11.7401   | 11.3246   | 11.6976   | 10.8353   | 10.2406   | 7.73472   |
| 0.314502  | 0.294579  | 1.15514   | 1.07324   | 0.710576  | 0.440819  |
| 0.0264652 | 0.0329809 | 0         | 0         | 0         | 0         |
| 13.7466   | 14.0311   | 11.3878   | 15.7928   | 14.483    | 16.3369   |
| 0         | 0         | 0         | 0         | 0         | 0         |
| 13.6523   | 12.8996   | 13.6321   | 11.8043   | 15.3205   | 13.0321   |
| 3.72875   | 4.50893   | 3.86163   | 3.83407   | 3.66238   | 3.17464   |
| 7.88965   | 6.10983   | 6.8964    | 7.37522   | 4.62742   | 6.20274   |
| 0         | 0         | 0         | 0         | 0.0864978 | 0         |
| 0         | 0.0553366 | 0         | 0         | 0         | 0         |
| 28.1613   | 28.3138   | 30.4113   | 27.6735   | 29.8081   | 29.9591   |
| 0.0620518 | 0         | 0         | 0         | 0         | 0         |
| 851.381   | 1000.39   | 907.884   | 901.55    | 872.157   | 885.113   |
| 0.189628  | 0.157542  | 0         | 0.0720131 | 0         | 0.106281  |
| 0         | 0         | 0         | 0         | 0         | 0         |
| 0.836954  | 0.625806  | 1.29169   | 1.02504   | 0.974564  | 0.387     |
| 0         | 0         | 0         | 0         | 0         | 0         |
| 7.18499   | 6.92636   | 8.22496   | 5.4553    | 8.40409   | 6.61931   |
| 77.5242   | 70.1294   | 71.3242   | 62.4576   | 59.3061   | 62.3011   |
| 13.2749   | 10.2654   | 19.1592   | 10.4676   | 18.7031   | 9.88182   |
| 0         | 0         | 0         | 0         | 0         | 0         |
| 7.75581   | 6.05582   | 7.25427   | 6.59384   | 7.79756   | 6.41082   |
| 12.7654   | 13.0843   | 16.7963   | 12.4781   | 17.6727   | 10.6685   |
| 15.3115   | 15.9038   | 13.5653   | 14.5289   | 13.4915   | 15.9659   |
| 14.2314   | 16.0854   | 21.0567   | 18.1407   | 15.2359   | 13.6031   |
| 5.22339   | 4.87222   | 7.00341   | 4.7127    | 6.86634   | 5.43416   |
| 0.0808642 | 0.302318  | 0.101877  | 0.184254  | 0         | 0.0679835 |

|           |          |          |          |           |           |
|-----------|----------|----------|----------|-----------|-----------|
| 2.06795   | 1.64554  | 3.50504  | 2.56419  | 2.85175   | 2.05289   |
| 0.47347   | 0.589719 | 0.352289 | 0.245737 | 0.489568  | 0.325769  |
| 0         | 0        | 0        | 0        | 0         | 0         |
| 21.5812   | 23.2545  | 1.41623  | 3.23738  | 3.50567   | 2.67464   |
| 30.9861   | 24.5868  | 23.3124  | 21.3969  | 18.726    | 20.4389   |
| 0.926044  | 2.70E-18 | 3.00E-65 | 2.18E-10 | 6.50E-06  | 1.92E-17  |
| 0         | 0        | 0        | 0        | 0         | 0.0652256 |
| 34.7922   | 34.6388  | 33.531   | 30.8956  | 41.5037   | 34.2274   |
| 1.91353   | 1.79     | 4.21585  | 4.15255  | 4.94958   | 4.11871   |
| 0.201508  | 0.321433 | 0.162477 | 0.229575 | 0.209539  | 0.108423  |
| 0.822609  | 0.486938 | 0.689183 | 0.534194 | 0.507888  | 0.427048  |
| 8.64346   | 7.75588  | 9.70041  | 9.0147   | 12.4442   | 12.1153   |
| 1.50334   | 2.81019  | 3.69328  | 1.62709  | 3.58245   | 1.70623   |
| 14.1891   | 18.2907  | 19.6891  | 23.0068  | 17.5835   | 26.7725   |
| 0.0834164 | 0.143495 | 0.117655 | 0.187022 | 0.0903549 | 0.112415  |
| 0.317019  | 0        | 0.599097 | 0        | 0         | 0.266522  |
| 1.27314   | 1.22757  | 1.8595   | 1.08933  | 1.7767    | 1.52853   |
| 3.63797   | 3.81495  | 3.49084  | 3.58949  | 3.33825   | 3.11839   |
| 6.06722   | 7.17882  | 5.96021  | 6.73046  | 5.96897   | 6.88076   |
| 0         | 0.169147 | 0        | 0        | 0.29404   | 0         |
| 0         | 0        | 0        | 0        | 0         | 0.100185  |
| 0.399124  | 0.298433 | 0.335225 | 0.333458 | 0.37468   | 0.279624  |
| 0         | 0        | 0        | 0        | 0         | 0         |
| 0.519735  | 0.304797 | 0.65479  | 0.731448 | 0.397388  | 0.282731  |
| 0.436154  | 0.652241 | 0.439592 | 0.198761 | 0.377946  | 0.073336  |
| 0.133161  | 0.285936 | 0.198797 | 0.489511 | 0         | 0.173999  |
| 12.9381   | 13.181   | 29.0691  | 32.0509  | 21.0725   | 30.8151   |
| 3.15507   | 3.17342  | 4.85983  | 3.66187  | 4.53952   | 4.60789   |
| 108.046   | 106.934  | 65.1215  | 61.2821  | 55.4686   | 53.5828   |
| 6.87361   | 6.423    | 6.95868  | 6.52439  | 7.50901   | 7.45452   |
| 12.8818   | 12.6394  | 11.5457  | 12.7452  | 8.16136   | 9.67465   |
| 3.30086   | 4.106    | 4.34864  | 4.39494  | 4.30538   | 4.54281   |

| FPKM     | FPKM     | FPKM      | FPKM     | FPKM     | FPKM      |
|----------|----------|-----------|----------|----------|-----------|
| 19.9134  | 23.6144  | 22.1078   | 20.9601  | 21.0721  | 22.3557   |
| 4.48203  | 4.96026  | 5.01461   | 5.0682   | 6.05044  | 6.49575   |
| 0.210848 | 0.147656 | 0.0802818 | 0.220317 | 0.197427 | 0.0662963 |
| 1.04718  | 0.680651 | 0.914198  | 0.728497 | 0.904185 | 1.05314   |
| 3.94342  | 4.40979  | 3.94156   | 3.70691  | 3.68677  | 4.18505   |
| 0        | 0        | 0         | 0        | 0        | 0         |
| 3.29042  | 4.00614  | 3.57148   | 4.48573  | 2.4673   | 2.19787   |
| 13.3962  | 12.3417  | 16.2924   | 13.0961  | 17.4237  | 12.1154   |
| 6.31979  | 4.83815  | 8.45488   | 5.16914  | 8.9012   | 7.28651   |
| 6.18779  | 6.61829  | 7.1205    | 5.77294  | 4.16927  | 4.91542   |

|           |           |           |           |           |           |
|-----------|-----------|-----------|-----------|-----------|-----------|
| 0         | 0         | 0         | 0         | 0         | 0         |
| 8.04308   | 7.89848   | 8.4484    | 9.45687   | 12.2255   | 9.58518   |
| 6.46592   | 5.1062    | 10.3172   | 6.99707   | 6.30362   | 3.53282   |
| 9.3352    | 9.26884   | 10.3374   | 8.73792   | 10.3658   | 8.35838   |
| 8.92699   | 8.45867   | 5.12848   | 6.16199   | 4.99803   | 4.98383   |
| 7.22E-08  | 0.0196309 | 5.78E-07  | 0.110076  | 1.64E-08  | 8.09E-08  |
| 36.2834   | 32.9827   | 38.624    | 34.7719   | 44.3344   | 40.8059   |
| 277.415   | 285.369   | 317.372   | 255.828   | 342.755   | 288.082   |
| 12.0488   | 15.0788   | 13.9576   | 16.2281   | 15.982    | 18.1131   |
| 0.810101  | 0.0396437 | 0.355626  | 0.0517806 | 0.707113  | 0.629647  |
| 2.10891   | 1.85078   | 2.15699   | 1.31739   | 2.12468   | 1.66814   |
| 18.2365   | 23.5191   | 32.1654   | 39.9746   | 23.4743   | 33.1591   |
| 1.70564   | 1.57217   | 1.28423   | 0.850874  | 2.70022   | 1.27274   |
| 0.519647  | 1.25372   | 0.471369  | 0.094724  | 0.911851  | 0.698998  |
| 78.7125   | 83.6802   | 78.7563   | 82.107    | 76.1225   | 80.1471   |
| 0.121683  | 0.151642  | 0.153303  | 0         | 0.26361   | 0         |
| 11.0142   | 10.0877   | 7.74621   | 10.8853   | 10.1576   | 8.55322   |
| 1.30384   | 1.32711   | 2.5742    | 1.70033   | 2.32356   | 2.05416   |
| 46.389    | 53.8788   | 76.9894   | 80.6846   | 54.5354   | 76.0929   |
| 13.067    | 14.4577   | 13.4706   | 15.0315   | 16.2981   | 15.9766   |
| 36.4381   | 35.5934   | 35.2226   | 34.0879   | 30.8828   | 36.3249   |
| 0.0520804 | 0.129805  | 0.131227  | 0.0593343 | 0.0564125 | 0.109462  |
| 20.0354   | 22.3259   | 20.6774   | 22.0689   | 21.1132   | 21.1877   |
| 0.398221  | 0.638052  | 0.609208  | 0.939779  | 0.585397  | 0.573924  |
| 2.24458   | 2.16988   | 2.33067   | 1.93646   | 2.54209   | 1.82964   |
| 7.14836   | 5.66978   | 6.56715   | 6.41764   | 8.50011   | 8.03436   |
| 2.08935   | 3.66275   | 2.24584   | 2.53154   | 1.46018   | 2.01902   |
| 27.0768   | 25.4089   | 23.1626   | 24.7687   | 21.025    | 24.3702   |
| 16.5006   | 14.3888   | 16.9307   | 17.3211   | 17.5967   | 21.7022   |
| 0         | 0         | 0         | 0         | 0         | 0         |
| 33.2649   | 34.7398   | 31.6879   | 28.5858   | 29.9972   | 26.6842   |
| 8.00528   | 8.50411   | 8.20115   | 7.75515   | 9.14982   | 7.55176   |
| 0         | 0         | 0         | 0         | 0         | 0         |
| 13.5258   | 14.003    | 12.4858   | 13.6127   | 13.8495   | 10.8901   |
| 10.6202   | 7.97542   | 8.76916   | 6.70281   | 16.7402   | 12.379    |
| 2317.82   | 2676      | 2251.34   | 2575.18   | 2097.83   | 2476.99   |
| 9.56735   | 9.77667   | 8.5821    | 7.15032   | 11.4823   | 10.6494   |
| 10.7846   | 12.1517   | 8.79933   | 6.44665   | 8.60574   | 7.67117   |
| 5.02195   | 4.44526   | 5.05305   | 3.99348   | 4.92856   | 4.15826   |
| 0.138577  | 0.155426  | 0.0174587 | 0.0157879 | 0.0600417 | 0.0233007 |
| 6.37936   | 6.13037   | 2.8033    | 3.36704   | 1.883     | 1.75374   |
| 0.158075  | 0         | 0.199151  | 0.360183  | 1.02734   | 0.132895  |
| 5.39076   | 4.39848   | 5.56789   | 4.41901   | 4.03348   | 3.34121   |

|           |           |           |          |          |          |
|-----------|-----------|-----------|----------|----------|----------|
| 345.887   | 383.788   | 227.245   | 178.869  | 130.74   | 189.368  |
| 16.5308   | 19.9174   | 17.7639   | 21.991   | 22.0744  | 24.7385  |
| 93.7169   | 95.2113   | 88.7274   | 82.5083  | 78.7577  | 74.5795  |
| 0.0216471 | 0         | 0.0272722 | 0        | 0        | 0        |
| 5.15204   | 4.45152   | 5.64269   | 3.99135  | 5.25319  | 4.18123  |
| 2.72321   | 2.74635   | 1.29643   | 1.63476  | 1.84808  | 1.50904  |
| 109.125   | 121.839   | 110.682   | 148.609  | 84.1514  | 122.914  |
| 12.9738   | 13.514    | 14.5482   | 13.8524  | 13.4614  | 13.1013  |
| 239.676   | 239.193   | 243.907   | 206.186  | 237.609  | 207.796  |
| 1.38668   | 1.76335   | 1.11714   | 1.35414  | 1.79835  | 1.70509  |
| 0         | 0         | 0         | 0        | 0        | 0        |
| 1.44245   | 1.13356   | 0.784813  | 0.82447  | 0.100971 | 0.230498 |
| 3.27279   | 2.96419   | 2.50098   | 1.95601  | 2.77016  | 1.99971  |
| 6.42952   | 4.10896   | 3.73858   | 4.13208  | 2.50002  | 5.54398  |
| 10.1352   | 11.341    | 11.3649   | 9.00774  | 9.6275   | 9.0561   |
| 1.87959   | 1.39969   | 1.96371   | 1.59298  | 1.56419  | 1.48384  |
| 78.0196   | 78.6019   | 73.8141   | 83.1536  | 72.529   | 80.5031  |
| 40.2558   | 39.4132   | 36.3561   | 40.4214  | 36.2138  | 41.5031  |
| 0         | 0         | 0         | 0        | 0        | 0        |
| 2.1822    | 2.79195   | 1.21063   | 1.39281  | 2.98961  | 2.49515  |
| 103.466   | 103.455   | 85.1192   | 85.1041  | 70.0782  | 77.3973  |
| 8.76002   | 8.56543   | 7.23306   | 7.5542   | 9.72225  | 10.2199  |
| 0         | 0         | 0         | 0        | 0        | 0        |
| 0         | 0         | 0         | 0        | 0        | 0        |
| 13.2367   | 14.4285   | 16.8666   | 13.1459  | 18.8702  | 13.6744  |
| 2.02637   | 3.32028   | 3.2478    | 8.70327  | 2.90165  | 4.64966  |
| 15.6669   | 16.3871   | 16.472    | 16.4365  | 13.1447  | 13.9294  |
| 0.0191801 | 0         | 0         | 0        | 0        | 0        |
| 6.76553   | 5.62883   | 6.33992   | 6.50396  | 6.77692  | 4.85364  |
| 46.2552   | 44.7446   | 49.5063   | 45.1257  | 43.6423  | 48.0786  |
| 30.9356   | 32.2894   | 28.5888   | 35.4967  | 24.7628  | 29.0536  |
| 8.18883   | 6.86855   | 7.3133    | 7.74727  | 10.1869  | 7.82309  |
| 47.2355   | 42.656    | 50.6435   | 51.2267  | 71.1381  | 66.0414  |
| 3.2486    | 2.3383    | 2.78731   | 2.79176  | 3.13963  | 1.56569  |
| 47.7286   | 49.6629   | 48.6696   | 49.5227  | 51.4583  | 58.6314  |
| 0.479577  | 0.0542085 | 0.274012  | 0.148673 | 0.329821 | 0.146281 |
| 9.66655   | 9.55475   | 9.79009   | 7.52452  | 10.6717  | 10.0675  |
| 13.0351   | 11.7766   | 14.9095   | 14.8308  | 14.3456  | 14.3093  |
| 3.78316   | 2.74585   | 4.88845   | 3.66279  | 4.75831  | 4.10093  |
| 0         | 0         | 0         | 0        | 0        | 0        |
| 2.20944   | 1.77804   | 2.06337   | 1.33694  | 1.04E-09 | 2.69196  |
| 6.49863   | 10.4269   | 24.255    | 23.0905  | 23.9772  | 35.524   |
| 1.24419   | 1.31351   | 1.28239   | 0.971197 | 1.33657  | 1.20668  |

|           |          |           |          |           |           |
|-----------|----------|-----------|----------|-----------|-----------|
| 0         | 0        | 0         | 0        | 0         | 0         |
| 11.1526   | 13.6812  | 11.6357   | 13.9468  | 9.62647   | 12.7457   |
| 0.88099   | 1.18234  | 1.16115   | 1.18127  | 1.96726   | 1.34458   |
| 0         | 0.225446 | 0         | 0        | 0         | 0.304182  |
| 1.3171    | 1.04173  | 1.82296   | 1.80199  | 1.54208   | 0.960494  |
| 5.99251   | 6.10446  | 6.60309   | 4.13388  | 7.74152   | 5.68968   |
| 2.2757    | 3.21579  | 3.37902   | 4.12048  | 2.06883   | 2.56233   |
| 0.312284  | 0        | 0         | 0.118593 | 0         | 0.0875138 |
| 3.47521   | 3.92386  | 4.73815   | 3.50689  | 5.39753   | 4.41697   |
| 0.117642  | 0        | 0         | 0.134027 | 0.0637135 | 0.0494514 |
| 5.39      | 4.05441  | 5.75061   | 3.59592  | 7.52146   | 4.61308   |
| 0         | 0        | 0         | 0        | 0         | 0         |
| 4.03582   | 3.51368  | 4.42063   | 3.61354  | 4.62987   | 3.57391   |
| 11.5624   | 11.0278  | 12.3382   | 12.1791  | 11.3432   | 10.5303   |
| 0         | 0        | 0         | 0        | 0         | 0         |
| 2.39048   | 2.72528  | 3.30583   | 2.76879  | 3.62454   | 4.38687   |
| 0.172799  | 0.323013 | 0.253985  | 0.328111 | 0.311954  | 0.290548  |
| 1.89203   | 4.25562  | 5.17433   | 3.94381  | 3.449     | 2.67695   |
| 5.88852   | 5.45357  | 4.8647    | 4.50912  | 4.80988   | 4.46361   |
| 56.1146   | 72.0087  | 129.847   | 117.396  | 108.351   | 140.922   |
| 40.4678   | 42.5431  | 44.3165   | 42.4987  | 43.1034   | 47.0635   |
| 0         | 0        | 0         | 0        | 0         | 0         |
| 15.9855   | 13.5758  | 18.1636   | 14.4255  | 16.875    | 15.7573   |
| 0         | 0        | 0         | 0        | 0         | 0         |
| 5.4922    | 4.64302  | 5.15604   | 4.36379  | 3.93236   | 3.8014    |
| 6.57684   | 7.18152  | 7.37638   | 6.75485  | 9.18038   | 6.45787   |
| 266.431   | 269.96   | 235.9     | 256.722  | 196.024   | 264.787   |
| 0.0807508 | 0        | 0         | 0        | 0.0437338 | 0.0339441 |
| 29.6355   | 29.9197  | 34.3026   | 29.6344  | 35.5869   | 30.1531   |
| 0.538823  | 0.479629 | 0.387908  | 1.05235  | 0.250132  | 0.194141  |
| 0.0518813 | 0        | 0         | 0        | 0.0561968 | 0         |
| 33.6382   | 30.0354  | 28.8838   | 27.5197  | 28.2398   | 26.746    |
| 0.232628  | 0.257688 | 0.0651269 | 0        | 0.605604  | 0.354931  |
| 20.9459   | 18.3042  | 14.4825   | 12.8439  | 11.062    | 14.1366   |
| 2.30585   | 2.39014  | 4.31682   | 2.4306   | 4.59847   | 3.15241   |
| 0         | 0.612428 | 0         | 0        | 0         | 0         |
| 9.70231   | 10.8191  | 10.5058   | 10.7814  | 11.2677   | 12.2466   |
| 6.22165   | 7.09819  | 6.95517   | 7.18805  | 8.44768   | 6.11466   |
| 55.8584   | 46.7503  | 54.4118   | 50.4215  | 49.5237   | 44.7978   |
| 0         | 0        | 0.351529  | 0        | 0         | 0         |
| 0.138006  | 1.0319   | 0         | 1.57228  | 0.149485  | 0.696141  |
| 0         | 0        | 0         | 0        | 0         | 0         |
| 0.885465  | 0.853624 | 0.71564   | 0.875558 | 0.778152  | 1.37648   |

|          |          |          |           |           |           |
|----------|----------|----------|-----------|-----------|-----------|
| 0        | 0        | 0        | 0         | 0         | 0         |
| 0        | 0        | 0        | 0         | 0         | 0.0393747 |
| 1.40345  | 1.76532  | 1.05758  | 1.34489   | 2.17373   | 1.94076   |
| 14.7455  | 9.56865  | 11.8393  | 9.39659   | 11.7671   | 9.44489   |
| 8.64519  | 7.81878  | 9.41651  | 8.73765   | 10.4001   | 9.45019   |
| 0        | 0        | 0        | 0         | 0         | 0         |
| 5.56474  | 5.99043  | 8.07398  | 9.62233   | 7.4009    | 7.67007   |
| 5.77623  | 6.78928  | 3.63858  | 4.26251   | 5.40347   | 4.00077   |
| 0.449137 | 0.408694 | 0.803491 | 0.270056  | 0.943506  | 0.302148  |
| 8.72013  | 8.19544  | 8.40345  | 7.29797   | 11.281    | 9.29357   |
| 5.37236  | 6.9366   | 0.732656 | 0.222161  | 8.15887   | 7.19393   |
| 0        | 0        | 0        | 0         | 0         | 0         |
| 1423.57  | 1717.84  | 1581.15  | 1570.13   | 1317.23   | 1516.67   |
| 0        | 0        | 0        | 0         | 0         | 0         |
| 0.92814  | 0.14163  | 0.572728 | 0.517917  | 0.553964  | 0.0955467 |
| 50.3003  | 50.2784  | 39.7461  | 47.2597   | 36.5204   | 49.1001   |
| 67.4388  | 64.6164  | 67.0884  | 69.2284   | 61.2696   | 62.072    |
| 1.38664  | 0.817403 | 0.702335 | 0.679927  | 0.697274  | 0.667422  |
| 1.87497  | 2.74294  | 2.10542  | 2.46118   | 2.03092   | 2.02178   |
| 18.6791  | 18.8939  | 16.2089  | 17.5822   | 15.6356   | 16.5158   |
| 50.5321  | 49.0491  | 50.4848  | 52.3467   | 45.5729   | 53.8194   |
| 11.9137  | 11.7956  | 14.103   | 12.3078   | 7.75097   | 9.52806   |
| 3.16282  | 3.08987  | 3.52151  | 2.49306   | 3.87354   | 3.33988   |
| 1.39412  | 1.33643  | 2.02661  | 2.62681   | 1.39393   | 1.9384    |
| 7.3732   | 6.82105  | 7.2991   | 6.13621   | 8.60041   | 6.72817   |
| 0.865754 | 1.0789   | 0.981651 | 1.28224   | 0.656437  | 0.43671   |
| 59.7627  | 64.7588  | 68.5518  | 64.6498   | 70.4364   | 58.8802   |
| 5.80211  | 4.64104  | 9.5151   | 2.37617   | 5.22793   | 1.93688   |
| 21.3204  | 27.2214  | 32.6282  | 40.2349   | 31.7363   | 26.3916   |
| 0.9787   | 0.609828 | 0.308255 | 1.39377   | 0.795081  | 1.23421   |
| 782.512  | 795.231  | 823.072  | 908.108   | 562.271   | 772.107   |
| 0.45106  | 0.216196 | 0.349705 | 0.118589  | 0.563745  | 0.379212  |
| 89.7281  | 82.5136  | 93.7849  | 87.7604   | 93.0576   | 101.785   |
| 0        | 0        | 0        | 0         | 0         | 0         |
| 3.10188  | 0.968623 | 0        | 0         | 0         | 0         |
| 0.503269 | 0.534502 | 0.495659 | 0.442343  | 0.521432  | 0.160944  |
| 26.7086  | 31.6355  | 26.6628  | 36.716    | 38.3608   | 41.0826   |
| 2.93107  | 2.89171  | 3.94916  | 2.99147   | 5.22531   | 4.38077   |
| 0        | 0        | 0        | 0         | 0         | 0         |
| 0        | 0        | 0        | 0         | 0.265027  | 0         |
| 1.34087  | 1.66766  | 1.52672  | 1.05881   | 1.45687   | 1.19921   |
| 0        | 0        | 0        | 0.0732781 | 0.0696695 | 0.108148  |
| 6.19804  | 7.24896  | 8.24497  | 6.43989   | 6.83749   | 4.88556   |



|           |          |           |          |           |          |
|-----------|----------|-----------|----------|-----------|----------|
| 0         | 0        | 0         | 0        | 0         | 0        |
| 0         | 0        | 0         | 0        | 0         | 0        |
| 2.84638   | 3.10521  | 3.17451   | 2.64742  | 3.57846   | 2.69112  |
| 17.4182   | 16.7671  | 19.6684   | 18.508   | 22.6541   | 20.3788  |
| 2.76609   | 2.86253  | 4.39377   | 4.06471  | 2.34476   | 2.39279  |
| 14.6849   | 12.8413  | 16.8151   | 12.7164  | 18.6926   | 19.8162  |
| 1.09711   | 1.12594  | 0.731749  | 1.43372  | 1.50293   | 1.27501  |
| 23.9664   | 23.38    | 22.14     | 21.6749  | 24.4094   | 25.7639  |
| 19.935    | 17.3937  | 21.3497   | 25.3232  | 29.4509   | 28.3961  |
| 0.719954  | 0.672904 | 1.17915   | 0.902254 | 0.701855  | 0.696065 |
| 0.316269  | 0.506743 | 0.474348  | 0.394636 | 0.358889  | 0.455813 |
| 6.28535   | 6.18208  | 5.48087   | 9.29128  | 6.63937   | 4.70553  |
| 6.80815   | 7.347    | 8.30133   | 6.92462  | 7.69078   | 6.59836  |
| 2.93816   | 3.19024  | 4.28805   | 2.58511  | 2.55234   | 2.81254  |
| 5.10205   | 2.9067   | 4.78444   | 3.40241  | 6.05682   | 5.87     |
| 59.2359   | 59.9852  | 52.5283   | 54.0181  | 49.9811   | 62.8382  |
| 0.509001  | 0.306222 | 0.508592  | 0.27995  | 0.760469  | 0.354144 |
| 13.3398   | 13.2879  | 15.6118   | 11.0703  | 11.6441   | 10.5765  |
| 0         | 0        | 0         | 0        | 0         | 0        |
| 0.014252  | 0        | 0.0359108 | 0        | 0.0154374 | 0        |
| 1.89094   | 2.06371  | 1.54109   | 1.49004  | 1.74243   | 1.60972  |
| 7.31106   | 7.17603  | 7.34037   | 8.08456  | 7.30919   | 8.28001  |
| 12.3213   | 10.2365  | 6.15064   | 8.21058  | 7.63838   | 8.59964  |
| 0         | 0        | 0         | 0        | 0         | 0        |
| 20.4972   | 20.168   | 24.3601   | 20.7335  | 28.4319   | 22.2086  |
| 0.0700757 | 7.68488  | 0.17657   | 57.615   | 1.18917   | 6.55903  |
| 6.82583   | 6.66316  | 7.21858   | 7.27703  | 8.48528   | 8.51157  |
| 0         | 0        | 0         | 0        | 0         | 0        |
| 0.997396  | 0.891174 | 0.924648  | 0.664638 | 1.12113   | 0.775238 |
| 59.4913   | 57.5303  | 64.2733   | 58.4848  | 85.4933   | 62.4977  |
| 65.089    | 61.7357  | 62.6624   | 57.4998  | 58.8747   | 53.7391  |
| 0         | 0        | 0         | 0        | 0         | 0        |
| 2.60653   | 2.07362  | 1.96596   | 3.00525  | 2.26646   | 2.86501  |
| 0.0274267 | 0        | 0         | 0        | 0         | 0        |
| 0         | 0        | 0         | 0        | 0         | 0        |
| 0         | 0        | 0         | 0        | 0         | 0        |
| 11.6161   | 12.3398  | 12.0123   | 10.9847  | 13.1957   | 12.5192  |
| 5.67802   | 3.6877   | 6.54275   | 2.90442  | 5.45972   | 1.97311  |
| 0.167121  | 0.310125 | 0.129968  | 0.433406 | 0.198653  | 0.264473 |
| 16.2226   | 11.7387  | 19.5151   | 13.4741  | 19.3859   | 15.5744  |
| 28.3979   | 31.6649  | 26.8454   | 32.5165  | 23.5282   | 28.4416  |
| 1.57742   | 1.40998  | 1.42543   | 1.105    | 1.89491   | 1.07703  |
| 1.47226   | 1.20886  | 1.8292    | 2.15522  | 2.20149   | 2.00757  |

|           |           |           |          |           |           |
|-----------|-----------|-----------|----------|-----------|-----------|
| 0.791474  | 1.04435   | 0.703865  | 0.477377 | 0.353009  | 0.234848  |
| 12.8223   | 10.299    | 19.2669   | 8.05655  | 15.8729   | 5.6945    |
| 0         | 0         | 0         | 0        | 0         | 0         |
| 43.4574   | 49.037    | 45.5688   | 49.9906  | 44.7701   | 54.307    |
| 112.911   | 110.734   | 118.482   | 128.432  | 91.5644   | 115.67    |
| 4.04741   | 4.00725   | 6.89793   | 5.16279  | 4.69338   | 3.96635   |
| 0.461396  | 61.8836   | 1.31245   | 647.942  | 1.81709   | 37.6264   |
| 0.585202  | 0.476022  | 0.700627  | 0.517493 | 0.492009  | 0.287508  |
| 0         | 0         | 0         | 0        | 0         | 0         |
| 13.1537   | 14.7307   | 14.0206   | 13.4991  | 11.3585   | 11.8205   |
| 13.9929   | 14.8849   | 16.7524   | 14.7969  | 13.482    | 12.089    |
| 0.386625  | 0.497872  | 1.03913   | 0.52857  | 0.879447  | 0.606742  |
| 45.4716   | 99.5452   | 22.1339   | 156.684  | 54.723    | 14.0751   |
| 4.83282   | 4.64693   | 5.19235   | 4.85169  | 4.61381   | 4.42737   |
| 0         | 0         | 0         | 0        | 0         | 0         |
| 0.0206282 | 0         | 0         | 0        | 0         | 0         |
| 38.1916   | 51.4392   | 55.2419   | 70.8852  | 35.6467   | 32.226    |
| 1.62793   | 1.77291   | 1.83316   | 1.54702  | 1.69433   | 2.12106   |
| 278.238   | 0         | 350.539   | 316.992  | 301.382   | 233.918   |
| 0.545894  | 0.396837  | 0.114625  | 0.259137 | 0.344926  | 0.15298   |
| 19.1523   | 22.5987   | 22.7369   | 22.8338  | 22.6917   | 22.5695   |
| 78.3777   | 88.7783   | 113.061   | 53.1119  | 55.704    | 82.0602   |
| 35.7697   | 34.1412   | 33.6833   | 29.4816  | 35.3737   | 37.4475   |
| 7.59907   | 5.79035   | 7.7797    | 5.64373  | 9.62077   | 5.89104   |
| 0.358491  | 0.20099   | 0.412607  | 0.459122 | 0.609302  | 0.517133  |
| 10.9905   | 12.0522   | 12.0648   | 12.3115  | 11.2559   | 13.4363   |
| 5.56883   | 10.3061   | 2.80128   | 6.25543  | 7.88616   | 3.56273   |
| 14.0589   | 14.0355   | 13.4065   | 11.7695  | 13.3774   | 11.6562   |
| 35.2064   | 36.4693   | 34.6803   | 33.0489  | 31.1777   | 26.9826   |
| 59.9158   | 55.3632   | 81.7679   | 83.6629  | 73.4084   | 74.0182   |
| 16.8054   | 16.0925   | 17.4274   | 11.6934  | 15.7185   | 12.6311   |
| 1.85287   | 3.80851   | 1.19098   | 3.36341  | 2.08869   | 1.83803   |
| 22.1117   | 22.1802   | 23.5316   | 23.9988  | 20.6129   | 28.3446   |
| 6.42418   | 5.71843   | 10.406    | 9.41009  | 11.9289   | 21.6035   |
| 0         | 0         | 0         | 0        | 0         | 0         |
| 0.0657221 | 0.0409514 | 0.0207001 | 0        | 0.0355944 | 0.0138133 |
| 2.83448   | 2.92629   | 3.43099   | 2.20034  | 4.18397   | 3.23571   |
| 0.602625  | 0.553362  | 0.479507  | 0.722695 | 0.51533   | 0.613294  |
| 22.1696   | 22.2489   | 23.1464   | 18.5279  | 24.5708   | 23.7792   |
| 3.52754   | 4.47679   | 2.98449   | 3.24366  | 3.99037   | 3.53442   |
| 8.99905   | 7.50424   | 15.74     | 4.78048  | 11.7756   | 5.65558   |
| 0.341487  | 0.234436  | 0.408743  | 0.194397 | 0.776375  | 0.372975  |
| 9.38967   | 7.50819   | 10.0164   | 7.77999  | 9.05256   | 8.07759   |

|           |           |            |           |           |           |
|-----------|-----------|------------|-----------|-----------|-----------|
| 17.9718   | 17.6812   | 18.9264    | 15.0867   | 21.2344   | 15.5924   |
| 0.0862351 | 0.0214932 | 0.0217287  | 0.078597  | 0.0560449 | 0.0724989 |
| 13.9394   | 15.4105   | 16.2608    | 16.9453   | 15.7647   | 13.4552   |
| 0.307126  | 0.313151  | 0.42211    | 0.190856  | 0.272187  | 0.234731  |
| 0         | 0         | 0          | 0         | 0         | 0         |
| 0         | 0         | 0          | 0         | 0         | 0         |
| 0         | 0         | 0.0398711  | 0         | 0.10284   | 0.0798191 |
| 13.586    | 14.9003   | 11.9287    | 17.711    | 8.4671    | 8.92278   |
| 0.0414343 | 0.0103271 | 0.00870021 | 0         | 0         | 0         |
| 1.83855   | 1.59387   | 2.36665    | 2.14016   | 3.33356   | 2.68815   |
| 0.373675  | 0.465766  | 0.314445   | 0.354768  | 0.224865  | 0.113444  |
| 14.2027   | 13.9067   | 13.562     | 11.7183   | 12.6064   | 12.4616   |
| 0.0704775 | 0.351316  | 0.0887914  | 0         | 0         | 0.0299456 |
| 28.7173   | 31.0909   | 30.5078    | 29.6281   | 34.2092   | 33.2564   |
| 0.0852489 | 0.0708247 | 0.107401   | 0.0647484 | 0.0615599 | 0.0477798 |
| 0.660101  | 1.02827   | 0.623723   | 0.517029  | 1.20658   | 0.79974   |
| 0         | 0         | 0          | 0         | 0         | 0         |
| 25.0876   | 23.3083   | 31.358     | 25.8281   | 38.1198   | 33.4285   |
| 8.54139   | 7.21397   | 8.84486    | 5.91538   | 9.00902   | 7.49675   |
| 0         | 0         | 0          | 0         | 0         | 0         |
| 81.6249   | 81.0701   | 47.8587    | 50.0661   | 69.8938   | 76.9037   |
| 26.751    | 25.6782   | 24.4267    | 23.2228   | 20.5608   | 20.9931   |
| 20.0226   | 21.0533   | 17.882     | 21.5857   | 17.7523   | 19.085    |
| 78.0831   | 79.914    | 61.5426    | 85.3057   | 63.5355   | 81.5017   |
| 23.4357   | 23.4602   | 25.8023    | 19.764    | 24.8089   | 21.9637   |
| 24.4255   | 21.8399   | 26.3635    | 23.9526   | 27.8023   | 21.5196   |
| 13.8977   | 16.6054   | 14.9735    | 14.8003   | 14.8934   | 17.5307   |
| 40.9423   | 34.3418   | 40.0747    | 31.4404   | 50.0618   | 72.5261   |
| 0.228324  | 0.360478  | 0.0910394  | 2.86E-12  | 0.272321  | 0.417008  |
| 12.8836   | 16.2288   | 15.5426    | 12.7012   | 14.3094   | 15.3892   |
| 3.71751   | 4.25859   | 4.45291    | 4.2934    | 6.58164   | 4.64227   |
| 2.41602   | 2.70361   | 1.92569    | 2.07844   | 2.83062   | 3.06749   |
| 48.8762   | 45.9305   | 44.5796    | 41.3612   | 44.7049   | 44.6483   |
| 1.31804   | 1.69232   | 2.01278    | 0.546045  | 1.25462   | 0.402943  |
| 7.10149   | 8.12656   | 9.29095    | 7.39045   | 10.3549   | 6.86011   |
| 1.46582   | 1.71697   | 1.80832    | 1.54347   | 2.57548   | 1.2671    |
| 17.1583   | 17.7229   | 18.842     | 20.8803   | 17.3485   | 18.2544   |
| 14.7911   | 15.2717   | 16.0358    | 15.5457   | 15.8891   | 14.6061   |
| 1.63722   | 2.07871   | 1.54163    | 0.699401  | 0.782897  | 1.07611   |
| 0         | 0         | 0          | 0         | 0         | 0         |
| 34.608    | 31.9256   | 41.2717    | 41.9796   | 38.8914   | 46.3133   |
| 0.935616  | 1.09272   | 1.94701    | 0.854182  | 0.978319  | 0.309655  |
| 0.920932  | 0.828389  | 3.0207     | 1.97436   | 2.81601   | 3.54167   |

|           |           |          |           |           |           |
|-----------|-----------|----------|-----------|-----------|-----------|
| 0.0733488 | 0         | 0        | 0         | 0         | 0         |
| 0.120641  | 0.0427009 | 0.129506 | 0.0390374 | 0.160337  | 0.387293  |
| 25.9445   | 32.82     | 31.3294  | 43.7236   | 23.3304   | 21.1533   |
| 0.148682  | 0.0370573 | 0        | 0         | 0.0966293 | 0         |
| 0.953762  | 0.86442   | 1.31084  | 1.87686   | 1.97227   | 0.656051  |
| 0         | 0         | 0        | 0.819317  | 0.0353204 | 0         |
| 0.940241  | 1.24347   | 0.604371 | 1.09306   | 0.997665  | 1.00019   |
| 0         | 0         | 0        | 0         | 0         | 0         |
| 0         | 0         | 0        | 0         | 0         | 0         |
| 6.28575   | 5.88794   | 6.09478  | 7.01066   | 7.984     | 8.59889   |
| 1.04095   | 1.13546   | 2.62017  | 2.66558   | 1.68955   | 1.58503   |
| 0         | 0         | 0        | 0         | 0         | 0         |
| 0         | 0         | 0        | 0         | 0         | 0         |
| 21.7341   | 21.402    | 22.0173  | 22.6554   | 20.9612   | 20.337    |
| 0.854606  | 0.355003  | 0.777601 | 0.595001  | 1.59425   | 0.478985  |
| 0         | 0         | 0        | 0         | 0         | 0         |
| 86.7925   | 91.2191   | 56.4551  | 50.1941   | 52.0049   | 63.4239   |
| 50.2798   | 53.224    | 52.6708  | 56.1382   | 53.0472   | 56.3259   |
| 7.21531   | 8.45041   | 5.80681  | 6.26831   | 6.79607   | 7.12096   |
| 3.04212   | 2.95601   | 3.77693  | 3.96743   | 3.35277   | 3.3927    |
| 8.78193   | 7.39577   | 9.50808  | 10.9431   | 8.24904   | 6.51787   |
| 0.422444  | 0.402579  | 0.125228 | 0.0566216 | 0.323     | 0.271588  |
| 0         | 0         | 0        | 0         | 0         | 0         |
| 1.75949   | 1.18714   | 2.16326  | 1.37715   | 3.07488   | 1.26518   |
| 13.8725   | 14.4456   | 14.6448  | 15.54     | 15.6884   | 16.6235   |
| 37.5618   | 36.0083   | 38.0007  | 36.1101   | 40.201    | 35.4216   |
| 0.38437   | 0.229087  | 0.505304 | 0.342709  | 0.380138  | 0.266945  |
| 4.27419   | 4.58612   | 4.25689  | 4.28363   | 3.82854   | 4.35347   |
| 0.764146  | 0.525395  | 0.697137 | 0.420279  | 0.970416  | 0.664579  |
| 32.2813   | 26.6355   | 24.7363  | 25.4801   | 30.8683   | 25.3309   |
| 6.16646   | 7.96239   | 8.98564  | 2.79321   | 10.3812   | 2.62334   |
| 5.94427   | 5.30842   | 5.84341  | 4.73462   | 7.35508   | 5.88335   |
| 5.46419   | 5.38315   | 7.07577  | 5.11961   | 6.0507    | 5.49371   |
| 9.9415    | 10.1537   | 10.8537  | 10.2971   | 10.9654   | 10.2427   |
| 3.8275    | 4.47407   | 3.82885  | 3.3756    | 1.78463   | 1.68638   |
| 0         | 0         | 0        | 0         | 0         | 0         |
| 0.0830918 | 0.0517745 | 0.183196 | 0.0473325 | 0.247509  | 0.0873204 |
| 4.72E-07  | 7.13E-08  | 1.78E-07 | 6.08E-07  | 1.47E-06  | 1.21E-05  |
| 0.155002  | 0.106437  | 0.218623 | 0.1977    | 0.0822336 | 0         |
| 11.1608   | 9.32453   | 8.67434  | 7.02088   | 10.3117   | 7.34105   |
| 5.44254   | 4.65052   | 8.15797  | 2.72675   | 7.00572   | 4.78746   |
| 5.70543   | 5.85216   | 6.33097  | 5.20008   | 6.32262   | 6.77062   |
| 0.589676  | 0.668048  | 1.01305  | 0.732881  | 1.16132   | 0.946427  |

|          |            |           |          |          |           |
|----------|------------|-----------|----------|----------|-----------|
| 4.93675  | 4.49754    | 5.2078    | 3.14875  | 6.09038  | 4.00876   |
| 7.67E-11 | 3.07E-07   | 9.13E-14  | 8.15E-15 | 0.526093 | 1.99E-18  |
| 1.50627  | 0.969769   | 1.76894   | 1.13023  | 2.33642  | 1.10183   |
| 4.06322  | 4.19328    | 3.59934   | 3.03788  | 4.74529  | 3.78962   |
| 12.358   | 12.1377    | 10.9843   | 11.7526  | 11.2589  | 11.1599   |
| 2.55959  | 3.47108    | 2.18093   | 2.9161   | 3.99476  | 3.86012   |
| 25.08    | 22.2678    | 24.7155   | 20.2871  | 34.035   | 25.0159   |
| 5.58898  | 5.49366    | 4.73216   | 4.8692   | 5.03477  | 4.14768   |
| 0.2026   | 0.309688   | 0.422661  | 0.382211 | 0.363389 | 0.473992  |
| 0.177368 | 0.221036   | 0.148972  | 0.471502 | 0.256162 | 0.447346  |
| 20.9505  | 24.0621    | 19.6425   | 24.2695  | 17.2398  | 20.0028   |
| 105.207  | 56.5556    | 87.0876   | 52.5611  | 59.9502  | 24.9714   |
| 0        | 0.0635112  | 0         | 0        | 0        | 0         |
| 7.59835  | 8.48481    | 9.05814   | 8.6877   | 7.49289  | 11.0817   |
| 42.6346  | 46.6309    | 46.5518   | 45.0787  | 55.285   | 53.4288   |
| 10.3609  | 11.3697    | 11.5437   | 9.79004  | 12.4248  | 10.5269   |
| 43.8443  | 48.5278    | 46.1523   | 53.073   | 32.6502  | 40.7405   |
| 0.384031 | 0.382625   | 0.675008  | 0.961037 | 1.49271  | 1.34862   |
| 16.2778  | 15.1291    | 17.9416   | 16.5534  | 24.6497  | 17.4466   |
| 12.7756  | 11.6292    | 12.6897   | 10.4768  | 13.7447  | 12.3076   |
| 31.8252  | 32.0537    | 35.1087   | 34.0588  | 36.8644  | 30.5197   |
| 2.80428  | 3.70438    | 3.427     | 2.30031  | 2.64266  | 2.00396   |
| 9.2876   | 9.12931    | 9.1916    | 8.80192  | 10.0661  | 8.35354   |
| 0        | 1.77E-09   | 0         | 0        | 3.35E-61 | 0         |
| 0.461097 | 0.430022   | 1.38751   | 1.68484  | 0.988006 | 0.808278  |
| 0        | 0          | 0         | 0        | 0        | 0         |
| 0.162682 | 0.141913   | 0.266441  | 0.203874 | 0.334805 | 0.0957378 |
| 0        | 0.00399146 | 0         | 0        | 0        | 0         |
| 0        | 0          | 0         | 0        | 0        | 0         |
| 0        | 0          | 0         | 0        | 0        | 0         |
| 13.259   | 14.4339    | 13.5637   | 14.1255  | 13.5494  | 15.0234   |
| 0.954988 | 0.825305   | 0.65801   | 0.841493 | 1.10336  | 0.888479  |
| 0        | 0          | 0         | 0        | 0        | 0         |
| 0        | 0          | 0         | 0        | 0        | 0         |
| 0        | 0          | 0.359643  | 0.108408 | 0.10307  | 0         |
| 1.11871  | 1.50631    | 1.45801   | 1.27453  | 1.53211  | 1.04862   |
| 7.19014  | 4.85245    | 7.83861   | 5.25764  | 7.83284  | 5.61182   |
| 0        | 0          | 0.0365577 | 0        | 0        | 0         |
| 21.7339  | 27.0847    | 23.1747   | 24.4553  | 24.7042  | 25.9165   |
| 23.3755  | 23.2173    | 20.8917   | 22.3066  | 19.1522  | 23.2214   |
| 16.2203  | 18.87      | 18.2254   | 19.6546  | 21.5257  | 20.9531   |
| 1.32854  | 1.43513    | 1.30227   | 1.07689  | 1.46982  | 1.41448   |
| 9.22233  | 9.00905    | 9.7036    | 7.96673  | 8.78192  | 8.69054   |

|           |          |           |           |          |           |
|-----------|----------|-----------|-----------|----------|-----------|
| 5.87973   | 6.06495  | 7.40602   | 6.93422   | 10.5994  | 8.63801   |
| 0         | 0        | 0         | 0         | 0        | 0         |
| 29.5966   | 32.4305  | 33.311    | 34.9401   | 26.8981  | 29.2378   |
| 0.326225  | 0        | 0         | 0         | 0        | 0.274261  |
| 3.65489   | 3.45671  | 3.04234   | 2.99904   | 4.58337  | 3.85918   |
| 0         | 0        | 0         | 0         | 0        | 0         |
| 0         | 0        | 0         | 0         | 0        | 0         |
| 62.5186   | 70.8481  | 55.305    | 68.5617   | 54.6622  | 68.1391   |
| 9.22655   | 6.2906   | 11.1467   | 10.6173   | 10.8428  | 8.57817   |
| 0.241178  | 0.277436 | 0.257103  | 0.0422723 | 0.160763 | 0.140373  |
| 0.714955  | 0.571138 | 0.704424  | 0.501253  | 0.963066 | 1.07114   |
| 2.49661   | 2.06126  | 2.77841   | 1.24449   | 2.01696  | 1.44787   |
| 3.25973   | 3.94662  | 4.39908   | 2.82827   | 11.2837  | 5.06161   |
| 0         | 0        | 0         | 0         | 0        | 0         |
| 9.59606   | 9.41723  | 11.6624   | 11.2025   | 12.9797  | 9.95157   |
| 13.528    | 12.6439  | 13.2694   | 13.1554   | 13.6066  | 11.3325   |
| 19.5491   | 17.4482  | 29.426    | 24.1764   | 21.8541  | 23.2668   |
| 0.328335  | 0.113659 | 0.367693  | 0.14547   | 0.711292 | 0.322041  |
| 20.9025   | 15.9988  | 20.766    | 15.4654   | 25.584   | 16.5516   |
| 0.0905321 | 0        | 0         | 0.103142  | 0        | 0.0190273 |
| 0.395765  | 0.392035 | 0.306537  | 0.37207   | 1.48371  | 0.897245  |
| 40.0192   | 37.8917  | 47.7878   | 50.7967   | 40.8664  | 40.2638   |
| 6.09683   | 5.50417  | 6.76258   | 5.59774   | 6.94732  | 6.44041   |
| 0.868099  | 2.97502  | 1.09368   | 4.45055   | 0.940308 | 2.18946   |
| 0.0649965 | 7.77586  | 0.682384  | 330.334   | 0        | 7.16099   |
| 107.482   | 124.061  | 106.695   | 124.113   | 119.917  | 132.72    |
| 0         | 0        | 0         | 0.126599  | 0.120365 | 0.0934215 |
| 6.45316   | 6.7022   | 10.1618   | 9.18815   | 5.24328  | 4.77475   |
| 0         | 0        | 0         | 0         | 0        | 0         |
| 0         | 0        | 0         | 0         | 0        | 0         |
| 0.69206   | 0.762931 | 0.972498  | 1.51625   | 0.951447 | 0.827979  |
| 12.7332   | 6.74103  | 20.6292   | 12.0035   | 14.8124  | 8.38279   |
| 2.85253   | 3.41554  | 1.97497   | 6.0312    | 1.4562   | 4.41888   |
| 0         | 0.178837 | 0.180797  | 0         | 0.310886 | 0.120647  |
| 0.640752  | 0.532336 | 1.07634   | 1.095     | 2.15926  | 1.70584   |
| 0         | 0.197873 | 0.136928  | 0.44203   | 0.124961 | 0.292264  |
| 0         | 0.296111 | 0.598711  | 0         | 0.257376 | 0.199763  |
| 5.96777   | 6.61797  | 5.59749   | 5.36131   | 8.34362  | 6.21069   |
| 0.394713  | 0.365545 | 0.319681  | 0.385449  | 0.509195 | 0.435172  |
| 0.0541358 | 0.033732 | 0.0341016 | 0.030838  | 0.146597 | 0.136538  |
| 1.53459   | 1.72161  | 1.46047   | 1.24154   | 2.0905   | 1.31447   |
| 153.868   | 96.1739  | 104.696   | 113.283   | 97.5391  | 72.9452   |
| 22.6824   | 23.6023  | 20.8901   | 24.1786   | 18.4877  | 17.7163   |

|           |           |           |           |           |           |
|-----------|-----------|-----------|-----------|-----------|-----------|
| 0.348384  | 0.253258  | 0.182881  | 0.132303  | 0.314469  | 0.292891  |
| 40.5264   | 33.8627   | 65.9079   | 44.194    | 56.9405   | 45.6      |
| 0         | 4.40747   | 0         | 0         | 0         | 0         |
| 0         | 0         | 0         | 0         | 0         | 0         |
| 19.9714   | 19.0135   | 19.3606   | 17.5382   | 21.6342   | 21.6864   |
| 0.333383  | 0.286823  | 0.098188  | 0.272148  | 1.60E-08  | 4.25E-08  |
| 27.8466   | 28.5501   | 22.5589   | 21.3829   | 15.2794   | 17.7476   |
| 0.754004  | 0.973198  | 1.35705   | 0.705627  | 1.22508   | 0.928211  |
| 0.152504  | 0.515851  | 0.10979   | 0.0496415 | 0.424772  | 0.256424  |
| 618.999   | 660.014   | 767.72    | 727.327   | 695.724   | 800.235   |
| 41.7935   | 40.8837   | 55.4484   | 46.9211   | 52.5989   | 51.9311   |
| 0.0209543 | 0         | 0.0593985 | 0         | 0.0226973 | 0.0176165 |
| 7.40823   | 7.64237   | 7.33884   | 7.8097    | 5.81023   | 6.15066   |
| 28.2117   | 23.178    | 23.6903   | 21.7993   | 23.5016   | 15.6459   |
| 0         | 0         | 0         | 0         | 0         | 0         |
| 1.1865    | 1.21109   | 0.78893   | 1.46167   | 1.1591    | 1.58441   |
| 0         | 0.0260186 | 0         | 0         | 0         | 0.0175527 |
| 12.2709   | 9.30668   | 12.3062   | 11.2159   | 19.3292   | 11.2527   |
| 0.22818   | 0.284358  | 0.191649  | 0         | 0.24716   | 0.191834  |
| 2.03908   | 2.06164   | 3.34447   | 2.92212   | 2.83379   | 4.23717   |
| 22.1455   | 29.6353   | 29.2799   | 33.5078   | 29.7266   | 29.8276   |
| 5.98536   | 5.69845   | 6.74446   | 4.82837   | 6.32215   | 5.50078   |
| 45.7733   | 55.9198   | 39.8142   | 48.7985   | 41.4178   | 50.3891   |
| 8.33152   | 7.01452   | 7.59122   | 7.26021   | 7.33243   | 7.44218   |
| 29.1791   | 27.0802   | 29.5092   | 26.9429   | 26.7984   | 28.6907   |
| 165.439   | 252.123   | 171.991   | 150.303   | 10.4354   | 25.1013   |
| 0         | 0         | 0         | 0         | 0         | 0         |
| 0         | 0         | 0         | 0         | 0         | 0.064974  |
| 0         | 0         | 0         | 0         | 0         | 0         |
| 0.115813  | 0         | 0         | 0         | 0.125446  | 0.19473   |
| 0.0741245 | 0.056897  | 0.10057   | 0.0928937 | 0.10097   | 0.164449  |
| 0         | 0         | 0         | 0         | 0         | 0         |
| 0.0461034 | 0         | 0         | 0.236385  | 0         | 0.0387597 |
| 0         | 0         | 0         | 0         | 0         | 0         |
| 16.0149   | 13.3103   | 17.8434   | 16.3957   | 21.2829   | 19.613    |
| 0         | 0         | 0         | 0         | 0         | 0         |
| 1.26955   | 1.07529   | 1.06594   | 0.840203  | 0.927793  | 0.284024  |
| 33.4179   | 28.1454   | 30.4197   | 27.7917   | 61.3292   | 42.4621   |
| 10.0688   | 4.60653   | 23.2904   | 8.07461   | 16.316    | 4.99288   |
| 36.012    | 39.7637   | 35.3317   | 44.84     | 35.0026   | 44.248    |
| 0.513677  | 0.329412  | 1.0277    | 0.697057  | 2.10159   | 1.28896   |
| 0         | 0         | 0         | 0         | 0         | 0         |
| 2.04465   | 3.49647   | 3.0544    | 3.47403   | 2.96397   | 3.49476   |

|           |           |          |           |           |           |
|-----------|-----------|----------|-----------|-----------|-----------|
| 8.24057   | 7.6582    | 7.76181  | 9.42397   | 13.0079   | 14.5789   |
| 5.74018   | 5.63173   | 7.42313  | 6.35528   | 7.31978   | 6.28476   |
| 1.88578   | 1.27085   | 1.76401  | 1.77039   | 1.56924   | 1.23838   |
| 68.6153   | 61.0847   | 78.1453  | 72.1771   | 79.7533   | 68.0663   |
| 2.06022   | 2.90977   | 2.76862  | 1.72126   | 1.33895   | 1.73205   |
| 125.02    | 141.335   | 129.097  | 123.542   | 96.2658   | 113.33    |
| 22.6787   | 28.8101   | 24.5893  | 20.5429   | 24.488    | 26.5576   |
| 20.0385   | 19.7821   | 19.4537  | 18.3006   | 18.9811   | 19.2338   |
| 13.3211   | 13.1673   | 13.5052  | 12.6064   | 15.3422   | 17.0664   |
| 6.10102   | 6.63085   | 7.53178  | 6.54133   | 7.69092   | 6.56626   |
| 0.0257493 | 0.0641774 | 0.162202 | 0.146678  | 0.0836732 | 0.0216477 |
| 0.0103575 | 0         | 0        | 0.0236002 | 0         | 0         |
| 25.409    | 20.5294   | 23.0278  | 24.1731   | 24.0231   | 26.5981   |
| 57.039    | 57.0608   | 53.3967  | 51.3887   | 40.3399   | 48.0313   |
| 60.5236   | 56.927    | 57.4332  | 57.8335   | 41.3009   | 46.4443   |
| 0         | 0         | 0        | 0         | 0         | 0         |
| 3.30186   | 3.57415   | 2.88458  | 3.34989   | 3.91589   | 3.18116   |
| 0         | 0         | 0        | 0         | 0         | 0         |
| 0         | 0         | 0        | 0         | 0         | 0         |
| 31.1194   | 32.6016   | 42.8896  | 43.655    | 55.2847   | 59.9149   |
| 0         | 0         | 0        | 0         | 0         | 0         |
| 9.40986   | 9.55336   | 10.3484  | 7.80487   | 10.3044   | 8.23936   |
| 3643.15   | 3776.41   | 4457.28  | 3920.73   | 3187.7    | 4207.14   |
| 55.3083   | 51.8311   | 53.1762  | 50.4295   | 54.3623   | 58.6148   |
| 59.7632   | 64.9783   | 48.544   | 52.4981   | 46.8388   | 59.4053   |
| 16.5897   | 17.1636   | 18.3352  | 17.5198   | 16.7581   | 17.9031   |
| 13.2774   | 12.52     | 16.066   | 12.8116   | 15.0372   | 12.9477   |
| 17.4222   | 17.4027   | 7.12514  | 6.657     | 9.23247   | 12.3036   |
| 0         | 0.309981  | 0.313378 | 0         | 0.0673572 | 0.308466  |
| 0.3926    | 0.244629  | 0.176649 | 0.351436  | 0.455632  | 0.306487  |
| 4.97725   | 4.47403   | 4.85201  | 5.07555   | 7.5124    | 6.69509   |
| 0         | 0         | 0.26625  | 0.120384  | 0.0572281 | 0.0888354 |
| 0         | 0         | 0        | 0         | 0         | 0         |
| 7.31066   | 7.41817   | 7.04322  | 7.52954   | 7.3794    | 5.55628   |
| 21.5306   | 21.492    | 18.3788  | 20.3578   | 19.5414   | 22.0381   |
| 0.0688615 | 0         | 0        | 0         | 0.0331508 | 0         |
| 27.1675   | 27.93     | 25.1965  | 30.7632   | 25.6234   | 26.1549   |
| 9.05804   | 4.85682   | 8.49815  | 5.61117   | 12.0614   | 7.45317   |
| 0         | 0         | 0        | 0         | 0         | 0         |
| 0.195343  | 0.121718  | 0.184578 | 0.111275  | 0.0264489 | 0.184755  |
| 6.16536   | 6.30851   | 7.38648  | 4.54875   | 8.89212   | 5.95066   |
| 143.014   | 154.025   | 145.94   | 131.544   | 137.81    | 162.995   |
| 0         | 0         | 0        | 0         | 0         | 0         |



|           |           |           |           |           |           |
|-----------|-----------|-----------|-----------|-----------|-----------|
| 6.47699   | 5.17945   | 11.2396   | 8.38248   | 13.0687   | 11.368    |
| 0         | 0         | 0         | 0         | 0         | 0         |
| 4.06074   | 4.40753   | 4.56584   | 3.53193   | 5.01336   | 4.80885   |
| 0         | 0         | 0         | 0.0212181 | 0         | 0         |
| 9.55464   | 13.6346   | 12.9002   | 16.4319   | 12.0151   | 9.43758   |
| 0.636056  | 0.697534  | 0.705177  | 0.521746  | 0.74408   | 0.770025  |
| 0.203234  | 0.194173  | 0.102418  | 0.0308721 | 0.0660416 | 0.0854305 |
| 0.456582  | 0.497868  | 0.359517  | 0.390132  | 1.05094   | 0.479818  |
| 12.0288   | 17.6952   | 18.0384   | 21.3512   | 21.2085   | 22.9703   |
| 8.92174   | 8.66714   | 7.61233   | 5.34213   | 8.52191   | 6.9847    |
| 0.0794536 | 0.0742612 | 0.125125  | 0.0678901 | 0.129094  | 0.0667976 |
| 3.17303   | 4.34965   | 25.5844   | 7.95296   | 5.49914   | 7.73606   |
| 0         | 0         | 0         | 0         | 0         | 0         |
| 86.654    | 98.9533   | 79.1952   | 92.4981   | 81.2114   | 102.184   |
| 59.889    | 51.977    | 58.2733   | 54.188    | 65.9757   | 66.5406   |
| 12.8626   | 11.5564   | 12.9693   | 10.485    | 15.8708   | 13.3889   |
| 33.7851   | 31.6947   | 34.4588   | 26.1123   | 38.4011   | 31.2629   |
| 4.96226   | 4.81635   | 7.45397   | 5.65341   | 6.35699   | 6.17752   |
| 27.272    | 26.4532   | 29.364    | 26.2049   | 28.8918   | 26.5736   |
| 0.0813207 | 0         | 0         | 0         | 0.17617   | 0.0683673 |
| 14.606    | 13.7849   | 16.9601   | 14.0895   | 18.7631   | 14.8168   |
| 190.259   | 221.226   | 130.462   | 158.864   | 158.903   | 179.3     |
| 0         | 0         | 0         | 0         | 0         | 0         |
| 99.4662   | 65.6427   | 38.0655   | 35.3371   | 53.0014   | 78.6772   |
| 9.40057   | 11.7947   | 5.43663   | 7.76546   | 4.12801   | 4.28057   |
| 30.2571   | 29.4891   | 24.7691   | 27.1975   | 39.2704   | 41.9666   |
| 16.2395   | 13.9381   | 18.3211   | 12.937    | 21.3993   | 18.2515   |
| 1390.39   | 1622.03   | 1265.47   | 1363.36   | 1245.31   | 1575.11   |
| 14.3768   | 12.5331   | 20.3273   | 19.1995   | 9.27633   | 11.0393   |
| 0         | 0         | 0         | 0         | 0.288286  | 0.223754  |
| 2.44196   | 1.37322   | 2.96423   | 2.17127   | 2.8709    | 2.51844   |
| 7.86331   | 10.3887   | 10.0556   | 12.2591   | 8.45334   | 9.74221   |
| 11.2848   | 11.2589   | 13.7902   | 10.818    | 12.7006   | 11.3106   |
| 0.0977664 | 0.0974691 | 0.0492686 | 0.178214  | 0.0635392 | 0.0657547 |
| 0.0166393 | 0         | 0         | 0         | 0.0540701 | 0         |
| 0         | 0         | 0         | 0         | 0         | 0         |
| 50.2636   | 51.4721   | 54.7035   | 52.4546   | 49.7089   | 44.6731   |
| 14.1197   | 14.2766   | 17.4635   | 15.8386   | 13.1892   | 12.2476   |
| 6.57765   | 7.37752   | 6.95148   | 6.08539   | 7.67559   | 6.34067   |
| 0.360251  | 0.173248  | 0.607219  | 0.22335   | 0.646793  | 0.461686  |
| 25.1918   | 30.0402   | 26.6569   | 30.7564   | 30.8751   | 33.7238   |
| 0         | 0         | 0         | 0         | 0         | 0         |
| 1.47103   | 0.785656  | 0.353007  | 0.319223  | 0.53113   | 0.412238  |

|           |            |           |           |          |           |
|-----------|------------|-----------|-----------|----------|-----------|
| 49.1239   | 54.2252    | 50.6026   | 55.3491   | 44.7326  | 48.6236   |
| 22.1959   | 21.4705    | 22.7879   | 21.5399   | 29.7514  | 21.284    |
| 4.65731   | 4.73554    | 4.84582   | 6.4411    | 5.64705  | 7.01275   |
| 0.644743  | 0.717652   | 1.21748   | 0.708387  | 1.89332  | 1.50765   |
| 4.41465   | 3.70388    | 6.36311   | 4.44692   | 6.39006  | 5.17035   |
| 0         | 0.0964412  | 0         | 0         | 0        | 0         |
| 1.53473   | 2.55826    | 2.43029   | 1.10836   | 3.78581  | 4.01486   |
| 14.0647   | 11.1792    | 13.7842   | 12.6262   | 13.8673  | 13.6089   |
| 6.50298   | 6.87033    | 6.42953   | 6.067     | 5.91613  | 5.36669   |
| 109.781   | 182.426    | 101.514   | 256.611   | 46.9822  | 81.3163   |
| 7.07451   | 6.64912    | 5.77592   | 6.43889   | 7.42751  | 8.09076   |
| 3.56648   | 3.8315     | 2.47903   | 1.68134   | 2.2646   | 2.27463   |
| 18.163    | 17.572     | 15.4534   | 10.8839   | 20.6538  | 20.6327   |
| 9.14249   | 8.57387    | 9.10121   | 7.89858   | 7.76759  | 6.50713   |
| 5.91545   | 4.14051    | 5.53083   | 4.79783   | 6.90804  | 4.18392   |
| 10.0282   | 10.9115    | 12.0635   | 10.1719   | 12.9181  | 12.9273   |
| 16.51     | 17.9104    | 20.0934   | 17.2309   | 20.5994  | 22.1905   |
| 0.0713504 | 0.26675    | 0         | 0         | 0        | 0.0599851 |
| 10.0112   | 9.7775     | 10.5046   | 8.84253   | 10.1586  | 9.07851   |
| 107.368   | 103.665    | 82.0178   | 87.3153   | 53.2222  | 61.7237   |
| 0         | 0          | 0         | 0         | 0        | 0         |
| 8.39282   | 11.9533    | 7.38483   | 7.58873   | 7.93653  | 8.39994   |
| 19.8157   | 21.1959    | 20.5118   | 17.1862   | 13.2457  | 11.4817   |
| 0.17068   | 0.0925007  | 13.7952   | 13.5481   | 15.1026  | 15.8931   |
| 0         | 0.0304364  | 0         | 0.0556502 | 0.158729 | 0.041066  |
| 0         | 0          | 0         | 0         | 0        | 0         |
| 0.0535322 | 0          | 0         | 0         | 0        | 0         |
| 29.4055   | 36.8587    | 26.618    | 46.0707   | 23.4952  | 26.2634   |
| 0.0324678 | 0          | 0.163619  | 0         | 0        | 0         |
| 35.4094   | 37.79      | 34.8595   | 30.5341   | 43.2959  | 51.3441   |
| 12.6583   | 13.0179    | 16.3244   | 12.6757   | 13.8219  | 11.6644   |
| 14.7179   | 13.4544    | 15.9475   | 13.9162   | 15.654   | 13.2202   |
| 29.0736   | 29.0594    | 29.3779   | 28.5447   | 29.6111  | 27.0703   |
| 8.2989    | 6.73031    | 7.51181   | 6.95291   | 9.04452  | 7.53515   |
| 18.7596   | 17.9176    | 15.3538   | 16.1984   | 14.6344  | 15.7203   |
| 0.434874  | 0.396893   | 0.557655  | 0.398199  | 0.677158 | 0.365604  |
| 5.2085    | 5.44387    | 5.83514   | 5.03127   | 4.66851  | 4.0895    |
| 4.3355    | 3.98917    | 4.33004   | 4.70901   | 4.28248  | 4.38144   |
| 4.05598   | 2.23936    | 3.01853   | 1.71578   | 5.43144  | 2.82001   |
| 4.40462   | 4.24746    | 4.32704   | 3.9428    | 4.23142  | 5.31206   |
| 0.0989488 | 0.112366   | 0.0785364 | 0.0634112 | 0.212697 | 0.0980099 |
| 0         | 0.00651062 | 0         | 0         | 0        | 0         |
| 0         | 0          | 0         | 0         | 0        | 0         |

|           |            |           |           |            |           |
|-----------|------------|-----------|-----------|------------|-----------|
| 11.5779   | 10.5219    | 15.2215   | 9.9063    | 15.4074    | 11.1507   |
| 10.1239   | 8.37441    | 9.29622   | 9.03201   | 10.4426    | 7.68044   |
| 39.5374   | 52.9191    | 45.3853   | 53.1351   | 37.4635    | 49.6503   |
| 0         | 0          | 0         | 0         | 0.185051   | 0         |
| 87.4502   | 80.8275    | 87.6291   | 79.8046   | 109.334    | 88.4817   |
| 46.6339   | 46.4438    | 50.0904   | 47.327    | 48.8248    | 41.7133   |
| 1.9924    | 1.63351    | 1.93765   | 1.05531   | 2.15813    | 1.92482   |
| 66.571    | 59.4897    | 81.2619   | 65.8569   | 87.0006    | 85.5512   |
| 0         | 0          | 0         | 0         | 0.0479869  | 0.0372451 |
| 0.237968  | 0.127095   | 0.171317  | 0.0580955 | 0.368231   | 0.342964  |
| 0.439025  | 0.183347   | 0.159253  | 0.161997  | 0.362102   | 0.228716  |
| 0         | 0          | 0         | 0         | 0          | 0         |
| 66.9114   | 68.5184    | 63.4618   | 69.5958   | 70.6264    | 71.1439   |
| 0.268115  | 0.378759   | 0.484159  | 0.458188  | 0.764795   | 0.525951  |
| 1.76613   | 1.57539    | 1.92399   | 1.49077   | 1.97786    | 1.6532    |
| 4.22805   | 3.38721    | 3.04384   | 3.37812   | 1.01111    | 2.79288   |
| 8.48932   | 9.07785    | 10.34     | 13.3574   | 11.7208    | 14.7463   |
| 26.0643   | 25.4598    | 26.3346   | 25.2556   | 30.2996    | 24.8779   |
| 42.114    | 41.863     | 50.133    | 42.4928   | 48.3969    | 43.1866   |
| 0.0390403 | 0.097304   | 0.0737777 | 0.155673  | 0          | 0.0164108 |
| 33.7118   | 33.1177    | 31.2706   | 30.5438   | 24.2552    | 26.7059   |
| 0         | 0          | 0         | 0         | 0          | 0         |
| 0.12698   | 0.158242   | 0.106651  | 0.032148  | 0.106977   | 0.106754  |
| 6.6604    | 5.99739    | 6.42126   | 6.47763   | 7.10443    | 6.00066   |
| 11.6285   | 13.8727    | 12.8891   | 16.8768   | 16.2488    | 18.314    |
| 4.74124   | 5.3694     | 3.52082   | 5.32399   | 3.31234    | 4.48002   |
| 7.11331   | 7.94581    | 7.61404   | 7.73889   | 8.80227    | 7.95397   |
| 6.65733   | 7.22826    | 6.83034   | 6.76575   | 6.36907    | 5.69709   |
| 0         | 0          | 0         | 0         | 0          | 0         |
| 0         | 0.00673976 | 0.111289  | 0.0369692 | 0.00585811 | 0.0272807 |
| 4.29222   | 5.44894    | 4.19464   | 4.593     | 4.4537     | 4.0132    |
| 6.88109   | 7.86258    | 7.72836   | 6.86301   | 8.2109     | 6.3965    |
| 45.0189   | 45.1271    | 53.922    | 46.0588   | 47.1991    | 36.2978   |
| 0         | 0          | 1.18393   | 0         | 0.0677367  | 0.226064  |
| 1.18884   | 1.29852    | 2.02639   | 2.73276   | 1.20441    | 1.03475   |
| 18.5265   | 16.6768    | 20.5394   | 17.8365   | 22.25      | 17.487    |
| 0.497012  | 0.47258    | 0.470716  | 0.690869  | 0.533683   | 0.562512  |
| 12.0846   | 11.1976    | 11.7405   | 10.9874   | 15.1024    | 13.0144   |
| 7.58942   | 7.51385    | 9.11913   | 5.99973   | 10.5358    | 7.1836    |
| 23.1883   | 49.3146    | 37.2995   | 46.7533   | 29.4228    | 27.5162   |
| 0.188657  | 0.28735    | 0.396134  | 0.238815  | 0.567638   | 0.59918   |
| 47.4174   | 51.2288    | 47.5623   | 55.6698   | 52.6741    | 63.6624   |
| 0         | 0          | 0         | 0         | 0          | 0         |

|            |          |          |           |           |           |
|------------|----------|----------|-----------|-----------|-----------|
| 0          | 0        | 0.439281 | 0.595861  | 0         | 0.146568  |
| 2.59223    | 3.69193  | 3.68864  | 5.44512   | 3.09616   | 4.3781    |
| 0          | 0        | 0.135182 | 0         | 0.116225  | 0.0902083 |
| 18.4585    | 20.2915  | 19.9551  | 17.7804   | 19.9098   | 17.4051   |
| 0.703142   | 0.591472 | 0.819417 | 0.360485  | 0.704507  | 0.280791  |
| 27.9116    | 31.9195  | 42.8042  | 38.1557   | 36.9262   | 38.7691   |
| 21.7385    | 23.2112  | 22.4851  | 23.7023   | 16.8592   | 19.628    |
| 0          | 0        | 0        | 0         | 0         | 0         |
| 10.1828    | 11.7428  | 12.2863  | 19.566    | 13.3894   | 16.5466   |
| 1154.55    | 1177.35  | 1252.67  | 1276.84   | 1108.03   | 973.908   |
| 4.59825    | 3.90091  | 3.92484  | 3.29654   | 5.01647   | 3.56122   |
| 10.1103    | 7.69369  | 13.294   | 10.359    | 13.7385   | 13.2947   |
| 5.26187    | 4.6162   | 6.79914  | 4.85099   | 4.37275   | 3.73108   |
| 6.31451    | 5.91687  | 7.591    | 11.8893   | 6.86586   | 6.56494   |
| 3.35703    | 4.07505  | 4.06478  | 4.37098   | 1.74763   | 1.94262   |
| 18.6111    | 23.4182  | 18.8963  | 18.8438   | 20.0751   | 20.1495   |
| 20.9911    | 18.0537  | 20.5268  | 18.3387   | 17.0529   | 18.2196   |
| 18.8079    | 22.6607  | 19.9108  | 17.6872   | 16.1181   | 18.4087   |
| 1.72424    | 2.00842  | 2.10866  | 2.79315   | 1.51093   | 2.02368   |
| 1.08E-31   | 7.70E-16 | 4.69E-69 | 9.63E-244 | 1.82E-32  | 2.77E-28  |
| 2.30976    | 2.08685  | 2.90996  | 2.0065    | 3.25245   | 1.50493   |
| 0          | 0        | 0        | 0         | 0         | 0         |
| 379.413    | 458.255  | 389.332  | 427.418   | 407.117   | 464.897   |
| 3.10716    | 2.1886   | 5.10595  | 2.30865   | 5.41424   | 1.8172    |
| 4.19685    | 3.81745  | 5.79772  | 4.87413   | 6.69767   | 6.85712   |
| 0          | 0        | 0        | 0         | 0         | 0         |
| 31.1978    | 31.2508  | 36.9169  | 33.8217   | 37.6245   | 38.5713   |
| 831.744    | 993.291  | 831.691  | 877.391   | 757.004   | 890.968   |
| 0.806463   | 0.886776 | 0.836727 | 1.24307   | 0.924929  | 0.917298  |
| 5.40526    | 5.58877  | 5.62516  | 4.68227   | 7.51446   | 6.30227   |
| 0.51185    | 1.02582  | 0.402284 | 1.59739   | 0.428811  | 0.430319  |
| 27.6039    | 29.2044  | 21.7894  | 27.4132   | 23.867    | 26.6914   |
| 5.18292    | 5.9674   | 5.46405  | 5.13998   | 7.33933   | 5.7436    |
| 9.13777    | 8.83912  | 7.27835  | 8.09675   | 6.11848   | 6.9368    |
| 143.402    | 146.297  | 146.424  | 144.934   | 121.727   | 139.824   |
| 0.00227192 | 0.101951 | 0        | 0.685229  | 0.0411656 | 0.0829212 |
| 24.6464    | 21.9006  | 16.2005  | 16.4406   | 18.9584   | 14.2942   |
| 0.480955   | 0.149841 | 0.406304 | 0.620131  | 0.911681  | 0.58045   |
| 0          | 0        | 0        | 0         | 0         | 0         |
| 5.9403     | 6.90733  | 4.62588  | 5.9417    | 3.97717   | 5.30867   |
| 0          | 0        | 0        | 0         | 0         | 19.4224   |
| 89.4896    | 92.7148  | 66.0576  | 101.503   | 66.9828   | 80.6157   |
| 0.747768   | 0.559121 | 0.376832 | 0.42596   | 0.0809967 | 0.251463  |

|           |          |           |           |          |           |
|-----------|----------|-----------|-----------|----------|-----------|
| 0.895378  | 0.598171 | 0.907088  | 0.662532  | 1.3098   | 0.977806  |
| 0.92556   | 0.346029 | 0.699642  | 0.632685  | 0.100255 | 0.233439  |
| 2.26858   | 2.41135  | 1.00873   | 0.608131  | 2.60183  | 2.52427   |
| 1990.25   | 2261.92  | 2026.7    | 2063.33   | 1857.01  | 2194.86   |
| 19.2578   | 22.5412  | 20.394    | 22.1287   | 17.3058  | 16.1627   |
| 15.846    | 16.2462  | 19.377    | 12.6164   | 17.3681  | 14.2568   |
| 2.31941   | 2.86291  | 2.82606   | 2.23418   | 2.90653  | 2.46382   |
| 2.20105   | 0        | 2.79164   | 0         | 0        | 0         |
| 0         | 0        | 0         | 0         | 0        | 0         |
| 24.5942   | 23.8221  | 17.9731   | 20.2356   | 13.5071  | 14.9151   |
| 2.45196   | 2.67061  | 2.60525   | 2.26119   | 3.37895  | 2.49631   |
| 1.08285   | 1.00547  | 2.19347   | 1.8626    | 1.65588  | 1.26737   |
| 15.1838   | 13.4984  | 12.6828   | 10.1225   | 11.6272  | 8.69717   |
| 28.71     | 26.3379  | 34.8387   | 32.8299   | 39.1418  | 32.5319   |
| 41.0968   | 43.9332  | 41.7404   | 52.4835   | 49.7357  | 45.3022   |
| 0         | 0        | 0         | 0         | 0        | 0         |
| 3.50724   | 3.50783  | 2.73082   | 2.88105   | 2.65765  | 2.86      |
| 10.5489   | 11.8619  | 10.4498   | 12.8114   | 9.72874  | 11.3547   |
| 0         | 0        | 0         | 0         | 0        | 0         |
| 0.893532  | 1.29905  | 0.696773  | 1.64802   | 1.03684  | 0.733323  |
| 2.20553   | 1.80579  | 2.0637    | 2.08153   | 2.11551  | 2.11899   |
| 184.967   | 188.611  | 153.699   | 173.135   | 124.426  | 155.519   |
| 15.7014   | 14.711   | 18.2221   | 14.5196   | 16.9081  | 14.8962   |
| 10.7077   | 8.38768  | 9.85612   | 8.81328   | 13.4846  | 11.2434   |
| 0         | 0.319856 | 0.323361  | 0         | 0        | 0.215782  |
| 0.0461372 | 0        | 0         | 0.078845  | 0.174912 | 0.0775763 |
| 0.0370099 | 0.101468 | 0.0559525 | 0.0674637 | 0.024053 | 0.0248918 |
| 0.953088  | 0.752233 | 1.00063   | 1.26681   | 1.82385  | 1.65596   |
| 6.0268    | 7.30838  | 6.57077   | 7.79053   | 4.36881  | 6.06068   |
| 58.5611   | 54.1108  | 54.84     | 54.0272   | 46.4467  | 57.9159   |
| 16.3234   | 15.2083  | 17.3561   | 14.0802   | 16.9734  | 13.2298   |
| 38.0308   | 152.717  | 10.4159   | 200.341   | 47.5588  | 6.25558   |
| 27.0092   | 28.032   | 32.2935   | 26.6501   | 35.5124  | 35.415    |
| 0.097407  | 0.121389 | 0.122719  | 0.332922  | 0        | 0.163783  |
| 8.39872   | 11.1546  | 10.1785   | 8.47595   | 11.0805  | 7.62285   |
| 4.98926   | 7.5714   | 11.9907   | 10.0156   | 26.1263  | 19.3823   |
| 8.00941   | 5.99523  | 7.62504   | 6.72832   | 12.1496  | 10.6621   |
| 0.083092  | 0.317708 | 0.0475836 | 0.433883  | 0.106368 | 0.169349  |
| 0         | 0        | 0         | 0         | 0        | 0         |
| 42.7706   | 44.2586  | 45.2247   | 42.9631   | 37.8485  | 35.4762   |
| 0         | 0        | 0         | 0         | 0        | 0.0589437 |
| 2.50168   | 2.17856  | 3.72135   | 3.88029   | 2.57918  | 3.11679   |
| 3.22055   | 3.16686  | 3.97289   | 2.90471   | 4.64216  | 3.67353   |

|           |           |           |           |           |           |
|-----------|-----------|-----------|-----------|-----------|-----------|
| 40.5692   | 39.2704   | 40.2841   | 47.0124   | 37.2589   | 43.373    |
| 0.170197  | 0.0941684 | 0.220999  | 0.204762  | 0.209824  | 0.0435615 |
| 0.249155  | 0         | 0         | 0         | 0.53976   | 0.104734  |
| 131.137   | 132.486   | 117.842   | 131.093   | 117.693   | 120.85    |
| 12.248    | 11.0181   | 14.4333   | 13.7544   | 13.1206   | 12.0271   |
| 0         | 0         | 0         | 0         | 0         | 0         |
| 0         | 0         | 0         | 0         | 0         | 0         |
| 3.41811   | 3.75915   | 4.6443    | 4.8447    | 4.68808   | 4.00653   |
| 8.04247   | 8.92811   | 4.36739   | 6.52971   | 5.00658   | 4.27445   |
| 0         | 0         | 0         | 0         | 0         | 0         |
| 5.17394   | 3.99242   | 3.90249   | 5.16897   | 6.57142   | 5.57254   |
| 15.4042   | 16.3159   | 17.6736   | 15.1852   | 18.2512   | 19.2709   |
| 0         | 0         | 0         | 0         | 0         | 0         |
| 10.3485   | 10.0475   | 9.83026   | 8.15898   | 9.91211   | 8.60179   |
| 0.741487  | 0.984992  | 0.872602  | 0.403417  | 0.803164  | 0.418632  |
| 0         | 0         | 0         | 0         | 0         | 0         |
| 14.6045   | 13.828    | 15.5433   | 14.1333   | 16.6259   | 13.0381   |
| 7.8898    | 8.42765   | 5.58533   | 5.0508    | 6.10434   | 7.70697   |
| 3.67669   | 5.32073   | 5.27944   | 4.14376   | 1.58344   | 1.46304   |
| 377.042   | 358.994   | 310.834   | 343.344   | 266.756   | 377.865   |
| 10.6358   | 10.6538   | 10.573    | 10.8277   | 9.24512   | 9.48687   |
| 2.45486   | 2.40139   | 1.73136   | 1.3957    | 1.38078   | 1.37336   |
| 0         | 0         | 0         | 0         | 0         | 0         |
| 126.922   | 132.747   | 114.891   | 134.801   | 99.6158   | 121.167   |
| 19.9803   | 19.3011   | 22.4344   | 22.1165   | 19.6221   | 18.8019   |
| 0.404442  | 0.33601   | 0.558066  | 0.438832  | 0.479806  | 0.680039  |
| 3.50626   | 3.87101   | 2.43195   | 3.2165    | 1.57492   | 2.01807   |
| 12.4629   | 12.1091   | 13.2175   | 11.6718   | 15.3681   | 11.5728   |
| 7.00251   | 6.68909   | 6.51784   | 7.04226   | 7.37472   | 7.7135    |
| 2.74884   | 2.40576   | 4.34218   | 1.41385   | 2.53831   | 1.85388   |
| 0.0290028 | 0         | 0.0365393 | 0         | 0         | 0         |
| 10.781    | 16.0439   | 9.93404   | 14.985    | 10.3373   | 10.9361   |
| 112.123   | 125.354   | 103.504   | 122.418   | 93.1411   | 112.744   |
| 0         | 0.0851595 | 0         | 0.0155707 | 0.0296078 | 0.0114901 |
| 1.26562   | 0.992108  | 1.59569   | 1.37118   | 0.694603  | 0.579039  |
| 0.0283883 | 0.0707549 | 0         | 0         | 0.0307496 | 0         |
| 30.8161   | 30.2601   | 28.6738   | 25.8987   | 22.8622   | 19.2151   |
| 8.05979   | 7.99909   | 8.29161   | 7.33722   | 6.65581   | 6.70189   |
| 4.06129   | 4.28925   | 3.99479   | 3.43419   | 4.03548   | 2.99596   |
| 0         | 0         | 0         | 0.039721  | 0.037765  | 0         |
| 106.805   | 103.241   | 57.1014   | 62.3235   | 44.4618   | 69.2792   |
| 36.6794   | 38.4895   | 38.7722   | 38.2407   | 33.1057   | 36.7174   |
| 39.141    | 39.1503   | 25.6182   | 31.7431   | 17.5778   | 25.9322   |

|           |           |           |           |           |           |
|-----------|-----------|-----------|-----------|-----------|-----------|
| 12.6796   | 11.4613   | 8.7615    | 8.84428   | 14.5168   | 12.3731   |
| 207.688   | 216.969   | 208.943   | 201.648   | 184.006   | 215.387   |
| 0         | 0         | 0         | 0         | 0         | 0         |
| 22.5437   | 20.2699   | 20.5745   | 24.2418   | 16.2309   | 18.5491   |
| 0         | 0         | 0         | 0         | 0         | 0         |
| 0         | 0         | 0         | 0         | 0         | 0.175832  |
| 2824.32   | 3373.79   | 2836.28   | 3165.07   | 2654.88   | 3095.96   |
| 445.647   | 386.833   | 589.743   | 450.362   | 801.57    | 536.03    |
| 119.564   | 113.615   | 110.528   | 107.059   | 82.6615   | 93.8816   |
| 2.25358   | 1.23327   | 1.92925   | 0.832475  | 3.79424   | 1.50669   |
| 4.93907   | 5.12697   | 4.80022   | 3.67301   | 3.85663   | 3.79642   |
| 0         | 0         | 0.0250474 | 0         | 0.0430698 | 0.0668574 |
| 10.3739   | 11.3942   | 10.6648   | 13.9438   | 12.672    | 14.2288   |
| 9.06792   | 8.04769   | 11.4242   | 8.0494    | 8.45731   | 8.68285   |
| 32.2235   | 29.3845   | 29.457    | 31.9203   | 23.6226   | 27.0907   |
| 11.4827   | 11.9923   | 12.8794   | 10.9443   | 13.5316   | 11.8036   |
| 0.0990822 | 0.123476  | 0.124829  | 1.24171   | 0.107324  | 0.166599  |
| 0.618675  | 0.655343  | 0.857385  | 0.599119  | 1.0052    | 0.754185  |
| 1.59045   | 1.44147   | 0.364316  | 0.98835   | 1.40952   | 1.094     |
| 300.367   | 310.218   | 305.208   | 278.012   | 254.54    | 281.24    |
| 0.0386935 | 0         | 0.195131  | 0         | 0         | 0.130217  |
| 0.631846  | 0.813652  | 1.40633   | 1.87161   | 1.48287   | 1.29259   |
| 0.807053  | 1.10187   | 15.1656   | 15.3729   | 2.05594   | 1.63928   |
| 0         | 0         | 0         | 0         | 0         | 0         |
| 1.93834   | 2.35062   | 2.48141   | 2.03023   | 2.40434   | 1.761     |
| 11.4538   | 11.8843   | 13.6342   | 13.7358   | 18.7828   | 21.4504   |
| 0         | 0         | 0.019486  | 0         | 0         | 0         |
| 26.4      | 27.4407   | 27.4463   | 26.4209   | 26.9721   | 25.4443   |
| 2.74143   | 1.64804   | 2.62683   | 2.5624    | 3.35633   | 2.66183   |
| 1.82782   | 1.84456   | 2.23456   | 1.26499   | 3.41696   | 1.32042   |
| 22.326    | 22.9657   | 17.3374   | 16.0671   | 14.0537   | 14.2388   |
| 0.122044  | 0.108637  | 0.0878618 | 0.0595899 | 0.0188851 | 0.0293155 |
| 0         | 0.0346769 | 0.105171  | 0.221913  | 0.0904221 | 0.0701813 |
| 11.22     | 11.4401   | 11.5253   | 11.5118   | 10.7377   | 10.4511   |
| 26.0898   | 26.3997   | 23.9068   | 25.824    | 22.8608   | 25.2184   |
| 2.70619   | 2.69796   | 2.45478   | 2.65148   | 1.52427   | 3.13968   |
| 0.0345306 | 0.0430319 | 0.0435035 | 0         | 0         | 0.0290303 |
| 0.0230317 | 0.0287021 | 0         | 0.104959  | 0.09979   | 0.0968153 |
| 6.3516    | 7.01927   | 4.45399   | 6.09849   | 4.43517   | 4.58422   |
| 22.9978   | 21.0405   | 20.4272   | 22.855    | 21.8954   | 20.3674   |
| 0.0552255 | 0.137644  | 0.034788  | 0         | 0.0598191 | 0         |
| 10.8843   | 8.94905   | 13.8932   | 8.49653   | 19.0764   | 14.5197   |
| 9.50059   | 10.5777   | 8.59242   | 6.75219   | 9.25854   | 8.28772   |

|           |           |           |           |           |           |
|-----------|-----------|-----------|-----------|-----------|-----------|
| 141.236   | 172.223   | 109.058   | 169.559   | 105.28    | 132.784   |
| 2.45314   | 1.73273   | 2.49926   | 2.73429   | 4.69086   | 4.49704   |
| 1.41823   | 0.530217  | 2.05477   | 0.646304  | 0.844906  | 0.178848  |
| 63.7507   | 66.2181   | 58.1167   | 56.693    | 55.7539   | 72.7609   |
| 8.25171   | 7.54396   | 8.70359   | 6.65824   | 7.86098   | 7.34798   |
| 0.0502791 | 0         | 0.0158361 | 0.028641  | 0.0544613 | 0.0105676 |
| 0         | 0         | 0.330543  | 0.446209  | 0.211373  | 0.145823  |
| 0.0621038 | 0.0345802 | 0.159817  | 0.133981  | 0.187496  | 0.153304  |
| 112.999   | 117.683   | 130.058   | 129.584   | 120.11    | 122.039   |
| 0.0337616 | 0         | 0.127604  | 0         | 0.10971   | 0         |
| 0.360174  | 0.138107  | 0.418862  | 0.315646  | 0.360123  | 0.442558  |
| 4.86115   | 4.6464    | 4.301     | 4.02061   | 5.27805   | 3.77498   |
| 6.47833   | 4.52515   | 4.91265   | 4.32497   | 8.96145   | 4.71791   |
| 0         | 0.0381198 | 0         | 0         | 0         | 0.0257164 |
| 95.589    | 93.6872   | 100.365   | 96.9458   | 93.4114   | 96.6564   |
| 71.257    | 74.4444   | 79.7338   | 68.4056   | 70.9834   | 66.1262   |
| 0.0114437 | 0.0570447 | 0.0720872 | 0.0260753 | 0.111561  | 0.0769671 |
| 0.20247   | 0.358558  | 0.0805526 | 0.109265  | 0.150055  | 0.125425  |
| 7.89309   | 8.30461   | 7.61202   | 6.84979   | 5.95106   | 5.87637   |
| 0.743537  | 0.566252  | 0.546436  | 0.564733  | 0.827756  | 1.12865   |
| 3.36919   | 3.53717   | 2.18205   | 2.19058   | 4.16522   | 3.41793   |
| 0         | 0.197534  | 0.599097  | 0         | 0         | 0         |
| 0.721491  | 0.604581  | 0.407471  | 0.53854   | 0.646762  | 0.475855  |
| 42.6673   | 45.5599   | 41.6042   | 43.3493   | 40.5655   | 48.5181   |
| 0.0962839 | 0.0899917 | 2.66868   | 1.06952   | 1.64261   | 1.01184   |
| 12.1657   | 9.90384   | 12.3001   | 11.3458   | 11.8771   | 9.76514   |
| 0         | 0         | 0         | 0         | 0         | 0         |
| 1.06461   | 0.963306  | 1.08586   | 1.11185   | 2.07274   | 1.53411   |
| 0.022087  | 0.0550495 | 0.0556527 | 0.0251633 | 0.0239241 | 0         |
| 0         | 0         | 0         | 0         | 0         | 0         |
| 0         | 0         | 0         | 0         | 0         | 0         |
| 0.163605  | 0.203885  | 0.226731  | 0.223671  | 0.194935  | 0.233827  |
| 5.5161    | 5.14041   | 8.97897   | 7.22983   | 5.86917   | 4.04238   |
| 0.0539213 | 0.0223989 | 0.0226443 | 0.109212  | 0.131414  | 0.0377769 |
| 2.74144   | 2.7677    | 2.77617   | 2.39188   | 4.05954   | 2.43605   |
| 38.3347   | 43.4619   | 39.7188   | 47.3023   | 36.9122   | 40.0299   |
| 55.0254   | 58.2816   | 57.4673   | 57.7175   | 52.7209   | 57.0893   |
| 5.18359   | 4.63149   | 3.94836   | 2.24943   | 5.236     | 3.93389   |
| 27.2114   | 27.6412   | 27.7496   | 27.7109   | 31.0562   | 29.0994   |
| 1.41559   | 2.06652   | 1.17197   | 0.691181  | 1.05143   | 1.25811   |
| 9.05209   | 8.02608   | 12.1355   | 8.78846   | 12.1275   | 9.20272   |
| 10.7124   | 12.5762   | 9.85671   | 10.7991   | 9.83922   | 8.6895    |
| 0         | 0         | 0         | 0         | 0         | 0         |



|           |           |          |           |           |           |
|-----------|-----------|----------|-----------|-----------|-----------|
| 0         | 0         | 0        | 0         | 0         | 0         |
| 9.92361   | 11.3165   | 10.246   | 11.2098   | 10.498    | 11.3718   |
| 206.312   | 208.46    | 198.202  | 200.674   | 187.244   | 194.924   |
| 7.63274   | 7.38457   | 7.02052  | 6.86279   | 7.38561   | 7.23349   |
| 0.0126053 | 0.0157087 | 0        | 0         | 0.0136538 | 0.0423901 |
| 0.0207505 | 2.41E-12  | 3.94E-13 | 7.22E-14  | 0.0909555 | 3.23E-13  |
| 5.9527    | 5.39704   | 5.07627  | 5.27637   | 5.88981   | 6.85766   |
| 84.3746   | 81.867    | 63.1006  | 102.797   | 86.044    | 106.515   |
| 0         | 0         | 0        | 0         | 0         | 0         |
| 0.819661  | 0.680973  | 0.258163 | 0.233456  | 0.0739867 | 0.11485   |
| 0.103699  | 0.193845  | 0.217744 | 0.118143  | 0.168488  | 0.0581209 |
| 11.5354   | 9.73336   | 14.3816  | 11.0886   | 13.2759   | 11.1122   |
| 0.0340928 | 0.0443832 | 0.055235 | 0.0902006 | 0.275415  | 0.334807  |
| 0         | 0         | 0        | 0         | 0         | 0         |
| 0.585044  | 0.43252   | 0.681404 | 0.494076  | 1.19961   | 0.66492   |
| 0.700786  | 1.40923   | 2.08849  | 1.85106   | 1.90543   | 1.72904   |
| 5.22607   | 4.38823   | 5.18078  | 4.25268   | 4.08821   | 3.43461   |
| 1.37084   | 0.703435  | 1.01592  | 2.20486   | 1.22283   | 1.49145   |
| 1.26783   | 1.36132   | 1.32845  | 1.28895   | 1.05761   | 0.96851   |
| 13.3623   | 12.0392   | 12.9526  | 10.9252   | 17.1761   | 11.9349   |
| 3.40514   | 3.04606   | 3.2281   | 2.64069   | 2.60195   | 3.34459   |
| 7.29542   | 6.0305    | 5.79849  | 6.50336   | 6.4678    | 6.83278   |
| 86.9206   | 36.1068   | 36.5024  | 132.036   | 31.3836   | 24.3584   |
| 0         | 0         | 0        | 0         | 0         | 0         |
| 4.92648   | 4.5789    | 5.60708  | 4.56704   | 9.20487   | 6.9588    |
| 0.653885  | 0.715496  | 0.944356 | 0.74496   | 1.4511    | 0.670401  |
| 0.0374727 | 0         | 0        | 0.042692  | 0         | 0         |
| 1.23909   | 1.02943   | 1.04071  | 1.09797   | 1.64041   | 0.347238  |
| 2.29E-07  | 4.28E-08  | 2.99E-07 | 1.68E-08  | 6.44E-08  | 2.25E-07  |
| 193.905   | 179.404   | 96.4998  | 109.969   | 79.193    | 102.888   |
| 9.98212   | 11.4907   | 10.2094  | 9.69044   | 10.0499   | 10.2598   |
| 0.740819  | 1.04337   | 0.926931 | 1.03116   | 0.805893  | 1.75987   |
| 1.19692   | 1.30219   | 0.742006 | 1.01731   | 2.24312   | 2.7313    |
| 3.73304   | 1.93528   | 3.27587  | 2.64098   | 3.26273   | 2.14683   |
| 11.3313   | 11.4222   | 13.7797  | 10.4298   | 14.4182   | 12.9838   |
| 0         | 0         | 0        | 0         | 0         | 0         |
| 0.203632  | 0.0499114 | 0.3527   | 0.41719   | 0.433543  | 0.311928  |
| 3.24303   | 2.61148   | 2.43657  | 2.47541   | 2.59278   | 2.83651   |
| 0         | 0.310602  | 0.314005 | 0.0946513 | 0.809912  | 0.698461  |
| 5.20968   | 3.98144   | 6.6648   | 4.59852   | 7.21174   | 4.6645    |
| 3.6229    | 3.77788   | 3.81928  | 3.30332   | 4.86334   | 3.34026   |
| 20.1853   | 21.7775   | 8.3935   | 10.2939   | 12.0515   | 14.0969   |
| 6.3772    | 7.12637   | 7.70075  | 5.99519   | 6.50638   | 5.14591   |

|           |           |           |          |           |           |
|-----------|-----------|-----------|----------|-----------|-----------|
| 0.921317  | 0.410052  | 1.57527   | 0.824718 | 1.35436   | 1.2725    |
| 0         | 0         | 0         | 0        | 0         | 0         |
| 0         | 0         | 0         | 0        | 0         | 0         |
| 0.0528812 | 0.263604  | 0.609128  | 0.728994 | 0.977588  | 0.980308  |
| 12.7099   | 13.2752   | 14.4574   | 14.9837  | 13.3544   | 12.8378   |
| 0.0504773 | 0.0629048 | 0.127188  | 0.158147 | 0.123021  | 0.0530461 |
| 0.211523  | 0.285567  | 0.0888296 | 0.180739 | 0.229118  | 0.0592768 |
| 0.591307  | 1.19744   | 0.744961  | 0.926291 | 0.480369  | 0.559259  |
| 10.3625   | 12.2433   | 8.1534    | 9.33388  | 12.1867   | 13.7851   |
| 0         | 0         | 0         | 1.66361  | 0         | 0         |
| 2.14244   | 0.971056  | 1.21869   | 0.392742 | 1.58506   | 0.581681  |
| 232.883   | 210.716   | 215.601   | 220.696  | 168.367   | 185.585   |
| 0         | 0         | 0         | 0        | 0         | 0         |
| 0.443632  | 0.552853  | 0.978095  | 0.505422 | 1.20133   | 0.932417  |
| 18.5999   | 18.954    | 20.6986   | 22.3096  | 18.4824   | 19.2867   |
| 3.81672   | 7.31753   | 3.14403   | 5.51903  | 5.40626   | 4.81315   |
| 0.026218  | 0.0653456 | 0.0660616 | 0.089609 | 0.0851963 | 0.0220418 |
| 0         | 0         | 0         | 0        | 0         | 0         |
| 7.84009   | 7.82801   | 3.89799   | 3.51289  | 9.05195   | 8.02715   |
| 7.9414    | 6.70079   | 21.4403   | 10.0896  | 13.2544   | 5.35327   |
| 0.0418829 | 0.0880781 | 0.228026  | 0.107362 | 0.154389  | 0         |
| 29.8375   | 31.4789   | 44.8471   | 41.9216  | 52.0171   | 50.9291   |
| 9.46136   | 9.49727   | 10.5954   | 7.33554  | 10.1059   | 6.739     |
| 0.141863  | 0         | 0.0893636 | 0        | 0.0768318 | 0.0894497 |
| 16.5965   | 18.0372   | 16.6589   | 17.9998  | 16.7321   | 14.5979   |
| 124.677   | 121.344   | 117.698   | 131.104  | 94.6966   | 128.615   |
| 0         | 0         | 0         | 0        | 0         | 0         |
| 6.18849   | 7.90733   | 5.5267    | 5.26552  | 3.4789    | 2.6343    |
| 34.9821   | 27.5151   | 36.3689   | 24.0829  | 37.0322   | 32.002    |
| 2.33181   | 2.17943   | 2.0401    | 1.84563  | 2.80686   | 1.63412   |
| 0         | 0         | 0         | 0        | 0         | 0         |
| 2.19603   | 1.89492   | 1.56672   | 1.36871  | 1.83083   | 1.35452   |
| 0         | 0         | 0         | 0        | 0         | 0         |
| 0.168229  | 0         | 0         | 0.191661 | 0.364979  | 0.141432  |
| 1.74489   | 1.99146   | 1.45651   | 1.29941  | 1.99956   | 1.23962   |
| 0.34551   | 0.406653  | 0.507841  | 0.502976 | 0.582165  | 0.177512  |
| 4.62556   | 3.30056   | 4.13567   | 2.37992  | 4.72747   | 2.19527   |
| 0.440884  | 0.588675  | 0.7935    | 0.574048 | 1.09156   | 0.476559  |
| 0         | 0         | 0         | 0        | 0         | 0         |
| 6.09481   | 5.19681   | 8.4443    | 6.17433  | 6.89437   | 6.86982   |
| 0.581514  | 0.536944  | 0.426987  | 0.897226 | 0.872858  | 0.473085  |
| 0.777558  | 0.70811   | 1.80851   | 1.09029  | 2.20277   | 1.30741   |
| 41.6656   | 41.3124   | 40.3946   | 37.7709  | 42.4479   | 38.1607   |

|            |           |           |           |           |           |
|------------|-----------|-----------|-----------|-----------|-----------|
| 5.49755    | 5.17804   | 4.28628   | 4.2051    | 6.00358   | 6.93505   |
| 7.13245    | 7.25681   | 7.25681   | 8.2797    | 10.2616   | 10.3829   |
| 61.5448    | 153.394   | 155.075   | 105.175   | 66.6641   | 129.354   |
| 5.95615    | 6.61546   | 14.3296   | 13.8034   | 10.9834   | 14.2893   |
| 0          | 0.0622448 | 0.0629269 | 0.113809  | 0.0541024 | 0         |
| 18.3951    | 16.5874   | 15.8269   | 17.4645   | 7.85689   | 8.67548   |
| 1.07316    | 1.16591   | 0.797348  | 0.893463  | 1.08791   | 1.20296   |
| 45.0043    | 43.7055   | 41.2118   | 39.1691   | 41.529    | 40.0129   |
| 0          | 0         | 0         | 0         | 0         | 0.126641  |
| 0          | 0         | 0         | 0         | 0         | 0         |
| 34.6108    | 30.8616   | 18.4192   | 21.8233   | 20.9426   | 31.6563   |
| 0          | 1.07982   | 0         | 1.75553   | 0.280132  | 0.671938  |
| 2.36705    | 1.84882   | 2.38361   | 1.78516   | 2.81672   | 2.61363   |
| 84.8473    | 85.2808   | 79.8281   | 90.376    | 69.4542   | 80.3495   |
| 0.106843   | 0         | 0.201909  | 0.0608619 | 0.289324  | 0.0449119 |
| 23.7835    | 97.1883   | 29.9638   | 534.431   | 23.1657   | 49.6519   |
| 3.03889    | 2.25177   | 6.00153   | 4.21127   | 6.31644   | 4.48822   |
| 9.74481    | 10.4091   | 13.689    | 10.4973   | 11.6288   | 8.72817   |
| 0.956561   | 98.2756   | 4.97251   | 397.028   | 20.7226   | 56.3659   |
| 30.7674    | 29.0837   | 27.4806   | 26.3713   | 28.8973   | 30.639    |
| 31.0746    | 33.064    | 32.8898   | 28.1734   | 30.2611   | 32.2949   |
| 0.0782397  | 0.0243756 | 0.0985704 | 0.0222843 | 0.0944226 | 0.0142105 |
| 0.00687605 | 0         | 0         | 0         | 0         | 0         |
| 2.81015    | 3.3254    | 1.66733   | 1.85911   | 1.6294    | 0.485324  |
| 14.9088    | 17.7556   | 15.3594   | 14.4752   | 14.5579   | 24.0184   |
| 0          | 0         | 0         | 0         | 0         | 0         |
| 59.265     | 0         | 199.107   | 0         | 0         | 33.2165   |
| 0.500401   | 0.695904  | 0.687809  | 1.01377   | 1.04429   | 1.0756    |
| 0.107944   | 0.134519  | 0.475976  | 0.122978  | 0.116922  | 0.136124  |
| 0.31798    | 0.980668  | 8.11E-06  | 1.13622   | 0.355741  | 0.838117  |
| 11.8292    | 11.3309   | 12.2923   | 10.6865   | 14.169    | 12.2107   |
| 11.0966    | 9.66399   | 9.66399   | 9.20729   | 8.99625   | 8.72596   |
| 12.7953    | 13.6059   | 11.9471   | 11.8707   | 14.8747   | 15.3143   |
| 0.0661864  | 0         | 0.333541  | 0.15081   | 0.0716918 | 0.333862  |
| 0          | 0         | 0         | 0         | 0         | 0         |
| 0          | 0         | 0.114945  | 0         | 0         | 0         |
| 4.3521     | 4.61257   | 3.94572   | 5.37532   | 5.28684   | 3.62467   |
| 58.6153    | 61.2637   | 48.0842   | 35.7168   | 34.1961   | 44.5502   |
| 9.31555    | 8.42729   | 8.24783   | 7.3513    | 8.09718   | 6.81623   |
| 0.677752   | 0.871853  | 0.881407  | 0.730648  | 1.01036   | 0.526917  |
| 97.4816    | 108.177   | 76.4831   | 93.6239   | 93.4608   | 98.0319   |
| 46.2045    | 0         | 0         | 0         | 0         | 0         |
| 7.62736    | 6.97705   | 8.23185   | 6.39347   | 8.81829   | 8.06258   |

|           |           |          |           |           |           |
|-----------|-----------|----------|-----------|-----------|-----------|
| 0         | 0         | 0        | 0         | 0         | 0         |
| 15.651    | 9.18325   | 16.6781  | 14.1161   | 22.6744   | 13.3225   |
| 0         | 0         | 0.346502 | 0         | 0         | 0         |
| 0         | 0         | 0        | 0         | 0         | 0.033884  |
| 0         | 0         | 0        | 0         | 0         | 0         |
| 23.8399   | 23.1149   | 28.0769  | 26.2411   | 31.4097   | 24.9034   |
| 0         | 0.0752224 | 0        | 0.137538  | 0         | 0.202987  |
| 4.58882   | 6.43699   | 4.35772  | 5.91101   | 2.67259   | 2.90795   |
| 3.32488   | 3.00581   | 4.28571  | 3.64564   | 4.38209   | 3.79703   |
| 5.15206   | 6.01968   | 6.23222  | 6.54788   | 5.20261   | 5.36101   |
| 0.0795248 | 0         | 0        | 0         | 0         | 0         |
| 0         | 0         | 0        | 0         | 0         | 0         |
| 0.0287711 | 0.107563  | 0.144989 | 0.0327784 | 0.0311642 | 0         |
| 9.29606   | 9.9177    | 8.04207  | 9.4735    | 8.78714   | 8.70502   |
| 0         | 0         | 0        | 0         | 0         | 0         |
| 14.3447   | 14.223    | 14.1533  | 13.5127   | 14.1077   | 12.6806   |
| 1.41083   | 1.82562   | 1.71744  | 2.10538   | 1.11013   | 2.07999   |
| 2.17914   | 0         | 0        | 2.48265   | 4.72079   | 3.66405   |
| 0.143865  | 0.179284  | 0.181248 | 0.163902  | 1.09082   | 0.725692  |
| 3.96354   | 3.59226   | 6.35534  | 7.06074   | 8.19616   | 8.54254   |
| 0         | 0         | 0        | 0         | 0         | 0.112712  |
| 1.42338   | 1.25163   | 1.67303  | 1.33078   | 1.22935   | 1.47715   |
| 21.721    | 21.1378   | 19.0612  | 19.869    | 19.1241   | 16.5425   |
| 1.17727   | 1.1047    | 0.557156 | 0.506297  | 1.12312   | 0.856736  |
| 1.31034   | 0.407773  | 1.82     | 0.594979  | 2.47298   | 0.958242  |
| 65.8726   | 67.1272   | 78.8548  | 79.4732   | 40.57     | 50.2453   |
| 1.84748   | 3.35481   | 3.39157  | 2.34534   | 3.94512   | 3.63891   |
| 0         | 0         | 0        | 0         | 0.0801643 | 0.0622197 |
| 1.97643   | 1.81973   | 2.58014  | 1.36806   | 2.94954   | 2.0768    |
| 5.56883   | 10.3061   | 2.80128  | 6.25543   | 7.88616   | 3.56273   |
| 22.4239   | 21.5617   | 16.3088  | 19.0049   | 19.8973   | 20.9348   |
| 10.8495   | 7.54312   | 9.49625  | 12.1005   | 9.15419   | 13.0579   |
| 0         | 0         | 0        | 0         | 0         | 0         |
| 0.806207  | 0.789402  | 0.362751 | 0.262428  | 0.935643  | 0.435721  |
| 6.20583   | 6.98891   | 6.72083  | 6.43112   | 6.96038   | 6.89493   |
| 0.014824  | 0.0738948 | 0        | 0         | 0         | 0         |
| 11.0817   | 10.8037   | 9.12298  | 12.1761   | 11.3546   | 10.9267   |
| 2.97132   | 2.44682   | 1.71509  | 1.16324   | 4.14008   | 4.18172   |
| 30.463    | 31.5533   | 26.8187  | 30.2492   | 31.2504   | 33.5721   |
| 0.247906  | 0.260939  | 0.505971 | 0.457548  | 0.690505  | 0.668798  |
| 0         | 0         | 0        | 0         | 0         | 0         |
| 76.7783   | 84.0397   | 106.71   | 123.21    | 102.475   | 99.0812   |
| 50.3436   | 56.8645   | 54.1813  | 55.5683   | 50.7262   | 43.246    |

|           |           |           |           |           |           |
|-----------|-----------|-----------|-----------|-----------|-----------|
| 20.4874   | 18.166    | 21.6991   | 16.9592   | 15.8135   | 17.0942   |
| 1.61619   | 1.7689    | 2.03616   | 1.50506   | 1.58317   | 1.31149   |
| 0         | 0         | 0         | 0         | 0         | 0         |
| 2.76484   | 2.70469   | 3.07909   | 2.67691   | 3.21969   | 2.61003   |
| 131.896   | 132.186   | 132.38    | 116.297   | 109.101   | 111.437   |
| 20.0611   | 19.3793   | 24.2563   | 22.4206   | 23.1638   | 20.035    |
| 0         | 0         | 0.229357  | 0         | 0.197193  | 0.153052  |
| 2.06604   | 1.75895   | 2.06171   | 2.09745   | 2.19357   | 2.51083   |
| 4.46136   | 4.09493   | 3.94308   | 3.81437   | 4.54376   | 3.77359   |
| 0.192858  | 0.721017  | 0.121486  | 0.219719  | 0.313349  | 0.243207  |
| 0         | 0         | 0.0414182 | 0         | 0         | 0.0276388 |
| 0.124875  | 0.116751  | 0.196626  | 0.0356323 | 0.105182  | 0.0524616 |
| 14.1629   | 14.4407   | 12.328    | 14.6687   | 13.5279   | 12.6646   |
| 55.8386   | 58.7802   | 54.2441   | 60.4449   | 64.4237   | 62.177    |
| 0.352557  | 0.244087  | 0.394819  | 0.446292  | 0.233373  | 0.312866  |
| 0.0365457 | 0.0910864 | 0.322296  | 0.749446  | 0.514612  | 0.614488  |
| 0.18339   | 0.15236   | 0.077015  | 0.139289  | 0.13243   | 0.256964  |
| 0         | 0         | 0         | 0         | 0         | 0         |
| 0.0564632 | 0.0879554 | 0.0355677 | 0.0964912 | 0.10703   | 0.0830712 |
| 11.4701   | 7.42624   | 7.5971    | 9.01302   | 8.23737   | 7.32571   |
| 0         | 0         | 0         | 0         | 0         | 0         |
| 1.45179   | 0.818457  | 0.544359  | 0.866382  | 0.636509  | 0.421377  |
| 2.84328   | 2.92189   | 2.82025   | 3.65025   | 3.97613   | 3.14852   |
| 28.2978   | 25.7894   | 30.8424   | 30.2635   | 28.0672   | 29.6484   |
| 0         | 0         | 0         | 0         | 0         | 0         |
| 24.1057   | 21.2216   | 23.9737   | 21.1671   | 23.3293   | 22.007    |
| 0         | 0         | 0         | 0         | 0         | 0         |
| 12.3883   | 11.391    | 13.3302   | 10.8658   | 13.4824   | 13.4295   |
| 0.292191  | 0.442155  | 0.210353  | 0.190222  | 0.0678204 | 0.0877316 |
| 0.0340409 | 0.0424217 | 0         | 0         | 0.0737448 | 0         |
| 1.09171   | 0.748267  | 0.962775  | 0.497506  | 0.886887  | 0.458906  |
| 23.9948   | 24.704    | 30.1335   | 23.1513   | 26.198    | 24.5805   |
| 0.169803  | 0.169287  | 0.0855709 | 0.116072  | 0.294284  | 0.399716  |
| 2.5421    | 2.32046   | 4.33772   | 2.89561   | 5.58377   | 3.21669   |
| 0.491703  | 1.22552   | 0         | 0         | 0         | 0.413381  |
| 0.0619851 | 0         | 0         | 0         | 0         | 0.0521116 |
| 6.69154   | 6.60589   | 9.31911   | 8.81761   | 6.74601   | 6.57457   |
| 0         | 0         | 0.0422869 | 0         | 0         | 0         |
| 7.84491   | 9.86096   | 8.12924   | 8.89888   | 10.2264   | 10.0785   |
| 40.1625   | 48.78     | 38.44     | 50.5496   | 42.0202   | 48.0581   |
| 5.61413   | 7.47065   | 6.23382   | 6.03494   | 8.45171   | 7.51979   |
| 0.203499  | 0.124819  | 0.730244  | 0.432782  | 0.265199  | 0.356633  |
| 543.389   | 376.789   | 604.876   | 514.39    | 589.386   | 631.786   |

|           |           |           |          |           |          |
|-----------|-----------|-----------|----------|-----------|----------|
| 0         | 0         | 0.0452388 | 0        | 0.155579  | 0        |
| 134.657   | 143.108   | 159.838   | 203.393  | 140.53    | 172.412  |
| 10.9315   | 10.5037   | 11.4881   | 9.66423  | 11.3425   | 9.55421  |
| 18.904    | 20.2694   | 19.8808   | 18.8372  | 20.2139   | 18.2699  |
| 0.217973  | 0.0270886 | 0.35601   | 0.173352 | 0.306085  | 0.165042 |
| 13.1514   | 12.8893   | 15.2816   | 11.5264  | 17.7512   | 13.0531  |
| 75.9254   | 79.0096   | 80.2486   | 79.8277  | 77.0378   | 79.1431  |
| 21.2144   | 19.8794   | 20.2011   | 16.6139  | 22.4251   | 18.0155  |
| 50.0858   | 58.9069   | 49.987    | 69.0603  | 46.0279   | 55.9034  |
| 0         | 0         | 0         | 0        | 0         | 0        |
| 3.06915   | 3.82522   | 2.1405    | 3.65099  | 2.71847   | 4.28462  |
| 12.9946   | 12.5132   | 14.0203   | 13.2437  | 11.5949   | 10.588   |
| 1.11074   | 1.16437   | 0.995035  | 1.62961  | 0.790141  | 0.613276 |
| 2.61512   | 3.61939   | 3.93195   | 4.45556  | 3.20493   | 3.79512  |
| 0         | 0         | 0         | 0        | 0         | 0        |
| 0         | 0         | 0         | 0        | 0         | 0        |
| 31.9136   | 38.7402   | 36.8827   | 32.3092  | 28.8403   | 25.6073  |
| 0.0234536 | 0.0292279 | 0.147741  | 0        | 0.228641  | 0        |
| 2.44461   | 3.01195   | 4.4977    | 4.12093  | 4.48335   | 3.99735  |
| 0.031999  | 0         | 0.040314  | 0        | 0.0346606 | 0        |
| 24.2504   | 26.1262   | 28.3255   | 24.8417  | 27.3366   | 23.0526  |
| 0.830686  | 1.03504   | 0.78487   | 0.473135 | 1.12462   | 0.698258 |
| 23.0102   | 23.7395   | 22.1722   | 24.6575  | 22.5983   | 27.4982  |
| 23.0368   | 21.6223   | 21.0937   | 22.8039  | 23.0196   | 27.4622  |
| 0.558716  | 0.522204  | 0.175975  | 0.318268 | 2.11817   | 1.1743   |
| 0.120091  | 0.0498859 | 0.504325  | 0.319242 | 0.520322  | 0.370195 |
| 35.0545   | 34.3903   | 35.8536   | 37.4315  | 32.5081   | 36.8836  |
| 23.1312   | 24.1711   | 24.5324   | 24.2426  | 23.795    | 24.7877  |
| 0.18393   | 0.651262  | 0         | 0.588067 | 0         | 0        |
| 16.0322   | 20.4726   | 31.4656   | 40.8056  | 0.653223  | 0.493247 |
| 29.4226   | 31.1647   | 28.5557   | 33.1373  | 26.8547   | 29.066   |
| 1.48002   | 2.04537   | 2.12492   | 1.35407  | 2.32405   | 1.63617  |
| 11.3354   | 11.3828   | 12.9672   | 11.5502  | 13.1359   | 11.2994  |
| 0         | 0         | 0         | 0        | 0         | 0.3879   |
| 0         | 0         | 0         | 0        | 0         | 0        |
| 0         | 0         | 0         | 0        | 0         | 0        |
| 0         | 0.286696  | 0         | 0        | 0         | 0        |
| 0         | 0         | 0         | 0        | 0         | 0        |
| 24.9056   | 25.3814   | 37.6612   | 27.075   | 37.647    | 34.2509  |
| 36.9905   | 37.7925   | 41.2275   | 33.3743  | 46.7348   | 38.2579  |
| 0.980181  | 0.777318  | 1.01036   | 0.482213 | 0.953128  | 0.571217 |
| 367.782   | 349.054   | 388.211   | 444.841  | 285.067   | 402.5    |
| 28.2214   | 30.7046   | 28.1938   | 31.1474  | 24.27     | 29.5185  |

|           |           |           |           |           |           |
|-----------|-----------|-----------|-----------|-----------|-----------|
| 0         | 0         | 0         | 0.0825907 | 0         | 0         |
| 0         | 0         | 0         | 0         | 0.0439357 | 0         |
| 1.42464   | 0.630354  | 0         | 0.538599  | 0         | 0.318956  |
| 2.60871   | 2.67069   | 3.02509   | 1.71293   | 4.39959   | 3.44777   |
| 0         | 0.0255101 | 0         | 0.0233215 | 0.0221731 | 0.0344193 |
| 20.2932   | 20.8345   | 13.1727   | 20.6393   | 13.0723   | 15.5016   |
| 3.39684   | 3.28111   | 2.8788    | 2.65769   | 2.57853   | 2.50597   |
| 27.9735   | 22.0909   | 25.7176   | 23.0229   | 29.5575   | 22.4023   |
| 1.65E-07  | 1.85E-07  | 1.67E-07  | 6.23E-07  | 1.52E-07  | 5.61E-08  |
| 0.416246  | 0.259362  | 0.874015  | 0.079037  | 0.375724  | 0         |
| 1.19545   | 1.33825   | 1.52145   | 1.32012   | 1.63566   | 1.318     |
| 0.88138   | 0         | 0.277603  | 0         | 1.67071   | 0.185247  |
| 21.7953   | 23.445    | 18.9971   | 25.4578   | 25.7629   | 27.6567   |
| 20.5886   | 25.62     | 25.8915   | 27.9432   | 16.0469   | 19.8002   |
| 0.634732  | 0.464868  | 0.422966  | 0.59498   | 0.28284   | 0.188166  |
| 0.436755  | 0.556654  | 0.0859755 | 0.932812  | 0.301838  | 0.157904  |
| 0.540596  | 0.505267  | 0.919447  | 0.461919  | 0.731953  | 0.522658  |
| 9.05734   | 9.95733   | 10.0664   | 9.38363   | 10.5517   | 9.13294   |
| 8.09261   | 7.13482   | 9.6667    | 7.32608   | 9.43864   | 6.93059   |
| 8.15451   | 9.76798   | 9.32408   | 9.96248   | 10.1064   | 8.29292   |
| 522.681   | 402.843   | 187.899   | 220.408   | 155.098   | 206.998   |
| 0         | 0         | 0         | 0         | 0         | 0         |
| 5.90122   | 5.03175   | 9.61477   | 4.29676   | 5.76729   | 1.4921    |
| 0         | 0         | 0         | 0         | 0         | 0         |
| 10.9984   | 9.82499   | 19.6472   | 18.5102   | 32.2265   | 20.8876   |
| 22.2793   | 25.1078   | 23.9177   | 26.9903   | 20.1305   | 19.2343   |
| 0.644361  | 0.267667  | 1.0824    | 0.367054  | 0.581632  | 0.180574  |
| 0.111065  | 26.8167   | 0.218634  | 173.774   | 0.300758  | 9.01061   |
| 2.5699    | 1.62599   | 2.44171   | 1.59453   | 2.73771   | 1.82706   |
| 0.420016  | 0.249931  | 0.691476  | 0.358809  | 1.2198    | 0.493522  |
| 29.3495   | 30.8795   | 32.964    | 34.2926   | 27.1607   | 30.668    |
| 13.9564   | 14.4174   | 12.2619   | 15.3773   | 15.3496   | 17.3684   |
| 0.593046  | 0.439437  | 0.411984  | 18.6686   | 0.329869  | 0.377305  |
| 199.164   | 208.473   | 140.359   | 192.605   | 139.83    | 190.41    |
| 3.1162    | 3.01133   | 3.501     | 3.02857   | 4.6473    | 3.05776   |
| 6.59243   | 6.86567   | 6.33442   | 5.45398   | 5.35921   | 4.84533   |
| 1.3788    | 1.54292   | 1.77253   | 0.961739  | 1.67636   | 1.32477   |
| 0.507081  | 0.631924  | 0         | 0.577709  | 0         | 0.106577  |
| 28.3245   | 23.0369   | 25.7309   | 23.0982   | 24.3832   | 23.938    |
| 0.0486875 | 0.109505  | 0.23174   | 0.118651  | 0.125007  | 0.110062  |
| 0.776308  | 0.642245  | 0.734675  | 0.884434  | 1.0853    | 1.08642   |
| 5.90802   | 5.90737   | 7.04043   | 5.49558   | 8.23646   | 7.91204   |
| 0         | 3.48519   | 0.0354599 | 45.671    | 0.0304872 | 2.2401    |

|           |          |          |          |          |           |
|-----------|----------|----------|----------|----------|-----------|
| 1.68169   | 1.16877  | 2.36315  | 0.994807 | 2.312    | 0.978798  |
| 0.311853  | 0.418093 | 0.721662 | 0.571372 | 0.137619 | 0.421633  |
| 2.36468   | 3.02651  | 2.33501  | 2.40279  | 2.6306   | 1.98802   |
| 0         | 0        | 0        | 0        | 0        | 0         |
| 271.707   | 281.564  | 279.479  | 244.108  | 288.775  | 276.631   |
| 18.0478   | 17.2517  | 17.036   | 16.6278  | 16.4984  | 16.6575   |
| 49.7994   | 52.4936  | 50.1954  | 49.1167  | 48.6874  | 50.7641   |
| 0         | 0        | 0        | 0        | 0        | 0         |
| 0         | 0        | 0        | 0        | 0        | 0         |
| 15.192    | 14.1492  | 14.8512  | 13.4421  | 16.9268  | 15.788    |
| 38.1503   | 39.1923  | 30.4851  | 40.5246  | 32.8736  | 35.5425   |
| 1.42705   | 2.52897  | 0.585339 | 1.48872  | 1.28484  | 0.677973  |
| 0         | 0        | 0        | 0        | 0        | 0         |
| 14.3382   | 15.9718  | 14.0381  | 15.0852  | 13.7167  | 14.1334   |
| 9.13889   | 9.91509  | 9.30796  | 8.24751  | 9.81224  | 7.35304   |
| 3.69658   | 4.76461  | 2.52817  | 2.81565  | 2.9058   | 4.81259   |
| 1.92799   | 1.73684  | 2.21793  | 2.4393   | 2.92227  | 2.46106   |
| 4.68117   | 3.98273  | 4.08066  | 3.68418  | 4.43505  | 4.20006   |
| 7.75505   | 7.5865   | 6.83916  | 7.50991  | 9.22612  | 8.67128   |
| 0.582577  | 0.871208 | 0.880755 | 0.265488 | 1.64069  | 0.293868  |
| 0         | 0        | 0        | 0        | 0        | 0         |
| 0.0431085 | 0        | 0.16972  | 0        | 0        | 0         |
| 3.12312   | 1.90076  | 3.56866  | 3.72361  | 5.11369  | 2.56458   |
| 0.0336643 | 0.27426  | 0.103001 | 0.495742 | 0.358195 | 0.243075  |
| 24.7688   | 24.3953  | 29.7939  | 20.8957  | 27.2702  | 26.0774   |
| 0.220818  | 0.293344 | 0.464639 | 0.243986 | 0.457227 | 0.310238  |
| 5.6241    | 5.35267  | 5.70032  | 4.34372  | 6.80306  | 5.0674    |
| 0.447499  | 62.8312  | 0.59554  | 567.68   | 1.21181  | 31.3516   |
| 0.24504   | 0.534396 | 0.231536 | 0.27917  | 0.265423 | 0.206008  |
| 5.2044    | 5.53471  | 4.49113  | 4.41924  | 4.44439  | 3.8478    |
| 2.02708   | 2.58737  | 3.17623  | 3.04148  | 1.87409  | 3.11709   |
| 0.349396  | 0.26125  | 1.05645  | 0.398061 | 0.605534 | 0.117497  |
| 6.49338   | 8.28357  | 6.48648  | 7.79177  | 13.8589  | 6.29892   |
| 0         | 0.127647 | 0.258092 | 0.116696 | 0.110949 | 0.0861135 |
| 14.856    | 13.7682  | 13.7501  | 15.7032  | 12.7804  | 15.6909   |
| 17.4874   | 16.7986  | 15.7525  | 17.2999  | 17.837   | 18.7939   |
| 119.535   | 125.981  | 105.769  | 128.751  | 85.5179  | 122.108   |
| 5.23353   | 5.81239  | 4.0697   | 4.53924  | 3.39898  | 4.95874   |
| 4.44337   | 4.99464  | 4.45814  | 4.62393  | 4.91828  | 4.45711   |
| 9.20829   | 9.57043  | 11.0861  | 8.46789  | 10.4361  | 9.62864   |
| 0         | 0        | 0        | 0        | 0        | 0         |
| 6.0805    | 6.59417  | 4.97058  | 5.94911  | 4.55006  | 4.62417   |
| 8.5725    | 8.90256  | 9.00011  | 8.57284  | 9.05342  | 8.20796   |



|          |           |           |           |           |          |
|----------|-----------|-----------|-----------|-----------|----------|
| 240.16   | 332.485   | 181.574   | 301.142   | 52.7046   | 77.6543  |
| 11.2181  | 11.1239   | 13.158    | 12.4714   | 12.2928   | 10.4707  |
| 0        | 0         | 0         | 0         | 0.120769  | 0        |
| 11.494   | 9.34094   | 11.9908   | 9.01397   | 10.6396   | 8.85487  |
| 0.768959 | 0.794718  | 0.869247  | 0.996026  | 1.04963   | 0.60641  |
| 0        | 0         | 0         | 0         | 0         | 0        |
| 12.6194  | 12.3895   | 9.88532   | 11.1144   | 11.475    | 11.6076  |
| 0.939476 | 7.64E-41  | 0.623611  | 0.947202  | 6.58E-33  | 0.486733 |
| 0        | 0         | 0         | 0         | 0.0235096 | 0        |
| 26.7116  | 27.4569   | 26.5272   | 26.5245   | 24.8739   | 27.88    |
| 0        | 0         | 0         | 0         | 0         | 0        |
| 51.3185  | 43.274    | 51.2288   | 47.383    | 58.7455   | 57.1391  |
| 0        | 0         | 0         | 0         | 0         | 0        |
| 8.54242  | 8.72172   | 7.02542   | 7.35569   | 8.51077   | 6.22134  |
| 7.13069  | 6.05185   | 7.8994    | 6.19795   | 8.38966   | 11.5246  |
| 8.03736  | 9.1174    | 7.63881   | 8.17295   | 9.31191   | 8.67268  |
| 1.0587   | 0.883831  | 1.77226   | 0.536072  | 0.621955  | 0.988276 |
| 221.797  | 213.334   | 126.544   | 109.094   | 121.643   | 186.975  |
| 9.97481  | 12.0618   | 12.0618   | 11.8422   | 11.7465   | 11.2037  |
| 1.9619   | 2.9339    | 3.35054   | 2.43384   | 3.02235   | 2.74899  |
| 22.0858  | 24.578    | 23.1386   | 23.5949   | 22.369    | 19.443   |
| 54.5732  | 64.1854   | 62.798    | 69.8233   | 55.616    | 62.7716  |
| 0        | 0         | 0         | 0         | 0         | 0        |
| 54.0966  | 59.101    | 55.1395   | 66.9719   | 57.6843   | 61.4024  |
| 123.19   | 136.628   | 111.652   | 103.893   | 94.952    | 115.298  |
| 13.6324  | 13.6771   | 14.3577   | 11.1007   | 13.2803   | 11.9331  |
| 0        | 0         | 0.0488803 | 0.0884047 | 0         | 0        |
| 13.9198  | 14.4805   | 17.3694   | 13.4503   | 16.2441   | 14.7763  |
| 0.945297 | 0.763982  | 3.21822   | 2.64824   | 2.37949   | 2.08307  |
| 12.0814  | 11.1043   | 11.274    | 9.8216    | 10.0232   | 8.24093  |
| 0        | 0.0421478 | 0.0426096 | 0.0385318 | 0.109903  | 0        |
| 29.3551  | 31.1778   | 25.0766   | 19.4065   | 21.3971   | 21.2545  |
| 22.979   | 34.2532   | 28.8053   | 31.4604   | 22.1143   | 28.8854  |
| 12.0766  | 10.9848   | 14.9359   | 11.9167   | 15.4565   | 11.7652  |
| 0        | 0         | 0         | 0         | 0         | 0        |
| 0.33783  | 0.245585  | 0.638424  | 0.0641473 | 0.426919  | 0.497031 |
| 0        | 0         | 0         | 0         | 0         | 0        |
| 3.25335  | 4.05433   | 2.58869   | 2.92618   | 2.96755   | 4.03072  |
| 5.00936  | 5.12943   | 5.01995   | 3.26846   | 4.38565   | 4.16991  |
| 0.24677  | 0         | 0         | 1.12457   | 0         | 0        |
| 11.9239  | 12.2432   | 14.3892   | 11.9871   | 14.6718   | 12.8255  |
| 0.182497 | 0.090971  | 0         | 0.0831663 | 0.0790708 | 0.061371 |
| 63.0051  | 62.9334   | 64.3804   | 58.8126   | 58.8252   | 61.8648  |

|           |           |           |           |           |           |
|-----------|-----------|-----------|-----------|-----------|-----------|
| 36.671    | 37.2332   | 42.8549   | 37.9905   | 32.1812   | 29.1405   |
| 0.92542   | 1.39318   | 0.788512  | 0.916679  | 1.17675   | 1.51278   |
| 0.0808642 | 0.100773  | 0         | 0.184254  | 0         | 0         |
| 1.83712   | 1.53433   | 3.17318   | 2.11026   | 2.53592   | 2.86952   |
| 3.377     | 2.75317   | 3.06167   | 2.84057   | 2.49557   | 2.36148   |
| 0.368685  | 0.530139  | 0.14292   | 0.258484  | 0.153597  | 0.0715287 |
| 0.485378  | 0.159348  | 0.410357  | 0.0595505 | 0.680217  | 0.38779   |
| 12.0769   | 11.6455   | 13.2595   | 13.1223   | 11.5177   | 10.8318   |
| 0.0557283 | 0.046299  | 0.0468063 | 0         | 0.0603637 | 0.0312343 |
| 27.0267   | 25.2993   | 27.7341   | 21.8111   | 18.4896   | 16.6431   |
| 0         | 0         | 0         | 0         | 0         | 0         |
| 85.0133   | 92.9628   | 76.6609   | 75.098    | 67.7719   | 65.1914   |
| 0.679293  | 0.386987  | 0.220065  | 0.0663349 | 0.420455  | 0.163169  |
| 4.61513   | 4.23523   | 5.63142   | 3.3363    | 5.47561   | 3.91639   |
| 82.8952   | 85.6329   | 76.3533   | 92.6791   | 57.128    | 60.2309   |
| 0         | 0         | 0         | 0         | 0         | 0         |
| 49.746    | 48.6993   | 43.6231   | 52.8373   | 39.4312   | 49.8888   |
| 14.1138   | 14.4971   | 17.6558   | 11.06     | 18.9366   | 15.1023   |
| 2.21552   | 2.90736   | 2.02543   | 4.75867   | 4.28199   | 3.21435   |
| 3.0726    | 3.8023    | 3.6545    | 3.74534   | 6.77248   | 5.04437   |
| 8.50872   | 9.27462   | 8.98027   | 7.53255   | 7.83036   | 8.04992   |
| 26.9888   | 26.6549   | 36.6059   | 34.1056   | 33.8576   | 28.6144   |
| 15.0588   | 15.3157   | 15.6437   | 16.8021   | 17.3518   | 16.4605   |
| 1.57676   | 0.982477  | 1.32432   | 1.94607   | 1.42326   | 1.54653   |
| 10.5485   | 10.2861   | 10.9995   | 11.2369   | 10.845    | 11.9746   |
| 1.97951   | 2.71979   | 1.87851   | 2.38285   | 3.45396   | 3.54184   |
| 0         | 0         | 0         | 0         | 0         | 0         |
| 11.8972   | 12.2286   | 11.5945   | 10.0592   | 14.452    | 10.7211   |
| 1.10916   | 1.84297   | 1.44913   | 2.71449   | 1.11242   | 1.83042   |
| 0         | 0         | 0         | 0.0255341 | 0.0182075 | 0.0376904 |
| 0.907033  | 1.02371   | 0.862437  | 1.30633   | 1.44591   | 1.49633   |
| 0.196391  | 0.0474864 | 0.247085  | 0.138162  | 0.179569  | 0.100955  |
| 2.77823   | 1.728     | 3.20863   | 2.30693   | 3.19322   | 1.062     |
| 44.1289   | 40.2916   | 40.279    | 36.5496   | 45.0466   | 44.0913   |
| 8.59361   | 7.59548   | 7.50453   | 8.09751   | 8.63122   | 7.12759   |
| 14.4142   | 17.9111   | 16.5229   | 15.1215   | 11.7057   | 14.2597   |
| 3.43839   | 2.89232   | 3.95283   | 3.13384   | 3.25884   | 3.50497   |
| 11.075    | 10.4481   | 13.3806   | 10.6833   | 13.2796   | 10.7656   |
| 174.678   | 210.622   | 161.637   | 202.279   | 140.415   | 190.066   |
| 5.81096   | 7.59274   | 7.18509   | 6.52583   | 7.69021   | 5.93287   |
| 3.34829   | 1.04316   | 2.4607    | 1.27155   | 2.11563   | 4.69157   |
| 8.04721   | 8.61812   | 9.12582   | 7.50387   | 8.37015   | 8.35672   |
| 20.6041   | 17.0005   | 23.1051   | 20.6674   | 30.5377   | 25.5286   |

|            |           |           |           |           |           |
|------------|-----------|-----------|-----------|-----------|-----------|
| 81.7686    | 94.4752   | 93.7785   | 95.1745   | 140.136   | 205.473   |
| 10.6537    | 11.8365   | 11.3479   | 9.45032   | 13.3917   | 11.8313   |
| 4.71508    | 4.84613   | 4.40931   | 4.34729   | 4.5281    | 4.76092   |
| 0.0549883  | 0.137053  | 0.138555  | 0.34456   | 0.446717  | 0.369835  |
| 13.0133    | 13.8933   | 12.2688   | 12.4166   | 12.7566   | 14.5599   |
| 5.10594    | 7.24991   | 4.64008   | 9.19598   | 24.039    | 37.714    |
| 4.04167    | 4.00518   | 5.60102   | 2.97691   | 6.16834   | 3.61457   |
| 31.8298    | 30.8883   | 31.5659   | 33.0051   | 29.9252   | 35.7896   |
| 36.2802    | 58.2637   | 53.5318   | 85.8706   | 74.9674   | 29.2772   |
| 0.339585   | 0.442974  | 0.488275  | 0.607454  | 0.489931  | 0.312292  |
| 34.4515    | 31.5498   | 35.0579   | 35.6954   | 34.9751   | 39.1612   |
| 0.117524   | 5.00E-09  | 0.231178  | 0.140595  | 0.1024    | 0.0659801 |
| 1.73371    | 1.44436   | 1.31508   | 1.18922   | 1.37714   | 1.75049   |
| 0.186309   | 0.348267  | 0.352084  | 0.530647  | 0.807225  | 1.09643   |
| 0.487175   | 0.0843209 | 0.421021  | 0         | 0.0732906 | 0.255983  |
| 14.9157    | 15.8529   | 11.4399   | 14.0803   | 12.9537   | 15.0798   |
| 2.93166    | 2.38597   | 3.18434   | 2.30173   | 2.45739   | 2.2861    |
| 0.102365   | 0         | 0.214941  | 0.0777482 | 0.332638  | 0.114746  |
| 0          | 0         | 0         | 0.250079  | 0         | 0.369082  |
| 1.7438     | 1.78782   | 2.71111   | 2.07122   | 3.42941   | 2.50578   |
| 0          | 0         | 0         | 0         | 0         | 0         |
| 14.6015    | 14.2829   | 13.6108   | 14.4093   | 13.5542   | 12.9768   |
| 0.0343248  | 0.256653  | 0.0864886 | 0.27374   | 0.14872   | 0.144287  |
| 0.0499468  | 0         | 0.0209752 | 0.0379357 | 0         | 0.013997  |
| 0.655802   | 0.535119  | 1.00654   | 0.334632  | 2.74047   | 2.54761   |
| 0.708554   | 0.511216  | 0.445266  | 0.344424  | 0.502983  | 0.525243  |
| 0          | 0         | 0         | 0         | 0         | 0         |
| 0.0386285  | 0         | 0         | 0         | 0.0418416 | 0.0324754 |
| 41.1957    | 40.8646   | 44.5121   | 40.3916   | 44.5322   | 42.849    |
| 27.8327    | 28.4899   | 22.4181   | 25.6261   | 34.3922   | 35.8602   |
| 7.37638    | 6.63217   | 7.03606   | 6.11754   | 7.0789    | 4.9803    |
| 6.44589    | 6.82875   | 6.42197   | 5.62572   | 5.99279   | 5.82976   |
| 21.7114    | 21.2138   | 19.744    | 22.9686   | 19.7572   | 20.1025   |
| 0.00748869 | 6.26E-06  | 2.86E-07  | 1.14E-06  | 7.88E-07  | 4.94E-07  |
| 0.526538   | 1.6273    | 0.636827  | 2.49548   | 0.365015  | 0.63744   |
| 16.6953    | 20.4589   | 19.0471   | 17.6821   | 20.0598   | 16.5832   |
| 12.584     | 11.8347   | 12.3191   | 10.4666   | 13.9255   | 10.7452   |
| 0.0671858  | 0.0837269 | 0.111757  | 0.0143516 | 0.0409354 | 0.0432455 |
| 16.4355    | 17.1542   | 17.9926   | 17.2315   | 17.2093   | 18.8088   |
| 0.181147   | 0.270894  | 0.319506  | 0.103189  | 0.0588643 | 0.0609169 |
| 0          | 0         | 0         | 0         | 0         | 0         |
| 10.483     | 10.0397   | 12.8164   | 12.9838   | 8.15001   | 11.2031   |
| 2.22354    | 1.77818   | 3.21673   | 1.59997   | 2.54531   | 1.2691    |

|           |           |           |           |           |           |
|-----------|-----------|-----------|-----------|-----------|-----------|
| 1.63033   | 1.65744   | 1.80762   | 2.11817   | 1.39414   | 1.41886   |
| 0         | 0         | 0         | 0         | 0         | 0         |
| 7.33354   | 7.61205   | 8.11331   | 6.11928   | 8.96143   | 6.64561   |
| 0.326224  | 0.161839  | 0.468114  | 0.15037   | 0.328679  | 0.228685  |
| 72.2654   | 71.3241   | 72.9523   | 69.2233   | 59.3251   | 67.8885   |
| 21.2809   | 17.3555   | 28.4901   | 18.0135   | 27.8803   | 19.1663   |
| 9.16505   | 8.42826   | 13.0255   | 9.25855   | 15.522    | 7.77349   |
| 12.5642   | 13.1707   | 13.5499   | 14.9756   | 15.1164   | 14.1854   |
| 0.169869  | 0.399859  | 0.237788  | 0.0645094 | 0.0204442 | 0.0158678 |
| 15.3972   | 13.8773   | 21.7452   | 14.2944   | 21.4452   | 12.7684   |
| 9.33581   | 7.17221   | 9.04946   | 6.1762    | 8.28526   | 7.22002   |
| 134.891   | 119.3     | 120.198   | 133.394   | 113.451   | 122.104   |
| 1.9147    | 2.50108   | 2.26692   | 2.28651   | 1.22439   | 1.6291    |
| 0         | 0         | 0         | 0         | 0         | 0         |
| 0.232864  | 0         | 0         | 0         | 0         | 0.0652571 |
| 33.3071   | 23.1085   | 27.3598   | 68.6104   | 42.2968   | 225.747   |
| 5.05136   | 3.0443    | 7.6159    | 5.8021    | 1.6594    | 1.39237   |
| 0         | 0         | 0         | 0         | 0.0404319 | 0         |
| 7.07938   | 11.8257   | 4.93391   | 15.0326   | 3.68728   | 9.49744   |
| 1.48132   | 1.4931    | 1.85252   | 1.74969   | 2.13545   | 1.92299   |
| 12.8556   | 13.5654   | 10.2789   | 11.4045   | 7.58979   | 8.64307   |
| 0.18995   | 0.372141  | 0.32264   | 0.24335   | 0.547019  | 0.385237  |
| 0         | 0         | 29.1055   | 0         | 0         | 0         |
| 30.6154   | 36.1338   | 32.9425   | 34.5802   | 37.1945   | 38.0006   |
| 1.80944   | 3.17883   | 2.4091    | 2.92079   | 1.4992    | 0.864675  |
| 0.614219  | 0.246852  | 0.80577   | 0.503173  | 1.44601   | 0.597455  |
| 2.53458   | 1.57929   | 1.67643   | 1.11895   | 3.67198   | 2.02431   |
| 0.024208  | 0.120684  | 0.162682  | 0         | 0.0262216 | 0.0916013 |
| 5.14857   | 5.09152   | 7.03048   | 9.08235   | 8.05942   | 7.42821   |
| 20.7538   | 17.012    | 23.6018   | 19.2951   | 21.8792   | 18.1851   |
| 0         | 0.335409  | 0.0868055 | 0.0981225 | 0.0466453 | 0.0362038 |
| 10.1109   | 9.98941   | 9.83106   | 10.1009   | 7.95908   | 9.6491    |
| 649.211   | 771.715   | 696.03    | 707.825   | 637.107   | 701.507   |
| 0.270118  | 0.252465  | 0.482104  | 0.538546  | 0.682701  | 0.548804  |
| 2.75354   | 2.85253   | 3.5501    | 2.61195   | 2.97742   | 2.75766   |
| 0.0261434 | 0.0162899 | 0.0329369 | 0         | 0.014159  | 0.0329686 |
| 0         | 0         | 0         | 0.0644474 | 0         | 0.0951155 |
| 102.453   | 104.655   | 76.8615   | 89.2291   | 67.8329   | 85.2416   |
| 0         | 0         | 0         | 0         | 0         | 0         |
| 2.27941   | 3.43862   | 1.51143   | 1.09343   | 2.27409   | 2.06762   |
| 9.23443   | 9.3912    | 10.5641   | 9.38952   | 11.1039   | 9.62728   |
| 19.9459   | 20.3513   | 20.1555   | 18.842    | 16.4288   | 19.843    |
| 3.89569   | 4.21539   | 5.03968   | 4.25426   | 6.05171   | 4.79291   |

|           |           |           |           |           |           |
|-----------|-----------|-----------|-----------|-----------|-----------|
| 23.7138   | 22.18     | 22.7881   | 20.7821   | 22.8425   | 20.1514   |
| 0         | 0         | 0         | 0         | 0         | 0         |
| 3.11149   | 2.39673   | 2.04195   | 2.11726   | 1.07108   | 2.16178   |
| 10.1019   | 11.9363   | 10.5125   | 7.00179   | 14.9947   | 15.5499   |
| 1.30439   | 1.02587   | 1.0406    | 0.758528  | 0.673881  | 0.431255  |
| 124.806   | 90.8197   | 123.081   | 93.8262   | 181.441   | 112.993   |
| 1.57518   | 1.87972   | 1.77945   | 0.941438  | 2.67573   | 0.958578  |
| 0.778804  | 1.07011   | 1.10194   | 1.14664   | 1.44058   | 1.06775   |
| 0.186772  | 0.232755  | 0.705916  | 0.851144  | 1.01154   | 0.785107  |
| 89.1779   | 92.1237   | 77.8862   | 93.0145   | 62.9311   | 86.4625   |
| 0         | 0.0468814 | 0         | 0         | 0         | 0         |
| 2.01515   | 1.67419   | 2.15413   | 1.73927   | 1.98434   | 1.79684   |
| 28.8843   | 30.0078   | 28.9724   | 29.9647   | 33.5132   | 29.4903   |
| 1.20305   | 1.25417   | 1.07846   | 1.70009   | 1.20288   | 1.1184    |
| 15.3189   | 14.6151   | 17.2993   | 13.4581   | 19.4183   | 14.3486   |
| 139.99    | 119.964   | 83.2865   | 75.3158   | 51.6455   | 66.9958   |
| 7.51561   | 7.41279   | 7.78942   | 5.53956   | 10.2662   | 7.98887   |
| 64.4811   | 63.0679   | 63.3462   | 67.2371   | 72.8154   | 74.7426   |
| 0         | 0         | 0         | 0         | 0         | 0         |
| 29.1493   | 29.5914   | 24.3426   | 29.9112   | 23.4885   | 27.5349   |
| 0         | 0         | 0         | 0         | 0         | 0         |
| 0.0910926 | 0.227039  | 0.229527  | 0.622681  | 0         | 0.229748  |
| 0.12501   | 0.389469  | 0.511858  | 1.17498   | 0.304669  | 0.761958  |
| 38.398    | 38.518    | 35.9333   | 41.1485   | 33.1174   | 34.9121   |
| 7.38375   | 7.02981   | 3.81342   | 3.47459   | 4.14799   | 5.51359   |
| 0.333305  | 0.5742    | 1.16318   | 0.598219  | 0.485644  | 0.689371  |
| 11.5533   | 13.509    | 13.2206   | 13.2321   | 14.1034   | 10.9978   |
| 0.423058  | 0.360726  | 0.0561044 | 0.177573  | 0.0964733 | 0.0935974 |
| 0         | 0         | 0         | 0         | 0         | 0         |
| 2.44543   | 1.73641   | 2.7572    | 2.64084   | 3.78352   | 2.74738   |
| 6.81451   | 7.16867   | 7.7809    | 7.42793   | 8.17932   | 6.49292   |
| 0         | 0         | 0         | 0         | 0         | 0         |
| 0         | 0         | 0         | 0         | 0         | 0         |
| 70.5195   | 78.012    | 64.2635   | 77.7579   | 54.8617   | 70.6657   |
| 0         | 0         | 0         | 0         | 0         | 0         |
| 0.0379917 | 0.142035  | 0         | 0.0432832 | 0.164607  | 0.0638801 |
| 0.532793  | 0.310352  | 0.462799  | 0.32677   | 0.701255  | 0.528304  |
| 5.91789   | 5.37729   | 6.23099   | 4.91617   | 6.80206   | 6.32447   |
| 11.8205   | 11.0975   | 10.4519   | 8.22857   | 12.2275   | 10.3395   |
| 0.0836111 | 0.10771   | 0.107189  | 0.122546  | 0.224741  | 0.128757  |
| 0         | 0         | 0         | 0         | 0         | 0         |
| 33.5992   | 31.2921   | 32.029    | 29.0147   | 26.5695   | 28.7731   |
| 0         | 0         | 0         | 0         | 0         | 0         |

|           |          |          |          |           |           |
|-----------|----------|----------|----------|-----------|-----------|
| 0         | 0        | 0        | 0        | 0         | 0         |
| 2.38802   | 3.31458  | 3.25623  | 4.67529  | 3.89937   | 5.83298   |
| 3.67377   | 5.47206  | 4.65483  | 6.65875  | 2.62855   | 2.46508   |
| 189.544   | 226.099  | 206.354  | 221.896  | 154.515   | 176.093   |
| 4.00239   | 4.2649   | 4.0924   | 3.899    | 5.21493   | 6.60779   |
| 40.2592   | 39.6814  | 42.9033  | 41.0718  | 41.1783   | 39.6203   |
| 0.393607  | 0.286132 | 0.661183 | 0.560537 | 0.994809  | 0.33091   |
| 2.89964   | 2.79967  | 2.00757  | 2.47019  | 3.11253   | 3.82135   |
| 0         | 0        | 0        | 0        | 0         | 0         |
| 0         | 0        | 0.184005 | 0        | 0.474604  | 0         |
| 7.65994   | 7.71868  | 8.78337  | 9.20408  | 8.45914   | 8.90504   |
| 8.51048   | 8.94225  | 6.52145  | 6.43407  | 9.58475   | 8.80012   |
| 7.49428   | 8.14153  | 7.92153  | 9.08827  | 9.33343   | 9.64562   |
| 57.354    | 62.2005  | 62.4044  | 63.6144  | 55.4501   | 52.7212   |
| 6.05723   | 5.52631  | 6.79849  | 5.15464  | 4.57513   | 3.8068    |
| 0         | 0        | 0        | 0        | 0         | 0         |
| 0         | 0        | 0        | 0        | 0         | 0         |
| 1.00203   | 0.832485 | 0.420804 | 1.77581  | 1.20598   | 1.31043   |
| 0.426185  | 0.265555 | 0.604047 | 0.485545 | 0.346226  | 0.582235  |
| 0         | 0        | 0        | 0        | 0         | 0         |
| 0.560857  | 0.384417 | 0.671268 | 0.51118  | 0.789761  | 0.707279  |
| 8.40832   | 9.41378  | 10.0886  | 7.84585  | 8.58731   | 6.95691   |
| 51.6102   | 48.4421  | 53.5713  | 48.2364  | 48.7867   | 46.9488   |
| 13.6775   | 12.0089  | 17.196   | 13.0874  | 15.6263   | 13.3519   |
| 0.0202047 | 0.43474  | 0.500649 | 0.397427 | 0.151058  | 0.0522591 |
| 149.209   | 160.751  | 143.917  | 164.158  | 140.608   | 145.957   |
| 0         | 0        | 0        | 0        | 0         | 0         |
| 0.172288  | 0.315485 | 0.372099 | 0.288418 | 0.0457026 | 0         |
| 7.57804   | 7.00034  | 7.52677  | 6.36018  | 6.33712   | 6.44731   |
| 18.0718   | 15.8407  | 18.6231  | 14.6175  | 11.7326   | 14.3325   |
| 1.01304   | 1.28999  | 1.48546  | 1.90571  | 0.681616  | 0.75506   |
| 0         | 0        | 0        | 0        | 0         | 0         |
| 2.45171   | 3.96366  | 2.25399  | 2.26475  | 2.5121    | 3.28675   |
| 4.62213   | 5.7601   | 4.05238  | 8.22218  | 5.32862   | 4.11312   |
| 0         | 0        | 0        | 0        | 0         | 0         |
| 2.47706   | 2.46952  | 3.24556  | 1.69324  | 3.43436   | 1.74929   |
| 0         | 0        | 0        | 0        | 0         | 0         |
| 0         | 0        | 0        | 0        | 0         | 0         |
| 32.2557   | 36.6653  | 34.7856  | 35.2778  | 35.9012   | 33.7838   |
| 7.79719   | 8.86662  | 7.88935  | 9.21634  | 9.65985   | 8.19399   |
| 63.835    | 70.288   | 62.3972  | 65.2907  | 52.0418   | 68.7085   |
| 35.8167   | 34.6914  | 31.1747  | 28.4262  | 26.8714   | 31.2578   |
| 11.8955   | 12.7954  | 11.3989  | 13.5541  | 12.5501   | 15.6943   |

|           |           |           |           |           |           |
|-----------|-----------|-----------|-----------|-----------|-----------|
| 3.58189   | 4.13713   | 1.98116   | 2.28922   | 3.12279   | 2.79099   |
| 50.2123   | 45.4187   | 50.3121   | 37.9799   | 45.3334   | 58.0135   |
| 0.0122153 | 0         | 0         | 0.0278334 | 0.0132314 | 0.0102696 |
| 8.80332   | 12.5417   | 9.90531   | 9.7735    | 8.6745    | 5.95883   |
| 0.48562   | 0.172908  | 0.437008  | 0.237111  | 0.676303  | 0.524914  |
| 2.12E-21  | 5.55E-10  | 3.96E-07  | 1.30E-09  | 2.66E-15  | 4.96E-18  |
| 18.7611   | 22.2726   | 21.2726   | 17.4368   | 15.0808   | 17.1009   |
| 0.398952  | 0.165724  | 0.16754   | 0.606025  | 0.288091  | 0.670807  |
| 0.8639    | 0.378526  | 0.946514  | 0.54475   | 1.59111   | 1.10115   |
| 0.440251  | 0.235171  | 0.118879  | 0.46581   | 0.408846  | 0.211504  |
| 5.89845   | 4.13094   | 4.32974   | 2.20761   | 5.83466   | 3.56549   |
| 0.23572   | 0.275339  | 0.307245  | 0.337145  | 0.505146  | 0.213266  |
| 6.76492   | 6.35093   | 8.29554   | 6.83368   | 7.57188   | 7.65897   |
| 0         | 0         | 0         | 0.147379  | 0         | 0         |
| 0.348121  | 0.100114  | 0.404844  | 0.244066  | 0.377077  | 0.292669  |
| 101.517   | 108.363   | 117.002   | 143.244   | 115.854   | 120.526   |
| 0         | 0         | 0         | 0         | 0         | 0         |
| 11.2896   | 10.1897   | 17.9066   | 15.4781   | 18.4949   | 10.7216   |
| 3.33378   | 3.4966    | 1.73895   | 1.67564   | 2.12417   | 1.80086   |
| 0         | 0         | 0         | 0         | 0         | 0         |
| 0.916429  | 3.71167   | 3.17506   | 1.30509   | 1.48899   | 2.11875   |
| 18.7202   | 19.4747   | 21.7975   | 18.7047   | 16.9775   | 20.7432   |
| 3.6232    | 3.12705   | 4.37266   | 3.32632   | 4.99145   | 2.99678   |
| 0         | 0         | 0         | 0         | 0         | 0         |
| 15.5216   | 14.8233   | 14.8725   | 14.1412   | 16.3519   | 14.0998   |
| 2.08222   | 2.40951   | 1.45218   | 1.69446   | 3.1012    | 2.12567   |
| 0         | 0         | 0         | 0         | 0         | 0         |
| 16.6623   | 17.5152   | 13.4243   | 12.1956   | 20.4106   | 19.1659   |
| 14.8988   | 14.7791   | 16.2574   | 15.1074   | 14.2274   | 14.1139   |
| 0         | 0         | 0         | 0         | 0         | 0         |
| 321.697   | 326.403   | 297.765   | 316.508   | 206.042   | 276.265   |
| 0         | 0         | 0         | 0         | 0         | 0         |
| 2.83844   | 2.62073   | 3.1996    | 2.25187   | 3.88363   | 2.7148    |
| 46.4214   | 54.1822   | 44.3558   | 51.3164   | 41.1623   | 54.2179   |
| 21.2967   | 24.9555   | 24.1924   | 26.868    | 21.4362   | 22.8354   |
| 0.226836  | 0.0418789 | 0.127014  | 0.0717862 | 0.0682512 | 0.0121082 |
| 0.0139958 | 0         | 0         | 0         | 0         | 0         |
| 1.71314   | 2.14674   | 1.71589   | 2.47078   | 2.00985   | 1.71455   |
| 773.296   | 869.941   | 768.165   | 757.276   | 703.247   | 803.389   |
| 1.49697   | 1.59901   | 1.56755   | 1.24034   | 2.59016   | 2.19015   |
| 0.224196  | 0.38872   | 0.294735  | 0.244317  | 0.147818  | 0.237654  |
| 33.0304   | 34.4449   | 33.2193   | 34.9642   | 35.5161   | 39.8166   |
| 0.0167457 | 0         | 0.0210972 | 0.0381562 | 0         | 0         |

|           |           |           |           |           |           |
|-----------|-----------|-----------|-----------|-----------|-----------|
| 0.887567  | 0.553042  | 0         | 0.168532  | 0.801162  | 0.994918  |
| 73.7675   | 84.7223   | 74.6334   | 83.2386   | 52.4032   | 61.1872   |
| 0.0498996 | 0.0583194 | 0.124146  | 0.0591144 | 0.046043  | 0.0703665 |
| 35.8843   | 31.6162   | 46.164    | 42.0395   | 32.1352   | 38.7143   |
| 28.1962   | 27.9714   | 30.3134   | 26.4482   | 28.4374   | 23.3492   |
| 19.1611   | 15.9263   | 13.9195   | 13.6363   | 24.4681   | 25.9136   |
| 0         | 0         | 0         | 0         | 0         | 0         |
| 1.59038   | 1.21476   | 1.92207   | 1.11168   | 2.37696   | 1.63899   |
| 0         | 0         | 0         | 0         | 0         | 0         |
| 3.24513   | 2.66166   | 3.11844   | 2.40501   | 4.27725   | 2.67254   |
| 8.03219   | 8.04947   | 9.99289   | 10.1042   | 9.13532   | 8.75045   |
| 25.5711   | 31.2613   | 26.8765   | 32.7892   | 36.1811   | 38.7763   |
| 4.07716   | 4.72904   | 3.14285   | 3.81682   | 4.67652   | 3.54485   |
| 0.131554  | 0.18354   | 0         | 0         | 0.0697917 | 0.0609412 |
| 0         | 0         | 0         | 0         | 0         | 0         |
| 2.09375   | 4.36914   | 0.960147  | 1.09684   | 1.49569   | 1.1247    |
| 0         | 0         | 0         | 0         | 0         | 0         |
| 0         | 0         | 0         | 0         | 0         | 0         |
| 8.35189   | 8.22397   | 8.40421   | 6.5404    | 8.48481   | 7.11174   |
| 20.9526   | 23.1848   | 23.0242   | 22.3889   | 20.6329   | 21.0333   |
| 0.0281387 | 0.0350664 | 0.106352  | 0.0641159 | 0.0304793 | 0         |
| 0         | 0         | 0         | 0         | 0         | 0         |
| 1.49305   | 1.60474   | 1.1701    | 1.36598   | 2.14402   | 2.35083   |
| 30.3817   | 32.5216   | 31.3019   | 34.0923   | 30.2953   | 33.9893   |
| 2.79305   | 3.61992   | 2.95582   | 2.62521   | 2.52619   | 2.50078   |
| 1.35461   | 1.33977   | 0.027089  | 0.195972  | 0.256192  | 0.144614  |
| 1160.31   | 1342.92   | 1077.5    | 1314.02   | 1070.9    | 1456.77   |
| 2.87585   | 3.68794   | 3.53173   | 3.53017   | 4.36247   | 3.48395   |
| 1.32743   | 1.47178   | 1.50505   | 1.6747    | 1.99849   | 1.61721   |
| 0         | 0         | 0.0325275 | 0.0294146 | 0.0279661 | 0.0217059 |
| 0         | 0         | 0         | 0         | 0         | 0         |
| 11.4359   | 13.2093   | 11.434    | 11.8706   | 8.16937   | 6.99749   |
| 24.8181   | 30.2266   | 27.0733   | 32.7907   | 23.5506   | 30.4024   |
| 40.2063   | 39.2842   | 33.3793   | 36.0257   | 30.7349   | 39.0959   |
| 3.42456   | 2.7643    | 3.33389   | 1.50742   | 5.1426    | 3.20624   |
| 2.09465   | 2.19573   | 2.94499   | 1.81605   | 4.13324   | 2.8249    |
| 562.559   | 467.459   | 230.246   | 218.828   | 225.024   | 306.55    |
| 4.99511   | 5.3911    | 9.75505   | 10.909    | 7.6414    | 6.05969   |
| 9.87683   | 9.52085   | 9.54931   | 8.20413   | 11.7514   | 8.3108    |
| 4.06684   | 3.70676   | 4.12875   | 3.7636    | 4.31958   | 4.78002   |
| 26.6568   | 26.0349   | 27.4477   | 27.4969   | 26.6694   | 32.033    |
| 1.07393   | 1.47217   | 0.8118    | 0.489406  | 0.232653  | 0.541722  |
| 4.02401   | 3.19517   | 3.23619   | 4.25179   | 3.55037   | 3.60127   |



|           |           |            |          |           |           |
|-----------|-----------|------------|----------|-----------|-----------|
| 280.546   | 309.238   | 278.865    | 299.444  | 271.679   | 305.324   |
| 50.5071   | 51.3474   | 51.8635    | 54.934   | 57.1078   | 63.0411   |
| 2.70829   | 1.57503   | 1.91075    | 1.76902  | 1.40811   | 1.33578   |
| 2.33753   | 2.48324   | 2.55872    | 2.13922  | 3.32061   | 3.93038   |
| 0         | 0         | 0          | 0.458611 | 0         | 0         |
| 11.6193   | 10.5633   | 12.1703    | 10.8506  | 11.3184   | 9.87144   |
| 134.659   | 136.47    | 128.699    | 117.078  | 109.774   | 114.48    |
| 0         | 0         | 0          | 0        | 0         | 0         |
| 2.03632   | 1.93083   | 0.501939   | 2.11821  | 0.5754    | 0.781546  |
| 25.0987   | 24.2341   | 22.7526    | 24.9081  | 23.2775   | 30.2296   |
| 7.7008    | 4.6591    | 7.5772     | 6.50481  | 11.0264   | 8.01156   |
| 7.41458   | 5.05971   | 8.04128    | 4.65171  | 12.0978   | 7.1806    |
| 0.0289775 | 0.0108335 | 0.00912686 | 0        | 0         | 0         |
| 3.30318   | 3.20752   | 2.82935    | 2.66874  | 3.28833   | 3.47772   |
| 14.7175   | 18.2182   | 18.7899    | 19.5152  | 18.021    | 17.6286   |
| 39.6084   | 46.3737   | 40.2225    | 47.8551  | 48.6285   | 56.8813   |
| 0         | 0         | 0          | 0        | 0         | 0         |
| 34.8414   | 39.8718   | 35.9182    | 36.6907  | 28.1043   | 31.8109   |
| 3.06512   | 2.56049   | 5.21954    | 4.91188  | 2.26203   | 2.54857   |
| 57.9962   | 56.1713   | 49.3973    | 57.9782  | 44.6305   | 47.5593   |
| 827.734   | 724.932   | 597.659    | 500.908  | 492.834   | 645.957   |
| 0.42598   | 0.627374  | 0.341519   | 0.286775 | 0.838932  | 0.472076  |
| 0.0207132 | 0         | 0          | 0        | 0         | 0         |
| 43.7145   | 43.4758   | 40.9067    | 41.7177  | 44.6953   | 51.5206   |
| 0         | 0         | 0          | 0        | 0         | 0         |
| 8.71206   | 4.6651    | 9.17519    | 2.79155  | 9.43673   | 4.17716   |
| 0         | 0         | 0          | 0        | 0.0696125 | 0.0540299 |
| 32.1186   | 33.4092   | 20.977     | 17.8053  | 13.0219   | 18.5969   |
| 0         | 0         | 0          | 0        | 0         | 0.0604342 |
| 7.8382    | 9.33188   | 7.58258    | 9.56778  | 11.7877   | 19.1218   |
| 0         | 0         | 0          | 0        | 0         | 0         |
| 22.8626   | 25.2547   | 26.7386    | 22.6828  | 21.7588   | 20.0513   |
| 8.0323    | 6.27743   | 8.61838    | 9.05051  | 10.7153   | 6.90126   |
| 7.9263    | 8.41076   | 8.58941    | 7.2712   | 8.82786   | 7.24862   |
| 0         | 0         | 0          | 0        | 0         | 0         |
| 3.84825   | 4.55824   | 3.68316    | 2.73706  | 2.49176   | 2.71543   |
| 6.93915   | 7.39706   | 6.08534    | 6.70431  | 4.40296   | 5.01881   |
| 0         | 0         | 0          | 0        | 0         | 0         |
| 12.3748   | 16.5385   | 11.2823    | 18.773   | 17.392    | 17.579    |
| 0.19632   | 0.439829  | 0.230558   | 0.282955 | 0.792904  | 0.329686  |
| 83.555    | 76.2753   | 73.5676    | 77.1852  | 61.8931   | 61.1469   |
| 0         | 0         | 0          | 0        | 173.131   | 0         |
| 0         | 0         | 0          | 0        | 0         | 0         |

|          |           |           |           |           |          |
|----------|-----------|-----------|-----------|-----------|----------|
| 2.31249  | 2.95212   | 1.63435   | 3.66272   | 1.58844   | 2.75025  |
| 10.4974  | 10.4686   | 7.86114   | 9.36468   | 8.12229   | 8.16929  |
| 0        | 0         | 0         | 0         | 0         | 0        |
| 9.42302  | 7.44064   | 13.9686   | 10.9986   | 17.0984   | 11.5102  |
| 5.16327  | 4.02767   | 7.96982   | 4.82718   | 6.98026   | 3.36331  |
| 0        | 0         | 0         | 0         | 0         | 0        |
| 16.5819  | 13.7989   | 15.2901   | 13.2676   | 16.4546   | 12.4961  |
| 8.53415  | 7.11897   | 13.9397   | 8.0428    | 25.5257   | 16.9329  |
| 25.414   | 28.7113   | 32.1187   | 36.8651   | 32.1477   | 38.7887  |
| 2.08111  | 1.69014   | 3.01638   | 2.02065   | 3.23138   | 2.14687  |
| 40.043   | 41.2806   | 33.4351   | 29.8105   | 31.7526   | 38.517   |
| 33.8873  | 33.9804   | 28.246    | 25.7042   | 24.4218   | 22.9776  |
| 1.60203  | 1.73005   | 1.90443   | 1.24782   | 2.55614   | 1.65981  |
| 3.10862  | 3.33961   | 3.78135   | 4.39646   | 2.43831   | 2.34309  |
| 12.8912  | 13.4064   | 10.3008   | 9.71032   | 11.4096   | 10.0845  |
| 7.02167  | 6.24032   | 6.13248   | 5.60933   | 10.8784   | 7.38488  |
| 6.10934  | 8.27176   | 13.8602   | 10.4142   | 16.1955   | 11.7013  |
| 0.348912 | 0.253641  | 0.73263   | 0.596264  | 0.314945  | 0.635558 |
| 0        | 0         | 0         | 0         | 0         | 0        |
| 0.125384 | 0.093752  | 0.0315931 | 0.0571391 | 0.0271627 | 0.105412 |
| 1.64025  | 1.94674   | 2.18948   | 0.734135  | 1.75553   | 0.853653 |
| 44.8362  | 43.6635   | 46.7784   | 51.2868   | 47.0141   | 51.7878  |
| 4.73291  | 5.03298   | 5.85015   | 4.25983   | 6.30012   | 4.91159  |
| 5.92428  | 6.06139   | 5.9576    | 4.67275   | 7.58385   | 5.61042  |
| 2.58703  | 2.85132   | 2.39142   | 2.19223   | 3.07013   | 2.41554  |
| 14.3425  | 15.4735   | 7.07461   | 8.48844   | 11.7935   | 13.081   |
| 0        | 0         | 0         | 0         | 0         | 0        |
| 0.137575 | 0.0321457 | 0.265403  | 0.183676  | 0.265544  | 0.108564 |
| 85.7322  | 83.9106   | 79.8112   | 72.2575   | 70.5658   | 77.9331  |
| 15.3616  | 13.6268   | 14.2866   | 14.2203   | 13.3597   | 14.3853  |
| 20.6693  | 20.0399   | 18.827    | 20.8337   | 19.255    | 19.1915  |
| 389.266  | 417.362   | 324.763   | 343.462   | 216.764   | 318.766  |
| 82.1445  | 88.8318   | 84.1906   | 84.5731   | 77.7598   | 76.1103  |
| 0.561099 | 0.243816  | 0.367043  | 0.419578  | 0.858706  | 0.471723 |
| 9.29499  | 8.22395   | 8.42274   | 9.75424   | 8.01246   | 7.19796  |
| 1.30439  | 1.21915   | 0.700837  | 0.677473  | 0.581778  | 0.516055 |
| 26.2947  | 28.5668   | 37.7482   | 37.3847   | 45.0667   | 45.8956  |
| 17.2206  | 19.2371   | 20.5946   | 20.2828   | 20.6248   | 25.5882  |
| 16.1044  | 14.1736   | 27.5617   | 28.0277   | 18.0011   | 11.0139  |
| 0        | 0         | 0         | 0         | 0         | 0        |
| 949.594  | 450.714   | 239.137   | 606.773   | 24.0633   | 530.464  |
| 0.12911  | 0.0804482 | 0.162659  | 0.294185  | 0.139849  | 0.108544 |
| 12.2982  | 12.7154   | 19.0859   | 16.7124   | 20.9303   | 13.8228  |

|           |          |          |          |           |          |
|-----------|----------|----------|----------|-----------|----------|
| 11.6136   | 11.8412  | 14.5385  | 11.5461  | 15.9797   | 10.7091  |
| 58.3789   | 20.5686  | 19.1658  | 25.1242  | 19.9663   | 29.5322  |
| 6.19889   | 5.2172   | 7.04004  | 3.76655  | 8.1158    | 8.9275   |
| 0.0556935 | 0        | 0        | 0        | 0.120652  | 0        |
| 0.988327  | 2.70963  | 5.97671  | 4.05354  | 1.28464   | 1.16326  |
| 0.588444  | 0.514609 | 0.552764 | 0.899753 | 1.09027   | 0.685653 |
| 0.148758  | 0.222459 | 0.112448 | 0.101687 | 0.193358  | 0.200101 |
| 6.4741    | 6.34828  | 10.4465  | 8.28656  | 9.37638   | 3.47205  |
| 5.46101   | 4.90993  | 6.35924  | 5.39471  | 8.36036   | 6.49356  |
| 10.8974   | 9.7002   | 13.6947  | 11.2017  | 14.3776   | 9.78151  |
| 5.66691   | 4.24467  | 9.35066  | 8.04909  | 10.0371   | 6.31481  |
| 0.830556  | 0.517519 | 1.04638  | 1.41936  | 1.12455   | 0.698258 |
| 11.5333   | 11.3447  | 11.0694  | 11.0085  | 14.2851   | 43.871   |
| 0         | 0        | 0        | 0        | 0         | 0        |
| 22.7261   | 28.8665  | 22.8812  | 20.7142  | 17.9939   | 19.1679  |
| 0         | 0        | 0        | 0        | 0.0326992 | 0        |
| 0.0670866 | 0.097783 | 0.259514 | 0.271591 | 0.18779   | 0.121544 |
| 11.9029   | 13.7009  | 13.313   | 15.3809  | 10.3802   | 11.9772  |
| 46.5179   | 44.8719  | 43.1555  | 36.2355  | 38.917    | 46.8186  |
| 0.0679827 | 0        | 0        | 0.154903 | 0         | 0        |
| 3.31795   | 1.77785  | 3.18913  | 2.30729  | 2.19673   | 1.63243  |
| 0         | 0        | 0        | 0        | 0         | 0.486223 |
| 11.0014   | 9.99388  | 9.78517  | 9.47219  | 10.8525   | 9.55571  |
| 36.5018   | 39.0298  | 40.4785  | 37.7565  | 39.3936   | 42.5283  |
| 7.22298   | 8.20223  | 5.97588  | 5.52083  | 8.49883   | 8.67944  |
| 4.95793   | 3.77983  | 7.23832  | 6.44592  | 3.98036   | 5.71287  |
| 0.204677  | 0.171996 | 0.395479 | 0.322233 | 0.281404  | 0.208718 |
| 3.11909   | 2.94384  | 2.7796   | 2.58974  | 2.63066   | 2.22914  |
| 25.6513   | 27.4984  | 34.105   | 30.1772  | 37.8665   | 42.6534  |
| 0         | 0        | 0        | 0        | 0         | 0        |
| 0.195841  | 0.244057 | 0.524303 | 0.278898 | 0.344712  | 0.205807 |
| 47.7488   | 32.8719  | 46.59    | 41.2445  | 27.3453   | 37.9098  |
| 7.24782   | 6.73715  | 6.5009   | 6.61359  | 7.5977    | 6.21463  |
| 1.83286   | 3.14065  | 7.21604  | 5.7424   | 4.71512   | 2.50397  |
| 5.86758   | 11.812   | 6.25502  | 10.2844  | 8.31122   | 4.93295  |
| 0         | 0        | 0        | 0        | 0         | 0        |
| 227.393   | 265.666  | 232.767  | 210.49   | 230.913   | 167.276  |
| 108.5     | 107.293  | 118.498  | 140.226  | 111.825   | 126.165  |
| 0.164188  | 0.45672  | 1.03511  | 0.443392 | 1.1121    | 1.01646  |
| 38.096    | 34.0144  | 36.3983  | 32.9906  | 35.4162   | 35.7622  |
| 0.166287  | 0        | 0.209497 | 0        | 0         | 0        |
| 69.1472   | 56.8749  | 109.852  | 113.62   | 64.871    | 91.7795  |
| 0.212307  | 0        | 0        | 0.120939 | 0.229967  | 0.133867 |

|           |           |           |           |           |           |
|-----------|-----------|-----------|-----------|-----------|-----------|
| 5.51934   | 4.63432   | 7.39741   | 5.26239   | 7.51844   | 4.96912   |
| 34.7244   | 40.9854   | 31.689    | 33.4451   | 26.3231   | 25.079    |
| 0         | 0         | 0         | 0         | 0         | 0         |
| 2.82308   | 3.12016   | 3.05575   | 2.65671   | 3.46186   | 3.21      |
| 1.92537   | 1.21381   | 2.25446   | 2.86451   | 2.06099   | 1.56155   |
| 0         | 0         | 0.0321455 | 0.0581366 | 0         | 0         |
| 0         | 0         | 0         | 0         | 0         | 0         |
| 0         | 3.43E-98  | 3.91E-45  | 3.33E-76  | 3.71E-34  | 3.67E-51  |
| 0         | 0         | 0         | 0         | 0         | 0         |
| 0.155776  | 0.116476  | 0.235506  | 0.0354945 | 0.303719  | 0.052385  |
| 5.93625   | 6.15327   | 6.91982   | 6.57345   | 7.81218   | 8.45773   |
| 12.8149   | 12.3422   | 10.7735   | 11.4657   | 10.2603   | 11.6229   |
| 0.375139  | 0.0779163 | 0.23631   | 0         | 0         | 0         |
| 8.15626   | 9.52905   | 7.73246   | 11.6851   | 8.43713   | 14.2456   |
| 0.375691  | 0.267534  | 0.811398  | 1.52864   | 0.232537  | 0.81218   |
| 25.1603   | 27.1123   | 28.6591   | 30.2315   | 23.761    | 23.1996   |
| 0.259923  | 0.323916  | 0.532132  | 0.370158  | 0.387123  | 0.204863  |
| 0.836495  | 1.42003   | 1.6145    | 1.72349   | 2.00488   | 1.60148   |
| 0.632112  | 0.414598  | 0.85924   | 0.322174  | 0.918927  | 0.391576  |
| 36.083    | 26.6155   | 24.6932   | 21.6285   | 31.5954   | 28.9012   |
| 0         | 0         | 0         | 0         | 0         | 0         |
| 5.40963   | 5.37759   | 6.02745   | 5.4506    | 5.14832   | 4.20619   |
| 5.81265   | 6.40454   | 7.09649   | 7.33515   | 7.14816   | 7.62114   |
| 16.1815   | 15.7816   | 13.4881   | 16.1701   | 15.7714   | 17.3329   |
| 11.0954   | 10.6025   | 11.5759   | 12.0938   | 11.688    | 10.3242   |
| 0.658445  | 0.664962  | 0.793135  | 0.71494   | 1.05692   | 0.723186  |
| 0.337276  | 0.480357  | 0.728431  | 0.850844  | 0.756755  | 0.526596  |
| 6.69101   | 5.72887   | 4.18457   | 3.86635   | 9.68513   | 7.13268   |
| 0.729772  | 0.636608  | 0.827465  | 0.831416  | 0.869521  | 1.41111   |
| 0.0455024 | 0.0378034 | 0.0191088 | 0         | 0.0328582 | 0.0255029 |
| 61.4873   | 68.7543   | 71.412    | 71.589    | 62.4794   | 65.1043   |
| 12.257    | 11.1694   | 10.4891   | 11.5254   | 10.1595   | 13.7912   |
| 6.38552   | 5.93422   | 7.12572   | 6.31906   | 8.95252   | 5.83645   |
| 0.172107  | 0.28624   | 0.110558  | 0.173473  | 0.158416  | 0         |
| 15.1931   | 17.9372   | 14.6077   | 19.1313   | 17.7561   | 22.5209   |
| 6.32402   | 5.88055   | 4.22796   | 4.61162   | 4.62867   | 5.97602   |
| 8.36899   | 9.02058   | 7.76437   | 9.29316   | 7.35585   | 7.78835   |
| 0         | 0         | 0         | 0         | 0         | 0         |
| 19.8012   | 18.3682   | 19.5938   | 17.868    | 20.6812   | 19.8001   |
| 0.0226955 | 0         | 0         | 0.261803  | 0.024583  | 0.0858627 |
| 0.435856  | 0.543164  | 0.525346  | 1.14233   | 0.308835  | 0.747604  |
| 4.71068   | 5.16316   | 5.07673   | 5.54461   | 5.74801   | 5.45141   |
| 0.132678  | 0         | 0         | 0.0755787 | 0         | 0.0557718 |

|           |           |           |           |           |           |
|-----------|-----------|-----------|-----------|-----------|-----------|
| 73.5977   | 92.0455   | 68.9814   | 67.7842   | 56.3819   | 66.9705   |
| 0.0727359 | 0.0533197 | 0.0377327 | 0.0877413 | 0.0648826 | 0.0575529 |
| 0.180919  | 0.338192  | 0.43307   | 0.556519  | 0.509517  | 0.349832  |
| 0.350649  | 0.145536  | 0.258381  | 0.0999082 | 0.221941  | 0.270085  |
| 0.716964  | 1.08528   | 0.461643  | 1.12045   | 0.496585  | 0.518797  |
| 19.4522   | 19.8795   | 16.8862   | 16.3528   | 14.4189   | 14.7888   |
| 25.9076   | 31.0098   | 29.1527   | 26.5519   | 25.0045   | 27.5984   |
| 16.0148   | 15.3633   | 15.2743   | 16.5289   | 17.3533   | 18.5663   |
| 1.62509   | 1.99782   | 2.18571   | 1.77638   | 1.8792    | 1.69856   |
| 0         | 0         | 0         | 15.5019   | 0         | 0         |
| 0         | 0         | 0         | 0         | 0         | 0         |
| 69.5414   | 82.2158   | 55.1319   | 79.9793   | 43.1137   | 60.4451   |
| 14.9861   | 12.2579   | 9.01841   | 7.97931   | 7.14011   | 9.33016   |
| 0         | 0         | 0         | 0         | 0         | 0         |
| 0.359893  | 0.256427  | 0.753584  | 0.603907  | 1.37802   | 0.622369  |
| 156.316   | 151.278   | 139.948   | 149.205   | 105.624   | 120.892   |
| 1.25468   | 1.59559   | 1.71548   | 1.31949   | 0.915013  | 0.518289  |
| 0.0185416 | 0.0115533 | 0.0817591 | 0.0528104 | 0.150629  | 0.0467645 |
| 20.5787   | 20.897    | 18.9022   | 19.7663   | 17.8603   | 16.5226   |
| 0         | 0         | 0         | 0         | 0         | 0         |
| 4.71209   | 4.34289   | 5.2423    | 4.42531   | 5.43371   | 3.26837   |
| 0.277708  | 0.302967  | 0.924969  | 0.426581  | 0.726411  | 0.431074  |
| 7.47526   | 7.60582   | 6.49704   | 6.19867   | 4.25351   | 3.32126   |
| 7.65313   | 7.64053   | 7.26399   | 6.50249   | 8.58909   | 7.12344   |
| 0         | 0         | 0         | 0         | 0         | 0         |
| 0         | 0         | 0         | 0         | 0         | 0         |
| 0.146996  | 0         | 0         | 0         | 0.077987  | 0         |
| 2.65631   | 9.15739   | 4.90663   | 43.4535   | 12.087    | 12.9508   |
| 46.7294   | 50.9632   | 59.4167   | 68.3169   | 37.2161   | 50.8219   |
| 2.70051   | 2.73198   | 2.40537   | 2.23167   | 2.52312   | 2.37691   |
| 0.493497  | 0.819994  | 0.725357  | 0         | 0.356364  | 0.207444  |
| 0.0620518 | 0         | 0.156353  | 0.141389  | 0         | 0.260839  |
| 2.382     | 1.77703   | 2.63351   | 2.5107    | 2.33441   | 2.15243   |
| 18.161    | 20.9849   | 17.8842   | 17.6131   | 19.2358   | 15.703    |
| 1.34832   | 1.24689   | 2.07988   | 2.71165   | 2.15405   | 1.73419   |
| 0.145316  | 0         | 0         | 0.165556  | 0.157403  | 0.122169  |
| 5.37607   | 2.47524   | 5.97231   | 4.64645   | 9.1795    | 6.34543   |
| 0         | 0         | 0         | 0         | 0         | 0         |
| 14.1491   | 13.2734   | 13.8522   | 11.5526   | 13.1974   | 10.8215   |
| 5.1702    | 5.53278   | 5.35129   | 4.73903   | 5.10816   | 3.98959   |
| 2.4413    | 1.31019   | 1.9011    | 0.869574  | 3.02997   | 1.61546   |
| 7.58727   | 7.3938    | 7.33656   | 6.57773   | 7.04165   | 5.52971   |
| 0.405356  | 0.106348  | 0.134392  | 0.12153   | 0.138655  | 0.0896809 |

|           |           |           |           |           |           |
|-----------|-----------|-----------|-----------|-----------|-----------|
| 111.74    | 114.133   | 114.554   | 107.075   | 101.808   | 105.942   |
| 384.617   | 371.217   | 427.354   | 446.258   | 412.342   | 454.727   |
| 1.25897   | 0.618385  | 0.432862  | 0.589697  | 0.892841  | 0.435887  |
| 21.4891   | 23.8919   | 19.995    | 23.8595   | 17.5935   | 16.6877   |
| 11.2847   | 12.9423   | 13.2841   | 12.6958   | 13.7895   | 11.0437   |
| 4.36126   | 3.57395   | 2.60995   | 3.0982    | 2.86368   | 2.80724   |
| 0         | 0         | 0         | 0         | 0         | 0         |
| 0         | 0         | 0         | 0         | 0         | 0         |
| 0.549425  | 0.248979  | 0.880976  | 0.398332  | 0.270512  | 0.5039    |
| 11.8479   | 12.0856   | 12.2157   | 10.6316   | 10.0587   | 10.6784   |
| 1.66765   | 1.11904   | 2.1414    | 2.19222   | 1.70215   | 1.32113   |
| 0.586382  | 0.365374  | 0         | 0.334027  | 2.54063   | 0.985957  |
| 2.02029   | 1.10419   | 3.71989   | 4.70938   | 5.23491   | 2.0512    |
| 0         | 0         | 0         | 0         | 0         | 0         |
| 0         | 0         | 0         | 0.0297748 | 0.0283086 | 0.0219718 |
| 12.6719   | 15.6922   | 13.9134   | 16.5635   | 13.7254   | 15.4621   |
| 2.54912   | 1.72296   | 3.37482   | 2.85495   | 3.41635   | 2.16194   |
| 56.7794   | 54.8902   | 47.3898   | 48.6594   | 44.9298   | 56.7979   |
| 1.22157   | 1.10237   | 1.6186    | 1.12777   | 1.82507   | 1.29259   |
| 40.2282   | 43.9784   | 39.3425   | 53.4251   | 35.1793   | 48.9237   |
| 0.0622058 | 0.344537  | 0.275455  | 0.340407  | 0.630592  | 0.413766  |
| 12.6109   | 11.5995   | 12.4323   | 11.8896   | 13.1944   | 11.1889   |
| 0.169373  | 0.140715  | 0.213385  | 0.0643211 | 0.183461  | 0.142394  |
| 2.14438   | 1.59142   | 3.09445   | 2.03233   | 3.25168   | 2.06496   |
| 13.5103   | 12.8396   | 14.0669   | 11.197    | 16.3968   | 22.2339   |
| 60.7155   | 42.2757   | 61.1622   | 27.558    | 36.7225   | 37.5226   |
| 0.073324  | 0.0913762 | 0.0461888 | 0.0417684 | 0.0397115 | 0.0924665 |
| 18.2565   | 17.2711   | 19.4737   | 14.7824   | 19.4632   | 16.8245   |
| 7.08466   | 9.19236   | 8.45303   | 7.07431   | 8.26078   | 8.0583    |
| 3.7784    | 6.05396   | 4.76023   | 5.53457   | 2.92334   | 5.89929   |
| 0.283869  | 0.285335  | 0.141287  | 0.28629   | 0.24801   | 0.378813  |
| 0         | 0         | 0         | 0         | 0         | 0         |
| 115.502   | 81.1134   | 127.122   | 95.6785   | 132.733   | 185.312   |
| 28.2994   | 23.9037   | 14.4636   | 14.6404   | 5.1686    | 5.28263   |
| 15.6083   | 14.2867   | 14.1279   | 12.8709   | 17.2319   | 17.0082   |
| 7.44055   | 10.5186   | 11.2488   | 16.5062   | 10.9866   | 9.19787   |
| 26.4799   | 25.0668   | 27.2503   | 26.309    | 29.9369   | 33.7553   |
| 0.343166  | 0.268659  | 0.369531  | 0.216537  | 0.152498  | 0.0221917 |
| 69.0411   | 71.5572   | 68.9744   | 65.7668   | 61.0668   | 57.336    |
| 0.981781  | 1.01958   | 0.700911  | 0.260989  | 0.921652  | 0.962961  |
| 0         | 0         | 0         | 0         | 0         | 0         |
| 0.771815  | 1.21913   | 0.0875136 | 0         | 0.62701   | 0         |
| 8.23924   | 5.63362   | 5.38915   | 3.73812   | 7.39766   | 4.94482   |

|          |           |           |             |           |           |
|----------|-----------|-----------|-------------|-----------|-----------|
| 10.5235  | 10.9979   | 10.3005   | 10.9181     | 11.4645   | 12.3402   |
| 9.09031  | 12.3869   | 9.96988   | 9.78764     | 13.3056   | 13.3783   |
| 12.8756  | 12.4447   | 11.8713   | 13.0664     | 13.9428   | 13.8542   |
| 16.9233  | 17.2653   | 18.0035   | 20.2014     | 20.6107   | 21.5637   |
| 3.08514  | 2.54174   | 3.44981   | 2.29849     | 4.42844   | 2.56137   |
| 43.7583  | 48.0911   | 23.5493   | 22.0817     | 57.3542   | 50.0398   |
| 2.61628  | 2.55322   | 2.98044   | 2.28379     | 3.48051   | 2.67662   |
| 1.96126  | 1.75678   | 1.91132   | 0.000643991 | 0.64101   | 1.0784    |
| 41.4785  | 43.5246   | 40.7462   | 41.8967     | 34.0966   | 36.5278   |
| 2.84681  | 2.97258   | 3.1099    | 2.03905     | 3.72611   | 2.56268   |
| 2.633    | 3.10088   | 2.50507   | 2.87245     | 3.37904   | 2.73877   |
| 45.9427  | 49.0232   | 48.3085   | 54.1119     | 42.4781   | 43.3946   |
| 2.03943  | 1.0101    | 1.91057   | 1.0128      | 2.63389   | 1.42881   |
| 1.17941  | 1.42239   | 1.17452   | 1.12709     | 1.62762   | 1.11942   |
| 12.5819  | 12.6058   | 11.0731   | 10.2388     | 17.1004   | 12.053    |
| 0.13229  | 0.122114  | 0.188512  | 0.150293    | 0.398024  | 0.111217  |
| 0        | 0         | 0         | 0           | 0         | 0         |
| 2.84229  | 2.92187   | 3.84559   | 2.75939     | 3.67766   | 2.39884   |
| 0.17521  | 0.145565  | 0.588639  | 0.0665381   | 0.316307  | 0.147301  |
| 11.3265  | 10.7425   | 13.3485   | 9.69667     | 13.5534   | 10.2449   |
| 5.02335  | 4.67183   | 4.95792   | 3.55305     | 6.28061   | 4.61046   |
| 17.4729  | 16.1646   | 16.2777   | 14.9227     | 19.0365   | 14.8714   |
| 3.52876  | 4.05926   | 3.44421   | 4.97009     | 4.26331   | 5.16722   |
| 0        | 0         | 0         | 0.06407     | 0         | 0         |
| 3.02996  | 3.13219   | 2.70344   | 2.24099     | 4.26119   | 2.36359   |
| 8.68268  | 10.5758   | 8.96125   | 8.71839     | 5.1541    | 4.33029   |
| 0.137665 | 0.174872  | 0.0867188 | 0.315702    | 0.158605  | 0.173839  |
| 0.358185 | 0.309618  | 0.330956  | 0.0494468   | 0.0955875 | 0.0741514 |
| 2.00948  | 3.33895   | 7.3353    | 6.00714     | 9.91575   | 6.43991   |
| 0.18059  | 0.0421967 | 1.66237   | 0.390592    | 0.516539  | 0.616263  |
| 0        | 0         | 0.751257  | 0           | 0.322952  | 0         |
| 0.64813  | 0.629026  | 1.04613   | 0.632718    | 0.741774  | 0.685279  |
| 0        | 0.0167774 | 0         | 0           | 0.0145827 | 0         |
| 10.3748  | 9.44426   | 7.26292   | 6.11767     | 6.32123   | 7.19752   |
| 0        | 0         | 0         | 0           | 0         | 0         |
| 0        | 0         | 0         | 0           | 0         | 0         |
| 31.0587  | 33.0649   | 27.6149   | 30.017      | 34.8696   | 34.8351   |
| 0.140807 | 0.0974855 | 0.197107  | 0.106946    | 0.254199  | 0.170991  |
| 0.102349 | 0.085031  | 0         | 0.136038    | 0.18477   | 0.114727  |
| 0.059289 | 0         | 0         | 0.0337735   | 0.0642206 | 0.0249225 |
| 0        | 0         | 0         | 0           | 0         | 0         |
| 0.335558 | 0.418172  | 0.0845508 | 0.0764591   | 0         | 0         |
| 27.6099  | 28.7316   | 27.1634   | 29.3973     | 28.2718   | 28.5986   |

|           |           |           |           |           |           |
|-----------|-----------|-----------|-----------|-----------|-----------|
| 7.37918   | 6.83241   | 6.66028   | 6.79424   | 8.2615    | 6.76832   |
| 0.412841  | 0.547261  | 0.211794  | 0.046904  | 0.182093  | 0.347081  |
| 9.34963   | 7.50125   | 11.6472   | 11.9434   | 12.603    | 13.6558   |
| 0         | 0         | 0         | 0         | 0         | 0         |
| 1.14872   | 0.987267  | 0         | 0         | 0         | 0         |
| 0         | 0         | 0         | 0.0581649 | 0         | 0         |
| 0.490969  | 0.147988  | 0.851102  | 0.203845  | 0.401543  | 0.187714  |
| 0.565162  | 0.39128   | 0.712022  | 0.64388   | 0.612172  | 0.422346  |
| 0         | 0.115759  | 0.0585135 | 0.0529136 | 0         | 0.0390466 |
| 0         | 0         | 0         | 0         | 0         | 0         |
| 6.41596   | 4.78656   | 8.0667    | 4.53171   | 11.1664   | 8.46745   |
| 15.3228   | 16.3716   | 15.8254   | 15.4022   | 13.8747   | 13.2942   |
| 0         | 0         | 0         | 0         | 0         | 0         |
| 0.118331  | 0.222109  | 0.181113  | 0.0713055 | 0.141238  | 0.0989338 |
| 86.814    | 96.1367   | 78.95     | 68.6862   | 64.7186   | 75.3472   |
| 12.6165   | 8.72067   | 5.78609   | 3.96319   | 12.9037   | 7.94998   |
| 122.368   | 134.57    | 137.065   | 122.208   | 111.807   | 112.403   |
| 0.0531328 | 0.0807713 | 0         | 0         | 0         | 0.0536296 |
| 0         | 0         | 0         | 0         | 0         | 0         |
| 0         | 0.142381  | 0         | 7.09E-63  | 0         | 0.190962  |
| 2.27E-09  | 1.16E-10  | 1.08E-08  | 3.14E-11  | 7.39E-09  | 9.18E-09  |
| 10.0974   | 11.217    | 7.54924   | 8.59881   | 13.5612   | 13.6553   |
| 0.164101  | 0.149808  | 0.371673  | 0.187882  | 1.07153   | 0.239258  |
| 12.8858   | 15.5479   | 14.4199   | 14.5851   | 13.4689   | 15.052    |
| 1.24528   | 0.862151  | 1.22024   | 1.13849   | 1.8651    | 1.034     |
| 0.203623  | 0.225559  | 0.171023  | 0.0515519 | 0.637173  | 0.285313  |
| 77.2454   | 79.4813   | 69.4297   | 87.802    | 61.6176   | 80.4147   |
| 25.9616   | 53.4032   | 38.1024   | 44.2603   | 26.7232   | 27.5162   |
| 0         | 0         | 0         | 0         | 0         | 0         |
| 11.5214   | 13.1642   | 13.2638   | 11.1102   | 12.4077   | 11.4646   |
| 73.4024   | 81.0535   | 65.5442   | 72.7328   | 56.5889   | 63.4984   |
| 1.83744   | 1.77102   | 1.2732    | 0.730384  | 1.53935   | 1.77911   |
| 0.0361642 | 0.0100151 | 0.0455617 | 0.0183117 | 0.0612975 | 0         |
| 5.06229   | 5.89279   | 6.39363   | 7.40702   | 7.6483    | 7.61239   |
| 22.7018   | 25.5051   | 20.1548   | 24.9484   | 21.0017   | 22.787    |
| 0         | 0         | 0         | 0.0815914 | 0         | 0         |
| 0         | 0         | 0         | 0         | 0         | 0         |
| 10.1682   | 10.6398   | 12.8852   | 11.326    | 18.3039   | 19.8489   |
| 6.64053   | 6.5038    | 6.83775   | 4.59253   | 6.62484   | 4.80724   |
| 8.68887   | 8.23124   | 8.43357   | 7.96467   | 9.18469   | 7.58686   |
| 0         | 0         | 0         | 0         | 0         | 0         |
| 2.52459   | 4.21409   | 3.70585   | 5.01359   | 5.74513   | 4.57593   |
| 0         | 0         | 0         | 0         | 0         | 0         |



|          |           |          |           |           |           |
|----------|-----------|----------|-----------|-----------|-----------|
| 134.678  | 136.038   | 137.237  | 141.434   | 134.4     | 132.551   |
| 97.3048  | 94.9435   | 104.698  | 85.8735   | 100.263   | 84.998    |
| 0        | 0         | 0        | 0         | 0         | 0         |
| 7.95204  | 10.1851   | 9.64736  | 11.4923   | 1.43558   | 0.990426  |
| 0        | 0         | 0        | 0         | 0         | 0         |
| 29.2211  | 27.3359   | 29.0279  | 26.1259   | 26.6388   | 29.6975   |
| 0.107594 | 0         | 0        | 0         | 0         | 0         |
| 26.8142  | 27.0745   | 26.094   | 25.3178   | 24.028    | 22.66     |
| 18.4967  | 11.7327   | 19.5133  | 10.5979   | 20.5947   | 9.655     |
| 9.97608  | 10.3712   | 11.168   | 12.8169   | 11.4241   | 14.4072   |
| 91.8936  | 61.8249   | 120.863  | 92.9255   | 110.997   | 100.733   |
| 23.7122  | 25.7977   | 26.8865  | 27.6581   | 26.4797   | 26.5485   |
| 2.4971   | 2.78397   | 2.55738  | 2.56348   | 3.60642   | 2.52373   |
| 14.3277  | 15.4535   | 13.0088  | 11.7948   | 12.5933   | 13.2325   |
| 51.7833  | 55.5672   | 54.9569  | 53.1151   | 50.3469   | 44.5978   |
| 27.7944  | 31.1858   | 28.1631  | 30.3134   | 30.1063   | 27.5248   |
| 2.22581  | 3.24321   | 3.45132  | 3.04299   | 4.93318   | 6.65019   |
| 1.11012  | 0.694077  | 0        | 0         | 0         | 0.0291327 |
| 0        | 0         | 0        | 0         | 0         | 0         |
| 0.687089 | 0.554044  | 0.814712 | 0.920928  | 0.963135  | 0.509686  |
| 0.711173 | 0.518788  | 0.590032 | 0.652134  | 0.638809  | 0.685388  |
| 0.297564 | 0.196319  | 0.154365 | 0.119651  | 0.417114  | 0.206019  |
| 0        | 0.0666353 | 0        | 0.0609184 | 0.173756  | 0         |
| 0        | 0         | 3.52667  | 0         | 0         | 0         |
| 11.9634  | 11.4988   | 9.10068  | 12.1053   | 7.6603    | 8.99702   |
| 15.9922  | 15.6265   | 14.4689  | 15.0815   | 15.3231   | 17.1535   |
| 1.1304   | 1.08914   | 0.359667 | 0.657684  | 0.448815  | 0.439196  |
| 39.6528  | 37.5007   | 37.4332  | 34.3753   | 36.7961   | 35.8749   |
| 1.82004  | 1.7641    | 2.3949   | 1.70491   | 4.16191   | 1.59814   |
| 21.7973  | 21.7334   | 25.4265  | 23.2886   | 20.2162   | 22.0713   |
| 0        | 0         | 0        | 0         | 0.0734896 | 0         |
| 7.26045  | 6.63671   | 8.28812  | 7.53691   | 7.96418   | 7.69965   |
| 11.7908  | 11.7749   | 13.9351  | 13.1057   | 14.7383   | 17.6308   |
| 1.62318  | 1.19908   | 0.361917 | 0.571662  | 2.56451   | 1.40993   |
| 0        | 0         | 0        | 0         | 0         | 0         |
| 0.612548 | 0.458014  | 0.240091 | 0.310163  | 0.427589  | 0.343318  |
| 19.1706  | 18.3794   | 16.6867  | 18.1399   | 21.1958   | 22.408    |
| 9.04129  | 8.93504   | 7.7469   | 8.52844   | 7.18705   | 6.6612    |
| 52.2124  | 68.444    | 37.5843  | 45.4113   | 40.4972   | 42.4047   |
| 0        | 0         | 0        | 0         | 0         | 0         |
| 6.78256  | 6.15506   | 8.11789  | 7.54876   | 8.89396   | 7.97944   |
| 1.80455  | 1.66767   | 2.14575  | 1.43219   | 2.45979   | 1.09095   |
| 0.341732 | 0.505715  | 0.322899 | 0.243331  | 0.902257  | 0.395035  |

|           |           |           |           |           |           |
|-----------|-----------|-----------|-----------|-----------|-----------|
| 0         | 0         | 0.064896  | 0         | 0         | 0.0866114 |
| 18.652    | 19.2814   | 17.307    | 24.3261   | 18.0119   | 21.1514   |
| 13.8934   | 13.7068   | 13.857    | 12.8277   | 14.2025   | 14.5274   |
| 5.29156   | 5.33365   | 4.97543   | 4.7874    | 4.82559   | 5.15196   |
| 0         | 0         | 0         | 11.9565   | 0         | 0.420146  |
| 0.0500345 | 0.0623529 | 0.126072  | 0.798048  | 0.108393  | 0.0420646 |
| 27.4527   | 34.6569   | 30.5351   | 32.0227   | 23.7374   | 29.9888   |
| 3.8169    | 3.63119   | 4.03949   | 4.98494   | 3.4755    | 3.25017   |
| 0.511537  | 0.841045  | 1.15682   | 0.871756  | 0.497296  | 0.385978  |
| 90.8709   | 52.7921   | 91.0895   | 85.6728   | 105.182   | 195.936   |
| 0.482161  | 0.400579  | 0.202484  | 0         | 0.174089  | 0.13512   |
| 0.0584498 | 1.09E-10  | 0.0779063 | 0.203526  | 0.26618   | 0.250598  |
| 0.066414  | 0.0458917 | 0.130568  | 0         | 0.0819004 | 0.251167  |
| 0.572278  | 0.49922   | 1.26173   | 0.619387  | 2.35554   | 1.25091   |
| 18.7872   | 20.9631   | 14.8292   | 18.6099   | 15.9287   | 17.0728   |
| 0         | 0         | 0         | 0         | 0         | 0         |
| 9.27402   | 8.93689   | 9.24184   | 7.65736   | 6.96812   | 7.19816   |
| 0.403616  | 0.379745  | 0.280594  | 0.113275  | 0.552912  | 0.412328  |
| 96.7179   | 89.8905   | 99.1733   | 88.9734   | 66.8262   | 80.6963   |
| 36.6419   | 36.3087   | 32.1941   | 33.007    | 30.0434   | 27.3219   |
| 2.90052   | 3.15458   | 2.4583    | 3.48476   | 2.79904   | 3.9016    |
| 23.4336   | 24.2469   | 25.8879   | 26.0284   | 24.394    | 25.7599   |
| 0.100993  | 0         | 0         | 0         | 0.109393  | 0         |
| 0         | 0         | 0         | 0         | 0         | 0         |
| 0.198559  | 0.0824814 | 0.16677   | 0.527835  | 0.215075  | 0.278219  |
| 5.38065   | 6.19238   | 5.22303   | 5.69461   | 7.13398   | 6.3775    |
| 4.99369   | 3.58621   | 3.66816   | 4.20424   | 7.57269   | 5.13753   |
| 1.10203   | 0.887031  | 1.60483   | 1.16391   | 1.44223   | 0.752763  |
| 33.505    | 29.8478   | 37.2077   | 29.8775   | 33.6192   | 26.1279   |
| 0.703853  | 0.267433  | 0.270363  | 0.244489  | 0         | 0.811874  |
| 4.67478   | 4.66758   | 4.89093   | 4.88333   | 6.85984   | 5.49298   |
| 1.17181   | 1.19571   | 1.25114   | 1.25944   | 2.10259   | 0.684844  |
| 0         | 0         | 0         | 0         | 0         | 0         |
| 3.15244   | 3.04961   | 2.81102   | 3.01756   | 3.63294   | 2.735     |
| 0         | 0         | 0         | 0         | 0         | 0         |
| 1137.43   | 1302.99   | 1109.44   | 1213.12   | 1059.96   | 1194.55   |
| 0.246047  | 0.220768  | 0.405044  | 0.854802  | 0.727758  | 0.562549  |
| 0.709118  | 0.692511  | 0.796427  | 0.328724  | 0.829723  | 0.869127  |
| 2.75151   | 2.36958   | 2.81829   | 2.06434   | 1.72038   | 1.61738   |
| 0         | 0.0507234 | 0.102559  | 0.0463717 | 0.0881763 | 0.102657  |
| 0.218452  | 0.408351  | 0.137609  | 0         | 0.709867  | 0.275482  |
| 13.5005   | 13.4974   | 16.2687   | 12.2352   | 16.2014   | 11.4911   |
| 13.1467   | 14.2535   | 11.0143   | 11.3831   | 14.3114   | 16.6894   |

|           |           |           |           |           |           |
|-----------|-----------|-----------|-----------|-----------|-----------|
| 6.85684   | 7.15855   | 7.01769   | 6.20812   | 6.31229   | 5.23652   |
| 0         | 0         | 0         | 0         | 0         | 0         |
| 1.64999   | 2.39458   | 2.26294   | 2.73642   | 1.99084   | 1.63299   |
| 0.516887  | 0.644144  | 0.964744  | 0.632501  | 0.725772  | 0.91739   |
| 15.2674   | 14.8293   | 15.901    | 13.1916   | 12.1077   | 10.8536   |
| 99.1578   | 77.9961   | 109.618   | 33.6949   | 95.3093   | 35.2849   |
| 34.2311   | 35        | 32.5188   | 36.1982   | 25.6287   | 39.0274   |
| 27.4916   | 24.0836   | 25.6121   | 24.0354   | 24.8984   | 24.155    |
| 0.0670265 | 0.0415729 | 0.13119   | 8.47E-12  | 0.0368397 | 0.112968  |
| 0         | 0.0457755 | 0         | 0         | 0.0397875 | 0.0308811 |
| 5.06458   | 5.17133   | 4.98101   | 3.07112   | 5.46815   | 5.09569   |
| 12.1238   | 11.211    | 12.6621   | 12.8916   | 14.4264   | 15.5991   |
| 1.06707   | 0.851894  | 0.756201  | 0.588854  | 1.75181   | 1.05129   |
| 21.687    | 29.79     | 24.3466   | 33.4974   | 24.9857   | 27.1927   |
| 0.395302  | 0.246312  | 0         | 0.0750601 | 0.499547  | 0.276946  |
| 27.6534   | 27.6907   | 29.2412   | 25.5093   | 27.5      | 26.8784   |
| 7.09397   | 6.93535   | 6.83308   | 6.80756   | 8.68489   | 6.92089   |
| 0.279268  | 0.169147  | 0.883848  | 0.0789171 | 0.982507  | 0.23298   |
| 0.903945  | 0.970037  | 1.17047   | 0.629352  | 1.82228   | 1.30882   |
| 10.1472   | 10.012    | 11.8246   | 10.1724   | 11.5274   | 8.73894   |
| 0.0504434 | 0.165031  | 0.0635513 | 0.0891399 | 0.0546392 | 0.0415427 |
| 0         | 0         | 0         | 0         | 0         | 0         |
| 0         | 0         | 0         | 0         | 0         | 0         |
| 0.364568  | 0.242306  | 0.336822  | 0.581485  | 0.368567  | 0.163465  |
| 11.3143   | 11.8046   | 10.2254   | 10.9455   | 11.8315   | 15.4462   |
| 0         | 0         | 0         | 0         | 0         | 0.0182608 |
| 0.0494667 | 0.21271   | 6.25E-188 | 7.40E-109 | 1.08E-204 | 0.0503111 |
| 3.51977   | 3.07365   | 5.50704   | 3.34656   | 4.04445   | 3.2471    |
| 0         | 0         | 0         | 0.283571  | 0         | 0         |
| 23.7269   | 17.1965   | 24.4159   | 21.3699   | 17.8898   | 14.2278   |
| 0         | 0         | 0         | 0         | 0         | 0         |
| 14.2697   | 12.3307   | 11.9366   | 14.1212   | 12.7738   | 15.0567   |
| 1.86006   | 3.7088    | 0         | 0.423827  | 0.402956  | 0.312755  |
| 0         | 0         | 0         | 0         | 0         | 0         |
| 11.7219   | 10.0841   | 7.27281   | 7.35221   | 5.97989   | 10.2363   |
| 0         | 10.247    | 2.58983   | 0         | 2.22664   | 0         |
| 3.1554    | 2.06247   | 2.76326   | 1.98339   | 4.76393   | 3.0572    |
| 0         | 0         | 0         | 0         | 0.0339258 | 0         |
| 1.85789   | 1.75716   | 2.34067   | 2.52219   | 3.04005   | 2.49248   |
| 0.26489   | 0.368942  | 0.137415  | 0.177521  | 0.219412  | 0.157197  |
| 0.770032  | 0.205631  | 0.485064  | 0.187989  | 0.417041  | 0.277447  |
| 0.0830797 | 0         | 0         | 0         | 0         | 0         |
| 0.0228219 | 0         | 0.0287523 | 0.0260006 | 0.0247202 | 0.0191866 |

|           |           |           |           |           |           |
|-----------|-----------|-----------|-----------|-----------|-----------|
| 0         | 0         | 0         | 0         | 0         | 0         |
| 51.7706   | 38.9239   | 43.8102   | 39.5878   | 55.1183   | 32.9549   |
| 0.864402  | 1.33227   | 0.954967  | 1.92151   | 0.962444  | 1.06384   |
| 10.9499   | 10.0727   | 11.605    | 9.49607   | 12.4606   | 11.0504   |
| 12.4724   | 10.4416   | 11.6887   | 12.1264   | 11.114    | 10.5319   |
| 0.0954701 | 0         | 0         | 0         | 0         | 0.240789  |
| 3.53359   | 4.25169   | 3.07023   | 2.31367   | 2.7863    | 2.26503   |
| 40.8975   | 38.3803   | 40.5611   | 39.8401   | 43.2183   | 45.9111   |
| 0.0168881 | 0.0420918 | 0         | 0.0192403 | 0.0365856 | 0         |
| 0.13822   | 0.0574164 | 0.232182  | 0.209962  | 0.0998112 | 0.232406  |
| 4.841     | 4.91292   | 4.76811   | 3.25454   | 5.00995   | 3.96444   |
| 22.997    | 18.5786   | 27.2799   | 18.6346   | 29.1049   | 22.7645   |
| 0.293276  | 0.402028  | 0.295588  | 0.334124  | 0.667108  | 0.591746  |
| 15.9628   | 16.2424   | 15.0105   | 15.2989   | 17.8253   | 14.5269   |
| 0         | 0         | 0         | 0         | 0         | 0         |
| 0         | 0         | 0         | 0         | 0         | 2.20455   |
| 0         | 0         | 0         | 0         | 0         | 0         |
| 0         | 0         | 0.0836479 | 0         | 0         | 0         |
| 4.19714   | 4.30262   | 4.6187    | 4.37731   | 3.61944   | 4.75527   |
| 17.3774   | 15.7606   | 17.866    | 17.1493   | 22.6028   | 20.2747   |
| 4.81427   | 5.24637   | 5.38263   | 5.41358   | 6.50142   | 5.57171   |
| 0.0830373 | 0         | 0.0348716 | 0.0630686 | 0.0899443 | 0         |
| 4.86617   | 4.22106   | 4.85392   | 3.94213   | 5.2116    | 4.30596   |
| 7.97346   | 6.63322   | 7.92956   | 6.87037   | 8.47339   | 6.57493   |
| 26.2561   | 25.0499   | 32.6027   | 27.1044   | 35.9339   | 32.1732   |
| 1.86872   | 1.82404   | 1.87551   | 2.14329   | 0.887312  | 1.941     |
| 49.7563   | 50.4372   | 56.8268   | 56.1288   | 50.3538   | 48.2832   |
| 0         | 0         | 0         | 0         | 0         | 0         |
| 22.8824   | 24.0381   | 27.6898   | 27.8025   | 35.7698   | 31.2841   |
| 24.3948   | 32.4426   | 15.8256   | 16.1777   | 12.4232   | 13.4686   |
| 1.4231    | 1.85595   | 0.0972891 | 0.100547  | 0.561622  | 0.547199  |
| 4.21697   | 4.09038   | 3.34102   | 3.16986   | 3.88493   | 4.07522   |
| 0.479642  | 1.49432   | 0.453209  | 0.68306   | 1.29885   | 0.907292  |
| 9.38476   | 10.8618   | 15.5743   | 14.7474   | 11.3338   | 12.9503   |
| 0         | 0         | 0.365667  | 0.992014  | 0         | 0         |
| 0.029523  | 0         | 0.0743893 | 0.033635  | 0.127915  | 0.074461  |
| 1.60181   | 1.5275    | 1.32545   | 1.20094   | 1.50933   | 0.990131  |
| 88.9729   | 105.463   | 65.458    | 87.862    | 84.8858   | 102.648   |
| 3.87261   | 2.84392   | 3.55029   | 1.35905   | 6.31082   | 3.69179   |
| 50.0868   | 50.9144   | 51.7634   | 46.2879   | 53.6266   | 62.1035   |
| 0.103389  | 0.0858957 | 0.0651277 | 0.294474  | 0.0559946 | 0.0144868 |
| 31.5336   | 40.3839   | 28.7431   | 11.0923   | 36.3603   | 39.4607   |
| 21.2333   | 20.1998   | 19.1526   | 19.4889   | 20.3432   | 23.5836   |

|           |           |           |           |           |           |
|-----------|-----------|-----------|-----------|-----------|-----------|
| 2.36727   | 3.64103   | 2.47621   | 2.81125   | 3.65739   | 3.76997   |
| 0         | 0         | 0         | 0         | 0         | 0.0163886 |
| 8.10795   | 7.82974   | 9.31006   | 7.28232   | 6.77342   | 7.53648   |
| 0         | 0         | 0         | 0         | 0         | 0         |
| 1.28434   | 1.64158   | 2.6968    | 1.83841   | 3.8168    | 2.99011   |
| 0         | 0         | 0         | 0         | 0         | 0         |
| 0         | 0         | 0         | 0         | 0         | 0         |
| 0.0278396 | 0.208162  | 0.0350738 | 0         | 0.120621  | 0.14043   |
| 1.58851   | 1.58968   | 2.47129   | 1.68637   | 3.10237   | 2.54955   |
| 3.68467   | 3.60118   | 3.77909   | 3.11181   | 3.89966   | 3.68273   |
| 5.30029   | 5.27447   | 3.27768   | 2.72069   | 8.15958   | 6.34939   |
| 306.507   | 267.109   | 266.818   | 276.235   | 217.746   | 253.649   |
| 0.436501  | 0.376702  | 0.612446  | 0.277249  | 0.445626  | 0.239612  |
| 282.424   | 211.591   | 474.008   | 213.645   | 354.393   | 217.48    |
| 0         | 0         | 0         | 0         | 0         | 0         |
| 6.04267   | 6.12585   | 6.45511   | 7.90164   | 7.48436   | 7.99558   |
| 15.3612   | 14.6032   | 15.467    | 17.4039   | 16.047    | 17.4165   |
| 0.174991  | 0.109037  | 0.440927  | 0.39873   | 0.284321  | 0.441352  |
| 0.118853  | 0.123428  | 0.0249561 | 0         | 0.193108  | 0.0499604 |
| 0.393604  | 0.809339  | 0.619854  | 0.896852  | 0.852687  | 0.463271  |
| 0.14311   | 0.237792  | 0.120199  | 0.0543478 | 0.0258357 | 0.0200525 |
| 42.9998   | 52.643    | 38.1153   | 39.9757   | 24.5975   | 27.7338   |
| 94.505    | 111.585   | 94.4773   | 100.256   | 75.9144   | 87.131    |
| 0         | 0         | 0.0458098 | 0.0414257 | 0.0997588 | 0         |
| 0.0418621 | 0.0362281 | 0         | 0.123186  | 0.161944  | 0.031922  |
| 0         | 0         | 0         | 0         | 0         | 0         |
| 17.4088   | 14.6053   | 19.7927   | 16.9208   | 20.0857   | 15.5646   |
| 7.04706   | 6.31436   | 6.42023   | 4.81052   | 9.24188   | 5.8511    |
| 5.85018   | 4.31626   | 6.78367   | 4.94073   | 6.99885   | 5.45664   |
| 2.4634    | 2.33527   | 1.9883    | 2.53659   | 1.61263   | 2.04595   |
| 14.6568   | 10.9693   | 8.0485    | 6.72295   | 6.9104    | 5.59767   |
| 26.2349   | 27.7613   | 31.4274   | 27.7973   | 33.0631   | 30.1042   |
| 7.44791   | 10.1023   | 5.76272   | 6.53448   | 9.41631   | 8.99971   |
| 24.5805   | 23.0256   | 33.4619   | 27.0644   | 27.8462   | 23.1617   |
| 0.165439  | 0.549785  | 0.660024  | 1.72775   | 0.537599  | 1.04315   |
| 0.403796  | 0.320224  | 0.462476  | 0.334573  | 0.55667   | 0.678952  |
| 0         | 0         | 0.187814  | 0         | 0         | 0         |
| 0         | 0         | 0         | 0         | 0         | 0         |
| 0         | 0         | 0         | 0         | 0         | 0         |
| 1.4122    | 0.963742  | 1.82152   | 1.45566   | 1.7846    | 1.32859   |
| 0         | 0         | 0         | 0         | 0         | 0         |
| 23.7699   | 18.1305   | 25.6114   | 23.126    | 28.2809   | 26.5941   |
| 9.92021   | 10.5019   | 9.01483   | 9.27651   | 7.89455   | 7.2603    |

|           |           |          |           |           |           |
|-----------|-----------|----------|-----------|-----------|-----------|
| 6.04238   | 5.89613   | 5.32953  | 5.1519    | 5.4293    | 5.6454    |
| 6.18674   | 7.94253   | 11.0196  | 14.4311   | 11.814    | 14.3558   |
| 0         | 0         | 0        | 0.336833  | 0         | 0         |
| 0.148634  | 0.185228  | 0.421329 | 0.0423341 | 0.0402494 | 0.0624793 |
| 2.45944   | 2.6022    | 2.47258  | 2.11322   | 2.39933   | 1.85968   |
| 0         | 0         | 0        | 0         | 0         | 0         |
| 0         | 0.501649  | 0.507146 | 0         | 0.436027  | 0         |
| 0.735043  | 1.22508   | 1.09822  | 1.43838   | 1.60552   | 0.62877   |
| 0         | 0         | 0        | 0         | 0         | 0         |
| 4.19768   | 4.77627   | 5.47783  | 3.87725   | 4.81431   | 3.60125   |
| 0         | 0         | 0        | 0         | 0         | 0         |
| 5.32494   | 5.6663    | 5.82029  | 7.00846   | 5.92589   | 4.84469   |
| 5.99869   | 6.29881   | 4.99895  | 5.93869   | 5.29534   | 5.45245   |
| 0         | 0         | 0        | 0         | 0         | 0         |
| 0.463469  | 0.505378  | 0.291952 | 0.528022  | 0.878535  | 0.730582  |
| 0.259726  | 0.21578   | 0        | 0         | 0.187553  | 0.43671   |
| 0.160354  | 0.262938  | 0.276452 | 0.163458  | 0.429659  | 0.198669  |
| 0.0603131 | 0.0375811 | 0        | 0.171784  | 0.163325  | 0.050706  |
| 35.8452   | 41.0816   | 38.4453  | 45.8814   | 42.9702   | 47.2629   |
| 1.18315   | 0.575532  | 1.52185  | 0.526155  | 2.61493   | 0.547637  |
| 43.2741   | 44.1562   | 43.6895  | 48.8775   | 44.3246   | 53.2837   |
| 0.693037  | 0.460327  | 1.76771  | 0.414256  | 1.12173   | 0.230153  |
| 0         | 0         | 0        | 0         | 0         | 0.0833331 |
| 2.63439   | 3.253     | 3.56019  | 2.50283   | 2.36558   | 2.08591   |
| 0         | 0.0859368 | 0        | 0.0785639 | 0.14939   | 0.231899  |
| 22.7365   | 14.2959   | 16.2754  | 15.1888   | 9.17943   | 7.21152   |
| 0         | 0         | 0        | 0         | 0         | 0         |
| 0         | 0         | 0        | 0         | 0         | 0         |
| 0.115807  | 0.202046  | 0.1459   | 0.131937  | 0.0501758 | 0.116832  |
| 0.673924  | 1.895     | 0.311311 | 0.793168  | 1.08636   | 1.1746    |
| 0         | 0         | 0        | 0         | 0         | 0         |
| 2.1242    | 2.01355   | 2.11924  | 1.91642   | 2.29217   | 2.4041    |
| 165.934   | 172.861   | 175.734  | 171.782   | 165.01    | 165.926   |
| 0.313148  | 0.216803  | 0.394521 | 0.237843  | 0.201005  | 0.195013  |
| 0.71546   | 0.445803  | 0.851299 | 0.45284   | 1.29162   | 0.46783   |
| 1.8342    | 1.25718   | 1.88167  | 1.73144   | 2.31317   | 1.11247   |
| 0         | 0         | 0        | 0         | 0         | 0         |
| 17.532    | 14.8655   | 11.9851  | 14.0725   | 10.736    | 13.1691   |
| 7.18349   | 9.76334   | 8.59765  | 10.4858   | 6.32207   | 6.68092   |
| 9.40986   | 10.6969   | 12.504   | 11.681    | 9.73113   | 10.6865   |
| 13.2925   | 16.3018   | 14.2465  | 14.5836   | 10.9944   | 10.6422   |
| 0.444745  | 0.578337  | 0.365422 | 0.70496   | 3.49784   | 4.97452   |
| 68.28     | 87.1802   | 78.2418  | 95.6307   | 74.3184   | 103.319   |

|          |           |           |           |           |           |
|----------|-----------|-----------|-----------|-----------|-----------|
| 4.5052   | 5.09489   | 5.11032   | 4.71258   | 4.35895   | 3.62584   |
| 11.8004  | 10.4159   | 12.7313   | 9.62623   | 15.4514   | 11.2253   |
| 0.344649 | 0.257701  | 0.434208  | 0.183238  | 0.547532  | 0.521551  |
| 0        | 0         | 0         | 0         | 0         | 0         |
| 0.886629 | 0.841477  | 0.954567  | 1.60464   | 0.888159  | 3.05752   |
| 3.20547  | 3.99465   | 4.84611   | 2.55635   | 6.24977   | 4.17706   |
| 1.0523   | 0.981206  | 0.932736  | 0.725008  | 0.692017  | 0.543354  |
| 13.097   | 12.7226   | 5.79047   | 6.99718   | 5.9477    | 7.4887    |
| 30.364   | 31.0311   | 30.2176   | 29.9762   | 28.7765   | 28.1142   |
| 48.9321  | 52.0044   | 48.1775   | 49.7623   | 51.466    | 56.0092   |
| 0.599965 | 3.47449   | 8.80364   | 9.00651   | 10.9331   | 13.1144   |
| 2.66308  | 3.21902   | 2.61351   | 2.69544   | 1.90655   | 1.7248    |
| 9.70269  | 7.0147    | 8.41606   | 7.33614   | 9.44217   | 8.43337   |
| 9.75264  | 10.1533   | 11.487    | 8.51818   | 11.9626   | 8.13319   |
| 0        | 0         | 0.0345397 | 0         | 0.0593922 | 0         |
| 10.8752  | 11.5508   | 12.6996   | 11.5905   | 12.2879   | 11.0144   |
| 0        | 0         | 0         | 0         | 0         | 0         |
| 0.104784 | 0.0466563 | 0.113145  | 0.230197  | 0.178219  | 0.138298  |
| 0.151967 | 0.147954  | 0.432271  | 0.0865665 | 0.246911  | 0.3194    |
| 13.5191  | 13.6292   | 13.0481   | 11.1688   | 11.3039   | 13.3818   |
| 0.991683 | 0.961204  | 0.694098  | 0.345219  | 0.865304  | 0.555813  |
| 19.8612  | 22.259    | 17.6835   | 23.9554   | 17.2245   | 19.4151   |
| 2.7426   | 2.75324   | 3.3113    | 2.54596   | 3.4796    | 2.94621   |
| 29.2362  | 28.9129   | 30.995    | 38.732    | 33.4175   | 47.5998   |
| 2.63002  | 2.68622   | 2.75119   | 2.36278   | 2.91577   | 2.04589   |
| 2.50534  | 4.16159   | 1.9447    | 2.1967    | 4.21461   | 4.9658    |
| 0.817458 | 0.632281  | 0.699791  | 0.629027  | 1.11354   | 0.874015  |
| 0.313205 | 0.195158  | 0.157837  | 0.0713659 | 0.0678515 | 0.0789947 |
| 7.5181   | 8.13497   | 7.64186   | 8.81128   | 10.7602   | 9.34695   |
| 30.4778  | 34.0168   | 26.9344   | 31.4608   | 24.5357   | 26.372    |
| 1.92892  | 1.88687   | 1.77689   | 1.40598   | 2.04443   | 1.82219   |
| 5.94379  | 5.48717   | 6.61156   | 6.2695    | 6.6766    | 6.84748   |
| 12.9947  | 11.9983   | 13.8328   | 10.5938   | 15.7184   | 14.586    |
| 0.969423 | 0.49422   | 0.777211  | 0.552223  | 0.668219  | 0.370457  |
| 2.23619  | 2.43621   | 2.48062   | 1.97083   | 2.90968   | 2.54213   |
| 4.0034   | 3.70206   | 5.16043   | 3.65784   | 5.49831   | 3.57349   |
| 0        | 0         | 0         | 0         | 0.0605602 | 0         |
| 11.7079  | 15.4347   | 10.32     | 17.747    | 15.4602   | 16.9476   |
| 20.6975  | 21.13     | 23.3651   | 23.1273   | 28.3975   | 27.3888   |
| 0        | 0         | 0         | 0         | 0         | 0         |
| 58.6812  | 54.1376   | 55.9899   | 49.4377   | 48.9765   | 43.479    |
| 0.115867 | 0         | 0.0729879 | 0.0660028 | 0.125505  | 0.097411  |
| 0        | 0         | 0         | 0         | 0         | 0         |

|          |          |          |           |           |          |
|----------|----------|----------|-----------|-----------|----------|
| 0.283297 | 1.14004  | 0.475883 | 0.420437  | 0.451733  | 0.486265 |
| 0        | 0        | 0        | 0         | 0         | 0        |
| 0        | 0        | 0        | 0         | 0.0747846 | 0        |
| 0        | 0        | 0        | 0         | 0         | 0        |
| 9.03097  | 11.7871  | 11.7011  | 26.2319   | 13.9826   | 12.5676  |
| 2.84141  | 7.6271   | 1.13681  | 6.69172   | 1.37673   | 2.11739  |
| 0.440316 | 1.00614  | 1.66585  | 1.5063    | 1.50653   | 1.36319  |
| 13.7572  | 14.331   | 13.5288  | 15.6562   | 10.7934   | 11.3389  |
| 15.5052  | 15.354   | 15.906   | 12.34     | 17.5526   | 14.3207  |
| 14.2034  | 16.8293  | 20.1665  | 14.0498   | 13.7731   | 11.9599  |
| 0        | 0        | 0        | 0         | 0         | 0        |
| 16.2027  | 15.3098  | 19.7106  | 14.5816   | 23.3442   | 15.2781  |
| 0        | 0        | 0        | 0         | 0         | 0        |
| 138.68   | 135.276  | 131.3    | 154.177   | 121.455   | 174.334  |
| 13.8036  | 14.6599  | 13.8211  | 12.8771   | 16.223    | 15.6002  |
| 0        | 0        | 0        | 0         | 0         | 0        |
| 26.3461  | 25.0315  | 19.4996  | 26.6807   | 18.2259   | 17.2558  |
| 16.927   | 18.5656  | 20.5142  | 19.9524   | 16.6783   | 14.4731  |
| 2.38171  | 3.88134  | 0.923263 | 2.71344   | 1.38913   | 1.07818  |
| 2.43812  | 3.54037  | 2.0834   | 3.18832   | 3.00835   | 2.72707  |
| 0.603603 | 0.378882 | 0.758928 | 0.309915  | 1.29991   | 0.364694 |
| 0        | 0        | 0        | 0         | 0         | 0        |
| 28.3084  | 28.7365  | 31.3974  | 32.4355   | 29.6677   | 30.2698  |
| 2.51486  | 2.20817  | 2.98008  | 2.35923   | 3.39002   | 2.3799   |
| 10.2032  | 9.15754  | 5.84596  | 3.52445   | 5.67466   | 3.90109  |
| 296.859  | 359.601  | 359.601  | 296.082   | 264.159   | 249.963  |
| 0        | 0        | 0        | 0         | 0         | 0        |
| 13.1188  | 11.0981  | 8.92569  | 10.2759   | 11.7877   | 10.8845  |
| 0        | 0        | 0        | 0         | 0         | 0        |
| 0        | 0        | 0        | 0         | 0.022276  | 0        |
| 0.251892 | 0.265715 | 0.10673  | 0.0967732 | 0.0466406 | 0.214442 |
| 8.82318  | 5.85984  | 6.05718  | 5.29691   | 1.14456   | 1.90996  |
| 0        | 0        | 0        | 0         | 0         | 0        |
| 24.7153  | 25.0461  | 24.5037  | 21.8524   | 27.7303   | 19.2496  |
| 5.68279  | 6.09829  | 2.21603  | 2.00395   | 2.1821    | 1.76316  |
| 13.9068  | 13.2905  | 17.288   | 11.9034   | 23.5819   | 17.2372  |
| 62.1759  | 47.947   | 58.1677  | 50.773    | 69.6423   | 49.5817  |
| 0        | 0        | 0        | 0         | 0         | 0        |
| 13.779   | 12.7357  | 12.5866  | 11.382    | 12.046    | 9.47796  |
| 32.0666  | 22.9643  | 33.6518  | 23.5827   | 51.7245   | 37.5303  |
| 20.9126  | 19.652   | 18.6825  | 14.61     | 15.6662   | 16.039   |
| 0.977297 | 0.957141 | 1.64271  | 1.39016   | 0.672603  | 0.433116 |
| 0        | 0        | 0        | 0         | 0         | 0        |



|           |           |           |          |           |            |
|-----------|-----------|-----------|----------|-----------|------------|
| 1.83643   | 1.14428   | 2.31364   | 1.04611  | 3.31531   | 1.15793    |
| 0.23142   | 0.327115  | 0.330699  | 0.334797 | 0.24229   | 0.54194    |
| 19.5183   | 19.0144   | 19.9717   | 20.8501  | 22.261    | 22.4065    |
| 7.41778   | 6.15974   | 8.62607   | 6.2377   | 10.622    | 7.95193    |
| 27.0701   | 18.9447   | 22.3607   | 21.6898  | 32.5943   | 23.4249    |
| 59.4594   | 59.5985   | 51.042    | 59.7405  | 55.2833   | 67.5607    |
| 0         | 0.0380794 | 0         | 0        | 0         | 0          |
| 0         | 0         | 0         | 0        | 0         | 0          |
| 19.7706   | 19.7401   | 21.0775   | 20.2432  | 23.5358   | 24.3398    |
| 18.6916   | 21.5372   | 20.7339   | 23.4024  | 20.4397   | 21.3179    |
| 73.1163   | 77.4573   | 65.9845   | 64.899   | 79.3038   | 74.7239    |
| 0.0282491 | 0         | 0         | 0        | 0.0305988 | 0          |
| 0         | 0         | 0         | 0        | 0         | 0.0490127  |
| 0.631377  | 0.645957  | 0.591953  | 0.535301 | 0.526422  | 0.395015   |
| 62.6395   | 68.6845   | 58.0258   | 65.6693  | 53.7809   | 64.8817    |
| 11.8775   | 12.5038   | 14.5829   | 12.0492  | 16.0441   | 13.3749    |
| 6.18763   | 5.5418    | 5.76259   | 5.73221  | 5.82151   | 5.70405    |
| 5.61879   | 5.74048   | 4.67672   | 5.19032  | 6.2872    | 5.26283    |
| 9.74847   | 8.00612   | 10.7031   | 7.54739  | 12.4275   | 11.2833    |
| 7.97064   | 8.81451   | 1.91249   | 1.53288  | 3.11727   | 1.89712    |
| 13.5727   | 15.3486   | 17.6302   | 15.7113  | 18.6189   | 14.323     |
| 34.2972   | 35.3745   | 43.069    | 40.4758  | 31.8581   | 35.5852    |
| 11.3334   | 9.76254   | 8.57515   | 8.48604  | 9.87657   | 9.58212    |
| 15.9194   | 16.1356   | 17.5545   | 16.495   | 14.9509   | 14.9254    |
| 0.35896   | 0.167005  | 0.284949  | 0.358367 | 0.557594  | 0.450661   |
| 9.24446   | 8.49275   | 10.5109   | 7.03298  | 10.2451   | 7.15531    |
| 6.01055   | 6.48686   | 4.73885   | 5.71353  | 4.51361   | 5.22023    |
| 7.11745   | 10.8488   | 8.59626   | 8.77878  | 9.55703   | 8.45626    |
| 54.1081   | 37.7115   | 80.8377   | 50.4571  | 97.4157   | 94.4383    |
| 0.566667  | 0.315922  | 0.751492  | 0.407743 | 1.42144   | 1.02803    |
| 0.27322   | 0.255365  | 0.344218  | 0.233456 | 0.147973  | 0.689099   |
| 0         | 0         | 0         | 0        | 0         | 0          |
| 8.29637   | 8.08708   | 7.36984   | 6.92306  | 6.49747   | 5.7504     |
| 0.060919  | 0         | 0         | 0        | 0         | 0.0256077  |
| 0         | 0         | 0         | 0        | 0         | 0          |
| 14.0853   | 12.4765   | 18.3501   | 17.5463  | 20.1002   | 18.3144    |
| 0.84722   | 1.14133   | 0.0174489 | 1.97201  | 1.84048   | 0.00171679 |
| 0.0599221 | 0         | 0.301972  | 0.273073 | 0         | 0.0503772  |
| 0         | 0         | 0         | 0.060027 | 0.0570711 | 0.0442958  |
| 0.176965  | 0.264204  | 0.135199  | 0.25486  | 0.166435  | 0.188069   |
| 19.3143   | 20.7632   | 21.989    | 22.8749  | 18.7828   | 25.0703    |
| 71.219    | 68.6312   | 71.0613   | 67.6361  | 65.6893   | 66.7306    |
| 0.547603  | 0.194978  | 0.197114  | 0        | 0.508416  | 0.131536   |

|           |           |          |           |           |           |
|-----------|-----------|----------|-----------|-----------|-----------|
| 14.238    | 13.3734   | 14.9055  | 13.7495   | 17.8975   | 16.3917   |
| 13.0882   | 9.4179    | 17.5461  | 11.9975   | 14.5334   | 11.5749   |
| 31.3877   | 31.5084   | 31.2023  | 30.9333   | 28.2358   | 32.0667   |
| 2.82E-07  | 0.0618544 | 0        | 0         | 0         | 0         |
| 0.685107  | 0.341512  | 0.690508 | 0.468319  | 0.742094  | 0         |
| 6.22405   | 5.92835   | 6.14876  | 5.20107   | 5.18254   | 4.34516   |
| 0.11566   | 0         | 0.221207 | 0.205892  | 0         | 0.11033   |
| 0         | 0.0157919 | 0        | 0         | 0.0411784 | 0         |
| 6.48162   | 6.2349    | 6.67712  | 6.1901    | 9.46274   | 8.8693    |
| 2.77174   | 2.2933    | 3.64261  | 2.29034   | 2.77394   | 2.8643    |
| 28.541    | 12.2745   | 41.5869  | 19.0912   | 21.4838   | 11.0869   |
| 5.87825   | 3.51528   | 9.89816  | 6.51365   | 13.2983   | 10.2021   |
| 1.02293   | 1.29154   | 0.881767 | 1.44142   | 0.714376  | 0.871301  |
| 16.5791   | 18.1412   | 12.1275  | 14.8657   | 7.93462   | 9.75534   |
| 23.5386   | 23.8415   | 25.8585  | 25.6211   | 21.1255   | 18.5338   |
| 10.6482   | 10.0916   | 14.1607  | 9.31305   | 14.6515   | 13.2896   |
| 0.721142  | 1.05728   | 0.908534 | 0.950461  | 0.995553  | 0.891578  |
| 0         | 0         | 0        | 0         | 0         | 0         |
| 0.0247535 | 0         | 0        | 0.0282013 | 0.143     | 0.0832424 |
| 1.33028   | 0.81574   | 1.30352  | 1.87641   | 1.60104   | 0.869853  |
| 63.7609   | 58.448    | 84.2672  | 71.2916   | 90.1436   | 71.8287   |
| 43.9413   | 45.9055   | 41.7717  | 41.982    | 46.6255   | 49.7952   |
| 17.3173   | 19.4446   | 17.9228  | 17.4932   | 16.0668   | 17.7165   |
| 0.158063  | 0.225117  | 0.768096 | 0.28298   | 0.342421  | 0.47459   |
| 34.1748   | 38.8627   | 36.1918  | 39.7148   | 34.4341   | 39.7108   |
| 0         | 0         | 0        | 0         | 0         | 0         |
| 6.20875   | 6.4488    | 8.57463  | 6.68408   | 11.8765   | 8.1304    |
| 0.292609  | 0.333136  | 0.186598 | 0.312786  | 0.219125  | 0.312815  |
| 0.177754  | 0.221517  | 0.559861 | 0.303768  | 0.673889  | 0.26152   |
| 78.2538   | 82.7021   | 83.3938  | 85.5567   | 83.3343   | 81.6501   |
| 3.23803   | 2.54384   | 3.71849  | 3.63514   | 3.72376   | 2.33838   |
| 6.844     | 4.61831   | 6.04324  | 4.51151   | 8.70817   | 4.92468   |
| 0         | 0         | 0        | 0         | 0         | 0         |
| 16.7491   | 17.5944   | 16.3883  | 16.6104   | 14.6359   | 14.6556   |
| 0.213803  | 0         | 0        | 0         | 0.231587  | 0.718988  |
| 15.1299   | 14.8817   | 14.7413  | 13.6073   | 16.766    | 14.9846   |
| 8.77557   | 8.10329   | 7.97008  | 6.98649   | 6.48974   | 6.47404   |
| 16.4987   | 17.5495   | 19.3137  | 16.8725   | 19.4556   | 17.8312   |
| 1.11807   | 0.869999  | 0.930761 | 0.63184   | 2.01563   | 0.817369  |
| 0.460212  | 0.267272  | 0.796472 | 0.353369  | 0.424927  | 0.205129  |
| 4.65755   | 5.21984   | 5.72741  | 5.39023   | 7.1738    | 6.09935   |
| 0         | 0         | 0        | 0         | 0         | 0         |
| 19.757    | 17.5807   | 21.9493  | 15.2353   | 22.2847   | 15.8549   |

|          |          |           |           |          |           |
|----------|----------|-----------|-----------|----------|-----------|
| 14.8519  | 14.7386  | 16.8249   | 15.5226   | 18.4964  | 13.9547   |
| 5.87619  | 5.56119  | 5.45644   | 4.00416   | 5.77193  | 4.65437   |
| 7.25396  | 7.53905  | 8.09754   | 9.8956    | 5.56897  | 5.04161   |
| 0        | 0        | 0         | 0         | 0        | 0         |
| 0.205994 | 0.128355 | 0.194642  | 0.146678  | 0.223129 | 0.194829  |
| 0        | 0.124255 | 0.0837444 | 0.0378649 | 0.108001 | 0.0558834 |
| 10.9159  | 15.2187  | 10.5722   | 13.5244   | 8.72024  | 10.2095   |
| 2.10293  | 1.34393  | 2.24179   | 0.860042  | 2.10263  | 0.634652  |
| 0.280023 | 0.174482 | 0.117596  | 0.106342  | 0.40442  | 0.588546  |
| 0        | 0        | 0         | 0         | 0        | 0         |
| 2.5603   | 2.19585  | 4.10248   | 0.971502  | 3.1207   | 0.896747  |
| 6.73296  | 5.92463  | 6.75391   | 6.37128   | 6.22398  | 6.1977    |
| 0.112255 | 0.209838 | 0.5657    | 0.639452  | 0.243185 | 0.188748  |
| 38.9356  | 40.1192  | 35.4744   | 29.9      | 32.9087  | 31.725    |
| 26.4597  | 20.3111  | 27.0794   | 20.1621   | 40.2915  | 27.4439   |
| 8.1452   | 7.73983  | 8.98345   | 7.62108   | 8.08493  | 10.7067   |
| 24.8909  | 22.7759  | 21.0377   | 17.1652   | 14.9746  | 16.8732   |
| 95.2023  | 103.87   | 97.6229   | 95.9007   | 90.2371  | 93.4741   |
| 0        | 0        | 0         | 0         | 0        | 0         |
| 2.46657  | 2.7944   | 2.96627   | 2.81012   | 3.00571  | 3.36972   |
| 0        | 0        | 0         | 0         | 0        | 0         |
| 0        | 0        | 0         | 0         | 0        | 0         |
| 10.0026  | 9.89968  | 11.239    | 9.65989   | 12.9007  | 10.3747   |
| 883.255  | 1045.71  | 870.098   | 974.588   | 898.542  | 1124.78   |
| 9.37358  | 9.62895  | 6.50302   | 7.34779   | 8.86529  | 6.88678   |
| 0.646854 | 0.989315 | 1.00016   | 1.30641   | 0.636962 | 0.469661  |
| 1.97022  | 1.19257  | 3.40415   | 1.92398   | 3.04872  | 0.757207  |
| 12.9758  | 14.0449  | 14.6068   | 16.1114   | 15.4349  | 18.3691   |
| 0.426234 | 0.652109 | 0.781798  | 0.670021  | 0.14107  | 0.109492  |
| 58.2112  | 61.091   | 67.23     | 61.961    | 58.2331  | 52.2238   |
| 0        | 0        | 0         | 0         | 0        | 0.0441738 |
| 15.0908  | 15.4513  | 15.0951   | 18.8342   | 17.9478  | 17.373    |
| 20.5973  | 20.8268  | 23.6981   | 21.977    | 24.9792  | 32.1369   |
| 22.4552  | 23.2478  | 17.1443   | 20.8489   | 20.338   | 23.8126   |
| 1.41523  | 1.21932  | 2.02511   | 1.57253   | 2.19533  | 6.44841   |
| 2.57649  | 3.07432  | 2.00447   | 2.23939   | 3.20608  | 3.01042   |
| 0        | 0        | 0         | 0         | 0        | 0         |
| 12.4234  | 10.7544  | 11.6749   | 10.7511   | 11.7906  | 11.2685   |
| 0        | 0        | 0         | 0         | 0        | 0         |
| 7.23874  | 6.01839  | 6.08566   | 6.44319   | 7.43439  | 6.07967   |
| 40.0416  | 45.4821  | 35.9571   | 38.0232   | 26.1804  | 32.5458   |
| 0        | 0        | 0         | 0         | 0        | 0         |
| 14.4674  | 13.8316  | 13.5367   | 10.7946   | 16.7656  | 14.4062   |

|           |           |          |           |           |           |
|-----------|-----------|----------|-----------|-----------|-----------|
| 0         | 0         | 0        | 0         | 0         | 0         |
| 0         | 0         | 0        | 0         | 0         | 0         |
| 11.8774   | 11.3098   | 10.2778  | 10.3395   | 10.3137   | 7.67149   |
| 9.37404   | 8.35393   | 10.574   | 9.06531   | 6.78886   | 5.93356   |
| 8.02093   | 11.1188   | 9.90942  | 9.43673   | 13.9993   | 12.9027   |
| 110.324   | 97.768    | 102.365  | 95.9361   | 106.557   | 109.321   |
| 11.3891   | 12.2693   | 14.2189  | 10.8649   | 12.9309   | 9.89216   |
| 0.19629   | 0.158285  | 0.151333 | 0.0985972 | 0.0923012 | 0.057325  |
| 28.8415   | 28.7606   | 26.0127  | 29.8467   | 26.5224   | 30.0468   |
| 11.099    | 9.89235   | 11.4739  | 9.65751   | 9.51066   | 9.13914   |
| 17.4672   | 13.9243   | 13.7934  | 14.4921   | 14.7993   | 16.4304   |
| 0.30051   | 0.214275  | 0.216214 | 0.260695  | 0.27884   | 0.348787  |
| 27.1828   | 25.4023   | 29.8639  | 27.171    | 25.7901   | 22.7864   |
| 38.1235   | 40.7988   | 24.9492  | 27.2291   | 15.8924   | 22.0084   |
| 2.52603   | 1.34912   | 2.84146  | 1.46463   | 2.14983   | 1.34625   |
| 0.0770068 | 0.0319886 | 0.161696 | 0.0584884 | 0.361453  | 0.194222  |
| 35.8825   | 40.7987   | 30.792   | 35.985    | 23.4617   | 32.1045   |
| 27.9222   | 30.0682   | 27.0817  | 36.7767   | 24.9338   | 33.855    |
| 0.210094  | 0.0581183 | 0.1468   | 0.106061  | 0.328883  | 0.019593  |
| 0.15964   | 0.198943  | 0.201123 | 0.254626  | 0.172919  | 0.268423  |
| 0         | 0         | 0        | 0.573308  | 0         | 0         |
| 11.0675   | 9.64959   | 10.8654  | 9.93204   | 10.5275   | 9.61882   |
| 4.51393   | 5.16996   | 4.91278  | 5.01229   | 4.63939   | 4.02037   |
| 17.5144   | 18.0706   | 19.5419  | 21.2181   | 22.2644   | 23.3917   |
| 1.81337   | 1.85359   | 1.61723  | 1.3464    | 2.06351   | 2.20096   |
| 5.22899   | 5.59064   | 7.70714  | 5.74158   | 6.76833   | 5.4002    |
| 1.8229    | 1.53971   | 2.14348  | 1.66144   | 2.67658   | 2.14555   |
| 23.5157   | 21.5569   | 22.8162  | 21.0468   | 24.8767   | 26.145    |
| 18.7016   | 23.9799   | 22.7665  | 22.898    | 29.5804   | 32.9229   |
| 0.182564  | 0.189592  | 0.19167  | 0.138661  | 0.0988747 | 0.0511612 |
| 2.21975   | 2.66745   | 1.49816  | 1.4451    | 1.03045   | 0.733138  |
| 3.93277   | 3.63843   | 3.77437  | 3.23939   | 4.3779    | 3.19642   |
| 0.426917  | 0.440778  | 0.502205 | 0.386844  | 0.367794  | 0.183331  |
| 0         | 0         | 0        | 0         | 0         | 0         |
| 5.60219   | 5.98943   | 5.58249  | 6.52056   | 6.8103    | 7.89034   |
| 0         | 0         | 0        | 0         | 0         | 0         |
| 0         | 0         | 0        | 0.254672  | 0.121065  | 0.0939652 |
| 75.3199   | 86.9657   | 67.369   | 71.6021   | 48.4046   | 61.673    |
| 6.92364   | 7.54945   | 8.24126  | 8.3956    | 6.9056    | 5.49527   |
| 0         | 0         | 0        | 0         | 0         | 0         |
| 0         | 0         | 0        | 0         | 0         | 0         |
| 488.156   | 489.402   | 464.396  | 447.199   | 356.48    | 442.551   |
| 64.4684   | 84.5879   | 69.7092  | 94.9285   | 66.5318   | 93.5838   |

|          |           |           |           |          |           |
|----------|-----------|-----------|-----------|----------|-----------|
| 3.81623  | 4.21159   | 4.76006   | 3.22297   | 5.98456  | 3.51163   |
| 1.85201  | 1.37036   | 1.89578   | 2.04403   | 3.38523  | 2.48149   |
| 7.36409  | 5.46722   | 7.6327    | 8.07739   | 4.51161  | 5.19216   |
| 23.1019  | 26.9265   | 19.6761   | 17.3745   | 29.7093  | 23.4761   |
| 0        | 0         | 0         | 0         | 0        | 0.10187   |
| 18.2925  | 21.1776   | 23.4374   | 24.634    | 28.8794  | 28.5271   |
| 1.40827  | 1.86367   | 1.61668   | 1.8054    | 0.754938 | 0.862774  |
| 0        | 0         | 0         | 0         | 0        | 0         |
| 8.893    | 9.84295   | 9.14007   | 8.64426   | 11.7569  | 12.2402   |
| 98.2095  | 72.9471   | 77.1908   | 91.7272   | 90.7454  | 101.328   |
| 0        | 0         | 0         | 0         | 0        | 0         |
| 0.232037 | 0.289388  | 0.136984  | 0.103638  | 0.292618 | 0.16547   |
| 0        | 0         | 0         | 0         | 0        | 0         |
| 0        | 0         | 0         | 0         | 0        | 0         |
| 0.387159 | 0.629288  | 0.730488  | 0.550783  | 0.468844 | 0.261232  |
| 4.88443  | 5.23658   | 5.29396   | 4.7464    | 4.4608   | 4.55931   |
| 0.235667 | 0         | 0         | 0         | 0        | 0         |
| 8.29499  | 7.80236   | 7.11282   | 8.56861   | 5.02986  | 6.73179   |
| 0.628354 | 0.708478  | 0.339272  | 0.374981  | 0.842673 | 0.628887  |
| 32.7206  | 38.7307   | 77.8966   | 77.6728   | 112.491  | 112.794   |
| 1.96555  | 1.58565   | 2.03368   | 1.52533   | 2.49931  | 1.98774   |
| 88.1246  | 92.6007   | 105.774   | 98.6167   | 91.0003  | 84.1268   |
| 9.48502  | 5.58538   | 9.30154   | 5.50202   | 11.2336  | 7.62366   |
| 0.142747 | 0.0702776 | 0.338524  | 0.226209  | 0.154621 | 0.0967976 |
| 0        | 0.194327  | 0.392912  | 0.177655  | 0        | 0         |
| 33.0882  | 38.202    | 31.9064   | 34.8129   | 29.5348  | 27.4694   |
| 3.26828  | 1.99052   | 3.68805   | 0.740801  | 1.89425  | 0.546855  |
| 0        | 0         | 0         | 0         | 0        | 0         |
| 34.1962  | 30.2364   | 14.3575   | 8.02075   | 19.8797  | 39.2302   |
| 1.44411  | 1.09468   | 1.17792   | 1.0974    | 2.23854  | 1.7574    |
| 6.40436  | 9.56145   | 8.93806   | 17.9097   | 4.79937  | 8.22494   |
| 0.597851 | 1.30382   | 1.12981   | 1.02168   | 2.26653  | 1.25655   |
| 0        | 0         | 0         | 0         | 0        | 0         |
| 44.2006  | 51.2489   | 37.5612   | 48.0891   | 33.3719  | 45.7178   |
| 24.1358  | 25.6928   | 32.935    | 42.5478   | 24.8618  | 30.6449   |
| 4.21681  | 4.05986   | 4.61335   | 3.71155   | 5.41607  | 3.88525   |
| 0        | 0.0282615 | 0.0285712 | 0.0516737 | 0        | 0         |
| 68.2945  | 70.6652   | 78.6316   | 60.4731   | 84.1493  | 71.1485   |
| 10.0992  | 10.0684   | 11.9906   | 11.064    | 10.5016  | 9.49575   |
| 4.00577  | 3.81825   | 3.456     | 2.40686   | 7.68768  | 3.9899    |
| 34.1348  | 32.3614   | 39.8574   | 33.1808   | 43.1208  | 37.7536   |
| 18.3166  | 18.472    | 20.1417   | 20.2646   | 18.9227  | 20.1462   |
| 0        | 0         | 0         | 0         | 0        | 0         |

|          |          |          |          |           |           |
|----------|----------|----------|----------|-----------|-----------|
| 0.094221 | 0        | 0        | 0        | 0         | 0.0184556 |
| 0        | 0        | 0        | 0        | 0         | 0         |
| 16.5369  | 15.678   | 18.2162  | 23.2154  | 21.5992   | 20.6138   |
| 9.08039  | 9.27847  | 11.2815  | 6.82034  | 9.61773   | 8.31069   |
| 0.543019 | 0.766937 | 1.77872  | 1.48476  | 1.5685    | 1.97826   |
| 2.20598  | 1.97299  | 2.07934  | 2.66557  | 2.31508   | 2.18799   |
| 19.3145  | 21.2663  | 23.9475  | 18.2301  | 18.3256   | 17.5861   |
| 5.14359  | 5.17813  | 4.58916  | 3.85801  | 5.01627   | 4.63206   |
| 0        | 0        | 0        | 0        | 0         | 0         |
| 0        | 0        | 0        | 0        | 0         | 0         |
| 17.4533  | 16.1122  | 12.6219  | 13.5781  | 15.4315   | 16.562    |
| 0        | 0        | 0        | 0        | 0         | 0         |
| 11.1974  | 11.9076  | 11.8634  | 12.8056  | 15.0629   | 12.7759   |
| 0        | 0        | 0        | 0        | 0         | 0         |
| 24.4723  | 23.6475  | 21.3138  | 21.361   | 26.5709   | 22.8874   |
| 0.450379 | 0.398237 | 0.507052 | 0.579076 | 1.01645   | 0.495178  |
| 0        | 0        | 0        | 0        | 0         | 0         |
| 12.2647  | 12.3735  | 13.2901  | 12.4365  | 13.7852   | 11.4002   |
| 56.0346  | 50.9225  | 51.1637  | 47.7205  | 46.4134   | 47.2997   |
| 0.652764 | 0.434466 | 0.272911 | 0.556567 | 0.445448  | 0.136587  |
| 6.18642  | 6.86231  | 5.65278  | 5.65396  | 4.7128    | 3.82931   |
| 4.55924  | 2.41877  | 3.54754  | 2.64188  | 5.3093    | 1.91195   |
| 0        | 0        | 0        | 0        | 0         | 0         |
| 1.71792  | 1.40486  | 1.11592  | 1.83476  | 1.71534   | 1.48932   |
| 0.6703   | 0.594367 | 0.60088  | 0.543374 | 0.795868  | 0.314276  |
| 7.24251  | 6.77393  | 7.17335  | 5.77762  | 6.44699   | 5.47615   |
| 7.40203  | 6.6293   | 7.19401  | 6.67242  | 8.64749   | 5.89753   |
| 12.5308  | 11.9243  | 10.1487  | 12.7222  | 15.2812   | 14.548    |
| 7.26282  | 6.80985  | 6.81441  | 7.45068  | 5.91907   | 6.62809   |
| 0        | 0.177511 | 0        | 0.162281 | 0.15429   | 0.239505  |
| 0.615861 | 0.530606 | 0.584162 | 0.196459 | 0.847524  | 0.364483  |
| 9.75281  | 8.26467  | 8.04806  | 5.94449  | 12.9409   | 11.192    |
| 0        | 0        | 0.723717 | 0.392673 | 0.248891  | 0.0965885 |
| 0.929908 | 1.02525  | 1.53144  | 1.67025  | 1.74288   | 2.1842    |
| 58.2214  | 57.3767  | 62.8041  | 53.7894  | 62.7922   | 54.8591   |
| 0        | 0        | 0        | 0        | 0.0934957 | 0         |
| 4.72002  | 4.2535   | 2.69576  | 7.8837   | 1.64257   | 3.27754   |
| 0.507653 | 0        | 0.213189 | 0.192787 | 0.183293  | 0.42679   |
| 2.18812  | 1.54245  | 1.52333  | 1.53268  | 3.39965   | 2.75927   |
| 222.156  | 245.18   | 222.562  | 229.526  | 176.568   | 201.047   |
| 7.04513  | 5.69942  | 7.20235  | 6.628    | 9.68918   | 7.67577   |
| 14.2079  | 12.5839  | 14.6405  | 12.8116  | 17.6495   | 16.0842   |
| 44.2727  | 82.7588  | 0        | 75.6586  | 23.9776   | 74.4411   |

|           |           |           |           |           |           |
|-----------|-----------|-----------|-----------|-----------|-----------|
| 84.2107   | 55.6594   | 74.2755   | 57.6379   | 89.72     | 74.6884   |
| 3.83624   | 4.95778   | 1.96904   | 4.04682   | 2.51372   | 2.62792   |
| 2.49609   | 2.25024   | 3.0555    | 1.49247   | 2.35856   | 2.72358   |
| 26.3344   | 28.2868   | 27.2881   | 21.4244   | 32.6842   | 23.5105   |
| 0.356465  | 0.33317   | 0.561368  | 0.28428   | 0.540562  | 0.464511  |
| 0         | 0         | 0         | 0         | 0         | 0.0240202 |
| 0         | 0.513051  | 0         | 0.205202  | 0         | 0         |
| 3.85111   | 2.98271   | 4.42107   | 3.66992   | 8.10898   | 4.5388    |
| 23.1502   | 22.9785   | 21.2152   | 21.7337   | 23.511    | 21.7568   |
| 0.195343  | 0.152147  | 0.276866  | 0.47292   | 0.370285  | 0.225812  |
| 2.55803   | 2.48558   | 2.69019   | 2.24771   | 3.62933   | 2.45364   |
| 0.0643914 | 0.0802444 | 0.324495  | 0.11004   | 0.139495  | 0.0541346 |
| 3.18044   | 3.15695   | 1.48032   | 1.60366   | 2.29572   | 1.62345   |
| 1.37814   | 1.46463   | 1.73096   | 1.51729   | 1.43991   | 1.42858   |
| 15.4914   | 18.0532   | 18.0647   | 18.2084   | 16.6048   | 20.2647   |
| 145.175   | 205.85    | 144.795   | 213.105   | 159.266   | 197.158   |
| 0         | 0         | 0         | 0.435198  | 0         | 0         |
| 0.0161904 | 0.080706  | 0         | 0         | 0.0175371 | 0.0136115 |
| 1.18566   | 0.83113   | 1.30704   | 1.09752   | 0.802675  | 1.37059   |
| 1.52E-11  | 1.03E-09  | 2.42E-10  | 0         | 0.346087  | 0.268777  |
| 3.55169   | 3.78741   | 3.72696   | 3.64687   | 5.5223    | 4.73214   |
| 0         | 0         | 0         | 0         | 0         | 0         |
| 5.65495   | 7.44912   | 16.0367   | 19.4013   | 9.05989   | 10.6834   |
| 7.06768   | 8.14973   | 8.12682   | 7.01568   | 7.13187   | 6.16651   |
| 2.4877    | 1.89885   | 2.72279   | 1.71823   | 2.67779   | 2.05223   |
| 0         | 0         | 0         | 0         | 0         | 0         |
| 70.1595   | 76.251    | 79.4452   | 92.4947   | 88.2861   | 92.6698   |
| 0         | 0         | 0         | 0.0714047 | 0         | 0         |
| 8.79549   | 8.54581   | 12.2079   | 10.5301   | 8.71971   | 12.2823   |
| 15.3102   | 15.6437   | 19.8126   | 15.4422   | 13.4639   | 11.6543   |
| 7.87429   | 6.82477   | 7.03987   | 6.72696   | 8.3111    | 7.44385   |
| 4.4441    | 3.71128   | 5.47701   | 5.82001   | 3.69342   | 4.4476    |
| 59.1582   | 61.9159   | 56.4314   | 65.1447   | 57.6113   | 58.9041   |
| 0         | 0         | 0         | 0         | 0         | 0         |
| 0         | 0         | 0         | 0         | 0         | 0         |
| 0.0551369 | 0.0114519 | 0.0347322 | 0         | 0.099815  | 0.0309028 |
| 5.26005   | 5.80942   | 6.58491   | 5.68894   | 6.31727   | 4.48289   |
| 11.3841   | 10.9206   | 9.90532   | 13.5293   | 9.22595   | 10.8101   |
| 0.199964  | 0         | 0.381038  | 0         | 0.649792  | 0.0840562 |
| 0.0671116 | 0.167269  | 0         | 0         | 0.218082  | 0.282108  |
| 10.1946   | 8.3689    | 11.6776   | 7.37048   | 16.4043   | 10.6725   |
| 1.02802   | 1.43574   | 1.20584   | 0.827925  | 1.32472   | 1.07289   |
| 42.8187   | 42.1476   | 40.0006   | 41.3008   | 38.5383   | 40.8058   |

|           |           |           |           |           |           |
|-----------|-----------|-----------|-----------|-----------|-----------|
| 0.445363  | 0.499677  | 0.253059  | 0.196338  | 0.145546  | 0.0655067 |
| 5.49917   | 4.67434   | 6.48764   | 7.82234   | 7.54042   | 6.09303   |
| 28.3525   | 30.0863   | 36.6879   | 37.6144   | 33.8814   | 32.8884   |
| 45.2891   | 53.1565   | 50.0804   | 56.0846   | 46.9029   | 45.6125   |
| 36.8331   | 30.8428   | 35.7662   | 24.0501   | 31.9333   | 37.5142   |
| 0.590858  | 1.30593   | 0.762121  | 0.522567  | 3.08294   | 1.55655   |
| 0         | 0         | 0         | 0         | 0         | 0         |
| 16.0345   | 17.1484   | 17.0131   | 14.1759   | 16.4209   | 13.2353   |
| 0         | 0         | 0.0876123 | 0         | 0         | 0         |
| 0.124108  | 0.0289994 | 0.0977239 | 0.141394  | 0.0840197 | 0.110861  |
| 10.6534   | 9.28472   | 8.60369   | 9.02514   | 11.7832   | 11.6177   |
| 1.37251   | 0.763111  | 0.744871  | 0.601415  | 0.892006  | 0.550315  |
| 17.6067   | 24.2632   | 17.7223   | 21.2264   | 15.924    | 19.0312   |
| 0         | 0         | 0         | 0         | 0.175066  | 0         |
| 0.536556  | 0.817606  | 0.500286  | 0.835771  | 0.281747  | 0.451089  |
| 17.5991   | 19.2424   | 13.5288   | 14.433    | 21.0016   | 24.3547   |
| 0.132782  | 0         | 0.0338651 | 0.0345774 | 0.117458  | 0.124035  |
| 0.756832  | 0.852111  | 1.8241    | 2.50083   | 5.00304   | 3.52627   |
| 12.4697   | 12.7195   | 14.0226   | 12.8385   | 13.1067   | 12.7742   |
| 11.9208   | 8.13001   | 10.1595   | 6.68418   | 17.1759   | 10.0381   |
| 58.1777   | 62.9401   | 62.1212   | 71.9149   | 59.0769   | 72.8208   |
| 41.578    | 54.3356   | 36.4698   | 67.1184   | 37.988    | 48.2122   |
| 18.011    | 17.2778   | 14.3102   | 14.6217   | 18.6411   | 22.2034   |
| 136.749   | 166.251   | 133.745   | 133.051   | 98.8227   | 109.336   |
| 43.9018   | 47.0554   | 34.8247   | 37.9138   | 34.0115   | 37.8504   |
| 0.171229  | 0         | 0         | 0         | 0         | 0         |
| 0.992829  | 1.54658   | 0.859939  | 7.56432   | 0.806559  | 0.886851  |
| 19.5084   | 16.5293   | 16.1819   | 16.0672   | 13.3359   | 11.6258   |
| 0.215833  | 0.23535   | 0.0679796 | 0.184421  | 0.0292233 | 0.0226817 |
| 326.844   | 303.761   | 231.982   | 261.354   | 188.791   | 248.374   |
| 0         | 0         | 0         | 0         | 0         | 0         |
| 0.221173  | 0.3675    | 0.0928818 | 0.167986  | 0.319426  | 0.185943  |
| 9.03681   | 7.99064   | 5.66891   | 6.57885   | 8.36692   | 7.25059   |
| 0         | 0         | 0         | 0         | 0         | 0         |
| 1.08826   | 0.835203  | 1.93654   | 1.07179   | 2.25293   | 1.33341   |
| 3.20962   | 1.50116   | 3.05818   | 1.71362   | 4.5399    | 1.9782    |
| 11.6909   | 12.5699   | 13.993    | 12.1499   | 13.7083   | 12.096    |
| 15.7078   | 15.0698   | 14.9186   | 11.6221   | 10.0346   | 9.41357   |
| 11.389    | 12.5994   | 13.6764   | 13.3561   | 19.6813   | 19.8729   |
| 224.067   | 238.412   | 218.41    | 232.342   | 200.496   | 201.846   |
| 0.0692613 | 0.25894   | 0.0872592 | 0.0526055 | 0.150045  | 0.097048  |
| 2.45064   | 2.10518   | 2.63782   | 2.33116   | 1.80402   | 2.32032   |
| 0.783214  | 0.870205  | 1.72382   | 0.698791  | 1.3492    | 0.706057  |



|           |           |           |           |           |           |
|-----------|-----------|-----------|-----------|-----------|-----------|
| 6.65485   | 6.63462   | 5.88674   | 5.80731   | 6.59492   | 6.95186   |
| 0.848772  | 1.13069   | 1.21682   | 1.56719   | 0.88767   | 0.984239  |
| 0.0154896 | 0         | 0         | 0.0176471 | 0         | 0         |
| 19.359    | 13.0514   | 20.6497   | 18.5347   | 36.8325   | 31.7319   |
| 13.4288   | 12.8429   | 12.8853   | 10.9878   | 14.7972   | 13.055    |
| 239.998   | 276.251   | 215.985   | 216.387   | 167.723   | 204.167   |
| 0.741708  | 0.463054  | 0.734206  | 0.181075  | 0.28693   | 0.178538  |
| 20.4315   | 19.5514   | 18.1542   | 13.6916   | 19.0117   | 20.9141   |
| 0         | 0         | 0         | 0         | 0         | 0         |
| 0         | 0         | 0.0839943 | 0.0759558 | 0.0240718 | 0         |
| 18.3166   | 18.0962   | 16.9485   | 16.928    | 18.3327   | 19.9017   |
| 74.6974   | 69.0269   | 48.1259   | 77.2092   | 61.9007   | 54.8742   |
| 3.18567   | 4.13344   | 3.44687   | 3.54398   | 2.43575   | 2.80426   |
| 40.78     | 45.7229   | 47.7723   | 51.4869   | 41.2694   | 38.7561   |
| 0.0684674 | 0.085324  | 0.086259  | 0         | 0.0741625 | 0.230246  |
| 61.6239   | 57.9852   | 61.9345   | 61.1678   | 62.4411   | 64.0158   |
| 3.23797   | 2.90997   | 7.41348   | 6.63305   | 7.21696   | 5.75851   |
| 0.572109  | 0.745369  | 0.360387  | 0.325897  | 1.01405   | 0.765194  |
| 9.44162   | 8.76887   | 6.61115   | 5.38966   | 6.35149   | 7.01859   |
| 0.0145626 | 0.0453698 | 0.0366936 | 0.0414774 | 0.0946436 | 0.0306074 |
| 0.0117435 | 0.0292699 | 0         | 0.21407   | 0         | 0         |
| 1.56911   | 1.3493    | 1.72421   | 1.57003   | 2.44626   | 1.95346   |
| 23.9621   | 23.7945   | 21.9508   | 24.9556   | 22.1749   | 23.6959   |
| 83.9137   | 72.8271   | 69.4416   | 67.8107   | 52.5412   | 64.1442   |
| 0.16592   | 0         | 0.104518  | 0.18903   | 0         | 0.0697456 |
| 0.442467  | 0.451663  | 0.0985576 | 0.422677  | 0.160034  | 0.446468  |
| 8.20231   | 8.30876   | 9.0514    | 8.31358   | 7.21827   | 6.9153    |
| 51.5742   | 56.4944   | 58.1321   | 46.0625   | 56.4676   | 48.9961   |
| 22.2418   | 16.8554   | 18.7915   | 18.4912   | 19.127    | 32.4704   |
| 132.593   | 140.037   | 110.941   | 134.888   | 104.033   | 134.009   |
| 2.86264   | 1.76704   | 2.46052   | 1.0668    | 3.47748   | 1.05713   |
| 5.39082   | 5.25123   | 5.12766   | 4.88264   | 4.27234   | 4.56988   |
| 0         | 0         | 0         | 0         | 0         | 0         |
| 0         | 0         | 0         | 0.0358976 | 0         | 0         |
| 0.961442  | 0.812003  | 0.585368  | 1.21924   | 1.00698   | 1.11774   |
| 1.70772   | 1.66743   | 1.61916   | 1.78512   | 1.8307    | 1.58372   |
| 155.112   | 181.154   | 193.624   | 222.937   | 197.801   | 261.053   |
| 10.0898   | 6.9844    | 9.30538   | 7.6442    | 7.47046   | 7.97587   |
| 7.49287   | 6.99022   | 8.28487   | 6.47596   | 10.1745   | 7.15421   |
| 3.28137   | 3.94161   | 3.19381   | 3.84638   | 2.45081   | 2.46987   |
| 29.2066   | 33.9627   | 34.3328   | 29.7752   | 27.9304   | 23.3214   |
| 9.24901   | 7.72249   | 9.18598   | 7.41119   | 6.6622    | 6.97226   |
| 7.75279   | 5.21551   | 6.65565   | 5.58878   | 8.99219   | 6.95047   |

|          |           |          |          |          |          |
|----------|-----------|----------|----------|----------|----------|
| 10.7875  | 8.73395   | 9.7698   | 10.3431  | 10.0149  | 8.64104  |
| 10.478   | 11.3796   | 12.5383  | 11.8714  | 13.0552  | 10.0913  |
| 0.401491 | 0.117726  | 0.267787 | 0.134533 | 0.460468 | 0.238262 |
| 4.43986  | 3.62456   | 5.99609  | 4.22985  | 7.79251  | 4.48288  |
| 0        | 0         | 0        | 0        | 0        | 0        |
| 0.176887 | 0.349024  | 0.482846 | 0.151143 | 0.223534 | 0.359385 |
| 0        | 0         | 0.104068 | 0        | 0        | 0        |
| 12.1987  | 11.7314   | 11.8106  | 11.0229  | 11.6838  | 9.31025  |
| 67.0659  | 65.017    | 65.331   | 58.4415  | 64.2163  | 63.5324  |
| 57.6433  | 62.7579   | 57.4323  | 64.2322  | 45.791   | 53.3931  |
| 8.00477  | 7.88373   | 6.86763  | 6.37532  | 6.15991  | 5.99295  |
| 31.7379  | 32.238    | 31.7184  | 30.1485  | 34.6293  | 39.0771  |
| 0        | 0         | 0        | 0        | 0        | 0        |
| 17.813   | 17.5981   | 12.2821  | 13.8833  | 11.7244  | 17.2355  |
| 0        | 0         | 0        | 0        | 0        | 0        |
| 0.9506   | 0.936559  | 0.835671 | 0.67993  | 1.17318  | 0.650406 |
| 11.1091  | 11.9686   | 9.07272  | 9.68279  | 12.3532  | 10.5219  |
| 20.6753  | 17.2061   | 14.8133  | 15.4646  | 18.2843  | 12.2927  |
| 16.0828  | 19.1381   | 19.7803  | 20.4017  | 17.4598  | 19.0481  |
| 18.9286  | 15.778    | 16.7818  | 17.5709  | 15.5768  | 15.7376  |
| 0        | 0         | 0        | 0        | 0        | 0        |
| 25.1186  | 22.3834   | 23.0218  | 19.2752  | 20.1773  | 18.0952  |
| 25.5064  | 24.6092   | 25.0176  | 23.9141  | 24.6965  | 22.9119  |
| 13.6617  | 13.913    | 14.1583  | 13.3746  | 16.7736  | 14.172   |
| 0.324959 | 0.0809927 | 0.245641 | 0.37022  | 0.63358  | 0.382476 |
| 3.61801  | 2.88763   | 4.58377  | 3.3346   | 6.27473  | 4.47712  |
| 2.0444   | 2.12552   | 2.42116  | 1.98076  | 2.71713  | 1.94859  |
| 369.49   | 386.869   | 198.798  | 211.708  | 151.303  | 205.89   |
| 106.79   | 108.601   | 105.916  | 117.787  | 92.9067  | 128.57   |
| 21.5252  | 24.843    | 22.4638  | 22.3805  | 20.5063  | 21.8924  |
| 6.83066  | 3.08808   | 4.19423  | 3.43687  | 5.42659  | 3.67745  |
| 0.359581 | 0.127272  | 0.357413 | 0.209438 | 0.280018 | 0.281001 |
| 8.44846  | 6.50929   | 7.06644  | 7.74807  | 8.35379  | 9.54888  |
| 0.386896 | 0.160716  | 0.406193 | 0.440783 | 0.349231 | 0.271056 |
| 6.58292  | 6.21409   | 11.8591  | 10.0273  | 11.8804  | 10.4499  |
| 62.6402  | 62.0439   | 60.5901  | 53.2083  | 51.129   | 46.4561  |
| 0.389206 | 0.199717  | 0.201906 | 0.312999 | 0.223189 | 0.32721  |
| 1.12072  | 1.47015   | 0.334409 | 0.672012 | 0.734757 | 0.942206 |
| 0        | 0         | 0        | 0        | 0        | 0        |
| 2.78967  | 2.53792   | 3.93993  | 4.88814  | 3.48275  | 2.26283  |
| 0        | 0         | 0        | 0        | 0        | 0        |
| 0.17191  | 0.146482  | 0.206785 | 0.125089 | 0.21992  | 0.18378  |
| 0        | 0         | 0        | 0        | 0        | 0        |

|           |           |           |           |           |           |
|-----------|-----------|-----------|-----------|-----------|-----------|
| 4.42592   | 4.63227   | 5.15898   | 3.95175   | 2.28986   | 2.03968   |
| 2.01319   | 2.538     | 2.32995   | 3.0135    | 2.5609    | 2.87308   |
| 2.08913   | 1.72853   | 1.7259    | 1.32662   | 0.871773  | 0.863781  |
| 0         | 0.0143957 | 0         | 0         | 0.0667338 | 0.029135  |
| 31.0849   | 29.8747   | 31.4616   | 31.9973   | 31.2585   | 29.4192   |
| 0.047003  | 0.0292875 | 0.148042  | 0.0803245 | 0         | 0.019758  |
| 6.3125    | 6.3637    | 6.5221    | 5.00387   | 6.44967   | 5.31222   |
| 7.40537   | 6.93988   | 6.76713   | 7.78436   | 7.95717   | 8.23464   |
| 0.286331  | 0.499011  | 0.408388  | 0.456199  | 0.660928  | 0.448858  |
| 12.8534   | 13.1644   | 15.3572   | 13.081    | 18.8469   | 15.1117   |
| 1.91379   | 2.12475   | 2.22628   | 2.58444   | 2.36434   | 1.92847   |
| 0         | 0         | 0         | 0.510381  | 0.485247  | 0         |
| 3.15194   | 2.37607   | 2.88544   | 0.833709  | 3.05963   | 2.86021   |
| 0         | 0         | 0         | 0         | 0         | 0         |
| 12.4322   | 12.3364   | 10.2743   | 13.0743   | 9.15008   | 10.9633   |
| 38.2722   | 35.9261   | 37.2874   | 34.6961   | 30.8837   | 36.9468   |
| 5.20272   | 4.99475   | 6.03326   | 5.20891   | 6.39457   | 5.88319   |
| 0.602381  | 0.54408   | 0.648978  | 0.487462  | 0.714034  | 0.440404  |
| 2.80003   | 2.39194   | 2.42805   | 1.86915   | 2.89363   | 2.05533   |
| 11.9816   | 11.9623   | 14.7349   | 11.582    | 15.6746   | 13.5073   |
| 0         | 0         | 0         | 0         | 0         | 0         |
| 76.5832   | 77.4189   | 73.0754   | 71.437    | 70.9303   | 78.8406   |
| 0.209316  | 0.130425  | 0.0879026 | 0.23847   | 0.34009   | 0.263962  |
| 29.7341   | 28.3102   | 29.9643   | 31.3311   | 30.9978   | 32.0459   |
| 0.0131523 | 0         | 0         | 0.0149842 | 0.0142463 | 0.0110573 |
| 12.9097   | 13.286    | 9.19629   | 8.86637   | 13.8931   | 12.768    |
| 213.908   | 88.5047   | 152.784   | 95.5116   | 206.694   | 135.969   |
| 0         | 0.133828  | 0.225491  | 0.203911  | 0.348965  | 0.0601889 |
| 252.619   | 288.45    | 262.668   | 257.449   | 218.126   | 256.25    |
| 194.291   | 214.978   | 175.908   | 172.255   | 158.151   | 191.015   |
| 0         | 0.0625286 | 0         | 0.114328  | 0.163047  | 0.0421831 |
| 0         | 0         | 0         | 0         | 0         | 0         |
| 0.0409116 | 0         | 0.0257713 | 0         | 0.0221573 | 0.0515923 |
| 5.54443   | 5.82278   | 6.33517   | 5.4474    | 7.09969   | 5.21109   |
| 0         | 0         | 0         | 0         | 0         | 0         |
| 38.4931   | 36.7441   | 36.1484   | 33.5917   | 36.3193   | 37.6208   |
| 0.193627  | 0.241298  | 0.29273   | 0.242656  | 0.461413  | 0.390683  |
| 0         | 0         | 0         | 0         | 0         | 0         |
| 0.0529196 | 0.593556  | 0         | 0.542633  | 0.0737013 | 0.494353  |
| 0         | 0         | 0         | 0         | 0         | 0         |
| 39.9212   | 36.7539   | 26.6151   | 24.6167   | 23.6956   | 24.5501   |
| 1.48467   | 1.20829   | 1.79412   | 2.3128    | 2.62557   | 1.75764   |
| 17.2243   | 19.2436   | 15.0337   | 18.0574   | 10.5056   | 14.1775   |

|          |          |           |           |          |           |
|----------|----------|-----------|-----------|----------|-----------|
| 0        | 0        | 0         | 0         | 0        | 0         |
| 74.8118  | 62.7271  | 62.1177   | 58.1442   | 46.3192  | 57.4238   |
| 22.6647  | 22.2483  | 20.0641   | 22.7842   | 16.227   | 23.7199   |
| 0        | 0        | 0         | 0         | 0        | 0         |
| 39.0934  | 53.2041  | 26.0402   | 34.4842   | 16.5188  | 14.0251   |
| 19.176   | 22.0136  | 19.5723   | 19.9452   | 12.4854  | 18.674    |
| 27.442   | 26.7969  | 26.4304   | 24.585    | 19.2583  | 24.0057   |
| 69.1735  | 74.9922  | 45.9297   | 45.1589   | 35.1883  | 46.5752   |
| 0        | 0        | 0         | 0         | 0        | 0         |
| 0.724791 | 0        | 0.913131  | 0.275247  | 0.261693 | 0.203114  |
| 12.9963  | 13.0682  | 13.681    | 10.9562   | 14.4631  | 11.323    |
| 0.398423 | 0.413762 | 1.00391   | 0.832181  | 1.11487  | 1.24214   |
| 300.978  | 342.116  | 314.152   | 346.421   | 307.152  | 360.977   |
| 0.17532  | 0.382346 | 0.0552194 | 0.0998695 | 0.189903 | 0.257939  |
| 2.12961  | 1.98072  | 2.0543    | 1.33834   | 2.14643  | 2.29739   |
| 0        | 0        | 0         | 0         | 0        | 0         |
| 10.4371  | 11.4942  | 7.49308   | 8.65161   | 10.5492  | 13.3426   |
| 3.34519  | 3.19926  | 3.37554   | 3.03432   | 3.78876  | 3.05522   |
| 11.1591  | 10.7928  | 11.003    | 9.25019   | 11.0773  | 9.62242   |
| 0.767213 | 0.701847 | 0.98217   | 0.922133  | 1.26322  | 1.19752   |
| 0.697618 | 0.797973 | 0.875256  | 0.876661  | 0.769817 | 0.611438  |
| 0        | 0        | 0.0535491 | 0.0968487 | 0        | 0         |
| 0        | 0        | 0         | 0         | 0        | 0         |
| 25.5714  | 26.1793  | 22.8691   | 26.9724   | 24.8767  | 26.9472   |
| 4.94771  | 5.93013  | 5.8821    | 7.8671    | 6.83639  | 6.19558   |
| 0        | 0        | 0         | 0         | 0.224103 | 0.173938  |
| 13.1913  | 16.261   | 14.9032   | 16.7179   | 10.4695  | 11.3024   |
| 2.6634   | 1.85481  | 3.84895   | 4.19457   | 4.32741  | 4.28074   |
| 0.121121 | 0.134168 | 0.244153  | 0.137991  | 0        | 0.0905128 |
| 13.9012  | 15.3854  | 12.5801   | 10.0365   | 14.7234  | 14.5685   |
| 92.4109  | 111.006  | 102.66    | 121.106   | 82.5199  | 110.338   |
| 1.3723   | 1.67601  | 1.06751   | 0.830923  | 0.959761 | 1.02278   |
| 18.3737  | 19.1557  | 19.3113   | 17.905    | 16.0119  | 14.9035   |
| 185.488  | 186.297  | 183.469   | 219.691   | 217.874  | 304.695   |
| 306.29   | 295.835  | 175.364   | 161.435   | 166.923  | 174.105   |
| 0        | 0        | 0         | 0         | 0        | 0         |
| 27.52    | 26.0336  | 25.36     | 15.9048   | 32.4126  | 27.4977   |
| 4.35906  | 4.5098   | 3.73027   | 2.6424    | 2.85081  | 3.23601   |
| 3.93653  | 3.78592  | 3.944     | 4.48482   | 2.41007  | 3.48935   |
| 16.8419  | 17.3266  | 20.5285   | 24.5287   | 21.2319  | 19.7709   |
| 0.106154 | 0.264577 | 0.066869  | 0.0604695 | 0.229967 | 0.223111  |
| 0        | 0.189029 | 0         | 0.46083   | 0        | 0         |
| 51.6017  | 32.153   | 65.0107   | 29.3945   | 111.788  | 0         |

|           |          |           |          |          |           |
|-----------|----------|-----------|----------|----------|-----------|
| 480.806   | 470.23   | 296.817   | 296.959  | 366.903  | 478.887   |
| 8.41553   | 6.64533  | 4.7243    | 3.98743  | 5.26532  | 4.20319   |
| 0         | 0        | 0         | 0        | 0        | 0         |
| 7.53624   | 6.13581  | 11.8049   | 4.40739  | 8.59846  | 3.90704   |
| 0.0666638 | 0        | 0.0839867 | 0        | 0.108313 | 0.0560451 |
| 0.618343  | 0.386359 | 0.311609  | 0.246564 | 0.200933 | 0.10397   |
| 9.37486   | 9.46468  | 9.48832   | 7.74492  | 10.3566  | 9.1738    |
| 10.002    | 8.99074  | 10.9924   | 7.50667  | 13.9289  | 9.41196   |
| 0.657474  | 0.449317 | 0.454241  | 0.265792 | 0.620271 | 0.606238  |
| 5.96863   | 5.67767  | 7.06696   | 5.12227  | 6.17797  | 3.93107   |
| 13.1053   | 11.5007  | 12.3557   | 10.4481  | 11.4065  | 11.188    |
| 0.561322  | 0.408053 | 0.494842  | 0.205555 | 0.871002 | 0.202247  |
| 2.70206   | 3.48054  | 3.19552   | 2.57587  | 1.47357  | 1.46747   |
| 1.02117   | 1.14403  | 0.792706  | 1.08114  | 0.815615 | 0.96257   |
| 0.704296  | 0.65827  | 1.20421   | 0.45851  | 1.58025  | 1.24766   |
| 2.58668   | 2.91651  | 3.25883   | 1.96464  | 3.53565  | 3.46908   |
| 2.55752   | 2.92522  | 2.16278   | 2.87382  | 1.70769  | 2.12068   |
| 0.468915  | 0.29218  | 0         | 0        | 0        | 0.788445  |
| 1.97555   | 0.273547 | 2.4889    | 1.00032  | 4.75528  | 1.29179   |
| 0         | 0.286653 | 0.579588  | 0        | 0        | 0         |
| 8.09999   | 9.59555  | 8.43994   | 8.99542  | 13.0462  | 9.76992   |
| 5.92326   | 6.59994  | 4.08654   | 3.23736  | 3.4975   | 5.4562    |
| 0.824433  | 0.948376 | 0.719076  | 0.578007 | 0.961702 | 1.49285   |
| 55.4199   | 54.0431  | 53.381    | 54.9244  | 48.3806  | 58.6011   |
| 20.4163   | 18.8657  | 14.9313   | 13.9243  | 12.687   | 14.0894   |
| 5.78821   | 6.07898  | 5.72225   | 6.288    | 5.38785  | 5.43545   |
| 0         | 0        | 0         | 0        | 0        | 0         |
| 21.6885   | 19.1418  | 19.2791   | 17.3685  | 17.0119  | 17.0245   |
| 6.15759   | 6.68898  | 6.99299   | 7.20439  | 7.89665  | 8.43439   |
| 88.2289   | 107.272  | 93.1283   | 128.059  | 72.3775  | 95.6667   |
| 37.0856   | 43.2058  | 29.8952   | 38.0421  | 32.1671  | 41.85     |
| 29.1835   | 31.3947  | 37.0112   | 28.7243  | 42.4033  | 37.3593   |
| 0.126042  | 0.251318 | 0.222313  | 0.804148 | 0.518801 | 0.445054  |
| 0.481647  | 0        | 0.303402  | 0        | 0.260855 | 0         |
| 2.46131   | 1.92237  | 0.575878  | 0.731239 | 1.03745  | 0.735894  |
| 61.8225   | 65.5009  | 76.4263   | 71.0234  | 66.3634  | 84.8439   |
| 0.470977  | 0.651357 | 0.63059   | 0.768555 | 0.589649 | 0.457054  |
| 22.6075   | 23.1896  | 19.4549   | 23.1617  | 24.0969  | 26.2447   |
| 0.316787  | 37.208   | 0.698435  | 411.257  | 0.428922 | 14.3151   |
| 19.1303   | 17.1928  | 19.6954   | 19.6448  | 26.7146  | 27.9918   |
| 0.359759  | 0.158593 | 0.135278  | 0.248549 | 0.670751 | 0.160373  |
| 2.23756   | 2.63353  | 1.72272   | 1.27461  | 0.807892 | 1.88114   |
| 0.619983  | 0.439536 | 0.781089  | 0.358923 | 0.629997 | 0.585802  |

|           |          |           |           |          |           |
|-----------|----------|-----------|-----------|----------|-----------|
| 2.69503   | 3.33992  | 3.17214   | 1.83214   | 1.77475  | 1.60618   |
| 0.177855  | 0.222648 | 0.161823  | 0.275456  | 0.41368  | 0.535053  |
| 5.27959   | 4.7433   | 5.95543   | 6.29472   | 8.11264  | 6.19342   |
| 3.31614   | 4.61849  | 5.28364   | 5.5556    | 4.43706  | 4.55071   |
| 56.6478   | 57.4567  | 58.8428   | 51.7671   | 48.712   | 45.1563   |
| 0.372909  | 0.103271 | 0.261006  | 0         | 0.359047 | 0.104503  |
| 0         | 0        | 0         | 0         | 0        | 0.0281365 |
| 0.102978  | 0.128332 | 0.389213  | 0.117322  | 0        | 0.17315   |
| 17.1286   | 19.7551  | 22.5443   | 14.5704   | 1.91293  | 1.857     |
| 103.865   | 109.08   | 114.065   | 95.3347   | 105.683  | 86.6784   |
| 0         | 0        | 0         | 0         | 0        | 0         |
| 0         | 0        | 0         | 0         | 0        | 0         |
| 6.46319   | 6.51336  | 6.93302   | 4.297     | 3.72804  | 3.58011   |
| 0         | 0        | 0         | 0         | 0        | 0         |
| 9.34851   | 11.0406  | 10.4661   | 12.5206   | 14.9562  | 14.1572   |
| 5.15514   | 5.1209   | 7.24149   | 5.83576   | 6.80188  | 7.37557   |
| 0         | 0        | 0         | 0         | 0        | 0         |
| 3.05036   | 2.5637   | 3.00886   | 2.66703   | 3.68828  | 3.63797   |
| 0         | 0        | 0         | 0         | 0        | 0         |
| 18.552    | 17.5861  | 21.3252   | 16.6945   | 23.0726  | 18.0663   |
| 1.76241   | 1.91896  | 3.22076   | 1.84065   | 5.54059  | 4.74001   |
| 0         | 0        | 0         | 0         | 0        | 0         |
| 17.4513   | 15.88    | 19.2295   | 16.3323   | 17.3102  | 17.1732   |
| 8.72299   | 9.73059  | 10.6604   | 9.34242   | 7.46684  | 6.15247   |
| 29.2666   | 27.5445  | 23.884    | 31.0537   | 35.5808  | 50.3848   |
| 6.70983   | 6.60002  | 6.91159   | 6.25013   | 6.30803  | 5.60556   |
| 7.28567   | 7.52315  | 7.39793   | 6.38049   | 8.56773  | 7.59259   |
| 0         | 0        | 0         | 0         | 0        | 0         |
| 0.873474  | 1.2732   | 1.26203   | 0.96679   | 1.52247  | 1.30934   |
| 1.80996   | 0.451114 | 1.36817   | 1.92458   | 2.48331  | 3.44908   |
| 2.37785   | 3.47079  | 4.75015   | 4.96907   | 4.55361  | 5.50025   |
| 5.78474   | 6.77745  | 6.12223   | 5.87436   | 7.00347  | 5.86731   |
| 12.4023   | 13.4333  | 10.0465   | 11.596    | 11.3939  | 10.9827   |
| 2.61766   | 2.53121  | 1.8768    | 1.79975   | 1.85805  | 2.01064   |
| 0         | 0        | 0         | 0         | 0        | 0         |
| 3.40565   | 4.19708  | 3.15847   | 3.72614   | 3.11663  | 3.70692   |
| 0         | 0        | 0         | 0         | 0        | 0         |
| 7.68994   | 6.5906   | 0         | 0         | 0        | 0         |
| 0.0258979 | 0        | 0         | 0         | 0        | 0         |
| 0.0620007 | 0.309061 | 0.234335  | 0.176591  | 0.268631 | 0.156374  |
| 3.55033   | 3.22956  | 3.94459   | 3.03363   | 4.26969  | 3.06772   |
| 0.130173  | 0.162221 | 0.0803255 | 0.0726382 | 0.141001 | 0.0916899 |
| 734.355   | 351.99   | 608.219   | 338.577   | 728.629  | 391.207   |

|           |           |           |           |           |           |
|-----------|-----------|-----------|-----------|-----------|-----------|
| 42.1096   | 47.91     | 38.6448   | 40.4318   | 42.7922   | 53.9509   |
| 3.15895   | 2.71989   | 3.97982   | 3.35028   | 2.70004   | 3.61184   |
| 25.1296   | 16.5298   | 35.7917   | 22.7499   | 4.02289   | 2.67632   |
| 35.5292   | 33.9915   | 40.6452   | 31.5164   | 37.7504   | 39.5348   |
| 2.32634   | 2.01065   | 3.26175   | 2.18013   | 3.33269   | 2.01887   |
| 0         | 0         | 0         | 0         | 0         | 0         |
| 0         | 0         | 0         | 0         | 0         | 0         |
| 0.737399  | 0.590751  | 1.03961   | 0.700088  | 0.950876  | 1.2694    |
| 148.26    | 121.188   | 145.453   | 140.385   | 153.62    | 137.118   |
| 42.584    | 48.8846   | 38.8098   | 41.5274   | 32.4876   | 38.5      |
| 0         | 0         | 0         | 0         | 0         | 0         |
| 0.146087  | 0.158033  | 0.136332  | 0.188781  | 0.0219765 | 0.0682306 |
| 0.372311  | 0.463973  | 0.234529  | 1.2725    | 0.470493  | 0.417342  |
| 0.0646016 | 0.0805064 | 0.108518  | 0.0245331 | 0.1866    | 0.108623  |
| 2.1087    | 4.01908   | 0.468821  | 1.13054   | 1.61231   | 3.12849   |
| 5.26233   | 5.31137   | 5.53394   | 5.10342   | 5.55873   | 5.59412   |
| 0         | 0         | 0         | 0         | 0         | 0         |
| 16.3427   | 14.8754   | 15.0247   | 18.8311   | 17.251    | 21.7219   |
| 23.6936   | 25.5025   | 21.2843   | 24.3121   | 21.2676   | 21.2719   |
| 52.0847   | 53.2296   | 51.1607   | 48.8562   | 51.967    | 44.6351   |
| 0.400481  | 0.166498  | 0.16835   | 0.152345  | 0.144583  | 0.112389  |
| 1.12418   | 1.16745   | 1.98956   | 1.52471   | 1.18869   | 0.630072  |
| 17.5071   | 19.4943   | 19.5971   | 19.3893   | 18.9989   | 20.0282   |
| 152.448   | 151.577   | 164.873   | 155.884   | 158.347   | 150.924   |
| 0.179021  | 0         | 0.150361  | 0.0679853 | 0.0646374 | 0.150505  |
| 7.54757   | 7.75689   | 8.27675   | 6.40979   | 8.56171   | 7.26425   |
| 2.46561   | 1.98235   | 2.32973   | 1.22329   | 2.43378   | 1.1033    |
| 33.1204   | 30.7726   | 26.155    | 28.4      | 28.6515   | 27.6116   |
| 24.887    | 24.8501   | 23.346    | 21.3466   | 21.0521   | 18.3424   |
| 5.19055   | 4.94647   | 6.07798   | 6.53964   | 5.62249   | 5.90391   |
| 6.45778   | 5.72279   | 4.70072   | 5.23181   | 7.46126   | 3.86072   |
| 40.8728   | 38.1531   | 39.9548   | 43.9889   | 38.961    | 42.0469   |
| 8.03103   | 8.36961   | 8.04382   | 6.51217   | 9.28692   | 7.54225   |
| 0         | 0         | 0         | 0         | 0         | 0         |
| 0.250903  | 0.25014   | 0.331906  | 0.314434  | 0.20383   | 0.179296  |
| 0         | 0         | 0         | 0         | 0         | 0         |
| 1.34687   | 1.35606   | 1.88048   | 1.16486   | 2.26572   | 0.806135  |
| 9.10704   | 7.33936   | 15.9138   | 9.45887   | 12.6467   | 14.7045   |
| 0         | 0         | 0         | 0         | 0         | 0         |
| 28.3323   | 28.0866   | 26.5976   | 22.9135   | 28.4387   | 27.1425   |
| 0         | 0         | 0.0993107 | 0         | 0         | 0         |
| 6.39368   | 6.977     | 7.0933    | 4.40314   | 7.33905   | 5.41536   |
| 0.0425048 | 0.159818  | 0.171559  | 1.20E-13  | 0         | 0.115578  |

|           |           |           |           |           |            |
|-----------|-----------|-----------|-----------|-----------|------------|
| 7.91772   | 5.75119   | 7.80181   | 6.23206   | 11.5149   | 5.5533     |
| 7.04885   | 7.35774   | 8.34897   | 7.20573   | 8.96582   | 6.60896    |
| 1.49408   | 1.7044    | 1.80885   | 1.88495   | 1.49681   | 1.26451    |
| 14.8388   | 12.1001   | 18.2692   | 13.8515   | 17.4678   | 11.7298    |
| 10.0031   | 10.6505   | 7.72867   | 8.68563   | 7.25857   | 5.75622    |
| 1.98142   | 1.94505   | 1.45644   | 0.988447  | 2.5303    | 1.83752    |
| 0.547527  | 0.0620297 | 0.564385  | 0.28354   | 1.61746   | 0.753238   |
| 1.603     | 1.10981   | 2.24394   | 1.01459   | 2.70096   | 2.39584    |
| 1.49741   | 1.98646   | 2.09951   | 2.2838    | 1.98821   | 1.62437    |
| 0.983118  | 1.11432   | 1.41706   | 1.27097   | 1.17596   | 1.09923    |
| 0         | 0         | 0         | 0         | 0         | 0          |
| 0.0325369 | 0.147187  | 0.114845  | 0.0333618 | 0.010573  | 0          |
| 0.188435  | 0.352242  | 0.237401  | 0.500923  | 0.272146  | 0.23763    |
| 10.7225   | 10.4152   | 11.86     | 11.9544   | 10.4331   | 9.85425    |
| 0         | 0         | 0         | 0         | 0.0789469 | 0          |
| 40.0978   | 45.6853   | 36.9713   | 37.0482   | 51.0763   | 52.8042    |
| 0.247651  | 0.3968    | 0.356576  | 0.322451  | 0.268251  | 0.26769    |
| 0         | 0         | 0.0762464 | 0.0126642 | 0.0120405 | 0.00934529 |
| 10.0509   | 10.4582   | 11.4696   | 9.25086   | 10.8659   | 8.96374    |
| 11.4915   | 8.9253    | 12.4599   | 9.12993   | 8.12559   | 4.14613    |
| 47.223    | 42.1624   | 44.2656   | 34.5122   | 48.5874   | 37.6708    |
| 97.5935   | 60.8104   | 122.954   | 83.3899   | 52.8556   | 61.536     |
| 0.0300935 | 0.0375025 | 0         | 0         | 0.0651934 | 0.0253     |
| 28.1145   | 26.6473   | 30.4314   | 28.808    | 36.3966   | 36.8097    |
| 0         | 0         | 0         | 0         | 0         | 0          |
| 0         | 0         | 0         | 0         | 0.0381746 | 0          |
| 0         | 0         | 0         | 0         | 0         | 0          |
| 7.8335    | 7.14692   | 8.51688   | 7.18191   | 9.6218    | 6.27597    |
| 4.48034   | 4.76455   | 6.08766   | 4.26109   | 5.6766    | 4.74462    |
| 0         | 0         | 0         | 0         | 0         | 0          |
| 0.0901563 | 0.216063  | 0.0174744 | 0.0158021 | 0.0976555 | 0.040813   |
| 3.14359   | 3.03648   | 3.14928   | 2.53146   | 3.829     | 3.49196    |
| 2.8508    | 3.18676   | 5.56212   | 3.80662   | 4.41572   | 3.87612    |
| 73.7028   | 77.9697   | 70.2279   | 76.5976   | 70.703    | 83.8781    |
| 10.4975   | 11.523    | 11.5807   | 11.371    | 12.549    | 10.8603    |
| 1.2394    | 1.31687   | 1.79047   | 0.456934  | 2.09286   | 0.919015   |
| 0.24995   | 0.214819  | 0.336617  | 0.216027  | 0.252069  | 0.166659   |
| 19.2305   | 20.8051   | 22.2384   | 20.2273   | 19.7782   | 20.4976    |
| 0         | 0         | 0         | 0         | 0         | 0          |
| 0         | 0         | 0         | 0         | 0         | 0          |
| 21.3561   | 19.6341   | 16.8317   | 19.9573   | 20.9031   | 19.2368    |
| 0.275335  | 0.171561  | 0.173441  | 0.268872  | 0.0213026 | 0.115739   |
| 0.847669  | 0.62836   | 0.519864  | 0.600505  | 0.420553  | 0.308434   |



|           |           |           |           |           |           |
|-----------|-----------|-----------|-----------|-----------|-----------|
| 0         | 0         | 0         | 0         | 0         | 0         |
| 0.262888  | 0.327611  | 0.294692  | 0.5146    | 0.426286  | 0.221013  |
| 0         | 0         | 0         | 0         | 0         | 0         |
| 0         | 0         | 0         | 0         | 0         | 0         |
| 1.57111   | 0.743531  | 1.21208   | 0.720699  | 0.569985  | 0.522695  |
| 0.068896  | 0.085858  | 0.173598  | 0.078492  | 0         | 0         |
| 0         | 0         | 0         | 155.634   | 0         | 0         |
| 1.13896   | 0.936871  | 0.924341  | 0.252833  | 1.17237   | 0.521616  |
| 2.47918   | 1.67588   | 2.80183   | 2.68959   | 1.13779   | 1.13457   |
| 9.03082   | 9.62988   | 11.6121   | 9.65224   | 10.5888   | 12.0277   |
| 0.196509  | 0.124669  | 0.299135  | 0.117928  | 0.233585  | 0.197422  |
| 1.12E-08  | 1.09E-08  | 1.39E-08  | 1.14E-08  | 8.24E-09  | 0.130206  |
| 0.0942571 | 0         | 0         | 0         | 0.102097  | 0.0396215 |
| 0         | 0         | 0         | 0         | 0         | 0         |
| 74.792    | 73.2693   | 60.3087   | 53.3304   | 45.5887   | 53.7426   |
| 0.0675523 | 0.105229  | 0.191489  | 0.153922  | 0.219514  | 0.0851881 |
| 14.7225   | 13.672    | 11.8983   | 11.2815   | 13.9389   | 12.3774   |
| 15.123    | 15.8051   | 13.8662   | 12.7814   | 14.5551   | 13.8346   |
| 5.80745   | 4.04541   | 7.93008   | 3.90267   | 2.2848    | 2.22927   |
| 22.8262   | 22.4337   | 21.8612   | 25.1692   | 20.8372   | 22.7678   |
| 0         | 0         | 0         | 0         | 0         | 0         |
| 13.6046   | 9.23055   | 20.8706   | 12.0866   | 15.2171   | 9.08472   |
| 0.132187  | 0.732739  | 0.446835  | 0.706733  | 0.697699  | 0.458088  |
| 7.31973   | 6.93065   | 6.54714   | 5.60895   | 5.60079   | 5.5406    |
| 0.425758  | 0.728614  | 0.805258  | 0.448245  | 0.593174  | 0.363476  |
| 6.07591   | 6.16754   | 8.40178   | 9.38537   | 7.94025   | 7.51241   |
| 6.5824    | 7.59212   | 11.1601   | 10.3846   | 8.34352   | 9.55678   |
| 10.9157   | 10.3608   | 12.7726   | 12.6746   | 18.9179   | 14.9346   |
| 0.985448  | 1.32884   | 0.998246  | 0.793401  | 2.16824   | 1.45565   |
| 0.0638395 | 0         | 0.0804285 | 0.0727313 | 0.0691497 | 0.0536707 |
| 0         | 0         | 0         | 0         | 0         | 0         |
| 7.59414   | 7.74988   | 7.80969   | 8.49291   | 7.5997    | 6.6582    |
| 5.189     | 4.65136   | 5.30446   | 4.48566   | 4.36338   | 4.22852   |
| 7.21708   | 7.37969   | 9.49043   | 7.85344   | 7.70791   | 7.78144   |
| 0.589767  | 0.445329  | 0.473     | 0.346372  | 0.348651  | 0.300626  |
| 87.6806   | 98.0262   | 85.569    | 84.0252   | 73.0833   | 88.9442   |
| 9.1702    | 9.73904   | 10.6399   | 9.40493   | 10.941    | 9.15908   |
| 21.0608   | 20.8786   | 17.3783   | 18.4172   | 20.552    | 17.5625   |
| 14.7605   | 17.5329   | 16.5509   | 17.8439   | 15.0114   | 14.1785   |
| 5.80534   | 6.50451   | 6.74353   | 6.64426   | 5.91324   | 5.97764   |
| 0.0200013 | 0.0747768 | 0.0251987 | 0.0227871 | 0.021665  | 0.0336307 |
| 1.71761   | 2.78658   | 1.16841   | 2.17074   | 1.7269    | 2.5871    |
| 0.801392  | 0.666548  | 1.49889   | 1.12672   | 0.733011  | 0.757374  |

|           |           |           |           |           |           |
|-----------|-----------|-----------|-----------|-----------|-----------|
| 8.39458   | 9.82083   | 8.97876   | 8.5879    | 9.50109   | 8.75697   |
| 0         | 0         | 0         | 0         | 0         | 0         |
| 3.8831    | 3.46094   | 4.60036   | 3.86735   | 4.93011   | 4.60489   |
| 1.04586   | 0.993029  | 1.00391   | 0.907834  | 0.611382  | 0.600135  |
| 0         | 0         | 0         | 0         | 0         | 0         |
| 1.10319   | 0.499923  | 0.631751  | 0.685549  | 0.325895  | 0.337259  |
| 6.17236   | 2.01555   | 3.49309   | 3.15879   | 2.93173   | 2.49747   |
| 1.22265   | 1.13157   | 1.88352   | 1.41972   | 3.32472   | 3.77061   |
| 0.302537  | 0.424149  | 0.524084  | 0.775519  | 0.655403  | 0.445106  |
| 6.23288   | 8.76322   | 6.88605   | 7.28309   | 6.57821   | 6.01935   |
| 3.51056   | 3.21395   | 2.9933    | 2.03289   | 2.48047   | 1.98857   |
| 2.79839   | 2.60978   | 2.99789   | 2.38239   | 2.6423    | 2.33716   |
| 43.0651   | 35.9865   | 37.4323   | 40.9496   | 29.5313   | 26.9747   |
| 0         | 0         | 0         | 0         | 0         | 0         |
| 1.13974   | 1.23772   | 1.16923   | 1.53963   | 1.23454   | 1.21827   |
| 0.180258  | 0.12327   | 0.10428   | 0.121923  | 0.402054  | 0.254491  |
| 0.0523364 | 0.0396221 | 0.150042  | 0.100768  | 0.0774878 | 0.0476849 |
| 6.17397   | 6.76557   | 7.04086   | 7.94357   | 8.7053    | 7.87535   |
| 0.875039  | 0.664922  | 0.860426  | 0.972601  | 1.27147   | 0.771541  |
| 0.435096  | 0.722954  | 0.487251  | 0.495697  | 0.81166   | 0.772224  |
| 24.4664   | 24.3004   | 32.0651   | 26.5652   | 35.653    | 29.3184   |
| 7.05686   | 8.12421   | 9.2293    | 10.3368   | 10.8834   | 13.0239   |
| 0.0931469 | 0.0985098 | 0.0806052 | 0.203299  | 0.0586256 | 0.164275  |
| 166.044   | 179.178   | 168.438   | 171.375   | 153.173   | 176.39    |
| 0.1139    | 0.283884  | 0.239162  | 0.173019  | 0.411247  | 0.191514  |
| 37.2827   | 39.3325   | 38.6265   | 41.8012   | 32.7655   | 37.6003   |
| 25.395    | 27.2452   | 23.2137   | 23.4938   | 21.4061   | 23.0354   |
| 27.3055   | 33.8461   | 27.1577   | 29.4398   | 24.1474   | 26.5027   |
| 60.4795   | 58.0721   | 56.443    | 64.1595   | 60.2846   | 70.3207   |
| 0         | 0         | 0         | 0         | 0         | 0         |
| 0.291348  | 0.308318  | 0.373976  | 0.231816  | 0.666697  | 0.5036    |
| 34.5379   | 38.9776   | 35.5984   | 31.5855   | 35.6903   | 32.1861   |
| 0.363801  | 0.211572  | 0.42778   | 0.524998  | 0         | 0.0203901 |
| 8.08751   | 9.73167   | 8.88622   | 13.0959   | 7.20923   | 10.0429   |
| 2.63003   | 2.52208   | 3.2312    | 1.98694   | 4.46513   | 1.97587   |
| 4.18135   | 3.44228   | 4.24624   | 3.69551   | 3.78802   | 3.08921   |
| 0         | 0         | 0         | 0         | 0         | 0         |
| 37.4132   | 35.9761   | 32.6048   | 35.854    | 27.0422   | 36.9818   |
| 10.8396   | 10.9225   | 8.83376   | 10.3115   | 11.7412   | 13.2634   |
| 0.462765  | 0.399252  | 0.672712  | 0.324443  | 1.11819   | 0.71825   |
| 38.0308   | 101.692   | 31.5082   | 154.134   | 29.4244   | 13.2062   |
| 0.570937  | 0.41853   | 1.14241   | 0.803507  | 0.909451  | 0.621168  |
| 0         | 0.0286563 | 0.0289703 | 0.0523955 | 0.0498153 | 0.0193321 |

|           |           |           |           |           |           |
|-----------|-----------|-----------|-----------|-----------|-----------|
| 11.4547   | 10.2486   | 8.51075   | 7.91933   | 10.8168   | 13.5809   |
| 0.129623  | 0.0807678 | 0.367438  | 0.0738385 | 0.280809  | 0.0544877 |
| 1.40558   | 3.05901   | 3.59298   | 2.77336   | 7.57937   | 10.5067   |
| 1.29534   | 0.896809  | 1.19676   | 1.01664   | 1.87079   | 1.04061   |
| 2.31443   | 2.16184   | 2.02756   | 1.69591   | 1.74654   | 1.6793    |
| 4.69945   | 5.19231   | 3.7713    | 3.41146   | 4.5258    | 3.36386   |
| 25.1008   | 19.9901   | 19.0035   | 20.7433   | 23.934    | 26.2466   |
| 81.8458   | 80.8168   | 52.9836   | 60.1848   | 41.764    | 62.9418   |
| 0.757403  | 0.858067  | 0.433735  | 0.902118  | 1.2679    | 0.926193  |
| 0.104468  | 0.260376  | 0.179142  | 0.436403  | 0.113158  | 0.14638   |
| 0.0201201 | 0.150442  | 0.0253483 | 0.114612  | 0         | 0.0169152 |
| 7.18051   | 5.88384   | 6.05847   | 5.20472   | 5.51666   | 4.22664   |
| 0.385715  | 0.120169  | 0.485945  | 0         | 0.208899  | 0.243207  |
| 3743.71   | 4527.27   | 3471.94   | 3787.58   | 3358.95   | 4487.69   |
| 5.77886   | 6.44661   | 6.04753   | 6.05281   | 4.64418   | 5.99459   |
| 11.6763   | 11.6965   | 11.734    | 11.2464   | 12.5155   | 10.9668   |
| 0.718085  | 0.955185  | 0.685037  | 0.42407   | 0.423683  | 0.374044  |
| 3.02213   | 3.25336   | 3.84669   | 3.63827   | 3.54329   | 3.09045   |
| 11.8703   | 11.8027   | 12.4093   | 10.7182   | 14.9778   | 10.5634   |
| 14.0088   | 17.8275   | 12.5415   | 13.4078   | 16.451    | 15.6671   |
| 0         | 0         | 0         | 0         | 0         | 0         |
| 0.111899  | 0.139448  | 0         | 0         | 0.136358  | 0.018512  |
| 125.064   | 76.0888   | 67.4973   | 55.6245   | 89.2357   | 53.3119   |
| 2.82914   | 3.66128   | 3.7014    | 1.98351   | 2.47987   | 2.93425   |
| 0         | 0         | 0         | 0         | 0         | 0         |
| 0.0721828 | 0.179908  | 0.0909398 | 0.0822366 | 0.104249  | 0.0809133 |
| 0         | 0         | 0         | 0         | 0         | 0         |
| 12.5114   | 12.5855   | 14.676    | 13.2002   | 17.3835   | 13.2926   |
| 0         | 0         | 0         | 0         | 0         | 0         |
| 0.215416  | 0.228272  | 0.195395  | 0.176695  | 0.199109  | 0.154539  |
| 37.6841   | 37.2682   | 41.8403   | 43.6217   | 37.2535   | 39.5765   |
| 15.9569   | 18.276    | 17.8254   | 15.8579   | 12.4036   | 15.2489   |
| 1.95419   | 1.32446   | 1.07982   | 1.13272   | 1.22548   | 2.10408   |
| 0         | 0         | 0         | 0         | 0         | 0         |
| 2.12321   | 2.97126   | 2.34604   | 2.79565   | 2.65798   | 2.22394   |
| 0.0338211 | 0         | 0         | 0         | 0.0732686 | 0         |
| 0.345757  | 0.178296  | 0.465646  | 0.312416  | 0.658634  | 0.415977  |
| 15.4985   | 15.5154   | 16.9386   | 14.3305   | 12.9297   | 11.8968   |
| 0         | 0         | 0         | 0.0306756 | 0         | 0.027623  |
| 0         | 0         | 0         | 0         | 0         | 0         |
| 2.95373   | 3.31351   | 4.12513   | 3.99891   | 3.38829   | 2.79799   |
| 6.61634   | 5.6307    | 2.12759   | 3.17501   | 3.93094   | 5.00939   |
| 27.4739   | 28.6627   | 28.76     | 30.9085   | 23.7328   | 27.3411   |

|          |            |           |           |          |            |
|----------|------------|-----------|-----------|----------|------------|
| 4.03258  | 3.68546    | 3.0303    | 2.75175   | 3.03235  | 3.11371    |
| 0        | 0.0832465  | 0.0841587 | 0         | 0.21707  | 0.11232    |
| 76.1737  | 69.9068    | 56.4156   | 60.582    | 65.7706  | 49.6158    |
| 0        | 0          | 0         | 0         | 0        | 0          |
| 0.582918 | 0.822081   | 0.721318  | 0.828388  | 0.779263 | 0.652579   |
| 0.856081 | 0.551005   | 0.865472  | 1.02037   | 0.784641 | 0.557925   |
| 34.3091  | 33.9835    | 34.2759   | 35.1862   | 31.1866  | 31.1544    |
| 0        | 0          | 0         | 0         | 0        | 0          |
| 6.64261  | 6.9504     | 6.86866   | 6.90741   | 6.53332  | 4.80743    |
| 2.33728  | 1.65054    | 1.40688   | 1.42017   | 2.27853  | 2.33614    |
| 258.285  | 251.1      | 311.383   | 311.444   | 270.623  | 278.387    |
| 0.903633 | 1.47878    | 1.29028   | 1.52156   | 1.05182  | 0.78226    |
| 21.6524  | 14.2152    | 33.7919   | 24.0568   | 28.3804  | 23.17      |
| 0        | 0          | 0         | 0         | 0        | 0          |
| 0        | 0          | 0         | 0         | 0        | 0          |
| 0        | 1.23E-06   | 0         | 5.86E-06  | 0        | 0          |
| 0.164847 | 0.246519   | 0.0830735 | 0.112685  | 0.178559 | 0.0554357  |
| 0        | 0          | 0         | 0.0366141 | 0        | 0          |
| 3.22957  | 3.62264    | 3.94918   | 2.91145   | 4.54865  | 2.62516    |
| 2.67108  | 2.69994    | 2.61735   | 2.48521   | 3.69694  | 2.81948    |
| 0        | 0          | 0         | 0         | 0        | 0          |
| 19.6855  | 21.7938    | 16.4993   | 23.0475   | 14.663   | 16.2373    |
| 284.072  | 279.907    | 256.284   | 211.368   | 260.686  | 210.495    |
| 6.87394  | 9.17817    | 3.34597   | 3.38172   | 4.68983  | 3.7526     |
| 235.831  | 256.068    | 234.805   | 247.529   | 178.982  | 198.095    |
| 27.5777  | 28.2475    | 24.7246   | 24.9664   | 31.6168  | 36.0045    |
| 48.9303  | 58.9944    | 56.473    | 60.4518   | 59.3926  | 62.8585    |
| 40.4404  | 38.5998    | 41.0444   | 41.4629   | 38.6884  | 44.624     |
| 0        | 0          | 0         | 0         | 0        | 0          |
| 0        | 0          | 0         | 0         | 0        | 0.0674847  |
| 43.0428  | 42.4908    | 38.893    | 40.4202   | 26.9091  | 30.5698    |
| 0        | 0          | 0         | 0         | 0        | 0          |
| 0        | 0          | 0         | 0         | 0        | 0          |
| 19.0972  | 18.7788    | 17.4808   | 17.111    | 15.0833  | 16.975     |
| 35.0475  | 34.0026    | 34.7265   | 31.1383   | 29.5714  | 27.4328    |
| 11.0092  | 10.8753    | 10.1487   | 10.962    | 10.1434  | 9.88574    |
| 0        | 0.00738925 | 0         | 0         | 0        | 0.00996989 |
| 0.318574 | 0.277905   | 0.602752  | 0.254062  | 0.552692 | 0.45531    |
| 0        | 0.0747515  | 0         | 0.0341686 | 0        | 0          |
| 1.19949  | 0.758583   | 0.613516  | 0.2774    | 0.52748  | 1.02351    |
| 0        | 0          | 0         | 0         | 0        | 0          |
| 0.589372 | 0.734474   | 1.85631   | 0.671461  | 0.957593 | 2.47746    |
| 0.253005 | 0.832261   | 0.480404  | 0.538626  | 0.303848 | 0.145107   |

|           |           |           |           |           |           |
|-----------|-----------|-----------|-----------|-----------|-----------|
| 0.0327633 | 0.204148  | 0.165108  | 0         | 0.248419  | 0.358078  |
| 10.8799   | 10.5295   | 13.3947   | 10.7094   | 15.3485   | 11.4682   |
| 8.17112   | 8.63928   | 8.15168   | 8.04551   | 6.61475   | 7.11823   |
| 4.30718   | 4.58704   | 5.33874   | 4.45779   | 5.73758   | 4.04367   |
| 0         | 0         | 0         | 0         | 0         | 0         |
| 8.37021   | 9.43811   | 9.58535   | 8.30666   | 8.69972   | 7.79128   |
| 0         | 0         | 0         | 0         | 0         | 0         |
| 20.4244   | 28.4298   | 16.1744   | 19.7368   | 11.8303   | 13.056    |
| 0         | 0.0254559 | 0         | 0.0465438 | 0.0221259 | 0.0171731 |
| 12.1067   | 8.49576   | 8.98375   | 30.2194   | 9.84588   | 13.9003   |
| 0.846361  | 1.21724   | 1.10634   | 1.46603   | 1.44251   | 1.20384   |
| 1.31616   | 0.729804  | 6.92E-07  | 0.402639  | 1.17274   | 0.0132944 |
| 13.5728   | 15.4603   | 15.069    | 12.2874   | 14.8334   | 11.8787   |
| 350.283   | 189.684   | 148.408   | 152.245   | 59.1944   | 104.708   |
| 0         | 0         | 0         | 0.0228825 | 0         | 0         |
| 45.4281   | 50.256    | 60.64     | 50.9601   | 48.9752   | 53.6897   |
| 2.47061   | 2.43581   | 2.6004    | 2.01306   | 2.60836   | 1.99819   |
| 7.68994   | 6.5906    | 0         | 0         | 0         | 0         |
| 0.0185462 | 0.0462245 | 0.0700965 | 0.0845174 | 0.0602666 | 0         |
| 0         | 0         | 0         | 0         | 0         | 0         |
| 0.750414  | 0.464953  | 1.06033   | 0.90089   | 0.505729  | 0.782394  |
| 0.861464  | 0.962497  | 1.57184   | 1.04914   | 1.41577   | 0.998956  |
| 69.3068   | 64.7775   | 29.1055   | 26.32     | 100.096   | 0         |
| 16.7721   | 12.6537   | 12.738    | 12.9189   | 10.8817   | 11.5269   |
| 12.0153   | 13.8754   | 16.0819   | 15.253    | 16.9593   | 18.316    |
| 12.3162   | 12.8688   | 11.8992   | 10.9326   | 12.4676   | 11.646    |
| 36.0058   | 33.9581   | 40.3924   | 39.5621   | 41.234    | 44.7458   |
| 8.6483    | 8.20192   | 9.45465   | 8.61429   | 8.51084   | 8.43261   |
| 0         | 0         | 0         | 0         | 0         | 0         |
| 5.46814   | 6.32814   | 7.42911   | 5.93549   | 5.37533   | 5.1146    |
| 124.724   | 136.232   | 132.446   | 132.267   | 95.3166   | 122.989   |
| 38.9442   | 42.4441   | 42.3071   | 47.7156   | 35.4108   | 41.1439   |
| 403.71    | 524.219   | 390.81    | 562.116   | 314.936   | 439.972   |
| 1.56959   | 1.94508   | 1.13077   | 1.10904   | 0.516959  | 0.969652  |
| 0         | 0         | 0         | 0         | 0         | 0         |
| 2.97357   | 3.04221   | 3.15411   | 2.1818    | 3.18836   | 2.52947   |
| 2.50598   | 1.04911   | 2.33864   | 2.08092   | 1.20595   | 0.897078  |
| 0.341025  | 0.141662  | 0.334166  | 0.431694  | 0.574609  | 0.414128  |
| 0.175436  | 0.218628  | 0.138139  | 0.308443  | 0.140761  | 0.0204841 |
| 1.4873    | 1.3905    | 2.20195   | 1.1014    | 2.57778   | 2.12578   |
| 178.461   | 198.428   | 190.656   | 206.801   | 156.617   | 148.964   |
| 7.08197   | 6.04623   | 14.8376   | 10.8321   | 24.2846   | 20.3617   |
| 264.277   | 290.086   | 271.776   | 291.162   | 213.358   | 226.19    |

|           |           |           |          |          |          |
|-----------|-----------|-----------|----------|----------|----------|
| 194.376   | 177.892   | 179.853   | 185.601  | 177.221  | 171.297  |
| 0         | 0         | 0         | 0        | 0        | 0        |
| 15.1755   | 15.4753   | 14.2164   | 12.2151  | 13.3232  | 14.2911  |
| 73.0321   | 81.9585   | 69.5822   | 80.4974  | 54.0993  | 69.8229  |
| 0.0461101 | 0.172387  | 0.116184  | 0.105065 | 0.199782 | 0.348888 |
| 15.2658   | 16.9364   | 12.3412   | 13.5787  | 18.1121  | 20.1409  |
| 9.38693   | 9.09394   | 10.5303   | 8.50751  | 9.78172  | 7.38103  |
| 0.0231707 | 0.0288753 | 0         | 0        | 0        | 0        |
| 6.55105   | 5.37932   | 6.58991   | 4.30067  | 10.3047  | 8.2542   |
| 53.6857   | 59.0593   | 55.8193   | 74.5676  | 52.6704  | 46.5523  |
| 6.50861   | 5.49829   | 6.90574   | 6.70529  | 8.18091  | 6.80975  |
| 0         | 0         | 0         | 0        | 0        | 0        |
| 1.25591   | 0.626079  | 1.68815   | 0.572447 | 0.635062 | 0.774326 |
| 52.772    | 49.9514   | 47.1621   | 41.2524  | 36.1381  | 39.8132  |
| 29.2311   | 26.6854   | 28.7715   | 24.5213  | 24.552   | 24.3294  |
| 0         | 0         | 0         | 0        | 0        | 0        |
| 0         | 0         | 0         | 0        | 0        | 0        |
| 14.6527   | 13.3038   | 10.8124   | 18.9591  | 19.2725  | 26.7492  |
| 156.05    | 174.332   | 152.532   | 194.97   | 129.529  | 144.325  |
| 6.8496    | 7.73703   | 6.84408   | 6.72726  | 7.27315  | 7.60241  |
| 0.0705841 | 0.0879618 | 0.0889257 | 0        | 0.267593 | 0.118682 |
| 0.294323  | 0.203769  | 0.350203  | 0.335317 | 0.460495 | 0.481134 |
| 0.623793  | 0.820558  | 0.523926  | 0.355339 | 1.12613  | 0.874051 |
| 37.7002   | 35.3244   | 38.7259   | 32.4831  | 38.6944  | 36.4863  |
| 7.5263    | 8.72723   | 8.97498   | 8.758    | 7.67278  | 6.93651  |
| 9.88177   | 11.6719   | 13.7138   | 13.0731  | 16.4407  | 13.2191  |
| 19.1452   | 17.9452   | 18.8776   | 15.5509  | 18.2986  | 19.1787  |
| 10.0155   | 10.8908   | 7.65328   | 7.72669  | 8.69278  | 8.89368  |
| 0.49566   | 0.910281  | 0.394395  | 0.624139 | 0.113029 | 0.350912 |
| 0         | 0         | 0         | 0        | 0        | 0        |
| 2.4868    | 2.16509   | 3.11155   | 2.969    | 2.10326  | 2.29116  |
| 0.93904   | 0.851634  | 0.910517  | 0.560121 | 1.33667  | 0.950661 |
| 0         | 0         | 0         | 0        | 0        | 0        |
| 1.898     | 1.98684   | 2.19991   | 1.70826  | 3.04269  | 2.32968  |
| 11.8987   | 12.3638   | 11.7606   | 10.8293  | 12.5369  | 11.5716  |
| 40.9019   | 38.5655   | 47.261    | 32.4178  | 41.6071  | 28.6337  |
| 25.7608   | 23.5644   | 29.2087   | 31.421   | 20.3818  | 22.475   |
| 1.39315   | 0.780005  | 1.22098   | 0.736088 | 1.61838  | 0.678978 |
| 1.88742   | 1.99024   | 0.670682  | 0.882176 | 0.366946 | 0.528925 |
| 1.69685   | 1.57891   | 2.9644    | 2.01052  | 2.42616  | 1.61677  |
| 1.16583   | 0.54973   | 0.873327  | 0.61026  | 0.443688 | 1.03311  |
| 0         | 0         | 0.0256348 | 0.046363 | 0        | 0        |
| 0         | 0         | 0         | 0        | 0        | 0        |

|           |           |          |           |           |           |
|-----------|-----------|----------|-----------|-----------|-----------|
| 42.5838   | 34.8631   | 27.9261  | 25.2535   | 24.2543   | 24.4203   |
| 8.09778   | 10.596    | 11.2222  | 7.84182   | 9.38535   | 5.78672   |
| 0         | 0         | 0        | 0         | 0         | 0         |
| 0         | 0         | 0        | 0         | 0         | 0         |
| 14.1732   | 12.9515   | 14.398   | 11.8626   | 12.7968   | 11.4099   |
| 19.5624   | 15.4661   | 17.1726  | 14.283    | 18.6377   | 16.694    |
| 0.161728  | 0.201546  | 0.305631 | 0.0921272 | 0.262771  | 0.543868  |
| 0.664872  | 0.720346  | 0.455261 | 0.447532  | 0.857432  | 0.735426  |
| 0.327704  | 0.157093  | 0.509456 | 0.30081   | 0.438013  | 0.179365  |
| 25.5393   | 22.7455   | 21.8295  | 21.4176   | 26.5372   | 26.2471   |
| 50.4414   | 50.9676   | 54.5708  | 65.5152   | 55.7446   | 63.4277   |
| 0.0972938 | 0         | 0        | 0.0369484 | 0.175645  | 0         |
| 13.077    | 13.1418   | 12.9554  | 13.2696   | 14.6052   | 12.7693   |
| 14.092    | 15.4151   | 13.2885  | 14.2547   | 11.9955   | 11.9271   |
| 5.9563    | 6.66432   | 8.21001  | 6.20094   | 10.1416   | 7.5336    |
| 0         | 0         | 0        | 0         | 0         | 0         |
| 31.7587   | 33.7115   | 32.9275  | 38.7701   | 30.5646   | 36.1397   |
| 0         | 0         | 0.174705 | 0         | 0         | 0         |
| 1.32361   | 1.55785   | 1.69844  | 1.6476    | 1.99126   | 1.4837    |
| 0.0204776 | 0.0765576 | 0        | 0         | 0.0443619 | 0.0344316 |
| 12.7503   | 13.5872   | 14.9098  | 11.9088   | 15.2219   | 13.2283   |
| 0         | 0         | 0.237859 | 0         | 0         | 0         |
| 320.938   | 436.463   | 289.451  | 493.623   | 547.115   | 468.521   |
| 2.90317   | 2.46124   | 7.24481  | 1.87639   | 6.69752   | 1.14409   |
| 0         | 0         | 0        | 0         | 0         | 0         |
| 41.3966   | 42.9618   | 39.0355  | 41.7959   | 43.5558   | 56.5023   |
| 1.08145   | 0.74872   | 2.42216  | 0.136897  | 2.47295   | 0.808163  |
| 0.284023  | 0.353949  | 0.39361  | 0.194149  | 0.830649  | 0.692466  |
| 60.6439   | 68.6701   | 54.5169  | 62.1971   | 49.3202   | 58.4161   |
| 0         | 0         | 0        | 0         | 0         | 0         |
| 19.9719   | 20.6481   | 21.9801  | 20.9993   | 19.9152   | 17.7357   |
| 9.45836   | 10.5331   | 10.1922  | 10.1797   | 10.8554   | 9.94809   |
| 0         | 0         | 0        | 0         | 0         | 0         |
| 4.18E-07  | 6.45E-07  | 1.06E-06 | 2.20E-07  | 3.18E-07  | 2.98E-07  |
| 0.0945665 | 0.117849  | 0.23828  | 0.053869  | 0.0512163 | 0.119255  |
| 8.35427   | 7.99285   | 6.22559  | 6.86368   | 9.38522   | 7.69692   |
| 12.4892   | 8.14726   | 10.3262  | 9.78226   | 9.65336   | 10.2539   |
| 11.9974   | 12.5794   | 15.5631  | 13.6089   | 19.9133   | 15.3341   |
| 5.25708   | 4.01535   | 2.35015  | 2.89805   | 1.46951   | 1.28313   |
| 15.9974   | 16.7906   | 16.0562  | 16.4522   | 15.9072   | 16.5016   |
| 10.6215   | 8.06053   | 6.4529   | 8.54728   | 7.53957   | 5.4102    |
| 5.01485   | 3.64244   | 6.57774  | 4.00826   | 10.2193   | 6.91006   |
| 0.0411385 | 0.0512667 | 0        | 0         | 0         | 0         |

|           |           |           |           |           |           |
|-----------|-----------|-----------|-----------|-----------|-----------|
| 9.16283   | 8.74562   | 11.1556   | 9.84652   | 9.2341    | 8.18869   |
| 5.54705   | 4.58221   | 4.8172    | 6.32792   | 5.76004   | 6.17717   |
| 2.8232    | 3.73732   | 3.56096   | 4.07827   | 3.33617   | 2.72682   |
| 7.0566    | 6.40165   | 7.51538   | 6.67953   | 7.89773   | 6.96392   |
| 12.6235   | 14.014    | 11.6813   | 13.7679   | 11.9781   | 13.7164   |
| 15.5356   | 13.786    | 17.1342   | 12.8777   | 17.2844   | 15.8887   |
| 3.40813   | 3.02918   | 4.79806   | 4.141     | 4.37669   | 2.8814    |
| 142.489   | 147.71    | 144.368   | 123.161   | 169.044   | 134.735   |
| 1.74898   | 1.25744   | 1.27122   | 1.14956   | 1.02009   | 1.01796   |
| 0.0692909 | 0         | 0.174593  | 0         | 0.0750545 | 0.0582537 |
| 28.4515   | 28.5468   | 31.525    | 27.095    | 30.5415   | 26.7408   |
| 2.45891   | 2.27588   | 2.75561   | 2.39832   | 3.1054    | 2.18997   |
| 126.045   | 135.44    | 100.39    | 114.349   | 76.0852   | 100.254   |
| 0.878021  | 0.687934  | 2.36398   | 4.6861    | 1.17811   | 1.2527    |
| 38.0308   | 186.099   | 20.8319   | 166.813   | 62.7828   | 6.95064   |
| 0.169369  | 0.167843  | 0.104204  | 0.0452038 | 0.150582  | 0.142391  |
| 6.98425   | 7.30267   | 7.13684   | 9.30296   | 11.6799   | 10.1484   |
| 1.09612   | 0.678452  | 0.628816  | 0.422589  | 1.56096   | 0.613682  |
| 7.03929   | 5.38717   | 6.91815   | 6.18951   | 6.32764   | 4.73932   |
| 0.152137  | 0.151674  | 0.0766679 | 0.138661  | 0.230708  | 0.153484  |
| 26.9178   | 25.5429   | 26.3869   | 26.8033   | 34.9065   | 31.7212   |
| 0         | 0         | 0         | 0.0623497 | 0         | 0         |
| 6.03953   | 5.08616   | 5.92286   | 4.42481   | 6.87463   | 5.32671   |
| 0.0257263 | 0         | 0.097234  | 0         | 0.111465  | 0.0432568 |
| 0.0219354 | 0.0273359 | 0         | 0         | 0         | 0         |
| 0         | 0.0263913 | 0         | 0         | 0         | 0         |
| 0.412019  | 0.616149  | 0.242239  | 0.0938813 | 0         | 0.346389  |
| 6.96872   | 7.82678   | 7.67576   | 6.77644   | 6.86871   | 6.09693   |
| 6.01554   | 5.65231   | 7.2507    | 5.66694   | 6.26359   | 4.45829   |
| 0         | 0         | 0         | 0         | 0         | 0.0343161 |
| 146.034   | 145.065   | 152.82    | 167.609   | 96.6593   | 118.709   |
| 0         | 0         | 0         | 0         | 0         | 0         |
| 1.16434   | 1.50473   | 1.65702   | 1.88163   | 2.82909   | 2.06618   |
| 0.359255  | 0.351218  | 0.131903  | 0.548035  | 0.182974  | 0.230598  |
| 1.37998   | 1.58215   | 0.869285  | 0.974754  | 1.55455   | 1.53142   |
| 6.13983   | 6.01972   | 6.90897   | 5.20196   | 5.71321   | 5.20308   |
| 22.4303   | 25.1079   | 27.0783   | 31.1389   | 23.0467   | 21.0492   |
| 4.29122   | 4.25557   | 4.91136   | 3.37404   | 4.38629   | 5.38611   |
| 0.184379  | 0.177208  | 0.0193533 | 0.122461  | 0.128575  | 0.0396059 |
| 23.7836   | 21.7555   | 20.6145   | 22.5917   | 20.7764   | 23.5066   |
| 0.0795248 | 0.0991036 | 0.225427  | 0.0302004 | 0.0430698 | 0.0167144 |
| 3.15524   | 3.19962   | 3.39057   | 2.00881   | 4.32238   | 3.53687   |
| 10.3406   | 6.72323   | 11.8207   | 7.21537   | 6.41542   | 6.75415   |



|           |          |           |          |            |           |
|-----------|----------|-----------|----------|------------|-----------|
| 0         | 0        | 0         | 0        | 0          | 0         |
| 7.43819   | 13.0001  | 8.26925   | 18.3405  | 18.9042    | 16.7821   |
| 19.7469   | 18.6072  | 20.4336   | 16.0949  | 22.6407    | 16.234    |
| 19.7198   | 24.012   | 19.3444   | 21.1802  | 18.8328    | 20.0588   |
| 2.27451   | 1.53735  | 3.20552   | 2.23994  | 3.71642    | 4.56984   |
| 0.194989  | 0.242996 | 0.245658  | 0.444296 | 0          | 0.49179   |
| 0         | 0        | 0         | 0        | 0          | 0         |
| 0.907335  | 0.205585 | 0.519595  | 0.187948 | 0.804115   | 0.554769  |
| 0.0089424 | 6.35E-07 | 0.182032  | 0.190855 | 8.64E-07   | 4.16E-07  |
| 7.92333   | 8.06911  | 8.90888   | 8.59012  | 7.42884    | 10.2425   |
| 0.253734  | 0.342553 | 0.426224  | 0.349299 | 0.801615   | 0.435523  |
| 17.8884   | 16.6334  | 14.1989   | 11.1295  | 12.0753    | 10.5777   |
| 1.32052   | 1.95339  | 1.46511   | 0.969976 | 1.63534    | 1.14373   |
| 0         | 0        | 0         | 0        | 0          | 0         |
| 0         | 0        | 0         | 0        | 0          | 0         |
| 0.206071  | 0.150275 | 0         | 0        | 0          | 0         |
| 18.5017   | 27.0502  | 37.0018   | 32.8406  | 59.2541    | 47.6295   |
| 0         | 0.617697 | 0         | 12.1411  | 0          | 0         |
| 30.4909   | 28.9984  | 27.2707   | 28.812   | 24.6343    | 28.3022   |
| 11.2927   | 12.1825  | 11.632    | 15.8099  | 12.9014    | 16.8465   |
| 4.8357    | 9.21811  | 3.53662   | 5.34582  | 4.23917    | 3.35053   |
| 7.23395   | 8.5114   | 7.40285   | 7.95004  | 6.28183    | 7.64082   |
| 0         | 0        | 0         | 0        | 0          | 0         |
| 5.21082   | 3.67345  | 3.0668    | 3.87828  | 5.08806    | 3.61336   |
| 189.107   | 182.571  | 183.411   | 189.06   | 130.257    | 174.522   |
| 0         | 0        | 0         | 0.156379 | 0          | 0         |
| 0.0610651 | 0        | 0         | 0        | 0          | 0.0513381 |
| 0         | 0        | 0         | 0        | 0          | 0         |
| 0         | 0        | 0         | 0        | 0          | 0         |
| 0.996642  | 0.909608 | 1.16147   | 1.21309  | 1.15006    | 0.701126  |
| 58.1516   | 57.5474  | 48.9345   | 46.8005  | 50.138     | 60.0959   |
| 0         | 0        | 0.0103018 | 0        | 0.00531429 | 0.0123741 |
| 12.6659   | 10.3945  | 8.12998   | 6.92171  | 8.96037    | 6.81032   |
| 766.24    | 802.416  | 627.557   | 672.025  | 496.795    | 658.006   |
| 0         | 0        | 0         | 0        | 0          | 0         |
| 21.1608   | 21.1145  | 19.6225   | 17.0289  | 17.2836    | 16.0487   |
| 5.56745   | 4.72782  | 3.34599   | 3.92606  | 3.36013    | 4.89805   |
| 120.386   | 110.557  | 135.008   | 114.31   | 114.267    | 105.288   |
| 0         | 0        | 0.0525413 | 0        | 0          | 0         |
| 0         | 0.258759 | 0         | 0        | 0          | 0.174565  |
| 55.2873   | 56.3433  | 40.7769   | 47.779   | 44.3348    | 45.6337   |
| 0.642632  | 0.489406 | 0.427301  | 0.223709 | 0.773428   | 0.630313  |
| 0         | 0        | 0         | 0        | 0          | 0         |

|           |           |           |           |           |           |
|-----------|-----------|-----------|-----------|-----------|-----------|
| 0.08714   | 0         | 0.0365946 | 0.0992771 | 0         | 0.122099  |
| 11.7218   | 10.1476   | 13.9756   | 11.1628   | 16.1244   | 12.0875   |
| 1.71631   | 1.46497   | 2.22154   | 1.76786   | 2.34294   | 1.91731   |
| 1.64386   | 0.906101  | 1.03551   | 1.04446   | 1.36969   | 0.983356  |
| 0         | 0         | 0         | 0         | 0         | 0         |
| 1.58045   | 1.49575   | 2.11257   | 0.930371  | 2.29981   | 1.1351    |
| 5.83959   | 5.95471   | 6.55414   | 4.77373   | 6.21192   | 4.45349   |
| 2.00457   | 2.39179   | 1.36124   | 1.86265   | 1.47834   | 1.21913   |
| 2.39859   | 2.77561   | 2.06255   | 2.38567   | 2.33005   | 2.73673   |
| 0         | 0         | 0.693004  | 0.313341  | 0         | 0         |
| 0.138356  | 0.172419  | 0.610081  | 0.210169  | 0.674391  | 0.407112  |
| 15.0319   | 15.0755   | 14.3169   | 19.4647   | 12.656    | 15.1243   |
| 0         | 0         | 0         | 0         | 0         | 0         |
| 6.19067   | 5.32173   | 6.75098   | 5.42773   | 8.03286   | 6.68829   |
| 0         | 0         | 0         | 0         | 0         | 0         |
| 2.57263   | 1.95435   | 1.68614   | 1.60558   | 2.6766    | 1.87777   |
| 0.0131463 | 0.0491486 | 0         | 0.0599093 | 0.0142398 | 0.0331567 |
| 0.177739  | 0.126545  | 0.223925  | 0.151891  | 0.116961  | 0.170172  |
| 548.823   | 585.071   | 508.27    | 534.65    | 377.267   | 482.246   |
| 25.3693   | 18.4349   | 20.3947   | 19.2372   | 42.7458   | 30.3822   |
| 0         | 0         | 0         | 1.01771   | 0         | 0         |
| 0.0197544 | 0.0492359 | 0.0248877 | 0         | 0         | 0.0166078 |
| 42.9917   | 41.5303   | 40.0906   | 39.0495   | 52.9222   | 55.5021   |
| 7.96664   | 7.78539   | 10.7994   | 6.92279   | 9.88676   | 8.64653   |
| 8.24766   | 8.01957   | 6.98696   | 7.7586    | 7.30399   | 7.23849   |
| 8.87589   | 10.6367   | 11.5399   | 11.1508   | 11.9082   | 11.4287   |
| 6.02161   | 6.92534   | 6.55735   | 6.75084   | 6.90412   | 7.51287   |
| 12.8802   | 14.314    | 11.9943   | 8.36535   | 18.0569   | 16.3805   |
| 0         | 0         | 0         | 0         | 0         | 0         |
| 1.82538   | 2.46523   | 1.59428   | 1.9619    | 1.30445   | 1.18376   |
| 0         | 0         | 0         | 0         | 0         | 0         |
| 0         | 0         | 0         | 0         | 0         | 0         |
| 1.52065   | 2.32045   | 1.25114   | 1.55567   | 1.98329   | 2.1916    |
| 36.7348   | 39.267    | 29.7497   | 37.329    | 19.9835   | 24.3009   |
| 0.0248926 | 0         | 0.0627221 | 0.0567194 | 0         | 0         |
| 0.0230477 | 0.0861661 | 0.116147  | 0.0919025 | 0.062412  | 0.0678177 |
| 2.29345   | 2.086     | 0.903798  | 1.1145    | 1.6012    | 1.65399   |
| 0         | 0.188824  | 0         | 0         | 0         | 0.127385  |
| 142.568   | 137.168   | 126.864   | 119.655   | 121.528   | 124.283   |
| 0.0180069 | 0.293765  | 0.102088  | 0.307632  | 0.0877719 | 0.0946173 |
| 1.31826   | 1.69259   | 1.66081   | 1.25156   | 1.44954   | 1.42732   |
| 1.82017   | 2.24895   | 2.15358   | 1.7631    | 1.08612   | 1.35783   |
| 0.802308  | 0.551633  | 0.906227  | 1.19773   | 1.25862   | 1.16295   |

|          |           |           |          |           |           |
|----------|-----------|-----------|----------|-----------|-----------|
| 5.11818  | 3.55848   | 4.08216   | 3.68177  | 5.79704   | 4.49937   |
| 0        | 0         | 0         | 0        | 0         | 0         |
| 0        | 0         | 0         | 0        | 0         | 0         |
| 12.9148  | 14.8128   | 14.991    | 22.7571  | 13.564    | 11.6972   |
| 0        | 0         | 0.0292709 | 0        | 0         | 0         |
| 10.427   | 10.2344   | 10.0596   | 8.74124  | 11.2303   | 10.1526   |
| 10.1617  | 9.31846   | 9.9842    | 13.9799  | 11.9069   | 9.67144   |
| 0.445805 | 0.555561  | 0.561649  | 0.507898 | 0.482887  | 0.936984  |
| 16.0716  | 18.3682   | 18.2194   | 15.7171  | 12.4273   | 13.2898   |
| 44.1417  | 40.5332   | 46.2906   | 47.6888  | 45.2375   | 48.0205   |
| 16.8914  | 14.6109   | 12.8443   | 16.1819  | 16.7404   | 9.79837   |
| 25.682   | 26.8362   | 35.2528   | 29.8759  | 30.0863   | 29.7591   |
| 0        | 0         | 0         | 0        | 0         | 0         |
| 0.226247 | 0.225559  | 0.285039  | 0.283536 | 0.29408   | 0.20923   |
| 0.030524 | 0.038039  | 0.115367  | 0.104327 | 0.033063  | 0         |
| 1.20981  | 1.50766   | 1.15091   | 1.37831  | 1.55113   | 2.80221   |
| 0        | 0         | 0         | 0        | 0         | 0         |
| 0        | 0         | 0         | 0        | 0         | 0         |
| 34.1025  | 30.0736   | 33.9904   | 28.8079  | 21.5795   | 29.8345   |
| 0.294232 | 0.334961  | 0.534754  | 0.277234 | 0.637412  | 0.216444  |
| 0.061852 | 0         | 0.0779245 | 0        | 0.0669968 | 0         |
| 6.8673   | 7.62469   | 8.08735   | 8.23193  | 9.47315   | 9.70948   |
| 0        | 0         | 0         | 0        | 0.024497  | 0.0190134 |
| 0.312176 | 167.674   | 6.29273   | 565.612  | 49.3688   | 99.381    |
| 8.70573  | 10.5882   | 8.32476   | 11.2303  | 11.4399   | 7.89164   |
| 1023.62  | 1198.78   | 1064.73   | 1035.99  | 1024.92   | 1134.24   |
| 0        | 0         | 0         | 0        | 0         | 0         |
| 4.16229  | 4.2254    | 5.12604   | 3.95169  | 4.85466   | 3.8728    |
| 3.44775  | 2.33097   | 3.88881   | 2.9333   | 3.85091   | 3.66362   |
| 0.824496 | 0.762084  | 0.614264  | 1.59877  | 1.28899   | 0.949218  |
| 0        | 0         | 0         | 0        | 0         | 0         |
| 0        | 0         | 0         | 0        | 0         | 0         |
| 20.376   | 19.2077   | 23.1643   | 21.1668  | 24.9904   | 24.3511   |
| 9.29934  | 14.8453   | 9.03056   | 30.4033  | 10.2626   | 13.6233   |
| 0.069596 | 0.0578203 | 0.0292269 | 0        | 0.125642  | 0.0585102 |
| 0        | 0         | 0         | 0        | 0         | 0         |
| 0.79549  | 0.844473  | 0.631015  | 0.604192 | 0.510612  | 0.619239  |
| 1.02176  | 1.20823   | 1.3579    | 1.52692  | 1.83584   | 1.05042   |
| 18.7482  | 19.6497   | 15.3833   | 21.5238  | 14.8923   | 22.3091   |
| 11.1113  | 10.1817   | 5.76442   | 6.6273   | 4.46022   | 5.22018   |
| 8.90797  | 8.80904   | 11.8453   | 7.69362  | 12.0128   | 7.60443   |
| 3.99688  | 3.31084   | 2.42888   | 2.67858  | 4.83868   | 4.84268   |
| 0        | 0         | 0         | 0        | 0         | 0         |

|           |           |           |           |            |            |
|-----------|-----------|-----------|-----------|------------|------------|
| 0         | 0         | 0         | 0         | 0.00913344 | 0.00472596 |
| 3.54847   | 3.22694   | 4.89344   | 4.2066    | 5.34992    | 3.91046    |
| 25.3465   | 20.8235   | 38.7538   | 17.238    | 31.155     | 16.7303    |
| 0.0829283 | 0         | 0         | 0         | 0          | 0.104578   |
| 0.29819   | 0.318517  | 0.26834   | 0.291191  | 0.322993   | 0.322318   |
| 0         | 0         | 0.181354  | 0         | 0          | 0          |
| 1.34803   | 2.15029   | 2.10592   | 4.54594   | 2.7451     | 3.12793    |
| 2.87708   | 2.12694   | 5.77494   | 1.27779   | 5.17638    | 0.983916   |
| 0.084104  | 0.042822  | 0.0643343 | 0.0198178 | 0.113461   | 0.0450382  |
| 0         | 0         | 0         | 0         | 0          | 0          |
| 4.29281   | 5.4136    | 1.66474   | 1.95191   | 0.916675   | 1.50594    |
| 9.26826   | 9.08068   | 13.7692   | 11.7955   | 20.941     | 25.4137    |
| 4.97671   | 4.6775    | 4.57095   | 4.51922   | 4.64877    | 4.0009     |
| 0.273256  | 0.153338  | 0.14954   | 0.243271  | 0.19825    | 0.18654    |
| 0         | 0         | 0         | 0         | 0          | 0          |
| 0.0725179 | 0.271115  | 0         | 0.330474  | 0.942599   | 0.304833   |
| 0.44278   | 0.551791  | 1.67351   | 0.630564  | 0.359707   | 0.837563   |
| 7.69236   | 6.0844    | 8.16455   | 8.32359   | 11.0145    | 8.43081    |
| 11.6896   | 11.2219   | 11.8008   | 8.47436   | 12.8609    | 9.02828    |
| 8.34013   | 7.66468   | 8.93869   | 6.35897   | 8.51067    | 8.93376    |
| 10.4484   | 8.2411    | 15.3712   | 7.94842   | 13.6096    | 5.30945    |
| 5.64794   | 5.30809   | 17.0142   | 9.16292   | 9.84793    | 9.54959    |
| 1.46079   | 1.14116   | 1.09873   | 1.78845   | 1.18082    | 1.31975    |
| 0         | 0         | 0         | 0         | 0          | 0          |
| 232.576   | 177.9     | 379.295   | 287.126   | 316.857    | 269.923    |
| 0         | 0         | 0         | 0         | 0          | 0          |
| 8.79814   | 8.09218   | 8.97356   | 7.21783   | 8.21133    | 7.28914    |
| 0.215309  | 0.306195  | 0.290395  | 0.193528  | 0.135239   | 0.117513   |
| 1.81344   | 2.7241    | 2.09943   | 2.9706    | 2.34652    | 2.15914    |
| 0         | 0         | 0         | 0         | 0          | 0          |
| 17.3529   | 17.1983   | 15.6049   | 14.3528   | 19.1608    | 15.0519    |
| 6.71974   | 7.55874   | 6.49069   | 6.0254    | 5.66673    | 5.77584    |
| 6.85456   | 4.91756   | 6.70212   | 5.87832   | 9.35825    | 5.58735    |
| 465.127   | 559.007   | 453.432   | 393.481   | 594.753    | 628.692    |
| 0.342043  | 0.472225  | 0.194875  | 0.250642  | 0.336909   | 0.156989   |
| 0.678344  | 0.619339  | 1.74823   | 1.48765   | 0.490849   | 0.0631638  |
| 3.04169   | 3.58574   | 4.55708   | 3.62151   | 4.45229    | 3.20224    |
| 9.63607   | 8.54031   | 12.6367   | 10.6215   | 10.7014    | 9.01754    |
| 0         | 0         | 0         | 0         | 0          | 0          |
| 2.59809   | 2.86179   | 4.86797   | 6.51129   | 4.57803    | 3.14065    |
| 10.2987   | 9.58866   | 11.8296   | 9.43867   | 13.1413    | 10.6908    |
| 2.83942   | 4.15772   | 1.72156   | 3.37643   | 1.15335    | 1.5964     |
| 0.0762168 | 0.0474906 | 0.096022  | 0.0144721 | 0.137594   | 0.0427176  |

|           |          |           |          |           |           |
|-----------|----------|-----------|----------|-----------|-----------|
| 27.6356   | 32.812   | 29.0736   | 29.2423  | 23.009    | 18.6649   |
| 17.5563   | 17.8428  | 21.7895   | 18.6478  | 25.6851   | 20.4622   |
| 0.679527  | 0.931481 | 1.49967   | 2.80202  | 0.515751  | 0.656967  |
| 5.81275   | 5.68233  | 5.10876   | 3.37076  | 7.08799   | 6.36459   |
| 37.1762   | 44.9165  | 47.4078   | 45.7116  | 43.6242   | 45.0395   |
| 0         | 0        | 0         | 0        | 0         | 0         |
| 16.2256   | 16.452   | 20.0973   | 16.5823  | 19.3029   | 17.6319   |
| 2.57233   | 2.39768  | 4.73428   | 5.4434   | 5.38904   | 4.93278   |
| 0         | 0        | 0         | 0        | 0         | 0         |
| 0         | 0        | 0         | 0        | 0         | 0         |
| 10.0512   | 11.1262  | 9.97698   | 10.7572  | 12.4956   | 14.0997   |
| 0.208566  | 0.129958 | 0.394145  | 0.475232 | 0.225915  | 0.438361  |
| 468.428   | 531.668  | 488.151   | 535.231  | 464.892   | 548.97    |
| 18.6865   | 16.0467  | 12.9384   | 13.2029  | 12.36     | 13.0168   |
| 0         | 0        | 0.0360326 | 0        | 0.0929387 | 0         |
| 6.13085   | 4.79089  | 3.91414   | 4.02162  | 10.8148   | 2.97053   |
| 25.4026   | 27.5474  | 27.7467   | 24.2796  | 24.1864   | 20.86     |
| 2.72259   | 2.97136  | 2.11432   | 2.37752  | 2.28137   | 2.47885   |
| 277.546   | 292.207  | 273.412   | 262.422  | 246.417   | 298.031   |
| 9.52241   | 9.78487  | 9.41853   | 11.2294  | 8.95727   | 8.07579   |
| 0         | 0        | 0         | 0        | 0         | 0         |
| 13.9673   | 13.5035  | 16.6636   | 13.0778  | 20.0419   | 15.1575   |
| 34.154    | 38.2635  | 34.1816   | 31.379   | 37.5908   | 40.0428   |
| 11.2983   | 10.7074  | 10.7074   | 9.94138  | 12.3902   | 10.6851   |
| 0.87729   | 0.744796 | 0.628616  | 0.793339 | 0.451375  | 0.58082   |
| 6.26E-38  | 2.30E-26 | 5.80E-73  | 0.157016 | 7.01E-10  | 6.39E-16  |
| 10.3379   | 10.8928  | 10.6587   | 11.827   | 11.1978   | 10.3605   |
| 4.40794   | 5.85312  | 4.35034   | 4.0437   | 5.75819   | 5.21221   |
| 2.10754   | 1.56467  | 1.88312   | 1.175    | 2.31523   | 1.62104   |
| 3.76401   | 3.28566  | 4.08652   | 3.26067  | 4.69712   | 3.45611   |
| 0.0501652 | 0.250063 | 0         | 0.114305 | 0         | 0.084349  |
| 0.438958  | 0.415521 | 0.575832  | 0.443184 | 0.527246  | 0.368627  |
| 4.32045   | 4.47383  | 4.29839   | 3.96822  | 5.21052   | 3.84195   |
| 0.275119  | 0.51428  | 0.404379  | 0.470158 | 0.447006  | 0.385494  |
| 0         | 0        | 0         | 0        | 0         | 0         |
| 304.016   | 305.909  | 271.984   | 299.595  | 206.049   | 244.375   |
| 10.8185   | 10.1677  | 10.7135   | 7.27548  | 12.1985   | 7.79787   |
| 0.0332358 | 0        | 0.0418722 | 0        | 0.0360003 | 0         |
| 0.10724   | 0        | 0.135107  | 0        | 0.232321  | 0.0450791 |
| 7.70912   | 7.38654  | 8.25079   | 6.56275  | 6.29461   | 5.90019   |
| 0         | 0        | 0         | 0        | 0.128019  | 0         |
| 187.967   | 167.407  | 210.727   | 175.16   | 195.094   | 201.277   |
| 0         | 0        | 0         | 0        | 0         | 0         |

|           |           |           |           |           |           |
|-----------|-----------|-----------|-----------|-----------|-----------|
| 20.2498   | 21.8075   | 20.3115   | 21.2819   | 17.0681   | 19.3295   |
| 3.96374   | 3.98685   | 4.44979   | 3.10463   | 5.50941   | 3.2871    |
| 0.0977375 | 0.52739   | 0.13327   | 0.909365  | 0.114581  | 0.474421  |
| 0         | 0         | 0         | 0         | 0         | 0         |
| 2.15164   | 1.32006   | 3.3363    | 1.62164   | 3.29871   | 1.75325   |
| 5.17781   | 6.05534   | 6.8896    | 6.26683   | 7.11717   | 6.79392   |
| 0.0384028 | 0.0478575 | 0.0725728 | 0.0437516 | 0.0415971 | 0.0322857 |
| 75.8342   | 73.0945   | 71.3512   | 71.5622   | 64.9366   | 67.581    |
| 3.71059   | 3.03872   | 3.9235    | 2.35527   | 4.59341   | 3.30894   |
| 28.7666   | 29.4704   | 29.1403   | 31.3708   | 27.9663   | 30.5301   |
| 2.71119   | 2.01057   | 2.58743   | 2.18101   | 2.73324   | 2.86194   |
| 1.2513    | 1.17878   | 1.37934   | 0.84009   | 1.20204   | 0.839055  |
| 2.00703   | 1.28056   | 1.77921   | 0.912524  | 2.06976   | 1.48098   |
| 1.5765    | 2.34665   | 3.48958   | 2.27005   | 2.56145   | 2.19977   |
| 4.19067   | 4.54445   | 5.61909   | 4.867     | 4.26867   | 3.56072   |
| 3.92472   | 3.00324   | 4.81446   | 4.11837   | 6.07844   | 4.10998   |
| 1.09952   | 0.708728  | 0.42996   | 0.388768  | 1.00631   | 0.685342  |
| 0.293098  | 0.274271  | 0.30795   | 0.390983  | 0.203684  | 0.165948  |
| 1.59394   | 1.28529   | 2.48063   | 1.6023    | 2.0312    | 2.20713   |
| 91.0883   | 87.2138   | 69.846    | 67.2195   | 53.4576   | 52.2619   |
| 91.3582   | 106.049   | 87.054    | 94.8369   | 67.0599   | 73.687    |
| 31.5977   | 30.6456   | 26.438    | 22.4992   | 17.2618   | 20.01     |
| 0.24649   | 0         | 0         | 0         | 0         | 0         |
| 0.475301  | 0.408153  | 0.155992  | 0.127412  | 0.121138  | 0.107453  |
| 88.1409   | 73.0044   | 85.9143   | 67.6322   | 96.8109   | 129.559   |
| 19.542    | 17.3567   | 25.6944   | 20.0341   | 29.9817   | 24.8997   |
| 0         | 0         | 0         | 0         | 0         | 0         |
| 32.2229   | 35.7023   | 39.8699   | 44.4604   | 34.2164   | 37.1218   |
| 4.87172   | 4.28216   | 4.76346   | 4.85994   | 2.52502   | 3.35557   |
| 0.204051  | 0.127144  | 0.128537  | 0         | 0.397843  | 0.120084  |
| 49.0906   | 54.0662   | 47.7649   | 55.9685   | 53.3275   | 59.0821   |
| 2.05794   | 1.53493   | 1.62055   | 1.23032   | 1.35022   | 0.900759  |
| 0.967108  | 0.708946  | 1.79179   | 1.68512   | 0.831879  | 2.2957    |
| 3.34983   | 3.90957   | 1.31747   | 1.67787   | 0.906173  | 2.81624   |
| 0         | 0         | 0         | 0         | 0         | 0         |
| 57.2614   | 64.0604   | 60.4024   | 62.2883   | 53.4681   | 66.639    |
| 0.384551  | 0.171153  | 0.346056  | 0.312938  | 0.148764  | 0.392575  |
| 2.32496   | 1.86691   | 2.92912   | 2.74591   | 3.28626   | 2.74932   |
| 8.4637    | 7.95479   | 6.49313   | 8.24196   | 9.42379   | 8.74535   |
| 4.82413   | 4.22399   | 4.13125   | 5.38828   | 4.32034   | 5.28833   |
| 54.2217   | 45.0019   | 64.5323   | 46.9968   | 55.6886   | 50.4617   |
| 0         | 0         | 2.94438   | 6.49817   | 0         | 0.794325  |
| 0         | 0         | 0         | 0         | 0         | 0         |

|           |           |           |          |           |           |
|-----------|-----------|-----------|----------|-----------|-----------|
| 1.6187    | 1.8056    | 2.2241    | 1.70828  | 3.09936   | 1.88149   |
| 2.06416   | 2.3312    | 1.67952   | 2.1067   | 1.56044   | 1.87998   |
| 0         | 0         | 0         | 0        | 0         | 0         |
| 12.5977   | 15.3398   | 11.6523   | 11.7267  | 9.13054   | 9.67546   |
| 0.457035  | 0.427167  | 0.863696  | 0.976298 | 0.92822   | 0.960587  |
| 0.118604  | 0.20785   | 0.129708  | 0.208524 | 0.630226  | 0.236354  |
| 15.091    | 16.4019   | 16.5093   | 16.7219  | 15.0028   | 17.9591   |
| 23.4364   | 20.7921   | 22.7212   | 22.3484  | 21.9407   | 26.1415   |
| 0.219505  | 0         | 0         | 0        | 0         | 0         |
| 42.5694   | 44.4629   | 28.4666   | 25.951   | 48.354    | 42.1947   |
| 0.49486   | 0.560672  | 0.657208  | 0.533055 | 0.341234  | 0.22712   |
| 5.34059   | 4.35655   | 7.97649   | 5.51362  | 11.1379   | 7.88844   |
| 8.2923    | 7.33302   | 7.66974   | 6.64594  | 6.66766   | 6.11605   |
| 1.11976   | 1.87848   | 2.17036   | 1.59465  | 1.79603   | 1.70175   |
| 0.404795  | 0.807129  | 0.453317  | 2.05537  | 1.46905   | 0.990012  |
| 0         | 0         | 0.152657  | 0        | 0.131249  | 0         |
| 0         | 0         | 0         | 0        | 0         | 0         |
| 0.095428  | 0         | 0.0601127 | 0        | 0.0516828 | 0.0401137 |
| 56.1023   | 61.8265   | 54.4658   | 59.906   | 50.1641   | 59.2348   |
| 0.184578  | 0.133171  | 0.33065   | 0.17     | 0.192267  | 0.149229  |
| 0         | 0         | 0         | 0        | 0         | 0         |
| 26.816    | 27.3829   | 16.0349   | 18.2394  | 22.9338   | 32.5718   |
| 10.5046   | 9.7383    | 8.47316   | 11.3839  | 11.309    | 12.1162   |
| 0         | 0         | 0         | 0        | 0         | 0         |
| 0         | 0         | 29.1055   | 0        | 0         | 0         |
| 0.393268  | 0.49009   | 0.754987  | 0.533385 | 0.791105  | 0.740056  |
| 5.25072   | 5.19414   | 6.16901   | 5.46406  | 5.30675   | 5.12508   |
| 0.262142  | 0.154007  | 0.287799  | 0.319987 | 0.316398  | 0.261315  |
| 5.96883   | 6.42875   | 6.23897   | 7.18194  | 5.03254   | 3.18372   |
| 0         | 0         | 0         | 0        | 0         | 0         |
| 0.917494  | 0.883521  | 2.15419   | 1.37788  | 1.80693   | 1.22715   |
| 27.3723   | 22.8087   | 28.6649   | 24.489   | 29.1799   | 25.5655   |
| 31.3331   | 35.4233   | 27.5706   | 27.198   | 25.732    | 26.4148   |
| 42.4218   | 46.5543   | 41.8424   | 42.7481  | 41.9979   | 45.443    |
| 35.3408   | 32.6007   | 29.5711   | 27.9468  | 23.2908   | 31.8309   |
| 104.701   | 106.92    | 105.143   | 107.526  | 81.2515   | 86.6334   |
| 0.0657333 | 0         | 0.0828144 | 0.224666 | 0.071201  | 0.110526  |
| 0         | 0.0215289 | 0         | 0.123011 | 0.0374252 | 0         |
| 15.0597   | 11.2565   | 12.1245   | 13.852   | 15.2      | 14.1836   |
| 0.119661  | 0         | 1.20605   | 0.545313 | 0.129615  | 0.503004  |
| 0         | 0         | 0         | 0        | 0         | 0         |
| 7.56932   | 7.63233   | 5.48578   | 4.80913  | 4.79565   | 4.57561   |
| 0.068904  | 0         | 0.0976609 | 0        | 0.0746354 | 0.0144818 |

|           |           |           |           |           |           |
|-----------|-----------|-----------|-----------|-----------|-----------|
| 9.06618   | 10.4775   | 8.58868   | 8.83879   | 7.22582   | 7.39932   |
| 85.1935   | 89.8756   | 91.5035   | 98.2401   | 69.4486   | 84.1423   |
| 0.449595  | 0.396868  | 0.212409  | 0.490874  | 0.0405827 | 0.125993  |
| 12.0818   | 11.8726   | 10.3264   | 11.9455   | 9.80067   | 13.4685   |
| 0.413218  | 0.545243  | 0.811515  | 0.761543  | 0.526576  | 0.41892   |
| 5.84875   | 4.89409   | 5.92631   | 4.95967   | 5.42314   | 3.44869   |
| 41.6532   | 38.9597   | 39.8452   | 47.6      | 34.3907   | 40.3899   |
| 139.143   | 143.602   | 135.027   | 110.222   | 55.7496   | 90.3422   |
| 96.971    | 102.328   | 109.892   | 97.9698   | 96.0558   | 87.7958   |
| 0         | 0         | 0         | 0         | 0         | 0         |
| 1.41698   | 0.884951  | 1.55991   | 0.856396  | 0.874653  | 0.825799  |
| 0.0121612 | 0.0757761 | 0.12257   | 0.152405  | 0.0790364 | 0.0306721 |
| 0.0846228 | 0.0351523 | 0.0710749 | 0.160682  | 0.15277   | 0.047429  |
| 0         | 0         | 0         | 0         | 0         | 0         |
| 0.18577   | 0.158256  | 0.115192  | 0.0925928 | 0.0990398 | 0.0683271 |
| 0         | 0.107086  | 0         | 0         | 0         | 0         |
| 11.6383   | 10.8117   | 12.8791   | 11.0341   | 16.1827   | 13.2883   |
| 0.0732877 | 0.102748  | 0.166198  | 0.0208737 | 0.18145   | 0.0616139 |
| 6.47458   | 4.04467   | 3.84753   | 3.11373   | 4.19261   | 4.30629   |
| 6.74044   | 5.70796   | 7.15644   | 4.9676    | 8.81767   | 6.03671   |
| 9.62052   | 22.2322   | 3.29488   | 13.1242   | 4.38413   | 4.37123   |
| 14.3129   | 9.18443   | 13.6586   | 9.94039   | 18.3387   | 10.7533   |
| 0.20234   | 1.26078   | 0.254919  | 2.76627   | 0         | 0.765494  |
| 0.273896  | 0.170664  | 0.207041  | 0.124818  | 0.474686  | 0.414482  |
| 45.8573   | 48.0151   | 44.6615   | 38.6144   | 53.0651   | 50.9229   |
| 6.78134   | 7.32564   | 7.33626   | 5.81539   | 4.99009   | 4.49276   |
| 0         | 0         | 0         | 0.516356  | 0.122732  | 0         |
| 1.47E-07  | 1.51E-07  | 1.10E-07  | 1.05E-07  | 4.32E-07  | 4.57E-08  |
| 2.42516   | 1.37452   | 2.13111   | 1.5433    | 2.60397   | 1.97379   |
| 0         | 0         | 0         | 0         | 0         | 0         |
| 0.348196  | 0.41785   | 0.389934  | 0.264463  | 0.335252  | 0.227681  |
| 10.2499   | 10.3784   | 11.0887   | 9.67841   | 13.8178   | 9.60074   |
| 6.91155   | 4.21135   | 7.53467   | 5.35535   | 6.67835   | 4.93346   |
| 11.9406   | 11.9589   | 9.78907   | 10.036    | 11.9959   | 10.7036   |
| 0         | 0         | 0         | 0         | 0         | 0         |
| 0.0788715 | 0         | 0.2981    | 0.089857  | 0.170864  | 0.331541  |
| 26.9203   | 26.2007   | 31.2217   | 28.1722   | 26.6848   | 27.2469   |
| 56.4928   | 51.956    | 54.5758   | 48.133    | 53.3256   | 45.6508   |
| 0         | 0         | 0         | 0         | 0         | 0         |
| 2.27776   | 2.12111   | 2.14435   | 1.96765   | 2.26388   | 2.0412    |
| 0         | 0         | 0         | 0         | 0         | 0         |
| 1.11388   | 1.66345   | 1.42652   | 1.8039    | 1.20653   | 1.02159   |
| 5.95529   | 4.7849    | 5.34739   | 5.41591   | 5.03604   | 4.04048   |



|          |           |          |           |           |          |
|----------|-----------|----------|-----------|-----------|----------|
| 0        | 0         | 0        | 0         | 0         | 0        |
| 0.561241 | 0.591816  | 0.435128 | 0.590227  | 0.732628  | 0.435547 |
| 0        | 0         | 0        | 0         | 0         | 0        |
| 10.042   | 9.09388   | 12.3455  | 10.8471   | 11.081    | 11.8962  |
| 0        | 0         | 0        | 0         | 0         | 0        |
| 0.997465 | 1.66774   | 1.61995  | 0.897565  | 1.81881   | 1.87467  |
| 3.16969  | 2.25718   | 0.285239 | 0.515882  | 0.980955  | 0.76137  |
| 5.64574  | 4.20236   | 4.31037  | 3.7422    | 7.18687   | 4.66833  |
| 1.98304  | 1.96299   | 2.43929  | 2.46754   | 2.46283   | 2.19925  |
| 0        | 0         | 0        | 0         | 0         | 0        |
| 0        | 0         | 0        | 0         | 0         | 0        |
| 14.4014  | 13.6422   | 14.8388  | 14.4145   | 13.7284   | 15.6917  |
| 0        | 0         | 0        | 0         | 0         | 0        |
| 0        | 0         | 0.15729  | 0         | 0         | 0        |
| 6.06872  | 6.1354    | 6.43753  | 7.23147   | 3.78994   | 4.86804  |
| 0.169437 | 0.663752  | 0.42972  | 0.240908  | 0.390975  | 0        |
| 0        | 0.0156678 | 0        | 0.0572946 | 0.0408549 | 0        |
| 1.55162  | 1.0153    | 1.44168  | 1.14903   | 2.26893   | 1.05995  |
| 0        | 0         | 0        | 0         | 0         | 0        |
| 0.217627 | 0         | 0        | 0         | 0.235729  | 0.274442 |
| 6.60E-09 | 1.39E-08  | 6.92E-09 | 2.45E-09  | 1.89E-09  | 1.91E-09 |
| 1.01217  | 1.64593   | 1.4307   | 1.29378   | 1.3504    | 2.03397  |
| 0        | 0         | 0        | 0         | 0         | 0        |
| 0        | 38.726    | 0        | 2150.77   | 0         | 99.603   |
| 36.6783  | 39.3017   | 45.1287  | 43.0189   | 46.7416   | 51.8665  |
| 16.0922  | 16.0472   | 18.3582  | 17.3592   | 19.6439   | 18.2161  |
| 6.4066   | 5.66981   | 9.42798  | 5.2612    | 8.79356   | 5.67811  |
| 21.545   | 22.4772   | 21.3339  | 17.3966   | 22.3896   | 18.0412  |
| 15.5349  | 17.6307   | 21.5605  | 24.8837   | 18.3838   | 19.1865  |
| 131.627  | 70.3731   | 23.2444  | 37.4858   | 99.7115   | 78.1282  |
| 0        | 0         | 0        | 0         | 0         | 0        |
| 14.8909  | 16.9943   | 8.12308  | 9.99769   | 12.5582   | 14.1756  |
| 0        | 0         | 0        | 0         | 0         | 0        |
| 14.7456  | 13.9652   | 14.2594  | 14.3629   | 15.2741   | 14.5322  |
| 21.2927  | 20.3437   | 22.129   | 19.5823   | 21.8341   | 17.7114  |
| 10.7167  | 8.79583   | 8.8364   | 7.6995    | 7.22459   | 7.27391  |
| 0        | 0         | 0        | 0         | 0         | 0        |
| 0        | 0         | 0        | 0.112044  | 0         | 0        |
| 0        | 0         | 0        | 0         | 0         | 0        |
| 2.20237  | 1.47032   | 2.57648  | 0.806505  | 1.36318   | 0.991908 |
| 13.6602  | 9.91041   | 10.5305  | 6.3666    | 9.31243   | 6.80623  |
| 12.2757  | 12.1275   | 11.5569  | 10.0442   | 3.99686   | 4.61005  |
| 35.5286  | 39.0475   | 40.6946  | 36.3238   | 78.6466   | 58.0329  |

|           |           |           |           |           |           |
|-----------|-----------|-----------|-----------|-----------|-----------|
| 0         | 0         | 0.150756  | 0         | 0.129615  | 0.100601  |
| 1.99297   | 2.13016   | 2.06887   | 1.44568   | 3.04812   | 1.97046   |
| 0         | 0.220603  | 0.17778   | 0.823755  | 0.421254  | 0.0707991 |
| 53.9773   | 49.9244   | 57.2157   | 54.9733   | 63.008    | 58.9159   |
| 0.0651928 | 0.121865  | 0.0821335 | 0         | 0         | 0         |
| 54.7825   | 55.5747   | 49.9461   | 53.8503   | 47.6489   | 55.9683   |
| 38.7751   | 38.9053   | 45.8378   | 35.1509   | 38.6695   | 31.7134   |
| 2.63275   | 1.4594    | 1.56489   | 1.79404   | 1.77146   | 1.39926   |
| 0         | 0         | 0         | 0         | 0         | 0         |
| 0         | 0         | 0         | 0         | 0         | 0         |
| 6.2122    | 11.5924   | 11.8764   | 17.8372   | 9.99998   | 18.0902   |
| 0         | 0         | 0         | 0         | 0         | 0         |
| 0.0150651 | 0         | 0         | 0         | 0         | 0         |
| 15.8701   | 17.2696   | 17.8893   | 16.0042   | 17.0256   | 15.3637   |
| 0.385714  | 0.977668  | 1.04464   | 0.794481  | 0.332177  | 0.434768  |
| 0.106921  | 0.0870169 | 0.065977  | 0.0932245 | 0.143587  | 0.0440271 |
| 19.949    | 18.1002   | 20.9441   | 18.2419   | 18.7652   | 18.5368   |
| 1.27851   | 1.91206   | 2.60573   | 2.0697    | 0.830901  | 1.52007   |
| 0         | 0         | 0         | 0         | 0         | 0         |
| 0         | 0         | 0         | 0         | 0         | 0         |
| 0.0228038 | 0.0284181 | 0.0287295 | 0.02598   | 0         | 0.0191715 |
| 0.310131  | 0.225449  | 0.47483   | 0         | 0.444579  | 0.345061  |
| 2.85913   | 3.25555   | 3.19361   | 2.76504   | 3.53952   | 2.55501   |
| 0.11839   | 0.168614  | 0.170462  | 0.211954  | 0.0732787 | 0.0568754 |
| 3.93893   | 4.16172   | 3.81176   | 3.47948   | 3.49364   | 2.83158   |
| 16.9338   | 16.5178   | 18.1797   | 15.5716   | 16.9485   | 12.3872   |
| 0.0324858 | 0         | 0.0136424 | 0.0246736 | 0.0117293 | 0.0182074 |
| 0         | 0         | 0         | 0         | 0         | 0         |
| 103.809   | 115.379   | 91.4992   | 127.009   | 99.7778   | 143.375   |
| 0.473428  | 0.368741  | 0.603906  | 1.08173   | 0.824155  | 1.03484   |
| 0         | 0         | 0.0459548 | 0         | 0         | 0         |
| 4.29352   | 3.30068   | 3.65297   | 3.81159   | 13.4688   | 9.46938   |
| 54.2557   | 50.5797   | 51.3315   | 39.8685   | 40.2548   | 39.8568   |
| 1.28391   | 1.82902   | 0.693476  | 1.67178   | 1.3909    | 1.23355   |
| 3.27262   | 3.41605   | 4.22877   | 2.82023   | 5.83232   | 5.04411   |
| 0         | 0.0879366 | 0.1778    | 0         | 0.2293    | 0.118648  |
| 34.2079   | 39.2727   | 36.6049   | 39.1505   | 39.8053   | 45.0724   |
| 4.74016   | 2.95359   | 7.02578   | 2.93844   | 5.61265   | 2.26604   |
| 0         | 0         | 0         | 0         | 0         | 0         |
| 0         | 0         | 0         | 0         | 0         | 0         |
| 15.2408   | 16.0938   | 15.6205   | 15.5046   | 19.761    | 22.2526   |
| 0         | 0         | 0         | 0         | 0         | 0         |
| 0         | 0         | 0         | 0         | 0.408132  | 0.633545  |

|           |           |           |           |           |           |
|-----------|-----------|-----------|-----------|-----------|-----------|
| 0         | 0         | 0         | 0         | 0         | 0         |
| 0         | 0         | 0         | 0         | 0         | 0         |
| 23.5264   | 49.3146   | 38.1024   | 44.2603   | 34.4383   | 20.1826   |
| 0         | 0         | 0         | 0         | 0         | 0         |
| 0         | 0         | 0         | 0         | 0         | 0         |
| 7.82442   | 10.1942   | 7.84403   | 6.16812   | 6.85633   | 6.89841   |
| 7.9514    | 6.40254   | 11.9121   | 7.86489   | 15.1649   | 10.8413   |
| 17.8292   | 20.7493   | 14.8547   | 16.771    | 15.1324   | 16.0105   |
| 8.46516   | 9.02359   | 10.021    | 7.73164   | 10.6067   | 9.41254   |
| 5.1114    | 3.60033   | 7.83953   | 3.88222   | 8.70604   | 3.51873   |
| 29.5977   | 29.7872   | 21.0524   | 31.0739   | 24.538    | 22.5897   |
| 0.022607  | 0         | 0         | 0.0257557 | 0.0979496 | 0.171054  |
| 26.4791   | 29.8428   | 21.4649   | 24.2022   | 22.1271   | 28.1423   |
| 0         | 0         | 0         | 0         | 0         | 0         |
| 5.2543    | 5.98811   | 5.65929   | 4.68345   | 7.6966    | 7.94209   |
| 9.73172   | 10.115    | 10.1476   | 9.50667   | 9.80106   | 8.6748    |
| 0.663282  | 0.901725  | 0.303868  | 0.755666  | 0.261256  | 0.557629  |
| 3.10766   | 4.93588   | 4.11479   | 9.89952   | 4.2506    | 4.57981   |
| 35.4554   | 36.2108   | 37.495    | 36.9161   | 37.7051   | 41.948    |
| 18.9467   | 16.3081   | 15.1227   | 16.0397   | 17.928    | 15.1794   |
| 7.46126   | 4.66665   | 5.78195   | 3.46435   | 8.4936    | 3.98853   |
| 0         | 0         | 0         | 0         | 0         | 0         |
| 0         | 0         | 0         | 0         | 0         | 0         |
| 4.49583   | 4.65716   | 5.53569   | 4.79948   | 4.69807   | 3.90347   |
| 0.247579  | 0.257111  | 0.259928  | 0.470105  | 0.156434  | 0.121417  |
| 15.361    | 14.3755   | 11.073    | 11.4751   | 13.2081   | 13.1649   |
| 0         | 0         | 0         | 0         | 0         | 0         |
| 0         | 0         | 0.0139331 | 0         | 0.0359377 | 0         |
| 0.176824  | 0.440715  | 0.0742573 | 0.134301  | 1.40457   | 1.93288   |
| 0.0996261 | 0.0558693 | 0.0564815 | 0.0227005 | 0.0215826 | 0.0837569 |
| 3.63077   | 4.71165   | 4.37771   | 4.20078   | 4.28939   | 4.81314   |
| 2.16135   | 1.7414    | 2.13355   | 1.33151   | 1.84339   | 1.20844   |
| 0.054793  | 0.204849  | 0.207094  | 0.12485   | 0.118701  | 0.552782  |
| 7.55911   | 6.417     | 5.63964   | 4.46633   | 7.69705   | 7.00728   |
| 288.41    | 290.908   | 129.025   | 155.072   | 112.37    | 87.984    |
| 9.9065    | 8.25579   | 10.5487   | 11.0068   | 10.0329   | 8.76686   |
| 0.856141  | 0.872936  | 3.08875   | 1.50742   | 1.30673   | 1.43954   |
| 0.264175  | 7.68E-09  | 0.323254  | 5.13E-09  | 0.291409  | 5.80E-09  |
| 165.742   | 189.022   | 139.257   | 184.253   | 111.734   | 113.032   |
| 0.644655  | 0.911227  | 0.564008  | 0.793853  | 0.614674  | 1.5847    |
| 5.24323   | 5.4983    | 4.52101   | 3.50197   | 2.64518   | 2.51401   |
| 0         | 0.285513  | 0         | 0         | 0         | 0         |
| 0.154427  | 0.641487  | 0.162129  | 3.75329   | 0.139393  | 0.129828  |

|           |           |           |           |           |           |
|-----------|-----------|-----------|-----------|-----------|-----------|
| 2.74083   | 2.67875   | 2.2766    | 2.60326   | 3.10557   | 2.58281   |
| 19.3253   | 21.3357   | 17.6202   | 25.0389   | 21.5671   | 22.213    |
| 29.2353   | 31.6043   | 26.2187   | 32.8088   | 21.7296   | 28.9918   |
| 16.4148   | 14.1697   | 32.2542   | 30.2546   | 24.9618   | 31.642    |
| 0.366161  | 0.49141   | 0.283883  | 0.738054  | 0.213564  | 0.236797  |
| 5.21766   | 6.50225   | 3.9441    | 5.60472   | 5.81314   | 4.01056   |
| 3.8493    | 4.04972   | 3.80166   | 3.57006   | 4.92376   | 4.716     |
| 4.37561   | 4.09701   | 4.45247   | 5.40378   | 5.79075   | 5.95962   |
| 0.140913  | 0.205789  | 0.700801  | 0.513744  | 0         | 0.0222094 |
| 6.21001   | 5.61444   | 7.21      | 5.54892   | 6.90233   | 5.15253   |
| 0.223244  | 0.289753  | 0.122521  | 0.560809  | 0.133518  | 0.0790294 |
| 0.0205841 | 0.0598544 | 0.0864433 | 0.0390852 | 0.0408766 | 0.0461475 |
| 1.7323    | 1.91065   | 2.03193   | 2.42727   | 2.11363   | 1.79116   |
| 33.4917   | 31.3383   | 38.1786   | 28.545    | 39.7125   | 29.582    |
| 0         | 0         | 0         | 0         | 0         | 0         |
| 0         | 0         | 0         | 0         | 0         | 0         |
| 0         | 0         | 0         | 0         | 0         | 0         |
| 7.19677   | 6.16093   | 7.03475   | 7.73037   | 7.19549   | 8.25575   |
| 0         | 0         | 0         | 0         | 0         | 0         |
| 5.61698   | 5.64905   | 6.71656   | 4.93986   | 6.97864   | 4.69661   |
| 1.56365   | 1.34719   | 1.02147   | 0.681786  | 1.69371   | 1.28212   |
| 20.6581   | 19.8584   | 22.5599   | 18.1515   | 20.4858   | 17.5188   |
| 0.310611  | 0.752329  | 0.190143  | 0.439707  | 0.495861  | 0.3277    |
| 0         | 0         | 0         | 0.0467016 | 0.0888037 | 0.0344626 |
| 20.4759   | 21.9755   | 17.1592   | 20.2431   | 19.8636   | 20.6545   |
| 0         | 0.111402  | 0.0750818 | 0         | 0         | 0.0501028 |
| 7.00883   | 8.54294   | 8.47452   | 6.63581   | 9.65346   | 9.45017   |
| 0         | 0         | 0         | 0.0369484 | 0.140516  | 0.190282  |
| 2.72385   | 3.12748   | 3.54733   | 2.02234   | 3.58029   | 2.49582   |
| 14.1724   | 14.845    | 15.7112   | 14.1773   | 19.4411   | 18.6212   |
| 0.0574274 | 0.107349  | 0.0361751 | 0.130852  | 0.0311021 | 0.0482799 |
| 0         | 0         | 0.321927  | 0.291117  | 0         | 0.644474  |
| 16.1656   | 23.2052   | 15.5701   | 20.9629   | 17.0321   | 21.731    |
| 6.92631   | 6.08567   | 7.85399   | 6.27802   | 11.8019   | 7.50096   |
| 2.68619   | 2.62843   | 2.88284   | 1.60951   | 3.01739   | 2.0743    |
| 54.8623   | 58.2234   | 50.7607   | 48.2743   | 36.8279   | 50.129    |
| 37.6118   | 34.411    | 36.1511   | 32.1209   | 31.1636   | 28.4401   |
| 0.171829  | 0.0856532 | 0.0432959 | 0.195762  | 0.223346  | 0.288917  |
| 2.75311   | 3.84473   | 3.19388   | 4.0617    | 2.69584   | 3.14319   |
| 4.06144   | 4.12334   | 5.69561   | 4.43433   | 5.56018   | 4.51201   |
| 0.0687297 | 0.051676  | 0.135916  | 0.102537  | 0.130829  | 0.0602678 |
| 0.0832278 | 0.259296  | 0.104855  | 0.4741    | 0.225377  | 0.279883  |
| 0         | 0         | 0         | 0         | 0         | 0         |

|           |          |           |           |           |           |
|-----------|----------|-----------|-----------|-----------|-----------|
| 117.134   | 114.207  | 102.742   | 104.64    | 85.6836   | 85.0416   |
| 46.8631   | 48.312   | 41.8867   | 48.5579   | 36.0639   | 41.0129   |
| 0.313888  | 0.547634 | 0.276817  | 0.536411  | 0.339997  | 0.369445  |
| 0         | 0        | 0         | 0         | 0         | 0         |
| 3.31183   | 3.84256  | 3.93262   | 2.21182   | 4.948     | 4.19244   |
| 0         | 0        | 0         | 0         | 0         | 0         |
| 16.8247   | 17.4964  | 15.0652   | 17.7591   | 13.126    | 17.9071   |
| 0         | 0        | 0         | 0         | 0         | 0         |
| 13.6322   | 16.452   | 12.9081   | 14.2558   | 12.4036   | 13.0613   |
| 0.34243   | 0.193189 | 0.338967  | 0.417991  | 0.45927   | 0.267322  |
| 0         | 0        | 0         | 0         | 0         | 0         |
| 5.4211    | 5.42091  | 5.3322    | 4.37543   | 5.3485    | 4.6674    |
| 4.69092   | 4.08358  | 4.68048   | 3.47169   | 4.95097   | 3.63216   |
| 0.713599  | 0.96139  | 1.06912   | 0.758059  | 1.13854   | 1.55658   |
| 0         | 0        | 0         | 0         | 0         | 0         |
| 2.90961   | 3.32704  | 3.06131   | 2.92279   | 3.65996   | 3.09495   |
| 2.32358   | 3.07114  | 1.95158   | 2.567     | 2.93633   | 3.78853   |
| 0         | 0        | 0         | 0         | 0         | 0         |
| 4.65061   | 5.51461  | 5.20649   | 6.66623   | 5.34774   | 6.98025   |
| 37.2421   | 33.9937  | 29.9403   | 33.892    | 22.4033   | 25.132    |
| 86.7528   | 86.4878  | 75.5427   | 75.5277   | 90.3394   | 112.058   |
| 28.0842   | 26.2062  | 34.4822   | 24.8581   | 34.8784   | 25.0619   |
| 4.28265   | 2.89539  | 4.61307   | 2.0193    | 3.32328   | 1.12402   |
| 0.163387  | 0.30542  | 0.257305  | 0.0930722 | 0.0442444 | 0         |
| 0.0258185 | 0.032175 | 0.0325275 | 0         | 0.0279661 | 0.0434118 |
| 0         | 0        | 0         | 0         | 0         | 0.115397  |
| 0.186314  | 0.199041 | 1.30E-163 | 1.78E-138 | 0.107104  | 0.0559974 |
| 12.7141   | 12.8085  | 12.8307   | 12.2218   | 14.5871   | 15.2072   |
| 0         | 0        | 0         | 0         | 0         | 0         |
| 0         | 0        | 0         | 0         | 0         | 0         |
| 4.90704   | 13.5222  | 9.02241   | 6.57814   | 0.141039  | 0         |
| 26.5422   | 27.169   | 25.3278   | 26.3533   | 25.5585   | 23.8406   |
| 7.28739   | 6.93499  | 7.12227   | 9.40939   | 8.32411   | 7.83462   |
| 0.20839   | 0        | 0         | 0         | 0.225724  | 0         |
| 21.237    | 20.8651  | 17.1581   | 15.5784   | 19.7979   | 22.0932   |
| 3.95072   | 3.53908  | 3.99962   | 3.17256   | 4.18089   | 3.40159   |
| 35.2121   | 29.701   | 37.9461   | 27.4484   | 44.4283   | 34.4769   |
| 6.8109    | 5.33807  | 6.71986   | 6.20765   | 12.6216   | 11.8797   |
| 0.627294  | 1.08647  | 0.460268  | 0.765086  | 0.494239  | 0.269463  |
| 7.23917   | 7.17864  | 8.46746   | 6.80516   | 8.99026   | 8.04632   |
| 13.6706   | 16.4086  | 13.1891   | 15.0009   | 13.8335   | 15.9088   |
| 13.6216   | 13.4674  | 16.0713   | 16.2549   | 14.7449   | 16.891    |
| 8.90132   | 8.47932  | 9.45294   | 8.86684   | 7.90016   | 8.52172   |

|           |           |           |           |           |           |
|-----------|-----------|-----------|-----------|-----------|-----------|
| 4.41925   | 3.58748   | 3.56798   | 4.09519   | 4.21377   | 3.00888   |
| 4.65239   | 4.5094    | 4.61987   | 2.87104   | 5.00437   | 4.38665   |
| 37.3116   | 36.6636   | 37.0424   | 32.0137   | 38.0822   | 32.0613   |
| 8.36576   | 7.98453   | 10.9161   | 9.68225   | 6.61642   | 7.47975   |
| 0.72213   | 0.659939  | 0.424563  | 0.411355  | 1.64261   | 0.890418  |
| 0         | 0         | 0         | 0         | 0         | 0         |
| 14.6666   | 15.3749   | 15.0706   | 14.9286   | 15.9212   | 14.5395   |
| 2.47233   | 3.12632   | 2.12997   | 1.56367   | 2.20539   | 2.21606   |
| 2.41989   | 2.75343   | 2.639     | 2.539     | 2.96307   | 2.46061   |
| 30.7956   | 30.7249   | 34.6233   | 26.6358   | 29.8676   | 24.5084   |
| 0         | 0         | 0         | 0         | 0         | 0         |
| 0         | 0         | 0         | 0         | 0         | 0         |
| 4.14507   | 3.64222   | 4.68679   | 4.44118   | 4.24076   | 3.78296   |
| 4.91295   | 4.43017   | 3.95657   | 4.88405   | 6.06019   | 4.45808   |
| 16.0606   | 15.5137   | 13.457    | 16.8967   | 12.8324   | 18.283    |
| 0.0725392 | 0.0451992 | 0         | 0.0413214 | 0         | 0         |
| 32.933    | 31.1225   | 33.4693   | 29.3491   | 30.9994   | 38.6733   |
| 0         | 0         | 0         | 0         | 0         | 0         |
| 45.3708   | 48.0249   | 41.63     | 43.9361   | 36.5146   | 40.2013   |
| 15.5796   | 15.6121   | 18.2489   | 16.7544   | 21.1752   | 18.5175   |
| 2.72983   | 3.41651   | 3.70488   | 3.05666   | 2.6904    | 2.08816   |
| 0.0129307 | 0.0161142 | 0.0733093 | 0.0662934 | 0.0630289 | 0.010871  |
| 2.96263   | 3.65716   | 3.5302    | 2.48055   | 2.89998   | 3.09493   |
| 0         | 0         | 0         | 0         | 0         | 0         |
| 1.03036   | 1.02723   | 0.778861  | 0.899967  | 0.334819  | 0.461992  |
| 3.81772   | 4.0257    | 4.30348   | 4.12055   | 4.40315   | 3.43051   |
| 0.836742  | 1.11145   | 0.872283  | 0.864219  | 1.09459   | 0.948737  |
| 15.8848   | 14.9925   | 15.8812   | 11.977    | 18.9562   | 14.4626   |
| 0         | 0         | 0         | 0         | 0         | 0         |
| 0.91376   | 1.29579   | 1.66726   | 2.26155   | 1.43345   | 1.43046   |
| 12.1952   | 11.0919   | 12.6761   | 12.0468   | 14.5351   | 11.3694   |
| 30.5795   | 35.6027   | 41.6362   | 40.4643   | 42.6486   | 44.4093   |
| 3.09217   | 3.52317   | 3.22786   | 3.0196    | 3.11014   | 2.95244   |
| 0.0885115 | 0.0831559 | 0         | 0.101102  | 0.0639159 | 0.0372063 |
| 2.24859   | 2.08135   | 2.13295   | 1.76305   | 2.44748   | 1.97329   |
| 0         | 0         | 0         | 0         | 0         | 0         |
| 20.5973   | 22.0963   | 19.424    | 20.9152   | 22.4275   | 25.4133   |
| 0.170166  | 0.0927743 | 0.191494  | 0.193867  | 0.224001  | 0.097795  |
| 32.4575   | 27.8557   | 31.6069   | 22.5748   | 28.4419   | 23.2761   |
| 18.7541   | 17.9748   | 16.1892   | 15.629    | 17.7709   | 17.1537   |
| 0         | 0         | 0.0269182 | 0         | 0         | 0         |
| 92.0385   | 117.894   | 119.847   | 211.177   | 89.2766   | 98.0087   |
| 17.6933   | 12.7998   | 15.2069   | 13.7516   | 5.92815   | 6.61808   |

|           |           |           |           |           |           |
|-----------|-----------|-----------|-----------|-----------|-----------|
| 0.584007  | 0.44787   | 0.396181  | 0.255904  | 0.778566  | 0.302143  |
| 0         | 0         | 0         | 0         | 0         | 0         |
| 2.41779   | 2.19131   | 2.63069   | 1.7529    | 3.03555   | 2.17126   |
| 0.0516139 | 0.192963  | 0.032513  | 0.323415  | 0.251582  | 0.282051  |
| 29.2507   | 28.4091   | 31.7795   | 29.2398   | 28.2087   | 26.9395   |
| 0         | 0         | 0         | 0         | 0         | 0         |
| 1.57057   | 2.1969    | 1.21144   | 4.34549   | 0.416622  | 1.13177   |
| 0         | 0         | 0         | 0         | 0         | 0         |
| 55.4984   | 59.2648   | 56.4392   | 64.908    | 51.7182   | 62.051    |
| 5.682     | 3.5123    | 3.74184   | 2.33039   | 2.06792   | 1.2993    |
| 8.4599    | 8.23782   | 8.50216   | 7.40679   | 9.53906   | 7.85618   |
| 0         | 0         | 0         | 0.0342672 | 0.0325797 | 0.0252868 |
| 0         | 0         | 0         | 0         | 0         | 0         |
| 12.9      | 12.816    | 10.1778   | 9.64199   | 11.1673   | 10.2415   |
| 38.116    | 38.5417   | 38.196    | 39.3793   | 37.9279   | 41.0142   |
| 0.0682323 | 0.0212578 | 0.0429814 | 0.0971699 | 0.018477  | 0         |
| 18.8354   | 17.288    | 21.9674   | 16.0894   | 19.0131   | 21.4075   |
| 0.0650652 | 20.9198   | 0.334722  | 195.4     | 0.566335  | 12.3078   |
| 0         | 0         | 0         | 0         | 0         | 0         |
| 16.3562   | 21.8465   | 10.4089   | 13.4024   | 6.47343   | 10.1721   |
| 0.500358  | 0.423946  | 0.462216  | 0.326819  | 0.888909  | 0.695021  |
| 6.54195   | 7.44352   | 7.07256   | 7.18491   | 5.29645   | 7.30094   |
| 0.628886  | 0.867072  | 0.615347  | 0.411693  | 1.27533   | 0.837898  |
| 6.70749   | 6.72137   | 7.09338   | 4.83918   | 7.50539   | 5.72256   |
| 33.4267   | 20.0651   | 35.3512   | 23.5964   | 38.197    | 21.6521   |
| 8.29595   | 8.82546   | 15.5501   | 18.2113   | 21.6979   | 19.3925   |
| 0.279548  | 0.487722  | 0.493066  | 0.191091  | 0.363361  | 0.658055  |
| 5.12887   | 4.976     | 5.44251   | 3.96085   | 7.08417   | 5.42605   |
| 73.7675   | 70.0026   | 52.4354   | 54.8715   | 31.1852   | 39.842    |
| 20.7704   | 16.8391   | 21.0119   | 10.2629   | 29.9138   | 15.6443   |
| 9.44402   | 9.79617   | 7.00704   | 7.2775    | 7.81387   | 9.16653   |
| 0.211429  | 0.105393  | 0.372918  | 0.144527  | 0.778654  | 0.568804  |
| 60.235    | 51.6607   | 64.4533   | 59.8205   | 56.7622   | 53.1836   |
| 9.36096   | 9.61368   | 9.37329   | 7.08669   | 10.3708   | 10.5359   |
| 0         | 0         | 0         | 0         | 0         | 0         |
| 9.00838   | 7.70796   | 12.2454   | 5.9574    | 10.7918   | 11.0553   |
| 10.2955   | 8.02162   | 10.2707   | 8.29683   | 14.3658   | 6.98055   |
| 0         | 0         | 0.111641  | 0.0336523 | 0.0319951 | 0.024833  |
| 3.51057   | 2.74531   | 4.88471   | 5.6532    | 5.56924   | 6.02951   |
| 19.9325   | 19.19     | 17.9589   | 15.2097   | 17.3217   | 13.5549   |
| 0.0689591 | 0         | 0.173757  | 0.0785639 | 0.29878   | 0.11595   |
| 3.31957   | 4.72782   | 3.78387   | 4.86248   | 4.28058   | 4.38554   |
| 0         | 0         | 0         | 0         | 0         | 0         |

|           |          |          |          |          |          |
|-----------|----------|----------|----------|----------|----------|
| 9.44451   | 7.26406  | 7.92744  | 6.19395  | 6.0462   | 6.5847   |
| 0.0621009 | 0.116085 | 0.273833 | 0.106126 | 0.134533 | 0.104418 |
| 21.8848   | 16.3045  | 41.5832  | 30.7437  | 39.2663  | 30.2487  |
| 3.05924   | 4.05423  | 2.27299  | 3.86964  | 2.8039   | 3.42925  |
| 0         | 0        | 0        | 0        | 0        | 0        |
| 0.723588  | 0.277904 | 0.837814 | 0.324647 | 0.636415 | 0.359962 |
| 37.1842   | 40.429   | 34.3035  | 37.3646  | 34.0061  | 35.5211  |
| 3.19869   | 2.87377  | 4.87335  | 3.32217  | 4.09325  | 3.76485  |
| 20.7112   | 18.7208  | 21.3054  | 20.4009  | 27.2753  | 22.2536  |



ents kilobase of transcript per per million mapped reads (FPKM).

| Control 1 | Control 2 | Control 3 | Control 4 | Control 5 | Control 6 |
|-----------|-----------|-----------|-----------|-----------|-----------|
| 36.7928   | 38.2125   | 94.2493   | 116.025   | 46.6829   | 53.6333   |
| 0         | 0         | 0         | 0.0382749 | 0.0204427 | 0.0427481 |
| 14.6801   | 18.553    | 17.216    | 13.5431   | 12.8734   | 13.8797   |
| 5.48703   | 3.72835   | 3.01644   | 4.34651   | 2.93793   | 2.25064   |
| 4.75209   | 4.97477   | 3.60951   | 4.32481   | 7.81338   | 1.50743   |
| 17.0982   | 14.3215   | 14.9753   | 17.9022   | 15.2911   | 15.2324   |
| 0.122742  | 0.0439404 | 0.0496417 | 0.044538  | 0         | 0         |
| 14.0122   | 11.7571   | 13.1894   | 13.5319   | 16.4475   | 16.2639   |
| 185.38    | 161.811   | 188.93    | 170.439   | 180.606   | 171.775   |
| 3.46579   | 4.6234    | 5.06304   | 4.1923    | 2.71997   | 3.2867    |
| 61.0737   | 60.0962   | 59.9396   | 58.5837   | 60.6464   | 57.7506   |
| 64.9057   | 76.4459   | 80.246    | 73.7697   | 75.6897   | 68.4054   |
| 19.6151   | 18.8348   | 21.0562   | 20.4712   | 18.2791   | 19.8734   |
| 0.550165  | 0.596829  | 0.525929  | 0.496056  | 0.116317  | 0.445927  |
| 1.2166    | 0.851579  | 1.18784   | 1.07741   | 0.894683  | 1.30797   |
| 0.295946  | 0.322827  | 0.139558  | 0.282214  | 0.289449  | 0.164761  |
| 2.3092    | 1.79581   | 1.08159   | 0.987964  | 0.872564  | 0.962606  |
| 0         | 0         | 0         | 0         | 0         | 0         |
| 35.1757   | 41.2604   | 34.2044   | 36.431    | 25.7696   | 33.4304   |
| 1.61529   | 1.9818    | 1.82376   | 1.7294    | 1.43692   | 1.84057   |
| 16.7036   | 10.1895   | 18.2328   | 10.5843   | 8.04464   | 13.797    |
| 0         | 0         | 0         | 0         | 0         | 0         |
| 20.1959   | 13.5281   | 13.7796   | 16.0288   | 13.7666   | 12.4578   |
| 0.0423032 | 0.0605766 | 0         | 0.0921006 | 0         | 0         |
| 29.4531   | 28.3227   | 35.9921   | 32.2446   | 39.7171   | 34.4679   |
| 0         | 0         | 0         | 0         | 0         | 0         |
| 17.1885   | 16.3329   | 17.5558   | 16.4187   | 13.6474   | 15.95     |
| 0.165213  | 0.160535  | 0.0668186 | 0.0770771 | 0.0640377 | 0.13391   |
| 1.72137   | 0.840321  | 2.06748   | 2.17669   | 1.45575   | 1.03585   |
| 0         | 0         | 0         | 0         | 0.0306013 | 0         |
| 23.4062   | 18.8889   | 22.9794   | 21.6436   | 24.0776   | 23.8691   |
| 8.95204   | 7.94432   | 6.86291   | 9.09168   | 7.64534   | 5.66141   |
| 50.1789   | 52.2515   | 49.5785   | 47.8317   | 52.5394   | 43.6817   |
| 0.0318299 | 0.0455792 | 0         | 0.138597  | 0         | 0.0773976 |
| 1588.19   | 2686.08   | 1962.92   | 2031.54   | 1773.11   | 1572.3    |
| 23.5365   | 24.2082   | 19.4555   | 24.0248   | 20.1289   | 22.6611   |
| 15.6058   | 12.2251   | 14.4944   | 14.2967   | 11.4005   | 15.9824   |
| 24.0203   | 25.3978   | 27.1666   | 30.0701   | 25.5039   | 24.7537   |
| 81.662    | 81.5319   | 72.8018   | 71.0371   | 76.5298   | 92.1937   |
| 0         | 0         | 0         | 0         | 0         | 0         |
| 27.9068   | 30.0949   | 31.7112   | 33.5325   | 35.141    | 34.0693   |

|           |           |          |           |           |           |
|-----------|-----------|----------|-----------|-----------|-----------|
| 12.6713   | 10.5514   | 8.3719   | 10.3626   | 6.39732   | 11.9362   |
| 0.0459372 | 0.0328901 | 0        | 0         | 0         | 0         |
| 75.5078   | 102.288   | 106.457  | 80.9519   | 97.7014   | 75.6838   |
| 23.2143   | 15.4414   | 22.5937  | 18.4774   | 41.0427   | 11.2896   |
| 18.0107   | 14.4323   | 16.796   | 15.2498   | 14.4348   | 14.8816   |
| 17.4704   | 12.049    | 14.6976  | 15.5254   | 12.2319   | 14.905    |
| 0         | 0         | 0        | 0         | 0         | 0         |
| 39.1553   | 48.292    | 45.0634  | 40.2397   | 49.3673   | 40.3986   |
| 10.1162   | 9.21884   | 11.2711  | 9.35661   | 10.6811   | 9.22662   |
| 1.30941   | 0.843129  | 1.14445  | 1.37118   | 1.28757   | 1.31062   |
| 1.15639   | 0.434555  | 4.96E-12 | 0.602278  | 0.642842  | 0.672564  |
| 8.70014   | 6.74949   | 3.29334  | 4.76074   | 3.82696   | 4.76836   |
| 3.15118   | 4.33187   | 4.48611  | 4.02489   | 3.51769   | 2.6563    |
| 0.231082  | 0.122258  | 0.235823 | 0.158933  | 0.357686  | 0.180617  |
| 0         | 0         | 0        | 0         | 0         | 0         |
| 0.105813  | 1.02E-14  | 0.131951 | 1.61E-15  | 0.0758387 | 0.0891282 |
| 0.0500036 | 0.087288  | 0.118363 | 0.0479605 | 0         | 0         |
| 32.9396   | 34.3494   | 27.8344  | 32.2946   | 30.8944   | 31.8645   |
| 9.78016   | 8.83944   | 9.21339  | 7.9666    | 6.33694   | 6.96162   |
| 32.3268   | 27.3845   | 30.856   | 31.8633   | 34.6856   | 29.4721   |
| 1.27607   | 1.51127   | 2.61404  | 1.71355   | 2.23526   | 1.18894   |
| 44.1322   | 36.1118   | 35.6976  | 32.0275   | 29.3245   | 22.9954   |
| 33.7634   | 31.8551   | 31.8144  | 31.602    | 34.1719   | 32.5117   |
| 0.134544  | 0.0825691 | 0.10883  | 0.139487  | 0.0745002 | 0.109052  |
| 7.41203   | 5.51684   | 5.63902  | 6.72673   | 6.19949   | 6.93482   |
| 0         | 0         | 0        | 0         | 0         | 0         |
| 0         | 0         | 0        | 0         | 0         | 0         |
| 31.8915   | 27.2332   | 30.1269  | 29.7      | 35.1267   | 29.627    |
| 1.08381   | 0.666704  | 0.373492 | 0.223396  | 0.487207  | 0.873264  |
| 0         | 0         | 0        | 0         | 0         | 0         |
| 5.27857   | 5.27857   | 8.37572  | 8.37572   | 8.36398   | 8.36398   |
| 2.17099   | 1.83279   | 1.25808  | 1.55201   | 1.3062    | 1.26065   |
| 4.40676   | 4.17335   | 3.44454  | 5.76287   | 1.90673   | 2.22316   |
| 10.0429   | 9.55208   | 6.78487  | 7.78304   | 5.61134   | 7.22818   |
| 1.59113   | 2.13599   | 1.10267  | 1.13566   | 1.46827   | 1.4521    |
| 6.92634   | 5.8523    | 6.18994  | 6.87775   | 3.4064    | 7.30931   |
| 0         | 0         | 0        | 0         | 0         | 0         |
| 0.999864  | 0.688906  | 0.717815 | 0.698418  | 0.794482  | 0.678777  |
| 7.25175   | 4.68965   | 5.29813  | 6.11276   | 2.17613   | 4.17133   |
| 2.69818   | 2.96507   | 3.18513  | 3.802     | 2.31051   | 3.66157   |
| 124.425   | 134.537   | 127.918  | 148.067   | 136.47    | 133.564   |
| 0.162822  | 0.116578  | 0.329259 | 0.118163  | 0.315556  | 0.263946  |
| 0         | 0         | 0        | 0.020706  | 0         | 0.023126  |

|           |           |           |          |          |           |
|-----------|-----------|-----------|----------|----------|-----------|
| 1.84882   | 2.00524   | 2.51713   | 2.2052   | 2.39818  | 2.67065   |
| 1.29537   | 1.04818   | 1.50395   | 1.67524  | 1.61634  | 1.14103   |
| 15.1799   | 16.7312   | 16.5413   | 14.345   | 15.6421  | 14.731    |
| 48.6704   | 46.0776   | 45.5601   | 46.494   | 53.38    | 38.5323   |
| 0         | 0         | 0         | 0        | 0        | 0         |
| 4.34635   | 3.87711   | 3.48686   | 3.74881  | 2.78941  | 3.03192   |
| 0         | 0         | 0         | 0        | 0        | 0         |
| 0.597496  | 0.819782  | 0.913483  | 0.465651 | 0.416996 | 0.476203  |
| 31.4971   | 29.0865   | 26.2456   | 23.0303  | 22.2471  | 25.954    |
| 36.1112   | 40.5201   | 43.4839   | 42.0518  | 50.0501  | 43.0734   |
| 0.842362  | 0.882892  | 0.464763  | 0.396055 | 0.513021 | 0.634004  |
| 0.16593   | 0.376209  | 0.156587  | 0.341186 | 0.15007  | 0.0896613 |
| 356.394   | 0         | 576.56    | 775.925  | 0        | 0         |
| 55.0268   | 61.392    | 57.6409   | 63.4352  | 60.2112  | 54.4525   |
| 0.13355   | 0.081648  | 0.324077  | 0.339218 | 0.339266 | 1.20903   |
| 45.913    | 14.4799   | 1.79938   | 4.50928  | 0.755673 | 11.8897   |
| 13.1408   | 12.4678   | 13.1376   | 12.9485  | 14.5976  | 12.242    |
| 0         | 0         | 0         | 0        | 0        | 0         |
| 18.7837   | 22.7058   | 19.5977   | 14.7478  | 21.2778  | 21.9813   |
| 0.0535468 | 0         | 0.0865916 | 0        | 0        | 0         |
| 24.6324   | 24.1894   | 25.7508   | 24.4895  | 23.8462  | 25.4487   |
| 6.13428   | 4.03592   | 3.45321   | 4.63223  | 3.85572  | 4.77047   |
| 0.105522  | 0.0898493 | 0.186171  | 0.121437 | 0.16214  | 0.206773  |
| 0.685166  | 0.7937    | 0.85692   | 0.681791 | 0.711389 | 0.689084  |
| 2.19058   | 1.89094   | 1.18987   | 2.16789  | 1.32038  | 2.30556   |
| 90.7733   | 106.427   | 144.281   | 136.716  | 131.336  | 131.809   |
| 3.3915    | 3.84094   | 2.13941   | 2.24827  | 2.39316  | 2.63424   |
| 53.7883   | 44.8709   | 35.6725   | 51.9916  | 65.2181  | 44.1568   |
| 13.4867   | 14.5606   | 14.8614   | 13.4235  | 11.2963  | 12.9102   |
| 40.5493   | 45.2151   | 55.1183   | 46.0411  | 41.4268  | 48.5924   |
| 0.0319539 | 0.0228784 | 0         | 0        | 0        | 0         |
| 2.76345   | 1.69815   | 3.23855   | 3.03192  | 2.56398  | 2.99825   |
| 7.76387   | 7.68627   | 11.0781   | 10.1657  | 7.09612  | 9.57813   |
| 0         | 0         | 0         | 0        | 0        | 0         |
| 0.18584   | 0.221768  | 0.100248  | 0.224872 | 0.288205 | 0.0502137 |
| 11.3676   | 13.7869   | 14.5401   | 10.8258  | 10.5702  | 10.4877   |
| 1.10822   | 0.913689  | 1.71135   | 1.07234  | 1.87443  | 1.27933   |
| 0.353612  | 0.151908  | 0.171618  | 0.153974 | 0.2193   | 0.458583  |
| 17.3078   | 18.4654   | 15.3616   | 13.5137  | 11.4817  | 14.1054   |
| 3.21929   | 2.06104   | 2.96131   | 3.00218  | 2.92034  | 3.15417   |
| 12.9384   | 11.0934   | 13.8588   | 13.717   | 13.8801  | 12.7798   |
| 0         | 0         | 0.0835654 | 0        | 0        | 0         |
| 42.4285   | 38.0004   | 43.0747   | 42.1447  | 41.2454  | 43.3946   |

|          |            |           |           |            |          |
|----------|------------|-----------|-----------|------------|----------|
| 0.140976 | 0.403745   | 0.684197  | 0.511545  | 0.218574   | 0.342798 |
| 3.05258  | 2.2019     | 3.1141    | 3.76934   | 3.14344    | 3.87751  |
| 28.5709  | 26.4695    | 29.758    | 29.9518   | 35.949     | 28.1066  |
| 9.45526  | 7.01425    | 9.1778    | 12.885    | 12.7051    | 12.9646  |
| 57.4337  | 57.7992    | 46.5565   | 58.1079   | 51.6498    | 50.2736  |
| 0        | 0          | 0         | 0         | 0          | 0        |
| 0        | 0          | 0.055763  | 0         | 0          | 0        |
| 15.4239  | 15.1486    | 11.3544   | 13.3914   | 10.0311    | 12.9855  |
| 0        | 0          | 0         | 0         | 0.0162502  | 0.033981 |
| 0        | 0          | 0         | 0         | 0          | 0        |
| 1.80091  | 1.44821    | 0.590662  | 0.8398    | 0.773006   | 0.94739  |
| 0        | 0          | 0         | 0         | 0.00203731 | 0        |
| 9.98284  | 8.58921    | 10.546    | 9.80412   | 10.4231    | 10.457   |
| 1.49605  | 1.04724    | 1.07237   | 1.63468   | 0.880609   | 1.53571  |
| 20.2913  | 18.1984    | 20.5777   | 21.8564   | 17.1891    | 18.9973  |
| 20.9846  | 23.7754    | 23.7807   | 24.1426   | 20.1851    | 22.5926  |
| 17.8352  | 14.2929    | 15.7447   | 16.2901   | 15.0779    | 15.8325  |
| 0.619895 | 1.3315     | 0.701989  | 0.764778  | 0.768884   | 1.05514  |
| 33.1297  | 31.0027    | 38.8363   | 31.9765   | 39.1679    | 36.4164  |
| 12.6501  | 12.5584    | 14.3225   | 14.0986   | 13.3505    | 12.745   |
| 22.96    | 20.1093    | 23.466    | 20.6971   | 21.773     | 22.0158  |
| 3.22594  | 2.67161    | 3.19599   | 2.52185   | 2.52187    | 2.97278  |
| 0        | 0          | 0         | 0         | 0          | 0        |
| 14.7018  | 10.6978    | 12.3862   | 13.2713   | 11.2689    | 11.6764  |
| 2.36865  | 2.2065     | 2.5958    | 2.6986    | 2.80368    | 2.3121   |
| 0        | 0.00531587 | 0         | 0         | 0.00575566 | 0        |
| 0        | 0          | 0         | 0         | 0          | 0        |
| 25.2493  | 23.5093    | 24.0664   | 23.9087   | 27.1917    | 27.5456  |
| 0.131743 | 0.0314418  | 0.0355214 | 0.0956082 | 0.034043   | 0.035594 |
| 0        | 0          | 0         | 0         | 0          | 0        |
| 9.42623  | 7.10622    | 7.97649   | 9.46372   | 11.0607    | 8.63684  |
| 13.3695  | 11.6325    | 11.8989   | 13.6371   | 9.08521    | 11.8195  |
| 0.781021 | 0.532568   | 0.601668  | 0.742239  | 0.360392   | 0.874203 |
| 10.4514  | 11.7832    | 13.6181   | 12.4239   | 14.3344    | 10.0811  |
| 0        | 0          | 0         | 0         | 0          | 0        |
| 0.605183 | 0.237983   | 0.440015  | 0.51101   | 0.272828   | 0.490693 |
| 4.74251  | 4.99513    | 3.89571   | 4.00667   | 4.27671    | 4.93078  |
| 2.99267  | 2.60801    | 2.86659   | 3.21126   | 1.96814    | 2.46999  |
| 33.2694  | 45.4312    | 45.9608   | 39.1015   | 34.0097    | 37.3868  |
| 0.684493 | 0.649931   | 0.683858  | 0.568866  | 0.671449   | 0.592245 |
| 181.988  | 131.292    | 125.887   | 109.238   | 243.048    | 46.2676  |
| 0        | 0          | 0         | 0         | 0          | 0        |
| 0        | 0          | 0         | 0         | 0.235683   | 0        |

|           |           |           |           |           |          |
|-----------|-----------|-----------|-----------|-----------|----------|
| 19.5461   | 16.2576   | 17.9746   | 21.3479   | 19.9561   | 21.1012  |
| 32.0801   | 21.0545   | 27.4933   | 31.4569   | 28.4215   | 28.6329  |
| 36.5952   | 33.2775   | 24.4392   | 25.3078   | 23.9693   | 23.5279  |
| 3.18335   | 3.19967   | 2.67398   | 2.93219   | 2.61015   | 2.38173  |
| 10.238    | 10.3674   | 17.4204   | 12.6545   | 12.8694   | 10.2158  |
| 2.37523   | 2.10963   | 2.57791   | 3.14202   | 1.74808   | 2.33955  |
| 3.48271   | 3.64782   | 5.02445   | 4.15071   | 2.83091   | 3.69613  |
| 1.48537   | 1.02805   | 0.760941  | 0.682708  | 1.38178   | 0.682234 |
| 8.83229   | 6.32375   | 8.29689   | 7.30124   | 6.10415   | 7.4974   |
| 0         | 1.24467   | 0         | 0         | 0         | 0        |
| 0         | 0         | 0         | 0         | 0         | 0        |
| 21.6684   | 24.1106   | 21.3203   | 22.6196   | 21.0284   | 21.1018  |
| 10.045    | 7.50272   | 7.59875   | 7.24262   | 9.85576   | 8.95073  |
| 0         | 0.0493234 | 0.0278616 | 0.0499942 | 0.0534041 | 0        |
| 1.98507   | 1.60648   | 1.67466   | 1.50249   | 1.20373   | 1.53908  |
| 0         | 0         | 0         | 0         | 0         | 0        |
| 3.82814   | 5.41408   | 4.9697    | 4.97323   | 3.5172    | 3.4476   |
| 9.39E-09  | 1.78E-10  | 3.09E-08  | 5.64E-09  | 0.117084  | 2.16E-10 |
| 0         | 0         | 0         | 0         | 0         | 0        |
| 0         | 0         | 0         | 0         | 0         | 0        |
| 4.10286   | 3.71689   | 3.2002    | 3.26587   | 2.75871   | 3.54588  |
| 10.3936   | 9.05412   | 9.95564   | 9.3979    | 10.3008   | 11.1899  |
| 0         | 0         | 0         | 0         | 0         | 0        |
| 0.18888   | 0.180498  | 0.203658  | 0.182902  | 1.44E-14  | 0.357502 |
| 0.0893997 | 0         | 0         | 0         | 0         | 0        |
| 28.3103   | 24.8984   | 27.1328   | 34.6242   | 32.7898   | 28.0945  |
| 1.39333   | 1.1961    | 1.51828   | 0.990424  | 1.73986   | 1.48318  |
| 0.916736  | 1.12062   | 1.08517   | 1.34681   | 1.404     | 1.95729  |
| 0.207458  | 0.198048  | 0.0932268 | 0.0669137 | 0.142955  | 0.168151 |
| 6.99925   | 5.54622   | 6.33625   | 6.31646   | 5.34721   | 6.77248  |
| 24.2524   | 30.4129   | 27.3197   | 26.7143   | 28.5028   | 28.424   |
| 9.58996   | 6.69749   | 9.47773   | 6.6017    | 7.39823   | 8.86126  |
| 0.469575  | 0         | 0.25322   | 0         | 0.849385  | 0.126869 |
| 19.3975   | 21.1113   | 26.0472   | 20.302    | 28.1706   | 22.9663  |
| 0.796046  | 0.766193  | 0.872266  | 0.733594  | 0.774062  | 0.453672 |
| 132.599   | 109.294   | 132.732   | 117.297   | 110.375   | 115.856  |
| 0         | 0         | 0         | 0         | 0         | 0        |
| 6.54974   | 7.91826   | 3.09454   | 4.08243   | 3.48726   | 1.49501  |
| 13.6064   | 14.7169   | 14.6337   | 14.8118   | 10.2029   | 13.2178  |
| 55.4664   | 47.6815   | 52.0201   | 53.7028   | 59.9575   | 51.7756  |
| 0.294962  | 0.389884  | 0.36706   | 0.312856  | 0.21107   | 0.220686 |
| 0.438432  | 0.313909  | 0.278645  | 0.272724  | 0.388434  | 0.431514 |
| 4.82339   | 3.24271   | 3.83538   | 4.39034   | 3.66308   | 4.17488  |

|           |            |           |           |           |           |
|-----------|------------|-----------|-----------|-----------|-----------|
| 3.37226   | 2.64173    | 2.88372   | 2.74696   | 2.63849   | 3.51802   |
| 0         | 0          | 0         | 0         | 0         | 0         |
| 22.0404   | 21.5519    | 19.9157   | 20.7471   | 22.4099   | 19.5305   |
| 53.1543   | 60.8508    | 53.2581   | 56.8681   | 60.4606   | 56.1628   |
| 6.11023   | 5.10008    | 5.22289   | 4.66912   | 3.92165   | 3.35081   |
| 18.7024   | 16.1591    | 12.3928   | 14.6516   | 13.8774   | 16.9633   |
| 6.74084   | 5.28228    | 6.06467   | 6.19117   | 5.85897   | 6.67103   |
| 0.250371  | 0.327273   | 0.38242   | 0.158264  | 0.160345  | 0.143701  |
| 0         | 0          | 0.265186  | 0         | 0         | 0         |
| 0.0434624 | 0.00691466 | 0.0416665 | 0.0280363 | 0         | 0.031313  |
| 25.4498   | 22.8859    | 24.0438   | 23.7881   | 27.3046   | 28.0535   |
| 0         | 0          | 0         | 0         | 0         | 0         |
| 0.443895  | 0.272418   | 0.564234  | 0.598265  | 2.06469   | 0.625382  |
| 0.328319  | 0          | 0         | 0.0529482 | 0.0296037 | 0         |
| 0         | 0          | 0         | 0         | 0         | 0         |
| 60.2818   | 78.455     | 71.1705   | 64.6853   | 69.6896   | 63.3404   |
| 0.621413  | 0.507728   | 0.885889  | 0.510062  | 0.754236  | 0.432743  |
| 0.588898  | 0.129303   | 0.0190539 | 0.0512849 | 0         | 0.0509143 |
| 1.89452   | 1.59695    | 1.48446   | 1.27485   | 1.3315    | 1.80734   |
| 68.0212   | 51.4588    | 49.4601   | 57.6995   | 60.2641   | 61.2818   |
| 9.49289   | 5.46403    | 9.63589   | 10.4013   | 13.708    | 3.31911   |
| 24.5207   | 22.1526    | 19.2426   | 24.3396   | 18.7211   | 20.1698   |
| 8.33119   | 4.70156    | 7.15204   | 6.08553   | 8.96789   | 6.43979   |
| 6.75687   | 5.45998    | 5.77499   | 6.05694   | 7.08309   | 5.94754   |
| 2.40469   | 2.07865    | 1.9451    | 2.23461   | 1.38675   | 1.80646   |
| 3.46165   | 2.56603    | 1.27189   | 2.62961   | 3.96211   | 3.48157   |
| 29.5422   | 26.8341    | 27.9085   | 31.9189   | 31.4468   | 28.6803   |
| 7.94126   | 5.28057    | 8.24042   | 6.23803   | 6.96513   | 6.56568   |
| 4.28092   | 1.11751    | 3.67258   | 3.99548   | 3.73958   | 1.9566    |
| 22.5556   | 12.2604    | 14.0013   | 15.8332   | 16.8736   | 17.3995   |
| 36.0602   | 29.0893    | 29.8321   | 35.7283   | 26.6824   | 33.1032   |
| 0.725538  | 0.519472   | 0.495174  | 1.0837    | 0.65912   | 1.44345   |
| 0.311448  | 0.312187   | 0.377886  | 0.226023  | 0.289727  | 0.302927  |
| 0.017847  | 0.0805021  | 0.0858221 | 0.094997  | 0.0396666 | 0.0875528 |
| 0         | 0.0247194  | 0         | 0         | 0         | 0         |
| 11.6034   | 8.59349    | 10.7384   | 10.6429   | 11.446    | 12.6062   |
| 3.97695   | 4.85355    | 3.21687   | 2.36139   | 2.03197   | 3.51649   |
| 17.7552   | 14.8416    | 12.4517   | 18.0902   | 20.1716   | 13.0088   |
| 21.729    | 19.2804    | 22.103    | 21.9386   | 21.7405   | 24.6157   |
| 24.9109   | 20.8759    | 20.15     | 18.5234   | 20.7621   | 21.1344   |
| 8.66011   | 5.87257    | 8.85722   | 8.06746   | 8.52087   | 9.95522   |
| 0.395273  | 0.169805   | 0.170522  | 0.420723  | 0.0817124 | 0.341741  |
| 9.20054   | 8.53189    | 9.86307   | 10.2568   | 8.93699   | 8.71522   |

|          |           |            |           |            |           |
|----------|-----------|------------|-----------|------------|-----------|
| 15.9755  | 14.6341   | 15.2026    | 15.8987   | 15.0252    | 16.7095   |
| 2.15959  | 2.33201   | 1.03093    | 1.43879   | 0.741015   | 1.46346   |
| 63.1918  | 63.0725   | 56.8392    | 57.1804   | 82.4521    | 45.8294   |
| 0.243775 | 0.632433  | 0.00018571 | 0.288831  | 0.00114019 | 0.0001167 |
| 2.08652  | 2.20529   | 1.76811    | 1.69449   | 1.84857    | 2.33546   |
| 2.74886  | 3.1731    | 3.04029    | 3.09412   | 2.82678    | 3.3648    |
| 0.27249  | 0         | 0.146941   | 0         | 0          | 0         |
| 0.178473 | 0.383349  | 0.384968   | 0.129521  | 0.138355   | 0.144658  |
| 21.9165  | 19.5894   | 21.3639    | 23.1618   | 23.9031    | 20.8521   |
| 1.33477  | 0.65388   | 0.795546   | 1.01965   | 0.707977   | 0.62635   |
| 0        | 0         | 0          | 0         | 0          | 0         |
| 0.249846 | 0.160924  | 0.222248   | 0.253862  | 0.135604   | 0.263358  |
| 504.718  | 1392.08   | 645.675    | 682.836   | 522.487    | 1136      |
| 0        | 0         | 0          | 0         | 0          | 0         |
| 0.26055  | 0.0932744 | 0.31613    | 0         | 0.100991   | 0.105592  |
| 0.529704 | 0.481575  | 0.402302   | 0.509327  | 0.307297   | 0.580693  |
| 22.9647  | 28.2101   | 22.3861    | 22.4804   | 22.8012    | 17.5736   |
| 196.352  | 255.919   | 246.96     | 261.948   | 311.837    | 155.107   |
| 16.9355  | 13.869    | 16.5141    | 14.7748   | 14.2457    | 15.9807   |
| 7.289    | 6.48253   | 7.12535    | 8.44464   | 6.41071    | 7.63004   |
| 20.8229  | 17.9657   | 18.7214    | 21.5258   | 21.5424    | 18.9115   |
| 7.3618   | 7.26558   | 7.57325    | 12.8449   | 7.87885    | 10.0019   |
| 2.72113  | 1.55141   | 2.73096    | 2.08449   | 1.79695    | 2.24641   |
| 2.64096  | 3.01931   | 1.72276    | 1.94751   | 1.32085    | 1.13935   |
| 1.64855  | 1.2285    | 1.08855    | 1.41612   | 1.74744    | 1.03624   |
| 0        | 0         | 0          | 0         | 0.201816   | 0.21101   |
| 5.37129  | 4.41616   | 5.82069    | 5.81908   | 5.35929    | 6.02006   |
| 4.2819   | 3.22298   | 4.48484    | 4.42214   | 4.16201    | 3.702     |
| 0.232528 | 0.582698  | 0.188087   | 0.210937  | 0.180259   | 0.282707  |
| 0.306818 | 0.278439  | 0.407266   | 0.403615  | 0.472013   | 0.493503  |
| 10.8811  | 7.55162   | 10.0433    | 11.207    | 9.48736    | 8.51286   |
| 4.77075  | 2.9278    | 2.94465    | 3.76381   | 2.19067    | 3.36834   |
| 511.474  | 466.891   | 485.425    | 507.84    | 548.546    | 479.176   |
| 0        | 0         | 0          | 0         | 0          | 0         |
| 0.882798 | 0.423491  | 0.275883   | 0.352941  | 0.318291   | 0.492527  |
| 29.6892  | 15.4176   | 20.4923    | 16.0292   | 29.6351    | 9.49413   |
| 23.726   | 25.088    | 24.4533    | 19.7333   | 20.394     | 23.6895   |
| 0        | 0         | 0.108699   | 0.0650155 | 0.0694499  | 0.036307  |
| 35.6305  | 29.4191   | 33.4523    | 39.1633   | 42.3481    | 32.6608   |
| 0.926076 | 0.525912  | 0.599688   | 0.708478  | 0.480218   | 0.684969  |
| 29.407   | 27.9634   | 27.7924    | 28.1214   | 29.0896    | 20.8559   |
| 6.6815   | 3.58787   | 6.23022    | 3.77135   | 4.13649    | 5.64123   |
| 0.391507 | 0.0560623 | 0.0633364  | 0         | 0.121401   | 0.380796  |

|           |           |           |          |            |           |
|-----------|-----------|-----------|----------|------------|-----------|
| 48.682    | 43.2716   | 54.9574   | 50.1262  | 48.3891    | 57.9781   |
| 1.61034   | 0.999633  | 1.21116   | 1.72918  | 1.80083    | 2.5656    |
| 0.237972  | 0.170787  | 0.301483  | 0.245056 | 0.0451714  | 0.0483343 |
| 0.422914  | 0.129771  | 0.342087  | 0.306916 | 0.140507   | 0.308879  |
| 2.33406   | 1.47478   | 2.1075    | 2.27821  | 1.79872    | 2.01563   |
| 60.7648   | 55.9155   | 55.3283   | 61.1723  | 62.7886    | 57.0643   |
| 22.2642   | 17.8264   | 18.5461   | 19.2413  | 20.1247    | 20.0909   |
| 30.9626   | 32.7711   | 27.1284   | 30.4063  | 26.0201    | 17.7252   |
| 12.6092   | 13.3963   | 14.4545   | 13.6572  | 12.5916    | 13.5609   |
| 0.541583  | 0.754139  | 0.449897  | 0.775007 | 1.0546     | 1.04338   |
| 2.1703    | 0.729264  | 3.01382   | 3.54602  | 0.783309   | 2.00464   |
| 9.43676   | 9.01803   | 10.3143   | 8.85768  | 10.0059    | 8.62862   |
| 13.7161   | 11.6144   | 13.2907   | 12.7766  | 12.844     | 14.4285   |
| 66.6157   | 68.3034   | 68.4831   | 71.1798  | 80.0322    | 66.2774   |
| 18.9313   | 18.1182   | 20.5234   | 20.843   | 18.718     | 20.8245   |
| 16.6932   | 15.6732   | 16.6736   | 18.1558  | 17.4821    | 16.6958   |
| 0         | 0         | 0         | 0        | 0          | 0         |
| 4.49961   | 5.20738   | 4.2577    | 4.86737  | 4.40957    | 4.12878   |
| 0.647176  | 0.679613  | 0.487528  | 0.469737 | 0.501235   | 0.590261  |
| 0.486992  | 0.400171  | 0.393918  | 0.506032 | 0.0825833  | 0.226863  |
| 0.99915   | 1.62946   | 1.12249   | 2.01417  | 1.16184    | 1.07979   |
| 7.81597   | 5.844     | 5.16438   | 6.85014  | 6.73508    | 7.08251   |
| 0.340557  | 0.292599  | 0.661128  | 0.296578 | 0.316806   | 0.16562   |
| 5.11316   | 3.57513   | 4.50647   | 4.26584  | 5.2493     | 4.19962   |
| 9.23473   | 7.96794   | 8.08733   | 7.62877  | 6.45328    | 7.83018   |
| 7.29735   | 6.50158   | 7.29522   | 7.54139  | 6.93763    | 6.9437    |
| 9.33458   | 6.85641   | 9.41806   | 6.64812  | 5.99797    | 7.35278   |
| 108.874   | 115.432   | 124.402   | 106.648  | 103.611    | 116.714   |
| 1.52952   | 1.24046   | 1.33572   | 0.834827 | 0.849999   | 1.12038   |
| 63.2304   | 63.1822   | 47.8605   | 57.4765  | 45.0099    | 49.1554   |
| 0.614736  | 0.385122  | 0.279702  | 0.334594 | 0.580799   | 0.622831  |
| 43.7344   | 40.93     | 41.92     | 43.651   | 43.4277    | 49.0051   |
| 7.25235   | 5.07752   | 7.59275   | 8.26117  | 7.11663    | 7.19903   |
| 0         | 0         | 0         | 0        | 0          | 0         |
| 0.63011   | 0.451146  | 0.127421  | 0.11432  | 0          | 0.127681  |
| 0         | 0.0650113 | 0         | 0        | 0.00439937 | 0         |
| 0.9149    | 0.870379  | 0.819426  | 0.661662 | 0.787504   | 1.15112   |
| 0.0767727 | 0.0274839 | 0         | 0        | 0.0595154  | 0.124454  |
| 0.0411474 | 0         | 0.0332833 | 0        | 0          | 0         |
| 0.124418  | 0.118776  | 0.11322   | 0.118396 | 0.170737   | 0.113452  |
| 15.2904   | 18.0533   | 15.6201   | 13.6175  | 9.65794    | 15.3717   |
| 2.62469   | 4.1183    | 2.43926   | 2.18847  | 0.432914   | 1.90108   |
| 0         | 0         | 0         | 0        | 0          | 0         |



|           |           |           |           |          |           |
|-----------|-----------|-----------|-----------|----------|-----------|
| 0         | 0         | 0         | 0         | 0        | 0         |
| 1.8997    | 2.04023   | 2.09153   | 3.14026   | 2.20902  | 1.83918   |
| 0         | 0         | 0         | 0         | 0        | 0         |
| 2.36783   | 3.57923   | 3.46643   | 3.56358   | 2.93361  | 3.06887   |
| 3.27448   | 3.41693   | 3.77575   | 3.337     | 2.75446  | 3.1623    |
| 477.34    | 437.453   | 462.145   | 485.393   | 501.735  | 425.771   |
| 0         | 0         | 0         | 0         | 0        | 0         |
| 38.9207   | 31.0769   | 32.6805   | 32.5315   | 30.1719  | 34.6342   |
| 2.37102   | 1.89348   | 1.25399   | 2.05159   | 2.05013  | 2.18049   |
| 0.960254  | 1.41549   | 1.00518   | 1.22978   | 0.613039 | 1.00724   |
| 10.0115   | 11.2652   | 9.92319   | 10.7541   | 10.3201  | 8.66325   |
| 0.0977782 | 0         | 0.158182  | 0.0354797 | 0.303197 | 0.0792526 |
| 11.6946   | 9.89886   | 12.4165   | 10.7753   | 13.7666  | 12.8351   |
| 2.39979   | 2.10361   | 1.93746   | 2.20227   | 2.15057  | 2.11703   |
| 10.4123   | 10.609    | 11.7767   | 10.1986   | 9.14846  | 9.55583   |
| 10.8975   | 11.9672   | 12.4777   | 12.3437   | 13.8421  | 18.6504   |
| 1.54417   | 1.00843   | 0.782523  | 1.25606   | 1.11816  | 1.21035   |
| 2.30303   | 4.1868    | 5.93332   | 1.10434   | 2.31973  | 2.73515   |
| 0.160443  | 0.229748  | 0.129779  | 0.135842  | 0.134743 | 0.335948  |
| 7.10346   | 7.89118   | 6.50007   | 7.21164   | 5.07439  | 7.05957   |
| 0         | 0         | 0         | 0.0430949 | 0        | 0         |
| 78.7184   | 79.2896   | 88.332    | 84.0325   | 86.3172  | 84.5041   |
| 0         | 0.0429056 | 0         | 0         | 0        | 0.0485718 |
| 12.849    | 12.1857   | 11.9808   | 12.4404   | 7.79752  | 10.4146   |
| 0.692613  | 0.725704  | 0.847193  | 1.0298    | 0.720265 | 0.46554   |
| 13.042    | 10.1609   | 12.1958   | 10.3949   | 10.8849  | 12.2667   |
| 0         | 0         | 0         | 0         | 0        | 0         |
| 0         | 0.1746    | 0         | 0         | 0        | 0         |
| 9.48828   | 6.15283   | 6.93752   | 9.09177   | 6.92426  | 5.31398   |
| 79.5817   | 92.5603   | 88.6236   | 91.0509   | 78.9251  | 77.7922   |
| 75.893    | 82.1675   | 80.0259   | 81.0054   | 80.0102  | 79.661    |
| 16.1951   | 15.7993   | 28.3397   | 22.3356   | 18.7071  | 29.9666   |
| 0         | 0         | 0         | 0         | 0        | 0         |
| 0         | 0         | 0         | 0         | 0        | 0         |
| 42.8824   | 37.3954   | 48.6347   | 40.8856   | 38.0745  | 41.7963   |
| 60.1016   | 49.2755   | 48.989    | 55.4135   | 60.9728  | 55.6109   |
| 0         | 0         | 0         | 0         | 0        | 0         |
| 28.8413   | 29.4081   | 22.6763   | 28.3111   | 31.8688  | 28.1453   |
| 0         | 0         | 0         | 0         | 0        | 0         |
| 0.273895  | 0.0735389 | 0.0553871 | 0.173924  | 0.132705 | 0.111001  |
| 40.2804   | 45.4662   | 38.9049   | 38.3907   | 38.672   | 41.3566   |
| 5.26966   | 1.23598   | 5.32816   | 2.24183   | 5.07119  | 4.3452    |
| 0.054163  | 0.0517063 | 0.0292076 | 0.0262047 | 0.041988 | 0.0292673 |

|           |           |           |           |            |           |
|-----------|-----------|-----------|-----------|------------|-----------|
| 7.72086   | 5.25502   | 6.99555   | 5.44049   | 6.54003    | 6.93777   |
| 9.65849   | 11.7387   | 10.3565   | 8.80556   | 7.54511    | 10.9207   |
| 0         | 0         | 0         | 0         | 0          | 0         |
| 1.55909   | 2.64639   | 0.768395  | 2.37163   | 1.36971    | 1.10253   |
| 24.8183   | 20.2376   | 22.7061   | 22.9519   | 24.0442    | 22.1036   |
| 0.979817  | 1.01182   | 0.990692  | 0.73842   | 0.80339    | 0.702539  |
| 0         | 0         | 0         | 0         | 0          | 0         |
| 0         | 0         | 0         | 0         | 0          | 0         |
| 0.452525  | 0.358105  | 0.385304  | 0.259268  | 0.313878   | 0.444005  |
| 18.4195   | 5.6918    | 17.4923   | 18.1952   | 7.1539     | 4.10051   |
| 12.0239   | 8.72465   | 9.21462   | 10.1234   | 11.1101    | 10.2104   |
| 11.4816   | 8.3079    | 10.9803   | 11.8718   | 10.4761    | 10.0968   |
| 82.1945   | 92.0694   | 93.4832   | 91.857    | 83.4036    | 84.3345   |
| 3.93326   | 2.89603   | 3.2041    | 3.13786   | 3.58975    | 3.0976    |
| 0.0117839 | 0.0168742 | 0.0381272 | 0.0256555 | 0.00913509 | 0.0477564 |
| 0         | 0         | 0         | 0         | 0          | 0         |
| 8.13635   | 6.31678   | 7.30488   | 7.30084   | 6.82988    | 6.54513   |
| 0         | 0         | 0         | 0         | 0          | 0         |
| 3.33519   | 2.56307   | 2.85328   | 2.9067    | 2.22456    | 3.35847   |
| 52.8953   | 49.5249   | 71.7662   | 57.5152   | 66.0996    | 30.5377   |
| 40.9779   | 53.4223   | 48.5827   | 48.6479   | 56.795     | 49.9004   |
| 5.92841   | 5.77922   | 6.21554   | 5.24556   | 6.68158    | 5.28569   |
| 0         | 0         | 0.0800739 | 0.0718414 | 0.0767414  | 0         |
| 1.37207   | 0.0280679 | 0.539065  | 0.825039  | 0          | 0.381295  |
| 0         | 0         | 0         | 0         | 0          | 0         |
| 37.3269   | 33.9413   | 28.3791   | 40.3325   | 29.9963    | 31.1189   |
| 10.0669   | 7.59827   | 7.20499   | 7.60306   | 7.38935    | 6.60233   |
| 4.49576   | 2.5251    | 5.06013   | 4.65154   | 3.77719    | 2.71862   |
| 24.7216   | 19.8928   | 23.2995   | 23.8908   | 25.4329    | 21.3847   |
| 7.45962   | 7.08735   | 8.13144   | 7.4673    | 7.03116    | 7.99451   |
| 0.800921  | 0.504631  | 0.708315  | 0.519244  | 0.298026   | 0.631862  |
| 0         | 0.121055  | 0         | 0.109865  | 0.469432   | 0         |
| 43.5617   | 38.9171   | 35.3379   | 32.0118   | 30.3396    | 30.5263   |
| 2.31416   | 2.02316   | 2.04921   | 2.20977   | 1.79397    | 1.63877   |
| 11.3642   | 11.0449   | 10.8016   | 13.2036   | 12.699     | 13.6072   |
| 0         | 0         | 0.0169993 | 0         | 0          | 0.0681363 |
| 6.66E-204 | 0.163548  | 0.430903  | 0         | 0.402335   | 0.260879  |
| 0         | 0         | 0         | 0         | 0          | 0         |
| 40.648    | 36.8267   | 40.3488   | 35.8854   | 36.1406    | 39.7639   |
| 11.4636   | 8.301     | 9.82296   | 8.87608   | 11.389     | 11.4034   |
| 0         | 0         | 0         | 0         | 0          | 0         |
| 14.7961   | 15.1648   | 12.7725   | 14.1524   | 12.9954    | 12.2985   |
| 43.5234   | 46.8174   | 32.9873   | 49.5195   | 43.7624    | 48.5694   |

|          |          |          |          |          |          |
|----------|----------|----------|----------|----------|----------|
| 7.10282  | 7.15321  | 4.79829  | 5.60794  | 6.71637  | 6.51625  |
| 0        | 0        | 0        | 0        | 0        | 0        |
| 0        | 0        | 0        | 0        | 0        | 0        |
| 0.145315 | 0.216756 | 0.179987 | 0.165684 | 0.154003 | 0.264363 |
| 272.846  | 261.609  | 267.193  | 294.059  | 345.434  | 264.934  |
| 4.07424  | 3.19019  | 3.71677  | 3.31559  | 3.22012  | 3.64848  |
| 0.151796 | 0.181138 | 0.163713 | 0.367204 | 0.1569   | 0.369107 |
| 11.8264  | 12.3355  | 11.1128  | 12.6173  | 13.1429  | 11.385   |
| 24.7096  | 32.3933  | 42.3502  | 36.5749  | 34.5598  | 40.4527  |
| 2.2563   | 2.74689  | 2.0331   | 1.4508   | 0.765283 | 0.726277 |
| 19.6524  | 16.0569  | 18.9433  | 18.9872  | 21.1937  | 16.8852  |
| 364.725  | 314.524  | 333.221  | 327.328  | 273.777  | 305.723  |
| 4.53966  | 5.17642  | 5.05472  | 5.04345  | 5.30054  | 3.70226  |
| 1.52019  | 1.08339  | 1.39251  | 1.72968  | 1.41614  | 1.80433  |
| 0        | 0        | 0        | 0        | 0        | 0        |
| 27.3813  | 64.5314  | 49.2566  | 39.0177  | 35.5984  | 17.5698  |
| 0        | 0        | 0        | 0        | 0        | 0        |
| 9.57141  | 6.39516  | 6.55935  | 6.8697   | 6.10162  | 7.94809  |
| 1.36198  | 1.8284   | 1.65251  | 1.36215  | 2.24363  | 2.07233  |
| 20.0317  | 20.016   | 17.0434  | 21.565   | 16.642   | 16.2715  |
| 8.35401  | 6.78879  | 8.15955  | 6.12328  | 8.419    | 7.93924  |
| 0        | 0        | 0        | 23.9837  | 0        | 0        |
| 0        | 0        | 0        | 0        | 0        | 0        |
| 0        | 0        | 0        | 0        | 0        | 0        |
| 0.786554 | 2.06491  | 0.848303 | 6.08871  | 0.609749 | 4.88772  |
| 2.12886  | 1.98693  | 4.55097  | 2.71745  | 2.16605  | 3.52805  |
| 1.61982  | 1.01479  | 0.32756  | 0.587766 | 0.941782 | 0.820574 |
| 13.052   | 14.3589  | 13.3536  | 13.5593  | 11.92    | 12.1249  |
| 135.675  | 130.306  | 131.381  | 156.402  | 150.362  | 117.705  |
| 7.18612  | 6.94613  | 8.99381  | 8.95225  | 8.28675  | 8.82617  |
| 0        | 0        | 0        | 0        | 0        | 0        |
| 0.791189 | 0.556753 | 0.531301 | 0.498345 | 0.382629 | 0.533461 |
| 13.9729  | 16.064   | 11.4585  | 13.2887  | 6.13983  | 8.28038  |
| 7.13047  | 6.17305  | 5.23993  | 7.57605  | 6.71989  | 7.74376  |
| 0.843764 | 0.751625 | 1.43213  | 1.62154  | 1.97288  | 2.21636  |
| 4.87987  | 4.88661  | 6.29431  | 4.9399   | 4.65763  | 5.08228  |
| 2.08395  | 1.2061   | 1.32866  | 1.56889  | 1.56371  | 1.90068  |
| 15.5291  | 14.0567  | 16.4464  | 19.4936  | 12.5806  | 14.8169  |
| 1.44204  | 1.53559  | 1.45061  | 2.90825  | 2.88863  | 2.56444  |
| 2.13099  | 1.67106  | 1.92892  | 2.17246  | 1.84864  | 1.27487  |
| 200.291  | 143.405  | 0        | 0        | 155.269  | 0        |
| 1.53987  | 1.57502  | 0.533814 | 0.798221 | 0.170533 | 1.06981  |
| 45.8457  | 26.724   | 27.7371  | 40.9026  | 23.8117  | 32.8809  |

|          |           |           |           |           |           |
|----------|-----------|-----------|-----------|-----------|-----------|
| 11.6998  | 9.58541   | 9.29881   | 10.7247   | 8.45175   | 8.09344   |
| 2.21575  | 1.33056   | 1.15631   | 1.60801   | 1.10818   | 1.21661   |
| 0        | 0         | 0         | 0         | 0         | 0         |
| 0        | 0         | 0         | 0         | 0         | 0         |
| 7.93065  | 5.15616   | 6.55176   | 6.48492   | 7.67889   | 6.86097   |
| 491.215  | 427.782   | 430.864   | 408.868   | 574.389   | 137.658   |
| 1.28E-05 | 1.30723   | 2.57E-05  | 2.10E-05  | 7.67E-06  | 4.88E-16  |
| 0        | 0.0944809 | 0.10674   | 0         | 0         | 0         |
| 28.316   | 33.8298   | 33.9964   | 34.7962   | 35.3977   | 30.4      |
| 0        | 0         | 0         | 0         | 0         | 0         |
| 39.6498  | 35.2434   | 35.8346   | 38.1518   | 40.1816   | 35.0501   |
| 0        | 0         | 0         | 0         | 0         | 0         |
| 17.8201  | 14.2714   | 18.4552   | 17.1259   | 18.4578   | 17.2439   |
| 0.699156 | 0.816739  | 0.803652  | 0.213638  | 0.399366  | 1.34216   |
| 39.9281  | 33.6648   | 36.5993   | 42.6716   | 45.8899   | 35.0897   |
| 17.9278  | 19.5764   | 15.5322   | 19.3563   | 16.9977   | 18.9612   |
| 0        | 0         | 0         | 0         | 0         | 0         |
| 0.305228 | 0.455286  | 0.423245  | 0.584923  | 0.449203  | 0.791672  |
| 0.367977 | 0.237118  | 0.0297649 | 0.213638  | 0.228209  | 0.387735  |
| 0        | 0         | 0         | 0         | 0         | 0         |
| 0        | 0.0300301 | 0.0339265 | 0.0304385 | 0.0325145 | 0.0339958 |
| 12.1487  | 10.6029   | 10.7317   | 12.2374   | 12.1488   | 12.594    |
| 17.1823  | 21.0499   | 18.6113   | 16.892    | 16.915    | 16.9387   |
| 36.2993  | 38.1662   | 32.2677   | 35.4005   | 38.6314   | 29.2401   |
| 0        | 0         | 0         | 0         | 0         | 0         |
| 0        | 0         | 0         | 0         | 0         | 0         |
| 0        | 0         | 0         | 0         | 0         | 288.87    |
| 2.10121  | 1.42062   | 1.9687    | 2.87795   | 1.74968   | 1.25473   |
| 30.1016  | 30.5426   | 30.6831   | 34.3205   | 26.1733   | 22.6226   |
| 0.247227 | 0.17701   | 0.184594  | 0.234622  | 0.147426  | 0.339114  |
| 1.01663  | 0.424352  | 0.230117  | 0.386788  | 0.454635  | 0.23729   |
| 16.0682  | 11.0738   | 14.8761   | 12.8143   | 13.6652   | 18.0117   |
| 0        | 0         | 0         | 0         | 0         | 0         |
| 0        | 0         | 0         | 0         | 0         | 0.108267  |
| 0.560165 | 0.803296  | 1.05766   | 1.2209    | 1.0135    | 1.5125    |
| 23.0996  | 28.153    | 25.4076   | 25.9569   | 26.5719   | 21.6499   |
| 1.69275  | 1.75932   | 1.5459    | 1.8625    | 1.5239    | 1.32777   |
| 28.4708  | 25.2023   | 31.8912   | 40.3911   | 23.8273   | 34.6697   |
| 8.22439  | 6.0602    | 9.33366   | 8.5741    | 9.38542   | 6.02948   |
| 0        | 0         | 0         | 0         | 0         | 0         |
| 0        | 0         | 0         | 0         | 0         | 0         |
| 0.1424   | 0.0509779 | 0.115185  | 0.0516712 | 0.110391  | 0.17313   |
| 15.9143  | 18.2756   | 17.8199   | 16.7125   | 15.8204   | 13.6578   |

|           |            |           |          |          |           |
|-----------|------------|-----------|----------|----------|-----------|
| 0         | 0          | 0         | 0        | 0        | 0         |
| 0.465918  | 0.333588   | 0.482867  | 0.369824 | 0.428909 | 0.377642  |
| 12.0172   | 11.1938    | 11.2368   | 10.6784  | 8.42135  | 9.14583   |
| 7.05049   | 14.1284    | 6.67919   | 7.36001  | 5.54772  | 9.9363    |
| 0         | 0          | 0         | 0        | 0        | 0         |
| 14.2893   | 12.4971    | 14.7865   | 13.8725  | 15.6144  | 19.4252   |
| 0         | 0          | 0         | 0        | 0        | 0         |
| 0         | 0          | 0         | 0        | 0        | 0         |
| 53.2016   | 67.3312    | 63.689    | 52.2276  | 62.3855  | 55.978    |
| 2.69166   | 1.86808    | 1.85869   | 1.93789  | 1.65953  | 1.99628   |
| 0         | 0          | 0         | 0        | 0        | 0         |
| 102.268   | 104.363    | 114.193   | 103.315  | 108.103  | 92.5143   |
| 0         | 0          | 0         | 0        | 0        | 0         |
| 14.5567   | 11.2577    | 10.9207   | 12.7615  | 10.1863  | 10.9431   |
| 3.54945   | 0.856667   | 4.57956   | 5.22747  | 3.19697  | 3.24409   |
| 38.5551   | 35.4585    | 39.5028   | 40.7223  | 39.1497  | 34.4779   |
| 0         | 0          | 0         | 0        | 0        | 0         |
| 5.45714   | 4.90095    | 5.48582   | 4.87603  | 6.62691  | 5.06239   |
| 1.54861   | 1.30761    | 1.43374   | 1.89375  | 2.24215  | 1.90866   |
| 8.22399   | 8.60656    | 5.95073   | 7.65283  | 4.63042  | 5.7036    |
| 39.8706   | 38.5108    | 34.4856   | 36.1269  | 44.948   | 33.1304   |
| 0         | 0.00839036 | 0         | 0        | 0        | 0         |
| 14.8771   | 12.3497    | 13.2344   | 15.452   | 10.8849  | 13.4413   |
| 331.561   | 415.922    | 296.725   | 309.231  | 284.777  | 263.984   |
| 21.9864   | 25.1468    | 26.6765   | 24.0356  | 22.9274  | 22.8846   |
| 11.6734   | 9.03165    | 10.7624   | 9.59193  | 8.96966  | 10.7606   |
| 0.0556339 | 0.0398328  | 0.0450011 | 0        | 0        | 0.0901863 |
| 7.66241   | 4.64996    | 6.50903   | 5.91217  | 8.56776  | 4.9639    |
| 0.0364163 | 0.15644    | 0.0589129 | 0.105712 | 0.056461 | 0.206617  |
| 28.1025   | 29.2524    | 28.3503   | 29.8856  | 31.7135  | 30.7008   |
| 0         | 0.0354499  | 0.0400495 | 0        | 0        | 0         |
| 0.770204  | 0.662741   | 0.828091  | 0.297777 | 0.368884 | 0.484814  |
| 2.08302   | 2.18341    | 2.12973   | 1.86241  | 2.01525  | 2.02603   |
| 34.265    | 29.3674    | 34.0265   | 37.5839  | 35.1341  | 35.9978   |
| 17.7205   | 18.7904    | 19.6567   | 17.6563  | 25.233   | 15.8717   |
| 39.7925   | 34.8219    | 37.8182   | 38.2311  | 34.0565  | 34.1594   |
| 1.89351   | 1.35572    | 0.68923   | 1.44286  | 0.660546 | 1.30454   |
| 15.0314   | 15.4562    | 15.3871   | 16.6623  | 13.9301  | 11.7582   |
| 0.808441  | 1.44707    | 1.9618    | 1.1734   | 0.626716 | 3.60398   |
| 1.70712   | 1.32542    | 1.57479   | 1.70239  | 1.44741  | 1.39661   |
| 2.39777   | 2.05285    | 1.58947   | 1.77782  | 0.815803 | 0.851711  |
| 0.14456   | 0.0345008  | 0.0389773 | 0.03497  | 0.149421 | 0.117171  |
| 21.8204   | 18.9053    | 19.4455   | 21.459   | 17.3827  | 21.1113   |

|           |           |           |            |           |          |
|-----------|-----------|-----------|------------|-----------|----------|
| 23.5771   | 19.3492   | 24.6487   | 25.9715    | 31.3626   | 24.9456  |
| 8.99078   | 10.7156   | 7.8711    | 7.17128    | 8.351     | 7.39841  |
| 35.4538   | 31.3752   | 32.3993   | 34.5773    | 31.8088   | 28.7831  |
| 7.13655   | 7.48947   | 17.99     | 8.26533    | 6.00604   | 7.54749  |
| 0         | 0         | 0         | 0          | 0         | 0        |
| 5.51013   | 6.85613   | 6.53409   | 5.82349    | 6.13774   | 4.37942  |
| 0.319475  | 0.357933  | 1.01702   | 1.22348    | 0.313094  | 0.289408 |
| 0.271222  | 0.271222  | 0.386538  | 0.386538   | 0.261137  | 0.261137 |
| 1.58402   | 2.26825   | 1.65143   | 1.30282    | 1.30982   | 1.51215  |
| 20.2881   | 16.2301   | 14.4043   | 17.6303    | 17.584    | 19.3343  |
| 19.2139   | 16.5165   | 16.5766   | 20.5464    | 19.1823   | 19.0547  |
| 0         | 0         | 0         | 0.00849835 | 0         | 0        |
| 0.0502621 | 0.0359867 | 0         | 0.0547142  | 0         | 0        |
| 19.3759   | 12.2004   | 12.6939   | 17.448     | 14.2183   | 19.9951  |
| 0         | 0         | 0         | 0          | 0         | 0        |
| 3.56671   | 4.06575   | 3.87203   | 2.14567    | 1.78268   | 2.51055  |
| 2.07191   | 1.48173   | 1.68954   | 1.5561     | 1.49054   | 2.27375  |
| 5.98009   | 5.76021   | 5.89087   | 5.96902    | 7.00801   | 6.25014  |
| 10.5223   | 11.441    | 11.9258   | 11.6965    | 10.9015   | 10.4797  |
| 0.403553  | 0.505639  | 0.0816065 | 0.219649   | 0.0782102 | 0.73596  |
| 2.88458   | 2.39902   | 2.17996   | 2.69088    | 3.0789    | 2.90381  |
| 0.0364884 | 0.339625  | 0.0295147 | 0.0529605  | 0.0282864 | 0        |
| 48.5904   | 37.0827   | 42.6841   | 48.1768    | 37.3822   | 44.0222  |
| 0         | 0.13924   | 0         | 0          | 0         | 0        |
| 3.0339    | 2.23042   | 2.21351   | 2.20427    | 2.98167   | 2.11247  |
| 0         | 0         | 0         | 0          | 0         | 0        |
| 0         | 0         | 0         | 0          | 0         | 0        |
| 0.531969  | 0.66654   | 0.623934  | 0.791422   | 0.536108  | 1.14262  |
| 0.534023  | 0.588618  | 0.366336  | 1.75888    | 0.478241  | 0.832738 |
| 0         | 0.107948  | 0         | 0          | 0         | 0        |
| 1.54721   | 1.5742    | 1.48205   | 1.7729     | 1.60975   | 2.11211  |
| 0         | 0         | 0         | 0          | 0         | 0        |
| 1.53501   | 1.72706   | 1.38576   | 2.00915    | 2.02931   | 1.83294  |
| 1.5916    | 1.15475   | 1.4934    | 1.26286    | 1.23383   | 1.27285  |
| 0         | 0         | 0         | 0          | 0         | 0        |
| 8.93508   | 7.0333    | 8.18262   | 8.45355    | 7.59154   | 9.92094  |
| 0.0444432 | 0         | 0.179746  | 0.0645065  | 0         | 0.108068 |
| 5.9969    | 4.20721   | 7.14049   | 6.6594     | 7.26533   | 8.7438   |
| 0.212997  | 0.152502  | 0.689155  | 0.927454   | 0.495355  | 0.517923 |
| 0.456246  | 0.495271  | 0.772969  | 0.577359   | 0.360201  | 0.582439 |
| 160.339   | 194.425   | 145.445   | 152.34     | 166.446   | 150.477  |
| 19.7188   | 26.086    | 19.4984   | 21.2991    | 21.7037   | 19.0228  |
| 73.3787   | 65.2435   | 60.4881   | 45.9496    | 28.7635   | 42.4045  |

|           |           |           |           |           |           |
|-----------|-----------|-----------|-----------|-----------|-----------|
| 0         | 0         | 0         | 0         | 0         | 0         |
| 0         | 0.0714127 | 0.0201692 | 0         | 0         | 0.0202105 |
| 2.42637   | 2.00161   | 2.23669   | 1.80862   | 1.52238   | 2.6611    |
| 1.55754   | 0.539438  | 1.24726   | 0.241855  | 0.886237  | 1.3661    |
| 26.0958   | 28.6253   | 25.3687   | 25.3097   | 26.3729   | 27.0564   |
| 0.0452332 | 0.0647723 | 0.0365882 | 0.131306  | 0         | 0         |
| 1.79049   | 0.945975  | 1.01016   | 1.04953   | 0.887791  | 1.08553   |
| 11.5787   | 10.7749   | 12.4544   | 11.837    | 12.5603   | 9.77304   |
| 0         | 0         | 0         | 0         | 0         | 0         |
| 0         | 0         | 0         | 0         | 0         | 0         |
| 0.313227  | 0.494354  | 0.0523664 | 0.826355  | 0.122434  | 0.522244  |
| 8.27647   | 4.29405   | 6.74318   | 7.66031   | 6.27657   | 4.66668   |
| 11.8465   | 13.24     | 9.55322   | 10.5631   | 9.14164   | 9.77768   |
| 0         | 0         | 19.0432   | 0         | 0         | 0         |
| 16.1406   | 14.162    | 14.753    | 13.1583   | 12.0311   | 13.3905   |
| 7.53463   | 8.44245   | 9.99411   | 7.1567    | 13.5629   | 2.79481   |
| 0.926154  | 0.740107  | 1.16216   | 1.01437   | 1.15736   | 1.05404   |
| 0.149037  | 0.106708  | 0.160737  | 0.324476  | 0.115536  | 0         |
| 0.875323  | 0.533374  | 0.617644  | 0.648753  | 0.707439  | 0.407573  |
| 0         | 0         | 0         | 0         | 0         | 0         |
| 1.81455   | 1.61099   | 1.55582   | 2.31766   | 1.99747   | 1.47075   |
| 13.1428   | 11.017    | 11.6039   | 11.8556   | 12.7303   | 8.81513   |
| 4.96803   | 6.47572   | 5.47235   | 5.48719   | 5.03593   | 5.58548   |
| 10.4906   | 9.60103   | 9.75923   | 9.79579   | 10.1622   | 11.2561   |
| 1.16508   | 1.36102   | 1.58721   | 1.42403   | 1.0458    | 0.79523   |
| 3.60187   | 3.58095   | 2.56386   | 2.82306   | 1.99445   | 2.36892   |
| 2.11986   | 2.98689   | 2.54058   | 2.27938   | 2.43484   | 2.94552   |
| 2.27841   | 1.70122   | 1.41299   | 1.5719    | 1.55815   | 1.60027   |
| 0.065144  | 0         | 0.0175645 | 0.0157587 | 0.0505006 | 0.0352009 |
| 0         | 0         | 0         | 0         | 0         | 0         |
| 2.4188    | 2.2716    | 1.93111   | 2.18851   | 2.36213   | 2.58432   |
| 12.9217   | 10.3049   | 11.5365   | 10.4045   | 9.20882   | 10.8055   |
| 23.8466   | 30.7196   | 31.0655   | 33.2451   | 31.0273   | 41.3542   |
| 15.488    | 14.1033   | 14.2801   | 14.9599   | 15.876    | 15.6605   |
| 5.7369    | 5.43301   | 6.81856   | 4.60883   | 4.34793   | 1.36712   |
| 23.0139   | 18.6464   | 21.3738   | 22.6748   | 22.4322   | 24.4435   |
| 49.4334   | 58.4891   | 56.8158   | 62.6288   | 55.642    | 49.1223   |
| 2.75319   | 1.45521   | 1.59023   | 1.01522   | 1.2972    | 1.72948   |
| 4.1934    | 2.6308    | 1.4179    | 3.91122   | 1.88692   | 3.57511   |
| 0.454572  | 0.622213  | 0.240323  | 0.53532   | 0.235849  | 0.484381  |
| 48.9382   | 45.6177   | 47.4841   | 52.5381   | 49.0628   | 44.5048   |
| 10.0085   | 10.6881   | 11.3597   | 11.0696   | 10.4681   | 11.0837   |
| 0.0401981 | 0.0863432 | 0.0758693 | 0         | 0.0207748 | 0         |

|           |           |           |           |           |           |
|-----------|-----------|-----------|-----------|-----------|-----------|
| 0         | 0.044708  | 0         | 0         | 0         | 0         |
| 51.9515   | 55.2821   | 53.8135   | 48.8427   | 39.6101   | 56.4062   |
| 0.0355349 | 0.0381635 | 0.0287435 | 0.0386825 | 0.110189  | 0.0144011 |
| 24.2034   | 22.8936   | 22.4443   | 26.7335   | 18.9135   | 19.5329   |
| 0         | 0         | 0         | 0         | 0         | 0         |
| 6.54783   | 4.44087   | 4.57342   | 5.0762    | 5.43817   | 6.35002   |
| 29.9756   | 28.7491   | 25.9284   | 28.5267   | 27.9929   | 23.0655   |
| 1.20694   | 0.840472  | 0.56169   | 0.515941  | 0.948457  | 0.603042  |
| 0.899421  | 0.579572  | 0.485016  | 0.478666  | 0.674004  | 0.874813  |
| 0.15983   | 0.0762902 | 0.158013  | 0.0644398 | 0.0826019 | 0.129548  |
| 0.723839  | 1.33666   | 1.16931   | 1.3546    | 0.631013  | 0.684123  |
| 2.77697   | 3.05886   | 3.80133   | 2.17032   | 1.98716   | 2.59711   |
| 8.57664   | 8.95019   | 8.55473   | 9.35668   | 9.2561    | 8.58734   |
| 9.06189   | 5.67712   | 7.7881    | 7.31622   | 6.55659   | 7.74282   |
| 33.6106   | 24.1591   | 30.1813   | 31.5813   | 34.1863   | 31.2152   |
| 17.4606   | 13.3913   | 16.6166   | 14.8648   | 14.9571   | 16.3165   |
| 14.5319   | 11.364    | 11.2741   | 13.4251   | 12.8535   | 11.9499   |
| 0         | 0         | 0         | 0         | 0         | 0         |
| 4.65135   | 4.20727   | 4.59098   | 5.20825   | 4.8072    | 2.65474   |
| 8.33654   | 7.4295    | 5.47399   | 4.91951   | 4.5198    | 4.56147   |
| 25.7947   | 21.2558   | 25.2258   | 25.9959   | 24.1112   | 25.9829   |
| 41.8672   | 32.0042   | 38.1127   | 41.6816   | 51.0586   | 38.2466   |
| 4.18946   | 4.2851    | 4.8142    | 6.75637   | 3.32506   | 2.66805   |
| 0.483621  | 0.661276  | 0.56162   | 0.470673  | 0.160649  | 0.23329   |
| 8.20114   | 6.90265   | 7.36157   | 7.25773   | 7.53352   | 7.60584   |
| 0         | 0         | 0         | 0         | 0.0232301 | 0         |
| 1.24403   | 0.734829  | 0.662461  | 0.865198  | 0.803659  | 1.13437   |
| 0         | 0         | 0         | 0         | 0         | 0         |
| 0.0608639 | 0.174311  | 0         | 0.0441701 | 0         | 0         |
| 8.23708   | 7.56449   | 6.51942   | 9.48558   | 6.5321    | 6.06339   |
| 12.6      | 9.24126   | 11.9609   | 10.7223   | 12.1918   | 13.0908   |
| 0         | 0.413935  | 0         | 0.419564  | 0.89636   | 0         |
| 1.0687    | 2.26819   | 1.88327   | 2.71452   | 2.01201   | 2.72241   |
| 17.9999   | 17.2523   | 16.8296   | 20.0855   | 17.1191   | 17.7199   |
| 0         | 0.0410076 | 0         | 0         | 0         | 0         |
| 15.0897   | 11.3817   | 14.437    | 13.6541   | 12.2903   | 13.8729   |
| 72.7653   | 66.5656   | 64.5575   | 75.8459   | 81.6154   | 72.1726   |
| 0         | 0         | 0         | 0         | 0         | 0         |
| 11.6016   | 8.75703   | 8.97074   | 10.1034   | 11.1583   | 8.86157   |
| 14.4383   | 16.0248   | 20.1161   | 16.8113   | 16.8963   | 16.6325   |
| 110.561   | 138.509   | 100.44    | 108.493   | 109.319   | 102.816   |
| 35.2289   | 42.9319   | 38.3327   | 34.4674   | 24.1228   | 31.346    |
| 0.659964  | 1.78883   | 1.18205   | 0.752632  | 0.95014   | 1.45193   |



|          |           |           |           |           |          |
|----------|-----------|-----------|-----------|-----------|----------|
| 0.373652 | 0.267528  | 0.906718  | 0.271166  | 0         | 0.302857 |
| 1.0189   | 0.902203  | 0.959835  | 0.544498  | 0.725759  | 0.744226 |
| 0.769828 | 0.435388  | 0.654095  | 0.525815  | 0.832487  | 0.650189 |
| 0        | 0         | 0.0131234 | 0         | 0         | 0        |
| 0.160027 | 0.0216294 | 0         | 0.0219235 | 0         | 0.110197 |
| 8.27882  | 8.86035   | 8.85901   | 9.73185   | 9.12541   | 6.88501  |
| 11.108   | 10.4771   | 3.93701   | 6.276     | 13.73     | 4.64453  |
| 3.01163  | 2.44197   | 2.88254   | 2.38391   | 2.43637   | 2.98593  |
| 5.42296  | 3.47887   | 4.228     | 3.75755   | 3.57857   | 4.12697  |
| 62.1227  | 67.7366   | 62.173    | 74.0495   | 71.2268   | 69.8594  |
| 6.26768  | 5.54969   | 4.73019   | 6.87746   | 5.56461   | 5.5918   |
| 179.987  | 94.4879   | 113.713   | 307.645   | 143.243   | 281.803  |
| 0.296786 | 0         | 0         | 0         | 0.0511274 | 0        |
| 7.3217   | 6.04288   | 6.05891   | 6.21693   | 6.23203   | 6.68698  |
| 2.03546  | 1.62422   | 1.97322   | 1.7929    | 1.22861   | 2.04022  |
| 0        | 0         | 0         | 0         | 0         | 0        |
| 2.69629  | 4.08662   | 3.82378   | 3.22736   | 4.04468   | 2.5544   |
| 5.00246  | 3.73876   | 4.50782   | 4.10806   | 4.13312   | 4.46369  |
| 25.6674  | 21.9614   | 24.3371   | 24.8541   | 25.0012   | 26.1457  |
| 10.1054  | 8.39022   | 8.32758   | 9.57167   | 10.5187   | 9.69051  |
| 0        | 0         | 0         | 1.72E-12  | 0         | 0        |
| 0        | 0         | 0.0348777 | 0         | 0         | 0        |
| 56.6158  | 46.9284   | 25.0507   | 43.4823   | 24.1924   | 27.9281  |
| 1.08238  | 1.10499   | 1.75369   | 1.90855   | 0.844904  | 1.76263  |
| 1.75505  | 1.17066   | 1.36761   | 1.33187   | 1.53569   | 1.40561  |
| 1.22181  | 0.966703  | 1.19695   | 1.26047   | 1.01454   | 1.67683  |
| 60.4022  | 42.1639   | 63.7103   | 76.2698   | 66.093    | 66.6172  |
| 2.07184  | 3.58672   | 2.60134   | 3.29887   | 5.2978    | 3.75961  |
| 32.0313  | 27.1449   | 32.4029   | 34.4936   | 34.7513   | 33.6288  |
| 0        | 0         | 0         | 0         | 0         | 0        |
| 1.95374  | 1.36316   | 1.67472   | 1.03746   | 1.42877   | 1.56331  |
| 2.405    | 1.2316    | 1.89733   | 1.83031   | 1.79375   | 1.04585  |
| 1.38342  | 1.67623   | 0.688626  | 1.00397   | 0.742463  | 1.81134  |
| 8.16863  | 5.08684   | 5.73228   | 6.63478   | 5.98297   | 7.00096  |
| 0.749413 | 0.453826  | 1.04228   | 0.662142  | 0.326448  | 0.398207 |
| 1.7473   | 2.06253   | 2.89961   | 0.603157  | 1.00494   | 0.517292 |
| 90.5401  | 88.2378   | 99.9126   | 108.265   | 104.003   | 75.7447  |
| 4.26422  | 3.61761   | 4.74099   | 3.6239    | 3.96678   | 5.37368  |
| 0.232194 | 0.277078  | 0.0626057 | 0.224677  | 0.12      | 0        |
| 0.271632 | 0.212163  | 0.159794  | 0.232969  | 0.363717  | 0.240182 |
| 0        | 0         | 0         | 0         | 0         | 0        |
| 7.89136  | 5.72108   | 6.36874   | 6.3069    | 4.85642   | 6.01241  |
| 35.9394  | 38.4552   | 37.0638   | 36.4507   | 37.4405   | 43.5676  |

|            |           |            |           |           |           |
|------------|-----------|------------|-----------|-----------|-----------|
| 0.17967    | 0.0643201 | 0.0726657  | 0.0651949 | 0.139283  | 0         |
| 0.554923   | 0.430424  | 0.610956   | 0.481024  | 0.442134  | 0.474772  |
| 19.714     | 20.4488   | 22.6953    | 21.78     | 23.2837   | 22.6763   |
| 14.7194    | 15.0261   | 13.1155    | 12.4764   | 15.6452   | 15.4259   |
| 73.3916    | 114.036   | 103.82     | 87.0933   | 119.856   | 77.7552   |
| 6.50879    | 5.43695   | 4.90273    | 6.28859   | 3.55886   | 4.44316   |
| 0          | 0.0531309 | 0.0600246  | 0         | 0         | 0         |
| 3.32819    | 2.70623   | 3.32793    | 3.3499    | 4.2007    | 3.38895   |
| 74.9236    | 79.4427   | 17.3461    | 62.0313   | 42.2787   | 242.629   |
| 15.3724    | 13.6703   | 14.7787    | 17.7217   | 17.716    | 14.5307   |
| 2805.14    | 2640.26   | 2840.23    | 2892.38   | 3414.61   | 2758.04   |
| 4.69682    | 5.28754   | 3.94527    | 4.24476   | 1.79564   | 3.83126   |
| 0.0544436  | 0.311845  | 0.132115   | 0.355596  | 0.126617  | 0.176513  |
| 1.05635    | 1.18052   | 1.09097    | 1.06957   | 0.986905  | 1.18936   |
| 4.66151    | 6.27402   | 6.05045    | 5.67752   | 5.40646   | 5.15487   |
| 0.115828   | 0.0955122 | 0.0931895  | 0.143644  | 0.0694483 | 0.0699478 |
| 0          | 0         | 0          | 0         | 0         | 0         |
| 0.932209   | 0.296642  | 0.0837828  | 0.601352  | 0.321184  | 0.587679  |
| 0          | 0         | 0.111686   | 0.100203  | 0         | 0.111914  |
| 36.0406    | 37.975    | 39.446     | 41.6597   | 43.853    | 40.2795   |
| 4.70986    | 5.22385   | 4.66016    | 5.76955   | 6.27865   | 4.44016   |
| 0.04717    | 0         | 0          | 0.0342321 | 0         | 0         |
| 0.00683371 | 0         | 0.0342332  | 0         | 0.0213149 | 0         |
| 2.41655    | 2.52267   | 2.26805    | 1.78051   | 2.33096   | 2.03346   |
| 126.577    | 98.367    | 147.651    | 185.171   | 140.731   | 138.654   |
| 67.5544    | 53.6847   | 60.7028    | 62.9864   | 72.6221   | 64.3279   |
| 23.6067    | 36.6297   | 45.2535    | 29.4968   | 38.3645   | 26.6844   |
| 4.6473     | 5.95642   | 3.94475    | 3.99719   | 2.51297   | 4.11557   |
| 0          | 0         | 0.00596997 | 0         | 0         | 0         |
| 6.52296    | 6.41275   | 6.38963    | 7.48437   | 6.9433    | 5.67512   |
| 0          | 0         | 0          | 0         | 0         | 0         |
| 0          | 0         | 0          | 0         | 0         | 0         |
| 3.24201    | 2.19437   | 2.49034    | 3.8087    | 2.45386   | 2.44929   |
| 0          | 0.490432  | 0          | 0.248551  | 0.265503  | 0.555199  |
| 1.87476    | 1.68855   | 2.30051    | 2.50094   | 1.14697   | 1.57597   |
| 3.23394    | 2.55775   | 3.01129    | 3.02918   | 4.11031   | 3.65751   |
| 15.1154    | 14.8427   | 16.5045    | 16.8925   | 17.6651   | 15.4269   |
| 6.21346    | 4.34922   | 5.74852    | 5.79139   | 5.27844   | 5.63155   |
| 20.438     | 20.4153   | 19.5642    | 17.7463   | 18.0434   | 20.6708   |
| 0          | 0         | 0          | 0         | 0         | 0         |
| 1.3451     | 1.5234    | 2.78931    | 2.3428    | 1.70631   | 1.52635   |
| 0          | 0.149365  | 0.0281241  | 0.075698  | 0.0269536 | 0         |
| 15.0026    | 8.3778    | 12.0167    | 13.938    | 15.0316   | 12.6004   |

|           |           |          |           |           |           |
|-----------|-----------|----------|-----------|-----------|-----------|
| 0.97271   | 0.348221  | 1.37691  | 0.352957  | 1.13109   | 0         |
| 3.10606   | 3.95357   | 3.25686  | 3.86819   | 3.24022   | 2.70406   |
| 0         | 0         | 0        | 0         | 0         | 0         |
| 1.51283   | 1.15618   | 0.866212 | 1.19657   | 0.737921  | 0.895538  |
| 6.04545   | 6.04995   | 5.05996  | 4.2691    | 3.69931   | 5.80364   |
| 7.64086   | 6.244     | 8.14511  | 6.70687   | 7.01883   | 8.11054   |
| 0.0749339 | 0.125186  | 0.101021 | 0.108762  | 0.0387266 | 0.0404909 |
| 627.132   | 778.098   | 678.29   | 563.068   | 590.095   | 380.707   |
| 1.07734   | 0.833065  | 0.313719 | 0.688025  | 0.200441  | 0.663649  |
| 0.881347  | 0.588259  | 1.09236  | 1.66101   | 1.09187   | 1.37988   |
| 0.773054  | 0.201885  | 0.284572 | 0.102315  | 0.110904  | 0.512662  |
| 524.264   | 605.529   | 546.756  | 599.712   | 627.497   | 584.106   |
| 10.6187   | 5.82087   | 7.0171   | 9.66712   | 7.75402   | 9.58661   |
| 103.819   | 105.227   | 99.6068  | 95.9596   | 105.496   | 103.428   |
| 0.436914  | 0.655439  | 0.881446 | 1.45958   | 0.811002  | 2.9019    |
| 4.56701   | 4.31032   | 3.24639  | 3.31436   | 2.89671   | 2.9165    |
| 23.1526   | 21.3132   | 24.8578  | 23.9955   | 24.2941   | 24.0907   |
| 0.71367   | 0.351295  | 0.577274 | 0.356072  | 0.553248  | 0.686914  |
| 16.2336   | 12.087    | 12.1882  | 13.2429   | 13.8077   | 13.0624   |
| 38.0972   | 37.8012   | 43.5962  | 37.3103   | 35.6989   | 18.6195   |
| 3.53673   | 3.88751   | 4.19045  | 4.95259   | 5.0973    | 3.99715   |
| 6.06422   | 6.19917   | 6.404    | 6.11233   | 6.18973   | 5.32482   |
| 0         | 0         | 0        | 0         | 0         | 0         |
| 0.461094  | 0.429175  | 0.522157 | 0.435011  | 0.786383  | 0.784837  |
| 5.53212   | 6.10804   | 7.44659  | 5.97958   | 6.76906   | 7.02122   |
| 0.0303631 | 0         | 0        | 0         | 0         | 0         |
| 39.076    | 35.2766   | 39.906   | 41.8745   | 45.7613   | 36.7009   |
| 0.0380892 | 0.0545422 | 0.184857 | 0.193494  | 0.265746  | 0.216108  |
| 7.64923   | 5.9403    | 6.93054  | 7.53759   | 7.67905   | 6.01779   |
| 18.8005   | 8.87517   | 7.09033  | 10.1525   | 12.6295   | 10.0472   |
| 2.16028   | 1.63093   | 1.59953  | 1.51754   | 1.99553   | 2.08784   |
| 0         | 0         | 0        | 0         | 0         | 0         |
| 1.36951   | 1.7375    | 1.1272   | 1.46466   | 1.09892   | 2.10322   |
| 0.381109  | 0.131481  | 0.291791 | 0.0589514 | 0.446312  | 0.47259   |
| 14.8123   | 22.613    | 15.7781  | 18.1298   | 15.2901   | 17.1412   |
| 0         | 0         | 0        | 0         | 0         | 0         |
| 38.6824   | 48.872    | 34.5082  | 40.0924   | 29.1442   | 37.8042   |
| 41.55     | 30.2212   | 41.9312  | 36.8544   | 32.4147   | 47.3626   |
| 79.6235   | 82.7541   | 84.4928  | 93.9128   | 87.8668   | 82.898    |
| 12.6431   | 10.7645   | 12.3829  | 11.5799   | 12.2055   | 11.8226   |
| 0         | 0         | 0        | 0         | 0         | 0         |
| 35.2462   | 40.377    | 38.7044  | 36.2754   | 38.4184   | 43.9778   |
| 5.29957   | 3.41132   | 3.99776  | 4.21506   | 4.70083   | 4.50199   |

|            |           |           |           |            |           |
|------------|-----------|-----------|-----------|------------|-----------|
| 451.199    | 433.873   | 396.702   | 415.12    | 444.36     | 406.045   |
| 9.24343    | 6.92016   | 7.32012   | 10.4387   | 8.41591    | 11.7882   |
| 1.22647    | 1.53673   | 1.35282   | 1.31488   | 1.2533     | 0.451863  |
| 0          | 0         | 0         | 0         | 0          | 0         |
| 0.780301   | 1.07439   | 0.582618  | 0.566279  | 0.390712   | 1.36267   |
| 0          | 0         | 0         | 0         | 0          | 0         |
| 0.10929    | 0.352124  | 0.265208  | 0.475884  | 0          | 0         |
| 23.1149    | 25.4035   | 26.0326   | 20.0444   | 26.1036    | 22.4662   |
| 0          | 2.22E-259 | 0.0262855 | 0         | 0          | 0         |
| 9.00233    | 6.58778   | 9.16253   | 7.74459   | 10.1369    | 8.74637   |
| 0.299588   | 0.17428   | 0.10602   | 0.183445  | 0.152411   | 0.288356  |
| 0.867854   | 1.10958   | 0.852415  | 1.07969   | 0.768884   | 1.60783   |
| 0          | 0         | 0         | 0         | 0          | 0         |
| 0          | 0.0692065 | 0         | 0         | 0          | 0         |
| 286.768    | 316.154   | 336.72    | 287.701   | 302.354    | 302.465   |
| 7.5889     | 9.35155   | 8.68578   | 11.0148   | 6.92357    | 14.7291   |
| 0.492851   | 2.4701    | 0.797315  | 1.07301   | 1.1462     | 0.998681  |
| 8.76456    | 5.87617   | 4.86624   | 5.16101   | 7.95662    | 5.57724   |
| 0          | 0         | 0         | 0         | 0          | 0         |
| 5.45543    | 6.36778   | 4.52403   | 4.55796   | 3.7849     | 4.23602   |
| 0.0684738  | 0         | 0         | 0         | 0.0796229  | 0.166501  |
| 0          | 0         | 0         | 0         | 0          | 0         |
| 8.90564    | 8.08027   | 8.94239   | 9.0816    | 8.95707    | 11.232    |
| 0.0739823  | 0.0176566 | 0.0199476 | 0         | 0.0191174  | 0.0199884 |
| 0.725322   | 0         | 1.46674   | 0.789568  | 0.843421   | 1.1758    |
| 8.30014    | 8.47949   | 7.67555   | 7.94624   | 6.19106    | 6.85102   |
| 21.9783    | 31.4645   | 19.4286   | 12.9147   | 19.2723    | 7.73041   |
| 0.160255   | 0.11474   | 0.103702  | 0.18608   | 0.173925   | 0.363699  |
| 0          | 0         | 0         | 0         | 0          | 0         |
| 106.836    | 118.346   | 130.49    | 122.206   | 123.318    | 103.382   |
| 23.4677    | 20.0648   | 20.4438   | 20.8491   | 20.7677    | 22.8788   |
| 4.15342    | 3.16618   | 1.87106   | 2.2031    | 1.79831    | 0.776186  |
| 55.0765    | 52.71     | 53.4803   | 42.7733   | 54.9498    | 35.6391   |
| 2.34995    | 2.4197    | 2.29267   | 1.77571   | 1.78972    | 2.33662   |
| 0.00460254 | 0.0059316 | 0         | 0         | 0.00441748 | 0         |
| 5.36798    | 3.50019   | 3.5279    | 4.15649   | 3.08383    | 4.48687   |
| 6.14752    | 6.99722   | 4.4953    | 4.97175   | 3.8626     | 3.63692   |
| 0.0628151  | 0         | 0.0169366 | 0.0759767 | 0          | 0.0169712 |
| 3.70453    | 0         | 0         | 0         | 0          | 1.50133   |
| 0.0599744  | 0         | 0         | 0.174098  | 0.0929861  | 0.145834  |
| 11.8297    | 11.7858   | 13.1747   | 11.0271   | 10.0581    | 11.6832   |
| 0          | 0         | 0         | 0         | 0          | 0         |
| 0          | 0         | 0         | 0         | 0          | 0         |

|           |           |           |           |           |           |
|-----------|-----------|-----------|-----------|-----------|-----------|
| 3.74111   | 3.47141   | 5.59224   | 4.15936   | 4.08343   | 5.19128   |
| 16.4038   | 11.5132   | 9.99972   | 9.03432   | 7.36407   | 10.7943   |
| 12.3233   | 16.0868   | 12.0867   | 13.5495   | 13.1531   | 15.6583   |
| 7.61288   | 7.28799   | 8.37199   | 8.65967   | 6.99575   | 9.22108   |
| 13.8186   | 10.4631   | 12.2035   | 11.7182   | 11.5929   | 14.6066   |
| 13.351    | 12.4268   | 13.4392   | 16.5791   | 13.9149   | 15.03     |
| 0         | 0         | 0         | 0         | 0         | 0         |
| 0.984391  | 0.836956  | 0.846019  | 1.38413   | 0.620031  | 0.897617  |
| 0         | 0.63727   | 0.239985  | 0.430625  | 0.229998  | 0.961905  |
| 0.427507  | 0.140266  | 0.369707  | 0.417138  | 0.129245  | 0.329323  |
| 6.94771   | 4.93609   | 5.48874   | 6.16173   | 4.22069   | 4.792     |
| 0.0789945 | 0.0141386 | 0.0159731 | 0         | 0.0153084 | 0.0640277 |
| 51.5525   | 43.048    | 37.4194   | 50.112    | 49.8207   | 49.3735   |
| 2.90192   | 3.00115   | 2.52118   | 3.54896   | 2.5204    | 5.24867   |
| 14.9796   | 11.7051   | 13.421    | 13.3277   | 14.3339   | 13.3609   |
| 0.412209  | 0.733196  | 0.169213  | 0.301406  | 0.521119  | 0.260278  |
| 1.34172   | 1.03377   | 1.02896   | 1.01751   | 0.809781  | 1.07998   |
| 0         | 0.0805768 | 0         | 0         | 0         | 0         |
| 2.40063   | 1.66462   | 3.29155   | 2.73438   | 2.19135   | 3.21346   |
| 0         | 0         | 0         | 0         | 0         | 0         |
| 0.797382  | 1.0573    | 0.843559  | 0.578675  | 3.16594   | 0.440341  |
| 0.19115   | 0.215065  | 0.154617  | 0.118904  | 0.0423378 | 0.177067  |
| 12.2001   | 14.2084   | 16.8801   | 9.91863   | 16.5669   | 12.3367   |
| 0         | 0         | 0         | 0         | 0         | 0         |
| 36.9108   | 31.0346   | 35.9582   | 35.7705   | 30.8805   | 37.9804   |
| 0         | 0         | 0         | 0         | 0         | 0         |
| 2.40742   | 1.71377   | 1.64508   | 1.56636   | 1.48981   | 1.45772   |
| 15.3636   | 15.9085   | 14.3358   | 13.9878   | 12.6674   | 12.3531   |
| 31.2588   | 34.9494   | 32.212    | 29.0417   | 36.1583   | 30.6061   |
| 1239.8    | 1114.73   | 1188.49   | 1349.18   | 1338.37   | 1250.44   |
| 36.8911   | 35.8889   | 35.1633   | 34.7483   | 27.5183   | 35.5873   |
| 0         | 0         | 0         | 0         | 0         | 0         |
| 0         | 0.0903606 | 0         | 0         | 0         | 0         |
| 21.3689   | 18.1406   | 20.0881   | 19.5534   | 22.0662   | 25.5364   |
| 0         | 0         | 0         | 0         | 0         | 0         |
| 9.37853   | 8.35261   | 10.7316   | 10.6828   | 9.95113   | 9.68469   |
| 23.0013   | 25.2188   | 20.5318   | 24.1518   | 24.5844   | 23.2153   |
| 0.0877671 | 0         | 0         | 0.0212314 | 0.0226795 | 0.0237127 |
| 20.1113   | 20.7607   | 19.1646   | 19.3435   | 17.4059   | 14.9797   |
| 27.829    | 34.8794   | 29.2426   | 34.3023   | 28.1569   | 29.5782   |
| 30.0339   | 29.6326   | 26.9511   | 29.5259   | 29.2774   | 27.7968   |
| 2.68562   | 3.001     | 2.09358   | 1.31587   | 1.43337   | 1.89818   |
| 5.38241   | 5.32041   | 4.14253   | 5.21786   | 5.72944   | 5.53467   |

|           |           |           |           |          |           |
|-----------|-----------|-----------|-----------|----------|-----------|
| 1.61752   | 5.24249   | 0.494209  | 4.43152   | 2.93636  | 0.535775  |
| 0.497044  | 0.977762  | 0.677505  | 0.483057  | 0.363621 | 0.837235  |
| 12.0912   | 6.52148   | 10.9402   | 10.324    | 12.2349  | 12.4622   |
| 25.5127   | 26.6527   | 20.9079   | 19.926    | 22.6968  | 20.0294   |
| 0         | 0         | 0         | 0         | 0        | 0         |
| 25.4022   | 18.1449   | 26.2094   | 25.5296   | 28.4904  | 27.7578   |
| 9.86411   | 11.2828   | 10.4115   | 13.3568   | 12.5893  | 11.1153   |
| 0         | 0         | 0         | 0         | 0        | 0         |
| 2.54371   | 2.6451    | 2.15261   | 2.30078   | 1.31447  | 1.5147    |
| 62.0367   | 94.2606   | 48.0913   | 59.159    | 50.3114  | 51.1474   |
| 24.4268   | 25.4301   | 22.0865   | 21.3083   | 26.3156  | 17.8519   |
| 2.42659   | 1.3597    | 1.10942   | 1.53132   | 0.736094 | 1.62477   |
| 0.0700865 | 0         | 0         | 0         | 0        | 0.0568074 |
| 57.886    | 48.7504   | 49.0685   | 55.0548   | 65.3472  | 50.7721   |
| 0         | 0         | 0         | 0         | 0        | 0         |
| 0.102676  | 0.0367569 | 0         | 0.0372568 | 0        | 0.0832222 |
| 11.7176   | 10.233    | 12.3093   | 14.5855   | 12.2444  | 7.99972   |
| 10.246    | 7.58551   | 8.55165   | 8.64911   | 9.796    | 9.50942   |
| 12.6166   | 10.6337   | 7.99733   | 9.82679   | 9.86387  | 11.3237   |
| 3.07387   | 3.31929   | 3.62769   | 2.26734   | 2.73449  | 3.30836   |
| 0.34369   | 0.49215   | 0.494228  | 0.498843  | 0.444056 | 0.402382  |
| 0         | 0         | 0         | 0         | 0        | 0         |
| 7.85652   | 8.33275   | 7.73613   | 8.04925   | 7.85204  | 7.64113   |
| 1.58636   | 1.34706   | 1.33023   | 1.06745   | 0.865089 | 1.2858    |
| 0         | 0         | 0         | 0         | 0        | 0         |
| 10.5706   | 8.34836   | 10.1772   | 9.41754   | 9.87426  | 9.96512   |
| 0.250057  | 0.403431  | 0.39159   | 0.263717  | 0.22167  | 0.454722  |
| 0         | 0         | 0         | 0.0131636 | 0        | 0         |
| 0         | 0         | 0         | 0         | 0        | 0         |
| 0.7996    | 0.817568  | 0.718792  | 0.576008  | 0.688878 | 0.592056  |
| 5.24201   | 3.46812   | 4.27593   | 4.1734    | 4.52664  | 4.26675   |
| 2.93318   | 2.40788   | 3.00665   | 2.88104   | 1.8034   | 2.64388   |
| 125.667   | 138.256   | 124.183   | 135.718   | 137.311  | 119.475   |
| 0.0312763 | 0         | 0.101196  | 0.0907918 | 0        | 0         |
| 0.0623533 | 0.0529121 | 0.0112064 | 0.0100542 | 0.01074  | 0.0598997 |
| 171.718   | 151.675   | 123.811   | 179.605   | 131.725  | 157.227   |
| 3.77875   | 2.73772   | 3.89346   | 3.81964   | 2.40625  | 2.47941   |
| 10.1588   | 8.58234   | 8.67085   | 9.00818   | 8.30198  | 8.96757   |
| 0.228661  | 0         | 0.277438  | 0.248915  | 0.265892 | 0.185337  |
| 3.3891    | 2.378     | 2.42797   | 2.73179   | 1.95727  | 1.98843   |
| 2.58185   | 2.60025   | 2.53035   | 2.51899   | 2.26725  | 2.24897   |
| 0         | 0         | 0         | 0         | 0.265349 | 0         |
| 1.25686   | 0.837827  | 0.981593  | 0.77059   | 0.806349 | 1.14175   |

|           |           |           |           |          |          |
|-----------|-----------|-----------|-----------|----------|----------|
| 0.554279  | 0.124017  | 0.0280216 | 0.213696  | 0.134277 | 0.449262 |
| 13.5783   | 12.3068   | 11.8086   | 12.6451   | 10.6782  | 13.3277  |
| 10.6036   | 7.4439    | 9.70446   | 8.92014   | 9.59575  | 10.0769  |
| 0.105958  | 0.504137  | 0.262966  | 0.0448559 | 0        | 0.276052 |
| 19.7341   | 14.4737   | 18.7956   | 17.2003   | 19.3016  | 19.3057  |
| 0.728373  | 0.825485  | 0.438651  | 0.210832  | 0.763934 | 1.04415  |
| 21.4338   | 16.5454   | 16.947    | 17.5327   | 19.0146  | 20.5942  |
| 4.75646   | 4.78334   | 4.17047   | 3.87345   | 2.75842  | 3.53154  |
| 5.6121    | 4.81271   | 3.3854    | 4.0728    | 3.44114  | 3.28953  |
| 0.0928077 | 0.110748  | 0.0250234 | 0.0449015 | 0        | 0.100298 |
| 0.151652  | 0.135725  | 0.0920013 | 0.110057  | 0.117563 | 0.153649 |
| 0.0725463 | 0.0259709 | 0         | 0.13162   | 0.056239 | 0        |
| 6.39478   | 5.70845   | 7.04706   | 5.74963   | 7.06945  | 6.08208  |
| 13.974    | 14.0468   | 13.5703   | 15.4696   | 14.4948  | 16.5417  |
| 2.25851   | 1.46487   | 1.46144   | 1.85113   | 1.70964  | 1.5075   |
| 20.3104   | 17.0853   | 18.17     | 16.6727   | 16.9073  | 17.0683  |
| 6.77004   | 5.56843   | 6.56569   | 6.9787    | 6.06544  | 7.52848  |
| 22.7236   | 18.5435   | 19.2357   | 22.1405   | 17.631   | 21.0781  |
| 13.7036   | 13.8486   | 13.3236   | 13.8882   | 12.9634  | 13.5447  |
| 26.8449   | 12.1382   | 12.7612   | 15.6238   | 20.7286  | 8.58557  |
| 45.4675   | 34.6684   | 35.9999   | 41.6195   | 43.2336  | 38.3003  |
| 0         | 0         | 0         | 0         | 0        | 0        |
| 12.2755   | 10.1181   | 11.5114   | 11.6868   | 13       | 11.6698  |
| 0         | 0         | 0         | 0         | 0.032041 | 0        |
| 42.9827   | 49.1188   | 45.9043   | 49.4863   | 43.5542  | 39.7488  |
| 0         | 0         | 0         | 0         | 0        | 0        |
| 0         | 0         | 0         | 0         | 0        | 0        |
| 0         | 0         | 0         | 0         | 0        | 0        |
| 31.111    | 37.722    | 43.5235   | 50.4497   | 40.1635  | 39.0304  |
| 0.32586   | 0.32586   | 0.359124  | 0.359124  | 0.285895 | 0.285895 |
| 40.8441   | 45.4994   | 46.0525   | 38.9105   | 46.6484  | 31.5544  |
| 436.676   | 513.692   | 521.661   | 569.225   | 604.287  | 507.291  |
| 4.46793   | 3.13344   | 3.12064   | 3.97284   | 2.90801  | 3.32477  |
| 26.1285   | 30.5485   | 29.1477   | 29.7773   | 29.7142  | 38.5526  |
| 11.3944   | 12.7585   | 11.115    | 11.1919   | 12.1386  | 10.0589  |
| 15.7784   | 14.5619   | 17.3489   | 13.6764   | 17.1431  | 13.3613  |
| 0.199387  | 0.178447  | 0.12096   | 0.253223  | 0.115926 | 0.16161  |
| 180.505   | 144.083   | 178.746   | 179.622   | 198.662  | 178.905  |
| 70.9121   | 86.0025   | 92.9211   | 75.4953   | 68.0163  | 70.7654  |
| 1.28593   | 1.0571    | 0.924589  | 0.829531  | 0.775345 | 0.733463 |
| 14.0713   | 11.4047   | 14.9218   | 14.8173   | 9.63203  | 13.4582  |
| 2.25355   | 0.48405   | 1.64057   | 0.490633  | 1.22289  | 1.64392  |
| 2.29353   | 1.50903   | 1.15358   | 1.68694   | 1.41773  | 1.25636  |

|          |          |          |          |          |           |
|----------|----------|----------|----------|----------|-----------|
| 0.683903 | 0.443536 | 0.385977 | 0.243801 | 0.08249  | 0.322122  |
| 5255.27  | 5253.38  | 5287.47  | 5129.74  | 5089.9   | 4326.25   |
| 0        | 0        | 0        | 0        | 0        | 0         |
| 0.29861  | 0.194363 | 0.417205 | 0.31521  | 0.252532 | 0.550076  |
| 0        | 0        | 0        | 0        | 0        | 0         |
| 8.47563  | 10.5568  | 8.7624   | 8.04351  | 8.12557  | 9.06486   |
| 15.7838  | 12.0173  | 11.9801  | 15.6349  | 15.2316  | 12.0624   |
| 0        | 0        | 0        | 0        | 0        | 0         |
| 15.061   | 12.8572  | 13.8133  | 14.9926  | 18.4053  | 15.535    |
| 0        | 0        | 0        | 0        | 0        | 0         |
| 1.4293   | 0.782561 | 1.46216  | 1.34234  | 1.10801  | 0.715539  |
| 130.044  | 150.027  | 128.171  | 153.043  | 143.611  | 151.606   |
| 0.336131 | 0.300277 | 0.465323 | 0.247498 | 0.231722 | 0.322386  |
| 8.86177  | 6.46668  | 8.32824  | 8.5118   | 8.33833  | 6.00499   |
| 0        | 0        | 0        | 0        | 0        | 0.0321676 |
| 46.6007  | 37.9382  | 43.0107  | 45.1028  | 41.9373  | 43.8117   |
| 0        | 0        | 0        | 0        | 0        | 0.0657688 |
| 0.833358 | 0.687852 | 0.795051 | 0.946146 | 0.66304  | 0.700169  |
| 32.3727  | 34.7248  | 35.9985  | 36.1445  | 34.071   | 31.7114   |
| 19.1964  | 19.9535  | 19.8882  | 23.2187  | 24.1603  | 26.1223   |
| 0.538996 | 0.514548 | 0.435983 | 0.521545 | 0.510691 | 0.800936  |
| 2.16947  | 2.23647  | 2.4108   | 2.37291  | 1.92985  | 2.79024   |
| 0.430942 | 0.205698 | 0.929548 | 0.990351 | 0.389752 | 0.232862  |
| 0.957696 | 0.477217 | 0.74561  | 0.723886 | 0.560607 | 0.81554   |
| 0.415506 | 0.558815 | 0.392446 | 0.531041 | 1.03469  | 0.405055  |
| 1.38875  | 1.9091   | 1.0784   | 1.1691   | 1.16271  | 1.26071   |
| 24.5061  | 23.3175  | 20.1131  | 21.8364  | 16.8961  | 17.6513   |
| 1.19999  | 1.09492  | 1.66451  | 1.49279  | 0.79404  | 1.52409   |
| 0        | 0        | 0        | 0        | 0        | 0         |
| 0.151996 | 0.210688 | 0.218571 | 0.173939 | 0.153964 | 0.277606  |
| 0        | 0        | 0        | 0        | 0        | 0.102165  |
| 0        | 0        | 0        | 0        | 0        | 0         |
| 322.005  | 157.178  | 176.473  | 227.052  | 173.214  | 110.425   |
| 6.83239  | 6.59313  | 6.47814  | 6.68845  | 6.17833  | 6.10619   |
| 5.77561  | 4.86378  | 6.29508  | 4.5607   | 5.27348  | 6.04831   |
| 20.3262  | 18.5595  | 20.4579  | 18.2892  | 17.8657  | 21.5397   |
| 62.8373  | 57.455   | 58.4698  | 66.6913  | 68.4456  | 58.7048   |
| 0.445    | 0.768589 | 0.359951 | 0.275579 | 0.504643 | 0.812749  |
| 0        | 0        | 0        | 0        | 0        | 0         |
| 0        | 0        | 0        | 0        | 0        | 0.0268532 |
| 0.190962 | 0.191415 | 0.324377 | 0.277169 | 0.16284  | 0.216693  |
| 9.46339  | 8.04368  | 9.73271  | 9.83346  | 6.9706   | 8.93113   |
| 0        | 0        | 0        | 0        | 0        | 0         |



|           |           |           |           |           |           |
|-----------|-----------|-----------|-----------|-----------|-----------|
| 38.1092   | 36.199    | 37.753    | 40.0397   | 46.7364   | 40.9926   |
| 6.03898   | 5.37745   | 4.83655   | 4.42108   | 5.29297   | 4.91091   |
| 33.6133   | 26.0505   | 32.9015   | 31.8093   | 30.4878   | 35.8581   |
| 11.8734   | 11.9976   | 10.6514   | 12.2934   | 9.97594   | 12.0449   |
| 0         | 0         | 0         | 0         | 0         | 0         |
| 0.347996  | 0.286532  | 0.633345  | 0.397761  | 0.451868  | 0.331423  |
| 53.0343   | 46.6815   | 59.0184   | 55.1111   | 63.7479   | 55.5884   |
| 0.131978  | 0.125992  | 0.106755  | 0.223485  | 0.102312  | 0.178288  |
| 15.6623   | 10.7438   | 11.7782   | 13.3516   | 14.5774   | 13.4748   |
| 0.325678  | 0.233179  | 0.338701  | 0.25886   | 0.252471  | 0.276543  |
| 2.7076    | 3.87718   | 3.6324    | 2.73177   | 2.25256   | 2.56929   |
| 6.60553   | 5.70596   | 5.60266   | 4.67731   | 5.78412   | 6.35111   |
| 10.7689   | 15.0175   | 10.3618   | 13.1275   | 11.4038   | 13.5207   |
| 0.107813  | 0.0257306 | 0.0581383 | 0.0260805 | 0.0557187 | 0         |
| 1.28105   | 0.917206  | 0.912855  | 0.92968   | 1.18225   | 0.741666  |
| 1026.79   | 1388.16   | 942.717   | 1537.65   | 1038.44   | 1340.02   |
| 1.28653   | 0.928443  | 0.999354  | 0.859559  | 0.981509  | 0.993121  |
| 0         | 0         | 0         | 0         | 0         | 0         |
| 1.85343   | 1.23224   | 1.66289   | 2.13304   | 1.49816   | 2.28823   |
| 17.4563   | 17.6259   | 21.3611   | 18.3258   | 17.1468   | 20.0443   |
| 32.5179   | 31.2064   | 35.4525   | 29.7453   | 26.7898   | 33.6988   |
| 3.8904    | 3.71599   | 3.63461   | 4.28955   | 3.69973   | 4.16803   |
| 0         | 0         | 0         | 0         | 0         | 0         |
| 0         | 0         | 0         | 0         | 0         | 0         |
| 0.280442  | 0.285446  | 0.215232  | 0.235202  | 0.386389  | 0.405935  |
| 4.06834   | 3.15064   | 4.41012   | 4.80027   | 4.22657   | 3.94806   |
| 0.254266  | 0.364404  | 0.308506  | 0.276788  | 0.0985554 | 0.206236  |
| 0.0822097 | 0.0392585 | 0.110935  | 0.0796121 | 0.0850804 | 0.0444686 |
| 6.85779   | 6.56043   | 7.34874   | 7.59408   | 6.96367   | 5.23194   |
| 21.8051   | 23.0508   | 26.0163   | 24.5769   | 24.1453   | 18.9906   |
| 5.46497   | 5.2989    | 4.9751    | 5.79537   | 5.53406   | 5.067     |
| 69.6328   | 61.0482   | 56.8261   | 70.7475   | 68.7846   | 58.8498   |
| 1.57637   | 1.60388   | 1.07377   | 0.903161  | 4.11631   | 2.08468   |
| 1.36251   | 1.42255   | 1.54414   | 2.15718   | 1.81956   | 1.84078   |
| 2.11192   | 1.32534   | 1.59356   | 1.60228   | 1.19591   | 1.42337   |
| 0         | 0.0399391 | 0         | 0         | 0.0864868 | 0         |
| 5.53934   | 4.51725   | 6.1904    | 5.36251   | 4.1681    | 2.92679   |
| 12.927    | 13.2632   | 16.7834   | 14.5286   | 12.3817   | 17.9556   |
| 0.0736884 | 0.0527595 | 0.11921   | 0.053477  | 0         | 0         |
| 10.307    | 7.88332   | 9.53095   | 7.86811   | 9.64299   | 8.66191   |
| 36.6053   | 34.945    | 36.6721   | 33.7142   | 33.4102   | 35.25     |
| 0         | 0         | 0         | 0         | 0         | 0         |
| 8.4626    | 6.4022    | 7.19377   | 7.42734   | 7.71797   | 7.58572   |

|            |           |           |           |          |          |
|------------|-----------|-----------|-----------|----------|----------|
| 10.5337    | 9.28838   | 9.51586   | 10.6319   | 10.6808  | 10.6983  |
| 6.66551    | 5.13652   | 5.821     | 5.86319   | 5.16316  | 5.42831  |
| 5.08094    | 4.3155    | 4.67397   | 5.16949   | 5.29038  | 4.2394   |
| 28.5556    | 29.716    | 33.7452   | 29.7394   | 28.6331  | 28.399   |
| 0.0307682  | 0.0440589 | 0.0248878 | 0.0893162 | 0.047704 | 0        |
| 32.8124    | 32.5906   | 34.0965   | 35.8949   | 34.0409  | 33.5517  |
| 4.47535    | 3.86155   | 4.02843   | 3.55064   | 2.90003  | 3.38904  |
| 0.0301769  | 0         | 0         | 0.0218999 | 0        | 0        |
| 2.68427    | 4.40269   | 2.57006   | 2.74314   | 1.74115  | 2.47541  |
| 3.1666     | 1.79565   | 1.70892   | 1.62815   | 3.27541  | 1.49867  |
| 69.7289    | 57.2838   | 65.7805   | 58.5004   | 84.5459  | 40.1445  |
| 4.26164    | 4.71928   | 5.56141   | 5.71128   | 4.22873  | 3.36209  |
| 0          | 0         | 0         | 0         | 0        | 0        |
| 11.7341    | 14.8287   | 15.0982   | 13.0809   | 12.7125  | 14.4626  |
| 6.2603     | 5.59406   | 6.35946   | 5.66127   | 6.10427  | 6.8779   |
| 0          | 0         | 0         | 0         | 0        | 0        |
| 20.2928    | 18.721    | 19.5478   | 19.1673   | 16.8574  | 19.2072  |
| 0.598553   | 0.618659  | 0.161346  | 0.289495  | 0.154615 | 0.242441 |
| 0.434468   | 0.488468  | 0.291313  | 0.373762  | 0.412361 | 0.300235 |
| 0          | 0         | 0         | 0         | 0        | 0        |
| 0          | 0         | 0         | 0         | 0        | 0        |
| 23.3055    | 18.8339   | 17.4867   | 18.5828   | 18.4602  | 20.0887  |
| 0.166408   | 0.357435  | 0.403812  | 0.483061  | 0.516008 | 0.404638 |
| 8.96923    | 21.8341   | 13.2332   | 9.32108   | 7.62059  | 10.6431  |
| 9.40843    | 6.71623   | 7.74247   | 8.71528   | 8.93658  | 9.64667  |
| 3.92923    | 2.97472   | 3.36646   | 2.99646   | 2.35013  | 3.35277  |
| 5.00329    | 5.72758   | 5.76137   | 4.44708   | 5.46786  | 5.52851  |
| 0.270598   | 0.398029  | 0.277513  | 0.425246  | 0.242847 | 0.384506 |
| 9.83366    | 8.81886   | 9.80058   | 8.67956   | 8.5294   | 9.19227  |
| 0          | 0.0288978 | 0.306069  | 0.0439363 | 0        | 0        |
| 10.8207    | 9.55145   | 9.10816   | 10.6169   | 8.35813  | 10.0213  |
| 59.6106    | 52.6825   | 61.9593   | 62.2123   | 67.2099  | 64.9892  |
| 128.318    | 103.724   | 120.922   | 124.134   | 99.8422  | 123.589  |
| 2.94236    | 1.98272   | 1.71574   | 4.60287   | 3.08204  | 0.844938 |
| 4.1291     | 3.8791    | 3.14218   | 4.68859   | 2.93972  | 3.5839   |
| 0.00871544 | 0         | 0.0352487 | 0.0231915 | 0        | 0        |
| 0.766678   | 1.04451   | 0.349813  | 1.56424   | 1.3259   | 2.28942  |
| 1.32532    | 0.334599  | 0.924532  | 0.744274  | 1.91225  | 1.01431  |
| 0          | 0         | 0         | 0         | 0        | 0        |
| 40.1964    | 29.8792   | 40.3198   | 38.7652   | 33.3195  | 40.5527  |
| 0.0930051  | 0         | 0         | 0.0674955 | 0        | 0        |
| 16.7742    | 16.0134   | 16.7638   | 13.9597   | 15.7363  | 16.1084  |
| 1.58267    | 1.79131   | 1.52796   | 1.66749   | 1.62293  | 1.15905  |

|           |           |           |           |           |           |
|-----------|-----------|-----------|-----------|-----------|-----------|
| 0         | 0         | 0         | 0         | 0         | 0         |
| 32.3521   | 40.8339   | 60.2364   | 35.3151   | 53.6119   | 33.6587   |
| 0.0644248 | 0.184508  | 0.208448  | 0.0935085 | 0.199772  | 0.156655  |
| 11.743    | 8.72819   | 9.57486   | 10.5906   | 9.79726   | 11.0742   |
| 0.0379004 | 0.142821  | 0.100331  | 0.0825151 | 0.0220357 | 0.14637   |
| 9.77566   | 10.6446   | 8.77808   | 8.78351   | 8.59318   | 9.26767   |
| 0.0235661 | 0         | 0         | 0         | 0         | 0         |
| 0         | 0         | 0         | 0         | 0         | 0         |
| 0         | 0         | 0         | 0         | 0         | 0         |
| 0         | 0         | 0         | 0         | 0         | 0         |
| 7.4866    | 7.20215   | 6.31162   | 6.06045   | 4.9044    | 7.5892    |
| 0.303705  | 0.179673  | 0.224189  | 0.239552  | 0.194538  | 0.21395   |
| 9.03768   | 7.01501   | 7.277     | 8.68991   | 7.68467   | 8.60312   |
| 4.56635   | 4.36141   | 4.58749   | 3.2211    | 3.37707   | 2.90173   |
| 0         | 0         | 0         | 0         | 0         | 0         |
| 0.104419  | 0.0373811 | 0         | 0.0757789 | 0.0809473 | 0         |
| 17.1281   | 11.3439   | 16.008    | 15.378    | 14.1113   | 14.9004   |
| 0         | 0         | 0         | 0         | 0         | 0         |
| 12.4665   | 9.77002   | 11.5319   | 11.5286   | 12.1521   | 12.9287   |
| 3.68787   | 2.49313   | 2.90623   | 3.07839   | 2.42945   | 3.07895   |
| 5.64288   | 9.11384   | 8.38571   | 6.10866   | 5.53707   | 6.12362   |
| 3.11181   | 2.91945   | 2.99446   | 3.58213   | 2.07959   | 1.43506   |
| 0.152038  | 0         | 0         | 0.110337  | 0.117862  | 0         |
| 0.119438  | 0.0855151 | 0.0966107 | 0.0650085 | 0.115737  | 0.0484041 |
| 58.3598   | 64.21     | 61.5495   | 78.1192   | 71.7717   | 50.2564   |
| 6.64528   | 6.51589   | 8.55384   | 5.20032   | 5.18318   | 5.75182   |
| 0.0251568 | 0         | 0         | 0         | 0         | 0         |
| 0.0429616 | 0.0615193 | 0.0521261 | 0.062356  | 0.0166522 | 0.0870545 |
| 32.7368   | 34.3441   | 33.6911   | 35.719    | 30.2243   | 29.2121   |
| 10.0166   | 8.81204   | 8.14964   | 12.1509   | 11.842    | 11.5739   |
| 48.9652   | 47.1428   | 44.3711   | 48.3581   | 54.3141   | 44.6044   |
| 0.203866  | 0.202728  | 0.443406  | 0.205485  | 0.28096   | 0.14688   |
| 0         | 0.0533454 | 0.060267  | 0         | 0         | 0.0603902 |
| 2.87762   | 2.17344   | 1.68869   | 2.89092   | 2.16954   | 3.30196   |
| 2.97281   | 2.36739   | 3.17757   | 2.2675    | 1.74019   | 2.50791   |
| 6.68593   | 5.95187   | 5.9826    | 7.04657   | 5.33681   | 5.87647   |
| 0.0440716 | 0         | 0         | 0.0639672 | 0.06833   | 0         |
| 3.34574   | 2.96517   | 3.75478   | 2.88349   | 3.53492   | 3.24917   |
| 9.20253   | 10.3019   | 6.00434   | 7.2688    | 6.26683   | 8.61283   |
| 0         | 0         | 0         | 0         | 0         | 0         |
| 21.1489   | 21.2777   | 18.4375   | 19.6868   | 17.3233   | 19.5759   |
| 1.32316   | 0.857132  | 0.662552  | 0.708748  | 0.561711  | 1.32781   |
| 0         | 0.137871  | 0         | 0         | 0.223916  | 0         |

|            |           |            |           |           |           |
|------------|-----------|------------|-----------|-----------|-----------|
| 0          | 0         | 0          | 0         | 0         | 0         |
| 0          | 0         | 0          | 0         | 0         | 0         |
| 15.5856    | 14.6002   | 13.5631    | 12.4621   | 15.3499   | 15.7215   |
| 2.40605    | 1.36627   | 0.872435   | 1.50527   | 0.707491  | 1.2777    |
| 0.00781433 | 0.015346  | 0.00632086 | 0.0205236 | 0.0351929 | 0         |
| 67.477     | 51.9907   | 57.0907    | 56.1125   | 68.4377   | 48.1779   |
| 33.2102    | 36.8862   | 38.2994    | 39.1672   | 36.6085   | 33.4869   |
| 0.105504   | 0.377694  | 0.0853399  | 0.076566  | 0.163576  | 0         |
| 11.7578    | 10.6658   | 12.1978    | 11.4847   | 10.0104   | 14.0602   |
| 23.4296    | 21.6303   | 23.3538    | 21.8452   | 21.3394   | 23.3969   |
| 4.59838    | 5.50668   | 4.44369    | 3.54385   | 3.59628   | 5.17842   |
| 7.01842    | 7.69833   | 7.87702    | 7.86827   | 6.46819   | 9.03558   |
| 30.9277    | 33.8013   | 34.9757    | 32.3243   | 29.207    | 31.4596   |
| 14.9629    | 14.5586   | 12.3698    | 12.0083   | 15.4016   | 14.6174   |
| 0          | 0         | 0          | 0         | 0         | 0         |
| 0.812003   | 0.357771  | 0.656813   | 1.26923   | 0.871584  | 0.708783  |
| 4.71951    | 4.59208   | 3.88278    | 4.918     | 5.06581   | 4.6754    |
| 63.7309    | 55.1638   | 60.2136    | 58.8665   | 61.5642   | 69.5626   |
| 0          | 0         | 0          | 0         | 0         | 0         |
| 0          | 0         | 0          | 0         | 0         | 0         |
| 0.354427   | 0.728173  | 0.767159   | 0.922313  | 0.535965  | 0.351692  |
| 20.4213    | 23.6377   | 18.9043    | 21.8185   | 22.2512   | 19.4028   |
| 29.6159    | 24.9785   | 30.8726    | 28.7869   | 25.7191   | 36.6326   |
| 82.2029    | 77.5599   | 75.9758    | 79.9329   | 91.4782   | 67.7257   |
| 0          | 0         | 0          | 0         | 0         | 0         |
| 10.1284    | 9.72168   | 10.1881    | 9.89755   | 9.82632   | 9.62374   |
| 11.4433    | 7.27145   | 11.4353    | 10.1558   | 13.7316   | 11.5553   |
| 0.539667   | 0.386391  | 0.945805   | 0.587469  | 0.836716  | 0.874836  |
| 37.7322    | 23.9739   | 52.9281    | 41.0423   | 39.9765   | 32.4005   |
| 0          | 0         | 0          | 0         | 0         | 0         |
| 0.627688   | 0.33506   | 0.261121   | 0.814076  | 1.07555   | 2.3751    |
| 27.16      | 20.96     | 23.5384    | 23.3301   | 28.9387   | 22.297    |
| 0.0443898  | 0         | 0          | 0         | 0.0688233 | 0.0359794 |
| 0          | 0         | 0          | 0         | 0         | 0         |
| 0          | 0         | 0          | 0         | 0         | 0         |
| 21.8885    | 21.0605   | 19.6368    | 22.4045   | 19.3111   | 23.8089   |
| 3.85541    | 5.31478   | 4.14681    | 4.28592   | 4.87483   | 4.05558   |
| 0.0391859  | 0.0611014 | 0.00443753 | 0.107162  | 0.0182265 | 0.107074  |
| 0          | 0         | 0          | 0         | 0         | 0         |
| 0.651401   | 0.233195  | 0.526905   | 0.315156  | 0.252488  | 0.30799   |
| 192.666    | 283.271   | 237.514    | 214.079   | 244.068   | 227.309   |
| 39.5038    | 43.213    | 32.4369    | 40.918    | 26.6708   | 31.1032   |
| 4.84965    | 4.55833   | 5.11166    | 5.85541   | 4.92383   | 5.21481   |

|           |           |           |           |           |           |
|-----------|-----------|-----------|-----------|-----------|-----------|
| 5.56814   | 6.19469   | 6.23625   | 4.16524   | 4.38292   | 5.8324    |
| 2.21484   | 1.27383   | 0.998563  | 1.81815   | 1.0133    | 1.7952    |
| 1.26888   | 0.458376  | 1.0627    | 0.888258  | 0.739963  | 0.464325  |
| 0         | 0.0711639 | 0         | 0         | 0         | 0         |
| 10.8652   | 14.6681   | 14.7111   | 12.4243   | 12.5786   | 12.9931   |
| 0         | 0.0878078 | 0.0496004 | 0         | 0.0475362 | 0         |
| 0         | 0         | 0         | 0.0802649 | 0         | 0         |
| 30.6785   | 38.3854   | 35.5758   | 33.6801   | 33.5663   | 40.9966   |
| 0.0258984 | 0.0185427 | 0         | 0.0187949 | 0         | 0         |
| 0.132292  | 0.9125    | 1.94646   | 0.590687  | 0.803846  | 1.09523   |
| 0.203933  | 0         | 0         | 0.110998  | 0         | 0.0413236 |
| 0         | 0         | 0         | 0         | 0         | 0         |
| 0         | 0         | 0         | 0         | 0         | 0         |
| 0.99543   | 1.07986   | 0.805183  | 1.00698   | 1.59011   | 1.24692   |
| 1.34431   | 1.3257    | 1.70288   | 1.56462   | 0.865162  | 1.31575   |
| 8.51138   | 7.43066   | 7.09009   | 7.23722   | 5.45981   | 7.34361   |
| 0.0663795 | 0         | 0.0134217 | 0.0642339 | 0.0578928 | 0.071741  |
| 1446.55   | 1500.51   | 1460.09   | 1534.55   | 1527.03   | 1336.22   |
| 0         | 0         | 0.167096  | 0.149917  | 0.160142  | 0.0837191 |
| 18.0667   | 17.0157   | 21.324    | 17.7751   | 21.3452   | 14.4225   |
| 0         | 0         | 0         | 0         | 0         | 0         |
| 0         | 0.0495221 | 0         | 0         | 0         | 0.056062  |
| 413.808   | 464.147   | 408.16    | 409.578   | 445.916   | 467.94    |
| 44.104    | 42.987    | 22.6548   | 28.5026   | 36.0618   | 27.2674   |
| 47.3848   | 44.1917   | 48.0462   | 45.2291   | 48.9708   | 49.2744   |
| 0.896376  | 1.55863   | 1.30511   | 0.910723  | 1.40962   | 1.47384   |
| 110.213   | 124.565   | 120.634   | 119.779   | 112.736   | 96.6784   |
| 261.764   | 124.946   | 211.736   | 126.645   | 135.283   | 0         |
| 45.1172   | 41.2554   | 41.1643   | 39.6012   | 35.4321   | 39.5805   |
| 2.09392   | 0.99945   | 2.03749   | 2.22077   | 0.665942  | 1.23347   |
| 5.84115   | 5.39632   | 8.49992   | 6.82662   | 4.56186   | 5.95624   |
| 21.4121   | 18.5587   | 20.8729   | 22.0199   | 17.7565   | 24.8049   |
| 0         | 0         | 0         | 0.0198982 | 0.0425108 | 0.0888951 |
| 5.80279   | 4.23183   | 6.57376   | 5.97609   | 5.93027   | 6.92404   |
| 0         | 0         | 0         | 0         | 0         | 0         |
| 0         | 0         | 0         | 0         | 0         | 0.0567249 |
| 0.858202  | 0.228512  | 0.630186  | 0.622817  | 0.44391   | 0.258689  |
| 10.3409   | 9.87743   | 8.86042   | 8.68331   | 9.21631   | 11.1864   |
| 2.42766   | 3.21437   | 1.45447   | 2.45172   | 1.67587   | 2.43296   |
| 0         | 0         | 0         | 0         | 0         | 0         |
| 2.04638   | 0.578978  | 1.97045   | 3.66096   | 2.36618   | 2.76584   |
| 33.427    | 25.0293   | 33.6      | 31.7045   | 25.5469   | 31.2859   |
| 0         | 0         | 0         | 0         | 0         | 0         |

|           |           |           |           |           |           |
|-----------|-----------|-----------|-----------|-----------|-----------|
| 5.94869   | 6.08091   | 5.66342   | 5.18303   | 4.70674   | 4.42337   |
| 0.0374699 | 0.152024  | 0.0404115 | 0.0271926 | 0         | 0.121482  |
| 13.0838   | 15.121    | 13.7104   | 14.8255   | 11.8948   | 10.3945   |
| 0         | 0         | 0         | 0         | 0         | 0         |
| 10.6815   | 8.17314   | 9.86842   | 7.79611   | 6.89773   | 8.90552   |
| 9.88494   | 17.1538   | 15.4494   | 15.928    | 16.4948   | 13.9872   |
| 9.48264   | 7.06323   | 8.37286   | 7.00615   | 6.09354   | 7.79131   |
| 23.8337   | 19.9274   | 25.1297   | 21.0028   | 20.3862   | 23.056    |
| 0         | 0         | 0         | 0         | 0.4257    | 0.890188  |
| 8.34576   | 8.3375    | 8.23032   | 7.36045   | 7.02684   | 7.28079   |
| 3.68286   | 3.44385   | 4.28821   | 4.46599   | 3.02466   | 3.64132   |
| 22.844    | 23.9656   | 26.5306   | 29.3174   | 28.9682   | 25.4934   |
| 2.90494   | 2.47899   | 3.43333   | 2.81766   | 2.86335   | 4.52686   |
| 0.17476   | 0.285953  | 1.5617    | 0.871593  | 0.876154  | 0.302271  |
| 83.5081   | 111.99    | 91.7174   | 101.224   | 79.3091   | 90.4917   |
| 0.714508  | 0.305354  | 0.777341  | 0.593609  | 0.38087   | 0.248889  |
| 38.9063   | 40.2211   | 41.5889   | 38.7154   | 36.9419   | 40.0666   |
| 0         | 0.365681  | 0.275419  | 0.247102  | 0.263956  | 0.137991  |
| 5.98077   | 5.05684   | 5.07387   | 5.46203   | 4.62264   | 4.65249   |
| 0         | 0         | 0         | 0         | 0         | 0         |
| 4.76079   | 3.28846   | 4.79746   | 3.98072   | 2.8042    | 3.54186   |
| 6.78037   | 5.46894   | 6.35627   | 5.77112   | 6.15663   | 6.42864   |
| 0.0375832 | 0.0298928 | 0         | 0.117036  | 0.122958  | 0         |
| 20.6937   | 17.587    | 20.2403   | 18.6473   | 20.0462   | 19.9627   |
| 0.373082  | 0.227805  | 0.20297   | 0.253089  | 0.199131  | 0.26235   |
| 0.0603019 | 0.0595717 | 0.0232876 | 0.0371438 | 0.0598201 | 0.0757106 |
| 19.3313   | 21.9372   | 19.0777   | 20.477    | 18.8681   | 18.0255   |
| 5.31322   | 4.3636    | 5.81461   | 6.12408   | 6.78406   | 5.06652   |
| 1101.55   | 1566.67   | 1265.14   | 1017.4    | 1306      | 1434.27   |
| 0         | 0         | 0         | 0         | 0         | 0         |
| 0.259277  | 0.0862263 | 0.0216471 | 0.116043  | 0.0933593 | 0.17715   |
| 35.2099   | 37.1946   | 37.2187   | 36.869    | 36.1236   | 41.2799   |
| 2.50165   | 2.75932   | 2.02354   | 2.5515    | 3.51174   | 3.12371   |
| 14.8156   | 11.6963   | 15.7118   | 14.7626   | 16.11     | 17.1644   |
| 1.04515   | 0.982156  | 0.792565  | 0.521459  | 0.75958   | 0.688295  |
| 2.01153   | 1.46364   | 2.28851   | 1.78025   | 2.66234   | 2.63783   |
| 0.865265  | 1.98896   | 0.773569  | 1.02453   | 0.953195  | 0.885886  |
| 3.75095   | 1.69865   | 4.33042   | 3.50892   | 3.21228   | 4.08524   |
| 0.422846  | 0.938524  | 0.547251  | 0.337554  | 0.147509  | 0.342731  |
| 2.3779    | 2.73079   | 3.27555   | 2.9217    | 2.81071   | 2.99601   |
| 134.925   | 153.198   | 151.215   | 148.921   | 157.945   | 125.473   |
| 0.260234  | 0.372736  | 0.175415  | 0.409189  | 0.403519  | 0.175773  |
| 6.32822   | 5.64408   | 6.57497   | 6.57203   | 5.56124   | 6.23468   |

|           |           |           |           |           |           |
|-----------|-----------|-----------|-----------|-----------|-----------|
| 0.475398  | 0.408451  | 0.25636   | 0.368005  | 0.294829  | 0.15413   |
| 4.02797   | 5.09121   | 5.60618   | 4.6542    | 7.01263   | 2.60819   |
| 37.7856   | 35.2002   | 36.4713   | 41.5166   | 44.7174   | 31.2699   |
| 24.6812   | 30.4518   | 25.065    | 23.117    | 24.9391   | 25.4228   |
| 7.1607    | 6.16529   | 4.3991    | 3.63985   | 4.45024   | 6.56316   |
| 14.9703   | 12.9349   | 15.2773   | 15.4232   | 16.8683   | 12.0804   |
| 0.0477503 | 0.102565  | 0.0386243 | 0         | 0.0740335 | 0.11611   |
| 3.84289   | 2.15552   | 3.45202   | 3.67055   | 3.79285   | 3.78442   |
| 0.170961  | 0.0473934 | 0.136756  | 0.150839  | 0.19639   | 0.0776306 |
| 0         | 0         | 0         | 0         | 0         | 0         |
| 42.3221   | 39.7123   | 38.6987   | 37.7724   | 41.0619   | 34.6231   |
| 87.1873   | 114.636   | 111.996   | 85.5925   | 98.9352   | 70.9289   |
| 0.1508    | 0.134962  | 0.0609895 | 0.0547192 | 0         | 0.146782  |
| 2.91248   | 2.30798   | 2.37993   | 3.75632   | 3.3914    | 4.42807   |
| 56.9234   | 53.9017   | 61.7645   | 57.1054   | 53.7543   | 57.9205   |
| 0.0519523 | 0         | 0         | 0         | 0         | 0         |
| 51.7216   | 49.5306   | 40.847    | 46.3573   | 36.154    | 35.8387   |
| 22.3309   | 31.411    | 26.5633   | 27.4042   | 27.8625   | 18.1306   |
| 0         | 0         | 0         | 0         | 0         | 0         |
| 0         | 0         | 0         | 0         | 0         | 0         |
| 3.72455   | 1.81618   | 2.52081   | 2.15645   | 1.40459   | 2.08539   |
| 0.1762    | 0.378468  | 0.142525  | 0.170495  | 0.409779  | 0.190421  |
| 1.31574   | 1.1007    | 0.761775  | 1.20612   | 1.27762   | 1.34706   |
| 0         | 0         | 0         | 0         | 0         | 0         |
| 9.70981   | 6.5274    | 8.64747   | 7.9681    | 7.82191   | 8.27688   |
| 114.037   | 100.712   | 115.113   | 131.575   | 135.771   | 94.5498   |
| 48.0397   | 48.2101   | 56.5888   | 49.2944   | 45.483    | 48.9559   |
| 19.5408   | 21.1427   | 21.0887   | 21.7566   | 17.3996   | 17.542    |
| 2.65485   | 2.71546   | 2.81215   | 2.79827   | 2.30309   | 1.84444   |
| 0.0434233 | 0.0932708 | 0.0702485 | 0.157565  | 0         | 0.0351961 |
| 8.50248   | 8.93986   | 8.84935   | 7.92516   | 8.12768   | 8.54616   |
| 0.0649922 | 0         | 0.0525709 | 0         | 0         | 0         |
| 0.410588  | 0         | 1.49452   | 0.893913  | 0.318294  | 0.831988  |
| 0         | 21.0258   | 23.7539   | 85.247    | 0         | 47.605    |
| 4.77155   | 3.9455    | 2.75837   | 3.15228   | 2.62346   | 2.8691    |
| 13.0157   | 10.1607   | 11.2979   | 11.9239   | 10.6541   | 12.0016   |
| 19.7418   | 17.771    | 18.2252   | 19.1107   | 18.0735   | 16.8276   |
| 0.0838851 | 0         | 0         | 0.0304385 | 0.0325145 | 0.0339958 |
| 0         | 0         | 0         | 0         | 0         | 0         |
| 12.7323   | 11.2758   | 12.3169   | 13.6551   | 10.2072   | 11.582    |
| 1.43109   | 1.72325   | 2.05207   | 2.07713   | 1.56325   | 1.79264   |
| 290.475   | 245.79    | 289.061   | 302.408   | 324.18    | 306.828   |
| 1.73119   | 1.67786   | 1.51986   | 1.97646   | 1.9476    | 1.985     |

|           |            |           |           |           |           |
|-----------|------------|-----------|-----------|-----------|-----------|
| 0.131811  | 0.212342   | 0.133274  | 0.0717431 | 0.229909  | 0.213674  |
| 0.0832479 | 0.0596039  | 0.336688  | 0.181243  | 0.064535  | 0.269901  |
| 6.86042   | 6.0472     | 5.9942    | 6.41125   | 7.04924   | 7.44906   |
| 0.0794479 | 0.127987   | 0.0642638 | 0.158556  | 0.16937   | 0.12879   |
| 11.3287   | 5.03826    | 8.54199   | 9.0311    | 7.86644   | 8.2246    |
| 0         | 0          | 0         | 0         | 0         | 0         |
| 0.0732953 | 0          | 0.0148214 | 0.0132976 | 0.028409  | 0.0792089 |
| 1.24851   | 1.91974    | 0.993283  | 1.30202   | 1.027     | 1.16627   |
| 5.40329   | 2.62599    | 4.05019   | 3.60453   | 3.54529   | 3.44867   |
| 0         | 0          | 0         | 0         | 0         | 0         |
| 27.8299   | 27.3599    | 26.7863   | 27.6108   | 32.4583   | 23.3909   |
| 15.949    | 14.5802    | 14.0603   | 15.1681   | 12.9025   | 14.366    |
| 1.93346   | 1.1621     | 1.77086   | 1.39699   | 1.22612   | 1.70214   |
| 13.7131   | 12.0808    | 8.56034   | 9.9735    | 8.96671   | 12.8305   |
| 65.919    | 64.8151    | 64.4849   | 63.2239   | 78.0278   | 51.4351   |
| 122.369   | 152.661    | 145.684   | 142.755   | 116.169   | 106.977   |
| 29.0141   | 30.7234    | 28.0087   | 32.4699   | 24.3343   | 28.1484   |
| 76.688    | 80.5318    | 79.0545   | 80.0594   | 76.1465   | 80.0806   |
| 6.49142   | 5.79062    | 6.97234   | 7.49117   | 8.49707   | 7.41787   |
| 18.4202   | 17.2425    | 20.2624   | 18.7384   | 18.8913   | 18.9677   |
| 1.30503   | 1.11669    | 1.46755   | 1.20117   | 1.13505   | 1.54795   |
| 0.359119  | 0.308546   | 0.290484  | 0.104248  | 0.445431  | 0.407509  |
| 0         | 0          | 0         | 0         | 0         | 0         |
| 7.67727   | 4.0127     | 4.5023    | 10.3909   | 8.48095   | 6.4716    |
| 6.23008   | 6.0672     | 5.78675   | 5.97729   | 5.70963   | 4.17241   |
| 0         | 0          | 0         | 0         | 0         | 0         |
| 0.0849128 | 0.0865508  | 0.0429276 | 0.112611  | 0.0444864 | 0.0396913 |
| 122.112   | 97.0158    | 99.2565   | 118.285   | 87.5517   | 144.932   |
| 9.77165   | 10.0207    | 11.2003   | 10.8184   | 7.7432    | 10.8043   |
| 16.6066   | 14.2401    | 15.5497   | 16.9192   | 12.9132   | 15.7764   |
| 0.772695  | 0.62986    | 0.468214  | 0.598255  | 0.648448  | 0.74609   |
| 12.4557   | 9.51052    | 9.86381   | 11.7575   | 11.6816   | 8.89558   |
| 0         | 0          | 0         | 0         | 0         | 0         |
| 4.54928   | 5.52633    | 5.03896   | 5.53266   | 4.16135   | 1.92387   |
| 8.94987   | 7.0115     | 8.25653   | 8.02531   | 7.61448   | 9.01901   |
| 538.005   | 566.302    | 456.876   | 438.13    | 418.745   | 404.747   |
| 8.84692   | 7.54189    | 8.33974   | 7.33911   | 7.28258   | 8.4926    |
| 7.12306   | 4.92411    | 5.44383   | 5.98931   | 7.00712   | 5.3156    |
| 16.3012   | 9.26166    | 11.3846   | 13.5589   | 20.1916   | 14.1544   |
| 0.041752  | 0.00664303 | 0.0150099 | 0.0101001 | 0.0251742 | 0.0188008 |
| 77.1741   | 83.5774    | 75.7166   | 90.0014   | 88.1283   | 63.2743   |
| 9.37715   | 13.1329    | 6.14999   | 9.72496   | 5.10817   | 11.0926   |
| 26.534    | 31.3962    | 27.4356   | 27.0254   | 22.0055   | 25.651    |



|          |          |           |           |           |           |
|----------|----------|-----------|-----------|-----------|-----------|
| 2.57136  | 3.00112  | 2.96043   | 2.30705   | 1.36558   | 2.01032   |
| 0        | 0        | 0         | 0         | 0         | 0         |
| 0        | 0        | 0         | 0         | 0         | 0         |
| 9.94657  | 8.06066  | 6.45415   | 8.32893   | 9.94205   | 11.2809   |
| 3.84006  | 2.96853  | 2.01252   | 2.51865   | 2.97226   | 3.68876   |
| 0        | 0.705326 | 0.398421  | 0         | 0.25456   | 0.798472  |
| 4.32791  | 4.79768  | 4.58044   | 4.16822   | 3.79405   | 5.09249   |
| 0.506329 | 0.281962 | 0.227533  | 0.489936  | 0.261676  | 0.410397  |
| 3.54082  | 2.86677  | 3.52877   | 3.31776   | 4.03049   | 3.6934    |
| 0        | 0        | 0         | 0         | 0         | 0.0233153 |
| 56.17    | 43.9945  | 54.9796   | 54.6183   | 59.9054   | 58.5523   |
| 30.9575  | 14.3749  | 18.9994   | 14.4178   | 27.8318   | 8.23984   |
| 38.5767  | 50.6152  | 32.5449   | 28.8753   | 40.9491   | 41.8138   |
| 0        | 0        | 0         | 0         | 0         | 0         |
| 100.875  | 97.4088  | 101.984   | 108.779   | 93.4369   | 102.436   |
| 0.449527 | 0.206621 | 0.207494  | 0.302512  | 0.274052  | 0.207918  |
| 5.09402  | 2.94181  | 4.50271   | 3.58289   | 4.4363    | 4.62964   |
| 6.08173  | 4.63184  | 6.15782   | 6.77141   | 7.05747   | 7.41168   |
| 0        | 0        | 0         | 0         | 0         | 0         |
| 0        | 0        | 0         | 0.0168356 | 0         | 0         |
| 0.124694 | 0        | 0.0672415 | 0.0301642 | 0.064443  | 0         |
| 42.664   | 35.7378  | 36.1392   | 36.6867   | 41.4789   | 35.424    |
| 554.589  | 567.267  | 562.707   | 560.616   | 646.229   | 560.468   |
| 0        | 0        | 0         | 0.0404966 | 0         | 0         |
| 71.7462  | 71.5398  | 87.5509   | 78.5359   | 55.3485   | 69.0306   |
| 5.37791  | 3.82243  | 4.4214    | 4.64929   | 4.73858   | 5.52613   |
| 0.702211 | 0.599876 | 0.531446  | 0.995269  | 0.82996   | 1.24827   |
| 4.27809  | 5.98118  | 2.30252   | 2.24072   | 2.92764   | 3.14465   |
| 0        | 0        | 0.024992  | 0.0224225 | 0.0479037 | 0.0250431 |
| 83.1388  | 71.3134  | 78.6114   | 72.9542   | 48.5715   | 48.1984   |
| 0        | 0        | 0         | 0         | 0         | 0         |
| 0        | 0        | 0         | 0         | 0         | 0         |
| 1.04173  | 1.89353  | 1.44606   | 2.28557   | 1.30044   | 1.83398   |
| 29.1546  | 25.6655  | 11.8227   | 23.7962   | 17.269    | 20.2863   |
| 0.178051 | 0.127481 | 0         | 0.25843   | 0.138028  | 0.144317  |
| 0        | 0        | 0         | 0         | 0         | 0         |
| 64.8656  | 61.3547  | 66.1937   | 77.8787   | 84.4098   | 62.0474   |
| 3.39164  | 3.96545  | 1.15345   | 1.53493   | 0.98895   | 1.01943   |
| 16.6989  | 15.0328  | 16.7949   | 13.7088   | 15.2334   | 16.9903   |
| 1.23707  | 1.10715  | 1.18826   | 1.23443   | 0.719248  | 0.752016  |
| 0        | 0        | 0         | 0         | 0         | 0         |
| 54.4862  | 57.0819  | 39.8083   | 38.2259   | 31.9378   | 27.0507   |
| 487.922  | 504.568  | 492.328   | 508.853   | 551.731   | 496.663   |

|           |           |           |           |           |           |
|-----------|-----------|-----------|-----------|-----------|-----------|
| 0         | 0         | 0         | 0         | 0         | 0         |
| 12.3535   | 12.5722   | 14.0669   | 9.51655   | 6.23899   | 6.08987   |
| 40.5064   | 42.4602   | 25.0555   | 89.2156   | 25.6546   | 267.578   |
| 5.70016   | 5.01924   | 4.9159    | 5.39614   | 5.66315   | 6.48825   |
| 7.21992   | 4.96353   | 6.07257   | 5.52189   | 5.85915   | 6.61947   |
| 0         | 0         | 0         | 0         | 0         | 0.0793484 |
| 24.5965   | 26.9868   | 28.9751   | 25.0168   | 26.0574   | 23.7769   |
| 0         | 0         | 0         | 0         | 0         | 0         |
| 7.19086   | 2.97234   | 5.69661   | 5.37993   | 6.83877   | 4.146     |
| 0.790742  | 0.439428  | 0.773513  | 0.602857  | 0.646073  | 0.325469  |
| 1.04968   | 1.20505   | 1.85779   | 1.48002   | 0.967158  | 0.882884  |
| 0.0484081 | 0.0346593 | 0.0391563 | 0         | 0         | 0         |
| 10.2102   | 6.12719   | 7.2143    | 7.85447   | 7.58425   | 7.4508    |
| 0         | 0         | 0.0413316 | 0.0185411 | 0         | 0         |
| 0.272722  | 0.219671  | 0.183832  | 0.371098  | 0.158563  | 0.285523  |
| 19.7548   | 15.4259   | 15.2134   | 14.8252   | 17.0933   | 18.1253   |
| 12.3823   | 11.2473   | 10.5951   | 10.9308   | 10.6019   | 10.6729   |
| 1.93273   | 0.94681   | 1.23422   | 1.18115   | 1.73485   | 1.31919   |
| 0.0225355 | 0.0179278 | 0         | 0         | 0         | 0         |
| 19.8963   | 16.166    | 16.4771   | 20.918    | 14.8923   | 21.0267   |
| 0         | 0         | 0         | 0         | 0         | 0         |
| 0.563429  | 0.386393  | 0.699016  | 0.89256   | 0.55723   | 1.07708   |
| 34.2827   | 43.7744   | 39.8633   | 34.7556   | 40.3375   | 33.033    |
| 5.72749   | 3.92519   | 4.72884   | 4.38619   | 5.19436   | 5.47589   |
| 3.1347    | 2.28988   | 3.2894    | 2.44398   | 3.03757   | 2.78111   |
| 6.48614   | 4.53034   | 5.74388   | 5.49883   | 5.39719   | 5.64309   |
| 0.446847  | 0.657891  | 0.316304  | 1.05385   | 0.681667  | 0.546256  |
| 2.11089   | 1.19118   | 1.70681   | 1.75778   | 1.56983   | 2.23794   |
| 0         | 0         | 0         | 0         | 0         | 0         |
| 0         | 0.063016  | 0.0711924 | 0         | 0.0682295 | 0.142676  |
| 0         | 0         | 0         | 0         | 0         | 0.0514106 |
| 10.0878   | 8.4052    | 9.62937   | 9.53373   | 7.88914   | 8.91792   |
| 0         | 0         | 0         | 0         | 0         | 0         |
| 19.5998   | 13.8968   | 11.6762   | 15.1802   | 9.54602   | 12.2114   |
| 11.9369   | 8.01619   | 8.18345   | 8.50251   | 8.40306   | 8.14875   |
| 2.08937   | 2.25896   | 3.02988   | 2.11215   | 2.08871   | 2.73254   |
| 16.2569   | 13.8669   | 13.8742   | 14.5406   | 13.8203   | 15.0134   |
| 0         | 0         | 0         | 0         | 0         | 0         |
| 7.52955   | 8.78809   | 9.51119   | 5.76399   | 12.074    | 12.206    |
| 0         | 0         | 0         | 0         | 0         | 0         |
| 0         | 0         | 0         | 0         | 0         | 0         |
| 0         | 0         | 0         | 0         | 0         | 0         |
| 16.3294   | 17.2973   | 18.5637   | 20.3471   | 19.8576   | 21.7587   |

|           |           |            |            |           |           |
|-----------|-----------|------------|------------|-----------|-----------|
| 0         | 0         | 0          | 0          | 0         | 0         |
| 5.44191   | 4.81691   | 4.70182    | 4.32815    | 5.15109   | 4.44917   |
| 0.154472  | 0.0552995 | 0.124949   | 0          | 0.119749  | 0         |
| 10.1502   | 11.5436   | 11.3467    | 9.1575     | 8.35502   | 8.61958   |
| 27.2276   | 24.0312   | 30.9342    | 34.0028    | 29.0483   | 30.6486   |
| 0         | 0         | 0          | 0          | 0         | 0         |
| 9.09098   | 7.21174   | 8.28924    | 8.6751     | 8.17977   | 9.81525   |
| 5.28644   | 4.98262   | 5.42489    | 5.30233    | 5.55388   | 5.38482   |
| 0.129889  | 0.0557988 | 0          | 0          | 0         | 0.0962553 |
| 0.0466044 | 0.0333679 | 0          | 0.0676433  | 0         | 0         |
| 2.2854    | 1.46344   | 2.09372    | 1.77137    | 1.86231   | 2.15027   |
| 22.8737   | 24.1208   | 24.0484    | 24.0431    | 24.0734   | 21.9631   |
| 0.354368  | 0.116269  | 0.491807   | 0.24737    | 0.498641  | 0.0726227 |
| 27.3877   | 30.6616   | 30.1944    | 29.9062    | 23.2458   | 23.0335   |
| 1035.95   | 2014.65   | 1443.61    | 1217.64    | 1006.7    | 2255.68   |
| 11.4802   | 9.60228   | 10.6833    | 8.9802     | 13.0582   | 14.8126   |
| 85.5038   | 83.3977   | 84.2885    | 89.0618    | 92.7527   | 69.3845   |
| 4.17731   | 3.21777   | 3.47604    | 3.04549    | 1.78293   | 3.35471   |
| 3.6136    | 3.30832   | 3.88132    | 3.76172    | 4.40864   | 3.48113   |
| 16.0516   | 13.9354   | 14.0244    | 17.2908    | 13.7875   | 13.5544   |
| 3.45849   | 2.04737   | 2.95379    | 2.43978    | 3.11544   | 4.0404    |
| 0         | 0         | 0          | 0          | 0         | 0         |
| 0         | 0         | 0          | 0          | 0         | 0         |
| 0.212196  | 0.208734  | 0.152256   | 0.216004   | 0.175091  | 0.221182  |
| 0.0733264 | 0.0175001 | 0.00988538 | 0.00886905 | 0.0284219 | 0.0396224 |
| 0         | 0.281767  | 0.156675   | 0.140567   | 0.150156  | 0.21805   |
| 0         | 0         | 0          | 0          | 0         | 0         |
| 0.419158  | 0.0689069 | 0.213678   | 0.951222   | 0.14724   | 0.337222  |
| 2.22958   | 2.20316   | 2.01683    | 2.17286    | 1.60718   | 2.49882   |
| 8.01555   | 6.652     | 6.12997    | 9.38657    | 6.43974   | 8.62312   |
| 9.75076   | 8.783     | 8.58686    | 10.8998    | 9.99731   | 10.8989   |
| 3.07823   | 0.369863  | 2.6504     | 7.28818    | 8.81722   | 1.97056   |
| 0         | 0         | 0          | 0          | 0         | 0         |
| 4.93192   | 4.84983   | 5.36156    | 4.50572    | 5.99652   | 5.203     |
| 15.5709   | 16.0357   | 17.6161    | 19.6134    | 13.8173   | 16.8925   |
| 65.5204   | 74.4881   | 72.9763    | 69.3434    | 78.4022   | 67.4162   |
| 0         | 0         | 0          | 0          | 0         | 0         |
| 0         | 0         | 0          | 0          | 0         | 0         |
| 15.7841   | 13.7243   | 13.091     | 14.6702    | 16.2671   | 14.5393   |
| 33.8953   | 31.8719   | 36.1143    | 34.9465    | 38.3402   | 35.432    |
| 561.014   | 785.106   | 615.11     | 657.877    | 619.8     | 831.904   |
| 2.0366    | 2.60935   | 1.73407    | 1.94473    | 1.32952   | 3.47523   |
| 2.45721   | 2.37341   | 3.13138    | 2.59074    | 1.7611    | 3.00626   |

|            |            |           |            |           |            |
|------------|------------|-----------|------------|-----------|------------|
| 3.50373    | 3.09897    | 2.87471   | 6.76411    | 2.60817   | 8.23652    |
| 0          | 0          | 0         | 0          | 0         | 0          |
| 24.634     | 20.4306    | 22.4588   | 21.0587    | 25.3297   | 21.3827    |
| 10.4005    | 8.86939    | 9.97844   | 8.69034    | 9.00297   | 7.48867    |
| 11.0888    | 10.0206    | 8.62121   | 9.92249    | 7.51128   | 12.5656    |
| 1.10347    | 0.917756   | 0.916188  | 0.599738   | 1.16475   | 0.956629   |
| 0.00485427 | 0.00173778 | 0         | 0.00352283 | 0         | 0.00767237 |
| 26.9637    | 29.258     | 26.563    | 28.7813    | 26.9662   | 26.399     |
| 4.69867    | 4.58366    | 3.13554   | 3.19679    | 3.59695   | 3.47519    |
| 0          | 0          | 0.0817182 | 0          | 0         | 0          |
| 2.84969    | 3.39093    | 4.04749   | 3.54291    | 3.82236   | 2.00516    |
| 0          | 0.0856884  | 0.0242016 | 0.0651403  | 0.0231944 | 0          |
| 5.40882    | 5.1119     | 5.0051    | 5.49539    | 4.69616   | 6.24286    |
| 8.36176    | 0.269072   | 5.09174   | 0.136366   | 7.429     | 4.56909    |
| 0.0135122  | 0.00967449 | 0.0109298 | 0          | 0         | 0.0547605  |
| 34.4713    | 31.0734    | 34.6213   | 37.341     | 36.6768   | 40.8844    |
| 0          | 0          | 0         | 0          | 0         | 0          |
| 5.33407    | 5.08005    | 3.08549   | 3.97862    | 3.86295   | 5.3768     |
| 4.84522    | 4.64197    | 4.12449   | 4.62137    | 4.29267   | 4.50694    |
| 0.0474734  | 0          | 0.240003  | 0.13781    | 0.24053   | 0.153916   |
| 0          | 0          | 0         | 0          | 0         | 0          |
| 0.297269   | 0.378381   | 0.400758  | 0.203748   | 0.128027  | 0.0401578  |
| 0.346236   | 0.3243     | 0.155323  | 0.19776    | 0.231027  | 0.239201   |
| 0          | 0.0487009  | 0         | 0.0109655  | 0         | 0.0490026  |
| 0.118937   | 0.0851566  | 0.0962057 | 0          | 0         | 0.0964024  |
| 20.9415    | 22.4342    | 26.8257   | 20.6825    | 20.6437   | 25.7319    |
| 15.4827    | 16.7709    | 11.3156   | 12.599     | 8.63213   | 14.3112    |
| 0          | 0          | 0         | 0          | 0         | 0          |
| 0          | 0          | 0         | 0          | 0         | 0          |
| 0          | 0          | 0         | 0          | 0         | 0          |
| 0.459358   | 0.680904   | 0.936508  | 1.13561    | 0.408257  | 0.556679   |
| 0          | 0          | 0         | 0          | 0         | 0          |
| 15.5257    | 12.1201    | 16.0289   | 17.4824    | 14.9865   | 16.0481    |
| 0.853826   | 0.614035   | 0.33637   | 0.606635   | 1.19078   | 1.17855    |
| 0          | 0          | 0         | 0          | 0         | 0          |
| 36.719     | 35.2123    | 18.1352   | 28.2129    | 22.9125   | 23.87      |
| 79.9862    | 67.2795    | 82.6881   | 84.6042    | 85.5562   | 78.1944    |
| 7.21874    | 5.69858    | 4.49161   | 5.29254    | 3.58723   | 5.85103    |
| 0.595031   | 0.588913   | 0.517629  | 0.581057   | 0.709085  | 0.96665    |
| 0.14977    | 0.251325   | 0.0605728 | 0.191341   | 0.090706  | 0.242787   |
| 272.454    | 312.32     | 306.604   | 307.245    | 334.956   | 249.024    |
| 0          | 0          | 0         | 0.204826   | 0.218796  | 0.228765   |
| 6.95415    | 5.44169    | 5.68718   | 5.74287    | 6.07342   | 6.54011    |

|           |           |           |           |           |           |
|-----------|-----------|-----------|-----------|-----------|-----------|
| 9.27908   | 3.63249   | 8.90959   | 6.83088   | 6.72753   | 10.8757   |
| 2.43371   | 3.87887   | 2.56736   | 2.74479   | 1.39911   | 1.85523   |
| 0         | 0         | 0         | 0         | 0         | 0         |
| 17.7954   | 14.3502   | 17.8315   | 16.6655   | 17.6913   | 18.0748   |
| 1.10446   | 0.652649  | 0.875943  | 0.931935  | 0.790029  | 0.546207  |
| 0.505321  | 0.87435   | 0.34062   | 1.2224    | 0.587599  | 0.750896  |
| 0.599646  | 0.306668  | 0.485042  | 0.373006  | 0.0664079 | 0.277733  |
| 22.2684   | 21.0348   | 22.9599   | 22.4191   | 19.3344   | 21.4907   |
| 0.146444  | 0.149787  | 0.1523    | 0.0151824 | 0.0973076 | 0.0678272 |
| 0.159141  | 0         | 0.222864  | 0.0957325 | 0.11866   | 0.0328562 |
| 0.613806  | 0.732456  | 0.910241  | 0.90946   | 0.614616  | 0.891373  |
| 0         | 0         | 0         | 0         | 0         | 0         |
| 6.23289   | 7.03283   | 7.59196   | 7.3738    | 6.27314   | 7.27594   |
| 32.2038   | 24.022    | 30.6224   | 32.2321   | 32.4255   | 29.359    |
| 1.12746   | 0.714455  | 0.57654   | 0.742981  | 0.371712  | 0.567215  |
| 0.141874  | 0.0338597 | 0.076506  | 0         | 0         | 0         |
| 1.32098   | 1.2935    | 1.40108   | 2.05569   | 1.23092   | 0.911132  |
| 50.4498   | 49.7411   | 49.829    | 51.0229   | 47.4006   | 43.9226   |
| 0         | 0         | 0         | 0         | 0         | 0         |
| 2.66013   | 4.64334   | 3.16112   | 3.52026   | 5.71515   | 4.33532   |
| 0.39741   | 0.113815  | 0.45004   | 0.288408  | 0.616157  | 0.708652  |
| 0.426734  | 0.343725  | 0.043147  | 0.193555  | 0.578919  | 0.172941  |
| 19.0625   | 16.3223   | 14.2235   | 14.1163   | 20.4473   | 8.5137    |
| 0         | 0         | 0         | 0         | 0         | 0         |
| 0.488891  | 0.175018  | 0.474545  | 0.212878  | 0.682193  | 0.198131  |
| 27.4624   | 22.9815   | 25.4592   | 29.1175   | 22.1952   | 23.2064   |
| 0.755008  | 0.329436  | 0.191984  | 0.323435  | 0.0834137 | 0.0938191 |
| 32.7255   | 33.5535   | 34.6282   | 31.5703   | 39.3441   | 36.2216   |
| 0.0598399 | 0.0214221 | 0.0242016 | 0.0651403 | 0         | 0.0242511 |
| 6.56852   | 5.39967   | 5.68211   | 4.61241   | 6.04678   | 5.92789   |
| 4.28698   | 0.512688  | 0.467186  | 0.369538  | 0.384684  | 0.771591  |
| 2.89871   | 2.78153   | 1.13609   | 1.323     | 2.52512   | 1.79249   |
| 2.92324   | 3.90631   | 2.72145   | 2.5845    | 1.3082    | 1.59046   |
| 14.7649   | 17.5042   | 14.309    | 18.8571   | 17.2682   | 20.866    |
| 0.363111  | 1.55988   | 0.44057   | 0.922308  | 0.28149   | 0.441471  |
| 26.6437   | 24.8043   | 32.5444   | 26.5494   | 32.2295   | 26.3146   |
| 0.926618  | 0.815252  | 0.974558  | 0.474074  | 0.813174  | 0.773776  |
| 17.0769   | 15.5379   | 17.7756   | 17.4521   | 16.4914   | 17.215    |
| 5.47403   | 6.35844   | 9.37381   | 7.43806   | 6.47819   | 6.74973   |
| 5.88818   | 4.90412   | 4.44693   | 6.36613   | 3.93581   | 4.06642   |
| 0         | 0         | 0         | 0         | 0         | 0         |
| 14.473    | 11.7349   | 13.3896   | 16.1073   | 11.1503   | 13.8866   |
| 0.284453  | 0.254578  | 0.431415  | 0.69671   | 0.578844  | 0.922234  |

|           |           |            |           |           |           |
|-----------|-----------|------------|-----------|-----------|-----------|
| 0.209556  | 0.100026  | 0          | 0.050693  | 0.108301  | 0.113235  |
| 6.14694   | 7.20696   | 7.82979    | 7.82188   | 4.05328   | 5.47754   |
| 16.7866   | 16.1503   | 18.6747    | 16.6031   | 18.5992   | 20.185    |
| 15.1427   | 13.0746   | 12.1631    | 12.3126   | 10.5301   | 12.8091   |
| 11.621    | 10.0664   | 13.1661    | 11.2211   | 14.7605   | 13.124    |
| 3.19314   | 3.81053   | 2.23362    | 3.40918   | 1.83126   | 0.847213  |
| 107.629   | 98.63     | 96.5062    | 108.968   | 127.873   | 99.2498   |
| 5.44587   | 1.58446   | 0.00796789 | 2.47255   | 3.98823   | 2.05608   |
| 0         | 0.0613859 | 0.0693507  | 0.0311104 | 0         | 0.104239  |
| 11.413    | 9.7576    | 9.79946    | 10.405    | 11.8175   | 12.4507   |
| 0.141589  | 0.125228  | 0.0808434  | 0.0785761 | 0.0645657 | 0.0540058 |
| 0         | 0.174025  | 0.0983024  | 0.132294  | 0.0471056 | 0.147755  |
| 269.147   | 292.275   | 286.512    | 308.537   | 327.812   | 266.873   |
| 0         | 0         | 0          | 0         | 0         | 0         |
| 13.1587   | 15.0674   | 16.5997    | 19.3404   | 18.2289   | 15.6711   |
| 9.32059   | 9.34953   | 10.967     | 9.08794   | 8.97877   | 8.97296   |
| 0.236409  | 0.112843  | 0.191227   | 0         | 0         | 0.447108  |
| 0         | 0         | 0          | 0.0992747 | 0.106046  | 0         |
| 35.7985   | 35.9505   | 34.3484    | 36.5985   | 30.0406   | 31.5633   |
| 9.61164   | 8.74628   | 8.29433    | 8.69106   | 7.96013   | 9.06446   |
| 0         | 0         | 0          | 0         | 0         | 0         |
| 303.01    | 378.537   | 362.387    | 324.803   | 381.473   | 312.041   |
| 0.201139  | 0.316825  | 0.162697   | 0.642268  | 0.124741  | 0.195636  |
| 0.0542435 | 0.194187  | 0.0438765  | 0.0393655 | 0.0420504 | 0.131899  |
| 5.85685   | 5.29512   | 5.12589    | 4.41794   | 4.92944   | 5.2042    |
| 9.71865   | 9.92791   | 10.3645    | 10.8365   | 9.09446   | 10.7473   |
| 9.85414   | 9.30998   | 8.19039    | 8.49097   | 9.00696   | 9.26329   |
| 3.36289   | 2.8984    | 3.27301    | 3.15713   | 3.90485   | 4.32745   |
| 0         | 0         | 0          | 0         | 0         | 0         |
| 12.9455   | 13.5992   | 12.8746    | 13.4502   | 9.45974   | 9.03066   |
| 58.5429   | 57.9248   | 58.7142    | 62.7476   | 50.3057   | 49.1398   |
| 39.9534   | 52.6226   | 47.076     | 43.0402   | 32.0429   | 46.5456   |
| 9.75769   | 7.64687   | 7.73444    | 8.54218   | 9.01646   | 7.11579   |
| 0.824309  | 0.325622  | 0.425352   | 1.00047   | 0.837333  | 0.748767  |
| 1.27955   | 1.61682   | 1.85143    | 1.47939   | 2.18765   | 1.72741   |
| 0         | 0         | 0          | 0         | 0         | 0         |
| 20.2683   | 16.1834   | 30.4123    | 15.1911   | 16.3364   | 18.6305   |
| 17.3621   | 18.2191   | 16.8306    | 18.8629   | 17.8357   | 15.8974   |
| 587.851   | 1217.84   | 801.207    | 711.495   | 517.164   | 1264.2    |
| 35.8897   | 15.7293   | 14.6423    | 25.2039   | 8.3186    | 11.3225   |
| 0.0386275 | 0         | 0.12498    | 0         | 0         | 0         |
| 1.03724   | 0.891176  | 0.587304   | 0.526922  | 0.562861  | 0.840721  |
| 176.25    | 148.552   | 141.883    | 161.31    | 104.504   | 156.552   |

|          |           |           |           |          |           |
|----------|-----------|-----------|-----------|----------|-----------|
| 0.60121  | 0.990046  | 1.1185    | 0.916248  | 0.978741 | 0.584761  |
| 176.578  | 205.302   | 177.136   | 193.242   | 192.04   | 209.316   |
| 0        | 0         | 0         | 0         | 0        | 0         |
| 0        | 0.0244332 | 0.172524  | 0.0247654 | 0.105819 | 0.118499  |
| 42.2684  | 41.4769   | 42.3024   | 43.8024   | 47.3934  | 36.9696   |
| 10.1732  | 11.0642   | 11.0612   | 12.4695   | 8.62552  | 10.4513   |
| 0.198014 | 0.0708871 | 0.0400424 | 0.107777  | 0.172691 | 0.160497  |
| 17.298   | 12.5082   | 15.6906   | 14.7178   | 14.2493  | 17.4173   |
| 0        | 0         | 0.108742  | 0.716813  | 0.468975 | 0         |
| 0        | 0         | 0         | 0         | 0        | 0.0620182 |
| 2.88547  | 1.5242    | 2.33421   | 2.88645   | 3.1485   | 1.95263   |
| 30.1683  | 30.5133   | 35.5433   | 32.0553   | 36.1757  | 32.0358   |
| 19.6919  | 19.6246   | 20.1339   | 18.8249   | 23.6522  | 19.8344   |
| 1.35921  | 1.75171   | 1.53922   | 1.18369   | 0.842947 | 1.10169   |
| 0        | 0         | 0         | 0         | 0        | 0         |
| 0.105994 | 0.0379448 | 0.214341  | 0.230765  | 0.246504 | 0.472514  |
| 5.59757  | 5.38297   | 6.83604   | 7.56696   | 6.80679  | 7.29482   |
| 0        | 0         | 0         | 0         | 0        | 0         |
| 0.138803 | 0.0220839 | 0.0249493 | 0.0435505 | 0.023911 | 0.131548  |
| 0        | 0         | 0         | 0         | 0        | 0         |
| 2.73255  | 2.58143   | 2.1796    | 2.42374   | 1.97121  | 2.49167   |
| 6.13954  | 5.43014   | 6.11108   | 5.45788   | 4.6477   | 5.97202   |
| 41.0247  | 41.1147   | 43.0811   | 40.7536   | 36.9441  | 34.377    |
| 12.0398  | 7.0284    | 9.93686   | 7.6055    | 6.32334  | 7.21447   |
| 6.93087  | 4.18396   | 5.74914   | 5.86817   | 5.76272  | 6.93952   |
| 0.142984 | 0.102374  | 0.0867428 | 0         | 0.138554 | 0.231787  |
| 14.7402  | 29.5939   | 19.0823   | 21.0775   | 17.385   | 9.00013   |
| 0        | 0         | 0         | 0         | 0        | 0         |
| 29.4127  | 27.5525   | 30.224    | 30.7072   | 30.5773  | 31.5657   |
| 4.06677  | 2.25662   | 2.99584   | 2.55      | 1.49034  | 2.13342   |
| 0        | 0         | 0         | 0         | 0        | 0         |
| 2.2401   | 1.58604   | 1.50551   | 1.54808   | 1.73608  | 1.39347   |
| 31.6921  | 24.8125   | 25.8783   | 31.3205   | 34.755   | 28.5069   |
| 5.5557   | 2.83027   | 7.12963   | 9.76935   | 4.67956  | 8.44314   |
| 48.2109  | 51.301    | 52.3935   | 51.5104   | 49.3099  | 51.5576   |
| 6.72705  | 5.84193   | 7.28719   | 6.66342   | 6.98218  | 7.78975   |
| 11.1167  | 9.92459   | 8.11548   | 14.908    | 11.1662  | 8.51066   |
| 2.06874  | 2.08616   | 2.18008   | 2.18854   | 2.13452  | 2.90484   |
| 0        | 0         | 0.117881  | 0.0264397 | 0.112975 | 0.118122  |
| 16.9582  | 11.6892   | 16.3458   | 19.9962   | 16.625   | 14.7501   |
| 15.2946  | 13.8591   | 16.2884   | 15.5204   | 12.85    | 15.5073   |
| 613.563  | 722.504   | 693.246   | 629.876   | 769.831  | 578.015   |
| 1.08466  | 1.24255   | 0.987028  | 0.846193  | 0.609612 | 0.7253    |

|           |           |          |           |           |           |
|-----------|-----------|----------|-----------|-----------|-----------|
| 1026.38   | 964.798   | 992.731  | 1048.54   | 1021.6    | 997.275   |
| 17.2641   | 14.4303   | 16.0246  | 16.3159   | 21.6193   | 15.9813   |
| 1.46237   | 1.06255   | 1.46148  | 1.04671   | 0.832439  | 1.30897   |
| 27.6258   | 31.151    | 27.3257  | 29.7349   | 25.3061   | 25.9978   |
| 10.0344   | 11.4      | 9.08955  | 12.3697   | 9.67034   | 11.3828   |
| 0.940402  | 0.605979  | 1.06494  | 1.19432   | 0.255155  | 0.533559  |
| 7.53632   | 5.04413   | 6.41247  | 6.3579    | 5.16006   | 6.10893   |
| 0.812003  | 0.491936  | 0.858909 | 0.725274  | 0.484213  | 0.75941   |
| 0         | 0         | 0        | 0         | 0         | 0         |
| 37.972    | 38.7638   | 44.1897  | 40.891    | 45.1993   | 45.8686   |
| 18.7564   | 18.1429   | 20.497   | 18.6619   | 18.8733   | 17.1183   |
| 0.110303  | 0.163764  | 0.153383 | 0.15659   | 0.19818   | 0.127761  |
| 27.0291   | 23.0117   | 24.3544  | 24.7987   | 22.1217   | 21.8018   |
| 8.67269   | 7.96504   | 10.1922  | 9.25965   | 10.0672   | 8.0416    |
| 0.165503  | 0.0473987 | 0.080323 | 0.14413   | 0.17962   | 0.107316  |
| 10.5097   | 8.11858   | 9.91293  | 10.969    | 11.103    | 11.7392   |
| 0.137198  | 0.110511  | 0.110977 | 0.132758  | 0.119654  | 0.0278001 |
| 3.0236    | 2.84591   | 1.26449  | 1.16855   | 1.19725   | 1.65202   |
| 0.139021  | 0.132715  | 0.112451 | 0.13452   | 0.107771  | 0.0751209 |
| 3.72336   | 3.67139   | 3.75148  | 3.65022   | 2.86109   | 3.44147   |
| 0.0766743 | 0.109795  | 0.124041 | 0         | 0         | 0         |
| 0         | 0         | 0        | 0         | 0         | 0         |
| 0.906018  | 0.481221  | 1.0822   | 0.722806  | 0.730257  | 0.534911  |
| 8.3629    | 6.26374   | 7.5174   | 6.75418   | 7.93633   | 6.99395   |
| 0         | 0         | 0        | 0         | 0         | 0         |
| 5.54921   | 4.57774   | 5.95233  | 7.04754   | 7.76208   | 7.43119   |
| 264.352   | 273.771   | 273.539  | 269.482   | 424.672   | 210.04    |
| 0.592774  | 0.763947  | 0.191793 | 0.0860374 | 0.275717  | 0.480463  |
| 0         | 0         | 0        | 0         | 0         | 0         |
| 2.74136   | 4.01473   | 4.08208  | 4.97363   | 2.80132   | 3.63594   |
| 0.180738  | 0.0917577 | 0.279853 | 0.118725  | 0.0815241 | 0.200474  |
| 63.259    | 72.387    | 78.8152  | 82.4059   | 55.5956   | 74.6698   |
| 1.51761   | 1.00006   | 2.53918  | 4.85566   | 1.47873   | 2.47144   |
| 0.462705  | 0.662576  | 0.374273 | 0.335794  | 0.358696  | 0.625064  |
| 0         | 0         | 0        | 0         | 0         | 0         |
| 19.7034   | 11.5891   | 14.9436  | 13.6948   | 16.6846   | 13.5849   |
| 0         | 0         | 0        | 0         | 0         | 0         |
| 10.5331   | 9.76117   | 10.2119  | 10.2734   | 11.0899   | 11.3378   |
| 0.137535  | 0.073211  | 0.110236 | 0.042387  | 0.0777798 | 0.0631211 |
| 2.01083   | 1.05431   | 1.7516   | 1.04905   | 2.02053   | 2.44046   |
| 40.3582   | 31.2559   | 33.6088  | 34.5619   | 37.386    | 20.0145   |
| 41.7723   | 41.2152   | 47.8175  | 45.127    | 37.602    | 27.0291   |
| 1.12373   | 0.83231   | 1.00299  | 1.29356   | 0.510662  | 1.09926   |



|           |           |          |           |           |           |
|-----------|-----------|----------|-----------|-----------|-----------|
| 1.41767   | 1.12749   | 1.72557  | 1.54061   | 1.84281   | 2.00919   |
| 16.2158   | 16.6038   | 13.6103  | 16.7031   | 16.1527   | 14.6981   |
| 0         | 0         | 0        | 0         | 0         | 0         |
| 12.8167   | 11.4076   | 10.674   | 9.95021   | 11.8682   | 11.1351   |
| 0         | 0         | 0        | 0         | 0         | 0         |
| 0.308722  | 0.221039  | 0.187289 | 0.130693  | 0.378933  | 0.125115  |
| 0         | 0         | 0        | 0         | 0         | 0         |
| 55.7057   | 91.0356   | 57.7243  | 58.4232   | 49.4254   | 43.7997   |
| 94.3682   | 100.13    | 92.2462  | 100.649   | 74.7311   | 87.7201   |
| 0         | 0         | 0        | 0         | 0         | 0         |
| 46.0193   | 38.1309   | 43.9503  | 49.8816   | 50.9239   | 51.0437   |
| 0.420221  | 0         | 0.339908 | 0.914886  | 0         | 0         |
| 48.4439   | 39.9171   | 43.8043  | 44.1266   | 41.0839   | 41.2249   |
| 0         | 0.0961602 | 0.108637 | 0.0974679 | 0.104116  | 0         |
| 0         | 0         | 0        | 0         | 0         | 0         |
| 0.388087  | 0.200059  | 0.259363 | 0.240332  | 0.288961  | 0.226479  |
| 3.88046   | 3.80367   | 2.54095  | 2.68202   | 2.90076   | 1.79728   |
| 15.4229   | 8.99169   | 11.1316  | 12.0657   | 12.59     | 12.9928   |
| 0.720515  | 0.564234  | 0.406758 | 0.346178  | 0.539576  | 0.505444  |
| 5.6155    | 4.76595   | 3.9706   | 5.07366   | 4.26659   | 5.30367   |
| 2.26267   | 12.5727   | 7.17983  | 6.04348   | 7.57288   | 1.96044   |
| 0.834288  | 0.805378  | 0.751671 | 0.616727  | 0.475983  | 0.557074  |
| 14.3471   | 27.1319   | 7.18546  | 9.72123   | 12.0785   | 13.6003   |
| 0.272694  | 0.272694  | 0.27321  | 0.27321   | 0.0968946 | 0.0968946 |
| 3.0115    | 2.66647   | 3.51588  | 3.89748   | 3.09719   | 2.89656   |
| 0         | 0         | 0        | 0         | 0         | 0         |
| 0.0810534 | 0.0580327 | 0        | 0.0588219 | 0         | 0         |
| 19.678    | 15.8322   | 17.2744  | 19.1472   | 15.4959   | 16.5283   |
| 1.67847   | 1.43894   | 1.60778  | 1.34631   | 1.23269   | 1.44996   |
| 0         | 0         | 0        | 0         | 0         | 0         |
| 14.1935   | 9.26693   | 11.0172  | 12.5844   | 10.8657   | 13.1514   |
| 12.8037   | 12.2297   | 12.1888  | 12.3009   | 15.7918   | 11.9255   |
| 0         | 0         | 0        | 0         | 0         | 0         |
| 0         | 0         | 0        | 0         | 0         | 0         |
| 33.1531   | 25.7617   | 30.3211  | 29.6053   | 29.6655   | 31.754    |
| 2.99997   | 2.83711   | 4.20114  | 3.57427   | 2.58561   | 2.26828   |
| 1.53489   | 0.430298  | 0.761489 | 0.986382  | 0.44687   | 0.709634  |
| 2.08515   | 1.74841   | 2.93737  | 2.27364   | 2.58186   | 2.38477   |
| 1.82111   | 2.07805   | 1.86441  | 1.36299   | 2.00733   | 1.59147   |
| 31.2781   | 37.8219   | 31.1235  | 32.5715   | 33.3689   | 28.6115   |
| 14.3634   | 20.6739   | 18.8947  | 22.7282   | 18.7971   | 31.3555   |
| 3.72509   | 3.05758   | 3.66239  | 3.91316   | 3.08718   | 3.21114   |
| 3.33137   | 3.26388   | 2.38858  | 2.4925    | 2.62435   | 3.26703   |

|          |           |           |          |           |          |
|----------|-----------|-----------|----------|-----------|----------|
| 52.5002  | 34.7025   | 46.6727   | 42.7311  | 55.0915   | 46.7895  |
| 13.6285  | 11.6488   | 13.2782   | 13.5487  | 13.7026   | 13.2996  |
| 24.2409  | 24.6311   | 24.1996   | 25.4575  | 22.1869   | 23.8434  |
| 169.15   | 144.696   | 160.364   | 170.256  | 181.848   | 155.682  |
| 40.7382  | 46.1353   | 23.0782   | 25.6156  | 20.8967   | 29.3927  |
| 0        | 0         | 0         | 0        | 0         | 0        |
| 0.584653 | 0.385553  | 0.373353  | 0.502452 | 0.763338  | 0.586116 |
| 7.38223  | 5.82413   | 6.54184   | 5.86921  | 6.67053   | 5.22126  |
| 0.124764 | 0.148881  | 0.370037  | 0.482898 | 0.225678  | 0.707878 |
| 59.5842  | 66.4706   | 67.248    | 67.3368  | 73.6561   | 53.0048  |
| 13.8254  | 13.4385   | 13.9541   | 14.6461  | 13.1973   | 14.2257  |
| 0.297238 | 0.331048  | 0.0801433 | 0.479358 | 0.0768079 | 0.187383 |
| 16.4099  | 14.9941   | 14.5789   | 15.68    | 12.6784   | 13.2993  |
| 0.954903 | 0.639583  | 0.735027  | 0.603572 | 0.59698   | 0.399474 |
| 0        | 0         | 0         | 0        | 0         | 0        |
| 0        | 1.25518   | 1.13443   | 1.0178   | 0.543609  | 0.852563 |
| 9.64367  | 8.29768   | 7.8369    | 6.74409  | 7.80566   | 9.48172  |
| 17.3205  | 18.4758   | 18.1532   | 17.6204  | 16.2459   | 14.1656  |
| 0        | 0         | 0         | 0        | 0         | 0        |
| 1.13496  | 0.775673  | 0.66767   | 0.898539 | 0.799853  | 0.627221 |
| 0        | 0         | 0         | 0.073619 | 0         | 0        |
| 0        | 0         | 0         | 0        | 0         | 0        |
| 8.11967  | 5.62549   | 6.24423   | 8.31252  | 10.7739   | 5.61665  |
| 0        | 0         | 0         | 0        | 0         | 0        |
| 64.5025  | 54.0969   | 47.7567   | 53.6686  | 61.1264   | 51.7544  |
| 42.7037  | 38.5271   | 52.103    | 50.566   | 51.4643   | 48.7197  |
| 0        | 0.0374481 | 0         | 0        | 0         | 0        |
| 2.90272  | 1.97254   | 3.17127   | 2.28248  | 2.20641   | 2.67799  |
| 1.72345  | 0.881397  | 0.896183  | 1.34008  | 0.954317  | 1.59647  |
| 16.4531  | 18.6302   | 16.0641   | 15.184   | 14.5714   | 15.9207  |
| 0        | 0         | 0.344578  | 0.154576 | 0         | 0.172641 |
| 0.23296  | 0.0907729 | 0.461643  | 0.567379 | 0.294848  | 0.462422 |
| 12.3155  | 10.4049   | 11.7992   | 10.9039  | 10.9899   | 11.5128  |
| 1.32892  | 1.63056   | 0.505023  | 0.723635 | 0.168426  | 1.26569  |
| 93.0275  | 90.0313   | 94.9388   | 99.7061  | 95.64     | 91.4312  |
| 2.66354  | 2.1507    | 2.14901   | 2.45614  | 2.25136   | 2.62988  |
| 86.0481  | 92.291    | 71.3339   | 95.9409  | 82.2949   | 89.0129  |
| 0        | 0         | 0         | 0        | 0         | 0        |
| 10.4317  | 10.4313   | 10.1534   | 10.408   | 12.8592   | 11.5096  |
| 1361.59  | 1257.56   | 1298.08   | 1392.27  | 1441.46   | 1323.85  |
| 2.77988  | 2.36499   | 2.40731   | 3.27532  | 2.43389   | 1.13985  |
| 14.8333  | 13.3367   | 16.9845   | 14.4668  | 14.4004   | 15.6754  |
| 0        | 0         | 0         | 0        | 0         | 0        |

|           |           |            |           |           |           |
|-----------|-----------|------------|-----------|-----------|-----------|
| 0         | 0         | 0          | 0         | 0         | 0         |
| 1.06454   | 0.122069  | 0.478847   | 0.396905  | 0.275428  | 0.639781  |
| 5.89494   | 6.0833    | 5.97718    | 5.12163   | 3.04657   | 4.50886   |
| 14.6853   | 8.98948   | 12.2189    | 11.5642   | 19.146    | 10.9122   |
| 0.0262018 | 0         | 0          | 0         | 0         | 0         |
| 60.7397   | 61.657    | 62.7786    | 70.234    | 75.0243   | 62.907    |
| 11.5253   | 9.81839   | 11.7404    | 10.8353   | 11.7535   | 12.0142   |
| 1.39196   | 1.07578   | 2.83642    | 1.39248   | 2.49008   | 2.97391   |
| 49.5758   | 38.9468   | 51.2235    | 48.6717   | 52.3794   | 50.0044   |
| 6.2379    | 5.18478   | 6.26339    | 4.19402   | 4.11895   | 8.18976   |
| 26.5958   | 25.8111   | 24.1814    | 26.1792   | 25.5714   | 23.2259   |
| 11.32     | 10.5152   | 11.2289    | 10.2051   | 11.5383   | 14.715    |
| 13.7539   | 12.1111   | 13.1948    | 11.4125   | 11.3697   | 13.301    |
| 28.8499   | 39.6664   | 30.4482    | 29.8065   | 33.7399   | 28.6826   |
| 4.08323   | 3.23084   | 4.06494    | 2.81179   | 1.66425   | 2.1656    |
| 0.131879  | 0.0786857 | 0.0711161  | 0.111658  | 0.170391  | 0.0356308 |
| 44.269    | 41.679    | 47.4625    | 46.7655   | 48.5068   | 20.3274   |
| 0.177441  | 0.304906  | 0.172234   | 0.334807  | 0.082533  | 0.258879  |
| 8.12202   | 7.70014   | 6.29789    | 5.65039   | 4.21202   | 4.44932   |
| 0.313246  | 0.542261  | 0.373839   | 0.418605  | 0.272387  | 0.388155  |
| 0.140534  | 0.100619  | 0.0284187  | 0.0764908 | 0.163416  | 0.0854304 |
| 0.0136307 | 0.0208494 | 0.00142074 | 0.0281746 | 0.0338027 | 0.0202703 |
| 66.633    | 60.6213   | 66.4351    | 64.8485   | 59.6435   | 59.8975   |
| 30.6537   | 29.4192   | 29.7436    | 31.5262   | 26.4051   | 29.2632   |
| 0         | 0         | 0          | 0         | 0         | 0         |
| 9.89234   | 11.1909   | 11.3627    | 11.4141   | 10.9637   | 9.54065   |
| 2.91183   | 3.70934   | 3.24238    | 3.78723   | 1.96414   | 2.45209   |
| 0         | 0.0170857 | 0          | 0         | 0         | 0         |
| 44.4426   | 50.7206   | 48.5252    | 51.5446   | 52.0123   | 47.9846   |
| 19.5881   | 17.7754   | 16.8855    | 15.6984   | 18.8784   | 18.6587   |
| 0.97884   | 0.808651  | 1.12065    | 0.786863  | 0.770486  | 1.11074   |
| 4.59439   | 3.79605   | 4.11368    | 3.78011   | 4.2468    | 3.9088    |
| 7.76451   | 9.09359   | 8.9841     | 10.3865   | 11.6264   | 9.66932   |
| 0         | 0         | 0.039182   | 0.140615  | 0         | 0         |
| 13.6343   | 13.7046   | 10.8786    | 9.97152   | 7.92202   | 10.8365   |
| 1.37236   | 1.08143   | 1.61011    | 1.24545   | 1.11707   | 1.16796   |
| 1.77552   | 1.07908   | 2.04167    | 0.989519  | 0.983121  | 1.7795    |
| 0         | 0         | 0          | 0         | 0         | 0         |
| 0.435526  | 0.184262  | 0.256209   | 0.179585  | 0.237873  | 0.288825  |
| 0         | 0         | 0.0401771  | 0         | 0         | 0         |
| 8.36073   | 6.27231   | 7.19392    | 7.10699   | 8.13399   | 7.50562   |
| 0         | 0         | 0.0827376  | 0         | 0         | 0         |
| 11.9508   | 11.0503   | 11.2175    | 10.8759   | 13.0049   | 10.9297   |

|           |           |           |           |           |           |
|-----------|-----------|-----------|-----------|-----------|-----------|
| 11.9501   | 7.58534   | 11.2985   | 11.6471   | 10.4372   | 10.4783   |
| 0.033338  | 0.0767829 | 0         | 0.121654  | 0         | 0.108089  |
| 174.98    | 100.226   | 283.076   | 126.986   | 162.777   | 255.289   |
| 40.5813   | 37.1494   | 44.3306   | 45.0182   | 45.6691   | 41.5476   |
| 0         | 0         | 0         | 0         | 0         | 0         |
| 7.44416   | 5.91132   | 5.85721   | 8.69289   | 7.92178   | 6.1983    |
| 0.671419  | 0.961447  | 0         | 0.324841  | 0.607244  | 0.634909  |
| 1.97969   | 1.28076   | 0.969197  | 1.42789   | 0.940503  | 0.820979  |
| 928.416   | 989.188   | 981.182   | 909.737   | 919.981   | 862.699   |
| 4.41046   | 4.62966   | 4.17169   | 4.36422   | 4.08474   | 4.20378   |
| 0         | 0         | 0         | 0         | 0         | 0         |
| 19.7722   | 14.31     | 19.3307   | 16.2933   | 15.2031   | 16.0695   |
| 0         | 0         | 0.0137465 | 0         | 0         | 0         |
| 2.34504   | 2.86156   | 1.45153   | 2.00164   | 0.854703  | 1.34046   |
| 59.0168   | 67.3014   | 72.9475   | 77.8091   | 54.4033   | 101.653   |
| 10.4346   | 10.892    | 9.42554   | 10.1818   | 8.52487   | 8.85631   |
| 1.14795   | 1.40005   | 1.75162   | 1.17493   | 1.52054   | 1.09519   |
| 1.34E-08  | 9.92E-09  | 1.33E-08  | 7.85E-09  | 2.06E-08  | 1.31E-08  |
| 0.222122  | 0.318071  | 0.17967   | 0.0805991 | 0.0860963 | 0.0900188 |
| 0         | 0.101857  | 0.0575368 | 0.0516213 | 0.165427  | 0.0576544 |
| 0.591211  | 0.846592  | 0.159406  | 0.143018  | 0.76386   | 0.798661  |
| 0.537923  | 0.843287  | 1.20327   | 0.764842  | 0.752982  | 0.670153  |
| 0.205854  | 0.343905  | 0.0555038 | 0.0995948 | 0.106388  | 0.222469  |
| 93.5036   | 92.5816   | 93.3444   | 97.0304   | 114.33    | 98.489    |
| 8.12292   | 5.78113   | 8.72794   | 6.26448   | 8.08273   | 9.47295   |
| 0         | 0         | 0         | 0         | 0         | 0         |
| 2.00664   | 1.22647   | 2.37531   | 1.63385   | 1.77058   | 1.481     |
| 19.4514   | 20.7921   | 20.5537   | 17.7944   | 18.6364   | 19.5409   |
| 4.01983   | 4.27898   | 4.63275   | 4.95677   | 3.14381   | 2.3932    |
| 0         | 0         | 0         | 0.0522373 | 0         | 0.0291712 |
| 1.94056   | 1.50329   | 1.62171   | 1.59399   | 1.68932   | 1.86942   |
| 21.7169   | 20.7558   | 17.2908   | 19.6844   | 16.6641   | 18.2547   |
| 0         | 0         | 0         | 0         | 0         | 0         |
| 5.38846   | 5.04512   | 7.0129    | 4.56225   | 5.3554    | 6.4113    |
| 20.791    | 18.7573   | 18.5669   | 21.3162   | 15.1169   | 19.2269   |
| 91.867    | 84.4639   | 92.0778   | 99.8321   | 101.806   | 88.6942   |
| 0         | 0         | 0         | 0         | 0         | 0         |
| 4.00463   | 2.79574   | 5.72285   | 5.45733   | 2.62553   | 3.60735   |
| 7.81737   | 9.04145   | 8.89947   | 7.61276   | 9.20244   | 8.01507   |
| 0.44303   | 0.324938  | 0.297175  | 0.305831  | 0.268054  | 0.324057  |
| 10.6872   | 7.63475   | 9.09334   | 9.23082   | 8.6326    | 9.83912   |
| 11.7525   | 10.0553   | 11.0461   | 10.9643   | 9.73788   | 10.6196   |
| 0.0891947 | 0.237704  | 0.0837536 | 0.298791  | 0.219485  | 0.268043  |

|           |           |          |           |          |           |
|-----------|-----------|----------|-----------|----------|-----------|
| 1.94747   | 1.55836   | 1.66284  | 1.41959   | 1.6694   | 1.7764    |
| 0         | 0         | 0        | 0         | 0        | 0         |
| 0.893007  | 0         | 0        | 1.57389   | 0.222516 | 0         |
| 0         | 0         | 0        | 0.0244665 | 0        | 0         |
| 39.2859   | 42.9551   | 38.5765  | 35.2071   | 31.5882  | 39.2108   |
| 1.71443   | 2.60378   | 1.51283  | 2.37527   | 2.69837  | 2.14756   |
| 0         | 0         | 0        | 0         | 0        | 0         |
| 0         | 0         | 0        | 0         | 0        | 0         |
| 13.0539   | 13.0489   | 14.2745  | 13.5704   | 16.5061  | 20.4888   |
| 0         | 0         | 0        | 0         | 0        | 0         |
| 7.14685   | 7.96699   | 6.76882  | 8.10816   | 7.81961  | 5.38947   |
| 7.18346   | 7.81999   | 8.98585  | 8.3527    | 8.61187  | 7.4458    |
| 0.0975994 | 0.139759  | 0.157892 | 0.265611  | 0.245897 | 0.375761  |
| 4.75162   | 4.19767   | 4.38382  | 3.76262   | 3.50142  | 5.13684   |
| 0         | 0         | 0        | 0         | 0        | 0         |
| 0         | 0         | 0        | 0         | 0        | 0         |
| 1.1176    | 0.373418  | 0.843738 | 0.702922  | 0.288794 | 0.603902  |
| 0         | 0         | 0        | 0         | 0        | 0         |
| 80.2646   | 91.8981   | 79.7445  | 67.0222   | 106.27   | 61.3139   |
| 107.538   | 90.3662   | 93.1293  | 115.065   | 119.274  | 104.485   |
| 4.81743   | 7.76067   | 9.33264  | 6.6251    | 5.01362  | 6.23774   |
| 0         | 0         | 0        | 0         | 0        | 0         |
| 11.3589   | 12.4681   | 12.7286  | 11.1336   | 10.0779  | 11.0701   |
| 9.81723   | 12.9839   | 7.72028  | 8.55924   | 3.75234  | 5.41539   |
| 165.479   | 216.974   | 222.814  | 123.207   | 123.557  | 216.229   |
| 0         | 0         | 0        | 0         | 0        | 0         |
| 10.2524   | 3.30497   | 10.3121  | 7.08604   | 8.32882  | 9.63026   |
| 0.478547  | 0.293683  | 0.88477  | 0.545741  | 0.47697  | 0.332467  |
| 5.0269    | 5.42043   | 5.04595  | 4.65903   | 5.82192  | 4.12356   |
| 9.22884   | 7.61319   | 9.84517  | 8.44472   | 9.62552  | 8.18495   |
| 10.9527   | 11.285    | 11.3063  | 12.0836   | 10.8309  | 12.8968   |
| 9.31626   | 7.66218   | 8.13664  | 6.87754   | 8.51399  | 8.08818   |
| 6.60596   | 4.70754   | 7.12457  | 5.06415   | 8.67932  | 6.03307   |
| 9.28589   | 10.5459   | 6.21614  | 8.59796   | 8.4397   | 8.30513   |
| 0.191037  | 0.382982  | 0.370863 | 0.499102  | 0.29619  | 0.433558  |
| 3.54375   | 4.45701   | 2.83467  | 3.50737   | 3.30155  | 2.64872   |
| 20.3429   | 16.785    | 17.9069  | 20.2106   | 20.5349  | 24.3582   |
| 2.94866   | 2.1181    | 1.2873   | 1.50144   | 1.113    | 0.778928  |
| 35.2317   | 31.3232   | 32.4547  | 29.8446   | 38.1817  | 37.6991   |
| 2.95899   | 2.13553   | 1.53182  | 1.88971   | 1.59653  | 2.51349   |
| 0         | 0         | 0        | 0         | 0        | 0.249781  |
| 5.01489   | 3.9643    | 2.88022  | 4.49174   | 2.73145  | 3.14299   |
| 0.0810169 | 0.0580066 | 0.113746 | 0.0661451 | 0.113051 | 0.0738756 |

|           |           |           |           |           |           |
|-----------|-----------|-----------|-----------|-----------|-----------|
| 51.7782   | 48.7353   | 51.1058   | 49.947    | 53.4889   | 44.5615   |
| 24.4354   | 19.7166   | 22.4755   | 20.6611   | 38.9338   | 8.45012   |
| 11.5084   | 8.06357   | 8.0987    | 9.40613   | 11.0586   | 9.74586   |
| 27.391    | 65.8384   | 214.351   | 305.271   | 180.151   | 392.928   |
| 4.11331   | 5.08341   | 5.3695    | 5.00231   | 4.4589    | 4.90535   |
| 0.224459  | 0.2755    | 0.153192  | 0.330617  | 0.0652515 | 0.341022  |
| 5.80328   | 3.28169   | 4.12607   | 3.46044   | 3.23798   | 4.25435   |
| 7.25009   | 5.73681   | 6.24569   | 5.9255    | 6.38338   | 7.07869   |
| 18.1314   | 17.4756   | 19.6891   | 17.674    | 17.2035   | 18.4665   |
| 0         | 0         | 0         | 0         | 0         | 0.0714231 |
| 0         | 0         | 0.067035  | 0.0601431 | 0.12849   | 0.134344  |
| 4.51003   | 2.69218   | 3.60866   | 3.76139   | 3.39814   | 3.85263   |
| 0         | 0         | 0         | 0         | 0         | 0         |
| 3.8411    | 1.04007   | 0.790574  | 1.85841   | 0.86787   | 0.958107  |
| 1.68128   | 0.832439  | 0.522118  | 0.963376  | 1.07885   | 0.878972  |
| 0.119511  | 0.0855674 | 0.19334   | 0.086731  | 0.0617643 | 0.0322891 |
| 0.0948866 | 0.067937  | 0.0767519 | 0.0344305 | 0         | 0.115363  |
| 0.0254658 | 0.018233  | 0         | 0.018481  | 0.0394829 | 0.0412817 |
| 0         | 0         | 0         | 0         | 0         | 0         |
| 0         | 0         | 0         | 0         | 0         | 0         |
| 3.55599   | 3.41618   | 3.60456   | 3.46264   | 4.74564   | 4.56052   |
| 3.09884   | 4.12046   | 2.86467   | 0.963808  | 4.11818   | 2.87053   |
| 12.5257   | 10.9251   | 10.5567   | 11.8137   | 13.6999   | 12.0536   |
| 16.1655   | 12.2535   | 15.4153   | 16.4162   | 16.5717   | 18.5634   |
| 39.5461   | 46.6674   | 43.0083   | 36.8295   | 30.1223   | 29.7468   |
| 3.10915   | 2.63278   | 3.21621   | 4.29578   | 3.33729   | 2.85931   |
| 28.8337   | 26.1728   | 30.966    | 29.4693   | 26.3024   | 30.5641   |
| 11.2692   | 11.5452   | 11.6351   | 10.7049   | 10.4407   | 8.3172    |
| 0         | 0.0333679 | 0         | 0         | 0         | 0         |
| 0         | 0         | 0         | 0         | 0         | 0         |
| 5.75602   | 4.297     | 4.58831   | 4.75586   | 4.13409   | 4.5873    |
| 0.594314  | 0.633007  | 0.634096  | 0.800135  | 0.457107  | 0.661319  |
| 0.540346  | 0.444192  | 0.307571  | 0.653564  | 0.279256  | 0.648842  |
| 33.8467   | 46.4804   | 47.9191   | 38.79     | 55.5635   | 30.5653   |
| 0.612474  | 1.31556   | 0.330279  | 0.148161  | 0.949599  | 0.330954  |
| 0.0534189 | 0.152988  | 0.086419  | 0.155068  | 0.124234  | 0.216489  |
| 0.850112  | 0.663165  | 0.615761  | 0.552612  | 0.658983  | 0.689044  |
| 35.2113   | 36.1642   | 36.6138   | 43.3176   | 39.0056   | 35.2321   |
| 13.423    | 15.8498   | 9.69464   | 12.2678   | 8.26006   | 13.6055   |
| 0.451185  | 0.453412  | 0.336904  | 0.302267  | 0.228815  | 0.460144  |
| 24.772    | 25.7337   | 29.2184   | 26.3452   | 26.4312   | 27.1973   |
| 11.4384   | 10.9347   | 11.6995   | 12.4135   | 10.3098   | 11.3784   |
| 0.310222  | 0.222113  | 0.0557623 | 0.266826  | 0.222992  | 0         |

|           |           |           |           |           |           |
|-----------|-----------|-----------|-----------|-----------|-----------|
| 1.95E-22  | 4.41E-32  | 2.63E-15  | 0.157723  | 0.226015  | 1.17E-28  |
| 21.1067   | 18.5479   | 21.2325   | 20.3051   | 19.3555   | 17.7667   |
| 0         | 0         | 0         | 0         | 0.0770515 | 0         |
| 712.362   | 802.686   | 549.283   | 1144.25   | 605.859   | 725.857   |
| 32.697    | 28.7283   | 29.0085   | 31.2431   | 31.3025   | 28.484    |
| 5.30966   | 5.32226   | 5.7265    | 4.11021   | 3.84172   | 3.72984   |
| 658.152   | 755.052   | 825.208   | 765.019   | 758.202   | 802.492   |
| 7.44467   | 6.36839   | 7.13399   | 7.24306   | 8.59912   | 8.18903   |
| 21.6451   | 21.8997   | 19.6405   | 19.4151   | 19.3662   | 16.6105   |
| 4.08485   | 3.22673   | 3.68198   | 3.6377    | 3.73324   | 3.81802   |
| 1.11316   | 1.25129   | 1.71979   | 0.686664  | 1.98476   | 0.812028  |
| 5.2926    | 3.83677   | 3.15729   | 4.32105   | 3.33361   | 3.86085   |
| 0         | 0         | 0.168037  | 0         | 0         | 0.336762  |
| 5.79791   | 8.95373   | 5.53663   | 6.9343    | 5.54807   | 5.38173   |
| 0.485343  | 0.393723  | 0.182988  | 0.211082  | 0.200426  | 0.261946  |
| 13.6379   | 12.2623   | 13.4254   | 11.1118   | 12.372    | 14.8185   |
| 0         | 0         | 0         | 0         | 0         | 0         |
| 3.0997    | 1.70541   | 2.4925    | 2.33238   | 1.11234   | 2.10252   |
| 0         | 0         | 0         | 0.0395846 | 0         | 0         |
| 24.3852   | 26.9445   | 25.8886   | 26.8855   | 28.8101   | 26.7968   |
| 0         | 0         | 0         | 0         | 0         | 0         |
| 0.27249   | 0.130065  | 0         | 0.0659171 | 0         | 0.294483  |
| 6.0072    | 2.79568   | 3.06124   | 3.57482   | 2.9804    | 4.52821   |
| 18.2508   | 17.6798   | 17.1068   | 16.6341   | 17.4813   | 14.5848   |
| 0.755192  | 0.689515  | 0.684797  | 0.68424   | 0.404356  | 0.801636  |
| 3.44952   | 2.23024   | 3.4341    | 2.74006   | 3.3615    | 5.07393   |
| 19.3566   | 17.0411   | 19.7936   | 19.39     | 22.2777   | 17.2887   |
| 0.0729671 | 0.0914254 | 0.0737771 | 0.066192  | 0.0848479 | 0.0295712 |
| 106.847   | 107.317   | 97.6692   | 91.1546   | 118.004   | 61.8544   |
| 0.396605  | 0.0454331 | 0         | 0.37609   | 0.393541  | 0.801891  |
| 0.121429  | 0.0869409 | 0.0491108 | 0.0881232 | 0.0470668 | 0         |
| 753.775   | 1015.6    | 1018.92   | 1043.69   | 1139.17   | 941.361   |
| 15.8711   | 13.4851   | 13.6506   | 14.7184   | 15.7449   | 19.7266   |
| 0.282695  | 0.276899  | 0.218293  | 0.21851   | 0.172899  | 0.146429  |
| 0.718609  | 0.308706  | 0.348761  | 0.312905  | 0.445662  | 0.349474  |
| 0.570322  | 0.436793  | 0.328951  | 0.443158  | 0.315765  | 0.264139  |
| 3.50109   | 2.1745    | 3.0253    | 2.74488   | 2.4852    | 3.84065   |
| 1.1856    | 0.622477  | 0.996369  | 0.785082  | 0.981177  | 1.23434   |
| 0         | 0         | 0         | 0         | 0         | 0         |
| 7.25474   | 5.5484    | 6.31283   | 6.32185   | 6.30567   | 6.6375    |
| 7.54456   | 5.85264   | 8.3825    | 6.89107   | 7.90669   | 8.0167    |
| 3.35768   | 1.94935   | 2.65057   | 3.35197   | 2.76736   | 3.65981   |
| 10.7121   | 10.8886   | 11.0612   | 9.54183   | 9.66936   | 12.1178   |

|           |           |            |           |           |           |
|-----------|-----------|------------|-----------|-----------|-----------|
| 39.6643   | 41.5784   | 38.9663    | 37.3555   | 36.017    | 31.9503   |
| 0.717839  | 0.513959  | 1.35484    | 1.01296   | 0.741973  | 0.969721  |
| 4.96305   | 3.44357   | 4.6241     | 5.60653   | 5.80493   | 4.85198   |
| 31.5888   | 34.5662   | 34.9692    | 39.4171   | 45.0151   | 32.9176   |
| 0         | 0         | 0          | 0         | 0         | 0         |
| 4.39891   | 4.39451   | 4.31268    | 4.32056   | 4.89198   | 3.36013   |
| 0         | 0         | 0          | 0         | 0         | 0         |
| 1.54649   | 2.09149   | 1.80689    | 2.11993   | 3.06377   | 1.39276   |
| 0.0643686 | 0.0921734 | 0.0520665  | 0.0467135 | 0.0997991 | 0.0521729 |
| 0.472653  | 0.166006  | 0.462396   | 0.217971  | 0.191708  | 0.265704  |
| 0.960136  | 1.00635   | 1.20899    | 0.91229   | 1.12798   | 1.29169   |
| 0.383624  | 0.137334  | 0.155153   | 0.139201  | 0.0743478 | 0.15547   |
| 0.594973  | 0.730268  | 0.378134   | 0.370099  | 0.395342  | 0.792261  |
| 0.0094581 | 0         | 0.00765047 | 0.0205918 | 0.0146641 | 0.0153322 |
| 0.651754  | 0.515429  | 0.402269   | 0.199542  | 1.75851   | 0.142632  |
| 10.1219   | 8.83439   | 7.53248    | 8.90186   | 8.47568   | 7.48593   |
| 1.87652   | 1.61393   | 1.92457    | 1.05189   | 1.98757   | 2.64654   |
| 7.18157   | 6.42068   | 10.0529    | 7.8852    | 6.85092   | 7.46463   |
| 11.9069   | 8.34748   | 9.74587    | 10.9299   | 8.35129   | 9.07645   |
| 0         | 0         | 0          | 0         | 0         | 0         |
| 0         | 0         | 0          | 0         | 0         | 0         |
| 56.0402   | 58.468    | 45.5954    | 54.3297   | 41.214    | 49.9079   |
| 1.39167   | 1.05568   | 1.19265    | 1.17827   | 1.59254   | 1.1011    |
| 0.173041  | 0.123894  | 0          | 0.251158  | 0         | 0         |
| 16.6385   | 20.444    | 19.1316    | 15.6584   | 19.3893   | 18.8805   |
| 22.0342   | 20.6689   | 25.8821    | 24.7507   | 22.9731   | 23.9161   |
| 0.535612  | 0.381495  | 0.864918   | 0.614416  | 0.757071  | 0.962746  |
| 0         | 0         | 0          | 0         | 0         | 0         |
| 5.96303   | 5.30143   | 6.397      | 6.56916   | 5.02876   | 5.27387   |
| 26.966    | 27.3782   | 28.42      | 25.7906   | 26.8414   | 26.3763   |
| 3.92066   | 3.60562   | 3.04114    | 2.97045   | 2.7274    | 3.22442   |
| 0.270459  | 7.73E-07  | 1.69E-11   | 1.65E-06  | 0.564325  | 0.194623  |
| 20.9102   | 16.8493   | 18.0385    | 19.6353   | 15.0396   | 18.8797   |
| 9.74141   | 8.29265   | 10.7449    | 9.06978   | 10.9534   | 11.0169   |
| 0         | 0         | 0          | 0         | 0         | 0         |
| 0         | 0         | 0.120965   | 0         | 0         | 0         |
| 0.193612  | 0.0924152 | 0.156609   | 0.187344  | 0.0500305 | 0.209239  |
| 113.835   | 153.449   | 156.272    | 114.975   | 105.418   | 98.3313   |
| 106.978   | 113.012   | 61.833     | 87.6173   | 69.417    | 79.4686   |
| 0         | 0         | 0          | 0         | 0         | 0         |
| 10.3771   | 50.1275   | 31.2111    | 14.6208   | 10.0556   | 11.8046   |
| 8.71647   | 11.7378   | 9.90402    | 10.0605   | 7.88626   | 7.75856   |
| 2.78959   | 1.97766   | 2.09899    | 2.18051   | 1.99347   | 1.86424   |



|           |           |           |           |           |           |
|-----------|-----------|-----------|-----------|-----------|-----------|
| 0         | 0         | 0.0477744 | 0         | 0         | 0         |
| 2.15265   | 1.39724   | 2.69126   | 1.7816    | 1.99623   | 2.20131   |
| 8.92412   | 6.58395   | 7.89299   | 7.80418   | 8.22196   | 9.26851   |
| 0         | 0         | 0         | 0.0119572 | 0         | 0         |
| 2.74443   | 2.43262   | 2.12218   | 5.60239   | 5.60825   | 4.87007   |
| 0         | 0         | 0         | 0         | 0         | 0         |
| 11.4809   | 10.6477   | 10.6132   | 12.1088   | 12.2621   | 10.8139   |
| 12.8574   | 12.7299   | 12.0063   | 11.9028   | 10.9969   | 10.456    |
| 6.77132   | 4.77759   | 5.28062   | 6.14969   | 6.28631   | 7.31175   |
| 10.7103   | 13.6081   | 13.1166   | 12.7947   | 16.5464   | 8.49764   |
| 23.9883   | 20.2925   | 23.7332   | 26.2667   | 22.2985   | 21.231    |
| 0         | 0.145257  | 0.650509  | 0.278518  | 0.157084  | 0.319989  |
| 6.16286   | 8.94963   | 5.82993   | 4.97787   | 3.23901   | 4.20501   |
| 0.0981569 | 0.0702784 | 0.0264657 | 0.0237447 | 0         | 0.0265198 |
| 0         | 0         | 0         | 0         | 0         | 0         |
| 0.202478  | 0         | 0.16378   | 0         | 0         | 0         |
| 23.0475   | 26.0856   | 28.2008   | 25.7009   | 19.2558   | 24.4331   |
| 3.64772   | 3.78697   | 4.05703   | 3.47448   | 2.89847   | 2.88269   |
| 11.8955   | 9.67675   | 11.4929   | 11.5152   | 10.9199   | 11.3937   |
| 0         | 0.063016  | 0         | 0.127746  | 0         | 0         |
| 0.145821  | 0.113699  | 0.181182  | 0.153074  | 0.204053  | 0.149814  |
| 2.24401   | 2.73106   | 3.4485    | 3.02883   | 2.95701   | 2.90997   |
| 0         | 0.0662559 | 0         | 0         | 0         | 0         |
| 0         | 0         | 0         | 0         | 0         | 0         |
| 67.9894   | 57.901    | 55.8805   | 66.8267   | 48.7977   | 48.8627   |
| 58.4154   | 37.4018   | 24.4562   | 38.8969   | 26.0491   | 21.2134   |
| 0         | 0         | 0         | 0         | 0.171555  | 0         |
| 6.09236   | 4.71501   | 5.12624   | 5.34112   | 4.88099   | 4.30813   |
| 23.9807   | 16.5297   | 17.9585   | 20.555    | 19.2765   | 17.9285   |
| 1.31203   | 1.37601   | 2.46634   | 2.03844   | 2.34937   | 2.09694   |
| 0.606235  | 0.424477  | 0.319009  | 0.519008  | 0.315873  | 0.638631  |
| 0         | 0         | 0         | 0         | 0         | 0         |
| 0.030897  | 0.110608  | 0.199936  | 0.0896901 | 0.0958074 | 0.150258  |
| 0         | 0         | 0         | 0         | 0         | 0         |
| 0.396427  | 0.0886982 | 0.240496  | 0.251732  | 0.326524  | 0.0803293 |
| 1340.64   | 1213.6    | 1277.95   | 1424.21   | 1471.1    | 1340.05   |
| 0.0514937 | 0.0368685 | 0.0312392 | 0.0373699 | 0.0299391 | 0.0521718 |
| 10.1283   | 8.03176   | 9.8246    | 8.84381   | 9.18632   | 8.98342   |
| 0.45691   | 0.206614  | 0.359859  | 0.296684  | 0.335561  | 0.282628  |
| 0         | 0.113327  | 0.0640157 | 0.0574341 | 0.122703  | 0.128293  |
| 0.0590624 | 0.0422875 | 0.0477744 | 0.0428626 | 0         | 0.0478721 |
| 5.27205   | 4.54308   | 4.74835   | 4.62233   | 6.34618   | 4.33423   |
| 9.16749   | 10.3089   | 9.48736   | 8.68805   | 8.40277   | 10.7525   |

|           |           |           |           |           |           |
|-----------|-----------|-----------|-----------|-----------|-----------|
| 3.6692    | 4.89406   | 3.52158   | 6.28707   | 5.18924   | 4.8117    |
| 3.06912   | 3.54653   | 1.85881   | 3.635     | 4.06211   | 5.98369   |
| 0         | 0         | 0         | 0         | 0         | 0         |
| 0         | 0         | 0         | 0         | 0         | 0         |
| 17.9058   | 19.8655   | 20.2134   | 17.14     | 16.227    | 18.2128   |
| 2.40331   | 1.22116   | 1.74332   | 1.8679    | 2.01934   | 1.87256   |
| 75.1041   | 70.9111   | 83.8286   | 78.7429   | 85.5642   | 55.213    |
| 45.0095   | 41.8218   | 47.565    | 46.7161   | 48.3578   | 43.8112   |
| 11.2324   | 15.0027   | 13.9385   | 14.3009   | 13.2904   | 14.1621   |
| 5.03327   | 3.24533   | 4.34313   | 4.32211   | 4.30414   | 4.46956   |
| 3.14966   | 2.20265   | 2.11321   | 2.4984    | 1.74134   | 2.33522   |
| 20.616    | 18.6737   | 22.3885   | 19.9698   | 21.1274   | 20.2966   |
| 11.5147   | 10.3437   | 10.1622   | 11.3659   | 9.73471   | 8.40602   |
| 0.483403  | 0.0557693 | 0         | 0.302052  | 0.148213  | 0.0344368 |
| 0.0815285 | 0.201062  | 0.0439645 | 0.0525926 | 0.091292  | 0.0660816 |
| 3.09713   | 2.12302   | 2.41534   | 2.10743   | 1.6024    | 2.17227   |
| 0.0873607 | 0         | 0.0353322 | 0         | 0         | 0.0354044 |
| 171.94    | 202.127   | 183.552   | 192.352   | 206.216   | 140.445   |
| 3.68562   | 2.3437    | 3.09891   | 4.01208   | 4.4737    | 3.73415   |
| 0.0366327 | 0.132083  | 0.27092   | 0.269177  | 0.113594  | 0.359279  |
| 30.5113   | 25.0611   | 28.1085   | 27.1277   | 30.015    | 25.8396   |
| 0         | 0         | 0.0359707 | 0.0322725 | 0         | 0         |
| 0         | 0.143787  | 0.162443  | 0         | 0         | 0         |
| 8.87104   | 11.2589   | 15.9826   | 14.0169   | 10.3883   | 14.5745   |
| 19.6385   | 17.878    | 19.3352   | 20.0069   | 19.341    | 20.4403   |
| 0.0335673 | 0.0961341 | 0.135759  | 0.0243604 | 0.0260219 | 0.10883   |
| 1.89576   | 1.28463   | 1.21594   | 1.19683   | 1.14361   | 1.53526   |
| 49.8968   | 55.9844   | 48.7389   | 56.9289   | 55.5237   | 52.3709   |
| 23.4121   | 27.2835   | 21.9195   | 22.6634   | 22.683    | 20.5407   |
| 0         | 0         | 0         | 0         | 0         | 0         |
| 17.5409   | 20.4509   | 17.4085   | 16.4163   | 16.9685   | 17.8665   |
| 30.4006   | 41.1598   | 39.7136   | 31.5592   | 32.075    | 31.1528   |
| 0         | 0         | 0         | 0         | 0         | 0         |
| 17.791    | 11.8751   | 11.6992   | 13.0063   | 13.5684   | 13.9742   |
| 21.5811   | 24.2332   | 10.679    | 10.3612   | 9.80724   | 6.76902   |
| 18.108    | 25.1341   | 17.644    | 17.1072   | 20.2247   | 9.23419   |
| 1.82174   | 1.45233   | 1.67104   | 1.47208   | 1.54337   | 2.16164   |
| 1.72232   | 1.73952   | 1.83284   | 1.74363   | 1.25542   | 1.92434   |
| 0         | 0         | 0         | 0         | 0         | 0         |
| 0         | 0         | 0         | 0         | 0         | 0         |
| 1.63646   | 1.60038   | 1.45576   | 1.58264   | 1.47956   | 1.0149    |
| 31.5284   | 26.0563   | 29.1855   | 29.2161   | 31.1091   | 30.5689   |
| 211.461   | 209.582   | 186.952   | 200.043   | 213.063   | 196.218   |

|           |          |           |           |           |           |
|-----------|----------|-----------|-----------|-----------|-----------|
| 47.1974   | 47.4108  | 54.0041   | 47.9372   | 46.5767   | 42.3791   |
| 7.67451   | 7.45519  | 6.69274   | 6.28022   | 5.76348   | 7.0628    |
| 10.0626   | 8.35826  | 9.24603   | 9.46473   | 8.93191   | 10.0041   |
| 0.0286092 | 0        | 0         | 0         | 0         | 0.0231887 |
| 0         | 0        | 0         | 0         | 0         | 0         |
| 3.44905   | 2.01939  | 1.69403   | 2.08589   | 1.57928   | 1.4902    |
| 0         | 0        | 0.0188075 | 0         | 0         | 0         |
| 12.0957   | 9.32369  | 8.26395   | 10.9474   | 6.92634   | 8.79991   |
| 0         | 0        | 0         | 0         | 0         | 0         |
| 0         | 0        | 0.218115  | 0         | 0.0341444 | 0         |
| 5.03139   | 4.34779  | 5.00754   | 7.05739   | 5.36668   | 6.89209   |
| 2.49538   | 1.93628  | 2.3913    | 2.25156   | 2.24301   | 2.92305   |
| 1.71845   | 2.37044  | 0.766346  | 0.662671  | 0.751781  | 1.25449   |
| 0.321742  | 0.105818 | 0.0354216 | 0.191341  | 0.297393  | 0.217401  |
| 1.69057   | 1.44577  | 2.58299   | 1.39728   | 3.96807   | 1.06576   |
| 9.22419   | 6.63995  | 7.36749   | 8.40846   | 4.41208   | 6.23228   |
| 0.970509  | 0.810677 | 0.850444  | 0.821702  | 0.689658  | 1.11439   |
| 2.95863   | 3.38001  | 3.22295   | 2.02028   | 1.89991   | 2.94075   |
| 11.7325   | 11.288   | 16.1265   | 16.215    | 9.42646   | 11.5939   |
| 0.294263  | 0.550598 | 0.579257  | 1.06483   | 1.84797   | 0.404617  |
| 2.11484   | 1.74131  | 2.34359   | 2.21008   | 2.67231   | 2.15982   |
| 8.57386   | 9.50094  | 7.77127   | 8.95001   | 5.39154   | 6.72486   |
| 2.2301    | 2.4288   | 3.20126   | 3.0317    | 2.58104   | 3.66606   |
| 15.7947   | 15.0668  | 15.6065   | 16.0522   | 14.397    | 14.2463   |
| 0         | 0        | 0         | 0         | 0         | 0         |
| 109.472   | 103.957  | 86.6895   | 115.625   | 98.272    | 85.3812   |
| 0         | 0        | 0         | 0         | 0         | 0         |
| 0         | 0        | 0         | 0.0313104 | 0         | 0         |
| 37.2405   | 26.0027  | 28.655    | 32.1263   | 35.6427   | 21.2434   |
| 0.907617  | 0.959283 | 0.524395  | 0.564578  | 0.904627  | 0.735654  |
| 14.107    | 13.1791  | 15.1636   | 17.0264   | 14.825    | 16.8762   |
| 12.1864   | 11.7263  | 12.6932   | 11.8294   | 13.0274   | 12.111    |
| 0         | 0        | 0         | 0         | 0         | 0         |
| 9.15927   | 9.28372  | 10.9346   | 9.77036   | 9.79514   | 8.13951   |
| 0.247921  | 0.157783 | 0.237675  | 0.159929  | 0.170837  | 0.200948  |
| 0.496315  | 0.710704 | 0.841153  | 0.806128  | 0.531323  | 0.40228   |
| 0.0510091 | 0.073043 | 0.103151  | 0.0555273 | 0.079086  | 0.124034  |
| 19.04     | 14.359   | 20.9217   | 15.5449   | 17.799    | 17.617    |
| 12.1368   | 11.976   | 11.3395   | 11.3143   | 10.4481   | 11.0173   |
| 3.86751   | 3.73502  | 5.18967   | 4.98248   | 3.85809   | 4.93298   |
| 30.3512   | 29.8221  | 30.7598   | 32.0168   | 29.5097   | 32.0295   |
| 0         | 0        | 0         | 0         | 0         | 0         |
| 19.6066   | 15.5209  | 42.7757   | 4.10834   | 18.8386   | 8.39357   |

|            |           |          |           |            |           |
|------------|-----------|----------|-----------|------------|-----------|
| 12.5158    | 8.82773   | 7.32654  | 11.1485   | 12.8163    | 7.37387   |
| 26.6555    | 20.8573   | 18.5535  | 36.8842   | 22.105     | 26.6284   |
| 8.34657    | 9.33935   | 9.90653  | 8.12707   | 7.02313    | 6.5272    |
| 52.0353    | 47.0834   | 52.2338  | 50.3216   | 53.1049    | 44.8233   |
| 0          | 0         | 0        | 0         | 328.192    | 0         |
| 29.4072    | 23.2991   | 26.7679  | 26.7374   | 31.4896    | 23.9533   |
| 2.53613    | 1.15434   | 1.94153  | 1.38696   | 1.63603    | 1.38754   |
| 10.1649    | 7.49888   | 9.29285  | 8.30885   | 7.87083    | 8.31058   |
| 16.9839    | 17.0331   | 17.5386  | 17.1401   | 17.934     | 19.9531   |
| 5.75882    | 3.4926    | 4.95961  | 3.61385   | 2.88868    | 4.50298   |
| 11.2084    | 11.3801   | 11.1024  | 10.9318   | 10.6602    | 10.651    |
| 0          | 0         | 0        | 0         | 0          | 0         |
| 0.178617   | 0         | 0        | 0         | 0          | 0         |
| 1.09572    | 0.695922  | 0.4191   | 0.591014  | 0.401658   | 0.45135   |
| 0.369179   | 0.528651  | 0.238897 | 0.589424  | 0.286193   | 0.418925  |
| 0.129889   | 0.0557988 | 0        | 0.0678691 | 0          | 0.0962553 |
| 0          | 0         | 0        | 0         | 0          | 0         |
| 0          | 0         | 0        | 0.0318315 | 0          | 0         |
| 7.78341    | 6.90358   | 7.64271  | 8.17777   | 7.77492    | 7.48571   |
| 4.04765    | 2.60277   | 2.22389  | 2.83769   | 2.36815    | 2.94649   |
| 3.46221    | 4.8052    | 3.61912  | 2.93779   | 4.54208    | 2.5472    |
| 6.16091    | 3.2403    | 8.30572  | 6.76182   | 7.34094    | 2.43526   |
| 20.8603    | 23.0794   | 21.6667  | 23.3056   | 21.8436    | 21.6566   |
| 64.6018    | 72.7592   | 36.6684  | 49.186    | 41.0823    | 39.5128   |
| 0          | 0         | 0        | 0         | 0          | 0         |
| 0          | 0         | 0        | 0         | 0.0158097  | 0.01653   |
| 51.866     | 49.3259   | 51.4675  | 55.7539   | 59.0226    | 47.4698   |
| 34.5715    | 34.3465   | 35.6934  | 36.1093   | 29.7802    | 36.8796   |
| 6.42876    | 4.39156   | 5.27918  | 4.62511   | 3.67886    | 5.01001   |
| 0.154996   | 0.0277433 | 0        | 0.0281206 | 0.0300385  | 0.031407  |
| 11.8868    | 7.9939    | 10.6427  | 11.0608   | 10.0692    | 12.4471   |
| 9.86355    | 6.65489   | 8.03896  | 8.25524   | 7.3331     | 7.37603   |
| 0.0541639  | 0         | 0        | 0         | 0.0839774  | 0         |
| 0.325871   | 0.750238  | 0.147639 | 0.606733  | 0.428329   | 0.459846  |
| 0          | 0         | 0        | 0         | 0          | 0         |
| 7.71E-17   | 3.17E-19  | 2.48E-20 | 8.52E-25  | 9.08E-14   | 0.27105   |
| 0.127734   | 0.0914555 | 0.154983 | 0.0926992 | 0.0990218  | 0.103533  |
| 45.0224    | 45.2867   | 46.4889  | 41.8578   | 46.001     | 35.6426   |
| 25.4435    | 30.2091   | 27.2076  | 26.3936   | 24.968     | 23.3146   |
| 9.07298    | 6.69714   | 6.94821  | 8.00652   | 4.54578    | 7.0565    |
| 19.0415    | 23.6124   | 16.8699  | 18.4677   | 8.25229    | 14.3254   |
| 0.00456157 | 0.0058788 | 0        | 0         | 0.00437816 | 0         |
| 97.512     | 130.408   | 107.351  | 109.947   | 110.744    | 118.902   |

|           |           |           |           |           |           |
|-----------|-----------|-----------|-----------|-----------|-----------|
| 3.69496   | 3.55034   | 3.13159   | 3.34533   | 3.23139   | 2.78354   |
| 7.29053   | 6.34566   | 6.48607   | 5.81981   | 5.53821   | 7.94726   |
| 0         | 0         | 0         | 0         | 0         | 0         |
| 17.7383   | 14.9352   | 15.5399   | 16.2319   | 14.734    | 17.5029   |
| 0         | 0         | 0         | 0         | 0         | 0         |
| 34.0337   | 30.73     | 23.6487   | 27.7393   | 20.8225   | 22.6588   |
| 6.097     | 5.5425    | 6.45559   | 7.23364   | 6.45245   | 7.94023   |
| 0         | 0         | 0         | 0         | 0         | 0         |
| 0.199408  | 0.0951816 | 0.215063  | 0.048238  | 0.103056  | 0.107751  |
| 0         | 0         | 0         | 0         | 0         | 0         |
| 16.7198   | 18.7147   | 18.8211   | 18.4001   | 21.5542   | 16.4072   |
| 11.0988   | 12.9704   | 10.0095   | 10.0914   | 10.0874   | 12.822    |
| 15.4342   | 14.6165   | 15.9606   | 16.3198   | 13.4219   | 14.6277   |
| 0.0833399 | 0.0397798 | 0.157294  | 0.0403208 | 0.150748  | 0.1351    |
| 7.03E-07  | 7.63E-06  | 0.0302854 | 1.66E-07  | 2.28E-05  | 0.653059  |
| 110.249   | 152.502   | 110.92    | 78.082    | 65.0542   | 121.913   |
| 0         | 0         | 0         | 0         | 0         | 0         |
| 10.8581   | 7.14388   | 4.0354    | 6.17617   | 7.7349    | 2.14076   |
| 9.27182   | 6.4995    | 4.51732   | 5.99326   | 6.03429   | 5.99462   |
| 8.9283    | 9.38079   | 1.12545   | 3.95481   | 4.58408   | 3.38324   |
| 2.54419   | 1.73022   | 3.3147    | 2.43489   | 3.31296   | 2.94601   |
| 0.241894  | 0.577305  | 0.945706  | 0.702188  | 1.68768   | 0.326772  |
| 0         | 0         | 0         | 0         | 0         | 0         |
| 5.36171   | 3.3275    | 4.47152   | 4.72895   | 3.60279   | 5.15474   |
| 0.0346387 | 0         | 0         | 0         | 0         | 0         |
| 0         | 0         | 0         | 0         | 0         | 0         |
| 16.2915   | 14.9914   | 14.4912   | 13.3399   | 13.6711   | 14.1275   |
| 0.722812  | 0.50276   | 0.501307  | 0.614334  | 0.448496  | 0.569155  |
| 19.014    | 15.2109   | 12.9269   | 17.7685   | 11.7243   | 14.0023   |
| 2.77E-09  | 0.597234  | 0.660319  | 0.206925  | 2.41E-10  | 0.907115  |
| 92.708    | 108.863   | 93.0972   | 104.72    | 100.896   | 87.5756   |
| 7.19934   | 4.97789   | 6.83756   | 5.98865   | 6.02699   | 7.00246   |
| 5.89563   | 6.73434   | 7.74595   | 6.2571    | 5.44219   | 8.42472   |
| 1.17256   | 0.734591  | 0.948462  | 0.744581  | 0.605992  | 0.910801  |
| 9.48944   | 10.5558   | 9.93341   | 9.67468   | 8.75636   | 10.1666   |
| 0         | 0         | 0         | 0         | 0         | 0         |
| 0.0744492 | 0.0533042 | 0.0903307 | 0         | 0.0288571 | 0.0301718 |
| 0.210553  | 0.150752  | 0.0567707 | 0.101868  | 0.170025  | 0.127995  |
| 3.088     | 5.18482   | 3.98525   | 5.53509   | 3.48469   | 3.94834   |
| 31.65     | 29.751    | 31.9907   | 30.4258   | 30.5942   | 31.7716   |
| 4.53259   | 6.85732   | 3.31105   | 4.12389   | 3.72591   | 2.39218   |
| 4.62251   | 3.54234   | 3.8559    | 3.72156   | 4.11541   | 4.44921   |
| 0.227446  | 0.265429  | 0.306883  | 0.244609  | 0.183873  | 0.162682  |

|           |            |           |           |           |            |
|-----------|------------|-----------|-----------|-----------|------------|
| 0         | 0          | 0         | 0         | 0         | 0          |
| 0.0267916 | 0          | 0.0650135 | 0.0194431 | 0.0415385 | 0.173724   |
| 1.35E-08  | 6.97E-08   | 1.90E-06  | 1.58E-08  | 3.37E-08  | 3.90E-08   |
| 7.98009   | 5.71359    | 7.62856   | 7.79193   | 6.57996   | 8.08517    |
| 2.34486   | 2.33177    | 1.12398   | 2.96223   | 0.976211  | 0.950294   |
| 13.5259   | 16.6017    | 18.0745   | 13.915    | 13.1357   | 16.3445    |
| 0         | 0          | 0         | 0         | 0         | 0          |
| 0.0416349 | 0.134194   | 0         | 0         | 0.0476549 | 0.134986   |
| 15.8138   | 15.817     | 19.6084   | 18.1972   | 19.3939   | 18.8383    |
| 58.7329   | 42.0516    | 47.5078   | 85.247    | 45.5306   | 47.605     |
| 0         | 0          | 0         | 0         | 0         | 0          |
| 0.0128779 | 0.0276611  | 0.0104167 | 0.0186915 | 0.0199663 | 0.041752   |
| 21.1835   | 19.7065    | 25.0066   | 23.0777   | 22.0608   | 20.596     |
| 0.191945  | 0          | 0.613294  | 0         | 0.318515  | 0.155578   |
| 13.8209   | 9.39529    | 7.02708   | 9.06013   | 4.9921    | 10.4391    |
| 56.8441   | 51.7407    | 52.1365   | 57.4312   | 58.7116   | 48.0711    |
| 3.45557   | 2.87616    | 2.20117   | 3.69896   | 1.74123   | 3.36102    |
| 0.932293  | 0          | 0.251371  | 0.225527  | 0.240909  | 0          |
| 579.48    | 535.892    | 860.418   | 1258.79   | 963.185   | 1397.04    |
| 10.4198   | 11.0292    | 12.194    | 14.7169   | 12.0456   | 11.7053    |
| 19.4579   | 18.9382    | 25.636    | 19.3006   | 15.1779   | 19.8039    |
| 0.0284548 | 0          | 0         | 0         | 0         | 0          |
| 4.97434   | 4.55777    | 4.86777   | 4.82171   | 4.63821   | 6.37205    |
| 0         | 0          | 0         | 0         | 0         | 0          |
| 29.0773   | 30.1413    | 28.2668   | 29.0212   | 32.0785   | 29.7291    |
| 30.2041   | 24.3907    | 19.4509   | 18.9053   | 17.6528   | 21.1444    |
| 16.6951   | 22.0541    | 20.3976   | 26.9737   | 19.6187   | 12.7834    |
| 0.0206109 | 0.059028   | 0.10003   | 0.104704  | 0.0479336 | 0.100235   |
| 10.2498   | 16.4867    | 12.5569   | 13.6809   | 11.3651   | 15.8268    |
| 0.0167645 | 0.00400102 | 10.4524   | 0         | 0         | 0.00905879 |
| 10.3263   | 7.50928    | 8.14308   | 8.70463   | 11.1203   | 11.6109    |
| 13.5497   | 12.7699    | 14.8069   | 14.0703   | 15.6287   | 15.1371    |
| 91.3058   | 65.6578    | 71.3421   | 76.2958   | 57.0903   | 74.0417    |
| 3.10271   | 2.35064    | 2.36381   | 1.80659   | 2.15356   | 2.25167    |
| 0.57666   | 0.412877   | 1.235     | 1.71856   | 0.839578  | 1.43436    |
| 3.16313   | 2.51794    | 2.7574    | 2.86335   | 2.00569   | 3.23571    |
| 1.75499   | 1.7053     | 1.80489   | 1.96503   | 1.28275   | 1.52408    |
| 10.436    | 9.3552     | 8.06899   | 9.2977    | 8.62577   | 10.7086    |
| 7.69312   | 4.60294    | 4.09052   | 6.8519    | 6.65196   | 9.78934    |
| 0         | 0          | 0.192888  | 0.173057  | 0         | 0          |
| 0         | 0          | 0         | 0         | 0         | 0          |
| 1.44284   | 1.03304    | 1.63392   | 2.09419   | 2.01332   | 1.9881     |
| 1.1791    | 2.10715    | 1.03128   | 2.63341   | 0.91233   | 2.98106    |

|           |           |            |           |           |           |
|-----------|-----------|------------|-----------|-----------|-----------|
| 15.6238   | 16.1547   | 14.2562    | 15.88     | 12.8709   | 13.1467   |
| 13.6848   | 14.672    | 12.4836    | 12.9428   | 15.3256   | 14.6633   |
| 3.1343    | 2.83246   | 3.23146    | 3.52032   | 2.75872   | 3.19293   |
| 0.15264   | 0         | 0          | 0.110774  | 0.236658  | 0         |
| 0         | 0         | 0          | 0         | 0         | 0         |
| 15.6726   | 16.3644   | 18.6763    | 17.1624   | 10.4682   | 13.5255   |
| 0         | 0         | 0          | 0.033234  | 0         | 0         |
| 38.6861   | 44.938    | 45.9372    | 42.6818   | 31.3096   | 36.3734   |
| 0.0506071 | 0.0298928 | 0.0231765  | 0.066371  | 0.121763  | 0         |
| 1.57765   | 2.17829   | 1.43532    | 1.99408   | 1.04105   | 1.40177   |
| 14.0746   | 15.252    | 16.5639    | 13.7117   | 14.5902   | 14.0378   |
| 53.2576   | 19.0657   | 64.6185    | 19.325    | 20.6431   | 0         |
| 0.190247  | 0.0741259 | 7.79E-20   | 0.0499464 | 0.0775651 | 4.54E-28  |
| 44.7597   | 43.8982   | 36.6806    | 39.9462   | 42.367    | 31.278    |
| 0.746222  | 0.320568  | 0.241442   | 1.29971   | 0.231393  | 0.604838  |
| 0         | 0         | 0.00596997 | 0         | 0         | 0         |
| 4.02083   | 2.95359   | 4.26578    | 4.28185   | 3.64309   | 4.61301   |
| 0.728318  | 0.272067  | 0.12807    | 1.6546    | 0.417315  | 0.821323  |
| 9.7017    | 8.71142   | 9.46286    | 10.0645   | 9.06903   | 9.54215   |
| 3.14197   | 1.61194   | 2.32132    | 1.22114   | 1.80946   | 1.57791   |
| 0.0124175 | 0         | 0          | 0         | 0.0192525 | 0         |
| 21.7934   | 21.5996   | 20.2021    | 22.3767   | 20.3366   | 19.7636   |
| 34.7087   | 33.9068   | 34.8581    | 36.0086   | 32.1586   | 31.8321   |
| 12.1761   | 9.46744   | 11.6151    | 11.024    | 11.4263   | 11.4523   |
| 19.4587   | 17.4912   | 19.2225    | 18.8019   | 22.1185   | 19.816    |
| 3.51335   | 4.34455   | 5.35303    | 3.99258   | 4.6971    | 4.91759   |
| 1.3045    | 0.941784  | 0.861736   | 0.938813  | 1.28094   | 1.25119   |
| 0         | 0         | 0          | 0         | 0         | 0         |
| 0         | 0         | 0          | 0         | 0         | 0         |
| 0.521807  | 0.303594  | 0.547236   | 0.219603  | 0.406171  | 0.475873  |
| 4.2091    | 5.7558    | 3.95325    | 3.44548   | 7.11343   | 4.9961    |
| 5.52588   | 7.0672    | 7.1994     | 7.04086   | 7.03058   | 6.87222   |
| 11.4303   | 11.6781   | 10.7784    | 10.9924   | 12.1084   | 13.8309   |
| 21.9738   | 22.5      | 26.8266    | 19.3016   | 29.3389   | 27.6371   |
| 0.0723873 | 0         | 0.0195175  | 0.0175109 | 0.112232  | 0.0391149 |
| 1.47411   | 2.03171   | 1.252      | 1.84539   | 1.39987   | 1.52339   |
| 0.0273476 | 0.0783214 | 0.176967   | 0.11908   | 0.169602  | 0.132997  |
| 0         | 0         | 0          | 0         | 0         | 0         |
| 811.457   | 1198.16   | 554.183    | 874.744   | 1038.73   | 1096.76   |
| 1.35925   | 1.42595   | 1.95031    | 1.40438   | 1.15767   | 2.00941   |
| 0         | 0         | 0.0526049  | 0         | 0         | 0.0263562 |
| 0         | 0         | 0.27482    | 0         | 0         | 0         |
| 1.06817   | 1.40284   | 1.62084    | 1.47755   | 0.692602  | 1.26681   |

|           |            |           |           |            |            |
|-----------|------------|-----------|-----------|------------|------------|
| 11.314    | 13.6521    | 10.1906   | 11.1621   | 5.42715    | 8.07079    |
| 7.37872   | 10.1509    | 7.311     | 7.24141   | 10.9906    | 9.41677    |
| 0         | 0.00425938 | 0         | 0         | 0.0207534  | 0.00482188 |
| 5.50438   | 5.5537     | 6.5269    | 5.19797   | 5.84345    | 5.42635    |
| 0.171573  | 0          | 0.0346955 | 0.0622569 | 0.365767   | 4.48487    |
| 0         | 0          | 0         | 0         | 0          | 0          |
| 5.66874   | 4.29571    | 5.46669   | 5.40513   | 5.62409    | 5.64556    |
| 7.61258   | 4.93707    | 7.62314   | 6.79849   | 7.25656    | 6.62024    |
| 0.314741  | 0.225348   | 0.509175  | 0.456826  | 0          | 0.255108   |
| 0.23456   | 0.33738    | 0.711491  | 0.89421   | 0.68188    | 0.903064   |
| 0         | 0          | 0.122454  | 0         | 0          | 0          |
| 27.6075   | 22.18      | 27.3346   | 28.4506   | 33.8927    | 27.1992    |
| 17.8566   | 19.7395    | 14.9419   | 16.1663   | 18.8177    | 17.9282    |
| 0.468202  | 0.419029   | 0.189359  | 0.679565  | 0.0907393  | 0.189747   |
| 0.0950088 | 0.476171   | 0.614806  | 0.827395  | 0.552392   | 0.539055   |
| 0         | 0          | 0         | 0         | 0          | 0          |
| 0.123951  | 0.0221867  | 0.0501309 | 0.0674653 | 0.0240223  | 0.0753501  |
| 12.2604   | 11.3704    | 12.6067   | 12.1948   | 10.1592    | 11.7515    |
| 1.07043   | 0.851566   | 1.92411   | 1.55366   | 1.56743    | 1.73524    |
| 0.159865  | 0.171691   | 0.129312  | 0.174026  | 0.24786    | 0.129576   |
| 18.1986   | 17.0035    | 17.1787   | 17.6605   | 17.0641    | 19.0873    |
| 11.8858   | 9.65166    | 12.7061   | 11.3177   | 12.1509    | 10.9813    |
| 8.46748   | 8.00529    | 8.70341   | 7.91045   | 9.21153    | 5.61194    |
| 5.51755   | 4.46575    | 6.37115   | 4.97621   | 6.27646    | 6.17352    |
| 17.7257   | 25.9521    | 13.6586   | 14.4357   | 14.358     | 15.8362    |
| 55.919    | 45.2709    | 51.2073   | 48.0844   | 63.0811    | 52.4179    |
| 39.2364   | 38.5154    | 35.5813   | 35.5459   | 23.351     | 35.0743    |
| 9.88593   | 11.6095    | 12.0322   | 10.8957   | 9.9915     | 9.77272    |
| 1.27006   | 1.68877    | 1.24747   | 1.25088   | 1.54718    | 2.05885    |
| 0.458069  | 0.274941   | 0.332399  | 0.327543  | 0.208974   | 0.447689   |
| 0.0459556 | 0.0342743  | 0.0387214 | 0.0347404 | 0.00593758 | 0.0124162  |
| 69.8306   | 72.1746    | 93.0453   | 62.7434   | 73.4673    | 85.9483    |
| 8.4434    | 7.63848    | 8.57339   | 7.69454   | 7.65246    | 8.58104    |
| 24.2287   | 22.916     | 22.2765   | 24.5202   | 22.45      | 20.9788    |
| 23.9524   | 22.7091    | 24.641    | 24.5352   | 25.3751    | 23.481     |
| 3.35746   | 2.36572    | 2.34936   | 3.1714    | 2.62341    | 2.54855    |
| 7.04788   | 7.06307    | 7.38331   | 6.89011   | 5.34907    | 8.07513    |
| 15.0524   | 11.6844    | 14.3744   | 16.1797   | 19.3696    | 17.0867    |
| 0         | 0          | 0         | 0         | 0          | 0          |
| 21.7835   | 15.9332    | 17.747    | 18.9022   | 21.6493    | 15.9288    |
| 0.288884  | 0.178567   | 0.123086  | 0.149083  | 0.263048   | 0.154705   |
| 61.5602   | 59.0634    | 62.4622   | 61.9819   | 48.3135    | 56.7429    |
| 0.0245182 | 0.244671   | 0.123952  | 0.12653   | 0.232834   | 0.172507   |



|           |           |           |           |           |           |
|-----------|-----------|-----------|-----------|-----------|-----------|
| 0.856216  | 1.16394   | 0.045936  | 0.755971  | 0.353441  | 0.310888  |
| 30.4276   | 30.7121   | 27.914    | 32.0282   | 29.726    | 32.8376   |
| 10.7554   | 10.7947   | 15.4578   | 14.101    | 16.9734   | 15.2559   |
| 10.5753   | 12.2378   | 10.7048   | 11.0115   | 9.28296   | 14.7452   |
| 1.28984   | 0.835548  | 0.69555   | 1.12921   | 0.825317  | 0.846323  |
| 1.06393   | 1.01647   | 1.76137   | 2.69714   | 0.209343  | 1.06745   |
| 4.76246   | 3.31698   | 5.05362   | 3.7366    | 3.497     | 4.4184    |
| 1.06907   | 1.20068   | 0.932572  | 0.973607  | 0.487505  | 1.05341   |
| 189.032   | 353.607   | 280.171   | 282.475   | 254.222   | 413.38    |
| 4.30882   | 2.97069   | 3.9065    | 3.84694   | 4.24033   | 4.27128   |
| 22.733    | 17.6089   | 22.4162   | 24.6887   | 24.7041   | 26.3592   |
| 0.0652355 | 0.0233537 | 0.0263838 | 0.0473425 | 0         | 0.0264378 |
| 1.23E-31  | 1.21E-52  | 1.84E-85  | 4.53E-14  | 3.14E-40  | 2.88E-107 |
| 26.3794   | 32.4446   | 28.8763   | 24.2596   | 22.1335   | 22.2296   |
| 3.24148   | 3.39197   | 2.96301   | 3.4149    | 1.75335   | 1.59349   |
| 0         | 0         | 0         | 0         | 0         | 0.0352583 |
| 1.57543   | 1.68988   | 1.48661   | 1.39856   | 1.0907    | 1.13625   |
| 0         | 0         | 0         | 0         | 0         | 0         |
| 0         | 0         | 0         | 0         | 0         | 0         |
| 0         | 0         | 0         | 0         | 0         | 0         |
| 0         | 0         | 0         | 0         | 0         | 0.694259  |
| 5.67961   | 5.01594   | 6.21319   | 5.50178   | 7.19596   | 4.92799   |
| 5.36596   | 5.08649   | 4.28628   | 5.91017   | 8.42758   | 7.32851   |
| 2.53716   | 2.35221   | 2.52585   | 2.57304   | 2.15596   | 2.67602   |
| 0.124975  | 0.119307  | 0.134787  | 0.0604645 | 0         | 0.0337656 |
| 24.4377   | 20.428    | 29.3474   | 29.3238   | 25.5823   | 24.4682   |
| 0         | 0         | 0         | 0.0834881 | 0.0891824 | 0         |
| 0.282518  | 0         | 0.195877  | 0.0878695 | 0.12515   | 0.032713  |
| 0.0398154 | 0.114028  | 0.0644117 | 0.115579  | 0.0925965 | 0.0645434 |
| 0         | 0         | 0         | 0.682024  | 0         | 0         |
| 15.9718   | 14.7859   | 18.8784   | 14.9589   | 15.6194   | 18.5409   |
| 0         | 0         | 0         | 0         | 0         | 0         |
| 0         | 0         | 0         | 0         | 0         | 0         |
| 0.123103  | 0.264419  | 0.199152  | 0.0893384 | 0.0954317 | 0.199559  |
| 7.54652   | 6.11766   | 7.52809   | 6.12626   | 6.08591   | 6.72769   |
| 18.548    | 15.5125   | 16.837    | 17.1493   | 14.2758   | 18.3611   |
| 13.7221   | 11.3502   | 13.0691   | 14.9836   | 11.2864   | 14.3499   |
| 0.513995  | 0.679404  | 0.447742  | 0.516483  | 0.55171   | 0.192282  |
| 9.79872   | 7.84432   | 6.80262   | 4.87139   | 9.9886    | 6.12862   |
| 1.88948   | 1.34033   | 1.51421   | 1.4347    | 0.963053  | 1.38971   |
| 1.06944   | 0.492137  | 0.953921  | 0.864608  | 0.709516  | 0.854665  |
| 3.51508   | 2.35436   | 2.59869   | 2.77039   | 3.22305   | 4.10514   |
| 40.343    | 34.3667   | 39.1507   | 41.6444   | 45.1528   | 45.6465   |

|          |           |           |          |           |          |
|----------|-----------|-----------|----------|-----------|----------|
| 0.376743 | 0.182978  | 0.511417  | 0.439262 | 0.427513  | 0.54511  |
| 31.4238  | 29.8935   | 36.2926   | 30.077   | 31.763    | 34.4292  |
| 7.77511  | 6.43352   | 7.5155    | 7.6456   | 6.76751   | 6.34137  |
| 0        | 0         | 0         | 0        | 0         | 0        |
| 4.88632  | 2.92559   | 3.3465    | 3.26191  | 2.27013   | 2.47016  |
| 0        | 0         | 0         | 0        | 0         | 0        |
| 28.3166  | 24.6303   | 25.5615   | 27.0205  | 27.5934   | 27.3632  |
| 0        | 0         | 0.0618746 | 0        | 0         | 0        |
| 0        | 0         | 0         | 0        | 0         | 0        |
| 1.31311  | 0.974211  | 1.52465   | 1.5009   | 0.670934  | 1.19035  |
| 0.074562 | 0.0266925 | 0.0603117 | 0.054111 | 0.0578016 | 0.151088 |
| 10.5355  | 10.8608   | 11.8482   | 12.975   | 13.2828   | 12.6937  |
| 53.1336  | 55.3748   | 51.0083   | 52.9667  | 53.5168   | 47.9516  |
| 1.14929  | 1.17706   | 1.72359   | 1.50691  | 1.41633   | 1.4398   |
| 68.2582  | 70.1644   | 71.7261   | 78.4791  | 73.8151   | 88.2009  |
| 18.1155  | 18.7504   | 22.0227   | 21.2196  | 19.3023   | 19.2691  |
| 28.3811  | 25.2823   | 23.0904   | 24.9076  | 28.4612   | 25.8125  |
| 7.97678  | 7.75924   | 6.88699   | 7.59665  | 4.57715   | 6.54452  |
| 4.74767  | 3.85248   | 4.94972   | 4.59396  | 3.76226   | 4.61778  |
| 13.2562  | 15.4681   | 13.0985   | 13.7432  | 12.4934   | 10.0867  |
| 6.57363  | 5.74631   | 7.3273    | 7.17044  | 7.85261   | 7.05613  |
| 28.654   | 35.1607   | 41.4113   | 33.4814  | 31.5692   | 28.1161  |
| 15.6912  | 14.4061   | 15.1799   | 18.0533  | 15.2845   | 15.0398  |
| 0.501461 | 0.199465  | 0.0450691 | 0.080871 | 0.0863867 | 0.225806 |
| 56.994   | 75.1661   | 61.5107   | 69.682   | 48.3957   | 55.4983  |
| 0        | 0         | 0         | 0        | 0         | 0        |
| 0        | 0         | 0         | 0        | 0         | 0        |
| 69.2507  | 68.1347   | 57.3678   | 58.602   | 70.2765   | 56.2943  |
| 47.7     | 102.457   | 115.751   | 34.6167  | 147.911   | 115.987  |
| 0        | 0         | 0         | 0        | 0         | 0        |
| 39.2182  | 29.006    | 33.7099   | 35.513   | 46.0459   | 25.5297  |
| 29.6858  | 35.1154   | 36.533    | 39.1962  | 32.7      | 33.8854  |
| 13.879   | 14.9727   | 14.6701   | 14.0476  | 12.8098   | 15.151   |
| 13.6697  | 14.6348   | 15.9346   | 17.5644  | 14.5219   | 15.3549  |
| 0        | 0         | 0         | 0        | 0         | 0        |
| 0        | 0.0437584 | 0.173417  | 0        | 0.219742  | 0        |
| 1.95117  | 2.04326   | 1.50987   | 1.12339  | 1.136     | 1.38114  |
| 0        | 0         | 0         | 0        | 0         | 0        |
| 3.87331  | 4.3719    | 5.01287   | 5.22503  | 4.83957   | 4.87538  |
| 11.2622  | 10.5294   | 11.3394   | 10.813   | 10.7028   | 9.89056  |
| 5.55376  | 6.54934   | 6.1156    | 4.91107  | 3.78076   | 5.4472   |
| 21.062   | 18.8014   | 20.8234   | 20.5173  | 18.1088   | 19.1809  |
| 0.431243 | 0.289293  | 1.87E-51  | 0.152509 | 0.305033  | 0.388634 |

|          |           |          |           |           |           |
|----------|-----------|----------|-----------|-----------|-----------|
| 63.8793  | 51.1621   | 60.529   | 51.1568   | 88.66     | 33.8308   |
| 0.433501 | 0.465567  | 1.05195  | 1.1011    | 0.840141  | 0.702734  |
| 9.09778  | 7.78318   | 8.24434  | 9.48767   | 8.05217   | 8.16799   |
| 9.96     | 5.9797    | 7.29783  | 8.44149   | 5.93821   | 7.12731   |
| 0        | 0         | 0        | 0         | 0         | 0         |
| 1.45639  | 1.30343   | 1.39893  | 1.55236   | 0.635072  | 1.84446   |
| 0.389435 | 0.402752  | 0.350007 | 0.439631  | 0.737968  | 0.561156  |
| 0.202826 | 0.0726098 | 0.235839 | 0.128795  | 0.196542  | 0.133573  |
| 5.02628  | 3.72724   | 5.18921  | 4.47872   | 4.65      | 5.87676   |
| 0.726273 | 1.13629   | 0.587468 | 0.702759  | 0.708986  | 0.915707  |
| 5.91653  | 5.7998    | 2.98709  | 6.22447   | 3.44764   | 2.57479   |
| 0        | 0.246358  | 0        | 0.249709  | 0         | 0         |
| 13.7881  | 8.5666    | 12.0285  | 8.2076    | 17.8661   | 6.99637   |
| 0        | 0         | 0        | 0         | 0         | 0         |
| 15.3699  | 14.403    | 4.09537  | 18.0107   | 16.0852   | 21.2515   |
| 0        | 0         | 0        | 0         | 0         | 0         |
| 0        | 0         | 0        | 0         | 0         | 0         |
| 11.3806  | 13.4381   | 11.1608  | 11.2401   | 8.1718    | 9.95632   |
| 0        | 0         | 0        | 0         | 0         | 0         |
| 0.764481 | 0.358734  | 0.405279 | 0.202598  | 0.754486  | 1.0188    |
| 0.695038 | 0.746895  | 0.643186 | 0.648516  | 0.577978  | 0.684699  |
| 5.50587  | 5.06432   | 5.89438  | 5.58581   | 5.53908   | 5.28551   |
| 0        | 0.0368543 | 0.166459 | 0.0373371 | 0.0398504 | 0.0417147 |
| 7.97271  | 6.78356   | 9.39655  | 8.23815   | 9.67319   | 8.03741   |
| 0.355404 | 0.107321  | 0.15807  | 0.150093  | 0.169174  | 0.315887  |
| 804.591  | 436.644   | 1880.38  | 2573.81   | 1031.68   | 2069.07   |
| 0        | 0.0712343 | 0        | 0         | 0         | 0.0508423 |
| 57.284   | 51.5735   | 44.2012  | 59.119    | 52.8016   | 47.7833   |
| 14.0561  | 15.2168   | 14.0297  | 15.2077   | 10.3961   | 14.2626   |
| 14.8582  | 11.5844   | 14.2047  | 15.2511   | 12.5888   | 14.1204   |
| 26.6754  | 21.587    | 22.8909  | 25.1505   | 25.476    | 21.7008   |
| 0        | 0.34335   | 0.387899 | 0         | 0         | 0         |
| 0.777172 | 0.817627  | 1.00229  | 0.854557  | 0.910032  | 0.800856  |
| 16.6119  | 13.6147   | 17.3518  | 17.0866   | 15.5142   | 17.9306   |
| 0.509565 | 0         | 0.549569 | 0.369801  | 0.263348  | 0.275346  |
| 18.4607  | 19.4115   | 21.2478  | 21.1378   | 20.9494   | 19.1572   |
| 0        | 0         | 0        | 0         | 0         | 0         |
| 1.38396  | 0.62546   | 0.751564 | 1.09778   | 1.49407   | 1.05022   |
| 152.459  | 177.733   | 180.967  | 121.873   | 105.778   | 206.815   |
| 0.220845 | 0.0849301 | 0.179078 | 0.123193  | 0.105693  | 0.0962232 |
| 0        | 0         | 0        | 0         | 0         | 0         |
| 0        | 0         | 0        | 0         | 0         | 0         |
| 0.322879 | 0.316666  | 0.119582 | 0.320878  | 0.112975  | 0.144091  |

|           |           |           |           |           |           |
|-----------|-----------|-----------|-----------|-----------|-----------|
| 29.8667   | 33.4149   | 31.6029   | 31.7491   | 25.3784   | 31.3299   |
| 0.465637  | 0.759662  | 0.511475  | 0.724222  | 0.361002  | 0.670438  |
| 0         | 0         | 23.9361   | 0         | 22.9399   | 0         |
| 0         | 0         | 0         | 0         | 0         | 0         |
| 0         | 0         | 0         | 0         | 0         | 0         |
| 3.529     | 3.84162   | 4.07239   | 4.52697   | 4.33052   | 4.24987   |
| 0.0538766 | 0.0964365 | 0.174319  | 0.0586488 | 0.104415  | 0.131006  |
| 0.649956  | 0.564493  | 0.866604  | 0.685697  | 0.06998   | 0.234382  |
| 15.6327   | 14.9861   | 16.7189   | 16.8513   | 17.5443   | 14.6325   |
| 0.409557  | 0.488725  | 0.676369  | 0.668752  | 0.754051  | 0.705415  |
| 5.35881   | 8.00078   | 7.68363   | 8.50153   | 6.63389   | 10.9654   |
| 0         | 0         | 0         | 0         | 0.0297422 | 0.0155486 |
| 9.46707   | 5.58692   | 5.70021   | 7.71367   | 8.09564   | 8.07077   |
| 17.6203   | 24.9336   | 13.8146   | 20.0243   | 7.96374   | 13.2682   |
| 74.9725   | 91.865    | 68.5118   | 93.2041   | 61.315    | 116.792   |
| 0         | 0         | 0         | 0         | 0         | 0         |
| 15.1958   | 11.2231   | 16.4017   | 14.8894   | 16.0164   | 13.832    |
| 0.136992  | 0.156934  | 0.0664859 | 0.0198835 | 0.0637189 | 0         |
| 16.89     | 16.8951   | 10.5501   | 14.1624   | 9.44192   | 13.8141   |
| 0.0519157 | 0.111512  | 0.0419936 | 0         | 0         | 0.0420795 |
| 0         | 0         | 0         | 0         | 0         | 0         |
| 17.3631   | 14.722    | 16.1438   | 16.9177   | 15.414    | 16.0035   |
| 1.02374   | 0.832356  | 0.763285  | 0.725497  | 0.750455  | 0.493211  |
| 1.57519   | 1.78193   | 1.45252   | 1.85189   | 1.70955   | 0.94479   |
| 29.9348   | 35.5896   | 30.7739   | 32.6612   | 25.806    | 30.215    |
| 12.166    | 10.5742   | 4.56767   | 3.92862   | 7.93979   | 6.51281   |
| 0         | 0         | 0         | 0         | 0         | 0         |
| 24.5671   | 24.5186   | 25.3979   | 28.5493   | 25.0571   | 29.9448   |
| 0.289449  | 0.31086   | 0.117065  | 0.595164  | 0.0934938 | 0.195507  |
| 6.50698   | 3.83119   | 4.43454   | 5.45313   | 5.44487   | 5.28832   |
| 5.54339   | 6.41517   | 5.048     | 6.22424   | 6.74978   | 3.7072    |
| 54.9682   | 58.7611   | 19.5692   | 21.2382   | 59.9964   | 49.6799   |
| 0         | 0         | 0.040658  | 0.0437735 | 0         | 0         |
| 9.12035   | 8.75339   | 9.93876   | 9.12148   | 7.34399   | 8.76558   |
| 3.68472   | 5.09852   | 2.94701   | 2.55388   | 2.43922   | 2.44967   |
| 0.359551  | 0.322451  | 0.363772  | 0.31163   | 0.237785  | 0.327097  |
| 0.249762  | 0         | 0         | 0         | 0         | 0         |
| 5.42194   | 2.89871   | 2.94178   | 7.28707   | 1.57606   | 2.00241   |
| 0.0683693 | 0         | 0.0554468 | 0.0247993 | 0.0533786 | 0.0553466 |
| 5.60046   | 5.60371   | 6.38855   | 5.83276   | 4.86039   | 7.45348   |
| 0.0572406 | 0.0409832 | 0.0463008 | 0.0207703 | 0.0443738 | 0         |
| 0         | 25.0565   | 28.3076   | 25.3972   | 81.3884   | 28.3654   |
| 7.71945   | 7.30312   | 6.13194   | 7.40244   | 7.68037   | 6.43172   |

|           |           |           |           |           |           |
|-----------|-----------|-----------|-----------|-----------|-----------|
| 0.542357  | 0.508923  | 0.303694  | 0.576087  | 0.421143  | 0.609339  |
| 23.0133   | 18.2257   | 16.8129   | 19.7683   | 14.1872   | 20.7137   |
| 0         | 0.0558832 | 0.0210447 | 0.18881   | 0         | 0         |
| 0.174671  | 0.041687  | 0.0941918 | 0.0422539 | 0         | 0         |
| 30.27     | 29.8658   | 30.4056   | 31.2694   | 26.6251   | 28.9392   |
| 139.1     | 88.6902   | 76.6835   | 91.8601   | 55.6631   | 68.7927   |
| 0.610741  | 0.378975  | 0.230541  | 0.384129  | 0.284074  | 0.396021  |
| 2.98044   | 3.76844   | 5.1294    | 4.34893   | 4.05563   | 3.93201   |
| 3.03124   | 2.55985   | 2.57765   | 1.9178    | 2.59088   | 3.2129    |
| 0.487829  | 0.481144  | 0.627258  | 0.354029  | 0.404693  | 0.335342  |
| 8.60568   | 11.1272   | 9.64257   | 8.26933   | 10.8772   | 8.74684   |
| 15.1406   | 14.1546   | 16.7323   | 16.4117   | 16.7835   | 19.424    |
| 0.0952868 | 0         | 0.154151  | 0         | 0         | 0         |
| 8.041     | 6.93706   | 7.58184   | 7.14757   | 6.33844   | 8.03307   |
| 150.297   | 157.545   | 115.76    | 135.942   | 132.272   | 38.9296   |
| 10.3882   | 10.668    | 13.2789   | 10.2078   | 13.0789   | 10.0794   |
| 19.6672   | 20.4359   | 21.9291   | 20.5675   | 21.5794   | 24.4427   |
| 1.70188   | 1.79731   | 1.23896   | 1.85263   | 1.12143   | 1.24149   |
| 28.4087   | 20.1978   | 22.8185   | 21.3375   | 21.2528   | 22.8652   |
| 7.2053    | 5.74072   | 7.5622    | 6.14386   | 6.92503   | 6.49366   |
| 0         | 0         | 0         | 0         | 0         | 0         |
| 6.09651   | 5.46524   | 5.70777   | 5.07429   | 3.10795   | 4.43876   |
| 0         | 0         | 0         | 0         | 0         | 0.204517  |
| 0         | 0         | 0         | 0.118363  | 0         | 0         |
| 0.0540344 | 0.0193438 | 0.0218536 | 0.0588206 | 0.0837765 | 0         |
| 0         | 0         | 0         | 0         | 0         | 0         |
| 0         | 0.137692  | 0         | 0.0697821 | 0         | 0         |
| 24.4147   | 21.5117   | 33.0336   | 28.9415   | 27.6181   | 22.8978   |
| 0.106683  | 0         | 0         | 0         | 0         | 0         |
| 0         | 0         | 0         | 0         | 0         | 0         |
| 0.198995  | 0.128229  | 0.0482888 | 0.0866484 | 0.0154264 | 0.145163  |
| 0.635039  | 0.606234  | 0.228298  | 0.204826  | 0.218796  | 2.294     |
| 8.96752   | 6.07939   | 6.93827   | 6.50789   | 8.59735   | 8.18143   |
| 164.226   | 155.577   | 163.288   | 144.368   | 180.432   | 95.5422   |
| 0         | 0         | 0.0471703 | 0.0423207 | 0.0904144 | 0.0472668 |
| 0.0632319 | 0.0679093 | 21.226    | 0.204161  | 0.122692  | 0.136813  |
| 18.2728   | 13.8931   | 11.9434   | 11.2903   | 16.095    | 10.6839   |
| 0.454057  | 0.188216  | 0.254744  | 0.128116  | 0.271081  | 0.157025  |
| 1.98061   | 2.2337    | 2.32606   | 2.55935   | 2.56569   | 5.21098   |
| 0.586502  | 0.390627  | 0.386148  | 0.415737  | 0.38065   | 0.364826  |
| 0.873187  | 0.715792  | 0.757485  | 0.982675  | 0.941785  | 0.728262  |
| 0.0407438 | 0.0729295 | 0.0659137 | 0.0739213 | 0.0315852 | 0.0825606 |
| 6.50073   | 7.18026   | 4.50483   | 6.83203   | 5.05483   | 5.6546    |

|           |           |           |           |           |           |
|-----------|-----------|-----------|-----------|-----------|-----------|
| 13.3768   | 12.281    | 14.0813   | 12.5663   | 11.9463   | 11.5423   |
| 0.657091  | 0.806511  | 1.11363   | 0.840187  | 0.63067   | 0.481871  |
| 53.9103   | 76.0479   | 18.874    | 0.662009  | 1.15677   | 8.26076   |
| 4.90515   | 3.79916   | 4.19565   | 3.93736   | 3.80255   | 3.88792   |
| 27.984    | 31.2688   | 29.3407   | 30.2001   | 23.0736   | 33.0082   |
| 8.54847   | 7.94789   | 6.91479   | 7.81866   | 7.19595   | 7.73181   |
| 0.148195  | 0.304901  | 0.33463   | 0.391847  | 0.107013  | 0.212183  |
| 0.0908211 | 0         | 0.0653009 | 0.0146468 | 0.0625832 | 0.102241  |
| 0.145421  | 0         | 0         | 0         | 0         | 0         |
| 0.675584  | 0.738655  | 0.849659  | 0.626277  | 1.27937   | 1.07932   |
| 53.8159   | 50.3318   | 52.6082   | 57.4224   | 57.3958   | 50.3041   |
| 0         | 0         | 0         | 0         | 0         | 0         |
| 0         | 0         | 0         | 0         | 0.0689698 | 0         |
| 0.776605  | 0.526769  | 0.495931  | 0.533933  | 0.602036  | 0.629464  |
| 4.2993    | 3.08398   | 2.81535   | 3.89254   | 2.82476   | 2.62203   |
| 4.17646   | 3.44267   | 4.94896   | 3.97041   | 4.3129    | 4.0597    |
| 2.67872   | 2.16322   | 1.91481   | 1.77446   | 2.13695   | 2.0702    |
| 0.324396  | 0.619363  | 0.524794  | 0.47084   | 1.17356   | 0.0876446 |
| 0.0397775 | 0         | 0         | 0         | 0.0154181 | 0         |
| 0         | 0         | 0         | 0         | 0         | 0         |
| 0.403847  | 0.289147  | 0.489995  | 0.14654   | 0.782671  | 0.490997  |
| 5.18559   | 3.39602   | 3.91988   | 3.43473   | 2.75175   | 3.76944   |
| 12.9955   | 9.43507   | 11.2751   | 11.1508   | 13.1914   | 12.1064   |
| 0         | 0.095293  | 0.107657  | 0         | 0         | 0         |
| 30.7304   | 44.0047   | 62.9197   | 25.0893   | 26.8005   | 24.908    |
| 19.0484   | 21.5879   | 13.5128   | 17.3721   | 12.4766   | 23.0352   |
| 0.322976  | 0.231245  | 0.174166  | 0.312519  | 0.250376  | 0.261783  |
| 11.7503   | 11.525    | 10.5462   | 10.046    | 12.2286   | 10.5678   |
| 0         | 0         | 0         | 0         | 0         | 0         |
| 35.6667   | 26.8044   | 28.9107   | 38.973    | 18.0467   | 23.7924   |
| 8.49606   | 5.04625   | 6.06212   | 7.13974   | 5.37693   | 6.45483   |
| 24.1932   | 18.8161   | 23.003    | 26.8752   | 20.8114   | 25.8594   |
| 0.769414  | 0.873819  | 0.922815  | 1.23228   | 0.822706  | 1.67744   |
| 59.3603   | 58.0996   | 57.2127   | 62.9084   | 55.9046   | 54.9511   |
| 21.6801   | 19.2227   | 23.756    | 25.5521   | 21.5948   | 22.9532   |
| 0         | 0         | 0         | 0         | 0         | 0         |
| 11.5762   | 12.5359   | 9.14651   | 10.1519   | 8.59395   | 9.14267   |
| 21.0266   | 19.7358   | 18.5361   | 20.56     | 18.5522   | 19.0887   |
| 0         | 0         | 0         | 0         | 0         | 0         |
| 33.7506   | 26.2416   | 30.032    | 29.8185   | 48.3977   | 27.0932   |
| 31.6024   | 29.5128   | 30.0914   | 27.5725   | 29.2048   | 26.4683   |
| 0.0268036 | 0.0191909 | 0.0433618 | 0.0194518 | 0.0519464 | 0.0434504 |
| 32.2124   | 29.8262   | 24.049    | 27.5426   | 21.4718   | 27.5487   |

|           |           |           |           |           |           |
|-----------|-----------|-----------|-----------|-----------|-----------|
| 2.7114    | 3.18084   | 2.35975   | 2.56839   | 2.07792   | 2.39205   |
| 0         | 0.0852941 | 0         | 0.095554  | 0         | 0         |
| 67.9407   | 56.7692   | 50.4855   | 55.6161   | 43.9858   | 48.0802   |
| 6.29429   | 13.6211   | 14.1299   | 12.5232   | 16.8313   | 20.9802   |
| 0         | 0         | 0         | 0         | 0         | 0         |
| 2.18E-167 | 9.39E-188 | 1.17E-57  | 8.22E-99  | 3.37E-111 | 3.02E-270 |
| 345.026   | 363.822   | 358.707   | 350.438   | 434.851   | 434.08    |
| 11.8666   | 9.68879   | 8.61059   | 8.77982   | 8.13152   | 8.62259   |
| 0.935683  | 1.11655   | 1.01903   | 1.50521   | 0.506943  | 0.568237  |
| 2.06359   | 2.35368   | 1.41694   | 1.77625   | 1.95315   | 2.21722   |
| 0         | 0         | 0         | 15.8569   | 0         | 0         |
| 0         | 0         | 0         | 0         | 0         | 0         |
| 0.674146  | 1.17652   | 0.749792  | 0.886747  | 0.718586  | 0.887929  |
| 6.01747   | 5.67795   | 5.12528   | 5.19604   | 5.84906   | 5.5449    |
| 0.231931  | 0.124544  | 0.117253  | 0.0631186 | 0.0224745 | 0.164489  |
| 5.83034   | 3.89608   | 3.83639   | 5.66036   | 4.9797    | 3.21498   |
| 0         | 0         | 0         | 0         | 0         | 0         |
| 4.00242   | 2.33744   | 3.16477   | 2.43326   | 3.13832   | 3.3198    |
| 0.0179193 | 0.025735  | 0.0148151 | 0.0537923 | 0.0575013 | 0.0145433 |
| 0.147253  | 0.0351434 | 0         | 0.0356213 | 0.0380509 | 0         |
| 7.08512   | 4.58504   | 7.0811    | 4.771     | 8.00109   | 7.48211   |
| 0.595772  | 0.289631  | 0.0684364 | 0.310845  | 0.598716  | 0.187876  |
| 14.0814   | 13.2327   | 13.9299   | 13.2744   | 13.494    | 13.1722   |
| 0.100783  | 0.0721585 | 0.122282  | 0.0731399 | 0         | 0.0816878 |
| 5.42606   | 3.9215    | 4.70503   | 4.97257   | 2.99636   | 3.17685   |
| 2.01366   | 1.44174   | 1.6719    | 2.00259   | 1.62711   | 1.67532   |
| 0.440967  | 0.552517  | 0.405329  | 0.400022  | 0.58269   | 0.406158  |
| 23.2708   | 26.22     | 23.6414   | 26.2157   | 20.8216   | 20.7891   |
| 7.13746   | 7.52316   | 8.95469   | 6.93636   | 6.91664   | 7.94739   |
| 2.81138   | 2.2046    | 2.49095   | 1.89454   | 1.40106   | 2.44179   |
| 12.5855   | 10.3682   | 11.7432   | 9.20903   | 11.5412   | 11.015    |
| 0.0433978 | 0.062144  | 0         | 0         | 0         | 0         |
| 2.67263   | 2.34134   | 2.07931   | 2.44864   | 1.89741   | 2.84988   |
| 20.6609   | 16.334    | 21.8858   | 19.9732   | 17.7062   | 21.4295   |
| 0         | 0         | 0         | 0         | 0         | 0         |
| 16.2455   | 13.1703   | 14.4027   | 15.7029   | 16.0979   | 14.2152   |
| 41.8552   | 40.9905   | 44.3069   | 43.8292   | 48.9293   | 41.1073   |
| 0.0249864 | 0         | 0.040422  | 0         | 0.0387397 | 0.060757  |
| 14.9363   | 11.1842   | 14.6393   | 12.7008   | 14.7317   | 13.9616   |
| 0         | 0         | 0         | 0         | 0         | 0         |
| 17.7166   | 11.3771   | 14.5858   | 16.1951   | 17.171    | 16.6882   |
| 17.7127   | 11.7808   | 16.6099   | 9.22709   | 11.9349   | 8.11578   |
| 0         | 0         | 0         | 0         | 0         | 0         |

|           |           |            |            |          |          |
|-----------|-----------|------------|------------|----------|----------|
| 0.995886  | 0.971659  | 1.1741     | 1.17679    | 0.921783 | 1.09244  |
| 6.99875   | 4.88806   | 5.24551    | 5.70272    | 7.29888  | 6.60424  |
| 0         | 0         | 0          | 0          | 0        | 0        |
| 2.79579   | 2.04685   | 2.40079    | 2.04629    | 1.40113  | 2.40191  |
| 1.91936   | 0.791925  | 1.21045    | 1.34569    | 1.31138  | 1.63481  |
| 0.357975  | 0.209988  | 0          | 0          | 0        | 0        |
| 2.2472    | 4.35767   | 3.54146    | 5.45158    | 3.00849  | 3.82995  |
| 0.416379  | 4.62E-11  | 0.186838   | 0.156673   | 0.161392 | 0.18014  |
| 24.846    | 22.4527   | 22.5047    | 25.3992    | 22.2932  | 21.3791  |
| 0.0169016 | 0.0242025 | 0.0068357  | 0.00613292 | 0        | 0        |
| 11.8956   | 7.61422   | 11.2074    | 11.1797    | 12.7078  | 11.1934  |
| 0         | 0         | 0          | 0          | 0        | 0        |
| 29.2904   | 28.6379   | 26.3673    | 27.4323    | 28.2223  | 24.073   |
| 40.061    | 52.8608   | 38.0703    | 55.5326    | 31.5161  | 40.0406  |
| 1.9585    | 2.19042   | 2.27673    | 2.45631    | 1.04435  | 2.0831   |
| 15.5803   | 15.004    | 14.7534    | 13.9563    | 13.9388  | 12.6866  |
| 0.155967  | 0.0837517 | 0.126159   | 0.0955024  | 0.14169  | 0.148145 |
| 291.439   | 289.872   | 255.434    | 289.226    | 279.267  | 262.188  |
| 3.44441   | 3.2818    | 2.68439    | 4.30763    | 2.63603  | 3.02187  |
| 0         | 0         | 0          | 0          | 0        | 0        |
| 2.23565   | 2.27789   | 1.9127     | 1.93446    | 1.86643  | 1.60318  |
| 0         | 0         | 0          | 0          | 0        | 0        |
| 17.4976   | 22.7468   | 22.8121    | 20.8153    | 17.1284  | 21.6351  |
| 2.17949   | 2.1777    | 1.93852    | 2.24865    | 2.31896  | 2.30218  |
| 0.836377  | 0.42892   | 0.327189   | 0.406019   | 0.357597 | 0.386515 |
| 2.27548   | 1.77373   | 1.55856    | 1.49155    | 1.32299  | 1.81461  |
| 0.695735  | 0.37953   | 0.66996    | 0.504908   | 0.256831 | 0.617623 |
| 143.866   | 147.507   | 130.788    | 139.679    | 140.882  | 125.355  |
| 0         | 0         | 0.00597355 | 0          | 0        | 0        |
| 11.3803   | 10.6398   | 11.9077    | 12.4514    | 13.9482  | 11.2551  |
| 1.3505    | 0.846527  | 1.18622    | 0.948486   | 0.824053 | 0.97512  |
| 15.7061   | 10.6516   | 14.7615    | 13.3442    | 12.3711  | 13.7832  |
| 21.8913   | 20.9702   | 18.2171    | 18.8495    | 21.0414  | 14.4791  |
| 6.54345   | 4.72118   | 5.99209    | 5.38664    | 5.83542  | 4.97264  |
| 20.5859   | 17.0262   | 22.7107    | 22.1517    | 26.1099  | 22.7874  |
| 4.43632   | 4.2139    | 3.35088    | 3.74025    | 2.87366  | 3.4351   |
| 0         | 0         | 0          | 0          | 0        | 0        |
| 33.6852   | 38.3713   | 36.4468    | 36.4131    | 32.0424  | 30.0289  |
| 2.71489   | 3.17647   | 1.98177    | 2.59496    | 2.15596  | 1.87848  |
| 0         | 0         | 0          | 0          | 0        | 0        |
| 14.7387   | 13.9285   | 13.9985    | 13.8452    | 14.3967  | 14.3616  |
| 56.7538   | 46.933    | 49.0918    | 49.8366    | 51.3108  | 47.8409  |
| 18.4761   | 18.5016   | 17.7686    | 16.2508    | 14.851   | 13.0777  |



|           |           |           |           |           |           |
|-----------|-----------|-----------|-----------|-----------|-----------|
| 13.554    | 14.4831   | 15.283    | 18.5253   | 11.995    | 16.9241   |
| 1.55405   | 1.72427   | 1.76485   | 1.64316   | 1.48397   | 2.17721   |
| 0         | 0         | 0         | 0         | 0         | 0         |
| 1.26033   | 1.46331   | 1.35009   | 1.35961   | 1.05625   | 0.993934  |
| 4.02991   | 2.38596   | 4.45077   | 4.33063   | 3.60468   | 3.61186   |
| 10.5217   | 9.66061   | 10.4586   | 11.7024   | 10.934    | 11.7478   |
| 0         | 0         | 0         | 0         | 0         | 0         |
| 7.55473   | 6.74374   | 7.72456   | 6.90666   | 7.14955   | 7.21019   |
| 0         | 0         | 0         | 0         | 0         | 0         |
| 0         | 0         | 0         | 0         | 0.0890076 | 0         |
| 25.4116   | 25.4357   | 29.863    | 28.7172   | 28.938    | 25.4265   |
| 179.937   | 348.793   | 313.4     | 227.671   | 381.313   | 271.848   |
| 0         | 0         | 0         | 0         | 0         | 0         |
| 10.4653   | 9.81519   | 10.2842   | 8.88162   | 6.80544   | 8.72787   |
| 0         | 0         | 0         | 0         | 0         | 0         |
| 0         | 0         | 0         | 0         | 0         | 0         |
| 17.6643   | 15.7523   | 14.4828   | 12.924    | 14.9609   | 14.5747   |
| 6.58766   | 6.16483   | 7.88145   | 5.84883   | 4.99698   | 5.77968   |
| 21.996    | 20.0199   | 21.46     | 20.9018   | 24.341    | 22.2009   |
| 0         | 0         | 0         | 0         | 0         | 0         |
| 4.7153    | 3.07309   | 3.42297   | 4.49683   | 3.67881   | 3.50342   |
| 56.3085   | 63.327    | 58.1713   | 57.3104   | 51.9048   | 49.0408   |
| 0         | 0         | 0         | 0         | 0         | 0         |
| 0         | 0.0379176 | 0         | 0         | 0         | 0         |
| 5.42393   | 3.9307    | 3.57503   | 2.81911   | 2.69386   | 3.17273   |
| 13.8265   | 11.8844   | 12.6776   | 12.9462   | 13.1298   | 13.2508   |
| 3.29782   | 3.59516   | 2.84937   | 3.69843   | 2.78881   | 2.82483   |
| 0.16702   | 0.161438  | 0.101324  | 0.113634  | 0.0728301 | 0.101531  |
| 26.4037   | 26.83     | 23.1265   | 25.4048   | 26.6477   | 16.2404   |
| 0.813811  | 0.422845  | 0.633593  | 1.19409   | 0.657825  | 0.601776  |
| 0         | 0         | 0.165894  | 0.0496129 | 0.0529967 | 0         |
| 0         | 0         | 2.47856   | 0         | 0         | 0         |
| 5.65423   | 7.15935   | 3.58227   | 3.86081   | 2.2456    | 4.35718   |
| 0.719146  | 0.901066  | 0.581702  | 0.391423  | 0.836239  | 0.437169  |
| 3.72403   | 3.59411   | 4.73508   | 4.28069   | 2.25179   | 3.76678   |
| 0         | 0         | 0.226648  | 0         | 0         | 0         |
| 11.1642   | 10.1203   | 10.7469   | 10.5659   | 12.1594   | 12.1027   |
| 38.3171   | 27.0942   | 32.0826   | 32.9591   | 34.6138   | 32.2765   |
| 0         | 0         | 0.249272  | 0         | 0         | 0.249781  |
| 3.83393   | 3.17075   | 3.28656   | 3.14622   | 1.80914   | 2.6915    |
| 1.15659   | 0.361563  | 0.925432  | 0.521649  | 0.811019  | 1.11903   |
| 5.98496   | 7.77132   | 5.54402   | 4.76056   | 3.06688   | 4.70494   |
| 0.0263294 | 0.0691215 | 0.0780901 | 0.0573231 | 0.102055  | 0.0569089 |

|           |           |           |           |           |           |
|-----------|-----------|-----------|-----------|-----------|-----------|
| 0         | 0         | 0         | 0         | 0         | 0         |
| 44.0486   | 32.3855   | 69.2442   | 23.7378   | 89.7872   | 16.2102   |
| 0.103376  | 0.0911994 | 0.135459  | 0.147408  | 0.258192  | 6.48E-09  |
| 0.777944  | 0.223645  | 0.345867  | 0.282098  | 0.421875  | 0.409588  |
| 10.1542   | 10.8076   | 10.6448   | 12.1403   | 10.1687   | 13.6852   |
| 2.97302   | 3.7693    | 2.52303   | 2.33676   | 1.49752   | 1.59961   |
| 4.99144   | 4.20373   | 4.85865   | 4.62927   | 5.77137   | 7.10402   |
| 1.98873   | 2.1668    | 2.72771   | 2.13352   | 2.48012   | 3.36404   |
| 8.2433    | 6.92547   | 9.12336   | 8.34177   | 7.7915    | 8.31961   |
| 229.211   | 167.138   | 153.333   | 163.388   | 144.096   | 134.41    |
| 35.0142   | 36.2809   | 45.4145   | 43.449    | 42.8099   | 48.008    |
| 0         | 0         | 0         | 0         | 0         | 0         |
| 1.24422   | 0.734716  | 0.923425  | 1.08448   | 0.780578  | 1.03448   |
| 0         | 0         | 0         | 0         | 0         | 0         |
| 12.9208   | 13.2306   | 12.8535   | 10.6952   | 18.3574   | 9.42531   |
| 6.20892   | 6.05564   | 9.9259    | 10.573    | 6.67033   | 8.91591   |
| 0.0172524 | 0.0123524 | 0         | 0.0125204 | 0         | 0.0139836 |
| 13.4138   | 13.541    | 16.5264   | 16.1745   | 17.0766   | 14.1149   |
| 10.0259   | 10.3376   | 10.5384   | 10.1371   | 11.1523   | 10.7293   |
| 0.0394958 | 0.0282782 | 0         | 0         | 0         | 0         |
| 0.881803  | 1.31806   | 0.7692    | 1.02039   | 0.942136  | 1.23194   |
| 4.22037   | 4.07336   | 3.64306   | 3.16126   | 3.85869   | 3.26593   |
| 1.6256    | 1.72288   | 1.31062   | 1.03096   | 0.877103  | 2.66853   |
| 0         | 0         | 0         | 0         | 0         | 0         |
| 9.9409    | 9.16661   | 9.8643    | 9.57617   | 8.90402   | 10.1616   |
| 4.31058   | 3.38305   | 3.822     | 4.69239   | 4.27342   | 3.9306    |
| 0.678503  | 0.721753  | 0.917325  | 0.562745  | 0.541014  | 0.911345  |
| 3.25163   | 1.91237   | 4.6028    | 3.7082    | 3.60101   | 5.45936   |
| 0.0380364 | 0.0544667 | 0.0923006 | 0.0184025 | 0.0196576 | 0.0411064 |
| 4.89092   | 3.8063    | 4.96173   | 4.71278   | 4.7172    | 6.2049    |
| 5.38636   | 2.58348   | 2.20551   | 3.41077   | 2.56861   | 3.26054   |
| 0.280749  | 0.113303  | 0.199936  | 0.0630828 | 0.421249  | 0.295254  |
| 5.2894    | 4.53331   | 3.57209   | 5.62036   | 4.88733   | 4.55836   |
| 53.1846   | 55.7198   | 61.4758   | 68.2237   | 37.5179   | 46.3691   |
| 1.08285   | 1.80619   | 0.875896  | 2.22152   | 1.2854    | 1.55719   |
| 0.28173   | 0.134475  | 0.101282  | 0.272609  | 0.0485336 | 0.253724  |
| 4.93991   | 4.24513   | 4.54065   | 4.61371   | 2.91865   | 3.88034   |
| 4.70428   | 5.83084   | 5.38273   | 6.27898   | 5.77262   | 5.96856   |
| 0.192966  | 0.449019  | 0.370704  | 0.770213  | 0.411373  | 0.508317  |
| 0         | 0         | 0         | 0         | 0         | 0         |
| 19.5397   | 14.391    | 18.8984   | 19.0199   | 22.5223   | 19.442    |
| 0.508065  | 0.637701  | 0.280644  | 0.18606   | 0.0297814 | 0.0259485 |
| 7.97656   | 6.33937   | 7.9714    | 7.62184   | 7.56163   | 7.57792   |

|           |           |           |           |           |           |
|-----------|-----------|-----------|-----------|-----------|-----------|
| 123.053   | 173.504   | 169.454   | 113.134   | 67.8867   | 179.284   |
| 18.2343   | 12.8816   | 12.4734   | 15.2562   | 23.2751   | 11.202    |
| 0         | 0.0391249 | 0         | 0.039657  | 0         | 0         |
| 16.0818   | 11.0433   | 12.678    | 11.5886   | 15.6144   | 12.1524   |
| 24.9654   | 24.7741   | 22.751    | 26.7394   | 21.402    | 24.5199   |
| 10.2676   | 7.70625   | 8.84147   | 10.8451   | 9.29331   | 7.01134   |
| 29.3865   | 23.5435   | 32.3893   | 39.7124   | 33.6873   | 36.3691   |
| 5.30314   | 4.83017   | 5.2707    | 4.65171   | 4.40619   | 4.54953   |
| 0         | 0         | 0         | 0         | 0         | 0         |
| 0.121303  | 0.130276  | 0         | 0.0440158 | 0.117545  | 0.17206   |
| 0.744164  | 0.679598  | 0.54357   | 0.998548  | 0.781383  | 0.922266  |
| 21.5123   | 19.742    | 19.4813   | 23.6622   | 19.1204   | 21.2637   |
| 105.999   | 99.3022   | 106.601   | 114.732   | 108.2     | 112.034   |
| 0.976383  | 0.854421  | 0.438765  | 0.669213  | 0.925109  | 0.0439662 |
| 0         | 0         | 0         | 0         | 0         | 0         |
| 0.351943  | 0.346478  | 0.213509  | 0.446969  | 0.443351  | 0.356577  |
| 1.46331   | 0.768316  | 1.26255   | 1.06195   | 1.81501   | 1.81863   |
| 65.2707   | 57.9208   | 66.7821   | 69.2355   | 79.8583   | 65.6029   |
| 2.80585   | 6.2336    | 3.13738   | 4.16234   | 2.65494   | 3.04346   |
| 0         | 0.281446  | 0         | 0.285273  | 0.30473   | 0.318614  |
| 2.95503   | 1.14569   | 4.27415   | 7.08525   | 2.85457   | 3.40301   |
| 28.1798   | 27.5658   | 29.5725   | 27.9407   | 27.3354   | 24.9411   |
| 8.27008   | 8.83649   | 9.29397   | 8.66726   | 8.47451   | 8.02647   |
| 0.0626739 | 0.0448733 | 0.0506957 | 0         | 0         | 0         |
| 8.17443   | 7.09183   | 8.28999   | 7.76726   | 8.50953   | 8.02838   |
| 1.60837   | 4.6053    | 4.47823   | 5.03656   | 8.13839   | 4.89701   |
| 0         | 0         | 0         | 0         | 0.04638   | 0         |
| 41.547    | 30.6238   | 37.6482   | 39.2586   | 42.3394   | 39.9776   |
| 0         | 0.0462886 | 0.0522945 | 0         | 0         | 0         |
| 8.4705    | 6.71672   | 7.80155   | 6.71756   | 7.11214   | 8.86876   |
| 6.49876   | 7.9374    | 4.17373   | 7.25339   | 8.78727   | 8.05903   |
| 20.7801   | 16.1029   | 22.6076   | 17.369    | 16.8675   | 17.6032   |
| 29.4262   | 23.83     | 23.7734   | 26.8753   | 26.3829   | 25.0667   |
| 0.265381  | 0.0633359 | 0.143107  | 0.0962958 | 0.0685758 | 0.0717    |
| 0         | 0         | 0         | 0         | 0         | 0         |
| 0         | 0         | 0         | 0         | 0         | 0.0212442 |
| 0.0946239 | 0.0948485 | 0.0918472 | 0.0824043 | 0.0733539 | 0.0613567 |
| 0.647037  | 0.961938  | 0.254124  | 0.144132  | 1.4305    | 0.45355   |
| 0.733549  | 0.513914  | 1.15282   | 1.09262   | 0.837202  | 0.749191  |
| 12.4763   | 11.4523   | 8.57155   | 9.45091   | 12.7821   | 9.23731   |
| 0.230715  | 0.765868  | 0.424137  | 0.593629  | 0.406485  | 0.629007  |
| 9.24696   | 8.29724   | 11.01     | 9.63062   | 9.34016   | 9.15035   |
| 0.293819  | 0.140246  | 0.0792215 | 0.118461  | 0.177157  | 0.132306  |

|           |           |           |           |           |           |
|-----------|-----------|-----------|-----------|-----------|-----------|
| 14.5064   | 16.8029   | 16.393    | 17.3034   | 14.9636   | 16.9348   |
| 20.0641   | 17.638    | 19.9729   | 19.1712   | 18.4786   | 19.5721   |
| 0.0975084 | 0.0465428 | 0.0525817 | 0.188703  | 0.428343  | 0.0790338 |
| 0.383664  | 0.164818  | 0.155169  | 0.167059  | 0.237938  | 0.124389  |
| 30.222    | 35.637    | 33.9147   | 33.457    | 32.0166   | 33.0937   |
| 1.56772   | 2.67409   | 1.34269   | 3.19024   | 2.14468   | 3.10209   |
| 0.413614  | 0.284294  | 0.254269  | 0.312174  | 0.243687  | 0.348658  |
| 0         | 0         | 0         | 0         | 0         | 0         |
| 4.34836   | 2.90869   | 3.43384   | 3.39111   | 2.84724   | 3.46705   |
| 52.943    | 68.615    | 64.9145   | 63.4688   | 57.5372   | 48.7514   |
| 32.2439   | 33.1628   | 33.802    | 33.9665   | 21.9286   | 28.8636   |
| 0         | 0         | 0         | 0         | 0         | 0         |
| 85.5221   | 99.873    | 88.5562   | 85.1634   | 85.6178   | 82.2473   |
| 0.38225   | 0.342104  | 0.193246  | 0.312081  | 0.148163  | 0.387283  |
| 26.9901   | 25.0367   | 27.594    | 26.182    | 31.7507   | 25.5416   |
| 22.8156   | 20.361    | 22.3951   | 23.6631   | 21.4197   | 19.5327   |
| 0         | 0         | 0         | 0         | 0         | 0         |
| 0.0365638 | 0.0104716 | 0.0177454 | 0.021228  | 0.0170069 | 0.0829814 |
| 21.2453   | 22.8564   | 21.0561   | 23.1906   | 16.9165   | 16.783    |
| 0.0944196 | 0.0682854 | 0.0385725 | 0         | 0.0415881 | 0.0386514 |
| 0.303741  | 0.317844  | 0.340186  | 0.389992  | 0.398478  | 0.549198  |
| 2.97392   | 2.62356   | 2.11559   | 2.96756   | 3.35522   | 3.33591   |
| 1.66384   | 1.37945   | 1.11966   | 1.25422   | 1.0632    | 1.36424   |
| 0.0361441 | 0.0528352 | 0.0884395 | 0.0295092 | 0.0315219 | 0.032958  |
| 0         | 0         | 0         | 0         | 0         | 0         |
| 6.29066   | 4.65825   | 5.53134   | 5.94653   | 3.86262   | 5.06577   |
| 0.351465  | 0.296049  | 0.351185  | 0.315079  | 0.160271  | 0.301631  |
| 46.4743   | 34.6892   | 49.5904   | 35.9311   | 32.3285   | 42.1072   |
| 13.8367   | 10.1024   | 11.0269   | 11.9178   | 10.6132   | 11.799    |
| 0.0741061 | 0.0353724 | 0.019981  | 0.0358534 | 0         | 0.0400437 |
| 22.5253   | 17.0957   | 21.2415   | 20.9036   | 21.601    | 20.0034   |
| 38.0722   | 36.0276   | 38.4241   | 34.0317   | 39.1631   | 44.7899   |
| 153.398   | 164.04    | 154.405   | 146.447   | 160.06    | 131.422   |
| 2.76019   | 3.47178   | 2.55019   | 2.93796   | 1.67709   | 1.90467   |
| 15.4678   | 12.2491   | 13.4037   | 12.6406   | 12.8224   | 8.88662   |
| 8.21E-14  | 1.02E-14  | 1.76E-20  | 1.61E-15  | 3.86E-86  | 1.14E-28  |
| 1.37426   | 0.646592  | 1.36569   | 0.968831  | 0.974033  | 1.52761   |
| 76.6458   | 89.6692   | 104.743   | 118.179   | 162.07    | 67.6742   |
| 76.6527   | 57.7926   | 74.2304   | 65.3326   | 99.6347   | 41.8466   |
| 0.0852741 | 0         | 0         | 0.682024  | 0         | 0         |
| 2.18412   | 1.55952   | 2.73142   | 2.72736   | 1.63207   | 2.23963   |
| 0         | 13.0339   | 0         | 0         | 14.1122   | 59.0205   |
| 2.34951   | 1.00932   | 1.6344    | 1.63688   | 1.27496   | 1.40922   |

|           |           |           |           |           |           |
|-----------|-----------|-----------|-----------|-----------|-----------|
| 0.243114  | 0.261098  | 0.472174  | 0.229362  | 0.245006  | 0.335297  |
| 0.177331  | 0.335269  | 0.459007  | 0.363804  | 0.13747   | 0.220091  |
| 16.3448   | 16.0264   | 17.5748   | 15.9823   | 13.5867   | 15.0569   |
| 19.0267   | 19.0267   | 20.6815   | 20.6815   | 18.9119   | 18.9119   |
| 0.0589199 | 0.0421855 | 0.0476591 | 0.0712654 | 0.0609008 | 0.0795943 |
| 47.0271   | 50.7866   | 50.4639   | 49.7736   | 34.6088   | 44.7101   |
| 40.4384   | 42.9007   | 40.3986   | 38.3002   | 38.3584   | 40.455    |
| 12.9137   | 11.7106   | 14.2818   | 11.0703   | 10.4884   | 11.2658   |
| 16.7093   | 10.6571   | 13.004    | 10.3862   | 14.9268   | 6.17872   |
| 20.0461   | 17.2474   | 21.7483   | 22.0449   | 23.7034   | 23.1634   |
| 0.057869  | 0         | 0         | 0.0419966 | 0.0224305 | 0.0234524 |
| 8.10394   | 7.07864   | 8.87766   | 9.16523   | 7.0064    | 6.81594   |
| 9.31538   | 8.21927   | 8.77644   | 9.82441   | 10.2669   | 8.22223   |
| 4.18096   | 2.34743   | 2.65201   | 3.84181   | 1.88877   | 1.9992    |
| 0.0783846 | 0.280609  | 0.253615  | 0.511966  | 0.182295  | 0.444733  |
| 32.0887   | 28.7652   | 36.444    | 38.5829   | 38.2892   | 34.2985   |
| 58.9033   | 49.8018   | 59.7767   | 66.7801   | 72.7026   | 64.5742   |
| 0         | 0         | 0.209104  | 0.187606  | 0.200402  | 0         |
| 0         | 0         | 0.0820552 | 0.073619  | 0         | 0         |
| 2.49325   | 3.31237   | 3.67863   | 2.14714   | 2.00983   | 2.3653    |
| 0         | 0         | 0.0442669 | 0         | 0.0424246 | 0.0887149 |
| 0         | 0         | 0         | 0         | 0         | 0         |
| 0         | 0         | 0         | 0         | 0         | 0         |
| 7.033     | 5.10716   | 3.80824   | 4.79933   | 1.70221   | 9.01529   |
| 16.9482   | 12.6994   | 14.6308   | 15.2684   | 13.1158   | 16.6739   |
| 0         | 0         | 0         | 0         | 0         | 0         |
| 0         | 0         | 0         | 0.0687078 | 0.073394  | 0         |
| 51.9641   | 51.4108   | 53.7521   | 46.8669   | 56.4572   | 37.1846   |
| 0.622771  | 0.28375   | 0.366361  | 0.369782  | 0.263336  | 0.36711   |
| 16.7774   | 18.8566   | 21.9325   | 17.2494   | 22.6944   | 21.5343   |
| 202.04    | 155.001   | 130.853   | 131.553   | 237.099   | 72.6772   |
| 0         | 0         | 0         | 0         | 0         | 0         |
| 10.1484   | 11.457    | 12.1691   | 11.1359   | 10.3058   | 9.93804   |
| 11.3149   | 8.90041   | 9.65666   | 10.2081   | 10.8262   | 11.8852   |
| 15.6068   | 10.9985   | 14.5168   | 13.7365   | 14.9952   | 15.1125   |
| 1.66489   | 1.84222   | 2.87703   | 1.61098   | 1.97508   | 3.63942   |
| 0         | 0         | 0         | 0         | 0         | 0         |
| 0.0912019 | 0.0217663 | 0.0491809 | 0.0220623 | 0.023567  | 0.0246407 |
| 1.51912   | 0.933751  | 1.82078   | 1.32936   | 1.38159   | 0.994509  |
| 0.469231  | 0.206291  | 0.226399  | 0.603394  | 1.02107   | 0.660568  |
| 0.0856299 | 0.0766367 | 0.121212  | 0.0155358 | 0.0331908 | 0.0607302 |
| 375.17    | 785.749   | 537.281   | 518.648   | 448.77    | 899.69    |
| 0         | 0         | 0         | 0         | 0.074906  | 0         |

|           |           |          |           |           |           |
|-----------|-----------|----------|-----------|-----------|-----------|
| 13.9484   | 11.9977   | 16.307   | 15.3251   | 15.5587   | 14.176    |
| 2.92783   | 2.25931   | 1.84198  | 2.76221   | 2.06803   | 1.76665   |
| 1.9113    | 1.67624   | 1.88838  | 1.53105   | 1.27147   | 1.91905   |
| 4.37978   | 3.53754   | 3.59046  | 3.94624   | 3.75195   | 3.85071   |
| 0         | 0         | 0        | 0         | 0         | 0         |
| 0         | 0         | 0        | 0         | 0         | 0         |
| 5.17117   | 5.61898   | 6.05174  | 4.16148   | 4.61553   | 5.86451   |
| 0         | 0         | 0        | 0         | 0         | 0         |
| 0         | 0         | 0        | 0         | 0         | 0         |
| 0.0829962 | 0.0198079 | 0.044756 | 0.0401546 | 0.0857866 | 0.112119  |
| 9.91659   | 11.7508   | 11.2789  | 13.2724   | 9.85834   | 14.262    |
| 13.9426   | 10.4335   | 13.6602  | 13.5015   | 12.0354   | 13.8172   |
| 1.62522   | 1.35454   | 0.938059 | 1.07199   | 0.80066   | 0.981892  |
| 0         | 0         | 0        | 0.0645843 | 0         | 0.0360662 |
| 59.6767   | 66.828    | 65.0827  | 60.3558   | 62.9556   | 58.7926   |
| 22.9277   | 18.6497   | 21.9027  | 25.0756   | 21.2982   | 18.5133   |
| 6.01478   | 5.46521   | 6.37353  | 6.90007   | 6.12008   | 7.31991   |
| 20.3519   | 20.7019   | 22.822   | 21.999    | 19.5625   | 23.7834   |
| 13.1388   | 0         | 31.8831  | 0         | 10.1854   | 0         |
| 0         | 0         | 0        | 0         | 0         | 0         |
| 0.124065  | 0.0592187 | 0.167256 | 0.182622  | 0.064118  | 0.132232  |
| 3.28374   | 8.52908   | 6.97812  | 9.7513    | 8.87994   | 10.2264   |
| 6.70402   | 4.79995   | 5.3541   | 5.68123   | 4.91747   | 5.67458   |
| 0         | 0         | 0        | 0         | 0         | 0         |
| 2.75889   | 6.75226   | 3.47776  | 5.29298   | 2.88839   | 4.91046   |
| 45.8115   | 41.5424   | 47.6101  | 43.7492   | 40.2141   | 38.2101   |
| 0.187028  | 0.133909  | 0.244381 | 0.177493  | 0.245363  | 0.279863  |
| 65.9496   | 59.6059   | 41.4741  | 49.1794   | 51.9676   | 49.7405   |
| 0.849615  | 0.649872  | 0.402975 | 0.55214   | 0.272572  | 0.498311  |
| 8.622     | 7.57364   | 8.0239   | 10.3612   | 9.96888   | 10.8735   |
| 0.0442036 | 0.189894  | 0        | 0.288714  | 0.0342673 | 0.429942  |
| 21.2798   | 24.1712   | 17.7305  | 20.9004   | 20.8996   | 18.6096   |
| 1.68037   | 3.00378   | 2.13445  | 1.14214   | 0.899865  | 1.48555   |
| 33.1226   | 44.0613   | 48.1567  | 43.0089   | 39.8431   | 31.2047   |
| 5.24274   | 5.0202    | 5.5415   | 5.7887    | 4.76236   | 6.04813   |
| 22.9976   | 19.1182   | 22.5627  | 23.6949   | 20.5998   | 20.557    |
| 0         | 0         | 0        | 0         | 0         | 0         |
| 0.0959351 | 0.343439  | 0.1164   | 0.0696218 | 0.111556  | 0.194397  |
| 8.75542   | 7.66229   | 7.52696  | 9.13971   | 6.74395   | 6.78119   |
| 0.188559  | 0.184272  | 0.129301 | 0.192433  | 0.168598  | 0.0743676 |
| 7.10483   | 7.35177   | 6.90447  | 6.99627   | 4.65144   | 6.91859   |
| 22.8738   | 16.6214   | 19.7683  | 21.3079   | 17.861    | 21.2708   |
| 22.1909   | 22.3418   | 24.8047  | 23.7121   | 19.1394   | 22.1952   |

|          |           |           |           |          |           |
|----------|-----------|-----------|-----------|----------|-----------|
| 6.99928  | 5.19363   | 6.14867   | 6.54728   | 7.08963  | 6.89091   |
| 0        | 0         | 0         | 0         | 0        | 0         |
| 18.2012  | 18.3203   | 12.2611   | 16.3014   | 17.957   | 18.9627   |
| 0.196406 | 0.0351558 | 0.0397173 | 0         | 0.237902 | 0.079597  |
| 3.56417  | 2.9206    | 3.23758   | 3.15937   | 2.90493  | 2.69696   |
| 1.8382   | 2.38263   | 3.23013   | 3.42705   | 2.7763   | 3.1083    |
| 7.90088  | 10.3767   | 11.8407   | 8.58313   | 11.1225  | 8.40761   |
| 19.0682  | 16.8061   | 18.9832   | 19.7856   | 19.7979  | 19.4094   |
| 2.8368   | 2.70813   | 3.19063   | 2.52928   | 2.63896  | 2.34312   |
| 15.344   | 25.5794   | 23.5262   | 25.0132   | 18.4638  | 24.9665   |
| 0.342415 | 0.326725  | 0.21582   | 0.243889  | 0.123181 | 0.432095  |
| 33.6742  | 42.4162   | 46.1035   | 37.3358   | 40.7524  | 49.2809   |
| 1.06459  | 1.19779   | 0.861126  | 1.43482   | 0.884237 | 1.29433   |
| 80.7882  | 58.049    | 68.333    | 77.7922   | 81.2581  | 54.3188   |
| 13.1116  | 13.6771   | 14.8786   | 13.1351   | 11.1106  | 11.685    |
| 0.89216  | 1.038     | 1.12758   | 0.768855  | 1.29678  | 0.904502  |
| 5.02102  | 4.66911   | 3.91461   | 4.44286   | 3.58286  | 3.903     |
| 0.858812 | 0.623654  | 0.771639  | 0.947464  | 0.518344 | 1.00469   |
| 7.93794  | 9.15416   | 9.27564   | 9.76602   | 5.14901  | 7.06226   |
| 0        | 0         | 0         | 0         | 0        | 0         |
| 8.07E-06 | 2.18E-07  | 8.80E-07  | 2.51E-07  | 4.25E-06 | 9.09E-07  |
| 11.3499  | 9.53868   | 11.8592   | 10.5621   | 8.40967  | 10.5055   |
| 1.03129  | 0.909702  | 0.736503  | 0.418299  | 0.88577  | 0.294915  |
| 0        | 0.0774204 | 0         | 0.0784733 | 0        | 0.0876446 |
| 0        | 0         | 0.0262447 | 0.023547  | 0        | 0         |
| 2.1604   | 1.56199   | 1.8797    | 2.37463   | 1.7522   | 2.355     |
| 60.8054  | 55.8109   | 54.7317   | 63.4272   | 48.2469  | 55.4225   |
| 0        | 0.26223   | 0         | 0         | 0        | 0         |
| 1.79041  | 1.39705   | 1.40927   | 1.21982   | 0.792008 | 0.907897  |
| 0        | 0         | 0         | 0         | 0        | 0         |
| 1.38073  | 1.01853   | 1.41047   | 0.83504   | 0.843348 | 0.785856  |
| 12.1055  | 11.4774   | 11.3404   | 11.4497   | 9.50221  | 10.5794   |
| 1.0426   | 0.959764  | 1.5662    | 0.648544  | 0.692778 | 0.482894  |
| 0        | 0         | 0         | 0         | 0        | 0         |
| 24.926   | 30.1088   | 28.4022   | 28.6452   | 31.355   | 30.2661   |
| 0        | 0         | 0         | 0         | 0        | 0         |
| 0.451021 | 0.393808  | 0.489395  | 0.43908   | 0.41786  | 0.748968  |
| 26.7361  | 23.9958   | 28.1592   | 26.3978   | 29.7086  | 30.2733   |
| 7.22494  | 6.64891   | 8.57942   | 5.98513   | 6.37835  | 7.12824   |
| 178.287  | 198.107   | 164.21    | 169.098   | 148.89   | 174.418   |
| 28.6473  | 25.0519   | 21.8037   | 25.3981   | 19.0517  | 20.2022   |
| 51.5943  | 50.41     | 55.05     | 52.7806   | 56.3453  | 57.5464   |
| 2.97679  | 1.84771   | 2.47336   | 2.52027   | 2.59517  | 2.88097   |

|          |           |           |           |           |           |
|----------|-----------|-----------|-----------|-----------|-----------|
| 158.553  | 247.759   | 171.131   | 171.971   | 227.305   | 71.2769   |
| 57.8138  | 44.7135   | 53.0738   | 63.2894   | 57.7358   | 58.512    |
| 39.7431  | 36.0098   | 37.5527   | 40.3282   | 40.534    | 35.0639   |
| 8.47522  | 4.35613   | 6.15689   | 10.1217   | 6.60366   | 5.28341   |
| 25.1758  | 17.0909   | 21.9901   | 22.4406   | 18.0515   | 23.2813   |
| 0.58391  | 0.139377  | 0.35416   | 0.176565  | 0.226292  | 0.118334  |
| 7.01928  | 4.99161   | 6.60126   | 5.5917    | 7.33273   | 7.26238   |
| 14.9652  | 22.2558   | 17.0937   | 19.111    | 17.5046   | 18.4464   |
| 1.58439  | 1.63089   | 1.92238   | 1.43728   | 1.72722   | 1.64539   |
| 0        | 0         | 0         | 0         | 0         | 0         |
| 0        | 0         | 0         | 0         | 0         | 0         |
| 3.69313  | 3.0903    | 2.24067   | 2.25244   | 1.94893   | 2.97125   |
| 0        | 0         | 0         | 0         | 0         | 0.0592298 |
| 3.66791  | 3.55066   | 3.80257   | 4.16849   | 3.22476   | 3.4837    |
| 1.22858  | 2.04456   | 1.28922   | 1.10848   | 0.669262  | 0.67284   |
| 0        | 0.0133095 | 0         | 0         | 0         | 0.0200895 |
| 0.150687 | 0.107889  | 0.0609438 | 0         | 0.175222  | 0.122137  |
| 26.1291  | 24.4451   | 21.2293   | 26.7159   | 25.2071   | 23.1552   |
| 59.132   | 57.3046   | 54.5268   | 62.7084   | 48.5967   | 37.604    |
| 0.664412 | 1.00124   | 0.81523   | 0.768846  | 0.779132  | 0.878753  |
| 0.469691 | 0         | 0.331434  | 0.0660797 | 0         | 0         |
| 70.2066  | 77.0102   | 72.3325   | 73.689    | 67.9744   | 60.1615   |
| 0.419813 | 0.165607  | 0.0415515 | 0.341087  | 0.0398222 | 0.340273  |
| 6.4232   | 6.24401   | 8.29324   | 7.75641   | 6.40975   | 7.5342    |
| 262.025  | 232.726   | 388.123   | 110.724   | 381.398   | 481.217   |
| 0        | 0         | 0.0351705 | 0.0157773 | 0.0168534 | 0         |
| 0.955701 | 0.430424  | 0.548614  | 0.872555  | 0.669177  | 0.56223   |
| 19.8215  | 18.5538   | 18.664    | 18.5238   | 14.6375   | 16.1535   |
| 1.56134  | 0.883226  | 1.33186   | 1.07351   | 1.40277   | 0.932841  |
| 0        | 0         | 0         | 0.141881  | 0.151558  | 0.158463  |
| 0.583851 | 0.384424  | 0.55485   | 0.330945  | 0.309355  | 0.472118  |
| 1.07337  | 0.794141  | 0.655794  | 0.703823  | 0.976779  | 0.85444   |
| 8.50597  | 6.44568   | 7.9103    | 8.90826   | 5.41929   | 7.25561   |
| 0        | 0         | 0         | 0         | 0         | 0         |
| 19.406   | 18.7773   | 15.9852   | 18.8096   | 13.9207   | 15.0175   |
| 15.9325  | 15.7828   | 11.281    | 11.6892   | 9.66094   | 12.9227   |
| 0        | 0         | 0         | 0         | 0         | 0         |
| 17.5803  | 16.5391   | 17.2552   | 17.1846   | 12.0994   | 14.7537   |
| 0.697119 | 0.970519  | 0.595212  | 0.505912  | 0.870673  | 0.345301  |
| 0        | 0         | 0         | 0         | 0         | 0         |
| 18.8618  | 17.3891   | 17.3568   | 18.6174   | 19.4217   | 17.4396   |
| 4.96048  | 3.62212   | 4.96685   | 4.86113   | 3.61558   | 4.92203   |
| 13.2824  | 9.31005   | 12.4937   | 10.4327   | 16.2655   | 12.8021   |



|           |           |           |            |            |           |
|-----------|-----------|-----------|------------|------------|-----------|
| 0         | 0         | 0         | 0.00777029 | 0          | 0         |
| 1.01214   | 0.682045  | 0.751278  | 0.74317    | 0.424622   | 0.472921  |
| 323.478   | 305.8     | 322.663   | 325.34     | 477.206    | 279.073   |
| 6.65622   | 5.01341   | 6.40686   | 5.62697    | 6.39914    | 7.57053   |
| 0.293989  | 0.46146   | 0.393288  | 0.451324   | 0.324326   | 0.403257  |
| 0         | 0         | 0         | 0          | 0          | 0         |
| 2.184     | 3.00356   | 2.13839   | 1.87684    | 2.56163    | 2.93448   |
| 0         | 0         | 0.0421888 | 0.00926972 | 0.00990196 | 0.0207062 |
| 0.657053  | 0.585626  | 1.0143    | 0.851032   | 0.612274   | 1.03945   |
| 4.87091   | 3.50148   | 3.46528   | 4.01758    | 3.8215     | 4.88351   |
| 27.6214   | 25.3651   | 28.7085   | 27.2592    | 26.4439    | 27.3516   |
| 144.395   | 118.05    | 98.0656   | 139.559    | 115.474    | 136.304   |
| 0.360882  | 0         | 0.29191   | 0.261899   | 0.186508   | 0.195005  |
| 0.0386275 | 0.110626  | 0.24996   | 0.0560653  | 0.179668   | 0.250471  |
| 2.90239   | 2.62813   | 2.46276   | 2.49867    | 2.58085    | 2.85988   |
| 1.42117   | 1.73091   | 1.15093   | 1.19377    | 0.644621   | 0.958292  |
| 6.5962    | 4.42332   | 6.71977   | 5.77198    | 6.19338    | 6.62062   |
| 39.2779   | 36.4521   | 33.5567   | 65.1013    | 38.1769    | 31.1294   |
| 0.0797168 | 0.0570757 | 0         | 0.115704   | 0.0926966  | 0.193839  |
| 0.0571859 | 0.081888  | 0.13877   | 0.0415008  | 0.132994   | 0         |
| 43.8201   | 40.8135   | 41.688    | 44.6194    | 47.4715    | 44.109    |
| 2.79127   | 3.29361   | 3.26687   | 2.68204    | 1.70447    | 1.04905   |
| 13.2685   | 10.4214   | 12.2492   | 13.1957    | 11.4398    | 10.5688   |
| 15.5991   | 14.3947   | 15.0895   | 16.9432    | 13.0606    | 11.9517   |
| 12.7653   | 9.77442   | 15.5601   | 14.5181    | 11.7513    | 11.9275   |
| 5.20926   | 6.06461   | 4.5905    | 6.05488    | 5.25308    | 7.4834    |
| 1.01376   | 0.90789   | 0.878096  | 0.887874   | 0.748071   | 1.03209   |
| 13.7555   | 13.1644   | 18.5813   | 21.6067    | 16.1137    | 18.1857   |
| 0.436395  | 0.223179  | 0.226923  | 0.0904857  | 0.0966573  | 0.176857  |
| 0         | 0.0096745 | 0.0437191 | 0.00980607 | 0.0104749  | 0.0438085 |
| 53.8702   | 41.6713   | 41.4457   | 40.6374    | 49.8498    | 30.593    |
| 10.5481   | 8.454     | 10.0527   | 11.1919    | 11.1929    | 9.16333   |
| 91.38     | 62.2669   | 75.2167   | 81.0938    | 129.207    | 76.9353   |
| 13.4393   | 11.2826   | 12.0644   | 10.9197    | 12.6246    | 10.9143   |
| 61.303    | 52.5223   | 92.3334   | 117.699    | 84.0561    | 86.4719   |
| 22.7282   | 20.3656   | 21.9072   | 24.0996    | 20.5734    | 22.7242   |
| 0.64949   | 0.503774  | 0.612919  | 0.549904   | 0.629368   | 0.877389  |
| 0         | 0         | 0         | 0          | 0          | 0         |
| 0         | 0         | 0         | 0          | 0          | 0         |
| 0.980568  | 0.31053   | 0.518606  | 0.328438   | 0.438549   | 0.259833  |
| 12.7798   | 11.3844   | 10.7838   | 11.4776    | 10.516     | 11.7694   |
| 3.98973   | 2.85657   | 3.45036   | 3.73282    | 3.88253    | 2.63181   |
| 41.6954   | 58.4304   | 30.3635   | 36.3368    | 24.3573    | 21.9526   |

|          |           |           |           |           |           |
|----------|-----------|-----------|-----------|-----------|-----------|
| 0        | 0         | 0         | 0         | 0         | 0         |
| 21.05    | 24.7619   | 25.921    | 26.9581   | 19.3344   | 24.9415   |
| 7.55393  | 8.52554   | 10.0904   | 8.63501   | 8.42256   | 6.80436   |
| 0        | 0.19392   | 0.219081  | 0         | 0         | 0         |
| 24.9573  | 22.6435   | 23.4456   | 26.5715   | 24.2261   | 26.2189   |
| 664.189  | 635.192   | 691.626   | 764.407   | 670.514   | 806.598   |
| 0.188543 | 0.185616  | 0.10485   | 0.196789  | 0.152315  | 0.124167  |
| 0        | 0         | 0.126879  | 0         | 0.121599  | 0         |
| 0        | 0         | 0         | 0         | 0         | 0         |
| 1.23783  | 1.72588   | 1.42284   | 1.22928   | 1.0606    | 1.82179   |
| 0.567152 | 0.0814796 | 0.536845  | 0.523438  | 0.432118  | 0.438584  |
| 0        | 0         | 0         | 0         | 0         | 0         |
| 0.140326 | 0.160753  | 0         | 0.101837  | 0.0217566 | 0.0682434 |
| 3.4525   | 2.37685   | 2.25561   | 1.78279   | 2.43624   | 2.33198   |
| 16.1865  | 14.4019   | 17.623    | 18.2688   | 15.4977   | 16.8808   |
| 0        | 0         | 0         | 0         | 0         | 0         |
| 0        | 0.164042  | 0.185327  | 0.0332546 | 0.142091  | 0.185706  |
| 0        | 0         | 0         | 0         | 0         | 0         |
| 22.9967  | 19.9467   | 22.8009   | 21.3058   | 24.1761   | 23.1439   |
| 7.07405  | 5.92021   | 6.02521   | 6.10272   | 6.48264   | 5.27809   |
| 182.94   | 133.562   | 178.335   | 163.192   | 138.862   | 184.966   |
| 0.27291  | 0.0888174 | 0.180615  | 0.0900253 | 0.0769324 | 0.060328  |
| 0        | 0         | 0         | 0         | 0         | 0         |
| 0.299796 | 0.143099  | 0.484998  | 0.0725224 | 0.309875  | 0.323993  |
| 0        | 0.47534   | 0         | 0.642407  | 0.171555  | 0.179371  |
| 103.768  | 87.479    | 89.9668   | 91.6359   | 108.741   | 81.2483   |
| 0.267365 | 0.179487  | 0.154658  | 0.299343  | 0.141801  | 0.308265  |
| 117.077  | 124.879   | 118.841   | 115.056   | 98.9824   | 123.15    |
| 0.123667 | 0         | 0         | 0         | 0         | 0.100237  |
| 9.15788  | 9.10101   | 9.76778   | 10.9649   | 9.00294   | 9.5536    |
| 33.3582  | 71.3062   | 23.9847   | 86.0032   | 33.0431   | 148.423   |
| 1.99833  | 4.78551   | 1.43792   | 2.49405   | 1.66425   | 0.723498  |
| 13.6156  | 14.7753   | 14.8055   | 13.1766   | 15.8545   | 16.6868   |
| 0.127438 | 0.27373   | 0.0687214 | 0.107898  | 0.0987919 | 0.137724  |
| 19.2652  | 18.9662   | 21.427    | 26.8699   | 24.7356   | 23.504    |
| 36.2913  | 41.8027   | 33.7683   | 41.9352   | 37.6025   | 35.8328   |
| 8.68452  | 8.19814   | 8.51325   | 9.05937   | 6.24017   | 7.78924   |
| 0        | 0         | 0         | 0         | 0         | 0         |
| 23.5007  | 30.8861   | 30.7272   | 28.3858   | 29.3236   | 28.9637   |
| 29.9977  | 35.8935   | 41.1962   | 29.5476   | 31.8458   | 38.6975   |
| 16.6919  | 13.0147   | 15.6465   | 15.8804   | 16.7995   | 17.1416   |
| 0        | 0.0341935 | 0.019315  | 0.0346585 | 0.0185112 | 0         |
| 10.6843  | 14.8323   | 12.1613   | 11.7357   | 8.0101    | 13.3796   |

|           |           |           |           |           |           |
|-----------|-----------|-----------|-----------|-----------|-----------|
| 0         | 0         | 0         | 0         | 0         | 0         |
| 3.6789    | 3.03485   | 3.1376    | 3.68554   | 3.81292   | 2.98187   |
| 0.0321622 | 0.103625  | 0.117071  | 0.168056  | 0         | 0         |
| 0.167373  | 0.219699  | 0.0676922 | 0.101221  | 0.173     | 0.0904409 |
| 112.85    | 113.122   | 138.939   | 132.068   | 131.428   | 91.3591   |
| 13.0176   | 16.0071   | 12.6848   | 11.5487   | 12.9364   | 13.448    |
| 7.12332   | 5.44272   | 5.61869   | 5.80426   | 5.40851   | 6.73947   |
| 0         | 0.0656793 | 0         | 0         | 0         | 0         |
| 5.40089   | 4.31959   | 5.44988   | 5.5319    | 5.71317   | 5.0218    |
| 0         | 0.0217394 | 0         | 0         | 0         | 0         |
| 2.64846   | 1.81724   | 0.624834  | 2.24238   | 1.96758   | 2.10195   |
| 6.24535   | 6.42277   | 6.04371   | 5.35643   | 6.21471   | 6.33218   |
| 2.65706   | 2.01682   | 2.14678   | 2.33428   | 2.05904   | 1.23976   |
| 0         | 0         | 0         | 0         | 0.138362  | 0.289331  |
| 14.2626   | 11.8383   | 11.1762   | 11.4463   | 9.61905   | 13.5413   |
| 3.3248    | 2.80391   | 2.94793   | 2.99312   | 2.55266   | 3.08333   |
| 4.92181   | 3.43798   | 4.32101   | 4.29783   | 4.34281   | 4.24876   |
| 0         | 0         | 0         | 0         | 0         | 0         |
| 3.35914   | 1.5255    | 2.48836   | 2.86441   | 2.0933    | 2.3561    |
| 0         | 0         | 0         | 0         | 0         | 0         |
| 7.34881   | 7.36625   | 7.7276    | 7.22401   | 8.1181    | 7.8517    |
| 4.5544    | 3.40834   | 3.12859   | 4.28515   | 3.28225   | 3.11644   |
| 0.183209  | 0.111935  | 0.310401  | 0.257408  | 0.230084  | 0.287492  |
| 34.3797   | 26.9272   | 33.524    | 33.2138   | 31.6206   | 33.0678   |
| 13.6314   | 16.0904   | 18.2019   | 15.6801   | 15.1967   | 13.0544   |
| 0         | 0         | 0         | 0         | 0         | 0         |
| 3.15416   | 2.65411   | 3.2089    | 3.75212   | 2.72244   | 3.24181   |
| 12.6343   | 7.60307   | 11.0888   | 9.8872    | 7.90759   | 9.99421   |
| 5.14704   | 3.33036   | 5.404     | 5.27598   | 2.61493   | 3.5466    |
| 2.41131   | 2.36691   | 2.7684    | 2.56845   | 1.56779   | 1.85988   |
| 96.1797   | 104.308   | 99.5219   | 96.5086   | 101.549   | 82.4222   |
| 5.30938   | 2.19637   | 3.43572   | 2.65437   | 3.93298   | 4.2078    |
| 2.16763   | 1.6094    | 1.1905    | 1.59245   | 0.943998  | 1.60512   |
| 13.9975   | 12.5563   | 15.5968   | 14.3747   | 13.666    | 14.6545   |
| 44.5089   | 33.4777   | 39.5552   | 43.7483   | 42.0078   | 32.0418   |
| 0.0375084 | 0         | 0.0606796 | 0.0272205 | 0.0581542 | 0.121607  |
| 76.1832   | 63.0559   | 70.906    | 74.0773   | 90.0031   | 65.2672   |
| 96.006    | 146.101   | 148.77    | 107.119   | 122.927   | 105.795   |
| 5.16395   | 4.15187   | 2.29393   | 2.30383   | 1.83752   | 2.36724   |
| 0.107719  | 0.153392  | 0.65841   | 1.09356   | 0.658355  | 0.520424  |
| 33.4382   | 43.8395   | 49.5035   | 37.0618   | 40.8551   | 30.0893   |
| 0.193836  | 0.117097  | 0.183738  | 0.0263747 | 0.176091  | 0.148483  |
| 12.2244   | 13.6307   | 13.8713   | 13.9974   | 11.6547   | 13.2994   |

|           |           |           |           |           |           |
|-----------|-----------|-----------|-----------|-----------|-----------|
| 3.78099   | 2.28606   | 2.5646    | 2.39339   | 3.07133   | 2.4234    |
| 0.0524222 | 0.0187667 | 0.0636049 | 0.0190219 | 0.0203193 | 0         |
| 0.900793  | 1.19968   | 0.836441  | 1.21405   | 0.698309  | 0.93873   |
| 0         | 0         | 0         | 0         | 0         | 0         |
| 0         | 0         | 0         | 0         | 0         | 0         |
| 4.58673   | 6.1532    | 3.71011   | 5.46603   | 2.58257   | 2.19149   |
| 12.4055   | 11.4387   | 10.219    | 10.8421   | 10.6348   | 10.4743   |
| 3.3546    | 3.38556   | 3.67329   | 3.55462   | 3.472     | 3.44216   |
| 0         | 0         | 0         | 0         | 0         | 0         |
| 1.17338   | 0.926995  | 0.920423  | 0.850402  | 0.990517  | 1.09374   |
| 19.275    | 15.7575   | 15.7113   | 18.2844   | 19.0249   | 17.5563   |
| 48.4721   | 48.9778   | 53.6018   | 50.5204   | 46.9134   | 48.9655   |
| 10.9057   | 10.4696   | 8.76468   | 8.57613   | 11.3902   | 8.64049   |
| 34.1314   | 32.6957   | 30.7003   | 33.7049   | 24.7273   | 27.7652   |
| 0.162944  | 0.0720145 | 0.0585767 | 0.0953795 | 0.101885  | 0.157835  |
| 14.7871   | 11.8861   | 14.6734   | 14.0424   | 15.6678   | 12.7875   |
| 0.723968  | 0.721179  | 0.611064  | 0.41118   | 0.463626  | 0.306157  |
| 1.85118   | 1.11503   | 2.89969   | 1.17284   | 3.18903   | 2.42929   |
| 33.0616   | 32.9683   | 33.6593   | 53.424    | 42.0053   | 36.6739   |
| 0.138588  | 0.429981  | 0.0747339 | 0.469353  | 0.286495  | 0.187217  |
| 0         | 0         | 0         | 0         | 0         | 0         |
| 15.9618   | 11.7792   | 16.3633   | 14.3661   | 17.0471   | 20.4977   |
| 37.9117   | 59.524    | 69.1153   | 38.2671   | 38.1919   | 47.4189   |
| 0         | 0         | 0         | 0         | 0         | 0         |
| 0         | 0         | 0         | 0         | 0         | 0.0552066 |
| 2.49501   | 1.59603   | 1.70386   | 2.67149   | 2.55248   | 1.95599   |
| 11.9984   | 12.6793   | 11.9903   | 11.0882   | 9.34405   | 10.5637   |
| 0.464827  | 0.350323  | 0.336411  | 0.656912  | 0.493098  | 0.713857  |
| 0         | 0         | 0         | 0         | 0         | 0         |
| 80.791    | 102.015   | 91.3813   | 87.1519   | 90.5511   | 79.5818   |
| 18.0883   | 18.1099   | 16.6357   | 15.8939   | 15.9948   | 14.7278   |
| 4.03761   | 3.45032   | 3.41122   | 3.99024   | 4.10355   | 4.11741   |
| 0.0364163 | 0.0782202 | 0         | 0.079284  | 0.0846915 | 0.0590333 |
| 13.3338   | 9.72577   | 11.2615   | 11.6614   | 10.2145   | 12.6786   |
| 13.5019   | 10.7263   | 11.3963   | 12.3207   | 13.3248   | 12.4283   |
| 8.00731   | 6.24803   | 5.49476   | 6.61576   | 4.29722   | 6.37083   |
| 0.925281  | 0.243895  | 0.355496  | 0.353159  | 0.414971  | 0.138874  |
| 0         | 0         | 0         | 0         | 0         | 0         |
| 0         | 0         | 0         | 0         | 0         | 0         |
| 1.96031   | 2.23821   | 2.34131   | 1.95505   | 1.44452   | 2.12871   |
| 0.759869  | 0.336794  | 0.585374  | 0.446412  | 0.617113  | 0.527914  |
| 1.59021   | 1.29115   | 1.3924    | 1.20166   | 0.95316   | 1.47498   |
| 2.28843   | 2.45771   | 2.64438   | 1.66075   | 3.54805   | 3.7097    |

|           |           |           |           |           |          |
|-----------|-----------|-----------|-----------|-----------|----------|
| 0.113492  | 0         | 0.0918016 | 0.288272  | 0.131972  | 0.137984 |
| 27.651    | 26.4752   | 28.5879   | 27.6623   | 28.1959   | 26.1334  |
| 0         | 0.0280381 | 0         | 0         | 0         | 0        |
| 2.72657   | 1.88439   | 2.35862   | 2.58333   | 2.2311    | 2.85455  |
| 0         | 0         | 0         | 0         | 0         | 0        |
| 10.6121   | 7.38777   | 9.1894    | 8.64345   | 9.5782    | 10.076   |
| 0.166784  | 0.597071  | 0.134908  | 0.605191  | 0.387881  | 0.540736 |
| 0         | 0         | 0         | 0         | 0         | 0        |
| 0.0654328 | 0         | 0.0882121 | 0.0949715 | 0.0507245 | 0.035357 |
| 2.76803   | 2.47806   | 2.15951   | 2.51954   | 2.0524    | 2.42003  |
| 17.5098   | 27.2391   | 20.1258   | 24.5972   | 13.4395   | 20.5298  |
| 29.0953   | 24.1147   | 29.936    | 34.6792   | 36.6175   | 33.3743  |
| 11.0115   | 8.22271   | 9.71256   | 9.79817   | 10.9731   | 11.4529  |
| 38.6952   | 40.1489   | 29.6337   | 34.5446   | 25.4062   | 24.9631  |
| 12.0498   | 11.7949   | 13.1841   | 12.6735   | 10.4016   | 11.4889  |
| 5.40171   | 4.64103   | 6.11707   | 4.41013   | 4.60624   | 4.48773  |
| 33.4987   | 35.2324   | 35.6579   | 31.1742   | 42.3544   | 42.5091  |
| 0.406983  | 0.325015  | 0.443155  | 0.374874  | 0.266961  | 0.431373 |
| 3.23207   | 2.00555   | 4.29916   | 2.86681   | 2.28283   | 3.84223  |
| 0.0252083 | 0.0360974 | 0.101953  | 0.0731765 | 0.136793  | 0.122593 |
| 0.305616  | 0.218816  | 0.247207  | 0         | 1.18459   | 0        |
| 0.658592  | 5.29172   | 5.32722   | 0.63727   | 5.55933   | 9.84585  |
| 2.2289    | 3.50308   | 4.17748   | 2.56441   | 2.65503   | 3.43694  |
| 5.34077   | 3.23104   | 3.58329   | 3.78576   | 3.46626   | 3.0537   |
| 0.0666354 | 0.286258  | 0.0539    | 0.193434  | 0.0516568 | 0.162031 |
| 6.80404   | 6.95776   | 7.2745    | 7.21241   | 4.31003   | 7.13618  |
| 0.873099  | 0.392519  | 0.558416  | 0.663095  | 0.629619  | 0.921625 |
| 4.03888   | 3.3138    | 3.78792   | 3.21628   | 2.87714   | 4.15842  |
| 1.07089   | 0.894528  | 1.73245   | 2.46102   | 1.24526   | 1.30199  |
| 5.91099   | 5.4834    | 5.52965   | 5.37146   | 5.43898   | 5.39522  |
| 39.8406   | 32.824    | 38.4436   | 41.2068   | 46.156    | 41.1973  |
| 15.9215   | 17.6587   | 17.9103   | 18.8219   | 16.4449   | 16.7888  |
| 0.207741  | 0.148738  | 0.0840186 | 0.150761  | 0.322088  | 0.168381 |
| 0         | 0         | 0         | 0         | 0         | 0        |
| 163.188   | 160.21    | 227.391   | 101.88    | 114.48    | 147.022  |
| 0         | 0.215101  | 0.0347157 | 0.155733  | 0         | 0        |
| 23.1106   | 19.1174   | 23.1181   | 24.344    | 25.301    | 24.1949  |
| 2.59606   | 1.41677   | 1.41646   | 1.7029    | 1.69009   | 1.62872  |
| 0         | 0         | 0.0136426 | 0         | 0         | 0        |
| 1.38472   | 0.991431  | 1.5681    | 1.2059    | 1.50284   | 0.448944 |
| 7.90686   | 5.70878   | 7.57659   | 5.92386   | 5.63718   | 8.4375   |
| 0         | 0         | 0         | 0         | 0         | 0        |
| 0.726108  | 0.441256  | 0.498509  | 0.328733  | 0.351155  | 0.280984 |

|           |           |           |           |           |           |
|-----------|-----------|-----------|-----------|-----------|-----------|
| 1.74613   | 1.17666   | 0.581582  | 1.34174   | 1.27401   | 1.58181   |
| 5.16917   | 4.16366   | 5.32706   | 4.6892    | 3.8531    | 4.81423   |
| 0         | 0         | 0         | 0         | 0         | 0         |
| 0         | 0         | 0         | 0         | 0         | 0         |
| 3.99224   | 2.24186   | 2.69104   | 3.35171   | 3.61066   | 3.0455    |
| 54.5536   | 56.0419   | 43.8321   | 54.9504   | 61.9039   | 41.1615   |
| 0         | 0         | 0         | 0         | 0         | 0         |
| 0         | 0         | 0         | 0         | 0         | 0         |
| 1.94508   | 2.10609   | 1.43285   | 1.23088   | 1.27494   | 1.67732   |
| 3.61236   | 4.14526   | 3.69512   | 4.24017   | 3.62367   | 3.74572   |
| 4.65269   | 2.32785   | 3.35538   | 3.33586   | 2.30316   | 3.40767   |
| 12.1019   | 13.0155   | 13.6091   | 12.2024   | 12.2566   | 14.9368   |
| 24.3181   | 23.9113   | 24.8511   | 24.6221   | 21.1539   | 23.7889   |
| 64.1917   | 82.8336   | 73.8718   | 68.8226   | 65.5804   | 66.0671   |
| 8.01625   | 8.86151   | 10.902    | 11.8269   | 9.90194   | 7.99685   |
| 0         | 0.0413607 | 0.0467272 | 0.0419232 | 0         | 0         |
| 112.174   | 103.402   | 123.184   | 130.322   | 133.572   | 99.0162   |
| 0.469015  | 0.723274  | 0.554474  | 0.41892   | 0.559366  | 0.526365  |
| 16.7705   | 14.1021   | 16.23     | 14.9459   | 16.9296   | 14.8441   |
| 10.7854   | 8.86667   | 8.91784   | 9.14824   | 10.4655   | 10.2948   |
| 0         | 0         | 0         | 0         | 0         | 0         |
| 25.7767   | 23.8603   | 24.98     | 25.9153   | 30.8696   | 25.3157   |
| 0.0877242 | 0.0314044 | 0         | 0.0318315 | 0         | 0         |
| 0.466606  | 0.779523  | 0         | 1.3545    | 3.25664   | 0.88772   |
| 21.0502   | 25.1245   | 26.7032   | 22.5136   | 19.7638   | 24.1949   |
| 0         | 0         | 0         | 0.0312873 | 0.0167106 | 0.0174719 |
| 1.43525   | 1.6628    | 1.36918   | 1.5324    | 1.19843   | 1.23574   |
| 0         | 0         | 0.310646  | 0.185806  | 0         | 0.10376   |
| 585.857   | 1524.84   | 1157.33   | 1073.89   | 1885.13   | 543.189   |
| 11.2926   | 9.08777   | 10.3654   | 10.7135   | 9.53287   | 10.9787   |
| 20.7066   | 23.2464   | 21.9749   | 20.7976   | 22.7725   | 19.6925   |
| 0.139459  | 0.309613  | 0.348992  | 0.541225  | 0.34468   | 0.509193  |
| 0         | 0         | 0         | 0         | 0         | 0         |
| 0         | 0         | 0         | 0         | 0         | 0         |
| 88.8466   | 97.523    | 100.011   | 85.7068   | 102.159   | 97.4884   |
| 2.29E-29  | 0.537405  | 1.05E-05  | 5.05E-09  | 8.97E-15  | 2.25E-10  |
| 25.8714   | 19.0904   | 27.7668   | 23.7904   | 22.9188   | 27.2388   |
| 30.7304   | 44.0047   | 62.9197   | 25.0893   | 26.8005   | 24.908    |
| 9.36954   | 8.66503   | 9.4538    | 9.03078   | 9.40083   | 9.17648   |
| 1.2479    | 0.763775  | 1.12337   | 0.920231  | 1.06101   | 0.603616  |
| 13.2511   | 10.9127   | 13.569    | 13.2629   | 11.3538   | 12.383    |
| 6.68401   | 5.64133   | 6.48071   | 5.81442   | 7.0803    | 6.9245    |
| 0.166834  | 0.103202  | 0.12036   | 0.0408018 | 0.0231791 | 0.0681613 |

|           |           |           |           |           |           |
|-----------|-----------|-----------|-----------|-----------|-----------|
| 4.42727   | 4.47507   | 6.10898   | 5.66991   | 5.38372   | 5.43545   |
| 0.050122  | 0.0199369 | 0         | 0         | 0         | 0         |
| 0         | 0         | 0         | 0         | 0         | 0         |
| 13.7643   | 15.0834   | 13.3435   | 13.7063   | 11.5256   | 10.4539   |
| 33.0644   | 21.4335   | 20.5793   | 23.3223   | 27.2103   | 21.7582   |
| 0         | 0         | 0         | 0         | 0         | 0         |
| 0         | 0.0951215 | 0         | 0         | 0         | 0         |
| 16.8133   | 14.4035   | 17.4918   | 16.7345   | 17.8802   | 17.1638   |
| 3.19308   | 2.12713   | 2.94987   | 3.12583   | 2.91132   | 3.49825   |
| 13.3982   | 17.7105   | 16.4371   | 15.9648   | 12.8759   | 13.0654   |
| 91.7677   | 71.2013   | 54.3997   | 83.6832   | 64.5421   | 66.0579   |
| 16.763    | 17.8691   | 20.0868   | 20.2828   | 19.7581   | 21.5421   |
| 0         | 0.162341  | 0.183405  | 0.740471  | 0.703089  | 0         |
| 26.3714   | 30.6715   | 30.4205   | 28.3066   | 28.3467   | 30.7728   |
| 31.8238   | 40.464    | 39.8703   | 30.8643   | 35.3517   | 35.0501   |
| 15.3727   | 10.0426   | 8.92881   | 8.85408   | 12.1245   | 15.1136   |
| 20.5797   | 17.1959   | 18.74     | 18.6493   | 14.5369   | 16.0052   |
| 3.22879   | 4.1998    | 3.62393   | 3.69703   | 2.08838   | 3.33405   |
| 23.6163   | 20.8139   | 20.4688   | 14.1249   | 11.2679   | 18.9623   |
| 39.4163   | 0         | 0         | 85.8154   | 30.5561   | 63.8965   |
| 89.6185   | 110.44    | 108.732   | 104.869   | 119.711   | 84.9304   |
| 0.475595  | 0.768453  | 0.380668  | 1.09869   | 0.519417  | 0.325426  |
| 0.900893  | 1.43338   | 0.809682  | 1.08966   | 0.465591  | 0.892472  |
| 3.74359   | 3.23218   | 3.16171   | 3.95533   | 2.81674   | 3.43591   |
| 6.18182   | 5.81686   | 6.74948   | 5.14235   | 4.79224   | 5.43637   |
| 0         | 0         | 0         | 0         | 0.0557331 | 0         |
| 1.70037   | 1.4098    | 0.257886  | 1.79484   | 0.804048  | 1.16286   |
| 0.0721749 | 0.0516759 | 0         | 0.0523787 | 0.223805  | 0.117     |
| 14.7486   | 11.6799   | 13.1147   | 15.6655   | 15.5337   | 15.1544   |
| 16.309    | 11.5052   | 14.8216   | 16.7441   | 17.3655   | 17.0291   |
| 0.1685    | 0.0344693 | 0.0292063 | 0.122283  | 0.0466513 | 0.0487767 |
| 34.5709   | 32.6667   | 32.5984   | 33.8591   | 33.4658   | 31.3249   |
| 0.863417  | 0.668665  | 0.247903  | 0.819949  | 0.533897  | 0.461491  |
| 0.881317  | 0.688371  | 0.864097  | 0.852784  | 0.910948  | 1.10398   |
| 0         | 0         | 0         | 0         | 0         | 0         |
| 101.877   | 111.412   | 84.9116   | 98.0121   | 84.6211   | 78.225    |
| 6.08045   | 5.47057   | 5.32139   | 5.93947   | 5.63344   | 5.79834   |
| 0.506242  | 0.271844  | 0.307116  | 0.33065   | 0.117734  | 0.348777  |
| 0         | 0         | 0         | 0         | 0         | 0         |
| 12.3071   | 17.1564   | 14.6441   | 9.91359   | 8.76099   | 11.843    |
| 16.6647   | 16.5784   | 16.3586   | 18.9309   | 15.3856   | 14.8648   |
| 0.124956  | 0.1342    | 0.084229  | 0.0906832 | 0.0645788 | 0.202563  |
| 0.216733  | 0.0221681 | 0         | 0.0224696 | 0.192017  | 0.150574  |

|           |           |           |            |           |           |
|-----------|-----------|-----------|------------|-----------|-----------|
| 0.362919  | 0.243603  | 0.27521   | 0.395065   | 0.492346  | 0.312543  |
| 0         | 0         | 0         | 0          | 0         | 0         |
| 1.15902   | 0.829839  | 2.06899   | 1.39221    | 1.30127   | 2.13801   |
| 21.0851   | 18.6219   | 22.7083   | 22.5925    | 23.5178   | 20.9524   |
| 0         | 0         | 0         | 0          | 0.141791  | 0.148251  |
| 0.061422  | 0.131931  | 0         | 0.044575   | 0         | 0.0497846 |
| 18.1901   | 13.7748   | 17.529    | 17.9068    | 21.0255   | 22.0479   |
| 0         | 0         | 0         | 0          | 0         | 0         |
| 0         | 0         | 0         | 0          | 0         | 0         |
| 138.265   | 147.41    | 127.629   | 142.12     | 134.935   | 118.733   |
| 0.32891   | 0.647607  | 0.59861   | 1.19348    | 0.764929  | 0.399889  |
| 0.220639  | 0.631892  | 0.35694   | 0.320243   | 0.513128  | 0.536505  |
| 18.6895   | 19.7277   | 20.5815   | 18.2131    | 17.8947   | 20.8257   |
| 2.08847   | 1.85301   | 1.76882   | 2.16351    | 2.24123   | 2.22385   |
| 0         | 0         | 0.0340232 | 0          | 0         | 0.0681855 |
| 22.6661   | 20.9055   | 21.1358   | 21.4658    | 22.3624   | 21.7556   |
| 1.19396   | 0.873562  | 0.986251  | 1.05506    | 1.72605   | 1.50917   |
| 7.34767   | 7.25006   | 5.52118   | 6.08325    | 6.28219   | 6.88051   |
| 0         | 0         | 0         | 0          | 0         | 0         |
| 17.1456   | 14.9601   | 16.5358   | 15.7443    | 18.3213   | 17.2249   |
| 0         | 0.0962011 | 0.0543416 | 0.292528   | 0.20832   | 0.108905  |
| 0.0680055 | 0.0486906 | 0.146689  | 0.0164509  | 0.0702919 | 0.0918679 |
| 0         | 0         | 0         | 0          | 0         | 0         |
| 0         | 0         | 0         | 0.00751241 | 0         | 0         |
| 1.58207   | 0.534546  | 1.46662   | 0.812724   | 0.689012  | 0.763627  |
| 0.104164  | 0         | 0.0987376 | 0.185548   | 0.198204  | 0.238673  |
| 0         | 0.0319166 | 0.0721156 | 0          | 4.04319   | 0.0361315 |
| 7.34078   | 6.50932   | 7.37712   | 6.24033    | 7.44456   | 6.56002   |
| 0.113009  | 0.102035  | 0.0677627 | 0.0261088  | 0.0671537 | 0.139554  |
| 4.90927   | 3.63477   | 4.4373    | 4.03508    | 4.13731   | 4.08464   |
| 0.052161  | 0.0268764 | 0.0466303 | 0.0511677  | 0.0403588 | 0.0397786 |
| 0.146254  | 0.104715  | 0.059151  | 0.0176899  | 0.0377928 | 0.0592719 |
| 7.28804   | 5.9544    | 5.60582   | 5.99211    | 5.34941   | 5.49648   |
| 32.6903   | 31.739    | 38.3046   | 34.5766    | 32.8425   | 35.1442   |
| 5.11477   | 4.99093   | 4.32926   | 4.6516     | 4.29965   | 5.5101    |
| 14.4903   | 12.195    | 11.4169   | 13.3345    | 10.8893   | 12.3256   |
| 1.10189   | 1.97359   | 1.92973   | 1.33355    | 2.42094   | 0.746881  |
| 10.5745   | 7.62016   | 9.25723   | 9.28063    | 8.63461   | 11.6111   |
| 12.8413   | 9.63191   | 9.76876   | 7.37765    | 9.00667   | 11.4615   |
| 13.9485   | 13.9488   | 12.1624   | 12.2275    | 11.316    | 12.4502   |
| 18.0092   | 14.8777   | 16.0778   | 23.1336    | 21.8355   | 17.9652   |
| 0.281164  | 0         | 0.454856  | 0.204046   | 0.435926  | 0         |
| 69.2631   | 61.8142   | 85.496    | 54.3543    | 61.1684   | 49.3797   |



|            |            |            |            |           |           |
|------------|------------|------------|------------|-----------|-----------|
| 0.00749285 | 0.043812   | 0.145735   | 0.163325   | 0.0580857 | 0.0614912 |
| 0          | 0          | 0          | 0          | 0         | 0         |
| 0          | 0          | 0          | 0          | 0         | 0         |
| 0.872276   | 0.88296    | 1.02185    | 1.2224     | 0.652884  | 0.755768  |
| 5.70343    | 6.61145    | 7.15197    | 6.87657    | 5.49749   | 6.1393    |
| 44.1573    | 39.7051    | 38.0598    | 43.4795    | 50.2367   | 44.3219   |
| 0.0299442  | 0.0643185  | 0.0242213  | 0.0217311  | 0.0464264 | 0.0728124 |
| 0.966377   | 0.425789   | 0.871877   | 0.64737    | 0.922031  | 1.47618   |
| 2.36291    | 3.15803    | 2.29357    | 2.40073    | 2.80871   | 1.78754   |
| 0          | 0          | 0          | 0          | 0         | 0         |
| 224.274    | 231.78     | 254.235    | 259.36     | 243.369   | 242.549   |
| 0          | 0          | 0          | 0          | 0         | 0         |
| 5.14252    | 6.31976    | 4.71844    | 3.95483    | 5.23608   | 4.16819   |
| 4.86286    | 4.82538    | 6.70694    | 5.40973    | 4.70214   | 6.4558    |
| 0          | 0          | 0          | 0          | 0         | 0         |
| 3.81689    | 2.83905    | 3.42179    | 2.89855    | 3.43361   | 4.40317   |
| 0          | 0          | 0          | 0          | 0         | 0         |
| 0.510085   | 0.364202   | 0.51218    | 0.918436   | 0.302404  | 0.617077  |
| 20.3627    | 23.8869    | 25.2182    | 23.9613    | 22.4742   | 18.556    |
| 0          | 0.0168945  | 0          | 0          | 0         | 0.0191256 |
| 1.04704    | 0.623841   | 0.671639   | 0.662771   | 0.566873  | 0.673095  |
| 12.3289    | 8.3882     | 9.18285    | 12.6414    | 6.09861   | 8.60063   |
| 31.7867    | 28.9338    | 32.2053    | 32.0041    | 31.4958   | 31.0841   |
| 0          | 0.103166   | 0.077701   | 0          | 0.0744672 | 0.0778599 |
| 12.5321    | 11.2321    | 9.79616    | 12.3902    | 8.8111    | 10.4362   |
| 0.04588    | 0          | 0          | 0.033296   | 0         | 0         |
| 8.24972    | 8.57738    | 6.96315    | 7.3405     | 7.09042   | 8.66354   |
| 3.52018    | 3.91795    | 4.77225    | 3.99511    | 3.05194   | 3.67095   |
| 0          | 0          | 0          | 0          | 0         | 0         |
| 85.1937    | 78.1309    | 73.8261    | 75.962     | 76.6369   | 60.9808   |
| 0          | 0          | 0.00953189 | 0          | 0         | 0.0191028 |
| 27.6641    | 28.2055    | 24.5172    | 26.1036    | 23.5538   | 25.0915   |
| 0          | 0.00380838 | 0          | 0.00772034 | 0         | 0.0306582 |
| 0          | 0          | 0          | 0          | 0         | 0         |
| 4.938      | 2.72963    | 4.19984    | 3.7417     | 5.06649   | 3.61983   |
| 7.30499    | 4.01312    | 6.05848    | 4.94206    | 5.6036    | 4.11876   |
| 15.4818    | 15.7421    | 14.2593    | 14.0679    | 12.153    | 12.2322   |
| 4.65981    | 3.33686    | 3.72874    | 4.06415    | 3.47255   | 3.85858   |
| 11.7994    | 9.71298    | 12.7948    | 11.3424    | 12.3564   | 12.2526   |
| 1.98257    | 3.40677    | 2.17112    | 2.58987    | 2.03347   | 1.85417   |
| 0          | 0          | 0          | 0          | 0         | 0         |
| 0.194409   | 0.100219   | 0.113222   | 0.101582   | 0.128605  | 0.0252118 |
| 16.0674    | 19.2923    | 13.8307    | 13.7607    | 15.3181   | 19.9526   |

|           |           |           |           |           |           |
|-----------|-----------|-----------|-----------|-----------|-----------|
| 1.21175   | 0.877195  | 0.738115  | 0.983403  | 1.11806   | 1.01357   |
| 0         | 0         | 0         | 0         | 0         | 0         |
| 0.500483  | 0.0462076 | 0.0522024 | 0.292725  | 0.398325  | 0.326936  |
| 0         | 0         | 0         | 0         | 0         | 0         |
| 0.022537  | 0.016136  | 0.0546891 | 0.032711  | 0         | 0.0365339 |
| 0.128945  | 0.276967  | 0.338979  | 0.093578  | 0.187426  | 0.222094  |
| 17.3341   | 15.2099   | 14.2598   | 18.0398   | 20.2422   | 13.9303   |
| 40.8579   | 46.2753   | 43.1311   | 45.246    | 33.132    | 47.9137   |
| 7.94935   | 9.71734   | 8.50808   | 9.77914   | 8.75521   | 9.38981   |
| 29.46     | 25.8044   | 30.2394   | 31.4486   | 24.0361   | 27.085    |
| 0.547623  | 0.377566  | 0.492179  | 0.294385  | 0.251571  | 0.476745  |
| 2.12184   | 1.49894   | 2.26553   | 1.51932   | 2.21511   | 2.27016   |
| 8.84853   | 6.86332   | 9.15976   | 7.88358   | 7.92111   | 8.97571   |
| 0         | 0         | 0         | 0.0768958 | 0         | 0         |
| 6.55295   | 4.60899   | 3.46095   | 4.78361   | 3.01809   | 4.28035   |
| 0         | 0.0636992 | 0         | 0.0645655 | 0         | 0         |
| 11.2745   | 9.11205   | 10.1952   | 10.3321   | 10.9112   | 4.46688   |
| 7.22571   | 5.51917   | 6.34301   | 6.00502   | 6.8018    | 6.72033   |
| 19.1842   | 22.1517   | 20.8644   | 16.9094   | 16.5214   | 18.7159   |
| 0         | 0         | 0         | 0         | 0         | 0         |
| 0.25155   | 0.450263  | 0.305211  | 0.547664  | 0.731271  | 0.254862  |
| 0.0600232 | 0         | 0.194206  | 0.304919  | 0.0930618 | 0.0486508 |
| 0.0997968 | 0.357263  | 0.322895  | 0.217273  | 0.154728  | 0.242666  |
| 5.12517   | 7.40343   | 6.18211   | 5.6444    | 5.5066    | 5.97611   |
| 4.53164   | 3.72973   | 3.90535   | 2.98134   | 3.80848   | 3.1238    |
| 9.2932    | 9.15953   | 10.9637   | 10.3316   | 15.4661   | 8.06934   |
| 16.5      | 13.2235   | 14.818    | 15.4466   | 16.2857   | 17.9857   |
| 302.212   | 682.81    | 370.378   | 419.301   | 289.711   | 759.702   |
| 75.5337   | 56.1355   | 62.4657   | 72.7532   | 98.4811   | 45.5578   |
| 3.11996   | 2.29111   | 1.42361   | 1.39336   | 0.496132  | 1.62105   |
| 4.57092   | 3.50594   | 4.73033   | 4.18667   | 3.93721   | 5.67893   |
| 11.7606   | 9.84152   | 11.9747   | 11.6224   | 9.83506   | 11.9274   |
| 16.6951   | 9.69667   | 13.7832   | 12.5448   | 11.1479   | 5.02956   |
| 0         | 0         | 0         | 0         | 0         | 0         |
| 0.0340469 | 0.109697  | 0.146881  | 0.250176  | 0.397941  | 0.279414  |
| 0.393696  | 0.1072    | 0.160378  | 0.21792   | 0.385929  | 0.715587  |
| 0.0814771 | 0.116672  | 0.0329526 | 0.0591294 | 0.0631623 | 0.0990599 |
| 9.24378   | 7.497     | 9.02119   | 8.29179   | 7.82378   | 9.55533   |
| 0         | 0         | 0         | 0         | 0         | 0         |
| 4.30448   | 1.09359   | 3.93107   | 3.12384   | 2.47576   | 3.03874   |
| 0         | 0         | 0         | 0         | 0         | 0         |
| 12.6018   | 13.6138   | 14.9291   | 12.1803   | 8.6452    | 9.44583   |
| 19.2119   | 16.4179   | 17.1351   | 17.8482   | 20.02     | 14.613    |

|           |           |           |           |           |          |
|-----------|-----------|-----------|-----------|-----------|----------|
| 0         | 0         | 0         | 0         | 0         | 0        |
| 81.1577   | 91.7107   | 81.4755   | 71.4137   | 72.0344   | 74.3659  |
| 3.33447   | 3.65135   | 4.12511   | 3.27396   | 1.82466   | 2.78219  |
| 0         | 0         | 4.51558   | 0         | 2.16382   | 0        |
| 0         | 0         | 0         | 0         | 1.82486   | 0        |
| 5.96822   | 4.0848    | 3.84945   | 5.00766   | 3.04644   | 3.37877  |
| 0         | 0.0511622 | 0.115601  | 0.25929   | 0.193882  | 0.115837 |
| 32.2851   | 53.9747   | 32.4258   | 25.5385   | 27.7392   | 31.8815  |
| 2.45135   | 2.42296   | 2.35071   | 2.49436   | 1.57815   | 2.25314  |
| 0.12249   | 0         | 0.09908   | 0         | 0         | 0        |
| 12.9059   | 13.4741   | 10.0976   | 13.1465   | 18.1906   | 18.2966  |
| 0.0438499 | 0.0313957 | 0         | 0.0318227 | 0.0679862 | 0.159938 |
| 1.61961   | 2.78306   | 3.66819   | 1.09702   | 0.753326  | 1.0502   |
| 0         | 0         | 0         | 0         | 0         | 0        |
| 0.0147757 | 0         | 0.0119517 | 0         | 0         | 0        |
| 13.5387   | 11.3139   | 12.4537   | 13.5057   | 10.1609   | 12.3891  |
| 147.903   | 130.288   | 157.238   | 147.665   | 187.149   | 141.339  |
| 61.6052   | 64.6483   | 52.4771   | 60.5445   | 49.2765   | 54.7102  |
| 25.3814   | 26.48     | 33.2242   | 36.0439   | 19.9292   | 26.6577  |
| 13.0852   | 15.6715   | 12.1745   | 13.5764   | 13.2145   | 13.0366  |
| 80.6113   | 62.1653   | 77.2747   | 74.2035   | 72.7291   | 75.4865  |
| 1.65613   | 1.50915   | 1.33961   | 1.49325   | 1.47838   | 1.99319  |
| 0.403174  | 0.428278  | 0.510137  | 0.448254  | 0.750953  | 0.81678  |
| 12.8677   | 11.473    | 9.99488   | 9.51105   | 8.62619   | 7.91314  |
| 0         | 0         | 0         | 0         | 0.11207   | 0.117176 |
| 1.91853   | 2.842     | 2.1405    | 2.52857   | 1.79499   | 2.55597  |
| 25.2326   | 28.3028   | 28.906    | 24.0367   | 21.2896   | 27.5171  |
| 0.0897844 | 0         | 0         | 0.0868775 | 0         | 0        |
| 21.1058   | 17.1014   | 13.0813   | 17.4761   | 12.0434   | 14.4451  |
| 0         | 0         | 0         | 0         | 0         | 0        |
| 0         | 0         | 0         | 0         | 0         | 0        |
| 82.1276   | 85.8186   | 75.947    | 81.6699   | 75.8835   | 68.0063  |
| 0         | 0         | 1.81607   | 1.08624   | 1.74049   | 0.606596 |
| 1.78087   | 1.04324   | 1.22225   | 1.33158   | 0.753033  | 1.13771  |
| 19.3811   | 15.6657   | 17.5858   | 16.5572   | 13.6824   | 16.2064  |
| 0         | 0         | 0         | 0         | 0         | 0        |
| 0         | 0         | 0         | 0         | 0         | 0        |
| 9.99204   | 7.4314    | 7.45582   | 8.1227    | 10.0278   | 9.35453  |
| 55.1927   | 48.3483   | 56.1687   | 44.8917   | 74.7029   | 25.0892  |
| 0         | 0         | 0         | 0         | 0         | 0        |
| 62.0192   | 58.6639   | 52.1546   | 71.0808   | 64.241    | 51.101   |
| 4.25223   | 3.14441   | 4.22191   | 3.84656   | 3.28107   | 4.24971  |
| 0         | 0.039067  | 0         | 0         | 0         | 0        |

|          |           |          |           |          |           |
|----------|-----------|----------|-----------|----------|-----------|
| 61.9555  | 59.7916   | 62.3751  | 64.558    | 55.3421  | 61.2761   |
| 1.93772  | 0.866801  | 0.966447 | 2.66907   | 5.12312  | 5.21695   |
| 0        | 0.0391249 | 0        | 0         | 0        | 0         |
| 74.5646  | 91.5911   | 86.9964  | 82.7944   | 88.4897  | 75.3886   |
| 5.976    | 4.8975    | 5.0336   | 6.30534   | 6.85403  | 6.36488   |
| 3.77024  | 4.70206   | 3.35529  | 3.41808   | 3.325    | 3.70548   |
| 0        | 0.244084  | 0        | 0         | 0        | 0         |
| 5.10567  | 5.52737   | 2.95915  | 4.58666   | 3.84175  | 4.28963   |
| 0        | 0         | 0        | 0.567768  | 0.606493 | 0.634124  |
| 0.147449 | 0.105571  | 0.198781 | 0.0356688 | 0.114305 | 0.0796748 |
| 6.03784  | 5.19171   | 6.00555  | 5.47197   | 5.39728  | 5.5261    |
| 15.7166  | 13.9603   | 16.1489  | 19.2567   | 17.8447  | 16.9488   |
| 0        | 0         | 0        | 0         | 0        | 0         |
| 0.747433 | 0.377751  | 0.497892 | 0.60624   | 0.47717  | 0.285091  |
| 0.708182 | 2.02818   | 2.48228  | 2.14142   | 1.55548  | 0.574005  |
| 1.36551  | 2.40343   | 2.12756  | 1.53104   | 1.93413  | 2.71938   |
| 3.36034  | 3.21921   | 2.81382  | 2.97104   | 2.84347  | 3.52926   |
| 0        | 0.0552995 | 0        | 0         | 0        | 0         |
| 0.41986  | 0.581183  | 0.543386 | 0.507834  | 0.455675 | 0.589872  |
| 4.45013  | 8.37377   | 8.0472   | 5.20162   | 5.75687  | 5.09627   |
| 34.1041  | 37.3582   | 36.8022  | 36.9337   | 34.3833  | 40.1176   |
| 1.82513  | 2.12349   | 1.66085  | 1.9868    | 1.94545  | 2.40392   |
| 32.8247  | 32.6768   | 30.4074  | 32.1092   | 28.53    | 30.328    |
| 26.3733  | 26.1187   | 25.6246  | 25.6902   | 27.1578  | 24.7864   |
| 1.15534  | 0.537902  | 0.775182 | 0.578014  | 0.702298 | 0.742328  |
| 3.45561  | 2.66159   | 3.26104  | 4.10367   | 3.45003  | 3.09795   |
| 135.326  | 281.134   | 186.85   | 121.505   | 108.322  | 221.073   |
| 16.3941  | 14.5407   | 15.3911  | 16.8735   | 16.7185  | 20.5249   |
| 0        | 0         | 0        | 0         | 0        | 0         |
| 1.20714  | 0.465387  | 0.713546 | 0.50541   | 0.287937 | 1.05369   |
| 0        | 56.4427   | 31.8831  | 28.6051   | 61.1123  | 63.8965   |
| 0.993304 | 1.18531   | 1.19489  | 1.09053   | 0.710792 | 1.77536   |
| 12.2665  | 9.86377   | 10.2221  | 11.363    | 11.2343  | 12.0468   |
| 0.189123 | 0.333431  | 0.179769 | 0.225485  | 0.103945 | 0.24287   |
| 0.983026 | 1.09165   | 0.876288 | 1.16473   | 1.15086  | 1.39842   |
| 6.40622  | 5.02018   | 3.80975  | 4.50734   | 5.98057  | 5.19245   |
| 1.32278  | 0.710314  | 0.891642 | 0.639977  | 1.62361  | 2.14432   |
| 0.036202 | 0.0259199 | 0        | 0.0525448 | 0        | 0.0293429 |
| 5.62345  | 4.6292    | 5.69164  | 5.45864   | 4.73557  | 6.13131   |
| 0.52503  | 0.375911  | 0.32476  | 0.560329  | 0.622488 | 0.525685  |
| 0        | 0         | 0        | 0         | 0        | 0         |
| 6.03645  | 4.69925   | 4.61154  | 4.93698   | 4.82809  | 5.63045   |
| 0.339342 | 0         | 0        | 0         | 0.263063 | 0         |

|          |           |           |           |           |          |
|----------|-----------|-----------|-----------|-----------|----------|
| 0.156251 | 0.0223746 | 0         | 0         | 0         | 0        |
| 0        | 0         | 0         | 0         | 0         | 0        |
| 0.688222 | 0.533817  | 0.765447  | 0.353781  | 0.57798   | 0.302156 |
| 18.6237  | 18.8008   | 16.3162   | 21.1157   | 19.5164   | 17.3113  |
| 5.04782  | 4.46665   | 5.19541   | 5.13591   | 5.14819   | 6.06238  |
| 1.62418  | 1.6884    | 1.65129   | 0.770094  | 1.12649   | 1.4957   |
| 21.6658  | 19.7032   | 20.1226   | 18.2012   | 23.6337   | 11.7622  |
| 0        | 0         | 0         | 0         | 0         | 0        |
| 33.7218  | 36.4845   | 38.7432   | 36.0289   | 34.3472   | 36.9244  |
| 8.21175  | 7.21047   | 9.10394   | 7.34917   | 7.31289   | 7.31279  |
| 11.2509  | 9.06619   | 11.7801   | 10.6167   | 8.05072   | 10.0136  |
| 0.610315 | 0.466105  | 0.378481  | 0.354333  | 0.205021  | 0.24734  |
| 9.20401  | 10.2364   | 15.5671   | 11.8393   | 10.4706   | 8.71572  |
| 0.210494 | 0.0822052 | 0.0619142 | 0.222195  | 0.148344  | 0.108571 |
| 10.5047  | 8.06265   | 8.3905    | 8.30579   | 8.41201   | 9.25022  |
| 0        | 0         | 0.0681058 | 0         | 0         | 0        |
| 77.7861  | 52.6804   | 84.4218   | 75.861    | 78.6735   | 85.1873  |
| 0        | 0         | 0         | 0         | 0         | 0        |
| 19.7755  | 19.4501   | 19.7597   | 20.2608   | 13.6858   | 19.6892  |
| 0        | 0         | 0         | 0.0700773 | 0         | 0        |
| 0.198129 | 0.141856  | 0.320524  | 0.287571  | 0.460777  | 0        |
| 1.01446  | 1.33161   | 1.23086   | 2.08593   | 1.57285   | 1.50747  |
| 4.37978  | 3.39626   | 5.95765   | 3.37645   | 6.44985   | 4.22556  |
| 0        | 0.0373811 | 0         | 0.0378894 | 0.283316  | 0        |
| 0.39796  | 0.552568  | 0.462418  | 0.465944  | 0.443173  | 0.390963 |
| 54.5949  | 56.592    | 57.4972   | 54.9685   | 67.8088   | 59.4234  |
| 0        | 0         | 0         | 0         | 0         | 0        |
| 0.185346 | 0.132704  | 0         | 0.134509  | 0.0957887 | 0.100153 |
| 0        | 0         | 0         | 0         | 0         | 0        |
| 1.12466  | 2.7091    | 2.19639   | 0.968879  | 2.72492   | 2.68882  |
| 1.30691  | 1.4333    | 1.68543   | 1.394     | 1.05089   | 1.16485  |
| 2.84981  | 1.9597    | 1.93907   | 2.19623   | 1.84945   | 1.91585  |
| 31.6611  | 36.6769   | 33.7902   | 33.1464   | 29.7707   | 27.4303  |
| 15.5121  | 11.9534   | 13.6359   | 13.1676   | 15.1318   | 13.5799  |
| 15.7497  | 17.781    | 17.6443   | 19.8224   | 21.6413   | 17.1676  |
| 33.2291  | 26.694    | 32.2364   | 31.5753   | 32.2557   | 32.9185  |
| 216.37   | 366.99    | 243.426   | 174.949   | 188.872   | 355.395  |
| 6.67419  | 8.43539   | 7.55932   | 7.39097   | 5.39057   | 6.85053  |
| 9.26372  | 7.20232   | 8.06021   | 9.01879   | 8.85556   | 7.67746  |
| 2.66107  | 2.09282   | 2.96863   | 2.22706   | 2.26661   | 2.54447  |
| 11.8803  | 10.6907   | 11.3689   | 11.4957   | 13.1856   | 10.445   |
| 111.245  | 124.992   | 119.85    | 116.451   | 98.8565   | 118.678  |
| 60.761   | 113.333   | 59.2536   | 35.7845   | 34.1532   | 39.4681  |

|           |           |           |           |           |           |
|-----------|-----------|-----------|-----------|-----------|-----------|
| 133.133   | 126.224   | 129.104   | 127.195   | 144.808   | 100.977   |
| 28.6141   | 33.7131   | 34.4965   | 32.3173   | 29.5381   | 26.3499   |
| 0         | 0         | 0         | 0         | 0         | 0         |
| 3.01237   | 2.30058   | 2.43664   | 2.91484   | 2.33523   | 1.9533    |
| 6.75609   | 6.81205   | 9.54137   | 8.84604   | 8.28487   | 7.96774   |
| 0.669155  | 0.478918  | 0.416198  | 0.485618  | 0.877644  | 0.625574  |
| 1.05583   | 1.12803   | 1.28773   | 1.18527   | 0.812102  | 1.09648   |
| 2.6563    | 1.82684   | 2.61777   | 1.9328    | 1.9886    | 1.66559   |
| 10.625    | 7.6683    | 9.05078   | 9.98837   | 7.38762   | 6.94111   |
| 0.0344125 | 0.0492774 | 0         | 0         | 0         | 0         |
| 11.3836   | 12.0091   | 13.3226   | 13.1103   | 12.3898   | 11.3106   |
| 0         | 0         | 0         | 0         | 0         | 0         |
| 20.693    | 17.1378   | 20.0223   | 20.6018   | 17.2436   | 19.7524   |
| 11.4973   | 9.73611   | 10.0552   | 12.0286   | 10.7226   | 11.5895   |
| 0.0954169 | 0.0326239 | 0.0924647 | 0.0783845 | 0.11797   | 0.169444  |
| 1.74072   | 0.699691  | 1.0375    | 2.06113   | 3.81157   | 3.19312   |
| 2.52677   | 1.42468   | 2.1205    | 2.31508   | 2.17916   | 2.07364   |
| 7.38738   | 6.41297   | 6.45278   | 6.65434   | 7.11734   | 6.15989   |
| 0.0411016 | 0         | 0.0664925 | 0.0596563 | 0.0955877 | 0.0333142 |
| 20.3103   | 19.9016   | 22.1894   | 20.4804   | 22.4792   | 18.7437   |
| 52.5931   | 59.4841   | 41.8937   | 49.8374   | 41.6621   | 55.0109   |
| 2.73257   | 4.30424   | 3.80176   | 3.25225   | 2.82445   | 3.69141   |
| 702.725   | 672.961   | 636.315   | 693.205   | 767.492   | 671.316   |
| 7.61381   | 11.9605   | 12.0944   | 8.76405   | 8.43366   | 14.6594   |
| 1.75235   | 1.74666   | 1.62172   | 1.03794   | 1.47814   | 1.32154   |
| 0         | 0         | 0         | 0         | 49.0182   | 0         |
| 1.32968   | 0.511732  | 1.12017   | 0.677154  | 0.74476   | 0.552163  |
| 10.7683   | 7.75793   | 11.0222   | 9.75183   | 9.49214   | 11.1628   |
| 17.3534   | 13.0094   | 57.9639   | 38.0774   | 135.001   | 127.748   |
| 9.11892   | 7.26496   | 8.58311   | 8.64721   | 7.94313   | 8.14375   |
| 0         | 0         | 0         | 0         | 0         | 0         |
| 46.4191   | 46.0665   | 45.749    | 49.6269   | 44.3592   | 45.4774   |
| 20.5284   | 20.937    | 15.7693   | 22.2079   | 17.4776   | 17.09     |
| 0         | 0         | 0         | 0         | 0         | 0         |
| 26.3095   | 35.3087   | 29.7225   | 30.8373   | 29.3352   | 27.9962   |
| 0.225989  | 6.54119   | 3.9194    | 1.59198   | 3.15854   | 2.61908   |
| 27.4588   | 19.5086   | 23.0247   | 26.3271   | 22.7706   | 25.9609   |
| 3.82E-12  | 3.83E-13  | 5.30E-17  | 2.43E-10  | 5.25E-14  | 6.86E-29  |
| 0         | 0         | 0         | 0         | 0         | 0         |
| 3.19174   | 2.49997   | 2.78341   | 3.16847   | 3.70074   | 3.35295   |
| 14.0364   | 11.9721   | 13.6398   | 13.8953   | 13.1086   | 13.744    |
| 10.3123   | 16.1105   | 4.7756    | 4.43829   | 6.12792   | 3.37708   |
| 17.7603   | 17.9016   | 11.9997   | 13.8286   | 14.1845   | 15.7854   |

|          |            |            |           |            |           |
|----------|------------|------------|-----------|------------|-----------|
| 24.2648  | 24.0488    | 25.4053    | 24.6144   | 22.3529    | 23.3174   |
| 0        | 0.00945903 | 0.00610648 | 0.0118704 | 0.00585234 | 0.0210594 |
| 0.266561 | 0.199151   | 0.140619   | 0.21027   | 0.206642   | 0.187876  |
| 82.2667  | 69.9004    | 70.992     | 75.3865   | 67.7174    | 69.3653   |
| 34.8469  | 24.6768    | 30.1179    | 29.3474   | 32.1105    | 34.558    |
| 7.91324  | 7.49793    | 8.34341    | 8.0856    | 8.9728     | 6.63732   |
| 0        | 0          | 0          | 0         | 0          | 0         |
| 0.789358 | 1.50711    | 2.55398    | 2.86426   | 2.85564    | 1.9194    |
| 0        | 0          | 0          | 0         | 0          | 0         |
| 75.0953  | 94.3788    | 97.8472    | 105.059   | 87.3703    | 106.743   |
| 75.6206  | 69.0365    | 72.3326    | 76.9552   | 89.1855    | 61.0484   |
| 20.2571  | 22.8023    | 18.1967    | 20.9139   | 18.6646    | 18.2339   |
| 0        | 0          | 0          | 0         | 0          | 0         |
| 1.43516  | 0.553293   | 1.07157    | 0.721051  | 0.684649   | 0.17896   |
| 71.2599  | 77.4029    | 82.8025    | 75.6667   | 72.5646    | 88.4964   |
| 0.103144 | 0.369247   | 0.166863   | 0.149708  | 0.0799592  | 0.250806  |
| 1.47463  | 1.338      | 1.48165    | 1.79919   | 1.13601    | 1.59278   |
| 19.2292  | 15.0102    | 13.0503    | 16.2695   | 15.5249    | 12.9629   |
| 2.7623   | 3.16441    | 3.42603    | 2.00465   | 3.7831     | 2.01505   |
| 3.87868  | 2.13239    | 3.30546    | 2.96562   | 2.14772    | 2.63855   |
| 0        | 0          | 0.186267   | 0         | 0.357029   | 0         |
| 0.855483 | 0.670449   | 0.75744    | 0.914479  | 0.681107   | 0.674657  |
| 33.7625  | 31.6998    | 30.0857    | 31.992    | 27.6064    | 23.016    |
| 0        | 0          | 0          | 0         | 0          | 0         |
| 0        | 0.0520311  | 0.0587822  | 0         | 0.253516   | 0.946662  |
| 8.21882  | 5.33161    | 5.96762    | 5.39411   | 6.13617    | 5.05211   |
| 4.62159  | 5.00535    | 5.29049    | 4.49133   | 5.22706    | 4.06188   |
| 3.95105  | 3.88369    | 3.97831    | 3.78686   | 4.60335    | 3.6568    |
| 0        | 0.0314418  | 0          | 0         | 0          | 0         |
| 0        | 0          | 0          | 0         | 0          | 0         |
| 0        | 0          | 0          | 0         | 0          | 0.429606  |
| 43.8012  | 46.0639    | 42.247     | 30.1334   | 27.2563    | 26.6123   |
| 5.98406  | 5.26439    | 6.51388    | 5.70558   | 5.74928    | 5.98541   |
| 3.81628  | 1.60729    | 1.90662    | 3.09537   | 5.30779    | 0.63684   |
| 11.0441  | 6.71326    | 11.4617    | 10.66     | 10.6608    | 9.71132   |
| 2.35889  | 1.81719    | 1.3284     | 2.25363   | 1.34255    | 1.74255   |
| 38.082   | 39.9175    | 41.1179    | 44.4655   | 40.0984    | 38.8872   |
| 0.170525 | 0.123345   | 0.150018   | 0.0829252 | 0.0218063  | 0.0349085 |
| 0.115043 | 0.247106   | 0          | 0         | 0.0891833  | 0         |
| 0.377274 | 0.213652   | 0.761788   | 0.590219  | 0.00018077 | 0.845929  |
| 1.67323  | 1.66174    | 0.982335   | 1.07719   | 0.627635   | 0.503109  |
| 0        | 0          | 0          | 0         | 0          | 0         |
| 105.813  | 96.2696    | 99.0667    | 104.155   | 131.426    | 98.0847   |

|            |           |           |           |           |           |
|------------|-----------|-----------|-----------|-----------|-----------|
| 0.0787452  | 0.0563801 | 0.0424636 | 0.152392  | 0.0813927 | 0.0212752 |
| 0          | 0.221568  | 0         | 0         | 0         | 0.250829  |
| 106.712    | 90.6754   | 103.146   | 102.208   | 100.276   | 98.5882   |
| 11.0097    | 12.4423   | 11.5073   | 7.84893   | 9.97409   | 8.88872   |
| 0.157884   | 0.0565208 | 0.0638544 | 0.076386  | 0.0815958 | 0.12797   |
| 26.9984    | 24.667    | 25.076    | 21.6208   | 23.5795   | 26.384    |
| 16.6823    | 17.8737   | 19.2033   | 20.5982   | 14.7066   | 13.841    |
| 0          | 0         | 0         | 0         | 0         | 0         |
| 0.554452   | 0.257717  | 0.199032  | 0.233331  | 0.642526  | 0.488492  |
| 0.0532256  | 0.0381085 | 0         | 0         | 0.165046  | 0.172566  |
| 126.243    | 105.004   | 111.081   | 117.171   | 142.423   | 123.187   |
| 45.8814    | 45.2187   | 40.9218   | 49.8054   | 42.0243   | 51.6255   |
| 0          | 0         | 0         | 0         | 0         | 0         |
| 2.98511    | 2.16826   | 2.4146    | 1.93027   | 1.84456   | 2.33146   |
| 7.58875    | 6.62716   | 6.07351   | 6.5269    | 4.46526   | 4.75026   |
| 9.12919    | 6.05716   | 7.70366   | 7.72111   | 8.28764   | 6.94053   |
| 1.84544    | 1.51809   | 1.01633   | 1.82368   | 1.06535   | 1.14571   |
| 15.559     | 13.8608   | 17.8341   | 16.2347   | 18.7038   | 18.0158   |
| 2485.52    | 2324.13   | 2302.76   | 2428.25   | 2826.11   | 2149.19   |
| 6.58433    | 5.83074   | 5.84794   | 7.94473   | 8.06146   | 8.66477   |
| 0          | 0         | 0         | 0         | 0         | 0         |
| 0          | 0         | 0         | 0         | 0         | 0         |
| 4.25031    | 3.17179   | 4.10599   | 3.30343   | 3.91136   | 4.48481   |
| 7.82832    | 7.28112   | 7.32016   | 7.82114   | 6.68585   | 6.39094   |
| 40.1582    | 21.7808   | 31.6645   | 43.3714   | 31.5112   | 39.4124   |
| 0.135081   | 0.0791305 | 0.0595985 | 0.0802067 | 0.0666378 | 0.109487  |
| 0          | 0         | 0         | 0         | 0         | 0         |
| 249.606    | 244.746   | 273.442   | 283.99    | 285.336   | 266.092   |
| 0.00433845 | 0.0453635 | 0         | 0.0462654 | 0.0056054 | 0.0138314 |
| 5.32E-12   | 0.0220994 | 8.89E-11  | 0.0466873 | 0.02459   | 0.0259887 |
| 34.5594    | 31.2723   | 29.8648   | 27.5754   | 36.1771   | 31.2828   |
| 34.4157    | 26.4799   | 29.8128   | 30.2218   | 27.6659   | 32.3101   |
| 0          | 0         | 0         | 0         | 0         | 0         |
| 2.22562    | 2.88443   | 1.86862   | 2.00363   | 1.85637   | 2.21496   |
| 47.9123    | 41.5829   | 49.7808   | 50.5733   | 49.4988   | 42.5847   |
| 1.59228    | 3.16679   | 3.00526   | 2.3432    | 1.33723   | 2.6529    |
| 0          | 0         | 0         | 0         | 0         | 0         |
| 9.39884    | 7.59842   | 7.7863    | 9.19162   | 8.21529   | 9.11017   |
| 0.224437   | 0.300985  | 0.136015  | 0.315332  | 0.358475  | 0.421614  |
| 7.203      | 6.46995   | 7.69785   | 6.84307   | 4.12868   | 5.73212   |
| 4.38962    | 2.709     | 3.30629   | 4.01791   | 2.72808   | 1.67507   |
| 0.479475   | 0.171647  | 0.581756  | 0.289969  | 0.433645  | 0.38863   |
| 44.3182    | 56.4233   | 58.6528   | 53.0845   | 59.7686   | 36.337    |



|           |           |           |           |           |           |
|-----------|-----------|-----------|-----------|-----------|-----------|
| 1.60878   | 1.15185   | 0.984774  | 1.46729   | 1.0112    | 0.951545  |
| 2.50219   | 2.17887   | 3.17271   | 1.93858   | 2.22807   | 2.60365   |
| 3.3256    | 1.94551   | 2.03391   | 2.42081   | 1.57199   | 2.29283   |
| 3.51319   | 2.03626   | 3.92432   | 3.97614   | 3.43677   | 3.45775   |
| 11.1375   | 10.4212   | 10.2924   | 9.76567   | 9.58017   | 10.7091   |
| 6.36806   | 6.32381   | 6.84626   | 6.3931    | 6.92733   | 7.0376    |
| 0         | 0.162017  | 0.091519  | 0.136851  | 0         | 0.0687797 |
| 134.644   | 159.004   | 120.423   | 110.157   | 124.749   | 119.589   |
| 1.22495   | 0.146173  | 0.495418  | 0         | 0.474799  | 0.165477  |
| 24.2675   | 20.6167   | 23.2429   | 25.2342   | 20.5441   | 25.5412   |
| 5.37145   | 3.84586   | 4.65246   | 3.89816   | 4.93788   | 4.89315   |
| 11.9362   | 10.0036   | 10.2955   | 10.3045   | 12.0441   | 10.8777   |
| 0         | 0.0142689 | 0.0322407 | 0         | 0.0926966 | 0         |
| 0         | 0.0190417 | 0.0959865 | 0.0792676 | 0.0211681 | 0.0221325 |
| 42.2769   | 51.751    | 55.4571   | 44.897    | 55.8883   | 40.2962   |
| 0         | 0         | 0         | 0         | 0         | 0         |
| 0         | 0         | 0.0498171 | 0.067043  | 0.0716157 | 0.049919  |
| 9.63655   | 8.23407   | 8.82964   | 8.68999   | 10.1627   | 9.16505   |
| 10.0866   | 7.88293   | 9.72665   | 9.77347   | 10.8541   | 9.29155   |
| 12.8841   | 10.4937   | 12.8462   | 11.9591   | 11.4081   | 12.158    |
| 304.374   | 312.943   | 314.845   | 320.883   | 268.756   | 296.913   |
| 4.19416   | 4.78163   | 4.55179   | 4.29794   | 4.34606   | 4.06576   |
| 20.7077   | 21.2054   | 21.3938   | 22.3818   | 20.6258   | 22.0635   |
| 1.44518   | 1.19817   | 1.39628   | 1.62311   | 1.96597   | 1.5419    |
| 9.08083   | 8.46854   | 9.48755   | 9.18173   | 8.25238   | 9.22124   |
| 0.0271641 | 0.0119891 | 0         | 0.0259246 | 0.0432699 | 0         |
| 11.9212   | 7.91952   | 9.98255   | 10.7417   | 8.49719   | 9.90569   |
| 19.631    | 20.2676   | 18.7021   | 18.8196   | 20.1783   | 18.4653   |
| 0.0802587 | 0.339231  | 0.0682603 | 0.326631  | 0.568857  | 0.289901  |
| 10.6597   | 8.88524   | 9.92764   | 8.27362   | 7.18551   | 9.74348   |
| 0.154574  | 0         | 0.19378   | 0.15454   | 0.185715  | 0.0191777 |
| 0         | 0.0337947 | 0.0763592 | 0         | 0         | 0.0382576 |
| 0         | 0         | 0         | 0         | 0         | 0         |
| 0         | 0         | 0         | 0         | 0         | 0         |
| 44.3393   | 43.7119   | 49.9353   | 52.227    | 64.5145   | 40.0161   |
| 1.57088   | 1.36923   | 1.30755   | 1.48703   | 1.07658   | 1.42094   |
| 0.0295249 | 0.105696  | 0.286585  | 0.0642803 | 0.160217  | 0.167517  |
| 7.49159   | 7.29754   | 6.77772   | 8.03615   | 6.32994   | 6.52079   |
| 5.59997   | 4.44096   | 4.91344   | 5.17778   | 5.52702   | 5.15175   |
| 18.0794   | 16.7887   | 17.2182   | 17.4676   | 15.082    | 14.462    |
| 29.6899   | 23.7043   | 16.0433   | 19.2878   | 16.6766   | 16.2245   |
| 23.5044   | 15.9789   | 18.7657   | 19.1103   | 27.6781   | 17.4836   |
| 167.724   | 60.0436   | 33.9172   | 0         | 32.5056   | 101.96    |

|           |           |           |           |           |           |
|-----------|-----------|-----------|-----------|-----------|-----------|
| 0         | 0         | 0         | 0         | 0         | 0         |
| 0.159926  | 0.124319  | 0.170017  | 0.149222  | 0.152315  | 0.211104  |
| 0.123995  | 0.0887783 | 0.100297  | 0.179971  | 0         | 0.301507  |
| 6.9831    | 7.82792   | 7.89412   | 4.94362   | 2.34014   | 3.72113   |
| 7.21849   | 8.06431   | 9.46094   | 8.07923   | 7.16335   | 8.66027   |
| 71.003    | 84.6262   | 72.5505   | 76.3013   | 65.2639   | 63.0495   |
| 0         | 0         | 0         | 0         | 0         | 0         |
| 0         | 0         | 0         | 0         | 0         | 0         |
| 5.34206   | 4.04134   | 5.51688   | 5.75431   | 4.81843   | 5.14688   |
| 0         | 0         | 0         | 0         | 0         | 0         |
| 0         | 0         | 0         | 0         | 0         | 0         |
| 0         | 0         | 0         | 0         | 0         | 0         |
| 0.5432    | 0.71295   | 0.773571  | 0.774002  | 0.421097  | 0.34053   |
| 3.6235    | 3.33241   | 3.23418   | 2.38028   | 2.63948   | 3.31675   |
| 0         | 0.115054  | 0.0649914 | 0.116619  | 0         | 0.195373  |
| 0         | 0         | 0         | 0         | 0         | 0         |
| 0.0924132 | 0.0211732 | 0.0119602 | 0.0214611 | 0.0515809 | 0.0119846 |
| 21.4926   | 20.6181   | 20.5912   | 20.265    | 22.5335   | 18.248    |
| 0.442241  | 1.39062   | 1.45718   | 2.12307   | 0.548531  | 0.358451  |
| 54.6215   | 53.6867   | 65.0133   | 58.4357   | 57.6969   | 48.0318   |
| 3.5763    | 3.97134   | 2.99639   | 3.24602   | 3.10081   | 2.61922   |
| 0         | 0.0476233 | 0         | 0         | 0         | 0         |
| 64.6956   | 53.2869   | 47.3007   | 39.4532   | 43.1161   | 39.9179   |
| 55.4522   | 58.5334   | 57.0331   | 53.1114   | 75.7135   | 40.7312   |
| 21.7748   | 21.2822   | 18.907    | 22.631    | 17.9059   | 18.5803   |
| 0.415208  | 0.14864   | 0.50378   | 1.05463   | 0.321876  | 0.50481   |
| 17.1922   | 15.6779   | 16.5704   | 16.3606   | 16.6558   | 20.6243   |
| 19.8545   | 17.1408   | 17.4533   | 19.3452   | 15.7853   | 19.9056   |
| 0         | 0         | 0         | 0         | 0         | 0         |
| 15.9967   | 14.1962   | 17.769    | 16.3554   | 16.6416   | 16.8962   |
| 3.23126   | 1.77735   | 1.4248    | 2.22476   | 2.22757   | 2.11009   |
| 2.67412   | 1.97323   | 2.31754   | 2.39611   | 2.66531   | 3.38389   |
| 0         | 0         | 0         | 0         | 0         | 0         |
| 25.0015   | 14.3205   | 16.1786   | 25.4017   | 15.5053   | 12.1588   |
| 16.2002   | 14.3995   | 14.8821   | 15.0409   | 17.6404   | 16.3172   |
| 52.0034   | 46.2183   | 45.2453   | 52.4391   | 41.6924   | 47.6346   |
| 27.5104   | 26.8488   | 27.4108   | 26.1858   | 24.6721   | 24.5832   |
| 0.276521  | 0         | 0.0248525 | 0.178379  | 0.0476364 | 0.116907  |
| 4.2204    | 3.25123   | 3.65147   | 3.80914   | 3.32349   | 2.66301   |
| 8.06377   | 7.01477   | 8.60187   | 8.31115   | 7.31175   | 7.61036   |
| 0.47382   | 0.358093  | 0.319386  | 0.22924   | 0.612187  | 0.213359  |
| 0.302762  | 0.289029  | 0.0816326 | 0.10986   | 0.15647   | 0.122699  |
| 23.4123   | 30.6648   | 24.6144   | 27.0309   | 21.7125   | 23.5144   |

|           |           |           |           |            |           |
|-----------|-----------|-----------|-----------|------------|-----------|
| 22.557    | 23.6312   | 22.5726   | 22.1836   | 23.4511    | 24.2083   |
| 0.535524  | 0.500285  | 0.627945  | 0.462729  | 0.145278   | 0.518133  |
| 16.155    | 15.2458   | 17.5694   | 14.6813   | 11.8966    | 15.6855   |
| 4.47399   | 4.87309   | 3.05427   | 3.61529   | 2.3614     | 3.70348   |
| 0.147351  | 0.140667  | 0.0794593 | 0.07129   | 0.114229   | 0.199054  |
| 5.71076   | 4.45308   | 5.05215   | 4.93381   | 5.45393    | 6.34944   |
| 15.3382   | 13.6396   | 12.4243   | 13.0315   | 12.7074    | 13.6252   |
| 0         | 0         | 0         | 0         | 0          | 0         |
| 1.37774   | 1.05008   | 0.647086  | 0.967598  | 0.723515   | 1.33284   |
| 101.596   | 107.791   | 102.194   | 95.9442   | 82.7286    | 102.22    |
| 0         | 0         | 0         | 0         | 0          | 0         |
| 1.90328   | 2.45288   | 3.46393   | 3.31498   | 3.46731    | 3.23961   |
| 43.5869   | 41.8767   | 46.5882   | 39.5344   | 46.2235    | 38.1196   |
| 6.54637   | 3.49968   | 5.22462   | 3.67396   | 4.66886    | 3.67886   |
| 0.0877886 | 0.0628549 | 0.142021  | 0.111492  | 0.0170138  | 0.0711556 |
| 0.382293  | 0.371905  | 0.201945  | 0.148923  | 0.212108   | 0.544348  |
| 65.8947   | 87.5211   | 67.2913   | 79.1626   | 69.0973    | 63.9887   |
| 20.8015   | 17.914    | 16.6739   | 19.5369   | 20.157     | 16.3017   |
| 8.91903   | 6.26904   | 7.83026   | 7.83426   | 7.79148    | 7.75253   |
| 10.5631   | 16.0907   | 9.03264   | 15.1624   | 9.83846    | 12.3653   |
| 4.97438   | 5.70863   | 3.52983   | 5.12951   | 4.35722    | 5.86743   |
| 1.41356   | 0.933876  | 1.2777    | 1.18601   | 1.35128    | 0.890896  |
| 32.2519   | 31.7657   | 28.6897   | 33.8585   | 30.1984    | 30.9456   |
| 0.20059   | 0.124469  | 0.205521  | 0.116457  | 0.1866     | 0.0758729 |
| 33.8022   | 37.7577   | 31.7111   | 35.7858   | 30.4346    | 32.2274   |
| 7.3076    | 9.7449    | 8.36895   | 5.26589   | 8.20507    | 9.7343    |
| 20.655    | 23.682    | 16.847    | 16.2645   | 15.5744    | 14.6823   |
| 183.616   | 142.478   | 160.651   | 142.188   | 198.034    | 193.268   |
| 0.827617  | 0.836145  | 0.910806  | 0.689483  | 0.418992   | 0.946567  |
| 0.297315  | 0.516975  | 0.377917  | 0.277415  | 0.197557   | 0.240984  |
| 4.11994   | 4.18531   | 4.02904   | 3.37474   | 3.09375    | 3.75679   |
| 83.1693   | 92.2546   | 72.7038   | 77.7292   | 77.3896    | 88.4959   |
| 0.472771  | 0.255777  | 0.269284  | 0.0400282 | 0.018325   | 0.0899449 |
| 0         | 0         | 0         | 0         | 0          | 0         |
| 0         | 0         | 0         | 0.0247377 | 0          | 0         |
| 0.241316  | 0.302361  | 0.390392  | 0.262691  | 0.23384    | 0.220044  |
| 0.370778  | 1.19E-05  | 3.10915   | 0.334969  | 0.00029344 | 3.57408   |
| 5.67194   | 5.94602   | 5.47406   | 5.82171   | 5.10926    | 5.81466   |
| 40.2738   | 39.3894   | 35.8313   | 39.6795   | 36.0017    | 38.3124   |
| 15.1501   | 10.2404   | 14.311    | 13.1696   | 16.5834    | 11.2577   |
| 8.31596   | 7.29412   | 8.00919   | 7.65648   | 8.6307     | 8.82491   |
| 4.08E-08  | 6.34E-08  | 3.54E-08  | 1.17E-08  | 4.41E-08   | 6.18E-09  |
| 0         | 0         | 0         | 0         | 0          | 0         |

|          |           |          |           |           |          |
|----------|-----------|----------|-----------|-----------|----------|
| 0.277964 | 0.265356  | 0.149893 | 0.134482  | 0.215482  | 0.225299 |
| 0        | 0         | 0        | 0         | 0         | 0        |
| 0.729431 | 0.25915   | 1.23526  | 0.791513  | 0.881144  | 0.832369 |
| 0.247064 | 0.0707574 | 0.119907 | 0.107579  | 0.0383056 | 0.240305 |
| 0        | 0         | 0        | 0         | 0         | 0        |
| 3.65167  | 1.63176   | 3.43558  | 2.98839   | 2.20845   | 2.83385  |
| 11.4127  | 13.29     | 15.2797  | 13.3994   | 15.737    | 13.8755  |
| 18.1289  | 15.0667   | 18.0695  | 16.6346   | 13.9254   | 17.6811  |
| 12.0629  | 9.03683   | 8.56347  | 9.5783    | 6.91605   | 10.3099  |
| 15.2573  | 23.3845   | 24.9306  | 22.145    | 27.6507   | 15.8812  |
| 9.57071  | 8.4534    | 13.984   | 10.4817   | 9.059     | 9.87618  |
| 20.6575  | 19.6914   | 23.8716  | 19.6034   | 21.97     | 21.2074  |
| 3.34004  | 1.27138   | 2.56489  | 2.79212   | 2.85145   | 3.42685  |
| 0.119947 | 0.0560847 | 0.113405 | 0.0767442 | 0.12651   | 0.203173 |
| 0        | 0         | 0        | 0         | 0         | 0        |
| 3.96051  | 4.07493   | 4.7935   | 4.49229   | 3.95721   | 4.32773  |
| 0.942532 | 0.417942  | 0.429449 | 0.433237  | 0.488533  | 0.349577 |
| 0.211203 | 0.252028  | 0.256256 | 0.204365  | 0.109152  | 0.114125 |
| 4.7077   | 4.74258   | 2.60243  | 6.31788   | 6.80381   | 4.21842  |
| 28.2898  | 26.6842   | 31.0249  | 27.2207   | 26.7871   | 25.3537  |
| 10.2338  | 8.14386   | 11.8775  | 10.1667   | 8.43153   | 11.1726  |
| 0.2866   | 0         | 0        | 0.0693304 | 0         | 0        |
| 67.0477  | 70.0058   | 67.5895  | 71.9995   | 75.1252   | 66.642   |
| 0.404979 | 0.275459  | 0.196547 | 0.26451   | 0.188367  | 0.114887 |
| 4.07275  | 1.80994   | 3.40796  | 1.52879   | 1.41532   | 1.8213   |
| 80.8986  | 80.1894   | 73.7238  | 70.6115   | 69.0529   | 58.906   |
| 54.3397  | 57.1373   | 53.8333  | 57.1987   | 56.317    | 49.5369  |
| 0.478667 | 0.20393   | 0.127994 | 0.206703  | 0.191668  | 0.128256 |
| 0.89791  | 1.21813   | 0.801248 | 1.302     | 0.624269  | 0.752821 |
| 1.9095   | 0.69479   | 1.82308  | 2.06734   | 1.74721   | 2.30889  |
| 76.7846  | 75.1985   | 71.6299  | 67.1835   | 61.1778   | 59.6771  |
| 52.8144  | 47.6463   | 45.3652  | 46.1727   | 44.7594   | 44.9279  |
| 0.14435  | 0.103352  | 0.175143 | 0.314272  | 0.34024   | 0.234001 |
| 11.5399  | 11.6982   | 9.7724   | 9.67081   | 11.6805   | 9.70937  |
| 7.04972  | 8.50533   | 7.37339  | 6.9043    | 5.56734   | 7.66082  |
| 190.113  | 189.307   | 193.78   | 213.661   | 220.469   | 181.121  |
| 0        | 0         | 0        | 0         | 0         | 0        |
| 0        | 0         | 0.149057 | 0         | 0         | 0        |
| 0        | 0         | 0        | 0         | 0         | 0        |
| 0.266926 | 0.573342  | 0.431823 | 0.193713  | 0.206925  | 0        |
| 3.50924  | 3.6256    | 3.50606  | 2.9057    | 2.45883   | 2.52982  |
| 0        | 0.104946  | 0        | 0.106373  | 0.227257  | 0        |
| 2.48698  | 2.67853   | 2.66607  | 2.9346    | 1.13467   | 1.22625  |

|          |           |          |           |           |          |
|----------|-----------|----------|-----------|-----------|----------|
| 3.81884  | 3.24827   | 3.06027  | 2.96147   | 1.68702   | 2.10322  |
| 55.2618  | 43.3541   | 50.1224  | 52.9033   | 38.8817   | 45.234   |
| 0        | 0         | 0        | 0         | 0         | 0        |
| 15.9691  | 18.8589   | 22.8092  | 20.7352   | 17.1526   | 12.7849  |
| 0.77516  | 1.03799   | 1.33092  | 1.05614   | 0.690237  | 0.858765 |
| 0        | 0         | 0        | 0         | 0         | 0        |
| 0.11515  | 0         | 0.192172 | 0.242463  | 0.105721  | 0.25266  |
| 34.7239  | 29.4843   | 38.0723  | 28.9049   | 28.6432   | 32.939   |
| 1.60392  | 1.24823   | 1.09995  | 1.16399   | 1.00011   | 0.904369 |
| 1.59249  | 0.656474  | 0.644066 | 0.525317  | 1.08488   | 0.684497 |
| 107.449  | 78.1872   | 91.1892  | 101.558   | 120.416   | 84.1944  |
| 11.6581  | 12.3787   | 11.4228  | 11.1104   | 8.04853   | 8.87876  |
| 611.501  | 585.575   | 566.987  | 617.674   | 660.397   | 538.426  |
| 0        | 0         | 0        | 0         | 0         | 0        |
| 23.4057  | 35.917    | 30.2622  | 36.5412   | 37.6635   | 37.2553  |
| 0.848007 | 0.659199  | 0.60101  | 0.580248  | 0.513389  | 0.759345 |
| 0        | 0.0209382 | 0        | 0         | 0         | 0        |
| 0        | 0         | 0        | 0         | 0         | 0        |
| 0        | 0         | 0        | 0         | 0         | 0        |
| 0        | 0.0978036 | 0.179    | 0.0634456 | 0.0169432 | 0        |
| 0        | 0         | 0        | 0         | 0         | 0        |
| 0        | 0         | 0        | 0         | 0         | 0        |
| 16.5154  | 14.9482   | 11.9306  | 12.8901   | 11.3536   | 12.4602  |
| 0        | 0.226293  | 0.170436 | 0         | 0.0816715 | 0.170785 |
| 14.5587  | 14.4564   | 13.739   | 16.0404   | 15.0653   | 13.6419  |
| 4.58317  | 3.26083   | 3.71009  | 4.4941    | 4.02324   | 4.60265  |
| 6.48056  | 6.95993   | 6.32654  | 5.91937   | 4.93721   | 5.70553  |
| 15.8308  | 17.4252   | 21.1396  | 15.7639   | 16.4335   | 15.0621  |
| 12.2508  | 11.3308   | 10.606   | 13.4321   | 12.0962   | 10.2474  |
| 4.33304  | 2.71083   | 3.93696  | 3.42684   | 3.70942   | 4.24426  |
| 0.818897 | 0.586315  | 0        | 0.594289  | 0.158705  | 0.497808 |
| 26.4862  | 21.2351   | 23.8962  | 22.9391   | 26.7374   | 25.6436  |
| 0        | 0         | 0        | 0         | 0         | 0        |
| 0        | 0         | 0        | 0         | 0         | 0        |
| 22.4978  | 20.3069   | 23.0283  | 21.8666   | 20.315    | 22.3843  |
| 56.7363  | 84.0609   | 64.5413  | 76.3308   | 72.9965   | 57.6465  |
| 0        | 0         | 0        | 0         | 0         | 0        |
| 10.1488  | 6.46667   | 5.68975  | 8.10776   | 6.91858   | 7.7347   |
| 52.4429  | 55.3798   | 57.1858  | 56.0072   | 52.4428   | 50.0592  |
| 0        | 0         | 0        | 0         | 0         | 0        |
| 2.52941  | 1.65808   | 2.23695  | 2.39857   | 2.00441   | 2.32353  |
| 3.25475  | 2.63465   | 1.55456  | 2.05244   | 1.36593   | 2.11945  |
| 0        | 0         | 0        | 0         | 0         | 0        |

|           |          |           |           |           |           |
|-----------|----------|-----------|-----------|-----------|-----------|
| 0         | 0.132261 | 0.149422  | 0         | 0.0954689 | 0         |
| 0         | 0        | 0         | 0         | 0         | 0         |
| 2.59728   | 1.60513  | 2.73116   | 2.63885   | 2.37376   | 2.7589    |
| 0.256021  | 0.458265 | 0.55224   | 0.371597  | 0.297707  | 0.518783  |
| 3.68692   | 2.15723  | 2.50126   | 2.2441    | 2.48936   | 3.24544   |
| 3.93783   | 4.17467  | 4.00144   | 3.34      | 4.32977   | 4.08767   |
| 13.7324   | 9.13146  | 10.7981   | 10.6419   | 8.96979   | 7.58577   |
| 21.7682   | 22.5329  | 18.2924   | 20.0969   | 15.4408   | 18.6329   |
| 2.92991   | 3.40963  | 3.46541   | 3.66975   | 1.92082   | 3.19123   |
| 6.4185    | 5.77669  | 6.72459   | 6.52297   | 7.65274   | 6.74096   |
| 6.78975   | 6.10916  | 5.78579   | 6.37672   | 6.47385   | 5.09131   |
| 7.20829   | 6.27328  | 6.82855   | 6.49782   | 5.34761   | 5.9902    |
| 2.51885   | 1.60479  | 2.64939   | 1.73608   | 1.00224   | 1.38431   |
| 0         | 0        | 0         | 0         | 0         | 0         |
| 7.12051   | 6.7121   | 4.54463   | 5.88523   | 4.89629   | 7.48304   |
| 0.467198  | 0.195128 | 0.409399  | 0.056509  | 0.150908  | 0.315566  |
| 3.72702   | 2.86493  | 3.5326    | 3.81656   | 2.26889   | 5.67111   |
| 1.43235   | 1.39846  | 1.57991   | 1.27573   | 1.00944   | 1.53037   |
| 0         | 0        | 0         | 0         | 0         | 0         |
| 0         | 0        | 0         | 0         | 0         | 0         |
| 0         | 0        | 0         | 0         | 0         | 0         |
| 14.642    | 13.9902  | 13.4635   | 14.6363   | 10.5639   | 9.23672   |
| 34.8645   | 36.1705  | 38.5309   | 35.3637   | 33.1649   | 34.9115   |
| 1.16993   | 0.837645 | 0.157722  | 0.70753   | 1.20926   | 1.10631   |
| 1.44744   | 1.31492  | 1.45637   | 1.45352   | 0.773391  | 1.47041   |
| 23.8431   | 18.4485  | 26.8113   | 25.855    | 29.2528   | 28.371    |
| 1.7792    | 1.48504  | 1.5361    | 1.44368   | 1.57713   | 1.51182   |
| 0.205781  | 0.331504 | 0.041613  | 0.186674  | 0.239287  | 0.125094  |
| 14.1768   | 14.2577  | 14.1056   | 13.5992   | 12.4087   | 13.3236   |
| 6.13433   | 2.57096  | 4.2358    | 3.25741   | 3.3056    | 5.27525   |
| 0.761945  | 0.591    | 0.642002  | 0.599037  | 0.590672  | 0.874908  |
| 0.712694  | 0.717575 | 0.66656   | 0.888963  | 0.431634  | 0.722078  |
| 0         | 0        | 0         | 0         | 0         | 0         |
| 5.54456   | 3.60774  | 3.85184   | 4.65035   | 3.56714   | 3.96277   |
| 8.91857   | 8.24346  | 7.43505   | 7.98986   | 10.1641   | 7.87562   |
| 43.1367   | 50.3239  | 52.0599   | 44.2072   | 46.9018   | 47.0279   |
| 0.199378  | 0.104318 | 0.0744337 | 0.0779113 | 0.0594466 | 0.0870169 |
| 0.0570974 | 0        | 0.0923699 | 0.0414366 | 0.0442628 | 0.0462794 |
| 0.717983  | 0.541198 | 0.581385  | 0.723417  | 0.221254  | 0.32768   |
| 0         | 0        | 0         | 0         | 0         | 0         |
| 0         | 0        | 0         | 0         | 0         | 14.1266   |
| 96.0245   | 92.8182  | 94.1128   | 95.1031   | 77.6738   | 85.509    |
| 41.0797   | 39.7426  | 43.8513   | 44.0632   | 38.73     | 41.0899   |

|            |            |          |           |          |           |
|------------|------------|----------|-----------|----------|-----------|
| 24.5727    | 20.0467    | 23.0375  | 25.7585   | 28.0134  | 22.911    |
| 12.8494    | 8.78992    | 12.3195  | 12.4826   | 11.3634  | 13.6153   |
| 5.34673    | 4.64133    | 4.40966  | 4.603     | 4.32096  | 3.89467   |
| 0.633456   | 1.02644    | 0.916908 | 0.82264   | 0.74952  | 0.864737  |
| 2.24459    | 1.86769    | 1.76653  | 1.89309   | 1.36382  | 1.42595   |
| 0.291456   | 0.280288   | 4.00E-84 | 4.46E-64  | 0.385978 | 3.03E-48  |
| 22.3428    | 20.8797    | 20.5148  | 23.9188   | 20.1916  | 17.6135   |
| 6.79683    | 6.65292    | 6.31776  | 8.25241   | 6.36714  | 6.73096   |
| 18.5466    | 20.6687    | 19.7141  | 21.6244   | 17.0524  | 16.9198   |
| 2.99581    | 2.47422    | 2.36084  | 3.41749   | 2.05433  | 2.90416   |
| 1.53349    | 1.48223    | 0.744244 | 1.05723   | 1.18878  | 0.994354  |
| 6.64145    | 7.41277    | 7.84122  | 6.65125   | 6.54111  | 9.21705   |
| 0          | 0          | 0        | 0         | 0        | 0.0130425 |
| 107.564    | 102.778    | 44.6077  | 57.9622   | 56.6614  | 48.6115   |
| 3.68518    | 4.4166     | 2.72488  | 3.40326   | 4.22047  | 2.90109   |
| 0.128651   | 0.0921119  | 0.182111 | 0.0233411 | 0.124666 | 0.234621  |
| 397.563    | 548.265    | 406.518  | 332.782   | 338.183  | 321.545   |
| 0          | 0          | 0        | 0         | 0        | 0         |
| 1.08666    | 0.9077     | 1.17197  | 0.788609  | 1.40399  | 1.02757   |
| 43.5898    | 49.6751    | 48.0213  | 44.9722   | 40.6019  | 44.3114   |
| 0          | 0          | 0        | 0         | 0        | 0         |
| 25.8701    | 26.4831    | 27.9343  | 26.8219   | 29.0393  | 30.9405   |
| 49.4664    | 48.4896    | 53.198   | 52.0482   | 50.6099  | 50.5034   |
| 445.49     | 467.027    | 323.249  | 408.287   | 439.7    | 424.433   |
| 17.6772    | 17.4407    | 17.428   | 14.4788   | 15.3538  | 16.3824   |
| 0.357369   | 0.266236   | 0.306212 | 0.296964  | 0.406401 | 0.402607  |
| 32.2652    | 33.9053    | 37.1538  | 32.5779   | 30.5952  | 31.3589   |
| 6.66535    | 7.09874    | 7.78393  | 7.67903   | 6.62032  | 7.9349    |
| 1.7593     | 1.1028     | 2.30588  | 2.56016   | 1.72918  | 2.2067    |
| 3.60932    | 2.34723    | 2.64556  | 1.48852   | 2.21604  | 2.46755   |
| 0.141242   | 0          | 0        | 0         | 0        | 0         |
| 0          | 0          | 0        | 0         | 0        | 0         |
| 0.858115   | 0.525647   | 0.697316 | 0.754884  | 0.603607 | 0.820102  |
| 15.7941    | 12.1119    | 12.7106  | 8.90198   | 12.9896  | 9.09759   |
| 0          | 0          | 0        | 0         | 0        | 0         |
| 1.41065    | 1.24006    | 0.972342 | 0.648097  | 0.539695 | 0.738306  |
| 0.108291   | 0          | 0        | 0.0785884 | 0        | 0.175546  |
| 0.196012   | 0          | 0        | 0         | 0        | 0.0529582 |
| 0.00015801 | 0.00010787 | 1.34742  | 3.73E-08  | 8.20E-07 | 2.95E-05  |
| 0          | 82.3426    | 0        | 0         | 0        | 0         |
| 35.4313    | 27.3734    | 34.1662  | 41.39     | 36.9169  | 43.3598   |
| 0          | 0          | 0        | 0         | 0        | 0         |
| 82.6389    | 80.966     | 91.9205  | 88.4097   | 95.286   | 93.2712   |

|          |          |           |           |          |          |
|----------|----------|-----------|-----------|----------|----------|
| 2.44299  | 0.878498 | 2.14896   | 3.90904   | 1.39278  | 2.27149  |
| 46.5131  | 44.9527  | 46.1454   | 49.6438   | 45.8149  | 50.5989  |
| 0.523982 | 0.640538 | 0.447358  | 0.487704  | 0.607211 | 0.335073 |
| 14.296   | 16.7792  | 14.7245   | 14.5065   | 13.6161  | 12.3542  |
| 0.602128 | 0.627072 | 0.61988   | 1.00637   | 0.339475 | 1.5085   |
| 11.8503  | 9.59303  | 9.14149   | 9.63157   | 7.69182  | 9.57085  |
| 14.4565  | 12.0894  | 16.0992   | 15.0416   | 14.533   | 13.3267  |
| 25.0139  | 20.9539  | 24.4462   | 23.4861   | 21.1695  | 24.5635  |
| 5.49175  | 4.54191  | 5.29336   | 6.27839   | 4.72025  | 5.63577  |
| 0.502672 | 0.44988  | 0.508252  | 0.501598  | 0.340969 | 0.56022  |
| 8.40189  | 8.47927  | 8.45181   | 6.14043   | 7.34035  | 7.73071  |
| 1.84468  | 1.60054  | 1.76357   | 1.58833   | 0.938621 | 2.0078   |
| 0        | 0        | 0         | 0         | 0        | 0        |
| 0.049948 | 0        | 0.0404019 | 0.0362482 | 0        | 0        |
| 0.288388 | 0.536848 | 0.279925  | 0.209288  | 0.223563 | 1.26224  |
| 23.1884  | 21.0375  | 23.3737   | 23.7479   | 21.169   | 20.1093  |
| 16.0539  | 14.6191  | 15.3711   | 14.1798   | 14.3034  | 15.4705  |
| 5.67528  | 5.41202  | 4.28392   | 5.58326   | 5.06329  | 6.20604  |
| 40.2308  | 41.0896  | 45.0084   | 39.24     | 44.4368  | 41.9125  |
| 20.9859  | 20.133   | 20.2568   | 23.1352   | 21.3987  | 18.6839  |
| 4.49299  | 3.81862  | 3.96294   | 3.05597   | 2.9124   | 3.18009  |
| 0        | 0        | 0         | 0         | 0        | 0        |
| 11.6762  | 11.5968  | 13.7689   | 10.0132   | 11.7437  | 10.1571  |
| 0.462335 | 0        | 0.186987  | 0.754931  | 0        | 0.281054 |
| 0        | 0        | 0         | 0         | 0        | 0        |
| 16.1754  | 18.1849  | 15.6895   | 14.4632   | 9.57522  | 11.6268  |
| 0.392397 | 0.856627 | 0.7446    | 0.84106   | 0.514378 | 2.81487  |
| 13.3101  | 10.6221  | 12.1067   | 13.0955   | 13.9275  | 13.3681  |
| 0        | 0        | 0         | 0         | 0        | 0        |
| 0        | 0        | 0         | 0         | 0        | 0        |
| 5.86056  | 6.64822  | 7.69202   | 5.7945    | 5.6751   | 6.75689  |
| 24.3527  | 18.1064  | 36.3536   | 25.5069   | 24.0385  | 25.2952  |
| 122.002  | 74.8721  | 112.782   | 50.5936   | 81.0664  | 84.7597  |
| 4.90105  | 3.04119  | 4.15524   | 3.38553   | 4.12302  | 3.75178  |
| 63.5444  | 93.4268  | 244.628   | 158.524   | 266.84   | 35.7546  |
| 8.17641  | 7.08977  | 9.82573   | 10.603    | 7.58539  | 9.1668   |
| 15.941   | 13.503   | 18.8544   | 19.2711   | 20.6957  | 21.8207  |
| 17.3713  | 12.8273  | 15.7988   | 16.01     | 15.9038  | 15.0623  |
| 41.4999  | 46.6438  | 43.4491   | 38.3209   | 32.6231  | 35.5527  |
| 21.9892  | 21.6732  | 19.5963   | 33.0533   | 20.6912  | 21.0516  |
| 7.37719  | 5.62148  | 6.13775   | 3.05929   | 5.06532  | 3.71581  |
| 0.61725  | 0.961868 | 0.117478  | 0.39525   | 0.168883 | 0.147148 |
| 2.40673  | 2.63751  | 2.10567   | 2.24564   | 2.09419  | 1.51281  |



|           |           |           |           |          |           |
|-----------|-----------|-----------|-----------|----------|-----------|
| 2.04456   | 1.62582   | 1.89297   | 2.60665   | 2.36122  | 1.04294   |
| 0         | 0.0347733 | 0         | 0         | 0        | 0         |
| 11.6111   | 7.04341   | 8.92704   | 9.28453   | 9.765    | 9.7573    |
| 0.129361  | 0.0926203 | 0.209276  | 0         | 0.200566 | 0.104852  |
| 0         | 0         | 0.0257465 | 0         | 0        | 0.0515984 |
| 7.40872   | 8.53988   | 8.84039   | 10.372    | 7.33195  | 7.19751   |
| 3.92939   | 4.33778   | 4.07451   | 4.01991   | 4.20686  | 4.66166   |
| 2.08852   | 1.02437   | 1.9421    | 1.46794   | 0.854146 | 0.853072  |
| 110.3     | 22.4454   | 49.9173   | 141.698   | 49.4016  | 0         |
| 1.25692   | 1.37862   | 0.930172  | 1.9602    | 0.808533 | 0.823693  |
| 0         | 0         | 0         | 0         | 0        | 0         |
| 0         | 0         | 0         | 0         | 0        | 0         |
| 0.0295013 | 0.169733  | 0.144371  | 0.0792949 | 0.200474 | 0.0747244 |
| 5.29823   | 5.83952   | 5.20548   | 5.67251   | 5.01937  | 5.02547   |
| 3.66965   | 4.19701   | 2.19732   | 3.07816   | 2.10587  | 1.93141   |
| 584.518   | 474.373   | 509.085   | 585.69    | 480.883  | 581.922   |
| 0.801118  | 0.286793  | 0.324004  | 0.290693  | 0.15526  | 0         |
| 0.966531  | 0.546309  | 0.909479  | 0.55489   | 0.371628 | 0.72505   |
| 723.524   | 927.896   | 762.231   | 698.841   | 676.776  | 684.372   |
| 5.00871   | 5.71395   | 4.88335   | 6.21674   | 3.38453  | 4.74868   |
| 1.55651   | 2.0835    | 1.69695   | 2.01361   | 3.4625   | 1.64557   |
| 10.0246   | 9.05827   | 8.10867   | 7.74781   | 7.72233  | 9.06213   |
| 56.3176   | 50.4285   | 53.9857   | 55.6628   | 47.1117  | 52.5678   |
| 8.2803    | 6.9458    | 8.35367   | 7.15113   | 7.8402   | 8.5565    |
| 583.239   | 1136.37   | 800.707   | 761.031   | 647.664  | 1667.26   |
| 0.931894  | 1.48841   | 0.75379   | 0.884382  | 0.889131 | 0.697229  |
| 0.148166  | 0.0909292 | 0.154091  | 0.138249  | 0.049226 | 0.154406  |
| 0.388675  | 0.834852  | 0.392989  | 0.775688  | 0.903921 | 1.10262   |
| 55.5502   | 54.4074   | 60.965    | 59.379    | 58.0863  | 52.4064   |
| 0         | 0         | 0         | 0         | 0        | 0         |
| 0         | 0         | 0         | 0         | 0        | 0         |
| 0         | 0         | 0         | 0         | 0        | 0         |
| 23.4133   | 19.1522   | 21.8521   | 23.8051   | 24.7879  | 23.3327   |
| 0         | 0         | 0         | 0         | 0        | 0         |
| 0         | 0         | 0         | 0         | 0        | 0         |
| 1.2767    | 1.1508    | 1.21493   | 1.78019   | 1.37721  | 1.21504   |
| 1.61929   | 2.31876   | 1.83374   | 2.17402   | 1.2553   | 2.03436   |
| 11.4081   | 8.9567    | 8.91385   | 8.71179   | 8.64847  | 9.36981   |
| 1.76945   | 1.57402   | 1.89969   | 1.62656   | 1.44653  | 1.61674   |
| 11.8988   | 9.088     | 10.9877   | 12.1112   | 11.6917  | 12.1742   |
| 0         | 0         | 0         | 0         | 0        | 0         |
| 7.14657   | 7.06457   | 7.91045   | 7.59232   | 8.022    | 8.52219   |
| 2.11912   | 0.785714  | 1.79476   | 1.99702   | 2.14515  | 2.00045   |

|           |            |           |          |           |           |
|-----------|------------|-----------|----------|-----------|-----------|
| 22.4699   | 18.2111    | 19.2082   | 20.0308  | 15.861    | 19.0271   |
| 0.319182  | 0.495885   | 0.268077  | 0.132529 | 0.188594  | 0.166897  |
| 41.228    | 35.5372    | 38.2631   | 38.9954  | 28.631    | 38.1324   |
| 0         | 0          | 0         | 0        | 0         | 0         |
| 99.9543   | 108.53     | 68.3748   | 101.443  | 83.7612   | 73.7373   |
| 2.64793   | 1.71435    | 1.69754   | 2.0852   | 1.49586   | 1.66676   |
| 0         | 0.501122   | 0         | 0.113018 | 0.64433   | 0.568394  |
| 3.0033    | 2.87397    | 3.15343   | 2.57774  | 2.12673   | 3.37054   |
| 0         | 0          | 0         | 0        | 0         | 0         |
| 0         | 0          | 0         | 0        | 0         | 0         |
| 33.2395   | 31.5439    | 33.7873   | 34.1492  | 36.8706   | 28.0818   |
| 0         | 0          | 0         | 0        | 0         | 0         |
| 0.0212997 | 0.0169446  | 0         | 0        | 0         | 0         |
| 2.32943   | 1.99286    | 2.90768   | 2.55066  | 2.56281   | 3.16439   |
| 0.0872084 | 0.0624395  | 0.100773  | 0.126577 | 0.0869211 | 0.0908811 |
| 0.243423  | 0.567262   | 0.206228  | 0.428418 | 0.300127  | 0.742558  |
| 0.186397  | 0.0667282  | 0.100515  | 0.157817 | 0.0240829 | 0.226621  |
| 2.49122   | 2.65671    | 2.68031   | 2.58635  | 1.89927   | 1.87733   |
| 15.7203   | 16.6993    | 17.9102   | 17.8957  | 15.8108   | 16.7393   |
| 1.27131   | 1.27131    | 1.6859    | 1.6859   | 1.34792   | 1.34792   |
| 1.9898    | 1.48104    | 1.45214   | 2.4913   | 1.81561   | 1.58177   |
| 0         | 0          | 0.0949409 | 0        | 0         | 0.0475675 |
| 0         | 0          | 0         | 0        | 0         | 0         |
| 24.9949   | 22.886     | 25.4711   | 25.1094  | 25.854    | 23.7769   |
| 1021.87   | 1103.78    | 1126.97   | 1101.61  | 1122.56   | 993.884   |
| 50.2716   | 44.7283    | 47.7595   | 43.9714  | 47.5858   | 44.0119   |
| 6.92713   | 5.73128    | 6.42551   | 6.60963  | 4.58295   | 5.90941   |
| 2.62375   | 2.91596    | 1.39375   | 2.58617  | 2.30719   | 3.61846   |
| 7.89809   | 5.38538    | 5.97978   | 6.43716  | 6.53549   | 5.70978   |
| 21.6551   | 17.2109    | 18.1449   | 22.8589  | 20.8838   | 20.6175   |
| 9.00802   | 7.71346    | 7.91635   | 8.21399  | 8.19062   | 8.66898   |
| 0         | 0.00425891 | 0.0252604 | 0.013598 | 0.0166005 | 0         |
| 134.841   | 224.015    | 190.686   | 146.656  | 280.84    | 210.681   |
| 0         | 0.175693   | 0.396979  | 0.534248 | 0.190229  | 0.198895  |
| 15.6317   | 16.898     | 19.9445   | 17.3441  | 14.2918   | 17.2839   |
| 25.5009   | 25.3287    | 24.5994   | 25.8546  | 23.9356   | 22.4641   |
| 199.873   | 134.64     | 189.02    | 170.427  | 128.425   | 185.67    |
| 2.65651   | 2.04991    | 2.65007   | 4.24091  | 4.85046   | 5.23889   |
| 0.479382  | 0.343229   | 0.560102  | 0.463862 | 0.412916  | 0.60442   |
| 4.0479    | 3.20985    | 3.13343   | 2.93763  | 3.3067    | 2.96344   |
| 0         | 0          | 0         | 0        | 0         | 0         |
| 22.0235   | 24.7989    | 20.9963   | 22.0589  | 17.657    | 22.9542   |
| 0         | 0          | 0         | 0        | 0         | 0         |

|           |           |           |           |           |           |
|-----------|-----------|-----------|-----------|-----------|-----------|
| 46.9382   | 54.2318   | 51.3258   | 51.2981   | 55.7823   | 33.0137   |
| 55.5868   | 52.8749   | 43.9137   | 42.151    | 39.1462   | 52.4159   |
| 104.013   | 128.213   | 119.304   | 110.104   | 114.499   | 116.5     |
| 3.01269   | 3.10073   | 2.63273   | 4.07991   | 4.0871    | 4.20789   |
| 0         | 0         | 0         | 0         | 0         | 0         |
| 12.5825   | 11.6973   | 11.2845   | 10.5063   | 10.4898   | 9.5736    |
| 225.907   | 233.702   | 216.61    | 234.591   | 272.986   | 204.63    |
| 5.42361   | 4.0054    | 4.63248   | 4.85809   | 5.04242   | 5.4566    |
| 139.657   | 151.349   | 148.815   | 152.782   | 182.616   | 114.437   |
| 7.69322   | 5.18355   | 5.16045   | 4.8682    | 3.64865   | 3.66279   |
| 0         | 0         | 0         | 0         | 0         | 0         |
| 10.6937   | 7.70966   | 9.7612    | 10.59     | 10.017    | 10.684    |
| 1.52329   | 4.77319   | 0.0181275 | 6.26624   | 9.80543   | 6.10818   |
| 0.354345  | 0.253704  | 0.0701932 | 0.699739  | 0.454085  | 0.175842  |
| 59.2984   | 90.8177   | 61.0533   | 60.0458   | 50.6945   | 59.2163   |
| 0.0698521 | 0.200051  | 0         | 0         | 0.0541505 | 0.0566175 |
| 14.7135   | 14.3676   | 15.9163   | 13.611    | 17.0679   | 11.9257   |
| 0         | 0         | 0         | 0         | 0         | 0         |
| 0         | 0         | 0         | 0         | 0         | 0         |
| 37.0333   | 33.3942   | 38.684    | 38.7135   | 41.7153   | 37.8914   |
| 11.2315   | 9.6631    | 9.02869   | 10.827    | 10.4791   | 10.4999   |
| 5.10508   | 3.35574   | 3.50928   | 3.237     | 2.95802   | 3.40348   |
| 0.437969  | 0.48462   | 0.257647  | 0.549     | 0.339521  | 0.516347  |
| 7.38803   | 7.70972   | 8.48596   | 7.76095   | 7.21641   | 7.53022   |
| 0         | 0         | 0         | 0         | 0         | 0         |
| 18.2205   | 17.1986   | 21.1422   | 20.6515   | 24.1232   | 22.5673   |
| 27.1169   | 19.8155   | 23.1686   | 26.4757   | 24.6966   | 25.1137   |
| 13.4253   | 11.281    | 13.9305   | 13.9448   | 14.2255   | 14.0444   |
| 0         | 0.0348799 | 0.0394056 | 0.0589238 | 0.0629427 | 0.0263241 |
| 4.78256   | 3.73551   | 2.1101    | 5.04842   | 1.68523   | 2.11441   |
| 12.8203   | 13.5363   | 12.0347   | 15.3883   | 8.99545   | 11.2361   |
| 64.6287   | 65.8738   | 64.8906   | 67.1679   | 60.9139   | 57.9545   |
| 22.8896   | 34.1058   | 51.7083   | 32.6615   | 29.0144   | 37.1055   |
| 2.0545    | 1.57006   | 1.42075   | 2.27897   | 1.62569   | 2.20019   |
| 32.9749   | 27.9562   | 29.5074   | 31.0377   | 33.8197   | 26.2895   |
| 0         | 0         | 0         | 0         | 0         | 0         |
| 35.0637   | 49.3682   | 29.9214   | 35.0297   | 28.0721   | 25.7611   |
| 10.7089   | 8.07515   | 6.8323    | 15.874    | 6.43441   | 20.3805   |
| 13.6797   | 12.1296   | 14.4207   | 14.156    | 14.4097   | 13.3722   |
| 0.105388  | 0.0377281 | 0.0426233 | 0.152965  | 0         | 0.0427104 |
| 0         | 0         | 0         | 0         | 0         | 0         |
| 7.84807   | 6.79772   | 7.45738   | 6.78482   | 6.68731   | 9.1474    |
| 0         | 0         | 0         | 0         | 0         | 0         |

|           |           |           |           |           |           |
|-----------|-----------|-----------|-----------|-----------|-----------|
| 10.8841   | 9.2301    | 11.6582   | 10.4255   | 11.9268   | 13.1566   |
| 2.62668   | 1.88065   | 2.47645   | 1.90622   | 1.3649    | 1.81136   |
| 15.0295   | 15.1272   | 16.6047   | 14.825    | 17.9029   | 16.9898   |
| 34.3724   | 31.424    | 36.9033   | 37.8323   | 35.3674   | 37.5354   |
| 7.94077   | 8.51811   | 10.4354   | 9.40222   | 5.2137    | 7.81693   |
| 0.918111  | 0.604762  | 0.653524  | 0.746244  | 0.797142  | 0.74416   |
| 1.70913   | 1.25675   | 1.17398   | 1.83482   | 1.03841   | 1.35774   |
| 0.0838152 | 0.12002   | 0.0677964 | 0.0608262 | 0         | 0         |
| 2.7258    | 1.85404   | 1.76387   | 0.890172  | 1.79612   | 1.10467   |
| 20.2843   | 15.9496   | 19.191    | 16.8237   | 17.2691   | 17.0283   |
| 176.547   | 158.37    | 191.871   | 175.388   | 200.879   | 191.446   |
| 6.73943   | 3.8961    | 6.40317   | 5.74065   | 6.31959   | 7.35973   |
| 0.906695  | 0.514387  | 1.1669    | 1.05783   | 0.605399  | 0.690978  |
| 14.4282   | 21.4511   | 15.9509   | 17.0369   | 8.63711   | 14.2042   |
| 8.56979   | 6.452     | 7.46261   | 8.17099   | 5.62475   | 5.49714   |
| 7.89519   | 5.53235   | 5.7822    | 8.45903   | 7.32228   | 3.98137   |
| 1.25438   | 2.15547   | 1.01464   | 0.971013  | 1.29655   | 0.813372  |
| 0         | 0         | 0.0784462 | 0         | 0.150363  | 0         |
| 0.127201  | 0         | 0         | 0.0307707 | 0.0328695 | 0.171835  |
| 1.68575   | 1.37007   | 0.718639  | 0.876206  | 0.353195  | 0.886288  |
| 1.75476   | 0.628052  | 0.777039  | 1.06766   | 0.908086  | 0.890955  |
| 1.59602   | 1.63617   | 1.40835   | 1.05296   | 0.759227  | 1.32303   |
| 40.8273   | 32.4061   | 27.8885   | 7.79984   | 7.69938   | 12.219    |
| 2.19166   | 2.8767    | 3.24996   | 3.71108   | 2.52479   | 3.33062   |
| 0         | 0.0753805 | 0.0851612 | 0.458434  | 0         | 0.170671  |
| 154.29    | 181.787   | 180.897   | 159.25    | 204.554   | 167.301   |
| 0.268844  | 0.164989  | 0.0310661 | 0.334466  | 0.0595464 | 0.0933889 |
| 13.1158   | 10.9672   | 12.7576   | 12.9067   | 11.8039   | 12.3905   |
| 20.4736   | 18.624    | 20.0348   | 20.7052   | 17.9868   | 18.8456   |
| 12.1435   | 12.1756   | 11.0462   | 10.9834   | 9.58094   | 9.88347   |
| 13.0453   | 13.7727   | 12.0924   | 11.4664   | 10.1304   | 11.6348   |
| 12.9398   | 10.5674   | 13.0624   | 12.5813   | 12.9196   | 12.5499   |
| 11.1354   | 15.0314   | 13.8837   | 11.8387   | 11.8214   | 15.1194   |
| 18.9712   | 11.4053   | 15.7261   | 17.8566   | 14.024    | 18.7263   |
| 0         | 0         | 0         | 0         | 0         | 0         |
| 9.40748   | 10.8688   | 10.4919   | 9.77528   | 8.56364   | 9.99348   |
| 0         | 0         | 0         | 0.088017  | 0         | 0         |
| 3.55893   | 3.21627   | 3.97022   | 2.77308   | 2.14326   | 3.17005   |
| 0         | 0.0457005 | 0         | 0.046322  | 0.0164938 | 0         |
| 1.215     | 0.913928  | 1.30797   | 1.58286   | 1.23966   | 1.45594   |
| 3.69468   | 5.95197   | 2.98855   | 1.34065   | 2.86417   | 1.49733   |
| 1.76262   | 0.851338  | 0.729055  | 2.05894   | 2.91364   | 2.52702   |
| 6.40221   | 7.42567   | 6.29186   | 7.52666   | 5.95556   | 5.05935   |

|           |           |           |           |           |           |
|-----------|-----------|-----------|-----------|-----------|-----------|
| 0.202478  | 0.28994   | 0         | 0.146942  | 0.156964  | 0         |
| 4.89965   | 4.24308   | 3.84999   | 4.30078   | 2.96628   | 4.38737   |
| 7.56061   | 7.20431   | 4.81149   | 6.09196   | 6.37817   | 1.89276   |
| 84.7719   | 95.7597   | 120.744   | 87.9368   | 154.502   | 129.544   |
| 0.460167  | 0.47967   | 0.25382   | 0.266729  | 0.284921  | 0.380897  |
| 0.25329   | 0.336794  | 0.117075  | 0.0787786 | 0.252455  | 0.293285  |
| 7.46423   | 6.50986   | 5.71466   | 6.66527   | 3.21466   | 4.78025   |
| 0         | 0         | 0         | 0         | 0         | 0         |
| 0.235872  | 0.329968  | 0.106036  | 0.110747  | 0.081013  | 0.117095  |
| 16.9168   | 18.1068   | 16.6585   | 17.3261   | 20.2426   | 13.8046   |
| 0         | 0         | 0         | 0         | 0         | 0         |
| 18.7685   | 23.2236   | 22.6399   | 20.9292   | 25.2464   | 19.4529   |
| 12.5858   | 12.4606   | 13.2469   | 11.351    | 11.202    | 11.6397   |
| 0         | 0.0947858 | 0         | 0         | 0.0164204 | 0         |
| 12.1488   | 12.0628   | 11.6892   | 8.7535    | 9.30705   | 12.2719   |
| 1.76105   | 1.06403   | 1.33432   | 1.32656   | 1.18086   | 1.63818   |
| 0.32886   | 0.268486  | 0.347779  | 0.35426   | 0.201539  | 0.284785  |
| 1.0922    | 1.74172   | 1.68661   | 1.261     | 2.07825   | 1.20718   |
| 16.9113   | 9.1736    | 11.3254   | 13.5364   | 9.84113   | 9.84128   |
| 4.36628   | 2.90383   | 4.59531   | 4.01034   | 3.73905   | 3.5917    |
| 31.9764   | 31.4465   | 35.5015   | 31.6409   | 30.7687   | 35.8514   |
| 8.92217   | 7.3619    | 9.0212    | 11.7655   | 9.40489   | 9.5688    |
| 0         | 0         | 0         | 0         | 0         | 0         |
| 7.25408   | 6.94783   | 6.58827   | 7.57338   | 7.64596   | 6.21492   |
| 12.0826   | 9.19104   | 8.82757   | 11.4998   | 9.79549   | 10.7309   |
| 46.4857   | 55.5804   | 68.9017   | 70.7294   | 63.2912   | 58.2171   |
| 6.46255   | 5.85499   | 6.49524   | 6.2231    | 5.51174   | 6.6282    |
| 0         | 0         | 0         | 0         | 0         | 0         |
| 0.25827   | 0.0924583 | 0         | 0         | 0.100108  | 0         |
| 16.919    | 12.709    | 14.2066   | 16.4869   | 17.1924   | 16.4595   |
| 4.65376   | 4.93945   | 3.43767   | 3.75655   | 2.89956   | 4.09938   |
| 0         | 0         | 0         | 0         | 0         | 0         |
| 0.0661606 | 0.085268  | 0.0602063 | 0.145247  | 0.0512887 | 0.0134057 |
| 7.67278   | 6.06978   | 6.66809   | 7.86696   | 6.83305   | 7.25541   |
| 0.711314  | 0.458359  | 0.287684  | 0.412971  | 2.04026   | 1.44136   |
| 0         | 0         | 0         | 0         | 0.168391  | 0         |
| 4.67571   | 7.14184   | 3.19376   | 4.97676   | 4.02742   | 3.53716   |
| 1.23893   | 0.980197  | 1.16287   | 1.08534   | 0.80953   | 1.06874   |
| 33.2904   | 28.0383   | 29.7671   | 31.0455   | 33.1523   | 27.9843   |
| 6.12836   | 7.76211   | 5.85401   | 8.15658   | 3.26812   | 6.58779   |
| 0         | 0         | 0         | 0.119419  | 0         | 0         |
| 0.164545  | 0.314162  | 0.221828  | 0.199022  | 0.0850384 | 0.177825  |
| 18.4764   | 15.6827   | 16.9527   | 19.0409   | 22.5842   | 19.7043   |

|            |            |            |           |           |           |
|------------|------------|------------|-----------|-----------|-----------|
| 0.0974783  | 0.556332   | 0.0628831  | 0.0565085 | 0.0452898 | 0         |
| 33.6687    | 18.2536    | 23.3883    | 27.1318   | 16.9742   | 14.0459   |
| 28.6473    | 32.8582    | 30.4535    | 29.7293   | 26.8844   | 28.4933   |
| 1.96261    | 1.58734    | 1.55812    | 1.81994   | 1.46509   | 2.0621    |
| 0          | 0          | 0          | 0         | 0         | 0         |
| 0.00649229 | 0.00697253 | 0.00450127 | 0.0282694 | 0         | 0.0115769 |
| 0.0675839  | 0.0279795  | 0          | 0.0395351 | 7.38E-11  | 0.0311894 |
| 13.3335    | 10.883     | 16.5013    | 16.1595   | 15.5045   | 17.2916   |
| 3.5824     | 3.17973    | 4.63315    | 4.04542   | 3.21774   | 4.77604   |
| 0          | 0          | 0          | 0.0207622 | 0         | 0         |
| 5.64275    | 6.00244    | 5.02074    | 5.96707   | 5.93662   | 7.90587   |
| 0          | 0          | 0          | 0         | 0         | 0         |
| 0          | 0          | 0          | 0         | 0         | 0         |
| 0.291158   | 0.391912   | 0.480444   | 0.287366  | 0.514619  | 0.585264  |
| 24.5273    | 30.177     | 27.5533    | 27.7109   | 25.9503   | 24.5879   |
| 14.6259    | 16.2888    | 14.3509    | 16.6699   | 15.8047   | 14.9521   |
| 10.2538    | 9.31502    | 6.19318    | 8.89296   | 8.94143   | 10.8289   |
| 125.84     | 166.46     | 137.8      | 136.067   | 104.545   | 107.624   |
| 0.167821   | 0.0600783  | 0          | 0         | 0         | 0         |
| 0          | 0          | 0          | 0         | 0         | 0         |
| 1.5402     | 1.49402    | 1.3565     | 2.19039   | 1.52173   | 0.66445   |
| 12.7387    | 12.2212    | 10.6908    | 13.7476   | 10.9421   | 11.6423   |
| 0          | 0          | 0          | 0         | 0         | 0         |
| 4.38503    | 2.83354    | 4.08286    | 4.93272   | 3.46285   | 3.98872   |
| 377.379    | 180.131    | 169.586    | 60.8602   | 65.0112   | 101.96    |
| 4.44102    | 6.2155     | 7.68877    | 6.14817   | 3.78415   | 4.76732   |
| 5.86072    | 5.2857     | 4.79794    | 5.34333   | 3.87447   | 4.97245   |
| 5.62652    | 7.52085    | 4.93188    | 6.05503   | 4.84272   | 7.16153   |
| 40.2544    | 44.6364    | 44.5878    | 40.1026   | 45.6392   | 39.7969   |
| 23.895     | 26.0687    | 26.0671    | 29.0814   | 31.95     | 23.7995   |
| 2.73932    | 1.73532    | 2.5258     | 1.95734   | 2.12597   | 2.53096   |
| 123.909    | 127.023    | 114.069    | 126.298   | 131.985   | 109.818   |
| 117.183    | 112.834    | 132.98     | 133.253   | 134.994   | 126.897   |
| 37.2859    | 32.1424    | 34.3599    | 35.134    | 40.9524   | 38.185    |
| 14.3227    | 15.8659    | 16.9044    | 15.2972   | 16.0263   | 14.201    |
| 0          | 0          | 0          | 0         | 0.31566   | 0         |
| 1.76574    | 1.38156    | 1.79551    | 1.94039   | 1.0559    | 1.196     |
| 4.02511    | 3.18526    | 4.3354     | 3.35157   | 2.3813    | 3.76045   |
| 0          | 0          | 0          | 0         | 0         | 0         |
| 0.871553   | 0.379835   | 0.643679   | 0.495001  | 0.41126   | 0.952135  |
| 13.4825    | 14.7377    | 13.0417    | 13.7945   | 12.7383   | 11.0511   |
| 0          | 0          | 0          | 0         | 0         | 0         |
| 0          | 0          | 0          | 0         | 0         | 0         |

|            |            |           |           |           |           |
|------------|------------|-----------|-----------|-----------|-----------|
| 18.6761    | 14.7938    | 17.7929   | 16.1059   | 16.4594   | 17.5677   |
| 96.2182    | 100.036    | 95.4727   | 107.121   | 72.4321   | 82.1594   |
| 10.5083    | 6.96144    | 9.20433   | 8.54761   | 9.59341   | 9.867     |
| 0.164865   | 0.147551   | 0.0333391 | 0.151983  | 0.0319516 | 0.0668145 |
| 5.13371    | 4.76354    | 5.39354   | 4.74268   | 5.26056   | 7.16225   |
| 0          | 0          | 0         | 0         | 7.12622   | 0         |
| 0.611973   | 0.637325   | 0.900022  | 0.605618  | 0.603795  | 0.450931  |
| 108.655    | 97.3955    | 101.325   | 109.833   | 89.7426   | 104.187   |
| 0.530464   | 1.32931    | 0.321811  | 0.288725  | 0.51403   | 0.10749   |
| 58.8779    | 53.2793    | 53.562    | 58.8638   | 56.1505   | 54.8874   |
| 0          | 0          | 0         | 0         | 0         | 0         |
| 8.74592    | 6.23978    | 7.52595   | 7.69751   | 6.80401   | 7.44081   |
| 102.323    | 80.5619    | 94.584    | 96.6828   | 111.307   | 74.4398   |
| 17.9701    | 15.3456    | 17.3252   | 17.54     | 17.3333   | 18.5388   |
| 12.8239    | 12.9725    | 9.90024   | 9.23169   | 11.194    | 10.9515   |
| 0          | 0          | 0         | 0         | 0         | 0         |
| 0          | 0          | 0         | 0         | 0         | 0         |
| 14.264     | 11.3219    | 11.9106   | 16.2077   | 10.4515   | 14.1245   |
| 3.70036    | 2.43456    | 2.53509   | 2.59975   | 1.84527   | 1.74721   |
| 0          | 0          | 0         | 0         | 0         | 0         |
| 1.02826    | 1.12E-06   | 1.11655   | 0.750224  | 0.406269  | 0.828974  |
| 0.770764   | 0.545302   | 0.640894  | 0.448173  | 0.560217  | 1.02257   |
| 5.31296    | 3.4732     | 4.8581    | 4.86155   | 9.13275   | 11.6084   |
| 1.31769    | 1.16043    | 0.937947  | 0.78414   | 0.806977  | 0.73694   |
| 37.9734    | 34.9602    | 37.3624   | 39.7429   | 44.5121   | 35.4044   |
| 0.00906856 | 0.00649292 | 0.0293418 | 0         | 0.0316358 | 0         |
| 0          | 0          | 0         | 0         | 0         | 0         |
| 0          | 0          | 0         | 0         | 0         | 0         |
| 0          | 0          | 0         | 0         | 0         | 0         |
| 2.64025    | 1.50217    | 1.41105   | 1.71078   | 1.90056   | 1.54769   |
| 0.09008    | 0.0322478  | 0.0364319 | 0.098059  | 0.0698314 | 0.0730128 |
| 0.0179061  | 0.127785   | 0.0578233 | 0.0907082 | 8.73E-14  | 0.130139  |
| 51.1207    | 54.5694    | 50.1411   | 52.4751   | 52.7655   | 39.8961   |
| 0.653983   | 0.409709   | 1.52086   | 0.771236  | 1.29913   | 0.397556  |
| 0.397863   | 0.247276   | 0.17879   | 0.387746  | 0.267734  | 0.644865  |
| 1.13389    | 0.938327   | 0.670589  | 1.15425   | 0.609459  | 0.680391  |
| 1.47632    | 1.08345    | 1.433     | 1.31246   | 1.91699   | 1.49576   |
| 21.4928    | 15.4901    | 19.9165   | 19.9273   | 22.4302   | 19.9726   |
| 0          | 0          | 0         | 0         | 0         | 0         |
| 16.849     | 17.8571    | 17.655    | 17.7909   | 14.9393   | 17.1733   |
| 5.63714    | 7.66856    | 6.99165   | 6.88647   | 5.31683   | 8.75759   |
| 0.117423   | 0.0840726  | 0.284943  | 0.085216  | 0         | 0         |
| 0.0373365  | 0.16708    | 0.0302007 | 0.144514  | 0.115777  | 0         |

|           |           |           |           |           |           |
|-----------|-----------|-----------|-----------|-----------|-----------|
| 0         | 0         | 0         | 0         | 0         | 0         |
| 0.317148  | 0.184425  | 0.43858   | 0.496605  | 0.0708934 | 0.235267  |
| 3.59948   | 2.68824   | 2.7986    | 2.57843   | 2.40549   | 2.45221   |
| 0         | 0.0148546 | 0         | 0         | 0         | 0         |
| 561.132   | 1020.14   | 832.673   | 643.978   | 588.74    | 1149.4    |
| 8.45192   | 6.48181   | 8.06682   | 8.23084   | 8.65186   | 8.52358   |
| 75.7852   | 75.5202   | 80.4785   | 70.0827   | 82.8305   | 63.9442   |
| 19.0475   | 17.0753   | 17.4031   | 16.7413   | 13.0504   | 16.1829   |
| 2.98424   | 4.29356   | 3.5785    | 3.63738   | 6.46453   | 3.68436   |
| 9.27798   | 7.89083   | 6.85856   | 7.65555   | 7.79767   | 7.29937   |
| 28.4527   | 32.8802   | 36.19     | 29.8124   | 27.9163   | 31.6854   |
| 0         | 0.0273984 | 0         | 0         | 0         | 0         |
| 0         | 0         | 0         | 0         | 0         | 0         |
| 0         | 0         | 0         | 0         | 0.12281   | 0         |
| 7.88727   | 6.97389   | 6.84756   | 8.27777   | 7.30487   | 6.78821   |
| 0         | 0         | 0         | 0         | 0         | 0         |
| 2.95605   | 3.48888   | 2.8581    | 3.16761   | 2.63173   | 2.75163   |
| 4.35384   | 3.19253   | 3.01641   | 2.86174   | 4.25302   | 4.58597   |
| 2.55293   | 1.13164   | 1.56312   | 2.92477   | 2.08174   | 3.50363   |
| 0.0308454 | 0.0662541 | 0.0748506 | 0.0447701 | 0.167383  | 0.150007  |
| 11.0196   | 11.5713   | 12.6728   | 12.5746   | 11.3453   | 14.7126   |
| 0.244981  | 0         | 0         | 0         | 0.0949565 | 0.0992826 |
| 0         | 0         | 0         | 0         | 0         | 0         |
| 0.0556759 | 0.0398628 | 0.140735  | 0.040405  | 0.0971118 | 0.141022  |
| 11.1415   | 13.4614   | 11.9999   | 8.34927   | 11.5944   | 9.66864   |
| 37.0864   | 32.9611   | 33.3751   | 39.2502   | 40.3796   | 36.0908   |
| 0         | 0         | 0         | 0         | 0         | 0         |
| 0.256967  | 0.210668  | 0.23766   | 0.184446  | 0.0591093 | 0.282548  |
| 0         | 0         | 0         | 0         | 0.0563188 | 0.0307224 |
| 49.4373   | 44.0795   | 52.215    | 52.0062   | 55.808    | 52.8141   |
| 10.2896   | 10.4125   | 9.99179   | 8.79817   | 7.95692   | 8.83552   |
| 21.2424   | 19.3929   | 22.1803   | 19.506    | 22.037    | 23.0216   |
| 0.906331  | 0.421795  | 0.219934  | 0.624854  | 0.351301  | 0.367306  |
| 11.81     | 12.1338   | 12.5329   | 10.5915   | 9.20747   | 12.8615   |
| 0         | 0         | 0         | 0         | 0         | 0         |
| 7.75118   | 7.19405   | 8.73705   | 6.77104   | 5.81411   | 7.44604   |
| 105.859   | 113.4     | 72.1975   | 76.0587   | 215.622   | 33.082    |
| 4.56938   | 3.54791   | 4.12063   | 4.06668   | 3.8893    | 4.24167   |
| 10.99     | 7.14351   | 8.31313   | 8.3567    | 7.79269   | 8.23892   |
| 1.82891   | 1.23194   | 1.92704   | 1.45824   | 1.37117   | 1.81923   |
| 48.5788   | 41.9402   | 51.7433   | 52.9578   | 48.3521   | 46.7575   |
| 0.573506  | 0.713729  | 0.510375  | 0.37684   | 0.698642  | 0.531252  |
| 0         | 0         | 0         | 0         | 0         | 0         |



|           |           |           |           |           |           |
|-----------|-----------|-----------|-----------|-----------|-----------|
| 0         | 0         | 0.286325  | 0         | 0         | 0         |
| 0         | 0         | 0         | 0         | 0         | 0         |
| 6.44021   | 8.12679   | 7.19528   | 10.4572   | 11.6385   | 11.5815   |
| 0.827396  | 0.863686  | 1.07583   | 0.813703  | 0.953124  | 1.11563   |
| 19.5592   | 20.2349   | 19.0271   | 23.7616   | 23.7793   | 20.6258   |
| 6.68892   | 5.29724   | 6.48531   | 5.80759   | 8.11163   | 7.20839   |
| 17.9399   | 15.1042   | 15.0622   | 15.9972   | 11.8911   | 15.9375   |
| 0.660629  | 0.455534  | 1.8868    | 1.03523   | 1.09399   | 1.11549   |
| 0         | 0         | 0         | 0         | 0         | 0         |
| 1.03195   | 1.00923   | 1.45405   | 0.841271  | 0.374339  | 0.593212  |
| 13.9682   | 16.1174   | 13.0886   | 12.1747   | 12.7929   | 11.0902   |
| 7.16415   | 5.05083   | 7.39267   | 6.33683   | 6.07633   | 6.88683   |
| 452.497   | 503.008   | 474.947   | 474.778   | 471.515   | 428.461   |
| 0.0358104 | 0.0127713 | 0.0288143 | 0.0391649 | 0.0289045 | 0.0148318 |
| 0.391306  | 0.22598   | 0.125042  | 0.427048  | 0.215712  | 0.195781  |
| 4.37718   | 4.00049   | 5.28864   | 4.45251   | 4.86977   | 5.78931   |
| 31.3033   | 38.679    | 36.7092   | 36.8384   | 35.8681   | 39.5507   |
| 18.0325   | 14.5667   | 18.5298   | 17.7956   | 17.4969   | 21.2315   |
| 0         | 0         | 0         | 0         | 0         | 0         |
| 32.6601   | 31.9009   | 35.2804   | 33.7735   | 30.6169   | 28.9671   |
| 0.0190125 | 0         | 0         | 0.0137977 | 0         | 0         |
| 0         | 0.266184  | 0         | 0.539607  | 0         | 0         |
| 0         | 0         | 0         | 0         | 0         | 0         |
| 0.106451  | 0.0961286 | 0.0964711 | 0.155044  | 0.0994969 | 0.118452  |
| 4.0038    | 3.17025   | 3.75039   | 3.54507   | 4.49584   | 4.31819   |
| 51.5169   | 59.4404   | 58.6202   | 60.2952   | 61.3113   | 57.1405   |
| 0         | 0         | 0         | 0         | 0         | 0         |
| 49.0275   | 47.1306   | 51.8231   | 56.2421   | 49.6333   | 43.2591   |
| 0.28199   | 0.514137  | 0.753368  | 0.950917  | 0.85336   | 0.36183   |
| 8.49756   | 10.1448   | 11.054    | 9.24323   | 7.95295   | 9.03698   |
| 37.6885   | 25.7916   | 36.7204   | 30.5616   | 37.6542   | 37.0052   |
| 0         | 0         | 0         | 0         | 0         | 0         |
| 0.340828  | 0.343856  | 0.100251  | 0.247345  | 0.0480391 | 0.0878986 |
| 2.13938   | 2.38861   | 2.0278    | 3.67756   | 2.3933    | 4.06483   |
| 10.3962   | 11.2621   | 11.129    | 10.6249   | 7.90952   | 9.67371   |
| 0.178482  | 0         | 0.14437   | 0         | 0.138362  | 0.433997  |
| 0.0554657 | 0.0264749 | 0.11964   | 0.10734   | 0.0573305 | 0.0299712 |
| 22.89     | 18.0428   | 24.0442   | 16.3853   | 18.5221   | 16.8575   |
| 9.63775   | 11.7177   | 7.64869   | 9.45769   | 10.6666   | 7.02564   |
| 1.01516   | 0.533767  | 1.60379   | 1.89935   | 0.70089   | 1.1828    |
| 0         | 0         | 0         | 0         | 0         | 0         |
| 43.8952   | 40.7863   | 49.0905   | 48.2771   | 60.173    | 48.3615   |
| 20.1916   | 16.5048   | 20.6879   | 20.0467   | 22.9792   | 20.2756   |

|          |           |           |           |           |          |
|----------|-----------|-----------|-----------|-----------|----------|
| 7.30634  | 8.22161   | 10.845    | 9.47405   | 9.48554   | 12.1164  |
| 2.48894  | 3.43559   | 4.21956   | 2.94857   | 2.79377   | 3.40517  |
| 108.012  | 117.206   | 119.788   | 123.825   | 131.212   | 113.86   |
| 0        | 0.0607856 | 0         | 0.0308061 | 0.0329073 | 0.068813 |
| 0.407973 | 0.406297  | 0.716996  | 0.644782  | 0.440444  | 0.75272  |
| 2921.03  | 4327.5    | 3424.62   | 2875.56   | 3153.26   | 2903.06  |
| 39.5013  | 41.553    | 41.5988   | 40.354    | 48.1119   | 39.3441  |
| 12.1245  | 13.9732   | 13.9582   | 12.7354   | 10.203    | 10.323   |
| 7.19335  | 11.2444   | 11.4543   | 10.0034   | 10.8316   | 10.562   |
| 10.7572  | 7.66507   | 10.0079   | 9.80206   | 10.8969   | 10.7248  |
| 22.7985  | 19.6962   | 20.3664   | 21.907    | 24.4459   | 22.5808  |
| 0        | 0         | 0         | 0.210461  | 0.0749384 | 0        |
| 0        | 0.0754309 | 0.0852181 | 0         | 0         | 0        |
| 9.12215  | 7.39037   | 7.37872   | 7.83821   | 6.88431   | 7.0048   |
| 0        | 0         | 0         | 0         | 0         | 0        |
| 2.72198  | 1.9811    | 1.65587   | 2.61209   | 2.16244   | 3.82905  |
| 31.6778  | 34.6042   | 30.8741   | 32.7635   | 27.4469   | 30.819   |
| 6.24628  | 5.16025   | 4.87205   | 5.79084   | 5.08167   | 5.04892  |
| 0.103702 | 0.0835301 | 0.0781657 | 0.0188146 | 0.0200979 | 0        |
| 238.718  | 279.765   | 285.078   | 258.647   | 305.783   | 273.013  |
| 23.342   | 31.7134   | 26.8568   | 25.12     | 24.0636   | 21.0304  |
| 0        | 0         | 0         | 0         | 0         | 0        |
| 0.286563 | 0.205173  | 0.197025  | 0.239158  | 0.233255  | 0.232269 |
| 17.7932  | 15.9959   | 17.5864   | 18.0003   | 20.3005   | 17.3442  |
| 0        | 0         | 0         | 0         | 0         | 0        |
| 0        | 0         | 0         | 0         | 0         | 0        |
| 16.7933  | 20.1941   | 19.8872   | 19.8399   | 17.4784   | 19.6129  |
| 39.4163  | 0         | 63.7661   | 0         | 0         | 31.9483  |
| 6.80287  | 5.51685   | 7.31183   | 6.87252   | 6.10698   | 4.60541  |
| 2.2297   | 2.53345   | 2.31326   | 2.63826   | 2.06668   | 2.16084  |
| 7.62717  | 5.942     | 6.57828   | 7.88915   | 6.20537   | 6.60156  |
| 20.2489  | 21.3455   | 20.7621   | 20.6688   | 15.2249   | 19.233   |
| 3.10856  | 3.0817    | 3.14307   | 3.03684   | 2.59518   | 2.6165   |
| 10.6353  | 13.3342   | 11.3173   | 12.2291   | 11.5425   | 17.4513  |
| 0.963542 | 0.957333  | 0.957452  | 0.749809  | 0.628515  | 0.896113 |
| 0.720162 | 0.446056  | 0.488193  | 0.254255  | 0.150887  | 0.28397  |
| 13.4735  | 10.7586   | 14.1955   | 12.6643   | 15.675    | 12.1239  |
| 0.645928 | 0.709124  | 0.644389  | 0.81252   | 1.08492   | 0.279225 |
| 41.3799  | 39.0011   | 33.7351   | 33.7067   | 37.4007   | 33.6296  |
| 28.6962  | 28.9298   | 26.4269   | 29.8927   | 20.9924   | 25.3527  |
| 2.27791  | 1.86367   | 1.31884   | 0.947936  | 1.47306   | 1.14662  |
| 67.2314  | 84.8273   | 61.7062   | 61.0599   | 129.604   | 29.7532  |
| 11.0506  | 8.55163   | 9.76825   | 8.6199    | 9.7208    | 9.84186  |

|           |           |            |           |           |           |
|-----------|-----------|------------|-----------|-----------|-----------|
| 0.213613  | 0         | 0          | 0.155023  | 0         | 0         |
| 31.2774   | 29.7468   | 35.6168    | 34.3541   | 38.3876   | 36.8678   |
| 9.34569   | 7.5433    | 9.07951    | 9.12032   | 8.45756   | 8.99545   |
| 11.2472   | 9.69246   | 10.4672    | 10.8736   | 8.58372   | 8.87465   |
| 20.5292   | 27.2725   | 28.7665    | 16.7487   | 22.3723   | 17.0493   |
| 0.476652  | 0         | 0.257036   | 0.69183   | 0.369508  | 0.386343  |
| 0         | 0         | 0          | 0         | 0         | 0         |
| 6.79024   | 6.2085    | 11.0592    | 4.69473   | 18.068    | 14.9865   |
| 0.100372  | 0.143728  | 0.28416    | 0.0364207 | 0.0778096 | 0.122032  |
| 18.6238   | 16.7269   | 17.6154    | 17.888    | 18.4026   | 16.2652   |
| 19.1127   | 20.6429   | 23.6009    | 21.0417   | 21.6099   | 19.9906   |
| 0.108703  | 0.0518323 | 0.118579   | 0.177313  | 0.163144  | 0.418094  |
| 0         | 0         | 0          | 0         | 0         | 0         |
| 14.7152   | 17.5591   | 14.5476    | 15.5567   | 13.7673   | 12.1208   |
| 1.61565   | 2.19107   | 1.47599    | 1.40701   | 1.93029   | 2.38798   |
| 20.0868   | 21.0619   | 23.4577    | 21.414    | 21.4193   | 22.2722   |
| 25.657    | 22.5359   | 16.6355    | 15.6664   | 17.7127   | 6.40622   |
| 0         | 0         | 0          | 0.073619  | 0         | 0.164446  |
| 0.1672    | 0.089784  | 0.0676223  | 0.212345  | 0.16202   | 0.237162  |
| 1.58389   | 1.24365   | 1.28032    | 0.945519  | 1.0496    | 1.03583   |
| 0.237754  | 0.437727  | 0.659363   | 0.591639  | 0.144815  | 0.440474  |
| 1.83006   | 1.13938   | 1.8021     | 1.09713   | 1.23364   | 0.515939  |
| 66.1781   | 56.2408   | 57.7855    | 60.9145   | 65.3173   | 32.0145   |
| 0.0204509 | 0         | 0.0165424  | 0         | 0.237808  | 0         |
| 8.79996   | 9.70713   | 9.66659    | 11.6075   | 12.5075   | 9.60439   |
| 8.37666   | 12.8747   | 7.81465    | 7.61913   | 5.97422   | 4.88848   |
| 0.456457  | 0.457524  | 0.369239   | 0.728839  | 0.637018  | 0.443963  |
| 0         | 0         | 0          | 0         | 0         | 0.0213248 |
| 5.61224   | 2.04498   | 4.45375    | 4.33429   | 2.05437   | 2.80443   |
| 10.8394   | 9.06166   | 11.6821    | 13.3863   | 13.2728   | 12.4049   |
| 0         | 0         | 0          | 0         | 0         | 0         |
| 0         | 0         | 0.00910731 | 0         | 7.53E-172 | 0         |
| 12.7173   | 12.1447   | 14.2569    | 14.2737   | 12.0453   | 10.0055   |
| 0         | 0         | 0.134372   | 0         | 0         | 0         |
| 11.2906   | 9.79532   | 13.2255    | 10.2995   | 11.4233   | 11.8165   |
| 2.75474   | 2.4751    | 3.91037    | 3.23395   | 3.39171   | 4.26861   |
| 0.641632  | 0.189163  | 0.41215    | 0.232822  | 0.687587  | 0.627232  |
| 0         | 0         | 0          | 0         | 0         | 0         |
| 0.0472913 | 0         | 0.038253   | 0         | 0.0733219 | 0         |
| 31.6852   | 27.2659   | 30.0793    | 28.7612   | 31.2628   | 29.5878   |
| 0         | 0         | 0          | 0.017954  | 0         | 0         |
| 22.2191   | 19.2458   | 20.9515    | 21.0793   | 18.2211   | 21.2836   |
| 3.44762   | 3.29124   | 2.87322    | 2.36932   | 1.55905   | 1.90528   |

|           |           |           |           |           |           |
|-----------|-----------|-----------|-----------|-----------|-----------|
| 8.91013   | 7.03778   | 8.1576    | 7.18714   | 8.60578   | 8.80798   |
| 0         | 0         | 0         | 0         | 0         | 0         |
| 23.9864   | 19.54     | 20.0058   | 19.4963   | 23.5532   | 16.1583   |
| 13.7167   | 9.50729   | 10.8286   | 10.1838   | 9.83811   | 7.50442   |
| 1.11346   | 1.15154   | 0.900658  | 1.07741   | 0.735296  | 0.869074  |
| 27.2878   | 28.2375   | 25.7776   | 29.7552   | 23.8389   | 26.9425   |
| 0.032661  | 0         | 0.0264188 | 0.0474054 | 0         | 0.0264729 |
| 1.49237   | 1.43218   | 1.64866   | 1.66653   | 1.73276   | 1.34864   |
| 2.45498   | 1.41649   | 2.0242    | 2.35798   | 1.61969   | 2.6851    |
| 0.583147  | 0.757727  | 0.580512  | 0.701511  | 1.01953   | 0.511672  |
| 18.5461   | 17.2      | 18.9429   | 17.2695   | 20.0432   | 19.4409   |
| 0.0488244 | 0.0699147 | 0.0394931 | 0.106298  | 0         | 0         |
| 21.9701   | 20.1721   | 26.046    | 26.6905   | 23.0009   | 23.9405   |
| 14.0755   | 13.2973   | 15.2595   | 14.4647   | 15.5162   | 14.6296   |
| 10.5791   | 9.14267   | 8.46922   | 8.4102    | 8.53824   | 8.43617   |
| 22.3609   | 19.862    | 23.6163   | 23.7059   | 20.157    | 22.189    |
| 0         | 0         | 0         | 0         | 0         | 0         |
| 20.3337   | 16.1296   | 18.4591   | 17.4108   | 23.1342   | 19.564    |
| 0.175849  | 0.0191688 | 0.113713  | 0.112214  | 0.0328706 | 0.0483324 |
| 0         | 0         | 0         | 0         | 0         | 0         |
| 31.6346   | 33.6619   | 32.9132   | 34.4833   | 54.7336   | 30.7804   |
| 0         | 0.0631903 | 0         | 0.0426998 | 0         | 0         |
| 0.0876628 | 0.0418433 | 0.0472725 | 0.0212062 | 0.0226525 | 0.0236846 |
| 0         | 0         | 0         | 0         | 0         | 0         |
| 0         | 0         | 0         | 0         | 0         | 0         |
| 5.82299   | 6.27806   | 5.91989   | 5.70142   | 6.49593   | 6.32468   |
| 4.84626   | 3.9978    | 4.21977   | 4.34524   | 2.92447   | 4.73784   |
| 0         | 0         | 0         | 0         | 0         | 0         |
| 0.54445   | 0.217422  | 0.793581  | 0.347333  | 0.507797  | 0.303461  |
| 22.4873   | 21.3122   | 14.7724   | 12.4047   | 19.3974   | 22.0196   |
| 1.37138   | 2.22677   | 1.8422    | 1.36845   | 0.949209  | 1.25049   |
| 60.8642   | 71.2594   | 59.7943   | 60.1327   | 49.1675   | 67.7063   |
| 0.338495  | 0.455255  | 0.458768  | 0.548446  | 0.171161  | 0.349502  |
| 5.40197   | 6.69465   | 5.99913   | 5.59775   | 5.54166   | 7.94411   |
| 11.0227   | 6.62147   | 8.57237   | 9.48682   | 9.92072   | 9.88648   |
| 17.6281   | 16.6397   | 3.27052   | 5.94726   | 31.8423   | 16.0552   |
| 12.13     | 11.3042   | 11.6468   | 12.511    | 10.7501   | 12.4326   |
| 17.0986   | 17.443    | 15.3003   | 17.6223   | 13.8689   | 13.7653   |
| 0.0522836 | 0         | 0.0845822 | 0         | 0         | 0         |
| 3.21185   | 2.24066   | 2.165     | 3.22739   | 3.21343   | 2.95933   |
| 0         | 0         | 0         | 0         | 0         | 0         |
| 0.725051  | 0.519123  | 0.167566  | 1.12753   | 0.722663  | 0.587679  |
| 9.65124   | 9.21347   | 10.1749   | 9.57348   | 9.80418   | 10.2233   |

|           |           |           |           |           |           |
|-----------|-----------|-----------|-----------|-----------|-----------|
| 41.384    | 45.4329   | 34.5905   | 38.969    | 41.8248   | 38.1398   |
| 0.327396  | 0.102554  | 0.165515  | 0.0890991 | 0.0634507 | 0.149268  |
| 61.0106   | 61.5066   | 64.5066   | 69.6703   | 70.2941   | 63.0364   |
| 0.282249  | 0.179624  | 0.0507258 | 0.242771  | 0.259329  | 0.0508295 |
| 0         | 0         | 0         | 0         | 0         | 0         |
| 14.9664   | 11.9717   | 13.0776   | 13.3044   | 12.9621   | 14.5134   |
| 0.143046  | 0.143386  | 0.416545  | 0.519056  | 0.465744  | 0.255076  |
| 4.49594   | 2.96487   | 3.78023   | 5.19469   | 5.64072   | 4.55514   |
| 86.3728   | 72.4692   | 81.3017   | 86.3926   | 91.9804   | 81.4461   |
| 5.80358   | 4.64545   | 4.43068   | 4.1881    | 4.0441    | 4.8912    |
| 288.939   | 323.632   | 347.443   | 329.599   | 333.276   | 314.255   |
| 0.608445  | 0.268083  | 0.22715   | 0.339661  | 0.344686  | 0.151743  |
| 1.35306   | 0.802351  | 0.684314  | 1.07395   | 1.11444   | 0.85303   |
| 24.494    | 21.0153   | 25.6339   | 21.0493   | 24.0092   | 24.9329   |
| 0         | 0         | 0         | 0         | 0         | 0         |
| 0         | 0         | 0         | 0         | 0         | 0         |
| 0.0513425 | 0.0204223 | 0         | 0         | 0         | 0         |
| 0         | 0         | 0.0157108 | 0         | 0         | 0.0629715 |
| 11.3214   | 13.0549   | 10.144    | 9.46906   | 11.1596   | 14.7814   |
| 0.465508  | 0.312464  | 0.235337  | 0.422284  | 0.112771  | 0.448055  |
| 39.9744   | 42.7523   | 41.18     | 42.5111   | 46.4961   | 37.2918   |
| 1.59E-14  | 0.0339918 | 4.12E-22  | 0.0445109 | 5.35E-90  | 0.041737  |
| 0         | 0.552059  | 0.196954  | 0.706821  | 0.0314596 | 0.131571  |
| 16.2351   | 14.5054   | 18.9194   | 17.4236   | 23.0116   | 17.2295   |
| 15.6896   | 16.3138   | 12.508    | 13.5609   | 8.98512   | 11.9149   |
| 70.3749   | 49.1504   | 59.2714   | 70.1793   | 75.1901   | 63.2054   |
| 3.56155   | 2.11656   | 4.51526   | 2.90658   | 2.07589   | 3.5874    |
| 4.74424   | 3.90051   | 3.99044   | 5.16121   | 3.91509   | 4.92528   |
| 40.348    | 39.562    | 40.0437   | 38.8703   | 39.3886   | 39.2115   |
| 89.8187   | 101.834   | 99.5952   | 99.0223   | 85.434    | 89.9597   |
| 13.633    | 13.0858   | 11.704    | 13.4513   | 12.5499   | 13.5016   |
| 0.0189588 | 0.0135741 | 0.0306708 | 0         | 0.0440915 | 0.0768338 |
| 7.02032   | 6.49683   | 5.6447    | 5.65748   | 4.67872   | 6.42059   |
| 18.5106   | 14.0843   | 16.9709   | 18.0337   | 16.7837   | 16.6317   |
| 0.0733952 | 0.0525496 | 0.0593679 | 0         | 0         | 0         |
| 0         | 0         | 0         | 0         | 0         | 0         |
| 25.2777   | 22.0332   | 21.7472   | 20.4104   | 20.1678   | 22.6142   |
| 5.79588   | 4.41405   | 4.75846   | 5.77229   | 5.49068   | 5.33256   |
| 12.8354   | 12.0635   | 15.8659   | 16.1058   | 17.7237   | 16.3158   |
| 12.4032   | 11.3927   | 12.2733   | 13.2427   | 9.99471   | 13.5059   |
| 43.3698   | 51.8827   | 40.2432   | 46.4609   | 34.4468   | 42.6692   |
| 2.3679    | 2.19158   | 2.94977   | 2.23935   | 3.6201    | 2.67493   |
| 10.4519   | 8.96537   | 9.29386   | 11.3719   | 9.30036   | 12.0685   |

|           |           |           |           |           |           |
|-----------|-----------|-----------|-----------|-----------|-----------|
| 0         | 0.0349574 | 0.0394931 | 0.0354328 | 0         | 0.0395738 |
| 3.66E-06  | 4.11E-05  | 3.62E-24  | 4.44E-05  | 5.34E-05  | 3.92E-05  |
| 7.8665    | 6.29573   | 6.1698    | 5.8177    | 5.04333   | 6.02112   |
| 0         | 0.069961  | 0.0395192 | 0.0354562 | 0.075749  | 0.1188    |
| 6.66429   | 6.52643   | 6.83978   | 6.62239   | 6.56681   | 6.55201   |
| 0         | 0         | 0         | 0         | 0         | 0         |
| 0         | 0         | 0         | 0         | 0         | 0         |
| 6.77568   | 6.68055   | 8.93845   | 6.53182   | 7.57581   | 7.67951   |
| 1.34683   | 1.1949    | 1.11311   | 1.63611   | 0.839806  | 1.56628   |
| 0.203595  | 0         | 0         | 0         | 0         | 0         |
| 13.0144   | 10.5602   | 13.2354   | 14.0574   | 10.6647   | 15.8048   |
| 1.1244    | 1.16123   | 1.27052   | 1.79257   | 2.04127   | 1.67592   |
| 11.8816   | 13.7775   | 10.9771   | 12.7364   | 10.2445   | 7.35384   |
| 6.48531   | 6.1049    | 7.21248   | 7.64731   | 7.4869    | 7.09584   |
| 7.5532    | 6.88993   | 7.74042   | 8.09799   | 5.01126   | 5.56135   |
| 3.88232   | 0.795018  | 0.84116   | 2.91832   | 0.752409  | 0.730496  |
| 5.29382   | 4.28958   | 5.09754   | 4.67668   | 3.60262   | 6.07204   |
| 0         | 0         | 0         | 0         | 0         | 0         |
| 0         | 0.0129854 | 0         | 0         | 0         | 0         |
| 0.43581   | 0.175518  | 0.190359  | 0.599258  | 0.0912185 | 0.22254   |
| 0.177623  | 0.381524  | 0.287351  | 0         | 0         | 0.287938  |
| 0         | 0         | 0         | 0         | 0         | 0         |
| 92.8998   | 83.5268   | 81.5685   | 106.546   | 92.2874   | 85.8833   |
| 16.0591   | 12.5197   | 15.3637   | 14.0262   | 14.492    | 15.2387   |
| 5.31177   | 5.96539   | 4.76436   | 7.35219   | 5.26344   | 5.1734    |
| 7.96978   | 6.92887   | 8.40115   | 7.33949   | 6.7793    | 7.53927   |
| 21.4135   | 19.1813   | 18.5218   | 19.8402   | 18.2694   | 18.1152   |
| 7.00559   | 5.94604   | 6.83726   | 6.3372    | 5.86428   | 6.7446    |
| 32.8467   | 29.3316   | 30.6788   | 29.8855   | 31.825    | 36.1984   |
| 0         | 0         | 0         | 0         | 0         | 0         |
| 0.926249  | 1.09568   | 0.944673  | 0.818325  | 0.749262  | 1.24038   |
| 10.9496   | 11.0488   | 10.3412   | 10.9044   | 12.2078   | 11.4473   |
| 0.689324  | 0.721332  | 0.364572  | 0.384811  | 0.452163  | 0.451274  |
| 6.14272   | 6.21617   | 6.02507   | 7.47661   | 6.88043   | 5.97858   |
| 15.8007   | 11.1969   | 16.7725   | 15.5094   | 14.5909   | 16.877    |
| 0.0229077 | 0.032803  | 0.0370592 | 0.0664982 | 0.0355169 | 0         |
| 5.22862   | 4.24066   | 5.5455    | 5.4792    | 3.88512   | 3.51699   |
| 0         | 0         | 0         | 0         | 0         | 0         |
| 166.751   | 154.124   | 139.107   | 161.239   | 218.805   | 189.377   |
| 6.74251   | 6.7218    | 8.87291   | 8.02074   | 7.46487   | 9.11588   |
| 0         | 0         | 0         | 0         | 0         | 0         |
| 44.8741   | 38.6436   | 37.1226   | 44.5164   | 41.1999   | 42.8962   |
| 0.0402059 | 0         | 0.0325217 | 0         | 0.0311682 | 0         |

|           |          |           |           |           |           |
|-----------|----------|-----------|-----------|-----------|-----------|
| 44.3818   | 37.3749  | 44.8807   | 47.6434   | 56.0088   | 44.719    |
| 3.85353   | 3.16979  | 2.44161   | 3.56025   | 4.80768   | 4.36618   |
| 10.7472   | 3.01816  | 6.71512   | 35.4468   | 9.82799   | 4.30343   |
| 3.1942    | 1.63787  | 2.14179   | 2.28084   | 0.549461  | 1.88252   |
| 0         | 0        | 0.278324  | 0         | 0         | 0.557785  |
| 1.5939    | 1.72218  | 2.27381   | 2.12416   | 3.12274   | 1.78518   |
| 53.6143   | 47.9466  | 56.9095   | 58.3783   | 67.1668   | 63.3248   |
| 0.159571  | 0        | 0         | 0         | 0         | 0         |
| 76.4401   | 54.7296  | 82.4411   | 73.9652   | 44.4431   | 67.1203   |
| 0.459396  | 0.751814 | 0.318511  | 0.333392  | 0.559634  | 0.425549  |
| 16.2345   | 13.1218  | 14.1965   | 13.5697   | 11.7218   | 13.6236   |
| 2.53025   | 2.36059  | 1.86061   | 1.78061   | 2.19925   | 2.42374   |
| 0.10887   | 0.152877 | 0.110109  | 0.0128408 | 9.46E-09  | 0.0540268 |
| 13.2281   | 14.9532  | 24.0624   | 21.9304   | 18.7183   | 19.0462   |
| 0         | 0        | 0.0255154 | 0.0686765 | 0.0733606 | 0.0511352 |
| 3.50537   | 3.34288  | 3.68146   | 2.78312   | 3.36291   | 3.72      |
| 66.0874   | 63.616   | 64.2911   | 68.6647   | 71.982    | 62.2107   |
| 0         | 0        | 0         | 0         | 0         | 0         |
| 19.9568   | 20.7262  | 17.838    | 19.5972   | 18.3436   | 16.9389   |
| 10.5355   | 8.10095  | 6.14337   | 8.11218   | 9.58637   | 12.3434   |
| 2.98917   | 2.50424  | 2.35556   | 2.50475   | 2.38892   | 2.41033   |
| 16.3121   | 22.5594  | 8.61241   | 15.1922   | 9.03052   | 7.20609   |
| 0.74962   | 0.763429 | 0.800209  | 0.545071  | 0.360272  | 0.765845  |
| 0         | 0        | 0         | 0         | 0         | 0         |
| 1.41577   | 1.19468  | 0.858892  | 1.17423   | 0.731685  | 0.778681  |
| 12.2184   | 15.534   | 9.83793   | 6.98851   | 9.14702   | 2.81015   |
| 4.12273   | 3.63914  | 3.31166   | 3.53914   | 2.91573   | 3.08921   |
| 10.1713   | 9.26255  | 7.71934   | 10.0004   | 10.7963   | 10.675    |
| 13.0988   | 17.3572  | 10.7535   | 13.4787   | 8.18413   | 12.5186   |
| 0         | 0        | 0         | 0         | 0         | 0         |
| 0.186135  | 0.133269 | 0.150561  | 0.135082  | 0         | 0.150869  |
| 0.0348513 | 0        | 0         | 0.0252922 | 0         | 0         |
| 0         | 0        | 0         | 0         | 0         | 0         |
| 0         | 0        | 0         | 0         | 0         | 0         |
| 1.44E-09  | 0.564623 | 2.44145   | 6.68361   | 0         | 2.43663   |
| 10.2923   | 8.55685  | 8.42339   | 9.79114   | 9.47388   | 9.84908   |
| 0         | 0        | 0         | 0         | 0         | 0         |
| 0         | 0        | 0         | 0         | 0         | 0         |
| 2.51297   | 3.6099   | 1.78264   | 3.3       | 1.8996    | 1.69653   |
| 19.401    | 23.9103  | 30.1373   | 21.6676   | 28.4926   | 21.2193   |
| 7.90018   | 8.45078  | 8.45505   | 8.42365   | 7.31962   | 8.55041   |
| 24.4473   | 22.0408  | 28.4686   | 26.0993   | 23.6838   | 26.1482   |
| 65.5998   | 54.0426  | 60.2308   | 65.2009   | 73.3593   | 55.0698   |

|           |           |           |           |           |           |
|-----------|-----------|-----------|-----------|-----------|-----------|
| 13.8783   | 14.6883   | 16.9672   | 14.0269   | 12.4863   | 16.152    |
| 0.161504  | 0.115634  | 0.153357  | 0.219125  | 0.174192  | 0.358564  |
| 5.1515    | 2.36636   | 3.53924   | 3.61993   | 1.51804   | 2.15031   |
| 48.3599   | 65.0054   | 50.5352   | 62.2582   | 51.2421   | 60.2363   |
| 2.7111    | 2.88907   | 2.09095   | 2.28778   | 3.42135   | 4.8037    |
| 1.61988   | 1.06761   | 0.534831  | 0.955589  | 0.814379  | 0.54237   |
| 0         | 0.106755  | 0         | 0         | 0         | 0.120853  |
| 58.1272   | 45.4865   | 60.17     | 55.6721   | 62.8229   | 60.0416   |
| 3.0233    | 3.03649   | 3.19272   | 3.47393   | 4.88278   | 0.987001  |
| 0.950568  | 1.49895   | 1.60386   | 1.76886   | 1.53711   | 1.17187   |
| 0.0677363 | 0.0969958 | 0.0547905 | 0         | 0         | 0         |
| 0.562063  | 0.60364   | 0.653547  | 0.586355  | 0.490185  | 0.697593  |
| 0         | 0.0482764 | 0.0545402 | 0.0489329 | 0         | 0         |
| 13.3758   | 13.1225   | 13.5992   | 14.0218   | 13.3996   | 11.816    |
| 1.18939   | 0.804271  | 1.08679   | 1.07096   | 1.12693   | 1.48177   |
| 0         | 0         | 0         | 0         | 0         | 0         |
| 20.7302   | 16.7393   | 20.461    | 18.7041   | 18.8148   | 20.1361   |
| 13.3492   | 11.8635   | 12.6183   | 11.8922   | 11.6285   | 10.6549   |
| 30.3153   | 27.6108   | 30.0946   | 34.585    | 31.2175   | 25.5382   |
| 0.0252794 | 0         | 0.010224  | 0         | 0.019597  | 0.0512246 |
| 0.42428   | 0.18986   | 0.171596  | 0.192442  | 0.370022  | 0.214933  |
| 1.62E-07  | 0.151383  | 3.23E-08  | 0.123833  | 0         | 0.433922  |
| 42.9961   | 44.7425   | 41.2883   | 39.039    | 58.9632   | 32.5242   |
| 4.31103   | 3.84063   | 4.3922    | 3.05695   | 3.13794   | 3.52091   |
| 16.1193   | 14.07     | 16.2982   | 16.312    | 16.0306   | 18.5177   |
| 1.40303   | 1.14153   | 1.0661    | 1.09534   | 0.477907  | 1.84365   |
| 34.1029   | 22.117    | 21.4287   | 24.7436   | 32.7025   | 34.1263   |
| 16.7613   | 12.8086   | 14.1804   | 15.167    | 17.7551   | 16.0894   |
| 1.90731   | 1.76114   | 1.70492   | 1.55236   | 1.52117   | 2.00578   |
| 0         | 0         | 0         | 0         | 0         | 0         |
| 1.61927   | 1.03164   | 1.39304   | 1.49381   | 0.712745  | 0.956547  |
| 0.288534  | 0.374914  | 0.0518644 | 0.37355   | 0.0497058 | 0.103941  |
| 0.259872  | 0.231609  | 0.181831  | 0.14572   | 0.0762404 | 0.33393   |
| 0         | 0         | 0         | 0         | 0         | 0         |
| 12.4482   | 10.849    | 9.6657    | 11.0661   | 10.8247   | 10.4161   |
| 33.2907   | 39.6765   | 33.1501   | 33.8536   | 23.3069   | 26.1453   |
| 0         | 0         | 0         | 0         | 0         | 0         |
| 26.9246   | 26.2788   | 33.378    | 27.8912   | 35.1611   | 34.7594   |
| 0.360604  | 0.340336  | 0.218764  | 0.315226  | 0.247779  | 0.298925  |
| 0.288868  | 0.206824  | 0         | 0         | 0.223935  | 0.234137  |
| 45.2306   | 41.8296   | 16.0551   | 88.5218   | 65.1844   | 71.9568   |
| 0.915452  | 0.59586   | 0.572197  | 0.785152  | 0.580641  | 0.876914  |
| 12.4548   | 15.6336   | 12.1661   | 13.7964   | 11.8121   | 12.6532   |



|           |           |           |          |           |           |
|-----------|-----------|-----------|----------|-----------|-----------|
| 7.94875   | 5.50822   | 6.75132   | 7.08962  | 7.55985   | 7.69979   |
| 2.54351   | 1.64      | 1.28445   | 1.75409  | 2.75612   | 2.49443   |
| 12.1945   | 11.9607   | 12.8633   | 10.5975  | 10.1942   | 11.3403   |
| 0         | 0         | 0         | 0        | 0         | 0         |
| 0.593728  | 0.765176  | 0.768407  | 0.775582 | 1.19669   | 0.481236  |
| 85.1387   | 34.8329   | 39.3525   | 44.1333  | 56.5721   | 69.0077   |
| 15.0175   | 11.9047   | 15.2538   | 14.8012  | 12.7788   | 14.9378   |
| 4.67083   | 2.96854   | 3.33342   | 4.35039  | 3.11762   | 4.31238   |
| 74.6185   | 64.597    | 69.925    | 76.5251  | 78.4279   | 72.2098   |
| 23.0542   | 27.9491   | 23.3999   | 23.2568  | 19.9246   | 21.4445   |
| 16.4993   | 12.4793   | 17.6196   | 13.8438  | 15.6646   | 16.7403   |
| 10.3542   | 12.7362   | 13.9815   | 10.7173  | 9.22364   | 11.1673   |
| 12.1287   | 10.4909   | 11.3985   | 9.0055   | 8.45123   | 11.5354   |
| 0         | 0         | 0         | 0        | 0         | 0.021245  |
| 0.177023  | 0.0316857 | 0.0357969 | 0.171294 | 0         | 0.0358701 |
| 0         | 0         | 0         | 0        | 0         | 0         |
| 0.831612  | 0.909355  | 0.642492  | 0.926899 | 0.673207  | 0.681895  |
| 10.111    | 10.1093   | 11.3242   | 12.3309  | 10.2036   | 10.0381   |
| 3.80637   | 23.9198   | 55.6275   | 7.74588  | 13.4778   | 10.1518   |
| 6.83889   | 4.29448   | 5.66787   | 7.15989  | 6.60529   | 6.86079   |
| 0         | 0         | 0         | 0        | 0         | 0         |
| 22.2867   | 26.1973   | 22.724    | 21.875   | 20.7191   | 20.6595   |
| 4.97098   | 4.52683   | 4.78064   | 4.92087  | 4.13772   | 4.38193   |
| 74.7098   | 92.2333   | 84.5929   | 75.0398  | 88.283    | 59.6808   |
| 19.3753   | 17.8008   | 20.0145   | 22.2561  | 22.6888   | 21.1239   |
| 0         | 0         | 0         | 0        | 0         | 0         |
| 15.7258   | 13.1221   | 16.3071   | 15.9606  | 13.2374   | 16.6955   |
| 9.79391   | 10.5737   | 15.1787   | 9.62687  | 12.817    | 11.7418   |
| 0.72917   | 0.737862  | 0.45612   | 0.585617 | 0.339158  | 0.464933  |
| 2.84752   | 3.05816   | 3.07107   | 2.87013  | 2.53447   | 2.09431   |
| 4.27863   | 4.59786   | 4.94739   | 4.87941  | 4.26453   | 4.45882   |
| 26.7414   | 25.5783   | 26.5312   | 32.2435  | 32.715    | 30.3955   |
| 9.90894   | 8.1718    | 9.02227   | 7.64289  | 8.32504   | 8.99867   |
| 11.1622   | 10.7214   | 10.3776   | 11.0738  | 8.87168   | 9.62021   |
| 0.0778663 | 0.0557508 | 0.0629845 | 0.25429  | 0.0301816 | 0.220896  |
| 11.9958   | 10.5662   | 11.9045   | 10.2423  | 10.8615   | 11.615    |
| 41.6381   | 39.9041   | 44.7759   | 48.9908  | 51.7461   | 49.6387   |
| 1.66884   | 1.52887   | 1.27598   | 1.2495   | 0.768022  | 1.42281   |
| 9.76704   | 7.66747   | 9.74511   | 10.2904  | 9.91605   | 10.8902   |
| 1057.47   | 2401.61   | 1389.36   | 1485.42  | 1295.04   | 3012.69   |
| 61.5682   | 60.083    | 61.3631   | 60.4023  | 63.5088   | 52.8671   |
| 0         | 0.0193935 | 0         | 0        | 0.0419959 | 0         |
| 1.32372   | 0.871938  | 1.09215   | 1.34491  | 0.574654  | 0.922711  |

|           |          |           |           |           |          |
|-----------|----------|-----------|-----------|-----------|----------|
| 4.1858    | 3.22032  | 4.03773   | 3.11318   | 2.80149   | 3.43487  |
| 53.2727   | 47.4473  | 57.5244   | 64.9674   | 84.0297   | 68.7453  |
| 0.877832  | 1.25702  | 0.71006   | 0.819075  | 0.194431  | 0.406578 |
| 0         | 0        | 0         | 0         | 0         | 0        |
| 13.512    | 11.661   | 12.491    | 13.9909   | 11.0172   | 12.3405  |
| 0.576899  | 0.239133 | 0.343841  | 0.242386  | 0.164766  | 0.196883 |
| 36.8388   | 42.4865  | 43.4811   | 38.0188   | 35.6609   | 37.564   |
| 20.7639   | 14.4844  | 22.8263   | 17.0193   | 19.8693   | 22.5457  |
| 14.0615   | 12.7923  | 12.4604   | 12.8924   | 13.1881   | 12.8323  |
| 99.8079   | 95.3698  | 92.1674   | 99.2968   | 74.2076   | 92.743   |
| 0         | 0        | 0         | 0         | 0         | 0        |
| 22.8941   | 22.0704  | 22.7597   | 22.298    | 20.7188   | 20.4202  |
| 2.12664   | 1.5857   | 0.84483   | 1.17805   | 1.31693   | 0.775161 |
| 0         | 0        | 0         | 0         | 0         | 0        |
| 11.2472   | 9.33384  | 8.1917    | 7.316     | 5.92611   | 8.36376  |
| 0         | 0        | 0.0675662 | 0.0606196 | 0         | 0        |
| 1.44908   | 1.25075  | 1.36597   | 1.29469   | 1.05399   | 1.30052  |
| 10.3194   | 8.97178  | 5.51511   | 9.89619   | 12.9997   | 4.63021  |
| 0         | 0        | 0         | 0         | 0         | 0        |
| 6.97581   | 6.48864  | 6.99296   | 6.72833   | 6.8868    | 6.04074  |
| 0         | 0        | 0         | 0         | 0         | 0        |
| 24.2007   | 23.2304  | 20.9175   | 23.7811   | 22.3004   | 21.3713  |
| 63.4295   | 54.5371  | 58.3032   | 74.1775   | 73.541    | 66.388   |
| 0         | 0        | 0         | 0         | 0         | 0        |
| 0         | 0        | 0         | 0         | 0         | 0        |
| 0.0376333 | 0        | 0.0608817 | 0.109245  | 0.116696  | 0        |
| 0         | 0        | 0         | 0         | 0         | 0        |
| 6.89055   | 8.90606  | 7.9149    | 7.63304   | 8.72309   | 8.2173   |
| 11.0784   | 10.9711  | 13.7118   | 10.5547   | 10.9941   | 11.0325  |
| 19.4077   | 12.9699  | 19.704    | 18.391    | 20.2931   | 21.4319  |
| 1.0013    | 1.24155  | 1.59302   | 0.903555  | 1.07369   | 1.70793  |
| 52.3531   | 91.8025  | 65.4527   | 105.182   | 82.4041   | 86.9028  |
| 129.171   | 135.085  | 127.135   | 137.617   | 135.246   | 130.961  |
| 6.50671   | 5.00933  | 4.73323   | 5.13746   | 4.79757   | 6.06783  |
| 0.357808  | 0.398182 | 0.401816  | 0.245267  | 0.292549  | 0.869335 |
| 0.082249  | 0.088333 | 0         | 0.0298448 | 0.0318803 | 0        |
| 22.5752   | 26.9086  | 28.5997   | 23.4903   | 21.7895   | 19.8958  |
| 12.7994   | 14.301   | 14.9494   | 13.4541   | 12.7032   | 13.6309  |
| 0         | 0.051575 | 0         | 0         | 0         | 0        |
| 2.36382   | 2.48739  | 1.94102   | 2.31328   | 1.888     | 2.43849  |
| 13.6262   | 9.87591  | 11.9218   | 10.3175   | 12.769    | 12.5208  |
| 9.78181   | 6.12582  | 4.57165   | 8.31234   | 13.0367   | 6.67328  |
| 0         | 0        | 0         | 0         | 0         | 0        |

|           |           |           |           |           |           |
|-----------|-----------|-----------|-----------|-----------|-----------|
| 2.06353   | 3.99927   | 2.44947   | 2.5478    | 1.55484   | 3.10722   |
| 7.49218   | 5.30762   | 6.73025   | 6.61835   | 6.08439   | 6.98257   |
| 117.674   | 124.192   | 119.071   | 123.492   | 132.822   | 112.812   |
| 1.00637   | 0.475829  | 0.430054  | 1.28154   | 1.61918   | 1.95459   |
| 0.23456   | 0.131204  | 0.0474327 | 0.0957512 | 0.0909173 | 0.106942  |
| 15.9997   | 16.0577   | 15.1861   | 19.2661   | 17.2157   | 16.6394   |
| 4.07929   | 3.8769    | 4.49922   | 4.63039   | 3.15964   | 4.1852    |
| 0         | 0         | 0         | 0         | 0         | 0         |
| 0         | 0         | 0         | 0         | 0         | 0         |
| 0.120225  | 0.0573857 | 0.0324157 | 0         | 0         | 0.064964  |
| 4.70616   | 4.02936   | 5.32936   | 4.56799   | 4.46913   | 4.73631   |
| 0.246426  | 0.529308  | 0.199329  | 0.357671  | 0.382066  | 0.199736  |
| 0.0462172 | 0         | 0.0186921 | 0         | 0.0179141 | 0         |
| 4.1741    | 3.31109   | 2.76909   | 2.52798   | 2.51417   | 2.23927   |
| 0         | 0         | 0         | 0         | 0         | 0         |
| 1.49E-07  | 0.0923824 | 2.20E-07  | 1.17E-07  | 0.10031   | 1.36E-07  |
| 69.4579   | 65.4785   | 67.8472   | 66.8987   | 73.3928   | 58.5009   |
| 7.67563   | 9.52168   | 6.68624   | 7.22308   | 4.72969   | 3.96525   |
| 8.35354   | 6.93231   | 9.18046   | 7.68382   | 8.58187   | 8.76705   |
| 8.10703   | 5.55748   | 8.06446   | 9.13807   | 7.5238    | 8.83592   |
| 43.1433   | 33.9462   | 38.7508   | 36.974    | 38.1197   | 42.937    |
| 8.06171   | 5.2473    | 5.69101   | 8.93535   | 6.13593   | 6.77189   |
| 22.2941   | 17.4831   | 17.5559   | 16.7943   | 17.3077   | 15.2092   |
| 54.6815   | 53.1986   | 53.7456   | 51.5985   | 54.2695   | 66.0986   |
| 0         | 0         | 0         | 0         | 0         | 0         |
| 0         | 0         | 0         | 0.0288636 | 0         | 0         |
| 1.16022   | 1.60342   | 1.39441   | 1.21077   | 1.82161   | 1.04468   |
| 0         | 0         | 0         | 0         | 0         | 0         |
| 14.3674   | 12.5777   | 15.6814   | 13.9554   | 12.4997   | 15.5355   |
| 17.4427   | 26.8033   | 25.2477   | 19.4689   | 13.68     | 16.7009   |
| 0.797129  | 0.285364  | 0.429854  | 0.482075  | 0.102991  | 0.430733  |
| 9.78023   | 8.38667   | 9.96545   | 9.43608   | 11.9016   | 11.307    |
| 33.8138   | 39.9993   | 41.8167   | 34.8382   | 32.1842   | 30.0975   |
| 0.209808  | 0         | 0         | 0         | 0.0813232 | 0.0850282 |
| 0         | 0         | 0         | 0         | 0         | 0         |
| 2.52977   | 2.39727   | 2.12653   | 2.68185   | 1.88421   | 2.15098   |
| 53.8457   | 57.3031   | 45.271    | 51.3314   | 44.3506   | 52.8613   |
| 0         | 0         | 0         | 0         | 0         | 0         |
| 10.1154   | 10.8881   | 9.01137   | 10.3417   | 8.39791   | 7.36798   |
| 80.5312   | 99.952    | 91.5983   | 86.3597   | 96.4813   | 82.4121   |
| 0         | 0         | 0         | 0         | 0.194939  | 0.20382   |
| 5.91695   | 5.00668   | 5.63213   | 5.76876   | 5.79155   | 5.32876   |
| 15.1986   | 12.3847   | 14.1731   | 12.9945   | 12.9675   | 15.3564   |

|           |           |           |          |            |           |
|-----------|-----------|-----------|----------|------------|-----------|
| 0         | 0         | 0         | 0        | 0          | 0         |
| 19.6436   | 19.4738   | 18.7267   | 20.4044  | 22.7165    | 19.0711   |
| 42.2136   | 47.7147   | 54.1818   | 60.3963  | 62.2748    | 52.812    |
| 0.261011  | 0         | 0.329885  | 0        | 0          | 0         |
| 0         | 0         | 0         | 0        | 0          | 0         |
| 3.30808   | 5.18766   | 4.74336   | 3.34446  | 4.3827     | 3.97156   |
| 0.212446  | 0.183228  | 0.0517503 | 0.18572  | 0          | 0.0518561 |
| 1.06141   | 0.947129  | 1.14866   | 0.847278 | 0.831487   | 0.769007  |
| 0.822254  | 0.747582  | 0.463583  | 0.684594 | 0.781483   | 0.702886  |
| 15.9424   | 11.9039   | 16.6767   | 13.65    | 14.7348    | 15.6206   |
| 26.4025   | 29.0873   | 25.2144   | 22.9311  | 28.1267    | 23.6784   |
| 0.460682  | 0.583562  | 0.630615  | 0.282891 | 0.41207    | 0.631905  |
| 0.098496  | 1.51621   | 0.0398357 | 0.536102 | 0.0381778  | 2.35511   |
| 44.6018   | 56.9485   | 55.02     | 47.9777  | 41.1179    | 50.0681   |
| 13.0401   | 10.6242   | 12.1846   | 12.5635  | 11.6775    | 13.394    |
| 13.2241   | 13.3873   | 13.126    | 11.7062  | 12.0164    | 10.483    |
| 0.449542  | 0.28745   | 0.359476  | 0.311838 | 0.312432   | 0.533216  |
| 3.85029   | 2.7293    | 4.29201   | 3.22517  | 3.86094    | 3.77289   |
| 1.96627   | 1.08992   | 0.71828   | 1.01268  | 0.491704   | 0.925391  |
| 2.14328   | 1.31134   | 1.82822   | 1.68268  | 2.12975    | 2.24257   |
| 4.77046   | 3.78265   | 4.02101   | 2.91197  | 2.38478    | 4.06537   |
| 0         | 0         | 0         | 0        | 0          | 0         |
| 1.13446   | 1.19738   | 0.399371  | 0.97937  | 0.300773   | 0.442232  |
| 0.32181   | 0.519979  | 0.573376  | 0.441839 | 0.987775   | 0.814237  |
| 0.0001141 | 1.65E-05  | 2.30674   | 2.47826  | 0.00033431 | 2.76E-05  |
| 0.474449  | 0.305939  | 0.174953  | 0.12361  | 0.294735   | 0.213051  |
| 0         | 0         | 0         | 0        | 0          | 0         |
| 22.3246   | 17.0867   | 20.7527   | 22.9202  | 20.3262    | 22.5775   |
| 0         | 0         | 0         | 0        | 0          | 0         |
| 20.6193   | 17.3865   | 18.06     | 18.6371  | 18.1269    | 19.2638   |
| 9.73162   | 9.51678   | 8.41578   | 10.9668  | 10.2428    | 9.90784   |
| 2.12384   | 1.67269   | 1.03076   | 0        | 0.38674    | 1.89359   |
| 0         | 0         | 0         | 0        | 0          | 0         |
| 2.61272   | 2.50178   | 3.2485    | 2.88469  | 2.29204    | 2.80475   |
| 19.8989   | 23.6755   | 21.2441   | 21.7677  | 22.3733    | 19.0343   |
| 2.3202    | 1.44036   | 2.09373   | 1.9174   | 2.11056    | 1.40229   |
| 0.516554  | 0.139455  | 0.371772  | 0.307458 | 0.486713   | 0.950964  |
| 48.0492   | 39.2118   | 35.5314   | 42.6568  | 43.3059    | 46.8751   |
| 0         | 0.0866935 | 0         | 0        | 0          | 0         |
| 15.1022   | 12.7287   | 14.9585   | 15.8546  | 17.5611    | 15.9992   |
| 2.59094   | 2.36099   | 3.26271   | 3.61101  | 1.48358    | 1.64662   |
| 0         | 0         | 0         | 0        | 0          | 0         |
| 3.73681   | 3.41786   | 3.64543   | 3.50904  | 4.32138    | 3.97739   |

|           |           |           |           |           |           |
|-----------|-----------|-----------|-----------|-----------|-----------|
| 0.205718  | 0.300256  | 0.509685  | 0.59661   | 0.323744  | 0.526119  |
| 7.6681    | 9.63939   | 7.64098   | 8.59398   | 9.36413   | 10.7171   |
| 2.1322    | 1.57507   | 2.24483   | 2.38246   | 2.02022   | 2.96266   |
| 4.51705   | 3.65164   | 3.99727   | 4.53891   | 3.6214    | 3.85393   |
| 9.13267   | 6.53882   | 8.70813   | 8.45659   | 10.018    | 8.49716   |
| 0         | 0         | 0         | 0         | 0         | 0         |
| 0         | 0         | 0         | 0         | 0         | 0         |
| 1.49566   | 1.69084   | 1.78288   | 1.99947   | 2.0138    | 1.65891   |
| 6.40029   | 6.67041   | 6.87883   | 7.11412   | 7.74073   | 7.92789   |
| 13.1648   | 11.9733   | 13.8155   | 12.2928   | 12.5094   | 13.9965   |
| 0.428255  | 0.109508  | 0.197947  | 0.133197  | 0.213422  | 0.198352  |
| 1.12155   | 1.34622   | 1.10287   | 0.702213  | 0.605201  | 1.05165   |
| 8.4358    | 6.34848   | 6.71415   | 5.75094   | 5.13398   | 5.34019   |
| 30.6808   | 29.5244   | 33.6699   | 31.5257   | 32.6908   | 28.1051   |
| 0.151574  | 0.0271311 | 0.0613027 | 0.11      | 0.117503  | 0.0614281 |
| 4.26268   | 7.50283   | 9.20428   | 9.58987   | 4.32338   | 9.74135   |
| 9.56122   | 11.0702   | 10.5557   | 9.97054   | 9.38186   | 9.70456   |
| 8.97117   | 9.35654   | 9.80409   | 10.9247   | 8.39486   | 7.52824   |
| 1.54718   | 0.109408  | 0.123603  | 0         | 0         | 0         |
| 5.03983   | 4.12391   | 4.49592   | 4.40989   | 4.44276   | 4.50515   |
| 11.618    | 27.8184   | 38.6686   | 47.962    | 91.4423   | 123.962   |
| 0.151983  | 0.149623  | 0.0922019 | 0.0413613 | 0.117819  | 0.184781  |
| 0.240981  | 0         | 0         | 0         | 0         | 0         |
| 2.49767   | 2.1791    | 2.5555    | 2.64088   | 2.20551   | 2.41325   |
| 0.0924054 | 0.0330803 | 0         | 0         | 0.0716341 | 0.0374489 |
| 29.0327   | 25.0714   | 28.085    | 24.6278   | 23.2548   | 24.7837   |
| 8.09513   | 6.67984   | 7.54655   | 7.81346   | 8.48757   | 7.31593   |
| 141.087   | 104.059   | 131.255   | 148.346   | 127.847   | 125.782   |
| 0.893339  | 2.34525   | 1.12405   | 1.94494   | 2.15454   | 1.52862   |
| 3.26143   | 2.89554   | 4.14999   | 3.07061   | 2.06398   | 2.96185   |
| 7.23446   | 4.90363   | 5.01243   | 5.47666   | 6.85822   | 5.44582   |
| 0.492139  | 1.36E-06  | 5.51E-07  | 4.59E-07  | 4.56E-07  | 3.76E-07  |
| 0.388368  | 0.319258  | 0.349047  | 0.375794  | 0.334521  | 0.256491  |
| 1.04767   | 0.821068  | 0.721468  | 0.585646  | 0.954848  | 0.677042  |
| 0.249762  | 0.357649  | 0.606081  | 0.181257  | 0.580857  | 2.42928   |
| 43.3138   | 49.4576   | 44.6758   | 43.4713   | 35.6805   | 40.6221   |
| 16.271    | 18.2376   | 17.7037   | 18.8405   | 15.3193   | 17.1562   |
| 7.29058   | 4.63744   | 7.08677   | 5.63152   | 6.40372   | 7.45632   |
| 0.338232  | 0.272438  | 0.410383  | 0.460239  | 0.163877  | 0.445491  |
| 18.9538   | 14.5365   | 17.5174   | 17.8573   | 15.4672   | 16.6813   |
| 0.0318987 | 0.0456777 | 0.180615  | 0.277793  | 0.0494567 | 0         |
| 0.230403  | 0.0659856 | 0.335463  | 0.167208  | 0.107167  | 0.224099  |
| 0.63115   | 0.258224  | 0.218796  | 0.196301  | 0         | 0.292325  |

|          |           |           |          |           |           |
|----------|-----------|-----------|----------|-----------|-----------|
| 7.56928  | 7.92763   | 8.4011    | 7.89576  | 6.72863   | 7.43147   |
| 2.14927  | 0.557165  | 1.01912   | 0.564742 | 0.804613  | 1.50177   |
| 35.9213  | 18.8266   | 31.4525   | 49.7194  | 33.8156   | 41.5031   |
| 63.2849  | 64.9514   | 65.2206   | 72.3406  | 51.0859   | 51.8449   |
| 3.02621  | 3.67269   | 6.46652   | 4.37938  | 4.79557   | 4.65338   |
| 15.6525  | 12.1271   | 15.8863   | 15.6878  | 15.174    | 16.6666   |
| 0        | 0         | 0         | 0        | 0         | 0         |
| 0.548676 | 0.271418  | 0.459951  | 0.463341 | 0.51041   | 0.0727724 |
| 12.3421  | 11.9201   | 17.3507   | 15.8422  | 14.5692   | 14.1496   |
| 0.509175 | 0.382686  | 0.330072  | 0.259467 | 0.414346  | 0.515355  |
| 1.29119  | 1.40264   | 2.30492   | 1.13091  | 0.966432  | 1.01046   |
| 15.0632  | 16.4301   | 15.2863   | 18.8131  | 18.0272   | 18.3512   |
| 0        | 0         | 0         | 0        | 0.0262247 | 0         |
| 0.431881 | 0.592669  | 0.494898  | 0.626848 | 0.585902  | 0.583424  |
| 0.93803  | 0.439131  | 0.700388  | 0.73311  | 0.279683  | 0.70182   |
| 0.245233 | 0.125416  | 0.0850132 | 0.279667 | 0.0543167 | 0.0567914 |
| 17.587   | 20.0985   | 17.9242   | 16.4822  | 13.5114   | 17.0706   |
| 0        | 0         | 0         | 0        | 0         | 0         |
| 0.19014  | 0.0340342 | 0.1538    | 0.137988 | 0.294799  | 0.269701  |
| 0.927262 | 0.695517  | 0.557175  | 0.634478 | 0.821518  | 1.25979   |
| 0        | 0         | 0         | 0        | 0         | 0         |
| 8.02187  | 6.46764   | 8.68526   | 8.16434  | 6.79866   | 8.80408   |
| 8.8607   | 6.37271   | 8.73002   | 9.73742  | 11.6307   | 8.53188   |
| 3.58359  | 2.59999   | 3.86493   | 2.46197  | 3.0003    | 3.75664   |
| 96.6076  | 103.91    | 108.472   | 111.028  | 88.6207   | 95.0476   |
| 72.1849  | 66.4357   | 86.7143   | 89.2087  | 81.4272   | 79.5375   |
| 20.331   | 19.4285   | 20.4816   | 21.4585  | 21.7072   | 24.9692   |
| 32.7409  | 38.0326   | 29.7305   | 31.6918  | 19.4801   | 28.0861   |
| 6.11646  | 5.34034   | 6.02951   | 5.87197  | 6.86408   | 6.45801   |
| 11.3351  | 9.87814   | 9.85919   | 10.8192  | 9.04875   | 9.99198   |
| 1.7275   | 2.42058   | 2.41527   | 1.66551  | 1.66433   | 1.88022   |
| 1.74371  | 1.02814   | 1.99122   | 2.15869  | 1.82884   | 2.57726   |
| 16.0294  | 14.1478   | 14.6446   | 17.0159  | 17.9164   | 16.2518   |
| 26.2663  | 23.9674   | 28.2079   | 27.6139  | 22.6742   | 29.5435   |
| 10.2189  | 9.59104   | 8.8423    | 9.7916   | 8.20275   | 8.6352    |
| 5.82897  | 12.8681   | 9.42988   | 9.87045  | 15.0624   | 7.8743    |
| 44.974   | 29.9184   | 29.0084   | 34.1821  | 32.9926   | 38.6244   |
| 17.5643  | 14.3652   | 17.7362   | 15.9452  | 17.7237   | 16.9077   |
| 3.52865  | 3.43438   | 3.70161   | 4.60144  | 5.59915   | 3.6198    |
| 0        | 0         | 0         | 0        | 0.0222387 | 0         |
| 0.106223 | 0.494348  | 0.343686  | 0.308351 | 0.329382  | 0.430486  |
| 15.5447  | 16.3094   | 17.6478   | 16.7084  | 16.8482   | 19.4838   |
| 2.25213  | 0.904561  | 1.24409   | 1.91345  | 0.809068  | 0.845928  |

|          |          |            |          |           |           |
|----------|----------|------------|----------|-----------|-----------|
| 0.66848  | 1.23643  | 1.21662    | 0.626624 | 0.582993  | 0.812739  |
| 0.602452 | 0.77642  | 1.07209    | 1.22419  | 0.560437  | 0.683631  |
| 23.0412  | 23.061   | 22.3446    | 25.0967  | 22.4631   | 25.4205   |
| 4.52476  | 4.50395  | 4.07694    | 5.32188  | 5.07864   | 4.59667   |
| 0.354238 | 0.639583 | 0.535698   | 0.525331 | 0.382067  | 0.436925  |
| 1.57162  | 0.656397 | 0.741564   | 0.570277 | 0.710702  | 0.849235  |
| 9.28788  | 8.57126  | 5.67608    | 7.14482  | 5.81684   | 4.31699   |
| 0.719072 | 0.514842 | 0.423938   | 0.286363 | 0.303366  | 0.528646  |
| 0.27488  | 0        | 0          | 0        | 0.213092  | 0         |
| 0        | 0        | 0          | 0        | 0         | 0         |
| 0        | 0        | 0          | 0        | 0         | 0         |
| 0.553445 | 0.538202 | 0.672958   | 0.431618 | 0.538507  | 0.471163  |
| 0        | 0        | 0          | 0        | 0         | 0         |
| 2.80629  | 2.55946  | 2.21624    | 3.78237  | 2.38295   | 3.3038    |
| 0.122327 | 0.112349 | 0.0507704  | 0.125869 | 0.0967466 | 0.107368  |
| 13.0752  | 14.7663  | 10.6856    | 12.6193  | 8.88216   | 9.06831   |
| 119.983  | 121.009  | 146.15     | 144.284  | 153.061   | 134.982   |
| 0.425831 | 0.348805 | 0.57255    | 0.201714 | 0.414578  | 0.756473  |
| 0        | 0        | 0          | 0        | 0         | 0         |
| 0        | 0        | 0          | 0        | 0         | 0         |
| 21.1974  | 19.1199  | 21.3711    | 19.9219  | 19.9405   | 21.966    |
| 13.5325  | 11.8169  | 14.684     | 14.4528  | 10.3121   | 13.2735   |
| 0.226476 | 0.210798 | 0.146554   | 0.197229 | 0.158011  | 0.11014   |
| 2.93268  | 4.75722  | 3.92893    | 4.3231   | 4.3693    | 4.97691   |
| 0.129889 | 0        | 0          | 0        | 0         | 0.0421117 |
| 2.29196  | 2.32282  | 1.75133    | 3.29691  | 1.89186   | 0.966413  |
| 12.557   | 15.4791  | 12.7096    | 11.8571  | 11.2608   | 13.3803   |
| 6.3725   | 5.09014  | 6.31843    | 6.56827  | 5.85277   | 6.18097   |
| 1.5081   | 0.269943 | 0.457452   | 0        | 0.292275  | 0.916774  |
| 44.3937  | 39.0362  | 74.5735    | 53.6694  | 67.1237   | 68.0087   |
| 3.64647  | 3.01731  | 1.98903    | 2.44954  | 1.67515   | 2.17449   |
| 31.2601  | 33.6299  | 30.1938    | 32.1623  | 34.9425   | 35.8306   |
| 21.3281  | 22.9716  | 17.2643    | 17.8578  | 17.8999   | 17.5107   |
| 0.524889 | 0.447301 | 0.733037   | 0.369725 | 0.430342  | 0.58705   |
| 0        | 0        | 0.00641929 | 0        | 0         | 0         |
| 1.15     | 1.04896  | 0.981184   | 1.00607  | 0.867075  | 0.881041  |
| 25.6039  | 39.5904  | 13.8651    | 19.9035  | 15.1187   | 6.63585   |
| 0.124348 | 0        | 0.502913   | 0        | 0.0963965 | 0.100788  |
| 0        | 0        | 0          | 0        | 0         | 0         |
| 36.8625  | 44.1713  | 50.7056    | 41.5445  | 55.3264   | 28.4934   |
| 7.07102  | 7.71871  | 7.62383    | 7.58169  | 7.62287   | 6.72506   |
| 0.224131 | 0.27461  | 0.174043   | 0.376664 | 0.18765   | 0.174399  |
| 10.4321  | 10.5315  | 6.82654    | 9.22489  | 9.12193   | 8.37517   |

|          |          |          |          |          |           |
|----------|----------|----------|----------|----------|-----------|
| 41.2033  | 38.756   | 45.8223  | 45.0931  | 39.6206  | 40.7595   |
| 6.34818  | 5.86826  | 6.06214  | 6.27535  | 3.90107  | 6.53394   |
| 36.8431  | 32.0967  | 36.2612  | 33.4799  | 44.9385  | 31.9256   |
| 17.7197  | 15.9762  | 14.7243  | 20.48    | 15.4503  | 25.3092   |
| 1.83517  | 2.62789  | 2.44656  | 2.417    | 2.81896  | 2.2312    |
| 0.449303 | 0.450369 | 0.690521 | 0.782561 | 0.487629 | 0.655515  |
| 0        | 0        | 0        | 0        | 0        | 0         |
| 1.90421  | 2.97315  | 4.16087  | 2.62987  | 1.73326  | 2.8089    |
| 4.98398  | 5.82693  | 6.04716  | 4.62422  | 4.01038  | 5.65044   |
| 1538.3   | 1738.76  | 1695.27  | 1741     | 1641.55  | 1450.93   |
| 27.0439  | 29.0347  | 32.7111  | 27.3251  | 31.3737  | 26.9447   |
| 41.931   | 0        | 0        | 0        | 0        | 33.9865   |
| 7.74227  | 6.4374   | 7.05621  | 6.90686  | 8.19387  | 7.62009   |
| 1.13116  | 0.82642  | 0.87763  | 0.686881 | 0.742677 | 0.785869  |
| 83.739   | 92.4116  | 80.4046  | 99.7789  | 82.0917  | 100.047   |
| 25.3984  | 18.0113  | 22.7831  | 22.3585  | 22.2621  | 21.5168   |
| 0        | 0        | 0        | 0        | 0        | 0         |
| 0.244084 | 0.119572 | 0.39487  | 0.261043 | 0.278848 | 0.53104   |
| 0        | 0        | 0        | 0        | 0        | 0         |
| 0        | 0        | 0        | 0        | 0        | 0         |
| 13.2947  | 10.8876  | 14.0667  | 15.4745  | 14.2208  | 12.948    |
| 0.466528 | 0.228543 | 0.317781 | 0.213832 | 0.418764 | 0.0796077 |
| 7.4557   | 4.70289  | 7.04025  | 6.001    | 5.6242   | 6.80267   |
| 0.354921 | 0.363024 | 0.451139 | 0.257572 | 0.27514  | 0.205482  |
| 25.9762  | 21.0536  | 23.2464  | 20.8533  | 23.1224  | 25.572    |
| 26.436   | 20.7252  | 25.2419  | 25.7805  | 28.9402  | 27.654    |
| 0        | 0        | 0        | 0        | 0        | 0.132783  |
| 10.2925  | 7.09079  | 8.49315  | 9.42617  | 10.9936  | 7.66997   |
| 1.62981  | 1.13946  | 1.06241  | 1.28715  | 0.780369 | 1.28993   |
| 43.7428  | 44.1756  | 38.9939  | 43.2259  | 34.5479  | 44.8229   |
| 0        | 0        | 0        | 0        | 0        | 0         |
| 7.39026  | 8.70605  | 8.02109  | 6.43898  | 7.2776   | 7.2357    |
| 5.03146  | 5.43243  | 4.55714  | 4.65807  | 3.30165  | 5.43121   |
| 0        | 0        | 0        | 0        | 0        | 0         |
| 87.2471  | 84.459   | 90.7601  | 87.6739  | 91.2393  | 76.7744   |
| 16.5459  | 14.1421  | 16.9526  | 15.7409  | 16.1033  | 16.6029   |
| 13.3448  | 16.2896  | 12.963   | 12.9687  | 10.7342  | 13.8145   |
| 0        | 0        | 0        | 0        | 0        | 0         |
| 0        | 0        | 0        | 0        | 0        | 0         |
| 2.8722   | 2.15477  | 2.55337  | 2.64103  | 2.86614  | 2.61706   |
| 0.70096  | 0.470507 | 0.389807 | 0.445112 | 0.373584 | 0.390604  |
| 6.06479  | 4.15604  | 5.54794  | 5.74256  | 6.57999  | 5.96984   |
| 0        | 0        | 0        | 0.115965 | 0        | 0         |



|           |           |           |           |           |           |
|-----------|-----------|-----------|-----------|-----------|-----------|
| 39.7882   | 48.1113   | 38.1296   | 38.2197   | 42.5389   | 36.0161   |
| 0         | 0         | 0         | 0         | 0         | 0         |
| 0         | 0         | 0         | 0         | 0         | 0         |
| 17.335    | 14.9564   | 16.7456   | 15.2503   | 14.6952   | 16.3755   |
| 3.72103   | 2.90365   | 2.87811   | 4.70587   | 3.70784   | 4.15537   |
| 0         | 0         | 0         | 0         | 0         | 0         |
| 0.186406  | 0.0857979 | 0.18309   | 0.164267  | 0.144505  | 0.140297  |
| 0         | 0         | 0         | 0.130347  | 0         | 0.194108  |
| 10.8325   | 7.25336   | 8.51523   | 10.4449   | 7.29718   | 8.27981   |
| 0         | 0         | 0.0496808 | 0.044573  | 0.0476131 | 0         |
| 1.22208   | 0.538661  | 0.383867  | 0.574521  | 0.137672  | 0.672285  |
| 2.4371    | 1.8323    | 2.23582   | 2.10468   | 1.32944   | 2.01656   |
| 0         | 0         | 0         | 0         | 0         | 0         |
| 7.386     | 6.17257   | 6.70629   | 7.12998   | 6.62236   | 7.7466    |
| 0.0277069 | 0.123985  | 0.0224116 | 0         | 0.0214789 | 0         |
| 0         | 0         | 0         | 0         | 0         | 0         |
| 0.0332497 | 0.0714184 | 0.0806849 | 0.0482598 | 0.0515513 | 0.0808499 |
| 0         | 0.02757   | 0.0622943 | 0.0558898 | 0         | 0.0936326 |
| 0         | 36.5288   | 0         | 0         | 0         | 0         |
| 0         | 0.309309  | 0.232961  | 0.104505  | 0         | 0.116719  |
| 16.3453   | 12.5924   | 19.6252   | 16.3877   | 16.0324   | 17.9278   |
| 11.8463   | 10.23     | 13.2      | 13.4044   | 12.1633   | 12.8155   |
| 19.4654   | 21.424    | 20.3821   | 21.5325   | 18.7037   | 18.0751   |
| 0         | 0.053385  | 0.0301559 | 0.054111  | 0.0289008 | 0         |
| 7.32008   | 4.99835   | 6.39497   | 6.25716   | 6.65609   | 7.06304   |
| 27.7858   | 22.6906   | 25.3139   | 30.5202   | 25.2045   | 26.0768   |
| 0         | 0         | 0         | 0         | 0         | 0         |
| 3.20668   | 1.63995   | 3.18669   | 2.12768   | 2.34382   | 2.30208   |
| 28.9799   | 26.8727   | 33.8559   | 29.1508   | 28.5825   | 27.1552   |
| 88.4917   | 98.1674   | 101.567   | 97.4442   | 91.4743   | 85.8322   |
| 53.7452   | 48.8331   | 48.8061   | 49.6996   | 56.0736   | 52.5542   |
| 28.0901   | 30.0696   | 32.9929   | 33.4306   | 32.813    | 32.4365   |
| 0         | 0         | 0         | 0         | 0         | 0         |
| 27.857    | 28.0151   | 29.5655   | 27.6939   | 29.0709   | 26.3255   |
| 5.82678   | 5.78678   | 5.6634    | 6.10419   | 5.90126   | 6.09394   |
| 8.45285   | 7.32974   | 9.38235   | 8.4859    | 8.77344   | 8.29771   |
| 0.250048  | 0.21672   | 0.212904  | 0.152812  | 0.193841  | 0.394677  |
| 11.9799   | 12.3518   | 10.5288   | 12.2082   | 9.61991   | 10.5263   |
| 0         | 0         | 0         | 0         | 0         | 0         |
| 1.27177   | 0.606326  | 1.07725   | 2.39399   | 1.57065   | 2.27016   |
| 0.89169   | 0.550584  | 0.438243  | 0.520347  | 0.704524  | 0.552466  |
| 64.5599   | 59.5718   | 60.047    | 58.8514   | 58.3336   | 61.3937   |
| 383.162   | 421.633   | 387.124   | 415.535   | 415.995   | 359.152   |

|           |           |           |           |           |           |
|-----------|-----------|-----------|-----------|-----------|-----------|
| 8.81313   | 9.61821   | 9.89722   | 10.6184   | 8.62301   | 7.83687   |
| 5.31458   | 3.66892   | 5.17094   | 4.45061   | 5.01719   | 4.0974    |
| 10.0581   | 7.92746   | 8.92773   | 9.47088   | 7.70238   | 9.48942   |
| 7.18525   | 5.93175   | 5.79847   | 6.00507   | 4.73482   | 6.60966   |
| 18.2242   | 17.2343   | 18.112    | 16.7464   | 16.876    | 18.1995   |
| 0         | 0         | 0         | 0         | 0         | 0         |
| 117.182   | 138.92    | 127.646   | 132.831   | 125.362   | 129.299   |
| 0.0768527 | 0.0825376 | 0         | 0.0557734 | 0         | 0.0622917 |
| 27.9983   | 26.8059   | 27.9451   | 30.4234   | 25.657    | 26.7044   |
| 47.2156   | 46.5009   | 54.3211   | 46.8799   | 47.5846   | 35.4721   |
| 0         | 0         | 0         | 0         | 0         | 0         |
| 14.1837   | 13.21     | 13.0046   | 14.2585   | 13.9724   | 12.2757   |
| 10.9577   | 7.75439   | 10.1434   | 10.4394   | 7.79184   | 9.76457   |
| 20.1594   | 17.8381   | 20.5307   | 21.151    | 17.9834   | 18.1981   |
| 48.7921   | 50.2997   | 51.9998   | 53.4592   | 56.6246   | 51.0141   |
| 33.0605   | 27.9722   | 30.5501   | 31.2592   | 25.6018   | 31.8655   |
| 1.06417   | 1.29527   | 0.688626  | 1.6218    | 0.824959  | 1.55258   |
| 8.68783   | 7.61241   | 8.06261   | 8.37679   | 10.8942   | 9.53533   |
| 0.553779  | 0.521198  | 0.752791  | 0.401888  | 0.268311  | 0.448857  |
| 14.7162   | 14.7287   | 15.3963   | 15.2112   | 12.7813   | 14.3823   |
| 2.8402    | 0.983967  | 0.741091  | 1.06384   | 1.27845   | 0.816867  |
| 0         | 0         | 0         | 0         | 0         | 0         |
| 0.324396  | 0.0774204 | 349.979   | 0.47084   | 0.251477  | 0.0876446 |
| 0         | 0         | 0         | 0         | 0.0429663 | 0         |
| 16.9613   | 14.3845   | 13.6983   | 13.2605   | 12.1567   | 12.0874   |
| 0.181884  | 0.265877  | 0.229879  | 0.0329991 | 0.220312  | 0.445955  |
| 31.1824   | 27.609    | 31.3338   | 31.5322   | 27.7543   | 30.2899   |
| 132.379   | 107.713   | 129.035   | 150.758   | 143.85    | 145.614   |
| 0         | 0         | 0         | 0         | 0         | 0         |
| 43.7393   | 46.1883   | 50.7356   | 56.7967   | 52.3272   | 56.5127   |
| 0         | 0         | 0.0833625 | 0         | 0         | 0         |
| 15.4272   | 13.5734   | 11.6096   | 12.4769   | 15.2914   | 10.2647   |
| 29.7515   | 34.5474   | 34.9421   | 29.5484   | 34.9738   | 31.303    |
| 1.17172   | 0.92529   | 1.28229   | 1.28176   | 1.12206   | 1.45251   |
| 1.88762   | 1.38447   | 1.40769   | 1.83096   | 2.61969   | 2.55992   |
| 1.17467   | 1.0513    | 0.902656  | 1.83283   | 0.91062   | 0.952107  |
| 4.26865   | 4.94079   | 4.37094   | 4.09865   | 5.0822    | 7.55066   |
| 0.0615878 | 0.0661435 | 0.0747257 | 0.0446954 | 0.0238719 | 0.0748784 |
| 51.738    | 44.9141   | 52.83     | 51.6581   | 56.3781   | 53.6217   |
| 15.8266   | 11.9864   | 16.4491   | 15.3329   | 15.3898   | 14.9956   |
| 2.36092   | 2.04011   | 1.9097    | 1.71336   | 0.694223  | 1.51769   |
| 0.534351  | 0.220276  | 0.222662  | 0.564055  | 0.251053  | 0.472483  |
| 2.95489   | 1.28221   | 1.93143   | 0.823108  | 1.18004   | 0.943498  |

|          |           |           |           |          |           |
|----------|-----------|-----------|-----------|----------|-----------|
| 0.771203 | 0.487206  | 0.752242  | 0.345682  | 0.404427 | 0.404467  |
| 0.399283 | 0.857637  | 0.430629  | 0.386356  | 0.30953  | 0         |
| 0.261197 | 0.200269  | 0.0829108 | 0.222325  | 0.131889 | 0.241938  |
| 0.222398 | 0         | 0.0599643 | 0.161398  | 0        | 0.120174  |
| 7.97979  | 6.0758    | 7.36158   | 6.78559   | 6.99133  | 8.03985   |
| 28.4045  | 25.4079   | 26.8153   | 24.3318   | 22.2532  | 25.4045   |
| 39.3746  | 68.4685   | 39.6396   | 27.4141   | 28.8881  | 39.6103   |
| 0        | 0         | 0         | 0         | 0        | 0         |
| 0        | 0         | 0.0286094 | 0         | 0        | 0         |
| 0.19859  | 0.142187  | 0.138506  | 0.144121  | 0.284242 | 0.180074  |
| 0.449658 | 0.48292   | 0.363719  | 0.489488  | 0.958601 | 1.09339   |
| 0        | 0         | 0.0419936 | 0         | 0        | 0         |
| 0.117423 | 0         | 0         | 0         | 0        | 0.190351  |
| 13.2224  | 12.4424   | 11.9043   | 12.2658   | 12.0633  | 9.3292    |
| 0.230121 | 0.248975  | 0.085084  | 0.292263  | 0.146645 | 0.464461  |
| 0        | 0         | 0         | 0         | 0        | 0         |
| 21.0155  | 13.363    | 16.9014   | 16.587    | 21.689   | 8.17328   |
| 0.477005 | 0.380492  | 0.771174  | 0.474553  | 0.707418 | 0.900663  |
| 5.08961  | 3.08819   | 3.48888   | 2.62936   | 2.80869  | 4.26514   |
| 0        | 0         | 0.0403618 | 0         | 0        | 0         |
| 0        | 0         | 0         | 0.0343642 | 0.036708 | 0         |
| 20.3042  | 22.8923   | 21.8353   | 23.0907   | 20.3838  | 27.145    |
| 0.106574 | 0.0840908 | 0.0950016 | 0.1725    | 0.101534 | 0.023591  |
| 27.1882  | 25.2283   | 22.7942   | 21.71     | 24.9197  | 25.6577   |
| 373.991  | 443.014   | 356.449   | 399.314   | 441.447  | 219.578   |
| 0.22962  | 0.109602  | 0.123823  | 0.129609  | 0.158227 | 0.124077  |
| 27.0835  | 30.0024   | 31.5907   | 30.3793   | 26.8432  | 25.0056   |
| 0.239345 | 0.155499  | 0.0968005 | 0.297327  | 0.153052 | 0.0431102 |
| 0        | 0         | 0         | 0         | 0        | 0         |
| 0.806618 | 0.606246  | 0.789443  | 1.15839   | 0.704266 | 1.17806   |
| 0        | 0         | 0         | 0         | 0        | 0         |
| 16.4556  | 17.0707   | 16.2069   | 16.5676   | 17.5917  | 15.1812   |
| 0.806089 | 1.26972   | 0.869372  | 0.994488  | 1.04149  | 1.06716   |
| 0        | 0         | 0         | 0         | 0        | 0         |
| 1.11652  | 0.655143  | 1.40983   | 1.05033   | 0.842085 | 1.62104   |
| 0.357067 | 0.22377   | 0.351882  | 0.396552  | 0.242283 | 0.325518  |
| 5.3192   | 5.96272   | 4.99797   | 4.5361    | 3.98468  | 6.51789   |
| 0        | 0         | 0         | 0         | 0        | 0         |
| 35.3647  | 37.9645   | 32.9278   | 34.2417   | 29.4688  | 34.2981   |
| 4.74E-06 | 0.28131   | 4.72E-06  | 3.74E-06  | 2.89E-06 | 2.50E-06  |
| 2.47494  | 1.94661   | 3.1439    | 2.74659   | 4.23336  | 3.00303   |
| 4.17898  | 3.68051   | 4.54694   | 4.34785   | 4.67306  | 3.17737   |
| 0        | 0         | 0         | 0         | 0        | 0         |

|           |            |          |           |            |           |
|-----------|------------|----------|-----------|------------|-----------|
| 3.27491   | 3.76229    | 3.15474  | 3.15448   | 2.86187    | 3.0526    |
| 4.56682   | 10.218     | 3.89923  | 6.3983    | 4.76953    | 6.52915   |
| 0.355492  | 0.210289   | 0.177959 | 0.0917541 | 0.0331175  | 0.261107  |
| 5.5369    | 3.15314    | 5.3993   | 5.86665   | 3.60901    | 6.51952   |
| 0.0758079 | 0.271385   | 0.122639 | 0         | 0          | 0.12289   |
| 6.38681   | 4.78371    | 5.7555   | 6.27753   | 5.82842    | 5.01338   |
| 1.82433   | 1.17278    | 1.49057  | 0.802394  | 0.714267   | 1.49362   |
| 0.0923071 | 0          | 0.298661 | 0.35149   | 0.0938656  | 0.0981421 |
| 0         | 0          | 0        | 0         | 0          | 0         |
| 0         | 0          | 0        | 0         | 0          | 0         |
| 10.8408   | 11.0863    | 11.4247  | 10.5039   | 10.9392    | 11.889    |
| 13.6681   | 11.5103    | 7.54717  | 12.8323   | 11.8354    | 14.8203   |
| 1.0874    | 1.08239    | 0.57944  | 1.13568   | 1.00745    | 0.967363  |
| 0         | 0.00763377 | 0        | 0         | 0.00826533 | 0         |
| 14.5904   | 12.2985    | 12.3521  | 14.7782   | 10.7999    | 12.4507   |
| 8.15678   | 6.21775    | 7.95399  | 7.54636   | 8.2363     | 7.0236    |
| 112.325   | 89.9967    | 95.7864  | 107.035   | 140.872    | 91.3197   |
| 0         | 0          | 0        | 0         | 0          | 0         |
| 0         | 0          | 0        | 0         | 0          | 0.318946  |
| 0.318643  | 0.330977   | 0.481842 | 0.20892   | 0.565236   | 0.108942  |
| 8.81966   | 5.26971    | 6.0269   | 6.66054   | 11.1734    | 3.12687   |
| 0         | 0          | 0        | 0         | 0          | 0.716451  |
| 32.8683   | 26.204     | 26.6326  | 33.1971   | 38.5815    | 29.6585   |
| 47.7      | 0          | 0        | 0         | 0          | 0         |
| 0.171378  | 0.0818021  | 0.107819 | 0.0690955 | 0.191901   | 0.18521   |
| 13.0853   | 10.4387    | 11.4721  | 10.1245   | 9.90911    | 10.7511   |
| 14.6381   | 12.9273    | 13.4379  | 14.2999   | 14.2447    | 12.0954   |
| 1.61338   | 2.50947    | 1.80004  | 1.37273   | 1.20759    | 0.992049  |
| 0         | 0          | 0        | 0         | 0.079075   | 0         |
| 0         | 0          | 0        | 0         | 0          | 0         |
| 0.0211168 | 0          | 0        | 0         | 0          | 0         |
| 2.06998   | 2.62294    | 2.14415  | 2.24793   | 1.09672    | 2.01576   |
| 1.70736   | 0.56756    | 1.45503  | 0.885044  | 0.992678   | 1.01319   |
| 4.01746   | 3.2478     | 4.31075  | 3.8561    | 5.18109    | 4.65212   |
| 0         | 0          | 0        | 0         | 0          | 0         |
| 1.78263   | 0.994495   | 1.2853   | 0.955684  | 0.751159   | 1.32916   |
| 4.19816   | 4.8971     | 2.9761   | 1.84855   | 1.97463    | 3.36452   |
| 12.5299   | 9.03155    | 11.8563  | 11.9865   | 12.42      | 14.3044   |
| 0         | 0.263876   | 0        | 0         | 0.142853   | 0         |
| 3.4551    | 3.24032    | 3.70011  | 4.02602   | 3.43294    | 3.70768   |
| 4.81673   | 3.98118    | 3.63182  | 3.85725   | 4.0868     | 4.17269   |
| 0.570743  | 0.485657   | 0.618478 | 0.555887  | 0.17244    | 0.468487  |
| 0.517406  | 0.322652   | 0.202509 | 0.27859   | 0.439917   | 0.581713  |

|           |          |          |           |           |          |
|-----------|----------|----------|-----------|-----------|----------|
| 0         | 0        | 0        | 0         | 0         | 0        |
| 17.2197   | 14.3994  | 15.2885  | 15.4936   | 14.7383   | 16.9026  |
| 0         | 0        | 0        | 0         | 0         | 0        |
| 10.6868   | 8.85467  | 11.3476  | 11.5923   | 12.1487   | 10.6362  |
| 5.13288   | 5.31027  | 6.06594  | 5.73278   | 5.20507   | 5.35314  |
| 0         | 0        | 0        | 0         | 0         | 0        |
| 543.299   | 721.939  | 609.682  | 616.979   | 510.444   | 672.707  |
| 0.295936  | 0.370797 | 0.418909 | 0.322149  | 0.516181  | 0.179899 |
| 14.3526   | 14.8989  | 15.1666  | 14.8628   | 12.4589   | 13.9332  |
| 1.3498    | 1.90078  | 2.19636  | 0.979576  | 1.76994   | 1.37655  |
| 2.68754   | 3.06068  | 2.9404   | 3.46549   | 1.82769   | 2.33589  |
| 0         | 0        | 0        | 0         | 0         | 0        |
| 0         | 0        | 0        | 0         | 0         | 0        |
| 149.919   | 151.085  | 163.833  | 158.112   | 174.329   | 132.054  |
| 24.0005   | 23.5173  | 27.1705  | 26.2179   | 20.3317   | 17.6067  |
| 0.954344  | 0.404914 | 0.922527 | 1.09445   | 0.45668   | 1.06957  |
| 0         | 0        | 0        | 0         | 0         | 0        |
| 0         | 0        | 0        | 0         | 0         | 0        |
| 4.4551    | 3.51525  | 3.47935  | 3.20411   | 4.02539   | 5.10994  |
| 42.3166   | 39.1243  | 42.2153  | 43.8702   | 38.59     | 39.5213  |
| 21.3539   | 22.0963  | 17.7252  | 21.0316   | 18.6034   | 22.212   |
| 1.8617    | 0.93167  | 1.78145  | 1.79558   | 1.91804   | 1.36469  |
| 33.358    | 28.917   | 29.7422  | 30.1856   | 36.5989   | 31.0879  |
| 0.876589  | 0.890578 | 1.1662   | 0.964236  | 0.526197  | 1.0311   |
| 0.0390155 | 0        | 0        | 0         | 0         | 0        |
| 4.61558   | 3.82257  | 4.73647  | 4.64946   | 4.61945   | 5.83498  |
| 52.9234   | 46.6827  | 43.9828  | 44.4617   | 48.4433   | 47.1206  |
| 0.652859  | 0.431478 | 0.446841 | 0.437346  | 0.467175  | 0.447754 |
| 91.79     | 90.4476  | 92.3942  | 62.412    | 64.8299   | 64.3617  |
| 25.9217   | 19.9549  | 24.4133  | 22.3883   | 19.7064   | 22.4999  |
| 25.5182   | 23.296   | 25.8382  | 25.3904   | 22.884    | 29.1532  |
| 6.71808   | 7.1766   | 7.33519  | 7.61689   | 7.35437   | 7.52416  |
| 7.15436   | 5.20589  | 5.80671  | 6.22126   | 5.18272   | 6.84825  |
| 21.7192   | 19.8265  | 26.003   | 22.1713   | 26.0653   | 27.5221  |
| 0.254039  | 0.145509 | 0.123292 | 0.0737441 | 0.0393869 | 0.370632 |
| 4.0285    | 3.33386  | 3.60888  | 3.62521   | 3.0805    | 3.46116  |
| 0         | 0        | 0        | 0         | 0         | 0        |
| 0         | 1.11982  | 0        | 0.399334  | 0.252213  | 0.407002 |
| 10.5976   | 7.90594  | 7.68281  | 9.47354   | 7.76205   | 9.38612  |
| 0.109065  | 0.140561 | 0.146312 | 0.195584  | 0.1691    | 0.212915 |
| 9.82637   | 10.4569  | 11.977   | 10.306    | 10.6959   | 12.0015  |
| 0         | 0        | 0        | 0         | 0         | 0        |
| 0.23078   | 0.315447 | 0.152733 | 0.182707  | 0.16264   | 0.03401  |

|           |           |           |           |           |          |
|-----------|-----------|-----------|-----------|-----------|----------|
| 15.0144   | 10.0764   | 13.5083   | 13.9688   | 10.8796   | 13.6631  |
| 11.3714   | 10.2436   | 10.6977   | 11.213    | 9.96426   | 9.06235  |
| 13.6931   | 10.5883   | 12.2252   | 11.7757   | 12.9371   | 12.8468  |
| 0         | 0         | 0         | 0         | 0         | 0        |
| 14.6799   | 12.8529   | 13.1635   | 14.58     | 15.5094   | 12.8164  |
| 15.2973   | 15.3946   | 15.1386   | 16.0108   | 18.0233   | 9.60091  |
| 15.5332   | 13.602    | 13.4272   | 14.784    | 16.7367   | 14.7438  |
| 18.1603   | 15.9385   | 17.6407   | 17.5425   | 16.4684   | 18.943   |
| 11.6009   | 10.0456   | 11.1471   | 9.11594   | 12.7007   | 10.158   |
| 0         | 0         | 0         | 0.0732603 | 0         | 0        |
| 0.0707224 | 0.101272  | 0.114412  | 0.153974  | 0.10965   | 0.171969 |
| 7.7994    | 6.41509   | 7.42209   | 5.93436   | 6.50648   | 7.37164  |
| 54.4551   | 67.9702   | 64.6571   | 63.0373   | 53.4569   | 52.534   |
| 7.60E-207 | 0         | 1.74E-202 | 0.0882884 | 7.25E-266 | 0.071138 |
| 0.504523  | 0.884748  | 0.865694  | 1.01457   | 0.71798   | 0.88642  |
| 24.7009   | 20.3537   | 26.57     | 23.0835   | 15.1172   | 11.5208  |
| 0.0597317 | 0         | 0         | 0.0433483 | 0         | 0        |
| 0.623536  | 0.526301  | 0.718122  | 0.550323  | 0.635344  | 0.270189 |
| 0         | 0         | 0         | 0         | 0         | 0        |
| 8.00638   | 6.77142   | 8.84053   | 7.51136   | 6.17263   | 8.87951  |
| 0         | 0         | 0         | 0         | 0         | 0        |
| 17.3185   | 16.4498   | 21.3716   | 18.9303   | 13.3468   | 12.903   |
| 9.52405   | 10.279    | 10.2722   | 8.76714   | 10.1709   | 8.80344  |
| 0.138319  | 0.187491  | 0.0621259 | 0.180074  | 0.149152  | 0.261161 |
| 10.9047   | 10.6761   | 14.5726   | 11.5365   | 12.7945   | 13.9303  |
| 0         | 0         | 0         | 0         | 0         | 0        |
| 14.4543   | 11.7974   | 15.4078   | 13.5455   | 11.6281   | 13.5294  |
| 14.1942   | 13.724    | 10.8686   | 12.0588   | 11.8226   | 11.2221  |
| 0         | 0.0862689 | 0.0974623 | 0         | 0         | 0        |
| 53.3643   | 40.9462   | 57.8298   | 54.3175   | 53.0184   | 46.0688  |
| 3.33403   | 3.33225   | 3.88781   | 3.36528   | 2.84699   | 4.49933  |
| 0         | 0         | 0         | 0         | 0         | 0        |
| 43.0074   | 43.3527   | 42.44     | 41.85     | 37.7653   | 43.5315  |
| 0         | 0         | 0         | 0         | 0         | 0        |
| 37.2752   | 23.0442   | 40.2782   | 30.8641   | 19.1988   | 48.5148  |
| 0         | 0         | 0         | 0         | 0         | 0        |
| 0.124712  | 0.133938  | 0.353071  | 0.090506  | 0.096679  | 0.303251 |
| 29.6233   | 33.556    | 31.4969   | 30.537    | 30.154    | 31.0574  |
| 0         | 0         | 0         | 0         | 0         | 0        |
| 0.0987991 | 0.141476  | 0.319666  | 0.322651  | 0         | 0.16016  |
| 1.22901   | 1.30834   | 0.693268  | 0.856706  | 0.814849  | 0.7209   |
| 1.1526    | 1.04373   | 1.01242   | 1.13038   | 1.23001   | 0.815281 |
| 0         | 0         | 0.120965  | 0.108529  | 0.115931  | 0        |

|            |           |           |            |           |           |
|------------|-----------|-----------|------------|-----------|-----------|
| 16.2942    | 12.2659   | 13.8869   | 15.2866    | 15.059    | 15.9812   |
| 6.0242     | 5.46089   | 6.15946   | 5.85534    | 5.02085   | 5.72074   |
| 20.5036    | 17.8021   | 19.298    | 17.8643    | 20.1567   | 21.4296   |
| 46.3916    | 45.5879   | 46.3638   | 42.9088    | 29.7325   | 38.8893   |
| 0          | 0.0212561 | 0         | 0.0107726  | 0.0230146 | 0.0120316 |
| 0          | 0.138727  | 0         | 0          | 0         | 0         |
| 8.86793    | 6.37072   | 7.22155   | 7.74013    | 8.37256   | 7.67341   |
| 0          | 0         | 0         | 0          | 0         | 0         |
| 0          | 0         | 0         | 0          | 0         | 0         |
| 0.00916359 | 0.0196829 | 0.0148245 | 0.00332509 | 0.0106556 | 0.0037137 |
| 0          | 0         | 0         | 0          | 0         | 0         |
| 76.969     | 107.836   | 87.3285   | 66.7308    | 61.023    | 74.4741   |
| 1.17002    | 1.03274   | 1.03258   | 1.53138    | 0.667398  | 0.887153  |
| 3.50794    | 3.55375   | 2.6977    | 3.82665    | 3.26897   | 3.44728   |
| 8.77188    | 9.25958   | 11.9066   | 9.93003    | 9.85996   | 7.85075   |
| 1.49351    | 1.58074   | 1.15554   | 1.36661    | 1.45982   | 0.947376  |
| 19.7622    | 22.9624   | 22.7752   | 20.7888    | 16.604    | 22.5065   |
| 1.44468    | 1.08068   | 1.70925   | 1.17362    | 1.45425   | 1.45059   |
| 0.0892938  | 0.0887961 | 0.01605   | 0.0648021  | 0         | 0         |
| 0          | 0         | 0         | 0.090854   | 0         | 0         |
| 5.76454    | 4.21382   | 5.40574   | 5.45512    | 4.77792   | 5.08375   |
| 0          | 0         | 0         | 0          | 0         | 0         |
| 0          | 0         | 0         | 0          | 0         | 0         |
| 0.0506334  | 0         | 0         | 0          | 0         | 0         |
| 14.4944    | 25.8827   | 16.7091   | 13.8419    | 16.7344   | 10.6878   |
| 5.62883    | 5.81589   | 5.9707    | 5.65038    | 5.74837   | 5.16334   |
| 16.2976    | 18.3297   | 15.5997   | 13.3059    | 11.2128   | 13.5125   |
| 10.7442    | 8.25828   | 9.80906   | 8.67158    | 7.11951   | 9.81311   |
| 27.9413    | 22.6891   | 18.8819   | 29.0732    | 16.0107   | 14.1568   |
| 656.832    | 1280.9    | 730.597   | 840.328    | 610.761   | 1532.15   |
| 1.6469     | 0.93519   | 0.689042  | 0.783055   | 0.528292  | 0.736481  |
| 0          | 0         | 0.0380094 | 0          | 0         | 0         |
| 1.07946    | 1.39117   | 1.04778   | 1.14896    | 1.11575   | 0.816607  |
| 0          | 0         | 0         | 0          | 0         | 0         |
| 14.2868    | 12.9719   | 13.1243   | 13.8413    | 12.0628   | 11.9648   |
| 6.91894    | 5.17839   | 4.89131   | 4.8391     | 5.75755   | 8.19596   |
| 7.86464    | 16.0644   | 13.2418   | 13.5285    | 11.1544   | 8.00571   |
| 6.45491    | 5.34216   | 4.68789   | 5.41482    | 5.40749   | 3.54421   |
| 0.292154   | 0.683814  | 0.517554  | 0.812206   | 1.11299   | 1.06479   |
| 17.0739    | 12.8406   | 15.4226   | 15.5132    | 18.0107   | 15.1971   |
| 1.49791    | 0.925293  | 1.43715   | 0.899545   | 1.28391   | 1.20106   |
| 0          | 0         | 0         | 0          | 0         | 0         |
| 0          | 0         | 0         | 0          | 0         | 0         |

|            |           |           |           |           |           |
|------------|-----------|-----------|-----------|-----------|-----------|
| 0.725575   | 0.809482  | 0.53512   | 0.4677    | 0.626784  | 0.87469   |
| 0          | 0         | 0         | 0         | 0         | 0         |
| 0          | 0         | 0         | 0         | 0         | 0         |
| 11.243     | 8.87101   | 9.02611   | 9.98383   | 9.70923   | 8.91864   |
| 9.62574    | 9.15254   | 9.44086   | 9.89578   | 9.93948   | 9.75776   |
| 1.34902    | 1.32036   | 1.4896    | 1.755     | 1.26456   | 1.39049   |
| 0          | 0         | 0         | 0         | 0         | 0         |
| 0.960824   | 1.15123   | 0.697886  | 1.25227   | 1.03366   | 1.50988   |
| 3.05083    | 3.16686   | 3.16449   | 3.12345   | 2.97163   | 3.27377   |
| 20.7549    | 25.6006   | 21.7749   | 27.9248   | 23.8954   | 26.6913   |
| 0.60072    | 0.559136  | 0.48591   | 0.435954  | 0.186275  | 1.41202   |
| 17.3105    | 21.8294   | 20.3809   | 19.8678   | 18.4734   | 19.2037   |
| 72.2799    | 61.467    | 72.1053   | 69.2924   | 92.0482   | 71.8555   |
| 0.794895   | 0.10163   | 0.114817  | 0.803497  | 0.726253  | 0.828372  |
| 27.5884    | 24.3546   | 27.5398   | 24.4294   | 29.2211   | 28.5988   |
| 0.00015108 | 5.69E-08  | 5.76E-06  | 6.81E-08  | 7.69E-07  | 0.293782  |
| 0          | 0         | 0.0498074 | 0         | 0.0477345 | 0         |
| 2.51051    | 1.5177    | 1.99619   | 1.41388   | 1.07663   | 1.76451   |
| 0          | 0         | 0         | 0         | 0         | 0         |
| 0.465348   | 0.230539  | 0.340756  | 0.367559  | 0.127902  | 0.207355  |
| 0.0426701  | 0.0916529 | 0         | 0.0928994 | 0.0330785 | 0.138342  |
| 25.1665    | 23.051    | 24.0856   | 25.9971   | 16.873    | 6.43189   |
| 1.99376    | 2.98094   | 1.40835   | 1.84413   | 0.637295  | 0.66633   |
| 6.00866    | 6.6109    | 7.65995   | 7.30146   | 7.27449   | 7.5972    |
| 9.02004    | 7.32714   | 7.43775   | 7.48939   | 7.2723    | 5.05792   |
| 0.105271   | 0.0418734 | 0         | 0         | 0         | 0         |
| 0          | 0         | 0         | 0         | 0         | 0         |
| 0          | 0         | 0         | 0         | 0         | 0         |
| 0.330233   | 0         | 0         | 0         | 0         | 0         |
| 0          | 0         | 0         | 0         | 0         | 0         |
| 9.9551     | 7.80046   | 9.15664   | 8.74532   | 8.89168   | 10.2146   |
| 53.1964    | 36.4803   | 40.1813   | 45.3869   | 57.2292   | 32.5666   |
| 64.8332    | 69.9167   | 64.8454   | 70.2041   | 64.5869   | 56.3843   |
| 16.6272    | 17.2915   | 14.9589   | 16.5601   | 16.6507   | 15.3052   |
| 1.89871    | 2.55242   | 1.88061   | 2.50277   | 2.79362   | 2.54401   |
| 19.6247    | 22.6975   | 17.4203   | 19.3775   | 18.3352   | 16.7704   |
| 101.487    | 110.136   | 116.151   | 113.732   | 115.052   | 92.7742   |
| 0.361713   | 0.442424  | 0.377919  | 0.185939  | 0.362191  | 0.378692  |
| 3.24403    | 2.39412   | 2.22039   | 1.84725   | 2.51483   | 2.0227    |
| 0.0610348  | 0.0737435 | 0.0277706 | 0.0249154 | 0.044358  | 0.0278274 |
| 16.9961    | 15.3645   | 17.5753   | 16.9563   | 14.4149   | 16.5436   |
| 0.0352212  | 0.0126088 | 0         | 0.0127803 | 0.054608  | 0.0253759 |
| 0          | 0         | 0         | 0         | 0         | 0         |



|           |           |            |           |           |           |
|-----------|-----------|------------|-----------|-----------|-----------|
| 62.7995   | 78.6411   | 77.023     | 73.9187   | 68.3266   | 69.8627   |
| 27.1173   | 45.2081   | 40.2169    | 32.2111   | 26.7725   | 45.6482   |
| 9.27122   | 8.25158   | 9.95798    | 9.05642   | 8.80369   | 10.2774   |
| 0         | 0         | 0          | 0         | 0         | 0         |
| 4.56868   | 5.17043   | 4.35117    | 5.18727   | 3.31321   | 2.74744   |
| 0.884529  | 0.34544   | 0.422782   | 0.408494  | 0.467523  | 0.260706  |
| 136.164   | 113.413   | 120.05     | 112.946   | 163.073   | 92.5616   |
| 0.44758   | 0.381728  | 0.249084   | 0.2233    | 0.247465  | 0.0693314 |
| 1.12351   | 0.536274  | 0.942442   | 1.08713   | 1.2258    | 0.674549  |
| 28.0162   | 18.0208   | 21.6456    | 25.8059   | 18.9721   | 21.2212   |
| 0         | 0         | 0.00583003 | 0         | 0         | 0         |
| 55.2706   | 51.6764   | 53.9541    | 56.0572   | 57.606    | 51.0486   |
| 0         | 0         | 0          | 0         | 0         | 0         |
| 12.9789   | 10.0801   | 13.8792    | 11.4944   | 9.54983   | 10.8764   |
| 30.7042   | 25.5252   | 32.8197    | 28.1386   | 39.7413   | 20.7667   |
| 15.2637   | 14.1514   | 11.6132    | 12.7051   | 8.49755   | 11.0626   |
| 2.96215   | 3.50674   | 3.17888    | 3.03297   | 2.35314   | 3.23293   |
| 794.565   | 1253.93   | 1222.41    | 1133.87   | 897.971   | 1690.28   |
| 22.7367   | 20.5217   | 19.4753    | 24.2286   | 21.5776   | 21.0373   |
| 26.8287   | 26.3084   | 19.343     | 22.6916   | 15.2659   | 21.2205   |
| 0         | 0         | 0          | 0         | 0         | 0         |
| 0.0256108 | 0.0183368 | 0          | 0.0557585 | 0.119123  | 0         |
| 0         | 0         | 0          | 0         | 0         | 0         |
| 6.75479   | 4.42294   | 5.04352    | 6.07523   | 5.28117   | 5.84934   |
| 84.1295   | 70.6779   | 87.2433    | 90.2391   | 99.5483   | 88.0213   |
| 5.12371   | 4.74602   | 6.37582    | 5.46778   | 4.9134    | 5.16014   |
| 0.449298  | 0.1316    | 0.247792   | 0.266779  | 0.221647  | 0.0993194 |
| 7.59509   | 9.69823   | 9.03918    | 8.10985   | 8.17546   | 7.09713   |
| 107.874   | 87.977    | 99.5682    | 111.778   | 90.6542   | 98.4918   |
| 0         | 0         | 0          | 0         | 0         | 0         |
| 0         | 0.0876997 | 0          | 0         | 0         | 0         |
| 1.25034   | 0.804399  | 1.12863    | 0.881092  | 1.18      | 1.39805   |
| 19.7193   | 18.1525   | 18.1092    | 20.3899   | 25.9184   | 17.2449   |
| 13.6349   | 12.0864   | 9.45437    | 17.2558   | 10.504    | 8.53468   |
| 10.3916   | 7.91957   | 9.64346    | 9.35606   | 9.57402   | 9.92898   |
| 0.28464   | 0.203797  | 0.216696   | 0.133662  | 0.194698  | 0.189997  |
| 16.1874   | 18.1198   | 17.3423    | 18.193    | 22.2471   | 15.0169   |
| 484.281   | 578.146   | 585.89     | 478.822   | 585.135   | 515.471   |
| 0         | 0.222147  | 0.100388   | 0.0675504 | 0.0962102 | 0.100593  |
| 7.10894   | 7.3379    | 8.00412    | 6.46795   | 4.80779   | 5.56879   |
| 2.34523   | 2.22968   | 2.70557    | 2.03679   | 2.1459    | 2.67994   |
| 545.864   | 644.344   | 658.449    | 630.307   | 615.271   | 593.847   |
| 0.292572  | 0         | 0          | 0.318487  | 0         | 0         |

|           |           |           |           |          |           |
|-----------|-----------|-----------|-----------|----------|-----------|
| 0         | 0.088295  | 0         | 0.0529561 | 0        | 0.0525734 |
| 2.33933   | 1.89267   | 1.07662   | 1.52074   | 0.975626 | 1.01801   |
| 1.69515   | 1.35856   | 1.1024    | 1.36706   | 1.32285  | 1.42795   |
| 0.498468  | 0.178447  | 0.483841  | 0.217048  | 0.347778 | 0.242415  |
| 4.12412   | 6.92959   | 4.87493   | 6.30457   | 5.01053  | 7.03654   |
| 0.1885    | 0.21594   | 0.0914843 | 0.109438  | 0.175354 | 0.305571  |
| 1.28799   | 1.17225   | 0.794613  | 1.37831   | 0.913851 | 1.09704   |
| 0.349057  | 0.462504  | 0.236506  | 0.359704  | 0.226663 | 0.488703  |
| 0         | 0         | 0         | 0         | 0        | 0         |
| 0.840426  | 0.376081  | 0.594828  | 0.304956  | 0.977267 | 0.851492  |
| 8.06756   | 6.20698   | 7.23353   | 5.8746    | 6.48728  | 7.09318   |
| 0         | 0         | 0         | 0         | 0        | 0         |
| 60.8076   | 56.7859   | 66.712    | 68.7564   | 65.3951  | 61.6595   |
| 0.127274  | 0         | 0         | 0         | 0        | 0.0687734 |
| 0.325005  | 0.29574   | 0.442176  | 0.364225  | 0.186787 | 0.482534  |
| 14.4733   | 16.1563   | 15.9644   | 15.3495   | 16.218   | 13.8374   |
| 5.02596   | 3.05818   | 4.33398   | 4.20604   | 3.53349  | 4.15934   |
| 13.3208   | 11.1121   | 11.0291   | 11.6735   | 17.3896  | 13.0888   |
| 7.219     | 5.51486   | 6.4316    | 6.06306   | 3.64517  | 5.9855    |
| 0.0602683 | 0.0431509 | 0         | 0.131213  | 0        | 0.0488495 |
| 70.9791   | 71.247    | 69.8576   | 72.5036   | 72.1595  | 69.7409   |
| 0.0389741 | 0.125572  | 0.168136  | 0.0282842 | 0.305911 | 0.0315898 |
| 42.0696   | 35.7132   | 40.4349   | 41.6841   | 43.8445  | 36.4261   |
| 0.608658  | 0.508419  | 0.410276  | 0.515333  | 0.235921 | 0         |
| 10.9832   | 9.77249   | 8.32443   | 8.24281   | 6.79441  | 9.31183   |
| 0         | 0         | 0.226274  | 0         | 0        | 0         |
| 61.4353   | 52.6668   | 51.8791   | 59.4957   | 62.304   | 58.4074   |
| 4.5768    | 3.73966   | 4.29238   | 3.67638   | 3.51929  | 4.24433   |
| 0.650408  | 0.598731  | 1.01462   | 0.505728  | 0.648265 | 0.979044  |
| 1.25936   | 1.43927   | 0.736185  | 1.11449   | 1.15563  | 1.42777   |
| 0         | 0         | 0         | 0         | 0        | 0         |
| 1.32597   | 0.780591  | 0.357516  | 0.171072  | 0.388322 | 1.09863   |
| 0         | 0.0303928 | 0         | 0         | 0        | 0         |
| 0         | 0         | 0         | 0         | 0        | 0         |
| 662.72    | 640.882   | 684.039   | 709.624   | 758.169  | 645.155   |
| 0         | 0         | 0         | 0         | 0        | 0         |
| 0.100067  | 0.143293  | 0.0809426 | 0.508345  | 0.155148 | 0.162216  |
| 0.233099  | 0.140817  | 0.141412  | 0.0317181 | 0.180702 | 0.159414  |
| 0         | 0.0697547 | 0         | 0.0707033 | 0        | 0         |
| 0.525252  | 0.144642  | 0.294138  | 0.527794  | 0.34454  | 0.556729  |
| 0.926814  | 0.427494  | 0.50958   | 0.624704  | 0.360871 | 0.43058   |
| 1.18954   | 0.917206  | 0.715481  | 1.37238   | 0.898509 | 1.63167   |
| 6.60641   | 6.64479   | 6.38336   | 6.64157   | 5.83883  | 5.27488   |

|          |           |          |           |           |          |
|----------|-----------|----------|-----------|-----------|----------|
| 0        | 0         | 0        | 0         | 0         | 0        |
| 1.56667  | 0.918258  | 1.29606  | 1.50078   | 1.29367   | 1.21612  |
| 17.7712  | 18.1663   | 17.0283  | 16.8148   | 12.3496   | 13.8501  |
| 7.54594  | 6.22046   | 7.04406  | 5.56502   | 6.38727   | 6.66174  |
| 0.443251 | 0.528932  | 0.478049 | 0.21445   | 0.68723   | 0.598783 |
| 0.295048 | 0.686559  | 0.238658 | 0.428244  | 0.171544  | 0.418506 |
| 71.7958  | 64.2262   | 64.7547  | 64.1502   | 63.4543   | 60.115   |
| 0        | 0.0961602 | 0.108637 | 0.194936  | 0.104116  | 0.217718 |
| 0        | 0         | 0        | 0         | 0         | 0        |
| 2.68273  | 2.30601   | 2.25248  | 3.08853   | 1.73678   | 1.99657  |
| 0        | 0         | 0        | 0         | 0.0744445 | 0        |
| 48.8873  | 43.0497   | 37.7345  | 48.2441   | 29.3057   | 34.9111  |
| 4.04328  | 3.49761   | 2.66768  | 2.87427   | 2.20503   | 2.88014  |
| 0        | 0         | 0        | 0.0141589 | 0         | 0        |
| 0.142331 | 0.0940043 | 0.122181 | 0.0834677 | 0.0657898 | 0.117954 |
| 21.13    | 21.3515   | 18.2888  | 19.1509   | 18.6262   | 21.874   |
| 21.3164  | 18.8156   | 20.0534  | 20.2673   | 22.5034   | 19.1209  |
| 0        | 0         | 0        | 0         | 0         | 0        |
| 6.32E-07 | 5.23E-07  | 1.59E-05 | 1.20E-06  | 1.00E-06  | 1.10E-07 |
| 1.30985  | 0.757602  | 1.38408  | 1.81643   | 1.03735   | 1.67865  |
| 14.9808  | 20.4901   | 14.8425  | 15.0819   | 8.96868   | 14.0645  |
| 69.8576  | 64.507    | 36.1016  | 89.7243   | 105.671   | 45.7054  |
| 2.96318  | 6.19272   | 1.74906  | 4.18462   | 5.21504   | 2.01228  |
| 0.359005 | 0.257041  | 0.254093 | 0.455939  | 0.278306  | 0.509225 |
| 18.1779  | 17.0344   | 14.2443  | 15.4958   | 12.4598   | 18.336   |
| 10.897   | 14.471    | 7.66335  | 9.30625   | 5.38635   | 8.11467  |
| 0        | 0         | 0        | 0         | 0         | 0        |
| 0        | 0         | 0        | 0         | 0         | 0        |
| 11.587   | 5.71622   | 9.72337  | 5.60304   | 3.70933   | 8.0442   |
| 0.133388 | 0.181313  | 0.126441 | 0.096802  | 0.0193844 | 0.225249 |
| 21.9765  | 42.6344   | 36.7847  | 31.6869   | 34.0168   | 33.2738  |
| 0.375138 | 0.417809  | 0.573167 | 0.544488  | 0.193875  | 0.337846 |
| 90.9926  | 116.662   | 75.9721  | 66.9908   | 86.7269   | 76.373   |
| 0.873005 | 1.54595   | 0.902932 | 1.22684   | 0.756858  | 1.45602  |
| 18.1039  | 14.4038   | 11.7726  | 11.232    | 12.9337   | 17.7811  |
| 11.4923  | 9.41336   | 13.4342  | 11.3295   | 10.2796   | 15.3724  |
| 0        | 0         | 0        | 0         | 0         | 0        |
| 31.6744  | 31.8782   | 33.3322  | 32.3619   | 35.667    | 36.0321  |
| 8.55429  | 6.48796   | 8.16011  | 7.32116   | 7.22596   | 8.51151  |
| 0.90027  | 2.51862   | 1.76658  | 0.883221  | 0.504041  | 0.743212 |
| 12.5333  | 9.46867   | 7.12991  | 9.95938   | 5.52872   | 6.86737  |
| 14.7522  | 16.2581   | 12.8698  | 18.2168   | 15.6871   | 15.4629  |
| 0        | 0         | 0        | 0         | 0.0252189 | 0        |

|           |           |           |           |           |           |
|-----------|-----------|-----------|-----------|-----------|-----------|
| 0         | 0         | 0         | 0         | 0         | 0         |
| 1.58E-113 | 0.218998  | 9.88E-72  | 2.94E-12  | 0.517722  | 0.240929  |
| 26.5579   | 25.3155   | 26.3697   | 28.3367   | 26.0755   | 22.6935   |
| 0.0639632 | 0.0228982 | 0.0258693 | 0         | 0.0743779 | 0.0259222 |
| 77.2049   | 72.7265   | 69.9888   | 82.7241   | 57.8952   | 70.5065   |
| 2.59405   | 1.47047   | 1.72377   | 1.60982   | 1.34551   | 1.8567    |
| 5.92723   | 5.34628   | 6.18825   | 6.15512   | 5.24858   | 5.39855   |
| 21.6945   | 21.7111   | 21.1006   | 20.7051   | 17.2034   | 19.7362   |
| 0.211892  | 0.0337135 | 0.0571317 | 0.102516  | 0.164262  | 0.228994  |
| 0.416379  | 0.29812   | 0.1684    | 0.302174  | 0.161392  | 0.168745  |
| 0.506215  | 0.414217  | 0.818934  | 0.839701  | 0.504547  | 0.468919  |
| 8.11088   | 11.3178   | 12.0041   | 10.5694   | 6.96082   | 9.30937   |
| 2.62317   | 2.57744   | 3.25046   | 2.22771   | 4.1752    | 2.14878   |
| 0         | 0         | 0         | 0.0945428 | 0         | 0         |
| 6.62501   | 6.16667   | 8.40091   | 6.2958    | 5.119     | 4.83914   |
| 9.99843   | 9.35822   | 9.9173    | 10.8251   | 7.29171   | 10.147    |
| 7.56546   | 6.149     | 7.66464   | 6.25446   | 9.08295   | 6.68065   |
| 2.46411   | 1.23087   | 1.59756   | 1.62435   | 1.53692   | 1.61719   |
| 5.10622   | 4.00162   | 1.4604    | 3.6161    | 3.13171   | 3.77673   |
| 4.0866    | 2.64579   | 2.42643   | 2.71332   | 2.22434   | 3.06567   |
| 7.59572   | 5.68759   | 7.08798   | 7.11702   | 6.82474   | 7.10248   |
| 0.921318  | 0.808525  | 0.997534  | 0.582395  | 0.725733  | 0.80695   |
| 0         | 0         | 0         | 0         | 0         | 0         |
| 0.42994   | 0.211832  | 0.497759  | 0.352217  | 0.372997  | 0.292687  |
| 0.0908299 | 0.468235  | 0         | 0.263668  | 0         | 0.294483  |
| 621.374   | 596.933   | 584.411   | 612.084   | 679.83    | 603.145   |
| 49.0018   | 60.0297   | 40.7636   | 37.0842   | 32.2966   | 39.5208   |
| 3.99567   | 1.67463   | 4.41446   | 3.43017   | 3.853     | 5.68734   |
| 13.0054   | 10.9365   | 10.0962   | 10.5151   | 11.8413   | 7.9237    |
| 0.226722  | 0.0324657 | 0         | 0.0658145 | 0.140607  | 0.147013  |
| 4.88557   | 3.36612   | 4.99652   | 4.5481    | 3.48447   | 4.29576   |
| 11.3849   | 10.5372   | 9.19523   | 9.33914   | 8.31395   | 8.46897   |
| 1.26025   | 1.1677    | 0.659607  | 0.860789  | 2.12634   | 1.56226   |
| 32.7266   | 31.3313   | 33.7517   | 32.3362   | 32.486    | 32.9608   |
| 4.51328   | 3.01778   | 3.53002   | 3.43778   | 5.03128   | 3.93026   |
| 0.191274  | 0         | 0         | 0         | 0         | 0.155034  |
| 4.79664   | 4.68799   | 6.29402   | 6.54201   | 6.02023   | 6.66476   |
| 0         | 0         | 0         | 0         | 0         | 0         |
| 0.723011  | 0.333696  | 0.613653  | 0.647698  | 0.505112  | 0.586025  |
| 9.88543   | 7.18301   | 9.21498   | 7.68279   | 11.4498   | 10.338    |
| 0         | 0         | 0         | 0         | 0         | 0         |
| 1.29078   | 0.848142  | 0.692363  | 0.794585  | 0.595084  | 1.1192    |
| 0.107304  | 0         | 0         | 0         | 0.124776  | 0.0434867 |

|          |           |            |           |            |           |
|----------|-----------|------------|-----------|------------|-----------|
| 56.9407  | 61.3738   | 56.3488    | 64.5091   | 57.7379    | 60.5019   |
| 8.05596  | 7.83443   | 6.50326    | 6.67357   | 7.31838    | 7.26347   |
| 3.82283  | 2.13834   | 3.33379    | 3.20778   | 3.56548    | 2.95329   |
| 0        | 0         | 0          | 0.0271515 | 0.0290034  | 0.0606495 |
| 15.8511  | 14.6717   | 16.9353    | 12.7267   | 13.7284    | 14.2945   |
| 1.44663  | 1.87557   | 1.13853    | 1.70246   | 1.84888    | 2.15495   |
| 7.84499  | 11.4335   | 6.8634     | 9.79049   | 15.5347    | 7.7687    |
| 2.15624  | 2.31252   | 1.73732    | 2.1075    | 2.11825    | 3.00509   |
| 35.0882  | 36.1667   | 41.9354    | 45.2659   | 42.3338    | 49.3568   |
| 4.55144  | 4.94983   | 4.78325    | 4.49167   | 5.69347    | 4.26202   |
| 1.05168  | 1.19142   | 1.14142    | 0.937118  | 0.712076   | 1.0898    |
| 13.267   | 10.5623   | 10.6275    | 12.841    | 11.3255    | 12.8485   |
| 0        | 0         | 0          | 0         | 0          | 0         |
| 0.208766 | 0         | 0.731755   | 0.353512  | 0.647355   | 0         |
| 11.5382  | 10.5172   | 10.4039    | 11.2342   | 9.12532    | 10.4748   |
| 182.493  | 214.451   | 186.538    | 158.195   | 226.803    | 181.081   |
| 25.1554  | 18.9256   | 23.3578    | 20.7478   | 24.6391    | 19.5219   |
| 1.02032  | 0.433751  | 0.722149   | 0.578486  | 0.790965   | 0.930376  |
| 0.241046 | 0         | 0.0924215  | 0.084164  | 0          | 0         |
| 53.0446  | 45.7941   | 54.1755    | 53.9677   | 59.5661    | 30.3057   |
| 0        | 0.0170263 | 0.00610648 | 0.0259324 | 0.00585234 | 0.0367648 |
| 4.31341  | 3.56014   | 4.57127    | 4.82591   | 5.85168    | 4.69392   |
| 10.6475  | 9.84495   | 9.74856    | 9.50478   | 12.7356    | 8.12717   |
| 0        | 0         | 0          | 0         | 0          | 0         |
| 46.9914  | 34.3459   | 37.6378    | 38.3375   | 38.8392    | 40.1575   |
| 2.54682  | 2.14471   | 2.71795    | 2.73367   | 2.34961    | 2.19776   |
| 30.1966  | 31.1256   | 30.3914    | 32.8083   | 33.7007    | 34.1811   |
| 0.942273 | 0.453855  | 0.388022   | 0.646525  | 0.398435   | 0.361043  |
| 5.62377  | 5.30811   | 5.42417    | 5.18642   | 4.62888    | 4.99135   |
| 0        | 0         | 0          | 0         | 0          | 0         |
| 0        | 0         | 0          | 0         | 0          | 0         |
| 0        | 0         | 0          | 0         | 0          | 0         |
| 3.12645  | 2.93084   | 3.57707    | 2.94114   | 2.35914    | 2.74807   |
| 0        | 0         | 0          | 0         | 0          | 0         |
| 18.708   | 18.8042   | 19.0658    | 19.8412   | 19.7635    | 18.3266   |
| 1.01792  | 1.59014   | 1.19764    | 1.74608   | 0.789111   | 0.900068  |
| 19.6988  | 20.1679   | 20.3528    | 19.9822   | 21.0765    | 17.3662   |
| 15.7516  | 14.3967   | 18.904     | 16.9845   | 21.6868    | 20.7685   |
| 0        | 0         | 0          | 0         | 0          | 0         |
| 2.17599  | 1.55966   | 1.61888    | 1.35308   | 1.22947    | 1.90068   |
| 0.333145 | 0.141625  | 0.320001   | 0.445763  | 0.217906   | 0.514736  |
| 0        | 0         | 0          | 0         | 62.1333    | 0         |
| 0        | 0         | 0          | 0         | 0          | 0         |

|            |            |            |           |           |            |
|------------|------------|------------|-----------|-----------|------------|
| 0.714914   | 1.02373    | 1.05142    | 0.754656  | 1.20919   | 0.842854   |
| 0          | 0          | 0.076093   | 0         | 0.0729262 | 0          |
| 3.11208    | 3.75018    | 2.54481    | 5.55367   | 2.14887   | 2.85326    |
| 2.90832    | 2.37286    | 2.47284    | 2.68982   | 2.07631   | 2.74104    |
| 32.4096    | 33.5848    | 28.3736    | 30.2272   | 18.6729   | 23.7235    |
| 0.123516   | 0.17687    | 0          | 0.0896374 | 0         | 0          |
| 9.73493    | 7.23341    | 9.34905    | 12.6072   | 15.3981   | 13.1241    |
| 18.2606    | 18.7461    | 21.2871    | 18.587    | 21.2859   | 23.3167    |
| 0          | 0          | 0          | 0         | 0         | 0          |
| 0.114297   | 0.244832   | 0.123274   | 0.0933178 | 0.202535  | 0.25735    |
| 0.576188   | 0.781654   | 0.956663   | 0.528189  | 1.36352   | 0.983199   |
| 0.0880814  | 0.126129   | 0.118745   | 0.127844  | 0.159325  | 0.0713929  |
| 7.10294    | 5.38052    | 5.28732    | 5.5127    | 6.45616   | 5.78041    |
| 13.7215    | 8.7048     | 10.9019    | 10.8814   | 12.3045   | 11.7024    |
| 20.4602    | 9.36369    | 27.0794    | 15.3113   | 12.4345   | 10.8219    |
| 2.35829    | 1.73673    | 1.93482    | 2.29824   | 1.8543    | 1.31072    |
| 0          | 0          | 0          | 0         | 0         | 0          |
| 0.411401   | 0.197209   | 0.277516   | 0.169136  | 0.30427   | 0.309883   |
| 0.708673   | 0.663519   | 0.661421   | 1.20662   | 0.655024  | 0.773236   |
| 0.00694377 | 0.00497161 | 0.00280834 | 0.0151177 | 0.0161488 | 0.00562816 |
| 9.57252    | 8.25225    | 8.67985    | 8.02245   | 9.19377   | 10.4551    |
| 67.8841    | 81.4223    | 72.0379    | 65.0234   | 64.0188   | 65.3201    |
| 2.80077    | 2.2221     | 2.3311     | 2.21009   | 2.38997   | 2.58426    |
| 0.41343    | 0.0623175  | 0.246411   | 0.236869  | 0.404839  | 0.211641   |
| 25.6474    | 37.903     | 27.3613    | 20.6653   | 14.3346   | 27.533     |
| 1.39896    | 1.09514    | 1.4655     | 1.43072   | 1.26706   | 1.80746    |
| 0.13424    | 0.0961136  | 0.0542922  | 0.243552  | 0.0520327 | 0.16321    |
| 0          | 0.0384978  | 0.0434929  | 0.0390213 | 0.0416827 | 0          |
| 2.35324    | 1.69909    | 1.39926    | 1.55256   | 2.17996   | 2.12506    |
| 0          | 0.0196021  | 0.044291   | 0         | 0         | 0.0221908  |
| 0          | 0          | 0.380057   | 0         | 0         | 0          |
| 16.671     | 16.1017    | 18.1661    | 17.534    | 18.2265   | 17.731     |
| 0.160474   | 0.258516   | 0.292059   | 0.465835  | 0.0622009 | 0.682864   |
| 0          | 0.0592032  | 0          | 0         | 0         | 0.0670216  |
| 0          | 0          | 0          | 0         | 0         | 0          |
| 0.26152    | 0.327676   | 0.290865   | 0.166066  | 0.228076  | 0.132482   |
| 0.716239   | 0.512813   | 1.03456    | 0.779681  | 1.03116   | 1.24436    |
| 1.03557    | 0.139022   | 0.15706    | 0         | 0.802793  | 0.157382   |
| 3.14686    | 1.60935    | 2.66664    | 2.71873   | 1.27783   | 1.57897    |
| 2.2221     | 1.859      | 1.58304    | 2.12856   | 1.71308   | 1.59276    |
| 3.16886    | 3.43716    | 3.0025     | 2.626     | 2.54845   | 3.04791    |
| 12.36      | 11.8069    | 10.6354    | 12.2192   | 9.97278   | 10.9127    |
| 0          | 0          | 0          | 0         | 0         | 0          |

|           |           |           |           |           |           |
|-----------|-----------|-----------|-----------|-----------|-----------|
| 0         | 0         | 0         | 0         | 0         | 0         |
| 1.78234   | 1.94457   | 2.03669   | 2.05314   | 1.3159    | 1.53637   |
| 0         | 0         | 0         | 0         | 0         | 0         |
| 0.438992  | 0.502897  | 0.315637  | 0.318584  | 0.3025    | 0.800592  |
| 0         | 0         | 0         | 0         | 0         | 0         |
| 3.61233   | 5.0845    | 3.7835    | 4.25278   | 4.03766   | 3.02211   |
| 5.70269   | 5.46646   | 5.2885    | 4.39399   | 4.34365   | 4.76488   |
| 68.8418   | 66.0306   | 62.0135   | 67.2047   | 67.4089   | 57.4745   |
| 65.559    | 94.2341   | 73.7393   | 75.2424   | 58.8891   | 59.766    |
| 7.96056   | 5.91718   | 7.50821   | 8.26106   | 7.09173   | 7.95441   |
| 0.398152  | 0.39766   | 0.396876  | 0.403068  | 0.401872  | 0.502666  |
| 5.31074   | 7.07771   | 5.61425   | 5.41863   | 4.89145   | 6.35025   |
| 0.477221  | 0.341681  | 0.386014  | 0.148426  | 0.369949  | 0.331546  |
| 0.152047  | 0.145151  | 0.112739  | 0.202296  | 0.0687571 | 0.112969  |
| 0.226346  | 0.315805  | 0.369544  | 0.250637  | 0.427276  | 0.821005  |
| 0.273135  | 0.122225  | 0.193317  | 0.0991095 | 0.0264673 | 0.0830194 |
| 11.4705   | 10.5951   | 11.3298   | 10.9426   | 12.1749   | 10.0342   |
| 0.957868  | 0.997549  | 2.46527   | 1.64306   | 0.945069  | 2.89379   |
| 0         | 0         | 0         | 0.03063   | 0         | 0.0342097 |
| 19.7463   | 19.0406   | 18.8632   | 18.1771   | 14.5626   | 17.7212   |
| 46.3739   | 55.0438   | 50.2357   | 51.2257   | 57.7596   | 47.7883   |
| 0.058192  | 0.0416644 | 0.0313802 | 0.056308  | 0.0300742 | 0.0314444 |
| 5.78857   | 4.45583   | 4.57234   | 3.90503   | 5.05621   | 4.4275    |
| 13.9089   | 15.1569   | 14.3919   | 15.3936   | 17.6543   | 16.6453   |
| 0.0468708 | 0.0671172 | 0.113739  | 0         | 0.036335  | 0         |
| 6.2158    | 5.61971   | 5.56019   | 5.97917   | 4.53514   | 6.10501   |
| 0.801868  | 1.05419   | 1.24388   | 1.03774   | 0.989256  | 0.905983  |
| 7.99637   | 6.91383   | 7.82035   | 7.55083   | 7.05987   | 8.88814   |
| 11.9022   | 12.058    | 13.5958   | 13.4102   | 14.8805   | 14.8608   |
| 1.78924   | 1.89597   | 1.36044   | 1.714     | 1.40092   | 1.46474   |
| 0         | 0         | 0         | 0         | 0         | 0         |
| 0         | 0         | 0         | 0         | 0         | 0         |
| 137.425   | 134.802   | 146.766   | 161.136   | 176.991   | 143.876   |
| 0.630763  | 0.77289   | 0.643908  | 0.252244  | 0.459996  | 0.668296  |
| 0.311255  | 0.445705  | 0.352475  | 0.180707  | 0.144774  | 0.353196  |
| 12.9886   | 11.0718   | 12.1468   | 12.0875   | 14.3751   | 14.9092   |
| 630.245   | 1054.46   | 645.4     | 861.814   | 599.757   | 553.852   |
| 34.2926   | 29.9156   | 29.7245   | 31.4082   | 30.0641   | 29.272    |
| 12.7025   | 11.279    | 12.1062   | 11.3399   | 12.3193   | 14.4486   |
| 0         | 0         | 0         | 0         | 0         | 0         |
| 1.68963   | 1.55538   | 1.3667    | 4.02892   | 1.02915   | 2.15207   |
| 2.79774   | 3.06697   | 2.40789   | 2.30616   | 2.18854   | 1.68282   |
| 3.43656   | 4.25495   | 3.70863   | 3.82758   | 1.80769   | 4.13213   |

|           |           |           |           |           |           |
|-----------|-----------|-----------|-----------|-----------|-----------|
| 0         | 0.0761923 | 0.344313  | 0.308914  | 0.577471  | 0.431272  |
| 0.0454067 | 0.130041  | 0.0183643 | 0.0329525 | 0.0352    | 0.0368037 |
| 19.3979   | 15.4275   | 17.0448   | 18.5794   | 17.097    | 18.1785   |
| 0.572508  | 0.345857  | 0.390732  | 0         | 0         | 0.348027  |
| 0         | 0         | 0         | 0         | 0         | 0         |
| 9.05864   | 7.9928    | 8.37461   | 7.84309   | 9.96491   | 4.16321   |
| 0         | 0         | 0         | 0         | 0         | 0         |
| 2.63556   | 1.56635   | 1.41564   | 4.01072   | 1.12733   | 1.53229   |
| 4.79225   | 3.69146   | 3.28292   | 4.11586   | 3.79957   | 3.6807    |
| 33.1049   | 27.5477   | 26.3546   | 27.7624   | 22.226    | 29.5784   |
| 3.93079   | 5.04527   | 3.79993   | 2.43518   | 2.37831   | 2.95291   |
| 3.48645   | 2.69376   | 3.54229   | 2.9001    | 2.37317   | 2.48129   |
| 10.0203   | 7.78371   | 9.82636   | 10.5007   | 9.86727   | 9.94055   |
| 7.44143   | 5.72667   | 7.02168   | 6.41616   | 5.85134   | 5.9258    |
| 16.582    | 19.0511   | 18.5597   | 20.9893   | 19.8799   | 19.6134   |
| 62.4862   | 51.7138   | 54.165    | 57.0486   | 46.0729   | 55.2406   |
| 187.319   | 259.678   | 145.778   | 30.0413   | 27.253    | 66.5096   |
| 21.5891   | 21.3069   | 18.8514   | 22.5621   | 22.4166   | 20.8048   |
| 0         | 0         | 0         | 0         | 0         | 0         |
| 4.09997   | 2.72932   | 2.96715   | 2.88767   | 2.32505   | 3.26308   |
| 0.360942  | 0.279963  | 0.462267  | 0.480227  | 0.139904  | 0.365694  |
| 7.24546   | 5.42957   | 7.14838   | 6.43677   | 7.40068   | 5.50732   |
| 0.101179  | 0.289769  | 0.0204604 | 0.110141  | 0.0588266 | 0.0410045 |
| 10.1247   | 7.73181   | 9.46706   | 8.21441   | 10.1276   | 10.2276   |
| 73.6543   | 85.2671   | 80.1955   | 71.5291   | 94.678    | 62.6668   |
| 0         | 0         | 0         | 0         | 0         | 0         |
| 33.5577   | 24.234    | 27.1776   | 24.8639   | 29.4467   | 15.8301   |
| 0.354861  | 0.195441  | 0.15456   | 0.0792397 | 0         | 0.132751  |
| 50.6243   | 50.3167   | 44.9475   | 48.8862   | 44.8329   | 41.1251   |
| 1.21946   | 1.13505   | 0.690479  | 0.64899   | 0.913835  | 0.955469  |
| 0.136867  | 0.0734958 | 0.0553546 | 0.186238  | 0.106102  | 0.110936  |
| 0         | 0         | 0         | 0         | 0         | 0         |
| 3.43913   | 2.86743   | 4.26036   | 4.13531   | 3.43183   | 3.71778   |
| 1.5572    | 0.477825  | 1.16962   | 2.7445    | 1.29339   | 1.08185   |
| 6.40433   | 5.82315   | 6.03843   | 6.48688   | 6.32014   | 6.24185   |
| 8.71213   | 15.1591   | 10.9803   | 10.072    | 9.10974   | 13.3018   |
| 0         | 0         | 0         | 0         | 0         | 0         |
| 0         | 0         | 0         | 0         | 0         | 0         |
| 16.1445   | 14.6642   | 15.4861   | 14.3672   | 15.1182   | 12.7649   |
| 21.7802   | 19.4616   | 21.2776   | 21.5533   | 19.2409   | 20.9813   |
| 0.060867  | 0.0637513 | 0.0875283 | 0.0995363 | 0.106325  | 0.0877073 |
| 17.4512   | 13.9014   | 17.8678   | 17.4333   | 16.1467   | 17.3126   |
| 56.5611   | 48.7541   | 64.4077   | 74.1245   | 80.4572   | 50.2966   |



|           |           |           |           |           |           |
|-----------|-----------|-----------|-----------|-----------|-----------|
| 36.7186   | 27.2072   | 35.4794   | 38.0997   | 43.6544   | 36.4467   |
| 5.74279   | 4.99143   | 5.15265   | 5.11596   | 4.71667   | 5.54053   |
| 9.06791   | 6.94722   | 9.07884   | 7.70417   | 7.12344   | 8.47579   |
| 15.3393   | 13.5607   | 13.6018   | 12.3602   | 13.5381   | 14.4176   |
| 1.58669   | 1.84606   | 2.11233   | 2.7108    | 2.22942   | 2.14344   |
| 0.974118  | 1.56926   | 2.20378   | 1.21504   | 0.920341  | 1.36939   |
| 0.416709  | 0.358027  | 0.269654  | 0.486022  | 0.193824  | 0.47286   |
| 6.94614   | 3.76063   | 4.70756   | 6.57207   | 4.9734    | 6.69608   |
| 18.2048   | 25.8696   | 21.2538   | 24.5643   | 15.9835   | 25.0542   |
| 3.14714   | 2.28964   | 2.83307   | 2.33305   | 2.57088   | 2.45486   |
| 7.37628   | 5.96365   | 6.42014   | 6.14494   | 5.74417   | 6.3635    |
| 34.0351   | 31.924    | 33.913    | 26.9767   | 43.7408   | 12.3677   |
| 0         | 0         | 0         | 0         | 0         | 0         |
| 0.0519555 | 0         | 0         | 0.0678691 | 0         | 0.0962553 |
| 4.96002   | 3.45576   | 4.7142    | 3.26188   | 4.94108   | 4.64081   |
| 7.76302   | 5.86177   | 6.88618   | 6.62796   | 6.80187   | 6.583     |
| 0         | 0         | 0         | 0         | 0         | 0.365316  |
| 5.41793   | 5.75693   | 6.78303   | 5.40947   | 5.27014   | 6.96472   |
| 0.131611  | 4.98E-09  | 2.16E-08  | 0.282189  | 1.66E-06  | 8.14E-07  |
| 32.6531   | 28.3923   | 27.9826   | 35.5706   | 33.8584   | 27.5341   |
| 4.13477   | 2.70138   | 2.78711   | 3.61332   | 2.28381   | 2.96038   |
| 0.23635   | 0         | 0.0955894 | 0         | 0.0916112 | 0.0957849 |
| 3.52802   | 3.85122   | 3.97869   | 4.1485    | 3.33746   | 4.23549   |
| 0.0946433 | 0.169407  | 0.30622   | 0.171711  | 0.0733689 | 0.0767115 |
| 15.6594   | 13.7794   | 12.4959   | 14.2013   | 10.4239   | 15.3265   |
| 0.726344  | 0.754644  | 0.781199  | 0.816322  | 0.782705  | 0.753812  |
| 5.31741   | 4.82827   | 6.40889   | 7.35815   | 5.54179   | 6.03383   |
| 3.57241   | 2.42688   | 2.17539   | 2.66704   | 2.50498   | 3.18886   |
| 12.3418   | 14.824    | 14.5381   | 12.7253   | 14.665    | 11.4793   |
| 19.6345   | 21.0196   | 23.5079   | 23.8395   | 26.8398   | 25.2541   |
| 10.5176   | 7.86883   | 9.46336   | 7.97585   | 9.61917   | 7.27965   |
| 168.666   | 227.724   | 162.032   | 113.988   | 114.035   | 221.5     |
| 0.0771338 | 0.0276132 | 0.062392  | 0.167932  | 0.0597953 | 0.187559  |
| 1.76554   | 1.05983   | 0.996734  | 1.53111   | 0.979928  | 1.14676   |
| 0.0897844 | 0         | 0         | 0         | 0         | 0         |
| 195.649   | 289.044   | 224.05    | 169.739   | 144.078   | 295.359   |
| 6.92286   | 6.2201    | 6.24167   | 6.93364   | 6.83993   | 6.76223   |
| 0         | 0         | 0         | 0         | 0         | 0         |
| 26.4624   | 21.8302   | 23.582    | 25.4924   | 21.8682   | 23.8416   |
| 1.0582    | 0.607325  | 0.441923  | 0.69134   | 0.454121  | 0.29193   |
| 17.0029   | 19.2051   | 11.382    | 11.9138   | 11.3628   | 11.2865   |
| 0         | 0         | 0         | 0.0487991 | 0         | 0         |
| 9.25075   | 7.13285   | 8.29817   | 8.21966   | 7.40118   | 7.59417   |

|          |           |          |           |           |           |
|----------|-----------|----------|-----------|-----------|-----------|
| 0        | 0         | 0        | 0         | 0.134544  | 1.72325   |
| 6.8834   | 5.93933   | 5.53215  | 6.88469   | 4.54938   | 5.47193   |
| 0        | 0         | 0        | 0         | 0         | 0         |
| 10.4683  | 8.36428   | 9.49225  | 10.1762   | 9.86098   | 9.8539    |
| 9.87548  | 8.49643   | 9.61528  | 9.93179   | 9.01033   | 9.47847   |
| 0.63346  | 0.976867  | 0.275904 | 1.09624   | 0.302196  | 0.592432  |
| 1.68661  | 1.70482   | 1.39102  | 1.82401   | 0.794748  | 2.49287   |
| 1.97018  | 2.47906   | 2.11335  | 1.24768   | 1.06132   | 2.40467   |
| 37.247   | 40.2018   | 39.0475  | 40.1723   | 36.8067   | 36.5052   |
| 27.3157  | 35.8467   | 30.6214  | 30.8717   | 26.1957   | 24.6786   |
| 7.29659  | 13.6469   | 10.9409  | 6.82621   | 8.71552   | 8.77062   |
| 3.43703  | 2.68272   | 3.16754  | 2.84188   | 2.79547   | 2.58031   |
| 0.272446 | 0.438898  | 0.055094 | 0.197719  | 0.316806  | 0.552066  |
| 1.86573  | 1.54874   | 2.29745  | 1.42013   | 0.931641  | 2.29875   |
| 0        | 0         | 0        | 0.395275  | 0.28149   | 0.294314  |
| 0        | 0         | 0        | 0         | 0         | 0         |
| 0        | 0.0287548 | 0        | 0.0291459 | 0.0311338 | 0         |
| 7.44639  | 4.26518   | 5.06999  | 6.44718   | 7.33868   | 7.80948   |
| 2.54767  | 1.77544   | 1.1815   | 3.03219   | 2.73866   | 4.48792   |
| 0.111434 | 0.146272  | 0.120182 | 0.134783  | 0.11518   | 0.0451605 |
| 2.02644  | 0.94313   | 1.27029  | 1.45218   | 1.49232   | 1.4166    |
| 5.89447  | 4.55395   | 3.88217  | 4.54826   | 3.86509   | 4.92873   |
| 6.5621   | 5.14038   | 4.68013  | 6.0296    | 5.53831   | 6.30535   |
| 0        | 0         | 0        | 0         | 0         | 0         |
| 30.8199  | 31.2135   | 32.7696  | 33.9767   | 37.7895   | 34.66     |
| 59.0304  | 63.5112   | 61.3987  | 64.9406   | 57.7242   | 58.8328   |
| 70.5501  | 56.7843   | 63.0093  | 71.2455   | 87.6961   | 61.2295   |
| 0        | 0.146579  | 0        | 0         | 0.317411  | 0.165936  |
| 0        | 0         | 0        | 0         | 0         | 0         |
| 42.6132  | 45.171    | 51.5692  | 45.2632   | 50.4097   | 41.1782   |
| 11.9825  | 8.53867   | 11.2449  | 12.4789   | 14.8956   | 14.3416   |
| 0        | 0         | 0        | 0         | 0         | 0         |
| 15.9142  | 14.8044   | 15.3375  | 15.415    | 12.2409   | 13.8265   |
| 47.533   | 62.3796   | 50.4783  | 62.9136   | 45.3776   | 60.2718   |
| 0.220018 | 0.341579  | 0.20763  | 0.159671  | 0.113708  | 0.14861   |
| 0        | 0         | 0        | 0.0339583 | 0         | 0.0168565 |
| 1.2111   | 0.975515  | 1.10209  | 0.219729  | 0.821506  | 0.981637  |
| 3.11691  | 1.81976   | 2.18784  | 1.99406   | 2.48286   | 2.56116   |
| 0        | 0         | 0        | 0.0487104 | 0.0520327 | 0         |
| 0        | 0         | 0        | 0.210461  | 0.0749384 | 0         |
| 0        | 0         | 0        | 0         | 0.0807492 | 0.253284  |
| 0.474587 | 0.30204   | 0.174169 | 0.269474  | 0.245271  | 0.174526  |
| 0        | 0         | 0        | 0         | 0         | 0         |

|           |           |           |           |           |           |
|-----------|-----------|-----------|-----------|-----------|-----------|
| 0.595354  | 0.542863  | 0.37858   | 0.981611  | 0.417974  | 0.803758  |
| 8.89887   | 0         | 8.5385    | 0         | 7.85652   | 0         |
| 0         | 0.0827558 | 0.0934934 | 0         | 0.0896024 | 0.0936846 |
| 0         | 0         | 0         | 0         | 0         | 0         |
| 0.67897   | 0.995408  | 0.967647  | 1.05587   | 1.02763   | 0.759977  |
| 0         | 0         | 0.0315922 | 0         | 0.0302774 | 0         |
| 27.5792   | 37.4446   | 37.4283   | 36.9901   | 29.3774   | 28.9772   |
| 3.92559   | 2.16238   | 2.4127    | 2.60458   | 2.47802   | 2.54656   |
| 366.626   | 433.22    | 446.366   | 412.011   | 451.261   | 320.069   |
| 0.278285  | 0.357436  | 0.402908  | 0.338939  | 0.323561  | 0.359998  |
| 25.2864   | 22.964    | 23.3055   | 23.9375   | 23.1737   | 25.0276   |
| 0.116651  | 0.0208728 | 0.12971   | 0.0211037 | 0.0789006 | 0.0118082 |
| 10.3272   | 8.30375   | 7.20716   | 8.51125   | 6.54102   | 8.81943   |
| 0.13875   | 0.397369  | 0.0841741 | 0.327254  | 0.215122  | 0.140577  |
| 0         | 0         | 0         | 0         | 0         | 0         |
| 0         | 0         | 0         | 0         | 0         | 0         |
| 1.4108    | 0.631314  | 0.713227  | 0.76788   | 0.410126  | 0.428811  |
| 49.0897   | 36.544    | 42.4922   | 49.9911   | 41.5839   | 47.7307   |
| 9.87183   | 8.05165   | 8.56009   | 9.10399   | 7.77804   | 9.43336   |
| 0.113427  | 0.0541411 | 0.0815546 | 0.0731699 | 0.0586203 | 0.143012  |
| 0         | 0         | 0         | 0         | 0.0270428 | 0         |
| 0.305267  | 0.72855   | 0.329232  | 0.332306  | 0.552177  | 0.577334  |
| 0.0481554 | 0         | 0         | 0         | 0         | 0         |
| 41.3621   | 38.1469   | 38.4831   | 45.5307   | 53.4529   | 47.8075   |
| 0         | 0         | 0         | 0.0945428 | 0.302973  | 0         |
| 9.72644   | 8.32977   | 8.28225   | 9.3601    | 6.84366   | 6.26377   |
| 39.1041   | 40.2509   | 40.7732   | 43.3616   | 36.3027   | 37.458    |
| 63.7757   | 59.565    | 69.8152   | 50.9713   | 71.3355   | 70.8104   |
| 10.3408   | 6.68504   | 7.80772   | 8.95367   | 5.26402   | 7.60917   |
| 100.255   | 72.0037   | 74.9096   | 92.6386   | 74.0094   | 77.3705   |
| 34.4415   | 38.7373   | 61.3531   | 55.6596   | 49.2605   | 44.1168   |
| 0.025691  | 0.0919713 | 0         | 0.0372888 | 0         | 0.0832937 |
| 36.4583   | 38.3526   | 35.7649   | 32.9583   | 26.6807   | 33.3359   |
| 7.02472   | 12.5746   | 7.87583   | 7.60888   | 3.48375   | 5.48252   |
| 0         | 0         | 0         | 0         | 0         | 0         |
| 0.387234  | 0.596093  | 0.4855    | 0.379381  | 0.195124  | 0.392333  |
| 227.968   | 241.638   | 241.026   | 249.938   | 295.146   | 255.008   |
| 8.43547   | 6.64486   | 6.09679   | 7.54038   | 4.8055    | 6.63739   |
| 0.204356  | 0.109736  | 0.0826499 | 0.111229  | 0.15842   | 0.165638  |
| 0         | 0         | 0         | 0         | 0         | 0         |
| 237.142   | 274.445   | 296.118   | 293.139   | 263.334   | 255.195   |
| 124.37    | 103.896   | 120.195   | 125.043   | 131.599   | 113.196   |
| 0.0560026 | 0.240581  | 0.158548  | 0.18289   | 0.151949  | 0.090784  |

|           |           |           |           |           |           |
|-----------|-----------|-----------|-----------|-----------|-----------|
| 0.358954  | 0.301182  | 0.340254  | 0.0585004 | 0.375842  | 0.203533  |
| 21.6857   | 16.005    | 19.7314   | 20.4846   | 23.7219   | 18.8285   |
| 2.66771   | 1.70965   | 2.04653   | 2.86311   | 1.70587   | 1.5099    |
| 0.0971815 | 0.0521851 | 0.0589561 | 0.0952106 | 0         | 0.0147692 |
| 0.367286  | 0.150268  | 0.381973  | 0.19039   | 0.325401  | 1.14826   |
| 14.1589   | 9.69447   | 11.9156   | 11.4464   | 11.8607   | 12.2836   |
| 0.508813  | 0.227674  | 0.271644  | 0.23616   | 0.253699  | 0.388741  |
| 0         | 0         | 0         | 0         | 0         | 0         |
| 6.0279    | 5.26789   | 6.93136   | 7.11938   | 6.18475   | 5.46062   |
| 1.46814   | 0.916971  | 1.16228   | 1.02012   | 1.28342   | 1.34189   |
| 5.5966    | 6.01158   | 6.18079   | 6.09201   | 5.83991   | 6.89252   |
| 4.13852   | 2.60147   | 5.67052   | 3.41361   | 3.45039   | 2.65619   |
| 0         | 0         | 0         | 0         | 0         | 0         |
| 0         | 0         | 0         | 0         | 0         | 0         |
| 0.140391  | 0.223816  | 0.0225979 | 0.231151  | 0.146925  | 0.0905771 |
| 6.67706   | 4.69171   | 5.90335   | 5.18373   | 6.03083   | 6.25525   |
| 1.34116   | 0.555929  | 0.285482  | 0.512263  | 0.601922  | 1.25869   |
| 0         | 0         | 0         | 0         | 0         | 0         |
| 0.316653  | 0.100763  | 0.313053  | 0.255334  | 0.190924  | 0.171105  |
| 0.0836948 | 0         | 0.067699  | 0         | 0.0973223 | 0.0169594 |
| 183.072   | 193.431   | 183.566   | 195.742   | 200.938   | 170.729   |
| 3.01479   | 2.762     | 3.80213   | 4.68161   | 3.49311   | 3.67852   |
| 0.152844  | 0.109433  | 0.412108  | 0.258817  | 0.118487  | 0.0825902 |
| 0         | 0         | 0         | 0.0249157 | 0         | 0         |
| 37.5644   | 47.6072   | 41.2647   | 42.664    | 40.0745   | 43.533    |
| 31.1637   | 40.0674   | 28.2781   | 30.1676   | 24.4624   | 27.8616   |
| 6.71618   | 6.56238   | 7.39028   | 5.96894   | 7.51655   | 6.20418   |
| 0         | 0         | 0         | 0         | 0         | 0         |
| 0         | 0.0153891 | 0         | 0         | 0         | 0         |
| 0         | 0         | 0         | 0         | 0         | 0         |
| 0         | 0.0834037 | 0.0336503 | 0.058852  | 0         | 0.0343424 |
| 1.76902   | 1.81771   | 2.23971   | 1.73082   | 1.90848   | 2.49366   |
| 1.73694   | 1.74071   | 2.12522   | 1.44787   | 1.17178   | 1.33597   |
| 83.9573   | 77.9117   | 84.9495   | 89.8801   | 91.1026   | 87.1681   |
| 10.6231   | 15.9412   | 8.18082   | 11.8281   | 4.99187   | 3.8039    |
| 11.2337   | 13.0448   | 16.8372   | 15.1747   | 18.5514   | 14.6909   |
| 2.59725   | 1.75373   | 1.86126   | 2.04643   | 2.24353   | 2.64648   |
| 0         | 0         | 0         | 0         | 0         | 0         |
| 0.906707  | 0.486889  | 0.229193  | 0.49351   | 0.680928  | 0.666018  |
| 30.4958   | 28.7575   | 29.4204   | 34.0427   | 36.4607   | 29.4002   |
| 1.57724   | 1.37858   | 1.48696   | 1.58677   | 1.72879   | 1.68424   |
| 1.13968   | 0.854819  | 1.33139   | 0.853323  | 0.841443  | 1.27548   |
| 0.034209  | 0.0734064 | 0.0549537 | 0.148789  | 0.0529357 | 0.055066  |

|           |           |           |            |           |           |
|-----------|-----------|-----------|------------|-----------|-----------|
| 193.686   | 241.893   | 202.541   | 211.648    | 183.754   | 174.281   |
| 1.42124   | 1.02898   | 1.31511   | 1.14629    | 0.972447  | 1.24824   |
| 0.936645  | 0.22354   | 0.505089  | 0.317212   | 0.080678  | 0.151836  |
| 1.76114   | 1.18575   | 2.07022   | 1.64503    | 1.52051   | 1.35747   |
| 4.15182   | 2.93593   | 3.64855   | 3.62682    | 4.29141   | 4.7362    |
| 7.52382   | 7.35698   | 5.39034   | 7.11382    | 5.79925   | 7.66645   |
| 82.7952   | 98.0298   | 84.5405   | 83.7562    | 79.7995   | 77.1019   |
| 0.648983  | 0.689948  | 0.222706  | 0.627971   | 0.350646  | 0.653543  |
| 0         | 0         | 0         | 0          | 0         | 0         |
| 0         | 0         | 0         | 0          | 0         | 0         |
| 2.84789   | 3.47094   | 3.23539   | 3.07692    | 2.46819   | 2.81406   |
| 0.216777  | 0.131735  | 0.29535   | 0.181186   | 0.168049  | 0.149132  |
| 0.845143  | 0.687007  | 0.497389  | 0.585646   | 0.973948  | 1.00736   |
| 8.81094   | 7.86677   | 10.8301   | 9.1502     | 11.0426   | 6.50892   |
| 59.0126   | 66.0355   | 76.9743   | 65.0886    | 81.2219   | 41.5883   |
| 82.7464   | 82.4838   | 91.8269   | 81.6407    | 94.205    | 93.8054   |
| 20.5978   | 17.3241   | 10.9402   | 19.0455    | 14.8135   | 17.2484   |
| 0         | 0         | 0         | 0.132486   | 0         | 0         |
| 26.6625   | 27.1815   | 28.4383   | 28.4745    | 27.1579   | 25.9669   |
| 245.539   | 272.459   | 223.902   | 236.121    | 232.549   | 220.037   |
| 0.0690447 | 0.214217  | 0.111698  | 0.0835117  | 0.196257  | 0.0373087 |
| 0.0288215 | 0         | 0.0233131 | 0          | 0         | 0.0233608 |
| 36.1599   | 31.6976   | 20.4646   | 23.2146    | 25.1152   | 19.4701   |
| 0         | 0         | 0         | 0          | 0         | 0         |
| 0.746035  | 0.396303  | 0.330926  | 0.68113    | 0.839523  | 0.741229  |
| 0.705402  | 0.272729  | 0         | 0          | 0         | 0         |
| 8.03486   | 8.58752   | 10.2198   | 10.8593    | 11.1034   | 8.87213   |
| 5.54966   | 3.44526   | 3.78379   | 4.40469    | 4.71811   | 3.94101   |
| 0         | 0         | 0         | 0.252342   | 0         | 0         |
| 11.8816   | 9.24065   | 11.0265   | 10.243     | 10.2893   | 10.7217   |
| 0         | 0         | 0.0574814 | 0          | 0         | 0         |
| 1.42887   | 1.63687   | 0.577892  | 0.103696   | 0.553841  | 1.15815   |
| 0.0294162 | 0         | 0         | 0.00640437 | 0.0171029 | 0.025035  |
| 0.0986936 | 0.0353314 | 0.119747  | 0.0716237  | 0.0765088 | 0         |
| 15.4714   | 11.7419   | 15.8684   | 18.9526    | 17.9905   | 17.6564   |
| 2.41785   | 1.85865   | 2.73474   | 2.72749    | 2.68511   | 2.55061   |
| 10.7799   | 7.29986   | 9.63238   | 9.41708    | 11.1215   | 9.37444   |
| 3.33396   | 2.36743   | 4.30949   | 3.77151    | 1.49216   | 2.94686   |
| 1.40736   | 0.666069  | 0.887554  | 0.960758   | 0.656453  | 0.676694  |
| 0.49362   | 0.196351  | 0.192558  | 0.143642   | 0.184544  | 0.192952  |
| 16.7893   | 16.9457   | 17.0344   | 16.2007    | 16.8774   | 17.0997   |
| 20.1219   | 4.39971   | 0.584774  | 0.524653   | 0.186812  | 0.683631  |
| 0         | 0         | 0         | 0          | 0         | 0         |

|            |           |          |            |           |            |
|------------|-----------|----------|------------|-----------|------------|
| 6.61689    | 4.62258   | 7.76858  | 6.89995    | 6.67335   | 7.10756    |
| 4.33044    | 2.47569   | 2.60687  | 2.85037    | 3.09682   | 3.91806    |
| 14.4005    | 12.2341   | 12.5176  | 13.4299    | 15.279    | 12.8393    |
| 0.747549   | 0.479477  | 0.705456 | 0.553812   | 0.543292  | 1.38855    |
| 0.173796   | 0.21744   | 0.30962  | 0.314815   | 0.239579  | 0.248412   |
| 0          | 0         | 0        | 0          | 0         | 0          |
| 30.7113    | 28.5006   | 28.5197  | 32.138     | 25.4209   | 29.6732    |
| 0.988364   | 0.90771   | 1.07366  | 1.75212    | 0.92006   | 1.80508    |
| 164.082    | 161.624   | 175.012  | 181.922    | 176.615   | 195.772    |
| 19.984     | 20.3614   | 22.5891  | 21.8872    | 21.0533   | 24.2672    |
| 0          | 0         | 0        | 0          | 0         | 0          |
| 0          | 0         | 0        | 0.315649   | 0         | 0          |
| 1.67237    | 1.97217   | 0.477441 | 1.35646    | 2.00823   | 0.770783   |
| 0          | 0         | 0        | 0.0525328  | 0         | 0          |
| 0.0893845  | 0.106663  | 0.112469 | 0.165774   | 0.307966  | 0.209298   |
| 0          | 0         | 0        | 0          | 0.0343194 | 0          |
| 2.86015    | 2.87193   | 2.39816  | 2.35411    | 2.24427   | 2.74232    |
| 14.8271    | 16.3918   | 14.8678  | 14.6287    | 14.059    | 13.4084    |
| 6.47578    | 6.25562   | 6.96234  | 6.66919    | 6.83896   | 7.20598    |
| 0.892139   | 0.993618  | 0.721633 | 0.503566   | 0.307378  | 0.562418   |
| 3.77995    | 4.17195   | 2.44805  | 2.92545    | 1.53815   | 0.977152   |
| 7.09291    | 6.0301    | 6.96886  | 6.59625    | 6.90243   | 7.38975    |
| 26.7058    | 29.6338   | 31.9614  | 28.4735    | 29.7456   | 27.1765    |
| 11.4633    | 8.08158   | 10.037   | 10.6481    | 10.2668   | 10.1733    |
| 0.00861554 | 0.0246758 | 0        | 0.00625246 | 0         | 0.00698319 |
| 0.302628   | 0.274637  | 0.118194 | 0.200131   | 0.193044  | 0.137975   |
| 3.14151    | 3.40099   | 3.13811  | 3.84553    | 3.15422   | 3.51267    |
| 69.322     | 77.3123   | 85.2861  | 81.3738    | 79.0979   | 68.9839    |
| 5.05562    | 6.24914   | 5.73382  | 4.55736    | 4.88011   | 4.31877    |
| 8.34087    | 7.27722   | 7.15967  | 7.59589    | 7.87036   | 10.2341    |
| 3.34591    | 3.63471   | 3.63969  | 3.93534    | 2.75032   | 4.13809    |
| 0.746688   | 0.432783  | 0.719025 | 0.490277   | 0.55128   | 0.518757   |
| 0          | 0         | 0        | 0          | 0         | 0          |
| 56.3609    | 68.8348   | 56.2943  | 53.4598    | 51.0328   | 54.1901    |
| 200.291    | 430.214   | 0        | 290.71     | 0         | 162.343    |
| 0          | 0         | 0        | 0          | 0         | 0          |
| 6.25977    | 7.26139   | 8.44184  | 6.84096    | 6.89976   | 7.47846    |
| 0          | 0         | 0        | 0          | 0         | 0          |
| 0.670281   | 0.191964  | 0.722903 | 0.486435   | 0.623535  | 0.796819   |
| 0          | 0         | 0        | 0          | 0         | 0          |
| 82.1618    | 72.5442   | 69.0881  | 75.7496    | 87.0816   | 64.546     |
| 126.011    | 152.086   | 112.35   | 142.923    | 139.132   | 131.613    |
| 0          | 0         | 0.999983 | 0          | 0.191673  | 0.200405   |

|           |           |           |           |           |           |
|-----------|-----------|-----------|-----------|-----------|-----------|
| 5.08382   | 7.12158   | 4.69327   | 5.0529    | 4.62646   | 5.86739   |
| 1353.14   | 1113.28   | 1274.99   | 1136.36   | 1298.25   | 1169.72   |
| 38.5742   | 42.8319   | 48.0191   | 40.0219   | 32.5642   | 35.929    |
| 0         | 0         | 0.0316257 | 0         | 0         | 0         |
| 18.7386   | 17.1572   | 18.0142   | 18.3884   | 14.4526   | 16.969    |
| 5.24185   | 3.49719   | 5.57216   | 4.85761   | 5.29149   | 4.78521   |
| 0.142887  | 0         | 0.115578  | 0         | 0.332305  | 0.115815  |
| 3.71928   | 3.23942   | 3.18133   | 3.50578   | 3.87745   | 4.07141   |
| 0         | 0         | 38.5836   | 0         | 0         | 0         |
| 0         | 0.0606995 | 0         | 0         | 0         | 0         |
| 6.60671   | 6.58276   | 4.71809   | 5.96706   | 4.90455   | 5.43847   |
| 0         | 0         | 0         | 0         | 0         | 0         |
| 9.92822   | 13.4778   | 10.2329   | 10.5512   | 10.4908   | 8.13116   |
| 0         | 0         | 0         | 0         | 0         | 0         |
| 30.6054   | 28.2561   | 32.0334   | 29.3472   | 29.9963   | 38.6997   |
| 26.1875   | 28.1104   | 31.8546   | 31.1039   | 27.9865   | 23.4432   |
| 31.2937   | 26.2291   | 30.4893   | 27.7417   | 30.3614   | 22.3561   |
| 10.4184   | 6.48531   | 10.4255   | 8.04151   | 10.283    | 9.0974    |
| 30.5811   | 24.838    | 27.6744   | 27.3936   | 37.227    | 29.257    |
| 6.60127   | 4.47383   | 5.05431   | 4.4981    | 5.70337   | 5.92237   |
| 14.2743   | 9.56847   | 13.7219   | 13.4609   | 14.4618   | 14.5001   |
| 12.5398   | 12.8427   | 12.6707   | 11.4564   | 11.7659   | 10.6573   |
| 5.88428   | 6.00485   | 4.63615   | 6.1966    | 3.48658   | 3.81213   |
| 11.6327   | 8.50465   | 11.6288   | 10.9374   | 11.3781   | 11.3701   |
| 3.398     | 2.22809   | 3.00796   | 3.52927   | 4.25074   | 3.14379   |
| 0.114283  | 0.0818246 | 0.0462207 | 0.0829374 | 0.132891  | 0.0926304 |
| 5.13381   | 2.53395   | 2.53464   | 3.20942   | 2.79764   | 7.52944   |
| 6.16132   | 3.70242   | 3.33734   | 7.1063    | 5.2881    | 4.90478   |
| 0.381202  | 0.251098  | 0.289845  | 0.254513  | 0.254141  | 0.321336  |
| 1.20866   | 0.465973  | 0.526433  | 0.742201  | 0.504524  | 0.48983   |
| 0.259348  | 0.278532  | 0.209781  | 0.0752853 | 0.180945  | 0.315315  |
| 10.9058   | 9.03169   | 11.1554   | 10.9489   | 11.2008   | 10.3348   |
| 0.271199  | 0.326564  | 0.368936  | 0.313113  | 0.344025  | 0.299749  |
| 0         | 0         | 0         | 0         | 0         | 0         |
| 0.0319955 | 0.0687245 | 0.103522  | 0         | 0.0992136 | 0.0518668 |
| 0.197556  | 0.084868  | 0.127839  | 0.114696  | 0.0612595 | 0.0800631 |
| 1.69172   | 2.38931   | 3.42112   | 2.65923   | 2.49976   | 1.14266   |
| 0.27647   | 0.0565564 | 0.159737  | 0.114651  | 0.0612354 | 0.128051  |
| 437.627   | 414.706   | 437.498   | 451.629   | 475.536   | 435.926   |
| 1.52331   | 1.94422   | 1.90183   | 1.65824   | 1.10388   | 1.66415   |
| 23.6131   | 20.9693   | 16.3857   | 23.8228   | 22.4204   | 10.2867   |
| 0         | 0         | 0         | 0         | 0         | 0         |
| 0         | 0         | 0         | 0         | 0         | 0         |

|          |           |           |          |           |          |
|----------|-----------|-----------|----------|-----------|----------|
| 0        | 0         | 0         | 0        | 0         | 0        |
| 7.52525  | 6.42225   | 7.95307   | 6.99634  | 6.07366   | 8.67427  |
| 7.46475  | 4.16074   | 5.67575   | 6.15138  | 5.36357   | 4.26007  |
| 2.84463  | 2.26814   | 3.8175    | 3.33118  | 3.10732   | 3.98251  |
| 0.432334 | 0.371451  | 0.209824  | 0.753005 | 0.469212  | 0.490589 |
| 9.77973  | 12.4725   | 12.8548   | 10.646   | 12.7936   | 13.8719  |
| 0        | 0.0592032 | 0         | 0        | 0         | 0        |
| 2.02226  | 1.09421   | 1.06137   | 1.59082  | 1.089     | 1.27625  |
| 0        | 0         | 0         | 0        | 0.0773641 | 0        |
| 26.5458  | 36.7683   | 21.6757   | 22.2611  | 16.8223   | 23.9282  |
| 0        | 0         | 0         | 0        | 0         | 0        |
| 0        | 0         | 0         | 0        | 0         | 0        |
| 2.82593  | 2.03633   | 1.99919   | 1.87278  | 1.62014   | 2.63667  |
| 0        | 0         | 0         | 0        | 0         | 0        |
| 0        | 0         | 0         | 0        | 0         | 0        |
| 27.0421  | 25.7444   | 17.5159   | 19.8489  | 13.1214   | 16.6518  |
| 54.3567  | 89.5286   | 76.9661   | 58.9836  | 64.0925   | 53.4527  |
| 0        | 0         | 0         | 0        | 0         | 0        |
| 58.4691  | 56.1898   | 52.4861   | 58.0137  | 39.9294   | 50.0198  |
| 3.39356  | 2.50118   | 1.95782   | 1.95572  | 1.89568   | 2.99329  |
| 5.3526   | 5.05626   | 5.60473   | 3.7011   | 3.65801   | 4.65849  |
| 3.38896  | 2.75378   | 2.56179   | 4.78472  | 1.81973   | 0.567345 |
| 8.72125  | 9.51615   | 7.25776   | 6.89092  | 7.03945   | 7.57595  |
| 38.0665  | 51.7066   | 48.5715   | 64.4938  | 66.1501   | 40.1321  |
| 3.91564  | 3.6624    | 2.85604   | 2.05321  | 2.71963   | 3.48563  |
| 0        | 0         | 0         | 0        | 0         | 0        |
| 1.45606  | 1.18151   | 0.824446  | 0.880576 | 0.639632  | 0.904811 |
| 23.1035  | 13.8523   | 19.7079   | 17.6281  | 23.3573   | 12.6726  |
| 5.71615  | 5.81588   | 5.93777   | 7.1613   | 4.99098   | 5.60853  |
| 270.232  | 335.48    | 255.915   | 183.589  | 180.198   | 360.391  |
| 2.09936  | 1.58661   | 1.79247   | 1.60819  | 1.62746   | 1.5598   |
| 0        | 0         | 0         | 0        | 0.206726  | 0        |
| 12.574   | 12.5667   | 12.0109   | 13.2669  | 11.7592   | 10.9938  |
| 2.01468  | 1.61557   | 1.49927   | 2.48556  | 2.03036   | 2.51477  |
| 1.59832  | 1.63802   | 1.53368   | 1.44423  | 1.57917   | 1.82893  |
| 11.75    | 15.2776   | 13.5375   | 14.0987  | 12.0981   | 13.3732  |
| 1.97523  | 1.49191   | 1.20095   | 1.30996  | 1.06883   | 1.30432  |
| 58.2856  | 64.1612   | 57.4165   | 57.2726  | 61.4231   | 57.3531  |
| 0        | 0.401445  | 0.453532  | 0.813808 | 0.76065   | 0.340845 |
| 11.7621  | 11.4463   | 13.3122   | 12.96    | 9.19475   | 13.0992  |
| 0        | 0         | 0.0753471 | 0        | 0         | 0        |
| 50.4759  | 64.667    | 58.1184   | 60.1948  | 55.3242   | 52.6526  |
| 0        | 0         | 0         | 0        | 0         | 0        |



|          |          |          |           |           |           |
|----------|----------|----------|-----------|-----------|-----------|
| 0.170547 | 0.155058 | 0.156473 | 0.259175  | 0.0826316 | 0.138234  |
| 0.288468 | 0.413075 | 0.155557 | 0.209346  | 0         | 0.155875  |
| 4.48728  | 4.9121   | 4.5353   | 4.49719   | 3.48902   | 8.31076   |
| 53.753   | 55.5108  | 51.0249  | 57.7584   | 52.8073   | 40.473    |
| 9.64978  | 6.90906  | 7.09592  | 8.2763    | 8.33074   | 5.56984   |
| 2.54326  | 1.39253  | 2.19331  | 1.64214   | 1.84112   | 1.925     |
| 22.95    | 21.1799  | 26.3389  | 23.1871   | 25.9332   | 29.0722   |
| 14.6005  | 14.076   | 16.0349  | 12.0725   | 11.2372   | 13.8381   |
| 5.01911  | 3.63537  | 4.39031  | 3.30363   | 2.8503    | 2.88555   |
| 0        | 5.55E-12 | 1.91E-10 | 2.57E-10  | 0.0313373 | 0.0710833 |
| 6.98692  | 3.6727   | 4.63868  | 5.10673   | 4.21615   | 5.37355   |
| 3.14406  | 4.80322  | 4.72453  | 4.64129   | 4.48133   | 1.93493   |
| 0.355433 | 0.289829 | 0.263544 | 0.315265  | 0.558729  | 0.520164  |
| 0        | 0        | 0        | 0         | 0         | 0         |
| 10.9915  | 10.1417  | 11.3062  | 10.7426   | 11.5017   | 11.0948   |
| 15.2182  | 19.7866  | 17.4486  | 17.5663   | 14.9928   | 14.9193   |
| 57.2494  | 68.1922  | 81.3815  | 61.7054   | 71.8752   | 74.8064   |
| 40.4486  | 37.9163  | 42.9771  | 42.3019   | 30.3093   | 35.0654   |
| 3.46772  | 2.08857  | 2.66051  | 2.91622   | 2.04213   | 2.76245   |
| 0        | 0        | 0        | 0.0730168 | 0         | 0         |
| 0.296924 | 0.164172 | 0.217351 | 0.254807  | 0.177755  | 0.217796  |
| 0        | 0        | 0        | 0         | 0         | 0         |
| 1.17669  | 1.13564  | 1.31873  | 1.12831   | 0.971567  | 1.0627    |
| 39.6302  | 45.4205  | 39.9117  | 43.0111   | 40.4      | 36.0755   |
| 9.19474  | 6.28481  | 6.67386  | 7.40235   | 6.73824   | 7.56195   |
| 11.9882  | 9.84763  | 11.5539  | 10.0067   | 11.8231   | 10.6289   |
| 2.84503  | 4.94697  | 3.94507  | 2.6546    | 3.46581   | 2.97515   |
| 36.9865  | 34.4841  | 37.1677  | 38.6952   | 38.5299   | 40.1759   |
| 0        | 0        | 0        | 0         | 0         | 0         |
| 0.844622 | 1.20947  | 1.36639  | 1.0216    | 0.491073  | 1.25509   |
| 45.5826  | 39.4189  | 36.7506  | 47.0724   | 51.7806   | 41.2822   |
| 4.72636  | 4.69669  | 4.54499  | 4.04027   | 2.97975   | 5.01836   |
| 7.96303  | 8.90648  | 10.7933  | 10.4333   | 7.54115   | 9.07092   |
| 46.0674  | 40.1115  | 47.333   | 46.5571   | 50.5652   | 44.1567   |
| 0.594051 | 0.471359 | 0.449403 | 0.4354    | 0.58249   | 0.43589   |
| 4.02523  | 3.47901  | 2.3013   | 4.0507    | 4.25834   | 4.61492   |
| 0.945978 | 0.488288 | 0.587233 | 1.02179   | 0.460467  | 0.855903  |
| 0.29311  | 0.339984 | 0.170697 | 0.034025  | 0.145408  | 0.237575  |
| 0.177196 | 0.126869 | 0        | 0         | 0         | 0.143624  |
| 0.122898 | 0.114003 | 0        | 0         | 0.350857  | 0.290382  |
| 3.46564  | 3.60332  | 2.60267  | 4.43089   | 4.22122   | 3.47766   |
| 9.79661  | 5.472    | 7.47754  | 7.8331    | 6.08632   | 7.054     |
| 15.1234  | 17.1836  | 18.5363  | 14.791    | 14.3147   | 24.9113   |

|           |           |           |           |           |          |
|-----------|-----------|-----------|-----------|-----------|----------|
| 1.76367   | 1.5711    | 2.04036   | 1.90501   | 2.09853   | 1.69547  |
| 17.7119   | 18.2381   | 17.5494   | 17.8875   | 12.9788   | 16.154   |
| 1.57351   | 1.22197   | 1.64394   | 1.55624   | 0.596285  | 1.45972  |
| 5.68901   | 8.0651    | 9.11507   | 5.54345   | 10.6311   | 7.31388  |
| 4.59583   | 4.40466   | 4.81085   | 4.68885   | 4.52518   | 5.16789  |
| 0.730134  | 0.794578  | 0.685077  | 0.759465  | 0.729502  | 0.670698 |
| 49.5916   | 44.6358   | 43.3188   | 55.9109   | 48.7169   | 61.1984  |
| 7.39513   | 9.30491   | 8.65011   | 9.10688   | 6.62091   | 6.90691  |
| 59.2069   | 33.0625   | 143.05    | 95.7486   | 93.6493   | 160.564  |
| 0.27488   | 0.196809  | 1.55642   | 0.598457  | 0.213092  | 0        |
| 0         | 0         | 0         | 0         | 0         | 0        |
| 0.33241   | 0.294775  | 0.243337  | 0.385039  | 0.210727  | 0.253207 |
| 6.94396   | 6.94846   | 5.54916   | 4.73578   | 5.43711   | 6.56637  |
| 7.81502   | 6.96738   | 8.55032   | 7.14251   | 7.49354   | 7.52134  |
| 0.842023  | 0.396173  | 0.447577  | 0.558694  | 0.39165   | 0.350994 |
| 14.1691   | 12.7749   | 13.0529   | 12.8815   | 15.7642   | 14.6496  |
| 2.31262   | 1.95818   | 1.8242    | 2.02349   | 1.6402    | 2.29986  |
| 191.546   | 272.202   | 265.293   | 230.514   | 249.48    | 153.166  |
| 0.290068  | 0.207683  | 0.195525  | 0.245592  | 0.0374775 | 0.274295 |
| 18.1324   | 14.5349   | 15.057    | 14.5857   | 14.428    | 14.9486  |
| 28.1812   | 25.5316   | 29.42     | 26.8548   | 29.4127   | 22.5873  |
| 16.6307   | 20.3866   | 28.4331   | 16.2751   | 23.4406   | 21.7514  |
| 4.13496   | 3.24543   | 3.09182   | 3.27924   | 2.63269   | 3.19028  |
| 2.24718   | 1.59651   | 1.45977   | 1.72527   | 1.80931   | 1.61045  |
| 83.4994   | 93.1975   | 76.6571   | 85.8364   | 62.3582   | 84.693   |
| 6.27566   | 7.94744   | 9.26416   | 4.52589   | 4.62174   | 6.00858  |
| 2.84432   | 2.18194   | 2.54721   | 2.65393   | 2.4412    | 1.97607  |
| 12.3661   | 11.3578   | 12.2869   | 13.3619   | 13.4184   | 11.5303  |
| 25.0091   | 24.8809   | 31.9329   | 27.375    | 27.0384   | 29.0728  |
| 65.0436   | 55.8552   | 55.9813   | 46.1402   | 108.609   | 38.2159  |
| 8.58957   | 6.81708   | 9.35026   | 8.02973   | 8.21624   | 7.85895  |
| 10.4572   | 13.4063   | 13.5672   | 17.0844   | 9.53574   | 12.5664  |
| 0         | 0         | 0         | 0         | 0         | 0        |
| 0         | 0         | 0         | 0         | 0         | 0        |
| 1.19567   | 1.79798   | 1.78392   | 1.70229   | 1.24682   | 1.57965  |
| 2.44695   | 2.22915   | 1.62874   | 1.7353    | 1.09724   | 2.12764  |
| 2.16507   | 0.16036   | 0.724667  | 1.02943   | 4.91943   | 3.8728   |
| 0.706218  | 0.288936  | 0.163213  | 0.366082  | 0         | 0.327093 |
| 1.80479   | 1.25419   | 1.61014   | 1.48312   | 0.843577  | 1.72099  |
| 0.0220719 | 0.0632121 | 0.0535604 | 0.0160179 | 0.0513313 | 0.10734  |
| 1.28769   | 1.04361   | 1.94515   | 2.14907   | 0.956748  | 1.13614  |
| 3.30876   | 3.08792   | 2.52052   | 3.19373   | 3.30032   | 3.42806  |
| 47.2675   | 46.9101   | 44.4542   | 46.5364   | 39.3745   | 38.9785  |

|           |           |          |          |          |           |
|-----------|-----------|----------|----------|----------|-----------|
| 0         | 0         | 0        | 0        | 0        | 0         |
| 0.0328656 | 0         | 0        | 0        | 0        | 0.019979  |
| 13.9052   | 17.5262   | 21.9409  | 14.0254  | 12.3461  | 14.186    |
| 21.2013   | 20.1981   | 22.3546  | 22.443   | 23.4338  | 21.325    |
| 0.496912  | 0.335538  | 0.48148  | 0.309473 | 0.385281 | 0.542427  |
| 2.00589   | 1.23822   | 1.34297  | 1.6313   | 1.09761  | 1.76592   |
| 2.71864   | 2.219     | 1.64929  | 2.03215  | 1.91785  | 2.26965   |
| 0.498948  | 0.357237  | 0.403589 | 0.339465 | 0.410967 | 0.278035  |
| 0         | 0         | 0        | 0        | 0        | 0         |
| 2.92325   | 1.67537   | 3.18234  | 3.39603  | 2.9473   | 3.50094   |
| 0.198232  | 0.227089  | 0.272588 | 0.215791 | 0.153673 | 0.297247  |
| 0.240824  | 0.193979  | 0.292197 | 0.109231 | 0.210027 | 0.121998  |
| 38.6039   | 30.4024   | 35.3299  | 34.0106  | 39.2549  | 37.0276   |
| 1.00213   | 0.544177  | 0.906281 | 0.644801 | 0.816629 | 0.86178   |
| 0.348656  | 0.0554734 | 0.451234 | 0.404842 | 0.432454 | 0.635845  |
| 0         | 0.0987318 | 0.111542 | 0.133433 | 0        | 0.0372568 |
| 0         | 0         | 0        | 0        | 0        | 0         |
| 4.82198   | 4.68624   | 5.43614  | 4.8464   | 5.22447  | 6.22096   |
| 7.96896   | 6.17355   | 7.29857  | 7.75686  | 6.14498  | 7.77486   |
| 6.30849   | 5.68563   | 4.4833   | 4.97311  | 3.93735  | 5.73402   |
| 22.4891   | 21.9874   | 23.1366  | 22.5078  | 19.929   | 27.4873   |
| 15.3686   | 15.6283   | 14.6141  | 12.981   | 15.4071  | 12.4359   |
| 14.2928   | 14.5274   | 14.4288  | 14.2063  | 17.3152  | 13.2998   |
| 10.9156   | 7.44728   | 9.4967   | 8.83269  | 9.71317  | 9.44829   |
| 89.4202   | 110.211   | 125.058  | 103.936  | 156.388  | 135.633   |
| 0         | 0         | 0        | 0        | 0        | 0         |
| 0         | 0         | 0        | 0        | 0        | 0         |
| 7.13054   | 6.37965   | 6.02173  | 5.84489  | 5.8999   | 6.02812   |
| 35.4857   | 37.1775   | 34.9663  | 32.1205  | 37.4924  | 30.9797   |
| 0         | 0         | 0        | 0        | 0        | 0         |
| 1.75319   | 1.2978    | 2.1392   | 1.9624   | 1.10571  | 1.46919   |
| 0         | 0         | 0        | 0        | 0        | 0         |
| 0.153668  | 0.550117  | 0.621494 | 0.892157 | 0.297814 | 0.124553  |
| 14.8195   | 24.3128   | 16.7371  | 23.6154  | 16.3107  | 11.7554   |
| 7.5763    | 5.1832    | 5.51246  | 5.88775  | 5.82489  | 7.12282   |
| 18.3254   | 15.6123   | 18.7604  | 19.0855  | 19.0554  | 18.5489   |
| 1.21357   | 1.76782   | 1.15917  | 1.6077   | 0.677803 | 1.26692   |
| 11.5381   | 10.0666   | 10.041   | 7.1055   | 7.6858   | 7.40391   |
| 10.306    | 8.79505   | 10.0036  | 10.0026  | 10.6364  | 9.78778   |
| 0.484921  | 0.328921  | 0.103222 | 0.444526 | 0.276993 | 0.372359  |
| 11.7853   | 9.9092    | 12.3065  | 11.6567  | 11.01    | 12.2376   |
| 8.64124   | 7.65071   | 11.911   | 9.06175  | 11.631   | 11.0938   |
| 1.13976   | 0.699466  | 1.03071  | 1.54516  | 0.450614 | 0.622952  |

|           |           |           |           |           |           |
|-----------|-----------|-----------|-----------|-----------|-----------|
| 10.0459   | 7.7518    | 8.93696   | 8.41695   | 6.47982   | 10.4947   |
| 1.10168   | 1.24891   | 1.3367    | 0.954973  | 1.18617   | 1.31462   |
| 0         | 0         | 0         | 0         | 0         | 0         |
| 0         | 0         | 0         | 0.038711  | 0         | 0         |
| 3.44467   | 2.35426   | 3.37188   | 3.41788   | 2.31815   | 4.03849   |
| 0         | 0         | 0         | 0         | 0         | 0         |
| 3.19383   | 3.0846    | 2.80645   | 2.70134   | 1.97716   | 2.51421   |
| 5.77526   | 5.38033   | 4.85254   | 4.84094   | 4.85879   | 4.27585   |
| 44.9881   | 46.1058   | 54.6324   | 49.3173   | 41.3166   | 47.0477   |
| 80.8527   | 72.6805   | 71.0668   | 85.0526   | 64.1975   | 74.6859   |
| 0         | 0         | 0         | 0         | 0         | 0         |
| 0         | 0         | 0         | 0         | 0         | 0         |
| 1.68507   | 1.26782   | 1.84443   | 1.72562   | 1.67157   | 2.08956   |
| 0.351912  | 1.00079   | 0.799789  | 0.554134  | 0.484619  | 0.621837  |
| 0         | 0.153526  | 0.173446  | 0.0518713 | 0         | 0.173801  |
| 0         | 0         | 0         | 0         | 0         | 0         |
| 15.6841   | 15.1068   | 15.8109   | 14.5931   | 18.002    | 15.1412   |
| 20.1433   | 19.7332   | 22.1001   | 20.191    | 18.87     | 17.7374   |
| 38.5138   | 32.7959   | 41.7243   | 37.7202   | 45.0116   | 41.9728   |
| 19.602    | 22.3444   | 21.0929   | 19.0453   | 19.6528   | 21.9959   |
| 2771.46   | 2720.49   | 2798.67   | 2848.28   | 2960.04   | 2626.53   |
| 0.732087  | 0.820425  | 0.463438  | 0.415791  | 0.44415   | 0.95457   |
| 0.0435655 | 0.229644  | 0.0331017 | 0.0829062 | 0         | 0.200174  |
| 0.344087  | 0.383227  | 0.324713  | 0.180346  | 0.059276  | 0.18593   |
| 0         | 0         | 0         | 0         | 0         | 0         |
| 0         | 0         | 0         | 0         | 0         | 0         |
| 0         | 0         | 0         | 0.0485338 | 0         | 0         |
| 0         | 0         | 0         | 0         | 0         | 0         |
| 4.23307   | 3.94838   | 5.24601   | 3.41022   | 3.25144   | 3.71434   |
| 15.2787   | 12.7523   | 14.7484   | 13.3649   | 11.7583   | 14.1522   |
| 36.3376   | 36.9004   | 40.1604   | 38.6424   | 36.7458   | 37.6909   |
| 0         | 0         | 0         | 0         | 0         | 0         |
| 12.2155   | 9.56345   | 11.8663   | 12.3447   | 12.4197   | 13.9263   |
| 80.3744   | 80.0825   | 88.453    | 75.9458   | 85.2208   | 81.9767   |
| 0         | 0.0579547 | 0         | 0.0234971 | 0.0125499 | 0.0131216 |
| 7.5665    | 8.27707   | 5.92702   | 9.42621   | 6.27842   | 5.49478   |
| 57.961    | 68.9135   | 59.0037   | 65.8055   | 69.7563   | 45.2504   |
| 7.51814   | 7.32399   | 7.26935   | 7.76907   | 5.2116    | 7.93828   |
| 7.17725   | 11.0347   | 9.87948   | 7.9196    | 8.43903   | 7.07228   |
| 14.7642   | 11.2009   | 11.7083   | 13.9927   | 11.0794   | 12.3096   |
| 0         | 0         | 0         | 0         | 0         | 0         |
| 0         | 0.202647  | 0         | 0         | 0.219412  | 0         |
| 0         | 0         | 0.0285137 | 0         | 0         | 0.028572  |

|           |           |           |           |           |           |
|-----------|-----------|-----------|-----------|-----------|-----------|
| 0.131607  | 0         | 0         | 0         | 0         | 0         |
| 3.37116   | 0.344812  | 0.779103  | 1.0485    | 27.8138   | 7.61179   |
| 0         | 0         | 0         | 0         | 0         | 0         |
| 0.972142  | 0.580029  | 1.04846   | 0.35275   | 0.502413  | 1.57591   |
| 0         | 0         | 0.132807  | 0.357459  | 0.50912   | 0.399236  |
| 0         | 0         | 0.0371114 | 0.0665919 | 0         | 0.0371873 |
| 0.476696  | 0.341305  | 0.578384  | 0.216217  | 0.138578  | 0.193189  |
| 0         | 0         | 0         | 0         | 0         | 0         |
| 0.261231  | 0.320634  | 0.211304  | 0.324994  | 0.26037   | 0.241985  |
| 5.51663   | 5.11294   | 5.3657    | 5.18247   | 4.25034   | 4.63601   |
| 21.6602   | 23.6318   | 25.7402   | 23.6514   | 23.805    | 25.1828   |
| 0.310809  | 0.3338    | 0.219981  | 0.140975  | 0.240944  | 0.377882  |
| 20.6965   | 18.5857   | 21.6072   | 19.4367   | 20.7352   | 21.495    |
| 8.86107   | 9.12135   | 8.18113   | 7.81637   | 8.7658    | 9.62463   |
| 140.535   | 127.899   | 168.853   | 181.958   | 188.709   | 140.413   |
| 1.33923   | 0.750665  | 1.1502    | 0.828995  | 0.823983  | 0.965974  |
| 94.9243   | 78.7809   | 72.469    | 89.8917   | 101.604   | 106.446   |
| 0.98164   | 0.359097  | 0.769238  | 0.33186   | 0.659745  | 0.690083  |
| 1.93495   | 0.99748   | 1.62775   | 1.06721   | 0.960003  | 1.06647   |
| 2.2086    | 1.83405   | 1.7361    | 2.13816   | 1.46585   | 2.25485   |
| 2.20358   | 1.54617   | 0.820324  | 1.43926   | 1.4691    | 2.03629   |
| 87.8479   | 89.1173   | 83.8643   | 87.2731   | 103.019   | 74.5736   |
| 3.55043   | 0.732902  | 2.70101   | 3.04075   | 4.07006   | 0.664033  |
| 7.67202   | 7.05544   | 6.01854   | 7.23036   | 6.53633   | 6.98623   |
| 17.7186   | 17.283    | 17.2335   | 15.4096   | 18.546    | 14.8848   |
| 28.3998   | 30.3762   | 27.2462   | 28.8726   | 34.4816   | 24.1296   |
| 11.5301   | 15.0666   | 16.7695   | 13.8799   | 14.6974   | 13.4179   |
| 43.7883   | 37.2283   | 41.859    | 45.917    | 46.5095   | 52.5419   |
| 0.359698  | 0.403066  | 0.602186  | 0.325262  | 0.621868  | 0.53129   |
| 11.785    | 9.5755    | 11.9055   | 11.2698   | 11.5351   | 10.7648   |
| 0.648595  | 0.499588  | 0.366412  | 0.542108  | 0.153632  | 0.565564  |
| 73.4454   | 83.4571   | 88.6334   | 99.0597   | 72.1888   | 82.5439   |
| 0.0336438 | 0         | 0.0272138 | 0.0488318 | 0         | 0.0272694 |
| 5.85911   | 5.27408   | 5.94193   | 6.14079   | 5.77551   | 6.34012   |
| 0.28467   | 0.358074  | 0         | 0.44226   | 0.0613351 | 0.10134   |
| 0         | 0         | 0         | 0         | 0         | 0         |
| 31.5139   | 31.7894   | 32.1635   | 32.7695   | 31.0199   | 28.3181   |
| 26.0966   | 27.9439   | 28.6024   | 27.7174   | 23.9202   | 26.5908   |
| 0.924606  | 0.487789  | 0.55108   | 0.17658   | 0.264073  | 1.65662   |
| 0.253461  | 0.0302455 | 0.0341699 | 0.0613136 | 0.147365  | 0.0342397 |
| 13.3283   | 12.2364   | 11.2044   | 12.7528   | 12.9438   | 11.7885   |
| 0         | 0         | 0         | 0         | 0         | 0         |
| 0.411783  | 0.318973  | 0.305861  | 0.250056  | 0.118718  | 0.0551676 |

|           |           |           |           |           |            |
|-----------|-----------|-----------|-----------|-----------|------------|
| 0         | 0.0366864 | 0         | 0.0743705 | 0.0397215 | 0.0207656  |
| 21.0907   | 26.4759   | 19.9354   | 28.154    | 22.0379   | 25.9993    |
| 0         | 0         | 0         | 0         | 0         | 0          |
| 0.0772145 | 0         | 0.0312286 | 0.056036  | 0.029929  | 0          |
| 32.2264   | 31.5775   | 39.7259   | 30.3754   | 36.7317   | 40.0238    |
| 0.529303  | 0.1893    | 0         | 0.191922  | 0         | 0          |
| 0         | 0         | 0         | 0         | 0         | 0          |
| 0         | 0         | 0         | 0         | 0         | 0          |
| 0         | 0         | 0         | 0         | 0         | 0          |
| 0         | 0         | 0         | 0         | 0         | 0          |
| 3.99827   | 3.1247    | 2.63721   | 2.9435    | 1.19032   | 3.74578    |
| 0.214996  | 0.230899  | 0.382592  | 0.312052  | 0.183335  | 0.209113   |
| 6.68767   | 7.25642   | 6.70614   | 6.46698   | 5.13094   | 6.20294    |
| 16.4764   | 16.0593   | 15.2242   | 19.1771   | 14.0691   | 13.3563    |
| 1.00296   | 0.490018  | 0.546452  | 1.50667   | 0.279474  | 0.966573   |
| 5.09E-07  | 4.10E-07  | 4.07E-07  | 3.84E-07  | 3.64E-07  | 3.95E-07   |
| 27.7965   | 40.2209   | 27.5533   | 39.3389   | 22.5352   | 23.5397    |
| 5.68534   | 6.42605   | 4.4179    | 5.09949   | 5.64538   | 2.14875    |
| 2.7531    | 5.20031   | 7.60451   | 1.87033   | 1.73694   | 2.04158    |
| 0.0352917 | 0.0181931 | 0.0380623 | 0.0163915 | 0.0196982 | 0.00686522 |
| 8.16314   | 9.94412   | 10.3673   | 8.15215   | 11.3871   | 8.3251     |
| 16.4914   | 12.4904   | 15.8749   | 13.7482   | 12.0446   | 13.2563    |
| 2.65113   | 2.81073   | 4.04145   | 4.44001   | 3.87325   | 4.42163    |
| 23.8712   | 17.4189   | 20.3943   | 23.3563   | 25.0665   | 19.8335    |
| 14.811    | 15.7238   | 15.543    | 17.6592   | 14.0245   | 12.1828    |
| 0         | 0         | 0         | 0         | 0         | 0          |
| 38.9917   | 35.2668   | 22.2263   | 30.6156   | 22.0802   | 18.5409    |
| 0         | 0         | 0         | 0.0175969 | 0.0939853 | 0.0196534  |
| 0.0749894 | 0.107382  | 0.206235  | 0.119726  | 0.116266  | 0.0729377  |
| 0.0955769 | 0.119755  | 0.0579827 | 0.0173405 | 0.0370464 | 0.0193671  |
| 15.3941   | 14.6982   | 14.1008   | 15.2543   | 12.348    | 15.3139    |
| 3.86912   | 3.97087   | 4.82931   | 4.12856   | 4.53737   | 4.09168    |
| 3.9218    | 4.0732    | 4.19547   | 3.71935   | 5.47763   | 4.84654    |
| 3.16012   | 3.70277   | 3.04825   | 3.6518    | 4.00381   | 4.53397    |
| 5.44158   | 7.27726   | 5.21738   | 6.5828    | 5.76834   | 5.58309    |
| 20.6753   | 18.366    | 21.8537   | 19.391    | 21.8666   | 23.2136    |
| 17.0435   | 13.3406   | 10.4531   | 11.0643   | 8.79441   | 9.70869    |
| 20.5849   | 15.9531   | 8.96576   | 12.6405   | 10.96     | 14.7596    |
| 11.997    | 9.13985   | 12.2218   | 11.981    | 10.5911   | 12.1538    |
| 0.50122   | 1.79432   | 0.810853  | 0.727488  | 0.58283   | 3.25004    |
| 1.01037   | 0.180852  | 0.544846  | 0.916556  | 0.652713  | 0.68245    |
| 14.28     | 12.0505   | 11.5762   | 13.4432   | 12.7305   | 11.6523    |
| 5.6313    | 4.89466   | 5.23264   | 5.72645   | 4.86289   | 6.49443    |

|          |           |           |            |           |           |
|----------|-----------|-----------|------------|-----------|-----------|
| 0        | 0.0358232 | 0.0404713 | 0.0726208  | 0         | 0.040554  |
| 0.271669 | 0.139989  | 0.105435  | 0.257509   | 0.281097  | 0.0352168 |
| 0.174267 | 0         | 0         | 0.126469   | 0         | 0         |
| 0        | 0         | 0         | 0.0987256  | 0         | 0.110264  |
| 45.5788  | 56.137    | 29.2206   | 37.6923    | 21.9605   | 15.9288   |
| 1.04274  | 0.773243  | 1.15221   | 0.770245   | 0.866084  | 0.762165  |
| 0        | 0         | 0         | 0          | 0         | 0         |
| 0        | 0         | 0         | 0          | 0         | 0         |
| 0        | 0         | 0         | 0          | 0         | 0         |
| 0.119937 | 0.120222  | 0.135821  | 0.330754   | 0.0185954 | 0.207604  |
| 0        | 0         | 0         | 0.00388515 | 0         | 0         |
| 6.36251  | 4.69338   | 4.59197   | 5.95425    | 4.8548    | 4.99977   |
| 4.00088  | 3.50607   | 2.64626   | 3.41817    | 2.78134   | 3.51607   |
| 842.509  | 1155.6    | 955.079   | 1001.02    | 1023.38   | 873.044   |
| 0.892655 | 0.499316  | 0.49641   | 0.749037   | 0.627125  | 0.429594  |
| 0        | 0         | 0         | 0          | 0         | 0         |
| 11.0362  | 12.5557   | 14.8167   | 20.5725    | 9.76621   | 14.9916   |
| 0        | 0         | 0         | 0          | 0         | 0         |
| 4.20988  | 3.68401   | 5.62502   | 5.34091    | 5.125     | 4.97935   |
| 21.9873  | 30.4289   | 20.2715   | 12.4125    | 24.8665   | 18.251    |
| 0        | 0         | 0         | 0          | 0         | 0         |
| 11.2595  | 9.68334   | 10.0059   | 9.26443    | 10.9874   | 11.9068   |
| 7.00989  | 5.73009   | 6.41578   | 5.79765    | 6.54761   | 7.34979   |
| 209.655  | 120.087   | 67.8343   | 30.4301    | 0         | 67.973    |
| 3.16613  | 2.38317   | 3.35677   | 2.54186    | 2.45339   | 3.30475   |
| 0        | 0.010986  | 0         | 0.0111354  | 0.0237898 | 0.0124368 |
| 0        | 0         | 0         | 0          | 0         | 0         |
| 0        | 0         | 0         | 0          | 0         | 0         |
| 0        | 0.221568  | 0         | 0          | 0         | 0         |
| 0.109141 | 0.312572  | 0.176564  | 0.158412   | 0.253824  | 0.206413  |
| 31.3904  | 24.9363   | 31.3627   | 33.2097    | 37.3971   | 31.7466   |
| 12.2886  | 11.9112   | 11.0685   | 11.2287    | 8.75068   | 11.6814   |
| 1.55328  | 2.21422   | 2.00052   | 1.79323    | 1.43011   | 2.12113   |
| 0        | 0         | 0         | 0          | 0         | 0         |
| 23.31    | 26.8262   | 21.5157   | 21.6488    | 22.2103   | 13.8451   |
| 7.18816  | 6.2138    | 6.90736   | 7.1273     | 6.20952   | 6.80857   |
| 2.44428  | 2.0193    | 1.87574   | 1.89594    | 1.29697   | 1.5752    |
| 0.992571 | 0.639595  | 1.04373   | 1.22455    | 1.00029   | 0.831329  |
| 5.05723  | 4.95169   | 5.75126   | 5.24283    | 3.92045   | 5.27038   |
| 1.13846  | 1.81429   | 1.33675   | 1.94557    | 1.93592   | 2.05388   |
| 14.9371  | 12.4099   | 11.7136   | 12.2535    | 13.3414   | 13.889    |
| 0.135001 | 0.110466  | 0.0779995 | 0.699803   | 0.373767  | 0.187582  |
| 0.747961 | 1.26497   | 0.713554  | 0.841916   | 0.513352  | 1.03659   |

|           |           |          |           |           |           |
|-----------|-----------|----------|-----------|-----------|-----------|
| 0         | 0         | 0        | 0         | 0.0263324 | 0.0275321 |
| 1.44347   | 0.916057  | 1.1676   | 1.02375   | 0.712093  | 1.16998   |
| 11.3737   | 9.43759   | 10.9414  | 10.9957   | 8.15581   | 10.0913   |
| 6.62993   | 13.4325   | 14.1905  | 26.9675   | 7.44794   | 8.11502   |
| 43.1443   | 33.1943   | 26.9152  | 39.0419   | 29.1987   | 40.5931   |
| 0         | 0         | 0        | 0         | 0         | 0         |
| 52.3523   | 59.0463   | 55.6631  | 52.4666   | 49.436    | 46.042    |
| 2.72842   | 2.52064   | 2.56293  | 2.81041   | 2.25157   | 2.14014   |
| 0.0954242 | 0.185445  | 0.13232  | 0.108823  | 0.0528388 | 0.121541  |
| 0         | 0         | 0        | 0         | 0         | 0         |
| 25.6361   | 20.2082   | 24.3745  | 24.2158   | 28.4957   | 25.8695   |
| 11.0733   | 9.07546   | 10.901   | 9.32808   | 10.6681   | 10.4207   |
| 0.129889  | 0.0557988 | 0        | 0.0678691 | 0         | 0.0962553 |
| 3.37192   | 3.1969    | 2.81704  | 2.47665   | 2.86839   | 3.23484   |
| 1.87635   | 1.15026   | 1.41854  | 1.335     | 1.7588    | 1.1133    |
| 0.245748  | 0.281521  | 0.119268 | 0.293712  | 0.0762031 | 0.239024  |
| 0         | 0         | 0        | 0         | 0         | 0         |
| 5.62558   | 3.80552   | 4.42988  | 4.02851   | 5.21784   | 5.21399   |
| 0.0397297 | 0         | 0        | 0.0576651 | 0.0615981 | 0.128809  |
| 0         | 0         | 0        | 0         | 0         | 0         |
| 16.8734   | 16.5024   | 20.4728  | 16.4113   | 14.9011   | 16.7784   |
| 43.5215   | 43.3469   | 44.4161  | 46.4478   | 48.4683   | 38.3353   |
| 0.0889032 | 0.0530441 | 0.035956 | 0.0430124 | 0.0574326 | 0.120098  |
| 0.690037  | 0.103671  | 0.286358 | 0.30024   | 0.099776  | 0.14965   |
| 37.22     | 37.1866   | 50.9731  | 50.3058   | 54.1726   | 38.0261   |
| 0         | 0         | 0        | 0         | 0         | 0         |
| 8.75304   | 7.20346   | 7.03133  | 7.24301   | 6.7075    | 7.43714   |
| 0.182906  | 0         | 0        | 0         | 0         | 0         |
| 1.45174   | 0.668632  | 0.233483 | 0.628436  | 1.42815   | 0.467921  |
| 21.1842   | 21.0893   | 19.5384  | 20.5515   | 16.573    | 18.9623   |
| 177.874   | 319.26    | 320.558  | 296.669   | 352.866   | 248.618   |
| 0         | 0         | 0        | 0         | 0         | 0         |
| 16.005    | 15.1589   | 14.6917  | 16.4526   | 15.3442   | 14.8383   |
| 0.148935  | 0.177724  | 0.147241 | 0.20416   | 0.115456  | 0.174368  |
| 1.38547   | 1.93885   | 1.37538  | 1.47772   | 1.80634   | 1.95669   |
| 0         | 0         | 0        | 0         | 0         | 0         |
| 25.1785   | 27.7395   | 30.0298  | 37.2012   | 35.8274   | 40.3144   |
| 21.7049   | 21.6942   | 20.6271  | 24.4096   | 15.2915   | 19.1858   |
| 1.40044   | 0.895257  | 1.09233  | 1.08892   | 1.4346    | 1.70266   |
| 0.66643   | 0.954302  | 0        | 1.45092   | 0.77494   | 0         |
| 0.12881   | 0.0307418 | 0.173653 | 0.0778996 | 0.0665702 | 0.0174008 |
| 0.450112  | 0.56224   | 0.770245 | 0.651083  | 0.390806  | 0.408611  |
| 4.45928   | 3.23218   | 2.84999  | 3.4759    | 3.92636   | 2.94506   |



|           |           |           |           |           |          |
|-----------|-----------|-----------|-----------|-----------|----------|
| 52.2192   | 61.0882   | 51.3962   | 57.3847   | 55.9408   | 53.3922  |
| 0         | 0         | 0.0217581 | 0         | 0         | 0        |
| 5.93925   | 5.80393   | 5.06382   | 6.0576    | 6.2841    | 4.35858  |
| 33.276    | 34.0216   | 37.0688   | 35.3422   | 27.4357   | 30.325   |
| 7.90462   | 13.0355   | 8.87593   | 5.87913   | 6.98875   | 14.8571  |
| 28.375    | 17.9375   | 26.1988   | 23.2709   | 26.4676   | 27.3743  |
| 2.61208   | 1.63296   | 2.03796   | 2.15613   | 1.42396   | 2.91937  |
| 32.8622   | 31.1779   | 33.7028   | 34.8266   | 36.9982   | 31.1715  |
| 2.73212   | 5.28121   | 2.19909   | 1.95231   | 1.4054    | 2.36349  |
| 3.1687    | 1.63025   | 2.22717   | 2.06484   | 2.07577   | 2.45652  |
| 17.7701   | 17.7689   | 19.5149   | 14.9565   | 12.4238   | 16.8213  |
| 63.7261   | 53.9025   | 73.9616   | 47.8313   | 50.949    | 37.4122  |
| 0.0854885 | 0.0612081 | 0.242025  | 0.155101  | 0.033136  | 0.138583 |
| 8.64594   | 6.01213   | 7.41987   | 6.70193   | 7.57629   | 6.40346  |
| 1.20615   | 5.82917   | 0.853678  | 0.984742  | 2.6882    | 1.09983  |
| 7.52331   | 2.28244   | 3.19744   | 3.47021   | 2.86667   | 2.73889  |
| 41.5654   | 62.9321   | 41.3308   | 135.722   | 23.8075   | 188.267  |
| 1.8921    | 1.73374   | 2.63133   | 2.3608    | 2.87401   | 2.14616  |
| 26.4771   | 24.5576   | 26.6141   | 26.8063   | 29.0436   | 26.4169  |
| 0.154389  | 0.116306  | 0.0362329 | 3.84E-13  | 0.0694499 | 0.101832 |
| 0.211759  | 0.156377  | 0.0285479 | 0.0922063 | 0.0656635 | 0.115379 |
| 1.62684   | 1.56843   | 1.71491   | 2.35425   | 1.20656   | 1.60417  |
| 0         | 0         | 0         | 0         | 0         | 0        |
| 0.969857  | 1.08977   | 1.50443   | 1.22807   | 1.17753   | 1.08538  |
| 0         | 0         | 0         | 0         | 0         | 0        |
| 16.8354   | 15.5251   | 17.3958   | 16.0455   | 15.2813   | 15.5313  |
| 36.6836   | 31.5783   | 32.6069   | 34.2235   | 40.6588   | 37.8558  |
| 2.45305   | 1.63146   | 2.13425   | 1.61886   | 1.83992   | 2.28956  |
| 0.895829  | 1.09947   | 1.08381   | 1.00918   | 1.3625    | 1.35539  |
| 0.0796537 | 0.0570305 | 0.257721  | 0.115612  | 0.123498  | 0.193686 |
| 4.50189   | 4.49648   | 5.07989   | 4.2255    | 3.31544   | 3.7584   |
| 19.8149   | 18.9727   | 21.7284   | 21.3036   | 26.4487   | 26.2639  |
| 0.563276  | 2.04755   | 0.140128  | 0.450671  | 1.35094   | 1.00712  |
| 5.77277   | 4.71608   | 4.98377   | 4.96821   | 5.03454   | 4.36409  |
| 0.317997  | 0.487885  | 0.698172  | 0.626392  | 0.387383  | 0.257747 |
| 0.133393  | 0.146248  | 0.125173  | 0.0726025 | 0.077557  | 0.205263 |
| 14.3011   | 10.4712   | 10.1137   | 9.87313   | 8.32422   | 10.8432  |
| 14.7039   | 13.1264   | 14.6174   | 14.0922   | 12.356    | 14.1015  |
| 0.294636  | 0.158215  | 0.148953  | 0.334098  | 0.285508  | 0.10448  |
| 5.87092   | 4.23053   | 4.94381   | 5.82466   | 8.3267    | 8.96083  |
| 1.12837   | 0.923302  | 0.586744  | 0.394815  | 0.468604  | 0.702266 |
| 13.2215   | 9.84395   | 12.5368   | 11.535    | 14.078    | 10.9496  |
| 23.5498   | 25.2776   | 28.1608   | 26.3138   | 28.3038   | 24.5662  |

|           |           |           |           |           |            |
|-----------|-----------|-----------|-----------|-----------|------------|
| 17.4147   | 18.1809   | 17.7752   | 17.7897   | 17.2472   | 12.751     |
| 0         | 0         | 0         | 0         | 0         | 0          |
| 19.9312   | 20.1889   | 20.4768   | 19.4688   | 19.353    | 22.6906    |
| 0         | 0         | 0         | 0         | 0         | 0          |
| 13.172    | 14.5822   | 14.0101   | 14.5988   | 12.2769   | 14.1406    |
| 10.7672   | 8.23893   | 11.4329   | 9.12969   | 10.5555   | 7.04771    |
| 6.61029   | 6.0886    | 7.24063   | 9.61939   | 6.61901   | 10.2971    |
| 0.186226  | 0.266669  | 0.150634  | 0.0450492 | 0.144365  | 0.1174     |
| 16.9182   | 20.6544   | 22.7202   | 21.0139   | 21.8587   | 19.1627    |
| 10.178    | 10.7625   | 14.5022   | 9.94178   | 10.0966   | 11.2132    |
| 6.14773   | 5.42022   | 4.43851   | 5.23583   | 4.29317   | 6.91847    |
| 3.02993   | 2.96533   | 2.38032   | 1.9774    | 1.67292   | 1.73147    |
| 13.9033   | 15.0371   | 11.8243   | 8.56241   | 11.3443   | 10.1935    |
| 5.31317   | 5.04548   | 5.45885   | 5.18174   | 3.71419   | 5.18293    |
| 0         | 0         | 0         | 0         | 0         | 0          |
| 10.6522   | 11.69     | 10.803    | 9.3531    | 10.6377   | 9.27494    |
| 0         | 0         | 0         | 0         | 0         | 0          |
| 1.44056   | 0.792364  | 0.912051  | 0.757714  | 1.27852   | 0.930829   |
| 0         | 0         | 0         | 0         | 0         | 0          |
| 0.829485  | 0.593895  | 0.796757  | 0.865335  | 0.442083  | 0.840407   |
| 0.28459   | 0.203761  | 0.258974  | 0.335614  | 0.937628  | 0.893845   |
| 2.76452   | 2.85905   | 2.67985   | 2.30879   | 2.26216   | 2.80981    |
| 0         | 0         | 0         | 0         | 49.0182   | 0          |
| 0.0806304 | 0.084506  | 0.101909  | 0.126549  | 0.0651104 | 0.10974    |
| 7.03245   | 7.28439   | 7.43689   | 7.80178   | 8.26687   | 7.96603    |
| 0.0157703 | 0.0564561 | 0.0382688 | 0.0572239 | 0         | 0.0639117  |
| 2.35339   | 3.28737   | 2.79943   | 2.91347   | 1.413     | 1.72049    |
| 3.36646   | 2.87533   | 2.61799   | 2.71805   | 3.2307    | 2.27239    |
| 1.56627   | 1.61494   | 1.61191   | 1.09774   | 1.56047   | 1.18537    |
| 0         | 0         | 0         | 0         | 0         | 0          |
| 10.5926   | 9.18503   | 10.6012   | 11.3354   | 11.5771   | 12.0649    |
| 0.912507  | 0.54596   | 0.555503  | 0.551852  | 0.591129  | 0.456554   |
| 42.9561   | 74.8463   | 60.1772   | 45.1862   | 57.8052   | 65.4799    |
| 14.9797   | 14.8332   | 16.532    | 13.3469   | 16.5893   | 15.9876    |
| 0         | 0         | 0         | 0         | 0         | 0.00486661 |
| 8.08328   | 8.9259    | 11.2499   | 8.42185   | 7.78677   | 7.27439    |
| 5.22928   | 5.14944   | 6.67252   | 6.57929   | 5.88131   | 6.48205    |
| 6.50307   | 6.75131   | 7.16197   | 6.5527    | 5.5648    | 6.34542    |
| 0         | 0         | 0         | 0         | 0         | 0          |
| 1.02349   | 1.34347   | 1.27632   | 1.1451    | 1.09096   | 0.93327    |
| 19.9864   | 19.9999   | 22.7068   | 22.9365   | 19.3864   | 20.8844    |
| 6.03617   | 5.33093   | 6.54309   | 6.60419   | 5.58194   | 5.98526    |
| 24.2431   | 23.7686   | 25.0195   | 23.9573   | 22.1767   | 25.5883    |

|           |           |           |           |           |           |
|-----------|-----------|-----------|-----------|-----------|-----------|
| 34.4494   | 31.3299   | 32.2663   | 34.2859   | 34.685    | 32.1308   |
| 12.6342   | 10.1583   | 12.4722   | 12.1685   | 12.4985   | 12.3076   |
| 2.52872   | 1.62414   | 2.52671   | 2.21296   | 2.19093   | 2.29074   |
| 37.2807   | 33.4946   | 34.673    | 36.7826   | 40.1268   | 35.9288   |
| 16.4642   | 12.8598   | 15.1777   | 14.0493   | 16.1267   | 15.8583   |
| 0.383039  | 0.134981  | 0.254369  | 0.136817  | 0.243782  | 0.377302  |
| 1.05615   | 0.855982  | 0.967046  | 0.969965  | 0.275503  | 0.0567777 |
| 95.7706   | 74.7538   | 59.5751   | 52.2114   | 77.0636   | 72.6827   |
| 22.6773   | 23.2739   | 24.371    | 24.6627   | 19.6134   | 22.5984   |
| 0         | 0         | 0         | 0         | 0         | 0         |
| 47.1377   | 42.7943   | 47.6159   | 47.4857   | 55.9972   | 48.4121   |
| 0.270838  | 0.18574   | 0.876313  | 0         | 0.209958  | 0.219523  |
| 27.7923   | 22.0149   | 27.241    | 30.3481   | 27.6749   | 30.2806   |
| 0.409449  | 0.439736  | 0.165597  | 0.148572  | 0         | 0.165936  |
| 53.6033   | 40.0199   | 49.4401   | 45.8909   | 43.2312   | 49.4399   |
| 0.725525  | 0.833874  | 0.900886  | 1.12233   | 0.878194  | 0.876936  |
| 1.75193   | 1.28434   | 1.59609   | 1.93252   | 1.21087   | 1.38658   |
| 14.7783   | 12.1847   | 13.8838   | 13.1676   | 17.1562   | 15.4514   |
| 81.4784   | 55.5336   | 77.7862   | 63.5275   | 123.717   | 14.0439   |
| 17.407    | 18.9121   | 18.3461   | 20.4202   | 17.1652   | 16.5058   |
| 14.7192   | 13.9164   | 14.8135   | 13.8013   | 11.5712   | 14.7352   |
| 18.7737   | 15.5096   | 16.0539   | 15.933    | 13.646    | 17.1782   |
| 0.694643  | 0         | 2.24753   | 1.51234   | 2.15399   | 5.63031   |
| 0         | 0         | 0         | 0         | 0         | 0         |
| 0         | 0         | 0         | 0         | 0         | 0         |
| 1.66207   | 2.13213   | 1.90644   | 2.21396   | 1.55805   | 2.84326   |
| 0         | 0         | 0         | 0         | 0         | 0         |
| 55.8525   | 57.3503   | 53.2461   | 55.1467   | 51.2385   | 43.1667   |
| 0.0448756 | 0         | 0.145196  | 0         | 0         | 0.0727464 |
| 0         | 0         | 0         | 0         | 0         | 0         |
| 0.126043  | 0.0601627 | 0         | 0.0304904 | 0.0651401 | 0.0681078 |
| 0.0406454 | 0.123681  | 0.12329   | 0.199106  | 0.0945269 | 0.0905974 |
| 0.328944  | 0.344218  | 0.347946  | 0.220358  | 0.196156  | 0.26662   |
| 30.5293   | 23.6441   | 29.6232   | 31.8932   | 32.1105   | 33.6502   |
| 0.40633   | 0.289853  | 0.328672  | 0.460752  | 0.0787483 | 0.672412  |
| 2.6015    | 2.55492   | 2.17879   | 1.9882    | 1.07082   | 1.95932   |
| 1.02626   | 0.0404947 | 0.600999  | 0.104707  | 7.06E-06  | 1.42E-07  |
| 6.64659   | 4.16041   | 5.84219   | 5.61218   | 5.28179   | 6.12439   |
| 0.0806989 | 0.173337  | 0.0652757 | 0.292823  | 0.187677  | 0.0654092 |
| 3.25004   | 3.71161   | 3.2155    | 4.17143   | 3.72717   | 4.96374   |
| 4.08825   | 3.51991   | 3.94182   | 3.74329   | 3.3203    | 3.11553   |
| 78.9629   | 69.5194   | 75.7625   | 85.5895   | 61.1077   | 69.3591   |
| 0.905921  | 0.960872  | 1.04544   | 1.00745   | 0.754268  | 0.726237  |

|           |           |           |           |           |           |
|-----------|-----------|-----------|-----------|-----------|-----------|
| 0         | 0         | 0         | 0         | 0         | 0         |
| 435.37    | 347.417   | 453.997   | 483.721   | 448.62    | 388.266   |
| 7.35943   | 9.04376   | 7.10756   | 8.12726   | 8.45526   | 7.98473   |
| 0         | 0         | 0         | 0         | 0         | 0         |
| 0         | 0         | 0         | 0         | 0         | 0         |
| 0.453233  | 0.588918  | 0.547653  | 0.257349  | 0.468471  | 0.833364  |
| 7.12592   | 5.78456   | 4.89652   | 5.91512   | 4.96986   | 5.91101   |
| 0         | 0         | 0         | 0         | 0         | 0         |
| 0         | 0         | 0.0199676 | 0.0179147 | 0         | 0         |
| 22.4325   | 17.2987   | 20.485    | 18.3266   | 24.4801   | 18.766    |
| 249.782   | 229.406   | 247.227   | 262.739   | 275.118   | 237.712   |
| 0         | 0         | 0         | 0         | 0         | 0         |
| 0         | 0         | 0         | 0         | 0         | 0         |
| 1.35525   | 1.76054   | 1.11652   | 1.83909   | 1.12038   | 1.89815   |
| 0.374129  | 0.357159  | 0.20175   | 0.615428  | 0.676738  | 1.05125   |
| 48.7907   | 77.9475   | 43.6202   | 39.2181   | 39.8398   | 49.6104   |
| 3.43862   | 1.60426   | 1.54325   | 1.94808   | 2.78606   | 1.31264   |
| 0.0650696 | 0         | 0         | 0.0354166 | 0.0126107 | 0.0659264 |
| 0.501522  | 0.274591  | 0.095452  | 0.149867  | 0.320178  | 0.26303   |
| 0.216275  | 0.58728   | 0.0388753 | 0.353149  | 0.340643  | 0.24347   |
| 9.83047   | 9.86037   | 11.807    | 10.3104   | 10.765    | 10.2153   |
| 11.5953   | 14.4708   | 12.2451   | 12.973    | 15.1687   | 10.1816   |
| 8.46925   | 8.39112   | 7.44931   | 7.73828   | 6.6965    | 7.05086   |
| 4.08877   | 3.93733   | 4.26684   | 3.46413   | 3.82042   | 3.65857   |
| 0         | 3.90E-09  | 0         | 5.03E-09  | 0         | 1.15E-08  |
| 25.8427   | 34.8193   | 25.6119   | 29.113    | 20.6536   | 26.774    |
| 2.40E-07  | 0         | 0         | 0         | 0         | 0.0269621 |
| 0.234904  | 0.168187  | 0.190009  | 0.284124  | 0         | 0.190398  |
| 3.59E-09  | 5.37E-08  | 1.78E-08  | 8.71E-07  | 0.0323611 | 1.65E-07  |
| 0         | 0         | 0         | 0         | 0         | 0         |
| 6.91959   | 6.39781   | 7.59858   | 8.57982   | 6.35879   | 7.13129   |
| 1.21924   | 0.892126  | 0.898554  | 1.04405   | 0.790573  | 0.763802  |
| 2.23448   | 1.55156   | 1.61444   | 1.98008   | 1.76349   | 2.05367   |
| 1.20759   | 1.30869   | 1.56561   | 1.37079   | 0.961736  | 1.35467   |
| 35.2559   | 31.1629   | 36.7775   | 35.409    | 36.2729   | 34.9652   |
| 6.64414   | 4.97929   | 5.70506   | 5.44816   | 4.73766   | 5.32122   |
| 0         | 0.187055  | 0.211325  | 0.592495  | 0         | 0         |
| 38.2276   | 41.6309   | 44.1426   | 41.9378   | 39.2936   | 39.3101   |
| 16.7885   | 14.8079   | 16.0275   | 15.4737   | 14.5113   | 15.5152   |
| 0.17149   | 0.030167  | 0.0340811 | 0.0305772 | 0.0326627 | 0.182139  |
| 0.0436712 | 0.0104226 | 0         | 0.0105643 | 0.0225697 | 0         |
| 0.171829  | 0.0894739 | 0.138989  | 0.102027  | 0.0847667 | 0.126612  |
| 39.3692   | 4.2998    | 2.15898   | 4.35828   | 5.69009   | 4.32679   |

|            |           |           |           |           |           |
|------------|-----------|-----------|-----------|-----------|-----------|
| 0.482073   | 0.93959   | 0.476593  | 0.44703   | 0.311426  | 0.607813  |
| 0.978182   | 1.09898   | 1.11539   | 0.940402  | 1.51805   | 1.1929    |
| 0          | 0         | 0         | 0         | 0         | 0         |
| 4.00214    | 4.71957   | 5.14151   | 3.07527   | 6.02254   | 3.05305   |
| 2489.16    | 3066.82   | 3723.16   | 3915.3    | 3920.26   | 3421.95   |
| 0.206332   | 0.0347733 | 0         | 0.0352456 | 0         | 0.0393648 |
| 23.5798    | 27.8571   | 24.2064   | 19.1452   | 17.4242   | 16.0789   |
| 0.0867717  | 0         | 0         | 0         | 0         | 0         |
| 0          | 0         | 0         | 0         | 0         | 0         |
| 30.0143    | 32.4909   | 33.7047   | 33.9565   | 34.119    | 28.6548   |
| 0.00878851 | 0         | 0         | 0         | 0         | 0         |
| 0          | 0         | 0         | 0         | 0         | 0         |
| 45.1525    | 40.2463   | 45.1454   | 42.7301   | 40.7003   | 32.3495   |
| 0          | 0         | 0         | 0         | 0         | 0         |
| 0          | 0         | 0         | 0         | 0         | 0         |
| 147.385    | 178.531   | 154.513   | 149.614   | 149.463   | 134.077   |
| 31.0531    | 31.0481   | 18.3517   | 24.6361   | 20.6176   | 17.0366   |
| 0.467178   | 0.723922  | 0.512141  | 0.294071  | 0.314128  | 0.32844   |
| 1.03519    | 0.663159  | 0.572921  | 0.711718  | 0.591314  | 0.44161   |
| 22.5832    | 18.2734   | 23.7017   | 26.0315   | 23.0598   | 23.0678   |
| 0.437641   | 0.454347  | 0.336299  | 0.301724  | 0.237486  | 0.390195  |
| 301.524    | 571.361   | 545.497   | 560.664   | 747.392   | 350.51    |
| 0          | 0         | 0         | 0         | 0         | 0         |
| 0.291832   | 0.263616  | 0.186738  | 0.333766  | 0.085465  | 0.286044  |
| 17.3179    | 12.4174   | 8.20389   | 14.2976   | 8.39314   | 4.72685   |
| 26.9403    | 25.9708   | 28.8498   | 27.5995   | 22.7053   | 20.6509   |
| 39.4163    | 112.885   | 0         | 85.8154   | 61.1123   | 63.8965   |
| 238.524    | 265.351   | 244.32    | 217.752   | 226.381   | 224.346   |
| 0.545533   | 0.64429   | 0.392241  | 0.868366  | 0.610864  | 0.197204  |
| 0.342136   | 0.146978  | 0.0553494 | 0.198635  | 0.0530458 | 0.0554626 |
| 10.7561    | 10.9792   | 10.2212   | 10.3754   | 12.0484   | 9.78691   |
| 0.58587    | 0.69598   | 0.52107   | 0.637376  | 0.336017  | 0.560332  |
| 10.504     | 6.74578   | 6.65955   | 6.28825   | 5.86996   | 6.20843   |
| 8.76968    | 7.66981   | 7.5203    | 8.26858   | 8.86269   | 10.0654   |
| 0.599371   | 0.257483  | 0.193928  | 0.369728  | 0.535444  | 0.510101  |
| 2.14328    | 1.4648    | 1.14701   | 1.60255   | 3.04609   | 2.37768   |
| 3.40116    | 2.19069   | 4.12448   | 3.4147    | 2.28884   | 3.39362   |
| 15.651     | 15.6371   | 18.9651   | 16.8626   | 14.3741   | 18.5557   |
| 0.826571   | 0.664772  | 1.03495   | 0.608075  | 0.614437  | 0.908581  |
| 26.8868    | 21.866    | 23.1505   | 27.0274   | 21.6175   | 25.5133   |
| 14.566     | 10.2853   | 11.7739   | 11.5038   | 12.8008   | 10.2893   |
| 9.46522    | 10.647    | 10.2491   | 9.7994    | 7.88331   | 8.05538   |
| 3.45216    | 3.12634   | 3.25275   | 2.99281   | 2.5966    | 2.91909   |

|           |           |           |            |           |           |
|-----------|-----------|-----------|------------|-----------|-----------|
| 5.0223    | 4.53947   | 5.33975   | 4.52365    | 4.27994   | 5.06196   |
| 0         | 0.217009  | 0         | 0          | 0.234962  | 0         |
| 31.986    | 28.0099   | 31.0602   | 28.8907    | 23.02     | 25.7864   |
| 0.923212  | 0.708635  | 0.854339  | 1.61753    | 0.483622  | 1.66499   |
| 6.85416   | 4.99063   | 6.48389   | 5.63464    | 4.18772   | 8.61578   |
| 31.4495   | 29.0776   | 27.0408   | 32.0929    | 30.1423   | 29.382    |
| 0.0474528 | 0.0113251 | 0.0639727 | 0.0803539  | 0.0490482 | 0.0897449 |
| 22.8979   | 24.0335   | 16.3629   | 21.4535    | 21.0734   | 15.1997   |
| 37.9924   | 26.3262   | 30.5267   | 33.4962    | 31.2459   | 30.4508   |
| 0.912338  | 0.983697  | 1.11215   | 0.963433   | 0.495723  | 0.978199  |
| 0.2294    | 0.164246  | 0.148446  | 0.199776   | 0.106701  | 0.260311  |
| 0         | 0.418564  | 0         | 0.848512   | 0.453192  | 0         |
| 12.2138   | 8.20671   | 10.1075   | 11.6593    | 11.6533   | 10.1282   |
| 0         | 0         | 0         | 0.00388515 | 0         | 0         |
| 27.6523   | 23.2514   | 28.0615   | 31.0472    | 28.3408   | 28.4026   |
| 0.299265  | 0.0297594 | 0.0336206 | 0.0301641  | 0         | 0.242564  |
| 5.44887   | 4.78302   | 5.13896   | 4.76456    | 5.56435   | 4.65589   |
| 0.366445  | 0.466431  | 0.131738  | 1.41832    | 0.347201  | 0.462024  |
| 41.9451   | 45.8315   | 43.5853   | 45.8511    | 41.1038   | 38.434    |
| 4.48719   | 5.44018   | 5.1927    | 3.63881    | 5.92739   | 2.42084   |
| 27.0921   | 23.5874   | 28.4992   | 20.8381    | 26.5066   | 19.7163   |
| 0.0805228 | 0         | 0.0651333 | 0.0584368  | 0         | 0.130533  |
| 0.114563  | 0.191392  | 0.0926678 | 0.138568   | 0.0296037 | 0.12381   |
| 1.13839   | 1.272     | 0.697592  | 0.600837   | 1.14992   | 0.671058  |
| 0.312647  | 0.165814  | 0.494666  | 0.350145   | 0.288902  | 0.287434  |
| 0         | 0         | 0         | 0          | 0         | 0         |
| 1.69304   | 1.94816   | 1.22274   | 2.41346    | 1.12498   | 1.81335   |
| 34.8031   | 39.3108   | 37.1359   | 39.5098    | 26.3112   | 37.5665   |
| 8.5475    | 6.82136   | 7.54038   | 8.78318    | 7.34954   | 8.06254   |
| 6.39267   | 8.95287   | 8.49451   | 8.47208    | 6.90341   | 9.48234   |
| 0         | 0         | 0         | 0          | 0         | 0         |
| 0.942715  | 0.666529  | 0.819734  | 0.735456   | 0.5207    | 0.592179  |
| 0.122978  | 0.101433  | 0.0636627 | 0.0761574  | 0         | 0.0637928 |
| 11.9029   | 7.8419    | 10.9652   | 13.6067    | 9.07491   | 11.4491   |
| 0         | 0         | 0         | 0          | 0         | 0         |
| 3.50871   | 2.77043   | 2.25458   | 1.83241    | 1.55066   | 1.83393   |
| 0.058547  | 0.0419185 | 0.0473574 | 0.0424886  | 0.0453865 | 0.142363  |
| 17.9616   | 20.5904   | 18.7565   | 17.7719    | 16.1307   | 16.9054   |
| 4.22055   | 4.39133   | 4.86021   | 4.48123    | 4.14217   | 4.48255   |
| 11.0147   | 10.4887   | 11.9346   | 9.39732    | 9.91165   | 8.09624   |
| 0         | 0         | 0         | 0          | 0         | 0         |
| 18.4394   | 11.0869   | 16.378    | 14.6394    | 14.4441   | 16.3825   |
| 1.78069   | 1.5636    | 1.11424   | 1.43857    | 0.677185  | 1.00759   |

|           |           |           |           |           |           |
|-----------|-----------|-----------|-----------|-----------|-----------|
| 9.9878    | 7.77679   | 9.99768   | 9.85772   | 11.8076   | 10.5646   |
| 19.7613   | 17.1621   | 17.6746   | 19.3709   | 15.6792   | 16.179    |
| 4.77342   | 1.97933   | 3.67038   | 4.93225   | 4.68812   | 5.62911   |
| 9.11463   | 10.2928   | 9.32851   | 6.76399   | 11.5061   | 6.6658    |
| 4.12383   | 3.43622   | 4.02124   | 3.6395    | 3.67498   | 3.66841   |
| 288.927   | 256.481   | 269.844   | 266.026   | 343.901   | 208.835   |
| 9.38543   | 5.84423   | 6.9909    | 6.96362   | 6.68832   | 8.22138   |
| 0         | 0.0417276 | 0         | 0         | 0.0225899 | 0         |
| 3.73089   | 3.82264   | 3.95441   | 4.0847    | 3.6901    | 4.0407    |
| 0         | 0         | 0         | 0         | 0         | 0         |
| 12.7489   | 8.53463   | 10.4434   | 9.67728   | 14.7165   | 8.74142   |
| 30.0116   | 26.4136   | 32.7157   | 29.5743   | 34.1245   | 36.5617   |
| 4.314     | 2.7731    | 2.75726   | 2.86817   | 2.62508   | 2.99504   |
| 3.75324   | 4.31797   | 4.02194   | 4.72589   | 3.73021   | 3.25013   |
| 135.024   | 168.678   | 142.49    | 139.474   | 149.276   | 146.151   |
| 27.3349   | 30.2576   | 29.3266   | 28.3451   | 29.0814   | 27.2081   |
| 2.47219   | 2.20153   | 1.55616   | 3.51836   | 3.10465   | 1.74563   |
| 27.0026   | 24.7017   | 27.8249   | 26.4478   | 29.5842   | 29.6913   |
| 0         | 0         | 0         | 0         | 0         | 0.18251   |
| 0         | 0.20235   | 0         | 0.259582  | 0.438181  | 0.515412  |
| 0         | 0         | 0         | 0         | 0         | 0         |
| 32.1624   | 29.8774   | 33.375    | 33.9987   | 30.7174   | 32.5476   |
| 8.8925    | 10.6757   | 10.2664   | 9.29145   | 7.14573   | 8.02925   |
| 0.482868  | 0.384138  | 0.477378  | 0.545107  | 0.582286  | 0.217434  |
| 7.51332   | 7.9071    | 7.5418    | 7.40152   | 6.25727   | 6.38334   |
| 0.335868  | 0.267195  | 0.181118  | 0.216663  | 0.0867901 | 0.15124   |
| 10.7217   | 7.76919   | 13.8465   | 11.8042   | 10.1075   | 11.3676   |
| 1.52859   | 3.25526   | 2.10302   | 1.27999   | 1.26601   | 1.57784   |
| 0         | 0         | 0         | 0         | 0         | 0         |
| 0.018915  | 0.080882  | 0.11016   | 0.0988344 | 0.161261  | 0.0689908 |
| 450.781   | 345.066   | 586.602   | 664.453   | 460.344   | 2361.47   |
| 0         | 0         | 0         | 0         | 0         | 0         |
| 37.1227   | 43.4086   | 46.6622   | 46.4694   | 38.4106   | 44.465    |
| 0.0459086 | 0.0328697 | 0.222807  | 0.09995   | 0.213534  | 0.111631  |
| 0         | 0.0308491 | 0         | 0         | 0         | 0         |
| 0         | 0         | 0         | 0         | 0         | 0         |
| 3.53897   | 2.6212    | 3.33967   | 2.84872   | 4.43044   | 4.35205   |
| 0.558692  | 0.33751   | 0.338935  | 0.405452  | 0.0812077 | 0         |
| 31.6566   | 28.9425   | 32.2238   | 31.4616   | 42.698    | 26.9803   |
| 16.8306   | 13.5242   | 14.9851   | 16.52     | 14.3615   | 13.4455   |
| 6.92794   | 5.68685   | 7.62442   | 6.93968   | 6.64145   | 7.18129   |
| 6.86292   | 4.32171   | 3.81232   | 4.16046   | 2.78191   | 3.21694   |
| 0.0346425 | 0         | 0.0280216 | 0.0125703 | 0.0402831 | 0.0280789 |

|           |           |          |           |           |           |
|-----------|-----------|----------|-----------|-----------|-----------|
| 7.63436   | 6.17528   | 7.56381  | 7.31816   | 5.93708   | 7.025     |
| 218.488   | 211.24    | 229.173  | 245.195   | 248.331   | 225.699   |
| 0.411245  | 0.235555  | 0.232853 | 0.149224  | 0.095641  | 0.166664  |
| 41.4699   | 43.5113   | 43.2313  | 49.0496   | 48        | 44.5588   |
| 11.2854   | 23.9137   | 20.2583  | 18.6308   | 16.5357   | 12.5202   |
| 0.931034  | 0.629569  | 0.564821 | 0.78828   | 1.00243   | 0.398279  |
| 13.6521   | 7.01259   | 12.1725  | 10.1642   | 11.9011   | 13.0386   |
| 0         | 0.18574   | 0.629518 | 0.188265  | 0.402212  | 1.05134   |
| 25.8263   | 20.7135   | 25.2358  | 21.1396   | 37.0186   | 18.0624   |
| 69.186    | 58.8051   | 59.3994  | 64.7004   | 47.5492   | 58.3686   |
| 17.2199   | 15.4081   | 17.7403  | 17.271    | 17.307    | 15.7372   |
| 1.4427    | 2.24835   | 1.64823  | 2.52583   | 1.9634    | 1.25233   |
| 0.335083  | 0.239913  | 0.406562 | 0         | 0         | 0.135798  |
| 0.0155248 | 0.0222309 | 0.037673 | 0.0450665 | 0.0361052 | 0.0125834 |
| 9.64838   | 18.1798   | 14.2436  | 20.6794   | 12.5968   | 7.86594   |
| 9.26157   | 7.88488   | 9.59748  | 9.66761   | 6.96226   | 8.31204   |
| 21.5493   | 20.5605   | 28.8323  | 22.3658   | 22.743    | 24.4763   |
| 0.0818607 | 0.0976845 | 0.286934 | 0.514868  | 0.169226  | 0.154819  |
| 7.13811   | 5.00005   | 5.91978  | 6.09662   | 6.06296   | 6.42273   |
| 0         | 0         | 0        | 0         | 0         | 0         |
| 1.44486   | 1.8216    | 1.72766  | 1.39048   | 1.07138   | 1.04381   |
| 0.116198  | 0.0332782 | 0.018798 | 0.0674615 | 0.0900784 | 0.0188365 |
| 0         | 0.0926199 | 0.427271 | 0.0938795 | 0.451273  | 0         |
| 4.56549   | 5.60707   | 4.5016   | 4.47411   | 4.28842   | 4.72689   |
| 2.51538   | 1.86528   | 1.01732  | 1.69507   | 1.11426   | 2.40287   |
| 17.5123   | 16.8776   | 11.4672  | 15.735    | 11.2485   | 11.761    |
| 183.864   | 140.022   | 172.161  | 182.893   | 134.709   | 168.809   |
| 1.16968   | 0.99081   | 0.799549 | 1.31513   | 0.689645  | 1.56231   |
| 0.857919  | 0.545644  | 0.66554  | 0.758344  | 0.461192  | 1.11655   |
| 9.24643   | 6.28311   | 7.00147  | 6.88516   | 6.57227   | 7.2852    |
| 0.0211168 | 0         | 0        | 0         | 0         | 0         |
| 1.13994   | 1.11682   | 1.31009  | 1.10588   | 1.09608   | 1.05961   |
| 34.4016   | 19.7047   | 32.4646  | 35.7844   | 21.3349   | 28.8131   |
| 2.66547   | 1.43132   | 1.25769  | 1.37018   | 2.66899   | 1.35028   |
| 6.20689   | 5.4788    | 6.49641  | 5.95339   | 5.29613   | 6.03639   |
| 22.9785   | 28.6311   | 25.225   | 27.6669   | 22.3823   | 28.804    |
| 0.119903  | 0.0858484 | 0        | 0         | 0         | 0.0971856 |
| 0         | 0         | 0        | 0         | 0         | 0         |
| 1.48256   | 1.61105   | 1.69251  | 1.61007   | 0.929225  | 2.04539   |
| 0         | 0         | 0        | 0         | 0         | 0         |
| 0         | 0         | 0        | 0         | 0         | 0         |
| 0.171927  | 0.223811  | 0.29121  | 0.26127   | 0.315923  | 0.272575  |
| 10.849    | 9.62977   | 12.7726  | 10.8123   | 9.99442   | 12.1362   |



|           |           |           |           |           |           |
|-----------|-----------|-----------|-----------|-----------|-----------|
| 28.8054   | 30.2838   | 30.3143   | 32.0936   | 30.1156   | 30.9855   |
| 0.586866  | 0.672296  | 0.427234  | 0.25554   | 0.545937  | 0.57081   |
| 0         | 0         | 0         | 0         | 0         | 0         |
| 67.6131   | 65.2893   | 67.0718   | 63.6397   | 66.6591   | 63.3995   |
| 6.16634   | 5.31863   | 8.3714    | 6.25456   | 6.0382    | 5.61182   |
| 2.59614   | 1.83584   | 1.73701   | 2.30274   | 2.21134   | 2.90959   |
| 3.16215   | 2.26404   | 3.04563   | 2.54324   | 2.5398    | 3.23681   |
| 7.21452   | 5.292     | 5.96577   | 5.30607   | 4.50904   | 6.44013   |
| 0         | 0         | 0         | 0         | 0         | 0         |
| 16.0737   | 13.6411   | 15.288    | 15.6092   | 16.0518   | 16.1177   |
| 4.28395   | 3.65744   | 3.26545   | 2.96878   | 3.11268   | 3.30919   |
| 15.5955   | 14.6656   | 14.6821   | 16.8718   | 15.4289   | 16.8679   |
| 73.2123   | 63.5673   | 112.845   | 60.6619   | 125.219   | 19.8092   |
| 28.8259   | 38.4981   | 19.9094   | 25.1153   | 18.4405   | 22.7618   |
| 0         | 0         | 0         | 0         | 0         | 0         |
| 0         | 0         | 0         | 0         | 0         | 0         |
| 17.442    | 17.9525   | 21.088    | 18.6368   | 27.129    | 13.2726   |
| 0.0595501 | 0.0852735 | 0.264929  | 0.108042  | 0.0230821 | 0.0724011 |
| 65.966    | 80.074    | 60.416    | 75.1829   | 67.8423   | 66.2721   |
| 0         | 0         | 0         | 0         | 0         | 0         |
| 8.86678   | 8.42133   | 8.13878   | 9.38442   | 7.0847    | 8.25015   |
| 7.76174   | 5.516     | 6.29235   | 8.17264   | 9.83139   | 4.3206    |
| 4.11573   | 4.55412   | 6.35562   | 7.73869   | 6.52619   | 6.36954   |
| 9.53853   | 8.50347   | 9.0695    | 8.32988   | 8.60966   | 9.79872   |
| 0         | 0.0769955 | 0.130479  | 0.0390213 | 0.166731  | 0.0871636 |
| 14.2282   | 15.364    | 15.1628   | 14.7546   | 11.2344   | 12.0548   |
| 0         | 0         | 0         | 0         | 0         | 0         |
| 0.899484  | 0.700838  | 0.898769  | 0.575975  | 1.21001   | 0.900606  |
| 16.9223   | 16.675    | 16.5185   | 15.5279   | 11.4286   | 12.3677   |
| 6.85551   | 6.36897   | 6.76254   | 6.64974   | 6.3774    | 7.37269   |
| 0         | 0.0294936 | 0.0999614 | 0         | 0         | 0.0667772 |
| 132.955   | 207.477   | 149.294   | 101.716   | 97.7314   | 200.318   |
| 0         | 0.167396  | 0         | 0         | 0         | 0         |
| 3.43289   | 1.07019   | 2.187     | 2.35847   | 2.83168   | 2.50611   |
| 4.57601   | 4.34391   | 4.01883   | 4.79805   | 3.41964   | 4.38093   |
| 0         | 551.68    | 0         | 565.179   | 0         | 0         |
| 16.863    | 13.4708   | 14.8901   | 14.6281   | 16.9112   | 15.0669   |
| 0.289133  | 1.13858   | 0.467748  | 0.104915  | 0.22414   | 0.351528  |
| 0.16832   | 0         | 0.0605114 | 0.0542901 | 0.115986  | 0.0606351 |
| 7.97651   | 5.27623   | 7.50119   | 6.82444   | 6.95649   | 5.88218   |
| 1.31286   | 0.994202  | 1.07215   | 1.02604   | 1.07006   | 1.06709   |
| 0         | 0.0659406 | 20.2958   | 0         | 0         | 0.0559862 |
| 35.039    | 30.915    | 39.4583   | 36.6153   | 41.6409   | 36.8729   |

|           |           |           |           |          |           |
|-----------|-----------|-----------|-----------|----------|-----------|
| 4.44941   | 5.92608   | 5.18572   | 4.09704   | 3.6347   | 3.87785   |
| 0         | 0         | 0         | 0         | 0        | 0         |
| 21.4961   | 20.2279   | 21.1965   | 23.3258   | 24.2819  | 15.2661   |
| 0.231281  | 0.22079   | 0.280617  | 0.167845  | 0.298821 | 0.343678  |
| 0         | 0         | 0         | 0         | 0        | 0.147512  |
| 6.09631   | 4.84101   | 5.4179    | 5.3665    | 6.23581  | 5.08245   |
| 0.858971  | 0.957836  | 0.748711  | 0.778603  | 0.606183 | 0.910135  |
| 0.506513  | 0.60874   | 1.18523   | 0.761427  | 0.995665 | 1.30495   |
| 10.4491   | 13.2383   | 12.7266   | 12.8791   | 13.2281  | 12.4418   |
| 4.75923   | 6.76983   | 5.44945   | 5.63413   | 5.15567  | 5.87802   |
| 37.5401   | 30.5632   | 35.0507   | 30.9895   | 29.5905  | 30.6771   |
| 0.0814997 | 0.0583523 | 0         | 0.425856  | 0.284312 | 0.264235  |
| 8.24634   | 8.26061   | 7.44263   | 8.13324   | 8.58776  | 7.27863   |
| 14.1895   | 13.4291   | 9.89449   | 11.0078   | 11.885   | 8.19617   |
| 6.45761   | 6.47862   | 6.63683   | 4.11646   | 4.65912  | 4.66814   |
| 0         | 0         | 0         | 0.0387671 | 0        | 0         |
| 4.55668   | 4.16722   | 3.91811   | 3.08456   | 2.8942   | 3.44505   |
| 26.8102   | 22.936    | 26.9215   | 24.4229   | 25.4116  | 25.8324   |
| 18.1304   | 17.2345   | 17.1165   | 17.0961   | 16.9217  | 16.9849   |
| 0         | 0         | 0         | 0         | 0        | 0         |
| 8.9617    | 8.47579   | 9.30633   | 9.60886   | 7.81335  | 8.99781   |
| 0         | 0         | 0         | 0         | 0        | 0         |
| 2.78E-45  | 1.33E-44  | 4.02E-53  | 5.65E-43  | 5.67E-45 | 2.20E-43  |
| 3.57907   | 2.06069   | 2.97529   | 2.17466   | 1.96988  | 2.86825   |
| 0.601273  | 0.21525   | 1.21589   | 0.436354  | 0.233058 | 0.487352  |
| 0.660025  | 0.322222  | 0.492651  | 0.504428  | 0.257768 | 0.989571  |
| 0.248082  | 0.710489  | 0.200669  | 1.26027   | 0.769269 | 0.804317  |
| 0         | 0         | 0         | 0         | 0        | 0         |
| 0.420221  | 0         | 0         | 0         | 0        | 0.340603  |
| 1.6789    | 2.07135   | 1.68257   | 1.82658   | 1.34401  | 1.65158   |
| 2.31406   | 1.77516   | 2.67399   | 2.63898   | 2.1783   | 2.54548   |
| 38.7443   | 32.8282   | 35.1946   | 38.2517   | 39.1893  | 33.2029   |
| 138.019   | 170.808   | 163.872   | 180.268   | 171.302  | 153.029   |
| 5.57888   | 4.88632   | 5.82701   | 5.50308   | 3.98893  | 5.3121    |
| 10.1646   | 8.07485   | 9.43147   | 9.57014   | 10.5417  | 10.2481   |
| 0         | 0         | 0         | 0         | 0        | 0         |
| 0         | 0         | 0         | 0         | 0        | 0         |
| 24.951    | 23.1281   | 24.2361   | 25.1076   | 24.1641  | 28.2734   |
| 0.229991  | 0.123502  | 0.0930176 | 0.0834544 | 0        | 0.0466039 |
| 0.699463  | 0.881032  | 0.339745  | 0.713335  | 0.25794  | 0.766308  |
| 5.93995   | 5.95404   | 7.26972   | 5.32281   | 4.92507  | 5.94489   |
| 15.1703   | 15.9239   | 12.998    | 12.8687   | 12.8412  | 14.4722   |
| 9.69494   | 10.5387   | 11.6475   | 11.3057   | 9.90905  | 11.7922   |

|           |           |           |           |           |           |
|-----------|-----------|-----------|-----------|-----------|-----------|
| 0.340123  | 0.108232  | 0.229265  | 0.191981  | 0.175779  | 0.275681  |
| 32.9      | 23.0442   | 33.505    | 27.5325   | 19.1988   | 48.9682   |
| 45.8564   | 60.4667   | 58.676    | 60.2973   | 81.4078   | 28.432    |
| 0.0789143 | 0.0401162 | 0.121731  | 0.091489  | 0.206129  | 0.102181  |
| 10.5823   | 11.3162   | 10.918    | 9.85855   | 9.80965   | 10.1158   |
| 95.6146   | 101.304   | 114.717   | 105.977   | 96.8056   | 108.308   |
| 14.978    | 17.6002   | 18.2292   | 17.6382   | 16.2879   | 17.592    |
| 10.1115   | 7.54337   | 9.06089   | 9.42594   | 7.27558   | 8.98158   |
| 0.162663  | 0.105166  | 0.0519794 | 0.118047  | 0.101709  | 0.119055  |
| 0         | 0         | 0         | 0         | 0         | 0         |
| 0.0557698 | 0.0998254 | 0.135333  | 0.101183  | 0.0216168 | 0.203415  |
| 8.6193    | 4.11417   | 9.87697   | 7.81898   | 5.01136   | 5.23967   |
| 38.954    | 42.0029   | 36.049    | 36.4644   | 35.4292   | 37.964    |
| 0.329233  | 0.212152  | 0.399465  | 0.215037  | 0.178659  | 0.640451  |
| 0         | 0         | 0         | 0         | 0         | 0.170185  |
| 1.41635   | 1.66463   | 1.51314   | 0.930905  | 0.745798  | 1.32129   |
| 7.61778   | 5.26561   | 5.99799   | 6.42525   | 6.3923    | 6.84774   |
| 9.38978   | 9.26065   | 9.42171   | 8.67081   | 8.70652   | 8.12496   |
| 132.078   | 153.761   | 115.93    | 113.643   | 118.065   | 126.102   |
| 0.444247  | 0.149803  | 0.241697  | 0.186953  | 0.223575  | 0.320253  |
| 9.37949   | 6.70625   | 8.88808   | 7.73892   | 9.25233   | 10.6097   |
| 15.8335   | 16.8796   | 14.8679   | 14.7168   | 13.5522   | 16.3153   |
| 3.16618   | 3.37403   | 3.00775   | 3.17945   | 4.36668   | 1.87996   |
| 20.4294   | 22.3079   | 25.7356   | 23.5582   | 19.1142   | 20.9666   |
| 0.0483665 | 0.0192386 | 0.029342  | 0.0380254 | 0.0281208 | 0.0130675 |
| 8.73461   | 10.4566   | 10.5599   | 9.71278   | 9.86557   | 7.72676   |
| 0         | 0         | 0         | 0         | 0         | 0         |
| 4.68658   | 4.61975   | 4.34931   | 5.13542   | 5.13575   | 6.0692    |
| 11.9783   | 9.17964   | 10.2017   | 10.8936   | 10.9218   | 10.497    |
| 16.023    | 12.9475   | 13.8474   | 13.5662   | 13.0155   | 15.6461   |
| 0.101254  | 0.0241654 | 0.0546018 | 0.0734822 | 0.0523294 | 0.273567  |
| 0         | 0         | 0         | 0         | 0         | 0         |
| 8.57324   | 7.31656   | 5.61086   | 6.58814   | 4.16818   | 6.46323   |
| 0.929053  | 0.825367  | 0.699808  | 0.318451  | 0.46035   | 0.778928  |
| 0.26433   | 0.212912  | 0.400896  | 0.215808  | 0.358597  | 0.482059  |
| 0.0290599 | 0.0208063 | 0.0235059 | 0.0632678 | 0.0225276 | 0.070662  |
| 10.7681   | 9.66562   | 9.90074   | 13.4271   | 11.2902   | 10.9953   |
| 9.4469    | 7.9031    | 8.60475   | 8.86593   | 10.056    | 6.96918   |
| 0         | 0         | 0         | 0         | 0         | 0         |
| 1.42584   | 0.992165  | 0.879692  | 1.18161   | 0.907908  | 1.48903   |
| 2.07209   | 3.01618   | 1.50675   | 2.0599    | 2.93917   | 2.50788   |
| 3.6825    | 3.6825    | 6.51805   | 6.51805   | 7.17927   | 7.17927   |
| 0         | 0         | 0         | 0         | 0         | 0         |

|           |           |           |          |           |           |
|-----------|-----------|-----------|----------|-----------|-----------|
| 0.52466   | 0.187303  | 0.931568  | 0.53231  | 0.366305  | 0.382994  |
| 1.31095   | 1.04813   | 1.93478   | 2.83382  | 1.15551   | 2.03165   |
| 12.9826   | 12.6038   | 11.6257   | 11.3017  | 7.65201   | 8.29193   |
| 16.2641   | 14.4718   | 16.4919   | 15.1045  | 15.5623   | 17.0807   |
| 0         | 0         | 0         | 0        | 0         | 0         |
| 0.256927  | 0.254721  | 0.495609  | 0.490452 | 0.943178  | 0.626358  |
| 0.416654  | 0.525161  | 0.426545  | 0.377967 | 0.403746  | 0.42214   |
| 1.80153   | 1.1777    | 1.56282   | 1.81899  | 1.39657   | 1.43904   |
| 1.99844   | 2.79356   | 2.30928   | 3.86748  | 1.03282   | 3.00821   |
| 8.33312   | 8.62093   | 8.74249   | 8.74111  | 9.89973   | 7.51531   |
| 0.759512  | 0.302109  | 0.546092  | 0.428705 | 0.915889  | 0.547209  |
| 0.544011  | 0.592007  | 0.516265  | 0.445543 | 0.421062  | 0.497614  |
| 4.86865   | 3.55604   | 5.12753   | 5.19319  | 6.15532   | 4.02566   |
| 8.61239   | 9.02545   | 7.67499   | 6.18411  | 5.7504    | 8.12409   |
| 5.84314   | 4.79939   | 6.31659   | 5.4393   | 5.95845   | 5.55492   |
| 37.6552   | 47.3808   | 37.7591   | 38.3752  | 43.0364   | 36.8536   |
| 2.06427   | 1.72431   | 1.73159   | 1.4426   | 1.21501   | 0.898551  |
| 7.80614   | 6.81404   | 7.50355   | 6.79031  | 6.32085   | 7.04219   |
| 0         | 0         | 0.127839  | 0        | 0         | 0         |
| 1.32593   | 0.94934   | 1.60467   | 1.08146  | 0.766414  | 1.26934   |
| 21.1601   | 19.4293   | 21.9176   | 25.8184  | 21.4124   | 21.4714   |
| 0         | 0         | 0.0862941 | 0        | 0         | 0         |
| 0         | 0         | 0.0351712 | 0        | 0         | 0         |
| 223.452   | 167.047   | 221.835   | 190.532  | 164.418   | 50.8395   |
| 35.1405   | 35.2795   | 37.9583   | 35.7723  | 31.0639   | 34.4971   |
| 0.270158  | 0.182597  | 0.267835  | 0.205456 | 0.178542  | 0.230929  |
| 0         | 0.0433634 | 0         | 0        | 0         | 0         |
| 4.96841   | 4.1411    | 4.41891   | 4.60868  | 3.48116   | 3.89651   |
| 0.0565288 | 0.0404736 | 0.228625  | 0.041024 | 0.65733   | 0.32073   |
| 7.36694   | 4.38996   | 6.15885   | 5.23424  | 6.20184   | 5.95237   |
| 1.63923   | 2.42919   | 6.68108   | 1.38327  | 2.56121   | 3.00748   |
| 6.95916   | 5.60546   | 1.40728   | 1.57825  | 2.36025   | 3.17286   |
| 0         | 0         | 0.376494  | 0.300248 | 0.08018   | 0.335339  |
| 0         | 0         | 0         | 0.12583  | 0.0336031 | 0.0702681 |
| 12.7357   | 8.85295   | 10.5264   | 11.1422  | 10.9021   | 11.5243   |
| 7.39077   | 3.97138   | 7.55335   | 6.61619  | 5.07759   | 4.0893    |
| 6.93451   | 6.7656    | 6.67679   | 7.34694  | 8.36482   | 6.08302   |
| 0         | 0         | 0         | 0        | 0         | 0         |
| 0         | 0         | 0         | 0        | 0         | 0         |
| 6.3038    | 6.30456   | 5.97734   | 5.48696  | 4.83503   | 6.52737   |
| 0.405701  | 0.214068  | 0.306537  | 0.19327  | 0.130375  | 0.157034  |
| 48.8523   | 34.1787   | 46.673    | 34.4637  | 38.7741   | 37.7884   |
| 2.29301   | 2.10144   | 2.58378   | 1.68145  | 2.32786   | 3.07713   |

|          |           |          |           |           |           |
|----------|-----------|----------|-----------|-----------|-----------|
| 3.71872  | 3.58065   | 2.51012  | 3.46184   | 3.65819   | 3.30517   |
| 1.38568  | 1.20257   | 2.0379   | 1.34099   | 1.36716   | 1.80383   |
| 0        | 0         | 0        | 0         | 0         | 0         |
| 1.90691  | 1.45722   | 1.67889  | 1.68907   | 1.58818   | 2.0743    |
| 0        | 0         | 0        | 0         | 0         | 0         |
| 82.4884  | 85.049    | 90.5426  | 83.868    | 78.6369   | 73.4727   |
| 0.104493 | 0         | 0        | 0.0379163 | 0.0405023 | 0.0846952 |
| 1.87648  | 2.22387   | 2.26348  | 1.94956   | 1.90902   | 2.60826   |
| 12.7852  | 11.0143   | 13.303   | 10.7394   | 11.6097   | 9.85438   |
| 24.7706  | 23.2738   | 24.0692  | 20.9644   | 22.3988   | 21.6246   |
| 9.21129  | 10.1392   | 7.83381  | 9.58988   | 8.07504   | 10.2222   |
| 10.1454  | 8.49781   | 10.6788  | 10.9968   | 10.9906   | 11.096    |
| 3.97183  | 4.04854   | 4.35732  | 4.25295   | 2.53143   | 3.82049   |
| 6.01793  | 4.42227   | 3.55125  | 4.27646   | 3.23522   | 3.11877   |
| 3.36407  | 2.99251   | 3.11967  | 3.61273   | 2.7791    | 4.64088   |
| 7.40943  | 5.0043    | 6.59353  | 5.81022   | 6.49661   | 6.45264   |
| 3.34341  | 3.59073   | 4.28199  | 4.1956    | 3.7258    | 1.91954   |
| 13.2137  | 12.4894   | 10.145   | 11.8655   | 8.54083   | 11.3014   |
| 11.3512  | 7.92432   | 7.55483  | 9.92184   | 7.72813   | 10.2091   |
| 0        | 0         | 0        | 0         | 0         | 0         |
| 19.0297  | 14.7714   | 18.5122  | 18.3263   | 17.3385   | 19.2544   |
| 0.51021  | 0.209387  | 0.251204 | 0.251686  | 0.22671   | 0.2811    |
| 0        | 0         | 0        | 0         | 0         | 0         |
| 0        | 0         | 0        | 0         | 0.0393869 | 0         |
| 10.7293  | 7.52398   | 8.92523  | 10.8904   | 9.49877   | 13.7304   |
| 1.21946  | 0.386458  | 0.355749 | 0.290158  | 0.340943  | 0.486104  |
| 0        | 0         | 0        | 0         | 0         | 0         |
| 0.747878 | 2.07887   | 2.91796  | 2.49026   | 2.35317   | 1.6046    |
| 4.11183  | 4.02392   | 3.47363  | 3.56968   | 3.27693   | 4.08032   |
| 0        | 0         | 0        | 0         | 0         | 0         |
| 0.646896 | 0.0771942 | 0        | 0.39122   | 0.250742  | 0.0873885 |
| 4.39338  | 4.76602   | 2.12687  | 3.94921   | 2.12863   | 3.99261   |
| 9.97156  | 6.05043   | 10.8501  | 8.44433   | 7.94412   | 7.25493   |
| 0        | 0         | 0        | 0         | 0         | 0         |
| 22.2606  | 19.5752   | 19.8484  | 20.4206   | 16.7322   | 16.2759   |
| 0        | 0.0296259 | 0.134345 | 0.111218  | 0         | 0.0456494 |
| 15.8599  | 13.6165   | 16.9812  | 15.6392   | 16.846    | 16.937    |
| 0        | 0         | 0        | 0         | 0         | 0         |
| 0.720457 | 0.839211  | 0.965548 | 0.797712  | 0.396145  | 0.853091  |
| 63.8755  | 68.1885   | 110.224  | 54.2486   | 42.6919   | 40.1592   |
| 662.158  | 359.936   | 664.14   | 954.182   | 896.494   | 4409.47   |
| 187.801  | 167.219   | 175.384  | 171.362   | 191.002   | 197.072   |
| 9.05632  | 7.61103   | 7.85605  | 9.44026   | 9.65406   | 8.49953   |

|           |           |           |           |           |           |
|-----------|-----------|-----------|-----------|-----------|-----------|
| 0         | 0         | 0         | 0         | 0         | 0         |
| 0         | 0         | 0         | 0         | 0         | 0         |
| 0         | 0         | 0         | 0         | 0         | 0         |
| 1.14156   | 0.956877  | 0.990946  | 0.747624  | 0.647526  | 1.17351   |
| 0         | 0         | 0         | 0         | 0         | 0         |
| 194.159   | 225.345   | 264.333   | 201.916   | 261.972   | 234.304   |
| 288.374   | 217.233   | 254.612   | 254.628   | 214.066   | 270.99    |
| 12.7734   | 10.8243   | 12.1438   | 10.6286   | 9.45452   | 10.6653   |
| 0.130505  | 0.0934393 | 0.105563  | 0         | 0.10117   | 0         |
| 0         | 0.0670121 | 0.075707  | 0         | 0         | 0         |
| 0         | 0         | 0         | 0         | 0         | 0         |
| 0         | 0         | 0         | 0         | 0         | 0         |
| 3.75921   | 3.20453   | 4.19743   | 3.58803   | 2.42851   | 3.2128    |
| 25.4187   | 24.6379   | 21.7849   | 21.6919   | 20.185    | 22.9632   |
| 0         | 0         | 0         | 0         | 0         | 0         |
| 0         | 0         | 0         | 0         | 0         | 0.379005  |
| 8.61E-200 | 0.0260163 | 0.0379321 | 2.82E-43  | 0.0370723 | 1.43E-56  |
| 2.1119    | 0.900156  | 1.19615   | 1.53072   | 0.710604  | 1.23275   |
| 0.836597  | 1.01162   | 0.751896  | 0.512691  | 1.02326   | 0.949326  |
| 0         | 0         | 0         | 0         | 0         | 0         |
| 0.224366  | 0.0535473 | 0.0302475 | 0.0814133 | 0         | 0.0606188 |
| 29.2259   | 26.8919   | 29.9465   | 27.1583   | 28.4797   | 29.6064   |
| 9.19345   | 9.85356   | 10.1405   | 10.4728   | 8.98422   | 11.9226   |
| 1.32982   | 0         | 0.215133  | 0.579045  | 0.824719  | 1.29344   |
| 7.9803    | 7.56708   | 8.65505   | 8.02492   | 8.4613    | 7.78324   |
| 1.05349   | 0.523966  | 0.591951  | 0.554437  | 0.673297  | 0.690935  |
| 6.01232   | 7.34704   | 6.05132   | 5.77694   | 5.01105   | 6.46562   |
| 0.0579947 | 0.259926  | 0.293651  | 0.168352  | 0.202313  | 0         |
| 0         | 0         | 0         | 0         | 0         | 0         |
| 5.33277   | 4.10387   | 4.72438   | 5.33124   | 4.09187   | 2.76397   |
| 4.53907   | 3.65297   | 4.41726   | 3.7384    | 3.85699   | 4.83127   |
| 16.4517   | 11.7068   | 11.2235   | 12.0004   | 9.26826   | 11.4239   |
| 79.8357   | 123.691   | 113.072   | 60.4413   | 59.5306   | 111.083   |
| 8.56015   | 8.35873   | 11.6375   | 8.2155    | 6.31949   | 7.7772    |
| 0         | 0         | 0         | 0         | 0.0162133 | 0         |
| 0.423225  | 0.337955  | 0.350548  | 0.48761   | 0.319118  | 0.342946  |
| 0         | 0         | 0         | 0         | 0         | 0         |
| 5.35445   | 4.69107   | 5.04766   | 4.58378   | 5.45348   | 4.8928    |
| 11.6891   | 12.6659   | 12.2679   | 11.131    | 11.5268   | 11.275    |
| 0.143159  | 0.130158  | 0.115799  | 0.103893  | 0.125879  | 0.179068  |
| 8.45626   | 7.93017   | 8.9128    | 8.47174   | 8.38737   | 8.12338   |
| 26.7338   | 28.6362   | 25.997    | 30.0697   | 24.5689   | 26.499    |
| 2.83699   | 2.61921   | 1.38895   | 2.70902   | 0.868135  | 2.66255   |

|           |           |            |           |            |           |
|-----------|-----------|------------|-----------|------------|-----------|
| 32.198    | 27.436    | 30.6127    | 31.8174   | 39.9978    | 31.7985   |
| 0.133335  | 0.19093   | 0.431407   | 0.267821  | 0.103363   | 0.216145  |
| 11.0349   | 10.6875   | 12.3847    | 10.7479   | 10.9691    | 8.41626   |
| 0.149148  | 0.208878  | 0.169654   | 0.241606  | 0.085646   | 0.10494   |
| 7.73121   | 6.8659    | 7.64331    | 7.02289   | 4.91971    | 5.89696   |
| 41.1674   | 47.7938   | 45.031     | 43.559    | 42.6092    | 43.4653   |
| 0         | 0.0899759 | 0          | 0.0455998 | 0          | 0.0509291 |
| 0.038168  | 0.0273275 | 0.123493   | 0.0276992 | 0.0295884  | 0.0618729 |
| 2.59348   | 3.58792   | 2.26643    | 2.04871   | 1.54573    | 2.32952   |
| 0         | 0         | 0          | 0         | 0          | 0         |
| 0         | 0.0161262 | 0          | 0         | 0.0349207  | 0.0730233 |
| 5.44784   | 5.58087   | 5.23979    | 5.14265   | 4.53453    | 5.34203   |
| 22.1482   | 23.863    | 22.7541    | 22.5079   | 16.8936    | 21.1555   |
| 8.10542   | 9.8287    | 8.0059     | 9.07947   | 7.08077    | 7.46531   |
| 0         | 0         | 0          | 0         | 0          | 0         |
| 0.0178631 | 0.0447637 | 0.0144491  | 0.0194453 | 0.00692387 | 0.0217179 |
| 0         | 0.206018  | 0.232749   | 1.0441    | 0.446124   | 0.466449  |
| 0.467738  | 0.418614  | 0.529681   | 0.254584  | 0.362597   | 0.360161  |
| 23.1227   | 14.8784   | 18.5578    | 20.0495   | 18.6778    | 18.6687   |
| 1.03841   | 1.13526   | 0.874586   | 1.12491   | 0.747802   | 1.09205   |
| 10.8079   | 8.16839   | 9.55717    | 9.27541   | 9.43831    | 8.96301   |
| 14.9871   | 17.6925   | 11.9423    | 11.7828   | 9.1286     | 13.1237   |
| 31.488    | 29.2197   | 29.9857    | 31.054    | 27.1388    | 32.7218   |
| 4.26917   | 3.60446   | 2.50127    | 3.70139   | 2.55836    | 2.69259   |
| 41.4812   | 53.8003   | 53.0552    | 54.7339   | 47.5164    | 72.8307   |
| 16.2467   | 13.5236   | 16.888     | 16.8061   | 15.9608    | 17.6558   |
| 0         | 0         | 0          | 0         | 0          | 0         |
| 0         | 0         | 0          | 0         | 0          | 0         |
| 0         | 0         | 0          | 0         | 0          | 0         |
| 2.46505   | 1.68007   | 1.89806    | 1.96094   | 1.56183    | 1.72904   |
| 146.677   | 170.636   | 157.416    | 141.336   | 132.188    | 133.3     |
| 0         | 0         | 0          | 0         | 0          | 0         |
| 4.47581   | 2.5975    | 1.30621    | 2.58466   | 1.81377    | 1.09328   |
| 5.00021   | 5.86571   | 5.98028    | 6.02835   | 5.22243    | 5.06703   |
| 0         | 0         | 0          | 0         | 0          | 0         |
| 0         | 0         | 0          | 0         | 0.0399294  | 0.0208743 |
| 1.19645   | 2.21297   | 0.914017   | 1.47126   | 0.747157   | 1.72402   |
| 1.38478   | 1.23016   | 1.04752    | 0.604835  | 1.01386    | 1.20555   |
| 4.0483    | 4.10325   | 4.33725    | 6.10798   | 2.80366    | 2.79962   |
| 7.8975    | 6.91839   | 7.83804    | 8.55717   | 9.21295    | 8.70072   |
| 58.2861   | 56.0583   | 58.4819    | 48.2191   | 53.3996    | 53.8545   |
| 0.226924  | 0.0801628 | 0.141507   | 0.182774  | 0.086795   | 0.111563  |
| 0         | 0         | 0.00633885 | 0         | 0          | 0         |

|           |          |           |           |          |          |
|-----------|----------|-----------|-----------|----------|----------|
| 20.5234   | 20.4239  | 21.0092   | 19.2998   | 22.3275  | 15.092   |
| 1.24311   | 1.16278  | 1.56349   | 0.898465  | 1.48109  | 1.04524  |
| 0         | 0        | 0         | 0         | 0        | 0        |
| 14.6724   | 16.3212  | 16.8019   | 14.9725   | 16.3205  | 13.3505  |
| 3.81217   | 3.01237  | 3.40323   | 2.61474   | 3.09941  | 2.43989  |
| 0         | 0        | 0         | 0         | 0        | 0        |
| 0         | 0        | 0         | 0         | 0        | 0        |
| 0.0579038 | 0        | 0         | 0.0420218 | 0        | 0        |
| 0         | 0        | 0         | 0         | 0        | 0        |
| 8.79749   | 7.21537  | 8.41631   | 9.72494   | 8.81288  | 7.39557  |
| 3.3138    | 2.23597  | 2.87694   | 3.23589   | 3.3759   | 2.6297   |
| 101.964   | 92.5776  | 101.736   | 108.636   | 114.337  | 96.9409  |
| 0.0466929 | 0        | 0         | 0.0338858 | 0        | 0        |
| 47.5028   | 47.6815  | 47.678    | 44.8534   | 49.7462  | 35.7603  |
| 7.95068   | 5.86679  | 6.75926   | 7.22716   | 6.96536  | 7.43065  |
| 0.345993  | 0.392231 | 0.373156  | 0.37664   | 0.603494 | 0.210329 |
| 0.329492  | 0.327653 | 0.459006  | 0.478237  | 0.354761 | 0.222554 |
| 4.60887   | 0        | 5.08182   | 0         | 4.25007  | 0        |
| 22.8498   | 16.3916  | 20.9776   | 21.6725   | 18.3159  | 21.7604  |
| 40.052    | 38.949   | 44.7834   | 39.6568   | 43.0882  | 39.9949  |
| 1.16266   | 1.4153   | 0.925936  | 1.43436   | 1.21069  | 0.673706 |
| 2.76743   | 4.05798  | 2.89522   | 3.94135   | 2.92014  | 3.239    |
| 4.64645   | 4.389    | 4.74748   | 4.72082   | 4.22129  | 4.84969  |
| 4.71384   | 4.23394  | 3.0215    | 3.38822   | 3.1067   | 2.89078  |
| 1.55776   | 2.56526  | 1.38605   | 1.41312   | 1.2076   | 0.820703 |
| 6.61993   | 5.77201  | 5.98362   | 5.63686   | 5.34839  | 6.59544  |
| 0         | 0        | 0.0817182 | 0         | 0        | 0        |
| 2.23126   | 2.23406  | 2.56623   | 2.22649   | 2.59456  | 2.81167  |
| 0         | 0        | 0         | 0         | 0        | 0        |
| 18.6359   | 22.9224  | 23.9005   | 19.8739   | 17.1544  | 19.4268  |
| 1.49085   | 1.31621  | 1.82249   | 1.43173   | 1.13835  | 1.26289  |
| 23.0033   | 21.0525  | 24.4069   | 26.5426   | 26.0399  | 24.6129  |
| 2.42331   | 3.18764  | 2.96305   | 2.74021   | 2.31547  | 2.64936  |
| 0         | 0        | 0         | 0         | 0        | 0        |
| 31.1112   | 28.01    | 31.9398   | 32.4261   | 32.5327  | 34.1749  |
| 0.493219  | 0.559131 | 0.299216  | 0.178969  | 0.159313 | 0.366456 |
| 5.26507   | 3.87124  | 4.43728   | 4.86195   | 4.33819  | 5.00854  |
| 96.1819   | 113.258  | 112.768   | 92.8363   | 117.747  | 109.307  |
| 10.2911   | 10.7199  | 9.01271   | 11.7642   | 11.6968  | 11.1635  |
| 5.85471   | 4.96115  | 7.12117   | 5.71576   | 5.40003  | 8.00926  |
| 0         | 0        | 0         | 0         | 0        | 0        |
| 16.4921   | 17.9046  | 16.9263   | 17.8122   | 18.6194  | 16.8338  |
| 1.27348   | 0.334321 | 0.858407  | 0.80096   | 0.427795 | 0.481691 |



|           |           |           |           |           |           |
|-----------|-----------|-----------|-----------|-----------|-----------|
| 0.0982032 | 0         | 0         | 0         | 0.152257  | 0         |
| 0         | 0         | 0         | 0         | 0         | 0         |
| 0         | 0.10113   | 0.114251  | 0.102505  | 0         | 0.457939  |
| 57.5538   | 45.4113   | 62.194    | 54.0179   | 59.1359   | 39.1431   |
| 25.1086   | 21.61     | 23.1336   | 25.885    | 26.7764   | 22.3022   |
| 24.1313   | 30.1053   | 22.9755   | 25.4271   | 24.5364   | 37.0112   |
| 0.752846  | 1.18585   | 0.578514  | 0.573672  | 0.904608  | 0.579697  |
| 55.1058   | 61.3454   | 63.937    | 59.8389   | 62.3107   | 55.1928   |
| 8.81865   | 7.66098   | 9.21845   | 9.59807   | 7.38341   | 6.87231   |
| 0         | 0.104891  | 0.17775   | 0.106317  | 0         | 0.237485  |
| 132.084   | 115.056   | 136.341   | 155.519   | 151.13    | 137.845   |
| 5.67662   | 4.5063    | 5.51797   | 5.99981   | 5.31966   | 5.61983   |
| 23.7312   | 22.1256   | 25.4656   | 21.1161   | 18.9988   | 21.7147   |
| 33.3578   | 41.2824   | 33.7393   | 35.3128   | 32.7074   | 30.6344   |
| 9.9977    | 1.87491   | 9.28392   | 10.0884   | 9.36686   | 5.39578   |
| 0         | 0         | 0         | 0         | 0         | 0         |
| 0         | 0         | 0         | 0         | 0.0234999 | 0.0737116 |
| 0.0260055 | 0.0372388 | 0.168282  | 0.0849268 | 0.0403197 | 0.200244  |
| 3.85981   | 4.32329   | 4.42301   | 3.91523   | 3.29821   | 4.17135   |
| 0         | 0.108391  | 0         | 0         | 0.352074  | 0         |
| 8.30887   | 6.14952   | 4.00232   | 4.26835   | 9.98742   | 2.11876   |
| 21.3343   | 21.731    | 26.6423   | 24.9184   | 20.1315   | 24.6943   |
| 0         | 0         | 0         | 0         | 0         | 0         |
| 4.05518   | 3.70827   | 3.72204   | 2.83618   | 3.24137   | 3.84035   |
| 0         | 0         | 0         | 0         | 0         | 0         |
| 95.3092   | 614.156   | 616.75    | 830.011   | 664.967   | 1236.02   |
| 17.4801   | 15.8489   | 17.1398   | 17.0174   | 14.3803   | 16.0384   |
| 25.4598   | 29.2207   | 25.2383   | 25.2797   | 17.6485   | 22.4044   |
| 4.21558   | 2.1706    | 2.82066   | 2.59429   | 2.00734   | 2.83807   |
| 9.83397   | 12.0879   | 5.47244   | 4.91733   | 7.26064   | 5.15178   |
| 2.19662   | 1.65828   | 1.41997   | 1.43405   | 0.947579  | 2.28698   |
| 0         | 0         | 0         | 0         | 0         | 0         |
| 0.234816  | 0.327842  | 0.322895  | 0.247095  | 0.136525  | 0.218876  |
| 3.63512   | 3.34478   | 2.8343    | 2.98225   | 2.90051   | 2.83988   |
| 5.83602   | 4.39276   | 6.01182   | 4.3077    | 5.2202    | 5.2963    |
| 0         | 0         | 0         | 0         | 0         | 0         |
| 0         | 0.0395052 | 0         | 0         | 0         | 0.0447223 |
| 9.33186   | 6.8429    | 6.84331   | 8.8913    | 6.19026   | 6.7037    |
| 47.6217   | 47.9942   | 45.7755   | 48.9774   | 36.1866   | 41.4011   |
| 0         | 0         | 0         | 0         | 0         | 0         |
| 0.0363398 | 0.0130093 | 0.0146973 | 0.0131862 | 0.0140856 | 0         |
| 0         | 0         | 0         | 0         | 0         | 0         |
| 50.111    | 46.0421   | 48.9597   | 46.1199   | 50.3293   | 48.7651   |

|            |           |           |           |            |           |
|------------|-----------|-----------|-----------|------------|-----------|
| 0.541077   | 0.807085  | 0.205156  | 0.39267   | 0.788656   | 0.205576  |
| 3.41549    | 5.68524   | 2.88014   | 2.44043   | 1.38924    | 2.1003    |
| 0.7144     | 0.429657  | 0.670321  | 0.871     | 1.06332    | 0.880148  |
| 0.170247   | 0.243787  | 0.137709  | 0.494205  | 0          | 0.137991  |
| 0.331245   | 0.417548  | 0.309531  | 0.13322   | 0.23455    | 0.411325  |
| 0.971626   | 0.632423  | 0.785928  | 0.961536  | 1.98576    | 0.429565  |
| 23.9976    | 25.3659   | 25.366    | 25.6836   | 29.3895    | 24.4989   |
| 24.4573    | 23.4036   | 17.2709   | 18.1999   | 20.8858    | 18.1243   |
| 59.5449    | 119.15    | 79.034    | 46.0554   | 37.061     | 46.0791   |
| 10.1199    | 10.9456   | 11.8433   | 10.0787   | 9.34737    | 10.7331   |
| 1.15202    | 0.726016  | 0.465922  | 0.529057  | 0.558164   | 0.821894  |
| 2.74409    | 1.98451   | 2.98186   | 1.85058   | 3.76024    | 2.988     |
| 76.6722    | 57.3828   | 64.1225   | 96.3452   | 73.5704    | 74.188    |
| 2.16579    | 1.89013   | 1.80381   | 1.86613   | 2.06313    | 2.36686   |
| 7.71654    | 6.31597   | 6.08993   | 5.81103   | 6.53168    | 6.57569   |
| 6.23321    | 4.61495   | 5.00632   | 5.97903   | 5.33505    | 7.74215   |
| 0.909122   | 0.68346   | 0.661834  | 0.59379   | 0.0704766  | 0.515812  |
| 0          | 0         | 0.0612565 | 0         | 0          | 0.0613818 |
| 0          | 0         | 0         | 0         | 0          | 0         |
| 0.905376   | 0.283099  | 0.356307  | 0.379097  | 0.532113   | 0.578529  |
| 0          | 0         | 0         | 0         | 0          | 0         |
| 0.177756   | 0.466657  | 0.191711  | 0.129001  | 0.367465   | 0.384206  |
| 0.0454281  | 0         | 0         | 0         | 0.00440207 | 0.036821  |
| 0.714435   | 0         | 0.346735  | 0.207391  | 0.443073   | 0.115815  |
| 0.00880753 | 0.0359443 | 0.0132307 | 0.0323241 | 0.00585234 | 0.0267705 |
| 0.908761   | 1.57242   | 0.367539  | 0.659504  | 1.35026    | 0.184145  |
| 35.0585    | 74.1788   | 36.3016   | 33.781    | 18.0425    | 27.3814   |
| 0.281762   | 0.134491  | 0         | 0.0340799 | 0.0364043  | 0.0761258 |
| 0          | 0         | 0         | 0         | 0          | 0         |
| 6.96043    | 4.97062   | 5.28751   | 6.99894   | 6.47053    | 5.49341   |
| 14.8893    | 13.3745   | 18.6616   | 14.2501   | 21.473     | 11.9378   |
| 2.42437    | 1.76794   | 2.52391   | 2.93234   | 2.54068    | 2.85657   |
| 0.697013   | 0.528875  | 0.60632   | 0.505835  | 0.631831   | 0.454114  |
| 17.3612    | 16.4511   | 19.9806   | 17.5065   | 20.7073    | 8.52691   |
| 74.8933    | 96.0375   | 88.6571   | 101.709   | 67.2021    | 69.5096   |
| 4.78232    | 3.82824   | 4.2133    | 3.78549   | 3.12374    | 3.79199   |
| 3.35976    | 11.4507   | 6.21175   | 9.79648   | 5.27426    | 6.19238   |
| 0          | 0.372789  | 0.421159  | 0.377859  | 0          | 0.21101   |
| 3.0197     | 2.4323    | 2.13725   | 3.28718   | 3.21876    | 3.36541   |
| 7.9        | 6.08413   | 7.06645   | 7.33796   | 9.22118    | 6.73879   |
| 0.113506   | 0.108357  | 0.244834  | 0.109831  | 0.0879916  | 0.0613336 |
| 2.62698    | 3.42045   | 12.7571   | 3.12402   | 3.27769    | 5.24214   |
| 0          | 0         | 0         | 0         | 0          | 0         |

|           |          |           |           |           |           |
|-----------|----------|-----------|-----------|-----------|-----------|
| 21.7374   | 22.7823  | 21.893    | 20.8877   | 19.2227   | 22.2404   |
| 0         | 0        | 0         | 0         | 0         | 0         |
| 5.38215   | 6.90245  | 7.12827   | 7.3397    | 6.64821   | 7.16682   |
| 5.18871   | 4.61296  | 2.80232   | 4.53703   | 3.55922   | 3.92878   |
| 0         | 0        | 0         | 0         | 0         | 0         |
| 0.0629269 | 0        | 0         | 0.0228336 | 0.0487819 | 0.0510044 |
| 23.2238   | 25.6425  | 22.6665   | 25.0441   | 19.035    | 21.5927   |
| 11.493    | 11.0675  | 11.3752   | 12.1332   | 12.834    | 11.1584   |
| 0         | 0        | 0         | 0         | 0         | 0         |
| 0         | 0        | 0         | 0         | 0         | 0         |
| 193.583   | 224.767  | 247.844   | 232.846   | 245.182   | 230.258   |
| 0.141046  | 0.230825 | 0.179283  | 0.160851  | 0.0468604 | 0.195981  |
| 0         | 0        | 0         | 0         | 0         | 0         |
| 7.13769   | 5.49457  | 6.84899   | 5.73011   | 6.22038   | 7.26948   |
| 3.5537    | 2.47116  | 3.83958   | 2.7336    | 3.55426   | 3.59877   |
| 0         | 0        | 0         | 0         | 0         | 0         |
| 32.8953   | 31.3462  | 31.1044   | 32.16     | 30.7858   | 28.6893   |
| 9.68091   | 7.96588  | 7.83069   | 7.60234   | 6.6087    | 8.43228   |
| 4.29538   | 2.59236  | 3.71092   | 3.26412   | 3.46931   | 3.66383   |
| 31.1071   | 26.0032  | 28.3395   | 27.986    | 38.9688   | 22.809    |
| 56.4656   | 51.6615  | 48.8155   | 51.899    | 48.0955   | 46.8824   |
| 8.53586   | 9.38175  | 6.42731   | 8.44652   | 8.42732   | 8.38664   |
| 11.1535   | 10.4227  | 9.26598   | 8.71821   | 9.07631   | 9.17193   |
| 10.9843   | 8.99289  | 9.63337   | 10.0711   | 9.55456   | 12.5636   |
| 2.99726   | 1.8664   | 2.36466   | 2.2058    | 2.42988   | 2.12143   |
| 16.2919   | 17.303   | 18.4756   | 19.58     | 18.958    | 17.6068   |
| 0.0296435 | 0.127345 | 0.0479561 | 0.0215128 | 0.0229801 | 0.0240271 |
| 0.190951  | 0        | 0.154457  | 0         | 0.148028  | 0.154772  |
| 0         | 0        | 0         | 0         | 0         | 0         |
| 0         | 0        | 0         | 0         | 0         | 0         |
| 8.83707   | 10.0775  | 10.2933   | 9.67814   | 9.31686   | 8.17855   |
| 0         | 0        | 0.0613027 | 0         | 0.0660953 | 0.030714  |
| 3.13549   | 2.30718  | 3.12535   | 3.36712   | 1.93086   | 2.98277   |
| 73.4488   | 75.3864  | 73.2684   | 75.1459   | 85.4279   | 69.8255   |
| 2.99224   | 9.00678  | 3.21069   | 2.21584   | 3.31376   | 3.81121   |
| 12.4738   | 13.7771  | 14.5041   | 14.6074   | 12.939    | 14.7923   |
| 2.49096   | 3.32379  | 3.97836   | 4.61186   | 2.87624   | 2.91329   |
| 0.102571  | 0.220317 | 0.0829676 | 0.297751  | 0.159029  | 0         |
| 0         | 0        | 0         | 0         | 0         | 0         |
| 0         | 0        | 0         | 0         | 0         | 0         |
| 31.5805   | 38.6883  | 34.8386   | 31.8014   | 23.3376   | 31.1876   |
| 0.37799   | 0        | 0         | 0.137157  | 0.293024  | 0         |
| 1.54714   | 1.41788  | 2.05238   | 1.43717   | 1.15139   | 1.05337   |

|           |           |           |           |           |           |
|-----------|-----------|-----------|-----------|-----------|-----------|
| 0         | 0         | 0         | 37.0256   | 0         | 0         |
| 34.3645   | 31.6244   | 29.9528   | 34.3688   | 33.5766   | 34.3348   |
| 0.548307  | 0.725921  | 1.0088    | 0.933309  | 0.755851  | 0.695822  |
| 0.0877242 | 0         | 0         | 0         | 0.0680051 | 0.106655  |
| 1.27558   | 0.885617  | 1.0839    | 1.11273   | 1.44832   | 1.47253   |
| 0         | 0         | 0         | 0         | 0         | 0         |
| 0.550804  | 0.548039  | 0.490191  | 0.370781  | 0.655539  | 0.79487   |
| 0.749009  | 0.536247  | 0.154755  | 0.438655  | 0.367658  | 0.379266  |
| 31.1926   | 22.8695   | 25.5471   | 24.9291   | 36.2463   | 25.7313   |
| 61.8767   | 55.4576   | 54.9448   | 50.3492   | 60.3729   | 44.0382   |
| 8.5719    | 7.59089   | 8.68529   | 8.72546   | 6.10297   | 7.88029   |
| 14.5458   | 15.2563   | 17.0036   | 14.4453   | 12.6609   | 14.0651   |
| 0.396609  | 0.0475586 | 0         | 0.376091  | 0.393544  | 0.859278  |
| 1.93227   | 1.80345   | 1.86998   | 2.12846   | 1.95265   | 1.84584   |
| 1.78072   | 0.902279  | 1.58442   | 1.42153   | 1.64591   | 2.02066   |
| 0.142887  | 0.102304  | 0         | 0         | 0         | 0.115815  |
| 11.8053   | 8.7065    | 11.2062   | 10.9283   | 9.03608   | 10.4339   |
| 0.2974    | 0         | 0.184103  | 0.105712  | 0.203259  | 0         |
| 0.0836948 | 0.0599239 | 0.101549  | 0.0303694 | 0.0973223 | 0         |
| 0.321569  | 0.166549  | 0.0578023 | 0.0259298 | 0.147724  | 0         |
| 0         | 0.241548  | 0.100245  | 0         | 0.261531  | 0.279027  |
| 114.034   | 107.826   | 107.733   | 110.596   | 117.083   | 108.206   |
| 7.31247   | 6.3249    | 6.86717   | 6.61427   | 5.7471    | 6.31216   |
| 0         | 0         | 0         | 0         | 0         | 0         |
| 3.43382   | 1.68809   | 1.92668   | 1.64085   | 3.01813   | 2.35202   |
| 0         | 0         | 0         | 0         | 0         | 0         |
| 0.156603  | 0         | 0.126673  | 0         | 0.0607005 | 0         |
| 7.60399   | 7.11016   | 8.53755   | 7.24798   | 9.19407   | 7.35915   |
| 0.34831   | 1.66E-18  | 3.58E-19  | 3.24E-16  | 1.21E-25  | 5.06E-21  |
| 0.629815  | 0.242811  | 0.744573  | 0.632863  | 0.375571  | 0.196341  |
| 0.708802  | 0.387983  | 0.573336  | 0.532967  | 0.515408  | 0.676734  |
| 69.8623   | 67.4912   | 71.7746   | 72.6653   | 84.6022   | 73.3006   |
| 0.0335825 | 0.0721334 | 0.0271642 | 0.0974858 | 0.0781011 | 0.190538  |
| 17.4147   | 17.1673   | 15.3007   | 17.4319   | 17.2908   | 13.8023   |
| 0.287766  | 0.226638  | 0.349152  | 0.292371  | 0.200772  | 0.443163  |
| 2.21756   | 1.67933   | 1.44879   | 1.36174   | 1.98356   | 1.79741   |
| 90.1317   | 91.4718   | 97.4368   | 95.4927   | 94.0958   | 76.7304   |
| 0.954344  | 0.404914  | 0.922527  | 1.09445   | 0.45668   | 1.06957   |
| 29.8022   | 21.4047   | 24.5368   | 27.4319   | 27.3606   | 27.0515   |
| 0.158203  | 0.22654   | 0.255934  | 0         | 0.245283  | 0.384686  |
| 8.18935   | 7.49215   | 5.20234   | 7.50399   | 8.28834   | 11.5825   |
| 0.0504159 | 0.073096  | 0.0424796 | 0.0687925 | 0.0696678 | 0.0562941 |
| 0.0554347 | 0.0198451 | 0         | 0         | 0.0859477 | 0.0449317 |

|          |          |           |           |           |          |
|----------|----------|-----------|-----------|-----------|----------|
| 14.7851  | 10.0905  | 13.1425   | 13.8139   | 14.6335   | 15.6367  |
| 0.852812 | 0.68083  | 0.557667  | 0.880014  | 0.870051  | 0.717732 |
| 0        | 0        | 0         | 0         | 0         | 0        |
| 0.134396 | 0.28827  | 0.116355  | 0.139156  | 0.235253  | 0.190125 |
| 4.71508  | 5.87218  | 5.61346   | 5.75926   | 5.27688   | 4.36     |
| 0        | 0.175986 | 0.49705   | 0.0891896 | 0.285818  | 0        |
| 1.01831  | 1.17503  | 2.0159    | 1.94197   | 1.67422   | 1.39829  |
| 8.7971   | 6.30941  | 8.06048   | 8.01329   | 9.2418    | 7.54833  |
| 11.6163  | 9.65854  | 9.15583   | 9.17805   | 9.84216   | 9.6551   |
| 4.18955  | 4.0941   | 5.31224   | 4.47857   | 4.0817    | 4.54299  |
| 18.84    | 19.2754  | 19.4297   | 20.7155   | 19.1164   | 27.4336  |
| 17.6228  | 18.6853  | 19.647    | 18.4221   | 19.2693   | 19.869   |
| 2.31813  | 1.72586  | 1.62856   | 1.937     | 1.63954   | 1.93132  |
| 3.80736  | 2.97158  | 2.69127   | 2.81291   | 3.32384   | 3.33627  |
| 102.598  | 87.8308  | 83.982    | 101.853   | 102.835   | 80.6285  |
| 12.1796  | 9.53989  | 9.58239   | 10.6768   | 9.10175   | 10.0985  |
| 0.848639 | 0.75262  | 1.96788   | 0.868669  | 0.910755  | 1.08764  |
| 0.908839 | 0.838986 | 3.06432   | 0.832239  | 2.14147   | 0.820142 |
| 0.657524 | 0.470775 | 0.797787  | 0.715766  | 0.254862  | 0        |
| 7.06965  | 7.48874  | 5.80515   | 5.14253   | 3.60359   | 4.34453  |
| 0        | 0        | 0         | 0         | 0         | 0        |
| 21.1276  | 16.9467  | 18.1371   | 20.9635   | 19.6519   | 19.112   |
| 6.23487  | 6.20662  | 6.74506   | 6.92141   | 5.83339   | 7.4108   |
| 1.06304  | 1.58077  | 0.859868  | 1.3649    | 0.507127  | 1.32558  |
| 42.4068  | 37.2124  | 43.4688   | 40.2184   | 47.7153   | 45.5199  |
| 1.18252  | 0.863757 | 0.831319  | 0.491523  | 0.428811  | 0.722925 |
| 7.24E-09 | 3.76E-08 | 1.75E-12  | 5.72E-10  | 1.90E-08  | 9.27E-10 |
| 0.42231  | 0.282729 | 0.388088  | 0.520674  | 0.0717469 | 0.2381   |
| 12.3353  | 9.82672  | 11.0789   | 12.0389   | 9.25499   | 10.7107  |
| 35.0669  | 32.9264  | 36.1872   | 33.605    | 33.546    | 31.8702  |
| 111.336  | 318.859  | 240.154   | 242.397   | 172.62    | 180.484  |
| 14.0037  | 10.0093  | 10.8369   | 10.3348   | 10.0518   | 10.4485  |
| 0        | 0        | 0         | 0         | 0         | 0        |
| 0        | 0        | 0.0762875 | 0         | 0         | 0        |
| 0        | 0        | 0         | 0         | 0         | 0        |
| 1.55567  | 0.708801 | 1.58724   | 1.53952   | 0.890781  | 0.902707 |
| 44.9035  | 36.5892  | 41.7156   | 42.1804   | 34.0672   | 34.0229  |
| 2.28483  | 2.15256  | 2.5834    | 1.7435    | 2.88271   | 2.10475  |
| 25.4244  | 22.2856  | 18.6942   | 23.6982   | 16.5814   | 13.2846  |
| 4.53585  | 3.64994  | 3.99364   | 3.17522   | 3.08062   | 3.57885  |
| 12.5715  | 10.6829  | 10.9083   | 11.7866   | 13.1943   | 11.2394  |
| 11.2402  | 12.3919  | 11.9727   | 13.7696   | 12.2114   | 14.1121  |
| 0.622602 | 0.541061 | 0.628455  | 0.619915  | 0.842039  | 0.550493 |

|           |           |           |           |           |           |
|-----------|-----------|-----------|-----------|-----------|-----------|
| 251.54    | 287.739   | 286.492   | 276.591   | 284.35    | 284.713   |
| 3.0416    | 3.48995   | 2.58646   | 3.36762   | 2.69042   | 2.68657   |
| 17.4769   | 16.8656   | 18.128    | 17.3077   | 15.4236   | 17.0645   |
| 10.9736   | 10.7257   | 12.0979   | 12.2915   | 12.7689   | 12.8994   |
| 62.0771   | 54.1583   | 50.6296   | 53.7253   | 41.5643   | 52.9653   |
| 1.39841   | 0.912894  | 1.01471   | 1.19395   | 0.860881  | 1.20014   |
| 0.0206152 | 0         | 0         | 0.0149609 | 0         | 0         |
| 0.192633  | 0.19309   | 0.186981  | 0.167757  | 0.119466  | 0.0624543 |
| 9.84258   | 7.10932   | 9.54858   | 8.3413    | 8.00067   | 8.43915   |
| 62.4135   | 71.1405   | 64.7633   | 64.292    | 63.7588   | 60.5673   |
| 0.16449   | 0.294403  | 0.1332    | 0.268699  | 0.318742  | 0.233297  |
| 0         | 0         | 0         | 0         | 0         | 0         |
| 10.7233   | 7.29377   | 7.93036   | 9.33848   | 6.94716   | 7.94657   |
| 10.2261   | 7.368     | 11.8996   | 8.33273   | 7.92748   | 9.31927   |
| 0.149379  | 0.132417  | 0.0517841 | 0.118732  | 0.12683   | 0.0576556 |
| 16.5651   | 12.3023   | 12.4435   | 13.9747   | 11.2071   | 14.0718   |
| 3.43209   | 4.22808   | 2.81849   | 3.53943   | 2.78911   | 3.29314   |
| 0.951874  | 1.81091   | 1.31992   | 1.34211   | 1.70773   | 1.85166   |
| 20.679    | 23.786    | 30.8314   | 25.2575   | 23.0304   | 22.9251   |
| 23.4056   | 18.3308   | 21.3205   | 22.5411   | 20.4874   | 22.2999   |
| 12.9358   | 19.9952   | 14.5802   | 22.4625   | 11.1325   | 15.3441   |
| 28.7922   | 27.7569   | 31.6017   | 32.9046   | 35.095    | 31.4037   |
| 3.34771   | 3.0037    | 2.77645   | 0.953345  | 4.30343   | 3.74385   |
| 0         | 0         | 0         | 0         | 0         | 0         |
| 0         | 0         | 0         | 0         | 0         | 0         |
| 0.324928  | 0.290802  | 0.0657068 | 0.176854  | 0.125944  | 0         |
| 6.57857   | 4.57623   | 5.20329   | 5.91427   | 5.83112   | 7.10835   |
| 17.5906   | 19.7289   | 17.6331   | 18.1697   | 18.7676   | 17.2026   |
| 24.5366   | 29.9487   | 19.607    | 19.84     | 18.2734   | 23.5151   |
| 58.3508   | 68.901    | 73.9283   | 49.8566   | 93.5181   | 60.3882   |
| 0         | 0         | 0         | 0         | 0         | 0         |
| 0         | 0         | 0         | 0         | 0         | 0         |
| 4.95773   | 3.21642   | 3.0755    | 3.3888    | 3.47025   | 2.81099   |
| 82.5372   | 67.6251   | 91.1557   | 93.5444   | 88.2436   | 95.2566   |
| 0.0279932 | 0.0400852 | 0.0226431 | 0.0203152 | 0.0651022 | 0.0567235 |
| 0.036915  | 0.0370026 | 0.0298598 | 0.0535798 | 0.0572342 | 0.0538575 |
| 24.6533   | 26.8171   | 24.3303   | 27.091    | 24.1706   | 23.6302   |
| 29.2315   | 28.596    | 29.4398   | 39.0635   | 30.2638   | 40.5237   |
| 16.2482   | 13.6253   | 12.6401   | 15.3355   | 15.4179   | 14.0093   |
| 10.8859   | 11.6801   | 13.1454   | 13.5269   | 12.8146   | 12.1009   |
| 1.14946   | 0.887123  | 0.350176  | 0.660849  | 0.717494  | 1.73026   |
| 41.2224   | 39.056    | 42.9211   | 49.5109   | 49.897    | 32.5431   |
| 0         | 0         | 0         | 0         | 0         | 0         |

|           |           |            |           |           |           |
|-----------|-----------|------------|-----------|-----------|-----------|
| 43.8574   | 39.9036   | 43.1837    | 47.0125   | 44.7149   | 43.2776   |
| 1.93339   | 1.93093   | 1.56388    | 2.65245   | 1.92003   | 2.22465   |
| 22.9904   | 25.6102   | 24.5537    | 27.1202   | 24.6978   | 24.2335   |
| 35.407    | 39.883    | 41.12      | 39.1015   | 37.3641   | 40.5806   |
| 12.8403   | 10.954    | 12.2151    | 12.1091   | 12.0522   | 12.0796   |
| 1.12108   | 0.897059  | 1.61061    | 1.55194   | 1.49921   | 2.35865   |
| 1.92199   | 2.31821   | 2.32003    | 2.17807   | 2.31516   | 3.04378   |
| 0.252431  | 0         | 0.14136    | 0.0422754 | 0.286006  | 0         |
| 0.0415947 | 0.0396995 | 0.00840803 | 0.0546752 | 0.0362615 | 0.0337123 |
| 0         | 0         | 0          | 0         | 0         | 0         |
| 4.10943   | 4.8724    | 3.72292    | 4.95059   | 3.28763   | 4.39669   |
| 7.00149   | 5.41652   | 6.40728    | 4.4998    | 5.95663   | 6.73299   |
| 18.8018   | 19.4153   | 19.2066    | 18.8077   | 14.3247   | 19.171    |
| 0.214556  | 0.0382381 | 0.0434993  | 0.0390804 | 0.0416723 | 0.0431998 |
| 0.14097   | 0.080881  | 0.136454   | 0.102304  | 0.0871833 | 0.159741  |
| 2.32223   | 0.348001  | 0.393154   | 0.156771  | 0.711718  | 0.525278  |
| 0         | 0         | 0          | 0         | 0         | 0         |
| 0         | 0         | 0          | 0         | 0         | 0         |
| 0         | 0         | 0          | 0         | 0         | 0         |
| 168.106   | 186.635   | 182.369    | 202.757   | 200.276   | 166.728   |
| 8.24082   | 4.80841   | 6.49186    | 6.32467   | 5.67766   | 5.54295   |
| 1.02943   | 0.810759  | 0.624515   | 0.784431  | 0.778081  | 0.709231  |
| 1.83E-06  | 3.73E-06  | 1.18E-06   | 2.14E-06  | 2.14E-06  | 9.10E-07  |
| 0         | 0         | 0.0791187  | 0.0709845 | 0         | 0.237841  |
| 4.66027   | 5.434     | 4.25426    | 4.63823   | 5.30768   | 5.54011   |
| 22.9169   | 20.3981   | 19.9629    | 21.8517   | 25.7005   | 22.8845   |
| 8.0813    | 7.39455   | 8.86042    | 8.0182    | 9.495     | 8.34122   |
| 0.109772  | 0.0785943 | 0.00986577 | 0.0354059 | 0.0567311 | 0.0692016 |
| 112.641   | 110.259   | 89.3523    | 124.419   | 123.153   | 102.897   |
| 0.548751  | 0.252575  | 0.142674   | 0.426684  | 0.151929  | 0.206505  |
| 14.8264   | 14.7202   | 16.2216    | 14.443    | 14.6357   | 15.4453   |
| 0.872937  | 0.806711  | 0.411707   | 0.47476   | 0.549945  | 0.663154  |
| 0.0323007 | 0         | 0          | 0.0226751 | 0.0488798 | 0         |
| 5.27789   | 5.71592   | 4.80642    | 7.07108   | 5.5866    | 5.62978   |
| 27.0515   | 23.1315   | 27.4807    | 24.1334   | 22.0895   | 23.2422   |
| 5.05153   | 7.64847   | 5.62666    | 5.70925   | 2.99593   | 2.72972   |
| 1.24734   | 2.38153   | 1.90579    | 1.5087    | 0.859518  | 3.14537   |
| 0.435001  | 2.58506   | 0.598168   | 0.694514  | 0.640717  | 0.317325  |
| 31.9444   | 26.0789   | 27.8259    | 29.9536   | 29.0627   | 30.9502   |
| 5.05304   | 4.22581   | 6.85126    | 5.62086   | 5.2818    | 4.83422   |
| 25.0396   | 28.8358   | 28.6119    | 21.4557   | 24.3225   | 26.2251   |
| 0         | 0         | 0          | 0         | 0         | 0         |
| 17.2238   | 14.5352   | 16.2668    | 18.1608   | 18.7522   | 16.5482   |

|           |           |           |           |           |           |
|-----------|-----------|-----------|-----------|-----------|-----------|
| 26.374    | 28.5605   | 31.2886   | 29.1834   | 27.7719   | 26.0851   |
| 32.3592   | 37.0814   | 26.3105   | 27.1227   | 16.1964   | 26.6952   |
| 4.76569   | 3.66678   | 5.39681   | 4.429     | 6.30811   | 1.97173   |
| 0         | 0         | 0.280597  | 0.125874  | 0.13446   | 0         |
| 0         | 0.0403499 | 0         | 0         | 0         | 0         |
| 24.1585   | 25.0884   | 24.3619   | 27.4651   | 20.4671   | 22.1896   |
| 2.06267   | 2.14061   | 2.4475    | 1.9966    | 1.67508   | 2.4545    |
| 8.00201   | 6.81099   | 6.69462   | 8.6895    | 7.3335    | 6.32198   |
| 14.9104   | 12.709    | 14.0469   | 16.8322   | 13.6228   | 11.6058   |
| 0.742462  | 0.475632  | 0.512058  | 0.805391  | 0.551334  | 0.677806  |
| 1.44569   | 1.8761    | 0.95013   | 0.786873  | 0.840542  | 0.878836  |
| 0         | 0.0908682 | 0.102658  | 0.276312  | 0.0983859 | 0.411473  |
| 24.9755   | 24.2159   | 24.534    | 25.8407   | 25.2641   | 22.2538   |
| 0.105023  | 0.243475  | 0.0826552 | 0.0526484 | 0.084391  | 0.236686  |
| 1.1906    | 1.4849    | 1.39798   | 1.75595   | 0.922969  | 1.86778   |
| 1.13118   | 0.48543   | 0.796833  | 0.836333  | 0.571029  | 0.691747  |
| 0.112744  | 0.156279  | 0.0656614 | 0.132549  | 0.131101  | 0.0146212 |
| 0.0478122 | 0.0342326 | 0.0386743 | 0.104094  | 0.0370647 | 0.0775068 |
| 2.92947   | 2.51975   | 2.91033   | 3.19609   | 2.89587   | 2.85253   |
| 36.3363   | 33.5317   | 32.8452   | 33.0779   | 30.6595   | 31.229    |
| 7.06271   | 6.28018   | 6.88004   | 8.29456   | 5.9461    | 6.06312   |
| 33.9698   | 31.8783   | 37.0975   | 38.2697   | 27.4772   | 30.968    |
| 6.5444    | 6.73152   | 6.74751   | 6.82306   | 7.41348   | 6.44379   |
| 8.51454   | 10.5279   | 7.0714    | 6.58244   | 6.09293   | 7.4316    |
| 0         | 0         | 0         | 0         | 0         | 0         |
| 1.44217   | 1.45056   | 1.15864   | 0.975173  | 1.48167   | 1.42144   |
| 2.84964   | 3.17509   | 3.15814   | 3.46139   | 3.38513   | 3.39771   |
| 7.08505   | 6.64181   | 7.03891   | 6.50052   | 6.77895   | 6.27727   |
| 1.32116   | 0.385012  | 0.646321  | 1.1329    | 0.268558  | 0.979519  |
| 1.13438   | 0.691871  | 1.0875    | 0.945204  | 0.944531  | 0.817294  |
| 0         | 0         | 0         | 0         | 0         | 0         |
| 0         | 0         | 0         | 0         | 0         | 0         |
| 0         | 0         | 0         | 0.252057  | 0.538498  | 0.281516  |
| 15.1771   | 13.0417   | 12.3492   | 9.86305   | 12.8579   | 10.4119   |
| 14.7232   | 9.26123   | 11.487    | 11.9525   | 10.423    | 12.1686   |
| 18.308    | 22.9351   | 13.0576   | 16.3794   | 21.9537   | 16.3761   |
| 2.7343    | 3.1158    | 1.7133    | 1.81664   | 1.59234   | 1.87291   |
| 0         | 0         | 0         | 0         | 0         | 0         |
| 0.787782  | 0.258517  | 0.637221  | 0.41687   | 0.394411  | 0.638524  |
| 0.356465  | 0.232901  | 0.355277  | 0.280472  | 0.203937  | 0.516379  |
| 0.043296  | 0.0309991 | 0.0700424 | 0.141393  | 0.0335637 | 0.0701856 |
| 3.02259   | 1.0973    | 2.58265   | 1.42117   | 2.07914   | 3.86464   |
| 0         | 0         | 0         | 0         | 0         | 0         |



|           |           |            |           |           |           |
|-----------|-----------|------------|-----------|-----------|-----------|
| 0         | 0         | 0          | 0         | 0         | 0         |
| 0.0807196 | 0         | 0.0326462  | 0.0878695 | 0.0312875 | 0.0654259 |
| 0.269833  | 0.262961  | 0.363771   | 0.326372  | 0.348632  | 0.227822  |
| 0         | 0         | 0          | 0         | 0         | 0         |
| 0.333215  | 2.14718   | 0.269531   | 0.967281  | 0.516627  | 1.08033   |
| 5.7825    | 6.19682   | 6.65285    | 5.69575   | 4.34385   | 5.27947   |
| 39.818    | 14.2545   | 16.104     | 14.4483   | 0         | 32.2739   |
| 27.9625   | 29.2027   | 37.3468    | 40.7724   | 25.9504   | 41.3356   |
| 0         | 0         | 0.134301   | 0         | 0         | 0         |
| 11.111    | 9.36285   | 11.4997    | 10.0634   | 13.463    | 11.7307   |
| 0         | 0         | 0          | 0         | 0         | 0         |
| 1.33687   | 0.976554  | 1.38534    | 1.08716   | 0.809027  | 1.08361   |
| 47.7804   | 52.3559   | 50.2712    | 49.2739   | 45.4144   | 44.8735   |
| 0.139145  | 0.154164  | 0.106958   | 0.0909451 | 0.118595  | 0.173691  |
| 87.4345   | 100.29    | 93.6014    | 96.4546   | 102.056   | 87.4469   |
| 16.8023   | 14.6716   | 19.1673    | 15.7432   | 14.5289   | 18.8989   |
| 0         | 0.135612  | 0          | 0.0687284 | 0         | 0         |
| 0         | 0         | 0          | 0.0396997 | 0         | 0.0442146 |
| 22.2325   | 22.5841   | 23.4831    | 21.6368   | 17.4544   | 21.8735   |
| 0.128737  | 0.110159  | 0.143572   | 0.163694  | 0.117455  | 0.142493  |
| 64.1906   | 52.9326   | 54.0844    | 56.9176   | 73.8496   | 28.3888   |
| 0.66246   | 0.482489  | 0.750683   | 1.08447   | 0.604866  | 0.43392   |
| 2.89488   | 4.03889   | 3.42227    | 3.33975   | 3.42369   | 3.66991   |
| 2.63194   | 2.39239   | 2.42512    | 2.0097    | 1.84516   | 2.02197   |
| 20.4455   | 20.3374   | 18.4736    | 21.4287   | 15.9529   | 18.6065   |
| 87.9592   | 89.2258   | 93.3893    | 101.062   | 110.288   | 79.8315   |
| 0.126696  | 0.0907122 | 0.512411   | 0.183892  | 0         | 0         |
| 4.66752   | 3.45419   | 3.71201    | 5.32291   | 3.89199   | 4.73693   |
| 23.7523   | 14.3982   | 17.0643    | 14.2085   | 24.5901   | 11.8095   |
| 7.01205   | 3.73426   | 4.14203    | 5.75481   | 4.32435   | 4.86227   |
| 21.2472   | 20.8586   | 15.8624    | 15.9578   | 10.8105   | 16.4818   |
| 3.49728   | 3.89311   | 4.11045    | 4.91543   | 5.17143   | 2.07474   |
| 15.9782   | 11.9693   | 14.5061    | 14.4185   | 14.8086   | 14.5145   |
| 9.04388   | 10.4614   | 13.2655    | 12.5417   | 11.776    | 8.49423   |
| 27.1681   | 26.3604   | 28.0568    | 26.3664   | 25.0637   | 24.5406   |
| 2.06825   | 1.73159   | 1.4706     | 1.66238   | 1.56453   | 1.62231   |
| 0         | 0         | 0          | 0         | 0         | 0         |
| 136.284   | 139.288   | 141.191    | 135.612   | 135.101   | 119.101   |
| 0.0758066 | 0.020941  | 0.00632086 | 0.0425595 | 0.122958  | 0.0168901 |
| 4.01418   | 3.40631   | 3.72803    | 3.15593   | 3.6305    | 2.98249   |
| 0         | 0         | 0          | 0         | 0         | 0         |
| 2.39759   | 1.99662   | 2.70239    | 2.07075   | 2.51099   | 1.7918    |
| 0         | 0         | 0          | 0         | 0         | 0         |

|           |           |          |           |           |           |
|-----------|-----------|----------|-----------|-----------|-----------|
| 1.42805   | 1.91711   | 1.4439   | 1.57613   | 1.86814   | 1.49508   |
| 13.9385   | 14.9982   | 10.983   | 9.53406   | 8.69394   | 10.6159   |
| 8.62633   | 9.1626    | 8.74122  | 9.19548   | 7.59358   | 9.06643   |
| 0         | 0         | 0.136139 | 0.244285  | 0         | 0         |
| 1.40846   | 1.36964   | 1.75237  | 1.26431   | 0.76109   | 1.65441   |
| 33.2208   | 39.3986   | 32.9722  | 35.9136   | 29.0955   | 32.1403   |
| 12.5178   | 12.428    | 12.6785  | 13.5038   | 11.2361   | 15.0972   |
| 0         | 0         | 0        | 0.0158362 | 0         | 0         |
| 0         | 0         | 0        | 0         | 0         | 0         |
| 17.9078   | 15.1745   | 14.177   | 8.50269   | 3.95057   | 13.5498   |
| 0         | 0         | 0        | 0         | 0         | 0         |
| 77.4191   | 64.1149   | 61.5575  | 54.097    | 49.7809   | 60.3913   |
| 0.189184  | 0.259126  | 0.240861 | 0.377868  | 0.347682  | 0.258282  |
| 0         | 0         | 0        | 0         | 0         | 0.0322369 |
| 1.34724   | 1.62638   | 2.07337  | 1.86073   | 1.25512   | 1.66324   |
| 0         | 0         | 0        | 0         | 0         | 0         |
| 17.042    | 15.3144   | 18.04    | 17.4788   | 16.7836   | 17.6188   |
| 5.40674   | 3.78616   | 4.37288  | 4.24942   | 4.03271   | 3.74677   |
| 0.0842365 | 0.0964194 | 0.293994 | 0.144786  | 0.131462  | 0.161708  |
| 1.05012   | 1.58728   | 0.943803 | 1.61004   | 1.35679   | 1.22945   |
| 0         | 0         | 0        | 0         | 0         | 0         |
| 0         | 0         | 0        | 0         | 0.0179658 | 0         |
| 0         | 0         | 0        | 0         | 0         | 0         |
| 93.6609   | 98.2671   | 98.9757  | 93.6268   | 80.5142   | 193.112   |
| 116.599   | 74.5892   | 81.8633  | 74.3735   | 154.411   | 36.433    |
| 1.00163   | 0.933915  | 1.0314   | 1.08111   | 0.912596  | 0.901886  |
| 103.443   | 108.065   | 115.125  | 97.3507   | 171.371   | 45.9039   |
| 15.5562   | 16.8791   | 20.3664  | 19.514    | 16.7837   | 16.4651   |
| 5.13013   | 4.13749   | 5.69187  | 4.7786    | 6.00353   | 4.89099   |
| 8.948     | 13.8061   | 12.9557  | 10.8462   | 11.4099   | 9.99025   |
| 18.7472   | 11.0964   | 17.5391  | 15.2565   | 17.2947   | 15.238    |
| 4.06837   | 3.44976   | 4.41357  | 3.99455   | 3.97016   | 3.77602   |
| 0         | 0         | 0        | 0         | 0         | 0         |
| 6.01572   | 3.06508   | 3.12329  | 3.63471   | 3.03668   | 3.24307   |
| 50.5064   | 55.5658   | 47.7141  | 48.7525   | 42.7606   | 44.4218   |
| 11.4535   | 10.7122   | 11.482   | 11.8864   | 10.77     | 6.9673    |
| 0         | 0         | 0        | 0         | 0         | 0         |
| 0.0321768 | 0.069114  | 0        | 0         | 0.049888  | 0         |
| 0.646012  | 0.231266  | 0.261273 | 0.234411  | 0.250399  | 0.523615  |
| 100.283   | 101.893   | 103.608  | 109.149   | 105.638   | 99.412    |
| 15.1269   | 15.4125   | 14.2397  | 12.6065   | 11.7529   | 11.52     |
| 0.929784  | 0.849875  | 1.07609  | 1.09027   | 0.997806  | 1.04326   |
| 0.590582  | 0.739979  | 0.437901 | 0.39288   | 0.419676  | 0.239343  |

|           |            |           |           |           |           |
|-----------|------------|-----------|-----------|-----------|-----------|
| 0         | 0          | 0         | 0         | 0         | 0         |
| 3.80531   | 2.58113    | 1.13401   | 2.61624   | 1.70786   | 3.57133   |
| 0.303814  | 0.183537   | 0.287987  | 0         | 0.225927  | 0.33244   |
| 3.78734   | 3.61555    | 2.88591   | 2.58921   | 1.91479   | 3.20324   |
| 14.6856   | 14.9013    | 12.4381   | 12.7683   | 10.6083   | 10.1834   |
| 2.5881    | 1.55584    | 2.15271   | 2.33892   | 2.47952   | 2.7706    |
| 0         | 0          | 0         | 0         | 0         | 0         |
| 30.0559   | 43.364     | 37.3022   | 42.3957   | 43.8151   | 40.6579   |
| 11.8553   | 9.93676    | 9.75433   | 10.5888   | 10.9403   | 13.6588   |
| 2.14674   | 2.00463    | 1.96285   | 1.62297   | 1.47133   | 1.77403   |
| 8.97217   | 6.33052    | 7.34519   | 6.81329   | 5.80094   | 7.17629   |
| 0         | 0.138874   | 0         | 0         | 0         | 0         |
| 0         | 0.00943112 | 0.0106548 | 0.0191188 | 0         | 0         |
| 0         | 0          | 0         | 0         | 0         | 0         |
| 2.40468   | 2.12613    | 3.6926    | 3.43697   | 2.02567   | 3.14914   |
| 0         | 0.0802422  | 0         | 0.0813335 | 0.260642  | 0.272517  |
| 208.166   | 242.508    | 170.962   | 196.513   | 140.174   | 175.658   |
| 2.58342   | 2.23377    | 2.21529   | 2.19243   | 3.03143   | 2.9979    |
| 84.9994   | 82.5271    | 93.8504   | 78.3655   | 89.8041   | 87.7004   |
| 142.93    | 155.216    | 120.694   | 106.342   | 102.662   | 140.676   |
| 10.7904   | 8.76666    | 10.0641   | 9.10121   | 11.9761   | 9.48348   |
| 7.06434   | 7.06946    | 6.99073   | 5.58157   | 5.99323   | 7.57814   |
| 3.0705    | 2.05659    | 3.35157   | 2.27623   | 2.85377   | 3.18448   |
| 0.421099  | 0.344694   | 0.803098  | 0.414741  | 0.373077  | 0.487893  |
| 35.7034   | 32.0955    | 35.8253   | 36.5984   | 37.7829   | 36.7959   |
| 22.4753   | 14.3215    | 14.9128   | 6.76639   | 12.0907   | 2.67509   |
| 0.0119191 | 0.00853383 | 0         | 0         | 0         | 0         |
| 7.20558   | 5.69699    | 5.75403   | 6.75442   | 5.87924   | 5.13442   |
| 0         | 0          | 0         | 0         | 0         | 0         |
| 0.0165076 | 0          | 0         | 0.0119798 | 0.0255938 | 0.0133799 |
| 5.04293   | 3.95711    | 5.41823   | 5.62494   | 5.11375   | 5.2848    |
| 10.6317   | 9.22031    | 6.17731   | 5.3611    | 4.87548   | 6.39223   |
| 37.2592   | 40.6091    | 31.6284   | 38.4523   | 34.2618   | 33.7126   |
| 19.3836   | 20.2615    | 21.6198   | 20.2682   | 25.7839   | 26.3982   |
| 1.80574   | 1.63468    | 1.10475   | 1.51816   | 0.764696  | 1.52134   |
| 45.2147   | 47.7762    | 50.2169   | 44.9184   | 48.2875   | 48.0841   |
| 0         | 0          | 0         | 0         | 0         | 0         |
| 24.5347   | 22.1071    | 23.2491   | 24.0157   | 36.6842   | 24.0381   |
| 4.31341   | 4.87264    | 4.44632   | 4.76384   | 4.01566   | 4.32308   |
| 2.32984   | 3.13999    | 2.32798   | 1.49189   | 2.33734   | 2.99924   |
| 11.1369   | 10.6358    | 11.764    | 12.5416   | 11.9006   | 12.8683   |
| 69.567    | 70.362     | 66.4375   | 63.9103   | 72.1904   | 57.2264   |
| 136.359   | 73.5584    | 92.5932   | 79.2813   | 87.5167   | 32.2861   |

|          |           |           |           |           |           |
|----------|-----------|-----------|-----------|-----------|-----------|
| 0        | 0         | 0         | 0         | 0         | 0         |
| 24.4392  | 16.4394   | 21.6511   | 19.194    | 14.6861   | 12.8234   |
| 7.25384  | 4.86766   | 6.20979   | 5.69216   | 6.52758   | 6.21726   |
| 40.8755  | 44.1872   | 37.7342   | 43.2633   | 41.5124   | 47.5828   |
| 3.91784  | 3.02306   | 3.5759    | 3.22747   | 3.50916   | 4.25909   |
| 0        | 0         | 0         | 0         | 0         | 0         |
| 0        | 0         | 0         | 0         | 0         | 0         |
| 0.236061 | 0.126761  | 0.143208  | 0.128485  | 0.228747  | 0         |
| 1.66E-05 | 0.0003055 | 1.66E-06  | 1.28E-06  | 8.18E-11  | 4.58E-06  |
| 17.1472  | 12.2368   | 13.775    | 14.4612   | 14.0559   | 13.2344   |
| 0        | 0         | 0         | 0         | 0         | 0         |
| 0.234987 | 0.20014   | 0.127153  | 0.07406   | 0.121861  | 0.0738838 |
| 0        | 0         | 0         | 0         | 0         | 0         |
| 534.213  | 395.505   | 1915      | 2987.44   | 1130.93   | 2274.55   |
| 13.4072  | 10.9892   | 11.9682   | 12.7226   | 12.8982   | 12.6106   |
| 0.784211 | 0.701641  | 0.704702  | 0.648036  | 0.877747  | 0.688514  |
| 0.874965 | 0.499759  | 0.612315  | 0.506555  | 0.548726  | 0.621536  |
| 0        | 0         | 0         | 0         | 0         | 0         |
| 0        | 0.0231387 | 0.0261441 | 0.0937976 | 0.0250454 | 0.0261794 |
| 17.7845  | 13.4079   | 17.1782   | 16.8196   | 19.884    | 17.7612   |
| 0.112931 | 0.161712  | 0         | 0.0819558 | 0.0875456 | 0         |
| 0.468554 | 0.239626  | 0.830199  | 1.11727   | 0.224857  | 0.434033  |
| 0        | 0         | 0         | 0         | 0         | 0         |
| 0.800053 | 0.880491  | 0.81109   | 0.779534  | 0.67552   | 0.774037  |
| 3.95572  | 3.77171   | 3.9838    | 3.6574    | 4.21644   | 3.74573   |
| 12.6193  | 11.7128   | 11.1909   | 12.9396   | 11.9936   | 12.2075   |
| 0        | 0         | 0         | 0.0281893 | 0         | 0         |
| 26.2009  | 22.926    | 25.4516   | 24.1261   | 22.2196   | 23.1723   |
| 0        | 0         | 0         | 0         | 0         | 0         |
| 9.3866   | 8.58541   | 10.0435   | 9.70339   | 9.44563   | 9.22802   |
| 112.147  | 181.706   | 113.274   | 106.918   | 117.594   | 129.584   |
| 0.819353 | 0.903638  | 0.591994  | 0.0005    | 0.410974  | 0.387399  |
| 0.254803 | 0.197637  | 0.0515262 | 0.0616383 | 0.0658423 | 0.0860526 |
| 24.4776  | 23.5045   | 26.479    | 24.1938   | 18.5709   | 21.3884   |
| 33.0483  | 47.3239   | 26.7321   | 71.9512   | 0         | 26.7867   |
| 0        | 0         | 0         | 0         | 0         | 0         |
| 0        | 0         | 0         | 0         | 0.0177419 | 0         |
| 1.32616  | 1.23436   | 1.93087   | 1.1549    | 1.33648   | 1.71984   |
| 0        | 0         | 0         | 0         | 0         | 0         |
| 371.528  | 539.902   | 533.138   | 530.847   | 462.466   | 499.205   |
| 273.437  | 237.298   | 272.337   | 287.365   | 302.799   | 219.55    |
| 226.96   | 199.168   | 190.123   | 226.161   | 187.788   | 174.229   |
| 0        | 0         | 0         | 0         | 0         | 0         |

|          |           |           |           |           |           |
|----------|-----------|-----------|-----------|-----------|-----------|
| 6.27272  | 4.2566    | 6.05842   | 5.80918   | 6.3506    | 6.86758   |
| 26.4385  | 20.8215   | 24.0412   | 27.2355   | 27.086    | 31.933    |
| 1.16289  | 0.496358  | 0.744112  | 0.38655   | 0.425703  | 1.31831   |
| 22.1455  | 17.735    | 22.325    | 19.9702   | 23.208    | 19.4787   |
| 1.01481  | 0.155484  | 0.470512  | 0.577861  | 0.561158  | 0.410707  |
| 0        | 0.0479145 | 0.0541314 | 0         | 0         | 0         |
| 15.3376  | 21.9628   | 21.3441   | 25.8521   | 17.5153   | 13.7684   |
| 15.7232  | 17.4267   | 20.1564   | 19.1971   | 18.9999   | 20.7838   |
| 13.5053  | 10.9251   | 16.6105   | 11.6517   | 12.6721   | 13.7126   |
| 0.133089 | 0.190579  | 0.179422  | 0.193171  | 0.240737  | 0.143831  |
| 37.3532  | 31.0562   | 32.5244   | 32.7329   | 30.3687   | 32.7841   |
| 25.5693  | 27.5827   | 28.9225   | 28.9716   | 28.4663   | 29.9319   |
| 0        | 0         | 0         | 0         | 0         | 0         |
| 0        | 0         | 0         | 0         | 0         | 0         |
| 5.89161  | 3.79525   | 5.2845    | 5.42726   | 5.05148   | 5.86999   |
| 0.140007 | 0.0601452 | 0.135898  | 0.0609632 | 0.130242  | 0.11348   |
| 0.208102 | 0.0372493 | 0.0420824 | 0         | 0.080662  | 0.0421684 |
| 19.573   | 15.5526   | 17.7613   | 16.8243   | 18.8404   | 17.5781   |
| 7.45882  | 7.62076   | 7.46428   | 9.39324   | 5.48775   | 5.41452   |
| 10.1309  | 8.46574   | 9.96176   | 8.5016    | 7.98067   | 8.3       |
| 13.8677  | 14.5472   | 14.6086   | 12.2485   | 15.584    | 18.2981   |
| 0        | 0         | 0         | 0         | 0         | 0         |
| 91.9363  | 108.072   | 110.987   | 83.1553   | 101.944   | 89.9572   |
| 0        | 0         | 0         | 0         | 0         | 0         |
| 1.18273  | 2.945     | 1.26612   | 1.31079   | 1.00083   | 1.4756    |
| 11.087   | 8.57607   | 7.52692   | 8.76798   | 5.94081   | 8.62704   |
| 11.1865  | 8.60003   | 11.0403   | 13.8767   | 9.15833   | 9.37853   |
| 0        | 0         | 0         | 0.138936  | 0         | 0         |
| 22.4016  | 22.9023   | 23.7486   | 24.689    | 21.857    | 25.0476   |
| 0.79895  | 0.143008  | 0         | 0         | 0         | 0.161894  |
| 0.164033 | 0.1896    | 0.136245  | 0.196968  | 0.0767174 | 0.0512427 |
| 6.68582  | 4.58729   | 6.09402   | 4.75085   | 4.60657   | 5.62154   |
| 11.868   | 9.1818    | 9.43012   | 9.85117   | 10.7962   | 6.72938   |
| 1.02725  | 0.54902   | 0.961137  | 0.592229  | 0.939448  | 1.33322   |
| 593.905  | 503.317   | 573.599   | 649.691   | 724.926   | 632.547   |
| 0        | 0         | 0.794249  | 1.18765   | 0         | 0.265291  |
| 35.975   | 29.7857   | 32.8245   | 32.5761   | 21.3185   | 25.577    |
| 2.21798  | 2.17402   | 1.86881   | 2.48135   | 1.32548   | 5.36673   |
| 8.63627  | 8.67933   | 7.07359   | 7.89096   | 6.97302   | 7.96679   |
| 4.38652  | 9.35061   | 5.48353   | 6.47527   | 8.65581   | 5.09071   |
| 0.309623 | 0.161602  | 0.0974905 | 0.192564  | 0.0858062 | 0.242624  |
| 3.0305   | 2.9879    | 3.75617   | 4.25229   | 3.44059   | 3.34844   |
| 12.294   | 8.19176   | 10.7286   | 9.82214   | 10.7325   | 12.4939   |

|           |            |           |           |            |           |
|-----------|------------|-----------|-----------|------------|-----------|
| 110.622   | 112.073    | 121.074   | 114.112   | 116.991    | 114.918   |
| 349.705   | 366.973    | 320.305   | 308.588   | 324.275    | 292.732   |
| 0.0912495 | 0          | 0         | 0         | 0          | 0         |
| 4.1746    | 5.79781    | 2.40034   | 3.92386   | 3.15823    | 2.87407   |
| 1309.47   | 1326.65    | 1310.14   | 1219.2    | 1344.25    | 1162.04   |
| 28.1027   | 29.1804    | 28.3566   | 29.3381   | 22.8902    | 26.3203   |
| 53.9241   | 49.9676    | 52.4133   | 62.3407   | 61.8743    | 50.8944   |
| 0.260495  | 0.149208   | 0.126425  | 0.189046  | 0.121164   | 0.337824  |
| 42.9288   | 39.9762    | 41.8283   | 41.2329   | 38.9634    | 35.7862   |
| 3.7643    | 3.55356    | 4.75499   | 3.90126   | 3.86754    | 4.399     |
| 87.8264   | 68.6871    | 79.636    | 73.5683   | 83.4269    | 76.2478   |
| 8.09869   | 4.95638    | 6.66703   | 5.60456   | 4.89264    | 4.98767   |
| 11.3316   | 8.81534    | 10.0825   | 10.0422   | 12.653     | 11.8694   |
| 11.6801   | 14.5428    | 8.75532   | 9.46494   | 6.39643    | 9.12592   |
| 6.55977   | 6.7632     | 4.09628   | 4.70342   | 4.55637    | 4.29607   |
| 2.83905   | 2.48441    | 2.01294   | 1.80598   | 1.82048    | 2.4716    |
| 11.8876   | 10.7224    | 9.73487   | 12.4337   | 13.5825    | 12.8554   |
| 52.0938   | 55.3946    | 65.4181   | 56.7936   | 56.9756    | 58.2565   |
| 1.09331   | 0.782789   | 0.744721  | 0.876954  | 1.20441    | 0.932805  |
| 0.150462  | 0          | 0         | 0         | 0          | 0         |
| 32.7071   | 36.6679    | 38.2776   | 32.9902   | 30.4261    | 31.4973   |
| 0.273488  | 0.374855   | 0.244564  | 0.38414   | 0.31082    | 0.308227  |
| 0         | 0          | 0         | 0         | 0          | 0         |
| 19.6967   | 18.359     | 18.3097   | 21.8816   | 17.1463    | 24.0109   |
| 18.6251   | 20.7379    | 26.6049   | 20.5493   | 18.2086    | 22.1334   |
| 0.165859  | 0          | 0         | 0         | 0.00590257 | 0         |
| 0.232403  | 0.260255   | 0.292569  | 0.207996  | 0.380052   | 0.140744  |
| 0.171265  | 0.0675676  | 0.10602   | 0.154095  | 0.065029   | 0.0679917 |
| 16.6775   | 20.3936    | 13.8806   | 17.7088   | 14.0174    | 13.4821   |
| 0         | 0.00597553 | 0.0303789 | 0.0136278 | 0.0232916  | 0.020294  |
| 0         | 0          | 0         | 0         | 0          | 0         |
| 7.19885   | 5.85593    | 7.07697   | 6.01316   | 6.51998    | 5.93602   |
| 0.517446  | 0.463102   | 0.523189  | 0.18776   | 0.701981   | 0.104852  |
| 0         | 0          | 0         | 0         | 0          | 0         |
| 12.0777   | 12.8877    | 13.6684   | 10.8501   | 13.3107    | 11.4931   |
| 0         | 0          | 0         | 0         | 0          | 0         |
| 37.5592   | 40.4058    | 38.3121   | 39.6902   | 33.6983    | 35.94     |
| 0         | 0          | 0         | 0         | 0          | 0         |
| 8.0316    | 6.1353     | 7.31644   | 6.67567   | 7.11908    | 7.48076   |
| 0.0641858 | 0.0459558  | 0.0259593 | 0.0232904 | 0.0248789  | 0.0260124 |
| 15.0701   | 13.2161    | 13.9895   | 15.4458   | 13.4764    | 14.2229   |
| 0.091404  | 0.0654435  | 0.129386  | 0.0829169 | 0.0708578  | 0.037043  |
| 0         | 0          | 0         | 0         | 0          | 0         |

|           |           |           |           |           |           |
|-----------|-----------|-----------|-----------|-----------|-----------|
| 6.86687   | 5.78235   | 7.02169   | 5.01475   | 5.22286   | 6.44096   |
| 0         | 0         | 0         | 0         | 0         | 0         |
| 0.358569  | 0.481366  | 0.326294  | 0.422858  | 0.277968  | 0.254303  |
| 28.5023   | 25.8814   | 29.249    | 28.6651   | 26.0883   | 27.1487   |
| 7.13345   | 7.13685   | 6.76363   | 6.65108   | 6.58285   | 9.6014    |
| 0         | 0         | 0.0477947 | 0         | 0.0916112 | 0.0478924 |
| 0.361713  | 0.658285  | 0.463256  | 1.09376   | 0.514077  | 0.70852   |
| 6.77546   | 5.97655   | 4.60365   | 6.29385   | 5.75668   | 5.35994   |
| 26.4878   | 25.3602   | 27.786    | 24.7825   | 23.7189   | 22.2646   |
| 4.40839   | 3.30043   | 5.89759   | 5.17346   | 5.44075   | 5.64126   |
| 20.991    | 25.214    | 23.4795   | 22.0124   | 17.9554   | 24.6693   |
| 45.2384   | 41.2621   | 46.4039   | 46.4481   | 39.4705   | 40.687    |
| 8.38665   | 14.8779   | 11.137    | 15.7203   | 16.5492   | 2.8355    |
| 0.205428  | 0.220623  | 0.502653  | 0.232941  | 0.325137  | 0.249759  |
| 0         | 0.0318308 | 0.0359609 | 0.0322637 | 0.0459532 | 0         |
| 9.39891   | 10.1981   | 8.95744   | 7.78318   | 6.02914   | 10.5988   |
| 31.8369   | 29.7177   | 33.1977   | 33.4506   | 30.6814   | 31.8939   |
| 1.94125   | 1.01926   | 0.999243  | 0.973353  | 2.46254   | 1.08711   |
| 0         | 0         | 0         | 0         | 0         | 0         |
| 40.6598   | 32.1562   | 35.7279   | 36.1791   | 43.1047   | 37.1085   |
| 2.20604   | 1.66122   | 1.47233   | 1.23601   | 1.25692   | 1.91488   |
| 1.37197   | 1.62695   | 1.28316   | 0.995667  | 1.22976   | 1.42479   |
| 18.7619   | 10.8692   | 13.2883   | 15.3784   | 12.7591   | 16.3156   |
| 0         | 0         | 0         | 0         | 0         | 0         |
| 12.2384   | 11.3609   | 15.3273   | 15.021    | 10.5499   | 17.9531   |
| 0         | 0         | 0         | 0         | 0         | 0         |
| 25.5264   | 21.7685   | 25.6426   | 25.486    | 30.6799   | 27.9798   |
| 0         | 0         | 0         | 0         | 0         | 0         |
| 0.0470801 | 0.134834  | 0.152329  | 0         | 0.255481  | 0.03816   |
| 11.4728   | 10.8579   | 13.0401   | 11.1491   | 11.1278   | 11.4902   |
| 42.655    | 38.9009   | 42.6062   | 46.5753   | 53.817    | 48.7071   |
| 1.07559   | 1.5808    | 0.670137  | 1.04294   | 0.763827  | 0.755599  |
| 0         | 0         | 0         | 0         | 0         | 0         |
| 13.7293   | 19.3358   | 8.92676   | 8.46429   | 11.8618   | 5.15684   |
| 30.9606   | 27.234    | 30.3966   | 32.8827   | 31.392    | 36.0619   |
| 3.77119   | 3.04052   | 4.58684   | 3.36025   | 2.96026   | 4.3132    |
| 9.32052   | 10.2547   | 7.79473   | 9.7829    | 8.53163   | 9.26202   |
| 8.39998   | 8.96148   | 7.46362   | 8.10759   | 6.99268   | 8.46689   |
| 2.04519   | 1.46432   | 0.808775  | 1.17089   | 1.07459   | 1.28932   |
| 4.46136   | 4.52518   | 3.00725   | 3.81584   | 2.59388   | 3.57303   |
| 0.0507635 | 0.0181728 | 0.0205308 | 0.03684   | 0         | 0.0411455 |
| 90.9406   | 97.7966   | 73.4479   | 72.9168   | 100.072   | 27.633    |
| 1.35543   | 1.07595   | 1.23939   | 0.620135  | 0.890856  | 1.19416   |

|           |           |           |           |           |           |
|-----------|-----------|-----------|-----------|-----------|-----------|
| 5.7497    | 6.54925   | 5.81352   | 4.88391   | 4.91311   | 5.56061   |
| 1.10074   | 1.43293   | 0.64754   | 0.217862  | 1.16361   | 0.567756  |
| 0         | 0         | 0         | 0         | 0         | 0         |
| 43.6835   | 59.4092   | 40.5256   | 37.1762   | 26.0963   | 60.2282   |
| 8.9017    | 8.19928   | 6.01184   | 7.02427   | 5.84248   | 9.87373   |
| 11.942    | 9.1792    | 10.4333   | 9.41609   | 9.83588   | 11.4929   |
| 0.569559  | 0.936427  | 0.605927  | 0.642842  | 0.768225  | 0.784019  |
| 0.0867717 | 0         | 0.0701879 | 0.0629718 | 0         | 0         |
| 0         | 0         | 0         | 0         | 0         | 0         |
| 0.113277  | 0.162209  | 0         | 0         | 0.0878144 | 0.18363   |
| 10.0705   | 7.78609   | 11.0025   | 10.0236   | 9.62295   | 10.4298   |
| 257.868   | 278.772   | 264.705   | 274.718   | 277.609   | 234.818   |
| 9.32833   | 8.39864   | 8.77093   | 10.1596   | 7.67274   | 7.45869   |
| 0.468113  | 0.301644  | 0.340783  | 0.713408  | 0.616911  | 0.341479  |
| 2.64193   | 2.38444   | 1.95641   | 2.44387   | 3.15863   | 2.56361   |
| 16.0851   | 18.7103   | 16.8264   | 17.2874   | 13.3836   | 13.9169   |
| 0.863186  | 0.567516  | 1.15324   | 0.380618  | 0.221208  | 0.231286  |
| 1.30512   | 2.17315   | 1.3589    | 1.71844   | 0.801405  | 1.77927   |
| 5.03797   | 4.97052   | 6.25886   | 4.54828   | 3.90549   | 4.04434   |
| 21.5133   | 25.1021   | 21.5556   | 24.0333   | 23.0256   | 20.7222   |
| 69.5261   | 55.2269   | 74.0293   | 71.2319   | 57.7592   | 67.7018   |
| 1.34342   | 0.83932   | 1.28667   | 0.986125  | 1.35191   | 1.80031   |
| 0         | 0.0261897 | 0.0887636 | 0.0530918 | 0.0283565 | 0         |
| 0         | 0         | 0.0830831 | 0         | 0         | 0.083253  |
| 0.691323  | 0.296985  | 0.167759  | 0.752559  | 0.267962  | 0.112068  |
| 110.84    | 185.13    | 115.78    | 79.4222   | 77.3819   | 146.039   |
| 2.48115   | 1.9873    | 1.13388   | 1.07004   | 1.13609   | 1.77977   |
| 0.202838  | 0.290411  | 0.328081  | 0.294295  | 0.157212  | 0.164352  |
| 26.3938   | 22.102    | 21.8975   | 26.0703   | 25.3486   | 23.6918   |
| 0         | 0         | 0         | 0         | 0         | 0         |
| 1.13012   | 0.622057  | 0.721458  | 1.41962   | 0.847148  | 1.24286   |
| 0.0413318 | 0.0295928 | 0         | 0         | 0.160205  | 0.0335008 |
| 0         | 0         | 0         | 0.0836635 | 0         | 0.0934414 |
| 3.3927    | 3.54667   | 2.42135   | 3.10603   | 3.2441    | 3.6488    |
| 0.696287  | 0.974902  | 0.867315  | 0.862143  | 0.472589  | 0.423939  |
| 0.0412164 | 0.0295101 | 0.0333391 | 0.0299114 | 0.0319516 | 0         |
| 8.81552   | 7.0338    | 9.62011   | 8.40393   | 8.37731   | 10.887    |
| 121.887   | 98.4165   | 121.62    | 124.395   | 143.279   | 116.683   |
| 11.1421   | 10.6666   | 10.6328   | 7.45002   | 8.92866   | 8.52366   |
| 0         | 0         | 0.0537173 | 0.0722919 | 0.0257409 | 0         |
| 0.231466  | 0         | 0         | 0.111986  | 0.059812  | 0.125074  |
| 0         | 0         | 0.212879  | 0         | 0         | 0.213314  |
| 0         | 0         | 0         | 0         | 0         | 0         |



|           |           |           |           |           |           |
|-----------|-----------|-----------|-----------|-----------|-----------|
| 7.59139   | 4.9355    | 5.99936   | 5.63586   | 5.7835    | 6.36526   |
| 1.55403   | 1.64249   | 1.55631   | 1.12778   | 1.11865   | 1.28958   |
| 0.0898691 | 0.0214482 | 0.145387  | 0.0434798 | 0.0232226 | 0.0485613 |
| 2.16581   | 2.09342   | 1.31391   | 0.943061  | 0.671588  | 1.3166    |
| 35.8353   | 31.6515   | 32.5559   | 32.0572   | 29.7851   | 30.1399   |
| 0         | 0.0383924 | 0.0650607 | 0.0389145 | 0         | 0.0217313 |
| 12.509    | 9.36      | 10.9062   | 10.343    | 12.2408   | 9.5988    |
| 212.915   | 249.976   | 1077.28   | 855.385   | 2457.98   | 2454.87   |
| 4.59504   | 4.66796   | 5.37093   | 5.74407   | 5.61365   | 6.61039   |
| 0         | 0         | 0         | 0         | 0         | 0         |
| 0         | 0         | 0         | 0         | 0         | 0         |
| 0.0849472 | 0.0912309 | 0.0687121 | 0.0308239 | 0.197557  | 0         |
| 2.28212   | 1.43961   | 2.04113   | 2.34199   | 1.88604   | 2.73793   |
| 43.0045   | 45.2135   | 50.7626   | 49.4157   | 32.7268   | 44.3965   |
| 16.6225   | 14.8892   | 20.2249   | 17.1698   | 19.3019   | 18.6528   |
| 2.9212    | 2.63714   | 2.74223   | 2.53829   | 2.05249   | 2.90621   |
| 1.26716   | 1.13238   | 1.41288   | 1.16488   | 1.102     | 0.811194  |
| 0         | 0         | 0         | 0         | 0         | 0         |
| 0.780828  | 0.660705  | 0.846913  | 0.953021  | 1.6646    | 0.90618   |
| 1.56328   | 0.752371  | 0.970826  | 0.798742  | 1.42019   | 1.70021   |
| 144.892   | 152.022   | 129.469   | 144.101   | 150.964   | 134.576   |
| 36.4883   | 27.9112   | 25.7951   | 28.3503   | 39.077    | 13.0459   |
| 22.6549   | 18.9027   | 24.2131   | 23.9458   | 28.6134   | 24.6551   |
| 8.25156   | 6.35105   | 3.83785   | 4.11696   | 5.27731   | 4.0129    |
| 0         | 0.0215796 | 0         | 0         | 0         | 0         |
| 0.684515  | 1.10272   | 0.968958  | 0.683052  | 1.06129   | 0.554823  |
| 8.53232   | 6.26518   | 9.19563   | 7.61694   | 7.98614   | 8.90008   |
| 7.59615   | 10.5823   | 11.4552   | 10.5553   | 7.55482   | 8.73426   |
| 16.5949   | 13.9856   | 16.9544   | 15.0261   | 14.797    | 16.306    |
| 0         | 0         | 0         | 0         | 0         | 0         |
| 0         | 0         | 0         | 0         | 0         | 0         |
| 94.4863   | 115.688   | 104.215   | 114.367   | 95.4148   | 104.133   |
| 0         | 0         | 0         | 0         | 0         | 0         |
| 12.8433   | 8.55536   | 11.7349   | 12.2605   | 10.7844   | 11.8017   |
| 2.10142   | 1.64787   | 1.61885   | 1.30717   | 0.853313  | 1.70327   |
| 3.67184   | 3.1851    | 3.15285   | 3.09518   | 3.88653   | 3.55994   |
| 1.4367    | 0.429885  | 0.780529  | 0.326798  | 1.21349   | 0.347611  |
| 0.0267819 | 0.134227  | 0.151643  | 0.0194361 | 0         | 0.0868304 |
| 31.3494   | 24.6221   | 31.5588   | 28.1458   | 31.5487   | 33.7694   |
| 16.058    | 15.2838   | 14.1557   | 20.5857   | 13.1939   | 17.8477   |
| 0.259696  | 0.145586  | 0.360313  | 0.227179  | 0.170426  | 0.24194   |
| 0.180851  | 0.144273  | 0.162541  | 0.14583   | 0.140685  | 0.162873  |
| 0.0219146 | 0.0156904 | 0.0354525 | 0.0159038 | 0.0169885 | 0.0177625 |

|           |           |           |           |           |           |
|-----------|-----------|-----------|-----------|-----------|-----------|
| 4.05071   | 4.21224   | 4.30804   | 3.85735   | 3.59708   | 3.9173    |
| 6.81137   | 5.08852   | 5.49279   | 5.77138   | 6.18914   | 6.39964   |
| 0         | 0         | 0         | 0         | 0         | 0         |
| 3.90397   | 3.79803   | 2.88139   | 4.48693   | 1.9923    | 3.08946   |
| 12.958    | 14.5882   | 11.5986   | 12.2162   | 7.85014   | 12.9703   |
| 5.96795   | 6.01251   | 5.85769   | 6.09428   | 6.18078   | 6.71093   |
| 0.647943  | 2.59792   | 1.57232   | 1.12854   | 1.00459   | 1.36547   |
| 0         | 0         | 0         | 0.0232399 | 0         | 0         |
| 0         | 0         | 0         | 0         | 0         | 0         |
| 0         | 0         | 0         | 0         | 0         | 0         |
| 3.50915   | 2.18354   | 3.11207   | 2.1171    | 2.56741   | 3.52966   |
| 26.5112   | 18.5263   | 24.7315   | 20.945    | 22.9807   | 25.9323   |
| 8.78953   | 7.84598   | 8.46389   | 8.11837   | 7.28573   | 8.51204   |
| 10.6865   | 7.51489   | 9.15784   | 9.73743   | 10.2292   | 9.17657   |
| 1.95561   | 4.27692   | 2.50221   | 2.16754   | 1.81923   | 1.35453   |
| 0         | 0         | 0         | 0         | 0         | 0.0401584 |
| 14.8722   | 11.903    | 13.146    | 13.5906   | 12.2626   | 12.8098   |
| 0.421565  | 0.225201  | 0.225425  | 0.342291  | 0.860351  | 0.177611  |
| 0.916347  | 1.03132   | 1.27099   | 1.33002   | 0.913328  | 0.74273   |
| 0.0756489 | 0.0541632 | 0.275372  | 0.0548998 | 0         | 0         |
| 22.371    | 21.0831   | 22.3878   | 22.3137   | 24.1986   | 20.9577   |
| 0.284128  | 0         | 0         | 0         | 0         | 0         |
| 5.6546    | 4.93878   | 5.94098   | 7.83374   | 5.4937    | 5.75806   |
| 31.2164   | 27.9198   | 32.1547   | 28.6443   | 24.41     | 30.3578   |
| 13.3916   | 15.9578   | 15.4962   | 11.2061   | 12.6649   | 10.8233   |
| 0         | 0         | 0         | 0         | 0         | 0         |
| 0.524841  | 0.751552  | 0.377363  | 0.507848  | 0.497279  | 0.850802  |
| 7.5537    | 7.37084   | 8.14368   | 7.31023   | 5.5572    | 7.77636   |
| 0         | 0         | 0         | 0         | 0         | 0         |
| 81.4183   | 95.529    | 83.4642   | 93.6539   | 100.656   | 69.1886   |
| 0.779424  | 0.625696  | 0.897929  | 0.565642  | 0.512673  | 0.727469  |
| 0         | 0         | 0         | 0         | 0         | 0         |
| 0         | 0         | 0         | 0         | 0         | 0         |
| 0.51845   | 0.862372  | 0.558749  | 0.501726  | 0.529265  | 0.686305  |
| 12.5652   | 18.6967   | 12.6655   | 13.5486   | 12.4108   | 11.5932   |
| 4.14428   | 3.12832   | 4.70844   | 4.38003   | 4.72739   | 4.75063   |
| 0.0403377 | 0.028881  | 0         | 0.0585476 | 0.0312704 | 0         |
| 9.41212   | 7.66485   | 8.79013   | 8.79889   | 9.05091   | 9.49238   |
| 5.67794   | 4.06995   | 5.5573    | 5.75263   | 4.14947   | 5.60243   |
| 0.250942  | 0.0898349 | 0.0676607 | 0.121409  | 0.162112  | 0.271196  |
| 0         | 0.0193862 | 0         | 0         | 0         | 0         |
| 76.3781   | 69.6584   | 75.6108   | 80.9757   | 84.6403   | 72.2706   |
| 0.407016  | 0.36427   | 0.713325  | 0.369224  | 0.552169  | 0.549834  |

|           |           |            |           |           |           |
|-----------|-----------|------------|-----------|-----------|-----------|
| 5.62737   | 3.21342   | 4.2027     | 4.68581   | 4.14388   | 7.76036   |
| 0.0900764 | 0.271691  | 0.538685   | 0.528422  | 0.577209  | 0.663448  |
| 110.05    | 181.399   | 160.428    | 158.62    | 90.7935   | 104.479   |
| 14.686    | 13.0242   | 14.5133    | 15.2983   | 13.4316   | 13.2671   |
| 2.96187   | 2.58333   | 2.85629    | 2.32256   | 2.79706   | 2.77483   |
| 0.329841  | 0         | 0.133401   | 0.718114  | 0.383546  | 0.668367  |
| 0         | 0.098463  | 0.083429   | 0.049901  | 0.0533045 | 0.111466  |
| 0.337008  | 0.329033  | 0.322162   | 1.4452    | 0.213753  | 0.310405  |
| 0         | 0         | 0          | 0         | 0         | 0         |
| 13.4468   | 12.7988   | 13.3944    | 13.2045   | 11.3831   | 9.76714   |
| 74.621    | 71.0803   | 75.3964    | 76.3542   | 85.109    | 64.2197   |
| 0         | 0         | 0          | 0         | 0         | 0         |
| 0         | 0.0310896 | 0          | 0.0315125 | 0.242369  | 0.140783  |
| 425.064   | 371.627   | 272.652    | 385.357   | 312.971   | 407.506   |
| 16.2599   | 12.622    | 16.0048    | 15.0038   | 16.1985   | 17.1189   |
| 38.8115   | 32.1719   | 32.8408    | 34.1482   | 46.5039   | 30.3601   |
| 41.1853   | 40.9892   | 41.7047    | 38.2327   | 39.5258   | 36.2017   |
| 7.00792   | 5.14833   | 6.16693    | 6.35424   | 5.39062   | 6.7457    |
| 40.46     | 31.0529   | 37.1366    | 34.9329   | 30.9646   | 32.0455   |
| 18.4167   | 19.6348   | 16.8717    | 21.0543   | 16.1353   | 16.9062   |
| 17.089    | 17.606    | 19.0038    | 20.6718   | 16.9491   | 18.4871   |
| 0         | 0.0446082 | 0.100792   | 0         | 0         | 0.0504991 |
| 0         | 0         | 0          | 0         | 0         | 0         |
| 0.193737  | 0.0693559 | 0.182828   | 0.0468661 | 0.0500626 | 0.130859  |
| 0         | 0         | 0          | 0.068796  | 0         | 0         |
| 19.1184   | 19.6457   | 21.3062    | 19.1835   | 15.6905   | 19.1901   |
| 0         | 0.013714  | 0.00845096 | 0.0252737 | 0         | 0         |
| 9.37762   | 6.13895   | 6.04189    | 6.93305   | 7.05557   | 7.26509   |
| 0         | 0         | 0          | 0         | 0         | 0         |
| 23.2316   | 20.1534   | 20.724     | 22.2115   | 19.271    | 20.9908   |
| 49.1027   | 41.0948   | 43.2698    | 47.1103   | 44.4946   | 48.8711   |
| 4.22369   | 3.19855   | 3.4953     | 2.98858   | 3.12315   | 2.57417   |
| 20.7282   | 27.7951   | 24.1473    | 19.7977   | 16.7542   | 17.4555   |
| 0         | 0         | 0.0761902  | 0         | 0         | 0.152692  |
| 0         | 0         | 0.0597243  | 0         | 0.114477  | 0.0598464 |
| 0.0765624 | 0.109628  | 0.123833   | 0.0832951 | 0.0296596 | 0.12409   |
| 25.8686   | 23.6987   | 23.4986    | 21.3584   | 29.1131   | 19.6906   |
| 0         | 0         | 0          | 0         | 0         | 0         |
| 178.335   | 188.816   | 172.873    | 198.712   | 186.345   | 175.488   |
| 54.8685   | 53.0286   | 56.4555    | 58.8671   | 58.281    | 54.8747   |
| 0         | 0         | 0          | 0         | 0         | 0         |
| 0.500634  | 0.130343  | 0.404953   | 0.594522  | 0.211691  | 0.405781  |
| 3.47499   | 2.90712   | 2.81092    | 2.8935    | 4.11174   | 1.54171   |

|            |           |           |           |           |          |
|------------|-----------|-----------|-----------|-----------|----------|
| 0          | 0         | 0         | 0         | 0         | 0        |
| 0          | 0         | 0         | 0         | 0         | 0        |
| 9.65412    | 8.34135   | 8.9896    | 9.49005   | 9.72795   | 11.0031  |
| 1.06095    | 0.714938  | 1.26203   | 1.31345   | 0.774086  | 1.21403  |
| 0          | 0         | 0         | 0         | 0         | 0        |
| 4.38027    | 3.49062   | 4.35609   | 3.77759   | 3.80267   | 4.21909  |
| 0.727917   | 1.80878   | 0.484892  | 0.963302  | 0.663874  | 0.763531 |
| 12.2864    | 17.2447   | 14.8415   | 16.1437   | 10.2799   | 12.7223  |
| 0          | 0         | 0         | 0         | 0.358407  | 0        |
| 0.292366   | 0.523322  | 0.394149  | 0.318263  | 0.151098  | 0.276468 |
| 0.0283208  | 0.0506929 | 0.0229081 | 0.0719353 | 0.0219547 | 0.022955 |
| 9.55985    | 8.92783   | 10.3216   | 8.89843   | 8.89313   | 8.99509  |
| 28.6216    | 24.8314   | 27.8553   | 29.3619   | 26.3179   | 29.1698  |
| 0          | 0         | 0         | 0         | 0         | 0        |
| 0.0498042  | 0.0356588 | 0.100714  | 0.0361438 | 0.135131  | 0.060552 |
| 20.0107    | 17.6655   | 19.0674   | 20.6431   | 20.8919   | 18.7319  |
| 4.20442    | 0         | 9.72318   | 5.66656   | 10.7092   | 38.9466  |
| 1.06595    | 1.00851   | 0.893016  | 1.18799   | 0.590242  | 0.647989 |
| 1.11575    | 0.602909  | 1.29416   | 1.2986    | 1.37086   | 1.26268  |
| 65.6759    | 54.1813   | 61.4839   | 69.0211   | 57.0009   | 65.2064  |
| 24.5243    | 24.9737   | 24.3292   | 24.7144   | 21.3796   | 21.0851  |
| 10.6646    | 9.25735   | 9.48374   | 8.09405   | 8.66183   | 9.07094  |
| 29.0264    | 26.3041   | 29.9709   | 31.7157   | 21.6128   | 30.6974  |
| 0          | 0         | 0         | 0         | 0         | 0        |
| 0.196546   | 0.281446  | 0.317963  | 0.285273  | 0.30473   | 0.159307 |
| 0.30244    | 0.0417367 | 0.342289  | 0.241422  | 0.293838  | 0.111996 |
| 2.89129    | 1.59623   | 2.02876   | 2.07298   | 2.10635   | 3.19054  |
| 0.00648416 | 5.34899   | 1.46E-07  | 1.12E-06  | 6.12E-07  | 0.437361 |
| 0          | 0         | 0         | 0         | 0.032663  | 0        |
| 1.41932    | 1.39728   | 1.2796    | 1.56649   | 1.27219   | 1.2942   |
| 0.120328   | 0.120614  | 0.175196  | 0.174649  | 0.111936  | 0.331602 |
| 6.135      | 6.718     | 8.17349   | 11.6108   | 27.1369   | 19.793   |
| 0          | 0         | 0         | 0         | 0         | 0        |
| 3.10232    | 3.27587   | 2.41914   | 3.12608   | 1.834     | 3.02106  |
| 0          | 0         | 0         | 0         | 0         | 0        |
| 13.687     | 13.2702   | 14.0211   | 13.5508   | 12.6654   | 14.3351  |
| 5.09311    | 3.32971   | 3.63711   | 4.35605   | 4.18941   | 4.28944  |
| 4.86659    | 4.63845   | 4.50063   | 5.01647   | 4.30131   | 5.10026  |
| 0          | 0         | 0         | 0         | 0         | 0        |
| 23.3724    | 17.6772   | 17.4223   | 17.599    | 15.9564   | 16.5578  |
| 8.11233    | 5.19166   | 6.81349   | 6.67467   | 7.37692   | 7.39943  |
| 9.94508    | 8.63817   | 9.95111   | 9.52883   | 6.09561   | 3.7663   |
| 1.70557    | 1.41595   | 1.65302   | 1.28723   | 1.47892   | 1.10458  |

|           |            |           |           |            |           |
|-----------|------------|-----------|-----------|------------|-----------|
| 5.53557   | 5.00684    | 5.92534   | 5.46459   | 6.15444    | 4.5593    |
| 30.7683   | 26.7566    | 30.6992   | 30.9743   | 30.7534    | 31.5752   |
| 6.90083   | 4.72604    | 5.80596   | 6.66624   | 5.72535    | 6.73447   |
| 0.0826635 | 0.384706   | 0.0334324 | 0.0599904 | 0.160205   | 0.134003  |
| 21.8866   | 24.6403    | 27.9785   | 26.748    | 25.0622    | 23.1942   |
| 70.5006   | 72.2631    | 75.6766   | 76.9866   | 69.9062    | 82.1207   |
| 0         | 0          | 0.166472  | 0         | 0          | 0.105487  |
| 3.75436   | 2.97101    | 4.15566   | 1.72081   | 1.22545    | 2.56256   |
| 0         | 0.0536705  | 0         | 0         | 0.0581108  | 0         |
| 3.10279   | 1.03608    | 0.741657  | 1.31286   | 0.74059    | 1.57677   |
| 7.53845   | 7.03817    | 8.91233   | 7.7559    | 8.41013    | 11.3966   |
| 0.705146  | 0.599535   | 0.677325  | 0.575705  | 0.444145   | 0.392937  |
| 0         | 0          | 0         | 0         | 0.0523182  | 0.164105  |
| 22.5514   | 27.0964    | 22.0401   | 22.68     | 20.5951    | 24.5246   |
| 0.351108  | 0.0286909  | 0.313031  | 0.554287  | 0.133312   | 0.182974  |
| 12.8307   | 9.38575    | 12.1828   | 10.327    | 11.3619    | 12.6177   |
| 8.21931   | 6.9341     | 6.94965   | 7.15157   | 7.50139    | 6.72892   |
| 0         | 0          | 0         | 0         | 0          | 0         |
| 6.62457   | 7.50671    | 5.75845   | 5.90724   | 3.75944    | 5.12379   |
| 0.835642  | 0.473657   | 0.450623  | 0.353757  | 0.485852   | 0.790202  |
| 9.82484   | 6.9098     | 9.52118   | 8.33563   | 9.34569    | 8.20701   |
| 3.36048   | 2.72353    | 2.68455   | 2.44395   | 2.11892    | 2.65847   |
| 12.1742   | 8.87882    | 11.9324   | 11.5282   | 12.8808    | 11.3444   |
| 5.77119   | 4.66138    | 5.65199   | 5.48627   | 5.43525    | 5.35428   |
| 0.173748  | 0          | 0.0702705 | 0         | 0          | 0         |
| 42.2753   | 38.4719    | 43.281    | 40.2239   | 49.3119    | 47.8528   |
| 27.5401   | 21.5913    | 22.4305   | 22.161    | 25         | 21.5254   |
| 0         | 0          | 0         | 0         | 0          | 0         |
| 11.2392   | 15.1087    | 14.1006   | 13.6496   | 12.269     | 14.8731   |
| 3.08121   | 1.99136    | 1.74715   | 2.50078   | 2.92894    | 2.83261   |
| 0         | 0          | 0         | 0         | 0          | 0         |
| 0         | 0          | 0         | 0         | 0          | 0         |
| 7.11272   | 4.99739    | 5.84295   | 4.58293   | 6.83654    | 6.3039    |
| 0         | 0.00694358 | 0         | 0.014076  | 0.00751803 | 0.0235816 |
| 65.1758   | 131.788    | 95.232    | 72.9231   | 66.0508    | 68.8723   |
| 842.219   | 1308.07    | 1557.55   | 918.279   | 1167.92    | 1368.47   |
| 14.3681   | 11.2388    | 13.8079   | 13.8672   | 14.1948    | 15.44     |
| 217.767   | 202.256    | 219.461   | 233.764   | 285.639    | 234.07    |
| 12.1804   | 9.86324    | 12.4582   | 11.5006   | 10.089     | 10.9386   |
| 35.4068   | 31.1301    | 37.1777   | 39.5751   | 39.4016    | 37.8838   |
| 1.50306   | 0.998212   | 1.18057   | 1.59649   | 1.36775    | 1.90663   |
| 3.4065    | 2.73665    | 2.04346   | 1.11441   | 1.14066    | 2.00436   |
| 0.272195  | 0.146165   | 0.110086  | 0.197536  | 0.474771   | 0.38609   |

|           |            |           |           |           |           |
|-----------|------------|-----------|-----------|-----------|-----------|
| 7.50935   | 8.53908    | 8.62618   | 8.65527   | 8.65852   | 8.74619   |
| 6.22169   | 4.65042    | 4.00854   | 4.90597   | 2.03341   | 2.04156   |
| 10.1141   | 9.29006    | 4.59196   | 7.74172   | 5.05611   | 7.59723   |
| 0.398972  | 0.232096   | 0.12102   | 0.398119  | 0.245033  | 0.111415  |
| 0         | 0.271641   | 0         | 0.55067   | 0.294114  | 0         |
| 6.28564   | 4.7107     | 7.31763   | 7.09819   | 6.96754   | 7.07071   |
| 1.6288    | 0.920004   | 0.902235  | 1.43056   | 0.730486  | 1.11209   |
| 0         | 0          | 0         | 0         | 0         | 0         |
| 0.0249021 | 0.0356588  | 0.0805712 | 0.0180719 | 0.0579135 | 0.020184  |
| 31.4079   | 23.0006    | 33.3962   | 30.3808   | 31.5814   | 31.6648   |
| 1.78175   | 1.78525    | 1.57802   | 1.59934   | 1.27481   | 1.27481   |
| 21.079    | 14.6966    | 19.5942   | 19.4919   | 18.7787   | 21.2188   |
| 1.9683    | 2.05517    | 1.79113   | 1.60698   | 1.69539   | 1.39595   |
| 0         | 3.40361    | 3.84523   | 0         | 0         | 0         |
| 0.378822  | 0.38747    | 0.494026  | 0.482509  | 0.437506  | 0.607829  |
| 0         | 0.0747527  | 0.0281506 | 0.176795  | 0.0269791 | 0.0846246 |
| 0         | 0          | 0         | 0         | 0         | 0         |
| 4.33654   | 4.78851    | 4.32292   | 4.74282   | 3.85891   | 4.2575    |
| 7.32673   | 8.09933    | 9.63599   | 7.25065   | 8.25306   | 8.32815   |
| 0         | 0          | 0         | 0         | 0         | 0         |
| 29.8953   | 26.2296    | 24.0866   | 23.9703   | 19.3482   | 23.1831   |
| 17.6835   | 21.8128    | 21.2808   | 17.8433   | 14.7702   | 17.0075   |
| 2.96487   | 1.87956    | 2.09845   | 3.20508   | 2.82514   | 2.25293   |
| 0.0529066 | 0.0361467  | 1.76E-20  | 0.0482919 | 3.86E-86  | 1.14E-28  |
| 1.44336   | 1.41616    | 0.994538  | 1.20265   | 0.663059  | 0.996572  |
| 12.8273   | 12.563     | 14.5794   | 13.2373   | 11.6277   | 13.6691   |
| 2.38566   | 1.18059    | 1.58918   | 1.88408   | 1.03349   | 1.30806   |
| 0         | 0          | 0         | 0         | 0         | 0         |
| 16.1641   | 12.9192    | 14.0751   | 15.3083   | 13.5128   | 14.0167   |
| 0.187554  | 0          | 0.303418  | 0         | 0.29079   | 0         |
| 0.349109  | 0.416593   | 0.376516  | 0.647462  | 0.420988  | 0.628811  |
| 16.1222   | 16.3459    | 15.8389   | 15.5478   | 12.6762   | 13.4604   |
| 2.18355   | 1.53814    | 0.796469  | 1.32539   | 1.34591   | 1.24856   |
| 11.4721   | 11.2874    | 11.798    | 11.053    | 11.023    | 10.6556   |
| 0.0485351 | 0.250203   | 0.176667  | 0         | 0.235159  | 0.0393394 |
| 0.0230274 | 0.00824357 | 0         | 0         | 0.0357023 | 0         |
| 4.53115   | 2.93365    | 3.15149   | 4.04661   | 2.3519    | 3.69972   |
| 21.5419   | 26.8331    | 22.4313   | 22.9635   | 21.1543   | 21.6576   |
| 7.71583   | 7.85533    | 6.53089   | 5.58589   | 4.86697   | 6.25391   |
| 14.0976   | 12.0786    | 14.343    | 14.3362   | 9.23681   | 12.6782   |
| 6.3331    | 5.63788    | 6.7774    | 6.67037   | 6.40844   | 5.8373    |
| 32.9085   | 31.0248    | 33.8326   | 33.1964   | 31.1979   | 31.2553   |
| 1.17568   | 1.11477    | 0.950982  | 1.12993   | 1.0592    | 1.13321   |

|           |           |           |           |           |           |
|-----------|-----------|-----------|-----------|-----------|-----------|
| 0         | 0         | 0         | 0         | 0         | 0         |
| 5.83961   | 4.98242   | 7.04596   | 6.74534   | 6.48864   | 5.48263   |
| 3.88009   | 3.32066   | 4.63423   | 3.7838    | 3.75988   | 5.13511   |
| 0.408968  | 0.323636  | 0.330806  | 0.546729  | 0.26698   | 0.366375  |
| 13.1388   | 12.4915   | 9.40817   | 11.2936   | 10.3942   | 11.566    |
| 0         | 0         | 0         | 0         | 0         | 0         |
| 0.963121  | 1.43662   | 0.84397   | 1.5144    | 0.684407  | 1.56128   |
| 42.8685   | 31.3051   | 39.8125   | 37.2262   | 48.3336   | 32.6675   |
| 0         | 0         | 0         | 0         | 0         | 0         |
| 24.7179   | 24.7179   | 22.4373   | 22.4373   | 25.1767   | 25.1767   |
| 2.42857   | 2.9553    | 2.57311   | 2.92915   | 1.9357    | 2.19023   |
| 0         | 0         | 0         | 0         | 0         | 0         |
| 23.7544   | 27.2976   | 24.656    | 26.0454   | 23.3928   | 22.9715   |
| 295.202   | 274.797   | 310.926   | 290.72    | 407.734   | 464.594   |
| 0         | 0         | 0         | 0         | 0         | 1.02883   |
| 0.301685  | 0.216001  | 0         | 0.172414  | 0.0255791 | 0.270794  |
| 32.4094   | 32.6138   | 37.0149   | 32.7534   | 31.0502   | 34.5867   |
| 288.546   | 339.222   | 221.748   | 211.314   | 270.752   | 270.031   |
| 26.8509   | 21.6706   | 27.834    | 28.5383   | 29.819    | 25.4964   |
| 0         | 0.0999813 | 0.338862  | 0.101341  | 0.324759  | 0.45274   |
| 5.94668   | 5.52576   | 5.85583   | 5.62906   | 5.30145   | 6.32885   |
| 23.3114   | 27.1769   | 27.2139   | 21.9247   | 21.5871   | 21.5362   |
| 0.045596  | 0.130583  | 0.135233  | 0.0551497 | 0.247427  | 0.12319   |
| 41.6458   | 29.1904   | 36.203    | 37.1895   | 40.9731   | 30.7454   |
| 15.7317   | 16.9056   | 15.7671   | 16.9832   | 16.3626   | 16.4155   |
| 12.7018   | 11.1942   | 12.217    | 12.9051   | 11.5474   | 12.5414   |
| 4.0791    | 4.12007   | 3.97708   | 4.30826   | 3.14807   | 2.89297   |
| 0         | 0         | 0         | 0         | 0         | 0         |
| 0.0456247 | 0.163332  | 0.0738099 | 0.132443  | 0.070738  | 0.110941  |
| 11.0638   | 9.38615   | 10.7607   | 10.6822   | 11.0635   | 12.117    |
| 32.1247   | 31.7959   | 34.1305   | 30.9345   | 29.1522   | 28.7734   |
| 0         | 0         | 0         | 0         | 0         | 0         |
| 0         | 0.13185   | 0.074479  | 0.200465  | 0         | 0.223894  |
| 0         | 0         | 0         | 0         | 0         | 0         |
| 13.3487   | 11.5813   | 13.6557   | 13.6193   | 14.183    | 13.8957   |
| 0.384902  | 0.127192  | 0.263441  | 0.150409  | 0.114762  | 0.239981  |
| 25.0465   | 19.3584   | 22.9824   | 24.0064   | 20.9604   | 22.7312   |
| 0         | 0         | 0         | 0         | 0         | 0         |
| 0.0712929 | 0.0258353 | 0.0328363 | 0.0261866 | 0         | 0.0292471 |
| 0.37025   | 0.361489  | 0.816786  | 0.830519  | 0.234838  | 0.572919  |
| 6.08941   | 6.23321   | 6.61365   | 6.26146   | 5.65023   | 6.04651   |
| 7.84715   | 4.10369   | 6.45118   | 6.25313   | 5.72543   | 6.79687   |
| 0.126114  | 0.060197  | 0.136015  | 0.305078  | 0         | 0.272586  |

|           |           |           |           |           |           |
|-----------|-----------|-----------|-----------|-----------|-----------|
| 0         | 0         | 0         | 0         | 0         | 0         |
| 0.0569598 | 0.0259338 | 0         | 0.0396018 | 0.0441561 | 0.0230736 |
| 0         | 0         | 0         | 0         | 0         | 0         |
| 0         | 0         | 0         | 0         | 0         | 0         |
| 1.8846    | 1.50545   | 1.80107   | 3.71529   | 2.03552   | 3.87273   |
| 12.0462   | 5.2905    | 6.27831   | 1.66732   | 1.15527   | 3.47271   |
| 0.0909421 | 0         | 0.220684  | 0         | 0.140999  | 0.0737116 |
| 0.127734  | 0.0914555 | 0         | 0.0463496 | 0.0495109 | 0.103533  |
| 0.296186  | 0.353439  | 0.319439  | 0.214948  | 0.306144  | 0.160046  |
| 0         | 0.10785   | 0.0270732 | 0.129563  | 0.103795  | 0.0271285 |
| 14.0022   | 11.1815   | 12.1942   | 11.6694   | 10.5112   | 13.4243   |
| 17.8686   | 15.9126   | 20.3064   | 18.4331   | 20.2054   | 15.6202   |
| 146.981   | 199.823   | 85.3209   | 169.328   | 197.201   | 236.781   |
| 1.27221   | 0.364351  | 0.294018  | 1.52998   | 0.563563  | 0.486122  |
| 6.54111   | 6.91405   | 5.05188   | 6.1222    | 4.96896   | 7.49522   |
| 12.9116   | 13.2599   | 13.3893   | 12.9087   | 12.3778   | 11.7544   |
| 6.553     | 6.17473   | 5.30059   | 5.98766   | 4.1061    | 4.48582   |
| 0.120856  | 0.0784958 | 0.149695  | 0.0795633 | 0.0936894 | 0.167932  |
| 24.2095   | 23.2136   | 25.6291   | 26.2439   | 21.6305   | 24.0475   |
| 17.671    | 18.1652   | 14.6989   | 17.7423   | 13.0643   | 20.2265   |
| 33.5534   | 35.2842   | 30.6998   | 25.3984   | 26.8508   | 27.2694   |
| 10.8582   | 19.2425   | 13.9202   | 9.60044   | 12.9199   | 16.5581   |
| 5.05338   | 4.05566   | 4.81954   | 4.08523   | 3.17041   | 4.25786   |
| 0.870501  | 0.807815  | 0.665041  | 0.701883  | 0.649851  | 0.96673   |
| 0.672317  | 0.641822  | 0.543824  | 0.552968  | 0.521191  | 0.581265  |
| 10.5448   | 9.70807   | 9.79734   | 8.74233   | 9.59352   | 8.94669   |
| 0         | 0         | 0         | 0         | 0         | 0         |
| 0         | 0         | 0         | 0         | 0.160037  | 0.334657  |
| 6.88727   | 5.41392   | 6.21378   | 4.80598   | 3.65898   | 4.39172   |
| 0.0326033 | 0.0233434 | 0.105489  | 0.0709824 | 0.0758238 | 0.13213   |
| 0.934186  | 0.569733  | 0.575348  | 0.714563  | 0.286642  | 0.266696  |
| 7.23893   | 5.33674   | 4.19295   | 4.75635   | 2.49143   | 4.30571   |
| 0         | 0         | 0         | 0         | 0         | 0         |
| 87.3392   | 88.753    | 85.7063   | 83.6595   | 84.7761   | 92.7293   |
| 0         | 0         | 0         | 0         | 0         | 0         |
| 0         | 0         | 0         | 0         | 0         | 0         |
| 0.548832  | 0.4586    | 0.107194  | 0.101235  | 0.271246  | 1.87E-29  |
| 28.0498   | 25.8894   | 26.316    | 30.2112   | 27.7355   | 17.8634   |
| 0.351669  | 0.327325  | 0.426687  | 0.714595  | 0.654286  | 0.513071  |
| 0.222664  | 0.174879  | 0.16221   | 0.1128    | 0.189778  | 0.144624  |
| 0.518486  | 1.00239   | 0.745783  | 0.775809  | 1.85558   | 3.4021    |
| 0.35832   | 0.259504  | 0.365243  | 0.163059  | 0.523229  | 0.521813  |
| 2.59392   | 6.58133   | 5.33835   | 2.90833   | 4.65945   | 2.62756   |



|           |            |           |           |            |           |
|-----------|------------|-----------|-----------|------------|-----------|
| 34.1953   | 32.1772    | 33.0003   | 39.1977   | 43.1905    | 43.593    |
| 0.0952836 | 0.054577   | 0         | 0.0138298 | 0.0590923  | 0.0308922 |
| 0         | 0.0957775  | 0         | 0         | 0          | 0         |
| 2.69E-09  | 4.62E-10   | 4.06E-09  | 4.64E-10  | 3.71E-09   | 7.32E-10  |
| 123.276   | 159.926    | 155.341   | 95.3051   | 83.6961    | 150.978   |
| 8.0152    | 7.30808    | 6.86866   | 8.20635   | 7.0275     | 7.5993    |
| 0         | 0          | 0         | 0         | 0          | 0         |
| 0         | 0          | 0         | 0         | 0          | 0         |
| 79.4748   | 70.3949    | 78.3823   | 84.6665   | 89.922     | 67.6234   |
| 0.20819   | 0          | 0         | 0         | 0          | 0         |
| 0         | 0          | 0         | 0         | 0          | 0         |
| 0.613789  | 0.937517   | 0.463383  | 0.504829  | 0          | 0.397997  |
| 0.57015   | 0.459244   | 0.172944  | 0.413768  | 0.0552487  | 0.40436   |
| 1.43419   | 0.937563   | 0.75658   | 0.814554  | 0.628413   | 1.11192   |
| 0         | 0          | 0         | 0         | 0          | 0         |
| 0         | 0          | 0.0933472 | 0         | 0          | 0         |
| 19.6195   | 16.2879    | 17.5845   | 17.3019   | 16.5333    | 17.3045   |
| 0.138101  | 0.321352   | 0.0837803 | 0.200445  | 0.053529   | 0.139919  |
| 0.581953  | 0.3125     | 0.47073   | 0.527917  | 0.281962   | 0.530654  |
| 4.24413   | 3.00352    | 4.30781   | 3.2941    | 2.89632    | 3.50642   |
| 0         | 0          | 0         | 0         | 0          | 0         |
| 0         | 0          | 0         | 0         | 0          | 0         |
| 0         | 0          | 0         | 0         | 0          | 0         |
| 0.101218  | 0.00225686 | 0.02178   | 0.0122003 | 0.00570166 | 0.0127745 |
| 4.26749   | 3.43737    | 3.96428   | 3.53251   | 3.15315    | 3.72918   |
| 46.5645   | 32.1485    | 39.1727   | 38.493    | 43.7117    | 57.8725   |
| 6.29615   | 7.19678    | 9.97948   | 6.37557   | 8.67365    | 9.47654   |
| 9.45079   | 8.53352    | 9.25512   | 8.20183   | 13.1962    | 7.7511    |
| 12.473    | 10.3338    | 12.107    | 13.0319   | 12.2017    | 10.4949   |
| 3.48927   | 2.31319    | 3.31022   | 3.11057   | 2.8719     | 2.898     |
| 1.60048   | 1.55657    | 1.23422   | 1.56647   | 1.47721    | 1.74987   |
| 0         | 0          | 0         | 0         | 0          | 0         |
| 0.326241  | 0.268187   | 0.342079  | 0.324448  | 0.33721    | 0.362366  |
| 0         | 0          | 0         | 0         | 0          | 0         |
| 0         | 0          | 0         | 0         | 0          | 0         |
| 10.416    | 8.91328    | 9.35921   | 9.76308   | 10.3998    | 9.04268   |
| 41.8556   | 34.7085    | 39.7083   | 40.5666   | 46.363     | 44.6831   |
| 32.2051   | 30.0081    | 37.6441   | 38.5799   | 38.6092    | 36.7652   |
| 0.321472  | 0.374022   | 0.292536  | 0.379109  | 0.467268   | 0.195423  |
| 11.1235   | 10.1212    | 11.8389   | 10.0995   | 11.923     | 13.7711   |
| 14.0542   | 12.9566    | 13.2888   | 19.4626   | 16.1666    | 26.6547   |
| 14.7066   | 13.6962    | 16.2715   | 12.4448   | 12.0003    | 13.7062   |
| 23.9982   | 12.4447    | 24.8157   | 18.8558   | 13.4167    | 18.5561   |

|           |           |           |           |           |           |
|-----------|-----------|-----------|-----------|-----------|-----------|
| 12.6043   | 11.0086   | 8.55406   | 8.06782   | 8.97004   | 8.30231   |
| 0.126962  | 0.110382  | 0.139375  | 0.0789761 | 0.0984232 | 0.176412  |
| 0.107617  | 0         | 0         | 0         | 0         | 0         |
| 10.9154   | 11.8075   | 6.99463   | 6.29264   | 7.12479   | 9.05799   |
| 1.51648   | 1.30293   | 1.04823   | 1.30063   | 0.961854  | 1.20681   |
| 11.211    | 12.7121   | 9.52774   | 10.3223   | 10.1075   | 8.62652   |
| 83.6255   | 89.9182   | 92.376    | 88.2099   | 91.0321   | 89.7745   |
| 0         | 0         | 0         | 0         | 0         | 0         |
| 3.81823   | 3.61467   | 4.59842   | 3.38673   | 4.43993   | 3.64499   |
| 0         | 0         | 0         | 0         | 0         | 0         |
| 0.272301  | 0.225254  | 0.171207  | 0.254623  | 0.137302  | 0.126902  |
| 6.71034   | 5.25788   | 6.85671   | 6.18096   | 6.07182   | 7.27436   |
| 3.11963   | 3.81572   | 3.46988   | 3.44312   | 4.33293   | 3.95088   |
| 0         | 0         | 0         | 0         | 0         | 0         |
| 0         | 0.0567028 | 0         | 0         | 0.0204646 | 0.064191  |
| 5.85302   | 3.70382   | 6.16818   | 3.81075   | 3.05945   | 4.3826    |
| 46.5954   | 54.6153   | 52.9219   | 53.0169   | 53.9339   | 43.2642   |
| 0         | 0         | 0         | 0         | 0         | 0         |
| 0.0568001 | 0.0813355 | 0.0689166 | 0.123662  | 0.132097  | 0.115096  |
| 4.28768   | 2.584     | 2.35096   | 3.40089   | 2.91953   | 2.65808   |
| 6.74225   | 4.18067   | 5.91239   | 5.51793   | 6.39904   | 5.32863   |
| 0         | 0         | 0.0351712 | 0         | 0         | 0         |
| 38.5671   | 41.1962   | 39.1466   | 40.8342   | 41.0362   | 43.8167   |
| 2.14933   | 1.43726   | 2.3126    | 2.04541   | 1.57188   | 1.89002   |
| 31.2518   | 0         | 0         | 0         | 48.4538   | 0         |
| 98.4581   | 81.1845   | 92.8877   | 84.5927   | 137.477   | 53.5501   |
| 97.7996   | 109.657   | 124.279   | 109.403   | 97.4832   | 102.174   |
| 4.87818   | 6.28563   | 4.66027   | 4.25655   | 3.28094   | 4.39215   |
| 0.257083  | 0.226213  | 0.148197  | 0.13296   | 0.135285  | 0.209574  |
| 0         | 0         | 0         | 0         | 0         | 0         |
| 6.66083   | 5.14657   | 6.05068   | 6.22943   | 5.78247   | 6.08199   |
| 30.0649   | 31.7949   | 30.2784   | 28.2247   | 31.0905   | 31.3913   |
| 0         | 0         | 0         | 0         | 0         | 0         |
| 0.876549  | 1.68967   | 0.436322  | 0.489329  | 1.30676   | 0.273259  |
| 25.3265   | 18.9176   | 24.4733   | 21.7283   | 20.8558   | 23.1915   |
| 13.6585   | 11.7029   | 13.696    | 13.0698   | 14.4161   | 12.822    |
| 36.6143   | 41.1736   | 39.2831   | 35.6442   | 36.6956   | 36.0659   |
| 1.79883   | 2.22812   | 0.902125  | 1.22712   | 0.655407  | 0.729007  |
| 0.0825861 | 0.0295674 | 0.0827046 | 0         | 0         | 1.42E-239 |
| 0.0992599 | 0.213205  | 0         | 0.144069  | 0.307791  | 0.160907  |
| 9.24947   | 7.08158   | 7.989     | 8.28273   | 9.59243   | 13.7685   |
| 2.23444   | 2.93267   | 3.01198   | 3.14145   | 2.63417   | 3.31996   |
| 2.72303   | 3.51164   | 3.85187   | 3.08659   | 2.24459   | 2.26691   |

|           |            |           |           |            |           |
|-----------|------------|-----------|-----------|------------|-----------|
| 0         | 0          | 0         | 0         | 0          | 0         |
| 0.428758  | 0.153491   | 0.606924  | 0.388947  | 0.415475   | 0.0868807 |
| 10.8042   | 8.79838    | 10.3807   | 9.46348   | 9.36606    | 10.7827   |
| 0.528849  | 0.314195   | 0.17293   | 0.775756  | 0.200625   | 0.100322  |
| 0.900723  | 0.498332   | 0.397405  | 0.207986  | 0.28565    | 0.0995545 |
| 114.426   | 130.894    | 131.998   | 122.077   | 129.022    | 122.18    |
| 0.345273  | 1.23604    | 1.11714   | 0.250571  | 0.936813   | 0.699638  |
| 0.0904139 | 0.00479516 | 0.0507875 | 0.058527  | 0.00623025 | 0.0236524 |
| 0         | 0          | 0         | 0         | 0          | 0         |
| 0.0531394 | 0.0380468  | 0.150442  | 0.192821  | 0.102986   | 0.15075   |
| 46.1896   | 48.0811    | 49.7134   | 48.9187   | 50.3259    | 44.7891   |
| 0         | 0          | 0         | 0         | 0          | 0         |
| 18.0233   | 15.3401    | 17.1717   | 14.9127   | 15.7553    | 17.2399   |
| 58.7329   | 84.1032    | 95.0157   | 170.494   | 45.5306    | 0         |
| 10.9766   | 10.1536    | 12.7468   | 11.5203   | 14.9993    | 9.03317   |
| 0         | 0.0228093  | 0.0257688 | 0.0693584 | 0.0987853  | 0         |
| 7.20628   | 4.81606    | 5.14947   | 6.50504   | 6.93649    | 6.66989   |
| 0         | 0          | 0         | 0         | 0          | 0         |
| 0         | 0          | 0         | 0         | 0          | 0         |
| 83.3739   | 104.37     | 115.544   | 88.5121   | 105.079    | 50.3815   |
| 0         | 0.0720225  | 0.0406837 | 0.0912525 | 0.0389905  | 0.0407669 |
| 86.8664   | 104.931    | 112.366   | 98.854    | 120.051    | 85.8251   |
| 0.77806   | 0.650879   | 0.516763  | 0.540883  | 0.635252   | 0.524457  |
| 33.8748   | 36.9258    | 33.7199   | 32.2696   | 34.8823    | 29.5385   |
| 0         | 0          | 0         | 0         | 0          | 0         |
| 8.1869    | 5.91179    | 4.40984   | 6.24218   | 4.65421    | 5.51553   |
| 3.73336   | 2.1308     | 2.76192   | 3.55785   | 2.95596    | 3.6506    |
| 0         | 0          | 0         | 0         | 0          | 0         |
| 0.167057  | 0.0797398  | 0.090086  | 0.303091  | 0          | 0.112838  |
| 55.7899   | 68.6669    | 66.2577   | 59.8091   | 72.2482    | 68.3044   |
| 14.2335   | 10.8419    | 15.0292   | 15.3586   | 13.7678    | 13.3959   |
| 2.9943    | 4.26363    | 2.28596   | 3.76005   | 2.6342     | 3.13598   |
| 1.48507   | 0.907203   | 1.48778   | 1.13707   | 1.20406    | 1.24787   |
| 2.47032   | 2.20077    | 0.932371  | 2.86805   | 2.9956     | 5.33873   |
| 7.11144   | 6.67101    | 7.72299   | 7.62188   | 8.7798     | 9.20648   |
| 11.6829   | 10.8579    | 10.9288   | 10.4244   | 12.2286    | 11.5156   |
| 5.2924    | 5.42184    | 5.56184   | 6.25147   | 5.41614    | 6.48017   |
| 0.309933  | 0.142654   | 0.232792  | 0.208858  | 0.154456   | 0.107662  |
| 0         | 0          | 4.81669   | 0         | 0          | 0         |
| 5.54396   | 3.14242    | 5.41865   | 3.52043   | 3.4024     | 2.24678   |
| 0.0481784 | 0          | 0         | 0         | 0.0186743  | 0         |
| 1.02168   | 0.517402   | 0.665161  | 0.795701  | 0.849971   | 0.8483    |
| 19.4781   | 20.5422    | 20.8419   | 19.0462   | 18.3594    | 21.8371   |

|           |           |           |           |           |           |
|-----------|-----------|-----------|-----------|-----------|-----------|
| 0.149049  | 0.453543  | 0.512391  | 0.29746   | 0.346635  | 0.120809  |
| 35.3153   | 36.5114   | 43.3544   | 29.3327   | 38.3086   | 34.8873   |
| 0.0367119 | 0.0700933 | 0.0296955 | 0.0621657 | 0.0474327 | 0.0595124 |
| 186.756   | 223.635   | 220.108   | 212.38    | 225.067   | 163.27    |
| 0         | 0         | 0         | 0.150662  | 0.160938  | 0         |
| 0.363085  | 0.342365  | 0.180734  | 0.273632  | 0.108257  | 0.169784  |
| 0.656384  | 0.76035   | 0.292158  | 0.560662  | 0.343562  | 0.279785  |
| 0         | 0         | 0         | 0         | 0         | 0         |
| 24.9989   | 18.8344   | 20.0879   | 22.9339   | 19.1742   | 21.5525   |
| 3.41942   | 4.82933   | 3.87727   | 3.8639    | 3.66749   | 3.7713    |
| 28.0267   | 32.5267   | 28.3096   | 26.1076   | 25.8002   | 31.4196   |
| 12.351    | 12.5434   | 12.3995   | 12.4597   | 11.6798   | 12.1409   |
| 4.13231   | 2.81168   | 4.01659   | 3.581     | 4.35178   | 3.80853   |
| 132.553   | 120.671   | 117.894   | 154.737   | 128.629   | 127.115   |
| 15.6294   | 15.0785   | 16.7849   | 17.4303   | 20.57     | 19.038    |
| 0         | 0         | 0         | 0         | 0         | 0         |
| 12.671    | 10.0231   | 11.1057   | 12.5788   | 14.2942   | 11.4883   |
| 0.0597245 | 0.0213808 | 0.0362324 | 0.119194  | 0.162048  | 0.16943   |
| 0         | 0         | 0         | 0         | 0         | 0         |
| 0         | 0         | 0         | 0         | 0         | 0         |
| 6.48824   | 6.49714   | 6.01892   | 5.30132   | 6.12015   | 4.89118   |
| 0.0518792 | 0         | 0         | 0         | 0.0402176 | 0.0840997 |
| 101.908   | 76.5328   | 112.843   | 109.371   | 108.934   | 105.134   |
| 0         | 0         | 0         | 0.0295299 | 0         | 0.0119931 |
| 101.805   | 130.9     | 124.059   | 138.498   | 111.761   | 77.9625   |
| 11.3296   | 8.56184   | 9.79252   | 9.25673   | 9.43959   | 10.2846   |
| 30.2201   | 20.808    | 22.892    | 25.7412   | 25.455    | 24.0973   |
| 3079.03   | 4367.02   | 3961.87   | 4386.78   | 4797.46   | 4560.38   |
| 0.201372  | 0.144179  | 0.162886  | 0         | 0         | 0.163219  |
| 27.1871   | 34.0786   | 33.0185   | 33.2839   | 31.8887   | 28.9343   |
| 0.0593283 | 0.021239  | 0         | 0.0322917 | 0         | 0.0120219 |
| 1.78804   | 1.6746    | 1.55732   | 1.62124   | 0.533889  | 0.967017  |
| 26.5053   | 26.9427   | 20.6623   | 23.5454   | 34.3881   | 35.9954   |
| 10.5795   | 8.9014    | 9.30983   | 8.33014   | 11.7255   | 14.3114   |
| 0         | 0         | 0         | 0         | 0         | 0         |
| 6.62419   | 4.69675   | 6.50274   | 6.02079   | 7.07956   | 5.36913   |
| 0         | 0         | 0         | 0         | 0         | 0         |
| 17.6306   | 14.6738   | 17.2044   | 16.9689   | 15.6694   | 16.4785   |
| 10.7498   | 7.20579   | 7.39746   | 10.6593   | 8.22031   | 8.71304   |
| 0.145002  | 0.207637  | 0         | 0.473537  | 0         | 0         |
| 9.51047   | 11.9906   | 14.377    | 12.3311   | 11.7507   | 13.2174   |
| 0.0703748 | 0.0209946 | 0.0332061 | 0.0297921 | 0.0818334 | 0.066548  |
| 1.16216   | 1.00913   | 0.900048  | 0.807513  | 0.785915  | 0.92193   |

|          |          |          |          |          |          |
|----------|----------|----------|----------|----------|----------|
| 0.166124 | 0.104539 | 0.151171 | 0.138455 | 0.507079 | 0.340831 |
| 16.7464  | 13.8666  | 15.1406  | 17.3937  | 19.0404  | 17.0583  |
| 1.31006  | 1.34752  | 0.820882 | 1.19177  | 0.61507  | 1.01698  |
| 0        | 0.182308 | 0        | 0        | 0        | 0.275178 |
| 0.207009 | 0.148215 | 0.223261 | 0.250384 | 0        | 0.167788 |
| 3.61416  | 4.5543   | 4.56054  | 6.60961  | 5.60351  | 8.3195   |
| 12.7924  | 11.7147  | 12.0756  | 11.8173  | 13.5928  | 11.1078  |
| 5.8415   | 4.3292   | 6.6042   | 5.1554   | 6.69362  | 6.81923  |
| 11.9384  | 8.90223  | 7.99286  | 9.74762  | 6.52453  | 8.682    |
| 1078.27  | 1079.22  | 1085.44  | 1153.97  | 1149.7   | 1036.71  |
| 55.5057  | 55.4737  | 55.9252  | 56.5716  | 59.1582  | 55.2703  |
| 15.4676  | 11.4017  | 14.5578  | 14.4797  | 13.3339  | 16.1971  |
| 28.117   | 33.7154  | 29.7457  | 34.0519  | 32.3531  | 28.1712  |
| 3.66241  | 3.187    | 3.0536   | 3.8028   | 3.34146  | 3.90472  |
| 27.1311  | 23.5026  | 29.1812  | 28.861   | 25.4531  | 27.134   |
| 34.7406  | 31.6407  | 37.0271  | 40.2648  | 38.9318  | 37.1167  |
| 48.7006  | 39.7203  | 43.1136  | 45.1249  | 37.3685  | 44.2831  |
| 0        | 0        | 0        | 0        | 0        | 0        |
| 6.56041  | 4.39718  | 5.29521  | 5.34142  | 4.24495  | 5.78404  |
| 14.0998  | 15.7036  | 14.3016  | 13.7245  | 15.0943  | 12.9703  |
| 0        | 0        | 0        | 0        | 0        | 0        |
| 12.87    | 13.9797  | 12.4817  | 13.1953  | 13.4127  | 12.9533  |
| 18.6798  | 16.9577  | 16.5695  | 14.6361  | 12.4696  | 16.4492  |
| 8.86783  | 10.4145  | 11.998   | 9.46814  | 7.49269  | 6.69643  |
| 43.3095  | 49.4952  | 41.798   | 42.6792  | 31.0691  | 38.199   |
| 0.708978 | 0.42476  | 0.213275 | 0.514518 | 0.415289 | 0.34194  |
| 30.5332  | 27.4251  | 25.1624  | 31.2139  | 21.2706  | 23.0955  |
| 0        | 0        | 0        | 0        | 0        | 0        |
| 0.551009 | 0.510211 | 0.672261 | 0.80962  | 0.791312 | 1.52244  |
| 0        | 0        | 0        | 0        | 0        | 0        |
| 18.0071  | 22.0021  | 17.4427  | 21.5443  | 19.2091  | 12.8212  |
| 3.67796  | 4.94456  | 4.14653  | 4.62656  | 4.21809  | 3.85134  |
| 10.3576  | 6.45524  | 5.77858  | 9.47428  | 7.08465  | 6.23461  |
| 0        | 0        | 0        | 0        | 0        | 0        |
| 0        | 0        | 0        | 0        | 0        | 0        |
| 25.1073  | 29.6423  | 33.7313  | 32.7557  | 35.6733  | 40.6199  |
| 37.2752  | 23.0442  | 40.2782  | 30.8641  | 19.1988  | 48.5148  |
| 9.9737   | 8.19535  | 9.69186  | 9.61841  | 8.35454  | 9.76593  |
| 0        | 0        | 0        | 0        | 0        | 0        |
| 0        | 0        | 0        | 0        | 0        | 0        |
| 1.47714  | 0.97625  | 0.735279 | 1.48429  | 0.792763 | 0.644685 |
| 11.9949  | 13.8178  | 14.3272  | 13.0255  | 10.86    | 12.2441  |
| 0.310514 | 0.277512 | 0.288764 | 0.292576 | 0.216904 | 0.355125 |

|           |           |           |           |           |          |
|-----------|-----------|-----------|-----------|-----------|----------|
| 1.22846   | 1.29346   | 1.60741   | 1.33727   | 0.86829   | 1.17142  |
| 0.368717  | 0.395725  | 0.340071  | 0.340939  | 0.280747  | 0.328674 |
| 0         | 0.10427   | 0         | 0.0528438 | 0         | 0.177059 |
| 20.4915   | 19.755    | 23.1776   | 21.3518   | 24.4841   | 22.5518  |
| 1.01356   | 0.775737  | 1.52661   | 1.16675   | 1.3818    | 1.58639  |
| 0         | 0         | 0         | 0         | 0         | 0        |
| 70.4989   | 62.4108   | 70.7936   | 66.1766   | 62.5797   | 70.4535  |
| 18.9685   | 21.6651   | 15.6857   | 18.3954   | 19.0373   | 15.9923  |
| 0         | 0         | 0         | 0         | 0         | 0        |
| 63.4048   | 30.2644   | 88.9506   | 88.1935   | 128.257   | 159.261  |
| 4.12366   | 4.13834   | 3.8511    | 3.97526   | 3.93063   | 3.92391  |
| 10.4849   | 10.7265   | 7.63145   | 7.20446   | 5.45519   | 6.5746   |
| 0.67965   | 0.789108  | 0.461118  | 0.653202  | 0.512635  | 0.595545 |
| 13.1685   | 17.3237   | 10.3054   | 11.67     | 5.80968   | 4.87685  |
| 15.1752   | 13.3739   | 16.3012   | 18.75     | 16.1221   | 19.1955  |
| 0         | 0         | 0         | 0         | 0         | 0        |
| 0.0626921 | 0.0691648 | 0.050709  | 0.0710883 | 0.0546741 | 0.139199 |
| 5.58209   | 4.03985   | 4.82962   | 4.97502   | 5.09616   | 5.79002  |
| 43.9304   | 59.848    | 56.7284   | 48.8809   | 46.8609   | 35.4917  |
| 0         | 0         | 0         | 0.0334833 | 0         | 0        |
| 0.63476   | 0.873992  | 0.55294   | 0.389786  | 0.47315   | 0.643118 |
| 13.1088   | 10.2206   | 11.2214   | 11.4976   | 10.1465   | 10.7718  |
| 0         | 0         | 0         | 0         | 0         | 0        |
| 4.8479    | 4.39875   | 4.38124   | 5.08949   | 6.24225   | 4.84943  |
| 0         | 0         | 0         | 0         | 0         | 0        |
| 7.77902   | 9.19206   | 6.057     | 6.40058   | 4.95285   | 6.09266  |
| 12.4724   | 8.86664   | 9.86592   | 11.2572   | 12.5054   | 9.84623  |
| 2.38766   | 1.92529   | 2.17509   | 2.4898    | 1.68922   | 1.97286  |
| 0.258615  | 0.211616  | 0.0896523 | 0.214494  | 0.143202  | 0.119781 |
| 0.121159  | 0.117365  | 0.0980034 | 0.113789  | 0.0828747 | 0.121311 |
| 11.7203   | 11.031    | 13.3059   | 13.729    | 15.9061   | 9.99356  |
| 10.0744   | 9.97941   | 12.2929   | 9.61664   | 10.0285   | 9.07031  |
| 0         | 0         | 0         | 0.0267715 | 0         | 0        |
| 3.69542   | 1.30881   | 1.90662   | 2.87881   | 1.72022   | 1.67711  |
| 0         | 0         | 0         | 0         | 0         | 0        |
| 0.785174  | 1.64419   | 2.78167   | 3.21803   | 1.53392   | 1.18653  |
| 5.28113   | 3.8094    | 3.18791   | 3.94701   | 2.93302   | 2.04443  |
| 3.13524   | 2.66932   | 2.75187   | 2.8132    | 2.93612   | 4.06716  |
| 10.7902   | 8.84764   | 10.8892   | 9.90019   | 11.5314   | 11.6611  |
| 0         | 0         | 0.0697777 | 0         | 0         | 0        |
| 33.7692   | 45.6605   | 51.2278   | 47.6321   | 48.278    | 75.1271  |
| 0         | 0.129559  | 0.146369  | 0         | 0.0935182 | 0        |
| 9.5178    | 7.79975   | 11.1228   | 8.59109   | 12.1924   | 11.3525  |

|           |           |          |           |           |           |
|-----------|-----------|----------|-----------|-----------|-----------|
| 15.8853   | 11.1904   | 11.9109  | 13.8795   | 14.0936   | 13.5353   |
| 0.195706  | 0.44372   | 0.738747 | 0.236713  | 0.252858  | 0.132189  |
| 0         | 0         | 0        | 0.0289311 | 0.0316026 | 0.0335959 |
| 0.771793  | 1.10518   | 1.71679  | 2.38263   | 0.610771  | 1.40752   |
| 7.12451   | 7.44838   | 8.21082  | 12.4913   | 12.7567   | 12.4181   |
| 3.45425   | 2.66527   | 3.67118  | 3.18016   | 2.97243   | 3.37968   |
| 11.9175   | 8.63242   | 7.23692  | 7.53713   | 7.03468   | 7.27993   |
| 105.431   | 83.4766   | 69.7746  | 63.97     | 66.5858   | 55.908    |
| 8.62138   | 6.33716   | 8.57643  | 7.28995   | 7.77699   | 9.12577   |
| 0         | 0.745579  | 0        | 0         | 0         | 0.42202   |
| 1.08338   | 0.775679  | 0        | 1.17934   | 0.419926  | 0.219529  |
| 0         | 0         | 0        | 0         | 0         | 0         |
| 2.45848   | 2.16915   | 2.1272   | 1.78417   | 0.93257   | 1.80754   |
| 0.0238017 | 0         | 20.0036  | 0.0172734 | 0.0184515 | 0         |
| 1.18579   | 0.761948  | 0.956619 | 0.851452  | 0.976672  | 0.661172  |
| 0.260622  | 0.1866    | 0        | 0.141853  | 0.033673  | 0.0352071 |
| 4.26463   | 3.29743   | 3.33421  | 3.66591   | 3.83494   | 3.35588   |
| 0         | 0         | 0        | 0         | 0         | 0         |
| 26.8752   | 29.4617   | 28.2927  | 29.1221   | 29.7451   | 28.0679   |
| 0.0299321 | 0.107154  | 0.121057 | 0.086889  | 0.0464076 | 0.0727828 |
| 0.37725   | 0.67526   | 0.6103   | 0.205333  | 0.511788  | 0.305774  |
| 3.6231    | 4.29724   | 1.83536  | 2.44343   | 1.16319   | 2.04675   |
| 0.146606  | 0.44611   | 0.317642 | 0.689594  | 0.369366  | 0.291671  |
| 0.0968162 | 0.381252  | 0.117469 | 0.0702612 | 0.22516   | 0.313891  |
| 5.05302   | 4.36915   | 4.34027  | 4.70928   | 3.75126   | 4.66925   |
| 0.939458  | 0.48287   | 0.853282 | 0.884987  | 0.331925  | 0.746254  |
| 0         | 0         | 0        | 0         | 0         | 0         |
| 0         | 0         | 0        | 0         | 0         | 0         |
| 28.7589   | 24.9345   | 18.8541  | 23.845    | 18.4269   | 22.7296   |
| 73.0867   | 29.8484   | 52.8777  | 59.5694   | 57.6944   | 50.8511   |
| 3.53695   | 1.97079   | 2.52643  | 2.17354   | 2.00117   | 2.20794   |
| 21.03     | 19.5735   | 24.7415  | 21.3853   | 18.162    | 18.8134   |
| 0         | 0.0223462 | 0        | 0.0226501 | 0         | 0         |
| 15.2514   | 13.4366   | 13.325   | 15.5032   | 8.49543   | 18.6847   |
| 0         | 0.0988275 | 0        | 0.179977  | 0         | 0         |
| 0         | 0         | 0        | 0         | 0         | 0         |
| 75.641    | 147.775   | 125.708  | 72.3014   | 61.4056   | 119.454   |
| 33.2575   | 32.206    | 30.8716  | 33.9606   | 25.983    | 31.1108   |
| 8.20889   | 8.59188   | 5.01334  | 6.48369   | 3.52685   | 3.50048   |
| 5.24553   | 4.9113    | 5.12283  | 4.63434   | 5.11362   | 4.84891   |
| 9.80519   | 9.14771   | 11.5964  | 11.3745   | 13.5323   | 10.3558   |
| 0.593174  | 0.667388  | 0.685438 | 0.691838  | 0.574797  | 0.463617  |
| 245.781   | 299.825   | 310.848  | 295.908   | 300.258   | 299.421   |

|            |           |           |           |           |           |
|------------|-----------|-----------|-----------|-----------|-----------|
| 0.164362   | 0.317009  | 0.162314  | 0.0892532 | 0.370383  | 0.235895  |
| 376.312    | 570.351   | 394.92    | 383.271   | 382.669   | 361.363   |
| 0          | 1.47E-05  | 0         | 0         | 3.28E-07  | 0.161878  |
| 4.49722    | 2.51154   | 3.3467    | 5.74414   | 3.20741   | 3.86386   |
| 1.8598     | 1.44073   | 2.58946   | 1.92497   | 1.51265   | 3.089     |
| 17.4647    | 15.5481   | 16.1136   | 16.1537   | 13.3009   | 17.4482   |
| 6.15438    | 4.63915   | 6.16416   | 6.32687   | 6.58523   | 6.74783   |
| 0          | 0         | 0         | 0         | 0         | 0         |
| 0          | 0         | 0         | 0         | 0         | 0         |
| 10.6597    | 6.42589   | 6.7711    | 7.9282    | 7.77894   | 7.83275   |
| 276.479    | 327.694   | 299.191   | 311.708   | 355.359   | 296.035   |
| 0          | 0         | 0         | 0         | 0         | 0         |
| 6.2505     | 4.82188   | 5.81758   | 6.56916   | 5.79717   | 5.52907   |
| 0.223427   | 0.191964  | 0.180726  | 0.032429  | 0.138563  | 0.253533  |
| 3.71768    | 3.40269   | 2.35612   | 2.97613   | 1.06961   | 3.04437   |
| 0          | 0         | 0         | 0         | 0         | 0         |
| 59.628     | 48.525    | 58.4856   | 61.156    | 68.7002   | 58.2282   |
| 6.08799    | 5.55106   | 5.66102   | 5.56991   | 4.41697   | 5.27193   |
| 0          | 0         | 0         | 0         | 0         | 0         |
| 4.88476    | 8.22046   | 5.21387   | 5.48181   | 3.7477    | 6.73465   |
| 11.4118    | 9.77624   | 9.40212   | 9.6018    | 8.34442   | 10.0878   |
| 7.64674    | 5.84636   | 8.49007   | 7.84177   | 8.25473   | 8.00583   |
| 0.00460254 | 0.0059316 | 0         | 0         | 0.0115534 | 0         |
| 0.049948   | 0.0357618 | 0.0404019 | 0.0362482 | 0.0387205 | 0.0809691 |
| 0.102287   | 0.292941  | 0         | 0.222694  | 0.0792942 | 0.24872   |
| 0.823958   | 0.399636  | 0.687982  | 1.87104   | 0.185442  | 1.12026   |
| 2.50496    | 2.75443   | 3.52538   | 2.41456   | 1.1555    | 3.22069   |
| 0          | 0.499954  | 0.211809  | 0.126688  | 0.0676646 | 0.636726  |
| 8.73484    | 6.25398   | 9.43549   | 8.81647   | 9.93208   | 10.0037   |
| 0.811704   | 0.71677   | 0.787885  | 0.765789  | 0.608271  | 0.460539  |
| 5.52844    | 6.08976   | 4.96856   | 5.91788   | 5.26479   | 4.90963   |
| 0.0826173  | 0.0887286 | 0.0668274 | 0.0299784 | 0         | 0         |
| 0          | 0         | 0         | 0         | 0         | 0         |
| 0          | 0         | 0         | 0         | 0         | 0         |
| 24.1724    | 17.5258   | 24.867    | 22.5388   | 25.6819   | 24.1893   |
| 0.896747   | 0.385232  | 0.725361  | 0.390471  | 0.417104  | 0.872213  |
| 0          | 0         | 0         | 0         | 0         | 0         |
| 11.1865    | 13.1027   | 12.6881   | 10.9577   | 9.85762   | 11.7338   |
| 0          | 0         | 0         | 0         | 0         | 0         |
| 11.3371    | 11.1455   | 12.5917   | 12.5074   | 12.4061   | 12.1023   |
| 0          | 0         | 0         | 0         | 0         | 0         |
| 0.155864   | 0.334787  | 0.378225  | 0         | 0.604141  | 0.252666  |
| 0.093504   | 0.0334736 | 0         | 0.0339288 | 0         | 0         |



|          |           |           |           |           |           |
|----------|-----------|-----------|-----------|-----------|-----------|
| 14.7072  | 15.4993   | 17.243    | 15.6901   | 15.9275   | 17.055    |
| 0        | 0         | 0         | 0         | 0         | 0         |
| 8.96996  | 6.75111   | 7.69718   | 6.68785   | 8.30095   | 7.98566   |
| 19.8489  | 17.1066   | 18.3269   | 18.0293   | 22.0307   | 19.6328   |
| 0.33621  | 0.412663  | 0.116551  | 0.174281  | 0.148934  | 0.11679   |
| 45.8849  | 58.2919   | 54.0578   | 45.6875   | 49.1018   | 60.6426   |
| 32.6599  | 34.4166   | 33.7867   | 30.4537   | 30.1267   | 26.7076   |
| 3.54841  | 7.59073   | 6.61805   | 6.42611   | 6.00225   | 5.46263   |
| 0.2156   | 0.118721  | 0.313803  | 0.165917  | 0.281866  | 0.119479  |
| 0        | 0         | 0         | 0         | 0         | 0         |
| 94.8702  | 87.3806   | 90.916    | 97.7887   | 103.159   | 95.9645   |
| 13.1287  | 12.3929   | 12.9206   | 14.0929   | 11.4407   | 12.6872   |
| 3.4805   | 3.75253   | 3.542     | 3.53698   | 4.02198   | 4.16371   |
| 4.55881  | 4.19612   | 27.8271   | 19.408    | 14.1305   | 4.04675   |
| 105.011  | 119.829   | 111.594   | 108.645   | 98.6891   | 107.736   |
| 0        | 0         | 0.0150039 | 0         | 0         | 0.0150346 |
| 20.7767  | 24.2501   | 25.9135   | 22.2473   | 20.1524   | 26.4999   |
| 5.00214  | 4.45384   | 5.05766   | 3.79303   | 3.20659   | 4.70415   |
| 2.31644  | 2.82191   | 3.63513   | 2.27875   | 3.00083   | 2.55816   |
| 4.24845  | 3.81322   | 4.82297   | 4.19383   | 4.36598   | 4.65421   |
| 0        | 0         | 0         | 0         | 0         | 0         |
| 22.616   | 17.7998   | 20.3817   | 18.6984   | 21.8838   | 20.8219   |
| 5.32381  | 4.68301   | 5.5367    | 5.55621   | 4.67738   | 4.80829   |
| 0        | 0.0875701 | 0.148399  | 0.0221903 | 0.18963   | 0.0247837 |
| 9.70053  | 11.8882   | 11.7429   | 9.21463   | 20.8736   | 9.58986   |
| 0        | 0         | 0         | 0         | 0         | 0         |
| 12.5735  | 12.7911   | 14.0789   | 13.8865   | 14.0612   | 13.4588   |
| 0.114532 | 0.0728907 | 0.16813   | 0.0831177 | 0.0197299 | 0.0825167 |
| 0.624306 | 0.0744986 | 0.967895  | 0.226535  | 0.80662   | 0.379516  |
| 7.96115  | 8.45614   | 10.0618   | 9.39277   | 8.01524   | 10.5212   |
| 1.81212  | 1.85349   | 1.73502   | 1.85186   | 1.60547   | 1.82849   |
| 31.0736  | 23.3065   | 30.7773   | 27.8312   | 28.2181   | 28.9447   |
| 0        | 0.0507819 | 0.0573709 | 0         | 0         | 0         |
| 0        | 0         | 0         | 0         | 0         | 0         |
| 22.3543  | 16.4706   | 16.2796   | 19.0237   | 13.8572   | 19.401    |
| 6.63901  | 5.76774   | 6.28287   | 6.99625   | 6.85265   | 7.76673   |
| 7.49475  | 5.83272   | 5.00803   | 7.33093   | 3.53655   | 8.45182   |
| 14.8093  | 17.2004   | 17.0482   | 16.1501   | 17.9633   | 17.4066   |
| 42.5999  | 38.8212   | 39.857    | 41.448    | 27.6815   | 38.4775   |
| 17.9587  | 16.4194   | 19.058    | 22.3802   | 19.8478   | 21.4735   |
| 0        | 0         | 0         | 0         | 0         | 0         |
| 3.96575  | 2.23428   | 3.24726   | 2.96058   | 4.10748   | 3.66228   |
| 0        | 0         | 0.0621639 | 0.0242471 | 0         | 0.062291  |

|           |           |           |           |           |           |
|-----------|-----------|-----------|-----------|-----------|-----------|
| 12.0769   | 5.74631   | 22.5052   | 15.9202   | 11.6139   | 31.4107   |
| 2.43402   | 2.90453   | 3.15013   | 2.75897   | 2.7315    | 2.81837   |
| 2.15604   | 1.54438   | 1.38166   | 0.65376   | 1.81068   | 1.31066   |
| 9.85774   | 8.92624   | 12.1072   | 11.2438   | 11.3083   | 7.12346   |
| 0         | 0         | 0         | 0         | 0         | 0         |
| 0.349399  | 0.0357376 | 0.242248  | 0.326013  | 0.116083  | 0.202286  |
| 0         | 0.0353549 | 0.159769  | 0.0358357 | 0.229427  | 0.326863  |
| 1.91052   | 2.00421   | 2.18995   | 2.2143    | 1.94051   | 3.06132   |
| 11.5036   | 13.0943   | 12.3015   | 10.8387   | 11.457    | 10.5883   |
| 8.8388    | 9.76719   | 8.77539   | 11.9804   | 10.4729   | 8.94301   |
| 12.4589   | 10.6986   | 12.1371   | 12.571    | 10.2999   | 11.7256   |
| 21.8685   | 21.114    | 20.6196   | 20.3272   | 21.56     | 23.0183   |
| 0         | 0         | 0         | 0         | 0         | 0         |
| 86.7495   | 129.068   | 118.323   | 107.647   | 107.098   | 144.773   |
| 0         | 0         | 0         | 0         | 0         | 0         |
| 2.66814   | 1.96169   | 1.50842   | 2.67545   | 2.04614   | 2.38353   |
| 2108.75   | 2028.15   | 1934.39   | 2033.87   | 2119.49   | 1991.99   |
| 19.1791   | 31.4534   | 13.2075   | 14.1067   | 13.0597   | 12.7093   |
| 0.0504856 | 0.0361467 | 0.0816736 | 0.183192  | 0.0195686 | 0.122761  |
| 21.5681   | 17.3163   | 19.4133   | 21.3417   | 24.9507   | 19.8532   |
| 4.49854   | 3.18872   | 3.40899   | 2.6168    | 2.30072   | 2.70092   |
| 0.239173  | 0.202955  | 0.268697  | 0.277715  | 0.337138  | 0.172318  |
| 26.6713   | 28.6605   | 28.5997   | 24.7071   | 34.2296   | 21.2437   |
| 0         | 0         | 0         | 0         | 0         | 0         |
| 2.14104   | 1.33393   | 1.43957   | 1.64328   | 1.43588   | 1.19472   |
| 4.2538    | 2.9384    | 3.29543   | 3.34794   | 2.83316   | 3.71494   |
| 2.89891   | 2.8377    | 2.37774   | 2.18757   | 2.00831   | 1.53265   |
| 9.21432   | 6.60223   | 8.74851   | 7.2975    | 6.22108   | 8.28385   |
| 0         | 0         | 0         | 0         | 0         | 0         |
| 57.7645   | 54.2726   | 53.0618   | 60.4953   | 71.0073   | 50.5363   |
| 9.14819   | 6.6399    | 8.25651   | 6.59726   | 5.68573   | 5.49007   |
| 5.30968   | 4.34949   | 4.75544   | 4.88165   | 3.01366   | 4.41273   |
| 3.60826   | 3.4583    | 3.60612   | 3.24938   | 2.88629   | 3.43151   |
| 0.501616  | 0.718296  | 0.483033  | 0.398702  | 0.370344  | 0.309773  |
| 4.75814   | 3.62474   | 4.7032    | 3.42543   | 4.60355   | 5.03215   |
| 18.0908   | 18.2862   | 16.441    | 19.3844   | 17.4066   | 15.2671   |
| 0.0608765 | 0.196139  | 0.147725  | 0.132538  | 0.0943848 | 0.148027  |
| 25.2538   | 21.0196   | 24.4874   | 24.1973   | 19.3023   | 25.8588   |
| 33.1364   | 36.4683   | 40.0597   | 36.0963   | 39.5879   | 21.922    |
| 0.0844704 | 0.0431994 | 0.0390436 | 0.0613017 | 0.028064  | 0.0489043 |
| 0         | 0         | 0         | 0         | 0         | 0         |
| 0.377058  | 0.168729  | 0.0762486 | 0.119717  | 0.0913441 | 0.17191   |
| 20.3659   | 21.6985   | 25.3604   | 22.8776   | 24.5562   | 20.6407   |

|           |            |            |            |           |           |
|-----------|------------|------------|------------|-----------|-----------|
| 0         | 0          | 0          | 0          | 0         | 0         |
| 0         | 0.0195225  | 0          | 0          | 0.0422752 | 0         |
| 81.6737   | 78.3641    | 86.724     | 91.5606    | 76.3254   | 75.7113   |
| 17.0733   | 14.3448    | 16.5055    | 18.6115    | 16.8231   | 18.5706   |
| 1.57927   | 1.63079    | 1.61198    | 1.01145    | 1.12906   | 1.49188   |
| 20.7917   | 20.7009    | 18.9944    | 21.302     | 15.7008   | 16.9317   |
| 0         | 0.00174225 | 0.00590493 | 0.00353189 | 0         | 0.0076921 |
| 6.17237   | 3.92566    | 4.23585    | 6.57612    | 5.57391   | 4.61105   |
| 3.94073   | 3.68683    | 2.86184    | 1.18911    | 2.22802   | 1.57376   |
| 10.6622   | 9.2632     | 10.5884    | 10.5554    | 9.05662   | 10.1918   |
| 30.804    | 19.8698    | 28.462     | 28.1404    | 23.7179   | 30.1322   |
| 21.6339   | 24.6567    | 18.7849    | 18.9683    | 22.7263   | 21.3998   |
| 0         | 0          | 0          | 0.0496129  | 0         | 0.166234  |
| 3.11877   | 2.60753    | 3.29089    | 2.67259    | 2.67577   | 3.55475   |
| 0.087386  | 0.0417111  | 0          | 0.0422784  | 0.067743  | 0.0236098 |
| 1.44927   | 0.887207   | 1.3466     | 1.5444     | 1.22791   | 1.88211   |
| 12.7169   | 9.72306    | 12.9395    | 13.3631    | 13.4271   | 12.9193   |
| 15.7702   | 14.6312    | 19.0294    | 16.924     | 17.6764   | 17.693    |
| 0         | 0          | 0.0638605  | 0.0286475  | 0         | 0         |
| 0.252526  | 0.0904018  | 0          | 0.549787   | 0         | 0.307021  |
| 634.482   | 1377.11    | 936.741    | 743.501    | 645.014   | 1248.18   |
| 4.51497   | 3.30418    | 3.97514    | 3.27962    | 3.90858   | 3.49749   |
| 0.0309748 | 0.0665322  | 0.10022    | 0.134874   | 0.0480243 | 0.125531  |
| 89.8198   | 89.1898    | 88.8164    | 98.3854    | 104.269   | 93.5873   |
| 0.509385  | 0.208406   | 0.235446   | 0.330062   | 0.338471  | 0.235928  |
| 15.5112   | 15.0229    | 16.0481    | 17.2778    | 18.969    | 19.4433   |
| 12.3122   | 12.7561    | 13.9866    | 11.9955    | 12.8925   | 11.5443   |
| 11.2742   | 7.46573    | 8.43441    | 9.19967    | 9.1494    | 9.29313   |
| 32.7806   | 39.367     | 37.9512    | 40.5878    | 28.2577   | 30.6016   |
| 10.0908   | 10.3785    | 5.83019    | 7.84617    | 11.7959   | 8.69825   |
| 0         | 0          | 0.121705   | 0          | 0         | 0         |
| 9.04717   | 8.90027    | 7.84579    | 8.37828    | 6.62356   | 7.33007   |
| 0.378778  | 0.354846   | 0.178964   | 4.08E-64   | 7.94E-60  | 8.46E-58  |
| 0.0324885 | 0          | 0          | 0          | 0         | 0.0592493 |
| 7.53621   | 9.32217    | 6.74902    | 7.27594    | 6.93759   | 6.62647   |
| 5.74463   | 4.86282    | 6.43766    | 5.75408    | 6.07693   | 7.05707   |
| 21.9373   | 28.0791    | 32.1271    | 31.2261    | 30.8795   | 31.1946   |
| 0.0620731 | 0.0463475  | 0.106892   | 0.0922336  | 0.142326  | 0.0553091 |
| 1.46788   | 1.63485    | 0.791559   | 0.828541   | 0.63218   | 0.528785  |
| 0         | 0          | 0          | 0          | 0         | 0         |
| 1146.68   | 1130.87    | 1080.53    | 1047.83    | 1650.8    | 282.046   |
| 22.9017   | 38.088     | 34.5698    | 26.5661    | 37.884    | 39.3177   |
| 0         | 0          | 0          | 0          | 0         | 0         |

|          |          |           |          |           |           |
|----------|----------|-----------|----------|-----------|-----------|
| 65.8245  | 58.7099  | 66.0773   | 71.3487  | 70.0001   | 66.486    |
| 3.98716  | 5.05694  | 4.83982   | 4.92984  | 3.97585   | 5.36015   |
| 1.26669  | 0.906929 | 0.508068  | 0.769218 | 0.324615  | 0.509107  |
| 0.491194 | 0.507315 | 0.556878  | 0.549057 | 0.444149  | 0.612779  |
| 0.101443 | 0.290525 | 0.0820552 | 0.147238 | 0.393201  | 0.082223  |
| 0.626134 | 0.4483   | 0.138127  | 0.33047  | 0.0882525 | 0.184546  |
| 0        | 0.201308 | 0         | 0        | 0         | 0         |
| 6.12737  | 6.08399  | 5.61873   | 5.39396  | 2.8999    | 5.27401   |
| 37.235   | 26.2906  | 35.7276   | 34.7617  | 29.5808   | 42.2174   |
| 0        | 0        | 0         | 0        | 0         | 0         |
| 43.8037  | 44.0703  | 41.4616   | 43.8452  | 45.6249   | 34.5837   |
| 1.16187  | 0.856863 | 0.863081  | 0.853458 | 0.665845  | 0.855527  |
| 15.05    | 15.7449  | 14.8966   | 14.3591  | 11.2671   | 14.5861   |
| 105.598  | 95.6343  | 107.124   | 99.8869  | 90.695    | 102.234   |
| 65.2393  | 66.8967  | 72.6187   | 71.5756  | 74.3211   | 64.9922   |
| 3.92259  | 3.44554  | 3.54436   | 3.29799  | 3.27818   | 3.84628   |
| 185.384  | 180.413  | 178.942   | 184.567  | 212.98    | 172.427   |
| 0        | 0        | 0         | 1.20E-07 | 0         | 0         |
| 0.205261 | 0.201297 | 0.19406   | 0.233348 | 0.156922  | 0.218439  |
| 0        | 0        | 0         | 0.105327 | 0.112511  | 0         |
| 0.27916  | 0.114213 | 0.258065  | 0.144708 | 0.0309156 | 0.32324   |
| 24.3171  | 30.0143  | 28.7874   | 31.7471  | 34.8051   | 27.5144   |
| 4.05828  | 3.01462  | 3.61782   | 4.14165  | 3.83424   | 4.09116   |
| 0        | 0        | 0         | 0        | 0         | 0         |
| 0        | 0        | 0         | 0        | 0         | 0         |
| 0        | 0        | 0         | 0        | 0         | 0.0636686 |
| 0        | 0        | 0         | 0        | 0         | 0         |
| 0        | 0        | 0         | 0        | 0         | 0         |
| 0        | 0        | 0         | 0        | 0         | 0         |
| 5.18916  | 4.24483  | 6.08288   | 4.44206  | 4.44731   | 4.83272   |
| 61.3696  | 58.9158  | 63.4168   | 70.4681  | 67.2475   | 65.893    |
| 21.0164  | 19.5065  | 16.2305   | 14.725   | 13.3475   | 18.4578   |
| 1.31061  | 1.61938  | 1.00825   | 0.993408 | 0.735246  | 1.16993   |
| 0        | 0        | 0         | 0        | 0         | 0         |
| 24.3767  | 25.8171  | 26.7432   | 27.8717  | 29.7789   | 26.4715   |
| 0.619376 | 0.480277 | 0.75008   | 0.934672 | 0.838674  | 1.08608   |
| 2.65093  | 2.59882  | 2.04532   | 2.69336  | 2.27636   | 2.18173   |
| 0.339006 | 0        | 0.0609195 | 0.290726 | 0.233588  | 0.0610449 |
| 627.341  | 449.164  | 0         | 0        | 0         | 508.481   |
| 0.608475 | 0.546551 | 0.483234  | 0.457639 | 0.70326   | 0.699461  |
| 47.0324  | 40.927   | 43.9994   | 41.6219  | 38.2915   | 42.7238   |
| 0.426787 | 0.459802 | 0.471163  | 0.399112 | 0.240698  | 0.422414  |
| 15.056   | 17.1163  | 13.2048   | 13.6589  | 15.9332   | 11.9826   |

|           |            |           |           |            |           |
|-----------|------------|-----------|-----------|------------|-----------|
| 14.9872   | 12.0105    | 16.4213   | 13.1513   | 14.6748    | 13.3386   |
| 48.5425   | 39.1086    | 40.4799   | 43.0137   | 36.8041    | 39.4531   |
| 34.6053   | 38.5275    | 43.3874   | 38.9693   | 31.8181    | 36.6792   |
| 11.7929   | 8.12784    | 10.2645   | 10.0575   | 11.1053    | 11.3818   |
| 0.331766  | 0.249586   | 0.290336  | 0.458607  | 0.553526   | 0.235438  |
| 50.0065   | 31.6586    | 34.38     | 34.7841   | 56.6642    | 32.1651   |
| 0.209967  | 0          | 0         | 0         | 0          | 0         |
| 0.0257738 | 0.00922679 | 0.010424  | 0         | 0.00999014 | 0.0208906 |
| 14.2131   | 11.1391    | 12.6066   | 13.3859   | 13.2033    | 9.93177   |
| 7.90E-09  | 0.180066   | 2.94E-09  | 0.192636  | 2.90E-08   | 0.382156  |
| 0         | 0.184426   | 0.0833422 | 0.336482  | 0.159747   | 0.0835126 |
| 21.2104   | 19.6733    | 17.8755   | 18.3248   | 12.4869    | 18.8649   |
| 7.4099    | 6.67066    | 6.25806   | 6.56368   | 4.18154    | 6.31509   |
| 62.5037   | 44.7514    | 25.279    | 22.68     | 24.2269    | 101.323   |
| 3.5705    | 2.73595    | 3.11057   | 3.08753   | 2.84247    | 3.65817   |
| 0         | 0          | 0         | 0         | 0          | 0         |
| 17.493    | 15.2438    | 13.0122   | 15.1381   | 9.59169    | 13.2951   |
| 7.99589   | 6.42324    | 7.30597   | 7.55023   | 7.67926    | 8.5891    |
| 24.0403   | 24.3202    | 28.5244   | 26.7074   | 27.3373    | 25.3552   |
| 0.449736  | 0.789411   | 0.509841  | 0.705989  | 0.307923   | 0.655764  |
| 25.7653   | 23.8822    | 28.293    | 26.7812   | 29.8962    | 27.4772   |
| 6.64245   | 6.64119    | 7.35061   | 7.56968   | 8.00242    | 6.42335   |
| 22.8879   | 26.9302    | 25.4697   | 27.1061   | 31.8217    | 29.7563   |
| 19.8447   | 14.0442    | 19.5958   | 17.1978   | 27.9271    | 10.5047   |
| 7.10916   | 5.21001    | 6.40776   | 6.16397   | 6.48187    | 6.21721   |
| 1.27953   | 1.07779    | 0.73058   | 1.03783   | 1.05026    | 1.09811   |
| 0.221286  | 0.264061   | 0.536982  | 0.321183  | 0.171544   | 0.478293  |
| 155.302   | 118.854    | 111.994   | 50.9962   | 47.2109    | 48.4528   |
| 0.0371727 | 0.0133075  | 0.0150341 | 0.0134885 | 0.0144084  | 0.0150649 |
| 1.58078   | 0.707382   | 0.958999  | 1.1472    | 0.306362   | 0.96096   |
| 1.914     | 1.67815    | 1.19707   | 1.8232    | 0.904363   | 1.44853   |
| 6.54542   | 6.54542    | 4.5352    | 4.5352    | 4.87015    | 4.87015   |
| 2.21718   | 2.95596    | 2.41186   | 2.46906   | 1.57062    | 2.26187   |
| 9.7382    | 9.34275    | 8.89283   | 9.46925   | 7.40772    | 10.368    |
| 772.185   | 726.155    | 469.174   | 556.221   | 579.957    | 749.352   |
| 0         | 0          | 0         | 0         | 0          | 0         |
| 0.869102  | 0.62226    | 1.17166   | 1.15632   | 0.561451   | 1.29147   |
| 0.0289686 | 0.0829638  | 0.0234321 | 0.0630691 | 0          | 0         |
| 0         | 0.0297762  | 0.0672794 | 0         | 0          | 0.0337085 |
| 5.58091   | 3.1691     | 0.31133   | 12.1505   | 1.64105    | 3.11967   |
| 8.36141   | 7.51804    | 7.91485   | 7.68428   | 8.45567    | 7.13311   |
| 0         | 0          | 0         | 0         | 0          | 0         |
| 0.0331302 | 0.0711619  | 0.133992  | 0.192346  | 0.154098   | 0.0537064 |

|           |           |            |           |           |           |
|-----------|-----------|------------|-----------|-----------|-----------|
| 0.0452887 | 0.324259  | 0.146533   | 0.295802  | 0.105326  | 0.0734161 |
| 0         | 0         | 0          | 0         | 0         | 0         |
| 12.9013   | 12.7498   | 14.321     | 14.3891   | 14.0305   | 13.9777   |
| 7.03035   | 5.99535   | 6.70269    | 6.72888   | 5.30127   | 5.88687   |
| 0.719532  | 0.925495  | 0.657936   | 0.885242  | 0.611872  | 0.567252  |
| 0.984317  | 0.738452  | 0.456419   | 1.23244   | 0.927719  | 1.60143   |
| 0.185257  | 0.384658  | 0.389612   | 0.282333  | 0.287228  | 0.225236  |
| 21.1197   | 19.2558   | 21.5256    | 23.0051   | 25.0124   | 21.1114   |
| 0.0371683 | 0         | 0.0300647  | 0         | 0         | 0.0301262 |
| 1.13386   | 1.94196   | 1.35895    | 1.31785   | 0.99938   | 1.43849   |
| 26.7155   | 29.2739   | 31.8257    | 33.0819   | 35.338    | 36.0083   |
| 0.0481554 | 0         | 0          | 0         | 0.0746616 | 0.0390315 |
| 0         | 0.201769  | 0          | 0.0511279 | 0.218462  | 0.228415  |
| 5.19307   | 4.88773   | 3.89741    | 3.73732   | 3.34426   | 2.88249   |
| 0         | 0         | 0.00761533 | 0         | 0         | 0         |
| 0.521246  | 0.210544  | 0.299822   | 0.452065  | 0.297872  | 0.311442  |
| 0.617587  | 1.03171   | 0.633735   | 1.17227   | 0.611627  | 1.16646   |
| 0         | 0         | 0.0997423  | 0         | 0         | 0.0999462 |
| 17.2362   | 13.8055   | 13.1323    | 18.7945   | 16.466    | 16.0167   |
| 7.9636    | 6.64238   | 6.23442    | 6.93818   | 4.8365    | 5.58357   |
| 0.120534  | 0.0143834 | 0.0324993  | 0.14579   | 0.155734  | 0.0814143 |
| 0.99021   | 0.977231  | 0.974142   | 1.12647   | 0.643146  | 0.629064  |
| 12.8402   | 9.58976   | 9.06235    | 9.77655   | 7.61251   | 9.19076   |
| 1.42928   | 1.57689   | 1.25673    | 0.147706  | 1.20022   | 1.33286   |
| 8.39844   | 7.92191   | 7.97089    | 8.46497   | 9.50826   | 8.36501   |
| 33.0605   | 29.3035   | 33.6848    | 31.9906   | 33.1914   | 25.6229   |
| 0         | 0         | 0          | 0         | 0         | 0         |
| 5.89073   | 4.89456   | 6.6179     | 5.77918   | 5.89146   | 5.45251   |
| 33.653    | 36.7042   | 34.4106    | 29.4364   | 23.2618   | 28.7589   |
| 1.39203   | 2.5796    | 1.25845    | 1.18849   | 0.761732  | 1.39376   |
| 32.0193   | 29.7064   | 31.9538    | 37.3082   | 36.6551   | 38.8138   |
| 37.1122   | 0         | 0          | 0         | 0         | 0         |
| 12.635    | 14.1984   | 14.0241    | 14.3503   | 15.2852   | 14.2824   |
| 0.193126  | 0.207411  | 0.117162   | 0.245271  | 0.074857  | 0.547872  |
| 1.6284    | 1.22306   | 1.3301     | 1.83057   | 1.73266   | 1.60456   |
| 0.95553   | 0.586407  | 0.662494   | 0.470552  | 0.767197  | 0.387245  |
| 0         | 0         | 0          | 0         | 0         | 0         |
| 1.01828   | 1.06404   | 0.868185   | 1.21832   | 1.23741   | 0.513053  |
| 51.2667   | 52.9416   | 48.4688    | 45.5904   | 48.8762   | 50.2634   |
| 12.7758   | 12.5623   | 12.9714    | 11.7527   | 14.3228   | 12.2509   |
| 0         | 0         | 0          | 0         | 0         | 0         |
| 0.614592  | 0.739596  | 0.601175   | 0.260025  | 0.551216  | 0.472106  |
| 9.86371   | 9.60224   | 9.46399    | 11.7723   | 7.84063   | 9.06612   |

|           |            |           |            |          |           |
|-----------|------------|-----------|------------|----------|-----------|
| 0         | 0          | 0         | 0          | 0        | 0         |
| 0         | 0          | 0         | 0          | 0        | 0         |
| 0.498921  | 4.47073    | 2.55571   | 0.758707   | 0.637027 | 1.14693   |
| 0         | 0          | 0         | 0          | 0        | 0         |
| 0         | 0          | 0         | 0          | 0        | 0         |
| 24.3582   | 21.6079    | 23.8962   | 23.8475    | 22.1755  | 25.4788   |
| 0         | 0          | 0         | 0          | 0        | 0         |
| 0         | 0          | 0         | 0.0459519  | 0        | 0         |
| 15.7825   | 19.7695    | 23.4331   | 20.126     | 20.4694  | 22.6494   |
| 20.0455   | 21.3263    | 20.1804   | 18.432     | 19.8383  | 17.9746   |
| 88.7229   | 68.3965    | 82.601    | 92.6881    | 102.387  | 66.6595   |
| 0.0577675 | 0.035981   | 0         | 0          | 0        | 0.0407327 |
| 6.83795   | 4.42709    | 6.88442   | 7.07409    | 4.00386  | 3.89146   |
| 20.5637   | 18.736     | 20.3788   | 19.7914    | 20.6485  | 20.4733   |
| 166.393   | 221.737    | 202.39    | 194.852    | 201.395  | 210.24    |
| 3609.13   | 4857.59    | 3781.68   | 3317.04    | 3787.64  | 3565.87   |
| 51.502    | 37.2233    | 47.4768   | 56.6226    | 52.729   | 61.3229   |
| 10.2128   | 11.7543    | 11.0803   | 10.6241    | 11.146   | 10.4391   |
| 33.8225   | 29.5546    | 33.8112   | 32.4097    | 34.2309  | 35.9992   |
| 0         | 0          | 0         | 0          | 0        | 0         |
| 0         | 0          | 0         | 0          | 0        | 0         |
| 2.21985   | 2.52854    | 2.2853    | 1.81236    | 3.26573  | 2.69889   |
| 19.4814   | 23.9789    | 18.2764   | 15.1307    | 13.2373  | 13.8022   |
| 0.0177546 | 0.012712   | 0.0143614 | 0          | 0        | 0.0143907 |
| 11.0747   | 5.79558    | 9.83763   | 10.2875    | 8.9287   | 12.2406   |
| 25.0437   | 21.0554    | 15.0337   | 16.5704    | 12.9808  | 17.537    |
| 0.543583  | 0.253823   | 0.229405  | 0.171517   | 0.201536 | 0.306499  |
| 0         | 0          | 0         | 0          | 0        | 0         |
| 0.0235228 | 0.00842094 | 0         | 0.00853546 | 0        | 0.019066  |
| 12.2084   | 8.00183    | 9.79447   | 11.3308    | 12.3973  | 11.0216   |
| 0.0423761 | 0          | 0         | 0          | 0        | 0         |
| 3.65466   | 2.68786    | 3.5155    | 2.90992    | 3.10829  | 3.19359   |
| 3.18095   | 2.73952    | 3.17495   | 3.23117    | 2.30484  | 2.93835   |
| 0         | 0          | 0         | 0          | 0        | 0         |
| 0.675404  | 0.682696   | 0.578457  | 0.749646   | 0.862373 | 0.998269  |
| 15.5675   | 15.6277    | 13.458    | 14.5457    | 9.95624  | 12.1448   |
| 10.1695   | 7.07422    | 9.81258   | 8.85936    | 8.69094  | 11.1437   |
| 5.02797   | 4.26308    | 3.15729   | 3.71292    | 3.55587  | 2.73503   |
| 5.51872   | 3.62823    | 4.34232   | 4.0722     | 4.39479  | 4.57626   |
| 0         | 0          | 0         | 0          | 0        | 0         |
| 0         | 0          | 0         | 0          | 0        | 0         |
| 22.4679   | 15.8558    | 15.9131   | 17.8657    | 27.3346  | 12.0246   |
| 5.51194   | 4.66124    | 5.7861    | 5.09674    | 6.64673  | 5.77142   |

|           |           |           |           |           |           |
|-----------|-----------|-----------|-----------|-----------|-----------|
| 0.0841079 | 0.321171  | 0.0680332 | 0.0610386 | 0.26624   | 0.170431  |
| 0         | 0.421458  | 0         | 0.106797  | 0.114082  | 1.07351   |
| 10.1028   | 11.2197   | 8.11185   | 8.91053   | 8.23204   | 9.68295   |
| 1.60375   | 1.24295   | 1.02977   | 1.33185   | 0.999725  | 2.03694   |
| 11.669    | 8.82585   | 10.6852   | 11.4965   | 12.5132   | 11.4508   |
| 0         | 0         | 0         | 0         | 0         | 0         |
| 21.875    | 19.3137   | 21.9823   | 20.3431   | 17.7615   | 21.2053   |
| 45.7407   | 48.549    | 45.2186   | 46.4179   | 49.2782   | 55.4186   |
| 18.9674   | 15.9038   | 16.7613   | 16.7407   | 17.7975   | 18.5195   |
| 0         | 0         | 0         | 0         | 0         | 0         |
| 0         | 0         | 0         | 0         | 0         | 0         |
| 28.6628   | 29.3212   | 28.3156   | 24.8865   | 24.156    | 22.3646   |
| 31.911    | 34.1053   | 31.981    | 32.906    | 32.4652   | 23.6935   |
| 0         | 0         | 0         | 0         | 0         | 0         |
| 0.049248  | 0         | 0         | 0         | 0         | 0.119751  |
| 0.283449  | 0         | 0.0982611 | 0.0293862 | 0.0313905 | 0.0656413 |
| 0         | 0         | 0         | 0         | 0.107845  | 0         |
| 0.252305  | 0.663873  | 0.136056  | 0.488273  | 0.456379  | 0.613505  |
| 16.7973   | 12.7782   | 12.2283   | 15.5424   | 15.4631   | 6.46703   |
| 1.94326   | 1.63427   | 2.27047   | 1.38787   | 1.74556   | 2.1501    |
| 9.15276   | 6.9165    | 6.75422   | 7.68446   | 6.82032   | 8.93611   |
| 0.586245  | 0.154528  | 0.399452  | 0.895028  | 0.263518  | 0.574788  |
| 4.52785   | 3.68118   | 4.04329   | 4.57192   | 4.5516    | 3.75572   |
| 7.60505   | 8.70027   | 8.5587    | 7.40882   | 7.08107   | 7.53768   |
| 0         | 0         | 0         | 0         | 0         | 0         |
| 13.3459   | 13.6102   | 14.5382   | 11.622    | 10.7741   | 14.8285   |
| 4.24008   | 2.80427   | 3.60411   | 3.37699   | 3.9973    | 3.59691   |
| 0.711828  | 1.11741   | 1.32873   | 1.3312    | 0.466925  | 0.798869  |
| 9.78804   | 7.89458   | 9.22223   | 8.79531   | 7.52606   | 9.17614   |
| 0         | 0         | 0         | 0         | 0         | 0         |
| 0         | 0.0696842 | 0         | 0         | 0.150899  | 0.315547  |
| 3.01697   | 3.72422   | 3.0568    | 3.34507   | 4.44852   | 3.9923    |
| 1.89954   | 1.55912   | 2.55236   | 1.99143   | 0.592988  | 1.79878   |
| 0         | 0.131282  | 0         | 0.266135  | 0         | 0         |
| 7.37748   | 5.4766    | 6.29103   | 6.13879   | 7.45325   | 4.67089   |
| 5.96741   | 6.26791   | 7.09362   | 5.59684   | 5.84387   | 6.09447   |
| 10.6507   | 9.79004   | 13.2414   | 10.5353   | 11.8916   | 14.0266   |
| 3.61691   | 3.37546   | 3.45222   | 4.39965   | 2.97792   | 3.55839   |
| 0.166233  | 0.371937  | 0.268926  | 0.150798  | 0.144975  | 0.235791  |
| 3563.94   | 2296.54   | 2594.52   | 2586.42   | 1657.69   | 1444.35   |
| 5.48622   | 3.40485   | 4.25944   | 4.30131   | 3.58764   | 2.9614    |
| 0.107321  | 0.0768398 | 0.156259  | 0.0876207 | 0.0831969 | 0         |
| 27.5356   | 27.0492   | 24.1801   | 26.7617   | 25.9423   | 20.0911   |



|           |           |           |           |           |           |
|-----------|-----------|-----------|-----------|-----------|-----------|
| 0.0441567 | 0.187171  | 0.10657   | 0.325887  | 8.10E-87  | 1.81E-96  |
| 2.76619   | 2.76192   | 2.62265   | 2.59997   | 3.86258   | 1.2821    |
| 0.119044  | 0.028411  | 0.0160487 | 0.0287974 | 0.0153808 | 0.0160815 |
| 0.162088  | 0         | 0.0564203 | 0.0334685 | 0         | 0.0371887 |
| 0.0798258 | 0.0571537 | 0.0645694 | 0.057931  | 0         | 0.258806  |
| 6.5167    | 5.84602   | 6.34873   | 5.71688   | 6.17366   | 6.5093    |
| 0.162107  | 0.0580327 | 0         | 0.352932  | 0         | 0         |
| 5.21346   | 4.07519   | 4.20749   | 4.14806   | 4.27194   | 4.08863   |
| 51.2606   | 53.3753   | 65.5619   | 65.9183   | 69.4975   | 56.4794   |
| 0.556182  | 0.371026  | 0.335442  | 0.352129  | 0.102201  | 0.256457  |
| 4.09048   | 9.40352   | 7.80874   | 2.87192   | 10.5113   | 6.61764   |
| 339.308   | 277.607   | 351.04    | 328.187   | 578.697   | 163.975   |
| 20.4701   | 17.1585   | 12.5194   | 15.1273   | 11.5629   | 12.4944   |
| 0         | 0         | 0         | 0         | 0         | 0         |
| 0         | 0         | 0         | 0         | 0         | 0         |
| 1.96819   | 2.2547    | 1.52835   | 4.11366   | 6.34722   | 6.1375    |
| 0         | 0         | 0         | 0         | 0         | 0         |
| 18.5415   | 18.63     | 18.5427   | 16.3673   | 16.6744   | 19.1176   |
| 5.05803   | 5.28242   | 4.522     | 3.25671   | 4.48121   | 7.45961   |
| 0.137167  | 0.330814  | 0         | 0.303556  | 0         | 0.0177871 |
| 37.7006   | 35.7131   | 40.0443   | 38.2858   | 34.8846   | 34.0199   |
| 0         | 0         | 0         | 0         | 0         | 0         |
| 28.0751   | 31.6907   | 30.511    | 39.3341   | 34.6318   | 33.965    |
| 0.135624  | 0.109243  | 0.0274255 | 0         | 0.105138  | 0         |
| 11.8564   | 7.91605   | 10.5586   | 12.0503   | 10.798    | 13.2756   |
| 51.9559   | 43.2734   | 45.8539   | 48.2111   | 53.8054   | 43.0684   |
| 22.4287   | 23.3827   | 18.3991   | 20.8418   | 17.4856   | 18.4882   |
| 0         | 0         | 0         | 0         | 0         | 0         |
| 0         | 0         | 0         | 0         | 0         | 0         |
| 23.6277   | 23.4933   | 25.8715   | 23.6728   | 19.9213   | 21.0621   |
| 1.56482   | 1.74434   | 0.836079  | 2.67496   | 1.36319   | 2.38868   |
| 6.76897   | 6.13681   | 6.8252    | 5.37369   | 5.96334   | 4.94611   |
| 1.17927   | 0.98506   | 1.7488    | 1.14109   | 1.37129   | 0.318614  |
| 0         | 0         | 0         | 0         | 0         | 0         |
| 0         | 0         | 0         | 0         | 0         | 0         |
| 0         | 0         | 0         | 0         | 0         | 0         |
| 0.0598771 | 0.0857417 | 0         | 0         | 0         | 0         |
| 65.5185   | 80.8055   | 60.054    | 68.9474   | 70.1428   | 39.1575   |
| 3.49461   | 1.36548   | 1.65485   | 2.10478   | 0.720742  | 1.65589   |
| 6.58974   | 4.70659   | 7.03999   | 7.84428   | 8.39035   | 8.19222   |
| 0         | 0         | 0         | 0         | 0         | 0         |
| 0         | 0         | 0         | 0         | 0         | 0         |
| 0.0313033 | 0.134475  | 0.0759619 | 0.0681521 | 0.121334  | 0.10149   |

|           |           |           |           |           |           |
|-----------|-----------|-----------|-----------|-----------|-----------|
| 73.8625   | 78.1458   | 78.2646   | 81.2276   | 83.3918   | 77.7785   |
| 1.8317    | 3.28276   | 1.32295   | 3.3342    | 1.27876   | 1.17601   |
| 0.0623596 | 0.26789   | 0.151324  | 0         | 0         | 0         |
| 0.11592   | 0.207491  | 0.210972  | 0.231344  | 0.202191  | 0.117446  |
| 0         | 0         | 0         | 0.0322921 | 0.0689893 | 0.0360662 |
| 46.0256   | 47.3151   | 49.4422   | 56.6662   | 54.7919   | 48.154    |
| 8.92871   | 10.5837   | 8.96926   | 9.42144   | 7.64356   | 10.1103   |
| 14.6279   | 13.6721   | 9.71933   | 13.1782   | 16.1159   | 14.7913   |
| 27.3425   | 23.4748   | 22.6064   | 26.8983   | 26.7961   | 26.4838   |
| 0.088833  | 0.127205  | 0.0359276 | 0.193403  | 0.172162  | 0.216006  |
| 0.364448  | 1.04375   | 1.17918   | 0.264486  | 0         | 1.18159   |
| 0         | 0         | 0         | 0         | 0         | 0         |
| 41.8253   | 36.6806   | 39.9344   | 38.9893   | 51.4197   | 44.3809   |
| 18.135    | 18.9428   | 18.129    | 19.3894   | 19.7929   | 15.1438   |
| 0         | 0         | 0         | 0         | 0         | 0         |
| 34.2887   | 38.4993   | 34.1695   | 34.1535   | 29.675    | 30.9673   |
| 8.33904   | 7.19847   | 8.3579    | 10.7968   | 9.42262   | 10.0604   |
| 1.67036   | 1.65695   | 1.28085   | 1.53695   | 1.27619   | 1.40756   |
| 0.611167  | 0.210615  | 0.408171  | 0.444053  | 0.394128  | 0.310565  |
| 0         | 0         | 0         | 0         | 0         | 0         |
| 171.901   | 155.835   | 173.68    | 168.81    | 187.186   | 67.8361   |
| 29.2099   | 22.5085   | 23.9852   | 23.7343   | 24.5414   | 23.6701   |
| 13.8507   | 16.796    | 14.9708   | 15.3671   | 13.1178   | 14.0121   |
| 0         | 0         | 0         | 0         | 0         | 0         |
| 3.09955   | 3.18283   | 2.4082    | 2.98933   | 2.84544   | 2.47923   |
| 1029      | 990.183   | 871.357   | 960.747   | 1076.26   | 971.891   |
| 0.107304  | 0         | 0         | 0.0389362 | 0.0415918 | 0         |
| 37.2817   | 38.9442   | 34.69     | 37.0738   | 27.3885   | 35.0557   |
| 0         | 0         | 0         | 0         | 0         | 0         |
| 0         | 0         | 0         | 0         | 0         | 0         |
| 0.109413  | 0         | 0         | 0.0794024 | 0         | 0         |
| 13.1507   | 12.2228   | 11.4963   | 13.1596   | 12.6641   | 11.1887   |
| 13.6463   | 11.2145   | 13.1357   | 13.9107   | 14.2743   | 13.6084   |
| 5.43341   | 4.79516   | 5.21097   | 5.81401   | 4.46579   | 5.38345   |
| 26.9124   | 21.2703   | 25.254    | 27.2358   | 26.6172   | 24.5277   |
| 0.0788649 | 0.0846986 | 0.0956883 | 0.143084  | 0.0611373 | 0.0319613 |
| 21.0096   | 21.2165   | 23.9016   | 23.7587   | 21.3018   | 19.9868   |
| 0         | 0         | 0         | 0         | 0         | 0         |
| 0.874918  | 0.689067  | 0.920015  | 0.507955  | 1.55998   | 3.54575   |
| 5.2059    | 4.9233    | 5.88815   | 7.37135   | 6.84275   | 7.33765   |
| 11.8556   | 11.9635   | 12.0355   | 11.8375   | 15.1738   | 11.7376   |
| 20.3152   | 19.0676   | 20.2989   | 19.0048   | 25.4094   | 18.0157   |
| 15.7966   | 14.8878   | 13.2991   | 16.221    | 12.4957   | 14.9377   |

|          |          |          |           |           |           |
|----------|----------|----------|-----------|-----------|-----------|
| 0        | 0        | 0        | 0         | 0         | 0         |
| 0        | 0        | 0        | 0         | 0         | 0         |
| 20.4968  | 20.2207  | 22.3081  | 22.0528   | 21.0687   | 25.4785   |
| 175.734  | 292.505  | 391.332  | 235.811   | 346.396   | 272.686   |
| 10.8636  | 7.85717  | 10.7531  | 11.4797   | 9.76737   | 12.5651   |
| 0.890542 | 0.956417 | 1.62077  | 1.45414   | 0.345181  | 0.541361  |
| 0        | 0        | 0        | 0         | 0         | 0         |
| 6.07762  | 5.07979  | 4.88381  | 5.68784   | 3.54669   | 5.24107   |
| 15.0616  | 13.2853  | 13.8528  | 14.7743   | 13.2663   | 12.6262   |
| 1.83809  | 1.10824  | 0.991371 | 1.31053   | 0.82495   | 1.09777   |
| 11.5854  | 11.8963  | 12.223   | 7.90766   | 12.3513   | 12.7163   |
| 587.795  | 518.776  | 553.259  | 585.771   | 653.586   | 529.342   |
| 0        | 0        | 0        | 0         | 0         | 0         |
| 0.867484 | 5.72106  | 3.80735  | 3.50841   | 5.55536   | 5.48707   |
| 2.88134  | 1.26121  | 1.88474  | 2.65603   | 1.8452    | 2.31695   |
| 0        | 0        | 0        | 0         | 0         | 0         |
| 34.6218  | 35.3063  | 31.8557  | 34.8935   | 76.579    | 13.2353   |
| 5.75498  | 5.90651  | 5.38079  | 5.89156   | 5.44522   | 4.84197   |
| 8.85949  | 6.98559  | 7.44428  | 6.75614   | 6.89599   | 7.52268   |
| 1.04474  | 0.822813 | 0.585913 | 0.93004   | 0.588525  | 0.750825  |
| 0        | 0        | 0        | 0         | 0         | 0         |
| 36.1948  | 34.9469  | 33.2807  | 35.2808   | 33.124    | 31.3038   |
| 0        | 0        | 0        | 0.0302664 | 0.0323308 | 0.0676074 |
| 16.5171  | 16.4223  | 18.2877  | 15.7105   | 15.2196   | 15.1918   |
| 47.5098  | 50.0803  | 60.0349  | 43.396    | 72.4588   | 27.7002   |
| 1.53118  | 0.99663  | 1.27607  | 1.07753   | 0.539542  | 1.42911   |
| 0        | 0        | 0        | 0         | 0         | 0         |
| 5.99009  | 5.00241  | 6.12698  | 6.06927   | 6.04681   | 5.9247    |
| 0        | 0        | 0        | 0         | 0         | 0         |
| 2.00364  | 3.92116  | 2.59313  | 2.03571   | 1.4497    | 1.29922   |
| 14.5878  | 13.8135  | 13.8851  | 14.3013   | 14.6976   | 14.4473   |
| 41.4559  | 63.0988  | 50.0641  | 39.6113   | 44.7346   | 42.7054   |
| 0        | 0        | 0        | 0         | 0         | 0         |
| 17.5747  | 23.746   | 20.6318  | 20.1867   | 12.2741   | 17.6766   |
| 29.5736  | 26.1144  | 29.3487  | 34.5586   | 32.8643   | 34.516    |
| 10.7045  | 13.4821  | 9.27275  | 11.4821   | 6.83319   | 10.4941   |
| 16.5112  | 13.4731  | 15.7247  | 14.5862   | 17.9225   | 15.5046   |
| 33.8502  | 40.7853  | 43.4543  | 43.2097   | 45.5118   | 37.1432   |
| 11.422   | 10.3415  | 10.7938  | 9.09938   | 9.91691   | 10.1152   |
| 26.3649  | 28.833   | 31.0034  | 27.2295   | 25.1364   | 30.021    |
| 0        | 0        | 0        | 0         | 0         | 0         |
| 1.88275  | 1.62732  | 1.64753  | 1.65339   | 1.64418   | 1.71682   |
| 13.3518  | 10.3953  | 11.0184  | 11.7824   | 8.15035   | 10.1061   |

|           |           |           |           |           |           |
|-----------|-----------|-----------|-----------|-----------|-----------|
| 7.08944   | 11.4715   | 6.9961    | 8.64349   | 6.4851    | 5.51638   |
| 12.0768   | 9.08974   | 9.44859   | 10.5706   | 9.61426   | 10.5108   |
| 0         | 0         | 0         | 0         | 0         | 0         |
| 0.742197  | 0.732964  | 0.683154  | 0.631492  | 0.714243  | 0.539343  |
| 0         | 0         | 0         | 0         | 0         | 0         |
| 0.0198353 | 0         | 0.0160444 | 0.086369  | 0.0307532 | 0.0482315 |
| 7.14345   | 7.0164    | 6.60063   | 6.72051   | 7.23218   | 7.15764   |
| 3.07762   | 2.5379    | 1.72419   | 2.65063   | 2.68288   | 3.49426   |
| 33.8391   | 26.6118   | 29.7386   | 31.5795   | 33.9148   | 32.2555   |
| 1.04499   | 1.25704   | 0.811458  | 0.920151  | 0.853295  | 1.19709   |
| 7.92548   | 6.03516   | 5.75882   | 6.94586   | 7.83615   | 6.58719   |
| 0.0647624 | 0.0518363 | 0.036077  | 0.0332987 | 0.0264719 | 0.0305022 |
| 38.2462   | 36.1253   | 35.0672   | 36.6737   | 43.8844   | 32.5823   |
| 6.50084   | 9.05303   | 9.80327   | 6.53992   | 7.86517   | 7.53843   |
| 0         | 0         | 0         | 0         | 0         | 0         |
| 0         | 0         | 0         | 0.0168356 | 0         | 0         |
| 2.44719   | 2.4822    | 2.18568   | 2.88596   | 2.21329   | 2.23147   |
| 0         | 0         | 0         | 0.0570669 | 0         | 0         |
| 29.3783   | 30.4943   | 32.5418   | 28.2781   | 29.0616   | 26.971    |
| 0.0791411 | 0.0566635 | 0         | 0         | 0.0613514 | 0         |
| 0.244233  | 0.291444  | 0.526814  | 0.236326  | 0.378667  | 0.461905  |
| 18.3613   | 15.2711   | 16.4482   | 15.9135   | 18.5157   | 19.2002   |
| 2.61725   | 1.87863   | 2.41853   | 2.66974   | 2.33601   | 3.14344   |
| 0.549514  | 0.492288  | 0.138423  | 1.18068   | 0.516214  | 1.10965   |
| 0.933828  | 0.303336  | 0.202561  | 0.332735  | 0.280966  | 0.288411  |
| 0.568053  | 0.203358  | 0.68923   | 0.961909  | 0.513758  | 0.767377  |
| 3.67423   | 2.98577   | 3.71273   | 3.95191   | 2.25596   | 2.71923   |
| 1.05982   | 0.745954  | 0.562718  | 1.08307   | 0.753962  | 1.06917   |
| 1.32E-05  | 1.09563   | 2.24147   | 5.81979   | 8.42E-06  | 2.74574   |
| 0.209967  | 0.150332  | 0         | 0         | 0         | 0         |
| 15.611    | 14.0273   | 15.8952   | 15.6908   | 17.6198   | 14.2449   |
| 0         | 0         | 0         | 0         | 0         | 0         |
| 0.805056  | 0.449381  | 0.90189   | 0.678264  | 0.581468  | 0.314028  |
| 1.36882   | 1.58835   | 1.37446   | 1.60995   | 0.914765  | 1.03296   |
| 3.8157    | 3.43851   | 4.15073   | 4.32079   | 4.48798   | 3.03943   |
| 0         | 0         | 0         | 0         | 0         | 0         |
| 1.65941   | 1.47413   | 1.14341   | 1.36037   | 1.33404   | 1.54427   |
| 0.243861  | 0.2619    | 0.789018  | 0.221218  | 0.37809   | 0.642388  |
| 8.23074   | 6.42624   | 8.18098   | 7.11151   | 7.59842   | 7.54585   |
| 11.7792   | 8.78877   | 8.91043   | 8.61931   | 8.25284   | 9.50402   |
| 12.9209   | 10.215    | 13.1173   | 13.2533   | 10.972    | 14.5401   |
| 53.0888   | 52.1998   | 57.0708   | 66.9055   | 58.7087   | 70.1005   |
| 0         | 0         | 0         | 0         | 0         | 0         |

|           |          |           |           |           |           |
|-----------|----------|-----------|-----------|-----------|-----------|
| 32.3552   | 38.0698  | 32.855    | 27.5835   | 41.3317   | 23.4756   |
| 12.8906   | 17.1036  | 13.9924   | 16.7783   | 9.4419    | 14.2653   |
| 0         | 0        | 0.0760707 | 0.0680097 | 0         | 0.343087  |
| 0.204072  | 1.82717  | 1.63335   | 0.231406  | 0.951005  | 1.36596   |
| 687.461   | 1380.8   | 711.953   | 903.015   | 728.678   | 1315.06   |
| 2.65943   | 2.74414  | 3.1002    | 2.83823   | 1.45527   | 3.04314   |
| 5.21832   | 4.58773  | 5.56255   | 4.70297   | 4.28993   | 4.51816   |
| 41.931    | 0        | 67.8343   | 30.4301   | 97.5168   | 33.9865   |
| 3.12538   | 1.61664  | 2.55678   | 3.56601   | 3.20622   | 2.71269   |
| 22.4806   | 22.4825  | 24.504    | 19.7687   | 21.3915   | 21.4331   |
| 22.7928   | 22.0071  | 22.6068   | 23.8306   | 21.1586   | 21.2079   |
| 0         | 0        | 0         | 0         | 0         | 0         |
| 2.06821   | 1.67922  | 1.31045   | 1.76393   | 1.68534   | 2.74701   |
| 0.0749741 | 0.021472 | 0.048516  | 0.0544101 | 0.0581211 | 0.0486152 |
| 20.283    | 20.1484  | 17.5951   | 19.1899   | 17.8247   | 17.7524   |
| 18.2847   | 20.5921  | 14.1923   | 14.7854   | 13.9753   | 15.5757   |
| 70.6724   | 63.5779  | 65.0327   | 63.9995   | 74.5172   | 55.3883   |
| 11.2792   | 13.879   | 15.3704   | 15.4948   | 12.1182   | 12.4376   |
| 482.458   | 239.144  | 480.308   | 296.263   | 201.389   | 240.645   |
| 0.28623   | 0.614806 | 0.231526  | 0.484685  | 0.44378   | 0.618664  |
| 47.408    | 43.325   | 44.1233   | 48.0813   | 43.7136   | 38.8434   |
| 0.413471  | 0.166357 | 0.188068  | 0.103105  | 0.10004   | 0.209286  |
| 3.65224   | 2.97449  | 2.17874   | 2.51797   | 1.87572   | 1.85016   |
| 14.2617   | 12.934   | 11.3437   | 9.83246   | 11.4244   | 10.9816   |
| 2.40902   | 0.597051 | 1.72377   | 2.21896   | 1.72386   | 2.77869   |
| 12.566    | 11.6636  | 11.5597   | 13.0161   | 15.4065   | 12.7046   |
| 1.66352   | 1.42926  | 1.04283   | 2.05232   | 1.19287   | 1.04496   |
| 1.84957   | 2.76623  | 4.8872    | 2.77402   | 1.49754   | 1.79897   |
| 0         | 0        | 0         | 0.321203  | 0         | 0         |
| 0         | 0        | 0         | 0.507686  | 0         | 0.189007  |
| 0         | 0        | 0         | 0         | 0         | 0         |
| 1.35948   | 0.961638 | 1.48388   | 1.53339   | 0.876128  | 1.35415   |
| 126.795   | 130.415  | 127.551   | 132.619   | 145.878   | 125.331   |
| 11.3568   | 8.12667  | 13.0418   | 11.5481   | 13.5462   | 13.6666   |
| 163.907   | 172.76   | 167.113   | 177.974   | 178.276   | 164.34    |
| 0         | 0        | 0         | 0         | 0         | 0         |
| 0         | 0        | 0.0286231 | 0.0256803 | 0         | 0         |
| 3.62541   | 2.16081  | 2.89544   | 3.99785   | 3.05447   | 3.10569   |
| 1.60948   | 0.610073 | 0         | 0         | 0         | 0.153475  |
| 3.6461    | 2.7641   | 1.70594   | 2.23097   | 1.96747   | 2.46274   |
| 54.7663   | 50.8547  | 54.0289   | 57.5353   | 49.5564   | 43.2063   |
| 2.52664   | 1.35677  | 1.9302    | 1.78269   | 1.14257   | 1.25151   |
| 4.79551   | 3.77426  | 4.01315   | 3.77326   | 3.33741   | 3.48946   |

|           |           |           |           |           |           |
|-----------|-----------|-----------|-----------|-----------|-----------|
| 0.600264  | 3.16361   | 1.23012   | 4.68549   | 0.929379  | 4.65416   |
| 0.336548  | 0.180721  | 0.416847  | 0.782833  | 0.305739  | 0.419969  |
| 0         | 0         | 0         | 0         | 0         | 0         |
| 1.45445   | 4.16543   | 1.17647   | 3.16656   | 1.12751   | 4.71552   |
| 32.9029   | 30.9562   | 26.5988   | 35.3945   | 33.7883   | 30.9825   |
| 0         | 0         | 0         | 0         | 0         | 0         |
| 10.3314   | 8.64395   | 10.3828   | 9.38631   | 9.74589   | 8.0409    |
| 0         | 0         | 0         | 0         | 0         | 0         |
| 491.505   | 191.95    | 361.425   | 291.84    | 173.192   | 217.299   |
| 15.2532   | 26.2471   | 22.2914   | 19.1159   | 18.9292   | 21.8175   |
| 29.5884   | 26.9446   | 30.4367   | 30.0822   | 29.6594   | 31.0591   |
| 3.56628   | 1.94889   | 1.36731   | 2.24771   | 3.05555   | 4.94385   |
| 0.229198  | 0.443075  | 0.252236  | 0.266627  | 0.349658  | 0.388228  |
| 10.2977   | 12.3704   | 12.8611   | 12.7456   | 11.3107   | 11.6365   |
| 0         | 0         | 0         | 0         | 0         | 0         |
| 18.4706   | 14.268    | 17.2158   | 19.6762   | 21.0708   | 20.5474   |
| 0.029189  | 0.0104494 | 0.0118052 | 0.0105915 | 0.0226277 | 0         |
| 18.4643   | 14.6931   | 17.6673   | 17.0204   | 14.0214   | 17.5922   |
| 0.0923817 | 0.418909  | 0.323811  | 0.357563  | 0.262591  | 0.299514  |
| 0.17468   | 0.250135  | 0.141295  | 0.253536  | 0         | 0         |
| 29.6411   | 16.7679   | 23.6375   | 20.2461   | 22.9966   | 20.725    |
| 24.1735   | 28.5312   | 26.1602   | 24.3089   | 24.24     | 20.864    |
| 0.233932  | 0.117864  | 0.182214  | 0.106891  | 0.221647  | 0.161519  |
| 32.3583   | 29.3888   | 26.7596   | 32.0351   | 22.0792   | 31.4772   |
| 88.1638   | 89.7562   | 97.1271   | 94.8416   | 104.01    | 84.6882   |
| 15.0905   | 11.8079   | 14.1778   | 13.354    | 12.5958   | 12.7746   |
| 0         | 0         | 0         | 0.040374  | 0         | 0         |
| 34.516    | 28.1212   | 34.7631   | 33.7208   | 31.684    | 32.7982   |
| 0.290431  | 0.415886  | 0.0939694 | 0.337233  | 0.135088  | 0.0941615 |
| 0.948809  | 0.630805  | 0.745544  | 0.541017  | 0.388781  | 0.461425  |
| 1.96222   | 1.92153   | 1.09454   | 1.37492   | 1.9144    | 1.8371    |
| 0.106037  | 0.121179  | 0.092287  | 0.178115  | 0.118396  | 0.224136  |
| 1.00385   | 1.43747   | 0.811993  | 0.364256  | 0         | 1.62731   |
| 0.918708  | 0.748505  | 1.25562   | 1.17251   | 0.245585  | 0.718966  |
| 0         | 0         | 0         | 0         | 0         | 0         |
| 0.88571   | 0.951793  | 1.4683    | 1.31734   | 1.14442   | 0.957513  |
| 1.40778   | 0.465204  | 1.13872   | 1.49318   | 0.251846  | 1.14105   |
| 0         | 0         | 0         | 0         | 0         | 0         |
| 4.38384   | 2.97022   | 2.45126   | 2.74372   | 1.6878    | 2.06279   |
| 10.2683   | 9.37219   | 10.4786   | 9.76887   | 9.93729   | 11.7986   |
| 17.1718   | 20.0803   | 16.7631   | 17.9021   | 16.5553   | 17.8748   |
| 10.6675   | 8.22961   | 13.2983   | 7.54879   | 8.9783    | 10.7615   |
| 14.4755   | 13.5437   | 14.0231   | 15.9591   | 15.6904   | 14.1556   |

|           |          |          |          |           |          |
|-----------|----------|----------|----------|-----------|----------|
| 13.232    | 9.34945  | 11.9685  | 10.1389  | 11.3357   | 11.5703  |
| 5.3649    | 4.68277  | 5.09533  | 5.24953  | 4.55616   | 5.88748  |
| 0         | 0        | 0        | 0        | 0         | 0        |
| 0.107477  | 0.153813 | 0.108566 | 0.136345 | 0.0832335 | 0.152315 |
| 0.417569  | 0.254745 | 0.551885 | 0.172139 | 0.13791   | 0.288386 |
| 0.603147  | 0.37015  | 0.139392 | 0.250123 | 0.534364  | 0.768226 |
| 0         | 0        | 0        | 0        | 0         | 0        |
| 6.04322   | 4.60868  | 5.66087  | 5.76672  | 5.65349   | 6.3354   |
| 1.21968   | 0.983579 | 0.67061  | 1.01714  | 0.486077  | 0.474728 |
| 54.6776   | 43.2812  | 48.0533  | 47.4274  | 64.3542   | 40.8246  |
| 1.16457   | 0.357638 | 1.25609  | 1.28792  | 0.473146  | 0.69689  |
| 13.0818   | 11.2288  | 12.6959  | 11.7919  | 14.6127   | 10.6236  |
| 19.2288   | 18.4376  | 20.5766  | 18.0635  | 18.1022   | 18.7577  |
| 50.906    | 49.9064  | 51.7734  | 56.0062  | 44.8612   | 49.2431  |
| 2.43997   | 3.20865  | 3.13669  | 1.96607  | 2.5417    | 2.7439   |
| 0         | 0        | 0        | 0        | 0         | 0        |
| 0         | 0        | 0        | 0        | 0         | 0        |
| 387.063   | 340.001  | 327.695  | 296.635  | 479.068   | 165.821  |
| 0         | 0        | 0        | 0        | 0         | 0        |
| 0.216496  | 0.26238  | 0.281685 | 0.157115 | 0.352215  | 0.262749 |
| 0.749776  | 0.536811 | 0.393888 | 0.499236 | 0.227695  | 0.407223 |
| 10.8054   | 6.96648  | 9.48821  | 8.55797  | 8.37713   | 9.50569  |
| 8.10424   | 6.62666  | 8.20734  | 8.47513  | 8.62139   | 8.7433   |
| 206.31    | 362.886  | 290.962  | 281.063  | 184.067   | 244.259  |
| 0.910221  | 1.04839  | 1.56855  | 0.890326 | 0.352809  | 0.721727 |
| 131.703   | 130.697  | 151.559  | 144.591  | 168.837   | 115.113  |
| 0         | 0        | 0        | 0        | 0         | 0        |
| 6.36248   | 5.47731  | 5.7331   | 5.79765  | 5.26841   | 6.09631  |
| 7.51295   | 7.52886  | 7.39987  | 7.05826  | 6.73805   | 7.51656  |
| 42.1886   | 39.7475  | 42.0654  | 41.9864  | 35.9221   | 39.0603  |
| 2.84503   | 4.94697  | 3.94507  | 2.6546   | 3.46581   | 2.97515  |
| 0         | 0        | 0        | 0        | 0         | 0        |
| 3.21618   | 2.84075  | 2.69876  | 3.22112  | 2.89712   | 3.47577  |
| 31.389    | 37.0929  | 40.6965  | 39.9564  | 35.7618   | 35.3555  |
| 46.6594   | 40.2737  | 41.847   | 49.3924  | 51.1791   | 46.2503  |
| 0.906146  | 0.53176  | 1.33921  | 0.70412  | 0.962833  | 0.898442 |
| 16.325    | 20.7127  | 17.3264  | 20.0213  | 11.8238   | 16.8728  |
| 3.4481    | 2.93167  | 3.83501  | 3.46028  | 4.42719   | 4.21404  |
| 0.307879  | 1.10218  | 0.697303 | 0.714986 | 0.716017  | 0.64882  |
| 0.0869763 | 0        | 0.140707 | 0.252481 | 0.337127  | 0.211492 |
| 20.8667   | 15.1587  | 18.6184  | 16.051   | 18.2595   | 17.0305  |
| 3.82214   | 2.9076   | 2.75791  | 2.64284  | 2.91759   | 3.33565  |
| 0         | 0        | 0        | 0        | 0         | 0        |

|           |           |           |           |           |           |
|-----------|-----------|-----------|-----------|-----------|-----------|
| 0         | 0         | 0         | 0         | 0         | 0         |
| 11.3747   | 10.0396   | 10.4633   | 11.0022   | 9.20557   | 10.7993   |
| 6.13828   | 4.60436   | 7.85328   | 4.71243   | 8.708     | 4.8401    |
| 29.7357   | 25.638    | 25.6207   | 26.4626   | 28.5326   | 25.1416   |
| 31.2841   | 32.4627   | 34.1364   | 29.4295   | 25.1454   | 37.0042   |
| 2.48978   | 0.625486  | 0.9893    | 1.07779   | 0.981989  | 1.91184   |
| 11.0973   | 7.84814   | 13.263    | 9.97098   | 8.82515   | 12.5192   |
| 0.391544  | 0.254853  | 0.14396   | 0.452058  | 0.331125  | 0.360636  |
| 36.6441   | 36.072    | 35.836    | 35.7977   | 37.6673   | 39.8106   |
| 0         | 0         | 0         | 0         | 0         | 0         |
| 0         | 0         | 0         | 0         | 0         | 0         |
| 0         | 0         | 0         | 0         | 0         | 0         |
| 15.4917   | 13.0317   | 13.3489   | 14.6766   | 14.4738   | 14.5478   |
| 12.458    | 13.4869   | 15.1563   | 16.2614   | 8.37034   | 7.80939   |
| 2.94675   | 5.53059   | 5.39195   | 4.85836   | 4.21388   | 4.75369   |
| 4.4401    | 3.77309   | 3.13522   | 3.37095   | 4.7257    | 3.90857   |
| 0         | 0         | 0         | 0         | 0         | 0         |
| 0.0556206 | 0         | 0         | 0         | 0.043122  | 0         |
| 1.22539   | 1.14188   | 1.0829    | 1.40566   | 1.23635   | 1.49586   |
| 182.743   | 191.538   | 161.199   | 169.188   | 156.866   | 143.036   |
| 0.479326  | 0.739174  | 0.208771  | 0.294339  | 0.257248  | 0.717249  |
| 2.8091    | 7.75773   | 3.63556   | 3.96074   | 2.86207   | 6.4403    |
| 0         | 0         | 0         | 0         | 0         | 0         |
| 0.346408  | 0.159443  | 0.0800579 | 0.251395  | 0.210997  | 0.0802216 |
| 0.0280652 | 0         | 0.0227014 | 0.0203674 | 0         | 0         |
| 54.1898   | 41.3715   | 46.9595   | 48.8128   | 52.2475   | 46.8823   |
| 0.886318  | 0.592352  | 0.767084  | 0.692751  | 0.618227  | 1.06773   |
| 0.152043  | 0.0544299 | 0.15373   | 0.11034   | 0.0883995 | 0.338898  |
| 8.32666   | 9.53593   | 7.41736   | 5.94912   | 3.65619   | 5.56868   |
| 5.36182   | 3.91398   | 4.48899   | 3.00961   | 5.22308   | 3.90457   |
| 0.589219  | 0.562493  | 0.317738  | 0.285071  | 0.456772  | 0.716373  |
| 13.54     | 11.3101   | 11.8214   | 13.2576   | 13.3704   | 8.71001   |
| 1.61098   | 2.16268   | 2.28041   | 2.33823   | 2.02939   | 2.12185   |
| 0.27589   | 0.040401  | 0.029342  | 0.114661  | 0.0437435 | 0.0130675 |
| 0         | 0.0787644 | 0.118645  | 0.0798355 | 0         | 0         |
| 0         | 0         | 0         | 0         | 0         | 0         |
| 15.9512   | 14.0607   | 15.442    | 13.7618   | 12.7074   | 15.7969   |
| 1.75531   | 2.44964   | 2.21398   | 2.80681   | 2.44473   | 3.42422   |
| 0.585893  | 0.419488  | 0.236959  | 0.212597  | 0.264946  | 0.237443  |
| 0.473095  | 0.118717  | 0.133937  | 0.274667  | 0.146853  | 0.143797  |
| 0         | 0         | 0         | 0         | 0         | 0         |
| 31.96     | 32.0302   | 31.2807   | 33.6897   | 31.3666   | 26.0284   |
| 0         | 0         | 0.398048  | 0         | 0         | 0         |



|           |            |           |           |           |            |
|-----------|------------|-----------|-----------|-----------|------------|
| 1.67595   | 0.95996    | 1.26527   | 2.1082    | 1.81891   | 1.53954    |
| 0         | 0          | 0         | 0         | 0         | 0          |
| 9.46986   | 11.0547    | 10.1578   | 11.9521   | 17.555    | 7.67564    |
| 17.4764   | 17.6582    | 16.03     | 17.7798   | 16.8822   | 17.6072    |
| 0.505283  | 1.80886    | 0.408713  | 1.10008   | 0.391703  | 0.409549   |
| 16.0381   | 12.8153    | 14.541    | 15.1132   | 13.9148   | 16.0509    |
| 0         | 0          | 0         | 0         | 0         | 0          |
| 2.51199   | 1.81125    | 2.18722   | 2.04827   | 2.40249   | 2.0924     |
| 29.3077   | 31.3746    | 28.8335   | 28.487    | 21.9694   | 22.2245    |
| 5.70668   | 4.18107    | 1.16968   | 2.12351   | 1.00402   | 3.31762    |
| 0.420727  | 0.254889   | 0.353406  | 0.234868  | 0.489231  | 0.354129   |
| 2.03155   | 1.38843    | 1.79267   | 1.67538   | 1.64647   | 1.69654    |
| 0.0740755 | 0.0530367  | 0.0898773 | 0.107516  | 0.172273  | 0.0900611  |
| 0         | 0.626354   | 0         | 0.634872  | 0         | 0          |
| 104.085   | 123.656    | 126.661   | 120.491   | 128.531   | 110.869    |
| 3.17865   | 3.62309    | 4.1438    | 4.46639   | 3.29425   | 3.93663    |
| 8.53713   | 6.79465    | 9.11656   | 8.17658   | 7.00923   | 10.2569    |
| 0         | 0          | 0         | 0         | 0.260667  | 0.272542   |
| 128.516   | 98.3506    | 98.7805   | 106.826   | 102.887   | 107.896    |
| 0.702579  | 0.679095   | 0.880868  | 0.803052  | 0.748894  | 1.29553    |
| 0         | 0          | 0         | 0         | 0         | 0          |
| 7.67629   | 5.49768    | 6.81961   | 6.52462   | 6.23923   | 7.46903    |
| 0.172401  | 0.0822905  | 0.108462  | 0.0834096 | 0.0742488 | 0.0621052  |
| 33.3972   | 33.7644    | 38.6101   | 39.1544   | 31.5357   | 40.4821    |
| 0         | 0          | 0         | 0         | 0         | 0          |
| 89.6474   | 76.8095    | 91.7042   | 87.8269   | 106.48    | 76.8128    |
| 124.754   | 163.993    | 134.179   | 82.7845   | 68.9318   | 155.913    |
| 1250.13   | 1783.88    | 1627.76   | 1571.51   | 1191.59   | 2760.12    |
| 3.51172   | 2.98734    | 3.31047   | 3.21002   | 2.89904   | 3.09093    |
| 1.71789   | 0.896619   | 1.07789   | 1.00202   | 1.82958   | 1.74376    |
| 5.44835   | 5.06065    | 4.60558   | 7.62296   | 9.47466   | 8.31494    |
| 3.92514   | 3.30731    | 3.87012   | 3.83205   | 3.23501   | 4.2866     |
| 0.234331  | 0.50333    | 0.13539   | 0.340117  | 0.103804  | 0.1628     |
| 4.47888   | 2.73506    | 4.79472   | 4.39736   | 4.0846    | 4.27086    |
| 4.96203   | 3.36925    | 3.57683   | 4.70144   | 1.54115   | 2.62326    |
| 0.24958   | 0.178694   | 0.378525  | 0.249046  | 0.217663  | 0.177006   |
| 7.17137   | 7.65133    | 6.73239   | 6.69904   | 5.9748    | 6.0218     |
| 3.26753   | 1.77958    | 3.02706   | 2.31051   | 2.03506   | 2.82949    |
| 0.121149  | 0.173389   | 0.394279  | 0.176243  | 0.0950461 | 0.0985192  |
| 15.4313   | 13.9597    | 16.3265   | 16.2896   | 9.89171   | 13.964     |
| 0         | 0.00532713 | 0         | 0         | 0.0173036 | 0.00603063 |
| 0.332756  | 0.277298   | 0.379547  | 0.380369  | 0.47008   | 0.447039   |
| 0.235304  | 0.322907   | 0.0634442 | 0.128073  | 0.532033  | 0.158935   |

|           |          |           |          |           |           |
|-----------|----------|-----------|----------|-----------|-----------|
| 11.2561   | 11.2562  | 12.2578   | 12.3027  | 10.5807   | 13.2179   |
| 25.6449   | 23.3269  | 22.6005   | 26.5528  | 21.2633   | 24.0377   |
| 3.75569   | 3.20226  | 3.2522    | 2.73688  | 2.56113   | 2.82939   |
| 5.81513   | 5.31898  | 5.6991    | 6.19266  | 3.13679   | 5.68252   |
| 16.6073   | 14.8629  | 16.2941   | 15.3126  | 17.3014   | 11.4043   |
| 3.1823    | 1.6722   | 1.97407   | 2.40517  | 3.58261   | 2.07144   |
| 1.53367   | 2.91865  | 2.28523   | 1.99171  | 1.90854   | 1.93006   |
| 0.56663   | 0.599725 | 0.318842  | 0.554244 | 0.706636  | 0.619019  |
| 0         | 0        | 0.076483  | 0        | 0         | 0         |
| 6.27311   | 5.62135  | 7.59533   | 7.35846  | 6.33109   | 4.8927    |
| 1.8764    | 1.89922  | 1.88245   | 1.63525  | 2.05988   | 2.29067   |
| 0         | 0        | 0         | 0        | 0.0185908 | 0.019538  |
| 0         | 0        | 0         | 0        | 0         | 0         |
| 0.998608  | 0.260165 | 6.00675   | 5.41554  | 4.57444   | 15.4229   |
| 12.1855   | 8.8871   | 10.8877   | 11.2209  | 11.8969   | 11.3713   |
| 1.52849   | 1.07134  | 1.55807   | 1.40939  | 1.93743   | 1.80622   |
| 0.319737  | 0.139899 | 0.129314  | 0.180475 | 0.0688515 | 0.0863859 |
| 0.963036  | 1.22914  | 0.406425  | 0.303866 | 0.227214  | 0.237566  |
| 0.418549  | 0.27243  | 0.369334  | 0.276135 | 0.383459  | 0.246726  |
| 0.924231  | 0.949441 | 0.910112  | 0.816542 | 1.71332   | 0.879402  |
| 15.7353   | 10.5859  | 13.9954   | 13.0646  | 14.1365   | 14.7536   |
| 2.38377   | 1.95055  | 2.59386   | 2.01827  | 3.03589   | 2.59917   |
| 0.172225  | 0.534342 | 0.325055  | 0.458285 | 0.356031  | 0.372251  |
| 2.54971   | 1.92054  | 1.36589   | 1.65894  | 1.28448   | 1.53107   |
| 0.0320094 | 0        | 0         | 0        | 0         | 0         |
| 15.7741   | 15.8606  | 15.5683   | 17.1767  | 13.6836   | 15.8421   |
| 0.613852  | 0.492247 | 0.516394  | 0.28511  | 0.342625  | 0.457744  |
| 1.64866   | 1.55961  | 1.61916   | 1.06835  | 1.05      | 1.36012   |
| 0.179587  | 0.349005 | 0.10376   | 0.24204  | 0.198884  | 0.270328  |
| 0.462685  | 0.368082 | 0.374256  | 0.485014 | 0.717361  | 0.416691  |
| 0         | 0        | 0         | 0        | 0         | 0         |
| 27.173    | 32.1947  | 34.0709   | 46.6863  | 37.2975   | 41.8419   |
| 0         | 0        | 0.0784945 | 0        | 0         | 0         |
| 4.72207   | 4.90778  | 4.06602   | 2.32144  | 2.71595   | 3.58047   |
| 76.9422   | 85.5406  | 85.3456   | 88.3568  | 91.5044   | 97.0779   |
| 5.16654   | 3.9322   | 4.49285   | 4.92043  | 4.6428    | 4.94217   |
| 0.255729  | 0.248422 | 0.496948  | 0.485386 | 0.289305  | 0.339237  |
| 1.81264   | 0.959619 | 1.45115   | 1.41624  | 1.6225    | 0.576603  |
| 23.0117   | 23.3307  | 20.5862   | 22.3828  | 20.2458   | 17.5158   |
| 190.644   | 132.286  | 118.077   | 143.92   | 128.519   | 173.914   |
| 0         | 0        | 0         | 0        | 0         | 0         |
| 15.2726   | 12.8412  | 15.3671   | 15.3461  | 13.6658   | 14.871    |
| 11.8178   | 11.8214  | 12.8393   | 10.2364  | 13.0165   | 11.9518   |

|           |           |           |            |           |           |
|-----------|-----------|-----------|------------|-----------|-----------|
| 0.440274  | 1.25781   | 0.728921  | 0.333062   | 1.1031    | 0.71273   |
| 17.3344   | 18.7847   | 16.8904   | 16.6049    | 14.3814   | 16.8545   |
| 55.931    | 60.9442   | 58.3639   | 61.479     | 58.8705   | 55.7422   |
| 0         | 0         | 0         | 0          | 0         | 0         |
| 49.0504   | 53.3196   | 52.6357   | 48.2635    | 59.4656   | 44.5453   |
| 4.89534   | 3.50766   | 3.56402   | 3.59626    | 4.31529   | 2.56413   |
| 12.5279   | 9.67789   | 10.9003   | 10.4375    | 8.7694    | 10.0875   |
| 3.33475   | 3.76392   | 2.48959   | 3.44272    | 3.08186   | 3.7413    |
| 52.3177   | 49.9214   | 47.4101   | 45.7837    | 50.7259   | 55.2774   |
| 0         | 1.85696   | 0.635553  | 2.83103    | 0.678864  | 3.13194   |
| 103.594   | 120.98    | 82.2687   | 92.9303    | 81.906    | 77.3952   |
| 113.611   | 118.672   | 126.788   | 115.199    | 113.942   | 126.658   |
| 13.1661   | 14.459    | 29.2538   | 31.6102    | 54.5376   | 16.1278   |
| 0.201976  | 0.32067   | 0.415001  | 0.189601   | 0.164442  | 0.178673  |
| 80.7503   | 84.0011   | 69.8496   | 78.8002    | 82.6383   | 69.9955   |
| 2.57572   | 1.31033   | 2.13827   | 2.77927    | 2.23319   | 3.07662   |
| 0.976114  | 0.228265  | 0.586428  | 0.624711   | 0.495063  | 0.185719  |
| 1.67996   | 2.13085   | 1.82479   | 1.77651    | 1.26512   | 1.36166   |
| 0         | 0         | 0         | 0          | 0         | 0         |
| 2.71515   | 2.01221   | 2.35035   | 2.83466    | 2.19714   | 2.85708   |
| 0.0550657 | 0         | 0.0445415 | 0          | 0.0426878 | 0         |
| 1.71414   | 1.77682   | 2.44195   | 2.56223    | 2.47915   | 2.61283   |
| 9.33159   | 7.7235    | 8.16456   | 9.17659    | 8.4253    | 8.05486   |
| 3.31241   | 3.41883   | 4.38438   | 5.24482    | 4.96892   | 6.24139   |
| 3.2389    | 4.63756   | 5.26065   | 6.46452    | 3.83363   | 3.18144   |
| 0.0269186 | 0.0385464 | 0         | 0.0195353  | 0         | 0.0436369 |
| 13.5111   | 11.128    | 11.5257   | 12.0743    | 12.9332   | 9.82275   |
| 2.70411   | 3.14564   | 2.89165   | 2.81261    | 2.98268   | 2.58954   |
| 21.7801   | 15.964    | 18.3984   | 19.3552    | 18.9257   | 21.4659   |
| 5.56445   | 4.00158   | 3.7769    | 3.32836    | 3.47084   | 3.95487   |
| 30.9568   | 30.5485   | 30.9221   | 30.7513    | 24.9178   | 28.5532   |
| 8.17304   | 7.17595   | 8.72655   | 9.02571    | 8.22865   | 8.05511   |
| 31.8808   | 29.9301   | 31.4979   | 32.6744    | 31.448    | 28.0818   |
| 122.83    | 120.979   | 119.248   | 106.637    | 125.707   | 135.384   |
| 5.74114   | 6.46748   | 6.04544   | 6.22048    | 5.53968   | 4.66884   |
| 10.0744   | 9.03388   | 9.7577    | 11.1679    | 8.61864   | 10.0155   |
| 0.676205  | 0.220068  | 0.348071  | 0.446122   | 0.142965  | 0.149478  |
| 17.7887   | 14.7282   | 17.9343   | 17.0376    | 15.413    | 17.3284   |
| 1.39558   | 0.974279  | 1.25821   | 1.41884    | 1.71358   | 1.50423   |
| 13.8005   | 13.061    | 13.0848   | 12.8375    | 9.83372   | 11.956    |
| 2.34469   | 2.8826    | 2.15853   | 1.41152    | 1.20327   | 1.95221   |
| 0         | 0         | 0         | 0.00755054 | 0.016131  | 0         |
| 0         | 0         | 0         | 0          | 0         | 0         |

|           |          |            |           |           |           |
|-----------|----------|------------|-----------|-----------|-----------|
| 6.7259    | 4.63305  | 6.06631    | 4.98079   | 3.91117   | 5.3405    |
| 85.2974   | 95.5509  | 97.1133    | 88.5826   | 89.1895   | 74.785    |
| 0         | 0.023424 | 0          | 0.0155406 | 0.14756   | 0.014464  |
| 0.673837  | 1.10699  | 0.20869    | 1.28086   | 0.324488  | 0.690683  |
| 0         | 0        | 0          | 0         | 0         | 0         |
| 2.93241   | 3.10711  | 3.01608    | 2.11893   | 2.17527   | 3.97503   |
| 0         | 0        | 0          | 0         | 0         | 0         |
| 30.2979   | 31.9137  | 28.7063    | 30.3916   | 21.9397   | 25.0834   |
| 0         | 1.21E-07 | 0          | 0         | 6.27E-08  | 0         |
| 0.0343165 | 0        | 0          | 0         | 0         | 0.0278147 |
| 1.57551   | 1.10404  | 1.92516    | 1.94617   | 1.22136   | 1.65739   |
| 0.256675  | 0.205038 | 0.171586   | 0.266941  | 0.0296001 | 0.139269  |
| 63.6463   | 65.9763  | 65.7545    | 67.4411   | 64.7815   | 61.9181   |
| 15.4964   | 21.5643  | 11.9628    | 11.7505   | 14.9493   | 19.7842   |
| 7.82012   | 5.01872  | 6.59124    | 6.23213   | 8.14638   | 8.58252   |
| 13.7515   | 17.8602  | 21.5197    | 17.7465   | 18.2465   | 19.9524   |
| 27.1802   | 26.2957  | 20.4519    | 20.3685   | 17.0536   | 20.9979   |
| 9.53609   | 7.00466  | 9.09481    | 7.80083   | 12.0196   | 7.3858    |
| 17.516    | 16.4094  | 15.4766    | 18.081    | 16.5398   | 14.5878   |
| 0         | 0        | 0          | 0         | 0         | 0         |
| 0.520377  | 0.45326  | 0.275352   | 0.41035   | 0.438338  | 0.440044  |
| 3.57152   | 1.75309  | 3.27046    | 2.47782   | 3.23882   | 3.84151   |
| 1.97707   | 1.13947  | 1.60293    | 1.44729   | 1.97479   | 1.05821   |
| 0         | 0        | 0          | 0         | 0         | 0         |
| 7.19299   | 9.90774  | 7.44477    | 8.30542   | 10.3238   | 7.03979   |
| 2.12E-05  | 2.81E-05 | 0.00013159 | 1.99E-05  | 0.0006101 | 2.52E-09  |
| 9.40602   | 7.88771  | 9.27592    | 8.97682   | 8.49033   | 8.40718   |
| 10.5364   | 15.2916  | 14.12      | 11.759    | 13.5103   | 13.9411   |
| 0.0234951 | 0        | 0          | 0         | 0         | 0         |
| 8.68316   | 10.1314  | 7.28377    | 8.16865   | 7.47925   | 9.90533   |
| 48.2783   | 56.0902  | 52.7785    | 51.8178   | 52.0733   | 48.9028   |
| 3.54399   | 3.8499   | 3.50919    | 4.05746   | 3.36315   | 3.88781   |
| 0         | 0        | 0          | 0         | 0         | 0         |
| 19.4333   | 15.7357  | 18.7719    | 20.3243   | 20.0293   | 19.3224   |
| 17.5412   | 13.4789  | 16.2238    | 18.371    | 15.7459   | 17.3591   |
| 0         | 0        | 0          | 0         | 0         | 0         |
| 0.609186  | 0.40273  | 0.378794   | 0.255942  | 0.381772  | 0.323584  |
| 0         | 0        | 0          | 0         | 0         | 0         |
| 14.0996   | 15.8568  | 13.2348    | 15.3174   | 16.8419   | 17.6119   |
| 4.46132   | 3.08727  | 7.04967    | 6.53258   | 7.4467    | 5.07981   |
| 40.1573   | 37.2429  | 43.2149    | 44.0078   | 34.6603   | 42.1295   |
| 0         | 0.201308 | 0          | 0         | 0         | 0         |
| 0.353845  | 0.175393 | 0.286218   | 0.286421  | 0.348157  | 0.264741  |

|           |           |           |           |           |           |
|-----------|-----------|-----------|-----------|-----------|-----------|
| 0.365436  | 0.17443   | 0.164219  | 0.20627   | 0.220338  | 0.394931  |
| 9.79794   | 6.79101   | 8.12792   | 9.31413   | 8.00805   | 8.11916   |
| 0         | 0.0499176 | 0.0565932 | 0.241748  | 2.12E-145 | 0.0552178 |
| 7.41815   | 7.05221   | 7.95187   | 7.88567   | 6.86988   | 6.25902   |
| 33.1678   | 27.5125   | 30.967    | 33.9711   | 35.6284   | 28.8644   |
| 1.08417   | 0.631904  | 1.4432    | 1.92655   | 1.35275   | 1.38189   |
| 8.97337   | 10.2961   | 9.02645   | 9.76821   | 9.00751   | 11.4693   |
| 0         | 0.156499  | 0.044201  | 0.158627  | 0.0423614 | 0         |
| 92.8051   | 104.214   | 93.8763   | 99.0609   | 96.2575   | 85.2995   |
| 0.813237  | 1.10511   | 0.899456  | 1.31285   | 0.90062   | 1.37212   |
| 9.67453   | 9.43773   | 7.82553   | 6.53829   | 6.84361   | 6.86134   |
| 0.0211168 | 0.0167992 | 0         | 0         | 0         | 0         |
| 4.29465   | 4.43146   | 5.87491   | 6.00425   | 6.31585   | 6.19417   |
| 110.669   | 122.245   | 135.794   | 108.115   | 109.309   | 119.346   |
| 7.87658   | 8.56463   | 8.68306   | 9.20575   | 8.42356   | 8.19078   |
| 17.1631   | 25.4318   | 18.3496   | 11.5891   | 11.801    | 12.7016   |
| 0         | 0.0546136 | 0         | 0.110713  | 0.029566  | 0         |
| 1.51429   | 0.701543  | 0.648466  | 1.0343    | 0.89769   | 1.15518   |
| 1.66E-19  | 3.83E-20  | 0.0352725 | 1.19E-23  | 0.0254818 | 8.34E-41  |
| 2.88674   | 2.81177   | 2.26118   | 1.87276   | 2.25301   | 2.21192   |
| 0.169407  | 0.212261  | 0.376832  | 0.276619  | 0.328317  | 0.205965  |
| 0         | 0         | 0         | 0         | 0         | 0         |
| 0         | 0.0711983 | 0.0714987 | 0.0160368 | 0.0171306 | 0.017911  |
| 11.1887   | 8.20004   | 10.6345   | 10.7509   | 11.2936   | 11.0022   |
| 58.3161   | 62.872    | 58.9455   | 57.4951   | 57.313    | 43.5726   |
| 0         | 0         | 0         | 0         | 0         | 0         |
| 1.27142   | 1.24134   | 1.02843   | 0.922694  | 1.16483   | 0.843161  |
| 164.777   | 158.444   | 193.982   | 184.471   | 192.296   | 175.882   |
| 43.1895   | 43.5413   | 44.4067   | 39.2181   | 39.7115   | 37.3454   |
| 9.04279   | 6.21617   | 7.04218   | 7.87153   | 7.21519   | 8.10922   |
| 24.4197   | 26.1673   | 25.7174   | 22.9204   | 24.7873   | 25.6798   |
| 15.0933   | 15.897    | 14.7386   | 11.2281   | 10.9284   | 14.3586   |
| 0         | 0         | 0         | 0         | 0         | 0         |
| 26.1659   | 25.8489   | 24.2684   | 24.7804   | 26.5003   | 18.2541   |
| 2.00442   | 1.79025   | 2.27927   | 1.44418   | 1.67991   | 1.25556   |
| 14.4357   | 15.1893   | 13.3414   | 14.3856   | 11.05     | 13.7611   |
| 15.4947   | 13.1711   | 13.7114   | 13.8426   | 14.9228   | 14.9911   |
| 0.141161  | 0.0577537 | 0.114183  | 0.146348  | 0.0156329 | 0.0326903 |
| 1.16476   | 1.04591   | 0.86494   | 0.905352  | 1.39697   | 0.890396  |
| 0         | 0         | 0         | 0         | 0         | 0         |
| 0.32637   | 0.521275  | 0.609218  | 0.491925  | 0.350318  | 0.468022  |
| 89.8811   | 86.9211   | 99.5744   | 107.332   | 103.829   | 106.107   |
| 0         | 0         | 0         | 0.0275283 | 0         | 0         |

|           |           |           |          |           |          |
|-----------|-----------|-----------|----------|-----------|----------|
| 56.7314   | 64.4857   | 55.0859   | 58.724   | 66.3648   | 50.5293  |
| 2.29425   | 2.94833   | 2.6647    | 2.13459  | 1.82414   | 2.33638  |
| 0.230891  | 0.74391   | 0.280144  | 0.209452 | 0.402727  | 0.280717 |
| 6.39115   | 6.19098   | 5.47377   | 5.94777  | 4.48821   | 6.76479  |
| 0.0754205 | 0         | 0         | 0        | 0.0584672 | 0        |
| 0         | 0.0312232 | 0.0265245 | 0        | 0.0169032 | 0.110459 |
| 23.3346   | 13.7416   | 16.7529   | 28.4578  | 16.3768   | 18.8016  |
| 92.2824   | 85.5706   | 88.6605   | 71.6599  | 87.945    | 72.7333  |
| 6.57173   | 5.27282   | 5.39118   | 4.96968  | 3.08113   | 4.52652  |
| 9.75918   | 10.466    | 12.7473   | 12.602   | 10.0276   | 10.0665  |
| 14.7741   | 19.2183   | 22.7572   | 21.6525  | 16.9192   | 19.5931  |
| 11.7297   | 9.67424   | 11.1273   | 12.0882  | 9.91476   | 11.4239  |
| 4.27912   | 3.8603    | 5.56714   | 4.51234  | 3.75158   | 5.80973  |
| 0.79389   | 0.236838  | 0.214054  | 0.28807  | 0.41029   | 0.589852 |
| 8.54926   | 10.5168   | 7.64244   | 6.30151  | 6.01963   | 9.05326  |
| 1.55878   | 1.60395   | 1.07718   | 0.919349 | 1.08264   | 0.869073 |
| 14.5946   | 12.9374   | 15.0337   | 13.3007  | 13.7461   | 14.2436  |
| 345.347   | 349.011   | 373.777   | 383.699  | 430.718   | 296.016  |
| 5.14612   | 3.8703    | 5.31692   | 3.53587  | 7.39761   | 1.9395   |
| 0         | 23.6619   | 0         | 71.9512  | 25.6195   | 0        |
| 10.0049   | 8.69364   | 10.8516   | 9.66995  | 10.7702   | 11.8322  |
| 0         | 0         | 0         | 0        | 0         | 0        |
| 14.011    | 11.768    | 15.0814   | 13.5307  | 10.7587   | 13.0452  |
| 23.4453   | 18.9559   | 19.9576   | 24.7017  | 24.8388   | 18.6951  |
| 0         | 0.322998  | 0         | 0.218095 | 0         | 0.243837 |
| 1.80476   | 1.68545   | 1.84066   | 2.44866  | 2.25069   | 1.65362  |
| 0         | 0         | 0         | 0        | 0         | 0        |
| 4.22379   | 4.14421   | 6.64328   | 4.65469  | 5.21471   | 6.02287  |
| 12.0411   | 10.3347   | 10.5565   | 9.09123  | 12.1753   | 10.8812  |
| 9.97552   | 11.815    | 11.8213   | 10.723   | 10.23     | 12.5496  |
| 14.7624   | 15.2463   | 8.60038   | 5.90935  | 6.47135   | 5.60287  |
| 0.535118  | 0.554537  | 0.467018  | 0.705152 | 0.392999  | 0.308177 |
| 9.18212   | 6.95943   | 7.25316   | 12.0258  | 9.45376   | 7.99478  |
| 43.3898   | 33.6992   | 37.0571   | 42.1056  | 41.6338   | 39.9881  |
| 3.59039   | 3.05258   | 5.58361   | 4.36719  | 3.18818   | 3.43582  |
| 10.9139   | 8.97017   | 9.87034   | 10.0386  | 10.8436   | 10.6581  |
| 0.189628  | 0.316797  | 0.276095  | 0.192663 | 0.274405  | 0.1537   |
| 0.534644  | 0.233737  | 0.360338  | 0.32313  | 0.253993  | 0.385235 |
| 0         | 0         | 0         | 0        | 0         | 0        |
| 0         | 0         | 0         | 0        | 0         | 0        |
| 4.71583   | 3.49026   | 3.92169   | 4.22988  | 3.18341   | 3.34991  |
| 9.46994   | 10.6472   | 11.1908   | 12.1343  | 11.9295   | 10.794   |
| 7.23091   | 9.80861   | 8.54839   | 8.51341  | 7.40486   | 6.67826  |

|           |           |           |           |           |           |
|-----------|-----------|-----------|-----------|-----------|-----------|
| 0         | 0         | 0         | 0         | 0         | 0         |
| 0.57908   | 0.48962   | 0.535445  | 0.648467  | 0.71826   | 0.71264   |
| 338.577   | 291.137   | 310.778   | 314.882   | 368.079   | 236.086   |
| 14.4577   | 14.472    | 14.4172   | 16.0864   | 17.7919   | 15.1534   |
| 0         | 0         | 0         | 0         | 0         | 0         |
| 206.007   | 330.198   | 189.739   | 191.068   | 196.551   | 207.069   |
| 8.15558   | 7.19148   | 4.80878   | 6.51051   | 7.43706   | 4.69684   |
| 0.145232  | 0         | 0.0751842 | 0.134909  | 0.0270207 | 0.0211888 |
| 56.2756   | 46.394    | 54.1926   | 53.7339   | 47.2027   | 51.3193   |
| 8.67847   | 6.12691   | 9.65364   | 8.23149   | 6.84243   | 5.26746   |
| 0.681936  | 0.403674  | 0.36484   | 0.49879   | 0.428745  | 0.58755   |
| 8.38138   | 11.18     | 9.31966   | 8.66012   | 8.57922   | 7.98706   |
| 0         | 0         | 0         | 0         | 0         | 0         |
| 25.795    | 22.6884   | 25.5358   | 25.9123   | 32.5183   | 23.4366   |
| 4.2725    | 4.05294   | 3.88013   | 4.14164   | 2.42729   | 3.25048   |
| 0.614029  | 0.457589  | 0.641574  | 0.6595    | 0.371585  | 0.332902  |
| 8.19768   | 9.23094   | 8.07769   | 8.03143   | 7.5393    | 6.79551   |
| 0.924093  | 0.620281  | 0.467175  | 0.482016  | 0.537278  | 0.749008  |
| 6.918     | 6.86002   | 4.21567   | 7.42732   | 6.90702   | 2.62155   |
| 2.44644   | 1.93093   | 1.75257   | 2.23739   | 1.77117   | 2.49973   |
| 16.4215   | 19.3258   | 14.5916   | 18.6365   | 16.6981   | 12.4204   |
| 0.549215  | 0.504518  | 0.461013  | 0.210568  | 0.498059  | 0.369565  |
| 0         | 0         | 0         | 0         | 0         | 0         |
| 10.2403   | 8.62122   | 10.0654   | 9.24617   | 9.16716   | 10.4546   |
| 0.119728  | 0.150016  | 0.0726343 | 0.130333  | 0.139223  | 0.169827  |
| 0.0824896 | 0.0885914 | 0.0667241 | 0.119728  | 0.111908  | 0.183867  |
| 0.742546  | 0.735887  | 0.999481  | 0.737282  | 0.866266  | 0.917797  |
| 97.1052   | 99.6811   | 92.0318   | 100.798   | 107.729   | 112.608   |
| 5.42134   | 5.85682   | 5.57882   | 4.05077   | 4.97362   | 4.18617   |
| 7.9406    | 9.86645   | 7.02784   | 7.70074   | 7.94993   | 4.38695   |
| 0.416709  | 0.358027  | 0.269654  | 0.486022  | 0.193824  | 0.47286   |
| 36.0005   | 31.5067   | 37.2164   | 37.3562   | 35.8408   | 36.5188   |
| 0.318332  | 0.151946  | 0.0858308 | 0.154013  | 0.246776  | 0.172013  |
| 0.0714744 | 0.102349  | 0.0385428 | 0.0172901 | 0.0184694 | 0.0193108 |
| 2.15185   | 1.60671   | 1.666     | 1.81817   | 1.7515    | 1.80531   |
| 14.1207   | 14.0081   | 13.5022   | 14.6116   | 12.1539   | 13.815    |
| 1.57156   | 1.37526   | 1.44776   | 1.17219   | 0.947566  | 0.990737  |
| 56.4154   | 55.6196   | 68.2153   | 55.994    | 45.6159   | 54.692    |
| 0.0665753 | 0         | 0.0538514 | 0.0483149 | 0.0516102 | 0.0539615 |
| 75.4429   | 85.1468   | 84.8708   | 79.727    | 75.0144   | 71.2959   |
| 0         | 0         | 0.0810525 | 0         | 0.155358  | 0         |
| 4.78248   | 2.65336   | 4.40434   | 4.89809   | 3.61116   | 5.20205   |
| 5.06053   | 4.19319   | 4.10486   | 3.21861   | 3.07449   | 3.90586   |

|          |           |           |           |           |           |
|----------|-----------|-----------|-----------|-----------|-----------|
| 17.1386  | 20.8795   | 11.2098   | 18.939    | 18.9033   | 19.551    |
| 0        | 0         | 0         | 0         | 0         | 0         |
| 19.4217  | 19.1417   | 18.4025   | 19.5648   | 18.3587   | 24.9969   |
| 13.3144  | 9.011     | 11.4853   | 11.5482   | 13.5363   | 12.5415   |
| 1.40414  | 1.20641   | 0.908628  | 1.04813   | 0.964113  | 0.585312  |
| 1.38889  | 0.904018  | 0.919183  | 0.916312  | 1.27245   | 0.921062  |
| 30.0536  | 30.3462   | 31.3395   | 29.6053   | 37.5786   | 27.719    |
| 118.249  | 112.885   | 31.8831   | 85.8154   | 30.5561   | 95.8448   |
| 5.4356   | 5.04258   | 5.20045   | 4.06136   | 4.7688    | 5.03344   |
| 7.65365  | 8.11678   | 7.02084   | 6.22486   | 6.25399   | 7.41882   |
| 62.8896  | 54.7352   | 61.0399   | 66.5174   | 72.6649   | 65.7274   |
| 37.5483  | 37.5516   | 33.5013   | 35.6532   | 33.5502   | 35.7208   |
| 0        | 0         | 0         | 0.0109321 | 0         | 0.0244194 |
| 0        | 0         | 0         | 0         | 0         | 0         |
| 49.7197  | 45.1787   | 50.4238   | 48.5662   | 43.2589   | 47.5459   |
| 15.8999  | 14.3887   | 15.5966   | 13.5427   | 12.7387   | 12.6866   |
| 873.544  | 1106.47   | 989.158   | 848.297   | 994.979   | 874.967   |
| 0        | 0         | 0         | 0         | 0         | 0         |
| 0        | 0         | 0         | 0         | 0.0159156 | 0         |
| 33.7466  | 31.3484   | 36.485    | 37.2252   | 34.5551   | 33.985    |
| 3.06041  | 2.01644   | 2.95644   | 2.7851    | 1.72235   | 2.76971   |
| 0.062251 | 0         | 0         | 0         | 0         | 0.0504565 |
| 11.6276  | 8.89528   | 6.46586   | 7.95686   | 6.21884   | 6.25335   |
| 0        | 0         | 0         | 0         | 0         | 0         |
| 28.8234  | 28.5745   | 23.35     | 23.4276   | 17.9874   | 20.8028   |
| 439.288  | 332.691   | 370.464   | 364.339   | 442.397   | 413.708   |
| 24.4002  | 36.1649   | 41.0139   | 31.1289   | 36.1044   | 28.3578   |
| 0        | 0.0154558 | 0         | 0         | 0         | 0         |
| 1.62994  | 2.02062   | 2.15513   | 2.26325   | 1.6539    | 2.03644   |
| 47.1721  | 54.1692   | 52.3471   | 57.622    | 58.9933   | 49.5681   |
| 0        | 0         | 0         | 0         | 0         | 0         |
| 6.05212  | 4.41247   | 5.7014    | 6.13292   | 6.1221    | 5.54854   |
| 11.4131  | 11.9387   | 11.8292   | 11.5957   | 10.767    | 8.9057    |
| 0.011259 | 0         | 0         | 0         | 0         | 0         |
| 39.7039  | 42.3899   | 28.3304   | 31.8995   | 27.0494   | 25.4731   |
| 193.185  | 339.567   | 254.369   | 138.595   | 140.507   | 277.838   |
| 0.156047 | 0.558795  | 0.694229  | 0.320865  | 0.201617  | 0.590248  |
| 0.101583 | 0         | 0         | 0.147441  | 0         | 0.164672  |
| 2.11697  | 0.948414  | 2.53886   | 1.44045   | 1.79244   | 2.2961    |
| 5.37175  | 2.70112   | 5.50395   | 4.93589   | 6.20954   | 0.974017  |
| 44.6822  | 31.9916   | 0         | 97.2801   | 0         | 0         |
| 19.2958  | 20.33     | 26.0556   | 30.6505   | 26.9171   | 27.1897   |
| 0.214255 | 0         | 0.0866532 | 0.0388722 | 0.0830469 | 0.238784  |



|           |           |           |           |           |           |
|-----------|-----------|-----------|-----------|-----------|-----------|
| 7.58429   | 6.56328   | 6.15893   | 8.1694    | 6.57388   | 7.30902   |
| 0         | 0.0158647 | 0         | 0         | 0.0171772 | 0         |
| 0.482778  | 0.306985  | 0.238534  | 0.194649  | 0.332358  | 0.434915  |
| 0.146241  | 0.139609  | 0.133079  | 0.0265322 | 0.177139  | 0.213362  |
| 2.65667   | 1.95153   | 1.90334   | 1.57745   | 1.93111   | 2.19806   |
| 0.089835  | 0.514561  | 0.217997  | 0.391169  | 0.48749   | 0.436886  |
| 0         | 0         | 0         | 0         | 0         | 0         |
| 21.9958   | 17.4239   | 21.2083   | 18.4675   | 18.1852   | 17.1834   |
| 10.0653   | 8.4438    | 7.7275    | 8.46156   | 7.78094   | 10.0304   |
| 0.210406  | 0         | 0         | 0.305391  | 0         | 0.170541  |
| 2.50339   | 2.76232   | 2.459     | 1.65098   | 1.6833    | 2.56296   |
| 0         | 0         | 0         | 0         | 0         | 0         |
| 1.64444   | 1.64444   | 1.20288   | 1.20288   | 0.532128  | 0.532128  |
| 5.3842    | 3.44153   | 4.99331   | 4.68063   | 5.59884   | 4.73983   |
| 44.3254   | 39.981    | 42.729    | 41.188    | 43.5721   | 34.6679   |
| 4.0567    | 2.98595   | 2.63737   | 2.88899   | 1.93979   | 2.95006   |
| 0         | 0.0591369 | 0.0668099 | 0.0599411 | 0         | 0         |
| 0         | 0         | 0         | 0         | 0         | 0         |
| 0.128186  | 0.0743742 | 0.106607  | 0.0951338 | 0.0514138 | 0.0798978 |
| 58.1595   | 56.2239   | 54.8955   | 60.2673   | 59.3923   | 57.2042   |
| 2.18656   | 2.09157   | 1.82811   | 2.24015   | 1.75203   | 1.83185   |
| 1.65859   | 4.03756   | 2.95152   | 2.49947   | 2.82868   | 0.995808  |
| 0.129214  | 0.208159  | 0.130649  | 0.164103  | 0.175296  | 0.0785495 |
| 0.0268501 | 0.0192241 | 0         | 0.0194856 | 0         | 0         |
| 0         | 0         | 0         | 0         | 0         | 0         |
| 0.216377  | 0.167306  | 0.0933211 | 0.167712  | 0.408661  | 0.0560662 |
| 0         | 0         | 0         | 0         | 0         | 0.164714  |
| 3.65588   | 2.55124   | 3.26479   | 2.79168   | 2.48944   | 3.01425   |
| 0.0895335 | 0.256417  | 0.144844  | 0.16244   | 0         | 0.036285  |
| 0         | 0.0150673 | 0         | 0         | 0         | 0.0426427 |
| 3.37751   | 3.2106    | 3.82782   | 3.30405   | 3.23955   | 3.15585   |
| 0         | 0         | 0         | 0         | 0         | 0         |
| 17.3906   | 21.2076   | 10.6943   | 14.7372   | 6.18991   | 12.2365   |
| 19.3182   | 16.0436   | 16.2195   | 17.2136   | 20.0988   | 15.1123   |
| 1.04482   | 1.34652   | 1.18318   | 0.758241  | 1.8359    | 1.24206   |
| 0.59306   | 0.902317  | 0.41975   | 0.430395  | 0.344812  | 0.540782  |
| 0         | 0         | 0         | 0         | 0         | 0         |
| 0.309292  | 0.238235  | 0.156073  | 0.154315  | 0.109894  | 0.229801  |
| 0.205184  | 0.0326461 | 0         | 0         | 0.0353469 | 0.170643  |
| 0.529556  | 1.1231    | 0.693281  | 0.397002  | 0.470078  | 0.458187  |
| 0         | 0         | 0         | 0         | 0         | 0         |
| 24.9674   | 14.6861   | 23.8848   | 21.9363   | 23.7127   | 26.0918   |
| 0         | 0         | 0         | 0         | 0         | 0         |

|           |           |           |           |           |          |
|-----------|-----------|-----------|-----------|-----------|----------|
| 0         | 0         | 0         | 0         | 0         | 0        |
| 4.75665   | 3.87914   | 3.6169    | 3.61304   | 2.69015   | 2.90558  |
| 8.10998   | 8.35375   | 6.63042   | 8.30043   | 7.10671   | 7.7868   |
| 8.83781   | 6.40889   | 7.54622   | 7.70373   | 8.16598   | 7.81587  |
| 10.164    | 11.0306   | 7.8706    | 6.29506   | 5.29182   | 8.60506  |
| 0         | 0.0482764 | 0         | 0.0978658 | 0.0522704 | 0        |
| 0.675047  | 0.491197  | 0.546031  | 0.325143  | 0.293051  | 0.556064 |
| 0         | 0         | 0         | 0         | 0         | 0        |
| 0.132407  | 0.189602  | 0.0749709 | 0.067263  | 0.0513219 | 0.139516 |
| 0.487837  | 0.395413  | 0.68859   | 0.362862  | 0.465943  | 0.608776 |
| 18.6789   | 16.4968   | 18.5611   | 18.5705   | 19.2895   | 17.7615  |
| 10.6816   | 11.6311   | 12.1322   | 10.7557   | 12.4071   | 11.919   |
| 0         | 0         | 0         | 0         | 0         | 0        |
| 0         | 0         | 0         | 0         | 0         | 0        |
| 0         | 0         | 0         | 0         | 0         | 0        |
| 13.4439   | 9.59425   | 9.16846   | 10.8818   | 8.80779   | 10.9337  |
| 2.01483   | 2.96385   | 2.54834   | 2.39269   | 1.95951   | 1.95971  |
| 82.1932   | 73.1645   | 74.8245   | 86.014    | 93.3062   | 83.9627  |
| 15.6021   | 27.5892   | 28.1577   | 22.1639   | 24.6105   | 24.1792  |
| 59.0332   | 60.8738   | 56.2612   | 55.8146   | 57.5074   | 60.3851  |
| 10.6184   | 9.48157   | 11.0919   | 9.37457   | 10.2018   | 8.88126  |
| 30.2478   | 29.565    | 30.9067   | 30.6994   | 29.3596   | 27.6752  |
| 0.0739642 | 0.158871  | 0.119656  | 0.0536771 | 0.0860072 | 0.149876 |
| 28.1179   | 28.12     | 41.9502   | 30.5762   | 34.5216   | 36.1647  |
| 0.958286  | 0.686463  | 1.25191   | 0.78449   | 0.900636  | 0.878246 |
| 0         | 0         | 0         | 0         | 0         | 0        |
| 26.3785   | 30.1003   | 27.8715   | 33.3812   | 36.2331   | 32.405   |
| 0.302555  | 0.505455  | 0.163154  | 0.365949  | 0.195454  | 0.326975 |
| 0         | 0         | 0         | 0.0292412 | 0         | 0        |
| 1.13772   | 0.876681  | 0.566344  | 0.463103  | 0.320575  | 0.436391 |
| 0.172576  | 0.556026  | 0.488577  | 0.626209  | 0.234122  | 0.454606 |
| 30.4713   | 23.671    | 25.9303   | 28.0481   | 23.2079   | 24.7538  |
| 14.0644   | 11.1919   | 14.7243   | 15.6601   | 14.8903   | 17.4252  |
| 33.1631   | 39.1779   | 37.4357   | 34.8037   | 34.0924   | 36.7806  |
| 0.978587  | 1.63485   | 0.659633  | 1.42036   | 1.51723   | 2.77612  |
| 6.36411   | 7.60313   | 7.15304   | 7.84079   | 6.05002   | 6.17799  |
| 3.81304   | 1.93751   | 2.0869    | 2.79875   | 2.93192   | 3.20514  |
| 0.577038  | 0.620662  | 0.706079  | 0.621295  | 0.647146  | 0.756058 |
| 3.30401   | 2.88309   | 2.38024   | 1.19889   | 1.76091   | 2.0922   |
| 18.1406   | 25.0732   | 24.9239   | 24.1167   | 28.9003   | 19.1786  |
| 0.0157856 | 0.0923011 | 0.0766118 | 0.0687353 | 0.0122372 | 0.051179 |
| 2.69645   | 1.58323   | 2.07437   | 2.04715   | 1.46638   | 2.18251  |
| 2.75238   | 1.54837   | 1.55049   | 2.99618   | 3.58154   | 0.876423 |

|           |          |           |           |           |           |
|-----------|----------|-----------|-----------|-----------|-----------|
| 17.8219   | 13.0778  | 13.9402   | 16.4426   | 16.2447   | 16.3013   |
| 0         | 0        | 0.081384  | 0.0730168 | 0.0779969 | 0         |
| 7.1076    | 6.61312  | 5.80474   | 6.05517   | 4.64484   | 6.09491   |
| 1.50526   | 3.26586  | 1.12089   | 1.49822   | 0.374814  | 1.16903   |
| 63.6748   | 76.6282  | 63.2149   | 70.2812   | 72.9801   | 67.9889   |
| 9.07304   | 8.85594  | 10.3794   | 9.62139   | 10.0767   | 10.2356   |
| 21.4835   | 20.759   | 24.2888   | 22.5054   | 23.3735   | 21.921    |
| 17.1759   | 19.3987  | 20.4964   | 13.5893   | 27.5349   | 14.7861   |
| 18.8795   | 15.7082  | 19.2372   | 19.4678   | 19.9349   | 21.1627   |
| 5.88458   | 5.15699  | 8.55391   | 7.09946   | 7.24853   | 6.21442   |
| 34.973    | 31.0267  | 34.0566   | 31.6621   | 35.3627   | 39.4344   |
| 1.60238   | 2.59199  | 1.77618   | 1.63664   | 1.88629   | 2.40515   |
| 28.701    | 33.036   | 26.0756   | 31.456    | 27.1726   | 17.8158   |
| 0         | 0        | 0         | 0         | 0         | 0         |
| 6.28903   | 5.68482  | 6.61319   | 6.98872   | 5.91136   | 5.32048   |
| 35.9301   | 33.0253  | 36.6713   | 38.198    | 39.7533   | 33.6053   |
| 0.444136  | 0.520352 | 0.326593  | 0.571381  | 0.422551  | 0.359987  |
| 0         | 0        | 0         | 0         | 0         | 0         |
| 12.6845   | 10.3058  | 12.655    | 11.5247   | 12.0899   | 10.9037   |
| 3.75333   | 3.02003  | 3.78777   | 3.60587   | 3.65784   | 4.4619    |
| 15.5288   | 15.8307  | 16.7611   | 13.9817   | 12.4611   | 12.1039   |
| 1.73554   | 1.41153  | 0.872582  | 1.02107   | 1.7452    | 1.93885   |
| 3.48462   | 2.38021  | 2.85104   | 3.2846    | 3.72597   | 2.66208   |
| 0         | 0        | 0         | 0         | 0         | 0         |
| 0.0376922 | 0        | 0         | 0.0364719 | 0         | 0.0611016 |
| 8.28487   | 5.05497  | 8.20732   | 8.09418   | 5.68748   | 7.97108   |
| 2.07545   | 1.56056  | 2.74071   | 1.26617   | 1.50004   | 1.7751    |
| 15.9651   | 19.1741  | 16.4131   | 17.6409   | 17.5666   | 24.7117   |
| 8.25302   | 10.3572  | 6.68801   | 5.03582   | 5.04318   | 6.79517   |
| 0         | 0        | 0         | 0         | 0         | 0         |
| 2.20509   | 2.03909  | 1.78928   | 2.60579   | 1.81861   | 1.86121   |
| 10.8891   | 7.2493   | 6.55192   | 7.4588    | 12.1734   | 5.35754   |
| 0.116676  | 0.150367 | 0.151002  | 0.237086  | 0.307526  | 0.0567417 |
| 3.63739   | 3.84984  | 2.49875   | 2.11178   | 2.1659    | 2.37567   |
| 20.5754   | 15.6763  | 18.1272   | 19.1661   | 18.9071   | 17.429    |
| 53.6714   | 63.7149  | 46.7405   | 34.2494   | 34.0746   | 43.7525   |
| 9.05624   | 8.3127   | 5.53387   | 7.21955   | 7.53246   | 7.21493   |
| 7.00523   | 7.21736  | 4.7721    | 8.11641   | 3.81948   | 5.97083   |
| 11.5259   | 8.96926  | 11.8227   | 11.1841   | 9.00645   | 9.57149   |
| 4.89194   | 2.33078  | 2.33103   | 3.29197   | 6.17801   | 5.11856   |
| 0.421469  | 0.241411 | 0.0681836 | 0.244694  | 0.196038  | 0         |
| 0         | 0        | 0         | 0         | 0         | 0         |
| 16.473    | 18.0126  | 17.8299   | 16.1338   | 17.9294   | 21.1182   |

|           |           |           |           |           |           |
|-----------|-----------|-----------|-----------|-----------|-----------|
| 19.7117   | 22.319    | 22.2659   | 20.3173   | 18.1555   | 20.3061   |
| 51.1179   | 43.8594   | 45.1506   | 52.8506   | 41.3064   | 42.5898   |
| 0.229991  | 0.123502  | 0.0930176 | 0         | 0.13372   | 0         |
| 41.3047   | 30.6506   | 36.126    | 39.7534   | 36.2226   | 39.6439   |
| 15.1216   | 9.37474   | 9.03563   | 12.0298   | 10.5403   | 12.2253   |
| 6.31463   | 5.53452   | 7.33876   | 6.92664   | 6.97707   | 6.61839   |
| 1.85433   | 1.48572   | 1.32137   | 1.4098    | 0.924111  | 0.894642  |
| 7.10205   | 5.12033   | 6.63774   | 6.49343   | 7.06406   | 6.23727   |
| 9.64018   | 8.81741   | 10.2492   | 9.60202   | 9.72505   | 9.72369   |
| 0.138688  | 0.0999153 | 0.0740265 | 0.0165254 | 0.0702304 | 0.0562752 |
| 0.575106  | 0.839462  | 0.697037  | 0.573352  | 0.42733   | 0.717832  |
| 7.50332   | 4.1563    | 6.39721   | 5.61579   | 6.16932   | 7.40451   |
| 6.83602   | 5.95574   | 5.82927   | 5.27242   | 5.14064   | 5.38274   |
| 7.08322   | 6.35125   | 7.02668   | 7.29839   | 5.87952   | 6.52651   |
| 1.14871   | 0.738103  | 1.78687   | 0.534386  | 4.29267   | 1.2653    |
| 5.06814   | 3.83651   | 4.94409   | 4.61501   | 4.5427    | 6.06676   |
| 7.8751    | 8.30967   | 7.36391   | 6.9554    | 5.4208    | 7.56004   |
| 60.9329   | 62.7653   | 58.9065   | 65.7828   | 55.0408   | 51.6486   |
| 114.969   | 114.938   | 124.529   | 122.585   | 130.822   | 121.976   |
| 0         | 0         | 0         | 0         | 0         | 0         |
| 3.00703   | 3.17139   | 2.45251   | 2.42674   | 4.08183   | 1.71926   |
| 22.0743   | 18.5995   | 21.0244   | 20.3306   | 23.2461   | 19.6015   |
| 11.1205   | 8.74811   | 9.96913   | 13.956    | 10.3367   | 11.0229   |
| 0.94891   | 1.27184   | 0.765983  | 0.942952  | 1.01      | 0.775821  |
| 27.0207   | 22.3558   | 22.9494   | 23.3678   | 26.7072   | 20.2586   |
| 0.149324  | 0.0341547 | 5.55E-22  | 0.0447915 | 0.108083  | 0.12585   |
| 33.0497   | 36.6661   | 39.5922   | 40.1598   | 40.674    | 37.062    |
| 28.8697   | 44.2584   | 46.1386   | 43.6787   | 45.6975   | 62.7829   |
| 4.7998    | 4.2764    | 3.91519   | 4.41284   | 4.11806   | 3.75927   |
| 0.0926238 | 0         | 0.0749215 | 0.0336094 | 0.0359017 | 0         |
| 0         | 0         | 0         | 0         | 0         | 0         |
| 0         | 0         | 0         | 0         | 0         | 0         |
| 0.0302139 | 0.0865304 | 0.0733183 | 0.0219268 | 0.140534  | 0.0734682 |
| 0.131666  | 0.0753234 | 0         | 0         | 0         | 0         |
| 0.63141   | 0.454882  | 0.184014  | 0.653431  | 0.595834  | 0.49341   |
| 80.8444   | 74.3281   | 68.0707   | 75.4421   | 122.055   | 104.755   |
| 0         | 0         | 0         | 0         | 0         | 0         |
| 0         | 0         | 0         | 0         | 0         | 0         |
| 4.17629   | 4.2288    | 4.53847   | 3.54924   | 6.31607   | 4.12752   |
| 10.9285   | 7.8527    | 9.73167   | 9.03185   | 8.91315   | 7.60909   |
| 0.439614  | 1.8057    | 0.280733  | 0.453367  | 0.860957  | 0.768905  |
| 38.343    | 38.676    | 43.3966   | 41.6533   | 36.4846   | 40.3215   |
| 9.43014   | 8.45088   | 9.18195   | 6.75282   | 6.19885   | 6.91713   |

|            |            |           |          |            |            |
|------------|------------|-----------|----------|------------|------------|
| 17.0583    | 28.836     | 29.6494   | 21.9361  | 29.2284    | 30.3159    |
| 0          | 0          | 0         | 0        | 0          | 0          |
| 0.274043   | 0.210049   | 0.288716  | 0.18486  | 0.362718   | 0.222118   |
| 1.41428    | 1.29387    | 1.62064   | 1.51104  | 0.670004   | 0.891582   |
| 95.7922    | 109.553    | 96.8231   | 105.362  | 93.0175    | 88.0399    |
| 39.5812    | 43.0746    | 43.7791   | 44.9035  | 50.0136    | 36.6182    |
| 3.03189    | 3.24736    | 2.50339   | 2.51454  | 2.19861    | 3.18759    |
| 0          | 0          | 0         | 0        | 0          | 0          |
| 0.252966   | 0.128962   | 0.132838  | 0.270144 | 0.120694   | 0.251144   |
| 11.1758    | 9.33932    | 11.0457   | 10.1566  | 11.297     | 9.93942    |
| 0          | 0          | 0         | 0        | 0          | 0          |
| 11.4003    | 8.32794    | 10.3502   | 9.71617  | 11.0323    | 8.47757    |
| 3.4371     | 2.59703    | 3.16685   | 3.12798  | 2.28907    | 2.92152    |
| 34.5062    | 35.1089    | 34.2525   | 39.3511  | 38.8561    | 32.038     |
| 9.77865    | 9.3403     | 9.38953   | 1.67535  | 7.81693    | 3.91883    |
| 7.80789    | 5.82648    | 7.66374   | 7.34476  | 8.76599    | 6.89915    |
| 0.161527   | 0.144563   | 0.0979922 | 0.435105 | 0.23772    | 0.196385   |
| 0.00751074 | 0.00537755 | 7.3754    | 0        | 0.00582244 | 0.00608771 |
| 0.622142   | 1.78177    | 0.754857  | 1.24162  | 2.53355    | 1.64149    |
| 23.9258    | 25.3561    | 26.0315   | 25.8539  | 24.5124    | 28.5622    |
| 1.68194    | 0.574498   | 0.986041  | 1.24301  | 1.05266    | 0.938029   |
| 18.3969    | 14.0091    | 9.34104   | 17.362   | 12.603     | 14.8047    |
| 15.8409    | 14.6069    | 3.30042   | 15.8506  | 13.0244    | 8.55973    |
| 13.1596    | 10.6104    | 9.78145   | 11.0995  | 6.6172     | 9.51317    |
| 26.7833    | 39.8118    | 41.0527   | 36.8554  | 31.5455    | 33.5857    |
| 1.09375    | 1.85297    | 1.23361   | 1.1515   | 0.907599   | 1.61072    |
| 50.8942    | 52.471     | 51.5782   | 56.524   | 60.2232    | 54.2821    |
| 1.54614    | 0.921407   | 0.29941   | 0.517233 | 0.817935   | 0.900531   |
| 16.4476    | 11.4951    | 13.1188   | 14.3483  | 16.0118    | 14.4215    |
| 17.5616    | 15.1873    | 16.6242   | 18.0536  | 15.711     | 16.2753    |
| 8.49427    | 11.6818    | 11.3607   | 9.15512  | 8.41041    | 8.99808    |
| 186.175    | 225.345    | 190.538   | 168.245  | 173.727    | 214.686    |
| 0          | 0          | 0         | 0        | 0.0159059  | 0          |
| 2.85509    | 2.13101    | 2.40751   | 2.45599  | 1.65785    | 2.85918    |
| 28.7389    | 30.4309    | 29.6984   | 31.3342  | 27.303     | 25.0766    |
| 20.8377    | 19.2411    | 20.1412   | 21.2884  | 17.9519    | 20.0681    |
| 0.209603   | 0.175084   | 0.31083   | 0.152113 | 0.270812   | 0          |
| 52.4201    | 123.855    | 33.6214   | 47.9233  | 34.0693    | 194.345    |
| 3.94968    | 3.18495    | 3.38844   | 3.25722  | 3.60309    | 3.96127    |
| 0          | 0          | 0         | 0        | 0          | 0          |
| 0.136753   | 0.176246   | 0.225847  | 0.251218 | 0.0265023  | 0.199521   |
| 5.05524    | 5.08864    | 5.82584   | 6.09474  | 4.65633    | 5.33108    |
| 0.290448   | 0.970459   | 0.861439  | 0.843135 | 0.863114   | 0.784727   |

|          |          |          |           |           |           |
|----------|----------|----------|-----------|-----------|-----------|
| 78.429   | 75.6124  | 84.4375  | 83.7792   | 83.2978   | 70.5818   |
| 0        | 0        | 0        | 0         | 0         | 0         |
| 42.4001  | 45.6641  | 43.4386  | 41.918    | 42.3909   | 36.9071   |
| 0        | 0        | 0        | 0         | 0.0294817 | 0.0308248 |
| 7.76854  | 4.54832  | 5.2216   | 4.74213   | 2.66284   | 4.52272   |
| 0        | 0        | 0        | 0         | 0         | 0         |
| 0.830823 | 0.54938  | 0.859836 | 1.13963   | 0.592683  | 0.296294  |
| 12.4892  | 11.8174  | 11.4779  | 11.8958   | 11.206    | 11.6735   |
| 0.072601 | 0.103962 | 0.176176 | 0.0526878 | 0.112563  | 0.117691  |
| 3.16449  | 2.22698  | 3.47855  | 2.78723   | 1.86608   | 2.49915   |
| 15.0331  | 12.2162  | 14.9677  | 13.0968   | 13.3139   | 14.9143   |
| 0.967993 | 0.741876 | 0.983937 | 0.995919  | 0.728775  | 0.780978  |
| 0        | 0        | 0        | 0         | 0         | 0         |
| 0.141756 | 0.911807 | 0.238883 | 0.176357  | 0.211889  | 0.175938  |
| 0        | 0        | 0        | 0         | 0         | 0         |
| 16.941   | 14.5561  | 16.0664  | 12.1505   | 12.7591   | 13.9747   |
| 4.78841  | 4.41651  | 4.33837  | 4.37794   | 6.22457   | 7.26236   |
| 1.94122  | 1.77431  | 2.48895  | 2.47285   | 2.04917   | 2.10905   |
| 1.72556  | 1.54489  | 2.14127  | 1.93965   | 1.19917   | 1.60167   |
| 1.77256  | 1.66857  | 1.31847  | 3.05371   | 1.76045   | 2.71262   |
| 9.11293  | 10.0305  | 10.1487  | 9.66459   | 9.0333    | 11.6357   |
| 139.43   | 24.9574  | 126.88   | 75.8903   | 0         | 84.7597   |
| 2.00631  | 2.16823  | 2.21416  | 1.95182   | 0.949257  | 2.75685   |
| 87.0428  | 48.3003  | 56.5441  | 56.4795   | 48.1713   | 42.6111   |
| 4.08347  | 2.76772  | 3.23288  | 2.90257   | 2.55248   | 3.38122   |
| 0.781051 | 0.209317 | 2.63489  | 1.28736   | 2.00169   | 1.47388   |
| 0.171091 | 0        | 0.374766 | 0         | 0.279031  | 0         |
| 0.629898 | 0.450778 | 0.873207 | 0.67471   | 0.836694  | 0.388806  |
| 0.234989 | 0.341792 | 0.430355 | 0.556481  | 0.588486  | 0.469347  |
| 11.6462  | 14.8528  | 14.184   | 15.1989   | 13.1833   | 12.9258   |
| 10.2084  | 5.63361  | 6.62765  | 8.96805   | 21.4901   | 4.67589   |
| 5.51318  | 4.0387   | 4.20927  | 4.92528   | 5.81911   | 5.70792   |
| 3.69188  | 2.90574  | 3.43104  | 3.59131   | 2.51691   | 2.12229   |
| 8.14023  | 7.37034  | 3.9204   | 2.68596   | 5.54231   | 5.01641   |
| 0        | 0.170291 | 0.17101  | 0.115071  | 0.163893  | 0.25704   |
| 9.89914  | 21.8928  | 15.1247  | 11.4944   | 8.18557   | 16.4038   |
| 20.0784  | 18.8139  | 22.2983  | 20.1594   | 18.9079   | 21.7041   |
| 6.811    | 5.50426  | 6.61403  | 6.76506   | 6.03362   | 6.7049    |
| 18.4188  | 14.4888  | 17.2451  | 14.9141   | 18.5865   | 17.337    |
| 0.233188 | 0.166958 | 0.377242 | 0         | 0         | 0         |
| 0        | 0        | 0        | 0         | 0         | 0         |
| 20.6546  | 21.3839  | 23.0338  | 21.2753   | 18.9536   | 19.3006   |
| 0        | 0        | 0        | 0         | 0         | 0         |

|           |           |           |           |           |           |
|-----------|-----------|-----------|-----------|-----------|-----------|
| 3.73911   | 7.33236   | 3.39542   | 4.89323   | 6.68935   | 2.33064   |
| 38.211    | 29.7812   | 36.1103   | 35.2381   | 47.2258   | 31.2109   |
| 1.91883   | 1.93547   | 1.49188   | 1.90629   | 1.35477   | 1.65447   |
| 0         | 0.0471561 | 0         | 0         | 0         | 0         |
| 70.7311   | 64.9014   | 70.1767   | 70.0513   | 88.2566   | 60.2099   |
| 34.9773   | 34.0638   | 35.9408   | 37.2206   | 37.8693   | 33.1061   |
| 1.5781    | 1.44375   | 2.41115   | 1.527     | 1.22337   | 3.09116   |
| 13.5299   | 9.90437   | 12.4701   | 11.5387   | 13.6505   | 12.1782   |
| 15.522    | 22.6556   | 13.7542   | 20.846    | 17.2552   | 17.6826   |
| 12.8772   | 13.1402   | 11.3005   | 11.2974   | 10.6957   | 10.3952   |
| 14.8754   | 15.2794   | 14.6997   | 13.1047   | 12.6075   | 11.8458   |
| 0.632774  | 0.40169   | 0.279722  | 0.325748  | 0.173941  | 0.189279  |
| 40.6883   | 45.0803   | 33.6056   | 38.0911   | 28.1261   | 32.8865   |
| 0.216814  | 0.0973069 | 0.0630287 | 0.0343398 | 0.161175  | 6.99E-169 |
| 18.0338   | 10.7684   | 11.4572   | 10.5969   | 10.9516   | 8.22604   |
| 0.0537692 | 0         | 0.173971  | 0.0780426 | 0.0416827 | 0.174327  |
| 623.533   | 695.799   | 716.549   | 719.178   | 669.181   | 697.266   |
| 604.678   | 653.954   | 418.459   | 495.933   | 455.422   | 593.984   |
| 6.88881   | 6.71943   | 6.47556   | 6.47355   | 7.20921   | 6.09086   |
| 35.2737   | 34.7643   | 35.6754   | 36.1013   | 28.1808   | 28.502    |
| 0.806377  | 0.434181  | 0.573694  | 0.842942  | 0.469963  | 0.694527  |
| 0.331677  | 0.0339249 | 0.191633  | 0.206318  | 0.220389  | 0.30724   |
| 4.3986    | 3.59826   | 3.83708   | 3.95422   | 3.73624   | 2.50456   |
| 0         | 0         | 0         | 0         | 0         | 0         |
| 8.16657   | 8.45584   | 7.16473   | 7.13475   | 4.30985   | 7.23032   |
| 0.0543234 | 0         | 0         | 0.0788469 | 0         | 0.0440309 |
| 0         | 0         | 0         | 0         | 0         | 0         |
| 1.63154   | 1.10709   | 0.62861   | 0.803618  | 0.798145  | 0.488701  |
| 27.4236   | 34.4351   | 45.7537   | 39.9541   | 39.406    | 57.4587   |
| 5.9265    | 5.74504   | 5.898     | 6.28226   | 6.68493   | 6.20688   |
| 0         | 0         | 0.0598441 | 0         | 0         | 0         |
| 2.11724   | 2.04063   | 1.38324   | 2.15703   | 2.08321   | 1.78209   |
| 0.0495123 | 1.1344    | 0.360446  | 0.431184  | 0.307062  | 0.56184   |
| 5.10114   | 3.34876   | 4.53705   | 3.74113   | 5.75631   | 5.0577    |
| 4.51702   | 2.37012   | 3.81201   | 3.46743   | 3.66601   | 4.74502   |
| 0         | 0         | 0         | 0.0387036 | 0         | 0.0432269 |
| 5.80927   | 4.01965   | 4.06779   | 4.04285   | 4.31859   | 5.27083   |
| 38.9277   | 46.3615   | 40.884    | 44.871    | 36.9787   | 36.5172   |
| 19.3063   | 16.0094   | 16.3954   | 14.2288   | 12.2391   | 15.6887   |
| 0         | 0         | 0         | 0         | 0         | 0         |
| 47.7453   | 67.4279   | 67.322    | 63.8872   | 73.3563   | 64.558    |
| 1.18289   | 3.3877    | 5.26248   | 2.57533   | 2.29248   | 3.3557    |
| 1.84783   | 1.19159   | 1.69264   | 1.35877   | 1.36606   | 1.6961    |

|           |           |           |           |           |           |
|-----------|-----------|-----------|-----------|-----------|-----------|
| 10.6821   | 11.037    | 10.8534   | 9.98965   | 10.368    | 9.39735   |
| 10.5317   | 9.51428   | 9.47703   | 10.3314   | 11.1195   | 10.1772   |
| 40.4273   | 55.5697   | 50.3701   | 46.0468   | 54.8524   | 47.5752   |
| 9.43052   | 12.9512   | 5.85264   | 8.84987   | 7.02708   | 6.98481   |
| 1483.63   | 1300.49   | 1407.03   | 1478.94   | 1499.4    | 1357.99   |
| 4.67262   | 3.333     | 3.56059   | 4.42099   | 3.37178   | 3.9643    |
| 2.06574   | 2.04043   | 1.77912   | 1.88788   | 1.49762   | 1.93787   |
| 0.940643  | 1.4523    | 0.862405  | 2.26217   | 1.093     | 1.08354   |
| 38.9426   | 32.0616   | 36.4509   | 38.1124   | 41.2227   | 41.5459   |
| 0.142372  | 0.254158  | 0.240268  | 0.29984   | 0.142141  | 0.0237784 |
| 24.5266   | 31.7846   | 20.5871   | 26.1441   | 17.5284   | 23.7775   |
| 0.826003  | 0.653566  | 0.913468  | 1.907     | 0.942644  | 1.17943   |
| 961.907   | 969.658   | 1004.3    | 1012.24   | 1063.13   | 940.072   |
| 49.3464   | 50.5133   | 58.4029   | 54.6159   | 73.9865   | 63.9551   |
| 0.0818627 | 0.117224  | 0.066217  | 0.178228  | 0.0634612 | 0.0663524 |
| 28.6362   | 32.5926   | 30.6378   | 29.6135   | 24.3747   | 24.8894   |
| 4.45815   | 4.84464   | 3.03735   | 4.62318   | 3.15101   | 3.65323   |
| 4.52612   | 4.30876   | 4.2725    | 3.40935   | 4.19592   | 4.62238   |
| 0.717707  | 1.19902   | 1.35459   | 1.21532   | 1.29821   | 0.969543  |
| 1.20886   | 0.89818   | 1.03317   | 1.05937   | 1.02553   | 1.1462    |
| 8.21577   | 5.56542   | 7.75174   | 6.9716    | 7.55996   | 7.7306    |
| 1.55028   | 0.685572  | 0.958935  | 0.595624  | 1.02507   | 0.813066  |
| 0.448793  | 0.321327  | 0.18151   | 0.203561  | 0.130467  | 0.136411  |
| 0.739406  | 1.34386   | 1.28819   | 1.27958   | 0.881844  | 1.38303   |
| 1.01942   | 0.938426  | 1.00129   | 0.581282  | 0.959616  | 1.18039   |
| 0         | 0.0470302 | 0         | 0         | 0         | 0.053241  |
| 0         | 0         | 0         | 0         | 0         | 0         |
| 2.05752   | 1.22908   | 1.68399   | 1.67873   | 1.62334   | 1.87492   |
| 2.58221   | 2.05424   | 1.35931   | 1.5765    | 1.14387   | 1.89364   |
| 37.1457   | 28.2698   | 26.3389   | 26.4377   | 27.2879   | 31.9156   |
| 10.5393   | 11.4659   | 10.112    | 11.6881   | 10.7522   | 9.94772   |
| 0.112893  | 0.0202074 | 0.0684879 | 0.0409644 | 0.0656375 | 0.11438   |
| 3.57404   | 3.07873   | 4.15577   | 3.64745   | 3.29015   | 3.30425   |
| 0         | 0         | 0         | 0         | 0         | 0         |
| 95.2064   | 78.332    | 69.7603   | 79.3915   | 114.902   | 47.1746   |
| 0         | 0         | 0         | 0.0349017 | 0         | 0         |
| 430.8     | 825.958   | 660.967   | 452.134   | 388.71    | 814.431   |
| 0         | 0.0274696 | 0.0310338 | 0.0278432 | 0         | 0.0310973 |
| 1.90024   | 1.93451   | 1.82526   | 1.6807    | 2.04852   | 1.92526   |
| 4.1206    | 3.63111   | 4.0473    | 4.41987   | 3.28211   | 3.96382   |
| 0.930126  | 0.736052  | 1.03253   | 1.21051   | 1.17645   | 0.952292  |
| 0         | 0         | 0         | 0         | 0         | 0         |
| 47.8324   | 46.8006   | 44.0268   | 39.1962   | 48.7272   | 40.4543   |



|           |           |           |           |           |           |
|-----------|-----------|-----------|-----------|-----------|-----------|
| 0         | 0.806655  | 2.43018   | 0.817625  | 0.873391  | 0.913182  |
| 81.4728   | 76.9716   | 73.5678   | 73.6734   | 73.1552   | 68.8416   |
| 3.91405   | 4.02389   | 4.74842   | 5.44238   | 4.22581   | 5.33295   |
| 4.02079   | 2.11573   | 2.9343    | 1.8071    | 1.82183   | 1.49053   |
| 2.22705   | 1.80627   | 1.50037   | 2.37185   | 1.32454   | 1.97851   |
| 58.3864   | 60.7078   | 61.6918   | 66.559    | 66.3922   | 63.8578   |
| 1.55917   | 1.51086   | 1.86892   | 1.54975   | 1.56752   | 1.19645   |
| 3.422     | 2.17055   | 4.22629   | 3.86678   | 3.66761   | 4.46762   |
| 11.0212   | 7.62258   | 9.15682   | 9.47509   | 11.5363   | 8.83253   |
| 70.3374   | 72.7784   | 55.2458   | 53.9361   | 55.9474   | 40.0112   |
| 5.45747   | 4.08056   | 5.05895   | 4.61722   | 4.30736   | 5.90463   |
| 0         | 0.0365788 | 0.0413249 | 0.111229  | 0.0396051 | 0         |
| 57.4924   | 67.2793   | 61.0673   | 58.3822   | 93.4437   | 100.02    |
| 0.230683  | 0.0825824 | 0.139946  | 0.0732423 | 0.0558841 | 0.105174  |
| 0         | 0         | 0         | 0         | 0         | 0         |
| 11.9869   | 9.09731   | 11.7644   | 8.29313   | 9.9119    | 5.37605   |
| 5.55311   | 7.12976   | 6.51878   | 6.9232    | 6.88766   | 5.53962   |
| 0         | 0         | 0         | 0         | 0.0296959 | 0.0310488 |
| 4.53461   | 5.07296   | 4.20286   | 3.90788   | 4.88236   | 4.82403   |
| 33.1597   | 34.341    | 35.1095   | 35.9249   | 29.1501   | 30.8261   |
| 0         | 0         | 0         | 0         | 0         | 0         |
| 5.18067   | 7.48674   | 5.89565   | 5.05615   | 3.43449   | 4.25702   |
| 5.58E-46  | 2.32E-14  | 0.227574  | 1.28E-25  | 3.23E-35  | 0.0762869 |
| 2977.62   | 2776.4    | 2700.29   | 3897.58   | 3427.86   | 2963.66   |
| 3.42336   | 2.62737   | 3.47054   | 3.03211   | 3.35596   | 3.25773   |
| 48.1925   | 50.3588   | 45.2313   | 46.8711   | 48.0001   | 46.2877   |
| 0         | 44.7514   | 0         | 22.68     | 0         | 0         |
| 0         | 0         | 0         | 0         | 0         | 0         |
| 0.334726  | 0         | 0         | 0         | 0         | 0         |
| 0         | 0         | 0         | 0         | 0         | 0         |
| 4.37132   | 3.24154   | 2.39957   | 3.90867   | 3.0862    | 3.64838   |
| 2.65548   | 3.72129   | 4.58966   | 4.24956   | 2.48084   | 5.2797    |
| 0.0989936 | 0.0708775 | 0.0800739 | 0         | 0         | 0         |
| 0.634688  | 0.293654  | 0.622526  | 0.493497  | 0.140627  | 0.293066  |
| 30.7295   | 34.7611   | 27.2666   | 30.2739   | 26.4444   | 31.0656   |
| 7.01803   | 6.07201   | 5.72167   | 5.97999   | 6.51692   | 5.29824   |
| 9.05197   | 8.36155   | 8.90161   | 8.60301   | 9.2263    | 8.94228   |
| 0.867326  | 1.17774   | 0.991865  | 0.390683  | 1.99391   | 0.242413  |
| 4.17489   | 2.98914   | 1.68849   | 2.59697   | 1.61822   | 3.14218   |
| 8.93593   | 5.33163   | 9.32856   | 9.03461   | 9.82843   | 4.4881    |
| 2.30436   | 1.90963   | 2.40195   | 1.78446   | 1.83325   | 2.36329   |
| 7.39443   | 5.01777   | 6.77448   | 6.93847   | 6.69737   | 6.68999   |
| 2.47416   | 1.32419   | 1.03328   | 0.871549  | 0.447738  | 0.859255  |

|           |            |           |            |           |           |
|-----------|------------|-----------|------------|-----------|-----------|
| 16.1623   | 13.3429    | 13.8834   | 14.8424    | 14.7337   | 11.641    |
| 0.0607012 | 0.11001    | 0.0491    | 0.154182   | 0         | 0.0246002 |
| 7.41088   | 5.75823    | 6.60799   | 6.28096    | 6.59836   | 6.43313   |
| 0         | 0          | 0         | 0          | 0         | 0         |
| 10.7726   | 7.59667    | 8.93264   | 8.97676    | 8.26712   | 8.42438   |
| 6.00488   | 5.18639    | 4.01256   | 3.03804    | 4.64837   | 4.8351    |
| 3.05435   | 3.18917    | 2.29045   | 2.97855    | 1.89916   | 1.80516   |
| 126.203   | 101.899    | 117.773   | 108.452    | 101.211   | 114.176   |
| 1.60626   | 1.38866    | 1.02958   | 1.7112     | 1.35112   | 2.09125   |
| 59.6107   | 59.9519    | 64.1778   | 62.1333    | 62.5878   | 59.4491   |
| 4.9493    | 2.73408    | 2.73508   | 3.83951    | 2.67913   | 4.82427   |
| 0         | 0          | 0         | 0          | 0         | 0         |
| 44.6534   | 38.0564    | 44.5847   | 46.5373    | 45.9252   | 40.3059   |
| 3.6459    | 3.58832    | 3.39601   | 3.38253    | 3.02773   | 2.16456   |
| 0         | 0          | 0         | 0          | 0         | 0         |
| 7.21004   | 7.01287    | 8.25291   | 6.41717    | 4.74566   | 7.27741   |
| 1.01073   | 0.82025    | 1.09428   | 0.771396   | 0.962739  | 0.8679    |
| 125.75    | 133.565    | 126.602   | 127.844    | 119.476   | 128.815   |
| 7.49876   | 9.59063    | 8.14669   | 8.31727    | 6.45308   | 6.09905   |
| 0         | 0          | 0         | 0          | 0         | 0         |
| 0         | 0          | 0         | 0          | 0         | 0         |
| 6.19224   | 13.5969    | 9.20468   | 5.59851    | 4.91489   | 6.45645   |
| 0.0691799 | 0.0247657  | 0         | 0.276128   | 0.0536293 | 0         |
| 21.5201   | 21.1225    | 23.6279   | 22.8245    | 26.6066   | 25.6413   |
| 90.2644   | 179.061    | 67.0744   | 119.195    | 79.8199   | 64.7851   |
| 4.44467   | 3.54934    | 4.82898   | 4.04153    | 3.70304   | 4.23571   |
| 0         | 0          | 0         | 0          | 0         | 0         |
| 0         | 0          | 0         | 0          | 0         | 0         |
| 0         | 0          | 0         | 0.646283   | 0.172591  | 0.180454  |
| 18.51     | 18.4799    | 17.2456   | 15.8242    | 14.7749   | 15.6837   |
| 2.41137   | 1.36998    | 1.54622   | 1.76444    | 0.820136  | 1.2473    |
| 70.4682   | 66.355     | 39.8318   | 54.3545    | 32.1994   | 34.2281   |
| 1.11569   | 1.93262    | 2.82383   | 0.888035   | 2.28781   | 1.57524   |
| 14.677    | 14.9911    | 17.0563   | 14.95      | 13.7155   | 16.6135   |
| 7.4334    | 5.38018    | 4.50545   | 4.26272    | 5.13442   | 5.53251   |
| 0.258896  | 0.237101   | 0.334704  | 0.300292   | 0.38485   | 0.54478   |
| 4.45172   | 3.14601    | 3.41421   | 3.20681    | 3.03564   | 3.47458   |
| 0.178152  | 0.255107   | 0.144103  | 0.129288   | 0.138106  | 0.072199  |
| 0.101956  | 0.00912481 | 0.0309263 | 0.0277467  | 0.0197595 | 0.0309895 |
| 4.98115   | 4.48803    | 5.16592   | 3.83507    | 2.99655   | 4.76219   |
| 0         | 0.0188883  | 0         | 0          | 0         | 0         |
| 0         | 0          | 0         | 0.00813682 | 0         | 0.0181756 |
| 0         | 0          | 0         | 0          | 0         | 0         |

|           |           |           |           |           |           |
|-----------|-----------|-----------|-----------|-----------|-----------|
| 0.0955335 | 0         | 0         | 0.0693304 | 0         | 0         |
| 0.0784679 | 0.0561815 | 0         | 0.0569456 | 0         | 0         |
| 38.5058   | 37.8633   | 37.5208   | 38.7364   | 39.5016   | 37.7721   |
| 0         | 0         | 0         | 0         | 0         | 0         |
| 0         | 0.135742  | 0         | 0         | 0.122477  | 0.230503  |
| 50.2523   | 52.6011   | 48.442    | 47.6526   | 44.2871   | 45.9495   |
| 0         | 0         | 0         | 0         | 0         | 0         |
| 0         | 0         | 0.0354154 | 0         | 0.034083  | 0         |
| 0.115953  | 0.114153  | 0.11724   | 0.105187  | 0.0561805 | 0.105732  |
| 1.2785    | 1.49174   | 1.99171   | 1.30584   | 1.72528   | 1.65036   |
| 9.23968   | 6.22341   | 5.25933   | 4.89246   | 4.82822   | 6.07447   |
| 0         | 0.0361467 | 0         | 0.0183192 | 0.0195686 | 0         |
| 10.3833   | 9.70822   | 10.0045   | 11.0814   | 10.2036   | 7.84667   |
| 410.11    | 205.108   | 383.843   | 395.164   | 247.636   | 79.353    |
| 4.33876   | 3.83933   | 4.64642   | 4.29068   | 2.66472   | 3.62815   |
| 0         | 0         | 0         | 0         | 0         | 0         |
| 10.7911   | 10.4633   | 8.91614   | 8.42164   | 7.87534   | 9.87584   |
| 1591.67   | 2944.17   | 2595.55   | 1792.34   | 1895.53   | 3665.49   |
| 10.1059   | 10.6002   | 11.4851   | 9.53422   | 10.1453   | 11.2219   |
| 9.53276   | 6.35227   | 9.24333   | 7.44818   | 7.33794   | 10.4183   |
| 0         | 0         | 0         | 0         | 0         | 0         |
| 13.0014   | 10.8978   | 13.4419   | 11.0162   | 12.1085   | 12.4877   |
| 0         | 0         | 0         | 0         | 0         | 0         |
| 0         | 0         | 0.0524323 | 0         | 0         | 0         |
| 0.100508  | 0.107943  | 0.121949  | 0.109411  | 0.0779155 | 0.0814653 |
| 70.1876   | 91.501    | 85.2837   | 91.5524   | 90.7731   | 66.7119   |
| 1.0635    | 0.598276  | 0.368674  | 1.04744   | 0.235554  | 0.677285  |
| 8.56528   | 7.78823   | 7.50088   | 7.27622   | 8.33229   | 7.21032   |
| 55.9111   | 48.2164   | 50.9063   | 59.377    | 62.7614   | 55.2163   |
| 0.0921036 | 0.0659444 | 0.223502  | 0.233944  | 0.249901  | 0.0746531 |
| 28.9242   | 20.3815   | 15.8073   | 18.7988   | 17.5619   | 20.1055   |
| 178.113   | 156.126   | 175.631   | 192.763   | 196.249   | 183.66    |
| 0         | 0         | 0         | 0         | 0         | 0         |
| 0.175472  | 0         | 0.0315395 | 0         | 0         | 0.142226  |
| 16.4275   | 12.2217   | 16.2364   | 13.4018   | 19.2454   | 12.1176   |
| 7.32189   | 6.34012   | 6.89319   | 7.06188   | 5.38289   | 6.27193   |
| 0         | 0         | 0         | 0         | 0         | 0         |
| 24.1969   | 28.924    | 24.5926   | 24.6329   | 20.108    | 16.1883   |
| 0.704813  | 0.47852   | 0.460398  | 0.622152  | 0.643309  | 0.50272   |
| 79.9456   | 93.558    | 90.2743   | 75.4088   | 72.7432   | 63.0976   |
| 13.347    | 12.911    | 14.0694   | 14.4777   | 12.9885   | 15.0188   |
| 15.3427   | 16.4189   | 23.3051   | 17.6282   | 13.0016   | 13.3661   |
| 28.3855   | 32.3498   | 23.9027   | 24.7973   | 21.3      | 20.5175   |

|           |           |           |          |           |           |
|-----------|-----------|-----------|----------|-----------|-----------|
| 0         | 0.513865  | 0         | 0        | 0         | 0.193909  |
| 29.6079   | 21.5349   | 19.7734   | 25.0062  | 17.3866   | 22.8047   |
| 72.8548   | 58.5357   | 68.6743   | 68.7407  | 78.4919   | 65.2857   |
| 0.157827  | 0.207169  | 0.234049  | 0.248166 | 0.36705   | 0.639622  |
| 7.01795   | 8.69146   | 6.3854    | 8.89977  | 7.25466   | 7.57136   |
| 11.1548   | 11.8008   | 10.8176   | 10.8001  | 9.18024   | 12.1831   |
| 10.7459   | 12.7085   | 9.36902   | 9.72048  | 8.49255   | 9.35349   |
| 1.94048   | 2.88035   | 2.23957   | 2.30127  | 1.85284   | 1.36183   |
| 0.651904  | 0.763118  | 1.83726   | 1.26535  | 0.108293  | 0.364841  |
| 0.2431    | 0.243677  | 0.0917647 | 0.141138 | 0.075382  | 0.170769  |
| 0         | 0         | 0         | 0        | 0.0604589 | 0.0316067 |
| 0.238033  | 0.297791  | 0.33007   | 0.391916 | 0.216243  | 0.295431  |
| 0         | 0         | 0         | 0        | 0         | 0         |
| 2.47913   | 1.62831   | 2.15447   | 2.4633   | 3.03368   | 2.66815   |
| 4.25329   | 3.13046   | 2.8269    | 3.63172  | 3.06088   | 3.50168   |
| 5.02144   | 5.37751   | 6.60764   | 5.23262  | 5.15699   | 4.48748   |
| 0.0667097 | 0.0238814 | 0.0809402 | 0.121031 | 0.206858  | 0.162211  |
| 0         | 0         | 0         | 0        | 0         | 0         |
| 39.9564   | 41.4843   | 36.2126   | 34.7965  | 45.1788   | 20.8273   |
| 3.51653   | 1.36096   | 2.53694   | 2.27612  | 1.39987   | 1.30958   |
| 29.6518   | 90.8708   | 15.4187   | 65.4897  | 25.6546   | 160.757   |
| 11.1974   | 9.14101   | 10.0401   | 10.7434  | 9.18083   | 11.3172   |
| 8.07767   | 7.50385   | 8.22936   | 6.67835  | 6.61863   | 7.91468   |
| 0.168648  | 0.0603696 | 0.272796  | 0.122367 | 0.0980476 | 0.102501  |
| 0         | 0         | 0         | 0        | 0         | 0         |
| 23.259    | 20.1625   | 20.2131   | 21.0877  | 20.3901   | 21.9682   |
| 35.1065   | 28.5101   | 32.1917   | 33.9413  | 30.8722   | 23.9515   |
| 38.7621   | 34.7643   | 48.6397   | 53.6819  | 93.049    | 58.1016   |
| 15.897    | 13.0179   | 14.7927   | 14.0788  | 16.523    | 15.2257   |
| 0.619463  | 0.625652  | 0.510728  | 0.69697  | 0.429747  | 1.35327   |
| 36.8702   | 56.7521   | 38.761    | 30.7666  | 34.9133   | 35.563    |
| 360.621   | 196.197   | 241.255   | 519.115  | 702.183   | 1069.6    |
| 0.116807  | 0.0356829 | 0.133284  | 0.127342 | 0.245908  | 0.0718137 |
| 16.2719   | 13.9256   | 16.4448   | 16.3934  | 14.4247   | 13.7786   |
| 0.997877  | 0.453594  | 0.38721   | 0.611194 | 0.253678  | 0.466529  |
| 0.703952  | 1.46405   | 0.677872  | 0.486543 | 1.22136   | 0.896621  |
| 12.8258   | 11.3542   | 8.4444    | 10.1738  | 10.3281   | 7.81696   |
| 2.27732   | 2.99412   | 2.68106   | 2.61172  | 2.3543    | 1.94656   |
| 0         | 0         | 0         | 0        | 0         | 0         |
| 13.9366   | 10.4627   | 13.3794   | 18.2766  | 17.6511   | 16.1808   |
| 65.9967   | 74.2751   | 71.2625   | 71.1582  | 67.2526   | 75.3868   |
| 4.68754   | 4.11693   | 5.00499   | 5.91919  | 4.9905    | 5.09121   |
| 0         | 0         | 0         | 0        | 0         | 0         |

|           |           |           |           |           |           |
|-----------|-----------|-----------|-----------|-----------|-----------|
| 0.0893877 | 0.106667  | 0.0843546 | 0.0324351 | 0.0577456 | 0.0724518 |
| 68.3827   | 76.3886   | 71.4184   | 61.666    | 59.2779   | 73.1575   |
| 0.208327  | 0         | 0         | 0         | 0         | 0         |
| 0         | 0         | 0         | 0         | 0         | 0         |
| 10.5908   | 12.1176   | 11.4223   | 12.5838   | 9.65901   | 10.8144   |
| 53.8187   | 51.7334   | 57.5286   | 53.1532   | 52.3508   | 58.1398   |
| 5.87094   | 2.03606   | 3.33906   | 5.32581   | 1.13781   | 1.56141   |
| 20.3595   | 21.9904   | 23.1876   | 22.5229   | 19.987    | 20.7825   |
| 2.79569   | 1.72243   | 2.53615   | 1.5878    | 1.05576   | 1.47816   |
| 3.50003   | 2.20642   | 3.91353   | 3.49969   | 3.16005   | 3.67244   |
| 33.3965   | 34.418    | 34.9237   | 35.9327   | 35.7785   | 35.0932   |
| 16.1993   | 18.6837   | 14.3724   | 17.8177   | 14.2271   | 23.0912   |
| 0.204937  | 0.23477   | 0.0663078 | 0.0594906 | 0.730804  | 0.332217  |
| 5.90321   | 7.26749   | 6.64003   | 5.12214   | 4.12698   | 5.04363   |
| 0         | 0         | 0         | 0         | 0         | 0         |
| 17.7432   | 16.0951   | 18.2975   | 17.9754   | 17.806    | 17.7903   |
| 0.287403  | 0.143133  | 0.154229  | 0.165441  | 0.28947   | 0.15396   |
| 0.158874  | 0.195871  | 0.0839247 | 0.18128   | 0.113422  | 0.189217  |
| 78.5793   | 81.1163   | 65.3609   | 87.0955   | 56.1642   | 70.3314   |
| 0.0328315 | 0.0352601 | 0.0265568 | 0.0357397 | 0.0127258 | 0         |
| 1.03582   | 0.862981  | 0.83785   | 1.05239   | 0.613185  | 0.183177  |
| 0         | 0         | 0.0288863 | 0         | 0         | 0         |
| 4.28013   | 3.59514   | 3.89675   | 3.78746   | 3.70106   | 4.11497   |
| 35.4182   | 24.7202   | 59.3593   | 27.183    | 26.9629   | 16.8838   |
| 0         | 0         | 0         | 0         | 0         | 0         |
| 3.44282   | 2.3546    | 3.36965   | 2.81217   | 2.20341   | 3.40848   |
| 0.41948   | 0.300562  | 0.242363  | 0.261119  | 0.13939   | 0.145715  |
| 0.280589  | 0.198416  | 0.271234  | 0.523736  | 0.430856  | 0.584945  |
| 0         | 0         | 0         | 0         | 0         | 0         |
| 0         | 0         | 0         | 0         | 0         | 0         |
| 4.39844   | 2.46373   | 2.10583   | 2.64922   | 1.7399    | 1.91615   |
| 5.13832   | 5.81066   | 4.27281   | 4.9313    | 5.00705   | 3.46416   |
| 73.547    | 149.628   | 102.508   | 84.1351   | 108.507   | 68.1284   |
| 12.2861   | 16.8602   | 15.183    | 11.8883   | 15.7417   | 10.7882   |
| 0         | 0         | 0         | 0         | 0         | 0         |
| 0.736753  | 0.562668  | 0.119189  | 0.392095  | 0.190381  | 0.517542  |
| 10.3037   | 7.7879    | 9.16632   | 9.6161    | 7.32836   | 9.45757   |
| 0.157326  | 0.104202  | 0.165759  | 0.275428  | 0.24179   | 0.268398  |
| 53.1711   | 46.6006   | 43.2745   | 47.958    | 55.3281   | 46.5105   |
| 1.34262   | 1.02538   | 1.81003   | 1.2342    | 1.87348   | 1.59609   |
| 36.6899   | 30.7277   | 33.3456   | 37.1088   | 38.8099   | 36.1788   |
| 0.524233  | 0.37534   | 0.238161  | 0.40438   | 0.275879  | 0.0944238 |
| 19.6584   | 22.5818   | 23.3826   | 18.2367   | 21.4734   | 18.2418   |

|           |           |           |           |           |           |
|-----------|-----------|-----------|-----------|-----------|-----------|
| 0         | 0         | 0         | 0.0644867 | 0         | 0.0240078 |
| 0         | 0         | 0         | 0         | 0         | 0         |
| 0         | 0         | 0         | 0         | 0         | 0         |
| 14.3363   | 11.7322   | 14.1644   | 15.3811   | 16.5372   | 13.4154   |
| 0         | 0         | 0         | 0         | 0         | 0         |
| 8.64802   | 9.11399   | 7.10482   | 8.41487   | 10.4438   | 4.78111   |
| 71.6509   | 71.5799   | 71.0628   | 70.2351   | 72.5206   | 73.1026   |
| 2.94634   | 3.36383   | 2.7375    | 4.392     | 2.50011   | 4.06624   |
| 4.85539   | 7.18674   | 3.96812   | 3.94354   | 2.67191   | 4.52676   |
| 0         | 0         | 0         | 0         | 0         | 0         |
| 0.0727609 | 0.0260477 | 0.0294274 | 0.0792058 | 0.0564054 | 0.147438  |
| 0         | 0         | 0         | 0         | 0         | 0         |
| 0         | 0         | 0         | 0         | 0         | 0         |
| 0.256579  | 0.137779  | 0.207542  | 0.0931021 | 0.149178  | 0.311949  |
| 0         | 0         | 0         | 0         | 0.156634  | 0         |
| 5.0028    | 7.44068   | 7.46776   | 6.19135   | 6.63237   | 5.26946   |
| 28.9063   | 24.0713   | 26.1412   | 26.7414   | 26.9017   | 26.6406   |
| 5.54309   | 4.66593   | 5.77938   | 6.70036   | 6.04325   | 4.53029   |
| 1.42872   | 1.72125   | 1.20227   | 1.23723   | 0.914807  | 1.52329   |
| 0         | 0         | 0         | 0         | 0         | 0         |
| 71.3426   | 75.2732   | 54.4062   | 50.3912   | 51.7291   | 56.4087   |
| 2.53317   | 1.24978   | 1.98015   | 1.9465    | 2.22779   | 2.04458   |
| 26.5583   | 25.0056   | 25.7596   | 27.4491   | 26.7126   | 25.5201   |
| 2.43747   | 2.76754   | 2.54798   | 2.32597   | 2.88106   | 2.81352   |
| 23.8475   | 21.9046   | 24.4295   | 24.195    | 22.683    | 23.9072   |
| 3.31253   | 1.78997   | 2.07277   | 2.81218   | 2.47102   | 2.33031   |
| 6.05417   | 9.52081   | 5.43443   | 8.44432   | 8.31444   | 7.46173   |
| 84.6459   | 87.0326   | 80.0521   | 85.8287   | 93.2144   | 96.3984   |
| 3.59178   | 2.25819   | 2.82582   | 2.8595    | 2.8606    | 3.36026   |
| 1.41993   | 0.683921  | 1.2112    | 1.14288   | 1.30088   | 1.33923   |
| 4.89931   | 4.19116   | 4.63203   | 4.26355   | 3.23901   | 3.62724   |
| 0         | 0         | 0         | 0         | 0         | 0         |
| 17.4655   | 17.5107   | 17.4247   | 18.2197   | 17.0349   | 17.3686   |
| 98.1625   | 113.386   | 120.447   | 106.334   | 121.443   | 115.042   |
| 0.263288  | 0.499058  | 0.282869  | 0.348197  | 0.137756  | 0.0940614 |
| 5.19534   | 4.64033   | 5.0514    | 5.865     | 4.69876   | 5.76355   |
| 2.23E-06  | 1.23798   | 0.782838  | 1.9872    | 1.71511   | 2.38068   |
| 15.4891   | 12.7566   | 13.0774   | 14.6296   | 12.4685   | 14.35     |
| 42.9476   | 41.7816   | 42.7609   | 39.2418   | 38.707    | 38.3774   |
| 0.40591   | 0.603603  | 0.505127  | 0.181278  | 0.701951  | 0.480852  |
| 0.188947  | 0.0784477 | 0.0488345 | 0.0608528 | 0.0554694 | 0.11808   |
| 22.4262   | 18.6907   | 21.3777   | 23.4729   | 23.7506   | 23.3775   |
| 7.08489   | 5.11446   | 5.49444   | 6.04565   | 6.33728   | 6.12117   |

|          |           |           |          |           |          |
|----------|-----------|-----------|----------|-----------|----------|
| 3.39052  | 2.60346   | 2.75577   | 2.79339  | 2.79345   | 3.95625  |
| 2.01105  | 1.75044   | 1.69049   | 2.26073  | 1.28388   | 1.5661   |
| 24.4424  | 32.1566   | 27.8408   | 28.1427  | 23.5885   | 21.2939  |
| 0.308298 | 0.393381  | 0.218161  | 0        | 0.272592  | 0        |
| 10.5474  | 9.99933   | 11.4429   | 9.98404  | 12.1947   | 11.0946  |
| 0        | 0         | 0         | 0        | 0         | 0        |
| 0        | 0         | 0         | 0        | 0         | 0        |
| 1.76969  | 0.872309  | 0.874016  | 1.18426  | 0.535048  | 0.615236 |
| 59.1572  | 52.3897   | 51.0729   | 65.2715  | 52.8929   | 47.7297  |
| 1.62435  | 1.79737   | 2.05049   | 1.44674  | 1.54541   | 2.33396  |
| 2.17977  | 1.68781   | 1.47096   | 1.86628  | 0.906607  | 1.37471  |
| 39.889   | 43.1395   | 41.2167   | 40.7285  | 38.7164   | 36.6967  |
| 13.5216  | 14.3337   | 13.3215   | 14.4877  | 12.3091   | 12.716   |
| 0.845571 | 1.61443   | 1.74791   | 1.36366  | 0.728333  | 1.14227  |
| 0.944693 | 1.35276   | 0.382071  | 1.02837  | 1.09851   | 0        |
| 1.05999  | 0.748815  | 0.640288  | 0.676978 | 0.624591  | 0.996573 |
| 0.10607  | 0.0379721 | 0.042899  | 0.346396 | 0         | 0.171947 |
| 0        | 0         | 0.0357983 | 0        | 0         | 0        |
| 0.178723 | 0.085308  | 0.216848  | 0.129702 | 0         | 0.120717 |
| 0        | 0         | 0         | 0        | 0         | 0        |
| 8.99731  | 8.30491   | 7.48693   | 9.23643  | 6.75303   | 7.09034  |
| 0        | 0         | 0         | 0        | 0.0999327 | 0        |
| 20.8095  | 15.863    | 15.7688   | 4.71442  | 10.5389   | 9.61353  |
| 13.0497  | 11.2763   | 11.4238   | 13.0789  | 12.5512   | 12.2636  |
| 1.15611  | 1.6555    | 1.46953   | 0.998821 | 0.512134  | 0.580088 |
| 13.9493  | 12.0866   | 18.8679   | 15.4238  | 13.9398   | 11.5315  |
| 11.8903  | 10.8046   | 11.0756   | 10.2853  | 9.23933   | 10.1086  |
| 7.49384  | 6.66515   | 9.2242    | 8.57986  | 8.44339   | 7.65854  |
| 0        | 0         | 0         | 0        | 0.0169737 | 0        |
| 0        | 0         | 0         | 0        | 0         | 0        |
| 0.398643 | 0.295263  | 0.322454  | 0.558652 | 0.394285  | 0.233979 |
| 20.1842  | 21.3564   | 21.3271   | 21.7814  | 22.3564   | 20.4938  |
| 10.698   | 8.68479   | 15.9624   | 11.4426  | 12.7304   | 12.6867  |
| 20.0492  | 16.585    | 19.8371   | 19.8015  | 19.8024   | 19.7013  |
| 0        | 0         | 0         | 0        | 0         | 0        |
| 0        | 0         | 0         | 0        | 0         | 0        |
| 4.90675  | 5.09272   | 4.83432   | 5.0465   | 4.55169   | 4.47186  |
| 14.151   | 12.687    | 13.0981   | 13.3171  | 12.8141   | 14.8221  |
| 23.857   | 18.2458   | 19.9553   | 23.1876  | 19.7252   | 21.0006  |
| 0        | 0         | 0         | 0        | 0         | 0        |
| 12.1637  | 12.5562   | 13.2772   | 13.6     | 14.5276   | 14.3661  |
| 9.19192  | 6.89043   | 8.40822   | 8.34962  | 8.27349   | 8.02539  |
| 61.2582  | 72.1903   | 59.4379   | 67.8461  | 56.6924   | 62.5905  |

|           |           |           |           |           |           |
|-----------|-----------|-----------|-----------|-----------|-----------|
| 0.0828135 | 0.0296465 | 0.0669862 | 0.0300496 | 0.0320992 | 0.0335616 |
| 6.40045   | 5.7106    | 6.06218   | 5.60611   | 6.98742   | 6.90534   |
| 4.88E-125 | 1.57E-77  | 2.16E-85  | 2.68E-183 | 2.72E-96  | 1.81E-41  |
| 0         | 0         | 0         | 0.0306124 | 0         | 0.0341902 |
| 2.24218   | 3.08723   | 2.61585   | 1.84624   | 2.77439   | 2.4814    |
| 3.23152   | 2.18578   | 2.18985   | 1.83588   | 2.23144   | 2.9885    |
| 4.06224   | 4.44828   | 5.41201   | 5.47218   | 4.85746   | 4.19643   |
| 31.5355   | 28.827    | 34.8401   | 38.6469   | 32.9545   | 32.5535   |
| 7.01309   | 5.75494   | 6.44986   | 6.60012   | 7.373     | 5.47673   |
| 7.93803   | 5.11264   | 6.35576   | 6.21798   | 10.7658   | 5.29672   |
| 0         | 0         | 0         | 0         | 0         | 0         |
| 6.79404   | 6.90466   | 7.23036   | 7.32508   | 4.97618   | 6.24833   |
| 0.178063  | 2.22E-06  | 2.69E-07  | 0.221472  | 0.128589  | 0.180591  |
| 9.36868   | 7.28793   | 9.66725   | 9.9229    | 12.6215   | 8.353     |
| 0.123469  | 0.123762  | 0.0998715 | 0.0716829 | 0.095715  | 0.160121  |
| 1.12547   | 0.633709  | 1.33205   | 0.816774  | 0.684582  | 0.780841  |
| 0         | 0         | 0         | 0         | 0         | 0         |
| 0         | 0         | 0         | 0         | 0         | 0         |
| 12.4098   | 11.5661   | 11.1993   | 10.4131   | 11.2552   | 19.4154   |
| 3.99634   | 2.99887   | 3.94745   | 4.57342   | 2.74056   | 3.27031   |
| 28.2424   | 24.5793   | 31.2569   | 28.6515   | 33.1466   | 26.407    |
| 0         | 0.142612  | 0.223428  | 0.086731  | 0.170547  | 0.0781397 |
| 1.48659   | 0.863003  | 1.34872   | 0.758108  | 0.778668  | 1.15608   |
| 0         | 0         | 0         | 0         | 0         | 0         |
| 16.8206   | 16.3592   | 17.0552   | 17.8234   | 15.6244   | 15.2979   |
| 0         | 0         | 0         | 0         | 0         | 0         |
| 10.0261   | 7.16753   | 7.0467    | 9.2504    | 8.51879   | 8.12646   |
| 0         | 0         | 0         | 0         | 0         | 0         |
| 7.67653   | 7.57455   | 6.75405   | 8.1727    | 5.77652   | 10.149    |
| 34.6049   | 35.5326   | 38.0383   | 34.6694   | 34.2278   | 35.182    |
| 0.153267  | 0         | 0         | 0         | 0         | 0         |
| 1.84532   | 1.25623   | 1.00325   | 1.49286   | 2.46237   | 1.78993   |
| 0.96508   | 1.2524    | 0.878213  | 0.787923  | 0.701386  | 1.41779   |
| 7.82E-08  | 0.0701547 | 8.16E-07  | 0.137778  | 0.134569  | 0.131295  |
| 20.5089   | 20.2086   | 20.806    | 20.2993   | 17.2692   | 15.5133   |
| 0.0847969 | 0.121214  | 0.0686332 | 0.0615592 | 0         | 0.206016  |
| 1.36488   | 1.62872   | 1.71016   | 1.51491   | 1.09957   | 1.51843   |
| 0.0404704 | 0         | 0.0327357 | 0.0587403 | 0.0627466 | 0.0656053 |
| 30.6453   | 27.742    | 26.9856   | 29.874    | 27.1991   | 26.3863   |
| 5.26176   | 3.09335   | 4.2366    | 5.32495   | 10.6091   | 6.74939   |
| 0         | 0         | 0         | 0         | 0         | 0         |
| 1.18242   | 0.883396  | 0.748513  | 0.559631  | 1.03619   | 1.04173   |
| 2.86969   | 5.44744   | 3.91331   | 2.94683   | 2.63493   | 3.3416    |



|           |           |           |           |           |           |
|-----------|-----------|-----------|-----------|-----------|-----------|
| 54.1323   | 42.4519   | 37.9657   | 44.599    | 57.2448   | 32.2662   |
| 57.5288   | 61.1396   | 54.4586   | 57.8995   | 49.208    | 49.6678   |
| 10.7947   | 10.1701   | 9.7087    | 11.0962   | 9.52982   | 11.2405   |
| 43.9353   | 42.7941   | 31.714    | 42.9553   | 26.8671   | 37.7441   |
| 6.47118   | 7.4256    | 9.11348   | 9.81182   | 8.39826   | 9.5536    |
| 35.6434   | 40.7816   | 42.9085   | 34.3458   | 41.1721   | 38.1933   |
| 0.141131  | 0.0808378 | 0         | 0.14339   | 0.0437628 | 0.0686349 |
| 15.1842   | 13.705    | 16.4174   | 13.7311   | 12.3855   | 14.152    |
| 0.34341   | 0.0983499 | 0.111111  | 0.0498437 | 0.212973  | 0         |
| 11.271    | 12.3224   | 12.5899   | 13.0353   | 12.0105   | 10.5565   |
| 0.357087  | 0.125225  | 0.147368  | 0.264433  | 0.186429  | 0.372126  |
| 2.39193   | 1.31773   | 1.78608   | 1.93601   | 2.06806   | 2.23679   |
| 1.51759   | 0.271641  | 0.92066   | 1.10134   | 0.588229  | 0         |
| 60.3533   | 47.5939   | 59.1314   | 58.6465   | 52.0113   | 58.6331   |
| 3.44588   | 3.96284   | 3.77795   | 3.32074   | 2.64638   | 3.0842    |
| 0.892103  | 0.744412  | 1.26125   | 0.683127  | 1.17057   | 1.54446   |
| 3246.05   | 3330.64   | 3265.65   | 3431.42   | 3404.07   | 2983.99   |
| 0.0836014 | 0.181076  | 0.21899   | 0.119704  | 0.0172892 | 0.235746  |
| 12.8987   | 11.9004   | 8.7529    | 9.36078   | 11.073    | 10.3145   |
| 0         | 0.317359  | 0.239025  | 0.107225  | 0.343615  | 0         |
| 3.00617   | 2.54709   | 2.64778   | 2.71432   | 2.55558   | 3.5415    |
| 0         | 0         | 0         | 0         | 0         | 0         |
| 0         | 0         | 0         | 0         | 0         | 0         |
| 30.4527   | 31.447    | 43.8394   | 36.1844   | 34.9292   | 33.4905   |
| 5.77168   | 5.46457   | 5.00645   | 5.67671   | 4.91584   | 5.44757   |
| 0         | 0.0237213 | 0         | 0         | 0         | 0         |
| 8.81328   | 7.32968   | 8.09246   | 8.09762   | 7.96933   | 7.14812   |
| 0         | 0         | 0         | 0         | 0         | 0         |
| 0         | 0         | 0         | 0         | 0         | 0         |
| 1.36275   | 0.973784  | 1.10237   | 1.15585   | 0.712061  | 0.678245  |
| 0         | 0         | 0         | 0         | 0         | 0         |
| 25.9406   | 28.9151   | 28.0984   | 26.5879   | 27.0452   | 26.1707   |
| 1.84408   | 1.6758    | 2.29483   | 1.64712   | 1.15465   | 1.03479   |
| 0.077811  | 0.0485306 | 0.0274137 | 0.147572  | 0.0262728 | 0.0549396 |
| 69.3267   | 57.7827   | 64.5966   | 67.4244   | 87.6525   | 54.7582   |
| 32.3639   | 21.8514   | 23.5743   | 30.448    | 28.5469   | 26.1777   |
| 0         | 0         | 0         | 0         | 0         | 0         |
| 5.58852   | 3.67747   | 4.78174   | 5.22786   | 4.80811   | 4.87007   |
| 0.297631  | 0.0665931 | 0.265424  | 0.280795  | 0.346504  | 0.434586  |
| 5.19941   | 4.0329    | 5.58256   | 5.36797   | 5.27825   | 6.3967    |
| 15.5719   | 14.8539   | 15.1783   | 16.6824   | 16.7452   | 14.7623   |
| 18.2071   | 18.6799   | 22.4944   | 22.1221   | 21.3624   | 18.4137   |
| 7.81791   | 6.76538   | 8.06021   | 7.17633   | 7.502     | 8.59733   |

|           |           |           |           |           |           |
|-----------|-----------|-----------|-----------|-----------|-----------|
| 11.2982   | 9.68845   | 13.9053   | 11.8158   | 10.3119   | 11.4087   |
| 44.8667   | 39.7973   | 45.2427   | 49.0957   | 49.0233   | 49.533    |
| 38.953    | 42.4839   | 44.4051   | 31.3823   | 42.9045   | 35.1365   |
| 10.3063   | 7.53636   | 8.11534   | 8.83732   | 8.72197   | 10.0439   |
| 18.478    | 17.6059   | 18.7767   | 15.9961   | 15.2571   | 18.1183   |
| 0.102145  | 0.0731339 | 0         | 0.0741285 | 0.158369  | 0         |
| 749.884   | 1025.6    | 1095.95   | 1125.09   | 1240.72   | 741.05    |
| 10.6627   | 6.79687   | 9.96732   | 8.13656   | 9.53769   | 10.236    |
| 44.5838   | 44.7304   | 48.8      | 43.6847   | 36.1459   | 45.9043   |
| 8.11718   | 4.428     | 6.07216   | 7.57387   | 5.23592   | 6.56276   |
| 58.0967   | 52.4316   | 52.5018   | 54.1514   | 62.8634   | 57.3113   |
| 0.0276654 | 0.0792316 | 0.134268  | 0.0803091 | 0.0214466 | 0.0224237 |
| 0         | 0         | 0         | 0         | 0         | 0         |
| 7.08252   | 5.84971   | 5.9949    | 6.57175   | 6.37288   | 5.65861   |
| 22.9564   | 22.5656   | 27.0958   | 23.4206   | 21.3763   | 24.4326   |
| 6.00171   | 4.24232   | 5.8362    | 5.98193   | 5.18652   | 5.77725   |
| 5.03388   | 4.27211   | 4.67901   | 5.24067   | 5.09321   | 4.26736   |
| 1.46586   | 1.52531   | 1.34026   | 0.637498  | 0.426679  | 1.83153   |
| 0         | 0         | 0         | 0         | 0         | 0         |
| 12.884    | 12.9064   | 13.4      | 14.2219   | 13.8573   | 12.7158   |
| 0         | 0         | 0         | 0         | 0.0587072 | 0.122764  |
| 0.25074   | 0.340793  | 0.154301  | 0.290501  | 0.251317  | 0.260723  |
| 22.2017   | 20.8252   | 18.9032   | 16.3286   | 12.3417   | 12.8101   |
| 0.230087  | 0.146433  | 0.0310187 | 0.250467  | 0.0891833 | 0.0310821 |
| 0.30261   | 0.433326  | 0         | 0.109805  | 0.234588  | 0.245275  |
| 3.48853   | 4.73705   | 2.62719   | 4.19038   | 1.95833   | 1.75504   |
| 1.21259   | 0.72928   | 1.02007   | 0.844797  | 0.827215  | 1.10078   |
| 0.667692  | 0.367735  | 0.304662  | 0.13667   | 0.225623  | 0.374668  |
| 26.2006   | 25.7489   | 29.1523   | 26.7152   | 32.426    | 26.4596   |
| 0         | 0         | 0         | 0.0265854 | 0         | 0         |
| 0         | 0         | 0         | 0         | 0         | 0         |
| 9.72819   | 11.1553   | 9.7707    | 10.3203   | 7.9       | 9.7481    |
| 16.0794   | 15.1638   | 14.9706   | 14.7658   | 15.6519   | 17.4194   |
| 0.232617  | 0.555165  | 0.219519  | 0.225086  | 0.300547  | 0.282816  |
| 0         | 0         | 0         | 0         | 0         | 0         |
| 0         | 0         | 0.13645   | 0         | 0.130771  | 0         |
| 0         | 0         | 0         | 0         | 0         | 0         |
| 14.4087   | 12.6303   | 14.7184   | 14.1792   | 13.0706   | 13.4416   |
| 14.935    | 15.176    | 16.231    | 14.6953   | 14.8808   | 16.1405   |
| 0.453984  | 0.549529  | 0.558138  | 0.500756  | 0.532662  | 0.494857  |
| 0         | 0         | 0         | 0.0447514 | 0         | 0.0249908 |
| 0         | 0         | 0         | 0         | 0         | 0         |
| 0.0721749 | 0         | 0         | 0         | 0.0559511 | 0         |

|           |          |           |           |           |           |
|-----------|----------|-----------|-----------|-----------|-----------|
| 0         | 0        | 0         | 0         | 0.100615  | 0         |
| 0.0717539 | 0        | 0.0580403 | 0         | 0.0556247 | 0         |
| 5.81164   | 5.20128  | 3.80221   | 2.41893   | 4.10775   | 1.93963   |
| 12.3038   | 9.43111  | 12.1184   | 11.4052   | 11.7102   | 13.5259   |
| 0.0755158 | 0.13517  | 0.152708  | 0.0822047 | 0.117082  | 0.15302   |
| 0         | 0        | 0         | 0         | 0         | 0         |
| 4.30501   | 3.69052  | 3.9015    | 3.7825    | 4.1521    | 4.28292   |
| 16.9193   | 25.4323  | 15.3895   | 16.13     | 13.0738   | 14.1128   |
| 6.30617   | 4.02366  | 5.49999   | 4.87226   | 5.63691   | 5.33738   |
| 14.2522   | 11.9833  | 13.1474   | 14.7759   | 12.7874   | 13.5938   |
| 5.64652   | 4.64517  | 4.73014   | 6.23945   | 5.43681   | 5.6126    |
| 3.24795   | 2.63077  | 2.79284   | 2.55826   | 3.06011   | 3.0385    |
| 3.54878   | 2.32668  | 3.78843   | 2.8599    | 3.10294   | 0.694015  |
| 0.748713  | 0.272933 | 0.17647   | 0.89992   | 0.468458  | 0.620977  |
| 0         | 0        | 0         | 0         | 0         | 0         |
| 6.44232   | 9.30046  | 6.74247   | 9.82768   | 15.0641   | 9.63353   |
| 20.4164   | 21.1646  | 20.7448   | 20.2066   | 23.235    | 18.2828   |
| 36.4821   | 38.6414  | 37.997    | 43.4624   | 43.7154   | 40.5606   |
| 11.2929   | 13.302   | 9.18371   | 9.34106   | 10.7783   | 11.3678   |
| 5.04936   | 5.31867  | 4.76016   | 4.96988   | 3.53865   | 5.26417   |
| 2.59693   | 1.16687  | 2.00033   | 1.23473   | 1.33205   | 1.46481   |
| 0.743216  | 0.957831 | 0.763594  | 0.647238  | 0.691383  | 0.12048   |
| 19.7813   | 15.4633  | 17.2565   | 16.1384   | 20.0688   | 18.6192   |
| 1.67986   | 1.25826  | 1.14976   | 1.40666   | 0.741281  | 1.29874   |
| 16.7163   | 18.4533  | 14.3256   | 15.1809   | 16.7691   | 15.2399   |
| 0.0485674 | 0        | 0         | 0.0352462 | 0.0376502 | 0         |
| 0.0849733 | 0        | 0.137466  | 0         | 0         | 0.0688737 |
| 37.1122   | 26.5716  | 30.0193   | 0         | 0         | 30.0807   |
| 35.5004   | 31.5612  | 33.2746   | 35.7755   | 37.6287   | 34.2291   |
| 16.2048   | 14.5434  | 14.7208   | 13.6103   | 13.9871   | 14.4978   |
| 3.83324   | 2.93624  | 3.6592    | 3.77391   | 2.90604   | 3.2212    |
| 0.835335  | 1.61023  | 1.14347   | 1.11917   | 0.797002  | 1.24997   |
| 0         | 0        | 0         | 0         | 0         | 0         |
| 16.2935   | 15.3181  | 16.1281   | 16.4213   | 16.1918   | 16.3039   |
| 17.9218   | 16.9907  | 18.5138   | 15.6611   | 13.8016   | 16.7845   |
| 50.0989   | 43.7449  | 45.8497   | 53.3956   | 45.6793   | 39.9889   |
| 0         | 0        | 0         | 0         | 0         | 0.084115  |
| 0.088833  | 0        | 0         | 0.0644677 | 0.619782  | 0.0360011 |
| 0         | 0        | 0         | 0         | 0         | 0         |
| 0         | 0        | 0         | 0         | 0         | 0         |
| 3.07086   | 2.69964  | 2.98704   | 2.0029    | 1.65736   | 4.06437   |
| 2.16414   | 2.43326  | 1.50416   | 1.48912   | 1.24272   | 1.13042   |
| 27.4243   | 27.4581  | 27.447    | 28.2891   | 29.8639   | 37.9725   |

|           |           |           |           |           |           |
|-----------|-----------|-----------|-----------|-----------|-----------|
| 0         | 0         | 0         | 0         | 0         | 0         |
| 0.29204   | 0.41819   | 0.9449    | 0.932529  | 0.226394  | 0.520758  |
| 0.0943126 | 0         | 0.0381438 | 0         | 0.0731126 | 0.0382218 |
| 18.1476   | 14.3631   | 19.7988   | 16.1803   | 17.4502   | 16.057    |
| 0.0466429 | 0.0200372 | 0.0377285 | 0.081239  | 0         | 0.0226834 |
| 18.4475   | 15.3371   | 16.9114   | 18.8627   | 14.0874   | 16.5145   |
| 0.0346387 | 0         | 0         | 0         | 0         | 0.0561516 |
| 8.42803   | 8.07047   | 8.65366   | 10.0835   | 10.2509   | 9.61161   |
| 5.40423   | 5.42129   | 5.87529   | 4.37163   | 4.63382   | 5.48829   |
| 65.7189   | 70.0362   | 71.7917   | 63.5464   | 72.0796   | 63.8769   |
| 132.691   | 151.752   | 156.194   | 158.501   | 149.406   | 136.363   |
| 14.0605   | 14.8985   | 13.2414   | 16.0151   | 10.2677   | 12.7834   |
| 4.99334   | 4.00366   | 5.64355   | 5.41081   | 5.27611   | 6.99957   |
| 0         | 0         | 0         | 0         | 0         | 0         |
| 8.46661   | 10.5286   | 8.3303    | 7.33013   | 7.63816   | 8.3072    |
| 0         | 0         | 0         | 0         | 0         | 0         |
| 0.158088  | 2.76E-46  | 0.161057  | 4.62E-223 | 1.20E-54  | 9.09E-54  |
| 10.9951   | 3.87142   | 17.4955   | 8.38169   | 8.39453   | 16.3535   |
| 10.1379   | 12.4398   | 8.6104    | 9.64856   | 13.3417   | 14.1726   |
| 27.4933   | 35.2074   | 32.2359   | 29.095    | 33.7257   | 28.7212   |
| 25.6485   | 25.2401   | 26.2907   | 26.4686   | 25.8617   | 27.241    |
| 29.2638   | 23.2503   | 26.436    | 29.0676   | 29.3659   | 30.4581   |
| 104.162   | 102.209   | 107.051   | 110.747   | 119.36    | 80.5956   |
| 16.1872   | 13.0489   | 16.896    | 15.2041   | 16.8309   | 17.7771   |
| 13.5686   | 10.2604   | 14.4837   | 10.8347   | 13.2145   | 11.2037   |
| 0.0907905 | 0.0216681 | 0         | 0         | 0         | 0.0245296 |
| 0         | 0         | 0         | 0         | 0         | 0         |
| 26.392    | 21.1702   | 16.9743   | 16.7092   | 14.9998   | 15.0954   |
| 3.79629   | 2.12864   | 6.1417    | 2.93004   | 2.85231   | 2.48871   |
| 9.15407   | 7.57361   | 8.05561   | 9.15182   | 5.29324   | 5.74518   |
| 0         | 0         | 0         | 0         | 0         | 0         |
| 0         | 0         | 0         | 0         | 0         | 0         |
| 15.1303   | 16.613    | 20.247    | 16.7652   | 14.0121   | 15.0209   |
| 0         | 0         | 0         | 0         | 0         | 0         |
| 16.331    | 12.6137   | 15.0701   | 16.391    | 16.3443   | 17.4964   |
| 0.066437  | 0         | 0.0537396 | 0.0711509 | 0.0457804 | 0.074791  |
| 0         | 0         | 0         | 0         | 0         | 0         |
| 0.205491  | 0.243086  | 0.0865716 | 0.537104  | 0.175544  | 0.338594  |
| 0.772754  | 0.585823  | 0.992751  | 0.725743  | 1.02191   | 0.847405  |
| 22.0111   | 22.4281   | 22.8124   | 25.0584   | 20.885    | 22.2148   |
| 5.32309   | 5.62761   | 5.60203   | 3.25622   | 3.11268   | 4.11752   |
| 3.62098   | 1.7067    | 1.82143   | 2.09912   | 2.17683   | 3.89633   |
| 0.0175897 | 0         | 0.0426841 | 0         | 0         | 0.171086  |

|           |           |           |           |           |           |
|-----------|-----------|-----------|-----------|-----------|-----------|
| 8.75114   | 6.97881   | 8.51736   | 7.46097   | 7.11494   | 8.18877   |
| 48.6767   | 59.6995   | 59.425    | 58.0582   | 57.1266   | 40.55     |
| 5.9837    | 4.52109   | 4.06557   | 3.4834    | 3.7508    | 4.04187   |
| 0.278757  | 0.0997925 | 0.225481  | 0.303449  | 0.324146  | 0.225942  |
| 0.0285095 | 0.0204123 | 0.0307477 | 0.0413797 | 0.029468  | 0.0462158 |
| 1.93533   | 1.77727   | 0.876362  | 2.79511   | 1.69643   | 2.05077   |
| 1.12562   | 1.15462   | 1.67754   | 1.45833   | 1.51767   | 1.33328   |
| 2.89922   | 2.17086   | 2.38092   | 2.31281   | 2.28183   | 2.15259   |
| 0.747949  | 1.09975   | 0.564879  | 1.17926   | 1.04627   | 0.755687  |
| 0.356769  | 0.25544   | 0.115433  | 0.18124   | 0.276573  | 0.318091  |
| 1.88874   | 2.13248   | 1.96847   | 2.24056   | 1.99917   | 2.57601   |
| 0         | 0         | 0         | 0         | 0         | 0         |
| 2.75527   | 2.96291   | 4.26208   | 4.86782   | 3.54704   | 3.83941   |
| 0.553738  | 0.589528  | 0.598225  | 0.392207  | 0.322728  | 0.385066  |
| 8.49912   | 5.15301   | 7.57687   | 7.16534   | 8.6073    | 7.09403   |
| 0         | 0         | 0         | 0         | 0         | 0         |
| 0.105014  | 0         | 0         | 0.0381051 | 0.040704  | 0.0425585 |
| 39.7427   | 29.2807   | 34.2231   | 32.273    | 37.7602   | 36.9325   |
| 9.7785    | 9.85811   | 8.20053   | 6.68009   | 6.56485   | 9.8205    |
| 0         | 0         | 0.0916278 | 0         | 0         | 0         |
| 34.2879   | 37.1547   | 31.035    | 32.48     | 30.2673   | 19.9818   |
| 9.11635   | 7.8256    | 8.36946   | 8.84862   | 9.31406   | 9.13467   |
| 25.5547   | 30.0855   | 29.9225   | 25.9026   | 27.4653   | 24.0942   |
| 0.707891  | 0.80633   | 1.09314   | 0.560432  | 0.349216  | 0.756332  |
| 35.1199   | 31.2631   | 35.3892   | 37.0944   | 33.3731   | 35.4119   |
| 29.4969   | 27.0526   | 26.1492   | 24.7013   | 26.8843   | 24.0191   |
| 9.60514   | 7.7435    | 9.94116   | 8.727     | 8.74569   | 12.3318   |
| 0         | 0         | 0         | 0         | 0         | 0         |
| 8.79409   | 7.30126   | 8.6567    | 8.80811   | 10.2077   | 8.93105   |
| 5.81095   | 6.92131   | 7.97257   | 6.87173   | 6.24143   | 5.79962   |
| 11.6416   | 9.40489   | 6.16969   | 10.091    | 4.42555   | 6.56378   |
| 18.8163   | 21.213    | 21.4354   | 25.4225   | 17.8021   | 20.4614   |
| 0.831829  | 0.491996  | 0.67285   | 0.31496   | 0.308405  | 0.879425  |
| 2.68662   | 1.81302   | 2.83509   | 2.79013   | 1.81938   | 3.05364   |
| 0         | 0         | 0         | 0         | 0         | 0         |
| 0         | 0         | 0         | 0.224386  | 0         | 0.25061   |
| 0.251318  | 0.128528  | 0.116163  | 0.0260551 | 0.0834967 | 0.0291002 |
| 3.08979   | 3.01975   | 2.56505   | 2.74722   | 2.7751    | 2.78287   |
| 0.547057  | 0.411599  | 0.427721  | 0.688123  | 0.4909    | 0.442432  |
| 8.10964   | 8.1559    | 7.0784    | 7.80146   | 7.69027   | 8.83552   |
| 128.749   | 159.271   | 164.762   | 91.6423   | 85.1241   | 151.304   |
| 0         | 0         | 0         | 0         | 0         | 0         |
| 29.984    | 25.1613   | 24.939    | 26.8216   | 18.5585   | 23.8485   |

|           |           |           |           |           |           |
|-----------|-----------|-----------|-----------|-----------|-----------|
| 37.1681   | 25.2213   | 25.6802   | 27.9911   | 20.3825   | 17.7382   |
| 0.376284  | 0.681956  | 0.547868  | 0.491541  | 0.525066  | 0.998162  |
| 17.4231   | 16.4068   | 15.5101   | 16.5502   | 17.2843   | 16.8157   |
| 2.01109   | 2.72569   | 2.35298   | 2.45719   | 2.45598   | 1.87262   |
| 0         | 0         | 0         | 0         | 0         | 0         |
| 1.00211   | 1.16781   | 1.1539    | 0.623775  | 0.811149  | 1.72148   |
| 0.0716657 | 0.102622  | 0         | 0.0780136 | 0.0555563 | 0.0580874 |
| 0         | 0.22957   | 0         | 0.155128  | 0.0828543 | 0.346516  |
| 31.0687   | 22.7499   | 27.0823   | 31.7429   | 34.5342   | 30.4646   |
| 6.8376    | 6.72761   | 6.50552   | 7.18329   | 6.06189   | 6.16967   |
| 0         | 0         | 0         | 0         | 0         | 0         |
| 0.996112  | 0.834963  | 1.29704   | 0.916844  | 1.77041   | 1.35877   |
| 0.0793966 | 0.397925  | 0.321111  | 0.518576  | 0.615494  | 0.321768  |
| 26.7597   | 24.5679   | 26.7321   | 28.0952   | 27.391    | 27.4373   |
| 7.21094   | 5.41535   | 6.5462    | 6.78679   | 5.69469   | 6.58712   |
| 0         | 0         | 0         | 0         | 0.0415299 | 0         |
| 0.464005  | 0.573833  | 0.409445  | 0.520412  | 0.261603  | 0.547043  |
| 29.8429   | 29.315    | 33.2249   | 33.4714   | 27.9985   | 30.1394   |
| 8.93884   | 7.3315    | 7.12861   | 6.63936   | 8.88151   | 8.7419    |
| 1.80601   | 1.50336   | 1.47217   | 1.21866   | 0.900725  | 1.29389   |
| 0.4397    | 0.521086  | 0.0738501 | 0.795514  | 0.0979842 | 0.668838  |
| 0         | 0         | 0         | 0         | 0         | 0         |
| 0.0612547 | 0.261933  | 0.185563  | 0.2768    | 0.238863  | 0.197242  |
| 111.136   | 90.5939   | 96.4748   | 101.312   | 87.6946   | 83.9893   |
| 0.167881  | 0.0922687 | 0.204135  | 0.195323  | 0.163648  | 0.242625  |
| 25.2632   | 19.9851   | 11.6817   | 16.3083   | 13.234    | 15.214    |
| 0         | 0         | 0         | 0.323186  | 0         | 0.360957  |
| 19.2033   | 18.7547   | 19.0524   | 20.9696   | 17.771    | 20.9883   |
| 4.64345   | 3.45655   | 4.35219   | 4.51986   | 3.54254   | 3.91303   |
| 0.391745  | 0.296064  | 0.440104  | 0.542269  | 0.253072  | 0.576245  |
| 2.99777   | 2.94982   | 3.69316   | 2.86721   | 3.51562   | 3.40167   |
| 0.311216  | 0.276288  | 0.359056  | 0.152493  | 0.228745  | 0.21381   |
| 25.9323   | 24.5828   | 27.9193   | 26.4478   | 28.6168   | 27.7031   |
| 0         | 0.179263  | 0.0337538 | 0.0605671 | 0         | 0.101468  |
| 0         | 0         | 0         | 0         | 0         | 0         |
| 17.7182   | 34.8432   | 13.0349   | 16.2912   | 21.8151   | 15.7258   |
| 0.0615915 | 0.205909  | 0         | 0.0268188 | 0         | 0         |
| 14.6717   | 12.0059   | 14.9434   | 17.0032   | 15.2862   | 13.0254   |
| 11.4708   | 7.5859    | 9.02251   | 10.9493   | 8.60541   | 7.66374   |
| 0.336519  | 0.144565  | 0.0544408 | 0.146531  | 0.156525  | 0.0545521 |
| 0         | 0         | 0         | 0         | 0         | 0         |
| 4.23832   | 4.21609   | 3.98434   | 3.69391   | 3.72404   | 3.21059   |
| 7.40611   | 7.84836   | 7.51488   | 6.26707   | 5.91735   | 6.56615   |

|           |           |           |          |           |           |
|-----------|-----------|-----------|----------|-----------|-----------|
| 0         | 0         | 0         | 0        | 0         | 0         |
| 4.56905   | 4.28075   | 4.65371   | 2.60231  | 2.40456   | 3.70338   |
| 18.2551   | 15.306    | 20.4005   | 23.9684  | 21.4447   | 19.5014   |
| 4.1156    | 3.09616   | 3.13604   | 2.68376  | 2.95928   | 3.52922   |
| 0.908089  | 0.650924  | 0.40301   | 0.594317 | 0.318163  | 0.640858  |
| 2318.99   | 2141.13   | 2497.27   | 2550.41  | 2528.88   | 2686.62   |
| 21.8028   | 17.2009   | 19.7738   | 23.7731  | 24.1481   | 22.1278   |
| 0.268286  | 0.384175  | 0.248013  | 0.333771 | 0.237691  | 0.37278   |
| 4.53592   | 8.05427   | 6.60423   | 6.64944  | 6.32937   | 5.51478   |
| 9.34717   | 6.5995    | 7.0365    | 7.01506  | 3.14488   | 5.49154   |
| 15.7737   | 18.3077   | 17.5235   | 17.1361  | 16.7362   | 16.9565   |
| 29.8445   | 25.7561   | 27.5659   | 31.03    | 31.7157   | 29.7053   |
| 0         | 0         | 0         | 0        | 0         | 0         |
| 2.70411   | 3.14564   | 2.89165   | 2.81207  | 2.98268   | 2.58954   |
| 16.3336   | 18.0043   | 12.0021   | 14.6521  | 11.4471   | 7.42349   |
| 0         | 0         | 0         | 0        | 0         | 0         |
| 325.401   | 125.374   | 247.817   | 195.33   | 240.947   | 315.127   |
| 18.2428   | 19.1631   | 19.4661   | 17.6522  | 17.0657   | 19.0398   |
| 0.303149  | 0.108524  | 0.337165  | 0.247501 | 0.0881271 | 0.15357   |
| 94.047    | 107.097   | 100.392   | 103.898  | 100.414   | 94.9366   |
| 0.0328754 | 0.0235382 | 0.0132961 | 0        | 0.0127428 | 0         |
| 12.5889   | 13.102    | 13.0436   | 13.8217  | 12.4756   | 16.2523   |
| 101.878   | 109.228   | 73.2197   | 102.073  | 76.3964   | 96.2254   |
| 5.66162   | 3.7281    | 5.3892    | 4.88452  | 5.76371   | 6.54235   |
| 7.36245   | 9.27759   | 6.6118    | 7.24372  | 6.70118   | 6.00282   |
| 2.57021   | 2.71274   | 3.36066   | 3.36924  | 1.42691   | 2.34033   |
| 0.225925  | 0.177164  | 0.321982  | 0.335724 | 0.233521  | 0.36624   |
| 22.421    | 25.4817   | 24.4821   | 26.6591  | 24.085    | 21.0803   |
| 49.0834   | 50.0527   | 52.1702   | 51.461   | 52.2579   | 47.3303   |
| 5.07812   | 6.0796    | 4.04025   | 5.0144   | 4.90466   | 6.27519   |
| 5.944     | 5.52369   | 4.9409    | 4.38918  | 10.0579   | 9.16599   |
| 1.0948    | 1.71024   | 0.40253   | 0.505603 | 0.462932  | 0.887376  |
| 0         | 0         | 0         | 0        | 0         | 0         |
| 13.9603   | 13.9182   | 12.0951   | 13.2475  | 9.86791   | 12.8019   |
| 6.56442   | 5.61738   | 5.59378   | 4.24167  | 4.25885   | 6.58684   |
| 0         | 0.0305333 | 0         | 0        | 0         | 0.0691311 |
| 0.16615   | 0.0396534 | 0.134395  | 0.241156 | 0         | 0.0448901 |
| 0         | 0         | 0         | 0        | 0         | 0         |
| 24.7084   | 28.8621   | 28.6535   | 30.4691  | 27.1653   | 25.3777   |
| 6.75745   | 10.4577   | 8.46549   | 7.47241  | 7.00239   | 6.84164   |
| 16.2389   | 3.60662   | 3.10835   | 3.00204  | 1.72249   | 2.51414   |
| 0         | 0         | 0         | 0        | 0         | 0         |
| 36.682    | 30.6044   | 36.471    | 35.8395  | 38.8369   | 36.6695   |

|           |           |           |            |           |           |
|-----------|-----------|-----------|------------|-----------|-----------|
| 0.890257  | 0.254963  | 0.288044  | 0.387645   | 0         | 0.43295   |
| 0         | 0         | 0         | 0          | 0         | 0         |
| 31.006    | 32.5562   | 32.4868   | 35.6455    | 29.9567   | 30.3521   |
| 0         | 0         | 0         | 0          | 0         | 0         |
| 41.8771   | 43.0248   | 39.9959   | 42.4292    | 44.8022   | 40.4504   |
| 9.52438   | 6.52279   | 12.4413   | 10.1748    | 9.30953   | 10.309    |
| 31.5098   | 24.0876   | 24.7557   | 28.4023    | 37.9306   | 30.2548   |
| 61.1335   | 51.1205   | 58.5066   | 65.8818    | 66.5492   | 45.2344   |
| 0.0642006 | 0.0459664 | 0         | 0.0465915  | 0.149308  | 0.15611   |
| 6.24019   | 4.73721   | 6.19767   | 5.58527    | 7.20984   | 6.51534   |
| 0         | 0         | 0         | 0          | 0         | 0.0649828 |
| 5.53053   | 5.16573   | 5.16538   | 5.28094    | 3.28885   | 4.19656   |
| 0         | 0         | 0         | 0          | 0         | 0         |
| 6.91219   | 8.56579   | 6.6187    | 5.0977     | 4.44311   | 7.20757   |
| 23.3032   | 24.1959   | 22.9419   | 19.8361    | 19.3724   | 24.3202   |
| 12.987    | 10.2446   | 10.7629   | 12.335     | 10.5623   | 9.75077   |
| 0         | 0         | 0         | 0          | 0         | 0         |
| 0.0423761 | 0.0303405 | 0.137109  | 0.123012   | 0         | 0         |
| 1.91016   | 0.932838  | 1.36557   | 0.903892   | 3.06475   | 4.75298   |
| 1.09877   | 0.862343  | 1.14515   | 1.10409    | 0.835404  | 1.54141   |
| 10.4376   | 11.7539   | 9.7543    | 7.90572    | 18.0682   | 9.65104   |
| 4.84606   | 4.30719   | 4.42676   | 4.57799    | 4.46922   | 5.01145   |
| 6.37657   | 7.42529   | 7.37191   | 5.20144    | 5.90985   | 7.07474   |
| 0.257699  | 0.0922539 | 0.0521119 | 0.140263   | 0.149829  | 0.104437  |
| 7.27E-161 | 4.56E-270 | 1.05E-43  | 0.0425335  | 1.27E-153 | 0.145693  |
| 1.27798   | 0.91501   | 1.20602   | 1.54576    | 0.165118  | 0.517923  |
| 62.067    | 76.9873   | 69.1856   | 64.0787    | 67.0149   | 61.3405   |
| 10.7744   | 7.43972   | 8.40659   | 9.46265    | 10.729    | 11.1489   |
| 0         | 0         | 0         | 0          | 0         | 0         |
| 0.320378  | 0.310343  | 0.431911  | 0.460449   | 0.243492  | 0.341144  |
| 0.6881    | 0.541933  | 0.55659   | 0.74905    | 0.746797  | 0.669274  |
| 6.87924   | 5.96522   | 8.22307   | 6.65652    | 7.99935   | 6.38126   |
| 15.8259   | 17.0831   | 15.8188   | 16.303     | 16.7461   | 17.8221   |
| 0.158736  | 0.194832  | 0.31516   | 0.0971976  | 0.0922903 | 0.108557  |
| 0.0980727 | 0         | 0         | 0          | 0         | 0.0794912 |
| 0         | 0         | 0         | 0          | 0         | 0         |
| 18.9227   | 17.0467   | 16.7786   | 20.9637    | 26.5529   | 16.4247   |
| 0.130329  | 0.139969  | 0.210841  | 0.236455   | 0.0505164 | 0.0528179 |
| 0         | 0         | 0         | 0          | 0         | 0         |
| 29.5917   | 0         | 0         | 0          | 0         | 0         |
| 0.0357781 | 0.0256165 | 0.0289402 | 0.00649121 | 0.0208018 | 0.0144997 |
| 1.60282   | 2.2356    | 1.48735   | 2.64884    | 4.23401   | 3.81243   |
| 20.9331   | 32.0844   | 25.1958   | 24.1518    | 24.8274   | 20.6753   |



|           |           |           |           |           |           |
|-----------|-----------|-----------|-----------|-----------|-----------|
| 16.1449   | 10.9324   | 16.6011   | 13.1018   | 16.7457   | 16.2892   |
| 19.1894   | 20.4858   | 16.5463   | 19.2812   | 13.8615   | 16.6681   |
| 5.50163   | 5.38571   | 5.0212    | 4.09863   | 3.84978   | 4.85388   |
| 0         | 0         | 0         | 0         | 0         | 0         |
| 66.7043   | 66.7303   | 68.5262   | 65.1896   | 61.0864   | 61.8797   |
| 14.3944   | 12.5567   | 12.35     | 13.0992   | 15.3643   | 12.0489   |
| 8.97511   | 6.57677   | 8.36685   | 7.29017   | 8.60354   | 10.1048   |
| 0.0932739 | 0.0526699 | 0.0304132 | 0.013521  | 0.0870957 | 0.0758686 |
| 0         | 0         | 0         | 0         | 0         | 0         |
| 0         | 0         | 0         | 0         | 0         | 0         |
| 111.387   | 33.6346   | 19.2548   | 29.2559   | 92.3001   | 102.106   |
| 19.2945   | 18.5763   | 18.9175   | 20.2345   | 21.6145   | 20.6741   |
| 0         | 0         | 0         | 0         | 0         | 0         |
| 34.3423   | 19.1985   | 29.0721   | 32.5616   | 23.4465   | 31.8314   |
| 0         | 0         | 0         | 0         | 0         | 0         |
| 8.60611   | 8.77589   | 9.51952   | 8.4913    | 9.03134   | 10.0873   |
| 118.089   | 94.4512   | 82.9177   | 105.529   | 74.4039   | 82.6249   |
| 50.8393   | 44.6477   | 46.5894   | 58.6307   | 56.2      | 54.4032   |
| 27.8111   | 19.8648   | 23.6742   | 23.5468   | 30.7481   | 23.5616   |
| 0.143157  | 0.204995  | 0.185275  | 0.311675  | 0.19976   | 0.301687  |
| 86.5888   | 65.4943   | 69.8706   | 77.1494   | 97.2379   | 38.076    |
| 305.119   | 255.342   | 269.053   | 280.269   | 377.493   | 128.654   |
| 1.01742   | 0.564753  | 1.04489   | 1.01213   | 1.18751   | 1.43619   |
| 21.3483   | 14.4396   | 18.6054   | 19.6403   | 23.018    | 20.0216   |
| 0         | 0         | 0         | 0         | 0         | 0         |
| 0.102533  | 0.110118  | 0.082937  | 0.0372051 | 0.0397426 | 0.12466   |
| 17.1353   | 11.6249   | 12.9394   | 15.7127   | 14.6436   | 14.2552   |
| 5.0685    | 4.88821   | 6.47951   | 5.0127    | 5.28022   | 5.24864   |
| 0.192948  | 0.138147  | 0.312144  | 0         | 0         | 0.156391  |
| 4.9946    | 3.97978   | 4.3286    | 7.32451   | 4.2109    | 8.38574   |
| 2.33299   | 1.62243   | 2.40697   | 1.935     | 1.82834   | 2.17083   |
| 36.5716   | 38.5067   | 35.0923   | 32.0049   | 47.4367   | 39.4265   |
| 0.838997  | 0.728634  | 0.452432  | 0.5976    | 0.794938  | 1.01376   |
| 0.417348  | 0.597626  | 0.450112  | 1.11055   | 0         | 0.902065  |
| 0.372275  | 0.248772  | 0.301126  | 0.432267  | 0.288594  | 0.281625  |
| 13.9179   | 12.0848   | 14.3694   | 14.347    | 10.2291   | 13.1705   |
| 17.2393   | 17.397    | 17.3775   | 16.8749   | 16.3739   | 16.1749   |
| 0.189519  | 0.593869  | 0.553961  | 0.171145  | 0.456165  | 0.443777  |
| 0.0640335 | 0         | 0.207182  | 0.0929405 | 0.248199  | 0.0519013 |
| 49.6762   | 53.6875   | 62.2595   | 54.2922   | 54.973    | 55.422    |
| 8.71991   | 5.97517   | 6.10137   | 6.87172   | 4.93508   | 6.02713   |
| 521.783   | 569.313   | 476.392   | 271.76    | 447.977   | 120.939   |
| 0         | 0         | 0         | 0         | 0         | 0         |

|           |           |           |           |           |           |
|-----------|-----------|-----------|-----------|-----------|-----------|
| 21.5092   | 22.5434   | 21.8548   | 21.348    | 23.302    | 20.2336   |
| 0         | 0         | 0         | 0         | 0         | 0         |
| 12.9689   | 12.3236   | 6.74464   | 10.5977   | 10.6075   | 10.234    |
| 2.40821   | 4.2623    | 1.63628   | 1.59389   | 2.07597   | 1.79578   |
| 0         | 0         | 0         | 0.15916   | 0         | 0         |
| 0.363425  | 0.260205  | 0.0367459 | 0.065936  | 0.2113    | 0.110463  |
| 14.9358   | 16.5388   | 13.1018   | 15.7702   | 12.5974   | 13.9621   |
| 0.522292  | 0.598322  | 0.422472  | 0.30323   | 0.485867  | 1.10067   |
| 1.67892   | 2.27013   | 3.22757   | 3.3783    | 2.59985   | 2.79787   |
| 9.38497   | 9.51255   | 8.93454   | 8.23927   | 7.32813   | 7.44642   |
| 0.201384  | 0.144187  | 0.114027  | 0.219222  | 0.124893  | 0.0489686 |
| 11.6843   | 8.45619   | 9.80881   | 10.8628   | 11.261    | 11.4669   |
| 0         | 0         | 0         | 0         | 0         | 0         |
| 12.5894   | 8.73792   | 11.1142   | 11.9388   | 10.9509   | 13.2613   |
| 0.228343  | 0.143053  | 0.161614  | 0.269283  | 0.221268  | 0.115675  |
| 27.1339   | 26.2097   | 28.8233   | 27.4556   | 23.1132   | 26.7917   |
| 0.0370936 | 0.185908  | 0.120017  | 0.0807585 | 0.0575111 | 0.0300656 |
| 8.73656   | 7.13314   | 9.03093   | 9.1183    | 5.911     | 8.648     |
| 16.1787   | 15.1579   | 14.7372   | 14.9541   | 11.5533   | 14.1176   |
| 2.27451   | 2.09576   | 2.39873   | 2.34017   | 2.44026   | 2.05359   |
| 0.525578  | 0.453689  | 0.328704  | 0.265496  | 0.32312   | 0.263686  |
| 0.570057  | 0.62148   | 0.380993  | 0.500887  | 0.475427  | 0.517919  |
| 20.702    | 17.5152   | 17.9312   | 18.6776   | 23.1199   | 18.46     |
| 5.57788   | 5.59853   | 3.70546   | 3.83388   | 3.19907   | 3.21283   |
| 0         | 0         | 0.0333306 | 0.0199872 | 0.0213505 | 0.0445891 |
| 0.796671  | 0.988695  | 0.386646  | 0.346895  | 0.288209  | 0.559631  |
| 63.9301   | 51.6075   | 61.9275   | 65.21     | 59.5912   | 60.1242   |
| 3.83675   | 3.9367    | 4.09316   | 3.93543   | 3.4427    | 3.15879   |
| 9.40816   | 10.6703   | 8.56075   | 7.66391   | 8.44727   | 6.32932   |
| 0.0470105 | 0.0591656 | 0.0523846 | 0.0841106 | 0.0658257 | 0.0430154 |
| 2.49597   | 2.5767    | 2.75      | 1.55518   | 1.1767    | 2.36195   |
| 2.4093    | 1.82033   | 2.1889    | 1.7541    | 2.72272   | 3.60117   |
| 0         | 0         | 0         | 0         | 0         | 0         |
| 0         | 0         | 0         | 0         | 0         | 0         |
| 0         | 0.174262  | 0.454921  | 0.403789  | 0         | 0.455851  |
| 4.95341   | 3.50049   | 3.50371   | 3.76596   | 2.11115   | 3.78896   |
| 18.0054   | 15.4724   | 12.9187   | 17.0555   | 18.371    | 15.0134   |
| 1.12316   | 0.993512  | 1.38485   | 0.856724  | 1.00702   | 0.923195  |
| 0.0365426 | 0.0784914 | 0.0295585 | 0.0795588 | 0.0283284 | 0.029619  |
| 13.3642   | 10.8395   | 10.2654   | 10.925    | 11.4687   | 12.4709   |
| 4.83876   | 4.69754   | 4.57035   | 5.78431   | 4.53174   | 4.956     |
| 0.173212  | 0.0446458 | 0.0252193 | 0         | 0.134276  | 0.0505418 |
| 0.082136  | 0.176423  | 0.199314  | 0.119215  | 0.127346  | 0.199722  |

|           |           |            |           |           |           |
|-----------|-----------|------------|-----------|-----------|-----------|
| 27.6731   | 28.4759   | 27.3626    | 28.4258   | 22.3607   | 28.1648   |
| 9.6974    | 9.80799   | 8.072      | 10.0888   | 9.61844   | 10.9077   |
| 3.17556   | 2.32101   | 3.31783    | 2.8807    | 2.30788   | 3.86085   |
| 0         | 0         | 0          | 0         | 0         | 0         |
| 34.3216   | 22.7361   | 32.5411    | 34.9978   | 36.9694   | 35.2707   |
| 10.1253   | 9.07897   | 8.83148    | 8.69524   | 9.91576   | 9.22611   |
| 9.87856   | 11.353    | 9.51149    | 10.0209   | 8.37157   | 9.43157   |
| 10.8851   | 8.90028   | 11.4445    | 6.23957   | 13.7295   | 14.6848   |
| 26.5657   | 29.1365   | 33.859     | 28.0338   | 25.3466   | 27.2138   |
| 0.3956    | 0.566485  | 0.319993   | 0.287094  | 0.306676  | 0.320647  |
| 0.0870789 | 0.0623468 | 0.158482   | 0.0315974 | 0.0337524 | 0.0352902 |
| 4.21391   | 4.14139   | 4.79112    | 3.91555   | 3.22722   | 3.76284   |
| 2.72437   | 2.18554   | 2.52037    | 1.84916   | 1.79313   | 2.66991   |
| 1.60245   | 1.55708   | 1.48136    | 1.86899   | 1.99646   | 1.66993   |
| 0.30362   | 0.300584  | 0.145536   | 0.348196  | 0.0929861 | 0.145834  |
| 0.600208  | 0.195335  | 0.308952   | 1.62353   | 0.888282  | 3.71501   |
| 3.74728   | 2.81075   | 3.26077    | 2.48996   | 2.31386   | 2.8999    |
| 0.0906466 | 0.090141  | 0.0733222  | 0.0913669 | 0.0702707 | 0.0734721 |
| 1.31322   | 1.64542   | 1.70716    | 1.12321   | 1.49068   | 0.684261  |
| 30.7524   | 35.2318   | 32.4364    | 26.0723   | 22.3029   | 23.5768   |
| 4.12511   | 2.80204   | 4.46607    | 3.60776   | 3.93582   | 4.04655   |
| 0.0248404 | 0.0296421 | 0.00669764 | 0.0180272 | 0.0320945 | 0.020134  |
| 0         | 0         | 0          | 0         | 0         | 0         |
| 0         | 0         | 0          | 0         | 0         | 0.104852  |
| 29.0924   | 24.3926   | 28.2479    | 26.9288   | 25.8964   | 26.4028   |
| 0.0401821 | 0         | 0          | 0         | 0         | 0         |
| 3.81647   | 2.60995   | 2.83456    | 3.38354   | 3.30988   | 4.48091   |
| 4.77456   | 3.17999   | 3.36806    | 3.86789   | 3.5722    | 4.38743   |
| 11.1754   | 11.5836   | 12.4303    | 11.4865   | 9.94744   | 10.5687   |
| 53.0754   | 58.7089   | 54.8558    | 48.9076   | 47.3877   | 41.3168   |
| 12.4788   | 16.2175   | 15.2681    | 14.7257   | 10.2022   | 12.2819   |
| 7.965     | 8.24628   | 6.92669    | 8.30415   | 5.65279   | 6.09219   |
| 7.91119   | 12.683    | 10.044     | 8.66188   | 33.3842   | 6.83051   |
| 11.2121   | 16.0006   | 9.30255    | 8.34682   | 10.5976   | 14.5304   |
| 0         | 0         | 0          | 0         | 0         | 0         |
| 3.88895   | 1.20799   | 3.90935    | 4.58134   | 4.78513   | 3.93648   |
| 7.16628   | 5.82935   | 7.28216    | 6.59735   | 5.66188   | 6.12173   |
| 1.30952   | 0.831371  | 1.07586    | 0.536249  | 0.392794  | 0.462025  |
| 0         | 0         | 0          | 0         | 0         | 0         |
| 0.442692  | 0         | 0.716168   | 0         | 1.02954   | 0.358816  |
| 0         | 0         | 0          | 0         | 0         | 0         |
| 8.45188   | 5.18411   | 8.02789    | 8.83971   | 5.58787   | 6.72403   |
| 0         | 0         | 0          | 0         | 0         | 0         |

|           |           |           |           |           |          |
|-----------|-----------|-----------|-----------|-----------|----------|
| 5.86235   | 4.24371   | 3.32722   | 2.20954   | 2.96282   | 6.19553  |
| 0         | 0         | 0         | 0         | 0         | 0        |
| 10.806    | 10.1263   | 13.4682   | 11.2122   | 10.5123   | 12.9376  |
| 25.845    | 40.9357   | 34.2695   | 37.6119   | 39.8052   | 51.7316  |
| 0.0805097 | 0.0144109 | 0.0325613 | 0.0146068 | 0.0936186 | 0        |
| 104.581   | 94.8846   | 105.692   | 109.093   | 122.847   | 101.076  |
| 0         | 0         | 0         | 0         | 0         | 0        |
| 12.1485   | 12.378    | 12.0943   | 13.6012   | 10.5042   | 12.8344  |
| 17.2186   | 16.0977   | 16.7334   | 15.4625   | 15.8931   | 15.5127  |
| 10.6773   | 7.47048   | 8.99499   | 8.76857   | 9.2435    | 10.3432  |
| 7.38324   | 7.04758   | 5.52575   | 6.43831   | 4.84058   | 6.17281  |
| 10.1548   | 9.43746   | 10.034    | 12.0932   | 10.4807   | 12.2804  |
| 5.23656   | 4.09198   | 4.86004   | 6.52536   | 5.26529   | 4.16062  |
| 7.56008   | 5.01741   | 5.78012   | 5.78712   | 5.98112   | 5.49814  |
| 0         | 0         | 0         | 0         | 0         | 0        |
| 0.266264  | 0.317733  | 0.143584  | 0.193232  | 0.0688039 | 0.50357  |
| 0.0769943 | 0.0551264 | 0.124558  | 0.111752  | 0.179062  | 0        |
| 3.88218   | 4.88269   | 5.58366   | 3.38875   | 4.24921   | 3.01141  |
| 7.54948   | 6.40179   | 5.28786   | 5.84609   | 5.49283   | 6.27294  |
| 0.802601  | 1.09183   | 0.454445  | 0.873693  | 0.435532  | 0.260214 |
| 0.219807  | 0         | 0.0888986 | 0         | 0         | 0        |
| 9.76017   | 10.9221   | 7.31      | 5.90261   | 6.24915   | 8.49694  |
| 2.45015   | 2.07731   | 1.87093   | 2.78689   | 2.59895   | 3.16413  |
| 46.1496   | 44.8283   | 50.0168   | 44.0537   | 45.6229   | 49.4124  |
| 19.0225   | 20.1107   | 16.5526   | 20.0039   | 17.8746   | 16.3316  |
| 7.25045   | 6.20971   | 6.60712   | 7.98148   | 7.17406   | 6.98017  |
| 3.01844   | 3.48907   | 2.61805   | 3.16704   | 2.07211   | 2.26969  |
| 1.89537   | 2.26175   | 1.21864   | 1.86928   | 0.565125  | 0.630263 |
| 1.00697   | 1.02998   | 1.04374   | 0.881046  | 1.29215   | 1.32582  |
| 1.7649    | 1.48026   | 1.01971   | 1.31742   | 1.25091   | 0.817436 |
| 0         | 0         | 0         | 0         | 0         | 0        |
| 9.56983   | 7.22584   | 8.78962   | 8.2383    | 8.68718   | 9.46802  |
| 8.95122   | 10.8385   | 10.0434   | 9.10372   | 8.88345   | 8.13402  |
| 0         | 0         | 0         | 0         | 0         | 0        |
| 28.7182   | 24.486    | 28.0879   | 27.0898   | 22.0254   | 24.9619  |
| 9.32752   | 6.97469   | 9.18301   | 8.96067   | 6.42852   | 7.13228  |
| 0         | 0         | 0         | 0.096589  | 0         | 0        |
| 2.8683    | 4.89717   | 2.32011   | 3.04231   | 3.24981   | 3.0402   |
| 3.45464   | 4.07062   | 3.43439   | 4.33471   | 2.34307   | 2.74147  |
| 2.76577   | 4.27296   | 2.31025   | 2.93445   | 2.167     | 1.77849  |
| 21.5604   | 27.2717   | 35.9695   | 34.0317   | 31.8958   | 22.7424  |
| 0         | 0         | 0.0664119 | 0         | 0         | 0        |
| 7.18776   | 5.80489   | 4.56946   | 6.95504   | 6.8336    | 6.96532  |

|           |            |           |           |           |           |
|-----------|------------|-----------|-----------|-----------|-----------|
| 7.72926   | 8.05001    | 7.62469   | 5.94249   | 5.22549   | 6.23265   |
| 13.4519   | 12.9556    | 13.8854   | 14.6799   | 14.1247   | 14.1986   |
| 4.67553   | 5.41409    | 5.22946   | 4.64983   | 4.74323   | 4.21075   |
| 0         | 0          | 0         | 0         | 0         | 0         |
| 6.12631   | 3.46392    | 3.24832   | 4.26742   | 3.51338   | 3.12709   |
| 7.50286   | 6.25122    | 7.14991   | 7.37065   | 7.76604   | 8.37765   |
| 0         | 0          | 0         | 0         | 0         | 0         |
| 27.9765   | 26.8876    | 27.9353   | 24.6526   | 24.5958   | 25.5635   |
| 0         | 0          | 0         | 0         | 0         | 0         |
| 31.4282   | 35.3812    | 29.5417   | 27.3417   | 27.8609   | 27.6479   |
| 1.12408   | 1.04014    | 0.576987  | 0.840812  | 0.755482  | 0.929307  |
| 0         | 0          | 0         | 0         | 0         | 0         |
| 22.638    | 20.9838    | 20.5791   | 24.0344   | 21.4624   | 19.7599   |
| 0         | 0          | 0         | 0         | 0         | 0         |
| 17.6199   | 16.0291    | 19.9371   | 15.9593   | 17.7304   | 15.9949   |
| 1.0755    | 0.860634   | 1.07465   | 1.19373   | 0.196176  | 0.871733  |
| 5.06324   | 4.73493    | 1.25374   | 4.79933   | 1.20156   | 6.03026   |
| 5.8362    | 4.20914    | 3.95589   | 5.98285   | 6.44277   | 9.55337   |
| 0         | 0.104119   | 0.588141  | 0         | 0         | 0.117869  |
| 43.5019   | 33.9627    | 41.9719   | 39.1      | 41.409    | 37.1105   |
| 14.5198   | 14.2745    | 12.9665   | 13.6648   | 12.1614   | 12.9277   |
| 15.7382   | 12.4928    | 13.1837   | 12.5097   | 12.5682   | 14.2358   |
| 0         | 0          | 0         | 0         | 0         | 0         |
| 8.41401   | 9.20209    | 9.65602   | 8.41976   | 9.342     | 11.272    |
| 16.6785   | 12.7948    | 15.0087   | 14.2137   | 14.9022   | 14.6086   |
| 10.6657   | 9.90471    | 12.9267   | 12.5429   | 15.1721   | 10.3853   |
| 0         | 0          | 0         | 0         | 0         | 0         |
| 8.09838   | 5.58769    | 6.47131   | 7.04403   | 4.52988   | 6.94545   |
| 0         | 0          | 0         | 0         | 0         | 0         |
| 11.5637   | 10.2371    | 10.8896   | 12.1402   | 10.9663   | 10.563    |
| 0.51717   | 0.277949   | 0.287301  | 0.562393  | 0.350438  | 0.287889  |
| 0         | 0.041918   | 0         | 0.0392501 | 0         | 0         |
| 41.2938   | 34.6267    | 38.2772   | 42.1898   | 38.6182   | 43.4034   |
| 0         | 0.00908078 | 0         | 0         | 0.0393285 | 0         |
| 22.9832   | 22.7499    | 21.3085   | 25.0564   | 20.8426   | 19.9552   |
| 0.0467674 | 0.0238565  | 0.0265515 | 0.0109718 | 6.67E-64  | 0.0506709 |
| 0         | 0          | 0         | 0         | 0         | 0         |
| 7.97148   | 5.78302    | 6.8152    | 5.96128   | 5.99955   | 7.87319   |
| 19.8081   | 13.8932    | 17.6549   | 18.8111   | 22.9179   | 10.8203   |
| 1.75927   | 1.47985    | 1.91695   | 1.55563   | 1.58728   | 1.524     |
| 0         | 0          | 0         | 0         | 0         | 0         |
| 5.75007   | 3.84661    | 4.08226   | 4.17223   | 4.51358   | 5.1405    |
| 0         | 0.0817761  | 0.184773  | 0.124332  | 0.0442708 | 0.0231439 |

|           |           |           |           |           |           |
|-----------|-----------|-----------|-----------|-----------|-----------|
| 0.175806  | 0.195834  | 0.191606  | 0.168907  | 0.228394  | 0.188648  |
| 28.5861   | 29.1898   | 30.6195   | 27.2933   | 31.282    | 30.8809   |
| 1065.57   | 2409.5    | 1576.05   | 1266.85   | 920.699   | 1914.39   |
| 0         | 0         | 0         | 0         | 0         | 0         |
| 0         | 0         | 0         | 0         | 0         | 0         |
| 1.02355   | 0.850096  | 0.46364   | 0.564534  | 0.761732  | 0.929175  |
| 2.09091   | 2.00498   | 1.14766   | 1.89676   | 1.76563   | 1.2408    |
| 0         | 0         | 0         | 0         | 0         | 0         |
| 1.18107   | 0.948975  | 0.944726  | 0.876168  | 0.874889  | 0.893475  |
| 26.4742   | 27.3462   | 25.7735   | 25.4019   | 25.147    | 23.5786   |
| 0         | 0         | 0         | 0         | 0         | 0.0321676 |
| 37.983    | 29.4599   | 31.1192   | 33.7585   | 40.319    | 28.2415   |
| 0.477863  | 0.373245  | 0.281115  | 0.378321  | 0.151546  | 0.475352  |
| 2.66262   | 1.95214   | 2.17097   | 2.36515   | 1.98154   | 1.55386   |
| 0.254236  | 0.187543  | 0.7336    | 0         | 0.393919  | 0.206596  |
| 0         | 0         | 0         | 0         | 0         | 0.0616348 |
| 4.07525   | 3.22231   | 2.376     | 3.80808   | 3.71349   | 3.53247   |
| 19.9865   | 16.2948   | 18.9877   | 19.1447   | 16.0138   | 21.7446   |
| 0         | 0         | 0         | 0         | 0         | 0         |
| 0.0334304 | 0.0478711 | 0         | 0.0485221 | 0.0259158 | 0.0270965 |
| 5.43667   | 4.0435    | 5.42158   | 5.37247   | 4.74943   | 7.17105   |
| 2.66149   | 2.47391   | 1.81291   | 2.50755   | 2.64238   | 2.68708   |
| 5.2542    | 5.40349   | 5.40911   | 5.5925    | 3.87565   | 4.85238   |
| 1.1928    | 0.894691  | 1.01078   | 1.00991   | 0.770565  | 1.24304   |
| 0         | 0         | 0         | 0         | 0         | 0         |
| 351.625   | 260.2     | 271.005   | 358.473   | 332.017   | 264.808   |
| 0.211464  | 0         | 0         | 0         | 0.192245  | 0         |
| 8.20966   | 8.38712   | 12.0045   | 5.65016   | 10.4916   | 10.8623   |
| 51.9838   | 42.6513   | 54.2816   | 59.6717   | 61.1724   | 51.4538   |
| 1.29292   | 1.07187   | 1.26599   | 0.938298  | 0.633028  | 0.551557  |
| 8.68074   | 8.49423   | 8.80668   | 8.02061   | 7.07055   | 7.24477   |
| 0         | 0         | 0         | 0.0174364 | 0         | 0.0194743 |
| 14.2926   | 11.5085   | 13.5595   | 14.4483   | 13.4962   | 13.5057   |
| 0         | 0         | 0         | 0         | 0         | 0         |
| 6.46327   | 6.75052   | 5.55927   | 4.70436   | 5.80428   | 6.04385   |
| 0         | 0         | 0         | 0         | 0         | 0         |
| 0         | 0.0242653 | 0         | 0         | 0         | 0.0274698 |
| 0         | 0         | 0         | 0         | 0         | 0         |
| 4.59457   | 5.42788   | 4.36683   | 3.08428   | 2.49325   | 7.1688    |
| 0.631314  | 1.35603   | 0.919183  | 1.37447   | 1.27245   | 0.204681  |
| 14.904    | 14.4674   | 15.495    | 18.9895   | 16.1554   | 16.378    |
| 0.0977077 | 0.0856938 | 0.0322709 | 0.084547  | 0.0620704 | 0.0880281 |
| 1.07531   | 2.95544   | 1.59931   | 2.2656    | 2.12433   | 2.193     |

|           |           |           |           |           |           |
|-----------|-----------|-----------|-----------|-----------|-----------|
| 0.921567  | 0.590369  | 1.02007   | 0.422399  | 0.714413  | 1.57255   |
| 3.56718   | 3.15357   | 1.31402   | 2.23631   | 0.986692  | 0.977348  |
| 866.251   | 1506.79   | 992.083   | 1009.66   | 816.518   | 1681.42   |
| 14.5922   | 14.599    | 9.6945    | 8.58484   | 9.01954   | 10.9444   |
| 0.196861  | 0.422845  | 0.0796183 | 0.214298  | 0.0763047 | 0.239343  |
| 20.385    | 17.4202   | 20.5508   | 20.5638   | 21.1321   | 18.8001   |
| 11.7715   | 11.9963   | 8.93094   | 7.85685   | 6.54433   | 7.55633   |
| 0.834413  | 0.830691  | 0.464149  | 0.577178  | 0.434733  | 0.708007  |
| 9.90942   | 9.84607   | 10.7606   | 11.0102   | 11.8851   | 10.9048   |
| 11.2093   | 9.18918   | 7.95748   | 9.36081   | 7.9377    | 8.73467   |
| 0         | 0         | 0         | 0         | 0         | 0         |
| 146.77    | 221.49    | 137.748   | 76.047    | 98.4458   | 161.921   |
| 0         | 0         | 0         | 0         | 0.160486  | 0         |
| 1.98008   | 0.590708  | 0.667353  | 0.838238  | 1.40707   | 1.47118   |
| 5.12624   | 6.37642   | 7.89839   | 7.28618   | 5.73114   | 5.56481   |
| 0         | 0         | 0.033888  | 0.212827  | 0.0324776 | 0.237701  |
| 2.93983   | 2.43111   | 3.07947   | 2.3255    | 2.33598   | 3.25256   |
| 0         | 0.0257682 | 0         | 0         | 0         | 0         |
| 0         | 0         | 0         | 0.0896374 | 0         | 0.100113  |
| 0         | 0         | 0         | 0         | 0         | 0         |
| 0.117525  | 0.168291  | 0.135805  | 0.0609213 | 0.0780917 | 0.0272165 |
| 2.04968   | 2.70971   | 2.53408   | 3.23655   | 2.54211   | 4.02789   |
| 30.2211   | 31.0258   | 26.865    | 30.9461   | 28.9737   | 32.2714   |
| 17.5559   | 23.6511   | 20.5535   | 16.1501   | 19.1613   | 10.425    |
| 21.3068   | 28.1413   | 24.1283   | 23.094    | 20.7552   | 21.4992   |
| 1.20069   | 1.5247    | 1.04452   | 1.15092   | 0.702487  | 1.15682   |
| 9.81132   | 9.15606   | 8.00989   | 10.0742   | 8.9952    | 9.25729   |
| 6.78237   | 5.23889   | 8.52512   | 7.54652   | 7.07949   | 9.69448   |
| 36.1687   | 35.5905   | 31.9942   | 35.3342   | 32.7476   | 31.6086   |
| 22.4916   | 18.4349   | 21.6016   | 18.5821   | 22.5526   | 22.1461   |
| 59.4032   | 56.2633   | 59.7964   | 60.5936   | 58.9986   | 61.7662   |
| 9.99865   | 10.8617   | 9.41241   | 9.34131   | 7.52837   | 8.57      |
| 0         | 0         | 0         | 0         | 0         | 0         |
| 2.17549   | 1.85302   | 1.57767   | 1.87822   | 1.10493   | 1.7025    |
| 0         | 0         | 0         | 0         | 0         | 0.228764  |
| 0.0987287 | 0         | 0.159719  | 0         | 0         | 0         |
| 4.89721   | 3.55305   | 4.46297   | 3.93305   | 3.8217    | 4.55147   |
| 10.8456   | 7.26941   | 10.6607   | 9.01683   | 10.3996   | 11.4628   |
| 13.4592   | 10.7101   | 11.1871   | 10.1869   | 8.21934   | 13.2609   |
| 8.2409    | 8.95817   | 9.30956   | 9.7639    | 9.34179   | 10.5475   |
| 9.02209   | 7.6555    | 6.99756   | 7.73889   | 7.43673   | 6.94245   |
| 6.42489   | 4.87069   | 5.93425   | 6.19536   | 5.46323   | 6.09053   |
| 23.1213   | 26.0178   | 19.1736   | 16.8456   | 14.1699   | 15.3467   |

|            |            |            |            |           |           |
|------------|------------|------------|------------|-----------|-----------|
| 20.0544    | 18.3934    | 17.8182    | 19.4743    | 13.4654   | 16.0068   |
| 2.96085    | 2.58015    | 2.86766    | 3.15243    | 2.26509   | 2.763     |
| 15.4121    | 19.2904    | 18.2842    | 14.057     | 22.5826   | 14.0651   |
| 1.72189    | 1.62324    | 1.92671    | 2.54087    | 2.00226   | 1.90739   |
| 0.256333   | 0.403765   | 0.248811   | 0.334846   | 0.357684  | 0.457086  |
| 2851.87    | 3062.79    | 1730.18    | 4655.55    | 4696.8    | 3178.22   |
| 0.821757   | 0.536229   | 1.19478    | 1.38145    | 1.00797   | 1.03703   |
| 0          | 0          | 0.00596997 | 0          | 0         | 0         |
| 0.828902   | 1.03859    | 0.880008   | 0.82713    | 0.642578  | 0.797826  |
| 15.6583    | 18.6995    | 21.8216    | 20.4106    | 17.8024   | 19.2259   |
| 0.50572    | 0.607241   | 0.398266   | 0.301683   | 0.114188  | 0.614378  |
| 4.00744    | 3.05053    | 3.01262    | 3.52535    | 2.82144   | 3.34653   |
| 0          | 0          | 0          | 0          | 0         | 0         |
| 0          | 0          | 0          | 0.381986   | 0         | 0         |
| 1.11325    | 0.706489   | 1.07444    | 0.716097   | 0.735517  | 0.758773  |
| 8.21095    | 8.00494    | 9.42571    | 6.61185    | 10.725    | 8.82504   |
| 15.6345    | 14.4877    | 13.6441    | 15.846     | 11.474    | 14.0368   |
| 16.0777    | 21.6169    | 17.9648    | 15.674     | 15.0088   | 17.6102   |
| 0.529718   | 0.382653   | 0.320514   | 0.497501   | 0.321544  | 0.409765  |
| 0          | 0.0276421  | 0.0312286  | 0.112072   | 0         | 0.062585  |
| 12.7252    | 10.5899    | 11.785     | 10.493     | 10.0697   | 9.88074   |
| 21.8327    | 21.4848    | 20.8978    | 23.9483    | 22.505    | 21.0439   |
| 3.11E-09   | 4.36E-10   | 2.34E-09   | 0          | 0         | 0         |
| 10.0953    | 7.55908    | 9.21436    | 11.7095    | 8.7429    | 11.0322   |
| 7.16055    | 5.92211    | 10.108     | 8.16187    | 7.33465   | 8.42444   |
| 0.818091   | 1.3918     | 0.434252   | 0.812142   | 1.11041   | 0.775256  |
| 0          | 0          | 0          | 0          | 0         | 0         |
| 9.04457    | 8.97586    | 7.50118    | 8.55787    | 15.0436   | 7.56292   |
| 24.699     | 17.9029    | 23.5807    | 23.0665    | 20.497    | 21.8187   |
| 0          | 0          | 0          | 0          | 0         | 0.0406091 |
| 0.00035037 | 0.00013249 | 5.07607    | 0.00010999 | 2.73284   | 0.0068244 |
| 0.970561   | 0.860356   | 0.89722    | 1.39194    | 0.841965  | 0.955245  |
| 8.97471    | 10.4886    | 11.7396    | 10.6793    | 8.86554   | 12.4046   |
| 0          | 0.135317   | 0.152874   | 0.137157   | 0         | 0.306374  |
| 0.32365    | 0.211162   | 0.23856    | 0.379853   | 0.362908  | 0.147559  |
| 0          | 0          | 0          | 0          | 0         | 0         |
| 2.70241    | 1.87336    | 1.09296    | 1.9045     | 1.29572   | 1.66495   |
| 1.71041    | 0.69709    | 2.9373     | 1.89055    | 1.8767    | 2.04752   |
| 5.27419    | 4.99518    | 5.07512    | 4.91623    | 5.40844   | 5.03725   |
| 25.8398    | 36.6712    | 25.353     | 24.9836    | 18.0838   | 24.0675   |
| 0.0521358  | 0.149313   | 0.0843432  | 0.0756718  | 0.080833  | 0.169031  |
| 0          | 0          | 0          | 0          | 0         | 0         |
| 0.0894503  | 0.0161283  | 0.0607817  | 0.0482148  | 0.0129412 | 0.153333  |



|           |           |           |           |           |          |
|-----------|-----------|-----------|-----------|-----------|----------|
| 0         | 0         | 0.0927669 | 0.0832295 | 0         | 0.464783 |
| 0.315291  | 0.423267  | 0.255033  | 0.314617  | 0.641599  | 0.127777 |
| 1.09568   | 1.23276   | 0.50644   | 0.567965  | 0.242681  | 1.14182  |
| 13.9074   | 11.9909   | 12.5264   | 11.7783   | 12.0041   | 12.6613  |
| 28.0348   | 23.6336   | 35.7363   | 32.6413   | 38.6204   | 40.7464  |
| 32.897    | 30.6162   | 25.6242   | 23.538    | 29.4694   | 19.2377  |
| 7.09693   | 6.016     | 6.11962   | 7.3854    | 5.00855   | 4.8026   |
| 21.0624   | 19.5088   | 22.4457   | 18.4395   | 14.1249   | 18.5622  |
| 0.245912  | 0.140855  | 0.198913  | 0.178463  | 0.190635  | 0.39864  |
| 0         | 0.035981  | 0         | 0         | 0         | 0        |
| 18.7943   | 22.8573   | 24.4843   | 23.8977   | 17.934    | 21.7023  |
| 2.96893   | 2.61754   | 1.52621   | 2.2668    | 1.05533   | 1.10342  |
| 24.9238   | 20.9387   | 24.3402   | 23.8259   | 26.8323   | 25.789   |
| 2.85749   | 2.36066   | 2.13357   | 1.99397   | 1.19278   | 1.33621  |
| 0         | 0         | 0         | 0.0235567 | 0         | 0        |
| 0         | 0         | 0         | 0         | 0         | 0        |
| 9.59408   | 8.90667   | 8.995     | 10.026    | 8.7662    | 9.96499  |
| 0.934605  | 0.636993  | 1.00325   | 0.661862  | 0.593853  | 0.931332 |
| 77.5805   | 83.653    | 75.9072   | 77.9502   | 76.522    | 70.0177  |
| 1.4105    | 0.487544  | 0.452519  | 0.977048  | 0.545642  | 0.72923  |
| 4.94626   | 3.47147   | 4.74184   | 4.51136   | 3.92909   | 5.36528  |
| 0         | 0         | 0         | 0         | 0         | 0        |
| 0.319321  | 0.408263  | 0.387438  | 0.248289  | 0.265224  | 0.351256 |
| 17.6161   | 14.1976   | 14.8504   | 15.0586   | 13.329    | 17.94    |
| 7.49947   | 7.2861    | 7.8292    | 9.43663   | 7.84434   | 7.83472  |
| 31.187    | 34.339    | 37.9636   | 39.0687   | 43.9098   | 35.7163  |
| 11.7078   | 16.4494   | 13.5911   | 17.3841   | 16.709    | 15.4453  |
| 0.477593  | 0.0682001 | 0.19503   | 0.174979  | 0.184606  | 0.11581  |
| 0.908163  | 0.918131  | 1.01243   | 1.07269   | 0.811735  | 0.985713 |
| 0         | 0         | 0         | 0         | 0.0922018 | 0        |
| 2.88551   | 2.98848   | 3.05904   | 5.52944   | 2.0849    | 4.22318  |
| 40.3546   | 36.3174   | 35.9665   | 38.034    | 38.5024   | 38.1534  |
| 0         | 0         | 0         | 0         | 0         | 0        |
| 12.1696   | 8.08732   | 11.4884   | 12.6409   | 12.1344   | 12.5596  |
| 36.5272   | 36.1176   | 36.534    | 39.7048   | 36.6897   | 43.0318  |
| 26.6678   | 20.6442   | 23.4692   | 20.3214   | 26.2601   | 26.1013  |
| 4.25638   | 3.99766   | 4.77557   | 4.55023   | 4.43484   | 5.11919  |
| 4.96787   | 4.12898   | 4.49612   | 4.65155   | 5.37278   | 5.51901  |
| 6.3275    | 4.75007   | 6.06571   | 6.84144   | 5.73085   | 6.52366  |
| 0         | 0         | 0.0188075 | 0         | 0         | 0        |
| 3.94048   | 1.41065   | 6.50755   | 6.79173   | 6.49128   | 7.85164  |
| 11.8347   | 9.69115   | 9.86157   | 11.4121   | 12.1153   | 10.8138  |
| 0.0925077 | 0.0331169 | 0.149655  | 0.0671345 | 0.10757   | 0        |

|           |           |           |           |           |           |
|-----------|-----------|-----------|-----------|-----------|-----------|
| 0.274649  | 0.157315  | 0.222158  | 0.358773  | 0.212913  | 0.267135  |
| 0         | 0         | 0         | 0         | 0         | 0         |
| 10.8766   | 14.8698   | 15.6225   | 14.6985   | 11.6066   | 12.0447   |
| 0         | 0         | 0.0317018 | 0         | 0.136721  | 0         |
| 29.9785   | 32.9261   | 31.087    | 29.9818   | 26.8122   | 28.2472   |
| 22.4993   | 17.292    | 14.6809   | 14.7804   | 27.0499   | 17.4476   |
| 0.153017  | 0         | 0.0644646 | 0.0487048 | 0.0576629 | 0.383019  |
| 0         | 0         | 0         | 0         | 0         | 0         |
| 0.938848  | 0.639407  | 1.09282   | 0.913992  | 0.967455  | 0.816649  |
| 3.98584   | 3.59577   | 4.44921   | 3.55789   | 4.23314   | 3.9414    |
| 17.9454   | 15.1472   | 16.8205   | 16.982    | 18.2916   | 16.7442   |
| 8.8902    | 7.58551   | 9.52577   | 8.62207   | 9.38808   | 9.56562   |
| 16.3101   | 27.2131   | 19.1714   | 28.0321   | 18.4476   | 21.9552   |
| 25.697    | 19.6146   | 23.8792   | 26.4855   | 26.3579   | 24.0868   |
| 32.3075   | 45.5872   | 34.304    | 36.5716   | 34.3421   | 33.6961   |
| 5.26089   | 4.64917   | 4.48029   | 4.00721   | 4.21466   | 3.87858   |
| 0         | 0         | 0         | 0         | 0         | 0         |
| 10.2837   | 1.86673   | 3.22112   | 0.810124  | 0.707045  | 1.92494   |
| 3.26653   | 3.21581   | 4.45876   | 2.96322   | 2.8488    | 3.97145   |
| 0         | 0         | 0.0188075 | 0         | 0         | 0         |
| 4.11765   | 2.7033    | 2.96369   | 3.26085   | 4.73845   | 1.76424   |
| 0.966854  | 0.525154  | 0.566326  | 0.82264   | 0.775366  | 0.756645  |
| 9.94228   | 13.5325   | 12.4311   | 12.9237   | 10.4174   | 7.8812    |
| 9.04137   | 5.68293   | 7.20423   | 7.48739   | 6.65713   | 6.85105   |
| 57.9184   | 52.9257   | 60.0774   | 57.3459   | 59.2401   | 50.0854   |
| 0.115882  | 0.0553131 | 0.031245  | 0.0560653 | 0         | 0.0939266 |
| 8.87226   | 5.83576   | 7.73861   | 7.93208   | 7.62371   | 7.73277   |
| 12.5571   | 12.1963   | 14.0094   | 13.4154   | 11.2413   | 10.304    |
| 1.33292   | 0.763477  | 0.646904  | 1.16079   | 0.20666   | 0.432151  |
| 0.124207  | 0.0782116 | 0.150535  | 0.0448857 | 0.0361317 | 0.0502718 |
| 0.957808  | 0.685772  | 0.449856  | 0.672676  | 0.574845  | 1.1019    |
| 0.0890868 | 0.0318922 | 0.0360303 | 0.0646519 | 0.0863268 | 0.0722078 |
| 34.4257   | 41.5779   | 43.2766   | 45.878    | 51.5176   | 51.1319   |
| 96.5442   | 112.638   | 99.1819   | 111.894   | 98.6263   | 85.5691   |
| 433.157   | 448.731   | 444.631   | 457.615   | 505.765   | 364.759   |
| 5.94513   | 6.9138    | 4.92522   | 5.54394   | 4.87216   | 8.42478   |
| 3.91954   | 3.27436   | 4.8531    | 5.45114   | 4.61003   | 4.71691   |
| 0.744738  | 0.527502  | 0.642962  | 0.644194  | 0.505845  | 0.791235  |
| 289.715   | 285.024   | 286.012   | 304.873   | 312.313   | 287.76    |
| 0.076119  | 0.0181666 | 0.0205237 | 0         | 0.0786782 | 0.0822627 |
| 0         | 0         | 0.163436  | 0         | 0         | 0.0818853 |
| 0.109238  | 0.127095  | 0.0883603 | 0.0693664 | 0.0529268 | 0.143879  |
| 0.0781356 | 0.279718  | 0.505618  | 0.113409  | 0.181716  | 0.189995  |

|           |            |            |            |           |            |
|-----------|------------|------------|------------|-----------|------------|
| 97.0157   | 93.9105    | 90.2848    | 127.098    | 108.959   | 109.848    |
| 0         | 0          | 0          | 0.0326371  | 0         | 0          |
| 0.535705  | 0.509454   | 0.41069    | 0.47341    | 0.564563  | 0.768872   |
| 3.56396   | 4.125      | 3.07479    | 2.28452    | 2.85473   | 2.64802    |
| 4.35E-05  | 0.00016091 | 0.00183083 | 0.00022091 | 5.90E-05  | 0.00295876 |
| 7.05762   | 5.63706    | 7.21517    | 6.67378    | 6.18806   | 6.86557    |
| 3.33117   | 3.64573    | 3.56061    | 3.72984    | 2.71149   | 2.83503    |
| 1.18027   | 1.12187    | 1.3662     | 1.53587    | 1.6564    | 1.94628    |
| 6.95801   | 4.63928    | 5.80558    | 6.06234    | 6.11265   | 4.52471    |
| 70.665    | 86.777     | 60.31      | 65.849     | 52.1491   | 61.7833    |
| 37.2752   | 19.5493    | 34.4767    | 23.6355    | 15.8985   | 43.5215    |
| 0.857239  | 0.613767   | 0.938134   | 0.878278   | 0.351818  | 0.817436   |
| 5.88432   | 4.49669    | 4.7484     | 5.23682    | 6.28387   | 6.20303    |
| 0         | 0          | 0          | 0          | 0         | 0          |
| 282.151   | 282.886    | 275.644    | 267.165    | 284.247   | 251.117    |
| 3.23519   | 2.7683     | 2.52114    | 2.80595    | 2.04919   | 2.94201    |
| 0.236931  | 0.339277   | 0          | 0          | 0         | 0.192041   |
| 0         | 0          | 0          | 0          | 0         | 0          |
| 0         | 0          | 0.395663   | 0.0443731  | 0         | 0          |
| 4.53146   | 3.13736    | 4.1251     | 3.50563    | 3.46649   | 4.26687    |
| 8.66799   | 8.55408    | 7.33972    | 6.5158     | 5.92359   | 7.99343    |
| 33.3115   | 28.1525    | 34.4298    | 33.3842    | 37.1704   | 34.8898    |
| 0.129888  | 0.185994   | 0.0350212  | 0.0314207  | 0.134255  | 0.105278   |
| 720.139   | 488.95     | 2634.16    | 3779.66    | 1551.96   | 2835.11    |
| 9.44753   | 8.68926    | 9.59015    | 9.74237    | 9.32129   | 11.8949    |
| 11.9453   | 12.6411    | 9.56802    | 9.3032     | 8.49224   | 10.7211    |
| 0         | 0          | 0          | 0          | 0         | 0          |
| 0.0464792 | 0.166391   | 0.018798   | 0.0168654  | 0.0720627 | 0.0188365  |
| 0.640692  | 0.86916    | 0.709175   | 0.783094   | 0.313689  | 0.683293   |
| 0         | 0          | 0          | 0          | 0         | 0          |
| 28.4562   | 37.0194    | 33.2236    | 36.5877    | 34.3382   | 30.5934    |
| 24.0328   | 19.0216    | 22.1277    | 20.7828    | 23.3601   | 22.0122    |
| 0.167162  | 0.478739   | 0          | 0.121312   | 0.518346  | 0          |
| 11.2054   | 7.61306    | 9.42488    | 10.9894    | 11.2939   | 6.75512    |
| 2.03437   | 1.69607    | 0.957065   | 1.42428    | 0.947685  | 2.76296    |
| 0.0727091 | 0.0390438  | 0.063714   | 0.0307804  | 0.0375768 | 0.0441999  |
| 13.3096   | 10.9087    | 12.2735    | 12.6487    | 10.6475   | 12.1972    |
| 90.0402   | 120.071    | 83.1037    | 64.4611    | 81.6894   | 82.3606    |
| 9.02909   | 8.85656    | 8.81058    | 6.45338    | 9.73281   | 6.72424    |
| 0         | 0          | 0          | 0.0204359  | 0.0873222 | 0.0228243  |
| 28.7424   | 30.0147    | 36.2835    | 29.7202    | 27.1487   | 15.8203    |
| 0.0337052 | 0.0542977  | 0          | 0.0244605  | 0         | 0          |
| 41.2546   | 39.8831    | 39.9134    | 37.3197    | 27.27     | 34.5492    |

|           |           |           |            |           |           |
|-----------|-----------|-----------|------------|-----------|-----------|
| 0         | 0         | 0         | 0          | 0         | 0         |
| 0         | 0         | 0         | 0          | 0         | 0         |
| 0         | 0         | 0.110783  | 0.165656   | 0         | 0.0370033 |
| 206.038   | 186.281   | 173.491   | 185.575    | 145.448   | 168.028   |
| 2.4087    | 2.09686   | 3.29744   | 2.19657    | 2.45286   | 3.33598   |
| 0.0328208 | 0.0469982 | 0         | 0          | 0         | 0.0266024 |
| 3.09743   | 5.37716   | 1.32136   | 0.615851   | 1.56241   | 1.28968   |
| 0         | 0.032406  | 0.0366107 | 0          | 0         | 0.0366855 |
| 37.4477   | 30.7085   | 34.1927   | 32.9439    | 32.2183   | 35.7915   |
| 12.2498   | 8.61209   | 11.5874   | 11.5416    | 11.9107   | 10.6017   |
| 7.29778   | 5.85564   | 5.74456   | 7.23303    | 6.52994   | 7.04579   |
| 0         | 0         | 0         | 0          | 0         | 0         |
| 12.5211   | 17.3219   | 9.78471   | 10.4729    | 10.3646   | 9.46069   |
| 2.94982   | 3.88843   | 3.69563   | 3.38633    | 2.92103   | 3.13128   |
| 30.6868   | 30.6      | 27.0076   | 32.0195    | 26.9505   | 27.7044   |
| 0.901283  | 1.01405   | 0.624883  | 0.685224   | 0.865043  | 0.41744   |
| 0.335872  | 0.616879  | 0.75598   | 0.445106   | 0.294335  | 0.426108  |
| 0.0938329 | 0         | 0         | 0          | 0         | 0.0760547 |
| 1.36795   | 1.95885   | 3.31952   | 2.18404    | 2.01487   | 1.99579   |
| 0.295548  | 0.0423214 | 0.0956253 | 0.042897   | 0.0458228 | 0.143731  |
| 3.12573   | 2.94469   | 3.21587   | 3.4225     | 2.29558   | 4.00028   |
| 5.44379   | 4.66466   | 4.52716   | 5.01369    | 3.45744   | 4.67818   |
| 62.9459   | 56.5387   | 60.0826   | 67.9764    | 71.7659   | 50.1344   |
| 13.2872   | 14.5396   | 14.827    | 14.8714    | 14.7407   | 16.4587   |
| 16.5249   | 13.7427   | 14.5144   | 15.6356    | 16.5282   | 16.8314   |
| 2.85829   | 2.60072   | 2.60773   | 2.70362    | 2.27039   | 2.18579   |
| 319.637   | 297.284   | 322.255   | 326.464    | 383.269   | 330.836   |
| 0         | 0.0956827 | 0.300272  | 0.0375705  | 0         | 0.0481415 |
| 2.13568   | 2.66642   | 2.09344   | 1.74041    | 1.31621   | 2.02344   |
| 0         | 0         | 0         | 0.00777029 | 0         | 0         |
| 1.14855   | 1.16455   | 1.7651    | 1.4359     | 1.15772   | 1.48205   |
| 0         | 0         | 0         | 0          | 0         | 0         |
| 35.283    | 34.825    | 42.2707   | 37.8173    | 46.4791   | 34.5176   |
| 12.0743   | 13.6367   | 15.3856   | 14.592     | 12.0821   | 14.0248   |
| 0.301169  | 0.308045  | 0.278411  | 0.265399   | 0.300177  | 0.226672  |
| 0.505586  | 0.525885  | 0.649702  | 0.782452   | 0.658182  | 1.22689   |
| 0.228958  | 0.461983  | 0.45458   | 0.332317   | 0.371119  | 0.354285  |
| 0.103093  | 0.0984172 | 0.0833901 | 0.149633   | 0.0532797 | 0.111414  |
| 10.4884   | 12.8186   | 9.24373   | 7.45388    | 6.96058   | 6.99975   |
| 0         | 0         | 0         | 0.137509   | 0         | 0         |
| 49.5202   | 57.2777   | 57.3378   | 59.6991    | 63.5369   | 44.7117   |
| 3.67878   | 7.43869   | 2.15819   | 2.46439    | 1.44159   | 3.17837   |
| 0.870322  | 3.00571   | 1.15951   | 0.965989   | 0.79375   | 1.16188   |

|           |           |           |           |           |           |
|-----------|-----------|-----------|-----------|-----------|-----------|
| 51.5881   | 51.1633   | 56.9518   | 53.5924   | 59.1732   | 63.5468   |
| 0.588774  | 0.479035  | 0.974265  | 0.932358  | 1.14107   | 0.846125  |
| 0         | 0         | 0         | 0         | 0         | 0         |
| 0.566859  | 0.607582  | 0.509115  | 0.367747  | 0.441497  | 0.665533  |
| 0.669688  | 1.37432   | 1.7551    | 0.60463   | 0.390732  | 0.522959  |
| 14.2311   | 20.6695   | 17.7132   | 11.4659   | 8.28538   | 15.6308   |
| 0         | 0         | 0         | 0         | 0         | 0         |
| 11.9716   | 10.341    | 9.99595   | 11.4906   | 15.4476   | 8.32612   |
| 11.9272   | 8.74944   | 11.9048   | 10.0953   | 11.2135   | 11.6117   |
| 5.86994   | 5.19816   | 5.56025   | 7.67907   | 5.80783   | 6.44805   |
| 7.39615   | 6.99663   | 6.19612   | 3.06933   | 4.50349   | 4.9227    |
| 0         | 0         | 0         | 0         | 0         | 0         |
| 0.55433   | 0.488058  | 0.478632  | 0.265282  | 0.330272  | 0.296285  |
| 36.3363   | 29.3709   | 35.4484   | 34.4376   | 45.4755   | 31.0901   |
| 0.0497125 | 0.10678   | 0         | 0.108232  | 0.0385379 | 0.0402936 |
| 0.253708  | 0.257337  | 0.393337  | 0.245494  | 0.196678  | 0.411277  |
| 0.045968  | 0.0940349 | 0.270419  | 0.0370664 | 0.0712702 | 0         |
| 1.67132   | 1.26017   | 1.49549   | 1.0412    | 1.05485   | 0.995055  |
| 0.0983324 | 0.0704041 | 0.0750403 | 0.266748  | 0.337709  | 0.413788  |
| 2.51785   | 1.76463   | 1.65027   | 1.90429   | 1.9761    | 2.77626   |
| 0.574461  | 0.376315  | 0.387566  | 0.312081  | 0.15125   | 0.234306  |
| 40.3986   | 41.3209   | 42.2823   | 40.6793   | 43.6081   | 41.0784   |
| 7.80396   | 7.67492   | 7.64232   | 7.06341   | 4.96218   | 6.54309   |
| 7.67157   | 4.65929   | 7.06068   | 6.37463   | 6.13684   | 4.42706   |
| 0         | 0         | 0         | 0         | 0         | 0         |
| 1.5518    | 1.11558   | 1.61809   | 1.78952   | 1.00795   | 1.37739   |
| 14.0913   | 12.322    | 14.418    | 14.7281   | 15.9709   | 13.6448   |
| 0.189968  | 0.136014  | 0.153661  | 0.611039  | 0.294533  | 0.615903  |
| 1.01026   | 0         | 0.653746  | 0.733167  | 1.01812   | 1.06451   |
| 2.49102   | 2.89023   | 3.45344   | 2.39603   | 2.07169   | 2.62257   |
| 34.4256   | 26.7902   | 32.2477   | 33.5598   | 30.9636   | 35.4813   |
| 0         | 0         | 0         | 0         | 0         | 0         |
| 0         | 0         | 0         | 0         | 0         | 0         |
| 50.8219   | 61.4124   | 42.3647   | 36.646    | 32.8377   | 49.3684   |
| 0         | 0         | 0         | 0.217292  | 0         | 0         |
| 11.2722   | 10.2435   | 15.9124   | 12.6246   | 13.0655   | 10.3993   |
| 37.7494   | 35.7057   | 30.1851   | 38.916    | 35.2578   | 38.8129   |
| 58.8079   | 61.531    | 64.216    | 64.7583   | 62.753    | 59.7704   |
| 25.3498   | 23.2488   | 22.9655   | 24.7116   | 23.7098   | 24.4269   |
| 0.0851279 | 0.0565964 | 0.0541029 | 0.0573661 | 0.0895612 | 0.068999  |
| 0.406433  | 0.581997  | 1.31502   | 0.294956  | 0.94522   | 0.988284  |
| 0         | 0         | 0         | 0         | 0         | 0         |
| 1029.96   | 1577.75   | 1147.38   | 1226.8    | 1179.26   | 1079.52   |

|           |           |           |           |           |           |
|-----------|-----------|-----------|-----------|-----------|-----------|
| 0         | 0.0197931 | 0.0223612 | 0         | 0         | 0.0224069 |
| 27.2829   | 33.4032   | 26.716    | 27.6848   | 28.325    | 29.4136   |
| 5.83928   | 7.57629   | 7.59378   | 6.41504   | 10.504    | 6.66795   |
| 28.8959   | 45.8255   | 19.2979   | 19.0952   | 35.4629   | 40.613    |
| 1.08798   | 1.03863   | 0.880047  | 1.57914   | 1.4057    | 0.881846  |
| 0.0893024 | 0.0319694 | 0.0361175 | 0.0324042 | 0.0519215 | 0.0180957 |
| 33.4735   | 32.0088   | 37.9186   | 35.0527   | 33.6701   | 29.3772   |
| 0         | 0         | 0         | 0         | 0         | 0         |
| 53.2692   | 48.2363   | 43.3509   | 52.0413   | 30.5565   | 40.4515   |
| 0.170394  | 0.0975991 | 0.137828  | 0.14839   | 0.158511  | 0.165732  |
| 0.608136  | 1.05187   | 1.00889   | 0.766183  | 0.689835  | 0.909183  |
| 2.76256   | 2.15573   | 1.48135   | 1.77958   | 0.794068  | 1.23279   |
| 0.294602  | 0.632789  | 0.170213  | 0.244341  | 0.163129  | 0.341122  |
| 1.04885   | 0.750958  | 0.754129  | 0.592022  | 0.451715  | 0.613983  |
| 0.43896   | 0.157143  | 0.443832  | 0.238921  | 0.340288  | 0.0889479 |
| 105.658   | 93.838    | 67.8401   | 78.9987   | 54.2194   | 60.9717   |
| 33.3374   | 29.0835   | 29.8212   | 28.6984   | 31.8827   | 26.5845   |
| 0.362773  | 0.246752  | 0.557536  | 0.671341  | 0.224982  | 0.36755   |
| 4.02718   | 3.90766   | 3.98643   | 3.03087   | 2.6291    | 3.12993   |
| 16.806    | 15.6101   | 15.3698   | 17.1775   | 14.8671   | 18.101    |
| 0         | 0         | 0         | 0         | 0         | 0         |
| 5.98623   | 2.14301   | 4.84214   | 1.08608   | 1.16016   | 3.63903   |
| 7.11076   | 7.22923   | 5.89273   | 8.30267   | 8.96371   | 6.2808    |
| 0.272687  | 0.320595  | 0.169276  | 0.283799  | 0.196319  | 0.297573  |
| 34.4485   | 30.2108   | 33.0742   | 30.8715   | 27.2877   | 29.2719   |
| 29.5415   | 30.9776   | 32.0996   | 30.8379   | 32.1667   | 34.8698   |
| 2.46615   | 1.94531   | 2.33928   | 2.51133   | 2.77399   | 3.35551   |
| 0         | 0         | 0         | 0         | 0         | 0         |
| 44.7564   | 44.7541   | 39.4394   | 50.2975   | 50.5866   | 45.4678   |
| 2.29497   | 1.68515   | 1.87302   | 2.18098   | 1.31925   | 2.9156    |
| 0.0365468 | 0.0261668 | 0.133029  | 0.0530454 | 0.0283317 | 0.0888673 |
| 1.30E-267 | 1.02E-213 | 2.40E-219 | 4.03E-239 | 4.35E-162 | 8.34E-188 |
| 2.98257   | 5.72423   | 2.245     | 4.32901   | 2.66538   | 3.32403   |
| 43.9992   | 44.358    | 42.3283   | 45.0573   | 41.6146   | 36.8291   |
| 0.0116722 | 0         | 0         | 0         | 0         | 0         |
| 0         | 0.0426884 | 0.0241136 | 0.0216345 | 0.0924403 | 0.0483259 |
| 0         | 0         | 0         | 0         | 0         | 0         |
| 83.8621   | 180.131   | 169.586   | 213.011   | 162.528   | 135.946   |
| 0.209913  | 0.488454  | 0.933867  | 0.552223  | 0.101705  | 0.191409  |
| 0         | 0         | 0         | 0         | 0         | 0         |
| 1.22771   | 1.56525   | 1.56561   | 1.28025   | 1.43537   | 1.17118   |
| 1158.2    | 1151.77   | 802.241   | 1221.83   | 1342.66   | 1204.98   |
| 0.431192  | 0.106123  | 0.113296  | 0.282358  | 0.301616  | 0.287369  |

|           |           |           |           |           |           |
|-----------|-----------|-----------|-----------|-----------|-----------|
| 0         | 0         | 0         | 0         | 0         | 0         |
| 4.48847   | 7.68753   | 4.69218   | 3.58242   | 3.82676   | 4.49939   |
| 0         | 0.0697181 | 0         | 0.119161  | 0.0282863 | 0         |
| 113.353   | 108.299   | 117.573   | 118.393   | 133.397   | 116.931   |
| 0.197069  | 0.417193  | 0.996288  | 0.441848  | 0.381124  | 0         |
| 0         | 0         | 0         | 0         | 0         | 0         |
| 8.28029   | 6.51383   | 7.5723    | 6.73638   | 6.9914    | 7.48092   |
| 5.40E-72  | 9.03E-145 | 3.88E-33  | 5.60E-35  | 7.63E-22  | 9.25E-48  |
| 19.6638   | 18.9767   | 19.9571   | 20.7998   | 23.5127   | 21.9087   |
| 106.495   | 117.929   | 114.062   | 114.939   | 118.322   | 117.064   |
| 6.74452   | 6.1697    | 7.0851    | 7.61973   | 7.83719   | 3.647     |
| 40.0081   | 42.5717   | 45.4424   | 49.8985   | 47.5367   | 45.8458   |
| 16.6694   | 14.3588   | 14.6344   | 15.1416   | 15.9746   | 15.1217   |
| 4.73761   | 3.82691   | 5.6598    | 5.65981   | 4.33186   | 4.47014   |
| 0.819824  | 0.624848  | 0.727314  | 0.882846  | 0.615039  | 0.750236  |
| 57.4934   | 70.949    | 29.0225   | 37.2703   | 29.429    | 17.2379   |
| 9.70501   | 8.40635   | 7.60315   | 11.3527   | 10.0225   | 11.6343   |
| 0.248134  | 0.226112  | 0.25545   | 0.0982229 | 0.192357  | 0.219405  |
| 14.6806   | 15.8389   | 21.1162   | 15.8048   | 17.7607   | 16.5211   |
| 8.15683   | 6.62761   | 7.87266   | 7.35321   | 7.31197   | 7.01689   |
| 0         | 0         | 0         | 0         | 0         | 0         |
| 0.407502  | 0.33665   | 0.291587  | 0.272983  | 0.522453  | 0.508145  |
| 22.7548   | 20.1579   | 21.2344   | 21.8472   | 22.6162   | 23.4653   |
| 0.216657  | 0.0688998 | 0.0493577 | 0.122269  | 0.146878  | 0.267441  |
| 0.032023  | 0         | 0.0259027 | 0.0309862 | 0         | 0.0432595 |
| 0         | 0         | 0.184103  | 0         | 0.132331  | 0.18448   |
| 0         | 0         | 0         | 0         | 0         | 0         |
| 74.1606   | 79.2727   | 81.2079   | 80.2306   | 84.4002   | 77.2882   |
| 2.01544   | 1.54821   | 2.11732   | 1.95557   | 2.18542   | 2.04684   |
| 96.7367   | 91.9156   | 78.4791   | 101.466   | 192.104   | 53.6456   |
| 13.7875   | 23.583    | 12.1996   | 14.5838   | 7.04059   | 7.79437   |
| 11.7101   | 9.10156   | 11.7514   | 13.2699   | 11.408    | 12.6383   |
| 79.0417   | 70.6061   | 78.9054   | 84.8621   | 97.8759   | 79.1054   |
| 7.76882   | 5.10871   | 5.05446   | 5.01099   | 5.89697   | 3.39564   |
| 3.7105    | 3.14208   | 3.55973   | 3.70368   | 4.05185   | 4.03662   |
| 2.46663   | 2.00331   | 2.39257   | 2.48909   | 2.84361   | 2.65665   |
| 0         | 0         | 0         | 0         | 0         | 0         |
| 3.56468   | 3.56539   | 1.93556   | 2.46464   | 1.45618   | 1.49116   |
| 0         | 0         | 0         | 0         | 0         | 0         |
| 0.630081  | 0.639095  | 0.212358  | 0.571576  | 0.122112  | 0.383026  |
| 92.2203   | 85.324    | 76.5285   | 86.8551   | 82.9095   | 70.785    |
| 0.0928878 | 0.299277  | 0         | 0.0674103 | 0         | 0         |
| 2.20256   | 1.72051   | 2.76103   | 2.63197   | 2.59231   | 3.08369   |

|          |           |           |           |           |           |
|----------|-----------|-----------|-----------|-----------|-----------|
| 0.105041 | 0.0891347 | 0.0377622 | 0.0762301 | 0.0542862 | 0.0378395 |
| 35.3118  | 34.8188   | 33.8463   | 36.785    | 32.4192   | 35.1131   |
| 80.8621  | 78.9916   | 69.4985   | 76.8345   | 76.8761   | 67.591    |
| 29.2204  | 30.2276   | 30.1255   | 28.4772   | 31.9551   | 26.4939   |
| 1.28069  | 0.941281  | 1.15336   | 0.947145  | 2.15486   | 1.85405   |
| 0.905256 | 0.531317  | 0.679788  | 0.82567   | 1.21715   | 0.66977   |
| 28.8959  | 45.8255   | 19.1983   | 19.0952   | 35.3285   | 40.613    |
| 0.527862 | 0.541776  | 0.695949  | 0.855708  | 0.628513  | 0.380534  |
| 0.765084 | 0.528964  | 0.639638  | 0.698357  | 0.661118  | 0.834306  |
| 0        | 0         | 0         | 0         | 0         | 0         |
| 0        | 0         | 0         | 0         | 0         | 0         |
| 8.05317  | 6.7797    | 7.05808   | 6.83337   | 7.17595   | 7.58896   |
| 63.4633  | 78.5744   | 66.2521   | 63.6859   | 58.3955   | 73.5012   |
| 0        | 0         | 0         | 0         | 0         | 0         |
| 16.72    | 14.4272   | 16.9056   | 17.9866   | 18.4562   | 18.9288   |
| 26.5533  | 26.8945   | 21.2165   | 23.7509   | 35.6564   | 31.8635   |
| 0        | 0.0157983 | 0.0178481 | 0.0480395 | 0.0342107 | 0.0357693 |
| 4.9315   | 4.95747   | 5.39924   | 7.44696   | 3.66851   | 6.62154   |
| 0        | 0         | 0         | 0         | 0         | 0         |
| 25.2351  | 26.2331   | 25.7385   | 26.2645   | 21.0093   | 27.3127   |
| 4.08256  | 4.3449    | 3.65858   | 4.34711   | 3.53647   | 4.25213   |
| 3.55551  | 2.87904   | 4.17701   | 2.7646    | 3.34692   | 3.43078   |
| 0        | 0         | 0         | 0         | 0         | 0         |
| 27.3688  | 21.7639   | 22.5365   | 29.551    | 22.7677   | 24.1836   |
| 0.135114 | 0.0134355 | 0.0607164 | 0.0544741 | 0.0145471 | 0.0811215 |
| 0        | 0         | 0         | 0         | 0         | 0         |
| 23.609   | 22.6906   | 25.2262   | 24.1235   | 24.1429   | 24.6901   |
| 24.8999  | 24.7425   | 30.214    | 27.542    | 32.6377   | 28.8352   |
| 0.74477  | 0.958662  | 0.386603  | 0.411331  | 0.439386  | 0.435388  |
| 0        | 0         | 0.0330988 | 0         | 0         | 0.0331664 |
| 0.624173 | 0.622462  | 0.685195  | 0.566217  | 0.34562   | 0.415571  |
| 31.3894  | 31.6235   | 29.6913   | 29.6262   | 30.2064   | 25.3726   |
| 0        | 0         | 0         | 0         | 0         | 0         |
| 43.996   | 42.4405   | 44.3601   | 40.2614   | 32.7789   | 30.5888   |
| 4.57118  | 5.59834   | 6.32472   | 5.76177   | 4.75595   | 4.58261   |
| 0        | 0         | 0.122417  | 0.0549155 | 0         | 0.0613336 |
| 0.278672 | 1.11687   | 0.31341   | 1.32234   | 1.73747   | 1.40113   |
| 1.55026  | 0.375828  | 0.58015   | 0.438459  | 0.557149  | 0.559318  |
| 26.5899  | 25.1983   | 24.5205   | 23.1559   | 22.6354   | 22.6575   |
| 23.125   | 19.5457   | 22.3664   | 23.8896   | 21.3416   | 23.1524   |
| 13.4579  | 12.1223   | 11.198    | 13.9161   | 12.1622   | 12.2105   |
| 29.7793  | 12.5694   | 15.7781   | 19.3464   | 21.1364   | 6.81601   |
| 667.915  | 1148.92   | 1106.63   | 1024.66   | 968.681   | 958.48    |



|           |           |           |           |           |           |
|-----------|-----------|-----------|-----------|-----------|-----------|
| 0         | 0         | 0         | 0         | 0         | 0         |
| 0.331997  | 0.323027  | 0.272391  | 0.0395107 | 0.189925  | 0.180191  |
| 0.127624  | 0.137065  | 0.41293   | 0.0926191 | 0.0989361 | 0.155165  |
| 0.485787  | 0.347814  | 0.916868  | 0.528817  | 0.0627649 | 0.131249  |
| 0         | 0         | 0         | 0         | 0         | 0         |
| 30.8788   | 24.3779   | 28.0767   | 29.4051   | 27.0864   | 22.6599   |
| 338.522   | 701.711   | 452.673   | 465.668   | 282.511   | 746.842   |
| 0.247251  | 0         | 0         | 0         | 0         | 0         |
| 4.31948   | 5.20473   | 7.24354   | 5.1226    | 2.12346   | 7.51453   |
| 4.31706   | 4.97323   | 4.48137   | 6.14945   | 5.23879   | 5.58065   |
| 7.87874   | 7.25591   | 6.92278   | 8.22907   | 9.29332   | 9.31603   |
| 4.29547   | 2.89574   | 3.012     | 3.26912   | 3.53533   | 3.01816   |
| 57.0961   | 54.4458   | 68.762    | 54.3233   | 57.1901   | 58.8893   |
| 0.0685374 | 0.0736072 | 0.0554385 | 0.0248694 | 0.0796969 | 0         |
| 5.98061   | 6.23127   | 6.46215   | 6.31601   | 4.67086   | 4.55808   |
| 0.963203  | 0.608502  | 0.596749  | 0.452303  | 0.307461  | 0.369032  |
| 0         | 0         | 0         | 0         | 0         | 0         |
| 0.137813  | 0.14068   | 0.111307  | 0.0855196 | 0.122005  | 0.0796811 |
| 0         | 0         | 0         | 0         | 0         | 0         |
| 0.171867  | 0.106863  | 0.0914606 | 0.134574  | 0.084148  | 0.179629  |
| 9.78368   | 10.2072   | 12.2846   | 11.5446   | 9.45822   | 8.57532   |
| 0         | 0.116006  | 0         | 0         | 0         | 0         |
| 0         | 0         | 0         | 0         | 0         | 0         |
| 24.1167   | 19.6051   | 21.535    | 21.364    | 22.1188   | 21.5562   |
| 2.8642    | 2.6332    | 2.87932   | 2.71569   | 2.727     | 3.20634   |
| 23.0092   | 32.2993   | 32.0904   | 27.1934   | 18.8411   | 30.6514   |
| 0.960974  | 0.713087  | 0.752252  | 0.962932  | 0.807702  | 0.8445    |
| 7.26626   | 5.24927   | 6.00961   | 5.58135   | 4.73419   | 4.69842   |
| 9.18105   | 6.10815   | 7.42636   | 7.67471   | 7.16309   | 7.56605   |
| 0.336219  | 0.0802422 | 0         | 0         | 0.260642  | 0.090839  |
| 1.22245   | 2.65731   | 2.83175   | 3.40586   | 0.596241  | 2.54034   |
| 0.161083  | 0.0288324 | 0.130297  | 0         | 0.0305686 | 0.146885  |
| 0         | 0         | 0         | 0         | 0         | 0         |
| 17700.1   | 4480.81   | 5192.58   | 3888.7    | 5106.96   | 9553.14   |
| 211.981   | 240.485   | 207.498   | 156.761   | 184.097   | 198.961   |
| 2.65279   | 2.26305   | 2.19144   | 2.66248   | 3.01909   | 2.69916   |
| 4.13193   | 2.42243   | 1.9477    | 2.93634   | 1.91972   | 2.54344   |
| 6.60926   | 4.98109   | 5.45754   | 5.49938   | 6.79648   | 5.98544   |
| 2.61622   | 2.0954    | 2.31348   | 2.34916   | 2.18282   | 2.92921   |
| 0.12277   | 0.039067  | 0.044136  | 0.0197992 | 0.0422991 | 0.180591  |
| 7.09755   | 5.65801   | 6.58617   | 5.94891   | 4.76227   | 6.17282   |
| 0         | 0         | 0         | 0         | 0         | 0         |
| 42.0706   | 52.6127   | 47.1846   | 45.4      | 41.3686   | 39.594    |

|           |           |           |           |           |           |
|-----------|-----------|-----------|-----------|-----------|-----------|
| 22.4677   | 28.0285   | 25.9998   | 16.8159   | 25.9675   | 19.8891   |
| 0         | 0.535834  | 0         | 1.08624   | 0         | 0         |
| 10.9989   | 10.6193   | 12.3567   | 11.8925   | 12.5314   | 13.6426   |
| 0.0341103 | 0.0976893 | 0.0827734 | 0.123772  | 0.0793285 | 0.0276476 |
| 1.19063   | 1.09603   | 0.756704  | 1.26524   | 1.58228   | 0.689319  |
| 0.974253  | 1.11607   | 1.10328   | 1.20196   | 0.604205  | 0.473799  |
| 0         | 0         | 0         | 0         | 0         | 0         |
| 11.931    | 11.7102   | 10.6158   | 12.8796   | 8.20857   | 10.7987   |
| 0.130343  | 0.34981   | 0.356601  | 0.212602  | 0.151893  | 0.180637  |
| 6.57484   | 5.13711   | 5.25494   | 4.86615   | 4.10585   | 5.07536   |
| 0.970403  | 0.756124  | 0.900336  | 0.931882  | 0.81868   | 0.717413  |
| 24.5043   | 20.6209   | 21.8758   | 19.388    | 21.7718   | 24.5116   |
| 0         | 0         | 0         | 0         | 0         | 0         |
| 48.1685   | 53.3395   | 38.2108   | 44.0612   | 31.6978   | 42.5572   |
| 0.562737  | 0.435141  | 0.418771  | 0.604414  | 0.226846  | 0.510851  |
| 15.539    | 14.7544   | 15.7115   | 17.3946   | 15.5495   | 15.3057   |
| 24.7013   | 20.0176   | 21.5454   | 23.2619   | 23.4236   | 24.4646   |
| 0         | 0         | 5.32656   | 0         | 0.0121526 | 0         |
| 59.7598   | 95.6146   | 102.744   | 76.6979   | 143.134   | 55.1869   |
| 0         | 0         | 0         | 0         | 0         | 0         |
| 54.4183   | 54.24     | 53.6429   | 57.0535   | 52.8288   | 54.3508   |
| 0.697069  | 0.748632  | 0.704806  | 0.252938  | 0.405284  | 0.282499  |
| 10.2595   | 9.50945   | 10.1923   | 9.40849   | 11.308    | 10.2259   |
| 6.71489   | 4.77631   | 6.14154   | 5.76493   | 3.94664   | 5.90509   |
| 0         | 0         | 0         | 0         | 0         | 0         |
| 1.42163   | 2.75421   | 2.23221   | 2.00271   | 2.07448   | 2.10121   |
| 35.6232   | 32.4316   | 34.3902   | 39.6701   | 37.4954   | 40.1579   |
| 0.61951   | 0.575426  | 0.501109  | 0.55895   | 0.272577  | 0.379993  |
| 7.85581   | 7.9193    | 5.61708   | 4.20507   | 4.50967   | 6.35918   |
| 2.01054   | 1.59374   | 0.987389  | 1.06826   | 1.22462   | 1.42591   |
| 0.172328  | 0.123383  | 0         | 0         | 0.0667955 | 0.139677  |
| 16.4959   | 16.6156   | 14.9191   | 14.5687   | 13.2578   | 13.6161   |
| 0.222636  | 0         | 0.360171  | 0         | 0.172591  | 0.541361  |
| 0.0212596 | 0.186573  | 0.119842  | 0.0769091 | 0.135903  | 0.103032  |
| 0.713952  | 1.13528   | 1.30854   | 0.771261  | 0.627228  | 0.886955  |
| 0.834596  | 0.329686  | 0.372462  | 0.302841  | 0.412736  | 0.548173  |
| 7.47847   | 6.10956   | 6.76268   | 6.34572   | 6.15419   | 7.18061   |
| 44.1717   | 44.718    | 44.5611   | 44.2849   | 36.893    | 36.0995   |
| 8.74439   | 9.22646   | 8.59947   | 8.85094   | 6.95717   | 7.83369   |
| 3.33025   | 2.70988   | 2.43413   | 2.96184   | 1.87821   | 2.57893   |
| 65.2496   | 58.9708   | 65.9312   | 71.3976   | 58.9279   | 67.1075   |
| 0.138334  | 0.198088  | 0         | 0         | 0.214477  | 0.112124  |
| 0.365209  | 0.224128  | 0.211007  | 0.0757253 | 0.0404451 | 0.169151  |

|           |           |           |           |           |          |
|-----------|-----------|-----------|-----------|-----------|----------|
| 0         | 0         | 0         | 0         | 0         | 0        |
| 0.776033  | 0         | 0         | 0         | 0         | 0.838424 |
| 4.77061   | 3.67856   | 5.01557   | 3.52288   | 5.24804   | 3.8949   |
| 8.08158   | 8.33971   | 8.3367    | 8.31066   | 9.05503   | 8.99022  |
| 6.565     | 2.57765   | 8.3937    | 3.38115   | 7.71602   | 8.58251  |
| 1.74777   | 1.4313    | 1.46917   | 1.58755   | 1.23978   | 1.36107  |
| 17.6109   | 17.0289   | 16.3419   | 15.8254   | 15.1853   | 16.1803  |
| 0         | 0         | 0         | 0         | 0         | 0        |
| 0.290164  | 0         | 0.0367007 | 0.249573  | 0         | 0        |
| 9.59763   | 7.16438   | 8.62298   | 6.91771   | 8.94855   | 7.43464  |
| 0.0432243 | 0.0247582 | 0.10489   | 0.0188212 | 0.0134033 | 0.105104 |
| 16.1727   | 16.3854   | 13.1882   | 16.3336   | 17.4221   | 14.322   |
| 0         | 0         | 4.48546   | 0         | 0         | 0        |
| 1.50418   | 2.08234   | 1.94215   | 1.80681   | 1.30215   | 1.3859   |
| 0         | 0         | 0         | 0         | 0         | 0        |
| 37.0536   | 31.4594   | 33.3382   | 33.8235   | 36.1544   | 32.1844  |
| 0         | 0         | 9.71E-183 | 0         | 0         | 0        |
| 1.11E-05  | 2.49241   | 1.04884   | 0.788527  | 0.853204  | 0.209761 |
| 0.0181431 | 0.116911  | 0.161432  | 0.105334  | 0.154713  | 0.073528 |
| 0         | 0         | 0         | 0         | 0         | 0        |
| 68.3192   | 58.3752   | 63.2964   | 66.0904   | 74.1686   | 67.9131  |
| 0         | 0         | 0         | 0         | 0         | 0        |
| 0.188682  | 0.43905   | 0.267086  | 0.513486  | 0.109702  | 0.497031 |
| 5.53482   | 6.20339   | 5.97955   | 6.16725   | 5.11457   | 5.26319  |
| 1.27018   | 0.818908  | 0.910006  | 1.15883   | 1.95616   | 1.35309  |
| 0.105994  | 0.113834  | 0         | 0.0769217 | 0         | 0        |
| 20.3824   | 19.2225   | 20.8091   | 20.2552   | 19.8751   | 18.2376  |
| 0.786117  | 0.938202  | 0.989313  | 1.01408   | 0.54177   | 0.28304  |
| 500.288   | 342.385   | 441.312   | 428.486   | 461.205   | 420.113  |
| 0         | 0         | 0         | 0         | 0         | 0        |
| 0.970464  | 0.442167  | 0.856351  | 1.21649   | 1.02589   | 1.14414  |
| 2.30558   | 2.37791   | 2.30899   | 1.93216   | 1.61664   | 2.40306  |
| 35.7686   | 42.1299   | 38.4971   | 36.4397   | 31.5861   | 31.8488  |
| 18.4856   | 13.3909   | 14.6097   | 17.3312   | 18.0705   | 17.6916  |
| 0         | 0         | 0         | 0         | 0         | 0        |
| 10.3647   | 56.276    | 17.8063   | 14.6558   | 8.14741   | 11.6686  |
| 4.18516   | 3.78775   | 2.47287   | 5.76753   | 3.35368   | 3.79234  |
| 0         | 0         | 0         | 0         | 0         | 0        |
| 0         | 0         | 0         | 0         | 0         | 0        |
| 0.808395  | 1.09666   | 1.06688   | 0.648421  | 0.428781  | 0.793174 |
| 2.09558   | 1.07032   | 1.44225   | 1.51679   | 1.1463    | 1.52109  |
| 28.9755   | 39.9714   | 29.8521   | 34.2377   | 28.2959   | 31.3568  |
| 0         | 0         | 0.162443  | 0.145742  | 0         | 0        |

|           |           |           |           |           |           |
|-----------|-----------|-----------|-----------|-----------|-----------|
| 2.35001   | 0.388284  | 0.584886  | 1.31188   | 1.54149   | 1.61172   |
| 0         | 0         | 0         | 0         | 0         | 0         |
| 0.995988  | 1.00916   | 0.533282  | 0.867492  | 0.636568  | 0.81942   |
| 0.090492  | 0         | 0.0731971 | 0         | 0         | 0         |
| 10.3555   | 11.5849   | 12.5645   | 11.3795   | 12.9994   | 11.3741   |
| 36.7766   | 37.1087   | 55.9866   | 39.4975   | 31.5927   | 28.6899   |
| 0         | 0         | 0         | 0.0117434 | 0         | 0         |
| 0.0225738 | 0         | 0         | 0.0655356 | 0.0174995 | 0         |
| 1.21434   | 1.13759   | 0.927178  | 0.90598   | 1.01176   | 0.653111  |
| 36.6137   | 32.4639   | 37.8954   | 35.1522   | 31.7845   | 37.1308   |
| 8.17054   | 7.04366   | 7.54208   | 8.11858   | 8.31471   | 6.87496   |
| 0.135539  | 0         | 0         | 0.098363  | 0.105072  | 0         |
| 0.534879  | 0.540654  | 0.330852  | 0.57084   | 0.317083  | 0.510044  |
| 0.138946  | 0.074612  | 0.196684  | 0.126044  | 0.0807848 | 0.0281551 |
| 3.96137   | 2.63606   | 4.2598    | 4.46446   | 3.35995   | 3.51302   |
| 3.53464   | 4.72439   | 4.25125   | 2.80177   | 7.20276   | 3.27385   |
| 2.52484   | 2.98097   | 3.6112    | 4.93877   | 3.00723   | 3.75411   |
| 0.547072  | 0.470032  | 0.531019  | 0.317616  | 0.339279  | 0.0886841 |
| 0.179234  | 0.513311  | 0.434935  | 0.455256  | 0.486306  | 0.581099  |
| 0         | 0.0203182 | 0.0229545 | 0         | 0.0219992 | 0         |
| 0         | 0.316498  | 0.0978631 | 0.0926231 | 0.280335  | 0.204748  |
| 0         | 0         | 0         | 0         | 0         | 0         |
| 1.54423   | 1.03654   | 1.2491    | 1.08565   | 1.72085   | 1.36899   |
| 0         | 0         | 0         | 0         | 0         | 0         |
| 0         | 0         | 0         | 0         | 0         | 0         |
| 101.906   | 96.353    | 109.991   | 98.8172   | 94.9101   | 101.24    |
| 0         | 0         | 0         | 0         | 0         | 0         |
| 1.02786   | 1.07406   | 0.764002  | 0.443529  | 0.882954  | 0.472848  |
| 1.23371   | 1.00266   | 1.04491   | 0.951851  | 0.948264  | 1.38688   |
| 6.60266   | 8.02061   | 7.53107   | 7.53746   | 8.13782   | 7.30771   |
| 0         | 0         | 0.0805857 | 0         | 0.115848  | 0         |
| 0         | 0         | 0         | 0         | 0         | 0         |
| 15.9252   | 13.1551   | 8.66645   | 12.1766   | 8.81073   | 9.06649   |
| 14.9716   | 15.4785   | 17.7941   | 15.1147   | 14.1581   | 13.8795   |
| 0.37959   | 0.214026  | 0.340026  | 0.12052   | 0.0321846 | 0.340722  |
| 193.972   | 205.019   | 202.458   | 164.085   | 235.842   | 218.426   |
| 4.51616   | 3.76896   | 3.21094   | 4.73874   | 3.76859   | 4.96615   |
| 10.8043   | 12.5844   | 11.5052   | 13.7683   | 9.1822    | 12.5276   |
| 0         | 0         | 0         | 0         | 0         | 0         |
| 26.3534   | 36.8893   | 33.9869   | 33.1181   | 26.8613   | 21.8965   |
| 7.98878   | 11.1271   | 8.51001   | 7.79349   | 6.29455   | 7.14746   |
| 10.4001   | 11.283    | 8.04846   | 9.12006   | 5.40074   | 9.84136   |
| 16.1673   | 10.2908   | 13.7247   | 12.4795   | 12.515    | 15.9603   |

|          |           |          |          |          |            |
|----------|-----------|----------|----------|----------|------------|
| 18.3892  | 14.7518   | 17.1591  | 21.1244  | 19.5299  | 22.9169    |
| 32.3803  | 44.1276   | 42.8495  | 35.637   | 42.2814  | 39.5831    |
| 2.96836  | 4.92887   | 5.46007  | 4.45578  | 4.60952  | 6.07588    |
| 4.75627  | 3.72579   | 5.31256  | 4.60559  | 4.86499  | 4.83697    |
| 0.173733 | 0         | 0        | 0.112072 | 0.188164 | 0.12517    |
| 2.60982  | 1.74658   | 2.66962  | 2.23895  | 2.25956  | 2.08627    |
| 21.889   | 18.5563   | 21.4192  | 20.6142  | 21.0329  | 22.5433    |
| 7.47742  | 7.03192   | 7.49145  | 5.78094  | 5.63735  | 5.0629     |
| 0.998244 | 1.49901   | 2.09357  | 0.868309 | 0.532832 | 0.983853   |
| 14.0472  | 13.2774   | 13.12    | 12.7245  | 13.8274  | 13.2697    |
| 6.92532  | 21.2433   | 13.0665  | 10.6465  | 10.7991  | 21.3106    |
| 8.02151  | 12.014    | 7.52928  | 8.3442   | 7.56988  | 11.338     |
| 2.0667   | 1.9025    | 2.36645  | 2.24003  | 1.60214  | 2.04497    |
| 53.1075  | 46.2045   | 50.2211  | 58.0669  | 53.8454  | 53.2297    |
| 40.5766  | 31.1549   | 36.0499  | 34.5599  | 30.1496  | 37.4161    |
| 2.67638  | 1.94952   | 1.92926  | 2.57646  | 2.0042   | 2.40538    |
| 0.109389 | 0.236692  | 0        | 0.160485 | 0        | 0.228757   |
| 10.2837  | 10.0633   | 11.4056  | 10.2297  | 9.06587  | 10.1937    |
| 10.7838  | 10.1083   | 9.25735  | 8.93778  | 8.39471  | 8.59456    |
| 1.30126  | 1.16471   | 0.684165 | 0.543267 | 1.10978  | 1.55582    |
| 30.5633  | 32.0771   | 30.2538  | 29.4378  | 23.9237  | 26.5829    |
| 242.635  | 238.848   | 200.319  | 214.283  | 211.015  | 249.176    |
| 0.604732 | 0.422179  | 0.377676 | 0.343459 | 0.200821 | 0.202455   |
| 12.2336  | 9.87226   | 10.5362  | 15.2227  | 14.0322  | 17.1445    |
| 144.126  | 122.949   | 80.6786  | 107.479  | 88.7324  | 77.5318    |
| 11.4037  | 9.72914   | 12.984   | 13.9741  | 9.74084  | 9.7583     |
| 0        | 0         | 0        | 0        | 0        | 0.144254   |
| 1.01E-05 | 0.0001785 | 3.29E-06 | 3.42E-06 | 3.74E-06 | 0.00025542 |
| 0.101026 | 0         | 0        | 0        | 0.783172 | 0          |
| 9.41527  | 9.95616   | 11.4823  | 12.8247  | 11.6782  | 13.5017    |
| 5.73252  | 7.03364   | 6.36855  | 6.17988  | 7.57867  | 7.01782    |
| 0        | 0         | 0        | 0        | 0        | 0.0467862  |
| 0        | 0         | 0        | 0        | 0        | 0          |
| 17.8618  | 24.7133   | 12.6908  | 14.2764  | 11.3206  | 22.2054    |
| 0        | 0.0375138 | 0        | 0        | 0        | 0          |
| 8.76753  | 8.10998   | 8.1072   | 8.64388  | 9.47452  | 8.14344    |
| 37.3626  | 31.9093   | 32.557   | 34.6321  | 36.2762  | 37.0937    |
| 0.775089 | 0.295973  | 0.72448  | 0.612496 | 0.413927 | 0.921413   |
| 21.635   | 25.3013   | 15.4535  | 17.2392  | 20.156   | 21.5719    |
| 3.35836  | 2.87433   | 1.33455  | 2.44141  | 1.2818   | 2.80071    |
| 24.7383  | 17.1834   | 25.6849  | 25.1878  | 24.8306  | 18.7045    |
| 17.3947  | 12.0669   | 17.6688  | 14.7906  | 10.9368  | 14.6675    |
| 3.34043  | 7.07435   | 4.94894  | 6.29019  | 5.20636  | 5.70006    |

|           |           |           |           |           |           |
|-----------|-----------|-----------|-----------|-----------|-----------|
| 2.49259   | 2.59269   | 2.23488   | 3.17326   | 1.97415   | 2.27103   |
| 0         | 0.0240758 | 0         | 0         | 0         | 0.0272553 |
| 42.478    | 36.9097   | 34.3689   | 44.0965   | 23.5543   | 51.1854   |
| 0         | 0         | 0         | 0         | 0         | 0         |
| 20.5607   | 22.1227   | 16.5382   | 19.4226   | 17.3637   | 15.1755   |
| 0         | 0         | 0         | 0         | 0         | 0         |
| 22.8054   | 29.9982   | 22.4263   | 17.715    | 35.6716   | 8.46819   |
| 5.2714    | 4.16914   | 4.97314   | 5.87307   | 4.55567   | 4.02723   |
| 0.217614  | 0.389518  | 0.264035  | 0.197408  | 0.337395  | 0.132288  |
| 44.3969   | 43.224    | 40.9153   | 42.789    | 35.9954   | 40.1105   |
| 70.1535   | 76.712    | 78.5837   | 73.5213   | 81.0566   | 75.1996   |
| 0.27488   | 0         | 0         | 0.398971  | 0         | 0         |
| 46.5002   | 51.02     | 47.2277   | 45.8888   | 40.2453   | 44.2204   |
| 32.9878   | 38.967    | 28.9839   | 37.3572   | 27.8315   | 29.0432   |
| 0.42711   | 0         | 1.48063   | 0.974165  | 0.567604  | 2.27494   |
| 22.0124   | 20.9268   | 25.3518   | 20.9469   | 18.8724   | 17.1328   |
| 0         | 0         | 0         | 0         | 0         | 0         |
| 0         | 0         | 0         | 0         | 0         | 0         |
| 2.51982   | 0         | 6.13592   | 4.87647   | 7.16247   | 22.4664   |
| 10.5921   | 10.2861   | 10.5813   | 11.2705   | 9.1639    | 9.83666   |
| 14.4264   | 11.727    | 4.45957   | 8.61898   | 8.49451   | 9.03046   |
| 16.2256   | 13.9317   | 14.9633   | 14.8628   | 15.1813   | 15.5687   |
| 14.1816   | 17.2674   | 16.4329   | 14.0916   | 14.432    | 16.3631   |
| 14.0067   | 12.7623   | 14.313    | 14.7341   | 13.8093   | 13.1217   |
| 123.751   | 160.309   | 133.133   | 138.786   | 106.47    | 129.089   |
| 0         | 0         | 0         | 0         | 0         | 0         |
| 97.2349   | 94.2768   | 96.7846   | 98.1507   | 92.9318   | 92.5714   |
| 7.22721   | 8.80353   | 7.69558   | 7.65597   | 6.67926   | 7.44213   |
| 0         | 0         | 0         | 0         | 0         | 0         |
| 0         | 0         | 0         | 0         | 0         | 0         |
| 2.9024    | 2.07806   | 2.29043   | 2.72281   | 2.79876   | 3.15578   |
| 47.1134   | 57.6428   | 49.4146   | 48.3557   | 49.9206   | 44.9763   |
| 0.0458231 | 0.0656169 | 0.111196  | 0.0332546 | 0.106568  | 0.0371411 |
| 0.101059  | 0.0723562 | 0.0817444 | 0.0733402 | 0.156685  | 0.0409558 |
| 42.7839   | 43.084    | 44.4401   | 37.7757   | 42.7333   | 35.9221   |
| 0         | 0         | 0.0987904 | 0.0886337 | 0         | 0         |
| 13.3927   | 16.1048   | 14.9547   | 13.1673   | 11.8769   | 15.1806   |
| 6.26014   | 16.2875   | 13.8454   | 11.8407   | 8.97988   | 6.44245   |
| 0         | 0.119576  | 0.241166  | 0.277035  | 0.145653  | 0.312868  |
| 0         | 0         | 0         | 0         | 0.0767414 | 0         |
| 0.0532161 | 0.133356  | 0.193704  | 0.154479  | 0.185643  | 0.107834  |
| 1.4124    | 1.39791   | 1.51208   | 1.29633   | 1.86779   | 2.2896    |
| 6.0131    | 5.31818   | 6.21264   | 6.67396   | 7.63843   | 6.10248   |

|           |           |           |            |           |           |
|-----------|-----------|-----------|------------|-----------|-----------|
| 0.583383  | 0.867513  | 0.544485  | 0.683908   | 0.556613  | 0.654718  |
| 15.5538   | 11.8881   | 16.1379   | 14.7169    | 15.2627   | 14.0963   |
| 14.6885   | 12.9549   | 13.7573   | 14.4802    | 13.6105   | 13.9123   |
| 18.6228   | 15.2987   | 15.8036   | 17.7557    | 18.1888   | 18.2998   |
| 0.0845384 | 0         | 0         | 0          | 0.131071  | 0         |
| 0.0286203 | 0.0819664 | 0.0463008 | 0.0623108  | 0.110935  | 0.0695932 |
| 0         | 0         | 0         | 0          | 0         | 0         |
| 1035.23   | 1099.07   | 1076.57   | 1093.93    | 1078.49   | 991.31    |
| 10.0082   | 11.7222   | 8.36337   | 10.5657    | 9.43453   | 10.7971   |
| 0         | 0         | 0         | 0          | 0         | 0         |
| 0         | 0         | 0         | 0          | 0         | 0         |
| 176.933   | 244.059   | 246.03    | 132.896    | 129.907   | 236.207   |
| 0.0860367 | 0         | 0         | 0          | 0.0333485 | 0         |
| 12.1625   | 10.4727   | 11.8723   | 11.4888    | 11.2552   | 10.9746   |
| 1.95491   | 1.96991   | 1.40559   | 1.83907    | 1.43128   | 2.28875   |
| 72.9014   | 42.3581   | 58.9305   | 57.6527    | 35.5732   | 41.5299   |
| 0         | 0         | 0         | 0          | 0         | 0         |
| 3.67059   | 4.55787   | 7.33183   | 3.71141    | 2.73048   | 6.33153   |
| 0.0948399 | 0         | 0.0191785 | 0          | 0.0367607 | 0.0384355 |
| 0         | 0         | 0         | 0          | 0         | 0         |
| 16.9914   | 16.2775   | 15.278    | 18.2656    | 14.9151   | 18.7063   |
| 42.5234   | 37.859    | 39.7415   | 39.9606    | 26.7986   | 38.2973   |
| 4.85006   | 8.10262   | 7.45392   | 6.10094    | 4.63714   | 6.42086   |
| 1.64254   | 1.49725   | 2.07071   | 1.1126     | 1.80224   | 2.08426   |
| 72.4261   | 71.2319   | 66.1327   | 68.7034    | 60.2769   | 47.5022   |
| 21.0108   | 22.0995   | 21.9879   | 22.6536    | 21.0294   | 21.5357   |
| 447.212   | 395.318   | 430.409   | 472.441    | 456.191   | 435.456   |
| 0.526551  | 0.508953  | 0.652186  | 0.30145    | 0.344411  | 0.426789  |
| 12.1866   | 8.97916   | 10.6783   | 12.3711    | 11.3932   | 11.8296   |
| 1.99348   | 0.662386  | 1.11298   | 1.15544    | 1.19733   | 1.17458   |
| 906.303   | 514.641   | 682.532   | 453.6      | 532.992   | 607.936   |
| 38.7473   | 33.7725   | 40.084    | 39.9085    | 31.8565   | 44.0757   |
| 0         | 0         | 0         | 0          | 0         | 0.0499092 |
| 5.48225   | 6.00408   | 6.50391   | 4.50905    | 4.86381   | 4.62458   |
| 54.6238   | 50.9949   | 54.4862   | 52.8469    | 53.5817   | 51.5035   |
| 5.66999   | 2.62963   | 3.37199   | 2.62648    | 4.13568   | 1.95562   |
| 11.9496   | 12.599    | 10.8188   | 11.4671    | 8.40241   | 13.3583   |
| 2.18267   | 3.07543   | 2.54194   | 2.36633    | 2.67835   | 2.81171   |
| 0         | 0         | 0         | 0.00929062 | 0         | 0         |
| 5.00477   | 3.03942   | 4.95188   | 4.21577    | 4.98828   | 6.8454    |
| 6.03755   | 5.43995   | 7.10337   | 6.21874    | 6.11552   | 6.82803   |
| 23.802    | 21.135    | 23.511    | 20.7241    | 27.2716   | 22.7562   |
| 9.62472   | 7.33811   | 10.4364   | 8.49507    | 10.0424   | 10.5421   |

|           |            |           |           |           |            |
|-----------|------------|-----------|-----------|-----------|------------|
| 0         | 0          | 0         | 0         | 0         | 0          |
| 8.66024   | 8.24846    | 11.311    | 8.16844   | 13.345    | 9.12309    |
| 4.3598    | 4.91027    | 4.99265   | 4.5149    | 5.43044   | 5.71755    |
| 6.511     | 8.20018    | 8.85172   | 7.71394   | 11.4631   | 5.69067    |
| 0.97631   | 1.25585    | 1.95826   | 1.08265   | 1.0945    | 0.825708   |
| 23.6903   | 20.7795    | 21.0845   | 25.6088   | 31.94     | 29.6699    |
| 0.414112  | 0.286955   | 0.313408  | 0.281186  | 0.351869  | 0.335652   |
| 0.0739839 | 0.105942   | 0.0598441 | 0.0536914 | 0.286767  | 0.179899   |
| 2.39607   | 2.40142    | 2.03499   | 2.0575    | 1.85747   | 2.0068     |
| 0.352773  | 0.349725   | 0.1317    | 0.669575  | 0.210366  | 0.307929   |
| 0.391082  | 0.223397   | 0.47529   | 0.355636  | 0.453287  | 0.2993     |
| 6.63426   | 10.4151    | 9.84645   | 9.36418   | 8.39863   | 7.69594    |
| 552.964   | 628.403    | 450.676   | 392.231   | 417.807   | 437.579    |
| 0.013164  | 0.00314171 | 8.2189    | 0         | 0         | 0.00711322 |
| 10.5829   | 13.9886    | 12.5112   | 12.4519   | 13.8352   | 10.8618    |
| 12.7583   | 9.3397     | 10.5001   | 10.6212   | 11.1236   | 11.0889    |
| 0.87001   | 0.622911   | 0         | 0.841843  | 0.674445  | 0.470115   |
| 9.89441   | 9.309      | 12.435    | 12.1654   | 11.6005   | 12.6593    |
| 0         | 0          | 0         | 0         | 0         | 0          |
| 0.336024  | 0.36088    | 0.203852  | 0.426753  | 0.195368  | 0.408538   |
| 42.4282   | 40.3458    | 39.0165   | 38.59     | 29.0959   | 33.3707    |
| 7.33524   | 6.85775    | 6.53872   | 7.29774   | 8.72202   | 7.30869    |
| 28.0278   | 19.8027    | 17.2712   | 18.304    | 12.9515   | 15.7562    |
| 0.604599  | 0.848447   | 0.50861   | 0.561623  | 0.618677  | 0.568455   |
| 2.69811   | 1.73779    | 2.67458   | 2.01089   | 1.76848   | 1.79848    |
| 4.04976   | 4.90288    | 5.03278   | 4.56879   | 3.3963    | 4.29705    |
| 0         | 0          | 0         | 0         | 0         | 0          |
| 4.40253   | 9.39271    | 8.16539   | 7.77772   | 5.03318   | 7.42515    |
| 0.347905  | 0.124547   | 0.492473  | 0.189361  | 0.0449502 | 0.49348    |
| 5.08803   | 4.74718    | 4.08903   | 4.64756   | 3.43157   | 4.45072    |
| 105.899   | 97.0922    | 91.6313   | 108.485   | 111.672   | 94.0686    |
| 8.05648   | 5.59015    | 6.84256   | 5.93271   | 5.36838   | 6.7077     |
| 30.5048   | 30.4875    | 28.0136   | 33.4767   | 27.6675   | 24.0812    |
| 26.4974   | 26.0252    | 28.5776   | 26.6256   | 23.043    | 26.7086    |
| 0.327072  | 0.0231276  | 0.0261284 | 0.16879   | 0.100166  | 0.10473    |
| 0         | 0          | 0         | 0         | 0         | 0          |
| 25.1591   | 21.2861    | 23.2752   | 24.5901   | 24.8372   | 26.3331    |
| 12.1051   | 11.8689    | 12.0325   | 11.5337   | 9.92933   | 11.3103    |
| 0         | 0          | 0         | 0         | 0         | 0          |
| 0.025373  | 0.109      | 0.0410474 | 0.0368273 | 0.118017  | 0.185091   |
| 34.2547   | 26.6066    | 28.0376   | 28.5406   | 34.4574   | 30.3249    |
| 0.267221  | 0.467684   | 0.288199  | 0.603329  | 0.391291  | 0.457249   |
| 3.73288   | 2.71216    | 2.17974   | 2.83507   | 2.50535   | 4.54633    |



|           |           |           |           |           |           |
|-----------|-----------|-----------|-----------|-----------|-----------|
| 0         | 0         | 0         | 0         | 0         | 0         |
| 1.11392   | 1.45905   | 2.72936   | 2.76093   | 1.37138   | 2.47202   |
| 0         | 0         | 0         | 0         | 0         | 0         |
| 7.42479   | 5.84155   | 7.58698   | 6.59233   | 8.35881   | 7.86552   |
| 23.5089   | 19.9589   | 16.5533   | 19.7776   | 24.2873   | 15.2586   |
| 0.120144  | 0         | 0         | 0.0435954 | 0         | 0         |
| 46.8012   | 40.2563   | 36.2902   | 38.7072   | 24.3689   | 29.0485   |
| 10.7833   | 8.34801   | 8.17988   | 8.20785   | 5.61693   | 6.69878   |
| 73.2182   | 84.3702   | 75.4309   | 77.0889   | 77.9216   | 71.7601   |
| 0.181556  | 0.12999   | 0.146857  | 0         | 0         | 0         |
| 0         | 0         | 0         | 0         | 0.0233987 | 0.0244647 |
| 0         | 0         | 0         | 0         | 0         | 0         |
| 16.2708   | 18.0782   | 21.891    | 22.4486   | 18.0423   | 17.2818   |
| 17.5592   | 15.9727   | 14.5525   | 16.1899   | 18.9677   | 18.8986   |
| 40.2643   | 45.6066   | 43.019    | 40.7577   | 45.2625   | 35.1664   |
| 3.66871   | 1.93076   | 3.37337   | 2.52591   | 2.7225    | 3.40568   |
| 0.0390568 | 0.111856  | 0.189553  | 0.19841   | 0.0908323 | 0.0949705 |
| 0.340437  | 0.376699  | 0.150203  | 0.202141  | 0.11996   | 0.250851  |
| 15.7511   | 16.1572   | 14.9513   | 14.3311   | 16.7026   | 17.0554   |
| 1.47999   | 1.48222   | 1.34948   | 1.08185   | 1.06523   | 1.08378   |
| 0         | 0         | 0         | 0         | 0         | 0         |
| 12.8415   | 11.6592   | 12.1639   | 12.81     | 12.0416   | 11.6556   |
| 4.72205   | 5.4223    | 6.04144   | 5.60102   | 5.41301   | 4.18298   |
| 15.8496   | 11.3039   | 19.0314   | 13.186    | 21.3588   | 4.9423    |
| 49.6291   | 55.1702   | 50.5312   | 50.747    | 50.6901   | 46.2128   |
| 0         | 0         | 0         | 0         | 0         | 0         |
| 0.107147  | 0.0435081 | 0.0769883 | 0.0918513 | 0.051048  | 0.0533737 |
| 0         | 0.0189221 | 0         | 0         | 0         | 0         |
| 0.023718  | 0.0113211 | 0.0159875 | 0.0200814 | 0.0337087 | 0.0200253 |
| 16.3021   | 18.7344   | 17.3331   | 18.0594   | 15.5364   | 18.3455   |
| 4.47043   | 5.35509   | 4.94884   | 5.35164   | 3.96063   | 4.75976   |
| 11.5217   | 10.6673   | 9.26613   | 11.5812   | 14.5784   | 8.6947    |
| 92.7769   | 100.147   | 116.428   | 109.751   | 106.464   | 106.687   |
| 19.1945   | 15.6937   | 15.7282   | 17.1211   | 19.8249   | 20.0325   |
| 2.56307   | 1.99129   | 2.13938   | 2.80989   | 3.91046   | 1.48074   |
| 18.9231   | 15.4208   | 14.5806   | 13.1265   | 13.494    | 15.9147   |
| 3.64161   | 3.01796   | 3.43347   | 3.69166   | 3.59331   | 3.16085   |
| 5.1377    | 5.78822   | 5.53086   | 5.53795   | 4.62711   | 5.87898   |
| 0.539468  | 0.371943  | 0.533335  | 0.493002  | 0.48016   | 0.534425  |
| 1617.71   | 1643.87   | 1652.69   | 1586.23   | 1634.46   | 1550.2    |
| 0         | 0         | 0         | 0         | 0         | 0         |
| 2.97843   | 2.50995   | 2.89006   | 2.94127   | 2.88373   | 2.20554   |
| 372.9     | 453.627   | 191.056   | 11.4164   | 15.8073   | 105.752   |

|           |           |           |           |           |           |
|-----------|-----------|-----------|-----------|-----------|-----------|
| 0.117285  | 0.0599811 | 0.0542109 | 0.0486374 | 0.0779321 | 0.0814826 |
| 14.8841   | 13.984    | 13.4922   | 13.4654   | 16.2634   | 17.2773   |
| 2.51509   | 2.65374   | 1.71318   | 1.95333   | 1.84712   | 2.07433   |
| 0.228849  | 1.96622   | 0.925558  | 1.49472   | 2.3063    | 1.48392   |
| 61.4774   | 61.2811   | 65.2608   | 59.4635   | 77.9072   | 47.2784   |
| 220.326   | 196.369   | 211.793   | 195.725   | 252.144   | 184.861   |
| 15.1577   | 11.5061   | 12.7624   | 13.465    | 11.0756   | 13.3569   |
| 73.0714   | 70.9281   | 72.7293   | 85.0778   | 86.0486   | 73.4155   |
| 0.0186474 | 0.0133512 | 0.0452506 | 0.0811966 | 0         | 0.136029  |
| 0.287154  | 0.196982  | 0.277457  | 0.108356  | 0         | 0         |
| 1.33666   | 0.957023  | 0.92674   | 0.831461  | 0.888171  | 0.154772  |
| 0.619652  | 0.443659  | 0.100245  | 0.359754  | 0.576436  | 0.10045   |
| 1.6304    | 2.88401   | 1.86183   | 3.96724   | 1.04087   | 1.08829   |
| 4.94883   | 5.19679   | 5.84682   | 4.76684   | 5.9755    | 4.52171   |
| 3.38383   | 2.49819   | 2.69688   | 3.16056   | 2.63128   | 4.06066   |
| 0.13424   | 0.0480568 | 0.162877  | 0         | 0.0520327 | 0         |
| 3.14207   | 1.40239   | 2.64058   | 2.04335   | 2.87865   | 2.38138   |
| 1.33E-07  | 8.32E-09  | 2.74E-06  | 0.147413  | 0.0379194 | 1.93E-15  |
| 125.177   | 207.971   | 150.518   | 101.12    | 89.6885   | 192.431   |
| 0         | 0         | 0.0694529 | 0         | 0         | 0         |
| 61.0109   | 62.5459   | 65.9749   | 53.0457   | 53.6611   | 61.4087   |
| 1.11403   | 1.06563   | 0.933072  | 0.917907  | 0.778532  | 0.964429  |
| 10.2315   | 9.54358   | 10.4722   | 10.9969   | 8.99257   | 10.7558   |
| 46.5213   | 51.3255   | 43.9394   | 48.4856   | 49.957    | 36.9545   |
| 54.915    | 72.204    | 41.3727   | 42.1968   | 51.2894   | 43.2734   |
| 2.10652   | 1.18528   | 0.701041  | 1.09231   | 0.497513  | 0.732887  |
| 6.22989   | 4.42004   | 6.07141   | 4.95104   | 5.6506    | 8.10553   |
| 65.1004   | 41.8682   | 56.2678   | 59.2167   | 70.7364   | 82.9237   |
| 0         | 0         | 0         | 0         | 0         | 0         |
| 0         | 0         | 0         | 0         | 0         | 0         |
| 0         | 0         | 0         | 0         | 0         | 0         |
| 15.8517   | 12.9964   | 13.2048   | 14.0126   | 13.8372   | 11.513    |
| 17.1363   | 18.8445   | 18.6858   | 26.9334   | 19.8898   | 10.5898   |
| 0.0674413 | 0         | 0.027276  | 0         | 0.0784223 | 0         |
| 0         | 0         | 0         | 0.0414046 | 0.0442286 | 0.138731  |
| 28.0405   | 28.1827   | 25.5516   | 29.1768   | 31.589    | 23.3966   |
| 0         | 0         | 0         | 0         | 0         | 0         |
| 12.4488   | 12.5011   | 11.6138   | 15.7307   | 11.9629   | 11.7665   |
| 0         | 0.0217215 | 0         | 0         | 0         | 0         |
| 0         | 0         | 0.158237  | 0         | 0.0758259 | 0.0792805 |
| 1.6693    | 1.81378   | 2.07322   | 1.4925    | 1.17861   | 2.22236   |
| 11.4593   | 9.95659   | 11.5381   | 10.8716   | 13.5564   | 10.3523   |
| 5.68394   | 5.26243   | 4.79466   | 4.62712   | 4.59251   | 5.58826   |

|           |           |           |           |           |           |
|-----------|-----------|-----------|-----------|-----------|-----------|
| 11.2311   | 8.6265    | 10.8967   | 9.326     | 12.8369   | 12.1458   |
| 11.8502   | 12.3218   | 10.0443   | 11.1003   | 9.09013   | 8.90233   |
| 17.319    | 16.6112   | 18.358    | 19.6509   | 22.5207   | 20.6682   |
| 0.255545  | 0.287517  | 0.383881  | 0.211947  | 0.424505  | 0.384666  |
| 4.05436   | 3.53724   | 3.58355   | 4.735     | 3.33033   | 4.17847   |
| 1.21154   | 1.30116   | 1.14332   | 0.879237  | 0.782671  | 1.30933   |
| 8.0998    | 5.64445   | 6.95136   | 6.20443   | 7.0253    | 7.78459   |
| 14.859    | 30.4115   | 26.2997   | 26.6388   | 22.894    | 25.1198   |
| 11.3477   | 10.3445   | 11.6396   | 13.0291   | 9.81797   | 10.9614   |
| 6.57312   | 4.43233   | 5.77098   | 6.21276   | 5.94192   | 6.49417   |
| 0         | 0         | 0         | 0         | 0         | 0         |
| 2.19832   | 2.3573    | 2.65259   | 2.77981   | 2.29096   | 2.21872   |
| 0         | 0.0644169 | 0         | 0         | 0         | 0         |
| 21.8735   | 22.5219   | 24.0007   | 24.5712   | 20.0356   | 22.94     |
| 19.8554   | 19.5865   | 20.31     | 19.9708   | 20.1494   | 19.809    |
| 0         | 0         | 0         | 0         | 0         | 0         |
| 0         | 0         | 0         | 0         | 0.0270812 | 0.028315  |
| 13.504    | 9.83594   | 14.9928   | 12.8608   | 12.7531   | 15.8713   |
| 0         | 0         | 0         | 0         | 0         | 0         |
| 54.6957   | 48.1865   | 52.7524   | 54.681    | 53.1901   | 53.3577   |
| 0         | 0         | 0         | 0         | 0         | 0         |
| 0.145898  | 0.169748  | 0.162269  | 0.264702  | 0.113103  | 0.206947  |
| 0.406891  | 0.582652  | 0.740533  | 0.147644  | 0.236571  | 1.40164   |
| 5.52389   | 6.15446   | 4.26299   | 6.29952   | 3.97633   | 4.61436   |
| 31.7842   | 25.8838   | 27.018    | 32.4573   | 28.2133   | 25.806    |
| 3.59871   | 3.01351   | 3.86014   | 3.4065    | 2.87468   | 3.88072   |
| 2.22793   | 1.03685   | 1.26149   | 1.61685   | 0.604494  | 0.812615  |
| 0.0855623 | 0.0408406 | 0.0922795 | 0.186282  | 0.110549  | 0         |
| 24.2151   | 23.683    | 24.669    | 23.029    | 28.4711   | 24.2636   |
| 4.84263   | 4.78143   | 4.2959    | 4.68253   | 4.85151   | 4.85243   |
| 1116.72   | 1082.99   | 1038.12   | 1113.68   | 1110.65   | 986.204   |
| 0         | 0         | 0         | 0         | 0         | 0         |
| 13.532    | 14.9351   | 12.3594   | 13.312    | 13.8842   | 13.8077   |
| 0         | 0         | 0         | 0         | 0         | 0         |
| 0.107338  | 0.0552513 | 0.0868233 | 0.0833927 | 0.0656487 | 0.0931389 |
| 0         | 0         | 0         | 0         | 0         | 0         |
| 462.345   | 353.493   | 621.256   | 675.591   | 460.878   | 2340.9    |
| 1.83258   | 1.72643   | 1.46283   | 1.27744   | 1.73842   | 1.21174   |
| 19.6775   | 13.3968   | 17.5013   | 17.2045   | 17.0432   | 18.1971   |
| 11.8805   | 10.8043   | 10.3849   | 10.5688   | 9.46995   | 8.85302   |
| 0         | 0         | 0         | 0         | 0         | 0         |
| 0.552893  | 0.178138  | 0.0894449 | 0.641991  | 0.36432   | 0.515359  |
| 170.59    | 368.296   | 365.134   | 221.57    | 271.948   | 483.586   |

|           |           |           |           |           |           |
|-----------|-----------|-----------|-----------|-----------|-----------|
| 1.43608   | 1.75951   | 1.82429   | 1.18002   | 0.777451  | 0.813724  |
| 3.86395   | 4.42643   | 5.00076   | 2.35548   | 2.15669   | 3.13186   |
| 56.389    | 66.6139   | 59.3423   | 53.3346   | 53.6327   | 52.6887   |
| 118.515   | 130.882   | 128.401   | 143.869   | 145.33    | 126.043   |
| 1.89103   | 1.6588    | 1.24873   | 1.01006   | 1.23168   | 1.16105   |
| 26.7214   | 25.888    | 24.4288   | 26.3108   | 26.4977   | 26.9943   |
| 1.20241   | 1.26744   | 1.32382   | 0.872607  | 0.880339  | 1.16409   |
| 0.0767328 | 0.164818  | 0.24827   | 0.111373  | 0.118969  | 0.124389  |
| 32.1102   | 25.5607   | 27.2062   | 31.221    | 46.9186   | 24.4983   |
| 1.6868    | 1.41594   | 1.67024   | 1.94174   | 1.37527   | 1.34364   |
| 0.247562  | 0.10635   | 0.0800991 | 0.035932  | 0.153531  | 0.0401314 |
| 19.133    | 19.3501   | 18.3709   | 18.8252   | 15.5515   | 17.4036   |
| 0         | 0         | 0         | 0         | 0         | 0         |
| 21.881    | 21.6366   | 18.4724   | 18.6301   | 15.8001   | 19.1985   |
| 310.006   | 330.742   | 228.742   | 356.292   | 249.178   | 322.578   |
| 0         | 44.7514   | 0         | 22.68     | 0         | 0         |
| 6.56028   | 5.79245   | 7.18155   | 7.06566   | 7.42178   | 7.29018   |
| 11.1858   | 10.468    | 11.5654   | 12.1336   | 11.4973   | 11.5678   |
| 0         | 0.156534  | 0.176844  | 0.0705164 | 0.075326  | 0         |
| 0.244363  | 0.201553  | 0.142315  | 0.28685   | 0         | 0.207603  |
| 7.51446   | 6.0547    | 6.52132   | 6.96379   | 6.23293   | 5.89539   |
| 37.7862   | 43.6102   | 43.1446   | 33.9906   | 43.3518   | 33.8374   |
| 14.5016   | 15.8133   | 15.7301   | 14.8394   | 16.3689   | 14.6803   |
| 63.6123   | 60.3309   | 66.3691   | 71.1203   | 68.6812   | 58.5093   |
| 4.48144   | 4.65018   | 3.20466   | 3.22869   | 3.6503    | 3.97454   |
| 1.16533   | 0.60419   | 0.682584  | 1.04984   | 0.311512  | 1.53081   |
| 23.775    | 18.166    | 20.697    | 20.4416   | 19.5499   | 22.1087   |
| 0         | 0         | 0         | 0         | 0         | 0         |
| 0         | 0         | 0         | 0         | 0         | 0         |
| 0.418042  | 0.168362  | 0.0634023 | 0.170651  | 0.141782  | 0.211773  |
| 0.992116  | 0.991167  | 1.10111   | 1.03813   | 1.53821   | 1.08466   |
| 50.0552   | 42.5101   | 42.2403   | 47.3614   | 53.5004   | 53.8091   |
| 6.2444    | 5.91961   | 6.0694    | 6.06913   | 6.10869   | 6.30658   |
| 6.75802   | 5.24735   | 8.62203   | 6.76881   | 6.5319    | 5.94031   |
| 0.104248  | 0.223919  | 0.0337297 | 0.0453928 | 0.242444  | 0.202792  |
| 0         | 0.0406603 | 0.140414  | 0.0412133 | 0.0336426 | 0         |
| 19.5774   | 15.6017   | 17.1124   | 16.4606   | 15.4423   | 15.6715   |
| 20.5517   | 18.4178   | 17.3719   | 16.2073   | 15.7992   | 10.8554   |
| 13.0031   | 12.391    | 13.1285   | 12.7971   | 10.4609   | 11.5441   |
| 22.3767   | 24.4365   | 18.027    | 23.3254   | 20.4657   | 19.8226   |
| 4.89294   | 9.342     | 5.01321   | 5.79979   | 4.80457   | 5.28785   |
| 2.35489   | 1.65126   | 1.54124   | 1.2765    | 0.977154  | 0.807834  |
| 0.517119  | 0.278753  | 0.212548  | 0.282544  | 0.326532  | 0.469236  |

|           |           |           |           |          |           |
|-----------|-----------|-----------|-----------|----------|-----------|
| 6.31858   | 5.71249   | 6.266     | 5.59588   | 5.52092  | 6.61156   |
| 45.708    | 48.8807   | 48.3376   | 50.6246   | 49.4833  | 42.7072   |
| 0         | 0         | 0         | 0         | 0        | 0         |
| 0         | 0         | 0         | 0         | 0        | 0         |
| 0         | 0         | 0         | 0.0476912 | 0        | 0.0532649 |
| 0.565307  | 0.350365  | 0.395825  | 0.491719  | 0.466895 | 0.549635  |
| 0.0281616 | 0.0604895 | 0.0455587 | 0.0817495 | 0        | 0.159781  |
| 7.87083   | 5.63536   | 6.10402   | 4.35761   | 7.04513  | 6.70858   |
| 38.776    | 46.3594   | 45.9473   | 37.9063   | 38.7765  | 38.6513   |
| 3.35987   | 3.31757   | 2.79804   | 3.30291   | 2.24504  | 2.91067   |
| 17.9951   | 16.7039   | 18.3493   | 17.8028   | 16.4161  | 19.8247   |
| 0         | 0         | 0         | 0         | 0        | 0         |
| 25.7402   | 23.5231   | 22.4709   | 25.0534   | 21.8571  | 22.3911   |
| 2.18794   | 2.01175   | 2.70124   | 2.8748    | 2.82092  | 3.03345   |
| 0.076278  | 0.109227  | 0         | 0.110713  | 0.118264 | 0.123652  |
| 0         | 0         | 0         | 0.0712678 | 0        | 0         |
| 14.6416   | 13.258    | 15.8491   | 15.7822   | 17.5263  | 17.1904   |
| 17.251    | 13.8535   | 18.2462   | 23.0525   | 21.4811  | 31.8055   |
| 1.77732   | 1.099     | 1.96042   | 2.22789   | 1.50306  | 1.89894   |
| 22.3394   | 20.381    | 23.9157   | 21.1285   | 21.4565  | 20.5187   |
| 0.0644811 | 0.277003  | 0.41726   | 0.0467951 | 0.199947 | 0.313585  |
| 2.88356   | 1.65373   | 3.70209   | 2.47518   | 2.58099  | 2.52951   |
| 0         | 0         | 0         | 0         | 0        | 0         |
| 9.74253   | 9.83541   | 7.25009   | 9.26213   | 8.45887  | 8.13355   |
| 26.7291   | 34.5998   | 26.5588   | 21.0645   | 25.5646  | 40.4136   |
| 2.94171   | 2.03307   | 1.3078    | 1.35584   | 2.54025  | 3.72015   |
| 19.6861   | 19.4861   | 21.696    | 19.7511   | 22.777   | 24.6524   |
| 10.6143   | 13.0691   | 14.1144   | 13.6554   | 11.1894  | 14.3388   |
| 2.46383   | 1.65311   | 2.36649   | 2.12421   | 1.79123  | 1.62349   |
| 122.291   | 119.409   | 112.921   | 98.4744   | 103.315  | 88.4091   |
| 0         | 0         | 0         | 0         | 0        | 0         |
| 27.2952   | 19.7399   | 19.3496   | 27.898    | 28.7217  | 22.9181   |
| 21.0451   | 17.8201   | 17.6563   | 17.5191   | 16.4221  | 19.4983   |
| 0         | 0         | 0         | 0         | 0        | 0         |
| 6.8817    | 8.50797   | 6.2441    | 8.72699   | 5.77402  | 6.63673   |
| 0.258562  | 0.123417  | 0.244003  | 0.344013  | 0.400883 | 0.251981  |
| 0         | 0         | 0         | 0         | 0        | 0         |
| 0         | 0         | 0         | 0         | 0        | 0         |
| 3.83147   | 7.41927   | 6.83233   | 5.18197   | 3.30774  | 2.75263   |
| 6.75919   | 6.44609   | 5.48833   | 5.64793   | 6.25235  | 5.95045   |
| 0         | 0         | 0         | 0         | 0        | 0         |
| 518.912   | 548.507   | 610.225   | 771       | 751.278  | 511.535   |
| 0.0277486 | 0         | 0.0224453 | 0.0201377 | 0        | 0.0224912 |

|            |            |            |            |           |            |
|------------|------------|------------|------------|-----------|------------|
| 65.6958    | 69.8777    | 63.1854    | 64.2585    | 73.5473   | 45.3156    |
| 90.2518    | 84.9354    | 92.6529    | 87.4561    | 77.4063   | 85.283     |
| 0.133545   | 0.0447733  | 0.0505827  | 0.114968   | 0.0809364 | 0.135163   |
| 4.20953    | 3.37853    | 3.93589    | 4.04861    | 2.83345   | 4.81527    |
| 0          | 0          | 0          | 0          | 0         | 0          |
| 0          | 0          | 0          | 0          | 0         | 0          |
| 12.6402    | 11.2049    | 13.9272    | 15.1092    | 13.5995   | 13.6689    |
| 20.3848    | 17.5604    | 20.3254    | 22.3978    | 22.5693   | 18.3437    |
| 0          | 0          | 0          | 0          | 0         | 0          |
| 5.03579    | 3.94235    | 4.61038    | 4.50807    | 4.27266   | 5.44258    |
| 1.6628     | 1.91696    | 1.77815    | 1.71805    | 1.46381   | 1.50766    |
| 20.0167    | 19.8295    | 18.3283    | 17.3342    | 14.8681   | 14.5989    |
| 61.3177    | 61.8642    | 62.9223    | 59.7885    | 53.5969   | 62.6638    |
| 0.0458231  | 0          | 0          | 0.0332546  | 0.0710455 | 0          |
| 16.6994    | 0          | 0          | 0          | 0         | 0          |
| 9.51531    | 8.26936    | 10.2922    | 9.05961    | 8.60224   | 10.718     |
| 0.00485427 | 0.00173778 | 0          | 0.00352283 | 0         | 0.00767237 |
| 50.6645    | 43.3538    | 50.1537    | 62.8049    | 52.4599   | 54.1793    |
| 10.9516    | 7.78242    | 6.71303    | 9.27738    | 7.76913   | 8.49987    |
| 14.386     | 12.5794    | 13.5992    | 11.8264    | 14.8208   | 13.3759    |
| 0          | 0          | 0.0776773  | 0          | 0         | 0          |
| 25.7369    | 23.6332    | 24.6195    | 24.2565    | 25.4198   | 23.8628    |
| 0.262292   | 0.13414    | 0.161816   | 0.216819   | 0.283163  | 0.350974   |
| 7.76685    | 7.14892    | 7.19656    | 7.09358    | 5.63188   | 7.51518    |
| 1.00802    | 0.515514   | 1.39777    | 0.83604    | 0.446531  | 0.350156   |
| 32.2533    | 34.5414    | 36.495     | 34.8815    | 32.4949   | 28.1753    |
| 11.5059    | 9.85841    | 9.69374    | 9.18374    | 8.63377   | 7.66205    |
| 6.73916    | 6.10757    | 6.69442    | 6.62393    | 7.06655   | 7.88682    |
| 0          | 0          | 0          | 0          | 0         | 0.0518114  |
| 0          | 8.16E-08   | 6.30E-06   | 0          | 0         | 1.60E-07   |
| 0          | 0          | 0          | 0          | 0         | 0          |
| 2.51799    | 2.03042    | 1.38094    | 1.9534     | 1.97443   | 1.9476     |
| 43.4262    | 46.8718    | 42.3828    | 45.0763    | 46.0572   | 36.9847    |
| 3.38448    | 3.40291    | 3.05426    | 3.39424    | 3.51718   | 3.37186    |
| 30.6316    | 29.2061    | 27.2839    | 32.987     | 31.7182   | 29.0155    |
| 1.06475    | 0.857637   | 1.18423    | 1.7386     | 0.928591  | 0.647265   |
| 5.1336     | 4.29211    | 3.86671    | 3.94187    | 4.33054   | 4.34887    |
| 205.083    | 235.451    | 230.066    | 248.096    | 280.504   | 222.227    |
| 6.76424    | 6.6831     | 4.01352    | 4.11087    | 5.37942   | 4.55058    |
| 1.93936    | 1.38855    | 0.697204   | 0.312762   | 0.835235  | 1.2226     |
| 0.0182334  | 0.00639419 | 0.00632086 | 0.0307854  | 0.0372122 | 0          |
| 65.2383    | 63.9353    | 68.8264    | 72.5236    | 70.0184   | 59.2859    |
| 1.07866    | 3.25157    | 1.54682    | 2.59934    | 1.46627   | 0.909166   |

|           |            |           |           |           |           |
|-----------|------------|-----------|-----------|-----------|-----------|
| 0         | 0          | 0         | 0         | 0         | 0         |
| 0.0938895 | 0.0705558  | 0.0254415 | 0.0921855 | 0.0510887 | 0.103785  |
| 74.3066   | 106.001    | 81.464    | 79.9852   | 80.9457   | 83.4051   |
| 0.708061  | 0.60835    | 0.458189  | 0.770779  | 0.38423   | 0.286954  |
| 10.2045   | 9.39373    | 8.64728   | 11.99     | 7.91069   | 7.58184   |
| 0.371791  | 0.266195   | 0.300734  | 0.629569  | 0.576436  | 0.904048  |
| 41.5721   | 45.2107    | 43.8314   | 38.6814   | 46.5792   | 35.906    |
| 17.8848   | 17.2741    | 21.039    | 17.0355   | 21.8097   | 16.6591   |
| 8.23336   | 5.06964    | 5.15024   | 5.21825   | 5.23375   | 6.09505   |
| 0.415782  | 0.229615   | 0.251158  | 0.336279  | 0.431009  | 0.292535  |
| 0         | 0          | 0         | 0         | 0         | 0         |
| 0         | 0          | 0         | 0.0338407 | 0         | 0.151188  |
| 294.431   | 321.209    | 366.896   | 355.761   | 360.117   | 317.575   |
| 0.0409112 | 0.0292916  | 0.0220615 | 0.0197933 | 0.0105717 | 0.0221066 |
| 0         | 0          | 0         | 0         | 0         | 0         |
| 1.1876    | 1.03217    | 0.720662  | 0.738498  | 0.657389  | 0.824807  |
| 7.00853   | 6.01521    | 6.77171   | 7.34437   | 6.96083   | 8.27478   |
| 29.44     | 22.7376    | 20.4001   | 20.5517   | 22.2638   | 18.6604   |
| 1.48729   | 0.794142   | 1.36616   | 1.20741   | 0.879385  | 0.939881  |
| 1.03453   | 0.390539   | 1.24414   | 0.90373   | 0.861045  | 0.915891  |
| 13.4011   | 10.7833    | 14.1715   | 15.4804   | 17.3464   | 15.1471   |
| 3.99581   | 4.56722    | 3.92784   | 4.49929   | 3.84771   | 3.3985    |
| 22.5686   | 19.3258    | 18.4014   | 18.5404   | 19.665    | 25.756    |
| 8.93837   | 8.25224    | 7.99112   | 7.85236   | 4.28514   | 7.14952   |
| 0.249762  | 0.536474   | 0.404054  | 0.362513  | 0         | 0.40488   |
| 1.23502   | 0.693063   | 1.24873   | 0.920503  | 1.17089   | 1.19718   |
| 11.6881   | 16.845     | 21.3456   | 13.4923   | 18.3609   | 14.91     |
| 0.0465231 | 0          | 0         | 0         | 0.0180327 | 0.0188543 |
| 7.18987   | 5.83955    | 6.16105   | 6.55488   | 6.94971   | 6.59251   |
| 878.76    | 763.065    | 833.919   | 925.417   | 1040.54   | 847.463   |
| 0.359137  | 0          | 0         | 0.0868775 | 0         | 0         |
| 4.62093   | 4.79712    | 4.96353   | 5.45093   | 4.73707   | 4.9732    |
| 2.05047   | 1.63122    | 2.21144   | 1.4605    | 2.1194    | 2.61607   |
| 40.3696   | 40.4367    | 43.2102   | 43.8095   | 36.264    | 38.9135   |
| 0.252514  | 0.258279   | 0.320969  | 0.143985  | 0.125841  | 0.204671  |
| 4.52941   | 2.84359    | 2.52735   | 3.0077    | 2.49459   | 3.04498   |
| 410.284   | 419.775    | 460.551   | 449.551   | 447.038   | 362.858   |
| 54.4713   | 49.3025    | 54.658    | 54.7433   | 56.2981   | 54.1487   |
| 0.0540449 | 0          | 0         | 0.0392213 | 0         | 0         |
| 0         | 0          | 0         | 0         | 0         | 0         |
| 33.4939   | 29.8869    | 24.8891   | 30.5533   | 31.497    | 38.1252   |
| 0         | 0.00697302 | 0         | 0         | 0         | 0         |
| 0.158     | 0.193929   | 0.255606  | 0.245707  | 0.139982  | 0.164654  |

|           |           |           |           |           |           |
|-----------|-----------|-----------|-----------|-----------|-----------|
| 0.55939   | 0.439452  | 0.427342  | 0.321385  | 0.367396  | 0.409324  |
| 8.29086   | 6.68719   | 7.24007   | 6.21329   | 5.7976    | 4.45716   |
| 0         | 0         | 0         | 0         | 0         | 0         |
| 52.4429   | 54.0641   | 56.1712   | 57.6767   | 50.8065   | 51.6118   |
| 0         | 0         | 0         | 0         | 0         | 0         |
| 0         | 0.0411994 | 0         | 0         | 0         | 0.0466402 |
| 6.32139   | 7.25597   | 6.00604   | 6.40801   | 5.91165   | 4.71706   |
| 14.6988   | 13.2899   | 10.4107   | 15.324    | 12.0123   | 15.3473   |
| 0.453596  | 0.505967  | 0.406319  | 0.54667   | 0.351635  | 0.384653  |
| 0         | 0         | 0         | 0.0313471 | 0         | 0         |
| 0.235585  | 0.0963855 | 0.258617  | 0.219817  | 0.182629  | 0.340982  |
| 0.926121  | 0.580199  | 0.4682    | 0.420064  | 0.179486  | 0.362142  |
| 0         | 0         | 0         | 0         | 0         | 0         |
| 43.434    | 48.8578   | 43.1204   | 47.9822   | 43.8971   | 42.8998   |
| 39.9285   | 38.0287   | 38.4564   | 38.4111   | 40.0232   | 40.6047   |
| 2.14868   | 1.60757   | 1.62016   | 1.62913   | 1.47889   | 2.17212   |
| 6.93704   | 4.82071   | 6.27138   | 5.74506   | 5.00873   | 6.2842    |
| 0         | 0         | 0         | 0         | 0         | 0         |
| 16.9212   | 18.8906   | 16.1352   | 12.3575   | 15.4525   | 15.9559   |
| 1.44451   | 1.73985   | 1.47076   | 1.43047   | 1.08016   | 1.22588   |
| 2.85922   | 2.66284   | 2.1754    | 2.4101    | 1.80881   | 2.35859   |
| 126.217   | 139.557   | 155.477   | 152.603   | 162.154   | 125.314   |
| 4.62327   | 5.2017    | 3.47255   | 4.55347   | 5.63204   | 2.67665   |
| 39.3197   | 40.343    | 44.8913   | 42.3566   | 38.6005   | 44.3428   |
| 0.405732  | 0.290496  | 0.208847  | 0.200759  | 0.257343  | 0.358756  |
| 9.31372   | 8.05591   | 8.4593    | 8.86282   | 9.58316   | 9.26077   |
| 2.23768   | 1.40852   | 1.71059   | 1.37377   | 1.29637   | 0.901636  |
| 0         | 0         | 0         | 0         | 0         | 0         |
| 0.0158173 | 0.0113249 | 0.057575  | 0.0516557 | 0.0551789 | 0.0128204 |
| 0.220562  | 0.113986  | 0.0157661 | 0.10186   | 0.0151099 | 0.0842689 |
| 5.10306   | 6.88394   | 3.918     | 6.74275   | 4.85894   | 6.48526   |
| 16.4623   | 10.3356   | 17.1741   | 17.4756   | 13.5367   | 14.8354   |
| 13.4153   | 9.91244   | 11.3071   | 12.8901   | 15.0588   | 13.5484   |
| 8.96393   | 7.86683   | 8.61474   | 9.8159    | 7.84341   | 8.89134   |
| 0.159907  | 0.261693  | 0.27717   | 0.232095  | 0.265634  | 0.703599  |
| 2.05579   | 0.981271  | 1.58033   | 1.12159   | 1.6728    | 1.31176   |
| 0         | 0         | 0         | 0         | 0         | 0         |
| 27.0138   | 20.7466   | 26.3638   | 28.2783   | 30.1216   | 28.2587   |
| 13.7987   | 12.0648   | 9.26647   | 8.68813   | 5.865     | 8.25757   |
| 0         | 0         | 0         | 0         | 0         | 0         |
| 0         | 0         | 0         | 0         | 0         | 0         |
| 11.8134   | 6.94593   | 11.4088   | 8.75502   | 9.57417   | 10.1554   |
| 8.14743   | 8.12662   | 9.45093   | 7.38486   | 7.76957   | 10.2545   |



|           |            |           |           |          |           |
|-----------|------------|-----------|-----------|----------|-----------|
| 15.3188   | 16.4391    | 17.1402   | 15.5695   | 13.7122  | 15.4592   |
| 0         | 0          | 0         | 0         | 0        | 0         |
| 8.49468   | 7.36913    | 8.30811   | 8.6706    | 7.97879  | 8.9322    |
| 0.0510838 | 0.00914376 | 0.0723112 | 0.0556087 | 0.039601 | 0.0207026 |
| 63.1295   | 57.8383    | 59.5672   | 70.2841   | 81.5137  | 76.5002   |
| 6.94079   | 6.40843    | 5.73443   | 6.31253   | 4.17686  | 5.55718   |
| 0         | 0          | 0         | 0         | 0        | 0         |
| 0.197612  | 0.059389   | 0.0304285 | 0.0819002 | 0.115612 | 0.110123  |
| 14.9613   | 12.9734    | 14.6375   | 13.1499   | 12.4267  | 14.0515   |
| 0.430969  | 0          | 0.174301  | 0.156381  | 0.167047 | 0         |
| 4.34109   | 3.49468    | 3.78455   | 3.94201   | 3.42512  | 3.29981   |
| 7.44316   | 7.6344     | 7.69047   | 6.99601   | 4.96254  | 7.19961   |
| 8.18161   | 4.94763    | 6.11867   | 5.76887   | 5.26671  | 6.6449    |
| 0.210107  | 0.0752161  | 0         | 0.0762391 | 0        | 0         |
| 5.43342   | 3.06641    | 3.77451   | 3.38645   | 3.12189  | 4.04129   |
| 0         | 0          | 0         | 0         | 0        | 0         |
| 0.554373  | 0.39692    | 0         | 0.366987  | 0.107439 | 0         |
| 0.471704  | 0.43905    | 0.343397  | 0.342324  | 0.292538 | 0.1147    |
| 0.167255  | 0.115766   | 0.168535  | 0.0723255 | 0.145156 | 0.135677  |
| 3.84526   | 5.57288    | 4.54506   | 3.06802   | 4.12988  | 3.87228   |
| 0         | 0          | 0         | 0         | 0        | 0         |
| 0         | 0.0461269  | 0         | 0         | 0        | 0         |
| 8.74744   | 12.2272    | 18.1124   | 15.5364   | 18.0058  | 13.8367   |
| 1.55197   | 1.25845    | 1.53508   | 2.19141   | 1.47119  | 1.36985   |
| 31.7391   | 30.8067    | 28.9587   | 34.1976   | 29.8039  | 30.0396   |
| 0.0609519 | 0.0654606  | 0.0246514 | 0.0663509 | 0.141753 | 0         |
| 45.7544   | 41.4067    | 41.2062   | 47.712    | 46.566   | 41.115    |
| 21.5744   | 24.9363    | 24.1215   | 21.6316   | 20.9585  | 11.4377   |
| 36.5588   | 27.4033    | 29.2164   | 35.6534   | 33.0428  | 26.6655   |
| 0.277938  | 0.118403   | 0.391174  | 0.251334  | 0.410421 | 0.652231  |
| 3.12018   | 4.76781    | 2.85028   | 3.23371   | 2.82902  | 2.88891   |
| 71.0123   | 48.2435    | 48.2124   | 46.6504   | 67.2794  | 26.5972   |
| 205.934   | 170.083    | 172.567   | 228.495   | 210.519  | 199.403   |
| 0         | 0          | 0         | 0         | 0        | 0         |
| 0         | 0          | 0         | 0         | 0        | 0         |
| 20.7116   | 21.9482    | 24.939    | 21.5479   | 21.5094  | 23.4132   |
| 3.99579   | 2.5813     | 1.74996   | 2.94341   | 2.36     | 2.91682   |
| 2.41039   | 2.30112    | 2.39154   | 3.03796   | 3.0944   | 2.84137   |
| 31.9849   | 27.0541    | 30.2837   | 31.8153   | 28.0418  | 30.3789   |
| 4.5412    | 4.39136    | 4.36405   | 3.70737   | 3.68442  | 3.24172   |
| 0.673016  | 0.350448   | 0.362926  | 0.577223  | 0.426872 | 0.595093  |
| 93.5647   | 93.9885    | 79.0004   | 80.0542   | 76.4451  | 91.6272   |
| 39.512    | 44.0795    | 39.3105   | 44.3363   | 46.2521  | 37.5599   |

|           |           |           |           |           |           |
|-----------|-----------|-----------|-----------|-----------|-----------|
| 48.8102   | 56.2516   | 52.0921   | 45.7496   | 47.9287   | 44.1287   |
| 92.229    | 106.373   | 40.9443   | 116.698   | 72.6154   | 114.351   |
| 0.0569598 | 0.0259338 | 0         | 0.0396018 | 0.0441561 | 0.0230736 |
| 78.1448   | 89.7782   | 95.0948   | 81.8239   | 68.0351   | 75.4865   |
| 36.5762   | 28.5888   | 38.6845   | 40.5578   | 37.79     | 34.1219   |
| 25.6965   | 23.4207   | 23.2735   | 24.17     | 19.3621   | 24.4159   |
| 0.182441  | 0.174165  | 0.0819847 | 0.1324    | 0.0942872 | 0.131444  |
| 0         | 0         | 0         | 0         | 0         | 0         |
| 10.3013   | 8.79124   | 9.94385   | 10.509    | 11.8002   | 10.8885   |
| 1.35211   | 1.00681   | 3.84981   | 0.785002  | 1.92865   | 1.79733   |
| 1.3296    | 1.4837    | 1.23471   | 1.04947   | 0.451332  | 0.888272  |
| 14.9537   | 12.8919   | 7.91673   | 11.7556   | 8.27253   | 8.21549   |
| 0         | 0         | 0         | 0         | 0         | 0.0753838 |
| 2.08448   | 1.56508   | 2.20758   | 2.28568   | 1.80117   | 1.67805   |
| 4.40226   | 4.55458   | 3.315     | 4.06908   | 2.30423   | 3.42217   |
| 3.09157   | 1.98167   | 2.18088   | 2.11654   | 1.85757   | 2.07845   |
| 158.107   | 190.75    | 154.43    | 114.823   | 200.538   | 259.537   |
| 1.66455   | 1.08097   | 2.16727   | 3.24486   | 2.43421   | 2.82365   |
| 0         | 0.116775  | 0         | 0         | 0         | 0         |
| 15.7873   | 15.0696   | 15.2217   | 16.1186   | 11.7545   | 16.5758   |
| 10.7398   | 7.91979   | 7.66451   | 8.97364   | 11.9933   | 12.8674   |
| 4.18701   | 3.75183   | 3.92033   | 4.03433   | 3.50013   | 3.75731   |
| 23.6262   | 15.0432   | 18.5825   | 18.4733   | 20.9765   | 17.5105   |
| 0.057801  | 0         | 0         | 0         | 0.0224041 | 0         |
| 84.4422   | 91.2009   | 88.9392   | 89.4329   | 78.405    | 99.3004   |
| 4.82497   | 4.10232   | 4.7403    | 4.65416   | 4.27807   | 4.66037   |
| 11.5227   | 7.70002   | 8.9654    | 9.87539   | 10.4639   | 10.4069   |
| 19.0485   | 18.6637   | 22.3584   | 20.9786   | 21.6101   | 22.1108   |
| 97.0218   | 111.652   | 103.689   | 108.452   | 100.057   | 105.835   |
| 0         | 0         | 0         | 0         | 0         | 0         |
| 10.7273   | 7.4984    | 5.86476   | 15.8162   | 5.55494   | 9.51965   |
| 0.589269  | 0.791541  | 0.652255  | 0.46985   | 0.421599  | 0.668877  |
| 3.14035   | 1.16874   | 0.454532  | 0.427097  | 5.70E-07  | 1.39491   |
| 998.914   | 932.893   | 996.546   | 1029.58   | 997.643   | 949.605   |
| 9.40263   | 7.4801    | 7.83757   | 9.46985   | 8.22599   | 8.48453   |
| 0         | 0.0169215 | 0         | 0.0343033 | 0.0183215 | 0         |
| 2.25612   | 1.44307   | 2.37764   | 2.20043   | 2.66818   | 2.34051   |
| 9.16083   | 14.4488   | 10.9432   | 8.87939   | 5.23745   | 8.48059   |
| 3.67418   | 2.73503   | 3.38474   | 3.38593   | 2.72395   | 3.40348   |
| 0.200516  | 0.200516  | 0.444229  | 0.444229  | 0.44612   | 0.44612   |
| 0.0625333 | 0.201477  | 0.164391  | 0.170181  | 0.109073  | 0.19007   |
| 12.5448   | 9.96422   | 13.7939   | 14.5095   | 16.4614   | 12.1274   |
| 9.78605   | 9.31434   | 8.56255   | 11.5534   | 13.0085   | 11.7958   |

|           |           |           |          |           |           |
|-----------|-----------|-----------|----------|-----------|-----------|
| 0         | 0         | 0         | 0        | 0         | 0         |
| 0.185597  | 0.132884  | 0.0375314 | 0.134691 | 0.143878  | 0.0752163 |
| 27.6284   | 29.3656   | 30.7399   | 28.0398  | 29.1614   | 26.6182   |
| 14.1899   | 11.538    | 12.4571   | 13.5384  | 13.0464   | 16.0376   |
| 1.37838   | 0.434232  | 0.445977  | 0.640201 | 0.299191  | 0.268133  |
| 0.365366  | 0.237775  | 0.45702   | 0.385732 | 0.334764  | 0.376778  |
| 0.10799   | 0.0966482 | 0.065513  | 0.117555 | 0.0418576 | 0.0218823 |
| 6.32695   | 4.86952   | 6.52509   | 6.52862  | 5.34923   | 6.04165   |
| 13.0435   | 12.0738   | 10.7959   | 15.52    | 14.2551   | 13.4066   |
| 4.09302   | 3.77079   | 6.94799   | 4.55661  | 3.44987   | 5.17506   |
| 3.90889   | 3.11883   | 4.86014   | 4.47202  | 4.22248   | 4.03361   |
| 24.4485   | 22.2685   | 24.6711   | 25.2317  | 18.8379   | 24.196    |
| 11.7973   | 10.7028   | 13.2541   | 12.7821  | 12.3511   | 12.2686   |
| 0.272848  | 0         | 0.220701  | 0.396021 | 0         | 0         |
| 25.3216   | 21.3072   | 22.2136   | 25.4617  | 29.4648   | 27.5911   |
| 0         | 0         | 0         | 0        | 0         | 0         |
| 1.16443   | 0.743888  | 1.00765   | 0.737497 | 0.635235  | 0.961709  |
| 0.0554136 | 0.0804939 | 0.275641  | 0.201444 | 8.80E-13  | 0.269988  |
| 0.290875  | 0.173551  | 0.196069  | 0.211093 | 0.319445  | 0.0982349 |
| 0.346252  | 0.156574  | 0.103186  | 0.19838  | 0.127146  | 0.221565  |
| 43.051    | 43.1186   | 49.6721   | 47.6713  | 37.3856   | 43.5839   |
| 25.5765   | 23.7188   | 24.9927   | 25.6187  | 20.5536   | 23.9503   |
| 0.610047  | 0.873564  | 0.696642  | 0.598977 | 0.667648  | 0.988927  |
| 0         | 0         | 0         | 0        | 0         | 0         |
| 26.6014   | 31.2616   | 31.1386   | 27.5143  | 30.3844   | 27.3537   |
| 7.13918   | 7.04059   | 5.752     | 6.60176  | 5.78897   | 7.31023   |
| 0         | 0         | 0         | 0        | 0         | 0         |
| 1.9009    | 1.53114   | 1.18277   | 1.43258  | 0.906837  | 1.48149   |
| 12.1954   | 10.3472   | 10.6942   | 10.7004  | 10.8322   | 11.2602   |
| 11.671    | 10.0581   | 9.78036   | 10.5517  | 12.0048   | 12.3785   |
| 0.344867  | 0.438965  | 0.247961  | 0.454205 | 0.11882   | 0.248468  |
| 24.1316   | 34.5556   | 23.9504   | 19.4467  | 20.314    | 22.3194   |
| 0.0353353 | 0         | 0.028582  | 0        | 0         | 0         |
| 0         | 0.0877008 | 0.09908   | 0        | 0         | 0.0992826 |
| 17.256    | 15.7026   | 16.7787   | 18.8948  | 20.3312   | 18.3282   |
| 0         | 0         | 0         | 0        | 0         | 0         |
| 2.00869   | 2.81883   | 2.40468   | 3.38196  | 4.85835   | 4.23308   |
| 4.06143   | 3.91888   | 4.17933   | 4.98262  | 3.6306    | 5.73118   |
| 2.68572   | 1.97443   | 3.04527   | 2.36673  | 1.84035   | 2.06025   |
| 38.2532   | 45.7894   | 35.2213   | 36.8956  | 35.7002   | 30.1554   |
| 7.66766   | 6.61877   | 7.62524   | 7.23875  | 6.75465   | 8.01749   |
| 13.2123   | 16.155    | 15.7843   | 14.9635  | 17.3086   | 17.5217   |
| 0.0770747 | 0.560779  | 0.352755  | 0.281313 | 0.338069  | 0.249887  |

|           |           |           |           |           |           |
|-----------|-----------|-----------|-----------|-----------|-----------|
| 84.3162   | 77.5798   | 87.0321   | 88.0182   | 98.4684   | 94.7625   |
| 18.169    | 14.1846   | 15.3371   | 16.0696   | 17.8477   | 12.8368   |
| 0         | 0         | 0         | 0         | 0         | 0         |
| 8.8518    | 6.46402   | 8.89378   | 7.64208   | 7.48089   | 8.05564   |
| 6.30092   | 7.64908   | 5.52464   | 7.11546   | 6.03242   | 7.11199   |
| 0.335167  | 0.662325  | 0.607285  | 0.311343  | 0.415722  | 0.402062  |
| 0.0308273 | 0.0165538 | 0.0311695 | 0.0279649 | 0         | 0.0124933 |
| 0         | 0.0440589 | 0.0497756 | 0.0446581 | 0.023852  | 0.0498773 |
| 1.44161   | 0.941094  | 1.20039   | 0.892352  | 0.62452   | 1.13411   |
| 41.5954   | 41.1041   | 39.7402   | 40.8613   | 34.7554   | 37.0523   |
| 17.7979   | 16.8881   | 18.0622   | 18.9735   | 17.2415   | 18.4815   |
| 1.27465   | 0.844897  | 1.16712   | 0.600772  | 0.659796  | 0.214983  |
| 0.347987  | 0.391525  | 0.603171  | 0.39685   | 0.269765  | 0.684992  |
| 1.60605   | 1.24646   | 1.39884   | 1.37664   | 1.01088   | 1.40481   |
| 0.585029  | 0.57884   | 0.771567  | 0.75093   | 1.00469   | 1.16646   |
| 0.0707645 | 0.100872  | 0.224838  | 0.0731333 | 0.062602  | 0.0654541 |
| 0.149211  | 0.0534162 | 0.0402313 | 0         | 0.0578354 | 0.0604703 |
| 0         | 0         | 0.108191  | 0.0485338 | 0.103688  | 0         |
| 0         | 0         | 0         | 0         | 0         | 0         |
| 8.8882    | 6.38019   | 8.9498    | 8.41203   | 8.29319   | 9.82221   |
| 133.563   | 130.655   | 124.098   | 124.861   | 94.4735   | 124.217   |
| 111.658   | 134.62    | 110.842   | 109.734   | 131.275   | 111.968   |
| 0         | 0         | 0         | 0         | 0         | 0.144666  |
| 9.21848   | 7.07018   | 7.11519   | 7.69687   | 7.66691   | 7.63137   |
| 2.93968   | 3.85089   | 4.12765   | 4.40911   | 4.57571   | 4.14237   |
| 0         | 0         | 0         | 0         | 0         | 0         |
| 0.046196  | 0         | 0         | 0         | 0         | 0         |
| 0         | 0         | 0         | 0         | 0         | 0         |
| 1.13757   | 1.01809   | 0.536757  | 0.963144  | 0.881859  | 1.38305   |
| 0.108942  | 0.0254425 | 8.74E-20  | 4.37E-15  | 0.0296492 | 5.06E-28  |
| 0.455184  | 0.398041  | 0.180956  | 0.512938  | 0.392082  | 1.96198   |
| 0.338585  | 0.12121   | 0.0912916 | 0.225241  | 0.21873   | 0.0686087 |
| 10.3259   | 9.80871   | 10.9712   | 11.6486   | 9.49305   | 8.34185   |
| 11.0803   | 9.24949   | 10.4292   | 12.2628   | 12.7868   | 10.124    |
| 13.8615   | 12.2835   | 13.5652   | 14.9709   | 14.2125   | 15.4936   |
| 5.62884   | 8.98321   | 6.08232   | 5.95592   | 4.36356   | 6.30372   |
| 0         | 0         | 0         | 0         | 0         | 0         |
| 0.363793  | 6.00E-20  | 0.147997  | 0.133097  | 0.139797  | 0.142353  |
| 1.00843   | 0.762129  | 0.974307  | 0.894466  | 0.760035  | 0.953594  |
| 24.1708   | 23.1983   | 23.7723   | 23.1558   | 21.3741   | 20.6013   |
| 9.22028   | 7.25702   | 6.78999   | 9.05973   | 10.6181   | 7.57427   |
| 19.0001   | 19.793    | 19.4171   | 21.2236   | 19.1524   | 21.685    |
| 0.400358  | 0.207573  | 0.245673  | 0.26049   | 0.310364  | 0.279744  |

|          |           |          |           |           |          |
|----------|-----------|----------|-----------|-----------|----------|
| 11.781   | 14.1969   | 10.9164  | 15.2932   | 9.43299   | 12.6422  |
| 103.236  | 109.57    | 117.185  | 109.638   | 98.2951   | 101.104  |
| 4.34954  | 3.80866   | 2.65778  | 2.61159   | 3.08077   | 2.81537  |
| 12.9443  | 19.3646   | 17.4932  | 20.2389   | 13.5019   | 19.4055  |
| 0        | 0         | 0        | 0         | 0         | 0        |
| 15.018   | 11.392    | 4.7707   | 10.4965   | 6.13355   | 6.1131   |
| 17.5975  | 14.7485   | 17.2103  | 14.0093   | 18.2298   | 11.6049  |
| 11.3424  | 10.7932   | 13.4875  | 15.3019   | 15.1807   | 13.3186  |
| 1.95477  | 2.17809   | 2.50002  | 2.13366   | 1.81605   | 1.86022  |
| 66.0113  | 77.7095   | 48.3802  | 52.6432   | 41.419    | 54.6277  |
| 129.132  | 127.846   | 140.345  | 159.825   | 160.406   | 126.832  |
| 0.105017 | 0.0718101 | 0.125382 | 0.060485  | 0.111337  | 0.186926 |
| 0.269855 | 0.772843  | 0.43656  | 0.979191  | 0.836782  | 0.874905 |
| 28.8811  | 23.5821   | 28.0336  | 33.1785   | 30.8684   | 24.7041  |
| 10.2185  | 8.30377   | 11.5486  | 10.9087   | 10.0529   | 9.83862  |
| 11.7265  | 8.31964   | 10.9081  | 11.8111   | 12.7314   | 12.2122  |
| 4.41185  | 2.76759   | 3.07651  | 2.843     | 3.06638   | 3.91596  |
| 40.0317  | 36.7433   | 40.6868  | 38.1802   | 39.4641   | 43.4885  |
| 9.33051  | 7.03207   | 6.44386  | 7.1673    | 7.31775   | 6.58971  |
| 0.223309 | 0         | 0.18063  | 0         | 0         | 0        |
| 1.12571  | 0.848936  | 1.03541  | 1.28714   | 0.931149  | 1.64799  |
| 43.5735  | 55.7177   | 58.1734  | 49.2473   | 53.0233   | 49.7258  |
| 17.1678  | 19.9451   | 15.0105  | 16.9024   | 15.1275   | 15.2119  |
| 38.637   | 42.9302   | 42.6306  | 42.6651   | 37.0043   | 39.2639  |
| 20.9356  | 17.7453   | 19.1667  | 19.6491   | 17.5356   | 20.4814  |
| 74.2922  | 79.4813   | 82.9019  | 82.5618   | 93.6199   | 94.1554  |
| 0.936227 | 0.603288  | 0.416512 | 0.645465  | 0.399178  | 0.645017 |
| 8.95807  | 8.15689   | 7.23513  | 9.56163   | 7.58388   | 9.48213  |
| 5.1889   | 4.94022   | 6.27946  | 4.76394   | 3.77611   | 6.03013  |
| 0        | 0         | 0.135901 | 0.0609647 | 0.0651227 | 0        |
| 3.22764  | 2.832     | 3.52302  | 3.07692   | 3.58849   | 3.61372  |
| 0.498219 | 0.535073  | 0.726758 | 0.420474  | 0.650945  | 0.181494 |
| 20.2394  | 15.6181   | 13.0364  | 16.8097   | 12.4358   | 12.8201  |
| 2.96391  | 1.59579   | 2.39241  | 3.12864   | 2.04549   | 3.9667   |
| 70.9855  | 77.2829   | 95.6036  | 121.978   | 79.5959   | 111.338  |
| 4.00605  | 3.58907   | 3.52882  | 3.30301   | 2.50395   | 2.53303  |
| 1.97951  | 1.98911   | 1.74654  | 2.24487   | 1.35675   | 1.92358  |
| 0.102095 | 0.024366  | 0.302803 | 0.0493948 | 0.0791456 | 0.248254 |
| 0.441072 | 0.332717  | 0.337661 | 0.331526  | 0.323608  | 0.421343 |
| 0        | 0         | 0        | 0         | 0         | 0        |
| 4.15E-07 | 9.17E-07  | 1.79E-06 | 4.18E-07  | 2.11E-06  | 0.931603 |
| 0        | 0         | 0        | 0.310921  | 0.274407  | 0        |
| 1.05958  | 1.12391   | 0.730099 | 0.968316  | 0.699714  | 0.827017 |

|           |           |          |           |           |          |
|-----------|-----------|----------|-----------|-----------|----------|
| 2.34212   | 2.06555   | 1.91076  | 2.23225   | 1.95591   | 2.00428  |
| 10.9961   | 3.7267    | 19.0174  | 11.4493   | 7.69151   | 2.99035  |
| 0.304022  | 0.217674  | 0.368876 | 0.772221  | 0.942731  | 0.739261 |
| 0.345058  | 0.571441  | 0.3542   | 0.0643813 | 0.270934  | 0.288842 |
| 1.80716   | 1.00388   | 1.08373  | 2.12552   | 1.71494   | 1.74256  |
| 0         | 0.121794  | 0.137597 | 0.0411501 | 0.0879134 | 0        |
| 5.76128   | 5.64695   | 7.00292  | 5.86182   | 5.2995    | 6.67895  |
| 0         | 0         | 0        | 0         | 0         | 0        |
| 898.14    | 806.624   | 808.573  | 858.496   | 863.3     | 764.191  |
| 24.9951   | 19.2949   | 23.3789  | 23.5557   | 26.9225   | 24.6394  |
| 0         | 0         | 0        | 0         | 0         | 0        |
| 2.70158   | 1.82401   | 1.45871  | 2.0614    | 1.80452   | 2.08053  |
| 8.76456   | 14.6271   | 7.96599  | 11.3566   | 7.04149   | 16.352   |
| 0         | 0         | 0        | 0         | 0         | 0        |
| 0         | 0         | 0        | 0         | 0         | 0        |
| 0         | 0         | 0        | 0         | 0         | 0        |
| 0         | 0         | 0        | 0         | 0         | 0        |
| 93.576    | 110.025   | 138.268  | 86.6389   | 100.752   | 123.853  |
| 0.0891549 | 0.0957498 | 0.180289 | 0.129403  | 0.276457  | 0.108395 |
| 25.5323   | 20.3903   | 19.9842  | 24.0139   | 22.2773   | 21.0142  |
| 24.7751   | 29.3433   | 29.4097  | 27.8454   | 24.2282   | 23.6825  |
| 0.393201  | 0.135684  | 0.282276 | 0.131498  | 0.380148  | 0.294904 |
| 6.33253   | 4.13539   | 5.76017  | 6.06014   | 3.91993   | 4.68151  |
| 40.3764   | 41.4313   | 34.5898  | 34.0839   | 37.7539   | 33.4957  |
| 20.7411   | 26.1243   | 24.2998  | 22.9053   | 23.8162   | 24.4561  |
| 2.5939    | 1.77785   | 2.02537  | 1.64534   | 2.00604   | 1.53018  |
| 5.44302   | 4.28545   | 5.01257  | 5.7339    | 5.94495   | 4.71337  |
| 0.708638  | 0.474778  | 0.318428 | 0.308704  | 0.127687  | 0.379993 |
| 2.4794    | 1.89963   | 2.04302  | 1.89184   | 1.35623   | 1.90634  |
| 1.79557   | 1.75346   | 2.25993  | 1.82211   | 1.58601   | 1.5569   |
| 0.134977  | 0.241603  | 0.16377  | 0.293866  | 0.156954  | 0.109403 |
| 0.640981  | 1.09199   | 0.665146 | 0.997     | 0.336835  | 0.534061 |
| 9.62017   | 20.9631   | 18.6927  | 15.8982   | 15.645    | 14.6203  |
| 16.844    | 34.8945   | 24.9757  | 24.8897   | 18.1019   | 37.3982  |
| 1.38806   | 1.12156   | 0.906483 | 1.27009   | 1.03651   | 1.3293   |
| 13.2905   | 17.7087   | 5.59779  | 12.925    | 5.45025   | 4.88456  |
| 1.80669   | 1.91947   | 2.71065  | 3.36246   | 1.21986   | 2.78705  |
| 0         | 0.072932  | 0        | 0         | 0         | 0.165127 |
| 61.1573   | 62.1788   | 61.948   | 54.3575   | 99.6823   | 29.9937  |
| 0         | 0.405708  | 0        | 0         | 0         | 0        |
| 12.7502   | 13.0546   | 15.6806  | 13.2726   | 13.7168   | 13.8446  |
| 0         | 0         | 0        | 0         | 0         | 0        |
| 0.765442  | 0.610571  | 2.4491   | 0.550782  | 1.67063   | 1.32693  |

|           |           |          |          |          |          |
|-----------|-----------|----------|----------|----------|----------|
| 6.08507   | 4.28068   | 5.64805  | 4.85181  | 5.77274  | 7.22794  |
| 11.5021   | 12.4125   | 9.34926  | 9.05441  | 5.03864  | 9.72057  |
| 1.6128    | 1.23921   | 1.42121  | 1.21801  | 1.27059  | 1.56226  |
| 0         | 0         | 0        | 0        | 0        | 0        |
| 22.9481   | 30.3535   | 28.9884  | 25.3052  | 26.6846  | 24.0957  |
| 0.0587795 | 0.042085  | 0.213957 | 0.227508 | 0        | 0.190572 |
| 4.51399   | 4.3196    | 3.44065  | 4.1421   | 3.4152   | 4.23922  |
| 1.26049   | 0.558681  | 0.873927 | 0.914758 | 0.604902 | 0.827064 |
| 0.127133  | 0.0910247 | 0        | 0        | 0.197111 | 0        |
| 1.86618   | 1.83144   | 1.97663  | 1.68766  | 1.62523  | 1.55649  |
| 20.9975   | 21.4218   | 20.5101  | 23.3877  | 23.7507  | 17.9544  |
| 21.2481   | 18.8423   | 16.3726  | 20.4871  | 12.6727  | 17.1135  |
| 1.74998   | 0.134668  | 0.548982 | 1.2501   | 0.344671 | 0.485455 |
| 11.9047   | 8.62804   | 10.4131  | 9.65073  | 10.9674  | 11.3703  |
| 0         | 0         | 0        | 0        | 0        | 0        |
| 4.23203   | 3.24094   | 4.02509  | 4.90502  | 4.00178  | 4.88773  |
| 3.19165   | 2.15391   | 2.50747  | 2.45989  | 2.07087  | 2.38064  |
| 0         | 0         | 0        | 0        | 0        | 0        |
| 0         | 0         | 0        | 0        | 0        | 0        |
| 6.22256   | 5.22822   | 7.43087  | 5.78367  | 6.81727  | 8.7348   |
| 20.2313   | 16.6966   | 16.9396  | 20.5797  | 22.9021  | 20.5823  |
| 0.413933  | 0.270597  | 0.553185 | 0.535494 | 0.181371 | 0.335507 |
| 26.8401   | 29.741    | 32.1438  | 39.4792  | 30.6328  | 22.1875  |
| 0         | 0         | 0        | 0        | 0        | 0        |
| 10.9291   | 10.8633   | 7.99397  | 7.63615  | 10.4552  | 7.82185  |
| 1521.59   | 2981.44   | 2229.13  | 1828.38  | 1365.21  | 2865.93  |
| 0.666899  | 0.201047  | 0.425875 | 0.407563 | 0.353731 | 0.426746 |
| 0         | 0         | 0        | 0        | 0        | 0        |
| 25.8607   | 27.0484   | 24.4368  | 26.2055  | 21.1101  | 15.8415  |
| 0.948517  | 1.0889    | 0.882292 | 0.845489 | 0.580259 | 0.79283  |
| 0.534908  | 0.157373  | 0.33687  | 0.330877 | 0.276995 | 0.30559  |
| 0         | 0         | 0        | 0        | 0        | 0        |
| 8.70709   | 9.76186   | 7.61405  | 8.42163  | 8.7908   | 10.4788  |
| 2.0697    | 1.22432   | 1.42257  | 1.52063  | 1.21967  | 1.22805  |
| 194.021   | 169.898   | 189.745  | 200.198  | 139.169  | 172.769  |
| 3.52785   | 2.88753   | 3.90426  | 4.31815  | 4.83348  | 5.24642  |
| 7.94018   | 7.16944   | 6.82952  | 9.03583  | 8.39407  | 8.03307  |
| 8.63154   | 12.707    | 12.7456  | 6.83281  | 6.38723  | 10.0641  |
| 31.3421   | 0         | 0        | 0        | 0        | 0        |
| 0.515531  | 0.479843  | 0.291902 | 0.486369 | 0.239788 | 0.417855 |
| 0.787761  | 0.717846  | 0.753059 | 0.883524 | 0.777235 | 0.812645 |
| 0         | 0         | 0        | 0        | 0        | 0        |
| 4.76827   | 3.62995   | 3.80041  | 3.53658  | 3.40531  | 4.45031  |

|           |           |           |           |           |           |
|-----------|-----------|-----------|-----------|-----------|-----------|
| 21.1022   | 26.8982   | 26.8645   | 19.4329   | 44.935    | 44.0559   |
| 0.633502  | 0.509673  | 0.627695  | 0.464146  | 0.678048  | 0.985008  |
| 42.5324   | 34.7414   | 38.0564   | 38.1902   | 41.1879   | 36.7149   |
| 0.348883  | 0.282936  | 0.31747   | 0.553716  | 0.355856  | 0.559429  |
| 4.88703   | 6.45311   | 6.95499   | 7.01553   | 3.38826   | 4.36739   |
| 38.2446   | 21.8879   | 25.9389   | 23.8776   | 23.6877   | 25.1714   |
| 31.1007   | 26.323    | 29.294    | 30.3395   | 34.6157   | 30.8283   |
| 0.241832  | 0.406415  | 0.588877  | 0.234003  | 0.140604  | 0.460086  |
| 0.109519  | 0.0879096 | 0.157645  | 0.106486  | 0.0951825 | 0.0898659 |
| 9.4997    | 6.80267   | 8.70962   | 7.9879    | 8.63008   | 9.6161    |
| 15.5325   | 13.4132   | 14.9812   | 15.0725   | 14.5601   | 13.8623   |
| 10.9725   | 10.0659   | 10.1795   | 11.2341   | 9.83824   | 11.3036   |
| 0.0671049 | 0.0800764 | 0.0120622 | 0.0757544 | 0.0462407 | 0.138999  |
| 12.9435   | 10.0956   | 11.1447   | 10.8591   | 12.2907   | 11.5979   |
| 12.6789   | 14.1538   | 14.2403   | 13.7285   | 12.9709   | 13.5618   |
| 234.85    | 287.581   | 453.95    | 363.515   | 319.939   | 394.846   |
| 0         | 0         | 0         | 0         | 0         | 0         |
| 0.818528  | 1.6516    | 0.451426  | 0.86403   | 1.38444   | 0.271409  |
| 81.7287   | 83.5407   | 76.392    | 82.6778   | 90.7189   | 88.8361   |
| 0         | 0.327582  | 0.222052  | 0.332037  | 0.283747  | 0.0741686 |
| 32.3261   | 21.3266   | 20.8027   | 24.1466   | 15.1111   | 19.3006   |
| 0         | 0         | 0         | 0         | 0         | 0         |
| 0         | 0         | 0         | 0         | 0         | 0         |
| 4.61977   | 5.41806   | 3.87235   | 4.34794   | 3.68163   | 3.96993   |
| 0         | 0         | 0         | 0         | 0         | 0         |
| 40.4926   | 34.0775   | 41.5302   | 39.0463   | 39.0213   | 38.3058   |
| 0.58213   | 0.265233  | 0.171227  | 0.26884   | 0.369226  | 0.214471  |
| 0.522706  | 1.26413   | 1.52014   | 0.595352  | 0.413129  | 0.870423  |
| 71.6919   | 92.732    | 57.45     | 56.1096   | 55.6229   | 61.3685   |
| 20.0895   | 18.1255   | 20.0228   | 20.9616   | 19.2983   | 19.0009   |
| 0.778375  | 0.76629   | 1.18052   | 0.706101  | 0.980539  | 1.2618    |
| 6.44064   | 4.33689   | 4.15536   | 8.17966   | 1.84261   | 1.92656   |
| 0         | 0         | 0         | 0         | 0         | 0.02467   |
| 4.08313   | 2.94849   | 3.40158   | 4.09027   | 3.49677   | 4.29252   |
| 7.66025   | 5.95373   | 7.50678   | 6.98573   | 7.95166   | 7.83112   |
| 14.6992   | 13.7718   | 13.7814   | 15.4976   | 11.9927   | 12.3829   |
| 0         | 0         | 0         | 0         | 0         | 0         |
| 35.4222   | 34.6707   | 36.5669   | 31.8801   | 31.4941   | 31.1361   |
| 1.50143   | 0.930798  | 0.757802  | 0.951422  | 0.538873  | 0.629173  |
| 2.3271    | 4.35587   | 4.36133   | 1.52396   | 2.38928   | 3.13431   |
| 0.14124   | 0.101125  | 0.0380821 | 0.102501  | 0.0364972 | 0.07632   |
| 12.5032   | 15.9274   | 14.811    | 13.795    | 11.8084   | 9.95423   |
| 0.0838019 | 0.0800007 | 0.0602539 | 0.101361  | 0.050528  | 0.0603771 |



|           |           |            |           |           |           |
|-----------|-----------|------------|-----------|-----------|-----------|
| 0         | 0         | 0          | 0         | 0         | 0         |
| 1.67923   | 0.841605  | 1.49412    | 1.09678   | 2.86388   | 1.49718   |
| 0         | 0         | 0          | 0         | 0         | 0         |
| 0.0474128 | 0.169733  | 0.0383513  | 0         | 0.0367552 | 0         |
| 0.187703  | 0.0895945 | 0          | 0.181626  | 0.0485034 | 0.202853  |
| 0         | 0         | 0          | 0         | 0         | 0         |
| 0         | 0         | 0          | 0         | 0         | 0         |
| 5.4833    | 2.40099   | 3.33566    | 2.10477   | 3.65353   | 4.22402   |
| 0         | 0         | 0          | 0         | 0         | 0         |
| 0         | 0         | 0          | 0         | 0         | 0         |
| 5.07047   | 4.70812   | 2.69154    | 3.73723   | 2.76378   | 4.23822   |
| 0         | 0.0101953 | 0          | 0         | 0         | 0         |
| 2.51778   | 2.61679   | 2.57857    | 2.44608   | 2.25089   | 2.18886   |
| 0         | 0         | 0          | 0         | 0.115939  | 0         |
| 9.00189   | 7.87902   | 7.9908     | 8.24612   | 7.79056   | 8.04296   |
| 7.37432   | 6.32024   | 7.16968    | 7.64526   | 7.40635   | 6.38935   |
| 42.7772   | 47.1019   | 44.9926    | 47.0486   | 45.281    | 42.3144   |
| 2.63315   | 1.04738   | 2.1299     | 0.318487  | 0.907225  | 0.829988  |
| 0         | 0         | 0          | 0         | 0         | 0         |
| 0.175511  | 0.376987  | 0.283934   | 0.382114  | 0         | 0         |
| 0.435674  | 0.151511  | 0.181238   | 0.42458   | 0.183345  | 0.201788  |
| 0.0229843 | 0.0329127 | 0.17662    | 0.0333603 | 0.0089089 | 0.0279444 |
| 0.147389  | 0.0633165 | 0          | 0.042785  | 0         | 0.0477854 |
| 32.7258   | 40.0022   | 46.9881    | 44.3604   | 36.7399   | 34.8436   |
| 5.30686   | 3.46488   | 2.74932    | 3.45699   | 3.71236   | 4.02487   |
| 0         | 0         | 0.0738342  | 0         | 0         | 0         |
| 3.583     | 3.34922   | 1.52961    | 2.2391    | 2.23751   | 1.3714    |
| 117.425   | 134.927   | 129.476    | 140.87    | 110.863   | 102.538   |
| 0.0187089 | 0.066976  | 0.0453997  | 0.0678868 | 0.0725171 | 0.0758209 |
| 4.87295   | 7.31552   | 3.05158    | 5.24754   | 3.89944   | 5.73342   |
| 8.74483   | 8.5415    | 7.32667    | 6.41308   | 8.39185   | 8.89355   |
| 0.341108  | 0.469667  | 0.339588   | 0.457012  | 0.183068  | 0.319015  |
| 43.7497   | 41.7487   | 46.422     | 50.4312   | 48.7368   | 45.6159   |
| 0         | 0         | 0          | 0         | 0         | 0         |
| 2.84591   | 2.18287   | 1.17475    | 2.56424   | 1.82432   | 1.98651   |
| 0.396482  | 0.378498  | 0.291551   | 0.322611  | 0.293388  | 0.22398   |
| 4.29501   | 3.41393   | 4.38685    | 2.56225   | 2.14446   | 4.66133   |
| 0.0268141 | 0.0511957 | 0.00722979 | 0.0518919 | 0.0138578 | 0.0289783 |
| 5.07025   | 4.53048   | 5.01729    | 5.60408   | 4.38435   | 6.06601   |
| 0         | 0         | 0          | 0         | 0         | 0         |
| 0         | 0         | 0          | 0         | 0         | 0         |
| 20.7671   | 18.9757   | 19.199     | 18.8175   | 17.2756   | 21.722    |
| 0.0438882 | 0.0628462 | 0          | 0.0637009 | 0.0340228 | 0         |

|           |           |          |            |           |           |
|-----------|-----------|----------|------------|-----------|-----------|
| 23.8085   | 20.1681   | 22.1626  | 23.3272    | 21.4721   | 22.7275   |
| 3.55553   | 4.72133   | 3.84416  | 3.67017    | 1.65776   | 3.46689   |
| 0         | 0         | 0        | 0          | 0         | 0         |
| 15.2301   | 14.2645   | 15.6728  | 17.9268    | 17.0962   | 14.4214   |
| 24.8087   | 18.5759   | 32.4688  | 22.8388    | 9.35465   | 21.7118   |
| 15.7837   | 21.5276   | 11.5537  | 12.2592    | 10.1122   | 13.2161   |
| 9.03779   | 7.16265   | 8.56418  | 8.2753     | 9.20641   | 9.05482   |
| 12.9078   | 10.7629   | 14.4046  | 10.9756    | 12.344    | 12.5453   |
| 3.58052   | 2.64471   | 3.46446  | 3.33851    | 3.47838   | 3.28786   |
| 23.038    | 25.3715   | 28.419   | 26.2681    | 28.3578   | 28.9224   |
| 11.2593   | 12.9764   | 10.2124  | 11.884     | 9.58588   | 11.5919   |
| 0         | 0.0492208 | 0.111214 | 0.0997803  | 0.106586  | 0.167163  |
| 121.94    | 133.991   | 127.261  | 122.517    | 118.001   | 105.342   |
| 7.8549    | 6.41369   | 6.39305  | 7.14724    | 5.54971   | 7.35029   |
| 0.500245  | 0.549098  | 0.408048 | 0.580942   | 0.530038  | 0.905228  |
| 4.60312   | 4.07661   | 3.64287  | 5.59633    | 2.77608   | 3.8608    |
| 0         | 0         | 0        | 0.00388515 | 0         | 0         |
| 2.84503   | 4.51729   | 3.98061  | 2.14839    | 3.5169    | 3.98874   |
| 0         | 0         | 0        | 0          | 0         | 0         |
| 0         | 0         | 0        | 0          | 0         | 0         |
| 0         | 0         | 0        | 0          | 0         | 0         |
| 0.0129547 | 0.0982647 | 0.296847 | 0.0376093  | 0.0451976 | 0.0832031 |
| 37.3741   | 38.3241   | 34.7446  | 37.3853    | 37.3954   | 33.2661   |
| 17.4691   | 14.1186   | 14.4198  | 16.4621    | 13.55     | 13.8168   |
| 13.9826   | 21.2194   | 14.2373  | 12.2312    | 11.8      | 17.6138   |
| 7.29105   | 1.30506   | 0        | 2.64562    | 1.41303   | 4.43223   |
| 4.37255   | 6.16823   | 4.03177  | 4.97784    | 3.53649   | 4.29723   |
| 91.8179   | 106.345   | 109.891  | 103.272    | 103.559   | 80.3974   |
| 0         | 0         | 0        | 0          | 0         | 0         |
| 6.67781   | 6.0362    | 6.75515  | 5.22764    | 5.6281    | 6.78421   |
| 0.524951  | 0.50114   | 0.424622 | 1.00391    | 0.2713    | 0.212745  |
| 28.4676   | 23.7793   | 25.2074  | 26.4112    | 27.1886   | 23.2998   |
| 4.48993   | 3.17951   | 3.3137   | 3.10383    | 2.33738   | 3.8119    |
| 0         | 0         | 0        | 0          | 0         | 0         |
| 7.67083   | 7.69882   | 8.95628  | 10.7858    | 6.81373   | 10.0478   |
| 14.9326   | 12.4833   | 14.3127  | 14.1367    | 12.7407   | 15.0238   |
| 0         | 0         | 0        | 0          | 0         | 0         |
| 0         | 0.0681355 | 0        | 0          | 0         | 0         |
| 0.233927  | 0         | 0.378438 | 0          | 0         | 0         |
| 0         | 0         | 0        | 0          | 0         | 0         |
| 0.488126  | 0.349489  | 0.542898 | 0.287913   | 0.283855  | 0.0494675 |
| 0.357053  | 0.36977   | 0.212656 | 0.23186    | 0.301428  | 0.260628  |
| 14.5392   | 17.3781   | 14.882   | 15.66      | 16.5342   | 15.251    |

|           |           |           |           |           |           |
|-----------|-----------|-----------|-----------|-----------|-----------|
| 0.307016  | 0.219818  | 0.186254  | 0.0557018 | 0.0595009 | 0.0622117 |
| 14.879    | 10.8702   | 11.9574   | 12.4715   | 15.1778   | 11.6316   |
| 1.20385   | 0.799659  | 0.942155  | 1.05533   | 0.698697  | 1.35115   |
| 9.44804   | 8.04225   | 7.49301   | 9.14216   | 5.45093   | 7.54915   |
| 2.20085   | 2.40103   | 2.79894   | 2.91085   | 1.96046   | 5.78786   |
| 28.8139   | 28.1812   | 28.9631   | 28.7206   | 30.591    | 28.3042   |
| 0.554374  | 0.198461  | 0.112105  | 0         | 0.322319  | 0.112335  |
| 8.72758   | 7.44535   | 8.38636   | 10.1295   | 7.41354   | 8.65436   |
| 38.3836   | 38.281    | 34.7985   | 38.4715   | 26.8384   | 31.3153   |
| 2.16231   | 0.998048  | 1.94306   | 0.906581  | 1.48984   | 1.40304   |
| 0.0577784 | 0.0413682 | 0         | 0         | 0.0671861 | 0.0468314 |
| 0.0702511 | 0.0502985 | 0.0568247 | 0.20393   | 0.163379  | 0         |
| 16.969    | 14.4642   | 16.3988   | 15.9054   | 18.8319   | 17.5616   |
| 0         | 0         | 0         | 0         | 0         | 0         |
| 1.03281   | 0.824481  | 0.803315  | 0.633974  | 0.615649  | 0.61196   |
| 81.8975   | 79.3739   | 78.048    | 89.8717   | 78.1663   | 82.9289   |
| 1.61697   | 1.64235   | 1.30793   | 1.77384   | 1.39926   | 1.24965   |
| 0.115761  | 0.138138  | 0.187274  | 0.25203   | 0.209393  | 0.0938284 |
| 2.19409   | 1.82549   | 2.40181   | 2.39052   | 1.18778   | 2.41614   |
| 0         | 0         | 0         | 0         | 0         | 0         |
| 23.4481   | 21.3559   | 24.1599   | 23.8657   | 28.9571   | 17.4626   |
| 7.46523   | 6.7259    | 6.28037   | 8.36566   | 6.7462    | 6.29937   |
| 3.04385   | 2.09388   | 3.62075   | 3.20518   | 1.38802   | 2.41877   |
| 10.6755   | 9.92089   | 9.45431   | 10.1616   | 10.8221   | 10.9991   |
| 2.99506   | 3.39763   | 3.58677   | 2.78048   | 2.32182   | 2.91627   |
| 1.90386   | 0.932668  | 0.405262  | 0.945352  | 0.310717  | 1.13705   |
| 2.66208   | 1.16715   | 1.60084   | 2.08354   | 1.32382   | 1.96741   |
| 0         | 0         | 0         | 0         | 0         | 0         |
| 5.22395   | 4.58482   | 5.70546   | 5.62553   | 4.90815   | 5.56103   |
| 0         | 0         | 0.0152453 | 0.0136779 | 0         | 0         |
| 0.376431  | 0.306197  | 0.172963  | 0.193976  | 0         | 0.176928  |
| 0.885322  | 1.50922   | 0.818422  | 0.856659  | 0.522907  | 1.1618    |
| 5.4233    | 1.54672   | 1.35829   | 1.61174   | 1.95727   | 3.63529   |
| 32.8546   | 34.0199   | 35.597    | 36.7127   | 29.6727   | 36.0071   |
| 2.96275   | 2.74887   | 2.52414   | 3.34605   | 2.47345   | 3.06926   |
| 22.9677   | 25.0734   | 23.5893   | 23.5494   | 21.3984   | 22.1165   |
| 0         | 0         | 0         | 0         | 0         | 0         |
| 13.3309   | 7.08775   | 5.84139   | 9.18618   | 16.9513   | 17.4737   |
| 19.4697   | 19.936    | 19.373    | 19.5104   | 24.4938   | 13.4894   |
| 7.37399   | 8.37555   | 7.21382   | 7.5929    | 7.42238   | 6.2585    |
| 0.0932088 | 0.166839  | 0         | 0         | 0.0722569 | 0.0377744 |
| 0         | 0         | 0         | 0         | 0         | 0         |
| 0.0847759 | 0.0202327 | 0         | 0.0205078 | 0.0219065 | 0.0458092 |

|           |           |           |           |           |           |
|-----------|-----------|-----------|-----------|-----------|-----------|
| 7.2583    | 5.8976    | 6.961     | 6.33758   | 6.04062   | 7.05766   |
| 4.57762   | 4.30434   | 4.18743   | 4.19891   | 3.53341   | 3.83771   |
| 5.30266   | 4.01368   | 5.91979   | 5.40236   | 6.2606    | 6.12401   |
| 58.1778   | 56.5663   | 57.6941   | 65.5264   | 61.6521   | 57.0104   |
| 22.8433   | 22.5432   | 21.8516   | 20.8312   | 25.7649   | 22.936    |
| 0.0108586 | 0.0602687 | 0.0265694 | 0.0167455 | 0.0168354 | 0.0440061 |
| 4.64559   | 3.99137   | 4.76888   | 4.47474   | 4.84542   | 4.45001   |
| 0.112931  | 0.0808562 | 0.0913473 | 0.0819558 | 0         | 0.183068  |
| 5.94489   | 4.04412   | 4.92136   | 4.9853    | 2.83815   | 3.59432   |
| 2.94175   | 3.28087   | 2.9744    | 3.61288   | 3.50845   | 2.84293   |
| 17.8069   | 17.383    | 19.9343   | 18.0899   | 16.822    | 18.3707   |
| 18.2042   | 17.5748   | 15.6821   | 18.0707   | 17.1188   | 18.9643   |
| 0.669802  | 1.04369   | 0.445082  | 0.457161  | 0.340892  | 0.51059   |
| 23.5275   | 16.1493   | 24.348    | 20.7752   | 25.5418   | 26.0905   |
| 0         | 0         | 0         | 0         | 0         | 0         |
| 0         | 0.0247897 | 0.0560124 | 0.0251269 | 0.0268406 | 0         |
| 9.32902   | 13.2619   | 12.0299   | 11.807    | 9.5378    | 9.13218   |
| 0         | 0         | 0         | 0         | 0         | 0         |
| 17.6503   | 17.6132   | 17.5797   | 18.5478   | 15.2005   | 17.7066   |
| 0.07519   | 0.215338  | 0.182459  | 0.1637    | 0.116577  | 0.121888  |
| 27.0925   | 30.8374   | 25.6606   | 27.6605   | 28.7214   | 26.6515   |
| 3.23463   | 2.95106   | 1.64791   | 2.02603   | 1.57293   | 1.69658   |
| 48.4908   | 46.2243   | 57.635    | 31.2046   | 37.3106   | 54.4982   |
| 0         | 0         | 0         | 0         | 0         | 0         |
| 0         | 0.120844  | 0         | 0.0612435 | 0.130841  | 0.0684011 |
| 0         | 1.14517   | 0         | 1.54765   | 0.309953  | 0.286911  |
| 0         | 0         | 0         | 0         | 0         | 0.190816  |
| 23.7739   | 19.907    | 20.0014   | 20.6066   | 19.704    | 19.4327   |
| 117.587   | 192.053   | 148.461   | 139.655   | 178.758   | 130.593   |
| 0         | 0         | 0.0167984 | 0.0150713 | 0         | 0.0168327 |
| 7.23258   | 12.4392   | 6.23837   | 4.80623   | 6.13856   | 7.59628   |
| 2.32944   | 2.18236   | 1.50315   | 2.18843   | 1.89546   | 2.08745   |
| 0         | 0         | 0         | 0         | 0         | 0         |
| 4.23478   | 3.33584   | 2.98411   | 2.67103   | 3.06804   | 2.40059   |
| 8.43E-33  | 2.28E-27  | 0.197167  | 0.0466156 | 3.49E-35  | 0.0488754 |
| 30.2598   | 34.9018   | 32.4208   | 32.2879   | 24.2804   | 36.3656   |
| 7.196     | 5.79133   | 6.54007   | 5.89603   | 5.62588   | 7.77098   |
| 1.99361   | 1.36388   | 1.44172   | 1.25994   | 1.71498   | 1.57208   |
| 1.07182   | 0.94647   | 1.01378   | 0.866265  | 0.564633  | 0.774135  |
| 1.26491   | 0.31026   | 0.629887  | 0.900924  | 0.33813   | 0.551246  |
| 63.2868   | 67.0014   | 61.1339   | 54.4008   | 52.9112   | 55.1728   |
| 0.635589  | 1.7295    | 1.93572   | 1.78203   | 1.46901   | 1.33163   |
| 1.91145   | 2.58507   | 0.171793  | 1.07892   | 1.48179   | 0.344288  |

|          |           |           |          |           |          |
|----------|-----------|-----------|----------|-----------|----------|
| 2.50838  | 1.71163   | 1.72415   | 1.60672  | 1.13203   | 1.33633  |
| 0.912147 | 0.81635   | 0.968385  | 1.11706  | 0.441944  | 1.1552   |
| 19.0211  | 11.3556   | 15.2226   | 16.3856  | 14.5751   | 14.8248  |
| 7.51812  | 7.73671   | 7.65331   | 7.35649  | 5.70246   | 5.65519  |
| 0.480449 | 0.344105  | 0.316111  | 0.34912  | 0.37264   | 0.633228 |
| 89.0211  | 72.1799   | 95.7976   | 96.4643  | 96.8193   | 96.7183  |
| 1.70759  | 2.78303   | 3.08961   | 2.05452  | 1.81145   | 2.05788  |
| 0.146183 | 0.209329  | 0.0788297 | 0.106088 | 0.0377745 | 0.118486 |
| 43.7517  | 34.5627   | 43.4768   | 45.8013  | 41.1512   | 43.7781  |
| 5.01857  | 4.02612   | 4.69523   | 5.26564  | 5.14043   | 4.96621  |
| 31.4228  | 39.1108   | 39.9455   | 33.6384  | 30.1847   | 39.8339  |
| 9.88671  | 7.7818    | 7.71959   | 8.3717   | 6.16114   | 5.96171  |
| 26.1258  | 21.0109   | 23.6655   | 26.759   | 37.5822   | 11.1715  |
| 8.47365  | 7.57381   | 9.40774   | 9.28451  | 10.5188   | 8.93318  |
| 2.78481  | 1.97288   | 2.5134    | 2.5741   | 2.20428   | 2.28094  |
| 47.079   | 37.5093   | 40.6582   | 30.5697  | 39.2405   | 30.6994  |
| 13.0773  | 11.4428   | 14.6843   | 11.7074  | 12.0506   | 12.7436  |
| 27.4739  | 26.5969   | 29.4904   | 30.0676  | 27.696    | 28.5791  |
| 0        | 0         | 0         | 0        | 0         | 0        |
| 0        | 0         | 0         | 0        | 0         | 0        |
| 0.402497 | 0.259362  | 0.716258  | 0.321309 | 0.343224  | 0.358861 |
| 5.10294  | 7.51666   | 4.67977   | 9.69461  | 6.09759   | 6.74422  |
| 8.64753  | 7.54679   | 9.5649    | 8.30554  | 6.58765   | 8.34217  |
| 15.0218  | 12.7719   | 7.56806   | 9.75031  | 7.75503   | 9.23669  |
| 1.53374  | 2.71205   | 1.37199   | 1.74749  | 1.08111   | 1.10199  |
| 0        | 0.139922  | 0.0395192 | 0.141825 | 0.075749  | 0.0396   |
| 22.7055  | 24.4119   | 24.0483   | 29.0591  | 29.9908   | 25.704   |
| 35.1943  | 37.551    | 33.9227   | 37.9188  | 38.0057   | 57.2585  |
| 0.25644  | 0.497554  | 0.21048   | 0.329344 | 0.143446  | 0.124984 |
| 0        | 0         | 0         | 0        | 0         | 0        |
| 13.8664  | 8.73673   | 11.1714   | 11.1634  | 12.7274   | 11.3441  |
| 0        | 0         | 0.110392  | 0        | 0         | 0        |
| 23.1811  | 27.8038   | 16.507    | 20.13    | 20.5814   | 27.6215  |
| 10.5168  | 8.3788    | 10.7587   | 8.04379  | 5.87482   | 6.10068  |
| 31.1928  | 38.556    | 28.6823   | 35.0429  | 42.7936   | 40.1393  |
| 0.691337 | 0.0824974 | 0.0932015 | 0.836193 | 0.446613  | 0.093392 |
| 0        | 0         | 0.458349  | 0.205613 | 0.658909  | 0.688929 |
| 28.6045  | 28.4032   | 30.0012   | 29.9634  | 24.5879   | 26.5588  |
| 0        | 0         | 0         | 0        | 0         | 0        |
| 2.41104  | 2.64693   | 3.2179    | 2.79957  | 3.55124   | 3.94102  |
| 21.7405  | 17.5189   | 19.792    | 19.3169  | 20.314    | 18.861   |
| 1.81884  | 1.69979   | 2.02874   | 1.61175  | 1.64747   | 1.76908  |
| 0.907559 | 0.710241  | 0.785323  | 0.474828 | 1.16168   | 0.547429 |

|           |            |           |            |           |           |
|-----------|------------|-----------|------------|-----------|-----------|
| 221.567   | 151.124    | 121.322   | 143.12     | 184.809   | 148.051   |
| 14.6459   | 9.22743    | 5.96745   | 10.213     | 8.25468   | 9.51006   |
| 5.20194   | 5.11556    | 5.72861   | 4.82126    | 3.93545   | 5.28313   |
| 13.0916   | 12.4685    | 11.0775   | 10.6358    | 7.78483   | 11.5528   |
| 1.95818   | 1.45187    | 2.1073    | 1.2987     | 2.28925   | 1.65753   |
| 0.247356  | 0.232446   | 0.162566  | 0.269266   | 0.659155  | 0.739308  |
| 1.85503   | 2.43796    | 2.22582   | 2.26097    | 1.85896   | 1.74188   |
| 5.55743   | 5.31695    | 5.60354   | 7.01016    | 4.31763   | 5.24373   |
| 31.2874   | 26.8559    | 28.3398   | 28.2991    | 34.0312   | 29.9025   |
| 26.5848   | 22.153     | 25.5592   | 27.9781    | 30.795    | 30.9479   |
| 5.5005    | 6.01325    | 5.93233   | 5.63719    | 5.30844   | 6.9352    |
| 1.88441   | 1.64736    | 1.92542   | 1.53553    | 1.25733   | 1.3449    |
| 2.64675   | 3.17996    | 2.87006   | 2.37537    | 2.63732   | 3.43731   |
| 26.8235   | 34.6227    | 31.1735   | 36.075     | 26.8925   | 31.3497   |
| 0         | 21.0258    | 23.7539   | 85.247     | 0         | 47.605    |
| 4.88993   | 3.3399     | 4.14066   | 3.65014    | 3.66457   | 3.83579   |
| 21.6969   | 19.4683    | 17.1987   | 15.4755    | 13.6435   | 14.7683   |
| 0         | 0          | 0         | 0          | 0         | 0         |
| 0.248696  | 0.178062   | 0.40233   | 0.270725   | 0.0963965 | 0.201577  |
| 1.11658   | 1.03633    | 0.669023  | 1.20048    | 0.801475  | 0.636872  |
| 26.3826   | 25.4658    | 29.4814   | 28.365     | 33.2917   | 29.3832   |
| 25.0687   | 25.7846    | 23.3267   | 25.0651    | 20.4935   | 19.6232   |
| 0.0756525 | 0          | 0         | 0.109805   | 0         | 0         |
| 0         | 0          | 0         | 0.0707033  | 0         | 0         |
| 0         | 0          | 0         | 0          | 0         | 0         |
| 5.82519   | 5.08512    | 5.04349   | 5.91117    | 6.72398   | 5.57131   |
| 0         | 0          | 0         | 0          | 0         | 0         |
| 0         | 0.00425891 | 0.0252604 | 0.00971286 | 0.0166005 | 0         |
| 1.7838    | 1.98933    | 1.60633   | 1.54361    | 1.38184   | 1.66943   |
| 0.184495  | 0.0636216  | 0.0541302 | 0.0408339  | 0.101324  | 0.0777977 |
| 12.1178   | 9.45991    | 5.00383   | 7.49901    | 5.71596   | 4.34711   |
| 0         | 0          | 0         | 0.0491229  | 0         | 0         |
| 0.0625536 | 0.0671807  | 0.0505983 | 0.0680944  | 0.0727387 | 0.126754  |
| 122.287   | 104.922    | 120.829   | 125.819    | 145.284   | 120.468   |
| 6.31938   | 9.48034    | 7.66743   | 10.2644    | 8.63177   | 10.4881   |
| 15.9361   | 14.9101    | 13.7627   | 14.9912    | 12.744    | 13.7131   |
| 0         | 0          | 0         | 0          | 0         | 0         |
| 1.31905   | 2.07771    | 1.81382   | 2.20169    | 0.511274  | 2.45901   |
| 0         | 0          | 0         | 0          | 0         | 0         |
| 84.8248   | 86.1622    | 87.6472   | 96.384     | 85.8202   | 85.2565   |
| 0         | 0          | 0         | 0          | 0         | 0         |
| 9.79872   | 6.8741     | 9.04123   | 7.51444    | 7.76096   | 8.67079   |
| 0         | 0          | 0         | 0          | 0         | 0         |

|           |           |           |           |           |           |
|-----------|-----------|-----------|-----------|-----------|-----------|
| 0         | 0         | 0         | 0         | 0         | 0         |
| 6.4372    | 6.03974   | 6.94774   | 6.94463   | 4.90084   | 6.89964   |
| 3832.1    | 695.763   | 45.5631   | 98.6648   | 24.901    | 171.33    |
| 5.91638   | 6.11748   | 4.94653   | 4.93946   | 5.14566   | 5.38825   |
| 0.0605022 | 0.0216592 | 0.0244695 | 0.087815  | 0.0938044 | 0.122598  |
| 0         | 0         | 0         | 0         | 0         | 0         |
| 0.464993  | 0.613927  | 1.27116   | 0.36283   | 0.332838  | 0.405791  |
| 49.4263   | 42.2214   | 47.5673   | 45.4302   | 40.2849   | 46.0561   |
| 7.93758   | 6.12032   | 5.83107   | 7.30419   | 6.39      | 11.4944   |
| 4.15091   | 3.61828   | 3.55596   | 4.30779   | 3.93709   | 4.62152   |
| 2.89405   | 2.69007   | 3.24445   | 3.24251   | 1.61375   | 2.51033   |
| 12.8237   | 11.1122   | 12.3789   | 16.3986   | 20.9198   | 18.9932   |
| 0.340879  | 0.0813542 | 0         | 0.247382  | 0         | 0.0920978 |
| 18.2778   | 15.3007   | 15.0804   | 16.4848   | 13.406    | 14.1862   |
| 21.8698   | 17.9071   | 22.0401   | 19.1175   | 19.7729   | 22.0183   |
| 7.70823   | 7.4444    | 7.425     | 7.64427   | 7.58636   | 8.83133   |
| 13.0473   | 14.5513   | 15.729    | 11.8358   | 14.5395   | 13.2699   |
| 0         | 0         | 0         | 0         | 0         | 0         |
| 1.08622   | 1.04589   | 1.0301    | 1.14166   | 0.842052  | 1.03221   |
| 0.18005   | 0.16114   | 0.0728194 | 0.0653328 | 0.0697888 | 0.0729683 |
| 2.79693   | 2.98978   | 4.4307    | 2.41993   | 1.21623   | 3.32252   |
| 0.569905  | 0.408041  | 0.460984  | 0.82718   | 0.589065  | 0.923854  |
| 8.22322   | 6.38501   | 7.51216   | 7.19316   | 6.48827   | 7.43654   |
| 3.88597   | 2.68292   | 3.03102   | 2.31653   | 3.49661   | 2.86849   |
| 4.46931   | 2.92289   | 3.88901   | 4.07188   | 3.62967   | 3.54412   |
| 0.587838  | 0.561174  | 0.0792483 | 0.106651  | 0.189875  | 0.0794104 |
| 30.0209   | 29.4368   | 30.8215   | 31.1863   | 27.6108   | 27.3293   |
| 13.489    | 12.1133   | 13.6585   | 12.3017   | 11.419    | 13.2894   |
| 3.99238   | 3.10621   | 3.48739   | 3.24504   | 3.26003   | 3.47363   |
| 0.432403  | 0.587024  | 0.641856  | 0.452905  | 0.652884  | 0.530812  |
| 0.691499  | 0.73085   | 0.396003  | 0.520513  | 0.601642  | 0.485593  |
| 84.8964   | 87.8245   | 56.8591   | 56.7277   | 63.4824   | 79.2549   |
| 2.6495    | 1.71171   | 0.72107   | 1.33003   | 0.830321  | 0.899445  |
| 0         | 0         | 0.159833  | 0         | 0         | 0         |
| 0.481653  | 0.775923  | 0.54111   | 0.559271  | 0.758623  | 0.692522  |
| 0.270646  | 0.217153  | 0.553785  | 0.256064  | 0.250628  | 0.278273  |
| 0         | 0         | 0         | 0         | 0         | 0         |
| 0.0553385 | 3.33E-09  | 0.0447165 | 0.0795776 | 0.165958  | 3.95E-09  |
| 63.9413   | 52.6021   | 55.6994   | 64.5038   | 58.9656   | 55.0285   |
| 2.1539    | 2.4157    | 1.27602   | 1.81624   | 1.12366   | 1.32421   |
| 1.95145   | 1.67014   | 1.80467   | 2.03434   | 1.77355   | 2.43601   |
| 2.92303   | 2.2324    | 1.51228   | 1.57301   | 1.70914   | 1.66928   |
| 42.5577   | 43.5228   | 43.9275   | 39.921    | 39.1357   | 34.9085   |

|           |           |           |           |           |           |
|-----------|-----------|-----------|-----------|-----------|-----------|
| 57.304    | 54.5637   | 63.6022   | 62.674    | 56.5936   | 58.8      |
| 39.9335   | 38.7745   | 39.5382   | 38.9374   | 42.4094   | 37.4511   |
| 0.0171322 | 0.0122664 | 0         | 0         | 0.0265624 | 0.0138863 |
| 8.70679   | 7.33107   | 7.15543   | 9.19999   | 8.36956   | 12.7593   |
| 26.0547   | 22.9914   | 18.0459   | 23.6902   | 25.2503   | 20.3154   |
| 0.032938  | 0         | 0.0266429 | 0         | 0.0255341 | 0         |
| 8.9517    | 6.95433   | 7.81556   | 7.22789   | 7.82774   | 8.22514   |
| 0.568247  | 0         | 0         | 0         | 0.110129  | 0         |
| 18.867    | 16.3685   | 19.988    | 19.7241   | 19.7491   | 20.4276   |
| 0.629295  | 0.32617   | 0.96359   | 0.709725  | 0.470873  | 0.514429  |
| 4.08548   | 3.55587   | 3.63423   | 3.6362    | 3.24396   | 3.24002   |
| 31.0661   | 19.8355   | 32.254    | 30.4507   | 27.7318   | 34.173    |
| 4.83182   | 5.32996   | 6.335     | 5.02828   | 4.73747   | 4.32946   |
| 2.24079   | 1.95931   | 1.94085   | 1.81326   | 1.32203   | 1.8966    |
| 8.00697   | 5.779     | 7.14416   | 5.67045   | 4.42795   | 5.12087   |
| 0         | 0.0324657 | 0         | 0.0740413 | 0         | 0         |
| 1.00725   | 0.521093  | 0.603822  | 0.680004  | 0.377175  | 0.577153  |
| 3.31554   | 4.71749   | 4.37299   | 5.07284   | 4.12551   | 5.2549    |
| 21.7475   | 22.675    | 23.5239   | 21.8556   | 20.8268   | 22.8993   |
| 1.76365   | 1.75739   | 2.56526   | 2.55      | 3.21301   | 1.31815   |
| 22.0012   | 28.8342   | 23.7509   | 24.8603   | 26.8345   | 26.2517   |
| 42.4935   | 31.1914   | 36.0645   | 40.8888   | 44.8747   | 39.7218   |
| 0.0665753 | 0.0476666 | 0.0538514 | 0.0483149 | 0.0516102 | 0.161885  |
| 4.67123   | 3.61701   | 5.06273   | 4.24585   | 3.23238   | 3.25176   |
| 10.7012   | 14.0784   | 8.58026   | 12.423    | 7.76056   | 11.7038   |
| 0         | 0         | 0         | 0         | 0         | 0         |
| 31.8416   | 33.6552   | 28.8637   | 29.825    | 33.1002   | 35.6226   |
| 9.00807   | 5.00658   | 3.7708    | 4.71882   | 4.2061    | 4.28399   |
| 23.3734   | 25.5308   | 15.6747   | 24.9781   | 21.8328   | 26.3774   |
| 5.24464   | 3.94709   | 4.12177   | 4.71441   | 2.51798   | 3.28483   |
| 35.5923   | 33.8506   | 45.4645   | 41.4378   | 35.373    | 39.0943   |
| 22.3597   | 19.3167   | 21.3533   | 19.7072   | 20.6079   | 20.7765   |
| 0.28679   | 0.293337  | 0.414248  | 0.327059  | 0.174683  | 0.332076  |
| 0         | 0         | 0         | 0         | 0         | 0         |
| 10.6167   | 10.572    | 8.24218   | 8.85604   | 8.70326   | 11.4242   |
| 10.7494   | 8.46314   | 7.92492   | 9.0676    | 11.777    | 8.68058   |
| 40.0543   | 40.8022   | 46.5572   | 41.7313   | 41.2116   | 34.5769   |
| 0         | 0         | 0         | 0         | 0         | 0         |
| 1.96272   | 1.93451   | 0.736562  | 0.774416  | 1.26779   | 0.628274  |
| 23.3223   | 37.5712   | 37.6283   | 33.9159   | 33.049    | 40.2645   |
| 0.0992597 | 0         | 0         | 0         | 0.0511031 | 0.0804533 |
| 0         | 0         | 0         | 0         | 0         | 0         |
| 0         | 0         | 0         | 0         | 0         | 0         |



|           |           |           |            |           |           |
|-----------|-----------|-----------|------------|-----------|-----------|
| 0.481733  | 0.238785  | 0.569509  | 0.618527   | 0.315993  | 0.33039   |
| 0         | 0         | 0         | 0          | 0         | 0         |
| 0         | 0         | 0         | 0          | 0         | 0         |
| 4.95828   | 4.75254   | 4.33581   | 4.51245    | 2.9503    | 3.43229   |
| 0         | 0         | 0         | 0          | 0         | 0         |
| 45.0099   | 41.8739   | 49.3418   | 47.331     | 42.4525   | 47.5939   |
| 0.691426  | 0.632595  | 0.683565  | 0.669074   | 0.565827  | 0.539668  |
| 7.90916   | 7.34136   | 5.68904   | 6.05766    | 5.05283   | 7.09973   |
| 0.547283  | 0.563276  | 0.719365  | 0.943286   | 0.87504   | 1.08125   |
| 3.53584   | 2.94693   | 3.52295   | 3.66193    | 3.24071   | 3.53762   |
| 0         | 0         | 5.73398   | 0          | 0         | 0.0467131 |
| 98.9886   | 107.964   | 103.341   | 100.263    | 92.7813   | 94.716    |
| 0         | 0         | 0         | 0          | 0         | 0         |
| 62.1703   | 110.558   | 81.7501   | 60.9287    | 151.67    | 93.2875   |
| 4.37339   | 4.20196   | 4.61022   | 4.6072     | 4.7902    | 4.93982   |
| 326.614   | 326.362   | 368.51    | 397.671    | 420.139   | 403.812   |
| 0         | 0         | 0.0583371 | 0          | 0         | 0.0292282 |
| 12.3954   | 11.7943   | 8.4433    | 19.1748    | 6.95398   | 19.8294   |
| 0.197585  | 0.16976   | 0.191787  | 0.172069   | 0.0919024 | 0.0960894 |
| 0         | 0         | 0         | 0          | 0         | 0         |
| 46.6856   | 47.5256   | 39.8669   | 49.6788    | 40.3087   | 45.6705   |
| 15.3575   | 13.5444   | 13.7425   | 12.1251    | 12.8452   | 13.3322   |
| 81.1616   | 73.7169   | 72.7227   | 78.9998    | 81.3335   | 64.9828   |
| 2.52789   | 1.22033   | 1.93633   | 1.4037     | 1.79636   | 1.1176    |
| 1.24785   | 0.559123  | 0.793593  | 1.11714    | 0.540379  | 0.98559   |
| 1.47723   | 2.36564   | 1.86319   | 2.79727    | 1.74687   | 2.96195   |
| 0         | 0         | 0         | 0          | 0         | 0         |
| 0.466338  | 0.233723  | 0.150885  | 0.406116   | 0.216908  | 0.151193  |
| 0.0328656 | 0         | 0         | 0          | 0.0382169 | 0.202287  |
| 0         | 0         | 0         | 0          | 0         | 0         |
| 33.5298   | 23.7886   | 30.5933   | 31.9485    | 28.2915   | 28.7366   |
| 1.28699   | 1.89142   | 1.86288   | 1.9663     | 1.36527   | 1.42747   |
| 2.46048   | 1.74111   | 1.43477   | 1.74403    | 1.8408    | 2.20293   |
| 184.78    | 201.605   | 212.622   | 203.206    | 210.23    | 182.994   |
| 6.74022   | 8.14997   | 8.04796   | 6.46452    | 9.77675   | 6.40797   |
| 0.942933  | 1.19139   | 0.807585  | 0.925822   | 0.859972  | 1.12394   |
| 1.90616   | 1.45999   | 1.73907   | 2.075      | 1.54642   | 1.85042   |
| 0         | 0         | 0         | 0          | 0         | 0         |
| 32.0182   | 25.3755   | 26.0618   | 24.9899    | 19.2012   | 23.5036   |
| 6.35739   | 7.72391   | 7.18589   | 7.40976    | 7.66974   | 7.12582   |
| 5.91144   | 3.51279   | 5.45921   | 5.17584    | 6.01124   | 5.89715   |
| 1.89039   | 1.58887   | 1.09696   | 1.07365    | 0.557512  | 1.44895   |
| 0         | 0.0504869 | 0         | 0.00626614 | 0         | 0.0571542 |

|           |            |           |           |           |            |
|-----------|------------|-----------|-----------|-----------|------------|
| 2.02601   | 1.31077    | 1.4611    | 1.23117   | 2.02475   | 1.29592    |
| 0.266584  | 0.381738   | 0.79066   | 0.580395  | 0.413321  | 0.720252   |
| 0         | 0          | 0         | 0         | 0         | 0          |
| 27.6401   | 30.4492    | 26.8981   | 29.4906   | 27.5288   | 25.3706    |
| 5.72439   | 2.9195     | 2.84162   | 4.54124   | 2.40725   | 3.53386    |
| 0.0459658 | 0          | 0         | 0         | 0         | 0          |
| 11.9735   | 9.92796    | 10.5792   | 11.8877   | 7.79841   | 11.323     |
| 0.436493  | 0.446458   | 0.403509  | 0.090506  | 0.386716  | 0.303251   |
| 18.401    | 18.6677    | 11.8334   | 14.8677   | 11.3631   | 14.0462    |
| 24.8556   | 21.6012    | 23.5652   | 22.7101   | 27.6378   | 23.6894    |
| 8.22586   | 14.9551    | 11.4814   | 10.1607   | 8.33953   | 10.9919    |
| 0.158799  | 0.238144   | 0.37122   | 0.333054  | 0.180083  | 0.199057   |
| 2.848     | 3.307      | 3.91237   | 3.23513   | 3.28343   | 3.27148    |
| 0.694735  | 0.742299   | 0.717576  | 1.02388   | 0.472284  | 0.511127   |
| 0.218739  | 0.219258   | 0.115007  | 0.206365  | 0.118699  | 0.141836   |
| 0.10477   | 0.05626    | 0.0847464 | 0.133059  | 0.101524  | 0.0424598  |
| 8.91106   | 8.83209    | 10.5161   | 10.1745   | 8.31621   | 8.15544    |
| 0.0256374 | 0.0550678  | 0.145163  | 0         | 0.0397491 | 0.02078    |
| 15.0052   | 17.2863    | 14.7245   | 14.6697   | 13.6442   | 16.3941    |
| 4.38153   | 3.55929    | 3.78355   | 4.24355   | 2.89308   | 3.46083    |
| 30.6785   | 42.5149    | 42.0755   | 44.8247   | 45.7679   | 32.1599    |
| 11.2463   | 8.4107     | 10.9032   | 8.62502   | 10.1888   | 9.3816     |
| 0         | 0          | 0         | 0         | 0         | 0          |
| 6.52261   | 4.82972    | 5.63676   | 6.47326   | 7.75751   | 9.35356    |
| 0         | 0          | 0         | 0         | 0         | 0          |
| 0         | 0          | 0         | 0.0704244 | 0         | 0          |
| 0         | 0          | 0         | 0         | 0         | 0          |
| 4.21086   | 4.52234    | 4.52186   | 4.37309   | 4.44623   | 4.47226    |
| 15.2673   | 15.3654    | 12.7571   | 15.0256   | 16.7482   | 12.4914    |
| 0.0417763 | 0.0897332  | 0.033792  | 0.0303178 | 0.0323857 | 0.169306   |
| 0         | 1.64206    | 0         | 0         | 9.77851   | 3.71782    |
| 4.10518   | 3.21055    | 3.6782    | 4.35422   | 3.4272    | 3.73692    |
| 0.0934587 | 0.167287   | 0.113395  | 0.0169562 | 0.054338  | 0.0568136  |
| 0         | 0          | 0         | 0         | 0         | 0          |
| 8.37842   | 5.44755    | 7.36326   | 8.08525   | 7.8292    | 8.80993    |
| 0         | 0          | 0         | 0         | 0         | 0          |
| 17.0315   | 13.8741    | 14.8682   | 16.0885   | 13.7486   | 15.2446    |
| 139.424   | 177.028    | 196.245   | 174.982   | 186.611   | 176.764    |
| 0         | 0          | 0         | 0         | 0         | 0          |
| 0.0919451 | 0.0164577  | 0.116207  | 0.0667262 | 0.0178193 | 0.0845517  |
| 7.76519   | 8.00048    | 7.10015   | 6.88907   | 6.44237   | 6.75777    |
| 0         | 0.00529934 | 0         | 0.0107428 | 0         | 0.00599918 |
| 25.4529   | 29.7975    | 25.3691   | 27.2076   | 23.8118   | 25.3623    |

|            |           |            |           |           |            |
|------------|-----------|------------|-----------|-----------|------------|
| 4.20E-06   | 1.15E-06  | 3.39E-06   | 1.66E-06  | 1.85E-06  | 1.73E-06   |
| 0.0531317  | 0.237758  | 0.0429772  | 0.0385587 | 0.0411885 | 0.0861301  |
| 0.0363804  | 0         | 0          | 0.0792058 | 0.0282027 | 0.11795    |
| 1.97867    | 1.17657   | 0.732435   | 1.50897   | 1.87187   | 0.788297   |
| 13.4021    | 11.6975   | 10.9174    | 11.215    | 9.1563    | 11.8378    |
| 0.351744   | 0.314791  | 0.497881   | 0.957154  | 0.5112    | 1.06902    |
| 6.25829    | 5.65272   | 6.30828    | 7.33668   | 7.76243   | 6.24314    |
| 1.52163    | 1.66286   | 2.65597    | 2.61539   | 2.04877   | 1.62281    |
| 6.11893    | 4.67044   | 5.78873    | 4.73124   | 5.37824   | 6.02621    |
| 0          | 0         | 0          | 0         | 0         | 0          |
| 8.2059     | 7.70169   | 9.0145     | 8.60551   | 7.75423   | 7.68907    |
| 1.37764    | 1.98638   | 1.62608    | 1.01646   | 1.73623   | 1.32836    |
| 0.363629   | 0.401038  | 0.171575   | 0.153935  | 0.164434  | 0.614394   |
| 5.97796    | 3.31785   | 5.9543     | 4.78241   | 6.44274   | 5.75433    |
| 18.2537    | 18.5159   | 18.9691    | 15.6746   | 15.5447   | 16.0051    |
| 2.20004    | 1.31922   | 2.2467     | 1.95584   | 1.57759   | 1.76091    |
| 40.5256    | 72.3875   | 38.9896    | 23.778    | 24.8909   | 23.5874    |
| 44.3331    | 44.3689   | 42.254     | 43.484    | 34.9169   | 35.1326    |
| 0.444873   | 0.514534  | 0.221446   | 0.546366  | 0.344873  | 0.194161   |
| 0.746141   | 0.267112  | 0.264048   | 0.507645  | 0.433815  | 0.755966   |
| 0.228182   | 0.163374  | 0.184572   | 0.193195  | 0.0294817 | 0.215774   |
| 1.53683    | 1.32041   | 0.944764   | 1.15992   | 0.953099  | 0.747391   |
| 0          | 0.0832775 | 0          | 0.25323   | 0         | 0.471376   |
| 0.130875   | 0.179261  | 0.178313   | 0.15998   | 0.0784698 | 0.162516   |
| 0          | 0         | 0          | 0         | 0         | 0          |
| 0.697695   | 0.522218  | 0.500296   | 0.72477   | 0.31994   | 0.565505   |
| 8.72122    | 8.03258   | 8.3441     | 8.6675    | 7.97123   | 8.41675    |
| 6.74147    | 6.93279   | 5.45304    | 6.43468   | 4.99004   | 5.42997    |
| 0          | 0         | 0          | 0         | 0         | 0          |
| 578.99     | 853.417   | 589.664    | 578.251   | 408.187   | 927.154    |
| 13.3385    | 10.4475   | 12.3153    | 12.4183   | 11.4346   | 12.8645    |
| 0.0301645  | 0.0647917 | 0.123522   | 0.131346  | 0.070152  | 0.147919   |
| 2.35822    | 1.56181   | 3.26662    | 5.7332    | 1.96524   | 1.72027    |
| 0          | 0.693799  | 0.261273   | 0.234411  | 0.250399  | 0.261807   |
| 0.0490842  | 0         | 0          | 0         | 0         | 0          |
| 0.605098   | 0.62088   | 0.625868   | 0.961258  | 0.818939  | 1.12171    |
| 0          | 0         | 0          | 0         | 0         | 0          |
| 0.925058   | 0.524103  | 0.603262   | 0.410294  | 0.597722  | 0.219891   |
| 0          | 0         | 0.0188075  | 0         | 0         | 0          |
| 25.3837    | 22.3491   | 18.1379    | 19.8699   | 14.8742   | 15.068     |
| 1.93E-07   | 2.32E-10  | 0.0514961  | 0.0832327 | 0.247631  | 0.0746619  |
| 5.39268    | 7.0738    | 5.32233    | 4.6291    | 3.16656   | 4.71345    |
| 0.00814712 | 0         | 0.00659004 | 0         | 0.0284283 | 0.00660352 |

|           |           |           |           |           |          |
|-----------|-----------|-----------|-----------|-----------|----------|
| 5.63073   | 5.41939   | 4.18126   | 4.08632   | 3.36322   | 5.23726  |
| 0.283433  | 0.608798  | 0.630474  | 1.18273   | 0.933817  | 0.57433  |
| 119.374   | 159.62    | 137.93    | 134.684   | 120.92    | 126.429  |
| 8.18587   | 6.55421   | 5.9804    | 7.82522   | 7.01117   | 7.96526  |
| 34.8857   | 30.7106   | 34.8486   | 36.1898   | 27.042    | 30.8328  |
| 0.0804369 | 0.129581  | 0.174951  | 0.195581  | 0.113165  | 0.478582 |
| 2.57895   | 1.97832   | 2.98703   | 2.95946   | 2.55908   | 3.07541  |
| 0.102714  | 0         | 0         | 0         | 0         | 0        |
| 0         | 0         | 0         | 0         | 0         | 0        |
| 20.4166   | 21.3584   | 20.2533   | 22.0398   | 20.6194   | 21.214   |
| 0.037229  | 0         | 0.0301138 | 0         | 0.0144302 | 0.045263 |
| 0         | 0         | 0         | 0         | 0         | 0        |
| 1.49239   | 1.3764    | 1.289     | 0.954556  | 1.01966   | 1.61968  |
| 105.237   | 97.1659   | 102.494   | 102.467   | 109.939   | 101.081  |
| 41.3529   | 35.0639   | 36.5595   | 45.6224   | 28.487    | 32.3312  |
| 0.447914  | 0.317343  | 0.264991  | 0.519728  | 0.137439  | 0.311351 |
| 0         | 0         | 0         | 0         | 0.0354567 | 0        |
| 5.08677   | 8.52867   | 9.59621   | 9.63761   | 9.58366   | 5.19281  |
| 88.9852   | 75.9719   | 81.837    | 85.4638   | 89.151    | 82.2726  |
| 34.285    | 40.1541   | 35.8609   | 33.6755   | 30.4161   | 30.9035  |
| 0         | 0         | 0         | 0         | 0         | 0        |
| 6.30312   | 9.25506   | 4.43165   | 5.12263   | 6.53396   | 4.13357  |
| 13.1205   | 16.7608   | 12.2903   | 13.1106   | 14.7776   | 12.5741  |
| 16.4134   | 11.2196   | 15.2304   | 15.957    | 15.0768   | 14.3579  |
| 0         | 0         | 0         | 0         | 0         | 0        |
| 39.0101   | 44.6129   | 36.392    | 36.9179   | 35.4345   | 40.3286  |
| 11.2099   | 8.00603   | 10.004    | 9.65594   | 10.1478   | 11.3727  |
| 39.4502   | 36.2227   | 40.553    | 43.5258   | 32.0423   | 29.9848  |
| 2.6954    | 3.52519   | 3.61772   | 2.86905   | 2.99613   | 3.27615  |
| 8.03616   | 5.41333   | 6.9573    | 7.48482   | 8.30463   | 5.90811  |
| 0.289031  | 0.0617859 | 0.14012   | 0.0209353 | 0.0672694 | 0.281581 |
| 17.2127   | 15.0586   | 17.2287   | 16.0672   | 19.0481   | 16.3146  |
| 0.24462   | 0.191065  | 0.197868  | 0.145248  | 0.0861968 | 0.162223 |
| 0         | 0         | 0         | 0         | 0         | 0        |
| 0         | 0         | 0         | 0         | 0         | 0        |
| 1.65348   | 1.60137   | 1.99744   | 1.35171   | 1.82423   | 1.90442  |
| 5.33718   | 4.50854   | 5.30526   | 4.89702   | 5.01681   | 5.46934  |
| 0.413802  | 0.220245  | 0.334716  | 0.165469  | 0.279453  | 0.295693 |
| 13.1774   | 10.6452   | 10.7641   | 12.1741   | 11.9963   | 10.4699  |
| 24.3559   | 20.1226   | 23.5564   | 23.5478   | 24.3755   | 23.9721  |
| 2.44334   | 1.82541   | 2.94988   | 3.05764   | 3.04665   | 2.13997  |
| 2.49875   | 0.638948  | 2.59867   | 0.777165  | 1.1069    | 1.01266  |
| 16.61     | 21.6121   | 11.877    | 21.2096   | 20.7443   | 9.45034  |

|          |          |           |           |          |          |
|----------|----------|-----------|-----------|----------|----------|
| 36.6715  | 34.725   | 42.1673   | 37.5675   | 36.5673  | 42.0913  |
| 7.62343  | 11.1437  | 11.3906   | 11.005    | 11.0617  | 11.5014  |
| 1.12864  | 0.784012 | 1.35393   | 1.37992   | 1.72374  | 1.25405  |
| 32.624   | 31.43    | 34.1542   | 33.2459   | 28.3668  | 29.6132  |
| 5.36148  | 4.49229  | 4.85232   | 2.78324   | 3.87807  | 4.62016  |
| 3.48174  | 4.9283   | 4.70198   | 2.31725   | 3.07069  | 3.15982  |
| 10.3712  | 9.80386  | 11.4939   | 10.2854   | 11.5591  | 10.8293  |
| 0.452758 | 0.486406 | 0.508693  | 0.288546  | 0.375205 | 0.514676 |
| 0.240797 | 0        | 0         | 0.174751  | 0        | 0.195174 |
| 39.4594  | 33.9413  | 34.7884   | 41.0651   | 37.2876  | 33.5308  |
| 38.7096  | 36.0423  | 34.8836   | 39.0101   | 35.8325  | 38.3984  |
| 0.174103 | 0.155818 | 0.0704142 | 0.157937  | 0        | 0.176396 |
| 0        | 0.201308 | 0.227428  | 0.204046  | 0.435926 | 0.227893 |
| 32.8723  | 24.4966  | 19.0742   | 21.1884   | 17.9364  | 21.2154  |
| 19.663   | 12.7292  | 17.1311   | 18.967    | 16.9579  | 16.7344  |
| 4.94053  | 4.90973  | 4.76061   | 4.99609   | 4.26948  | 4.04823  |
| 77.807   | 86.1577  | 87.3473   | 74.6446   | 76.0648  | 70.7991  |
| 158.323  | 134.312  | 143.17    | 144.392   | 179.745  | 132.488  |
| 0.198472 | 0.142103 | 0         | 0.0480117 | 0.102573 | 0.107246 |
| 4.41285  | 3.61384  | 3.92194   | 3.90767   | 4.03033  | 4.59339  |
| 0.280097 | 0.200544 | 0         | 0         | 0.217135 | 0.227028 |
| 15.0784  | 12.8533  | 22.1392   | 17.9288   | 13.5874  | 17.5698  |
| 0        | 0        | 0         | 0         | 0        | 0        |
| 0        | 0        | 0.506716  | 0         | 0        | 0        |
| 17.4691  | 16.8891  | 13.6192   | 15.6008   | 13.0703  | 11.8438  |
| 0        | 0        | 0         | 0         | 0        | 0        |
| 31.1505  | 25.2725  | 29.5953   | 29.6626   | 37.2585  | 16.3967  |
| 0.675809 | 0.621353 | 0.786411  | 0.60345   | 0.619321 | 0.783806 |
| 0        | 0        | 0         | 0         | 0        | 0        |
| 0.198662 | 0        | 0         | 0         | 0.154006 | 0        |
| 112.118  | 106.38   | 109.595   | 123.262   | 127.448  | 116.85   |
| 23.0491  | 21.7204  | 21.9169   | 21.1549   | 22.2364  | 21.6011  |
| 0        | 0        | 0         | 0         | 0        | 0        |
| 20.5234  | 14.919   | 17.2139   | 17.0035   | 19.3947  | 8.99279  |
| 0        | 0        | 0         | 0         | 0        | 0        |
| 27.2365  | 36.0905  | 29.0049   | 30.5733   | 24.342   | 23.7437  |
| 5.88385  | 7.37865  | 5.1343    | 4.78759   | 4.86533  | 4.16209  |
| 848.556  | 1550.96  | 988.622   | 1045.08   | 804.033  | 1998.12  |
| 23.0007  | 14.9408  | 19.4351   | 19.1689   | 18.3194  | 22.7173  |
| 0        | 0        | 0         | 0         | 0        | 0        |
| 25.1409  | 24.293   | 24.1705   | 23.5797   | 27.4176  | 23.0543  |
| 2.57417  | 3.60598  | 2.42168   | 2.76157   | 3.18852  | 2.76686  |
| 8.22257  | 9.03459  | 8.82546   | 8.79024   | 8.48267  | 11.1249  |

|           |           |           |           |           |           |
|-----------|-----------|-----------|-----------|-----------|-----------|
| 0.54572   | 0.814011  | 0.64374   | 0.462045  | 0.581695  | 0.99523   |
| 3.51955   | 4.11512   | 2.92525   | 2.81197   | 1.90238   | 1.64882   |
| 7.76663   | 6.47875   | 7.32683   | 6.37942   | 5.8206    | 7.0278    |
| 11.3263   | 11.0419   | 11.5748   | 12.6232   | 8.74116   | 9.5629    |
| 0.329609  | 0.28363   | 0.473028  | 0.736909  | 0.0921285 | 0.305738  |
| 2.53486   | 0         | 2.0504    | 3.68616   | 0         | 4.10918   |
| 0.390886  | 0.37782   | 0.526538  | 0.268071  | 0.832749  | 0.6296    |
| 0.134514  | 0.240773  | 0         | 0.195238  | 0.104277  | 0         |
| 11.3983   | 9.5634    | 8.05684   | 11.3569   | 10.7423   | 9.88052   |
| 0         | 0.0391823 | 0.0147554 | 0         | 0.0141413 | 0.0147856 |
| 14.0567   | 14.7043   | 14.0527   | 13.447    | 10.2837   | 12.0099   |
| 0         | 0         | 0         | 0         | 0         | 0         |
| 9.652     | 9.56859   | 11.0854   | 10.0579   | 9.90456   | 9.32774   |
| 1.14619   | 0.832686  | 0.849475  | 0.498578  | 0.293724  | 0.670329  |
| 0.0551246 | 0.0328901 | 0         | 0.100012  | 0.079136  | 0         |
| 0         | 0         | 0.147583  | 0.13241   | 0         | 0.147885  |
| 0.145166  | 0.138582  | 0.0848047 | 0.0526748 | 0.0812753 | 0.163419  |
| 1.7313    | 1.1566    | 0.655288  | 1.08875   | 1.07388   | 1.68367   |
| 0         | 0         | 0         | 0         | 0         | 0         |
| 156.118   | 216.928   | 178.882   | 173.983   | 169.684   | 162.431   |
| 1.82705   | 1.13136   | 1.51781   | 1.03924   | 0.88044   | 0.680408  |
| 0         | 0         | 0         | 0         | 0         | 0         |
| 0         | 0         | 0         | 0         | 0         | 0         |
| 3.59478   | 2.59878   | 3.52882   | 3.62192   | 3.08434   | 2.80054   |
| 25.6851   | 24.0116   | 28.4071   | 27.4742   | 26.9889   | 27.1825   |
| 6.83288   | 5.05593   | 5.13091   | 6.51471   | 4.44863   | 7.55668   |
| 1.5443    | 0.962359  | 0.624576  | 0.788659  | 0.642922  | 0.741752  |
| 0         | 0         | 0.0276167 | 0.0495547 | 0         | 0.0276731 |
| 31.6935   | 29.6009   | 33.6536   | 30.9678   | 30.3299   | 33.6245   |
| 9.39088   | 8.97367   | 9.62388   | 9.67968   | 11.118    | 8.97704   |
| 12.2096   | 10.6758   | 12.3331   | 12.1638   | 8.98185   | 12.0055   |
| 0.218175  | 0.208279  | 0.117652  | 0.131945  | 0.140944  | 0.147365  |
| 0.278046  | 0.0565423 | 0.663234  | 0.326037  | 0.274357  | 0.213586  |
| 9.54512   | 10.3589   | 10.7037   | 10.6161   | 10.0533   | 10.7822   |
| 37.4682   | 37.4934   | 38.252    | 41.1056   | 37.3406   | 36.3606   |
| 2.02238   | 3.53932   | 2.93708   | 1.93988   | 1.36362   | 1.9592    |
| 3.65667   | 3.80737   | 3.61004   | 4.14381   | 2.86321   | 3.36939   |
| 10.984    | 9.2297    | 11.5996   | 11.1266   | 11.2942   | 9.64484   |
| 0         | 0         | 0         | 0         | 0         | 0         |
| 26.5844   | 26.2188   | 26.7814   | 24.3451   | 22.035    | 23.9414   |
| 1.71635   | 2.31462   | 1.40416   | 1.48434   | 1.31222   | 1.42893   |
| 0         | 0         | 0         | 0         | 0         | 0         |
| 7.52212   | 5.98041   | 5.62871   | 6.1279    | 7.23295   | 6.1331    |

|           |           |           |           |           |           |
|-----------|-----------|-----------|-----------|-----------|-----------|
| 85.359    | 51.4709   | 58.0258   | 50.1422   | 98.4045   | 22.6853   |
| 1.40938   | 0.556537  | 0.596975  | 0.707353  | 0.468035  | 0.333139  |
| 0.664599  | 0.79299   | 0.654801  | 0.612872  | 0.525308  | 0.693058  |
| 6.47529   | 7.79276   | 5.50375   | 7.33845   | 4.5557    | 5.42913   |
| 0         | 0.107947  | 0.487815  | 0         | 0.116878  | 0.549914  |
| 8.39517   | 7.92498   | 6.94217   | 6.95485   | 9.07124   | 8.43243   |
| 0.0949165 | 0.0906112 | 0.076776  | 0.27553   | 0.196215  | 0.076933  |
| 0.0502541 | 0.143924  | 0.121949  | 0.145881  | 0.155831  | 0.162931  |
| 10.7374   | 9.60397   | 11.0926   | 11.8167   | 10.2657   | 11.4883   |
| 0.171561  | 0.171969  | 0.208159  | 0.211659  | 0.119697  | 0.0834337 |
| 5.18556   | 3.82587   | 5.04865   | 4.56797   | 3.55193   | 5.45454   |
| 0.6537    | 0.434606  | 0.453227  | 0.474402  | 0.289576  | 0.302769  |
| 28.9928   | 26.542    | 29.9183   | 29.5833   | 24.3984   | 25.1983   |
| 0.16763   | 0.0600101 | 0         | 0.121652  | 0         | 0         |
| 9.11636   | 8.31666   | 6.11957   | 7.39414   | 7.60795   | 8.14259   |
| 4.66093   | 4.58223   | 5.47939   | 6.44656   | 6.48355   | 5.21709   |
| 1.49674   | 0.951408  | 1.68905   | 1.5048    | 1.23954   | 1.34335   |
| 6.05791   | 3.66735   | 5.29851   | 3.85126   | 4.87754   | 5.70854   |
| 0.830356  | 1.04041   | 1.27615   | 0.753255  | 0.579334  | 0.975896  |
| 18.716    | 16.0826   | 16.7784   | 17.4267   | 18.0916   | 18.8162   |
| 0.151557  | 0.170518  | 0.245182  | 0.18855   | 0.184626  | 0.193037  |
| 9.8442    | 7.65911   | 8.2282    | 8.38242   | 9.51378   | 8.19183   |
| 14.8673   | 12.1157   | 13.1671   | 12.9693   | 15.5957   | 13.5235   |
| 0.0461594 | 0.0495738 | 0         | 0.0167493 | 0.0178917 | 0.0187069 |
| 1.67009   | 2.1031    | 1.89613   | 2.71297   | 1.79419   | 1.46724   |
| 0.0712    | 0         | 0         | 0         | 0         | 0         |
| 0.0514452 | 0.0736676 | 0         | 0.0373347 | 0.0797623 | 0         |
| 1.01244   | 1.89101   | 1.24621   | 1.30976   | 1.19435   | 1.10605   |
| 0         | 0         | 0         | 0         | 0         | 0         |
| 10.2802   | 8.29088   | 9.84348   | 9.28761   | 8.8978    | 9.7744    |
| 0         | 0         | 0         | 0         | 0         | 0         |
| 17.5311   | 12.332    | 14.5301   | 16.5682   | 18.8351   | 14.7991   |
| 7.07232   | 7.17148   | 5.5838    | 6.95795   | 5.31644   | 8.75853   |
| 4.55239   | 4.6493    | 7.29222   | 4.29745   | 6.36583   | 4.2381    |
| 0         | 0         | 0         | 0         | 0         | 0         |
| 10.1186   | 19.6234   | 1.25671   | 1.59007   | 20.8043   | 3.84241   |
| 7.59227   | 7.96248   | 7.87116   | 7.46934   | 7.46068   | 7.45389   |
| 58.0424   | 63.0346   | 62.3198   | 56.8956   | 55.4644   | 49.3378   |
| 0         | 0         | 0         | 0         | 0         | 0.0488894 |
| 0.356033  | 0.198266  | 0.287988  | 0.114836  | 0.0613339 | 0.384769  |
| 0.0730283 | 0.0224086 | 0.0154409 | 0.418801  | 0.0242625 | 0.096703  |
| 0         | 0         | 0.138992  | 0         | 0         | 0         |
| 0.154781  | 0.0316629 | 0.0357712 | 0.0802337 | 0.0514236 | 0.179221  |

|           |            |           |           |            |           |
|-----------|------------|-----------|-----------|------------|-----------|
| 72.0012   | 102.204    | 86.1606   | 81.0012   | 74.0386    | 128.187   |
| 39.0487   | 42.0892    | 40.6838   | 42.9696   | 40.8825    | 41.025    |
| 78.7027   | 59.6068    | 68.4197   | 79.6795   | 92.3001    | 81.5138   |
| 23.7259   | 31.6681    | 27.5671   | 26.9411   | 28.0755    | 26.4962   |
| 1.29E-06  | 0.002409   | 1.07E-06  | 0.173888  | 0.182557   | 8.97E-07  |
| 7.20734   | 5.32172    | 6.34861   | 6.44943   | 6.91298    | 7.84868   |
| 126.727   | 159.613    | 193.278   | 159.368   | 170.353    | 133.97    |
| 12.3277   | 13.2538    | 12.812    | 12.8255   | 9.90437    | 11.6054   |
| 0.0635373 | 0          | 0         | 0         | 0          | 0         |
| 8.86311   | 7.85547    | 8.91386   | 9.90892   | 6.90776    | 7.14486   |
| 111.605   | 133.909    | 118.969   | 111.978   | 116.52     | 106.264   |
| 1.52374   | 1.23643    | 0.986018  | 1.03209   | 1.65372    | 1.31738   |
| 0.196024  | 0.140349   | 0         | 0.426773  | 0.15196    | 0         |
| 2.33287   | 1.54181    | 1.45155   | 1.56277   | 2.15626    | 1.74542   |
| 5.29205   | 4.57352    | 3.60177   | 4.31426   | 2.85547    | 4.89406   |
| 0         | 0.00887498 | 0.0100265 | 0         | 0.00960923 | 0         |
| 12.4722   | 9.20374    | 9.37457   | 10.8365   | 11.79      | 11.8365   |
| 0         | 0.117747   | 0.133024  | 0.119348  | 0.063744   | 0.0666482 |
| 25.0742   | 20.0882    | 21.2791   | 19.662    | 17.749     | 20.5899   |
| 37.1403   | 28.5136    | 33.8972   | 36.2729   | 35.9011    | 34.6053   |
| 3.02419   | 3.10334    | 3.506     | 3.26745   | 3.25591    | 3.51316   |
| 32.0136   | 30.2661    | 33.4063   | 33.2448   | 32.9071    | 34.6214   |
| 4.29197   | 4.42035    | 7.1036    | 5.31905   | 4.5685     | 5.2717    |
| 0         | 0          | 0         | 0         | 0          | 0         |
| 10.8726   | 10.8851    | 11.2121   | 11.6351   | 8.37152    | 9.72366   |
| 3.89068   | 3.14279    | 2.94535   | 3.54752   | 3.44146    | 3.63868   |
| 3.1198    | 0.279215   | 0.157722  | 0.141506  | 0          | 0         |
| 0         | 0          | 0         | 0         | 0          | 0         |
| 0         | 0          | 0         | 0         | 0          | 0         |
| 0.11705   | 0.502835   | 0.284039  | 0.0849456 | 0.0907393  | 0.379493  |
| 3.69118   | 3.30036    | 2.97144   | 2.28143   | 2.43703    | 2.92025   |
| 36.6659   | 33.5381    | 35.795    | 37.0728   | 29.5978    | 32.6223   |
| 13.7905   | 20.4215    | 21.4585   | 19.1317   | 15.9715    | 20.2454   |
| 0         | 0          | 0         | 0         | 0          | 0         |
| 1.86558   | 1.53926    | 1.22164   | 1.28945   | 1.22585    | 1.48332   |
| 38.1839   | 38.5003    | 47.4771   | 39.402    | 46.192     | 41.6176   |
| 10.179    | 8.80158    | 7.63696   | 7.72578   | 4.86034    | 8.03121   |
| 21.6476   | 20.8128    | 20.5503   | 15.55     | 15.8545    | 18.5331   |
| 211.375   | 41.357     | 53.3887   | 135.809   | 128.425    | 189.97    |
| 8.74052   | 7.76567    | 7.90558   | 8.10194   | 7.97695    | 8.43698   |
| 6.71993   | 9.93863    | 8.07315   | 8.32507   | 9.3142     | 8.50042   |
| 15.264    | 17.2018    | 16.7697   | 15.873    | 13.0604    | 14.7335   |
| 34.8143   | 25.6805    | 36.346    | 31.8101   | 37.2187    | 36.7722   |



|           |          |           |          |          |          |
|-----------|----------|-----------|----------|----------|----------|
| 0.231698  | 0.174472 | 5.35E-09  | 0.3206   | 0.163058 | 0.258511 |
| 6.4548    | 4.73958  | 4.16775   | 5.60982  | 6.173    | 7.36579  |
| 16.6986   | 16.9282  | 15.9372   | 15.8277  | 16.1511  | 16.2228  |
| 9.36942   | 6.57794  | 8.15781   | 8.19411  | 7.63817  | 9.02451  |
| 0         | 0        | 0         | 0        | 0        | 0        |
| 49.5899   | 45.9946  | 54.2865   | 55.4645  | 57.8514  | 53.8543  |
| 0         | 0        | 0         | 0        | 0        | 0        |
| 2.65468   | 3.87978  | 3.23205   | 3.07851  | 2.88537  | 3.66012  |
| 0         | 0        | 0         | 0        | 0        | 0        |
| 0         | 0.118304 | 0.0334134 | 0        | 0        | 0.122671 |
| 7.90912   | 5.05897  | 7.35472   | 7.06472  | 7.32186  | 7.91335  |
| 0         | 0        | 0         | 0        | 0        | 0        |
| 10.5206   | 9.63997  | 10.9576   | 10.855   | 12.2057  | 8.93855  |
| 3.6661    | 0        | 0         | 0        | 0        | 2.9715   |
| 0         | 0        | 0         | 0        | 0        | 0        |
| 5.95821   | 5.87236  | 5.06137   | 4.25244  | 4.1378   | 3.83669  |
| 31.2712   | 46.8293  | 33.8635   | 30.7149  | 24.1567  | 33.1826  |
| 109.974   | 116.359  | 92.7628   | 95.6749  | 114.264  | 35.8418  |
| 3.23977   | 2.53539  | 2.25492   | 2.2418   | 2.10267  | 2.50381  |
| 611.681   | 828.081  | 753.456   | 753.093  | 755.351  | 972.562  |
| 5.47343   | 4.8892   | 5.70449   | 5.17297  | 5.16348  | 5.53082  |
| 49.4045   | 49.3845  | 48.5045   | 51.9267  | 56.759   | 46.5516  |
| 0         | 0        | 0         | 0        | 0        | 0        |
| 0.111352  | 0.206247 | 0.189658  | 0.273725 | 0.110098 | 0.298913 |
| 164.487   | 289.538  | 186.43    | 143.164  | 131.658  | 261.056  |
| 12.1618   | 7.89713  | 11.2576   | 10.0192  | 11.5906  | 10.4851  |
| 15.3056   | 12.8213  | 12.7406   | 14.6796  | 15.6445  | 18.1811  |
| 0.312079  | 0        | 0         | 0        | 0        | 0        |
| 4.46485   | 1.98759  | 1.84094   | 2.11982  | 2.28688  | 2.52031  |
| 12.2786   | 10.4767  | 11.2003   | 11.3213  | 11.8617  | 9.89993  |
| 65.7855   | 60.5251  | 66.814    | 67.7233  | 71.8087  | 57.7847  |
| 0         | 0        | 0         | 0        | 0        | 0        |
| 0.0843902 | 0        | 0         | 0        | 0        | 0        |
| 0         | 0        | 0.0827376 | 0.148463 | 0        | 0        |
| 22.1292   | 19.9406  | 21.6764   | 21.5986  | 23.7068  | 23.4248  |
| 0         | 0        | 0         | 0        | 0        | 0        |
| 6.84384   | 5.75002  | 6.12927   | 5.63707  | 6.32807  | 6.28545  |
| 0         | 0        | 0         | 0        | 0        | 0        |
| 1.22763   | 2.50166  | 1.90963   | 2.74128  | 2.70863  | 1.53083  |
| 15.9956   | 16.5821  | 14.6161   | 10.3347  | 11.395   | 10.352   |
| 10.4412   | 9.4684   | 9.1406    | 10.4026  | 8.23211  | 10.0077  |
| 52.1519   | 59.8952  | 63.5137   | 70.8193  | 50.8548  | 55.9055  |
| 43.8781   | 43.077   | 36.1608   | 42.745   | 33.2285  | 38.9405  |

|           |           |           |           |          |           |
|-----------|-----------|-----------|-----------|----------|-----------|
| 0         | 0         | 0         | 0         | 0        | 0.0486113 |
| 7.43784   | 5.57622   | 4.79244   | 5.15505   | 4.32136  | 6.02862   |
| 51.0873   | 48.0943   | 48.2809   | 41.0539   | 42.5338  | 43.7783   |
| 35.7628   | 35.8193   | 27.7314   | 32.6604   | 23.0562  | 29.2306   |
| 0.895525  | 0.728965  | 0.725791  | 1.30371   | 0.697519 | 0.795297  |
| 16.008    | 15.8262   | 16.3092   | 19.0108   | 19.2256  | 17.1917   |
| 13.4105   | 15.8894   | 13.2701   | 13.2198   | 13.3103  | 12.4565   |
| 0         | 0         | 0         | 0         | 0        | 0         |
| 2.51692   | 2.08147   | 2.54474   | 2.98606   | 1.84555  | 2.21159   |
| 2.76908   | 2.09124   | 2.1478    | 2.918     | 1.82317  | 4.79631   |
| 7.43679   | 7.29267   | 6.73525   | 7.08778   | 6.39405  | 5.66668   |
| 0         | 0         | 0         | 0         | 0        | 0         |
| 4.36115   | 3.27472   | 3.33213   | 3.2785    | 2.79711  | 3.53514   |
| 0         | 0         | 0         | 0         | 0        | 0         |
| 0         | 0         | 0         | 0         | 2.16382  | 0         |
| 13.5896   | 10.8842   | 12.5416   | 12.1936   | 13.7582  | 14.8174   |
| 1.57119   | 1.65432   | 2.24277   | 2.07926   | 1.71954  | 2.24735   |
| 12.0044   | 8.94007   | 11.2672   | 10.7509   | 9.78871  | 10.5187   |
| 19.0407   | 17.9356   | 20.0702   | 21.7204   | 18.4277  | 20.7141   |
| 25.4515   | 19.6433   | 18.7764   | 21.5571   | 14.9337  | 18.3655   |
| 0         | 0         | 0         | 0         | 0        | 0         |
| 0.098324  | 0         | 0.0151102 | 0.0357879 | 0.222636 | 0.0399705 |
| 0.0151614 | 0         | 0         | 0.0330087 | 0        | 0         |
| 2.91845   | 2.56318   | 2.86428   | 2.37213   | 2.38309  | 2.96476   |
| 32.2913   | 28.4609   | 27.8989   | 26.9219   | 26.7111  | 20.4619   |
| 1.09305   | 0.917523  | 1.05322   | 0.690655  | 0.845959 | 1.24359   |
| 1.44525   | 0.716514  | 0.914344  | 0.927867  | 1.12038  | 1.41164   |
| 13.1415   | 10.3242   | 12.2646   | 12.0501   | 12.4063  | 11.3157   |
| 42.6037   | 55.5637   | 36.8848   | 50.0903   | 42.5285  | 45.6982   |
| 0.165605  | 0.0296424 | 0         | 0         | 0        | 0         |
| 6.83023   | 8.36013   | 9.9797    | 6.4667    | 9.60651  | 5.31787   |
| 3.7643    | 4.39051   | 2.40643   | 3.43681   | 1.50614  | 3.29733   |
| 0         | 0         | 0.506716  | 0         | 0        | 0         |
| 21.45     | 26.0675   | 24.1953   | 23.1682   | 21.7775  | 24.9958   |
| 1.76747   | 1.98631   | 1.46586   | 1.76978   | 1.47423  | 1.83154   |
| 0         | 0.0634119 | 0.0716396 | 0         | 0        | 0         |
| 12.623    | 15.3801   | 14.2409   | 12.8572   | 12.9615  | 12.2956   |
| 0         | 0         | 0.107464  | 0         | 0        | 0.215367  |
| 0.0418    | 0.059856  | 0.135245  | 0.273015  | 0.226828 | 0.0677606 |
| 0         | 0         | 0         | 0         | 0        | 0         |
| 0.0752667 | 0         | 0         | 0         | 0        | 0.0610062 |
| 3.04748   | 2.90925   | 2.71155   | 1.62185   | 2.20496  | 1.72906   |
| 0         | 0         | 0         | 0         | 0        | 0         |

|           |           |           |           |           |           |
|-----------|-----------|-----------|-----------|-----------|-----------|
| 0.240288  | 0.0860209 | 0.242955  | 0.174381  | 0.0465688 | 0.146071  |
| 0         | 0         | 0         | 0         | 0         | 0         |
| 10.5053   | 6.9951    | 4.8436    | 8.0051    | 7.65526   | 6.13074   |
| 5.45E-10  | 1.10E-07  | 2.23E-08  | 7.92E-09  | 7.27E-09  | 4.23E-08  |
| 0.515163  | 0.423089  | 0.600545  | 0.582786  | 0.505076  | 0.650897  |
| 0.325859  | 0         | 0.263581  | 0.236482  | 0         | 0         |
| 810.079   | 1687.27   | 1001.8    | 960.837   | 808.189   | 1915.55   |
| 617.2     | 220.952   | 340.391   | 244.316   | 130.49    | 272.87    |
| 2.14432   | 1.3346    | 1.2697    | 1.81045   | 1.49934   | 1.53357   |
| 0.277972  | 0.0720576 | 0.221345  | 0.0755451 | 0.0793527 | 0.24089   |
| 0.974952  | 0.923223  | 0.864937  | 0.730364  | 0.658276  | 1.22358   |
| 4.05572   | 2.25132   | 3.31745   | 3.77003   | 1.51899   | 2.36397   |
| 0.0754977 | 0.0735747 | 0.183206  | 0.0182633 | 0         | 0.0203978 |
| 0.522513  | 2.99287   | 1.05663   | 1.51679   | 1.41771   | 0.423514  |
| 7.06181   | 6.41448   | 5.267     | 10.0968   | 10.4041   | 10.0523   |
| 26.9771   | 25.5738   | 26.4635   | 23.9356   | 22.808    | 25.5198   |
| 10.6233   | 14.6985   | 9.95446   | 8.85093   | 10.6953   | 10.5116   |
| 0.0494206 | 0.0353842 | 0.139914  | 0.0358654 | 0.0574675 | 0.0600856 |
| 27.8122   | 22.4425   | 29.8455   | 24.8019   | 29.2527   | 34.3233   |
| 24.8819   | 25.1313   | 27.243    | 27.0693   | 24.937    | 22.7304   |
| 12.8286   | 15.1042   | 9.17525   | 13.5892   | 9.63085   | 10.9088   |
| 0         | 0         | 0         | 0         | 0         | 0         |
| 8.24999   | 6.1268    | 5.8701    | 8.59456   | 5.84654   | 8.29912   |
| 0         | 0         | 0         | 0         | 0         | 0         |
| 15.8613   | 9.66828   | 8.53014   | 10.6397   | 7.97574   | 10.2502   |
| 0.068665  | 0.196651  | 0.583188  | 0.298988  | 0.425841  | 2.50449   |
| 0         | 0         | 0         | 0         | 0         | 0         |
| 0         | 0         | 0         | 0         | 0         | 0         |
| 1.85645   | 2.27718   | 0.505383  | 1.3179    | 0.606483  | 1.43717   |
| 0.0660825 | 0.0709707 | 0.0267264 | 0         | 0         | 0.026781  |
| 0.0515171 | 0.0737705 | 0.0416711 | 0         | 0         | 0         |
| 0         | 0         | 0         | 0         | 0         | 0         |
| 0.0893168 | 0         | 0         | 0         | 0.0346199 | 0         |
| 0         | 0         | 0         | 0         | 0         | 0         |
| 0.0231086 | 0.0165453 | 0.0934604 | 0.0335406 | 0.0179141 | 0.0561909 |
| 21.0166   | 27.6558   | 24.755    | 34.3857   | 20.8174   | 16.8266   |
| 1.39872   | 0.993232  | 1.10371   | 1.01482   | 1.44543   | 1.2442    |
| 6.6785    | 6.82949   | 7.93227   | 6.8666    | 4.63988   | 5.24783   |
| 0         | 0         | 0         | 0         | 0         | 0         |
| 0         | 0         | 0         | 0         | 0         | 0         |
| 12.8518   | 13.4462   | 12.9914   | 13.3587   | 13.1677   | 11.8229   |
| 0         | 0         | 0         | 0.0669052 | 0         | 0         |
| 0         | 0         | 0         | 0         | 0         | 0         |

|           |           |            |            |            |            |
|-----------|-----------|------------|------------|------------|------------|
| 9.84912   | 11.9618   | 12.8884    | 11.3122    | 9.93837    | 11.3643    |
| 0.0829423 | 0.11877   | 0.0335452  | 0.0902891  | 0.160745   | 0.168069   |
| 0.218035  | 0.160438  | 0.348901   | 0.15548    | 0.18327    | 0.347758   |
| 1.9147    | 2.38416   | 1.6161     | 2.35616    | 1.61338    | 1.28203    |
| 0.280471  | 0.301217  | 0.17015    | 0.305314   | 0          | 0.227331   |
| 1.02374   | 1.11211   | 0.599647   | 0.589235   | 0.711522   | 1.25897    |
| 14.3755   | 13.8483   | 14.694     | 15.5256    | 15.8029    | 11.8614    |
| 15.7257   | 11.4308   | 12.1391    | 16.3945    | 11.6339    | 13.005     |
| 13.5678   | 10.6093   | 10.6891    | 11.311     | 12.278     | 15.6743    |
| 0         | 0         | 0          | 0          | 0          | 0          |
| 0.454877  | 0.162842  | 0          | 0          | 0.176314   | 0.184347   |
| 0.61128   | 0.437064  | 0.283416   | 1.61381    | 0.676478   | 0.353416   |
| 24.7217   | 21.3887   | 19.2558    | 20.7204    | 22.5877    | 21.9977    |
| 0.894865  | 0.71423   | 0.640775   | 0.713297   | 0.705086   | 0.832332   |
| 0         | 0         | 0          | 0          | 0          | 0          |
| 3.83572   | 4.06135   | 3.49135    | 3.31437    | 3.92554    | 3.90587    |
| 13.8888   | 10.7271   | 10.0823    | 11.3038    | 9.84591    | 10.988     |
| 13.3509   | 12.5062   | 12.487     | 14.6057    | 14.1614    | 12.6516    |
| 0.949191  | 0.951444  | 1.22845    | 1.37769    | 1.61882    | 0.692416   |
| 18.9961   | 14.7983   | 16.5664    | 16.745     | 15.6984    | 16.736     |
| 2.1308    | 1.855     | 2.33072    | 2.47768    | 2.60913    | 2.61025    |
| 0         | 0         | 0          | 0          | 0          | 0          |
| 0.569818  | 0.605492  | 0.868974   | 0.529043   | 0.45832    | 0.526883   |
| 0         | 0.0225222 | 0.00647679 | 0.0138355  | 0.00295583 | 0.00927147 |
| 0         | 0         | 0          | 0          | 0          | 0          |
| 0.333215  | 0.477151  | 0          | 0          | 0.258313   | 0          |
| 0.117187  | 0.125855  | 0.426555   | 0          | 0.0454225  | 0.0949839  |
| 0         | 0         | 0          | 0.064644   | 0          | 0          |
| 1.66E-60  | 5.62389   | 0.866907   | 1.30734    | 2.46728    | 3.26E-48   |
| 0.86121   | 0.702936  | 0.529428   | 0.662496   | 0.547451   | 0.642197   |
| 67.2598   | 54.7393   | 47.5174    | 55.8678    | 50.3683    | 58.8005    |
| 0         | 0         | 0          | 0          | 0          | 0          |
| 0.921687  | 1.22555   | 0.639029   | 0.76444    | 0.714506   | 0.960503   |
| 45.0653   | 47.3331   | 51.4007    | 44.6199    | 35.5022    | 44.5021    |
| 0.239727  | 0.338519  | 0.356783   | 0.216167   | 0.298552   | 0.264945   |
| 2.98896   | 3.04637   | 2.45534    | 2.43373    | 2.84317    | 3.56022    |
| 0         | 0         | 0          | 0          | 0          | 0          |
| 25.8968   | 25.1661   | 20.4695    | 27.2368    | 19.0108    | 24.6562    |
| 0         | 0         | 0          | 0          | 0          | 0.0313746  |
| 1.83498   | 3.44395   | 1.69096    | 1.72486    | 4.28385    | 1.53377    |
| 0         | 0         | 0          | 0          | 0          | 0          |
| 15.1991   | 12.6176   | 13.0585    | 12.4612    | 10.6999    | 11.5536    |
| 0         | 0         | 0          | 0.00777029 | 0          | 0          |

|           |           |           |           |           |           |
|-----------|-----------|-----------|-----------|-----------|-----------|
| 1.84711   | 1.61738   | 1.66675   | 1.74418   | 1.70491   | 1.9755    |
| 16.7145   | 22.5657   | 20.5194   | 16.3344   | 18.0973   | 13.5438   |
| 20.8853   | 19.9298   | 18.6817   | 18.6039   | 18.275    | 18.0814   |
| 0.0327746 | 0.105602  | 0.119304  | 0.0237851 | 0.112838  | 0.119548  |
| 18.8866   | 17.0471   | 14.7702   | 13.3816   | 14.9188   | 14.5102   |
| 0.332756  | 0.336041  | 0.372927  | 0.130116  | 0.401685  | 0.304387  |
| 0.0636598 | 0.0227896 | 0.0257465 | 0.046199  | 0.0740251 | 0.0257992 |
| 0         | 0         | 0         | 0         | 0         | 0         |
| 0.0744316 | 0.0532916 | 0         | 0.270082  | 0.288503  | 0.120659  |
| 79.5376   | 79.1925   | 84.2641   | 82.816    | 98.552    | 64.3494   |
| 0         | 0.141895  | 0.0801528 | 0.0719122 | 0.153634  | 0.120475  |
| 0.0450189 | 0.112814  | 0.0546224 | 0.0980131 | 0.0174497 | 0.0182447 |
| 2.77039   | 3.55671   | 3.63183   | 2.95801   | 1.82674   | 2.34874   |
| 3.8283    | 2.74798   | 3.06502   | 2.96254   | 3.71726   | 3.83912   |
| 0         | 0         | 0         | 0         | 0         | 0         |
| 2.07661   | 2.07661   | 4.16072   | 4.16072   | 2.96093   | 2.96093   |
| 88.3592   | 77.4237   | 90.4748   | 86.5378   | 100.256   | 93.8282   |
| 13.7095   | 21.8378   | 19.8557   | 15.2433   | 18.3793   | 16.4641   |
| 18.8085   | 20.5264   | 21.1504   | 22.0253   | 18.3902   | 20.3958   |
| 0.30297   | 0.223918  | 0.153166  | 0.0893225 | 0.271775  | 0.214871  |
| 0.517369  | 0.477916  | 0.361694  | 0.21902   | 0.28648   | 0.600728  |
| 0         | 0         | 0         | 0         | 0         | 0         |
| 1.6438    | 2.6555    | 1.53202   | 2.56554   | 1.34558   | 1.25991   |
| 2.32624   | 1.70048   | 2.5922    | 1.88889   | 2.15644   | 2.33379   |
| 27.1487   | 14.5551   | 22.7287   | 25.1519   | 19.905    | 31.1573   |
| 11.0954   | 7.88733   | 10.2356   | 12.1165   | 10.4035   | 10.1709   |
| 7.17987   | 6.55238   | 5.64796   | 7.12453   | 6.55364   | 6.99224   |
| 4.03301   | 4.32349   | 3.36361   | 2.7249    | 2.19132   | 3.29114   |
| 2.94926   | 3.48794   | 3.4293    | 2.8283    | 5.67496   | 2.75332   |
| 1.96173   | 1.38013   | 1.29354   | 1.75241   | 1.47914   | 1.55974   |
| 0.0450125 | 0.0322281 | 0         | 0.0326664 | 0.0348944 | 0         |
| 0         | 0         | 0         | 0         | 0         | 0         |
| 0.874951  | 0.0963766 | 0.489967  | 0.586124  | 0.365225  | 0.218208  |
| 0.402916  | 0.19232   | 0         | 0.0974679 | 0         | 0.217718  |
| 0.747078  | 0.45848   | 0.462472  | 0.409392  | 0.354579  | 0.426344  |
| 0         | 0         | 0         | 0         | 0         | 0         |
| 0         | 0.0127767 | 0.0108259 | 0         | 0         | 0         |
| 2.73191   | 2.39179   | 2.34718   | 1.48952   | 1.93128   | 2.17989   |
| 3.6374    | 3.30124   | 1.86479   | 1.63589   | 2.18433   | 1.95165   |
| 12.3961   | 6.17575   | 17.9209   | 8.79936   | 19.3912   | 10.8465   |
| 1.73314   | 1.12651   | 0.391454  | 0.318689  | 0.500216  | 1.0979    |
| 0.450525  | 0.266103  | 0.491212  | 0.524102  | 0.297617  | 0.377969  |
| 0         | 0.216337  | 0.244407  | 0.219279  | 0.117118  | 0.244907  |

|           |           |          |           |           |           |
|-----------|-----------|----------|-----------|-----------|-----------|
| 9.28646   | 11.0294   | 11.3116  | 10.1487   | 8.38473   | 6.0245    |
| 0.196772  | 0.140885  | 0.171408 | 0.219694  | 0.140807  | 0.257638  |
| 15.1873   | 10.3006   | 5.85119  | 7.79397   | 6.90413   | 8.78652   |
| 67.7507   | 79.1376   | 85.9866  | 104.897   | 88.0819   | 123.65    |
| 1.89969   | 1.83595   | 1.07597  | 1.29653   | 1.15383   | 1.44806   |
| 2.62255   | 2.76919   | 2.57115  | 2.97148   | 2.45013   | 2.04089   |
| 12.9749   | 10.463    | 12.0446  | 12.6471   | 12.4076   | 11.8812   |
| 23.5978   | 16.3328   | 41.4029  | 29.181    | 35.8241   | 41.9645   |
| 0         | 0.229259  | 0        | 0         | 0         | 0.259535  |
| 3.74102   | 2.87087   | 3.14306  | 2.50493   | 3.17248   | 3.93686   |
| 5.05913   | 3.69492   | 3.75006  | 3.38911   | 4.18424   | 4.42973   |
| 36.1666   | 35.5142   | 38.511   | 41.2692   | 33.719    | 40.4891   |
| 24.9293   | 25.4328   | 29.9876  | 31.4857   | 28.9884   | 30.5693   |
| 6.32498   | 4.63704   | 6.09649  | 6.34925   | 5.8134    | 5.4029    |
| 0         | 0         | 0        | 0         | 0         | 0         |
| 42.1214   | 32.9415   | 33       | 39.683    | 39.6077   | 24.5495   |
| 0.0402935 | 0.0532155 | 0.130371 | 0.111138  | 0.105527  | 0.0326592 |
| 0.81461   | 1.25858   | 0.572221 | 1.19791   | 0.797682  | 0.990403  |
| 15.5667   | 14.5939   | 14.4616  | 14.8157   | 13.0084   | 13.4449   |
| 0         | 0         | 0        | 0.0726208 | 0.0775739 | 0         |
| 161.472   | 137.539   | 142.501  | 159.868   | 173.831   | 175.789   |
| 0         | 0         | 0        | 0         | 0         | 0         |
| 15.5248   | 20.4174   | 14.144   | 19.3905   | 11.8873   | 13.9963   |
| 0.0530821 | 0         | 0.042937 | 0         | 0         | 0.0860497 |
| 20.8265   | 14.4568   | 11.1195  | 14.3539   | 15.8005   | 18.3988   |
| 1.00989   | 0.552936  | 0.432914 | 0.527865  | 0.798604  | 0.389966  |
| 0         | 0         | 0        | 0         | 0         | 0         |
| 0         | 0.386171  | 0.145426 | 0.391423  | 0.278746  | 0.291446  |
| 94.2129   | 81.5303   | 61.7738  | 88.3436   | 100.312   | 96.6392   |
| 109.369   | 147.009   | 115.399  | 113.948   | 101.894   | 119.619   |
| 1.73308   | 0.894275  | 1.23018  | 1.39718   | 1.21132   | 1.72094   |
| 0         | 0.0233488 | 0        | 0.0236664 | 0         | 0         |
| 3.01117   | 3.04499   | 2.25991  | 1.82481   | 1.23935   | 1.27065   |
| 39.059    | 32.7112   | 30.8281  | 31.4953   | 27.4653   | 30.3475   |
| 0.505026  | 0.221884  | 0.102126 | 0.433144  | 0.28473   | 0.260489  |
| 0.110562  | 0         | 0        | 0.160474  | 0         | 0.0896142 |
| 8.33816   | 5.61033   | 7.15087  | 7.5888    | 6.49219   | 7.27653   |
| 22.1945   | 23.6555   | 21.7853  | 19.1347   | 20.1688   | 17.6936   |
| 7.54986   | 4.96359   | 5.5436   | 5.93853   | 5.81596   | 6.6454    |
| 1.14847   | 1.09573   | 1.6651   | 0.970051  | 1.94833   | 1.54848   |
| 12.053    | 10.1383   | 10.8766  | 9.47447   | 10.064    | 12.5759   |
| 0         | 0         | 0        | 0         | 0         | 0         |
| 3.19054   | 2.33468   | 3.09237  | 2.73364   | 2.98546   | 2.11896   |

|           |           |            |           |           |           |
|-----------|-----------|------------|-----------|-----------|-----------|
| 0.63789   | 0.664932  | 0.311785   | 0.709227  | 0.494502  | 0.568041  |
| 12.3284   | 13.5658   | 14.3585    | 13.7519   | 11.5212   | 13.0884   |
| 8.71594   | 8.77689   | 8.6182     | 7.07747   | 12.2685   | 12.7595   |
| 24.1413   | 20.726    | 25.247     | 24.1622   | 22.6136   | 26.5752   |
| 1.23213   | 1.05862   | 0.398657   | 1.25185   | 0.382066  | 0.199736  |
| 39.957    | 28.5837   | 37.9218    | 34.5038   | 30.2951   | 33.4872   |
| 27.4388   | 27.4183   | 22.087     | 19.8858   | 21.65     | 26.0044   |
| 6.97762   | 7.77571   | 6.69083    | 6.94223   | 4.95858   | 5.60999   |
| 1.36873   | 1.32479   | 1.14814    | 1.76589   | 1.61124   | 2.05445   |
| 0         | 0         | 0          | 0         | 0         | 0         |
| 0.293989  | 0.493843  | 0.320118   | 0.262589  | 0.368154  | 0.339102  |
| 9.82383   | 8.17      | 5.30141    | 6.25192   | 6.52133   | 7.00233   |
| 0         | 0         | 0          | 0         | 0         | 0         |
| 0.32398   | 0.43079   | 0.262061   | 0.302295  | 0.43055   | 0.262597  |
| 8.43304   | 5.241     | 4.87159    | 6.19437   | 4.4571    | 6.55853   |
| 1.35249   | 0.833236  | 0.865023   | 0.958698  | 0.902171  | 0.930526  |
| 0.0225095 | 0.0161163 | 0          | 0.0163355 | 0         | 0.0182447 |
| 5.27438   | 5.23817   | 6.19308    | 5.22122   | 5.08115   | 5.70009   |
| 10.3561   | 7.44541   | 4.81149    | 9.16159   | 11.8101   | 12.5563   |
| 0.941143  | 0.585948  | 0.198593   | 0.564221  | 0.444097  | 0.331664  |
| 3.08503   | 2.34687   | 2.65138    | 3.35829   | 3.13892   | 3.90706   |
| 34.7206   | 35.4806   | 31.3997    | 31.2222   | 30.0402   | 31.0748   |
| 0.486787  | 0.465676  | 0.415617   | 0.642852  | 0.563897  | 0.799871  |
| 13.8452   | 17.077    | 16.0709    | 13.8962   | 13.2442   | 13.2447   |
| 0.0182334 | 0.101058  | 0.00632086 | 0.0409392 | 0.0428661 | 0         |
| 1.58235   | 1.47281   | 1.51459    | 1.41629   | 1.51289   | 1.49631   |
| 10.8632   | 11.372    | 8.83006    | 10.0929   | 10.6356   | 8.08607   |
| 1.11912   | 1.31727   | 1.24007    | 0.863778  | 0.588518  | 0.79033   |
| 3.68623   | 1.97946   | 3.72822    | 3.00956   | 4.76271   | 2.61434   |
| 1.30628   | 0.552912  | 0.528702   | 0.703949  | 0.506698  | 0.994646  |
| 0         | 0         | 0          | 0         | 0         | 0         |
| 13.3325   | 13.017    | 14.2316    | 12.2577   | 12.0026   | 13.2149   |
| 0         | 606.972   | 0          | 922.889   | 0         | 0         |
| 35.4361   | 24.498    | 61.9249    | 34.0473   | 41.8078   | 66.4115   |
| 1.12456   | 1.87872   | 2.4257     | 1.29219   | 1.16237   | 1.29129   |
| 0         | 0         | 0          | 0         | 0         | 0         |
| 0.912395  | 0.675033  | 0.516612   | 0.48557   | 0.612996  | 1.05999   |
| 43.3427   | 47.0736   | 58.1616    | 48.3343   | 43.4867   | 46.3194   |
| 16.732    | 17.6592   | 11.3954    | 15.603    | 12.5676   | 10.4348   |
| 19.8182   | 17.139    | 18.1533    | 17.0101   | 14.9082   | 17.1233   |
| 67.8953   | 65.4491   | 79.138     | 77.6142   | 89.4219   | 61.7174   |
| 1.16223   | 0.594384  | 0.268602   | 1.08444   | 0         | 0.134576  |
| 12.6333   | 9.49256   | 11.5822    | 11.0732   | 11.9567   | 12.5259   |

|           |           |            |             |           |           |
|-----------|-----------|------------|-------------|-----------|-----------|
| 3.01298   | 3.11898   | 3.18575    | 3.57611     | 2.80405   | 3.19064   |
| 14.5018   | 10.5615   | 11.1218    | 11.9148     | 13.3853   | 11.9944   |
| 9.82883   | 8.16166   | 9.13303    | 9.13726     | 9.23571   | 8.62499   |
| 0.207022  | 0.444671  | 0.334911   | 0.300479    | 0.320973  | 0.167798  |
| 0         | 0         | 0          | 0           | 0         | 0         |
| 0         | 0         | 0          | 0           | 0         | 0         |
| 7.29157   | 4.30368   | 7.45543    | 6.33189     | 6.45585   | 7.55816   |
| 2.12784   | 1.70816   | 1.96456    | 2.57371     | 1.94945   | 1.68984   |
| 40.5717   | 34.997    | 44.3871    | 40.3523     | 37.1025   | 31.5697   |
| 0.263659  | 0.188775  | 0.298576   | 0.191342    | 0.28615   | 0.299187  |
| 0         | 0         | 0          | 0           | 0         | 0         |
| 0         | 0         | 0          | 0           | 0         | 0         |
| 4.3834    | 4.96782   | 1.10603    | 0.595268    | 3.37158   | 5.09277   |
| 0         | 0         | 0.0524784  | 0           | 0         | 0         |
| 1.26E-247 | 0         | 2.99E-248  | 1.094179999 | 8.28E-295 | 2.69E-202 |
| 22.4328   | 21.3261   | 30.5176    | 28.564      | 29.1738   | 27.7576   |
| 6.40207   | 5.20942   | 6.12215    | 5.1156      | 4.99177   | 4.68669   |
| 1.96312   | 1.49582   | 2.34547    | 1.80371     | 1.32638   | 1.83934   |
| 39.5564   | 38.8088   | 42.0652    | 36.2843     | 36.6545   | 35.0468   |
| 21.4101   | 26.5725   | 26.973     | 24.1908     | 26.6889   | 23.0978   |
| 0         | 0         | 0          | 0           | 0         | 0         |
| 22.9011   | 19.0685   | 23.1186    | 23.0903     | 22.4124   | 22.751    |
| 0.0543928 | 0.0194721 | 0.0219986  | 0.0197369   | 0         | 0         |
| 4.10731   | 4.428     | 3.13296    | 2.89247     | 4.07805   | 5.90048   |
| 0.0254658 | 0.0425437 | 0          | 0.018481    | 0.0394829 | 0.0412817 |
| 1.79444   | 1.73625   | 1.66032    | 2.15301     | 1.21061   | 1.5985    |
| 0.0142644 | 0         | 0.00384605 | 0           | 0.0294879 | 0         |
| 41.315    | 31.0296   | 39.523     | 45.097      | 47.9113   | 44.8319   |
| 0.178482  | 0         | 0          | 0           | 0         | 0         |
| 14.0604   | 15.0048   | 14.1481    | 12.8481     | 10.2141   | 12.6696   |
| 78.5305   | 71.0447   | 53.9852    | 81.7243     | 57.9117   | 67.7522   |
| 0.468939  | 0.0604352 | 0.0986219  | 0.183771    | 0.196305  | 0.0608145 |
| 0.0943502 | 0.091947  | 0.076318   | 0.0684716   | 0.0487611 | 0.179501  |
| 28.6686   | 27.0521   | 28.0959    | 26.8669     | 28.4615   | 26.7659   |
| 0         | 0         | 0          | 0.0721317   | 0         | 0         |
| 0.312312  | 0         | 0          | 0           | 0.243628  | 0         |
| 5.92745   | 4.51439   | 3.797      | 5.35753     | 4.83823   | 5.71468   |
| 7.54029   | 6.05878   | 6.05209    | 6.12709     | 7.09417   | 5.72624   |
| 13.9612   | 12.3101   | 13.047     | 12.3351     | 12.6321   | 13.0485   |
| 28.2377   | 23.1545   | 28.0783    | 30.2931     | 22.7314   | 29.1757   |
| 21.9983   | 17.296    | 19.6732    | 20.6197     | 31.1478   | 21.2132   |
| 0         | 0.0357135 | 0          | 0           | 0.0773362 | 0.0808596 |
| 0.590641  | 0.516862  | 0.690094   | 0.508016    | 0.457874  | 0.585119  |



|          |           |          |           |           |           |
|----------|-----------|----------|-----------|-----------|-----------|
| 5.57073  | 5.51237   | 5.46022  | 5.68452   | 5.31787   | 6.06289   |
| 7.54386  | 7.21649   | 7.04514  | 6.42365   | 5.66512   | 5.24578   |
| 7.08715  | 5.25093   | 7.59679  | 7.56249   | 7.95513   | 9.60975   |
| 0        | 0.26857   | 0        | 0         | 0         | 0         |
| 5.66652  | 4.02259   | 5.16866  | 4.82976   | 4.59839   | 4.7688    |
| 61.1873  | 56.0433   | 56.0209  | 64.641    | 66.0513   | 66.3192   |
| 0        | 0         | 0        | 0.110099  | 0         | 0         |
| 0        | 0         | 0        | 0         | 0.0337021 | 0         |
| 9.18419  | 6.30929   | 6.99525  | 7.6863    | 7.66164   | 7.46553   |
| 0        | 0         | 0        | 0         | 0         | 0         |
| 2.93804  | 2.2781    | 2.77207  | 2.26695   | 2.43906   | 2.32493   |
| 22.4269  | 15.4289   | 20.3754  | 21.0876   | 20.4597   | 22.1031   |
| 11.2147  | 12.7265   | 10.6482  | 14.4113   | 11.2      | 11.226    |
| 0.149922 | 0.697717  | 0.42444  | 0.489604  | 0.0581108 | 0.182275  |
| 0        | 0         | 0        | 0.0474895 | 0.0760927 | 0.0265198 |
| 23.8037  | 27.5206   | 26.0737  | 23.2802   | 22.6524   | 23.386    |
| 0        | 0         | 0        | 0         | 0         | 0         |
| 0        | 0         | 0        | 0         | 0         | 0         |
| 18.0152  | 17.1839   | 15.4252  | 15.003    | 12.3276   | 14.0341   |
| 9.09151  | 7.17354   | 6.57025  | 6.64151   | 8.26013   | 7.7343    |
| 15.9908  | 13.9427   | 37.693   | 54.7492   | 38.3044   | 96.6516   |
| 0.262237 | 0.15445   | 0.222099 | 0.899827  | 0.425256  | 0.614487  |
| 6.02265  | 4.13729   | 6.41867  | 6.20174   | 6.18308   | 4.71665   |
| 4.47125  | 5.93223   | 3.70031  | 3.74196   | 2.74485   | 3.48844   |
| 13.8545  | 11.4977   | 16.5553  | 10.3973   | 10.4962   | 14.675    |
| 14.4983  | 12.603    | 13.3226  | 14.7357   | 12.2727   | 13.3646   |
| 0        | 0         | 0        | 0         | 0         | 0         |
| 13.0085  | 12.7456   | 13.2599  | 11.8038   | 14.3119   | 13.4219   |
| 2.31827  | 1.43852   | 1.2918   | 2.31799   | 0.998421  | 1.3362    |
| 0        | 0.0363523 | 0.041069 | 0.22108   | 0.196799  | 0.123459  |
| 2.00296  | 2.36286   | 1.99913  | 1.53447   | 1.75881   | 1.75559   |
| 0        | 0         | 0        | 0         | 0.115574  | 0.0268531 |
| 0        | 0         | 0        | 0         | 0         | 0         |
| 29.8281  | 36.5573   | 40.6303  | 33.9837   | 22.348    | 32.8071   |
| 0        | 0         | 0        | 0         | 0         | 0         |
| 28.8554  | 26.0595   | 26.5066  | 30.9606   | 28.8295   | 23.872    |
| 4.54503  | 4.07826   | 4.63923  | 4.96705   | 3.92106   | 4.27338   |
| 26.694   | 26.0483   | 32.4554  | 25.3122   | 28.9911   | 22.6746   |
| 0.111734 | 0.0799992 | 0        | 0         | 0         | 0.090564  |
| 0        | 0         | 0        | 0         | 0         | 0         |
| 39.8916  | 36.6223   | 39.2229  | 41.8811   | 42.4697   | 37.0757   |
| 152.787  | 174.047   | 167.182  | 179.236   | 159.642   | 165.133   |
| 17.2772  | 15.8688   | 17.7738  | 17.0402   | 18.5222   | 18.4917   |

|           |            |            |            |           |           |
|-----------|------------|------------|------------|-----------|-----------|
| 0.0858631 | 0          | 0          | 0          | 0         | 0         |
| 21.4171   | 27.7648    | 11.3773    | 13.7901    | 11.5867   | 8.60579   |
| 0.297802  | 0.236912   | 0.214121   | 0.348194   | 0.218035  | 0.362068  |
| 51.8291   | 40.349     | 43.8417    | 53.6676    | 53.3564   | 47.5263   |
| 12.6584   | 8.19419    | 10.5962    | 11.7216    | 11.5761   | 11.4685   |
| 3.68776   | 1.91477    | 3.18789    | 2.92143    | 3.81902   | 3.46822   |
| 71.4293   | 82.2206    | 74.5554    | 73.1208    | 64.6374   | 68.9183   |
| 2.09655   | 1.08319    | 1.33108    | 0.731982   | 2.53073   | 0.910813  |
| 0         | 0.00728289 | 0.00822785 | 0.00738194 | 0.0157708 | 0.037101  |
| 21.1769   | 20.0993    | 24.7264    | 19.0603    | 25.1061   | 24.4023   |
| 0         | 0          | 0          | 0          | 0         | 0         |
| 0         | 0          | 0          | 0          | 0         | 0         |
| 1.19876   | 1.31766    | 1.23283    | 1.09973    | 0.748522  | 5.36E-05  |
| 32.6662   | 37.0507    | 36.9601    | 34.3455    | 30.9439   | 31.5142   |
| 2.10659   | 1.76516    | 2.71912    | 4.81413    | 1.70256   | 2.5067    |
| 2.21617   | 0.58936    | 0.512177   | 2.02188    | 2.30705   | 2.61744   |
| 5.19168   | 3.64082    | 4.41838    | 4.47601    | 5.20316   | 4.16316   |
| 0         | 0          | 0          | 0          | 0         | 0         |
| 0.101074  | 0.100511   | 0          | 0.117364   | 0.0783542 | 0         |
| 4.4391    | 3.49696    | 3.683      | 3.26524    | 3.95572   | 5.05055   |
| 83.0685   | 92.3083    | 86.782     | 89.5024    | 91.7212   | 80.3724   |
| 0.0970192 | 0.108539   | 0.198649   | 0.126738   | 0         | 0.0196588 |
| 0         | 0          | 0          | 0          | 0         | 0         |
| 2.81781   | 3.08742    | 2.27524    | 1.3881     | 2.83164   | 1.77652   |
| 5.79036   | 4.04047    | 5.57069    | 4.75534    | 4.49914   | 5.43033   |
| 14.4757   | 16.0929    | 17.8275    | 16.9305    | 15.995    | 15.8688   |
| 3.47281   | 4.72736    | 4.26565    | 3.71819    | 3.75575   | 3.04071   |
| 18.4727   | 14.4794    | 16.2978    | 17.7035    | 19.4595   | 17.7198   |
| 11.5425   | 10.8226    | 9.79333    | 6.93889    | 6.01628   | 2.86142   |
| 7.36312   | 5.87315    | 7.63047    | 7.2145     | 8.43331   | 7.5036    |
| 20.4439   | 12.5623    | 13.7342    | 19.2206    | 26.6264   | 28.1515   |
| 1.38381   | 1.14063    | 0.999184   | 0.940539   | 0.790105  | 0.971071  |
| 0.353742  | 0.569863   | 0.858404   | 0.449254   | 0.274226  | 0.788479  |
| 14.0263   | 17.3976    | 18.5856    | 19.3303    | 16.4179   | 16.6422   |
| 9.39845   | 9.35285    | 9.81663    | 7.9939     | 10.6112   | 10.7452   |
| 0.206427  | 0.211139   | 0.119267   | 0.321016   | 0.160025  | 0.167316  |
| 5.82157   | 5.04104    | 3.82252    | 3.91262    | 2.11065   | 3.65874   |
| 2.9178    | 2.40602    | 4.3849     | 2.82959    | 4.00394   | 3.51962   |
| 5.33097   | 5.07988    | 5.30883    | 4.70655    | 5.07783   | 6.09766   |
| 12.3943   | 9.02879    | 9.7013     | 12.7141    | 10.3782   | 11.458    |
| 15.5973   | 17.7024    | 19.9993    | 20.2489    | 19.1669   | 17.1371   |
| 28.8446   | 26.2496    | 31.2305    | 31.447     | 30.9671   | 29.7279   |
| 26.2919   | 35.7897    | 23.705     | 23.5561    | 20.8851   | 28.1508   |

|           |            |            |            |            |            |
|-----------|------------|------------|------------|------------|------------|
| 51.4668   | 47.0618    | 42.4839    | 48.6094    | 48.6227    | 40.1002    |
| 4.19361   | 2.56426    | 3.21615    | 3.72207    | 4.65738    | 4.41175    |
| 0.0433563 | 0.0124169  | 0.00701401 | 0.0125858  | 0.0067221  | 0.0281134  |
| 69.007    | 85.6617    | 74.6232    | 78.4732    | 64.4405    | 69.9961    |
| 5.61943   | 4.35332    | 4.20271    | 8.38235    | 8.36576    | 9.22953    |
| 16.1154   | 12.8936    | 14.6493    | 13.5887    | 11.7394    | 11.6522    |
| 0.0785775 | 0          | 0.0211866  | 0.11405    | 0.0203048  | 0.0424598  |
| 6.81327   | 4.28084    | 6.24218    | 6.15541    | 6.62913    | 7.1002     |
| 20.1415   | 20.583     | 23.9063    | 20.2774    | 19.506     | 20.6853    |
| 0.0634281 | 0.0454133  | 0.102611   | 0.0920618  | 0.0491704  | 0.102821   |
| 30.6912   | 32.3563    | 32.8474    | 31.0788    | 33.6062    | 31.5749    |
| 0         | 0          | 0          | 0          | 0          | 0          |
| 7.4459    | 7.72734    | 8.8139     | 7.55001    | 6.45599    | 6.07721    |
| 54.6327   | 52.5928    | 45.4148    | 63.4587    | 43.5054    | 53.5698    |
| 28.2229   | 25.5237    | 28.156     | 27.9416    | 23.9757    | 26.8842    |
| 1.94981   | 1.91284    | 2.08049    | 1.78822    | 1.73653    | 2.35613    |
| 20.4067   | 18.8524    | 21.5979    | 19.7619    | 24.636     | 19.4072    |
| 3.33915   | 3.85727    | 3.57001    | 3.20484    | 3.28491    | 3.48141    |
| 52.5207   | 62.2415    | 71.9225    | 67.7817    | 67.7897    | 71.1999    |
| 0         | 0.0362524  | 0          | 0          | 0          | 0          |
| 0.166446  | 0.159062   | 0.249323   | 0.55368    | 0.376667   | 0.383744   |
| 9.63736   | 6.27471    | 8.19343    | 8.06528    | 7.57035    | 8.60888    |
| 0         | 0          | 0          | 0          | 0          | 0          |
| 0.969684  | 0.953092   | 0.239279   | 0.214678   | 0.668188   | 0          |
| 23.9266   | 19.2092    | 24.448     | 25.9058    | 27.3837    | 25.5808    |
| 0.214342  | 0.214851   | 0.312078   | 0.279993   | 0.166161   | 0.312716   |
| 1.07372   | 0.790884   | 0.812274   | 1.0539     | 0.862303   | 1.23968    |
| 19.984    | 14.4788    | 15.6505    | 16.3577    | 21.5285    | 19.4179    |
| 0.121066  | 0.0821489  | 0.0481132  | 0.129165   | 0.0925796  | 0.146142   |
| 0         | 0.0635466  | 0.0717918  | 0.0644108  | 0          | 0          |
| 0         | 0.00295966 | 0          | 0.00599983 | 0.00801131 | 0.00335052 |
| 7.583     | 5.31184    | 6.00976    | 6.19863    | 5.90471    | 5.0595     |
| 100.125   | 100.472    | 86.1084    | 81.9679    | 103.138    | 82.2614    |
| 0         | 8.42642    | 0          | 10.6858    | 0          | 12.2253    |
| 397.9     | 478.554    | 488.803    | 488.187    | 478.091    | 475.594    |
| 0         | 0          | 0          | 0          | 0          | 0          |
| 2.01369   | 1.15832    | 2.73352    | 1.67001    | 0.613064   | 1.57335    |
| 15.6177   | 12.556     | 12.4036    | 13.8557    | 13.0153    | 12.7328    |
| 0.13953   | 0.279722   | 0.158008   | 0.303778   | 0.194699   | 0.203569   |
| 3.21843   | 2.06344    | 3.19499    | 2.28259    | 3.5043     | 2.79836    |
| 4.01551   | 3.66198    | 3.36022    | 3.5897     | 2.58585    | 3.27567    |
| 10.8417   | 10.708     | 9.72959    | 10.5354    | 10.9842    | 10.688     |
| 10.1139   | 11.9287    | 11.5852    | 9.11423    | 9.89123    | 10.8075    |

|           |           |           |          |           |           |
|-----------|-----------|-----------|----------|-----------|-----------|
| 11.2258   | 10.4371   | 10.7226   | 12.8356  | 10.265    | 8.83874   |
| 0.60152   | 0.215338  | 0         | 0        | 0.0582884 | 0.182832  |
| 17.2186   | 17.0778   | 14.8553   | 19.4942  | 21.9031   | 16.5783   |
| 0.179349  | 0.256822  | 0         | 0        | 0         | 0         |
| 0.892807  | 0.489265  | 0.681608  | 0.956034 | 0.817827  | 0.894828  |
| 0         | 0         | 0         | 0        | 0         | 0         |
| 0.188257  | 0.127357  | 0.143882  | 0.129089 | 0.0897742 | 0.169425  |
| 0.735438  | 1.45816   | 0.915201  | 1.39588  | 0.657834  | 1.19219   |
| 30.1781   | 34.9188   | 33.5293   | 35.1923  | 32.6179   | 31.2924   |
| 0.719437  | 0.85186   | 0.897843  | 0.928832 | 0.664397  | 1.37239   |
| 7.61961   | 4.88487   | 7.28513   | 5.71478  | 7.9211    | 5.41365   |
| 10.4398   | 9.40515   | 8.61734   | 8.26079  | 5.98343   | 7.72428   |
| 0.0677986 | 0         | 0         | 0        | 0         | 0         |
| 4.19961   | 3.25741   | 3.39698   | 2.41279  | 2.57735   | 2.69477   |
| 8.06688   | 7.05355   | 8.11311   | 8.75554  | 8.41189   | 9.1423    |
| 55.0442   | 62.8693   | 67.4488   | 67.6476  | 72.5155   | 64.7983   |
| 61.8071   | 53.4002   | 54.615    | 53.6088  | 71.2859   | 45.8932   |
| 0         | 0         | 0         | 0        | 0         | 0         |
| 4.95932   | 3.88613   | 5.23723   | 5.51857  | 3.84454   | 6.09654   |
| 0         | 0         | 0         | 0        | 0         | 0         |
| 2.24104   | 2.89708   | 2.21556   | 1.80707  | 3.37806   | 2.06872   |
| 0         | 0         | 0.0775496 | 0        | 0.037161  | 0         |
| 0.0914757 | 0.0327474 | 0.0369964 | 0.265542 | 0.0709134 | 0         |
| 0.207603  | 0         | 0.142305  | 0.602646 | 0         | 0.168269  |
| 27.5945   | 26.0021   | 28.7482   | 30.7709  | 29.6212   | 37.4868   |
| 41.505    | 50.0486   | 55.8677   | 42.7475  | 41.4827   | 39.7912   |
| 0.213228  | 0.370929  | 0.466239  | 0.227161 | 0.256814  | 0.451658  |
| 0.846358  | 0.386057  | 0.411084  | 0.391307 | 0.78723   | 0.316082  |
| 2.14929   | 3.02834   | 2.57584   | 1.9338   | 2.46864   | 2.9864    |
| 23.6055   | 25.4643   | 30.0413   | 23.7549  | 28.303    | 24.2359   |
| 16.247    | 22.9657   | 20.0027   | 21.7609  | 14.7713   | 20.4309   |
| 6.29325   | 4.78121   | 6.0096    | 5.30294  | 5.54266   | 4.94503   |
| 0         | 0         | 0         | 0        | 0         | 0         |
| 17.1108   | 17.6595   | 18.1498   | 18.445   | 18.3668   | 17.2732   |
| 0         | 0         | 0         | 0        | 0         | 0         |
| 3.6881    | 3.39678   | 3.01504   | 5.38496  | 4.46479   | 3.57025   |
| 11.8581   | 11.0084   | 11.6239   | 11.3665  | 9.72674   | 14.0796   |
| 46.6231   | 44.7945   | 48.1886   | 45.6113  | 43.4592   | 45.9796   |
| 0         | 0         | 0         | 0        | 0.022308  | 0.0233244 |
| 0.338872  | 0.233259  | 0.162669  | 0.267815 | 0.332978  | 0.523057  |
| 0.0197874 | 0         | 0.0160056 | 0        | 0         | 0         |
| 36.4549   | 24.3098   | 33.2459   | 30.0872  | 25.4898   | 26.9408   |
| 30.5369   | 24.0153   | 24.8555   | 27.7475  | 27.4642   | 29.7785   |

|           |           |           |           |           |           |
|-----------|-----------|-----------|-----------|-----------|-----------|
| 1.33758   | 1.84188   | 1.58158   | 1.90407   | 1.59525   | 1.66819   |
| 20        | 15.5338   | 18.8365   | 16.7811   | 18.4125   | 19.2327   |
| 10.6057   | 10.5395   | 4.72167   | 7.84853   | 7.00706   | 4.55011   |
| 1.79985   | 1.47372   | 1.12158   | 1.30619   | 1.09338   | 1.91402   |
| 13.8575   | 13.4704   | 15.1144   | 11.5186   | 11.7929   | 13.2944   |
| 23.8295   | 19.3913   | 20.1226   | 19.6543   | 17.0615   | 17.723    |
| 0         | 0         | 0         | 0         | 0         | 0         |
| 95.7364   | 93.1633   | 101.775   | 99.4056   | 110.203   | 113.325   |
| 1.65069   | 1.13178   | 0.803414  | 0.964448  | 0.683228  | 1.04312   |
| 17.5511   | 17.9968   | 18.37     | 17.6335   | 19.5883   | 16.7278   |
| 0         | 0         | 0         | 0         | 0         | 0         |
| 3.0307    | 2.1319    | 2.66047   | 2.17965   | 2.50926   | 3.23389   |
| 2.4504    | 1.85533   | 1.97351   | 2.21754   | 1.9798    | 2.03384   |
| 8.76629   | 7.77932   | 9.06833   | 9.71303   | 9.5715    | 10.6681   |
| 0.104178  | 0.0372949 | 0.0421339 | 0.132307  | 0.0807607 | 0.2111    |
| 1.28927   | 1.84374   | 1.41713   | 1.53274   | 1.31828   | 3.04667   |
| 21.6847   | 23.9567   | 23.0574   | 22.9283   | 21.7861   | 20.7837   |
| 16.4073   | 13.452    | 15.2206   | 15.8117   | 13.1708   | 15.7998   |
| 8.51372   | 9.43655   | 10.9258   | 10.0996   | 9.26534   | 10.6827   |
| 2.70719   | 2.54639   | 2.57627   | 2.44623   | 2.75706   | 3.11934   |
| 0.0445506 | 0.0637947 | 0.144144  | 0         | 0         | 0         |
| 42.9137   | 23.618    | 23.8559   | 40.0359   | 19.8103   | 9.11984   |
| 4.55614   | 2.64565   | 4.20078   | 2.58742   | 2.6675    | 3.62028   |
| 55.0944   | 42.6877   | 53.8115   | 52.961    | 57.3296   | 55.55     |
| 32.3951   | 38.1221   | 33.4677   | 32.036    | 29.0831   | 29.6373   |
| 90.6155   | 68.6574   | 55.6132   | 79.4585   | 59.7487   | 64.5135   |
| 9.32266   | 9.83803   | 10.2415   | 8.45516   | 8.09545   | 8.81932   |
| 3.63214   | 3.45584   | 4.07398   | 3.74885   | 3.91694   | 3.87296   |
| 0.109608  | 0.0697578 | 0.0394045 | 0.176766  | 0.122735  | 0.0296138 |
| 602.032   | 893.784   | 845.435   | 731.491   | 616.438   | 704.46    |
| 134.854   | 129.148   | 140.738   | 151.576   | 163.377   | 108.976   |
| 0.825196  | 0.564679  | 0.767377  | 0.463602  | 0.823501  | 1.00189   |
| 26.7644   | 27.4309   | 27.1967   | 30.9021   | 35.1103   | 22.4358   |
| 0.177124  | 0.0905838 | 0.0818696 | 0.128542  | 0.137309  | 0.082037  |
| 0.18344   | 0.0525357 | 0         | 0.0532502 | 0.0853231 | 0         |
| 14.8579   | 12.3458   | 14.8702   | 14.5315   | 12.2536   | 14.2412   |
| 1.36032   | 0.973962  | 0.733556  | 0.329069  | 0.351513  | 0.367528  |
| 0.781751  | 0.842122  | 0.796086  | 0.628061  | 0.887867  | 0.882751  |
| 0.122868  | 0.417863  | 0.919487  | 0.512713  | 0.0714368 | 0.0746914 |
| 60.4704   | 58.7222   | 62.5675   | 61.1187   | 68.9448   | 57.4903   |
| 0         | 0         | 0         | 0         | 0         | 0         |
| 7.87714   | 6.2095    | 8.11155   | 7.40623   | 6.29016   | 7.45791   |
| 43.7042   | 39.8826   | 44.0315   | 45.8292   | 58.0804   | 46.889    |

|           |           |           |           |           |           |
|-----------|-----------|-----------|-----------|-----------|-----------|
| 27.0494   | 24.5609   | 26.468    | 27.9193   | 27.2211   | 27.6481   |
| 13.5303   | 13.1486   | 14.7644   | 16.6242   | 10.1409   | 12.1336   |
| 68.7776   | 34.0215   | 90.2937   | 53.8132   | 53.7926   | 33.8148   |
| 0.0816477 | 0.0493241 | 0.0773944 | 0.079992  | 0.0118676 | 0.0893407 |
| 28.9907   | 26.8444   | 30.9637   | 24.5927   | 25.1371   | 26.4276   |
| 3.85853   | 3.2924    | 3.52632   | 3.72046   | 4.91688   | 4.45546   |
| 0         | 0         | 0.0247126 | 0         | 0.0236841 | 0.0247631 |
| 0.843107  | 0.905473  | 0.681973  | 0.573617  | 1.02123   | 0.98234   |
| 9.04467   | 11.5448   | 12.3185   | 12.4031   | 7.04153   | 10.4483   |
| 0.138593  | 0.396921  | 0.224211  | 0.301739  | 0         | 0         |
| 43.6145   | 433.177   | 55.5863   | 40.0969   | 133.005   | 379.502   |
| 0.407463  | 0.278475  | 0.359551  | 0.349468  | 0.301514  | 0.195155  |
| 2.43607   | 2.21392   | 2.39768   | 2.35186   | 1.95856   | 2.34734   |
| 0         | 0         | 0.0162697 | 0         | 0         | 0         |
| 34.8099   | 28.1421   | 29.6319   | 30.3795   | 24.4747   | 24.2372   |
| 5.39479   | 3.44686   | 4.28546   | 3.87998   | 3.54449   | 4.31383   |
| 62.5037   | 0         | 0         | 45.36     | 0         | 0         |
| 2.18714   | 2.42722   | 2.06399   | 1.87824   | 1.94983   | 1.77275   |
| 6.0662    | 5.82338   | 5.06353   | 4.55645   | 3.39525   | 5.75531   |
| 14.4026   | 11.5222   | 11.5636   | 13.101    | 14.5956   | 12.9568   |
| 1.93589   | 1.06278   | 1.1352    | 1.01859   | 0.872367  | 0.675026  |
| 1.01762   | 0.757927  | 1.38899   | 0.599387  | 1.64426   | 1.56474   |
| 17.7215   | 26.6144   | 11.7124   | 10.8219   | 14.7432   | 23.1223   |
| 1.77993   | 1.48602   | 1.08151   | 1.50416   | 1.37983   | 1.67996   |
| 1039.37   | 2048.49   | 1414.87   | 1536.22   | 1519.2    | 2951.93   |
| 1.84768   | 2.40723   | 2.14246   | 2.17703   | 1.46504   | 1.55003   |
| 17.3861   | 15.9506   | 16.3568   | 17.5242   | 19.6131   | 15.7336   |
| 0.210954  | 0.151039  | 0.113758  | 0.204124  | 0.109023  | 0.0569952 |
| 0.27589   | 0.040401  | 0.0130409 | 0.0773671 | 0.0437435 | 0.0130675 |
| 13.8013   | 13.3711   | 14.5437   | 8.95251   | 15.2437   | 18.8979   |
| 154.404   | 151.078   | 159.038   | 154.409   | 131.364   | 148.642   |
| 14.1703   | 11.4769   | 13.0136   | 12.883    | 11.8954   | 12.5325   |
| 3.34731   | 1.93108   | 2.1232    | 2.00977   | 2.18418   | 2.61551   |
| 0.265009  | 0.379483  | 0         | 0.192322  | 0         | 0.214799  |
| 0         | 0         | 45.3855   | 0         | 0         | 0         |
| 2.35451   | 1.67921   | 1.95389   | 2.05438   | 1.52986   | 1.88635   |
| 4.02961   | 4.49772   | 4.98219   | 5.8376    | 5.03614   | 4.66946   |
| 1.7438    | 1.98893   | 2.11579   | 2.56044   | 1.99629   | 2.6789    |
| 0         | 0.424207  | 0         | 0         | 0         | 0         |
| 5.68442   | 3.81779   | 4.42629   | 5.26522   | 4.10506   | 4.44893   |
| 0         | 0         | 0         | 0         | 0         | 0         |
| 13.0499   | 11.2121   | 16.0706   | 14.3797   | 14.5759   | 17.8304   |
| 13.5968   | 11.943    | 18.0279   | 15.0555   | 23.2541   | 14.4291   |

|           |           |           |           |           |           |
|-----------|-----------|-----------|-----------|-----------|-----------|
| 4.184     | 12.9812   | 10.1531   | 4.04854   | 3.2435    | 7.91297   |
| 0.780787  | 0.325727  | 0.136733  | 1.05735   | 0.390765  | 0.454549  |
| 0.668769  | 0.90977   | 1.62286   | 1.31041   | 1.19241   | 1.08412   |
| 8.59949   | 7.39206   | 7.75611   | 7.89461   | 8.11251   | 9.1188    |
| 0.176349  | 0.46764   | 0.507184  | 0.0853199 | 0         | 0.0714686 |
| 16.4683   | 19.5043   | 22.9786   | 17.6283   | 20.1074   | 19.0767   |
| 12.4407   | 12.7388   | 13.8737   | 15.4015   | 18.2248   | 14.2728   |
| 1.04747   | 0.867315  | 1.00614   | 0.665148  | 1.06593   | 1.11433   |
| 0.731209  | 0.149581  | 0.422472  | 0.227422  | 0.242933  | 0.59267   |
| 4.49604   | 5.38923   | 6.429     | 4.20382   | 5.12583   | 5.56863   |
| 39.9619   | 53.4686   | 30.5061   | 51.6581   | 46.275    | 57.493    |
| 15.4843   | 16.1741   | 12.0102   | 16.548    | 13.302    | 25.6168   |
| 1.45028   | 0.401242  | 0.231373  | 0.695211  | 1.13375   | 1.19235   |
| 0.379916  | 0.0906708 | 0.256088  | 0.321663  | 0.294516  | 0.20529   |
| 3.61117   | 2.18963   | 2.07214   | 2.92378   | 2.32704   | 3.02736   |
| 0.0735774 | 0.0439    | 0         | 0.040683  | 0.0456307 | 0         |
| 0         | 0         | 0         | 0         | 0         | 0         |
| 2.44111   | 1.44798   | 2.15783   | 2.29503   | 1.78551   | 2.45864   |
| 13.2161   | 10.0377   | 12.3209   | 12.0868   | 10.6261   | 12.4873   |
| 5.87505   | 4.40484   | 6.142     | 6.83789   | 4.38256   | 3.90837   |
| 68.7255   | 74.0365   | 66.4596   | 68.0753   | 68.4895   | 62.8569   |
| 63.2121   | 70.2993   | 72.9923   | 78.1547   | 74.8202   | 89.3253   |
| 0         | 0         | 0         | 0.0582462 | 0.0622188 | 0.130107  |
| 0         | 0         | 0         | 0         | 0         | 0         |
| 0.687369  | 0.237586  | 0.287585  | 0.447232  | 0.404238  | 0.499501  |
| 0.0499142 | 0.0357376 | 0.0403746 | 0.0362236 | 0.116083  | 0.242743  |
| 0         | 0         | 2.36157   | 0         | 0         | 0         |
| 0         | 0         | 0         | 0         | 0         | 0         |
| 0.529775  | 3.03447   | 1.14273   | 0.717673  | 2.10821   | 1.86074   |
| 333.919   | 614.748   | 347.254   | 276.938   | 184.894   | 270.648   |
| 0.0388307 | 0         | 0.0628188 | 0.0281802 | 0.120409  | 0.0314736 |
| 30.5904   | 28.1633   | 25.6467   | 27.3661   | 25.2989   | 19.6272   |
| 0.243177  | 0         | 0         | 0.176478  | 0         | 0.197104  |
| 10.5395   | 8.5375    | 10.2433   | 9.86336   | 9.67111   | 11.0815   |
| 9.75997   | 12.5316   | 11.1991   | 11.6164   | 10.3011   | 12.2376   |
| 2.48088   | 1.58192   | 2.57871   | 1.71781   | 1.76028   | 4.36395   |
| 0.0822763 | 0.117817  | 0         | 0.119419  | 0         | 0.0666877 |
| 0.247445  | 0         | 0.200153  | 0.0897877 | 0.191823  | 0.100281  |
| 6.42468   | 5.99387   | 7.43649   | 6.60914   | 5.58421   | 3.40148   |
| 0         | 0         | 0         | 0         | 0         | 0         |
| 1.43532   | 1.13765   | 0.583828  | 1.14588   | 1.24064   | 0.577272  |
| 0.528578  | 0.226537  | 0.565033  | 0.254383  | 0.168114  | 0.165794  |
| 26.8733   | 32.6071   | 32.4937   | 28.6712   | 27.531    | 44.214    |

|          |          |           |           |           |           |
|----------|----------|-----------|-----------|-----------|-----------|
| 2.21154  | 1.86115  | 1.8203    | 2.63446   | 2.74845   | 2.42707   |
| 13.9537  | 20.2099  | 22.4284   | 28.401    | 23.5771   | 27.6577   |
| 6.5747   | 4.99076  | 5.42242   | 5.24216   | 5.29911   | 5.41376   |
| 0        | 0        | 0         | 0         | 0         | 0         |
| 51.059   | 51.4828  | 49.0403   | 51.999    | 50.2501   | 53.0082   |
| 1.0001   | 1.67079  | 1.68534   | 1.754     | 0.581471  | 1.48613   |
| 45.8557  | 43.2502  | 46.1261   | 51.8582   | 44.5113   | 46.0929   |
| 4.17884  | 3.84682  | 4.70811   | 3.79083   | 2.89241   | 2.90322   |
| 6.86528  | 6.52621  | 6.23709   | 5.87889   | 5.90514   | 6.01863   |
| 89.1531  | 100.968  | 79.8578   | 95.5278   | 116.226   | 55.0317   |
| 8.0095   | 6.67369  | 7.51473   | 7.23946   | 5.73583   | 7.48956   |
| 1.41699  | 0.977117 | 1.07571   | 1.15477   | 1.11648   | 1.34621   |
| 0        | 0        | 0         | 0         | 0         | 0         |
| 0        | 0        | 0         | 0.0470004 | 0         | 0         |
| 7.65228  | 6.92531  | 8.72315   | 8.47592   | 7.51603   | 8.24112   |
| 1.68847  | 1.70143  | 1.65482   | 1.19294   | 1.50284   | 1.67993   |
| 0        | 0        | 0         | 0         | 0         | 0         |
| 2.66811  | 1.68165  | 2.11452   | 1.82275   | 1.47989   | 2.23929   |
| 24.2505  | 20.7343  | 21.0496   | 22.2224   | 17.5646   | 18.2414   |
| 5.59447  | 5.75104  | 5.57896   | 7.02428   | 7.26844   | 6.42219   |
| 0.109182 | 0.128427 | 0.0584335 | 0.0260372 | 0.0847142 | 0.0291141 |
| 0        | 0        | 0         | 0         | 0         | 0         |
| 13.1615  | 10.2736  | 16.0491   | 14.3273   | 14.9976   | 15.0392   |
| 4.52518  | 4.80845  | 6.2472    | 5.22911   | 5.78842   | 5.39742   |
| 15.4841  | 17.7538  | 18.7852   | 16.2349   | 12.4455   | 20.5884   |
| 0.559939 | 0.43876  | 0.509825  | 0.571369  | 0.278051  | 0.326796  |
| 6.30618  | 4.06784  | 3.34252   | 3.5569    | 3.69868   | 6.49779   |
| 20.8051  | 16.463   | 17.4112   | 19.3618   | 21.3632   | 19.5824   |
| 7.94438  | 7.19587  | 4.0069    | 7.78245   | 6.30985   | 6.88411   |
| 7.46873  | 7.27547  | 1.6028    | 5.75204   | 4.96275   | 6.54784   |
| 0        | 0.300733 | 0.135901  | 0.243859  | 0.0651227 | 0.476628  |
| 1.26243  | 0.858883 | 0.914521  | 0.702297  | 0.795171  | 1.11483   |
| 75.2263  | 85.3822  | 86.2609   | 81.4985   | 78.9669   | 71.8491   |
| 1.50823  | 1.10146  | 0.829582  | 1.6856    | 1.66026   | 1.85815   |
| 0        | 0        | 0         | 0.0741285 | 0.0791845 | 0         |
| 1.09365  | 0.713432 | 1.53337   | 1.16407   | 1.22463   | 0.689456  |
| 0.416483 | 0.68814  | 0.544198  | 0.441749  | 0.471878  | 0.337573  |
| 13.4982  | 13.4732  | 8.61036   | 14.3625   | 9.12817   | 9.25805   |
| 0.316849 | 0.324974 | 0.367266  | 0.360448  | 0.212389  | 0.347001  |
| 7.86848  | 8.8258   | 9.15054   | 9.20549   | 9.22555   | 8.21603   |
| 0.535274 | 0.383246 | 0.649458  | 0.679801  | 0.414952  | 0.108464  |
| 0        | 0        | 0         | 0         | 276.282   | 0         |
| 6.64489  | 4.99283  | 5.80654   | 5.8825    | 5.32609   | 6.30961   |



|           |           |           |           |          |           |
|-----------|-----------|-----------|-----------|----------|-----------|
| 9.46003   | 6.38159   | 8.61733   | 7.16302   | 13.0225  | 7.38555   |
| 11.0417   | 9.67324   | 9.82989   | 9.15948   | 9.38075  | 10.3612   |
| 0         | 0         | 0         | 0         | 0        | 0         |
| 0         | 0         | 0.0489497 | 0         | 0        | 0         |
| 8.29538   | 9.76342   | 6.95924   | 6.84016   | 5.69356  | 5.87023   |
| 0         | 0         | 0         | 0         | 0        | 0         |
| 0.973599  | 0.428031  | 0.455935  | 0.545414  | 0.397236 | 0.719912  |
| 17.6291   | 10.8349   | 1.39802   | 4.7663    | 1.22151  | 1.37049   |
| 0.521823  | 0.574793  | 1.49356   | 1.45653   | 1.52475  | 2.27745   |
| 0.165327  | 0.355113  | 0.13373   | 0.179971  | 0.352451 | 0.201005  |
| 8.37509   | 6.24625   | 9.03259   | 11.6494   | 8.11562  | 17.2536   |
| 30.9426   | 23.4285   | 26.9648   | 28.2276   | 30.2385  | 30.4422   |
| 38.0968   | 37.0027   | 36.8316   | 41.8215   | 41.9429  | 53.9767   |
| 2.28979   | 2.06086   | 2.01086   | 2.08889   | 1.24284  | 1.32595   |
| 27.4741   | 21.3624   | 25.3368   | 24.3282   | 30.7082  | 25.8838   |
| 0         | 0         | 0         | 0         | 0        | 0         |
| 10.0216   | 7.24978   | 9.76817   | 10.9209   | 10.68    | 9.487     |
| 0         | 0         | 0         | 0         | 0        | 0         |
| 0         | 0         | 0         | 0         | 0        | 0         |
| 1.65963   | 1.23777   | 0.997536  | 1.08472   | 1.95804  | 1.14576   |
| 15.1907   | 15.3531   | 16.947    | 15.1622   | 16.253   | 14.896    |
| 51.1683   | 49.6992   | 49.2494   | 57.6752   | 51.827   | 52.0862   |
| 0         | 0         | 0         | 0         | 0        | 0         |
| 1.14752   | 1.04003   | 0.752009  | 0.790609  | 0.867053 | 0.729953  |
| 11.4195   | 11.3027   | 11.1675   | 11.9364   | 11.6677  | 12.0567   |
| 46.8144   | 41.3462   | 37.3044   | 35.7773   | 42.0701  | 22.5573   |
| 7.04397   | 6.21079   | 7.0694    | 6.91058   | 6.52238  | 6.66094   |
| 0         | 0         | 0         | 0         | 0        | 0         |
| 31.3166   | 35.2251   | 33.8174   | 41.6814   | 31.0504  | 31.5259   |
| 6.94135   | 5.75874   | 5.77779   | 4.88254   | 7.58767  | 5.69173   |
| 0.0306405 | 0.021938  | 0         | 0.0444727 | 0.023753 | 0.0248351 |
| 16.2915   | 16.4455   | 17.6599   | 16.2567   | 14.6487  | 14.7019   |
| 5.80654   | 6.09748   | 7.29121   | 9.02981   | 7.20211  | 7.84399   |
| 4.67172   | 3.39487   | 5.9947    | 3.97606   | 4.5721   | 4.68605   |
| 5.56756   | 6.26029   | 7.47477   | 5.71006   | 5.21168  | 5.82902   |
| 8.76506   | 7.90766   | 8.99953   | 8.72416   | 8.09907  | 10.6016   |
| 0.262158  | 0.145989  | 0.0942464 | 0.177675  | 0.549907 | 0.283317  |
| 0         | 0         | 0         | 0         | 0        | 0         |
| 0         | 0         | 0         | 0         | 0        | 0         |
| 0         | 0.108169  | 0         | 0         | 0        | 0         |
| 24.3515   | 21.8928   | 24.4183   | 23.84     | 17.8394  | 22.3431   |
| 0.447388  | 0.297509  | 0.206507  | 0.301073  | 0.123695 | 0.413858  |
| 0         | 0.0763975 | 0         | 0.0774365 | 0        | 0         |

|           |          |           |          |           |           |
|-----------|----------|-----------|----------|-----------|-----------|
| 9.92549   | 9.16236  | 11.0462   | 10.2502  | 9.84925   | 11.404    |
| 2.02823   | 1.85267  | 1.76755   | 1.64992  | 1.91342   | 1.64515   |
| 17.0293   | 19.5483  | 18.6115   | 19.6893  | 19.4778   | 22.3015   |
| 0.754031  | 0.593859 | 0.378151  | 0.262663 | 0.233815  | 0.440041  |
| 0         | 0        | 0         | 0        | 0         | 0.0843091 |
| 9.13516   | 7.94759  | 9.10767   | 10.6767  | 8.35807   | 9.34154   |
| 1.6258    | 1.63595  | 1.06628   | 1.27553  | 0.579076  | 0.320537  |
| 10.239    | 8.56964  | 10.5333   | 10.24    | 10.6119   | 10.262    |
| 1.71577   | 0.366654 | 0.414228  | 0.366388 | 0.457117  | 0.664123  |
| 0         | 0        | 0         | 0        | 0         | 0         |
| 1.21E-244 | 0        | 0.161387  | 0        | 4.95E-182 | 5.20E-213 |
| 6.49554   | 6.31184  | 6.04852   | 7.22594  | 6.74371   | 7.05114   |
| 50.662    | 83.2396  | 54.8624   | 49.9148  | 55.8848   | 44.5024   |
| 0         | 0        | 0         | 0        | 0         | 0         |
| 528.755   | 549.527  | 550.613   | 553.915  | 556.666   | 480.61    |
| 0.983034  | 0.60967  | 0.852798  | 0.963603 | 0.393407  | 0.67647   |
| 0.414319  | 0.4123   | 4.37E-06  | 5.15E-06 | 3.85E-06  | 2.86E-06  |
| 57.8225   | 53.4175  | 47.7087   | 61.9784  | 38.1323   | 52.2265   |
| 36.655    | 12.4253  | 23.3559   | 45.8529  | 14.8347   | 11.9892   |
| 501.275   | 511.439  | 411.262   | 427.028  | 428.568   | 375.679   |
| 15.6293   | 15.2468  | 17.3041   | 22.4014  | 19.0828   | 20.9816   |
| 5.74359   | 4.35797  | 4.86911   | 5.71666  | 4.92419   | 7.33379   |
| 0         | 0.267033 | 0.22626   | 0.135332 | 0.216844  | 0.0755742 |
| 0.381877  | 0.464809 | 0.401561  | 0.47113  | 0.325641  | 0.309524  |
| 2.74E-09  | 3.97E-26 | 0.0414578 | 2.76E-09 | 9.27E-10  | 7.10E-10  |
| 0         | 0        | 0         | 0        | 0         | 0         |
| 5.26795   | 7.34499  | 4.61001   | 4.58319  | 4.37038   | 4.3947    |
| 19.2502   | 20.4231  | 18.742    | 18.943   | 16.7349   | 20.1753   |
| 0.513079  | 0.549121 | 0.451634  | 0.606773 | 0.613224  | 0.829764  |
| 1.85059   | 2.18749  | 13.615    | 1.86358  | 1.89575   | 1.64926   |
| 20.1043   | 16.3158  | 19.774    | 25.5311  | 15.5436   | 17.8038   |
| 48.2038   | 50.3011  | 55.5477   | 49.8984  | 51.2943   | 51.1657   |
| 1.98829   | 2.23027  | 1.98355   | 1.68343  | 1.33584   | 2.09505   |
| 1.02233   | 0.878489 | 1.08684   | 1.12358  | 0.837812  | 0.733931  |
| 10.0399   | 10.4302  | 7.52393   | 7.17898  | 9.30921   | 8.57647   |
| 1.2047    | 1.28005  | 0.768231  | 0.847831 | 0.792713  | 1.12412   |
| 36.5367   | 35.8845  | 38.1189   | 39.3204  | 39.6932   | 38.8132   |
| 0         | 0        | 0.064377  | 0        | 0.0925466 | 0.0322543 |
| 23.0533   | 17.6392  | 19.634    | 19.6858  | 23.0134   | 23.2182   |
| 3.25748   | 3.30809  | 3.55576   | 1.87602  | 2.00961   | 2.33482   |
| 0.199783  | 0.143047 | 0.242411  | 0.181241 | 0.206504  | 0.303633  |
| 1.00825   | 0.727145 | 2.14633   | 4.18E-06 | 4.54E-06  | 1.67473   |
| 5.35784   | 4.96259  | 4.7466    | 5.30782  | 3.79088   | 4.58397   |

|           |           |           |           |           |           |
|-----------|-----------|-----------|-----------|-----------|-----------|
| 0.0679468 | 0.126486  | 0.131906  | 0.0986204 | 0.0842774 | 0.152315  |
| 13.4794   | 10.8447   | 12.5947   | 13.1865   | 14.1735   | 12.5059   |
| 16.8494   | 15.5425   | 16.459    | 17.0648   | 17.5768   | 16.0299   |
| 2.6788    | 2.56351   | 2.34315   | 3.18812   | 2.32301   | 3.07994   |
| 0.265261  | 0.189922  | 0.138835  | 0.147209  | 0.181442  | 0.265591  |
| 4.38435   | 2.54119   | 2.87091   | 3.1818    | 3.07512   | 4.90744   |
| 0         | 0         | 0         | 0         | 0         | 0         |
| 422.418   | 508.484   | 359.571   | 384.523   | 394.041   | 469.999   |
| 4.57686   | 4.44728   | 5.68541   | 5.45676   | 4.56178   | 5.82952   |
| 4.8743    | 4.02835   | 4.65616   | 4.79734   | 4.48397   | 5.49347   |
| 85.5625   | 66.35     | 83.1207   | 95.6712   | 84.7809   | 76.839    |
| 4.21219   | 2.83121   | 2.98995   | 3.49356   | 1.93256   | 2.22963   |
| 0.9547    | 1.0784    | 0.38703   | 0.819778  | 0.409726  | 0.55585   |
| 0.0940387 | 0.0538639 | 0.0836726 | 0.0887192 | 0.0656102 | 0.099088  |
| 0         | 0         | 0         | 0         | 0         | 0         |
| 4.93356   | 3.62503   | 3.97794   | 4.24317   | 4.72214   | 5.04793   |
| 0.59748   | 0.404019  | 0.469865  | 0.433602  | 0.476042  | 0.470826  |
| 15.8807   | 13.2397   | 15.5943   | 15.5054   | 15.7299   | 16.1739   |
| 6.82521   | 5.85663   | 6.3815    | 7.05798   | 5.52918   | 4.75928   |
| 7.52319   | 7.79697   | 10.0526   | 9.56204   | 8.18426   | 9.46674   |
| 33.8399   | 32.2117   | 39.1327   | 35.8452   | 32.5539   | 40.1      |
| 0.592794  | 1.41476   | 0.958999  | 0.286801  | 0.919087  | 0.96096   |
| 25.2247   | 29.2986   | 28.6891   | 26.2732   | 23.8482   | 26.5078   |
| 70.4568   | 66.7157   | 65.2017   | 71.0529   | 65.5316   | 65.731    |
| 0         | 0.0515113 | 0         | 0         | 0         | 0.029157  |
| 2.19399   | 1.58244   | 5.12731   | 3.48849   | 3.75806   | 3.98845   |
| 1.8051    | 1.91469   | 2.23522   | 1.92456   | 1.81396   | 2.05917   |
| 0         | 0         | 0         | 0.035932  | 0.115148  | 0.0401314 |
| 17.2995   | 17.6633   | 20.9902   | 16.3056   | 22.8483   | 19.1448   |
| 9.73381   | 6.96922   | 9.36818   | 8.57503   | 7.10193   | 8.88105   |
| 3.47622   | 2.85559   | 1.66224   | 2.33691   | 2.30773   | 1.98222   |
| 0.115268  | 0.115268  | 0.0513272 | 0.0513272 | 0.0499349 | 0.0499349 |
| 2.25261   | 1.21547   | 0.686586  | 1.80061   | 1.06294   | 1.08491   |
| 8.01324   | 6.38301   | 7.12433   | 6.51637   | 7.1319    | 7.77382   |
| 0.0818417 | 0.0583726 | 0.0662757 | 1.35E-15  | 1.44E-15  | 0.0665302 |
| 251.553   | 258.777   | 255.521   | 251.832   | 261.561   | 227.634   |
| 1.53363   | 1.86191   | 1.21355   | 0.87103   | 0.465219  | 0.756645  |
| 2.62304   | 1.94427   | 3.29485   | 3.85184   | 3.82749   | 3.07649   |
| 0         | 0         | 0         | 0         | 0         | 0.0408718 |
| 45.4994   | 49.8037   | 60.882    | 47.3842   | 47.0292   | 46.2133   |
| 0         | 0         | 0         | 0         | 0         | 0         |
| 507.21    | 479.595   | 492.839   | 497.203   | 563.603   | 487.18    |
| 3.66566   | 2.99316   | 3.06503   | 3.93058   | 3.30465   | 3.68889   |

|           |           |          |            |           |           |
|-----------|-----------|----------|------------|-----------|-----------|
| 0         | 0         | 0        | 0          | 0         | 0         |
| 0         | 0         | 0        | 0          | 0         | 0         |
| 0         | 0         | 0        | 0          | 0         | 0         |
| 2.69598   | 2.12432   | 2.22687  | 2.54658    | 2.30007   | 2.97138   |
| 0.337175  | 0.42247   | 0.545469 | 0.244694   | 0.196038  | 0.341615  |
| 0.0475656 | 0.0681122 | 0.230849 | 0          | 0.0368736 | 0.308428  |
| 8.28814   | 7.55537   | 8.91836  | 8.26354    | 9.38147   | 11.0646   |
| 7.05215   | 6.87172   | 3.74029  | 4.24087    | 3.07875   | 3.72765   |
| 61.729    | 56.5616   | 47.3523  | 54.4662    | 52.333    | 35.9695   |
| 68.1665   | 63.7656   | 72.3449  | 70.4498    | 77.7868   | 66.5534   |
| 0         | 0         | 0        | 0          | 0         | 0         |
| 14.9625   | 14.5301   | 14.2174  | 15.9009    | 15.0389   | 15.6404   |
| 0.652199  | 0.698691  | 0.789347 | 0.638972   | 0.850963  | 0.462407  |
| 23.6373   | 22.6574   | 21.5543  | 22.5046    | 19.2445   | 21.7096   |
| 5.80936   | 6.20061   | 6.29432  | 6.32741    | 7.02387   | 5.63457   |
| 1.99457   | 2.30067   | 1.7237   | 1.23374    | 1.39265   | 2.33236   |
| 7.28699   | 14.803    | 7.95045  | 9.59273    | 5.1235    | 10.8512   |
| 0         | 0         | 0        | 0          | 0         | 0         |
| 1.07887   | 1.71655   | 0.654505 | 1.39192    | 1.02221   | 1.19023   |
| 28.8552   | 19.7185   | 23.0046  | 27.2682    | 26.7677   | 25.1268   |
| 0.558514  | 0.640072  | 0.635849 | 0.974608   | 0.432969  | 1.08815   |
| 21.7339   | 17.6095   | 21.2614  | 21.5104    | 20.8887   | 22.3039   |
| 131.845   | 171.56    | 157.487  | 95.5063    | 82.9189   | 171.232   |
| 0         | 0         | 0        | 0          | 0         | 0         |
| 11.3431   | 10.1576   | 13.1826  | 10.9728    | 12.6549   | 14.3507   |
| 0         | 0         | 0        | 0          | 0         | 0.0508425 |
| 22.3881   | 26.7932   | 19.7008  | 19.4012    | 16.9706   | 17.3024   |
| 0.646369  | 0.857311  | 0.527972 | 0.615728   | 0.59995   | 0.747034  |
| 15.9157   | 18.8773   | 16.1796  | 14.4264    | 14.4201   | 23.4749   |
| 0         | 0         | 0        | 0          | 0         | 0         |
| 22.7599   | 22.8901   | 22.965   | 24.7947    | 19.4041   | 18.1714   |
| 40.2178   | 32.6711   | 26.1174  | 40.6951    | 26.8072   | 33.4993   |
| 29.3505   | 22.9426   | 23.6695  | 26.623     | 24.817    | 24.6731   |
| 3.07315   | 2.0311    | 2.83697  | 3.69539    | 3.58148   | 3.03822   |
| 22.5348   | 23.9173   | 23.3399  | 21.0976    | 18.5331   | 18.4701   |
| 23.441    | 17.3197   | 22.0777  | 18.0213    | 24.81     | 19.636    |
| 3.30601   | 2.63763   | 2.86706  | 3.52466    | 2.47045   | 2.7818    |
| 0         | 0         | 0        | 0.00555932 | 0         | 0         |
| 6.26299   | 5.16354   | 4.67901  | 4.47856    | 3.58626   | 5.28519   |
| 4.88688   | 6.31542   | 5.41071  | 4.6029     | 4.59443   | 5.61841   |
| 3.52796   | 1.50153   | 2.09943  | 5.9414     | 0.90993   | 1.61892   |
| 7.06449   | 5.79824   | 6.73637  | 6.42728    | 6.94577   | 6.07979   |
| 88.3358   | 75.0441   | 89.9643  | 71.4144    | 127.379   | 193.837   |

|           |           |           |           |           |           |
|-----------|-----------|-----------|-----------|-----------|-----------|
| 0.0558435 | 0.0533105 | 0         | 0.0270177 | 0.0288605 | 0.0603507 |
| 0.036761  | 0         | 0         | 0         | 0         | 0         |
| 41.097    | 42.8442   | 39.6983   | 39.6791   | 36.4504   | 34.6277   |
| 0.0519426 | 0.130165  | 0.0420153 | 0.0376957 | 0.0604    | 0.0210506 |
| 0         | 0         | 0         | 0         | 0         | 0         |
| 0.994927  | 0.755962  | 1.14968   | 1.14936   | 0.944428  | 2.81425   |
| 23.7714   | 20.6479   | 21.3556   | 22.3587   | 17.9158   | 21.7495   |
| 5.22732   | 3.98307   | 5.07393   | 4.80149   | 5.03432   | 5.22657   |
| 4.13197   | 2.95841   | 3.08032   | 3.36423   | 3.54255   | 3.54839   |
| 13.9631   | 13.0553   | 11.3609   | 10.1333   | 11.9705   | 8.72119   |
| 26.457    | 19.6437   | 24.5698   | 24.3925   | 24.223    | 23.4497   |
| 0.147502  | 0.0660054 | 0.0745697 | 0.120426  | 0.142932  | 0.104611  |
| 2.5771    | 2.9973    | 0.10768   | 3.50282   | 1.11082   | 2.29111   |
| 0.81187   | 0.607706  | 0.358203  | 0.562407  | 0.715198  | 0.732826  |
| 25.2331   | 21.0577   | 22.7775   | 21.6268   | 21.8359   | 20.8151   |
| 1.46409   | 1.04826   | 0.592138  | 0.929705  | 0.496557  | 0.890023  |
| 2.91137   | 2.77949   | 5.1789    | 2.59757   | 3.16919   | 3.6625    |
| 0.0875242 | 0.0208886 | 0.0235989 | 0.0423453 | 0.0226167 | 0.0472942 |
| 9.9736    | 7.62052   | 9.58427   | 11.2889   | 9.05948   | 9.32669   |
| 9.71341   | 5.35564   | 8.91842   | 14.4721   | 14.3353   | 13.8554   |
| 3.9122    | 2.17527   | 1.42842   | 1.69497   | 1.38373   | 2.90903   |
| 23.8782   | 26.8235   | 23.9186   | 25.9925   | 22.4966   | 24.368    |
| 0         | 0         | 0         | 0         | 0         | 0         |
| 0.497444  | 0.161891  | 0.301779  | 0.377413  | 0.271691  | 0.412358  |
| 7.56424   | 7.86315   | 5.70107   | 6.83616   | 11.4525   | 4.18198   |
| 0         | 0         | 0         | 0         | 0         | 0         |
| 139.738   | 220.206   | 192.688   | 115.467   | 102.318   | 201.596   |
| 71.67     | 77.6649   | 71.656    | 72.8171   | 73.0785   | 56.7302   |
| 0         | 0         | 0         | 0         | 0         | 0         |
| 16.0435   | 17.689    | 16.0188   | 17.8487   | 16.475    | 16.9095   |
| 5.10056   | 4.71124   | 4.85001   | 4.15361   | 4.1792    | 4.30581   |
| 7.73278   | 6.2496    | 7.66298   | 6.76957   | 5.81672   | 6.96937   |
| 23.6907   | 18.6791   | 24.6689   | 19.3902   | 23.8675   | 21.4208   |
| 45.4946   | 36.2118   | 42.1396   | 47.5676   | 46.1025   | 46.7554   |
| 0         | 0         | 0         | 0         | 0         | 0         |
| 11.1739   | 12.4699   | 12.5815   | 13.0202   | 8.62149   | 11.9907   |
| 9.41872   | 9.9193    | 8.96928   | 9.25895   | 9.42526   | 8.37435   |
| 0.958071  | 0.69821   | 0.81648   | 0.7822    | 0.954914  | 1.16482   |
| 39.3472   | 38.642    | 44.2241   | 43.6611   | 43.8134   | 36.3059   |
| 0.764467  | 0.736083  | 0.639685  | 0.612179  | 0.551756  | 0.705092  |
| 74.3775   | 74.3775   | 108.758   | 108.758   | 102.602   | 102.602   |
| 1.58642   | 2.02692   | 2.17924   | 1.04396   | 0.979951  | 1.05673   |
| 9.67634   | 10.6294   | 10.025    | 10.822    | 7.03885   | 11.7108   |

|           |           |           |           |           |           |
|-----------|-----------|-----------|-----------|-----------|-----------|
| 20.5014   | 21.0317   | 27.2975   | 20.9923   | 22.0267   | 27.2624   |
| 0         | 0         | 0         | 0         | 0         | 0         |
| 143.856   | 107.729   | 119.464   | 124.983   | 102.424   | 133.869   |
| 0         | 0         | 0         | 0         | 0         | 0         |
| 14.5851   | 13.0485   | 12.4609   | 16.6795   | 13.5097   | 14.1046   |
| 1.65263   | 3.62529   | 1.77764   | 1.32694   | 2.8894    | 3.80479   |
| 0.172238  | 0.127777  | 0.209565  | 0.327856  | 0.247524  | 0.287454  |
| 0         | 0         | 0         | 0.0334206 | 0         | 0         |
| 3.17608   | 2.50756   | 2.95327   | 2.82407   | 2.40891   | 3.11702   |
| 0.0970458 | 0.0667036 | 0.090396  | 0.116594  | 0.22118   | 0.100683  |
| 247.201   | 233.711   | 263.095   | 287.359   | 290.713   | 272.381   |
| 7.83094   | 5.66677   | 6.92707   | 6.59478   | 9.18716   | 6.29633   |
| 9.52991   | 6.01503   | 8.57314   | 8.24269   | 9.14561   | 8.10486   |
| 3.75595   | 3.27716   | 5.24582   | 3.40793   | 2.71157   | 5.19735   |
| 35.7547   | 23.3442   | 21.0079   | 28.012    | 28.454    | 33.2739   |
| 0         | 0         | 0         | 0         | 0         | 0         |
| 9.81747   | 10.4104   | 9.31549   | 10.5539   | 9.34482   | 9.48855   |
| 23.5771   | 27.3678   | 31.5335   | 25.7469   | 26.2176   | 24.92     |
| 3.38056   | 4.16873   | 4.41615   | 2.92821   | 2.72319   | 2.65684   |
| 91.3398   | 83.9533   | 98.9783   | 99.7846   | 88.7978   | 83.0216   |
| 7.92107   | 6.11359   | 6.65427   | 5.65414   | 5.75424   | 6.3612    |
| 1.52975   | 0.883284  | 1.19747   | 1.00273   | 0.879851  | 0.559961  |
| 23.2933   | 23.0584   | 22.8622   | 19.8113   | 21.9856   | 20.4708   |
| 0         | 0         | 0         | 0         | 0         | 0         |
| 91.4321   | 182.764   | 194.721   | 124.866   | 57.4435   | 239.397   |
| 0.0349835 | 0         | 0         | 0.0507763 | 0.0542395 | 0         |
| 34.5774   | 29.6288   | 44.6179   | 39.8734   | 39.4465   | 39.5158   |
| 5.1885    | 4.24594   | 4.74017   | 4.08487   | 4.28202   | 4.95383   |
| 0         | 0         | 0         | 0         | 0         | 0         |
| 0.290029  | 0.305924  | 0.279694  | 0.368506  | 0.155878  | 0.258707  |
| 25.353    | 26.1939   | 25.1127   | 25.4267   | 20.294    | 25.4568   |
| 45.0799   | 36.4429   | 39.8274   | 37.7292   | 39.9611   | 41.7004   |
| 13.5854   | 12.5771   | 21.2238   | 14.7872   | 14.1324   | 17.201    |
| 0.0417055 | 0.0597207 | 0.0337347 | 0         | 0         | 0.0338037 |
| 2.32841   | 2.20372   | 2.35426   | 2.52183   | 1.96914   | 1.9016    |
| 0         | 0         | 0         | 0.0179738 | 0         | 0.0200744 |
| 16.2858   | 17.1417   | 14.7353   | 16.3995   | 14.5353   | 14.5751   |
| 6.08575   | 5.79473   | 4.77039   | 8.17287   | 2.28593   | 5.84805   |
| 25.1857   | 19.9428   | 20.5097   | 23.1493   | 22.9628   | 22.5765   |
| 13.1307   | 12.041    | 11.3016   | 13.1172   | 12.3906   | 12.3865   |
| 7.78895   | 5.95929   | 7.84118   | 8.00843   | 7.53541   | 7.99047   |
| 0         | 0         | 2.47856   | 0         | 0         | 0         |
| 24.2078   | 26.8921   | 24.1638   | 24.9114   | 21.9226   | 22.3311   |

|           |           |          |           |           |           |
|-----------|-----------|----------|-----------|-----------|-----------|
| 0         | 0         | 0        | 0         | 0         | 0         |
| 0         | 0         | 0        | 0         | 0         | 0         |
| 18.2571   | 16.0361   | 14.2985  | 15.5483   | 15.6253   | 15.6847   |
| 0.114372  | 0.122832  | 0        | 0.0830017 | 0         | 0         |
| 2.09756   | 2.34429   | 4.51066  | 3.19298   | 2.53824   | 2.15628   |
| 22.1181   | 18.8496   | 20.9298  | 23.739    | 23.7157   | 20.0109   |
| 0         | 0         | 0        | 0         | 0         | 0         |
| 9.83473   | 5.84443   | 7.67668  | 7.20861   | 8.2149    | 8.6888    |
| 20.3673   | 15.8832   | 22.6645  | 20.6148   | 16.7178   | 17.6048   |
| 3.04734   | 2.06701   | 2.95143  | 2.5607    | 1.95826   | 3.18497   |
| 6.7092    | 7.29594   | 7.25569  | 7.17823   | 6.41919   | 5.26738   |
| 58.5299   | 60.3653   | 58.9708  | 58.0725   | 48.0394   | 49.0127   |
| 2.36802   | 0.974763  | 1.58387  | 1.66815   | 1.02286   | 1.51785   |
| 0.0159786 | 0.0343211 | 0.051699 | 0.0231919 | 0.0123868 | 0.0129512 |
| 19.4196   | 14.5445   | 16.9685  | 16.1244   | 17.4032   | 19.038    |
| 0.0725281 | 0.0346192 | 0.039111 | 0.017545  | 0.0374833 | 0         |
| 4.59443   | 4.61798   | 5.28864  | 5.12963   | 3.39044   | 4.90557   |
| 24.5967   | 23.0641   | 23.0093  | 24.1801   | 23.0993   | 28.0792   |
| 30.1135   | 48.2163   | 38.37    | 37.5444   | 34.7472   | 44.4239   |
| 2.81201   | 2.25426   | 4.39363  | 3.26168   | 3.05561   | 3.77926   |
| 0         | 0         | 0        | 0         | 0         | 0         |
| 0         | 0         | 0        | 0         | 0         | 0         |
| 97.3834   | 148.292   | 95.6345  | 129.151   | 87.2084   | 108.916   |
| 0.595001  | 0.576366  | 0.509595 | 1.04141   | 0.949641  | 0.255319  |
| 16.2933   | 13.9989   | 18.0645  | 16.5541   | 15.3928   | 15.2841   |
| 0         | 0         | 0        | 0.025742  | 0         | 0         |
| 17.234    | 16.3697   | 18.5359  | 17.4962   | 16.5165   | 15.2737   |
| 41.1886   | 37.9472   | 40.2465  | 41.9031   | 38.9645   | 37.5553   |
| 30.5769   | 28.4794   | 27.8607  | 31.6404   | 24.0942   | 25.605    |
| 0         | 0         | 0        | 0         | 0         | 0         |
| 0         | 0         | 0        | 0         | 0         | 0         |
| 37.4477   | 45.5941   | 44.2786  | 38.1553   | 48.6425   | 47.4519   |
| 3.38209   | 2.85543   | 2.99926  | 2.47336   | 1.8843    | 3.00011   |
| 91.3385   | 98.2818   | 83.8301  | 90.4223   | 91.6256   | 89.2237   |
| 26.2817   | 24.9959   | 26.8246  | 27.7472   | 26.7042   | 26.243    |
| 0.281582  | 0.0336013 | 0.113883 | 0.136233  | 0.0727624 | 0.190193  |
| 0         | 0         | 0        | 0         | 0         | 0         |
| 1.66864   | 1.33256   | 1.93374  | 1.96781   | 1.71645   | 1.9507    |
| 8.15822   | 6.74342   | 8.99988  | 8.85679   | 6.06729   | 8.49412   |
| 35.2315   | 29.3854   | 25.7941  | 36.7836   | 41.7074   | 39.0823   |
| 18.7547   | 17.1719   | 21.261   | 20.9472   | 21.0247   | 24.13     |
| 0.932496  | 0.40059   | 0.512909 | 0.730868  | 0.462647  | 0.513957  |
| 12.5821   | 20.4881   | 16.9498  | 16.072    | 14.4688   | 17.2103   |

|           |           |           |           |           |           |
|-----------|-----------|-----------|-----------|-----------|-----------|
| 9.211     | 9.48343   | 6.91981   | 5.06194   | 4.67242   | 5.18077   |
| 73.2907   | 68.6779   | 72.2248   | 68.3444   | 75.6732   | 69.6377   |
| 53.8068   | 38.7831   | 52.6192   | 51.8028   | 43.1811   | 53.273    |
| 0.665753  | 0.476666  | 0.538514  | 0.579779  | 1.08381   | 0.863384  |
| 0         | 0         | 0         | 0         | 0         | 0.0749117 |
| 0.0169088 | 0.0238033 | 0.122066  | 0.0365538 | 0.0261985 | 0.0815784 |
| 7.93312   | 6.82512   | 6.10645   | 5.80364   | 4.95958   | 7.19061   |
| 0         | 0         | 0         | 0         | 0         | 0         |
| 1.86891   | 1.50874   | 1.17083   | 1.75682   | 1.2009    | 1.59005   |
| 14.0901   | 9.36076   | 9.10945   | 8.96705   | 8.25201   | 9.83652   |
| 0         | 0         | 0         | 0         | 0         | 0         |
| 0.205904  | 0.390241  | 0.234214  | 0.0207525 | 0.29022   | 0.303442  |
| 0.756002  | 0.143778  | 0.0615133 | 0.0647928 | 0.0498285 | 0.0723652 |
| 0.282547  | 0.177011  | 0.285683  | 0.256312  | 0.219035  | 0.429401  |
| 4.69618   | 3.40108   | 3.94349   | 3.56487   | 3.38205   | 3.50122   |
| 1.14375   | 2.94025   | 1.63068   | 2.66288   | 1.40762   | 1.20473   |
| 8.60452   | 6.1079    | 9.75574   | 16.9718   | 10.1479   | 17.4055   |
| 41.2597   | 32.0758   | 37.3597   | 27.0663   | 55.7678   | 24.6658   |
| 3.72086   | 2.59487   | 1.75893   | 1.97554   | 2.44743   | 2.62421   |
| 0         | 0         | 0         | 0         | 0         | 0         |
| 0         | 0         | 0.0746653 | 0         | 0         | 0         |
| 15.1979   | 17.0262   | 15.4028   | 16.2846   | 17.326    | 16.5937   |
| 7.26374   | 6.7713    | 8.18297   | 8.31166   | 5.2896    | 6.81404   |
| 9.04175   | 7.25403   | 8.17892   | 8.62695   | 6.19572   | 9.06265   |
| 0.448371  | 0.233473  | 0.659416  | 0.473296  | 0.600373  | 0.693802  |
| 0         | 0.0444481 | 0         | 0         | 0         | 0.0251589 |
| 17.6155   | 18.8816   | 16.1197   | 20.0526   | 15.2247   | 20.7669   |
| 0         | 0         | 0         | 0         | 0         | 0         |
| 0         | 0         | 0         | 0         | 0         | 0         |
| 0.594313  | 0.565179  | 0.559525  | 0.360905  | 0.536239  | 0.679438  |
| 11.7555   | 10.0131   | 10.4737   | 11.0182   | 11.652    | 10.8264   |
| 2.52054   | 2.03668   | 2.38832   | 2.19504   | 1.95396   | 2.42239   |
| 0.135043  | 0         | 0         | 0         | 0.104687  | 0.109457  |
| 95.7582   | 85.494    | 96.454    | 94.8619   | 109.746   | 67.7829   |
| 1.37092   | 1.00871   | 0.886293  | 0.916802  | 0.67695   | 0.919172  |
| 40.8601   | 43.4103   | 43.6246   | 40.7048   | 37.9948   | 38.1168   |
| 0         | 0         | 0         | 0         | 0         | 0         |
| 1.67007   | 0.940003  | 1.52268   | 1.40116   | 1.38447   | 1.62751   |
| 0.0329527 | 0.0235935 | 0.0799644 | 0.0239144 | 0.0510909 | 0.0801279 |
| 18.1676   | 19.8556   | 21.0876   | 19.4133   | 17.4178   | 21.0727   |
| 0         | 0         | 0         | 0         | 0         | 0         |
| 49.6004   | 54.0538   | 51.5608   | 52.1868   | 54.8197   | 41.7636   |
| 9.69126   | 6.08409   | 6.5462    | 9.73478   | 5.53658   | 6.70716   |



|           |           |           |            |           |           |
|-----------|-----------|-----------|------------|-----------|-----------|
| 2.16581   | 1.70575   | 1.31391   | 1.49318    | 0.503691  | 1.40437   |
| 26.2481   | 26.9256   | 24.1461   | 29.3766    | 21.9962   | 22.963    |
| 511.18    | 641.145   | 368.992   | 481.539    | 416.063   | 352.105   |
| 38.133    | 43.2965   | 37.9313   | 38.1732    | 34.5326   | 40.2227   |
| 0         | 0         | 0         | 0          | 0         | 0         |
| 112.076   | 106.272   | 118.142   | 115.984    | 108.229   | 107.293   |
| 15.9101   | 12.6496   | 15.9014   | 13.7054    | 17.3683   | 12.1461   |
| 6.22168   | 5.81186   | 5.4061    | 6.68459    | 5.36951   | 6.36269   |
| 6.9929    | 5.27759   | 5.90613   | 5.86595    | 4.02512   | 4.9329    |
| 8.22105   | 8.87502   | 6.54626   | 7.30437    | 7.30622   | 7.14088   |
| 0.978624  | 0.407666  | 0.546916  | 0.555251   | 0.331045  | 0.533612  |
| 16.0902   | 15.7593   | 15.6631   | 16.0747    | 21.5989   | 18.0098   |
| 39.2656   | 31.0618   | 33.8548   | 40.5798    | 26.9878   | 36.6444   |
| 0.0397083 | 0.0284304 | 0         | 0.259353   | 0.12313   | 0.354034  |
| 0         | 0         | 0         | 0          | 0         | 0         |
| 25.8082   | 21.7801   | 27.1025   | 22.6427    | 22.7157   | 24.3832   |
| 20.5768   | 19.1535   | 19.781    | 21.1798    | 22.8838   | 22.1513   |
| 0         | 0         | 0         | 0          | 0         | 0.0378941 |
| 10.4295   | 12.4274   | 12.8219   | 11.4285    | 11.7207   | 11.3814   |
| 41.9655   | 41.9086   | 33.122    | 39.8422    | 36.1072   | 30.8803   |
| 0.0850691 | 0.0406052 | 0.0229369 | 0.0617362  | 0.0659469 | 0.0229838 |
| 10.8256   | 8.32351   | 9.19241   | 9.66464    | 11.7008   | 10.1187   |
| 2.62768   | 1.8483    | 1.56586   | 1.66328    | 1.88081   | 1.18245   |
| 9.29733   | 9.54039   | 10.0959   | 10.8273    | 9.26194   | 8.34765   |
| 33.649    | 50.9495   | 27.5981   | 36.4681    | 22.2867   | 18.5738   |
| 81.8831   | 91.7439   | 58.2912   | 74.5409    | 53.2554   | 61.9065   |
| 1.91633   | 1.30798   | 2.02302   | 1.44152    | 1.65037   | 2.37108   |
| 0         | 0         | 0         | 0          | 0         | 0         |
| 3.53241   | 2.07332   | 2.92333   | 2.84126    | 3.09552   | 3.34392   |
| 4.14703   | 3.34739   | 4.88097   | 4.85323    | 5.08721   | 6.53904   |
| 7.97409   | 6.64338   | 7.72072   | 7.08152    | 6.69764   | 7.77966   |
| 24.0369   | 24.3279   | 27.5498   | 26.7798    | 30.1893   | 35.3912   |
| 0         | 0.0592696 | 0         | 0          | 0         | 0         |
| 7.90949   | 7.94653   | 8.46164   | 8.70267    | 3.95585   | 7.03132   |
| 0.42324   | 0.570714  | 0.496425  | 0.785689   | 0.148354  | 0.62759   |
| 15.7921   | 18.207    | 18.7351   | 20.7761    | 18.8971   | 19.0688   |
| 2.38655   | 1.63869   | 1.62979   | 1.54741    | 1.47097   | 2.02951   |
| 34.4538   | 36.2346   | 31.2591   | 32.3435    | 32.8716   | 32.4713   |
| 0.864609  | 1.32652   | 1.79837   | 0.986012   | 1.24476   | 1.80204   |
| 7.57696   | 6.27153   | 7.57323   | 7.81906    | 7.60411   | 7.93099   |
| 0         | 0         | 0         | 0.00777029 | 0         | 0         |
| 6.15519   | 4.18418   | 5.4574    | 5.54411    | 4.09582   | 6.26157   |
| 11.7189   | 11.3934   | 11.6823   | 12.5447    | 11.6572   | 15.0261   |

|           |           |          |           |           |           |
|-----------|-----------|----------|-----------|-----------|-----------|
| 1.24846   | 0.830519  | 1.28088  | 1.05168   | 0.665369  | 0.687305  |
| 0.654052  | 0.572353  | 0.235133 | 0.421918  | 0.112674  | 0.353421  |
| 1.64708   | 1.4829    | 1.1848   | 1.51677   | 1.21934   | 1.25704   |
| 0.402278  | 0.489639  | 0.618249 | 0.321134  | 0.374222  | 0.32606   |
| 11.7842   | 10.0108   | 12.3773  | 9.97735   | 10.2943   | 12.2363   |
| 2.8024    | 1.67367   | 2.26427  | 1.79652   | 1.63815   | 1.59063   |
| 36.7583   | 37.8198   | 32.0192  | 33.6781   | 31.5692   | 31.6515   |
| 0         | 0         | 0        | 0         | 0         | 0         |
| 0.115685  | 0.0596363 | 0        | 0.0134327 | 0         | 0.109369  |
| 0.0737619 | 0.0528121 | 0        | 0         | 0.0571814 | 0         |
| 9.35089   | 9.23151   | 10.2739  | 8.63958   | 7.44056   | 7.87971   |
| 0.322036  | 0.230572  | 0.607807 | 0.93483   | 0.332863  | 0.696057  |
| 0         | 0.440424  | 0        | 0.113119  | 0.360504  | 0         |
| 8.23229   | 5.98546   | 6.93449  | 6.88362   | 5.83774   | 7.52265   |
| 13.5061   | 15.6445   | 15.5732  | 14.3778   | 11.5616   | 13.7569   |
| 1.49639   | 0.988058  | 2.15185  | 1.26695   | 1.36628   | 1.53634   |
| 3.10352   | 2.27374   | 3.15257  | 3.1951    | 2.01424   | 3.51026   |
| 38.0331   | 40.3692   | 38.762   | 37.5877   | 35.5483   | 40.5626   |
| 0.642536  | 0.283912  | 0.325977 | 0.257845  | 0.349754  | 0.0899927 |
| 35.1162   | 28.121    | 31.3567  | 34.0551   | 38.0291   | 34.6464   |
| 11.5298   | 12.6035   | 12.2284  | 9.9106    | 10.8785   | 9.83622   |
| 0.191844  | 0.62279   | 0.211127 | 0.409925  | 0.224867  | 0.230388  |
| 9.48146   | 8.63996   | 13.124   | 10.0453   | 12.5778   | 9.65767   |
| 8.43876   | 9.58922   | 6.86998  | 8.65284   | 6.41524   | 7.3695    |
| 2.47139   | 2.61785   | 1.99152  | 2.24663   | 2.97741   | 0.860097  |
| 0.376896  | 0.594908  | 0.451938 | 0.281545  | 0.196116  | 0.393015  |
| 1.45252   | 1.1229    | 1.2043   | 1.1492    | 1.95458   | 0.647893  |
| 0         | 0         | 0        | 0         | 0         | 0         |
| 0.329101  | 0.409764  | 0.369506 | 0.266094  | 0.191257  | 0.369644  |
| 13.0822   | 9.71585   | 11.371   | 11.6633   | 12.2939   | 11.4551   |
| 4.13376   | 2.40179   | 3.06146  | 3.7054    | 4.35307   | 4.43276   |
| 200.422   | 150.981   | 144.412  | 252.061   | 144.1     | 250.75    |
| 4.82041   | 3.26444   | 3.72855  | 3.86268   | 2.63921   | 3.78501   |
| 0.273515  | 0.22031   | 0.193585 | 0.248118  | 0.291545  | 0.277116  |
| 10.3778   | 12.2708   | 10.9255  | 13.5953   | 11.98     | 12.0222   |
| 249.849   | 307.958   | 366.2    | 346.968   | 410.911   | 403.795   |
| 26.2011   | 26.1429   | 25.1829  | 26.7832   | 21.4411   | 24.6893   |
| 5.26631   | 4.68973   | 4.98478  | 4.90588   | 5.05761   | 4.87984   |
| 3.37557   | 2.16945   | 1.99945  | 1.89033   | 1.85442   | 2.24051   |
| 3.28736   | 2.11433   | 2.88442  | 2.83063   | 1.9437    | 2.48387   |
| 0         | 0         | 0        | 0         | 0         | 0         |
| 211.038   | 223.059   | 207.685  | 202.622   | 208.536   | 193.028   |
| 13.6878   | 9.43567   | 12.202   | 13.3449   | 11.431    | 11.8814   |

|           |           |           |            |           |           |
|-----------|-----------|-----------|------------|-----------|-----------|
| 0         | 0         | 0         | 0          | 0         | 0         |
| 1.95519   | 1.12713   | 2.81465   | 1.38435    | 2.87917   | 3.47539   |
| 10.3049   | 6.90334   | 8.52603   | 8.93492    | 9.01672   | 10.552    |
| 6.8909    | 7.08123   | 7.37046   | 5.56568    | 6.5928    | 7.63171   |
| 2.45339   | 2.86169   | 2.70889   | 3.08691    | 2.90028   | 3.22151   |
| 7.42013   | 7.22877   | 5.53384   | 8.31154    | 6.45658   | 6.6122    |
| 16.6109   | 16.4625   | 14.9357   | 17.4051    | 16.2467   | 13.6838   |
| 44.7718   | 42.5983   | 31.9659   | 42.2686    | 33.3847   | 32.2053   |
| 11.3234   | 9.45255   | 9.80356   | 10.5802    | 7.53798   | 10.7737   |
| 0         | 0         | 1.08E-187 | 2.15E-187  | 2.17E-99  | 2.77E-171 |
| 16.6292   | 14.9618   | 17.1413   | 16.447     | 6.73081   | 13.1207   |
| 0.215827  | 0.132453  | 0.149639  | 0.0447514  | 0.0717055 | 0.0999631 |
| 43.6834   | 50.0559   | 36.0961   | 38.016     | 35.0549   | 31.8633   |
| 5.7316    | 4.38847   | 4.20094   | 4.65188    | 3.53645   | 4.62669   |
| 1828.1    | 1759.63   | 1798.1    | 1745.23    | 1899.99   | 1785.01   |
| 3.10029   | 3.07805   | 4.26319   | 4.82986    | 3.55702   | 4.30542   |
| 9.32169   | 7.8742    | 10.8971   | 7.45841    | 6.83091   | 8.23972   |
| 0         | 0.0350734 | 0         | 0.00888759 | 0.0379751 | 0.0397052 |
| 0         | 0         | 0         | 0.0358113  | 0.0255026 | 0.0266644 |
| 4.08487   | 2.66717   | 4.28087   | 4.17635    | 4.06288   | 2.72787   |
| 20.1034   | 22.5946   | 21.4043   | 23.1394    | 22.9055   | 20.9933   |
| 11.4794   | 11.2205   | 12.6234   | 12.7398    | 11.9965   | 13.6845   |
| 2.33205   | 2.7389    | 1.72088   | 1.98933    | 1.37967   | 2.33789   |
| 18.1789   | 15.1471   | 16.8235   | 18.4497    | 16.108    | 17.5979   |
| 0.0299592 | 0.0214502 | 0         | 0.010871   | 0.0116124 | 0.0485659 |
| 0.970749  | 1.14351   | 0.921938  | 0.953334   | 0.719862  | 1.62052   |
| 0.0748848 | 0         | 0.121146  | 0.10869    | 0.116104  | 0.121393  |
| 251.679   | 339.272   | 345.308   | 294.521    | 304.634   | 295.264   |
| 5.86932   | 5.81726   | 4.84566   | 5.53555    | 6.75917   | 5.61241   |
| 5.26423   | 4.54266   | 5.39239   | 4.86302    | 5.51547   | 6.10213   |
| 115.619   | 137.651   | 143.016   | 145.829    | 150.723   | 127.852   |
| 295.487   | 403.594   | 590.295   | 482.886    | 299.782   | 395.75    |
| 103.113   | 117.65    | 106.515   | 104.217    | 98.3913   | 96.2239   |
| 0         | 0         | 0         | 0          | 0         | 0         |
| 0         | 0         | 0         | 0          | 0         | 0         |
| 0.47582   | 0.61322   | 0.925463  | 0.621559   | 0.813342  | 0.617068  |
| 2.66432   | 2.04787   | 3.07421   | 2.67284    | 3.70561   | 3.3028    |
| 1493.52   | 2140.02   | 1947.88   | 1916.65    | 1569.07   | 1527.37   |
| 0         | 0         | 0         | 0          | 0         | 0         |
| 0.581779  | 0.362211  | 0.552431  | 0.312066   | 0.254915  | 0.287031  |
| 0.227952  | 0.139894  | 0.272189  | 0.220572   | 0.151468  | 0.14957   |
| 5.82595   | 4.41425   | 5.45916   | 6.14905    | 6.13509   | 5.25765   |
| 53.8011   | 48.6056   | 51.7852   | 58.2643    | 54.9035   | 55.3967   |

|          |           |           |           |           |           |
|----------|-----------|-----------|-----------|-----------|-----------|
| 12.5821  | 11.6619   | 20.6742   | 12.1757   | 17.7323   | 7.38878   |
| 14.0118  | 11.1095   | 11.1691   | 9.13356   | 11.1659   | 10.5313   |
| 0        | 0         | 0         | 0         | 0         | 0         |
| 14.4292  | 11.1405   | 13.4555   | 13.0462   | 12.3556   | 12.663    |
| 10.021   | 9.09245   | 8.02374   | 6.60726   | 7.65164   | 7.77105   |
| 3.9541   | 3.02765   | 2.58072   | 2.20956   | 2.23557   | 2.26757   |
| 0        | 0.100517  | 0.0212919 | 0.0764124 | 0.0816241 | 0         |
| 0        | 0         | 0         | 0         | 0         | 0         |
| 6.99531  | 4.38245   | 3.63404   | 3.61053   | 3.08543   | 3.15268   |
| 0        | 0         | 0         | 0         | 0         | 0         |
| 22.4657  | 22.3549   | 25.4837   | 20.3974   | 20.985    | 16.4476   |
| 0        | 0.0164834 | 0.0186221 | 0.0835377 | 0.0535412 | 0.0373204 |
| 0        | 0         | 0         | 0         | 0         | 0         |
| 4.71228  | 5.16746   | 4.98754   | 4.71982   | 5.54249   | 5.17623   |
| 0.176022 | 0.113425  | 0.128142  | 0.102194  | 0.0545819 | 0.0998701 |
| 0.51248  | 0.593386  | 0.0684792 | 0.804867  | 0.122434  | 0.635433  |
| 16.4184  | 14.1098   | 15.6055   | 17.5721   | 19.5449   | 16.7629   |
| 0        | 0.0943105 | 0.0355158 | 0.0796609 | 0.0850941 | 0         |
| 3.69498  | 4.38479   | 3.23207   | 3.3807    | 2.53057   | 2.53595   |
| 20.2238  | 20.2822   | 17.7248   | 19.712    | 14.7433   | 18.5071   |
| 9.89111  | 6.94738   | 9.19913   | 10.01     | 11.0001   | 9.43782   |
| 11.8977  | 9.02351   | 12.4015   | 11.5209   | 12.235    | 11.8927   |
| 6.91098  | 5.42825   | 6.86316   | 7.72674   | 5.9516    | 7.63147   |
| 3.64631  | 2.45073   | 2.40268   | 2.41387   | 2.60666   | 2.11078   |
| 0        | 0         | 0         | 0         | 0         | 0         |
| 19.1299  | 17.7182   | 20.3525   | 18.0394   | 20.293    | 17.5      |
| 20.1077  | 9.92011   | 12.8621   | 12.6112   | 26.4274   | 11.6122   |
| 6.99136  | 7.4513    | 7.92031   | 9.4797    | 7.30408   | 8.53469   |
| 715.317  | 688.108   | 805.074   | 855.848   | 869.261   | 713.356   |
| 17.923   | 13.422    | 14.3179   | 21.1422   | 12.765    | 14.2705   |
| 11.251   | 13.3289   | 11.4462   | 9.21725   | 11.1947   | 10.4355   |
| 9.85979  | 9.58817   | 8.21346   | 7.79621   | 10.2673   | 5.84467   |
| 0        | 0         | 0         | 0         | 0         | 0         |
| 13.4908  | 10.4294   | 10.1409   | 10.481    | 8.02773   | 10.5876   |
| 0        | 0         | 0         | 0         | 0         | 0         |
| 38.3932  | 37.4847   | 34.8455   | 34.8369   | 38.918    | 38.2496   |
| 80.1534  | 69.5088   | 77.7853   | 73.7295   | 68.8492   | 77.7629   |
| 0.14649  | 0.167815  | 0.33968   | 0.0992232 | 0.211981  | 0.189976  |
| 0        | 0         | 0         | 0         | 0         | 0         |
| 5.57712  | 5.57447   | 6.96772   | 6.09107   | 5.26508   | 5.37069   |
| 15.2394  | 24.374    | 20.4049   | 17.7423   | 13.9098   | 17.7312   |
| 401.316  | 525.031   | 456.065   | 414.961   | 621.91    | 534.829   |
| 0.937054 | 0.446585  | 0.799661  | 0.843489  | 0.786738  | 0.975332  |

|           |           |          |           |          |           |
|-----------|-----------|----------|-----------|----------|-----------|
| 18.4589   | 23.2093   | 23.7009  | 22.0414   | 20.748   | 18.2909   |
| 10.52     | 7.73992   | 9.56577  | 10.4427   | 9.52387  | 10.1538   |
| 13.5634   | 11.9308   | 13.9704  | 14.8516   | 12.1739  | 8.9273    |
| 7.12386   | 6.60165   | 5.50705  | 8.03299   | 8.17893  | 7.67447   |
| 151.543   | 191.939   | 210.581  | 158.322   | 167.005  | 165.664   |
| 11.8341   | 7.13707   | 9.65506  | 10.1092   | 9.46128  | 16.5735   |
| 10.069    | 12.1221   | 8.5204   | 12.1518   | 9.33033  | 7.42158   |
| 68.9321   | 70.1547   | 55.2426  | 57.9862   | 68.8539  | 49.3037   |
| 1.12947   | 0.946515  | 1.26526  | 0.967813  | 0.718591 | 0.893609  |
| 0.605871  | 0.573225  | 0.612596 | 0.581021  | 0.469681 | 0.701541  |
| 63.2318   | 362.182   | 358.028  | 275.331   | 294.109  | 102.503   |
| 76.4349   | 87.5302   | 73.4144  | 78.6412   | 59.9068  | 60.7893   |
| 19.6761   | 17.1952   | 18.2615  | 19.7712   | 18.297   | 18.3243   |
| 0.118741  | 0.0283389 | 0.192095 | 0.114897  | 0.122734 | 0         |
| 2.41428   | 3.6143    | 2.75176  | 3.10597   | 2.89245  | 3.11318   |
| 1.04124   | 0.894614  | 1.89504  | 0.868998  | 0.928268 | 0.759568  |
| 3.15577   | 2.72461   | 3.1413   | 2.59827   | 4.21672  | 3.437     |
| 0.0428684 | 0         | 0        | 0         | 0        | 0.0347463 |
| 1.62873   | 1.28275   | 1.34379  | 0.969237  | 1.13635  | 2.21783   |
| 15.1724   | 14.134    | 15.9067  | 15.4899   | 16.1594  | 14.5905   |
| 0         | 0         | 0        | 0         | 0        | 0         |
| 0         | 0         | 0        | 0         | 0        | 0         |
| 3.49255   | 4.00781   | 3.36685  | 3.64567   | 2.93001  | 3.41251   |
| 5.01906   | 6.04226   | 6.50289  | 5.44752   | 5.88793  | 5.43616   |
| 19.1602   | 16.3075   | 18.8009  | 20.3812   | 20.98    | 20.6121   |
| 6.68654   | 4.42975   | 5.63396  | 5.76588   | 5.9655   | 5.77786   |
| 0         | 0         | 0        | 0         | 0        | 0         |
| 54.606    | 41.8633   | 49.1591  | 53.4631   | 59.1846  | 48.7691   |
| 2.6767    | 2.10541   | 3.56789  | 3.47467   | 3.36095  | 3.6363    |
| 0         | 0         | 0        | 0         | 0        | 0         |
| 0.0926548 | 0         | 0        | 0.0336206 | 0        | 0         |
| 1.35334   | 0.851513  | 0.762964 | 1.13095   | 1.5578   | 1.16341   |
| 6.19462   | 6.25042   | 5.86194  | 5.65849   | 4.46843  | 4.90463   |
| 0         | 0         | 0        | 0         | 0        | 0         |
| 23.3766   | 20.6849   | 20.9361  | 25.2323   | 22.3963  | 21.4222   |
| 197.082   | 28.2213   | 63.7661  | 114.421   | 91.6684  | 191.69    |
| 10.6079   | 9.16543   | 9.03178  | 8.7116    | 8.28447  | 8.86745   |
| 0         | 0         | 0        | 0         | 0        | 0         |
| 15.2894   | 14.4736   | 14.3607  | 14.3401   | 12.3854  | 9.46635   |
| 0.475121  | 0.640334  | 0.429529 | 0.385369  | 0.454985 | 0.271836  |
| 11.2995   | 12.8577   | 13.3835  | 12.4468   | 12.279   | 11.1212   |
| 9.69947   | 6.43767   | 9.5302   | 7.43786   | 8.61812  | 8.9872    |
| 1.73936   | 1.07483   | 1.43996  | 1.66793   | 0.55496  | 0.795858  |

|           |           |           |           |           |           |
|-----------|-----------|-----------|-----------|-----------|-----------|
| 8.1779    | 7.9369    | 7.32595   | 8.30422   | 7.00888   | 7.48087   |
| 19.5191   | 15.7652   | 19.9885   | 19.8641   | 18.7591   | 21.77     |
| 39.2156   | 36.6206   | 37.2543   | 35.7801   | 36.2886   | 35.6135   |
| 0         | 0         | 0         | 0         | 0         | 0         |
| 12.6295   | 13.0783   | 15.1037   | 12.538    | 15.3612   | 15.0806   |
| 2.7936    | 1.46679   | 2.28479   | 1.59937   | 2.50252   | 2.44042   |
| 0         | 0.0228093 | 0         | 0.0231195 | 0         | 0.0516429 |
| 9.40373   | 9.47726   | 10.4184   | 10.8496   | 10.8742   | 9.82948   |
| 0.076336  | 0.0273275 | 0.0308733 | 0.0276992 | 0.0591768 | 0         |
| 3.00986   | 3.60103   | 4.45259   | 3.36254   | 3.68399   | 3.78763   |
| 2.0544    | 2.12661   | 1.3214    | 2.49683   | 1.18965   | 1.28398   |
| 8.80461   | 9.39274   | 10.3282   | 9.34498   | 25.4671   | 7.5044    |
| 16.3268   | 12.2463   | 17.9726   | 16.1842   | 22.9979   | 14.5601   |
| 1.82763   | 1.39618   | 1.4229    | 1.64574   | 1.70923   | 1.12192   |
| 0.925139  | 1.12875   | 1.08392   | 1.40917   | 0.603656  | 1.40914   |
| 28.5785   | 19.1801   | 23.4835   | 20.895    | 17.5719   | 23.0514   |
| 0.36796   | 0.331854  | 0.342876  | 0.348926  | 0.507109  | 0         |
| 2.08575   | 2.52398   | 2.2191    | 2.36433   | 2.29087   | 2.16223   |
| 3.64E-06  | 1.29E-37  | 2.34E-59  | 0.0498336 | 1.13E-06  | 9.16E-34  |
| 22.2449   | 18.5382   | 22.72     | 21.5101   | 17.4633   | 20.0717   |
| 0         | 0         | 0         | 0         | 0         | 0         |
| 0.0722268 | 0         | 0.0292114 | 0.0786244 | 0.0279957 | 0         |
| 14.7575   | 15.0094   | 11.827    | 14.5159   | 11.1411   | 13.5256   |
| 56.9602   | 56.3904   | 52.1191   | 48.024    | 53.6719   | 45.8805   |
| 18.8903   | 14.5589   | 14.6213   | 14.0793   | 15.3342   | 15.5136   |
| 0         | 0         | 0.179544  | 0         | 0         | 0         |
| 0.0841079 | 0.321171  | 0.0680332 | 0.0610386 | 0.26624   | 0.170431  |
| 5.3101    | 4.32169   | 4.54534   | 4.44876   | 5.12736   | 5.08855   |
| 43.2489   | 42.0288   | 38.7229   | 39.7334   | 47.7569   | 34.2182   |
| 0.101124  | 0.541377  | 0.450223  | 0.308341  | 0.434401  | 0.0442546 |
| 6.76262   | 4.93007   | 5.63103   | 5.65011   | 5.60961   | 5.6579    |
| 30.9755   | 63.8798   | 23.9847   | 64.2545   | 24.8336   | 281.329   |
| 856.032   | 1730.5    | 992.144   | 1088.99   | 782.057   | 1803.59   |
| 0         | 0         | 0         | 0         | 0         | 0         |
| 36.3128   | 25.1891   | 34.1264   | 47.8685   | 37.6468   | 24.6397   |
| 6.26041   | 7.58193   | 7.49823   | 6.20176   | 6.86179   | 6.20913   |
| 16.8764   | 19.1805   | 17.2485   | 17.4325   | 12.5743   | 17.8182   |
| 0         | 0         | 0         | 0         | 0         | 0         |
| 5.83136   | 5.7291    | 5.46223   | 6.3252    | 5.44039   | 5.63892   |
| 11.2723   | 9.35664   | 10.5042   | 10.1412   | 11.4905   | 9.9645    |
| 22.5122   | 21.8822   | 22.405    | 20.113    | 18.0438   | 21.0452   |
| 1.68835   | 0.556059  | 1.28373   | 0.808674  | 0.916183  | 1.83374   |
| 0         | 0         | 0         | 0         | 0         | 0         |

|           |           |           |          |           |          |
|-----------|-----------|-----------|----------|-----------|----------|
| 3.53995   | 3.26205   | 3.98728   | 4.15824  | 2.80498   | 3.65023  |
| 0.0245215 | 0.0175569 | 0.0198349 | 0        | 0.0570283 | 0        |
| 4.13222   | 4.70514   | 5.789     | 5.52085  | 4.12309   | 4.78064  |
| 6.79506   | 7.94307   | 4.82336   | 6.6757   | 5.55431   | 5.80736  |
| 18.8497   | 14.0948   | 16.5342   | 15.9002  | 19.7839   | 19.1695  |
| 6.71541   | 15.2093   | 6.96578   | 10.6423  | 2.12485   | 5.55471  |
| 0.768402  | 0.366774  | 0.414363  | 0.278822 | 0.546037  | 0.674717 |
| 19.5947   | 23.538    | 23.622    | 20.6704  | 20.6437   | 21.6677  |
| 28.0264   | 20.7598   | 30.5989   | 29.2151  | 31.5012   | 30.9444  |
| 11.5545   | 10.8588   | 10.2131   | 14.3983  | 8.447     | 11.0223  |
| 0.422619  | 0.34744   | 0.340727  | 0.381828 | 0.240757  | 0.408471 |
| 0.801663  | 0.340133  | 1.12878   | 0.560234 | 0.828615  | 0.553512 |
| 0.543906  | 0.637243  | 1.07989   | 0.825328 | 0.30665   | 0.400776 |
| 0         | 0         | 0         | 0        | 0         | 0        |
| 1.12674   | 0.69148   | 0.3906    | 0.467256 | 1.24781   | 0.260933 |
| 7.45645   | 6.7441    | 7.31122   | 6.63923  | 5.89914   | 6.59994  |
| 8.18011   | 4.37987   | 7.30717   | 5.52348  | 7.7199    | 6.97618  |
| 8.00234   | 5.30058   | 6.84216   | 5.97308  | 7.36463   | 7.54985  |
| 0         | 0         | 0.0803975 | 0        | 0         | 0        |
| 0.274798  | 0.615755  | 0         | 0.177267 | 0.295872  | 0.197985 |
| 4.0192    | 4.0192    | 3.58522   | 3.58522  | 3.92919   | 3.92919  |
| 60.3119   | 64.825    | 53.8157   | 64.1322  | 56.883    | 54.6291  |
| 2.97957   | 2.16815   | 1.82228   | 3.66585  | 1.52109   | 3.71116  |
| 67.7009   | 67.5586   | 71.9683   | 79.9507  | 80.5133   | 70.2447  |
| 0.140881  | 0.302604  | 0.341867  | 0.306719 | 0.327639  | 0.304503 |
| 0         | 0         | 0         | 0        | 0         | 0        |
| 61.9744   | 49.9201   | 69.3282   | 61.1809  | 59.6816   | 62.6407  |
| 0.399594  | 0.520185  | 0.352607  | 0.764526 | 0.394254  | 0.412216 |
| 0.358607  | 0.346738  | 0.419569  | 0.30662  | 0.551693  | 0.39441  |
| 13.8464   | 10.1967   | 14.3014   | 11.5618  | 9.47674   | 11.1898  |
| 103.669   | 151.388   | 112.051   | 105.527  | 82.1231   | 95.4251  |
| 98.1641   | 75.9444   | 99.6131   | 93.0054  | 86.7886   | 82.0652  |
| 49.4402   | 50.6264   | 49.5994   | 49.1598  | 46.5397   | 50.4815  |
| 32.0274   | 41.9615   | 28.2846   | 24.3419  | 30.07     | 25.5321  |
| 6.30016   | 8.29403   | 6.49338   | 6.342    | 5.15969   | 4.11814  |
| 5.70092   | 5.44639   | 6.31825   | 5.47106  | 5.13183   | 6.49669  |
| 349.316   | 436.99    | 283.797   | 655.821  | 696.276   | 292.197  |
| 26.7254   | 25.2555   | 26.4454   | 25.5048  | 30.2319   | 24.4865  |
| 4.30215   | 4.99021   | 6.92812   | 4.22297  | 5.65649   | 6.56072  |
| 3.61023   | 2.84334   | 3.71288   | 3.10658  | 3.28848   | 3.77272  |
| 24.0298   | 16.9944   | 5.91452   | 17.9455  | 11.5074   | 14.9331  |
| 21.3777   | 25.7885   | 25.1408   | 24.0866  | 17.0514   | 21.3448  |
| 28.5306   | 29.2205   | 29.6992   | 29.0907  | 25.4445   | 26.0976  |

|           |           |           |           |           |           |
|-----------|-----------|-----------|-----------|-----------|-----------|
| 0         | 0         | 0         | 0         | 0         | 0         |
| 20.3062   | 26.683    | 19.7761   | 23.6739   | 17.7407   | 18.8613   |
| 15.1701   | 9.31291   | 13.1156   | 12.2816   | 16.3648   | 13.9361   |
| 0         | 0         | 0.019568  | 0         | 0         | 0         |
| 2.52945   | 2.63857   | 4.33343   | 2.95686   | 2.78021   | 3.96318   |
| 0         | 0         | 0         | 0         | 0         | 0         |
| 0.390505  | 0.280435  | 0.152368  | 0.338134  | 0.303636  | 0.46659   |
| 2.47E-12  | 0.151219  | 0.0896772 | 0.246216  | 7.85E-38  | 0.168846  |
| 0         | 0         | 0         | 0         | 0         | 0         |
| 0.0471403 | 0.067503  | 0.0381308 | 0.0342105 | 0.109632  | 0.0382088 |
| 0         | 0         | 0         | 0         | 0         | 0         |
| 0         | 0         | 0         | 0         | 0         | 0         |
| 1.06499   | 0.841813  | 1.10517   | 1.118     | 0.315089  | 1.25263   |
| 0         | 0         | 0         | 0         | 0         | 0         |
| 1.11185   | 0.515849  | 0.727227  | 0.326787  | 0.78543   | 1.30352   |
| 22.2493   | 19.7355   | 15.8973   | 16.4946   | 16.4681   | 19.9885   |
| 0         | 0         | 0         | 0         | 0         | 0         |
| 0.266098  | 0.204965  | 0.102116  | 0.119111  | 0.221922  | 0.134549  |
| 0.234013  | 0.143613  | 0.0811235 | 0.0727832 | 0.0259158 | 0.243868  |
| 4.22271   | 3.34351   | 5.46507   | 3.85766   | 4.96804   | 5.35544   |
| 1.78518   | 0.975797  | 1.22662   | 1.42091   | 1.48807   | 1.40028   |
| 0.0419425 | 0.0900902 | 0.305338  | 0.0608769 | 0.195087  | 0.339958  |
| 28.4822   | 34.3055   | 33.2661   | 32.2607   | 34.0484   | 32.6869   |
| 0.9352    | 1.67396   | 0.378232  | 1.06046   | 1.48017   | 1.13702   |
| 0.340879  | 0.0813542 | 0.0919099 | 0.247382  | 0         | 0.0920978 |
| 11.3918   | 11.8394   | 12.0419   | 12.7047   | 10.8931   | 10.4972   |
| 0.721059  | 0.599298  | 0.929688  | 0.898656  | 0.478778  | 0.973934  |
| 28.2993   | 30.4121   | 32.839    | 33.9814   | 25.6902   | 30.5606   |
| 0.833799  | 1.23326   | 0.766416  | 0.583128  | 0.749272  | 0.697211  |
| 56.0716   | 49.9768   | 53.9899   | 50.9905   | 43.7253   | 63.9028   |
| 12.7262   | 10.4983   | 10.0702   | 11.4107   | 19.0877   | 13.3049   |
| 41.2069   | 38.5334   | 39.5965   | 35.4225   | 35.6323   | 34.6569   |
| 18.6715   | 16.717    | 19.0034   | 19.4439   | 19.6459   | 18.2782   |
| 0         | 0         | 0         | 0         | 0         | 0         |
| 0.222306  | 0.195898  | 0.138322  | 0.198562  | 0.185592  | 0.180187  |
| 32.0709   | 31.9782   | 31.7771   | 31.4677   | 30.9451   | 32.6918   |
| 21.2459   | 25.0133   | 26.8206   | 21.6332   | 20.3752   | 22.9126   |
| 879.84    | 1238.16   | 857.788   | 733.371   | 763.903   | 730.613   |
| 0.0624899 | 0         | 0         | 0         | 0         | 0         |
| 0.0660825 | 0.0236569 | 0.0534528 | 0.0239786 | 0.0512282 | 0.0803431 |
| 0         | 0         | 0         | 0         | 0         | 0         |
| 1.19485   | 0.975613  | 0.787416  | 0.928422  | 0.841055  | 1.10423   |
| 3.04957   | 2.41572   | 2.95409   | 2.86563   | 2.93893   | 2.885     |



|           |          |           |           |           |           |
|-----------|----------|-----------|-----------|-----------|-----------|
| 13.8762   | 14.0078  | 10.1784   | 14.8238   | 8.78601   | 14.6003   |
| 5.79126   | 4.97335  | 4.01108   | 6.84868   | 4.49891   | 9.08025   |
| 1.4423    | 0.734335 | 0.751838  | 0.837361  | 0.844781  | 1.35088   |
| 0.137049  | 0        | 0         | 0         | 0         | 0         |
| 30.293    | 26.1006  | 30.3879   | 25.9958   | 28.0762   | 25.8293   |
| 1.06862   | 1.16694  | 0.941982  | 0.725721  | 0.82847   | 1.41066   |
| 12.1658   | 10.0244  | 11.7195   | 10.5333   | 9.72958   | 11.8371   |
| 20.4406   | 17.665   | 19.5696   | 21.0923   | 21.3858   | 19.6419   |
| 12.4281   | 8.7388   | 10.0014   | 9.5621    | 10.646    | 11.2859   |
| 0.581997  | 0.417704 | 0.435987  | 1.04415   | 0.591773  | 1.35454   |
| 26.1843   | 24.8729  | 27.275    | 24.9684   | 23.4903   | 22.5623   |
| 0.0302635 | 0        | 0         | 0         | 0         | 0         |
| 0.298843  | 0.47548  | 0.214869  | 0.192778  | 0.154445  | 0.322963  |
| 25.057    | 21.3593  | 19.8309   | 24.7328   | 15.5528   | 18.2585   |
| 2.67631   | 3.09802  | 3.15351   | 2.62222   | 3.34061   | 3.17452   |
| 6.24532   | 12.7602  | 7.63918   | 7.6276    | 7.55742   | 6.42015   |
| 5.39114   | 4.01786  | 4.38061   | 3.98358   | 4.54023   | 5.66075   |
| 0         | 0        | 0         | 0         | 0         | 0         |
| 0         | 0        | 0         | 0         | 0         | 0         |
| 2.52E-08  | 1.86E-08 | 2.38E-08  | 1.44E-08  | 0.0809221 | 2.43E-08  |
| 62.7118   | 66.8534  | 61.2128   | 63.7304   | 62.2146   | 63.7981   |
| 0         | 0        | 0.0357749 | 0.0192581 | 0.0411432 | 0.0286784 |
| 23.3843   | 34.7659  | 24.7233   | 22.4961   | 25.5219   | 22.0944   |
| 1.01061   | 0.898695 | 0.980122  | 0.679019  | 0.930268  | 0.897713  |
| 99.7636   | 113.368  | 104.455   | 100.272   | 80.47     | 91.7733   |
| 13.9444   | 11.5031  | 14.9243   | 14.4707   | 12.4833   | 11.096    |
| 0         | 0        | 0         | 0         | 0         | 0         |
| 0.105803  | 0.050502 | 0.0285273 | 0.0511888 | 0         | 0.428785  |
| 0         | 0        | 0         | 0         | 0         | 0         |
| 4.04368   | 4.9577   | 4.80496   | 4.98617   | 4.32758   | 5.16285   |
| 6.24393   | 6.10234  | 6.50868   | 6.06678   | 6.05416   | 5.79363   |
| 6.68783   | 6.74337  | 6.61535   | 7.27543   | 7.1581    | 6.84271   |
| 18.8964   | 15.0677  | 17.396    | 19.4056   | 16.9542   | 18.9733   |
| 0.972975  | 0.502439 | 0.4114    | 0.332777  | 0.424185  | 0.443511  |
| 25.2895   | 21.4762  | 26.3629   | 25.5021   | 26.7065   | 23.842    |
| 0         | 0        | 0         | 0         | 0         | 0         |
| 0         | 0        | 0         | 0         | 0         | 0         |
| 9.53386   | 7.78171  | 8.97648   | 8.44105   | 8.85418   | 9.01801   |
| 9.59842   | 10.2229  | 10.754    | 10.5763   | 9.64578   | 10.4708   |
| 0         | 0        | 0         | 0         | 0         | 0         |
| 6.14415   | 4.70005  | 5.90308   | 5.52984   | 5.73367   | 6.13262   |
| 5.81769   | 6.03258  | 6.37769   | 6.82932   | 5.82478   | 5.43975   |
| 0         | 0        | 0         | 0         | 0.0209518 | 0         |

|          |           |           |          |          |          |
|----------|-----------|-----------|----------|----------|----------|
| 74.5891  | 65.4491   | 75.1293   | 78.4311  | 84.4744  | 81.8122  |
| 6.06983  | 3.53011   | 3.80756   | 4.24282  | 2.59276  | 4.37399  |
| 0        | 0         | 0         | 0        | 0        | 0        |
| 10.9037  | 8.60372   | 6.09915   | 6.91002  | 3.38488  | 6.29007  |
| 5.54407  | 5.67064   | 4.39297   | 5.34929  | 4.07857  | 4.51423  |
| 0.393292 | 0.362043  | 0.227233  | 0.163096 | 0.217776 | 0.409855 |
| 1.79498  | 1.65745   | 3.24284   | 2.99468  | 2.48373  | 3.467    |
| 7.2207   | 6.59383   | 8.62124   | 7.73488  | 8.7237   | 10.4781  |
| 16.1179  | 14.6067   | 28.4453   | 20.6129  | 23.7227  | 31.2898  |
| 63.8079  | 50.1772   | 237.93    | 350.657  | 180.518  | 293.472  |
| 0.216116 | 0         | 0         | 0.156839 | 0        | 0        |
| 5.11224  | 3.76485   | 5.73019   | 4.55806  | 5.32187  | 5.62352  |
| 0        | 0         | 0         | 0        | 0        | 0        |
| 12.212   | 8.96702   | 9.59399   | 10.6748  | 9.79962  | 10.9102  |
| 0.13214  | 0.493836  | 0.668041  | 0.500551 | 0.47528  | 0.66258  |
| 25.6908  | 23.3451   | 23.4478   | 25.3243  | 24.673   | 26.2054  |
| 11.6721  | 10.19     | 12.4386   | 11.7709  | 11.3334  | 11.7268  |
| 0        | 0         | 0         | 0        | 0        | 0        |
| 46.4829  | 47.0981   | 51.1634   | 50.7267  | 58.3714  | 48.8989  |
| 0.494761 | 0.708479  | 1.20061   | 0.8378   | 0.383546 | 2.0051   |
| 1.22396  | 2.73516   | 3.00541   | 1.40598  | 3.99792  | 7.42432  |
| 99.1448  | 94.6478   | 26.7321   | 47.9675  | 51.2391  | 26.7867  |
| 0        | 0         | 0         | 0        | 0        | 0        |
| 2.24382  | 2.62059   | 1.42326   | 1.77192  | 2.09695  | 2.61763  |
| 188.022  | 272.892   | 306.269   | 272.275  | 246.559  | 315.609  |
| 7.19147  | 2.2393    | 3.81894   | 3.49859  | 2.39367  | 2.95483  |
| 5.88259  | 4.73999   | 5.76811   | 5.53199  | 5.07349  | 6.10186  |
| 0        | 0         | 0         | 0        | 0        | 0        |
| 11.125   | 9.29528   | 11.8292   | 10.5536  | 9.48736  | 10.8404  |
| 18.4941  | 14.674    | 15.6153   | 18.5862  | 17.9079  | 16.5344  |
| 0        | 0         | 0         | 0        | 0        | 0        |
| 0.291133 | 0.564752  | 0.358235  | 0.209561 | 0.157669 | 0.43083  |
| 2.00773  | 2.66964   | 2.32002   | 1.66519  | 1.60089  | 1.58084  |
| 0        | 0         | 0         | 0        | 0        | 0        |
| 1.09845  | 1.40736   | 1.35615   | 0.62934  | 0.851535 | 0.937189 |
| 124.365  | 204.323   | 139.467   | 137.458  | 72.4669  | 93.8154  |
| 0.394114 | 0.0564356 | 0.414428  | 0.143008 | 0.366628 | 0.191666 |
| 0.152325 | 0         | 0.123213  | 0        | 0        | 0.123465 |
| 0.207589 | 0.208082  | 0.0671658 | 0.150651 | 0.128741 | 0.235561 |
| 0.502772 | 0.494966  | 0.76253   | 0.478893 | 0.511556 | 0.356575 |
| 22.3572  | 21.022    | 21.36     | 23.509   | 22.9437  | 24.1247  |
| 13.9924  | 13.6485   | 15.7123   | 14.288   | 13.6546  | 13.236   |
| 122.495  | 121.385   | 127.361   | 126.144  | 129.322  | 107.697  |

|          |           |           |           |           |           |
|----------|-----------|-----------|-----------|-----------|-----------|
| 2.63204  | 4.16571   | 2.34066   | 2.92661   | 2.07619   | 2.81952   |
| 0        | 0.093771  | 0.95344   | 0.0950462 | 0.507644  | 0.849235  |
| 0.125029 | 0.0447593 | 0.202267  | 0.045368  | 0.145387  | 0.10134   |
| 1.54449  | 1.17494   | 0.572598  | 0.420324  | 0.573712  | 0.417287  |
| 1.04554  | 0.928867  | 1.07849   | 1.01982   | 2.59628   | 2.94802   |
| 1.71213  | 1.69604   | 1.97301   | 1.42975   | 1.6909    | 1.95804   |
| 0.101128 | 0.108609  | 0.0818004 | 0.0733904 | 0.078396  | 0.0819677 |
| 0.531065 | 0         | 0         | 0.128411  | 0         | 0         |
| 0.978099 | 0.466867  | 1.55596   | 1.44331   | 0.859336  | 1.13632   |
| 7.84056  | 9.01933   | 10.9788   | 9.45811   | 8.92809   | 7.96498   |
| 25.5499  | 26.6599   | 21.1468   | 25.3835   | 16.7341   | 22.9136   |
| 0        | 0         | 0         | 0         | 0         | 0         |
| 42.8424  | 40.9072   | 52.589    | 43.5038   | 43.263    | 43.6693   |
| 211.294  | 281.024   | 157.585   | 175.452   | 148.111   | 174.125   |
| 0        | 0         | 0         | 0.0245953 | 0         | 0         |
| 38.0136  | 41.0789   | 38.5875   | 40.4006   | 35.4686   | 32.1974   |
| 0        | 0         | 0         | 0         | 0         | 0         |
| 2.87714  | 2.67699   | 1.29037   | 2.48059   | 2.6128    | 3.15633   |
| 22.5756  | 26.4089   | 23.2874   | 21.762    | 27.3563   | 22.0874   |
| 16.8161  | 16.1575   | 20.8743   | 18.4641   | 19.3284   | 18.6158   |
| 0        | 0         | 0         | 0         | 0         | 0         |
| 1.36981  | 1.61826   | 1.93903   | 1.34203   | 1.32738   | 2.05402   |
| 0.292087 | 0.0929462 | 0         | 0         | 0.0503179 | 0.105221  |
| 2.1565   | 1.92146   | 1.97012   | 1.47629   | 1.50848   | 1.44156   |
| 10.6135  | 10.9488   | 11.0873   | 12.6267   | 8.81998   | 9.49069   |
| 23.0741  | 15.5052   | 19.6169   | 20.6576   | 21.7582   | 17.0313   |
| 66.7794  | 68.2361   | 61.6182   | 67.7199   | 65.2534   | 62.6403   |
| 15.43    | 14.9467   | 15.4177   | 15.3625   | 15.0257   | 16.2798   |
| 3.76172  | 2.65824   | 3.38694   | 2.95304   | 3.67397   | 3.52175   |
| 2.82217  | 2.04023   | 2.53735   | 1.98916   | 1.66053   | 1.9172    |
| 0.328264 | 0.235031  | 0.232335  | 0.0595568 | 0.190857  | 0.166293  |
| 46.4984  | 42.6834   | 47.5447   | 48.3728   | 45.8615   | 44.3156   |
| 1.81952  | 2.23064   | 1.63238   | 1.98709   | 2.01052   | 2.04476   |
| 0.226054 | 0.0809251 | 0.0609501 | 0.0136709 | 0.0292067 | 0.0763434 |
| 1.65454  | 1.02857   | 0.898758  | 0.963646  | 1.4519    | 1.31249   |
| 9.35635  | 8.4743    | 9.1493    | 9.55261   | 8.94295   | 8.80949   |
| 28.1612  | 32.8883   | 23.7381   | 22.1582   | 12.7841   | 15.0258   |
| 26.4696  | 25.0787   | 27.5937   | 27.4515   | 30.1415   | 27.4131   |
| 9.5491   | 7.58863   | 9.59693   | 8.58939   | 8.70699   | 9.19692   |
| 22.9001  | 25.2123   | 23.1204   | 27.577    | 25.1817   | 23.6193   |
| 1.23794  | 0.846056  | 0.864801  | 0.571708  | 0.348972  | 1.0034    |
| 15.5887  | 16.7053   | 15.3351   | 16.4168   | 14.3299   | 16.945    |
| 175.344  | 83.7484   | 183.82    | 167.794   | 131.551   | 194.481   |

|           |           |           |           |           |           |
|-----------|-----------|-----------|-----------|-----------|-----------|
| 0.0917334 | 0         | 0         | 0         | 0         | 0         |
| 8.91077   | 8.40552   | 5.24063   | 5.42036   | 4.29284   | 6.18049   |
| 0.049019  | 0.0701934 | 0         | 0.071148  | 0.0380003 | 0.0397316 |
| 20.0008   | 16.159    | 20.6699   | 18.8339   | 17.2897   | 19.5835   |
| 0.591419  | 0.457321  | 0.363574  | 0.46354   | 0.330104  | 0.728635  |
| 1.48711   | 1.06474   | 1.9957    | 1.17733   | 1.02182   | 1.50669   |
| 3.28304   | 2.88787   | 2.20034   | 2.21238   | 1.78154   | 2.31888   |
| 0.0931637 | 0.100055  | 0.113037  | 0.0338053 | 0.0541665 | 0.0377562 |
| 5.46093   | 7.53419   | 3.59026   | 5.66415   | 3.4795    | 4.42627   |
| 1.27089   | 1.20505   | 0.555675  | 0.747819  | 1.14498   | 1.19714   |
| 131.834   | 170.091   | 162.903   | 162.188   | 147.813   | 137.879   |
| 1.99963   | 2.20185   | 0.998365  | 1.95157   | 0.587986  | 0.570064  |
| 20.4185   | 16.6706   | 17.1968   | 17.3287   | 21.0233   | 17.03     |
| 1.13981   | 0.136014  | 0.768307  | 1.10291   | 1.03086   | 1.23181   |
| 0         | 0         | 0         | 0         | 0         | 0         |
| 1.99681   | 1.73989   | 1.91993   | 1.54482   | 1.7378    | 1.81697   |
| 22.0163   | 20.0498   | 20.9719   | 22.2145   | 19.9868   | 19.5668   |
| 1.31751   | 1.01588   | 1.33897   | 1.27486   | 1.1523    | 1.64291   |
| 4.1716    | 2.89894   | 3.07741   | 4.71919   | 4.47037   | 6.86189   |
| 1.48056   | 1.53323   | 1.79625   | 1.45816   | 1.65321   | 1.86427   |
| 0         | 0         | 0         | 0         | 0.0532929 | 0.111442  |
| 0         | 0         | 0         | 0         | 0         | 0         |
| 0.0544932 | 0.0195081 | 0         | 0.0593201 | 0         | 0         |
| 1.6238    | 1.86018   | 1.44481   | 1.64979   | 2.76935   | 1.31615   |
| 3.18731   | 2.80252   | 3.18877   | 2.86093   | 2.88266   | 2.51544   |
| 2.96828   | 2.52173   | 2.63392   | 2.65248   | 2.28389   | 2.10067   |
| 0.156962  | 0.0749211 | 0.0952225 | 0.15188   | 0.121679  | 0.0848152 |
| 0.0495123 | 0.0354499 | 0         | 0.107796  | 0.0383827 | 0         |
| 7.28539   | 8.88532   | 8.49187   | 8.4524    | 7.88939   | 7.53917   |
| 0.104105  | 0.298149  | 0.10526   | 0.188877  | 0.0403519 | 0.168761  |
| 151.924   | 151.618   | 132.525   | 150.112   | 239.443   | 72.6512   |
| 10.0218   | 9.77179   | 10.9194   | 8.81948   | 8.81225   | 9.57779   |
| 55.8696   | 70.2951   | 65.2458   | 61.7614   | 71.0135   | 66.5942   |
| 0         | 0.0640085 | 0         | 0         | 0         | 0         |
| 2.12847   | 1.39332   | 2.00043   | 1.66236   | 1.27288   | 1.5116    |
| 20.9797   | 14.6623   | 20.5596   | 20.8358   | 20.8977   | 19.129    |
| 20.8649   | 16.3617   | 20.0919   | 19.6286   | 15.5758   | 18.3434   |
| 0         | 0.108837  | 0         | 0.220635  | 0         | 0         |
| 10.6682   | 11.2754   | 10.7471   | 8.05402   | 7.05838   | 8.93196   |
| 8.89395   | 7.12147   | 8.75587   | 7.98213   | 9.04528   | 9.09015   |
| 1.78071   | 0.900052  | 2.16005   | 1.92407   | 1.05945   | 1.40846   |
| 0.52273   | 0.374265  | 0.845651  | 0         | 0.405228  | 0.42369   |
| 45.33     | 39.8095   | 38.3163   | 35.4099   | 38.3974   | 36.2747   |

|           |           |           |           |           |           |
|-----------|-----------|-----------|-----------|-----------|-----------|
| 0         | 0         | 0.0404567 | 0         | 0         | 0.0405394 |
| 0.147276  | 0.15817   | 0.0595641 | 0.0178134 | 0.0761135 | 0.0795812 |
| 5.67476   | 6.91567   | 5.51687   | 6.39857   | 9.22814   | 6.31769   |
| 6.24735   | 5.96189   | 5.94763   | 5.8392    | 6.66599   | 6.83456   |
| 0         | 0         | 0         | 0         | 0         | 0         |
| 6.16958   | 6.00906   | 4.82368   | 5.55003   | 6.02207   | 6.44585   |
| 20.7066   | 21.0009   | 20.9038   | 22.2008   | 19.4578   | 21.0513   |
| 15.424    | 13.952    | 15.7344   | 15.6909   | 17.6062   | 16.5573   |
| 4.25063   | 3.30494   | 4.64656   | 3.83943   | 4.04625   | 5.5418    |
| 0         | 0         | 0         | 0.122702  | 0         | 0.137042  |
| 1.15653   | 1.75962   | 0.818558  | 0.944231  | 0.560351  | 1.17176   |
| 63.6854   | 55.8992   | 62.4367   | 72.75     | 79.5862   | 60.8437   |
| 9.99914   | 8.1407    | 10.458    | 8.25141   | 8.08489   | 8.23536   |
| 0         | 0         | 0         | 0         | 0         | 0         |
| 0         | 0         | 0         | 0         | 0         | 0         |
| 0.174953  | 0.187894  | 0.247653  | 0.428511  | 0.186486  | 0.194982  |
| 15.8121   | 15.9996   | 16.1062   | 16.6204   | 16.2008   | 17.5885   |
| 1.54988   | 1.01873   | 2.03465   | 1.29073   | 1.1818    | 1.42099   |
| 0         | 0         | 0         | 0         | 0         | 0         |
| 0.285515  | 0         | 0         | 0         | 0         | 0         |
| 0.270201  | 0.193459  | 0.327841  | 0.39218   | 0.26183   | 2.79234   |
| 2.8044    | 3.01185   | 3.45195   | 2.4334    | 2.03223   | 2.52014   |
| 0.0678609 | 0         | 0         | 0         | 0.0526068 | 0         |
| 1.77749   | 1.58176   | 1.94695   | 1.4503    | 1.15625   | 1.33091   |
| 7.45474   | 5.68555   | 5.30901   | 2.76382   | 1.00505   | 2.33155   |
| 0.143659  | 0.144     | 1.02258   | 3.48214   | 0.356373  | 1.04796   |
| 6.16073   | 5.70906   | 6.39791   | 5.97005   | 5.22353   | 6.17266   |
| 13.859    | 11.0716   | 11.8827   | 11.8738   | 15.1907   | 13.2076   |
| 29.4269   | 28.0149   | 30.4457   | 31.4734   | 27.0301   | 27.7932   |
| 0         | 0         | 0         | 0         | 0         | 0         |
| 17.5251   | 14.3749   | 14.3821   | 18.8302   | 16.1577   | 16.3098   |
| 0.334112  | 0.310984  | 0.459437  | 0.290966  | 0.233108  | 0.29789   |
| 2.57879   | 2.53754   | 2.27557   | 2.81047   | 1.59961   | 2.13907   |
| 170.98    | 153.266   | 183.839   | 181.845   | 195.215   | 185.529   |
| 0.149162  | 0.0710354 | 0.24076   | 0.108317  | 0.115397  | 0.160867  |
| 8.76903   | 8.51633   | 9.02318   | 7.2286    | 7.95355   | 8.98304   |
| 0.0477421 | 0.0854561 | 0.0772352 | 0.121266  | 0.0370104 | 0.154786  |
| 23.3169   | 19.6085   | 20.7992   | 21.8308   | 27.7666   | 20.1335   |
| 8.30822   | 5.25217   | 6.4434    | 7.25157   | 6.36017   | 6.78349   |
| 0         | 0.0763023 | 0.0862026 | 0         | 0         | 0         |
| 1.98492   | 0.756216  | 1.31827   | 1.533     | 1.27052   | 1.41696   |
| 20.5957   | 19.5108   | 20.4707   | 20.9747   | 20.5225   | 21.241    |
| 16.2194   | 15.9705   | 14.4974   | 17.7459   | 12.273    | 15.3105   |

|          |           |          |            |           |           |
|----------|-----------|----------|------------|-----------|-----------|
| 0        | 0         | 0        | 0          | 0         | 0         |
| 34.5711  | 46.2042   | 31.2263  | 38.4696    | 33.6489   | 33.8587   |
| 0.105539 | 0.075564  | 0.128053 | 0          | 0.0409078 | 0.085543  |
| 338.334  | 243.617   | 277.906  | 234.782    | 414.379   | 115.341   |
| 4.30914  | 3.58557   | 4.01312  | 4.25133    | 3.71971   | 4.44612   |
| 0        | 0         | 0        | 0          | 0.0241439 | 0.0504878 |
| 17.3553  | 21.337    | 16.7445  | 21.88      | 19.7922   | 19.769    |
| 11.0463  | 11.5586   | 11.2475  | 10.9149    | 9.28837   | 9.14929   |
| 11.9704  | 10.2988   | 10.3682  | 11.1723    | 11.7034   | 11.3322   |
| 12.0606  | 11.6873   | 10.3323  | 9.62233    | 8.77328   | 11.4847   |
| 0.328592 | 0.369403  | 0.396765 | 0.59194    | 0.233911  | 0.201245  |
| 0        | 0         | 0        | 0          | 0         | 0         |
| 6.51135  | 8.72861   | 4.38022  | 4.62564    | 3.38949   | 5.0396    |
| 0.21675  | 0.0471557 | 0        | 0          | 0         | 0.0533831 |
| 0        | 0         | 0        | 0          | 0         | 0         |
| 1.60211  | 1.91396   | 1.44893  | 1.60616    | 1.63421   | 1.93527   |
| 13.0741  | 13.8041   | 12.2466  | 11.9945    | 15.9578   | 13.4216   |
| 0.575522 | 0.156277  | 0.149474 | 0.103493   | 0.0512437 | 0.383161  |
| 0        | 0         | 0        | 0          | 0         | 0         |
| 1.07349  | 0.640497  | 0.578882 | 0.519366   | 0.138697  | 2.17525   |
| 104.757  | 132.4     | 139.449  | 102.1      | 138.676   | 127.039   |
| 0        | 0         | 0        | 0          | 0         | 0         |
| 0.205428 | 0         | 0        | 0          | 0         | 0         |
| 1.15992  | 0.553652  | 1.01642  | 0.631329   | 1.34878   | 1.0185    |
| 1.44144  | 1.08636   | 1.56483  | 1.87193    | 1.29386   | 1.38355   |
| 7.15856  | 5.62049   | 6.35605  | 6.8274     | 7.24411   | 6.41368   |
| 41.0183  | 29.4342   | 34.7551  | 40.0588    | 42.521    | 37.2849   |
| 0        | 0         | 0        | 0.00388515 | 0         | 0         |
| 17.3643  | 18.2622   | 21.3959  | 17.3679    | 14.6816   | 18.0122   |
| 2.52988  | 2.22352   | 2.76677  | 3.1262     | 2.67189   | 4.10654   |
| 7.48967  | 6.16253   | 5.61916  | 6.25462    | 6.23506   | 6.0331    |
| 0        | 0         | 0        | 0          | 0         | 0         |
| 8.94553  | 5.76435   | 5.37521  | 5.00806    | 3.76456   | 6.31843   |
| 0.487068 | 0.331295  | 0.541722 | 0.326964   | 0.405902  | 0.335642  |
| 85.9684  | 83.5216   | 89.7684  | 93.6768    | 101.496   | 81.7746   |
| 1.01E-09 | 0.149461  | 3.20E-10 | 7.97E-10   | 0.0495588 | 1.04E-09  |
| 29.0781  | 17.7381   | 64.1645  | 8.18778    | 35.1652   | 14.7069   |
| 42.3113  | 55.9013   | 53.7779  | 42.7807    | 43.9013   | 45.5145   |
| 293.015  | 286.935   | 273.787  | 286.313    | 326.448   | 270.542   |
| 5.36117  | 5.49265   | 6.06157  | 6.42717    | 5.94707   | 5.35373   |
| 0        | 0         | 0        | 0          | 0         | 0         |
| 13.9615  | 17.218    | 18.0823  | 15.7547    | 13.4962   | 13.9639   |
| 0        | 0         | 0        | 0          | 0         | 0         |

|           |            |           |           |           |            |
|-----------|------------|-----------|-----------|-----------|------------|
| 12.0867   | 10.6638    | 12.9339   | 13.3494   | 12.5649   | 13.0328    |
| 3.32537   | 3.24044    | 3.32481   | 3.8085    | 2.80025   | 3.60208    |
| 4.6984    | 4.10967    | 6.44016   | 5.39172   | 6.01065   | 4.78371    |
| 19.4993   | 21.0627    | 19.7841   | 18.0363   | 18.8879   | 20.1899    |
| 4.63329   | 4.10331    | 3.76696   | 3.91172   | 2.66177   | 3.87134    |
| 14.1959   | 13.5023    | 15.5128   | 13.1894   | 14.1248   | 13.6848    |
| 5.60148   | 4.4121     | 5.17905   | 4.70337   | 4.2409    | 4.86377    |
| 0         | 0          | 0         | 0         | 0         | 0          |
| 0.17843   | 0.650377   | 0.301778  | 0.588591  | 0.113172  | 0.065738   |
| 24.4106   | 21.5012    | 21.3214   | 20.9855   | 23.2665   | 20.815     |
| 3.88851   | 2.98296    | 1.4828    | 2.66071   | 0.861266  | 3.46694    |
| 2113.99   | 4418.97    | 3193.24   | 3317.32   | 4574.32   | 2668.45    |
| 0         | 0.203636   | 0.460115  | 0         | 0         | 0.230528   |
| 0         | 0.694612   | 0.896843  | 0.603479  | 0.322319  | 0.449339   |
| 0.21637   | 0.24344    | 0.20002   | 0.201887  | 0.239619  | 0.275589   |
| 19.3469   | 21.1425    | 24.4212   | 17.8091   | 22.8917   | 20.0143    |
| 0.152515  | 0.104998   | 0.118621  | 0.123454  | 0.0636634 | 0.152146   |
| 0.241918  | 1.12E-19   | 0.0368578 | 0.11641   | 0.0543406 | 0.0292077  |
| 14.2917   | 11.2459    | 12.4259   | 10.3717   | 12.3101   | 10.9403    |
| 1.07E-06  | 2.96E-09   | 2.00E-05  | 0.514502  | 1.80366   | 2.79E-07   |
| 0.248868  | 0.0779557  | 0.0377445 | 0.0564399 | 0.0482315 | 0.0882506  |
| 5.32371   | 4.04581    | 4.40362   | 4.30089   | 3.14536   | 4.37988    |
| 0.407134  | 1.27586    | 0.587002  | 1.1205    | 0.473175  | 1.19699    |
| 77.8836   | 98.4658    | 107.136   | 93.0131   | 98.9881   | 96.4909    |
| 12.0904   | 12.5519    | 12.032    | 13.4538   | 15.6211   | 12.799     |
| 7.02555   | 4.98624    | 5.7441    | 6.04507   | 6.83631   | 7.35306    |
| 0.0180727 | 0.00431317 | 11.2837   | 0         | 0         | 0.00976564 |
| 43.2945   | 35.9196    | 39.2327   | 40.3149   | 36.6937   | 36.8114    |
| 0         | 0          | 0.0212924 | 0         | 0         | 0          |
| 47.0897   | 40.7177    | 32.7142   | 34.8043   | 26.8722   | 28.5495    |
| 0.66735   | 0.345085   | 0.35987   | 0.565026  | 0.229929  | 0.360606   |
| 14.2402   | 15.1856    | 14.012    | 13.2523   | 15.1951   | 13.1173    |
| 28.9406   | 27.4206    | 27.8627   | 27.5388   | 23.4484   | 26.9329    |
| 2.75216   | 1.91133    | 2.27064   | 2.41667   | 2.26148   | 2.20836    |
| 0         | 0.0552372  | 0         | 0.147847  | 0         | 0.0468979  |
| 0.0298715 | 0.0213874  | 0.0241624 | 0         | 0         | 0          |
| 54.0661   | 46.3936    | 44.397    | 48.5991   | 57.0506   | 51.8549    |
| 25.4726   | 23.4832    | 23.3645   | 21.9244   | 25.9093   | 24.5234    |
| 0.103579  | 0          | 0         | 0         | 0         | 0          |
| 0.878243  | 2.14533    | 2.13118   | 2.99932   | 1.08131   | 1.75868    |
| 11.0099   | 7.08949    | 7.79264   | 8.2655    | 7.91171   | 9.7874     |
| 0.823146  | 0.671212   | 0.684321  | 1.12837   | 0.673566  | 0.908116   |
| 8.64283   | 6.40002    | 8.60708   | 7.73292   | 7.56051   | 8.81661    |

|          |           |           |           |           |           |
|----------|-----------|-----------|-----------|-----------|-----------|
| 28.332   | 24.7151   | 23.7004   | 25.8917   | 23.6306   | 24.1867   |
| 20.6111  | 26.8871   | 23.6817   | 23.8532   | 23.967    | 23.2238   |
| 9.91037  | 8.66013   | 8.90204   | 8.74045   | 8.12871   | 8.73904   |
| 0        | 0         | 0         | 0         | 0         | 0         |
| 0        | 0         | 0         | 0         | 0         | 0         |
| 0        | 0         | 0         | 0         | 0         | 0         |
| 585.298  | 674.774   | 683       | 635.831   | 701.889   | 573.645   |
| 0        | 0         | 0         | 0         | 0         | 0         |
| 0.143328 | 0.159983  | 0.0862913 | 0.0774196 | 0.0827    | 0.12649   |
| 9.97761  | 9.08699   | 9.68166   | 10.8401   | 13.5472   | 13.8479   |
| 0        | 0         | 0         | 0         | 0         | 0.0408718 |
| 0        | 0         | 0         | 0         | 0         | 0         |
| 74.7503  | 101.949   | 78.0352   | 68.8216   | 99.8184   | 68.3007   |
| 2.96412  | 2.50192   | 3.04652   | 2.28927   | 2.4981    | 2.50172   |
| 1215.46  | 2379.68   | 1462.51   | 1479.5    | 1153.19   | 2759.66   |
| 0.838015 | 0.875004  | 0.536634  | 0.684183  | 1.13687   | 1.44338   |
| 0        | 0.27304   | 0         | 0         | 0         | 0         |
| 0        | 0         | 0         | 0         | 0         | 0         |
| 0.431899 | 0.115299  | 0.249693  | 0.313482  | 0.220501  | 0.349949  |
| 4.63685  | 2.53674   | 4.90471   | 4.69381   | 3.28119   | 3.35358   |
| 0.094704 | 0         | 0         | 0.103093  | 0.073416  | 0.115141  |
| 0        | 0         | 0         | 0         | 0         | 0         |
| 0.989091 | 0.624375  | 0.538019  | 0.723935  | 0.687387  | 0.898434  |
| 26.0076  | 24.6015   | 24.8414   | 27.0392   | 26.0309   | 23.4732   |
| 0        | 0.0204124 | 0         | 0.02069   | 0         | 0         |
| 0        | 0         | 0         | 0         | 0         | 0         |
| 18.1029  | 13.757    | 16.0981   | 16.6522   | 19.3401   | 16.12     |
| 0        | 0.0987852 | 0         | 0.0500643 | 0.0534789 | 0         |
| 0.871078 | 0.900864  | 0.861175  | 0.351198  | 1.12546   | 0.706038  |
| 18.6865  | 21.5251   | 20.7484   | 20.692    | 16.357    | 14.671    |
| 4.64027  | 3.72387   | 3.16486   | 2.90043   | 2.69921   | 3.45192   |
| 1.19819  | 1.11785   | 0.998563  | 0.922249  | 0.90071   | 1.14775   |
| 6.13127  | 4.20649   | 5.31434   | 5.36919   | 5.35339   | 6.1795    |
| 18.2006  | 14.7558   | 14.2647   | 16.9172   | 13.2326   | 13.1395   |
| 12.9121  | 10.8793   | 11.5407   | 11.8038   | 12.7748   | 14.2241   |
| 2.53511  | 1.57497   | 3.69929   | 2.07451   | 1.68589   | 0.211523  |
| 126.678  | 150.949   | 149.59    | 130.469   | 135.671   | 139.65    |
| 0        | 0         | 0         | 0         | 0         | 0         |
| 0        | 0         | 0         | 0.0791693 | 0.084569  | 0         |
| 1.39467  | 0         | 2.25194   | 8.04E-06  | 0         | 0.0755736 |
| 0        | 0.137334  | 0.0775764 | 0.139201  | 0         | 0.31094   |
| 141.223  | 101.113   | 0         | 0         | 0         | 0         |
| 23.9124  | 22.9302   | 17.801    | 18.9702   | 16.0303   | 22.1988   |



|           |          |           |          |           |          |
|-----------|----------|-----------|----------|-----------|----------|
| 0         | 0        | 0         | 0        | 0.295629  | 0        |
| 81.4277   | 84.4197  | 79.0718   | 78.6612  | 80.3761   | 74.2883  |
| 46.4337   | 42.3181  | 47.6403   | 44.8598  | 38.8073   | 24.8317  |
| 0.038668  | 0.055371 | 0.0938332 | 0.112248 | 0.029976  | 0        |
| 2.95961   | 4.08117  | 3.62089   | 3.18198  | 3.03105   | 3.70219  |
| 33.2734   | 34.9894  | 34.4825   | 37.8799  | 30.5553   | 32.9319  |
| 10.6775   | 11.514   | 4.58174   | 3.77994  | 8.02503   | 8.39064  |
| 58.6295   | 49.3487  | 51.6223   | 54.9648  | 41.9972   | 50.3299  |
| 0.193368  | 0.375787 | 0.357512  | 0.300708 | 0.0428291 | 0.179121 |
| 56.0023   | 62.1465  | 63.8256   | 54.297   | 54.6198   | 57.6289  |
| 0.789987  | 0.754154 | 1.38451   | 1.21032  | 0.714479  | 1.20948  |
| 8.97812   | 7.71393  | 7.63276   | 8.51689  | 5.98725   | 8.74469  |
| 0.86646   | 1.14113  | 1.2892    | 0.670152 | 1.15271   | 0.7751   |
| 131.583   | 147.771  | 145.533   | 147.693  | 162.078   | 134.015  |
| 11.9514   | 14.2989  | 17.5021   | 16.2412  | 10.8495   | 13.2642  |
| 34.6356   | 33.3084  | 30.5323   | 30.2572  | 28.8656   | 23.3694  |
| 14.3463   | 18.4471  | 20.1972   | 17.2188  | 15.3527   | 16.4712  |
| 4.75377   | 0        | 0         | 0        | 0         | 3.85309  |
| 0.264756  | 0.18956  | 0.214156  | 0.576415 | 0.307865  | 0.107297 |
| 0.0225475 | 0.119582 | 0.109429  | 0.10227  | 0.176977  | 0.122175 |
| 3.55947   | 3.35988  | 3.28256   | 3.51286  | 3.02226   | 3.73811  |
| 0.0439404 | 0        | 0         | 0        | 0         | 0        |
| 2.04348   | 1.90646  | 0.901599  | 0.741496 | 0.480042  | 0.62739  |
| 10.3586   | 10.2839  | 10.752    | 11.143   | 10.8926   | 13.214   |
| 4.01261   | 3.0518   | 3.81049   | 4.18471  | 2.85651   | 3.31945  |
| 2.15776   | 1.43215  | 2.21675   | 1.46306  | 1.22097   | 2.02979  |
| 9.18592   | 8.23702  | 8.87628   | 8.20775  | 7.98548   | 7.31639  |
| 16.2185   | 27.4838  | 17.1648   | 15.0976  | 16.1567   | 18.9506  |
| 2.32476   | 1.81244  | 2.42369   | 2.96183  | 2.52307   | 2.26116  |
| 3.76856   | 3.47709  | 5.12243   | 4.5112   | 5.05983   | 4.69204  |
| 22.3019   | 22.7163  | 25.009    | 21.9566  | 20.0254   | 24.5397  |
| 3.09657   | 3.32563  | 2.71006   | 2.91036  | 2.47921   | 2.38644  |
| 0.765916  | 1.27956  | 0.734263  | 0.699946 | 0.681713  | 0.896713 |
| 17.957    | 15.274   | 15.919    | 15.6531  | 14.8815   | 16.784   |
| 1.43329   | 1.1526   | 1.54499   | 1.31693  | 1.54751   | 2.64679  |
| 82.5649   | 81.4143  | 82.801    | 87.0764  | 82.5987   | 84.229   |
| 0.854702  | 0.858597 | 1.07787   | 0.797649 | 0.977266  | 1.0451   |
| 0         | 0        | 0         | 0        | 0         | 0        |
| 30.2672   | 32.0861  | 33.4264   | 34.1468  | 29.1121   | 30.5233  |
| 4.7095    | 4.29152  | 5.36782   | 6.21412  | 4.81252   | 4.68475  |
| 0         | 0        | 0         | 0.114565 | 0         | 0        |
| 0         | 0        | 0         | 0        | 0         | 0        |
| 7.52547   | 5.59366  | 8.24297   | 7.35569  | 5.35387   | 5.47818  |

|           |           |           |           |           |           |
|-----------|-----------|-----------|-----------|-----------|-----------|
| 0.873063  | 1.49329   | 0.66697   | 0.950397  | 0.789614  | 0.786275  |
| 14.9077   | 12.4538   | 16.0795   | 16.2483   | 17.6397   | 16.5569   |
| 30.3519   | 31.269    | 28.0824   | 28.3519   | 15.4672   | 27.5414   |
| 14.4639   | 13.8173   | 13.713    | 12.3904   | 14.609    | 15.5941   |
| 20.5138   | 20.1071   | 15.8073   | 18.8524   | 12.7531   | 22.1039   |
| 65.2813   | 76.8728   | 70.5261   | 65.8955   | 85.8493   | 59.6545   |
| 0.561684  | 0.402155  | 0.176645  | 0.814258  | 0.13655   | 0.211534  |
| 0         | 0.131397  | 0.0742229 | 0.0998879 | 0.106701  | 0.334686  |
| 43.9888   | 48.4943   | 43.8545   | 43.625    | 30.7636   | 43.9442   |
| 0.0447125 | 0.0320133 | 0         | 0         | 0.0346618 | 0.036241  |
| 13.3283   | 12.4574   | 11.7853   | 15.9314   | 13.0293   | 13.2669   |
| 0.649187  | 0.297474  | 0         | 0         | 0         | 0.449013  |
| 0.0483447 | 0         | 0.039105  | 0         | 0.0374775 | 0         |
| 0         | 0         | 0         | 0.224582  | 0         | 0         |
| 9.65915   | 8.61119   | 8.36035   | 8.42143   | 8.93962   | 9.40565   |
| 44.1951   | 40.373    | 42.9885   | 45.2347   | 49.5826   | 45.8118   |
| 0         | 0         | 0         | 0         | 0         | 0         |
| 13.3576   | 8.83579   | 6.56874   | 8.31721   | 7.31659   | 8.48688   |
| 107.942   | 118.741   | 108.151   | 112.56    | 103.392   | 102.283   |
| 0.273454  | 0.195788  | 0.0552975 | 0         | 0.0529962 | 0         |
| 21.1236   | 15.712    | 19.576    | 19.0704   | 23.7227   | 23.3377   |
| 23.3979   | 21.2333   | 23.221    | 20.7717   | 25.7636   | 20.7586   |
| 0.19885   | 0         | 0         | 0         | 0.0293606 | 0.0402935 |
| 3.64993   | 3.29913   | 3.66985   | 3.14689   | 2.9844    | 2.85533   |
| 0.0574074 | 0.0685043 | 0.10835   | 0.0416616 | 0.0593374 | 0.0155102 |
| 0         | 4.60939   | 2.93755   | 3.65669   | 3.57732   | 3.85587   |
| 52.8529   | 32.6236   | 48.0237   | 42.5273   | 58.1054   | 16.1368   |
| 6.08011   | 7.71313   | 9.93518   | 10.5721   | 9.11046   | 9.39322   |
| 0.668991  | 0.478985  | 0.646085  | 0.630365  | 0.642409  | 0.833482  |
| 4.43E-08  | 0         | 4.02E-06  | 0         | 0.0515298 | 0         |
| 49.9225   | 42.7389   | 45.2061   | 48.0371   | 51.7772   | 47.1902   |
| 4.50586   | 5.15401   | 5.13313   | 5.28793   | 4.32949   | 7.82777   |
| 0.0783624 | 0.168318  | 0.190157  | 0.227476  | 0.183762  | 0.222304  |
| 0.221802  | 0.029776  | 0         | 0.120724  | 0.128958  | 0.0337082 |
| 10.5851   | 10.3675   | 11.508    | 11.6627   | 12.2875   | 9.18301   |
| 8.85591   | 9.176     | 11.1016   | 10.0882   | 8.92586   | 10.2889   |
| 0.652008  | 0.350119  | 0.395547  | 0.236587  | 0.252723  | 0.132119  |
| 0.0861371 | 0.0925088 | 0.139349  | 0.125022  | 0.13355   | 0.0349085 |
| 0         | 0         | 0.0200011 | 0         | 0         | 0.020042  |
| 0         | 0         | 0         | 0         | 0         | 0         |
| 0.138762  | 0.165584  | 0.0374138 | 0         | 0.10757   | 0.0374903 |
| 0.223018  | 0.224545  | 0.229073  | 0.205522  | 0         | 0.205033  |
| 0.253461  | 0.120982  | 1.29845   | 0.245255  | 0.458469  | 0.0684794 |

|           |           |           |           |           |           |
|-----------|-----------|-----------|-----------|-----------|-----------|
| 0         | 0         | 0         | 0.0776766 | 0         | 0         |
| 7.51297   | 1.7212    | 0.485049  | 0.928805  | 0.384126  | 0.481976  |
| 75.0276   | 87.0667   | 84.8817   | 80.0082   | 66.6281   | 78.1614   |
| 24.7516   | 23.7485   | 23.7649   | 22.962    | 18.5747   | 20.154    |
| 0         | 0         | 0         | 0         | 0         | 0         |
| 2.10981   | 5.16116   | 4.62199   | 2.48808   | 1.56741   | 1.85258   |
| 0.997613  | 0.614023  | 0.806949  | 0.584269  | 0.529145  | 0.510694  |
| 84.274    | 83.7301   | 82.3749   | 86.5465   | 81.6348   | 85.9678   |
| 1.90499   | 1.66703   | 1.4553    | 1.52073   | 1.49319   | 0.857811  |
| 32.9086   | 28.8276   | 28.6435   | 32.9796   | 26.4302   | 29.6807   |
| 0         | 0         | 0         | 0         | 0         | 0         |
| 0         | 0         | 0         | 0         | 0         | 0         |
| 0         | 0         | 0.255934  | 0         | 0         | 0         |
| 8.47283   | 9.70622   | 10.5544   | 8.69043   | 8.45118   | 6.73017   |
| 33.2858   | 33.678    | 39.2486   | 38.6724   | 37.3729   | 36.6056   |
| 0.207604  | 0.297281  | 0.167927  | 0.301324  | 0         | 0         |
| 0         | 0         | 0         | 0         | 0         | 0         |
| 9.13116   | 21.066    | 14.0295   | 12.4819   | 8.68909   | 5.09071   |
| 0.806599  | 0.120293  | 0.377685  | 0.182479  | 0.295578  | 0.583239  |
| 25.9954   | 37.0633   | 25.7058   | 22.1216   | 19.2901   | 29.0841   |
| 27.9229   | 33.3461   | 30.3938   | 31.8264   | 28.7481   | 28.5415   |
| 0         | 0         | 0         | 50.7945   | 0         | 0         |
| 0.0319955 | 0         | 0         | 0         | 0         | 0.0518668 |
| 3.25473   | 2.81665   | 2.47243   | 2.83442   | 2.21596   | 2.61513   |
| 3.02196   | 2.77639   | 2.48767   | 2.62007   | 2.23901   | 2.34102   |
| 25.8772   | 21.3526   | 23.8468   | 24.0602   | 22.9205   | 25.0031   |
| 45.2426   | 31.4014   | 42.9756   | 44.4999   | 32.0981   | 36.1265   |
| 5.44161   | 4.86455   | 4.50732   | 3.7136    | 3.86992   | 4.50986   |
| 0         | 0         | 0         | 0         | 0         | 0         |
| 5.39942   | 4.63362   | 4.90205   | 5.16461   | 5.2615    | 4.8443    |
| 2.40828   | 1.46132   | 1.51155   | 1.54751   | 1.58063   | 1.9983    |
| 21.7116   | 26.5501   | 8.73543   | 12.0608   | 14.8892   | 14.1873   |
| 0.475825  | 0.511023  | 0.553273  | 0.453226  | 0.345813  | 0.313359  |
| 0         | 0.0599579 | 0.101606  | 0.0607733 | 0.0973775 | 0.033938  |
| 4.08398   | 1.85947   | 3.30147   | 2.15289   | 1.15047   | 4.50983   |
| 0.0405812 | 0.0387405 | 0.0328253 | 0.0490842 | 0         | 0.0328925 |
| 71.1222   | 75.6347   | 67.0459   | 65.5792   | 75.4364   | 70.3137   |
| 17.6041   | 24.166    | 21.5266   | 21.851    | 21.5856   | 27.1362   |
| 3.03785   | 6.57261   | 2.85376   | 4.94813   | 2.08885   | 1.73819   |
| 21.8477   | 20.009    | 16.1543   | 21.0917   | 13.9061   | 15.7527   |
| 44.8948   | 38.7516   | 31.2952   | 41.011    | 39.791    | 41.2911   |
| 2.05754   | 1.13473   | 1.07596   | 1.84822   | 1.48728   | 1.19284   |
| 0.152956  | 0.109514  | 0         | 0.111003  | 0         | 0         |

|           |           |           |           |           |           |
|-----------|-----------|-----------|-----------|-----------|-----------|
| 50.1      | 51.4146   | 45.7683   | 52.3052   | 36.8623   | 46.6633   |
| 50.0893   | 42.7593   | 46.5086   | 43.2714   | 50.13     | 35.6813   |
| 8.15524   | 9.57595   | 8.99538   | 6.99448   | 7.3336    | 7.73982   |
| 23.2713   | 19.077    | 20.2868   | 19.9396   | 19.7457   | 17.3563   |
| 0.223022  | 0.351295  | 0.469035  | 0.356072  | 0.103734  | 0.32538   |
| 0.114704  | 0.184783  | 0.115977  | 0.166485  | 0.20007   | 0.325399  |
| 1.10083   | 0.324447  | 0.308445  | 0.711761  | 0.266932  | 0.269961  |
| 1.46647   | 0.873419  | 1.03923   | 0.904134  | 1.21731   | 1.54626   |
| 0         | 0         | 0         | 0         | 0         | 0         |
| 1.42412   | 0.728315  | 0.329126  | 0.442932  | 1.104     | 0.577148  |
| 5.78285   | 5.41489   | 4.89658   | 5.45372   | 4.92742   | 4.84229   |
| 0         | 0.0311086 | 0         | 0.0315316 | 0         | 0         |
| 75.6087   | 75.2593   | 67.622    | 68.1627   | 72.5842   | 70.2411   |
| 0.0221115 | 0.0158314 | 0.0357712 | 0         | 0.0171412 | 0.0179221 |
| 1.69655   | 2.42939   | 2.17954   | 1.44849   | 1.39255   | 1.456     |
| 0.079246  | 0.141847  | 0.0641005 | 0.0287551 | 0.0614327 | 0.160579  |
| 0.386982  | 0.0923571 | 0.292153  | 0.0936132 | 0.099998  | 0.104554  |
| 1.81059   | 1.35836   | 1.35994   | 1.4313    | 0.94416   | 1.52007   |
| 14.4074   | 15.1948   | 22.4198   | 20.0484   | 18.9103   | 14.2357   |
| 0         | 0         | 0         | 0         | 0         | 0         |
| 4.5992    | 3.20882   | 3.43508   | 3.36209   | 3.39621   | 3.41489   |
| 8.87404   | 3.03072   | 4.33465   | 2.70929   | 3.45393   | 4.28747   |
| 0         | 0         | 0         | 0         | 0         | 0.026805  |
| 0.2639    | 0.10797   | 0.304948  | 0.109438  | 0.496836  | 0.2139    |
| 17.4036   | 12.5168   | 14.708    | 14.3511   | 15.0749   | 15.6288   |
| 13.3938   | 13.6034   | 12.8426   | 14.826    | 13.708    | 17.9005   |
| 12.3716   | 10.4311   | 14.2082   | 11.5974   | 12.2852   | 12.4563   |
| 0.121678  | 0.0871193 | 0.0328077 | 0.206043  | 0.159177  | 0.0657495 |
| 13.1114   | 11.2686   | 11.9782   | 10.7563   | 9.43326   | 11.9314   |
| 0.126747  | 0.194037  | 0.154127  | 0.282794  | 0.172241  | 0.202234  |
| 1.25501   | 0.91946   | 1.41649   | 1.20732   | 0.972903  | 1.04088   |
| 3.19436   | 4.27905   | 6.03429   | 5.18175   | 5.02212   | 3.5134    |
| 0         | 0         | 0.195318  | 0         | 0         | 0         |
| 11.9906   | 7.96235   | 11.7302   | 9.68792   | 14.141    | 11.5427   |
| 1.24406   | 1.13294   | 1.44571   | 1.30457   | 1.06141   | 1.62045   |
| 0         | 0         | 0         | 0         | 0         | 0         |
| 0.537571  | 0.468553  | 0.990221  | 1.25253   | 0.403421  | 0.503067  |
| 0         | 0         | 0         | 0         | 0         | 0         |
| 4.75359   | 3.92774   | 4.7476    | 4.26793   | 3.96437   | 4.49354   |
| 0         | 0         | 0         | 0         | 0         | 0         |
| 0         | 0         | 0         | 0         | 0         | 0         |
| 53.4261   | 53.8422   | 56.0072   | 55.3874   | 58.5237   | 49.1895   |
| 47.0222   | 66.1035   | 46.1725   | 54.4801   | 50.8947   | 61.7945   |

|           |           |           |           |           |           |
|-----------|-----------|-----------|-----------|-----------|-----------|
| 0         | 0         | 0         | 0         | 0         | 0         |
| 2.59429   | 2.49483   | 2.73624   | 2.49184   | 2.56321   | 1.97912   |
| 0.0667881 | 0.215186  | 0.648282  | 0.484693  | 0.207101  | 0.649608  |
| 13.9073   | 11.0501   | 11.0925   | 12.2155   | 15.3948   | 7.70508   |
| 8.44792   | 7.21173   | 8.6731    | 8.01721   | 7.85035   | 9.15171   |
| 0         | 0         | 0         | 0         | 0         | 0         |
| 0         | 0         | 0         | 0         | 0         | 0         |
| 0         | 0         | 0         | 0         | 0         | 0         |
| 128.69    | 123.445   | 115.984   | 88.1384   | 133.281   | 47.5147   |
| 0.813055  | 0.388088  | 0.701508  | 0.944078  | 0.756351  | 1.53769   |
| 0         | 0         | 0.0536932 | 0         | 0.0257293 | 0         |
| 0         | 0         | 0         | 0         | 0         | 0         |
| 1006.13   | 1061.08   | 949.913   | 951.634   | 1116.01   | 946.615   |
| 13.6405   | 12.3934   | 12.6932   | 12.0775   | 15.1559   | 14.0742   |
| 1.318     | 0.7064    | 0.651847  | 0.601227  | 0.595526  | 0.579926  |
| 19.1739   | 14.2397   | 19.0475   | 18.2826   | 16.0366   | 20.2155   |
| 3.12817   | 2.19431   | 2.42773   | 2.28551   | 2.50693   | 5.22515   |
| 69.7266   | 73.8121   | 80.5497   | 72.0688   | 82.2586   | 80.02     |
| 4.58508   | 3.28283   | 4.42201   | 3.07152   | 1.23038   | 1.42937   |
| 0         | 0         | 0         | 0         | 0         | 0         |
| 9.37624   | 9.27986   | 9.60275   | 10.5452   | 17.9777   | 7.2154    |
| 21.9475   | 21.3939   | 19.5134   | 22.2984   | 14.3198   | 18.6338   |
| 0.450466  | 0         | 0.485831  | 0.326911  | 0.349208  | 0.365118  |
| 22.1844   | 15.3886   | 18.4665   | 18.4187   | 23.0573   | 19.6623   |
| 0         | 0.072333  | 0         | 0         | 0         | 0         |
| 0.122746  | 0.0741521 | 0         | 0.0751605 | 0.0816541 | 0.0746174 |
| 15.2647   | 15.6368   | 11.8615   | 14.0768   | 9.24475   | 13.2197   |
| 0.315526  | 0.153834  | 0.343866  | 0.193365  | 0.0799853 | 0.367709  |
| 10.27     | 13.7804   | 12.7866   | 12.1105   | 10.8928   | 10.0589   |
| 0         | 0.0229082 | 0.0258805 | 0.0464394 | 0.0248034 | 0.0518668 |
| 1.69301   | 0.832229  | 0.98109   | 1.19197   | 0.685605  | 1.14695   |
| 0.796389  | 0.382737  | 0.732427  | 0.862972  | 0.820345  | 1.26454   |
| 1.9429    | 1.45431   | 1.00009   | 1.13761   | 1.0954    | 1.27057   |
| 0         | 0         | 0         | 0.0258165 | 0.0275773 | 0.0288337 |
| 7.09591   | 12.4805   | 10.6445   | 8.77842   | 6.40151   | 10.707    |
| 0.179931  | 0.179943  | 0.137212  | 0.187644  | 0.0683192 | 0.165039  |
| 0         | 0.01986   | 0.0673106 | 0.0402602 | 0.0215031 | 0.0224827 |
| 6.89214   | 4.23044   | 5.19249   | 5.98484   | 4.65102   | 5.70431   |
| 4.1382    | 3.59136   | 2.94167   | 4.36824   | 2.3008    | 2.77819   |
| 0.0698346 | 0.0125001 | 0         | 0.0570152 | 0.0135342 | 0.115565  |
| 1.1856    | 1.50387   | 1.31464   | 1.05924   | 0.690171  | 1.64676   |
| 0.432627  | 0.206502  | 0.233295  | 0.470947  | 0.0558965 | 0.0584431 |
| 48.5297   | 46.3195   | 62.9852   | 50.4658   | 55.4631   | 58.0206   |

|           |           |           |           |           |           |
|-----------|-----------|-----------|-----------|-----------|-----------|
| 3.31936   | 4.08608   | 3.08535   | 3.25415   | 1.71548   | 3.44567   |
| 12.9206   | 9.61881   | 10.0355   | 11.0016   | 7.88209   | 9.87752   |
| 11.2384   | 9.56044   | 11.5749   | 10.2496   | 11.2924   | 12.6106   |
| 0.427283  | 0.324468  | 0.178047  | 0.187932  | 0.331236  | 0.482759  |
| 0         | 0         | 0         | 0.254279  | 0.203717  | 0.0709993 |
| 0         | 0         | 0         | 0         | 0         | 0         |
| 34.295    | 31.8362   | 37.1304   | 36.4888   | 36.3126   | 39.7198   |
| 15.2769   | 13.9332   | 21.4549   | 16.8924   | 17.5374   | 15.4723   |
| 24.6337   | 18.3419   | 23.0317   | 26.5289   | 29.0261   | 23.1574   |
| 14.2059   | 14.3085   | 10.2675   | 10.6231   | 9.58806   | 11.25     |
| 0.200764  | 0.0919956 | 0.227351  | 0.128214  | 0.136959  | 0.123672  |
| 9.7555    | 9.45305   | 5.69496   | 8.28757   | 7.59969   | 7.83356   |
| 13.5737   | 11.5153   | 13.2583   | 12.8245   | 14.5727   | 12.6003   |
| 35.1769   | 36.7138   | 35.9498   | 38.2483   | 39.5978   | 36.0749   |
| 27.3938   | 23.9039   | 28.5125   | 25.0451   | 26.441    | 27.9178   |
| 0         | 0.0660901 | 0         | 0         | 0         | 0.074818  |
| 0.10809   | 0.0773902 | 0.0874316 | 0         | 0         | 0.0438052 |
| 0         | 0         | 0         | 0         | 0         | 0         |
| 1.9212    | 1.3244    | 1.30472   | 1.07575   | 2.03434   | 2.57681   |
| 0         | 0         | 0         | 0         | 0         | 0         |
| 0.659094  | 0.235949  | 0.566448  | 0.179369  | 0.287403  | 0.734549  |
| 105.222   | 90.5656   | 100.185   | 115.095   | 85.797    | 86.6799   |
| 69.3857   | 76.2783   | 69.0036   | 71.7628   | 55.7829   | 64.3943   |
| 4.24487   | 4.37442   | 4.36977   | 5.41414   | 5.88302   | 5.47351   |
| 0         | 0         | 0         | 0         | 0         | 0         |
| 0.0683786 | 0.0489578 | 0.11062   | 0.0992472 | 0         | 0.0554232 |
| 8.82776   | 6.84398   | 7.35804   | 7.35506   | 7.70787   | 6.72431   |
| 10.391    | 8.66241   | 10.5211   | 9.60638   | 7.66098   | 10.0125   |
| 5.98924   | 4.8158    | 4.90369   | 5.07672   | 3.75104   | 5.20459   |
| 20.1699   | 18.6714   | 21.7165   | 19.3307   | 21.698    | 21.1875   |
| 0.256693  | 0         | 0         | 0         | 0         | 0.0693528 |
| 674.618   | 678.649   | 728.925   | 868.302   | 984.93    | 589.512   |
| 55.5785   | 53.8954   | 52.2565   | 60.5446   | 56.8166   | 50.0965   |
| 0.0901081 | 0.0756058 | 0.0728866 | 0.0882835 | 0.0589367 | 0.12521   |
| 13.2219   | 10.4133   | 13.9785   | 15.6387   | 17.8024   | 15.1915   |
| 1.46324   | 0.550974  | 1.32166   | 0.699651  | 0.383125  | 0.734388  |
| 3.40301   | 2.14966   | 1.42922   | 2.34193   | 2.20025   | 1.57217   |
| 0.142584  | 0.217787  | 0.376756  | 0.234546  | 0.368445  | 0.277366  |
| 3.49254   | 3.29735   | 3.35128   | 3.31735   | 3.91522   | 3.20549   |
| 45.4057   | 43.5397   | 54.0762   | 54.8184   | 54.7251   | 58.1723   |
| 16.2133   | 15.0726   | 15.6548   | 15.1257   | 16.4999   | 14.3858   |
| 4.04692   | 3.82691   | 4.63248   | 4.37768   | 3.7294    | 3.89906   |
| 420.699   | 554.672   | 522.892   | 495.196   | 385.791   | 540.595   |

|           |            |            |           |           |            |
|-----------|------------|------------|-----------|-----------|------------|
| 2.52763   | 1.04197    | 2.1065     | 2.44579   | 0.653152  | 1.86248    |
| 21.7218   | 8.82292    | 10.3002    | 17.9753   | 16.6583   | 15.6045    |
| 4.10916   | 4.29576    | 3.22524    | 1.71424   | 2.53107   | 6.60331    |
| 18.7238   | 17.2699    | 23.3185    | 19.4956   | 19.6816   | 21.3142    |
| 51.683    | 53.9392    | 43.2114    | 44.6032   | 39.3435   | 42.721     |
| 3.64896   | 1.98552    | 3.2009     | 2.25805   | 3.28276   | 2.68969    |
| 0.116126  | 0.194002   | 0.187863   | 0.19664   | 0.330082  | 0.0627491  |
| 0         | 0          | 0          | 0         | 0         | 0          |
| 13.8364   | 10.2869    | 10.7496    | 10.9112   | 12.0891   | 12.9099    |
| 5.77117   | 4.81673    | 5.96988    | 5.8916    | 6.57457   | 6.0778     |
| 4.39343   | 3.99578    | 2.97747    | 2.75753   | 2.57741   | 3.4327     |
| 0.772199  | 0.235099   | 0.265603   | 0.0966298 | 0.655352  | 0          |
| 0.0466429 | 0.0200372  | 0.0377285  | 0.081239  | 0         | 0.0226834  |
| 0.286117  | 0.263385   | 0.661242   | 0.326292  | 0.126744  | 1.15954    |
| 3.76099   | 3.78197    | 4.48844    | 3.39672   | 3.55071   | 3.306      |
| 0.582295  | 0          | 0          | 0         | 0         | 0.707955   |
| 62.2123   | 74.8322    | 57.6326    | 59.9621   | 62.917    | 58.6918    |
| 0         | 0.0316869  | 0.0715966  | 0.0321179 | 0.0343084 | 0          |
| 1.3846    | 1.50873    | 1.09863    | 0.788952  | 0.612219  | 1.05384    |
| 0.377463  | 0.270256   | 0.915966   | 1.09573   | 1.17046   | 0          |
| 0.0257807 | 0.0738341  | 0.0834141  | 0.0935478 | 0.0199856 | 0.0241727  |
| 5.03753   | 4.57237    | 4.90896    | 4.6346    | 4.39716   | 4.72609    |
| 0         | 0.00674318 | 0.00761811 | 0.0153792 | 0.0389432 | 0.00254383 |
| 20.4116   | 22.9786    | 24.065     | 23.3377   | 22.4663   | 20.6804    |
| 29.2103   | 28.3379    | 26.1564    | 28.7473   | 30.3833   | 27.1864    |
| 17.202    | 15.1433    | 19.1375    | 17.702    | 22.5717   | 17.8369    |
| 14.981    | 10.1479    | 15.0901    | 16.9607   | 14.5615   | 12.7055    |
| 2.16635   | 2.73477    | 2.7207     | 2.52373   | 2.82844   | 1.80211    |
| 0         | 0          | 0          | 0         | 0         | 0          |
| 257.445   | 220.216    | 326.25     | 404.418   | 337.012   | 594.668    |
| 10.1968   | 10.3974    | 14.6685    | 14.1088   | 9.87865   | 10.8675    |
| 0         | 0          | 0          | 0         | 0         | 0          |
| 0         | 0          | 0          | 0         | 0         | 0          |
| 7.4516    | 4.9882     | 8.07299    | 5.16269   | 6.07663   | 5.02038    |
| 0.205242  | 0.0734747  | 0.0415041  | 0.0186185 | 0.0795534 | 0.124767   |
| 14.7197   | 11.1555    | 14.3898    | 13.7298   | 11.9334   | 14.1314    |
| 165.178   | 182.848    | 190.985    | 204.524   | 200.319   | 199.616    |
| 0.145163  | 0.0259832  | 0.0293545  | 0.215085  | 0.112532  | 0.117659   |
| 0.582996  | 0.536775   | 0.557372   | 0.638892  | 0.529064  | 0.986307   |
| 4.10995   | 7.79552    | 6.41562    | 6.43628   | 5.58965   | 5.66898    |
| 90.1138   | 89.7849    | 95.8316    | 96.7858   | 90.2698   | 86.8953    |
| 0         | 0          | 0          | 0         | 0         | 0          |
| 0         | 0          | 0          | 0         | 0         | 0          |

|           |            |           |           |            |          |
|-----------|------------|-----------|-----------|------------|----------|
| 4.34544   | 3.66682    | 4.14229   | 5.36051   | 4.25206    | 6.69048  |
| 21.5337   | 17.9814    | 16.9156   | 13.9543   | 12.2442    | 18.9911  |
| 0.66358   | 0.475111   | 0.306718  | 0.550368  | 0.146976   | 0.61469  |
| 14.4623   | 10.4913    | 10.9769   | 13.5813   | 10.9673    | 11.6777  |
| 0.488267  | 0.294967   | 0.506029  | 0.520443  | 0.520455   | 0.593636 |
| 2.09183   | 1.67391    | 2.53806   | 2.45572   | 2.28934    | 2.49338  |
| 0         | 0.0115389  | 0         | 0         | 0          | 0        |
| 2.90828   | 4.0406     | 0.980188  | 2.86438   | 2.7645     | 3.36752  |
| 0         | 0          | 0         | 0         | 0          | 0        |
| 0.296981  | 0.141755   | 0.0800739 | 0         | 0.153483   | 0        |
| 1.49237   | 1.90194    | 1.32786   | 1.27798   | 1.22632    | 1.42734  |
| 0         | 0          | 0         | 0         | 0          | 0        |
| 8.35E-09  | 6.18E-09   | 8.65E-09  | 4.99E-09  | 1.30E-08   | 8.26E-09 |
| 5.94002   | 3.70034    | 4.86952   | 4.29079   | 5.2493     | 6.11109  |
| 1.68252   | 0.876111   | 1.73213   | 1.44304   | 0.711445   | 0.991811 |
| 4.91735   | 3.52073    | 3.33794   | 3.65827   | 2.89253    | 3.74534  |
| 0.0012243 | 0.00010361 | 2.30E-05  | 2.67E-06  | 0.00250985 | 7.74E-06 |
| 5.51542   | 4.56904    | 5.15982   | 5.69529   | 5.28161    | 5.52223  |
| 14.7324   | 19.5261    | 15.1478   | 15.1733   | 13.4901    | 20.2588  |
| 12.7708   | 10.7727    | 9.4395    | 20.9328   | 7.62422    | 18.6796  |
| 0         | 0          | 0         | 0         | 0          | 0        |
| 7.0625    | 4.44058    | 5.16174   | 4.73512   | 4.55783    | 4.03904  |
| 5.0974    | 3.94635    | 4.8774    | 5.3237    | 5.07599    | 5.99626  |
| 2.09039   | 1.49669    | 1.87986   | 1.85615   | 1.78255    | 2.26244  |
| 1174.34   | 1033.11    | 1090.63   | 1285.15   | 1263.06    | 1118.67  |
| 16.8481   | 21.6255    | 18.0944   | 16.2341   | 18.2194    | 15.8937  |
| 14.6206   | 13.4864    | 15.5265   | 14.3859   | 11.8208    | 13.7771  |
| 0         | 1375.75    | 1554.25   | 1394.46   | 0          | 1557.43  |
| 0         | 0.226313   | 0.255678  | 0         | 0          | 0.2562   |
| 2.94574   | 4.21818    | 6.35399   | 3.0879    | 5.83582    | 5.04053  |
| 25.268    | 22.6844    | 22.2647   | 22.8742   | 24.3991    | 23.4007  |
| 1.25627   | 1.0136     | 1.37845   | 1.75102   | 0.878176   | 0.707125 |
| 2.35645   | 1.37764    | 1.57158   | 1.59966   | 1.57791    | 1.34226  |
| 167.766   | 162.196    | 172.425   | 164.801   | 185.105    | 157.674  |
| 0         | 0.084473   | 0.127244  | 0.0285406 | 0.0304872  | 0        |
| 1.87855   | 1.05491    | 1.75788   | 1.3633    | 1.8846     | 2.59743  |
| 12.9492   | 9.93927    | 8.03784   | 10.7107   | 6.05083    | 10.0641  |
| 0         | 0          | 0         | 0         | 0          | 0        |
| 0         | 0          | 0         | 0.190951  | 0          | 0        |
| 13.5691   | 13.793     | 12.8074   | 11.3699   | 11.7952    | 22.8155  |
| 3.02016   | 2.22725    | 1.68563   | 2.73973   | 2.29445    | 2.76617  |
| 1.80021   | 1.24132    | 2.69369   | 2.03043   | 1.60173    | 1.72125  |
| 4.22813   | 2.41005    | 2.98839   | 3.76851   | 3.72322    | 3.21077  |



|           |           |           |           |           |           |
|-----------|-----------|-----------|-----------|-----------|-----------|
| 16.5721   | 13.5679   | 13.9947   | 16.6824   | 12.5274   | 14.5202   |
| 47.3469   | 46.1542   | 45.3085   | 41.9767   | 40.8706   | 44.2354   |
| 6.94974   | 6.20871   | 7.46737   | 6.63189   | 6.70629   | 7.60034   |
| 0.134062  | 0.191971  | 0.10844   | 0         | 0.103927  | 0.217323  |
| 0.797819  | 1.56134   | 0.989521  | 1.65978   | 0.948339  | 1.12088   |
| 0         | 0         | 0         | 0         | 0         | 0         |
| 12.922    | 11.7821   | 10.7771   | 9.32471   | 8.47066   | 10.645    |
| 2.18139   | 1.37534   | 1.40885   | 1.32907   | 1.24308   | 1.64934   |
| 18.0783   | 6.7737    | 13.6755   | 9.40872   | 5.04219   | 11.0231   |
| 0         | 0         | 0.0427148 | 0.0383232 | 0         | 0         |
| 139.984   | 125.282   | 424.614   | 304.767   | 271.295   | 368.751   |
| 0         | 0.0511754 | 0         | 0.0518713 | 0.166228  | 0.231734  |
| 2.02237   | 1.04576   | 0.84822   | 1.38613   | 0.72582   | 1.12315   |
| 0         | 0         | 0         | 0         | 0         | 0         |
| 3.84297   | 3.9586    | 1.84504   | 1.51141   | 2.36408   | 1.56747   |
| 14.0142   | 12.5978   | 14.7647   | 14.5953   | 12.2445   | 13.9948   |
| 0         | 0         | 0         | 0         | 0         | 0         |
| 0         | 0         | 0         | 0         | 0         | 0         |
| 13.665    | 11.7691   | 13.7271   | 12.8097   | 15.3842   | 12.4127   |
| 20.3279   | 17.8681   | 22.2104   | 20.3305   | 17.1277   | 20.2322   |
| 47.7232   | 48.0229   | 54.2305   | 52.7061   | 53.3636   | 53.6146   |
| 0         | 0         | 0         | 0         | 0         | 0         |
| 0.289728  | 0.0819515 | 0.144664  | 0.124599  | 0.0443658 | 0.0231935 |
| 60.63     | 69.7795   | 73.928    | 71.7087   | 62.3169   | 65.8986   |
| 0.141789  | 0.203036  | 0         | 0.411595  | 0.109917  | 0.459699  |
| 0         | 0         | 0         | 0         | 0         | 0         |
| 4.07216   | 3.08263   | 3.68847   | 4.00188   | 3.5514    | 3.21467   |
| 13.5139   | 9.47811   | 14.0485   | 11.6745   | 12.2593   | 13.6679   |
| 6.55058   | 5.56593   | 6.78109   | 5.74936   | 7.16619   | 7.26163   |
| 42.0532   | 33.6211   | 36.0962   | 38.2554   | 43.7041   | 31.5687   |
| 0         | 0         | 0         | 0         | 0         | 0         |
| 2.01043   | 1.90113   | 2.85351   | 3.1107    | 3.38168   | 2.98232   |
| 0         | 0         | 0         | 0         | 0         | 0         |
| 1.38715   | 1.62665   | 1.37338   | 1.5899    | 0.973739  | 1.51978   |
| 4.12431   | 4.10642   | 3.47507   | 3.55429   | 2.34797   | 4.23085   |
| 0.0770935 | 0.0275988 | 0.0935391 | 0.0279741 | 0         | 0.0624869 |
| 12.2536   | 14.9081   | 16.2591   | 13.6522   | 13.4354   | 13.8621   |
| 0.0293597 | 0.112114  | 0.0228404 | 0.0213069 | 0.02276   | 0         |
| 20.7809   | 20.5896   | 21.2519   | 21.4918   | 21.1479   | 19.0844   |
| 13.8543   | 11.4575   | 11.6555   | 12.384    | 13.2287   | 12.4815   |
| 21.7781   | 15.36     | 18.1357   | 19.6673   | 20.9485   | 21.075    |
| 1.55109   | 2.39463   | 1.37227   | 1.82919   | 1.50304   | 1.65009   |
| 6.75349   | 5.85475   | 6.58328   | 6.3533    | 6.72693   | 6.40963   |

|           |           |           |          |           |           |
|-----------|-----------|-----------|----------|-----------|-----------|
| 3.13096   | 2.08384   | 1.92618   | 2.24019  | 1.91438   | 2.03735   |
| 0.301682  | 0.377998  | 1.09811   | 0.218936 | 0.233869  | 0.122262  |
| 0.778804  | 0.868031  | 1.02818   | 0.653447 | 0.702363  | 0.83112   |
| 2.24922   | 4.34358   | 3.7143    | 4.83735  | 8.37856   | 3.7642    |
| 6.3239    | 4.14784   | 5.15105   | 5.23124  | 5.72516   | 4.62391   |
| 0.21972   | 0.432616  | 0.311022  | 0.318909 | 0.68132   | 0.400703  |
| 0.422772  | 0.279048  | 0.651883  | 0.580068 | 0.742534  | 0.621091  |
| 5.83409   | 5.52553   | 5.05125   | 6.64888  | 6.60838   | 7.28821   |
| 24.7674   | 21.7831   | 22.8287   | 24.6756  | 27.8993   | 24.6102   |
| 0.0379079 | 0.0271413 | 0.0306629 | 0        | 0.0146934 | 0.0614512 |
| 64.1724   | 55.7251   | 59.1632   | 62.7787  | 69.8672   | 52.9901   |
| 1.6355    | 1.48978   | 2.20348   | 2.408    | 2.30363   | 2.6493    |
| 1.27716   | 1.66747   | 1.36122   | 1.02499  | 2.05003   | 2.05818   |
| 15.1442   | 12.07     | 12.8514   | 13.0399  | 11.3306   | 13.5941   |
| 0.592902  | 0.769418  | 0.479586  | 0.564742 | 0.51708   | 0.510602  |
| 0         | 0         | 0         | 0        | 0         | 0         |
| 1.28952   | 2.00043   | 2.17306   | 2.37857  | 1.54114   | 1.9162    |
| 0         | 0         | 0         | 0        | 0         | 0         |
| 19.9069   | 24.0749   | 19.8567   | 22.1567  | 17.2712   | 17.222    |
| 23.2053   | 21.1126   | 20.5942   | 21.7976  | 21.9118   | 20.8071   |
| 44.291    | 40.6478   | 37.4212   | 38.1561  | 23.0826   | 23.6861   |
| 11.9323   | 11.5148   | 11.0645   | 11.7195  | 10.9534   | 10.0635   |
| 0         | 0         | 0         | 0.247403 | 0         | 0         |
| 6.09577   | 6.64149   | 4.21653   | 4.25943  | 4.72568   | 5.50577   |
| 11.3627   | 11.8263   | 11.9765   | 11.4601  | 10.2938   | 9.00223   |
| 0.633505  | 1.05835   | 0.512429  | 0.153249 | 0.491103  | 0         |
| 0.412508  | 0.489103  | 0.754429  | 0.394639 | 0.323567  | 0.403835  |
| 44.7035   | 36.1406   | 34.6253   | 40.2235  | 36.3173   | 36.4008   |
| 2.95384   | 2.33899   | 2.61083   | 3.35035  | 2.57799   | 3.69435   |
| 0.0515891 | 0.0738736 | 0.0417294 | 0.112317 | 0         | 0.0836294 |
| 0         | 0         | 0         | 0        | 0         | 0         |
| 1.89927   | 2.27512   | 1.97944   | 2.14702  | 1.67055   | 2.69399   |
| 4.75563   | 3.05031   | 4.25488   | 4.84516  | 5.02203   | 4.52247   |
| 13.401    | 12.3504   | 15.1907   | 16.6576  | 15.2774   | 20.4084   |
| 47.9208   | 52.7262   | 41.5747   | 44.8057  | 47.1014   | 38.4078   |
| 18.4376   | 17.155    | 19.0592   | 17.3982  | 19.5637   | 17.1341   |
| 62.379    | 67.7429   | 59.5297   | 36.9413  | 42.6192   | 45.6398   |
| 3.82775   | 4.11089   | 5.60262   | 4.86126  | 3.17928   | 4.24749   |
| 2.47038   | 2.529     | 2.76949   | 2.3904   | 3.39338   | 4.19786   |
| 14.0717   | 14.2704   | 17.1991   | 15.5984  | 12.2646   | 12.8536   |
| 8.18661   | 5.67325   | 6.01446   | 7.63768  | 9.81798   | 7.64759   |
| 76.2809   | 15.631    | 19.7414   | 49.6752  | 43.6495   | 65.839    |
| 46.2922   | 42.2947   | 43.4961   | 47.8274  | 45.0267   | 42.3541   |

|           |           |           |           |           |           |
|-----------|-----------|-----------|-----------|-----------|-----------|
| 0         | 0         | 0         | 0         | 0         | 0         |
| 3.95755   | 3.29805   | 3.20118   | 2.91915   | 1.91119   | 3.10256   |
| 0         | 0.194632  | 0         | 0         | 0.210735  | 0         |
| 1.72587   | 1.04441   | 1.14148   | 2.31683   | 1.30284   | 1.51021   |
| 21.113    | 15.9636   | 22.087    | 20.668    | 19.4462   | 20.3436   |
| 14.8524   | 15.606    | 14.2154   | 14.4602   | 10.1045   | 12.2568   |
| 8.55677   | 7.39754   | 7.75426   | 8.29693   | 5.91771   | 8.20179   |
| 13.5034   | 9.10884   | 9.65288   | 10.2819   | 11.1129   | 10.6709   |
| 408.218   | 362.099   | 330.513   | 337.168   | 424.881   | 349.681   |
| 5.71215   | 6.41434   | 5.89841   | 4.6494    | 5.74714   | 6.69853   |
| 24.3045   | 23.5605   | 26.6176   | 22.1964   | 25.7214   | 21.5075   |
| 1.66575   | 0.809293  | 2.26169   | 1.29521   | 1.24519   | 1.54302   |
| 37.6366   | 29.1564   | 35.3514   | 39.1383   | 40.2513   | 39.8286   |
| 0         | 0         | 0         | 0.0168267 | 0.0215692 | 0         |
| 0.95028   | 1.00787   | 1.4629    | 1.23892   | 1.06658   | 1.30697   |
| 0.540652  | 0.221198  | 0         | 0.560516  | 0.239498  | 0.375614  |
| 37.5044   | 35.4743   | 43.1515   | 36.8534   | 36.111    | 38.1536   |
| 6.28247   | 7.53801   | 6.00994   | 7.20328   | 5.09265   | 5.6502    |
| 0         | 0         | 0         | 0         | 0         | 0.0841904 |
| 0.671081  | 0.540541  | 0.678529  | 0.852277  | 0.682805  | 0.339958  |
| 0         | 0         | 0         | 0         | 0         | 0         |
| 0         | 0         | 0         | 0         | 0         | 0         |
| 71.3086   | 86.0302   | 79.5545   | 81.9009   | 84.2076   | 63.7983   |
| 2.6869    | 2.30852   | 3.34251   | 3.28127   | 4.28078   | 3.63471   |
| 7.15473   | 4.60711   | 6.40686   | 5.32907   | 5.76926   | 6.31411   |
| 13.2272   | 14.4695   | 17.2059   | 12.1158   | 16.0741   | 10.6994   |
| 11.7845   | 15.9375   | 11.121    | 9.5553    | 8.45885   | 11.9692   |
| 16.2882   | 14.5723   | 14.2667   | 17.0952   | 15.9581   | 19.0887   |
| 6.13968   | 5.32717   | 5.87276   | 6.58552   | 7.35166   | 6.09838   |
| 0.287502  | 0.321558  | 0.265384  | 0.356235  | 0.158255  | 0.265926  |
| 8.0325    | 6.22205   | 6.57793   | 7.08776   | 7.23125   | 7.17297   |
| 53.3072   | 39.659    | 47.4      | 50.5834   | 49.53     | 43.4406   |
| 3.31501   | 2.90227   | 3.31005   | 4.17555   | 2.89642   | 4.63726   |
| 1.49679   | 1.03766   | 1.234     | 1.49462   | 0.92397   | 1.39824   |
| 0.0760998 | 0         | 0.0615556 | 0.055227  | 0.0589937 | 0         |
| 13.8989   | 11.404    | 13.0723   | 13.5054   | 10.4854   | 15.3673   |
| 0         | 0.0770815 | 0.261249  | 0.0781298 | 0         | 0.174522  |
| 0         | 0         | 0         | 0         | 0         | 0         |
| 0         | 0.652362  | 0         | 0         | 0.156962  | 0         |
| 0.154227  | 0.287101  | 0.174651  | 0.13431   | 0.0956472 | 0.150007  |
| 0         | 0         | 0         | 0         | 0         | 0         |
| 43.5606   | 46.0132   | 39.3994   | 39.3858   | 43.724    | 35.1239   |
| 80.0907   | 99.716    | 121.213   | 83.8592   | 154.734   | 123.174   |

|           |          |          |          |           |           |
|-----------|----------|----------|----------|-----------|-----------|
| 10.2158   | 7.05046  | 9.80984  | 7.04604  | 7.11591   | 6.71196   |
| 0.370949  | 0.415842 | 0.429224 | 0.291843 | 0.384     | 0.279352  |
| 21.8619   | 23.5808  | 23.5418  | 23.4404  | 23.2726   | 21.7786   |
| 0.395861  | 0.152615 | 0.270941 | 0.243086 | 0.0944238 | 0.246814  |
| 2.93193   | 2.65284  | 2.58007  | 2.78245  | 2.52264   | 2.82037   |
| 12.1177   | 10.772   | 9.52335  | 10.3443  | 10.2644   | 11.9583   |
| 11.5346   | 10.6821  | 8.46663  | 7.61506  | 7.2665    | 8.84271   |
| 0         | 0        | 0        | 0        | 0         | 0         |
| 9.0547    | 7.47143  | 7.88251  | 9.66558  | 8.12104   | 9.57709   |
| 20.7797   | 18.5142  | 23.8375  | 21.1722  | 19.3507   | 26.1021   |
| 0.949693  | 0.226654 | 0.256063 | 0.287171 | 0.42946   | 0.833905  |
| 0         | 0        | 0        | 0        | 0         | 0         |
| 25.287    | 31.3449  | 14.746   | 13.3722  | 21.2745   | 22.7204   |
| 1.89736   | 1.47151  | 1.31647  | 1.77011  | 1.21298   | 1.55544   |
| 8.14164   | 8.38931  | 9.98687  | 8.36007  | 8.08931   | 9.16402   |
| 19.9803   | 22.6696  | 22.7142  | 21.9702  | 20.4065   | 18.2275   |
| 8.66038   | 8.07432  | 7.66434  | 8.34488  | 8.18998   | 6.73083   |
| 0.584601  | 0.209282 | 0.472872 | 0.212128 | 0.226596  | 0.473839  |
| 0.505781  | 0.415778 | 0.272744 | 0.163135 | 0.435655  | 0.288485  |
| 0.320096  | 0.302535 | 0.263257 | 0.401626 | 0.248166  | 0.374727  |
| 0         | 0        | 0        | 0        | 0         | 0         |
| 0.47514   | 0.52575  | 0.698784 | 0.407512 | 0.267881  | 0.385117  |
| 18.7763   | 14.4077  | 16.1305  | 15.6937  | 15.8005   | 14.5471   |
| 200.011   | 249.945  | 291.596  | 238.696  | 253.867   | 169.916   |
| 0         | 0        | 0        | 0        | 0         | 0         |
| 2.8378    | 2.50926  | 3.08799  | 2.37261  | 2.3404    | 2.75345   |
| 9.13574   | 8.44002  | 7.66782  | 10.2301  | 7.65331   | 7.88256   |
| 5.04298   | 3.94266  | 3.02865  | 3.63548  | 3.27885   | 3.54825   |
| 0.839322  | 0.772635 | 1.74577  | 0.870159 | 0.836557  | 0.87467   |
| 3.86905   | 4.18274  | 4.94034  | 3.82978  | 4.26473   | 4.72044   |
| 5.48388   | 4.26194  | 5.19406  | 5.61247  | 4.61461   | 4.97674   |
| 0         | 0        | 0        | 0        | 0         | 0         |
| 5.2529    | 5.02754  | 5.09686  | 5.82328  | 5.91384   | 5.00933   |
| 0         | 0        | 0        | 0        | 0         | 0         |
| 2.94971   | 2.33696  | 2.50372  | 2.53445  | 2.81555   | 3.13781   |
| 0         | 0        | 0        | 0        | 0         | 0         |
| 0         | 0        | 0        | 0        | 0         | 0         |
| 0.0364163 | 0        | 0        | 0.026428 | 0         | 0.0295167 |
| 20.3976   | 19.346   | 23.2846  | 20.9228  | 20.9807   | 20.6483   |
| 0         | 0        | 0        | 0        | 0         | 0         |
| 1.58121   | 1.07915  | 0.713475 | 1.63487  | 0.933812  | 1.15939   |
| 46.4113   | 47.8238  | 47.7444  | 49.0546  | 53.357    | 47.842    |
| 12.2126   | 10.3763  | 10.8979  | 12.7872  | 12.7268   | 11.4773   |

|           |           |            |           |           |           |
|-----------|-----------|------------|-----------|-----------|-----------|
| 3.65E-06  | 5.10E-06  | 1.99E-05   | 6.93E-06  | 6.74E-06  | 0.437771  |
| 3.82991   | 3.18984   | 2.73967    | 3.61137   | 2.92861   | 3.54774   |
| 155.988   | 143.148   | 174.77     | 166.584   | 151.797   | 170.496   |
| 0.587443  | 0.168239  | 0.261344   | 0.234475  | 0.091079  | 0.190457  |
| 7.61519   | 30.182    | 16.1319    | 12.8586   | 12.641    | 7.62433   |
| 15.8449   | 17.1894   | 21.3077    | 17.9168   | 20.457    | 16.4125   |
| 0         | 0         | 0          | 0         | 0         | 0         |
| 0.940025  | 0.638317  | 0.572975   | 1.23209   | 0.702792  | 1.45209   |
| 0.0193498 | 0.0298928 | 0.00632086 | 0.109667  | 0.0768807 | 0         |
| 0         | 0         | 0          | 0         | 0.0755256 | 0         |
| 15.8565   | 23.2839   | 19.7967    | 18.2383   | 15.4399   | 13.984    |
| 19.7136   | 25.6639   | 17.1808    | 15.844    | 13.1989   | 16.2915   |
| 0.688612  | 0.578151  | 1.47E-11   | 0.209276  | 6.64E-08  | 5.60E-12  |
| 7.00205   | 7.38973   | 6.06684    | 7.06142   | 4.3437    | 8.10524   |
| 0.62366   | 0.530505  | 0.573395   | 1.08629   | 0.396391  | 0.621777  |
| 1.49385   | 1.67616   | 1.32506    | 1.43483   | 1.17571   | 1.12186   |
| 20.3834   | 19.9794   | 19.3311    | 22.5232   | 19.9134   | 25.9433   |
| 344.908   | 396.549   | 366.736    | 373.525   | 381.715   | 365.076   |
| 0.404235  | 0.506493  | 0.163489   | 0.330031  | 0.313369  | 0.409558  |
| 0.360891  | 0.516782  | 0.291917   | 0         | 0         | 0         |
| 26.4328   | 32.1706   | 29.9474    | 26.5938   | 23.2      | 24.8184   |
| 7.76359   | 6.4474    | 7.18772    | 7.26759   | 7.03891   | 8.1781    |
| 0.604675  | 0.394959  | 0.454786   | 0.477317  | 0.59211   | 0.438519  |
| 0.205294  | 0.440959  | 0.498174   | 0.148985  | 0.636588  | 0.166398  |
| 63.4885   | 65.9455   | 72.2849    | 68.4199   | 62.3777   | 67.0604   |
| 0.379061  | 0.43147   | 0.545092   | 0.724871  | 0.81626   | 0.43392   |
| 14.7046   | 16.9594   | 13.0935    | 15.2061   | 12.3572   | 17.4466   |
| 0         | 0         | 0          | 0         | 0         | 0         |
| 2.89913   | 1.61319   | 1.65522    | 1.46199   | 1.65114   | 2.05498   |
| 0.366434  | 0.24926   | 0.237212   | 0.438597  | 0.333921  | 0.237697  |
| 156.228   | 180.153   | 156.443    | 163.525   | 174.969   | 123.888   |
| 16.9042   | 16.1676   | 14.709     | 19.005    | 13.9034   | 15.3377   |
| 8.50108   | 10.352    | 9.15042    | 7.43241   | 9.02905   | 8.62657   |
| 15.1298   | 12.8177   | 14.0162    | 13.2794   | 13.0951   | 14.8314   |
| 0         | 0.0205714 | 0          | 0.0834047 | 0.0445466 | 0.0355299 |
| 0.0611674 | 0.262768  | 0          | 0.0887806 | 0.189672  | 0.0495783 |
| 0         | 0         | 0.0267025  | 0         | 0         | 0         |
| 48.3396   | 49.4519   | 49.7513    | 48.6726   | 50.945    | 39.9691   |
| 26.966    | 28.4913   | 27.9657    | 26.2311   | 21.6363   | 22.2863   |
| 0.141885  | 0.0507933 | 0.200843   | 0.12871   | 0.0549955 | 0.115002  |
| 0         | 0         | 0          | 0         | 0         | 0         |
| 0         | 0         | 0          | 0         | 0         | 0         |
| 0.155967  | 0.186115  | 0.336422   | 0.0754585 | 0.322421  | 0.294971  |

|           |           |           |           |           |           |
|-----------|-----------|-----------|-----------|-----------|-----------|
| 33.6278   | 31.1112   | 32.1136   | 35.6503   | 42.6171   | 27.9804   |
| 12.3549   | 9.65411   | 10.2975   | 10.9123   | 9.59579   | 11.1618   |
| 0.146937  | 1.15787   | 1.3081    | 2.02606   | 0.341723  | 0.953769  |
| 0.963164  | 0.50971   | 0.812957  | 0.987697  | 0.486952  | 0.933418  |
| 0.744247  | 0.888111  | 0.802675  | 0.540114  | 0.384635  | 0.201079  |
| 7.18105   | 6.82545   | 7.5725    | 7.17167   | 7.58932   | 8.29285   |
| 35.1683   | 31.891    | 38.2035   | 31.3272   | 28.9106   | 34.0412   |
| 0.762442  | 0.349372  | 0.268618  | 0.491838  | 0.189138  | 0.464175  |
| 46.7408   | 36.7421   | 40.6559   | 43.9668   | 47.6609   | 42.5282   |
| 0         | 0         | 0.0378888 | 0         | 0         | 0         |
| 23.0352   | 14.2593   | 18.1874   | 19.265    | 19.7634   | 16.5489   |
| 6.52729   | 3.73873   | 3.56386   | 7.87522   | 11.7014   | 11.1764   |
| 7.64565   | 6.67161   | 7.58557   | 6.97908   | 7.13096   | 6.72962   |
| 26.0219   | 27.7397   | 23.6419   | 31.3985   | 30.1923   | 30.2126   |
| 0.0498976 | 0.0857417 | 0.0484333 | 0         | 0.0440967 | 0.109198  |
| 1.50155   | 1.93515   | 2.42915   | 1.30765   | 1.16403   | 1.21706   |
| 14.2638   | 10.5225   | 13.1484   | 11.8437   | 10.6213   | 11.3449   |
| 36.2591   | 50.5459   | 35.9245   | 42.7096   | 39.4977   | 36.1664   |
| 2.20907   | 2.30058   | 2.92397   | 1.45742   | 3.26933   | 0.813875  |
| 37.2752   | 23.0442   | 40.2782   | 30.8641   | 19.1988   | 45.6282   |
| 15.7521   | 15.7829   | 19.1991   | 21.9419   | 17.0887   | 13.2779   |
| 11.385    | 17.018    | 1.93876   | 13.0458   | 2.94195   | 2.26651   |
| 52.0622   | 68.6195   | 52.1856   | 55.6047   | 56.3575   | 44.8053   |
| 0.194341  | 0.194802  | 0.332362  | 0.233718  | 0.215223  | 0.108014  |
| 9.5627    | 7.49632   | 9.55756   | 8.60651   | 9.54629   | 9.95919   |
| 9.68784   | 12.173    | 12.2215   | 10.7555   | 9.49961   | 10.3224   |
| 0         | 0         | 0         | 0         | 0         | 0         |
| 10.6238   | 10.0941   | 10.3769   | 9.89193   | 10.5666   | 11.373    |
| 17.0462   | 11.7833   | 16.6423   | 16.6595   | 17.9757   | 17.3334   |
| 0         | 0         | 0         | 0         | 0         | 0         |
| 0         | 0         | 0         | 0         | 0         | 0         |
| 0         | 0         | 0         | 0         | 0         | 0         |
| 5.59061   | 5.89951   | 6.13341   | 5.41676   | 5.10118   | 5.06497   |
| 13.911    | 10.6462   | 11.3127   | 10.3011   | 13.6602   | 13.3903   |
| 0         | 0         | 0         | 0         | 0         | 0         |
| 1.35582   | 1.27421   | 0.973747  | 1.30081   | 0.638815  | 0.79415   |
| 1.70813   | 1.27858   | 1.8841    | 1.85943   | 0.963033  | 1.00691   |
| 7.28617   | 5.66974   | 6.93402   | 6.77613   | 6.67777   | 7.1736    |
| 63.9951   | 66.4      | 48.1745   | 53.2564   | 43.0379   | 51.2938   |
| 0.0374133 | 0.107149  | 0.121051  | 0.0271515 | 0         | 0.0303247 |
| 6.92831   | 6.62056   | 7.25895   | 6.65121   | 6.82997   | 7.31801   |
| 4.801     | 3.79587   | 4.6491    | 5.54711   | 5.38285   | 4.30933   |
| 30.0449   | 19.771    | 26.743    | 28.5534   | 33.2746   | 28.3033   |

|           |           |           |           |           |           |
|-----------|-----------|-----------|-----------|-----------|-----------|
| 3.14925   | 1.81173   | 2.12993   | 2.19579   | 1.81079   | 2.06632   |
| 0.880317  | 0.900137  | 0.551933  | 0.395251  | 0.649552  | 0.668024  |
| 0         | 0         | 0         | 0         | 0         | 0         |
| 0         | 0         | 0         | 0         | 0         | 0         |
| 0.104607  | 0         | 0         | 0.0759148 | 0         | 0.254361  |
| 0.0775607 | 0         | 0         | 0         | 0         | 0         |
| 20.988    | 20.2561   | 21.5918   | 21.0742   | 16.5866   | 18.876    |
| 15.6084   | 20.4809   | 16.8017   | 20.1565   | 13.158    | 16.2588   |
| 23.4906   | 22.6944   | 24.2354   | 25.7078   | 21.6562   | 24.1972   |
| 29.5939   | 27.8208   | 28.7044   | 26.4335   | 23.0459   | 26.5017   |
| 16.4914   | 13.1244   | 14.8107   | 14.5708   | 12.0953   | 14.253    |
| 0         | 0         | 0         | 0         | 0         | 0         |
| 8.41566   | 10.8035   | 7.18053   | 8.29105   | 6.73305   | 5.86558   |
| 35.4377   | 37.0591   | 63.1426   | 33.5724   | 64.2137   | 49.6646   |
| 0.065876  | 0         | 0         | 0         | 0.0255341 | 0         |
| 0         | 0         | 0         | 0         | 0         | 0         |
| 3.11844   | 2.92157   | 3.46165   | 3.15391   | 3.29187   | 2.58138   |
| 0.0797397 | 0         | 0.0644999 | 0         | 0         | 0         |
| 25.193    | 21.3115   | 19.7779   | 22.3928   | 20.091    | 23.619    |
| 12.6374   | 9.87934   | 9.46753   | 10.4833   | 14.3899   | 12.4027   |
| 0.0477503 | 0.136753  | 0.193121  | 0.138613  | 0.11105   | 0.193516  |
| 2.89697   | 8.88928   | 4.64392   | 11.5215   | 2.25898   | 8.45672   |
| 60.0199   | 74.2094   | 79.4009   | 74.7503   | 75.0957   | 71.1414   |
| 1.96655   | 1.08541   | 1.70742   | 2.51385   | 4.30772   | 3.49532   |
| 20.3843   | 21.4296   | 18.3868   | 21.855    | 15.3116   | 17.313    |
| 50.3131   | 40.0168   | 43.5718   | 43.4083   | 44.9393   | 48.7212   |
| 1.1685    | 1.46974   | 1.27726   | 1.37514   | 1.6403    | 2.21419   |
| 11.236    | 11.9111   | 12.1859   | 13.7688   | 10.0234   | 18.5315   |
| 0.0695229 | 0.503994  | 0.404898  | 0.315338  | 0.336846  | 0.352192  |
| 7.61698   | 6.53972   | 6.10901   | 4.54402   | 5.15419   | 5.23205   |
| 25.4758   | 20.0925   | 25.0214   | 28.4333   | 30.1859   | 26.9823   |
| 0         | 0         | 0         | 0         | 0         | 0         |
| 0.112432  | 0.0201247 | 0.0909437 | 0         | 0         | 0.0227824 |
| 0.0874918 | 0.140739  | 0.203278  | 0.240069  | 0.462689  | 3.00E-08  |
| 35.938    | 29.8714   | 36.4411   | 28.6977   | 31.7349   | 26.2956   |
| 0         | 0         | 0         | 0         | 0         | 0         |
| 69.4128   | 140.688   | 170.624   | 156.558   | 94.941    | 169.262   |
| 1.20061   | 1.19001   | 1.53555   | 1.14205   | 0.897507  | 1.67323   |
| 0.228299  | 0.217944  | 0.0615556 | 0.165681  | 0.147484  | 0.154204  |
| 22.8099   | 21.4081   | 21.6427   | 27.8643   | 18.9271   | 17.7562   |
| 11.6964   | 9.88176   | 10.407    | 11.3743   | 7.07242   | 6.63621   |
| 24.3002   | 25.1789   | 26.0443   | 26.9974   | 28.0793   | 25.7237   |
| 0         | 0.107258  | 0         | 0.0271791 | 0         | 0         |

|           |           |           |           |           |          |
|-----------|-----------|-----------|-----------|-----------|----------|
| 0.100314  | 0         | 0         | 0         | 0.311083  | 0.299551 |
| 7.55025   | 4.06634   | 8.64743   | 5.57633   | 4.71354   | 1.89549  |
| 2.53623   | 2.62649   | 2.7632    | 3.01035   | 2.22068   | 2.37008  |
| 3.85108   | 2.82278   | 2.58562   | 3.34822   | 2.44222   | 3.11634  |
| 42.8853   | 41.0058   | 44.406    | 43.0202   | 42.827    | 41.8885  |
| 0         | 0         | 0         | 0         | 0         | 0        |
| 0.28488   | 0.307794  | 0.326401  | 0.208198  | 0.288779  | 0.291044 |
| 0.850043  | 0.608614  | 1.37516   | 1.85067   | 0.658966  | 1.03348  |
| 0         | 0         | 0         | 0         | 0         | 0        |
| 0         | 0         | 0         | 0         | 0         | 0        |
| 0.748248  | 1.08589   | 1.10235   | 0.96478   | 0.939067  | 1.06582  |
| 0.497609  | 0.369002  | 0.546257  | 0.541685  | 0.7164    | 0.417733 |
| 0.916187  | 0.769506  | 0.826595  | 0.85669   | 0.628292  | 0.771162 |
| 24.7429   | 18.4212   | 20.8114   | 20.4245   | 24.7023   | 23.0312  |
| 1.10002   | 1.29722   | 0.994468  | 1.0331    | 0.953079  | 1.20629  |
| 0         | 0         | 0         | 0         | 0         | 0        |
| 9.84041   | 7.80794   | 8.81112   | 9.03329   | 11.7463   | 8.11487  |
| 0.22768   | 0.0959798 | 0.0849576 | 0.203009  | 0.398922  | 0.330124 |
| 23.5661   | 20.8308   | 20.7956   | 24.1362   | 17.6902   | 18.4752  |
| 2.93673   | 2.4501    | 2.79364   | 2.98628   | 2.54913   | 2.69878  |
| 3.59E-07  | 4.20E-08  | 1.88E-06  | 3.81E-07  | 1.19E-06  | 1.80E-06 |
| 27.9321   | 25.0651   | 22.5474   | 25.4786   | 29.7429   | 23.6363  |
| 33.074    | 26.6311   | 29.4091   | 30.5162   | 22.876    | 26.5891  |
| 1.68E-10  | 2.07E-06  | 0.257202  | 0.26258   | 1.39E-14  | 5.63E-32 |
| 5166.94   | 3306.36   | 4953.49   | 5160.61   | 3762.04   | 4969.94  |
| 0.252192  | 0         | 0         | 0.183021  | 0.195504  | 0.229963 |
| 46.449    | 45.3186   | 47.0953   | 52.4969   | 45.5723   | 48.8872  |
| 10.0823   | 8.58938   | 8.98123   | 6.57595   | 8.2117    | 6.46522  |
| 0         | 0         | 0         | 0         | 0         | 0        |
| 0         | 0         | 0.0266073 | 0.0238717 | 0.0764997 | 0.426587 |
| 215.304   | 222.706   | 211.965   | 210.634   | 213.261   | 181.24   |
| 4.32172   | 3.14672   | 4.44376   | 2.97688   | 2.89599   | 5.28404  |
| 16.6455   | 10.6196   | 13.171    | 13.775    | 14.2541   | 15.2679  |
| 2.37868   | 1.9957    | 1.83549   | 2.27703   | 2.19743   | 2.89216  |
| 0.435772  | 0.561608  | 1.2337    | 0.316247  | 0.337817  | 0.105962 |
| 11.4683   | 8.75237   | 15.8453   | 8.6397    | 8.78592   | 12.7839  |
| 0.0218987 | 0.0155442 | 2.99E-12  | 0.0157138 | 1.02E-12  | 1.04E-12 |
| 3.27236   | 1.99151   | 2.14237   | 2.2932    | 2.57642   | 2.33739  |
| 15.9235   | 12.4289   | 13.1022   | 13.3462   | 12.9552   | 11.4295  |
| 3.99645   | 4.53964   | 4.75309   | 4.27597   | 4.1955    | 5.75905  |
| 0         | 0         | 0         | 0.0263111 | 0         | 0        |
| 0.0720505 | 0         | 0         | 0         | 0.0279273 | 0        |
| 7.61908   | 6.58145   | 7.52036   | 7.57692   | 6.66784   | 8.05161  |



|          |           |           |           |           |           |
|----------|-----------|-----------|-----------|-----------|-----------|
| 14.9304  | 10.3471   | 10.572    | 9.94113   | 9.36939   | 13.52     |
| 11.3495  | 10.6798   | 9.6169    | 11.7763   | 14.7724   | 17.3174   |
| 9.04642  | 7.94216   | 8.31931   | 9.73048   | 10.3524   | 8.59814   |
| 0.999085 | 0.605276  | 0.404717  | 0.613507  | 0.68514   | 0.778646  |
| 68.3159  | 74.7257   | 54.3771   | 58.6605   | 54.1612   | 67.4705   |
| 17.6266  | 11.974    | 14.988    | 14.785    | 14.4278   | 15.5197   |
| 0.415537 | 0.266249  | 0.318456  | 0.254026  | 0.254431  | 0.177629  |
| 0.358032 | 1.60215   | 0.941217  | 0.389746  | 0.277552  | 0.725493  |
| 11.9723  | 12.0126   | 14.0598   | 13.4912   | 13.3044   | 12.308    |
| 0.700058 | 0.194922  | 0.440427  | 0.310472  | 0.0904493 | 0.28371   |
| 12.1203  | 12.787    | 11.9723   | 12.2485   | 19.9039   | 10.2217   |
| 493.111  | 597.326   | 548.522   | 527.372   | 510.64    | 528.941   |
| 0        | 0         | 0         | 0         | 0         | 0         |
| 408.22   | 399.81    | 503.068   | 255.19    | 593.186   | 117.493   |
| 7.42694  | 5.78582   | 7.35949   | 6.97201   | 5.28426   | 6.14937   |
| 3.01535  | 2.33884   | 1.62604   | 1.36768   | 1.26617   | 2.34221   |
| 0        | 0         | 0.0765811 | 0.137416  | 0         | 0.0767377 |
| 1.31124  | 1.05262   | 0.964217  | 0.908339  | 0.508248  | 1.23999   |
| 0.332672 | 0.272972  | 0.59706   | 0.24256   | 0.283675  | 0.526436  |
| 2.61003  | 1.45346   | 4.92614   | 2.10461   | 2.47297   | 1.6454    |
| 0.732154 | 3.47186   | 0.68006   | 2.36424   | 0.95487   | 0.225201  |
| 0        | 0         | 0         | 0         | 0         | 0         |
| 0.546186 | 0.372538  | 0.420875  | 0.302591  | 0.323229  | 0.27528   |
| 3.43543  | 2.98679   | 2.58036   | 2.40412   | 2.18763   | 1.98895   |
| 90.735   | 77.5955   | 109.324   | 89.0906   | 109.634   | 70.1167   |
| 3.27769  | 3.56767   | 3.75842   | 3.43594   | 3.79975   | 3.7596    |
| 88.173   | 71.628    | 78.1351   | 91.1529   | 101.687   | 89.1204   |
| 3.24637  | 3.65895   | 3.98123   | 2.96393   | 2.72771   | 3.27638   |
| 0.23902  | 0.10268   | 0.212672  | 0.0867304 | 0.185292  | 0.23248   |
| 4.63658  | 3.48342   | 5.00737   | 3.68874   | 5.32153   | 3.9635    |
| 1.48046  | 2.40633   | 1.19246   | 1.9822    | 1.94204   | 1.23487   |
| 110.826  | 109.268   | 123.592   | 148.329   | 120.658   | 147.499   |
| 1.80489  | 1.92521   | 2.17501   | 1.89793   | 1.02797   | 1.6122    |
| 0.835721 | 1.19672   | 0         | 0.909746  | 0.323932  | 0.33869   |
| 0.702254 | 0.617716  | 0.568035  | 0.595     | 0.449232  | 0.353036  |
| 7.23775  | 7.93712   | 7.55893   | 9.06455   | 6.98392   | 7.15359   |
| 3.11358  | 1.9303    | 2.48797   | 2.30732   | 1.16499   | 1.96515   |
| 0        | 0         | 0         | 0         | 0         | 0         |
| 0.412317 | 0.404693  | 0.284599  | 0.413595  | 0.416896  | 0.344408  |
| 0        | 0.0712258 | 0         | 0         | 0.0257062 | 0.107509  |
| 0        | 0         | 0         | 0         | 0         | 0         |
| 0.769498 | 0.585272  | 0.577187  | 0.595175  | 0.649589  | 0.906493  |
| 50.1819  | 59.2149   | 60.3513   | 58.881    | 59.3986   | 49.6201   |

|          |           |           |          |          |          |
|----------|-----------|-----------|----------|----------|----------|
| 0        | 0         | 0         | 0        | 0        | 0        |
| 2.49636  | 4.42368   | 3.63466   | 4.48395  | 3.24148  | 2.02338  |
| 63.2266  | 68.3332   | 70.1726   | 70.0229  | 72.9514  | 62.2201  |
| 52.0658  | 68.3856   | 61.527    | 59.9479  | 65.0477  | 62.3623  |
| 10.0328  | 6.51678   | 8.39417   | 9.50777  | 9.35444  | 8.38339  |
| 10.4985  | 9.3204    | 8.58477   | 8.20163  | 6.93872  | 8.74871  |
| 13.1615  | 11.4241   | 12.3846   | 11.8944  | 13.4406  | 12.4079  |
| 0        | 0         | 0         | 0        | 0        | 0        |
| 0.668536 | 0.425475  | 0.60085   | 0.91643  | 0.115169 | 0.722495 |
| 0        | 0.0643085 | 0.0181631 | 0        | 0        | 0        |
| 0        | 0         | 17.674    | 0        | 0        | 35.4202  |
| 0        | 0         | 0         | 0.121038 | 0        | 0        |
| 0.103144 | 0         | 0         | 0        | 0        | 0        |
| 0        | 0         | 0         | 0        | 0        | 0        |
| 0.722696 | 0.676647  | 0.989279  | 1.49273  | 1.72383  | 1.53201  |
| 10.7557  | 7.92672   | 10.2058   | 9.40047  | 9.97088  | 9.87722  |
| 31.3099  | 28.0779   | 27.4859   | 30.8915  | 31.862   | 28.1786  |
| 1.35517  | 0.930794  | 1.266     | 0.618709 | 0.542532 | 0.996991 |
| 15.2623  | 15.1486   | 15.0497   | 14.5767  | 11.2578  | 13.5911  |
| 0.633142 | 0.690279  | 0.593612  | 0.438597 | 0.423891 | 0.361561 |
| 70.0557  | 84.2072   | 53.4054   | 57.777   | 60.9387  | 64.2091  |
| 0.712436 | 0.556375  | 0.419486  | 1.08026  | 0.85306  | 0.699724 |
| 19.0189  | 13.9241   | 15.2571   | 15.9933  | 17.4537  | 14.8134  |
| 9.39797  | 2.46359   | 4.41204   | 12.24    | 10.1913  | 22.4986  |
| 4.65392  | 4.67813   | 5.28544   | 4.86583  | 3.51296  | 4.12876  |
| 11.1869  | 11.9207   | 12.7757   | 14.1726  | 7.91464  | 10.3122  |
| 11.1134  | 11.6373   | 10.7309   | 11.1879  | 9.27392  | 13.5333  |
| 1.79401  | 1.40844   | 0.767053  | 1.12208  | 0.920996 | 1.01769  |
| 0        | 0         | 0         | 0        | 0        | 0        |
| 9.35077  | 9.54784   | 8.78893   | 9.49297  | 7.82607  | 7.55275  |
| 0        | 0         | 0.122706  | 0        | 0.117599 | 0        |
| 0        | 0.0244789 | 0.0829652 | 0        | 0        | 0        |
| 5.47549  | 3.7731    | 4.63695   | 4.82249  | 4.84253  | 4.8652   |
| 14.6386  | 11.9701   | 12.4978   | 14.9505  | 13.7897  | 13.583   |
| 0.601663 | 0.476821  | 0.540824  | 0.628966 | 0.456918 | 0.544074 |
| 20.352   | 18.338    | 24.7588   | 19.1959  | 21.4085  | 20.9993  |
| 0        | 0         | 0         | 0        | 0        | 0        |
| 16.3762  | 16.2115   | 16.7816   | 15.6295  | 17.716   | 17.1573  |
| 15.7006  | 23.4332   | 23.5788   | 25.9302  | 23.6267  | 26.6213  |
| 13.8532  | 12.7747   | 12.2029   | 12.7379  | 11.6388  | 12.3454  |
| 12.188   | 10.3864   | 10.2014   | 13.6822  | 9.09327  | 10.8311  |
| 5.66377  | 4.77928   | 5.25697   | 5.44508  | 9.55658  | 2.2589   |
| 0        | 0         | 0         | 0        | 0        | 0        |

|           |          |          |          |           |          |
|-----------|----------|----------|----------|-----------|----------|
| 4.451     | 4.26807  | 4.24324  | 5.36439  | 4.49795   | 3.9298   |
| 0.33291   | 0.20548  | 0.194999 | 0.158289 | 0.160186  | 0.297749 |
| 16.0344   | 12.9582  | 14.1591  | 14.8799  | 12.1311   | 14.9583  |
| 2.33273   | 1.73341  | 2.95064  | 2.13684  | 2.09578   | 2.61196  |
| 2.63736   | 1.91527  | 1.76076  | 2.16853  | 1.45161   | 2.39782  |
| 14.5384   | 17.8156  | 19.3305  | 21.4851  | 14.4158   | 17.0994  |
| 49.4708   | 41.1643  | 45.4838  | 43.8715  | 52.5821   | 45.5191  |
| 0         | 0        | 0        | 0        | 0         | 0        |
| 0         | 0        | 0        | 0        | 0         | 0        |
| 1.09214   | 0.794823 | 0.741191 | 0.69162  | 1.37109   | 0.873419 |
| 0.0656356 | 0.211431 | 0.115102 | 0.182608 | 0.0508863 | 0        |
| 59.2266   | 57.7115  | 63.8636  | 57.897   | 59.3764   | 61.0871  |
| 0.480484  | 0.65676  | 0.565314 | 0.665692 | 0.60951   | 1.30996  |
| 3.07086   | 2.29224  | 1.74405  | 1.75441  | 1.97537   | 2.06537  |
| 13.3476   | 13.6193  | 12.8307  | 16.7059  | 18.695    | 12.4911  |
| 15.5016   | 14.1581  | 15.7809  | 14.7473  | 17.4673   | 15.6441  |
| 6.29882   | 6.78507  | 5.8294   | 5.23008  | 4.22309   | 5.1514   |
| 6.52303   | 4.18065  | 8.32962  | 4.42388  | 4.37731   | 4.3334   |
| 5.28589   | 3.5945   | 4.29517  | 4.44914  | 4.58419   | 3.97138  |
| 34.7925   | 28.0285  | 33.2818  | 33.3008  | 30.9241   | 25.7529  |
| 0.997     | 0.897329 | 0.692512 | 0.737244 | 0.8182    | 1.12274  |
| 11.8816   | 12.518   | 14.9616  | 14.0537  | 12.1187   | 14.6324  |
| 17.0514   | 0        | 17.9564  | 0        | 16.6737   | 0        |
| 14.1283   | 17.0299  | 11.1098  | 11.1914  | 8.31197   | 14.0166  |
| 0.903525  | 0.18483  | 0.104406 | 0        | 0         | 0        |
| 27.6959   | 45.0748  | 43.4558  | 32.0461  | 11.4681   | 11.3595  |
| 0         | 0        | 0        | 0        | 0         | 0        |
| 1.51669   | 1.77177  | 1.4851   | 2.31725  | 1.23765   | 2.00575  |
| 0.622981  | 0.46703  | 0.6199   | 0.677956 | 0.157942  | 0.871344 |
| 33.0475   | 40.1118  | 46.2826  | 38.0038  | 42.3725   | 31.5049  |
| 21.6781   | 22.0114  | 26.4425  | 24.3236  | 16.8413   | 25.2824  |
| 0.832352  | 1.44181  | 1.1728   | 0.681995 | 0.874213  | 0.97933  |
| 0.131879  | 0.163651 | 0.02842  | 0.11514  | 0.136565  | 0.152606 |
| 1.89636   | 3.09267  | 2.72698  | 3.28764  | 2.69516   | 2.81795  |
| 0         | 0        | 0        | 0        | 0         | 0        |
| 5.10146   | 3.81858  | 3.6388   | 5.1158   | 2.69641   | 3.96575  |
| 12.1038   | 10.2955  | 11.7359  | 10.4668  | 10.9525   | 11.6784  |
| 0         | 0        | 0        | 0        | 0         | 0        |
| 0         | 0        | 0        | 0        | 0         | 0        |
| 0.0311711 | 0        | 0        | 0        | 0         | 0        |
| 0         | 0        | 0        | 0        | 0         | 0        |
| 27.2861   | 20.6733  | 25.6012  | 24.8244  | 25.2155   | 26.1924  |
| 8.92269   | 6.65086  | 8.25829  | 7.4402   | 8.49595   | 6.05102  |

|           |           |           |           |           |            |
|-----------|-----------|-----------|-----------|-----------|------------|
| 8.06946   | 8.86299   | 10.2981   | 8.07491   | 8.68686   | 10.1026    |
| 0         | 0         | 0         | 0         | 0         | 0          |
| 25.9344   | 21.8556   | 20.0673   | 26.7393   | 26.6296   | 23.1377    |
| 10.0556   | 6.88169   | 6.84502   | 5.43996   | 7.55226   | 6.13924    |
| 0.234671  | 0.16802   | 0.189821  | 0.170305  | 0         | 0          |
| 0         | 0         | 0         | 0         | 0         | 0          |
| 14.7599   | 14.5728   | 17.5206   | 15.6501   | 12.077    | 20.496     |
| 0.60431   | 1.01558   | 0.530398  | 0.585354  | 0.731986  | 0.696624   |
| 0.0253864 | 0.0817927 | 0         | 0.0368467 | 0.0196799 | 0.082306   |
| 11.1599   | 9.33411   | 11.037    | 11.2574   | 7.90211   | 11.5742    |
| 0.0612465 | 0.0438513 | 0.0330273 | 0.0444477 | 0.0474792 | 0.0496423  |
| 0         | 0         | 0         | 0         | 0.024391  | 0          |
| 0.919877  | 0.478992  | 0.541142  | 0.788948  | 1.36138   | 0.881154   |
| 14.3879   | 13.2138   | 14.6965   | 13.5187   | 14.0857   | 14.2733    |
| 26.0399   | 18.903    | 29.2934   | 24.4881   | 26.7752   | 24.9366    |
| 75.3564   | 80.1978   | 75.3944   | 83.0302   | 67.71     | 67.3235    |
| 6.33948   | 16.4848   | 6.82665   | 13.6043   | 12.6931   | 11.8213    |
| 22.5112   | 24.3473   | 22.0025   | 25.3134   | 28.0573   | 23.1246    |
| 0.389014  | 0.0779401 | 0.246471  | 0.192002  | 0.129221  | 0.183821   |
| 0         | 0         | 2.47856   | 0         | 0         | 0          |
| 1.64931   | 2.13362   | 2.6985    | 1.8226    | 2.46996   | 3.31167    |
| 1.80252   | 1.00377   | 0.324004  | 5.08712   | 0.931559  | 0          |
| 51.5828   | 44.3711   | 44.0785   | 37.8491   | 45.5652   | 45.9554    |
| 0         | 0         | 0         | 0         | 0         | 0          |
| 5.11485   | 4.14085   | 4.08322   | 3.66342   | 3.57638   | 3.54964    |
| 0.524099  | 0.403909  | 0.394766  | 0.497884  | 0.391422  | 0.586023   |
| 0.0383465 | 0.0274553 | 0.175186  | 0         | 0         | 0.0884219  |
| 0         | 0.0310903 | 0         | 0         | 0         | 0          |
| 0.474031  | 0.0925628 | 0.13943   | 0         | 0         | 0.0698578  |
| 0         | 0         | 0         | 0         | 0         | 0.00673375 |
| 0         | 0         | 0         | 0         | 0         | 0          |
| 0.052997  | 0.189724  | 0.0857363 | 0         | 0         | 0.128867   |
| 2.7814    | 2.0701    | 1.28891   | 4.01898   | 1.37889   | 1.38586    |
| 9.68435   | 7.8564    | 8.7343    | 8.63979   | 8.44484   | 9.18841    |
| 6.32394   | 8.18185   | 5.02556   | 6.06552   | 3.69831   | 5.27564    |
| 4.26788   | 3.05572   | 5.10528   | 3.90888   | 5.4411    | 4.46999    |
| 2.03614   | 3.11635   | 2.27244   | 1.47766   | 1.45894   | 1.1065     |
| 79.4076   | 68.8658   | 80.3367   | 86.4538   | 91.1768   | 89.7752    |
| 11.2204   | 9.24727   | 10.3871   | 10.8259   | 8.64685   | 10.3921    |
| 2.76834   | 2.67754   | 2.59282   | 3.48938   | 2.56021   | 2.75558    |
| 25.0196   | 25.7925   | 26.7894   | 24.0506   | 27.2031   | 24.5069    |
| 8.79753   | 8.95146   | 10.7598   | 10.3621   | 8.87145   | 10.7723    |
| 0.0570533 | 0.285943  | 0.0461492 | 0.248427  | 0.0442286 | 0.184974   |

|           |            |           |           |           |           |
|-----------|------------|-----------|-----------|-----------|-----------|
| 5.04814   | 3.85447    | 0.881653  | 2.21943   | 1.42658   | 0.935069  |
| 10.3732   | 9.29111    | 8.165     | 9.83275   | 8.83718   | 9.40528   |
| 95.3455   | 118.05     | 98.6993   | 101.642   | 103.855   | 79.4734   |
| 0         | 0          | 0         | 0         | 0         | 0         |
| 3.05967   | 2.36838    | 2.30501   | 2.27589   | 1.72066   | 2.68503   |
| 26.4526   | 28.031     | 26.4036   | 26.2454   | 26.579    | 23.9287   |
| 72.4985   | 75.6446    | 83.0981   | 82.2781   | 85.4883   | 77.5292   |
| 0         | 0          | 0         | 0         | 0         | 0         |
| 4.74368   | 4.02987    | 4.34734   | 4.51295   | 4.37061   | 4.25839   |
| 4.43543   | 4.7391     | 5.24361   | 5.29876   | 4.44349   | 3.65037   |
| 0.0045991 | 0.00592716 | 0         | 0         | 0.0115448 | 0         |
| 2.08078   | 1.08016    | 2.77959   | 1.38748   | 1.92807   | 2.31652   |
| 16.8841   | 13.9932    | 14.7896   | 18.8884   | 12.4672   | 16.5378   |
| 175.165   | 185.801    | 176.731   | 179.44    | 203.482   | 167.009   |
| 0.369297  | 0.293789   | 0.564243  | 0.268006  | 1.0179    | 0.465621  |
| 0.822768  | 0.8938     | 0.622566  | 0.595054  | 0.637852  | 0.497889  |
| 2.72293   | 2.29852    | 2.07163   | 2.23728   | 2.76202   | 3.51392   |
| 31.4179   | 29.7766    | 29.6342   | 29.2524   | 33.9631   | 21.8819   |
| 1.29268   | 1.18997    | 1.38171   | 0.268034  | 0.715788  | 0.598719  |
| 11.6651   | 9.31881    | 12.318    | 12.4126   | 12.0379   | 12.86     |
| 7.96872   | 6.74458    | 9.55551   | 8.37171   | 7.3883    | 8.63631   |
| 16.9742   | 18.3658    | 19.9903   | 24.269    | 21.4367   | 22.4368   |
| 69.4537   | 72.1215    | 71.5035   | 62.7224   | 46.4442   | 65.9896   |
| 1.41838   | 0.823202   | 0.836961  | 0.818831  | 1.15709   | 1.02964   |
| 0.018419  | 0.0131876  | 0.0148987 | 0.0713053 | 0.0571227 | 0.0597252 |
| 47.1609   | 37.4854    | 40.9907   | 43.5105   | 47.8399   | 41.904    |
| 18.258    | 14.5602    | 16.1047   | 17.3283   | 15.4333   | 17.4793   |
| 3.30169   | 3.03933    | 3.89695   | 3.27626   | 4.17875   | 4.39639   |
| 0         | 0          | 0.2604    | 0         | 0         | 0.130466  |
| 3.19325   | 4.26586    | 2.07061   | 2.39192   | 1.76575   | 2.12151   |
| 0.219657  | 0.12357    | 0.203059  | 0.102477  | 0.218934  | 0.101737  |
| 38.7395   | 46.548     | 17.1013   | 6.72356   | 8.44048   | 5.5445    |
| 0         | 0          | 0         | 0         | 0         | 0         |
| 59.2272   | 51.4837    | 59.8636   | 39.7478   | 130.511   | 17.9097   |
| 0.32572   | 0.295398   | 0.298597  | 0.378209  | 0.505006  | 0.0704018 |
| 9.09518   | 7.76428    | 8.81523   | 7.96751   | 8.01029   | 8.0917    |
| 2.34846   | 1.65628    | 2.47985   | 3.42217   | 3.01182   | 2.15437   |
| 0.216599  | 0.128343   | 0.2477    | 0.238495  | 0.156331  | 0.351122  |
| 2.28924   | 2.04367    | 2.12289   | 2.24525   | 2.1979    | 2.85701   |
| 2.49095   | 3.67083    | 2.6213    | 2.57996   | 1.91227   | 2.0974    |
| 0         | 0          | 0         | 0         | 0         | 0         |
| 18.055    | 20.0768    | 12.6589   | 12.521    | 8.99775   | 15.4676   |
| 23.9183   | 23.1067    | 22.1593   | 24.5983   | 27.2915   | 19.8024   |

|           |           |          |          |           |           |
|-----------|-----------|----------|----------|-----------|-----------|
| 0.232373  | 0.138646  | 0.156635 | 0.196744 | 0.150116  | 0.282519  |
| 12.4341   | 10.3863   | 4.84046  | 9.3938   | 23.5436   | 21.3284   |
| 2.50612   | 1.34257   | 1.70331  | 1.69254  | 1.87355   | 1.41928   |
| 36.8214   | 37.9553   | 39.9244  | 37.1252  | 38.5678   | 39.5959   |
| 1391.1    | 814.909   | 1278.67  | 871.88   | 882.328   | 1537.54   |
| 0         | 0         | 0        | 0        | 0         | 0         |
| 0.369568  | 0.496131  | 0.186835 | 0.569929 | 0.214871  | 0.599094  |
| 0.0494129 | 0         | 0        | 0        | 0         | 0         |
| 25.1767   | 24.0201   | 27.8065  | 23.3676  | 20.8724   | 25.4274   |
| 0.244518  | 0.0583568 | 0.17581  | 0.266177 | 0.115839  | 0.308296  |
| 0.828086  | 2.81625   | 0.502367 | 0.751197 | 0.962918  | 0.83899   |
| 0         | 0         | 0        | 0        | 0         | 0         |
| 0.378141  | 0.360989  | 0.101957 | 0.182949 | 0         | 0.204331  |
| 1.75015   | 2.06663   | 1.85409  | 2.75823  | 1.65036   | 3.58873   |
| 0.982301  | 1.18156   | 0.900505 | 0.836438 | 0.883334  | 1.40129   |
| 0.835833  | 0.719522  | 0.732414 | 0.758185 | 0.609398  | 0.911302  |
| 91.6682   | 128.185   | 121.306  | 107.934  | 62.4155   | 86.0571   |
| 3.94268   | 2.4634    | 3.06606  | 3.484    | 2.62046   | 3.44873   |
| 18.9007   | 14.4743   | 19.0697  | 17.4198  | 20.5252   | 17.8633   |
| 4.30764   | 4.16657   | 4.79873  | 4.92252  | 5.02356   | 4.62488   |
| 0         | 0         | 0        | 0        | 0         | 0         |
| 4.19515   | 3.40614   | 4.07204  | 4.3658   | 4.91724   | 5.89613   |
| 53.5231   | 58.3083   | 61.8734  | 57.9847  | 62.8767   | 66.3055   |
| 0         | 0         | 0        | 0        | 0         | 0         |
| 0.80549   | 0.865073  | 0        | 0.14614  | 0.624428  | 0.816096  |
| 39.3653   | 46.9796   | 45.6394  | 37.7153  | 53.0042   | 53.8626   |
| 54.6324   | 51.5386   | 68.3094  | 57.8832  | 64.9817   | 63.0327   |
| 10.8075   | 8.69996   | 11.3645  | 11.1924  | 11.5709   | 11.1037   |
| 22.6025   | 24.3384   | 34.5591  | 34.9915  | 31.1427   | 30.2486   |
| 6.64297   | 9.05437   | 8.26554  | 6.86947  | 8.46132   | 7.68757   |
| 4.63651   | 3.33753   | 3.20506  | 3.62456  | 3.68465   | 2.66854   |
| 21.3898   | 14.8198   | 19.6252  | 20.8462  | 20.2596   | 20.1914   |
| 0.0320356 | 0         | 0.116612 | 0        | 0.0248345 | 0         |
| 0.0279271 | 0.0799812 | 0.609922 | 0.202672 | 0.108248  | 0.0905435 |
| 0.90304   | 0.812797  | 0.674969 | 1.0421   | 0.445398  | 0.951483  |
| 4.33449   | 1.45788   | 1.71227  | 1.96052  | 1.65664   | 2.74524   |
| 1.52842   | 0.650676  | 1.23631  | 0.689504 | 0.608439  | 0.401784  |
| 24.0543   | 25.6893   | 20.1093  | 24.1208  | 17.7792   | 17.7904   |
| 1.11913   | 0.356123  | 0.804661 | 0.902416 | 2.60271   | 1.7134    |
| 0         | 0         | 0        | 0        | 0         | 0         |
| 0         | 0         | 0        | 0        | 0         | 0         |
| 0         | 0         | 0        | 0        | 0         | 0         |
| 10.6139   | 13.0983   | 10.9728  | 11.1908  | 9.44836   | 10.5966   |

|           |           |           |           |           |           |
|-----------|-----------|-----------|-----------|-----------|-----------|
| 35.1134   | 37.9952   | 42.7966   | 44.6615   | 46.9276   | 43.0129   |
| 3.01659   | 2.69838   | 2.89638   | 2.78625   | 3.54117   | 3.55008   |
| 1.38161   | 0.536999  | 0.606674  | 0.458359  | 0.612027  | 0.0959866 |
| 58.2525   | 39.9806   | 45.3379   | 55.4377   | 54.6303   | 39.3573   |
| 2.88711   | 2.67665   | 2.96407   | 2.61904   | 2.79767   | 3.01513   |
| 0         | 0         | 0         | 0         | 0         | 0         |
| 21.4174   | 18.0441   | 20.5561   | 21.9149   | 20.0942   | 20.1456   |
| 2.21783   | 2.64654   | 1.19597   | 1.78835   | 1.52826   | 1.39815   |
| 0.0203438 | 0.0291316 | 0.0329114 | 0.0295278 | 0         | 0         |
| 0.200334  | 0.286871  | 0.405116  | 0.181733  | 0.116477  | 0.162378  |
| 0         | 0.0306751 | 0         | 0.0621846 | 0         | 0         |
| 0         | 0         | 0         | 0         | 0         | 0         |
| 11.5053   | 11.0911   | 12.2564   | 12.3606   | 10.8136   | 11.4079   |
| 0         | 22.0912   | 35.451    | 10.6869   | 0         | 17.9038   |
| 13.8656   | 13.1055   | 14.3534   | 14.8957   | 14.5054   | 13.829    |
| 1.34646   | 1.219     | 1.20225   | 0.83891   | 1.03407   | 1.01626   |
| 0         | 0         | 0.0383201 | 0.0171902 | 0         | 0.0383985 |
| 25.8753   | 22.3738   | 23.1764   | 25.6602   | 27.5154   | 26.097    |
| 0         | 0.09711   | 0.21942   | 0.137803  | 0.147202  | 0.197882  |
| 59.5922   | 58.9333   | 62.947    | 56.9053   | 56.8614   | 60.2749   |
| 23.4182   | 20.5472   | 21.87     | 21.9676   | 21.4576   | 21.2984   |
| 17.3711   | 16.026    | 17.1496   | 17.1935   | 12.0207   | 15.7477   |
| 4.57097   | 3.05584   | 2.93124   | 3.7207    | 2.22556   | 5.13064   |
| 0.219571  | 0.157209  | 0.142086  | 0.191216  | 0         | 0.106782  |
| 0.387661  | 0.13658   | 0.137136  | 0.280848  | 0.131428  | 0.0343375 |
| 8.88604   | 6.36222   | 8.12271   | 7.06042   | 7.46731   | 7.22194   |
| 4.4113    | 5.45201   | 4.8001    | 3.75398   | 4.09144   | 3.61807   |
| 0.0526191 | 0.0376743 | 0.0425625 | 0.152746  | 0.0407911 | 0.0852991 |
| 1.38461   | 1.1728    | 1.63335   | 0.956709  | 1.29955   | 1.47259   |
| 20.7086   | 7.9349    | 19.1301   | 18.0231   | 18.9558   | 23.1263   |
| 0.409135  | 1.65995   | 1.13071   | 1.11344   | 1.6387    | 1.3541    |
| 22.1728   | 22.1312   | 23.1788   | 25.6368   | 23.4523   | 20.7894   |
| 0.534547  | 0.326025  | 0.496441  | 0.632183  | 0.383694  | 0.481409  |
| 0         | 0         | 0.0051329 | 0         | 0         | 0.0025717 |
| 3.2832    | 3.0481    | 3.15672   | 4.4593    | 3.92516   | 5.27789   |
| 2.24672   | 2.81492   | 3.13316   | 2.79698   | 2.89767   | 2.40181   |
| 8.05725   | 8.77783   | 9.24012   | 8.38727   | 8.97488   | 9.94246   |
| 0.270469  | 0.348571  | 0.481309  | 0.314055  | 0.272573  | 0.306914  |
| 30.1166   | 36.2497   | 30.3189   | 21.8561   | 28.1897   | 17.8355   |
| 14.6449   | 15.2596   | 11.4578   | 14.0078   | 16.3757   | 6.42607   |
| 21.1519   | 21.8116   | 22.651    | 21.9152   | 21.3989   | 20.5408   |
| 24.3838   | 21.7176   | 25.8046   | 26.8995   | 32.8137   | 26.9038   |
| 85.4124   | 79.0161   | 72.2676   | 82.8235   | 85.5897   | 95.1549   |

|           |           |           |           |           |           |
|-----------|-----------|-----------|-----------|-----------|-----------|
| 0         | 0         | 0         | 0         | 0         | 0         |
| 13.9539   | 13.0642   | 15.7366   | 13.7506   | 15.0947   | 15.1195   |
| 99.4434   | 97.8082   | 108.883   | 109.724   | 105.884   | 95.4734   |
| 143.569   | 132.305   | 158.811   | 157.174   | 164.936   | 148.106   |
| 232.95    | 204.273   | 171.874   | 228.173   | 228.235   | 192.319   |
| 25.011    | 20.4531   | 22.3985   | 22.6633   | 23.0549   | 19.094    |
| 0         | 0         | 0         | 0         | 0         | 0         |
| 10.0247   | 9.62186   | 7.46535   | 9.40204   | 9.47408   | 7.87845   |
| 0         | 0         | 0         | 0.0727188 | 0.349555  | 0.0812175 |
| 23.0422   | 23.3271   | 21.9031   | 23.5175   | 21.9162   | 27.1406   |
| 1.99221   | 0.9077    | 1.61146   | 3.023     | 2.10599   | 2.49553   |
| 70.6123   | 69.174    | 76.4318   | 76.3178   | 76.1509   | 74.5864   |
| 0.108448  | 0.0776469 | 0.350889  | 0.354166  | 0.378322  | 0.803676  |
| 0         | 0.0461267 | 0         | 0         | 0.0499429 | 0.0522183 |
| 0.17804   | 0.203958  | 0.288026  | 0.103366  | 0.0552078 | 0.0577231 |
| 0.62504   | 0.703241  | 0.288904  | 0.518404  | 0.276881  | 0.144748  |
| 0.0480926 | 0.0344334 | 0.0389011 | 0.0698033 | 0.0372821 | 0         |
| 71.3039   | 80.4494   | 77.8452   | 76.1721   | 70.9348   | 64.1816   |
| 1.40919   | 1.49149   | 2.37884   | 1.55624   | 2.18485   | 1.19185   |
| 0         | 0         | 0         | 0         | 0         | 0         |
| 0         | 0         | 0         | 0         | 0         | 0         |
| 20.5666   | 16.4165   | 17.6821   | 19.9355   | 22.0101   | 19.1701   |
| 0.763166  | 0.546413  | 0.658464  | 0.701535  | 0.236647  | 0.824763  |
| 13.459    | 14.3735   | 12.7928   | 14.2072   | 11.4524   | 14.0678   |
| 13.7566   | 14.2356   | 17.16     | 16.2958   | 14.4831   | 14.1933   |
| 29.5917   | 22.9589   | 30.8111   | 27.9203   | 26.1268   | 30.4008   |
| 0         | 0.0582717 | 0         | 0         | 0.126185  | 0.0659671 |
| 0.0279483 | 0.0200536 | 0.045192  | 0.060805  | 0         | 0.0452816 |
| 0.112411  | 0.053656  | 0.0606179 | 0.19035   | 0.0580951 | 0.212597  |
| 4.38442   | 7.04885   | 3.86888   | 3.73145   | 2.37921   | 5.26597   |
| 7.74339   | 4.09081   | 7.69252   | 8.2656    | 7.41608   | 6.79423   |
| 0.556182  | 0.275486  | 0.335442  | 0.572182  | 0.102201  | 0.256457  |
| 18.8328   | 15.2034   | 19.725    | 17.1788   | 23.6142   | 21.3165   |
| 0.124453  | 0         | 0.0755001 | 0         | 0.0723579 | 0         |
| 6.7772    | 5.22293   | 5.83519   | 6.11564   | 6.57037   | 7.00081   |
| 10.6066   | 9.01166   | 6.86354   | 8.27895   | 4.38526   | 5.76959   |
| 20.2157   | 21.0313   | 22.1792   | 25.8969   | 23.0743   | 24.6235   |
| 3.19903   | 3.31405   | 5.90804   | 4.00629   | 5.85967   | 8.1       |
| 0         | 0.109227  | 0         | 0.0553563 | 0         | 0         |
| 0.796915  | 0.494378  | 0.947966  | 0.581541  | 0.5892    | 0.863984  |
| 19.0295   | 13.6248   | 15.3926   | 13.8101   | 0         | 15.4241   |
| 0         | 0         | 0         | 0         | 0         | 0         |
| 0.333393  | 0.793521  | 1.52523   | 0.684907  | 0.344281  | 0.630475  |



|           |           |           |           |          |            |
|-----------|-----------|-----------|-----------|----------|------------|
| 81.0666   | 111.556   | 88.2089   | 93.0208   | 104.137  | 42.7762    |
| 10.7885   | 7.72897   | 10.1889   | 10.3161   | 8.77673  | 10.2996    |
| 8.50736   | 8.85365   | 8.63334   | 8.12441   | 8.61059  | 7.18149    |
| 0.0175289 | 0.0041834 | 10.9291   | 0         | 0        | 0.00947182 |
| 0.227957  | 0.160884  | 0.136317  | 0.411286  | 0.308362 | 0.137767   |
| 4.24E-07  | 0.35903   | 0.268444  | 5.14E-06  | 0.258926 | 1.35033    |
| 0         | 0         | 0         | 0         | 0        | 0          |
| 14.9953   | 14.9475   | 17.3581   | 13.7351   | 14.0173  | 14.7267    |
| 3.24404   | 2.28144   | 2.98116   | 1.96421   | 2.02377  | 2.90946    |
| 0.116264  | 0.0832426 | 0.0940434 | 0.0421874 | 0.135194 | 0.141354   |
| 1.88486   | 2.68428   | 2.19157   | 1.99712   | 1.81999  | 2.13516    |
| 86.3468   | 109.707   | 91.0009   | 98.4001   | 93.1511  | 72.1338    |
| 0         | 0         | 0.0312123 | 0.08401   | 0        | 0.0312761  |
| 0         | 0         | 0         | 0         | 0        | 0          |
| 4.41965   | 3.28532   | 3.22582   | 2.6422    | 3.33161  | 3.43777    |
| 0.363959  | 0.260589  | 0.306619  | 0.165615  | 0.145654 | 0.112169   |
| 140.229   | 113.586   | 131.184   | 164.689   | 188.512  | 127.555    |
| 5.63543   | 4.2722    | 5.1617    | 6.01431   | 4.11169  | 5.23942    |
| 19.7869   | 21.2727   | 23.3806   | 22.5298   | 23.6898  | 20.8895    |
| 16.8292   | 13.7702   | 15.6753   | 14.539    | 14.9384  | 14.3992    |
| 8.67234   | 9.26928   | 9.23014   | 7.85956   | 6.72293  | 9.11445    |
| 0         | 0         | 0         | 0         | 0        | 0          |
| 0         | 0.0406917 | 0         | 0         | 0        | 0          |
| 0         | 0         | 0         | 0         | 0        | 0.0405669  |
| 14.7249   | 7.34493   | 13.8299   | 9.41997   | 23.2086  | 6.22204    |
| 17.7447   | 17.1621   | 21.11     | 20.2885   | 26.2373  | 14.7942    |
| 0         | 0         | 0         | 0         | 0        | 0          |
| 1.50187   | 0.901871  | 1.01889   | 0.949295  | 1.50228  | 0.981704   |
| 0.562432  | 0.402691  | 0.111414  | 1.11066   | 0.720745 | 0.279104   |
| 6.84047   | 5.01227   | 5.53312   | 5.43955   | 5.0659   | 5.82755    |
| 3.30514   | 2.40354   | 3.22403   | 2.91459   | 2.96966  | 3.02315    |
| 6.82578   | 4.8309    | 6.54491   | 6.24062   | 7.78449  | 7.50742    |
| 0         | 0         | 0         | 0         | 0        | 0          |
| 0.644248  | 0.415142  | 0.26056   | 0.514297  | 0.149829 | 0.261092   |
| 38.5285   | 35.4372   | 40.0691   | 39.7917   | 41.2679  | 37.3246    |
| 2.70976   | 1.6078    | 1.6642    | 1.77533   | 1.63384  | 1.71844    |
| 0         | 0         | 0         | 0         | 0        | 0          |
| 0.812823  | 1.03191   | 0.437735  | 0.930158  | 0.517813 | 1.02715    |
| 52.4452   | 57.5299   | 56.3656   | 64.0522   | 52.0703  | 62.7602    |
| 10.5694   | 7.00714   | 4.92519   | 7.86856   | 7.99385  | 8.36806    |
| 0.387432  | 0.292695  | 0.175669  | 0.327712  | 0.217676 | 0.296714   |
| 1.63779   | 1.31921   | 1.65597   | 1.04001   | 1.58705  | 2.48904    |
| 0         | 0         | 0         | 0         | 0        | 0          |

|           |           |           |           |           |           |
|-----------|-----------|-----------|-----------|-----------|-----------|
| 0         | 0         | 0         | 0         | 0         | 0.0288615 |
| 14.4875   | 16.8751   | 14.5871   | 16.1865   | 14.679    | 8.36846   |
| 0         | 0.201804  | 0         | 0         | 0.145667  | 0         |
| 18.9635   | 19.3336   | 18.5561   | 18.6675   | 22.2563   | 24.4047   |
| 0.283373  | 0.102938  | 0.148763  | 0.084702  | 0.0859151 | 0.292138  |
| 16.0496   | 16.5016   | 17.4914   | 15.82     | 14.9931   | 13.8788   |
| 8.33728   | 8.36328   | 8.18395   | 8.54005   | 6.49689   | 7.42637   |
| 10.0393   | 7.46905   | 9.59722   | 9.66391   | 9.94658   | 10.4461   |
| 0         | 0         | 0         | 0         | 0         | 0         |
| 0.0933555 | 0.0668408 | 0.0755134 | 0.0677498 | 0         | 0         |
| 10.6988   | 8.61217   | 9.23319   | 9.94664   | 9.84799   | 10.6283   |
| 5.11171   | 3.91642   | 4.07679   | 3.65766   | 4.70336   | 4.99509   |
| 14.0903   | 12.4774   | 14.243    | 13.1866   | 13.2285   | 12.185    |
| 20.0871   | 18.1059   | 17.6988   | 21.3458   | 18.6306   | 16.1359   |
| 0.191812  | 0.274667  | 0.387882  | 0.0696007 | 0.223043  | 0         |
| 1.94254   | 1.87226   | 2.23605   | 1.78928   | 1.41901   | 2.18007   |
| 1.06509   | 0.739473  | 0.965955  | 1.05403   | 1.25102   | 1.15105   |
| 7.84194   | 6.64204   | 7.23393   | 6.78081   | 6.41549   | 9.08795   |
| 3.01718   | 1.4153    | 1.3293    | 1.77053   | 0.969003  | 2.22819   |
| 15.6335   | 16.8947   | 15.554    | 16.113    | 15.2462   | 19.1181   |
| 0.544963  | 0.546257  | 0.60244   | 0.725065  | 0.535121  | 0.471159  |
| 17.4551   | 21.6198   | 17.5627   | 17.857    | 17.9963   | 20.7132   |
| 10.0368   | 9.38848   | 8.93894   | 9.66888   | 7.85015   | 7.65972   |
| 0.0968684 | 0.0231186 | 0.0522366 | 0.164031  | 0.0250313 | 0.15703   |
| 217.37    | 208.58    | 220.161   | 212.248   | 262.391   | 199.033   |
| 0.677742  | 1.05677   | 1.0859    | 1.33909   | 1.0407    | 3.55031   |
| 0         | 0         | 7.14312   | 0         | 0         | 0         |
| 36.5976   | 29.5162   | 28.6979   | 35.2344   | 27.456    | 27.1492   |
| 0         | 0         | 0         | 0         | 0         | 0         |
| 0.861315  | 1.40156   | 0.760037  | 0.397773  | 0.364203  | 0.126932  |
| 0         | 0         | 0         | 0         | 0         | 0         |
| 9.04065   | 8.3363    | 8.03295   | 9.54316   | 8.14108   | 7.23519   |
| 17.8547   | 15.2844   | 15.8178   | 17.7103   | 14.251    | 14.5836   |
| 0.240288  | 0.344083  | 0.437319  | 0.435954  | 0.791669  | 0.0486904 |
| 16.925    | 15.6205   | 18.0949   | 17.1545   | 14.726    | 15.8889   |
| 1.98178   | 1.88413   | 1.43659   | 1.17886   | 1.36001   | 1.3693    |
| 0         | 0         | 0         | 0         | 0         | 0         |
| 7.43128   | 7.44444   | 6.41511   | 5.18907   | 5.93028   | 6.14984   |
| 0.938699  | 1.06744   | 0.669966  | 0.641159  | 0.0428055 | 0.179023  |
| 0         | 0         | 0         | 0         | 0         | 0         |
| 0.131565  | 0.109898  | 0.0886839 | 0.175046  | 0.152987  | 0.391007  |
| 0.0346965 | 0         | 0         | 0         | 0         | 0.0281227 |
| 41.5654   | 66.8044   | 32.7648   | 46.9626   | 42.2787   | 254.506   |

|           |           |          |           |          |           |
|-----------|-----------|----------|-----------|----------|-----------|
| 1.71957   | 2.7086    | 2.68913  | 2.87023   | 2.48834  | 3.39151   |
| 13.4428   | 11.8402   | 10.6067  | 12.295    | 12.5692  | 11.5747   |
| 6.70004   | 5.1515    | 6.17739  | 6.35053   | 6.79737  | 6.47659   |
| 0         | 0         | 0        | 0         | 0        | 0         |
| 7.96461   | 7.77832   | 8.22149  | 11.2215   | 6.58763  | 7.482     |
| 0.254807  | 0.273656  | 0.103054 | 0.0924592 | 0        | 0.309795  |
| 0.883275  | 0.860802  | 0.694535 | 0.337481  | 0.577114 | 0.529652  |
| 2.60946   | 1.87026   | 2.31622  | 2.894     | 2.45205  | 2.70529   |
| 0         | 0         | 0        | 0         | 0        | 0         |
| 7.86023   | 5.46181   | 6.45276  | 6.39957   | 6.06941  | 6.2565    |
| 17.4723   | 17.1137   | 16.922   | 16.0512   | 14.4905  | 16.7623   |
| 3.39841   | 3.22584   | 2.95388  | 2.91712   | 2.51045  | 3.42352   |
| 0.471909  | 0.513575  | 0.503868 | 0.328774  | 0.263399 | 0.611997  |
| 3.63419   | 2.5559    | 3.40825  | 3.74062   | 3.60156  | 3.59898   |
| 3.61E-14  | 0.135722  | 0.500796 | 0.65212   | 1.08E-06 | 0.217688  |
| 0.064438  | 0         | 0        | 0         | 0        | 0         |
| 29.005    | 22.5067   | 27.0954  | 27.2486   | 27.8808  | 26.9389   |
| 31.5131   | 40.9354   | 32.8253  | 32.2042   | 40.2837  | 34.6648   |
| 30.0048   | 25.6655   | 23.9714  | 28.83     | 27.0017  | 31.4626   |
| 11.6682   | 9.97996   | 10.0019  | 11.1109   | 9.84706  | 11.6077   |
| 0         | 0         | 0        | 0         | 0        | 0         |
| 19.2995   | 18.4031   | 18.502   | 20.4538   | 11.5594  | 15.3618   |
| 18.0766   | 15.5849   | 15.9215  | 17.3143   | 17.1348  | 17.6616   |
| 0         | 0         | 0        | 0         | 0        | 0         |
| 13.1711   | 12.4568   | 7.45046  | 10.2689   | 7.41635  | 9.55754   |
| 5.74122   | 0.54508   | 6.20096  | 1.19152   | 5.29258  | 0.627897  |
| 6.69029   | 6.7621    | 8.8292   | 7.25865   | 7.64532  | 7.53538   |
| 6.83065   | 8.25261   | 5.43425  | 5.55023   | 4.67627  | 7.36754   |
| 2.50716   | 2.10906   | 2.02346  | 2.1164    | 1.9929   | 3.12805   |
| 53.6716   | 68.487    | 90.8797  | 78.5934   | 83.1217  | 76.9997   |
| 6.39247   | 5.87481   | 5.86532  | 5.19306   | 5.10347  | 4.79465   |
| 26.8196   | 33.6482   | 36.3467  | 47.1948   | 34.941   | 34.3802   |
| 0.413503  | 0.555113  | 0.627139 | 0.412619  | 0.300519 | 0.377053  |
| 7.52471   | 7.68778   | 8.19153  | 8.45289   | 5.63883  | 7.36967   |
| 2.21999   | 1.8085    | 1.95141  | 1.47175   | 1.7499   | 2.03395   |
| 0.0558273 | 0.0799426 | 0        | 0.0405149 | 0        | 0.0301666 |
| 60.6591   | 65.547    | 58.9218  | 64.7655   | 64.0771  | 51.7821   |
| 105.765   | 63.5952   | 199.551  | 218.407   | 434.831  | 471.288   |
| 0.0476189 | 0.0170471 | 0.019259 | 0.0345579 | 0        | 0.0192983 |
| 10.806    | 10.0736   | 10.8554  | 9.5002    | 9.20529  | 10.1339   |
| 6.28767   | 4.21429   | 6.0942   | 5.25658   | 6.10898  | 8.10479   |
| 2.02351   | 1.77313   | 1.47987  | 1.7037    | 1.50537  | 1.98933   |
| 0.731157  | 2.08439   | 0.39529  | 1.47118   | 1.47723  | 1.24879   |

|          |          |           |           |           |          |
|----------|----------|-----------|-----------|-----------|----------|
| 0        | 0        | 0         | 0         | 0         | 0        |
| 30.1955  | 22.7788  | 27.391    | 28.2271   | 33.4137   | 27.7944  |
| 0        | 0        | 0         | 0         | 0         | 0        |
| 16.839   | 14.712   | 14.8526   | 16.3836   | 17.8844   | 15.1918  |
| 7.01185  | 6.52311  | 7.89424   | 6.99613   | 5.85366   | 6.20221  |
| 1.15916  | 1.11484  | 0.839662  | 0.753336  | 0.61695   | 0.841379 |
| 0        | 0        | 0         | 0         | 0         | 0        |
| 18.882   | 10.9615  | 23.3456   | 35.5674   | 27.6488   | 29.5212  |
| 0.663858 | 0.740387 | 0.538846  | 0.428244  | 0.459494  | 0.298933 |
| 12.5558  | 10.5652  | 7.82649   | 10.4741   | 5.34336   | 7.58021  |
| 2.24685  | 1.8081   | 2.0876    | 0.932749  | 1.57234   | 2.67414  |
| 6.38925  | 6.0419   | 4.9081    | 6.73647   | 4.76614   | 5.04842  |
| 8.4252   | 8.83799  | 10.2791   | 10.2989   | 10.8928   | 10.0278  |
| 51.2467  | 59.7589  | 39.5535   | 53.7291   | 33.9716   | 36.1536  |
| 3.53954  | 2.72242  | 2.6117    | 3.05067   | 2.32453   | 2.7679   |
| 16.8998  | 16.7946  | 16.0516   | 17.2744   | 11.4514   | 14.9613  |
| 58.3843  | 55.632   | 65.5778   | 60.9453   | 64.3922   | 62.0364  |
| 14.4645  | 11.7421  | 12.5419   | 13.9684   | 10.5565   | 13.7896  |
| 0        | 0        | 0         | 0         | 0         | 0        |
| 0.284627 | 0.226431 | 0.25581   | 0.137706  | 0.563877  | 0.205067 |
| 5.45163  | 3.85547  | 3.97774   | 1.87321   | 3.27745   | 2.34463  |
| 1.15901  | 2.81551  | 1.77631   | 3.33261   | 2.42879   | 2.03298  |
| 28.4225  | 25.1245  | 27.7318   | 20.8456   | 47.1941   | 11.5749  |
| 4.73118  | 2.45081  | 3.43248   | 3.8467    | 2.78643   | 3.54081  |
| 0.207022 | 0        | 0         | 0         | 0         | 0.167798 |
| 0        | 0        | 0         | 0         | 0         | 0        |
| 0        | 0        | 0.0433665 | 0         | 0         | 0.173821 |
| 14.1039  | 14.0197  | 15.1327   | 16.322    | 14.3171   | 16.0654  |
| 0.868904 | 1.2837   | 2.00309   | 1.05102   | 0.935298  | 1.06544  |
| 8.42263  | 8.04791  | 8.25806   | 7.35717   | 6.31566   | 7.64604  |
| 57.5245  | 59.5255  | 59.9975   | 65.3694   | 66.4082   | 61.3601  |
| 0.219473 | 0.104759 | 0.295879  | 0.0530918 | 0.113426  | 0.17789  |
| 0.282492 | 0        | 0         | 0.102505  | 0         | 0        |
| 3.9103   | 3.16568  | 3.55575   | 4.11756   | 3.74458   | 4.57807  |
| 37.9851  | 41.5372  | 40.0925   | 38.7099   | 34.7312   | 37.2737  |
| 6.12592  | 5.62662  | 5.38857   | 5.92572   | 7.40669   | 4.79965  |
| 0        | 0        | 0         | 0         | 0.0265562 | 0        |
| 0        | 0        | 0         | 0         | 0         | 0        |
| 24.6376  | 34.4116  | 43.7821   | 18.7602   | 4.81893   | 7.31194  |
| 0        | 0        | 0         | 0         | 0         | 0        |
| 4.18172  | 4.90299  | 5.54721   | 4.982     | 4.86416   | 5.23217  |
| 8.69876  | 4.48563  | 5.69821   | 4.69151   | 5.3284    | 5.98726  |
| 0.347087 | 0.372761 | 0.140376  | 0.125944  | 0.134534  | 0.281326 |

|          |           |           |           |           |           |
|----------|-----------|-----------|-----------|-----------|-----------|
| 63.2843  | 57.9298   | 58.54     | 60.175    | 53.31     | 58.1862   |
| 0        | 0         | 0         | 0         | 0         | 0         |
| 6.95319  | 4.28036   | 5.56631   | 3.9328    | 3.83428   | 5.74038   |
| 5.14623  | 5.45848   | 5.22128   | 5.56683   | 6.12607   | 6.9228    |
| 0.761123 | 0.877974  | 1.0432    | 1.07403   | 0.917831  | 0.736872  |
| 15.8072  | 11.7105   | 20.2042   | 15.8706   | 17.4391   | 10.4616   |
| 3.385    | 4.04309   | 2.99878   | 2.93306   | 2.52165   | 3.30085   |
| 63.0619  | 55.9036   | 61.6276   | 45.9327   | 41.0627   | 47.9593   |
| 3.36158  | 2.92029   | 2.46533   | 2.11429   | 1.7373    | 2.36139   |
| 1.55295  | 0.942009  | 1.09913   | 1.29918   | 0.551772  | 0.629357  |
| 7.75128  | 7.40366   | 7.0824    | 6.89064   | 6.04968   | 4.89487   |
| 85.3074  | 61.7631   | 63.4235   | 58.8855   | 87.5225   | 23.6387   |
| 0        | 0         | 0         | 0         | 0         | 0         |
| 2.43096  | 2.71348   | 2.50374   | 2.36687   | 1.8494    | 2.33753   |
| 17.68    | 15.8055   | 18.9103   | 19.4115   | 18.8095   | 17.8995   |
| 2.35928  | 0.527875  | 1.7891    | 1.07011   | 1.2574    | 0.836621  |
| 0        | 0         | 0         | 0         | 0         | 0.0825635 |
| 0        | 0         | 0.0185584 | 0         | 0         | 0         |
| 0.790453 | 0.38947   | 0.330003  | 0.277571  | 0.395336  | 0.358234  |
| 16.4522  | 12.2024   | 14.4759   | 15.9569   | 17.7773   | 17.0997   |
| 30.2261  | 34.6663   | 33.2781   | 34.8532   | 30.0707   | 33.6184   |
| 22.7384  | 15.935    | 18.5227   | 21.1683   | 25.2568   | 22.542    |
| 0        | 0         | 0         | 0         | 0         | 0         |
| 27.3879  | 26.5955   | 15.6497   | 44.4067   | 25.7152   | 15.974    |
| 0        | 0         | 0         | 0         | 0         | 0         |
| 3.36457  | 3.15621   | 2.69026   | 2.94679   | 2.60827   | 3.29118   |
| 0        | 0         | 0         | 0         | 0         | 0         |
| 0        | 0         | 0         | 0         | 0         | 0         |
| 39.1028  | 36.5047   | 37.4331   | 39.8991   | 31.3604   | 39.1539   |
| 12.902   | 10.0204   | 12.3819   | 11.1089   | 10.1713   | 11.1665   |
| 0        | 0.0672681 | 0.0759962 | 0.0681829 | 0.0728333 | 0         |
| 0        | 0         | 0         | 0         | 0         | 0         |
| 12.4933  | 12.4333   | 14.5249   | 13.7812   | 13.3733   | 12.6982   |
| 12.9335  | 10.5434   | 13.1881   | 12.7538   | 12.964    | 12.455    |
| 0        | 0         | 0         | 0         | 0         | 0         |
| 25.9456  | 20.5043   | 15.5868   | 19.8256   | 21.8748   | 18.4141   |
| 0.155173 | 0.133294  | 0.116116  | 0.177293  | 0.138314  | 0.176025  |
| 0.081501 | 0         | 0         | 0         | 0         | 0.0660593 |
| 0        | 0         | 0         | 0         | 0         | 0         |
| 0.230257 | 0         | 0         | 0.0403067 | 0.0594996 | 0.249368  |
| 0.129817 | 0.0929462 | 0         | 0         | 0         | 0         |
| 0        | 0         | 0         | 0.0426918 | 0         | 0         |
| 12.2865  | 13.3653   | 4.47864   | 7.38581   | 3.55643   | 3.5475    |

|           |           |           |           |           |           |
|-----------|-----------|-----------|-----------|-----------|-----------|
| 0         | 0         | 0         | 0         | 0         | 0         |
| 11.1977   | 8.69154   | 13.348    | 12.8234   | 12.7581   | 18.7647   |
| 16.0474   | 11.2343   | 13.8556   | 12.6178   | 10.1637   | 11.5121   |
| 30.4275   | 24.9317   | 30.4665   | 35.0253   | 30.5726   | 30.5887   |
| 18.4617   | 16.4042   | 14.3207   | 18.4824   | 18.1283   | 16.1917   |
| 3.5006    | 2.96969   | 4.16602   | 6.118     | 3.83999   | 4.43253   |
| 2.32521   | 2.16689   | 1.70169   | 2.67849   | 1.65948   | 1.61542   |
| 10.6669   | 9.38476   | 10.3476   | 11.3369   | 9.89633   | 10.4883   |
| 0.175752  | 0.0904669 | 0.112159  | 0.0828024 | 0.136245  | 0.0924796 |
| 18.9394   | 17.99     | 23.0817   | 23.4576   | 23.883    | 22.4125   |
| 0.0494791 | 0.0354261 | 0.0400227 | 0         | 0         | 0         |
| 5.6498    | 4.12659   | 4.55467   | 3.67364   | 5.49678   | 6.16211   |
| 8.75092   | 9.77044   | 9.95186   | 12.7957   | 12.1572   | 11.1661   |
| 0.195885  | 0.42075   | 0.237671  | 0.355393  | 0.455559  | 0.476314  |
| 13.374    | 10.8463   | 11.776    | 12.5833   | 12.0166   | 11.0666   |
| 0         | 0         | 0         | 0         | 0         | 0         |
| 0.0961559 | 0.48192   | 0.466671  | 0.697821  | 0.372708  | 0.233813  |
| 54.6267   | 59.4433   | 62.1744   | 59.7883   | 52.425    | 52.2359   |
| 0         | 0         | 0         | 0         | 0         | 0         |
| 0.584964  | 0.227867  | 0.175645  | 0.942488  | 0.552243  | 0.888315  |
| 31.4967   | 36.9516   | 32.2614   | 33.5695   | 33.8507   | 41.17     |
| 30.1188   | 27.2455   | 30.977    | 29.9075   | 32.1984   | 28.0216   |
| 10.3469   | 5.77613   | 7.34806   | 10.147    | 7.16352   | 8.75782   |
| 8.16425   | 5.67582   | 7.22301   | 7.00942   | 7.10606   | 7.63659   |
| 0         | 0         | 0         | 0         | 0         | 0         |
| 0.980391  | 1.06934   | 1.11764   | 0.788098  | 0.683697  | 1.23447   |
| 0         | 0         | 0         | 0         | 0         | 0         |
| 14.7116   | 19.4914   | 15.3682   | 15.122    | 13.5794   | 12.0087   |
| 3.96722   | 3.72566   | 6.39751   | 3.59429   | 2.92452   | 4.3577    |
| 0         | 0         | 0         | 0.0317698 | 0         | 0         |
| 16.7648   | 12.978    | 23.3476   | 12.4773   | 14.2888   | 15.0927   |
| 0.0585384 | 0.038358  | 0.0473505 | 0         | 0.0453789 | 0.0474473 |
| 16.4794   | 17.1494   | 12.9675   | 16.0241   | 11.5935   | 15.0742   |
| 43.915    | 43.0806   | 43.5814   | 45.8669   | 40.9269   | 39.8243   |
| 3.17569   | 3.04399   | 3.03209   | 2.93416   | 2.77124   | 3.58678   |
| 0.347681  | 0.145682  | 3.13E-06  | 1.29E-06  | 0.0285763 | 0.0447459 |
| 17.2166   | 13.7735   | 14.505    | 14.3884   | 16.308    | 15.2512   |
| 0.758941  | 0.886579  | 0.969303  | 0.87931   | 0.712204  | 1.74831   |
| 2.65544   | 3.20083   | 2.31106   | 2.41497   | 1.19864   | 2.34303   |
| 9.13614   | 6.73338   | 7.01632   | 7.34412   | 8.31873   | 7.52595   |
| 0.367665  | 0.230336  | 0.27881   | 0.150087  | 0.160324  | 0.204878  |
| 5.25309   | 4.38742   | 6.18538   | 4.62      | 4.74718   | 6.52536   |
| 7.58263   | 8.44901   | 7.03265   | 8.05627   | 5.1475    | 7.93564   |

|          |           |           |          |           |           |
|----------|-----------|-----------|----------|-----------|-----------|
| 10.883   | 9.05162   | 9.34716   | 9.24773  | 9.87401   | 10.219    |
| 0        | 0.0569077 | 0.0642914 | 0.115363 | 0.0616157 | 0.193269  |
| 18.7943  | 23.4062   | 22.542    | 23.0931  | 24.0322   | 21.903    |
| 31.6747  | 30.9782   | 28.2971   | 29.1205  | 22.2105   | 27.3075   |
| 23.3228  | 24.73     | 27.0404   | 21.9229  | 23.3321   | 20.1642   |
| 0.398284 | 0.177016  | 0.137092  | 0.168482 | 0.131387  | 0.0130675 |
| 0.731209 | 0.822693  | 0.929438  | 0.530652 | 0.647823  | 0.423336  |
| 1.302    | 0.377081  | 0.717144  | 1.00518  | 0.172547  | 0.337164  |
| 4.23306  | 5.90207   | 4.235     | 4.2038   | 2.7634    | 4.15337   |
| 0.434587 | 0.35005   | 0.175764  | 0.236541 | 0.0421123 | 0.176124  |
| 6.48331  | 2.70618   | 5.38103   | 3.91053  | 5.52819   | 5.78146   |
| 0        | 0         | 0         | 0        | 0         | 0         |
| 0        | 0         | 0         | 0        | 0         | 0         |
| 4.36357  | 3.66121   | 4.56366   | 3.90892  | 3.25057   | 3.13616   |
| 2.65866  | 0.859668  | 2.21991   | 1.36928  | 1.92807   | 4.10133   |
| 0        | 0.0714506 | 0         | 0        | 0         | 0.0808864 |
| 0        | 112.911   | 0         | 0        | 0         | 0         |
| 1.07213  | 0.62141   | 0.825927  | 0.741013 | 0.791553  | 0.413808  |
| 4.61484  | 3.45357   | 3.86416   | 3.14712  | 3.07413   | 2.65029   |
| 0        | 0         | 0.250317  | 0.224582 | 0         | 0.501657  |
| 24.8647  | 22.1351   | 24.8685   | 25.4298  | 21.575    | 20.7843   |
| 19.1727  | 15.0035   | 18.5444   | 17.492   | 15.5586   | 18.0044   |
| 0        | 0         | 0         | 0        | 0         | 0         |
| 397.043  | 708.95    | 484.127   | 567.715  | 442.015   | 770.68    |
| 5.42454  | 4.98987   | 4.96901   | 5.05773  | 5.01285   | 4.25119   |
| 9.28714  | 6.71127   | 7.58789   | 7.61759  | 8.86827   | 9.13225   |
| 18.7737  | 16.6865   | 13.6308   | 15.3962  | 14.7603   | 11.748    |
| 5.43135  | 4.28699   | 3.81106   | 3.65669  | 5.35186   | 4.48185   |
| 0        | 0         | 0         | 0        | 0         | 0         |
| 481.689  | 335.674   | 332.893   | 421.108  | 689.654   | 176.089   |
| 0.131139 | 0.0938933 | 0.053038  | 0.237925 | 0         | 0.106293  |
| 27.9701  | 28.1857   | 34.6618   | 23.3643  | 30.7174   | 30.6908   |
| 0        | 0         | 0         | 0        | 0         | 0         |
| 19.3788  | 15.2466   | 17.876    | 17.8796  | 18.81     | 17.6403   |
| 0        | 0         | 0         | 0        | 0         | 0         |
| 20.1535  | 16.9047   | 20.0197   | 19.8716  | 18.2728   | 18.2774   |
| 40.1584  | 33.9349   | 40.162    | 45.5907  | 36.6155   | 51.7535   |
| 5.58222  | 4.21185   | 5.13538   | 4.73481  | 4.45078   | 5.63812   |
| 20.0088  | 29.0374   | 21.2652   | 17.7766  | 16.485    | 20.6541   |
| 11.3834  | 8.35096   | 10.4776   | 13.2606  | 10.7047   | 11.5074   |
| 14.1693  | 9.63869   | 11.2633   | 8.64477  | 14.4419   | 9.91962   |
| 0.224007 | 0.142564  | 0.25166   | 0        | 0.241186  | 0.0403475 |
| 0        | 0.0586924 | 0         | 0        | 0         | 0.0664434 |

|           |            |           |           |           |           |
|-----------|------------|-----------|-----------|-----------|-----------|
| 48.2536   | 45.5863    | 47.7275   | 46.4529   | 42.2746   | 38.5514   |
| 7.43995   | 7.09512    | 8.04068   | 11.1347   | 7.92143   | 13.2117   |
| 10.6919   | 8.36521    | 7.50337   | 8.35606   | 7.47513   | 8.57537   |
| 0         | 0          | 0         | 0         | 0         | 0         |
| 2.74812   | 2.01538    | 3.06175   | 2.59549   | 2.52479   | 2.41988   |
| 1.92958   | 2.00952    | 2.75268   | 2.57152   | 2.28456   | 2.81518   |
| 67.5773   | 63.1839    | 62.5935   | 72.7618   | 78.4778   | 57.1367   |
| 0         | 0.199585   | 0.225481  | 0.10115   | 0.108049  | 0.225942  |
| 29.0019   | 30.3023    | 33.0546   | 29.1072   | 34.4908   | 28.7082   |
| 35.0056   | 35.3669    | 39.4215   | 35.5109   | 33.3118   | 43.2718   |
| 2.33037   | 2.54267    | 1.54071   | 1.58867   | 2.78072   | 2.60976   |
| 0.255587  | 0.0914976  | 0.310108  | 0         | 0.0990674 | 0.103581  |
| 0         | 0          | 0         | 0         | 0         | 0         |
| 7.78636   | 6.47748    | 6.85807   | 5.29192   | 7.01338   | 6.49142   |
| 2.89506   | 1.22148    | 1.88177   | 2.13852   | 2.04391   | 3.1846    |
| 191.666   | 257.536    | 257.113   | 197.678   | 168.425   | 174.292   |
| 55.5664   | 45.9851    | 52.5889   | 52.12     | 50.7056   | 55.4539   |
| 4.51274   | 7.95005    | 4.22662   | 3.89263   | 2.94598   | 4.84489   |
| 0         | 0          | 0         | 0         | 0         | 0         |
| 26.0105   | 25.8276    | 19.473    | 20.3093   | 18.6625   | 21.698    |
| 0.397192  | 0.00014514 | 0.147004  | 0.41537   | 0.357141  | 0.250793  |
| 0.0675332 | 0.0241762  | 0.072835  | 0.0980201 | 0.157058  | 0.018246  |
| 0         | 0.0588559  | 0         | 0         | 0.0318626 | 0         |
| 0.015069  | 0.0323674  | 0.0426616 | 0.0218717 | 0.0116817 | 0.0305349 |
| 0.824283  | 0.942003   | 0.807788  | 0.621204  | 0.761881  | 0.835136  |
| 19.9863   | 23.5699    | 24.8232   | 23.0153   | 31.5712   | 23.6575   |
| 1.52436   | 1.59223    | 1.72784   | 0.73939   | 1.43563   | 1.69483   |
| 0         | 0          | 0         | 0         | 0         | 0         |
| 0         | 0.0706879  | 0.0798597 | 0.0716492 | 0.076536  | 0         |
| 22.1346   | 20.7881    | 22.7647   | 22.1392   | 21.5212   | 21.3859   |
| 2.43851   | 2.24713    | 3.30696   | 3.29054   | 3.15354   | 3.10369   |
| 69.2757   | 56.6824    | 80.2375   | 81.7187   | 59.3469   | 77.5574   |
| 11.7787   | 10.7627    | 11.4165   | 12.3641   | 12.9486   | 12.5483   |
| 4.24912   | 3.79657    | 3.52224   | 4.23048   | 3.6751    | 3.70022   |
| 19.1333   | 16.4389    | 17.83     | 17.4887   | 20.8635   | 14.7392   |
| 51.0668   | 28.1574    | 41.2089   | 69.8197   | 47.2946   | 61.9699   |
| 0         | 0          | 0         | 0         | 34.3296   | 0.314856  |
| 0         | 0          | 0         | 0         | 0         | 0         |
| 94.7439   | 132.534    | 95.0569   | 85.4279   | 156.003   | 70.5912   |
| 8.41215   | 7.45363    | 8.38084   | 10.4015   | 9.14122   | 9.24056   |
| 1.27963   | 1.89258    | 2.16953   | 1.37134   | 1.5114    | 1.58005   |
| 1.57418   | 1.37734    | 1.34031   | 1.39864   | 1.01167   | 0.973859  |
| 0.381807  | 0.338919   | 0.254091  | 0.197888  | 0.375796  | 0.272837  |



|           |           |           |           |           |           |
|-----------|-----------|-----------|-----------|-----------|-----------|
| 21.7161   | 17.3423   | 21.7082   | 15.4248   | 16.9198   | 18.1361   |
| 6.01429   | 6.09015   | 4.3306    | 5.3822    | 5.86769   | 6.04655   |
| 7.31898   | 5.64632   | 6.53185   | 6.1151    | 5.82034   | 5.93228   |
| 59.8563   | 50.0361   | 49.0527   | 52.1722   | 57.2854   | 53.6476   |
| 65.8085   | 64.417    | 62.1009   | 71.9292   | 51.6757   | 67.9893   |
| 0         | 0         | 0         | 0         | 0.0236547 | 0         |
| 0         | 0         | 0         | 0         | 0         | 0         |
| 0         | 0         | 0         | 0.0244829 | 0.0261527 | 0         |
| 0         | 0         | 0         | 0         | 0         | 0         |
| 0.0562159 | 0         | 0         | 0.0407969 | 0.0217897 | 0.0455649 |
| 15.1107   | 12.0471   | 11.9585   | 12.5468   | 10.5954   | 13.2849   |
| 8.5245    | 4.13779   | 26.9001   | 17.498    | 14.2486   | 2.75224   |
| 0.776169  | 0.0926203 | 0.627827  | 0.4694    | 0.501415  | 0.524259  |
| 37.5769   | 43.4804   | 42.6045   | 36.9261   | 34.0809   | 34.149    |
| 0.272889  | 0.174522  | 0.150892  | 0.115523  | 0.118513  | 0.174184  |
| 12.079    | 10.33     | 11.8814   | 11.9585   | 10.5488   | 12.3892   |
| 0         | 0         | 0         | 0         | 0         | 0         |
| 0.449156  | 0.227055  | 0.277766  | 0.258885  | 0.204908  | 0.299744  |
| 0         | 0         | 0.082395  | 0.295696  | 0         | 0.165127  |
| 8.24491   | 5.58075   | 8.14027   | 7.60505   | 9.38595   | 8.74657   |
| 0.338354  | 0.138431  | 0.449629  | 0.0876962 | 0.187355  | 0.41137   |
| 0.781972  | 0.979785  | 0.421681  | 0.756655  | 0.70723   | 0.633815  |
| 0.0713534 | 0.0843188 | 0.102611  | 0.138095  | 0.110634  | 0.195207  |
| 11.8401   | 9.43834   | 9.69044   | 10.6442   | 7.37766   | 8.43977   |
| 29.9956   | 26.4651   | 29.8989   | 24.975    | 30.2355   | 20.8687   |
| 8.10E-06  | 1.99892   | 3.76E-06  | 0.0775732 | 3.0487    | 0.0349711 |
| 4.08305   | 3.13813   | 3.05129   | 3.45643   | 2.56873   | 3.44121   |
| 0.0429183 | 0.0614573 | 0.0347157 | 0         | 0.0332709 | 0         |
| 963.641   | 1211.61   | 1319.73   | 1150.13   | 1253.68   | 1387.49   |
| 26.4381   | 23.5732   | 19.9596   | 21.9751   | 26.8351   | 19.7433   |
| 0         | 0         | 0         | 0         | 0         | 0         |
| 0.173984  | 0.12457   | 0.0469108 | 0.0420879 | 0.134875  | 0.14102   |
| 0.254194  | 0.0421175 | 0.190333  | 0.170764  | 0.15252   | 0.190722  |
| 34.1313   | 36.7832   | 33.8886   | 34.7526   | 42.559    | 22.8565   |
| 0.017847  | 0.0805021 | 0.0858221 | 0.094997  | 0.0396666 | 0.0875528 |
| 9.86066   | 7.98826   | 12.4567   | 13.2287   | 13.4305   | 11.5587   |
| 0.0442363 | 0.0158362 | 0.0357819 | 0         | 0.0171463 | 0.035855  |
| 0         | 0.212616  | 0.117647  | 0.117362  | 0.0281864 | 0.0294705 |
| 20.8172   | 15.6023   | 23.3104   | 20.4243   | 24.6062   | 24.3148   |
| 0         | 0         | 0         | 0         | 0         | 0         |
| 0         | 0         | 0         | 0         | 0         | 0         |
| 0         | 0.152502  | 0         | 0         | 0         | 0         |
| 37.0637   | 30.0797   | 36.7853   | 36.5942   | 48.3001   | 42.1787   |

|           |           |           |           |           |           |
|-----------|-----------|-----------|-----------|-----------|-----------|
| 15.9393   | 16.5785   | 16.4963   | 15.0781   | 20.3152   | 17.1788   |
| 0         | 0         | 0         | 0         | 0         | 0         |
| 0         | 0         | 0         | 0         | 0         | 0         |
| 0.427927  | 0.235683  | 0.46596   | 0.48972   | 0.357254  | 0.37353   |
| 0.0954073 | 0.0683098 | 0.0514487 | 0.0230796 | 0         | 0.103108  |
| 32.9      | 23.0442   | 33.0578   | 27.5325   | 19.1988   | 42.8303   |
| 46.707    | 45.3311   | 43.9543   | 45.0297   | 53.9005   | 47.5934   |
| 9.7145    | 8.44584   | 8.36811   | 8.62937   | 9.8781    | 9.08825   |
| 0         | 0         | 0         | 0         | 0         | 0         |
| 3.92216   | 3.79237   | 4.31409   | 3.89715   | 3.893     | 3.49101   |
| 10.5618   | 12.4748   | 10.9051   | 11.4238   | 11.1934   | 10.1281   |
| 3.02418   | 3.44753   | 1.16095   | 1.99093   | 1.75661   | 2.09896   |
| 7.84725   | 7.16906   | 7.15744   | 6.62502   | 7.19006   | 5.86377   |
| 3.326     | 2.50237   | 1.23263   | 1.55529   | 1.52823   | 1.5545    |
| 0         | 0         | 0.246187  | 0         | 0         | 0         |
| 5.6015    | 5.00901   | 3.93014   | 5.07774   | 4.0951    | 4.92491   |
| 0.167549  | 0.147037  | 0.186145  | 0.212364  | 0.228296  | 0.0927777 |
| 6.04923   | 5.08177   | 4.52959   | 3.32413   | 3.95474   | 4.49056   |
| 0         | 0         | 0         | 0         | 0         | 0.0502756 |
| 0.24226   | 0.0433634 | 0.195959  | 0.131859  | 0.281706  | 0.19636   |
| 37.5357   | 40.5944   | 37.9321   | 41.9229   | 44.0458   | 36.2751   |
| 0.65104   | 0.427297  | 0.439084  | 0.511836  | 0.73609   | 0.637604  |
| 19.9815   | 17.3385   | 17.8257   | 18.4773   | 14.7325   | 17.6978   |
| 3.45376   | 2.88344   | 2.938     | 2.5712    | 2.47981   | 3.70841   |
| 0         | 0         | 0         | 0         | 0         | 0         |
| 12.346    | 10.9227   | 11.7674   | 10.997    | 11.2716   | 11.8807   |
| 14.04     | 13.8084   | 15.2241   | 13.6125   | 14.7601   | 15.5983   |
| 3.19689   | 1.93728   | 1.83447   | 3.1338    | 2.56405   | 2.21567   |
| 0.618855  | 0.468357  | 0.407744  | 0.310499  | 0.272922  | 0.250407  |
| 712.789   | 0         | 288.28    | 775.925   | 276.282   | 288.87    |
| 127.447   | 137.488   | 114.05    | 123.557   | 128.78    | 127.432   |
| 0.0180986 | 0.0259165 | 0.0292792 | 0.026269  | 0.0140303 | 0         |
| 0         | 0         | 0         | 0         | 0         | 0         |
| 0         | 0         | 0         | 0         | 0         | 0         |
| 4.75571   | 3.85917   | 4.76506   | 5.76994   | 5.15539   | 5.35583   |
| 33.8142   | 24.1806   | 31.5915   | 34.73     | 39.8      | 34.0702   |
| 6.70897   | 10.6584   | 7.10303   | 8.80361   | 5.47721   | 5.93939   |
| 5.95773   | 9.06444   | 10.1201   | 9.62008   | 7.27417   | 9.53715   |
| 31.6678   | 26.5348   | 29.3146   | 36.3827   | 36.4226   | 25.423    |
| 2.34867   | 2.32837   | 1.89979   | 1.18002   | 1.12045   | 1.46436   |
| 0.0927888 | 0.0930288 | 0.127335  | 0.097212  | 0.162204  | 0.127352  |
| 56.8984   | 61.0435   | 59.5273   | 70.0991   | 68.0103   | 75.71     |
| 0.23359   | 0.262815  | 0.377892  | 0.411692  | 0.336296  | 0.540949  |

|           |           |           |           |           |          |
|-----------|-----------|-----------|-----------|-----------|----------|
| 2.05979   | 1.07262   | 1.45157   | 1.31366   | 1.65727   | 1.64424  |
| 17.3205   | 15.5549   | 19.2037   | 17.8253   | 16.9576   | 23.8419  |
| 34.7884   | 49.7452   | 59.4477   | 25.411    | 37.6381   | 22.8776  |
| 587.329   | 294.361   | 380.063   | 426.235   | 227.653   | 761.68   |
| 12.233    | 14.0834   | 10.9914   | 13.5688   | 8.83663   | 9.21105  |
| 0         | 0         | 0         | 0         | 0         | 0        |
| 9.14087   | 7.62125   | 7.62553   | 6.36487   | 9.53053   | 6.36761  |
| 0.899848  | 0.633131  | 0.766338  | 0.559085  | 1.07454   | 1.04933  |
| 23.29     | 18.0318   | 23.4368   | 23.9779   | 22.7368   | 17.5975  |
| 3.38792   | 3.67003   | 4.37755   | 4.31066   | 4.1442    | 6.36578  |
| 3.44607   | 3.72212   | 2.91647   | 3.61523   | 2.7859    | 2.99428  |
| 41.0544   | 34.4065   | 31.9342   | 37.9508   | 27.5195   | 35.8027  |
| 5.58649   | 3.82667   | 4.87092   | 4.08932   | 4.57446   | 4.54764  |
| 0.392192  | 0.449283  | 0.274938  | 0.455393  | 0.18242   | 0.169538 |
| 0         | 0         | 0         | 0         | 0         | 0        |
| 0         | 0         | 0         | 0         | 0         | 0        |
| 0         | 0         | 0         | 0.174182  | 0         | 0        |
| 12.7276   | 9.74691   | 11.0116   | 10.3937   | 12.5921   | 10.8353  |
| 0.654858  | 0.555287  | 0.504483  | 0.820586  | 0.834951  | 0.674483 |
| 0         | 0.213492  | 0         | 0         | 0         | 0        |
| 0         | 0         | 0.31228   | 0.246133  | 0         | 0        |
| 0.173095  | 0.216801  | 0.245042  | 0.439558  | 0.0671761 | 0.140342 |
| 7.12195   | 6.55854   | 7.68108   | 6.78697   | 7.7332    | 7.42467  |
| 42.5138   | 14.3688   | 50.8353   | 4.21594   | 91.5029   | 61.6407  |
| 13.9862   | 10.5322   | 12.7772   | 12.586    | 14.5925   | 12.0565  |
| 0         | 0         | 0         | 0         | 0         | 0        |
| 0         | 0         | 0         | 0         | 0         | 0        |
| 9.11537   | 10.2943   | 7.99028   | 7.79948   | 6.8493    | 8.37447  |
| 0.199842  | 0.0953888 | 0.125726  | 0.145029  | 0.120494  | 0.269965 |
| 1.16047   | 1.19439   | 0.234671  | 0.736905  | 0.449809  | 0.352726 |
| 0.17744   | 0.205023  | 0.261691  | 0.115502  | 0.199042  | 0.239045 |
| 0.204726  | 0.474468  | 0.139724  | 0.200575  | 0.11903   | 0        |
| 7.23918   | 6.53535   | 7.14685   | 5.87423   | 5.13887   | 6.36201  |
| 10.6599   | 9.26101   | 10.4999   | 12.256    | 11.4385   | 7.88686  |
| 180.011   | 166.839   | 152.433   | 156.153   | 184.141   | 88.2675  |
| 1.55E-115 | 3.17E-92  | 1.11E-111 | 1.77E-73  | 2.96E-51  | 3.94E-19 |
| 0.266523  | 0.377987  | 0.43871   | 0.535627  | 0.430689  | 0.896642 |
| 2.22712   | 2.89923   | 4.20344   | 3.7223    | 5.70268   | 2.40688  |
| 0         | 0.110138  | 0.124428  | 0.0558179 | 0         | 0        |
| 0.839232  | 0.450655  | 0.509128  | 0.152261  | 0.243969  | 0.425141 |
| 182.005   | 202.832   | 239.366   | 399.163   | 244.978   | 300.99   |
| 0.810572  | 0.0527595 | 0.23842   | 1.65779   | 0.856866  | 1.43345  |
| 22.3175   | 18.0586   | 19.9902   | 21.1581   | 19.1601   | 18.298   |

|           |           |           |           |           |           |
|-----------|-----------|-----------|-----------|-----------|-----------|
| 20.5321   | 24.6597   | 23.8235   | 22.23     | 20.1128   | 21.2007   |
| 0.433809  | 1.00347   | 0.755784  | 0.460126  | 0.258689  | 0.784376  |
| 3.84465   | 2.26693   | 2.62966   | 3.03632   | 3.06809   | 3.20787   |
| 1.28906   | 0.503421  | 0.710926  | 0.680357  | 0.590493  | 0.712379  |
| 1.62857   | 1.14426   | 1.27002   | 1.18104   | 1.19207   | 1.29461   |
| 1542.39   | 1563.66   | 1600.48   | 1709.25   | 1767.09   | 1457.82   |
| 0         | 0         | 1.20607   | 0         | 0         | 0         |
| 0         | 0.0781919 | 0.0441687 | 0.0396276 | 0         | 0         |
| 0.0650489 | 0         | 0         | 0.0472071 | 0.0504269 | 0         |
| 0         | 0         | 0         | 0         | 0         | 0         |
| 29.4414   | 26.9429   | 29.7481   | 28.136    | 25.7445   | 30.9127   |
| 7.06319   | 5.89996   | 7.00007   | 6.67288   | 6.21542   | 6.42123   |
| 13.3153   | 11.8447   | 8.68167   | 6.91063   | 5.81799   | 6.54092   |
| 0         | 0.0343886 | 0.0388505 | 0.0348562 | 0         | 0         |
| 1.87827   | 1.49855   | 1.42389   | 1.44529   | 1.09753   | 1.71671   |
| 0.862217  | 1.02477   | 0.822967  | 0.901046  | 0.360938  | 1.22999   |
| 3.76204   | 2.94897   | 3.54147   | 2.84786   | 3.59521   | 3.89043   |
| 25.6829   | 23.5399   | 22.9747   | 23.5433   | 22.0669   | 24.2236   |
| 2.50461   | 2.99578   | 2.2166    | 1.75349   | 1.78171   | 2.31667   |
| 0         | 0         | 0         | 0         | 0         | 0         |
| 0         | 0         | 0         | 0         | 0         | 0         |
| 1.37742   | 1.12324   | 0.986111  | 1.01015   | 0.862741  | 1.4006    |
| 37.9207   | 37.3538   | 36.7851   | 38.4911   | 37.8094   | 43.8839   |
| 0         | 0         | 1.21589   | 0         | 0         | 0         |
| 0         | 0         | 0         | 0         | 0         | 0         |
| 0         | 0         | 0         | 0         | 0         | 0         |
| 34.9565   | 37.468    | 41.0457   | 29.3206   | 23.8582   | 23.7345   |
| 24.7625   | 26.1028   | 25.7547   | 26.3672   | 26.8112   | 27.1801   |
| 21.9106   | 17.7887   | 18.1066   | 16.5632   | 14.4054   | 12.6759   |
| 0.0285565 | 0.0102229 | 0.0115494 | 0.0310859 | 0.0221374 | 0         |
| 0.679469  | 0.62867   | 6.91E-06  | 4.68E-05  | 0.864765  | 0.550657  |
| 6.40734   | 6.92179   | 6.38008   | 7.43767   | 8.31398   | 8.37706   |
| 23.6484   | 24.1105   | 29.3363   | 25.8937   | 26.8289   | 20.4849   |
| 20.3455   | 16.7925   | 19.5047   | 22.216    | 21.1756   | 15.8036   |
| 0         | 0         | 0         | 0         | 0         | 0.033482  |
| 0         | 0         | 0         | 0.0762102 | 0.040704  | 0.0425585 |
| 0         | 0.105967  | 0.0598581 | 0.053704  | 0.0286835 | 0.0299903 |
| 0         | 0         | 0         | 0         | 0         | 0         |
| 8.37772   | 6.53273   | 7.00388   | 6.64069   | 7.29104   | 7.43815   |
| 1042.1    | 997.216   | 864.736   | 1011.64   | 984.888   | 888.074   |
| 0.576272  | 0.4126    | 0.349601  | 0.261382  | 0.781787  | 0.817404  |
| 1.75531   | 1.35647   | 1.785     | 1.45849   | 1.24484   | 2.224     |
| 0         | 0         | 0         | 0         | 0.134544  | 1.72325   |

|           |           |           |           |           |          |
|-----------|-----------|-----------|-----------|-----------|----------|
| 41.9512   | 49.2696   | 36.7328   | 39.74     | 34.9899   | 39.7805  |
| 0.245945  | 0.367496  | 0.436802  | 0.294891  | 0.0994748 | 0.173345 |
| 6.4824    | 5.43061   | 4.74411   | 3.87233   | 4.37574   | 4.36063  |
| 9.99082   | 7.81117   | 11.2285   | 8.15861   | 9.10914   | 6.81428  |
| 2.58381   | 2.0812    | 2.61249   | 0.937558  | 0.834587  | 2.26879  |
| 13.3741   | 11.6244   | 13.8871   | 13.9637   | 15.1346   | 12.6384  |
| 1.17364   | 1.18382   | 1.13296   | 0.992767  | 1.33756   | 1.5465   |
| 8.35371   | 6.03725   | 7.53763   | 7.59535   | 6.52984   | 7.9777   |
| 27.9052   | 24.2317   | 28.1092   | 29.4227   | 28.7597   | 26.5149  |
| 0         | 0         | 0         | 0         | 0         | 0        |
| 1.67552   | 1.64877   | 0.981176  | 2.21035   | 0.850817  | 0.184346 |
| 0.310764  | 2.67002   | 1.25685   | 1.35316   | 1.92727   | 1.76319  |
| 4.7246    | 5.4796    | 4.62      | 5.83593   | 3.08565   | 4.36715  |
| 8.27632   | 12.2464   | 12.4072   | 8.98271   | 7.62783   | 9.04866  |
| 0         | 0.235109  | 0.796843  | 0.476612  | 0         | 0.399236 |
| 0.361296  | 0.680855  | 0.493626  | 0.607624  | 0.678433  | 0.433446 |
| 0.469692  | 0.420363  | 0.94981   | 0.596512  | 0.728225  | 0.285526 |
| 9.23626   | 6.82404   | 9.45896   | 7.44075   | 7.12015   | 6.87539  |
| 9.50306   | 6.32174   | 7.56867   | 7.58561   | 8.4427    | 8.46557  |
| 7.93863   | 5.95783   | 6.67283   | 6.55077   | 8.84195   | 7.4811   |
| 0.259079  | 0.0490353 | 0.0978109 | 0.136495  | 0.0400706 | 0.145396 |
| 56.7115   | 51.4025   | 61.4531   | 58.0455   | 63.143    | 52.4678  |
| 0         | 0.0975557 | 0.0367379 | 0.0439478 | 0.0352089 | 0.12271  |
| 0.0985968 | 0.0705934 | 0         | 0.0715535 | 0.0764338 | 0        |
| 24.9574   | 22.9309   | 25.9746   | 22.9313   | 22.3694   | 25.427   |
| 2.65519   | 1.13496   | 2.1691    | 1.60097   | 1.96618   | 2.19495  |
| 5.85E-12  | 5.45E-12  | 0         | 0.229391  | 1.48E-11  | 0        |
| 121.352   | 62.2915   | 97.1432   | 122.138   | 111.815   | 114.766  |
| 6.2946    | 15.6688   | 5.8984    | 16.9493   | 6.56845   | 8.71706  |
| 4.51059   | 2.50233   | 5.62985   | 3.53356   | 2.63988   | 0.798991 |
| 15.8389   | 20.4321   | 15.1311   | 16.9446   | 15.0563   | 15.4941  |
| 8.07039   | 7.17836   | 2.05882   | 4.97831   | 3.82597   | 2.41526  |
| 5.15261   | 4.31866   | 4.74821   | 4.88249   | 4.99182   | 4.197    |
| 0         | 0         | 0         | 0         | 0         | 0        |
| 0.302287  | 0.494717  | 0.558907  | 0.609401  | 0.700296  | 0.557818 |
| 0         | 0         | 0         | 0         | 0         | 0        |
| 0         | 0         | 0         | 0         | 0         | 0        |
| 1.30579   | 2.0435    | 2.01393   | 1.85101   | 2.23617   | 1.50123  |
| 0         | 0         | 0.0352695 | 0.0316434 | 0         | 0        |
| 40.983    | 35.936    | 38.031    | 42.1612   | 43.9779   | 41.1697  |
| 4.39647   | 2.5797    | 2.89337   | 2.93573   | 4.56781   | 2.19292  |
| 21.9903   | 18.2218   | 18.7055   | 19.9661   | 20.2121   | 19.5289  |
| 8.77878   | 6.3164    | 5.49189   | 8.09703   | 7.30831   | 4.90724  |

|            |           |           |           |           |            |
|------------|-----------|-----------|-----------|-----------|------------|
| 34.2543    | 46.2247   | 28.6429   | 23.4513   | 22.6505   | 27.7743    |
| 4.57306    | 4.11671   | 3.00683   | 2.93059   | 4.0634    | 3.20807    |
| 0          | 0.120717  | 0.0545519 | 0.0489434 | 0.0522815 | 0.16399    |
| 0.046341   | 0.0663585 | 0.112453  | 0.100891  | 0.143697  | 0.0751219  |
| 460.941    | 532.016   | 499.345   | 527.788   | 458.779   | 439.246    |
| 21.4526    | 21.5619   | 24.0092   | 24.6471   | 21.9631   | 20.527     |
| 0          | 0         | 0         | 0         | 0         | 0          |
| 23.9211    | 15.5151   | 18.087    | 22.9672   | 14.2006   | 20.0939    |
| 0          | 0         | 0         | 0         | 0         | 0          |
| 0          | 0         | 0         | 0         | 0         | 0          |
| 6.22E-11   | 1.71E-10  | 1.13E-09  | 0.214147  | 4.11E-10  | 8.58E-10   |
| 0          | 0         | 0         | 0         | 0         | 0          |
| 0.63449    | 0.227141  | 0.0641533 | 0         | 0.0614833 | 0.192853   |
| 20.0121    | 21.4971   | 19.7613   | 19.9266   | 19.2247   | 18.5821    |
| 27.9183    | 27.7409   | 29.6513   | 30.4192   | 30.6654   | 31.8745    |
| 0.857536   | 0.416032  | 0.594357  | 0.608108  | 0.688429  | 0.773329   |
| 0.256449   | 0.571238  | 0.737551  | 0.579007  | 0.534559  | 0.277147   |
| 18.8789    | 14.8834   | 18.4466   | 18.1885   | 16.8419   | 19.8634    |
| 0.102568   | 0         | 0.0276551 | 0.0248118 | 0.159025  | 0.0554232  |
| 8.11809    | 15.4867   | 14.4993   | 13.404    | 12.7977   | 13.4249    |
| 15.5752    | 18.3456   | 16.0888   | 18.0135   | 15.8652   | 19.7357    |
| 0          | 0         | 0.0433896 | 0         | 0.0207919 | 0          |
| 0          | 0         | 0.0312941 | 0.0280767 | 0         | 0          |
| 0.13862    | 0.297747  | 0.252285  | 0.150898  | 0.32238   | 0.252801   |
| 13.6155    | 10.9301   | 12.591    | 9.60884   | 9.0139    | 9.94139    |
| 6.39844    | 6.02108   | 4.78921   | 4.41049   | 3.5993    | 5.74328    |
| 31.3974    | 32.0017   | 31.7669   | 32.286    | 26.1252   | 31.7717    |
| 4.78236    | 4.62386   | 4.43186   | 4.60476   | 3.99928   | 5.60075    |
| 25.9314    | 17.8833   | 21.9363   | 21.7363   | 23.2691   | 25.532     |
| 0          | 0         | 0         | 0         | 0         | 0          |
| 8.50564    | 9.13481   | 9.9822    | 8.12922   | 9.3607    | 10.218     |
| 0.00758505 | 0.0244389 | 1.9058    | 0.0247712 | 0.0117603 | 0.00614794 |
| 5.68232    | 5.58857   | 6.0046    | 5.85443   | 5.30392   | 5.40256    |
| 0.305428   | 0.222357  | 0.555872  | 0.886618  | 0.473545  | 0.618899   |
| 0          | 0         | 0         | 0         | 0         | 0          |
| 123.113    | 153.677   | 124.912   | 127.051   | 134.548   | 125.392    |
| 0          | 0         | 0         | 0         | 0         | 0          |
| 0          | 0         | 0         | 0         | 0         | 0          |
| 5.27871    | 3.22004   | 4.39316   | 4.4532    | 4.12169   | 4.61839    |
| 4.16188    | 4.59881   | 3.51916   | 3.92612   | 3.27243   | 3.27701    |
| 1.27024    | 1.00882   | 1.18289   | 1.14649   | 1.05091   | 1.46217    |
| 8.56E-09   | 6.63E-09  | 8.78E-09  | 0.676152  | 0.0763744 | 0.0799846  |
| 24.3438    | 22.8499   | 21.639    | 23.412    | 24.6636   | 22.4585    |

|           |           |           |           |           |           |
|-----------|-----------|-----------|-----------|-----------|-----------|
| 7.53664   | 8.02693   | 9.37215   | 8.20747   | 8.35834   | 7.91307   |
| 21.675    | 18.5229   | 18.5756   | 19.302    | 19.5434   | 21.4296   |
| 5.6156    | 4.02203   | 4.48974   | 4.38078   | 5.07973   | 4.1481    |
| 10.6308   | 5.52832   | 4.43529   | 5.76592   | 7.54717   | 6.07699   |
| 1.47783   | 2.02353   | 1.78016   | 1.90714   | 1.38371   | 1.01667   |
| 28.5042   | 27.4511   | 28.574    | 30.4569   | 27.9279   | 28.7658   |
| 0         | 0         | 0         | 0         | 0         | 0         |
| 36.6009   | 30.4447   | 37.2871   | 40.2615   | 41.5173   | 38.1735   |
| 94.6828   | 102.571   | 93.8629   | 100.445   | 95.945    | 86.4474   |
| 2.7       | 2.48547   | 3.32344   | 2.60447   | 3.43213   | 2.75933   |
| 0         | 0         | 0         | 0         | 0         | 0         |
| 20.0959   | 16.6634   | 20.0965   | 20.8116   | 18.8608   | 20.8451   |
| 0         | 0         | 0         | 0         | 0         | 0         |
| 0         | 0         | 0         | 0         | 0         | 0         |
| 0.107342  | 0.0768549 | 0.0578846 | 0.129834  | 0.110951  | 0.145007  |
| 0         | 0         | 0         | 0         | 0         | 0         |
| 0.933114  | 0.78599   | 0.754777  | 0.717011  | 0.638263  | 0.75632   |
| 0         | 0.063931  | 0         | 0.0648004 | 0         | 0         |
| 12.1855   | 10.3604   | 11.8279   | 12.97     | 13.5398   | 13.2101   |
| 24.6823   | 23.035    | 20.0035   | 24.5907   | 24.7195   | 23.9762   |
| 0.582758  | 0.481435  | 0.580161  | 0.553046  | 0.521265  | 0.236172  |
| 70.1345   | 63.9279   | 66.7951   | 76.4623   | 80.7556   | 60.8449   |
| 40.5064   | 65.0984   | 32.7648   | 68.207    | 15.598    | 88.8128   |
| 21.3114   | 22.4788   | 19.1777   | 19.8305   | 14.7126   | 19.0187   |
| 0.347295  | 0.165771  | 0.28092   | 0         | 0.358972  | 0.469158  |
| 0.051915  | 0.01239   | 0.041993  | 0         | 0.0268302 | 0.0280525 |
| 0.448478  | 0         | 0.0806142 | 0.0723261 | 0.0772591 | 0.080779  |
| 4.95573   | 3.30477   | 4.32926   | 4.68872   | 4.22896   | 5.30931   |
| 24.73     | 21.056    | 24.1485   | 26.678    | 23.0571   | 21.128    |
| 123.872   | 125.443   | 126.169   | 113.955   | 123.733   | 111.661   |
| 9.84453   | 8.6995    | 10.0793   | 9.10744   | 12.8569   | 14.6288   |
| 2.46796   | 2.70057   | 2.68684   | 2.34089   | 1.7219    | 1.85085   |
| 0.100519  | 0.0479797 | 0.0271026 | 0.0486323 | 0.0259746 | 0.108632  |
| 58.6166   | 60.9728   | 56.7429   | 54.0397   | 53.4441   | 50.1429   |
| 1.03123   | 0.738344  | 3.33658   | 2.24515   | 1.59886   | 0.83585   |
| 0.375575  | 0.17927   | 0.101265  | 0.272562  | 0.0970506 | 0.202944  |
| 0         | 0.0709938 | 0         | 0         | 0.0799673 | 0         |
| 0         | 0.0439404 | 0         | 0         | 0         | 0.0994864 |
| 9.56258   | 10.2699   | 8.60828   | 11.9766   | 10.4022   | 10.6261   |
| 0.114397  | 0.0491435 | 0.148053  | 0.182643  | 0.141891  | 0.111267  |
| 15.2389   | 14.4751   | 15.4226   | 14.2435   | 13.5923   | 14.3984   |
| 0.0803679 | 0.115084  | 0.065008  | 0.174973  | 0.124605  | 0.0977114 |
| 0         | 0.162959  | 0.0920517 | 0.0825877 | 0.0882206 | 0.0922399 |

|           |           |           |           |           |           |
|-----------|-----------|-----------|-----------|-----------|-----------|
| 15.0912   | 11.1831   | 13.5601   | 13.9541   | 13.5113   | 14.0839   |
| 0         | 0         | 0         | 0         | 0         | 0         |
| 0         | 0         | 0         | 0         | 0         | 0         |
| 9.79404   | 7.94237   | 10.0363   | 10.4104   | 8.72503   | 10.1279   |
| 7.89277   | 5.65858   | 6.75736   | 5.94092   | 6.17548   | 6.86463   |
| 130.245   | 144.894   | 89.648    | 141.879   | 85.6034   | 114.275   |
| 0         | 0         | 0         | 0         | 0         | 0         |
| 0         | 0         | 0         | 0         | 0         | 0         |
| 1.95387   | 0.874332  | 0.856073  | 1.18163   | 0.568     | 0.329932  |
| 60.8849   | 49.3962   | 56.8241   | 64.7994   | 55.7083   | 62.1895   |
| 1.40866   | 1.01298   | 0.966085  | 0.880042  | 1.58105   | 1.15666   |
| 0.244837  | 0.0584328 | 0.0990217 | 0.0296137 | 0.0949006 | 0.0330747 |
| 3.56688   | 4.40961   | 4.55934   | 3.64125   | 3.44719   | 2.37069   |
| 3.17983   | 2.78482   | 2.48026   | 2.80209   | 1.8049    | 2.46232   |
| 7.38208   | 6.95551   | 7.20168   | 7.5497    | 7.58017   | 7.21244   |
| 0.0263509 | 0.0188668 | 0         | 0         | 0         | 0         |
| 12.634    | 15.4401   | 15.3014   | 13.9354   | 12.2283   | 15.0588   |
| 0         | 0         | 0         | 0         | 0         | 0.0551557 |
| 6.60074   | 3.5819    | 4.38012   | 5.85868   | 2.8757    | 4.31946   |
| 0         | 0         | 0         | 0         | 0         | 0         |
| 1.16516   | 1.00108   | 0.873934  | 0.84558   | 1.00179   | 1.11611   |
| 3.78459   | 1.45398   | 2.61329   | 3.75138   | 2.36141   | 3.66608   |
| 0         | 0         | 0         | 0         | 0         | 0         |
| 0         | 0         | 0.0191724 | 0         | 0.0183744 | 0         |
| 0         | 0         | 0.114154  | 0.0341393 | 0         | 0.0762584 |
| 0.228494  | 0.218371  | 0.145817  | 0.130826  | 0.114993  | 0.23753   |
| 4.60412   | 3.29646   | 3.70785   | 3.69301   | 4.05447   | 3.81363   |
| 1.63412   | 1.06853   | 1.25763   | 1.22458   | 1.15779   | 1.31298   |
| 0         | 0         | 0         | 0.0965427 | 0         | 0         |
| 13.5359   | 16.407    | 10.9794   | 12.6901   | 10.2082   | 12.7252   |
| 0.0554621 | 0.0991877 | 0.0674233 | 0.0804516 | 0.0644848 | 0.0225563 |
| 0.315549  | 0.395373  | 0.382862  | 0.51525   | 0.430631  | 0.383645  |
| 0         | 0.0181416 | 0.040991  | 0.0183884 | 0         | 0         |
| 18.2949   | 20.8202   | 16.7415   | 18.5198   | 17.9035   | 17.1189   |
| 4.13961   | 1.61E-18  | 5.22E-26  | 5.65E-28  | 2.47E-36  | 3.89E-20  |
| 0.076336  | 0         | 0.0308733 | 0         | 0.0295884 | 0         |
| 0.823948  | 0.708496  | 0.889218  | 0.797272  | 0.979882  | 0.801406  |
| 0         | 0.144074  | 0.325536  | 0.146034  | 0.545978  | 0         |
| 377.379   | 120.087   | 339.172   | 273.871   | 390.067   | 305.879   |
| 5.51322   | 4.15349   | 4.91365   | 4.79619   | 4.42692   | 5.33932   |
| 10.7782   | 12.9392   | 13.4532   | 12.8118   | 13.4335   | 11.9368   |
| 358.185   | 521.484   | 396.409   | 341.032   | 418.753   | 366.71    |
| 0.194557  | 0.107845  | 0.172603  | 0.100202  | 0.150824  | 0.213651  |



|           |           |            |          |           |           |
|-----------|-----------|------------|----------|-----------|-----------|
| 21.5839   | 16.2516   | 20.2191    | 20.4142  | 19.3673   | 21.1648   |
| 5.75982   | 4.33523   | 4.88232    | 4.71891  | 5.49834   | 5.27042   |
| 34.8941   | 30.6136   | 24.3823    | 24.6099  | 23.6215   | 23.7682   |
| 0.64905   | 0.775977  | 1.05798    | 0.603135 | 0.639698  | 0.609394  |
| 56.4681   | 55.9449   | 51.1792    | 47.2331  | 49.2422   | 44.2091   |
| 117.829   | 134.627   | 174.692    | 135.141  | 142.58    | 140.99    |
| 0         | 0         | 0          | 0        | 0         | 0         |
| 14.5759   | 11.7605   | 10.9889    | 12.3278  | 12.3515   | 11.3034   |
| 17.1919   | 14.8639   | 16.7761    | 17.2288  | 16.8616   | 17.1097   |
| 41.8101   | 41.938    | 44.355     | 44.9234  | 43.8298   | 38.6132   |
| 3.28532   | 2.61521   | 3.05357    | 2.97657  | 3.5276    | 2.61324   |
| 0         | 0         | 0          | 0        | 0         | 0         |
| 25.1658   | 20.0442   | 23.3134    | 19.9127  | 31.6024   | 27.9492   |
| 5.9471    | 4.6881    | 4.94006    | 5.23139  | 5.01387   | 5.27475   |
| 0         | 0         | 0          | 0        | 0         | 0         |
| 1.28506   | 1.63941   | 1.34184    | 1.27171  | 1.21355   | 1.21202   |
| 26.2914   | 22.6667   | 26.032     | 24.7365  | 19.7007   | 24.6616   |
| 74.5964   | 83.8436   | 82.339     | 83.6036  | 72.2348   | 85.9581   |
| 16.4531   | 17.9396   | 18.4774    | 16.5597  | 16.66     | 17.5397   |
| 0.401649  | 0.143787  | 0.162443   | 0.72871  | 0.311365  | 0.32555   |
| 0         | 0         | 0          | 0        | 0         | 0         |
| 3.4757    | 1.81472   | 2.99535    | 2.34998  | 1.06969   | 2.97385   |
| 22.8176   | 18.9876   | 26.3424    | 23.912   | 26.5544   | 23.3142   |
| 0         | 0         | 0          | 0        | 0         | 0         |
| 17.0459   | 13.0662   | 17.2552    | 16.0434  | 17.8661   | 17.8116   |
| 11.6457   | 12.8828   | 11.7607    | 13.7616  | 13.596    | 13.517    |
| 170.409   | 144.319   | 149.638    | 160.767  | 163.587   | 155.512   |
| 0.392047  | 0.280698  | 0.158559   | 0.426773 | 0.15196   | 0.317767  |
| 11.53     | 14.5072   | 11.2464    | 11.8743  | 13.0786   | 9.13915   |
| 23.27     | 9.97575   | 16.9446    | 14.9259  | 22.5882   | 15.1453   |
| 0         | 0         | 0          | 0        | 0         | 0         |
| 18.6259   | 17.2566   | 17.6604    | 16.9396  | 15.5994   | 15.742    |
| 0.0586781 | 0.0393866 | 0.00889942 | 0.104524 | 0.0614091 | 0.0647738 |
| 0         | 0         | 0          | 0        | 0         | 0         |
| 16.6063   | 13.9171   | 16.1332    | 14.6303  | 16.7738   | 14.7958   |
| 2.86022   | 4.12515   | 4.09867    | 3.56041  | 2.11743   | 2.92223   |
| 12.6441   | 10.441    | 9.06842    | 10.0325  | 10.9781   | 8.33541   |
| 3.60412   | 3.3882    | 3.46747    | 2.14046  | 1.56833   | 1.64806   |
| 0         | 0         | 0          | 0        | 0         | 0         |
| 72.6303   | 67.5517   | 70.0067    | 75.7399  | 82.8299   | 78.9156   |
| 0.230296  | 0.409083  | 0.352955   | 0.215961 | 0.182004  | 0.186663  |
| 0.819705  | 0.860929  | 0.641065   | 0.546573 | 0.76207   | 0.898067  |
| 9.97787   | 9.42214   | 11.5213    | 9.39591  | 8.53019   | 12.6599   |

|           |           |           |           |           |           |
|-----------|-----------|-----------|-----------|-----------|-----------|
| 129.473   | 134.432   | 124.565   | 133.616   | 127.413   | 106.097   |
| 0         | 0         | 0         | 0         | 0         | 0         |
| 2.59309   | 2.01666   | 2.649     | 2.30365   | 2.36546   | 2.9262    |
| 1.58704   | 1.18085   | 1.63612   | 1.4905    | 1.59215   | 1.26113   |
| 24.6462   | 22.3563   | 27.7302   | 36.1758   | 29.8084   | 22.7552   |
| 0.0867956 | 0.15536   | 0.140414  | 0.220462  | 0.0672853 | 0.0703507 |
| 0         | 0         | 0         | 0         | 0         | 0         |
| 1.39296   | 1.49576   | 1.20703   | 1.08283   | 1.15671   | 1.45134   |
| 0.53691   | 0.422859  | 0.477725  | 0.350681  | 0.457843  | 0.304629  |
| 8.66809   | 7.62892   | 7.43717   | 7.63133   | 6.88617   | 7.98344   |
| 0         | 0         | 0         | 0.0260294 | 0         | 0         |
| 0         | 0         | 0         | 0         | 0         | 0         |
| 30.5007   | 37.0447   | 37.9199   | 33.8876   | 43.5139   | 20.8114   |
| 0.424768  | 0.912377  | 0.515379  | 0.154131  | 0.329286  | 0.172144  |
| 10.3685   | 7.8326    | 9.49108   | 9.61655   | 8.87545   | 8.66096   |
| 7.72842   | 9.67378   | 8.21857   | 8.23648   | 8.59198   | 6.96503   |
| 13.4241   | 12.2222   | 13.0247   | 12.7883   | 8.58984   | 8.01579   |
| 5.94956   | 3.72753   | 4.90766   | 5.26522   | 3.72132   | 7.66687   |
| 57.0243   | 42.2172   | 50.7614   | 50.6991   | 53.4844   | 45.9343   |
| 60.6258   | 63.4585   | 56.5452   | 63.2547   | 56.3422   | 54.6095   |
| 0.46157   | 0.329965  | 0.12438   | 0.223217  | 0.238363  | 0.498166  |
| 0.919607  | 1.29783   | 0.981785  | 1.20113   | 1.29579   | 1.26813   |
| 0         | 0         | 0         | 0         | 0         | 0         |
| 2.50161   | 1.83325   | 1.88067   | 1.6446    | 1.84803   | 2.24233   |
| 4.60307   | 2.4969    | 3.66262   | 3.45708   | 2.72328   | 3.16544   |
| 27.0641   | 24.8304   | 37.6226   | 36.8309   | 39.8485   | 32.9108   |
| 0.147484  | 0         | 0         | 0         | 0         | 0         |
| 23.8256   | 36.334    | 32.7189   | 33.116    | 38.9747   | 58.4798   |
| 0         | 0         | 0         | 0         | 0         | 0         |
| 17.8102   | 16.391    | 16.9951   | 17.6227   | 16.6947   | 16.0559   |
| 1.46789   | 0.99122   | 1.20919   | 2.07599   | 1.3619    | 1.72171   |
| 7.85759   | 6.74552   | 5.40326   | 4.83374   | 4.40015   | 5.17959   |
| 0.694571  | 0.568342  | 0.481564  | 0.396049  | 0.461522  | 0.804247  |
| 7.94014   | 6.67344   | 7.91729   | 8.45971   | 6.83955   | 7.73414   |
| 0         | 0.0179811 | 0.0101571 | 0.0744214 | 0.0778749 | 0         |
| 0.117997  | 0.211209  | 0.0795377 | 0.0999045 | 0.198191  | 0.350681  |
| 38.7781   | 34.1313   | 37.5029   | 40.2567   | 34.2713   | 39.6704   |
| 53.0025   | 46.5261   | 47.447    | 55.1418   | 49.7704   | 50.891    |
| 0.322795  | 0.348644  | 0.431781  | 0.349475  | 0.779155  | 0.144719  |
| 19.2677   | 17.1613   | 19.4383   | 21.0967   | 18.5027   | 20.9174   |
| 0         | 0         | 0         | 0         | 0         | 0         |
| 15.2912   | 11.131    | 13.171    | 12.4742   | 13.9429   | 11.9972   |
| 0         | 0         | 0         | 0         | 0         | 0         |

|          |           |           |          |          |           |
|----------|-----------|-----------|----------|----------|-----------|
| 0        | 0         | 0         | 0        | 0        | 0         |
| 32.6766  | 32.2937   | 32.7825   | 36.5801  | 29.441   | 31.5602   |
| 28.741   | 34.3368   | 31.6281   | 32.9288  | 20.0504  | 20.3634   |
| 1.34899  | 1.04079   | 1.8925    | 1.00134  | 1.1626   | 1.21868   |
| 5.68311  | 6.65145   | 5.24665   | 4.56426  | 4.99305  | 5.51534   |
| 0.385628 | 0.138051  | 0.389909  | 0.559715 | 0.298945 | 0.390706  |
| 0        | 0.0275843 | 0.0311634 | 0        | 0        | 0         |
| 0        | 0         | 0         | 0        | 0        | 0         |
| 0.310357 | 0.22221   | 0.313802  | 0.28154  | 0.135334 | 0.345888  |
| 3.10589  | 3.15389   | 2.97202   | 3.2113   | 3.05061  | 2.6655    |
| 0        | 0         | 0         | 0        | 0        | 0         |
| 2.41215  | 1.49895   | 0.920347  | 1.12299  | 0.352818 | 0.811562  |
| 0.906362 | 0.449265  | 0.733138  | 0.657763 | 0.540482 | 0.621616  |
| 15.3563  | 13.504    | 18.0565   | 13.5489  | 12.7606  | 12.6362   |
| 1.85499  | 0.356496  | 0.205259  | 1.83793  | 0.139887 | 0.584309  |
| 7.89166  | 4.09098   | 7.22995   | 7.95545  | 6.80964  | 4.6369    |
| 12.6727  | 10.8182   | 7.42546   | 10.965   | 11.9021  | 11.7201   |
| 0        | 0         | 0         | 0        | 0        | 0         |
| 0        | 0         | 0         | 0        | 0        | 0         |
| 0.783006 | 0.961059  | 0.588118  | 0.446476 | 0.390213 | 0.271994  |
| 4.13932  | 4.21697   | 7.74586   | 4.42377  | 5.82704  | 6.7268    |
| 0.164767 | 0.132718  | 0.133276  | 0.159435 | 0        | 0.0333858 |
| 17.2622  | 13.8383   | 15.3446   | 14.9588  | 14.4344  | 16.7248   |
| 33.1835  | 30.7164   | 29.7683   | 34.095   | 30.7274  | 29.4416   |
| 27.9836  | 31.3231   | 27.2985   | 29.52    | 29.5473  | 26.3271   |
| 11.6153  | 8.74722   | 13.3844   | 9.61798  | 7.6856   | 11.1714   |
| 154.076  | 219.213   | 122.313   | 218.819  | 109.381  | 179.356   |
| 9.20286  | 7.57675   | 9.08329   | 7.69133  | 8.80828  | 8.47088   |
| 50.0869  | 43.5018   | 31.1169   | 34.7326  | 22.7486  | 25.9866   |
| 45.4106  | 38.1287   | 41.9047   | 43.0841  | 49.2811  | 44.9408   |
| 121.615  | 118.771   | 141.215   | 131.832  | 126.25   | 139.749   |
| 5.4898   | 2.4457    | 6.95693   | 5.79901  | 3.40463  | 3.23013   |
| 71.413   | 84.2931   | 89.6699   | 78.4901  | 77.6536  | 69.9263   |
| 9.29465  | 8.34725   | 9.06305   | 9.38261  | 7.89262  | 8.95433   |
| 2.43417  | 1.75278   | 2.56526   | 1.67567  | 2.13501  | 1.90533   |
| 4.19062  | 3.33379   | 3.01308   | 4.16759  | 4.69247  | 2.13863   |
| 0.604    | 0.455044  | 0.514261  | 0.447933 | 0.312017 | 0.446647  |
| 18.779   | 17.6448   | 19.0638   | 19.6018  | 15.9715  | 17.0787   |
| 2.02808  | 1.20482   | 1.49859   | 1.3843   | 1.61894  | 1.86596   |
| 49.4315  | 41.7822   | 47.9441   | 36.5376  | 44.7067  | 32.7086   |
| 0        | 0         | 0         | 0        | 0        | 0         |
| 1.15717  | 0.982285  | 0.422395  | 0.727167 | 0.687569 | 0.401156  |
| 0.152556 | 0         | 0         | 0        | 0        | 0         |

|          |           |          |           |           |           |
|----------|-----------|----------|-----------|-----------|-----------|
| 234.08   | 288.613   | 247.842  | 273.626   | 269.388   | 235.066   |
| 6.59811  | 6.76324   | 5.96251  | 6.29408   | 6.4836    | 6.44474   |
| 15.124   | 15.2541   | 12.8815  | 14.2729   | 12.7254   | 14.7975   |
| 0.333996 | 0.597659  | 0.40047  | 0.475061  | 0.507557  | 0.137858  |
| 0        | 0         | 0        | 0         | 0         | 0         |
| 24.3082  | 16.2424   | 18.6728  | 26.5899   | 26.066    | 26.3882   |
| 30.2424  | 37.8683   | 21.8303  | 21.9294   | 21.3841   | 23.7621   |
| 24.0516  | 23.574    | 23.2329  | 22.9952   | 19.5336   | 24.1161   |
| 14.0214  | 10.5688   | 13.1833  | 12.8744   | 14.4437   | 13.7639   |
| 0        | 0.156069  | 0        | 0         | 0.0375885 | 0.039301  |
| 0        | 0         | 0        | 0         | 0         | 0         |
| 0        | 0         | 0        | 0         | 0         | 0         |
| 0        | 0         | 0        | 0         | 0         | 0         |
| 94.6186  | 108.721   | 117.377  | 107.969   | 117.427   | 76.4902   |
| 1.63969  | 1.64037   | 2.05306  | 1.87458   | 1.6716    | 1.58391   |
| 0        | 0         | 0        | 0         | 0         | 0         |
| 0        | 0.0795177 | 0        | 0         | 0         | 0         |
| 0        | 0         | 0        | 0         | 0         | 0         |
| 9.39122  | 14.7074   | 10.8191  | 11.2651   | 8.86462   | 14.4689   |
| 165.326  | 204.363   | 137.134  | 145.957   | 161.831   | 183.794   |
| 48.2328  | 76.568    | 66.13    | 44.1587   | 48.9675   | 53.1856   |
| 1.30986  | 1.75352   | 1.9356   | 1.78351   | 1.96782   | 2.01819   |
| 7.95344  | 6.32      | 7.80986  | 6.99371   | 6.38432   | 9.35264   |
| 2.55128  | 2.07584   | 1.38776  | 2.39346   | 2.08283   | 1.19498   |
| 0        | 0         | 0        | 0         | 0         | 0         |
| 9.73129  | 9.14237   | 7.40002  | 9.97164   | 6.42117   | 7.25768   |
| 14.6769  | 15.2083   | 13.0799  | 13.2455   | 9.8369    | 11.777    |
| 11.5086  | 9.36914   | 7.2117   | 10.7026   | 7.53593   | 9.13615   |
| 4.44808  | 3.70074   | 4.34413  | 3.76468   | 3.23547   | 3.78601   |
| 2.59137  | 0.93192   | 1.64842  | 2.75171   | 1.15146   | 0.758464  |
| 5.24236  | 4.85199   | 3.58541  | 5.22729   | 4.16308   | 3.28183   |
| 6.64754  | 3.64505   | 6.88123  | 7.29527   | 7.73883   | 7.52213   |
| 7.15934  | 7.23029   | 8.04651  | 7.438     | 10.253    | 6.56643   |
| 0        | 0         | 0        | 0.0668218 | 0.0713793 | 0         |
| 0.672584 | 0.58857   | 0.745535 | 0.867744  | 0.405531  | 0.868204  |
| 72.9427  | 73.7062   | 77.4865  | 75.6317   | 82.0142   | 68.4726   |
| 8.22348  | 6.68169   | 9.64396  | 8.15848   | 7.91007   | 8.1891    |
| 0.542305 | 0.871287  | 0.617521 | 1.11874   | 1.51462   | 0.844476  |
| 12.0449  | 7.96299   | 11.2541  | 9.33143   | 12.7282   | 11.2237   |
| 8.93562  | 5.37733   | 8.58517  | 9.5131    | 7.67075   | 8.62718   |
| 0        | 0         | 0        | 0         | 0         | 0.0341919 |
| 0.587196 | 0.540541  | 0.441044 | 0.213069  | 0.292631  | 0.339958  |
| 1.84864  | 12.6786   | 1.81013  | 3.10684   | 2.41363   | 2.20815   |

|           |           |            |           |           |           |
|-----------|-----------|------------|-----------|-----------|-----------|
| 18.4844   | 15.9489   | 18.4293    | 19.3176   | 21.9034   | 17.8693   |
| 15.6918   | 12.8532   | 21.233     | 16.1915   | 16.2294   | 16.8966   |
| 47.646    | 46.4977   | 54.0693    | 56.9076   | 53.5158   | 58.196    |
| 2.38838   | 1.82126   | 1.47642    | 2.02922   | 2.01709   | 2.54968   |
| 32.0353   | 32.7602   | 35.0794    | 38.5745   | 34.2528   | 23.3832   |
| 43.4788   | 43.1967   | 41.2494    | 44.2157   | 41.7881   | 43.6173   |
| 0         | 0         | 0.00632086 | 0         | 0         | 0.0253351 |
| 6.52248   | 5.20129   | 4.51769    | 4.70514   | 4.51134   | 4.14705   |
| 3.23956   | 5.06065   | 3.77181    | 3.91834   | 3.19627   | 5.25154   |
| 19.1446   | 18.9772   | 18.1466    | 18.0755   | 15.4958   | 18.4204   |
| 0         | 0.0809296 | 0.0228573  | 0         | 0.0985786 | 0.122157  |
| 11.0775   | 9.60153   | 10.6532    | 10.3902   | 11.7184   | 11.1999   |
| 21.2958   | 21.2319   | 26.1933    | 22.2834   | 19.2131   | 18.8512   |
| 0.827586  | 0.666603  | 0.188274   | 0.39414   | 0.461119  | 0.817521  |
| 15.4503   | 14.4192   | 14.0191    | 13.8109   | 12.709    | 13.8646   |
| 9.40477   | 9.67626   | 7.46002    | 8.95562   | 9.39029   | 9.03732   |
| 0.124274  | 0.0593184 | 0.0335075  | 0         | 0.0963389 | 0.033576  |
| 0         | 0         | 0          | 0         | 0         | 0         |
| 1.52457   | 2.58682   | 1.69509    | 7.28623   | 2.6873    | 4.05051   |
| 0         | 0.129704  | 0.0366331  | 0.0328669 | 0         | 0         |
| 3.7102    | 2.65643   | 5.14476    | 4.23117   | 2.87621   | 3.43685   |
| 4.43199   | 4.42958   | 3.22671    | 2.77007   | 2.91784   | 3.9666    |
| 3.72227   | 6.76519   | 7.17976    | 5.92212   | 5.54916   | 3.94534   |
| 6.55974   | 4.54911   | 4.11149    | 4.21219   | 2.8621    | 3.47964   |
| 14.5533   | 13.9553   | 15.5239    | 15.9539   | 15.9999   | 14.0243   |
| 0.284392  | 0.610857  | 0.306718   | 0.963144  | 0.220465  | 0.307345  |
| 0         | 0         | 0          | 0         | 0         | 0         |
| 21.7093   | 21.5745   | 26.5417    | 26.0914   | 25.182    | 19.9547   |
| 0         | 0         | 0          | 0         | 0         | 0         |
| 0.896181  | 0.325661  | 0.514448   | 0.59716   | 0.474927  | 0.543185  |
| 0.156194  | 0.111832  | 0.126342   | 0.226705  | 0         | 0.253201  |
| 0.0593951 | 0         | 0          | 0         | 0         | 0         |
| 0         | 0         | 0          | 0         | 0         | 0         |
| 9.50459   | 8.49132   | 9.78018    | 9.91919   | 9.87847   | 9.13547   |
| 0         | 0         | 0          | 0         | 0         | 0         |
| 15.5652   | 23.0329   | 10.7181    | 13.0445   | 10.5833   | 6.91131   |
| 0         | 0.0535617 | 0          | 0         | 0.057993  | 0         |
| 57.3322   | 83.382    | 56.5219    | 63.8875   | 59.2616   | 75.1598   |
| 0         | 0         | 0          | 0         | 0         | 0         |
| 24.3995   | 21.3626   | 20.5302    | 20.6132   | 18.7627   | 20.7312   |
| 0.382318  | 0.32392   | 0.013141   | 0.328325  | 0.0876794 | 0.174904  |
| 8.72095   | 6.33051   | 5.19216    | 5.77921   | 5.98191   | 5.93321   |
| 39.207    | 39.4667   | 43.9166    | 33.0788   | 33.1065   | 33.1336   |

|           |            |           |            |            |           |
|-----------|------------|-----------|------------|------------|-----------|
| 31.6512   | 28.3396    | 31.2778   | 32.8994    | 34.6686    | 32.131    |
| 0         | 0          | 0         | 0          | 0          | 0         |
| 0         | 0.0695996  | 0         | 0          | 0          | 0.0262636 |
| 4.56305   | 3.17123    | 2.00788   | 3.36006    | 2.57519    | 2.48047   |
| 0.0207183 | 0.00507987 | 0.0145268 | 0.00514896 | 0.00825021 | 0.0345697 |
| 318.404   | 425.247    | 335.197   | 358.2      | 380.969    | 317.839   |
| 4.96107   | 5.84151    | 6.75578   | 4.9091     | 3.75374    | 3.7289    |
| 8.09429   | 9.32297    | 11.1589   | 8.93896    | 10.8036    | 12.3227   |
| 6.84968   | 6.59325    | 7.14986   | 6.4354     | 7.62345    | 5.96656   |
| 1.26398   | 1.28422    | 1.73943   | 1.72773    | 1.45838    | 1.72876   |
| 0         | 0          | 0         | 0          | 0          | 0         |
| 25.7811   | 28.0586    | 33.0612   | 29.7182    | 30.2243    | 30.4119   |
| 19.8521   | 20.6131    | 19.3946   | 20.0201    | 19.0871    | 14.8369   |
| 10.7455   | 8.53848    | 9.70042   | 7.10334    | 9.46901    | 7.45536   |
| 7.88771   | 5.05776    | 6.06632   | 6.27024    | 5.43936    | 7.54866   |
| 21.4476   | 21.0873    | 20.8565   | 21.0751    | 19.5898    | 21.2459   |
| 44.2204   | 31.2827    | 44.2111   | 43.5775    | 47.007     | 42.856    |
| 8.19402   | 5.97078    | 7.55636   | 6.97981    | 7.64733    | 8.08995   |
| 1.41851   | 1.16228    | 1.07705   | 1.15559    | 0.68815    | 0.774848  |
| 4.45361   | 4.24065    | 4.94685   | 4.96472    | 4.77657    | 5.41099   |
| 6.22456   | 6.22921    | 6.11586   | 5.79242    | 8.18712    | 7.7917    |
| 0         | 0          | 0.101094  | 0          | 0          | 0         |
| 0         | 0          | 0         | 0          | 0          | 0         |
| 37.3948   | 49.6141    | 25.4319   | 28.0174    | 12.2434    | 8.72039   |
| 0         | 0          | 0         | 0          | 0          | 0         |
| 24.7167   | 19.3899    | 21.5663   | 20.6086    | 24.5127    | 21.9969   |
| 3.81139   | 2.55364    | 2.60213   | 2.94363    | 2.3583     | 3.23097   |
| 0.174693  | 0.22793    | 0.0953717 | 0.147558   | 0.157623   | 0.164804  |
| 0.467633  | 0.357225   | 0.6215    | 0.252229   | 0.140521   | 0.140959  |
| 26.8162   | 18.7066    | 26.1808   | 23.3157    | 29.092     | 24.8712   |
| 11.0971   | 10.3852    | 10.109    | 11.0362    | 9.6574     | 9.77497   |
| 9.29595   | 7.28656    | 8.2565    | 9.95401    | 10.0324    | 7.83016   |
| 7.35358   | 9.23468    | 8.0253    | 9.69911    | 7.82703    | 7.80519   |
| 5.57564   | 7.66755    | 9.47701   | 8.14615    | 6.1693     | 5.45494   |
| 8.33416   | 7.24528    | 8.51785   | 8.32124    | 7.86588    | 8.43091   |
| 5.43495   | 4.09699    | 6.7198    | 5.74541    | 5.35342    | 8.51239   |
| 0         | 0          | 0         | 0          | 0          | 0         |
| 0         | 0          | 0         | 0          | 0          | 0         |
| 0         | 0.0205874  | 0.0232586 | 0.0626022  | 0.0668719  | 0.0233062 |
| 0.435405  | 0.207828   | 0.586984  | 0.631963   | 0.225022   | 0.470548  |
| 16.8057   | 14.9107    | 14.1031   | 16.6189    | 14.267     | 16.1012   |
| 5.86028   | 7.16084    | 5.93976   | 6.0883     | 5.41089    | 5.68036   |
| 4.18447   | 3.11828    | 3.49986   | 3.5532     | 2.38325    | 2.60719   |

|           |           |           |           |           |           |
|-----------|-----------|-----------|-----------|-----------|-----------|
| 0.344176  | 0.301185  | 0.0927991 | 0.208146  | 0.10376   | 0.108487  |
| 4.79372   | 4.50247   | 3.74738   | 5.12829   | 3.7955    | 3.98262   |
| 158.186   | 178.896   | 172.433   | 175.76    | 182.144   | 159.887   |
| 0         | 0         | 0         | 0         | 0         | 0         |
| 0.0319678 | 0.0228883 | 0.0258581 | 0.0231996 | 0.0247819 | 0.0259109 |
| 0.0533803 | 0.343974  | 0.129535  | 0.116217  | 0.124144  | 0.173066  |
| 145.736   | 143.209   | 167.165   | 155.235   | 178.104   | 133.707   |
| 3.79657   | 3.22443   | 4.0452    | 3.83833   | 3.65357   | 4.35059   |
| 0.0168737 | 0         | 0         | 0.0122455 | 0.0130807 | 0         |
| 0         | 0         | 0         | 0         | 0         | 0         |
| 17.132    | 16.7116   | 16.0588   | 17.8846   | 18.6884   | 17.7692   |
| 0         | 0         | 0         | 0         | 0         | 0         |
| 29.193    | 26.8495   | 27.626    | 31.4482   | 31.4018   | 28.8483   |
| 72.1869   | 73.7796   | 84.9584   | 86.2569   | 67.0086   | 67.4798   |
| 34.6343   | 33.5525   | 35.0577   | 38.1407   | 36.3555   | 33.894    |
| 7.36008   | 5.3278    | 4.94659   | 4.2122    | 4.65682   | 4.56192   |
| 2.57192   | 1.94593   | 2.59678   | 2.29009   | 2.14227   | 2.86082   |
| 21.7088   | 18.3384   | 20.0248   | 19.8045   | 22.035    | 19.8672   |
| 43.0966   | 37.0755   | 35.941    | 41.5819   | 33.0466   | 36.1228   |
| 0         | 0         | 0         | 0         | 0         | 0         |
| 0         | 0         | 0         | 0         | 0         | 0         |
| 0.0125303 | 0.0179429 | 0.0709483 | 0.0454672 | 0.0679956 | 0.0715165 |
| 6.31562   | 4.90332   | 4.4896    | 4.44277   | 4.56557   | 4.79713   |
| 7.76358   | 6.01004   | 5.1711    | 4.38803   | 6.37014   | 5.33502   |
| 0.014853  | 0         | 0         | 0         | 0.0230285 | 0         |
| 1.16702   | 1.48544   | 0.891533  | 0.705771  | 0.301563  | 0.840806  |
| 70.1625   | 74.3192   | 70.2678   | 69.7709   | 56.3705   | 61.9531   |
| 18.6607   | 20.3877   | 22.2046   | 21.314    | 16.8474   | 20.075    |
| 2.37451   | 3.27494   | 4.12444   | 3.08367   | 3.95279   | 2.99836   |
| 0.674236  | 0.618511  | 0.357903  | 0.443433  | 0.44101   | 0.700192  |
| 0.421538  | 0.418716  | 0.213108  | 0.388467  | 0         | 0.253089  |
| 0         | 0         | 0         | 0         | 0         | 0         |
| 0         | 2.21063   | 0         | 2.24069   | 0         | 2.50257   |
| 0.952854  | 0.717211  | 1.10671   | 1.18797   | 0.681847  | 0.871336  |
| 5.03287   | 3.1607    | 5.39788   | 4.61854   | 4.72049   | 5.5203    |
| 19.0633   | 20.2358   | 22.0386   | 24.6518   | 19.1238   | 20.603    |
| 18.3734   | 13.3069   | 14.0954   | 16.7126   | 22.7303   | 13.5012   |
| 233.589   | 308.253   | 265.752   | 254.176   | 240.957   | 248.955   |
| 9.17363   | 7.80548   | 7.52136   | 8.32418   | 8.08958   | 8.55995   |
| 21.785    | 17.4954   | 15.7853   | 16.5984   | 16.905    | 16.9492   |
| 0.0859482 | 0         | 0.0347609 | 0         | 0         | 0.0348319 |
| 61.3519   | 56.135    | 56.3291   | 55.0095   | 47.7421   | 52.0269   |
| 11.9268   | 7.69112   | 9.19602   | 9.39177   | 9.44627   | 9.64356   |

|           |          |           |           |           |          |
|-----------|----------|-----------|-----------|-----------|----------|
| 0.565903  | 0.63452  | 0.74276   | 0.976347  | 0.744956  | 0.986601 |
| 1.77613   | 1.00726  | 1.89185   | 1.72288   | 2.11303   | 2.00975  |
| 12.672    | 11.1432  | 12.9951   | 12.3415   | 12.7143   | 12.7986  |
| 1.40383   | 0.890095 | 0.443272  | 1.7538    | 0.679131  | 2.27331  |
| 4.90794   | 4.11137  | 5.68693   | 5.78789   | 4.83198   | 5.46981  |
| 0         | 0        | 0         | 0         | 0         | 0        |
| 19.1858   | 22.7252  | 22.3055   | 26.489    | 15.8296   | 20.401   |
| 29.0831   | 40.4233  | 31.9624   | 32.7541   | 25.5191   | 30.7156  |
| 21.0435   | 20.7483  | 22.9372   | 18.8913   | 19.6702   | 17.8637  |
| 5.5825    | 5.41811  | 7.82699   | 7.33739   | 5.98657   | 4.77618  |
| 0         | 0        | 0         | 0         | 0         | 0        |
| 0.190754  | 0.239009 | 0.308595  | 0.346085  | 0.258783  | 0.231919 |
| 0         | 0        | 0         | 0.0894877 | 0         | 0        |
| 287.926   | 268.31   | 282.852   | 292.058   | 296.201   | 230.362  |
| 11.4537   | 11.6673  | 13.2232   | 12.0148   | 9.88807   | 11.6467  |
| 0         | 0.101323 | 0.0572351 | 0         | 0.109706  | 0        |
| 141.507   | 148.623  | 147.2     | 162.428   | 171.995   | 145.05   |
| 10.2517   | 7.74401  | 7.72421   | 8.89271   | 12.3898   | 15.0044  |
| 1.05695   | 2.21279  | 2.01218   | 3.01318   | 2.783     | 2.43487  |
| 46.8874   | 43.4253  | 42.7237   | 46.6958   | 48.8397   | 47.7089  |
| 1.63717   | 1.15048  | 1.7509    | 1.8757    | 0.781084  | 0.604522 |
| 0         | 0        | 0         | 0         | 0         | 0        |
| 0         | 0        | 0         | 0         | 0         | 0        |
| 0.155535  | 0.334081 | 0.880666  | 0.790124  | 0.36172   | 0        |
| 2.58918   | 1.48818  | 1.20531   | 1.56013   | 1.73084   | 1.47293  |
| 0         | 0.253441 | 0         | 0         | 0.274409  | 0.573821 |
| 0         | 0        | 0         | 0         | 0         | 0        |
| 156.485   | 174.821  | 173.522   | 154.018   | 168.125   | 149.868  |
| 0         | 0        | 0         | 0         | 0.0381524 | 0        |
| 5.64088   | 4.92263  | 5.46866   | 5.23862   | 5.5002    | 5.76312  |
| 2.12105   | 2.66846  | 1.12745   | 3.25449   | 2.06709   | 2.5051   |
| 0.180802  | 0.158217 | 0.227495  | 0.218685  | 0.202454  | 0.211677 |
| 1.51831   | 1.64051  | 1.81987   | 1.72292   | 1.64783   | 1.65578  |
| 40.4927   | 41.4337  | 35.3615   | 39.9665   | 37.4737   | 31.1443  |
| 1.0086    | 0.401157 | 0.144812  | 0.230975  | 0.246729  | 0.201539 |
| 0.0605154 | 0.173311 | 0.0978993 | 0.0878342 | 0.0938249 | 0.147149 |
| 9.55823   | 6.19026  | 8.15654   | 7.71244   | 8.73153   | 8.80623  |
| 6.07665   | 5.26851  | 4.80008   | 6.16707   | 6.14601   | 6.19514  |
| 48.6306   | 39.7657  | 43.9702   | 47.8196   | 48.3616   | 46.8748  |
| 7.42789   | 6.74388  | 6.75046   | 6.55957   | 5.82759   | 6.29257  |
| 35.2472   | 32.2387  | 45.6093   | 29.6182   | 38.5327   | 32.3888  |
| 0         | 0        | 0         | 0         | 0         | 0        |
| 42.285    | 38.7414  | 30.3653   | 42.2493   | 36.5771   | 34.4685  |



|           |           |           |           |           |           |
|-----------|-----------|-----------|-----------|-----------|-----------|
| 17.5138   | 16.1826   | 15.0911   | 20.8178   | 17.0641   | 20.86     |
| 86.5426   | 59.7654   | 68.6764   | 66.8965   | 98.1547   | 30.8281   |
| 0         | 34.1523   | 38.5836   | 69.2335   | 36.9778   | 77.3249   |
| 1.89101   | 1.74069   | 1.9185    | 2.35625   | 2.29862   | 2.84863   |
| 0         | 0         | 0         | 0         | 0         | 0         |
| 0.527037  | 0.616583  | 0.715902  | 0.648914  | 0.0741145 | 0.363233  |
| 32.0313   | 26.9952   | 29.0659   | 30.8836   | 32.7523   | 29.9698   |
| 2.85707   | 2.41619   | 3.33256   | 3.03501   | 4.20499   | 0.771916  |
| 0         | 0         | 0         | 0         | 0         | 0         |
| 0.0802805 | 0.0287397 | 0         | 0.058261  | 0         | 0.06507   |
| 0         | 0         | 0         | 0         | 0         | 0         |
| 281.669   | 288.855   | 298.343   | 272.196   | 259.664   | 297.126   |
| 9.44089   | 8.84789   | 8.79529   | 9.61328   | 9.99467   | 9.51273   |
| 0.142538  | 0.153081  | 0         | 0.103442  | 0.165746  | 0.0577658 |
| 1.54121   | 0.735651  | 0.831102  | 1.37946   | 1.19477   | 1.37412   |
| 26.4143   | 21.6048   | 26.1191   | 25.1995   | 35.3538   | 19.9082   |
| 0.229099  | 0.410076  | 0.463283  | 0.623479  | 0.177601  | 0.371384  |
| 2.8562    | 3.66996   | 3.60247   | 2.98727   | 1.75955   | 2.38314   |
| 17.2295   | 12.1134   | 11.7968   | 15.2465   | 16.9402   | 12.5615   |
| 11.8187   | 11.4598   | 11.3767   | 11.0118   | 8.49539   | 10.3688   |
| 0.121194  | 0.173546  | 0.147047  | 0.2492    | 0.140928  | 0.130976  |
| 1.05822   | 0.396872  | 0.0815211 | 0.767969  | 0.585963  | 0.776034  |
| 22.1059   | 25.4941   | 23.0802   | 25.2094   | 14.6042   | 20.7453   |
| 4.40293   | 4.86535   | 4.70921   | 5.65837   | 5.01353   | 4.95251   |
| 2.16799   | 1.80013   | 2.4677    | 1.98288   | 1.95313   | 2.08375   |
| 1.89499   | 1.58523   | 1.25992   | 2.1973    | 1.16537   | 1.35598   |
| 4.74786   | 3.86259   | 4.43244   | 4.56234   | 3.85519   | 4.74571   |
| 13.5603   | 10.864    | 13.6916   | 13.2361   | 11.1247   | 13.7085   |
| 3.93302   | 2.63248   | 4.03901   | 3.74512   | 4.75056   | 2.62164   |
| 30.3699   | 31.896    | 31.225    | 31.168    | 23.7914   | 24.0227   |
| 0.0751118 | 0.286819  | 0.263278  | 0.25438   | 0.0582278 | 0.365284  |
| 0         | 0.072333  | 0.0817182 | 0.0733167 | 0         | 0         |
| 0         | 0         | 0         | 0         | 0         | 0         |
| 2.08626   | 1.08572   | 0.663029  | 1.27538   | 1.43233   | 2.98826   |
| 10.3013   | 10.2216   | 10.9301   | 11.7269   | 12.542    | 12.0701   |
| 2.53435   | 1.83346   | 0.650942  | 1.85635   | 0.767265  | 1.77426   |
| 177.528   | 166.516   | 186.056   | 172.889   | 185.722   | 163.438   |
| 17.3263   | 12.1115   | 14.552    | 13.7636   | 11.9533   | 14.7474   |
| 1.23604   | 0.844279  | 1.1062    | 0.982112  | 1.01785   | 1.19396   |
| 0         | 0         | 0         | 0         | 0         | 0         |
| 0.175094  | 0.376092  | 0.56652   | 0.381207  | 0.95015   | 0.14192   |
| 3.83859   | 3.74501   | 3.8556    | 2.96941   | 1.96202   | 2.94035   |
| 28.0054   | 21.0077   | 27.4789   | 23.2644   | 34.688    | 24.5759   |

|           |            |          |          |          |          |
|-----------|------------|----------|----------|----------|----------|
| 12.7995   | 14.213     | 10.7441  | 13.1497  | 11.4825  | 16.0709  |
| 39.8021   | 41.7528    | 44.0548  | 39.8101  | 52.5844  | 52.149   |
| 9.51898   | 8.00692    | 8.74967  | 9.9153   | 7.51258  | 8.20105  |
| 10.8809   | 9.2728     | 13.0543  | 10.1582  | 12.6919  | 9.24928  |
| 0         | 0          | 0        | 0        | 0        | 0        |
| 0.0220639 | 0.195029   | 0        | 0        | 0        | 0.35767  |
| 0         | 0.0176862  | 0        | 0        | 0        | 0        |
| 0.324426  | 0.696849   | 0.262422 | 1.64809  | 0.754501 | 0.525917 |
| 1.06345   | 0.581375   | 0.811806 | 0.798064 | 0.882541 | 1.22609  |
| 0.805434  | 0.69201    | 0.586349 | 0.49684  | 0.624385 | 0.42434  |
| 0         | 0          | 0        | 0        | 0        | 0        |
| 0.353522  | 0.582164   | 0.915061 | 0.949262 | 0.548111 | 0.974241 |
| 0         | 0          | 0        | 0        | 0        | 0        |
| 0.251428  | 6.18E-11   | 0.404142 | 0.197315 | 0.368547 | 0.335404 |
| 0.360657  | 0.322779   | 0.36466  | 0.458037 | 0.489277 | 0.438487 |
| 0         | 0          | 0        | 0        | 0        | 0        |
| 0         | 0          | 0        | 0        | 0        | 0        |
| 26.4881   | 24.8695    | 28.9444  | 28.2635  | 20.6681  | 24.6441  |
| 28.8851   | 35.8966    | 33.9859  | 34.5025  | 31.7185  | 32.2875  |
| 26.3056   | 22.1517    | 22.3646  | 26.4506  | 27.2797  | 23.3083  |
| 1.29552   | 0.952607   | 1.4397   | 1.27653  | 1.36537  | 1.07202  |
| 0.220435  | 0.493948   | 0.285291 | 0.290326 | 0.151896 | 0.207897 |
| 0.337606  | 0.527387   | 0.471688 | 0.245007 | 0.309302 | 0.174135 |
| 321.074   | 0.00039509 | 276.914  | 247.27   | 168.761  | 292.298  |
| 25.0279   | 27.5562    | 25.3322  | 25.9204  | 25.6169  | 23.6668  |
| 0         | 0          | 0        | 0        | 0        | 0        |
| 0         | 0          | 0        | 0        | 0        | 0        |
| 0.931343  | 0.26673    | 0.47084  | 0.490022 | 0.306846 | 0.150977 |
| 0         | 0          | 0        | 0        | 0        | 0        |
| 20.2598   | 28.2143    | 17.6484  | 17.9343  | 21.5738  | 12.2708  |
| 7.99945   | 8.34712    | 10.7147  | 8.97333  | 8.51466  | 9.34782  |
| 34.1816   | 30.4802    | 25.6522  | 29.2717  | 33.7588  | 35.415   |
| 9.51277   | 10.6124    | 9.84205  | 9.5794   | 9.46102  | 9.05526  |
| 0         | 0          | 0        | 0        | 0        | 0        |
| 0         | 0          | 0        | 0        | 0        | 0        |
| 0         | 0          | 0        | 0        | 0        | 0        |
| 426.847   | 628.985    | 567.405  | 443.411  | 473.77   | 672.789  |
| 13.3317   | 17.6351    | 10.6661  | 8.16743  | 6.12772  | 7.27815  |
| 0.98824   | 0.683159   | 1.15672  | 1.14936  | 1.16215  | 1.36692  |
| 10.5377   | 11.0154    | 10.8535  | 11.0632  | 10.1295  | 8.54114  |
| 51.4336   | 51.8882    | 57.0507  | 49.8187  | 49.1416  | 52.6399  |
| 17.3603   | 14.3226    | 25.3915  | 25.8542  | 16.4027  | 15.2824  |
| 0.390978  | 0.492268   | 2.12E-67 | 0.308197 | 0.622448 | 0.247314 |

|           |           |            |           |           |           |
|-----------|-----------|------------|-----------|-----------|-----------|
| 0.892615  | 0.263157  | 0.552131   | 0.647787  | 0.773377  | 0.808611  |
| 0         | 0         | 0          | 0         | 0         | 0         |
| 10.119    | 10.8053   | 9.36991    | 10.6077   | 6.77884   | 9.82522   |
| 63.3401   | 65.1075   | 60.7378    | 64.0924   | 69.5475   | 73.6329   |
| 0.0999874 | 0.0245156 | 0.00692414 | 0.0751683 | 0.0398158 | 0.0702502 |
| 13.8112   | 13.3237   | 13.7386    | 10.2342   | 10.61     | 15.6755   |
| 0.0363088 | 0.0519929 | 0          | 0.02635   | 0.0562944 | 0.0588591 |
| 0.161779  | 0.193051  | 0.13086    | 0.0782707 | 0.0836092 | 0.0874183 |
| 0         | 0         | 0          | 0         | 0         | 0         |
| 0         | 0         | 0          | 0         | 0         | 0         |
| 0.356064  | 0.304663  | 0.344193   | 0.283569  | 0.383938  | 0.399603  |
| 0         | 0         | 0          | 0         | 0         | 0.112757  |
| 0         | 0.0398929 | 0          | 0.0404355 | 0         | 0         |
| 28.5292   | 26.686    | 33.5976    | 29.5748   | 23.0114   | 27.9773   |
| 12.1456   | 20.0556   | 11.9118    | 12.7234   | 7.05739   | 10.192    |
| 0         | 0         | 0.00551565 | 0         | 0         | 0.0110538 |
| 11.3459   | 10.4768   | 11.2044    | 11.6632   | 11.3026   | 11.6712   |
| 9.62255   | 6.70722   | 9.18971    | 8.13241   | 8.4038    | 9.1726    |
| 9.6214    | 8.0075    | 7.88049    | 9.67481   | 8.50286   | 7.70618   |
| 0.382263  | 0.121641  | 0.137424   | 0.339063  | 0.296336  | 0.309837  |
| 12.6531   | 11.8168   | 12.0438    | 11.6084   | 11.1336   | 12.7187   |
| 0         | 0         | 0          | 0         | 0         | 0         |
| 0         | 0         | 0          | 0         | 0         | 0         |
| 14.67     | 12.9592   | 13.3602    | 12.7908   | 13.4996   | 15.3977   |
| 0         | 0         | 0          | 0         | 0         | 0         |
| 37.2728   | 38.7572   | 42.24      | 41.4483   | 42.5564   | 43.6896   |
| 13.0975   | 12.9867   | 13.7459    | 13.7385   | 11.4844   | 11.3118   |
| 13.1545   | 10.8443   | 12.8796    | 12.5245   | 9.56447   | 12.2321   |
| 27.0618   | 31.8832   | 29.1346    | 33.7459   | 47.6447   | 24.174    |
| 1.04513   | 0.941248  | 0.968698   | 1.14502   | 1.22848   | 1.03804   |
| 0.352225  | 0.386685  | 0.446355   | 0.604957  | 0.418677  | 0.352104  |
| 0         | 0         | 0          | 0         | 0         | 0         |
| 2.08E-10  | 2.95E-12  | 7.25E-10   | 3.87E-10  | 9.11E-11  | 1.08E-10  |
| 0.752471  | 1.04384   | 0.6467     | 0.625719  | 0.802075  | 0.546372  |
| 1.37582   | 3.09758   | 3.02065    | 1.71164   | 1.37129   | 1.59307   |
| 18.1452   | 19.2973   | 19.7249    | 20.3948   | 19.8646   | 18.4021   |
| 3.10689   | 2.97849   | 2.61787    | 3.29831   | 2.35508   | 2.89794   |
| 0         | 0.0650309 | 0.0244896  | 0.0219718 | 0.0234704 | 0.0490793 |
| 0.156251  | 0.402743  | 0.303333   | 0.362862  | 0.314934  | 0.202635  |
| 295.213   | 256.333   | 288.975    | 317.182   | 321.708   | 315.018   |
| 8.12859   | 8.59438   | 8.57235    | 9.28677   | 6.76249   | 8.57527   |
| 31.5808   | 24.0244   | 31.2309    | 30.3355   | 37.8908   | 25.0711   |
| 3.01701   | 1.92568   | 2.22774    | 2.5833    | 2.63144   | 1.93604   |

|           |           |           |           |           |           |
|-----------|-----------|-----------|-----------|-----------|-----------|
| 92.5672   | 71.0194   | 91.9871   | 81.1066   | 52.632    | 76.1255   |
| 45.7123   | 45.7326   | 47.1845   | 49.2587   | 48.0844   | 52.3959   |
| 22.3      | 24.6855   | 23.8264   | 25.7501   | 22.0927   | 20.5425   |
| 2.6838    | 7.51254   | 4.14438   | 6.72835   | 3.59363   | 2.76857   |
| 89.9499   | 108.876   | 97.5288   | 91.8686   | 94.1558   | 77.1386   |
| 0.481979  | 0.595276  | 0.575047  | 0.81324   | 0.40166   | 0.468792  |
| 16.3025   | 20.3372   | 16.5171   | 15.7244   | 13.315    | 16.416    |
| 3.81174   | 3.75775   | 4.6528    | 4.61349   | 5.23759   | 4.89728   |
| 0         | 0         | 0         | 0         | 0         | 0         |
| 0         | 0         | 0         | 0         | 0         | 0         |
| 6.03147   | 5.98409   | 6.62114   | 5.87788   | 6.54596   | 4.95855   |
| 0.473504  | 1.35608   | 0.383007  | 0         | 0.367067  | 0.383791  |
| 0.150043  | 0.397659  | 0.0902174 | 0.0386679 | 0.23832   | 4.51E-09  |
| 0.138075  | 0.0988589 | 0.111686  | 0.200407  | 0.107038  | 0         |
| 0         | 0         | 0         | 0         | 0         | 0         |
| 19.2815   | 13.2354   | 17.4448   | 14.113    | 15.4116   | 16.8801   |
| 0         | 0         | 0         | 0         | 0         | 0         |
| 16.9321   | 11.5937   | 14.9623   | 13.8761   | 12.5289   | 15.4855   |
| 1.11054   | 1.02231   | 0.727192  | 1.11297   | 0.614936  | 0.857269  |
| 1.78418   | 1.50099   | 1.29887   | 1.1977    | 1.00276   | 1.37383   |
| 1.05308   | 0.828444  | 1.30398   | 1.09444   | 0.634923  | 0.86409   |
| 12.408    | 10.9368   | 10.6402   | 11.1331   | 9.02693   | 9.49445   |
| 0         | 0         | 0         | 0         | 0         | 0         |
| 0.247084  | 0.0811435 | 0.162128  | 0.0816389 | 0.0859151 | 0.246898  |
| 3.05627   | 3.1172    | 3.40505   | 3.38976   | 3.10687   | 2.99135   |
| 1.23398   | 0.883505  | 0.99814   | 0.646765  | 0.318866  | 0.833484  |
| 40.3705   | 28.4629   | 30.9921   | 34.4896   | 27.3946   | 29.4907   |
| 0.0955058 | 4.88E-13  | 0.0258667 | 0.0463878 | 0.0987425 | 0.0773668 |
| 1.0024    | 1.07651   | 1.16283   | 1.28298   | 1.32908   | 1.13318   |
| 0.234728  | 0.605368  | 0.254241  | 0.292023  | 0.0343888 | 0.191775  |
| 2.88342   | 1.84895   | 1.96734   | 2.07436   | 1.84644   | 2.58082   |
| 17.5688   | 16.4395   | 18.2182   | 18.4647   | 21.9447   | 21.5969   |
| 39.8145   | 35.2725   | 36.591    | 34.1139   | 44.2298   | 30.8      |
| 0.554374  | 0         | 0         | 0         | 0.10744   | 0.224669  |
| 0.0192198 | 0.0206415 | 0.0272063 | 0.0383574 | 0.0335238 | 0.0662077 |
| 25.8415   | 26.0584   | 24.0505   | 26.5862   | 26.365    | 23.9779   |
| 10.2869   | 11.0213   | 9.8384    | 9.10291   | 9.48748   | 10.9127   |
| 0         | 0         | 0         | 0         | 0.0475757 | 0.0497432 |
| 0.287742  | 0.206018  | 0         | 0.208819  | 0.223062  | 0.233224  |
| 0         | 0         | 26.7321   | 23.9837   | 51.2391   | 26.7867   |
| 13.379    | 14.3291   | 14.0014   | 14.2343   | 11.1694   | 14.1509   |
| 24.447    | 27.0322   | 26.6363   | 24.293    | 26.7887   | 20.4441   |
| 8.74526   | 6.62582   | 7.05549   | 7.07338   | 6.98908   | 7.00523   |

|           |           |           |           |           |           |
|-----------|-----------|-----------|-----------|-----------|-----------|
| 0         | 0.0282329 | 0.0318961 | 0         | 0.0305686 | 0         |
| 118.311   | 97.4509   | 106.263   | 118.291   | 134.629   | 72.5673   |
| 67.3061   | 64.7948   | 71.11     | 72.811    | 74.4637   | 62.6527   |
| 29.6518   | 101.938   | 23.9847   | 47.7311   | 41.2526   | 214.894   |
| 5.71829   | 5.682     | 4.68471   | 5.00112   | 4.19137   | 5.09539   |
| 0         | 0         | 0         | 0         | 0         | 0         |
| 11.8151   | 7.77329   | 3.91138   | 7.04329   | 4.75894   | 5.67599   |
| 14.2525   | 14.8577   | 13.742    | 17.7903   | 15.3356   | 15.7346   |
| 0         | 0         | 0         | 34.1626   | 0         | 0         |
| 1.5333    | 1.07821   | 1.07415   | 1.23197   | 1.0719    | 1.10964   |
| 114.446   | 165.782   | 152.96    | 127.609   | 110.019   | 87.8479   |
| 59.0681   | 58.2309   | 53.0681   | 56.2626   | 52.7347   | 58.0125   |
| 3.13139   | 3.97448   | 5.98689   | 5.47467   | 3.19989   | 3.57641   |
| 20.6728   | 21.89     | 21.6781   | 23.1948   | 24.9192   | 21.9622   |
| 8.22787   | 5.82937   | 8.02672   | 7.55395   | 7.48113   | 8.39635   |
| 64.3511   | 56.8363   | 64.7968   | 69.2333   | 69.5876   | 60.4278   |
| 0         | 0         | 0         | 0         | 0.0234511 | 0.0245195 |
| 0         | 0         | 0         | 0         | 0         | 0         |
| 2.74882   | 3.05001   | 3.16673   | 3.27064   | 2.45844   | 3.27691   |
| 0         | 0         | 0.0842242 | 0.15113   | 0.121078  | 0.0421982 |
| 0         | 0         | 0         | 0         | 0         | 0         |
| 0.384129  | 0.0954068 | 0.731439  | 0.264049  | 0.384532  | 0.359021  |
| 147.636   | 249.569   | 193.781   | 134.136   | 120.189   | 308.452   |
| 0         | 0         | 0         | 0         | 0         | 0         |
| 0         | 0         | 0         | 0         | 0         | 0         |
| 23.5382   | 25.6035   | 24.5547   | 23.4263   | 25.3531   | 21.8302   |
| 0         | 0         | 0         | 0         | 0.0553014 | 0         |
| 0.0570415 | 0.0204203 | 0.0230699 | 0         | 0         | 0.023117  |
| 0         | 0         | 0         | 0         | 0.0340026 | 0         |
| 11.176    | 7.76776   | 8.5777    | 8.49583   | 8.74773   | 8.35364   |
| 0.404491  | 0.37015   | 0.302501  | 0.264926  | 0.53675   | 0.327854  |
| 0         | 0         | 0         | 0         | 0         | 0         |
| 22.2701   | 23.4848   | 25.9734   | 21.9249   | 26.3646   | 24.3474   |
| 2.17273   | 0.0648182 | 3.41737   | 0.284699  | 1.21647   | 1.27189   |
| 2.40181   | 1.59961   | 1.63938   | 1.81044   | 2.46881   | 2.78159   |
| 16.9807   | 11.9756   | 8.07891   | 15.2439   | 8.75821   | 8.56283   |
| 0         | 0         | 0         | 0         | 0         | 0         |
| 21.6017   | 20.1365   | 20.6121   | 21.5916   | 19.7695   | 19.6911   |
| 0         | 0         | 0         | 0         | 0         | 0         |
| 13.771    | 8.40437   | 8.22103   | 9.87225   | 10.5889   | 12.9814   |
| 0.0234314 | 0         | 0         | 0         | 0.0181644 | 0         |
| 7.1985    | 6.2711    | 6.48181   | 7.32722   | 5.7993    | 5.83314   |
| 0         | 0.0301156 | 0.0340232 | 0.0305252 | 0         | 0.0340927 |

|          |          |           |           |          |           |
|----------|----------|-----------|-----------|----------|-----------|
| 76.1827  | 67.3637  | 80.9864   | 78.8326   | 69.0821  | 79.3529   |
| 11.5115  | 9.19609  | 8.4413    | 10.23     | 9.48811  | 9.26537   |
| 14.39    | 10.6532  | 12.0491   | 11.1654   | 10.9984  | 14.7948   |
| 0        | 0.086979 | 0.0982645 | 0         | 0        | 0         |
| 0        | 0        | 0         | 0         | 0        | 0         |
| 6.60641  | 5.13161  | 6.72031   | 6.33709   | 5.41709  | 5.45849   |
| 0.715285 | 0.224057 | 0.28929   | 0.291991  | 0.242594 | 0.144941  |
| 0        | 0        | 0         | 0         | 0        | 0         |
| 58.4421  | 38.4131  | 47.4822   | 48.4461   | 71.5427  | 25.2531   |
| 2.84544  | 1.59821  | 1.98415   | 4.96664   | 1.63535  | 2.96243   |
| 15.6418  | 11.3819  | 13.2995   | 12.782    | 14.9572  | 14.5672   |
| 4.49746  | 4.28605  | 4.76691   | 4.36685   | 2.98156  | 3.68305   |
| 8.64532  | 10.1425  | 8.20065   | 7.91187   | 8.39767  | 8.16114   |
| 18.3044  | 14.4696  | 16.8478   | 18.0421   | 19.4818  | 17.783    |
| 0.817257 | 0.351084 | 0.52885   | 0.474478  | 0.63355  | 0.353288  |
| 0.425021 | 0.304307 | 1.71896   | 0.616891  | 0.98845  | 1.03348   |
| 0        | 0        | 0         | 0         | 0        | 0         |
| 2.23876  | 1.61244  | 0.826004  | 1.71265   | 1.15268  | 1.59104   |
| 0.975857 | 1.10627  | 2.17071   | 1.59344   | 2.14341  | 0.856878  |
| 0        | 0        | 0.0245399 | 0.0440339 | 0        | 0         |
| 0        | 0        | 0         | 0         | 0        | 0         |
| 9.46449  | 7.63638  | 7.93323   | 7.67469   | 8.51318  | 8.7766    |
| 25.5977  | 21.1259  | 26.0179   | 25.9004   | 25.4566  | 26.149    |
| 0.118661 | 0.169918 | 0.159971  | 0.229638  | 0.168644 | 0.0641191 |
| 3.29866  | 3.37443  | 3.75265   | 4.44687   | 3.1255   | 2.9825    |
| 12.9051  | 15.8521  | 16.9457   | 14.057    | 16.6926  | 12.3117   |
| 15.9343  | 17.927   | 17.005    | 17.8847   | 13.9366  | 15.5078   |
| 1.33551  | 1.24007  | 1.14778   | 0.514889  | 0.355886 | 0.389014  |
| 143.052  | 211.516  | 212.054   | 82.6916   | 113.895  | 148.681   |
| 0        | 0        | 0         | 0         | 0        | 0         |
| 0        | 0        | 0         | 0         | 0        | 0         |
| 17.6677  | 17.897   | 14.4118   | 16.7132   | 14.0596  | 16.8299   |
| 23.2965  | 20.4905  | 24.3546   | 22.4687   | 25.6044  | 22.5063   |
| 18.723   | 19.342   | 17.9079   | 18.8081   | 15.254   | 14.7865   |
| 20.1476  | 22.9687  | 19.3454   | 18.8693   | 20.0767  | 9.38868   |
| 25.3216  | 17.6378  | 23.9428   | 23.8173   | 20.8918  | 23.7366   |
| 56.9273  | 47.2099  | 53.2432   | 52.6076   | 49.2531  | 52.1238   |
| 57.792   | 50.7255  | 51.0136   | 52.66     | 57.3407  | 42.5677   |
| 0        | 0        | 0         | 0         | 0        | 0         |
| 1.75016  | 1.97455  | 1.84466   | 1.84765   | 1.19229  | 1.28997   |
| 50.9714  | 40.9981  | 40.2648   | 49.5048   | 54.3105  | 39.7318   |
| 25.1712  | 22.4623  | 25.3768   | 23.6149   | 23.3026  | 23.5954   |
| 7.94264  | 6.7515   | 9.32248   | 8.97721   | 8.04368  | 7.86226   |

|           |           |           |           |           |           |
|-----------|-----------|-----------|-----------|-----------|-----------|
| 16.6991   | 13.3286   | 13.5338   | 12.9912   | 12.0387   | 15.1151   |
| 10.8464   | 19.1255   | 9.65611   | 8.4733    | 6.73343   | 3.55548   |
| 0         | 0         | 0         | 0         | 0         | 0         |
| 196.991   | 240.461   | 257.413   | 243.495   | 274.467   | 261.79    |
| 0         | 0         | 0.0143821 | 0.0129035 | 0         | 0.0288231 |
| 0.0826862 | 0.0986696 | 0         | 0.180021  | 0.0427331 | 0.0893599 |
| 179.397   | 257.879   | 239.035   | 192.166   | 212.417   | 192.216   |
| 6.23157   | 6.69159   | 4.53624   | 6.59136   | 5.35633   | 7.42963   |
| 1.47739   | 1.39779   | 1.37642   | 1.22534   | 0.797617  | 1.38993   |
| 36.285    | 46.2667   | 39.8394   | 41.3714   | 36.7098   | 37.7192   |
| 20.9315   | 19.2638   | 17.5916   | 17.4404   | 16.7423   | 19.0741   |
| 17.5905   | 15.6117   | 12.9645   | 14.6741   | 10.8869   | 11.0411   |
| 15.4066   | 13.6415   | 14.4685   | 14.3283   | 14.569    | 14.3132   |
| 1.21373   | 2.16681   | 2.05469   | 1.02463   | 0.59423   | 2.48278   |
| 40.1352   | 39.0039   | 46.3807   | 39.0548   | 40.6941   | 37.6486   |
| 1.87654   | 2.06429   | 1.88324   | 2.05305   | 1.60783   | 1.24695   |
| 11.9786   | 10.5557   | 9.8995    | 10.9221   | 9.45086   | 10.8389   |
| 18.5323   | 14.3572   | 16.3249   | 12.7315   | 15.0557   | 16.9306   |
| 0         | 0         | 0         | 0         | 0         | 0         |
| 0         | 0         | 0.083315  | 0         | 0.106463  | 0         |
| 1.5495    | 1.24497   | 1.61539   | 1.71171   | 2.08201   | 1.5071    |
| 1.90216   | 1.02935   | 2.59419   | 1.41254   | 1.83466   | 1.57762   |
| 56.5406   | 57.8158   | 51.25     | 52.9124   | 45.2566   | 48.1878   |
| 17.0439   | 16.7161   | 21.3052   | 20.9811   | 22.5554   | 17.752    |
| 2.55742   | 2.44528   | 3.05714   | 2.0028    | 2.75424   | 2.45334   |
| 1.66515   | 1.00154   | 1.25715   | 1.8203    | 1.18729   | 1.2957    |
| 0.169362  | 0         | 0         | 0         | 0         | 0         |
| 0.222274  | 0.134278  | 0.101134  | 0.022684  | 0.0323082 | 0.158345  |
| 7.31281   | 14.1561   | 11.8304   | 5.30704   | 7.13875   | 11.8546   |
| 5.52356   | 3.78922   | 5.17445   | 4.04584   | 4.93918   | 5.51821   |
| 0.227968  | 0.163221  | 0.248939  | 0.253332  | 0.149111  | 0.032482  |
| 0.461671  | 0         | 0.147529  | 0         | 0.0436547 | 0         |
| 11.216    | 10.8029   | 10.274    | 11.1073   | 10.1957   | 10.7955   |
| 0.292062  | 0.295215  | 0.152863  | 0.149615  | 0.0665914 | 0.250651  |
| 41.2223   | 44.0462   | 41.2587   | 41.6219   | 33.5709   | 37.6524   |
| 39.6609   | 27.884    | 37.3463   | 35.8364   | 32.9871   | 35.5127   |
| 15.158    | 19.3747   | 17.8924   | 17.9653   | 13.0881   | 20.1361   |
| 8.82845   | 6.91106   | 6.95619   | 8.72683   | 6.24406   | 6.36025   |
| 1.44352   | 1.77083   | 1.39617   | 1.84837   | 0.872164  | 0.905999  |
| 13.3886   | 11.0679   | 11.0115   | 12.2055   | 10.5808   | 11.7243   |
| 1.07088   | 1.66336   | 2.3061    | 1.20225   | 0.814847  | 0.917513  |
| 19.6792   | 18.1606   | 23.4725   | 21.5874   | 25.669    | 26.638    |
| 0         | 0         | 0         | 0         | 0         | 0         |

|           |           |           |           |           |           |
|-----------|-----------|-----------|-----------|-----------|-----------|
| 0         | 0         | 0         | 0         | 0         | 0         |
| 30.8107   | 35.7836   | 30.4741   | 28.8169   | 42.8825   | 28.3523   |
| 2.31944   | 1.9067    | 1.87615   | 2.17577   | 2.08442   | 2.20028   |
| 9.81726   | 8.52711   | 9.64014   | 9.58433   | 8.40302   | 10.3108   |
| 0.107774  | 0.19291   | 0.0871763 | 0.156427  | 0.0417741 | 0.0873545 |
| 7.99092   | 8.77424   | 9.73386   | 11.0482   | 7.39445   | 8.21774   |
| 0.257327  | 0.210561  | 0.178411  | 0.133391  | 0.256479  | 0.0595921 |
| 0         | 0         | 0         | 0         | 0         | 0         |
| 0.431696  | 0.282078  | 0.416682  | 0.538666  | 0.481337  | 0.454524  |
| 8.90951   | 7.56034   | 5.87214   | 5.37105   | 5.99319   | 5.11997   |
| 42.5005   | 46.0137   | 38.5304   | 40.4587   | 40.7502   | 35.2365   |
| 26.9043   | 27.2775   | 28.139    | 29.2161   | 27.0332   | 25.6952   |
| 0.365706  | 0.364814  | 0.412148  | 0.522381  | 0.455048  | 0.386085  |
| 2.15995   | 1.58614   | 1.79194   | 2.25079   | 2.23257   | 1.70582   |
| 1.11071   | 1.22345   | 0.898428  | 1.24009   | 1.49026   | 1.38502   |
| 0.515545  | 0.529349  | 0.544145  | 0.490104  | 0.491301  | 0.585544  |
| 10.4381   | 10.3303   | 9.02737   | 8.98427   | 6.16714   | 7.85336   |
| 0.0921611 | 0.0329928 | 0.0745473 | 0.0334415 | 0         | 0.11205   |
| 0         | 0         | 0         | 0         | 0         | 0         |
| 29.644    | 25.2771   | 25.4916   | 30.007    | 29.1904   | 28.2264   |
| 0         | 0         | 0         | 0         | 0         | 0         |
| 1.64608   | 1.72721   | 1.62992   | 1.44175   | 1.58409   | 1.70228   |
| 0.291551  | 0.782794  | 0.47166   | 0.423168  | 0.226015  | 0.649858  |
| 0         | 0         | 0         | 0         | 0         | 0         |
| 82.3471   | 80.186    | 59.7719   | 76.583    | 107.073   | 36.8499   |
| 32.0184   | 33.8567   | 32.1866   | 31.4966   | 35.7969   | 35.1026   |
| 55.7395   | 51.6512   | 54.6018   | 54.0718   | 34.9391   | 46.3853   |
| 0         | 0         | 0         | 0         | 0         | 0         |
| 9.01898   | 7.64458   | 9.22577   | 9.93636   | 9.83506   | 8.8374    |
| 0.278254  | 0.531266  | 0.182203  | 0.182702  | 0.184892  | 0.0751781 |
| 43.8287   | 45.9471   | 43.0483   | 44.2667   | 42.4195   | 42.2985   |
| 0.563532  | 0.158946  | 0.497269  | 0.235465  | 0.21181   | 0.304508  |
| 12.8805   | 11.9106   | 14.2763   | 13.9082   | 12.7376   | 14.5842   |
| 0.176772  | 0.126565  | 0.285974  | 0.256573  | 0         | 0.143279  |
| 0         | 0         | 0         | 0         | 0         | 0         |
| 1.82908   | 1.52785   | 1.6028    | 1.65924   | 1.33916   | 1.3178    |
| 0         | 0         | 0         | 0         | 0         | 0         |
| 0         | 0         | 0         | 0         | 0         | 0         |
| 2.44327   | 1.91753   | 2.34686   | 2.1482    | 3.33281   | 1.66615   |
| 18.9651   | 19.7548   | 20.625    | 19.7013   | 18.4882   | 14.6007   |
| 0         | 0         | 0         | 0         | 0         | 0         |
| 0.154377  | 0.082898  | 0         | 0.0210061 | 0.0224389 | 0.0234612 |
| 10.6413   | 7.51971   | 7.04683   | 7.19236   | 7.17274   | 8.86815   |



|           |           |            |           |           |           |
|-----------|-----------|------------|-----------|-----------|-----------|
| 3.16943   | 2.73342   | 3.9038     | 3.86837   | 3.8344    | 3.79501   |
| 0         | 0         | 0          | 0         | 0         | 0         |
| 1.83614   | 1.31464   | 1.06441    | 0.710677  | 0.782872  | 0.892952  |
| 0         | 0         | 2.40E-05   | 0         | 0         | 2.33E-05  |
| 4.66621   | 7.39775   | 4.62814    | 4.55545   | 4.6939    | 6.16846   |
| 0         | 0.172943  | 0          | 0.0280463 | 0.159787  | 0         |
| 16.4194   | 12.717    | 18.0221    | 16.1368   | 14.4281   | 17.7689   |
| 8.96562   | 9.01197   | 9.1836     | 9.99963   | 7.16497   | 9.21206   |
| 25.8929   | 28.5505   | 27.6096    | 32.8557   | 29.0325   | 30.5525   |
| 16.7334   | 16.8021   | 16.9717    | 17.0096   | 13.4425   | 16.6082   |
| 3.11232   | 2.11966   | 2.39469    | 1.65268   | 1.80469   | 2.4406    |
| 7.40228   | 5.69836   | 8.39221    | 6.65589   | 8.11314   | 8.25569   |
| 17.7239   | 15.2641   | 17.9919    | 18.3133   | 17.2145   | 17.6488   |
| 0         | 0.0686877 | 0          | 0         | 0         | 0         |
| 0.672726  | 0.256885  | 0.435323   | 0.35802   | 0.278137  | 0.436213  |
| 64.8515   | 62.939    | 63.5868    | 54.1469   | 87.9943   | 33.5075   |
| 13.922    | 9.59739   | 12.2925    | 11.6516   | 14.5307   | 12.5223   |
| 0         | 0.382295  | 0          | 0.332138  | 0.118264  | 0.185478  |
| 3.20814   | 2.29503   | 3.07246    | 2.91267   | 3.19801   | 2.74932   |
| 85.1137   | 98.4909   | 88.7884    | 90.924    | 79.2822   | 84.2596   |
| 4.73856   | 3.27068   | 5.4047     | 6.185     | 5.74795   | 6.97692   |
| 24.4656   | 19.9431   | 22.0683    | 21.9378   | 19.1856   | 21.866    |
| 24.3629   | 27.1589   | 35.9794    | 33.0208   | 28.5327   | 36.9281   |
| 0.160534  | 0.0459758 | 0.0519412  | 0         | 0.0248897 | 0.0260237 |
| 1959.78   | 2129.8    | 2236.3     | 1447.64   | 1275.08   | 1701.93   |
| 0.61161   | 0.609933  | 0.689072   | 0.586524  | 0.474129  | 0.619663  |
| 5.13E-24  | 1.59E-20  | 0.191629   | 2.12E-31  | 1.51E-24  | 1.32E-20  |
| 0         | 0         | 0          | 0         | 0         | 0         |
| 3.11712   | 3.67591   | 2.07643    | 2.52829   | 1.42144   | 1.93205   |
| 13.9286   | 15.4414   | 18.4747    | 16.521    | 25.2139   | 15.3563   |
| 3.05229   | 1.40753   | 2.72002    | 2.2151    | 2.20576   | 3.0191    |
| 0.367224  | 0.0108764 | 0.0811686  | 0.348529  | 0.173047  | 0.241622  |
| 0.0291765 | 0         | 0.00842824 | 0.0665561 | 0         | 0.065285  |
| 0         | 0.083374  | 0          | 0.0422539 | 0.0451358 | 0.235961  |
| 0         | 0         | 0          | 0         | 0         | 0         |
| 12.2863   | 8.86208   | 14.6334    | 11.8746   | 11.9364   | 13.6593   |
| 8.82725   | 10.5915   | 11.0396    | 8.16239   | 7.97813   | 8.10958   |
| 0.0162818 | 0         | 0          | 0         | 0.0126219 | 0         |
| 0.26872   | 0.160332  | 0.0724541  | 0.162513  | 0.190956  | 0.145204  |
| 16.7934   | 13.3766   | 15.9694    | 17.0487   | 18.6014   | 17.7413   |
| 0         | 0         | 0          | 0         | 0         | 0         |
| 13.6327   | 10.7633   | 11.7447    | 12.2006   | 11.7477   | 12.9116   |
| 13.2212   | 23.8238   | 13.04      | 14.4815   | 12.2687   | 15.3772   |

|           |           |           |           |           |           |
|-----------|-----------|-----------|-----------|-----------|-----------|
| 111.358   | 152.345   | 154.885   | 121.835   | 119.926   | 162.264   |
| 0         | 0         | 0         | 0         | 0         | 0         |
| 0         | 0         | 0         | 0         | 0         | 0         |
| 0         | 0         | 0         | 0         | 0         | 0         |
| 6.07277   | 5.25883   | 6.25181   | 6.28842   | 4.2053    | 5.19456   |
| 0         | 0         | 0         | 0         | 0         | 0         |
| 11.9877   | 11.0439   | 11.1073   | 11.6119   | 9.55556   | 9.78505   |
| 0.131805  | 0.132117  | 0.170583  | 0.0382612 | 0.0408708 | 0.192298  |
| 0         | 0         | 0         | 0.163544  | 0.349398  | 0         |
| 0.254368  | 0.182123  | 0         | 0         | 0         | 0         |
| 8.44669   | 11.0703   | 5.90593   | 8.41564   | 9.32258   | 9.97939   |
| 23.1013   | 25.1615   | 26.0049   | 23.5296   | 17.0745   | 25.7627   |
| 1.54962   | 2.40391   | 0.417819  | 1.68688   | 1.50161   | 1.15135   |
| 0.302969  | 0.253073  | 0.163376  | 0.329805  | 0.336756  | 0.245566  |
| 0         | 0         | 0         | 0.0129128 | 0         | 0         |
| 22.4151   | 20.8263   | 22.7853   | 20.7031   | 22.2872   | 21.3772   |
| 5.41631   | 3.69568   | 4.71046   | 4.69502   | 4.57558   | 4.68074   |
| 0         | 0         | 0         | 0         | 0         | 0.0194806 |
| 9.18431   | 6.70936   | 8.03803   | 8.67404   | 7.63992   | 7.91229   |
| 6.34604   | 3.95004   | 2.0361    | 2.25958   | 4.03707   | 3.88999   |
| 0         | 0         | 0         | 0         | 0         | 0         |
| 0.0377386 | 0         | 0         | 0.0821627 | 0         | 0         |
| 7.09753   | 4.65525   | 5.87441   | 7.18529   | 5.47929   | 5.7989    |
| 0.727917  | 0.613147  | 0.692703  | 0.403965  | 0.63068   | 0.381765  |
| 0         | 0         | 0.018119  | 0.0325124 | 0         | 0.0181561 |
| 60.0813   | 63.9604   | 63.7288   | 61.1646   | 57.2562   | 59.7194   |
| 0.995312  | 0.528721  | 0.129853  | 0.489311  | 0.721802  | 0.468426  |
| 0         | 0         | 0         | 0         | 0         | 0         |
| 16.5854   | 20.1774   | 16.6615   | 15.0793   | 8.29735   | 13.8236   |
| 0         | 0         | 0         | 0         | 0         | 0         |
| 9.96996   | 11.5546   | 12.9772   | 12.362    | 11.266    | 11.3485   |
| 9.47702   | 7.76861   | 8.55662   | 8.31829   | 7.92646   | 9.11413   |
| 10.451    | 11.4514   | 11.9093   | 9.68443   | 8.48539   | 9.93544   |
| 34.7001   | 30.8454   | 33.7457   | 34.3744   | 34.1082   | 33.3619   |
| 8.67978   | 7.41796   | 4.48445   | 5.27957   | 4.67703   | 4.66645   |
| 14.5141   | 13.6394   | 12.8644   | 14.1454   | 12.8128   | 12.3939   |
| 0         | 0         | 0.0261522 | 0         | 0         | 0         |
| 0         | 0         | 0         | 0         | 0         | 0         |
| 0.016157  | 0.0347043 | 0.0522763 | 0.0234508 | 0.0375755 | 0.0130958 |
| 0.12945   | 0.0772364 | 0.174516  | 0.0782868 | 0.167253  | 0.174873  |
| 0.146585  | 0.104952  | 0.11857   | 0.0236398 | 0         | 0.118132  |
| 11.5558   | 11.794    | 10.7912   | 12.8635   | 15.0275   | 15.103    |
| 0         | 0         | 0         | 0         | 0         | 0         |

|           |           |           |           |           |           |
|-----------|-----------|-----------|-----------|-----------|-----------|
| 1.18015   | 1.02569   | 0.750197  | 0.73386   | 0.65326   | 0.819627  |
| 16.2694   | 15.2896   | 15.0081   | 14.0775   | 11.09     | 12.8109   |
| 0.712559  | 0.689403  | 0.577507  | 0.423701  | 0.752641  | 0.840002  |
| 18.3576   | 11.8025   | 15.811    | 15.9586   | 14.3827   | 17.2692   |
| 0         | 8.39331   | 0         | 0         | 0         | 9.50173   |
| 0.538201  | 1.6377    | 2.82971   | 0.979169  | 1.46028   | 1.74492   |
| 0         | 0         | 0         | 0         | 0         | 0         |
| 1.13231   | 0.608759  | 0.870744  | 0.986533  | 0.965564  | 0.825999  |
| 0         | 0         | 0         | 0.0183884 | 0.0196425 | 0.0616123 |
| 9.82561   | 11.7507   | 20.7864   | 12.9293   | 9.70953   | 6.12614   |
| 7.94513   | 10.6791   | 11.7731   | 10.7504   | 7.81721   | 7.24384   |
| 1.60224   | 0.860378  | 0.81001   | 1.01742   | 0.31052   | 0.973999  |
| 0         | 0         | 0         | 0         | 0         | 0         |
| 4.95726   | 5.71974   | 5.79838   | 5.44812   | 5.55706   | 6.17157   |
| 12.8916   | 11.4874   | 12.5587   | 13.2734   | 12.2704   | 13.3545   |
| 28.8067   | 19.7156   | 26.6786   | 27.243    | 30.157    | 27.3217   |
| 0.0265029 | 0.0759024 | 0         | 0.0384673 | 0         | 0.0859261 |
| 54.6862   | 71.8784   | 41.56     | 56.2578   | 34.2309   | 45.5837   |
| 149.489   | 147.552   | 151.437   | 153.406   | 175.016   | 135.382   |
| 0         | 0         | 0         | 0         | 0         | 0         |
| 0         | 0         | 0.170493  | 0.0382409 | 0         | 0         |
| 0.0377772 | 0.0811433 | 0.0305572 | 0         | 0.0292855 | 0.0612394 |
| 5.92325   | 5.37685   | 5.17197   | 5.20815   | 4.41447   | 5.31457   |
| 13.5344   | 9.46149   | 6.81001   | 6.41922   | 7.10489   | 5.96014   |
| 24.4912   | 21.9168   | 30.9108   | 26.5983   | 27.6121   | 29.6356   |
| 4.29406   | 3.77714   | 3.74039   | 4.14411   | 3.43634   | 4.07402   |
| 0         | 0         | 0         | 0         | 0         | 0         |
| 10.2661   | 8.87693   | 11.1359   | 10.0674   | 10.6317   | 11.4787   |
| 15.1725   | 10.3767   | 12.2924   | 15.0896   | 14.1696   | 12.3444   |
| 0         | 0         | 0         | 0         | 0         | 0         |
| 2.39704   | 1.66033   | 2.31786   | 2.43087   | 2.56035   | 2.88584   |
| 0         | 0.157902  | 0         | 0.16005   | 0         | 0         |
| 29.7295   | 25.0842   | 29.432    | 28.6943   | 27.7803   | 28.194    |
| 12.5992   | 12.1048   | 14.2602   | 11.8483   | 17.1675   | 17.4505   |
| 0         | 0         | 0         | 0         | 0         | 0         |
| 0         | 0         | 0         | 0         | 0         | 0         |
| 1.20053   | 0.903221  | 0.985964  | 0.789658  | 0.709139  | 0.845854  |
| 4.36038   | 3.49361   | 3.86293   | 4.06852   | 3.67533   | 3.30984   |
| 4.54427   | 3.35487   | 3.70692   | 3.23628   | 2.94541   | 3.07195   |
| 0         | 0         | 0         | 0         | 0         | 0         |
| 0         | 0.0173209 | 0.0233404 | 0         | 0.0187539 | 0.0196083 |
| 0         | 0         | 0         | 0         | 0         | 0         |
| 13.4179   | 12.2433   | 14.0843   | 12.4551   | 12.337    | 10.7745   |

|           |            |           |           |           |           |
|-----------|------------|-----------|-----------|-----------|-----------|
| 9.47574   | 5.39752    | 6.45047   | 7.21861   | 7.60267   | 7.265     |
| 6.54439   | 4.8028     | 6.61704   | 5.96312   | 6.69396   | 8.76708   |
| 6.16645   | 4.88065    | 5.7936    | 5.90387   | 8.1373    | 7.32127   |
| 7.71155   | 5.76048    | 5.69735   | 5.17483   | 2.47681   | 4.02572   |
| 0.826449  | 0.710066   | 0.401099  | 0.359861  | 0.768811  | 0.803837  |
| 0.354592  | 0.190411   | 0.143411  | 0.193     | 0.206164  | 0.287409  |
| 0         | 0          | 0         | 0         | 0         | 0         |
| 0.0566197 | 0.0405386  | 0.0114496 | 0.0410899 | 0.0493791 | 0.0516287 |
| 23.9541   | 22.1503    | 25.6309   | 25.3511   | 19.5462   | 20.6556   |
| 9.41868   | 6.4777     | 8.56152   | 7.58397   | 6.51778   | 7.97699   |
| 12.998    | 10.5171    | 12.4762   | 13.3627   | 10.2159   | 10.6771   |
| 0         | 0.144573   | 0.489995  | 0.14654   | 0.156534  | 0.163666  |
| 0.143157  | 0.122997   | 0.301072  | 0.145448  | 0.155369  | 0.208861  |
| 0.407852  | 0.525412   | 0.658375  | 0.650658  | 0.630389  | 0.725495  |
| 42.8202   | 49.6131    | 47.5795   | 48.8411   | 45.4344   | 38.8652   |
| 1.8665    | 1.28013    | 0.461415  | 1.53988   | 2.66994   | 1.60095   |
| 3.77935   | 2.15517    | 3.73337   | 3.42236   | 4.01877   | 3.74101   |
| 16.3966   | 11.614     | 12.614    | 13.5732   | 13.3523   | 14.1638   |
| 3138.03   | 6184.6     | 4009.41   | 3511.67   | 2976.74   | 6053.21   |
| 39.8225   | 40.6866    | 42.1003   | 43.7774   | 33.431    | 43.0681   |
| 29.9323   | 22.6106    | 25.8776   | 31.9857   | 28.526    | 26.3756   |
| 1.13182   | 0.438032   | 0.618584  | 0.710383  | 0.118568  | 0.545467  |
| 83.6645   | 78.7883    | 49.1954   | 46.2196   | 32.5481   | 35.0803   |
| 0         | 0          | 0         | 0         | 0         | 0         |
| 5.39678   | 4.81965    | 5.99582   | 5.41411   | 4.3094    | 5.31781   |
| 0.0299442 | 0          | 0.0242213 | 0.0434621 | 0         | 0         |
| 67.0081   | 56.5015    | 63.1186   | 63.8392   | 75.3708   | 59.4726   |
| 0         | 0          | 0         | 0         | 0         | 0         |
| 0         | 0          | 0         | 0         | 0         | 0         |
| 0         | 0          | 0         | 0         | 0         | 0         |
| 0         | 0          | 0         | 0         | 0         | 0         |
| 4.32891   | 3.00051    | 5.01369   | 3.08219   | 3.10886   | 3.92539   |
| 0.245117  | 0.00725994 | 0.0770069 | 0.26354   | 0.190018  | 0.230123  |
| 15.1981   | 12.0467    | 14.6137   | 14.5525   | 15.8872   | 14.4201   |
| 2.49622   | 1.98496    | 2.27433   | 2.43804   | 2.03371   | 2.73978   |
| 2.14491   | 1.9154     | 2.40055   | 1.57802   | 2.57078   | 1.53285   |
| 7.83272   | 5.05199    | 8.00332   | 6.91872   | 5.61654   | 7.27899   |
| 0.69317   | 0.414874   | 0.528358  | 0.678266  | 0.526608  | 0.260967  |
| 0.24411   | 0.196625   | 0.0987279 | 0.199299  | 0.141928  | 0.0247324 |
| 0.142263  | 0.458359   | 0.345221  | 0.464592  | 0.716848  | 0.288272  |
| 5.78529   | 6.41438    | 5.15908   | 4.08369   | 3.88948   | 3.78347   |
| 21.6932   | 22.5695    | 21.7757   | 24.2394   | 19.8503   | 19.892    |
| 0         | 0          | 0         | 0         | 0         | 0         |

|           |           |           |           |           |          |
|-----------|-----------|-----------|-----------|-----------|----------|
| 88.7641   | 67.8481   | 82.1605   | 79.8247   | 64.1838   | 78.4425  |
| 35.0035   | 35.0538   | 31.4338   | 30.4057   | 37.992    | 33.1186  |
| 0         | 0.168587  | 0.0476461 | 0.299165  | 0.182686  | 0.143395 |
| 0         | 0         | 0         | 0         | 0.168523  | 0        |
| 0.310026  | 0.206118  | 0.214949  | 0.449983  | 0.22317   | 0.161541 |
| 0         | 0         | 0         | 0         | 0         | 0        |
| 0         | 0         | 0         | 0         | 0         | 0        |
| 11.9359   | 13.0502   | 10.4017   | 10.9608   | 13.0083   | 14.7673  |
| 8.8463    | 10.8228   | 11.8797   | 11.0635   | 9.88721   | 11.173   |
| 0.613417  | 0.575161  | 0.507403  | 0.385766  | 0.622186  | 0.657887 |
| 0         | 0         | 0         | 0         | 0         | 0        |
| 0         | 0.0946105 | 0         | 0.0958972 | 0         | 0.21421  |
| 0         | 0         | 0         | 0         | 0         | 0        |
| 3.28595   | 2.56741   | 2.19385   | 4.41922   | 1.66789   | 6.88038  |
| 134.106   | 128.401   | 127.022   | 126.953   | 141.601   | 124.085  |
| 0.419213  | 0.253972  | 0.469513  | 0.280828  | 0.374977  | 0.444336 |
| 3.38296   | 2.64235   | 3.239     | 3.66086   | 2.77024   | 2.7429   |
| 33.4459   | 25.3257   | 29.7812   | 29.5979   | 26.9362   | 28.5801  |
| 93.7325   | 100.748   | 94.8431   | 85.325    | 114.784   | 103.075  |
| 0.866266  | 0.628293  | 0.181951  | 1.49685   | 1.01606   | 2.00622  |
| 5.86023   | 6.86292   | 5.73236   | 6.29689   | 6.19812   | 5.11812  |
| 16.718    | 12.4145   | 12.155    | 13.8363   | 10.2395   | 13.396   |
| 8.73477   | 6.93206   | 6.00131   | 6.79722   | 6.40421   | 6.69598  |
| 6.05164   | 6.26658   | 5.26927   | 7.98417   | 5.95652   | 5.8574   |
| 7.47976   | 8.06539   | 6.97499   | 6.60382   | 4.69651   | 7.70432  |
| 1.97429   | 2.60094   | 2.108     | 1.60471   | 1.71416   | 1.53622  |
| 0.654675  | 0.366836  | 0.569845  | 0.325347  | 0.314438  | 0.605617 |
| 12.9213   | 16.2741   | 12.5422   | 17.7742   | 19.7605   | 22.1365  |
| 14.3423   | 10.701    | 13.5262   | 12.3113   | 17.0647   | 14.1011  |
| 1.93146   | 1.00214   | 1.40384   | 1.4017    | 1.32363   | 1.4294   |
| 0.0209443 | 0.0149957 | 0.0338828 | 0.0303993 | 0.048709  | 0        |
| 73.2283   | 86.5317   | 88.924    | 63.2582   | 91.5519   | 79.5543  |
| 0.34232   | 0.334183  | 0.343993  | 0.274764  | 0.381928  | 0.302674 |
| 0.232479  | 0.124838  | 0.141036  | 0.27416   | 0.0901106 | 0.11777  |
| 7.57056   | 5.85183   | 5.9964    | 5.20848   | 4.35161   | 7.39345  |
| 2.71479   | 1.78494   | 1.64375   | 2.57671   | 2.18447   | 2.0941   |
| 18.4893   | 15.6735   | 18.0442   | 19.7219   | 15.0993   | 18.1323  |
| 13.6887   | 13.592    | 15.0208   | 13.8924   | 14.6507   | 15.6106  |
| 27.6479   | 23.6685   | 20.6018   | 21.6025   | 20.8316   | 12.0176  |
| 6.51761   | 5.21049   | 6.04053   | 4.73562   | 4.14467   | 6.20355  |
| 18.3318   | 19.5255   | 14.7164   | 18.7561   | 15.8944   | 15.6328  |
| 2.03722   | 1.50794   | 2.02205   | 1.27149   | 1.51062   | 2.02635  |
| 6.06264   | 3.82493   | 3.78424   | 4.95341   | 3.80671   | 5.02722  |

|           |            |           |           |           |           |
|-----------|------------|-----------|-----------|-----------|-----------|
| 2.81064   | 1.90645    | 2.78201   | 2.76437   | 2.92425   | 2.51792   |
| 0.312328  | 0.139763   | 0.0789486 | 0.127497  | 0.226989  | 0.189864  |
| 0         | 0          | 0         | 0.0294021 | 0         | 0         |
| 48.5787   | 45.5413    | 49.4234   | 54.0385   | 57.9459   | 51.1492   |
| 9.82636   | 8.10013    | 7.70386   | 10.3764   | 12.0725   | 10.8798   |
| 14.0193   | 12.3119    | 13.7647   | 13.7192   | 13.9591   | 12.8582   |
| 0         | 0.00735651 | 0         | 0         | 0         | 0         |
| 0.330684  | 0.157842   | 0.118882  | 0.0799945 | 0.0854506 | 0.0893436 |
| 15.5326   | 12.8045    | 11.0079   | 13.1079   | 12.7868   | 13.2827   |
| 0.821404  | 0.58811    | 0.797301  | 1.17518   | 1.25534   | 1.06524   |
| 29.1413   | 25.6217    | 28.4747   | 29.8784   | 32.8741   | 29.9312   |
| 267.08    | 287.032    | 338.722   | 407.368   | 274.41    | 432.684   |
| 0         | 0          | 0         | 0         | 0         | 0         |
| 214.892   | 179.492    | 218.582   | 185.157   | 217.827   | 234.845   |
| 0         | 0          | 0.380057  | 0         | 0         | 0         |
| 0.261011  | 0          | 0.633379  | 0.37884   | 0.303509  | 0.528895  |
| 8.9108    | 7.33115    | 10.2481   | 9.47669   | 9.19364   | 9.32359   |
| 0.118982  | 0.0425944  | 0         | 0.129521  | 0.27671   | 0         |
| 0         | 0.400645   | 0.223791  | 0.100391  | 0.214477  | 0.448496  |
| 14.4496   | 10.1894    | 11.3349   | 12.5456   | 11.54     | 11.6412   |
| 35.0697   | 30.2092    | 36.0496   | 35.843    | 35.6192   | 34.2026   |
| 0         | 0.0522196  | 0         | 0.070573  | 0         | 0         |
| 37.9646   | 27.6038    | 32.9341   | 33.6346   | 25.8489   | 32.6964   |
| 0.0254514 | 0.148821   | 0.0823491 | 0.388859  | 0.180394  | 0.229216  |
| 0.721278  | 0.937209   | 0.475385  | 0.465284  | 0.600564  | 0.346441  |
| 26.5083   | 19.6815    | 29.2287   | 26.5129   | 26.5905   | 32.6157   |
| 0.579161  | 0.6597     | 0.447178  | 0.372545  | 0.275507  | 0.458761  |
| 1.30529   | 0.983835   | 0.960512  | 1.87356   | 0.861335  | 0.898269  |
| 8.16346   | 9.27359    | 10.0209   | 9.60149   | 9.31887   | 8.93758   |
| 5.01472   | 3.43434    | 4.93811   | 4.43042   | 5.07063   | 4.24132   |
| 0.27589   | 0.040401   | 0.029342  | 0.114661  | 0.0437435 | 0.0130675 |
| 0         | 0          | 0         | 0         | 0         | 0         |
| 0.0545644 | 0          | 0         | 0         | 0         | 0.0884525 |
| 188.627   | 165.467    | 140.011   | 127.905   | 118.615   | 155.743   |
| 1.98959   | 1.94933    | 1.10113   | 1.10191   | 2.35413   | 1.9097    |
| 8.12776   | 10.6038    | 7.46696   | 6.92915   | 6.45327   | 6.21501   |
| 14.8928   | 16.7602    | 13.9073   | 14.7621   | 10.5126   | 12.6599   |
| 12.4283   | 10.8986    | 12.749    | 10.3858   | 11.9035   | 14.2542   |
| 242.323   | 280.779    | 322.029   | 184.927   | 398.1     | 98.2328   |
| 0.373071  | 0.100167   | 0.150885  | 0.372273  | 0.0361513 | 0.0755966 |
| 4.5803    | 4.00036    | 4.4257    | 4.0483    | 3.59217   | 3.50304   |
| 9.1643    | 9.09119    | 5.11306   | 6.16992   | 5.00725   | 5.99607   |
| 0.75765   | 0.738353   | 0.714989  | 0.840034  | 1.07679   | 0.733509  |

|           |           |           |           |           |           |
|-----------|-----------|-----------|-----------|-----------|-----------|
| 0.762183  | 0.727611  | 0.671305  | 0.971041  | 0.393904  | 0.672677  |
| 0.100291  | 0.119678  | 0.162247  | 0.315394  | 0.259158  | 0.162579  |
| 83.3288   | 69.7466   | 83.7749   | 98.5266   | 82.8576   | 87.0162   |
| 10.2306   | 11.9452   | 10.6306   | 12.6217   | 12.4149   | 9.40848   |
| 5.99802   | 3.26696   | 6.22086   | 6.38243   | 5.59112   | 6.50201   |
| 62.4608   | 51.0791   | 50.3796   | 52.6331   | 52.2759   | 50.2907   |
| 2.63739   | 2.54586   | 2.16666   | 1.81573   | 1.45582   | 2.18063   |
| 7.74918   | 6.40056   | 7.32247   | 6.35355   | 5.57096   | 7.8226    |
| 0         | 0         | 0         | 0         | 0         | 0         |
| 3.66997   | 2.77995   | 3.35577   | 2.81776   | 2.92748   | 3.79373   |
| 18.3807   | 17.9048   | 20.2917   | 20.2092   | 17.9388   | 20.5889   |
| 8.70024   | 7.46545   | 8.77723   | 8.6217    | 11.37     | 8.844     |
| 102.026   | 76.0208   | 87.049    | 105.311   | 84.274    | 93.3135   |
| 8.43E-71  | 0         | 1.31E-37  | 0.112618  | 0         | 0         |
| 41.9003   | 39.8933   | 38.6219   | 43.4424   | 28.4571   | 37.2557   |
| 5.79599   | 4.10832   | 5.22741   | 5.06854   | 4.89753   | 5.14414   |
| 2.1393    | 1.34644   | 1.83353   | 1.92822   | 2.41098   | 1.99453   |
| 1.9229    | 1.72977   | 1.95421   | 1.41337   | 1.47155   | 1.79835   |
| 26.6894   | 26.7778   | 28.4609   | 26.7694   | 23.7895   | 27.7364   |
| 14.7739   | 15.6971   | 14.983    | 16.3912   | 9.48375   | 14.6221   |
| 11.1224   | 7.36525   | 7.2987    | 9.3104    | 8.68609   | 8.13377   |
| 1.20107   | 1.17671   | 1.5676    | 1.77205   | 2.02814   | 1.811     |
| 18.9876   | 22.1626   | 25.556    | 25.7609   | 24.0602   | 21.516    |
| 1.16192   | 0.85531   | 0.289083  | 0.437673  | 0.0923506 | 0.193116  |
| 0         | 0         | 0         | 0         | 0.148028  | 0         |
| 0         | 0         | 0         | 0         | 0         | 0         |
| 1.94302   | 1.39117   | 0.698521  | 1.30564   | 1.00417   | 1.8082    |
| 0         | 0         | 0         | 0         | 0         | 0         |
| 25.5722   | 25.0695   | 25.9002   | 24.4112   | 21.5522   | 28.8585   |
| 6.91801   | 6.91671   | 6.19056   | 6.632     | 7.06035   | 6.36231   |
| 5.15012   | 8.41905   | 6.36228   | 4.23019   | 4.555     | 5.95786   |
| 0.0591571 | 0.127066  | 0.047851  | 0.128794  | 0.183438  | 0         |
| 3.69569   | 3.79242   | 4.64341   | 4.35244   | 3.76384   | 3.5809    |
| 0.10986   | 0.0786575 | 0.222158  | 0.119591  | 0.17033   | 0.133568  |
| 0.149466  | 0.21403   | 0.0604501 | 0.0542352 | 0.0579343 | 0.0605737 |
| 0.278501  | 0.405817  | 0.653697  | 0.326144  | 0.293214  | 0.421016  |
| 0.0291026 | 0.0104185 | 0         | 0         | 0         | 0         |
| 0         | 0         | 0         | 0         | 0         | 0         |
| 5.77498   | 5.71135   | 4.53684   | 5.35183   | 3.60725   | 4.78184   |
| 51.8077   | 45.3363   | 35.126    | 54.5278   | 50.4179   | 38.7995   |
| 8.67462   | 10.1168   | 12.8146   | 10.8836   | 8.84565   | 11.1939   |
| 14.7169   | 12.7317   | 14.3529   | 16.3666   | 17.0604   | 17.1501   |
| 2.05687   | 1.35327   | 1.52886   | 1.70787   | 1.29285   | 1.98257   |

|           |          |           |          |          |           |
|-----------|----------|-----------|----------|----------|-----------|
| 6.64124   | 7.81804  | 4.48213   | 4.33179  | 3.26907  | 5.23434   |
| 80.686    | 75.6106  | 77.4288   | 88.5705  | 84.4934  | 82.8947   |
| 6.76076   | 6.44402  | 6.11804   | 6.71564  | 6.55131  | 6.02781   |
| 0         | 0        | 0         | 0        | 0        | 0         |
| 0         | 0        | 0         | 0        | 0        | 0         |
| 10.9124   | 11.4712  | 12.2875   | 11.7186  | 12.1539  | 14.4178   |
| 32.2383   | 25.5059  | 28.167    | 26.5748  | 39.0139  | 23.1285   |
| 0         | 0        | 0         | 0        | 0        | 0         |
| 0         | 0        | 0         | 0        | 0        | 0         |
| 11.6532   | 12.5182  | 8.63525   | 10.2098  | 6.67951  | 9.74826   |
| 4.52997   | 4.17875  | 4.44887   | 8.51339  | 3.41359  | 4.60859   |
| 0         | 0        | 0         | 0        | 0        | 0         |
| 18.2716   | 15.613   | 16.7694   | 16.6126  | 17.7003  | 20.4316   |
| 29.7555   | 26.7474  | 22.3395   | 25.5932  | 27.777   | 28.2187   |
| 127.943   | 209.382  | 178.034   | 142.676  | 223.609  | 136.568   |
| 4.61425   | 5.50619  | 6.02922   | 6.4397   | 4.03563  | 6.80873   |
| 1.30392   | 0.843597 | 1.04201   | 1.03748  | 1.36399  | 0.929536  |
| 2.98455   | 3.02389  | 2.15602   | 2.35665  | 2.03719  | 2.38865   |
| 0.365245  | 0.156905 | 0.324983  | 0.238558 | 0.169886 | 0.266439  |
| 9.9193    | 8.73426  | 8.75293   | 9.54821  | 9.16484  | 8.13847   |
| 17.196    | 15.6734  | 15.1312   | 16.2695  | 16.8572  | 16.6223   |
| 19.4237   | 18.1361  | 19.6056   | 17.5496  | 19.2633  | 22.3922   |
| 0.211592  | 0.159912 | 0.228203  | 0.142182 | 0.197443 | 0.161975  |
| 63.9842   | 57.4763  | 66.3444   | 67.0877  | 64.9779  | 62.169    |
| 46.312    | 51.8452  | 43.5476   | 51.4039  | 47.9031  | 32.2362   |
| 6.07902   | 5.40678  | 6.68861   | 6.52157  | 5.61993  | 6.0596    |
| 21.6009   | 22.7106  | 20.8584   | 22.262   | 21.105   | 21.2896   |
| 56.7552   | 47.2969  | 53.0745   | 54.8371  | 47.4746  | 58.4923   |
| 0.914063  | 0.333642 | 0.60889   | 0.637338 | 0.555761 | 0.828041  |
| 2.55517   | 3.32628  | 4.17123   | 2.69721  | 2.449    | 2.07105   |
| 0         | 0        | 0         | 0        | 0        | 0.0857596 |
| 0         | 0        | 0         | 0        | 0        | 0         |
| 0         | 0        | 0         | 0        | 0        | 0         |
| 4.44365   | 1.70528  | 5.11465   | 4.24054  | 3.93477  | 4.00671   |
| 4.62548   | 3.65297  | 5.14734   | 5.12674  | 4.86792  | 4.77159   |
| 9.57515   | 8.38305  | 16.6541   | 11.8815  | 24.576   | 22.3983   |
| 9.50071   | 9.20838  | 10.0003   | 8.76154  | 8.69849  | 9.5482    |
| 2.31597   | 1.46686  | 0         | 0.129288 | 0.345265 | 0.072199  |
| 0         | 0        | 0         | 0        | 0        | 0         |
| 0.945918  | 0.146678 | 0.781775  | 0.855643 | 0.599875 | 0.969584  |
| 0.0221416 | 0        | 0.0119399 | 0        | 0        | 0         |
| 8.80957   | 11.5873  | 2.79966   | 6.53376  | 8.12449  | 4.33981   |
| 5.08077   | 6.45241  | 7.57574   | 7.18161  | 5.65093  | 7.48385   |



|          |          |           |           |           |            |
|----------|----------|-----------|-----------|-----------|------------|
| 47.3105  | 56.2657  | 50.8616   | 52.4075   | 54.1076   | 54.7597    |
| 0        | 0        | 0         | 0         | 0         | 0          |
| 10.4829  | 8.81904  | 8.65286   | 10.253    | 8.66213   | 8.26502    |
| 18.2007  | 15.6981  | 16.984    | 15.3687   | 14.9213   | 14.4197    |
| 15.0238  | 10.2519  | 12.1112   | 14.1001   | 12.5616   | 12.9407    |
| 7.73E-09 | 0.415174 | 0.370546  | 3.96E-09  | 0.0908337 | 3.02E-09   |
| 0        | 0        | 0         | 0         | 0         | 0          |
| 0        | 0        | 0         | 0         | 0         | 0          |
| 44.6822  | 0        | 0         | 32.4267   | 34.6384   | 0          |
| 0        | 0        | 0         | 0         | 0         | 0          |
| 0        | 0.112848 | 0         | 0         | 0         | 0.0306983  |
| 0        | 0        | 0         | 0         | 0         | 0          |
| 8.57121  | 7.0524   | 9.98028   | 9.46838   | 10.4223   | 9.03424    |
| 2.70449  | 1.98623  | 2.17688   | 2.55235   | 1.882     | 2.46434    |
| 0        | 0        | 0         | 0         | 0         | 0          |
| 11.2246  | 10.8273  | 9.42842   | 10.7103   | 9.16308   | 9.81099    |
| 4.34231  | 3.66265  | 4.28323   | 3.62526   | 4.16538   | 3.42754    |
| 0.16297  | 0.272261 | 0.0878822 | 0.11827   | 0.0842246 | 0.0880618  |
| 0        | 0        | 0         | 0         | 0         | 0.00456154 |
| 91.2912  | 97.6358  | 77.3784   | 84.191    | 70.7093   | 76.8254    |
| 4.3001   | 4.01221  | 4.6808    | 4.36555   | 3.24485   | 5.54314    |
| 6.29019  | 5.07555  | 7.61182   | 6.50317   | 4.41184   | 5.78629    |
| 0        | 0        | 0         | 0.0595413 | 0.0636023 | 0          |
| 0.149014 | 0.213382 | 0         | 0.270354  | 0         | 0.301951   |
| 12.846   | 11.7268  | 7.83643   | 9.96348   | 8.7136    | 9.3275     |
| 0.139907 | 0.500854 | 0.113168  | 0.101533  | 0.216916  | 0.340198   |
| 1.9855   | 2.0102   | 2.6098    | 2.73549   | 2.17651   | 2.14995    |
| 38.8581  | 38.9504  | 41.9431   | 46.5378   | 43.8189   | 38.7588    |
| 5.6879   | 4.85711  | 5.50977   | 5.73866   | 5.37725   | 4.38534    |
| 0        | 0        | 0         | 0         | 0         | 0          |
| 0.246425 | 0        | 0         | 0.715342  | 0         | 0.199736   |
| 0        | 0.138509 | 0         | 0         | 0.299937  | 0          |
| 17.4236  | 9.17035  | 9.20518   | 18.4017   | 34.4832   | 7.99647    |
| 4.32226  | 2.45205  | 2.02512   | 4.05095   | 2.98449   | 3.12046    |
| 124.798  | 122.946  | 101.291   | 78.1012   | 151.001   | 70.1393    |
| 0        | 0        | 0         | 0         | 0         | 0          |
| 36.0344  | 29.7057  | 36.5717   | 35.1406   | 42.3859   | 30.737     |
| 5.09958  | 3.71106  | 4.84119   | 3.21971   | 2.99449   | 4.33427    |
| 0.333105 | 0        | 0.488987  | 0.438714  | 0.688609  | 0.239994   |
| 11.7226  | 8.13529  | 10.395    | 10.4527   | 10.8542   | 10.2784    |
| 2.59973  | 2.52864  | 1.58707   | 2.70542   | 1.06472   | 1.35177    |
| 0        | 0        | 0         | 0         | 0         | 0          |
| 155.876  | 270.245  | 252.203   | 151.552   | 143.381   | 310.144    |

|           |           |           |           |           |           |
|-----------|-----------|-----------|-----------|-----------|-----------|
| 55.5367   | 53.5257   | 55.878    | 48.5879   | 65.1983   | 38.4228   |
| 7.02452   | 5.48577   | 6.85586   | 6.33479   | 5.77492   | 7.26499   |
| 0.264061  | 0.189063  | 0.213594  | 0.191634  | 0.204704  | 0.21403   |
| 14.2603   | 17.5549   | 10.5307   | 12.1153   | 10.9978   | 6.76562   |
| 0.0980727 | 0.0702182 | 0.079329  | 0.0711731 | 0         | 0.0794912 |
| 0         | 0         | 0.121211  | 0.434997  | 0         | 0.607294  |
| 2.87589   | 3.45463   | 3.47833   | 3.17465   | 3.16249   | 3.05319   |
| 1.09502   | 0.462038  | 0.599863  | 0.771345  | 0.525134  | 0.445103  |
| 0         | 0         | 0         | 0         | 0         | 0         |
| 4.02153   | 4.96226   | 4.2911    | 5.83699   | 4.44417   | 3.12088   |
| 1.3318    | 2.54277   | 2.15453   | 2.57736   | 2.23693   | 2.69866   |
| 0.308169  | 0         | 0         | 0         | 0         | 0         |
| 0.409038  | 0.309134  | 0.14705   | 0.11544   | 0.0176163 | 0.147351  |
| 0         | 0         | 0         | 0         | 0         | 0         |
| 0         | 0         | 0         | 0         | 0         | 0         |
| 38.4089   | 38.7571   | 39.3412   | 32.4539   | 37.3665   | 34.8798   |
| 0.956409  | 1.11886   | 1.0751    | 1.05361   | 1.5844    | 1.82458   |
| 7.04248   | 7.27493   | 8.57312   | 7.04332   | 7.93113   | 7.59669   |
| 8.71181   | 9.47782   | 5.68931   | 4.22242   | 5.49031   | 5.51747   |
| 75.7685   | 81.3311   | 81.8007   | 82.2785   | 68.9673   | 78.3434   |
| 10.098    | 7.7993    | 8.82734   | 9.16041   | 8.61406   | 7.97535   |
| 13.6398   | 14.6564   | 12.8104   | 13.7498   | 13.0738   | 12.8252   |
| 0.196093  | 0.124797  | 0         | 0.126495  | 0         | 0.141278  |
| 0.409313  | 0.293061  | 0.066217  | 0.118818  | 0         | 0         |
| 0         | 0         | 0         | 0         | 0         | 0         |
| 79.9801   | 74.2982   | 33.8002   | 68.2878   | 38.6187   | 35.922    |
| 4.50503   | 2.42697   | 3.8563    | 3.5868    | 4.23832   | 4.62639   |
| 1.29838   | 0.753393  | 1.46561   | 0.763624  | 0.501179  | 0.374006  |
| 0.254842  | 0.121641  | 0.240492  | 0.123295  | 0.164631  | 0.103279  |
| 0         | 0         | 0         | 0         | 0         | 0         |
| 9.47535   | 7.80818   | 9.31424   | 8.67477   | 9.21611   | 9.52231   |
| 0         | 0         | 0         | 0         | 0         | 0         |
| 0.0193498 | 0.0145468 | 0         | 0.0216038 | 0.0161541 | 0         |
| 24.2134   | 19.8486   | 22.3636   | 25.8073   | 22.5517   | 21.9655   |
| 2.11839   | 2.0412    | 1.50534   | 1.76724   | 1.41199   | 2.13425   |
| 11.3023   | 8.67193   | 10.2948   | 10.3763   | 8.61111   | 9.54153   |
| 0.329488  | 0.306679  | 0.386449  | 0.251071  | 0.332052  | 0.280414  |
| 36.2823   | 34.117    | 32.948    | 35.9853   | 38.1021   | 29.7609   |
| 0.622812  | 0.297281  | 0.335853  | 0.75331   | 0         | 0.84135   |
| 4.13007   | 4.32498   | 3.59536   | 4.30479   | 2.61473   | 4.04208   |
| 0.238172  | 0.113287  | 0.219909  | 0.282965  | 0.185053  | 0.528891  |
| 6.65646   | 4.87065   | 5.11802   | 5.0696    | 4.64985   | 5.79549   |
| 0.032938  | 0.070749  | 0.0266429 | 0         | 0         | 0.0266974 |

|           |           |           |           |           |           |
|-----------|-----------|-----------|-----------|-----------|-----------|
| 1.1519    | 1.38904   | 1.47118   | 0.681964  | 1.01047   | 1.27763   |
| 12.9289   | 9.21467   | 10.9639   | 9.66379   | 10.0189   | 11.2794   |
| 9.6891    | 9.77317   | 8.24469   | 6.99559   | 9.25512   | 7.0275    |
| 125.016   | 164.231   | 154.539   | 144.342   | 140.69    | 133.368   |
| 0.0399015 | 0         | 0         | 0         | 0         | 0         |
| 0         | 0         | 0         | 0         | 0         | 0         |
| 0.114638  | 0.164158  | 0         | 0.0415975 | 0         | 0.0464591 |
| 0         | 0         | 0.0448569 | 0.0201225 | 0         | 0         |
| 0.136821  | 0.122451  | 0.0553357 | 0.248233  | 0.106066  | 0.138622  |
| 6.96871   | 7.09865   | 7.30228   | 7.51702   | 7.4281    | 8.16447   |
| 1.06471   | 0.158816  | 0.179422  | 0.482926  | 0.0343909 | 0.107873  |
| 0         | 0         | 0         | 0         | 0         | 0         |
| 2.88705   | 2.20262   | 2.25871   | 2.23258   | 1.98126   | 2.60858   |
| 12.3517   | 11.3249   | 11.5005   | 13.6715   | 12.0552   | 11.1639   |
| 0.125606  | 0.121407  | 0.155575  | 0.0962979 | 0.13923   | 0.251873  |
| 0         | 0         | 0         | 0         | 0         | 0         |
| 22.9045   | 21.8619   | 23.2586   | 24.7375   | 25.4977   | 22.6714   |
| 0         | 0         | 0         | 0         | 0         | 0         |
| 16.4615   | 13.7837   | 8.65121   | 10.484    | 9.08423   | 7.68894   |
| 0.335252  | 0.397854  | 0.204905  | 0.463428  | 0.196375  | 0.293987  |
| 7.85674   | 7.39322   | 7.86225   | 8.01508   | 7.2566    | 7.67818   |
| 24.4661   | 24.4871   | 25.1495   | 26.5739   | 28.6485   | 24.496    |
| 14.9868   | 14.2814   | 14.4833   | 15.3852   | 14.408    | 15.1515   |
| 0         | 0         | 0         | 0.097824  | 0.104496  | 0         |
| 2.99019   | 2.6292    | 2.65209   | 2.4175    | 2.50105   | 2.25357   |
| 0.4981    | 0.118877  | 0.0671506 | 0.0602467 | 0         | 0         |
| 0         | 0         | 7.0489    | 0         | 0         | 14.1266   |
| 48.1428   | 86.1733   | 194.709   | 104.814   | 149.284   | 117.064   |
| 28.3823   | 29.1688   | 31.6904   | 33.8981   | 32.8062   | 28.7533   |
| 0.313227  | 0.475756  | 0.0725073 | 0.781847  | 0.050187  | 0.674289  |
| 0.0762764 | 0.0364083 | 0.0321346 | 0.184517  | 0.0307972 | 0.0412164 |
| 0.283578  | 0.101518  | 0.22938   | 0.308696  | 0.879335  | 0.229849  |
| 4.84112   | 4.13206   | 3.66512   | 2.87294   | 4.73274   | 4.50378   |
| 116.786   | 220.89    | 105.762   | 102.435   | 115.166   | 111.565   |
| 3.52296   | 3.02685   | 3.82667   | 3.48195   | 3.48534   | 3.48096   |
| 11.7544   | 13.8904   | 10.084    | 13.8431   | 11.6447   | 10.8976   |
| 1.10452   | 4.40596   | 2.55263   | 2.336     | 1.63909   | 3.65773   |
| 4.8503    | 1.94046   | 2.88499   | 3.82958   | 3.31751   | 3.46773   |
| 57.5703   | 55.1909   | 63.9009   | 65.2445   | 56.5251   | 63.1365   |
| 115.199   | 105.614   | 127.332   | 92.4855   | 90.9814   | 89.4003   |
| 15.0289   | 13.7776   | 14.0457   | 13.9281   | 15.3504   | 12.3872   |
| 1.76657   | 0.754339  | 0.803977  | 0.807195  | 0.631012  | 0.896463  |
| 12.6096   | 11.2963   | 12.9668   | 12.0363   | 10.2168   | 11.5433   |

|           |           |           |           |           |           |
|-----------|-----------|-----------|-----------|-----------|-----------|
| 0         | 0.0240609 | 0.122367  | 0         | 0.117274  | 0         |
| 14.5705   | 11.5193   | 14.4496   | 13.8694   | 14.8651   | 14.2148   |
| 10.871    | 8.73963   | 10.8115   | 9.94902   | 10.0767   | 10.9566   |
| 0.530029  | 0.379491  | 0         | 0.384652  | 0         | 0.429606  |
| 116.929   | 125.836   | 158.219   | 171.548   | 140.444   | 195.692   |
| 0         | 0         | 0         | 0         | 0         | 0         |
| 20.8952   | 19.5088   | 22.4457   | 18.4395   | 14.1249   | 18.5622   |
| 0         | 0.423145  | 0         | 0         | 0         | 0         |
| 16.8133   | 13.6517   | 15.3964   | 15.4312   | 15.6165   | 15.7813   |
| 0.0561065 | 0.139739  | 0.28169   | 0.186983  | 0.0626323 | 0.213847  |
| 13.4821   | 10.8509   | 12.7273   | 12.9133   | 11.9731   | 12.6229   |
| 18.4082   | 20.6491   | 16.8767   | 15.5275   | 13.387    | 18.8199   |
| 0         | 0         | 0         | 0         | 0         | 0         |
| 0         | 0         | 0         | 0         | 0         | 0         |
| 0.231189  | 0.116843  | 0.924022  | 0.226994  | 0.305731  | 0.352728  |
| 12.7828   | 5.94684   | 9.44146   | 9.97414   | 10.2059   | 10.3923   |
| 65.4587   | 66.8479   | 71.8765   | 72.4616   | 70.2334   | 63.437    |
| 1.49668   | 1.3803    | 1.10592   | 1.16108   | 1.15859   | 0.862273  |
| 0.129889  | 0         | 0         | 0.0678691 | 0         | 0.0962553 |
| 1.65E-08  | 1.63E-07  | 1.07E-08  | 6.81E-06  | 3.01E-08  | 0         |
| 15.0878   | 14.5327   | 14.783    | 15.7763   | 17.5236   | 17.2404   |
| 14.3297   | 11.2886   | 13.1705   | 13.7069   | 13.2421   | 12.8642   |
| 0.0466929 | 0         | 0.0755378 | 0         | 0         | 0         |
| 13.9553   | 13.4648   | 13.8839   | 14.9071   | 15.8515   | 14.3659   |
| 7.465     | 5.96036   | 4.83433   | 6.01573   | 4.58603   | 5.49123   |
| 0.10525   | 0.150714  | 0.113513  | 0.0763817 | 0.0815913 | 0.142181  |
| 0.084778  | 0.121399  | 0         | 0.0615249 | 0.0657212 | 0         |
| 64.446    | 72.1627   | 63.6976   | 69.8536   | 64.6034   | 60.8442   |
| 0         | 0         | 0         | 0         | 0.0253306 | 0         |
| 2.79664   | 2.31129   | 1.96102   | 2.42123   | 2.58783   | 2.26075   |
| 60.442    | 60.2427   | 55.9311   | 56.6645   | 43.365    | 51.7531   |
| 42.9952   | 40.6301   | 46.1657   | 43.651    | 44.2071   | 35.549    |
| 3.96637   | 3.97575   | 4.39894   | 7.23061   | 2.77962   | 3.56117   |
| 0.15295   | 0.109509  | 0.123718  | 0.110998  | 0.161385  | 0.247942  |
| 4.88641   | 5.75647   | 4.90558   | 4.09944   | 4.64769   | 5.78637   |
| 0.0631693 | 0.022614  | 0.0510964 | 0.160451  | 0         | 0.0256004 |
| 0.0543928 | 0.0973605 | 0.0219986 | 0.0789477 | 0.0632492 | 0.0440872 |
| 1.19581   | 1.22085   | 1.50464   | 1.1571    | 1.13302   | 1.41797   |
| 2.90046   | 2.70848   | 2.77426   | 3.16687   | 3.21032   | 2.67102   |
| 4.35813   | 4.20085   | 4.30386   | 5.43517   | 4.93213   | 5.66357   |
| 0         | 0         | 0.63659   | 0         | 0.305048  | 0         |
| 3.66997   | 2.7481    | 3.0073    | 2.62874   | 3.30723   | 4.21914   |
| 9.15316   | 10.5888   | 11.0801   | 8.15239   | 6.45013   | 10.5812   |

|          |           |           |            |          |           |
|----------|-----------|-----------|------------|----------|-----------|
| 25.0615  | 32.2623   | 34.0929   | 24.7225    | 24.4473  | 21.985    |
| 56.6452  | 48.3111   | 45.5358   | 44.4859    | 44.9067  | 60.8242   |
| 39.5398  | 44.2794   | 35.3316   | 37.1561    | 85.7991  | 32.5277   |
| 6.80429  | 6.18044   | 13.9747   | 10.8173    | 8.76925  | 8.22206   |
| 56.7734  | 75.7661   | 62.339    | 49.9428    | 48.6579  | 62.7624   |
| 0.364287 | 0.478175  | 0.343775  | 0.352493   | 0.141201 | 0.196845  |
| 60.2782  | 60.2059   | 64.9907   | 57.9362    | 62.229   | 56.4702   |
| 4.60933  | 3.27567   | 3.54687   | 2.71305    | 3.4814   | 2.84623   |
| 0.665188 | 0.582098  | 0.298921  | 0.321826   | 0.171888 | 0.239625  |
| 0        | 0.42702   | 0.241213  | 0          | 0.462349 | 0.241706  |
| 44.8506  | 40.1801   | 40.0142   | 36.5404    | 30.5505  | 36.5431   |
| 2.87317  | 2.12538   | 3.16115   | 2.32228    | 2.32233  | 1.84319   |
| 0        | 0         | 0         | 0          | 0        | 0         |
| 2.64508  | 3.84911   | 2.50641   | 2.88007    | 2.13767  | 2.87739   |
| 14.1316  | 11.9638   | 11.5243   | 12.4795    | 11.065   | 12.1989   |
| 0.907788 | 0.612605  | 0.759612  | 0.832963   | 0.744176 | 0.77808   |
| 0        | 0         | 0         | 0          | 0        | 0         |
| 0.210566 | 0         | 0         | 0          | 0        | 0         |
| 67.843   | 52.083    | 66.8039   | 57.3581    | 28.215   | 36.1484   |
| 7.37643  | 5.95404   | 7.46395   | 7.09486    | 7.64366  | 8.30856   |
| 79.1856  | 77.0806   | 74.0772   | 83.589     | 76.585   | 84.7343   |
| 0.202279 | 0.672421  | 0.0545402 | 0.195732   | 0.125448 | 0         |
| 9.30E-08 | 0.0139265 | 0.906779  | 0.00056243 | 0.665413 | 0         |
| 0.159227 | 0         | 0.0321989 | 0.115554   | 0.123435 | 0.129059  |
| 0        | 0         | 0         | 0.0139427  | 0        | 0         |
| 2.51501  | 3.05555   | 1.90793   | 1.86125    | 2.1686   | 1.96545   |
| 81.1147  | 89.3716   | 81.2542   | 85.6153    | 92.078   | 77.1383   |
| 11.0676  | 9.33208   | 12.1964   | 18.3163    | 14.419   | 17.513    |
| 40.3149  | 25.1895   | 27.4909   | 39.5143    | 30.3321  | 37.2614   |
| 111.46   | 171.435   | 90.8615   | 86.2092    | 44.45    | 88.7894   |
| 5.07677  | 4.27855   | 3.67874   | 3.64593    | 2.78771  | 3.1719    |
| 25.1261  | 26.2489   | 24.3943   | 27.7904    | 23.6118  | 21.4968   |
| 11.7994  | 10.331    | 11.0312   | 11.0633    | 9.99168  | 10.9505   |
| 0        | 0         | 0         | 0          | 0        | 0         |
| 0.586276 | 0.209881  | 0.118557  | 0.191462   | 0.113623 | 0.0712795 |
| 36.3448  | 39.2875   | 36.3574   | 37.2345    | 36.0141  | 35.2728   |
| 0.550411 | 0.342681  | 0.861397  | 0.555747   | 0.75134  | 1.28019   |
| 5.46323  | 5.27902   | 4.05982   | 3.38455    | 2.27253  | 2.62808   |
| 14.2274  | 14.5776   | 12.2128   | 12.2101    | 13.289   | 13.1436   |
| 16.1907  | 15.5053   | 14.8923   | 13.6091    | 12.922   | 11.7665   |
| 39.007   | 37.2391   | 43.1798   | 39.4203    | 30.5798  | 38.2468   |
| 4.27827  | 4.62165   | 2.39976   | 3.89483    | 2.18287  | 3.65078   |
| 0.141288 | 0.0974127 | 0.126983  | 0.170892   | 0.113585 | 0.254486  |

|           |           |           |           |           |           |
|-----------|-----------|-----------|-----------|-----------|-----------|
| 0         | 0         | 0         | 0         | 0         | 0         |
| 6.13869   | 5.70417   | 6.51794   | 5.45806   | 6.00301   | 6.13323   |
| 3.89699   | 3.70453   | 4.03023   | 5.14523   | 4.06051   | 5.12542   |
| 26.5131   | 24.2195   | 22.3497   | 23.5168   | 21.1046   | 19.843    |
| 9.71945   | 5.2563    | 7.05642   | 8.10583   | 6.60747   | 7.76058   |
| 0.297285  | 0.123229  | 0.113906  | 0.06813   | 0.109165  | 0.0887745 |
| 0.199737  | 0.143008  | 0         | 0.0365614 | 0.15484   | 0         |
| 0.446726  | 0.365526  | 0.664328  | 0.185255  | 0.247363  | 0.362085  |
| 0.244211  | 0.17485   | 0.271614  | 0.31015   | 0.212981  | 0.346397  |
| 8.65535   | 8.16259   | 8.17309   | 9.06202   | 6.20407   | 8.56141   |
| 0         | 0         | 0         | 0         | 0         | 0         |
| 0         | 0         | 0         | 0         | 0         | 0         |
| 0.690903  | 0.465632  | 0.525501  | 0.500941  | 0.314769  | 0.493664  |
| 241.291   | 262.375   | 212.245   | 232.99    | 218.464   | 209.963   |
| 0         | 0         | 0         | 0         | 0         | 0         |
| 7.71225   | 7.80081   | 7.56716   | 7.4598    | 5.73102   | 6.95382   |
| 136.247   | 118.975   | 160.22    | 149.299   | 155.831   | 156.142   |
| 8.74802   | 5.85745   | 8.65792   | 7.89375   | 8.10921   | 8.88196   |
| 0         | 0         | 0         | 0         | 0         | 0         |
| 3.06238   | 2.87032   | 2.9566    | 3.56455   | 2.46853   | 2.61157   |
| 4.05459   | 2.82164   | 3.91177   | 3.60834   | 3.74966   | 3.76484   |
| 0         | 0         | 0.0232422 | 0.0207861 | 0         | 0         |
| 39.433    | 53.2786   | 64.0747   | 46.2126   | 38.1185   | 34.6633   |
| 0.10291   | 0.133719  | 0.147986  | 0.0331928 | 0.142319  | 0         |
| 7.32687   | 5.24      | 6.09019   | 6.20993   | 7.56293   | 7.47852   |
| 0.0707044 | 0.0253115 | 0.0285957 | 0.0256557 | 0.0274056 | 0.0859624 |
| 15.7398   | 12.2768   | 13.6529   | 13.1941   | 17.6577   | 6.61972   |
| 0         | 0         | 0         | 0         | 0         | 0         |
| 15.7381   | 13.4352   | 14.8247   | 17.6691   | 16.8668   | 15.4275   |
| 9.69494   | 8.30643   | 7.49723   | 8.93759   | 4.80044   | 6.86468   |
| 1237.22   | 2208.46   | 1629.46   | 1905.84   | 1292.9    | 2520.93   |
| 0.155921  | 0.066982  | 0.227019  | 0.135786  | 0.145047  | 0.126379  |
| 11.2576   | 9.98436   | 11.4919   | 9.8823    | 9.29871   | 10.7451   |
| 3.24653   | 2.54409   | 3.34288   | 3.43825   | 2.93953   | 3.01819   |
| 39.1838   | 36.7061   | 29.6532   | 25.6987   | 32.1568   | 32.6707   |
| 1.97909   | 1.36948   | 1.73926   | 2.03228   | 1.56897   | 1.90456   |
| 3.88292   | 6.3037    | 6.28163   | 5.34091   | 6.37021   | 5.1966    |
| 10.591    | 9.73689   | 10.9669   | 12.7404   | 9.45626   | 12.0749   |
| 0         | 0         | 0         | 0         | 0         | 0         |
| 0         | 0         | 0         | 0         | 0         | 0         |
| 0         | 0.0705934 | 0         | 0         | 0         | 0         |
| 0.72503   | 0.865179  | 0.698169  | 0.676501  | 0.669112  | 0.72758   |
| 0.467382  | 0.267709  | 0.0756111 | 0.135675  | 0.0724643 | 0.0757657 |

|          |           |           |           |           |           |
|----------|-----------|-----------|-----------|-----------|-----------|
| 0.638672 | 0.594461  | 0.516609  | 0.556195  | 0.396087  | 0.465899  |
| 0        | 0.0213355 | 0.205438  | 0.0165885 | 0.0924028 | 0.0966126 |
| 6.03202  | 3.74485   | 5.89967   | 4.57783   | 4.73725   | 6.61474   |
| 65.1953  | 70.9359   | 82.8039   | 82.6415   | 45.1427   | 46.0026   |
| 2.49048  | 1.985     | 2.0145    | 0.920744  | 1.16568   | 1.52348   |
| 125.654  | 101.244   | 120.255   | 122.46    | 132.521   | 124.542   |
| 4.43184  | 3.74824   | 3.75286   | 3.0454    | 3.30679   | 3.88401   |
| 4.30902  | 3.89465   | 3.83057   | 4.13339   | 3.80344   | 4.04589   |
| 0.270201 | 0.0483647 | 0.10928   | 0.098045  | 0.0523661 | 0.0547518 |
| 2.16115  | 1.95906   | 1.84464   | 2.00626   | 1.59809   | 0.931749  |
| 0        | 0         | 0         | 0         | 0         | 0         |
| 23.3251  | 26.8753   | 23.8679   | 23.3267   | 21.6239   | 19.5898   |
| 0        | 0         | 0         | 0         | 0         | 0         |
| 1.51631  | 3.53584   | 3.18313   | 3.51648   | 2.84909   | 1.89251   |
| 16.3586  | 15.0182   | 14.2671   | 14.8596   | 12.4352   | 13.8081   |
| 19.571   | 19.1991   | 21.4494   | 19.5836   | 15.7454   | 19.3856   |
| 20.3624  | 18.4019   | 20.9779   | 21.273    | 15.9334   | 18.9245   |
| 13.5457  | 11.0873   | 12.4894   | 12.7921   | 12.9394   | 14.6695   |
| 4.16438  | 3.56409   | 4.66209   | 3.89211   | 4.29192   | 5.22824   |
| 7.4651   | 6.17665   | 7.21984   | 7.20638   | 7.30207   | 6.79255   |
| 7.41028  | 4.82474   | 5.60061   | 5.95771   | 8.09515   | 5.8786    |
| 3.80711  | 3.15621   | 3.69539   | 3.46088   | 2.73387   | 3.73543   |
| 10.0802  | 9.41914   | 12.8525   | 11.9805   | 11.5063   | 11.667    |
| 0        | 0         | 0         | 0         | 0         | 0         |
| 33.6099  | 45.7057   | 41.0209   | 37.7628   | 36.4463   | 46.8714   |
| 0        | 0         | 0         | 0         | 0         | 0         |
| 0.480327 | 0.540422  | 0.499534  | 0.0995948 | 0.638326  | 0.389321  |
| 1.85609  | 1.74433   | 1.8905    | 1.94973   | 1.6511    | 1.40964   |
| 19.684   | 20.0656   | 25.9721   | 18.4135   | 21.8429   | 11.0607   |
| 0.947402 | 0.406993  | 0.613068  | 0.275019  | 0.734441  | 0.614321  |
| 81.0858  | 62.3843   | 76.5045   | 85.1806   | 97.2164   | 70.1177   |
| 15.77    | 13.5875   | 14.2695   | 14.587    | 14.7116   | 14.6886   |
| 0.158445 | 0.183149  | 0.0858584 | 0.179316  | 0.0979205 | 0.199361  |
| 1.39841  | 0.571329  | 0.295166  | 1.85374   | 0.990085  | 0.324645  |
| 0        | 0         | 0         | 0         | 0         | 0         |
| 0.183305 | 0.233652  | 0.569744  | 0.513699  | 0.619241  | 0.223211  |
| 1.57856  | 1.67076   | 1.3879    | 0.871644  | 1.46315   | 1.16822   |
| 0        | 0         | 0         | 0         | 0         | 0         |
| 10.0825  | 8.51734   | 9.55518   | 9.52668   | 8.66739   | 10.4917   |
| 10.8748  | 12.0322   | 12.7743   | 14.1573   | 9.0975    | 12.501    |
| 0        | 0         | 0         | 0         | 0         | 0         |
| 0        | 0         | 0         | 0         | 0         | 0         |
| 0        | 0         | 0         | 0         | 0         | 0         |

|           |           |           |           |           |           |
|-----------|-----------|-----------|-----------|-----------|-----------|
| 0.583679  | 0.417903  | 0.531142  | 0.476535  | 0.339358  | 0.650501  |
| 18.6428   | 19.8799   | 18.0316   | 19.4306   | 15.9282   | 16.3645   |
| 19.0633   | 22.3583   | 21.1474   | 20.9496   | 19.7043   | 16.1873   |
| 0.849305  | 1.1293    | 0.981408  | 1.10064   | 1.22273   | 2.06517   |
| 7.63882   | 4.57891   | 5.93939   | 6.0808    | 7.9645    | 6.83947   |
| 2.35146   | 3.277     | 2.75117   | 3.10826   | 2.96219   | 2.961     |
| 11.3661   | 9.70039   | 11.9958   | 10.6378   | 11.3717   | 13.4      |
| 0         | 0         | 0         | 0.033234  | 0.0355007 | 0         |
| 0.261628  | 0.454921  | 0.54418   | 0.27124   | 0.927168  | 0.121176  |
| 6.28045   | 5.55523   | 6.85763   | 6.07284   | 7.05762   | 5.84091   |
| 14.862    | 18.7758   | 17.3354   | 14.6934   | 14.8607   | 17.2399   |
| 14.7164   | 10.1967   | 8.09628   | 9.42339   | 9.80724   | 8.88335   |
| 39.9396   | 35.4223   | 37.8845   | 37.2454   | 30.9735   | 34.2471   |
| 0.0783306 | 0.0645834 | 0.0820836 | 0.0163654 | 0.0174816 | 0         |
| 0.47081   | 0.224727  | 0.53316   | 0.410011  | 0.235209  | 0.432489  |
| 6.02123   | 4.976     | 6.13049   | 7.1959    | 6.61845   | 6.75002   |
| 0         | 0         | 0         | 0         | 0         | 0         |
| 3.64704   | 2.75142   | 3.01789   | 3.30469   | 2.96942   | 3.27832   |
| 0         | 0         | 0         | 31.7138   | 0         | 0         |
| 16.2143   | 17.4162   | 15.4187   | 14.3018   | 11.9178   | 14.7144   |
| 8.59993   | 6.7642    | 7.35957   | 8.23105   | 6.20302   | 7.33421   |
| 0         | 0.063641  | 0.0359492 | 0         | 0.0344531 | 0.0360227 |
| 0         | 0.103103  | 0         | 0         | 0         | 0         |
| 19.4475   | 17.0007   | 17.1212   | 17.0468   | 14.3337   | 19.4233   |
| 3.53195   | 3.06626   | 2.83665   | 2.87081   | 6.57773   | 5.95074   |
| 3.3003    | 2.64254   | 2.32312   | 3.72975   | 3.14435   | 3.65516   |
| 5.33655   | 4.90899   | 6.52251   | 4.49631   | 5.40667   | 5.56074   |
| 0.266349  | 0.217944  | 0.277     | 0.331362  | 0.353962  | 0.43177   |
| 1.11689   | 0.919621  | 0.677571  | 0.364745  | 0.173166  | 0.588429  |
| 2.12929   | 1.52453   | 1.81021   | 2.25482   | 1.56644   | 1.86675   |
| 0.540794  | 0.878     | 0.465652  | 1.63769   | 1.17879   | 0.861633  |
| 3.32863   | 2.59158   | 2.3135    | 2.37284   | 0.887392  | 2.01048   |
| 0         | 0         | 0         | 0         | 0         | 0         |
| 1.53857   | 1.37238   | 1.96207   | 1.24179   | 0.952139  | 1.87957   |
| 562.981   | 106.303   | 602.575   | 115.434   | 443.468   | 529.186   |
| 4.56376   | 3.7549    | 5.15375   | 4.77365   | 5.00523   | 5.49909   |
| 4.0072    | 1.75237   | 2.15443   | 2.525     | 1.71134   | 1.40032   |
| 100.75    | 115.533   | 113.586   | 119.615   | 110.231   | 109.559   |
| 0         | 0         | 0.0418551 | 0.105389  | 0.0250708 | 0         |
| 7.22266   | 7.83428   | 7.77402   | 5.8701    | 6.73655   | 6.38682   |
| 0.28833   | 0.365512  | 0.542129  | 0.649208  | 0.308257  | 0.24441   |
| 12.0652   | 9.70748   | 11.0702   | 10.6177   | 9.96696   | 10.2224   |
| 2.9395    | 2.22319   | 2.34421   | 1.92292   | 2.18258   | 2.24846   |



|           |           |           |           |           |           |
|-----------|-----------|-----------|-----------|-----------|-----------|
| 6.56786   | 5.10885   | 6.24723   | 5.86975   | 8.70585   | 5.47135   |
| 0         | 0         | 0         | 0         | 0         | 0         |
| 4.87609   | 3.41      | 4.05365   | 4.19258   | 3.86789   | 4.41464   |
| 1.07233   | 0.554934  | 0.339043  | 0.433192  | 0.210942  | 0.67639   |
| 0         | 0         | 0         | 0         | 0         | 0         |
| 0.0139931 | 0         | 19.6237   | 0         | 0.0112116 | 0.0117223 |
| 19.2208   | 28.8114   | 21.0764   | 19.9176   | 13.8002   | 20.7307   |
| 0         | 0         | 0         | 0         | 0         | 0         |
| 0.270845  | 0.19392   | 0.438162  | 0         | 0         | 0.219529  |
| 6.65366   | 6.2091    | 6.25885   | 6.83609   | 7.80944   | 6.66551   |
| 36.1241   | 50.774    | 37.9417   | 38.7203   | 35.6957   | 31.3901   |
| 0         | 0         | 0         | 0         | 0         | 0         |
| 0.914712  | 0.773475  | 1.79147   | 1.16556   | 1.28635   | 1.68119   |
| 1.63294   | 1.39825   | 2.03483   | 1.61744   | 1.90738   | 2.08371   |
| 58.133    | 53.134    | 63.7219   | 63.9219   | 65.0545   | 71.7024   |
| 0.154472  | 0.221198  | 0.374848  | 0.280258  | 0.239498  | 0.25041   |
| 4.10097   | 2.12458   | 3.78343   | 1.45376   | 2.21939   | 1.83296   |
| 16.6214   | 12.8105   | 16.2874   | 17.4032   | 14.2497   | 17.4064   |
| 0         | 0         | 0         | 0         | 0.0987255 | 0         |
| 41.6924   | 35.2237   | 40.6142   | 47.0699   | 46.321    | 40.529    |
| 0.713567  | 0.31969   | 0.487866  | 0.504292  | 0.568596  | 0.772644  |
| 0.183863  | 0.329106  | 0.48335   | 0.166791  | 0.2138    | 0.335311  |
| 0         | 0         | 0         | 0         | 0         | 0         |
| 0.565913  | 0.580716  | 0.656064  | 0.659825  | 0.362779  | 0.47855   |
| 64.1667   | 65.3376   | 73.7442   | 69.0733   | 67.8617   | 65.1841   |
| 16.571    | 13.9324   | 13.4829   | 15.3626   | 12.3568   | 14.1965   |
| 0         | 0         | 0         | 0         | 0         | 0         |
| 0.480392  | 1.17028   | 1.29606   | 0.547531  | 0.636933  | 0.472283  |
| 0         | 0.0283541 | 0.032033  | 0.0287397 | 0         | 0         |
| 105.086   | 98.2767   | 91.7188   | 85.0322   | 87.771    | 84.6923   |
| 0         | 0         | 0         | 0.0671569 | 0         | 0         |
| 130.351   | 158.498   | 131.312   | 141.328   | 144.263   | 122.36    |
| 0         | 0         | 0         | 0         | 0         | 0         |
| 4.70017   | 3.73459   | 3.43096   | 4.28455   | 4.3546    | 5.57509   |
| 0.0341176 | 0.0488559 | 0.220782  | 0.0495203 | 0.0528978 | 0.0276535 |
| 23.5956   | 23.4703   | 23.4065   | 21.7285   | 22.8723   | 20.3468   |
| 7.90577   | 6.23918   | 6.19916   | 5.62188   | 7.51528   | 6.10349   |
| 34.6317   | 30.1766   | 33.399    | 34.3207   | 33.3124   | 30.3314   |
| 0.0167625 | 0.036005  | 0.0636514 | 0         | 0         | 0.0271732 |
| 6.93594   | 3.96392   | 5.61008   | 5.78188   | 5.10933   | 5.29313   |
| 1.23115   | 0.949287  | 1.22567   | 1.20275   | 0.807576  | 0.844368  |
| 0.399137  | 0.224075  | 0.332695  | 0.273205  | 0.178751  | 0.429687  |
| 26.1943   | 28.4202   | 34.3851   | 32.3855   | 29.3028   | 34.3055   |

|           |           |           |           |           |           |
|-----------|-----------|-----------|-----------|-----------|-----------|
| 0.116744  | 0.0626899 | 0.133779  | 0.0211808 | 0.0678764 | 0.0788542 |
| 45.9584   | 50.3761   | 49.9375   | 46.2679   | 42.8812   | 43.7939   |
| 6.44307   | 4.94863   | 6.81804   | 6.41848   | 6.75682   | 6.82819   |
| 9.72294   | 8.39989   | 10.0257   | 10.3246   | 10.6087   | 9.51599   |
| 2.5922    | 2.98079   | 3.30401   | 2.62228   | 2.49667   | 2.86509   |
| 9.54786   | 8.51133   | 8.94411   | 9.06528   | 8.45485   | 9.91063   |
| 6.31916   | 4.49736   | 6.36385   | 5.60908   | 5.91358   | 6.63193   |
| 0.49502   | 1.35863   | 1.86859   | 1.91597   | 2.23852   | 2.00615   |
| 15.2998   | 12.7397   | 14.2304   | 14.9137   | 12.7779   | 14.8775   |
| 30.6187   | 29.0217   | 27.3818   | 30.8688   | 18.4418   | 20.7587   |
| 3.75207   | 2.8426    | 3.77607   | 3.13455   | 2.43516   | 3.6777    |
| 37.1679   | 41.1845   | 40.2563   | 39.0534   | 35.6408   | 34.0709   |
| 11.0931   | 8.24625   | 10.2267   | 10.3514   | 10.0305   | 11.0225   |
| 0         | 0         | 0.0280185 | 0         | 0.0537049 | 0.0280758 |
| 182.957   | 188.357   | 177.399   | 186.451   | 196.248   | 178.259   |
| 77.2138   | 74.3344   | 77.3627   | 81.5717   | 85.4003   | 79.1013   |
| 3.45803   | 3.6463    | 4.75513   | 4.54002   | 4.92278   | 3.84755   |
| 0         | 0         | 0         | 0         | 0         | 0         |
| 4.39176   | 4.1137    | 3.64195   | 4.7738    | 4.20141   | 4.21472   |
| 37.3691   | 34.7618   | 34.8838   | 35.2747   | 30.401    | 36.8785   |
| 17.0066   | 16.7362   | 18.8713   | 20.4358   | 16.3298   | 20.7248   |
| 0.157252  | 0.225179  | 0.254396  | 0.351872  | 0.243808  | 0.127458  |
| 38.0437   | 37.3888   | 46.3043   | 48.3809   | 45.4901   | 34.6175   |
| 88.2884   | 122.811   | 98.9137   | 89.9318   | 80.7578   | 82.4627   |
| 8.24532   | 8.25933   | 12.1773   | 12.2082   | 12.4386   | 12.4386   |
| 0.148187  | 0.138636  | 0.119866  | 0.137577  | 0.0980284 | 0.175705  |
| 19.8041   | 20.0044   | 20.5758   | 21.1539   | 14.9797   | 17.8781   |
| 1.23493   | 0.625392  | 0.822532  | 0.52302   | 0.57371   | 1.02347   |
| 15.1735   | 14.9862   | 13.7289   | 14.2325   | 16.6445   | 17.6459   |
| 0.0700002 | 0.0250594 | 0.0283109 | 0.0508004 | 0.0271326 | 0         |
| 31.6566   | 28.3315   | 30.8399   | 30.1308   | 31.765    | 28.7929   |
| 13.6149   | 12.9974   | 12.2365   | 11.9106   | 13.5195   | 12.5623   |
| 1.14863   | 0.72463   | 0.688985  | 1.43733   | 0.822268  | 0.794029  |
| 0.453067  | 0.94821   | 0.620192  | 0.885228  | 0.810519  | 1.07343   |
| 0.47397   | 0.597262  | 0.39872   | 0.33021   | 0.396823  | 0.56857   |
| 6.11634   | 4.82832   | 3.67885   | 4.22534   | 3.7233    | 4.71916   |
| 36.4759   | 31.6805   | 36.2943   | 38.1509   | 40.3226   | 35.5234   |
| 1.8246    | 2.09954   | 0.316261  | 1.18227   | 0.70723   | 1.21481   |
| 1.25964   | 0.90188   | 0         | 2.74244   | 0         | 1.02098   |
| 0         | 0         | 0         | 0         | 0         | 0         |
| 0         | 0         | 0         | 0         | 0         | 0         |
| 0.095115  | 0.0681005 | 0.0384683 | 0.0172567 | 0.0553009 | 0.0192735 |
| 56.5776   | 47.4387   | 66.2474   | 49.6248   | 52.7674   | 52.4128   |

|           |           |           |           |           |           |
|-----------|-----------|-----------|-----------|-----------|-----------|
| 5.04816   | 3.34286   | 4.18861   | 3.5183    | 3.82766   | 3.94735   |
| 0.356416  | 0.538728  | 0.384396  | 0.373616  | 0.460498  | 0.353084  |
| 21.0297   | 17.5745   | 21.4208   | 19.4695   | 20.7213   | 17.8614   |
| 34.3313   | 35.8802   | 38.2973   | 35.8714   | 36.4353   | 30.4552   |
| 23.7996   | 26.9665   | 20.2608   | 26.1154   | 22.7501   | 23.6601   |
| 0.950779  | 0.510554  | 0.384533  | 0.344999  | 0.184265  | 0.385319  |
| 12.9483   | 9.53517   | 13.3629   | 10.2098   | 11.1065   | 10.8574   |
| 8.24145   | 8.461     | 8.64018   | 7.5848    | 8.2211    | 8.02343   |
| 0.251227  | 0.300622  | 0.237081  | 0.243093  | 0.293147  | 0.205325  |
| 0         | 0         | 0.0844625 | 0         | 0         | 0         |
| 1424.81   | 2492.82   | 1751.92   | 1725.02   | 1425.47   | 3027.65   |
| 3.1011    | 3.38275   | 4.8988    | 3.62732   | 4.0727    | 4.33218   |
| 13.8032   | 11.8215   | 13.7535   | 13.6174   | 14.9572   | 13.7049   |
| 4.42569   | 3.16871   | 2.7287    | 3.84068   | 2.75908   | 3.01021   |
| 4.03571   | 3.57536   | 2.76447   | 3.56245   | 2.26715   | 3.47793   |
| 0         | 0         | 0         | 0         | 0         | 0         |
| 2.76421   | 1.34385   | 1.76665   | 1.28783   | 1.74603   | 1.43834   |
| 0.156944  | 0.256843  | 0.235762  | 0.48813   | 0.191188  | 0.327107  |
| 3.43242   | 2.46828   | 3.00677   | 3.26329   | 2.8003    | 2.79424   |
| 17.9095   | 22.0612   | 22.7004   | 20.9687   | 21.487    | 25.2525   |
| 0.108746  | 0.0194649 | 0.043981  | 0.0789186 | 0.0843012 | 0.0220355 |
| 7.54428   | 5.6842    | 6.70556   | 5.82517   | 6.73251   | 6.22155   |
| 17.2367   | 13.6614   | 14.0552   | 16.2336   | 12.6288   | 14.0581   |
| 0.702903  | 0.354302  | 1.00407   | 0.707813  | 0.883324  | 0.538107  |
| 75.7666   | 71.2429   | 72.8151   | 72.7562   | 83.0632   | 59.761    |
| 16.2121   | 15.8275   | 16.7033   | 15.6706   | 14.6507   | 18.0422   |
| 15.1498   | 23.0174   | 16.1504   | 18.4712   | 15.7004   | 17.604    |
| 0.785564  | 0.937415  | 0.635427  | 0.76013   | 1.28563   | 1.06121   |
| 2.10371   | 0.753108  | 0.850824  | 1.5267    | 1.08722   | 0.852563  |
| 0.0390775 | 0.0559575 | 0.063218  | 0.0567185 | 0.454402  | 0.0633472 |
| 1.7658    | 2.90015   | 2.11835   | 1.76203   | 2.27529   | 2.20972   |
| 1.5864    | 1.01484   | 1.23183   | 1.14957   | 1.48047   | 1.42112   |
| 53.5433   | 49.5058   | 46.8933   | 48.0359   | 54.149    | 64.2134   |
| 0.377497  | 0.360374  | 0.407133  | 0.182637  | 0.292641  | 0.305974  |
| 1.8719    | 1.74232   | 1.43843   | 1.29055   | 1.30601   | 0.910342  |
| 7.86736   | 6.47964   | 7.08469   | 6.50557   | 6.41779   | 6.80743   |
| 0         | 0         | 0         | 0         | 0         | 0         |
| 2.77568   | 1.15543   | 2.71512   | 2.22517   | 2.77726   | 1.85738   |
| 1.27958   | 0.796656  | 0.630016  | 0.847865  | 0.517539  | 0.676397  |
| 0         | 0         | 0         | 0         | 0         | 0         |
| 0         | 0         | 0         | 0         | 0         | 0         |
| 0         | 0         | 0         | 0.0205157 | 0         | 0         |
| 2.4213    | 1.98917   | 2.2335    | 2.60632   | 2.44455   | 2.32119   |

|           |           |           |            |          |           |
|-----------|-----------|-----------|------------|----------|-----------|
| 2.73197   | 2.03643   | 2.20378   | 2.18905    | 1.81614  | 2.22648   |
| 39.6335   | 35.8229   | 35.5211   | 40.3139    | 42.5473  | 38.0095   |
| 3.35926   | 2.90624   | 3.05689   | 2.43788    | 1.46484  | 2.55262   |
| 2.27324   | 2.06883   | 1.77632   | 1.64961    | 2.12062  | 1.96744   |
| 7.12166   | 8.07395   | 9.11947   | 9.48098    | 7.98234  | 9.01464   |
| 0         | 0         | 7.70856   | 0          | 0        | 0         |
| 0         | 0.0193561 | 0         | 0.00980965 | 0        | 0         |
| 8.24747   | 9.25121   | 7.81088   | 8.13008    | 6.23373  | 6.85197   |
| 19.2025   | 18.1067   | 19.2135   | 19.0685    | 17.6772  | 18.9503   |
| 0.16697   | 0.732226  | 0.202846  | 0.271712   | 0.238962 | 0.0828579 |
| 1.77771   | 1.53788   | 0.679521  | 1.68418    | 2.00953  | 3.8813    |
| 0.0349625 | 0.0625812 | 0.0565609 | 0.0888052  | 0.054207 | 0.0283383 |
| 40.5937   | 48.049    | 82.3554   | 52.6243    | 104.543  | 47.3735   |
| 18.9615   | 22.484    | 19.6187   | 20.7413    | 12.844   | 17.4953   |
| 0         | 0         | 0         | 0          | 0        | 0         |
| 5.89659   | 4.84459   | 5.87669   | 5.18896    | 4.66037  | 4.28175   |
| 7.90927   | 4.02107   | 3.64682   | 6.17709    | 7.95424  | 4.11106   |
| 23.8909   | 17.7684   | 22.1712   | 26.7463    | 23.1148  | 26.1194   |
| 1.28463   | 0.994843  | 1.25528   | 1.41382    | 1.06901  | 1.71662   |
| 0         | 0         | 0         | 0          | 0        | 0         |
| 0         | 0         | 0         | 0          | 0        | 0         |
| 8.04268   | 7.36661   | 7.61913   | 7.61402    | 8.13334  | 10.5476   |
| 10.8908   | 9.79762   | 5.11136   | 4.76864    | 6.85211  | 7.38348   |
| 0         | 0         | 0         | 0          | 0        | 0         |
| 0.932654  | 0.73103   | 0.509664  | 0.756402   | 0.907426 | 1.25639   |
| 28.5367   | 23.7637   | 28.1831   | 25.9659    | 22.9786  | 27.7252   |
| 8.3616    | 9.23362   | 8.2768    | 10.5149    | 9.75162  | 9.14774   |
| 15.1184   | 15.8182   | 15.4248   | 17.1451    | 15.2204  | 14.378    |
| 0         | 0         | 0         | 0          | 0        | 0         |
| 1.28586   | 1.43791   | 0.7927    | 0.418348   | 1.86592  | 0.661885  |
| 614.386   | 574.558   | 680.988   | 536.513    | 650.473  | 688.192   |
| 104.01    | 115.902   | 111.722   | 119.439    | 107.903  | 97.0735   |
| 6.19609   | 5.78061   | 7.3718    | 6.2156     | 6.4156   | 6.61424   |
| 6.23265   | 4.5566    | 5.82853   | 5.03844    | 5.01513  | 5.89729   |
| 28.4176   | 30.2103   | 28.7016   | 32.7617    | 29.4502  | 34.342    |
| 0         | 0         | 0         | 0          | 0        | 0         |
| 1.28711   | 1.21072   | 1.2193    | 1.12059    | 1.11162  | 0.7161    |
| 12.5172   | 9.30025   | 10.889    | 10.1123    | 9.70351  | 8.99704   |
| 0         | 0         | 0.0558152 | 0          | 0        | 0         |
| 0.0657449 | 0.0941442 | 0         | 0.0477123  | 0.101933 | 0         |
| 0         | 0         | 0         | 0          | 0        | 0         |
| 67.1688   | 54.2565   | 65.2186   | 62.5009    | 57.8733  | 61.2722   |
| 57.6965   | 54.393    | 50.7086   | 59.1133    | 61.8192  | 52.4515   |

|           |           |           |            |           |           |
|-----------|-----------|-----------|------------|-----------|-----------|
| 1.3293    | 1.2303    | 1.18571   | 1.62988    | 0.754037  | 1.16259   |
| 56.8508   | 43.6317   | 56.8632   | 60.1576    | 62.5694   | 67.1534   |
| 52.6133   | 40.4084   | 50.7146   | 53.3469    | 54.9523   | 52.1441   |
| 0         | 0         | 0         | 0          | 0         | 0         |
| 3.3349    | 3.15082   | 3.22592   | 2.54495    | 3.14497   | 2.84239   |
| 1.05551   | 0.881679  | 0.711483  | 0.561735   | 0.409124  | 0.655903  |
| 2.52958   | 3.76551   | 2.83817   | 3.20681    | 3.10067   | 4.9277    |
| 42.067    | 33.0898   | 29.2412   | 44.7983    | 38.9039   | 37.2257   |
| 0.65604   | 1.16E-31  | 3.54E-91  | 7.06E-82   | 2.67E-25  | 8.09E-98  |
| 23.6123   | 19.0341   | 21.2922   | 22.8996    | 16.9221   | 19.3313   |
| 0.625064  | 0.261809  | 0.330963  | 0.188828   | 0.37299   | 0.363556  |
| 0         | 0         | 0         | 0          | 0         | 0         |
| 0.401263  | 0.0314227 | 0         | 0.127401   | 0.244964  | 0.0355724 |
| 3.5451    | 3.17981   | 5.19926   | 3.9179     | 4.52452   | 3.92842   |
| 24.8776   | 35.8384   | 22.5475   | 8.82509    | 8.89591   | 15.6177   |
| 2.97E-18  | 2.52216   | 6.83236   | 0.00089474 | 4.15501   | 1.28118   |
| 1.08552   | 0.47702   | 0.622893  | 0.605655   | 0.242729  | 0.372489  |
| 72.0033   | 51.0718   | 59.6029   | 59.7903    | 57.0158   | 60.9576   |
| 44.5306   | 54.2269   | 49.7463   | 50.1205    | 53.7218   | 55.3504   |
| 308.019   | 257.882   | 276.907   | 321.382    | 245.802   | 276.719   |
| 14.3545   | 14.4315   | 14.4835   | 14.5915    | 15.8194   | 14.7563   |
| 72.571    | 45.2771   | 93.4995   | 83.2113    | 39.8237   | 43.5659   |
| 0.0246418 | 0.0176431 | 0.121504  | 0.017883   | 0.0764147 | 0         |
| 0.155651  | 0.278607  | 0.220329  | 0.225917   | 0.361988  | 0.56772   |
| 0         | 0         | 0         | 0          | 0         | 0         |
| 6.90733   | 6.93746   | 5.238     | 6.16153    | 4.2763    | 2.17724   |
| 7.4175    | 6.81211   | 8.5152    | 6.82194    | 8.32668   | 7.89671   |
| 49.0521   | 51.6338   | 54.2589   | 51.9206    | 56.0927   | 49.5731   |
| 788.688   | 1066.23   | 999.959   | 829.413    | 1036.3    | 1094.76   |
| 9.05702   | 7.69607   | 7.40654   | 7.58405    | 8.10131   | 8.55107   |
| 0.615654  | 1.17668   | 2.20027   | 1.63912    | 0.477264  | 0.374256  |
| 0         | 0         | 0         | 0          | 0         | 0         |
| 0         | 0         | 0         | 0          | 0         | 0         |
| 6.84699   | 5.30777   | 6.62109   | 4.93162    | 7.02398   | 8.09508   |
| 47.9895   | 41.8074   | 50.4694   | 50.8023    | 53.3917   | 49.0469   |
| 0         | 0         | 0         | 0          | 0         | 0         |
| 0.193155  | 0.0518608 | 0.0781196 | 0.122654   | 0.0748684 | 0.0391397 |
| 14.0698   | 12.1553   | 11.8785   | 13.1676    | 11.7296   | 12.4876   |
| 0         | 0.10997   | 0.248477  | 0.334396   | 0         | 0.49797   |
| 0         | 0.0684002 | 0         | 0          | 0         | 0.0774331 |
| 24.3127   | 15.9988   | 21.4284   | 20.4217    | 18.4365   | 21.4816   |
| 82.2566   | 99.1745   | 107.177   | 96.3711    | 101.557   | 110.007   |
| 0         | 0         | 0         | 0          | 0         | 0         |

|           |           |          |           |           |           |
|-----------|-----------|----------|-----------|-----------|-----------|
| 9.08232   | 8.8768    | 9.21229  | 8.83012   | 10.617    | 9.95559   |
| 0         | 0         | 0        | 0         | 0         | 0         |
| 18.6739   | 13.5986   | 11.9762  | 15.2618   | 19.1547   | 18.0111   |
| 27.2013   | 17.7038   | 20.455   | 29.7769   | 27.3454   | 24.4617   |
| 1.52202   | 1.29121   | 0.975802 | 0.798474  | 0.686807  | 0.833422  |
| 0.814374  | 1.0434    | 1.00543  | 0.964272  | 0.481793  | 0.607966  |
| 7.55439   | 2.88857   | 6.48292  | 6.62206   | 7.13668   | 9.45896   |
| 16.7245   | 15.4343   | 16.251   | 18.1145   | 14.6089   | 18.7271   |
| 2.46496   | 1.98009   | 2.43153  | 2.31244   | 1.81766   | 1.75428   |
| 0         | 0         | 0        | 0         | 0         | 0         |
| 2.78355   | 1.79367   | 3.15218  | 3.33312   | 2.9131    | 3.04581   |
| 6.01456   | 7.36353   | 6.0441   | 7.19659   | 6.14952   | 6.17438   |
| 0.321226  | 0         | 0.259833 | 1.04904   | 0.373529  | 0.260365  |
| 14.7932   | 13.6482   | 14.7217  | 13.3108   | 16.0429   | 12.8537   |
| 0         | 0         | 0.140961 | 0.126469  | 0         | 0         |
| 34.7455   | 36.0562   | 33.6118  | 32.8674   | 35.0137   | 33.4505   |
| 14.8113   | 14.9979   | 15.6975  | 14.5415   | 14.3309   | 15.14     |
| 518.531   | 523.857   | 536.61   | 549.958   | 540.406   | 488.974   |
| 0.265008  | 0.100165  | 0.409296 | 0.572383  | 0.477922  | 0.50447   |
| 0         | 0         | 0        | 0         | 0         | 0         |
| 33.8518   | 39.4467   | 35.4305  | 33.6473   | 31.4868   | 28.5475   |
| 57.5294   | 48.1447   | 68.7773  | 54.4752   | 56.4646   | 49.0434   |
| 0         | 0         | 0        | 0         | 0         | 0         |
| 3.98433   | 3.16723   | 3.66908  | 3.69222   | 2.66104   | 3.18803   |
| 0.678907  | 0.653089  | 0.431339 | 0.321796  | 0.361214  | 0.573488  |
| 3.60612   | 2.31149   | 2.71956  | 2.9041    | 1.77487   | 4.19396   |
| 0.185492  | 0.1056    | 0.287065 | 0.197606  | 0.0673175 | 0.254883  |
| 0.147228  | 0.0478578 | 0.193732 | 0.195955  | 0.0515669 | 0.118335  |
| 47.1268   | 54.8964   | 52.8696  | 51.4297   | 56.4799   | 55.43     |
| 0         | 0         | 0        | 0         | 0         | 0         |
| 26.83     | 23.4735   | 27.1926  | 24.1181   | 24.8365   | 25.6392   |
| 0.553072  | 0.557984  | 0.650718 | 0.437863  | 0.389773  | 0.590919  |
| 25.5768   | 27.9836   | 27.7712  | 27.7856   | 24.8851   | 24.7654   |
| 4.64789   | 5.5826    | 4.35813  | 3.70321   | 4.80271   | 6.99433   |
| 0.836037  | 0.922821  | 0.648076 | 1.44098   | 1.35023   | 2.48467   |
| 64.6831   | 78.3808   | 66.5118  | 68.485    | 58.5472   | 55.8107   |
| 0         | 0         | 0        | 0         | 0         | 0         |
| 6.08247   | 5.02807   | 6.35943  | 6.78433   | 5.19281   | 6.57978   |
| 0.19899   | 0.194556  | 0.296747 | 0.216311  | 0.173299  | 0.146019  |
| 29.1332   | 30.7107   | 30.7682  | 30.0444   | 28.3953   | 29.3886   |
| 0.0329815 | 0.106265  | 0        | 0.0957421 | 0         | 0.0267326 |
| 12.4496   | 14.0742   | 14.0768  | 17.4353   | 10.6137   | 15.3052   |
| 2.5068    | 2.21688   | 2.10045  | 2.45295   | 2.13354   | 2.88184   |

|           |           |           |           |           |           |
|-----------|-----------|-----------|-----------|-----------|-----------|
| 0         | 0.0465332 | 0.0525709 | 0         | 0         | 0.0526784 |
| 0         | 0         | 0         | 0         | 0         | 0         |
| 3.18615   | 2.12961   | 2.68753   | 2.73816   | 2.49532   | 3.17215   |
| 0         | 0         | 0         | 0         | 0         | 0         |
| 8.11121   | 7.84008   | 7.96692   | 8.28307   | 8.21923   | 7.70145   |
| 3.28925   | 2.95768   | 3.2474    | 3.87571   | 2.73934   | 3.22242   |
| 48.7309   | 55.6098   | 54.457    | 59.5248   | 38.9497   | 45.0327   |
| 5.15995   | 5.54164   | 7.13936   | 2.66069   | 5.68432   | 3.30183   |
| 0.157729  | 0.0282325 | 0.0318957 | 0.114467  | 0.122274  | 0.143825  |
| 132.276   | 107.542   | 116.424   | 126.794   | 101.099   | 113.46    |
| 40.0633   | 37.3896   | 43.6257   | 46.7865   | 37.4297   | 42.4652   |
| 0.404106  | 0.650997  | 0.245155  | 0.366583  | 0.391586  | 0.900738  |
| 35.0582   | 37.9475   | 37.6723   | 37.2045   | 33.3449   | 36.9187   |
| 0         | 0         | 0         | 0.134067  | 0         | 0         |
| 46.3549   | 48.8578   | 62.1804   | 49.2642   | 77.362    | 59.6718   |
| 0         | 0         | 0         | 0         | 0         | 0         |
| 0.224758  | 0.202596  | 0.0622645 | 0.0555446 | 0.206622  | 0.150988  |
| 0.320844  | 0.216322  | 0.0910314 | 0.156714  | 0.10493   | 0.109711  |
| 0.529122  | 0.263243  | 0.342604  | 0.390325  | 0.0456033 | 0.2543    |
| 37.7316   | 45.6547   | 38.9621   | 39.2011   | 34.2289   | 35.7883   |
| 16.0271   | 21.9087   | 19.2805   | 13.9178   | 14.0809   | 12.7306   |
| 15.0114   | 13.3745   | 12.2395   | 13.7391   | 13.7585   | 11.6754   |
| 356.394   | 255.172   | 0         | 0         | 552.565   | 288.87    |
| 0         | 0         | 0         | 0         | 0         | 0         |
| 7.40649   | 5.194     | 6.83377   | 6.60453   | 5.60707   | 7.04317   |
| 2.57578   | 2.74683   | 1.99555   | 3.02047   | 2.1319    | 2.16612   |
| 0.658989  | 0.528741  | 0.970047  | 0.566765  | 0.222385  | 0.606076  |
| 12.1899   | 13.4024   | 15.468    | 13.0378   | 15.0561   | 12.9274   |
| 0         | 0         | 0         | 0         | 0         | 0         |
| 16.2788   | 14.1981   | 16.8029   | 16.4591   | 15.9065   | 16.8589   |
| 1.18087   | 2.53643   | 1.71932   | 1.54256   | 1.83085   | 1.14856   |
| 7.47458   | 5.90691   | 5.11177   | 3.81986   | 3.87573   | 4.37328   |
| 0.0959975 | 0         | 0         | 0         | 0         | 0         |
| 0.351999  | 0.60746   | 0.237352  | 0.918456  | 0.566899  | 0.99077   |
| 3.79537   | 3.48694   | 3.45035   | 2.96561   | 1.83998   | 3.33943   |
| 35.1218   | 32.2431   | 33.8704   | 35.9654   | 39.7733   | 37.1415   |
| 0.0789717 | 0         | 0.0638786 | 0         | 0.18366   | 0.0640093 |
| 1.74E-08  | 1.99E-09  | 1.89E-08  | 0.0984544 | 1.16E-08  | 1.78E-08  |
| 13.3302   | 10.9413   | 13.1747   | 12.1193   | 12.7967   | 12.0645   |
| 1.34868   | 1.387     | 1.28927   | 1.01435   | 1.06453   | 1.1329    |
| 21.6823   | 19.3697   | 21.0974   | 22.481    | 20.7878   | 24.0321   |
| 9.59761   | 9.29972   | 10.6526   | 11.0903   | 11.0612   | 12.3587   |
| 0         | 0         | 0         | 0         | 0         | 0         |

|           |           |            |            |           |           |
|-----------|-----------|------------|------------|-----------|-----------|
| 5.11055   | 6.26302   | 5.03806    | 4.28673    | 3.33921   | 5.143     |
| 9.83276   | 4.74695   | 6.54161    | 7.48783    | 5.80221   | 7.03976   |
| 16.1467   | 13.776    | 15.1325    | 15.8965    | 14.5027   | 14.6154   |
| 0         | 0         | 0          | 0          | 0         | 0         |
| 1.47569   | 1.43912   | 1.27598    | 0.775506   | 0.690333  | 1.07236   |
| 1.50389   | 0.701014  | 0.58793    | 0.824991   | 0.962046  | 1.15468   |
| 0         | 0         | 0          | 0          | 0         | 0         |
| 0         | 0         | 0          | 0          | 0         | 0         |
| 42.3581   | 39.0414   | 41.9263    | 40.6513    | 46.8992   | 44.1099   |
| 55.4593   | 54.6037   | 53.254     | 62.0967    | 61.0351   | 60.6121   |
| 1.47881   | 1.0588    | 0.828125   | 1.27958    | 1.27867   | 1.19863   |
| 14.0158   | 14.7942   | 15.0437    | 12.4373    | 10.9954   | 13.3194   |
| 8.46613   | 9.03188   | 7.46031    | 9.79913    | 9.97143   | 8.13449   |
| 0.0418676 | 0.0374705 | 0.0507988  | 0.0227881  | 0.0243423 | 0.0169676 |
| 46.4151   | 37.2514   | 42.4265    | 39.95      | 43.6582   | 41.3671   |
| 7.0015    | 4.49363   | 5.91481    | 6.04793    | 6.85057   | 6.05888   |
| 3.27737   | 2.42887   | 2.0929     | 1.62736    | 6.77512   | 3.12246   |
| 0.783684  | 0.695767  | 1.04806    | 0.743145   | 0.980138  | 0.906222  |
| 26.0607   | 21.2046   | 21.9211    | 23.9863    | 21.74     | 22.8248   |
| 19.8475   | 16.5692   | 19.3112    | 20.6611    | 21.9126   | 21.1638   |
| 21.9244   | 16.558    | 21.9832    | 20.5792    | 22.2934   | 15.4251   |
| 0         | 0         | 0          | 0          | 0         | 0         |
| 0.941004  | 0.80556   | 1.48922    | 1.49942    | 1.3321    | 1.32646   |
| 1.34081   | 1.27652   | 1.39527    | 0.804876   | 0.561888  | 1.12789   |
| 0.603488  | 0.353335  | 0.975374   | 0.00737178 | 0.771499  | 0.266665  |
| 12.944    | 9.76908   | 12.7136    | 10.955     | 12.4722   | 19.5375   |
| 0.0178958 | 0.0942443 | 0          | 0.0957258  | 0.112124  | 0         |
| 1.03499   | 0.834105  | 0.6351     | 0.861875   | 1.3064    | 0.399467  |
| 3.76223   | 3.53217   | 3.31979    | 4.24965    | 3.15752   | 3.35178   |
| 8.89531   | 8.1792    | 6.11102    | 9.30739    | 6.73834   | 8.93836   |
| 0.556791  | 0.498315  | 0.26272    | 0.404073   | 0.431633  | 0.338474  |
| 1.48166   | 0.683118  | 0.363178   | 1.09971    | 0.99198   | 1.16455   |
| 1.94771   | 1.45328   | 2.62029    | 1.88073    | 2.48641   | 2.30796   |
| 0         | 0.0189221 | 0          | 0          | 0         | 0         |
| 21.6422   | 18.8068   | 17.6773    | 18.1274    | 22.4018   | 22.1346   |
| 0.0707224 | 0         | 0          | 0.0513245  | 0         | 0         |
| 0.746364  | 0.950014  | 0.26832    | 1.4444     | 2.31437   | 1.36115   |
| 33.2396   | 25.5642   | 31.4919    | 34.1262    | 41.9792   | 30.3754   |
| 16.3464   | 15.9051   | 16.9032    | 17.0774    | 18.9848   | 19.8497   |
| 0.0390568 | 0.0838918 | 0.221146   | 0.255098   | 0.151387  | 0.348225  |
| 0         | 0.0153474 | 0.00866935 | 0          | 0.0249256 | 0         |
| 14.8056   | 13.9538   | 15.7643    | 16.6652    | 12.1802   | 14.8169   |
| 1.03891   | 2.10947   | 1.7605     | 0.901608   | 0.8848    | 1.38749   |



|           |           |           |           |           |           |
|-----------|-----------|-----------|-----------|-----------|-----------|
| 0         | 0         | 0         | 0         | 0         | 0         |
| 0.419462  | 0.374778  | 0.381329  | 0.493259  | 0.365945  | 0.508677  |
| 3.33581   | 3.2559    | 3.18512   | 2.25781   | 2.60549   | 2.98836   |
| 10.5088   | 8.12691   | 9.94047   | 8.95085   | 9.6397    | 10.55     |
| 13.5738   | 11.5329   | 13.2273   | 17.5779   | 9.30062   | 12.6422   |
| 79.903    | 74.4765   | 61.6899   | 42.4318   | 155.166   | 18.533    |
| 37.0841   | 36.1995   | 24.4593   | 35.7613   | 18.5632   | 30.1604   |
| 55.8248   | 54.1893   | 50.3464   | 51.3317   | 49.3189   | 45.3056   |
| 0         | 0         | 0         | 0         | 0         | 0         |
| 0.452293  | 0.292174  | 0.670578  | 0.417978  | 0.373229  | 0.357815  |
| 0         | 0.0694795 | 0         | 0.0704244 | 0         | 0         |
| 146.658   | 172.343   | 166.96    | 170.116   | 152.102   | 156.037   |
| 1.66502   | 0.561     | 0.950685  | 0.710787  | 0.759266  | 1.58771   |
| 45.3445   | 65.4237   | 55.9904   | 42.9977   | 45.2261   | 29.9392   |
| 0.216102  | 0.6189    | 0.699202  | 0.57504   | 0.0558419 | 0.175158  |
| 39.0497   | 44.2198   | 37.4248   | 39.9221   | 42.0041   | 37.3266   |
| 0.639919  | 0.45817   | 0.608962  | 0.983437  | 0.904608  | 1.06786   |
| 25.4368   | 25.7249   | 22.067    | 24.6441   | 31.5504   | 17.2155   |
| 0         | 0         | 0         | 0         | 0         | 0         |
| 4.06115   | 4.53715   | 4.53867   | 3.3032    | 3.08743   | 3.22809   |
| 42.8053   | 44.7369   | 43.3558   | 47.2445   | 41.9073   | 42.9302   |
| 4.96603   | 5.54942   | 6.19807   | 6.73851   | 6.207     | 4.25954   |
| 0.0629269 | 0.0675817 | 0.0509003 | 0.137002  | 0.024391  | 0.0765066 |
| 6.45701   | 6.47234   | 8.31319   | 5.81841   | 8.34263   | 5.71338   |
| 53.4308   | 64.5115   | 46.172    | 50.8178   | 53.7693   | 44.9887   |
| 8.69649   | 8.83577   | 6.32641   | 7.35009   | 6.69249   | 8.91522   |
| 25.211    | 20.225    | 23.9244   | 23.3989   | 13.3305   | 17.9029   |
| 0.0974253 | 0.139509  | 0.157611  | 0.141407  | 0.151051  | 0.0789665 |
| 264.479   | 266.585   | 348.634   | 232.808   | 421.949   | 100.103   |
| 1.43822   | 0.98683   | 1.16334   | 1.00025   | 1.30075   | 1.31144   |
| 0         | 0         | 0         | 0         | 0         | 0.133079  |
| 52.945    | 58.5376   | 60.0731   | 64.4045   | 64.3299   | 55.2916   |
| 0         | 0.0241986 | 0.0273384 | 0         | 0         | 0         |
| 13.9153   | 9.79832   | 12.3432   | 11.7509   | 10.9375   | 14.0862   |
| 1.04591   | 0.793553  | 1.09212   | 1.20596   | 0.620031  | 0.648279  |
| 0         | 0         | 0         | 0         | 0         | 0         |
| 0         | 0         | 0         | 0         | 0         | 0         |
| 0.0788537 | 0.0141144 | 0.0637831 | 0         | 0.0305643 | 0.0319568 |
| 0.120355  | 0.172344  | 0.194706  | 0.0582293 | 0.0311004 | 0.162587  |
| 7.23103   | 6.00331   | 4.91581   | 7.15808   | 6.94087   | 8.66636   |
| 17.7498   | 14.2618   | 15.9129   | 16.9784   | 20.1239   | 16.9245   |
| 19.869    | 30.6153   | 25.2583   | 26.1704   | 19.0534   | 30.5149   |
| 118.836   | 181.612   | 105.221   | 125.615   | 76.2881   | 118.132   |

|           |           |           |           |           |           |
|-----------|-----------|-----------|-----------|-----------|-----------|
| 4.23756   | 4.45517   | 3.90475   | 3.08468   | 5.09326   | 3.66695   |
| 14.5754   | 16.3768   | 15.3695   | 15.177    | 16.0163   | 15.8103   |
| 8.01636   | 6.14      | 7.70573   | 7.37349   | 5.8242    | 6.86019   |
| 1.92004   | 1.41316   | 1.01011   | 1.01343   | 1.25948   | 1.5889    |
| 61.0885   | 66.3445   | 63.1424   | 72.641    | 68.3907   | 50.6209   |
| 1.10427   | 1.17815   | 0.915932  | 0.838905  | 1.51332   | 1.14409   |
| 0.322383  | 0.580882  | 0.237738  | 0.158978  | 0.755497  | 0.413949  |
| 0.0199198 | 0         | 0         | 0         | 0         | 0         |
| 22.5613   | 25.3446   | 22.9999   | 25.0605   | 18.8084   | 20.5238   |
| 0.764422  | 0.729749  | 0.669853  | 0.277378  | 0.691357  | 1.08428   |
| 0         | 0         | 0         | 0         | 0         | 0         |
| 12.0031   | 11.5423   | 12.6834   | 11.3576   | 11.9147   | 10.1755   |
| 3.95237   | 3.96239   | 4.19859   | 3.72284   | 3.85071   | 3.61447   |
| 0         | 0         | 0         | 0         | 0         | 0         |
| 4.25258   | 6.01276   | 4.27266   | 3.95487   | 4.68326   | 5.18366   |
| 43.0784   | 45.6482   | 45.9229   | 38.9252   | 45.1378   | 34.8484   |
| 3.31854   | 3.10415   | 3.48526   | 3.90382   | 2.98752   | 3.1887    |
| 0         | 0         | 0         | 0         | 0         | 0         |
| 0.611936  | 0.655041  | 0.57186   | 0.685504  | 0.502011  | 0.770435  |
| 17.7132   | 16.1564   | 20.2898   | 15.6508   | 17.3631   | 15.2447   |
| 0.260886  | 0         | 0         | 0         | 0         | 0.0528639 |
| 4.76942   | 0.709219  | 4.28652   | 3.92415   | 1.2655    | 2.86962   |
| 17.1578   | 14.3997   | 14.1262   | 14.5067   | 17.1572   | 20.3953   |
| 4.20737   | 2.71166   | 3.26349   | 2.98987   | 3.00251   | 2.82472   |
| 0.164164  | 0.445864  | 0.0796416 | 0.0714387 | 0.127379  | 0.0797924 |
| 33.2602   | 26.1128   | 22.2201   | 25.694    | 18.6428   | 21.1351   |
| 0.105631  | 0.0632003 | 0.178082  | 0.543318  | 0.179454  | 0.157052  |
| 5.89039   | 3.77011   | 4.45781   | 4.22619   | 3.23448   | 4.28608   |
| 19.1045   | 15.3458   | 19.0259   | 18.7993   | 17.8767   | 18.9722   |
| 4.50788   | 3.56355   | 3.9224    | 4.08673   | 4.1009    | 3.7921    |
| 4.81889   | 4.23594   | 5.16906   | 3.6021    | 4.00718   | 4.49003   |
| 14.7923   | 11.492    | 9.5047    | 10.2105   | 12.7545   | 11.954    |
| 66.4842   | 57.6954   | 63.9115   | 68.8516   | 60.3509   | 68.5539   |
| 0         | 0         | 0         | 0         | 0         | 0         |
| 0.827639  | 0.818316  | 0.605702  | 0.572031  | 0.39718   | 0.734718  |
| 35.6196   | 27.3615   | 28.287    | 33.071    | 38.7921   | 29.8644   |
| 3.49788   | 3.26197   | 2.89985   | 3.26116   | 3.03005   | 4.0156    |
| 2.40723   | 2.5346    | 1.98534   | 1.74697   | 1.39044   | 1.33902   |
| 5.68631   | 5.24179   | 6.64059   | 7.17007   | 6.33667   | 6.22208   |
| 60.3316   | 78.8864   | 59.1384   | 63.0808   | 56.3661   | 60.5011   |
| 0.404066  | 0.333256  | 0.529482  | 0.293214  | 0         | 0.0523764 |
| 3.45543   | 3.16      | 2.69339   | 2.86102   | 2.53259   | 2.62252   |
| 0.0290132 | 0.0207729 | 0         | 0.0210554 | 0.0224915 | 0.0940663 |

|           |           |           |           |           |           |
|-----------|-----------|-----------|-----------|-----------|-----------|
| 9.33351   | 8.03073   | 8.97736   | 9.7873    | 8.05564   | 8.20361   |
| 0         | 0         | 0         | 0         | 0         | 0         |
| 23.8405   | 16.4756   | 19.2435   | 19.9241   | 18.7117   | 21.7586   |
| 19.3462   | 16.0473   | 17.3973   | 19.0362   | 18.7856   | 19.8746   |
| 0         | 0         | 0         | 0         | 0         | 0         |
| 0.112369  | 0.0804541 | 0.090893  | 0.163096  | 0.0871102 | 0.0455394 |
| 0.0516252 | 0.0369627 | 0.125276  | 0         | 0.160083  | 0         |
| 0.133875  | 0.287556  | 0.0541445 | 0         | 0.103782  | 0         |
| 2.96472   | 2.84678   | 2.51061   | 2.18462   | 1.93251   | 2.02364   |
| 65.344    | 61.2871   | 69.2344   | 73.6809   | 81.615    | 65.393    |
| 0.860316  | 0.398569  | 1.14617   | 0.899794  | 0.549236  | 0.922917  |
| 157.665   | 112.885   | 255.065   | 228.841   | 30.5561   | 351.431   |
| 0.574508  | 0.691549  | 0.422233  | 0.49247   | 0.46559   | 0.444251  |
| 34.6742   | 39.9468   | 37.7988   | 34.3502   | 36.958    | 36.51     |
| 1.60567   | 1.65951   | 1.0985    | 1.64092   | 1.52298   | 1.54297   |
| 37.5217   | 33.9172   | 40.3951   | 44.8088   | 42.6952   | 41.0058   |
| 0.317325  | 0.198799  | 0.0962541 | 0.230288  | 0.0922481 | 0.160751  |
| 2.34057   | 1.25686   | 0.946622  | 2.01708   | 1.13403   | 1.42284   |
| 1.25827   | 1.28377   | 1.56999   | 1.31408   | 1.0531    | 1.41411   |
| 134.963   | 110.391   | 212.087   | 133.538   | 269.203   | 131.262   |
| 8.1125    | 7.18362   | 5.26743   | 6.81667   | 4.80008   | 5.2782    |
| 75.9949   | 60.3424   | 70.1345   | 71.2264   | 84.1795   | 70.1199   |
| 2.69132   | 2.16621   | 2.06314   | 1.92761   | 1.6364    | 1.15499   |
| 12.3457   | 10.7359   | 7.43921   | 8.01643   | 8.79428   | 5.75299   |
| 0.45081   | 0.10759   | 0.2431    | 0.261728  | 0.27958   | 0.755152  |
| 0         | 0         | 0         | 0         | 0         | 0         |
| 0.0817478 | 0.0585299 | 0         | 0         | 0.0316861 | 0.0331297 |
| 0.602438  | 0.383408  | 0.379011  | 0.4372    | 0.415129  | 0.705317  |
| 0.598541  | 0.304704  | 0.344239  | 0.212815  | 0.725327  | 0.524626  |
| 0.10834   | 0.0336759 | 0.176075  | 0.0605598 | 0.0368341 | 0.0750083 |
| 0.200406  | 0         | 0.225533  | 0.202346  | 0.190562  | 0.110688  |
| 0         | 0         | 0         | 0         | 0         | 0         |
| 1.62843   | 1.49217   | 2.07839   | 1.96128   | 2.35546   | 1.75935   |
| 28.2792   | 29.8978   | 26.175    | 27.2876   | 26.6469   | 24.5257   |
| 1.13455   | 1.17146   | 1.22201   | 1.2222    | 1.17158   | 1.44497   |
| 14.5879   | 14.3019   | 15.9943   | 15.2871   | 12.9042   | 13.0833   |
| 32.2516   | 37.8544   | 38.0284   | 33.6007   | 26.3925   | 32.5988   |
| 0         | 0         | 0         | 0         | 0         | 0         |
| 65.965    | 53.6596   | 77.7564   | 51.7006   | 76.7993   | 60.2889   |
| 0.152956  | 0.109514  | 0         | 0.222006  | 0         | 0         |
| 12.8755   | 8.04118   | 10.0254   | 9.47985   | 10.7379   | 10.642    |
| 0.561618  | 0.49202   | 0.569645  | 0.502358  | 0.366806  | 0.518643  |
| 19.2927   | 21.7094   | 20.089    | 23.1688   | 21.6513   | 23.6825   |

|           |           |           |            |           |           |
|-----------|-----------|-----------|------------|-----------|-----------|
| 1.7295    | 2.33711   | 4.52985   | 13.6619    | 3.04101   | 2.51774   |
| 1.09202   | 1.95466   | 1.32497   | 0.528333   | 0.564368  | 0.7376    |
| 3.63041   | 3.23373   | 2.08188   | 2.44893    | 2.04569   | 1.62848   |
| 0         | 0         | 0         | 0          | 0         | 0         |
| 1.55094   | 1.06652   | 1.20286   | 2.11111    | 1.36167   | 1.85083   |
| 10.3054   | 11.9933   | 10.9354   | 9.13553    | 10.3567   | 10.5703   |
| 2.20051   | 2.20322   | 2.88862   | 1.08589    | 0.932561  | 3.23645   |
| 0.284477  | 0.271573  | 0.191756  | 0.172042   | 0.110265  | 0.345867  |
| 0         | 0         | 0         | 0          | 0         | 0         |
| 13.4253   | 13.195    | 17.8775   | 14.281     | 15.1296   | 12.7373   |
| 0.219393  | 0.314162  | 0.177463  | 0.159217   | 0.170077  | 0.133369  |
| 1.80716   | 0.84147   | 1.399     | 1.08622    | 1.15171   | 0.710004  |
| 22.4753   | 15.3102   | 9.65026   | 13.6552    | 16.5786   | 21.8898   |
| 0.42111   | 0.594976  | 0.0886201 | 0.838629   | 0.14284   | 0.651383  |
| 0.451366  | 0.386501  | 0.291271  | 0.392615   | 0.488737  | 0.291818  |
| 0         | 0.248553  | 0.140402  | 0.0839778  | 0.0897055 | 0.0468962 |
| 14.5305   | 15.6636   | 11.087    | 16.2639    | 11.7919   | 10.0429   |
| 5.58588   | 7.01766   | 5.529     | 6.69137    | 4.35187   | 4.64479   |
| 0         | 0         | 0.0108259 | 0.00388515 | 0         | 0.014464  |
| 0.639222  | 0.183765  | 0.3617    | 0.510225   | 0.223618  | 0.543659  |
| 2.77333   | 1.78709   | 2.37789   | 1.93215    | 1.46195   | 2.56258   |
| 2.85537   | 2.16937   | 2.82403   | 2.55178    | 2.93848   | 2.63778   |
| 0.18034   | 0.121726  | 0.1238    | 0.0883317  | 0.103806  | 0.218492  |
| 1.66708   | 1.29019   | 2.16502   | 1.89645    | 2.30231   | 2.17424   |
| 0         | 0         | 0         | 0          | 0         | 0         |
| 0         | 0         | 0         | 0.0165067  | 0         | 0         |
| 34.4784   | 32.7094   | 33.2026   | 30.4712    | 28.2122   | 26.2824   |
| 9.70412   | 10.7325   | 9.54509   | 10.308     | 9.1198    | 9.31559   |
| 0         | 0         | 0         | 0          | 0         | 0         |
| 0         | 0         | 0         | 0          | 0         | 0.0201432 |
| 11.933    | 8.93902   | 12.0408   | 10.2596    | 10.5247   | 10.9798   |
| 4.13273   | 2.7062    | 2.55336   | 3.64728    | 3.21985   | 2.52491   |
| 0.0390756 | 9.62E-154 | 0         | 3.95E-146  | 2.89E-287 | 0         |
| 0.0438882 | 0.0628462 | 0         | 0.0637009  | 0.0340228 | 0.106719  |
| 10.5721   | 9.05188   | 8.76827   | 9.68764    | 9.7441    | 10.0893   |
| 1.54612   | 2.72497   | 2.51725   | 1.7406     | 1.07601   | 2.5385    |
| 7.66338   | 6.08676   | 6.97536   | 6.72695    | 7.51054   | 7.92346   |
| 22.3741   | 21.5007   | 23.2984   | 25.2387    | 23.5556   | 21.1814   |
| 36.7708   | 65.0785   | 26.7354   | 38.7536    | 23.8612   | 16.9113   |
| 0         | 0         | 0         | 0          | 0         | 0         |
| 25.9464   | 20.2026   | 22.9313   | 25.2067    | 22.8757   | 23.0002   |
| 0.543888  | 0.340736  | 0.43994   | 0.444048   | 0.685149  | 0.385734  |
| 0         | 0.136574  | 0.0342876 | 0.0615249  | 0.147873  | 0.0687154 |

|           |           |           |          |           |           |
|-----------|-----------|-----------|----------|-----------|-----------|
| 1.32603   | 1.08499   | 0.888813  | 1.29911  | 1.22905   | 1.50424   |
| 9.6211    | 11.1362   | 10.6784   | 11.3443  | 7.94428   | 9.22021   |
| 6.08556   | 4.32383   | 4.74585   | 6.29612  | 4.899     | 7.23444   |
| 3.20921   | 2.56443   | 2.34091   | 2.59931  | 2.59889   | 2.55472   |
| 6.70482   | 7.22306   | 6.45482   | 5.65403  | 6.00007   | 5.95643   |
| 624.045   | 642.88    | 627.152   | 648.574  | 670.439   | 581.539   |
| 1.87936   | 0.724548  | 1.75405   | 1.04915  | 2.46554   | 3.3981    |
| 32.7648   | 31.0189   | 38.3523   | 31.9776  | 31.6822   | 34.1419   |
| 5.85537   | 6.27404   | 3.59305   | 2.72544  | 2.37915   | 2.6512    |
| 0.487327  | 0.465529  | 0.394658  | 0.660169 | 0.529212  | 1.29032   |
| 5.59892   | 4.30788   | 6.31336   | 5.50659  | 5.05297   | 5.22899   |
| 1.66444   | 2.59371   | 1.58392   | 1.49213  | 1.02465   | 1.86491   |
| 51.7875   | 57.4999   | 53.7252   | 61.4485  | 56.315    | 55.2466   |
| 18.3952   | 13.8716   | 14.3769   | 15.208   | 15.9679   | 17.2601   |
| 10.0871   | 8.35093   | 13.9386   | 11.4506  | 13.4842   | 11.1047   |
| 4.87465   | 3.95509   | 2.88586   | 4.47904  | 3.22274   | 5.36744   |
| 24.1037   | 22.0766   | 17.873    | 16.7517  | 15.8959   | 18.3077   |
| 6.87104   | 4.965     | 5.85577   | 6.16622  | 5.74005   | 6.00157   |
| 0         | 0         | 0         | 0        | 0         | 0         |
| 0.297771  | 0.710662  | 0.428197  | 0.528239 | 0.512971  | 0.268171  |
| 1.45912   | 3.37519   | 3.60128   | 3.50255  | 1.53718   | 1.51624   |
| 11.2421   | 9.57928   | 7.1398    | 8.63663  | 8.23842   | 4.7696    |
| 3.25668   | 3.30077   | 2.89435   | 3.02663  | 2.32541   | 3.49919   |
| 13.1602   | 12.7945   | 14.3986   | 15.7946  | 15.4638   | 12.9729   |
| 0         | 0         | 0         | 0        | 0         | 0         |
| 0.229675  | 0.184998  | 0.0464449 | 0.208349 | 0.0890238 | 0.13962   |
| 24.036    | 19.3763   | 23.8109   | 23.7619  | 23.9178   | 25.3812   |
| 307.952   | 386.988   | 345.056   | 348.25   | 383.903   | 310.283   |
| 5.70814   | 3.70914   | 5.8588    | 3.41147  | 3.90445   | 4.66552   |
| 0         | 0         | 0         | 0        | 0         | 0         |
| 13.5958   | 12.707    | 12.446    | 14.5341  | 11.5493   | 13.3952   |
| 0         | 0         | 0         | 0        | 0         | 0         |
| 39.6044   | 48.2573   | 32.2627   | 27.2167  | 35.0602   | 34.6556   |
| 0.81173   | 0.841714  | 1.01885   | 0.751594 | 1.06324   | 1.45199   |
| 9.7215    | 11.1506   | 11.4699   | 8.35424  | 8.64057   | 6.3305    |
| 0.225505  | 0.0705639 | 0.125274  | 0.22491  | 0.371436  | 0.217496  |
| 4.07967   | 3.89261   | 5.91828   | 5.54729  | 3.88672   | 4.88843   |
| 0.0176911 | 2.30E-19  | 1.25E-31  | 1.74E-22 | 0.0268305 | 0.0298982 |
| 2.26E-07  | 1.18E-07  | 4.69E-08  | 3.86E-08 | 6.46E-08  | 5.93E-08  |
| 3.48941   | 2.55894   | 2.62797   | 2.43353  | 2.37676   | 2.53801   |
| 1.26556   | 0.895489  | 0.650398  | 0.745557 | 0.715613  | 0.567195  |
| 22.6766   | 19.4174   | 22.3059   | 23.6508  | 25.0216   | 20.7125   |
| 0         | 0         | 0         | 0        | 0         | 0         |

|           |           |           |            |           |           |
|-----------|-----------|-----------|------------|-----------|-----------|
| 27.9077   | 14.5959   | 21.122    | 29.1701    | 27.4489   | 25.374    |
| 5.79272   | 4.93849   | 3.23646   | 4.00886    | 4.56005   | 4.81621   |
| 21.4307   | 22.6585   | 20.7522   | 21.5731    | 34.4476   | 17.2147   |
| 4.47765   | 3.44516   | 3.64891   | 3.37076    | 2.38317   | 3.19594   |
| 0         | 0         | 0         | 0          | 0         | 0         |
| 11.3984   | 8.91635   | 11.1028   | 9.98631    | 10.5341   | 10.9118   |
| 0         | 0         | 0         | 0          | 0         | 0         |
| 3.9419    | 5.34293   | 4.62638   | 3.95802    | 3.34533   | 3.49644   |
| 0.144775  | 0.466452  | 0.409869  | 0.157598   | 0.168347  | 0.0586724 |
| 891.927   | 831.415   | 834.652   | 867.428    | 894.783   | 875.425   |
| 2.91687   | 1.84529   | 2.57069   | 2.16106    | 2.44345   | 2.62535   |
| 14.1778   | 11.0444   | 10.176    | 12.4354    | 10.5653   | 10.5884   |
| 12.8273   | 12.5121   | 14.2816   | 13.5954    | 15.6174   | 15.5154   |
| 8.31368   | 7.91281   | 7.21856   | 9.44795    | 7.52785   | 8.34236   |
| 0         | 0         | 0         | 0          | 0         | 0         |
| 0         | 0.118344  | 0         | 0.359861   | 0.128135  | 0         |
| 0.309668  | 0.166287  | 0.532279  | 0.252823   | 0.300074  | 0.125498  |
| 0         | 0         | 0         | 0          | 0         | 0         |
| 0         | 0         | 0         | 0.142258   | 0         | 0         |
| 51.2233   | 53.422    | 55.6993   | 54.6146    | 48.4227   | 52.7835   |
| 0.111455  | 0.1197    | 0.135231  | 0.262877   | 0.172804  | 0.0903384 |
| 15.0774   | 14.8817   | 16.9425   | 16.0321    | 16.2955   | 15.6144   |
| 6.2032    | 5.19052   | 5.00757   | 5.17072    | 5.89032   | 5.14906   |
| 0.879228  | 0.52003   | 0.587504  | 0.610329   | 0.444516  | 0.588706  |
| 25.349    | 18.8184   | 21.081    | 28.6739    | 23.2597   | 23.396    |
| 32.3679   | 27.2351   | 31.5146   | 33.8402    | 30.6307   | 30.6203   |
| 0         | 0         | 0.152483  | 0          | 0         | 0.954972  |
| 0         | 0         | 0.0827376 | 0.0742313  | 0.0792942 | 0         |
| 63.4698   | 89.6211   | 45.8153   | 65.1926    | 111.215   | 66.6183   |
| 53.0979   | 50.8858   | 54.5858   | 54.7715    | 50.7338   | 54.919    |
| 38.8259   | 31.1156   | 31.2633   | 28.9537    | 32.1602   | 28.8126   |
| 0         | 0         | 0         | 0          | 0         | 0         |
| 0.277987  | 0.447825  | 0.224858  | 0.20174    | 0         | 0         |
| 23.7098   | 21.2694   | 19.5151   | 18.8345    | 20.5835   | 21.7178   |
| 0.156518  | 0.298837  | 0         | 0.151451   | 0         | 0.253726  |
| 0         | 0         | 0         | 0          | 0         | 0         |
| 15.7382   | 13.459    | 13.7587   | 16.1571    | 16.0557   | 15.7244   |
| 19.858    | 18.1399   | 18.5049   | 19.5185    | 20.273    | 19.3112   |
| 0         | 0         | 0         | 0.00388515 | 0         | 0         |
| 0.0771742 | 0.0828828 | 0.0624246 | 0.0560067  | 0.119653  | 0.156381  |
| 63.6372   | 58.6681   | 71.7893   | 48.3451    | 66.2442   | 98.3299   |
| 0.502624  | 0.599782  | 0.135521  | 0.607939   | 0.129881  | 0.135798  |
| 0         | 0         | 0         | 0          | 0         | 0         |

|           |           |           |           |           |           |
|-----------|-----------|-----------|-----------|-----------|-----------|
| 5.11719   | 5.0833    | 5.6345    | 4.33582   | 5.23385   | 5.38544   |
| 9.53126   | 12.2654   | 9.68331   | 10.5323   | 9.35912   | 9.97093   |
| 38.1549   | 49.732    | 41.759    | 45.5276   | 39.112    | 49.7431   |
| 0         | 0         | 0         | 0         | 0         | 0         |
| 28.8959   | 45.8255   | 19.2979   | 19.0952   | 35.4629   | 40.613    |
| 0         | 0         | 0         | 0         | 0         | 0         |
| 13.5514   | 10.4095   | 12.8988   | 12.2893   | 11.1242   | 10.9555   |
| 0.196651  | 0.151629  | 0.146831  | 0.230537  | 0.0820868 | 0.13487   |
| 5.01149   | 4.79876   | 5.35549   | 4.99708   | 6.04857   | 8.1735    |
| 33.0894   | 37.0233   | 30.5835   | 31.4506   | 36.6776   | 31.5493   |
| 6.51087   | 7.56623   | 5.75265   | 7.92355   | 6.36739   | 5.31787   |
| 0.0616272 | 0         | 0         | 0.0447239 | 0         | 0.0499509 |
| 0         | 0         | 0         | 0         | 0         | 0         |
| 0.645756  | 0.202278  | 0.0979386 | 0.205029  | 0.187725  | 0.0654259 |
| 32.5005   | 28.7894   | 35.6952   | 31.7661   | 38.2238   | 33.4832   |
| 0.137441  | 0.0861044 | 0.0555865 | 0.112211  | 0.0266366 | 0.167101  |
| 12.6424   | 11.4043   | 13.6434   | 13.8304   | 12.6632   | 15.9921   |
| 1.7467    | 1.4713    | 1.24665   | 1.97599   | 1.67268   | 1.74888   |
| 0.0386423 | 0.207504  | 0.125028  | 0.112174  | 0.119825  | 0.156605  |
| 1.32214   | 1.28176   | 1.16962   | 1.10572   | 1.29138   | 1.30674   |
| 6.5494    | 6.70961   | 7.367     | 8.2806    | 8.60715   | 7.13637   |
| 18.3427   | 23.4644   | 16.4756   | 19.3611   | 14.3883   | 15.1084   |
| 0.831541  | 0.595367  | 1.27797   | 0.362078  | 0.257849  | 0.471794  |
| 46.6068   | 48.9031   | 58.1602   | 48.0355   | 47.7396   | 48.9809   |
| 0.422015  | 0.302155  | 0.4267    | 1.14849   | 1.79934   | 0.684115  |
| 0         | 0         | 0         | 0         | 0         | 0         |
| 0.0441507 | 0.0316111 | 0.107138  | 0.032041  | 0.0342263 | 0.143143  |
| 0         | 0         | 0         | 0         | 0         | 0         |
| 0         | 0         | 0         | 0         | 0         | 0.0391337 |
| 7.91669   | 8.3681    | 8.15173   | 7.18561   | 5.38496   | 7.36407   |
| 8.12414   | 9.74662   | 3.96343   | 8.23234   | 8.39427   | 6.14868   |
| 0         | 0         | 0         | 0.27967   | 0         | 0         |
| 0         | 0.133599  | 0.301867  | 0.0451386 | 0.0482173 | 0         |
| 7.57363   | 5.10079   | 6.38197   | 5.90703   | 7.03253   | 6.59739   |
| 5.25691   | 3.62278   | 3.44199   | 4.39157   | 3.66815   | 5.25775   |
| 35.7773   | 32.3873   | 38.9906   | 34.0839   | 31.9274   | 30.6493   |
| 1.00585   | 0.96023   | 0.813612  | 0.729967  | 0.143932  | 1.27387   |
| 40.69     | 34.7087   | 35.202    | 37.9794   | 42.7643   | 36.3928   |
| 1500.4    | 2862.9    | 2693.79   | 2095.69   | 2381.35   | 2457.01   |
| 0         | 0.354332  | 0.100077  | 0.179575  | 0         | 0.100281  |
| 14.8415   | 16.675    | 17.8961   | 14.8883   | 14.2566   | 14.4878   |
| 0         | 0         | 0.0810595 | 0         | 0         | 0         |
| 0.453439  | 0.324654  | 0         | 0.658138  | 0         | 0.367528  |

|           |           |           |           |           |           |
|-----------|-----------|-----------|-----------|-----------|-----------|
| 24.0694   | 27.6052   | 28.1005   | 28.7314   | 24.3173   | 23.22     |
| 0         | 0.0184199 | 0         | 0         | 0         | 0.0417049 |
| 0         | 0         | 0         | 0         | 0         | 0         |
| 0         | 0         | 0.0806146 | 0         | 0         | 0         |
| 12.7847   | 11.2377   | 13.1594   | 11.3369   | 10.7804   | 12.6441   |
| 0         | 0         | 0         | 0         | 0         | 0         |
| 60.7025   | 56.5332   | 63.769    | 52.8249   | 54.4706   | 47.0067   |
| 37.1807   | 30.4555   | 35.7858   | 36.2524   | 38.0117   | 42.9209   |
| 2.1798    | 1.89228   | 2.78254   | 2.37499   | 1.95214   | 2.35839   |
| 3.79286   | 2.63918   | 3.59348   | 3.40497   | 4.93901   | 4.38232   |
| 105.967   | 114.088   | 101.064   | 100.748   | 126.071   | 60.8409   |
| 3.17749   | 2.57247   | 2.30644   | 2.68247   | 3.09371   | 3.52841   |
| 0.168305  | 0.241007  | 0.136139  | 0         | 0.130473  | 0.136417  |
| 0.451147  | 0.393233  | 0.25386   | 0.370111  | 0.114044  | 0.158987  |
| 2.918     | 3.30325   | 2.77496   | 3.54849   | 2.50663   | 3.73947   |
| 3.10447   | 2.97861   | 2.55208   | 3.09436   | 4.11386   | 3.14824   |
| 0         | 0         | 0         | 0         | 0         | 0         |
| 6.12989   | 5.86166   | 6.65031   | 7.27949   | 6.18003   | 6.97925   |
| 1.25153   | 1.04766   | 0.988188  | 0.951811  | 1.84435   | 1.11211   |
| 17.0077   | 13.5536   | 14.7577   | 14.9281   | 14.7337   | 15.7591   |
| 0.0786613 | 0.0187733 | 0.0212092 | 0.0190286 | 0.0609795 | 0.106263  |
| 0         | 0         | 0         | 0         | 0         | 0         |
| 0.391146  | 0.155314  | 0.488129  | 0.15732   | 0.521649  | 0.324574  |
| 1.0092    | 1.75424   | 1.24975   | 1.0877    | 0.86617   | 1.1431    |
| 9.29414   | 6.52979   | 8.57695   | 6.67352   | 11.576    | 6.50875   |
| 0         | 0         | 0         | 0         | 0         | 0         |
| 41.5187   | 43.8645   | 46.318    | 45.1694   | 40.2442   | 38.1269   |
| 139.861   | 100.267   | 116.014   | 152.181   | 139.748   | 124.808   |
| 0         | 0         | 0         | 0         | 0         | 0         |
| 28.5206   | 25.7395   | 25.8085   | 26.981    | 29.8647   | 24.3617   |
| 12.9588   | 14.6574   | 12.2828   | 13.5297   | 14.8531   | 11.7279   |
| 0         | 0         | 0         | 0         | 0         | 0         |
| 0         | 0.0156428 | 0.0176724 | 0         | 0         | 0.0177086 |
| 0.341071  | 0.06105   | 0.310371  | 0.330029  | 0.297454  | 0.368599  |
| 88.4424   | 148.883   | 110.228   | 62.3417   | 51.5501   | 104.868   |
| 89.4104   | 116.217   | 122.234   | 112.915   | 124.322   | 108.509   |
| 15.9414   | 17.4987   | 18.5488   | 17.9556   | 18.7904   | 16.671    |
| 168.26    | 183.377   | 179.468   | 190.216   | 190.133   | 168.255   |
| 2.7126    | 1.98086   | 2.27285   | 2.03133   | 1.39911   | 1.88331   |
| 13.5899   | 10.1338   | 12.1278   | 10.1845   | 11.1209   | 12.3276   |
| 1.16684   | 2.08859   | 1.57306   | 1.6936    | 0.603036  | 1.26102   |
| 8.81692   | 11.876    | 11.1571   | 10.0468   | 7.75331   | 8.63403   |
| 22.7649   | 28.125    | 27.9723   | 24.3841   | 20.5451   | 29.024    |



|           |           |          |          |          |          |
|-----------|-----------|----------|----------|----------|----------|
| 0.629295  | 0.32617   | 0.96359  | 0.709725 | 0.470873 | 0.514429 |
| 0         | 0         | 0        | 0        | 0        | 0        |
| 0         | 0         | 0        | 0        | 0        | 0        |
| 12.6734   | 12.0663   | 12.8008  | 12.9997  | 13.5646  | 12.7115  |
| 0         | 0         | 0        | 0        | 0        | 0        |
| 1.25883   | 1.33951   | 1.10059  | 1.45658  | 0.738596 | 1.29599  |
| 4.00622   | 3.69197   | 3.27264  | 3.36797  | 1.78346  | 2.79708  |
| 11.3612   | 10.6744   | 11.6249  | 11.0333  | 11.2709  | 12.0638  |
| 28.5085   | 29.0498   | 34.4146  | 33.9447  | 34.5163  | 30.5903  |
| 111.336   | 159.43    | 270.174  | 215.464  | 172.62   | 210.565  |
| 10.9381   | 9.11885   | 10.9616  | 9.44136  | 11.849   | 11.3307  |
| 3.70307   | 2.67949   | 2.66041  | 4.22398  | 2.29623  | 2.85238  |
| 2.09562   | 2.42647   | 2.13213  | 2.11491  | 2.77952  | 1.73838  |
| 8.77143   | 8.81861   | 12.272   | 10.342   | 11.208   | 11.333   |
| 52.8662   | 65.4249   | 67.9442  | 55.7636  | 56.8989  | 60.3017  |
| 5.61357   | 5.19792   | 6.04713  | 5.83309  | 5.8607   | 5.9288   |
| 3.39014   | 2.50232   | 2.65609  | 2.17935  | 2.00397  | 2.3143   |
| 9.14034   | 12.6278   | 11.715   | 12.2856  | 12.5747  | 11.9998  |
| 0         | 0         | 0        | 0        | 0        | 0        |
| 18.1615   | 25.3917   | 21.1227  | 20.6075  | 15.032   | 17.8452  |
| 0         | 0         | 0        | 0.128595 | 0        | 0        |
| 14.9381   | 16.6476   | 14.6574  | 16.4734  | 17.0683  | 14.2662  |
| 21.6332   | 20.2057   | 14.8544  | 17.6407  | 15.0809  | 16.601   |
| 4.16605   | 3.73632   | 4.97674  | 3.33489  | 2.62642  | 3.72516  |
| 15.1299   | 14.5447   | 12.3026  | 15.236   | 12.9307  | 10.9823  |
| 0.0326748 | 0.0935791 | 0.105721 | 0        | 0.113987 | 0.107173 |
| 0         | 0.115499  | 0        | 0        | 0        | 0        |
| 2.29016   | 2.25915   | 0.60051  | 1.61009  | 1.36797  | 1.54295  |
| 23.7482   | 23.043    | 24.0115  | 28.7283  | 28.1261  | 27.8801  |
| 23.3167   | 17.668    | 18.4653  | 19.3614  | 15.4724  | 15.7668  |
| 3.61609   | 3.18573   | 5.17104  | 5.52461  | 6.86236  | 6.79492  |
| 13.0862   | 11.1474   | 11.9765  | 11.9569  | 13.1185  | 12.2464  |
| 11.3248   | 9.33017   | 10.089   | 10.9207  | 11.882   | 13.3538  |
| 31.5742   | 28.8723   | 30.0791  | 30.8707  | 29.9457  | 29.6122  |
| 104.104   | 81.5408   | 97.4472  | 96.053   | 143.401  | 64.1742  |
| 0.183154  | 0.147527  | 0.203706 | 0.178609 | 0.164169 | 0.204122 |
| 20.5279   | 25.7558   | 39.8511  | 20.8565  | 32.4334  | 30.2664  |
| 0         | 0         | 0        | 0        | 0        | 0        |
| 0         | 0         | 0        | 0        | 0        | 0        |
| 1.6902    | 1.95594   | 1.91688  | 1.6779   | 0.790083 | 1.20568  |
| 12.0417   | 11.9121   | 10.9089  | 12.2163  | 9.63665  | 10.4534  |
| 2.47277   | 4.72043   | 3.60024  | 4.88587  | 2.46468  | 2.98444  |
| 4.20558   | 1.85666   | 2.20512  | 2.9073   | 2.33242  | 2.51952  |

|           |           |           |           |           |           |
|-----------|-----------|-----------|-----------|-----------|-----------|
| 30.8575   | 24.3349   | 20.5793   | 30.4243   | 24.8558   | 24.0485   |
| 3.98369   | 5.46026   | 4.86494   | 4.29006   | 4.51997   | 6.31424   |
| 0         | 0         | 0         | 0         | 0         | 0         |
| 9.77471   | 8.57462   | 8.89281   | 9.20127   | 10.0805   | 8.50631   |
| 0.0569598 | 0.0259338 | 0         | 0.0396018 | 0.0441561 | 0.0230736 |
| 0.348432  | 0.187082  | 0.0528253 | 0.0473943 | 0.113931  | 0.052958  |
| 7.22231   | 3.42308   | 5.43057   | 5.16754   | 3.94285   | 5.85393   |
| 30.9533   | 32.5982   | 29.732    | 32.2911   | 31.6234   | 30.5498   |
| 79.3675   | 83.1115   | 73.6536   | 85.7884   | 86.5582   | 49.4122   |
| 27.0525   | 28.2509   | 24.0763   | 26.4042   | 21.9248   | 25.1516   |
| 39.2842   | 43.8217   | 38.9155   | 39.1478   | 43.6503   | 34.722    |
| 0.040604  | 0.0581435 | 0         | 0         | 0.0314769 | 0.0987328 |
| 42.7162   | 33.7517   | 41.5771   | 37.6964   | 31.5584   | 41.8002   |
| 6.79599   | 5.62072   | 7.52697   | 5.98326   | 7.14139   | 6.91942   |
| 1.05035   | 0.668011  | 1.0779    | 0.993985  | 0.812897  | 0.907285  |
| 5.71185   | 6.28075   | 4.41652   | 4.20183   | 3.91219   | 4.28532   |
| 0.839971  | 0.833853  | 0.937037  | 1.0396    | 0.447962  | 0.765951  |
| 4.92929   | 6.41452   | 4.52259   | 5.31628   | 3.49326   | 2.72903   |
| 14.6695   | 8.27299   | 12.191    | 10.0626   | 12.4625   | 10.017    |
| 0         | 0         | 0         | 0         | 0         | 0.0414381 |
| 11.8502   | 9.04822   | 10.851    | 10.5021   | 11.597    | 9.44339   |
| 6.7555    | 9.67362   | 10.5976   | 9.8547    | 10.7913   | 8.241     |
| 62.7223   | 77.1714   | 53.6213   | 52.0805   | 68.1029   | 39.1257   |
| 2.84571   | 0.495996  | 0.589907  | 1.50614   | 1.29806   | 0.694079  |
| 11.4485   | 19.8906   | 12.5091   | 12.6653   | 24.9976   | 11.7881   |
| 38.6052   | 64.7681   | 47.6261   | 50.9719   | 44.0608   | 80.7101   |
| 0.0613458 | 0.204959  | 0         | 0.0267118 | 0         | 0         |
| 15.5465   | 14.0978   | 14.8617   | 15.0121   | 14.8657   | 12.5229   |
| 0.0346667 | 0.0329298 | 0.0662122 | 0.0166924 | 0.035663  | 0.0278917 |
| 38.9453   | 38.246    | 44.2591   | 44.0333   | 50.8988   | 47.8404   |
| 0         | 0         | 0         | 0         | 0         | 0         |
| 38.442    | 103.864   | 85.2976   | 71.7903   | 123.623   | 68.5958   |
| 16.5266   | 18.4007   | 17.3986   | 18.1729   | 16.8623   | 17.8948   |
| 0.706598  | 0.178557  | 0.773277  | 0.422298  | 0.515544  | 0.774858  |
| 0.269585  | 0.302076  | 0.142929  | 0.321577  | 0.104078  | 0.138106  |
| 0         | 0.0373019 | 0.0842836 | 0.189046  | 0.040388  | 0.084456  |
| 11.8612   | 11.182    | 7.20934   | 11.0481   | 8.03854   | 8.71642   |
| 0         | 0         | 0         | 0         | 0         | 0         |
| 232.777   | 289.197   | 265.914   | 277.606   | 247.389   | 281.818   |
| 398.254   | 414.054   | 458.65    | 442.345   | 489.566   | 420.724   |
| 1.67781   | 2.30964   | 2.24301   | 1.60816   | 1.61453   | 1.79421   |
| 0.17541   | 0.17541   | 0.105993  | 0.105993  | 0.205747  | 0.205747  |
| 9.27219   | 8.98114   | 10.0503   | 9.01144   | 7.59047   | 9.70176   |

|           |           |           |           |           |           |
|-----------|-----------|-----------|-----------|-----------|-----------|
| 0         | 0         | 0         | 0         | 0         | 0         |
| 0.280868  | 0.201096  | 0.0378647 | 0.135887  | 0.0725777 | 0.151769  |
| 8.01546   | 7.98068   | 9.26944   | 9.92225   | 9.07784   | 8.5441    |
| 0.118482  | 0         | 2.55E-22  | 0         | 0.0787277 | 2.56E-06  |
| 215.488   | 211.877   | 208.575   | 197.596   | 231.083   | 196.92    |
| 10.5764   | 12.0377   | 9.85304   | 10.2163   | 8.48171   | 9.51846   |
| 7.02591   | 6.94498   | 4.24113   | 5.8979    | 5.12142   | 5.73723   |
| 1.33113   | 1.06809   | 0.835388  | 1.3491    | 0.978537  | 1.41376   |
| 0.0230653 | 0         | 0.018657  | 0.0502166 | 0.0357611 | 0.0747807 |
| 7.30597   | 6.05247   | 7.48177   | 7.32434   | 8.31403   | 8.65485   |
| 0         | 0         | 0         | 0         | 0         | 0         |
| 8.24421   | 6.53562   | 7.80073   | 7.4822    | 7.53566   | 8.92908   |
| 0.373116  | 0.433523  | 0.714017  | 0.510873  | 0.233493  | 0.683595  |
| 0.960475  | 1.2344    | 0.464854  | 1.0439    | 0.744575  | 0.933374  |
| 23.9866   | 23.2937   | 23.0262   | 23.8969   | 19.4566   | 23.9203   |
| 0         | 0         | 0         | 0         | 0         | 0         |
| 0         | 0.0160478 | 0         | 0         | 0         | 0.0181671 |
| 22.85     | 15.524    | 17.2545   | 15.265    | 26.0927   | 26.6097   |
| 0.874117  | 0.451499  | 0.731822  | 0.480418  | 0.474682  | 0.385405  |
| 11.8833   | 10.1355   | 11.1239   | 15.2561   | 8.29946   | 12.6714   |
| 42.5398   | 38.4855   | 36.0639   | 38.9785   | 30.6774   | 30.8452   |
| 0.542993  | 0.347849  | 0.288958  | 0.30073   | 0.376627  | 0.370622  |
| 10.2905   | 8.37309   | 10.3365   | 8.12113   | 8.53803   | 9.7023    |
| 133.006   | 139.184   | 120.988   | 140.861   | 148.367   | 130.406   |
| 1.48718   | 1.37709   | 2.04266   | 1.89786   | 1.70561   | 1.41098   |
| 0         | 0         | 0         | 0         | 0         | 0         |
| 23.5847   | 17.6747   | 23.2822   | 21.148    | 25.8478   | 19.4502   |
| 2.42728   | 1.91434   | 2.4585    | 1.82215   | 4.18172   | 3.57392   |
| 6.54774   | 5.07585   | 5.66184   | 7.08976   | 6.70989   | 7.73541   |
| 5.06541   | 5.8657    | 5.49792   | 5.42032   | 4.42765   | 3.93811   |
| 0         | 0         | 0.109034  | 0         | 0.104496  | 0         |
| 22.6505   | 18.9694   | 17.9501   | 23.5238   | 13.9641   | 11.6399   |
| 5.65005   | 5.97024   | 5.55561   | 5.86852   | 5.129     | 6.24795   |
| 1.30533   | 1.12705   | 0.266902  | 0.809276  | 0.77205   | 2.22591   |
| 5.89589   | 3.64957   | 4.46364   | 3.04446   | 2.87762   | 3.20437   |
| 1.69728   | 1.64111   | 1.25785   | 1.61438   | 1.41231   | 1.38813   |
| 1.80412   | 1.81538   | 2.12981   | 2.61856   | 1.39858   | 1.6599    |
| 0         | 0         | 0         | 0.0810374 | 0         | 0         |
| 0.415874  | 0.628596  | 0.492633  | 0.477352  | 0.322392  | 0.532291  |
| 0.737103  | 0.412306  | 0.608649  | 0.133732  | 0.32142   | 0.336064  |
| 0         | 0         | 0.5424    | 0         | 0         | 0         |
| 1.51407   | 1.50998   | 2.29631   | 1.80515   | 1.4882    | 2.47637   |
| 0.0525716 | 0.602244  | 0.72291   | 0.572282  | 0         | 0.0639166 |

|           |           |           |           |           |           |
|-----------|-----------|-----------|-----------|-----------|-----------|
| 2.34122   | 2.31699   | 2.49631   | 2.42018   | 2.58376   | 1.82386   |
| 10.6431   | 11.2626   | 11.2079   | 9.56983   | 8.1469    | 9.65742   |
| 0.495083  | 0.553219  | 0.502973  | 0.616098  | 0.321993  | 0.463643  |
| 8.08789   | 8.68575   | 10.9954   | 8.2046    | 8.234     | 7.46185   |
| 6.13527   | 6.54811   | 6.08744   | 6.47827   | 5.17611   | 5.3753    |
| 0         | 0.0506715 | 0.0858693 | 0.102721  | 0.0822955 | 0.0573632 |
| 6.28195   | 5.66629   | 3.66156   | 3.8438    | 3.62853   | 3.89368   |
| 6.73839   | 5.32498   | 5.71631   | 5.86561   | 9.28505   | 7.98434   |
| 0.283433  | 0.304399  | 0.458526  | 0.565654  | 0.274652  | 0.172299  |
| 0         | 0         | 0         | 0         | 0         | 0         |
| 2.22775   | 1.41975   | 1.32017   | 1.55455   | 1.51823   | 1.32752   |
| 5.99915   | 8.59055   | 10.8765   | 7.4313    | 8.33907   | 7.29377   |
| 0         | 30.0218   | 0         | 0         | 32.5056   | 0         |
| 0.80511   | 1.0971    | 0.756275  | 1.28165   | 1.18787   | 1.26304   |
| 21.3702   | 20.8928   | 26.3131   | 22.4274   | 28.6761   | 23.7694   |
| 1.29491   | 1.48474   | 1.40485   | 1.9707    | 1.69515   | 2.25909   |
| 0.213831  | 0.229648  | 0.216204  | 0.310361  | 0.165765  | 0.0866584 |
| 0.412885  | 0         | 0         | 0.149819  | 0         | 0.334657  |
| 0.247076  | 0.31807   | 0.19964   | 0.322379  | 0.30622   | 0.200086  |
| 27.8227   | 24.2885   | 27.5334   | 28.8617   | 30.6332   | 28.5824   |
| 4.39414   | 3.04856   | 2.20423   | 2.22482   | 2.9839    | 2.84375   |
| 12.2161   | 11.3204   | 12.5049   | 13.2807   | 11.3063   | 13.6219   |
| 9.2704    | 8.19363   | 9.61637   | 8.19154   | 8.70556   | 10.8572   |
| 468.777   | 313.26    | 252.79    | 249.48    | 314.95    | 329.299   |
| 1.46833   | 0.21026   | 0.237541  | 0.511486  | 0.318717  | 0.285632  |
| 0.0289118 | 0.0221029 | 0         | 0         | 0         | 0         |
| 64.504    | 55.9233   | 60.7539   | 63.9618   | 55.1442   | 60.5023   |
| 51.9281   | 50.9158   | 48.6248   | 55.0117   | 63.1925   | 41.3983   |
| 26.7403   | 27.2368   | 29.0419   | 30.0165   | 29.4549   | 23.6275   |
| 17.5475   | 18.7404   | 18.8246   | 19.5279   | 23.7222   | 14.2594   |
| 4.7771    | 3.25233   | 3.92309   | 3.56817   | 1.73306   | 2.60439   |
| 0.0464576 | 0.0332627 | 0         | 0.0337151 | 0         | 0         |
| 0         | 0         | 0         | 0         | 0         | 0         |
| 0.0389949 | 0.0837588 | 0         | 0         | 0         | 0.0316067 |
| 21.6587   | 14.6693   | 18.2134   | 22.8068   | 19.0639   | 22.1001   |
| 0.21813   | 0.0567915 | 0.0160401 | 0.0719548 | 0.0153725 | 0.0964371 |
| 8.7595    | 8.15697   | 7.69394   | 9.74988   | 9.26924   | 8.86394   |
| 10.6378   | 10.1947   | 13.868    | 10.8387   | 9.45495   | 13.2542   |
| 0.0128869 | 0.0925242 | 0         | 0.0187045 | 0         | 0.0104453 |
| 0.101178  | 0.120736  | 0.0886611 | 0.134616  | 0.0784349 | 0.129846  |
| 38.4416   | 26.0188   | 36.8985   | 34.8967   | 36.0896   | 31.6814   |
| 13.5075   | 12.3864   | 12.8996   | 14.7571   | 14.133    | 17.3471   |
| 37.0802   | 27.0285   | 34.1297   | 32.6066   | 43.9464   | 32.8222   |

|           |           |           |           |           |           |
|-----------|-----------|-----------|-----------|-----------|-----------|
| 0.0418    | 0.029928  | 0         | 0.030335  | 0.032404  | 0         |
| 0.0574188 | 0.0411107 | 0.116112  | 0.333359  | 0.578655  | 0.209429  |
| 0         | 0         | 0         | 0         | 0         | 0         |
| 0.206442  | 0.147809  | 0         | 0.149819  | 0.160037  | 0.167329  |
| 0         | 0         | 0         | 0         | 0         | 0         |
| 2.59219   | 2.95938   | 3.2936    | 2.10393   | 2.34727   | 2.18443   |
| 4.41444   | 4.0348    | 3.90712   | 3.45069   | 4.76698   | 5.39901   |
| 13.2763   | 12.2268   | 13.308    | 13.7146   | 13.2466   | 13.1464   |
| 0.469725  | 0.286596  | 0.440564  | 0.376075  | 0.397026  | 0.520335  |
| 6.8614    | 6.56798   | 6.15331   | 7.55937   | 5.12635   | 5.7226    |
| 0         | 0         | 0         | 0         | 0         | 0.0458536 |
| 4.74707   | 3.18328   | 3.54283   | 4.0466    | 2.41755   | 2.9198    |
| 0.0204509 | 0         | 0         | 0         | 0         | 0.0165762 |
| 24.5381   | 22.4741   | 22.8656   | 25.2779   | 21.4652   | 20.7921   |
| 33.997    | 30.2074   | 37.499    | 35.652    | 37.0803   | 40.1677   |
| 0         | 0         | 0         | 0         | 0         | 0         |
| 0.536034  | 0.410259  | 0.777467  | 0.576808  | 0.659136  | 0.749093  |
| 108.467   | 88.0971   | 92.3111   | 117.289   | 72.1631   | 93.0393   |
| 0         | 0         | 0.0860783 | 0.0772285 | 0         | 0.0862543 |
| 2.97792   | 2.79639   | 2.6684    | 2.49844   | 2.64352   | 2.91658   |
| 20.1621   | 23.2379   | 17.8998   | 18.9655   | 21.9473   | 19.5877   |
| 2.56408   | 1.83157   | 2.44917   | 2.64488   | 1.4882    | 1.79578   |
| 134.047   | 0         | 72.2851   | 64.8534   | 242.468   | 144.866   |
| 8.89938   | 8.29915   | 10.5891   | 10.2489   | 7.07289   | 10.3311   |
| 0.15191   | 0.0613045 | 0.0384766 | 0.0460282 | 0.0491675 | 0.043375  |
| 4.52712   | 4.95733   | 5.33129   | 2.31911   | 3.71593   | 5.66596   |
| 28.0153   | 20.4255   | 24.1061   | 23.8354   | 25.0955   | 29.7271   |
| 0.057268  | 0.0307521 | 0         | 0.0623407 | 0.0221975 | 0.0928353 |
| 19.3352   | 18.6189   | 18.9597   | 16.6847   | 16.5052   | 16.1656   |
| 0.0245133 | 0.0351021 | 0.0396567 | 0         | 0.0570093 | 0         |
| 0.0404595 | 0         | 0         | 0         | 0         | 0         |
| 1.57583   | 1.08159   | 1.38087   | 1.43419   | 1.32745   | 1.4724    |
| 4.89634   | 5.35373   | 6.55452   | 5.38113   | 4.26867   | 5.12247   |
| 0.304483  | 0.054501  | 0.24629   | 0.0552421 | 0         | 0.123397  |
| 30.2911   | 33.9571   | 30.7927   | 33.5219   | 32.9359   | 33.1084   |
| 4.18618   | 3.69499   | 3.35801   | 3.28959   | 3.5485    | 3.4554    |
| 12.6288   | 11.5315   | 8.25023   | 11.0404   | 8.81064   | 8.53492   |
| 0         | 0         | 0         | 0         | 0         | 0         |
| 0.307223  | 0.297461  | 0.248507  | 0.252892  | 0.367538  | 0.487079  |
| 4.77774   | 3.32795   | 3.67377   | 3.01353   | 3.87741   | 4.55142   |
| 0.0527595 | 0.0377748 | 0         | 0.0382885 | 0         | 0         |
| 23.9684   | 20.4822   | 20.6811   | 21.0635   | 17.6798   | 21.9392   |
| 16.9544   | 13.9642   | 14.7382   | 13.3967   | 12.8516   | 17.9577   |

|           |           |            |           |           |           |
|-----------|-----------|------------|-----------|-----------|-----------|
| 0.353243  | 0.210763  | 0.142866   | 0.128178  | 0.31948   | 0.0954386 |
| 0         | 0         | 0          | 0         | 0         | 0         |
| 0         | 0         | 0          | 0         | 0         | 0         |
| 4.23728   | 2.4369    | 5.65843    | 3.23555   | 2.14915   | 4.48344   |
| 14.8424   | 21.5978   | 19.657     | 16.8408   | 17.6018   | 16.0508   |
| 42.8837   | 47.4933   | 43.7819    | 30.3055   | 37.9755   | 27.859    |
| 0.227191  | 0.338278  | 0.214287   | 0.281307  | 0.154201  | 0.298878  |
| 5.04948   | 4.63183   | 5.1442     | 5.30027   | 5.59305   | 5.73713   |
| 0.265261  | 0.207188  | 0.214565   | 0.210005  | 0.25237   | 0.156366  |
| 3.87427   | 2.30012   | 0.745034   | 1.63476   | 8.28699   | 3.23975   |
| 1.36429   | 1.0989    | 1.4484     | 0.433163  | 0.264404  | 1.03792   |
| 7.4264    | 5.30231   | 8.00382    | 6.12713   | 5.56408   | 7.1795    |
| 4.63489   | 5.21873   | 3.50799    | 4.48727   | 3.50343   | 3.78791   |
| 27.9485   | 25.5711   | 17.8475    | 23.4283   | 13.0393   | 20.6327   |
| 121.918   | 123.747   | 123.105    | 126.818   | 125.501   | 88.4978   |
| 0         | 0         | 0          | 0         | 0         | 0         |
| 6.41918   | 6.71406   | 7.25138    | 7.38796   | 6.90594   | 8.04974   |
| 0.338078  | 0.411097  | 0.175599   | 0.817016  | 0.450048  | 0.789384  |
| 4.29319   | 3.53718   | 3.91952    | 3.42492   | 2.83871   | 3.45419   |
| 2.78186   | 1.91589   | 2.57713    | 2.7675    | 2.10009   | 2.37674   |
| 0.0567898 | 0.0406604 | 0.137808   | 0         | 0.220122  | 0         |
| 12.4744   | 16.8466   | 7.80026    | 8.01488   | 12.3968   | 11.3438   |
| 0.919645  | 3.62146   | 1.8597     | 2.66961   | 2.13877   | 1.86351   |
| 0.247991  | 0.651041  | 0.334324   | 0.359943  | 0.736944  | 0.43551   |
| 0.44829   | 0         | 0.362612   | 0.325332  | 0         | 0.363353  |
| 46.5437   | 39.4581   | 43.7694    | 44.9811   | 44.5051   | 42.6653   |
| 38.844    | 34.1974   | 36.4193    | 37.761    | 45.5055   | 35.9562   |
| 3.09499   | 3.19559   | 2.86436    | 2.50615   | 3.00848   | 3.59346   |
| 0         | 0         | 0          | 0         | 0         | 0         |
| 0         | 0         | 0          | 0.0448738 | 0.0479345 | 0         |
| 0         | 0.0351668 | 0          | 0         | 0         | 0.0398109 |
| 1.93395   | 2.01657   | 2.23618    | 1.54652   | 1.66398   | 1.83827   |
| 31.1673   | 41.2118   | 41.2135    | 36.9311   | 32.4755   | 49.1856   |
| 4.10581   | 2.58766   | 3.66997    | 2.50392   | 2.94217   | 3.03426   |
| 9.15266   | 8.30381   | 5.97333    | 8.10752   | 6.16531   | 6.98335   |
| 0         | 0         | 0          | 0         | 0         | 0         |
| 0         | 0         | 0          | 0         | 0         | 0         |
| 1.41242   | 0.842723  | 0.698182   | 1.36669   | 0.851614  | 0.763211  |
| 30.3363   | 25.2277   | 27.0547    | 27.3546   | 28.4744   | 28.2391   |
| 0.0182334 | 0.0294665 | 0.00632086 | 0.0268968 | 0.0403853 | 0         |
| 17.4106   | 18.8909   | 17.308     | 15.534    | 16.7816   | 18.4168   |
| 10.5852   | 8.82075   | 8.38396    | 9.05699   | 4.69923   | 7.82768   |
| 6.79187   | 5.28835   | 7.89735    | 6.28445   | 5.23226   | 7.19096   |

|           |           |           |           |           |          |
|-----------|-----------|-----------|-----------|-----------|----------|
| 22.9085   | 27.85     | 22.8791   | 18.3215   | 17.2154   | 21.2965  |
| 0         | 0         | 0         | 0         | 0         | 0        |
| 190.398   | 140.944   | 193.003   | 166.323   | 171.207   | 108.81   |
| 4.78248   | 3.35956   | 5.66886   | 4.16924   | 4.80336   | 5.1441   |
| 0.0862646 | 0.185291  | 0.139555  | 0.187811  | 0.150466  | 0.139841 |
| 11.1242   | 10.7654   | 10.0174   | 10.2928   | 9.22063   | 9.7018   |
| 62.2454   | 68.5472   | 61.5809   | 75.4952   | 47.8274   | 65.7328  |
| 0.184526  | 0.0566218 | 0.0852913 | 0.0573918 | 0.102177  | 0.128198 |
| 6.89878   | 5.2626    | 6.3793    | 5.55386   | 7.35304   | 6.94334  |
| 7.10716   | 5.80477   | 5.85127   | 8.31385   | 9.91869   | 5.47003  |
| 39.168    | 74.5256   | 49.9498   | 44.4348   | 82.8758   | 60.4264  |
| 0         | 30.0218   | 0         | 30.4301   | 0         | 101.96   |
| 2.2604    | 2.09282   | 0.741108  | 0.806004  | 0.226573  | 0.805445 |
| 18.3293   | 17.7834   | 18.9422   | 18.5024   | 20.804    | 20.377   |
| 13.6208   | 10.9114   | 11.0888   | 13.1798   | 10.9729   | 11.4538  |
| 17.3799   | 14.7684   | 18.8778   | 16.1965   | 20.3104   | 18.6873  |
| 10.2179   | 12.6723   | 14.1075   | 11.4553   | 8.38539   | 9.1958   |
| 0.176855  | 0.126625  | 0.198698  | 0.11408   | 0.190429  | 0.12741  |
| 0.0877186 | 0.224319  | 0.221202  | 0.101859  | 0.108381  | 0.113768 |
| 10.3103   | 12.5265   | 11.6351   | 12.6753   | 8.47017   | 11.029   |
| 9.46088   | 10.1517   | 11.9147   | 9.90337   | 8.52452   | 10.0421  |
| 5.73589   | 4.39967   | 6.2045    | 5.616     | 5.02147   | 6.21499  |
| 0         | 0         | 0         | 0         | 0         | 0        |
| 7.3643    | 6.10519   | 7.21072   | 8.39126   | 8.16242   | 7.1446   |
| 1.49461   | 0.802583  | 1.20896   | 1.35583   | 0.579321  | 2.42286  |
| 18.9895   | 17.2282   | 17.7973   | 19.116    | 17.1203   | 17.1356  |
| 0.773179  | 1.31111   | 1.0204    | 1.5652    | 1.10412   | 0.857572 |
| 1.52251   | 2.11961   | 2.59989   | 3.37611   | 2.88511   | 2.46809  |
| 15.6963   | 20.1642   | 16.0928   | 15.7977   | 18.878    | 15.8639  |
| 4.54182   | 4.13607   | 3.96273   | 4.02936   | 4.09847   | 3.92947  |
| 3.51631   | 2.95106   | 3.34738   | 3.07546   | 2.51374   | 4.50367  |
| 4.55831   | 4.30032   | 4.55113   | 7.11066   | 2.61672   | 1.67682  |
| 0         | 0         | 0         | 0         | 0.0387992 | 0        |
| 32.3431   | 29.7241   | 28.5771   | 41.2477   | 26.6604   | 26.4568  |
| 0.393589  | 0.657539  | 0.778229  | 0.380846  | 0.508527  | 0.638034 |
| 0         | 0         | 0         | 0         | 0         | 0        |
| 20.5715   | 29.4545   | 23.099    | 20.7314   | 19.594    | 21.866   |
| 22.6747   | 22.5775   | 29.9388   | 27.7941   | 23.2599   | 23.7212  |
| 0.178915  | 0.256199  | 0.578882  | 0.519366  | 0.138697  | 0.290033 |
| 54.5159   | 45.1985   | 57.1786   | 62.3774   | 64.6585   | 59.8862  |
| 1.16665   | 1.00375   | 0.665676  | 0.988845  | 0.743381  | 0.945608 |
| 10.7466   | 9.76729   | 10.419    | 10.3221   | 11.0956   | 11.2737  |
| 19.3103   | 18.1864   | 21.0517   | 17.7182   | 19.4983   | 17.1171  |

|           |          |           |           |            |            |
|-----------|----------|-----------|-----------|------------|------------|
| 0         | 0        | 0         | 0         | 0          | 0          |
| 0         | 0        | 0         | 0         | 0          | 0.009333   |
| 3.01816   | 2.38762  | 3.14129   | 3.89052   | 2.38881    | 3.23325    |
| 2.76069   | 2.87183  | 1.74708   | 1.66174   | 1.8506     | 2.89572    |
| 44.5418   | 39.3361  | 47.8877   | 48.2696   | 38.5681    | 45.368     |
| 0.410258  | 0.334945 | 0.448143  | 0.308969  | 0.639268   | 0.298252   |
| 0.159089  | 0.196258 | 0.714441  | 0.383204  | 3.36E-26   | 0.523895   |
| 3.36412   | 3.48009  | 3.90539   | 3.1379    | 2.91648    | 2.76065    |
| 2.44315   | 3.15887  | 2.67119   | 3.33818   | 1.62237    | 2.75923    |
| 0         | 0        | 0         | 0         | 0          | 0          |
| 0         | 0        | 0         | 0         | 0          | 0          |
| 1.38589   | 1.08248  | 0.611464  | 1.28006   | 0.586016   | 1.02119    |
| 0.114801  | 0        | 0.0309533 | 0.027771  | 0.0296651  | 0.0310166  |
| 0         | 0        | 0         | 0         | 0          | 0.276318   |
| 105.606   | 104.894  | 100.327   | 109.751   | 111.792    | 98.7163    |
| 0.145235  | 0.103986 | 0.381803  | 0.23715   | 0.140736   | 0.588591   |
| 0         | 0        | 0         | 0.044464  | 0          | 0.0496606  |
| 36.5731   | 35.9118  | 33.5981   | 39.0543   | 33.3474    | 27.244     |
| 11.4401   | 11.8389  | 10.0417   | 7.12683   | 11.3919    | 11.8331    |
| 0         | 0        | 0         | 0.0294673 | 0          | 0.0658111  |
| 35.9892   | 29.5238  | 37.9873   | 34        | 35.7091    | 38.4422    |
| 4.21705   | 4.10628  | 4.50263   | 5.05984   | 3.09477    | 4.14725    |
| 7.70506   | 6.95877  | 6.59168   | 7.94035   | 8.70253    | 6.52686    |
| 0.0249504 | 0.020097 | 0.0315341 | 0.0203703 | 0.00483548 | 0.00505578 |
| 17.7036   | 16.997   | 19.0215   | 16.1367   | 13.9061    | 16.1524    |
| 58.4163   | 68.7561  | 56.1166   | 58.2913   | 57.3669    | 63.5032    |
| 8.51774   | 6.23216  | 8.16393   | 6.56071   | 6.77091    | 7.5332     |
| 0.171433  | 0.490972 | 0         | 0.373237  | 0.265796   | 0          |
| 0         | 0        | 0         | 0         | 0          | 0          |
| 0.537469  | 0.427575 | 0.652122  | 0.671755  | 0.347212   | 0.338829   |
| 4.36714   | 4.0743   | 3.54779   | 5.55659   | 4.93899    | 5.25594    |
| 17.1769   | 14.8264  | 16.6814   | 15.9415   | 16.5326    | 15.8403    |
| 6.38498   | 5.38846  | 5.5642    | 5.5446    | 6.92462    | 7.82544    |
| 71.3268   | 82.5335  | 69.9782   | 70.2142   | 76.4301    | 47.4624    |
| 0.125618  | 0.26982  | 0.228622  | 0.182327  | 0.304316   | 0.203635   |
| 33.1877   | 28.4593  | 32.1876   | 34.2724   | 36.0478    | 27.1936    |
| 154.187   | 158.325  | 124.217   | 127.78    | 176.761    | 98.757     |
| 59.0045   | 57.6163  | 55.9611   | 56.0056   | 54.1917    | 53.6082    |
| 1.33764   | 1.11596  | 1.28898   | 1.58696   | 2.10998    | 1.89499    |
| 438.371   | 440.917  | 437.153   | 477.161   | 447.48     | 390.163    |
| 30.3065   | 34.5532  | 34.2012   | 32.9206   | 24.5063    | 29.6162    |
| 0.401388  | 0.145407 | 0.185832  | 0.0368456 | 0.209917   | 0.212466   |
| 1.18147   | 1.05739  | 1.64852   | 1.80057   | 1.48833    | 1.96312    |



|           |           |           |           |          |           |
|-----------|-----------|-----------|-----------|----------|-----------|
| 0         | 0         | 0         | 0         | 0        | 0         |
| 0.515617  | 2.23349   | 0.834144  | 0.374192  | 0.799428 | 0.417925  |
| 36.4643   | 27.4645   | 20.7183   | 24.3803   | 20.6162  | 24.9702   |
| 8.94338   | 7.26545   | 7.12851   | 8.13258   | 8.91984  | 9.73898   |
| 48.8829   | 54.1674   | 55.449    | 43.251    | 45.9371  | 48.4023   |
| 12.6222   | 9.14996   | 11.8903   | 8.15507   | 13.3476  | 10.0522   |
| 16.4339   | 18.377    | 15.7587   | 16.3507   | 15.8905  | 13.7499   |
| 2.74643   | 3.18285   | 3.07519   | 3.35377   | 3.61677  | 3.00392   |
| 0         | 0         | 0         | 0         | 0        | 0         |
| 16.3313   | 14.9023   | 15.7467   | 16.3904   | 14.215   | 14.3516   |
| 93.9644   | 104.187   | 106.02    | 98.5165   | 104.265  | 85.1423   |
| 9.25353   | 7.94314   | 9.88355   | 7.92747   | 6.65826  | 7.29311   |
| 42.0158   | 43.94     | 44.4828   | 45.7832   | 41.2392  | 42.0592   |
| 1.23556   | 0.786343  | 0.296124  | 0.542428  | 0.4257   | 1.23637   |
| 0.0253295 | 0.0181354 | 0.0204885 | 0         | 0        | 0.0205304 |
| 1.08644   | 0.697403  | 1.06062   | 1.45003   | 1.0552   | 1.33608   |
| 118.368   | 229.436   | 169.444   | 184.519   | 107.155  | 87.1044   |
| 0         | 0         | 0         | 0         | 0        | 0         |
| 0         | 0         | 0         | 0         | 0        | 0         |
| 8.68592   | 7.47939   | 8.87972   | 7.72574   | 6.79783  | 8.25175   |
| 4.36057   | 2.90371   | 4.03137   | 3.31913   | 3.38038  | 3.75782   |
| 0         | 0         | 0         | 0         | 0        | 0         |
| 0         | 0         | 0         | 0         | 0        | 0         |
| 1.28079   | 0.816462  | 1.16143   | 1.35027   | 2.20761  | 0.717729  |
| 4.51E-08  | 9.82E-09  | 0.118988  | 0.146307  | 1.51E-08 | 4.65E-09  |
| 29.7502   | 20.9821   | 26.7213   | 29.6909   | 29.4712  | 27.4776   |
| 150.822   | 153.927   | 147.513   | 166.604   | 153.572  | 151.175   |
| 0         | 0         | 0         | 0         | 0        | 0         |
| 22.3022   | 21.9672   | 20.9048   | 23.2215   | 18.4305  | 20.2659   |
| 88.0667   | 85.5946   | 71.2751   | 95.6576   | 60.9738  | 67.0328   |
| 5.0508    | 4.70836   | 3.79406   | 4.31272   | 4.74657  | 4.87514   |
| 1.70326   | 1.4634    | 2.37394   | 0.988869  | 1.56416  | 0.860188  |
| 0.0676315 | 0.129128  | 0.34647   | 0.163605  | 0.122334 | 0.127908  |
| 0.252993  | 0.0724554 | 0.204641  | 0.0734408 | 0.117675 | 0.123036  |
| 21.8607   | 19.0798   | 21.9021   | 20.2724   | 18.2729  | 21.9903   |
| 0.175608  | 0         | 0         | 0         | 0        | 0         |
| 0.47314   | 0.338759  | 0.422999  | 0.271078  | 0.135131 | 0.363312  |
| 25.4281   | 24.272    | 27.289    | 28.9423   | 26.9868  | 29.3835   |
| 0         | 0.709322  | 0         | 0         | 0.256002 | 0.267665  |
| 42.7944   | 40.6937   | 41.2501   | 44.0293   | 41.7105  | 46.3206   |
| 6.87133   | 5.68606   | 7.63587   | 7.79844   | 8.44649  | 8.46695   |
| 0.306843  | 0.458471  | 0.252093  | 0.135914  | 0.175673 | 0.656742  |
| 0.0769943 | 0.0551264 | 0.186837  | 0.0558761 | 0.119374 | 0         |

|           |           |           |           |           |           |
|-----------|-----------|-----------|-----------|-----------|-----------|
| 9.04467   | 6.26825   | 8.00389   | 7.60176   | 9.99299   | 6.87674   |
| 46.9587   | 52.0241   | 47.1949   | 47.1174   | 37.1038   | 33.4907   |
| 0.795028  | 0.426918  | 0.643082  | 0.769288  | 0.205439  | 1.07399   |
| 10.7345   | 10.9549   | 11.2688   | 10.6706   | 11.8724   | 10.1805   |
| 3.10933   | 4.52327   | 3.46394   | 3.05652   | 2.00501   | 3.58558   |
| 0         | 0         | 1.38917   | 0         | 0         | 0         |
| 0.886777  | 1.02363   | 0.586845  | 0.717115  | 0.766912  | 0.882613  |
| 16.2772   | 17.9032   | 15.3951   | 15.0105   | 17.2731   | 18.258    |
| 37.4791   | 35.24     | 41.915    | 35.7929   | 46.6806   | 43.3527   |
| 24.3078   | 25.6262   | 27.1675   | 26.4917   | 22.3154   | 25.1882   |
| 0.171926  | 0         | 0         | 0         | 0         | 0.069676  |
| 104.699   | 123.967   | 112.792   | 117.511   | 107.278   | 111.592   |
| 2.73961   | 2.60692   | 4.03567   | 4.2182    | 2.39224   | 2.93201   |
| 1.18142   | 1.11724   | 2.1552    | 1.75826   | 1.6293    | 2.45881   |
| 1.25214   | 1.53154   | 1.35045   | 1.2116    | 1.6178    | 1.69151   |
| 7.3687    | 5.65733   | 5.55966   | 5.81763   | 5.33592   | 5.42197   |
| 0.962882  | 0.590919  | 0.630502  | 0.698781  | 0.604262  | 0.631791  |
| 15.3407   | 2.74591   | 0         | 0         | 5.94617   | 15.5427   |
| 7.99082   | 6.95914   | 8.11952   | 8.47702   | 8.5751    | 8.54746   |
| 3.55561   | 4.31727   | 4.34374   | 3.75084   | 3.23943   | 3.65442   |
| 0.334175  | 0.136722  | 0.205949  | 0.161678  | 0.185041  | 0.374045  |
| 9.09008   | 9.59121   | 9.80371   | 7.82361   | 7.9987    | 8.32434   |
| 0         | 0         | 0         | 0         | 0         | 0         |
| 0.868447  | 0.482098  | 0.386149  | 0.460159  | 0.464538  | 0.364587  |
| 7.45985   | 6.39429   | 6.58655   | 5.45188   | 6.43462   | 6.451     |
| 7.63513   | 8.22306   | 6.39535   | 7.02605   | 7.49947   | 8.33668   |
| 0         | 0         | 0         | 0         | 0         | 0         |
| 1.32806   | 0.769612  | 0.884037  | 0.932916  | 0.657309  | 0.941284  |
| 6.37696   | 4.13996   | 5.21165   | 4.65185   | 4.25194   | 3.669     |
| 24.4098   | 20.606    | 24.0478   | 24.3735   | 24.3017   | 24.6637   |
| 49.1076   | 31.1102   | 24.501    | 26.0501   | 32.8009   | 35.3797   |
| 11.4989   | 9.95231   | 9.74393   | 9.46007   | 12.4917   | 10.6102   |
| 0         | 0         | 0         | 0         | 0         | 0         |
| 12.6315   | 11.393    | 12.3604   | 13.8397   | 9.77074   | 12.2031   |
| 6.11696   | 5.79242   | 7.48121   | 7.50723   | 5.49565   | 5.97639   |
| 25.7327   | 27.0814   | 22.91     | 19.1107   | 17.4594   | 21.1042   |
| 11.2416   | 11.3415   | 7.6306    | 7.93006   | 5.42383   | 7.67806   |
| 29.9426   | 30.853    | 32.606    | 34.4799   | 30.2659   | 31.7207   |
| 2.14257   | 1.60827   | 2.09647   | 2.05648   | 1.68774   | 2.26882   |
| 0.0797568 | 0.0746164 | 0.0206444 | 0.0926095 | 0.0791408 | 0.0620598 |
| 0.613631  | 0.473098  | 0.559904  | 0.411118  | 0.317419  | 0.751982  |
| 4.36791   | 4.21781   | 3.67701   | 5.06319   | 4.88145   | 3.93472   |
| 7.73231   | 6.43003   | 9.49031   | 7.197     | 7.05808   | 7.62699   |

|           |          |           |           |           |           |
|-----------|----------|-----------|-----------|-----------|-----------|
| 7.5512    | 8.7317   | 7.04336   | 9.83748   | 4.82335   | 6.61739   |
| 11.2185   | 8.67068  | 8.86499   | 8.0997    | 9.29882   | 9.69915   |
| 11.982    | 8.4399   | 11.171    | 9.7556    | 9.9221    | 10.341    |
| 42.8401   | 37.3752  | 35.3173   | 38.5317   | 37.6974   | 39.8204   |
| 4.20514   | 2.98571  | 3.89467   | 3.74857   | 3.9499    | 4.35709   |
| 15.4594   | 12.7532  | 15.5889   | 18.4636   | 12.717    | 14.159    |
| 403.323   | 492.574  | 487.261   | 463.089   | 479.336   | 481.982   |
| 5.21379   | 3.29513  | 5.68325   | 4.53016   | 5.90218   | 4.74188   |
| 1.15202   | 0.824823 | 1.28129   | 0.41802   | 0.334898  | 0.817031  |
| 5.48756   | 3.3061   | 2.6795    | 3.93385   | 2.95708   | 2.27817   |
| 23.3037   | 19.8004  | 16.8121   | 17.3248   | 23.725    | 20.4858   |
| 0         | 0.104787 | 0         | 0.0531058 | 0         | 0         |
| 8.96017   | 9.37883  | 9.83636   | 8.20346   | 7.83737   | 9.31451   |
| 3.26624   | 4.12351  | 4.49678   | 4.23764   | 3.22447   | 5.15432   |
| 10.1092   | 8.2567   | 10.1154   | 11.6296   | 11.6682   | 11.694    |
| 1.81496   | 1.00604  | 2.50994   | 3.3566    | 2.04239   | 3.17944   |
| 0.663428  | 0.686057 | 0.304858  | 0.562343  | 0.704729  | 0.617371  |
| 6.73989   | 5.10192  | 4.82035   | 4.64536   | 4.94985   | 5.74187   |
| 4.93734   | 4.43888  | 3.58472   | 1.69039   | 6.32796   | 2.59855   |
| 0         | 0        | 0         | 0         | 0         | 0         |
| 6.8167    | 8.14871  | 8.4773    | 7.97622   | 8.72975   | 7.69142   |
| 0.0627664 | 0.134819 | 0.0507704 | 0.0227753 | 0.0729862 | 0.0508743 |
| 0         | 0        | 0         | 0         | 0         | 0         |
| 25.5857   | 22.6827  | 23.3149   | 23.164    | 27.377    | 23.2596   |
| 1.62929   | 3.03301  | 0.527161  | 1.89185   | 1.51566   | 1.3206    |
| 5.9084    | 5.59733  | 6.83682   | 6.36204   | 5.45121   | 7.02537   |
| 4.77571   | 4.64013  | 4.83472   | 5.25262   | 5.60639   | 6.93754   |
| 14.9455   | 13.5431  | 15.7334   | 16.3785   | 17.4592   | 13.9581   |
| 27.9696   | 25.1402  | 30.6732   | 27.726    | 29.617    | 28.8636   |
| 0         | 36.5288  | 0         | 148.102   | 0         | 0         |
| 0         | 0        | 0         | 0         | 0.0174168 | 0         |
| 1.79795   | 0.835989 | 0.993909  | 1.0383    | 0.810304  | 1.07569   |
| 0         | 0        | 0         | 0.310217  | 0         | 0         |
| 14.383    | 11.6792  | 12.9438   | 13.384    | 13.894    | 13.8033   |
| 16.1561   | 14.7669  | 18.2817   | 24.7903   | 19.0198   | 25.7721   |
| 0.645106  | 0.63509  | 0.608782  | 1.09238   | 1.02103   | 0.827893  |
| 0.671013  | 0.460415 | 0.565384  | 0.365225  | 1.04036   | 0.226616  |
| 10.7646   | 6.19073  | 8.41355   | 8.96172   | 6.45821   | 8.68297   |
| 6.98741   | 6.92438  | 6.64024   | 6.98368   | 6.3692    | 7.1879    |
| 5.8367    | 3.33139  | 4.61478   | 4.35511   | 4.40998   | 4.95739   |
| 2.10782   | 2.21109  | 0.951612  | 1.24509   | 0.570005  | 1.62899   |
| 0.0607645 | 0        | 0         | 0         | 0.0471056 | 0.0985034 |
| 2.29699   | 1.7202   | 2.79745   | 2.70141   | 2.63924   | 2.39666   |

|          |           |           |          |          |           |
|----------|-----------|-----------|----------|----------|-----------|
| 54.4271  | 46.3233   | 47.465    | 42.6188  | 50.534   | 27.4447   |
| 32.8787  | 28.4276   | 30.4364   | 30.8644  | 35.1059  | 32.8265   |
| 1.03613  | 0.890217  | 0.419051  | 0.939921 | 1.04419  | 0.713844  |
| 0        | 0         | 0         | 0        | 0        | 0         |
| 60.0517  | 57.845    | 63.1891   | 63.3826  | 70.3573  | 45.4272   |
| 43.15    | 56.0989   | 54.0454   | 57.6157  | 43.0686  | 40.6688   |
| 0        | 0         | 0         | 0.104451 | 0        | 0         |
| 16.8373  | 20.5557   | 17.5481   | 17.7413  | 17.6126  | 20.4271   |
| 56.6084  | 63.1873   | 62.5787   | 55.5651  | 56.8367  | 50.4423   |
| 9.36159  | 6.21262   | 7.43259   | 7.62307  | 8.70133  | 6.70252   |
| 0        | 0         | 0         | 0        | 0        | 0         |
| 6.75999  | 4.27846   | 5.8356    | 4.24122  | 4.01285  | 4.97346   |
| 8.97502  | 2.62913   | 4.35608   | 13.5004  | 11.0901  | 23.7946   |
| 5.67456  | 4.14207   | 5.59215   | 4.95299  | 5.00783  | 6.0698    |
| 0        | 0         | 0         | 0        | 0        | 0         |
| 82.7559  | 75.6389   | 79.7186   | 80.2774  | 67.1252  | 78.6418   |
| 0        | 0.0471978 | 0         | 0        | 0        | 0         |
| 4.09985  | 3.86474   | 3.48335   | 3.0585   | 2.86159  | 3.1423    |
| 2.82995  | 1.51964   | 2.77961   | 1.71145  | 2.35052  | 2.86721   |
| 180.342  | 379.437   | 204.876   | 95.8632  | 394.234  | 744.709   |
| 2.88464  | 2.87366   | 2.58549   | 3.21356  | 2.32684  | 3.21713   |
| 0        | 0         | 0         | 0        | 0        | 0         |
| 1.17853  | 0.933152  | 1.21124   | 1.16721  | 1.12859  | 0.932765  |
| 0        | 0         | 0         | 0        | 0        | 0         |
| 27.7011  | 16.3575   | 19.5963   | 30.5001  | 31.2152  | 41.0089   |
| 0        | 0         | 0         | 0        | 0        | 0         |
| 6.42352  | 8.69981   | 4.8766    | 5.1813   | 3.71103  | 5.0231    |
| 0.157058 | 0.224902  | 0.412884  | 0.39893  | 0.273947 | 0.350078  |
| 0        | 0         | 0.0187421 | 0        | 0        | 0.0187805 |
| 24.2385  | 30.1193   | 21.6662   | 23.5051  | 17.9345  | 22.2954   |
| 7.27985  | 6.61949   | 7.73396   | 7.1108   | 8.15957  | 7.21063   |
| 0.508317 | 0.313649  | 0.609474  | 0.521459 | 0.529773 | 0.539802  |
| 0.129094 | 0.351384  | 0.241638  | 0.356162 | 0.11579  | 0.138361  |
| 0.106417 | 0         | 0         | 0        | 0        | 0         |
| 7.3445   | 5.30438   | 5.59542   | 6.25969  | 5.42875  | 7.14701   |
| 15.2545  | 12.5509   | 17.5437   | 16.5843  | 15.6393  | 15.8216   |
| 12.4202  | 7.65486   | 9.27858   | 7.96718  | 7.5572   | 8.18537   |
| 0.269072 | 0.157192  | 0.354627  | 0.15153  | 0.246122 | 0.350795  |
| 134.581  | 151.97    | 102.856   | 60.5618  | 52.76    | 65.8286   |
| 0        | 0         | 0         | 0        | 0        | 0         |
| 1.23259  | 0.718733  | 0.727787  | 1.46374  | 1.41339  | 1.20661   |
| 42.3919  | 35.0703   | 43.8433   | 43.3123  | 47.8162  | 44.4581   |
| 2.36924  | 2.01726   | 2.12361   | 2.46292  | 2.73019  | 2.02415   |

|           |           |           |           |            |           |
|-----------|-----------|-----------|-----------|------------|-----------|
| 64.2752   | 98.2076   | 91.4107   | 74.1466   | 108.696    | 104.568   |
| 32.9541   | 31.1087   | 34.713    | 31.7593   | 31.5809    | 34.9783   |
| 0         | 0         | 0         | 0         | 0          | 0         |
| 0         | 0         | 0         | 0         | 0          | 0         |
| 29.7982   | 30.7367   | 24.5944   | 26.534    | 14.6127    | 20.6574   |
| 1.47363   | 1.54147   | 0.0993326 | 0.891202  | 1.52998    | 0.995357  |
| 1.15543   | 0.776058  | 0.934585  | 1.15043   | 1.05911    | 0.820645  |
| 17.9025   | 15.5311   | 17.4405   | 17.7338   | 19.3485    | 18.4295   |
| 69.4917   | 69.6971   | 68.2399   | 71.7676   | 78.5169    | 68.2114   |
| 0.132165  | 0         | 0         | 0.0239786 | 0          | 0.026781  |
| 0         | 0         | 0         | 0         | 0          | 0         |
| 2.21449   | 2.47296   | 2.00514   | 2.32669   | 3.02346    | 2.23695   |
| 0.126696  | 0         | 0.102482  | 0         | 0          | 0         |
| 0         | 0         | 0         | 0         | 0          | 0         |
| 26.5203   | 23.5951   | 22.1161   | 24.201    | 14.1065    | 22.4034   |
| 17.1373   | 13.4289   | 17.3924   | 15.0149   | 16.5767    | 12.5878   |
| 13.8135   | 11.1059   | 10.0721   | 16.9241   | 12.867     | 12.123    |
| 0         | 0         | 0         | 0         | 0          | 0         |
| 20.0687   | 24.3828   | 21.7904   | 23.3993   | 18.9754    | 20.3228   |
| 7.46E-52  | 8.51E-25  | 3.70E-31  | 1.69E-09  | 0.00116002 | 1.29E-27  |
| 0         | 0         | 0         | 0         | 0          | 0         |
| 0         | 0.0637555 | 0         | 0         | 0          | 0.0306983 |
| 8.20521   | 6.41156   | 7.20644   | 7.54742   | 7.67287    | 8.16238   |
| 0.223867  | 0.149612  | 0.186702  | 0.177863  | 0.0924214  | 0.108355  |
| 230.96    | 215.631   | 215.552   | 244.091   | 260.184    | 257.421   |
| 10.2127   | 11.6084   | 10.0353   | 9.75799   | 6.26076    | 7.32691   |
| 0.777341  | 0.546255  | 0.256168  | 0.292512  | 0.223188   | 0.198353  |
| 3.62794   | 2.01037   | 2.67276   | 2.63567   | 2.97877    | 3.28081   |
| 3.91937   | 1.82157   | 3.33716   | 4.5909    | 2.31875    | 3.26038   |
| 0         | 0         | 0         | 0         | 0          | 0         |
| 27.4886   | 31.7955   | 30.7706   | 30.8043   | 27.8171    | 27.0903   |
| 24.1896   | 25.5093   | 28.5135   | 33.0256   | 28.9157    | 25.0082   |
| 1.28176   | 1.83543   | 1.43555   | 1.35952   | 1.45224    | 1.5184    |
| 19.5969   | 17.548    | 17.1239   | 22.6013   | 17.4151    | 18.9631   |
| 33.743    | 24.2913   | 32.6626   | 31.3587   | 38.4136    | 20.6509   |
| 4.37991   | 8.10238   | 10.4844   | 3.5074    | 4.24001    | 3.92165   |
| 0.55425   | 0.515882  | 0.403489  | 0.241337  | 0.171865   | 0.224619  |
| 0.182508  | 0.169874  | 0.147627  | 0.304634  | 0.240521   | 0.147929  |
| 0         | 0         | 0         | 0         | 0          | 0         |
| 36.326    | 37.711    | 37.7069   | 41.568    | 34.7921    | 40.1957   |
| 0         | 0         | 0         | 0         | 0          | 0         |
| 0.0626864 | 0.0448823 | 0.0760586 | 0.068239  | 0.0728932  | 0.0508094 |
| 7.83667   | 6.28422   | 7.94804   | 8.12834   | 7.19668    | 9.34869   |

|            |           |           |           |           |           |
|------------|-----------|-----------|-----------|-----------|-----------|
| 2.99574    | 1.66307   | 2.3354    | 2.39462   | 2.05309   | 2.37536   |
| 0.118574   | 0.107447  | 0.145067  | 0.175688  | 0.143626  | 0.128144  |
| 0.27051    | 0.312868  | 0.302968  | 0.483235  | 0.4678    | 0.472247  |
| 11.4326    | 8.20652   | 9.4676    | 8.93321   | 5.24365   | 6.99233   |
| 12.5718    | 12.4202   | 11.8639   | 11.1746   | 8.46148   | 12.9545   |
| 1.43298    | 1.93797   | 1.24496   | 1.11697   | 1.19315   | 1.76372   |
| 20.9157    | 16.8471   | 15.188    | 14.0865   | 20.6976   | 10.724    |
| 7.64498    | 8.54202   | 8.63357   | 7.20961   | 6.14717   | 6.91332   |
| 2.08438    | 2.66436   | 3.44211   | 2.71107   | 2.73542   | 1.39742   |
| 3.89016    | 3.30457   | 4.18667   | 3.54091   | 2.99015   | 3.34015   |
| 0          | 0         | 0         | 0         | 0         | 0         |
| 0.864624   | 0.841527  | 0.972571  | 0.931405  | 0.617905  | 0.438004  |
| 4.07085    | 3.35314   | 4.42929   | 3.45103   | 2.98822   | 2.89077   |
| 1.16502    | 0.968191  | 0.504837  | 0.973809  | 0.709613  | 1.18879   |
| 29.8503    | 31.2363   | 30.8002   | 30.4394   | 27.7996   | 28.7441   |
| 0.0921126  | 0.219836  | 0.12418   | 0.155978  | 0.190419  | 0.298641  |
| 0          | 0         | 0         | 0         | 0         | 0         |
| 71.4158    | 73.4173   | 70.4322   | 63.7453   | 64.9845   | 54.6347   |
| 0          | 0         | 0         | 0         | 0         | 0         |
| 7.44966    | 6.37155   | 6.5182    | 6.64323   | 5.98296   | 7.27287   |
| 1719.3     | 2091.08   | 2046.26   | 2219.59   | 2399.82   | 1954.1    |
| 7.03341    | 7.81469   | 8.89803   | 8.26332   | 6.54954   | 7.52578   |
| 21.5181    | 23.4154   | 22.9927   | 18.5938   | 25.505    | 14.1274   |
| 0.0310104  | 0.0777101 | 0.0501674 | 0.0450096 | 0.0480795 | 0.025135  |
| 0.083871   | 0         | 0.0150755 | 0.0693028 | 0         | 0.0151064 |
| 3.64343    | 1.32906   | 3.07236   | 2.62812   | 3.63924   | 3.30106   |
| 0          | 0         | 0         | 0         | 0         | 0         |
| 0.172313   | 0.24255   | 0.136169  | 0.489192  | 0.241668  | 0.181491  |
| 0          | 0         | 0         | 0         | 0         | 0         |
| 0          | 0         | 0         | 0         | 0         | 0         |
| 0.0804988  | 0.0687544 | 0.0455297 | 0         | 0.0625076 | 0.0652143 |
| 9.4607     | 8.30427   | 8.38839   | 11.6521   | 12.7641   | 9.51154   |
| 0.00656939 | 0         | 0         | 0         | 0         | 0         |
| 27.4172    | 26.75     | 32.517    | 27.8432   | 22.8807   | 28.4772   |
| 7.55396    | 4.69829   | 7.7561    | 6.5157    | 5.6785    | 8.14304   |
| 2.6997     | 2.2169    | 1.80429   | 1.88618   | 1.54478   | 2.08842   |
| 10.581     | 9.80023   | 12.3289   | 11.4415   | 10.8149   | 11.5054   |
| 3.68324    | 4.34381   | 3.94072   | 4.10269   | 3.34418   | 4.08726   |
| 0          | 0         | 0         | 0         | 0.0743135 | 0.0517995 |
| 0.0699846  | 0         | 0.0566092 | 0.101578  | 0         | 0.0567249 |
| 36.9064    | 38.0911   | 38.2108   | 33.0778   | 35.7055   | 45.0278   |
| 3.48756    | 3.87942   | 3.86201   | 3.27386   | 2.70235   | 3.65593   |
| 0          | 0         | 0         | 0         | 0         | 0         |

|           |           |           |           |           |           |
|-----------|-----------|-----------|-----------|-----------|-----------|
| 0         | 0.0325257 | 0.0367459 | 0.065936  | 0         | 0.036821  |
| 7.83872   | 5.72743   | 6.17098   | 6.68694   | 5.98022   | 7.18407   |
| 8.65209   | 8.8228    | 9.33134   | 8.56224   | 11.7885   | 5.10023   |
| 0         | 0         | 0         | 0         | 0         | 0         |
| 3.45298   | 5.27417   | 5.02748   | 5.20668   | 3.92598   | 3.70057   |
| 15.9843   | 16.9462   | 13.8432   | 13.9413   | 10.8461   | 16.5082   |
| 0.405624  | 0.363024  | 0.451139  | 0.18398   | 0.393057  | 0.164386  |
| 15.9285   | 6.92445   | 9.36683   | 9.21756   | 12.3007   | 11.8914   |
| 0         | 0         | 0         | 0         | 0         | 0         |
| 9.53944   | 8.26209   | 9.24087   | 9.11743   | 9.20843   | 11.0348   |
| 0.210923  | 0.100294  | 0         | 0.135543  | 0.072394  | 0.114704  |
| 0.0379911 | 0         | 0         | 0         | 0         | 0         |
| 0         | 0         | 0.0351712 | 0         | 0         | 0         |
| 27.4881   | 22.4998   | 26.0076   | 25.048    | 18.0295   | 21.5981   |
| 0.496008  | 0.304399  | 0.114632  | 0.257115  | 0.329582  | 0.114866  |
| 6.09001   | 8.15531   | 7.86795   | 6.13831   | 7.10337   | 7.41903   |
| 7.24214   | 4.96681   | 6.35083   | 7.62525   | 6.4979    | 6.14541   |
| 55.4889   | 49.9966   | 58.5063   | 51.865    | 51.8342   | 49.8848   |
| 22.1672   | 19.5462   | 21.9917   | 23.4069   | 22.1711   | 21.0738   |
| 3.939     | 4.24452   | 4.69986   | 4.91978   | 2.69661   | 3.45647   |
| 4.40587   | 4.14839   | 4.63783   | 3.81061   | 4.02369   | 4.67177   |
| 0.0553834 | 0.0793069 | 0         | 0.0401927 | 0         | 0         |
| 0.222122  | 0.159035  | 0.17967   | 0         | 0         | 0.0900188 |
| 10.2326   | 12.0026   | 12.4366   | 12.6218   | 13.6381   | 14.1031   |
| 17.4568   | 18.1352   | 18.82     | 19.4384   | 17.3679   | 20.016    |
| 0.307713  | 0.881267  | 0.580773  | 0.297751  | 0.318059  | 0.332549  |
| 18.2499   | 15.5006   | 12.5857   | 15.1529   | 16.7718   | 13.1809   |
| 0         | 0         | 0         | 0         | 0.032095  | 0.0335572 |
| 19.3065   | 13.8518   | 15.4935   | 18.3775   | 16.2503   | 20.0572   |
| 0         | 0.0403347 | 0         | 0         | 0         | 0         |
| 0.0265595 | 0.0760653 | 0         | 0.0989203 | 0.0823584 | 0.134549  |
| 40.2549   | 33.8548   | 29.9494   | 43.4264   | 26.2597   | 38.0557   |
| 11.2825   | 9.68677   | 10.0997   | 9.52845   | 11.1926   | 10.7828   |
| 0.210027  | 0.0269374 | 0.0424716 | 0.109215  | 0         | 0         |
| 13.4051   | 10.9172   | 12.1908   | 10.3285   | 14.9211   | 12.5699   |
| 4.43932   | 5.4034    | 6.10449   | 4.02712   | 4.12971   | 5.0375    |
| 4.91122   | 4.28727   | 5.55964   | 4.78243   | 5.17769   | 5.39849   |
| 5.16959   | 5.01822   | 5.12083   | 5.68636   | 4.2635    | 6.11073   |
| 0         | 0         | 0         | 0         | 0         | 0         |
| 26.2275   | 28.9184   | 26.66     | 27.1083   | 22.5773   | 18.943    |
| 3.45472   | 2.95812   | 3.54724   | 3.51001   | 3.00609   | 3.60022   |
| 0         | 0         | 0         | 0         | 0         | 0         |
| 43.8809   | 30.5797   | 44.5663   | 41.0425   | 50.659    | 40.4575   |

|           |           |           |           |           |           |
|-----------|-----------|-----------|-----------|-----------|-----------|
| 0         | 0         | 0         | 0         | 0         | 0.0352583 |
| 7.75483   | 4.33288   | 6.59516   | 5.47003   | 6.5735    | 8.98775   |
| 2.81027   | 2.46581   | 2.49726   | 2.46946   | 1.47303   | 2.56733   |
| 0         | 0.166432  | 0         | 0         | 0.360403  | 0         |
| 3.91733   | 2.24379   | 3.38469   | 3.21743   | 4.94166   | 2.56897   |
| 0         | 0         | 0         | 0         | 0.0616157 | 0         |
| 0.662379  | 0.316167  | 0.535785  | 0.640934  | 1.19814   | 0.894801  |
| 9.28053   | 8.93662   | 8.70325   | 8.81112   | 8.82406   | 7.99861   |
| 3.97436   | 6.9209    | 6.13173   | 4.86203   | 4.4377    | 5.75515   |
| 0.452927  | 0.0526462 | 0.139016  | 0.23932   | 0.149049  | 0.0978109 |
| 0         | 0         | 0         | 0         | 0         | 0         |
| 0.449752  | 0         | 0         | 0.225878  | 0.0413629 | 0.0432474 |
| 0.588721  | 0.702522  | 0.582028  | 0.458893  | 0.523998  | 0.512525  |
| 1.3492    | 1.76719   | 1.07326   | 0.915312  | 1.2728    | 0.978544  |
| 1.06886   | 0.139142  | 0.628783  | 0.141034  | 0.301307  | 0.945103  |
| 0.0730852 | 0         | 0         | 0         | 0         | 0         |
| 0.0229581 | 0.0876669 | 0.055711  | 0         | 0         | 0         |
| 0.12765   | 0.18279   | 0.15488   | 0.254754  | 0.0742171 | 0.232795  |
| 0.257282  | 0.233332  | 0.221984  | 0.348533  | 0.265932  | 0.29195   |
| 22.8345   | 21.2994   | 19.9149   | 23.0888   | 19.7586   | 20.2038   |
| 0         | 0         | 0         | 0         | 0         | 0         |
| 0.600935  | 0.729568  | 0.676291  | 0.720528  | 0.486108  | 0.55061   |
| 7.83893   | 7.20274   | 7.22846   | 6.90247   | 9.93566   | 7.82566   |
| 0.208215  | 0.331748  | 0.29044   | 0.426443  | 0.258737  | 0.435055  |
| 0         | 0.29206   | 0         | 0.0493386 | 0.0527038 | 0         |
| 0.248529  | 0.088971  | 0.0251288 | 0.157817  | 0.0722488 | 0.125901  |
| 0.244884  | 0.325618  | 0.311272  | 0.27927   | 0.298317  | 0.453685  |
| 4.23362   | 3.93346   | 3.62246   | 3.17067   | 3.52418   | 3.92954   |
| 4.47471   | 4.34335   | 4.61539   | 4.25031   | 3.08672   | 4.34324   |
| 73.871    | 73.1487   | 95.3914   | 78.0661   | 70.676    | 68.1673   |
| 7.29992   | 6.25326   | 7.2755    | 6.59845   | 6.2148    | 7.1055    |
| 12.7649   | 10.4451   | 11.2208   | 12.4068   | 10.2237   | 11.3889   |
| 4.29483   | 2.82501   | 2.82439   | 2.73679   | 2.62564   | 2.66035   |
| 5.25753   | 4.71748   | 4.23446   | 4.56876   | 3.58594   | 2.77997   |
| 2186.33   | 2129.81   | 2196.65   | 2113.04   | 2092.4    | 2183.96   |
| 0         | 0         | 0         | 0         | 0         | 0         |
| 14.012    | 17.8102   | 15.4092   | 19.1949   | 15.8663   | 17.0996   |
| 5.82979   | 4.02005   | 4.96087   | 4.45508   | 5.15975   | 5.85596   |
| 3.54861   | 3.04888   | 3.00288   | 3.3875    | 4.95169   | 3.29665   |
| 14.8889   | 15.5276   | 14.861    | 14.7195   | 16.7687   | 15.3923   |
| 0         | 0         | 0         | 0         | 0         | 0         |
| 327.6     | 306.485   | 269.97    | 292.399   | 301.5     | 237.976   |
| 2.1268    | 1.85119   | 2.09981   | 2.37572   | 1.6164    | 2.23086   |



|           |           |           |           |           |           |
|-----------|-----------|-----------|-----------|-----------|-----------|
| 0.405758  | 0.421247  | 0.295388  | 0.338636  | 0.204457  | 0.591985  |
| 0.747961  | 0.392503  | 1.01716   | 0.439647  | 0.115824  | 0.605618  |
| 0.222086  | 0.134164  | 0.113679  | 0.0226648 | 0.0322809 | 0.15821   |
| 0         | 0         | 0         | 0         | 0         | 0         |
| 50.4118   | 47.0121   | 50.1795   | 54.7762   | 58.9082   | 48.8891   |
| 14.9019   | 14.1331   | 16.5401   | 15.528    | 14.1733   | 15.4088   |
| 6.34949   | 8.72027   | 3.78195   | 3.01611   | 1.83465   | 1.96502   |
| 23.003    | 22.7875   | 20.3468   | 21.5068   | 17.9567   | 20.5249   |
| 0.423282  | 0.233125  | 0.395059  | 0.307183  | 0.353376  | 0.633387  |
| 0.0558543 | 0.119972  | 0.0225897 | 0.0202672 | 0.0432991 | 0.135815  |
| 0.214957  | 0.327048  | 0.30428   | 0.136498  | 0.083319  | 0.196009  |
| 0.497635  | 0.482174  | 0.566154  | 0.46819   | 0.959563  | 0.917445  |
| 0         | 0         | 0.0651333 | 0         | 0         | 0         |
| 0         | 0         | 0         | 0         | 0         | 0         |
| 39.4348   | 30.3066   | 39.6874   | 34.9663   | 34.5992   | 48.1025   |
| 87.729    | 98.1534   | 103.563   | 103.452   | 113.241   | 97.2005   |
| 1.4973    | 0.593926  | 0.749616  | 1.94391   | 0.930144  | 2.24069   |
| 11.4347   | 8.33837   | 8.99286   | 9.55617   | 9.9294    | 10.6388   |
| 0         | 0.475007  | 0         | 0         | 0         | 0         |
| 1.77505   | 1.07538   | 0.110446  | 1.68455   | 1.05849   | 0.553359  |
| 1.30893   | 2.12402   | 2.22983   | 2.7433    | 1.97319   | 2.5029    |
| 10.0991   | 8.42824   | 8.81937   | 11.087    | 11.0952   | 9.95838   |
| 137.6     | 156.707   | 147.58    | 123.085   | 140.134   | 133.608   |
| 4.63743   | 4.39617   | 3.93973   | 4.04232   | 3.59501   | 3.6958    |
| 9.11453   | 6.00105   | 8.73997   | 7.66982   | 7.89052   | 8.54704   |
| 0.356725  | 0.361829  | 0.336639  | 0.323602  | 0.230449  | 0.192758  |
| 0.329362  | 0.795368  | 0.466226  | 0.771623  | 0.50972   | 0.63229   |
| 17.1778   | 15.0477   | 18.7682   | 18.7909   | 16.9733   | 16.9214   |
| 10.6928   | 11.7228   | 12.1692   | 12.8985   | 14.4407   | 12.9042   |
| 28.8472   | 28.4171   | 29.1341   | 29.0841   | 27.5737   | 27.1048   |
| 35.2639   | 35.1511   | 37.5764   | 39.4426   | 41.6758   | 36.4584   |
| 0         | 0         | 0         | 0         | 0.0761286 | 0.079597  |
| 22.6115   | 17.6343   | 30.4833   | 24.5775   | 19.4187   | 29.5412   |
| 0.165282  | 0.118339  | 0.133693  | 0.279879  | 0.128129  | 0.223277  |
| 3.29083   | 3.68003   | 3.94056   | 3.98904   | 2.98831   | 3.37855   |
| 1.51164   | 2.07803   | 1.95638   | 2.28182   | 1.82809   | 1.96038   |
| 1.3326    | 2.25519   | 2.15583   | 2.491     | 1.56523   | 1.3747    |
| 12.5227   | 13.268    | 14.9931   | 16.7153   | 13.5943   | 14.003    |
| 0.450708  | 0.436592  | 0.950738  | 0.743963  | 0.267185  | 0.179076  |
| 142.617   | 180.891   | 215.31    | 211.84    | 227.11    | 216.009   |
| 25.0847   | 24.8627   | 21.8808   | 24.7539   | 25.1874   | 24.479    |
| 0.0569598 | 0.0259338 | 0         | 0.0396018 | 0.0441561 | 0.0230736 |
| 11.7835   | 17.0693   | 17.1882   | 14.6046   | 12.1707   | 12.4418   |

|          |           |           |          |           |           |
|----------|-----------|-----------|----------|-----------|-----------|
| 0.521361 | 0.501601  | 0.948867  | 0.662132 | 0.454688  | 0.818751  |
| 0.155892 | 0.531833  | 0.168135  | 0.230987 | 0.30591   | 0.257984  |
| 0        | 0         | 0         | 0        | 0         | 0         |
| 0        | 0.0640085 | 0         | 0        | 0         | 0         |
| 1.50802  | 0.810445  | 1.30474   | 1.44505  | 1.29914   | 1.30865   |
| 18.1515  | 13.788    | 17.1378   | 16.9058  | 17.391    | 19.3438   |
| 5.0303   | 4.26287   | 4.89539   | 4.13353  | 4.74278   | 4.87951   |
| 10.2514  | 8.35711   | 10.7821   | 10.0416  | 10.5805   | 10.5884   |
| 5.35764  | 5.19454   | 5.20644   | 4.61716  | 4.58596   | 5.18693   |
| 11.5836  | 7.81722   | 9.0191    | 13.9857  | 16.0105   | 10.8888   |
| 8.32373  | 7.90722   | 9.15322   | 8.68595  | 10.6701   | 9.34832   |
| 0        | 0         | 0         | 0        | 0         | 0         |
| 3.46E-07 | 5.39E-07  | 1.34E-06  | 3.89E-07 | 2.24E-07  | 3.50E-07  |
| 17.5834  | 44.4952   | 19.3293   | 51.4969  | 19.9952   | 33.6493   |
| 0        | 0         | 0         | 0        | 0         | 0         |
| 5.7283   | 4.60588   | 6.39865   | 3.51376  | 4.88121   | 5.61948   |
| 12.5866  | 11.7045   | 10.7473   | 11.8836  | 9.18274   | 11.4701   |
| 6.26962  | 4.3656    | 5.82371   | 5.33746  | 7.54415   | 5.4168    |
| 0        | 0         | 63.7661   | 0        | 0         | 0         |
| 24.3317  | 24.9818   | 26.7799   | 27.052   | 21.8803   | 25.7565   |
| 177.981  | 161.468   | 188.768   | 223.031  | 228.353   | 189.562   |
| 0        | 0.230997  | 0         | 0.234139 | 0.250108  | 0         |
| 0.187905 | 0.269072  | 0.151992  | 0.136366 | 0.0728333 | 0.228455  |
| 0.585246 | 0.676887  | 0.564431  | 0.702428 | 1.02953   | 0.802766  |
| 3.799    | 5.30487   | 3.34014   | 2.84262  | 3.40235   | 3.78686   |
| 3.92429  | 4.31778   | 2.77427   | 4.19666  | 2.09121   | 3.21662   |
| 7.7244   | 7.14437   | 7.35699   | 6.26579  | 7.51064   | 7.87418   |
| 174.175  | 62.4628   | 119.89    | 20.9555  | 91.325    | 214.251   |
| 0.260622 | 0.1866    | 0         | 0.141853 | 0.033673  | 0.0352071 |
| 9.89009  | 7.298     | 9.07798   | 8.85911  | 9.6512    | 8.8633    |
| 7.40704  | 5.94334   | 4.6193    | 7.59966  | 7.7715    | 8.3067    |
| 0.056659 | 0.0467387 | 0.0916607 | 0        | 0.043923  | 0.475849  |
| 0.707889 | 0.253418  | 0.572597  | 0.553245 | 0.717618  | 0.684108  |
| 0        | 0         | 0         | 0        | 0         | 0         |
| 7.77642  | 6.60298   | 4.2356    | 7.31668  | 5.93752   | 5.00443   |
| 0        | 0.210953  | 0         | 0.213822 | 0         | 0         |
| 0        | 0         | 0         | 0        | 0         | 0.0746313 |
| 128.84   | 41.0885   | 53.2646   | 56.9495  | 26.5944   | 71.3965   |
| 46.715   | 47.0196   | 52.3472   | 49.3738  | 57.4953   | 50.89     |
| 9.86647  | 9.42533   | 10.323    | 9.88429  | 10.7039   | 8.27961   |
| 13.9894  | 11.108    | 10.6913   | 12.8935  | 10.8328   | 11.5946   |
| 24.1377  | 27.482    | 30.3555   | 27.203   | 38.3823   | 27.7047   |
| 6.89129  | 3.8831    | 4.26233   | 4.97705  | 4.15673   | 5.50756   |

|          |           |           |           |           |           |
|----------|-----------|-----------|-----------|-----------|-----------|
| 0        | 0         | 0.13645   | 0         | 0.130771  | 0         |
| 9.16376  | 8.08987   | 4.46182   | 6.32748   | 6.06934   | 7.13909   |
| 21.9623  | 24.1087   | 22.334    | 19.9505   | 18.6262   | 22.5072   |
| 0.119515 | 0         | 0         | 0.086734  | 0         | 0         |
| 17.8166  | 14.3059   | 16.0683   | 14.192    | 14.9502   | 12.7807   |
| 29.7123  | 27.7473   | 30.5066   | 31.0722   | 29.8367   | 29.0405   |
| 18.6796  | 15.1942   | 18.7125   | 19.5134   | 19.8861   | 20.7165   |
| 8.88858  | 8.31547   | 7.86508   | 8.82652   | 9.26991   | 8.59763   |
| 44.7611  | 43.581    | 42.2198   | 49.6813   | 48.9875   | 36.7825   |
| 1.40173  | 0.200722  | 0.566915  | 0.101726  | 1.41264   | 0.340845  |
| 1.94967  | 2.00597   | 2.19117   | 1.47063   | 2.03673   | 2.19245   |
| 58.3609  | 60.0567   | 55.289    | 63.1686   | 37.0014   | 49.2811   |
| 0.465414 | 0.40265   | 0.439208  | 0.365906  | 0.33073   | 0.330079  |
| 0        | 0.0124749 | 0.0140935 | 0.0126445 | 0.0135069 | 0         |
| 0        | 0         | 0         | 0         | 0         | 0         |
| 60.0011  | 60.0071   | 61.5905   | 64.5533   | 64.0099   | 52.2211   |
| 25.7974  | 23.689    | 23.8506   | 27.1688   | 28.2257   | 24.0873   |
| 12.3995  | 9.97383   | 11.1648   | 11.5166   | 7.93113   | 11.0221   |
| 0.934964 | 0.964923  | 0.603699  | 0.684489  | 1.05842   | 0.73554   |
| 11.8926  | 11.2496   | 9.81281   | 9.8434    | 9.30347   | 11.6271   |
| 27.3014  | 25.6809   | 27.3292   | 26.0592   | 30.9088   | 20.6686   |
| 0        | 0         | 0         | 0         | 0         | 0         |
| 6.38571  | 6.80449   | 6.18019   | 6.10052   | 5.64644   | 6.73931   |
| 0.116126 | 0         | 0         | 0.0842744 | 0         | 0.0313746 |
| 44.8282  | 41.8962   | 40.9591   | 35.6095   | 45.8455   | 25.9694   |
| 36.7112  | 41.3738   | 23.578    | 30.2807   | 25.6265   | 21.2856   |
| 48.8163  | 51.4494   | 55.7394   | 55.4397   | 53.7356   | 49.6284   |
| 0        | 0         | 0         | 0         | 0         | 0         |
| 0        | 0.0446836 | 0         | 0.0452913 | 0         | 0         |
| 1.05342  | 1.98334   | 2.146     | 1.81211   | 2.29865   | 2.8461    |
| 0        | 0         | 0         | 0         | 0         | 0         |
| 25.2844  | 25.7812   | 26.5239   | 26.2389   | 24.0864   | 26.1743   |
| 0        | 0         | 0.0261985 | 0         | 0         | 0         |
| 0.545043 | 0.716992  | 0.728164  | 0.832634  | 1.02223   | 0.215962  |
| 0        | 0         | 0         | 0         | 0         | 0         |
| 13.3048  | 14.3931   | 14.4818   | 12.6579   | 15.8913   | 10.1844   |
| 0.164223 | 0.0587904 | 0.0996277 | 0         | 0         | 0.0332771 |
| 0.414587 | 0.430809  | 0.23772   | 0.41038   | 0.547195  | 0.230351  |
| 19.446   | 19.6152   | 22.8749   | 23.3695   | 17.6588   | 23.2462   |
| 12.753   | 13.1191   | 12.1387   | 11.3694   | 12.9545   | 13.2774   |
| 0        | 0         | 0         | 0         | 0         | 0         |
| 8.41887  | 7.29163   | 5.38198   | 8.47478   | 2.94742   | 4.73262   |
| 0.598541 | 0.538427  | 0.471734  | 0.456648  | 0.939894  | 0.64685   |

|           |           |           |           |           |           |
|-----------|-----------|-----------|-----------|-----------|-----------|
| 0         | 0         | 0         | 0         | 0         | 0         |
| 0.0002738 | 2.22E-09  | 8.25E-05  | 0.0010378 | 3.76E-05  | 1.72E-06  |
| 1.24312   | 1.22683   | 1.19577   | 1.34104   | 0.911595  | 0.762501  |
| 1.02289   | 0.661318  | 0.437902  | 1.1783    | 1.52884   | 1.23458   |
| 0.110601  | 0.039594  | 0         | 0         | 0.0428697 | 0.0448228 |
| 8.05149   | 8.69009   | 10.0315   | 8.8606    | 9.39041   | 9.42862   |
| 3.97766   | 2.71955   | 4.02259   | 3.8772    | 4.2797    | 3.82599   |
| 12.5021   | 10.3775   | 13.3285   | 15.633    | 13.5107   | 18.2677   |
| 47.9421   | 47.4311   | 49.5057   | 52.2504   | 52.2338   | 51.6509   |
| 0.425258  | 0.378904  | 0.25684   | 0.384057  | 0.246151  | 0.128683  |
| 9.48793   | 8.41177   | 9.27232   | 8.50131   | 8.7271    | 9.85578   |
| 9.94991   | 9.20521   | 10.3708   | 9.31509   | 10.1845   | 10.2339   |
| 4.9514    | 4.10261   | 4.12621   | 3.59332   | 3.31991   | 4.5554    |
| 1.40296   | 1.2129    | 1.52876   | 1.32438   | 1.24032   | 1.39167   |
| 25.6855   | 23.5764   | 24.9078   | 26.2422   | 22.1579   | 20.1717   |
| 105.758   | 112.052   | 112.865   | 110.22    | 119.744   | 109.435   |
| 0.0351167 | 0.0251429 | 0.0284052 | 0.0764544 | 0.081669  | 0.0853897 |
| 6.08581   | 4.56444   | 5.45583   | 4.67939   | 6.11595   | 5.10942   |
| 0.0320372 | 0.022938  | 0         | 0         | 0         | 0         |
| 0.750537  | 1.03922   | 1.46366   | 1.72595   | 1.16208   | 1.57244   |
| 0         | 0         | 0         | 0         | 0         | 0         |
| 0.888281  | 0.423995  | 0.239504  | 0.322321  | 0.114768  | 0.239994  |
| 5.28777   | 5.85919   | 6.04235   | 5.45158   | 6.3114    | 5.64652   |
| 2.17833   | 2.37574   | 3.9133    | 2.81245   | 1.27633   | 2.11463   |
| 0         | 0         | 0         | 0         | 0         | 0         |
| 13.2688   | 10.6499   | 12.631    | 13.7901   | 11.8562   | 11.7182   |
| 111.088   | 110.019   | 115.295   | 115.804   | 87.2048   | 108.588   |
| 9.27424   | 8.59655   | 6.40647   | 7.1687    | 8.09388   | 8.63418   |
| 7.28864   | 4.39019   | 5.54473   | 5.22653   | 6.12114   | 5.9546    |
| 8.0298    | 7.97999   | 7.60325   | 7.1698    | 9.65996   | 9.40395   |
| 0         | 0         | 0         | 0         | 0         | 0         |
| 18.7951   | 13.2649   | 15.5973   | 16.6917   | 12.1104   | 15.7478   |
| 1.29602   | 1.28301   | 0.70124   | 0.513718  | 0.636067  | 0.583696  |
| 2.19392   | 2.32913   | 2.14178   | 1.59217   | 2.58047   | 2.57539   |
| 0         | 0         | 0.0605114 | 0         | 0         | 0         |
| 0.0526842 | 0.0188604 | 0         | 0.0673076 | 0.0204208 | 0.0213512 |
| 6.362     | 3.92135   | 5.95174   | 5.56462   | 5.74908   | 6.92323   |
| 7.41344   | 4.92188   | 7.71169   | 6.40767   | 7.7578    | 8.35364   |
| 59.226    | 63.8565   | 60.5254   | 68.5174   | 75.2012   | 61.4648   |
| 0         | 0         | 0         | 0         | 0         | 0         |
| 0         | 0         | 0         | 0         | 0         | 0         |
| 20.195    | 14.4117   | 11.6727   | 29.7185   | 11.81     | 27.2278   |
| 14.7312   | 14.2562   | 10.5736   | 17.5046   | 14.0552   | 17.5494   |

|          |           |          |           |           |           |
|----------|-----------|----------|-----------|-----------|-----------|
| 14.8325  | 9.26927   | 11.7203  | 13.253    | 12.9938   | 12.7866   |
| 21.1637  | 20.8607   | 20.4424  | 23.1376   | 22.6287   | 19.9394   |
| 8.22725  | 7.48396   | 10.3666  | 8.88537   | 8.12829   | 8.76012   |
| 508.137  | 353.69    | 345.964  | 304.624   | 650.961   | 98.3578   |
| 15.5335  | 13.4048   | 16.9192  | 16.4618   | 18.6256   | 16.412    |
| 2.38804  | 2.70505   | 2.79655  | 2.35384   | 1.93414   | 2.4556    |
| 52.0922  | 58.754    | 65.1972  | 63.8229   | 57.4591   | 58.9138   |
| 0.549997 | 0.928213  | 0.826208 | 0.684245  | 0.51773   | 0.509476  |
| 82.766   | 84.4474   | 83.4716  | 87.5771   | 92.1022   | 83.1764   |
| 0.934583 | 0.286776  | 0.269988 | 0.24223   | 0.362252  | 0.0541079 |
| 5.98276  | 5.59781   | 4.61937  | 5.08188   | 4.74334   | 5.23496   |
| 10.2687  | 7.38672   | 10.0025  | 10.2161   | 8.5211    | 9.28049   |
| 0        | 0         | 0        | 0.0580568 | 0.0620165 | 0         |
| 9.12307  | 7.7435    | 9.39599  | 7.01394   | 5.28793   | 6.91393   |
| 0.177869 | 0.0509402 | 0.172649 | 0.154899  | 0.0551546 | 0.0576674 |
| 0.412555 | 0.692305  | 1.54763  | 1.76169   | 1.43538   | 0.46749   |
| 15.2168  | 15.0286   | 17.4039  | 15.5764   | 13.6876   | 15.9137   |
| 10.8758  | 8.61623   | 12.3369  | 10.7183   | 10.6261   | 12.1535   |
| 95.485   | 141.834   | 210.483  | 173.591   | 186.874   | 202.74    |
| 13.8508  | 12.3863   | 16.626   | 14.5643   | 14.8067   | 11.2906   |
| 0.946873 | 0.764036  | 0.86317  | 0.705608  | 0.602435  | 1.09571   |
| 0        | 0         | 0        | 0         | 0         | 0         |
| 0        | 0         | 0        | 0         | 0         | 0         |
| 2.65071  | 2.29411   | 2.19123  | 2.09278   | 2.34842   | 2.4082    |
| 0        | 0         | 0        | 0         | 0         | 0         |
| 0        | 0         | 0        | 0         | 0         | 0         |
| 40.9763  | 39.0679   | 37.3296  | 40.4961   | 36.7357   | 33.3418   |
| 0        | 0         | 0        | 0         | 0         | 0         |
| 0.606386 | 0         | 1.08313  | 0         | 0.766527  | 0         |
| 5.78756  | 5.74353   | 5.10246  | 5.70761   | 5.5676    | 4.25559   |
| 0        | 0.0501077 | 0        | 0.0507891 | 0         | 0         |
| 27.1177  | 23.0274   | 23.34    | 25.6305   | 25.4382   | 25.5765   |
| 2.94545  | 2.84079   | 2.91072  | 3.23841   | 2.53023   | 2.57323   |
| 3.97323  | 4.72103   | 3.52843  | 3.53895   | 3.4323    | 4.65608   |
| 1.62611  | 1.12546   | 1.18379  | 0.983414  | 1.34462   | 1.40588   |
| 6.62931  | 5.26066   | 7.82005  | 6.3345    | 6.9093    | 8.53755   |
| 1.64104  | 1.39973   | 0.969584 | 1.1288    | 0.951356  | 1.51518   |
| 66.6691  | 60.4532   | 61.5217  | 69.1482   | 71.0688   | 58.9796   |
| 8.7265   | 10.1094   | 9.66442  | 8.82232   | 9.35242   | 9.94636   |
| 19.1106  | 19.808    | 18.5644  | 21.2738   | 15.0727   | 20.3469   |
| 0        | 0         | 0        | 0         | 0         | 0         |
| 10.1963  | 11.38     | 9.25831  | 11.7161   | 11.159    | 10.9382   |
| 0.186433 | 0.138761  | 0.276279 | 0.246451  | 0.617578  | 0.399944  |

|           |           |          |           |           |           |
|-----------|-----------|----------|-----------|-----------|-----------|
| 289.499   | 365.543   | 248.431  | 270.105   | 263.817   | 180.667   |
| 0.217173  | 0.406671  | 0.28377  | 0.193977  | 0.28491   | 0.29789   |
| 18.0081   | 16.3705   | 17.455   | 17.9703   | 25.635    | 17.8856   |
| 4.57193   | 3.47256   | 3.49601  | 3.58683   | 3.50704   | 2.65631   |
| 16.5354   | 14.5656   | 15.8765  | 17.678    | 13.551    | 16.4717   |
| 0         | 0         | 0        | 0         | 0         | 0         |
| 0         | 0.0303575 | 0        | 0         | 0         | 0         |
| 11.6022   | 9.11162   | 11.2972  | 9.81244   | 10.9386   | 11.9035   |
| 0         | 0.0790695 | 0        | 0.0400724 | 0.0428055 | 0.134267  |
| 6.33796   | 8.2156    | 6.19889  | 7.21501   | 5.61977   | 5.60719   |
| 34.1291   | 32.8811   | 35.6499  | 34.5244   | 36.7279   | 26.8673   |
| 4.17529   | 2.28603   | 2.38398  | 2.31712   | 0.951986  | 2.98607   |
| 124.663   | 120.393   | 144.705  | 147.209   | 150.234   | 141.571   |
| 0         | 0.239657  | 1.08301  | 0         | 0         | 0.271307  |
| 9.1067    | 7.19582   | 6.79291  | 10.911    | 9.76173   | 9.17145   |
| 23.9967   | 19.1043   | 21.5192  | 21.4281   | 21.6954   | 21.131    |
| 3.02059   | 2.37732   | 1.84245  | 2.50968   | 2.59693   | 2.55825   |
| 1.86259   | 1.65622   | 1.40941  | 1.85316   | 1.83982   | 1.85059   |
| 11.5863   | 13.977    | 10.6367  | 11.551    | 6.71935   | 8.84551   |
| 14.0355   | 10.5414   | 12.5804  | 10.1308   | 10.5673   | 11.909    |
| 2.06921   | 0.600107  | 0.402545 | 0.570251  | 0.162439  | 0.148609  |
| 1.44825   | 1.45168   | 1.12753  | 2.194     | 1.40338   | 2.33303   |
| 0         | 0         | 0        | 0         | 0         | 0.120238  |
| 3.60291   | 2.47973   | 2.2091   | 2.68308   | 2.72925   | 3.07039   |
| 1.56437   | 2.12811   | 1.51846  | 1.41911   | 1.57654   | 0.887581  |
| 0.220886  | 0.25304   | 0.17867  | 0.160301  | 0.273975  | 0.286457  |
| 4.58395   | 4.41068   | 3.84029  | 4.46715   | 3.85966   | 4.35381   |
| 2.33628   | 1.82606   | 2.48819  | 2.11935   | 2.83742   | 3.04559   |
| 46.8461   | 51.3155   | 32.8345  | 58.147    | 44.1712   | 56.4427   |
| 1.21723   | 1.05185   | 1.71444  | 0.743389  | 0.991441  | 1.7093    |
| 20.3409   | 21.1858   | 23.8774  | 22.8113   | 28.268    | 19.1008   |
| 0         | 0         | 0        | 0         | 0         | 0         |
| 0         | 0         | 0        | 0         | 0         | 0         |
| 1.99772   | 1.7549    | 2.26705  | 1.10707   | 0.676188  | 0.99015   |
| 626.181   | 573.341   | 587.559  | 654.483   | 809.244   | 769.141   |
| 1.02818   | 1.18099   | 1.16249  | 1.11916   | 1.27869   | 2.11077   |
| 356.394   | 0         | 0        | 0         | 0         | 0         |
| 28.9714   | 32.6369   | 32.2277  | 30.1295   | 26.7861   | 33.6293   |
| 0         | 0         | 0        | 0         | 0         | 0         |
| 0         | 0         | 0        | 0         | 0         | 0         |
| 0         | 0         | 0        | 0         | 0         | 0         |
| 2.34069   | 2.58566   | 1.78515  | 2.52376   | 1.60717   | 2.98133   |
| 0.0456247 | 0.0979993 | 0.184525 | 0.0993321 | 0.070738  | 0.0369804 |

|          |           |           |           |          |           |
|----------|-----------|-----------|-----------|----------|-----------|
| 7.02997  | 5.71664   | 6.45838   | 3.2585    | 3.24261  | 3.62952   |
| 16.9252  | 14.9789   | 15.1803   | 17.0552   | 17.1879  | 16.2153   |
| 462.939  | 486.085   | 442.763   | 484.806   | 475.97   | 435.834   |
| 31.5877  | 26.8238   | 29.2856   | 30.1262   | 32.2855  | 27.8387   |
| 0.379061 | 0.295513  | 0.487453  | 0.51875   | 0.395014 | 0.193599  |
| 6.53572  | 2.55239   | 4.2052    | 4.23998   | 2.87871  | 2.96973   |
| 473.47   | 439.617   | 381.584   | 485.138   | 674.065  | 191.73    |
| 6.3545   | 5.01238   | 6.62105   | 4.7679    | 4.2686   | 4.89955   |
| 0.078282 | 0.243269  | 0.111307  | 0.376135  | 0.263395 | 0.198284  |
| 0        | 0         | 0         | 0.0532113 | 0        | 0         |
| 0.645225 | 0.346477  | 0.365337  | 0.327776  | 0.200075 | 0.339935  |
| 28.7988  | 19.9253   | 22.6855   | 24.0371   | 25.7057  | 23.976    |
| 1.14783  | 1.16229   | 0.610127  | 1.1067    | 2.11013  | 0.544921  |
| 4.88649  | 4.07151   | 4.16062   | 3.81581   | 3.81024  | 3.96067   |
| 551.154  | 1233.76   | 693.009   | 740.388   | 556.806  | 1312.46   |
| 4.74078  | 5.50062   | 5.0629    | 4.1162    | 3.82524  | 5.65977   |
| 7.17048  | 5.05418   | 4.70199   | 6.18387   | 7.61484  | 3.82007   |
| 20.7434  | 23.0775   | 24.3509   | 24.8581   | 25.7289  | 26.4269   |
| 46.532   | 44.7155   | 44.3815   | 52.8421   | 50.0121  | 43.2211   |
| 25.4698  | 19.1486   | 23.5128   | 24.1709   | 25.8401  | 21.587    |
| 17.7815  | 14.3041   | 18.685    | 19.0627   | 21.2233  | 19.2856   |
| 0        | 0         | 0         | 0         | 0        | 0         |
| 35.6914  | 35.4962   | 34.0284   | 37.3972   | 39.5492  | 30.3463   |
| 1.86724  | 1.596     | 0.954252  | 1.10774   | 0.630349 | 1.12644   |
| 5.25593  | 3.79736   | 3.01464   | 3.9877    | 3.51887  | 6.4289    |
| 8.86905  | 7.99497   | 7.41168   | 8.02615   | 7.89017  | 8.07642   |
| 0        | 0.0538638 | 0         | 0         | 0.11664  | 0         |
| 48.4935  | 48.3144   | 49.6486   | 53.8506   | 52.2633  | 47.0255   |
| 954      | 546.437   | 655.92    | 900.035   | 776.533  | 1082.55   |
| 0.445918 | 0.446976  | 0.649249  | 0.90611   | 0.276546 | 0.57829   |
| 0.102003 | 0         | 0.30711   | 0         | 0        | 0.0826765 |
| 21.4902  | 28.378    | 22.6479   | 24.225    | 21.8181  | 22.0458   |
| 9.7634   | 8.29861   | 11.2613   | 11.9427   | 10.9872  | 9.45768   |
| 1.47E-52 | 0         | 0         | 0.0478885 | 0        | 1.03E-69  |
| 30.2807  | 30.3077   | 20.218    | 29.6904   | 25.7428  | 24.0715   |
| 6.09561  | 4.40438   | 5.65437   | 4.82953   | 3.90172  | 4.74805   |
| 24.419   | 23.4838   | 24.8946   | 25.4285   | 27.4989  | 24.3014   |
| 0        | 0         | 0.0179771 | 0.0161289 | 0        | 0.0180139 |
| 1.41648  | 0.933036  | 2.1082    | 2.01481   | 1.58123  | 2.11251   |
| 6.08122  | 6.43735   | 5.74285   | 6.75913   | 6.41332  | 6.21445   |
| 0.107226 | 0.191929  | 0         | 0.116724  | 0.207808 | 0.0869103 |
| 13.2473  | 10.0846   | 11.7261   | 11.5406   | 15.2666  | 13.4418   |
| 99.496   | 101.361   | 91.6902   | 105.535   | 98.3286  | 92.4318   |

|           |           |           |           |            |           |
|-----------|-----------|-----------|-----------|------------|-----------|
| 1.29666   | 1.28053   | 1.04884   | 1.16815   | 0.554589   | 0.833543  |
| 0         | 0         | 0         | 0         | 0          | 0         |
| 16.7873   | 14.3273   | 13.8453   | 17.4807   | 18.0954    | 13.2824   |
| 0         | 0.105999  | 0         | 0         | 0          | 0.119997  |
| 143.323   | 158.458   | 202.318   | 202.953   | 232.077    | 229.731   |
| 0         | 0         | 0.245176  | 0         | 0          | 0         |
| 0.113915  | 0.0815608 | 0.122858  | 0.137783  | 0.0883085  | 0.215441  |
| 0         | 0         | 0         | 0         | 0          | 0         |
| 0         | 0.0232816 | 0.0263024 | 0         | 0          | 0         |
| 9.38693   | 6.72891   | 10.5846   | 7.89733   | 8.96382    | 9.2121    |
| 447.013   | 562.24    | 506.093   | 562.02    | 435.18     | 631.714   |
| 31.5529   | 28.8394   | 29.9853   | 36.6899   | 36.8162    | 31.128    |
| 4.2996    | 5.51013   | 6.69268   | 5.79483   | 5.48984    | 5.59352   |
| 0.423572  | 0.194111  | 0.315799  | 0.295058  | 0.328866   | 0.19236   |
| 17.3607   | 10.4484   | 13.9297   | 14.0293   | 15.0512    | 16.36     |
| 17.2554   | 23.2383   | 20.4101   | 19.6286   | 13.0316    | 15.0776   |
| 474.818   | 613.977   | 515.384   | 465.094   | 511.632    | 494.176   |
| 3.76599   | 2.88102   | 2.78555   | 3.0137    | 2.44126    | 3.24646   |
| 0.287714  | 0.893142  | 0.0953076 | 0.440796  | 0.601123   | 0.849124  |
| 119.04    | 132.987   | 137.851   | 138.501   | 136.814    | 135.158   |
| 14.9746   | 5.15769   | 11.9826   | 10.1      | 13.772     | 16.298    |
| 17.728    | 21.0517   | 30.1661   | 19.0826   | 26.051     | 17.0415   |
| 8.88256   | 9.35498   | 7.89569   | 7.00075   | 7.27832    | 8.0357    |
| 40.9541   | 41.8508   | 33.9743   | 27.6897   | 28.6033    | 35.2179   |
| 0         | 0         | 0         | 0         | 0          | 0         |
| 0.0807637 | 0.0289126 | 0.0979922 | 0.0586117 | 0.0626093  | 0.163654  |
| 150.669   | 172.96    | 184.608   | 95.6247   | 246.532    | 216.305   |
| 447.513   | 580.893   | 469.854   | 511.247   | 519.547    | 434.389   |
| 17.832    | 15.5566   | 14.294    | 16.9049   | 16.1587    | 11.5562   |
| 9.15196   | 9.64384   | 9.27099   | 9.48732   | 9.90057    | 8.94767   |
| 0         | 0         | 0         | 0         | 0.0276707  | 0         |
| 4.08341   | 3.39232   | 3.60555   | 4.84098   | 2.97221    | 4.97725   |
| 0.0106267 | 0         | 0.0257871 | 0.0385598 | 0.00823796 | 0.0861327 |
| 0.100826  | 0.0683901 | 0.0558016 | 0.123236  | 0.115186   | 0.0903253 |
| 0         | 0         | 0         | 0         | 0          | 0         |
| 0         | 0         | 0         | 0         | 0          | 0         |
| 4.43622   | 4.09999   | 5.65087   | 4.40979   | 4.59357    | 4.58995   |
| 8.34998   | 8.41729   | 5.67891   | 6.51193   | 3.76807    | 3.93974   |
| 5.42725   | 8.30496   | 6.02548   | 3.86143   | 4.12521    | 4.91688   |
| 0         | 0         | 0         | 0         | 0          | 0         |
| 8.86868   | 7.86755   | 7.57322   | 8.46654   | 6.98649    | 8.97489   |
| 0         | 0.137512  | 0.155355  | 0.0696913 | 0          | 0.155672  |
| 1.15626   | 0.0413931 | 0         | 0.083912  | 0.0448176  | 0.0937189 |



|           |           |           |           |           |           |
|-----------|-----------|-----------|-----------|-----------|-----------|
| 0         | 0         | 0         | 0         | 0         | 0         |
| 8.45944   | 5.82809   | 6.72893   | 6.08631   | 6.1172    | 6.2073    |
| 0.159175  | 0.0284913 | 0         | 0.0288788 | 0         | 0         |
| 69.279    | 95.0351   | 65.8034   | 80.86     | 64.5069   | 67.118    |
| 31.0566   | 35.4913   | 32.6103   | 36.6471   | 29.6123   | 36.0124   |
| 0         | 0         | 0         | 0.0654338 | 0         | 0         |
| 7.24801   | 8.5677    | 8.06683   | 5.72642   | 6.39059   | 6.89956   |
| 3.66E-67  | 4.51E-78  | 0.520719  | 0.160687  | 0.17034   | 0.261758  |
| 13.4637   | 11.4861   | 12.6821   | 15.1787   | 12.927    | 14.7854   |
| 10.1725   | 10.046    | 8.64561   | 10.2275   | 12.6046   | 14.8402   |
| 0.272101  | 0.0834941 | 0.0943274 | 0.0846295 | 0         | 0.0315068 |
| 9.31731   | 8.89051   | 9.16243   | 20.7026   | 6.13174   | 7.12452   |
| 15.2859   | 12.5234   | 9.4237    | 11.2825   | 12.6372   | 7.78598   |
| 0.641166  | 0.434925  | 0.456503  | 1.0441    | 0.411428  | 0.488672  |
| 0         | 0         | 0         | 0         | 0         | 0         |
| 13.3109   | 10.7475   | 13.5454   | 13.3993   | 13.2942   | 13.4027   |
| 0.53108   | 0.887234  | 0.680168  | 0.578121  | 0.411701  | 0.394587  |
| 0.635016  | 0.681917  | 0.513597  | 0.460791  | 0.246094  | 0.257335  |
| 21.2349   | 23.8262   | 20.7529   | 22.7147   | 18.1303   | 19.0035   |
| 8.11528   | 4.64024   | 5.97168   | 7.44356   | 6.72798   | 7.0345    |
| 4.85316   | 4.10868   | 4.56221   | 3.68865   | 4.21982   | 6.99021   |
| 2.723     | 2.28528   | 2.4797    | 2.44722   | 3.50876   | 1.82709   |
| 2110.12   | 1753.74   | 1919.04   | 2075.48   | 2121.24   | 1734.6    |
| 0         | 0         | 0         | 0         | 0         | 0         |
| 0         | 0.0433539 | 0         | 0         | 0.0704111 | 0.0736189 |
| 0         | 0.0196971 | 0         | 0.019965  | 0         | 0.0445967 |
| 0         | 94.6478   | 80.1963   | 95.9349   | 76.8586   | 53.5735   |
| 0         | 0         | 0         | 0         | 0         | 0         |
| 8.39499   | 6.26752   | 7.08073   | 8.03988   | 7.69827   | 6.65322   |
| 4.40339   | 3.28519   | 3.56181   | 4.21594   | 4.90504   | 4.49874   |
| 0         | 0         | 0         | 0         | 0         | 0         |
| 0         | 0         | 0         | 0         | 0         | 0         |
| 12.0706   | 10.2184   | 12.127    | 12.1857   | 12.1542   | 12.0157   |
| 0         | 0         | 6.78E-272 | 6.92E-133 | 5.92E-38  | 0         |
| 0.218035  | 0.401423  | 0.138572  | 0.24865   | 0.0603658 | 0.0757392 |
| 0.251808  | 0.103023  | 0.203682  | 0.208847  | 0         | 0         |
| 0.0292789 | 0         | 0         | 0         | 0         | 0.0237315 |
| 1.41019   | 1.32438   | 1.34807   | 1.60821   | 1.33456   | 1.57349   |
| 20.7425   | 16.1552   | 12.9482   | 11.7746   | 17.0103   | 8.49673   |
| 0.145128  | 0.083127  | 0.0469564 | 0.189579  | 0.0450021 | 0.141157  |
| 14.558    | 17.3772   | 18.0235   | 17.6475   | 16.6199   | 17.6788   |
| 0.0302861 | 0.0830071 | 0.0270112 | 0.0239684 | 0.0451    | 0.0241993 |
| 0         | 0         | 0         | 0         | 0         | 0         |

|           |           |           |           |           |           |
|-----------|-----------|-----------|-----------|-----------|-----------|
| 7.39495   | 7.63105   | 7.31861   | 8.26945   | 7.36935   | 8.30133   |
| 3.575     | 3.74898   | 3.71315   | 4.12234   | 3.03918   | 3.43712   |
| 107.552   | 178.422   | 158.412   | 162.242   | 101.105   | 92.3471   |
| 11.9203   | 12.3883   | 12.078    | 14.5409   | 11.5753   | 14.8058   |
| 14.6479   | 10.5235   | 11.7774   | 12.9491   | 12.2683   | 12.6952   |
| 7.15938   | 4.66832   | 4.0806    | 5.62844   | 1.91577   | 3.72737   |
| 40.2668   | 36.9841   | 37.6291   | 35.4243   | 32.846    | 35.9551   |
| 0         | 0         | 0         | 0         | 0         | 0         |
| 0.0526156 | 0         | 0         | 0.0381841 | 0         | 0         |
| 0         | 0         | 0         | 0         | 0         | 0         |
| 0.123386  | 0.0530053 | 0.0399219 | 0.107452  | 0         | 0.140012  |
| 0         | 0         | 0.0439002 | 0         | 0.0210366 | 0         |
| 0         | 0         | 0         | 0         | 0         | 0         |
| 0         | 0         | 0         | 0         | 0         | 0         |
| 0.15094   | 0.0865118 | 0.0732499 | 0.021905  | 0.0233939 | 0         |
| 3.9859    | 3.10564   | 4.2356    | 4.16881   | 3.30199   | 3.32573   |
| 23.1237   | 24.1582   | 24.4597   | 26.7018   | 21.1168   | 21.6011   |
| 10.1005   | 8.89104   | 9.55179   | 10.928    | 9.09909   | 9.12789   |
| 2.77327   | 2.05915   | 2.90791   | 1.64079   | 5.89255   | 5.4947    |
| 17.5325   | 22.847    | 15.7745   | 19.2941   | 11.5158   | 16.0219   |
| 0.324684  | 0.306186  | 1.06E-09  | 0.516572  | 0.185184  | 0.263494  |
| 3.68811   | 3.17543   | 3.81402   | 3.57435   | 4.21624   | 2.55418   |
| 13.766    | 12.0644   | 6.91858   | 14.6542   | 9.79473   | 15.1607   |
| 0         | 0         | 0         | 0         | 0         | 0         |
| 1.0835    | 1.23997   | 1.02012   | 1.3956    | 0.977522  | 1.21229   |
| 0         | 0         | 0         | 0         | 0         | 0         |
| 4.76361   | 4.00379   | 4.69081   | 4.12656   | 4.02853   | 3.83054   |
| 4.58334   | 6.14449   | 6.49833   | 4.62777   | 6.3998    | 4.11314   |
| 13.8717   | 13.6261   | 15.1204   | 16.144    | 11.2126   | 12.0892   |
| 4.82904   | 3.56521   | 4.78225   | 3.94122   | 3.90682   | 5.13344   |
| 23.4404   | 22.278    | 17.9427   | 20.8142   | 14.3647   | 20.8676   |
| 0.103831  | 0.0743414 | 0.209968  | 0.0753524 | 0.120738  | 0.0841589 |
| 0.245652  | 0.469019  | 0.728577  | 0.564534  | 0.666516  | 0.564142  |
| 16.762    | 14.455    | 15.0671   | 16.428    | 21.8136   | 15.9482   |
| 51.2367   | 36.7701   | 42.959    | 48.749    | 55.7957   | 45.8887   |
| 10.6442   | 10.3971   | 11.4819   | 8.43455   | 10.0623   | 9.50861   |
| 1.08801   | 0.949399  | 0.715056  | 0.986985  | 0.790727  | 0.799193  |
| 0         | 0         | 0         | 0         | 0         | 0         |
| 0         | 0         | 0.171169  | 0         | 0         | 0.171519  |
| 9.33646   | 6.43198   | 9.06839   | 7.288     | 9.10618   | 9.70851   |
| 305.236   | 594.524   | 416.166   | 696.509   | 352.225   | 636.486   |
| 97.844    | 83.7211   | 84.2031   | 95.6907   | 102.139   | 83.5352   |
| 0         | 0         | 0         | 0         | 0         | 0         |

|           |           |           |           |           |           |
|-----------|-----------|-----------|-----------|-----------|-----------|
| 0         | 48.8619   | 55.2018   | 0         | 52.9044   | 55.3146   |
| 10.0309   | 11.0852   | 8.71681   | 9.27798   | 7.37603   | 7.12004   |
| 7.23184   | 8.74295   | 9.97324   | 4.55998   | 5.88195   | 7.68741   |
| 17.4701   | 13.4146   | 22.7328   | 26.2754   | 29.834    | 42.0698   |
| 1.44322   | 1.739     | 1.13892   | 1.30282   | 1.17338   | 1.79746   |
| 13.2872   | 10.7086   | 12.3951   | 13.5435   | 10.0417   | 12.7992   |
| 3.88468   | 3.08295   | 2.68794   | 3.37963   | 3.19288   | 3.03486   |
| 11.6317   | 7.13522   | 9.7332    | 7.32809   | 6.81989   | 8.62094   |
| 0.394161  | 0.333523  | 0.550705  | 0.234041  | 0.333338  | 0.726093  |
| 0         | 0         | 0         | 0         | 0         | 0         |
| 0         | 0.0116495 | 5.49823   | 0         | 0.0126133 | 0         |
| 0.166492  | 0.0993374 | 0.157117  | 0.241652  | 0.107556  | 0.17993   |
| 1.63018   | 3.4309    | 1.61015   | 1.5944    | 0.494183  | 1.17859   |
| 53.0421   | 46.8619   | 51.1172   | 50.8801   | 56.7148   | 49.7824   |
| 17.053    | 17.2236   | 19.953    | 17.3478   | 19.0321   | 16.7116   |
| 0         | 0         | 0         | 0         | 0         | 0         |
| 13.3457   | 12.1696   | 14.9249   | 13.6484   | 11.448    | 13.3577   |
| 0.586926  | 0.630342  | 1.18688   | 3.62051   | 1.13749   | 8.32516   |
| 1.7533    | 1.81537   | 2.98856   | 1.49977   | 1.64183   | 1.94071   |
| 11.3535   | 11.4443   | 12.4575   | 12.8694   | 11.8859   | 12.7888   |
| 82.1718   | 74.7857   | 85.8764   | 82.4804   | 76.9381   | 78.3401   |
| 4.53746   | 3.93508   | 4.41982   | 4.33644   | 3.46796   | 4.16986   |
| 11.8981   | 9.52357   | 11.2034   | 11.5571   | 12.0616   | 11.5231   |
| 0         | 0         | 0         | 0         | 0         | 0         |
| 6.27929   | 4.72857   | 6.02553   | 5.92024   | 5.85688   | 5.53357   |
| 1.62424   | 2.25083   | 1.10191   | 1.21677   | 1.21852   | 1.82612   |
| 0.103703  | 0.0192491 | 0.0871472 | 0.121133  | 0.0401959 | 0.186875  |
| 2.55366   | 3.39547   | 2.00486   | 2.21985   | 2.0125    | 2.80958   |
| 11.1026   | 9.51067   | 9.68666   | 11.9801   | 10.1548   | 10.5693   |
| 0.100902  | 0.036122  | 0.306067  | 0.16476   | 0.136887  | 0.102231  |
| 2.5161    | 3.31343   | 1.88985   | 2.9346    | 2.33365   | 4.26085   |
| 0.166436  | 0.253543  | 0.254931  | 0.133635  | 0.203144  | 0.22388   |
| 9.29841   | 8.65786   | 8.89844   | 8.6172    | 10.5586   | 9.83663   |
| 4.31217   | 3.18404   | 3.52124   | 3.49558   | 3.18822   | 3.69488   |
| 3.37294   | 2.70555   | 3.26438   | 3.33706   | 3.22551   | 3.00616   |
| 0         | 0.025086  | 0         | 0         | 0         | 0         |
| 0         | 0         | 0         | 0         | 0         | 0         |
| 13.611    | 14.9296   | 6.7819    | 8.4948    | 10.4248   | 6.97228   |
| 0.0346062 | 0         | 0         | 0         | 0.0536545 | 0.0280495 |
| 0.113321  | 0.0721201 | 0.108637  | 0.131582  | 0.0780867 | 0.0204109 |
| 26.699    | 26.9252   | 29.1698   | 29.9097   | 23.5669   | 26.9442   |
| 0         | 0.0237213 | 0         | 0.0721317 | 0         | 0         |
| 1.00875   | 1.92599   | 0.815959  | 0.244023  | 0.782     | 0.545085  |

|           |           |           |           |           |           |
|-----------|-----------|-----------|-----------|-----------|-----------|
| 4.09127   | 3.38656   | 4.44025   | 4.49685   | 3.66911   | 4.07531   |
| 10.4654   | 7.50456   | 8.58247   | 10.0058   | 9.33687   | 9.14812   |
| 5.21E-07  | 0.154309  | 0.180383  | 2.54E-07  | 0.386277  | 0.350838  |
| 0         | 0         | 0         | 0         | 0         | 0         |
| 15.2946   | 14.6328   | 14.7866   | 13.2664   | 16.0418   | 17.5925   |
| 0         | 0         | 0         | 0         | 0         | 0         |
| 8.31025   | 8.89462   | 8.42202   | 7.16434   | 8.05358   | 8.80803   |
| 26.6371   | 31.4905   | 32.1045   | 26.6213   | 25.8716   | 27.3285   |
| 0.514278  | 0.152639  | 0.498364  | 0.941357  | 0.241763  | 0.334535  |
| 0.243981  | 0         | 0.463228  | 0.241001  | 0         | 0.269167  |
| 2.14386   | 2.24341   | 2.08984   | 2.75264   | 1.44888   | 1.60401   |
| 0.0684268 | 0.0489923 | 0.79976   | 0.198635  | 0.238706  | 0.61625   |
| 0         | 0         | 0         | 0         | 0         | 0         |
| 10.3818   | 6.39911   | 10.5783   | 8.1861    | 12.6627   | 13.3152   |
| 10.8026   | 10.9171   | 11.0516   | 11.3308   | 9.85627   | 9.22085   |
| 3.28386   | 5.18794   | 3.66678   | 3.91149   | 3.98458   | 4.28184   |
| 0.056013  | 0.0534723 | 0.0151026 | 0.0270998 | 0         | 0.136201  |
| 25.4404   | 9.78791   | 16.8725   | 13.9      | 16.6048   | 16.354    |
| 216.447   | 196.103   | 313.329   | 129.041   | 1109.4    | 247.481   |
| 8.55318   | 8.16027   | 7.4016    | 8.60052   | 8.66687   | 8.67061   |
| 10.7418   | 9.08483   | 10.7702   | 10.4829   | 10.7335   | 12.1384   |
| 63.2251   | 72.6771   | 35.82     | 58.2191   | 24.2283   | 21.2354   |
| 0.124558  | 0         | 0         | 0         | 0.0965592 | 0         |
| 0.288766  | 0.284928  | 0.0656935 | 0.152988  | 0.0839459 | 0.0658278 |
| 0.149557  | 0.013385  | 0.0302435 | 0.0271341 | 0.0289848 | 0.0303053 |
| 3.83324   | 3.20561   | 5.75477   | 4.36194   | 2.68631   | 2.56014   |
| 5.2539    | 5.10614   | 6.50314   | 5.89699   | 6.13429   | 5.28532   |
| 11.6816   | 7.73944   | 9.0194    | 9.8776    | 11.979    | 11.1489   |
| 2.38904   | 1.49669   | 1.26817   | 2.11303   | 2.54653   | 2.35998   |
| 0         | 0         | 0         | 0         | 0         | 0         |
| 0         | 0         | 0         | 0         | 0         | 0         |
| 0         | 0         | 0         | 0         | 0         | 0         |
| 0.22455   | 0.0826835 | 0.207582  | 0.158304  | 0.188995  | 0.213206  |
| 13.3224   | 11.6075   | 12.3849   | 14.0865   | 14.9783   | 14.963    |
| 16.138    | 14.1321   | 16.2671   | 12.7928   | 15.3014   | 12.2755   |
| 0         | 0         | 0         | 0         | 0         | 0.114266  |
| 0         | 0         | 0         | 0         | 0         | 0         |
| 1.75815   | 2.56027   | 1.49444   | 2.05445   | 1.06263   | 1.25597   |
| 2.23635   | 1.50624   | 0.822761  | 1.8156    | 0.839463  | 1.68998   |
| 8.41341   | 7.42846   | 8.15053   | 10.8692   | 8.41883   | 12.9775   |
| 12.9183   | 11.4216   | 11.9554   | 12.8781   | 11.5825   | 11.4395   |
| 0         | 0         | 0         | 0         | 0         | 0         |
| 3.30889   | 3.19576   | 3.93619   | 4.46482   | 2.77113   | 3.04465   |

|           |           |           |            |           |          |
|-----------|-----------|-----------|------------|-----------|----------|
| 385.419   | 429.695   | 321.811   | 372.54     | 550.865   | 205.745  |
| 0         | 0         | 0         | 0          | 0         | 0        |
| 12.2521   | 8.5186    | 10.999    | 12.7783    | 8.95509   | 13.0562  |
| 27.0427   | 18.9313   | 21.8252   | 27.2869    | 30.2877   | 30.3844  |
| 12.9619   | 17.1304   | 7.84434   | 18.0231    | 12.7294   | 12.2488  |
| 4.53548   | 5.16993   | 4.06068   | 3.88391    | 2.84688   | 4.16773  |
| 3.14339   | 4.55739   | 3.66133   | 3.38756    | 2.46117   | 3.08284  |
| 0         | 0         | 0         | 0          | 0         | 0        |
| 0         | 0         | 0         | 0          | 0         | 0        |
| 0.0616261 | 0.0147077 | 0.016616  | 0          | 0.063698  | 0.0666   |
| 4.96866   | 4.30411   | 4.02723   | 4.72884    | 4.93483   | 3.55558  |
| 65.2708   | 48.7437   | 50.094    | 57.9514    | 68.498    | 57.8776  |
| 0         | 0         | 0         | 0          | 0         | 0        |
| 2.96482   | 3.11943   | 1.0942    | 3.0028     | 3.83119   | 4.50975  |
| 1.93602   | 1.82389   | 1.27754   | 0.998295   | 1.18487   | 1.89957  |
| 2.42804   | 2.18072   | 2.21234   | 2.34729    | 2.31871   | 3.62757  |
| 0         | 0.0670972 | 0.151606  | 0.0680097  | 0.0726483 | 0.227874 |
| 5.14654   | 6.15978   | 4.79529   | 4.37986    | 4.68968   | 5.40019  |
| 1.67591   | 2.65637   | 1.01009   | 2.04107    | 2.15086   | 1.46664  |
| 1.06739   | 1.17593   | 1.08597   | 1.0219     | 0.956343  | 1.13876  |
| 13.0135   | 12.9105   | 14.0609   | 14.457     | 13.1354   | 12.8987  |
| 0.198916  | 0         | 0.0357552 | 0.0320791  | 0         | 0        |
| 2.30149   | 1.43289   | 1.96955   | 2.22697    | 1.96515   | 2.48724  |
| 1.34555   | 1.05499   | 1.33277   | 1.02357    | 0.688998  | 1.1776   |
| 0.0262366 | 0         | 0.0106111 | 0.00952018 | 0.0101695 | 0        |
| 3.56845   | 3.204     | 3.04068   | 2.99193    | 3.47788   | 2.80132  |
| 0         | 0         | 0         | 0.00777029 | 0         | 0        |
| 19.8986   | 14.9282   | 17.2582   | 15.9536    | 16.3029   | 16.315   |
| 0         | 0         | 0         | 0          | 0         | 0        |
| 22.3406   | 14.277    | 17.428    | 21.3582    | 21.163    | 22.7822  |
| 0         | 0.0236357 | 0         | 0          | 0         | 0        |
| 6.62923   | 7.17516   | 8.69796   | 6.88658    | 6.82346   | 5.85842  |
| 45.9769   | 53.3019   | 51.4746   | 59.8825    | 64.7929   | 48.063   |
| 9.2848    | 7.81654   | 7.57636   | 9.56674    | 10.2033   | 7.09566  |
| 39.248    | 50.4949   | 44.8909   | 46.2505    | 39.822    | 39.0284  |
| 0         | 0         | 0         | 0          | 0         | 0        |
| 7.35166   | 5.05159   | 7.18727   | 6.69399    | 6.62574   | 8.91672  |
| 1.60515   | 1.14498   | 2.08933   | 1.22952    | 1.29075   | 1.54307  |
| 0         | 0         | 0         | 0          | 0         | 0        |
| 2.81866   | 2.69255   | 3.29292   | 2.46697    | 2.75472   | 4.04382  |
| 6.05768   | 3.54241   | 5.19923   | 4.19669    | 5.51555   | 7.7034   |
| 0.427889  | 0.402098  | 0.216319  | 0.426974   | 0.331706  | 0.28179  |
| 1.26167   | 1.084     | 0.969513  | 1.08348    | 0.961766  | 0.937408 |

|           |           |           |           |           |           |
|-----------|-----------|-----------|-----------|-----------|-----------|
| 12.2614   | 10.0268   | 10.289    | 10.5182   | 12.0178   | 10.7809   |
| 21.0078   | 16.5053   | 19.1933   | 18.3674   | 21.6227   | 18.7984   |
| 6.43429   | 6.19362   | 9.14658   | 7.78246   | 9.22773   | 8.54714   |
| 0         | 0         | 0         | 0         | 0         | 0         |
| 0         | 0         | 0         | 0         | 0         | 0         |
| 56.4897   | 39.7495   | 44.2724   | 48.311    | 61.1259   | 47.1762   |
| 0.026961  | 0.109387  | 0.0581553 | 0.0717424 | 0.0209006 | 0.0655585 |
| 25.6244   | 30.077    | 30.1815   | 34.5823   | 38.4511   | 29.8789   |
| 0         | 0         | 0         | 0         | 0         | 0         |
| 11.9937   | 11.6734   | 12.7412   | 14.6565   | 13.4924   | 10.5937   |
| 11.5342   | 9.64625   | 11.5447   | 11.6942   | 11.1018   | 11.3719   |
| 17.2088   | 42.7002   | 51.5973   | 14.7234   | 10.5222   | 10.2418   |
| 4.2725    | 2.72257   | 8.00852   | 4.97067   | 7.3073    | 2.00662   |
| 2382.08   | 2202.57   | 2239.77   | 2370.17   | 2380.56   | 2249.92   |
| 0         | 0         | 0         | 0.0773749 | 0.0826522 | 0         |
| 8.55681   | 8.09207   | 7.40045   | 8.01952   | 7.25093   | 6.79058   |
| 23.843    | 21.4471   | 23.4276   | 24.5283   | 23.1815   | 24.7934   |
| 2.61072   | 1.43452   | 2.40643   | 2.02683   | 1.88267   | 2.31292   |
| 0         | 0         | 0         | 0         | 0         | 0         |
| 1.72852   | 0.882798  | 0.801828  | 1.18906   | 0.945964  | 1.00918   |
| 0         | 0         | 0         | 0.0111354 | 0.0576355 | 0.0248737 |
| 0.238402  | 0.325127  | 0.541786  | 0.378981  | 0.316823  | 0.542893  |
| 73.7205   | 103.364   | 70.1545   | 79.6855   | 104.05    | 62.8959   |
| 8.92403   | 6.61098   | 6.55621   | 7.70204   | 7.95361   | 8.42025   |
| 25.1049   | 19.7344   | 23.573    | 22.654    | 23.3955   | 24.7867   |
| 0         | 0.280698  | 0         | 0.284516  | 0.15196   | 0.317767  |
| 8.06825   | 7.42951   | 8.44906   | 8.27037   | 6.18212   | 7.32605   |
| 0.163859  | 0.11732   | 0.0331355 | 0.0891864 | 0         | 0.132813  |
| 0         | 0         | 0         | 0         | 0         | 0         |
| 54.4903   | 57.5673   | 62.5302   | 56.8905   | 58.9164   | 46.6631   |
| 0.0346062 | 0.0743321 | 0         | 0.075343  | 0.0804817 | 0.112198  |
| 66.8969   | 60.3017   | 58.9259   | 68.0025   | 59.2257   | 52.5709   |
| 0.17116   | 0         | 0.138448  | 0.0414046 | 0.3096    | 0.0462436 |
| 1.31288   | 0.402856  | 0.758544  | 0.816669  | 0.87237   | 1.67221   |
| 15.9972   | 13.5243   | 14.3673   | 15.0964   | 15.1993   | 16.6946   |
| 11.3159   | 8.60621   | 9.97351   | 10.0113   | 9.86465   | 10.0776   |
| 4.14867   | 2.78305   | 3.6581    | 3.14639   | 3.44791   | 4.99852   |
| 31.7627   | 38.3265   | 32.2515   | 36.4809   | 33.4425   | 28.3561   |
| 1.29397   | 1.91468   | 2.37244   | 0.876452  | 1.87246   | 1.39841   |
| 1.64566   | 1.01164   | 1.49249   | 1.33905   | 1.13399   | 1.69764   |
| 55.8618   | 57.0559   | 39.4034   | 75.7969   | 42.2787   | 290.767   |
| 0.645225  | 0.323378  | 0.600196  | 0.398014  | 0.500188  | 0.653721  |
| 0.320055  | 0.546443  | 0.477944  | 0.305438  | 0.343539  | 0.339236  |

|           |           |           |           |           |           |
|-----------|-----------|-----------|-----------|-----------|-----------|
| 0.695295  | 0.582243  | 0.969672  | 0.53262   | 0.839601  | 1.03319   |
| 8.43116   | 7.6986    | 7.91294   | 8.92891   | 6.2412    | 8.22893   |
| 0.19882   | 0.106763  | 0.128657  | 0.144287  | 0.0308256 | 0.0886325 |
| 5.06168   | 5.69111   | 3.843     | 4.40442   | 3.09129   | 5.28817   |
| 0.291521  | 0.493292  | 0.583461  | 0.471165  | 0.676319  | 0.309821  |
| 41.1174   | 38.7893   | 44.0486   | 41.5547   | 30.9904   | 30.5769   |
| 7.73773   | 6.4302    | 6.74355   | 6.97      | 6.05593   | 7.22002   |
| 0.0346062 | 0.222996  | 0.111969  | 0.100457  | 0         | 0.112198  |
| 16.3323   | 10.1703   | 12.1591   | 13.3719   | 13.1258   | 13.7388   |
| 0         | 0         | 0         | 0         | 0         | 0         |
| 0         | 0         | 0         | 0         | 0         | 0         |
| 6.98443   | 4.48064   | 5.85295   | 6.46769   | 6.73556   | 6.00078   |
| 5.28676   | 4.67442   | 3.91356   | 4.32657   | 3.55891   | 5.09136   |
| 8.32947   | 7.31119   | 9.33107   | 8.49819   | 7.26765   | 9.54788   |
| 20.2688   | 16.7422   | 22.1216   | 21.0031   | 22.3777   | 22.5554   |
| 0.957658  | 0.68594   | 1.17001   | 1.04293   | 0.949475  | 0.903035  |
| 0.122085  | 0.0874106 | 0.0987522 | 0.177199  | 0         | 0.0989541 |
| 0         | 0         | 0         | 0         | 0         | 0         |
| 2.7877    | 2.76151   | 4.41717   | 3.76904   | 2.98998   | 3.6215    |
| 17.9774   | 14.5217   | 15.1381   | 17.1277   | 16.5807   | 14.646    |
| 0.227594  | 0.162953  | 0.128867  | 0.181686  | 0.229365  | 0.129131  |
| 9.62754   | 10.7134   | 11.2246   | 12.5704   | 15.187    | 13.4651   |
| 10.3976   | 8.28816   | 8.01326   | 8.69542   | 6.6687    | 7.78705   |
| 26.0905   | 19.1346   | 21.6986   | 27.295    | 25.6627   | 26.0589   |
| 12.5753   | 15.4976   | 12.6938   | 8.72109   | 8.92606   | 12.769    |
| 8.32814   | 7.47727   | 6.10024   | 6.30459   | 4.44015   | 8.16482   |
| 0         | 0         | 0         | 0         | 0         | 0         |
| 0.3248    | 0.388807  | 0.474871  | 0.394095  | 0.350195  | 0.319716  |
| 0         | 0         | 0         | 0         | 0.0197034 | 0         |
| 0.019283  | 0.0276128 | 0.0701904 | 0.0629741 | 0.0276841 | 0         |
| 79.4074   | 86.3997   | 84.44     | 77.7074   | 83.7715   | 51.747    |
| 81.5221   | 74.6359   | 35.2324   | 58.8293   | 35.8296   | 27.3262   |
| 48.2269   | 46.7507   | 51.967    | 41.9456   | 48.7457   | 36.28     |
| 10.0234   | 7.60889   | 7.595     | 9.10821   | 6.07741   | 7.88496   |
| 0.146898  | 0.026294  | 0.0297056 | 0         | 0.0284693 | 0.148832  |
| 163.816   | 176.215   | 172.316   | 89.757    | 89.6989   | 99.0518   |
| 47.8845   | 47.3234   | 43.4714   | 50.0926   | 46.7959   | 37.4701   |
| 13.2998   | 14.6764   | 13.1352   | 14.1695   | 13.6389   | 15.2624   |
| 10.0531   | 7.725     | 8.3934    | 9.1956    | 9.6289    | 9.22697   |
| 0.175502  | 0.0418853 | 0.0473199 | 0         | 0         | 0         |
| 8.33613   | 8.9689    | 8.40132   | 9.87569   | 8.50578   | 6.48279   |
| 8.83372   | 7.93514   | 9.87367   | 9.79137   | 7.84411   | 8.0713    |
| 34.6609   | 31.0538   | 35.5918   | 38.3241   | 49.1277   | 38.3914   |

|           |           |           |          |           |          |
|-----------|-----------|-----------|----------|-----------|----------|
| 0         | 0         | 0         | 0        | 0         | 0        |
| 32.9759   | 32.4908   | 37.1444   | 34.849   | 40.5526   | 37.708   |
| 0.0368528 | 0         | 0.0298095 | 0        | 0.0285689 | 0.119482 |
| 11.3751   | 9.85197   | 9.56552   | 10.4721  | 13.1825   | 8.76938  |
| 158.853   | 174.431   | 168.236   | 162.735  | 177.357   | 153.494  |
| 0.809666  | 1.01448   | 0.736787  | 1.15069  | 0.784582  | 0.875015 |
| 8.28636   | 6.65195   | 7.55567   | 7.03398  | 8.79846   | 9.0772   |
| 2.88586   | 1.80562   | 3.11242   | 2.96224  | 3.58752   | 3.05556  |
| 0.0260722 | 0         | 0         | 0        | 0         | 0        |
| 5.95723   | 3.0867    | 3.67741   | 3.75442  | 2.73442   | 3.36727  |
| 13.9755   | 9.12968   | 10.7253   | 13.8932  | 10.0331   | 11.7864  |
| 14.1425   | 12.2353   | 6.19643   | 16.6781  | 16.6736   | 22.2095  |
| 1.79569   | 0.514271  | 0         | 1.30316  | 0.835227  | 0.873279 |
| 17.1557   | 11.5196   | 13.8002   | 15.6059  | 13.9726   | 13.5365  |
| 0         | 0         | 0         | 0        | 0         | 0        |
| 6.82186   | 5.58611   | 6.10373   | 6.0946   | 6.07881   | 7.18615  |
| 19.7049   | 20.2764   | 18.1334   | 18.4106  | 14.6483   | 15.1999  |
| 5.14631   | 5.67189   | 5.79978   | 5.79099  | 4.8636    | 5.41326  |
| 35.5039   | 29.3844   | 29.6869   | 31.094   | 22.1986   | 27.7535  |
| 0.425994  | 0         | 0.172289  | 0        | 0.660474  | 0        |
| 0         | 0         | 0         | 0        | 0         | 0        |
| 14.2985   | 13.8633   | 17.1077   | 14.1599  | 16.7421   | 15.694   |
| 0.39124   | 0.42018   | 0.36921   | 0.331251 | 0.202197  | 0.317113 |
| 0         | 0.0655165 | 0         | 0        | 0         | 0        |
| 0.755816  | 0.154614  | 0.873377  | 0.391792 | 0.418514  | 0.700131 |
| 144.861   | 138.289   | 178.109   | 188.791  | 169.677   | 182.309  |
| 1610.63   | 1294.69   | 1125      | 1453.7   | 1643.16   | 1545.17  |
| 0.55145   | 0.658047  | 0.446057  | 0.133399 | 0         | 0        |
| 0.146757  | 0.171708  | 0.270993  | 0.232762 | 0.322294  | 0.207349 |
| 4.50861   | 4.52828   | 3.71446   | 5.0746   | 4.02913   | 4.65257  |
| 29.3843   | 30.1385   | 31.8488   | 28.1384  | 28.7771   | 27.3497  |
| 4.7719    | 4.84494   | 3.56359   | 4.31607  | 4.18247   | 4.60031  |
| 64.6372   | 39.796    | 57.9375   | 60.327   | 65.2773   | 53.7808  |
| 11.199    | 8.81742   | 9.23928   | 9.66634  | 8.45086   | 8.77556  |
| 1.26055   | 0.192381  | 0.38524   | 0.577769 | 0.590174  | 0.774353 |
| 34.8534   | 27.4361   | 31.253    | 36.0457  | 28.2513   | 29.1187  |
| 16.239    | 13.8949   | 16.3657   | 16.0638  | 18.1608   | 18.487   |
| 17.8889   | 13.7276   | 15.4358   | 18.3616  | 20.7841   | 16.5266  |
| 28.0185   | 20.9166   | 16.2574   | 22.9254  | 18.9865   | 25.5805  |
| 74.3243   | 61.8267   | 60.223    | 65.7467  | 81.1562   | 59.6741  |
| 0         | 0         | 0         | 0        | 0         | 0        |
| 3.04552   | 8.14066   | 5.9123    | 2.35999  | 5.98103   | 4.11587  |
| 7.43198   | 7.59047   | 6.09068   | 4.84481  | 4.44008   | 5.76256  |



|          |           |           |           |           |           |
|----------|-----------|-----------|-----------|-----------|-----------|
| 16.5248  | 10.4193   | 15.1347   | 16.7509   | 14.1739   | 14.1284   |
| 55.8318  | 50.4344   | 46.2028   | 52.5237   | 38.5907   | 48.0353   |
| 1.04655  | 0.156118  | 0.176717  | 0.471442  | 0.172842  | 0.724151  |
| 19.6651  | 16.2588   | 18.8849   | 18.8688   | 24.9953   | 15.1974   |
| 19.6005  | 12.8608   | 13.2958   | 13.6916   | 7.40025   | 10.7592   |
| 3.89353  | 3.20775   | 4.07696   | 3.532     | 3.98997   | 3.60976   |
| 0        | 0         | 0.520269  | 0         | 0.249308  | 0         |
| 64.0768  | 48.1095   | 54.4298   | 55.3869   | 61.855    | 55.7131   |
| 18.7363  | 14.7524   | 13.3866   | 16.1094   | 12.2416   | 14.8123   |
| 0        | 0         | 0         | 0         | 0         | 0         |
| 5.10964  | 4.41315   | 5.0805    | 5.88631   | 5.84514   | 7.25066   |
| 0        | 0.0410788 | 0.0232044 | 0.0416374 | 0.111193  | 0.0465037 |
| 45.1943  | 38.0879   | 35.3623   | 36.3393   | 27.8608   | 35.0624   |
| 59.3423  | 72.8084   | 61.4144   | 66.6375   | 61.5145   | 59.3183   |
| 15.9001  | 16.0642   | 17.9277   | 15.892    | 16.0046   | 15.9537   |
| 0        | 0         | 0         | 0         | 0         | 0         |
| 0        | 0         | 0         | 0         | 0         | 0         |
| 0        | 0         | 0         | 0         | 0         | 0         |
| 1.36424  | 0.390708  | 0.441402  | 0         | 0.634547  | 0.221152  |
| 5.06907  | 4.27668   | 6.57288   | 4.31961   | 4.69524   | 5.68126   |
| 10.6934  | 7.81053   | 10.0029   | 9.65451   | 9.23988   | 10.4607   |
| 0.62713  | 0.628619  | 0.405818  | 0.523388  | 0.340313  | 0.50831   |
| 0.887684 | 0.775715  | 0.666419  | 0.963972  | 0.638603  | 0.669694  |
| 13.4263  | 13.8862   | 14.3472   | 26.5731   | 11.2189   | 13.4011   |
| 58.7723  | 98.9419   | 79.1958   | 78.412    | 105.42    | 83.0764   |
| 0        | 0.0606995 | 0.13715   | 0         | 0.0657212 | 0.137431  |
| 14.2585  | 10.3526   | 10.5588   | 11.6594   | 11.8319   | 16.7658   |
| 31.6486  | 31.9743   | 34.3917   | 38.5018   | 34.892    | 34.562    |
| 6.08266  | 5.84839   | 6.76759   | 6.74518   | 8.05978   | 7.66848   |
| 33.9321  | 39.0009   | 33.8013   | 33.0054   | 39.2157   | 28.1532   |
| 23.3943  | 20.0018   | 21.1387   | 22.7825   | 16.4572   | 19.4299   |
| 2.98695  | 2.77398   | 2.53864   | 2.51326   | 1.67792   | 2.42103   |
| 0.546184 | 0.421139  | 0.475782  | 0.518338  | 0.423411  | 0.204323  |
| 230.198  | 206.505   | 214.898   | 232.011   | 255.347   | 213.012   |
| 0        | 0         | 0         | 0         | 0.0949146 | 0         |
| 5.78E-07 | 0.424277  | 0.470173  | 3.10E-07  | 8.91E-07  | 5.10E-07  |
| 3.98422  | 2.85263   | 0.358084  | 2.57015   | 2.05909   | 0         |
| 3.2045   | 3.68915   | 3.43244   | 3.1738    | 3.08823   | 3.50964   |
| 0        | 0.0285996 | 0.0323105 | 0.0289886 | 0         | 0         |
| 0.520549 | 0.412636  | 0.601517  | 0.296821  | 0.288241  | 0.376717  |
| 0        | 0         | 0         | 0         | 0         | 0         |
| 2.27986  | 1.68798   | 1.78126   | 1.67333   | 1.38579   | 1.61691   |
| 0        | 0         | 0         | 0         | 0         | 0         |

|           |           |           |           |           |           |
|-----------|-----------|-----------|-----------|-----------|-----------|
| 0         | 0         | 0         | 0         | 0         | 0         |
| 14.2176   | 15.1162   | 16.1367   | 15.3605   | 15.6707   | 12.0321   |
| 0.248562  | 0.177966  | 0.201057  | 0.288618  | 0.655144  | 0         |
| 3.12577   | 2.34805   | 2.08625   | 1.23958   | 0.900402  | 2.10436   |
| 3.07516   | 2.41995   | 2.86287   | 3.29729   | 2.54499   | 2.68339   |
| 10.6405   | 7.80267   | 7.85555   | 9.31901   | 8.60185   | 9.17989   |
| 49.0957   | 29.8306   | 46.6785   | 38.6724   | 55.4644   | 47.0754   |
| 0.771838  | 0.733652  | 1.27018   | 0.550479  | 0.618973  | 0.701104  |
| 0         | 0         | 0         | 0         | 0         | 0         |
| 69.877    | 58.6555   | 70.6703   | 74.9098   | 78.3856   | 69.2779   |
| 0         | 0.143787  | 0         | 0.145742  | 0         | 0.32555   |
| 107.982   | 105.082   | 118.679   | 110.971   | 117.383   | 115.216   |
| 2.03503   | 1.05967   | 1.04752   | 1.69168   | 2.32336   | 1.8594    |
| 7.51283   | 5.96682   | 4.14522   | 4.76616   | 3.95342   | 4.43599   |
| 7.25689   | 6.27792   | 7.54194   | 7.1698    | 4.97952   | 6.03508   |
| 22.0472   | 17.6233   | 17.6715   | 21.0736   | 19.0954   | 19.1538   |
| 9.52167   | 8.62036   | 8.33707   | 9.17238   | 7.9723    | 8.63513   |
| 30.6894   | 29.6965   | 31.1726   | 32.4425   | 31.1922   | 26.6439   |
| 61.3619   | 72.3514   | 65.5095   | 64.3736   | 57.4374   | 59.8183   |
| 17.3143   | 12.9648   | 14.9631   | 13.177    | 27.3324   | 13.6928   |
| 0         | 0         | 0         | 0.0510668 | 0         | 0.0285175 |
| 0.361202  | 0.29094   | 0.255648  | 0.294897  | 0.280009  | 0.182979  |
| 15.7686   | 13.2356   | 11.4281   | 11.155    | 12.4649   | 12.8799   |
| 0.754304  | 0.634358  | 1.82344   | 0.963143  | 1.23389   | 0.46892   |
| 2.05773   | 1.60723   | 2.26972   | 2.38933   | 1.82721   | 2.09241   |
| 11.5354   | 8.69683   | 9.13727   | 8.69937   | 10.7556   | 10.0177   |
| 0         | 0         | 0         | 0         | 0         | 0         |
| 1.14181   | 2.56154   | 1.90875   | 2.54114   | 1.94733   | 2.28284   |
| 10.0937   | 11.9729   | 9.52942   | 10.3427   | 8.47881   | 11.6614   |
| 6.34553   | 5.15217   | 5.84386   | 5.25587   | 4.99934   | 6.20547   |
| 1.10605   | 1.3419    | 1.21016   | 0.84751   | 1.10813   | 1.21985   |
| 0         | 0.0342117 | 0.0821793 | 0.0368716 | 0.0369419 | 0.0391356 |
| 1.85108   | 1.86219   | 2.53973   | 1.54742   | 1.65296   | 1.63331   |
| 23.5529   | 24.124    | 25.539    | 26.5826   | 22.9185   | 20.1105   |
| 4.10991   | 7.27779   | 8.185     | 6.40171   | 9.05143   | 7.74788   |
| 6.88357   | 5.57221   | 6.47219   | 7.37952   | 6.28494   | 6.88004   |
| 7.74446   | 6.40456   | 5.65733   | 8.97505   | 5.35207   | 7.00705   |
| 0.251163  | 0.178342  | 0.292006  | 0.491777  | 0.527156  | 0.481497  |
| 11.1567   | 13.4286   | 12.0471   | 10.2116   | 9.62373   | 13.2021   |
| 151.145   | 144.796   | 161.9     | 177.748   | 133.857   | 144.885   |
| 9.55657   | 14.6208   | 9.14034   | 12.3009   | 11.0751   | 14.0657   |
| 0.0711314 | 0.0509287 | 0         | 0         | 0         | 0         |
| 41.7832   | 33.5718   | 38.1102   | 40.8902   | 39.7457   | 33.2922   |

|           |           |           |           |           |            |
|-----------|-----------|-----------|-----------|-----------|------------|
| 2.16339   | 1.68055   | 2.08272   | 1.69822   | 1.72126   | 2.06122    |
| 1.4511    | 1.1337    | 0.900196  | 1.42376   | 1.59915   | 1.46853    |
| 24.7596   | 27.863    | 32.6729   | 39.1322   | 40.559    | 36.4778    |
| 6.94806   | 7.82269   | 5.859     | 7.42484   | 4.71297   | 6.99731    |
| 0         | 0.0450263 | 0.0508685 | 0         | 0.146254  | 0          |
| 7.30508   | 6.10794   | 6.45563   | 8.80651   | 5.25737   | 9.10569    |
| 129.304   | 150.951   | 142.84    | 144.116   | 208.384   | 70.9201    |
| 66.455    | 58.4235   | 65.5748   | 62.336    | 52.672    | 62.0115    |
| 22.684    | 25.7026   | 29.272    | 22.7573   | 24.8838   | 24.3924    |
| 0.0228935 | 0.0355715 | 0.0123454 | 0.0138452 | 0.031551  | 0.00618533 |
| 14.1005   | 14.6016   | 12.7192   | 13.8405   | 10.6658   | 13.0365    |
| 47.5601   | 44.6947   | 32.6967   | 48.1214   | 33.2497   | 30.3386    |
| 11.5639   | 11.7871   | 13.2244   | 12.1128   | 12.7182   | 12.0509    |
| 3.0383    | 2.25876   | 2.88645   | 2.72815   | 2.96084   | 3.32743    |
| 1.62532   | 3.20018   | 2.0542    | 1.47441   | 1.41747   | 1.56439    |
| 2.50E-169 | 1.46E-39  | 3.06E-89  | 0         | 3.14E-113 | 4.10E-116  |
| 0.0543234 | 0         | 0.0439411 | 0.0394234 | 0.0842246 | 0.0440309  |
| 52.4451   | 44.6126   | 44.4441   | 46.303    | 62.905    | 42.7745    |
| 33.0631   | 32.9999   | 39.6965   | 35.7674   | 39.6972   | 33.0482    |
| 0         | 0         | 0         | 0         | 0.0173229 | 0          |
| 5.1348    | 6.23571   | 5.74065   | 6.23841   | 4.85067   | 5.76216    |
| 58.0719   | 54.835    | 54.585    | 57.4542   | 59.6944   | 57.9591    |
| 9.14266   | 8.59158   | 10.0299   | 10.1598   | 9.78965   | 9.81882    |
| 5.82473   | 7.36501   | 9.92423   | 7.4649    | 11.7209   | 4.52024    |
| 5.29E-07  | 1.59E-07  | 6.01E-07  | 2.21E-07  | 5.14E-07  | 6.44E-07   |
| 0.269834  | 0.148002  | 0.0798284 | 0.0935852 | 0.160246  | 0.154864   |
| 2.9608    | 3.78608   | 2.36505   | 3.09043   | 2.62571   | 2.03554    |
| 4.85063   | 4.2708    | 4.2417    | 4.29717   | 3.89579   | 4.09099    |
| 2.16493   | 1.21447   | 2.04002   | 1.7007    | 1.66098   | 2.15273    |
| 0         | 0         | 0         | 0         | 0         | 0          |
| 17.1348   | 17.3593   | 12.4166   | 9.71181   | 16.8427   | 13.399     |
| 0         | 0         | 0         | 0         | 0         | 0          |
| 3.84862   | 1.34053   | 1.51447   | 1.7362    | 2.90287   | 2.02342    |
| 9.55865   | 6.33246   | 8.63566   | 6.97737   | 8.37912   | 8.5022     |
| 29.1596   | 26.5977   | 32.6013   | 40.3231   | 34.0314   | 44.2587    |
| 0.0840103 | 0.107307  | 0.0679542 | 0.0848046 | 0.0588082 | 0.0747255  |
| 0         | 0         | 0         | 0         | 0         | 0          |
| 74.1303   | 62.9687   | 71.3742   | 75.8467   | 78.6402   | 76.5893    |
| 20.4868   | 19.9358   | 20.8577   | 18.9193   | 19.5678   | 19.5006    |
| 13.5196   | 14.7881   | 14.23     | 17.0477   | 13.0917   | 12.3752    |
| 0.808619  | 0.0798883 | 0.775354  | 0.148083  | 1.03938   | 1.12944    |
| 1.95754   | 1.51368   | 2.0901    | 2.21616   | 2.00312   | 2.6021     |
| 24.784    | 27.274    | 25.9137   | 25.685    | 23.8616   | 24.4       |

|           |           |           |          |           |           |
|-----------|-----------|-----------|----------|-----------|-----------|
| 47.655    | 58.8321   | 45.2471   | 54.0086  | 50.2975   | 46.6826   |
| 12.5562   | 11.47     | 12.2309   | 14.4298  | 17.2472   | 14.1186   |
| 7.21043   | 6.73222   | 6.64024   | 7.69001  | 7.95013   | 4.58067   |
| 51.7163   | 45.6669   | 55.611    | 52.4925  | 53.7968   | 38.6752   |
| 3.51823   | 1.92907   | 1.25671   | 1.4494   | 1.15529   | 1.84993   |
| 6.65384   | 6.23847   | 7.28768   | 6.9347   | 6.48247   | 8.04865   |
| 13.85     | 9.72746   | 14.6172   | 23.8357  | 8.48714   | 19.779    |
| 0.772108  | 0.460679  | 0.832724  | 0.653722 | 0.897826  | 0.730123  |
| 7.76813   | 5.38445   | 6.88463   | 7.5637   | 5.47327   | 6.68357   |
| 0.403461  | 0.468726  | 0.85802   | 0.364178 | 0.321616  | 0.130804  |
| 0         | 0         | 0.307809  | 0.312704 | 0         | 0.272616  |
| 36.2281   | 61.8039   | 51.0459   | 49.7493  | 42.1886   | 53.3677   |
| 56.634    | 61.9254   | 64.8389   | 60.2523  | 69.6603   | 52.6991   |
| 1.10343   | 1.54244   | 0.722532  | 1.14397  | 1.14052   | 1.36284   |
| 0.267744  | 0.115238  | 0.119386  | 0.126502 | 0.166048  | 0.293075  |
| 35.5496   | 33.8465   | 36.1858   | 37.1927  | 33.9769   | 31.7194   |
| 36.3362   | 35.3381   | 48.1638   | 42.9672  | 61.3931   | 56.5245   |
| 3.73798   | 2.46589   | 2.51644   | 2.06711  | 3.01786   | 3.08597   |
| 10.3452   | 7.72155   | 9.16596   | 9.53505  | 7.5314    | 11.5699   |
| 6.53082   | 7.59373   | 7.90284   | 9.89614  | 4.61727   | 5.20875   |
| 29.3417   | 24.1136   | 28.1711   | 30.3668  | 30.2622   | 31.8477   |
| 0.199198  | 0.285244  | 0.161127  | 0.433685 | 0.308843  | 0.807284  |
| 16.0296   | 12.1653   | 9.98164   | 9.78422  | 9.58254   | 11.6922   |
| 2.5129    | 2.18937   | 1.73876   | 2.26315  | 2.18281   | 3.0675    |
| 0         | 0         | 0         | 0        | 0         | 0         |
| 1.69185   | 2.42266   | 1.98126   | 1.37441  | 1.64433   | 1.51457   |
| 20.3263   | 20.9405   | 21.025    | 22.4324  | 18.8476   | 25.1038   |
| 0.289956  | 0.221516  | 0.0443381 | 0.253697 | 0.125311  | 0.272126  |
| 0         | 0         | 0         | 0        | 0         | 0.0836021 |
| 10.2357   | 8.45686   | 9.53075   | 10.2925  | 9.44791   | 9.47993   |
| 42.6025   | 74.6256   | 61.2746   | 78.7545  | 42.7219   | 87.6351   |
| 48.3498   | 61.871    | 66.2012   | 60.2243  | 46.886    | 51.2309   |
| 16.5985   | 18.5434   | 18.1138   | 22.0148  | 22.7953   | 18.1508   |
| 0         | 0         | 0         | 0        | 0         | 0         |
| 9.69515   | 8.85098   | 9.41528   | 9.26192  | 9.05668   | 7.99153   |
| 0.140173  | 0         | 0         | 0        | 0.108664  | 0         |
| 8.07752   | 9.28841   | 7.98569   | 6.86861  | 7.46358   | 6.61324   |
| 18.5506   | 14.9887   | 17.3543   | 16.3155  | 16.4375   | 19.4636   |
| 0         | 0         | 0         | 0        | 0         | 0         |
| 0.0756402 | 0.0135391 | 0.0611838 | 0.145546 | 0.0746271 | 0.0780271 |
| 0         | 0         | 0         | 0        | 0         | 0         |
| 3.21041   | 3.15806   | 4.40332   | 2.97815  | 3.05143   | 2.2401    |
| 131.182   | 119.823   | 117.016   | 130.744  | 152.914   | 103.884   |

|           |           |           |           |           |          |
|-----------|-----------|-----------|-----------|-----------|----------|
| 1.34156   | 1.31748   | 1.35      | 1.36745   | 1.02029   | 0.882474 |
| 0.160808  | 0.0959461 | 0.0650371 | 0.0389004 | 0.0623304 | 0.108617 |
| 1.12536   | 1.26128   | 0.743369  | 1.03086   | 1.36509   | 0.947496 |
| 6.54822   | 7.61866   | 6.01901   | 6.96624   | 5.30703   | 7.20742  |
| 0.0972514 | 0         | 0.0262216 | 0.0235257 | 0.175912  | 0.105101 |
| 1.03802   | 0.14864   | 0         | 0.150662  | 0         | 0        |
| 19.9022   | 0         | 2.01231   | 0         | 0         | 6.04926  |
| 6.27433   | 6.32392   | 6.38209   | 5.33509   | 5.26059   | 5.30382  |
| 25.4943   | 23.9021   | 23.8703   | 24.895    | 21.5995   | 27.5963  |
| 34.8738   | 44.4617   | 37.8571   | 53.6567   | 37.905    | 41.477   |
| 41.494    | 38.0242   | 41.7275   | 41.9353   | 38.7236   | 39.566   |
| 0         | 0         | 0         | 0         | 0         | 0        |
| 2.46967   | 2.86199   | 2.03886   | 2.32812   | 1.85532   | 1.32074  |
| 7.324     | 5.23667   | 6.56141   | 5.63024   | 5.51274   | 7.06632  |
| 21.7526   | 23.5064   | 19.258    | 23.2804   | 19.7335   | 19.8654  |
| 5.2769    | 3.81531   | 4.95447   | 4.78818   | 6.13329   | 5.50522  |
| 0.206046  | 0.344225  | 0.111111  | 0.149531  | 0         | 0.278345 |
| 12.4292   | 16.4386   | 12.5672   | 15.4929   | 10.9736   | 18.9359  |
| 0.0874505 | 0.109573  | 0.0530527 | 0.111063  | 0.152534  | 0.283526 |
| 15.1361   | 15.4246   | 12.4613   | 15.6076   | 17.0582   | 19.1064  |
| 2.617     | 3.03147   | 3.11502   | 3.3043    | 3.10086   | 1.48309  |
| 20.9055   | 17.7969   | 19.3216   | 17.4654   | 14.8696   | 20.4965  |
| 0         | 0         | 0         | 0         | 0         | 0        |
| 0         | 0         | 0         | 0         | 0         | 0        |
| 0         | 0         | 0         | 0         | 0         | 0        |
| 0.0802805 | 0         | 0         | 0.0291305 | 0         | 0.06507  |
| 0         | 0         | 0         | 0         | 0         | 0        |
| 1.32204   | 1.51573   | 1.67745   | 1.59905   | 1.24592   | 1.98204  |
| 44.2667   | 39.119    | 39.7957   | 44.5747   | 39.5861   | 40.5361  |
| 65.3927   | 59.2222   | 23.1281   | 31.3999   | 16.4189   | 176.903  |
| 9.48656   | 8.19148   | 7.60793   | 9.11528   | 8.54042   | 7.37803  |
| 0         | 0         | 0         | 0         | 0         | 0        |
| 0         | 0         | 0         | 0         | 0         | 0        |
| 4.1321    | 4.10904   | 1.11412   | 1.49937   | 3.02531   | 6.32628  |
| 6.50664   | 4.23398   | 5.20665   | 4.39284   | 4.30029   | 4.73657  |
| 1.86193   | 2.36664   | 2.1322    | 2.29255   | 1.75154   | 2.28917  |
| 894.148   | 918.796   | 942.086   | 901.601   | 1008.19   | 878.325  |
| 0.545478  | 0.369997  | 0.650228  | 0.375029  | 0.200304  | 0.442129 |
| 0         | 0         | 0         | 0         | 0         | 0        |
| 2.21044   | 2.36374   | 2.30416   | 1.93753   | 2.55963   | 2.58283  |
| 3.98904   | 2.71686   | 3.73338   | 2.8548    | 3.82796   | 3.72607  |
| 0         | 0         | 0.0821677 | 0         | 0         | 0        |
| 1.82333   | 1.19293   | 2.46656   | 1.75669   | 1.94962   | 1.63075  |

|           |           |           |           |           |           |
|-----------|-----------|-----------|-----------|-----------|-----------|
| 2.02153   | 1.50526   | 1.85457   | 1.2441    | 1.10333   | 1.92686   |
| 17.0494   | 12.9761   | 18.4237   | 14.9944   | 15.7678   | 16.1534   |
| 0.169379  | 0.0659985 | 0.0372809 | 0.0674535 | 0.0602933 | 0.0373571 |
| 4.71638   | 4.96509   | 3.87894   | 4.68978   | 3.80376   | 3.86459   |
| 3.44731   | 3.10516   | 3.6205    | 3.49038   | 4.00861   | 3.85324   |
| 0.384253  | 0.244549  | 0.172675  | 0.49575   | 0.132391  | 0.207633  |
| 0.934805  | 1.51213   | 1.59631   | 1.20605   | 0.912554  | 1.01025   |
| 0         | 0         | 0         | 0         | 0         | 0         |
| 3.46581   | 2.84777   | 3.7112    | 2.97034   | 2.82749   | 3.04994   |
| 14.1237   | 18.9923   | 17.9281   | 12.8477   | 14.5271   | 14.5252   |
| 8.92936   | 6.40829   | 7.88165   | 6.84062   | 6.33564   | 7.45103   |
| 0         | 0         | 0         | 0         | 0         | 0         |
| 0.492944  | 0.304257  | 0.439981  | 0.666133  | 1.01464   | 0.71643   |
| 5.70844   | 4.42007   | 6.04418   | 3.8518    | 3.33138   | 4.52291   |
| 10.235    | 5.0856    | 4.70495   | 5.31712   | 5.15949   | 4.39724   |
| 13.3795   | 13.0811   | 12.3229   | 14.2381   | 10.1322   | 13.2822   |
| 2.27538   | 1.3033    | 1.71781   | 1.28433   | 1.72471   | 1.88526   |
| 39.5618   | 1.25E-05  | 27.9895   | 22.1473   | 36.7624   | 44.5073   |
| 1.72334   | 7.0023    | 2.44677   | 8.54263   | 0.807678  | 7.07531   |
| 0         | 0.0436266 | 0.0123218 | 0.011055  | 0.011809  | 0         |
| 5.67636   | 9.91194   | 5.61908   | 7.56769   | 5.37047   | 7.94535   |
| 16.2392   | 12.9561   | 15.5702   | 14.8981   | 15.6348   | 15.1492   |
| 0.0410749 | 0         | 0.0332107 | 0         | 0         | 0         |
| 11.818    | 8.06383   | 9.50315   | 9.87368   | 9.87446   | 11.534    |
| 0         | 0         | 0         | 0         | 0         | 0         |
| 4.00041   | 2.1356    | 2.79011   | 3.04374   | 2.8046    | 3.04583   |
| 2.95161   | 2.87175   | 3.46479   | 1.98256   | 3.03236   | 2.072     |
| 4.41691   | 4.60449   | 5.43058   | 5.0774    | 6.21808   | 5.92857   |
| 0         | 0         | 0         | 0         | 0         | 0         |
| 55.0969   | 57.2097   | 42.0009   | 50.736    | 71.2903   | 71.5926   |
| 0         | 0         | 0         | 0         | 0         | 0         |
| 0         | 0         | 0         | 0         | 0         | 0         |
| 9.0796    | 7.06886   | 5.98953   | 6.97307   | 9.22542   | 9.28847   |
| 1.20419   | 0.762336  | 0.631516  | 1.10026   | 1.02078   | 0.695688  |
| 1.17908   | 0.920948  | 0.606924  | 1.78916   | 1.24642   | 1.56385   |
| 11.7768   | 8.36315   | 9.40387   | 10.9174   | 12.7154   | 10.2352   |
| 0.75914   | 0.586186  | 0.607174  | 0.413004  | 0.529117  | 0.553223  |
| 14.2284   | 13.9896   | 13.9721   | 13.6142   | 16.805    | 15.3963   |
| 2.80263   | 4.79149   | 3.272     | 3.98585   | 2.80231   | 3.90112   |
| 3.89678   | 3.53457   | 2.75574   | 3.8398    | 2.41091   | 3.54743   |
| 19.6623   | 20.3696   | 19.1619   | 22.7561   | 15.3549   | 15.8323   |
| 0.339912  | 0.27849   | 0.337509  | 0.168425  | 0.208102  | 0.508425  |
| 0         | 0         | 0         | 0         | 0         | 0         |

|           |           |           |           |           |           |
|-----------|-----------|-----------|-----------|-----------|-----------|
| 0         | 0         | 0         | 0         | 0         | 0.0762486 |
| 7.96762   | 7.85097   | 7.91248   | 7.67149   | 8.19473   | 9.71901   |
| 0.620011  | 0.630828  | 1.31977   | 0.68677   | 0.607127  | 0.423191  |
| 10.6473   | 8.61226   | 8.8219    | 9.91974   | 9.01245   | 8.02358   |
| 0.0673799 | 0.0428821 | 0.075698  | 0.0488988 | 0.0522339 | 0.0647275 |
| 11.5054   | 8.99898   | 9.86962   | 8.91386   | 8.56543   | 7.82974   |
| 2.82E-08  | 0.0849927 | 0.153047  | 0.0794085 | 0.10617   | 0.0847113 |
| 8.0365    | 6.69185   | 6.12828   | 6.93701   | 6.86125   | 6.42776   |
| 1.8114    | 1.97002   | 1.35392   | 1.63073   | 1.10205   | 1.37528   |
| 25.6057   | 21.5457   | 26.6881   | 24.6542   | 25.865    | 26.9614   |
| 36.716    | 29.7873   | 27.7765   | 33.3778   | 27.6577   | 24.8334   |
| 0.101966  | 0         | 0.0412393 | 0.258996  | 0         | 0.123971  |
| 13.5407   | 11.2794   | 12.5798   | 11.7312   | 12.0568   | 14.18     |
| 7.65984   | 7.61489   | 7.87487   | 8.15836   | 8.41577   | 9.02251   |
| 0.551816  | 0         | 0         | 0         | 0         | 0.447266  |
| 0         | 0         | 0         | 0         | 0         | 0         |
| 0.0768527 | 0.0825376 | 0         | 0.0557734 | 0.0595774 | 0         |
| 3.15593   | 2.861     | 2.62622   | 2.07614   | 2.60492   | 2.57639   |
| 0.267158  | 0.191249  | 0.148659  | 0.169671  | 0.0906157 | 0.527636  |
| 5.15089   | 4.87242   | 5.38772   | 4.96854   | 3.92891   | 4.35258   |
| 43.1878   | 50.9302   | 53.0843   | 47.7382   | 54.2921   | 47.0057   |
| 1.3102    | 0.796831  | 0.399198  | 0.642342  | 0.711489  | 1.38017   |
| 0.498499  | 0.439281  | 1.22002   | 0.324665  | 0.683708  | 0.269367  |
| 0         | 0.101857  | 0         | 0         | 0.110284  | 0         |
| 0         | 0         | 0         | 0         | 0         | 0         |
| 6.38007   | 3.73746   | 6.56818   | 5.68244   | 5.62038   | 4.93621   |
| 0         | 0         | 0         | 0.0367961 | 0         | 0.0410965 |
| 4.83306   | 4.08561   | 3.48506   | 3.26256   | 3.25514   | 4.21984   |
| 25.3021   | 19.6813   | 23.7803   | 26.0244   | 29.8143   | 27.1923   |
| 0.517349  | 0.657464  | 1.06902   | 0.585291  | 0.472192  | 0.422689  |
| 2.8065    | 3.17702   | 3.18021   | 3.6606    | 3.02826   | 3.46337   |
| 13.9868   | 17.4146   | 15.7624   | 17.8579   | 15.9517   | 13.2582   |
| 4.23756   | 9.77625   | 6.47449   | 6.83394   | 7.66505   | 5.72447   |
| 0.303845  | 0.0955704 | 0.338663  | 0.342292  | 0.339599  | 0.0272694 |
| 8.49856   | 9.05372   | 9.03294   | 11.6002   | 12.0731   | 10.9482   |
| 41.4795   | 51.4436   | 38.7457   | 44.2817   | 38.7821   | 27.3946   |
| 2.27776   | 1.30167   | 3.48203   | 2.15346   | 1.78195   | 1.76151   |
| 4.47041   | 3.66882   | 3.84471   | 4.79586   | 4.53396   | 4.89806   |
| 37.1849   | 42.6976   | 32.0301   | 28.3991   | 31.2136   | 35.263    |
| 7.8649    | 5.1167    | 6.90417   | 6.5489    | 6.98814   | 7.29875   |
| 2.90936   | 2.4103    | 3.23474   | 3.27066   | 2.65643   | 2.59636   |
| 9.15042   | 9.26625   | 5.9499    | 5.65003   | 4.82048   | 6.57671   |
| 0         | 0.0549544 | 0.0620848 | 0.0557018 | 0.0595009 | 0         |

|           |            |           |           |           |           |
|-----------|------------|-----------|-----------|-----------|-----------|
| 62.4949   | 67.5609    | 76.1987   | 68.0356   | 69.2557   | 55.9671   |
| 2.61865   | 1.96562    | 2.80145   | 4.3372    | 2.603     | 1.88286   |
| 2.97315   | 4.40949    | 2.5767    | 4.68523   | 5.30112   | 3.37378   |
| 1.17845   | 1.37611    | 1.42945   | 1.10266   | 1.10534   | 1.23188   |
| 0.712659  | 0.42771    | 0.457773  | 0.486767  | 0.341228  | 0.501183  |
| 0.0126984 | 0.00454592 | 0         | 0         | 0         | 0         |
| 0         | 0          | 0         | 0         | 0         | 0         |
| 13.0957   | 10.4566    | 10.9287   | 11.1811   | 10.8445   | 11.5181   |
| 1.71256   | 1.24354    | 1.69194   | 1.34188   | 1.08329   | 1.28548   |
| 0.473189  | 0.39526    | 0.255169  | 0.372019  | 0.366824  | 0.926878  |
| 8.80076   | 4.66575    | 5.92336   | 7.02068   | 5.62476   | 5.88102   |
| 1.13076   | 1.95257    | 1.39887   | 1.20678   | 1.44378   | 1.72521   |
| 57.5608   | 69.8198    | 62.0889   | 63.5277   | 59.9221   | 53.9122   |
| 0         | 0          | 0.0186601 | 0         | 0         | 0.0186983 |
| 0.204573  | 0.0732353  | 0.330951  | 0.371156  | 0         | 0.24872   |
| 3.72666   | 1.21224    | 2.07204   | 1.42783   | 1.90357   | 1.86655   |
| 18.8383   | 23.2976    | 18.0088   | 15.8771   | 13.5753   | 14.0569   |
| 1.4615    | 0.837127   | 0.945745  | 0.636384  | 0.679788  | 0.23692   |
| 0.189508  | 0.248754   | 0.28103   | 0.114608  | 0.318304  | 0.179203  |
| 0         | 0.0378632  | 0         | 0         | 0         | 0         |
| 9.24068   | 10.3415    | 10.7174   | 10.0901   | 8.3758    | 9.37963   |
| 0         | 0.0171134  | 0         | 0         | 0         | 0.0193733 |
| 87.1349   | 86.1047    | 84.1295   | 91.2044   | 73.0279   | 76.2784   |
| 27.624    | 29.0975    | 26.6916   | 29.3461   | 26.8149   | 28.7405   |
| 20.6002   | 15.2616    | 17.6622   | 19.8853   | 16.5477   | 18.8013   |
| 4.07661   | 3.51816    | 4.37044   | 4.32322   | 4.95667   | 3.63856   |
| 0.276767  | 0.0283085  | 0.255852  | 0.200854  | 0.245204  | 0.224329  |
| 0.283825  | 0.216823   | 0.107967  | 0.0823489 | 0.0735105 | 0.290455  |
| 27.5105   | 28.9016    | 25.8357   | 24.6298   | 18.3316   | 22.0552   |
| 0.999563  | 0.796994   | 1.04741   | 1.05513   | 1.16232   | 0.847006  |
| 37.6039   | 34.7676    | 38.5602   | 39.4306   | 38.9064   | 35.8791   |
| 10.6524   | 8.1676     | 7.48467   | 10.043    | 8.03787   | 8.31362   |
| 1.7054    | 1.47138    | 1.65467   | 1.79552   | 2.5828    | 1.25123   |
| 13.0596   | 13.1832    | 14.5607   | 14.2164   | 14.5019   | 11.3481   |
| 0         | 0          | 0         | 0         | 0         | 0         |
| 0.419524  | 0.27055    | 0.473521  | 0.548157  | 0.37004   | 0.553922  |
| 0         | 0          | 0         | 0         | 0         | 0         |
| 3.16102   | 2.46486    | 1.54327   | 3.2675    | 1.30516   | 1.12647   |
| 3.24585   | 3.18442    | 2.75844   | 3.0041    | 2.68345   | 3.32189   |
| 5.49937   | 23.6725    | 3.05822   | 7.69097   | 9.681     | 7.91657   |
| 24.8852   | 20.2815    | 21.358    | 22.5176   | 19.1899   | 19.6829   |
| 0.553973  | 0.679944   | 0.422492  | 0.574326  | 0.515338  | 0.833882  |
| 17.4792   | 14.7077    | 16.0608   | 12.2634   | 14.5327   | 14.8951   |



|           |           |           |           |            |           |
|-----------|-----------|-----------|-----------|------------|-----------|
| 894.106   | 2519.7    | 1124.75   | 1165.37   | 1240.85    | 2873.31   |
| 0         | 0         | 0         | 0         | 0          | 0         |
| 32.0374   | 31.6527   | 29.8374   | 28.6989   | 25.5951    | 36.551    |
| 0.0128959 | 0.036933  | 0.0208625 | 0.0280764 | 0.00999713 | 0.0418103 |
| 0         | 0         | 0         | 0         | 0          | 0         |
| 0         | 0.0689356 | 0         | 0         | 0          | 0         |
| 25.3539   | 23.2892   | 23.9957   | 23.5565   | 23.7639    | 24.3211   |
| 49.77     | 51.7488   | 44.1859   | 38.717    | 41.1264    | 46.9293   |
| 10.3692   | 8.41845   | 7.62357   | 7.10854   | 6.61729    | 8.55466   |
| 0         | 0         | 0         | 0         | 0          | 0         |
| 6.58005   | 4.97948   | 6.5955    | 7.10307   | 5.76328    | 6.25667   |
| 1.37882   | 0.884386  | 1.20049   | 1.04232   | 1.08373    | 0.908057  |
| 2.43359   | 3.05925   | 2.45879   | 2.65914   | 3.17993    | 2.98724   |
| 33.8248   | 30.3851   | 30.6654   | 32.3635   | 28.6363    | 28.1828   |
| 9.60477   | 9.62532   | 8.05374   | 7.14027   | 7.23488    | 11.4796   |
| 8.61483   | 8.01944   | 7.35534   | 8.41169   | 7.50943    | 8.07902   |
| 17.5559   | 23.6511   | 20.5535   | 16.1501   | 19.1613    | 10.425    |
| 7.57715   | 6.32683   | 7.11452   | 7.86334   | 7.28536    | 8.52713   |
| 1.65282   | 1.63167   | 0.974374  | 2.26641   | 1.0252     | 1.45826   |
| 0.644809  | 0.471908  | 0.592622  | 0.329602  | 0.332236   | 0.605458  |
| 3.48326   | 2.41031   | 6.55853   | 4.1051    | 3.2791     | 2.98226   |
| 6.67067   | 4.46148   | 4.9065    | 5.47876   | 4.23782    | 4.83328   |
| 34.2808   | 28.6732   | 30.6894   | 30.8371   | 32.1186    | 25.638    |
| 3.39452   | 2.59721   | 2.74576   | 2.46347   | 1.67693    | 1.83425   |
| 0.883136  | 0.858133  | 0.918451  | 0.915583  | 0.745748   | 1.38049   |
| 0         | 0         | 0         | 0         | 0          | 0         |
| 0.67459   | 1.11722   | 0.671757  | 0.790927  | 0.603816   | 0.969045  |
| 15.0449   | 16.9525   | 18.1261   | 16.825    | 21.4415    | 9.3957    |
| 25.4707   | 28.2203   | 26.7811   | 23.3337   | 24.1517    | 24.0556   |
| 171.552   | 148.926   | 159.595   | 175.342   | 187.962    | 159.614   |
| 0.0216446 | 0         | 0.0175079 | 0.0628315 | 0          | 0         |
| 5.70975   | 5.32725   | 4.3485    | 5.93114   | 3.78805    | 4.22472   |
| 0.832134  | 0.223422  | 0.168274  | 0.301947  | 0.161271   | 0.168618  |
| 2.00065   | 3.76842   | 1.66787   | 0.906982  | 3.846      | 4.20887   |
| 0.683085  | 0.521796  | 0.730976  | 0.849261  | 0.825839   | 1.01444   |
| 0         | 0.321768  | 1.93876   | 3.91513   | 0          | 1.45704   |
| 5.62E-09  | 3.75E-09  | 8.08E-09  | 8.02E-09  | 2.76E-09   | 2.67E-09  |
| 1.05087   | 1.2996    | 1.46823   | 1.45594   | 1.48118    | 0.929197  |
| 0.558509  | 0.588061  | 0.398617  | 0.417241  | 0.432965   | 0.945324  |
| 124.972   | 102.321   | 107.009   | 125.759   | 137.851    | 102.424   |
| 6.08384   | 3.68919   | 5.29771   | 5.04589   | 4.52378    | 6.3149    |
| 9.0524    | 6.81262   | 7.5013    | 7.7374    | 8.26513    | 8.0384    |
| 14.2872   | 12.3444   | 18.9507   | 14.1797   | 15.8237    | 12.4072   |

|           |           |           |           |          |            |
|-----------|-----------|-----------|-----------|----------|------------|
| 14.8952   | 19.8788   | 16.1488   | 12.6281   | 12.4534  | 13.9703    |
| 0         | 0.0342104 | 0.0772985 | 0.0693514 | 0        | 0.0774566  |
| 5.26844   | 4.3976    | 5.16094   | 5.22592   | 5.25398  | 3.7123     |
| 0         | 0         | 0         | 0         | 0        | 1.55095    |
| 0         | 0         | 0.0680282 | 0         | 0        | 0          |
| 28.9614   | 23.1829   | 24.5418   | 25.6739   | 28.9124  | 26.2444    |
| 42.6605   | 49.4018   | 37.6954   | 41.3915   | 44.5022  | 34.3523    |
| 0.862382  | 0.548844  | 0.645892  | 0.834462  | 1.03994  | 0.569547   |
| 0         | 0         | 0         | 0         | 0        | 0          |
| 0.0579038 | 0.529228  | 0.221743  | 0.452609  | 0.483479 | 0.702091   |
| 1.10335   | 1.03305   | 0.480567  | 1.39613   | 1.35977  | 1.03189    |
| 7.19427   | 4.96331   | 6.93228   | 6.2481    | 6.31869  | 6.35165    |
| 2.01806   | 1.78412   | 1.28496   | 1.84973   | 1.53329  | 1.52886    |
| 39.526    | 34.4067   | 38.0587   | 37.6707   | 33.1349  | 36.5614    |
| 9.4878    | 7.7453    | 8.31239   | 9.65537   | 7.49148  | 8.92265    |
| 0         | 0         | 0         | 0         | 0        | 0          |
| 0.399952  | 0.37058   | 0.494784  | 0.460988  | 0.39212  | 0.553003   |
| 0         | 0         | 0         | 0         | 0        | 0          |
| 4.61E-05  | 1.43E-05  | 0.546809  | 1.0353    | 3.40E-07 | 0.00014681 |
| 13.1519   | 11.3124   | 12.1163   | 11.7245   | 11.6307  | 13.3643    |
| 1.35092   | 1.06128   | 1.15116   | 1.17185   | 1.33877  | 1.06955    |
| 27.1196   | 21.9683   | 18.7681   | 21.4236   | 30.0115  | 12.1061    |
| 0         | 0         | 0         | 0         | 0        | 0          |
| 18.8494   | 18.14     | 20.749    | 13.3209   | 17.4497  | 15.5448    |
| 0         | 0.443137  | 0         | 0.224582  | 0.239899 | 0          |
| 4.66353   | 2.49518   | 2.10427   | 2.32151   | 0.919573 | 2.42685    |
| 12.5356   | 12.6505   | 11.7126   | 10.2953   | 10.4373  | 11.0029    |
| 26.1585   | 23.8693   | 24.8424   | 23.6391   | 35.0041  | 24.8258    |
| 1.13746   | 0.421242  | 1.14216   | 0.455436  | 0.63853  | 0.381497   |
| 1.39782   | 1.13729   | 0.668123  | 1.52164   | 0.394041 | 0.772487   |
| 0         | 0         | 0         | 0         | 0        | 0          |
| 13.3183   | 9.21422   | 10.0206   | 11.3169   | 9.61008  | 11.7156    |
| 23.1809   | 17.3243   | 13.483    | 16.6061   | 12.4356  | 15.1812    |
| 21.8175   | 19.4011   | 17.9617   | 17.9182   | 17.455   | 17.9355    |
| 10.9488   | 10.4758   | 10.4291   | 9.80045   | 9.44717  | 9.87758    |
| 0         | 0         | 0         | 0         | 0        | 0          |
| 0         | 0         | 0         | 0         | 0        | 0          |
| 3.74066   | 1.23611   | 2.19657   | 2.31008   | 2.06333  | 2.65294    |
| 0.463447  | 0.663639  | 0.374873  | 0.168166  | 0.179636 | 0          |
| 3.17385   | 2.29603   | 3.42459   | 2.87313   | 3.22362  | 2.77648    |
| 2.96613   | 1.89286   | 2.24277   | 2.66732   | 2.6493   | 1.77698    |
| 6.17297   | 4.04922   | 4.51476   | 5.63331   | 5.55902  | 6.29168    |
| 0         | 0         | 0         | 0         | 0        | 0          |

|           |           |           |           |           |           |
|-----------|-----------|-----------|-----------|-----------|-----------|
| 4.87629   | 3.99222   | 3.10816   | 2.79619   | 2.16125   | 2.26818   |
| 0         | 0         | 0         | 0         | 0         | 0         |
| 0.100031  | 0.107431  | 0.0809134 | 0.108892  | 0.0775459 | 0         |
| 12.1015   | 12.245    | 13.2339   | 12.1643   | 11.102    | 10.5223   |
| 0.264756  | 0.758242  | 0.321234  | 0.288208  | 0.102622  | 0.107297  |
| 0.189651  | 0.135787  | 0.191756  | 0.137633  | 0.0735103 | 0.230578  |
| 0         | 0         | 0         | 0         | 0         | 0         |
| 33.0432   | 31.7601   | 33.1796   | 34.1595   | 36.4741   | 30.6619   |
| 7.56709   | 5.75106   | 8.44334   | 7.81717   | 5.50407   | 5.48228   |
| 0.792746  | 0.665148  | 0.480917  | 0.485415  | 0.614549  | 0.535687  |
| 0.19686   | 0.134236  | 0.204732  | 0.139463  | 0.119907  | 0.117772  |
| 49.0798   | 54.7362   | 48.5666   | 50.1082   | 65.8588   | 54.4066   |
| 0         | 0         | 0         | 0         | 0         | 0         |
| 0         | 0         | 0         | 0         | 0         | 0         |
| 12.4981   | 10.6209   | 12.1716   | 12.4778   | 11.7018   | 12.4464   |
| 14.6813   | 17.4325   | 17.4898   | 17.7355   | 16.297    | 12.6213   |
| 0.136705  | 0.163131  | 0.0368594 | 0.0330698 | 0.0706507 | 0.0738694 |
| 10.5459   | 8.13352   | 9.55723   | 9.90715   | 10.0287   | 10.3653   |
| 0.440676  | 0.495811  | 0.432837  | 0.54824   | 0.341619  | 0.357183  |
| 33.4604   | 31.117    | 32.1427   | 33.53     | 33.9735   | 28.4498   |
| 15.3175   | 13.5379   | 14.6112   | 15.0107   | 14.675    | 18.4207   |
| 0         | 0         | 0         | 0         | 0         | 0         |
| 4.84839   | 4.27192   | 4.08597   | 5.13429   | 5.50332   | 4.97227   |
| 75.4336   | 83.4355   | 68.0463   | 78.1472   | 85.0244   | 43.3324   |
| 6.3513    | 5.96727   | 3.41412   | 5.27049   | 4.31077   | 5.11536   |
| 3.54711   | 2.4486    | 3.3581    | 3.37073   | 3.77326   | 2.86193   |
| 0.0473136 | 0.0677512 | 0.114813  | 0.0686726 | 0         | 0.0958731 |
| 7.20628   | 6.2466    | 7.81081   | 7.16522   | 5.71226   | 6.70353   |
| 3.36732   | 1.81166   | 2.30345   | 3.04246   | 2.53138   | 2.36384   |
| 19.337    | 16.6562   | 20.3307   | 16.7666   | 22.0514   | 20.063    |
| 0         | 0         | 0         | 0         | 0         | 0         |
| 12.1114   | 15.0032   | 11.4684   | 15.277    | 5.66319   | 10.3621   |
| 0         | 0         | 0         | 0         | 0         | 0         |
| 0.34246   | 0.0817317 | 0.0923364 | 0         | 0         | 0.0925252 |
| 5.38537   | 4.05989   | 4.5988    | 4.90981   | 4.87465   | 4.76626   |
| 1.85235   | 1.78135   | 2.70305   | 1.52897   | 3.77276   | 2.44362   |
| 17.7661   | 18.5945   | 12.7704   | 12.571    | 10.263    | 11.8715   |
| 0         | 0         | 0         | 0         | 0         | 0         |
| 0         | 0         | 0         | 0         | 0         | 0         |
| 41.3363   | 37.355    | 39.1434   | 43.4862   | 36.7091   | 38.6678   |
| 15.6351   | 15.0695   | 16.9626   | 15.0253   | 12.4918   | 16.1264   |
| 11.7599   | 11.6241   | 11.507    | 13.2361   | 13.6205   | 14.0135   |
| 0.572422  | 0.345681  | 0.043853  | 0.285059  | 0.212648  | 0.479536  |

|            |           |           |           |           |           |
|------------|-----------|-----------|-----------|-----------|-----------|
| 3.17332    | 2.5044    | 3.09187   | 6.49009   | 1.92887   | 6.02101   |
| 0          | 0.117554  | 0         | 0         | 0         | 0         |
| 35.3235    | 9.48411   | 3.57156   | 0         | 6.84583   | 3.57886   |
| 63.7601    | 57.6182   | 62.2342   | 67.5204   | 66.4625   | 67.9747   |
| 30.9493    | 36.2827   | 39.1389   | 35.1514   | 39.504    | 30.4596   |
| 0          | 0.201036  | 0         | 0         | 0         | 0.0758618 |
| 1.10344    | 0.792058  | 1.74544   | 0.941898  | 1.34063   | 1.24624   |
| 2.49899    | 2.57201   | 3.4953    | 2.49365   | 5.00457   | 1.77232   |
| 3.61658    | 1.72627   | 3.9005    | 2.62461   | 0.934542  | 3.90848   |
| 6.79107    | 4.64768   | 5.82215   | 3.78403   | 4.86706   | 3.97895   |
| 0          | 0         | 0         | 0         | 0         | 0         |
| 1.45075    | 1.25463   | 0.859262  | 0.887679  | 1.33582   | 1.04912   |
| 0.00350964 | 0.015077  | 0.0170333 | 0         | 0         | 0         |
| 5.29899    | 4.90688   | 4.9911    | 5.98201   | 6.31698   | 4.86768   |
| 1.99837    | 1.24791   | 1.34906   | 1.70105   | 1.3861    | 1.69282   |
| 0          | 0         | 0         | 0         | 0         | 28.3654   |
| 0.111534   | 0.11057   | 0.104097  | 0.0933948 | 0.0931138 | 0.10431   |
| 10.2607    | 6.49129   | 8.42356   | 9.48798   | 7.84352   | 9.29268   |
| 0          | 0         | 0         | 0         | 0.0206493 | 0.0215901 |
| 0.180574   | 0.0718263 | 0.0996254 | 0.0182007 | 0         | 0.146362  |
| 35.9832    | 37.4336   | 32.7063   | 32.3379   | 33.2837   | 33.8026   |
| 6.33664    | 10.3254   | 7.95349   | 7.69079   | 5.25104   | 7.52699   |
| 23.419     | 19.2943   | 20.737    | 21.5258   | 22.1742   | 24.6981   |
| 11.4839    | 11.4815   | 10.4073   | 11.9664   | 8.93686   | 11.2611   |
| 13.6411    | 14.7601   | 12.0274   | 13.4011   | 10.7788   | 12.5497   |
| 0.349066   | 0.249925  | 0.188235  | 0.337765  | 0.0902005 | 0.047155  |
| 79.2379    | 82.2193   | 78.8116   | 88.8993   | 88.7483   | 81.8297   |
| 21.1909    | 25.6014   | 18.8384   | 22.9037   | 22.5839   | 18.41     |
| 0          | 0         | 0         | 0         | 0         | 0         |
| 0.146098   | 0.31381   | 0.206807  | 0.397597  | 0.0849431 | 0.088813  |
| 22.6335    | 36.5194   | 19.8733   | 18.6348   | 14.9889   | 21.2166   |
| 5.44782    | 3.21732   | 3.4804    | 6.33328   | 3.4028    | 3.8672    |
| 0          | 0         | 0         | 0         | 0         | 0         |
| 1.12988    | 0.586522  | 0.725417  | 0.735387  | 0.440633  | 0.381611  |
| 0          | 0         | 0         | 0         | 0         | 0         |
| 0.500424   | 0.345384  | 0.274583  | 0.246533  | 0.235672  | 0.318589  |
| 25.6886    | 28.2444   | 29.5952   | 19.391    | 25.0391   | 27.6715   |
| 51.0719    | 49.3849   | 52.3179   | 53.329    | 49.2163   | 53.2909   |
| 1.19352    | 0.722135  | 0.514886  | 1.09713   | 2.03551   | 0.257969  |
| 5.46746    | 7.31408   | 5.19506   | 6.12295   | 4.09037   | 5.44541   |
| 34.4373    | 33.0422   | 33.0874   | 38.1854   | 43.4098   | 33.8163   |
| 41.4228    | 40.1951   | 44.7198   | 47.5162   | 54.4689   | 35.6505   |
| 0          | 255.172   | 0         | 258.642   | 0         | 0         |

|           |           |           |          |          |           |
|-----------|-----------|-----------|----------|----------|-----------|
| 2.51834   | 1.2914    | 1.95445   | 2.49444  | 2.3216   | 3.00663   |
| 0         | 0         | 0         | 0        | 0        | 0         |
| 16.8698   | 9.73993   | 13.3805   | 13.8266  | 14.7629  | 11.6112   |
| 7.59835   | 6.91331   | 7.20516   | 7.14308  | 6.18033  | 7.21994   |
| 0.4624    | 0.792818  | 0.319168  | 0.37584  | 0.707965 | 0.802178  |
| 0.53661   | 0.192101  | 0.231028  | 0.257525 | 0.167737 | 0.238516  |
| 1.08944   | 1.04922   | 0.62545   | 1.09449  | 1.16734  | 1.93791   |
| 4.58892   | 3.57427   | 4.62821   | 4.78408  | 4.92678  | 4.65324   |
| 12.8587   | 14.9018   | 16.5984   | 11.5098  | 15.7752  | 12.6374   |
| 2.22997   | 2.12882   | 1.42799   | 1.82062  | 1.33254  | 1.24263   |
| 0         | 0         | 0         | 0        | 0        | 0         |
| 22.7138   | 25.7505   | 22.6228   | 23.9735  | 24.0216  | 25.1057   |
| 0         | 0         | 0         | 0        | 0        | 0         |
| 0         | 0.0228191 | 0.0515598 | 0        | 0.024707 | 0.0258326 |
| 1.79295   | 1.2564    | 1.46056   | 1.22735  | 1.36035  | 1.43263   |
| 0.255687  | 0.264462  | 0.301813  | 0.434767 | 0.208734 | 0.292713  |
| 0         | 0         | 0.0474151 | 0        | 0        | 0.213804  |
| 1.89487   | 1.25236   | 1.83583   | 1.34493  | 1.59804  | 1.29964   |
| 3.16164   | 1.0401    | 1.51819   | 1.71231  | 2.30247  | 1.67387   |
| 22.8417   | 23.4741   | 22.4736   | 25.1055  | 25.0891  | 20.7122   |
| 55.4101   | 48.4812   | 54.9702   | 59.472   | 51.6099  | 52.1996   |
| 0.202635  | 0.0583092 | 0.2635    | 0.257509 | 0.209324 | 0.224979  |
| 7.34619   | 5.25974   | 7.19758   | 7.0583   | 6.6574   | 6.83491   |
| 0         | 0         | 0         | 0        | 0        | 0         |
| 25.9089   | 29.093    | 36.8072   | 35.3853  | 29.904   | 27.3386   |
| 0         | 0         | 0         | 0        | 0        | 0         |
| 78.9489   | 49.1422   | 46.5372   | 48.9913  | 41.4088  | 50.9231   |
| 4.24165   | 4.00524   | 4.22657   | 4.37199  | 3.8124   | 3.28852   |
| 5.53624   | 4.6103    | 4.65185   | 5.20117  | 4.98216  | 5.23914   |
| 0         | 0         | 0         | 0        | 0        | 0         |
| 12.6865   | 11.439    | 12.2103   | 13.638   | 12.989   | 13.7452   |
| 4.41111   | 4.24183   | 4.04577   | 3.14765  | 2.64697  | 3.06675   |
| 5.45113   | 4.41446   | 3.31931   | 4.32618  | 3.26804  | 4.44334   |
| 6.7578    | 4.75122   | 6.6338    | 6.28507  | 6.69921  | 6.86767   |
| 12.3521   | 12.0881   | 12.9479   | 12.7124  | 13.6296  | 13.6624   |
| 40.2664   | 49.4841   | 41.9192   | 44.1255  | 47.3136  | 29.7636   |
| 1.41105   | 1.96208   | 2.1685    | 1.16066  | 1.26593  | 1.20106   |
| 1.77591   | 3.21853   | 0.561132  | 3.76574  | 1.22614  | 0.629753  |
| 17.3319   | 32.8288   | 19.8052   | 16.2051  | 12.1208  | 29.1739   |
| 0.0936821 | 0.0335373 | 0.151555  | 0.10198  | 0.108936 | 0.151865  |
| 9.29247   | 8.84461   | 7.37428   | 8.57767  | 5.88066  | 7.62757   |
| 0         | 0         | 0         | 0        | 0        | 0         |
| 0.39996   | 1.07546   | 0.856377  | 0.527743 | 0.393721 | 0.324182  |

|           |           |           |           |          |           |
|-----------|-----------|-----------|-----------|----------|-----------|
| 0         | 0         | 0         | 0         | 0        | 0         |
| 12.045    | 14.0436   | 13.002    | 12.0623   | 10.8698  | 12.6865   |
| 40.2258   | 46.9529   | 42.9621   | 43.214    | 41.6572  | 41.0809   |
| 4.44626   | 1.09994   | 1.03971   | 2.45106   | 1.16307  | 1.25338   |
| 6.30126   | 5.41488   | 5.96018   | 6.17723   | 5.26604  | 5.82626   |
| 7.89922   | 7.01512   | 7.19307   | 7.29076   | 6.3037   | 6.50648   |
| 2.51335   | 2.22366   | 3.0423    | 3.19296   | 3.03729  | 2.40758   |
| 0.390298  | 0.264739  | 0.265856  | 0.387601  | 0.350339 | 0.4662    |
| 0         | 0         | 44.2303   | 39.6829   | 0        | 0         |
| 0         | 0         | 0         | 0         | 0        | 0         |
| 30.8109   | 24.5994   | 27.1811   | 30.3742   | 25.6837  | 26.9392   |
| 19.2119   | 18.949    | 22.3651   | 18.8983   | 19.9285  | 19.5162   |
| 0.503156  | 0.331809  | 0.267085  | 0.427648  | 0.457242 | 0.567055  |
| 0.751031  | 0.4353    | 0.17357   | 0.700761  | 0.665384 | 0.840635  |
| 0         | 0         | 0         | 0         | 0        | 0         |
| 0         | 0         | 0         | 0         | 0        | 0         |
| 8.42763   | 4.86074   | 7.4797    | 6.45587   | 6.71471  | 6.16677   |
| 0         | 0         | 0         | 0         | 0        | 0         |
| 6.35687   | 5.22016   | 5.8771    | 6.04387   | 5.03646  | 5.48294   |
| 44.0821   | 45.1256   | 45.8973   | 46.9453   | 48.1563  | 42.3177   |
| 0         | 0         | 0         | 0         | 0        | 0         |
| 13.5905   | 13.9539   | 14.8427   | 14.0531   | 13.6387  | 12.1136   |
| 174.012   | 185.468   | 179.657   | 188.875   | 219.366  | 173.969   |
| 0.263516  | 0.353935  | 0.273533  | 0.15106   | 0.324256 | 0.179015  |
| 200.711   | 274.336   | 198.55    | 194.711   | 199.076  | 207.926   |
| 4.16632   | 5.17901   | 6.85484   | 4.64473   | 3.97197  | 5.33126   |
| 0.802927  | 0.810729  | 0.782696  | 0.702226  | 0.542641 | 0.800984  |
| 30.7404   | 33.0219   | 32.1714   | 32.6716   | 30.4599  | 37.1068   |
| 0.0984323 | 0.08703   | 0.0398059 | 0.0576176 | 0        | 0.0468879 |
| 0.633482  | 0.453561  | 0.717375  | 0.459729  | 0.098217 | 0.61615   |
| 0.732263  | 0.440401  | 0.995086  | 0.616443  | 0.590368 | 0.688488  |
| 0         | 0         | 0         | 0         | 0        | 0         |
| 0.842106  | 0.486983  | 0.0523971 | 0.399586  | 0.351515 | 0         |
| 0         | 0         | 0         | 0         | 0        | 0         |
| 22.0829   | 15.7333   | 20.0873   | 21.5092   | 18.3487  | 17.2033   |
| 17.4494   | 17.1823   | 19.6705   | 17.7256   | 17.8597  | 18.8289   |
| 0.425054  | 0.0760826 | 0.257863  | 0.231352  | 0.164754 | 0.0861301 |
| 0.786554  | 1.31403   | 0.848303  | 1.3319    | 0.812998 | 1.06255   |
| 0.793658  | 1.37797   | 1.28805   | 0.819362  | 1.21421  | 1.15215   |
| 0         | 0         | 0         | 0         | 0        | 0         |
| 2.97504   | 2.78548   | 3.70223   | 3.81984   | 3.19334  | 2.78235   |
| 0         | 0         | 0         | 0         | 0.156964 | 0         |
| 0         | 0         | 0         | 0         | 0        | 0         |

|           |           |           |           |           |           |
|-----------|-----------|-----------|-----------|-----------|-----------|
| 12.8829   | 8.60897   | 10.6192   | 10.863    | 11.8893   | 16.4423   |
| 0.643908  | 0.541985  | 0.574389  | 0.978796  | 0.665759  | 0.50485   |
| 7.66536   | 5.97096   | 7.98133   | 7.99694   | 7.9297    | 7.98837   |
| 57.7396   | 60.9432   | 58.4353   | 66.6901   | 61.3619   | 52.4393   |
| 0.0298743 | 0.074863  | 0.0724942 | 0.0867213 | 0.104216  | 0.0726424 |
| 3.75163   | 4.21388   | 2.72152   | 5.29399   | 5.355     | 5.69549   |
| 0.0328793 | 0.0470819 | 0         | 0.0238611 | 0.0254886 | 0.0266498 |
| 1.26932   | 1.38556   | 1.21187   | 1.61582   | 1.4034    | 1.61913   |
| 6.83866   | 4.98117   | 2.3769    | 4.6291    | 3.88616   | 4.62328   |
| 0         | 0         | 0         | 0.0197807 | 0         | 0         |
| 0.472267  | 0.354235  | 0.67306   | 0.5549    | 0.523012  | 1.85926   |
| 0         | 0         | 0         | 0         | 0         | 0         |
| 0.637943  | 0.498278  | 0.609841  | 0.462967  | 0.629419  | 0.752108  |
| 6.49922   | 8.60864   | 7.67535   | 9.00871   | 6.8017    | 7.42765   |
| 3.12907   | 2.14434   | 2.11884   | 2.7704    | 2.09997   | 2.82607   |
| 0.0878433 | 0.0628941 | 0.0852656 | 0.0637494 | 0.0680975 | 0.0427199 |
| 15.6957   | 18.368    | 16.3696   | 16.345    | 14.6631   | 14.5962   |
| 3.97647   | 1.86143   | 1.5605    | 1.88662   | 2.24271   | 2.48077   |
| 13.9667   | 14.3391   | 14.0766   | 12.8665   | 11.3348   | 12.7919   |
| 1.18383   | 0.526888  | 0.284685  | 0.534053  | 0.471265  | 1.0114    |
| 0.243535  | 0.101169  | 0.239797  | 0.194041  | 0.152824  | 0.0621589 |
| 0         | 0         | 0         | 0         | 0         | 0         |
| 7.37725   | 8.28626   | 10.1349   | 7.98821   | 6.72507   | 8.56588   |
| 35.1746   | 33.5201   | 35.2463   | 35.4577   | 29.4853   | 34.9215   |
| 2.38256   | 1.97134   | 1.71842   | 2.38748   | 1.83134   | 2.08124   |
| 6.08543   | 3.56988   | 5.20016   | 3.5702    | 4.96342   | 6.67102   |
| 0.126047  | 0.0902474 | 0         | 0         | 0         | 0         |
| 14.7945   | 12.8159   | 14.3658   | 15.2027   | 12.6711   | 14.2025   |
| 1.84015   | 1.91555   | 1.48819   | 1.82031   | 1.68533   | 1.62626   |
| 20.2937   | 18.4294   | 25.3095   | 18.6838   | 30.8425   | 18.706    |
| 19.1409   | 17.6561   | 20.2451   | 17.1873   | 17.5785   | 20.0215   |
| 51.9007   | 46.4969   | 44.1471   | 44.3681   | 58.7617   | 26.9707   |
| 10.1242   | 8.06323   | 6.34904   | 8.049     | 6.74611   | 7.43764   |
| 3.54483   | 2.07192   | 2.16256   | 2.48814   | 1.54455   | 1.65307   |
| 16.5476   | 25.2728   | 17.9848   | 12.0833   | 9.29332   | 13.6615   |
| 6.08854   | 3.64467   | 6.43805   | 5.10668   | 4.83599   | 6.26979   |
| 0         | 0         | 0         | 0         | 0         | 0         |
| 368.923   | 350.465   | 336.846   | 396.425   | 498.504   | 357.82    |
| 0.794882  | 0.411359  | 0.420295  | 0.484348  | 0.449998  | 0.572166  |
| 2.36533   | 1.84576   | 2.13899   | 2.23732   | 2.16328   | 2.15413   |
| 6.62892   | 4.91982   | 6.44093   | 5.50006   | 4.52782   | 5.61867   |
| 0         | 0         | 0         | 0         | 0         | 0         |
| 0         | 0         | 0         | 0         | 0         | 0         |

|           |           |           |           |           |           |
|-----------|-----------|-----------|-----------|-----------|-----------|
| 0         | 0         | 0         | 0         | 0         | 0         |
| 2.10432   | 1.64281   | 1.85622   | 1.84321   | 1.77146   | 2.01059   |
| 4.55142   | 5.34564   | 5.7656    | 4.96527   | 4.99015   | 5.7137    |
| 2.16821   | 1.5368    | 1.71845   | 2.13391   | 0.938191  | 1.46872   |
| 2.66538   | 1.88186   | 2.21586   | 2.22984   | 1.43489   | 2.2804    |
| 0         | 0         | 0         | 0         | 0         | 0.0687945 |
| 84.8077   | 85.8274   | 75.9539   | 74.2712   | 79.3805   | 95.7963   |
| 0.40978   | 0.157176  | 0.224921  | 0.435456  | 0.363049  | 0.16607   |
| 0         | 0         | 0.179941  | 0         | 0         | 0         |
| 5.77147   | 5.3072    | 5.91419   | 5.22887   | 4.37238   | 5.88734   |
| 14.0233   | 12.6835   | 13.9935   | 13.7912   | 11.396    | 12.3933   |
| 59.8061   | 52.2858   | 48.9359   | 48.8317   | 102.853   | 31.2606   |
| 4.03596   | 3.2473    | 1.90376   | 3.66967   | 2.55316   | 2.49675   |
| 15.1511   | 12.5442   | 16.3407   | 13.478    | 15.4894   | 14.9979   |
| 801.905   | 719.71    | 764.341   | 708.774   | 822.867   | 625.2     |
| 0         | 0         | 0         | 0         | 0         | 0         |
| 12.3875   | 11.78     | 14.1312   | 13.565    | 11.1361   | 13.8978   |
| 11.4292   | 11.0675   | 12.1051   | 11.1905   | 11.1314   | 10.9015   |
| 0.0298112 | 0.0640327 | 0         | 0.043269  | 0         | 0         |
| 6.93888   | 5.24778   | 4.46655   | 5.57414   | 4.24178   | 5.86755   |
| 6.57623   | 4.42985   | 4.59544   | 4.40538   | 4.76618   | 5.33026   |
| 25.2885   | 31.8909   | 26.8476   | 32.35     | 26.1425   | 33.6656   |
| 24.626    | 24.3722   | 24.781    | 26.0932   | 26.7596   | 22.2882   |
| 19.0195   | 17.2983   | 17.5098   | 17.3846   | 17.8295   | 18.8499   |
| 0         | 0.198286  | 0.224014  | 0.200983  | 0         | 0         |
| 21.0403   | 17.0326   | 19.5791   | 18.2563   | 21.9896   | 19.6312   |
| 11.1309   | 8.71328   | 9.87716   | 11.2469   | 8.42035   | 10.0567   |
| 0         | 0         | 0         | 0.0194009 | 0.0828964 | 0         |
| 3.70937   | 4.32847   | 4.23756   | 6.23581   | 3.46372   | 3.62152   |
| 0         | 0         | 0         | 0         | 0         | 0         |
| 49.6827   | 55.1303   | 58.8184   | 57.4578   | 61.8774   | 55.1612   |
| 0.900994  | 0.761532  | 0.0536988 | 0.341246  | 0.479517  | 0.661801  |
| 0         | 0         | 0         | 0         | 0         | 0         |
| 13.2966   | 12.8879   | 18.0054   | 14.3265   | 20.156    | 17.3818   |
| 3.26479   | 1.59883   | 1.85201   | 2.26675   | 0.975115  | 2.03908   |
| 16.709    | 18.0115   | 15.4588   | 18.3885   | 17.2329   | 16.8321   |
| 0.0569598 | 0.0259338 | 0         | 0.0396018 | 0.0441561 | 0.0230736 |
| 1.93281   | 1.59054   | 2.53626   | 1.84587   | 1.42395   | 2.19507   |
| 4.24219   | 3.38611   | 3.20157   | 3.19648   | 3.74493   | 3.1094    |
| 17.7897   | 25.6142   | 20.855    | 20.5992   | 18.6268   | 11.7048   |
| 0.818108  | 0.898672  | 0.587869  | 0.916016  | 0.382716  | 0.0920978 |
| 34.4199   | 34.5791   | 30.1045   | 34.0049   | 28.534    | 31.0594   |
| 8.59379   | 7.38896   | 9.98686   | 8.71499   | 8.9603    | 9.39894   |



|            |            |           |           |           |            |
|------------|------------|-----------|-----------|-----------|------------|
| 7.01048    | 5.95863    | 5.20079   | 6.41596   | 4.45836   | 4.25141    |
| 15.5286    | 11.3547    | 17.1997   | 13.5828   | 12.8837   | 15.8476    |
| 995.347    | 898.225    | 1060.08   | 852.431   | 1021.02   | 766.834    |
| 0.154639   | 0.131223   | 0.0277962 | 0.094393  | 0.106559  | 0.243733   |
| 0          | 0          | 0         | 0         | 0         | 0          |
| 9.90711    | 8.37371    | 9.7986    | 11.803    | 11.4737   | 13.943     |
| 10.1558    | 8.4021     | 9.96285   | 9.78759   | 8.35326   | 10.1784    |
| 0.0975541  | 0.279388   | 0.315638  | 0.0707968 | 0.378127  | 0.0790709  |
| 0.00572537 | 0.00204963 | 0         | 0         | 0         | 0.00556872 |
| 0.988738   | 1.25777    | 0.439865  | 0.591907  | 1.08628   | 1.74964    |
| 0.0898965  | 0.16147    | 0.0727154 | 0.100679  | 0.0696891 | 0.142524   |
| 0.0602552  | 0.0431416  | 0.0548316 | 0.0655924 | 0.0233554 | 0.0488388  |
| 0          | 0          | 0         | 0         | 0         | 0          |
| 0.430327   | 0.308106   | 0.232055  | 0         | 0         | 0.93012    |
| 0.137814   | 0.710453   | 0.445905  | 0.100014  | 0.427347  | 0.446817   |
| 545.038    | 633.055    | 628.956   | 534.639   | 659.172   | 577.059    |
| 1.37685    | 0.813482   | 0.557917  | 0.248228  | 0.661414  | 0.506111   |
| 5.84378    | 4.84368    | 4.64174   | 4.83314   | 4.83628   | 4.11783    |
| 38.7032    | 37.8593    | 29.5213   | 42.4394   | 39.6097   | 34.3284    |
| 6.14021    | 4.81088    | 5.36117   | 7.44484   | 5.84177   | 6.42452    |
| 18.393     | 37.8645    | 18.8976   | 28.947    | 22.7941   | 28.0335    |
| 1.02108    | 0.91486    | 1.02014   | 1.17513   | 0.683017  | 0.705745   |
| 3.44042    | 3.09587    | 3.54869   | 3.51997   | 3.48422   | 3.9923     |
| 7.2901     | 8.64224    | 8.70023   | 7.47617   | 4.40996   | 7.30377    |
| 0.0546952  | 0.058741   | 0.0442418 | 0.0595399 | 0.0212003 | 0.110831   |
| 2.00885    | 2.09668    | 2.1513    | 1.93012   | 1.60116   | 1.9837     |
| 29.4635    | 29.5686    | 27.7488   | 27.0635   | 24.3664   | 30.8358    |
| 0          | 0          | 0         | 0         | 0         | 0          |
| 0.14185    | 0.0338539  | 0.0764929 | 0.0857857 | 0.0366547 | 0.0383247  |
| 21.3884    | 20.4214    | 21.4762   | 23.3027   | 20.5612   | 21.0207    |
| 0.237768   | 0.212797   | 0.0480814 | 0.158173  | 0.107521  | 0.144539   |
| 23.3221    | 18.502     | 22.8075   | 22.1193   | 23.9548   | 23.9571    |
| 1.08279    | 1.17625    | 0.93625   | 1.02967   | 1.15779   | 1.39212    |
| 0          | 0.0705934  | 0         | 0         | 0         | 0          |
| 0          | 0          | 0         | 0         | 0         | 0          |
| 2.89985    | 2.48438    | 2.22534   | 2.37427   | 1.78688   | 2.3906     |
| 8.55054    | 8.37182    | 10.4112   | 10.1522   | 9.57972   | 9.35495    |
| 4.71334    | 2.35089    | 3.25564   | 4.03549   | 3.20226   | 4.1208     |
| 2.96595    | 3.78381    | 2.22462   | 2.34812   | 2.25745   | 3.14706    |
| 32.8946    | 48.9155    | 39.8434   | 36.0329   | 38.0544   | 31.5844    |
| 0          | 0          | 0         | 0         | 0         | 0          |
| 0          | 0          | 0         | 0         | 0         | 0          |
| 174.921    | 171.352    | 171.931   | 187.64    | 199.578   | 176.056    |

|           |           |           |           |          |          |
|-----------|-----------|-----------|-----------|----------|----------|
| 0         | 0         | 0         | 0         | 0        | 0        |
| 0         | 0.619947  | 0         | 0         | 0        | 0        |
| 1.27653   | 0.974901  | 1.03256   | 1.11168   | 1.31945  | 1.42554  |
| 0         | 0         | 0         | 0         | 0        | 0        |
| 0.34893   | 0.499655  | 0.338691  | 0.354515  | 0.432794 | 0.56564  |
| 28.4301   | 28.0466   | 28.5671   | 28.2999   | 32.4431  | 23.0197  |
| 0.0546857 | 0         | 0.0442341 | 0.0396864 | 0        | 0        |
| 2.51838   | 2.16803   | 2.44933   | 2.6109    | 2.11498  | 2.43004  |
| 0.63544   | 0.579307  | 0.63008   | 0.653814  | 0.605051 | 0.921993 |
| 4.03015   | 3.55461   | 2.78746   | 3.0943    | 2.94312  | 3.73999  |
| 0         | 0         | 0         | 0         | 0        | 0        |
| 20.4877   | 25.3144   | 21.1619   | 21.2428   | 14.6588  | 21.1028  |
| 11.5021   | 9.58617   | 10.2219   | 12.452    | 11.7028  | 10.9878  |
| 129.111   | 157.201   | 159.339   | 141.271   | 150.286  | 119.09   |
| 28.261    | 26.4382   | 31.5185   | 30.4033   | 29.5601  | 28.7417  |
| 0         | 0         | 0         | 0         | 0        | 0        |
| 0         | 0         | 0         | 0         | 0        | 0        |
| 82.4952   | 89.4944   | 91.4476   | 90.4067   | 72.2307  | 84.2703  |
| 38.959    | 40.5967   | 40.8712   | 38.4848   | 36.7182  | 38.5495  |
| 1.0335    | 1.06371   | 0.888229  | 0.890663  | 0.500743 | 0.83769  |
| 0.429493  | 0.615017  | 0.810618  | 0.935072  | 1.22081  | 0.928315 |
| 63.1864   | 51.1073   | 58.4573   | 64.0544   | 67.811   | 42.8123  |
| 6.00344   | 4.78999   | 6.68105   | 5.99417   | 5.21669  | 5.00911  |
| 3.15384   | 3.58293   | 4.3008    | 3.49841   | 3.55711  | 2.3873   |
| 0         | 0         | 0         | 0         | 0        | 0        |
| 0         | 0         | 0         | 0         | 0        | 0        |
| 0         | 0         | 0         | 0         | 0        | 0        |
| 2.35748   | 1.7617    | 2.10491   | 2.29051   | 2.48668  | 2.11965  |
| 0         | 0         | 0         | 0         | 0        | 0        |
| 4.47701   | 4.97459   | 5.83774   | 4.70493   | 5.27235  | 5.51258  |
| 22.6673   | 14.8863   | 20.0693   | 19.5456   | 19.3726  | 22.6264  |
| 0         | 0         | 0         | 0         | 0        | 0        |
| 1.01574   | 0.969667  | 0.69521   | 0.661536  | 0.686466 | 1.30882  |
| 13.5897   | 14.8338   | 14.2295   | 15.1164   | 15.2976  | 14.9695  |
| 34.7089   | 31.1548   | 39.0528   | 34.408    | 36.0642  | 36.7132  |
| 6.54051   | 6.54949   | 5.06851   | 4.54741   | 7.80047  | 4.00378  |
| 0         | 0.0177158 | 0.0200145 | 0         | 0        | 0        |
| 3.3976    | 2.09813   | 3.10896   | 2.96654   | 2.07417  | 2.42685  |
| 0         | 0         | 0         | 0         | 0        | 0        |
| 3.65552   | 3.47502   | 2.13484   | 2.96214   | 1.49575  | 3.09362  |
| 0.0625147 | 0.0447593 | 0.202267  | 0.136104  | 0.290774 | 0.10134  |
| 1.34259   | 1.42442   | 1.71923   | 1.3895    | 1.93436  | 1.30732  |
| 27.2368   | 26.0039   | 25.8101   | 26.0586   | 28.9695  | 19.0383  |

|           |          |          |           |           |           |
|-----------|----------|----------|-----------|-----------|-----------|
| 1.40354   | 0.742652 | 0.558504 | 0.798035  | 0.887613  | 1.07996   |
| 1.69943   | 1.59501  | 1.47941  | 2.15614   | 1.379     | 1.49274   |
| 44.3675   | 39.1051  | 37.6247  | 44.4845   | 34.8075   | 45.0487   |
| 0         | 0        | 0        | 0         | 0         | 0         |
| 3.19715   | 2.43869  | 2.23736  | 3.37703   | 4.35471   | 5.19664   |
| 8.60621   | 6.08627  | 7.52513  | 8.40676   | 10.1016   | 9.11538   |
| 0         | 0        | 0        | 0         | 0         | 0         |
| 0.0637569 | 0        | 0.154715 | 0.092539  | 0.0494253 | 0.0516771 |
| 0.987518  | 0.537353 | 0.591099 | 0.716659  | 0.872714  | 0.816425  |
| 0         | 0        | 0        | 0         | 0         | 0         |
| 59.2559   | 67.6217  | 53.0967  | 55.6974   | 41.9581   | 54.3589   |
| 17.3663   | 17.3911  | 14.0782  | 13.8106   | 16.2056   | 7.72011   |
| 0.43405   | 0.524951 | 0.221567 | 1.01955   | 0.657871  | 0.969072  |
| 7.52726   | 7.13671  | 10.652   | 10.8637   | 9.24692   | 7.38339   |
| 0.58013   | 0.950872 | 0.377193 | 0.792933  | 0.46662   | 0.250189  |
| 6.89463   | 8.74212  | 8.13826  | 7.19      | 6.68133   | 6.94447   |
| 0         | 0        | 0        | 0         | 0         | 0         |
| 0         | 0        | 0        | 0         | 0         | 0         |
| 5.30794   | 5.9597   | 16.3933  | 11.6      | 5.75137   | 11.929    |
| 1.20643   | 1.37642  | 1.48649  | 1.21251   | 2.02377   | 1.31621   |
| 6.77199   | 4.37014  | 6.0011   | 5.32625   | 5.90333   | 6.03227   |
| 2.82476   | 2.87237  | 2.90674  | 2.62637   | 2.0474    | 2.46826   |
| 59.0444   | 68.6971  | 66.7347  | 61.7119   | 38.658    | 59.9549   |
| 13.0192   | 11.1799  | 13.9922  | 13.1733   | 13.8431   | 15.0259   |
| 0         | 0        | 0        | 0         | 0         | 0.141161  |
| 64.9549   | 55.7008  | 62.5961  | 71.8826   | 67.9976   | 64.8648   |
| 48.1764   | 55.8395  | 50.2361  | 51.0566   | 43.8327   | 46.4421   |
| 0.810545  | 0.649483 | 0.598404 | 0.602231  | 0.479528  | 0.545604  |
| 10.0469   | 7.20731  | 7.04213  | 5.13347   | 3.94699   | 3.74878   |
| 0.257296  | 0.109618 | 0.123841 | 0.0964485 | 0.103027  | 0.140755  |
| 35.4604   | 38.1943  | 41.6482  | 39.3874   | 48.6463   | 40.0781   |
| 1.48784   | 1.30929  | 1.54257  | 1.4132    | 1.92211   | 1.5156    |
| 21.8165   | 17.8289  | 20.7596  | 23.2873   | 23.0266   | 19.6936   |
| 1.33872   | 0.83482  | 0.986803 | 0.940193  | 1.00432   | 0.813808  |
| 39.9732   | 63.8983  | 58.5783  | 24.0112   | 17.3925   | 47.4192   |
| 80.5429   | 67.2476  | 54.2112  | 47.7125   | 85.2888   | 56.5565   |
| 6.63849   | 6.25596  | 6.3036   | 5.69361   | 5.14626   | 5.82734   |
| 7.56903   | 6.19689  | 5.95239  | 6.0881    | 5.14572   | 4.96196   |
| 2.50324   | 1.39821  | 1.7918   | 1.76397   | 2.24576   | 1.60136   |
| 1.93128   | 1.43594  | 1.27377  | 1.14281   | 1.00194   | 1.3125    |
| 106.528   | 118.885  | 100.675  | 85.8021   | 90.0412   | 91.0265   |
| 9.88333   | 6.0418   | 8.66632  | 8.41205   | 8.97576   | 9.53726   |
| 0.374133  | 0.348234 | 0.332892 | 0.325818  | 0.464054  | 0.363897  |

|           |          |           |           |           |           |
|-----------|----------|-----------|-----------|-----------|-----------|
| 1.14209   | 1.19931  | 1.29333   | 1.57478   | 1.32804   | 1.41941   |
| 0         | 0        | 0         | 0         | 0         | 0         |
| 24.8843   | 26.3929  | 29.9007   | 34.128    | 26.9462   | 38.8017   |
| 2.79077   | 2.32408  | 2.99386   | 2.45623   | 2.51636   | 2.72725   |
| 0.200298  | 0.197188 | 0.162017  | 0.23621   | 0.116456  | 0.101468  |
| 1.73602   | 1.11412  | 0.693555  | 1.18304   | 1.01755   | 1.32989   |
| 0.132911  | 0.619541 | 0.592642  | 0.916329  | 0.154552  | 0.432838  |
| 0.244575  | 0.175111 | 0.296748  | 0.177492  | 0.189598  | 0         |
| 0         | 0        | 0.0226325 | 0.0406113 | 0         | 0         |
| 1.50666   | 0.759112 | 1.21871   | 1.09341   | 0.995442  | 1.26685   |
| 5.16939   | 4.559    | 4.26542   | 5.61809   | 3.97511   | 4.10355   |
| 8.70425   | 7.87597  | 9.45227   | 7.85874   | 12.2733   | 8.63832   |
| 3.14E-123 | 1.96E-35 | 9.29E-123 | 1.12E-67  | 0.102135  | 5.71E-95  |
| 13.8943   | 10.3361  | 11.3458   | 14.057    | 12.8409   | 11.6452   |
| 2.55577   | 1.70789  | 2.51523   | 3.98776   | 2.77378   | 3.7633    |
| 0         | 0.170735 | 0         | 0         | 0         | 0         |
| 28.977    | 23.3718  | 26.3795   | 29.1897   | 28.5673   | 30.2193   |
| 0.0589319 | 0        | 0         | 0.299376  | 0.0456849 | 0.0477663 |
| 0.385602  | 0.915937 | 0.763851  | 0.479723  | 0.658855  | 1.07305   |
| 3.74731   | 3.95936  | 3.38321   | 3.23325   | 2.54316   | 3.1236    |
| 0.221682  | 0.190464 | 0.179314  | 0.193054  | 0.103111  | 0.0718723 |
| 12.1086   | 25.5495  | 14.6529   | 15.1541   | 10.1724   | 12.4979   |
| 1.28045   | 0.740473 | 0.677207  | 0.822024  | 0.649023  | 0.958012  |
| 1.8313    | 1.4585   | 1.78089   | 1.80685   | 1.85033   | 1.60107   |
| 24.4148   | 21.4138  | 23.2447   | 24.3624   | 24.2552   | 21.0415   |
| 25.5615   | 28.2977  | 33.0378   | 29.9957   | 30.1869   | 29.7773   |
| 0.231168  | 0.744802 | 0.0934934 | 0.587169  | 0.716819  | 1.03053   |
| 0.666088  | 0.238174 | 0.59102   | 0.766906  | 0.216351  | 0.270803  |
| 9.46943   | 9.50002  | 10.0015   | 9.41108   | 10.3023   | 11.2596   |
| 0         | 0        | 0         | 0.036545  | 0         | 0         |
| 0         | 0.147938 | 0.111422  | 0         | 0         | 0         |
| 78.2698   | 84.5766  | 77.8766   | 83.8036   | 77.4705   | 65.3413   |
| 0         | 0        | 0         | 0         | 0         | 0         |
| 0         | 0        | 0         | 0         | 0         | 0         |
| 2.66168   | 2.84878  | 3.06598   | 1.96431   | 1.91798   | 2.98341   |
| 1.46745   | 1.24974  | 1.68677   | 1.39004   | 1.52077   | 2.02826   |
| 117.185   | 140.389  | 117.354   | 123.926   | 116.058   | 111.916   |
| 12.1165   | 11.7893  | 12.454    | 15.5773   | 10.9566   | 12.5961   |
| 1.3532    | 0.889075 | 0.424953  | 1.29398   | 2.2338    | 2.56783   |
| 0.194851  | 0.488283 | 0.788054  | 0.282813  | 0.226577  | 0.2369    |
| 2.3109    | 2.41866  | 3.36641   | 3.37526   | 2.55082   | 2.69229   |
| 0         | 0.072932 | 0         | 0         | 0         | 0         |
| 8.07923   | 9.00713  | 6.03433   | 5.34012   | 6.82083   | 8.13187   |

|           |           |           |           |           |           |
|-----------|-----------|-----------|-----------|-----------|-----------|
| 6.03793   | 6.42231   | 6.02231   | 6.48745   | 6.27133   | 5.87307   |
| 65.774    | 24.9815   | 58.1158   | 51.0831   | 25.6183   | 43.4134   |
| 0         | 0.0426712 | 0         | 0.0216258 | 0         | 0.0483064 |
| 16.6422   | 13.476    | 16.0135   | 15.5078   | 15.5869   | 17.2294   |
| 0         | 0         | 0         | 0         | 0         | 0         |
| 0.717497  | 0.299666  | 0.532004  | 0.303742  | 0.417161  | 0.678481  |
| 12.8175   | 15.181    | 10.3207   | 9.90284   | 11.9797   | 10.9657   |
| 13.7138   | 12.0207   | 13.5131   | 13.6679   | 15.4764   | 13.5812   |
| 5.96931   | 6.96011   | 7.38512   | 7.86039   | 7.58019   | 7.58089   |
| 0.578999  | 0.511022  | 0.458156  | 0.280548  | 0.31319   | 0.41301   |
| 0.0932376 | 0.111261  | 0.0251393 | 0.0225547 | 0.0240931 | 0.0251907 |
| 19.3293   | 18.3341   | 19.1629   | 22.3002   | 17.8019   | 15.9883   |
| 1.64706   | 1.61643   | 2.37849   | 2.0919    | 1.96384   | 2.6393    |
| 22.0307   | 17.2224   | 16.2192   | 22.5743   | 15.4652   | 16.3328   |
| 258.739   | 20.3749   | 84.4484   | 100.208   | 132.522   | 258.578   |
| 0         | 0         | 0         | 0         | 0         | 0         |
| 0         | 0         | 0         | 0         | 0         | 0         |
| 0         | 0         | 0         | 0         | 0         | 0         |
| 32.7918   | 34.9468   | 31.622    | 32.9608   | 29.3466   | 36.1629   |
| 2.69982   | 1.75066   | 1.5328    | 1.50091   | 1.86391   | 2.1883    |
| 52.9001   | 52.6657   | 54.2682   | 47.8265   | 45.6738   | 53.1382   |
| 9.98053   | 11.7943   | 8.75267   | 6.85503   | 6.53308   | 8.13083   |
| 0         | 0         | 0         | 0         | 0         | 0         |
| 9.19679   | 8.09778   | 9.45538   | 7.74888   | 6.32051   | 8.12038   |
| 95.0665   | 125.677   | 87.8493   | 83.0837   | 78.8258   | 95.0031   |
| 1.90847   | 1.23798   | 1.49092   | 1.72826   | 1.46683   | 0.727361  |
| 2.30318   | 2.9715    | 2.10813   | 1.95161   | 0.992614  | 2.66018   |
| 6.67072   | 5.81963   | 4.98772   | 5.32924   | 4.73669   | 4.99792   |
| 4.48029   | 4.50642   | 4.22508   | 4.20939   | 2.05105   | 3.644     |
| 0         | 0         | 0         | 0         | 0         | 0         |
| 7.17848   | 5.88061   | 5.88625   | 6.68778   | 7.04204   | 7.80225   |
| 1.10352   | 0.592574  | 0.510065  | 0.429023  | 0.733256  | 0.511108  |
| 0         | 0         | 0         | 0         | 0         | 0         |
| 1.37706   | 0.944497  | 1.80573   | 0.830154  | 0.954399  | 1.1027    |
| 0.285046  | 0.48981   | 1.06061   | 0.744707  | 0.441944  | 0.785534  |
| 0.589646  | 0.39306   | 0.888118  | 0.20658   | 0.346767  | 0.412007  |
| 0.187291  | 4.84E-103 | 0         | 0.135942  | 3.99E-124 | 1.14E-66  |
| 0.412973  | 0.374737  | 0.318478  | 0.691971  | 1.01418   | 0.636569  |
| 19.5787   | 16.8704   | 18.4379   | 19.1857   | 21.4649   | 16.9878   |
| 2.54098   | 1.48851   | 1.30795   | 4.69391   | 1.25351   | 2.43402   |
| 14.5035   | 12.351    | 14.9493   | 15.8293   | 13.7808   | 15.0114   |
| 0         | 0         | 0         | 0         | 0         | 0         |
| 12.4527   | 13.2864   | 16.0966   | 10.3661   | 9.65352   | 16.6243   |

|           |           |           |           |           |           |
|-----------|-----------|-----------|-----------|-----------|-----------|
| 21.5012   | 23.859    | 17.3778   | 21.5564   | 18.3301   | 17.775    |
| 10.1871   | 10.7211   | 11.5209   | 10.7471   | 9.45102   | 9.93894   |
| 0         | 0         | 0         | 0         | 0         | 0         |
| 66.2749   | 74.0234   | 80.8334   | 74.1135   | 94.1054   | 59.5897   |
| 2.53393   | 1.17926   | 0.819857  | 1.56308   | 0.589302  | 1.02692   |
| 0.0425714 | 0.324213  | 0.0344351 | 0.269218  | 0.388894  | 0.252114  |
| 0.367634  | 0         | 0         | 0         | 0         | 0         |
| 36.7527   | 32.0896   | 33.8756   | 32.7426   | 31.0955   | 35.7463   |
| 2.42718   | 2.17227   | 1.10435   | 1.65136   | 1.76399   | 1.47548   |
| 0.379711  | 0.339832  | 0.383926  | 0         | 0.147179  | 0.628361  |
| 2.38175   | 2.42608   | 2.4628    | 2.22742   | 2.36031   | 2.48774   |
| 0.75042   | 0.714034  | 0.607     | 0.81294   | 0.653808  | 0.910027  |
| 0         | 0         | 0         | 0         | 0         | 0         |
| 21.2448   | 16.7509   | 17.6738   | 16.7332   | 17.6023   | 11.8301   |
| 0.129361  | 0.340251  | 0.260955  | 0.307511  | 0.178281  | 0.291255  |
| 0         | 0         | 0         | 0         | 0         | 0         |
| 0         | 0         | 0         | 0         | 0         | 0         |
| 11.4197   | 9.25461   | 10.8209   | 10.7825   | 11.1061   | 10.3229   |
| 23.7514   | 24.0824   | 22.3742   | 23.9816   | 22.0149   | 22.3004   |
| 320.036   | 484.092   | 198.006   | 287.283   | 295.538   | 302.452   |
| 4.70571   | 4.22662   | 4.85836   | 5.59436   | 5.03331   | 5.07936   |
| 5.76101   | 6.4302    | 6.71537   | 6.34873   | 4.99232   | 7.68815   |
| 21.225    | 16.8056   | 17.6098   | 20.2089   | 17.071    | 18.7379   |
| 116.968   | 142.833   | 122.561   | 110.494   | 92.5749   | 102.442   |
| 1.76627   | 0.722636  | 0.204099  | 1.09869   | 1.17363   | 2.4542    |
| 1.15534   | 1.07996   | 1.19413   | 1.28097   | 1.49273   | 0.728346  |
| 0         | 0         | 0.074752  | 0         | 0.0333096 | 0.0400774 |
| 25.1296   | 20.5996   | 22.0949   | 24.5211   | 24.8787   | 26.1919   |
| 0.682419  | 0.778705  | 1.00049   | 0.789295  | 0.314107  | 0.77783   |
| 0         | 0         | 0         | 0         | 0         | 0         |
| 8.38245   | 10.1935   | 5.6829    | 6.48795   | 5.27349   | 5.22751   |
| 0         | 0         | 0         | 0         | 0         | 0         |
| 21.5986   | 18.2758   | 17.5483   | 21.3202   | 16.0489   | 16.6156   |
| 34.8506   | 27.7969   | 27.7245   | 31.9667   | 34.4398   | 29.8081   |
| 23.8173   | 21.362    | 23.8913   | 24.4011   | 25.3462   | 23.8626   |
| 1.59963   | 0.430913  | 0.447893  | 1.02694   | 0.620031  | 0.698146  |
| 0.47155   | 0.0450161 | 0.203428  | 0.182513  | 0.146221  | 0.152883  |
| 0.589384  | 0.241136  | 0.612952  | 0.183311  | 0.130543  | 0.341225  |
| 13.3316   | 9.56396   | 13.5699   | 10.2792   | 10.8852   | 12.7949   |
| 0.0507378 | 0.145309  | 0.0820816 | 0.0736427 | 0.0786655 | 0.0411247 |
| 0         | 0         | 0.123467  | 0         | 0         | 0         |
| 0.792605  | 0.484598  | 0.554679  | 0.613986  | 0.628247  | 1.09719   |
| 7.07691   | 5.27342   | 6.44216   | 5.76373   | 5.76129   | 6.16762   |

|           |           |           |           |           |           |
|-----------|-----------|-----------|-----------|-----------|-----------|
| 113.369   | 129.695   | 127.404   | 137.044   | 131.764   | 111.669   |
| 14.8965   | 12.7701   | 11.593    | 12.3366   | 12.8115   | 11.2321   |
| 6.15275   | 3.85459   | 5.36001   | 5.29833   | 5.88436   | 6.35121   |
| 0         | 0         | 0         | 0         | 0         | 0         |
| 2.52E-08  | 1.86E-08  | 2.38E-08  | 1.44E-08  | 3.83E-08  | 2.43E-08  |
| 1.15491   | 1.26791   | 1.05875   | 1.22928   | 1.01468   | 1.12332   |
| 23.6375   | 22.3857   | 24.5595   | 25.8951   | 23.3818   | 24.3386   |
| 9.55047   | 9.2718    | 8.27511   | 9.28042   | 5.67196   | 7.47857   |
| 0.232682  | 0.446239  | 0.752848  | 0.845314  | 1.14323   | 0.754387  |
| 22.7823   | 22.6011   | 23.3611   | 27.1966   | 25.2221   | 27.4298   |
| 1.48013   | 1.20539   | 1.77125   | 1.26988   | 1.17228   | 1.34875   |
| 5.45294   | 5.08201   | 3.03087   | 2.80769   | 3.42427   | 3.03707   |
| 73.0976   | 81.8888   | 82.7478   | 77.863    | 76.7886   | 76.1147   |
| 31.4379   | 31.9229   | 33.2662   | 32.6441   | 34.2574   | 30.77     |
| 0.145065  | 0.0886301 | 0.226681  | 0.137561  | 0.0959627 | 0.0188127 |
| 8.93505   | 9.91      | 9.4119    | 9.97795   | 7.35701   | 9.39168   |
| 88.2926   | 78.899    | 90.842    | 99.5008   | 96.6961   | 86.3556   |
| 0         | 0         | 0.025076  | 0.269975  | 0         | 0.150763  |
| 4.58871   | 3.11742   | 2.29873   | 3.08413   | 2.28391   | 3.33892   |
| 1.50488   | 1.89445   | 1.53831   | 1.60818   | 1.62812   | 1.80953   |
| 10.0769   | 10.3946   | 10.8399   | 10.4417   | 10.5901   | 8.75705   |
| 5.2409    | 5.75059   | 3.71523   | 6.47053   | 3.97771   | 5.61861   |
| 35.5159   | 31.7859   | 28.1366   | 30.7778   | 33.2819   | 34.5442   |
| 0.453233  | 0.484756  | 0.408477  | 0.304555  | 0.351353  | 0.599795  |
| 0.235264  | 0.450497  | 0.424777  | 0.357553  | 0.570401  | 0.427105  |
| 10.3986   | 7.62724   | 9.56447   | 9.69676   | 9.70908   | 9.14729   |
| 0         | 0.03403   | 0         | 0.0325028 | 0         | 0.0421356 |
| 0.0314099 | 0.0674667 | 0.0508137 | 0.0455895 | 0.0243494 | 0         |
| 53.749    | 42.0356   | 50.0656   | 46.1185   | 67.4447   | 55.5869   |
| 5.8627    | 6.36813   | 5.61365   | 5.09105   | 3.24355   | 4.95499   |
| 4.85733   | 3.39117   | 4.32027   | 4.70982   | 3.9061    | 4.55781   |
| 0         | 0         | 0         | 0         | 0         | 0         |
| 7.58686   | 5.63455   | 7.65761   | 7.64308   | 5.17206   | 7.44401   |
| 39.3971   | 33.3174   | 37.8996   | 43.6902   | 49.3745   | 39.5951   |
| 24.2075   | 20.8712   | 23.1834   | 20.8644   | 24.0573   | 27.7049   |
| 3.67236   | 4.16558   | 5.20677   | 4.85107   | 4.31834   | 4.98325   |
| 0.871336  | 0.374316  | 0.704806  | 0.379406  | 0.945662  | 0.564998  |
| 136.011   | 89.8499   | 108.433   | 171.667   | 96.817    | 165.731   |
| 6.46124   | 5.00189   | 5.86787   | 5.72164   | 6.70861   | 6.99534   |
| 13.8852   | 12.2661   | 12.0166   | 11.7609   | 12.07     | 11.1007   |
| 40.5358   | 34.2662   | 36.543    | 38.1006   | 42.1385   | 37.9553   |
| 4.46867   | 2.58467   | 1.67613   | 3.38895   | 2.18116   | 2.50534   |
| 531.524   | 540.328   | 569.75    | 532.279   | 502.508   | 518.286   |

|           |           |           |           |           |           |
|-----------|-----------|-----------|-----------|-----------|-----------|
| 0         | 0.451259  | 0.0955889 | 0         | 0.488592  | 0         |
| 0         | 0         | 0         | 0         | 0         | 0         |
| 0.0500406 | 0.0537422 | 0         | 0.054473  | 0         | 0.0811192 |
| 9.49835   | 8.06196   | 9.03746   | 9.75759   | 8.08421   | 8.53779   |
| 0         | 0         | 0         | 0         | 0         | 0         |
| 0.104904  | 0         | 0.339419  | 0.0761307 | 0.243969  | 0.170056  |
| 0         | 0         | 0         | 0         | 0         | 0         |
| 138.91    | 147.227   | 171.867   | 164.697   | 155.828   | 172.541   |
| 0.0001882 | 0.382433  | 3.24E-05  | 8.63E-06  | 0.353465  | 0.117562  |
| 0.0538477 | 0.0771079 | 0.0871126 | 0         | 0.0834872 | 0.0436454 |
| 0         | 0         | 0         | 0         | 0         | 0         |
| 55.7299   | 46.7468   | 52.1827   | 62.778    | 56.9488   | 52.7279   |
| 1.22732   | 1.07845   | 1.18834   | 1.37652   | 0.951436  | 1.08522   |
| 0.29653   | 0.265387  | 0.959429  | 0.968388  | 0.172406  | 0.600869  |
| 14.7948   | 14.0524   | 13.1162   | 13.6988   | 12.9877   | 11.2173   |
| 8.16093   | 6.63022   | 4.97656   | 7.24206   | 6.80179   | 7.00885   |
| 16.4111   | 17.7347   | 20.1897   | 16.2427   | 17.8503   | 18.9376   |
| 0.0870789 | 0.0623468 | 0.158482  | 0.0315974 | 0.0337524 | 0.0352902 |
| 1.55971   | 1.19597   | 1.10696   | 1.00046   | 1.43143   | 2.0064    |
| 13.7403   | 12.3532   | 13.5181   | 14.5994   | 13.7763   | 13.8383   |
| 0         | 0         | 0.0563952 | 0         | 0         | 0         |
| 10.2804   | 8.59842   | 11.0381   | 8.93552   | 8.65596   | 11.5563   |
| 14.6236   | 13.2673   | 16.4913   | 16.9877   | 16.052    | 16.1993   |
| 10.3805   | 3.51086   | 8.14045   | 9.11078   | 9.17491   | 9.28078   |
| 17.0736   | 17.631    | 11.3386   | 15.4762   | 11.8967   | 12.9054   |
| 7.85273   | 7.33737   | 8.19215   | 8.00585   | 9.71406   | 7.82576   |
| 28.3213   | 34.1188   | 31.9781   | 38.6514   | 43.011    | 36.7442   |
| 0         | 0         | 0         | 0         | 0         | 0         |
| 85.2066   | 95.514    | 99.3561   | 83.1566   | 97.0446   | 92.6734   |
| 2.0298    | 1.4533    | 1.20627   | 1.71357   | 1.28452   | 0.8394    |
| 105.195   | 129.507   | 118.839   | 117.083   | 110.047   | 102.482   |
| 0.770733  | 0.902995  | 0.821794  | 1.01697   | 0.733276  | 1.05064   |
| 0.266048  | 0.123255  | 0.177224  | 0.454296  | 0.327565  | 0.418597  |
| 0.115827  | 0.792798  | 0         | 1.19216   | 0         | 0.993539  |
| 0         | 0         | 0         | 0.0460547 | 0.0139278 | 0.0655307 |
| 26.0626   | 22.2657   | 25.2648   | 27.1613   | 23.9496   | 27.5227   |
| 0         | 0         | 0         | 0         | 0         | 0         |
| 58.9344   | 64.1415   | 66.7178   | 70.3418   | 53.5101   | 60.5279   |
| 4.92443   | 3.39521   | 3.02433   | 2.97812   | 3.88819   | 5.35884   |
| 0.0312898 | 0.0522734 | 0.075929  | 0.0605534 | 0.0970252 | 0.0338152 |
| 29.5344   | 29.1157   | 26.5909   | 28.1115   | 29.281    | 28.8106   |
| 21.4988   | 20.1311   | 23.7673   | 22.1511   | 18.3055   | 20.388    |
| 9.78368   | 11.0565   | 5.80886   | 8.50756   | 7.32548   | 9.47898   |



|           |           |           |           |           |           |
|-----------|-----------|-----------|-----------|-----------|-----------|
| 2.02969   | 2.45659   | 1.5621    | 1.19584   | 2.20531   | 1.89522   |
| 2.65315   | 2.20354   | 2.14608   | 1.92544   | 1.87166   | 2.12896   |
| 0         | 0         | 0         | 0         | 0         | 0         |
| 0         | 0         | 0         | 0         | 0         | 0         |
| 5.66199   | 4.74548   | 4.75361   | 5.33087   | 4.60367   | 4.86877   |
| 0         | 0.0514244 | 0.116193  | 0.0521238 | 0         | 0         |
| 0         | 0.132667  | 1.05032   | 0.269926  | 0.28458   | 0         |
| 0         | 0         | 0         | 0         | 0         | 0         |
| 1.02033   | 1.47475   | 0.473563  | 1.1628    | 0.725092  | 1.58369   |
| 19.1998   | 17.5817   | 21.1868   | 16.0371   | 12.8922   | 20.6171   |
| 26.3203   | 34.8774   | 34.6735   | 33.1142   | 28.8752   | 29.3056   |
| 0.222135  | 0.151416  | 0.130665  | 0.172135  | 0.0973288 | 0.153084  |
| 0.0898759 | 0         | 0.0872386 | 0.0521797 | 0.0418039 | 0.0437085 |
| 2.39151   | 1.23245   | 3.0262    | 1.94392   | 2.24589   | 2.30616   |
| 0.494596  | 0.590202  | 0.36673   | 0.508495  | 0.191709  | 0.334072  |
| 0.164381  | 0         | 0         | 0.536824  | 0         | 0.266473  |
| 55.2267   | 77.0938   | 52.2606   | 52.9863   | 42.5373   | 49.4063   |
| 12.8739   | 8.84327   | 13.0128   | 13.7941   | 9.09546   | 12.8975   |
| 2.41831   | 2.03053   | 1.82275   | 2.19376   | 1.77245   | 2.14722   |
| 0.564728  | 0.981955  | 0.946223  | 0.731845  | 0.437786  | 0.490426  |
| 0         | 0         | 0         | 0         | 0         | 0         |
| 0         | 0         | 0         | 0         | 0         | 0         |
| 0.0915059 | 0.0655165 | 0.0740173 | 0         | 0         | 0.0741686 |
| 0.629117  | 4.32E-13  | 5.68E-08  | 6.32E-07  | 0.429168  | 2.28E-06  |
| 3.67171   | 2.78434   | 2.70699   | 2.98788   | 3.08189   | 3.02572   |
| 94.4358   | 75.0058   | 95.8343   | 88.1022   | 99.4963   | 90.6267   |
| 13.1015   | 12.9479   | 13.5517   | 11.81     | 11.6183   | 13.8721   |
| 2.62732   | 3.42631   | 2.58058   | 2.92814   | 1.09111   | 1.6732    |
| 27.1927   | 26.0787   | 30.1297   | 28.7665   | 30.3689   | 31.7391   |
| 4.42724   | 2.43832   | 2.47923   | 3.11407   | 1.90084   | 4.25091   |
| 10.8587   | 8.02055   | 11.6119   | 10.1786   | 12.859    | 11.5578   |
| 0         | 0         | 0         | 0         | 0.107038  | 0         |
| 0         | 0         | 0         | 0         | 0         | 0         |
| 0         | 0         | 0         | 0         | 0         | 0         |
| 9.64848   | 5.09067   | 7.05874   | 7.88192   | 5.28666   | 4.91335   |
| 35.698    | 24.9749   | 26.7798   | 40.0198   | 23.3178   | 22.9484   |
| 18.9047   | 16.1494   | 16.0729   | 17.6609   | 16.1821   | 16.868    |
| 1.82206   | 2.0371    | 1.38411   | 3.221     | 1.5874    | 2.76802   |
| 0         | 0         | 0         | 0         | 0         | 0         |
| 0         | 0         | 0         | 0         | 0         | 0         |
| 0.375575  | 0.089635  | 0.612654  | 1.2737    | 0.491319  | 0.613907  |
| 2.8511    | 2.90736   | 2.46926   | 3.07229   | 2.56743   | 3.36133   |
| 1.48414   | 2.0721    | 1.98081   | 1.45404   | 1.03548   | 0.962357  |

|           |           |           |           |           |           |
|-----------|-----------|-----------|-----------|-----------|-----------|
| 0         | 0         | 0         | 0         | 0         | 0         |
| 0.0657879 | 0.117757  | 0.212858  | 0.14323   | 0.102     | 0.15997   |
| 8.79119   | 9.34853   | 7.11101   | 7.34905   | 6.90136   | 7.17568   |
| 22.8979   | 18.4276   | 19.5392   | 24.7296   | 23.2563   | 21.6829   |
| 2.13071   | 2.59343   | 2.27501   | 1.91741   | 1.2223    | 1.58885   |
| 0.316315  | 0.18717   | 0         | 0.265602  | 0.0911948 | 0.467213  |
| 0.224669  | 0.804294  | 0.545191  | 1.14132   | 0.870834  | 0.182102  |
| 0.0422337 | 0.0167992 | 0         | 0         | 0         | 0         |
| 0         | 0.0189221 | 0         | 0         | 0         | 0         |
| 30.2379   | 25.46     | 29.7309   | 28.7925   | 24.4544   | 27.0389   |
| 2.68317   | 2.8243    | 2.44571   | 3.02256   | 2.74751   | 3.84647   |
| 0.06632   | 0.0741936 | 0.0134112 | 0.0721945 | 0.0257062 | 0         |
| 0         | 0         | 0         | 0         | 0         | 0         |
| 0.0895334 | 0.0205133 | 0.0115875 | 0.146413  | 0.076868  | 0.0643337 |
| 3.84133   | 3.27288   | 4.20776   | 4.24093   | 5.16428   | 3.31652   |
| 7.13771   | 7.5244    | 0.870379  | 5.77862   | 4.11516   | 6.16329   |
| 0.832089  | 0.0322032 | 0.472961  | 0.408185  | 0.13947   | 0.200964  |
| 0.0370481 | 0         | 0.0282386 | 0.0506707 | 0         | 0.0276581 |
| 9.35117   | 7.94958   | 8.92474   | 8.09559   | 5.8551    | 8.66087   |
| 13.6832   | 10.1679   | 14.3256   | 13.2288   | 9.51198   | 10.7662   |
| 2.99898   | 2.63091   | 4.06527   | 3.7086    | 3.56872   | 4.10781   |
| 0.509565  | 0.608065  | 0.686961  | 0.616334  | 0.263348  | 0.688366  |
| 21.4468   | 30.8469   | 27.2244   | 26.9047   | 23.0016   | 30.9209   |
| 81.6543   | 88.7956   | 86.2491   | 81.2309   | 86.3588   | 92.5842   |
| 3.79333   | 3.24749   | 4.4631    | 4.29295   | 3.14665   | 4.58029   |
| 0         | 0         | 0         | 0         | 0         | 0         |
| 0         | 0         | 0         | 0         | 0         | 0         |
| 0.131149  | 0.15024   | 0.212167  | 0.342637  | 0.264338  | 0.170081  |
| 2.19187   | 2.34571   | 2.48071   | 3.48654   | 2.34831   | 2.37979   |
| 24.5682   | 20.5986   | 21.5128   | 27.1587   | 27.4865   | 22.5561   |
| 0         | 0         | 0         | 0         | 0         | 0         |
| 4.16154   | 4.32271   | 4.91847   | 3.9277    | 3.86128   | 3.93233   |
| 1.6497    | 2.25157   | 3.25262   | 2.5922    | 2.07817   | 2.42356   |
| 0.357574  | 0.0959632 | 0.289113  | 0.227005  | 0.173124  | 0.434558  |
| 10.7871   | 7.10296   | 10.5476   | 9.74612   | 11.7206   | 10.5691   |
| 7.76654   | 9.25961   | 6.20018   | 10.4638   | 5.26157   | 7.88237   |
| 61.7853   | 81.9015   | 89.6226   | 71.6608   | 70.9791   | 65.6722   |
| 0.0290256 | 0.0207817 | 0         | 0.126386  | 0.337516  | 0.117631  |
| 2.92745   | 2.1341    | 3.01376   | 2.85842   | 2.18688   | 2.11394   |
| 51.3069   | 47.55     | 55.3536   | 53.0557   | 57.8363   | 48.4864   |
| 0.0786351 | 0         | 0         | 0.0570669 | 0         | 0         |
| 5.65855   | 4.57456   | 4.95169   | 4.07973   | 4.72971   | 5.60273   |
| 0         | 0         | 0         | 0         | 0         | 0         |

|           |           |           |           |           |           |
|-----------|-----------|-----------|-----------|-----------|-----------|
| 16.9972   | 16.5253   | 14.6998   | 15.227    | 12.3973   | 12.8625   |
| 0         | 0         | 0         | 0.108342  | 0.231555  | 0.242081  |
| 4.19945   | 4.84011   | 4.63963   | 5.67438   | 4.98646   | 5.09742   |
| 0.230264  | 0.265133  | 0.271166  | 0.345168  | 0.259881  | 0.214951  |
| 0.831325  | 0.703433  | 0.672442  | 0.932384  | 0.995977  | 0.857585  |
| 7.60424   | 4.9633    | 6.13724   | 6.77994   | 6.31841   | 5.77905   |
| 6.71531   | 8.02055   | 8.63936   | 8.46579   | 4.4446    | 5.87941   |
| 0.0254658 | 0.0425437 | 0         | 0.018481  | 0.0394829 | 0.0412817 |
| 6.27004   | 3.76582   | 5.51727   | 4.7478    | 4.77065   | 5.24015   |
| 0.389697  | 0.435965  | 0.315218  | 0         | 0         | 0.0789646 |
| 23.8747   | 23.9177   | 25.3377   | 21.3009   | 25.8298   | 24.5596   |
| 1.19295   | 0.778636  | 0.967144  | 1.02315   | 0.759274  | 1.4079    |
| 0.192062  | 0.137512  | 0.0776773 | 0.0696913 | 0         | 0.155672  |
| 5.88449   | 4.06077   | 5.08085   | 4.79642   | 4.36106   | 4.62035   |
| 22.1401   | 19.1418   | 21.9981   | 21.492    | 22.8619   | 23.0058   |
| 20.8531   | 18.87     | 25.4976   | 24.4193   | 26.5475   | 19.6083   |
| 0.0381482 | 0.0273134 | 0.0308573 | 0.0553697 | 0         | 0.0618409 |
| 0.277987  | 0.199033  | 0.224858  | 0         | 0.2155    | 0.225318  |
| 0         | 0         | 0.0758031 | 0         | 0.0726483 | 0         |
| 0         | 0.338062  | 0.993007  | 0.0685319 | 1.46412   | 0         |
| 12.0186   | 7.22312   | 7.68153   | 8.44197   | 5.92538   | 7.88498   |
| 9.32063   | 9.21982   | 8.38247   | 8.90019   | 9.98259   | 8.1014    |
| 0         | 0         | 0         | 0         | 0         | 0         |
| 0.0423761 | 0         | 0.0342771 | 0.184518  | 0         | 0         |
| 16.9176   | 20.2646   | 17.8989   | 18.2995   | 15.9323   | 17.7791   |
| 5.35615   | 3.79187   | 5.13839   | 6.12704   | 4.9988    | 5.02892   |
| 1.177     | 1.15571   | 1.14246   | 1.41548   | 0.808148  | 2.1533    |
| 7.47274   | 5.57641   | 7.0094    | 6.08508   | 7.83277   | 6.48345   |
| 13.6036   | 16.9486   | 18.3628   | 15.4185   | 11.5667   | 10.97     |
| 2.77823   | 1.57082   | 2.77527   | 2.36609   | 2.63713   | 2.17122   |
| 9.6874    | 8.57218   | 12.9394   | 10.5635   | 10.4752   | 10.0264   |
| 16.7568   | 16.374    | 12.4034   | 14.0345   | 9.31366   | 13.1121   |
| 3.6494    | 2.87981   | 5.5228    | 4.22894   | 6.38088   | 5.48185   |
| 9.32185   | 7.34169   | 5.52952   | 6.4751    | 5.71233   | 6.22444   |
| 1.05597   | 0.584225  | 1.35888   | 1.25401   | 1.15349   | 0.894806  |
| 56.0919   | 45.1877   | 48.6793   | 52.3534   | 53.113    | 37.7098   |
| 2.66663   | 1.78803   | 3.38954   | 0.82938   | 1.54221   | 1.06354   |
| 6.34663   | 4.97075   | 3.993     | 5.18154   | 3.21915   | 3.46537   |
| 23.7495   | 18.4484   | 20.3522   | 19.3485   | 20.3265   | 19.7205   |
| 5.602     | 4.58391   | 5.17868   | 3.56766   | 4.75635   | 6.57925   |
| 0         | 0         | 0         | 0         | 0         | 0         |
| 1.8794    | 1.59398   | 1.8154    | 1.92355   | 1.96497   | 1.66363   |
| 4.78381   | 3.37288   | 4.70989   | 4.8945    | 5.08642   | 4.8024    |

|           |           |           |           |           |           |
|-----------|-----------|-----------|-----------|-----------|-----------|
| 0         | 0         | 0         | 0         | 0         | 0         |
| 0         | 0         | 0         | 0         | 0         | 0         |
| 0.338095  | 0.497259  | 0.299229  | 0.338314  | 0.227577  | 0.356067  |
| 9.45932   | 7.32298   | 8.05794   | 9.16022   | 8.7767    | 8.62549   |
| 28.9998   | 29.695    | 32.4958   | 30.0447   | 25.2579   | 28.9329   |
| 2.46257   | 2.52233   | 3.66934   | 2.57401   | 2.87596   | 3.24127   |
| 62.436    | 61.8531   | 61.0123   | 62.2967   | 66.2072   | 61.8636   |
| 0.0737326 | 0.0527912 | 0.0447306 | 0.0936409 | 0.085738  | 0.134466  |
| 6.95284   | 7.28987   | 6.87379   | 7.38901   | 7.03304   | 8.41313   |
| 38.1268   | 32.2692   | 34.2713   | 35.2552   | 56.4261   | 39.3753   |
| 130.379   | 134.523   | 118.464   | 120.43    | 143.873   | 68.5231   |
| 0.129984  | 0.279199  | 0.105142  | 0.330162  | 0.352681  | 0.105357  |
| 0         | 0         | 0         | 0         | 0         | 0         |
| 10.3506   | 6.63293   | 11.2403   | 9.62819   | 11.3488   | 10.3826   |
| 9.75597   | 10.8676   | 8.50434   | 9.74371   | 6.49829   | 7.23579   |
| 7.93292   | 6.20697   | 6.01416   | 6.33653   | 5.98895   | 5.98443   |
| 6.0042    | 5.30414   | 5.83765   | 7.31663   | 3.56638   | 3.16995   |
| 14.3987   | 11.5682   | 13.9997   | 13.2896   | 15.0673   | 12.6351   |
| 1.69862   | 1.87715   | 1.76228   | 1.82228   | 1.3168    | 1.43665   |
| 185.561   | 0         | 150.096   | 161.598   | 172.62    | 180.484   |
| 0.974105  | 0.61026   | 0.717582  | 0.934151  | 1.26756   | 0.944634  |
| 16.8337   | 14.5195   | 15.8347   | 16.2071   | 18.1083   | 15.4909   |
| 16.5091   | 18.1297   | 21.7261   | 19.4605   | 14.4695   | 14.8269   |
| 18.7744   | 25.6291   | 18.9033   | 18.3294   | 11.2384   | 17.7617   |
| 7.42257   | 6.4896    | 6.46127   | 6.74991   | 6.85684   | 7.77529   |
| 23.4062   | 19.0592   | 20.1936   | 18.9268   | 23.2852   | 13.7912   |
| 9.00632   | 10.3513   | 10.2086   | 9.03006   | 11.8967   | 10.2295   |
| 0         | 0.163473  | 0.0349171 | 0         | 0.150593  | 0.0411245 |
| 8.02742   | 6.8821    | 8.05123   | 8.33076   | 7.295     | 7.78038   |
| 22.7763   | 23.7227   | 20.409    | 21.4943   | 17.5327   | 21.8636   |
| 2.90609   | 2.76875   | 3.24899   | 2.99363   | 2.89651   | 3.29872   |
| 0         | 0.201308  | 0         | 0         | 0         | 0         |
| 0.440586  | 0.0788628 | 0         | 0         | 0.11385   | 0.158715  |
| 25.4627   | 24.2464   | 21.2798   | 23.1184   | 22.559    | 17.4518   |
| 23.5543   | 26.2009   | 24.9851   | 22.8909   | 20.6949   | 20.453    |
| 70.024    | 83.4357   | 79.0747   | 81.871    | 82.4376   | 49.7849   |
| 2.21206   | 2.07532   | 1.41909   | 2.32497   | 1.00524   | 2.10208   |
| 0.357129  | 0.986262  | 0.206339  | 0.5924    | 0.0791006 | 0.496226  |
| 3.30333   | 1.75122   | 2.62089   | 3.07193   | 2.05003   | 2.1288    |
| 10.4409   | 11.1844   | 11.0507   | 11.3365   | 11.6519   | 9.76798   |
| 0.258951  | 0.249271  | 0         | 0.341094  | 0.196004  | 0.211639  |
| 8.4032    | 9.35598   | 10.1022   | 8.69994   | 8.09804   | 9.31055   |
| 8.67337   | 11.9199   | 5.71724   | 6.70832   | 6.47223   | 8.5954    |

|           |          |           |           |           |           |
|-----------|----------|-----------|-----------|-----------|-----------|
| 5.89962   | 14.1445  | 6.80526   | 11.2916   | 5.53971   | 2.37408   |
| 0         | 0        | 0         | 0         | 0         | 0         |
| 0.04803   | 0        | 0         | 0         | 0.0372336 | 0.0389299 |
| 3.40369   | 4.32085  | 7.67826   | 10.5513   | 6.40174   | 3.68449   |
| 11.5662   | 11.9166  | 9.07722   | 9.83452   | 8.96611   | 8.24124   |
| 19.6053   | 20.8934  | 20.9546   | 22.0358   | 18.4952   | 18.4106   |
| 0.327918  | 0.281739 | 0.212197  | 0.793252  | 0.152524  | 0.318946  |
| 32.7565   | 27.9388  | 32.2669   | 37.018    | 33.2822   | 31.9953   |
| 1.87072   | 1.8639   | 2.10786   | 1.53552   | 2.18033   | 1.63659   |
| 5.41505   | 3.25335  | 4.32297   | 4.56198   | 3.28524   | 3.53035   |
| 0         | 0        | 0         | 0         | 0         | 0         |
| 15.6791   | 15.1686  | 15.9957   | 14.7252   | 13.6267   | 14.8851   |
| 0         | 0        | 0         | 0.0563464 | 0         | 0         |
| 16.7011   | 16.3521  | 16.7176   | 14.9786   | 10.7136   | 13.6722   |
| 6.07227   | 5.92858  | 6.19548   | 3.95606   | 5.40272   | 4.92178   |
| 21.1931   | 17.6063  | 23.0604   | 20.9374   | 22.4909   | 25.9341   |
| 0         | 0        | 0         | 0         | 0         | 0         |
| 10.7133   | 9.36958  | 8.28237   | 8.04947   | 7.37995   | 7.26639   |
| 11.8953   | 12.5062  | 13.2174   | 15.3342   | 13.0475   | 12.7116   |
| 15.8878   | 13.7203  | 15.9783   | 16.3096   | 10.9015   | 15.3796   |
| 2.56306   | 1.72212  | 2.00268   | 1.93155   | 1.24492   | 3.08164   |
| 0         | 0        | 0         | 0         | 0         | 0         |
| 1.5332    | 0.764249 | 1.08319   | 0.999993  | 0.692071  | 1.13259   |
| 0.287414  | 0.174216 | 0.3204    | 0.171813  | 0.0746758 | 0.49881   |
| 0         | 0        | 0         | 0         | 0         | 0         |
| 2.82      | 3.31563  | 3.15321   | 2.67854   | 3.90071   | 2.58823   |
| 90.9815   | 179.625  | 84.3664   | 52.4634   | 53.7909   | 74.5966   |
| 0         | 0        | 0         | 0         | 0         | 0         |
| 0.0273601 | 0        | 0.022131  | 0         | 0.0424199 | 0         |
| 358.716   | 317.608  | 344.445   | 382.09    | 406.998   | 335.28    |
| 40.9825   | 49.3387  | 53.3471   | 45.4251   | 52.6457   | 48.8219   |
| 0         | 0        | 0.0841363 | 0         | 0         | 0         |
| 0.508087  | 0.65185  | 0.176724  | 0.815913  | 0.995929  | 0.326928  |
| 0.0433528 | 0        | 0.0175336 | 0         | 0         | 0         |
| 1.10983   | 0.794617 | 1.25681   | 2.41627   | 0.860357  | 0.899554  |
| 16.4408   | 26.1769  | 40.6812   | 28.5309   | 23.4427   | 26.7778   |
| 0         | 0        | 0.0609273 | 0.0273316 | 0         | 0         |
| 5.20659   | 3.81452  | 5.38681   | 5.97533   | 4.50556   | 6.47739   |
| 0         | 0        | 0         | 0         | 0         | 0         |
| 3.45991   | 2.62164  | 2.761     | 3.02885   | 3.19935   | 3.28206   |
| 0         | 0        | 0.164684  | 0         | 0         | 0         |
| 0         | 0        | 0         | 0         | 0         | 0         |
| 7.40655   | 5.08717  | 5.56655   | 5.97992   | 5.64783   | 4.08435   |

|           |           |           |           |           |          |
|-----------|-----------|-----------|-----------|-----------|----------|
| 17.6973   | 15.6471   | 17.7341   | 18.4693   | 24.3383   | 18.4812  |
| 35.393    | 39.4856   | 67.8697   | 32.8263   | 50.0847   | 39.5068  |
| 4.93737   | 5.21054   | 3.43212   | 3.44317   | 3.56837   | 4.36666  |
| 36.0771   | 41.0945   | 36.3289   | 30.1982   | 33.7847   | 38.247   |
| 1.67923   | 0.841605  | 2.3091    | 1.94983   | 1.17159   | 0.816641 |
| 12.8683   | 11.734    | 12.7227   | 11.6987   | 11.2277   | 12.0071  |
| 2.151     | 1.2841    | 1.12765   | 1.08639   | 0.781861  | 1.27992  |
| 0         | 0         | 0         | 0         | 0         | 0        |
| 197.397   | 235.444   | 262.877   | 229.685   | 276.645   | 236.567  |
| 0         | 0         | 0         | 0.228413  | 0.487984  | 0        |
| 235.288   | 225.131   | 226.467   | 255.968   | 246.17    | 200.62   |
| 0         | 0         | 0         | 0         | 0         | 0        |
| 0.0449029 | 0.0321497 | 0.0363211 | 0.0325869 | 0         | 0.145581 |
| 1.47682   | 1.22324   | 2.8108    | 1.66023   | 1.43668   | 2.18285  |
| 2.32778   | 1.98793   | 2.12393   | 2.23631   | 1.85345   | 2.43515  |
| 0.186417  | 0.337849  | 0.53791   | 0.152197  | 0.295049  | 0.472334 |
| 1.71099   | 1.37548   | 1.09262   | 1.85165   | 1.44273   | 1.33815  |
| 22.9358   | 23.1139   | 23.1311   | 23.876    | 22.1565   | 22.1782  |
| 10.8429   | 12.4652   | 11.3315   | 13.1058   | 11.2737   | 8.4111   |
| 5.12483   | 4.54022   | 2.6039    | 4.84501   | 3.75861   | 4.2384   |
| 0.576996  | 0.495742  | 0.591179  | 0.586231  | 0.626215  | 0.311783 |
| 0.360374  | 1.23E-47  | 0.131478  | 0.170018  | 8.77E-37  | 3.01E-32 |
| 14.855    | 13.6351   | 14.2585   | 15.0946   | 11.5815   | 13.6204  |
| 6.43182   | 5.12313   | 6.11302   | 5.43785   | 6.86828   | 5.96912  |
| 3.42083   | 2.01764   | 2.91797   | 2.61103   | 2.62963   | 3.46297  |
| 100.946   | 72.3961   | 0.351281  | 93.8143   | 83.3088   | 103.544  |
| 0         | 0         | 0         | 0         | 0         | 0        |
| 16.9463   | 29.6589   | 27.5842   | 18.5991   | 27.5715   | 20.5185  |
| 26.9297   | 27.9916   | 32.4701   | 13.7381   | 18.6033   | 26.4266  |
| 215.094   | 193.452   | 138.957   | 174.425   | 159.039   | 185.242  |
| 9.50503   | 13.568    | 8.51046   | 7.67887   | 7.92455   | 7.36497  |
| 21.8244   | 18.8294   | 15.1728   | 17.8319   | 16.1229   | 14.7905  |
| 0.0301396 | 0.115091  | 0.175532  | 0.0874917 | 0.0233647 | 0        |
| 1301.69   | 1253.45   | 1314.85   | 1227.34   | 1419.83   | 1211.35  |
| 15.3669   | 12.6282   | 18.4955   | 17.2455   | 19.7726   | 15.6228  |
| 0.170991  | 0.088419  | 0.215151  | 0.0344698 | 0.0810058 | 0.100096 |
| 0.310169  | 0.137915  | 0.292419  | 0.237436  | 0.266448  | 0.118645 |
| 0         | 0         | 0         | 0         | 0         | 0        |
| 22.2991   | 17.7636   | 25.2295   | 25.2092   | 22.5233   | 24.3052  |
| 17.4534   | 25.2377   | 23.055    | 23.7004   | 19.5183   | 33.2464  |
| 9.52775   | 11.4399   | 7.87731   | 7.58755   | 5.94807   | 8.57683  |
| 7.0984    | 6.14239   | 11.8092   | 5.183     | 12.3643   | 12.5923  |
| 1.61978   | 1.42974   | 1.99814   | 1.84202   | 1.81089   | 2.0976   |

|          |           |           |           |          |           |
|----------|-----------|-----------|-----------|----------|-----------|
| 9.78329  | 8.41815   | 9.84752   | 10.9444   | 9.04658  | 10.3566   |
| 20.9375  | 17.6287   | 19.9888   | 20.2814   | 23.6152  | 20.321    |
| 46.1452  | 39.2842   | 42.6853   | 44.4808   | 51.8057  | 46.5523   |
| 0        | 0         | 0         | 0         | 0        | 0         |
| 219.898  | 217.629   | 346.508   | 220.035   | 222.508  | 205.109   |
| 4.05455  | 3.6198    | 3.62506   | 3.01616   | 2.99392  | 3.1396    |
| 0.495643 | 0.506958  | 0.458189  | 0.334004  | 0.411675 | 0.516517  |
| 17.8049  | 14.673    | 16.4002   | 17.5327   | 20.4372  | 14.7758   |
| 3.87512  | 2.88699   | 2.13909   | 2.69823   | 3.20703  | 1.14601   |
| 0        | 0         | 0         | 0         | 0        | 0         |
| 994.712  | 1275.42   | 1581.23   | 2140.14   | 1244.29  | 1594.86   |
| 14.3491  | 11.7066   | 8.89022   | 11.7674   | 15.8308  | 10.0357   |
| 0        | 0         | 0         | 0         | 0        | 0         |
| 0.365756 | 0.192041  | 0.216959  | 0.274901  | 0.210029 | 0.238952  |
| 5.00202  | 4.94191   | 5.29275   | 5.87065   | 5.22734  | 6.20926   |
| 0.756161 | 0.257808  | 0.757273  | 0.705548  | 0.139569 | 0.408596  |
| 2.14032  | 1.42999   | 1.18605   | 1.65711   | 1.41322  | 2.35912   |
| 0.961526 | 0.803173  | 0.691341  | 0.581497  | 1.14569  | 0.736052  |
| 0.825156 | 0.516946  | 0         | 0.0748538 | 0.159918 | 0.0836021 |
| 0        | 0         | 0         | 0         | 0        | 0         |
| 0.313923 | 0.275845  | 0.248155  | 0.238175  | 0.204642 | 0.277576  |
| 0.522681 | 0.413703  | 0.581715  | 0.539886  | 0.256883 | 0.270156  |
| 8.45845  | 9.48375   | 10.9389   | 9.87254   | 10.6588  | 8.64422   |
| 34.0536  | 31.6776   | 41.3529   | 36.9086   | 46.1233  | 39.6893   |
| 1.59E-14 | 0.0339918 | 0.0598811 | 1.54E-16  | 0.035872 | 3.43E-30  |
| 9.53731  | 5.84375   | 8.55813   | 6.20842   | 10.5102  | 6.78699   |
| 47.875   | 45.9798   | 50.098    | 55.6618   | 63.262   | 48.9644   |
| 3.32245  | 3.65562   | 3.3725    | 3.67435   | 2.19419  | 4.16578   |
| 0        | 0         | 0         | 0         | 0        | 0         |
| 128.601  | 128.272   | 145.797   | 142.831   | 150.004  | 154.77    |
| 19.5291  | 22.6229   | 25.5717   | 20.2959   | 22.4759  | 22.0591   |
| 5.7696   | 2.31789   | 4.08611   | 2.94205   | 1.4857   | 0.903492  |
| 5.5476   | 3.83148   | 3.68785   | 4.60114   | 7.83321  | 4.49652   |
| 0.133645 | 0.13157   | 0.135128  | 0.084865  | 0.103604 | 0.216648  |
| 59.8397  | 56.7194   | 64.4165   | 59.1415   | 61.937   | 62.9256   |
| 14.4004  | 14.4014   | 13.5924   | 14.1244   | 9.82473  | 10.8184   |
| 4.38904  | 3.55661   | 4.40894   | 4.57441   | 4.74768  | 4.43145   |
| 20.9664  | 16.7766   | 18.519    | 21.0256   | 22.7624  | 21.6035   |
| 21.4976  | 17.5361   | 17.4351   | 20.6229   | 23.0795  | 20.8591   |
| 0        | 0.0660901 | 0         | 0         | 0        | 0         |
| 3.0888   | 2.28332   | 2.77425   | 3.34777   | 2.85903  | 3.01968   |
| 16.0467  | 11.3826   | 14.3039   | 14.9032   | 16.035   | 16.3635   |
| 4.33462  | 4.08392   | 3.73834   | 4.7514    | 1.70381  | 1.90603   |

|           |           |           |           |           |           |
|-----------|-----------|-----------|-----------|-----------|-----------|
| 7.49924   | 7.5287    | 6.73464   | 7.87843   | 6.94528   | 6.51222   |
| 0.703672  | 0.337547  | 0.567759  | 0.389577  | 0.600256  | 0.65194   |
| 2.07221   | 2.51641   | 2.67859   | 2.10833   | 1.96864   | 2.23946   |
| 0         | 0         | 0         | 0         | 0         | 0         |
| 6.98097   | 6.2573    | 6.76749   | 7.33501   | 4.62682   | 6.49337   |
| 4.01295   | 5.92596   | 5.07186   | 4.00437   | 3.20811   | 4.67565   |
| 0.311057  | 0.148474  | 0.167738  | 0.150493  | 0.0803787 | 0.0840407 |
| 6.69975   | 3.73092   | 4.05078   | 5.1568    | 3.25265   | 4.11392   |
| 0         | 0.113427  | 0.213574  | 0.0383232 | 0         | 0         |
| 63.2883   | 53.8181   | 49.4457   | 65.6895   | 71.0967   | 57.5805   |
| 0         | 0         | 0         | 0         | 0         | 0         |
| 0         | 0         | 0         | 0         | 0         | 0         |
| 7.16249   | 4.84449   | 6.91844   | 5.95756   | 6.01035   | 7.46586   |
| 0         | 0.294793  | 0         | 0         | 0         | 0         |
| 0         | 0         | 0         | 0         | 0         | 0         |
| 6.20087   | 5.68529   | 6.32703   | 5.60165   | 4.69072   | 6.29827   |
| 12.2906   | 12.696    | 14.0415   | 13.2119   | 10.3915   | 9.82013   |
| 19.5342   | 20.8654   | 19.0243   | 20.9363   | 19.5592   | 20.054    |
| 0.0885877 | 0.0908143 | 0.138727  | 0.124465  | 0.0642138 | 0.078679  |
| 0.608952  | 0.926496  | 0.820948  | 1.3442    | 0.334382  | 0.534707  |
| 3.36466   | 2.9781    | 4.26457   | 5.65266   | 3.47094   | 4.27329   |
| 2.00E-248 | 0.0951391 | 0.0732873 | 1.92E-254 | 0.035003  | 0.0351393 |
| 1.54792   | 1.24866   | 1.25208   | 1.07842   | 1.79995   | 1.20445   |
| 10.5116   | 9.79366   | 10.566    | 9.8553    | 9.63904   | 11.4166   |
| 7.84726   | 5.3064    | 7.20949   | 6.2574    | 4.54379   | 6.75314   |
| 10.724    | 7.44781   | 8.84789   | 9.378     | 9.63521   | 9.65696   |
| 0.150629  | 0.0239618 | 0.108298  | 0.414612  | 0.103791  | 0.108519  |
| 1.5908    | 0.37931   | 0.834885  | 0.98294   | 0.840353  | 0.766942  |
| 10.0801   | 13.19     | 9.45399   | 11.1937   | 9.59944   | 16.4815   |
| 21.0933   | 17.191    | 19.1946   | 23.1245   | 24.4408   | 21.4619   |
| 115.858   | 131.326   | 111.718   | 111.586   | 103.599   | 118.752   |
| 1.38378   | 1.23778   | 1.45437   | 1.4557    | 1.20132   | 1.57018   |
| 0         | 0         | 0         | 0         | 0         | 0         |
| 0.16288   | 0.241352  | 6.31E-09  | 3.14E-09  | 9.56E-10  | 1.25E-08  |
| 9.28261   | 7.30192   | 9.12475   | 8.64485   | 9.36287   | 9.30735   |
| 53.2439   | 51.4149   | 60.2301   | 58.8173   | 61.1621   | 63.2665   |
| 84.4467   | 63.3632   | 74.3605   | 85.5609   | 98.267    | 63.1004   |
| 11.424    | 7.48159   | 11.6605   | 11.7686   | 12.6047   | 11.6705   |
| 2.16652   | 1.52907   | 1.27015   | 1.43526   | 1.54085   | 1.84464   |
| 10.0758   | 5.04031   | 5.79488   | 7.6815    | 5.80085   | 5.94294   |
| 6.77367   | 5.35196   | 6.83834   | 6.33353   | 5.55216   | 6.08017   |
| 4.83466   | 4.34387   | 2.07035   | 1.99508   | 2.13116   | 2.22825   |
| 0         | 0         | 0.0496224 | 0         | 0         | 0         |



|           |           |           |           |            |           |
|-----------|-----------|-----------|-----------|------------|-----------|
| 0         | 0         | 0         | 0         | 0          | 0         |
| 0         | 0         | 0         | 0         | 0          | 0         |
| 0.402966  | 0.20983   | 0.385215  | 0.505123  | 0.34143    | 0.415695  |
| 1.22543   | 0.791087  | 1.02373   | 0.918477  | 1.10571    | 1.30263   |
| 1.59647   | 1.26917   | 1.28688   | 0.769719  | 1.78433    | 1.86562   |
| 26.7525   | 28.2939   | 30.6443   | 25.4297   | 22.6834    | 27.7584   |
| 0.06718   | 0.016878  | 0.0911142 | 0         | 0.14523    | 0         |
| 18.5314   | 68.5038   | 17.1485   | 17.3223   | 22.0562    | 18.857    |
| 8.63641   | 8.71773   | 6.58499   | 10.2234   | 9.21945    | 9.23793   |
| 0         | 0         | 0         | 0         | 0          | 0         |
| 24.9047   | 24.5802   | 31.1896   | 31.2399   | 25.9037    | 25.2774   |
| 30.1559   | 21.4972   | 27.2467   | 28.0591   | 30.7665    | 29.388    |
| 0         | 0         | 0         | 0         | 0          | 0         |
| 21.1538   | 22.8209   | 23.5419   | 22.5089   | 25.6092    | 21.8523   |
| 0         | 0         | 0         | 0         | 0          | 0         |
| 0.180826  | 0.144499  | 0.345666  | 0.27024   | 0          | 0.761708  |
| 0.23036   | 0.376991  | 1.17124   | 0.573177  | 0.306135   | 0.133368  |
| 0         | 763.075   | 0         | 0         | 0          | 0         |
| 0         | 0         | 0         | 0.0208025 | 0          | 0.0697013 |
| 47.8526   | 44.2572   | 46.2849   | 51.7246   | 60.6638    | 48.0918   |
| 0.0959166 | 0.0686744 | 0.0193958 | 0.176199  | 0.0836511  | 0.103659  |
| 8.29133   | 5.82621   | 7.41828   | 7.67708   | 6.10363    | 6.20345   |
| 23.7086   | 33.6028   | 38.7305   | 33.0257   | 26.5154    | 24.4527   |
| 0.328902  | 0.117744  | 0.0665106 | 0.258581  | 0.148733   | 0.0444311 |
| 0         | 0         | 0.0431387 | 0         | 0.0206717  | 0         |
| 20.8209   | 17.4557   | 18.3243   | 17.9413   | 18.469     | 23.6593   |
| 0.737175  | 0.688439  | 1.08887   | 0.674541  | 0.894473   | 0.67544   |
| 22.0728   | 29.5301   | 22.8357   | 21.7519   | 23.608     | 24.6727   |
| 33.7845   | 51.0122   | 42.8188   | 38.3525   | 33.0537    | 26.8056   |
| 8.10556   | 8.56873   | 12.1916   | 5.78844   | 10.3227    | 10.7152   |
| 1.09485   | 0.408855  | 0.991706  | 0.867668  | 0.444676   | 0.639319  |
| 20.0595   | 24.3581   | 20.7477   | 22.3932   | 18.822     | 22.5671   |
| 0         | 0         | 0         | 0         | 0          | 0         |
| 0         | 0         | 0         | 0         | 0.00441748 | 0         |
| 4.92443   | 7.16641   | 4.52487   | 4.91378   | 10.7261    | 3.75272   |
| 0         | 0         | 0         | 0         | 0.053442   | 0         |
| 92.6186   | 112.893   | 119.091   | 100.586   | 106.325    | 98.5442   |
| 0         | 0         | 0         | 0         | 0          | 0         |
| 20.5391   | 16.4766   | 19.0055   | 20.5351   | 18.0204    | 20.4299   |
| 15.8194   | 13.9249   | 16.5082   | 13.7753   | 13.5282    | 14.5976   |
| 159.5     | 140.963   | 132.286   | 129.735   | 193.528    | 63.908    |
| 1.09695   | 1.0472    | 0.788713  | 0.707624  | 0.94486    | 0.790326  |
| 0.306887  | 0         | 0         | 0         | 0          | 0         |

|          |          |          |           |           |           |
|----------|----------|----------|-----------|-----------|-----------|
| 13.9969  | 12.3133  | 14.4664  | 15.4863   | 11.9138   | 14.3107   |
| 3.41277  | 3.36885  | 3.32307  | 3.38613   | 3.52113   | 3.68484   |
| 2.83177  | 2.37365  | 1.28495  | 2.40593   | 1.17793   | 2.51917   |
| 18.3535  | 14.6908  | 16.7676  | 14.6865   | 20.1992   | 12.5953   |
| 1.53395  | 1.36615  | 1.60393  | 1.62909   | 1.04412   | 1.18267   |
| 7.2154   | 8.80582  | 6.58067  | 6.29208   | 5.2107    | 5.86647   |
| 8.47347  | 6.30633  | 8.71182  | 8.36636   | 9.35185   | 8.42238   |
| 0        | 0        | 0        | 0         | 0         | 0         |
| 0        | 0        | 0        | 0         | 0         | 0         |
| 0        | 0.097577 | 0.146984 | 0.0989041 | 0         | 0.036821  |
| 39.2096  | 53.9798  | 47.7037  | 40.3114   | 45.0955   | 45.9126   |
| 0.084006 | 0.120293 | 0.135901 | 0.182894  | 0.260491  | 0         |
| 0.167138 | 0.156367 | 0.155745 | 0.544164  | 0.41578   | 0.413117  |
| 110.999  | 135.366  | 124.742  | 135.636   | 138.601   | 117.529   |
| 1.50127  | 1.50483  | 0.797997 | 1.12062   | 0.332516  | 0.521497  |
| 13.404   | 9.93646  | 13.0918  | 12.5134   | 12.5858   | 14.678    |
| 28.0769  | 26.6878  | 28.5225  | 24.9984   | 25.8541   | 21.8073   |
| 11.3138  | 21.9342  | 17.5091  | 18.8957   | 15.1384   | 9.88209   |
| 0.966779 | 0.561473 | 0.490124 | 0.758409  | 0.746085  | 0.46775   |
| 0        | 0        | 0        | 0         | 0         | 0         |
| 0        | 0        | 0        | 0         | 0         | 0         |
| 26.2504  | 21.7577  | 30.7614  | 31.4574   | 36.9406   | 33.6431   |
| 22.6611  | 18.861   | 22.8165  | 22.4359   | 25.2552   | 23.9799   |
| 0.111581 | 0        | 0        | 0.0202438 | 0.0864991 | 0.09044   |
| 11.5093  | 8.70083  | 10.404   | 11.0684   | 11.0554   | 11.4737   |
| 3.30493  | 2.83729  | 2.72397  | 3.0009    | 3.14487   | 2.98345   |
| 3.01993  | 1.95898  | 2.29246  | 1.75819   | 2.24156   | 2.60679   |
| 0.272394 | 0.148783 | 0.131241 | 0.0816832 | 0.101424  | 0.082479  |
| 44.6346  | 72.6266  | 51.0644  | 93.784    | 132.707   | 62.5162   |
| 7.06826  | 3.6945   | 3.95782  | 5.32665   | 2.89841   | 4.80864   |
| 0.17532  | 0.161391 | 0.182331 | 0.199938  | 0.213575  | 0.629314  |
| 209.021  | 231.476  | 233.745  | 226.624   | 213.2     | 193.757   |
| 0.375253 | 0.343067 | 0.450728 | 0.340175  | 0.302271  | 0.35477   |
| 4.03485  | 3.45609  | 3.99394  | 3.48973   | 2.79938   | 3.59891   |
| 0.115008 | 0.190334 | 0.110255 | 0.0989214 | 0.206081  | 0.131456  |
| 0.089002 | 0.148689 | 0.161743 | 0.0645904 | 0.0229986 | 0.0721391 |
| 8.33183  | 6.62825  | 9.3329   | 8.62068   | 7.64228   | 7.51561   |
| 33.1773  | 28.9697  | 29.5721  | 27.0483   | 28.6087   | 23.8754   |
| 0.533853 | 0.955571 | 0.215911 | 0.387426  | 0.620776  | 1.94717   |
| 1.25869  | 0.747197 | 0.979468 | 1.41643   | 1.08074   | 1.26558   |
| 0.933664 | 1.32875  | 1.31003  | 1.50079   | 1.19054   | 1.47497   |
| 0        | 0        | 0        | 0         | 0         | 0         |
| 1.5873   | 0.837204 | 0.933712 | 0.994336  | 1.27573   | 1.7209    |

|          |          |           |           |           |          |
|----------|----------|-----------|-----------|-----------|----------|
| 0.665983 | 0.476831 | 0.404025  | 0.362487  | 0.12907   | 0.404851 |
| 11.6803  | 10.0573  | 11.7017   | 9.94878   | 8.98028   | 10.4719  |
| 241.014  | 232.624  | 262.34    | 273.306   | 277.098   | 249.513  |
| 0        | 0        | 0         | 0         | 0         | 0        |
| 20.468   | 22.7475  | 24.1172   | 22.0588   | 28.3109   | 25.0026  |
| 10.4646  | 11.3622  | 16.6501   | 11.3915   | 17.1161   | 15.6589  |
| 5.10287  | 3.33306  | 2.7613    | 6.67047   | 3.29276   | 3.51812  |
| 9.05267  | 7.65857  | 9.32761   | 7.58857   | 6.8554    | 10.7172  |
| 12.0776  | 10.9315  | 9.96865   | 9.47896   | 10.0045   | 7.63856  |
| 12.2987  | 13.0833  | 14.8334   | 18.7821   | 10.2504   | 17.4428  |
| 0.674389 | 0.240137 | 0.39534   | 0.634474  | 0.0899428 | 0.521338 |
| 94.6519  | 95.2901  | 81.7412   | 106.004   | 91.7083   | 68.8158  |
| 0.738673 | 0.132219 | 0.485467  | 0.502564  | 0.429473  | 0.486459 |
| 22.8536  | 20.108   | 20.1261   | 20.6199   | 20.0139   | 20.4781  |
| 0.227469 | 0.451575 | 0.17327   | 0.286995  | 0.266188  | 0.27317  |
| 6.03329  | 5.08722  | 5.83633   | 5.21842   | 5.33771   | 5.57103  |
| 10.88    | 8.74061  | 9.50513   | 10.2376   | 10.316    | 10.7513  |
| 63.0496  | 72.7367  | 76.9045   | 62.2465   | 64.0021   | 67.4155  |
| 0.311316 | 0.133738 | 0.0503635 | 0.293706  | 0.0724012 | 0.176633 |
| 0        | 0        | 0         | 0         | 0         | 0        |
| 111.131  | 119.488  | 128.389   | 137.344   | 122.267   | 117.749  |
| 22.61    | 21.2745  | 24.8607   | 21.2849   | 20.4517   | 23.286   |
| 8.38582  | 6.81773  | 7.51215   | 6.85357   | 6.91092   | 9.21087  |
| 2.74406  | 1.7282   | 2.0552    | 2.32331   | 1.93027   | 1.91524  |
| 10.2816  | 25.5493  | 38.9804   | 14.5115   | 13.8713   | 11.8377  |
| 0        | 0        | 0         | 0         | 0         | 0        |
| 6.30975  | 8.67703  | 6.39739   | 4.66595   | 4.52034   | 5.51106  |
| 13.4704  | 12.3435  | 11.0879   | 12.9897   | 9.84986   | 12.1575  |
| 45.196   | 39.0516  | 47.516    | 50.1439   | 53.839    | 45.7911  |
| 0.939402 | 0.751723 | 0.804561  | 1.12287   | 0.685402  | 0.940574 |
| 10.5641  | 9.82078  | 9.98281   | 9.66228   | 8.63141   | 10.3566  |
| 0.61932  | 0.965674 | 0.936311  | 0.713416  | 0.856487  | 0.445451 |
| 3.36937  | 1.59783  | 2.05291   | 2.22292   | 1.28903   | 2.30538  |
| 34.1333  | 38.6322  | 40.1696   | 42.521    | 33.7774   | 55.113   |
| 13.5076  | 11.9491  | 12.2215   | 11.2302   | 11.1726   | 10.9842  |
| 15.4714  | 20.515   | 12.6647   | 17.0214   | 11.7058   | 13.142   |
| 0        | 0        | 0         | 0         | 0         | 0        |
| 10.0785  | 8.92239  | 10.8991   | 11.022    | 10.2885   | 10.3406  |
| 8.70759  | 5.47326  | 6.4561    | 6.5639    | 6.68191   | 7.85227  |
| 74.6921  | 22.6021  | 25.3827   | 17.9321   | 131.61    | 13.4027  |
| 0        | 0.070032 | 0.0791187 | 0.0709845 | 0.0758259 | 0        |
| 15.952   | 13.1202  | 18.3228   | 16.8716   | 15.2993   | 17.6078  |
| 1.68499  | 1.36945  | 0.773569  | 1.45417   | 1.41214   | 0.996622 |

|           |           |           |           |           |          |
|-----------|-----------|-----------|-----------|-----------|----------|
| 0         | 0         | 0         | 0         | 0         | 0        |
| 0         | 0         | 0         | 0         | 0         | 0        |
| 0         | 0         | 0         | 0         | 0         | 0        |
| 0.453259  | 0.185443  | 0.188553  | 0.42292   | 0.170667  | 0.482844 |
| 0.0152143 | 0.0108932 | 0.0123066 | 0         | 0.0235887 | 0        |
| 1.4614    | 9.98775   | 0.537318  | 0.38566   | 2.36879   | 1.2922   |
| 1591.52   | 1497.75   | 1562.97   | 1775.65   | 1839.98   | 1752.77  |
| 0         | 0         | 0         | 0         | 0         | 0        |
| 0         | 0         | 0         | 0         | 0         | 0        |
| 248.163   | 245.234   | 373.189   | 351.949   | 305.392   | 354.06   |
| 0.0412978 | 0         | 0         | 0.0599411 | 0         | 0        |
| 53.9834   | 43.0276   | 57.569    | 54.9036   | 65.6778   | 51.745   |
| 6.97164   | 4.26711   | 5.24505   | 5.87695   | 4.55545   | 5.854    |
| 1115.23   | 1422.22   | 1327.92   | 1064.19   | 1331.05   | 1171.59  |
| 59.8997   | 58.1815   | 56.6926   | 66.7844   | 50.0506   | 55.6047  |
| 16.5419   | 19.1335   | 13.4414   | 13.7379   | 13.4861   | 26.2246  |
| 1475.61   | 1495.4    | 1470.97   | 1452.29   | 1456.74   | 1343.63  |
| 40.6403   | 42.2187   | 41.3467   | 42.533    | 39.529    | 31.5923  |
| 2.14354   | 2.13157   | 1.73387   | 1.7803    | 2.38178   | 3.95744  |
| 0.0301153 | 0.0431239 | 0.0487193 | 0.0218552 | 0.0466917 | 0        |
| 15.3218   | 18.188    | 19.586    | 17.1768   | 15.6148   | 18.5476  |
| 5.78721   | 6.16785   | 4.9313    | 4.5846    | 2.73975   | 5.94398  |
| 0         | 0         | 0         | 0         | 0         | 0        |
| 0.794244  | 0.595269  | 0.432206  | 0.49984   | 0.643863  | 0.556536 |
| 0.513671  | 0.394457  | 0.601777  | 0.630856  | 0.527647  | 0.383385 |
| 0         | 0         | 0         | 0         | 0         | 0        |
| 0         | 0.487054  | 0.183446  | 0.658241  | 0.175791  | 0.367619 |
| 11.3339   | 10.0289   | 9.63895   | 9.42612   | 6.33799   | 8.11273  |
| 0         | 0         | 0         | 0         | 0         | 0        |
| 2.98327   | 3.55069   | 3.32194   | 3.26158   | 2.68811   | 2.38664  |
| 27.0781   | 24.8168   | 24.1765   | 24.7066   | 25.959    | 23.6183  |
| 4.32457   | 3.63501   | 3.84472   | 3.03475   | 2.83903   | 3.84205  |
| 13.2951   | 9.03444   | 10.3332   | 10.8805   | 9.34977   | 10.1589  |
| 0         | 0         | 0         | 0         | 0.12849   | 0        |
| 10.2703   | 15.1598   | 14.2044   | 12.759    | 14.9664   | 13.0317  |
| 0         | 0         | 0         | 0         | 0         | 0        |
| 0         | 0         | 0         | 0         | 0         | 0        |
| 129.724   | 138.77    | 139.027   | 139.534   | 137.354   | 128.48   |
| 13.0204   | 10.7029   | 7.29609   | 9.07445   | 7.31927   | 6.98825  |
| 5.33848   | 5.70887   | 6.86481   | 4.79312   | 4.66905   | 5.96352  |
| 25.7377   | 20.3281   | 21.6734   | 24.4845   | 20.3618   | 20.5248  |
| 1.42774   | 0.877769  | 0.828325  | 0.800334  | 0.559665  | 1.3042   |
| 22.4116   | 18.8185   | 19.6065   | 19.3989   | 35.1325   | 15.0741  |

|           |           |           |           |           |           |
|-----------|-----------|-----------|-----------|-----------|-----------|
| 2.46817   | 2.74892   | 2.9725    | 2.06983   | 3.1039    | 2.17836   |
| 8.86472   | 6.56465   | 8.70842   | 6.88651   | 7.43944   | 8.35289   |
| 6.50187   | 6.29816   | 6.47086   | 6.22191   | 6.42391   | 6.04494   |
| 0.476181  | 0.433919  | 0.840378  | 0.644023  | 0.402701  | 0.701747  |
| 0.824004  | 1.99115   | 1.41636   | 1.27074   | 1.03802   | 1.50274   |
| 27.0815   | 29.8818   | 29.9412   | 26.438    | 28.7362   | 27.0693   |
| 35.0002   | 34.8801   | 42.2114   | 40.0646   | 33.3252   | 38.4002   |
| 5.63015   | 4.46117   | 5.01174   | 4.54591   | 3.76597   | 5.55096   |
| 3.81105   | 4.11608   | 2.50822   | 2.76574   | 2.70401   | 2.98427   |
| 187.717   | 236.072   | 203.626   | 207.617   | 198.419   | 193.074   |
| 0.928088  | 0.706024  | 0.586493  | 0.926104  | 0.427184  | 0.658216  |
| 723.583   | 791.549   | 769.008   | 716.515   | 734.292   | 663.603   |
| 0.258864  | 0.463355  | 0.279187  | 0.375725  | 0.267568  | 0.31582   |
| 0.0564855 | 0         | 0.41121   | 0.16397   | 0.0437885 | 0.0915669 |
| 1.3165    | 1.62721   | 0.763284  | 0.694343  | 1.06662   | 0.516135  |
| 2.16548   | 1.27237   | 1.61834   | 1.47758   | 1.41413   | 1.38317   |
| 4.90541   | 5.91292   | 3.86744   | 3.7402    | 2.31053   | 2.36547   |
| 0.572263  | 0.375585  | 0.154297  | 0.830603  | 0.443627  | 0.309226  |
| 3.12909   | 4.08061   | 3.54796   | 2.81825   | 2.46903   | 2.85325   |
| 0         | 0         | 0         | 0.0742861 | 0         | 0         |
| 7.01741   | 10.156    | 1.9195    | 5.42101   | 4.24096   | 2.88707   |
| 23.0852   | 23.5673   | 26.0572   | 24.0789   | 25.9594   | 27.9247   |
| 2.00793   | 1.04112   | 1.43755   | 1.60794   | 1.50296   | 1.6462    |
| 0         | 0         | 0         | 0         | 0         | 0.495425  |
| 16.3757   | 10.6912   | 13.5204   | 11.1629   | 13.6854   | 14.539    |
| 0         | 0         | 0         | 0         | 0         | 0         |
| 0         | 0         | 0         | 0         | 0         | 0         |
| 1.04683   | 0.749509  | 0.483862  | 0.434115  | 0.347793  | 0.363638  |
| 24.362    | 27.1005   | 25.7116   | 23.3583   | 24.8736   | 28.0689   |
| 30.2325   | 55.1176   | 41.9842   | 51.255    | 40.1393   | 41.1898   |
| 0         | 0         | 0         | 0         | 0         | 0         |
| 0.729814  | 0.522533  | 0.737914  | 0.397229  | 0.707204  | 0.33274   |
| 3.42641   | 2.6698    | 3.23833   | 3.13767   | 2.88066   | 3.44811   |
| 2.75119   | 2.0474    | 3.15895   | 2.83417   | 2.82077   | 3.05873   |
| 0.178376  | 0.0957853 | 0         | 0         | 0         | 0.0932975 |
| 1.2274    | 1.01061   | 1.07555   | 1.27673   | 1.55411   | 0.928523  |
| 12.0987   | 9.54856   | 7.24828   | 8.6798    | 6.69678   | 4.82292   |
| 0         | 0         | 0.0190196 | 0.0170642 | 0.0182281 | 0.0190585 |
| 22.8152   | 16.8267   | 19.9132   | 21.7296   | 21.5747   | 18.8354   |
| 0.0948399 | 0.271897  | 0.0958926 | 0.275595  | 0.165423  | 0.0576532 |
| 1.03447   | 2.98653   | 1.07969   | 0.702298  | 0.569116  | 1.67694   |
| 0         | 0         | 0         | 0         | 0         | 0         |
| 0         | 0         | 0         | 0         | 0         | 0         |

|           |           |           |           |           |           |
|-----------|-----------|-----------|-----------|-----------|-----------|
| 36.4236   | 39.051    | 41.6925   | 34.3517   | 33.3411   | 33.5986   |
| 0.15783   | 0.283491  | 0.194532  | 0.161072  | 0.319792  | 0.250228  |
| 10.0124   | 6.7567    | 6.33013   | 11.6092   | 14.6314   | 13.3857   |
| 76.485    | 72.293    | 90.8738   | 63.826    | 39.7769   | 55.4226   |
| 0         | 0         | 0         | 0         | 0.0160316 | 0         |
| 19.02     | 16.9627   | 16.6024   | 20.1796   | 20.2213   | 22.0199   |
| 8.56866   | 6.78885   | 7.45618   | 6.85011   | 6.55406   | 7.52925   |
| 20.3335   | 20.2965   | 21.5848   | 19.2708   | 17.3834   | 20.3734   |
| 0.614705  | 1.02694   | 0.607716  | 0.446102  | 0.741267  | 0.719679  |
| 0.28945   | 0.460345  | 0.185105  | 0.419737  | 0.228827  | 0.280791  |
| 12.0352   | 10.9261   | 10.9157   | 9.59043   | 9.53312   | 11.3878   |
| 47.3581   | 58.6954   | 49.5648   | 51.4824   | 52.1917   | 45.6658   |
| 25.8773   | 65.3536   | 56.4233   | 53.1768   | 101.569   | 72.5126   |
| 20.5644   | 18.1714   | 21.0875   | 20.4953   | 21.9743   | 22.8241   |
| 0.0399781 | 0         | 0         | 0.0145022 | 0         | 0         |
| 23.6449   | 24.1555   | 22.8898   | 20.3592   | 21.6548   | 21.0844   |
| 12.2544   | 10.7151   | 11.813    | 10.7821   | 14.7121   | 10.7237   |
| 0.268336  | 0.168037  | 0.980434  | 0.438623  | 0.831991  | 0.568511  |
| 0         | 0         | 0         | 0         | 0         | 0         |
| 11.3618   | 15.4063   | 19.5969   | 12.2132   | 14.1381   | 15.551    |
| 0         | 0         | 0         | 0         | 0         | 0         |
| 12.3098   | 10.8515   | 10.759    | 11.2547   | 9.14038   | 10.4885   |
| 4.43211   | 3.41961   | 3.47043   | 3.93612   | 3.59272   | 3.83842   |
| 8.00236   | 7.63939   | 9.18543   | 9.51317   | 9.86661   | 6.6468    |
| 0         | 0         | 0         | 0.0742313 | 0         | 0.0829068 |
| 0         | 0.0407231 | 0.0920139 | 0.0412769 | 0.0881844 | 0.046101  |
| 27.0277   | 26.9808   | 25.0816   | 28.4866   | 28.9418   | 25.8821   |
| 0         | 0         | 0.0642914 | 0         | 0         | 0         |
| 810.961   | 707.162   | 775.706   | 815.977   | 874.669   | 806.479   |
| 0.0809645 | 0.115938  | 0         | 0.0587574 | 0         | 0.0656245 |
| 0         | 0         | 0         | 0         | 0         | 0         |
| 0.589629  | 0.24946   | 0.325186  | 0.641856  | 0.353205  | 0.434467  |
| 0         | 0         | 0         | 0         | 0         | 0         |
| 7.54616   | 5.28947   | 5.31767   | 6.08609   | 5.67929   | 5.42365   |
| 64.5488   | 55.5744   | 60.6996   | 67.1993   | 74.7199   | 56.0444   |
| 12.905    | 10.6635   | 9.09273   | 7.95174   | 6.82673   | 8.32189   |
| 0         | 0         | 0         | 0         | 0         | 0         |
| 7.51081   | 5.54615   | 5.01604   | 5.70866   | 5.75757   | 8.97993   |
| 12.4811   | 9.97532   | 9.03918   | 10.7429   | 9.78805   | 13.5277   |
| 15.7329   | 14.6254   | 14.6403   | 16.4089   | 16.5663   | 16.2689   |
| 16.6039   | 11.3822   | 15.488    | 14.7331   | 26.017    | 24.3389   |
| 4.55576   | 4.33059   | 3.91225   | 3.83875   | 4.36271   | 5.68799   |
| 0.103579  | 0         | 0         | 0         | 0         | 0.167908  |

|          |           |           |           |           |           |
|----------|-----------|-----------|-----------|-----------|-----------|
| 1.69136  | 1.65273   | 1.54051   | 1.74469   | 0.99809   | 1.41407   |
| 0.330621 | 0.315954  | 0.401149  | 0.340224  | 0.470143  | 0.468965  |
| 0        | 0         | 0         | 0         | 0         | 0         |
| 24.7729  | 2.67148   | 24.652    | 2.77542   | 23.6897   | 1.63937   |
| 23.1359  | 20.1857   | 22.116    | 20.1798   | 26.8043   | 16.2558   |
| 1.17E-08 | 6.26E-09  | 1.53E-09  | 3.79E-12  | 7.27E-24  | 1.19E-20  |
| 0        | 0         | 0.0653604 | 0         | 0         | 0         |
| 33.4239  | 31.3347   | 28.9786   | 33.5845   | 30.9274   | 30.6421   |
| 2.7568   | 3.56179   | 0.871638  | 1.50149   | 1.84083   | 2.48236   |
| 0.247787 | 0.236548  | 0.0668099 | 0.299706  | 0.128059  | 0.0669465 |
| 0.800794 | 0.652904  | 0.404841  | 0.36776   | 0.271595  | 0.365102  |
| 11.1875  | 9.02898   | 9.01742   | 10.0707   | 11.1202   | 9.65205   |
| 1.73306  | 1.30978   | 1.01244   | 1.25772   | 0.746388  | 1.09255   |
| 23.2227  | 23.9244   | 24.7953   | 24.9401   | 20.8084   | 22.3885   |
| 0.562906 | 0.598477  | 0.605365  | 0.3274    | 0.288532  | 0.477452  |
| 0.406069 | 0         | 0.164231  | 0.147346  | 0.314791  | 0         |
| 1.52339  | 0.884171  | 1.41579   | 1.31961   | 1.15381   | 0.882061  |
| 4.20738  | 3.42166   | 3.7491    | 3.61415   | 2.70699   | 3.64016   |
| 5.99384  | 6.88212   | 6.92143   | 6.66993   | 5.90873   | 6.25024   |
| 0        | 0         | 0         | 0         | 0.134776  | 0         |
| 0        | 0.109287  | 0         | 0         | 0         | 0         |
| 0.596444 | 0.244024  | 0.578941  | 0.494685  | 0.779428  | 0.663     |
| 0        | 0         | 0         | 0         | 0         | 0         |
| 0.587406 | 1.1776    | 0.918606  | 0.937841  | 0.607155  | 1.46008   |
| 0.223468 | 0.159998  | 0.0903792 | 0.0810872 | 0.0866177 | 0.271692  |
| 0.710689 | 2.03673   | 0.909939  | 0.866307  | 0.553097  | 0.695196  |
| 19.9293  | 24.4673   | 23.7165   | 22.3341   | 22.8942   | 21.4954   |
| 3.81266  | 3.7868    | 3.09482   | 2.69907   | 4.78863   | 3.95467   |
| 83.4029  | 70.1326   | 85.9101   | 70.4314   | 111.877   | 53.313    |
| 6.40881  | 6.85523   | 6.7782    | 6.64026   | 6.1117    | 6.20416   |
| 12.697   | 15.0418   | 16.0508   | 11.6611   | 12.7492   | 11.2978   |
| 2.89419  | 4.14343   | 3.43196   | 3.05441   | 3.44623   | 3.29671   |
| FPKM     | FPKM      | FPKM      | FPKM      | FPKM      | FPKM      |
| 18.5417  | 19.318    | 19.0554   | 18.6814   | 14.9662   | 16.5516   |
| 5.05553  | 4.60127   | 4.40122   | 5.2546    | 4.6166    | 4.30604   |
| 0.14284  | 0.0508392 | 0.329177  | 0.0518307 | 0.110732  | 0.079744  |
| 0.714697 | 1.00008   | 1.04991   | 0.704008  | 0.882768  | 0.904235  |
| 5.30079  | 4.22153   | 4.8662    | 4.12563   | 3.75194   | 4.03184   |
| 0        | 0         | 0         | 0         | 0         | 0         |
| 3.93533  | 3.49171   | 4.02966   | 4.04596   | 4.24285   | 4.49164   |
| 14.2285  | 10.9476   | 12.139    | 11.9029   | 12.2704   | 13.7359   |
| 4.81939  | 6.54539   | 4.34586   | 3.77671   | 3.6362    | 3.8432    |
| 9.36134  | 6.47912   | 3.18032   | 5.88787   | 6.77325   | 7.58768   |

|           |           |           |           |           |           |
|-----------|-----------|-----------|-----------|-----------|-----------|
| 0         | 0         | 0         | 0         | 0         | 0         |
| 10.698    | 10.3863   | 8.86781   | 9.44126   | 6.9       | 9.91416   |
| 6.83333   | 4.40097   | 3.9684    | 5.65946   | 4.12379   | 4.31167   |
| 10.6199   | 7.84154   | 9.07853   | 9.15259   | 7.97298   | 10.0424   |
| 6.41914   | 5.94106   | 6.45865   | 6.9909    | 5.52235   | 6.03732   |
| 4.01E-08  | 6.68E-08  | 3.91E-07  | 5.67E-08  | 3.69E-08  | 1.84E-08  |
| 31.392    | 31.5835   | 29.8998   | 29.1971   | 28.0674   | 27.88     |
| 304.758   | 270.004   | 294.794   | 285.613   | 234.378   | 279.449   |
| 12.1635   | 11.2372   | 9.20407   | 11.7223   | 8.31406   | 10.124    |
| 0.278206  | 0.302364  | 3.92E-05  | 0.362394  | 1.45119   | 0.0657498 |
| 2.68573   | 2.24783   | 2.8543    | 2.9616    | 2.4204    | 2.21303   |
| 38.6239   | 52.365    | 47.9837   | 46.4146   | 39.8804   | 46.5994   |
| 2.08134   | 1.36062   | 0.867918  | 1.82006   | 1.77383   | 1.91751   |
| 0.851987  | 0.457505  | 0.689155  | 0.772878  | 0.495355  | 0.0863205 |
| 79.43     | 73.8433   | 80.3946   | 82.2952   | 75.1839   | 75.359    |
| 0.311728  | 0         | 0.126075  | 0         | 0         | 0.378999  |
| 5.32595   | 7.38315   | 4.90385   | 4.60527   | 4.61191   | 5.78643   |
| 1.85942   | 1.4821    | 1.47306   | 1.45768   | 1.24798   | 1.47846   |
| 42.6236   | 50.0876   | 42.8724   | 51.1713   | 47.7827   | 54.2835   |
| 15.0321   | 14.2313   | 13.1372   | 14.1194   | 12.1086   | 13.386    |
| 31.8785   | 28.9171   | 27.5067   | 29.3337   | 37.5313   | 26.2566   |
| 0.100065  | 0.0716443 | 0.0539601 | 0.0484124 | 0.0775716 | 0.0540705 |
| 17.3494   | 18.3897   | 19.4343   | 16.7432   | 12.8123   | 18.9621   |
| 0.874424  | 0.834761  | 0.736775  | 0.819672  | 0.875578  | 0.974531  |
| 3.43978   | 2.08892   | 2.60032   | 2.67134   | 2.19437   | 2.79172   |
| 6.41266   | 6.2581    | 5.10892   | 5.40984   | 4.46314   | 4.50969   |
| 2.74181   | 2.42066   | 2.65061   | 2.87891   | 3.10545   | 2.65681   |
| 19.7589   | 21.3915   | 22.477    | 19.7546   | 19.6674   | 22.3537   |
| 17.4586   | 19.1563   | 18.8586   | 19.1138   | 15.7301   | 14.5923   |
| 0         | 0         | 0         | 0         | 0         | 0         |
| 31.8005   | 27.5423   | 30.7156   | 32.9067   | 33.4955   | 32.615    |
| 8.86064   | 7.13121   | 8.14453   | 8.70543   | 8.49752   | 8.56704   |
| 0         | 0.0813542 | 0         | 0         | 0         | 0         |
| 16.3596   | 11.598    | 13.2474   | 12.1579   | 12.9594   | 13.8687   |
| 7.13613   | 6.21321   | 6.03557   | 6.78236   | 3.23309   | 5.86847   |
| 2023.05   | 1986.27   | 2124.12   | 2096.57   | 2122.3    | 1902.52   |
| 7.54893   | 5.12418   | 8.96101   | 4.80249   | 6.34605   | 6.35711   |
| 8.39803   | 7.10433   | 10.2219   | 10.2774   | 11.1235   | 11.9879   |
| 4.41433   | 3.71181   | 4.17304   | 4.27663   | 4.63525   | 4.83768   |
| 0.0355007 | 0.0254178 | 0.114863  | 0.0652139 | 0.0550414 | 0.0863236 |
| 6.32333   | 4.42903   | 4.92308   | 6.97978   | 4.78935   | 5.53129   |
| 0.607433  | 0.28994   | 0.16378   | 0.440825  | 0.313927  | 0.164115  |
| 4.11598   | 3.24421   | 5.14378   | 3.54387   | 3.89027   | 4.42888   |



|           |           |           |           |           |           |
|-----------|-----------|-----------|-----------|-----------|-----------|
| 205.468   | 158.248   | 256.577   | 183.29    | 328.235   | 110.877   |
| 15.4905   | 15.5349   | 10.5002   | 11.6024   | 8.0958    | 10.2501   |
| 84.1958   | 72.8892   | 82.0048   | 83.2479   | 95.1921   | 82.6665   |
| 0.0277278 | 0.0595577 | 0.0448569 | 0.0201225 | 0.021495  | 0         |
| 8.35904   | 6.18651   | 7.94293   | 6.28342   | 5.86616   | 6.73249   |
| 1.49594   | 1.21372   | 1.43498   | 1.55812   | 2.13964   | 0.902193  |
| 136.732   | 161.408   | 161.927   | 154.897   | 171.485   | 178.979   |
| 16.172    | 14.095    | 15.611    | 15.4607   | 14.8709   | 14.4093   |
| 268.582   | 213.827   | 244.61    | 268.624   | 231.041   | 248.66    |
| 2.4166    | 3.10578   | 3.25464   | 3.02525   | 1.33947   | 3.28088   |
| 0         | 0         | 0         | 0         | 0         | 0         |
| 0.617346  | 0.267923  | 2.62849   | 1.26551   | 1.36941   | 0.472827  |
| 4.00885   | 2.72265   | 4.26181   | 3.44128   | 4.04892   | 2.9708    |
| 4.43454   | 3.17504   | 3.07458   | 3.67797   | 3.11032   | 2.05391   |
| 8.15631   | 8.05401   | 8.98906   | 8.68147   | 8.40419   | 8.12598   |
| 0.851453  | 1.13516   | 1.3537    | 1.06537   | 0.933188  | 0.856715  |
| 74.7282   | 80.2329   | 70.5119   | 79.7494   | 86.6234   | 78.1562   |
| 35.6781   | 38.8694   | 38.5484   | 34.6971   | 36.0274   | 35.5437   |
| 0         | 0         | 0         | 0         | 0         | 0         |
| 0.895986  | 1.20118   | 0.454428  | 0.650233  | 0.983034  | 1.36531   |
| 84.3259   | 75.733    | 90.7335   | 96.38     | 101.359   | 70.7825   |
| 6.07644   | 7.53942   | 7.95913   | 8.19317   | 6.71789   | 6.88403   |
| 0         | 0         | 0         | 0         | 0         | 0         |
| 0         | 0         | 0         | 0.178083  | 0         | 0         |
| 16.608    | 11.5791   | 14.1248   | 13.831    | 16.6765   | 13.8209   |
| 5.3913    | 6.76305   | 6.94072   | 5.63432   | 5.41453   | 9.3702    |
| 16.2178   | 14.0924   | 14.7921   | 16.9733   | 17.7206   | 14.1202   |
| 0.0188983 | 0         | 0.010191  | 0.0428588 | 0         | 0         |
| 10.9356   | 11.5229   | 9.79358   | 8.67289   | 8.55423   | 10.6565   |
| 38.5486   | 63.0852   | 52.7372   | 40.2902   | 31.7818   | 35.6177   |
| 36.2701   | 42.6628   | 39.5581   | 42.5749   | 36.4484   | 40.7736   |
| 4.96653   | 9.01956   | 5.65621   | 7.2083    | 5.05127   | 5.2527    |
| 49.8087   | 54.4351   | 62.0536   | 56.181    | 53.8683   | 60.4836   |
| 1.70391   | 1.1686    | 1.52334   | 1.5099    | 1.94658   | 2.25333   |
| 50.392    | 53.214    | 51.2445   | 53.7727   | 43.251    | 50.7042   |
| 0.334307  | 0.159572  | 0.0450691 | 0.363919  | 0.0431934 | 0.0903224 |
| 10.9418   | 8.86469   | 8.85993   | 8.98116   | 7.43753   | 6.79868   |
| 14.5343   | 13.9017   | 12.2073   | 14.2735   | 17.0391   | 14.5812   |
| 4.01158   | 3.12639   | 2.64186   | 3.43943   | 2.57319   | 3.26591   |
| 0         | 0         | 0         | 0         | 0         | 0         |
| 5.40E-14  | 1.30919   | 1.23724   | 0.850626  | 1.67E-08  | 6.74E-10  |
| 22.2669   | 31.7737   | 11.0256   | 17.5942   | 23.5937   | 5.73491   |
| 1.20024   | 0.759495  | 0.873363  | 0.947189  | 0.963241  | 1.08733   |

|           |          |          |           |           |           |
|-----------|----------|----------|-----------|-----------|-----------|
| 0         | 0        | 0        | 0         | 0         | 0         |
| 11.1604   | 10.4678  | 14.6245  | 10.5291   | 8.73826   | 9.36251   |
| 1.53644   | 1.49161  | 1.44642  | 1.61269   | 1.1507    | 1.81524   |
| 0         | 0        | 0        | 0.168166  | 0         | 0         |
| 1.25564   | 1.09242  | 1.70901  | 1.50784   | 1.63211   | 1.74257   |
| 6.61949   | 5.12262  | 6.57905  | 6.79529   | 5.40995   | 7.27743   |
| 3.59162   | 2.90695  | 3.59991  | 3.532     | 3.38956   | 3.75493   |
| 0         | 0        | 0        | 0         | 0.103363  | 0         |
| 6.24601   | 3.19821  | 4.02106  | 4.79592   | 3.22433   | 3.79788   |
| 0.0753435 | 0        | 0        | 0.164034  | 0.0584075 | 0         |
| 4.72709   | 3.69624  | 4.22613  | 3.38539   | 4.05025   | 3.2265    |
| 0         | 0        | 0        | 0         | 0         | 0         |
| 5.62779   | 4.60399  | 6.44887  | 5.36253   | 5.08233   | 5.87991   |
| 11.2489   | 10.1891  | 8.22881  | 10.15     | 11.6656   | 9.32188   |
| 0         | 0        | 0        | 0         | 0         | 0         |
| 2.49581   | 3.02602  | 2.63634  | 2.22211   | 2.0969    | 1.73423   |
| 0.368896  | 0.132061 | 0.387911 | 0.348029  | 0.200182  | 0.0598006 |
| 3.6648    | 3.34339  | 3.10782  | 3.17438   | 3.52896   | 2.2997    |
| 4.94596   | 3.71828  | 3.56728  | 4.63627   | 4.0898    | 5.17812   |
| 127.144   | 120.834  | 75.8094  | 83.5545   | 60.1005   | 38.7544   |
| 37.1486   | 42.1566  | 43.8098  | 40.1738   | 41.6259   | 40.9369   |
| 0         | 0        | 0        | 0         | 0         | 0         |
| 12.5987   | 12.4641  | 15.2463  | 11.9472   | 14.329    | 13.1048   |
| 0         | 0        | 0        | 0         | 0         | 0         |
| 4.45057   | 3.28756  | 3.81213  | 3.16227   | 4.22546   | 3.66357   |
| 9.19054   | 6.41701  | 8.59738  | 8.03484   | 8.40286   | 9.06937   |
| 215.535   | 234.943  | 222.997  | 225.093   | 251.651   | 165.919   |
| 0         | 0        | 0        | 0         | 0         | 0         |
| 29.9893   | 30.1961  | 29.8652  | 33.0668   | 30.6346   | 32.6986   |
| 0.0985968 | 0.705934 | 0.319012 | 0.500874  | 0.229301  | 0.319664  |
| 0.0664547 | 0        | 0.215017 | 0.0482274 | 0         | 0.0538638 |
| 31.676    | 34.4424  | 43.1094  | 31.8477   | 32.1335   | 37.3751   |
| 0.0888593 | 0.244941 | 0        | 0.192216  | 0.205326  | 0.649417  |
| 15.8231   | 14.7073  | 15.6431  | 16.882    | 13.6317   | 13.7576   |
| 3.25719   | 2.35185  | 1.98717  | 2.24361   | 1.64769   | 2.64006   |
| 0         | 0.225348 | 0        | 0         | 0         | 0         |
| 9.55369   | 9.42606  | 10.158   | 9.07573   | 9.54031   | 8.26543   |
| 7.96929   | 6.91133  | 7.71728  | 6.2722    | 7.48312   | 5.82254   |
| 36.3355   | 40.1126  | 35.9359  | 38.7755   | 37.7353   | 32.8375   |
| 0         | 0        | 0.144547 | 0         | 0         | 0         |
| 1.59095   | 4.17665  | 1.57286  | 3.46374   | 1.64443   | 1.28952   |
| 0         | 0        | 0        | 0         | 0         | 0         |
| 0.813193  | 0.674162 | 0.848184 | 0.65227   | 0.514273  | 0.468322  |

|           |           |           |          |          |           |
|-----------|-----------|-----------|----------|----------|-----------|
| 0         | 0         | 0.0160856 | 0        | 0        | 0         |
| 0         | 0.171862  | 0         | 0.174199 | 0.209356 | 0.0486246 |
| 0.806434  | 0.757826  | 0.828975  | 1.02418  | 0.794474 | 1.11664   |
| 7.47224   | 6.66862   | 6.27336   | 5.79062  | 7.97509  | 6.80166   |
| 8.43644   | 7.64213   | 8.31019   | 8.58054  | 7.60584  | 7.64845   |
| 0         | 0         | 0         | 0        | 0        | 0         |
| 4.75959   | 4.53701   | 4.88844   | 5.22562  | 3.70652  | 5.85375   |
| 2.56432   | 2.67877   | 3.74042   | 3.53891  | 2.93297  | 1.90811   |
| 0.583202  | 0.263781  | 0.325888  | 0.397868 | 0.232184 | 0.349926  |
| 8.89343   | 8.04937   | 8.34259   | 8.17469  | 7.1823   | 8.39507   |
| 3.72447   | 7.18728   | 3.81602   | 22.653   | 5.27957  | 13.6182   |
| 0         | 0         | 0         | 0        | 0        | 0         |
| 1272.96   | 1251.13   | 1395.13   | 1427.74  | 1438.81  | 1383.21   |
| 0         | 0.0446257 | 0         | 0        | 0        | 0         |
| 1.47393   | 0.104228  | 0.117752  | 0        | 0        | 0.235985  |
| 36.2854   | 43.4088   | 38.0074   | 37.2692  | 37.2615  | 30.372    |
| 59.8996   | 65.0581   | 60.0084   | 64.2075  | 59.1793  | 63.862    |
| 0.764445  | 0.655711  | 0.945242  | 0.737965 | 0.639205 | 0.929851  |
| 3.39362   | 1.94382   | 2.49164   | 2.38703  | 2.10463  | 2.20052   |
| 16.9738   | 14.5311   | 15.294    | 15.5698  | 16.9794  | 16.8951   |
| 38.7999   | 38.6284   | 46.7237   | 39.3689  | 41.3577  | 35.0262   |
| 9.55404   | 11.5046   | 15.5341   | 12.9642  | 18.7602  | 16.5493   |
| 3.88677   | 3.37453   | 3.90582   | 3.9625   | 2.77835  | 3.99191   |
| 0.68682   | 1.03267   | 0.944443  | 1.14641  | 1.43757  | 1.16905   |
| 7.80417   | 6.62238   | 6.58993   | 6.22462  | 5.79284  | 7.437     |
| 0.887154  | 0.635185  | 1.4352    | 0.40239  | 0.773702 | 0.988719  |
| 59.2715   | 49.1969   | 49.8895   | 53.5696  | 57.5341  | 56.4916   |
| 5.04553   | 1.91277   | 2.83951   | 2.64912  | 2.61288  | 1.64912   |
| 26.4715   | 22.7917   | 19.2439   | 19.2109  | 16.8845  | 23.9004   |
| 0.626808  | 0.448782  | 0         | 1.36466  | 0.242956 | 0.508049  |
| 795.787   | 970.36    | 970.735   | 1006.28  | 997.121  | 885.709   |
| 0.399989  | 0.222744  | 0.143797  | 0.129013 | 0.137812 | 0.180114  |
| 93.6047   | 94.9709   | 106.928   | 94.6791  | 98.2419  | 85.59     |
| 0         | 0         | 0         | 0        | 0        | 0         |
| 0         | 0         | 1.6578    | 0        | 0        | 0         |
| 0.40124   | 0.0327726 | 0.254766  | 0.731625 | 0.223464 | 0.259704  |
| 27.8184   | 27.859    | 22.4859   | 26.6876  | 17.9736  | 24.9765   |
| 4.43228   | 3.06142   | 2.80487   | 2.08132  | 2.36476  | 3.57138   |
| 0         | 0         | 0         | 0        | 0        | 0         |
| 0         | 0         | 0.253506  | 0        | 0        | 0         |
| 1.32104   | 1.78891   | 1.89141   | 1.4862   | 1.874    | 1.81789   |
| 0.0411933 | 0.117975  | 0.0333205 | 0        | 0        | 0         |
| 7.12313   | 5.99459   | 7.55358   | 6.28795  | 6.54911  | 8.08164   |

|           |           |          |            |           |           |
|-----------|-----------|----------|------------|-----------|-----------|
| 0         | 0         | 0        | 0          | 0         | 0         |
| 0         | 0         | 0        | 0          | 0         | 0         |
| 3.92085   | 2.56761   | 3.32621  | 2.99291    | 3.08584   | 3.49772   |
| 19.0299   | 18.2492   | 18.2145  | 18.1841    | 16.8808   | 20.3652   |
| 3.08099   | 2.60125   | 2.55431  | 2.19854    | 4.79651   | 3.66248   |
| 16.4836   | 12.5454   | 14.6658  | 15.9403    | 15.1622   | 17.4472   |
| 1.07463   | 0.976561  | 1.1367   | 0.779876   | 0.704903  | 0.871021  |
| 20.3686   | 22.9141   | 19.3243  | 22.1013    | 18.4276   | 20.7696   |
| 22.4868   | 25.574    | 24.4226  | 20.8507    | 20.0254   | 22.4741   |
| 1.38328   | 0.363148  | 0.857829 | 1.10426    | 1.64426   | 1.19594   |
| 0.308654  | 0.400545  | 0.218456 | 0.363993   | 0.239273  | 0.687979  |
| 11.3112   | 10.7187   | 7.75006  | 7.96729    | 6.35723   | 8.11645   |
| 7.15412   | 5.03852   | 5.55989  | 7.10913    | 7.05029   | 6.06395   |
| 2.72014   | 2.34775   | 2.8935   | 2.56897    | 2.16647   | 2.6578    |
| 5.15161   | 4.54135   | 3.91738  | 4.81507    | 4.16997   | 4.40887   |
| 49.0095   | 54.7915   | 49.7181  | 52.4053    | 53.3289   | 49.4898   |
| 0.786871  | 0.515095  | 0.618299 | 0.489469   | 0.487996  | 0.510228  |
| 13.5765   | 10.0963   | 13.3625  | 12.3621    | 11.7004   | 11.801    |
| 0         | 0         | 0        | 0          | 0         | 0         |
| 0.0182553 | 0.0130705 | 0        | 0.0132482  | 0.0141518 | 0.0147966 |
| 2.31974   | 1.4021    | 1.68159  | 1.53051    | 1.81691   | 1.51389   |
| 6.65066   | 6.98331   | 8.03017  | 6.87212    | 5.82021   | 6.08416   |
| 10.8193   | 7.03575   | 7.62749  | 7.27551    | 13.0042   | 4.26404   |
| 0         | 0         | 0        | 0          | 0         | 0         |
| 23.8484   | 21.1561   | 21.0847  | 21.4048    | 25.5847   | 23.6558   |
| 60.1091   | 52.2057   | 57.8661  | 67.3985    | 44.3477   | 80.5137   |
| 7.79602   | 7.33429   | 6.76028  | 7.59222    | 7.04429   | 6.9372    |
| 0         | 0         | 0        | 0          | 0         | 0         |
| 0.795464  | 0.724865  | 0.799419 | 0.699736   | 0.672715  | 0.507985  |
| 55.9288   | 54.8793   | 59.6402  | 56.9606    | 46.439    | 56.6795   |
| 61.768    | 57.323    | 59.7014  | 60.793     | 52.2922   | 52.501    |
| 0         | 0         | 0        | 0          | 0         | 0         |
| 2.28962   | 2.74747   | 1.80924  | 1.88276    | 2.30528   | 2.0888    |
| 0         | 0         | 0        | 0.00849835 | 0         | 0.0189831 |
| 0         | 0         | 0        | 0          | 0         | 0         |
| 0         | 0         | 0        | 0          | 0         | 0         |
| 14.6634   | 10.4706   | 11.4328  | 10.5419    | 12.0663   | 13.5376   |
| 5.43442   | 4.16041   | 3.54185  | 4.23913    | 3.5383    | 3.24802   |
| 0.339787  | 0.288502  | 0.342981 | 0.353627   | 0.296041  | 0.207352  |
| 11.6634   | 10.2704   | 8.13297  | 10.1182    | 8.52198   | 8.04094   |
| 23.7957   | 25.1424   | 24.5922  | 24.2321    | 19.5649   | 20.3477   |
| 1.52113   | 1.63331   | 2.06578  | 1.94607    | 2.18656   | 2.00825   |
| 2.28706   | 1.20037   | 2.97023  | 1.4877     | 1.15659   | 2.2721    |

|            |            |            |           |            |           |
|------------|------------|------------|-----------|------------|-----------|
| 1.13307    | 0.469674   | 0.289426   | 0.346226  | 0.13869    | 0.38669   |
| 10.0401    | 7.3448     | 6.35588    | 6.65276   | 6.89501    | 6.54578   |
| 0          | 0          | 0          | 0         | 0          | 0         |
| 48.191     | 48.597     | 51.3899    | 50.8309   | 43.0954    | 46.9459   |
| 90.7146    | 106.417    | 111.73     | 101.798   | 105.701    | 100.567   |
| 5.35925    | 4.099      | 5.59561    | 4.60485   | 4.88193    | 6.21287   |
| 816.838    | 1792.64    | 1084.61    | 981.235   | 836.76     | 1691.56   |
| 0.402244   | 0.297333   | 0.558102   | 0.706354  | 0.293361   | 0.728433  |
| 0          | 0          | 0          | 0         | 0          | 0         |
| 14.9304    | 13.6782    | 17.386     | 18.7289   | 13.3799    | 15.9061   |
| 13.0217    | 11.9585    | 11.4141    | 12.7559   | 12.3592    | 14.046    |
| 0.643795   | 0.449126   | 0.5074     | 0.515133  | 0.345517   | 0.548578  |
| 61.951     | 90.8708    | 49.0402    | 30.1648   | 24.8336    | 259.65    |
| 4.52231    | 3.61319    | 4.19211    | 4.10478   | 4.00223    | 3.52329   |
| 0          | 0          | 0          | 0         | 0          | 0         |
| 0.00880753 | 0.00756722 | 0.00712423 | 0.0195406 | 0.00585234 | 0.0281982 |
| 41.2553    | 21.1353    | 65.1913    | 61.3569   | 22.5125    | 51.4443   |
| 2.07737    | 0.989652   | 0.82417    | 1.30522   | 1.01957    | 1.19261   |
| 0          | 255.172    | 288.28     | 258.642   | 276.282    | 288.87    |
| 0.174809   | 0.0834398  | 0          | 0.253724  | 0.180686   | 0.0944589 |
| 21.5294    | 20.6495    | 22.0351    | 21.8188   | 19.3918    | 22.824    |
| 58.0344    | 99.1357    | 124.225    | 72.8576   | 96.9219    | 113.891   |
| 33.6089    | 29.9897    | 29.4361    | 30.4863   | 34.2107    | 22.9964   |
| 3.79002    | 3.76962    | 3.22464    | 2.72295   | 3.20464    | 4.19313   |
| 0.309775   | 0.327894   | 0.334552   | 0.224881  | 0.160084   | 0.657079  |
| 13.1502    | 12.6835    | 12.6835    | 14.2188   | 10.1376    | 13.9569   |
| 7.033      | 5.10716    | 3.80824    | 4.79933   | 1.70221    | 9.01529   |
| 13.6304    | 11.0057    | 11.1461    | 14.1157   | 11.1064    | 10.7253   |
| 37.8873    | 30.2532    | 36.3059    | 36.136    | 40.2675    | 39.5082   |
| 48.2371    | 56.9454    | 49.7328    | 44.9479   | 54.5429    | 50.4606   |
| 14.4464    | 11.9861    | 12.6781    | 11.9993   | 13.7176    | 8.71118   |
| 9.95454    | 16.8117    | 12.3066    | 9.27965   | 7.99719    | 12.4253   |
| 22.7605    | 33.9467    | 33.8426    | 29.8525   | 26.5199    | 23.6347   |
| 10.5798    | 11.7832    | 7.60691    | 22.1807   | 9.1129     | 8.57527   |
| 0          | 0          | 0          | 0         | 0          | 0         |
| 0          | 0          | 0.0170236  | 0         | 0.0163151  | 0         |
| 3.18574    | 1.733      | 2.145      | 2.05363   | 1.08995    | 1.97628   |
| 0.853154   | 0.436316   | 0.821547   | 0.972949  | 0.629884   | 1.0208    |
| 14.9871    | 13.1934    | 12.9142    | 13.9046   | 12.7088    | 11.1447   |
| 4.51808    | 3.60489    | 3.96469    | 3.8233    | 4.32962    | 3.8101    |
| 9.2124     | 4.16963    | 5.63006    | 6.70821   | 6.65354    | 10.2909   |
| 0.590326   | 0.344455   | 0.318222   | 0.206198  | 0.203704   | 0.106291  |
| 6.4713     | 6.28093    | 6.94163    | 6.25563   | 6.16979    | 5.62649   |

|           |           |           |           |            |           |
|-----------|-----------|-----------|-----------|------------|-----------|
| 19.884    | 12.8588   | 15.1614   | 18.0851   | 12.5415    | 14.7303   |
| 0.751117  | 0.28471   | 0.73265   | 1.33068   | 0.308265   | 0.895303  |
| 15.8396   | 13.3926   | 10.9784   | 19.9508   | 17.015     | 13.783    |
| 0.42916   | 0.512118  | 0.809991  | 0.415266  | 0.38814    | 0.463799  |
| 0         | 0         | 0         | 0         | 0          | 0         |
| 0         | 0         | 0         | 0         | 0          | 0         |
| 0         | 0         | 0         | 0         | 0          | 0         |
| 10.4921   | 12.601    | 12.2284   | 12.9976   | 7.65264    | 14.7909   |
| 0         | 0.0265996 | 0.0132878 | 0.0260443 | 0.00587759 | 0.0354895 |
| 1.48467   | 1.57616   | 1.73926   | 1.78337   | 2.18281    | 2.03328   |
| 0.429901  | 0.237984  | 0.193739  | 0.260518  | 0.0618415  | 0.247859  |
| 11.4423   | 13.2321   | 17.1679   | 14.355    | 15.8938    | 13.6629   |
| 0         | 0.0646348 | 0         | 0         | 0          | 0         |
| 29.7068   | 26.9413   | 28.5288   | 30.1135   | 25.3151    | 28.8232   |
| 0.0727968 | 0.0260605 | 0.0883258 | 0.31698   | 0.112866   | 0.118008  |
| 0.792677  | 0.68105   | 0.598435  | 0.57526   | 0.409664   | 0.513993  |
| 0         | 0         | 0         | 0         | 0          | 0         |
| 32.4752   | 24.8462   | 26.1961   | 29.4391   | 23.088     | 30.2505   |
| 9.01746   | 6.1125    | 8.45368   | 7.54295   | 9.04034    | 6.6835    |
| 0         | 0         | 0         | 0         | 0          | 0         |
| 83.506    | 75.2981   | 71.6952   | 73.8687   | 75.1019    | 58.5373   |
| 21.5895   | 21.664    | 21.1685   | 23.0089   | 23.8656    | 20.4453   |
| 18.743    | 16.017    | 18.3909   | 19.5103   | 17.6037    | 19.1807   |
| 67.6439   | 75.8189   | 60.4479   | 59.7852   | 58.057     | 62.6603   |
| 22.7507   | 21.2761   | 21.9545   | 22.0599   | 25.4426    | 19.8516   |
| 28.7979   | 21.0037   | 25.7902   | 25.2192   | 26.5712    | 25.5328   |
| 15.1756   | 15.2145   | 14.02     | 15.1382   | 11.8993    | 15.2584   |
| 33.5836   | 33.4322   | 29.8979   | 43.8041   | 29.3182    | 42.0435   |
| 0.368805  | 0.240878  | 0.449697  | 0.443127  | 0.190669   | 0.39981   |
| 16.0238   | 11.7733   | 10.9225   | 16.799    | 13.8723    | 11.777    |
| 5.17402   | 3.77807   | 3.32254   | 4.26459   | 4.16036    | 3.80554   |
| 2.27364   | 1.8992    | 2.1967    | 2.4292    | 1.51776    | 2.09882   |
| 45.4813   | 47.9176   | 44.4771   | 50.5075   | 39.9467    | 41.4482   |
| 1.0232    | 0.76922   | 0.786262  | 0.779681  | 1.11048    | 0.580536  |
| 11.3704   | 8.92374   | 9.1265    | 11.7745   | 7.32279    | 9.35784   |
| 2.17096   | 2.00629   | 3.05606   | 2.96672   | 3.36422    | 3.94557   |
| 17.868    | 17.5065   | 18.4538   | 16.9989   | 13.7571    | 18.1245   |
| 18.0848   | 15.4427   | 17.3356   | 20.0276   | 18.89      | 19.0368   |
| 1.33524   | 1.2346    | 1.01367   | 1.84462   | 0.7033     | 1.86614   |
| 0         | 0         | 0         | 0         | 0          | 0         |
| 34.0987   | 35.7791   | 35.2368   | 37.1838   | 37.0905    | 38.5036   |
| 1.10971   | 0.589677  | 0.633233  | 0.652159  | 0.4528     | 0.240062  |
| 2.36784   | 1.82888   | 1.44384   | 2.4187    | 1.798      | 1.18694   |

|           |           |           |           |          |           |
|-----------|-----------|-----------|-----------|----------|-----------|
| 0         | 0         | 0         | 0         | 0        | 0         |
| 0.0438899 | 0.513263  | 0.0710032 | 0.473057  | 0.229663 | 0.463206  |
| 25.3317   | 24.6017   | 29.5182   | 26.2104   | 27.3176  | 25.2079   |
| 0.114268  | 0.0272711 | 0         | 0         | 0        | 0.12349   |
| 2.33228   | 1.19276   | 1.5272    | 1.28958   | 0.947059 | 0.900188  |
| 0.341164  | 0.244267  | 0.152054  | 0.161687  | 0.172715 | 0.780411  |
| 0.835674  | 0.563131  | 0.457267  | 0.802672  | 0.381075 | 0.577732  |
| 0         | 0         | 0         | 0         | 0        | 0         |
| 0         | 0         | 0         | 0         | 0        | 0         |
| 7.70531   | 9.11124   | 6.85807   | 8.26968   | 7.23498  | 8.24802   |
| 2.58138   | 0.835601  | 1.48223   | 0.604145  | 0.838955 | 1.88993   |
| 0         | 0         | 0         | 0         | 0        | 0         |
| 0         | 0         | 0         | 0         | 0        | 0         |
| 21.7272   | 17.4125   | 20.5891   | 21.4572   | 25.5647  | 20.9847   |
| 0.729775  | 0.304795  | 0.787067  | 0.750282  | 0.754311 | 0.591507  |
| 0         | 0         | 0         | 0         | 0        | 0         |
| 55.2642   | 58.8796   | 56.0752   | 58.9474   | 89.9706  | 41.5752   |
| 47.1745   | 49.0945   | 49.9865   | 53.6251   | 46.3573  | 47.6011   |
| 6.42927   | 7.21469   | 6.07559   | 6.63985   | 5.63104  | 6.86468   |
| 4.319     | 3.83369   | 4.36709   | 4.94379   | 4.47375  | 5.82708   |
| 4.04252   | 2.98875   | 3.37654   | 4.08171   | 3.57665  | 4.13136   |
| 0.350129  | 0.182317  | 0.102986  | 0.161697  | 0.222075 | 0.103197  |
| 0         | 0         | 0         | 0         | 0        | 0         |
| 1.30264   | 0.875177  | 0.835634  | 1.00488   | 0.955246 | 0.944291  |
| 13.4645   | 12.8839   | 13.3791   | 13.1886   | 8.66603  | 12.6438   |
| 32.4347   | 37.2839   | 32.2579   | 32.8996   | 26.7676  | 30.996    |
| 0.577962  | 0.275873  | 0.294353  | 0.217486  | 0.431451 | 0.294955  |
| 5.15359   | 5.73025   | 5.98862   | 5.48951   | 4.78436  | 5.43814   |
| 0.573775  | 0.386647  | 0.409513  | 0.342917  | 0.340141 | 0.300924  |
| 33.2981   | 36.9505   | 40.3381   | 33.468    | 35.1448  | 36.0965   |
| 3.61623   | 2.38474   | 1.69348   | 2.90061   | 2.1394   | 3.85668   |
| 6.15013   | 5.32217   | 6.15112   | 6.13268   | 5.95407  | 5.95567   |
| 6.33319   | 4.9961    | 5.87255   | 5.50587   | 6.9086   | 6.1199    |
| 9.521     | 8.51037   | 8.7892    | 9.82929   | 7.17193  | 8.57786   |
| 2.5458    | 3.47075   | 3.73626   | 2.59736   | 1.46577  | 1.39609   |
| 0         | 0         | 0         | 0         | 0        | 0         |
| 0.159648  | 0         | 0.172182  | 0.0965497 | 0.020627 | 0.0215667 |
| 2.24E-08  | 1.19E-06  | 1.05E-07  | 1.18E-07  | 2.29E-07 | 1.18E-06  |
| 0.0992707 | 0.0696249 | 0         | 0.176922  | 0.207783 | 0.119216  |
| 6.8844    | 5.25586   | 5.77663   | 6.3163    | 5.25716  | 6.86173   |
| 5.33712   | 5.76581   | 5.9332    | 4.82663   | 4.59701  | 5.73396   |
| 5.81835   | 5.17206   | 5.16106   | 5.42599   | 4.00931  | 5.23996   |
| 0.446322  | 0.614535  | 0.499875  | 0.573061  | 0.718607 | 0.667863  |

|           |           |          |            |           |           |
|-----------|-----------|----------|------------|-----------|-----------|
| 5.18428   | 3.37723   | 4.16456  | 4.24574    | 3.58554   | 4.20268   |
| 0.755932  | 1.86E-13  | 2.89E-22 | 6.83E-29   | 2.76E-13  | 3.44E-19  |
| 1.61462   | 0.838867  | 1.17402  | 1.36011    | 0.628122  | 1.3654    |
| 3.57814   | 2.91123   | 3.42052  | 3.65902    | 2.14341   | 3.49343   |
| 12.744    | 9.62868   | 11.8817  | 12.2665    | 10.9712   | 11.9604   |
| 4.04969   | 2.27785   | 2.02831  | 2.1689     | 1.86841   | 1.95434   |
| 23.0416   | 26.514    | 20.4014  | 20.2155    | 16.1521   | 19.8841   |
| 5.29068   | 4.68693   | 5.23616  | 5.64318    | 5.99735   | 5.22619   |
| 0.346015  | 0.307672  | 0.217245 | 0.188331   | 0.377851  | 0.302346  |
| 0.0757301 | 0         | 0        | 0          | 0         | 0         |
| 17.7517   | 21.423    | 19.1546  | 20.1041    | 19.1906   | 17.7887   |
| 65.5276   | 51.9752   | 39.3047  | 56.1429    | 46.5712   | 46.1975   |
| 0         | 0         | 0        | 0          | 0         | 0         |
| 10.6048   | 8.26721   | 11.1176  | 8.20243    | 11.0605   | 12.1865   |
| 40.6073   | 35.0919   | 36.0064  | 42.9097    | 37.4767   | 37.531    |
| 11.2837   | 8.94355   | 9.71733  | 10.2611    | 9.859     | 10.1348   |
| 36.0237   | 41.4      | 46.1739  | 45.8958    | 46.83     | 38.3323   |
| 1.28242   | 0.702222  | 0.397912 | 0.568198   | 0.42183   | 1.0339    |
| 17.091    | 14.1635   | 13.9741  | 15.6978    | 16.3385   | 14.5188   |
| 12.87     | 10.2297   | 10.8323  | 11.5316    | 10.6348   | 11.2603   |
| 40.5703   | 39.7913   | 41.5104  | 42.3377    | 31.4932   | 42.6531   |
| 2.76584   | 1.74883   | 2.23723  | 2.60678    | 1.75428   | 2.15447   |
| 9.34688   | 6.74441   | 8.18791  | 10.6438    | 6.88179   | 9.04826   |
| 8.90E-38  | 0.189082  | 0.147666 | 0          | 0         | 0.165667  |
| 0.726495  | 0.610535  | 1.10663  | 0.695341   | 0.612116  | 0.921404  |
| 0         | 0         | 0        | 0          | 0         | 0         |
| 0.29173   | 0.134275  | 0.134842 | 0.0302448  | 0.0969229 | 0.152008  |
| 0         | 0.0469982 | 0        | 0.00396978 | 0.0254432 | 0         |
| 0         | 0         | 0        | 0          | 0         | 0         |
| 0         | 0         | 0        | 0          | 0         | 0         |
| 14.2141   | 13.3131   | 13.6004  | 12.8789    | 10.4932   | 12.002    |
| 0.92979   | 0.782434  | 0.844394 | 0.804906   | 0.60706   | 0.859334  |
| 0         | 0         | 0        | 0          | 0         | 0         |
| 0         | 0         | 0        | 0          | 0         | 0         |
| 0         | 0         | 0        | 0          | 0         | 0.0987907 |
| 1.46589   | 1.15569   | 1.3989   | 1.13554    | 1.2513    | 1.12141   |
| 4.53894   | 4.15672   | 4.56798  | 3.58126    | 3.6414    | 4.85538   |
| 0         | 0         | 0        | 0          | 0         | 0         |
| 20.3159   | 23.3498   | 19.2131  | 20.5357    | 19.5385   | 17.3643   |
| 16.5063   | 18.8725   | 21.0625  | 23.3078    | 21.773    | 20.2758   |
| 15.1896   | 17.0988   | 16.2861  | 16.9407    | 15.4026   | 14.5253   |
| 1.70172   | 1.57006   | 1.40004  | 1.28881    | 1.78783   | 1.80802   |
| 8.95701   | 8.17896   | 7.73515  | 6.75148    | 6.00438   | 6.66373   |



|           |           |           |          |          |           |
|-----------|-----------|-----------|----------|----------|-----------|
| 7.63028   | 7.66699   | 8.42422   | 8.82389  | 7.15244  | 8.97374   |
| 0         | 0         | 0         | 0        | 0        | 0         |
| 28.9094   | 28.9998   | 25.6054   | 27.1246  | 26.2546  | 24.5449   |
| 0         | 0         | 0.337999  | 0        | 0        | 0         |
| 4.11028   | 3.0626    | 3.49378   | 3.11436  | 3.06754  | 3.78325   |
| 0         | 0         | 0         | 0        | 0        | 0         |
| 0         | 0         | 0         | 0        | 0        | 0         |
| 66.4836   | 58.6556   | 47.6259   | 52.5966  | 48.6808  | 41.7462   |
| 5.90945   | 2.92796   | 2.66806   | 4.48349  | 5.35975  | 5.52077   |
| 0.142581  | 0.187156  | 0.307548  | 0.172455 | 0.20264  | 0.134827  |
| 0.692708  | 0.361467  | 0.303901  | 0.426026 | 0.263948 | 0.494849  |
| 2.39846   | 1.51692   | 2.03706   | 1.66325  | 1.40106  | 1.85262   |
| 4.99261   | 4.23422   | 2.46392   | 5.48876  | 2.44202  | 2.98683   |
| 0         | 0         | 0         | 0        | 0        | 0         |
| 8.14958   | 8.01759   | 6.18853   | 5.47308  | 5.39825  | 7.77685   |
| 12.439    | 11.7419   | 14.1164   | 14.731   | 14.5843  | 12.1388   |
| 21.6798   | 17.3961   | 26.1963   | 25.1461  | 27.7112  | 41.6044   |
| 0.841128  | 0.150558  | 0.491379  | 0.491729 | 0.398478 | 0.681763  |
| 21.5662   | 14.976    | 13.3411   | 14.1126  | 15.4931  | 17.4504   |
| 0.115962  | 0.0207562 | 0         | 0.084156 | 0        | 0.105741  |
| 0.494694  | 0.793502  | 1.44199   | 1.22863  | 0.93126  | 1.37324   |
| 30.422    | 39.135    | 32.9906   | 37.2815  | 34.6411  | 27.4129   |
| 6.75373   | 4.6708    | 5.48485   | 5.19597  | 5.80217  | 6.06651   |
| 3.33584   | 3.5826    | 3.59773   | 3.0261   | 2.155    | 3.60508   |
| 173.751   | 892.186   | 216.337   | 166.454  | 601.091  | 1449.54   |
| 95.3181   | 117.648   | 102.11    | 105.408  | 98.4644  | 96.2659   |
| 0         | 0         | 0.230265  | 0        | 0        | 0         |
| 6.42984   | 3.12515   | 5.38659   | 7.44174  | 5.16241  | 8.55909   |
| 0         | 0         | 0         | 0        | 0        | 0         |
| 0         | 0         | 0         | 0        | 0        | 0         |
| 1.32969   | 1.70877   | 0.937665  | 1.70727  | 0.84578  | 1.38174   |
| 10.7884   | 9.0197    | 7.9352    | 7.21664  | 6.41019  | 7.10414   |
| 5.73009   | 10.0087   | 8.16823   | 7.48434  | 5.38571  | 6.4751    |
| 0         | 0.131609  | 0.148686  | 0        | 0        | 0         |
| 1.45909   | 1.69761   | 1.21711   | 0.992707 | 0.777637 | 1.2196    |
| 0.523349  | 0.829901  | 1.1418    | 1.34465  | 0.619545 | 2.1084    |
| 0         | 0.217913  | 0         | 0.441753 | 0        | 0         |
| 6.36448   | 4.29163   | 4.22198   | 3.98342  | 4.82942  | 4.12144   |
| 0.144454  | 0.180995  | 0.116846  | 0.137638 | 0.215078 | 0.204898  |
| 0.0693424 | 0.0496478 | 0.0560897 | 0        | 0        | 0.0562044 |
| 2.03649   | 2.43664   | 2.11784   | 1.78966  | 1.65528  | 1.67643   |
| 38.69     | 55.2383   | 91.6138   | 38.1279  | 115.191  | 67.1629   |
| 22.5335   | 23.8056   | 25.5565   | 22.4419  | 23.3035  | 24.8121   |

|           |           |           |           |           |           |
|-----------|-----------|-----------|-----------|-----------|-----------|
| 0.148748  | 0.292878  | 0.330879  | 0.242886  | 0.086484  | 0.241131  |
| 37.9771   | 33.5956   | 28.4824   | 35.5279   | 18.219    | 23.9267   |
| 0         | 0         | 0         | 0         | 0         | 0         |
| 0         | 0         | 0         | 0         | 0         | 114.466   |
| 17.2628   | 16.6747   | 15.6851   | 16.4365   | 15.1104   | 13.0357   |
| 0.208271  | 0.074154  | 0.318874  | 1.12E-08  | 0.318379  | 1.88E-08  |
| 18.6603   | 17.424    | 20.6112   | 22.0057   | 24.8904   | 19.1785   |
| 1.13827   | 1.16073   | 1.56244   | 1.00129   | 0.721966  | 0.866689  |
| 0.195342  | 0.0999009 | 0.0451452 | 0.121511  | 0.259598  | 0.0226188 |
| 796.919   | 746.832   | 687.999   | 803.607   | 880.167   | 845.372   |
| 41.1292   | 41.9622   | 36.8929   | 39.1519   | 37.0188   | 42.643    |
| 0.0268403 | 0.0384343 | 0         | 0.0194785 | 0.041614  | 0         |
| 9.68607   | 5.7792    | 9.42731   | 11.8442   | 7.41722   | 10.3561   |
| 23.2836   | 22.3737   | 14.4202   | 18.9407   | 16.6701   | 18.5056   |
| 0         | 0         | 0         | 0         | 0         | 0         |
| 1.44349   | 0.980061  | 2.17578   | 1.22836   | 1.12036   | 1.29101   |
| 0         | 0         | 0         | 0         | 0         | 0         |
| 24.6193   | 16.9817   | 25.0304   | 17.896    | 13.1967   | 15.1557   |
| 0.0974253 | 0.0697547 | 0         | 0.0707033 | 0.0755256 | 0.157933  |
| 2.69398   | 3.74007   | 3.37496   | 2.43192   | 3.96035   | 1.6643    |
| 24.762    | 24.7474   | 22.4866   | 24.6296   | 18.3266   | 20.4293   |
| 5.85712   | 4.73909   | 4.67993   | 4.68259   | 5.27883   | 5.26845   |
| 44.288    | 48.9726   | 46.0844   | 46.8517   | 39.7986   | 44.6224   |
| 5.97114   | 5.38951   | 6.57693   | 5.25536   | 6.45094   | 6.64187   |
| 27.3693   | 26.1864   | 29.0868   | 29.8124   | 26.193    | 27.3316   |
| 76.5943   | 52.098    | 232.247   | 185.17    | 106.198   | 266.328   |
| 0         | 0         | 0         | 0         | 0         | 0         |
| 0         | 0.0708775 | 0         | 0         | 0         | 0         |
| 0         | 0         | 0         | 0         | 0         | 0         |
| 0         | 0         | 0         | 0.215312  | 0.114999  | 0         |
| 0.0914176 | 0.0647423 | 0.0558543 | 0.0459358 | 0.0544031 | 0.104747  |
| 0         | 0         | 0.0620848 | 0         | 0         | 0         |
| 0.0590624 | 0         | 0         | 0         | 0         | 0         |
| 0         | 0         | 0         | 0         | 0         | 0         |
| 14.0132   | 12.8083   | 11.3131   | 11.5386   | 10.4787   | 12.8323   |
| 0         | 0         | 0         | 0         | 0         | 0         |
| 0.432735  | 0.325577  | 0.229891  | 0.558301  | 0.584288  | 0.830561  |
| 27.4129   | 40.2795   | 22.2276   | 28.4479   | 14.0918   | 19.591    |
| 8.32493   | 5.71731   | 5.42307   | 7.55237   | 6.23832   | 4.29515   |
| 41.8418   | 42.7752   | 46.9462   | 42.0337   | 44.6253   | 45.1229   |
| 0.803048  | 0.928422  | 0.547863  | 0.568748  | 0.330148  | 0.556823  |
| 0         | 0         | 0         | 0         | 0         | 0         |
| 3.15119   | 3.11406   | 2.87129   | 3.7353    | 3.83684   | 3.77794   |

|           |           |           |           |           |           |
|-----------|-----------|-----------|-----------|-----------|-----------|
| 6.24908   | 8.67597   | 6.51285   | 4.92753   | 6.25733   | 7.27295   |
| 6.11463   | 6.49217   | 6.1688    | 6.80478   | 6.11554   | 4.89629   |
| 1.71054   | 1.1876    | 1.90353   | 1.36175   | 1.35015   | 1.39485   |
| 64.3247   | 58.937    | 61.0033   | 64.8612   | 66.7753   | 67.1935   |
| 3.16672   | 2.26731   | 2.7038    | 2.0428    | 1.77298   | 3.9927    |
| 121.271   | 112.07    | 112.868   | 111.437   | 128.257   | 110.344   |
| 19.8912   | 25.1039   | 21.4929   | 23.6344   | 21.6338   | 18.7516   |
| 16.4187   | 16.2444   | 16.4749   | 13.3482   | 16.3531   | 14.5994   |
| 13.2256   | 14.1182   | 11.428    | 13.4482   | 9.08925   | 9.59345   |
| 8.07303   | 6.77699   | 7.5564    | 6.99138   | 7.81639   | 8.47283   |
| 0.0989465 | 0         | 0.0533572 | 0.0478715 | 0.0255683 | 0.106933  |
| 0         | 0.0379953 | 0.0429252 | 0.019256  | 0.0205694 | 0.0322597 |
| 23.1888   | 26.6124   | 23.5216   | 19.9399   | 20.9242   | 22.7538   |
| 54.118    | 57.656    | 55.0826   | 59.9544   | 64.7941   | 56.9155   |
| 53.3305   | 54.3836   | 55.5507   | 58.874    | 65.1966   | 57.6026   |
| 0         | 0         | 0         | 0         | 0         | 0         |
| 3.79715   | 2.49766   | 3.87052   | 3.29335   | 3.78123   | 3.00266   |
| 0         | 0         | 0         | 0         | 0         | 0         |
| 0         | 0         | 0         | 0         | 0         | 0         |
| 41.4596   | 52.4062   | 34.5634   | 34.5066   | 33.5833   | 32.8944   |
| 0         | 0         | 0         | 0         | 0         | 0         |
| 7.51477   | 6.90749   | 7.2364    | 7.22993   | 5.99828   | 6.26519   |
| 3035.28   | 3864.24   | 3534.68   | 3941.86   | 3578.49   | 3532.01   |
| 46.9913   | 45.4435   | 47.84     | 46.4983   | 46.9573   | 46.5656   |
| 52.6462   | 52.2191   | 51.8175   | 52.0199   | 46.0893   | 45.3456   |
| 17.0219   | 17.2679   | 18.75     | 19.0346   | 18.9564   | 17.1476   |
| 13.8484   | 13.4855   | 13.4018   | 14.2844   | 12.2999   | 14.0337   |
| 12.7717   | 10.865    | 10.8584   | 9.96628   | 14.1592   | 5.89946   |
| 0.0796523 | 0         | 0         | 0.0578051 | 0.277868  | 0.403511  |
| 0.826161  | 1.92885   | 0.784485  | 1.09485   | 0.72399   | 1.19369   |
| 4.32687   | 4.32517   | 2.68834   | 3.56484   | 2.00931   | 4.26948   |
| 0.0676742 | 0         | 0.0547403 | 0         | 0         | 0.0548522 |
| 0         | 0         | 0         | 0         | 0         | 0         |
| 10.2629   | 8.24063   | 10.3417   | 8.89973   | 8.38301   | 11.0208   |
| 20.6751   | 20.0413   | 22.9673   | 21.473    | 20.5987   | 23.6447   |
| 0         | 0         | 0         | 0         | 0         | 0.0158873 |
| 27.4185   | 27.3029   | 30.8363   | 31.2102   | 33.0091   | 30.2966   |
| 7.35094   | 7.26627   | 5.05856   | 6.13094   | 4.84803   | 5.42462   |
| 0         | 0         | 0         | 0         | 0         | 0         |
| 0.187661  | 0.335904  | 0.202393  | 0.476661  | 0.19397   | 0.304211  |
| 7.42379   | 6.03941   | 5.01283   | 6.49633   | 4.97102   | 6.20327   |
| 129.352   | 115.741   | 118.46    | 127.697   | 141.082   | 113.949   |
| 0         | 0         | 0         | 0         | 0         | 0         |

|           |           |          |          |           |           |
|-----------|-----------|----------|----------|-----------|-----------|
| 7.11572   | 6.9288    | 13.3277  | 9.67006  | 7.76358   | 9.40746   |
| 0         | 0         | 0        | 0        | 0         | 0         |
| 4.64211   | 3.92432   | 4.29779  | 3.36886  | 4.11892   | 4.4879    |
| 0         | 0         | 0        | 0        | 0         | 0         |
| 14.505    | 13.8531   | 12.2471  | 11.2588  | 10.9784   | 11.5352   |
| 0.554012  | 0.279997  | 0.448129 | 0.473007 | 0.530532  | 0.713189  |
| 0.0867739 | 0.0372771 | 0.105284 | 0.157433 | 0.0403611 | 0.0351666 |
| 0.65794   | 0.472708  | 0.295663 | 0.636638 | 0.283358  | 0.177761  |
| 16.3305   | 19.1276   | 11.452   | 13.3095  | 13.5471   | 16.1148   |
| 10.3798   | 6.20513   | 7.61345  | 6.9916   | 6.85911   | 9.49135   |
| 0.228987  | 0.200384  | 0.205803 | 0.16618  | 0.15779   | 0.391825  |
| 8.5351    | 10.4759   | 11.1777  | 15.6327  | 7.24669   | 17.7891   |
| 0         | 0         | 0        | 0        | 0         | 0         |
| 73.7506   | 77.7821   | 70.2727  | 68.9071  | 70.3408   | 61.0521   |
| 48.3801   | 45.8862   | 49.0577  | 42.1902  | 49.4634   | 47.3417   |
| 13.0107   | 11.9797   | 11.6256  | 12.6612  | 9.2395    | 12.2176   |
| 30.2272   | 25.6755   | 29.6839  | 32.6672  | 22.7339   | 29.1532   |
| 4.64488   | 6.52001   | 5.28967  | 6.69739  | 3.36389   | 3.8639    |
| 29.7226   | 24.7799   | 28.4398  | 29.2856  | 31.3199   | 30.0943   |
| 0.104164  | 0.0372896 | 0        | 0        | 0         | 0         |
| 14.5823   | 12.6807   | 13.3588  | 13.9949  | 11.9735   | 13.8452   |
| 151.591   | 168.331   | 150.861  | 152.158  | 146.622   | 124.576   |
| 0         | 0         | 0        | 0        | 0         | 0         |
| 19.8644   | 25.9929   | 52.3596  | 16.6538  | 15.3992   | 18.8768   |
| 8.48224   | 8.27884   | 8.59478  | 7.72362  | 8.40548   | 9.08029   |
| 26.5667   | 30.9587   | 31.2922  | 31.1586  | 25.6049   | 24.4144   |
| 15.9527   | 11.1419   | 9.37427  | 10.2492  | 12.088    | 12.5373   |
| 1066.35   | 1268.21   | 1166.52  | 1209.74  | 1152.6    | 1021.84   |
| 12.4105   | 11.0062   | 16.7061  | 13.2361  | 15.7898   | 11.9692   |
| 0         | 0         | 0        | 0        | 0         | 0         |
| 3.31432   | 2.70342   | 1.23398  | 2.38028  | 1.65571   | 2.16385   |
| 9.16334   | 10.8985   | 9.43351  | 8.90331  | 9.09961   | 7.67272   |
| 13.2219   | 11.0454   | 13.3353  | 12.0399  | 13.6148   | 14.1084   |
| 0         | 0.0358646 | 0        | 0        | 0.0194159 | 0         |
| 0         | 0         | 0        | 0        | 0.0330448 | 0.0345503 |
| 0         | 0         | 0        | 0        | 0         | 0         |
| 58.3978   | 50.5955   | 58.6993  | 57.6359  | 58.9626   | 63.4465   |
| 16.3278   | 13.9587   | 16.1641  | 16.3466  | 18.8784   | 18.2288   |
| 7.5718    | 5.60241   | 6.70835  | 5.97778  | 7.26289   | 6.64534   |
| 0.548766  | 0.671814  | 0.506396 | 0.360841 | 0.337713  | 0.494554  |
| 29.4887   | 30.1267   | 25.6686  | 29.7558  | 18.9796   | 25.9637   |
| 0         | 0         | 0        | 0        | 0         | 0.0422877 |
| 0.269177  | 0.385452  | 0.217732 | 0.130231 | 0.0695568 | 0.290903  |

|           |           |           |          |           |           |
|-----------|-----------|-----------|----------|-----------|-----------|
| 51.5529   | 47.5192   | 56.0478   | 59.2535  | 59.2056   | 57.3888   |
| 24.1585   | 29.8406   | 22.7757   | 22.3964  | 19.6314   | 28.438    |
| 4.42221   | 6.01369   | 5.66564   | 5.277    | 3.8193    | 5.3645    |
| 1.29669   | 1.22286   | 0.977432  | 0.897759 | 0.799859  | 1.24191   |
| 4.64      | 3.44463   | 2.90394   | 3.28321  | 2.75483   | 2.25245   |
| 0         | 0         | 0         | 0        | 0         | 0         |
| 3.47824   | 2.21518   | 1.57775   | 1.90698  | 1.08717   | 0.961785  |
| 12.1786   | 12.398    | 11.8668   | 11.5817  | 11.5961   | 12.2538   |
| 6.18712   | 5.36905   | 6.29558   | 6.01325  | 4.59297   | 5.13891   |
| 342.517   | 346.043   | 345.89    | 319.953  | 215.049   | 340.703   |
| 5.97365   | 7.14045   | 7.57554   | 6.35582  | 5.96518   | 6.2985    |
| 1.7328    | 1.6918    | 2.16615   | 1.94345  | 3.05294   | 0.893769  |
| 11.0588   | 13.2274   | 12.1672   | 8.48125  | 7.86124   | 8.25891   |
| 7.20261   | 8.53017   | 9.73292   | 7.76065  | 7.86956   | 7.0605    |
| 4.78224   | 4.54474   | 2.6252    | 6.80339  | 2.02426   | 2.23071   |
| 11.3535   | 10.1265   | 9.60812   | 8.84082  | 7.70923   | 9.29192   |
| 18.3753   | 15.807    | 12.8397   | 13.4457  | 15.9615   | 17.3464   |
| 0         | 0         | 0.0739256 | 0        | 0         | 0.0740767 |
| 8.59091   | 8.25282   | 9.17794   | 8.45654  | 8.97747   | 8.99234   |
| 70.2634   | 66.3196   | 72.5334   | 82.6744  | 101.975   | 56.5341   |
| 0         | 0         | 0         | 0        | 0         | 0         |
| 6.82562   | 6.47529   | 5.79716   | 5.57266  | 6.21731   | 5.5324    |
| 12.2344   | 9.82369   | 7.49201   | 26.5512  | 8.50948   | 6.11757   |
| 0.185461  | 14.8598   | 0.184513  | 15.8308  | 0.168947  | 14.8238   |
| 0         | 0         | 0.0506097 | 0        | 0.0970069 | 0         |
| 0         | 0         | 0         | 0        | 0         | 0         |
| 0.0342846 | 0         | 0         | 0        | 0         | 0         |
| 31.9532   | 30.1871   | 44.3876   | 33.1214  | 28.9011   | 35.3586   |
| 0.041588  | 0         | 0         | 0        | 0.0322397 | 0.134834  |
| 41.684    | 45.939    | 41.6333   | 48.2167  | 35.536    | 37.1118   |
| 14.0743   | 10.3746   | 12.8843   | 12.0631  | 10.6035   | 12.6795   |
| 14.7375   | 11.9487   | 15.0466   | 13.5355  | 15.522    | 14.9853   |
| 28.4069   | 22.7958   | 27.8612   | 27.2797  | 30.3719   | 29.7897   |
| 6.39438   | 6.35804   | 6.69355   | 5.96977  | 6.08535   | 5.48774   |
| 17.0718   | 13.9254   | 17.0406   | 17.5515  | 18.1594   | 18.1645   |
| 0.417881  | 0.263624  | 0.354093  | 0.303264 | 0.337663  | 0.524006  |
| 6.1857    | 4.56504   | 5.58516   | 5.58279  | 5.59102   | 5.57507   |
| 4.63259   | 4.04593   | 4.46871   | 4.21807  | 3.89867   | 4.39619   |
| 0.767237  | 0.674888  | 0.336899  | 0.286353 | 1.42746   | 0.941691  |
| 3.59333   | 4.06351   | 4.4821    | 3.97255  | 3.98316   | 4.02853   |
| 0.104292  | 0.0746708 | 0.0369072 | 0.059603 | 0.0808485 | 0.111873  |
| 0         | 0         | 0         | 0        | 0         | 0         |
| 0         | 0         | 0         | 0        | 0         | 0         |

|           |           |            |           |           |          |
|-----------|-----------|------------|-----------|-----------|----------|
| 17.5943   | 10.9359   | 11.0165    | 13.5153   | 9.93234   | 13.9664  |
| 11.0267   | 9.44571   | 9.16958    | 8.83928   | 9.46395   | 10.5563  |
| 37.1922   | 46.5696   | 39.278     | 39.2743   | 35.9149   | 35.5898  |
| 0         | 0         | 0.0885032  | 0         | 0         | 0        |
| 81.8819   | 91.8906   | 76.406     | 75.0445   | 67.4524   | 79.1114  |
| 54.0121   | 48.3071   | 53.8951    | 57.8294   | 60.2114   | 57.8528  |
| 1.70138   | 1.04184   | 1.77459    | 1.65713   | 1.54454   | 0.925398 |
| 67.4964   | 62.3881   | 59.6537    | 59.5545   | 67.8541   | 65.9575  |
| 0         | 0         | 0          | 0         | 0.0439905 | 0        |
| 0.152406  | 0.0935314 | 0.0352224  | 0.110604  | 0.0506347 | 0.12353  |
| 0.375189  | 0.192146  | 0.346361   | 0.187986  | 0.290453  | 0.131236 |
| 0         | 0         | 0          | 0         | 0         | 0        |
| 67.0725   | 64.3566   | 60.0346    | 66.5443   | 54.8821   | 70.2997  |
| 0.503694  | 0.385269  | 0.33335    | 0.606493  | 0.275179  | 0.324821 |
| 1.75217   | 1.84916   | 1.99912    | 1.99973   | 1.95995   | 2.08762  |
| 3.02435   | 5.51416   | 5.00646    | 5.92093   | 3.18964   | 2.02378  |
| 10.0614   | 10.3729   | 9.03563    | 9.59196   | 10.3611   | 8.04447  |
| 27.4728   | 22.8653   | 25.7101    | 26.0251   | 25.2075   | 28.3724  |
| 50.7995   | 44.117    | 46.8077    | 48.853    | 48.0059   | 46.8571  |
| 0.22503   | 0.143215  | 0.161798   | 0.0362907 | 0.0969149 | 0.182394 |
| 31.906    | 30.6086   | 35.3853    | 35.4621   | 41.5862   | 34.7259  |
| 0         | 0         | 0          | 0         | 0         | 0        |
| 0.0542161 | 0.0776354 | 0.146181   | 0.0786912 | 0.0560389 | 0.117184 |
| 7.10074   | 5.26091   | 6.71144    | 6.3612    | 6.90596   | 6.79895  |
| 14.869    | 16.992    | 13.9258    | 10.8823   | 11.4892   | 13.9181  |
| 3.91671   | 6.48539   | 7.39284    | 5.13834   | 3.49352   | 4.50662  |
| 9.02113   | 10.1789   | 8.06111    | 9.33597   | 8.24998   | 9.44638  |
| 7.48059   | 6.37885   | 7.10412    | 7.11487   | 7.26368   | 6.89102  |
| 0         | 0         | 0          | 0         | 0.126997  | 0.132783 |
| 0.139703  | 0.0198396 | 0.00560346 | 0.0714258 | 0.0895042 | 0.202137 |
| 4.85563   | 3.91798   | 5.0082     | 4.92214   | 4.36162   | 4.9768   |
| 8.9935    | 5.94232   | 7.33487    | 7.7072    | 7.86445   | 8.78051  |
| 44.5769   | 38.5841   | 43.3866    | 44.0078   | 46.1305   | 46.1074  |
| 0.608059  | 0         | 0          | 0         | 0.162073  | 0.248936 |
| 0.671817  | 0.718305  | 0.478209   | 0.708572  | 0.930501  | 0.914811 |
| 20.3793   | 19.7733   | 21.9414    | 20.7449   | 21.0148   | 23.3279  |
| 0.640814  | 0.553485  | 0.645511   | 0.330254  | 0.443703  | 0.511345 |
| 14.2104   | 11.6508   | 12.4112    | 13.4423   | 11.0892   | 11.5414  |
| 9.73854   | 6.85912   | 8.82542    | 9.43076   | 7.42679   | 8.70222  |
| 32.9      | 19.5493   | 31.1906    | 28.7596   | 15.8985   | 43.2246  |
| 0.268501  | 0.403707  | 0.152029   | 0.0389712 | 0.208146  | 0.282918 |
| 52.2811   | 58.876    | 62.3964    | 55.6343   | 48.6982   | 56.7819  |
| 0         | 0         | 0          | 0         | 0         | 0        |

|          |           |           |          |          |           |
|----------|-----------|-----------|----------|----------|-----------|
| 0.223309 | 0.159885  | 0.361261  | 0.16206  | 0.346226 | 0.181     |
| 5.54386  | 4.40443   | 5.38357   | 5.57235  | 4.86075  | 6.23561   |
| 0        | 0.0984045 | 0         | 0        | 0        | 0.1114    |
| 20.1114  | 14.687    | 19.1078   | 18.9745  | 20.1674  | 17.9289   |
| 0.585425 | 0.532002  | 0.528177  | 0.359491 | 0.715655 | 0.620508  |
| 39.4842  | 31.3269   | 33.6152   | 31.1124  | 34.3132  | 42.2814   |
| 25.386   | 20.2218   | 24.1895   | 20.9791  | 20.5554  | 25.2085   |
| 0        | 0         | 0         | 0        | 0        | 0         |
| 16.1579  | 21.372    | 18.4237   | 18.3191  | 18.0091  | 19.3292   |
| 1079.9   | 1261.32   | 1223.9    | 1196.98  | 1084.2   | 1153.27   |
| 5.02264  | 3.61007   | 6.23807   | 4.34838  | 4.95911  | 5.18504   |
| 10.4291  | 10.4785   | 8.49558   | 9.62139  | 11.3836  | 11.0748   |
| 5.50642  | 3.37574   | 3.43582   | 3.50189  | 5.31194  | 6.23235   |
| 15.0651  | 14.6323   | 14.3334   | 14.2936  | 13.5454  | 16.1143   |
| 1.56364  | 3.4387    | 1.94237   | 3.24218  | 1.73193  | 1.31305   |
| 19.243   | 18.2585   | 23.1834   | 19.2356  | 17.1979  | 19.1005   |
| 15.9917  | 16.7186   | 20.42     | 18.6125  | 15.9706  | 17.9346   |
| 17.9792  | 17.4595   | 16.4906   | 19.9632  | 17.865   | 16.4433   |
| 2.13537  | 1.04995   | 1.60041   | 1.1103   | 0.914758 | 1.27522   |
| 2.24E-31 | 0.201439  | 3.19E-212 | 0.180006 | 0.331725 | 2.76E-32  |
| 1.73816  | 1.42984   | 1.43587   | 1.82502  | 1.77748  | 1.55871   |
| 0        | 0         | 0         | 0        | 0        | 0         |
| 327.596  | 337.893   | 307.829   | 285.485  | 291.902  | 253.666   |
| 2.59562  | 1.85841   | 4.33906   | 3.26506  | 2.54874  | 4.7687    |
| 7.06571  | 6.15209   | 4.60743   | 5.29169  | 4.09494  | 6.27229   |
| 0        | 0         | 0         | 0        | 0        | 0         |
| 31.8764  | 27.9216   | 28.9107   | 27.7965  | 21.9076  | 25.4041   |
| 856.726  | 708.543   | 806.555   | 835.418  | 745.496  | 721.576   |
| 0.850703 | 0.783112  | 0.688117  | 0.749664 | 0.471056 | 1.08354   |
| 6.44348  | 5.44563   | 5.86606   | 6.33878  | 5.8831   | 6.13065   |
| 1.14885  | 1.71386   | 1.53328   | 1.81127  | 2.12604  | 2.42485   |
| 26.753   | 29.2883   | 31.5867   | 27.7262  | 22.7769  | 26.7143   |
| 4.92335  | 3.95722   | 4.3952    | 4.48832  | 3.89511  | 4.22852   |
| 7.35977  | 6.46546   | 10.1565   | 8.14818  | 9.40031  | 10.3185   |
| 123.597  | 118.679   | 126.205   | 135.34   | 139.501  | 109.627   |
| 1.82552  | 1.26962   | 1.71888   | 1.30928  | 1.72306  | 2.85303   |
| 21.1379  | 14.4791   | 21.613    | 18.1292  | 20.0042  | 19.2838   |
| 0.52101  | 0.366746  | 0.373736  | 0.44499  | 0.22013  | 0.332889  |
| 0        | 0         | 0         | 0        | 0        | 0         |
| 5.09258  | 5.10467   | 7.77818   | 5.47845  | 6.24689  | 5.68167   |
| 0        | 0         | 0         | 0        | 0        | 0         |
| 90.9713  | 123.434   | 70.6664   | 90.8178  | 68.2215  | 83.8946   |
| 0.478907 | 0.548622  | 1.23961   | 0.208531 | 0.445508 | 0.0776341 |

|            |           |           |            |           |           |
|------------|-----------|-----------|------------|-----------|-----------|
| 0.839475   | 0.905805  | 0.659907  | 0.849479   | 0.650774  | 0.622922  |
| 0.23711    | 0.084883  | 0.767173  | 0.430187   | 0.643339  | 0.480463  |
| 2.2221     | 1.83575   | 1.38262   | 2.605      | 1.06006   | 1.17763   |
| 1852.48    | 1908.81   | 1881.52   | 2034.68    | 2173.59   | 1795.75   |
| 20.371     | 17.3706   | 18.4958   | 19.5236    | 22.7696   | 19.3672   |
| 16.626     | 12.8756   | 14.2804   | 15.4393    | 13.8604   | 9.37995   |
| 3.03184    | 2.11891   | 2.21096   | 1.93725    | 1.64341   | 1.96111   |
| 0          | 0         | 0         | 1.0239     | 0         | 1.14438   |
| 0          | 0         | 0         | 0          | 0         | 0         |
| 32.308     | 36.8108   | 29.2254   | 31.9298    | 19.8389   | 21.6824   |
| 3.61121    | 2.04959   | 3.28392   | 3.15497    | 2.59224   | 3.4636    |
| 1.44141    | 0.856773  | 1.36391   | 1.34211    | 0.948738  | 1.47692   |
| 13.5715    | 9.76793   | 11.7124   | 11.7103    | 13.8897   | 11.5776   |
| 41.6751    | 33.6735   | 33.9308   | 33.7685    | 29.5168   | 36.1676   |
| 35.9277    | 47.7578   | 51.1315   | 37.1909    | 29.4281   | 34.1428   |
| 0          | 0         | 0         | 0          | 0         | 0         |
| 2.39082    | 1.93265   | 2.6357    | 2.2108     | 2.34664   | 2.40667   |
| 10.9339    | 11.867    | 11.9682   | 10.8215    | 11.933    | 10.4326   |
| 0          | 0         | 0         | 0          | 0         | 0         |
| 2.01634    | 2.10687   | 2.00557   | 1.77966    | 2.72474   | 3.24639   |
| 2.58236    | 2.02226   | 2.08935   | 1.40555    | 1.3763    | 1.96284   |
| 137.207    | 164.184   | 152.211   | 157.567    | 171.822   | 140.774   |
| 17.6456    | 12.7811   | 16.3156   | 15.8314    | 16.4332   | 15.8016   |
| 12.54      | 9.52005   | 7.83378   | 10.3193    | 9.15697   | 6.79159   |
| 0          | 0         | 0         | 0          | 0         | 0.266473  |
| 0          | 0.0423124 | 0.0239012 | 0          | 0         | 0         |
| 0.00948119 | 0.0339418 | 0.053684  | 0.00688067 | 0.0220499 | 0.0230545 |
| 1.18011    | 1.39852   | 1.31665   | 1.29941    | 0.94639   | 0.890556  |
| 6.79929    | 6.71764   | 6.9408    | 6.85209    | 6.05349   | 6.52181   |
| 42.1114    | 53.0121   | 48.3493   | 52.0743    | 50.5789   | 44.4062   |
| 16.568     | 12.0553   | 14.9734   | 14.0002    | 18.8698   | 15.1995   |
| 50.0373    | 42.6497   | 41.3308   | 59.8355    | 25.6546   | 209.609   |
| 23.847     | 20.6088   | 20.6495   | 24.7137    | 19.9261   | 25.6807   |
| 0          | 0         | 0.100923  | 0.362187   | 0.193445  | 0.101129  |
| 11.5768    | 6.76966   | 10.3278   | 9.48211    | 9.20543   | 9.77568   |
| 12.3313    | 15.5057   | 9.05134   | 11.2897    | 5.4622    | 5.24054   |
| 9.54142    | 8.2547    | 7.47668   | 8.09447    | 5.89849   | 6.8654    |
| 0.125784   | 0.384867  | 0.219271  | 0.236986   | 0.15314   | 0.284681  |
| 0.0259713  | 0         | 0         | 0          | 0         | 0         |
| 43.7789    | 39.8377   | 36.401    | 41.0895    | 44.84     | 37.5658   |
| 0          | 0         | 0         | 0          | 0.0348095 | 0         |
| 3.2044     | 3.23412   | 3.12286   | 6.97648    | 9.84663   | 4.97551   |
| 3.81365    | 2.87664   | 2.28535   | 2.97034    | 2.39843   | 2.82988   |



|           |           |           |           |           |           |
|-----------|-----------|-----------|-----------|-----------|-----------|
| 32.4904   | 35.562    | 32.9127   | 30.678    | 31.0044   | 31.8721   |
| 0.48915   | 0.15678   | 0.0666063 | 0.0523365 | 0.0480535 | 0.157396  |
| 0.478714  | 0.57125   | 0.258148  | 0.115804  | 0.123702  | 0         |
| 127.352   | 135.204   | 119.751   | 135.869   | 117.469   | 129.125   |
| 14.2096   | 10.7433   | 13.6668   | 14.6811   | 13.1325   | 14.9669   |
| 0         | 0         | 0         | 0         | 0         | 0         |
| 0         | 0         | 0         | 0         | 0         | 0         |
| 6.43281   | 4.7984    | 5.80187   | 5.04919   | 3.78786   | 5.16537   |
| 5.15079   | 4.95955   | 4.45371   | 5.49962   | 5.18628   | 4.99068   |
| 0         | 0         | 0         | 0         | 0         | 0         |
| 6.72179   | 4.18522   | 4.03352   | 6.30714   | 4.19816   | 4.2735    |
| 14.8688   | 15.8351   | 14.5655   | 16.8384   | 16.5761   | 15.7238   |
| 0         | 0         | 0         | 0         | 0         | 0         |
| 9.29597   | 6.62297   | 9.3264    | 8.1177    | 7.9973    | 6.67568   |
| 0.637823  | 0.456669  | 0.29979   | 0.825755  | 0.542606  | 0.272316  |
| 0         | 0         | 0         | 0         | 0         | 0.0170811 |
| 13.2684   | 11.8654   | 13.9063   | 14.7799   | 12.7809   | 12.6791   |
| 5.48613   | 5.47848   | 5.52756   | 6.77534   | 7.05092   | 4.05663   |
| 2.25217   | 1.02814   | 2.7447    | 4.26281   | 2.12035   | 5.32867   |
| 344.554   | 362.707   | 257.505   | 259.614   | 283.077   | 183.553   |
| 10.2114   | 9.97304   | 11.8337   | 11.9735   | 11.0912   | 11.4386   |
| 1.23733   | 1.09594   | 1.31069   | 1.97214   | 1.92835   | 0.744736  |
| 0         | 0         | 0.0657068 | 0         | 0         | 0         |
| 89.2675   | 112.254   | 104.197   | 112.755   | 106.211   | 101.548   |
| 23.37     | 18.8742   | 23.4908   | 23.8194   | 22.5614   | 25.5088   |
| 0.690732  | 0.459226  | 0.319268  | 0.572888  | 0.248609  | 0.359911  |
| 3.94967   | 4.29461   | 4.53413   | 7.72221   | 4.76757   | 5.42318   |
| 11.4992   | 10.9776   | 13.5692   | 11.7815   | 12.0956   | 12.6101   |
| 6.48328   | 6.73692   | 6.28841   | 7.43228   | 5.64862   | 5.97572   |
| 3.17877   | 3.16064   | 3.28484   | 2.43475   | 1.09513   | 2.4329    |
| 0         | 0.0265984 | 0         | 0.0606604 | 0         | 0         |
| 15.9467   | 11.5261   | 13.0872   | 15.0965   | 14.7476   | 12.7205   |
| 99.7512   | 96.6982   | 95.0049   | 92.3423   | 102.206   | 84.8821   |
| 0.0350123 | 0.0125341 | 0.0708018 | 0         | 0.013571  | 0.0283786 |
| 1.69478   | 0.475189  | 0.821633  | 0.899083  | 1.06467   | 1.46689   |
| 0.181813  | 0.0781046 | 0.0294129 | 0.0791668 | 0.0563776 | 0.147365  |
| 25.9292   | 23.4027   | 26.7881   | 26.0819   | 26.3954   | 31.029    |
| 9.24955   | 7.21305   | 8.53178   | 9.27835   | 9.91431   | 7.75025   |
| 4.24881   | 3.51425   | 4.08288   | 3.97028   | 3.47581   | 4.14628   |
| 0         | 0         | 0         | 0         | 0         | 0         |
| 65.8298   | 88.8575   | 64.5037   | 70.3504   | 59.7902   | 14.9035   |
| 29.0123   | 31.3339   | 41.535    | 28.2215   | 30.7839   | 30.3149   |
| 22.3699   | 20.6942   | 25.4815   | 22.126    | 22.8676   | 12.0445   |

|           |           |           |           |           |           |
|-----------|-----------|-----------|-----------|-----------|-----------|
| 9.55694   | 9.87825   | 10.7019   | 10.6641   | 12.4406   | 13.0186   |
| 164.132   | 157.523   | 152.411   | 155.322   | 156.8     | 122.245   |
| 0         | 0         | 0         | 0         | 0         | 0         |
| 16.7447   | 19.0972   | 19.4294   | 17.1054   | 16.8243   | 16.117    |
| 0         | 0         | 0         | 0         | 0         | 0         |
| 0         | 0.191808  | 0         | 0         | 0.207677  | 0         |
| 2777.61   | 2815.72   | 2945.47   | 2958.24   | 3080.68   | 2714.92   |
| 342.032   | 446.434   | 274.185   | 304.131   | 311.187   | 339.071   |
| 88.834    | 86.7638   | 99.2088   | 109.723   | 108.019   | 89.7613   |
| 1.28093   | 1.22581   | 0.513446  | 0.809316  | 0.602051  | 1.10638   |
| 5.29753   | 3.55401   | 6.01709   | 5.27738   | 5.87446   | 5.0151    |
| 0.0254658 | 0.0425437 | 0         | 0.018481  | 0.0394829 | 0.0412817 |
| 12.5644   | 15.2679   | 14.6231   | 13.5831   | 11.6972   | 13.9088   |
| 12.1339   | 7.73837   | 10.9339   | 9.99799   | 10.3671   | 9.9517    |
| 28.6508   | 26.0905   | 30.1637   | 30.9287   | 33.5818   | 27.9878   |
| 13.2287   | 11.2376   | 13.0657   | 12.3487   | 11.4487   | 12.1232   |
| 0         | 0.0908682 | 0         | 0.184208  | 0         | 0         |
| 0.713214  | 0.453909  | 0.352553  | 0.345061  | 0.276447  | 0.353273  |
| 0.926004  | 0.928201  | 1.79766   | 1.34404   | 0.861423  | 0.300223  |
| 223.803   | 222.714   | 263.205   | 295.819   | 354.983   | 239.285   |
| 0         | 0.0354857 | 0         | 0         | 0         | 0         |
| 1.42982   | 2.16334   | 1.78938   | 1.95782   | 1.38029   | 2.09917   |
| 7.36198   | 4.00318   | 2.1808    | 4.42133   | 2.06424   | 7.39611   |
| 0         | 0         | 0         | 0         | 0         | 0         |
| 3.36381   | 2.10259   | 2.67773   | 2.5768    | 2.29724   | 1.64455   |
| 12.3229   | 15.6433   | 8.48933   | 10.1117   | 10.555    | 10.1628   |
| 0.356607  | 0.0283693 | 0.0320502 | 0.0287551 | 0         | 0.0722605 |
| 23.644    | 22.3424   | 25.6539   | 26.6311   | 24.5165   | 24.4417   |
| 3.62277   | 2.83286   | 3.19042   | 2.83549   | 2.45378   | 3.51764   |
| 2.1505    | 1.3659    | 1.93166   | 1.65367   | 2.43048   | 2.64262   |
| 16.2712   | 15.2973   | 17.355    | 18.6857   | 16.3727   | 15.3209   |
| 0.0446647 | 0.0799477 | 0.0722568 | 0.048621  | 0.0519372 | 0.0181011 |
| 0         | 0.153116  | 0         | 0.103465  | 0.193414  | 0.0288894 |
| 10.8196   | 10.2606   | 11.8231   | 13.8669   | 12.8503   | 12.9725   |
| 24.4476   | 23.1072   | 23.1418   | 22.5563   | 22.2935   | 21.8135   |
| 1.94116   | 1.93584   | 1.34586   | 0.905616  | 1.02113   | 1.34861   |
| 0.0442301 | 0.0316679 | 0.0357769 | 0.0320986 | 0.0342879 | 0.03585   |
| 0         | 0.0211224 | 0         | 0.0214096 | 0.0457397 | 0.0239118 |
| 3.81203   | 3.49869   | 3.18695   | 6.36843   | 3.05431   | 3.69115   |
| 20.0454   | 18.5559   | 20.0817   | 19.3026   | 16.2705   | 19.1631   |
| 0.106107  | 0.101294  | 0         | 0.077004  | 0.137093  | 0.0573357 |
| 12.1393   | 8.57837   | 9.00908   | 11.3314   | 7.71962   | 10.0578   |
| 7.5915    | 7.48388   | 9.99778   | 9.08064   | 6.29907   | 8.90509   |

|           |           |           |           |           |           |
|-----------|-----------|-----------|-----------|-----------|-----------|
| 118.661   | 133.706   | 97.556    | 131.289   | 87.4639   | 108.792   |
| 2.33682   | 1.88429   | 1.05521   | 1.53122   | 0.668334  | 1.31481   |
| 0.908301  | 0.195098  | 0.293883  | 0.922839  | 0.352065  | 0.441725  |
| 39.9711   | 62.3319   | 50.6474   | 51.7758   | 41.7646   | 49.4887   |
| 8.9607    | 6.38369   | 7.79038   | 8.35708   | 6.34597   | 8.07799   |
| 0.080503  | 0.0115277 | 0.0130234 | 0.0350535 | 0.0124814 | 0         |
| 0         | 0.159073  | 0.183466  | 0.243888  | 0         | 0.0450145 |
| 0.0888596 | 0.033942  | 0.0136905 | 0.0184244 | 0.147609  | 0.0932857 |
| 106.945   | 103.385   | 104.572   | 110.36    | 117.525   | 114.31    |
| 0.216226  | 0         | 0.0699603 | 0.0941515 | 0.100573  | 0         |
| 0.212929  | 0.127044  | 0.172234  | 0.128772  | 0.137555  | 0.143822  |
| 4.23736   | 4.18553   | 5.54172   | 3.54864   | 4.85002   | 5.43808   |
| 5.10041   | 5.525     | 4.48902   | 3.77817   | 3.33932   | 4.0698    |
| 0         | 0.028053  | 0         | 0         | 0         | 0         |
| 74.794    | 87.3853   | 85.3732   | 86.7687   | 85.6307   | 76.2139   |
| 69.8159   | 61.9096   | 67.8384   | 69.9899   | 79.0556   | 71.3063   |
| 0         | 0.0314851 | 0.0118568 | 0.0319133 | 0.0227266 | 0.11881   |
| 0.286643  | 0.146594  | 0.154573  | 0.287269  | 0.380932  | 0.199143  |
| 6.27859   | 6.15225   | 7.4108    | 7.06187   | 8.66108   | 7.28759   |
| 0.502653  | 0.681897  | 0.363787  | 0.633573  | 0.471699  | 0.707619  |
| 2.40648   | 1.99218   | 1.5208    | 1.84164   | 1.76353   | 2.95411   |
| 0.203035  | 0         | 0         | 0         | 0         | 0         |
| 0.525813  | 0.501963  | 0.373766  | 0.416282  | 0.481731  | 0.219552  |
| 34.8487   | 42.0479   | 35.7723   | 35.8705   | 34.9462   | 32.659    |
| 0.0308325 | 0.0662264 | 0.0249398 | 0         | 0.0956073 | 0         |
| 11.1366   | 10.2469   | 11.9009   | 13.0442   | 15.8236   | 12.1649   |
| 0         | 0         | 0         | 0         | 0         | 0         |
| 1.34743   | 1.11567   | 1.33933   | 0.918962  | 0.893576  | 1.15791   |
| 0.0282912 | 0.0202559 | 0.0228841 | 0.0205314 | 0.0219317 | 0.0687928 |
| 0         | 0         | 0         | 0         | 0         | 0         |
| 0         | 0         | 0         | 0         | 0         | 0         |
| 0.335299  | 0.240068  | 0.0678042 | 0.121666  | 0.243683  | 0.169857  |
| 3.87668   | 3.53669   | 4.12202   | 4.152     | 6.90725   | 8.64099   |
| 0         | 0.0494511 | 0.152084  | 0.168471  | 0         | 0.0761972 |
| 2.6003    | 2.37096   | 1.95951   | 1.69353   | 1.51615   | 2.53996   |
| 33.2724   | 32.232    | 33.0113   | 32.9738   | 32.4912   | 30.3795   |
| 45.2847   | 41.6722   | 49.937    | 47.5484   | 50.3826   | 34.9726   |
| 5.32885   | 4.92399   | 5.51606   | 4.1654    | 2.72441   | 5.31545   |
| 30.8941   | 29.0225   | 32.5686   | 28.0747   | 27.8151   | 28.1371   |
| 1.45058   | 1.26114   | 0.880008  | 0.751937  | 2.8916    | 0.629862  |
| 9.32334   | 6.69751   | 9.10321   | 9.34369   | 11.1496   | 10.5278   |
| 10.7514   | 8.67      | 9.91095   | 10.7371   | 10.8578   | 9.05055   |
| 0         | 0         | 0         | 0         | 0         | 0         |

|           |           |           |           |           |           |
|-----------|-----------|-----------|-----------|-----------|-----------|
| 0         | 0         | 0         | 0         | 0         | 0         |
| 12.3603   | 10.5694   | 10.6311   | 10.5565   | 8.24294   | 9.6247    |
| 196.591   | 190.69    | 190.415   | 210.737   | 206.336   | 194.974   |
| 5.65494   | 5.74934   | 6.86125   | 5.93696   | 6.56595   | 6.40674   |
| 0.0161461 | 0         | 0         | 0         | 0         | 0         |
| 0         | 0         | 0.0219167 | 0         | 1.02E-11  | 0.0215434 |
| 7.15388   | 5.61559   | 5.69695   | 5.73486   | 4.85263   | 4.74198   |
| 72.842    | 101.992   | 97.9872   | 78.2566   | 86.7483   | 80.2721   |
| 0         | 0         | 0         | 0         | 0         | 0         |
| 0         | 0.563782  | 0.283082  | 0.57145   | 0.40695   | 0.212745  |
| 0.0885523 | 0.0158504 | 0         | 0.032132  | 0.0514853 | 0.0897183 |
| 13.2366   | 11.4607   | 14.1927   | 15.3026   | 13.3634   | 15.3445   |
| 0.0901446 | 0.0950915 | 0.239629  | 0.0626582 | 0.0973047 | 0.157859  |
| 0         | 0         | 0         | 0         | 0         | 0         |
| 0.47229   | 0.327876  | 0.259862  | 0.491025  | 0.29615   | 0.449514  |
| 1.25141   | 1.52011   | 1.48103   | 0.728557  | 1.09686   | 1.3875    |
| 4.79985   | 3.42405   | 4.87469   | 4.29557   | 6.19782   | 4.89954   |
| 0.9296    | 1.10929   | 1.16968   | 0.974461  | 0.800711  | 0.586034  |
| 1.50675   | 1.1281    | 1.35445   | 1.38492   | 1.64777   | 1.55917   |
| 13.7464   | 11.266    | 12.085    | 10.5968   | 10.3798   | 11.0962   |
| 2.61266   | 1.73148   | 2.47137   | 2.09976   | 2.30993   | 1.75887   |
| 7.45689   | 6.31987   | 7.7577    | 6.38264   | 7.39388   | 7.29069   |
| 37.1122   | 53.1432   | 90.0578   | 80.7989   | 0         | 90.242    |
| 0         | 0         | 0         | 0         | 0         | 0         |
| 5.5058    | 4.92619   | 3.647     | 3.45356   | 4.04151   | 3.98513   |
| 0.531136  | 0.365657  | 0.446149  | 0.311329  | 0.221709  | 0.546408  |
| 0         | 0.0343662 | 0         | 0         | 0.0744188 | 0.0778092 |
| 2.11619   | 1.38889   | 1.85439   | 1.2798    | 0.956961  | 1.00056   |
| 3.52E-07  | 1.41E-07  | 9.14E-08  | 9.05E-08  | 1.14E-07  | 1.51E-07  |
| 116.121   | 119.301   | 120.276   | 110.183   | 163.284   | 65.3699   |
| 10.1149   | 9.20471   | 10.8651   | 9.44945   | 9.40689   | 9.37065   |
| 0.823032  | 0.660615  | 1.25222   | 0.701814  | 0.986043  | 0.476204  |
| 1.72782   | 1.13254   | 1.24012   | 1.74841   | 1.03759   | 1.00596   |
| 3.737     | 3.86382   | 3.30209   | 3.7019    | 3.1073    | 3.75032   |
| 10.7736   | 11.3549   | 11.3663   | 11.0111   | 11.3929   | 11.6394   |
| 0         | 0         | 0         | 0         | 0         | 0         |
| 0.138488  | 0.16529   | 0.283591  | 0.2308    | 0.159079  | 0.249129  |
| 2.23987   | 2.26576   | 2.07089   | 2.24114   | 1.54711   | 2.12663   |
| 0.106417  | 0.304769  | 0.172157  | 0.231686  | 0         | 0         |
| 5.95166   | 4.1137    | 5.57486   | 5.38189   | 6.20835   | 7.66413   |
| 4.3611    | 3.31203   | 3.70607   | 3.9655    | 3.51192   | 4.09515   |
| 15.7026   | 13.9425   | 15.0882   | 16.1026   | 14.9478   | 12.8953   |
| 6.89584   | 6.27509   | 9.59936   | 7.88202   | 9.47602   | 9.02466   |

|           |           |          |           |            |           |
|-----------|-----------|----------|-----------|------------|-----------|
| 1.85446   | 0.603528  | 1.2273   | 1.46817   | 0.849497   | 1.36646   |
| 0         | 0         | 0        | 0         | 0          | 0         |
| 0         | 0         | 0        | 0.357124  | 0          | 0         |
| 0.304812  | 0         | 0        | 0.78651   | 0.21004    | 0.395298  |
| 12.7274   | 10.1188   | 11.4633  | 13.1464   | 10.9409    | 12.9424   |
| 0.242461  | 0.0810122 | 0.130748 | 0.187689  | 0.112776   | 0.157218  |
| 0.13547   | 0.0808283 | 0.109579 | 0.114699  | 0.192534   | 0.274507  |
| 0.757404  | 1.01679   | 1.14872  | 1.03062   | 0.954121   | 0.920853  |
| 11.6756   | 15.339    | 9.98968  | 13.6631   | 8.90107    | 11.131    |
| 0         | 0         | 0        | 0         | 0          | 0         |
| 1.56696   | 1.17935   | 1.08395  | 1.10045   | 1.94645    | 1.06882   |
| 192.286   | 199.357   | 192.175  | 190.085   | 205.738    | 163.972   |
| 0         | 0         | 0        | 0         | 0          | 0         |
| 1.13649   | 0.508568  | 1.37893  | 1.54645   | 0.550643   | 0.806021  |
| 28.0456   | 30.3381   | 28.5785  | 30.412    | 28.3959    | 29.4922   |
| 2.63245   | 3.50031   | 2.12933  | 2.31979   | 2.62378    | 2.74331   |
| 0.13433   | 0.120222  | 0        | 0.0487429 | 0          | 0.0544396 |
| 0         | 0         | 0        | 0         | 0          | 0         |
| 8.55293   | 5.77101   | 12.8241  | 9.37688   | 13.3113    | 8.53535   |
| 9.5499    | 6.69978   | 6.51326  | 8.78936   | 3.02983    | 4.3015    |
| 0         | 0.151242  | 0        | 0.0109499 | 0.00779786 | 0.0244594 |
| 41.5171   | 35.5367   | 42.1936  | 37.4207   | 28.1521    | 32.7439   |
| 11.1098   | 9.03837   | 10.6196  | 7.08472   | 7.30724    | 9.82204   |
| 0         | 0.0325257 | 0.18373  | 0.0989041 | 0.0704332  | 0.147284  |
| 20.3206   | 17.1188   | 17.4077  | 19.2318   | 18.7331    | 20.3642   |
| 112.225   | 134.035   | 125.022  | 105.761   | 129.224    | 120.76    |
| 0         | 0         | 0        | 0         | 0          | 0         |
| 4.21426   | 3.44838   | 4.95092  | 6.33519   | 4.43373    | 3.49713   |
| 24.7036   | 20.1062   | 23.6969  | 20.2222   | 23.0745    | 24.1591   |
| 3.15331   | 2.55468   | 1.74554  | 2.64927   | 2.83034    | 3.90066   |
| 0.0139516 | 0         | 0        | 0         | 0          | 0         |
| 2.40393   | 1.87401   | 1.6838   | 2.29627   | 1.6193     | 1.94249   |
| 0         | 0         | 0        | 0         | 0          | 0         |
| 0         | 0         | 0        | 0         | 0          | 0.174658  |
| 1.63324   | 1.05235   | 1.19071  | 1.38553   | 1.31046    | 1.20027   |
| 0.221281  | 0.176037  | 0.198878 | 0.214117  | 0.247781   | 0.139499  |
| 3.96584   | 2.77105   | 2.24166  | 2.01119   | 2.44469    | 2.20751   |
| 0.443715  | 0.462097  | 0.522054 | 0.409833  | 0.312704   | 0.392341  |
| 0         | 0         | 0        | 0         | 0          | 0         |
| 6.66068   | 6.11598   | 5.94744  | 6.12069   | 6.26991    | 5.59151   |
| 1.05657   | 0.751922  | 1.14735  | 0.488224  | 0.52101    | 0.85699   |
| 2.2984    | 1.06965   | 0.96055  | 0.917395  | 0.712702   | 0.962514  |
| 42.3675   | 34.5384   | 36.502   | 41.3574   | 40.355     | 37.4525   |

|            |            |            |           |            |           |
|------------|------------|------------|-----------|------------|-----------|
| 4.91693    | 4.75707    | 4.06677    | 4.35413   | 2.80607    | 4.36369   |
| 8.66898    | 8.63291    | 12.0855    | 12.0855   | 11.8297    | 11.8297   |
| 236.498    | 84.664     | 63.7661    | 143.026   | 122.225    | 127.793   |
| 8.11895    | 8.93245    | 5.55433    | 7.34862   | 5.34774    | 5.00042   |
| 0.063978   | 0.045807   | 0.0517505  | 0.04643   | 0          | 0         |
| 8.52455    | 9.66946    | 11.4664    | 5.97809   | 14.1078    | 13.3532   |
| 1.26887    | 0.870633   | 0.570202   | 0.972     | 0.683089   | 1.07131   |
| 44.1853    | 40.5028    | 45.8653    | 43.9103   | 40.6421    | 40.9999   |
| 0          | 0          | 0.156072   | 0.140026  | 0.299153   | 0         |
| 0          | 0          | 0          | 0         | 0          | 0         |
| 15.3636    | 15.2688    | 34.7471    | 12.5365   | 11.6731    | 14.2494   |
| 2.71273    | 2.19315    | 1.65277    | 2.56322   | 1.30357    | 2.30986   |
| 2.08179    | 2.14788    | 1.76164    | 2.19259   | 1.96143    | 2.29308   |
| 72.9345    | 73.6927    | 88.7522    | 86.6243   | 87.0085    | 84.8852   |
| 0.136854   | 0          | 0          | 0.198635  | 0.0530458  | 0.166388  |
| 693.2      | 1165.38    | 910.669    | 932.097   | 656.865    | 1773.4    |
| 3.4717     | 4.67005    | 2.63799    | 2.51948   | 4.07775    | 4.86042   |
| 9.21802    | 7.38975    | 8.17745    | 8.97807   | 8.42285    | 10.2519   |
| 306.557    | 245.894    | 320.264    | 349.028   | 383.615    | 441.434   |
| 27.4897    | 24.3331    | 25.8469    | 26.3076   | 27.1326    | 23.0879   |
| 26.5659    | 26.7018    | 30.1517    | 32.2378   | 32.59      | 29.668    |
| 0.0974293  | 0.0179384  | 0          | 0         | 0          | 0.0203072 |
| 0.00880753 | 0.00756722 | 0.00712423 | 0.0268455 | 0.00585234 | 0.0281982 |
| 4.64841    | 0.854735   | 2.06562    | 1.68106   | 2.10862    | 2.51361   |
| 16.8389    | 18.0508    | 15.3708    | 16.9992   | 11.0848    | 13.0385   |
| 0          | 0          | 0          | 0         | 0          | 0         |
| 50.6083    | 18.1173    | 40.936     | 0         | 39.2323    | 82.0394   |
| 0.427308   | 0.359259   | 0.369161   | 0.540452  | 0.318638   | 0.528817  |
| 0.0691323  | 0.148492   | 0.11184    | 0.0501706 | 0          | 0.0560341 |
| 9.54E-07   | 3.86E-06   | 9.93E-07   | 0.666084  | 0.0903235  | 7.01E-07  |
| 13.5511    | 10.3847    | 11.7466    | 11.2195   | 10.7719    | 12.4897   |
| 9.38838    | 9.38838    | 10.2348    | 10.2348   | 10.0074    | 10.0074   |
| 12.559     | 14.3335    | 11.4627    | 13.0641   | 10.7059    | 10.9399   |
| 0.169556   | 0.424896   | 0.274301   | 0.184575  | 0.131442   | 0.137431  |
| 0          | 0          | 0          | 0         | 0          | 0         |
| 0          | 0          | 0.0945298  | 0         | 0          | 0         |
| 3.54273    | 2.98415    | 4.29847    | 2.30636   | 2.94832    | 2.82928   |
| 46.0858    | 34.3975    | 36.7263    | 28.2278   | 65.305     | 12.3632   |
| 7.69112    | 7.23767    | 9.948      | 6.74649   | 7.0452     | 9.0148    |
| 0.830802   | 0.534702   | 0.422927   | 0.548747  | 0.564471   | 0.573829  |
| 90.0094    | 92.5097    | 91.583     | 94.2784   | 95.5826    | 85.8207   |
| 0          | 0          | 0          | 42.9504   | 0          | 0         |
| 7.67753    | 6.246      | 6.7698     | 7.5555    | 6.46189    | 6.67423   |

|           |           |           |          |           |           |
|-----------|-----------|-----------|----------|-----------|-----------|
| 0         | 0         | 0         | 0        | 0         | 0         |
| 11.026    | 10.8249   | 7.09445   | 8.9717   | 8.28853   | 10.9004   |
| 0         | 0         | 0         | 0        | 0         | 0         |
| 0         | 0         | 0.0417586 | 0        | 0         | 0         |
| 0         | 0         | 0         | 0        | 0         | 0         |
| 27.1857   | 20.8195   | 24.0854   | 23.4168  | 26.6278   | 27.1767   |
| 0.077317  | 0         | 0         | 0        | 0         | 0         |
| 3.95792   | 4.37758   | 6.06848   | 5.16592  | 5.9533    | 5.60208   |
| 3.64339   | 3.57801   | 3.57431   | 3.63559  | 2.68128   | 3.45192   |
| 6.82711   | 6.70779   | 6.77014   | 8.07718  | 7.50715   | 7.25976   |
| 0         | 0         | 0         | 0        | 0         | 0         |
| 0         | 0         | 0         | 0        | 0         | 0         |
| 0.110558  | 0.107742  | 0.149047  | 0.135395 | 0.0285689 | 0         |
| 8.17573   | 7.62996   | 10.2572   | 7.69046  | 8.29588   | 7.50432   |
| 0         | 0         | 0         | 0        | 0         | 0         |
| 16.0236   | 13.6891   | 14.8856   | 14.2289  | 13.6884   | 13.4059   |
| 1.8908    | 1.62705   | 1.76023   | 1.92462  | 1.41455   | 1.74599   |
| 0         | 0         | 0         | 2.02566  | 0         | 6.78721   |
| 0.737103  | 0.65969   | 1.78868   | 1.20359  | 0.142853  | 1.64298   |
| 6.92303   | 6.14638   | 6.71988   | 8.50759  | 5.29528   | 8.37962   |
| 0         | 0.0614763 | 0         | 0        | 0         | 0.13919   |
| 1.36915   | 1.2623    | 2.3097    | 1.97879  | 1.60798   | 1.5837    |
| 20.358    | 18.8112   | 21.258    | 19.3397  | 22.3609   | 20.8522   |
| 0.445012  | 0.678988  | 0.571467  | 0.550967 | 0.588911  | 0.981323  |
| 1.46145   | 0.603278  | 0.965815  | 0.830636 | 1.06553   | 1.51262   |
| 49.6518   | 55.7441   | 54.9918   | 57.0622  | 93.2979   | 35.4349   |
| 2.56926   | 2.71091   | 2.7892    | 1.86456  | 1.99173   | 1.26045   |
| 0         | 0         | 0         | 0        | 0         | 0         |
| 2.35318   | 1.58652   | 1.58793   | 1.19866  | 1.96385   | 1.79698   |
| 7.033     | 5.10716   | 3.80824   | 4.79933  | 1.70221   | 9.01529   |
| 19.9395   | 16.5708   | 18.5661   | 18.5379  | 18.0485   | 18.572    |
| 5.70515   | 9.9501    | 8.04629   | 7.53753  | 6.35057   | 9.12986   |
| 0         | 0         | 0         | 0        | 0         | 0         |
| 0.516334  | 0.316873  | 0.357988  | 0.481774 | 0.228726  | 0.298933  |
| 8.73214   | 5.92087   | 7.83856   | 7.65776  | 8.52835   | 8.15428   |
| 0.0189881 | 0         | 0         | 0        | 0         | 0.0153905 |
| 9.07804   | 10.826    | 9.4697    | 10.6908  | 10.6503   | 9.35817   |
| 1.84434   | 0.720263  | 2.18348   | 2.66471  | 1.72867   | 1.1823    |
| 29.7608   | 28.4998   | 26.73     | 28.3811  | 20.3099   | 27.3534   |
| 0.270968  | 0.440162  | 0.21918   | 0.230446 | 0.177235  | 0.164717  |
| 0         | 0         | 0         | 0        | 0         | 0         |
| 97.8636   | 102.661   | 62.2792   | 67.3317  | 69.6113   | 77.3615   |
| 49.7079   | 47.1529   | 48.6012   | 49.8511  | 48.8999   | 50.2686   |

|           |           |           |           |           |           |
|-----------|-----------|-----------|-----------|-----------|-----------|
| 21.2989   | 19.2541   | 20.6556   | 19.557    | 22.796    | 19.6675   |
| 1.62013   | 1.21154   | 1.83469   | 2.15556   | 1.70251   | 1.80926   |
| 0         | 0         | 0         | 0         | 0.087013  | 0         |
| 3.27557   | 2.66544   | 2.66909   | 2.14907   | 2.19258   | 2.60597   |
| 114.625   | 80.66     | 89.9994   | 104.527   | 116.796   | 95.0558   |
| 18.0218   | 16.34     | 20.5294   | 19.4617   | 20.0315   | 20.7344   |
| 0         | 0         | 0.188621  | 0.169229  | 0         | 0         |
| 2.46297   | 2.08236   | 2.09822   | 2.71916   | 2.09214   | 1.63528   |
| 4.34032   | 4.18924   | 4.16984   | 3.93223   | 3.64237   | 4.76596   |
| 0.370547  | 0.442174  | 0.0999092 | 0.179275  | 0.0957511 | 0         |
| 0         | 0         | 0         | 0         | 0         | 0         |
| 0.240001  | 0.0572659 | 0.258732  | 0.029014  | 0.0340724 | 0.129889  |
| 9.89522   | 11.6899   | 13.0733   | 10.652    | 11.2507   | 8.82245   |
| 53.1065   | 41.7991   | 51.5019   | 53.5663   | 45.7312   | 49.828    |
| 0.225795  | 0.305367  | 0.142054  | 0.200278  | 0.136142  | 0.325359  |
| 0.0936227 | 0.16758   | 0         | 0         | 0         | 0         |
| 0         | 0.112125  | 0.190009  | 0         | 0         | 0         |
| 0         | 0         | 0         | 0         | 0         | 0         |
| 0.0723235 | 0.0258911 | 0.117002  | 0.104973  | 0.0840995 | 0         |
| 10.4952   | 9.66594   | 10.0062   | 9.96279   | 13.3247   | 13.0252   |
| 0         | 0         | 0         | 0         | 0         | 0         |
| 0.420623  | 0.935176  | 0.734189  | 1.10855   | 0.29175   | 0.753633  |
| 5.57164   | 4.63135   | 3.91321   | 4.82254   | 3.48698   | 5.55137   |
| 24.1681   | 29.1449   | 25.9943   | 23.9902   | 24.1259   | 22.9893   |
| 0         | 0         | 0         | 0         | 0         | 0         |
| 22.0398   | 19.329    | 21.4078   | 22.353    | 22.8317   | 19.2155   |
| 0         | 0         | 0         | 0         | 0         | 0         |
| 13.854    | 10.5931   | 12.0132   | 11.9666   | 10.4188   | 11.8699   |
| 0.294067  | 0.210546  | 0.281113  | 0.44622   | 0.0828964 | 0.368361  |
| 0.0436029 | 0         | 0         | 0         | 0.0338017 | 0         |
| 0.908938  | 1.60193   | 1.47139   | 1.1163    | 1.35504   | 1.58679   |
| 25.882    | 31.0957   | 19.627    | 25.3287   | 24.5482   | 21.4153   |
| 0.0870002 | 0.186872  | 0.281491  | 0.220982  | 0.303498  | 0.0705166 |
| 2.70305   | 2.30789   | 1.88721   | 2.04557   | 1.86015   | 1.95358   |
| 1.88946   | 1.35282   | 0         | 0.914146  | 0         | 1.02098   |
| 0         | 0.170539  | 0         | 0.0576195 | 0.0615494 | 0.257414  |
| 6.66074   | 6.04438   | 5.6801    | 7.88774   | 8.94608   | 5.96374   |
| 0         | 0         | 0.0347764 | 0         | 0         | 0         |
| 7.22102   | 7.63059   | 6.65022   | 7.86064   | 7.78977   | 6.09969   |
| 50.056    | 62.6853   | 59.0193   | 58.638    | 37.4084   | 48.3949   |
| 5.85041   | 8.37756   | 8.47866   | 8.40304   | 6.51953   | 6.42139   |
| 0.0855292 | 0.340833  | 0.361961  | 0.209505  | 0.219508  | 0.348404  |
| 295.67    | 374.313   | 400.593   | 393.999   | 434.4     | 532.225   |



|           |           |           |           |           |           |
|-----------|-----------|-----------|-----------|-----------|-----------|
| 0.0459944 | 0.0658622 | 0.0372039 | 0.0667579 | 0         | 0.11184   |
| 152.293   | 191.278   | 134.369   | 155.242   | 148.702   | 137.804   |
| 11.8533   | 9.82674   | 10.8354   | 11.5953   | 12.5608   | 12.8943   |
| 19.6955   | 17.6496   | 17.3542   | 19.9757   | 18.8781   | 19.0671   |
| 0.0556857 | 0.418883  | 0.090086  | 0.323634  | 0.130584  | 0.0677027 |
| 14.5223   | 10.3205   | 12.5118   | 10.5901   | 9.56863   | 11.6654   |
| 80.6247   | 79.8369   | 70.5774   | 82.0168   | 77.4659   | 77.3216   |
| 21.9543   | 16.0517   | 17.1431   | 18.1255   | 19.2962   | 16.9041   |
| 44.8613   | 51.0998   | 49.8635   | 40.4113   | 45.2347   | 37.2516   |
| 0         | 0         | 0         | 0         | 0         | 0         |
| 9.77306   | 4.72675   | 9.05962   | 8.05993   | 7.05412   | 5.53165   |
| 13.4439   | 10.3741   | 12.5843   | 13.0443   | 14.3243   | 12.8949   |
| 1.19679   | 0.724326  | 0.997591  | 0.815515  | 0.78274   | 1.45625   |
| 2.71847   | 3.92636   | 2.79544   | 3.23445   | 2.14902   | 2.25014   |
| 0.0481784 | 0         | 0         | 0         | 0         | 0         |
| 0         | 0         | 0         | 0         | 0         | 0         |
| 28.9416   | 26.4309   | 30.3394   | 34.3365   | 38.7209   | 31.1294   |
| 0.0300417 | 0.0860372 | 0.0729005 | 0.0436037 | 0.0931553 | 0.146099  |
| 5.03819   | 4.47744   | 4.86056   | 4.6402    | 3.81138   | 4.46082   |
| 0         | 0         | 0.0331539 | 0         | 0         | 0         |
| 23.1306   | 21.908    | 24.4976   | 23.3539   | 22.4302   | 23.7948   |
| 0         | 0.761762  | 1.72124   | 0.579103  | 0         | 0         |
| 21.3273   | 22.7148   | 20.8141   | 20.9233   | 20.9102   | 22.007    |
| 26.4556   | 28.0924   | 28.8523   | 23.3109   | 22.0946   | 27.0331   |
| 0         | 1.66529   | 0.578882  | 1.16857   | 0.693487  | 0.580065  |
| 0         | 0.0550678 | 0.0207376 | 0.186056  | 0.0397491 | 0.06234   |
| 35.895    | 36.0861   | 38.1065   | 37.8982   | 39.7291   | 38.9267   |
| 22.1186   | 23.867    | 24.2515   | 24.2628   | 21.8893   | 22.0919   |
| 0         | 0         | 0         | 0         | 0.0913187 | 0         |
| 27.2868   | 0.739058  | 29.7496   | 11.6687   | 0.451076  | 15.1768   |
| 31.498    | 33.1553   | 40.3857   | 39.7327   | 32.2229   | 36.0712   |
| 1.96143   | 1.49661   | 2.12815   | 1.68289   | 1.31417   | 1.9362    |
| 13.1838   | 10.5905   | 12.6849   | 12.6732   | 13.5568   | 13.0517   |
| 0.591     | 0.423145  | 0.119511  | 0.428899  | 0.114538  | 0.638701  |
| 0         | 0         | 0         | 0         | 0         | 0         |
| 0         | 0         | 0         | 0.0105727 | 0         | 0         |
| 0         | 0         | 0.23836   | 0.0950462 | 0.203058  | 0         |
| 0         | 0         | 0         | 0         | 0         | 0         |
| 22.8897   | 23.2178   | 23.5038   | 18.1331   | 23.4398   | 29.4153   |
| 43.883    | 33.1322   | 36.9429   | 43.9341   | 30.6472   | 37.4463   |
| 0.898833  | 0.602687  | 0.51932   | 0.486636  | 0.530887  | 0.728534  |
| 360.06    | 446.298   | 426.322   | 438.184   | 478.504   | 433.249   |
| 25.6289   | 29.2434   | 33.0092   | 29.8973   | 32.3195   | 28.5844   |

|           |           |           |           |           |           |
|-----------|-----------|-----------|-----------|-----------|-----------|
| 0         | 0         | 0.037555  | 0.033694  | 0         | 0         |
| 0.129889  | 0.0557988 | 0         | 0         | 0         | 0.0421117 |
| 0.681386  | 0.391405  | 0.489816  | 0.744922  | 0         | 0.620019  |
| 2.68757   | 2.08889   | 2.09836   | 2.68052   | 1.82162   | 2.28321   |
| 0.0524409 | 0.0187733 | 0.0212092 | 0         | 0         | 0.0637576 |
| 19.1079   | 26.1539   | 28.1359   | 21.8373   | 19.9905   | 21.9337   |
| 3.90543   | 2.6711    | 3.74559   | 3.64583   | 4.48375   | 3.66827   |
| 28.0768   | 23.2558   | 24.2306   | 20.3563   | 28.5866   | 17.3979   |
| 2.28E-07  | 7.90E-08  | 2.32E-07  | 7.63E-07  | 1.91E-07  | 2.05E-07  |
| 0.177723  | 0         | 0.287513  | 0.38693   | 0         | 0         |
| 1.92446   | 1.45924   | 1.74115   | 1.69346   | 1.45006   | 1.75072   |
| 1.12896   | 0.202078  | 0.228298  | 0.204826  | 0.218796  | 0         |
| 20.3508   | 21.4216   | 19.3205   | 25.0005   | 18.5881   | 15.9428   |
| 21.2938   | 18.8697   | 21.0696   | 25.5548   | 18.3508   | 22.5083   |
| 0.38225   | 0.547367  | 0.54109   | 0.451506  | 0.482301  | 0.271098  |
| 0.743005  | 0.140817  | 0.288716  | 1.10808   | 0.877968  | 0.604593  |
| 0.692448  | 1.33861   | 0.588113  | 0.628153  | 0.509957  | 0.869941  |
| 8.48209   | 8.08062   | 8.05174   | 8.69924   | 8.15138   | 8.21025   |
| 9.29052   | 6.42087   | 7.09742   | 7.07005   | 7.93571   | 8.31468   |
| 8.85513   | 8.96973   | 8.5195    | 7.4201    | 7.59979   | 7.90943   |
| 184.534   | 166.015   | 198.817   | 101.965   | 240.726   | 63.6917   |
| 0         | 0         | 0         | 0         | 0         | 0         |
| 5.45602   | 2.60427   | 3.58578   | 3.75331   | 2.99596   | 2.57967   |
| 0         | 0         | 0         | 0         | 0         | 0         |
| 13.1386   | 13.5381   | 6.03432   | 12.9792   | 10.6254   | 10.247    |
| 32.0185   | 29.9934   | 32.9906   | 33.9987   | 30.5811   | 36.1398   |
| 0.6878    | 0.393962  | 0.667617  | 0.598979  | 0.746471  | 0.445988  |
| 177.236   | 334.262   | 262.099   | 265.936   | 225.256   | 257.216   |
| 2.08033   | 1.12197   | 1.63733   | 1.09945   | 1.35411   | 1.40614   |
| 0.598936  | 0.354564  | 0.375671  | 0.408177  | 0.246016  | 0.341943  |
| 36.4288   | 35.983    | 38.2165   | 35.7514   | 29.0456   | 38.2158   |
| 17.2887   | 17.5151   | 16.2676   | 19.7163   | 12.7038   | 18.4934   |
| 0.472204  | 0.367488  | 0.398563  | 0.372486  | 0.588878  | 0.615707  |
| 117.083   | 187.477   | 176.377   | 154.591   | 207.056   | 163.293   |
| 4.78718   | 4.00753   | 4.64187   | 5.06754   | 3.7025    | 4.35024   |
| 5.92638   | 4.99125   | 5.25093   | 4.8851    | 5.01912   | 4.65082   |
| 1.54984   | 1.18708   | 1.63264   | 1.25553   | 1.36911   | 1.13934   |
| 1.3261    | 1.14494   | 0.412051  | 0.530289  | 0.125879  | 1.07485   |
| 26.5422   | 22.5584   | 29.4498   | 27.8541   | 30.9381   | 25.0734   |
| 0.222728  | 0.0955093 | 0         | 0.0905172 | 0.0483453 | 0.119818  |
| 0.418689  | 0.328972  | 0.338669  | 0.512185  | 0.613078  | 0.772524  |
| 6.67726   | 6.09392   | 5.02663   | 5.479     | 5.86649   | 5.94615   |
| 52.6843   | 43.7422   | 73.245    | 34.0827   | 28.8426   | 69.6057   |

|           |          |           |           |          |           |
|-----------|----------|-----------|-----------|----------|-----------|
| 1.24274   | 0.949095 | 1.13926   | 1.11231   | 1.34874  | 0.67152   |
| 0.794629  | 0.438159 | 0.298651  | 0.864229  | 0.709523 | 0.4221    |
| 0.818627  | 0.820569 | 0.927039  | 0.950547  | 0.634612 | 1.19434   |
| 0         | 0        | 0         | 0         | 0        | 0         |
| 228.875   | 206.249  | 199.368   | 228.016   | 241.941  | 200.579   |
| 19.4167   | 17.554   | 19.6077   | 20.5798   | 21.4016  | 17.1349   |
| 51.1631   | 44.5604  | 55.3749   | 51.2577   | 49.3158  | 51.9258   |
| 0         | 0        | 0         | 0         | 0        | 0         |
| 0         | 0        | 0         | 0         | 0        | 0         |
| 17.285    | 16.4784  | 15.1584   | 18.1089   | 11.734   | 15.4534   |
| 31.6921   | 31.6119  | 31.5335   | 37.5817   | 26.8827  | 27.569    |
| 0.973896  | 0.901146 | 1.37532   | 1.30966   | 1.42659  | 1.22701   |
| 0         | 0        | 0         | 0         | 0        | 0         |
| 17.433    | 13.9715  | 17.6219   | 15.5211   | 13.9779  | 17.5536   |
| 8.07738   | 7.4144   | 8.50972   | 8.42204   | 7.99158  | 6.87614   |
| 2.70568   | 3.5451   | 2.84514   | 2.8668    | 3.2511   | 2.69745   |
| 1.4712    | 1.83     | 1.68089   | 1.63015   | 1.26999  | 1.32981   |
| 4.87974   | 5.27763  | 5.0341    | 5.28102   | 4.012    | 4.5091    |
| 7.71496   | 6.86322  | 6.88327   | 7.36506   | 6.75081  | 5.81041   |
| 1.3432    | 0.961705 | 0.845045  | 0.541547  | 1.04127  | 0.967741  |
| 0         | 0        | 0         | 0         | 0        | 0         |
| 0.0276088 | 0        | 0         | 0.0200362 | 0        | 0         |
| 3.95388   | 5.12893  | 4.62801   | 4.08468   | 2.88481  | 3.54408   |
| 0.086241  | 0.084902 | 0.0871982 | 0.32571   | 0.136496 | 0.0699012 |
| 28.5961   | 17.9295  | 18.8712   | 19.0253   | 26.3136  | 12.2365   |
| 0.296515  | 0.354333 | 0.496754  | 0.356148  | 0.22977  | 0.370526  |
| 6.15016   | 4.78063  | 5.0485    | 4.83093   | 5.45105  | 4.99313   |
| 1006.91   | 2867.53  | 1307.57   | 1262.62   | 1363.45  | 3153.15   |
| 0.313872  | 0.505634 | 0.126942  | 0.0569456 | 0.364977 | 0.318004  |
| 4.74842   | 3.67652  | 4.82352   | 4.99755   | 5.59342  | 5.29132   |
| 2.09003   | 3.08297  | 2.71478   | 2.80307   | 2.79791  | 3.07934   |
| 0.0895081 | 0.384517 | 0.289605  | 0.194873  | 0.416328 | 0.217648  |
| 5.8566    | 7.22361  | 5.01595   | 4.96457   | 3.05219  | 4.90654   |
| 0.262403  | 0.187875 | 0         | 0.666506  | 0.203419 | 0.212686  |
| 13.3959   | 13.4523  | 12.2526   | 12.3639   | 10.1983  | 11.0249   |
| 17.6023   | 16.1446  | 17.6203   | 17.9084   | 13.6166  | 16.6275   |
| 100.181   | 120.955  | 115.602   | 112.006   | 123.835  | 106.219   |
| 3.58467   | 3.8796   | 3.85184   | 3.55558   | 3.35579  | 1.90017   |
| 4.955     | 4.62944  | 4.44166   | 4.78672   | 5.79328  | 4.70093   |
| 9.50472   | 7.27842  | 10.4133   | 8.26192   | 6.94177  | 8.3591    |
| 0         | 0        | 0         | 0         | 0        | 0         |
| 6.15351   | 5.74669  | 7.1656    | 6.36418   | 6.61389  | 7.46939   |
| 10.3705   | 8.16756  | 10.1155   | 8.96482   | 10.0965  | 9.96311   |

|           |           |           |           |           |           |
|-----------|-----------|-----------|-----------|-----------|-----------|
| 353.651   | 364.243   | 398.604   | 480.882   | 325.926   | 486.172   |
| 11.4465   | 10.1498   | 9.95662   | 10.8579   | 11.828    | 11.2711   |
| 0         | 0         | 0         | 0.0518211 | 0.0553556 | 0         |
| 9.65304   | 9.94236   | 9.74546   | 8.67606   | 9.34055   | 8.68996   |
| 0.459079  | 0.386596  | 0.606605  | 0.577777  | 0.355886  | 0.667164  |
| 0         | 0         | 0         | 0         | 0         | 0         |
| 10.9451   | 10.0358   | 10.3489   | 13.224    | 13.5017   | 12.8841   |
| 1.27243   | 0.216951  | 1.07E-29  | 0.534592  | 0.722797  | 1.93222   |
| 0         | 0         | 0         | 0         | 0         | 0         |
| 25.8648   | 23.289    | 28.5935   | 29.5177   | 24.9902   | 27.072    |
| 0         | 0.0163003 | 0         | 0         | 0         | 0         |
| 46.8896   | 51.4885   | 42.1301   | 43.3428   | 42.3245   | 41.0328   |
| 0         | 0         | 0         | 0         | 0         | 0         |
| 5.6354    | 6.68128   | 6.3638    | 6.34637   | 5.35482   | 4.12276   |
| 7.79513   | 8.20262   | 8.63001   | 6.08563   | 9.33903   | 7.2117    |
| 8.21733   | 6.78081   | 7.37551   | 8.00074   | 6.88894   | 6.69977   |
| 0.408756  | 0.526592  | 0.165317  | 0.653823  | 0.261906  | 0.450763  |
| 143.125   | 178.331   | 168.78    | 142.462   | 160.058   | 32.0144   |
| 9.13404   | 9.11802   | 9.78363   | 9.78363   | 10.4223   | 10.4223   |
| 2.12209   | 1.55936   | 1.80686   | 1.37793   | 1.25545   | 1.62949   |
| 22.4021   | 22.5434   | 22.4083   | 22.1714   | 24.2238   | 24.6816   |
| 61.5995   | 56.3405   | 57.0591   | 59.579    | 43.3529   | 52.7169   |
| 0         | 0         | 0         | 0         | 0         | 0         |
| 63.5837   | 59.7323   | 65.4188   | 63.9508   | 43.8785   | 52.7743   |
| 103.466   | 91.4637   | 92.0193   | 97.5597   | 109.123   | 64.7586   |
| 16.4239   | 14.3548   | 18.1871   | 14.1182   | 15.0597   | 16.5533   |
| 0         | 0.126514  | 0         | 0         | 0         | 0         |
| 15.4287   | 11.827    | 15.7032   | 14.0888   | 13.5843   | 15.1832   |
| 1.99599   | 0.960619  | 0.644029  | 0.190806  | 0.254347  | 1.00793   |
| 11.0327   | 8.21376   | 10.9695   | 8.97733   | 11.444    | 8.99775   |
| 0.0433214 | 0.0310173 | 0.0350418 | 0         | 0         | 0.0351134 |
| 27.9197   | 17.1622   | 23.4149   | 23.3378   | 35.2225   | 17.4507   |
| 35.7825   | 26.8805   | 34.8867   | 33.8316   | 30.9335   | 32.6049   |
| 12.6111   | 11.1243   | 13.0777   | 12.1639   | 12.5127   | 13.9649   |
| 0         | 0         | 0         | 0         | 0         | 0         |
| 0.324544  | 0.568009  | 0.145843  | 0.157018  | 0.223637  | 0.263054  |
| 0         | 0.295854  | 0         | 0         | 0         | 0         |
| 1.31596   | 1.88441   | 2.30632   | 2.70588   | 1.53023   | 2.84435   |
| 4.6464    | 4.9421    | 4.66197   | 5.07251   | 4.53205   | 3.54466   |
| 0         | 0         | 0         | 0         | 0         | 1.0248    |
| 15.7925   | 12.333    | 13.7401   | 15.4168   | 16.3717   | 15.2914   |
| 0.093504  | 0.0669471 | 0         | 0.203573  | 0.108729  | 0.0378941 |
| 59.706    | 65.8317   | 68.5182   | 64.1563   | 77.3672   | 61.2099   |

|           |           |           |           |          |           |
|-----------|-----------|-----------|-----------|----------|-----------|
| 40.1084   | 31.1739   | 31.0797   | 35.1334   | 43.7529  | 36.5076   |
| 1.88429   | 1.53409   | 0.91491   | 0.843942  | 0.759135 | 1.65413   |
| 0.103579  | 0.0741604 | 0         | 0         | 0        | 0.0839541 |
| 2.23583   | 1.39456   | 2.83285   | 2.58488   | 2.64022  | 2.45117   |
| 2.6277    | 3.24176   | 3.40079   | 3.69658   | 3.00854  | 2.91624   |
| 0.32694   | 0.364129  | 0.293839  | 0.659074  | 0.394254 | 0.412216  |
| 0.169319  | 0.638239  | 0.287644  | 0.596293  | 0.387029 | 1.05677   |
| 13.1032   | 9.95105   | 12.8505   | 13.1888   | 12.5778  | 12.764    |
| 0.0237941 | 0         | 0.0384931 | 0.0518034 | 0        | 0.154287  |
| 20.5369   | 20.979    | 26.3799   | 24.1956   | 21.8133  | 23.1104   |
| 0         | 0         | 0         | 0         | 0        | 0         |
| 71.5848   | 66.2096   | 70.9304   | 65.6267   | 94.8111  | 61.2261   |
| 0.0497203 | 0.0355988 | 0.18098   | 0.0541244 | 0.250536 | 0.1612    |
| 4.86052   | 3.92773   | 4.26795   | 4.46264   | 3.65434  | 3.92097   |
| 69.4861   | 62.5663   | 71.1291   | 67.4434   | 78.2088  | 62.7571   |
| 0         | 0         | 0         | 0         | 0        | 0         |
| 39.3887   | 45.4149   | 45.7402   | 45.368    | 43.084   | 39.9603   |
| 20.6612   | 13.4687   | 18.1307   | 16.93     | 16.4533  | 20.8299   |
| 1.67394   | 2.54844   | 1.87603   | 3.28144   | 1.54307  | 2.67432   |
| 4.12833   | 3.4484    | 2.64927   | 2.77632   | 2.7568   | 2.63238   |
| 8.92897   | 7.94746   | 7.78072   | 9.97552   | 7.70212  | 8.19287   |
| 30.4996   | 30.3518   | 28.3696   | 27.9717   | 27.6825  | 32.0543   |
| 17.6421   | 14.769    | 15.7047   | 17.8589   | 15.009   | 15.3995   |
| 1.51475   | 1.68705   | 1.49753   | 0.854996  | 0.913311 | 0.954921  |
| 12.8246   | 10.2752   | 14.7266   | 13.4896   | 15.1197  | 14.3545   |
| 1.34349   | 1.60756   | 1.38742   | 1.24574   | 0.477565 | 0.759697  |
| 0         | 0         | 0.0761902 | 0         | 0        | 0.038173  |
| 11.9138   | 8.5483    | 11.6643   | 9.75179   | 11.0421  | 11.2388   |
| 1.57857   | 2.22278   | 3.61781   | 2.2912    | 2.20272  | 3.19871   |
| 0.021531  | 0.0632423 | 0         | 0.0312509 | 0        | 0         |
| 2.10442   | 3.29596   | 2.65973   | 2.14765   | 1.44445  | 2.29204   |
| 0.0487175 | 0.0356768 | 0.082242  | 0.155834  | 0.122632 | 0.161796  |
| 0.891577  | 2.56228   | 1.75129   | 4.6546    | 4.26642  | 5.94921   |
| 40.4223   | 36.2468   | 38.2141   | 36.1873   | 30.6824  | 35.5958   |
| 9.47804   | 5.75703   | 8.68622   | 9.32968   | 9.19307  | 10.2768   |
| 11.7719   | 14.8805   | 15.3419   | 14.4488   | 14.7971  | 13.5486   |
| 2.86275   | 2.48326   | 3.02812   | 3.03642   | 2.85941  | 2.32035   |
| 14.0142   | 9.12431   | 12.7793   | 14.8581   | 15.8937  | 13.8411   |
| 149.59    | 176.679   | 159.551   | 157.552   | 167.139  | 131.763   |
| 7.1551    | 7.79177   | 4.29642   | 5.55444   | 4.44614  | 5.02463   |
| 1.78701   | 2.55892   | 2.31276   | 3.11247   | 1.38531  | 3.47623   |
| 8.21739   | 7.78097   | 8.88685   | 10.1111   | 8.75995  | 10.3694   |
| 30.704    | 30.0404   | 16.561    | 19.9806   | 22.0502  | 21.5251   |

|           |            |           |           |           |           |
|-----------|------------|-----------|-----------|-----------|-----------|
| 76.2249   | 120.257    | 72.924    | 83.9166   | 71.8571   | 59.6157   |
| 10.8075   | 8.05736    | 9.38163   | 10.3154   | 7.65508   | 9.66377   |
| 4.79427   | 4.88144    | 4.5579    | 4.56374   | 3.90966   | 4.26442   |
| 0.140869  | 0.201719   | 0.113946  | 0.204462  | 0.109204  | 0.228358  |
| 14.4739   | 12.919     | 15.032    | 15.4838   | 13.4601   | 15.841    |
| 1.68901   | 5.00898    | 2.83389   | 1.11696   | 2.01116   | 1.51584   |
| 4.33349   | 3.12573    | 2.69048   | 2.59324   | 2.39941   | 2.07259   |
| 29.7062   | 31.6739    | 32.5979   | 31.873    | 34.2095   | 28.5831   |
| 64.7917   | 65.6488    | 56.3432   | 41.3455   | 56.8777   | 79.8351   |
| 0.311131  | 0.607224   | 0.301165  | 0.309033  | 0.29762   | 0.0754451 |
| 33.279    | 31.8948    | 30.6773   | 30.5482   | 32.7253   | 26.4597   |
| 0.216807  | 5.68E-09   | 6.41E-09  | 0.0573553 | 0.0688758 | 6.86E-08  |
| 1.63222   | 1.80363    | 0.843254  | 1.39672   | 0.922244  | 1.43996   |
| 0.119322  | 0.170864   | 0.28955   | 0.346375  | 0.0924999 | 0.193428  |
| 0.428054  | 0.0620531  | 0.405755  | 0.062897  | 0.26875   | 0.316118  |
| 13.1623   | 13.3942    | 19.8131   | 12.9972   | 12.8652   | 13.0821   |
| 2.76192   | 2.61878    | 2.44054   | 2.85248   | 2.52381   | 2.95047   |
| 0.0874124 | 0.156464   | 0.141412  | 0.126874  | 0.0677635 | 0.106276  |
| 0         | 0          | 0         | 0         | 0         | 0         |
| 2.61383   | 2.07561    | 2.03739   | 2.01187   | 1.60874   | 2.38823   |
| 0         | 0          | 0         | 0         | 0         | 0         |
| 14.1465   | 13.8339    | 15.0115   | 16.939    | 15.3456   | 14.3151   |
| 0.835366  | 0.692544   | 0.497892  | 2.20161   | 1.63601   | 1.10473   |
| 0.0426512 | 0          | 0         | 0.0309527 | 0         | 0         |
| 1.64797   | 1.44243    | 1.07466   | 0.838206  | 0.649527  | 0.914214  |
| 0.37183   | 0.597417   | 1.10019   | 0.708005  | 0.13673   | 0.67924   |
| 0         | 0          | 0         | 0         | 0         | 0         |
| 0.0494791 | 0.0708522  | 0.0800454 | 0         | 0         | 0.0401045 |
| 41.8183   | 38.436     | 38.8233   | 37.8972   | 33.3056   | 43.1356   |
| 32.9436   | 35.7192    | 26.9536   | 33.6726   | 27.9737   | 26.2966   |
| 7.42894   | 5.24007    | 6.12298   | 6.56346   | 6.81192   | 7.09279   |
| 7.11387   | 5.15679    | 6.21637   | 6.25348   | 5.91564   | 6.37242   |
| 21.1578   | 19.3823    | 22.2626   | 23.0904   | 23.0271   | 22.1548   |
| 2.55E-06  | 0.00050111 | 7.43E-05  | 1.96E-05  | 1.57E-05  | 5.65E-06  |
| 3.21034   | 3.74721    | 3.25143   | 4.131     | 2.46779   | 5.75084   |
| 16.5139   | 15.9066    | 17.2658   | 16.5541   | 13.2623   | 13.995    |
| 12.9416   | 10.5511    | 10.7436   | 12.7881   | 11.424    | 12.3244   |
| 0.108917  | 0.098903   | 0.106592  | 0.0790434 | 0.168867  | 0.0196178 |
| 21.6094   | 19.303     | 18.7237   | 20.4385   | 17.9003   | 17.659    |
| 0.0464061 | 0.0332259  | 0.0187685 | 0.117872  | 0.251823  | 0.188069  |
| 0         | 0          | 0         | 0         | 0         | 0         |
| 6.83347   | 10.0624    | 11.6725   | 7.89534   | 9.65104   | 8.18472   |
| 2.19457   | 1.36375    | 1.49955   | 1.09551   | 0.887402  | 1.13048   |

|           |           |           |           |           |           |
|-----------|-----------|-----------|-----------|-----------|-----------|
| 1.33713   | 1.17101   | 1.06658   | 0.850529  | 0.79742   | 1.08379   |
| 0         | 0         | 0         | 0         | 0         | 0         |
| 7.41097   | 6.38761   | 7.27368   | 7.38228   | 7.97727   | 8.10158   |
| 0.840874  | 0.402708  | 0.190421  | 0.227158  | 0.169627  | 0.239475  |
| 59.6556   | 63.3679   | 56.1243   | 60.1187   | 58.7046   | 47.5224   |
| 23.3141   | 20.5283   | 16.1438   | 14.6977   | 12.1402   | 12.9319   |
| 10.7448   | 9.70538   | 8.46674   | 9.83737   | 8.79579   | 10.4059   |
| 11.6075   | 11.5906   | 11.0071   | 11.8335   | 9.42623   | 11.0322   |
| 0.459345  | 0.0173096 | 0.449777  | 0.403535  | 0.318608  | 0.489887  |
| 13.5657   | 9.56331   | 10.5677   | 11.4597   | 13.6102   | 13.3164   |
| 9.08984   | 6.18885   | 7.74308   | 6.80271   | 7.53566   | 6.83057   |
| 134.512   | 157.545   | 141.317   | 123.013   | 144.308   | 123.884   |
| 2.39343   | 2.51759   | 2.91595   | 2.6376    | 1.3973    | 2.34711   |
| 0         | 0         | 0         | 0         | 0         | 0         |
| 0         | 0         | 0.0402114 | 0.0360772 | 0         | 0         |
| 22.2733   | 28.8122   | 23.5052   | 42.7087   | 18.9853   | 55.6881   |
| 2.38658   | 1.44294   | 4.2899    | 2.96361   | 5.05697   | 3.43893   |
| 0         | 0.0342326 | 0         | 0.104094  | 0         | 0.0387534 |
| 19.1392   | 24.1557   | 21.8278   | 24.1949   | 19.7428   | 22.769    |
| 1.93927   | 1.30857   | 1.34294   | 1.13399   | 1.20052   | 1.42484   |
| 11.8934   | 19.0054   | 13.6443   | 14.2841   | 10.1853   | 9.52098   |
| 0.381978  | 0.264112  | 0.144455  | 0.215553  | 0.159446  | 0.177707  |
| 29.5917   | 0         | 23.9361   | 0         | 0         | 0         |
| 33.6613   | 31.8129   | 32.9458   | 29.6807   | 33.5316   | 24.7826   |
| 3.82289   | 2.33129   | 2.78385   | 3.05541   | 1.86305   | 4.77008   |
| 0.344714  | 0.488825  | 0.341909  | 0.52378   | 0.287381  | 0.363681  |
| 1.54211   | 1.13317   | 0.656515  | 1.08968   | 0.660651  | 0.888107  |
| 0         | 0         | 0         | 0.0900209 | 0.0240378 | 0         |
| 6.33952   | 9.4435    | 7.67465   | 7.13263   | 7.22331   | 7.41446   |
| 21.5669   | 19.2729   | 20.1618   | 21.8192   | 22.9727   | 20.2277   |
| 0.0551597 | 0.0789865 | 0         | 0.0400304 | 0         | 0.0298058 |
| 9.89157   | 10.368    | 9.65793   | 10.8665   | 7.3264    | 9.33092   |
| 616.847   | 593.876   | 615.705   | 632.087   | 652.662   | 589.713   |
| 0.345993  | 0.433518  | 0.443123  | 0.460338  | 0.156461  | 0.327179  |
| 3.57817   | 2.92256   | 3.67787   | 2.99469   | 2.83997   | 3.18157   |
| 0.0167435 | 0.0479522 | 0.0135435 | 0.0121511 | 0.0259597 | 0.0271424 |
| 0.144917  | 0         | 0.0586101 | 0.105169  | 0.112342  | 0.05873   |
| 72.0795   | 84.5174   | 87.7784   | 91.4307   | 94.4379   | 82.7747   |
| 0         | 0         | 0         | 0         | 0         | 0         |
| 1.61351   | 1.4303    | 1.42944   | 1.05944   | 2.14426   | 1.30781   |
| 7.40039   | 6.8307    | 8.26642   | 8.40245   | 6.65148   | 8.32058   |
| 19.1082   | 17.4539   | 17.1354   | 19.5068   | 20.961    | 17.4868   |
| 4.43013   | 4.14785   | 4.41039   | 4.00112   | 4.03814   | 3.9459    |

|           |           |           |           |           |           |
|-----------|-----------|-----------|-----------|-----------|-----------|
| 20.0898   | 19.3557   | 20.8427   | 19.8884   | 19.6705   | 19.257    |
| 0         | 0         | 0         | 0         | 0         | 0         |
| 1.68869   | 1.88267   | 1.79119   | 1.18536   | 2.5962    | 0.338203  |
| 13.2832   | 8.31286   | 11.2113   | 8.09397   | 8.07833   | 3.41489   |
| 1.22813   | 1.11116   | 1.15913   | 0.618965  | 0.980922  | 0.990745  |
| 93.1769   | 100.039   | 74.1544   | 77.785    | 81.3776   | 87.832    |
| 2.4985    | 1.41634   | 2.53621   | 3.25985   | 2.30867   | 2.83331   |
| 1.78031   | 1.18674   | 1.6759    | 1.54449   | 1.08266   | 1.7913    |
| 0.478472  | 0.171288  | 0.193513  | 1.04171   | 0         | 0.193909  |
| 77.0737   | 83.7754   | 89.673    | 82.5996   | 83.5611   | 82.6215   |
| 0         | 0         | 0         | 0         | 0         | 0         |
| 1.79902   | 1.62408   | 1.32866   | 2.83823   | 2.1829    | 1.96536   |
| 24.7601   | 29.7245   | 27.7111   | 25.017    | 26.42     | 23.7885   |
| 1.25946   | 0.498615  | 0.934856  | 1.06456   | 0.620272  | 0.70858   |
| 17.7699   | 13.6329   | 15.6955   | 15.1975   | 15.8493   | 15.6491   |
| 69.0984   | 64.9604   | 76.6176   | 66.4044   | 95.8867   | 37.7436   |
| 9.67416   | 6.05504   | 6.53381   | 8.2826    | 5.35508   | 7.57217   |
| 57.1774   | 63.2194   | 53.0794   | 51.6281   | 50.1173   | 49.1942   |
| 0         | 0         | 0         | 0         | 0         | 0         |
| 25.4809   | 22.6838   | 21.7725   | 26.252    | 18.8831   | 22.3146   |
| 0         | 0         | 0         | 0         | 0         | 0         |
| 2.33361   | 1.67082   | 1.22694   | 2.45563   | 1.80905   | 2.45891   |
| 0.120094  | 0.143309  | 0.291425  | 0.290515  | 0.310329  | 0.162234  |
| 28.5325   | 30.9096   | 33.0617   | 30.7195   | 32.9527   | 32.5909   |
| 4.58205   | 4.10083   | 4.5854    | 2.11027   | 6.32999   | 2.09503   |
| 0.983647  | 1.04481   | 0.877207  | 1.28493   | 0.916779  | 1.05046   |
| 12.3974   | 10.4274   | 10.957    | 11.5352   | 12.3017   | 11.9525   |
| 0.171125  | 0.061261  | 0.645956  | 0.765827  | 0.198988  | 0.531692  |
| 0         | 0         | 0         | 0         | 0         | 0         |
| 3.63971   | 3.44191   | 2.96467   | 3.60068   | 2.18516   | 2.84153   |
| 8.50065   | 7.34185   | 8.7906    | 7.63002   | 7.70541   | 8.75758   |
| 0         | 0         | 0         | 0         | 0         | 0         |
| 0.208779  | 0.298963  | 0         | 0         | 0         | 0         |
| 62.2476   | 74.4453   | 76.9436   | 69.5349   | 84.6792   | 74.3727   |
| 0         | 0         | 0         | 0         | 0         | 0         |
| 0.194654  | 0.104526  | 0.196814  | 0.105948  | 0.0377247 | 0.197217  |
| 0.488706  | 0.48918   | 0.395304  | 0.442869  | 0.510789  | 0.267811  |
| 7.60236   | 5.7749    | 6.27413   | 6.26459   | 5.3486    | 6.32164   |
| 11.9976   | 11.416    | 12.5202   | 11.1598   | 9.38024   | 11.0837   |
| 0.0645865 | 0.0972672 | 0.0612159 | 0.0803435 | 0.080004  | 0.0706649 |
| 0         | 0         | 0         | 0         | 0         | 0         |
| 26.2687   | 24.2167   | 27.868    | 24.6706   | 30.3462   | 19.9      |
| 0         | 0         | 0         | 0         | 0         | 0         |



|          |           |          |          |           |          |
|----------|-----------|----------|----------|-----------|----------|
| 0        | 0         | 0        | 0        | 0         | 0        |
| 4.36457  | 5.51457   | 5.69661  | 5.17731  | 3.96859   | 5.23449  |
| 3.07681  | 5.34305   | 8.76336  | 6.58315  | 4.19926   | 5.81902  |
| 148.553  | 144.182   | 176.199  | 192.591  | 183.024   | 131.765  |
| 5.75819  | 4.54833   | 6.16017  | 6.47044  | 5.01102   | 5.32965  |
| 41.8724  | 35.9037   | 41.9997  | 49.2965  | 47.0025   | 44.0303  |
| 0.210071 | 0.45122   | 0.339844 | 0.426866 | 0.0977101 | 0.340539 |
| 3.22354  | 2.85091   | 3.32908  | 3.22965  | 2.9052    | 2.52226  |
| 0        | 0         | 0        | 0        | 0         | 0        |
| 0.187079 | 0.26789   | 0        | 0        | 0         | 0        |
| 7.66531  | 5.65286   | 6.51033  | 6.78668  | 6.0314    | 6.21299  |
| 8.97461  | 7.94343   | 6.88389  | 6.34459  | 6.27352   | 8.80432  |
| 7.69332  | 8.81346   | 7.03994  | 7.31067  | 7.03333   | 6.63959  |
| 53.4289  | 49.1651   | 50.535   | 61.5982  | 57.2333   | 53.7878  |
| 4.71771  | 3.98375   | 5.4685   | 4.92014  | 5.37775   | 5.23366  |
| 0        | 0         | 0        | 0        | 0         | 0        |
| 0        | 0         | 0        | 0        | 0         | 0        |
| 0.998276 | 1.42949   | 0.576775 | 0.517476 | 0.331663  | 1.2715   |
| 0.477662 | 0.390853  | 0.386371 | 0.297127 | 0.634784  | 0.276544 |
| 0        | 0         | 0        | 0        | 0         | 0        |
| 0.39512  | 0.617233  | 0.5811   | 0.391017 | 0.389841  | 0.26203  |
| 8.71854  | 7.29495   | 8.76747  | 10.4213  | 10.7346   | 10.8911  |
| 50.2117  | 50.7459   | 52.1115  | 48.0432  | 52.4435   | 50.7023  |
| 14.0687  | 12.5306   | 12.5315  | 13.0032  | 11.8276   | 11.8383  |
| 0.645689 | 0.0981733 | 0.57342  | 0.409626 | 0.288486  | 0.206356 |
| 116.263  | 130.968   | 126.292  | 125.346  | 115.439   | 112.752  |
| 0        | 0.0383859 | 0        | 0        | 0         | 0        |
| 0.486404 | 0.388026  | 0.349727 | 0.431435 | 0.209482  | 0.262831 |
| 7.23398  | 5.94874   | 5.75799  | 5.73453  | 7.55668   | 5.57805  |
| 11.0104  | 10.8052   | 12.6065  | 9.14912  | 13.9165   | 8.62916  |
| 0.821389 | 0.552762  | 1.50841  | 1.0725   | 1.2099    | 1.1197   |
| 0        | 0         | 0        | 0        | 0         | 0        |
| 1.78239  | 2.00539   | 1.6477   | 2.46383  | 2.43448   | 0.756739 |
| 11.2869  | 10.3866   | 10.614   | 10.1007  | 10.3333   | 15.9676  |
| 0        | 0         | 0        | 0        | 0         | 0        |
| 2.6652   | 2.08997   | 2.4638   | 3.86837  | 2.65642   | 3.08605  |
| 0        | 0         | 0        | 0        | 0         | 0        |
| 0        | 0         | 0        | 0        | 0         | 0        |
| 33.7755  | 30.351    | 33.0977  | 32.3586  | 32.6564   | 32.0347  |
| 7.52176  | 5.85471   | 7.47274  | 7.29336  | 7.83917   | 6.45083  |
| 54.2637  | 62.2657   | 55.0259  | 59.3652  | 61.2393   | 54.4664  |
| 31.178   | 28.0193   | 30.1768  | 31.8037  | 47.9883   | 27.2893  |
| 12.6375  | 11.6605   | 11.3905  | 11.4586  | 10.3846   | 9.51777  |

|           |           |           |           |           |           |
|-----------|-----------|-----------|-----------|-----------|-----------|
| 3.24519   | 4.08615   | 5.70252   | 4.06051   | 3.03622   | 4.80717   |
| 60.4228   | 46.7149   | 42.0742   | 41.5539   | 67.028    | 20.7125   |
| 0.0156466 | 0         | 0         | 0         | 0         | 0.0126821 |
| 6.45352   | 6.21297   | 5.02791   | 6.9336    | 6.46289   | 5.12153   |
| 0.177723  | 0.318115  | 0.359391  | 0.709372  | 0.482207  | 0.576201  |
| 1.05E-09  | 1.86E-21  | 8.80E-09  | 1.24E-10  | 3.65E-10  | 7.77E-15  |
| 18.213    | 17.3869   | 22.0982   | 20.1934   | 22.4531   | 19.9906   |
| 0.255508  | 0.609797  | 0.206675  | 0.309045  | 0.330123  | 0.207098  |
| 0.9699    | 0.749793  | 0.784532  | 1.02859   | 0.710365  | 0.9115    |
| 0.362627  | 0.0865276 | 0.260658  | 0.116925  | 0.249804  | 0.424414  |
| 3.98059   | 2.45885   | 2.8789    | 2.87746   | 2.19032   | 1.85993   |
| 0.180455  | 0.230095  | 0.163643  | 0.187031  | 0.199077  | 0.176981  |
| 6.75884   | 7.23812   | 5.60727   | 6.3304    | 5.41869   | 5.66556   |
| 0         | 0.0296592 | 0         | 0         | 0.128452  | 0.151092  |
| 0.0343006 | 0.0736756 | 0.16647   | 0.149355  | 0.0531807 | 0.0556035 |
| 108.362   | 111.79    | 108.198   | 112.565   | 110.494   | 123.946   |
| 0         | 0         | 0         | 0         | 0.0306998 | 0         |
| 5.62049   | 6.0784    | 6.01858   | 4.86659   | 1.91872   | 5.84139   |
| 1.86461   | 2.03366   | 1.67235   | 2.93773   | 2.93588   | 2.31006   |
| 0         | 0.0524299 | 0         | 0.0118095 | 0         | 0         |
| 0.586926  | 1.26068   | 0.949506  | 0.638914  | 1.81998   | 1.42717   |
| 18.9744   | 18.4692   | 18.9862   | 17.3585   | 16.9029   | 17.0211   |
| 4.61091   | 3.09701   | 4.55578   | 4.42529   | 5.12299   | 5.35638   |
| 0         | 0         | 0         | 0         | 0         | 0         |
| 16.2546   | 14.6426   | 17.3503   | 16.4538   | 14.9452   | 16.8654   |
| 1.19068   | 0.852501  | 1.81065   | 0.760403  | 1.84606   | 1.81436   |
| 0.0456284 | 0.0181495 | 0         | 0         | 0         | 0         |
| 19.5273   | 15.7407   | 17.7709   | 16.5896   | 14.3608   | 14.7497   |
| 14.5534   | 11.8212   | 14.4292   | 13.5161   | 14.2977   | 14.0594   |
| 0         | 0         | 0         | 0         | 0         | 0         |
| 227.275   | 253.515   | 260.274   | 248.772   | 276.204   | 213.093   |
| 0         | 0         | 0         | 0         | 0         | 0         |
| 3.40026   | 2.6453    | 2.86945   | 3.35426   | 2.75004   | 2.83953   |
| 44.6672   | 45.9213   | 37.8675   | 37.5761   | 42.5065   | 39.6855   |
| 23.6513   | 25.5069   | 21.1491   | 23.5685   | 18.4896   | 20.6896   |
| 0         | 0.0462291 | 0.0522274 | 0.0117145 | 0.0143011 | 0.063964  |
| 0         | 0         | 0         | 0         | 0         | 0         |
| 3.05887   | 2.34      | 2.94969   | 2.94802   | 2.88857   | 3.63439   |
| 703.891   | 620.31    | 678.765   | 739.839   | 791.275   | 668.419   |
| 1.41942   | 1.64031   | 1.5712    | 2.0602    | 1.04244   | 1.25141   |
| 0.224743  | 0.250307  | 0.18179   | 0.289956  | 0.212941  | 0.242883  |
| 36.8533   | 41.9833   | 37.0956   | 37.3106   | 32.3208   | 33.7499   |
| 0         | 0.030715  | 0         | 0.0311327 | 0.016628  | 0.0173856 |

|            |           |           |           |           |           |
|------------|-----------|-----------|-----------|-----------|-----------|
| 0.947402   | 0.135664  | 0.306534  | 0         | 0.293776  | 1.22864   |
| 49.1413    | 59.6322   | 56.7014   | 55.9853   | 47.4789   | 40.7093   |
| 0.00509914 | 0.0750055 | 0.0242034 | 0.0823396 | 0.0246455 | 0.0727585 |
| 40.9181    | 27.1923   | 31.1707   | 38.2589   | 30.3585   | 21.1082   |
| 27.1736    | 24.9768   | 27.0816   | 29.1961   | 34.5297   | 27.0372   |
| 14.5377    | 10.8548   | 8.94543   | 11.8045   | 14.4208   | 12.7933   |
| 0          | 0         | 0         | 0         | 0         | 0         |
| 1.98083    | 1.3059    | 1.65417   | 1.00852   | 1.196     | 1.598     |
| 0          | 0         | 0         | 0         | 0         | 0         |
| 4.85652    | 2.62686   | 3.99696   | 3.50138   | 3.83061   | 4.07389   |
| 8.18786    | 8.2564    | 9.98651   | 8.89756   | 6.11473   | 6.74078   |
| 24.5807    | 28.1676   | 16.6891   | 19.8748   | 18.2893   | 21.634    |
| 3.66203    | 3.77036   | 3.55727   | 3.89651   | 3.2313    | 3.2491    |
| 0.110045   | 0.0923323 | 0.120168  | 0.093588  | 0.0719782 | 0.120414  |
| 0          | 0         | 0         | 0         | 0         | 0         |
| 1.43192    | 0.533324  | 1.55408   | 1.32      | 1.57544   | 0.843245  |
| 0          | 0         | 0         | 0         | 0         | 0         |
| 0          | 0         | 0         | 0         | 0         | 0         |
| 9.23182    | 6.93784   | 8.11597   | 8.01304   | 8.32871   | 8.02116   |
| 19.6483    | 19.0481   | 21.7656   | 21.2918   | 16.4116   | 21.0378   |
| 0          | 0.051612  | 0.0583086 | 0.0261569 | 0         | 0         |
| 0          | 0         | 0         | 0         | 0         | 0         |
| 1.38657    | 1.21248   | 1.00616   | 0.902718  | 0.719235  | 1.23389   |
| 31.1976    | 32.4508   | 33.3661   | 35.7169   | 32.5907   | 32.8664   |
| 1.87824    | 2.07481   | 2.92279   | 2.68721   | 2.78729   | 3.36374   |
| 0.633454   | 0.138034  | 0.757444  | 0.399747  | 1.13158   | 0.26788   |
| 1209.62    | 1073.23   | 1206.64   | 1033.82   | 1168.85   | 956.807   |
| 4.11186    | 2.96734   | 3.49806   | 2.77638   | 2.54513   | 2.16652   |
| 1.61621    | 1.6531    | 1.73932   | 1.79334   | 1.50306   | 1.79797   |
| 0.0330709  | 0.0710343 | 0.133752  | 0.216001  | 0.025637  | 0.187635  |
| 0          | 0         | 0         | 0         | 0         | 0         |
| 12.0163    | 9.37608   | 10.273    | 10.5083   | 15.6701   | 11.3017   |
| 24.3644    | 26.5172   | 28.0763   | 23.768    | 23.7914   | 21.3355   |
| 32.5539    | 33.7432   | 35.532    | 34.9601   | 37.4795   | 29.5373   |
| 1.14648    | 0.53534   | 0.766081  | 0.904368  | 1.12062   | 2.26254   |
| 3.3938     | 2.54133   | 2.70205   | 2.19781   | 2.05644   | 2.27417   |
| 282.923    | 257.333   | 273.874   | 215.873   | 367.054   | 92.6301   |
| 8.80835    | 9.50913   | 10.2524   | 7.98427   | 7.61726   | 8.09236   |
| 9.83004    | 7.622     | 8.67335   | 8.8933    | 8.30384   | 9.67364   |
| 4.56859    | 3.89868   | 4.24089   | 4.50224   | 4.43032   | 4.30422   |
| 26.9209    | 25.1626   | 26.7447   | 22.8925   | 20.2698   | 21.798    |
| 0.27512    | 0.295471  | 0.778887  | 0.499149  | 0.213277  | 0.445988  |
| 2.74391    | 3.06552   | 3.63136   | 2.7443    | 3.06139   | 2.72927   |

|            |           |            |           |            |           |
|------------|-----------|------------|-----------|------------|-----------|
| 243.695    | 266.421   | 245.339    | 255.875   | 213.968    | 227.605   |
| 48.379     | 54.7172   | 51.0677    | 51.9607   | 42.5267    | 43.0843   |
| 1.71139    | 2.88117   | 1.68362    | 2.65181   | 2.36654    | 1.64957   |
| 3.19047    | 2.88176   | 3.33507    | 3.02781   | 1.94059    | 1.7903    |
| 0.515617   | 0.369172  | 0          | 0         | 0          | 0         |
| 14.3603    | 11.829    | 11.9823    | 10.6871   | 11.5782    | 13.942    |
| 111.416    | 100.009   | 101.612    | 120.038   | 129.085    | 78.4503   |
| 0          | 0         | 0          | 0         | 0          | 0         |
| 3.62896    | 3.32903   | 4.2655     | 3.95041   | 3.60445    | 3.58483   |
| 25.4386    | 26.0151   | 28.2731    | 28.0876   | 22.1925    | 24.2391   |
| 6.87093    | 8.60904   | 6.61036    | 4.81637   | 5.02381    | 6.79264   |
| 9.37708    | 5.65992   | 6.56409    | 5.06024   | 6.01132    | 8.03961   |
| 0.00927931 | 0         | 0.00643358 | 0.0259746 | 0.00616583 | 0.0387341 |
| 3.14323    | 2.98272   | 2.9107     | 3.03764   | 2.6735     | 3.24555   |
| 16.2035    | 15.4385   | 17.5436    | 16.0602   | 16.7157    | 14.0023   |
| 41.9777    | 43.4993   | 38.3362    | 38.7842   | 30.2323    | 34.6097   |
| 0          | 0         | 0          | 0         | 0.0159835  | 0         |
| 32.2727    | 25.7357   | 33.3802    | 33.2701   | 37.197     | 29.8281   |
| 1.72576    | 2.10054   | 1.67512    | 2.47352   | 1.73919    | 1.71352   |
| 53.1377    | 45.216    | 43.9717    | 54.4184   | 64.3882    | 48.5755   |
| 610.601    | 496.286   | 462.189    | 538.911   | 862.05     | 211.112   |
| 0.347223   | 0.443938  | 0.581785   | 0.593967  | 0.11536    | 0.261334  |
| 0          | 0         | 0          | 0.0192544 | 0          | 0         |
| 39.3642    | 40.9152   | 38.0041    | 37.8867   | 34.252     | 33.7715   |
| 0          | 0         | 0          | 0         | 0          | 0.0175901 |
| 5.92836    | 5.68026   | 3.45546    | 4.7452    | 3.64957    | 2.54389   |
| 0          | 0         | 0          | 0.119481  | 0          | 0.0667225 |
| 16.6308    | 23.1531   | 42.0592    | 20.0037   | 29.008     | 32.597    |
| 0          | 0.0659252 | 0.074479   | 0         | 0          | 0         |
| 8.65048    | 6.16149   | 5.90955    | 8.03429   | 5.24665    | 10.8261   |
| 0          | 0.181903  | 0          | 0         | 0          | 0         |
| 21.4685    | 20.2187   | 23.0428    | 21.457    | 20.7659    | 20.3932   |
| 6.73771    | 6.92122   | 5.76172    | 6.1949    | 6.54364    | 7.76324   |
| 6.72467    | 6.77806   | 8.64403    | 7.1566    | 6.9622     | 7.4559    |
| 0          | 0         | 0.017136   | 0         | 0          | 0         |
| 3.96661    | 2.7394    | 4.26713    | 4.77695   | 3.65764    | 4.78981   |
| 5.31558    | 4.78851   | 7.04863    | 4.98011   | 7.04238    | 5.86233   |
| 0          | 0         | 0          | 0         | 0          | 0         |
| 12.2876    | 19.5158   | 14.078     | 14.4861   | 9.0539     | 15.2081   |
| 0.318127   | 0.61139   | 0.650088   | 0.595403  | 0.350456   | 0.461421  |
| 71.4286    | 64.5718   | 62.8453    | 72.1285   | 86.7321    | 62.5929   |
| 68.2447    | 48.8619   | 0          | 0         | 0          | 0         |
| 0          | 0         | 0          | 0         | 0          | 0         |

|           |           |           |           |           |          |
|-----------|-----------|-----------|-----------|-----------|----------|
| 3.17881   | 2.06906   | 2.51283   | 3.35552   | 3.08032   | 3.27922  |
| 8.60807   | 5.55721   | 7.95669   | 8.19675   | 8.69653   | 5.66824  |
| 0         | 0         | 0         | 0         | 0         | 0        |
| 8.54508   | 10.3821   | 6.42653   | 8.72241   | 8.81843   | 8.2951   |
| 5.57866   | 3.09055   | 3.3282    | 2.91275   | 2.73961   | 4.27617  |
| 0         | 0         | 0         | 0         | 0         | 0        |
| 14.0434   | 11.2554   | 13.5635   | 11.9662   | 12.6469   | 10.5332  |
| 14.2947   | 14.4734   | 3.45708   | 8.62465   | 4.33288   | 5.53215  |
| 40.3551   | 30.9533   | 32.8114   | 29.0262   | 22.7083   | 27.4465  |
| 2.60919   | 1.297     | 2.9326    | 2.12014   | 1.68999   | 2.26663  |
| 45.2776   | 32.6838   | 44.979    | 36.2216   | 47.5219   | 30.4917  |
| 31.5719   | 26.3154   | 30.6121   | 30.1004   | 31.3212   | 28.0647  |
| 2.60788   | 1.17417   | 1.67581   | 2.17931   | 2.15662   | 2.09739  |
| 2.74608   | 4.42382   | 2.55444   | 3.18861   | 3.72541   | 2.33708  |
| 10.4146   | 10.2771   | 9.35204   | 11.0568   | 7.93406   | 9.6176   |
| 8.16988   | 7.00398   | 5.36212   | 5.90303   | 3.83339   | 5.83779  |
| 13.1797   | 12.1536   | 7.37689   | 10.1198   | 6.93304   | 6.17587  |
| 0.11173   | 0.0799966 | 0.150627  | 0.0540564 | 0.144358  | 0.090561 |
| 0         | 0         | 0         | 0         | 0         | 0        |
| 0.0963625 | 0.0229979 | 0.0519638 | 0.0466213 | 0.0747017 | 0.05207  |
| 1.02548   | 1.43264   | 0.768799  | 0.653455  | 0.814361  | 0.669006 |
| 42.0267   | 41.8188   | 40.6601   | 37.0239   | 37.5032   | 36.6656  |
| 5.41069   | 3.66885   | 5.46419   | 4.47223   | 4.56034   | 4.94531  |
| 8.34202   | 6.31814   | 7.74623   | 8.03142   | 7.29327   | 8.31137  |
| 3.18075   | 2.59319   | 2.61306   | 1.88506   | 2.42685   | 2.44316  |
| 14.914    | 16.4021   | 16.1739   | 19.5039   | 9.78034   | 15.8716  |
| 0         | 0         | 0.707624  | 0         | 0         | 0        |
| 0.176219  | 0         | 0.120268  | 0.0959138 | 0.102456  | 0.254521 |
| 69.3489   | 67.4607   | 68.8996   | 70.3761   | 72.122    | 54.7091  |
| 14.9033   | 11.6729   | 14.496    | 12.7723   | 14.6055   | 13.5699  |
| 19.5843   | 17.4753   | 20.0647   | 20.1078   | 21.5303   | 19.4483  |
| 220.707   | 274.626   | 243.567   | 181.287   | 343.88    | 148.152  |
| 90.6867   | 70.88     | 89.2551   | 83.3719   | 76.8019   | 91.461   |
| 0.570462  | 0.28481   | 0.441462  | 0.449846  | 0.270225  | 0.282536 |
| 9.86176   | 7.25861   | 8.55793   | 8.6604    | 8.13752   | 6.85139  |
| 0.786254  | 0.686087  | 0.973852  | 0.677586  | 1.40957   | 0.637286 |
| 30.2747   | 29.844    | 24.9079   | 24.859    | 20.1034   | 24.8779  |
| 13.9435   | 21.9811   | 15.428    | 14.3494   | 11.0261   | 9.86536  |
| 12.3883   | 15.8176   | 13.2512   | 15.1591   | 13.2041   | 16.1528  |
| 0         | 0         | 0         | 0         | 0         | 0        |
| 367.277   | 319.009   | 767.637   | 369.67    | 454.226   | 88.9034  |
| 0.248065  | 0.236813  | 0.401309  | 0.420058  | 0.256405  | 0.335108 |
| 23.8914   | 17.6382   | 16.3517   | 17.1457   | 14.4741   | 16.9744  |

|           |            |           |          |           |           |
|-----------|------------|-----------|----------|-----------|-----------|
| 15.5659   | 13.0405    | 13.2547   | 14.0055  | 11.898    | 15.182    |
| 141.879   | 159.256    | 115.034   | 37.373   | 40.7048   | 43.2788   |
| 5.06328   | 3.69112    | 3.81634   | 5.26123  | 4.83505   | 5.05533   |
| 0         | 0          | 0         | 0        | 0.0553021 | 0         |
| 0.253189  | 0.362557   | 1.6384    | 0.367488 | 0.785105  | 2.87306   |
| 0.561997  | 0.421314   | 0.390411  | 0.254307 | 0.281903  | 0.246515  |
| 0.152435  | 0.109141   | 0.215778  | 0.248906 | 0.0886277 | 0.0926655 |
| 6.19104   | 4.73685    | 4.96532   | 7.27654  | 5.52124   | 7.75511   |
| 6.77987   | 5.60949    | 4.79475   | 6.42219  | 5.78246   | 6.18738   |
| 9.76043   | 9.20914    | 7.78182   | 8.65736  | 3.95948   | 7.06047   |
| 3.21976   | 2.12795    | 1.94174   | 1.88037  | 3.05724   | 3.30462   |
| 0         | 0.190425   | 0.645399  | 0.193015 | 0.20618   | 0.431146  |
| 7.40115   | 7.63271    | 6.32912   | 10.4924  | 5.52745   | 20.4021   |
| 0         | 0          | 0         | 0        | 0         | 0         |
| 31.0431   | 23.072     | 21.3307   | 29.239   | 20.1451   | 25.4754   |
| 0         | 0.0276855  | 0         | 0        | 0.029976  | 0         |
| 0.100575  | 0.00346078 | 0.0541301 | 0.236622 | 0.0349937 | 0.105303  |
| 11.2228   | 11.0485    | 11.893    | 10.7912  | 10.9378   | 9.9055    |
| 37.8819   | 42.1195    | 42.7002   | 44.1123  | 47.6366   | 21.9977   |
| 0.261237  | 0.0623468  | 0         | 0        | 0.0675049 | 0         |
| 1.76184   | 2.12402    | 1.07613   | 2.65742  | 1.52944   | 1.68052   |
| 0.1852    | 0          | 0         | 0        | 0         | 0         |
| 11.1349   | 9.99926    | 11.4202   | 11.3418  | 10.3597   | 11.6621   |
| 33.096    | 36.7812    | 32.9297   | 34.8611  | 30.2123   | 32.3962   |
| 7.28104   | 5.77211    | 6.37273   | 7.27265  | 4.54632   | 4.48755   |
| 5.86497   | 5.53653    | 4.38145   | 3.00924  | 5.84979   | 4.84459   |
| 0.153063  | 0.167436   | 0.277618  | 0.132077 | 0.235121  | 0.114993  |
| 2.31233   | 2.02295    | 3.13968   | 2.32016  | 1.83623   | 1.48101   |
| 18.141    | 18.9075    | 24.9364   | 27.1221  | 23.142    | 24.1963   |
| 0         | 0          | 0         | 0        | 0         | 0         |
| 0.156783  | 0.0898027  | 0.101455  | 0.136536 | 0.0972322 | 0.127078  |
| 18.521    | 18.8632    | 44.6699   | 77.8087  | 46.1119   | 34.5064   |
| 6.63123   | 7.29675    | 6.59492   | 6.41391  | 8.60819   | 5.76253   |
| 3.52156   | 1.05057    | 0.474753  | 1.91674  | 2.27497   | 2.14076   |
| 5.20323   | 4.96721    | 3.74114   | 7.55215  | 3.13726   | 9.37198   |
| 0.0211168 | 0          | 0         | 0        | 0         | 0         |
| 236.655   | 182.474    | 265.05    | 264.222  | 239.907   | 398.388   |
| 127.225   | 146.391    | 133.55    | 126.526  | 137.756   | 147.955   |
| 1.0524    | 0.482003   | 0.638871  | 0.50971  | 0.52188   | 0.47482   |
| 32.4833   | 30.4165    | 30.8116   | 32.285   | 30.3822   | 30.227    |
| 0.425994  | 0.305003   | 0.344578  | 0.154576 | 0         | 0.345282  |
| 42.8363   | 69.5201    | 21.4471   | 78.2011  | 90.6875   | 30.2385   |
| 0.203958  | 0.0973533  | 0.109985  | 0        | 0.210815  | 0.0551049 |

|           |           |           |           |           |           |
|-----------|-----------|-----------|-----------|-----------|-----------|
| 5.7661    | 4.54681   | 4.82611   | 4.524     | 3.92581   | 4.84938   |
| 35.0185   | 31.1539   | 31.8438   | 30.6282   | 39.5047   | 34.2916   |
| 0         | 0         | 0         | 0         | 0         | 0         |
| 3.90695   | 3.31476   | 3.17977   | 3.32348   | 2.22444   | 2.66197   |
| 1.36367   | 1.24641   | 1.12651   | 1.83188   | 1.37203   | 1.2464    |
| 0         | 0         | 0.026429  | 0.0237143 | 0.0253286 | 0.0529743 |
| 0         | 0         | 0         | 0         | 0         | 0         |
| 3.52E-25  | 9.95E-97  | 4.52E-179 | 1.09E-27  | 9.65E-43  | 8.18E-57  |
| 0         | 0         | 0         | 0         | 0         | 0         |
| 0.0399066 | 0.0285723 | 0.080699  | 0.0579218 | 0.108277  | 0.0485184 |
| 8.17224   | 8.64962   | 7.87495   | 6.24017   | 7.65748   | 8.10229   |
| 10.7945   | 10.8586   | 11.6538   | 11.0383   | 11.7566   | 9.71471   |
| 0         | 0.2867    | 0.0647798 | 0.11624   | 0.434587  | 0.194737  |
| 10.4212   | 10.977    | 9.99288   | 8.5485    | 7.12707   | 10.6272   |
| 0.824951  | 1.62429   | 0.834108  | 0.947913  | 0.586222  | 1.61591   |
| 29.7442   | 27.2303   | 32.1183   | 32.8609   | 30.6696   | 33.1436   |
| 0.749105  | 0.19368   | 0.302968  | 0.362426  | 0.209704  | 0.252989  |
| 1.7096    | 0.865839  | 0.461235  | 1.07542   | 0.45956   | 1.21951   |
| 0.617907  | 0.381387  | 0.654926  | 0.355648  | 0.41294   | 0.673536  |
| 24.8099   | 45.4202   | 31.1522   | 16.2879   | 19.8444   | 23.7982   |
| 0         | 0         | 0         | 0         | 0         | 0         |
| 4.00531   | 3.72804   | 4.04977   | 4.9705    | 5.09217   | 4.99952   |
| 7.14808   | 6.51371   | 7.14981   | 6.34531   | 6.06722   | 4.99949   |
| 12.3813   | 15.7939   | 14.2935   | 13.677    | 12.271    | 12.322    |
| 13.7238   | 13.7677   | 12.2449   | 11.8718   | 13.8936   | 14.9625   |
| 0.627313  | 0.655056  | 0.56234   | 0.644963  | 0.225093  | 0.236846  |
| 0.617165  | 0.50816   | 0.299528  | 0.268733  | 1.02864   | 0.525245  |
| 3.02133   | 3.43239   | 3.14211   | 3.1211    | 2.77235   | 2.99861   |
| 1.49562   | 1.60625   | 0.604889  | 1.28891   | 0.942036  | 0.757657  |
| 0.019428  | 0         | 0.0157149 | 0         | 0         | 0         |
| 63.7886   | 67.7026   | 68.5726   | 73.3404   | 63.7086   | 64.2011   |
| 11.0968   | 11.5175   | 12.0194   | 12.397    | 10.5287   | 10.7089   |
| 5.91266   | 5.40462   | 6.0206    | 5.26594   | 5.22661   | 6.07456   |
| 0.184544  | 0.226065  | 0.183732  | 0.266317  | 0.254024  | 0.0758415 |
| 25.0943   | 25.3005   | 12.4275   | 19.3264   | 17.4684   | 15.3586   |
| 2.89407   | 5.49644   | 3.31761   | 3.6639    | 3.55795   | 2.89894   |
| 9.26169   | 7.80479   | 9.32179   | 8.68451   | 9.13652   | 9.24304   |
| 0         | 0         | 0         | 0         | 0         | 0         |
| 17.3176   | 15.6702   | 17.7713   | 16.4562   | 15.0525   | 16.8411   |
| 0.265794  | 0.313818  | 0.125414  | 0.318086  | 0.0901445 | 0.192432  |
| 0.389299  | 0.313263  | 0.122453  | 0.265038  | 0.264457  | 0.33508   |
| 5.57954   | 5.4002    | 6.40959   | 5.06476   | 5.12842   | 5.81873   |
| 0         | 0         | 0         | 0         | 0.0658726 | 0         |

|           |           |           |           |           |           |
|-----------|-----------|-----------|-----------|-----------|-----------|
| 67.4332   | 65.0796   | 71.8853   | 79.6226   | 83.6791   | 61.976    |
| 0.169893  | 0.149108  | 0.146289  | 0.103408  | 0.174189  | 0.208777  |
| 0.834261  | 0.87938   | 0.468623  | 0.706344  | 0.736556  | 0.732546  |
| 0.112211  | 0.107126  | 0.151388  | 0.1901    | 0.0871378 | 0.0910721 |
| 1.07827   | 0.43762   | 0.98105   | 1.03588   | 1.03143   | 1.4098    |
| 17.4023   | 15.5679   | 17.4459   | 17.6307   | 22.2339   | 19.5091   |
| 26.0588   | 26.2221   | 27.9898   | 27.1448   | 22.5099   | 21.4089   |
| 11.1337   | 13.0834   | 14.0271   | 11.6623   | 12.1887   | 10.387    |
| 1.09705   | 1.61121   | 1.0694    | 1.44939   | 1.00309   | 0.911993  |
| 0         | 0         | 7.0489    | 0         | 0         | 0         |
| 0         | 0         | 0         | 0         | 0         | 0         |
| 68.6301   | 71.7402   | 77.5226   | 85.7613   | 89.0397   | 93.5346   |
| 6.92626   | 6.58848   | 10.0045   | 7.46796   | 9.69038   | 4.86544   |
| 0.136601  | 0         | 0         | 0         | 0         | 0         |
| 0.701963  | 1.36898   | 0.276457  | 1.45266   | 0.88056   | 1.47101   |
| 127.734   | 116.924   | 120.215   | 142.568   | 137.564   | 133.784   |
| 1.28948   | 1.18593   | 1.21406   | 1.05707   | 0.881564  | 1.43142   |
| 0.0237499 | 0.034009  | 0         | 0.0172357 | 0.0368226 | 0.0481253 |
| 16.9019   | 14.8454   | 16.9724   | 15.6676   | 17.0782   | 14.1688   |
| 0         | 0         | 0         | 0         | 0         | 0         |
| 5.93484   | 3.79906   | 3.32078   | 3.66959   | 3.38954   | 4.22383   |
| 0.232182  | 0.254456  | 0.344979  | 0.566681  | 0.289467  | 0.311352  |
| 5.54504   | 3.44947   | 6.17644   | 6.487     | 7.07038   | 6.55747   |
| 7.7433    | 5.7876    | 6.94037   | 7.92552   | 7.44995   | 6.11957   |
| 0         | 0         | 0         | 0         | 0         | 0         |
| 0         | 0         | 0         | 0         | 0         | 0         |
| 0         | 0.0495221 | 0         | 0         | 0         | 0.056062  |
| 35.4467   | 53.6343   | 39.0342   | 32.627    | 36.2288   | 36.4331   |
| 52.8666   | 70.6991   | 68.1741   | 52.8792   | 57.1295   | 54.9088   |
| 3.18615   | 2.58071   | 2.53038   | 2.2438    | 3.13042   | 3.1323    |
| 0.421413  | 0.150862  | 0.170436  | 0.611654  | 0.326686  | 0.256177  |
| 0         | 0.0569077 | 0.0642914 | 0.115363  | 0.0616157 | 0.0644229 |
| 2.80203   | 1.79815   | 1.89715   | 2.13893   | 2.71925   | 2.64125   |
| 18.7719   | 14.2309   | 17.4469   | 19.7133   | 20.0307   | 17.7809   |
| 1.0731    | 1.23073   | 1.30796   | 1.51861   | 1.58085   | 1.91816   |
| 0.186135  | 0.133269  | 0.301122  | 0         | 0.288589  | 0.150869  |
| 5.19009   | 4.25033   | 4.19816   | 2.95415   | 3.65528   | 5.66398   |
| 0         | 0         | 0         | 0         | 0         | 0         |
| 14.2597   | 12.066    | 13.428    | 17.9935   | 14.6936   | 17.6175   |
| 5.21568   | 4.13575   | 4.67396   | 5.39871   | 6.18624   | 5.23454   |
| 2.14997   | 1.38389   | 1.80932   | 1.74936   | 1.11128   | 1.74263   |
| 7.39535   | 6.48199   | 8.61038   | 6.76447   | 6.1209    | 7.94802   |
| 0.109309  | 0.0195658 | 0.0663136 | 0.0396639 | 0.127107  | 0.0442994 |



|           |           |           |           |           |          |
|-----------|-----------|-----------|-----------|-----------|----------|
| 105.871   | 101.579   | 109.802   | 111.639   | 115.285   | 106.778  |
| 367.035   | 388.924   | 370.017   | 357.111   | 365.272   | 371.903  |
| 0.700832  | 0.72434   | 0.404732  | 1.00537   | 0.178309  | 0.521851 |
| 26.0412   | 23.1158   | 30.2147   | 29.7703   | 31.6272   | 36.1547  |
| 12.6628   | 10.7696   | 12.9891   | 12.2      | 11.2404   | 11.2033  |
| 5.12502   | 2.43702   | 3.10009   | 2.90265   | 2.91329   | 3.01659  |
| 0         | 0         | 0         | 0         | 0         | 0        |
| 0         | 0         | 0         | 0         | 0         | 0        |
| 0.383868  | 0.595491  | 0.207002  | 0.65002   | 0.495967  | 0.518563 |
| 8.02773   | 7.78907   | 7.48872   | 10.3755   | 11.3103   | 7.88395  |
| 1.02697   | 0.705877  | 0.797465  | 1.07322   | 0.509517  | 0.898983 |
| 0         | 1.34443   | 0.911319  | 1.36271   | 0.582261  | 0.608788 |
| 2.56788   | 2.54633   | 2.1898    | 2.64357   | 1.92894   | 0.968291 |
| 0.0243981 | 0         | 0         | 0         | 0         | 0        |
| 0         | 0.0239681 | 0         | 0         | 0         | 0        |
| 11.6524   | 18.0691   | 15.9283   | 12.0375   | 10.5708   | 14.0221  |
| 2.21367   | 2.57554   | 1.7906    | 1.6065    | 1.02964   | 1.97368  |
| 44.5407   | 48.5023   | 47.1723   | 41.6907   | 47.3471   | 33.5752  |
| 1.56471   | 1.06235   | 1.63663   | 0.978909  | 1.46395   | 1.22451  |
| 33.7445   | 40.5034   | 44.5523   | 40.2025   | 37.0874   | 38.4569  |
| 0.216638  | 0.591059  | 0.0725073 | 0.830124  | 0.0915499 | 0.57375  |
| 13.8274   | 15.5727   | 14.1834   | 13.9272   | 17.2778   | 15.89    |
| 0.650848  | 0.36244   | 0.116991  | 0.41985   | 0.448486  | 0.351689 |
| 2.08516   | 2.16328   | 1.43401   | 1.35907   | 1.18074   | 1.81157  |
| 5.41339   | 24.6588   | 18.6065   | 15.0782   | 11.5781   | 17.3806  |
| 36.2693   | 39.2046   | 38.2835   | 37.4754   | 34.5468   | 26.2337  |
| 0.0469603 | 0.0672453 | 0.0379852 | 0.0340799 | 0.218426  | 0        |
| 17.1866   | 13.355    | 15.5961   | 16.6228   | 16.7248   | 15.8265  |
| 7.58      | 5.84761   | 7.42666   | 7.43795   | 5.95897   | 7.22558  |
| 1.03709   | 10.148    | 8.38879   | 5.01755   | 1.60793   | 2.52178  |
| 0.0359119 | 0.160701  | 0.339301  | 0.263877  | 0.261381  | 0.116431 |
| 0         | 0         | 0         | 0         | 0         | 0        |
| 50.5091   | 56.0077   | 66.8948   | 45.0768   | 44.5579   | 59.5952  |
| 16.5207   | 17.2878   | 27.216    | 26.8333   | 20.3131   | 16.9222  |
| 14.77     | 12.9489   | 14.5291   | 13.5007   | 11.3782   | 12.7917  |
| 40.0436   | 36.9353   | 35.1411   | 35.9658   | 26.6922   | 43.5557  |
| 23.7571   | 25.3707   | 23.3577   | 24.6716   | 20.1029   | 24.2733  |
| 0.180335  | 0.0242097 | 0.123076  | 0.2004    | 0.139798  | 0.277492 |
| 69.9863   | 58.5081   | 75.9507   | 73.007    | 73.6689   | 69.9941  |
| 0.461106  | 0.570247  | 0.169536  | 0.395475  | 0.454945  | 0.441695 |
| 0         | 0         | 0         | 0         | 0         | 0        |
| 0         | 0         | 0         | 0         | 0.574793  | 1.55774  |
| 3.1443    | 4.21275   | 3.55063   | 3.00484   | 3.45117   | 3.17939  |

|          |           |           |           |           |           |
|----------|-----------|-----------|-----------|-----------|-----------|
| 11.0128  | 9.80403   | 9.97636   | 10.8959   | 8.0103    | 7.74553   |
| 11.5367  | 11.8585   | 11.5373   | 13.7232   | 6.95272   | 7.24097   |
| 13.3552  | 11.5847   | 11.8809   | 12.7896   | 10.5634   | 11.8418   |
| 15.0087  | 17.6468   | 13.6816   | 15.843    | 16.7466   | 16.0509   |
| 3.86295  | 3.22467   | 3.41632   | 3.56714   | 4.11624   | 4.67273   |
| 36.6798  | 38.2778   | 49.8786   | 44.2316   | 24.0228   | 35.5193   |
| 3.43614  | 2.38587   | 2.96269   | 3.05543   | 2.81743   | 3.07586   |
| 1.49565  | 4.54E-05  | 1.11E-06  | 2.43279   | 7.84E-07  | 3.76E-06  |
| 32.8872  | 32.2334   | 40.5425   | 36.7259   | 33.2133   | 37.9575   |
| 3.3032   | 2.70567   | 3.94206   | 2.98245   | 2.40948   | 2.88479   |
| 4.71852  | 3.99658   | 4.3345    | 3.05257   | 3.30194   | 3.5436    |
| 48.7742  | 43.8904   | 47.0746   | 49.7661   | 51.9483   | 50.7472   |
| 1.77503  | 1.12701   | 0.893979  | 0.972204  | 1.29814   | 0.895807  |
| 1.04806  | 1.0642    | 1.45837   | 1.11402   | 0.793597  | 1.20473   |
| 10.0384  | 8.61314   | 7.3106    | 8.52489   | 6.91111   | 7.29215   |
| 0.284777 | 0.25334   | 0.30509   | 0.172934  | 0.310499  | 0.286796  |
| 0        | 0         | 0         | 0         | 0         | 0         |
| 3.14488  | 1.88656   | 2.11988   | 1.93277   | 2.22932   | 2.56035   |
| 0.448853 | 0         | 0.302557  | 0.217161  | 0.057993  | 0.181905  |
| 13.6734  | 9.83333   | 12.2715   | 12.423    | 10.7021   | 11.5406   |
| 5.64212  | 5.75652   | 5.57184   | 6.77025   | 5.18927   | 4.38668   |
| 17.7875  | 13.5053   | 16.2458   | 16.0532   | 16.6303   | 16.5826   |
| 6.53162  | 6.82807   | 6.3279    | 7.55174   | 5.85277   | 7.77004   |
| 0        | 0         | 0         | 0         | 0         | 0         |
| 2.10514  | 1.74929   | 1.11171   | 0.960479  | 1.98685   | 1.7534    |
| 5.7179   | 5.44354   | 7.42048   | 7.15917   | 6.47842   | 8.0468    |
| 0.266782 | 0.317667  | 0.301313  | 0.573411  | 0.0686593 | 0.216493  |
| 0.169605 | 0.0611198 | 0.0690075 | 0.143541  | 0.110707  | 0.158878  |
| 4.4439   | 3.37076   | 4.80463   | 5.10893   | 4.84343   | 6.86506   |
| 0.354206 | 0.165619  | 0.0350824 | 0.241312  | 1.32648   | 7.25966   |
| 0.190951 | 0.136718  | 0.154457  | 0         | 0.148028  | 0         |
| 0.629736 | 0.661612  | 0.583147  | 0.649831  | 0.758118  | 0.259375  |
| 0        | 0         | 0         | 0.0344154 | 0         | 0.0745457 |
| 7.30637  | 5.18012   | 6.34037   | 6.34306   | 9.43667   | 3.94454   |
| 0        | 0         | 0         | 0         | 0         | 0         |
| 0        | 0         | 0         | 0         | 0         | 0         |
| 32.2048  | 28.2826   | 28.6804   | 31.5167   | 23.5335   | 29.5101   |
| 0.18036  | 0.24392   | 0.226939  | 0.349041  | 0.0776765 | 0.536021  |
| 0.196647 | 0.140796  | 0.159064  | 0.174424  | 0.0338764 | 0.159389  |
| 0        | 0         | 0.0307144 | 0         | 0.0294362 | 0.0615545 |
| 0        | 0         | 0         | 0         | 0         | 0         |
| 0.429815 | 0.553931  | 0.0695338 | 0         | 0.13328   | 0.069676  |
| 27.8839  | 25.6508   | 25.3556   | 29.4615   | 29.2739   | 29.9142   |

|           |           |            |           |           |           |
|-----------|-----------|------------|-----------|-----------|-----------|
| 8.26694   | 7.09572   | 6.78251    | 7.15546   | 6.66818   | 7.65246   |
| 0.158203  | 0.201369  | 0.227497   | 0.112077  | 0.102201  | 0.491766  |
| 13.4279   | 12.1813   | 9.90674    | 11.9401   | 9.74581   | 11.0632   |
| 0         | 0         | 0          | 0         | 0         | 0         |
| 0         | 0         | 1.23122    | 0         | 0         | 0         |
| 0         | 0         | 0          | 0         | 0         | 0         |
| 0.570789  | 0.166765  | 0.370765   | 0.51835   | 0.347676  | 0.325564  |
| 2.01088   | 1.38216   | 1.43137    | 2.56842   | 0.935317  | 2.08625   |
| 0         | 0.212972  | 0.192484   | 0.0863472 | 0.0461183 | 0.0482194 |
| 0         | 0         | 0          | 0         | 0.0249006 | 0         |
| 7.57219   | 6.817     | 5.21672    | 7.71687   | 5.83254   | 5.44236   |
| 15.2538   | 13.4632   | 14.283     | 15.4546   | 15.9061   | 14.8351   |
| 0         | 0         | 0          | 0         | 0         | 0         |
| 0.0225475 | 0.0573994 | 0.109429   | 0.0736341 | 0.211498  | 0.122175  |
| 45.5317   | 64.2088   | 55.2445    | 65.0318   | 54.1255   | 64.4996   |
| 7.84149   | 9.33862   | 12.0177    | 11.4712   | 14.6008   | 10.5776   |
| 121.735   | 101.879   | 110.017    | 126.753   | 138.343   | 120.465   |
| 0.169786  | 0.0650027 | 0.231756   | 0         | 0.127965  | 0         |
| 0         | 0         | 0          | 0         | 0         | 0         |
| 0         | 0.418379  | 0.353103   | 0.74344   | 0.341711  | 0.472753  |
| 3.30E-08  | 1.93E-08  | 3.68E-08   | 3.61E-08  | 2.06E-08  | 9.69E-08  |
| 13.4563   | 10.8271   | 8.92957    | 12.7995   | 10.9633   | 15.619    |
| 0.323221  | 0.226565  | 0.128499   | 0.161746  | 0.329843  | 0.305766  |
| 11.4529   | 11.515    | 14.9407    | 13.3106   | 14.5476   | 14.2768   |
| 0.984619  | 1.05745   | 1.13094    | 0.786011  | 1.08387   | 1.32479   |
| 0.550619  | 0.269738  | 0.398502   | 0.441657  | 0.426849  | 0.328849  |
| 69.4971   | 77.1307   | 76.3152    | 75.3062   | 75.1149   | 79.1273   |
| 33.5083   | 23.0442   | 32.1284    | 28.7596   | 19.1988   | 48.5148   |
| 0         | 0         | 0          | 0         | 0         | 0         |
| 11.7414   | 9.43153   | 11.0688    | 9.10221   | 9.48524   | 10.7876   |
| 61.1905   | 52.4635   | 62.2652    | 60.8316   | 67.3813   | 54.4661   |
| 1.46829   | 2.96682   | 0.885641   | 1.33607   | 0.743324  | 1.03998   |
| 0.0463227 | 0.0442216 | 0          | 0         | 0.0359101 | 0.0166872 |
| 7.42624   | 7.20669   | 5.6341     | 8.56307   | 5.37266   | 7.61572   |
| 21.2313   | 22.0105   | 20.143     | 21.6611   | 24.331    | 20.3881   |
| 0         | 0         | 0          | 0         | 0         | 0         |
| 0         | 0         | 0          | 0         | 0         | 0         |
| 16.3162   | 11.5122   | 9.50077    | 9.78163   | 13.3003   | 15.7649   |
| 6.9115    | 4.82682   | 5.94407    | 5.4328    | 6.06057   | 5.94967   |
| 7.52873   | 8.19464   | 8.22832    | 6.91059   | 7.40574   | 7.88961   |
| 0         | 0         | 0          | 0         | 0         | 0         |
| 2.40305   | 4.07832   | 2.37573    | 2.2176    | 1.5639    | 3.43863   |
| 0         | 0         | 0.00594855 | 0         | 0         | 0         |

|           |          |          |           |           |          |
|-----------|----------|----------|-----------|-----------|----------|
| 136.587   | 125.136  | 125.545  | 146.952   | 123.772   | 123.768  |
| 85.188    | 67.3152  | 79.0926  | 77.1335   | 82.2682   | 75.372   |
| 0         | 0        | 0        | 0         | 0         | 0        |
| 6.97913   | 9.45364  | 7.39989  | 10.0613   | 9.57775   | 7.56791  |
| 0         | 0        | 0        | 0         | 0         | 0        |
| 26.6254   | 27.0237  | 26.2479  | 28.7321   | 25.9304   | 23.1331  |
| 0         | 0        | 0        | 0         | 0         | 0.223411 |
| 25.9443   | 25.0105  | 26.5669  | 23.9834   | 25.2836   | 23.0924  |
| 13.7294   | 12.432   | 10.5688  | 9.53826   | 10.342    | 10.8554  |
| 9.50334   | 10.3236  | 10.1125  | 8.85746   | 10.2799   | 10.4323  |
| 23.6576   | 16.6095  | 19.5449  | 21.3693   | 40.7036   | 33.6964  |
| 23.6475   | 24.5425  | 24.2951  | 27.3253   | 26.741    | 24.4424  |
| 2.66201   | 2.19159  | 2.42588  | 2.2813    | 2.15961   | 2.05729  |
| 14.1775   | 11.6167  | 15.189   | 15.1988   | 12.5426   | 15.2581  |
| 50.0559   | 46.4775  | 52.1144  | 55.3627   | 56.8062   | 50.6943  |
| 23.5655   | 24.5831  | 22.5461  | 27.7677   | 27.7955   | 23.6192  |
| 3.0558    | 3.64291  | 2.7319   | 3.24689   | 2.14216   | 1.9909   |
| 0         | 0.447597 | 1.25779  | 1.54699   | 1.37737   | 3.02316  |
| 0         | 0        | 0        | 0         | 0         | 0        |
| 0.569471  | 0.518929 | 0.879391 | 0.525986  | 0.722393  | 0.755305 |
| 0.422143  | 0.636308 | 0.359435 | 0.483721  | 0.27558   | 0.378178 |
| 0.269047  | 0.160527 | 0.253898 | 0.146439  | 0.104285  | 0.127208 |
| 0.0684907 | 0.196152 | 0.277004 | 0.0994099 | 0.0530951 | 0.111028 |
| 0         | 0        | 0        | 0         | 0         | 0        |
| 8.12678   | 9.33873  | 9.46536  | 11.5112   | 11.0439   | 10.8725  |
| 14.8384   | 14.1076  | 15.3326  | 14.7764   | 14.3937   | 11.7088  |
| 0.582851  | 0.616955 | 1.05976  | 0.508563  | 0.457783  | 0.752936 |
| 37.8699   | 34.3324  | 38.4378  | 38.1707   | 36.7109   | 36.6042  |
| 3.52284   | 2.85611  | 3.35241  | 2.03023   | 2.20886   | 3.31728  |
| 18.8592   | 19.0465  | 20.6317  | 19.4032   | 16.5539   | 17.97    |
| 0.0941002 | 0.033687 | 0        | 0         | 0.036474  | 0        |
| 6.75069   | 7.60495  | 7.35067  | 8.49634   | 8.63667   | 8.28402  |
| 14.9298   | 14.298   | 12.9467  | 12.8743   | 10.2144   | 12.3723  |
| 0.591497  | 0.717128 | 0.644252 | 0.225361  | 0.165411  | 0.235302 |
| 0         | 0        | 0        | 0         | 0         | 0        |
| 0.453331  | 0.274642 | 0.239759 | 0.303684  | 0.297363  | 0.240249 |
| 16.5791   | 15.4662  | 16.6921  | 15.694    | 14.1837   | 15.5954  |
| 6.94236   | 5.99592  | 7.55453  | 7.13932   | 7.48146   | 7.29241  |
| 65.4925   | 59.8222  | 51.8985  | 85.5172   | 48.71     | 72.5521  |
| 0         | 0        | 0        | 0         | 0         | 0        |
| 6.43478   | 5.72614  | 6.02235  | 6.07107   | 6.3054    | 6.33735  |
| 2.36339   | 1.52479  | 2.22681  | 1.88478   | 2.01333   | 1.43144  |
| 0.766016  | 0.763916 | 0.464711 | 0.516204  | 0.190873  | 0.554359 |

|          |           |           |          |          |           |
|----------|-----------|-----------|----------|----------|-----------|
| 0        | 0         | 0.0533699 | 0        | 0        | 0.053479  |
| 16.485   | 17.2827   | 23.8694   | 18.9519  | 13.2101  | 16.5136   |
| 11.7528  | 11.0958   | 12.3855   | 12.2153  | 10.9504  | 10.6078   |
| 4.61     | 4.37116   | 4.5755    | 4.59336  | 5.19641  | 4.62525   |
| 1.92039  | 0         | 0         | 0        | 0        | 0.518846  |
| 0.512713 | 0.0917732 | 0.0518404 | 0.139532 | 0.34778  | 0.0519464 |
| 25.0192  | 23.4292   | 27.333    | 30.3353  | 33.5869  | 28.2544   |
| 4.41988  | 2.74546   | 3.30642   | 2.96919  | 2.57604  | 2.5483    |
| 0.655227 | 0.561396  | 0.688192  | 0.617438 | 0.759802 | 0.689599  |
| 63.9336  | 72.387    | 50.2136   | 199.18   | 98.0785  | 186.544   |
| 0.411733 | 0.147397  | 0.499564  | 0        | 0.319182 | 0.834309  |
| 0.148952 | 0.388524  | 0.188404  | 0.509897 | 0.177976 | 0.185903  |
| 0.158529 | 0.105956  | 0.0732176 | 0.030827 | 0.131916 | 0         |
| 0.659726 | 1.02343   | 0.622579  | 0.930952 | 0.738732 | 0.445609  |
| 16.0559  | 15.3775   | 17.3718   | 15.7444  | 16.0593  | 15.5666   |
| 0        | 0         | 0         | 0        | 0        | 0         |
| 10.1793  | 7.40707   | 9.7107    | 8.5099   | 6.51736  | 7.16286   |
| 0.202801 | 0.0527431 | 0.136935  | 0.106515 | 0.105898 | 0.119925  |
| 67.0137  | 58.8433   | 64.4557   | 70.607   | 91.2481  | 51.1619   |
| 33.99    | 27.8188   | 34.8388   | 30.5035  | 33.9155  | 32.8961   |
| 2.36426  | 3.2888    | 2.84128   | 3.43157  | 2.6183   | 2.46383   |
| 24.4315  | 25.5011   | 23.413    | 25.5631  | 23.5035  | 24.7002   |
| 0        | 0         | 0         | 0.28164  | 0        | 0         |
| 0        | 0         | 0         | 0        | 0        | 0         |
| 0.339112 | 0.242798  | 0.280016  | 0.12305  | 0.131442 | 0.206146  |
| 7.72061  | 5.85139   | 5.6967    | 7.98094  | 4.8465   | 5.6473    |
| 4.31487  | 4.39342   | 4.73546   | 4.31156  | 4.70647  | 4.07733   |
| 0.353466 | 0.22157   | 0.262177  | 0.299113 | 0.786269 | 0.679423  |
| 28.2758  | 24.1069   | 25.0691   | 26.8517  | 27.782   | 29.5558   |
| 1.23161  | 0.16135   | 0         | 0        | 0        | 0         |
| 4.0383   | 4.33668   | 3.58158   | 4.39566  | 3.52898  | 5.55307   |
| 1.48684  | 1.45104   | 1.16743   | 1.18248  | 0.697969 | 1.19303   |
| 0        | 0         | 0         | 0        | 0        | 0         |
| 3.3189   | 3.23432   | 3.34079   | 3.30487  | 2.81584  | 3.24301   |
| 0        | 0         | 0         | 0        | 0        | 0         |
| 1106.4   | 1140.91   | 1147.77   | 1141.16  | 1194.8   | 1052.75   |
| 0.563927 | 0.602707  | 0.815593  | 0.804904 | 0.365802 | 0.532372  |
| 0.80973  | 0.562219  | 0.49657   | 0.783173 | 0.267627 | 0.417704  |
| 1.46134  | 1.66175   | 2.57269   | 1.74674  | 0.999574 | 1.43993   |
| 0.156407 | 0.0746565 | 0.0843432 | 0.113508 | 0.121249 | 0         |
| 0.139907 | 0.200342  | 0.452672  | 0.101533 | 0.433833 | 0.453598  |
| 16.7944  | 10.2478   | 15.8317   | 14.8539  | 12.4437  | 13.9688   |
| 8.16717  | 10.8512   | 9.53481   | 8.67673  | 6.20078  | 6.41503   |

|           |           |           |           |           |           |
|-----------|-----------|-----------|-----------|-----------|-----------|
| 7.32879   | 5.13622   | 6.9475    | 6.69051   | 7.48501   | 6.1131    |
| 0         | 0         | 0         | 0         | 0         | 0         |
| 1.87269   | 2.18361   | 1.40658   | 1.88325   | 1.30657   | 1.79977   |
| 0.392343  | 0.403809  | 0.297524  | 0.266935  | 0.171085  | 0.337883  |
| 17.2553   | 14.9871   | 17.3804   | 14.7885   | 17.0711   | 16.6334   |
| 73.2514   | 48.395    | 32.6774   | 69.8151   | 38.2633   | 45.3577   |
| 27.3942   | 30.9424   | 29.7359   | 29.6493   | 28.8034   | 25.7132   |
| 25.0264   | 23.6692   | 24.8133   | 25.1108   | 22.092    | 25.5444   |
| 0.0858294 | 0.125566  | 0.20863   | 0.0936956 | 0.238423  | 0.0701984 |
| 0         | 0         | 0         | 0         | 0         | 0.0381357 |
| 5.06421   | 4.43496   | 4.94269   | 4.95087   | 5.66166   | 4.71533   |
| 12.6935   | 12.3434   | 13.69     | 11.9886   | 15.4582   | 12.66     |
| 0.683407  | 0.733959  | 0.621893  | 0.635449  | 0.728458  | 0.571234  |
| 23.6439   | 24.6637   | 23.4586   | 19.8505   | 14.8325   | 21.577    |
| 0.16878   | 0.241687  | 0.341308  | 0.244974  | 0.196262  | 0.136802  |
| 28.9131   | 25.0969   | 28.5141   | 29.0513   | 26.9248   | 29.431    |
| 8.87149   | 6.92365   | 7.97777   | 7.34463   | 8.1008    | 7.80141   |
| 0.399356  | 0.615176  | 0.711152  | 0.291622  | 0         | 0.383644  |
| 1.28651   | 0.944147  | 0.650396  | 0.863622  | 0.847726  | 0.83421   |
| 10.9979   | 8.35443   | 10.6121   | 11.2406   | 10.8131   | 11.7439   |
| 0.0237352 | 0.0462615 | 0.0711073 | 0.0524956 | 0.108798  | 0.0705401 |
| 0         | 0         | 0         | 0         | 0         | 0         |
| 0         | 0         | 0         | 0         | 0         | 0         |
| 0.529238  | 0.312055  | 0.453272  | 0.293706  | 0.168936  | 0.302799  |
| 8.87092   | 11.4047   | 10.2267   | 10.8232   | 9.74216   | 11.0111   |
| 0         | 0         | 0         | 0         | 0         | 0         |
| 7.58E-89  | 0.140421  | 0.0496182 | 0.0452153 | 0.108844  | 2.77E-174 |
| 3.5651    | 2.53684   | 3.13218   | 3.37536   | 2.97631   | 3.48533   |
| 0         | 0         | 0         | 0         | 0         | 0         |
| 12.7309   | 12.0219   | 12.0805   | 13.3219   | 15.0398   | 12.1757   |
| 0         | 0         | 0         | 0         | 0         | 0         |
| 7.33176   | 10.0097   | 8.44993   | 13.6692   | 4.53792   | 6.8483    |
| 1.90604   | 0         | 0.385439  | 0.345811  | 0.369397  | 0.772453  |
| 0         | 0         | 0         | 0         | 0         | 0         |
| 16.3385   | 17.8938   | 19.9805   | 18.887    | 19.5912   | 14.9179   |
| 2.63308   | 1.88524   | 8.5194    | 3.82175   | 4.08242   | 4.26841   |
| 3.15418   | 2.33711   | 2.26062   | 2.0974    | 2.23477   | 2.55062   |
| 0         | 0.028724  | 0.032451  | 0.0582293 | 0         | 0         |
| 2.22787   | 2.68269   | 2.86694   | 2.60907   | 2.2766    | 2.79073   |
| 0.059876  | 0         | 0.0807208 | 0.0434531 | 0.0154723 | 0.0970631 |
| 0.0704523 | 0         | 0.0569875 | 0.0511285 | 0.109231  | 0.228416  |
| 0.106417  | 0         | 0         | 0         | 0         | 0         |
| 0.0292325 | 0.0627898 | 0.0236456 | 0.0424291 | 0.0226615 | 0         |

|           |           |           |           |           |           |
|-----------|-----------|-----------|-----------|-----------|-----------|
| 0         | 0         | 0         | 0         | 0         | 0         |
| 38.9409   | 37.7872   | 32.766    | 41.7127   | 48.0727   | 42.1829   |
| 1.23485   | 1.77775   | 2.50863   | 1.81234   | 1.42962   | 1.9706    |
| 12.1132   | 9.77215   | 11.1151   | 10.9542   | 11.7872   | 11.7104   |
| 9.09417   | 9.1338    | 9.74892   | 10.1465   | 11.1358   | 9.74508   |
| 0         | 0.0875555 | 0.296748  | 0.354985  | 0.284397  | 0         |
| 2.89604   | 2.18526   | 3.3946    | 2.4667    | 2.44671   | 3.16259   |
| 35.5628   | 36.2623   | 34.2049   | 33.3601   | 35.8534   | 35.2488   |
| 0.0216319 | 0.0309761 | 0.0699904 | 0         | 0.0335388 | 0.0175334 |
| 0         | 0.126761  | 0.286417  | 0.0856567 | 0.182998  | 0.143501  |
| 4.29344   | 3.35914   | 3.08217   | 4.05951   | 4.30029   | 3.9841    |
| 19.1374   | 18.2402   | 22.0435   | 19.7496   | 16.6353   | 20.8937   |
| 0.300525  | 0.322756  | 0.243089  | 0.245359  | 0.378579  | 0.274034  |
| 18.4653   | 16.2091   | 15.9933   | 18.6017   | 18.792    | 17.9054   |
| 0         | 0         | 0         | 0         | 0         | 0         |
| 0         | 0         | 0         | 0         | 0         | 0         |
| 0         | 0.11136   | 0         | 0         | 0         | 0         |
| 0         | 0         | 0         | 0         | 0         | 0         |
| 3.44422   | 4.41089   | 3.39663   | 3.4351    | 3.13966   | 2.01844   |
| 21.807    | 22.9684   | 19.5128   | 26.4511   | 17.4181   | 21.7813   |
| 5.73948   | 6.47932   | 5.93809   | 6.06375   | 5.31847   | 5.90696   |
| 0.106362  | 0.0761534 | 0.0860343 | 0.0514593 | 0.0549691 | 0         |
| 4.63095   | 3.56686   | 4.04858   | 4.06516   | 3.6897    | 3.27013   |
| 7.17485   | 6.87199   | 6.5367    | 7.52379   | 7.00849   | 8.44371   |
| 30.4124   | 28.0219   | 27.9101   | 26.9493   | 20.3635   | 28.8244   |
| 1.55234   | 1.85755   | 1.58355   | 1.67057   | 2.39084   | 1.2606    |
| 52.5134   | 46.5132   | 48.0924   | 51.8425   | 56.9929   | 50.7681   |
| 0         | 0         | 0         | 0         | 0         | 0         |
| 24.3403   | 27.091    | 25.3528   | 23.3405   | 16.9865   | 24.123    |
| 8.62796   | 19.5341   | 18.6735   | 30.9689   | 22.5964   | 23.2478   |
| 0.24022   | 0.819496  | 0.285749  | 0.194842  | 0.712026  | 0.687199  |
| 4.4827    | 3.90725   | 3.15301   | 3.94018   | 3.38872   | 2.86608   |
| 0.460779  | 0.659818  | 0.74543   | 0.780257  | 0.476271  | 0.622462  |
| 12.1038   | 11.9307   | 15.6246   | 12.6946   | 12.3822   | 11.4009   |
| 0         | 0.266184  | 0         | 0.269804  | 0         | 0         |
| 0.0378159 | 0.054151  | 0.0611771 | 0.0548874 | 0         | 0.0306511 |
| 1.41958   | 0.982012  | 1.2926    | 1.23066   | 1.37168   | 1.57361   |
| 69.5676   | 85.5558   | 78.6867   | 71.6953   | 72.577    | 68.9938   |
| 4.16321   | 1.99775   | 3.09885   | 3.88914   | 3.51922   | 3.85904   |
| 47.2852   | 42.5391   | 41.0703   | 44.2592   | 39.4696   | 29.3611   |
| 0.110359  | 0.173833  | 0.160681  | 0.0160179 | 0.119773  | 0.05367   |
| 30.1539   | 45.4448   | 48.3301   | 27.0163   | 34.775    | 34.8507   |
| 19.9195   | 19.5553   | 17.135    | 18.5518   | 20.5199   | 18.7845   |

|           |           |           |           |           |           |
|-----------|-----------|-----------|-----------|-----------|-----------|
| 2.92861   | 3.64789   | 3.91314   | 2.57568   | 3.05077   | 2.51006   |
| 0.0249695 | 0         | 0         | 0         | 0         | 0.0202386 |
| 7.58845   | 6.33394   | 7.38191   | 8.2316    | 11.8892   | 10.5533   |
| 0         | 0         | 0         | 0         | 0         | 0         |
| 2.32003   | 1.7819    | 1.74014   | 2.38777   | 1.70042   | 2.22236   |
| 0         | 0         | 0         | 0         | 0         | 0         |
| 0         | 0         | 0         | 0         | 0         | 0         |
| 0         | 0.0510633 | 0.0576888 | 0.0776366 | 0.0276439 | 0.0867101 |
| 1.94223   | 2.14108   | 1.28426   | 1.51019   | 1.15911   | 1.39933   |
| 3.63953   | 3.22059   | 4.0936    | 3.01136   | 3.47409   | 3.48553   |
| 4.77479   | 4.8965    | 5.31053   | 3.89829   | 3.43157   | 4.83765   |
| 167.958   | 274.662   | 312.064   | 231.691   | 304.426   | 200.02    |
| 0.441998  | 0.315325  | 0.496481  | 0.397319  | 0.291519  | 0.392014  |
| 207.163   | 197.022   | 152.387   | 159.54    | 162.422   | 137.429   |
| 0         | 0         | 0         | 0         | 0         | 0         |
| 11.6378   | 9.89877   | 10.231    | 9.24362   | 8.90991   | 9.50486   |
| 16.0986   | 14.9118   | 17.3625   | 16.3337   | 16.4228   | 17.5367   |
| 0         | 0         | 0         | 0.162667  | 0.347523  | 0.090839  |
| 0.050746  | 0.0363332 | 0         | 0         | 0.0196695 | 0.0205657 |
| 0.478958  | 0.649752  | 0.774839  | 0.750059  | 0.41038   | 0.490373  |
| 0.397172  | 0.174995  | 0.0741379 | 0.0886876 | 0.0947365 | 0.0247631 |
| 23.6765   | 25.3943   | 36.9874   | 27.3058   | 49.7775   | 26.6945   |
| 75.2508   | 74.9191   | 75.0543   | 77.2438   | 91.1853   | 61.7518   |
| 0         | 0.0177695 | 0.0200751 | 0         | 0         | 0         |
| 0.150809  | 0.0411829 | 0         | 0.0480466 | 0.0577332 | 0.0536619 |
| 0         | 0         | 0.0499742 | 0         | 0         | 0         |
| 11.3586   | 11.5763   | 8.77361   | 11.1306   | 7.96095   | 12.0933   |
| 4.43868   | 4.88719   | 3.92224   | 4.11451   | 3.64334   | 5.59307   |
| 6.63602   | 5.23173   | 6.24226   | 5.08643   | 7.77432   | 7.43351   |
| 2.34262   | 2.57164   | 2.5715    | 2.20569   | 2.65309   | 2.19823   |
| 8.17179   | 6.58785   | 7.86346   | 7.9207    | 8.82392   | 8.41267   |
| 30.2767   | 25.2323   | 25.4459   | 26.3054   | 29.108    | 27.5576   |
| 5.951     | 6.3363    | 7.12122   | 7.34633   | 5.87365   | 6.38988   |
| 27.999    | 27.4598   | 25.895    | 31.207    | 27.1107   | 25.948    |
| 1.80124   | 1.99769   | 2.08549   | 2.92195   | 1.80704   | 3.3207    |
| 0.376161  | 0.572314  | 0.228202  | 0.30711   | 0.182254  | 0.343002  |
| 0         | 0         | 0         | 0         | 0         | 0         |
| 0         | 0         | 0         | 0         | 0         | 0         |
| 0         | 0         | 0         | 0         | 0         | 0         |
| 1.29206   | 0.925088  | 0.940606  | 1.00018   | 0.868072  | 1.46616   |
| 0         | 0         | 0         | 0         | 0         | 0         |
| 21.1871   | 24.4291   | 22.767    | 20.8191   | 20.0212   | 24.0671   |
| 9.09247   | 7.4848    | 8.3773    | 8.34525   | 10.6672   | 9.57674   |



|           |           |          |           |           |          |
|-----------|-----------|----------|-----------|-----------|----------|
| 4.92126   | 4.42271   | 4.72488  | 5.09753   | 4.15688   | 4.05987  |
| 10.2473   | 10.5162   | 12.9306  | 11.5764   | 12.1806   | 15.0612  |
| 0.0946756 | 0         | 0        | 0         | 0.073394  | 0        |
| 0.285578  | 0.408937  | 0.346497 | 0.276332  | 0.221384  | 0.115735 |
| 2.02572   | 2.64738   | 2.43998  | 3.85061   | 1.92628   | 2.26463  |
| 0         | 0         | 0        | 0         | 0         | 0        |
| 0         | 0         | 0        | 0.748385  | 0.399714  | 0        |
| 1.14839   | 1.00735   | 1.37741  | 1.64019   | 0.24035   | 1.00592  |
| 0         | 0         | 0        | 0         | 0         | 0        |
| 5.3493    | 3.77092   | 3.81527  | 4.39105   | 4.05092   | 4.69246  |
| 0         | 0         | 0        | 0         | 0         | 0        |
| 6.47811   | 4.7051    | 5.06367  | 6.35125   | 5.57724   | 5.88183  |
| 5.63427   | 6.79914   | 7.4612   | 6.71178   | 6.45204   | 5.78218  |
| 0         | 0         | 0        | 0         | 0         | 0        |
| 0.593657  | 0.531309  | 0.180074 | 0.807801  | 0.115053  | 0.300737 |
| 0         | 0.0793982 | 0.1794   | 0         | 0.0859669 | 0.179767 |
| 0.29188   | 0.37926   | 0.262328 | 0.43149   | 0.22627   | 0.341724 |
| 0.115882  | 0.0553131 | 0        | 0.0280327 | 0.119778  | 0.187853 |
| 44.2074   | 47.0636   | 42.3046  | 45.3864   | 32.8192   | 44.3991  |
| 0.986153  | 1.08503   | 1.14828  | 1.20742   | 0.261446  | 0.518743 |
| 48.3334   | 49.1233   | 48.3584  | 51.0082   | 43.7102   | 48.6783  |
| 0.903541  | 0.498922  | 0.376735 | 0.967917  | 0.44961   | 0.94126  |
| 0.0634827 | 0         | 0        | 0         | 0         | 0        |
| 3.19462   | 2.43944   | 3.58818  | 2.94301   | 3.97776   | 3.34041  |
| 0.0883296 | 0.189727  | 0        | 0.0641024 | 0         | 0.143188 |
| 14.8264   | 9.85714   | 6.3176   | 9.31871   | 8.62021   | 4.07728  |
| 0         | 0         | 0        | 0         | 0         | 0        |
| 0         | 0         | 0        | 0         | 0         | 0        |
| 0.296673  | 0.233654  | 0.143984 | 0.172241  | 0.0919943 | 0.168325 |
| 1.18556   | 0.710226  | 1.29355  | 0.99068   | 1.37802   | 0.786769 |
| 0         | 0         | 0        | 0         | 0         | 0        |
| 1.93412   | 2.33671   | 2.017    | 2.79779   | 2.06578   | 1.61879  |
| 174.189   | 146.863   | 170.724  | 167.515   | 193.63    | 163.118  |
| 0.445679  | 0.202095  | 0.2163   | 0.280312  | 0.230332  | 0.325114 |
| 0.916431  | 0.729053  | 0.535371 | 0.812864  | 0.7499    | 0.907865 |
| 1.25862   | 1.00929   | 1.04522  | 1.19351   | 1.13181   | 1.11537  |
| 0         | 0         | 0        | 0         | 0         | 0        |
| 16.5873   | 22.6561   | 20.2547  | 12.8016   | 21.7609   | 15.5905  |
| 9.25883   | 9.57315   | 10.7222  | 10.545    | 9.25062   | 9.34578  |
| 11.224    | 11.2653   | 12.6093  | 12.2979   | 12.1921   | 13.8426  |
| 12.4248   | 11.0565   | 12.096   | 14.5432   | 14.3893   | 13.7326  |
| 0.767819  | 1.06402   | 0.500866 | 0.575195  | 0.46082   | 0.32121  |
| 82.0343   | 97.2757   | 78.2975  | 90.3681   | 85.3519   | 88.8372  |

|           |           |           |           |           |           |
|-----------|-----------|-----------|-----------|-----------|-----------|
| 5.72963   | 4.51401   | 5.61465   | 6.98978   | 5.66754   | 7.02435   |
| 11.09     | 9.01648   | 8.86242   | 9.3694    | 9.30927   | 11.033    |
| 0.117723  | 0.126431  | 0.166641  | 0         | 0.0912606 | 0.0477092 |
| 0.0815969 | 0         | 0         | 0         | 0         | 0         |
| 1.78358   | 1.98675   | 2.14762   | 2.43969   | 1.55837   | 1.71262   |
| 9.85411   | 6.90837   | 9.79743   | 5.51246   | 5.0927    | 6.9887    |
| 0.70728   | 0.726657  | 0.587452  | 0.62834   | 0.474546  | 0.454983  |
| 7.65855   | 5.52068   | 5.47844   | 6.5788    | 7.83526   | 3.29378   |
| 29.5881   | 24.4881   | 29.7338   | 28.7836   | 26.6631   | 28.5116   |
| 44.9739   | 43.3968   | 42.8859   | 42.5633   | 37.6966   | 41.2665   |
| 6.28357   | 7.06671   | 1.82829   | 2.88697   | 1.05132   | 0.696171  |
| 3.40381   | 2.39513   | 3.3513    | 3.49016   | 4.06301   | 4.16505   |
| 6.172     | 6.28708   | 6.83052   | 5.98575   | 5.1326    | 6.88996   |
| 11.6697   | 8.27676   | 10.0825   | 9.64938   | 9.47158   | 10.7993   |
| 0         | 0.0251429 | 0         | 0         | 0         | 0.0419503 |
| 10.7628   | 10.8947   | 10.5683   | 9.98181   | 9.80281   | 10.2932   |
| 0         | 0         | 0         | 0         | 0         | 0         |
| 0.134135  | 0.116574  | 0.0450871 | 0.159868  | 0.103981  | 0.163054  |
| 0.340644  | 0.243895  | 0.394722  | 0.213661  | 0.113174  | 0.157773  |
| 8.11836   | 11.4317   | 10.4303   | 10.1785   | 11.8148   | 7.63345   |
| 0.423415  | 0.555788  | 0.456656  | 0.947446  | 0.547063  | 0.285993  |
| 20.7548   | 19.5601   | 22.0901   | 24.175    | 18.3347   | 20.5138   |
| 2.48836   | 2.09603   | 2.2759    | 2.51403   | 2.10553   | 2.26737   |
| 30.8905   | 34.8263   | 41.0355   | 41.6307   | 31.4339   | 38.2926   |
| 2.84036   | 1.36006   | 2.25724   | 1.97752   | 1.48245   | 2.00567   |
| 1.89513   | 3.12143   | 2.1306    | 1.97116   | 2.04192   | 2.20153   |
| 0.800495  | 0.461977  | 0.952399  | 0.566311  | 0.547295  | 0.806029  |
| 0.120355  | 0.0574481 | 0.032451  | 0.0291147 | 0.124402  | 0         |
| 7.14308   | 6.76987   | 5.903     | 7.53071   | 4.29603   | 7.29577   |
| 27.9548   | 22.641    | 27.952    | 28.2721   | 27.3573   | 26.688    |
| 1.91284   | 1.70243   | 1.8696    | 1.85091   | 2.75977   | 1.45352   |
| 6.34473   | 7.16684   | 7.52661   | 8.38966   | 7.21294   | 8.56995   |
| 11.6031   | 9.83983   | 9.89816   | 8.3519    | 9.7552    | 8.12047   |
| 0.95952   | 0.969879  | 1.23269   | 1.31109   | 0.96261   | 1.32711   |
| 3.1886    | 2.72151   | 3.26406   | 2.94155   | 1.6479    | 2.96411   |
| 4.12029   | 2.62575   | 3.15506   | 3.79849   | 2.98097   | 3.3677    |
| 0         | 0         | 0         | 0         | 0         | 0         |
| 11.2948   | 13.6597   | 14.6761   | 11.5898   | 11.5621   | 12.5252   |
| 21.0294   | 21.2766   | 19.603    | 19.9572   | 16.6739   | 20.76     |
| 0         | 0         | 0         | 0         | 0         | 0         |
| 54.5434   | 49.0225   | 48.4047   | 52.899    | 58.3726   | 51.3069   |
| 0         | 0.0531309 | 0.120049  | 0         | 0.0575265 | 0.120295  |
| 0         | 0         | 0         | 0         | 0         | 0         |

|          |          |           |          |           |          |
|----------|----------|-----------|----------|-----------|----------|
| 0.56699  | 0.259811 | 0.293521  | 0.351125 | 0.548854  | 0.350573 |
| 0        | 0.622829 | 0         | 0        | 0         | 0.35254  |
| 0        | 0        | 0         | 0        | 0         | 0        |
| 0        | 0        | 0         | 0        | 0         | 0        |
| 32.4893  | 48.704   | 35.6877   | 40.514   | 26.7893   | 47.4669  |
| 12.1492  | 7.03948  | 4.69261   | 6.48347  | 4.9164    | 6.73689  |
| 0.953696 | 0.875076 | 0.997398  | 1.22457  | 0.58306   | 1.13206  |
| 11.3171  | 10.4762  | 12.9735   | 12.4278  | 12.9652   | 12.862   |
| 17.1147  | 13.4334  | 14.8344   | 14.5285  | 14.7884   | 14.1883  |
| 9.61634  | 9.42827  | 6.65724   | 9.70319  | 10.5889   | 11.9139  |
| 0        | 0        | 0         | 0        | 0         | 0        |
| 18.7504  | 16.2916  | 16.9516   | 16.7822  | 15.5393   | 16.1928  |
| 0        | 0        | 0         | 0        | 0         | 0        |
| 104.575  | 135.64   | 123.794   | 117.274  | 131.548   | 125.244  |
| 17.1778  | 16.0407  | 16.0866   | 18.9838  | 17.6528   | 18.1564  |
| 0        | 0        | 0         | 0        | 0         | 0        |
| 28.1633  | 33.923   | 31.6993   | 27.3215  | 32.6253   | 34.589   |
| 18.0846  | 14.437   | 15.6689   | 16.1846  | 15.3097   | 16.5707  |
| 3.98941  | 2.01624  | 2.46767   | 3.57641  | 2.91073   | 4.75522  |
| 2.57985  | 3.63592  | 3.42673   | 4.43427  | 3.43148   | 5.3267   |
| 0.539388 | 0.295216 | 0.328518  | 0.446238 | 0.158891  | 0.112468 |
| 0        | 0        | 0         | 0        | 0         | 0        |
| 35.4242  | 30.4724  | 35.2855   | 35.9534  | 30.8945   | 30.1173  |
| 2.99157  | 2.30637  | 2.57908   | 2.29408  | 2.83636   | 2.93898  |
| 3.49828  | 3.49368  | 2.70514   | 3.36134  | 2.10939   | 5.18019  |
| 264.219  | 264.219  | 285.03    | 285.03   | 330.178   | 330.178  |
| 0        | 0        | 0         | 0        | 0         | 0        |
| 12.2877  | 13.8185  | 12.7304   | 11.9157  | 8.64251   | 11.9538  |
| 0        | 0        | 0         | 0        | 0         | 0        |
| 0        | 0        | 0         | 0        | 0         | 0        |
| 0.323218 | 0.154939 | 0.131115  | 0.117394 | 0.209969  | 0.306709 |
| 3.24836  | 2.32577  | 3.88656   | 4.91124  | 4.77405   | 0.658227 |
| 0        | 0        | 0         | 0        | 0.0210753 | 0        |
| 30.2602  | 20.5781  | 27.9174   | 27.0021  | 24.5573   | 28.6147  |
| 3.30254  | 3.07461  | 4.92215   | 2.70416  | 3.42601   | 2.92655  |
| 18.101   | 15.7051  | 12.9953   | 12.532   | 10.2871   | 10.4308  |
| 46.0088  | 49.3085  | 40.1506   | 38.537   | 40.9136   | 42.2056  |
| 0.021607 | 0        | 0.0174774 | 0        | 0         | 0        |
| 11.9359  | 10.0869  | 11.2216   | 12.4251  | 13.1209   | 10.9591  |
| 31.7622  | 25.3009  | 23.307    | 19.4772  | 19.0757   | 20.6413  |
| 22.0103  | 17.797   | 19.7565   | 22.483   | 21.3657   | 20.3474  |
| 1.03219  | 1.15643  | 0.956279  | 0.928233 | 0.856844  | 1.75009  |
| 0        | 0        | 0         | 0        | 0         | 0        |

|           |           |           |           |           |           |
|-----------|-----------|-----------|-----------|-----------|-----------|
| 1.17614   | 0.982444  | 0.951357  | 1.28032   | 1.5196    | 3.97209   |
| 0.336223  | 0.298456  | 0.37002   | 0.244003  | 0.671913  | 0.177972  |
| 16.6975   | 18.9776   | 18.9909   | 17.2358   | 16.3453   | 17.9129   |
| 7.87911   | 5.78969   | 6.95702   | 6.01466   | 4.56605   | 7.28349   |
| 19.6824   | 26.2813   | 31.1342   | 14.4909   | 21.742    | 26.3448   |
| 56.4409   | 62.7002   | 52.7449   | 56.8736   | 57.7534   | 49.3882   |
| 0.0391397 | 0         | 0         | 0.0568087 | 0         | 0         |
| 0         | 0         | 0         | 0         | 0         | 0         |
| 21.4866   | 20.5936   | 18.1484   | 20.8185   | 15.3018   | 18.4319   |
| 19.9783   | 18.3654   | 17.6925   | 17.6592   | 17.4247   | 20.5409   |
| 69.392    | 61.587    | 62.5768   | 64.5645   | 45.5462   | 57.7703   |
| 0.0723684 | 0.0518144 | 0.0292687 | 0.0262595 | 0         | 0.0879856 |
| 0         | 0         | 0         | 0.0270966 | 0         | 0.0605268 |
| 0.436322  | 0.519408  | 0.286105  | 0.316647  | 0.370009  | 0.253262  |
| 55.5542   | 52.2507   | 61.4277   | 56.7185   | 59.8305   | 52.1615   |
| 18.0101   | 13.1143   | 13.9964   | 12.2609   | 12.3255   | 11.5835   |
| 5.81002   | 6.08249   | 5.88439   | 6.63764   | 6.01798   | 4.92028   |
| 5.25193   | 5.49342   | 5.36705   | 5.72499   | 5.64632   | 5.2554    |
| 8.15581   | 6.96487   | 7.96718   | 6.87304   | 6.33969   | 7.15512   |
| 5.62514   | 9.59598   | 7.08702   | 5.87366   | 6.58648   | 5.69309   |
| 15.0875   | 13.26     | 14.7098   | 16.1812   | 14.6888   | 15.6821   |
| 33.7859   | 36.9094   | 36.0569   | 39.3292   | 29.7498   | 35.1491   |
| 7.11453   | 9.45166   | 8.88172   | 9.02307   | 7.33248   | 8.2332    |
| 19.3932   | 15.2193   | 18.6798   | 18.0603   | 16.718    | 17.9807   |
| 0.0572184 | 0.286771  | 0.16199   | 0.145336  | 0.310496  | 0.18551   |
| 10.2754   | 7.59524   | 7.99496   | 9.18995   | 8.63327   | 8.64586   |
| 3.2591    | 4.49783   | 3.59159   | 2.77681   | 3.735     | 3.33066   |
| 10.0962   | 6.85095   | 7.25245   | 6.67073   | 5.89915   | 7.9389    |
| 41.3509   | 39.4847   | 41.8206   | 45.7883   | 55.4389   | 59.0861   |
| 0.916854  | 0.970999  | 0.540768  | 0.790135  | 0.533069  | 0.990854  |
| 0.349967  | 0.187927  | 0.141541  | 0.444461  | 0.203475  | 0.212745  |
| 0         | 0         | 0         | 0         | 0         | 0         |
| 6.60471   | 4.66138   | 6.32408   | 5.27337   | 7.83786   | 5.471     |
| 0         | 0.0279344 | 0         | 0.0283142 | 0         | 0.0632467 |
| 0         | 0         | 0         | 0         | 0         | 0         |
| 17.2888   | 17.6844   | 15.1631   | 14.8303   | 13.0556   | 15.6273   |
| 1.63504   | 0.878007  | 1.27874   | 1.55317   | 1.79833   | 2.56318   |
| 0         | 0         | 0.0620848 | 0.278509  | 0         | 0.0622117 |
| 0.0674885 | 0.144962  | 0.272951  | 0         | 0.0523182 | 0.109403  |
| 0.316516  | 0.098417  | 0.0875593 | 0.110471  | 0.210518  | 0.159525  |
| 20.2267   | 19.6206   | 19.4616   | 21.0713   | 13.5093   | 18.4657   |
| 69.2539   | 56.7392   | 62.5239   | 74.4659   | 78.1952   | 60.1118   |
| 0.100203  | 0.224199  | 0.570744  | 0.436316  | 0.0776792 | 0.49137   |

|           |           |           |           |           |           |
|-----------|-----------|-----------|-----------|-----------|-----------|
| 17.264    | 14.932    | 15.0467   | 15.6671   | 16.573    | 15.5844   |
| 9.74636   | 9.30166   | 9.43347   | 5.39293   | 7.27907   | 10.7169   |
| 27.8569   | 27.9903   | 28.6326   | 28.0299   | 27.6232   | 29.0548   |
| 0         | 0         | 0         | 0         | 0         | 0         |
| 0.526532  | 0.502649  | 0.709835  | 0.254742  | 0         | 0.284514  |
| 4.19691   | 5.07942   | 6.03677   | 5.45435   | 4.90068   | 5.52248   |
| 0.0562233 | 0         | 0.119835  | 0.0408023 | 0.200276  | 0.13509   |
| 0.0324632 | 0.0116215 | 0.0131294 | 0         | 0.012583  | 0.0131563 |
| 7.32997   | 6.86907   | 6.3009    | 5.67902   | 4.55548   | 5.89368   |
| 2.65705   | 2.77784   | 1.98268   | 2.80272   | 2.98929   | 2.68736   |
| 33.5197   | 29.1625   | 13.475    | 11.3429   | 18.1368   | 13.5347   |
| 6.34121   | 5.05237   | 3.97201   | 4.8923    | 3.10175   | 5.21839   |
| 1.22406   | 0.92578   | 1.08774   | 1.32623   | 1.20285   | 1.36944   |
| 18.5247   | 9.26327   | 11.2684   | 8.02554   | 16.7819   | 4.0809    |
| 18.2574   | 18.3587   | 22.0106   | 15.8796   | 20.4917   | 18.5002   |
| 11.475    | 9.97244   | 10.2089   | 12.1424   | 10.3952   | 11.3804   |
| 0.815038  | 0.881811  | 1.06948   | 1.05153   | 0.365057  | 0.631255  |
| 0         | 0         | 0         | 0         | 0         | 0         |
| 0         | 0.0652415 | 0.102588  | 0.0230101 | 0         | 0         |
| 1.00073   | 0.735872  | 0.721963  | 0.804765  | 1.17416   | 0.898819  |
| 94.7554   | 73.6726   | 70.3484   | 75.2038   | 71.3901   | 85.8814   |
| 41.8294   | 43.335    | 46.1063   | 42.5277   | 39.1759   | 42.2709   |
| 19.182    | 18.3311   | 19.884    | 18.8287   | 15.7963   | 15.5971   |
| 0.202462  | 0.289918  | 0.140372  | 0.209901  | 0.0224217 | 0.164102  |
| 34.7946   | 37.78     | 34.8934   | 36.0691   | 32.6906   | 32.5128   |
| 0         | 0         | 0         | 0         | 0         | 0         |
| 6.67894   | 5.44024   | 6.93308   | 6.64707   | 4.71015   | 5.99241   |
| 0.666315  | 0.503573  | 0.640025  | 0.520495  | 0.430448  | 0.588827  |
| 0.227685  | 0.203773  | 0.368339  | 0.33047   | 0.264757  | 0.13841   |
| 83.2481   | 84.9454   | 83.3305   | 85.2807   | 75.1609   | 76.3976   |
| 3.37076   | 2.16201   | 2.96765   | 3.44262   | 3.78407   | 3.72769   |
| 7.92427   | 3.96058   | 4.31964   | 4.15335   | 2.38895   | 2.79256   |
| 0         | 0         | 0         | 0         | 0         | 0         |
| 18.2484   | 16.2849   | 19.1766   | 17.9037   | 16.2073   | 18.5507   |
| 0.27386   | 0.392157  | 0.66456   | 0.397491  | 0.212301  | 0.887892  |
| 16.1079   | 13.6954   | 16.116    | 17.1223   | 13.4312   | 16.4187   |
| 8.64492   | 6.44816   | 9.98692   | 9.20587   | 8.95887   | 10.0439   |
| 17.3095   | 16.329    | 14.6536   | 17.0308   | 12.3538   | 14.6781   |
| 1.27178   | 0.638462  | 1.35553   | 1.01827   | 0.685742  | 1.07131   |
| 0.660843  | 0.329457  | 0.532166  | 0.453771  | 0.50473   | 0.536444  |
| 5.80238   | 4.19106   | 5.10406   | 5.08424   | 4.22801   | 5.1999    |
| 0         | 0         | 0         | 0         | 0         | 0         |
| 20.9355   | 17.6399   | 18.4907   | 22.327    | 16.8294   | 20.5628   |

|           |          |           |           |          |           |
|-----------|----------|-----------|-----------|----------|-----------|
| 17.5619   | 13.9829  | 16.5491   | 17.1899   | 18.6431  | 17.3456   |
| 5.59704   | 4.67513  | 4.75038   | 4.42189   | 3.72827  | 4.23636   |
| 7.19108   | 8.04829  | 9.1103    | 8.64177   | 7.7711   | 8.56146   |
| 0         | 0        | 0         | 0         | 0        | 0         |
| 0.0329822 | 0.141688 | 0.213429  | 0.119679  | 0.102273 | 0.0801995 |
| 0.0425716 | 0.060961 | 0.0344353 | 0.12358   | 0.198013 | 0.0690115 |
| 10.137    | 9.13508  | 10.6738   | 9.8934    | 9.95859  | 10.6248   |
| 1.17415   | 0.494511 | 0.446939  | 0.651607  | 0.535423 | 0.503835  |
| 0.23912   | 0.342411 | 0.193419  | 0.13015   | 0.602452 | 0.0969075 |
| 0         | 0        | 0         | 0         | 0        | 0         |
| 3.00603   | 0.831021 | 1.49222   | 2.18141   | 0.635605 | 0.830137  |
| 6.45578   | 5.3505   | 6.59013   | 5.82945   | 6.33689  | 5.73469   |
| 0.359468  | 0.205898 | 0.17446   | 0.313047  | 0.334399 | 0.407906  |
| 35.9151   | 26.8494  | 32.7151   | 29.6647   | 30.1933  | 26.4185   |
| 19.5229   | 19.7961  | 16.2958   | 17.1898   | 11.6747  | 13.775    |
| 9.56093   | 8.7604   | 7.64373   | 9.15289   | 11.2533  | 10.4865   |
| 18.0062   | 11.5035  | 15.828    | 15.1022   | 19.5656  | 9.44344   |
| 88.0622   | 77.7526  | 84.7848   | 92.0002   | 81.3122  | 85.4349   |
| 0         | 0        | 0         | 0         | 0        | 0         |
| 1.61562   | 1.54233  | 1.10355   | 1.45909   | 1.53077  | 1.86241   |
| 0         | 0        | 0         | 0         | 0        | 0         |
| 0         | 0        | 0         | 0         | 0        | 0         |
| 12.4547   | 10.0053  | 11.0987   | 11.4064   | 11.9996  | 11.6406   |
| 815.106   | 841.093  | 818.663   | 765.522   | 795.495  | 723.121   |
| 7.69886   | 9.45261  | 5.60855   | 6.55883   | 5.0662   | 6.22884   |
| 2.07138   | 2.13023  | 1.73643   | 1.72189   | 0.729895 | 1.61787   |
| 1.94682   | 0.929257 | 0.991505  | 1.20353   | 1.06203  | 0.75976   |
| 18.0034   | 18.3352  | 13.9363   | 18.3036   | 18.8445  | 16.6994   |
| 0.260658  | 0.214994 | 0.308431  | 0.276721  | 1.29408  | 0.711656  |
| 53.6629   | 55.4426  | 54.0649   | 56.432    | 58.0536  | 53.4242   |
| 0         | 0        | 0.0181466 | 0.0162809 | 0        | 0         |
| 22.5353   | 27.2275  | 23.2568   | 19.3149   | 14.9471  | 22.2021   |
| 20.568    | 19.7887  | 19.8787   | 23.4801   | 15.6752  | 21.6817   |
| 19.5597   | 21.0144  | 24.1626   | 22.1693   | 16.8219  | 21.017    |
| 1.11899   | 0.801174 | 0.99564   | 1.42924   | 0.537823 | 1.99535   |
| 2.03432   | 2.61845  | 2.23244   | 2.6496    | 1.71502  | 2.13547   |
| 0         | 0        | 0         | 0         | 0        | 0         |
| 11.6474   | 8.49866  | 9.69138   | 11.2499   | 10.7258  | 8.7491    |
| 0         | 0        | 0         | 0         | 0        | 0         |
| 6.22617   | 8.37531  | 6.71488   | 7.25672   | 6.6547   | 7.7686    |
| 29.8112   | 30.5895  | 34.0784   | 35.3305   | 38.2602  | 33.249    |
| 0         | 0        | 0         | 0         | 0        | 0         |
| 16.1586   | 11.1077  | 14.3666   | 15.9994   | 13.7368  | 14.2044   |

|           |           |           |           |           |           |
|-----------|-----------|-----------|-----------|-----------|-----------|
| 0         | 0         | 0         | 0         | 0         | 0         |
| 0         | 0         | 0         | 0         | 0         | 0         |
| 12.8951   | 9.52829   | 7.75872   | 9.08162   | 11.7693   | 7.95479   |
| 8.83087   | 6.12281   | 8.45598   | 7.45996   | 9.59228   | 6.81822   |
| 8.32547   | 8.70831   | 9.1295    | 10.2079   | 7.29118   | 9.08926   |
| 93.9677   | 92.5542   | 78.6188   | 91.1707   | 90.3046   | 77.9754   |
| 15.2913   | 10.2561   | 12.9019   | 13.1061   | 18.5304   | 11.5037   |
| 0.0817348 | 0.0651176 | 0.142806  | 0.0644771 | 0.0288132 | 0.0856918 |
| 24.0917   | 23.9368   | 26.7921   | 25.949    | 25.365    | 25.0918   |
| 10.6656   | 8.52894   | 9.73739   | 11.5475   | 7.17203   | 10.51     |
| 13.0676   | 16.8378   | 12.9759   | 11.0803   | 13.9728   | 15.0254   |
| 0.330007  | 0.459056  | 0.311171  | 0.372239  | 0.411956  | 0.460411  |
| 32.253    | 21.57     | 26.2526   | 27.6568   | 32.2253   | 28.6592   |
| 21.9651   | 23.1845   | 22.5483   | 19.457    | 17.9509   | 9.9256    |
| 2.28225   | 1.40652   | 1.3086    | 1.86592   | 1.03019   | 1.84984   |
| 0.0657586 | 0.023541  | 0.0797862 | 0.262472  | 0.0764657 | 0.0799494 |
| 21.3293   | 22.4891   | 18.9035   | 18.088    | 30.5309   | 12.9564   |
| 37.844    | 35.0455   | 31.8582   | 34.1906   | 33.0007   | 26.2873   |
| 0.23958   | 0.128065  | 0.0723409 | 0.169572  | 0.0462764 | 0.0727641 |
| 0.0408966 | 0.0292812 | 0.132322  | 0.0593588 | 0         | 0.198888  |
| 0.214857  | 0         | 0         | 0         | 0.166561  | 0.522447  |
| 12.4149   | 9.06028   | 10.9551   | 9.39446   | 11.7851   | 11.3933   |
| 2.68139   | 2.47157   | 3.18324   | 3.15162   | 4.1204    | 4.867     |
| 32.0941   | 29.2963   | 26.914    | 27.5209   | 28.1065   | 27.201    |
| 4.12343   | 3.94951   | 2.52265   | 3.20078   | 2.66043   | 2.64415   |
| 6.94035   | 5.14281   | 5.91573   | 6.78334   | 5.7563    | 6.23026   |
| 2.64628   | 1.69035   | 2.05658   | 2.16521   | 2.03132   | 1.82947   |
| 24.1964   | 21.6793   | 23.3429   | 25.0667   | 23.7317   | 24.1326   |
| 24.8785   | 23.1439   | 16.2017   | 16.0021   | 14.0507   | 20.6795   |
| 0.0779486 | 0.0837145 | 0.28373   | 0.113172  | 0.0604269 | 0.03159   |
| 1.92936   | 2.90819   | 4.18904   | 2.06341   | 2.44031   | 3.00417   |
| 4.07464   | 2.83744   | 4.25531   | 3.70642   | 3.19118   | 4.04912   |
| 0.176146  | 0.152587  | 0.234635  | 0.421023  | 0.180008  | 0.470229  |
| 0         | 0         | 0         | 0         | 0         | 0         |
| 5.43551   | 5.46123   | 4.95533   | 4.90886   | 5.20265   | 5.32386   |
| 0         | 0         | 0         | 0         | 0         | 0         |
| 0         | 0         | 0         | 0         | 0         | 0         |
| 59.394    | 57.0213   | 61.2983   | 62.408    | 63.6172   | 53.6838   |
| 10.4941   | 9.02829   | 10.3744   | 8.8697    | 10.4292   | 11.8609   |
| 0         | 0         | 0         | 0         | 0         | 0         |
| 0         | 0         | 0         | 0         | 0         | 0         |
| 369.919   | 369.558   | 373.191   | 388.922   | 427.955   | 311.622   |
| 107.286   | 121.307   | 111.275   | 115.811   | 90.9464   | 107.211   |

|           |           |           |           |          |           |
|-----------|-----------|-----------|-----------|----------|-----------|
| 5.08276   | 3.81328   | 2.81302   | 4.04163   | 3.31809  | 4.35629   |
| 1.55678   | 1.43309   | 1.37918   | 1.72158   | 1.32178  | 1.02148   |
| 5.4522    | 6.15487   | 6.68291   | 5.64385   | 8.36251  | 5.61211   |
| 28.8348   | 21.6547   | 27.752    | 29.2653   | 23.2686  | 28.5036   |
| 0         | 0         | 0.125545  | 0         | 0        | 0         |
| 21.4972   | 19.1071   | 16.5261   | 20.698    | 17.3483  | 19.1643   |
| 1.58583   | 0.784288  | 1.61851   | 1.96556   | 2.06623  | 2.04158   |
| 0         | 0         | 0.0719649 | 0         | 0        | 0         |
| 8.99994   | 9.27319   | 8.76513   | 9.13644   | 6.67071  | 7.6843    |
| 111.436   | 126.394   | 90.5335   | 68.302    | 76.98    | 93.2929   |
| 0         | 0         | 0         | 0         | 0        | 0         |
| 0.177959  | 0.132512  | 0.204753  | 0.266367  | 0.107163 | 0.208249  |
| 0         | 0         | 0         | 0         | 0        | 0         |
| 0         | 0         | 0         | 0         | 0        | 0         |
| 0.608425  | 0.341398  | 0.321528  | 0.69025   | 0.207204 | 0.195629  |
| 4.73835   | 3.65607   | 4.03121   | 4.88541   | 4.69556  | 4.02702   |
| 0         | 0         | 0         | 0         | 0        | 0         |
| 8.62966   | 9.05417   | 11.2261   | 8.95594   | 9.21209  | 8.70466   |
| 0.383266  | 0.439057  | 0.372019  | 0.305957  | 0.178268 | 0.403845  |
| 87.6081   | 108.925   | 51.4759   | 64.9012   | 53.3541  | 48.6272   |
| 2.32307   | 1.78519   | 2.3218    | 1.95952   | 2.14032  | 2.32655   |
| 99.4294   | 89.8301   | 101.142   | 97.922    | 68.852   | 97.1627   |
| 3.24873   | 1.68876   | 1.31391   | 2.71292   | 5.36467  | 4.99587   |
| 0.0812639 | 0.130913  | 0.220234  | 0.179467  | 0.252865 | 0.293558  |
| 0         | 0         | 0         | 0         | 0        | 0         |
| 35.0623   | 27.8793   | 33.9895   | 33.5716   | 32.9032  | 35.0627   |
| 2.95304   | 1.64389   | 2.2041    | 2.9528    | 0.576259 | 1.12706   |
| 0         | 0         | 0         | 0         | 0        | 0         |
| 18.6308   | 13.0029   | 18.1369   | 14.6621   | 24.7708  | 5.35058   |
| 1.59609   | 1.66174   | 1.55486   | 1.57912   | 1.49015  | 1.85181   |
| 12.6704   | 16.2302   | 16.0355   | 14.5055   | 10.2877  | 16.6893   |
| 0.765787  | 0.548289  | 0.929144  | 0.972554  | 1.03889  | 0.310348  |
| 0         | 0         | 0         | 0         | 0        | 0         |
| 39.7532   | 41.1587   | 44.1553   | 38.4802   | 37.421   | 41.8501   |
| 28.6169   | 32.6435   | 32.4028   | 30.304    | 31.2706  | 33.1864   |
| 4.04352   | 2.96456   | 4.23875   | 3.73254   | 3.78652  | 4.87661   |
| 0.0290484 | 0.0207981 | 0.0469933 | 0.0421619 | 0        | 0.0235447 |
| 75.8884   | 52.1157   | 67.6833   | 63.8493   | 57.4369  | 64.7029   |
| 7.51322   | 8.25422   | 9.40892   | 7.63047   | 8.71248  | 7.34793   |
| 5.26305   | 3.99409   | 3.05592   | 4.30844   | 3.55632  | 3.61718   |
| 37.5101   | 33.553    | 35.5275   | 43.5841   | 26.9116  | 33.4604   |
| 20.026    | 19.8729   | 19.6358   | 20.8649   | 14.9988  | 19.5661   |
| 0         | 0         | 0         | 0         | 0        | 0         |



|          |          |           |           |            |          |
|----------|----------|-----------|-----------|------------|----------|
| 0        | 0        | 0         | 0         | 0          | 0        |
| 0        | 0        | 0         | 0         | 0.00897393 | 0        |
| 16.8034  | 16.9674  | 16.6015   | 15.2542   | 12.4737    | 12.9642  |
| 10.1168  | 7.105    | 7.68808   | 9.5632    | 9.54115    | 8.17386  |
| 0.973773 | 0.730403 | 0.862681  | 0.572078  | 0.826777   | 0.526184 |
| 1.79815  | 2.55872  | 3.03736   | 1.88401   | 2.68281    | 2.20794  |
| 20.8134  | 17.8434  | 19.9592   | 19.6954   | 19.0406    | 18.6463  |
| 5.36921  | 4.19678  | 4.9689    | 4.47506   | 4.36223    | 4.694    |
| 0        | 0        | 0         | 0         | 0          | 0        |
| 0        | 0        | 0         | 0         | 0          | 0        |
| 11.5507  | 12.3068  | 10.1579   | 14.3919   | 11.0433    | 9.54251  |
| 0        | 0        | 0         | 0         | 0          | 0        |
| 11.8977  | 15.0745  | 12.3529   | 14.6616   | 9.8798     | 10.031   |
| 0        | 0        | 0         | 0         | 0          | 0        |
| 20.6731  | 23.5576  | 25.0767   | 19.5991   | 18.9696    | 17.823   |
| 0.862938 | 1.05513  | 0.470834  | 0.496246  | 0.614271   | 0.862684 |
| 0        | 0        | 0         | 0         | 0          | 0        |
| 11.8079  | 11.298   | 11.2234   | 12.4035   | 12.3433    | 14.0965  |
| 45.9775  | 52.9359  | 58.7115   | 50.2467   | 55.8843    | 46.8551  |
| 0.234115 | 0.310433 | 0.194839  | 0.30834   | 0.567995   | 0.263554 |
| 3.22192  | 3.92785  | 4.57836   | 4.55002   | 3.57776    | 3.52902  |
| 3.17644  | 2.42759  | 1.55468   | 1.84582   | 1.14656    | 1.5972   |
| 0        | 0        | 0         | 0         | 0          | 0        |
| 1.75358  | 1.28014  | 1.27924   | 1.14772   | 2.02557    | 1.30973  |
| 0.908119 | 0.531979 | 0.560936  | 0.491283  | 0.62719    | 0.508551 |
| 7.93497  | 6.05726  | 7.70842   | 6.45014   | 6.70915    | 6.19511  |
| 7.67698  | 5.49723  | 5.8206    | 6.36204   | 6.16829    | 6.65134  |
| 13.0753  | 11.9024  | 10.5322   | 10.1229   | 8.63371    | 11.7042  |
| 6.83918  | 6.29942  | 6.85746   | 6.54881   | 7.20718    | 5.91871  |
| 0.364907 | 0.130633 | 0         | 0.13241   | 0          | 0        |
| 0.419616 | 0.564804 | 0.324243  | 0.441265  | 0.282181   | 0.410059 |
| 6.87079  | 6.8871   | 6.61865   | 6.93543   | 6.87583    | 8.5054   |
| 0.147161 | 0.210729 | 0.119036  | 0.213595  | 0          | 0.119279 |
| 1.05328  | 1.22411  | 1.14831   | 0.830849  | 0.816516   | 1.07676  |
| 49.2704  | 46.946   | 41.2849   | 48.0902   | 55.942     | 35.3725  |
| 0        | 0        | 0.0894313 | 0.0802368 | 0          | 0        |
| 23.4481  | 33.9864  | 22.0916   | 22.8547   | 25.2785    | 31.3705  |
| 1.08375  | 0.775946 | 0.175325  | 0.471899  | 0.168028   | 0.52705  |
| 1.78822  | 1.77648  | 1.17093   | 1.86732   | 0.926382   | 1.80236  |
| 180.601  | 200.62   | 194.162   | 212.779   | 219.031    | 175.592  |
| 7.94723  | 7.50966  | 7.43877   | 7.518     | 7.21266    | 7.34924  |
| 10.8498  | 11.3271  | 10.0299   | 10.7248   | 8.16234    | 9.57391  |
| 99.2404  | 81.2048  | 57.3382   | 51.4432   | 98.9134    | 91.9288  |

|           |           |           |           |           |           |
|-----------|-----------|-----------|-----------|-----------|-----------|
| 49.3039   | 52.2808   | 40.5541   | 30.2702   | 24.7551   | 25.8829   |
| 2.36592   | 2.69295   | 2.79701   | 2.9497    | 1.97518   | 2.45854   |
| 1.36053   | 1.55858   | 1.99925   | 2.78106   | 1.51174   | 3.19798   |
| 34.0384   | 20.1535   | 28.5203   | 30.8946   | 21.8357   | 29.3155   |
| 0.456596  | 0.294222  | 0.295465  | 0.298224  | 0.283168  | 0.499616  |
| 0         | 0.0262027 | 0         | 0.0531181 | 0         | 0.0296631 |
| 0.307613  | 0         | 0         | 0.16743   | 0.0447121 | 0         |
| 5.85492   | 7.31126   | 4.95967   | 5.0018    | 4.44947   | 5.30611   |
| 21.5486   | 18.0995   | 20.9638   | 22.4834   | 24.2899   | 23.2117   |
| 0.437875  | 0.31351   | 0.328889  | 0.272377  | 0.169724  | 0.152105  |
| 2.84081   | 2.26573   | 2.02259   | 1.85908   | 1.76323   | 2.26241   |
| 0.164958  | 0.0295266 | 0.0333577 | 0.0897845 | 0         | 0.16713   |
| 1.5834    | 2.04381   | 1.61909   | 2.13371   | 1.12295   | 1.97058   |
| 1.37475   | 1.26071   | 1.60713   | 1.08028   | 1.26984   | 1.44738   |
| 15.6888   | 15.8145   | 13.29     | 16.1937   | 11.8214   | 12.6494   |
| 146.021   | 156.183   | 124.863   | 154.414   | 108.116   | 112.075   |
| 0         | 0         | 0         | 0         | 0         | 0         |
| 0         | 0.0148482 | 0.0167748 | 0.0602006 | 0.0643066 | 0.0336182 |
| 0.569515  | 1.83493   | 0.921338  | 0.482192  | 1.03016   | 0.923222  |
| 0.409231  | 6.37E-12  | 2.18E-10  | 5.99E-11  | 6.13E-11  | 0         |
| 4.1808    | 3.61183   | 4.3806    | 3.1511    | 4.33028   | 4.30352   |
| 0         | 0         | 0         | 0         | 0         | 0         |
| 7.84933   | 9.66241   | 7.84177   | 9.43403   | 7.96377   | 13.6619   |
| 10.4464   | 6.74429   | 9.08261   | 8.29074   | 10.0185   | 10.574    |
| 2.66869   | 1.44018   | 2.35196   | 2.24023   | 2.31583   | 1.95321   |
| 0         | 0         | 0         | 0         | 0         | 0         |
| 79.3393   | 94.1801   | 72.3842   | 59.5517   | 70.6412   | 72.9351   |
| 0         | 0         | 0         | 0         | 0         | 0         |
| 9.92947   | 8.06633   | 9.73077   | 10.5318   | 5.18099   | 7.8934    |
| 16.7501   | 15.0581   | 13.4371   | 14.7188   | 11.0426   | 14.7119   |
| 9.22255   | 7.29979   | 7.3542    | 7.25896   | 7.05688   | 7.06037   |
| 5.21924   | 4.35835   | 4.62116   | 4.15988   | 3.93303   | 4.05592   |
| 59.7047   | 58.8137   | 58.1003   | 65.1882   | 60.1799   | 61.9202   |
| 0         | 0         | 0         | 0         | 0         | 0         |
| 0         | 0         | 0         | 0         | 0         | 0         |
| 0.0712132 | 0.0821989 | 0.0928643 | 0.0512536 | 0.0729992 | 0.267137  |
| 7.56619   | 5.55751   | 6.94617   | 6.35865   | 5.75808   | 6.96631   |
| 11.4348   | 9.16333   | 9.58877   | 7.15628   | 7.48173   | 11.0537   |
| 0.0640335 | 0.0229234 | 0.11654   | 0.0929405 | 0.0992795 | 0.155704  |
| 0.0859631 | 0         | 0         | 0         | 0.0666399 | 0         |
| 10.6138   | 7.20525   | 6.51854   | 6.22665   | 6.04408   | 6.49195   |
| 1.13517   | 1.39795   | 1.08349   | 1.28515   | 0.6336    | 0.515252  |
| 39.6721   | 37.5993   | 35.6604   | 41.0962   | 38.0618   | 36.2152   |

|           |           |           |           |           |           |
|-----------|-----------|-----------|-----------|-----------|-----------|
| 0.172113  | 0.236601  | 0.179399  | 0.239819  | 0.227806  | 0.307415  |
| 7.00316   | 5.80127   | 6.71862   | 6.73706   | 7.41747   | 7.5904    |
| 29.9351   | 29.6693   | 36.5039   | 26.6342   | 30.3503   | 27.5216   |
| 47.2094   | 40.701    | 44.5634   | 45.3342   | 36.9962   | 38.1942   |
| 23.9627   | 22.7645   | 18.9304   | 22.2621   | 22.0458   | 18.818    |
| 1.31564   | 1.28369   | 0.83816   | 1.46467   | 0.502775  | 0.460205  |
| 0         | 0         | 0         | 0         | 0         | 0         |
| 18.1188   | 13.8924   | 17.2295   | 16.4445   | 17.1724   | 16.054    |
| 0.0890757 | 0         | 0.0720516 | 0         | 0.0690529 | 0.0721989 |
| 0.119228  | 0.0782509 | 0.0803673 | 0.0576837 | 0.0154045 | 0.0322126 |
| 8.78857   | 8.91553   | 9.90584   | 9.35045   | 7.97779   | 8.90846   |
| 1.24416   | 1.83968   | 1.50956   | 0.569224  | 0.461278  | 0.964586  |
| 19.3308   | 16.5742   | 19.3808   | 18.4235   | 17.853    | 18.666    |
| 0         | 0         | 0.334911  | 0.150239  | 0         | 0         |
| 0.256304  | 0.291678  | 0.319067  | 0.646509  | 0.0716391 | 0.324479  |
| 17.2385   | 21.1446   | 15.1255   | 18.2027   | 14.8793   | 13.7173   |
| 0.051024  | 0.0521888 | 0.110059  | 0.0329147 | 0.126575  | 0.0551422 |
| 1.62022   | 1.57283   | 1.69328   | 2.46073   | 1.81381   | 2.40823   |
| 11.9497   | 10.97     | 10.6708   | 11.7203   | 10.5018   | 11.0282   |
| 9.36626   | 7.65013   | 8.60659   | 6.49793   | 7.01995   | 7.06897   |
| 42.4655   | 58.0705   | 61.5024   | 60.7819   | 53.0271   | 65.155    |
| 50.2459   | 53.8965   | 57.5127   | 54.5324   | 55.588    | 57.3505   |
| 16.1948   | 13.4966   | 16.8688   | 15.5956   | 13.628    | 17.207    |
| 115.979   | 120.522   | 143.112   | 148.498   | 150.823   | 127.75    |
| 34.9436   | 35.1591   | 39.6835   | 36.6449   | 40.4359   | 39.277    |
| 0         | 0         | 0         | 0         | 0         | 0         |
| 6.04064   | 10.1296   | 11.5725   | 8.88296   | 8.44136   | 15.9125   |
| 15.4601   | 13.2445   | 13.358    | 13.5746   | 14.5646   | 17.3892   |
| 0.207345  | 0.0989702 | 0.251576  | 0.025079  | 0.0535791 | 0         |
| 207.058   | 242.702   | 239.108   | 218.242   | 240.418   | 183.58    |
| 0         | 0         | 0         | 0         | 0         | 0         |
| 0         | 0.135225  | 0.15277   | 0.274128  | 0         | 0         |
| 5.47542   | 5.7085    | 6.95424   | 6.27412   | 5.02654   | 6.42344   |
| 0         | 0         | 0         | 0         | 0         | 0         |
| 0.920391  | 1.29542   | 1.20671   | 1.22089   | 0.469063  | 0.618752  |
| 2.41987   | 1.50751   | 1.21061   | 1.07256   | 1.21288   | 1.74414   |
| 13.1068   | 9.16354   | 12.0131   | 10.6122   | 10.8202   | 11.9533   |
| 14.6425   | 11.8882   | 16.0579   | 13.7925   | 15.6805   | 15.0916   |
| 16.1698   | 10.6271   | 13.6954   | 15.275    | 7.91028   | 12.9532   |
| 225.501   | 231.3     | 237.854   | 222.167   | 242.581   | 231.892   |
| 0.0295722 | 0.0423463 | 0         | 0.0214611 | 0.0458497 | 0.0239693 |
| 2.71236   | 2.64024   | 2.6377    | 2.98579   | 2.26804   | 2.7419    |
| 1.12409   | 0.770209  | 0.645275  | 0.657879  | 0.45913   | 0.489844  |

|           |           |           |           |           |           |
|-----------|-----------|-----------|-----------|-----------|-----------|
| 4.49787   | 5.76554   | 4.6945    | 4.52774   | 4.10545   | 3.38107   |
| 0.974723  | 0.993141  | 1.122     | 0.897821  | 0.813745  | 0.941977  |
| 0.0198406 | 0.0142055 | 0.0160487 | 0.0287974 | 0         | 0.0160815 |
| 17.9948   | 18.9749   | 15.7719   | 12.3945   | 16.6756   | 16.3187   |
| 11.9636   | 12.0164   | 12.4832   | 11.9193   | 8.10103   | 10.5898   |
| 205.733   | 226.301   | 248.891   | 254.52    | 239.741   | 209.485   |
| 0.339305  | 0.34011   | 0.768478  | 0.394753  | 0.578675  | 0.440028  |
| 20.8025   | 18.8857   | 18.2055   | 20.945    | 20.1658   | 16.1498   |
| 0         | 0         | 0         | 0         | 0         | 0         |
| 0.0569315 | 0.0815238 | 0.115127  | 0.0206581 | 0.0882684 | 0.0692174 |
| 16.5654   | 17.1978   | 18.1912   | 16.7913   | 15.103    | 15.5722   |
| 79.7463   | 108.288   | 93.4595   | 95.4035   | 108.655   | 89.424    |
| 4.03251   | 3.17936   | 4.15493   | 4.63357   | 4.50302   | 4.2607    |
| 51.151    | 47.5066   | 50.0175   | 49.5387   | 60.52     | 62.0012   |
| 0         | 0         | 0         | 0         | 0         | 0         |
| 59.1408   | 62.8648   | 61.5535   | 60.1486   | 57.8388   | 61.7909   |
| 4.98499   | 6.08185   | 3.32258   | 3.90712   | 3.74078   | 3.84656   |
| 0.566265  | 0.52468   | 0.484984  | 0.652683  | 0.361511  | 0.377981  |
| 6.74704   | 4.64846   | 5.95181   | 5.85726   | 6.01991   | 4.49878   |
| 0.0932662 | 0.100165  | 0.143338  | 0.108296  | 0.224134  | 0.15875   |
| 0.0120337 | 0         | 0.0121673 | 0.164312  | 0         | 0         |
| 1.87449   | 1.60578   | 2.15027   | 1.65947   | 1.38406   | 1.66723   |
| 22.6479   | 23.8271   | 24.9606   | 22.1545   | 27.0794   | 25.0727   |
| 54.2803   | 49.5136   | 54.1577   | 55.4991   | 66.3678   | 29.344    |
| 0.212527  | 0         | 0.0859544 | 0.308469  | 0.0823771 | 0.17226   |
| 0.681081  | 0.33718   | 0.153456  | 0.219397  | 0.0753431 | 0.305472  |
| 8.43819   | 7.46761   | 8.92088   | 8.13931   | 8.20722   | 8.25414   |
| 54.1608   | 41.3066   | 52.7146   | 52.3793   | 49.4211   | 50.2563   |
| 22.1853   | 24.6704   | 29.1536   | 18.6497   | 16.9372   | 12.5991   |
| 122.989   | 132.017   | 130.992   | 128.669   | 141.956   | 133.65    |
| 1.23367   | 1.0305    | 1.02561   | 0.820691  | 0.61101   | 0.527743  |
| 5.04074   | 4.76269   | 5.57606   | 5.42036   | 4.79084   | 4.19763   |
| 0         | 0         | 0         | 0         | 0         | 0         |
| 0.121079  | 0.0288968 | 0.0652924 | 0.0585796 | 0.0312875 | 0.032713  |
| 3.33629   | 1.8365    | 1.76835   | 1.72023   | 1.96908   | 3.0477    |
| 1.82661   | 1.43698   | 1.97001   | 1.86566   | 1.31113   | 1.60848   |
| 160.493   | 199.525   | 166.596   | 167.429   | 243.661   | 203.291   |
| 4.32258   | 5.00141   | 7.51505   | 5.15981   | 7.88723   | 5.96513   |
| 7.32364   | 5.5952    | 5.70806   | 5.83399   | 6.93537   | 7.15615   |
| 3.74789   | 2.93329   | 3.74347   | 3.81008   | 4.3052    | 3.64043   |
| 28.7324   | 25.7585   | 27.7366   | 33.8402   | 32.1224   | 26.8418   |
| 6.14072   | 4.89143   | 4.88724   | 5.91802   | 5.32673   | 5.48939   |
| 0.790928  | 1.06966   | 0.888563  | 1.53064   | 2.691     | 2.63553   |

|           |           |           |          |           |          |
|-----------|-----------|-----------|----------|-----------|----------|
| 9.94425   | 8.69381   | 9.10471   | 9.33496  | 7.6273    | 8.88057  |
| 10.099    | 9.126     | 8.96971   | 8.78624  | 9.82305   | 9.72516  |
| 0.332762  | 0.0649776 | 0.122347  | 0.197584 | 0.140707  | 0.269715 |
| 3.06223   | 4.20314   | 3.10478   | 2.43738  | 2.50517   | 3.74022  |
| 0         | 0         | 0         | 0        | 0         | 0        |
| 0.377624  | 0.310927  | 0.519269  | 0.315156 | 0.483021  | 0.59685  |
| 0         | 0         | 0.0427923 | 0        | 0         | 0        |
| 12.1251   | 7.94988   | 9.83481   | 9.88107  | 12.1649   | 9.21693  |
| 58.4594   | 58.628    | 57.5488   | 60.2892  | 58.7832   | 55.6935  |
| 46.3206   | 54.0274   | 52.1804   | 53.0604  | 55.3253   | 49.3751  |
| 8.17411   | 6.94028   | 7.53806   | 7.8825   | 7.80418   | 8.63301  |
| 29.9588   | 31.933    | 29.4328   | 29.1754  | 26.2032   | 27.5918  |
| 0         | 0         | 0         | 0        | 0         | 0        |
| 14.0023   | 12.4577   | 12.3659   | 15.2258  | 13.2392   | 11.2749  |
| 0         | 0         | 0         | 0        | 0         | 0        |
| 1.1042    | 0.891945  | 0.801728  | 1.17128  | 1.16327   | 0.780424 |
| 8.13022   | 8.19151   | 7.86313   | 6.03373  | 5.40562   | 7.18828  |
| 15.4782   | 18.94     | 18.4785   | 17.834   | 11.5135   | 15.2046  |
| 16.9369   | 16.2742   | 17.5693   | 16.9054  | 18.0737   | 20.5221  |
| 14.8428   | 21.3647   | 16.9451   | 20.7706  | 12.286    | 16.0819  |
| 0         | 0         | 0         | 0        | 0         | 0        |
| 18.0944   | 15.6858   | 14.7506   | 19.9472  | 23.702    | 16.424   |
| 23.1781   | 20.8521   | 23.2479   | 25.0264  | 29.327    | 26.7751  |
| 17.8393   | 12.7545   | 14.929    | 17.6669  | 14.8642   | 14.9646  |
| 0.0832479 | 0.238416  | 0.134675  | 0.241658 | 0.12907   | 0.13495  |
| 2.96804   | 2.40467   | 2.46396   | 2.60742  | 2.3816    | 3.08098  |
| 1.60944   | 1.62078   | 1.54242   | 1.50245  | 0.863094  | 1.10413  |
| 178.821   | 192.214   | 216.308   | 200.624  | 285.442   | 139.31   |
| 117.224   | 117.117   | 116.931   | 117.703  | 108.487   | 99.9649  |
| 22.5882   | 19.6157   | 22.3278   | 21.3761  | 20.7227   | 21.5959  |
| 3.33967   | 3.36933   | 2.69023   | 3.55536  | 3.5411    | 3.17671  |
| 0.204402  | 0.376324  | 0.530549  | 0.357838 | 0.182541  | 0.242359 |
| 5.70267   | 6.46208   | 4.39485   | 4.82286  | 3.75942   | 4.47663  |
| 0.330383  | 0.295685  | 0.13362   | 0.299706 | 0.192088  | 0.20084  |
| 11.3799   | 11.0476   | 7.41126   | 11.7471  | 10.7366   | 11.6024  |
| 53.4813   | 39.6058   | 55.2053   | 55.3693  | 55.6458   | 53.8529  |
| 0.175953  | 0.440926  | 0.166045  | 0.085128 | 0.0454671 | 0.118846 |
| 0.67999   | 0.48686   | 0.55003   | 0.575728 | 0.556424  | 0.214338 |
| 0         | 0         | 0         | 0        | 0         | 0        |
| 3.80844   | 2.91596   | 3.81215   | 3.37663  | 4.44853   | 5.76883  |
| 0         | 0         | 0         | 0        | 0         | 0        |
| 0.369786  | 0.164792  | 0.170058  | 0.239397 | 0.139831  | 0.21079  |
| 0         | 0         | 0         | 0        | 0         | 0        |

|           |           |           |           |          |           |
|-----------|-----------|-----------|-----------|----------|-----------|
| 3.27219   | 2.16241   | 3.17756   | 2.5596    | 6.02164  | 5.42219   |
| 2.27894   | 2.96241   | 3.29829   | 2.48055   | 1.34842  | 2.50318   |
| 3.00497   | 0.690993  | 2.43066   | 0.716309  | 2.43152  | 2.77342   |
| 0         | 0         | 0         | 0.0295299 | 0        | 0.0119931 |
| 27.7959   | 27.9244   | 27.8514   | 25.7061   | 23.5785  | 25.5728   |
| 0.120412  | 0.0431064 | 0.0243497 | 0.0436926 | 0        | 0.170797  |
| 6.93674   | 5.56154   | 7.13112   | 6.62076   | 8.86203  | 7.54292   |
| 7.23429   | 6.61035   | 4.89003   | 5.85583   | 4.92183  | 5.90464   |
| 0.514144  | 0.420526  | 0.671709  | 0.336775  | 0.265534 | 0.456213  |
| 16.5914   | 13.2182   | 15.1739   | 16.6369   | 15.9593  | 16.8242   |
| 2.92159   | 2.53369   | 2.54209   | 3.70755   | 2.51967  | 3.90987   |
| 0.573822  | 0.410846  | 0         | 0         | 0        | 0.465102  |
| 2.88102   | 1.85      | 3.1171    | 2.78129   | 2.98072  | 3.13442   |
| 0         | 0         | 0         | 0         | 0        | 0         |
| 9.9928    | 10.7851   | 9.49885   | 9.77428   | 10.9431  | 8.88985   |
| 37.5227   | 28.1398   | 25.2393   | 32.184    | 32.7865  | 31.9713   |
| 6.30161   | 4.6354    | 5.49426   | 5.63228   | 5.68124  | 5.24063   |
| 0.626287  | 0.248133  | 0.44331   | 0.243683  | 0.303594 | 0.75224   |
| 1.89061   | 1.19503   | 0.751048  | 1.33263   | 1.17115  | 1.32439   |
| 14.7529   | 11.7136   | 13.1629   | 14.3121   | 11.5537  | 13.7282   |
| 0         | 0         | 0         | 0         | 0        | 0         |
| 83.6189   | 84.2161   | 84.9368   | 85.6285   | 78.6324  | 71.2802   |
| 0.312798  | 0.383927  | 0.216871  | 0.259432  | 0.311768 | 0.181095  |
| 26.6754   | 29.2409   | 29.0718   | 30.4287   | 24.585   | 27.9372   |
| 0         | 0         | 0.013627  | 0         | 0        | 0.0136548 |
| 9.08276   | 8.95595   | 8.01672   | 7.50581   | 6.25725  | 7.47014   |
| 117.497   | 125.143   | 82.942    | 101.73    | 85.5051  | 75.6617   |
| 0         | 0.262631  | 0.0741767 | 0.0665506 | 0.106634 | 0.0371642 |
| 243.277   | 232.56    | 228.475   | 253.777   | 272.592  | 248.418   |
| 144.014   | 140.861   | 157.52    | 143.921   | 159.722  | 130.493   |
| 0.0642696 | 0.161055  | 0         | 0.0699624 | 0        | 0         |
| 0         | 0         | 0         | 0         | 0        | 0         |
| 0.0262018 | 0.01876   | 0.0423882 | 0         | 0        | 0.0424749 |
| 6.21761   | 4.51167   | 5.07447   | 4.90401   | 5.83738  | 5.38662   |
| 0         | 0         | 0         | 0         | 0        | 0         |
| 36.2715   | 33.3896   | 33.4009   | 40.8217   | 32.425   | 24.42     |
| 0.272818  | 0.28412   | 0.180554  | 0.341981  | 0.153813 | 0.100513  |
| 0         | 0         | 0         | 0         | 0        | 0         |
| 0         | 0.0485338 | 0.877305  | 0.546603  | 1.89179  | 0         |
| 0         | 0         | 0         | 0         | 0        | 0         |
| 34.133    | 22.7847   | 27.6443   | 24.7501   | 42.5325  | 11.6641   |
| 1.47479   | 1.50052   | 1.82079   | 1.40827   | 1.14328  | 1.06954   |
| 15.5269   | 14.8556   | 17.4471   | 18.9188   | 17.5139  | 15.5043   |

|           |           |           |           |           |           |
|-----------|-----------|-----------|-----------|-----------|-----------|
| 0         | 0         | 0         | 0         | 0         | 0         |
| 39.6879   | 37.9111   | 42.9269   | 37.384    | 66.6014   | 28.725    |
| 19.002    | 20.1762   | 20.3804   | 19.9084   | 18.9889   | 18.4586   |
| 0         | 0         | 0         | 0         | 0         | 0         |
| 18.1459   | 19.5591   | 25.3453   | 28.8922   | 31.9005   | 26.9242   |
| 18.0642   | 15.0068   | 19.8001   | 21.6252   | 20.2028   | 7.17753   |
| 21.7535   | 21.6547   | 23.978    | 21.9471   | 22.099    | 23.1983   |
| 55.9164   | 48.3263   | 59.7058   | 54.7538   | 64.7978   | 26.921    |
| 0         | 0         | 0         | 0         | 0         | 0         |
| 0.618922  | 0.443137  | 0.250317  | 0.224582  | 0.239899  | 0.501657  |
| 13.8353   | 9.98175   | 11.9291   | 11.7421   | 13.933    | 12.5469   |
| 0.574132  | 0.791686  | 0.688006  | 0.462953  | 0.494529  | 0.448118  |
| 269.365   | 272.221   | 269.8     | 273.228   | 302.233   | 269.04    |
| 0.168425  | 0         | 0.363296  | 0.325945  | 0.0870439 | 0.136514  |
| 2.58406   | 2.15525   | 2.34343   | 2.64814   | 1.54346   | 2.89587   |
| 0         | 0         | 0         | 0         | 0         | 0         |
| 11.0329   | 8.46841   | 9.64115   | 8.22983   | 5.12548   | 7.31875   |
| 4.30739   | 2.68547   | 3.91498   | 3.50502   | 3.64838   | 4.09789   |
| 11.2011   | 11.0651   | 10.5656   | 10.3005   | 11.0282   | 10.6891   |
| 0.583875  | 1.04882   | 0.517872  | 0.695117  | 0.495897  | 0.645671  |
| 0.649047  | 0.588069  | 0.497385  | 0.543648  | 0.311833  | 0.519397  |
| 0.163331  | 0.0779612 | 0         | 0.0395107 | 0.0844111 | 0         |
| 0         | 0         | 0         | 0         | 0         | 0         |
| 25.1731   | 26.9463   | 28.6536   | 24.7197   | 22.2669   | 23.9954   |
| 11.7444   | 11.3082   | 14.5582   | 13.023    | 10.7606   | 16.3457   |
| 0         | 0         | 0         | 0         | 0         | 0         |
| 15.0677   | 12.42     | 15.2605   | 17.1221   | 16.2614   | 17.1391   |
| 1.40475   | 1.50867   | 1.21744   | 2.33018   | 1.63348   | 1.30126   |
| 0.137904  | 0         | 0         | 0.0250193 | 0.0267257 | 0.0279433 |
| 12.421    | 12.8937   | 11.0805   | 11.4462   | 8.79895   | 9.15663   |
| 99.437    | 115.988   | 108.283   | 115.915   | 103.953   | 106.857   |
| 1.74075   | 1.42685   | 2.44133   | 0.966838  | 2.18666   | 1.46154   |
| 22.7804   | 20.4472   | 26.8213   | 22.2877   | 23.0661   | 25.9962   |
| 165.305   | 205.294   | 142.623   | 155.088   | 155.11    | 138.5     |
| 253.237   | 153.408   | 197.778   | 158.992   | 326.002   | 75.367    |
| 0         | 0         | 0         | 0         | 0         | 0         |
| 21.0117   | 16.6972   | 15.2113   | 20.9831   | 8.92992   | 18.715    |
| 3.64509   | 2.29302   | 3.01661   | 2.73705   | 4.23043   | 1.84441   |
| 4.39665   | 6.55327   | 7.1819    | 3.73883   | 5.09852   | 5.41965   |
| 23.0588   | 24.7842   | 17.0196   | 21.3723   | 18.0544   | 21.4077   |
| 0.0679859 | 0.0973533 | 0.164977  | 0.0493386 | 0.158111  | 0.11021   |
| 0.194292  | 0         | 0.0523863 | 0.0470004 | 0.0502061 | 0.0524934 |
| 132.193   | 23.6619   | 80.1963   | 23.9837   | 25.6195   | 53.5735   |

|           |           |          |           |           |           |
|-----------|-----------|----------|-----------|-----------|-----------|
| 362.468   | 355.065   | 287.183  | 334.036   | 518.245   | 176.772   |
| 4.05625   | 4.7379    | 4.27331  | 4.72489   | 2.56546   | 3.02827   |
| 0         | 0         | 0        | 0         | 0         | 0         |
| 7.23979   | 4.33115   | 4.19038  | 4.78702   | 3.56699   | 3.54694   |
| 0.0426948 | 0.0917059 | 0.13814  | 0.0619687 | 0.0330977 | 0.0346056 |
| 0.278862  | 0.255187  | 0.192198 | 0.287397  | 0.184199  | 0.128394  |
| 9.31564   | 9.00615   | 9.23638  | 10.1386   | 9.84765   | 9.62746   |
| 11.6136   | 8.64489   | 10.0656  | 8.32027   | 7.72397   | 8.14412   |
| 0.29883   | 0.31121   | 0.329615 | 0.571738  | 0.484375  | 0.484424  |
| 7.16328   | 4.60261   | 4.95985  | 4.72072   | 5.7057    | 5.83257   |
| 11.821    | 11.9658   | 10.9705  | 10.757    | 7.1817    | 9.64137   |
| 0.205428  | 0.294164  | 0.667632 | 0.304377  | 0.481733  | 0.416265  |
| 2.91778   | 1.7022    | 3.61713  | 3.57073   | 4.05088   | 3.79701   |
| 1.20231   | 1.09733   | 1.05802  | 1.42867   | 1.0652    | 1.85265   |
| 1.03101   | 0.968864  | 1.25094  | 1.12233   | 0.874183  | 1.20127   |
| 4.25992   | 2.37224   | 2.55241  | 3.03425   | 2.38503   | 3.32492   |
| 2.24378   | 1.73503   | 1.81495  | 2.31226   | 3.37446   | 2.83711   |
| 0.300316  | 0         | 0.24292  | 1.36215   | 0.465619  | 0.973665  |
| 0.281164  | 1.61047   | 0.227428 | 1.22428   | 0.435926  | 0.911572  |
| 0         | 0         | 0.119162 | 0         | 0         | 0         |
| 8.3703    | 8.41884   | 6.62091  | 7.19565   | 6.70263   | 7.34409   |
| 2.80046   | 3.45942   | 3.0313   | 2.78524   | 2.7714    | 3.03989   |
| 0.893551  | 0.407123  | 0.262827 | 1.00217   | 0.188917  | 0.658412  |
| 49.3686   | 52.4044   | 52.6052  | 53.4263   | 53.5109   | 50.104    |
| 16.3667   | 14.6903   | 13.0948  | 15.9229   | 11.7224   | 9.61288   |
| 5.54185   | 5.34447   | 5.4002   | 5.55122   | 5.48948   | 5.34193   |
| 0         | 0         | 0        | 0         | 0         | 0         |
| 17.9063   | 14.6672   | 19.6101  | 20.6957   | 18.1656   | 16.0068   |
| 9.30261   | 6.06447   | 6.64532  | 5.72723   | 4.73127   | 9.13661   |
| 98.9567   | 113.801   | 108.808  | 93.887    | 94.453    | 103.579   |
| 27.3005   | 33.7505   | 31.2104  | 31.9641   | 23.7034   | 29.504    |
| 42.0959   | 30.2103   | 33.3175  | 35.2168   | 26.8267   | 32.9392   |
| 0.774947  | 0.786034  | 0.757431 | 0.679559  | 0.550689  | 1.09921   |
| 0.154235  | 0.110429  | 0.124758 | 0         | 0.239131  | 0         |
| 1.11052   | 1.0323    | 0.686001 | 0.730832  | 0.841439  | 0.711944  |
| 62.0849   | 58.3535   | 61.2141  | 66.2255   | 60.1148   | 55.6882   |
| 1.03098   | 0.877612  | 1.21659  | 0.990526  | 1.12212   | 1.10629   |
| 14.8347   | 20.2494   | 17.4094  | 17.9948   | 16.3814   | 14.4752   |
| 557.531   | 1095.06   | 649.631  | 749.614   | 507.334   | 1189.93   |
| 16.7436   | 18.6771   | 19.7194  | 17.8044   | 14.3562   | 17.9005   |
| 0.279444  | 0.0218828 | 0.09889  | 0.0998139 | 0.23681   | 0.232137  |
| 1.7515    | 1.71005   | 2.44711  | 1.96442   | 2.0984    | 1.80682   |
| 0.500305  | 0.603796  | 0.365431 | 0.719189  | 0.463498  | 0.366179  |



|          |           |           |            |           |          |
|----------|-----------|-----------|------------|-----------|----------|
| 3.38743  | 1.98855   | 3.0795    | 2.93114    | 2.60396   | 2.38241  |
| 0.244992 | 0.291364  | 0.180764  | 0.352067   | 0.30791   | 0.185488 |
| 8.17805  | 6.19314   | 7.50569   | 6.50563    | 7.68086   | 7.45716  |
| 4.80976  | 3.62244   | 3.58739   | 4.21578    | 3.97055   | 3.18952  |
| 62.3042  | 47.2399   | 49.8436   | 57.6821    | 59.7611   | 49.7377  |
| 0.265366 | 0         | 0.128789  | 0.115548   | 0.0822863 | 0.473194 |
| 0        | 0.0306929 | 0         | 0          | 0         | 0        |
| 0.26381  | 0         | 0.333423  | 0          | 0.306764  | 1.81753  |
| 11.9909  | 12.4599   | 2.8013    | 7.53983    | 1.39151   | 1.78484  |
| 103.057  | 79.1227   | 101.583   | 116.08     | 101.54    | 97.1553  |
| 0        | 0         | 0         | 0          | 0         | 0        |
| 0        | 0         | 0.127839  | 0          | 0         | 0        |
| 6.01383  | 3.80798   | 8.27534   | 6.32024    | 5.92894   | 5.39722  |
| 0        | 0         | 0         | 0          | 0         | 0        |
| 11.9874  | 13.6416   | 12.1346   | 12.3772    | 10.0348   | 12.2084  |
| 6.04367  | 6.78593   | 5.84642   | 8.13442    | 6.02473   | 7.159    |
| 0        | 0         | 0         | 0          | 0         | 0        |
| 2.0899   | 2.34207   | 1.73947   | 2.15412    | 1.12704   | 1.96398  |
| 0        | 0         | 0         | 0          | 0         | 0        |
| 20.8442  | 18.2296   | 19.5783   | 17.7594    | 16.8333   | 20.3225  |
| 0.922158 | 1.32019   | 0.386658  | 1.17855    | 0.887329  | 1.2127   |
| 0        | 0         | 0         | 0          | 0         | 0        |
| 18.3624  | 17.1603   | 19.6045   | 17.2635    | 17.572    | 19.5901  |
| 8.8298   | 7.37064   | 8.49623   | 9.29304    | 9.89443   | 10.006   |
| 32.1162  | 39.0988   | 34.1246   | 31.2659    | 40.4251   | 25.9406  |
| 6.62163  | 5.08928   | 6.44919   | 5.60961    | 6.55792   | 6.57191  |
| 9.12181  | 7.29897   | 7.71827   | 7.89549    | 8.30246   | 7.7825   |
| 0        | 0         | 0         | 0          | 0         | 0        |
| 1.17509  | 1.19847   | 1.41119   | 0.911228   | 0.727795  | 0.888905 |
| 1.08191  | 1.10661   | 1.62525   | 1.68248    | 0.599079  | 0.876922 |
| 3.3655   | 2.10843   | 3.22591   | 3.18734    | 2.80467   | 4.28273  |
| 8.73942  | 7.75879   | 8.68316   | 8.26222    | 5.00209   | 9.18536  |
| 8.90547  | 10.5473   | 10.2135   | 12.2366    | 7.61989   | 10.9001  |
| 1.79271  | 2.40061   | 1.44979   | 1.92979    | 1.34382   | 1.31214  |
| 0        | 0         | 0         | 0          | 0         | 0        |
| 7.7832   | 8.11357   | 7.72872   | 6.63736    | 6.25423   | 6.80501  |
| 0        | 0         | 0         | 0          | 0         | 0        |
| 0        | 0         | 4.81727   | 0          | 0         | 0        |
| 0        | 0         | 0         | 0.00802465 | 0         | 0        |
| 0.595624 | 0.341164  | 0.481788  | 0.28817    | 0.215477  | 0.193109 |
| 4.26169  | 3.12034   | 3.58856   | 3.50814    | 3.94846   | 3.777    |
| 0.166738 | 0.0584722 | 0.0165146 | 0.066676   | 0.129258  | 0        |
| 448.766  | 361.321   | 338.518   | 366.955    | 346.32    | 323.094  |

|           |           |           |           |           |           |
|-----------|-----------|-----------|-----------|-----------|-----------|
| 43.2999   | 41.7359   | 33.8748   | 33.8453   | 25.555    | 29.5944   |
| 1.50081   | 1.74878   | 2.21371   | 2.38121   | 1.98471   | 3.27966   |
| 44.8537   | 9.99704   | 1.09943   | 2.466     | 1.38894   | 9.36428   |
| 37.8831   | 37.3337   | 35.0311   | 41.3436   | 33.3569   | 35.2703   |
| 1.82633   | 1.54849   | 2.99344   | 2.61592   | 1.75112   | 2.25941   |
| 0         | 0         | 127.561   | 0         | 0         | 0         |
| 0         | 0         | 0         | 0         | 0         | 0         |
| 0.854578  | 0.933894  | 0.836777  | 0.636503  | 0.941422  | 1.00254   |
| 146.688   | 142.184   | 124.215   | 135.525   | 155.337   | 122.27    |
| 29.3401   | 31.2117   | 32.5733   | 33.1287   | 33.6239   | 29.6456   |
| 0         | 0         | 0         | 0         | 0         | 0         |
| 0.103955  | 0.0186069 | 0.131389  | 0.01886   | 0.090662  | 0.0947925 |
| 0.317928  | 1.76414   | 1.15725   | 1.03827   | 0.554542  | 1.675     |
| 0.082748  | 0.0197487 | 0.0223111 | 0.0600517 | 0.0213825 | 0.0447134 |
| 0.476652  | 1.3651    | 1.79925   | 0.69183   | 0.615847  | 1.03025   |
| 5.51496   | 5.34458   | 5.04672   | 5.21513   | 5.24694   | 4.51522   |
| 0         | 0         | 0         | 0         | 0         | 0         |
| 12.3589   | 14.0117   | 12.3781   | 14.4643   | 10.6194   | 11.8384   |
| 20.2941   | 21.2084   | 28.0689   | 26.2787   | 23.8586   | 24.6743   |
| 57.9011   | 48.5142   | 62.5483   | 59.7368   | 69.0144   | 64.1802   |
| 0.684335  | 0.244832  | 0         | 0.124258  | 0.132886  | 0.138613  |
| 2.53706   | 0.883697  | 0.610107  | 0.870834  | 0.39867   | 0.805876  |
| 19.0055   | 13.95     | 17.2178   | 15.8213   | 15.3974   | 15.515    |
| 149.612   | 139.969   | 137.933   | 153.64    | 163.87    | 153.857   |
| 0.152872  | 0         | 0.0618276 | 0         | 0.118509  | 0.123908  |
| 10.6109   | 7.53386   | 8.77364   | 8.20316   | 8.43134   | 9.49634   |
| 0.662203  | 0.273533  | 0.350228  | 0.499056  | 0.967467  | 0.743175  |
| 33.7118   | 26.6107   | 30.4998   | 32.181    | 28.1537   | 25.3804   |
| 23.8142   | 18.1535   | 23.1391   | 22.2586   | 24.0006   | 22.4897   |
| 8.60402   | 6.32845   | 7.27611   | 9.7258    | 9.03488   | 6.84705   |
| 6.98504   | 3.68506   | 4.31189   | 5.73616   | 7.97987   | 4.3207    |
| 37.2718   | 34.4573   | 34.9819   | 31.1202   | 38.8629   | 28.2343   |
| 9.0655    | 6.66051   | 6.90658   | 8.34483   | 7.58818   | 7.73766   |
| 0         | 0         | 0         | 0         | 0         | 0         |
| 0.289243  | 0.172577  | 0.220965  | 0.326525  | 0.149484  | 0.364686  |
| 0         | 0         | 0         | 0         | 0         | 0         |
| 1.52915   | 1.10488   | 1.16785   | 1.17469   | 0.635915  | 0.578443  |
| 10.5721   | 9.28426   | 7.32103   | 10.3009   | 7.47976   | 7.62734   |
| 0.0207441 | 0         | 0         | 0         | 0         | 0         |
| 27.9625   | 25.1287   | 28.936    | 28.6856   | 26.0926   | 27.6195   |
| 0         | 0         | 0         | 0         | 0         | 0         |
| 7.57898   | 7.43894   | 7.76147   | 7.67323   | 5.08551   | 7.23243   |
| 0.0547588 | 0         | 0.132372  | 0         | 0.0444314 | 0         |

|           |            |            |           |            |           |
|-----------|------------|------------|-----------|------------|-----------|
| 8.2532    | 6.42297    | 6.64529    | 6.11285   | 6.41265    | 6.41395   |
| 8.14304   | 5.92332    | 7.3026     | 6.47741   | 6.49014    | 7.12431   |
| 2.33662   | 1.32612    | 1.91635    | 2.07624   | 2.18866    | 2.00138   |
| 14.5189   | 10.7437    | 10.2787    | 11.8708   | 8.78202    | 9.33553   |
| 10.4494   | 7.34801    | 5.68527    | 6.04857   | 6.17181    | 6.25134   |
| 2.58652   | 2.28937    | 2.51026    | 2.7655    | 1.59278    | 2.74009   |
| 0.0637569 | 0.228244   | 0.30943    | 0.0462695 | 0.0494253  | 0.103354  |
| 2.05328   | 0.816726   | 0.369079   | 1.82123   | 0.530577   | 0.55475   |
| 2.22738   | 1.88271    | 2.30215    | 2.06547   | 1.89458    | 2.73313   |
| 1.28382   | 1.43537    | 1.35772    | 0.909842  | 1.05448    | 1.29115   |
| 0         | 0          | 0          | 0         | 0          | 0         |
| 0.0416764 | 0.0328235  | 0.0168556  | 0.0541847 | 0.0242312  | 0.0168901 |
| 0.0804555 | 0.37443    | 0.325394   | 0.408716  | 0.311852   | 0.456483  |
| 13.8374   | 14.0977    | 15.1061    | 14.6522   | 14.352     | 14.8271   |
| 0         | 0          | 0          | 0.0677512 | 0          | 0.294341  |
| 37.2388   | 41.0958    | 34.8176    | 40.753    | 30.0404    | 32.5667   |
| 0.226583  | 0.227121   | 0.366556   | 0.164435  | 0.245911   | 0.257114  |
| 0.0284767 | 0.0516092  | 0.00575856 | 0         | 0          | 0         |
| 11.1221   | 8.87446    | 9.50365    | 9.58841   | 10.9302    | 10.0321   |
| 12.3195   | 10.4342    | 9.24171    | 9.35142   | 8.85469    | 9.3257    |
| 41.2324   | 31.8683    | 37.972     | 43.8461   | 37.3998    | 39.8951   |
| 31.2518   | 44.7514    | 151.674    | 113.4     | 72.6807    | 50.6613   |
| 0.154187  | 0.0551975  | 0          | 0.0279741 | 0.0896462  | 0         |
| 25.8676   | 34.24      | 23.5613    | 23.1371   | 20.3339    | 19.792    |
| 0         | 0          | 0          | 0         | 0          | 0         |
| 0         | 0.0161607  | 0          | 0         | 0          | 0.0182949 |
| 0         | 0          | 0          | 0         | 0          | 0         |
| 8.35136   | 6.21447    | 7.32304    | 7.43071   | 7.20094    | 7.64076   |
| 6.2244    | 4.13645    | 4.72551    | 4.81979   | 5.57929    | 5.14202   |
| 0         | 0          | 0          | 0         | 0          | 0         |
| 0.0355326 | 0.00636017 | 0.035927   | 0.0322333 | 0.00688636 | 0.0216003 |
| 3.7032    | 2.7672     | 3.0216     | 3.3212    | 3.03374    | 3.22439   |
| 5.57556   | 3.63619    | 4.58401    | 5.83412   | 4.56621    | 4.53386   |
| 62.7949   | 70.5468    | 65.2692    | 64.1625   | 53.8109    | 55.9022   |
| 11.7045   | 10.9491    | 11.9471    | 12.1851   | 11.72      | 12.508    |
| 0.65404   | 0.367978   | 0.755564   | 0.677772  | 0.651931   | 0.568102  |
| 0.40848   | 0.158089   | 0.178601   | 0.240358  | 0.145493   | 0.10738   |
| 21.5388   | 18.6498    | 21.1011    | 21.8863   | 21.2415    | 21.1304   |
| 0         | 0          | 0          | 0         | 0          | 0         |
| 0         | 0          | 0          | 0         | 0          | 0         |
| 18.3902   | 18.8298    | 18.5035    | 17.9811   | 14.3604    | 15.6765   |
| 0.151147  | 0.306618   | 0.326025   | 0.255943  | 0.195285   | 0.34711   |
| 0.48458   | 0.195518   | 0.226155   | 0.277245  | 0.318863   | 0.321518  |

|            |           |           |           |            |           |
|------------|-----------|-----------|-----------|------------|-----------|
| 0          | 0         | 0         | 0         | 0          | 0         |
| 0.70894    | 0.841132  | 0.79952   | 0.9202    | 0.766022   | 0.78605   |
| 0.00265073 | 0         | 0         | 0         | 0          | 0         |
| 0          | 0         | 0         | 0         | 0          | 0         |
| 0.719846   | 0.459016  | 0.431965  | 0.729329  | 0.138521   | 0.325872  |
| 0          | 0         | 0         | 0.0320218 | 0.0684118  | 0.0357643 |
| 0          | 0         | 0         | 0         | 27.1295    | 0         |
| 0.939719   | 0.808862  | 1.99293   | 0.71143   | 0.719521   | 0.740569  |
| 1.05717    | 1.81607   | 1.75172   | 1.80594   | 1.28805    | 1.55916   |
| 11.3291    | 10.8152   | 11.1574   | 11.9719   | 12.3263    | 10.9547   |
| 0.153377   | 0.184822  | 0.144783  | 0.129898  | 0.1762     | 0.209228  |
| 1.04E-08   | 8.05E-09  | 1.05E-08  | 6.24E-09  | 1.81E-08   | 1.00E-08  |
| 0          | 0.0432215 | 0         | 0         | 0          | 0.0489294 |
| 0          | 0.0026422 | 0         | 0         | 0.00442742 | 0         |
| 55.4677    | 58.0303   | 53.8476   | 50.8315   | 59.3438    | 35.8022   |
| 0.129791   | 0.0929282 | 0.227469  | 0.094192  | 0.134155   | 0.227934  |
| 8.80047    | 6.92105   | 9.37833   | 7.78561   | 8.3816     | 7.06514   |
| 15.7541    | 12.6987   | 14.3926   | 15.6141   | 14.4266    | 15.6617   |
| 1.35043    | 1.62524   | 3.16947   | 1.30102   | 6.45863    | 6.21462   |
| 24.6519    | 23.2521   | 25.4455   | 29.0475   | 29.617     | 31.3409   |
| 0          | 0         | 0         | 0         | 0          | 0         |
| 9.08165    | 7.85419   | 7.15562   | 7.80683   | 7.63569    | 6.48923   |
| 0.365176   | 0.749974  | 0.0886201 | 0.898102  | 0.184431   | 0.835498  |
| 7.30714    | 5.56622   | 6.32893   | 6.07778   | 6.81563    | 6.82866   |
| 0.577764   | 0.272594  | 0.780746  | 0.665303  | 0.849564   | 0.785554  |
| 8.18333    | 7.8842    | 7.59949   | 5.05743   | 6.68806    | 6.8001    |
| 10.8681    | 9.52601   | 12.0196   | 10.7947   | 11.9018    | 9.64504   |
| 10.6493    | 11.4644   | 10.783    | 12.7045   | 10.9281    | 12.1401   |
| 1.00392    | 1.10977   | 0.899415  | 0.475091  | 0.888628   | 0.709061  |
| 0          | 0         | 0         | 0         | 0          | 0         |
| 0          | 0         | 0         | 0         | 0          | 0         |
| 8.09333    | 7.43984   | 7.59976   | 8.74536   | 7.77827    | 8.64998   |
| 4.2853     | 3.77784   | 4.50382   | 4.14656   | 4.36158    | 4.30037   |
| 6.77542    | 5.50293   | 7.7432    | 6.88517   | 6.42483    | 8.53536   |
| 0.43516    | 0.311339  | 0.944131  | 0.481812  | 0.461467   | 0.445205  |
| 83.8374    | 73.3993   | 84.8987   | 93.8615   | 99.5486    | 82.7625   |
| 9.72247    | 8.80426   | 9.03946   | 8.94679   | 8.05082    | 9.08531   |
| 17.4742    | 17.4008   | 17.7123   | 16.6674   | 18.8969    | 17.0788   |
| 15.4026    | 12.8476   | 18.1899   | 15.7144   | 14.5374    | 17.0411   |
| 5.55998    | 4.3716    | 5.40786   | 5.17368   | 4.38951    | 3.64948   |
| 0          | 0         | 0         | 0         | 0.0397215  | 0.0207656 |
| 1.88088    | 2.24841   | 2.20925   | 2.71847   | 3.07409    | 2.06398   |
| 0.481374   | 1.47758   | 1.62047   | 0.857677  | 0.836066   | 1.75396   |

|          |           |           |           |            |          |
|----------|-----------|-----------|-----------|------------|----------|
| 10.4454  | 8.26427   | 8.52006   | 9.33218   | 10.6151    | 9.92482  |
| 0        | 0         | 0         | 0         | 0          | 0        |
| 3.85403  | 3.75747   | 2.74448   | 4.23884   | 2.4002     | 3.79122  |
| 0.659189 | 0.563315  | 0.842807  | 0.756157  | 0.774762   | 0.999648 |
| 0        | 0         | 0         | 0         | 0          | 0        |
| 0.513843 | 0.0919754 | 0.519546  | 1.02549   | 0.497924   | 0.312365 |
| 0.634184 | 0.847586  | 0.889163  | 1.56481   | 1.70432    | 1.98757  |
| 1.88505  | 2.15811   | 1.155     | 1.2905    | 1.30947    | 1.3677   |
| 0.242199 | 0.797686  | 0.548548  | 0.421844  | 0.488167   | 0.431883 |
| 6.96013  | 6.50763   | 7.5507    | 7.42808   | 7.29993    | 7.93117  |
| 2.48057  | 1.16029   | 2.30295   | 2.02134   | 2.39331    | 1.94785  |
| 2.44073  | 2.18651   | 2.82786   | 2.30609   | 2.67514    | 2.7094   |
| 40.4094  | 30.208    | 30.2651   | 33.4635   | 30.3868    | 29.4605  |
| 0        | 0         | 0         | 0         | 0          | 0        |
| 1.43903  | 0.925793  | 1.40018   | 1.5741    | 0.970051   | 1.50451  |
| 0.137079 | 0.127953  | 0.125985  | 0.107022  | 0.106266   | 0.178681 |
| 0.240919 | 0.170836  | 0.0996392 | 0.097518  | 0.00779529 | 0.228348 |
| 7.63568  | 7.32173   | 7.72028   | 8.41081   | 5.54923    | 7.9571   |
| 1.33953  | 0.900362  | 1.45944   | 1.72602   | 1.71659    | 2.32658  |
| 0.619237 | 0.266017  | 0.400711  | 0.5168    | 0.480042   | 0.552402 |
| 23.2495  | 19.5997   | 21.7787   | 19.5347   | 22.103     | 26.1876  |
| 8.86694  | 8.13602   | 8.73905   | 8.02801   | 5.4056     | 7.43117  |
| 0.39838  | 0.641043  | 0.397734  | 0.347447  | 0.27822    | 0.597185 |
| 134.897  | 138.246   | 146.203   | 155.639   | 154.683    | 152.077  |
| 0.194526 | 0.383011  | 0.157348  | 0.317634  | 0.226199   | 0.118252 |
| 40.5979  | 43.6953   | 44.0074   | 44.3041   | 43.7948    | 42.2278  |
| 21.5226  | 20.8382   | 24.8279   | 24.6714   | 24.3634    | 23.491   |
| 26.9791  | 27.2889   | 28.3548   | 25.4142   | 23.5873    | 22.632   |
| 54.9746  | 55.1976   | 49.6366   | 54.6791   | 47.1929    | 41.2732  |
| 0        | 0.128172  | 0         | 0         | 0          | 0        |
| 0.345044 | 0.257119  | 0.461239  | 0.247651  | 0.15844    | 0.245277 |
| 35.3242  | 29.3075   | 35.3993   | 32.7619   | 28.2455    | 33.7886  |
| 2.23676  | 0.177942  | 0.452318  | 0.0676357 | 0.0722488  | 0        |
| 12.1764  | 11.5633   | 12.1295   | 12.0903   | 11.1639    | 13.5171  |
| 4.5873   | 1.94157   | 3.42068   | 3.17303   | 3.81545    | 3.76657  |
| 4.67423  | 4.13684   | 3.33453   | 4.61712   | 4.32811    | 4.63053  |
| 0        | 0         | 0         | 0         | 0          | 0        |
| 34.4105  | 31.893    | 34.1367   | 34.386    | 32.5065    | 29.6797  |
| 9.3479   | 11.483    | 10.0818   | 11.9052   | 9.09382    | 8.13391  |
| 1.41349  | 0.554986  | 0.590114  | 0.595624  | 0.812985   | 0.739151 |
| 63.01    | 37.8026   | 30.8375   | 97.896    | 17.4451    | 165.817  |
| 0.77433  | 0.739207  | 0.487153  | 0.842918  | 0.533576   | 0.348678 |
| 0        | 0         | 0.0476498 | 0.0427509 | 0          | 0        |

|           |           |           |           |           |           |
|-----------|-----------|-----------|-----------|-----------|-----------|
| 9.53075   | 11.5826   | 9.94085   | 12.1041   | 7.58313   | 7.62335   |
| 0.166033  | 0.118877  | 0.0671506 | 0.0602467 | 0         | 0         |
| 3.65299   | 4.75456   | 2.23723   | 4.13752   | 2.37674   | 0.919986  |
| 1.32736   | 0.712775  | 0.805258  | 0.695711  | 0.685995  | 0.597707  |
| 1.69523   | 1.51514   | 1.84506   | 1.69076   | 1.64208   | 1.88837   |
| 4.2267    | 4.36528   | 4.12719   | 3.85017   | 2.6454    | 3.6826    |
| 20.8372   | 24.4125   | 26.6708   | 18.9832   | 18.3492   | 19.1129   |
| 37.4533   | 50.5583   | 43.6495   | 64.9731   | 72.7688   | 38.0165   |
| 0.970156  | 1.26293   | 1.46247   | 0.928078  | 0.717894  | 0.965058  |
| 0.178418  | 0.255487  | 0.0360796 | 0.258962  | 0.209197  | 0.25458   |
| 0.362952  | 0.184521  | 0.145924  | 1.02708   | 0.163159  | 0.273454  |
| 4.89973   | 5.11183   | 5.12964   | 5.01879   | 5.26343   | 5.01534   |
| 0         | 0         | 0.0999092 | 0.0896374 | 0         | 0.100113  |
| 2988.44   | 3552.93   | 3281.58   | 3028.54   | 3131.82   | 3123.62   |
| 3.46229   | 3.97484   | 4.70787   | 4.37547   | 4.21114   | 3.91915   |
| 10.9005   | 10.5656   | 11.5835   | 12.2209   | 10.8452   | 13.6403   |
| 0.538383  | 0.249442  | 0.564761  | 0.459359  | 0.441309  | 0.384774  |
| 4.05061   | 3.19003   | 3.45399   | 4.32967   | 3.49569   | 3.76815   |
| 11.8079   | 12.0443   | 11.5791   | 12.619    | 13.6051   | 14.5527   |
| 17.3765   | 19.4205   | 21.0251   | 19.9376   | 13.4881   | 17.164    |
| 0         | 0         | 0         | 0         | 0         | 0         |
| 0.0358327 | 0         | 0.0289844 | 0.0818744 | 0.125002  | 0.0290436 |
| 43.7785   | 51.1041   | 36.8735   | 54.7934   | 34.8513   | 61.0278   |
| 2.09068   | 3.9917    | 3.6077    | 2.62989   | 2.49522   | 1.92051   |
| 0         | 0         | 0         | 0         | 0         | 0         |
| 0.339016  | 0.17653   | 0.274223  | 0.0447327 | 0.0955673 | 0.124902  |
| 0         | 0         | 0         | 0         | 0         | 0         |
| 14.6169   | 11.2793   | 12.7816   | 12.6875   | 13.8755   | 12.9375   |
| 0         | 0         | 0         | 0         | 0         | 0         |
| 0.198659  | 0         | 0         | 0.144171  | 0.136885  | 0.143122  |
| 30.717    | 34.4122   | 31.486    | 37.1781   | 38.78     | 35.6511   |
| 15.3293   | 14.7919   | 17.3356   | 15.2065   | 14.4198   | 12.6633   |
| 1.36134   | 0.597394  | 0.994599  | 1.21104   | 1.53194   | 0.818662  |
| 0         | 0         | 0         | 0         | 0         | 0         |
| 2.89794   | 2.3462    | 2.61456   | 2.63695   | 2.66128   | 3.6498    |
| 0.0433214 | 0.0620345 | 0         | 0         | 0         | 0.0351134 |
| 0.328342  | 0.174948  | 0.179118  | 0.221659  | 0.266375  | 0.396104  |
| 13.8101   | 11.9477   | 13.4316   | 14.4667   | 17.1421   | 13.4256   |
| 0         | 0         | 0         | 0.0125145 | 0         | 0         |
| 0.0681744 | 0         | 0         | 0         | 0         | 0         |
| 3.70772   | 3.00069   | 2.84989   | 3.45149   | 3.16898   | 3.30125   |
| 2.73442   | 3.4415    | 3.65758   | 4.98746   | 3.93212   | 2.21663   |
| 25.7874   | 25.1437   | 23.9491   | 26.6586   | 25.5722   | 21.1397   |

|           |            |            |          |            |           |
|-----------|------------|------------|----------|------------|-----------|
| 2.76018   | 2.85916    | 3.00972    | 2.92495  | 2.51975    | 2.43618   |
| 0         | 0          | 0.138423   | 0.124191 | 0.198993   | 0.0693528 |
| 61.2545   | 64.2791    | 55.5991    | 51.6175  | 39.7525    | 41.0582   |
| 0         | 0          | 0          | 0        | 0          | 0         |
| 0.675125  | 0.481529   | 0.64555    | 0.490653 | 0.438331   | 0.365258  |
| 0.527198  | 0.94466    | 1.02044    | 1.27652  | 0.53168    | 1.01763   |
| 29.4059   | 26.0559    | 28.5825    | 32.4822  | 32.1158    | 27.6533   |
| 0         | 0          | 0          | 0        | 0          | 0         |
| 5.79943   | 5.08618    | 6.28177    | 6.14565  | 6.90705    | 6.42474   |
| 1.53017   | 1.691      | 1.26463    | 1.23118  | 1.34094    | 1.34811   |
| 236.045   | 256.879    | 244.118    | 230.288  | 285.275    | 268.154   |
| 1.36563   | 1.13058    | 1.56589    | 1.57985  | 1.40629    | 1.65158   |
| 7.73895   | 7.34987    | 4.75789    | 9.87847  | 9.19209    | 12.3096   |
| 0         | 0          | 0          | 0        | 0          | 0         |
| 0         | 0          | 0          | 0        | 0          | 0         |
| 0         | 2.31086    | 0.0933678  | 0.72144  | 0.252656   | 1.57116   |
| 0.126692  | 0.120945   | 0.170797   | 0.306475 | 0.0327378  | 0.171146  |
| 0         | 0          | 0          | 0        | 0          | 0         |
| 3.4467    | 2.36095    | 2.76911    | 2.81754  | 3.34388    | 3.86717   |
| 2.71809   | 1.93249    | 2.69061    | 2.74504  | 2.68177    | 2.98883   |
| 0         | 0          | 0          | 0        | 0          | 0         |
| 18.0094   | 17.7875    | 18.3764    | 20.544   | 17.678     | 17.6843   |
| 273.196   | 233.3      | 277.491    | 312.744  | 251.087    | 285.955   |
| 2.68718   | 1.96491    | 3.12167    | 2.73849  | 3.81171    | 2.4561    |
| 202.02    | 188.135    | 199.84     | 216.513  | 214.53     | 192.441   |
| 28.5337   | 27.9414    | 24.4064    | 29.1802  | 21.4381    | 24.1107   |
| 54.6556   | 52.9451    | 49.5       | 49.038   | 40.1023    | 44.2469   |
| 41.3567   | 38.8347    | 40.9956    | 41.4684  | 32.1105    | 41.259    |
| 0         | 0          | 0          | 0        | 0          | 0         |
| 0.102819  | 0          | 0          | 0        | 0          | 0.0833381 |
| 35.5589   | 34.1924    | 34.2926    | 38.4528  | 49.1837    | 35.6384   |
| 0         | 0          | 0.0992448  | 0        | 0          | 0         |
| 0         | 0          | 0          | 0        | 0          | 0         |
| 17.0084   | 16.8754    | 16.2826    | 17.8446  | 15.9506    | 15.9028   |
| 29.3527   | 29.2433    | 31.1112    | 33.7026  | 36.4628    | 36.0007   |
| 13.3421   | 11.7382    | 14.3972    | 13.9155  | 14.8201    | 17.6907   |
| 0         | 0.00543787 | 0.00614344 | 0        | 0.00588776 | 0.006156  |
| 0.36853   | 0.40903    | 0.298097   | 0.356038 | 0.0949006  | 0.331666  |
| 0.0768329 | 0.0513744  | 0          | 0.055759 | 0          | 0         |
| 0.779705  | 0.446603   | 0.632439   | 0.623845 | 0.785771   | 0.678985  |
| 0         | 0          | 0          | 0        | 0          | 0         |
| 0.377463  | 0.270256   | 0.610644   | 0.273931 | 0.292615   | 0.611892  |
| 0.327101  | 0.300954   | 0.1695     | 0.194814 | 0.426554   | 0.260187  |

|           |           |           |           |           |          |
|-----------|-----------|-----------|-----------|-----------|----------|
| 0.209832  | 0.180283  | 0.135783  | 0.243646  | 0.260264  | 0.238106 |
| 14.3597   | 8.46153   | 9.83347   | 11.6735   | 9.92463   | 14.8231  |
| 7.57747   | 6.66297   | 6.09094   | 8.8673    | 7.32434   | 6.23776  |
| 5.11096   | 3.59552   | 3.94988   | 4.67952   | 4.65316   | 4.80895  |
| 0.107659  | 0.0770815 | 0         | 0.0781298 | 0.0834587 | 0        |
| 8.8375    | 7.59194   | 7.89078   | 8.09678   | 7.18897   | 7.95663  |
| 0         | 0         | 0         | 0         | 0         | 0        |
| 12.9262   | 13.8565   | 10.7992   | 18.001    | 7.55677   | 15.404   |
| 0.156988  | 0.0749336 | 0.169312  | 0.151905  | 0.0608497 | 0.127244 |
| 23.9386   | 36.6507   | 29.0249   | 12.4195   | 20.5417   | 13.9116  |
| 0.950763  | 0.849875  | 0.858536  | 0.839145  | 0.669165  | 0.811293 |
| 0.388889  | 1.01421   | 0.494774  | 1.02839   | 0.414445  | 1.06786  |
| 16.8996   | 12.1102   | 15.4547   | 16.0362   | 15.6411   | 16.2928  |
| 106.382   | 63.7076   | 133.299   | 187.137   | 55.4809   | 22.0347  |
| 0         | 0.0368398 | 0         | 0         | 0.0398877 | 0        |
| 40.8925   | 44.4018   | 42.8256   | 43.5499   | 40.0003   | 38.4076  |
| 3.02439   | 1.62047   | 2.25196   | 2.76174   | 2.42219   | 2.20786  |
| 0         | 0         | 4.81727   | 0         | 0         | 0        |
| 0.0475116 | 0.0170087 | 0.0384311 | 0.05172   | 0.147327  | 0.115529 |
| 0         | 0         | 0         | 0         | 0         | 0        |
| 0.653386  | 0.598889  | 0.533213  | 0.60986   | 0.510834  | 0.340729 |
| 0.837098  | 1.17145   | 1.04644   | 0.828405  | 0.619434  | 0.555133 |
| 118.367   | 21.1871   | 47.8722   | 42.9504   | 22.9399   | 74.9532  |
| 10.438    | 12.2381   | 15.5013   | 12.0038   | 13.9356   | 14.1453  |
| 17.7978   | 13.9552   | 15.8107   | 15.4053   | 10.5062   | 15.2456  |
| 15.9048   | 10.9256   | 11.6386   | 13.1813   | 14.0803   | 11.9762  |
| 34.9925   | 40.9858   | 37.598    | 36.1807   | 39.0824   | 39.9985  |
| 7.27045   | 7.84543   | 8.11489   | 8.04893   | 7.01443   | 7.39061  |
| 0         | 0         | 0         | 0         | 0         | 0        |
| 6.25796   | 4.55618   | 6.76444   | 5.56834   | 5.9645    | 6.105    |
| 72.4598   | 74.0333   | 83.1284   | 71.9469   | 88.7247   | 55.2763  |
| 39.3099   | 42.6307   | 35.6068   | 35.5859   | 33.5734   | 37.387   |
| 451.136   | 555.469   | 559.59    | 580.744   | 498.211   | 549.176  |
| 0.95104   | 1.13495   | 1.35643   | 0.8478    | 1.21973   | 0.859001 |
| 0         | 0         | 0         | 0         | 0         | 0        |
| 3.69351   | 2.42894   | 3.07561   | 3.34652   | 3.15044   | 2.97718  |
| 1.94638   | 1.90588   | 2.06439   | 3.02892   | 1.81368   | 1.34249  |
| 0.53389   | 0.486506  | 0.706668  | 0.317007  | 0.451505  | 0.275377 |
| 0.12484   | 0.139663  | 0.113604  | 0.120799  | 0.108876  | 0.158107 |
| 2.09587   | 1.73927   | 2.15755   | 1.45168   | 1.10795   | 1.96896  |
| 181.771   | 155.543   | 173.543   | 198.511   | 211.43    | 184.485  |
| 8.51999   | 17.2957   | 10.4186   | 8.58361   | 7.69268   | 6.54014  |
| 276.033   | 275.629   | 312.668   | 321.521   | 350.648   | 317.149  |



|          |          |           |           |          |          |
|----------|----------|-----------|-----------|----------|----------|
| 164.132  | 165.576  | 169.416   | 157.581   | 188.035  | 151.821  |
| 0        | 0        | 0         | 0         | 0        | 0        |
| 15.0928  | 13.5764  | 16.4751   | 14.5114   | 13.5106  | 16.0662  |
| 67.0175  | 71.367   | 75.6502   | 74.098    | 71.3564  | 65.0982  |
| 0.354374 | 0.16915  | 0.143323  | 0.514352  | 0.137358 | 0.335104 |
| 11.6978  | 14.8243  | 14.3307   | 14.1245   | 12.6715  | 11.7408  |
| 9.96961  | 6.22444  | 8.71036   | 6.77587   | 9.77937  | 8.48432  |
| 0        | 0        | 0         | 0         | 0        | 0        |
| 4.83525  | 3.01174  | 2.70097   | 3.60344   | 1.79854  | 3.81369  |
| 67.3959  | 59.3463  | 70.9252   | 63.4421   | 66.8296  | 65.7741  |
| 6.78381  | 5.18912  | 5.00748   | 4.43787   | 5.61843  | 6.86221  |
| 0        | 0        | 0         | 0         | 0        | 0        |
| 0.750893 | 0.84461  | 1.30157   | 1.1673    | 0.5822   | 1.04334  |
| 42.5321  | 36.5063  | 45.7892   | 41.7062   | 55.9338  | 38.865   |
| 25.6052  | 23.9706  | 25.3333   | 26.694    | 30.7017  | 27.4403  |
| 0        | 0        | 0         | 0         | 0        | 0        |
| 0        | 0        | 0         | 0         | 0        | 0        |
| 19.573   | 23.0365  | 17.7841   | 13.6207   | 12.679   | 15.8646  |
| 141.314  | 155.601  | 143.45    | 168.03    | 163.303  | 129.612  |
| 7.00162  | 7.11726  | 7.83097   | 7.40224   | 5.76281  | 6.09542  |
| 0.226028 | 0.194198 | 0.43879   | 0.426484  | 0.070088 | 0.109922 |
| 0.481719 | 0.31491  | 0.457418  | 0.349592  | 0.389672 | 0.814851 |
| 0.754626 | 1.0806   | 0.646308  | 0.57986   | 0.550586 | 0.647629 |
| 39.2025  | 33.4624  | 38.2346   | 40.1728   | 38.6231  | 33.9484  |
| 9.07334  | 8.89555  | 9.25745   | 7.81931   | 7.63326  | 7.1871   |
| 12.4103  | 15.137   | 12.5421   | 13.2769   | 10.9412  | 12.1351  |
| 18.2348  | 17.182   | 15.3548   | 15.9446   | 13.7246  | 12.0973  |
| 10.0043  | 6.81615  | 8.30509   | 6.24578   | 7.35942  | 5.58971  |
| 1.00246  | 0.956988 | 1.67579   | 0.921502  | 1.2952   | 1.27296  |
| 0        | 0        | 0         | 0         | 0        | 0        |
| 2.81444  | 1.5777   | 1.90594   | 2.07416   | 1.35305  | 2.19278  |
| 0.900536 | 0.482448 | 0.453356  | 0.562132  | 0.434488 | 0.449179 |
| 0        | 0        | 0         | 0         | 0        | 0        |
| 1.0697   | 1.37511  | 0.806266  | 0.776303  | 0.94233  | 1.16261  |
| 11.8366  | 10.3466  | 10.0303   | 10.542    | 8.15046  | 9.65693  |
| 26.6092  | 19.7111  | 29.1393   | 24.9431   | 27.0844  | 33.9557  |
| 29.7159  | 27.6359  | 28.9975   | 32.9825   | 30.6401  | 31.1667  |
| 1.65517  | 1.18507  | 1.23424   | 1.21996   | 1.30316  | 1.32061  |
| 0.681885 | 0.976433 | 1.85526   | 0.494856  | 0.816939 | 0.703425 |
| 1.99962  | 1.01671  | 1.24239   | 1.17775   | 0.898629 | 1.29191  |
| 0.322878 | 0.260071 | 0.0652924 | 0.234319  | 0.312875 | 0.130852 |
| 0.026063 | 0        | 0         | 0.0047286 | 0        | 0        |
| 0        | 0        | 0         | 0         | 0        | 0        |

|           |           |          |           |           |           |
|-----------|-----------|----------|-----------|-----------|-----------|
| 24.997    | 29.5358   | 28.1087  | 30.4618   | 28.563    | 28.986    |
| 10.6836   | 6.98088   | 10.2359  | 7.45219   | 6.59352   | 8.65943   |
| 0         | 0         | 0        | 0         | 0         | 0         |
| 0.0393274 | 0         | 0        | 0         | 0         | 0         |
| 14.9874   | 11.6469   | 14.6179  | 13.0788   | 14.4211   | 13.6537   |
| 20.2615   | 15.9344   | 19.3531  | 18.1847   | 22.3073   | 19.4801   |
| 0.103579  | 0.148321  | 0.502697 | 0.300676  | 0.240888  | 0.0839541 |
| 0.703439  | 0.485714  | 0.826176 | 0.258627  | 0.811881  | 0.488969  |
| 0.346381  | 0.205525  | 0.14324  | 0.189832  | 0.0762658 | 0.212018  |
| 22.9775   | 22.5524   | 21.2929  | 25.1288   | 20.0956   | 19.3803   |
| 61.356    | 66.5386   | 60.052   | 63.3345   | 56.2401   | 66.7156   |
| 0.0415412 | 0.0594854 | 0        | 0.0602944 | 0.0966101 | 0         |
| 14.583    | 11.4877   | 13.2636  | 14.4848   | 15.2513   | 14.5027   |
| 9.82746   | 9.85601   | 13.3913  | 9.72541   | 16.6126   | 11.4827   |
| 6.82387   | 5.36367   | 7.3722   | 6.13759   | 5.87272   | 7.54482   |
| 0         | 0         | 0        | 0         | 0         | 0         |
| 31.4308   | 32.4211   | 31.9474  | 30.349    | 30.8494   | 32.0935   |
| 0         | 0         | 0        | 0         | 0         | 0         |
| 1.72681   | 1.34876   | 1.70153  | 2.18736   | 1.41167   | 2.34121   |
| 0.131149  | 0.05634   | 0        | 0         | 0.0610011 | 0.0425202 |
| 19.7702   | 13.9596   | 18.4784  | 16.0355   | 14.5187   | 15.8113   |
| 0         | 0         | 0        | 0         | 0         | 0         |
| 292.036   | 436.198   | 198.771  | 263.876   | 238.319   | 271.85    |
| 2.63704   | 1.99687   | 1.38829  | 1.3753    | 2.19673   | 3.4271    |
| 0         | 0         | 0        | 0         | 0         | 0         |
| 39.3059   | 42.4959   | 39.9357  | 36.5587   | 36.6159   | 36.2499   |
| 1.53913   | 0.881593  | 1.36953  | 1.00528   | 1.31248   | 1.49702   |
| 0.691228  | 0.33862   | 0.176564 | 0.13201   | 0.169216  | 0.471801  |
| 54.3882   | 51.6373   | 56.2094  | 56.476    | 54.4062   | 54.1076   |
| 0         | 0         | 0        | 0         | 0         | 0         |
| 20.2171   | 18.4857   | 20.6608  | 18.4222   | 22.5838   | 20.4953   |
| 10.1047   | 8.8588    | 10.3001  | 7.96914   | 9.79152   | 9.90334   |
| 0         | 0         | 0        | 0         | 0         | 0         |
| 7.97E-07  | 3.14E-07  | 2.31E-07 | 7.31E-07  | 2.24E-06  | 7.02E-07  |
| 0         | 0.0433634 | 0        | 0.0879063 | 0.0939019 | 0         |
| 6.63305   | 7.62029   | 6.8132   | 7.33588   | 5.10843   | 6.98088   |
| 10.1234   | 10.5592   | 9.30089  | 11.7005   | 10.0278   | 9.21947   |
| 14.6433   | 11.9519   | 14.9377  | 14.9896   | 12.2427   | 15.4954   |
| 2.38941   | 1.32196   | 1.22993  | 0.709378  | 2.44167   | 1.14441   |
| 14.9679   | 15.4994   | 14.4358  | 17.1218   | 17.975    | 14.8539   |
| 16.9064   | 16.0341   | 9.79718  | 14.2226   | 15.323    | 14.402    |
| 2.62135   | 2.66935   | 2.18746  | 2.91373   | 2.57267   | 3.42026   |
| 0         | 0.0377281 | 0        | 0         | 0.0408494 | 0.0427104 |

|           |           |           |           |           |           |
|-----------|-----------|-----------|-----------|-----------|-----------|
| 8.07148   | 7.23514   | 9.39387   | 8.01216   | 8.06755   | 8.72864   |
| 5.0188    | 5.02586   | 5.94782   | 6.55261   | 5.39841   | 4.67433   |
| 3.94858   | 2.13643   | 3.01085   | 3.09318   | 2.39025   | 2.15782   |
| 7.56024   | 6.54526   | 7.07145   | 7.26081   | 7.92492   | 8.56391   |
| 12.2251   | 13.1996   | 15.8994   | 14.4545   | 11.7914   | 13.5474   |
| 13.663    | 12.6699   | 14.1534   | 15.1212   | 13.6241   | 14.4413   |
| 3.90331   | 3.88497   | 2.68208   | 3.25921   | 3.54529   | 3.79008   |
| 156.434   | 121.736   | 146.894   | 151.276   | 113.898   | 151.593   |
| 1.12013   | 1.29552   | 0.557569  | 0.437715  | 1.73668   | 0.488871  |
| 0         | 0.127093  | 0         | 0.0644108 | 0.0688039 | 0         |
| 28.1736   | 27.5982   | 25.1322   | 28.8212   | 31.0767   | 27.4179   |
| 2.61766   | 2.17365   | 2.55741   | 2.35663   | 2.42568   | 2.34679   |
| 104.324   | 105.788   | 105.466   | 91.3456   | 108.631   | 90.6287   |
| 1.34959   | 2.41219   | 0.714937  | 2.94608   | 0.990406  | 2.39823   |
| 51.0963   | 49.4737   | 8.56597   | 37.0815   | 8.20947   | 131.353   |
| 0.0508228 | 0.0718887 | 0.112606  | 0.0809067 | 0.056412  | 0.0500618 |
| 5.81065   | 7.45847   | 10.4246   | 8.33763   | 8.81953   | 8.82353   |
| 0.813796  | 1.70735   | 0.517052  | 0.189992  | 0.501114  | 0.659609  |
| 7.55749   | 4.15202   | 4.99337   | 4.75151   | 4.2925    | 4.21514   |
| 0.116923  | 0.0558097 | 0.126102  | 0.19799   | 0.0604269 | 0.18954   |
| 31.2829   | 32.1673   | 31.6299   | 31.894    | 34.9756   | 31.3027   |
| 0         | 0         | 0.0283512 | 0.0508728 | 0         | 0         |
| 5.74771   | 4.77927   | 5.58136   | 4.89518   | 6.17699   | 5.81489   |
| 0.0659054 | 0         | 0.0266548 | 0         | 0.0510909 | 0.0267093 |
| 0.0280971 | 0         | 0         | 0         | 0         | 0         |
| 0         | 0.0194218 | 0.0219418 | 0         | 0         | 0         |
| 0.598122  | 0.428244  | 0.398431  | 0.383001  | 1.2001    | 0.427763  |
| 7.34469   | 6.42813   | 7.37603   | 7.57729   | 7.83281   | 7.223     |
| 5.07251   | 4.64974   | 5.52279   | 4.56012   | 4.73507   | 5.56254   |
| 0.0522836 | 0         | 0         | 0.0379431 | 0.040531  | 0.0423776 |
| 101.741   | 114.883   | 106.109   | 116.93    | 119.347   | 94.2631   |
| 0         | 0         | 0         | 0         | 0         | 0         |
| 1.76733   | 2.05639   | 0.893666  | 1.25267   | 1.11334   | 0.80573   |
| 0.165661  | 0.185328  | 0.111666  | 0.254971  | 0.431643  | 0.0895158 |
| 2.40395   | 1.29089   | 1.60136   | 1.87287   | 1.20584   | 1.40405   |
| 6.45346   | 4.4502    | 5.68187   | 5.16945   | 6.22531   | 4.00547   |
| 37.1178   | 34.8502   | 39.26     | 36.4745   | 35.0016   | 41.1489   |
| 4.33535   | 3.93547   | 3.47547   | 3.59571   | 3.12077   | 3.98457   |
| 0.162004  | 0.194954  | 0.118669  | 0.207225  | 0.126431  | 0.15402   |
| 24.9844   | 26.8883   | 32.3938   | 27.989    | 27.3411   | 31.0707   |
| 0         | 0         | 0         | 0         | 0.0394829 | 0.0206409 |
| 1.94153   | 2.35465   | 3.30117   | 2.84676   | 2.82591   | 2.28022   |
| 7.96203   | 6.29224   | 8.74912   | 7.84961   | 6.63812   | 8.03642   |

|            |           |           |            |           |           |
|------------|-----------|-----------|------------|-----------|-----------|
| 0          | 0         | 0         | 0          | 0         | 0         |
| 10.4206    | 5.71834   | 14.7773   | 10.751     | 4.3415    | 11.7847   |
| 21.3847    | 14.8315   | 18.6482   | 18.777     | 20.0887   | 19.918    |
| 19.2819    | 18.7752   | 17.4683   | 17.8412    | 17.7128   | 17.8947   |
| 2.56775    | 1.55562   | 1.51781   | 1.8993     | 1.5312    | 2.40144   |
| 0.249762   | 0.178825  | 0.404054  | 0.181257   | 0         | 0         |
| 0          | 0         | 0         | 0          | 0         | 0         |
| 0          | 0.0756469 | 0.0854621 | 0.0766757  | 0.0819053 | 0.0856369 |
| 2.67E-05   | 3.49E-05  | 1.72E-06  | 0.00020966 | 1.14E-05  | 0.194237  |
| 6.60229    | 8.36035   | 7.67967   | 8.51364    | 7.90994   | 7.56269   |
| 0.392717   | 0.310265  | 0.350523  | 0.216208   | 0.199461  | 0.329287  |
| 14.3797    | 9.74471   | 11.6502   | 12.5594    | 17.8912   | 10.3875   |
| 1.40314    | 0.821811  | 0.501226  | 0.469334   | 0.508396  | 0.443694  |
| 0          | 0         | 0         | 0.0643334  | 0         | 0         |
| 0          | 0         | 0         | 0          | 0         | 0         |
| 0.134759   | 0         | 0.0665823 | 0.185846   | 0         | 0.0250193 |
| 31.8694    | 38.6213   | 21.6752   | 23.0017    | 17.6061   | 17.6236   |
| 11.1107    | 19.3194   | 16.6905   | 10.367     | 5.16791   | 12.8651   |
| 24.0068    | 27.8332   | 29.8307   | 27.7357    | 29.9506   | 26.1747   |
| 14.2488    | 16.1272   | 15.1928   | 17.2344    | 11.1204   | 17.0321   |
| 9.72412    | 5.75022   | 9.35173   | 11.8283    | 7.62984   | 9.82822   |
| 5.77666    | 8.00975   | 6.74864   | 6.73178    | 6.09742   | 6.98908   |
| 0          | 0         | 0         | 0          | 0         | 0         |
| 3.92189    | 4.02887   | 3.70435   | 3.46492    | 1.58625   | 1.91519   |
| 171.054    | 195.621   | 171.802   | 198.228    | 210.924   | 158.962   |
| 0          | 0         | 0         | 0          | 0         | 0         |
| 0          | 0         | 0.253077  | 0          | 0.0606359 | 0         |
| 0          | 0         | 0         | 0          | 0         | 0         |
| 0          | 0         | 0         | 0          | 0         | 0         |
| 1.06823    | 0.972286  | 0.513705  | 0.478538   | 0.327221  | 0.93432   |
| 41.6689    | 47.0698   | 41.0852   | 39.9773    | 41.5372   | 23.1265   |
| 0.00837912 | 0.0134984 | 0.0564808 | 0.00760109 | 0         | 0.0510782 |
| 7.47433    | 7.11431   | 5.44125   | 8.00875    | 4.7717    | 8.30333   |
| 533.405    | 590.278   | 624.352   | 593.85     | 623.175   | 474.336   |
| 0          | 0         | 0         | 0          | 0         | 0         |
| 19.8859    | 14.0603   | 15.1333   | 17.8594    | 18.7595   | 12.4587   |
| 3.54244    | 2.3777    | 2.81648   | 2.62635    | 3.45672   | 2.9484    |
| 102.099    | 98.423    | 99.2581   | 101.187    | 105.856   | 104.622   |
| 0          | 0.0382469 | 0         | 0          | 0         | 0         |
| 0          | 0.380851  | 0         | 0          | 0         | 0         |
| 39.6836    | 37.1906   | 41.2332   | 41.6767    | 39.1419   | 45.1093   |
| 0.66309    | 0.425646  | 0.554855  | 0.0331873  | 0.19498   | 0.166797  |
| 0.0689386  | 0         | 0         | 0          | 0         | 0         |

|           |           |           |           |           |           |
|-----------|-----------|-----------|-----------|-----------|-----------|
| 0.0372058 | 0.0266387 | 0.030095  | 0.0540019 | 0.0865276 | 0         |
| 16.0605   | 11.8027   | 11.2274   | 12.2888   | 11.7013   | 13.7572   |
| 1.71657   | 1.48778   | 1.3885    | 1.79213   | 1.3774    | 1.19606   |
| 1.01232   | 0.956735  | 0.818842  | 0.881587  | 0.627811  | 1.47693   |
| 0         | 0         | 0         | 0         | 0         | 0         |
| 1.45174   | 0.901914  | 1.53637   | 1.11572   | 0.943549  | 1.27407   |
| 6.80766   | 4.39295   | 6.46691   | 5.4       | 5.72284   | 6.00329   |
| 2.31271   | 1.73408   | 2.12111   | 2.77526   | 2.10342   | 2.36161   |
| 1.82878   | 2.51399   | 2.46544   | 1.96422   | 2.64637   | 2.11473   |
| 0         | 0         | 0         | 0         | 0         | 0         |
| 0.265831  | 0.148034  | 0.167242  | 0.107177  | 0.137384  | 0.0718215 |
| 13.1086   | 15.3609   | 13.7602   | 12.1614   | 9.83706   | 14.2344   |
| 0         | 0         | 0         | 0         | 0         | 0         |
| 6.41865   | 5.5265    | 5.79827   | 5.72066   | 5.43892   | 5.88608   |
| 0         | 0.0352842 | 0         | 0.035764  | 0         | 0.0798876 |
| 1.77923   | 1.31964   | 1.42723   | 1.60491   | 1.13094   | 1.55079   |
| 0         | 0.0361693 | 0.0817246 | 0.0366612 | 0.0130539 | 0.0272972 |
| 0.215019  | 0.126756  | 0.189993  | 0.213122  | 0.0736102 | 0.112105  |
| 374.486   | 397.276   | 400.118   | 397.516   | 408.478   | 308.682   |
| 11.8533   | 19.7488   | 12.7203   | 12.1312   | 7.03733   | 13.229    |
| 0.490377  | 1.0533    | 0.925532  | 1.54213   | 1.14044   | 0.529957  |
| 0         | 0.0181168 | 0         | 0         | 0         | 0         |
| 40.7264   | 40.4359   | 36.1869   | 40.0865   | 35.2923   | 36.2701   |
| 8.48947   | 6.51934   | 7.59      | 10.0055   | 8.72841   | 9.48174   |
| 8.19838   | 7.27033   | 8.02557   | 7.32876   | 9.126     | 7.32899   |
| 11.8053   | 10.0824   | 11.4126   | 11.123    | 9.25736   | 11.0308   |
| 6.4002    | 7.09394   | 6.78651   | 5.44864   | 5.13646   | 6.0023    |
| 12.3674   | 5.40835   | 8.60604   | 13.0777   | 8.32442   | 10.8446   |
| 0         | 0         | 0         | 0         | 0         | 0         |
| 1.22166   | 1.57783   | 2.07903   | 1.3272    | 1.30526   | 2.49182   |
| 0         | 0         | 0         | 0.164921  | 0         | 0         |
| 0         | 0         | 0         | 0         | 0         | 0         |
| 1.23228   | 1.73612   | 1.15754   | 1.15392   | 0.739575  | 1.41766   |
| 24.663    | 27.8865   | 26.6529   | 23.8303   | 29.9658   | 19.9923   |
| 0         | 0         | 0         | 0         | 0         | 0         |
| 0.0442826 | 0.042274  | 0.0119398 | 0.0214245 | 0.0228857 | 0         |
| 1.28088   | 1.28592   | 2.11721   | 1.05081   | 1.29517   | 1.46702   |
| 0.097041  | 0.0694795 | 0.156989  | 0.140849  | 0         | 0         |
| 120.681   | 116.887   | 103.606   | 126.43    | 120.662   | 104.478   |
| 0.558097  | 0.450791  | 0.48586   | 0.60199   | 0.432646  | 0.765845  |
| 1.56063   | 1.06243   | 1.03472   | 1.37395   | 0.852828  | 0.870945  |
| 1.57326   | 1.84893   | 1.38709   | 1.52178   | 0.758314  | 1.74997   |
| 0.956801  | 0.634307  | 1.14657   | 1.08013   | 0.934026  | 0.97658   |

|           |           |           |           |          |           |
|-----------|-----------|-----------|-----------|----------|-----------|
| 4.07372   | 3.6929    | 3.97718   | 3.57492   | 2.97122  | 3.08884   |
| 0         | 0         | 0         | 0         | 0        | 0         |
| 0         | 0         | 0         | 0         | 0        | 0         |
| 27.7038   | 24.3144   | 23.5237   | 24.3866   | 22.4943  | 34.4664   |
| 0         | 0         | 0         | 0         | 0        | 0         |
| 13.9577   | 9.72115   | 9.62768   | 10.0102   | 8.62387  | 8.89858   |
| 7.94068   | 9.43655   | 10.992    | 9.98075   | 8.63072  | 9.88651   |
| 0.856546  | 1.43096   | 0.230948  | 0.621611  | 1.10668  | 0.46284   |
| 16.6579   | 13.205    | 16.7409   | 17.6476   | 19.5998  | 16.7099   |
| 44.3176   | 42.5892   | 45.7412   | 43.7464   | 48.6317  | 48.2367   |
| 21.8143   | 17.4886   | 12.7957   | 19.2987   | 13.2755  | 19.3892   |
| 32.3536   | 30.5279   | 26.3583   | 29.4329   | 27.7814  | 26.2616   |
| 0         | 0         | 0         | 0         | 0        | 0         |
| 0.40572   | 0.165993  | 0.328178  | 0.16825   | 0.112329 | 0.30536   |
| 0.0781964 | 0.0839807 | 0.189754  | 0.0567485 | 0.121238 | 0         |
| 0.917133  | 0.996296  | 1.30463   | 1.14755   | 0.907107 | 1.05097   |
| 0         | 0         | 0         | 0         | 0        | 0         |
| 0         | 0         | 0         | 0         | 0        | 0         |
| 30.2105   | 28.0747   | 35.9466   | 38.2038   | 39.2967  | 32.9862   |
| 0.155847  | 0.324358  | 0.252124  | 0.454988  | 0.219123 | 0.355426  |
| 0         | 0         | 0         | 0         | 0        | 0         |
| 8.93331   | 8.7429    | 7.43162   | 9.48761   | 8.12127  | 10.0323   |
| 0         | 0.0414819 | 0.0468642 | 0         | 0        | 0         |
| 466.376   | 729.577   | 566.564   | 566.74    | 327.341  | 513.705   |
| 13.8591   | 14.4111   | 16.5373   | 19.9256   | 15.9285  | 22.9836   |
| 962.392   | 906.106   | 945.449   | 995.457   | 1035.36  | 884.674   |
| 0         | 0         | 0         | 0         | 0        | 0         |
| 3.94369   | 2.90939   | 4.11062   | 3.43441   | 4.6516   | 4.64503   |
| 2.18664   | 2.43934   | 2.54173   | 2.35624   | 1.28269  | 1.89644   |
| 1.29817   | 0.728226  | 1.13825   | 0.877303  | 0.607229 | 0.696132  |
| 0         | 0         | 0         | 0         | 0        | 0         |
| 0         | 0         | 0         | 0         | 0        | 0         |
| 21.825    | 23.4247   | 19.6486   | 21.2377   | 21.5285  | 22.6537   |
| 61.0535   | 59.8194   | 53.9831   | 44.2126   | 37.9507  | 53.8308   |
| 0.0891454 | 0.0425509 | 0.024036  | 0.0862592 | 0        | 0.0722553 |
| 0         | 0         | 0         | 0         | 0        | 0         |
| 0.301909  | 0.729543  | 0.702097  | 0.410813  | 0.672877 | 0.458826  |
| 1.09834   | 1.33898   | 1.07397   | 1.53456   | 0.917924 | 1.78877   |
| 16.8102   | 21.4704   | 19.4747   | 15.5509   | 15.991   | 16.6198   |
| 8.12085   | 4.01611   | 7.04283   | 3.64569   | 9.34587  | 2.51074   |
| 11.6388   | 8.21984   | 8.98772   | 9.51821   | 9.06343  | 9.0346    |
| 2.58992   | 1.37997   | 1.53466   | 2.33851   | 1.14395  | 3.39291   |
| 0         | 0         | 0         | 0         | 0        | 0         |

|           |            |           |          |           |            |
|-----------|------------|-----------|----------|-----------|------------|
| 0         | 0.00171845 | 0.0364017 | 0        | 0         | 0.00758703 |
| 5.52798   | 4.52963    | 3.57718   | 3.7443   | 5.14245   | 4.48061    |
| 20.3301   | 12.827     | 15.4429   | 15.8773  | 18.4802   | 16.5451    |
| 0.0531114 | 0          | 0         | 0        | 0.0411728 | 0.0430486  |
| 0.327386  | 0.234402   | 0.22068   | 0.118795 | 0.465291  | 0.176905   |
| 0         | 0          | 0         | 0.13381  | 0         | 0          |
| 2.5555    | 3.65938    | 3.18444   | 3.25804  | 3.74796   | 4.53451    |
| 1.87385   | 0.760264   | 0.353668  | 0.997252 | 2.66317   | 0.658156   |
| 0.0675157 | 0.0752783  | 0.0564417 | 0.132533 | 0.0169263 | 0.0938199  |
| 0         | 0          | 0         | 0        | 0         | 0          |
| 3.1606    | 1.14906    | 1.769     | 1.36434  | 4.3995    | 0.543963   |
| 11.1313   | 17.744     | 10.7303   | 9.71855  | 8.55675   | 8.48622    |
| 4.9394    | 4.48021    | 4.90648   | 4.77301  | 3.90313   | 4.68682    |
| 0.17566   | 0.167853   | 0.162542  | 0.377363 | 0.108785  | 0.16027    |
| 0         | 0          | 0         | 0        | 0         | 0          |
| 0.371552  | 0.266024   | 0.601082  | 0.134821 | 0         | 0.150578   |
| 0.567155  | 0.304554   | 1.03221   | 0.308696 | 0.659502  | 0.689548   |
| 8.61587   | 8.18211    | 5.36792   | 6.62818  | 5.28403   | 5.61594    |
| 13.7415   | 8.10973    | 13.5107   | 10.9968  | 11.8166   | 13.1738    |
| 7.78185   | 6.93012    | 6.72831   | 7.38357  | 5.71286   | 6.18487    |
| 11.3146   | 6.43119    | 6.37208   | 6.30091  | 4.04334   | 4.5315     |
| 8.54702   | 10.6142    | 7.08588   | 8.3375   | 6.65342   | 9.61757    |
| 1.25672   | 1.79958    | 2.34933   | 1.94565  | 1.40722   | 1.26761    |
| 0         | 0          | 0         | 0        | 0         | 0          |
| 266.111   | 248.402    | 162.375   | 125.388  | 235.151   | 217.191    |
| 0         | 0          | 0         | 0        | 0         | 0          |
| 7.48217   | 6.98236    | 7.75273   | 6.63404  | 6.28116   | 7.23609    |
| 0.159924  | 0.110317   | 0.191664  | 0.102322 | 0.0948793 | 0.176359   |
| 5.17301   | 5.16011    | 5.22027   | 6.02304  | 4.127     | 5.85174    |
| 0         | 0          | 0         | 0        | 0         | 0          |
| 16.8226   | 11.8124    | 13.4525   | 13.0684  | 14.7037   | 12.6965    |
| 7.55763   | 5.38079    | 7.72435   | 5.98245  | 6.08118   | 6.33405    |
| 8.85903   | 10.0386    | 8.66132   | 5.7023   | 3.01711   | 6.93328    |
| 504.599   | 443.533    | 501.67    | 495.312  | 350.932   | 475.44     |
| 0.0810253 | 0.200413   | 0.195877  | 0.233004 | 0.187477  | 0.194468   |
| 0.485865  | 1.37007    | 2.1656    | 1.12916  | 1.27971   | 1.58945    |
| 3.2292    | 2.89011    | 2.69721   | 3.18408  | 2.96589   | 3.99245    |
| 8.30282   | 8.5501     | 8.18172   | 8.35379  | 9.78712   | 10.0765    |
| 0         | 0          | 0         | 0        | 0         | 0          |
| 1.86884   | 2.03585    | 1.32183   | 1.75391  | 1.44323   | 2.67566    |
| 10.5636   | 9.48401    | 8.85049   | 8.66628  | 8.10941   | 8.34056    |
| 5.38733   | 5.35454    | 6.38026   | 7.80286  | 4.00012   | 5.52735    |
| 0.081355  | 0.0349492  | 0.171097  | 0.141698 | 0.0882947 | 0.0923173  |

|           |          |           |           |           |           |
|-----------|----------|-----------|-----------|-----------|-----------|
| 27.0803   | 22.3618  | 21.0861   | 22.3719   | 26.4693   | 20.124    |
| 16.5981   | 16.8423  | 15.3313   | 16.3314   | 18.1546   | 19.045    |
| 1.61634   | 2.36709  | 3.46281   | 3.48773   | 1.97271   | 5.00666   |
| 7.08888   | 5.65415  | 5.86028   | 7.23142   | 4.97698   | 8.0585    |
| 51.8775   | 32.9162  | 33.5075   | 41.1604   | 48.0945   | 33.4976   |
| 0         | 0        | 0         | 0         | 0         | 0         |
| 17.2232   | 15.086   | 17.2787   | 16.046    | 16.6723   | 17.6615   |
| 2.66035   | 2.19629  | 0.856627  | 2.20007   | 2.0939    | 2.66854   |
| 0         | 0        | 0         | 0         | 0         | 0         |
| 0         | 0        | 0         | 0         | 0         | 0         |
| 9.36335   | 9.14814  | 9.32922   | 8.2639    | 7.78789   | 8.08341   |
| 0         | 0.191276 | 0.108047  | 0.0969386 | 0.310651  | 0.54134   |
| 458.004   | 531.786  | 504.119   | 494.337   | 458.579   | 454.34    |
| 13.3958   | 14.7468  | 14.8705   | 15.2587   | 15.5614   | 12.912    |
| 0.278193  | 0        | 0         | 0.217121  | 0         | 0.0445402 |
| 3.0429    | 8.60296  | 5.03535   | 3.15446   | 2.77727   | 1.90648   |
| 24.6904   | 18.3685  | 21.9118   | 23.8973   | 25.9113   | 24.5981   |
| 3.02702   | 2.05633  | 3.31794   | 2.01607   | 2.17361   | 2.5642    |
| 191.173   | 179.773  | 203.143   | 165.788   | 201.495   | 170.93    |
| 10.3248   | 10.4183  | 10.3421   | 9.12347   | 10.3264   | 10.3632   |
| 0         | 0        | 0         | 0         | 0         | 0         |
| 16.5268   | 12.832   | 12.9498   | 12.6987   | 12.7604   | 14.3641   |
| 31.4425   | 27.9174  | 28.0796   | 34.409    | 38.293    | 34.9512   |
| 10.7605   | 10.7605  | 12.7633   | 12.7633   | 11.8627   | 11.8627   |
| 0.990278  | 1.28227  | 0.937359  | 1.36087   | 0.98546   | 1.05313   |
| 3.85E-19  | 2.46E-33 | 0.169013  | 0.216442  | 6.24E-12  | 0.255995  |
| 11.6108   | 9.61943  | 10.7557   | 11.2349   | 12.1726   | 11.5844   |
| 4.38503   | 4.69858  | 4.70035   | 5.21653   | 4.10463   | 2.96536   |
| 1.45507   | 1.35709  | 1.23893   | 1.09766   | 1.06863   | 1.39664   |
| 2.44399   | 2.40206  | 2.80359   | 2.98295   | 2.23909   | 3.29555   |
| 0.0642565 | 0        | 0.0519758 | 0.186528  | 0.0996253 | 0.208328  |
| 0.474506  | 0.407718 | 0.319388  | 0.413263  | 0.310767  | 0.362734  |
| 5.032     | 3.75804  | 4.6056    | 4.66206   | 5.05965   | 5.22542   |
| 0.411133  | 0.462571 | 0.427574  | 0.596734  | 0.364248  | 0.71408   |
| 0         | 0.23722  | 0         | 0         | 0         | 0         |
| 210.074   | 229.329  | 268.688   | 291.759   | 289.4     | 239.821   |
| 9.54664   | 7.69338  | 9.11682   | 9.01883   | 7.2866    | 9.4593    |
| 0.127715  | 0.060961 | 0         | 0.030895  | 0         | 0         |
| 0.068682  | 0.147525 | 0.0555554 | 0.0498437 | 0.0532433 | 0.111338  |
| 8.36414   | 5.47072  | 7.74123   | 7.77425   | 8.52381   | 8.28512   |
| 0         | 0        | 0         | 0         | 0         | 0         |
| 154.944   | 159.877  | 156.687   | 178.775   | 177.402   | 157.861   |
| 0         | 0        | 0         | 0         | 0         | 0         |



|          |           |           |           |          |           |
|----------|-----------|-----------|-----------|----------|-----------|
| 16.2144  | 16.0162   | 18.6285   | 19.2658   | 19.3635  | 15.0402   |
| 4.30821  | 2.7655    | 3.41786   | 2.87192   | 2.71932  | 3.09707   |
| 1.1069   | 1.18546   | 0.89535   | 1.53679   | 1.16743  | 0.585871  |
| 0        | 0         | 0         | 0         | 0        | 0         |
| 2.20482  | 2.15541   | 1.44047   | 1.13852   | 1.44626  | 2.40569   |
| 6.17041  | 5.97045   | 5.58435   | 7.21511   | 4.62848  | 5.69155   |
| 0.024595 | 0.0528287 | 0.0198944 | 0.0713962 | 0        | 0.0598053 |
| 61.4628  | 63.4478   | 54.2441   | 63.3207   | 67.2504  | 60.1442   |
| 3.87021  | 3.76758   | 2.81474   | 2.79636   | 2.36862  | 3.16445   |
| 26.681   | 28.9071   | 31.0467   | 29.8121   | 30.8805  | 28.7559   |
| 2.23322  | 2.45436   | 2.95765   | 2.24989   | 2.39144  | 2.4144    |
| 0.791901 | 0.683084  | 0.864302  | 0.858512  | 0.76178  | 0.711442  |
| 1.71776  | 0.870085  | 1.30847   | 1.83023   | 1.13486  | 1.21953   |
| 1.89313  | 1.7671    | 2.26861   | 2.01502   | 2.08723  | 1.06843   |
| 4.77232  | 3.96962   | 4.68784   | 3.48834   | 3.98584  | 4.98073   |
| 5.46815  | 3.75722   | 3.9237    | 3.5203    | 3.82877  | 3.64578   |
| 0.910719 | 0.62587   | 0.353602  | 0.563875  | 0.169418 | 0.787229  |
| 0.375119 | 0.313565  | 0.415932  | 0.499243  | 0.343825 | 0.425699  |
| 1.92157  | 1.4618    | 1.45718   | 0.871575  | 1.48963  | 1.46016   |
| 78.2813  | 51.2221   | 76.7393   | 76.8712   | 95.7549  | 69.4939   |
| 94.4483  | 73.7899   | 76.6375   | 96.9943   | 93.0186  | 82.5717   |
| 18.565   | 16.379    | 21.4933   | 19.7305   | 23.4862  | 17.5079   |
| 0        | 0         | 0.127693  | 0.114565  | 0        | 0         |
| 0.179062 | 0.164835  | 0.281403  | 0.133662  | 0.237963 | 0.0746414 |
| 50.5184  | 57.1255   | 57.4733   | 52.9561   | 79.1167  | 106.808   |
| 14.7274  | 21.4111   | 16.9909   | 14.8636   | 12.0062  | 15.3163   |
| 0        | 0         | 0         | 0         | 0        | 0         |
| 13.6596  | 15.3838   | 16.3048   | 19.3438   | 19.6901  | 24.0583   |
| 4.38827  | 4.87813   | 3.50959   | 5.53133   | 4.74582  | 3.5434    |
| 0.470463 | 0.523978  | 0.27484   | 0.151744  | 0.182355 | 0.0423696 |
| 44.5408  | 46.4315   | 46.5958   | 47.3792   | 33.5223  | 43.387    |
| 1.96442  | 2.72718   | 2.11434   | 1.99761   | 2.48291  | 2.94854   |
| 2.14963  | 3.15666   | 1.06096   | 3.01428   | 1.49696  | 1.12219   |
| 2.67895  | 0.767232  | 3.90051   | 2.14344   | 1.66883  | 1.30283   |
| 0        | 0         | 0         | 0         | 0        | 0         |
| 52.0345  | 57.1239   | 55.5857   | 58.8009   | 53.5474  | 51.2094   |
| 0.211102 | 0.226717  | 0.227675  | 0.204267  | 0.136375 | 0.256658  |
| 3.58341  | 3.03524   | 2.6129    | 3.85072   | 2.81703  | 3.59965   |
| 6.90441  | 7.89214   | 6.46666   | 6.76878   | 5.21156  | 6.08716   |
| 4.22044  | 4.75674   | 4.70423   | 5.67141   | 5.32247  | 5.51586   |
| 83.1613  | 83.3304   | 89.5527   | 64.4246   | 54.55    | 62.537    |
| 0        | 0         | 0         | 0         | 2.9086   | 1.49733   |
| 0        | 0         | 0         | 0         | 0        | 0         |

|          |           |           |           |           |           |
|----------|-----------|-----------|-----------|-----------|-----------|
| 2.26709  | 1.61927   | 1.90504   | 1.72199   | 1.73474   | 1.74717   |
| 1.15674  | 1.10427   | 0.868833  | 0.939406  | 1.9002    | 0.625053  |
| 0        | 0         | 0         | 0         | 0         | 0         |
| 12.5845  | 12.9745   | 10.9991   | 10.7492   | 7.65333   | 12.8895   |
| 0.512238 | 0.785899  | 0.769487  | 0.424846  | 0.397095  | 0.118625  |
| 0.131875 | 2.08739   | 1.0359    | 1.01051   | 0.393312  | 1.24871   |
| 18.7858  | 14.5035   | 16.3378   | 17.9035   | 17.1175   | 18.3028   |
| 20.6428  | 19.9617   | 22.3493   | 19.2257   | 22.7071   | 22.6348   |
| 0        | 0         | 0         | 0.204046  | 0.217963  | 0         |
| 42.3167  | 34.1781   | 32.4333   | 38.4644   | 27.5155   | 39.35     |
| 0.633762 | 0.165432  | 0.652467  | 0.443291  | 0.616232  | 0.691141  |
| 6.12605  | 5.91084   | 3.53946   | 4.10706   | 2.92856   | 4.01959   |
| 7.38516  | 6.39181   | 6.39538   | 7.56641   | 7.86358   | 7.25352   |
| 1.62738  | 1.61939   | 1.33866   | 1.68145   | 1.26157   | 1.31904   |
| 0.940985 | 0.439985  | 0.497073  | 0.308915  | 0.357288  | 1.50094   |
| 0        | 0.444503  | 0         | 0.112636  | 0         | 0.503204  |
| 0        | 0         | 0         | 0         | 0         | 0         |
| 0        | 0         | 0.0988723 | 0.0443536 | 0.0947574 | 0.198149  |
| 50.5143  | 51.2496   | 49.921    | 52.3045   | 54.5065   | 47.6247   |
| 0.254554 | 0.175766  | 0.14728   | 0.119006  | 0.0643465 | 0.0817618 |
| 0        | 0         | 0         | 0         | 0         | 0         |
| 20.968   | 29.8052   | 26.8716   | 30.4709   | 26.9455   | 17.3693   |
| 6.64562  | 10.9848   | 9.09191   | 9.52661   | 7.44147   | 9.177     |
| 0        | 255.172   | 0         | 0         | 0         | 0         |
| 0        | 0         | 95.7444   | 0         | 0         | 0         |
| 0.407786 | 0.618284  | 0.368656  | 0.626692  | 0.632245  | 0.466623  |
| 5.11421  | 5.19385   | 5.44747   | 4.3937    | 4.50656   | 4.78565   |
| 0.364558 | 0.212935  | 0.302644  | 0.250642  | 0.2603    | 0.447118  |
| 5.86229  | 6.38793   | 4.86945   | 6.46553   | 7.50149   | 7.21606   |
| 0        | 0         | 0         | 0         | 0         | 0         |
| 1.76283  | 0.917927  | 0.86419   | 1.39562   | 1.1181    | 1.55872   |
| 23.3074  | 23.6644   | 23.2825   | 25.334    | 24.8255   | 24.866    |
| 24.0837  | 30.7456   | 33.6962   | 30.7114   | 33.7724   | 25.1178   |
| 39.6768  | 39.1232   | 41.9536   | 43.2134   | 46.4967   | 45.0747   |
| 24.8995  | 27.3207   | 30.254    | 27.7265   | 32.4346   | 22.1237   |
| 100.926  | 87.9838   | 109.387   | 106.982   | 116.246   | 103.448   |
| 0        | 0         | 0         | 0         | 0         | 0.068245  |
| 0        | 0.0712956 | 0         | 0         | 0.0171542 | 0         |
| 12.7167  | 13.4199   | 14.2583   | 10.8207   | 10.9275   | 14.0382   |
| 0.306548 | 0.548707  | 0.247961  | 0.222468  | 0.237641  | 0.124234  |
| 0        | 0         | 0         | 0         | 0         | 0         |
| 5.99778  | 4.6732    | 6.13149   | 5.27756   | 5.92958   | 4.81345   |
| 0.088259 | 0         | 0         | 0.0160124 | 0         | 0.0178838 |

|           |           |           |           |           |           |
|-----------|-----------|-----------|-----------|-----------|-----------|
| 8.21891   | 7.22034   | 8.90811   | 7.64358   | 8.15869   | 7.07089   |
| 91.4569   | 93.7804   | 91.2852   | 88.9848   | 125.902   | 97.9754   |
| 1.89562   | 2.26778   | 0.698733  | 1.95034   | 1.52532   | 1.96434   |
| 10.6352   | 10.2016   | 10.643    | 10.0005   | 9.77722   | 10.2779   |
| 0.918474  | 0.445837  | 0.428132  | 0.564876  | 0.37411   | 0.555186  |
| 5.65416   | 2.17539   | 4.84144   | 2.32055   | 1.47686   | 1.90616   |
| 42.242    | 55.8249   | 49.4983   | 48.4947   | 50.012    | 49.4601   |
| 84.1723   | 78.4621   | 116.726   | 163.236   | 126.743   | 97.3335   |
| 104.523   | 89.7766   | 97.9778   | 114.103   | 115.314   | 102.8     |
| 0         | 0         | 0         | 0         | 0         | 0         |
| 0.972851  | 0.840364  | 0.93844   | 0.976406  | 0.754737  | 0.642965  |
| 0.0778861 | 0.11153   | 0.0378003 | 0.0452187 | 0.0241514 | 0.0631293 |
| 0.144524  | 0.0517383 | 0.0292257 | 0.183547  | 0.112037  | 0.117142  |
| 0         | 0.0264917 | 0         | 0         | 0.0286835 | 0         |
| 0.117116  | 0.0186333 | 0.131574  | 0.118047  | 0.107604  | 0         |
| 0         | 0         | 0         | 0         | 0         | 0         |
| 12.6708   | 10.148    | 10.7165   | 11.1876   | 11.5807   | 10.8048   |
| 0.125166  | 0.0168029 | 0.0759329 | 0.0681261 | 0         | 0.230168  |
| 3.11962   | 2.6795    | 3.0145    | 2.77948   | 2.54562   | 1.03328   |
| 8.07019   | 6.14496   | 7.79193   | 6.95366   | 6.57391   | 6.56192   |
| 7.69683   | 6.13896   | 13.9677   | 9.72438   | 13.6028   | 14.5458   |
| 8.15611   | 6.65682   | 5.84718   | 5.07346   | 8.01864   | 7.8443    |
| 3.23972   | 3.2474    | 2.62054   | 2.53921   | 2.00918   | 3.15108   |
| 0.385916  | 0.150714  | 0.397294  | 0.203685  | 0.135986  | 0.170617  |
| 48.7084   | 42.0956   | 45.5018   | 46.3566   | 36.1262   | 43.2971   |
| 4.76797   | 4.46157   | 6.64424   | 8.23939   | 7.70347   | 8.80057   |
| 0.145135  | 0         | 0         | 0         | 0         | 0         |
| 1.93E-07  | 4.20E-08  | 2.26E-07  | 1.88E-07  | 3.14E-07  | 7.26E-07  |
| 1.85085   | 2.28467   | 1.4455    | 1.56317   | 0.803142  | 1.32291   |
| 0         | 0         | 0         | 0         | 0         | 0         |
| 0.330373  | 0.283849  | 0.454295  | 0.359637  | 0.332943  | 0.441835  |
| 13.807    | 10.9328   | 8.68636   | 9.68339   | 9.15459   | 9.6102    |
| 7.25914   | 4.32521   | 9.81504   | 5.16729   | 7.25687   | 6.34141   |
| 10.3412   | 8.9394    | 9.36955   | 9.82289   | 10.277    | 8.433     |
| 0         | 0         | 0         | 0         | 0         | 0         |
| 0         | 0         | 0.245155  | 0.293267  | 0.234952  | 0.0818853 |
| 23.8769   | 21.3012   | 25.2568   | 25.0055   | 25.2889   | 26.7977   |
| 58.554    | 42.0394   | 47.0738   | 43.9312   | 63.9826   | 45.153    |
| 0         | 0         | 0         | 0         | 0         | 0         |
| 2.51681   | 2.1578    | 2.25623   | 2.28021   | 2.44816   | 2.13091   |
| 0         | 0         | 0         | 0         | 0         | 0         |
| 1.74514   | 1.24104   | 1.41161   | 1.42907   | 1.79162   | 1.2998    |
| 5.2527    | 3.76083   | 4.61415   | 4.96529   | 5.03161   | 4.79985   |

|           |          |          |          |          |           |
|-----------|----------|----------|----------|----------|-----------|
| 0         | 0        | 0        | 0        | 0        | 0         |
| 0.70046   | 0.699483 | 0.581498 | 0.508336 | 0.600166 | 0.522924  |
| 0         | 0        | 0        | 0        | 0        | 0         |
| 9.89594   | 10.0515  | 8.67625  | 10.8077  | 8.95618  | 8.5704    |
| 0         | 0        | 0        | 0        | 0        | 0         |
| 1.27765   | 1.39564  | 0.816269 | 0.683649 | 0.470448 | 0.681988  |
| 1.16001   | 1.03818  | 3.04951  | 1.47322  | 1.12408  | 1.17529   |
| 4.08835   | 3.84443  | 3.36361  | 3.08384  | 2.23591  | 3.70526   |
| 2.95441   | 2.01211  | 2.73948  | 2.22251  | 2.31823  | 2.30704   |
| 0         | 0        | 0        | 0        | 0        | 0         |
| 0         | 0        | 0        | 0        | 0        | 0         |
| 14.2456   | 14.9196  | 13.2448  | 14.4639  | 14.0827  | 15.064    |
| 0         | 0        | 0        | 0        | 0        | 0         |
| 0         | 0        | 0.258707 | 0        | 0        | 0         |
| 6.22775   | 4.45778  | 8.01967  | 4.60479  | 5.72465  | 4.81174   |
| 0.434756  | 0.615764 | 0.175303 | 0.471843 | 0.521795 | 0         |
| 0         | 0        | 0        | 0        | 0        | 0.0130529 |
| 0.521712  | 0.515835 | 0.462193 | 0.991696 | 1.15554  | 1.44982   |
| 0.0404927 | 0        | 0        | 0        | 0        | 0         |
| 0.139379  | 0        | 0        | 0        | 0        | 0         |
| 1.76E-08  | 6.91E-10 | 2.67E-09 | 8.35E-09 | 1.61E-09 | 1.81E-08  |
| 2.22933   | 2.10557  | 1.48353  | 1.29659  | 2.29202  | 1.08929   |
| 0         | 0        | 0        | 0        | 0        | 0         |
| 298.532   | 170.995  | 185.132  | 28.8867  | 568.924  | 340.775   |
| 27.9      | 41.6787  | 35.8938  | 34.2518  | 32.8924  | 30.8239   |
| 20.4096   | 16.0945  | 20.3162  | 18.7722  | 18.7629  | 21.2457   |
| 6.09115   | 2.97782  | 4.41484  | 3.78573  | 4.28557  | 4.27854   |
| 23.5374   | 16.8901  | 20.7268  | 22.14    | 20.9971  | 22.5953   |
| 20.2128   | 22.9271  | 16.083   | 16.4123  | 13.7222  | 15.0474   |
| 106.948   | 42.5684  | 197.176  | 90.4497  | 134.103  | 45.2353   |
| 0         | 0        | 0        | 0        | 0        | 0         |
| 15.9707   | 18.2793  | 16.9432  | 20.5765  | 10.5024  | 16.786    |
| 0         | 0        | 0        | 0        | 0        | 0         |
| 13.7799   | 13.5659  | 11.872   | 12.1879  | 10.3208  | 10.9073   |
| 21.2799   | 16.1949  | 18.7728  | 18.2045  | 21.0236  | 20.4067   |
| 9.92247   | 7.42029  | 7.1805   | 7.96145  | 8.73362  | 7.46331   |
| 0         | 0        | 0        | 0        | 0        | 0         |
| 0.0839805 | 0        | 0        | 0        | 0        | 0.102104  |
| 0         | 0        | 0        | 0        | 0        | 0         |
| 0.705254  | 1.15417  | 0.896446 | 1.24298  | 0.546724 | 0.653294  |
| 6.60737   | 4.75265  | 4.13214  | 6.92623  | 7.13779  | 6.61998   |
| 4.84346   | 6.03936  | 10.4809  | 6.91688  | 6.29406  | 9.57693   |
| 41.1103   | 44.2432  | 29.1063  | 29.4299  | 23.693   | 24.8795   |

|           |            |           |           |           |           |
|-----------|------------|-----------|-----------|-----------|-----------|
| 0.344867  | 0          | 0         | 0         | 0         | 0.124234  |
| 2.0365    | 1.67031    | 1.53901   | 1.58894   | 1.67508   | 1.94514   |
| 0.135971  | 0.189044   | 0.294213  | 0.224387  | 0.277014  | 0.174885  |
| 53.5876   | 57.4339    | 56.5435   | 57.4401   | 55.8432   | 62.6128   |
| 0         | 0.0298941  | 0.135092  | 0.212105  | 0         | 0.101526  |
| 46.0354   | 50.4043    | 44.2121   | 51.1229   | 49.1983   | 43.8218   |
| 31.7199   | 24.835     | 28.4681   | 33.3731   | 36.0739   | 30.9306   |
| 0.42908   | 0.804676   | 1.28722   | 0.835467  | 0.466807  | 1.18228   |
| 0         | 0.15703    | 0         | 0         | 0         | 0         |
| 0         | 0          | 0         | 0         | 0         | 0         |
| 24.2153   | 20.2321    | 19.3883   | 22.88     | 18.2753   | 18.4731   |
| 0         | 0.0673538  | 0         | 0         | 0.0729262 | 0         |
| 0         | 0          | 0         | 0         | 0         | 0         |
| 14.8164   | 13.4054    | 13.4532   | 14.4347   | 13.7228   | 11.5493   |
| 0.123491  | 0.549956   | 0.447345  | 0.322222  | 0.779007  | 0.738298  |
| 0.0754646 | 0.0540312  | 0.0406149 | 0.054766  | 0.0585013 | 0.0569679 |
| 17.1472   | 17.6533    | 16.3177   | 20.008    | 17.463    | 15.6243   |
| 0.659027  | 1.64169    | 1.05973   | 0.477517  | 1.28094   | 1.33347   |
| 0         | 0          | 0         | 0         | 0         | 0         |
| 0         | 0          | 0         | 0         | 0         | 0         |
| 0         | 0.0209134  | 0         | 0         | 0         | 0         |
| 0.173794  | 0.124433   | 0.187439  | 0.227027  | 0.242511  | 0.601033  |
| 2.75507   | 2.29392    | 3.19622   | 2.97546   | 1.77481   | 2.23639   |
| 0.064991  | 0.20164    | 0.0525699 | 0.0786085 | 0.134352  | 0.105355  |
| 3.98511   | 3.7171     | 3.66708   | 2.97167   | 2.89093   | 3.70421   |
| 18.396    | 13.1939    | 15.4923   | 17.7851   | 18.1551   | 16.2703   |
| 0.0832219 | 0.00993088 | 0.0673165 | 0.0100659 | 0.0107525 | 0.0899388 |
| 0         | 0          | 0         | 0         | 0         | 0         |
| 107.437   | 132.601    | 132.323   | 122.526   | 122.162   | 114.153   |
| 1.09154   | 1.13068    | 0.788328  | 1.0562    | 0.564121  | 1.08134   |
| 0         | 0          | 0         | 0.0339073 | 0         | 0         |
| 3.64257   | 5.95751    | 4.30405   | 2.56573   | 2.21473   | 2.83664   |
| 37.6604   | 35.2092    | 46.1138   | 42.5632   | 40.8988   | 38.258    |
| 1.88028   | 0.841003   | 1.14136   | 1.19353   | 1.4572    | 1.52353   |
| 4.29938   | 3.5785     | 3.41972   | 4.18619   | 3.48571   | 3.93491   |
| 0.0903851 | 0.064714   | 0.0731107 | 0.0655941 | 0.140136  | 0.14652   |
| 39.1325   | 35.1575    | 34.8934   | 36.8581   | 27.2945   | 31.1527   |
| 3.51204   | 2.42932    | 1.70931   | 2.65675   | 1.73046   | 2.46064   |
| 0         | 0          | 0         | 0         | 0         | 0         |
| 0         | 0          | 0         | 0         | 0         | 0         |
| 14.8265   | 15.6711    | 12.744    | 11.1067   | 11.2827   | 11.2859   |
| 0         | 0          | 0         | 0         | 0         | 0         |
| 0.482631  | 0.345554   | 0.39039   | 0.350254  | 0.748286  | 0.391188  |

|           |           |           |           |           |           |
|-----------|-----------|-----------|-----------|-----------|-----------|
| 0         | 0         | 0         | 0         | 0         | 0         |
| 0         | 0.227424  | 0         | 0         | 0.164902  | 1.12E-09  |
| 33.5083   | 23.0442   | 36.2514   | 25.5469   | 19.1988   | 48.5148   |
| 0         | 0         | 0         | 0         | 0         | 0         |
| 0         | 0         | 0         | 0         | 0         | 0         |
| 9.83225   | 6.7186    | 10.0024   | 10.3409   | 9.38342   | 9.14737   |
| 10.3163   | 7.87727   | 6.32633   | 6.73485   | 5.40696   | 5.61782   |
| 16.7047   | 14.5161   | 28.0607   | 19.463    | 17.0889   | 7.45611   |
| 9.29221   | 7.68538   | 8.18119   | 7.01231   | 8.56573   | 7.24304   |
| 3.84291   | 3.56669   | 2.41768   | 3.27089   | 2.16995   | 3.23017   |
| 26.7908   | 29.5843   | 33.4514   | 30.7194   | 34.2626   | 39.1072   |
| 0.0868717 | 0.103664  | 0.0234229 | 0.147103  | 0         | 0.0704124 |
| 21.2737   | 25.2679   | 20.4983   | 20.7445   | 23.31     | 20.8075   |
| 0         | 0         | 0         | 0         | 0         | 0         |
| 5.26562   | 5.33055   | 6.34657   | 6.84554   | 5.96079   | 5.89318   |
| 9.72478   | 7.40581   | 10.2331   | 8.5074    | 6.59986   | 7.35196   |
| 0.38618   | 0.331797  | 0.562272  | 0.392361  | 0.299373  | 0.25041   |
| 10.0061   | 13.0542   | 9.43218   | 11.7968   | 9.14854   | 17.6124   |
| 29.2489   | 34.508    | 31.4438   | 32.4672   | 27.2207   | 29.2531   |
| 18.625    | 15.8527   | 17.7238   | 16.2075   | 18.3153   | 16.9237   |
| 3.22778   | 1.91079   | 2.01286   | 3.04912   | 3.29902   | 3.85856   |
| 0         | 0         | 0         | 0         | 0         | 0         |
| 0         | 0         | 0         | 0         | 0         | 0         |
| 5.97629   | 4.68395   | 5.3269    | 5.11609   | 5.93732   | 6.23134   |
| 0.132135  | 0.245976  | 0.192386  | 0.0383571 | 0.327786  | 0.14994   |
| 9.74666   | 10.4737   | 11.6922   | 12.5598   | 11.9322   | 10.9954   |
| 0         | 0         | 0         | 0         | 0         | 0         |
| 0         | 0.0101425 | 0         | 0         | 0.0109816 | 0         |
| 0.528484  | 1.51404   | 0.42748   | 1.07965   | 0.234108  | 0.430904  |
| 0.0797568 | 0.0746164 | 0.0412887 | 0.0926095 | 0.0989259 | 0.0827463 |
| 4.60073   | 3.44263   | 4.36082   | 4.11659   | 3.43249   | 3.75708   |
| 2.06517   | 1.7539    | 2.07872   | 1.86236   | 2.37168   | 2.06437   |
| 0         | 0.251253  | 0.113541  | 0.203736  | 0.108816  | 0.227547  |
| 6.14717   | 6.07613   | 5.07191   | 6.44596   | 6.09478   | 5.21771   |
| 187.788   | 148.947   | 116.411   | 182.041   | 129.398   | 159.626   |
| 6.99282   | 7.87575   | 7.30877   | 6.4433    | 6.60868   | 6.36844   |
| 1.94402   | 1.14206   | 0.766081  | 1.59169   | 1.08198   | 1.09087   |
| 1.31E-08  | 2.35E-09  | 0.257201  | 5.23E-09  | 7.72E-09  | 0.136648  |
| 233.992   | 218.607   | 253.711   | 239.876   | 250.002   | 265.224   |
| 0.573428  | 0.548939  | 0.805268  | 0.679707  | 0.98019   | 0.654569  |
| 2.98787   | 2.87044   | 4.19933   | 2.68703   | 3.97899   | 2.95975   |
| 0.293463  | 0         | 0         | 0         | 0         | 0         |
| 2.50553   | 5.05127   | 3.73334   | 3.75624   | 2.17233   | 6.039     |

|           |           |           |           |           |           |
|-----------|-----------|-----------|-----------|-----------|-----------|
| 3.40705   | 2.66163   | 3.10715   | 3.2524    | 2.88662   | 3.91202   |
| 20.209    | 27.6432   | 24.3415   | 23.44     | 22.8837   | 26.9663   |
| 25.5039   | 28.1642   | 26.8198   | 31.6378   | 30.9908   | 29.1975   |
| 13.896    | 13.5928   | 17.1849   | 12.7925   | 14.8641   | 5.50886   |
| 0.793718  | 1.54987   | 1.28404   | 2.12078   | 0.97889   | 1.87152   |
| 4.39188   | 4.23824   | 4.01587   | 4.71161   | 3.25663   | 6.96476   |
| 4.28637   | 4.20429   | 4.70972   | 4.69301   | 4.4945    | 4.05663   |
| 5.09939   | 6.50543   | 6.65983   | 6.76606   | 6.15591   | 4.73492   |
| 0.342667  | 0.151444  | 0         | 0.0245568 | 0         | 0         |
| 6.0827    | 5.13678   | 5.3407    | 6.07441   | 7.33507   | 4.6774    |
| 0.855924  | 0.646891  | 1.26122   | 0.830041  | 0.322944  | 1.14168   |
| 0.105465  | 0.0849495 | 0.0604267 | 0.0574032 | 0.0510986 | 0.1211    |
| 0.84165   | 0.931299  | 0.866464  | 1.11055   | 0.771089  | 1.13698   |
| 42.5695   | 31.3576   | 38.2442   | 40.3487   | 36.8038   | 40.3134   |
| 0         | 0         | 0         | 0         | 0         | 0         |
| 0         | 0         | 0         | 0         | 0         | 0         |
| 0         | 0         | 0         | 0         | 0         | 0         |
| 7.51972   | 6.95869   | 6.18557   | 7.79333   | 7.12283   | 7.1274    |
| 0         | 0         | 0         | 0.0549024 | 0         | 0         |
| 6.41221   | 4.29279   | 5.60532   | 5.313     | 5.03934   | 5.19731   |
| 1.03853   | 1.16846   | 0.900048  | 1.13052   | 0.440879  | 0.501049  |
| 22.0094   | 16.6141   | 19.7274   | 20.0555   | 21.8739   | 19.3923   |
| 0.289979  | 0.0708865 | 0.0781861 | 0.284938  | 0         | 0.0783459 |
| 0         | 0         | 0         | 0         | 0         | 0.127675  |
| 17.0851   | 19.3021   | 17.0788   | 20.4809   | 14.7048   | 21.6244   |
| 0.114504  | 0.0546551 | 0         | 0.138496  | 0         | 0.0928093 |
| 9.84442   | 7.83703   | 8.60126   | 9.94839   | 6.70105   | 7.80855   |
| 0.0830823 | 0.0461269 | 0         | 0         | 0         | 0.0336705 |
| 2.74414   | 2.21736   | 2.18797   | 2.61736   | 1.91457   | 2.28777   |
| 16.3823   | 13.9729   | 14.436    | 14.9786   | 13.3071   | 13.8996   |
| 0.0735587 | 0.158     | 0.1785    | 0.106766  | 0.171071  | 0.0298109 |
| 0         | 0         | 0         | 0         | 0         | 0         |
| 17.491    | 21.2515   | 22.7227   | 16.7708   | 14.6002   | 16.6687   |
| 7.36276   | 5.5842    | 5.3977    | 4.73739   | 4.10152   | 5.06592   |
| 3.05843   | 2.29927   | 2.74191   | 2.0161    | 3.00319   | 3.16067   |
| 53.6231   | 48.8293   | 55.4045   | 59.1254   | 59.9887   | 45.5285   |
| 35.3545   | 31.1506   | 34.0214   | 36.3593   | 46.4072   | 36.2015   |
| 0.132057  | 0.126067  | 0.284849  | 0.0319454 | 0         | 0.249753  |
| 2.63587   | 3.23265   | 4.19224   | 3.87841   | 3.80915   | 3.36753   |
| 5.70793   | 4.00547   | 5.21828   | 4.06005   | 4.51674   | 5.09285   |
| 0.120773  | 0.115965  | 0.175474  | 0.157514  | 0.670262  | 0.24358   |
| 0.266516  | 0.19082   | 0.258695  | 0.116049  | 0.165286  | 0.0864081 |
| 0         | 0         | 0         | 0         | 0         | 0         |

|           |           |           |           |           |           |
|-----------|-----------|-----------|-----------|-----------|-----------|
| 135.278   | 98.4668   | 103.154   | 120.585   | 121.066   | 106.479   |
| 46.6539   | 52.697    | 51.5848   | 51.0334   | 53.9563   | 45.9477   |
| 0.201029  | 0.431799  | 0.292695  | 0.583562  | 0.311682  | 0.553999  |
| 0         | 0         | 0         | 0         | 0         | 0         |
| 3.55947   | 3.56094   | 2.87919   | 3.46782   | 3.85554   | 3.59646   |
| 0         | 0         | 0         | 0         | 0         | 0         |
| 16.9921   | 14.0754   | 16.9802   | 17.3931   | 17.3867   | 18.068    |
| 0         | 0         | 0         | 0         | 0         | 0         |
| 15.3294   | 11.0282   | 16.6319   | 17.4475   | 15.7022   | 16.4176   |
| 0.187979  | 0.13459   | 0.0506842 | 0.318313  | 0.218587  | 0.177758  |
| 0.0716146 | 0         | 0         | 0         | 0         | 0         |
| 5.37107   | 4.20498   | 5.14307   | 4.39573   | 4.52692   | 4.80097   |
| 3.92996   | 3.54109   | 4.45464   | 3.43405   | 4.80806   | 4.8971    |
| 1.5687    | 0.751722  | 0.619459  | 0.555772  | 0.450046  | 0.540632  |
| 0         | 0         | 0         | 0         | 0         | 0         |
| 3.1258    | 2.84056   | 3.52247   | 3.27665   | 2.84774   | 3.0641    |
| 5.18593   | 5.16595   | 3.79355   | 5.98891   | 4.57955   | 4.93439   |
| 0         | 0.0246632 | 0         | 0         | 0         | 0         |
| 4.35673   | 5.36618   | 4.7364    | 6.42493   | 4.21168   | 6.8721    |
| 24.5255   | 22.3396   | 24.6226   | 26.1315   | 36.1997   | 16.6218   |
| 49.3722   | 60.4768   | 68.9848   | 68.9935   | 74.7622   | 62.9309   |
| 30.296    | 22.9865   | 25.2198   | 29.9182   | 26.1557   | 26.4963   |
| 1.86338   | 1.62552   | 1.9995    | 2.19631   | 1.36934   | 1.22759   |
| 0.261603  | 0.561909  | 0.211605  | 0.34173   | 0.405598  | 0.254446  |
| 0         | 0.0236781 | 0.0267503 | 0.0240001 | 0         | 0         |
| 0         | 0         | 0         | 0.0637969 | 0         | 0.071253  |
| 0.0702056 | 2.17E-41  | 4.96E-25  | 0.14282   | 2.09E-103 | 0.0499424 |
| 12.9241   | 12.7376   | 12.4798   | 11.7876   | 10.2142   | 11.4577   |
| 0         | 0         | 0         | 0         | 0         | 0         |
| 0         | 0         | 0         | 0         | 0         | 0         |
| 2.0052    | 1.79121   | 22.3052   | 10.833    | 22.045    | 7.57031   |
| 27.5731   | 23.3711   | 27.3293   | 27.9498   | 27.9126   | 29.7021   |
| 5.37435   | 5.99468   | 5.99466   | 6.48676   | 5.92051   | 5.50244   |
| 0         | 0         | 0.215911  | 0         | 0         | 0         |
| 17.7957   | 20.5571   | 20.5839   | 18.8243   | 16.5165   | 18.663    |
| 5.39507   | 3.70425   | 4.24904   | 4.49486   | 3.50975   | 4.31041   |
| 34.5963   | 26.2053   | 29.6396   | 29.6617   | 28.6818   | 28.3155   |
| 10.9944   | 6.51719   | 7.3798    | 6.6821    | 9.6964    | 5.65694   |
| 0.767039  | 0.575291  | 0.512769  | 0.598854  | 0.754834  | 0.605371  |
| 7.57291   | 6.55496   | 7.6106    | 5.63874   | 6.20457   | 6.75493   |
| 13.4555   | 16.0015   | 13.5676   | 14.4802   | 15.4678   | 13.7447   |
| 16.241    | 20.1292   | 19.0314   | 17.2558   | 15.3613   | 17.9109   |
| 7.61107   | 8.24887   | 7.89473   | 7.90617   | 10.5047   | 7.76572   |



|           |          |          |           |           |           |
|-----------|----------|----------|-----------|-----------|-----------|
| 3.90662   | 4.36684  | 2.83754  | 3.38477   | 2.78125   | 3.69957   |
| 4.69703   | 3.60002  | 4.60272  | 5.61613   | 4.84426   | 3.8071    |
| 36.6871   | 33.3457  | 38.8659  | 36.1653   | 34.0064   | 33.2062   |
| 8.71713   | 10.2296  | 8.32375  | 8.39376   | 10.3178   | 8.96115   |
| 0.585817  | 0.596038 | 0.598555 | 0.537017  | 0.549742  | 0.64976   |
| 0         | 0        | 0        | 0         | 0         | 0         |
| 16.1231   | 15.7315  | 16.7678  | 17.6303   | 12.4052   | 15.4858   |
| 1.68818   | 1.42544  | 1.16777  | 1.1829    | 1.71486   | 1.90623   |
| 2.70758   | 2.48243  | 2.5766   | 2.67623   | 2.15595   | 3.05852   |
| 31.7152   | 22.4301  | 25.2859  | 27.2333   | 33.1775   | 29.4741   |
| 0         | 0        | 0        | 0         | 0         | 0         |
| 0         | 0        | 0        | 0         | 0         | 0         |
| 4.42444   | 3.26562  | 4.25809  | 3.75455   | 3.3242    | 3.93632   |
| 5.1849    | 4.12762  | 4.53667  | 4.88308   | 3.94151   | 5.40878   |
| 13.9771   | 15.5748  | 15.0479  | 14.2865   | 10.6064   | 14.2808   |
| 0.139373  | 0.133051 | 0        | 0.0337152 | 0.0360147 | 0.0376555 |
| 25.324    | 22.6619  | 25.7153  | 24.9415   | 30.4135   | 29.6384   |
| 0         | 0        | 0        | 0         | 0         | 0         |
| 29.285    | 36.9412  | 35.8095  | 38.6828   | 37.9417   | 28.3928   |
| 16.0043   | 16.3601  | 14.7901  | 14.8729   | 14.5478   | 15.6813   |
| 2.65624   | 2.63246  | 3.08327  | 1.91679   | 2.52451   | 2.84631   |
| 0.0165629 | 0        | 0.05359  | 0.0596121 | 0.0128398 | 0.0134248 |
| 4.04631   | 3.22519  | 3.55298  | 3.79245   | 3.74509   | 3.446     |
| 0         | 0        | 0        | 0         | 0         | 0         |
| 0.351943  | 0.503968 | 0.747283 | 0.446969  | 0.17052   | 0.320919  |
| 4.55355   | 3.37365  | 3.58719  | 3.80747   | 4.52759   | 4.20431   |
| 0.815771  | 0.582742 | 0.847637 | 0.776431  | 0.509577  | 0.68846   |
| 17.5053   | 12.5981  | 14.7497  | 14.1188   | 16.6329   | 12.8884   |
| 0         | 0        | 0        | 0         | 0         | 0         |
| 1.45295   | 1.8205   | 1.17526  | 1.55236   | 1.56438   | 1.66836   |
| 13.0352   | 10.1387  | 12.7762  | 12.4738   | 10.884    | 12.8349   |
| 32.7539   | 30.2763  | 27.0421  | 31.3438   | 26.3953   | 29.9903   |
| 4.41342   | 3.97016  | 4.94297  | 4.02415   | 3.04851   | 3.96705   |
| 0.0615165 | 0.18828  | 0.413706 | 0.0685648 | 0.0146482 | 0.138126  |
| 2.44377   | 1.9168   | 3.03421  | 2.53288   | 2.55202   | 2.84284   |
| 0         | 0        | 0        | 0         | 0         | 0         |
| 24.1283   | 22.0133  | 24.8696  | 23.6982   | 19.669    | 24.1012   |
| 0.148999  | 0.189656 | 0.138842 | 0.158182  | 0         | 0.120769  |
| 28.2031   | 25.1819  | 25.1903  | 26.2448   | 35.398    | 24.5476   |
| 17.2937   | 15.6247  | 17.6318  | 17.3021   | 14.7858   | 17.127    |
| 0.0273679 | 0        | 0        | 0         | 0.042432  | 0         |
| 209.428   | 215.591  | 264.279  | 317.138   | 272.033   | 457.806   |
| 7.68246   | 15.8139  | 8.93289  | 25.9948   | 48.2401   | 10.0409   |

|           |           |           |           |           |           |
|-----------|-----------|-----------|-----------|-----------|-----------|
| 0.345256  | 0.494393  | 0.511996  | 0.208799  | 0.0446079 | 0.139921  |
| 0         | 0         | 0         | 0         | 0         | 0         |
| 1.68924   | 1.7638    | 2.04959   | 1.88995   | 2.07342   | 1.14099   |
| 0.429729  | 0.260342  | 0.240645  | 0.191915  | 0.205004  | 0.26793   |
| 26.928    | 24.8181   | 27.4908   | 28.4185   | 29.7572   | 25.4833   |
| 0         | 0         | 0         | 0         | 0         | 0         |
| 4.22875   | 4.40928   | 4.78213   | 4.43945   | 2.76896   | 5.32434   |
| 0         | 0         | 0         | 0         | 0         | 0         |
| 50.9858   | 60.667    | 54.7422   | 55.2147   | 54.5417   | 53.0767   |
| 0.932548  | 0.625305  | 2.07249   | 1.52114   | 3.24978   | 2.12392   |
| 9.51046   | 7.50291   | 9.83264   | 9.84249   | 9.46675   | 10.351    |
| 0         | 0         | 0         | 0.0279595 | 0         | 0.0312271 |
| 0         | 0         | 0         | 0         | 0         | 0         |
| 12.713    | 9.80784   | 10.921    | 12.7782   | 11.7398   | 9.18599   |
| 36.5297   | 40.1479   | 38.4448   | 38.3884   | 38.7555   | 34.961    |
| 0.065549  | 0.0625758 | 0         | 0.0317134 | 0         | 0.0354198 |
| 10.0473   | 12.4476   | 12.0439   | 15.1712   | 13.4113   | 16.0971   |
| 161.933   | 252.827   | 189.567   | 116.611   | 124.952   | 272.3     |
| 0         | 0         | 0         | 0         | 0         | 0         |
| 15.3638   | 20.103    | 25.2243   | 21.9682   | 23.8067   | 13.9406   |
| 0.70592   | 0.653499  | 0.253778  | 0.227687  | 0.189829  | 0.254297  |
| 6.91518   | 6.44839   | 4.89665   | 6.3522    | 6.09555   | 6.56119   |
| 0.411477  | 0.441803  | 0.180493  | 0.177777  | 0.325623  | 0.486324  |
| 7.63264   | 4.62408   | 6.86251   | 7.33582   | 6.96378   | 7.24139   |
| 22.1925   | 21.2409   | 13.0994   | 18.2484   | 16.8463   | 14.1733   |
| 9.45997   | 9.92778   | 7.44233   | 10.9092   | 17.279    | 13.2345   |
| 0.286458  | 0.717846  | 0.289638  | 0.155916  | 0.277584  | 0.406322  |
| 6.30501   | 5.11406   | 5.18915   | 5.98355   | 5.21245   | 5.8609    |
| 33.4435   | 39.1309   | 59.6645   | 42.2291   | 60.3006   | 42.2639   |
| 25.2531   | 12.5574   | 19.8934   | 15.982    | 16.842    | 23.1406   |
| 8.11157   | 8.08034   | 6.6469    | 8.267     | 6.56165   | 6.00299   |
| 0.487475  | 0.193902  | 0.21906   | 0.550308  | 0.293921  | 0.307312  |
| 49.9376   | 45.2699   | 45.899    | 47.7511   | 63.7674   | 47.3612   |
| 9.95948   | 6.65541   | 8.46675   | 8.75836   | 8.65935   | 8.8006    |
| 0         | 0         | 0         | 0         | 0         | 0         |
| 7.17217   | 4.36776   | 4.35745   | 9.35039   | 5.54389   | 7.98605   |
| 12.3691   | 11.3732   | 12.4385   | 10.1513   | 11.7381   | 13.7814   |
| 0.0378353 | 0.0270894 | 0.0306042 | 0         | 0.0879916 | 0.0613336 |
| 3.10667   | 3.4267    | 1.64447   | 2.12769   | 2.24518   | 2.38229   |
| 16.8775   | 13.8752   | 18.7167   | 18.8383   | 18.7604   | 18.7881   |
| 0.264989  | 0.0632423 | 0.071448  | 0.0641024 | 0.136949  | 0.286376  |
| 3.23964   | 3.04437   | 2.4567    | 2.64495   | 3.13927   | 3.93876   |
| 0         | 0         | 0         | 0         | 0         | 0         |

|          |           |           |           |           |          |
|----------|-----------|-----------|-----------|-----------|----------|
| 6.30274  | 5.89007   | 8.22899   | 7.29151   | 6.15277   | 7.62176  |
| 0.119317 | 0.0569527 | 0.0965135 | 0.0865908 | 0.0616645 | 0.161185 |
| 12.0794  | 11.916    | 5.85816   | 11.3665   | 15.7566   | 17.088   |
| 3.01429  | 3.38114   | 2.21008   | 4.05161   | 2.27118   | 3.65379  |
| 0        | 0         | 0         | 0         | 0         | 0        |
| 0.548434 | 0.432273  | 0.459306  | 0.370874  | 0.361591  | 0.312368 |
| 42.8997  | 52.5585   | 56.264    | 49.5734   | 46.4593   | 45.8029  |
| 3.90663  | 3.56115   | 3.96155   | 3.34681   | 3.27962   | 3.90787  |
| 26.5557  | 23.2778   | 24.9768   | 26.0165   | 17.0141   | 26.1643  |
